# Supplementary material for: Paleomagnetic constraints on the timing and distribution of Cenozoic rotations in Central and Eastern Anatolia
Source: Copernicus journal article supplement (doi:10.5194/se-9-295-2018), 2018-03-21
Supplement: Supplementary file 1 [file se-9-295-2018-supplement.zip]

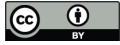

## *Supplement of*

# **Paleomagnetic constraints on the timing and distribution of Cenozoic rotations in Central and Eastern Anatolia**

**Derya Gürer et al.**

*Correspondence to:* Derya Gürer ([derya.guerer@gmail.com](mailto:derya.guerer@gmail.com))

- [se-9-295-2018-supplement-title-page.pdf](#)
- [se-2017-66\\_DATA\\_dir](#) files
  - .DS\_Store
  - dir files Sivas
    - \* .DS\_Store
    - \* GemSed.dir
    - \* Gemerek\_rev.dir
    - \* Inkonak\_nor.dir
    - \* Inkonak\_rev.dir
    - \* KalKar\_nor.dir
    - \* KalKar\_rev.dir
    - \* SS01.dir
    - \* SS02.dir
    - \* SS03.dir
    - \* SS04.dir
    - \* SS05.dir
    - \* SS06.dir
    - \* SS11.dir
    - \* SS12.dir
    - \* SS13.dir
    - \* SS14.dir
    - \* SS15.dir
    - \* SS16.dir
    - \* SS17.dir
    - \* SS18.dir
    - \* SS19.dir
    - \* SS20.dir



- \* SS21.dir
- \* SS22.dir
- \* SS23.dir
- \* SS24.dir
- \* SS25.dir
- \* SS26.dir
- \* SS27.dir
- \* SS28.dir
- \* SS29.dir
- \* SS30.dir
- \* SS31.dir
- \* SS32.dir
- \* SS33.dir
- \* SS34.dir
- \* SS35.dir
- \* SS37.dir
- \* SS38.dir
- \* SS39.dir
- \* SS40.dir
- \* SS41.dir
- \* SS42.dir
- \* SS43.dir
- \* SS44.dir
- \* SS45.dir
- \* SS51.dir
- \* SS52.dir
- \* SS53.dir
- \* SS54.dir
- \* SS55.dir
- \* SS56.dir
- \* SS57.dir
- \* SS58.dir
- \* SS59.dir
- \* Yenikoy\_nor.dir
- \* Yenikoy\_rev.dir
- dir files Tauride basins
  - \* BR1.dir
  - \* BR2.dir
  - \* BR3.dir
  - \* BR4.dir
  - \* BR5.dir
  - \* BR6.dir
  - \* SS07.dir
  - \* SS08.dir
  - \* SS09.dir
  - \* SS10.dir
- dir files Ulukisla



- \* .DS\_Store
- \* AD3.dir
- \* AD4.dir
- \* AD5.dir
- \* AL1.dir
- \* AL2.dir
- \* AL4.dir
- \* AR1.dir
- \* AR2.dir
- \* AR3.dir
- \* AT1.dir
- \* AT2.dir
- \* AT3.dir
- \* AT4.dir
- \* BU1.dir
- \* BU2.dir
- \* CP1.dir
- \* CP2.dir
- \* CP3.dir
- \* EC1.dir
- \* EM1.dir
- \* EM2.dir
- \* EM3.dir
- \* EM4.dir
- \* EM5.dir
- \* ER1.dir
- \* ER2.dir
- \* GM2.dir
- \* HB1.dir
- \* HG2.dir
- \* HP1.dir
- \* HP2.dir
- \* HP3.dir
- \* HP4.dir
- \* HP6.dir
- \* KG1.dir
- \* KG2.dir
- \* KL1.dir
- \* PC1.dir
- \* PC2.dir
- \* PC3.dir
- \* PC4.dir
- \* TC1.dir
- \* TC2.dir
- \* TT1.dir
- \* YK1.dir
- \* YK2.dir



- \* YK3.dir
- \* YK4.dir
- \* YL1.dir
- se-2017-66\_DATA\_pmag files
  - .DS\_Store
  - Literature\_data\_Central\_Turkey.pmag
  - SE\_Anatolia.pmag
  - sites\_Sivas.pmag
  - sites\_Ulukisla.pmag
- se-2017-66\_Supplement.docx
- se-2017-66\_Supplement.pdf

The copyright of individual parts of the supplement might differ from the CC BY 4.0 License.
