# Supplementary material for: Paleomagnetic constraints on the timing and distribution of Cenozoic rotations in Central and Eastern Anatolia
Source: Copernicus journal article supplement (doi:10.5194/se-9-295-2018), 2018-03-21
Supplement: Supplementary file 2 [file se-9-295-2018-supplement.zip]

Archive with 132 entries (127 files):
- se-2017-66_DATA_pmag files/
- se-2017-66_DATA_pmag files/sites_Sivas.pmag
- se-2017-66_DATA_pmag files/.DS_Store
- se-2017-66_DATA_pmag files/Literature_data_Central_Turkey.pmag
- se-2017-66_DATA_pmag files/SE_Anatolia.pmag
- se-2017-66_DATA_pmag files/sites_Ulukisla.pmag
- se-2017-66_Supplement.pdf
- se-9-295-2018-supplement-title-page.pdf
- se-2017-66_DATA_dir files/
- se-2017-66_DATA_dir files/dir files Sivas/
- se-2017-66_DATA_dir files/dir files Sivas/GemSed.dir
- se-2017-66_DATA_dir files/dir files Sivas/SS06.dir
- se-2017-66_DATA_dir files/dir files Sivas/Inkonak_rev.dir
- se-2017-66_DATA_dir files/dir files Sivas/SS56.dir
- se-2017-66_DATA_dir files/dir files Sivas/SS18.dir
- se-2017-66_DATA_dir files/dir files Sivas/SS42.dir
- se-2017-66_DATA_dir files/dir files Sivas/SS40.dir
- se-2017-66_DATA_dir files/dir files Sivas/SS14.dir
- se-2017-66_DATA_dir files/dir files Sivas/SS38.dir
- se-2017-66_DATA_dir files/dir files Sivas/SS52.dir
- se-2017-66_DATA_dir files/dir files Sivas/SS11.dir
- se-2017-66_DATA_dir files/dir files Sivas/SS34.dir
- se-2017-66_DATA_dir files/dir files Sivas/SS12.dir
- se-2017-66_DATA_dir files/dir files Sivas/SS57.dir
- se-2017-66_DATA_dir files/dir files Sivas/SS04.dir
- se-2017-66_DATA_dir files/dir files Sivas/SS02.dir
- se-2017-66_DATA_dir files/dir files Sivas/SS22.dir
- se-2017-66_DATA_dir files/dir files Sivas/KalKar_rev.dir
- se-2017-66_DATA_dir files/dir files Sivas/SS54.dir
- se-2017-66_DATA_dir files/dir files Sivas/SS29.dir
- se-2017-66_DATA_dir files/dir files Sivas/SS37.dir
- se-2017-66_DATA_dir files/dir files Sivas/.DS_Store
- se-2017-66_DATA_dir files/dir files Sivas/SS24.dir
- se-2017-66_DATA_dir files/dir files Sivas/SS43.dir
- se-2017-66_DATA_dir files/dir files Sivas/Inkonak_nor.dir
- se-2017-66_DATA_dir files/dir files Sivas/SS44.dir
- se-2017-66_DATA_dir files/dir files Sivas/SS27.dir
- se-2017-66_DATA_dir files/dir files Sivas/SS01.dir
- se-2017-66_DATA_dir files/dir files Sivas/SS45.dir
- se-2017-66_DATA_dir files/dir files Sivas/SS32.dir
- se-2017-66_DATA_dir files/dir files Sivas/SS31.dir
- se-2017-66_DATA_dir files/dir files Sivas/SS16.dir
- se-2017-66_DATA_dir files/dir files Sivas/SS51.dir
- se-2017-66_DATA_dir files/dir files Sivas/SS15.dir
- se-2017-66_DATA_dir files/dir files Sivas/SS17.dir
- se-2017-66_DATA_dir files/dir files Sivas/SS33.dir
- se-2017-66_DATA_dir files/dir files Sivas/SS30.dir
- se-2017-66_DATA_dir files/dir files Sivas/SS23.dir
- se-2017-66_DATA_dir files/dir files Sivas/Yenikoy_nor.dir
- se-2017-66_DATA_dir files/dir files Sivas/KalKar_nor.dir
- se-2017-66_DATA_dir files/dir files Sivas/SS59.dir
- se-2017-66_DATA_dir files/dir files Sivas/Gemerek_rev.dir
- se-2017-66_DATA_dir files/dir files Sivas/SS39.dir
- se-2017-66_DATA_dir files/dir files Sivas/Yenikoy_rev.dir
- se-2017-66_DATA_dir files/dir files Sivas/SS55.dir
- se-2017-66_DATA_dir files/dir files Sivas/SS25.dir
- se-2017-66_DATA_dir files/dir files Sivas/SS20.dir
- se-2017-66_DATA_dir files/dir files Sivas/SS19.dir
- se-2017-66_DATA_dir files/dir files Sivas/SS53.dir
- se-2017-66_DATA_dir files/dir files Sivas/SS41.dir
- se-2017-66_DATA_dir files/dir files Sivas/SS03.dir
- se-2017-66_DATA_dir files/dir files Sivas/SS21.dir
- se-2017-66_DATA_dir files/dir files Sivas/SS05.dir
- se-2017-66_DATA_dir files/dir files Sivas/SS35.dir
- se-2017-66_DATA_dir files/dir files Sivas/SS26.dir
- se-2017-66_DATA_dir files/dir files Sivas/SS58.dir
- se-2017-66_DATA_dir files/dir files Sivas/SS13.dir
- se-2017-66_DATA_dir files/dir files Sivas/SS28.dir
- se-2017-66_DATA_dir files/dir files Tauride basins/
- se-2017-66_DATA_dir files/dir files Tauride basins/BR2.dir
- se-2017-66_DATA_dir files/dir files Tauride basins/BR6.dir
- se-2017-66_DATA_dir files/dir files Tauride basins/SS10.dir
- se-2017-66_DATA_dir files/dir files Tauride basins/BR3.dir
- se-2017-66_DATA_dir files/dir files Tauride basins/BR1.dir
- se-2017-66_DATA_dir files/dir files Tauride basins/SS07.dir
- se-2017-66_DATA_dir files/dir files Tauride basins/BR4.dir
- se-2017-66_DATA_dir files/dir files Tauride basins/SS08.dir
- se-2017-66_DATA_dir files/dir files Tauride basins/BR5.dir
- se-2017-66_DATA_dir files/dir files Tauride basins/SS09.dir
- se-2017-66_DATA_dir files/dir files Ulukisla/
- se-2017-66_DATA_dir files/dir files Ulukisla/BU2.dir
- se-2017-66_DATA_dir files/dir files Ulukisla/AL1.dir
- se-2017-66_DATA_dir files/dir files Ulukisla/PC3.dir
- se-2017-66_DATA_dir files/dir files Ulukisla/EM4.dir
- se-2017-66_DATA_dir files/dir files Ulukisla/GM2.dir
- se-2017-66_DATA_dir files/dir files Ulukisla/TC1.dir
- se-2017-66_DATA_dir files/dir files Ulukisla/AD3.dir
- se-2017-66_DATA_dir files/dir files Ulukisla/AT1.dir
- se-2017-66_DATA_dir files/dir files Ulukisla/AT3.dir
- se-2017-66_DATA_dir files/dir files Ulukisla/TT1.dir
- se-2017-66_DATA_dir files/dir files Ulukisla/AD5.dir
- se-2017-66_DATA_dir files/dir files Ulukisla/HB1.dir
- se-2017-66_DATA_dir files/dir files Ulukisla/ER1.dir
- se-2017-66_DATA_dir files/dir files Ulukisla/YK1.dir
- se-2017-66_DATA_dir files/dir files Ulukisla/CP1.dir
- se-2017-66_DATA_dir files/dir files Ulukisla/AR1.dir
- se-2017-66_DATA_dir files/dir files Ulukisla/AL4.dir
- se-2017-66_DATA_dir files/dir files Ulukisla/HP3.dir
- se-2017-66_DATA_dir files/dir files Ulukisla/.DS_Store
- se-2017-66_DATA_dir files/dir files Ulukisla/CP2.dir
- se-2017-66_DATA_dir files/dir files Ulukisla/EM5.dir
- se-2017-66_DATA_dir files/dir files Ulukisla/YK3.dir
- se-2017-66_DATA_dir files/dir files Ulukisla/CP3.dir
- se-2017-66_DATA_dir files/dir files Ulukisla/EM2.dir
- se-2017-66_DATA_dir files/dir files Ulukisla/YL1.dir
- se-2017-66_DATA_dir files/dir files Ulukisla/BU1.dir
- se-2017-66_DATA_dir files/dir files Ulukisla/KG1.dir
- se-2017-66_DATA_dir files/dir files Ulukisla/PC1.dir
- se-2017-66_DATA_dir files/dir files Ulukisla/YK4.dir
- se-2017-66_DATA_dir files/dir files Ulukisla/HP2.dir
- se-2017-66_DATA_dir files/dir files Ulukisla/AL2.dir
- se-2017-66_DATA_dir files/dir files Ulukisla/HG2.dir
- se-2017-66_DATA_dir files/dir files Ulukisla/EC1.dir
- se-2017-66_DATA_dir files/dir files Ulukisla/HP4.dir
- se-2017-66_DATA_dir files/dir files Ulukisla/TC2.dir
- se-2017-66_DATA_dir files/dir files Ulukisla/EM3.dir
- se-2017-66_DATA_dir files/dir files Ulukisla/AT4.dir
- se-2017-66_DATA_dir files/dir files Ulukisla/EM1.dir
- se-2017-66_DATA_dir files/dir files Ulukisla/AD4.dir
- se-2017-66_DATA_dir files/dir files Ulukisla/YK2.dir
- se-2017-66_DATA_dir files/dir files Ulukisla/ER2.dir
- se-2017-66_DATA_dir files/dir files Ulukisla/KG2.dir
- se-2017-66_DATA_dir files/dir files Ulukisla/AR2.dir
- se-2017-66_DATA_dir files/dir files Ulukisla/AR3.dir
- se-2017-66_DATA_dir files/dir files Ulukisla/PC2.dir
- se-2017-66_DATA_dir files/dir files Ulukisla/HP6.dir
- se-2017-66_DATA_dir files/dir files Ulukisla/HP1.dir
- se-2017-66_DATA_dir files/dir files Ulukisla/KL1.dir
- se-2017-66_DATA_dir files/dir files Ulukisla/AT2.dir
- se-2017-66_DATA_dir files/dir files Ulukisla/PC4.dir
- se-2017-66_DATA_dir files/.DS_Store
- se-2017-66_Supplement.docx
