# Supplementary material for: Paleomagnetic constraints on the timing and distribution of Cenozoic rotations in Central and Eastern Anatolia
Source: Copernicus journal article supplement (doi:10.5194/se-9-295-2018), 2018-03-21
Supplement: Supplementary file 2 [file se-9-295-2018-supplement.zip › se-2017-66_DATA_dir files/dir files Sivas/Gemerek_rev.dir]

[{"version":"v1.1.0","exported":"2016-10-09T19:07:57.578Z","volume":10.5,"added":"2016-10-09T18:44:29.162Z","format":"Utrecht","demagType":"Unknown","strat":null,"patch":1.1,"GEO":[{"dec":60.568131570047456,"inc":-20.27590445713042,"MAD":5.570430537473367,"cm":[3.552713678800501e-15,7.815970093361102e-14,0],"intensity":1059.4982846363614,"type":"GC","origin":false,"forced":true,"remark":"","nSteps":5,"minStep":"100","maxStep":"300","steps":["100","150","200","250","300"],"group":"None","version":"v1.1.0"}],"TECT":[{"dec":241.4979173633609,"inc":-19.173369076421324,"MAD":5.5704305374733245,"cm":[5.46229728115577e-14,4.884981308350689e-14,4.263256414560601e-14],"intensity":1059.4982846363614,"type":"GC","origin":false,"forced":true,"remark":"","nSteps":5,"minStep":"100","maxStep":"300","steps":["100","150","200","250","300"],"group":"None","version":"v1.1.0"}],"interpreted":true,"name":"TG  1.1","coreAzi":5,"coreDip":80,"bedStrike":218,"bedDip":85,"data":[{"visible":false,"include":false,"step":"20","x":505.46666666666664,"y":-183.84761904761905,"z":803.5238095238095,"a95":0.6,"info":"\"\" at \"\""},{"visible":true,"include":true,"step":"100","x":526.0952380952381,"y":-164.03809523809525,"z":764.8571428571429,"a95":0.6,"info":"\"\" at \"\""},{"visible":true,"include":true,"step":"150","x":399.6,"y":-128.64761904761903,"z":447.2476190476191,"a95":0.7,"info":"\"\" at \"\""},{"visible":true,"include":true,"step":"200","x":286.29523809523806,"y":-156.13333333333335,"z":214.1809523809524,"a95":0.6,"info":"\"\" at \"\""},{"visible":true,"include":true,"step":"250","x":182.62857142857143,"y":-129.75238095238097,"z":11.095238095238095,"a95":0.8,"info":"\"\" at \"\""},{"visible":true,"include":true,"step":"300","x":158.68571428571428,"y":-131.26666666666665,"z":-12.257142857142856,"a95":0.6,"info":"\"\" at \"\""},{"visible":true,"include":false,"step":"330","x":104.5904761904762,"y":-108.65714285714287,"z":-49.5047619047619,"a95":0.6,"info":"\"\" at \"\""},{"visible":true,"include":false,"step":"360","x":92.21904761904761,"y":-61.590476190476195,"z":-21.40952380952381,"a95":0.5,"info":"\"\" at \"\""},{"visible":true,"include":false,"step":"390","x":77.92380952380952,"y":-47.59047619047619,"z":-31.80952380952381,"a95":0.7,"info":"\"\" at \"\""},{"visible":true,"include":false,"step":"420","x":81.35238095238095,"y":-57.81904761904762,"z":-36.60952380952381,"a95":0.7,"info":"\"\" at \"\""},{"visible":true,"include":false,"step":"450","x":70.95238095238095,"y":-40.49523809523809,"z":-30.361904761904764,"a95":0.7,"info":"\"\" at \"\""},{"visible":true,"include":false,"step":"480","x":48.31428571428572,"y":-40.02857142857143,"z":-26.552380952380954,"a95":0.7,"info":"\"\" at \"\""},{"visible":true,"include":false,"step":"510","x":30.076190476190476,"y":-1.5714285714285714,"z":-7.161904761904762,"a95":1,"info":"\"\" at \"\""},{"visible":true,"include":false,"step":"530","x":37.04761904761905,"y":-14,"z":-26.01904761904762,"a95":1.5,"info":"\"\" at \"\""},{"visible":true,"include":false,"step":"550","x":19.285714285714285,"y":-26.085714285714282,"z":-36.53333333333334,"a95":0.8,"info":"\"\" at \"\""},{"visible":true,"include":false,"step":"570","x":41.095238095238095,"y":-40.333333333333336,"z":-34.561904761904756,"a95":1,"info":"\"\" at \"\""}]},{"version":"v1.1.0","exported":"2016-10-09T19:07:57.578Z","volume":10.5,"added":"2016-10-09T18:44:29.162Z","format":"Utrecht","demagType":"Unknown","strat":null,"patch":1.1,"GEO":[{"dec":77.46693252781051,"inc":-10.921036462044077,"MAD":3.486144252630043,"cm":[-4.440892098500626e-15,-2.886579864025407e-15,0],"intensity":279.0212314843579,"type":"GC","origin":false,"forced":true,"remark":"","nSteps":8,"minStep":"100","maxStep":"390","steps":["100","150","200","250","300","330","360","390"],"group":"None","version":"v1.1.0"}],"TECT":[{"dec":235.78357374891854,"inc":-37.24567012378521,"MAD":3.4861442526301794,"cm":[-1.9491352976075405e-14,-5.329070518200751e-15,-1.3322676295501878e-14],"intensity":279.0212314843578,"type":"GC","origin":false,"forced":true,"remark":"","nSteps":8,"minStep":"100","maxStep":"390","steps":["100","150","200","250","300","330","360","390"],"group":"None","version":"v1.1.0"}],"interpreted":true,"name":"TG  2.1","coreAzi":144,"coreDip":37.5,"bedStrike":218,"bedDip":85,"data":[{"visible":true,"include":false,"step":"20","x":-261.0190476190476,"y":-102.84761904761906,"z":-140.84761904761905,"a95":0.8,"info":"\"\" at \"\""},{"visible":true,"include":true,"step":"100","x":-192.21904761904761,"y":-101.04761904761905,"z":-86.08571428571429,"a95":1,"info":"\"\" at \"\""},{"visible":true,"include":true,"step":"150","x":-125.57142857142857,"y":-73.20952380952382,"z":-100.60952380952382,"a95":1.1,"info":"\"\" at \"\""},{"visible":true,"include":true,"step":"200","x":-65.2,"y":-59.266666666666666,"z":-110.02857142857142,"a95":0.7,"info":"\"\" at \"\""},{"visible":true,"include":true,"step":"250","x":-20.914285714285715,"y":-27.952380952380953,"z":-109.47619047619048,"a95":0.6,"info":"\"\" at \"\""},{"visible":true,"include":true,"step":"300","x":-12.2,"y":-29.695238095238096,"z":-105.14285714285714,"a95":0.6,"info":"\"\" at \"\""},{"visible":true,"include":true,"step":"330","x":-5.866666666666667,"y":-25.276190476190475,"z":-99.16190476190476,"a95":0.4,"info":"\"\" at \"\""},{"visible":true,"include":true,"step":"360","x":-5.866666666666667,"y":-17.83809523809524,"z":-80.0952380952381,"a95":0.6,"info":"\"\" at \"\""},{"visible":true,"include":true,"step":"390","x":-1.6857142857142857,"y":-15.628571428571428,"z":-77.13333333333333,"a95":0.5,"info":"\"\" at \"\""},{"visible":true,"include":false,"step":"420","x":-2.0952380952380953,"y":-18.714285714285715,"z":-72.57142857142857,"a95":0.6,"info":"\"\" at \"\""},{"visible":true,"include":false,"step":"450","x":-5.571428571428571,"y":-19.123809523809523,"z":-70.19047619047619,"a95":0.6,"info":"\"\" at \"\""},{"visible":true,"include":false,"step":"480","x":-10.838095238095239,"y":-15.628571428571428,"z":-58.44761904761905,"a95":0.6,"info":"\"\" at \"\""},{"visible":true,"include":false,"step":"510","x":-12.838095238095239,"y":-5.390476190476191,"z":-34.06666666666666,"a95":0.9,"info":"\"\" at \"\""},{"visible":true,"include":false,"step":"530","x":-9.952380952380953,"y":-7.019047619047619,"z":-37.18095238095238,"a95":1.5,"info":"\"\" at \"\""},{"visible":true,"include":false,"step":"550","x":-9.142857142857142,"y":-8.285714285714286,"z":-44.55238095238095,"a95":0.8,"info":"\"\" at \"\""},{"visible":true,"include":false,"step":"570","x":0.42857142857142855,"y":-8.00952380952381,"z":-41.49523809523809,"a95":0.8,"info":"\"\" at \"\""}]},{"version":"v1.1.0","exported":"2016-10-09T19:07:57.578Z","volume":10.5,"added":"2016-10-09T18:44:29.163Z","format":"Utrecht","demagType":"Unknown","strat":null,"patch":1.1,"GEO":[{"dec":344.4478408048492,"inc":-32.91376249602911,"MAD":2.629641218672053,"cm":[-1.7763568394002505e-15,-5.551115123125783e-15,0],"intensity":134.4855686059486,"type":"GC","origin":false,"forced":true,"remark":"","nSteps":4,"minStep":"150","maxStep":"300","steps":["150","200","250","300"],"group":"None","version":"v1.1.0"}],"TECT":[{"dec":82.04946689462724,"inc":-46.06044838795871,"MAD":2.6296412186737497,"cm":[4.551914400963142e-15,6.8833827526759706e-15,-4.440892098500626e-16],"intensity":134.4855686059486,"type":"GC","origin":false,"forced":true,"remark":"","nSteps":4,"minStep":"150","maxStep":"300","steps":["150","200","250","300"],"group":"None","version":"v1.1.0"}],"interpreted":true,"name":"TG  3A.1","coreAzi":16,"coreDip":81,"bedStrike":218,"bedDip":85,"data":[{"visible":false,"include":false,"step":"20","x":98.42857142857143,"y":-29.98095238095238,"z":160.45714285714286,"a95":0.9,"info":"\"\" at \"\""},{"visible":true,"include":false,"step":"100","x":85.00952380952381,"y":-25.276190476190475,"z":172.22857142857143,"a95":0.8,"info":"\"\" at \"\""},{"visible":true,"include":true,"step":"150","x":50.028571428571425,"y":-16.676190476190477,"z":109.79047619047618,"a95":0.6,"info":"\"\" at \"\""},{"visible":true,"include":true,"step":"200","x":20.4,"y":-17.485714285714284,"z":57.69523809523809,"a95":0.8,"info":"\"\" at \"\""},{"visible":true,"include":true,"step":"250","x":2.6761904761904765,"y":-12.895238095238096,"z":18.104761904761904,"a95":1.5,"info":"\"\" at \"\""},{"visible":true,"include":true,"step":"300","x":-0.8095238095238095,"y":-13.714285714285714,"z":11.619047619047619,"a95":1.5,"info":"\"\" at \"\""},{"visible":true,"include":false,"step":"330","x":-7.085714285714286,"y":-14.40952380952381,"z":6.447619047619048,"a95":1.5,"info":"\"\" at \"\""},{"visible":true,"include":false,"step":"360","x":-1.1047619047619048,"y":-11.095238095238095,"z":8.628571428571428,"a95":1.5,"info":"\"\" at \"\""},{"visible":true,"include":false,"step":"390","x":-7.847619047619048,"y":-6.561904761904763,"z":9.123809523809523,"a95":1.2,"info":"\"\" at \"\""},{"visible":true,"include":false,"step":"420","x":-4.704761904761905,"y":-8.371428571428572,"z":8.161904761904761,"a95":1,"info":"\"\" at \"\""},{"visible":true,"include":false,"step":"450","x":-3.4285714285714284,"y":-2.0095238095238095,"z":6.809523809523809,"a95":2.1,"info":"\"\" at \"\""},{"visible":true,"include":false,"step":"480","x":-5.085714285714285,"y":-5.609523809523809,"z":9.352380952380953,"a95":1.5,"info":"\"\" at \"\""},{"visible":true,"include":false,"step":"510","x":1.6761904761904762,"y":0.6666666666666666,"z":5.552380952380952,"a95":2.3,"info":"\"\" at \"\""},{"visible":true,"include":false,"step":"530","x":-2.761904761904762,"y":3.5714285714285716,"z":6.219047619047619,"a95":5.3,"info":"\"\" at \"\""},{"visible":true,"include":false,"step":"550","x":-6.0095238095238095,"y":1.5714285714285714,"z":1.7999999999999998,"a95":4.1,"info":"\"\" at \"\""},{"visible":true,"include":false,"step":"570","x":-0.20952380952380953,"y":1.7619047619047619,"z":6.4,"a95":2.4,"info":"\"\" at \"\""}]},{"version":"v1.1.0","exported":"2016-10-09T19:07:57.579Z","volume":10.5,"added":"2016-10-09T18:44:29.163Z","format":"Utrecht","demagType":"Unknown","strat":null,"patch":1.1,"GEO":[],"TECT":[],"interpreted":false,"name":"TG  3C.1","coreAzi":126,"coreDip":16,"bedStrike":218,"bedDip":85,"data":[{"visible":false,"include":false,"step":"20","x":-23.676190476190477,"y":-22.885714285714286,"z":-13.019047619047617,"a95":5.1,"info":"\"\" at \"\""},{"visible":true,"include":true,"step":"100","x":-11.838095238095239,"y":-8.676190476190476,"z":3.1523809523809527,"a95":14.1,"info":"\"\" at \"\""},{"visible":true,"include":true,"step":"150","x":0,"y":-2.895238095238095,"z":8.152380952380952,"a95":14.7,"info":"\"\" at \"\""},{"visible":true,"include":true,"step":"200","x":7.476190476190476,"y":2.7523809523809524,"z":8.114285714285714,"a95":3.3,"info":"\"\" at \"\""},{"visible":true,"include":true,"step":"250","x":13.523809523809524,"y":4.0476190476190474,"z":5.628571428571429,"a95":2.4,"info":"\"\" at \"\""},{"visible":true,"include":true,"step":"300","x":14.123809523809525,"y":0.7523809523809524,"z":5.285714285714286,"a95":2.6,"info":"\"\" at \"\""},{"visible":true,"include":true,"step":"330","x":13.361904761904762,"y":1.5142857142857142,"z":3.2,"a95":2.9,"info":"\"\" at \"\""},{"visible":true,"include":false,"step":"360","x":14.352380952380951,"y":4.180952380952381,"z":1.1619047619047618,"a95":3.4,"info":"\"\" at \"\""},{"visible":true,"include":false,"step":"390","x":9.533333333333333,"y":6.857142857142857,"z":1.6285714285714288,"a95":3.2,"info":"\"\" at \"\""},{"visible":true,"include":false,"step":"420","x":8.952380952380953,"y":7.79047619047619,"z":2.4095238095238094,"a95":3.4,"info":"\"\" at \"\""},{"visible":true,"include":false,"step":"450","x":-2.8476190476190473,"y":4.238095238095238,"z":-3.019047619047619,"a95":5.5,"info":"\"\" at \"\""},{"visible":true,"include":false,"step":"480","x":-0.5238095238095238,"y":1.6285714285714288,"z":5.228571428571429,"a95":7.8,"info":"\"\" at \"\""},{"visible":true,"include":false,"step":"510","x":-3.3714285714285714,"y":0.8095238095238095,"z":-1.8571428571428572,"a95":12.2,"info":"\"\" at \"\""},{"visible":true,"include":false,"step":"530","x":-8.428571428571429,"y":9.466666666666667,"z":0.49523809523809526,"a95":4.2,"info":"\"\" at \"\""}]},{"version":"v1.1.0","exported":"2016-10-09T19:07:57.579Z","volume":10.5,"added":"2016-10-09T18:44:29.164Z","format":"Utrecht","demagType":"Unknown","strat":null,"patch":1.1,"GEO":[{"dec":69.83330366747231,"inc":-20.26113001662404,"MAD":4.385632087018197,"cm":[-2.220446049250313e-15,1.7763568394002505e-15,0],"intensity":175.024792801586,"type":"GC","origin":false,"forced":true,"remark":"","nSteps":7,"minStep":"100","maxStep":"300","steps":["100","150","200","250","250","260","300"],"group":"None","version":"v1.1.0"}],"TECT":[{"dec":240.50239086045514,"inc":-29.676503005531583,"MAD":4.385632087018606,"cm":[-3.524958103184872e-15,-6.217248937900877e-15,3.552713678800501e-15],"intensity":175.024792801586,"type":"GC","origin":false,"forced":true,"remark":"","nSteps":7,"minStep":"100","maxStep":"300","steps":["100","150","200","250","250","260","300"],"group":"None","version":"v1.1.0"}],"interpreted":true,"name":"TG  4B.1","coreAzi":359,"coreDip":78,"bedStrike":220,"bedDip":95,"data":[{"visible":false,"include":false,"step":"20","x":-22.83809523809524,"y":42.59047619047619,"z":125.65714285714287,"a95":0.5,"info":"\"\" at \"\""},{"visible":true,"include":true,"step":"100","x":-22.780952380952378,"y":55.142857142857146,"z":143.4952380952381,"a95":0.6,"info":"\"\" at \"\""},{"visible":true,"include":true,"step":"150","x":-39.74285714285715,"y":41.48571428571429,"z":84.95238095238095,"a95":0.8,"info":"\"\" at \"\""},{"visible":true,"include":true,"step":"200","x":-41.666666666666664,"y":25.97142857142857,"z":28.18095238095238,"a95":0.8,"info":"\"\" at \"\""},{"visible":true,"include":true,"step":"250","x":-45.49523809523809,"y":20.104761904761904,"z":15.161904761904761,"a95":1.1,"info":"\"\" at \"\""},{"visible":true,"include":true,"step":"250","x":-31.304761904761904,"y":18.40952380952381,"z":5,"a95":5.6,"info":"\"\" at \"\""},{"visible":true,"include":true,"step":"260","x":-36.352380952380955,"y":18.99047619047619,"z":10.504761904761905,"a95":4.4,"info":"\"\" at \"\""},{"visible":true,"include":true,"step":"300","x":-31.038095238095234,"y":17.61904761904762,"z":6.314285714285714,"a95":6.4,"info":"\"\" at \"\""},{"visible":true,"include":false,"step":"330","x":-27.095238095238095,"y":13.41904761904762,"z":5.257142857142857,"a95":8.7,"info":"\"\" at \"\""},{"visible":true,"include":false,"step":"360","x":-15.257142857142856,"y":7.3619047619047615,"z":0.7904761904761906,"a95":9.9,"info":"\"\" at \"\""},{"visible":true,"include":false,"step":"390","x":-13.942857142857143,"y":6.571428571428571,"z":2.6285714285714286,"a95":10.7,"info":"\"\" at \"\""},{"visible":true,"include":false,"step":"420","x":-16.047619047619047,"y":3.1523809523809527,"z":-0.5238095238095238,"a95":10.3,"info":"\"\" at \"\""},{"visible":true,"include":false,"step":"450","x":-10.257142857142858,"y":3.1523809523809527,"z":2.104761904761905,"a95":10.8,"info":"\"\" at \"\""},{"visible":true,"include":false,"step":"480","x":-4.733333333333333,"y":5,"z":1.8380952380952382,"a95":16.6,"info":"\"\" at \"\""},{"visible":true,"include":false,"step":"510","x":-6.838095238095238,"y":0.7904761904761906,"z":-2.6285714285714286,"a95":13.4,"info":"\"\" at \"\""},{"visible":true,"include":false,"step":"530","x":-10.523809523809524,"y":0.5238095238095238,"z":0.3904761904761904,"a95":5.7,"info":"\"\" at \"\""},{"visible":true,"include":false,"step":"550","x":-3.1523809523809527,"y":5.523809523809524,"z":-2.3714285714285714,"a95":5.8,"info":"\"\" at \"\""}]},{"version":"v1.1.0","exported":"2016-10-09T19:07:57.579Z","volume":10.5,"added":"2016-10-09T18:44:29.164Z","format":"Utrecht","demagType":"Unknown","strat":null,"patch":1.1,"GEO":[],"TECT":[],"interpreted":false,"name":"TG  5.1","coreAzi":130,"coreDip":3,"bedStrike":218,"bedDip":85,"data":[{"visible":true,"include":false,"step":"20","x":-260.2,"y":-79.78095238095239,"z":-36.2,"a95":0.8,"info":"\"\" at \"\""},{"visible":true,"include":false,"step":"100","x":-212.14285714285714,"y":-60.142857142857146,"z":59.209523809523816,"a95":0.6,"info":"\"\" at \"\""},{"visible":true,"include":false,"step":"150","x":-171.1809523809524,"y":-22.142857142857142,"z":74.2,"a95":1,"info":"\"\" at \"\""},{"visible":true,"include":false,"step":"200","x":-119.6952380952381,"y":-14.523809523809524,"z":86.05714285714286,"a95":0.7,"info":"\"\" at \"\""},{"visible":true,"include":true,"step":"250","x":-84.8952380952381,"y":3.314285714285714,"z":80.06666666666668,"a95":0.8,"info":"\"\" at \"\""},{"visible":true,"include":false,"step":"300","x":-69.79047619047618,"y":-1.6857142857142857,"z":66.64761904761905,"a95":0.6,"info":"\"\" at \"\""},{"visible":true,"include":false,"step":"330","x":-53.57142857142857,"y":-0.11428571428571428,"z":49.971428571428575,"a95":1.1,"info":"\"\" at \"\""},{"visible":true,"include":false,"step":"360","x":-27.133333333333333,"y":0.5809523809523809,"z":20.82857142857143,"a95":0.6,"info":"\"\" at \"\""},{"visible":true,"include":true,"step":"390","x":-21.152380952380952,"y":1.3904761904761904,"z":16.904761904761905,"a95":1.2,"info":"\"\" at \"\""},{"visible":true,"include":true,"step":"420","x":-19.295238095238094,"y":0.8761904761904761,"z":14.609523809523811,"a95":0.7,"info":"\"\" at \"\""},{"visible":true,"include":true,"step":"450","x":-13.342857142857142,"y":0.3333333333333333,"z":7.6380952380952385,"a95":1.2,"info":"\"\" at \"\""},{"visible":true,"include":true,"step":"480","x":-10.17142857142857,"y":0.3904761904761904,"z":4.114285714285715,"a95":2.8,"info":"\"\" at \"\""},{"visible":true,"include":true,"step":"510","x":-12.885714285714286,"y":1.5619047619047617,"z":-1.3523809523809522,"a95":6.5,"info":"\"\" at \"\""},{"visible":false,"include":false,"step":"530","x":-12.076190476190476,"y":1.6476190476190478,"z":-1.0761904761904764,"a95":4.5,"info":"\"\" at \"\""},{"visible":false,"include":false,"step":"550","x":-15.133333333333335,"y":1.8761904761904762,"z":-4.961904761904762,"a95":3.2,"info":"\"\" at \"\""},{"visible":false,"include":false,"step":"570","x":-7.561904761904763,"y":2.1809523809523808,"z":1.9238095238095236,"a95":2.7,"info":"\"\" at \"\""}]},{"version":"v1.1.0","exported":"2016-10-09T19:07:57.579Z","volume":10.5,"added":"2016-10-09T18:44:29.167Z","format":"Utrecht","demagType":"Unknown","strat":null,"patch":1.1,"GEO":[],"TECT":[],"interpreted":false,"name":"TG  5.2","coreAzi":130,"coreDip":3,"bedStrike":218,"bedDip":85,"data":[{"visible":true,"include":false,"step":"20","x":-197.0190476190476,"y":-82.06666666666668,"z":-50.10476190476191,"a95":0.9,"info":"\"\" at \"\""},{"visible":true,"include":false,"step":"100","x":-186.4952380952381,"y":-41.03809523809524,"z":49.19047619047619,"a95":1.2,"info":"\"\" at \"\""},{"visible":true,"include":false,"step":"150","x":-137.57142857142858,"y":-20.257142857142856,"z":64.31428571428572,"a95":1.3,"info":"\"\" at \"\""},{"visible":true,"include":false,"step":"200","x":-117.53333333333333,"y":-6.190476190476191,"z":81.01904761904763,"a95":0.8,"info":"\"\" at \"\""},{"visible":true,"include":false,"step":"250","x":-88.5904761904762,"y":0.09523809523809523,"z":80.00952380952381,"a95":1,"info":"\"\" at \"\""},{"visible":true,"include":true,"step":"300","x":-70.71428571428571,"y":0.6380952380952382,"z":70.54285714285714,"a95":0.8,"info":"\"\" at \"\""},{"visible":true,"include":true,"step":"330","x":-63.74285714285714,"y":-2.619047619047619,"z":56.88571428571428,"a95":0.9,"info":"\"\" at \"\""},{"visible":true,"include":true,"step":"360","x":-50.96190476190476,"y":-1.1619047619047618,"z":47.733333333333334,"a95":0.8,"info":"\"\" at \"\""},{"visible":true,"include":true,"step":"390","x":-37.714285714285715,"y":-0.6952380952380952,"z":33.87619047619047,"a95":1.1,"info":"\"\" at \"\""},{"visible":true,"include":true,"step":"420","x":-30.333333333333332,"y":-1.5714285714285714,"z":29.314285714285717,"a95":2.4,"info":"\"\" at \"\""},{"visible":true,"include":true,"step":"450","x":-23.238095238095237,"y":3.838095238095238,"z":7.876190476190477,"a95":4,"info":"\"\" at \"\""},{"visible":true,"include":true,"step":"480","x":-16.39047619047619,"y":1.5714285714285714,"z":7.142857142857143,"a95":3.5,"info":"\"\" at \"\""},{"visible":false,"include":false,"step":"510","x":-16.323809523809523,"y":13.361904761904762,"z":5.552380952380952,"a95":4.7,"info":"\"\" at \"\""},{"visible":true,"include":true,"step":"530","x":-16.97142857142857,"y":2.619047619047619,"z":4.390476190476191,"a95":4.7,"info":"\"\" at \"\""},{"visible":true,"include":false,"step":"550","x":-17.952380952380953,"y":-1.2190476190476192,"z":5.980952380952381,"a95":5.5,"info":"\"\" at \"\""},{"visible":true,"include":false,"step":"570","x":-14.876190476190475,"y":-5.285714285714286,"z":-0.3238095238095238,"a95":4.3,"info":"\"\" at \"\""}]},{"version":"v1.1.0","exported":"2016-10-09T19:07:57.579Z","volume":10.5,"added":"2016-10-09T18:44:29.167Z","format":"Utrecht","demagType":"Unknown","strat":null,"patch":1.1,"GEO":[],"TECT":[],"interpreted":false,"name":"TG  7A.1","coreAzi":355,"coreDip":81,"bedStrike":218,"bedDip":85,"data":[{"visible":true,"include":false,"step":"20","x":65.83809523809524,"y":67.4,"z":328.64761904761906,"a95":0.6,"info":"\"\" at \"\""},{"visible":true,"include":false,"step":"100","x":54.971428571428575,"y":51.77142857142857,"z":330.57142857142856,"a95":0.9,"info":"\"\" at \"\""},{"visible":true,"include":false,"step":"150","x":25.104761904761908,"y":36.08571428571428,"z":215.0190476190476,"a95":0.5,"info":"\"\" at \"\""},{"visible":true,"include":false,"step":"200","x":2.380952380952381,"y":30.676190476190477,"z":139.45714285714286,"a95":0.5,"info":"\"\" at \"\""},{"visible":true,"include":true,"step":"250","x":-14.123809523809525,"y":26.73333333333333,"z":80.68571428571428,"a95":0.5,"info":"\"\" at \"\""},{"visible":true,"include":true,"step":"300","x":-9.466666666666667,"y":20.98095238095238,"z":61.00952380952381,"a95":0.6,"info":"\"\" at \"\""},{"visible":true,"include":true,"step":"330","x":-10.114285714285714,"y":15.342857142857142,"z":53.599999999999994,"a95":0.6,"info":"\"\" at \"\""},{"visible":true,"include":true,"step":"360","x":-9.40952380952381,"y":15.399999999999999,"z":42.476190476190474,"a95":0.5,"info":"\"\" at \"\""},{"visible":true,"include":true,"step":"390","x":-8.247619047619047,"y":13.600000000000001,"z":37.561904761904756,"a95":0.6,"info":"\"\" at \"\""},{"visible":true,"include":true,"step":"420","x":-6.504761904761905,"y":12.380952380952381,"z":35.59047619047619,"a95":0.6,"info":"\"\" at \"\""},{"visible":true,"include":true,"step":"450","x":-9.371428571428572,"y":12.761904761904763,"z":30.714285714285715,"a95":0.7,"info":"\"\" at \"\""},{"visible":true,"include":true,"step":"480","x":-6.438095238095237,"y":10.533333333333333,"z":26.152380952380955,"a95":0.7,"info":"\"\" at \"\""},{"visible":true,"include":false,"step":"510","x":-9.638095238095238,"y":4.161904761904762,"z":7.380952380952381,"a95":2.8,"info":"\"\" at \"\""},{"visible":true,"include":false,"step":"530","x":-6.314285714285714,"y":2.8857142857142857,"z":12.561904761904762,"a95":3,"info":"\"\" at \"\""},{"visible":true,"include":false,"step":"550","x":-9.638095238095238,"y":3.5619047619047617,"z":7.704761904761905,"a95":2.4,"info":"\"\" at \"\""},{"visible":true,"include":false,"step":"570","x":-5.504761904761905,"y":-0.3523809523809524,"z":10.104761904761904,"a95":2,"info":"\"\" at \"\""}]},{"version":"v1.1.0","exported":"2016-10-09T19:07:57.579Z","volume":10.5,"added":"2016-10-09T18:44:29.167Z","format":"Utrecht","demagType":"Unknown","strat":null,"patch":1.1,"GEO":[],"TECT":[],"interpreted":false,"name":"TG  7B.1","coreAzi":22,"coreDip":80,"bedStrike":218,"bedDip":85,"data":[{"visible":true,"include":false,"step":"20","x":47.08571428571428,"y":37.08571428571428,"z":348.9238095238095,"a95":1,"info":"\"\" at \"\""},{"visible":true,"include":false,"step":"100","x":34.98095238095238,"y":24.466666666666665,"z":344.97142857142853,"a95":1.6,"info":"\"\" at \"\""},{"visible":true,"include":false,"step":"150","x":12.361904761904762,"y":38.93333333333334,"z":252.78095238095236,"a95":1.1,"info":"\"\" at \"\""},{"visible":true,"include":false,"step":"200","x":15.523809523809524,"y":43.84761904761905,"z":213.0190476190476,"a95":3.6,"info":"\"\" at \"\""},{"visible":true,"include":false,"step":"250","x":7.923809523809524,"y":42.38095238095238,"z":177.92380952380952,"a95":0.8,"info":"\"\" at \"\""},{"visible":true,"include":false,"step":"300","x":6.742857142857143,"y":32.542857142857144,"z":157.38095238095238,"a95":0.6,"info":"\"\" at \"\""},{"visible":true,"include":true,"step":"330","x":-0.17142857142857143,"y":28.35238095238095,"z":141.45714285714286,"a95":0.7,"info":"\"\" at \"\""},{"visible":true,"include":true,"step":"360","x":2.2666666666666666,"y":31.142857142857142,"z":130.56190476190477,"a95":0.6,"info":"\"\" at \"\""},{"visible":true,"include":true,"step":"390","x":3.7809523809523813,"y":27.6,"z":115.48571428571428,"a95":0.5,"info":"\"\" at \"\""},{"visible":true,"include":true,"step":"420","x":2.2666666666666666,"y":26.323809523809523,"z":108.37142857142858,"a95":0.8,"info":"\"\" at \"\""},{"visible":true,"include":true,"step":"450","x":-6.104761904761904,"y":25.799999999999997,"z":73.44761904761906,"a95":1.2,"info":"\"\" at \"\""},{"visible":true,"include":true,"step":"480","x":-3.542857142857143,"y":25.276190476190475,"z":70.1047619047619,"a95":1.1,"info":"\"\" at \"\""},{"visible":true,"include":true,"step":"510","x":-5.980952380952381,"y":19.114285714285714,"z":66.0952380952381,"a95":0.7,"info":"\"\" at \"\""},{"visible":true,"include":true,"step":"530","x":-3.3714285714285714,"y":21.847619047619048,"z":54.94285714285714,"a95":1.4,"info":"\"\" at \"\""},{"visible":true,"include":true,"step":"550","x":-4.819047619047619,"y":15.980952380952383,"z":46.31428571428572,"a95":1.3,"info":"\"\" at \"\""},{"visible":true,"include":true,"step":"570","x":-7.380952380952381,"y":12.552380952380954,"z":37.65714285714286,"a95":1.4,"info":"\"\" at \"\""},{"visible":false,"include":false,"step":"590","x":-48.980952380952374,"y":8.77142857142857,"z":11.276190476190477,"a95":1.1,"info":"\"\" at \"\""}]},{"version":"v1.1.0","exported":"2016-10-09T19:07:57.579Z","volume":10.5,"added":"2016-10-09T18:44:29.167Z","format":"Utrecht","demagType":"Unknown","strat":null,"patch":1.1,"GEO":[],"TECT":[],"interpreted":false,"name":"TG  8.1","coreAzi":64,"coreDip":83,"bedStrike":218,"bedDip":85,"data":[{"visible":false,"include":false,"step":"20","x":5.171428571428571,"y":-23.476190476190474,"z":93.9047619047619,"a95":0.4,"info":"\"\" at \"\""},{"visible":true,"include":false,"step":"100","x":7.666666666666667,"y":-16.847619047619048,"z":93.11428571428571,"a95":0.3,"info":"\"\" at \"\""},{"visible":true,"include":false,"step":"150","x":3.3714285714285714,"y":-4.590476190476191,"z":64.18095238095238,"a95":0.5,"info":"\"\" at \"\""},{"visible":true,"include":false,"step":"200","x":-0.9333333333333333,"y":7.380952380952381,"z":32.82857142857143,"a95":0.6,"info":"\"\" at \"\""},{"visible":true,"include":true,"step":"250","x":-1.3333333333333333,"y":8.885714285714286,"z":17.780952380952378,"a95":0.7,"info":"\"\" at \"\""},{"visible":true,"include":true,"step":"300","x":-1.2190476190476192,"y":5.6380952380952385,"z":13.914285714285715,"a95":1,"info":"\"\" at \"\""},{"visible":true,"include":true,"step":"330","x":-1.7428571428571429,"y":5,"z":10.80952380952381,"a95":1.2,"info":"\"\" at \"\""},{"visible":true,"include":true,"step":"360","x":-2.5523809523809526,"y":2.3238095238095235,"z":7.323809523809524,"a95":1.9,"info":"\"\" at \"\""},{"visible":true,"include":true,"step":"390","x":-3.314285714285714,"y":1.8571428571428572,"z":4.733333333333333,"a95":1.7,"info":"\"\" at \"\""},{"visible":true,"include":true,"step":"420","x":-2.038095238095238,"y":2.4380952380952383,"z":3.8095238095238093,"a95":2.8,"info":"\"\" at \"\""},{"visible":true,"include":true,"step":"450","x":-2.780952380952381,"y":1.3523809523809522,"z":1.5523809523809524,"a95":3.5,"info":"\"\" at \"\""},{"visible":true,"include":true,"step":"480","x":-4.3238095238095235,"y":0.12380952380952381,"z":1.4952380952380953,"a95":3,"info":"\"\" at \"\""},{"visible":true,"include":true,"step":"510","x":-4.79047619047619,"y":0.8380952380952381,"z":1.9047619047619047,"a95":3,"info":"\"\" at \"\""},{"visible":true,"include":true,"step":"530","x":-3.4380952380952383,"y":1.0952380952380953,"z":0.7904761904761906,"a95":6.1,"info":"\"\" at \"\""},{"visible":false,"include":false,"step":"550","x":-5.333333333333333,"y":3.0476190476190474,"z":-0.8095238095238095,"a95":6.1,"info":"\"\" at \"\""},{"visible":false,"include":false,"step":"570","x":-1.7523809523809522,"y":0.5523809523809524,"z":-0.43809523809523804,"a95":11.6,"info":"\"\" at \"\""}]},{"version":"v1.1.0","exported":"2016-10-09T19:07:57.580Z","volume":10.5,"added":"2016-10-09T18:44:29.167Z","format":"Utrecht","demagType":"Unknown","strat":null,"patch":1.1,"GEO":[],"TECT":[],"interpreted":false,"name":"TG  8.2","coreAzi":64,"coreDip":83,"bedStrike":218,"bedDip":85,"data":[{"visible":false,"include":false,"step":"20","x":18.40952380952381,"y":-32.095238095238095,"z":138.36190476190475,"a95":1,"info":"\"\" at \"\""},{"visible":true,"include":false,"step":"100","x":6.838095238095238,"y":-3.685714285714286,"z":131.25714285714287,"a95":1.1,"info":"\"\" at \"\""},{"visible":true,"include":false,"step":"150","x":0.5238095238095238,"y":11.571428571428571,"z":85.61904761904762,"a95":2.3,"info":"\"\" at \"\""},{"visible":true,"include":false,"step":"200","x":-0.9714285714285713,"y":14.628571428571428,"z":70.91428571428571,"a95":0.8,"info":"\"\" at \"\""},{"visible":true,"include":true,"step":"250","x":-3.5238095238095237,"y":18.514285714285716,"z":45.42857142857143,"a95":1.1,"info":"\"\" at \"\""},{"visible":true,"include":true,"step":"300","x":-2.038095238095238,"y":15.980952380952383,"z":37.076190476190476,"a95":1.1,"info":"\"\" at \"\""},{"visible":true,"include":true,"step":"330","x":-0.17142857142857143,"y":12.609523809523811,"z":32.857142857142854,"a95":2.4,"info":"\"\" at \"\""},{"visible":true,"include":true,"step":"360","x":-2.7333333333333334,"y":11.857142857142858,"z":26.876190476190477,"a95":1.6,"info":"\"\" at \"\""},{"visible":true,"include":true,"step":"390","x":-1.6857142857142857,"y":9.238095238095237,"z":22.2,"a95":1.5,"info":"\"\" at \"\""},{"visible":true,"include":true,"step":"420","x":-0.8761904761904761,"y":8.952380952380953,"z":19.438095238095237,"a95":2.4,"info":"\"\" at \"\""},{"visible":true,"include":true,"step":"450","x":-6.857142857142857,"y":4.180952380952381,"z":10.17142857142857,"a95":4,"info":"\"\" at \"\""},{"visible":true,"include":true,"step":"480","x":-7.20952380952381,"y":4.819047619047619,"z":11.761904761904763,"a95":3.5,"info":"\"\" at \"\""},{"visible":true,"include":true,"step":"510","x":-7.495238095238095,"y":4.533333333333333,"z":7.6952380952380945,"a95":3.8,"info":"\"\" at \"\""},{"visible":true,"include":true,"step":"530","x":-8.371428571428572,"y":4.590476190476191,"z":6.914285714285714,"a95":3.8,"info":"\"\" at \"\""},{"visible":true,"include":true,"step":"550","x":-5.466666666666667,"y":0.6952380952380952,"z":6.714285714285714,"a95":5.4,"info":"\"\" at \"\""},{"visible":true,"include":false,"step":"570","x":-5.980952380952381,"y":0.9904761904761905,"z":1.4190476190476191,"a95":8.1,"info":"\"\" at \"\""},{"visible":false,"include":false,"step":"590","x":-28.59047619047619,"y":-0.3523809523809524,"z":1.3047619047619048,"a95":7,"info":"\"\" at \"\""}]},{"version":"v1.1.0","exported":"2016-10-09T19:07:57.580Z","volume":10.5,"added":"2016-10-09T18:44:29.168Z","format":"Utrecht","demagType":"Unknown","strat":null,"patch":1.1,"GEO":[],"TECT":[],"interpreted":false,"name":"TG  9.1","coreAzi":20,"coreDip":59,"bedStrike":218,"bedDip":85,"data":[{"visible":false,"include":false,"step":"20","x":-161.71428571428572,"y":-31.43809523809524,"z":439.14285714285717,"a95":0.5,"info":"\"\" at \"\""},{"visible":true,"include":false,"step":"100","x":-144.68571428571428,"y":-27.771428571428572,"z":417.6952380952381,"a95":0.4,"info":"\"\" at \"\""},{"visible":true,"include":false,"step":"150","x":-140.2095238095238,"y":-12.438095238095238,"z":319.7333333333333,"a95":0.6,"info":"\"\" at \"\""},{"visible":true,"include":false,"step":"200","x":-120.74285714285713,"y":-10.571428571428571,"z":238,"a95":0.6,"info":"\"\" at \"\""},{"visible":true,"include":false,"step":"250","x":-101.85714285714286,"y":-3.2571428571428576,"z":172.54285714285714,"a95":0.6,"info":"\"\" at \"\""},{"visible":true,"include":false,"step":"300","x":-88.9047619047619,"y":-3.076190476190476,"z":137.16190476190476,"a95":0.7,"info":"\"\" at \"\""},{"visible":true,"include":false,"step":"330","x":-81.87619047619049,"y":-0.8761904761904761,"z":118.39047619047618,"a95":0.6,"info":"\"\" at \"\""},{"visible":true,"include":true,"step":"360","x":-71.76190476190476,"y":-7.20952380952381,"z":97.44761904761906,"a95":0.8,"info":"\"\" at \"\""},{"visible":true,"include":true,"step":"390","x":-53.51428571428571,"y":-3.7809523809523813,"z":69.93333333333332,"a95":0.6,"info":"\"\" at \"\""},{"visible":true,"include":true,"step":"420","x":-50.780952380952385,"y":-1.8571428571428572,"z":68.16190476190476,"a95":0.5,"info":"\"\" at \"\""},{"visible":true,"include":true,"step":"450","x":-50.971428571428575,"y":-4.8,"z":63.55238095238095,"a95":0.8,"info":"\"\" at \"\""},{"visible":true,"include":true,"step":"480","x":-42.48571428571429,"y":-4.0285714285714285,"z":52.06666666666667,"a95":0.7,"info":"\"\" at \"\""},{"visible":true,"include":true,"step":"510","x":-29.419047619047618,"y":-9.085714285714285,"z":44.86666666666667,"a95":1.2,"info":"\"\" at \"\""},{"visible":true,"include":true,"step":"530","x":-27.219047619047622,"y":2.3714285714285714,"z":38.75238095238095,"a95":1.2,"info":"\"\" at \"\""},{"visible":false,"include":false,"step":"550","x":-32.266666666666666,"y":0.0761904761904762,"z":26.257142857142856,"a95":1,"info":"\"\" at \"\""},{"visible":false,"include":false,"step":"570","x":-26.780952380952378,"y":6.828571428571429,"z":32.72380952380953,"a95":0.7,"info":"\"\" at \"\""}]},{"version":"v1.1.0","exported":"2016-10-09T19:07:57.580Z","volume":10.5,"added":"2016-10-09T18:44:29.169Z","format":"Utrecht","demagType":"Unknown","strat":null,"patch":1.1,"GEO":[],"TECT":[],"interpreted":false,"name":"TG 10.1","coreAzi":183,"coreDip":22,"bedStrike":218,"bedDip":85,"data":[{"visible":false,"include":false,"step":"20","x":-213.32380952380953,"y":-10.523809523809524,"z":66.41904761904762,"a95":1.3,"info":"\"\" at \"\""},{"visible":true,"include":false,"step":"100","x":-145.7238095238095,"y":-31.82857142857143,"z":47.21904761904762,"a95":1.4,"info":"\"\" at \"\""},{"visible":true,"include":false,"step":"150","x":-89.42857142857143,"y":-30.24761904761905,"z":45.23809523809524,"a95":1.6,"info":"\"\" at \"\""},{"visible":true,"include":false,"step":"200","x":-71.99047619047619,"y":-34.97142857142857,"z":51.12380952380952,"a95":0.7,"info":"\"\" at \"\""},{"visible":true,"include":false,"step":"250","x":-48.75238095238095,"y":-32.885714285714286,"z":43.21904761904762,"a95":0.8,"info":"\"\" at \"\""},{"visible":true,"include":true,"step":"300","x":-38.46666666666666,"y":-29.17142857142857,"z":39.6,"a95":0.9,"info":"\"\" at \"\""},{"visible":true,"include":true,"step":"330","x":-33.2952380952381,"y":-24.75238095238095,"z":31.990476190476187,"a95":1.4,"info":"\"\" at \"\""},{"visible":true,"include":true,"step":"360","x":-29.514285714285712,"y":-21.20952380952381,"z":30.123809523809523,"a95":1,"info":"\"\" at \"\""},{"visible":true,"include":true,"step":"390","x":-25.104761904761908,"y":-19.17142857142857,"z":31.780952380952378,"a95":1,"info":"\"\" at \"\""},{"visible":true,"include":true,"step":"420","x":-23.53333333333333,"y":-18.714285714285715,"z":29.83809523809524,"a95":1.2,"info":"\"\" at \"\""},{"visible":true,"include":true,"step":"450","x":-21.323809523809523,"y":-10.695238095238095,"z":25.885714285714286,"a95":2.1,"info":"\"\" at \"\""},{"visible":true,"include":true,"step":"480","x":-19.114285714285714,"y":-10.22857142857143,"z":22.2,"a95":2.5,"info":"\"\" at \"\""},{"visible":true,"include":true,"step":"510","x":-18.82857142857143,"y":-12.438095238095238,"z":18.714285714285715,"a95":2.2,"info":"\"\" at \"\""},{"visible":true,"include":true,"step":"530","x":-19.46666666666667,"y":-9.933333333333334,"z":14.99047619047619,"a95":2.7,"info":"\"\" at \"\""},{"visible":true,"include":true,"step":"550","x":-9.123809523809523,"y":-3.076190476190476,"z":16.038095238095238,"a95":3,"info":"\"\" at \"\""},{"visible":true,"include":true,"step":"570","x":-9.761904761904763,"y":-3.657142857142857,"z":8.161904761904761,"a95":5.1,"info":"\"\" at \"\""}]},{"version":"v1.1.0","exported":"2016-10-09T19:07:57.580Z","volume":10.5,"added":"2016-10-09T18:44:29.169Z","format":"Utrecht","demagType":"Unknown","strat":null,"patch":1.1,"GEO":[],"TECT":[],"interpreted":false,"name":"TG 10.2","coreAzi":183,"coreDip":22,"bedStrike":218,"bedDip":85,"data":[{"visible":false,"include":false,"step":"20","x":-251.83809523809526,"y":-5.285714285714286,"z":-4.847619047619047,"a95":0.7,"info":"\"\" at \"\""},{"visible":true,"include":false,"step":"100","x":-196.22857142857143,"y":-33.352380952380955,"z":53.04761904761905,"a95":0.9,"info":"\"\" at \"\""},{"visible":true,"include":false,"step":"150","x":-146.95238095238096,"y":-25.390476190476193,"z":53.51428571428571,"a95":1,"info":"\"\" at \"\""},{"visible":true,"include":false,"step":"200","x":-94.6,"y":-36.78095238095238,"z":53.34285714285714,"a95":1,"info":"\"\" at \"\""},{"visible":true,"include":false,"step":"250","x":-56.599999999999994,"y":-37.82857142857143,"z":48.08571428571428,"a95":1,"info":"\"\" at \"\""},{"visible":true,"include":true,"step":"300","x":-48,"y":-29.45714285714286,"z":40.46666666666666,"a95":1,"info":"\"\" at \"\""},{"visible":true,"include":true,"step":"330","x":-43.93333333333334,"y":-27.428571428571427,"z":32.91428571428572,"a95":0.9,"info":"\"\" at \"\""},{"visible":true,"include":true,"step":"360","x":-35.333333333333336,"y":-28.533333333333335,"z":29.580952380952382,"a95":1.1,"info":"\"\" at \"\""},{"visible":true,"include":true,"step":"390","x":-31.666666666666668,"y":-23.238095238095237,"z":23.238095238095237,"a95":1.1,"info":"\"\" at \"\""},{"visible":true,"include":true,"step":"420","x":-30.038095238095234,"y":-23.41904761904762,"z":25.6,"a95":1.3,"info":"\"\" at \"\""},{"visible":true,"include":true,"step":"450","x":-25.61904761904762,"y":-21.895238095238096,"z":25.685714285714283,"a95":1.1,"info":"\"\" at \"\""},{"visible":true,"include":true,"step":"480","x":-22.961904761904762,"y":-20.695238095238096,"z":18.314285714285717,"a95":1,"info":"\"\" at \"\""},{"visible":true,"include":true,"step":"510","x":-22.38095238095238,"y":-18.38095238095238,"z":17.714285714285715,"a95":1,"info":"\"\" at \"\""},{"visible":true,"include":true,"step":"530","x":-22.228571428571428,"y":-16.095238095238095,"z":13.142857142857142,"a95":1.5,"info":"\"\" at \"\""},{"visible":false,"include":false,"step":"550","x":-18.295238095238094,"y":-7.4,"z":7.809523809523809,"a95":1.2,"info":"\"\" at \"\""},{"visible":false,"include":false,"step":"570","x":-17.40952380952381,"y":-0.5238095238095238,"z":7.485714285714285,"a95":1.8,"info":"\"\" at \"\""}]},{"version":"v1.1.0","exported":"2016-10-09T19:07:57.580Z","volume":10.5,"added":"2016-10-09T18:44:29.169Z","format":"Utrecht","demagType":"Unknown","strat":null,"patch":1.1,"GEO":[],"TECT":[],"interpreted":false,"name":"TG 11.1","coreAzi":134,"coreDip":80,"bedStrike":218,"bedDip":85,"data":[{"visible":false,"include":false,"step":"20","x":-54.39047619047619,"y":-67.11428571428571,"z":171.9047619047619,"a95":0.4,"info":"\"\" at \"\""},{"visible":true,"include":false,"step":"100","x":-30.61904761904762,"y":-37.476190476190474,"z":160.45714285714286,"a95":0.5,"info":"\"\" at \"\""},{"visible":true,"include":false,"step":"150","x":-16.095238095238095,"y":-30.676190476190477,"z":112.4095238095238,"a95":0.5,"info":"\"\" at \"\""},{"visible":true,"include":false,"step":"200","x":2.1523809523809527,"y":-17.666666666666668,"z":71.00952380952381,"a95":0.4,"info":"\"\" at \"\""},{"visible":true,"include":false,"step":"250","x":8.77142857142857,"y":-10.114285714285714,"z":41.01904761904762,"a95":0.5,"info":"\"\" at \"\""},{"visible":true,"include":true,"step":"300","x":12.142857142857142,"y":-6.628571428571428,"z":32.48571428571429,"a95":0.5,"info":"\"\" at \"\""},{"visible":true,"include":true,"step":"330","x":9.99047619047619,"y":-6.276190476190477,"z":27.54285714285714,"a95":0.6,"info":"\"\" at \"\""},{"visible":true,"include":true,"step":"360","x":8.82857142857143,"y":-5.580952380952381,"z":23.81904761904762,"a95":0.7,"info":"\"\" at \"\""},{"visible":true,"include":true,"step":"390","x":5.523809523809524,"y":-7.438095238095237,"z":20.333333333333332,"a95":1,"info":"\"\" at \"\""},{"visible":true,"include":true,"step":"420","x":0.6952380952380952,"y":-4.066666666666667,"z":20.01904761904762,"a95":0.8,"info":"\"\" at \"\""},{"visible":true,"include":true,"step":"450","x":2.2952380952380955,"y":-4.133333333333333,"z":17.942857142857143,"a95":1.1,"info":"\"\" at \"\""},{"visible":true,"include":true,"step":"480","x":-1.180952380952381,"y":-0.42857142857142855,"z":18.933333333333334,"a95":1.1,"info":"\"\" at \"\""},{"visible":true,"include":true,"step":"510","x":-3,"y":-7.285714285714286,"z":12.133333333333335,"a95":1.1,"info":"\"\" at \"\""},{"visible":true,"include":true,"step":"530","x":-5.657142857142857,"y":-4.504761904761905,"z":10.971428571428572,"a95":2.3,"info":"\"\" at \"\""},{"visible":true,"include":true,"step":"550","x":-5.685714285714286,"y":-1.0857142857142859,"z":11.914285714285715,"a95":2.2,"info":"\"\" at \"\""},{"visible":true,"include":false,"step":"570","x":-4.847619047619047,"y":-2.342857142857143,"z":4.933333333333333,"a95":2.6,"info":"\"\" at \"\""}]},{"version":"v1.1.0","exported":"2016-10-09T19:07:57.580Z","volume":10.5,"added":"2016-10-09T18:44:29.170Z","format":"Utrecht","demagType":"Unknown","strat":null,"patch":1.1,"GEO":[],"TECT":[],"interpreted":false,"name":"TG 11.2","coreAzi":134,"coreDip":80,"bedStrike":218,"bedDip":85,"data":[{"visible":true,"include":false,"step":"20","x":-21.82857142857143,"y":-57.60952380952381,"z":145.7238095238095,"a95":1,"info":"\"\" at \"\""},{"visible":true,"include":false,"step":"100","x":-5.257142857142857,"y":-32.61904761904762,"z":128.36190476190475,"a95":1,"info":"\"\" at \"\""},{"visible":true,"include":false,"step":"150","x":10.257142857142858,"y":-16.304761904761904,"z":74.57142857142857,"a95":2,"info":"\"\" at \"\""},{"visible":true,"include":false,"step":"200","x":17.38095238095238,"y":-15.161904761904761,"z":58.61904761904762,"a95":0.7,"info":"\"\" at \"\""},{"visible":true,"include":false,"step":"250","x":14.542857142857141,"y":-7.095238095238095,"z":35.39047619047619,"a95":1.5,"info":"\"\" at \"\""},{"visible":true,"include":true,"step":"300","x":17.142857142857142,"y":-4.590476190476191,"z":29.666666666666668,"a95":0.9,"info":"\"\" at \"\""},{"visible":true,"include":true,"step":"330","x":15.80952380952381,"y":-5.980952380952381,"z":24.923809523809524,"a95":2.2,"info":"\"\" at \"\""},{"visible":true,"include":true,"step":"360","x":13.942857142857143,"y":-1.5714285714285714,"z":21.99047619047619,"a95":1.4,"info":"\"\" at \"\""},{"visible":true,"include":true,"step":"390","x":9.933333333333334,"y":-1.5714285714285714,"z":20.914285714285715,"a95":1.8,"info":"\"\" at \"\""},{"visible":true,"include":true,"step":"420","x":8.77142857142857,"y":-0.5238095238095238,"z":17.58095238095238,"a95":2.2,"info":"\"\" at \"\""},{"visible":true,"include":true,"step":"450","x":5.4,"y":0.6380952380952382,"z":11.704761904761906,"a95":5,"info":"\"\" at \"\""},{"visible":true,"include":true,"step":"480","x":1.4571428571428573,"y":-2.8476190476190473,"z":8.685714285714287,"a95":4.9,"info":"\"\" at \"\""},{"visible":true,"include":true,"step":"510","x":1.3333333333333333,"y":0.3523809523809524,"z":11.447619047619048,"a95":3.9,"info":"\"\" at \"\""},{"visible":true,"include":false,"step":"530","x":3.3714285714285714,"y":1.7999999999999998,"z":10.114285714285714,"a95":4.2,"info":"\"\" at \"\""},{"visible":true,"include":false,"step":"550","x":3.314285714285714,"y":1.9142857142857144,"z":4.476190476190476,"a95":6.7,"info":"\"\" at \"\""},{"visible":true,"include":false,"step":"570","x":6.800000000000001,"y":5.285714285714286,"z":1.9428571428571426,"a95":4.2,"info":"\"\" at \"\""}]},{"version":"v1.1.0","exported":"2016-10-09T19:07:57.580Z","volume":10.5,"added":"2016-10-09T18:44:29.170Z","format":"Utrecht","demagType":"Unknown","strat":null,"patch":1.1,"GEO":[],"TECT":[],"interpreted":false,"name":"TG 12.1","coreAzi":190,"coreDip":68,"bedStrike":218,"bedDip":85,"data":[{"visible":true,"include":false,"step":"20","x":-161.07619047619048,"y":-31.200000000000003,"z":136.92380952380952,"a95":0.9,"info":"\"\" at \"\""},{"visible":true,"include":false,"step":"100","x":-112.55238095238094,"y":-31.257142857142856,"z":128.73333333333335,"a95":0.7,"info":"\"\" at \"\""},{"visible":true,"include":false,"step":"150","x":-71.4095238095238,"y":-29.98095238095238,"z":89.57142857142857,"a95":0.8,"info":"\"\" at \"\""},{"visible":true,"include":false,"step":"200","x":-33.12380952380953,"y":-29.98095238095238,"z":55.2,"a95":0.8,"info":"\"\" at \"\""},{"visible":true,"include":true,"step":"250","x":-9.352380952380953,"y":-24.466666666666665,"z":30.066666666666666,"a95":0.7,"info":"\"\" at \"\""},{"visible":true,"include":true,"step":"300","x":-6.504761904761905,"y":-19.17142857142857,"z":24.142857142857142,"a95":0.9,"info":"\"\" at \"\""},{"visible":true,"include":true,"step":"330","x":-4.533333333333333,"y":-19.81904761904762,"z":22.866666666666667,"a95":1.1,"info":"\"\" at \"\""},{"visible":true,"include":true,"step":"360","x":-4.942857142857143,"y":-12.495238095238093,"z":13.41904761904762,"a95":1.1,"info":"\"\" at \"\""},{"visible":true,"include":true,"step":"390","x":-5.6380952380952385,"y":-10.114285714285714,"z":11.647619047619047,"a95":1.5,"info":"\"\" at \"\""},{"visible":true,"include":true,"step":"420","x":-1.6857142857142857,"y":-11.447619047619048,"z":8.047619047619047,"a95":0.8,"info":"\"\" at \"\""},{"visible":true,"include":true,"step":"450","x":-5.666666666666667,"y":-8.933333333333334,"z":6.561904761904763,"a95":1.2,"info":"\"\" at \"\""},{"visible":true,"include":true,"step":"480","x":-3.8190476190476192,"y":-13.180952380952382,"z":12.495238095238093,"a95":0.9,"info":"\"\" at \"\""},{"visible":true,"include":true,"step":"510","x":-0.3142857142857143,"y":-8.533333333333333,"z":0.047619047619047616,"a95":1.6,"info":"\"\" at \"\""},{"visible":true,"include":false,"step":"530","x":-2.723809523809524,"y":-1.3333333333333333,"z":4.20952380952381,"a95":4,"info":"\"\" at \"\""},{"visible":true,"include":false,"step":"550","x":-2.380952380952381,"y":1.4,"z":6.285714285714286,"a95":3.4,"info":"\"\" at \"\""},{"visible":true,"include":false,"step":"570","x":-7.742857142857143,"y":7.085714285714286,"z":6.961904761904761,"a95":1.5,"info":"\"\" at \"\""}]},{"version":"v1.1.0","exported":"2016-10-09T19:07:57.580Z","volume":10.5,"added":"2016-10-09T18:44:29.170Z","format":"Utrecht","demagType":"Unknown","strat":null,"patch":1.1,"GEO":[],"TECT":[],"interpreted":false,"name":"TG 12.2","coreAzi":190,"coreDip":68,"bedStrike":218,"bedDip":85,"data":[{"visible":true,"include":false,"step":"20","x":-110.74285714285713,"y":-20.257142857142856,"z":114.28571428571429,"a95":1,"info":"\"\" at \"\""},{"visible":true,"include":false,"step":"100","x":-81.80952380952381,"y":-26.304761904761904,"z":109.95238095238095,"a95":1.8,"info":"\"\" at \"\""},{"visible":true,"include":false,"step":"150","x":-32.61904761904762,"y":-23.676190476190477,"z":66.01904761904763,"a95":2.1,"info":"\"\" at \"\""},{"visible":true,"include":false,"step":"200","x":-13.714285714285714,"y":-26.076190476190476,"z":49.780952380952385,"a95":0.6,"info":"\"\" at \"\""},{"visible":true,"include":false,"step":"250","x":-3.619047619047619,"y":-20.41904761904762,"z":32.076190476190476,"a95":1,"info":"\"\" at \"\""},{"visible":true,"include":true,"step":"300","x":-2.0952380952380953,"y":-19.114285714285714,"z":26.18095238095238,"a95":1,"info":"\"\" at \"\""},{"visible":true,"include":true,"step":"330","x":-1.0476190476190477,"y":-14.523809523809524,"z":18.104761904761904,"a95":1.7,"info":"\"\" at \"\""},{"visible":true,"include":true,"step":"360","x":4.704761904761905,"y":-9.59047619047619,"z":18.8,"a95":1.8,"info":"\"\" at \"\""},{"visible":true,"include":true,"step":"390","x":0.7523809523809524,"y":-9.180952380952382,"z":13.476190476190476,"a95":2.2,"info":"\"\" at \"\""},{"visible":true,"include":true,"step":"420","x":-4.238095238095238,"y":-7.904761904761905,"z":12.285714285714286,"a95":2.8,"info":"\"\" at \"\""},{"visible":true,"include":true,"step":"450","x":2.1523809523809527,"y":-3.2571428571428576,"z":7.60952380952381,"a95":4,"info":"\"\" at \"\""},{"visible":true,"include":true,"step":"480","x":2.038095238095238,"y":3.7142857142857144,"z":14.438095238095238,"a95":4.7,"info":"\"\" at \"\""},{"visible":true,"include":true,"step":"510","x":-0.05714285714285714,"y":-1.4571428571428573,"z":2.961904761904762,"a95":11.7,"info":"\"\" at \"\""},{"visible":true,"include":false,"step":"530","x":0.9333333333333333,"y":-3.542857142857143,"z":11.066666666666666,"a95":4.5,"info":"\"\" at \"\""}]},{"version":"v1.1.0","exported":"2016-10-09T19:07:57.581Z","volume":10.5,"added":"2016-10-09T18:44:29.170Z","format":"Utrecht","demagType":"Unknown","strat":null,"patch":1.1,"GEO":[],"TECT":[],"interpreted":false,"name":"TG 13A.1","coreAzi":240,"coreDip":33,"bedStrike":218,"bedDip":85,"data":[{"visible":true,"include":false,"step":"20","x":-251.65714285714287,"y":62.22857142857143,"z":38.523809523809526,"a95":0.8,"info":"\"\" at \"\""},{"visible":false,"include":false,"step":"100","x":-89.77142857142857,"y":17.085714285714285,"z":103.72380952380952,"a95":0.7,"info":"\"\" at \"\""},{"visible":true,"include":false,"step":"150","x":-143.46666666666667,"y":17.723809523809525,"z":27.133333333333333,"a95":1.1,"info":"\"\" at \"\""},{"visible":true,"include":false,"step":"200","x":-104.88571428571429,"y":-4.180952380952381,"z":17.285714285714285,"a95":1.2,"info":"\"\" at \"\""},{"visible":true,"include":false,"step":"250","x":-69.32380952380952,"y":-8.371428571428572,"z":5.495238095238095,"a95":1.1,"info":"\"\" at \"\""},{"visible":true,"include":false,"step":"300","x":-60.028571428571425,"y":-10.514285714285714,"z":7.085714285714286,"a95":1.1,"info":"\"\" at \"\""},{"visible":true,"include":true,"step":"330","x":-54.095238095238095,"y":-12.78095238095238,"z":6.533333333333333,"a95":0.8,"info":"\"\" at \"\""},{"visible":true,"include":true,"step":"360","x":-45.60952380952381,"y":-8.885714285714286,"z":4.295238095238095,"a95":1.1,"info":"\"\" at \"\""},{"visible":true,"include":true,"step":"390","x":-35.095238095238095,"y":-5.752380952380952,"z":4.20952380952381,"a95":1.3,"info":"\"\" at \"\""},{"visible":true,"include":true,"step":"420","x":-32.6,"y":-9.466666666666667,"z":7.238095238095238,"a95":1.1,"info":"\"\" at \"\""},{"visible":true,"include":true,"step":"450","x":-29.742857142857144,"y":-8.647619047619047,"z":4.9904761904761905,"a95":1.2,"info":"\"\" at \"\""},{"visible":true,"include":true,"step":"480","x":-31.19047619047619,"y":-5.123809523809523,"z":0.3904761904761904,"a95":1.1,"info":"\"\" at \"\""},{"visible":true,"include":true,"step":"510","x":-17.83809523809524,"y":-4.885714285714285,"z":-3.685714285714286,"a95":1.6,"info":"\"\" at \"\""},{"visible":true,"include":true,"step":"530","x":-17.571428571428573,"y":-4.104761904761905,"z":1.7333333333333332,"a95":2.5,"info":"\"\" at \"\""},{"visible":true,"include":false,"step":"550","x":-20.4,"y":0.3238095238095238,"z":-0.09523809523809523,"a95":2.2,"info":"\"\" at \"\""},{"visible":true,"include":false,"step":"570","x":-21.152380952380952,"y":1.9142857142857144,"z":-2.2857142857142856,"a95":1.2,"info":"\"\" at \"\""}]},{"version":"v1.1.0","exported":"2016-10-09T19:07:57.581Z","volume":10.5,"added":"2016-10-09T18:44:29.171Z","format":"Utrecht","demagType":"Unknown","strat":null,"patch":1.1,"GEO":[],"TECT":[],"interpreted":false,"name":"TG 13A.2","coreAzi":240,"coreDip":33,"bedStrike":218,"bedDip":85,"data":[{"visible":false,"include":false,"step":"20","x":-188.07619047619048,"y":53.400000000000006,"z":12.761904761904763,"a95":1.2,"info":"\"\" at \"\""},{"visible":true,"include":false,"step":"100","x":-148.8761904761905,"y":32.352380952380955,"z":37.74285714285715,"a95":1.1,"info":"\"\" at \"\""},{"visible":true,"include":false,"step":"150","x":-85.75238095238095,"y":10.780952380952382,"z":20.780952380952378,"a95":1.7,"info":"\"\" at \"\""},{"visible":true,"include":false,"step":"200","x":-64.41904761904762,"y":1.1523809523809523,"z":20.047619047619047,"a95":0.8,"info":"\"\" at \"\""},{"visible":true,"include":false,"step":"250","x":-36.81904761904762,"y":-1.9428571428571426,"z":10.104761904761904,"a95":1.6,"info":"\"\" at \"\""},{"visible":true,"include":true,"step":"300","x":-27.952380952380953,"y":-3.2,"z":8.4,"a95":1.5,"info":"\"\" at \"\""},{"visible":true,"include":true,"step":"330","x":-25.799999999999997,"y":-2.961904761904762,"z":6.942857142857143,"a95":1.8,"info":"\"\" at \"\""},{"visible":true,"include":true,"step":"360","x":-21.961904761904762,"y":-1.3333333333333333,"z":4.6761904761904765,"a95":2.1,"info":"\"\" at \"\""},{"visible":true,"include":true,"step":"390","x":-21.323809523809523,"y":-3.4285714285714284,"z":4.847619047619047,"a95":2.3,"info":"\"\" at \"\""},{"visible":true,"include":true,"step":"420","x":-20.685714285714283,"y":-2.3238095238095235,"z":6.742857142857143,"a95":2.2,"info":"\"\" at \"\""},{"visible":true,"include":true,"step":"450","x":-17.485714285714284,"y":-2.2095238095238097,"z":2.4952380952380953,"a95":2.4,"info":"\"\" at \"\""},{"visible":true,"include":true,"step":"480","x":-19.295238095238094,"y":-1.2761904761904763,"z":2.876190476190476,"a95":2.3,"info":"\"\" at \"\""},{"visible":true,"include":true,"step":"510","x":-15.22857142857143,"y":-2.7333333333333334,"z":5.6380952380952385,"a95":2.9,"info":"\"\" at \"\""},{"visible":true,"include":true,"step":"530","x":-16.095238095238095,"y":-0.3523809523809524,"z":9.466666666666667,"a95":2.5,"info":"\"\" at \"\""},{"visible":true,"include":false,"step":"550","x":-14.057142857142857,"y":-4.180952380952381,"z":2.3523809523809525,"a95":2.8,"info":"\"\" at \"\""},{"visible":true,"include":false,"step":"570","x":-6.504761904761905,"y":-1.8571428571428572,"z":0.5523809523809524,"a95":5.3,"info":"\"\" at \"\""}]},{"version":"v1.1.0","exported":"2016-10-09T19:07:57.581Z","volume":10.5,"added":"2016-10-09T18:44:29.171Z","format":"Utrecht","demagType":"Unknown","strat":null,"patch":1.1,"GEO":[],"TECT":[],"interpreted":false,"name":"TG 14.1","coreAzi":297,"coreDip":26,"bedStrike":218,"bedDip":85,"data":[{"visible":false,"include":false,"step":"20","x":-157.58095238095237,"y":74.43809523809524,"z":84.42857142857143,"a95":0.5,"info":"\"\" at \"\""},{"visible":true,"include":false,"step":"100","x":-111.39047619047618,"y":49.03809523809524,"z":83.26666666666667,"a95":0.7,"info":"\"\" at \"\""},{"visible":true,"include":false,"step":"150","x":-75.01904761904763,"y":25.571428571428573,"z":50.93333333333333,"a95":1.1,"info":"\"\" at \"\""},{"visible":true,"include":false,"step":"200","x":-41.666666666666664,"y":12.895238095238096,"z":27.771428571428572,"a95":0.9,"info":"\"\" at \"\""},{"visible":true,"include":false,"step":"250","x":-17.723809523809525,"y":-0.22857142857142856,"z":6.6571428571428575,"a95":1,"info":"\"\" at \"\""},{"visible":true,"include":false,"step":"300","x":-13.885714285714286,"y":-0.5809523809523809,"z":5.0285714285714285,"a95":1.6,"info":"\"\" at \"\""},{"visible":true,"include":false,"step":"330","x":-11.857142857142858,"y":-0.7523809523809524,"z":4.9714285714285715,"a95":1.6,"info":"\"\" at \"\""},{"visible":true,"include":true,"step":"360","x":-7.904761904761905,"y":-0.05714285714285714,"z":0.7238095238095238,"a95":2.2,"info":"\"\" at \"\""},{"visible":true,"include":true,"step":"390","x":-8.076190476190476,"y":-2.961904761904762,"z":3.2,"a95":3.6,"info":"\"\" at \"\""},{"visible":true,"include":true,"step":"420","x":-7.142857142857143,"y":-3.7142857142857144,"z":2.5904761904761906,"a95":1.9,"info":"\"\" at \"\""},{"visible":true,"include":true,"step":"450","x":-7.438095238095237,"y":-1.0571428571428572,"z":3.8476190476190473,"a95":3.2,"info":"\"\" at \"\""},{"visible":true,"include":true,"step":"480","x":-8.019047619047619,"y":0.8857142857142858,"z":1.9428571428571426,"a95":2.2,"info":"\"\" at \"\""},{"visible":true,"include":true,"step":"510","x":-6.0095238095238095,"y":-2.3238095238095235,"z":-0.12380952380952381,"a95":6.3,"info":"\"\" at \"\""},{"visible":true,"include":true,"step":"530","x":-10.980952380952381,"y":-0.6476190476190476,"z":0.41904761904761906,"a95":4.9,"info":"\"\" at \"\""},{"visible":true,"include":true,"step":"550","x":-6.590476190476191,"y":0.20952380952380953,"z":3.8857142857142852,"a95":6.1,"info":"\"\" at \"\""},{"visible":true,"include":false,"step":"570","x":-2.4095238095238094,"y":1.7619047619047619,"z":0.08571428571428572,"a95":12,"info":"\"\" at \"\""}]},{"version":"v1.1.0","exported":"2016-10-09T19:07:57.581Z","volume":10.5,"added":"2016-10-09T18:44:29.171Z","format":"Utrecht","demagType":"Unknown","strat":null,"patch":1.1,"GEO":[],"TECT":[],"interpreted":false,"name":"TG 14.2","coreAzi":297,"coreDip":26,"bedStrike":218,"bedDip":85,"data":[{"visible":false,"include":false,"step":"20","x":-135.85714285714286,"y":85.41904761904762,"z":86.78095238095239,"a95":1,"info":"\"\" at \"\""},{"visible":true,"include":true,"step":"100","x":-101.33333333333333,"y":56.13333333333333,"z":89.1047619047619,"a95":1,"info":"\"\" at \"\""},{"visible":true,"include":true,"step":"150","x":-65.78095238095239,"y":28.009523809523813,"z":49.5047619047619,"a95":0.8,"info":"\"\" at \"\""},{"visible":true,"include":true,"step":"200","x":-33.647619047619045,"y":9.819047619047618,"z":20.8,"a95":1.3,"info":"\"\" at \"\""},{"visible":true,"include":true,"step":"250","x":-24.695238095238096,"y":2.7904761904761903,"z":11.361904761904762,"a95":2.2,"info":"\"\" at \"\""},{"visible":true,"include":true,"step":"300","x":-14.295238095238094,"y":0.9333333333333333,"z":3.314285714285714,"a95":3.6,"info":"\"\" at \"\""},{"visible":true,"include":false,"step":"330","x":-12.028571428571428,"y":3.076190476190476,"z":2.0666666666666664,"a95":3.8,"info":"\"\" at \"\""},{"visible":true,"include":false,"step":"360","x":-7.847619047619048,"y":4.3619047619047615,"z":1.5142857142857142,"a95":5.2,"info":"\"\" at \"\""},{"visible":true,"include":false,"step":"390","x":-9.533333333333333,"y":2.961904761904762,"z":5.866666666666667,"a95":4.2,"info":"\"\" at \"\""},{"visible":true,"include":false,"step":"420","x":-8.428571428571429,"y":0.5809523809523809,"z":4.647619047619047,"a95":5.2,"info":"\"\" at \"\""},{"visible":true,"include":false,"step":"450","x":-12.2,"y":1.3904761904761904,"z":2.8476190476190473,"a95":3.8,"info":"\"\" at \"\""},{"visible":true,"include":false,"step":"480","x":-8.371428571428572,"y":1.6285714285714288,"z":4.476190476190476,"a95":4.2,"info":"\"\" at \"\""},{"visible":true,"include":false,"step":"510","x":-9.123809523809523,"y":5.580952380952381,"z":2.380952380952381,"a95":4.3,"info":"\"\" at \"\""},{"visible":true,"include":false,"step":"540","x":-13.247619047619047,"y":-0.9333333333333333,"z":4.095238095238095,"a95":3.6,"info":"\"\" at \"\""}]},{"version":"v1.1.0","exported":"2016-10-09T19:07:57.581Z","volume":10.5,"added":"2016-10-09T18:44:29.172Z","format":"Utrecht","demagType":"Unknown","strat":null,"patch":1.1,"GEO":[],"TECT":[],"interpreted":false,"name":"TG 15A.1","coreAzi":68,"coreDip":44,"bedStrike":218,"bedDip":85,"data":[{"visible":false,"include":false,"step":"20","x":-117.60952380952382,"y":-69.79047619047618,"z":177.04761904761904,"a95":0.4,"info":"\"\" at \"\""},{"visible":true,"include":true,"step":"100","x":-84.83809523809524,"y":-50.780952380952385,"z":102.53333333333333,"a95":0.9,"info":"\"\" at \"\""},{"visible":true,"include":true,"step":"150","x":-58.10476190476191,"y":-33.40952380952381,"z":63.62857142857143,"a95":0.9,"info":"\"\" at \"\""},{"visible":true,"include":true,"step":"200","x":-33.58095238095238,"y":-8.19047619047619,"z":30.82857142857143,"a95":1.1,"info":"\"\" at \"\""},{"visible":true,"include":true,"step":"250","x":-28.40952380952381,"y":-1.3333333333333333,"z":23.00952380952381,"a95":1.4,"info":"\"\" at \"\""},{"visible":true,"include":true,"step":"300","x":-20.104761904761904,"y":1.2190476190476192,"z":15.600000000000001,"a95":2.4,"info":"\"\" at \"\""},{"visible":true,"include":false,"step":"330","x":-17.666666666666668,"y":-1.9714285714285713,"z":11.619047619047619,"a95":2,"info":"\"\" at \"\""},{"visible":true,"include":false,"step":"360","x":-14.704761904761906,"y":0.3523809523809524,"z":12.352380952380951,"a95":3.2,"info":"\"\" at \"\""},{"visible":true,"include":false,"step":"390","x":-13.542857142857141,"y":-2.619047619047619,"z":11.304761904761905,"a95":2.7,"info":"\"\" at \"\""},{"visible":true,"include":false,"step":"420","x":-12.028571428571428,"y":0.3523809523809524,"z":9.761904761904763,"a95":4.2,"info":"\"\" at \"\""},{"visible":true,"include":false,"step":"450","x":-11.971428571428572,"y":0.8095238095238095,"z":5.666666666666667,"a95":3.6,"info":"\"\" at \"\""},{"visible":true,"include":false,"step":"480","x":-11.152380952380952,"y":0.11428571428571428,"z":7.723809523809523,"a95":3.3,"info":"\"\" at \"\""},{"visible":true,"include":false,"step":"510","x":-10.457142857142857,"y":-3.2571428571428576,"z":7.876190476190477,"a95":4,"info":"\"\" at \"\""},{"visible":true,"include":false,"step":"540","x":-10.342857142857142,"y":1.6857142857142857,"z":9.40952380952381,"a95":3.9,"info":"\"\" at \"\""}]},{"version":"v1.1.0","exported":"2016-10-09T19:07:57.581Z","volume":10.5,"added":"2016-10-09T18:44:29.172Z","format":"Utrecht","demagType":"Unknown","strat":null,"patch":1.1,"GEO":[],"TECT":[],"interpreted":false,"name":"TG 15B.1","coreAzi":318,"coreDip":25,"bedStrike":218,"bedDip":85,"data":[{"visible":true,"include":false,"step":"20","x":-124.05714285714285,"y":26.73333333333333,"z":114.67619047619047,"a95":0.6,"info":"\"\" at \"\""},{"visible":false,"include":false,"step":"100","x":-197.50476190476192,"y":34.285714285714285,"z":48.86666666666667,"a95":0.8,"info":"\"\" at \"\""},{"visible":true,"include":true,"step":"150","x":-63.971428571428575,"y":6.219047619047619,"z":65.45714285714286,"a95":0.8,"info":"\"\" at \"\""},{"visible":true,"include":true,"step":"200","x":-40.38095238095238,"y":-0.9904761904761905,"z":33.12380952380953,"a95":1,"info":"\"\" at \"\""},{"visible":true,"include":true,"step":"250","x":-23.761904761904763,"y":-3.314285714285714,"z":14.438095238095238,"a95":1.5,"info":"\"\" at \"\""},{"visible":true,"include":true,"step":"300","x":-21.904761904761905,"y":-1.2190476190476192,"z":10.923809523809524,"a95":1.3,"info":"\"\" at \"\""},{"visible":true,"include":true,"step":"330","x":-19.35238095238095,"y":-1.8571428571428572,"z":8.133333333333335,"a95":1.1,"info":"\"\" at \"\""},{"visible":true,"include":true,"step":"360","x":-12.314285714285715,"y":-2.4952380952380953,"z":4.295238095238095,"a95":2.2,"info":"\"\" at \"\""},{"visible":true,"include":true,"step":"390","x":-9.238095238095237,"y":-1.1047619047619048,"z":5.6952380952380945,"a95":1.5,"info":"\"\" at \"\""},{"visible":true,"include":false,"step":"420","x":-12.380952380952381,"y":-1.7999999999999998,"z":4.619047619047619,"a95":3.2,"info":"\"\" at \"\""},{"visible":true,"include":false,"step":"450","x":-12.552380952380954,"y":-1.5238095238095237,"z":4.6952380952380945,"a95":1.9,"info":"\"\" at \"\""},{"visible":true,"include":false,"step":"480","x":-10.752380952380953,"y":1.1428571428571428,"z":4.914285714285715,"a95":2.3,"info":"\"\" at \"\""},{"visible":true,"include":false,"step":"510","x":-3.9904761904761905,"y":9.352380952380953,"z":0.4666666666666667,"a95":4,"info":"\"\" at \"\""},{"visible":true,"include":false,"step":"530","x":-6.333333333333333,"y":4.0095238095238095,"z":-2.9904761904761905,"a95":3.7,"info":"\"\" at \"\""},{"visible":true,"include":false,"step":"550","x":-11.323809523809524,"y":1.4095238095238096,"z":4.9523809523809526,"a95":4.8,"info":"\"\" at \"\""},{"visible":true,"include":false,"step":"570","x":-7.533333333333333,"y":-2.895238095238095,"z":-0.4666666666666667,"a95":4.6,"info":"\"\" at \"\""}]},{"version":"v1.1.0","exported":"2016-10-09T19:07:57.581Z","volume":10.5,"added":"2016-10-09T18:44:29.172Z","format":"Utrecht","demagType":"Unknown","strat":null,"patch":1.1,"GEO":[],"TECT":[],"interpreted":false,"name":"TG 16.1A","coreAzi":252,"coreDip":55,"bedStrike":216,"bedDip":70,"data":[{"visible":false,"include":false,"step":"20","x":-144.57142857142858,"y":148.98095238095237,"z":169.26666666666665,"a95":0.4,"info":"\"\" at \"\""},{"visible":true,"include":true,"step":"100","x":-109.81904761904761,"y":97.56190476190477,"z":156.68571428571428,"a95":0.6,"info":"\"\" at \"\""},{"visible":true,"include":true,"step":"150","x":-76.23809523809524,"y":63.857142857142854,"z":103.75238095238096,"a95":0.5,"info":"\"\" at \"\""},{"visible":true,"include":true,"step":"200","x":-23.238095238095237,"y":7.79047619047619,"z":35.44761904761905,"a95":0.7,"info":"\"\" at \"\""},{"visible":true,"include":true,"step":"250","x":-15.047619047619047,"y":-0.4095238095238095,"z":20.276190476190475,"a95":1.4,"info":"\"\" at \"\""},{"visible":true,"include":true,"step":"250","x":-6.838095238095238,"y":-0.26666666666666666,"z":7.3619047619047615,"a95":17.8,"info":"\"\" at \"\""},{"visible":true,"include":false,"step":"260","x":-5.580952380952381,"y":-2.0476190476190474,"z":10.504761904761905,"a95":14.8,"info":"\"\" at \"\""},{"visible":true,"include":false,"step":"300","x":-2.104761904761905,"y":-2.3714285714285714,"z":6.838095238095238,"a95":20.8,"info":"\"\" at \"\""},{"visible":true,"include":false,"step":"330","x":-1.0476190476190477,"y":-2.3714285714285714,"z":2.104761904761905,"a95":23,"info":"\"\" at \"\""},{"visible":true,"include":false,"step":"360","x":-2.104761904761905,"y":-1.8380952380952382,"z":1.0476190476190477,"a95":19.3,"info":"\"\" at \"\""},{"visible":true,"include":false,"step":"390","x":-3.9428571428571426,"y":0.26666666666666666,"z":1.0476190476190477,"a95":14.6,"info":"\"\" at \"\""}]},{"version":"v1.1.0","exported":"2016-10-09T19:07:57.581Z","volume":10.5,"added":"2016-10-09T18:44:29.172Z","format":"Utrecht","demagType":"Unknown","strat":null,"patch":1.1,"GEO":[],"TECT":[],"interpreted":false,"name":"TG 16.2","coreAzi":252,"coreDip":55,"bedStrike":216,"bedDip":70,"data":[{"visible":false,"include":false,"step":"20","x":-145.67619047619047,"y":133.0095238095238,"z":161.71428571428572,"a95":1.3,"info":"\"\" at \"\""},{"visible":true,"include":false,"step":"100","x":-102.03809523809525,"y":99.47619047619048,"z":147.76190476190476,"a95":1,"info":"\"\" at \"\""},{"visible":true,"include":true,"step":"150","x":-78.20952380952382,"y":61.476190476190474,"z":99.61904761904762,"a95":0.9,"info":"\"\" at \"\""},{"visible":true,"include":true,"step":"200","x":-29.923809523809524,"y":14.58095238095238,"z":33.93333333333334,"a95":1.5,"info":"\"\" at \"\""},{"visible":true,"include":true,"step":"250","x":-14.933333333333334,"y":1.7428571428571429,"z":14.152380952380952,"a95":2.3,"info":"\"\" at \"\""},{"visible":true,"include":true,"step":"300","x":-12.78095238095238,"y":-5.114285714285715,"z":4.561904761904762,"a95":2.9,"info":"\"\" at \"\""},{"visible":true,"include":true,"step":"330","x":-8.133333333333335,"y":-3.838095238095238,"z":2.8476190476190473,"a95":4,"info":"\"\" at \"\""},{"visible":true,"include":false,"step":"360","x":-3.2571428571428576,"y":-5.923809523809524,"z":0.5809523809523809,"a95":6.9,"info":"\"\" at \"\""},{"visible":true,"include":false,"step":"390","x":-9.352380952380953,"y":-4.123809523809523,"z":1.6285714285714288,"a95":4.6,"info":"\"\" at \"\""},{"visible":true,"include":false,"step":"420","x":-11.276190476190477,"y":-3.7809523809523813,"z":4.123809523809523,"a95":3.8,"info":"\"\" at \"\""},{"visible":true,"include":false,"step":"450","x":-11.971428571428572,"y":2.1523809523809527,"z":1.3333333333333333,"a95":4,"info":"\"\" at \"\""},{"visible":true,"include":false,"step":"480","x":-9.123809523809523,"y":0.5238095238095238,"z":5.0285714285714285,"a95":4.2,"info":"\"\" at \"\""},{"visible":true,"include":false,"step":"510","x":-15.514285714285714,"y":1.3904761904761904,"z":2.380952380952381,"a95":3.3,"info":"\"\" at \"\""}]},{"version":"v1.1.0","exported":"2016-10-09T19:07:57.581Z","volume":10.5,"added":"2016-10-09T18:44:29.172Z","format":"Utrecht","demagType":"Unknown","strat":null,"patch":1.1,"GEO":[{"dec":298.9465120338142,"inc":-1.639108239594032,"MAD":5.736460670704794,"cm":[4.440892098500626e-16,-2.220446049250313e-15,0],"intensity":114.81481846731518,"type":"GC","origin":false,"forced":true,"remark":"","nSteps":4,"minStep":"150","maxStep":"250","steps":["150","200","250","250"],"group":"None","version":"v1.1.0"}],"TECT":[{"dec":284.5504229865316,"inc":-70.38720376195383,"MAD":5.736460670704865,"cm":[-9.325873406851315e-15,3.552713678800501e-15,-7.771561172376096e-16],"intensity":114.81481846731518,"type":"GC","origin":false,"forced":true,"remark":"","nSteps":4,"minStep":"150","maxStep":"250","steps":["150","200","250","250"],"group":"None","version":"v1.1.0"}],"interpreted":true,"name":"TG 17.1","coreAzi":326,"coreDip":70,"bedStrike":216,"bedDip":70,"data":[{"visible":false,"include":false,"step":"20","x":-37.714285714285715,"y":6.104761904761904,"z":154.9714285714286,"a95":0.5,"info":"\"\" at \"\""},{"visible":true,"include":false,"step":"100","x":-36.25714285714285,"y":-7.666666666666667,"z":125.27619047619048,"a95":0.5,"info":"\"\" at \"\""},{"visible":true,"include":true,"step":"150","x":-33.23809523809524,"y":-14.933333333333334,"z":78.00952380952381,"a95":0.7,"info":"\"\" at \"\""},{"visible":true,"include":true,"step":"200","x":-27.657142857142855,"y":-28.81904761904762,"z":32.65714285714286,"a95":0.7,"info":"\"\" at \"\""},{"visible":true,"include":true,"step":"250","x":-23.942857142857143,"y":-27.952380952380953,"z":22.83809523809524,"a95":1,"info":"\"\" at \"\""},{"visible":true,"include":true,"step":"250","x":-16.304761904761904,"y":-25.780952380952378,"z":17.228571428571428,"a95":5.5,"info":"\"\" at \"\""},{"visible":true,"include":false,"step":"260","x":-17.942857142857143,"y":-23.61904761904762,"z":16.685714285714283,"a95":6.5,"info":"\"\" at \"\""},{"visible":true,"include":false,"step":"300","x":-13.676190476190476,"y":-21.82857142857143,"z":15.123809523809525,"a95":6.7,"info":"\"\" at \"\""},{"visible":true,"include":false,"step":"330","x":-13.942857142857143,"y":-20.780952380952378,"z":12.885714285714286,"a95":6,"info":"\"\" at \"\""},{"visible":true,"include":false,"step":"360","x":-7.3619047619047615,"y":-15.78095238095238,"z":6.838095238095238,"a95":12.3,"info":"\"\" at \"\""},{"visible":true,"include":false,"step":"390","x":-8.676190476190476,"y":-14.733333333333333,"z":7.895238095238096,"a95":11.3,"info":"\"\" at \"\""},{"visible":true,"include":false,"step":"420","x":-8.41904761904762,"y":-14.733333333333333,"z":5.390476190476191,"a95":11.1,"info":"\"\" at \"\""},{"visible":true,"include":false,"step":"450","x":-7.628571428571428,"y":-6.571428571428571,"z":5,"a95":15.1,"info":"\"\" at \"\""},{"visible":true,"include":false,"step":"480","x":-2.895238095238095,"y":-5,"z":3.0285714285714285,"a95":19,"info":"\"\" at \"\""},{"visible":true,"include":false,"step":"510","x":-3.685714285714286,"y":-4.20952380952381,"z":3.2857142857142856,"a95":18.7,"info":"\"\" at \"\""},{"visible":true,"include":false,"step":"530","x":-6.314285714285714,"y":-4.733333333333333,"z":0.5238095238095238,"a95":8,"info":"\"\" at \"\""},{"visible":true,"include":false,"step":"550","x":-2.6285714285714286,"y":-3.685714285714286,"z":0.6571428571428571,"a95":7.9,"info":"\"\" at \"\""}]},{"version":"v1.1.0","exported":"2016-10-09T19:07:57.581Z","volume":10.5,"added":"2016-10-09T18:44:29.172Z","format":"Utrecht","demagType":"Unknown","strat":null,"patch":1.1,"GEO":[{"dec":270.7034117981528,"inc":-0.5109399299471344,"MAD":6.055491928122286,"cm":[-4.440892098500626e-16,-1.4710455076283324e-15,0],"intensity":170.5488336846717,"type":"GC","origin":false,"forced":true,"remark":"","nSteps":4,"minStep":"100","maxStep":"250","steps":["100","150","200","250"],"group":"None","version":"v1.1.0"}],"TECT":[{"dec":241.10827168817886,"inc":-50.35121849075921,"MAD":6.05549192812229,"cm":[-5.218048215738236e-15,4.440892098500626e-15,2.220446049250313e-15],"intensity":170.5488336846717,"type":"GC","origin":false,"forced":true,"remark":"","nSteps":4,"minStep":"100","maxStep":"250","steps":["100","150","200","250"],"group":"None","version":"v1.1.0"}],"interpreted":true,"name":"TG 17.2A","coreAzi":326,"coreDip":70,"bedStrike":216,"bedDip":70,"data":[{"visible":false,"include":false,"step":"20","x":-42.304761904761904,"y":4.419047619047619,"z":145.9904761904762,"a95":0.8,"info":"\"\" at \"\""},{"visible":true,"include":true,"step":"100","x":-39.857142857142854,"y":2.1523809523809527,"z":133.40952380952382,"a95":0.7,"info":"\"\" at \"\""},{"visible":true,"include":true,"step":"150","x":-39.8,"y":-3.3714285714285714,"z":83.29523809523809,"a95":0.8,"info":"\"\" at \"\""},{"visible":true,"include":true,"step":"200","x":-32.13333333333333,"y":-13.828571428571427,"z":34.78095238095238,"a95":0.8,"info":"\"\" at \"\""},{"visible":true,"include":true,"step":"250","x":-30.16190476190476,"y":-16.20952380952381,"z":21.46666666666667,"a95":1.1,"info":"\"\" at \"\""},{"visible":true,"include":false,"step":"300","x":-22.314285714285717,"y":-12.78095238095238,"z":12.752380952380953,"a95":1.6,"info":"\"\" at \"\""},{"visible":true,"include":false,"step":"330","x":-19.81904761904762,"y":-8.133333333333335,"z":10.2,"a95":1.8,"info":"\"\" at \"\""},{"visible":true,"include":false,"step":"360","x":-18.066666666666666,"y":-7.723809523809523,"z":5.428571428571429,"a95":2.4,"info":"\"\" at \"\""},{"visible":true,"include":false,"step":"390","x":-16.97142857142857,"y":-7.0285714285714285,"z":2.1523809523809527,"a95":2.3,"info":"\"\" at \"\""},{"visible":true,"include":false,"step":"420","x":-13.714285714285714,"y":-4.3619047619047615,"z":2.0666666666666664,"a95":3.3,"info":"\"\" at \"\""},{"visible":true,"include":false,"step":"450","x":-10.695238095238095,"y":-3.657142857142857,"z":3.7523809523809524,"a95":4.3,"info":"\"\" at \"\""},{"visible":true,"include":false,"step":"480","x":-9.647619047619047,"y":3.7142857142857144,"z":1.8285714285714285,"a95":4.3,"info":"\"\" at \"\""},{"visible":true,"include":false,"step":"510","x":-3.314285714285714,"y":0.9333333333333333,"z":-0.9619047619047618,"a95":10.7,"info":"\"\" at \"\""},{"visible":true,"include":false,"step":"540","x":-7.323809523809524,"y":1.7428571428571429,"z":-2.761904761904762,"a95":4.4,"info":"\"\" at \"\""}]},{"version":"v1.1.0","exported":"2016-10-09T19:07:57.582Z","volume":10.5,"added":"2016-10-09T18:44:29.172Z","format":"Utrecht","demagType":"Unknown","strat":null,"patch":1.1,"GEO":[{"dec":70.0233313999558,"inc":-13.321629066833564,"MAD":5.9459975320357135,"cm":[1.1102230246251565e-15,2.220446049250313e-16,0],"intensity":152.07859467037463,"type":"GC","origin":false,"forced":true,"remark":"","nSteps":4,"minStep":"100","maxStep":"250","steps":["100","150","200","250"],"group":"None","version":"v1.1.0"}],"TECT":[{"dec":242.53597030089742,"inc":-25.647386307578543,"MAD":5.9459975320361655,"cm":[-2.3314683517128287e-15,-3.1086244689504383e-15,-8.881784197001252e-16],"intensity":152.07859467037466,"type":"GC","origin":false,"forced":true,"remark":"","nSteps":4,"minStep":"100","maxStep":"250","steps":["100","150","200","250"],"group":"None","version":"v1.1.0"}],"interpreted":true,"name":"TG 18.1A","coreAzi":356,"coreDip":60,"bedStrike":216,"bedDip":70,"data":[{"visible":false,"include":false,"step":"20","x":-42.41904761904762,"y":32.19047619047619,"z":147.41904761904763,"a95":0.4,"info":"\"\" at \"\""},{"visible":true,"include":true,"step":"100","x":-33.58095238095238,"y":20.742857142857144,"z":129.37142857142857,"a95":0.4,"info":"\"\" at \"\""},{"visible":true,"include":true,"step":"150","x":-25.504761904761907,"y":16.152380952380952,"z":71.87619047619049,"a95":0.5,"info":"\"\" at \"\""},{"visible":true,"include":true,"step":"200","x":-18.304761904761904,"y":8.019047619047619,"z":22.257142857142856,"a95":0.7,"info":"\"\" at \"\""},{"visible":true,"include":true,"step":"250","x":-15.342857142857142,"y":5.866666666666667,"z":12.142857142857142,"a95":1,"info":"\"\" at \"\""},{"visible":true,"include":false,"step":"250","x":-4.733333333333333,"y":7.628571428571428,"z":-5.257142857142857,"a95":15.6,"info":"\"\" at \"\""},{"visible":true,"include":false,"step":"260","x":-9.257142857142858,"y":3.2095238095238097,"z":7.876190476190477,"a95":12.3,"info":"\"\" at \"\""},{"visible":true,"include":false,"step":"300","x":-6.838095238095238,"y":3.685714285714286,"z":4.733333333333333,"a95":17.5,"info":"\"\" at \"\""},{"visible":true,"include":false,"step":"330","x":-9.466666666666667,"y":2.895238095238095,"z":3.9428571428571426,"a95":12.8,"info":"\"\" at \"\""},{"visible":true,"include":false,"step":"360","x":-5.523809523809524,"y":2.6285714285714286,"z":1.9714285714285713,"a95":14.4,"info":"\"\" at \"\""},{"visible":true,"include":false,"step":"390","x":-5.257142857142857,"y":1.3142857142857143,"z":3.0285714285714285,"a95":13.9,"info":"\"\" at \"\""},{"visible":true,"include":false,"step":"420","x":-3.419047619047619,"y":0.7904761904761906,"z":0.3904761904761904,"a95":14.9,"info":"\"\" at \"\""},{"visible":true,"include":false,"step":"450","x":-6.571428571428571,"y":2.104761904761905,"z":1.7142857142857142,"a95":14.2,"info":"\"\" at \"\""},{"visible":true,"include":false,"step":"480","x":-3.419047619047619,"y":1.3142857142857143,"z":0.3904761904761904,"a95":15.5,"info":"\"\" at \"\""},{"visible":true,"include":false,"step":"510","x":-4.20952380952381,"y":1.0476190476190477,"z":-2.3714285714285714,"a95":15.5,"info":"\"\" at \"\""},{"visible":true,"include":false,"step":"530","x":-8.152380952380952,"y":0,"z":2.6285714285714286,"a95":8.3,"info":"\"\" at \"\""}]},{"version":"v1.1.0","exported":"2016-10-09T19:07:57.582Z","volume":10.5,"added":"2016-10-09T18:44:29.176Z","format":"Utrecht","demagType":"Unknown","strat":null,"patch":1.1,"GEO":[{"dec":71.18780639160764,"inc":-4.886149231544721,"MAD":6.291502022732373,"cm":[-1.1102230246251565e-16,2.220446049250313e-16,0],"intensity":136.1920992244281,"type":"GC","origin":false,"forced":true,"remark":"","nSteps":6,"minStep":"100","maxStep":"330","steps":["100","150","200","250","300","330"],"group":"None","version":"v1.1.0"}],"TECT":[{"dec":234.7498916312988,"inc":-30.690874250811977,"MAD":6.291502022730599,"cm":[-2.858824288409778e-15,-8.881784197001252e-16,0],"intensity":136.1920992244281,"type":"GC","origin":false,"forced":true,"remark":"","nSteps":6,"minStep":"100","maxStep":"330","steps":["100","150","200","250","300","330"],"group":"None","version":"v1.1.0"}],"interpreted":true,"name":"TG 18.1B","coreAzi":356,"coreDip":60,"bedStrike":216,"bedDip":70,"data":[{"visible":false,"include":false,"step":"20","x":-34.4,"y":-6.685714285714286,"z":135.67619047619047,"a95":0.5,"info":"\"\" at \"\""},{"visible":true,"include":true,"step":"100","x":-27.314285714285717,"y":-0.11428571428571428,"z":126.02857142857142,"a95":1.4,"info":"\"\" at \"\""},{"visible":true,"include":true,"step":"150","x":-24.866666666666667,"y":3.9523809523809526,"z":73.88571428571429,"a95":1,"info":"\"\" at \"\""},{"visible":true,"include":true,"step":"200","x":-18.53333333333333,"y":3.1333333333333333,"z":28.066666666666666,"a95":1.4,"info":"\"\" at \"\""},{"visible":true,"include":true,"step":"250","x":-14.876190476190475,"y":2.9047619047619047,"z":14.676190476190476,"a95":2.2,"info":"\"\" at \"\""},{"visible":true,"include":true,"step":"300","x":-11.219047619047618,"y":0.9904761904761905,"z":7.295238095238095,"a95":3.8,"info":"\"\" at \"\""},{"visible":true,"include":true,"step":"330","x":-11.152380952380952,"y":3.9523809523809526,"z":4.561904761904762,"a95":3.7,"info":"\"\" at \"\""},{"visible":true,"include":false,"step":"360","x":-9.352380952380953,"y":3.2,"z":3.104761904761905,"a95":5.2,"info":"\"\" at \"\""},{"visible":true,"include":false,"step":"390","x":-13.542857142857141,"y":1.8571428571428572,"z":-0.5809523809523809,"a95":3.4,"info":"\"\" at \"\""},{"visible":true,"include":false,"step":"420","x":-13.304761904761904,"y":0.5238095238095238,"z":0.02857142857142857,"a95":4,"info":"\"\" at \"\""},{"visible":true,"include":false,"step":"450","x":-11.733333333333334,"y":1.9714285714285713,"z":5.2,"a95":5,"info":"\"\" at \"\""},{"visible":true,"include":false,"step":"480","x":-5,"y":4.180952380952381,"z":0.02857142857142857,"a95":8.6,"info":"\"\" at \"\""},{"visible":true,"include":false,"step":"510","x":-6.104761904761904,"y":5.6952380952380945,"z":-2.5904761904761906,"a95":6.9,"info":"\"\" at \"\""}]},{"version":"v1.1.0","exported":"2016-10-09T19:07:57.582Z","volume":10.5,"added":"2016-10-09T18:44:29.177Z","format":"Utrecht","demagType":"Unknown","strat":null,"patch":1.1,"GEO":[{"dec":68.17857557426572,"inc":-8.918745251320189,"MAD":5.951947164476158,"cm":[-1.1102230246251565e-15,-4.218847493575595e-15,0],"intensity":187.61623855765134,"type":"GC","origin":false,"forced":true,"remark":"","nSteps":5,"minStep":"100","maxStep":"300","steps":["100","150","200","250","300"],"group":"None","version":"v1.1.0"}],"TECT":[{"dec":237.27758030468868,"inc":-26.191144485931993,"MAD":5.951947164477592,"cm":[-2.4424906541753444e-15,2.4424906541753444e-15,-1.9984014443252818e-15],"intensity":187.61623855765137,"type":"GC","origin":false,"forced":true,"remark":"","nSteps":5,"minStep":"100","maxStep":"300","steps":["100","150","200","250","300"],"group":"None","version":"v1.1.0"}],"interpreted":true,"name":"TG 19.1","coreAzi":327,"coreDip":51,"bedStrike":216,"bedDip":70,"data":[{"visible":false,"include":false,"step":"20","x":-83.03809523809524,"y":58.34285714285714,"z":190.2952380952381,"a95":0.5,"info":"\"\" at \"\""},{"visible":true,"include":true,"step":"100","x":-58.8,"y":39.457142857142856,"z":171.03809523809525,"a95":0.9,"info":"\"\" at \"\""},{"visible":true,"include":true,"step":"150","x":-46.65714285714286,"y":23.00952380952381,"z":105.46666666666667,"a95":0.5,"info":"\"\" at \"\""},{"visible":true,"include":true,"step":"200","x":-23.53333333333333,"y":9.238095238095237,"z":33.76190476190476,"a95":1.4,"info":"\"\" at \"\""},{"visible":true,"include":true,"step":"250","x":-17.552380952380954,"y":1.9714285714285713,"z":11.971428571428572,"a95":2.6,"info":"\"\" at \"\""},{"visible":true,"include":true,"step":"300","x":-14.123809523809525,"y":-2.3238095238095235,"z":-2.2095238095238097,"a95":3,"info":"\"\" at \"\""},{"visible":true,"include":false,"step":"330","x":-13.714285714285714,"y":3.314285714285714,"z":0.5523809523809524,"a95":3.3,"info":"\"\" at \"\""},{"visible":true,"include":false,"step":"360","x":-12.142857142857142,"y":2.1523809523809527,"z":0.22857142857142856,"a95":3.8,"info":"\"\" at \"\""},{"visible":true,"include":false,"step":"390","x":-10.866666666666665,"y":2.7333333333333334,"z":-1.2190476190476192,"a95":4.2,"info":"\"\" at \"\""},{"visible":true,"include":false,"step":"420","x":-9.761904761904763,"y":-3.895238095238095,"z":0.6380952380952382,"a95":5.3,"info":"\"\" at \"\""},{"visible":true,"include":false,"step":"450","x":-6.219047619047619,"y":5.057142857142857,"z":-5.666666666666667,"a95":4.5,"info":"\"\" at \"\""},{"visible":true,"include":false,"step":"480","x":-5.580952380952381,"y":0.8761904761904761,"z":-3.895238095238095,"a95":6.8,"info":"\"\" at \"\""},{"visible":true,"include":false,"step":"510","x":-2.038095238095238,"y":1.6285714285714288,"z":-1.5142857142857142,"a95":16.1,"info":"\"\" at \"\""},{"visible":true,"include":false,"step":"540","x":-12.78095238095238,"y":1.5142857142857142,"z":2.7904761904761903,"a95":3.7,"info":"\"\" at \"\""}]},{"version":"v1.1.0","exported":"2016-10-09T19:07:57.582Z","volume":10.5,"added":"2016-10-09T18:44:29.177Z","format":"Utrecht","demagType":"Unknown","strat":null,"patch":1.1,"GEO":[{"dec":80.37503903366405,"inc":-1.6403514535538346,"MAD":10.737814756590359,"cm":[0,6.5503158452884236e-15,0],"intensity":216.6945281929215,"type":"GC","origin":false,"forced":true,"remark":"","nSteps":4,"minStep":"100","maxStep":"250","steps":["100","150","200","250"],"group":"None","version":"v1.1.0"}],"TECT":[{"dec":236.41967620192275,"inc":-40.32451774951811,"MAD":10.737814756591266,"cm":[1.1379786002407855e-14,1.4210854715202004e-14,3.1086244689504383e-15],"intensity":216.6945281929215,"type":"GC","origin":false,"forced":true,"remark":"","nSteps":4,"minStep":"100","maxStep":"250","steps":["100","150","200","250"],"group":"None","version":"v1.1.0"}],"interpreted":true,"name":"TG 19.2","coreAzi":327,"coreDip":51,"bedStrike":216,"bedDip":70,"data":[{"visible":false,"include":false,"step":"20","x":-104.70476190476191,"y":33.647619047619045,"z":219.46666666666667,"a95":0.3,"info":"\"\" at \"\""},{"visible":true,"include":true,"step":"100","x":-69.08571428571429,"y":32.48571428571429,"z":186.93333333333334,"a95":0.5,"info":"\"\" at \"\""},{"visible":true,"include":true,"step":"150","x":-45.49523809523809,"y":20.571428571428573,"z":110.37142857142858,"a95":0.5,"info":"\"\" at \"\""},{"visible":true,"include":true,"step":"200","x":-21.152380952380952,"y":-2.4952380952380953,"z":24.466666666666665,"a95":1.6,"info":"\"\" at \"\""},{"visible":true,"include":true,"step":"250","x":-20.4,"y":-2.1523809523809527,"z":8.076190476190476,"a95":1.5,"info":"\"\" at \"\""},{"visible":true,"include":false,"step":"250","x":-7.628571428571428,"y":-2.104761904761905,"z":-5.523809523809524,"a95":15.1,"info":"\"\" at \"\""},{"visible":true,"include":false,"step":"260","x":-9.523809523809524,"y":-2.0476190476190474,"z":4.2,"a95":11.9,"info":"\"\" at \"\""},{"visible":true,"include":false,"step":"300","x":-5.257142857142857,"y":-1.0476190476190477,"z":3.419047619047619,"a95":17,"info":"\"\" at \"\""},{"visible":true,"include":false,"step":"330","x":-7.895238095238096,"y":-3.419047619047619,"z":1.0476190476190477,"a95":11.1,"info":"\"\" at \"\""},{"visible":true,"include":false,"step":"360","x":-2.895238095238095,"y":-2.104761904761905,"z":-0.9238095238095237,"a95":16.2,"info":"\"\" at \"\""},{"visible":true,"include":false,"step":"390","x":-6.571428571428571,"y":-0.26666666666666666,"z":1.3142857142857143,"a95":13,"info":"\"\" at \"\""},{"visible":true,"include":false,"step":"420","x":-4.733333333333333,"y":4.20952380952381,"z":2.4952380952380953,"a95":17.2,"info":"\"\" at \"\""}]},{"version":"v1.1.0","exported":"2016-10-09T19:07:57.582Z","volume":10.5,"added":"2016-10-09T18:44:29.178Z","format":"Utrecht","demagType":"Unknown","strat":null,"patch":1.1,"GEO":[],"TECT":[],"interpreted":false,"name":"TG 20A.1","coreAzi":3,"coreDip":54,"bedStrike":230,"bedDip":75,"data":[{"visible":false,"include":false,"step":"20","x":-183.15238095238095,"y":152.59047619047618,"z":144.71428571428572,"a95":0.4,"info":"\"\" at \"\""},{"visible":true,"include":false,"step":"100","x":-167.75238095238097,"y":114.64761904761905,"z":166.53333333333333,"a95":0.6,"info":"\"\" at \"\""},{"visible":true,"include":false,"step":"150","x":-147.53333333333333,"y":107.20952380952382,"z":98.66666666666667,"a95":0.4,"info":"\"\" at \"\""},{"visible":true,"include":false,"step":"200","x":-121.84761904761906,"y":87.44761904761906,"z":47.03809523809524,"a95":1.1,"info":"\"\" at \"\""},{"visible":true,"include":false,"step":"250","x":-120.62857142857142,"y":74.96190476190476,"z":34.95238095238095,"a95":0.9,"info":"\"\" at \"\""},{"visible":false,"include":false,"step":"250","x":-100.47619047619048,"y":68.12380952380951,"z":18.152380952380952,"a95":1.3,"info":"\"\" at \"\""},{"visible":true,"include":false,"step":"260","x":-108.68571428571428,"y":62.91428571428572,"z":33.91428571428572,"a95":1.1,"info":"\"\" at \"\""},{"visible":true,"include":false,"step":"300","x":-100.47619047619048,"y":61.285714285714285,"z":28.54285714285714,"a95":1.3,"info":"\"\" at \"\""},{"visible":true,"include":false,"step":"330","x":-95.4857142857143,"y":57.60952380952381,"z":25.38095238095238,"a95":1.4,"info":"\"\" at \"\""},{"visible":true,"include":true,"step":"360","x":-89.17142857142856,"y":54.19047619047619,"z":16.438095238095237,"a95":1.9,"info":"\"\" at \"\""},{"visible":true,"include":true,"step":"390","x":-83.12380952380951,"y":47.34285714285714,"z":17.361904761904764,"a95":2,"info":"\"\" at \"\""},{"visible":true,"include":true,"step":"420","x":-81.54285714285714,"y":40.77142857142857,"z":12.495238095238093,"a95":1.6,"info":"\"\" at \"\""},{"visible":true,"include":true,"step":"450","x":-73.64761904761905,"y":39.457142857142856,"z":12.761904761904763,"a95":1.5,"info":"\"\" at \"\""},{"visible":true,"include":true,"step":"480","x":-67.6,"y":34.457142857142856,"z":11.838095238095239,"a95":1.6,"info":"\"\" at \"\""},{"visible":true,"include":true,"step":"510","x":-62.599999999999994,"y":27.885714285714286,"z":14.466666666666667,"a95":2.4,"info":"\"\" at \"\""},{"visible":true,"include":false,"step":"530","x":-58.65714285714286,"y":31.304761904761904,"z":14.333333333333334,"a95":2.6,"info":"\"\" at \"\""},{"visible":true,"include":false,"step":"550","x":-47.87619047619047,"y":27.885714285714286,"z":15.78095238095238,"a95":2.8,"info":"\"\" at \"\""},{"visible":true,"include":false,"step":"570","x":-55.23809523809524,"y":24.990476190476187,"z":15.390476190476189,"a95":2.4,"info":"\"\" at \"\""}]},{"version":"v1.1.0","exported":"2016-10-09T19:07:57.582Z","volume":10.5,"added":"2016-10-09T18:44:29.178Z","format":"Utrecht","demagType":"Unknown","strat":null,"patch":1.1,"GEO":[],"TECT":[],"interpreted":false,"name":"TG 20A.2","coreAzi":3,"coreDip":54,"bedStrike":230,"bedDip":75,"data":[{"visible":false,"include":false,"step":"20","x":-322.37142857142857,"y":137.24761904761903,"z":182.4,"a95":0.7,"info":"\"\" at \"\""},{"visible":true,"include":false,"step":"100","x":-301.9809523809524,"y":96.5142857142857,"z":226.76190476190476,"a95":1.5,"info":"\"\" at \"\""},{"visible":true,"include":false,"step":"150","x":-283.32380952380953,"y":91.45714285714286,"z":159.7047619047619,"a95":0.7,"info":"\"\" at \"\""},{"visible":true,"include":false,"step":"200","x":-262,"y":74.72380952380952,"z":101.07619047619048,"a95":0.7,"info":"\"\" at \"\""},{"visible":true,"include":false,"step":"250","x":-254.97142857142856,"y":54.15238095238095,"z":85.0952380952381,"a95":0.9,"info":"\"\" at \"\""},{"visible":true,"include":true,"step":"300","x":-219.8190476190476,"y":46.77142857142857,"z":62.780952380952385,"a95":1,"info":"\"\" at \"\""},{"visible":true,"include":true,"step":"330","x":-209.06666666666666,"y":51.77142857142857,"z":62.523809523809526,"a95":0.7,"info":"\"\" at \"\""},{"visible":true,"include":true,"step":"360","x":-198.66666666666666,"y":44.857142857142854,"z":54.7047619047619,"a95":0.8,"info":"\"\" at \"\""},{"visible":true,"include":true,"step":"390","x":-192.8,"y":38.81904761904762,"z":53.400000000000006,"a95":0.8,"info":"\"\" at \"\""},{"visible":true,"include":true,"step":"420","x":-180.88571428571427,"y":40.733333333333334,"z":56.5047619047619,"a95":0.6,"info":"\"\" at \"\""},{"visible":true,"include":true,"step":"450","x":-172.22857142857143,"y":44.857142857142854,"z":50.80952380952381,"a95":0.8,"info":"\"\" at \"\""},{"visible":true,"include":true,"step":"480","x":-163.57142857142858,"y":29.638095238095236,"z":45.23809523809524,"a95":0.8,"info":"\"\" at \"\""},{"visible":true,"include":true,"step":"510","x":-152.35238095238097,"y":24.695238095238096,"z":44.82857142857143,"a95":0.7,"info":"\"\" at \"\""},{"visible":true,"include":true,"step":"540","x":-128.41904761904763,"y":27.37142857142857,"z":39.01904761904762,"a95":0.8,"info":"\"\" at \"\""}]},{"version":"v1.1.0","exported":"2016-10-09T19:07:57.582Z","volume":10.5,"added":"2016-10-09T18:44:29.178Z","format":"Utrecht","demagType":"Unknown","strat":null,"patch":1.1,"GEO":[],"TECT":[],"interpreted":false,"name":"TG 20B.1","coreAzi":329,"coreDip":50,"bedStrike":230,"bedDip":75,"data":[{"visible":true,"include":false,"step":"20","x":-34.457142857142856,"y":30.771428571428572,"z":89.82857142857144,"a95":1.8,"info":"\"\" at \"\""},{"visible":true,"include":false,"step":"100","x":-39.19047619047619,"y":21.82857142857143,"z":83.9047619047619,"a95":1.7,"info":"\"\" at \"\""},{"visible":true,"include":false,"step":"150","x":-23.40952380952381,"y":11.047619047619047,"z":31.428571428571427,"a95":5.5,"info":"\"\" at \"\""},{"visible":true,"include":false,"step":"200","x":-19.723809523809525,"y":5.180952380952381,"z":20.20952380952381,"a95":1.6,"info":"\"\" at \"\""},{"visible":true,"include":false,"step":"250","x":-11.885714285714286,"y":0.7047619047619048,"z":4.380952380952381,"a95":3.8,"info":"\"\" at \"\""},{"visible":true,"include":false,"step":"300","x":-10.285714285714286,"y":0.8095238095238095,"z":5,"a95":4.1,"info":"\"\" at \"\""},{"visible":true,"include":false,"step":"330","x":-8.952380952380953,"y":-0.11428571428571428,"z":2.761904761904762,"a95":4.5,"info":"\"\" at \"\""},{"visible":true,"include":false,"step":"360","x":-7.20952380952381,"y":0.11428571428571428,"z":-0.2571428571428572,"a95":4.7,"info":"\"\" at \"\""},{"visible":true,"include":false,"step":"390","x":-6.561904761904763,"y":0.5238095238095238,"z":1.9142857142857144,"a95":5.5,"info":"\"\" at \"\""},{"visible":true,"include":false,"step":"420","x":-7.266666666666667,"y":-0.6952380952380952,"z":2.6476190476190475,"a95":5.2,"info":"\"\" at \"\""},{"visible":true,"include":false,"step":"450","x":-8.019047619047619,"y":2.2095238095238097,"z":-1.4190476190476191,"a95":5.2,"info":"\"\" at \"\""},{"visible":true,"include":false,"step":"9999\"TG 21B.1\"","x":-0.7619047619047619,"y":1.9047619047619047,"z":null,"a95":6,"info":"230 at 75"},{"visible":true,"include":false,"step":"20","x":-96.6,"y":-17.561904761904763,"z":157.92380952380952,"a95":0.7,"info":"\"\" at \"\""},{"visible":true,"include":false,"step":"100","x":-71.54285714285714,"y":-9.733333333333334,"z":105.25714285714287,"a95":0.7,"info":"\"\" at \"\""},{"visible":true,"include":false,"step":"150","x":-53.12380952380952,"y":-3.9523809523809526,"z":58.13333333333333,"a95":1,"info":"\"\" at \"\""},{"visible":true,"include":false,"step":"200","x":-38.58095238095238,"y":-1.4857142857142858,"z":20.057142857142857,"a95":1.1,"info":"\"\" at \"\""},{"visible":true,"include":false,"step":"250","x":-31.323809523809523,"y":-1.2190476190476192,"z":14.609523809523811,"a95":1.8,"info":"\"\" at \"\""},{"visible":true,"include":false,"step":"250","x":-28.54285714285714,"y":-5.066666666666667,"z":20.257142857142856,"a95":9.6,"info":"\"\" at \"\""},{"visible":true,"include":true,"step":"260","x":-22.152380952380952,"y":0.9714285714285713,"z":9.41904761904762,"a95":12.7,"info":"\"\" at \"\""},{"visible":true,"include":true,"step":"300","x":-19.333333333333332,"y":0,"z":5.523809523809524,"a95":11.2,"info":"\"\" at \"\""},{"visible":true,"include":true,"step":"330","x":-13.21904761904762,"y":0.5238095238095238,"z":4.8,"a95":16,"info":"\"\" at \"\""},{"visible":true,"include":true,"step":"330","x":-15.057142857142857,"y":0.5238095238095238,"z":3.1904761904761907,"a95":12.1,"info":"\"\" at \"\""},{"visible":true,"include":true,"step":"360","x":-11.571428571428571,"y":-0.3904761904761904,"z":4.476190476190476,"a95":14.7,"info":"\"\" at \"\""},{"visible":true,"include":true,"step":"390","x":-6.314285714285714,"y":0.5238095238095238,"z":3.419047619047619,"a95":15.5,"info":"\"\" at \"\""},{"visible":true,"include":false,"step":"420","x":-4.20952380952381,"y":1.180952380952381,"z":2.8285714285714283,"a95":18.6,"info":"\"\" at \"\""},{"visible":true,"include":false,"step":"450","x":-4.20952380952381,"y":-1.7714285714285716,"z":0.8857142857142858,"a95":17.1,"info":"\"\" at \"\""}]},{"version":"v1.1.0","exported":"2016-10-09T19:07:57.582Z","volume":10.5,"added":"2016-10-09T18:44:29.178Z","format":"Utrecht","demagType":"Unknown","strat":null,"patch":1.1,"GEO":[],"TECT":[],"interpreted":false,"name":"TG 22A.1","coreAzi":349,"coreDip":60,"bedStrike":230,"bedDip":75,"data":[{"visible":true,"include":false,"step":"20","x":-59.5047619047619,"y":57.2952380952381,"z":161.41904761904763,"a95":0.3,"info":"\"\" at \"\""},{"visible":true,"include":false,"step":"100","x":-62.63809523809524,"y":46.25714285714285,"z":163.51428571428573,"a95":0.7,"info":"\"\" at \"\""},{"visible":true,"include":false,"step":"150","x":-62.22857142857143,"y":36.42857142857143,"z":85.5904761904762,"a95":0.6,"info":"\"\" at \"\""},{"visible":true,"include":true,"step":"200","x":-58.27619047619047,"y":26.20952380952381,"z":37.65714285714286,"a95":1.5,"info":"\"\" at \"\""},{"visible":true,"include":true,"step":"250","x":-52.76190476190476,"y":23.361904761904764,"z":26.40952380952381,"a95":1.1,"info":"\"\" at \"\""},{"visible":false,"include":false,"step":"250","x":-32.095238095238095,"y":29.723809523809525,"z":-1.8380952380952382,"a95":3.6,"info":"\"\" at \"\""},{"visible":true,"include":true,"step":"260","x":-42.142857142857146,"y":19.514285714285716,"z":20.238095238095237,"a95":4,"info":"\"\" at \"\""},{"visible":true,"include":true,"step":"300","x":-34.457142857142856,"y":16.571428571428573,"z":11.971428571428572,"a95":5,"info":"\"\" at \"\""},{"visible":true,"include":true,"step":"330","x":-23.676190476190477,"y":14.733333333333333,"z":8.41904761904762,"a95":7.8,"info":"\"\" at \"\""},{"visible":true,"include":true,"step":"360","x":-16.83809523809524,"y":7.104761904761904,"z":4.476190476190476,"a95":10.8,"info":"\"\" at \"\""},{"visible":true,"include":true,"step":"390","x":-11.571428571428571,"y":3.419047619047619,"z":4.20952380952381,"a95":11,"info":"\"\" at \"\""},{"visible":true,"include":true,"step":"420","x":-5.257142857142857,"y":3.685714285714286,"z":3.685714285714286,"a95":15.6,"info":"\"\" at \"\""},{"visible":true,"include":true,"step":"450","x":-5.79047619047619,"y":4.20952380952381,"z":3.0285714285714285,"a95":15.7,"info":"\"\" at \"\""},{"visible":true,"include":false,"step":"480","x":-3.1523809523809527,"y":2.3714285714285714,"z":1.580952380952381,"a95":14.7,"info":"\"\" at \"\""},{"visible":true,"include":false,"step":"510","x":-2.104761904761905,"y":1.8380952380952382,"z":-0.7904761904761906,"a95":13.7,"info":"\"\" at \"\""},{"visible":true,"include":false,"step":"530","x":-1.580952380952381,"y":0.5238095238095238,"z":-2.895238095238095,"a95":9.8,"info":"\"\" at \"\""}]},{"version":"v1.1.0","exported":"2016-10-09T19:07:57.583Z","volume":10.5,"added":"2016-10-09T18:44:29.179Z","format":"Utrecht","demagType":"Unknown","strat":null,"patch":1.1,"GEO":[],"TECT":[],"interpreted":false,"name":"TG 24.1A","coreAzi":322,"coreDip":38,"bedStrike":230,"bedDip":75,"data":[{"visible":true,"include":false,"step":"120","x":-102.56190476190477,"y":60.48571428571429,"z":70.33333333333333,"a95":0.3,"info":"\"\" at \"\""},{"visible":true,"include":false,"step":"100","x":-104.24761904761904,"y":37.885714285714286,"z":110.31428571428572,"a95":0.7,"info":"\"\" at \"\""},{"visible":true,"include":false,"step":"150","x":-78.0952380952381,"y":19.057142857142857,"z":68.5904761904762,"a95":0.8,"info":"\"\" at \"\""},{"visible":true,"include":false,"step":"200","x":-56.41904761904762,"y":4.704761904761905,"z":38.666666666666664,"a95":1.2,"info":"\"\" at \"\""},{"visible":true,"include":false,"step":"250","x":-50.96190476190476,"y":0.7523809523809524,"z":27.01904761904762,"a95":1.2,"info":"\"\" at \"\""},{"visible":false,"include":false,"step":"250","x":-36.03809523809524,"y":14.733333333333333,"z":3.419047619047619,"a95":4.6,"info":"\"\" at \"\""},{"visible":true,"include":true,"step":"260","x":-43.457142857142856,"y":1.1047619047619048,"z":21.02857142857143,"a95":4.8,"info":"\"\" at \"\""},{"visible":true,"include":true,"step":"300","x":-35.24761904761905,"y":1.580952380952381,"z":17.228571428571428,"a95":5.4,"info":"\"\" at \"\""},{"visible":true,"include":true,"step":"330","x":-28.933333333333334,"y":1.3142857142857143,"z":13.542857142857141,"a95":5.7,"info":"\"\" at \"\""},{"visible":true,"include":true,"step":"360","x":-21.82857142857143,"y":1.580952380952381,"z":8.285714285714286,"a95":10.8,"info":"\"\" at \"\""},{"visible":true,"include":true,"step":"390","x":-12.095238095238095,"y":0.7904761904761906,"z":4.476190476190476,"a95":11.9,"info":"\"\" at \"\""},{"visible":true,"include":true,"step":"420","x":-5.523809523809524,"y":-0.26666666666666666,"z":1.9714285714285713,"a95":15.9,"info":"\"\" at \"\""},{"visible":true,"include":true,"step":"450","x":-2.3714285714285714,"y":0.5238095238095238,"z":0.7904761904761906,"a95":13.5,"info":"\"\" at \"\""},{"visible":true,"include":true,"step":"480","x":-1.580952380952381,"y":1.0476190476190477,"z":-0.13333333333333333,"a95":17.5,"info":"\"\" at \"\""},{"visible":true,"include":true,"step":"510","x":-2.6285714285714286,"y":1.580952380952381,"z":0,"a95":15.7,"info":"\"\" at \"\""}]},{"version":"v1.1.0","exported":"2016-10-09T19:07:57.583Z","volume":10.5,"added":"2016-10-09T18:44:29.179Z","format":"Utrecht","demagType":"Unknown","strat":null,"patch":1.1,"GEO":[],"TECT":[],"interpreted":false,"name":"TG 24.2A","coreAzi":322,"coreDip":38,"bedStrike":230,"bedDip":75,"data":[{"visible":true,"include":false,"step":"20","x":-110.05714285714285,"y":45.79047619047619,"z":60.142857142857146,"a95":0.7,"info":"\"\" at \"\""},{"visible":true,"include":false,"step":"100","x":-91.6952380952381,"y":39.68571428571428,"z":101.07619047619048,"a95":0.9,"info":"\"\" at \"\""},{"visible":true,"include":false,"step":"150","x":-75.94285714285714,"y":14.295238095238094,"z":68.39047619047619,"a95":1,"info":"\"\" at \"\""},{"visible":true,"include":false,"step":"200","x":-56.88571428571428,"y":8.542857142857143,"z":37.13333333333333,"a95":3.9,"info":"\"\" at \"\""},{"visible":true,"include":false,"step":"250","x":-49.561904761904756,"y":0.05714285714285714,"z":29.085714285714282,"a95":1,"info":"\"\" at \"\""},{"visible":true,"include":true,"step":"300","x":-31.257142857142856,"y":-0.7523809523809524,"z":18.00952380952381,"a95":1.5,"info":"\"\" at \"\""},{"visible":true,"include":true,"step":"330","x":-27.24761904761905,"y":-0.11428571428571428,"z":15.980952380952383,"a95":1.1,"info":"\"\" at \"\""},{"visible":true,"include":true,"step":"360","x":-19.58095238095238,"y":0.7523809523809524,"z":11.504761904761905,"a95":2.9,"info":"\"\" at \"\""},{"visible":true,"include":true,"step":"390","x":-13.076190476190478,"y":0.11428571428571428,"z":6.685714285714286,"a95":3.9,"info":"\"\" at \"\""},{"visible":true,"include":true,"step":"420","x":-6.857142857142857,"y":-0.4095238095238095,"z":2.2666666666666666,"a95":7.3,"info":"\"\" at \"\""},{"visible":true,"include":true,"step":"450","x":-4.295238095238095,"y":-1.0476190476190477,"z":1.1904761904761905,"a95":10.3,"info":"\"\" at \"\""},{"visible":true,"include":true,"step":"480","x":-2.9047619047619047,"y":0.5809523809523809,"z":0.29523809523809524,"a95":15.2,"info":"\"\" at \"\""},{"visible":true,"include":false,"step":"510","x":-1.7428571428571429,"y":0.6380952380952382,"z":-2.3238095238095235,"a95":13.3,"info":"\"\" at \"\""}]},{"version":"v1.1.0","exported":"2016-10-09T19:07:57.583Z","volume":10.5,"added":"2016-10-09T18:44:29.179Z","format":"Utrecht","demagType":"Unknown","strat":null,"patch":1.1,"GEO":[],"TECT":[],"interpreted":false,"name":"TG 25A.1","coreAzi":242,"coreDip":27,"bedStrike":218,"bedDip":40,"data":[{"visible":true,"include":false,"step":"20","x":-112.84761904761906,"y":86.00952380952381,"z":36.695238095238096,"a95":1.1,"info":"\"\" at \"\""},{"visible":true,"include":false,"step":"100","x":-83.64761904761905,"y":43.4,"z":23.933333333333334,"a95":1.5,"info":"\"\" at \"\""},{"visible":true,"include":false,"step":"150","x":-50.76190476190476,"y":20.257142857142856,"z":22.228571428571428,"a95":2,"info":"\"\" at \"\""},{"visible":true,"include":false,"step":"200","x":-44.40952380952381,"y":20.257142857142856,"z":23.361904761904764,"a95":1.3,"info":"\"\" at \"\""},{"visible":true,"include":false,"step":"250","x":-30.152380952380955,"y":15.304761904761904,"z":17.504761904761907,"a95":1.7,"info":"\"\" at \"\""},{"visible":true,"include":false,"step":"300","x":-25.104761904761908,"y":9.876190476190477,"z":14.323809523809524,"a95":1.8,"info":"\"\" at \"\""},{"visible":true,"include":true,"step":"330","x":-20.742857142857144,"y":6.219047619047619,"z":11.704761904761906,"a95":2.3,"info":"\"\" at \"\""},{"visible":true,"include":true,"step":"360","x":-17.142857142857142,"y":6.685714285714286,"z":8.514285714285714,"a95":2.4,"info":"\"\" at \"\""},{"visible":true,"include":true,"step":"390","x":-10.752380952380953,"y":6.914285714285714,"z":6.714285714285714,"a95":3.3,"info":"\"\" at \"\""},{"visible":true,"include":true,"step":"420","x":-16.20952380952381,"y":5.057142857142857,"z":5.809523809523809,"a95":3.3,"info":"\"\" at \"\""},{"visible":true,"include":true,"step":"450","x":-10.80952380952381,"y":4.761904761904762,"z":3.8666666666666667,"a95":3.9,"info":"\"\" at \"\""},{"visible":true,"include":true,"step":"480","x":-7.20952380952381,"y":2.961904761904762,"z":3.838095238095238,"a95":5.6,"info":"\"\" at \"\""},{"visible":true,"include":true,"step":"510","x":-5.466666666666667,"y":0.8761904761904761,"z":1.7714285714285716,"a95":8.6,"info":"\"\" at \"\""},{"visible":true,"include":true,"step":"530","x":-5.285714285714286,"y":2.380952380952381,"z":4.333333333333333,"a95":5.8,"info":"\"\" at \"\""}]},{"version":"v1.1.0","exported":"2016-10-09T19:07:57.583Z","volume":10.5,"added":"2016-10-09T18:44:29.179Z","format":"Utrecht","demagType":"Unknown","strat":null,"patch":1.1,"GEO":[],"TECT":[],"interpreted":false,"name":"TG 25B.1","coreAzi":343,"coreDip":57,"bedStrike":218,"bedDip":40,"data":[{"visible":true,"include":false,"step":"20","x":-2.2666666666666666,"y":-41.31428571428572,"z":122.14285714285714,"a95":0.3,"info":"\"\" at \"\""},{"visible":true,"include":false,"step":"100","x":-0.8095238095238095,"y":-31.02857142857143,"z":103.17142857142856,"a95":0.4,"info":"\"\" at \"\""},{"visible":true,"include":false,"step":"150","x":-3.838095238095238,"y":-22.485714285714284,"z":55.58095238095238,"a95":0.6,"info":"\"\" at \"\""},{"visible":true,"include":true,"step":"200","x":-7.904761904761905,"y":-18.82857142857143,"z":30.61904761904762,"a95":1.1,"info":"\"\" at \"\""},{"visible":true,"include":true,"step":"250","x":-6.800000000000001,"y":-14.238095238095237,"z":22.047619047619047,"a95":1.1,"info":"\"\" at \"\""},{"visible":false,"include":false,"step":"250","x":2.895238095238095,"y":-5,"z":5.133333333333333,"a95":18.9,"info":"\"\" at \"\""},{"visible":true,"include":true,"step":"260","x":-4.257142857142857,"y":-10.99047619047619,"z":16.295238095238094,"a95":10.8,"info":"\"\" at \"\""},{"visible":true,"include":true,"step":"300","x":-3.1523809523809527,"y":-7.628571428571428,"z":12.22857142857143,"a95":13.3,"info":"\"\" at \"\""},{"visible":true,"include":true,"step":"330","x":-3.9428571428571426,"y":-6.0476190476190474,"z":8.676190476190476,"a95":14.4,"info":"\"\" at \"\""},{"visible":true,"include":true,"step":"360","x":-3.419047619047619,"y":-5,"z":5.914285714285715,"a95":16.9,"info":"\"\" at \"\""},{"visible":true,"include":false,"step":"390","x":-2.104761904761905,"y":-2.895238095238095,"z":3.8095238095238093,"a95":17.9,"info":"\"\" at \"\""}]},{"version":"v1.1.0","exported":"2016-10-09T19:07:57.583Z","volume":10.5,"added":"2016-10-09T18:44:29.179Z","format":"Utrecht","demagType":"Unknown","strat":null,"patch":1.1,"GEO":[],"TECT":[],"interpreted":false,"name":"TG 26A.1","coreAzi":128,"coreDip":50,"bedStrike":218,"bedDip":40,"data":[{"visible":true,"include":false,"step":"20","x":-49.8,"y":-26.609523809523807,"z":0.6666666666666666,"a95":1.1,"info":"\"\" at \"\""},{"visible":true,"include":false,"step":"100","x":-44.44761904761905,"y":-20.219047619047622,"z":15.161904761904761,"a95":1.1,"info":"\"\" at \"\""},{"visible":true,"include":false,"step":"150","x":-29.05714285714286,"y":-11.152380952380952,"z":14.266666666666667,"a95":1.2,"info":"\"\" at \"\""},{"visible":true,"include":false,"step":"200","x":-18.59047619047619,"y":-3.1333333333333333,"z":15.076190476190478,"a95":0.8,"info":"\"\" at \"\""},{"visible":true,"include":false,"step":"250","x":-15.22857142857143,"y":-1.2761904761904763,"z":13.247619047619047,"a95":1.6,"info":"\"\" at \"\""},{"visible":false,"include":false,"step":"250","x":-6.314285714285714,"y":3.419047619047619,"z":3.0285714285714285,"a95":15.9,"info":"\"\" at \"\""},{"visible":true,"include":true,"step":"260","x":-10.780952380952382,"y":-0.5238095238095238,"z":9.333333333333334,"a95":9.8,"info":"\"\" at \"\""},{"visible":true,"include":true,"step":"300","x":-9.20952380952381,"y":0.26666666666666666,"z":6.9714285714285715,"a95":16.3,"info":"\"\" at \"\""},{"visible":true,"include":true,"step":"330","x":-7.628571428571428,"y":0,"z":6.571428571428571,"a95":16.7,"info":"\"\" at \"\""},{"visible":true,"include":true,"step":"360","x":-7.104761904761904,"y":0.5238095238095238,"z":6.180952380952381,"a95":17.6,"info":"\"\" at \"\""},{"visible":true,"include":true,"step":"390","x":-4.733333333333333,"y":0.7904761904761906,"z":3.9428571428571426,"a95":17.2,"info":"\"\" at \"\""},{"visible":true,"include":true,"step":"420","x":-3.419047619047619,"y":0,"z":2.4952380952380953,"a95":17.1,"info":"\"\" at \"\""},{"visible":true,"include":true,"step":"450","x":-1.580952380952381,"y":0,"z":1.580952380952381,"a95":23.4,"info":"\"\" at \"\""},{"visible":true,"include":true,"step":"480","x":-1.3142857142857143,"y":0,"z":1.580952380952381,"a95":19.8,"info":"\"\" at \"\""},{"visible":true,"include":false,"step":"510","x":-1.0476190476190477,"y":0.26666666666666666,"z":0.7904761904761906,"a95":23.8,"info":"\"\" at \"\""}]},{"version":"v1.1.0","exported":"2016-10-09T19:07:57.583Z","volume":10.5,"added":"2016-10-09T18:44:29.180Z","format":"Utrecht","demagType":"Unknown","strat":null,"patch":1.1,"GEO":[],"TECT":[],"interpreted":false,"name":"TG 26B.1","coreAzi":137,"coreDip":34,"bedStrike":218,"bedDip":40,"data":[{"visible":true,"include":false,"step":"20","x":-17.095238095238095,"y":-1.0476190476190477,"z":-4.733333333333333,"a95":8.3,"info":"\"\" at \"\""},{"visible":true,"include":false,"step":"100","x":-8.942857142857143,"y":0,"z":-0.7904761904761906,"a95":12.9,"info":"\"\" at \"\""},{"visible":true,"include":false,"step":"150","x":-7.628571428571428,"y":-1.8380952380952382,"z":0.13333333333333333,"a95":12.6,"info":"\"\" at \"\""},{"visible":true,"include":true,"step":"200","x":-3.6095238095238096,"y":0.05714285714285714,"z":0.8666666666666666,"a95":11,"info":"\"\" at \"\""},{"visible":true,"include":true,"step":"250","x":-1.5523809523809524,"y":0.12380952380952381,"z":0.6666666666666666,"a95":26.2,"info":"\"\" at \"\""},{"visible":true,"include":true,"step":"300","x":-1.1619047619047618,"y":0.29523809523809524,"z":1.1333333333333333,"a95":18.6,"info":"\"\" at \"\""},{"visible":true,"include":true,"step":"330","x":-0.9333333333333333,"y":0.4095238095238095,"z":0.29523809523809524,"a95":30.8,"info":"\"\" at \"\""}]},{"version":"v1.1.0","exported":"2016-10-09T19:07:57.583Z","volume":10.5,"added":"2016-10-09T18:44:29.180Z","format":"Utrecht","demagType":"Unknown","strat":null,"patch":1.1,"GEO":[],"TECT":[],"interpreted":false,"name":"TG 26B.2","coreAzi":137,"coreDip":34,"bedStrike":218,"bedDip":40,"data":[{"visible":true,"include":false,"step":"20","x":-23.476190476190474,"y":-1.5142857142857142,"z":-3.2571428571428576,"a95":1.9,"info":"\"\" at \"\""},{"visible":true,"include":false,"step":"100","x":-18.59047619047619,"y":-1.1047619047619048,"z":0.4666666666666667,"a95":2.3,"info":"\"\" at \"\""},{"visible":true,"include":false,"step":"150","x":-11.390476190476189,"y":-0.3523809523809524,"z":1.3047619047619048,"a95":3.9,"info":"\"\" at \"\""},{"visible":true,"include":true,"step":"200","x":-5.285714285714286,"y":0.5238095238095238,"z":2.238095238095238,"a95":8.2,"info":"\"\" at \"\""},{"visible":true,"include":true,"step":"250","x":-4.066666666666667,"y":0.17142857142857143,"z":1.9428571428571426,"a95":9.8,"info":"\"\" at \"\""},{"visible":false,"include":false,"step":"300","x":-1.3333333333333333,"y":-0.4095238095238095,"z":-1.6285714285714288,"a95":21.9,"info":"\"\" at \"\""},{"visible":true,"include":true,"step":"330","x":-2.619047619047619,"y":0.5809523809523809,"z":0.9904761904761905,"a95":11.3,"info":"\"\" at \"\""},{"visible":true,"include":true,"step":"360","x":-0.4095238095238095,"y":-0.11428571428571428,"z":0.08571428571428572,"a95":100.4,"info":"\"\" at \"\""}]},{"version":"v1.1.0","exported":"2016-10-09T19:07:57.583Z","volume":10.5,"added":"2016-10-09T18:44:29.181Z","format":"Utrecht","demagType":"Unknown","strat":null,"patch":1.1,"GEO":[],"TECT":[],"interpreted":false,"name":"TG 27.1","coreAzi":356,"coreDip":3,"bedStrike":234,"bedDip":66,"data":[{"visible":false,"include":false,"step":"20","x":-253.28571428571428,"y":29.514285714285712,"z":75.71428571428571,"a95":0.8,"info":"\"\" at \"\""},{"visible":true,"include":false,"step":"100","x":-178.9714285714286,"y":18.476190476190474,"z":85.76190476190476,"a95":1,"info":"\"\" at \"\""},{"visible":true,"include":false,"step":"150","x":-88.66666666666667,"y":8.77142857142857,"z":41.04761904761905,"a95":0.9,"info":"\"\" at \"\""},{"visible":true,"include":false,"step":"200","x":-27.657142857142855,"y":2.7333333333333334,"z":10.514285714285714,"a95":1,"info":"\"\" at \"\""},{"visible":true,"include":false,"step":"250","x":-6.800000000000001,"y":2.619047619047619,"z":3.685714285714286,"a95":3.6,"info":"\"\" at \"\""},{"visible":true,"include":false,"step":"250","x":0.7904761904761906,"y":9.733333333333334,"z":-10.390476190476189,"a95":14.9,"info":"\"\" at \"\""},{"visible":true,"include":false,"step":"260","x":-6.838095238095238,"y":2.3714285714285714,"z":1.580952380952381,"a95":14.3,"info":"\"\" at \"\""},{"visible":true,"include":false,"step":"300","x":-3.1523809523809527,"y":2.104761904761905,"z":1.7142857142857142,"a95":15.3,"info":"\"\" at \"\""},{"visible":true,"include":false,"step":"330","x":-6.0476190476190474,"y":4.733333333333333,"z":-0.7904761904761906,"a95":13.9,"info":"\"\" at \"\""},{"visible":true,"include":false,"step":"360","x":-6.0476190476190474,"y":1.0476190476190477,"z":0.3904761904761904,"a95":14.1,"info":"\"\" at \"\""},{"visible":true,"include":false,"step":"390","x":-2.6285714285714286,"y":1.8380952380952382,"z":-2.6285714285714286,"a95":15.8,"info":"\"\" at \"\""},{"visible":true,"include":false,"step":"420","x":-5.79047619047619,"y":3.1523809523809527,"z":-2.895238095238095,"a95":13.7,"info":"\"\" at \"\""},{"visible":true,"include":false,"step":"450","x":-2.104761904761905,"y":2.895238095238095,"z":-2.3714285714285714,"a95":13.9,"info":"\"\" at \"\""},{"visible":true,"include":false,"step":"480","x":-3.685714285714286,"y":1.8380952380952382,"z":-7.761904761904762,"a95":16.8,"info":"\"\" at \"\""},{"visible":true,"include":false,"step":"510","x":-5.79047619047619,"y":-0.26666666666666666,"z":-3.419047619047619,"a95":12.9,"info":"\"\" at \"\""}]},{"version":"v1.1.0","exported":"2016-10-09T19:07:57.583Z","volume":10.5,"added":"2016-10-09T18:44:29.183Z","format":"Utrecht","demagType":"Unknown","strat":null,"patch":1.1,"GEO":[],"TECT":[],"interpreted":false,"name":"TG 28.1","coreAzi":22,"coreDip":28,"bedStrike":234,"bedDip":66,"data":[{"visible":true,"include":false,"step":"20","x":-23.885714285714286,"y":-7.0285714285714285,"z":25.219047619047622,"a95":0.8,"info":"\"\" at \"\""},{"visible":true,"include":false,"step":"100","x":-14.58095238095238,"y":-4.476190476190476,"z":23.97142857142857,"a95":0.9,"info":"\"\" at \"\""},{"visible":true,"include":false,"step":"150","x":-6.276190476190477,"y":-2.038095238095238,"z":10.6,"a95":0.8,"info":"\"\" at \"\""},{"visible":true,"include":false,"step":"200","x":-1.9142857142857144,"y":-1.5714285714285714,"z":3.7142857142857144,"a95":3.3,"info":"\"\" at \"\""},{"visible":true,"include":false,"step":"250","x":-0.8761904761904761,"y":-0.9333333333333333,"z":1.2190476190476192,"a95":9.5,"info":"\"\" at \"\""},{"visible":true,"include":false,"step":"250","x":1.0476190476190477,"y":-2.104761904761905,"z":-3.0285714285714285,"a95":19.8,"info":"\"\" at \"\""},{"visible":true,"include":false,"step":"260","x":-0.5238095238095238,"y":-0.5238095238095238,"z":0.5238095238095238,"a95":58.5,"info":"\"\" at \"\""},{"visible":true,"include":false,"step":"300","x":0,"y":-0.7904761904761906,"z":0.6571428571428571,"a95":31.6,"info":"\"\" at \"\""},{"visible":true,"include":false,"step":"330","x":-0.7904761904761906,"y":-0.5238095238095238,"z":-0.13333333333333333,"a95":26.7,"info":"\"\" at \"\""},{"visible":true,"include":false,"step":"360","x":-0.26666666666666666,"y":-0.26666666666666666,"z":0.5238095238095238,"a95":36,"info":"\"\" at \"\""}]},{"version":"v1.1.0","exported":"2016-10-09T19:07:57.583Z","volume":10.5,"added":"2016-10-09T18:44:29.183Z","format":"Utrecht","demagType":"Unknown","strat":null,"patch":1.1,"GEO":[],"TECT":[],"interpreted":false,"name":"TG 28.2A","coreAzi":22,"coreDip":28,"bedStrike":234,"bedDip":66,"data":[{"visible":true,"include":false,"step":"20","x":-22.65714285714286,"y":-9.533333333333333,"z":27.4,"a95":1.5,"info":"\"\" at \"\""},{"visible":true,"include":false,"step":"100","x":-16.73333333333333,"y":-6.219047619047619,"z":26.761904761904763,"a95":1.1,"info":"\"\" at \"\""},{"visible":true,"include":false,"step":"150","x":-5.285714285714286,"y":-2.2666666666666666,"z":9.819047619047618,"a95":3.4,"info":"\"\" at \"\""},{"visible":true,"include":false,"step":"200","x":-0.4666666666666667,"y":-0.3523809523809524,"z":2.8476190476190473,"a95":15.3,"info":"\"\" at \"\""},{"visible":true,"include":false,"step":"250","x":-0.29523809523809524,"y":0,"z":1.9714285714285713,"a95":20.7,"info":"\"\" at \"\""},{"visible":true,"include":false,"step":"300","x":0.22857142857142856,"y":-1.3333333333333333,"z":0.6952380952380952,"a95":34.7,"info":"\"\" at \"\""},{"visible":true,"include":false,"step":"330","x":-0.4095238095238095,"y":-0.22857142857142856,"z":0.6952380952380952,"a95":59,"info":"\"\" at \"\""},{"visible":true,"include":false,"step":"360","x":-1.2190476190476192,"y":-0.11428571428571428,"z":0.38095238095238093,"a95":34.5,"info":"\"\" at \"\""}]},{"version":"v1.1.0","exported":"2016-10-09T19:07:57.583Z","volume":10.5,"added":"2016-10-09T18:44:29.183Z","format":"Utrecht","demagType":"Unknown","strat":null,"patch":1.1,"GEO":[],"TECT":[],"interpreted":false,"name":"TG 29.1A","coreAzi":285,"coreDip":75,"bedStrike":234,"bedDip":66,"data":[{"visible":true,"include":false,"step":"20","x":-3.4857142857142858,"y":18.304761904761904,"z":9.504761904761905,"a95":0.9,"info":"\"\" at \"\""},{"visible":true,"include":false,"step":"100","x":-2.619047619047619,"y":11.619047619047619,"z":13.390476190476189,"a95":1,"info":"\"\" at \"\""},{"visible":true,"include":false,"step":"150","x":-0.4095238095238095,"y":5.923809523809524,"z":5.895238095238095,"a95":1.7,"info":"\"\" at \"\""},{"visible":true,"include":false,"step":"200","x":0.05714285714285714,"y":3.1333333333333333,"z":2.2952380952380955,"a95":2.6,"info":"\"\" at \"\""},{"visible":true,"include":false,"step":"250","x":0.7523809523809524,"y":0.5238095238095238,"z":-0.2,"a95":17.6,"info":"\"\" at \"\""},{"visible":true,"include":false,"step":"250","x":1.8380952380952382,"y":0,"z":-3.8095238095238093,"a95":22.1,"info":"\"\" at \"\""},{"visible":true,"include":false,"step":"260","x":0.5238095238095238,"y":0.5238095238095238,"z":0.13333333333333333,"a95":36.6,"info":"\"\" at \"\""},{"visible":true,"include":false,"step":"300","x":0.5238095238095238,"y":0.26666666666666666,"z":-0.13333333333333333,"a95":61.9,"info":"\"\" at \"\""},{"visible":true,"include":false,"step":"330","x":-0.5238095238095238,"y":0.7904761904761906,"z":-0.5238095238095238,"a95":13.9,"info":"\"\" at \"\""},{"visible":true,"include":false,"step":"360","x":0,"y":0.5238095238095238,"z":0,"a95":44.2,"info":"\"\" at \"\""}]},{"version":"v1.1.0","exported":"2016-10-09T19:07:57.584Z","volume":10.5,"added":"2016-10-09T18:44:29.183Z","format":"Utrecht","demagType":"Unknown","strat":null,"patch":1.1,"GEO":[],"TECT":[],"interpreted":false,"name":"TG 29.2A","coreAzi":285,"coreDip":75,"bedStrike":234,"bedDip":66,"data":[{"visible":false,"include":false,"step":"20","x":-2.7904761904761903,"y":14.523809523809524,"z":7.6952380952380945,"a95":3,"info":"\"\" at \"\""},{"visible":true,"include":true,"step":"100","x":-1.4571428571428573,"y":10.514285714285714,"z":14.904761904761905,"a95":2.3,"info":"\"\" at \"\""},{"visible":true,"include":true,"step":"150","x":1.0476190476190477,"y":3.7142857142857144,"z":4.266666666666667,"a95":8.1,"info":"\"\" at \"\""},{"visible":true,"include":true,"step":"200","x":1.5142857142857142,"y":1.9142857142857144,"z":0.7809523809523808,"a95":15.7,"info":"\"\" at \"\""},{"visible":true,"include":false,"step":"250","x":1.7999999999999998,"y":1.3904761904761904,"z":0.11428571428571428,"a95":19.5,"info":"\"\" at \"\""},{"visible":true,"include":false,"step":"300","x":1.1047619047619048,"y":-0.17142857142857143,"z":-0.3238095238095238,"a95":42,"info":"\"\" at \"\""},{"visible":true,"include":false,"step":"330","x":0.29523809523809524,"y":0.4666666666666667,"z":-0.08571428571428572,"a95":65.5,"info":"\"\" at \"\""},{"visible":true,"include":false,"step":"360","x":-0.3523809523809524,"y":0.8095238095238095,"z":-0.11428571428571428,"a95":45.7,"info":"\"\" at \"\""}]},{"version":"v1.1.0","exported":"2016-10-09T19:07:57.584Z","volume":10.5,"added":"2016-10-09T18:44:29.184Z","format":"Utrecht","demagType":"Unknown","strat":null,"patch":1.1,"GEO":[{"dec":295.0521015952801,"inc":-21.587091002062902,"MAD":5.3543889340798865,"cm":[-4.440892098500626e-16,0,0],"intensity":94.25601552466047,"type":"GC","origin":false,"forced":true,"remark":"","nSteps":4,"minStep":"100","maxStep":"250","steps":["100","150","200","250"],"group":"None","version":"v1.1.0"}],"TECT":[{"dec":233.34409225449815,"inc":-63.25025002656044,"MAD":5.354388934079949,"cm":[4.440892098500626e-16,6.217248937900877e-15,-1.3322676295501878e-15],"intensity":94.25601552466044,"type":"GC","origin":false,"forced":true,"remark":"","nSteps":4,"minStep":"100","maxStep":"250","steps":["100","150","200","250"],"group":"None","version":"v1.1.0"}],"interpreted":true,"name":"TG 30.1","coreAzi":50,"coreDip":16,"bedStrike":234,"bedDip":66,"data":[{"visible":false,"include":false,"step":"20","x":-43.22857142857143,"y":-46.13333333333333,"z":24.75238095238095,"a95":0.5,"info":"\"\" at \"\""},{"visible":true,"include":true,"step":"100","x":-33.523809523809526,"y":-45.733333333333334,"z":61.74285714285714,"a95":0.5,"info":"\"\" at \"\""},{"visible":true,"include":true,"step":"150","x":-6.628571428571428,"y":-23.304761904761904,"z":41.95238095238095,"a95":0.7,"info":"\"\" at \"\""},{"visible":true,"include":true,"step":"200","x":9.40952380952381,"y":-12.085714285714285,"z":23.123809523809523,"a95":0.8,"info":"\"\" at \"\""},{"visible":true,"include":true,"step":"250","x":15.399999999999999,"y":-4.590476190476191,"z":15.866666666666665,"a95":1.1,"info":"\"\" at \"\""},{"visible":false,"include":false,"step":"250","x":20.257142857142856,"y":-6.571428571428571,"z":-5.523809523809524,"a95":10.7,"info":"\"\" at \"\""},{"visible":true,"include":false,"step":"260","x":14.99047619047619,"y":-1.8380952380952382,"z":10.123809523809523,"a95":9.6,"info":"\"\" at \"\""},{"visible":true,"include":false,"step":"300","x":11.571428571428571,"y":-0.26666666666666666,"z":5.657142857142857,"a95":12.5,"info":"\"\" at \"\""},{"visible":true,"include":false,"step":"330","x":9.20952380952381,"y":-1.8380952380952382,"z":5.390476190476191,"a95":13.8,"info":"\"\" at \"\""},{"visible":true,"include":false,"step":"360","x":7.104761904761904,"y":0,"z":4.076190476190476,"a95":17,"info":"\"\" at \"\""},{"visible":true,"include":false,"step":"390","x":4.733333333333333,"y":-0.5238095238095238,"z":3.685714285714286,"a95":20.1,"info":"\"\" at \"\""},{"visible":true,"include":false,"step":"420","x":3.9428571428571426,"y":0.7904761904761906,"z":1.4476190476190476,"a95":21.4,"info":"\"\" at \"\""},{"visible":true,"include":false,"step":"450","x":3.419047619047619,"y":0,"z":3.0285714285714285,"a95":20.2,"info":"\"\" at \"\""},{"visible":true,"include":false,"step":"480","x":1.3142857142857143,"y":-1.0476190476190477,"z":0.9238095238095237,"a95":20.8,"info":"\"\" at \"\""}]},{"version":"v1.1.0","exported":"2016-10-09T19:07:57.584Z","volume":10.5,"added":"2016-10-09T18:44:29.184Z","format":"Utrecht","demagType":"Unknown","strat":null,"patch":1.1,"GEO":[{"dec":72.74548333183168,"inc":-7.1716536446198145,"MAD":7.253502988295705,"cm":[3.3306690738754696e-16,1.2212453270876722e-15,0],"intensity":70.5775603017035,"type":"GC","origin":false,"forced":true,"remark":"","nSteps":5,"minStep":"100","maxStep":"300","steps":["100","150","200","250","300"],"group":"None","version":"v1.1.0"}],"TECT":[{"dec":248.54309242812218,"inc":-13.916441583554105,"MAD":7.253502988295757,"cm":[1.3877787807814457e-16,-3.3584246494910985e-15,1.3322676295501878e-15],"intensity":70.57756030170347,"type":"GC","origin":false,"forced":true,"remark":"","nSteps":5,"minStep":"100","maxStep":"300","steps":["100","150","200","250","300"],"group":"None","version":"v1.1.0"}],"interpreted":true,"name":"TG 30.2","coreAzi":50,"coreDip":16,"bedStrike":234,"bedDip":66,"data":[{"visible":false,"include":false,"step":"20","x":-25.504761904761907,"y":-79.72380952380952,"z":2.4095238095238094,"a95":0.9,"info":"\"\" at \"\""},{"visible":true,"include":true,"step":"100","x":-20.685714285714283,"y":-50.4952380952381,"z":31.552380952380954,"a95":1.6,"info":"\"\" at \"\""},{"visible":true,"include":true,"step":"150","x":-4.942857142857143,"y":-34.4,"z":18.19047619047619,"a95":1.1,"info":"\"\" at \"\""},{"visible":true,"include":true,"step":"200","x":9.933333333333334,"y":-23.942857142857143,"z":7.6952380952380945,"a95":2.1,"info":"\"\" at \"\""},{"visible":true,"include":true,"step":"250","x":12.257142857142856,"y":-16.904761904761905,"z":3.3714285714285714,"a95":2,"info":"\"\" at \"\""},{"visible":true,"include":true,"step":"300","x":8.371428571428572,"y":-12.2,"z":-1.5714285714285714,"a95":2.8,"info":"\"\" at \"\""},{"visible":true,"include":false,"step":"330","x":6.161904761904762,"y":-10.342857142857142,"z":0.8380952380952381,"a95":3,"info":"\"\" at \"\""},{"visible":true,"include":false,"step":"360","x":3.9523809523809526,"y":-7.847619047619048,"z":-0.22857142857142856,"a95":4.5,"info":"\"\" at \"\""},{"visible":true,"include":false,"step":"390","x":4.419047619047619,"y":-6.0476190476190474,"z":-0.4095238095238095,"a95":5.9,"info":"\"\" at \"\""},{"visible":true,"include":false,"step":"420","x":2.380952380952381,"y":-5.4,"z":-0.6095238095238096,"a95":7.2,"info":"\"\" at \"\""},{"visible":true,"include":false,"step":"450","x":0.6952380952380952,"y":-2.380952380952381,"z":0.08571428571428572,"a95":17,"info":"\"\" at \"\""},{"visible":true,"include":false,"step":"480","x":-0.11428571428571428,"y":-1.7428571428571429,"z":-0.2,"a95":21.3,"info":"\"\" at \"\""},{"visible":true,"include":false,"step":"510","x":-0.4095238095238095,"y":0,"z":-0.17142857142857143,"a95":86,"info":"\"\" at \"\""}]},{"version":"v1.1.0","exported":"2016-10-09T19:07:57.584Z","volume":10.5,"added":"2016-10-09T18:44:29.185Z","format":"Utrecht","demagType":"Unknown","strat":null,"patch":1.1,"GEO":[],"TECT":[],"interpreted":false,"name":"TG 32.1","coreAzi":357,"coreDip":62,"bedStrike":234,"bedDip":66,"data":[{"visible":false,"include":false,"step":"20","x":13.657142857142858,"y":19.876190476190477,"z":203.28571428571428,"a95":0.7,"info":"\"\" at \"\""},{"visible":true,"include":true,"step":"100","x":11.914285714285715,"y":26.02857142857143,"z":147.73333333333335,"a95":0.6,"info":"\"\" at \"\""},{"visible":true,"include":true,"step":"150","x":11.914285714285715,"y":16.323809523809523,"z":95.76190476190476,"a95":0.9,"info":"\"\" at \"\""},{"visible":true,"include":true,"step":"200","x":8.371428571428572,"y":12.552380952380954,"z":40.23809523809524,"a95":1.5,"info":"\"\" at \"\""},{"visible":true,"include":true,"step":"250","x":6.447619047619048,"y":10.22857142857143,"z":6.247619047619047,"a95":3.8,"info":"\"\" at \"\""},{"visible":true,"include":true,"step":"300","x":4.647619047619047,"y":10.114285714285714,"z":-1.6285714285714288,"a95":4.5,"info":"\"\" at \"\""},{"visible":true,"include":false,"step":"330","x":3.657142857142857,"y":9.238095238095237,"z":-2.9047619047619047,"a95":4.9,"info":"\"\" at \"\""},{"visible":true,"include":false,"step":"360","x":1.3333333333333333,"y":7.723809523809523,"z":-4.0095238095238095,"a95":5.6,"info":"\"\" at \"\""},{"visible":true,"include":false,"step":"390","x":-0.9333333333333333,"y":6.333333333333333,"z":-1.4857142857142858,"a95":8.2,"info":"\"\" at \"\""},{"visible":true,"include":false,"step":"420","x":0,"y":5.114285714285715,"z":2.5523809523809526,"a95":15.9,"info":"\"\" at \"\""},{"visible":true,"include":false,"step":"450","x":-0.8095238095238095,"y":-3.1333333333333333,"z":0.29523809523809524,"a95":14,"info":"\"\" at \"\""},{"visible":true,"include":false,"step":"480","x":-1.6857142857142857,"y":-2.3238095238095235,"z":4.885714285714285,"a95":7.2,"info":"\"\" at \"\""}]},{"version":"v1.1.0","exported":"2016-10-09T19:07:57.584Z","volume":10.5,"added":"2016-10-09T18:44:29.185Z","format":"Utrecht","demagType":"Unknown","strat":null,"patch":1.1,"GEO":[{"dec":38.4951299828698,"inc":-25.47643733325872,"MAD":13.62008398639148,"cm":[-1.5543122344752192e-15,-8.881784197001252e-16,0],"intensity":196.9242484743517,"type":"GC","origin":false,"forced":true,"remark":"","nSteps":4,"minStep":"100","maxStep":"250","steps":["100","150","200","250"],"group":"None","version":"v1.1.0"}],"TECT":[{"dec":72.720567280139,"inc":-23.29195407211678,"MAD":13.620083986392615,"cm":[-6.772360450213455e-15,-2.1316282072803006e-14,2.6645352591003757e-15],"intensity":196.9242484743517,"type":"GC","origin":false,"forced":true,"remark":"","nSteps":4,"minStep":"100","maxStep":"250","steps":["100","150","200","250"],"group":"None","version":"v1.1.0"}],"interpreted":true,"name":"TG 32.2","coreAzi":357,"coreDip":62,"bedStrike":234,"bedDip":66,"data":[{"visible":false,"include":false,"step":"20","x":10.980952380952381,"y":10.4,"z":188.06666666666666,"a95":0.4,"info":"\"\" at \"\""},{"visible":true,"include":true,"step":"100","x":6.276190476190477,"y":7.723809523809523,"z":187.85714285714286,"a95":0.4,"info":"\"\" at \"\""},{"visible":true,"include":true,"step":"150","x":14.057142857142857,"y":0.17142857142857143,"z":119.66666666666667,"a95":0.6,"info":"\"\" at \"\""},{"visible":true,"include":true,"step":"200","x":9.647619047619047,"y":-10.80952380952381,"z":43.34285714285714,"a95":0.4,"info":"\"\" at \"\""},{"visible":true,"include":true,"step":"250","x":6.628571428571428,"y":-10.17142857142857,"z":8.628571428571428,"a95":1.3,"info":"\"\" at \"\""},{"visible":true,"include":false,"step":"250","x":0.819047619047619,"y":-0.6095238095238096,"z":-0.41904761904761906,"a95":14.7,"info":"\"\" at \"\""},{"visible":true,"include":false,"step":"260","x":3.9428571428571426,"y":-7.895238095238096,"z":1.580952380952381,"a95":12.4,"info":"\"\" at \"\""},{"visible":true,"include":false,"step":"300","x":3.419047619047619,"y":-5,"z":-2.6285714285714286,"a95":16.8,"info":"\"\" at \"\""},{"visible":true,"include":false,"step":"330","x":1.3142857142857143,"y":-3.9428571428571426,"z":-3.0285714285714285,"a95":18.2,"info":"\"\" at \"\""},{"visible":true,"include":false,"step":"360","x":1.3142857142857143,"y":-1.8380952380952382,"z":-3.1523809523809527,"a95":17.7,"info":"\"\" at \"\""},{"visible":true,"include":false,"step":"390","x":0.26666666666666666,"y":-1.8380952380952382,"z":-0.6571428571428571,"a95":24.3,"info":"\"\" at \"\""},{"visible":true,"include":false,"step":"420","x":-0.7904761904761906,"y":-1.3142857142857143,"z":-1.0476190476190477,"a95":18.1,"info":"\"\" at \"\""}]},{"version":"v1.1.0","exported":"2016-10-09T19:07:57.584Z","volume":10.5,"added":"2016-10-09T18:44:29.185Z","format":"Utrecht","demagType":"Unknown","strat":null,"patch":1.1,"GEO":[{"dec":10.730176132670863,"inc":-61.27561924335837,"MAD":8.100174762635817,"cm":[-1.1102230246251565e-16,1.9845236565174673e-15,0],"intensity":35.676603612892784,"type":"dir","forced":true,"remark":"","origin":false,"nSteps":5,"minStep":"300","maxStep":"420","steps":["300","330","360","390","420"],"group":"None","version":"v1.1.0"}],"TECT":[{"dec":127.56967434664739,"inc":-39.41825069284672,"MAD":8.100174762635783,"cm":[-1.1657341758564144e-15,7.771561172376096e-16,2.7755575615628914e-16],"intensity":35.67660361289278,"type":"dir","forced":true,"remark":"","origin":false,"nSteps":5,"minStep":"300","maxStep":"420","steps":["300","330","360","390","420"],"group":"None","version":"v1.1.0"}],"interpreted":true,"name":"TG 33A.1","coreAzi":47,"coreDip":37,"bedStrike":241,"bedDip":71,"data":[{"visible":false,"include":false,"step":"20","x":-55.08571428571428,"y":-105.9904761904762,"z":123.3047619047619,"a95":0.3,"info":"\"\" at \"\""},{"visible":false,"include":false,"step":"100","x":-41.08571428571428,"y":-92.5047619047619,"z":140.06666666666666,"a95":0.5,"info":"\"\" at \"\""},{"visible":true,"include":false,"step":"150","x":5.752380952380952,"y":-57.05714285714286,"z":70.3047619047619,"a95":0.3,"info":"\"\" at \"\""},{"visible":true,"include":false,"step":"200","x":28.933333333333334,"y":-35.20952380952381,"z":18.304761904761904,"a95":0.4,"info":"\"\" at \"\""},{"visible":true,"include":false,"step":"250","x":35.67619047619048,"y":-24,"z":-0.05714285714285714,"a95":0.8,"info":"\"\" at \"\""},{"visible":false,"include":false,"step":"250","x":2.895238095238095,"y":-2.7333333333333334,"z":-2.580952380952381,"a95":3,"info":"\"\" at \"\""},{"visible":true,"include":false,"step":"260","x":31.304761904761904,"y":-16.304761904761904,"z":-5.390476190476191,"a95":6.6,"info":"\"\" at \"\""},{"visible":true,"include":true,"step":"300","x":26.571428571428573,"y":-12.885714285714286,"z":-6.838095238095238,"a95":6.3,"info":"\"\" at \"\""},{"visible":true,"include":true,"step":"330","x":26.038095238095234,"y":-6.314285714285714,"z":-5.657142857142857,"a95":7.2,"info":"\"\" at \"\""},{"visible":true,"include":true,"step":"360","x":21.047619047619047,"y":-3.685714285714286,"z":-5.914285714285715,"a95":10.4,"info":"\"\" at \"\""},{"visible":true,"include":true,"step":"390","x":12.095238095238095,"y":-0.26666666666666666,"z":-0.7904761904761906,"a95":9.6,"info":"\"\" at \"\""},{"visible":true,"include":true,"step":"420","x":5.257142857142857,"y":-1.580952380952381,"z":-0.26666666666666666,"a95":15.6,"info":"\"\" at \"\""},{"visible":false,"include":false,"step":"450","x":8.152380952380952,"y":-0.5238095238095238,"z":-1.7142857142857142,"a95":14.5,"info":"\"\" at \"\""},{"visible":false,"include":false,"step":"480","x":2.104761904761905,"y":-0.7904761904761906,"z":-2.895238095238095,"a95":17.6,"info":"\"\" at \"\""},{"visible":false,"include":false,"step":"510","x":-16.571428571428573,"y":-1.3142857142857143,"z":10.390476190476189,"a95":4.7,"info":"\"\" at \"\""}]},{"version":"v1.1.0","exported":"2016-10-09T19:07:57.584Z","volume":10.5,"added":"2016-10-09T18:44:29.187Z","format":"Utrecht","demagType":"Unknown","strat":null,"patch":1.1,"GEO":[{"dec":6.326475286555706,"inc":-65.98199814604301,"MAD":5.889222256722447,"cm":[0,1.9984014443252818e-15,0],"intensity":54.03620605321816,"type":"dir","forced":true,"remark":"","origin":false,"nSteps":3,"minStep":"250","maxStep":"330","steps":["250","300","330"],"group":"None","version":"v1.1.0"}],"TECT":[{"dec":133.69785957618126,"inc":-37.68835080443691,"MAD":5.88922225672245,"cm":[2.220446049250313e-15,6.661338147750939e-16,-8.881784197001252e-16],"intensity":54.03620605321816,"type":"dir","forced":true,"remark":"","origin":false,"nSteps":3,"minStep":"250","maxStep":"330","steps":["250","300","330"],"group":"None","version":"v1.1.0"}],"interpreted":true,"name":"TG 33B.1","coreAzi":48,"coreDip":48,"bedStrike":241,"bedDip":71,"data":[{"visible":false,"include":false,"step":"20","x":23.933333333333334,"y":-84.6952380952381,"z":64.57142857142857,"a95":1.5,"info":"\"\" at \"\""},{"visible":true,"include":false,"step":"100","x":26.82857142857143,"y":-46.81904761904762,"z":56.028571428571425,"a95":1.8,"info":"\"\" at \"\""},{"visible":true,"include":false,"step":"150","x":32.095238095238095,"y":-22.361904761904764,"z":5.79047619047619,"a95":6.7,"info":"\"\" at \"\""},{"visible":true,"include":false,"step":"200","x":38.93333333333334,"y":-17.38095238095238,"z":-7.266666666666667,"a95":0.8,"info":"\"\" at \"\""},{"visible":true,"include":true,"step":"250","x":27.285714285714285,"y":-10.438095238095238,"z":-13.619047619047619,"a95":1.4,"info":"\"\" at \"\""},{"visible":true,"include":true,"step":"300","x":22.895238095238096,"y":-5.342857142857143,"z":-11.857142857142858,"a95":1.5,"info":"\"\" at \"\""},{"visible":true,"include":true,"step":"330","x":16.61904761904762,"y":-5.466666666666667,"z":-13.571428571428571,"a95":2.1,"info":"\"\" at \"\""},{"visible":true,"include":false,"step":"360","x":9.533333333333333,"y":-6.219047619047619,"z":-14.266666666666667,"a95":2.6,"info":"\"\" at \"\""},{"visible":true,"include":false,"step":"390","x":7.085714285714286,"y":-5.114285714285715,"z":-6.161904761904762,"a95":4.3,"info":"\"\" at \"\""},{"visible":false,"include":false,"step":"420","x":2.7333333333333334,"y":-1.1619047619047618,"z":-14.238095238095237,"a95":3.9,"info":"\"\" at \"\""},{"visible":true,"include":false,"step":"450","x":0.17142857142857143,"y":-3.019047619047619,"z":-3.5142857142857142,"a95":11.9,"info":"\"\" at \"\""},{"visible":false,"include":false,"step":"480","x":-8.485714285714286,"y":-0.8761904761904761,"z":-4.123809523809523,"a95":6.8,"info":"\"\" at \"\""}]},{"version":"v1.1.0","exported":"2016-10-09T19:07:57.584Z","volume":10.5,"added":"2016-10-09T18:44:29.187Z","format":"Utrecht","demagType":"Unknown","strat":null,"patch":1.1,"GEO":[{"dec":353.1611536660274,"inc":-42.89055979350648,"MAD":3.096746884751928,"cm":[0,-1.5792922525292852e-14,0],"intensity":261.36062157959384,"type":"dir","forced":true,"remark":"","origin":false,"nSteps":9,"minStep":"260","maxStep":"510","steps":["260","300","330","360","390","420","450","480","510"],"group":"None","version":"v1.1.0"}],"TECT":[{"dec":117.81732839222502,"inc":-59.671635465853164,"MAD":3.0967468847517967,"cm":[5.204170427930421e-16,-9.658940314238862e-15,-5.551115123125783e-15],"intensity":261.3606215795938,"type":"dir","forced":true,"remark":"","origin":false,"nSteps":9,"minStep":"260","maxStep":"510","steps":["260","300","330","360","390","420","450","480","510"],"group":"None","version":"v1.1.0"}],"interpreted":true,"name":"TG 35A.1","coreAzi":8,"coreDip":65,"bedStrike":241,"bedDip":71,"data":[{"visible":false,"include":false,"step":"20","x":387.74285714285713,"y":-89.13333333333333,"z":-24.085714285714285,"a95":1.5,"info":"\"\" at \"\""},{"visible":true,"include":false,"step":"100","x":368.8,"y":-65.25714285714287,"z":134.92380952380952,"a95":0.7,"info":"\"\" at \"\""},{"visible":true,"include":false,"step":"150","x":356.42857142857144,"y":-67.80952380952381,"z":5.838095238095238,"a95":0.9,"info":"\"\" at \"\""},{"visible":true,"include":false,"step":"200","x":320.8095238095238,"y":-103.19999999999999,"z":-79.17142857142856,"a95":0.9,"info":"\"\" at \"\""},{"visible":true,"include":false,"step":"250","x":285.4761904761905,"y":-83.96190476190476,"z":-88.66666666666667,"a95":1,"info":"\"\" at \"\""},{"visible":false,"include":false,"step":"250","x":311.43809523809523,"y":-50.5047619047619,"z":-165.05714285714285,"a95":1.2,"info":"\"\" at \"\""},{"visible":true,"include":true,"step":"260","x":248.04761904761904,"y":-51.2952380952381,"z":-83.38095238095238,"a95":1,"info":"\"\" at \"\""},{"visible":true,"include":true,"step":"300","x":198.33333333333334,"y":-55.76190476190476,"z":-72.85714285714286,"a95":1,"info":"\"\" at \"\""},{"visible":true,"include":true,"step":"330","x":155.71428571428572,"y":-22.885714285714286,"z":-52.60952380952381,"a95":1.3,"info":"\"\" at \"\""},{"visible":true,"include":true,"step":"360","x":133.88571428571427,"y":-17.61904761904762,"z":-46.02857142857143,"a95":1.5,"info":"\"\" at \"\""},{"visible":true,"include":true,"step":"390","x":92.85714285714286,"y":-13.942857142857143,"z":-29.066666666666666,"a95":1.6,"info":"\"\" at \"\""},{"visible":true,"include":true,"step":"420","x":49.19047619047619,"y":-4.733333333333333,"z":-14.857142857142858,"a95":3.7,"info":"\"\" at \"\""},{"visible":true,"include":true,"step":"450","x":48.92380952380953,"y":-5.523809523809524,"z":-10,"a95":3.8,"info":"\"\" at \"\""},{"visible":true,"include":true,"step":"480","x":13.942857142857143,"y":-0.5238095238095238,"z":-4.6,"a95":11.6,"info":"\"\" at \"\""},{"visible":false,"include":false,"step":"510","x":-5.257142857142857,"y":-0.7904761904761906,"z":1.8380952380952382,"a95":5.1,"info":"\"\" at \"\""}]},{"version":"v1.1.0","exported":"2016-10-09T19:07:57.584Z","volume":10.5,"added":"2016-10-09T18:44:29.187Z","format":"Utrecht","demagType":"Unknown","strat":null,"patch":1.1,"GEO":[{"dec":353.71238219515493,"inc":-46.41309719716846,"MAD":1.7677468596047903,"cm":[1.1102230246251565e-16,1.4405143744511406e-14,0],"intensity":224.04442283029618,"type":"dir","forced":true,"remark":"","origin":false,"nSteps":7,"minStep":"300","maxStep":"480","steps":["300","330","360","390","420","450","480"],"group":"None","version":"v1.1.0"}],"TECT":[{"dec":121.87648557270484,"inc":-56.84132392499037,"MAD":1.7677468596049375,"cm":[-5.773159728050814e-15,8.104628079763643e-15,4.218847493575595e-15],"intensity":224.0444228302962,"type":"dir","forced":true,"remark":"","origin":false,"nSteps":7,"minStep":"300","maxStep":"480","steps":["300","330","360","390","420","450","480"],"group":"None","version":"v1.1.0"}],"interpreted":true,"name":"TG 35A.2","coreAzi":8,"coreDip":65,"bedStrike":241,"bedDip":71,"data":[{"visible":false,"include":false,"step":"20","x":364.32380952380953,"y":-147.76190476190476,"z":-56.41904761904762,"a95":1,"info":"\"\" at \"\""},{"visible":true,"include":false,"step":"150","x":342.247619047619,"y":-66.12380952380951,"z":-22.6,"a95":0.5,"info":"\"\" at \"\""},{"visible":true,"include":false,"step":"200","x":320.1714285714286,"y":-64.03809523809524,"z":-96.74285714285713,"a95":0.5,"info":"\"\" at \"\""},{"visible":true,"include":false,"step":"250","x":283.0952380952381,"y":-36.42857142857143,"z":-102.67619047619047,"a95":0.5,"info":"\"\" at \"\""},{"visible":true,"include":true,"step":"300","x":190.06666666666666,"y":-39.10476190476191,"z":-77.04761904761905,"a95":0.6,"info":"\"\" at \"\""},{"visible":true,"include":true,"step":"330","x":161.82857142857142,"y":-29.923809523809524,"z":-62.58095238095238,"a95":0.6,"info":"\"\" at \"\""},{"visible":true,"include":true,"step":"360","x":120.92380952380952,"y":-21.26666666666667,"z":-51.10476190476191,"a95":0.6,"info":"\"\" at \"\""},{"visible":true,"include":true,"step":"390","x":95.87619047619049,"y":-16.561904761904763,"z":-41.08571428571428,"a95":0.7,"info":"\"\" at \"\""},{"visible":true,"include":true,"step":"420","x":70.13333333333333,"y":-9.466666666666667,"z":-32.10476190476191,"a95":0.7,"info":"\"\" at \"\""},{"visible":true,"include":true,"step":"450","x":32.77142857142857,"y":-3.019047619047619,"z":-19.81904761904762,"a95":1.5,"info":"\"\" at \"\""},{"visible":true,"include":true,"step":"480","x":14.057142857142857,"y":-2.8476190476190473,"z":-5.228571428571429,"a95":2.4,"info":"\"\" at \"\""},{"visible":false,"include":false,"step":"510","x":4.3619047619047615,"y":-1.7428571428571429,"z":-7.876190476190477,"a95":5.3,"info":"\"\" at \"\""},{"visible":false,"include":false,"step":"540","x":-6.504761904761905,"y":-0.9333333333333333,"z":-1.4857142857142858,"a95":5.9,"info":"\"\" at \"\""}]},{"version":"v1.1.0","exported":"2016-10-09T19:07:57.584Z","volume":10.5,"added":"2016-10-09T18:44:29.187Z","format":"Utrecht","demagType":"Unknown","strat":null,"patch":1.1,"GEO":[{"dec":8.878246053926944,"inc":-47.86127657929085,"MAD":4.576887146804015,"cm":[32.05673643587481,7.936726357687868,-29.671249671647],"intensity":81.57781588980839,"type":"dir","forced":false,"remark":"","origin":false,"nSteps":7,"minStep":"250","maxStep":"450","steps":["250","300","330","360","390","420","450"],"group":"None","version":"v1.1.0"}],"TECT":[{"dec":113.07638515402192,"inc":-47.91395661567607,"MAD":4.57688714680401,"cm":[-6.749256134239284,29.447239289911014,-32.53177943350668],"intensity":81.57781588980839,"type":"dir","forced":false,"remark":"","origin":false,"nSteps":7,"minStep":"250","maxStep":"450","steps":["250","300","330","360","390","420","450"],"group":"None","version":"v1.1.0"}],"interpreted":true,"name":"TG 35B.1","coreAzi":277,"coreDip":12,"bedStrike":241,"bedDip":71,"data":[{"visible":false,"include":false,"step":"20","x":-52.34285714285714,"y":202.0095238095238,"z":-76.54285714285714,"a95":1.1,"info":"\"\" at \"\""},{"visible":true,"include":false,"step":"100","x":-11.571428571428571,"y":163.8761904761905,"z":-8.942857142857143,"a95":1.6,"info":"\"\" at \"\""},{"visible":true,"include":false,"step":"150","x":43.923809523809524,"y":106.79047619047618,"z":-14.99047619047619,"a95":1.5,"info":"\"\" at \"\""},{"visible":true,"include":false,"step":"200","x":54.72380952380953,"y":95.8952380952381,"z":-20.895238095238096,"a95":0.9,"info":"\"\" at \"\""},{"visible":true,"include":true,"step":"250","x":59.142857142857146,"y":61.457142857142856,"z":-14.095238095238095,"a95":0.7,"info":"\"\" at \"\""},{"visible":true,"include":true,"step":"300","x":50.028571428571425,"y":51.36190476190476,"z":-17.98095238095238,"a95":0.6,"info":"\"\" at \"\""},{"visible":true,"include":true,"step":"330","x":38.93333333333334,"y":43.93333333333334,"z":-13.514285714285714,"a95":1,"info":"\"\" at \"\""},{"visible":true,"include":true,"step":"360","x":24.923809523809524,"y":32.19047619047619,"z":-11.704761904761906,"a95":1,"info":"\"\" at \"\""},{"visible":true,"include":true,"step":"390","x":17.02857142857143,"y":22.371428571428574,"z":-6.419047619047619,"a95":1.5,"info":"\"\" at \"\""},{"visible":true,"include":true,"step":"420","x":7.847619047619048,"y":11.152380952380952,"z":-4.066666666666667,"a95":3.6,"info":"\"\" at \"\""},{"visible":true,"include":true,"step":"450","x":-0.5238095238095238,"y":7.0285714285714285,"z":-2.5904761904761906,"a95":7.7,"info":"\"\" at \"\""},{"visible":true,"include":false,"step":"480","x":0.17142857142857143,"y":7.20952380952381,"z":-0.5238095238095238,"a95":6.6,"info":"\"\" at \"\""},{"visible":false,"include":false,"step":"510","x":-17.314285714285717,"y":4.3619047619047615,"z":-2.123809523809524,"a95":4.3,"info":"\"\" at \"\""}]},{"version":"v1.1.0","exported":"2016-10-09T19:07:57.584Z","volume":10.5,"added":"2016-10-09T18:44:29.187Z","format":"Utrecht","demagType":"Unknown","strat":null,"patch":1.1,"GEO":[],"TECT":[],"interpreted":false,"name":"TG 36.1","coreAzi":327,"coreDip":35,"bedStrike":241,"bedDip":71,"data":[{"visible":true,"include":false,"step":"20","x":-83.79047619047618,"y":7.20952380952381,"z":103.42857142857143,"a95":0.5,"info":"\"\" at \"\""},{"visible":true,"include":false,"step":"150","x":-46.95238095238095,"y":-36.666666666666664,"z":78.18095238095238,"a95":0.6,"info":"\"\" at \"\""},{"visible":true,"include":false,"step":"200","x":-37.13333333333333,"y":-47.76190476190476,"z":45.12380952380953,"a95":0.6,"info":"\"\" at \"\""},{"visible":true,"include":false,"step":"250","x":-30.799999999999997,"y":-56.30476190476191,"z":34.57142857142857,"a95":0.8,"info":"\"\" at \"\""},{"visible":true,"include":false,"step":"300","x":-32.65714285714286,"y":-49.61904761904762,"z":19.666666666666668,"a95":0.8,"info":"\"\" at \"\""},{"visible":true,"include":false,"step":"330","x":-25.447619047619046,"y":-45.266666666666666,"z":12.838095238095239,"a95":0.9,"info":"\"\" at \"\""},{"visible":true,"include":false,"step":"360","x":-32.076190476190476,"y":-36.666666666666664,"z":-0.05714285714285714,"a95":1,"info":"\"\" at \"\""},{"visible":true,"include":false,"step":"390","x":-31.83809523809524,"y":-32.076190476190476,"z":8.571428571428571,"a95":1.8,"info":"\"\" at \"\""},{"visible":true,"include":false,"step":"420","x":-17.780952380952378,"y":-30.390476190476193,"z":2.2952380952380955,"a95":1.9,"info":"\"\" at \"\""},{"visible":true,"include":false,"step":"450","x":-24.40952380952381,"y":-14.99047619047619,"z":12.2,"a95":1.7,"info":"\"\" at \"\""},{"visible":true,"include":false,"step":"480","x":-28.18095238095238,"y":-6.561904761904763,"z":13.828571428571427,"a95":2,"info":"\"\" at \"\""},{"visible":true,"include":false,"step":"510","x":-19.695238095238096,"y":0.5809523809523809,"z":0.29523809523809524,"a95":2.8,"info":"\"\" at \"\""},{"visible":true,"include":false,"step":"540","x":-33.7047619047619,"y":18.066666666666666,"z":11.885714285714286,"a95":1.8,"info":"\"\" at \"\""}]},{"version":"v1.1.0","exported":"2016-10-09T19:07:57.584Z","volume":10.5,"added":"2016-10-09T18:44:29.187Z","format":"Utrecht","demagType":"Unknown","strat":null,"patch":1.1,"GEO":[],"TECT":[],"interpreted":false,"name":"TG 36.2","coreAzi":327,"coreDip":35,"bedStrike":241,"bedDip":71,"data":[{"visible":false,"include":false,"step":"20","x":-66.81904761904762,"y":130.33333333333334,"z":73.39047619047619,"a95":0.5,"info":"\"\" at \"\""},{"visible":true,"include":true,"step":"100","x":-41.25714285714285,"y":95,"z":95.96190476190476,"a95":0.5,"info":"\"\" at \"\""},{"visible":true,"include":true,"step":"150","x":-17.485714285714284,"y":69.4952380952381,"z":44.94285714285714,"a95":0.5,"info":"\"\" at \"\""},{"visible":true,"include":true,"step":"200","x":-1.6285714285714288,"y":53.400000000000006,"z":6.133333333333334,"a95":0.5,"info":"\"\" at \"\""},{"visible":true,"include":false,"step":"250","x":7.904761904761905,"y":53.22857142857143,"z":-1.9714285714285713,"a95":0.5,"info":"\"\" at \"\""},{"visible":false,"include":false,"step":"250","x":17.885714285714286,"y":54.971428571428575,"z":-20.780952380952378,"a95":3.1,"info":"\"\" at \"\""},{"visible":true,"include":false,"step":"260","x":9.733333333333334,"y":43.142857142857146,"z":0.9238095238095237,"a95":3.6,"info":"\"\" at \"\""},{"visible":true,"include":false,"step":"300","x":1.3142857142857143,"y":43.666666666666664,"z":-5.914285714285715,"a95":3.4,"info":"\"\" at \"\""},{"visible":true,"include":false,"step":"330","x":4.20952380952381,"y":31.82857142857143,"z":-12.361904761904762,"a95":5.5,"info":"\"\" at \"\""},{"visible":true,"include":false,"step":"360","x":0,"y":19.2,"z":-13.41904761904762,"a95":8.2,"info":"\"\" at \"\""},{"visible":true,"include":false,"step":"390","x":-4.20952380952381,"y":32.095238095238095,"z":-19.066666666666666,"a95":6.1,"info":"\"\" at \"\""},{"visible":true,"include":false,"step":"420","x":-0.7904761904761906,"y":23.933333333333334,"z":-9.466666666666667,"a95":9.5,"info":"\"\" at \"\""},{"visible":true,"include":false,"step":"450","x":-2.104761904761905,"y":22.61904761904762,"z":-3.552380952380952,"a95":4.8,"info":"\"\" at \"\""},{"visible":true,"include":false,"step":"480","x":-5,"y":16.047619047619047,"z":-8.019047619047619,"a95":10.9,"info":"\"\" at \"\""},{"visible":true,"include":false,"step":"510","x":-10.780952380952382,"y":-0.7904761904761906,"z":-3.552380952380952,"a95":12.3,"info":"\"\" at \"\""},{"visible":true,"include":false,"step":"530","x":10.523809523809524,"y":12.885714285714286,"z":-30.64761904761905,"a95":6.8,"info":"\"\" at \"\""},{"visible":true,"include":false,"step":"550","x":-19.2,"y":-0.26666666666666666,"z":-14.466666666666667,"a95":2.8,"info":"\"\" at \"\""},{"visible":true,"include":false,"step":"570","x":-3.1523809523809527,"y":-0.5238095238095238,"z":-7.761904761904762,"a95":5.9,"info":"\"\" at \"\""}]},{"version":"v1.1.0","exported":"2016-10-09T19:07:57.585Z","volume":10.5,"added":"2016-10-09T18:44:29.188Z","format":"Utrecht","demagType":"Unknown","strat":null,"patch":1.1,"GEO":[{"dec":274.3553745515172,"inc":-12.997348132887055,"MAD":5.817155628065538,"cm":[5.551115123125783e-16,3.552713678800501e-15,0],"intensity":54.016842086750536,"type":"GC","origin":false,"forced":true,"remark":"","nSteps":5,"minStep":"100","maxStep":"250","steps":["100","150","200","250","250"],"group":"None","version":"v1.1.0"}],"TECT":[{"dec":238.310527555065,"inc":-35.43493508606435,"MAD":5.817155628065023,"cm":[-1.1102230246251565e-15,4.884981308350689e-15,1.8318679906315083e-15],"intensity":54.01684208675053,"type":"GC","origin":false,"forced":true,"remark":"","nSteps":5,"minStep":"100","maxStep":"250","steps":["100","150","200","250","250"],"group":"None","version":"v1.1.0"}],"interpreted":true,"name":"TG 37.1","coreAzi":311,"coreDip":40,"bedStrike":241,"bedDip":71,"data":[{"visible":false,"include":false,"step":"20","x":-8.82857142857143,"y":32.65714285714286,"z":44.304761904761904,"a95":0.7,"info":"\"\" at \"\""},{"visible":true,"include":true,"step":"100","x":-7.380952380952381,"y":27.428571428571427,"z":45.55238095238095,"a95":0.6,"info":"\"\" at \"\""},{"visible":true,"include":true,"step":"150","x":-0.9333333333333333,"y":18.361904761904764,"z":25.476190476190474,"a95":0.6,"info":"\"\" at \"\""},{"visible":true,"include":true,"step":"200","x":3.838095238095238,"y":9.352380952380953,"z":6.590476190476191,"a95":0.9,"info":"\"\" at \"\""},{"visible":true,"include":true,"step":"250","x":5.923809523809524,"y":6.857142857142857,"z":1.5142857142857142,"a95":1.8,"info":"\"\" at \"\""},{"visible":true,"include":true,"step":"250","x":4.733333333333333,"y":5.257142857142857,"z":-2.6285714285714286,"a95":15.1,"info":"\"\" at \"\""},{"visible":true,"include":false,"step":"260","x":3.685714285714286,"y":3.419047619047619,"z":0.5238095238095238,"a95":16.5,"info":"\"\" at \"\""},{"visible":true,"include":false,"step":"300","x":3.1523809523809527,"y":2.895238095238095,"z":-0.26666666666666666,"a95":13.9,"info":"\"\" at \"\""},{"visible":true,"include":false,"step":"330","x":2.6285714285714286,"y":3.1523809523809527,"z":0.5238095238095238,"a95":14.5,"info":"\"\" at \"\""},{"visible":true,"include":false,"step":"360","x":2.104761904761905,"y":2.895238095238095,"z":-0.3904761904761904,"a95":12.4,"info":"\"\" at \"\""},{"visible":true,"include":false,"step":"390","x":1.8380952380952382,"y":2.3714285714285714,"z":0.7904761904761906,"a95":15.6,"info":"\"\" at \"\""},{"visible":false,"include":false,"step":"420","x":1.0476190476190477,"y":2.104761904761905,"z":-0.13333333333333333,"a95":20.1,"info":"\"\" at \"\""},{"visible":false,"include":false,"step":"450","x":0.26666666666666666,"y":1.3142857142857143,"z":-0.3904761904761904,"a95":16.6,"info":"\"\" at \"\""},{"visible":false,"include":false,"step":"480","x":-0.5238095238095238,"y":0.5238095238095238,"z":0.7904761904761906,"a95":22.5,"info":"\"\" at \"\""}]},{"version":"v1.1.0","exported":"2016-10-09T19:07:57.585Z","volume":10.5,"added":"2016-10-09T18:44:29.188Z","format":"Utrecht","demagType":"Unknown","strat":null,"patch":1.1,"GEO":[],"TECT":[],"interpreted":false,"name":"TG 37.2","coreAzi":311,"coreDip":40,"bedStrike":241,"bedDip":71,"data":[{"visible":true,"include":false,"step":"20","x":61.77142857142857,"y":340.6190476190476,"z":132.68571428571428,"a95":1.8,"info":"\"\" at \"\""},{"visible":true,"include":false,"step":"100","x":67.75238095238095,"y":321.56190476190477,"z":127.80952380952381,"a95":1.9,"info":"\"\" at \"\""},{"visible":true,"include":false,"step":"150","x":74.8952380952381,"y":313.54285714285714,"z":105.63809523809525,"a95":1.8,"info":"\"\" at \"\""},{"visible":true,"include":false,"step":"200","x":81.75238095238095,"y":308.14285714285717,"z":77.25714285714287,"a95":1.9,"info":"\"\" at \"\""},{"visible":true,"include":false,"step":"250","x":67.05714285714286,"y":311.57142857142856,"z":66.79047619047618,"a95":1.9,"info":"\"\" at \"\""},{"visible":true,"include":false,"step":"300","x":44.57142857142857,"y":274.7904761904762,"z":47.93333333333334,"a95":1.9,"info":"\"\" at \"\""},{"visible":true,"include":true,"step":"330","x":52.76190476190476,"y":243.87619047619046,"z":41.48571428571429,"a95":1.9,"info":"\"\" at \"\""},{"visible":true,"include":true,"step":"360","x":42.59047619047619,"y":213.0190476190476,"z":35.00952380952381,"a95":2.1,"info":"\"\" at \"\""},{"visible":true,"include":true,"step":"390","x":32.48571428571429,"y":176.0095238095238,"z":27.19047619047619,"a95":1.9,"info":"\"\" at \"\""},{"visible":true,"include":true,"step":"420","x":22.2,"y":112.26666666666667,"z":16.933333333333334,"a95":2.2,"info":"\"\" at \"\""},{"visible":true,"include":true,"step":"450","x":9.00952380952381,"y":58.04761904761905,"z":8.857142857142858,"a95":2,"info":"\"\" at \"\""},{"visible":true,"include":true,"step":"480","x":0.6952380952380952,"y":19.58095238095238,"z":3.6285714285714286,"a95":3.2,"info":"\"\" at \"\""},{"visible":true,"include":true,"step":"510","x":-1.6285714285714288,"y":7.438095238095237,"z":3.1333333333333333,"a95":5.3,"info":"\"\" at \"\""},{"visible":true,"include":true,"step":"540","x":-1.2761904761904763,"y":2.038095238095238,"z":0.49523809523809526,"a95":16.1,"info":"\"\" at \"\""}]},{"version":"v1.1.0","exported":"2016-10-09T19:07:57.585Z","volume":10.5,"added":"2016-10-09T18:44:29.188Z","format":"Utrecht","demagType":"Unknown","strat":null,"patch":1.1,"GEO":[{"dec":268.52036416565494,"inc":-5.940014788315093,"MAD":3.452354079540146,"cm":[0,3.95516952522712e-16,0],"intensity":134.61236360518356,"type":"GC","origin":false,"forced":true,"remark":"","nSteps":4,"minStep":"100","maxStep":"250","steps":["100","150","200","250"],"group":"None","version":"v1.1.0"}],"TECT":[{"dec":244.35928460886447,"inc":-27.919873795582447,"MAD":3.452354079540291,"cm":[6.2727600891321345e-15,3.552713678800501e-15,1.7763568394002505e-15],"intensity":134.61236360518353,"type":"GC","origin":false,"forced":true,"remark":"","nSteps":4,"minStep":"100","maxStep":"250","steps":["100","150","200","250"],"group":"None","version":"v1.1.0"}],"interpreted":true,"name":"TG 38A.1","coreAzi":314,"coreDip":64,"bedStrike":241,"bedDip":71,"data":[{"visible":false,"include":false,"step":"20","x":42.24761904761905,"y":53.285714285714285,"z":55.95238095238095,"a95":1.6,"info":"\"\" at \"\""},{"visible":true,"include":true,"step":"100","x":39.16190476190476,"y":60.60952380952381,"z":83.29523809523809,"a95":0.8,"info":"\"\" at \"\""},{"visible":true,"include":true,"step":"150","x":36.55238095238095,"y":48.34285714285714,"z":37.476190476190474,"a95":0.9,"info":"\"\" at \"\""},{"visible":true,"include":true,"step":"200","x":35.733333333333334,"y":34.86666666666667,"z":-1.8857142857142857,"a95":1,"info":"\"\" at \"\""},{"visible":true,"include":true,"step":"250","x":34.457142857142856,"y":26.38095238095238,"z":-11.647619047619047,"a95":1,"info":"\"\" at \"\""},{"visible":false,"include":false,"step":"250","x":41.03809523809524,"y":31.038095238095234,"z":-35.77142857142857,"a95":2.8,"info":"\"\" at \"\""},{"visible":true,"include":false,"step":"260","x":27.61904761904762,"y":20.514285714285716,"z":-11.180952380952382,"a95":5.5,"info":"\"\" at \"\""},{"visible":true,"include":false,"step":"300","x":21.304761904761904,"y":16.047619047619047,"z":-8.019047619047619,"a95":10.8,"info":"\"\" at \"\""},{"visible":true,"include":false,"step":"330","x":15.78095238095238,"y":12.885714285714286,"z":-6.838095238095238,"a95":10,"info":"\"\" at \"\""},{"visible":true,"include":false,"step":"360","x":13.152380952380952,"y":10.257142857142858,"z":-6.0476190476190474,"a95":11.5,"info":"\"\" at \"\""},{"visible":true,"include":false,"step":"390","x":6.0476190476190474,"y":6.314285714285714,"z":-5.257142857142857,"a95":16,"info":"\"\" at \"\""},{"visible":true,"include":false,"step":"420","x":2.6285714285714286,"y":3.1523809523809527,"z":-2.104761904761905,"a95":15.3,"info":"\"\" at \"\""},{"visible":false,"include":false,"step":"450","x":1.3142857142857143,"y":2.6285714285714286,"z":-1.580952380952381,"a95":17,"info":"\"\" at \"\""},{"visible":false,"include":false,"step":"480","x":-0.5238095238095238,"y":2.3714285714285714,"z":-0.26666666666666666,"a95":20.8,"info":"\"\" at \"\""}]},{"version":"v1.1.0","exported":"2016-10-09T19:07:57.585Z","volume":10.5,"added":"2016-10-09T18:44:29.188Z","format":"Utrecht","demagType":"Unknown","strat":null,"patch":1.1,"GEO":[{"dec":293.39788864306195,"inc":-6.90883128120754,"MAD":7.127572613454482,"cm":[-8.326672684688674e-17,-5.551115123125783e-16,0],"intensity":46.91974235033929,"type":"GC","origin":false,"forced":true,"remark":"","nSteps":5,"minStep":"100","maxStep":"250","steps":["100","150","200","250","250"],"group":"None","version":"v1.1.0"}],"TECT":[{"dec":254.22257459997888,"inc":-51.52009897155222,"MAD":7.127572613454405,"cm":[5.828670879282072e-16,4.496403249731884e-15,1.304512053934559e-15],"intensity":46.919742350339284,"type":"GC","origin":false,"forced":true,"remark":"","nSteps":5,"minStep":"100","maxStep":"250","steps":["100","150","200","250","250"],"group":"None","version":"v1.1.0"}],"interpreted":true,"name":"TG 39.1A","coreAzi":316,"coreDip":56,"bedStrike":241,"bedDip":71,"data":[{"visible":false,"include":false,"step":"20","x":-15.342857142857142,"y":28.295238095238098,"z":44.27619047619047,"a95":0.5,"info":"\"\" at \"\""},{"visible":true,"include":true,"step":"100","x":-10.80952380952381,"y":23.00952380952381,"z":42.27619047619047,"a95":0.5,"info":"\"\" at \"\""},{"visible":true,"include":true,"step":"150","x":-3.895238095238095,"y":13.41904761904762,"z":21.495238095238093,"a95":0.7,"info":"\"\" at \"\""},{"visible":true,"include":true,"step":"200","x":-0.4666666666666667,"y":5.342857142857143,"z":5.428571428571429,"a95":1.4,"info":"\"\" at \"\""},{"visible":true,"include":true,"step":"250","x":1.3333333333333333,"y":2.8476190476190473,"z":0.38095238095238093,"a95":7.3,"info":"\"\" at \"\""},{"visible":true,"include":true,"step":"250","x":2.3714285714285714,"y":2.104761904761905,"z":-3.552380952380952,"a95":19.7,"info":"\"\" at \"\""},{"visible":true,"include":false,"step":"260","x":1.3142857142857143,"y":1.3142857142857143,"z":0,"a95":25,"info":"\"\" at \"\""},{"visible":true,"include":false,"step":"300","x":1.0476190476190477,"y":0.5238095238095238,"z":-0.7904761904761906,"a95":26.1,"info":"\"\" at \"\""},{"visible":true,"include":false,"step":"330","x":0.7904761904761906,"y":0.7904761904761906,"z":-0.5238095238095238,"a95":24,"info":"\"\" at \"\""},{"visible":true,"include":false,"step":"360","x":0.7904761904761906,"y":1.0476190476190477,"z":-0.7904761904761906,"a95":18.7,"info":"\"\" at \"\""},{"visible":true,"include":false,"step":"390","x":-0.5238095238095238,"y":0.26666666666666666,"z":-0.13333333333333333,"a95":34.2,"info":"\"\" at \"\""}]},{"version":"v1.1.0","exported":"2016-10-09T19:07:57.585Z","volume":10.5,"added":"2016-10-09T18:44:29.188Z","format":"Utrecht","demagType":"Unknown","strat":null,"patch":1.1,"GEO":[{"dec":287.2749123973389,"inc":-3.4703931779657657,"MAD":0.6012502704695497,"cm":[2.220446049250313e-16,-1.2073675392798577e-15,0],"intensity":44.12859994757745,"type":"GC","origin":false,"forced":true,"remark":"","nSteps":4,"minStep":"100","maxStep":"250","steps":["100","150","200","250"],"group":"None","version":"v1.1.0"}],"TECT":[{"dec":255.4362999877186,"inc":-44.56735836104727,"MAD":0.6012502704595836,"cm":[5.828670879282072e-16,6.13398221105399e-15,-2.3869795029440866e-15],"intensity":44.128599947577456,"type":"GC","origin":false,"forced":true,"remark":"","nSteps":4,"minStep":"100","maxStep":"250","steps":["100","150","200","250"],"group":"None","version":"v1.1.0"}],"interpreted":true,"name":"TG 39.2A","coreAzi":316,"coreDip":56,"bedStrike":241,"bedDip":71,"data":[{"visible":false,"include":false,"step":"20","x":-17.257142857142856,"y":24.34285714285714,"z":42.44761904761905,"a95":1.1,"info":"\"\" at \"\""},{"visible":true,"include":true,"step":"100","x":-9.238095238095237,"y":19.17142857142857,"z":36.89523809523809,"a95":1.3,"info":"\"\" at \"\""},{"visible":true,"include":true,"step":"150","x":-4.180952380952381,"y":12.666666666666666,"z":21.095238095238095,"a95":1.8,"info":"\"\" at \"\""},{"visible":true,"include":true,"step":"200","x":0.6952380952380952,"y":4.180952380952381,"z":3.2857142857142856,"a95":8.3,"info":"\"\" at \"\""},{"visible":true,"include":true,"step":"250","x":1.4571428571428573,"y":2.7904761904761903,"z":0.5809523809523809,"a95":14.3,"info":"\"\" at \"\""},{"visible":true,"include":false,"step":"300","x":0.05714285714285714,"y":1.6285714285714288,"z":-0.08571428571428572,"a95":28.2,"info":"\"\" at \"\""},{"visible":true,"include":false,"step":"330","x":0.11428571428571428,"y":1.2190476190476192,"z":-0.14285714285714285,"a95":29.1,"info":"\"\" at \"\""},{"visible":true,"include":false,"step":"360","x":0,"y":1.3904761904761904,"z":-0.43809523809523804,"a95":29.3,"info":"\"\" at \"\""},{"visible":false,"include":false,"step":"390","x":-0.22857142857142856,"y":1.1619047619047618,"z":-0.2,"a95":39.7,"info":"\"\" at \"\""},{"visible":false,"include":false,"step":"420","x":-1.1047619047619048,"y":0.17142857142857143,"z":0.17142857142857143,"a95":42.8,"info":"\"\" at \"\""}]},{"version":"v1.1.0","exported":"2016-10-09T19:07:57.585Z","volume":10.5,"added":"2016-10-09T18:44:29.188Z","format":"Utrecht","demagType":"Unknown","strat":null,"patch":1.1,"GEO":[{"dec":294.36780979479545,"inc":-6.972011359369945,"MAD":0.9049469250411296,"cm":[-8.881784197001252e-16,4.3298697960381105e-15,0],"intensity":145.04898601738378,"type":"GC","origin":false,"forced":true,"remark":"","nSteps":3,"minStep":"150","maxStep":"250","steps":["150","200","250"],"group":"None","version":"v1.1.0"}],"TECT":[{"dec":264.86043725043686,"inc":-41.993024371798775,"MAD":0.904946925048779,"cm":[3.3306690738754696e-15,3.441691376337985e-14,7.549516567451064e-15],"intensity":145.0489860173838,"type":"GC","origin":false,"forced":true,"remark":"","nSteps":3,"minStep":"150","maxStep":"250","steps":["150","200","250"],"group":"None","version":"v1.1.0"}],"interpreted":true,"name":"TG 40.1","coreAzi":278,"coreDip":53,"bedStrike":251,"bedDip":65,"data":[{"visible":false,"include":false,"step":"20","x":-154.44761904761904,"y":156.94285714285715,"z":138.2952380952381,"a95":0.4,"info":"\"\" at \"\""},{"visible":true,"include":false,"step":"100","x":-117.78095238095239,"y":125.16190476190476,"z":140.0952380952381,"a95":0.5,"info":"\"\" at \"\""},{"visible":true,"include":true,"step":"150","x":-70.95238095238095,"y":79.55238095238094,"z":77.57142857142857,"a95":0.5,"info":"\"\" at \"\""},{"visible":true,"include":true,"step":"200","x":-28.704761904761902,"y":38.05714285714286,"z":27.62857142857143,"a95":0.7,"info":"\"\" at \"\""},{"visible":true,"include":true,"step":"250","x":-5.809523809523809,"y":14.40952380952381,"z":1.9142857142857144,"a95":1.5,"info":"\"\" at \"\""},{"visible":true,"include":false,"step":"250","x":-13.942857142857143,"y":17.61904761904762,"z":-14.600000000000001,"a95":7.4,"info":"\"\" at \"\""},{"visible":true,"include":false,"step":"260","x":-1.0476190476190477,"y":8.41904761904762,"z":-1.580952380952381,"a95":9.6,"info":"\"\" at \"\""},{"visible":true,"include":false,"step":"300","x":-1.580952380952381,"y":4.20952380952381,"z":-3.552380952380952,"a95":16.5,"info":"\"\" at \"\""},{"visible":true,"include":false,"step":"330","x":-1.3142857142857143,"y":3.419047619047619,"z":0,"a95":16.4,"info":"\"\" at \"\""},{"visible":true,"include":false,"step":"360","x":-1.8380952380952382,"y":3.1523809523809527,"z":0.6571428571428571,"a95":16.6,"info":"\"\" at \"\""},{"visible":true,"include":false,"step":"390","x":-4.476190476190476,"y":2.3714285714285714,"z":-1.8380952380952382,"a95":14.7,"info":"\"\" at \"\""}]},{"version":"v1.1.0","exported":"2016-10-09T19:07:57.585Z","volume":10.5,"added":"2016-10-09T18:44:29.189Z","format":"Utrecht","demagType":"Unknown","strat":null,"patch":1.1,"GEO":[{"dec":300.3352440315314,"inc":-17.138152028738844,"MAD":12.83157251784963,"cm":[7.771561172376096e-16,5.551115123125783e-15,0],"intensity":135.83085252940955,"type":"GC","origin":false,"forced":true,"remark":"","nSteps":4,"minStep":"150","maxStep":"300","steps":["150","200","250","300"],"group":"None","version":"v1.1.0"}],"TECT":[{"dec":254.60842915631446,"inc":-51.39597559873486,"MAD":12.831572517850478,"cm":[-1.1102230246251565e-16,-6.328271240363392e-15,2.4424906541753444e-15],"intensity":135.83085252940958,"type":"GC","origin":false,"forced":true,"remark":"","nSteps":4,"minStep":"150","maxStep":"300","steps":["150","200","250","300"],"group":"None","version":"v1.1.0"}],"interpreted":true,"name":"TG 40.2","coreAzi":278,"coreDip":53,"bedStrike":251,"bedDip":65,"data":[{"visible":false,"include":false,"step":"20","x":-149.8,"y":155.6095238095238,"z":139.6,"a95":0.8,"info":"\"\" at \"\""},{"visible":true,"include":false,"step":"100","x":-103.8952380952381,"y":113.24761904761904,"z":125.65714285714287,"a95":0.8,"info":"\"\" at \"\""},{"visible":true,"include":true,"step":"150","x":-61.647619047619045,"y":85.47619047619048,"z":79.22857142857143,"a95":1,"info":"\"\" at \"\""},{"visible":true,"include":true,"step":"200","x":-19.523809523809526,"y":30.97142857142857,"z":18.066666666666666,"a95":1.7,"info":"\"\" at \"\""},{"visible":true,"include":true,"step":"250","x":-3.1333333333333333,"y":13.600000000000001,"z":-0.11428571428571428,"a95":3.8,"info":"\"\" at \"\""},{"visible":true,"include":true,"step":"300","x":-3.838095238095238,"y":6.333333333333333,"z":-3.5142857142857142,"a95":5.2,"info":"\"\" at \"\""},{"visible":true,"include":false,"step":"330","x":-2.8476190476190473,"y":4.419047619047619,"z":-2.5523809523809526,"a95":6.9,"info":"\"\" at \"\""},{"visible":true,"include":false,"step":"360","x":-1.9714285714285713,"y":1.3904761904761904,"z":-2.0666666666666664,"a95":15.7,"info":"\"\" at \"\""},{"visible":true,"include":false,"step":"390","x":-4.533333333333333,"y":1.1047619047619048,"z":-0.8761904761904761,"a95":12.5,"info":"\"\" at \"\""},{"visible":true,"include":false,"step":"420","x":-3.838095238095238,"y":0.05714285714285714,"z":-1.361904761904762,"a95":10.3,"info":"\"\" at \"\""},{"visible":true,"include":false,"step":"450","x":-6.9714285714285715,"y":1.4571428571428573,"z":-1.7714285714285716,"a95":5.5,"info":"\"\" at \"\""},{"visible":true,"include":false,"step":"480","x":-6.39047619047619,"y":5.980952380952381,"z":0.6095238095238096,"a95":4.8,"info":"\"\" at \"\""}]},{"version":"v1.1.0","exported":"2016-10-09T19:07:57.585Z","volume":10.5,"added":"2016-10-09T18:44:29.189Z","format":"Utrecht","demagType":"Unknown","strat":null,"patch":1.1,"GEO":[{"dec":27.707682522668733,"inc":-56.513000589554636,"MAD":4.337573120581195,"cm":[1.6653345369377348e-16,-5.551115123125783e-17,0],"intensity":14.75183988678536,"type":"dir","forced":true,"remark":"","origin":false,"nSteps":4,"minStep":"250","maxStep":"360","steps":["250","300","330","360"],"group":"None","version":"v1.1.0"}],"TECT":[{"dec":127.02595256168422,"inc":-44.05632759963239,"MAD":4.337573120581228,"cm":[-5.273559366969494e-16,-4.718447854656915e-16,-1.1102230246251565e-16],"intensity":14.751839886785358,"type":"dir","forced":true,"remark":"","origin":false,"nSteps":4,"minStep":"250","maxStep":"360","steps":["250","300","330","360"],"group":"None","version":"v1.1.0"}],"interpreted":true,"name":"TG 42.1A","coreAzi":244,"coreDip":70,"bedStrike":251,"bedDip":65,"data":[{"visible":false,"include":false,"step":"20","x":-14.523809523809524,"y":22.485714285714284,"z":-6.3619047619047615,"a95":0.8,"info":"\"\" at \"\""},{"visible":true,"include":false,"step":"100","x":-15.399999999999999,"y":19.523809523809526,"z":6.333333333333333,"a95":0.6,"info":"\"\" at \"\""},{"visible":true,"include":false,"step":"150","x":-7.380952380952381,"y":12.380952380952381,"z":1.3047619047619048,"a95":1.3,"info":"\"\" at \"\""},{"visible":true,"include":false,"step":"200","x":-2.619047619047619,"y":6.219047619047619,"z":-4.561904761904762,"a95":1.7,"info":"\"\" at \"\""},{"visible":true,"include":false,"step":"250","x":-0.7523809523809524,"y":3.7809523809523813,"z":-5.723809523809524,"a95":2.8,"info":"\"\" at \"\""},{"visible":true,"include":true,"step":"250","x":-1.8380952380952382,"y":3.685714285714286,"z":-10.914285714285715,"a95":14.6,"info":"\"\" at \"\""},{"visible":false,"include":false,"step":"260","x":1.0476190476190477,"y":1.580952380952381,"z":-3.8095238095238093,"a95":19.8,"info":"\"\" at \"\""},{"visible":true,"include":true,"step":"300","x":0.26666666666666666,"y":1.580952380952381,"z":-3.9428571428571426,"a95":20.7,"info":"\"\" at \"\""},{"visible":true,"include":true,"step":"330","x":-0.26666666666666666,"y":0.7904761904761906,"z":-2.761904761904762,"a95":19.9,"info":"\"\" at \"\""},{"visible":true,"include":true,"step":"360","x":-0.5238095238095238,"y":1.3142857142857143,"z":-2.761904761904762,"a95":19.6,"info":"\"\" at \"\""},{"visible":true,"include":false,"step":"390","x":-0.26666666666666666,"y":0.5238095238095238,"z":-0.9238095238095237,"a95":25.3,"info":"\"\" at \"\""}]},{"version":"v1.1.0","exported":"2016-10-09T19:07:57.585Z","volume":10.5,"added":"2016-10-09T18:44:29.189Z","format":"Utrecht","demagType":"Unknown","strat":null,"patch":1.1,"GEO":[{"dec":24.500375668472202,"inc":-46.067392909957995,"MAD":5.946813860055004,"cm":[-5.551115123125783e-17,1.1102230246251565e-16,0],"intensity":13.019758227724124,"type":"dir","forced":true,"remark":"","origin":false,"nSteps":4,"minStep":"250","maxStep":"360","steps":["250","300","330","360"],"group":"None","version":"v1.1.0"}],"TECT":[{"dec":113.6535161430728,"inc":-49.505552231980005,"MAD":5.946813860054961,"cm":[2.7755575615628914e-16,5.551115123125783e-17,1.1102230246251565e-16],"intensity":13.019758227724125,"type":"dir","forced":true,"remark":"","origin":false,"nSteps":4,"minStep":"250","maxStep":"360","steps":["250","300","330","360"],"group":"None","version":"v1.1.0"}],"interpreted":true,"name":"TG 42.2A","coreAzi":244,"coreDip":70,"bedStrike":251,"bedDip":65,"data":[{"visible":false,"include":false,"step":"20","x":-23.00952380952381,"y":20.104761904761904,"z":-8.82857142857143,"a95":1.6,"info":"\"\" at \"\""},{"visible":true,"include":false,"step":"100","x":-18.247619047619047,"y":20.104761904761904,"z":7.761904761904762,"a95":1.9,"info":"\"\" at \"\""},{"visible":true,"include":false,"step":"150","x":-10.866666666666665,"y":14.704761904761906,"z":1.361904761904762,"a95":2.5,"info":"\"\" at \"\""},{"visible":true,"include":false,"step":"200","x":-4.476190476190476,"y":5.580952380952381,"z":-6.828571428571429,"a95":4.2,"info":"\"\" at \"\""},{"visible":true,"include":true,"step":"250","x":-1.9142857142857144,"y":4.647619047619047,"z":-7.171428571428571,"a95":5,"info":"\"\" at \"\""},{"visible":true,"include":true,"step":"300","x":-1.7999999999999998,"y":2.380952380952381,"z":-6.104761904761904,"a95":7.4,"info":"\"\" at \"\""},{"visible":true,"include":true,"step":"330","x":-1.3904761904761904,"y":2.1523809523809527,"z":-4.885714285714285,"a95":7.8,"info":"\"\" at \"\""},{"visible":true,"include":true,"step":"360","x":-1.6857142857142857,"y":1.5714285714285714,"z":-3.685714285714286,"a95":11.1,"info":"\"\" at \"\""},{"visible":true,"include":false,"step":"390","x":-0.8095238095238095,"y":1.9714285714285713,"z":-2.4095238095238094,"a95":14.2,"info":"\"\" at \"\""},{"visible":false,"include":false,"step":"420","x":-0.8761904761904761,"y":0.17142857142857143,"z":-1.3047619047619048,"a95":27.6,"info":"\"\" at \"\""},{"visible":false,"include":false,"step":"450","x":-2.3238095238095235,"y":0.29523809523809524,"z":-2.4380952380952383,"a95":11.6,"info":"\"\" at \"\""},{"visible":false,"include":false,"step":"480","x":-0.9333333333333333,"y":0.22857142857142856,"z":0.08571428571428572,"a95":39.9,"info":"\"\" at \"\""}]},{"version":"v1.1.0","exported":"2016-10-09T19:07:57.585Z","volume":10.5,"added":"2016-10-09T18:44:29.189Z","format":"Utrecht","demagType":"Unknown","strat":null,"patch":1.1,"GEO":[],"TECT":[],"interpreted":false,"name":"TG 43.1A","coreAzi":2,"coreDip":59,"bedStrike":251,"bedDip":65,"data":[{"visible":false,"include":false,"step":"20","x":9.99047619047619,"y":-14.295238095238094,"z":77.37142857142857,"a95":0.7,"info":"\"\" at \"\""},{"visible":true,"include":false,"step":"100","x":6.800000000000001,"y":-6.914285714285714,"z":94.07619047619048,"a95":0.4,"info":"\"\" at \"\""},{"visible":true,"include":false,"step":"150","x":5.6952380952380945,"y":-1.0476190476190477,"z":53.07619047619047,"a95":0.5,"info":"\"\" at \"\""},{"visible":true,"include":false,"step":"200","x":3.7142857142857144,"y":2.0952380952380953,"z":21.99047619047619,"a95":0.7,"info":"\"\" at \"\""},{"visible":true,"include":false,"step":"250","x":1.4571428571428573,"y":-1.3333333333333333,"z":5.9523809523809526,"a95":5.7,"info":"\"\" at \"\""},{"visible":true,"include":false,"step":"250","x":-1.3142857142857143,"y":2.895238095238095,"z":-5.657142857142857,"a95":18.9,"info":"\"\" at \"\""},{"visible":true,"include":false,"step":"260","x":0,"y":1.3142857142857143,"z":0.5238095238095238,"a95":20.6,"info":"\"\" at \"\""},{"visible":true,"include":false,"step":"300","x":1.3142857142857143,"y":-2.6285714285714286,"z":0.26666666666666666,"a95":17.1,"info":"\"\" at \"\""},{"visible":true,"include":false,"step":"330","x":0,"y":-0.7904761904761906,"z":0.5238095238095238,"a95":34.2,"info":"\"\" at \"\""},{"visible":true,"include":false,"step":"360","x":-1.0476190476190477,"y":0.5238095238095238,"z":-0.9238095238095237,"a95":23.7,"info":"\"\" at \"\""}]},{"version":"v1.1.0","exported":"2016-10-09T19:07:57.585Z","volume":10.5,"added":"2016-10-09T18:44:29.189Z","format":"Utrecht","demagType":"Unknown","strat":null,"patch":1.1,"GEO":[],"TECT":[],"interpreted":false,"name":"TG 43.2A","coreAzi":2,"coreDip":59,"bedStrike":251,"bedDip":65,"data":[{"visible":false,"include":false,"step":"20","x":18.066666666666666,"y":-20.4,"z":86.86666666666667,"a95":0.5,"info":"\"\" at \"\""},{"visible":false,"include":false,"step":"100","x":14.704761904761906,"y":-18.64761904761905,"z":89.5142857142857,"a95":0.6,"info":"\"\" at \"\""},{"visible":true,"include":false,"step":"150","x":12.609523809523811,"y":-11.152380952380952,"z":56.161904761904765,"a95":0.7,"info":"\"\" at \"\""},{"visible":true,"include":false,"step":"200","x":7.438095238095237,"y":-5.285714285714286,"z":13.276190476190477,"a95":2.8,"info":"\"\" at \"\""},{"visible":false,"include":false,"step":"250","x":4.647619047619047,"y":-4.942857142857143,"z":-1.5142857142857142,"a95":6.4,"info":"\"\" at \"\""},{"visible":true,"include":false,"step":"300","x":4.476190476190476,"y":-3.3714285714285714,"z":3.8095238095238093,"a95":6.5,"info":"\"\" at \"\""},{"visible":true,"include":false,"step":"330","x":9.819047619047618,"y":0.8761904761904761,"z":2.4666666666666663,"a95":5,"info":"\"\" at \"\""},{"visible":true,"include":false,"step":"360","x":3.5999999999999996,"y":1.3333333333333333,"z":-1.1619047619047618,"a95":12.7,"info":"\"\" at \"\""},{"visible":true,"include":false,"step":"390","x":2.8476190476190473,"y":0,"z":-1.657142857142857,"a95":13.4,"info":"\"\" at \"\""},{"visible":true,"include":false,"step":"420","x":-1.1047619047619048,"y":-6.857142857142857,"z":2.7333333333333334,"a95":6,"info":"\"\" at \"\""},{"visible":true,"include":false,"step":"450","x":0.4666666666666667,"y":1.7999999999999998,"z":-5.866666666666667,"a95":6.7,"info":"\"\" at \"\""},{"visible":true,"include":false,"step":"480","x":-4.819047619047619,"y":0.4666666666666667,"z":-2.619047619047619,"a95":9.2,"info":"\"\" at \"\""}]},{"version":"v1.1.0","exported":"2016-10-09T19:07:57.586Z","volume":10.5,"added":"2016-10-09T18:44:29.189Z","format":"Utrecht","demagType":"Unknown","strat":null,"patch":1.1,"GEO":[{"dec":285.7135620924381,"inc":-9.007282601902258,"MAD":4.379430279775273,"cm":[-1.942890293094024e-16,3.2612801348363973e-16,0],"intensity":57.3253166361743,"type":"GC","origin":false,"forced":true,"remark":"","nSteps":6,"minStep":"150","maxStep":"330","steps":["150","200","250","260","300","330"],"group":"None","version":"v1.1.0"}],"TECT":[{"dec":249.69442891174498,"inc":-57.87452375015838,"MAD":4.379430279775296,"cm":[7.91033905045424e-16,1.1934897514720433e-15,-5.273559366969494e-16],"intensity":57.32531663617429,"type":"GC","origin":false,"forced":true,"remark":"","nSteps":6,"minStep":"150","maxStep":"330","steps":["150","200","250","260","300","330"],"group":"None","version":"v1.1.0"}],"interpreted":true,"name":"TG 44.1A","coreAzi":23,"coreDip":31,"bedStrike":225,"bedDip":65,"data":[{"visible":false,"include":false,"step":"20","x":-63.39047619047619,"y":-20.98095238095238,"z":76.15238095238095,"a95":0.5,"info":"\"\" at \"\""},{"visible":true,"include":false,"step":"100","x":-48.22857142857143,"y":-22.952380952380953,"z":84.78095238095239,"a95":0.5,"info":"\"\" at \"\""},{"visible":true,"include":true,"step":"150","x":-21.847619047619048,"y":-11.676190476190476,"z":51.48571428571429,"a95":0.7,"info":"\"\" at \"\""},{"visible":true,"include":true,"step":"200","x":-1.1619047619047618,"y":-3.9523809523809526,"z":23.41904761904762,"a95":0.7,"info":"\"\" at \"\""},{"visible":true,"include":true,"step":"250","x":5.6952380952380945,"y":-0.9904761904761905,"z":7.552380952380952,"a95":0.9,"info":"\"\" at \"\""},{"visible":false,"include":false,"step":"250","x":13.942857142857143,"y":-2.895238095238095,"z":-4.342857142857143,"a95":10.8,"info":"\"\" at \"\""},{"visible":true,"include":true,"step":"260","x":5,"y":-0.5238095238095238,"z":2.6285714285714286,"a95":16.8,"info":"\"\" at \"\""},{"visible":true,"include":true,"step":"300","x":3.419047619047619,"y":-0.5238095238095238,"z":1.7142857142857142,"a95":19.8,"info":"\"\" at \"\""},{"visible":true,"include":true,"step":"330","x":3.1523809523809527,"y":-0.5238095238095238,"z":1.3142857142857143,"a95":20.1,"info":"\"\" at \"\""},{"visible":true,"include":false,"step":"360","x":2.6285714285714286,"y":1.0476190476190477,"z":0.9238095238095237,"a95":19.6,"info":"\"\" at \"\""},{"visible":true,"include":false,"step":"390","x":1.8380952380952382,"y":0.26666666666666666,"z":0.9238095238095237,"a95":21.3,"info":"\"\" at \"\""},{"visible":true,"include":false,"step":"420","x":1.3142857142857143,"y":1.0476190476190477,"z":-0.26666666666666666,"a95":18.2,"info":"\"\" at \"\""}]},{"version":"v1.1.0","exported":"2016-10-09T19:07:57.586Z","volume":10.5,"added":"2016-10-09T18:44:29.189Z","format":"Utrecht","demagType":"Unknown","strat":null,"patch":1.1,"GEO":[{"dec":284.6313361495561,"inc":-13.766250268744162,"MAD":6.475389557925558,"cm":[-1.2212453270876722e-15,3.3306690738754696e-16,0],"intensity":104.00485249450448,"type":"GC","origin":false,"forced":true,"remark":"","nSteps":6,"minStep":"100","maxStep":"330","steps":["100","150","200","250","300","330"],"group":"None","version":"v1.1.0"}],"TECT":[{"dec":240.75033112740283,"inc":-59.32314911611337,"MAD":6.47538955792632,"cm":[6.0923488476305465e-15,1.8596235662471372e-14,2.220446049250313e-16],"intensity":104.00485249450448,"type":"GC","origin":false,"forced":true,"remark":"","nSteps":6,"minStep":"100","maxStep":"330","steps":["100","150","200","250","300","330"],"group":"None","version":"v1.1.0"}],"interpreted":true,"name":"TG 44.2","coreAzi":23,"coreDip":31,"bedStrike":225,"bedDip":65,"data":[{"visible":true,"include":false,"step":"20","x":-78.5047619047619,"y":-47.476190476190474,"z":86.28571428571429,"a95":0.8,"info":"\"\" at \"\""},{"visible":true,"include":true,"step":"100","x":-46.13333333333333,"y":-29.695238095238096,"z":89.4,"a95":1,"info":"\"\" at \"\""},{"visible":true,"include":true,"step":"150","x":-22.076190476190476,"y":-15.866666666666665,"z":55.86666666666667,"a95":0.8,"info":"\"\" at \"\""},{"visible":true,"include":true,"step":"200","x":2.619047619047619,"y":-4.180952380952381,"z":16.876190476190477,"a95":2.7,"info":"\"\" at \"\""},{"visible":true,"include":true,"step":"250","x":6.9714285714285715,"y":-0.6952380952380952,"z":5.2,"a95":5.6,"info":"\"\" at \"\""},{"visible":true,"include":true,"step":"300","x":5.523809523809524,"y":-0.9904761904761905,"z":3.542857142857143,"a95":6.9,"info":"\"\" at \"\""},{"visible":true,"include":true,"step":"330","x":4.647619047619047,"y":0.8761904761904761,"z":1.5142857142857142,"a95":8.5,"info":"\"\" at \"\""},{"visible":true,"include":false,"step":"360","x":2.7333333333333334,"y":0.11428571428571428,"z":2.4666666666666663,"a95":12.6,"info":"\"\" at \"\""},{"visible":true,"include":false,"step":"390","x":2.4952380952380953,"y":2.2095238095238097,"z":0.6952380952380952,"a95":11.6,"info":"\"\" at \"\""},{"visible":false,"include":false,"step":"420","x":-0.4666666666666667,"y":0.6952380952380952,"z":2.4095238095238094,"a95":18.4,"info":"\"\" at \"\""},{"visible":false,"include":false,"step":"450","x":-3.895238095238095,"y":0.22857142857142856,"z":-1.0761904761904764,"a95":11.2,"info":"\"\" at \"\""},{"visible":false,"include":false,"step":"480","x":-1.3904761904761904,"y":0.6952380952380952,"z":-1.1047619047619048,"a95":22.5,"info":"\"\" at \"\""},{"visible":false,"include":false,"step":"510","x":-0.11428571428571428,"y":0.29523809523809524,"z":-0.38095238095238093,"a95":72.9,"info":"\"\" at \"\""}]},{"version":"v1.1.0","exported":"2016-10-09T19:07:57.586Z","volume":10.5,"added":"2016-10-09T18:44:29.189Z","format":"Utrecht","demagType":"Unknown","strat":null,"patch":1.1,"GEO":[{"dec":35.68436409682499,"inc":-60.78354942715149,"MAD":6.354191653864518,"cm":[6.916969190781932,5.887282049985066,-14.248723981760087],"intensity":26.95168937359406,"type":"dir","forced":false,"remark":"","origin":false,"nSteps":6,"minStep":"250","maxStep":"360","steps":["250","250","260","300","330","360"],"group":"None","version":"v1.1.0"}],"TECT":[{"dec":102.55288478743648,"inc":-26.13340889266537,"MAD":6.354191653864518,"cm":[-2.51167778468866,15.315929025455656,-6.681652536894911],"intensity":26.951689373594057,"type":"dir","forced":false,"remark":"","origin":false,"nSteps":6,"minStep":"250","maxStep":"360","steps":["250","250","260","300","330","360"],"group":"None","version":"v1.1.0"}],"interpreted":true,"name":"TG 45.1A","coreAzi":59,"coreDip":41,"bedStrike":225,"bedDip":65,"data":[{"visible":true,"include":false,"step":"20","x":49.8,"y":-14.819047619047618,"z":-14.933333333333334,"a95":0.9,"info":"\"\" at \"\""},{"visible":true,"include":false,"step":"100","x":47.59047619047619,"y":-16.26666666666667,"z":-7.057142857142857,"a95":0.8,"info":"\"\" at \"\""},{"visible":true,"include":false,"step":"150","x":46.01904761904762,"y":-9.066666666666666,"z":-7.142857142857143,"a95":1,"info":"\"\" at \"\""},{"visible":true,"include":false,"step":"200","x":39.34285714285714,"y":-10.80952380952381,"z":-6.828571428571429,"a95":0.7,"info":"\"\" at \"\""},{"visible":true,"include":true,"step":"250","x":28.704761904761902,"y":-6.857142857142857,"z":-5.142857142857143,"a95":1,"info":"\"\" at \"\""},{"visible":true,"include":true,"step":"250","x":27.61904761904762,"y":-3.685714285714286,"z":-6.838095238095238,"a95":6.6,"info":"\"\" at \"\""},{"visible":true,"include":true,"step":"260","x":19.99047619047619,"y":-3.1523809523809527,"z":-3.552380952380952,"a95":10.1,"info":"\"\" at \"\""},{"visible":true,"include":true,"step":"300","x":13.152380952380952,"y":-2.895238095238095,"z":-1.180952380952381,"a95":10,"info":"\"\" at \"\""},{"visible":true,"include":true,"step":"330","x":5.79047619047619,"y":-0.7904761904761906,"z":-0.3904761904761904,"a95":14.6,"info":"\"\" at \"\""},{"visible":true,"include":true,"step":"360","x":3.1523809523809527,"y":0,"z":0,"a95":17.8,"info":"\"\" at \"\""},{"visible":true,"include":false,"step":"390","x":0.7904761904761906,"y":0.26666666666666666,"z":0.5238095238095238,"a95":33.4,"info":"\"\" at \"\""}]},{"version":"v1.1.0","exported":"2016-10-09T19:07:57.586Z","volume":10.5,"added":"2016-10-09T18:44:29.190Z","format":"Utrecht","demagType":"Unknown","strat":null,"patch":1.1,"GEO":[{"dec":39.69940627124299,"inc":-61.87184414850653,"MAD":4.775593497208818,"cm":[-1.3600232051658168e-15,1.3877787807814457e-15,0],"intensity":34.83382774768738,"type":"dir","forced":true,"remark":"","origin":false,"nSteps":6,"minStep":"200","maxStep":"390","steps":["200","250","300","330","360","390"],"group":"None","version":"v1.1.0"}],"TECT":[{"dec":103.98707493722907,"inc":-24.341668414315986,"MAD":4.775593497208829,"cm":[-4.9960036108132044e-15,-6.661338147750939e-16,1.6028844918025698e-15],"intensity":34.83382774768739,"type":"dir","forced":true,"remark":"","origin":false,"nSteps":6,"minStep":"200","maxStep":"390","steps":["200","250","300","330","360","390"],"group":"None","version":"v1.1.0"}],"interpreted":true,"name":"TG 45.2A","coreAzi":59,"coreDip":41,"bedStrike":225,"bedDip":65,"data":[{"visible":true,"include":false,"step":"20","x":36.42857142857143,"y":-14.352380952380951,"z":-16.676190476190477,"a95":1.1,"info":"\"\" at \"\""},{"visible":false,"include":false,"step":"100","x":38.46666666666666,"y":-11.676190476190476,"z":-7.0285714285714285,"a95":1.1,"info":"\"\" at \"\""},{"visible":true,"include":false,"step":"150","x":36.666666666666664,"y":-8.82857142857143,"z":-8.657142857142858,"a95":1,"info":"\"\" at \"\""},{"visible":true,"include":true,"step":"200","x":31.38095238095238,"y":-4.180952380952381,"z":-8.304761904761905,"a95":1.1,"info":"\"\" at \"\""},{"visible":true,"include":true,"step":"250","x":23.00952380952381,"y":-4.647619047619047,"z":-5.495238095238095,"a95":1.6,"info":"\"\" at \"\""},{"visible":true,"include":true,"step":"300","x":12.142857142857142,"y":-2.1523809523809527,"z":-1.5142857142857142,"a95":2.8,"info":"\"\" at \"\""},{"visible":true,"include":true,"step":"330","x":5.580952380952381,"y":-2.961904761904762,"z":-2.5523809523809526,"a95":6,"info":"\"\" at \"\""},{"visible":true,"include":true,"step":"360","x":5.057142857142857,"y":0.22857142857142856,"z":-2.8190476190476192,"a95":6.8,"info":"\"\" at \"\""},{"visible":true,"include":true,"step":"390","x":2.038095238095238,"y":0.17142857142857143,"z":-0.6666666666666666,"a95":23.2,"info":"\"\" at \"\""},{"visible":true,"include":false,"step":"420","x":2.7333333333333334,"y":-1.1047619047619048,"z":1.1333333333333333,"a95":12.8,"info":"\"\" at \"\""},{"visible":true,"include":false,"step":"450","x":2.5523809523809526,"y":-0.8095238095238095,"z":0.9904761904761905,"a95":13.1,"info":"\"\" at \"\""},{"visible":false,"include":false,"step":"480","x":1.1619047619047618,"y":0.8761904761904761,"z":-2.2666666666666666,"a95":14.8,"info":"\"\" at \"\""},{"visible":false,"include":false,"step":"510","x":-1.0476190476190477,"y":-2.6761904761904765,"z":2.2095238095238097,"a95":9.6,"info":"\"\" at \"\""},{"visible":false,"include":false,"step":"540","x":-1.5714285714285714,"y":1.7999999999999998,"z":1.1904761904761905,"a95":9.9,"info":"\"\" at \"\""}]},{"version":"v1.1.0","exported":"2016-10-09T19:07:57.586Z","volume":10.5,"added":"2016-10-09T18:44:29.190Z","format":"Utrecht","demagType":"Unknown","strat":null,"patch":1.1,"GEO":[{"dec":312.6483049577366,"inc":-45.45141151385548,"MAD":6.9299902573755325,"cm":[8.326672684688674e-17,6.938893903907228e-17,0],"intensity":12.081871128981811,"type":"dir","forced":true,"remark":"","origin":false,"nSteps":7,"minStep":"250","maxStep":"420","steps":["250","260","300","330","360","390","420"],"group":"None","version":"v1.1.0"}],"TECT":[{"dec":185.94782184634667,"inc":-53.299780981827176,"MAD":6.929990257375474,"cm":[1.5265566588595902e-16,1.5612511283791264e-17,-1.6653345369377348e-16],"intensity":12.081871128981811,"type":"dir","forced":true,"remark":"","origin":false,"nSteps":7,"minStep":"250","maxStep":"420","steps":["250","260","300","330","360","390","420"],"group":"None","version":"v1.1.0"}],"interpreted":true,"name":"TG 46.1","coreAzi":315,"coreDip":65,"bedStrike":247,"bedDip":75,"data":[{"visible":false,"include":false,"step":"20","x":3.314285714285714,"y":27.54285714285714,"z":46.86666666666667,"a95":0.8,"info":"\"\" at \"\""},{"visible":false,"include":false,"step":"100","x":5.923809523809524,"y":18.771428571428572,"z":47.03809523809524,"a95":0.7,"info":"\"\" at \"\""},{"visible":true,"include":false,"step":"150","x":7.552380952380952,"y":9.819047619047618,"z":20.885714285714286,"a95":0.9,"info":"\"\" at \"\""},{"visible":true,"include":false,"step":"200","x":9.819047619047618,"y":3.542857142857143,"z":2.123809523809524,"a95":1.1,"info":"\"\" at \"\""},{"visible":true,"include":true,"step":"250","x":9.819047619047618,"y":0.11428571428571428,"z":-3.019047619047619,"a95":1.2,"info":"\"\" at \"\""},{"visible":false,"include":false,"step":"250","x":6.838095238095238,"y":-2.895238095238095,"z":-7.3619047619047615,"a95":16.5,"info":"\"\" at \"\""},{"visible":true,"include":true,"step":"260","x":8.152380952380952,"y":-0.26666666666666666,"z":-2.895238095238095,"a95":13.5,"info":"\"\" at \"\""},{"visible":true,"include":true,"step":"300","x":4.733333333333333,"y":-0.5238095238095238,"z":-1.9714285714285713,"a95":17.6,"info":"\"\" at \"\""},{"visible":true,"include":true,"step":"330","x":4.20952380952381,"y":-1.0476190476190477,"z":-2.4952380952380953,"a95":17.9,"info":"\"\" at \"\""},{"visible":true,"include":true,"step":"360","x":4.20952380952381,"y":-0.26666666666666666,"z":-1.9714285714285713,"a95":17.2,"info":"\"\" at \"\""},{"visible":true,"include":true,"step":"390","x":2.3714285714285714,"y":0.7904761904761906,"z":-1.4476190476190476,"a95":19.3,"info":"\"\" at \"\""},{"visible":true,"include":true,"step":"420","x":1.8380952380952382,"y":0.26666666666666666,"z":-0.13333333333333333,"a95":14.8,"info":"\"\" at \"\""},{"visible":true,"include":false,"step":"450","x":1.0476190476190477,"y":0,"z":-0.26666666666666666,"a95":34,"info":"\"\" at \"\""},{"visible":false,"include":false,"step":"480","x":-0.26666666666666666,"y":-0.26666666666666666,"z":0.3904761904761904,"a95":53.8,"info":"\"\" at \"\""}]},{"version":"v1.1.0","exported":"2016-10-09T19:07:57.586Z","volume":10.5,"added":"2016-10-09T18:44:29.190Z","format":"Utrecht","demagType":"Unknown","strat":null,"patch":1.1,"GEO":[{"dec":266.2916288291756,"inc":-1.4651618124412635,"MAD":20.493044295636583,"cm":[-5.551115123125783e-17,-1.1709383462843448e-15,0],"intensity":11.574508702345872,"type":"GC","origin":false,"forced":true,"remark":"","nSteps":5,"minStep":"100","maxStep":"300","steps":["100","150","200","250","300"],"group":"None","version":"v1.1.0"}],"TECT":[{"dec":250.6858417352521,"inc":-19.00390699405338,"MAD":20.493044295636597,"cm":[-1.448494102440634e-16,-6.106226635438361e-16,-4.718447854656915e-16],"intensity":11.574508702345872,"type":"GC","origin":false,"forced":true,"remark":"","nSteps":5,"minStep":"100","maxStep":"300","steps":["100","150","200","250","300"],"group":"None","version":"v1.1.0"}],"interpreted":true,"name":"TG 47.1","coreAzi":157,"coreDip":15,"bedStrike":247,"bedDip":75,"data":[{"visible":false,"include":false,"step":"20","x":-25.24761904761905,"y":-1.8380952380952382,"z":-16.304761904761904,"a95":3.7,"info":"\"\" at \"\""},{"visible":true,"include":true,"step":"100","x":-10.257142857142858,"y":-2.104761904761905,"z":-3.685714285714286,"a95":12,"info":"\"\" at \"\""},{"visible":true,"include":true,"step":"150","x":-4.733333333333333,"y":-0.5238095238095238,"z":-2.895238095238095,"a95":10.3,"info":"\"\" at \"\""},{"visible":true,"include":true,"step":"200","x":-2.742857142857143,"y":-1.5904761904761904,"z":-2.1333333333333333,"a95":9.4,"info":"\"\" at \"\""},{"visible":true,"include":true,"step":"250","x":0.01904761904761905,"y":-0.6761904761904761,"z":-2.0571428571428574,"a95":14,"info":"\"\" at \"\""},{"visible":true,"include":true,"step":"300","x":0.09523809523809523,"y":-0.3619047619047619,"z":-1.2761904761904763,"a95":27.1,"info":"\"\" at \"\""},{"visible":true,"include":false,"step":"330","x":-0.3523809523809524,"y":0.29523809523809524,"z":-0.9619047619047618,"a95":38.6,"info":"\"\" at \"\""}]},{"version":"v1.1.0","exported":"2016-10-09T19:07:57.586Z","volume":10.5,"added":"2016-10-09T18:44:29.190Z","format":"Utrecht","demagType":"Unknown","strat":null,"patch":1.1,"GEO":[],"TECT":[],"interpreted":false,"name":"TG 47.2","coreAzi":157,"coreDip":15,"bedStrike":247,"bedDip":75,"data":[{"visible":false,"include":false,"step":"20","x":-31.961904761904766,"y":-4.819047619047619,"z":-18.8,"a95":1.3,"info":"\"\" at \"\""},{"visible":true,"include":true,"step":"100","x":-14.99047619047619,"y":-3.2,"z":-5.114285714285715,"a95":2.2,"info":"\"\" at \"\""},{"visible":true,"include":true,"step":"150","x":-7.323809523809524,"y":-1.3333333333333333,"z":-3.1333333333333333,"a95":3.7,"info":"\"\" at \"\""},{"visible":true,"include":true,"step":"200","x":-3.019047619047619,"y":-0.6380952380952382,"z":-1.6857142857142857,"a95":10.1,"info":"\"\" at \"\""},{"visible":true,"include":false,"step":"250","x":-0.9333333333333333,"y":-0.22857142857142856,"z":-0.08571428571428572,"a95":41.4,"info":"\"\" at \"\""},{"visible":true,"include":false,"step":"300","x":-0.05714285714285714,"y":0.17142857142857143,"z":-1.1333333333333333,"a95":38,"info":"\"\" at \"\""},{"visible":true,"include":false,"step":"330","x":-0.6380952380952382,"y":0.6952380952380952,"z":-0.05714285714285714,"a95":45.5,"info":"\"\" at \"\""},{"visible":true,"include":false,"step":"360","x":-0.6380952380952382,"y":0.7523809523809524,"z":-0.43809523809523804,"a95":30.9,"info":"\"\" at \"\""}]},{"version":"v1.1.0","exported":"2016-10-09T19:07:57.586Z","volume":10.5,"added":"2016-10-09T18:44:29.190Z","format":"Utrecht","demagType":"Unknown","strat":null,"patch":1.1,"GEO":[],"TECT":[],"interpreted":false,"name":"TG 48.1","coreAzi":148,"coreDip":38,"bedStrike":240,"bedDip":52,"data":[{"visible":true,"include":false,"step":"20","x":-18.152380952380952,"y":-5.79047619047619,"z":-12.885714285714286,"a95":4.3,"info":"\"\" at \"\""},{"visible":true,"include":false,"step":"100","x":-5,"y":-1.8380952380952382,"z":-1.8380952380952382,"a95":16,"info":"\"\" at \"\""},{"visible":true,"include":false,"step":"150","x":-3.1523809523809527,"y":-0.5238095238095238,"z":-1.7142857142857142,"a95":15.4,"info":"\"\" at \"\""},{"visible":true,"include":false,"step":"200","x":-1.7904761904761906,"y":-0.8857142857142858,"z":-1.619047619047619,"a95":14.1,"info":"\"\" at \"\""},{"visible":true,"include":false,"step":"250","x":-0.047619047619047616,"y":0.14285714285714285,"z":-1.4952380952380953,"a95":28.6,"info":"\"\" at \"\""},{"visible":true,"include":false,"step":"300","x":1.9904761904761903,"y":-3.542857142857143,"z":-1.6285714285714288,"a95":9.9,"info":"\"\" at \"\""},{"visible":true,"include":false,"step":"330","x":-0.4666666666666667,"y":0.4095238095238095,"z":-0.7523809523809524,"a95":38.1,"info":"\"\" at \"\""}]},{"version":"v1.1.0","exported":"2016-10-09T19:07:57.586Z","volume":10.5,"added":"2016-10-09T18:44:29.190Z","format":"Utrecht","demagType":"Unknown","strat":null,"patch":1.1,"GEO":[],"TECT":[],"interpreted":false,"name":"TG 50.1","coreAzi":136,"coreDip":37,"bedStrike":240,"bedDip":52,"data":[{"visible":false,"include":false,"step":"20","x":-112.84761904761906,"y":-97.32380952380952,"z":-57.07619047619047,"a95":1.3,"info":"\"\" at \"\""},{"visible":true,"include":true,"step":"100","x":-67.86666666666667,"y":-58.92380952380953,"z":-17.61904761904762,"a95":2.2,"info":"\"\" at \"\""},{"visible":true,"include":true,"step":"150","x":-46.561904761904756,"y":-38.4,"z":-17.885714285714286,"a95":2.7,"info":"\"\" at \"\""},{"visible":true,"include":true,"step":"200","x":-18.780952380952378,"y":-17.18095238095238,"z":-10.533333333333333,"a95":1.2,"info":"\"\" at \"\""},{"visible":true,"include":false,"step":"250","x":-1.5238095238095237,"y":-2.9142857142857146,"z":-8.685714285714287,"a95":4.2,"info":"\"\" at \"\""},{"visible":true,"include":false,"step":"300","x":0.12380952380952381,"y":-6.276190476190477,"z":-4.704761904761905,"a95":4.7,"info":"\"\" at \"\""},{"visible":true,"include":false,"step":"330","x":-5.523809523809524,"y":1.3904761904761904,"z":-4.9714285714285715,"a95":13.5,"info":"\"\" at \"\""},{"visible":true,"include":false,"step":"360","x":-3.076190476190476,"y":2.8476190476190473,"z":-1.657142857142857,"a95":8.8,"info":"\"\" at \"\""},{"visible":true,"include":false,"step":"390","x":-2.7904761904761903,"y":2.4952380952380953,"z":1.3904761904761904,"a95":10,"info":"\"\" at \"\""}]},{"version":"v1.1.0","exported":"2016-10-09T19:07:57.586Z","volume":10.5,"added":"2016-10-09T18:44:29.190Z","format":"Utrecht","demagType":"Unknown","strat":null,"patch":1.1,"GEO":[{"dec":73.27515940680217,"inc":-11.809812649668288,"MAD":4.443207266393525,"cm":[-1.1102230246251565e-15,-5.384581669432009e-15,0],"intensity":67.79048221142882,"type":"GC","origin":false,"forced":true,"remark":"","nSteps":4,"minStep":"150","maxStep":"300","steps":["150","200","250","300"],"group":"None","version":"v1.1.0"}],"TECT":[{"dec":257.4605991595534,"inc":-2.9299707462153486,"MAD":4.443207266393576,"cm":[-1.582067810090848e-15,-7.979727989493313e-15,-1.7763568394002505e-15],"intensity":67.79048221142882,"type":"GC","origin":false,"forced":true,"remark":"","nSteps":4,"minStep":"150","maxStep":"300","steps":["150","200","250","300"],"group":"None","version":"v1.1.0"}],"interpreted":true,"name":"TG 50.2","coreAzi":136,"coreDip":37,"bedStrike":240,"bedDip":52,"data":[{"visible":true,"include":false,"step":"20","x":-130.33333333333334,"y":-92.21904761904761,"z":-58.13333333333333,"a95":0.5,"info":"\"\" at \"\""},{"visible":true,"include":false,"step":"100","x":-73.61904761904762,"y":-49.161904761904765,"z":-19.2,"a95":0.7,"info":"\"\" at \"\""},{"visible":true,"include":true,"step":"150","x":-55.08571428571428,"y":-31.723809523809525,"z":-17.428571428571427,"a95":0.7,"info":"\"\" at \"\""},{"visible":true,"include":true,"step":"200","x":-28.476190476190474,"y":-18.59047619047619,"z":-13.104761904761904,"a95":1.3,"info":"\"\" at \"\""},{"visible":true,"include":true,"step":"250","x":-2.9047619047619047,"y":-3.4285714285714284,"z":-9.152380952380952,"a95":3.3,"info":"\"\" at \"\""},{"visible":true,"include":true,"step":"300","x":2.038095238095238,"y":-1.3904761904761904,"z":-8.742857142857142,"a95":3.9,"info":"\"\" at \"\""},{"visible":true,"include":false,"step":"330","x":-5.114285714285715,"y":0.3523809523809524,"z":-7.057142857142857,"a95":4.6,"info":"\"\" at \"\""},{"visible":true,"include":false,"step":"360","x":-0.7523809523809524,"y":1.2190476190476192,"z":-0.4666666666666667,"a95":26.2,"info":"\"\" at \"\""},{"visible":true,"include":false,"step":"390","x":-3.3714285714285714,"y":5.523809523809524,"z":-2.9333333333333336,"a95":6.3,"info":"\"\" at \"\""},{"visible":true,"include":false,"step":"420","x":-8.076190476190476,"y":-0.22857142857142856,"z":-1.2476190476190476,"a95":5.5,"info":"\"\" at \"\""},{"visible":true,"include":false,"step":"450","x":-11.152380952380952,"y":-3.3714285714285714,"z":-1.2476190476190476,"a95":3.4,"info":"\"\" at \"\""},{"visible":true,"include":false,"step":"480","x":-2.7904761904761903,"y":1.3904761904761904,"z":-4.333333333333333,"a95":8.2,"info":"\"\" at \"\""},{"visible":true,"include":false,"step":"510","x":-13.885714285714286,"y":6.39047619047619,"z":2.1523809523809527,"a95":3,"info":"\"\" at \"\""}]},{"version":"v1.1.0","exported":"2016-10-09T19:07:57.586Z","volume":10.5,"added":"2016-10-09T18:44:29.190Z","format":"Utrecht","demagType":"Unknown","strat":null,"patch":1.1,"GEO":[{"dec":359.0092718869248,"inc":-59.82624925145109,"MAD":11.993211292727597,"cm":[-5.551115123125783e-17,4.5102810375396984e-17,0],"intensity":4.137555447285882,"type":"dir","forced":true,"remark":"","origin":false,"nSteps":6,"minStep":"200","maxStep":"390","steps":["200","250","300","330","360","390"],"group":"None","version":"v1.1.0"}],"TECT":[{"dec":119.30596603714218,"inc":-61.47691108405934,"MAD":11.993211292727583,"cm":[-3.677613769070831e-16,-2.220446049250313e-16,5.551115123125783e-17],"intensity":4.137555447285882,"type":"dir","forced":true,"remark":"","origin":false,"nSteps":6,"minStep":"200","maxStep":"390","steps":["200","250","300","330","360","390"],"group":"None","version":"v1.1.0"}],"interpreted":true,"name":"TG 51.1","coreAzi":276,"coreDip":53,"bedStrike":240,"bedDip":52,"data":[{"visible":false,"include":false,"step":"20","x":-2.3714285714285714,"y":12.885714285714286,"z":0.9238095238095237,"a95":4,"info":"\"\" at \"\""},{"visible":true,"include":false,"step":"100","x":-0.26666666666666666,"y":5,"z":1.580952380952381,"a95":14.4,"info":"\"\" at \"\""},{"visible":true,"include":false,"step":"150","x":0.7904761904761906,"y":3.419047619047619,"z":0.13333333333333333,"a95":14.1,"info":"\"\" at \"\""},{"visible":true,"include":true,"step":"200","x":1.9904761904761903,"y":1.3523809523809522,"z":-1.3047619047619048,"a95":9,"info":"\"\" at \"\""},{"visible":true,"include":true,"step":"250","x":1.7809523809523808,"y":1.5142857142857142,"z":-1.8285714285714285,"a95":11,"info":"\"\" at \"\""},{"visible":true,"include":true,"step":"300","x":0.9238095238095237,"y":0.5333333333333333,"z":-1.2952380952380953,"a95":17.3,"info":"\"\" at \"\""},{"visible":true,"include":true,"step":"330","x":0.5238095238095238,"y":1.2190476190476192,"z":-1.3904761904761904,"a95":20.4,"info":"\"\" at \"\""},{"visible":true,"include":true,"step":"360","x":0.6380952380952382,"y":0.6952380952380952,"z":-1.3333333333333333,"a95":17.9,"info":"\"\" at \"\""},{"visible":true,"include":true,"step":"390","x":0.6952380952380952,"y":0.6380952380952382,"z":-1.1333333333333333,"a95":25.1,"info":"\"\" at \"\""},{"visible":true,"include":false,"step":"420","x":0,"y":0.4095238095238095,"z":-0.8761904761904761,"a95":33.5,"info":"\"\" at \"\""}]},{"version":"v1.1.0","exported":"2016-10-09T19:07:57.586Z","volume":10.5,"added":"2016-10-09T18:44:29.190Z","format":"Utrecht","demagType":"Unknown","strat":null,"patch":1.1,"GEO":[{"dec":271.71827559077695,"inc":-14.069638529979743,"MAD":2.6169576075183216,"cm":[-3.885780586188048e-16,-2.0539125955565396e-15,0],"intensity":22.474097965548683,"type":"GC","origin":false,"forced":true,"remark":"","nSteps":4,"minStep":"100","maxStep":"250","steps":["100","150","200","250"],"group":"None","version":"v1.1.0"}],"TECT":[{"dec":248.4380218064856,"inc":-33.47209256663616,"MAD":2.616957607518502,"cm":[4.462576141950336e-16,3.3306690738754696e-16,-3.3306690738754696e-16],"intensity":22.474097965548683,"type":"GC","origin":false,"forced":true,"remark":"","nSteps":4,"minStep":"100","maxStep":"250","steps":["100","150","200","250"],"group":"None","version":"v1.1.0"}],"interpreted":true,"name":"TG 51.2","coreAzi":276,"coreDip":53,"bedStrike":240,"bedDip":52,"data":[{"visible":false,"include":false,"step":"20","x":-6.561904761904763,"y":26.73333333333333,"z":8.019047619047619,"a95":2.1,"info":"\"\" at \"\""},{"visible":true,"include":true,"step":"100","x":-2.961904761904762,"y":18.361904761904764,"z":10.342857142857142,"a95":2.7,"info":"\"\" at \"\""},{"visible":true,"include":true,"step":"150","x":-0.9904761904761905,"y":12.085714285714285,"z":4.647619047619047,"a95":3.5,"info":"\"\" at \"\""},{"visible":true,"include":true,"step":"200","x":0.8761904761904761,"y":5.285714285714286,"z":-0.6380952380952382,"a95":6.4,"info":"\"\" at \"\""},{"visible":true,"include":true,"step":"250","x":1.2190476190476192,"y":2.7333333333333334,"z":-2.7904761904761903,"a95":12,"info":"\"\" at \"\""},{"visible":true,"include":false,"step":"300","x":1.7428571428571429,"y":1.3904761904761904,"z":-3.9809523809523806,"a95":8.3,"info":"\"\" at \"\""},{"visible":true,"include":false,"step":"330","x":0.8761904761904761,"y":1.7428571428571429,"z":-2.3238095238095235,"a95":17.1,"info":"\"\" at \"\""},{"visible":true,"include":false,"step":"360","x":-0.17142857142857143,"y":1.9142857142857144,"z":1.361904761904762,"a95":20.1,"info":"\"\" at \"\""},{"visible":true,"include":false,"step":"390","x":-0.11428571428571428,"y":0.7523809523809524,"z":-1.0761904761904764,"a95":39.4,"info":"\"\" at \"\""},{"visible":true,"include":false,"step":"420","x":0.05714285714285714,"y":0.5238095238095238,"z":-0.8095238095238095,"a95":40.5,"info":"\"\" at \"\""},{"visible":false,"include":false,"step":"450","x":-0.4666666666666667,"y":0.8761904761904761,"z":-0.4666666666666667,"a95":38.9,"info":"\"\" at \"\""},{"visible":false,"include":false,"step":"480","x":2.2666666666666666,"y":-0.5238095238095238,"z":-0.08571428571428572,"a95":16.5,"info":"\"\" at \"\""}]},{"version":"v1.1.0","exported":"2016-10-09T19:07:57.587Z","volume":10.5,"added":"2016-10-09T18:44:29.191Z","format":"Utrecht","demagType":"Unknown","strat":null,"patch":1.1,"GEO":[],"TECT":[],"interpreted":false,"name":"TG 52.1","coreAzi":150,"coreDip":38,"bedStrike":240,"bedDip":52,"data":[{"visible":false,"include":false,"step":"20","x":-11.314285714285713,"y":-4.733333333333333,"z":-4.342857142857143,"a95":5,"info":"\"\" at \"\""},{"visible":true,"include":false,"step":"100","x":-3.9428571428571426,"y":-1.8380952380952382,"z":-1.7142857142857142,"a95":15.2,"info":"\"\" at \"\""},{"visible":true,"include":false,"step":"150","x":-2.104761904761905,"y":-0.26666666666666666,"z":-0.5238095238095238,"a95":12.7,"info":"\"\" at \"\""},{"visible":true,"include":false,"step":"200","x":-0.21904761904761902,"y":-0.9428571428571428,"z":-0.047619047619047616,"a95":45,"info":"\"\" at \"\""},{"visible":true,"include":false,"step":"250","x":0.12380952380952381,"y":-0.21904761904761902,"z":-0.3619047619047619,"a95":86.5,"info":"\"\" at \"\""},{"visible":true,"include":false,"step":"300","x":0.22857142857142856,"y":-0.0761904761904762,"z":-2.6285714285714286,"a95":13.4,"info":"\"\" at \"\""},{"visible":true,"include":false,"step":"330","x":-0.4095238095238095,"y":0.11428571428571428,"z":0.05714285714285714,"a95":84.7,"info":"\"\" at \"\""}]},{"version":"v1.1.0","exported":"2016-10-09T19:07:57.587Z","volume":10.5,"added":"2016-10-09T18:44:29.191Z","format":"Utrecht","demagType":"Unknown","strat":null,"patch":1.1,"GEO":[],"TECT":[],"interpreted":false,"name":"TG 52.2","coreAzi":150,"coreDip":38,"bedStrike":240,"bedDip":52,"data":[{"visible":false,"include":false,"step":"20","x":-9.647619047619047,"y":-3.7142857142857144,"z":-4.3619047619047615,"a95":3.9,"info":"\"\" at \"\""},{"visible":true,"include":false,"step":"100","x":-5.580952380952381,"y":-3.076190476190476,"z":-1.5142857142857142,"a95":5.9,"info":"\"\" at \"\""},{"visible":true,"include":false,"step":"150","x":-3.5999999999999996,"y":-1.7428571428571429,"z":-1.2190476190476192,"a95":9.7,"info":"\"\" at \"\""},{"visible":true,"include":false,"step":"200","x":-0.8761904761904761,"y":-0.5809523809523809,"z":-0.3523809523809524,"a95":30.3,"info":"\"\" at \"\""},{"visible":true,"include":false,"step":"250","x":0.4095238095238095,"y":-1.1047619047619048,"z":0.29523809523809524,"a95":34.6,"info":"\"\" at \"\""},{"visible":true,"include":false,"step":"300","x":0.5238095238095238,"y":-0.22857142857142856,"z":-0.9047619047619048,"a95":36.1,"info":"\"\" at \"\""},{"visible":true,"include":false,"step":"330","x":-0.29523809523809524,"y":0.11428571428571428,"z":0.2571428571428572,"a95":97.4,"info":"\"\" at \"\""},{"visible":true,"include":false,"step":"360","x":-1.8571428571428572,"y":1.6285714285714288,"z":-0.11428571428571428,"a95":17.6,"info":"\"\" at \"\""}]},{"version":"v1.1.0","exported":"2016-10-09T19:07:57.587Z","volume":10.5,"added":"2016-10-09T18:44:29.191Z","format":"Utrecht","demagType":"Unknown","strat":null,"patch":1.1,"GEO":[{"dec":56.449011520327645,"inc":-36.93112567095694,"MAD":7.166087404577221,"cm":[-8.881784197001252e-16,-6.8833827526759706e-15,0],"intensity":94.01459528703047,"type":"GC","origin":false,"forced":true,"remark":"","nSteps":3,"minStep":"150","maxStep":"250","steps":["150","200","250"],"group":"None","version":"v1.1.0"}],"TECT":[{"dec":108.1263064921219,"inc":-29.029425299471523,"MAD":7.166087404577699,"cm":[-2.220446049250313e-16,-1.4765966227514582e-14,0],"intensity":94.01459528703046,"type":"GC","origin":false,"forced":true,"remark":"","nSteps":3,"minStep":"150","maxStep":"250","steps":["150","200","250"],"group":"None","version":"v1.1.0"}],"interpreted":true,"name":"TG 53B.1","coreAzi":310,"coreDip":36,"bedStrike":257,"bedDip":68,"data":[{"visible":false,"include":false,"step":"20","x":-48.13333333333333,"y":133.0952380952381,"z":95.21904761904761,"a95":1.2,"info":"\"\" at \"\""},{"visible":true,"include":false,"step":"100","x":-22.885714285714286,"y":77.33333333333333,"z":95.87619047619049,"a95":1.4,"info":"\"\" at \"\""},{"visible":true,"include":true,"step":"150","x":-8.41904761904762,"y":51.81904761904762,"z":67.86666666666667,"a95":1.8,"info":"\"\" at \"\""},{"visible":true,"include":true,"step":"200","x":2.580952380952381,"y":18.847619047619048,"z":30.59047619047619,"a95":1.3,"info":"\"\" at \"\""},{"visible":true,"include":true,"step":"250","x":7.961904761904761,"y":3.2190476190476187,"z":8.352380952380953,"a95":3,"info":"\"\" at \"\""},{"visible":true,"include":false,"step":"300","x":5.076190476190476,"y":-0.0761904761904762,"z":2.5428571428571427,"a95":7.4,"info":"\"\" at \"\""},{"visible":true,"include":false,"step":"330","x":6.276190476190477,"y":3.542857142857143,"z":-1.3333333333333333,"a95":5.5,"info":"\"\" at \"\""},{"visible":true,"include":false,"step":"360","x":7.323809523809524,"y":1.7428571428571429,"z":2.4380952380952383,"a95":3.8,"info":"\"\" at \"\""},{"visible":true,"include":false,"step":"390","x":2.038095238095238,"y":-0.17142857142857143,"z":2.2666666666666666,"a95":9.9,"info":"\"\" at \"\""},{"visible":true,"include":false,"step":"420","x":5.057142857142857,"y":-1.2761904761904763,"z":-2.5523809523809526,"a95":6.9,"info":"\"\" at \"\""},{"visible":true,"include":false,"step":"450","x":-0.17142857142857143,"y":-0.29523809523809524,"z":-2,"a95":21.3,"info":"\"\" at \"\""}]},{"version":"v1.1.0","exported":"2016-10-09T19:07:57.587Z","volume":10.5,"added":"2016-10-09T18:44:29.191Z","format":"Utrecht","demagType":"Unknown","strat":null,"patch":1.1,"GEO":[{"dec":67.82653380514796,"inc":-25.14608278076463,"MAD":4.65023166677164,"cm":[4.440892098500626e-16,-6.328271240363392e-15,0],"intensity":138.2370224520813,"type":"GC","origin":false,"forced":true,"remark":"","nSteps":5,"minStep":"100","maxStep":"300","steps":["100","150","200","250","300"],"group":"None","version":"v1.1.0"}],"TECT":[{"dec":97.8257152599856,"inc":-17.03688117355118,"MAD":4.650231666771496,"cm":[-2.4702462297909733e-15,-1.049160758270773e-14,-1.9984014443252818e-15],"intensity":138.2370224520813,"type":"GC","origin":false,"forced":true,"remark":"","nSteps":5,"minStep":"100","maxStep":"300","steps":["100","150","200","250","300"],"group":"None","version":"v1.1.0"}],"interpreted":true,"name":"TG 53B.2","coreAzi":310,"coreDip":36,"bedStrike":257,"bedDip":68,"data":[{"visible":false,"include":false,"step":"20","x":-41.78095238095238,"y":115.80952380952381,"z":101.6,"a95":0.8,"info":"\"\" at \"\""},{"visible":true,"include":true,"step":"100","x":-17.314285714285717,"y":78.9047619047619,"z":102.4952380952381,"a95":1,"info":"\"\" at \"\""},{"visible":true,"include":true,"step":"150","x":-8.714285714285714,"y":58.457142857142856,"z":78.84761904761905,"a95":1,"info":"\"\" at \"\""},{"visible":true,"include":true,"step":"200","x":10.752380952380953,"y":25.447619047619046,"z":38.60952380952381,"a95":1.5,"info":"\"\" at \"\""},{"visible":true,"include":true,"step":"250","x":19.638095238095236,"y":10.057142857142857,"z":16.123809523809523,"a95":1.7,"info":"\"\" at \"\""},{"visible":false,"include":false,"step":"300","x":3.9523809523809526,"y":12.895238095238096,"z":-4.914285714285715,"a95":3.6,"info":"\"\" at \"\""},{"visible":true,"include":true,"step":"300","x":12.142857142857142,"y":5.466666666666667,"z":6.885714285714285,"a95":2.7,"info":"\"\" at \"\""},{"visible":true,"include":false,"step":"330","x":12.142857142857142,"y":-0.5238095238095238,"z":3.5142857142857142,"a95":3,"info":"\"\" at \"\""},{"visible":true,"include":false,"step":"360","x":6.628571428571428,"y":-1.1619047619047618,"z":4.704761904761905,"a95":5.2,"info":"\"\" at \"\""},{"visible":true,"include":false,"step":"390","x":7.961904761904761,"y":-1.2190476190476192,"z":3.019047619047619,"a95":5.4,"info":"\"\" at \"\""},{"visible":true,"include":false,"step":"420","x":4.533333333333333,"y":1.1619047619047618,"z":0.5238095238095238,"a95":7.9,"info":"\"\" at \"\""},{"visible":true,"include":false,"step":"450","x":0.8095238095238095,"y":1.8571428571428572,"z":-0.9904761904761905,"a95":13.7,"info":"\"\" at \"\""},{"visible":true,"include":false,"step":"480","x":7.380952380952381,"y":-0.8761904761904761,"z":-0.8380952380952381,"a95":5,"info":"\"\" at \"\""}]},{"version":"v1.1.0","exported":"2016-10-09T19:07:57.587Z","volume":10.5,"added":"2016-10-09T18:44:29.191Z","format":"Utrecht","demagType":"Unknown","strat":null,"patch":1.1,"GEO":[],"TECT":[],"interpreted":false,"name":"TG 54.1","coreAzi":261,"coreDip":27,"bedStrike":257,"bedDip":68,"data":[{"visible":false,"include":false,"step":"20","x":-131.26666666666665,"y":145.4952380952381,"z":-12.085714285714285,"a95":0.8,"info":"\"\" at \"\""},{"visible":true,"include":false,"step":"100","x":-72.04761904761905,"y":83.32380952380952,"z":14.057142857142857,"a95":1.3,"info":"\"\" at \"\""},{"visible":true,"include":true,"step":"150","x":-54.44761904761905,"y":65.07619047619048,"z":9.00952380952381,"a95":1.2,"info":"\"\" at \"\""},{"visible":true,"include":true,"step":"200","x":-23.64761904761905,"y":33.40952380952381,"z":6.6571428571428575,"a95":1.8,"info":"\"\" at \"\""},{"visible":true,"include":true,"step":"250","x":-8.714285714285714,"y":13.77142857142857,"z":-1.1904761904761905,"a95":3.4,"info":"\"\" at \"\""},{"visible":true,"include":true,"step":"300","x":-0.9333333333333333,"y":4.0095238095238095,"z":1.1619047619047618,"a95":10.3,"info":"\"\" at \"\""},{"visible":true,"include":false,"step":"330","x":-0.8761904761904761,"y":2.9047619047619047,"z":1.6,"a95":11.5,"info":"\"\" at \"\""},{"visible":true,"include":false,"step":"360","x":-4.3619047619047615,"y":3.542857142857143,"z":1.6285714285714288,"a95":8.2,"info":"\"\" at \"\""},{"visible":true,"include":false,"step":"390","x":-7.0285714285714285,"y":9.123809523809523,"z":-0.6666666666666666,"a95":4.8,"info":"\"\" at \"\""},{"visible":true,"include":false,"step":"420","x":-3.542857142857143,"y":1.7999999999999998,"z":2.2666666666666666,"a95":8.9,"info":"\"\" at \"\""},{"visible":true,"include":false,"step":"450","x":-5.6380952380952385,"y":-0.7523809523809524,"z":-4.561904761904762,"a95":5.8,"info":"\"\" at \"\""},{"visible":true,"include":false,"step":"480","x":1.7999999999999998,"y":-1.9714285714285713,"z":-1.2190476190476192,"a95":13.4,"info":"\"\" at \"\""}]},{"version":"v1.1.0","exported":"2016-10-09T19:07:57.587Z","volume":10.5,"added":"2016-10-09T18:44:29.191Z","format":"Utrecht","demagType":"Unknown","strat":null,"patch":1.1,"GEO":[],"TECT":[],"interpreted":false,"name":"TG 54.2","coreAzi":261,"coreDip":27,"bedStrike":257,"bedDip":68,"data":[{"visible":false,"include":false,"step":"20","x":-139.93333333333334,"y":155.1904761904762,"z":-12.628571428571428,"a95":1.3,"info":"\"\" at \"\""},{"visible":true,"include":true,"step":"100","x":-85.4857142857143,"y":89.17142857142856,"z":10,"a95":1.6,"info":"\"\" at \"\""},{"visible":true,"include":true,"step":"150","x":-59.714285714285715,"y":67.33333333333333,"z":11.180952380952382,"a95":1.4,"info":"\"\" at \"\""},{"visible":true,"include":true,"step":"200","x":-28.961904761904766,"y":36.65714285714286,"z":9.133333333333335,"a95":1.5,"info":"\"\" at \"\""},{"visible":true,"include":true,"step":"250","x":-8.780952380952382,"y":18.45714285714286,"z":6.142857142857143,"a95":2.7,"info":"\"\" at \"\""},{"visible":true,"include":false,"step":"300","x":-3.5333333333333337,"y":13.952380952380953,"z":3.9428571428571426,"a95":2.7,"info":"\"\" at \"\""},{"visible":true,"include":false,"step":"330","x":-5.342857142857143,"y":6.276190476190477,"z":1.6285714285714288,"a95":3.8,"info":"\"\" at \"\""},{"visible":true,"include":false,"step":"360","x":-3.5999999999999996,"y":8.019047619047619,"z":-0.6095238095238096,"a95":4.2,"info":"\"\" at \"\""},{"visible":true,"include":false,"step":"390","x":-2.5523809523809526,"y":1.4571428571428573,"z":-0.43809523809523804,"a95":11.2,"info":"\"\" at \"\""},{"visible":true,"include":false,"step":"420","x":-3.9523809523809526,"y":4.942857142857143,"z":0.11428571428571428,"a95":8,"info":"\"\" at \"\""},{"visible":true,"include":false,"step":"450","x":-2.7333333333333334,"y":0.9333333333333333,"z":-0.3238095238095238,"a95":13.1,"info":"\"\" at \"\""},{"visible":true,"include":false,"step":"480","x":-5.4,"y":-0.6952380952380952,"z":1.5428571428571427,"a95":7,"info":"\"\" at \"\""},{"visible":true,"include":false,"step":"510","x":-6.104761904761904,"y":-3.838095238095238,"z":4.885714285714285,"a95":5.2,"info":"\"\" at \"\""}]},{"version":"v1.1.0","exported":"2016-10-09T19:07:57.587Z","volume":10.5,"added":"2016-10-09T18:44:29.191Z","format":"Utrecht","demagType":"Unknown","strat":null,"patch":1.1,"GEO":[{"dec":71.42021201848195,"inc":-25.721518702638647,"MAD":6.811491867471437,"cm":[1.3322676295501878e-15,3.6637359812630166e-15,0],"intensity":36.920324829117206,"type":"GC","origin":false,"forced":true,"remark":"","nSteps":4,"minStep":"100","maxStep":"250","steps":["100","150","200","250"],"group":"None","version":"v1.1.0"}],"TECT":[{"dec":99.40056286584024,"inc":-14.110769661838404,"MAD":6.811491867471424,"cm":[1.3877787807814457e-15,7.771561172376096e-16,2.220446049250313e-16],"intensity":36.920324829117206,"type":"GC","origin":false,"forced":true,"remark":"","nSteps":4,"minStep":"100","maxStep":"250","steps":["100","150","200","250"],"group":"None","version":"v1.1.0"}],"interpreted":true,"name":"TG 55.1A","coreAzi":295,"coreDip":41,"bedStrike":257,"bedDip":68,"data":[{"visible":false,"include":false,"step":"20","x":-11.314285714285713,"y":35.51428571428571,"z":23.54285714285714,"a95":4,"info":"\"\" at \"\""},{"visible":true,"include":true,"step":"100","x":-0.26666666666666666,"y":23.142857142857142,"z":18.285714285714285,"a95":7.3,"info":"\"\" at \"\""},{"visible":true,"include":true,"step":"150","x":3.1523809523809527,"y":17.885714285714286,"z":13.942857142857143,"a95":7.2,"info":"\"\" at \"\""},{"visible":true,"include":true,"step":"200","x":11.142857142857142,"y":7,"z":5.704761904761905,"a95":2.9,"info":"\"\" at \"\""},{"visible":true,"include":true,"step":"250","x":11.542857142857143,"y":5.809523809523809,"z":1.657142857142857,"a95":2.8,"info":"\"\" at \"\""},{"visible":false,"include":false,"step":"300","x":10.6,"y":3.580952380952381,"z":-1.9333333333333333,"a95":3.6,"info":"\"\" at \"\""},{"visible":true,"include":false,"step":"330","x":8.371428571428572,"y":4.476190476190476,"z":1.6857142857142857,"a95":3.8,"info":"\"\" at \"\""},{"visible":true,"include":false,"step":"360","x":6.561904761904763,"y":3.314285714285714,"z":1.7714285714285716,"a95":5,"info":"\"\" at \"\""},{"visible":true,"include":false,"step":"390","x":4.942857142857143,"y":2.4952380952380953,"z":1.0476190476190477,"a95":7,"info":"\"\" at \"\""},{"visible":true,"include":false,"step":"420","x":3.2571428571428576,"y":2.038095238095238,"z":0.8380952380952381,"a95":10.4,"info":"\"\" at \"\""},{"visible":true,"include":false,"step":"450","x":1.8571428571428572,"y":1.9142857142857144,"z":0.3238095238095238,"a95":13.3,"info":"\"\" at \"\""},{"visible":true,"include":false,"step":"480","x":1.9142857142857144,"y":1.0476190476190477,"z":-0.7238095238095238,"a95":14.8,"info":"\"\" at \"\""},{"visible":true,"include":false,"step":"510","x":-0.5809523809523809,"y":0.3523809523809524,"z":1.5428571428571427,"a95":22.6,"info":"\"\" at \"\""},{"visible":true,"include":false,"step":"530","x":-3.895238095238095,"y":0.4095238095238095,"z":-0.7523809523809524,"a95":10.7,"info":"\"\" at \"\""}]},{"version":"v1.1.0","exported":"2016-10-09T19:07:57.587Z","volume":10.5,"added":"2016-10-09T18:44:29.192Z","format":"Utrecht","demagType":"Unknown","strat":null,"patch":1.1,"GEO":[{"dec":86.10395961692444,"inc":-4.002138552931036,"MAD":8.947179526117683,"cm":[0,4.718447854656915e-16,0],"intensity":38.66560636594567,"type":"GC","origin":false,"forced":true,"remark":"","nSteps":3,"minStep":"100","maxStep":"200","steps":["100","150","200"],"group":"None","version":"v1.1.0"}],"TECT":[{"dec":264.1659803662161,"inc":-6.903757534719538,"MAD":8.94717952611779,"cm":[1.9984014443252818e-15,4.98212582300539e-15,-3.3306690738754696e-16],"intensity":38.66560636594567,"type":"GC","origin":false,"forced":true,"remark":"","nSteps":3,"minStep":"100","maxStep":"200","steps":["100","150","200"],"group":"None","version":"v1.1.0"}],"interpreted":true,"name":"TG 55.2A","coreAzi":295,"coreDip":41,"bedStrike":257,"bedDip":68,"data":[{"visible":false,"include":false,"step":"20","x":-21.20952380952381,"y":27.19047619047619,"z":22.83809523809524,"a95":1.4,"info":"\"\" at \"\""},{"visible":true,"include":true,"step":"100","x":-13.41904761904762,"y":17.314285714285717,"z":21.99047619047619,"a95":1.6,"info":"\"\" at \"\""},{"visible":true,"include":true,"step":"150","x":-9.180952380952382,"y":13.361904761904762,"z":15.514285714285714,"a95":2.3,"info":"\"\" at \"\""},{"visible":true,"include":true,"step":"200","x":-1.5714285714285714,"y":5.6952380952380945,"z":5.228571428571429,"a95":6.3,"info":"\"\" at \"\""},{"visible":true,"include":false,"step":"250","x":2.961904761904762,"y":1.9142857142857144,"z":0.4095238095238095,"a95":11.4,"info":"\"\" at \"\""},{"visible":true,"include":false,"step":"300","x":0.7523809523809524,"y":1.9142857142857144,"z":-0.6666666666666666,"a95":17.9,"info":"\"\" at \"\""},{"visible":true,"include":false,"step":"330","x":-0.7523809523809524,"y":2.5523809523809526,"z":0.38095238095238093,"a95":17,"info":"\"\" at \"\""},{"visible":true,"include":false,"step":"360","x":-0.8095238095238095,"y":1.2761904761904763,"z":0.3523809523809524,"a95":30.4,"info":"\"\" at \"\""},{"visible":true,"include":false,"step":"390","x":-1.6857142857142857,"y":0.9904761904761905,"z":-1.3047619047619048,"a95":22.3,"info":"\"\" at \"\""},{"visible":true,"include":false,"step":"420","x":-2.038095238095238,"y":0.7523809523809524,"z":0.3523809523809524,"a95":21.4,"info":"\"\" at \"\""},{"visible":true,"include":false,"step":"450","x":-4.0095238095238095,"y":0.6952380952380952,"z":0.9904761904761905,"a95":11.4,"info":"\"\" at \"\""},{"visible":true,"include":false,"step":"480","x":-2.2666666666666666,"y":2.7333333333333334,"z":-0.7809523809523808,"a95":12.6,"info":"\"\" at \"\""}]},{"version":"v1.1.0","exported":"2016-10-09T19:07:57.587Z","volume":10.5,"added":"2016-10-09T18:44:29.192Z","format":"Utrecht","demagType":"Unknown","strat":null,"patch":1.1,"GEO":[{"dec":357.91407980886356,"inc":-49.64950956541581,"MAD":2.6175411575142014,"cm":[12.415099643721497,-0.749928541133115,-8.914107253137654],"intensity":34.62537310391086,"type":"dir","forced":false,"remark":"","origin":false,"nSteps":6,"minStep":"330","maxStep":"480","steps":["330","360","390","420","450","480"],"group":"None","version":"v1.1.0"}],"TECT":[{"dec":152.3351305543638,"inc":-61.03841099455529,"MAD":2.6175411575142142,"cm":[-3.1123066404948863,2.834855660575628,-14.71174839575551],"intensity":34.62537310391087,"type":"dir","forced":false,"remark":"","origin":false,"nSteps":6,"minStep":"330","maxStep":"480","steps":["330","360","390","420","450","480"],"group":"None","version":"v1.1.0"}],"interpreted":true,"name":"TG 56.1","coreAzi":165,"coreDip":22,"bedStrike":257,"bedDip":68,"data":[{"visible":false,"include":false,"step":"20","x":-73.12380952380951,"y":-15.78095238095238,"z":-176.23809523809524,"a95":0.9,"info":"\"\" at \"\""},{"visible":true,"include":false,"step":"100","x":-45.50476190476191,"y":-17.61904761904762,"z":-97.71428571428571,"a95":1.7,"info":"\"\" at \"\""},{"visible":true,"include":false,"step":"150","x":-14.2,"y":-15.257142857142856,"z":-83.78095238095239,"a95":1.6,"info":"\"\" at \"\""},{"visible":true,"include":false,"step":"200","x":13.657142857142858,"y":-11.59047619047619,"z":-64.83809523809524,"a95":0.8,"info":"\"\" at \"\""},{"visible":true,"include":false,"step":"250","x":15.2,"y":-8.723809523809523,"z":-51.542857142857144,"a95":0.9,"info":"\"\" at \"\""},{"visible":true,"include":false,"step":"300","x":15.77142857142857,"y":-6.847619047619048,"z":-41.72380952380953,"a95":0.9,"info":"\"\" at \"\""},{"visible":true,"include":true,"step":"330","x":13.600000000000001,"y":-5.342857142857143,"z":-33.32380952380952,"a95":1.1,"info":"\"\" at \"\""},{"visible":true,"include":true,"step":"360","x":8.428571428571429,"y":-4.647619047619047,"z":-22.83809523809524,"a95":1.4,"info":"\"\" at \"\""},{"visible":true,"include":true,"step":"390","x":3.895238095238095,"y":-2.1523809523809527,"z":-15.019047619047617,"a95":2.3,"info":"\"\" at \"\""},{"visible":true,"include":true,"step":"420","x":0.05714285714285714,"y":-0.5809523809523809,"z":-7.847619047619048,"a95":5.5,"info":"\"\" at \"\""},{"visible":true,"include":true,"step":"450","x":-1.1619047619047618,"y":-1.0476190476190477,"z":-5.780952380952381,"a95":7,"info":"\"\" at \"\""},{"visible":true,"include":true,"step":"480","x":-2.619047619047619,"y":-1.1619047619047618,"z":-3.019047619047619,"a95":8,"info":"\"\" at \"\""},{"visible":true,"include":false,"step":"510","x":-4.942857142857143,"y":-2.4952380952380953,"z":-1.5714285714285714,"a95":5.7,"info":"\"\" at \"\""},{"visible":true,"include":false,"step":"530","x":-6.104761904761904,"y":-0.22857142857142856,"z":-1.9428571428571426,"a95":5.8,"info":"\"\" at \"\""}]},{"version":"v1.1.0","exported":"2016-10-09T19:07:57.587Z","volume":10.5,"added":"2016-10-09T18:44:29.192Z","format":"Utrecht","demagType":"Unknown","strat":null,"patch":1.1,"GEO":[{"dec":358.1529282076273,"inc":-45.977359143486126,"MAD":2.060049186801216,"cm":[24.360076462604106,-2.8326649637211068,-23.150376584632138],"intensity":77.80000699508562,"type":"dir","forced":false,"remark":"","origin":false,"nSteps":7,"minStep":"250","maxStep":"450","steps":["250","300","330","360","390","420","450"],"group":"None","version":"v1.1.0"}],"TECT":[{"dec":148.90117940899927,"inc":-64.36088956967204,"MAD":2.0600491868011965,"cm":[-11.406448537011828,5.424687965787454,-31.270480397928615],"intensity":77.80000699508564,"type":"dir","forced":false,"remark":"","origin":false,"nSteps":7,"minStep":"250","maxStep":"450","steps":["250","300","330","360","390","420","450"],"group":"None","version":"v1.1.0"}],"interpreted":true,"name":"TG 56.2","coreAzi":165,"coreDip":22,"bedStrike":257,"bedDip":68,"data":[{"visible":false,"include":false,"step":"20","x":-112.43809523809523,"y":-42.885714285714286,"z":-241.63809523809522,"a95":0.8,"info":"\"\" at \"\""},{"visible":true,"include":false,"step":"100","x":-56.476190476190474,"y":-21.20952380952381,"z":-132.4,"a95":0.8,"info":"\"\" at \"\""},{"visible":true,"include":false,"step":"150","x":-25.62857142857143,"y":-19.523809523809526,"z":-116.97142857142858,"a95":0.6,"info":"\"\" at \"\""},{"visible":true,"include":false,"step":"200","x":15.161904761904761,"y":-14,"z":-92.44761904761906,"a95":1,"info":"\"\" at \"\""},{"visible":true,"include":true,"step":"250","x":31.495238095238093,"y":-11.447619047619048,"z":-75.21904761904761,"a95":0.6,"info":"\"\" at \"\""},{"visible":true,"include":true,"step":"300","x":23.81904761904762,"y":-7.495238095238095,"z":-53.57142857142857,"a95":0.8,"info":"\"\" at \"\""},{"visible":true,"include":true,"step":"330","x":15.571428571428571,"y":-4.295238095238095,"z":-36.95238095238095,"a95":1,"info":"\"\" at \"\""},{"visible":true,"include":true,"step":"360","x":10.4,"y":-2.4380952380952383,"z":-24.695238095238096,"a95":1.6,"info":"\"\" at \"\""},{"visible":true,"include":true,"step":"390","x":4.123809523809523,"y":-0.9904761904761905,"z":-15.685714285714285,"a95":2.9,"info":"\"\" at \"\""},{"visible":true,"include":true,"step":"420","x":1.7999999999999998,"y":0.22857142857142856,"z":-6.533333333333333,"a95":6.2,"info":"\"\" at \"\""},{"visible":true,"include":true,"step":"450","x":-0.5809523809523809,"y":1.4571428571428573,"z":-5.523809523809524,"a95":7.8,"info":"\"\" at \"\""},{"visible":true,"include":false,"step":"480","x":2.2666666666666666,"y":1.2190476190476192,"z":-3.923809523809524,"a95":8.1,"info":"\"\" at \"\""},{"visible":true,"include":false,"step":"510","x":-2.6761904761904765,"y":1.5714285714285714,"z":-2.8476190476190473,"a95":7.5,"info":"\"\" at \"\""},{"visible":true,"include":false,"step":"540","x":-4.0095238095238095,"y":4.180952380952381,"z":-6.685714285714286,"a95":4.5,"info":"\"\" at \"\""}]},{"version":"v1.1.0","exported":"2016-10-09T19:07:57.587Z","volume":10.5,"added":"2016-10-09T18:44:29.192Z","format":"Utrecht","demagType":"Unknown","strat":null,"patch":1.1,"GEO":[],"TECT":[],"interpreted":false,"name":"TG 57.1","coreAzi":168,"coreDip":18,"bedStrike":257,"bedDip":68,"data":[{"visible":false,"include":false,"step":"20","x":-12.361904761904762,"y":-5,"z":-11.971428571428572,"a95":6.6,"info":"\"\" at \"\""},{"visible":true,"include":false,"step":"100","x":-4.733333333333333,"y":-1.0476190476190477,"z":-3.419047619047619,"a95":17.4,"info":"\"\" at \"\""},{"visible":true,"include":false,"step":"150","x":-3.1523809523809527,"y":-0.26666666666666666,"z":-2.3714285714285714,"a95":12.6,"info":"\"\" at \"\""},{"visible":true,"include":false,"step":"200","x":-0.8476190476190476,"y":-1.2952380952380953,"z":-1.8476190476190475,"a95":10.3,"info":"\"\" at \"\""},{"visible":true,"include":false,"step":"250","x":-0.7428571428571429,"y":-0.047619047619047616,"z":-1.961904761904762,"a95":17.8,"info":"\"\" at \"\""},{"visible":true,"include":false,"step":"300","x":-0.8095238095238095,"y":-0.4095238095238095,"z":-4.2,"a95":8.4,"info":"\"\" at \"\""},{"visible":true,"include":false,"step":"330","x":-1.1047619047619048,"y":0.22857142857142856,"z":-1.0761904761904764,"a95":19.2,"info":"\"\" at \"\""},{"visible":true,"include":false,"step":"360","x":-0.9904761904761905,"y":-0.6380952380952382,"z":-0.8380952380952381,"a95":24.6,"info":"\"\" at \"\""},{"visible":true,"include":false,"step":"390","x":-1.1047619047619048,"y":0.05714285714285714,"z":-0.5809523809523809,"a95":28.8,"info":"\"\" at \"\""},{"visible":true,"include":false,"step":"420","x":-1.1047619047619048,"y":0.29523809523809524,"z":-0.6952380952380952,"a95":25.5,"info":"\"\" at \"\""},{"visible":true,"include":false,"step":"450","x":-0.5809523809523809,"y":-0.9904761904761905,"z":-1.019047619047619,"a95":19.4,"info":"\"\" at \"\""},{"visible":true,"include":false,"step":"480","x":-0.9904761904761905,"y":0,"z":-0.5523809523809524,"a95":35.1,"info":"\"\" at \"\""},{"visible":true,"include":false,"step":"510","x":-1.2190476190476192,"y":-0.7523809523809524,"z":-0.8095238095238095,"a95":19.6,"info":"\"\" at \"\""}]},{"version":"v1.1.0","exported":"2016-10-09T19:07:57.588Z","volume":10.5,"added":"2016-10-09T18:44:29.192Z","format":"Utrecht","demagType":"Unknown","strat":null,"patch":1.1,"GEO":[],"TECT":[],"interpreted":false,"name":"TG 57.2","coreAzi":168,"coreDip":18,"bedStrike":257,"bedDip":68,"data":[{"visible":false,"include":false,"step":"20","x":-14.295238095238094,"y":-4.590476190476191,"z":-11.8,"a95":1.9,"info":"\"\" at \"\""},{"visible":true,"include":false,"step":"100","x":-8.485714285714286,"y":-2.380952380952381,"z":-5.171428571428571,"a95":4.5,"info":"\"\" at \"\""},{"visible":true,"include":false,"step":"150","x":-5.285714285714286,"y":-1.4571428571428573,"z":-3.895238095238095,"a95":6.1,"info":"\"\" at \"\""},{"visible":true,"include":false,"step":"200","x":-2.2666666666666666,"y":-0.5809523809523809,"z":-2.4095238095238094,"a95":14.8,"info":"\"\" at \"\""},{"visible":true,"include":false,"step":"250","x":0.9333333333333333,"y":-0.05714285714285714,"z":-2.4666666666666663,"a95":15.5,"info":"\"\" at \"\""},{"visible":true,"include":false,"step":"300","x":-0.8761904761904761,"y":0.17142857142857143,"z":-2.4666666666666663,"a95":12.8,"info":"\"\" at \"\""},{"visible":true,"include":false,"step":"330","x":-1.2761904761904763,"y":-0.05714285714285714,"z":-1.2476190476190476,"a95":24.4,"info":"\"\" at \"\""},{"visible":true,"include":false,"step":"360","x":-0.4666666666666667,"y":0.11428571428571428,"z":-1.3047619047619048,"a95":18.4,"info":"\"\" at \"\""},{"visible":true,"include":false,"step":"390","x":-0.4095238095238095,"y":-0.05714285714285714,"z":-0.9619047619047618,"a95":34.1,"info":"\"\" at \"\""},{"visible":true,"include":false,"step":"420","x":-0.9904761904761905,"y":-0.6380952380952382,"z":-1.1047619047619048,"a95":27.7,"info":"\"\" at \"\""},{"visible":true,"include":false,"step":"450","x":-1.5714285714285714,"y":-0.22857142857142856,"z":-1.0476190476190477,"a95":17.3,"info":"\"\" at \"\""},{"visible":true,"include":false,"step":"480","x":0.22857142857142856,"y":-0.22857142857142856,"z":-0.38095238095238093,"a95":75.5,"info":"\"\" at \"\""}]},{"version":"v1.1.0","exported":"2016-10-09T19:07:57.588Z","volume":10.5,"added":"2016-10-09T18:44:29.192Z","format":"Utrecht","demagType":"Unknown","strat":null,"patch":1.1,"GEO":[{"dec":92.67848668545616,"inc":-9.242002145162617,"MAD":3.6305208857503266,"cm":[0,6.2450045135165055e-15,0],"intensity":109.61952463592377,"type":"GC","origin":false,"forced":true,"remark":"","nSteps":4,"minStep":"100","maxStep":"250","steps":["100","150","200","250"],"group":"None","version":"v1.1.0"}],"TECT":[{"dec":271.67315052469536,"inc":-10.78621623427981,"MAD":3.630520885750356,"cm":[-3.1086244689504383e-15,8.992806499463768e-15,8.881784197001252e-16],"intensity":109.61952463592375,"type":"GC","origin":false,"forced":true,"remark":"","nSteps":4,"minStep":"100","maxStep":"250","steps":["100","150","200","250"],"group":"None","version":"v1.1.0"}],"interpreted":true,"name":"TG 58.1","coreAzi":272,"coreDip":40,"bedStrike":257,"bedDip":68,"data":[{"visible":false,"include":false,"step":"20","x":-71.01904761904763,"y":122.57142857142857,"z":13.019047619047617,"a95":1.5,"info":"\"\" at \"\""},{"visible":true,"include":true,"step":"100","x":-46.81904761904762,"y":80.22857142857143,"z":26.304761904761904,"a95":1.4,"info":"\"\" at \"\""},{"visible":true,"include":true,"step":"150","x":-23.40952380952381,"y":58.65714285714286,"z":13.80952380952381,"a95":2.5,"info":"\"\" at \"\""},{"visible":true,"include":true,"step":"200","x":2.5428571428571427,"y":30.37142857142857,"z":-1.1619047619047618,"a95":1.7,"info":"\"\" at \"\""},{"visible":true,"include":true,"step":"250","x":4.838095238095238,"y":18.65714285714286,"z":-4.495238095238095,"a95":2.6,"info":"\"\" at \"\""},{"visible":true,"include":false,"step":"300","x":3.5238095238095237,"y":13.97142857142857,"z":-8.266666666666666,"a95":2.9,"info":"\"\" at \"\""},{"visible":true,"include":false,"step":"330","x":-0.4666666666666667,"y":11.914285714285715,"z":-4.647619047619047,"a95":3.2,"info":"\"\" at \"\""},{"visible":true,"include":false,"step":"360","x":0.5809523809523809,"y":8.019047619047619,"z":-3.104761904761905,"a95":3.9,"info":"\"\" at \"\""},{"visible":true,"include":false,"step":"390","x":-2.4952380952380953,"y":5.4,"z":-1.1619047619047618,"a95":6.8,"info":"\"\" at \"\""},{"visible":true,"include":false,"step":"420","x":-6.104761904761904,"y":4.295238095238095,"z":0.3523809523809524,"a95":6.4,"info":"\"\" at \"\""},{"visible":true,"include":false,"step":"450","x":-5.923809523809524,"y":1.9142857142857144,"z":0.08571428571428572,"a95":6.9,"info":"\"\" at \"\""},{"visible":true,"include":false,"step":"480","x":-9.647619047619047,"y":4.0095238095238095,"z":-0.29523809523809524,"a95":5.3,"info":"\"\" at \"\""},{"visible":true,"include":false,"step":"510","x":-10.457142857142857,"y":1.0476190476190477,"z":0.3523809523809524,"a95":4.2,"info":"\"\" at \"\""},{"visible":true,"include":false,"step":"530","x":-12.838095238095239,"y":-1.4571428571428573,"z":-1.657142857142857,"a95":3.6,"info":"\"\" at \"\""}]},{"version":"v1.1.0","exported":"2016-10-09T19:07:57.588Z","volume":10.5,"added":"2016-10-09T18:44:29.192Z","format":"Utrecht","demagType":"Unknown","strat":null,"patch":1.1,"GEO":[{"dec":92.24234951012244,"inc":-0.47420675008535235,"MAD":3.8848776600543924,"cm":[0,-5.245803791353865e-15,0],"intensity":105.66030754057631,"type":"GC","origin":false,"forced":true,"remark":"","nSteps":4,"minStep":"100","maxStep":"250","steps":["100","150","200","250"],"group":"None","version":"v1.1.0"}],"TECT":[{"dec":263.2789697530295,"inc":-13.924913900230909,"MAD":3.8848776600544044,"cm":[-1.9272777818102327e-15,-1.6653345369377348e-15,-3.1086244689504383e-15],"intensity":105.6603075405763,"type":"GC","origin":false,"forced":true,"remark":"","nSteps":4,"minStep":"100","maxStep":"250","steps":["100","150","200","250"],"group":"None","version":"v1.1.0"}],"interpreted":true,"name":"TG 58.2","coreAzi":272,"coreDip":40,"bedStrike":257,"bedDip":68,"data":[{"visible":false,"include":false,"step":"20","x":-75.65714285714286,"y":117.08571428571429,"z":104.97142857142858,"a95":1.1,"info":"\"\" at \"\""},{"visible":true,"include":true,"step":"100","x":-47.53333333333334,"y":74.08571428571429,"z":38.142857142857146,"a95":1.1,"info":"\"\" at \"\""},{"visible":true,"include":true,"step":"150","x":-24.285714285714285,"y":56.19047619047619,"z":20.571428571428573,"a95":1.4,"info":"\"\" at \"\""},{"visible":true,"include":true,"step":"200","x":-0.9904761904761905,"y":29.866666666666667,"z":1.6285714285714288,"a95":1.8,"info":"\"\" at \"\""},{"visible":true,"include":true,"step":"250","x":5.342857142857143,"y":17.314285714285717,"z":-6.0476190476190474,"a95":2.3,"info":"\"\" at \"\""},{"visible":true,"include":false,"step":"300","x":4.476190476190476,"y":12.028571428571428,"z":-4.533333333333333,"a95":4.1,"info":"\"\" at \"\""},{"visible":true,"include":false,"step":"330","x":1.5714285714285714,"y":9.466666666666667,"z":-4.038095238095238,"a95":5,"info":"\"\" at \"\""},{"visible":true,"include":false,"step":"360","x":-0.22857142857142856,"y":6.685714285714286,"z":-2.3238095238095235,"a95":6,"info":"\"\" at \"\""},{"visible":true,"include":false,"step":"390","x":-2.380952380952381,"y":3.3714285714285714,"z":-0.05714285714285714,"a95":12.5,"info":"\"\" at \"\""},{"visible":true,"include":false,"step":"420","x":-2.7904761904761903,"y":2.038095238095238,"z":-1.3904761904761904,"a95":11,"info":"\"\" at \"\""},{"visible":true,"include":false,"step":"450","x":-3.1333333333333333,"y":-0.5809523809523809,"z":0.2,"a95":12.4,"info":"\"\" at \"\""},{"visible":true,"include":false,"step":"480","x":-4.533333333333333,"y":4.3619047619047615,"z":-1.3047619047619048,"a95":8.3,"info":"\"\" at \"\""}]},{"version":"v1.1.0","exported":"2016-10-09T19:07:57.588Z","volume":10.5,"added":"2016-10-09T18:44:29.193Z","format":"Utrecht","demagType":"Unknown","strat":null,"patch":1.1,"GEO":[],"TECT":[],"interpreted":false,"name":"TG 59.1","coreAzi":325,"coreDip":80,"bedStrike":257,"bedDip":68,"data":[{"visible":false,"include":false,"step":"20","x":7.628571428571428,"y":11.314285714285713,"z":13.41904761904762,"a95":4.2,"info":"\"\" at \"\""},{"visible":true,"include":false,"step":"100","x":3.9428571428571426,"y":4.476190476190476,"z":7.895238095238096,"a95":18.7,"info":"\"\" at \"\""},{"visible":true,"include":false,"step":"150","x":5,"y":4.476190476190476,"z":7.3619047619047615,"a95":11,"info":"\"\" at \"\""},{"visible":true,"include":false,"step":"200","x":4.657142857142857,"y":3.857142857142857,"z":6.914285714285714,"a95":2.8,"info":"\"\" at \"\""},{"visible":true,"include":false,"step":"250","x":4.266666666666667,"y":3.9904761904761905,"z":5.419047619047619,"a95":4.7,"info":"\"\" at \"\""},{"visible":false,"include":false,"step":"300","x":3.8476190476190473,"y":3.2666666666666666,"z":2.9428571428571426,"a95":5.5,"info":"\"\" at \"\""},{"visible":true,"include":false,"step":"330","x":3.2571428571428576,"y":3.9523809523809526,"z":5.752380952380952,"a95":5,"info":"\"\" at \"\""},{"visible":true,"include":false,"step":"360","x":2.2666666666666666,"y":3.7809523809523813,"z":5.228571428571429,"a95":4.6,"info":"\"\" at \"\""},{"visible":true,"include":false,"step":"390","x":1.2190476190476192,"y":3.314285714285714,"z":4.9714285714285715,"a95":5.8,"info":"\"\" at \"\""},{"visible":true,"include":false,"step":"420","x":0.5809523809523809,"y":2.9047619047619047,"z":4.885714285714285,"a95":5.6,"info":"\"\" at \"\""},{"visible":true,"include":false,"step":"450","x":-0.29523809523809524,"y":1.6285714285714288,"z":4.0095238095238095,"a95":10.1,"info":"\"\" at \"\""},{"visible":true,"include":false,"step":"480","x":-0.6952380952380952,"y":2.3238095238095235,"z":3.457142857142857,"a95":9,"info":"\"\" at \"\""},{"visible":true,"include":false,"step":"510","x":-1.6285714285714288,"y":0.4666666666666667,"z":3.2,"a95":10.3,"info":"\"\" at \"\""},{"visible":true,"include":false,"step":"530","x":-1.3333333333333333,"y":0.29523809523809524,"z":1.8285714285714285,"a95":11.1,"info":"\"\" at \"\""}]},{"version":"v1.1.0","exported":"2016-10-09T19:07:57.588Z","volume":10.5,"added":"2016-10-09T18:44:29.193Z","format":"Utrecht","demagType":"Unknown","strat":null,"patch":1.1,"GEO":[],"TECT":[],"interpreted":false,"name":"TG 59.2","coreAzi":325,"coreDip":80,"bedStrike":257,"bedDip":68,"data":[{"visible":false,"include":false,"step":"20","x":14.99047619047619,"y":-2.0952380952380953,"z":8.219047619047618,"a95":2.3,"info":"\"\" at \"\""},{"visible":true,"include":true,"step":"100","x":12.380952380952381,"y":-3.2,"z":8.4,"a95":3.1,"info":"\"\" at \"\""},{"visible":true,"include":true,"step":"150","x":11.676190476190476,"y":-2.9047619047619047,"z":5.780952380952381,"a95":2.9,"info":"\"\" at \"\""},{"visible":true,"include":true,"step":"200","x":10.22857142857143,"y":-3.019047619047619,"z":4.333333333333333,"a95":3.6,"info":"\"\" at \"\""},{"visible":false,"include":false,"step":"250","x":9.238095238095237,"y":-3.5999999999999996,"z":0.8095238095238095,"a95":4,"info":"\"\" at \"\""},{"visible":true,"include":true,"step":"300","x":7.847619047619048,"y":-1.1619047619047618,"z":3.9809523809523806,"a95":4.1,"info":"\"\" at \"\""},{"visible":true,"include":true,"step":"330","x":5.752380952380952,"y":-1.5142857142857142,"z":4.847619047619047,"a95":5.4,"info":"\"\" at \"\""},{"visible":true,"include":false,"step":"360","x":5.580952380952381,"y":-0.6952380952380952,"z":4.914285714285715,"a95":4.9,"info":"\"\" at \"\""},{"visible":true,"include":false,"step":"390","x":2.4380952380952383,"y":0.17142857142857143,"z":5.980952380952381,"a95":7.5,"info":"\"\" at \"\""},{"visible":true,"include":false,"step":"420","x":1.6857142857142857,"y":1.2761904761904763,"z":4.590476190476191,"a95":8.1,"info":"\"\" at \"\""},{"visible":true,"include":false,"step":"450","x":0.11428571428571428,"y":1.3333333333333333,"z":6.276190476190477,"a95":7,"info":"\"\" at \"\""},{"visible":true,"include":false,"step":"480","x":1.9142857142857144,"y":0.8761904761904761,"z":6.857142857142857,"a95":5.7,"info":"\"\" at \"\""},{"visible":true,"include":false,"step":"510","x":-0.29523809523809524,"y":0.9904761904761905,"z":5.228571428571429,"a95":6.7,"info":"\"\" at \"\""},{"visible":false,"include":false,"step":"540","x":-2.380952380952381,"y":1.5714285714285714,"z":0.38095238095238093,"a95":13.5,"info":"\"\" at \"\""}]},{"version":"v1.1.0","exported":"2016-10-09T19:07:57.588Z","volume":10.5,"added":"2016-10-09T18:44:29.193Z","format":"Utrecht","demagType":"Unknown","strat":null,"patch":1.1,"GEO":[],"TECT":[],"interpreted":false,"name":"TG 60.1","coreAzi":317,"coreDip":67,"bedStrike":257,"bedDip":68,"data":[{"visible":true,"include":false,"step":"20","x":-17.61904761904762,"y":27.885714285714286,"z":29.333333333333332,"a95":3.4,"info":"\"\" at \"\""},{"visible":true,"include":false,"step":"100","x":-8.152380952380952,"y":15.523809523809524,"z":21.304761904761904,"a95":7.7,"info":"\"\" at \"\""},{"visible":true,"include":false,"step":"150","x":-5.257142857142857,"y":10.523809523809524,"z":13.676190476190476,"a95":8.5,"info":"\"\" at \"\""},{"visible":true,"include":false,"step":"200","x":-3.4000000000000004,"y":1.980952380952381,"z":4.6,"a95":6.2,"info":"\"\" at \"\""},{"visible":true,"include":false,"step":"250","x":-1.9333333333333333,"y":1.3333333333333333,"z":2.3904761904761904,"a95":13.2,"info":"\"\" at \"\""},{"visible":true,"include":false,"step":"300","x":-1.5428571428571427,"y":1.438095238095238,"z":-2.4476190476190474,"a95":12.9,"info":"\"\" at \"\""},{"visible":true,"include":false,"step":"330","x":-1.2761904761904763,"y":1.1047619047619048,"z":0.3238095238095238,"a95":21.2,"info":"\"\" at \"\""},{"visible":true,"include":false,"step":"360","x":-1.1047619047619048,"y":1.5714285714285714,"z":0.3238095238095238,"a95":19,"info":"\"\" at \"\""},{"visible":true,"include":false,"step":"390","x":-1.2190476190476192,"y":1.2190476190476192,"z":-0.38095238095238093,"a95":22.3,"info":"\"\" at \"\""},{"visible":true,"include":false,"step":"420","x":-1.4571428571428573,"y":0.9904761904761905,"z":1.4857142857142858,"a95":18.6,"info":"\"\" at \"\""}]}]
