# Supplementary material for: Paleomagnetic constraints on the timing and distribution of Cenozoic rotations in Central and Eastern Anatolia
Source: Copernicus journal article supplement (doi:10.5194/se-9-295-2018), 2018-03-21
Supplement: Supplementary file 2 [file se-9-295-2018-supplement.zip › se-2017-66_DATA_dir files/dir files Sivas/Inkonak_rev.dir]

[{"version":"v1.1.0","exported":"2016-10-11T12:28:25.708Z","info":"","GEO":[],"TECT":[],"interpreted":false,"name":"IN 001.1","coreAzi":115,"coreDip":30.5,"bedStrike":82,"bedDip":20,"data":[{"visible":false,"include":false,"step":"20","x":-2073.442857142857,"y":-2472.512380952381,"z":-27.778904761904762,"a95":"12.23091","info":"\"93-11-11\" at \"12:11\""},{"visible":true,"include":false,"step":"100","x":-2389.7685714285712,"y":-2047.9657142857143,"z":59.1994761904762,"a95":"9.821589","info":"\"93-11-11\" at \"16:09\""},{"visible":true,"include":false,"step":"140","x":-1761.0590476190475,"y":-1561.595238095238,"z":-191.7514285714286,"a95":"1.245241","info":"\"93-11-12\" at \"11:29\""},{"visible":true,"include":false,"step":"180","x":-1334.6257142857144,"y":-997.6361904761904,"z":-296.8093333333333,"a95":"1.538546","info":"\"93-11-12\" at \"14:10\""},{"visible":true,"include":false,"step":"220","x":-597.3828571428572,"y":-1051.017142857143,"z":-362.4199047619048,"a95":"3.192845","info":"\"93-11-15\" at \"11:36\""},{"visible":true,"include":true,"step":"260","x":-607.5619047619048,"y":-798.053619047619,"z":-311.1002857142857,"a95":"2.238646","info":"\"93-11-15\" at \"14:43\""},{"visible":true,"include":true,"step":"300","x":-472.72066666666666,"y":-610.4828571428571,"z":-239.05838095238093,"a95":"2.477501","info":"\"93-11-15\" at \"20:39\""},{"visible":true,"include":true,"step":"340","x":-432.5327619047619,"y":-485.9046666666666,"z":-246.18533333333332,"a95":"4.008864","info":"\"93-11-16\" at \"09:11\""},{"visible":true,"include":true,"step":"380","x":-416.0993333333333,"y":-366.3430476190476,"z":-211.2072380952381,"a95":"2.949192","info":"\"93-11-16\" at \"12:02\""},{"visible":true,"include":true,"step":"420","x":-398.3452380952381,"y":-322.5984761904762,"z":-205.4715238095238,"a95":"2.754497","info":"\"93-11-16\" at \"14:55\""},{"visible":true,"include":true,"step":"460","x":-317.66914285714284,"y":-361.6330476190476,"z":-252.86009523809523,"a95":"3.933305","info":"\"93-11-16\" at \"16:52\""},{"visible":true,"include":false,"step":"500","x":-119.48323809523811,"y":-288.084,"z":-196.83828571428572,"a95":"4.399237","info":"\"93-11-17\" at \"11:24\""},{"visible":true,"include":false,"step":"540","x":-147.83942857142858,"y":-200.51714285714283,"z":-161.7207619047619,"a95":"16.95891","info":"\"93-11-17\" at \"14:51\""},{"visible":true,"include":false,"step":"580","x":-129.33866666666668,"y":-139.68161904761905,"z":-154.9912380952381,"a95":"12.69973","info":"\"93-11-17\" at \"17:29\""},{"visible":true,"include":false,"step":"620","x":-90.43361904761905,"y":-70.2922,"z":-141.0554285714286,"a95":"5.105817","info":"\"93-11-18\" at \"11:57\""},{"visible":true,"include":false,"step":"660","x":14.5696,"y":-26.598285714285712,"z":-88.34015238095238,"a95":"5.88056","info":"\"93-11-18\" at \"14:55\""},{"visible":true,"include":false,"step":"700","x":-37.84920952380952,"y":49.75046666666667,"z":-46.58498095238095,"a95":"5.204055","info":"\"93-11-18\" at \"19:39\""}],"demagType":"Unknown","patch":1.1,"format":"Unknown","strat":null},{"version":"v1.1.0","exported":"2016-10-11T12:28:25.708Z","info":"","GEO":[],"TECT":[],"interpreted":false,"name":"IN 002.1","coreAzi":120,"coreDip":32,"bedStrike":82,"bedDip":20,"data":[{"visible":true,"include":false,"step":"20","x":-2747.1047619047617,"y":-2412.7561904761906,"z":516.3998095238096,"a95":"24.61143","info":"\"93-10-28\" at \"09:54\""},{"visible":true,"include":false,"step":"140","x":-2099.5104761904763,"y":-1797.4733333333334,"z":-1.999947619047619,"a95":"1.577409","info":"\"93-10-28\" at \"16:08\""},{"visible":true,"include":false,"step":"180","x":-1808.1304761904762,"y":-1152.3580952380953,"z":-64.53737142857142,"a95":"2.185803","info":"\"93-10-29\" at \"14:06\""},{"visible":true,"include":false,"step":"220","x":-1383.5704761904763,"y":-1000.3457142857142,"z":-263.3754285714286,"a95":"2.403575","info":"\"93-10-29\" at \"16:36\""},{"visible":true,"include":false,"step":"260","x":-1053.0895238095238,"y":-718.6872380952382,"z":-315.9498095238095,"a95":"2.344827","info":"\"93-11-15\" at \"14:44\""},{"visible":true,"include":true,"step":"300","x":-846.423238095238,"y":-506.8353333333333,"z":-249.14761904761906,"a95":"2.672682","info":"\"93-11-15\" at \"20:42\""},{"visible":true,"include":true,"step":"340","x":-678.6953333333333,"y":-456.02209523809523,"z":-305.9167619047619,"a95":"2.986926","info":"\"93-11-16\" at \"09:12\""},{"visible":true,"include":true,"step":"380","x":-652.0915238095238,"y":-370.52761904761905,"z":-232.40504761904762,"a95":"2.585072","info":"\"93-11-16\" at \"12:05\""},{"visible":true,"include":true,"step":"420","x":-641.5205714285714,"y":-347.1682857142857,"z":-242.05933333333334,"a95":"2.589569","info":"\"93-11-16\" at \"14:57\""},{"visible":true,"include":true,"step":"460","x":-607.907619047619,"y":-389.89666666666665,"z":-339.66390476190475,"a95":"2.497695","info":"\"93-11-16\" at \"16:53\""},{"visible":true,"include":true,"step":"500","x":-574.2040952380952,"y":-307.4498095238095,"z":-298.10942857142857,"a95":"2.812292","info":"\"93-11-17\" at \"11:25\""},{"visible":true,"include":false,"step":"540","x":-174.8078095238095,"y":-214.76790476190476,"z":-81.84757142857143,"a95":"122.5892","info":"\"93-11-17\" at \"14:52\""},{"visible":true,"include":false,"step":"580","x":-111.91371428571429,"y":-176.69695238095238,"z":-99.49638095238095,"a95":"154.5112","info":"\"93-11-17\" at \"17:29\""},{"visible":true,"include":false,"step":"620","x":-148.74285714285713,"y":-185.55438095238094,"z":-238.29923809523808,"a95":"3.208856","info":"\"93-11-18\" at \"11:58\""},{"visible":true,"include":false,"step":"660","x":-19.36426666666667,"y":-190.1147619047619,"z":-121.72352380952381,"a95":"3.362101","info":"\"93-11-18\" at \"14:56\""},{"visible":true,"include":false,"step":"700","x":-19.47575238095238,"y":-39.972361904761904,"z":-10.592952380952381,"a95":"12.35397","info":"\"93-11-18\" at \"19:40\""}],"demagType":"Unknown","patch":1.1,"format":"Unknown","strat":null},{"version":"v1.1.0","exported":"2016-10-11T12:28:25.709Z","info":"","GEO":[],"TECT":[],"interpreted":false,"name":"IN 003.1","coreAzi":72,"coreDip":64,"bedStrike":82,"bedDip":20,"data":[{"visible":true,"include":false,"step":"20","x":-260.3104761904762,"y":-254.16038095238096,"z":243.23828571428572,"a95":"1.262683","info":"\"94-02-07\" at \"10:57\""},{"visible":true,"include":false,"step":"100","x":-204.40628571428573,"y":-203.1557142857143,"z":161.11619047619047,"a95":"6.54335","info":"\"94-02-08\" at \"09:32\""},{"visible":false,"include":false,"step":"140","x":216.85619047619045,"y":144.60533333333333,"z":145.68238095238095,"a95":"1.890019","info":"\"94-02-09\" at \"10:05\""},{"visible":true,"include":false,"step":"180","x":-123.55790476190475,"y":-162.18009523809525,"z":59.73364761904762,"a95":"16.17306","info":"\"94-02-09\" at \"12:54\""},{"visible":true,"include":true,"step":"220","x":-127.25152380952382,"y":-112.79828571428573,"z":40.028552380952384,"a95":"1.614493","info":"\"94-02-10\" at \"13:40\""},{"visible":true,"include":true,"step":"260","x":-130.60104761904762,"y":-91.45785714285714,"z":34.21011428571429,"a95":"2.520108","info":"\"94-02-11\" at \"09:06\""},{"visible":true,"include":true,"step":"300","x":-118.02209523809523,"y":-70.29693333333333,"z":9.232901904761905,"a95":"2.48525","info":"\"94-02-11\" at \"16:02\""},{"visible":true,"include":true,"step":"340","x":-85.87617142857142,"y":-89.06171428571429,"z":25.596799999999998,"a95":"2.693548","info":"\"94-02-14\" at \"09:16\""},{"visible":true,"include":true,"step":"380","x":-57.16542857142857,"y":-72.29760952380953,"z":8.761409523809524,"a95":"6.114439","info":"\"94-02-14\" at \"12:59\""},{"visible":true,"include":true,"step":"420","x":-57.61767619047619,"y":-26.968809523809526,"z":17.610533333333333,"a95":"5.093199","info":"\"94-02-16\" at \"12:56\""},{"visible":true,"include":false,"step":"460","x":-39.44045714285714,"y":-31.92097142857143,"z":4.932730476190476,"a95":"4.927443","info":"\"94-02-16\" at \"15:44\""},{"visible":true,"include":false,"step":"500","x":-41.544895238095236,"y":-29.53954285714286,"z":8.303655238095237,"a95":"5.868449","info":"\"94-02-17\" at \"13:20\""},{"visible":true,"include":false,"step":"540","x":-48.41188571428571,"y":-28.47032380952381,"z":1.092309523809524,"a95":"4.808672","info":"\"94-02-18\" at \"09:50\""},{"visible":false,"include":false,"step":"580","x":-21.949390476190477,"y":-24.742866666666664,"z":-0.7199615238095238,"a95":"8.302626","info":"\"94-02-18\" at \"15:13\""},{"visible":false,"include":false,"step":"620","x":-125.09095238095237,"y":-40.27762857142857,"z":-2.4204104761904763,"a95":"5.691222","info":"\"94-02-21\" at \"09:41\""},{"visible":false,"include":false,"step":"660","x":-13.372142857142856,"y":-7.135633333333333,"z":10.675085714285714,"a95":"15.32481","info":"\"94-02-21\" at \"12:57\""},{"visible":false,"include":false,"step":"700","x":-10.932038095238095,"y":11.443333333333333,"z":14.804009523809524,"a95":"14.23856","info":"\"94-02-21\" at \"15:27\""}],"demagType":"Unknown","patch":1.1,"format":"Unknown","strat":null},{"version":"v1.1.0","exported":"2016-10-11T12:28:25.709Z","info":"","GEO":[],"TECT":[],"interpreted":false,"name":"IN 005.1","coreAzi":351,"coreDip":52,"bedStrike":82,"bedDip":20,"data":[{"visible":false,"include":false,"step":"20","x":-33.88229523809524,"y":20.52624761904762,"z":148.9007619047619,"a95":"3.744278","info":"\"94-02-07\" at \"10:58\""},{"visible":false,"include":false,"step":"100","x":-22.692314285714286,"y":14.753733333333333,"z":93.45436190476191,"a95":"2.642373","info":"\"94-02-08\" at \"09:33\""},{"visible":true,"include":false,"step":"140","x":-17.12875238095238,"y":14.210066666666668,"z":62.86218095238095,"a95":"8.326504","info":"\"94-02-09\" at \"10:05\""},{"visible":true,"include":false,"step":"180","x":-10.780438095238095,"y":0.4209875238095238,"z":17.348114285714285,"a95":"11.13635","info":"\"94-02-09\" at \"12:55\""},{"visible":true,"include":false,"step":"220","x":-7.622521904761904,"y":4.485366666666667,"z":0.06149862857142857,"a95":"17.90821","info":"\"94-02-10\" at \"13:41\""},{"visible":true,"include":false,"step":"260","x":-7.025034285714286,"y":-0.832098,"z":-5.019647619047619,"a95":"29.71714","info":"\"94-02-11\" at \"09:07\""},{"visible":true,"include":false,"step":"300","x":-10.156819047619049,"y":-2.0808885714285714,"z":-8.471457142857142,"a95":"11.13925","info":"\"94-02-11\" at \"16:03\""},{"visible":true,"include":false,"step":"340","x":-9.084039047619047,"y":-2.505952380952381,"z":0.2392732380952381,"a95":"16.33163","info":"\"94-02-14\" at \"09:17\""},{"visible":true,"include":false,"step":"380","x":-9.047235238095238,"y":-1.2353819047619048,"z":-6.058414285714285,"a95":"15.60392","info":"\"94-02-14\" at \"13:00\""},{"visible":false,"include":false,"step":"420","x":-3.6406057142857144,"y":-8.26762380952381,"z":-11.220657142857144,"a95":"14.61152","info":"\"94-02-16\" at \"12:56\""},{"visible":false,"include":false,"step":"460","x":-3.5997028571428573,"y":-1.1644885714285715,"z":1.8132695238095238,"a95":"45.76959","info":"\"94-02-16\" at \"15:45\""},{"visible":false,"include":false,"step":"500","x":-1.1415009523809525,"y":-2.905105714285714,"z":-5.53519619047619,"a95":"25.39074","info":"\"94-02-17\" at \"13:21\""},{"visible":false,"include":false,"step":"540","x":-7.50714,"y":-5.126358095238095,"z":13.53267619047619,"a95":"16.93428","info":"\"94-02-18\" at \"09:51\""}],"demagType":"Unknown","patch":1.1,"format":"Unknown","strat":null},{"version":"v1.1.0","exported":"2016-10-11T12:28:25.709Z","info":"","GEO":[],"TECT":[],"interpreted":false,"name":"IN 006.1","coreAzi":352,"coreDip":70,"bedStrike":82,"bedDip":20,"data":[{"visible":true,"include":false,"step":"20","x":3.8969304761904757,"y":0.705538,"z":13.310085714285714,"a95":"7.805641","info":"\"94-02-07\" at \"10:59\""},{"visible":true,"include":false,"step":"100","x":0.30812866666666666,"y":0.2580179047619048,"z":5.075879047619047,"a95":"14.07079","info":"\"94-02-08\" at \"09:34\""},{"visible":true,"include":false,"step":"140","x":0.6544030476190477,"y":0.2158,"z":3.774520952380952,"a95":"16.76613","info":"\"94-02-09\" at \"10:07\""},{"visible":true,"include":false,"step":"180","x":-0.20727561904761907,"y":-0.21476314285714285,"z":0.9791085714285714,"a95":"144.8981","info":"\"94-02-09\" at \"12:56\""},{"visible":true,"include":false,"step":"220","x":-0.22666447619047617,"y":0.20337495238095238,"z":0.5758785714285715,"a95":"62.78147","info":"\"94-02-10\" at \"13:42\""},{"visible":true,"include":false,"step":"260","x":-0.3354650476190476,"y":0.06557219047619048,"z":0.44492114285714285,"a95":"97.86157","info":"\"94-02-11\" at \"09:09\""},{"visible":true,"include":false,"step":"300","x":-1.7877609523809523,"y":-1.0084542857142857,"z":-1.1104495238095238,"a95":"18.4762","info":"\"94-02-11\" at \"16:04\""},{"visible":true,"include":false,"step":"340","x":-2.9330180952380953,"y":-2.924574285714286,"z":3.251864761904762,"a95":"12.10178","info":"\"94-02-14\" at \"09:18\""},{"visible":true,"include":false,"step":"380","x":0.10127495238095238,"y":-0.4086415238095238,"z":0.6220922857142858,"a95":"51.92553","info":"\"94-02-14\" at \"13:02\""},{"visible":true,"include":false,"step":"420","x":-0.3654509523809524,"y":-0.42389095238095237,"z":-0.8819600952380953,"a95":"72.52689","info":"\"94-02-16\" at \"12:57\""},{"visible":true,"include":false,"step":"460","x":-0.8663552380952382,"y":-1.1413438095238095,"z":1.102515238095238,"a95":"30.41981","info":"\"94-02-16\" at \"15:46\""},{"visible":true,"include":false,"step":"500","x":-0.2590948571428571,"y":-1.0650666666666666,"z":-0.5866245714285714,"a95":"51.61272","info":"\"94-02-17\" at \"13:22\""},{"visible":true,"include":false,"step":"540","x":2.99394,"y":-1.783504761904762,"z":5.075497142857143,"a95":"15.15425","info":"\"94-02-18\" at \"09:54\""}],"demagType":"Unknown","patch":1.1,"format":"Unknown","strat":null},{"version":"v1.1.0","exported":"2016-10-11T12:28:25.709Z","info":"","GEO":[{"dec":107.6877004430479,"inc":-9.883024187031483,"MAD":9.753707492085022,"cm":[4.440892098500626e-15,1.0325074129013956e-14,0],"intensity":558.5107566156595,"type":"GC","origin":false,"forced":true,"remark":"","nSteps":7,"minStep":"100","maxStep":"340","steps":["100","140","180","220","260","300","340"],"group":"None","version":"v1.1.0"}],"TECT":[{"dec":103.10023311637406,"inc":-17.89900876647969,"MAD":9.753707492085002,"cm":[1.7763568394002505e-15,1.5210055437364645e-14,5.329070518200751e-15],"intensity":558.5107566156595,"type":"GC","origin":false,"forced":true,"remark":"","nSteps":7,"minStep":"100","maxStep":"340","steps":["100","140","180","220","260","300","340"],"group":"None","version":"v1.1.0"}],"interpreted":true,"name":"IN 007.2","coreAzi":106,"coreDip":3,"bedStrike":82,"bedDip":20,"data":[{"visible":true,"include":false,"step":"20","x":261.1646666666667,"y":280.1244761904762,"z":-33.55262857142857,"a95":"5.106606","info":"\"94-02-07\" at \"10:59\""},{"visible":true,"include":true,"step":"100","x":299.0724761904762,"y":148.95590476190478,"z":-74.97872380952381,"a95":"2.005084","info":"\"94-02-08\" at \"09:36\""},{"visible":true,"include":true,"step":"140","x":283.902,"y":64.58386666666667,"z":-54.40127619047619,"a95":"1.960653","info":"\"94-02-09\" at \"10:08\""},{"visible":true,"include":true,"step":"180","x":257.68704761904763,"y":-25.725314285714283,"z":-78.857,"a95":"7.323977","info":"\"94-02-09\" at \"12:57\""},{"visible":true,"include":true,"step":"220","x":273.8540952380952,"y":-59.76302857142857,"z":-62.688428571428574,"a95":"5.170512","info":"\"94-02-10\" at \"13:43\""},{"visible":true,"include":true,"step":"260","x":241.47409523809523,"y":-99.9684761904762,"z":-48.51275238095238,"a95":"2.711879","info":"\"94-02-11\" at \"09:09\""},{"visible":true,"include":true,"step":"300","x":227.42590476190477,"y":-52.53243809523809,"z":-64.9388380952381,"a95":"11.62878","info":"\"94-02-11\" at \"16:05\""},{"visible":true,"include":true,"step":"340","x":242.7712380952381,"y":-64.17311428571428,"z":-30.622095238095238,"a95":"2.829491","info":"\"94-02-14\" at \"09:19\""},{"visible":true,"include":false,"step":"380","x":203.66723809523808,"y":-54.85071428571429,"z":-55.43601904761905,"a95":"2.587744","info":"\"94-02-14\" at \"13:03\""},{"visible":true,"include":false,"step":"420","x":203.21857142857144,"y":-66.00478095238095,"z":-81.0366,"a95":"10.12026","info":"\"94-02-16\" at \"12:58\""},{"visible":true,"include":false,"step":"460","x":202.55361904761907,"y":-61.197790476190484,"z":-33.1156,"a95":"3.508542","info":"\"94-02-16\" at \"15:47\""},{"visible":true,"include":false,"step":"500","x":201.3924761904762,"y":-67.86519047619048,"z":-35.06658095238095,"a95":"5.489883","info":"\"94-02-17\" at \"13:23\""},{"visible":true,"include":false,"step":"540","x":204.40066666666667,"y":-54.80788571428572,"z":-40.39888571428572,"a95":"7.023576","info":"\"94-02-18\" at \"09:55\""},{"visible":true,"include":false,"step":"580","x":185.16085714285714,"y":-24.773523809523812,"z":-17.398,"a95":"3.130934","info":"\"94-02-18\" at \"15:15\""},{"visible":true,"include":false,"step":"620","x":141.01847619047618,"y":-75.3822,"z":-38.1476,"a95":"2.151241","info":"\"94-02-21\" at \"09:42\""},{"visible":true,"include":false,"step":"660","x":149.6702857142857,"y":-45.8158,"z":-3.433802857142857,"a95":"11.65955","info":"\"94-02-21\" at \"12:58\""},{"visible":false,"include":false,"step":"700","x":13.4742,"y":-14.096504761904761,"z":17.3212,"a95":"17.04515","info":"\"94-02-21\" at \"15:28\""}],"demagType":"Unknown","patch":1.1,"format":"Unknown","strat":null},{"version":"v1.1.0","exported":"2016-10-11T12:28:25.709Z","info":"","GEO":[],"TECT":[],"interpreted":false,"name":"IN 008.2","coreAzi":94,"coreDip":40,"bedStrike":82,"bedDip":20,"data":[{"visible":true,"include":false,"step":"20","x":41.904714285714284,"y":42.5848380952381,"z":121.10085714285714,"a95":"4.298292","info":"\"94-02-07\" at \"11:00\""},{"visible":true,"include":false,"step":"100","x":11.905904761904761,"y":-3.926772380952381,"z":74.07121904761905,"a95":"3.199674","info":"\"94-02-08\" at \"09:36\""},{"visible":true,"include":false,"step":"140","x":-31.019523809523808,"y":-40.556714285714285,"z":44.56359047619048,"a95":"1.914315","info":"\"94-02-09\" at \"10:09\""},{"visible":true,"include":false,"step":"180","x":-48.87925714285715,"y":-73.2188,"z":19.411419047619045,"a95":"11.54753","info":"\"94-02-09\" at \"12:58\""},{"visible":true,"include":true,"step":"220","x":-61.61668571428571,"y":-56.21806666666667,"z":18.192485714285713,"a95":"1.293502","info":"\"94-02-10\" at \"13:44\""},{"visible":true,"include":true,"step":"260","x":-43.58255238095238,"y":-58.235533333333336,"z":13.743809523809524,"a95":"3.560338","info":"\"94-02-11\" at \"09:10\""},{"visible":true,"include":true,"step":"300","x":-46.57237142857143,"y":-36.45552380952381,"z":0.15536514285714287,"a95":"2.28207","info":"\"94-02-11\" at \"16:05\""},{"visible":true,"include":true,"step":"340","x":-31.39967619047619,"y":-41.22868571428572,"z":23.690733333333334,"a95":"3.907883","info":"\"94-02-14\" at \"09:20\""},{"visible":true,"include":true,"step":"380","x":-17.947742857142856,"y":-8.195013333333334,"z":-4.298149523809523,"a95":"5.159472","info":"\"94-02-14\" at \"13:03\""},{"visible":true,"include":true,"step":"420","x":-14.602142857142857,"y":-10.893961904761905,"z":-11.682790476190476,"a95":"9.217667","info":"\"94-02-16\" at \"12:59\""},{"visible":true,"include":false,"step":"460","x":-7.135226666666667,"y":-2.5924714285714283,"z":5.972931428571429,"a95":"17.70684","info":"\"94-02-16\" at \"15:48\""},{"visible":true,"include":false,"step":"500","x":-5.9672961904761905,"y":-7.1248885714285715,"z":-0.5161928571428571,"a95":"17.98746","info":"\"94-02-17\" at \"13:24\""},{"visible":true,"include":false,"step":"540","x":-2.852800952380952,"y":-1.5932647619047617,"z":6.804557142857143,"a95":"28.38261","info":"\"94-02-18\" at \"09:56\""},{"visible":true,"include":false,"step":"580","x":-1.1030933333333333,"y":2.0108895238095235,"z":8.723222857142858,"a95":"17.94028","info":"\"94-02-18\" at \"15:15\""},{"visible":true,"include":false,"step":"620","x":-9.75367619047619,"y":-1.6738771428571428,"z":-4.957240952380952,"a95":"18.9638","info":"\"94-02-21\" at \"09:43\""},{"visible":true,"include":false,"step":"660","x":-5.440345714285714,"y":-2.2288190476190475,"z":8.25618380952381,"a95":"21.15388","info":"\"94-02-21\" at \"12:59\""}],"demagType":"Unknown","patch":1.1,"format":"Unknown","strat":null},{"version":"v1.1.0","exported":"2016-10-11T12:28:25.709Z","info":"","GEO":[{"dec":184.97423456190788,"inc":-28.808546981793263,"MAD":12.33191413400675,"cm":[3.885780586188048e-16,1.582067810090848e-15,0],"intensity":20.844311121266667,"type":"dir","forced":true,"remark":"","origin":false,"nSteps":4,"minStep":"300","maxStep":"420","steps":["300","340","380","420"],"group":"None","version":"v1.1.0"}],"TECT":[{"dec":189.14824919887803,"inc":-48.14728250507796,"MAD":12.331914134006768,"cm":[1.0547118733938987e-15,7.216449660063518e-16,-2.220446049250313e-16],"intensity":20.844311121266667,"type":"dir","forced":true,"remark":"","origin":false,"nSteps":4,"minStep":"300","maxStep":"420","steps":["300","340","380","420"],"group":"None","version":"v1.1.0"}],"interpreted":true,"name":"IN 009.1","coreAzi":120,"coreDip":32,"bedStrike":82,"bedDip":20,"data":[{"visible":false,"include":false,"step":"20","x":-15.210742857142856,"y":-6.538671428571428,"z":-3.4451390476190475,"a95":"8.318121","info":"\"93-11-11\" at \"12:12\""},{"visible":false,"include":false,"step":"100","x":0.39857952380952383,"y":-11.882409523809523,"z":16.819590476190477,"a95":"2.839459","info":"\"93-11-11\" at \"16:10\""},{"visible":true,"include":false,"step":"140","x":5.883455238095238,"y":14.994219047619048,"z":9.350920952380951,"a95":"3.79988","info":"\"93-11-12\" at \"11:30\""},{"visible":true,"include":false,"step":"180","x":12.219704761904763,"y":15.177809523809524,"z":5.149712380952382,"a95":"16.91053","info":"\"93-11-12\" at \"14:11\""},{"visible":true,"include":false,"step":"220","x":11.404361904761904,"y":21.047342857142855,"z":1.833457142857143,"a95":"3.209874","info":"\"93-11-15\" at \"11:38\""},{"visible":true,"include":false,"step":"260","x":11.168133333333333,"y":20.899009523809525,"z":2.2089685714285716,"a95":"3.851057","info":"\"93-11-15\" at \"14:45\""},{"visible":true,"include":true,"step":"300","x":11.922685714285715,"y":12.689980952380953,"z":1.4479009523809523,"a95":"4.081243","info":"\"93-11-15\" at \"20:43\""},{"visible":true,"include":true,"step":"340","x":3.486060952380952,"y":9.776114285714286,"z":-1.4953304761904762,"a95":"8.663862","info":"\"93-11-16\" at \"09:13\""},{"visible":true,"include":true,"step":"380","x":4.67692,"y":5.962350476190476,"z":2.4683876190476193,"a95":"10.36321","info":"\"93-11-16\" at \"12:06\""},{"visible":true,"include":true,"step":"420","x":1.840364761904762,"y":2.9393266666666666,"z":-0.559930761904762,"a95":"122.905","info":"\"93-11-16\" at \"14:57\""},{"visible":true,"include":false,"step":"460","x":-0.4506162857142857,"y":5.832352380952381,"z":-3.8279400000000003,"a95":"13.10138","info":"\"93-11-16\" at \"16:54\""},{"visible":true,"include":false,"step":"500","x":1.625389523809524,"y":10.610533333333333,"z":-11.332504761904762,"a95":"24.60205","info":"\"93-11-17\" at \"11:26\""},{"visible":false,"include":false,"step":"540","x":-2.2770885714285716,"y":-0.6456195238095238,"z":-1.8709466666666665,"a95":"46.53698","info":"\"93-11-17\" at \"14:53\""}],"demagType":"Unknown","patch":1.1,"format":"Unknown","strat":null},{"version":"v1.1.0","exported":"2016-10-11T12:28:25.709Z","info":"","GEO":[{"dec":19.055880439473754,"inc":-1.0243246388607024,"MAD":6.877650953839365,"cm":[-7.771561172376096e-16,-1.1102230246251565e-16,0],"intensity":60.36903440944632,"type":"GC","origin":false,"forced":true,"remark":"","nSteps":6,"minStep":"100","maxStep":"340","steps":["100","140","220","260","300","340"],"group":"None","version":"v1.1.0"}],"TECT":[{"dec":200.35088437013889,"inc":-16.722889479636567,"MAD":6.877650953839369,"cm":[-5.9396931817445875e-15,-1.1102230246251565e-15,-2.220446049250313e-16],"intensity":60.369034409446314,"type":"GC","origin":false,"forced":true,"remark":"","nSteps":6,"minStep":"100","maxStep":"340","steps":["100","140","220","260","300","340"],"group":"None","version":"v1.1.0"}],"interpreted":true,"name":"IN 010.1","coreAzi":55,"coreDip":30,"bedStrike":82,"bedDip":20,"data":[{"visible":false,"include":false,"step":"20","x":-14.702142857142857,"y":52.889314285714285,"z":5.649513333333333,"a95":"3.857493","info":"\"93-11-11\" at \"12:14\""},{"visible":true,"include":true,"step":"100","x":-10.419695238095239,"y":39.954009523809525,"z":37.973933333333335,"a95":"3.581693","info":"\"93-11-11\" at \"16:11\""},{"visible":true,"include":true,"step":"140","x":24.781809523809525,"y":25.39741904761905,"z":12.68572380952381,"a95":"2.794954","info":"\"93-11-12\" at \"11:31\""},{"visible":false,"include":false,"step":"180","x":38.39136190476191,"y":10.093904761904762,"z":2.350702857142857,"a95":"3.539577","info":"\"93-11-12\" at \"14:13\""},{"visible":true,"include":true,"step":"220","x":36.13927619047619,"y":21.128780952380954,"z":-8.701090476190476,"a95":"2.852769","info":"\"93-11-15\" at \"11:38\""},{"visible":true,"include":true,"step":"260","x":34.69735238095238,"y":14.386104761904763,"z":-8.263972380952382,"a95":"4.345849","info":"\"93-11-15\" at \"14:46\""},{"visible":true,"include":true,"step":"300","x":28.991809523809522,"y":13.52262857142857,"z":-6.9838104761904765,"a95":"3.859635","info":"\"93-11-15\" at \"20:44\""},{"visible":true,"include":true,"step":"340","x":21.80095238095238,"y":9.160864761904762,"z":-4.768264761904762,"a95":"9.203588","info":"\"93-11-16\" at \"09:15\""},{"visible":true,"include":false,"step":"380","x":14.491657142857141,"y":4.960788571428571,"z":-1.8442104761904763,"a95":"9.426181","info":"\"93-11-16\" at \"12:07\""},{"visible":false,"include":false,"step":"420","x":9.453991428571427,"y":-0.9882752380952381,"z":-0.9829009523809524,"a95":"23.38407","info":"\"93-11-16\" at \"14:59\""},{"visible":true,"include":false,"step":"460","x":5.585610476190476,"y":6.536949523809524,"z":-6.490215238095239,"a95":"13.55393","info":"\"93-11-16\" at \"16:54\""},{"visible":true,"include":false,"step":"500","x":1.0974790476190475,"y":5.153071428571429,"z":-4.631770476190476,"a95":"37.85771","info":"\"93-11-17\" at \"11:27\""},{"visible":true,"include":false,"step":"540","x":-3.499545714285714,"y":-1.4131304761904762,"z":-3.3282866666666666,"a95":"32.56553","info":"\"93-11-17\" at \"14:54\""}],"demagType":"Unknown","patch":1.1,"format":"Unknown","strat":null},{"version":"v1.1.0","exported":"2016-10-11T12:28:25.710Z","info":"","GEO":[{"dec":168.8585085469881,"inc":-16.999935546865323,"MAD":15.042403118142072,"cm":[1.1102230246251565e-16,1.6046192152785466e-15,0],"intensity":8.88777931380238,"type":"dir","forced":true,"remark":"","origin":false,"nSteps":4,"minStep":"220","maxStep":"340","steps":["220","260","300","340"],"group":"None","version":"v1.1.0"}],"TECT":[{"dec":168.23923327428633,"inc":-36.96468150989719,"MAD":15.042403118142103,"cm":[4.440892098500626e-16,1.813653394133752e-15,-5.551115123125783e-17],"intensity":8.887779313802382,"type":"dir","forced":true,"remark":"","origin":false,"nSteps":4,"minStep":"220","maxStep":"340","steps":["220","260","300","340"],"group":"None","version":"v1.1.0"}],"interpreted":true,"name":"IN 011.1","coreAzi":38,"coreDip":41,"bedStrike":82,"bedDip":20,"data":[{"visible":false,"include":false,"step":"20","x":-18.382314285714283,"y":-0.8204486666666666,"z":56.19965714285714,"a95":"2.043486","info":"\"93-10-28\" at \"10:00\""},{"visible":true,"include":false,"step":"140","x":-3.849865714285714,"y":5.506101904761905,"z":5.313287619047619,"a95":"10.23935","info":"\"93-10-28\" at \"16:10\""},{"visible":true,"include":false,"step":"180","x":-3.3090561904761904,"y":7.100549523809524,"z":-3.153390476190476,"a95":"11.23135","info":"\"93-10-29\" at \"14:07\""},{"visible":true,"include":true,"step":"220","x":0.5998506666666666,"y":5.577637142857143,"z":-4.024157142857143,"a95":"47.89827","info":"\"93-10-29\" at \"16:39\""},{"visible":true,"include":true,"step":"260","x":-2.3315876190476192,"y":6.274639047619047,"z":-5.680646666666667,"a95":"9.279719","info":"\"93-11-15\" at \"14:47\""},{"visible":true,"include":true,"step":"300","x":-2.633784761904762,"y":2.704342857142857,"z":-3.663599047619048,"a95":"22.10378","info":"\"93-11-15\" at \"20:45\""},{"visible":true,"include":true,"step":"340","x":0.8099979047619047,"y":0.8230647619047619,"z":-1.9788390476190476,"a95":"66.57452","info":"\"93-11-16\" at \"09:18\""},{"visible":true,"include":false,"step":"380","x":-0.2775993333333333,"y":1.5019742857142857,"z":-0.2774269523809524,"a95":"83.21897","info":"\"93-11-16\" at \"12:08\""},{"visible":true,"include":false,"step":"420","x":0.9858961904761905,"y":0.5841684761904762,"z":-2.2828961904761904,"a95":"67.11402","info":"\"93-11-16\" at \"15:00\""},{"visible":true,"include":false,"step":"460","x":-0.5085348571428572,"y":6.3347999999999995,"z":-6.601074285714286,"a95":"14.14143","info":"\"93-11-16\" at \"16:55\""},{"visible":true,"include":false,"step":"500","x":6.685655238095238,"y":3.872762857142857,"z":-14.094466666666666,"a95":"33.42682","info":"\"93-11-17\" at \"11:28\""}],"demagType":"Unknown","patch":1.1,"format":"Unknown","strat":null},{"version":"v1.1.0","exported":"2016-10-11T12:28:25.710Z","info":"","GEO":[],"TECT":[],"interpreted":false,"name":"IN 012.1","coreAzi":31,"coreDip":34,"bedStrike":82,"bedDip":20,"data":[{"visible":true,"include":false,"step":"20","x":-9.894085714285714,"y":1.3129828571428572,"z":10.101476190476191,"a95":"5.52813","info":"\"93-11-11\" at \"12:17\""},{"visible":true,"include":false,"step":"100","x":-6.447432380952382,"y":-0.03931383809523809,"z":12.88489523809524,"a95":"2.859776","info":"\"93-11-11\" at \"16:12\""},{"visible":true,"include":false,"step":"140","x":-4.969495238095238,"y":1.4847819047619049,"z":5.444338095238096,"a95":"8.402782","info":"\"93-11-12\" at \"11:32\""},{"visible":true,"include":false,"step":"180","x":-1.5754276190476189,"y":2.21664,"z":4.933637142857143,"a95":"8.808981","info":"\"93-11-12\" at \"14:14\""},{"visible":true,"include":false,"step":"220","x":-2.4448885714285717,"y":1.9255609523809523,"z":3.2680961904761907,"a95":"14.13833","info":"\"93-11-15\" at \"11:41\""},{"visible":true,"include":false,"step":"260","x":-1.493812380952381,"y":2.1161180952380954,"z":1.850244761904762,"a95":"12.82164","info":"\"93-11-15\" at \"14:48\""},{"visible":true,"include":false,"step":"300","x":-0.4073417142857143,"y":2.253547619047619,"z":2.361466666666667,"a95":"16.81489","info":"\"93-11-15\" at \"20:46\""},{"visible":true,"include":false,"step":"340","x":-0.860028,"y":2.6254980952380955,"z":1.1103285714285716,"a95":"21.30218","info":"\"93-11-16\" at \"09:20\""},{"visible":true,"include":false,"step":"380","x":-0.47055695238095235,"y":1.2386085714285715,"z":2.0245438095238093,"a95":"24.7497","info":"\"93-11-16\" at \"12:09\""},{"visible":true,"include":false,"step":"420","x":-0.9568209523809524,"y":0.6011088571428571,"z":1.39356,"a95":"59.26754","info":"\"93-11-16\" at \"15:00\""},{"visible":true,"include":false,"step":"460","x":-1.6716571428571427,"y":0.5159655238095239,"z":0.7272677142857142,"a95":"28.78809","info":"\"93-11-16\" at \"16:56\""},{"visible":true,"include":false,"step":"500","x":0.5384375238095238,"y":-1.2308438095238095,"z":-1.4469695238095237,"a95":"155.7834","info":"\"93-11-17\" at \"11:31\""}],"demagType":"Unknown","patch":1.1,"format":"Unknown","strat":null},{"version":"v1.1.0","exported":"2016-10-11T12:28:25.710Z","info":"","GEO":[{"dec":352.8257655378336,"inc":-16.056520183802682,"MAD":12.237320349362177,"cm":[-9.769962616701378e-15,7.105427357601002e-15,0],"intensity":486.8069130232628,"type":"GC","origin":false,"forced":true,"remark":"","nSteps":9,"minStep":"180","maxStep":"500","steps":["180","220","260","300","340","380","420","460","500"],"group":"None","version":"v1.1.0"}],"TECT":[{"dec":172.79543129321712,"inc":-3.9415193806786673,"MAD":12.237320349362191,"cm":[-1.3877787807814457e-14,3.552713678800501e-15,-5.329070518200751e-15],"intensity":486.80691302326284,"type":"GC","origin":false,"forced":true,"remark":"","nSteps":9,"minStep":"180","maxStep":"500","steps":["180","220","260","300","340","380","420","460","500"],"group":"None","version":"v1.1.0"}],"interpreted":true,"name":"IN 013.1","coreAzi":61,"coreDip":14,"bedStrike":82,"bedDip":20,"data":[{"visible":false,"include":false,"step":"20","x":-980.3038095238096,"y":-424.68752380952384,"z":779.7793333333333,"a95":"2.769321","info":"\"93-10-28\" at \"10:03\""},{"visible":true,"include":false,"step":"140","x":188.42295238095238,"y":91.93720952380951,"z":53.6222,"a95":"10.25444","info":"\"93-10-28\" at \"16:12\""},{"visible":true,"include":true,"step":"180","x":266.7644761904762,"y":84.21358095238095,"z":-76.9023238095238,"a95":"8.142619","info":"\"93-10-29\" at \"14:09\""},{"visible":true,"include":true,"step":"220","x":264.86228571428575,"y":59.8527619047619,"z":-92.25113333333333,"a95":"8.430749","info":"\"93-10-29\" at \"16:40\""},{"visible":true,"include":true,"step":"260","x":220.7394285714286,"y":75.77572380952381,"z":-137.28485714285713,"a95":"8.292555","info":"\"93-11-15\" at \"14:49\""},{"visible":true,"include":true,"step":"300","x":185.06209523809525,"y":21.939885714285715,"z":-92.67370476190476,"a95":"10.71301","info":"\"93-11-15\" at \"20:47\""},{"visible":true,"include":true,"step":"340","x":145.75171428571429,"y":1.8594514285714285,"z":-182.81409523809523,"a95":"9.222228","info":"\"93-11-16\" at \"09:21\""},{"visible":true,"include":true,"step":"380","x":131.03380952380954,"y":-20.2248,"z":-177.292,"a95":"9.262701","info":"\"93-11-16\" at \"12:10\""},{"visible":true,"include":true,"step":"420","x":143.56342857142857,"y":16.677857142857142,"z":-230.36361904761907,"a95":"6.678777","info":"\"93-11-16\" at \"15:02\""},{"visible":true,"include":true,"step":"460","x":119.05914285714286,"y":-43.6402,"z":-212.22009523809524,"a95":"6.837094","info":"\"93-11-16\" at \"16:57\""},{"visible":true,"include":true,"step":"500","x":105.95095238095237,"y":-27.26694285714286,"z":-231.02828571428572,"a95":"5.66322","info":"\"93-11-17\" at \"11:33\""},{"visible":true,"include":false,"step":"540","x":95.62266666666667,"y":-72.43717142857142,"z":-166.51847619047618,"a95":"8.458989","info":"\"93-11-17\" at \"14:56\""},{"visible":true,"include":false,"step":"580","x":-73.81661904761904,"y":-47.762209523809524,"z":-107.56914285714286,"a95":"10.21533","info":"\"93-11-17\" at \"17:30\""},{"visible":true,"include":false,"step":"620","x":-50.83068571428572,"y":-120.89657142857143,"z":-60.37546666666667,"a95":"7.818206","info":"\"93-11-18\" at \"11:59\""}],"demagType":"Unknown","patch":1.1,"format":"Unknown","strat":null},{"version":"v1.1.0","exported":"2016-10-11T12:28:25.710Z","info":"","GEO":[],"TECT":[],"interpreted":false,"name":"IN 014.1","coreAzi":88,"coreDip":57,"bedStrike":82,"bedDip":20,"data":[{"visible":true,"include":false,"step":"20","x":-1695.4333333333332,"y":-3536.7457142857143,"z":3375.4923809523807,"a95":"1.460169","info":"\"93-11-11\" at \"12:19\""},{"visible":true,"include":false,"step":"100","x":-971.6657142857142,"y":-3273.5542857142855,"z":3146.7790476190476,"a95":"2.763974","info":"\"93-11-11\" at \"16:14\""},{"visible":true,"include":false,"step":"140","x":118.88523809523811,"y":-2077.4523809523807,"z":1918.3457142857144,"a95":"2.239551","info":"\"93-11-12\" at \"11:33\""},{"visible":true,"include":false,"step":"180","x":-517.7083809523809,"y":-1405.8095238095239,"z":1386.5342857142857,"a95":"1.286402","info":"\"93-11-12\" at \"14:16\""},{"visible":true,"include":true,"step":"220","x":-103.02552380952382,"y":-1110.1142857142859,"z":947.6354285714286,"a95":"1.517589","info":"\"93-11-15\" at \"11:42\""},{"visible":true,"include":true,"step":"260","x":113.97533333333334,"y":-775.3498095238095,"z":672.3539047619048,"a95":"2.144333","info":"\"93-11-15\" at \"14:50\""},{"visible":true,"include":true,"step":"300","x":18.190619047619048,"y":-552.658761904762,"z":498.7059047619048,"a95":"2.47278","info":"\"93-11-15\" at \"20:48\""},{"visible":true,"include":true,"step":"340","x":25.273142857142858,"y":-451.72333333333336,"z":330.9893333333333,"a95":"2.886414","info":"\"93-11-16\" at \"09:22\""},{"visible":true,"include":true,"step":"380","x":47.715161904761906,"y":-420.1286666666666,"z":295.9190476190476,"a95":"2.905342","info":"\"93-11-16\" at \"12:11\""},{"visible":true,"include":true,"step":"420","x":39.71021904761905,"y":-351.4217142857143,"z":222.50885714285712,"a95":"3.215153","info":"\"93-11-16\" at \"15:02\""},{"visible":true,"include":true,"step":"460","x":25.488419047619047,"y":-336.26209523809524,"z":171.50619047619048,"a95":"4.729355","info":"\"93-11-16\" at \"16:57\""},{"visible":true,"include":true,"step":"500","x":13.820780952380952,"y":-297.8701904761905,"z":167.54466666666667,"a95":"4.471881","info":"\"93-11-17\" at \"11:34\""},{"visible":true,"include":true,"step":"540","x":67.34780952380953,"y":-210.26590476190475,"z":155.30828571428572,"a95":"5.390898","info":"\"93-11-17\" at \"14:57\""},{"visible":true,"include":true,"step":"580","x":-53.64990476190476,"y":-42.34498095238095,"z":40.51399047619048,"a95":"14.5355","info":"\"93-11-17\" at \"17:31\""},{"visible":true,"include":false,"step":"620","x":-23.51730476190476,"y":-43.58094285714286,"z":-90.14910476190477,"a95":"8.858821","info":"\"93-11-18\" at \"12:01\""},{"visible":true,"include":false,"step":"660","x":-22.352942857142857,"y":-13.675209523809523,"z":37.69560952380952,"a95":"15.45161","info":"\"93-11-18\" at \"14:57\""},{"visible":true,"include":false,"step":"700","x":-23.117266666666666,"y":-28.191533333333332,"z":14.5506,"a95":"13.8888","info":"\"93-11-18\" at \"19:42\""}],"demagType":"Unknown","patch":1.1,"format":"Unknown","strat":null},{"version":"v1.1.0","exported":"2016-10-11T12:28:25.710Z","info":"","GEO":[{"dec":142.23130350745737,"inc":-6.9589872292225206,"MAD":14.205143402468812,"cm":[-2.0872192862952943e-14,-1.6209256159527285e-14,0],"intensity":247.63319966510943,"type":"dir","forced":true,"remark":"","origin":false,"nSteps":7,"minStep":"460","maxStep":"700","steps":["460","500","540","580","620","660","700"],"group":"None","version":"v1.1.0"}],"TECT":[{"dec":139.3189731908086,"inc":-24.11384544104312,"MAD":14.205143402468815,"cm":[-1.3697376566312869e-14,-1.6209256159527285e-14,-7.993605777301127e-15],"intensity":247.6331996651094,"type":"dir","forced":true,"remark":"","origin":false,"nSteps":7,"minStep":"460","maxStep":"700","steps":["460","500","540","580","620","660","700"],"group":"None","version":"v1.1.0"}],"interpreted":true,"name":"IN 015.1","coreAzi":50,"coreDip":84,"bedStrike":82,"bedDip":20,"data":[{"visible":true,"include":false,"step":"20","x":117.0777142857143,"y":363.9770476190476,"z":307.95009523809523,"a95":"3.780262","info":"\"93-11-11\" at \"12:21\""},{"visible":true,"include":false,"step":"100","x":107.02657142857143,"y":336.322,"z":279.8002857142857,"a95":"3.897896","info":"\"93-11-11\" at \"16:15\""},{"visible":true,"include":false,"step":"140","x":22.959533333333333,"y":345.1697142857143,"z":154.64190476190475,"a95":"1.486861","info":"\"93-11-12\" at \"11:34\""},{"visible":true,"include":false,"step":"180","x":131.67714285714285,"y":330.7961904761905,"z":64.79141904761904,"a95":"1.529693","info":"\"93-11-12\" at \"14:16\""},{"visible":false,"include":false,"step":"220","x":336.21590476190477,"y":233.82333333333332,"z":26.675295238095238,"a95":"4.212393","info":"\"93-11-15\" at \"11:44\""},{"visible":true,"include":false,"step":"260","x":-18.458114285714288,"y":317.93942857142855,"z":-2.1775790476190475,"a95":"2.459472","info":"\"93-11-15\" at \"14:51\""},{"visible":true,"include":false,"step":"300","x":-16.368485714285715,"y":299.22038095238094,"z":-3.728482857142857,"a95":"2.299877","info":"\"93-11-15\" at \"20:49\""},{"visible":true,"include":false,"step":"340","x":-21.48684761904762,"y":278.8682857142857,"z":-14.134295238095238,"a95":"1.79333","info":"\"93-11-16\" at \"09:23\""},{"visible":true,"include":false,"step":"380","x":-63.735504761904764,"y":263.85838095238097,"z":-3.2923685714285718,"a95":"2.005255","info":"\"93-11-16\" at \"12:12\""},{"visible":true,"include":false,"step":"420","x":25.343190476190475,"y":255.81866666666667,"z":-18.959666666666667,"a95":"1.405147","info":"\"93-11-16\" at \"15:04\""},{"visible":true,"include":true,"step":"460","x":-4.421433333333333,"y":243.9282857142857,"z":-29.294228571428572,"a95":"1.79059","info":"\"93-11-16\" at \"16:58\""},{"visible":true,"include":true,"step":"500","x":70.86390476190476,"y":223.4605714285714,"z":-15.542771428571427,"a95":"2.081041","info":"\"93-11-17\" at \"11:35\""},{"visible":true,"include":true,"step":"540","x":-0.3215655238095238,"y":209.68885714285716,"z":-13.19927619047619,"a95":"1.989072","info":"\"93-11-17\" at \"14:58\""},{"visible":true,"include":true,"step":"580","x":-31.08452380952381,"y":164.48828571428572,"z":-17.148533333333333,"a95":"17.7401","info":"\"93-11-17\" at \"17:31\""},{"visible":true,"include":true,"step":"620","x":-83.7850380952381,"y":162.01704761904762,"z":-53.65765714285714,"a95":"3.335991","info":"\"93-11-18\" at \"12:02\""},{"visible":true,"include":true,"step":"660","x":-7.798325714285714,"y":139.14695238095237,"z":-22.89945714285714,"a95":"3.058333","info":"\"93-11-18\" at \"14:58\""},{"visible":true,"include":true,"step":"700","x":-9.041032380952382,"y":-0.7259118095238095,"z":-15.355171428571428,"a95":"44.13195","info":"\"93-11-18\" at \"19:43\""}],"demagType":"Unknown","patch":1.1,"format":"Unknown","strat":null},{"version":"v1.1.0","exported":"2016-10-11T12:28:25.710Z","info":"","GEO":[{"dec":127.27631573519204,"inc":-16.96039502057313,"MAD":7.646144354916099,"cm":[-1.9456658506555868e-14,-1.4210854715202004e-14,0],"intensity":208.50855306533722,"type":"dir","forced":true,"remark":"","origin":false,"nSteps":6,"minStep":"460","maxStep":"700","steps":["460","500","580","620","660","700"],"group":"None","version":"v1.1.0"}],"TECT":[{"dec":120.67973000531913,"inc":-30.434785462648197,"MAD":7.646144354916095,"cm":[-6.938893903907228e-15,-1.0658141036401503e-14,-8.104628079763643e-15],"intensity":208.50855306533725,"type":"dir","forced":true,"remark":"","origin":false,"nSteps":6,"minStep":"460","maxStep":"700","steps":["460","500","580","620","660","700"],"group":"None","version":"v1.1.0"}],"interpreted":true,"name":"IN 016.1","coreAzi":30,"coreDip":85,"bedStrike":82,"bedDip":20,"data":[{"visible":false,"include":false,"step":"20","x":-36.90797142857143,"y":296.50476190476195,"z":95.06025714285714,"a95":"4.655964","info":"\"93-11-11\" at \"12:23\""},{"visible":true,"include":false,"step":"100","x":20.788838095238095,"y":286.668,"z":67.32749523809524,"a95":"1.757193","info":"\"93-11-11\" at \"16:17\""},{"visible":true,"include":false,"step":"140","x":-44.86482857142857,"y":275.850380952381,"z":1.2198809523809524,"a95":"1.750609","info":"\"93-11-12\" at \"11:35\""},{"visible":true,"include":false,"step":"180","x":-67.93900952380952,"y":276.68076190476194,"z":-36.55291428571429,"a95":"1.578842","info":"\"93-11-12\" at \"14:17\""},{"visible":true,"include":false,"step":"220","x":-112.52828571428572,"y":261.9592380952381,"z":-56.97717142857143,"a95":"3.612903","info":"\"93-11-15\" at \"11:46\""},{"visible":true,"include":false,"step":"260","x":-112.24780952380954,"y":240.47590476190476,"z":-52.111466666666665,"a95":"4.074556","info":"\"93-11-15\" at \"14:52\""},{"visible":true,"include":false,"step":"300","x":-113.72609523809524,"y":236.46219047619047,"z":-61.42615238095238,"a95":"2.086992","info":"\"93-11-15\" at \"20:50\""},{"visible":true,"include":false,"step":"340","x":-50.285180952380955,"y":235.64104761904764,"z":-59.38570476190476,"a95":"2.035161","info":"\"93-11-16\" at \"09:24\""},{"visible":true,"include":false,"step":"380","x":-81.59064761904763,"y":219.15009523809525,"z":-50.24350476190476,"a95":"2.348023","info":"\"93-11-16\" at \"12:13\""},{"visible":true,"include":false,"step":"420","x":-67.13427619047619,"y":217.22057142857142,"z":-58.434019047619046,"a95":"2.215287","info":"\"93-11-16\" at \"15:05\""},{"visible":true,"include":true,"step":"460","x":-6.0563714285714285,"y":208.12114285714284,"z":-61.99613333333333,"a95":"6.110213","info":"\"93-11-16\" at \"16:59\""},{"visible":true,"include":true,"step":"500","x":-4.147324761904762,"y":201.0790476190476,"z":-64.12122857142857,"a95":"1.514027","info":"\"93-11-17\" at \"11:36\""},{"visible":false,"include":false,"step":"540","x":47.602619047619044,"y":180.89704761904764,"z":-51.5015619047619,"a95":"3.554859","info":"\"93-11-17\" at \"14:59\""},{"visible":true,"include":true,"step":"580","x":-5.221745714285714,"y":158.90104761904763,"z":-55.663561904761906,"a95":"15.61695","info":"\"93-11-17\" at \"17:32\""},{"visible":true,"include":true,"step":"620","x":-54.39508571428572,"y":135.6404761904762,"z":-53.07615238095239,"a95":"3.134319","info":"\"93-11-18\" at \"12:03\""},{"visible":true,"include":true,"step":"660","x":-30.077980952380955,"y":134.4232380952381,"z":-32.38357142857143,"a95":"2.17076","info":"\"93-11-18\" at \"14:59\""},{"visible":true,"include":true,"step":"700","x":-3.2620057142857144,"y":-12.623914285714285,"z":-9.905314285714285,"a95":"14.13365","info":"\"93-11-18\" at \"19:44\""}],"demagType":"Unknown","patch":1.1,"format":"Unknown","strat":null},{"version":"v1.1.0","exported":"2016-10-11T12:28:25.711Z","info":"","GEO":[{"dec":0.2991922117710146,"inc":-9.941324878629537,"MAD":1.022612739841321,"cm":[-1.0302869668521453e-13,0,0],"intensity":1121.1114099959234,"type":"GC","origin":false,"forced":true,"remark":"","nSteps":4,"minStep":"100","maxStep":"220","steps":["100","140","180","220"],"group":"None","version":"v1.1.0"}],"TECT":[{"dec":180.29695596236817,"inc":-9.853449741509397,"MAD":1.0226127398412876,"cm":[3.219646771412954e-14,-1.4210854715202004e-14,5.773159728050814e-15],"intensity":1121.1114099959234,"type":"GC","origin":false,"forced":true,"remark":"","nSteps":4,"minStep":"100","maxStep":"220","steps":["100","140","180","220"],"group":"None","version":"v1.1.0"}],"interpreted":true,"name":"IN 017.1","coreAzi":32,"coreDip":71,"bedStrike":82,"bedDip":20,"data":[{"visible":true,"include":false,"step":"20","x":-366.6321904761905,"y":-73.84951428571428,"z":1266.404761904762,"a95":"2.807041","info":"\"94-02-07\" at \"11:01\""},{"visible":true,"include":true,"step":"100","x":-281.882,"y":-301.7164761904762,"z":761.0155238095238,"a95":"2.347643","info":"\"94-02-08\" at \"09:39\""},{"visible":true,"include":true,"step":"140","x":-304.9650476190476,"y":-464.612380952381,"z":150.93780952380953,"a95":"3.262817","info":"\"94-02-09\" at \"10:10\""},{"visible":true,"include":true,"step":"180","x":-287.60304761904763,"y":-513.6108571428571,"z":-126.96952380952382,"a95":"9.849669","info":"\"94-02-09\" at \"12:59\""},{"visible":true,"include":true,"step":"220","x":-266.0770476190476,"y":-451.123619047619,"z":-136.62504761904762,"a95":"3.240291","info":"\"94-02-10\" at \"13:44\""},{"visible":true,"include":false,"step":"260","x":-100.66619047619047,"y":-386.3184761904762,"z":-101.70342857142857,"a95":"4.187405","info":"\"94-02-11\" at \"09:11\""},{"visible":true,"include":false,"step":"300","x":-224.7673333333333,"y":-224.14533333333333,"z":-113.11809523809524,"a95":"10.39975","info":"\"94-02-11\" at \"16:06\""},{"visible":true,"include":false,"step":"340","x":-152.63733333333334,"y":-259.7038095238095,"z":-67.15162857142857,"a95":"4.32385","info":"\"94-02-14\" at \"09:21\""},{"visible":true,"include":false,"step":"380","x":-175.46409523809524,"y":-224.51161904761904,"z":-79.3294761904762,"a95":"4.333261","info":"\"94-02-14\" at \"13:04\""},{"visible":true,"include":false,"step":"420","x":-121.25171428571429,"y":-227.27380952380952,"z":-129.33371428571428,"a95":"10.0059","info":"\"94-02-16\" at \"12:59\""},{"visible":true,"include":false,"step":"460","x":-117.98409523809525,"y":-200.64580952380953,"z":-48.15117142857143,"a95":"4.876665","info":"\"94-02-16\" at \"15:49\""},{"visible":true,"include":false,"step":"500","x":-97.91704761904761,"y":-209.17952380952383,"z":-79.75525714285715,"a95":"4.440348","info":"\"94-02-17\" at \"13:25\""},{"visible":true,"include":false,"step":"540","x":-98.42933333333333,"y":-197.08971428571428,"z":-30.756638095238095,"a95":"4.704951","info":"\"94-02-18\" at \"09:57\""},{"visible":true,"include":false,"step":"580","x":-62.04757142857143,"y":-156.57133333333334,"z":-21.974295238095237,"a95":"7.255016","info":"\"94-02-18\" at \"15:16\""},{"visible":true,"include":false,"step":"620","x":-31.19304761904762,"y":-129.094,"z":-36.837761904761905,"a95":"4.480659","info":"\"94-02-21\" at \"09:44\""},{"visible":true,"include":false,"step":"660","x":-42.73005714285714,"y":-85.57089523809525,"z":-15.083638095238095,"a95":"5.407341","info":"\"94-02-21\" at \"12:59\""},{"visible":true,"include":false,"step":"700","x":5.957459047619047,"y":-29.562428571428573,"z":-21.775504761904763,"a95":"7.764223","info":"\"94-02-21\" at \"15:29\""}],"demagType":"Unknown","patch":1.1,"format":"Unknown","strat":null},{"version":"v1.1.0","exported":"2016-10-11T12:28:25.711Z","info":"","GEO":[{"dec":72.14463044658606,"inc":-21.046482761344663,"MAD":5.838560998598124,"cm":[-9.237055564881302e-14,-1.0658141036401503e-13,0],"intensity":1639.8586859748896,"type":"GC","origin":false,"forced":true,"remark":"","nSteps":5,"minStep":"140","maxStep":"380","steps":["140","180","300","340","380"],"group":"None","version":"v1.1.0"}],"TECT":[{"dec":65.46767001061772,"inc":-16.429292133784955,"MAD":5.838560998597752,"cm":[-1.4210854715202004e-14,-7.105427357601002e-15,-1.0658141036401503e-14],"intensity":1639.8586859748896,"type":"GC","origin":false,"forced":true,"remark":"","nSteps":5,"minStep":"140","maxStep":"380","steps":["140","180","300","340","380"],"group":"None","version":"v1.1.0"}],"interpreted":true,"name":"IN 018.1","coreAzi":56,"coreDip":20,"bedStrike":82,"bedDip":20,"data":[{"visible":true,"include":false,"step":"20","x":-1449.615238095238,"y":-491.31428571428575,"z":1353.6104761904762,"a95":"1.394574","info":"\"93-10-28\" at \"10:05\""},{"visible":true,"include":true,"step":"140","x":-932.6633333333333,"y":246.81019047619048,"z":751.6811428571428,"a95":"2.251491","info":"\"93-10-28\" at \"16:14\""},{"visible":true,"include":true,"step":"180","x":-627.580380952381,"y":526.754761904762,"z":377.5339047619048,"a95":"2.166268","info":"\"93-10-29\" at \"14:10\""},{"visible":true,"include":false,"step":"220","x":136.9226666666667,"y":607.5435238095239,"z":290.5930476190476,"a95":"1.794649","info":"\"93-10-29\" at \"16:42\""},{"visible":true,"include":false,"step":"260","x":-523.010380952381,"y":448.6007619047619,"z":217.6112380952381,"a95":"1.97697","info":"\"93-11-15\" at \"14:53\""},{"visible":true,"include":true,"step":"300","x":-420.6031428571428,"y":403.25904761904764,"z":171.96571428571428,"a95":"2.736595","info":"\"93-11-15\" at \"20:50\""},{"visible":true,"include":true,"step":"340","x":-322.1418095238095,"y":421.5295238095238,"z":144.71142857142857,"a95":"1.908172","info":"\"93-11-16\" at \"09:25\""},{"visible":true,"include":true,"step":"380","x":-273.6921904761905,"y":430.8025714285714,"z":128.48009523809523,"a95":"2.24698","info":"\"93-11-16\" at \"12:15\""},{"visible":true,"include":false,"step":"420","x":-283.11876190476187,"y":418.682,"z":57.52403809523809,"a95":"2.310825","info":"\"93-11-16\" at \"15:06\""},{"visible":true,"include":false,"step":"460","x":-313.8169523809524,"y":393.93142857142857,"z":59.21909523809524,"a95":"2.317206","info":"\"93-11-16\" at \"17:00\""},{"visible":true,"include":false,"step":"500","x":-274.10552380952385,"y":338.56438095238093,"z":34.51669523809524,"a95":"2.40552","info":"\"93-11-17\" at \"11:36\""},{"visible":true,"include":false,"step":"540","x":-230.78209523809522,"y":303.7493333333333,"z":35.05513333333333,"a95":"2.720718","info":"\"93-11-17\" at \"15:00\""},{"visible":true,"include":false,"step":"580","x":-117.51447619047619,"y":316.85895238095236,"z":-1.1860838095238095,"a95":"2.472004","info":"\"93-11-17\" at \"17:33\""},{"visible":true,"include":false,"step":"620","x":-120.80857142857143,"y":328.9753333333333,"z":0.8451014285714284,"a95":"2.446141","info":"\"93-11-18\" at \"12:05\""},{"visible":true,"include":false,"step":"660","x":-15.661009523809522,"y":52.580533333333335,"z":-9.358750476190476,"a95":"8.593397","info":"\"93-11-18\" at \"15:00\""}],"demagType":"Unknown","patch":1.1,"format":"Unknown","strat":null},{"version":"v1.1.0","exported":"2016-10-11T12:28:25.711Z","info":"","GEO":[{"dec":129.95137647977606,"inc":-14.329369219450799,"MAD":8.405654334134258,"cm":[3.9968028886505635e-15,3.552713678800501e-15,0],"intensity":311.25032383916476,"type":"dir","forced":true,"remark":"","origin":false,"nSteps":5,"minStep":"460","maxStep":"620","steps":["460","500","540","580","620"],"group":"None","version":"v1.1.0"}],"TECT":[{"dec":124.34637295246063,"inc":-28.59691661366924,"MAD":8.405654334134256,"cm":[-9.769962616701378e-15,-3.552713678800501e-15,1.7763568394002505e-15],"intensity":311.2503238391647,"type":"dir","forced":true,"remark":"","origin":false,"nSteps":5,"minStep":"460","maxStep":"620","steps":["460","500","540","580","620"],"group":"None","version":"v1.1.0"}],"interpreted":true,"name":"IN 019.2","coreAzi":8,"coreDip":70,"bedStrike":82,"bedDip":20,"data":[{"visible":false,"include":false,"step":"20","x":104.95247619047619,"y":349.44409523809526,"z":1976.6485714285716,"a95":"8.477311","info":"\"93-11-11\" at \"12:24\""},{"visible":false,"include":false,"step":"100","x":217.89980952380952,"y":280.7322857142857,"z":1858.0657142857142,"a95":"1.375534","info":"\"93-11-11\" at \"16:18\""},{"visible":true,"include":false,"step":"140","x":-8.840878095238097,"y":397.0613333333334,"z":949.0999999999999,"a95":"2.564244","info":"\"93-11-12\" at \"11:37\""},{"visible":true,"include":false,"step":"180","x":-147.65495238095238,"y":445.66914285714284,"z":363.07666666666665,"a95":"2.881183","info":"\"93-11-12\" at \"14:19\""},{"visible":true,"include":false,"step":"220","x":-158.02914285714286,"y":433.6697142857143,"z":155.66047619047617,"a95":"4.300596","info":"\"93-11-15\" at \"11:48\""},{"visible":true,"include":false,"step":"260","x":-156.14323809523808,"y":351.24028571428573,"z":-8.620731428571428,"a95":"4.119145","info":"\"93-11-15\" at \"14:54\""},{"visible":true,"include":false,"step":"300","x":-138.68361904761906,"y":262.0143809523809,"z":-57.511809523809525,"a95":"4.410058","info":"\"93-11-15\" at \"20:51\""},{"visible":true,"include":false,"step":"340","x":-132.66619047619048,"y":240.79485714285715,"z":-76.06338095238095,"a95":"5.380505","info":"\"93-11-16\" at \"09:26\""},{"visible":true,"include":false,"step":"380","x":-90.59822857142856,"y":246.46133333333333,"z":-92.68498095238095,"a95":"4.107985","info":"\"93-11-16\" at \"12:17\""},{"visible":true,"include":false,"step":"420","x":-82.74602857142857,"y":199.05980952380955,"z":-103.68171428571428,"a95":"4.533193","info":"\"93-11-16\" at \"15:07\""},{"visible":true,"include":true,"step":"460","x":-65.95224761904763,"y":178.20914285714284,"z":-114.33495238095239,"a95":"4.103137","info":"\"93-11-16\" at \"17:00\""},{"visible":true,"include":true,"step":"500","x":-89.71138095238095,"y":136.42085714285716,"z":-71.47793333333333,"a95":"5.858685","info":"\"93-11-17\" at \"11:37\""},{"visible":true,"include":true,"step":"540","x":-87.38934285714286,"y":157.60914285714284,"z":-62.25074285714285,"a95":"5.628098","info":"\"93-11-17\" at \"15:01\""},{"visible":true,"include":true,"step":"580","x":-57.06678095238095,"y":120.86476190476189,"z":-60.33653333333333,"a95":"6.383429","info":"\"93-11-17\" at \"17:34\""},{"visible":true,"include":true,"step":"620","x":-25.53489523809524,"y":92.77618095238095,"z":-8.440538095238095,"a95":"8.248886","info":"\"93-11-18\" at \"12:06\""},{"visible":true,"include":false,"step":"700","x":-7.18028,"y":-4.508892380952381,"z":-6.015937142857143,"a95":"40.58936","info":"\"93-11-18\" at \"19:46\""}],"demagType":"Unknown","patch":1.1,"format":"Unknown","strat":null},{"version":"v1.1.0","exported":"2016-10-11T12:28:25.711Z","info":"","GEO":[{"dec":137.2226299654501,"inc":-24.96986867411326,"MAD":0,"cm":[-1.4210854715202004e-14,0,0],"intensity":696.8158585781564,"type":"dir","forced":true,"remark":"","origin":false,"nSteps":1,"minStep":"540","maxStep":"540","steps":["540"],"group":"None","version":"v1.1.0"}],"TECT":[{"dec":129.0422214101435,"inc":-40.643594819647234,"MAD":1.344760325882845e-7,"cm":[-7.105427357601002e-14,-1.4210854715202004e-14,2.842170943040401e-14],"intensity":696.8158585781564,"type":"dir","forced":true,"remark":"","origin":false,"nSteps":1,"minStep":"540","maxStep":"540","steps":["540"],"group":"None","version":"v1.1.0"}],"interpreted":true,"name":"IN 020.2","coreAzi":-5,"coreDip":46,"bedStrike":82,"bedDip":20,"data":[{"visible":false,"include":false,"step":"20","x":-1379.7409523809524,"y":985.4857142857143,"z":2265.3352380952383,"a95":"4.536226","info":"\"93-11-11\" at \"12:25\""},{"visible":false,"include":false,"step":"100","x":-1141.1990476190476,"y":1043.1285714285714,"z":2133.4333333333334,"a95":"3.311301","info":"\"93-11-11\" at \"16:19\""},{"visible":false,"include":false,"step":"140","x":-654.8217142857143,"y":768.23,"z":618.1194285714286,"a95":"3.313477","info":"\"93-11-12\" at \"11:39\""},{"visible":true,"include":false,"step":"180","x":-414.1901904761905,"y":703.8865714285714,"z":-36.608085714285714,"a95":"3.299011","info":"\"93-11-12\" at \"14:20\""},{"visible":true,"include":false,"step":"220","x":-369.0300952380952,"y":586.0462857142857,"z":-270.9585714285714,"a95":"4.9761","info":"\"93-11-15\" at \"11:49\""},{"visible":true,"include":false,"step":"260","x":-211.84285714285713,"y":483.0782857142857,"z":-385.45561904761905,"a95":"4.57889","info":"\"93-11-15\" at \"14:55\""},{"visible":true,"include":false,"step":"300","x":-226.27057142857143,"y":369.3992380952381,"z":-328.295619047619,"a95":"4.854707","info":"\"93-11-15\" at \"20:53\""},{"visible":true,"include":false,"step":"340","x":-125.65961904761905,"y":325.13190476190476,"z":-328.6670476190476,"a95":"6.48005","info":"\"93-11-16\" at \"09:26\""},{"visible":true,"include":false,"step":"380","x":-181.60542857142858,"y":268.31685714285715,"z":-318.7506666666667,"a95":"4.130893","info":"\"93-11-16\" at \"12:18\""},{"visible":true,"include":false,"step":"420","x":-144.84952380952382,"y":293.4014285714286,"z":-358.6260952380952,"a95":"5.480851","info":"\"93-11-16\" at \"15:09\""},{"visible":true,"include":false,"step":"460","x":-129.87657142857142,"y":221.15800000000002,"z":-310.6108571428572,"a95":"7.5748","info":"\"93-11-16\" at \"17:01\""},{"visible":true,"include":false,"step":"500","x":-190.90961904761903,"y":191.9964761904762,"z":-329.9748571428571,"a95":"5.442679","info":"\"93-11-17\" at \"11:38\""},{"visible":true,"include":true,"step":"540","x":-77.40792380952381,"y":193.48333333333335,"z":-279.2137142857143,"a95":"6.076443","info":"\"93-11-17\" at \"15:02\""},{"visible":true,"include":false,"step":"580","x":-69.68013333333333,"y":105.70390476190477,"z":-294.9720952380952,"a95":"8.662462","info":"\"93-11-17\" at \"17:34\""},{"visible":true,"include":false,"step":"620","x":-18.733542857142858,"y":99.55695238095238,"z":-164.2612380952381,"a95":"7.604314","info":"\"93-11-18\" at \"12:07\""},{"visible":true,"include":false,"step":"660","x":-49.01862857142857,"y":-26.3076,"z":-32.24406666666667,"a95":"13.98762","info":"\"93-11-18\" at \"15:02\""}],"demagType":"Unknown","patch":1.1,"format":"Unknown","strat":null},{"version":"v1.1.0","exported":"2016-10-11T12:28:25.711Z","info":"","GEO":[{"dec":159.43205830326974,"inc":-17.31202260251599,"MAD":5.3126733564859,"cm":[-20.147880281399118,8.35978848892939,-3.900140903580681],"intensity":40.21841100748206,"type":"dir","forced":false,"remark":"","origin":false,"nSteps":5,"minStep":"260","maxStep":"420","steps":["260","300","340","380","420"],"group":"None","version":"v1.1.0"}],"TECT":[{"dec":156.97325814615965,"inc":-36.750479326852194,"MAD":5.3126733564858934,"cm":[-17.565921910642153,7.996917904336364,-10.88677794122473],"intensity":40.218411007482054,"type":"dir","forced":false,"remark":"","origin":false,"nSteps":5,"minStep":"260","maxStep":"420","steps":["260","300","340","380","420"],"group":"None","version":"v1.1.0"}],"interpreted":true,"name":"IN 021.1","coreAzi":50,"coreDip":36,"bedStrike":82,"bedDip":20,"data":[{"visible":false,"include":false,"step":"20","x":-95.30380952380953,"y":-33.126828571428575,"z":51.82787619047618,"a95":"30.93991","info":"\"93-11-11\" at \"12:28\""},{"visible":false,"include":false,"step":"100","x":-61.464304761904756,"y":-7.706416190476191,"z":88.6108380952381,"a95":"2.758573","info":"\"93-11-11\" at \"16:20\""},{"visible":true,"include":false,"step":"140","x":-21.18652380952381,"y":24.496990476190472,"z":26.27069523809524,"a95":"3.937172","info":"\"93-11-12\" at \"11:40\""},{"visible":true,"include":false,"step":"180","x":0.8873192380952382,"y":44.475809523809524,"z":-12.191304761904762,"a95":"5.432704","info":"\"93-11-12\" at \"14:21\""},{"visible":true,"include":false,"step":"220","x":-0.735984380952381,"y":41.79633333333333,"z":-21.696942857142858,"a95":"7.980591","info":"\"93-11-15\" at \"11:49\""},{"visible":true,"include":true,"step":"260","x":1.8060457142857143,"y":40.33919047619048,"z":-17.43573333333333,"a95":"5.342627","info":"\"93-11-15\" at \"14:56\""},{"visible":true,"include":true,"step":"300","x":-2.236964761904762,"y":26.342457142857143,"z":-9.522609523809523,"a95":"11.22459","info":"\"93-11-15\" at \"20:54\""},{"visible":true,"include":true,"step":"340","x":-1.6561533333333334,"y":17.19167619047619,"z":-5.754998095238095,"a95":"13.77653","info":"\"93-11-16\" at \"09:27\""},{"visible":true,"include":true,"step":"380","x":-0.8105075238095238,"y":15.988161904761904,"z":-5.23706380952381,"a95":"11.09202","info":"\"93-11-16\" at \"12:19\""},{"visible":true,"include":true,"step":"420","x":-0.5666937142857142,"y":4.177215238095238,"z":0.0056610619047619045,"a95":"43.70927","info":"\"93-11-16\" at \"15:10\""},{"visible":false,"include":false,"step":"460","x":-0.9423894285714286,"y":2.6984085714285717,"z":-8.375400952380952,"a95":"26.44904","info":"\"93-11-16\" at \"17:02\""},{"visible":false,"include":false,"step":"500","x":-7.566211428571429,"y":-1.2655171428571428,"z":-3.3875828571428572,"a95":"64.64406","info":"\"93-11-17\" at \"11:39\""},{"visible":false,"include":false,"step":"540","x":-3.436217142857143,"y":5.154517142857143,"z":3.0834333333333332,"a95":"76.55637","info":"\"93-11-17\" at \"15:03\""}],"demagType":"Unknown","patch":1.1,"format":"Unknown","strat":null},{"version":"v1.1.0","exported":"2016-10-11T12:28:25.711Z","info":"","GEO":[{"dec":0.1652817535642157,"inc":-30.02577857443622,"MAD":5.547002129611963,"cm":[-1.942890293094024e-15,0,0],"intensity":43.5743129303824,"type":"GC","origin":false,"forced":true,"remark":"","nSteps":7,"minStep":"100","maxStep":"340","steps":["100","140","180","220","260","300","340"],"group":"None","version":"v1.1.0"}],"TECT":[{"dec":359.1775069943121,"inc":-10.200491409933287,"MAD":5.547002129611972,"cm":[6.938893903907228e-17,-1.1102230246251565e-16,4.163336342344337e-16],"intensity":43.574312930382405,"type":"GC","origin":false,"forced":true,"remark":"","nSteps":7,"minStep":"100","maxStep":"340","steps":["100","140","180","220","260","300","340"],"group":"None","version":"v1.1.0"}],"interpreted":true,"name":"IN 023.1","coreAzi":88,"coreDip":15,"bedStrike":82,"bedDip":20,"data":[{"visible":true,"include":false,"step":"20","x":-28.007466666666666,"y":-26.170361904761904,"z":11.160876190476191,"a95":"5.036559","info":"\"93-11-11\" at \"12:29\""},{"visible":true,"include":true,"step":"100","x":-18.88477142857143,"y":-14.824066666666667,"z":30.968333333333334,"a95":"4.311387","info":"\"93-11-11\" at \"16:20\""},{"visible":true,"include":true,"step":"140","x":-3.671987619047619,"y":-3.0365361904761903,"z":22.474838095238095,"a95":"2.988784","info":"\"93-11-12\" at \"11:41\""},{"visible":true,"include":true,"step":"180","x":4.895043809523809,"y":0.10250761904761904,"z":17.500095238095238,"a95":"2.989172","info":"\"93-11-12\" at \"14:22\""},{"visible":true,"include":true,"step":"220","x":5.3259742857142855,"y":1.9121676190476191,"z":15.788723809523809,"a95":"9.029474","info":"\"93-11-15\" at \"11:50\""},{"visible":true,"include":true,"step":"260","x":4.3390676190476185,"y":0.41732342857142857,"z":10.72592380952381,"a95":"5.018716","info":"\"93-11-15\" at \"14:57\""},{"visible":true,"include":true,"step":"300","x":4.07996,"y":0.9132111428571429,"z":12.853314285714285,"a95":"8.944122","info":"\"93-11-15\" at \"20:58\""},{"visible":true,"include":true,"step":"340","x":4.415788571428571,"y":0.6905369523809524,"z":7.627166666666667,"a95":"22.71017","info":"\"93-11-16\" at \"09:28\""},{"visible":true,"include":false,"step":"380","x":1.416204761904762,"y":3.0993695238095236,"z":4.162457142857143,"a95":"17.4535","info":"\"93-11-16\" at \"12:21\""},{"visible":true,"include":false,"step":"420","x":-2.3106714285714283,"y":1.102612380952381,"z":1.112452380952381,"a95":"41.32103","info":"\"93-11-16\" at \"15:11\""},{"visible":true,"include":false,"step":"460","x":-1.6429142857142855,"y":1.8667971428571428,"z":2.1492933333333335,"a95":"40.8133","info":"\"93-11-16\" at \"17:03\""},{"visible":true,"include":false,"step":"500","x":-6.279585714285714,"y":-9.136872380952381,"z":-2.6324314285714285,"a95":"25.61509","info":"\"93-11-17\" at \"11:39\""}],"demagType":"Unknown","patch":1.1,"format":"Unknown","strat":null},{"version":"v1.1.0","exported":"2016-10-11T12:28:25.711Z","info":"","GEO":[{"dec":133.5476402065931,"inc":-42.36124928157239,"MAD":3.939080866835926,"cm":[-8.881784197001252e-16,1.3322676295501878e-15,0],"intensity":99.94680142421464,"type":"dir","forced":true,"remark":"","origin":false,"nSteps":4,"minStep":"260","maxStep":"380","steps":["260","300","340","380"],"group":"None","version":"v1.1.0"}],"TECT":[{"dec":116.28787646087801,"inc":-56.20993983891584,"MAD":3.9390808668358637,"cm":[5.329070518200751e-15,5.10702591327572e-15,4.440892098500626e-16],"intensity":99.94680142421464,"type":"dir","forced":true,"remark":"","origin":false,"nSteps":4,"minStep":"260","maxStep":"380","steps":["260","300","340","380"],"group":"None","version":"v1.1.0"}],"interpreted":true,"name":"IN 024.1","coreAzi":20,"coreDip":76,"bedStrike":82,"bedDip":20,"data":[{"visible":false,"include":false,"step":"20","x":26.282247619047617,"y":26.76378095238095,"z":41.684780952380954,"a95":"3.782949","info":"\"93-11-11\" at \"12:30\""},{"visible":false,"include":false,"step":"100","x":15.58527619047619,"y":51.52231428571428,"z":70.82097142857143,"a95":"3.056903","info":"\"93-11-11\" at \"16:21\""},{"visible":true,"include":false,"step":"140","x":-3.4243838095238095,"y":64.1640380952381,"z":-16.64498095238095,"a95":"2.744951","info":"\"93-11-12\" at \"11:42\""},{"visible":true,"include":false,"step":"180","x":-16.303961904761906,"y":67.18906666666666,"z":-55.110800000000005,"a95":"1.38094","info":"\"93-11-12\" at \"14:23\""},{"visible":true,"include":false,"step":"220","x":-24.776304761904765,"y":63.27131428571428,"z":-63.0076,"a95":"5.052636","info":"\"93-11-15\" at \"11:51\""},{"visible":true,"include":true,"step":"260","x":-5.713546666666667,"y":51.679590476190484,"z":-55.760600000000004,"a95":"2.005126","info":"\"93-11-15\" at \"14:58\""},{"visible":true,"include":true,"step":"300","x":-6.446564761904762,"y":38.142857142857146,"z":-43.489314285714286,"a95":"7.813024","info":"\"93-11-15\" at \"20:59\""},{"visible":true,"include":true,"step":"340","x":-10.580580952380952,"y":39.47000952380952,"z":-39.05717142857143,"a95":"3.310905","info":"\"93-11-16\" at \"09:31\""},{"visible":true,"include":true,"step":"380","x":-7.941280952380952,"y":15.834361904761904,"z":-16.660219047619048,"a95":"19.99477","info":"\"93-11-16\" at \"12:22\""},{"visible":false,"include":false,"step":"420","x":-9.273851428571428,"y":6.482853333333333,"z":-13.887590476190477,"a95":"7.515805","info":"\"93-11-16\" at \"15:12\""},{"visible":false,"include":false,"step":"460","x":-4.48566,"y":4.026259047619048,"z":-4.699875238095238,"a95":"31.74769","info":"\"93-11-16\" at \"17:03\""},{"visible":false,"include":false,"step":"500","x":-5.634121904761905,"y":-6.1861419047619055,"z":-4.446156190476191,"a95":"37.49948","info":"\"93-11-17\" at \"11:40\""},{"visible":false,"include":false,"step":"540","x":-11.27827619047619,"y":3.598240952380952,"z":10.473904761904762,"a95":"24.83444","info":"\"93-11-17\" at \"15:04\""}],"demagType":"Unknown","patch":1.1,"format":"Unknown","strat":null},{"version":"v1.1.0","exported":"2016-10-11T12:28:25.711Z","info":"","GEO":[{"dec":113.37155358154592,"inc":-18.957669976731225,"MAD":8.496759070445428,"cm":[-2.7291432490100975,4.499397890774397,-0.7978297650975683],"intensity":17.052437645687753,"type":"dir","forced":false,"remark":"","origin":false,"nSteps":4,"minStep":"300","maxStep":"460","steps":["300","340","420","460"],"group":"None","version":"v1.1.0"}],"TECT":[{"dec":105.52591839125216,"inc":-28.272830410039912,"MAD":8.496759070445425,"cm":[-2.2601287606714893,4.433482203095771,-1.888224067004955],"intensity":17.052437645687753,"type":"dir","forced":false,"remark":"","origin":false,"nSteps":4,"minStep":"300","maxStep":"460","steps":["300","340","420","460"],"group":"None","version":"v1.1.0"}],"interpreted":true,"name":"IN 025.1","coreAzi":82,"coreDip":20,"bedStrike":82,"bedDip":20,"data":[{"visible":true,"include":false,"step":"20","x":-15.749266666666667,"y":-5.521358095238095,"z":11.02582857142857,"a95":"7.618828","info":"\"93-11-11\" at \"12:33\""},{"visible":true,"include":false,"step":"100","x":-14.5614,"y":5.168851428571428,"z":21.13757142857143,"a95":"2.360226","info":"\"93-11-11\" at \"16:22\""},{"visible":true,"include":false,"step":"140","x":0.7263856190476191,"y":10.5508,"z":13.32042857142857,"a95":"6.491795","info":"\"93-11-12\" at \"11:43\""},{"visible":true,"include":false,"step":"180","x":3.773024761904762,"y":12.150247619047619,"z":14.224657142857144,"a95":"4.369095","info":"\"93-11-12\" at \"14:24\""},{"visible":true,"include":false,"step":"220","x":5.605755238095238,"y":12.839466666666667,"z":13.433552380952381,"a95":"9.567956","info":"\"93-11-15\" at \"11:53\""},{"visible":true,"include":false,"step":"260","x":6.6515466666666665,"y":10.024780952380953,"z":9.067858095238094,"a95":"3.718904","info":"\"93-11-15\" at \"14:58\""},{"visible":true,"include":true,"step":"300","x":6.427902857142858,"y":8.135021904761905,"z":9.430257142857144,"a95":"9.90543","info":"\"93-11-15\" at \"21:00\""},{"visible":true,"include":true,"step":"340","x":5.612154285714285,"y":4.468787619047619,"z":6.117401904761905,"a95":"50.59349","info":"\"93-11-16\" at \"09:32\""},{"visible":true,"include":false,"step":"380","x":-1.5973085714285715,"y":2.281435238095238,"z":6.203032380952381,"a95":"66.52576","info":"\"93-11-16\" at \"12:24\""},{"visible":true,"include":true,"step":"420","x":-0.45714495238095243,"y":1.7990304761904763,"z":0.05282098095238095,"a95":"60.11412","info":"\"93-11-16\" at \"15:13\""},{"visible":true,"include":true,"step":"460","x":-3.0080485714285716,"y":-1.0877257142857144,"z":-1.3720285714285714,"a95":"47.46124","info":"\"93-11-16\" at \"17:04\""},{"visible":true,"include":false,"step":"500","x":-2.9041857142857146,"y":-8.062538095238095,"z":-4.210119047619047,"a95":"50.05961","info":"\"93-11-17\" at \"11:41\""}],"demagType":"Unknown","patch":1.1,"format":"Unknown","strat":null},{"version":"v1.1.0","exported":"2016-10-11T12:28:25.711Z","info":"","GEO":[],"TECT":[],"interpreted":false,"name":"IN 026.1","coreAzi":62,"coreDip":75,"bedStrike":82,"bedDip":20,"data":[{"visible":true,"include":false,"step":"20","x":-14.564095238095238,"y":22.630466666666667,"z":59.143342857142855,"a95":"2.590952","info":"\"93-11-11\" at \"12:34\""},{"visible":true,"include":false,"step":"100","x":-24.913495238095237,"y":21.396390476190476,"z":72.0508380952381,"a95":"6.214777","info":"\"93-11-11\" at \"16:23\""},{"visible":true,"include":false,"step":"140","x":-24.226304761904764,"y":31.576285714285714,"z":50.326904761904764,"a95":"1.815722","info":"\"93-11-12\" at \"11:45\""},{"visible":true,"include":false,"step":"180","x":-18.920914285714286,"y":32.096799999999995,"z":40.23842857142857,"a95":"1.910605","info":"\"93-11-12\" at \"14:25\""},{"visible":true,"include":false,"step":"220","x":-19.958257142857143,"y":25.163047619047617,"z":34.643190476190476,"a95":"4.348678","info":"\"93-11-15\" at \"11:55\""},{"visible":true,"include":false,"step":"260","x":-8.949830476190476,"y":20.95062857142857,"z":26.11228571428571,"a95":"2.577564","info":"\"93-11-15\" at \"14:59\""},{"visible":true,"include":false,"step":"300","x":-9.528514285714285,"y":12.608933333333333,"z":18.705390476190477,"a95":"4.067165","info":"\"93-11-15\" at \"21:01\""},{"visible":true,"include":false,"step":"340","x":-3.106572380952381,"y":6.362762857142857,"z":7.51669619047619,"a95":"6.974847","info":"\"93-11-16\" at \"09:33\""},{"visible":true,"include":false,"step":"380","x":-0.13902571428571428,"y":1.690872380952381,"z":6.478350476190475,"a95":"10.03048","info":"\"93-11-16\" at \"12:25\""},{"visible":true,"include":false,"step":"420","x":-1.9256685714285713,"y":0.20691857142857145,"z":5.350702857142857,"a95":"18.09442","info":"\"93-11-16\" at \"15:14\""},{"visible":true,"include":false,"step":"460","x":-2.2521219047619048,"y":1.3624133333333333,"z":1.9625057142857143,"a95":"21.12991","info":"\"93-11-16\" at \"17:05\""},{"visible":true,"include":false,"step":"500","x":-0.7316112380952381,"y":-8.723118095238096,"z":-2.83352,"a95":"54.41486","info":"\"93-11-17\" at \"11:42\""}],"demagType":"Unknown","patch":1.1,"format":"Unknown","strat":null},{"version":"v1.1.0","exported":"2016-10-11T12:28:25.711Z","info":"","GEO":[],"TECT":[],"interpreted":false,"name":"IN 027.1","coreAzi":55,"coreDip":23,"bedStrike":82,"bedDip":20,"data":[{"visible":true,"include":false,"step":"20","x":-75.15338095238096,"y":-43.638933333333334,"z":46.10585714285714,"a95":"2.856806","info":"\"93-11-11\" at \"12:35\""},{"visible":true,"include":true,"step":"100","x":-51.589685714285714,"y":-26.73112380952381,"z":47.22082857142857,"a95":"6.463933","info":"\"93-11-11\" at \"16:24\""},{"visible":true,"include":true,"step":"140","x":-30.81184761904762,"y":-10.092457142857143,"z":23.484561904761904,"a95":"5.646638","info":"\"93-11-12\" at \"11:46\""},{"visible":true,"include":true,"step":"180","x":-9.296908571428572,"y":-1.2784123809523809,"z":10.175038095238095,"a95":"13.25891","info":"\"93-11-12\" at \"14:26\""},{"visible":true,"include":false,"step":"220","x":-0.08447499047619048,"y":3.9415714285714283,"z":1.6380038095238096,"a95":"55.89647","info":"\"93-11-15\" at \"11:56\""},{"visible":true,"include":false,"step":"260","x":-0.00899409142857143,"y":3.5583809523809524,"z":-1.0810409523809523,"a95":"32.72813","info":"\"93-11-15\" at \"15:00\""},{"visible":true,"include":false,"step":"300","x":1.4171761904761904,"y":1.8535666666666668,"z":2.4296371428571426,"a95":"43.6157","info":"\"93-11-15\" at \"21:02\""},{"visible":true,"include":false,"step":"340","x":-0.5322957142857143,"y":0.7987599999999999,"z":-1.5746695238095239,"a95":"87.72361","info":"\"93-11-16\" at \"09:36\""},{"visible":true,"include":false,"step":"380","x":0.8077680952380952,"y":2.035020952380952,"z":-1.2702019047619049,"a95":"64.27556","info":"\"93-11-16\" at \"12:26\""},{"visible":true,"include":false,"step":"420","x":-0.14320314285714286,"y":0.9377618095238095,"z":-3.3074504761904766,"a95":"36.33906","info":"\"93-11-16\" at \"15:15\""},{"visible":true,"include":false,"step":"460","x":-4.028405714285714,"y":0.04846890476190476,"z":-4.538688571428572,"a95":"23.79876","info":"\"93-11-16\" at \"17:07\""},{"visible":true,"include":false,"step":"500","x":2.3856609523809524,"y":-4.052190476190477,"z":-5.8893466666666665,"a95":"29.47817","info":"\"93-11-17\" at \"11:43\""}],"demagType":"Unknown","patch":1.1,"format":"Unknown","strat":null},{"version":"v1.1.0","exported":"2016-10-11T12:28:25.712Z","info":"","GEO":[{"dec":82.54612019333342,"inc":-9.858467984857214,"MAD":13.074818594489757,"cm":[2.220446049250313e-16,5.551115123125783e-16,0],"intensity":246.82929333683262,"type":"GC","origin":false,"forced":true,"remark":"","nSteps":4,"minStep":"100","maxStep":"220","steps":["100","140","180","220"],"group":"None","version":"v1.1.0"}],"TECT":[{"dec":79.11003117585813,"inc":-9.445028987999843,"MAD":13.074818594489573,"cm":[-1.5543122344752192e-15,3.774758283725532e-15,-8.881784197001252e-16],"intensity":246.82929333683262,"type":"GC","origin":false,"forced":true,"remark":"","nSteps":4,"minStep":"100","maxStep":"220","steps":["100","140","180","220"],"group":"None","version":"v1.1.0"}],"interpreted":true,"name":"IN 028.1","coreAzi":105,"coreDip":27,"bedStrike":82,"bedDip":20,"data":[{"visible":true,"include":false,"step":"20","x":-271.2983809523809,"y":-104.98247619047619,"z":71.49424761904763,"a95":"1.577684","info":"\"93-11-11\" at \"12:36\""},{"visible":true,"include":true,"step":"100","x":-175.4595238095238,"y":-110.36485714285713,"z":80.28998095238096,"a95":"2.364575","info":"\"93-11-11\" at \"16:25\""},{"visible":true,"include":true,"step":"140","x":-106.3112380952381,"y":-48.26101904761905,"z":52.15087619047619,"a95":"2.449573","info":"\"93-11-12\" at \"11:47\""},{"visible":true,"include":true,"step":"180","x":-45.710590476190475,"y":-17.522638095238094,"z":31.519323809523808,"a95":"5.538557","info":"\"93-11-12\" at \"14:27\""},{"visible":true,"include":true,"step":"220","x":-22.323009523809525,"y":-0.2676450476190476,"z":17.522180952380953,"a95":"9.713632","info":"\"93-11-15\" at \"11:57\""},{"visible":true,"include":false,"step":"260","x":-23.08464761904762,"y":2.0493933333333336,"z":2.601718095238095,"a95":"13.93382","info":"\"93-11-15\" at \"15:01\""},{"visible":true,"include":false,"step":"300","x":-7.598798095238095,"y":8.878753333333334,"z":14.358504761904761,"a95":"14.55379","info":"\"93-11-15\" at \"21:04\""},{"visible":true,"include":false,"step":"340","x":-13.43107619047619,"y":2.575581904761905,"z":-1.2650609523809524,"a95":"19.74266","info":"\"93-11-16\" at \"09:37\""},{"visible":true,"include":false,"step":"380","x":-5.7786904761904765,"y":0.7091371428571429,"z":-9.234285714285713,"a95":"83.80408","info":"\"93-11-16\" at \"12:27\""},{"visible":true,"include":false,"step":"420","x":-13.212733333333333,"y":15.928352380952381,"z":-9.405814285714285,"a95":"22.37015","info":"\"93-11-16\" at \"15:16\""},{"visible":true,"include":false,"step":"460","x":-32.89111428571429,"y":13.004923809523811,"z":-10.86704761904762,"a95":"8.572177","info":"\"93-11-16\" at \"17:08\""},{"visible":true,"include":false,"step":"500","x":6.052538095238096,"y":3.7847609523809522,"z":-7.089770476190476,"a95":"44.12365","info":"\"93-11-17\" at \"11:44\""},{"visible":true,"include":false,"step":"540","x":7.036335238095238,"y":5.196289523809524,"z":-30.999114285714285,"a95":"11.10804","info":"\"93-11-17\" at \"15:06\""}],"demagType":"Unknown","patch":1.1,"format":"Unknown","strat":null},{"version":"v1.1.0","exported":"2016-10-11T12:28:25.712Z","info":"","GEO":[{"dec":66.75304208439553,"inc":-1.0134466711735672,"MAD":4.163420808310678,"cm":[-3.552713678800501e-15,-9.103828801926284e-15,0],"intensity":253.6415842760584,"type":"GC","origin":false,"forced":true,"remark":"","nSteps":4,"minStep":"100","maxStep":"220","steps":["100","140","180","220"],"group":"None","version":"v1.1.0"}],"TECT":[{"dec":247.29668007662772,"inc":-4.204124231445658,"MAD":4.16342080831071,"cm":[1.7763568394002505e-15,-5.995204332975845e-15,0],"intensity":253.6415842760584,"type":"GC","origin":false,"forced":true,"remark":"","nSteps":4,"minStep":"100","maxStep":"220","steps":["100","140","180","220"],"group":"None","version":"v1.1.0"}],"interpreted":true,"name":"IN 029.1","coreAzi":105,"coreDip":0,"bedStrike":82,"bedDip":20,"data":[{"visible":true,"include":false,"step":"20","x":-281.55685714285715,"y":-27.691971428571428,"z":-61.7295619047619,"a95":"2.284605","info":"\"93-11-11\" at \"12:37\""},{"visible":true,"include":true,"step":"100","x":-224.6355238095238,"y":-36.245980952380954,"z":-24.689428571428568,"a95":"1.991896","info":"\"93-11-11\" at \"16:26\""},{"visible":true,"include":true,"step":"140","x":-136.10438095238095,"y":-3.220034285714286,"z":1.8914895238095237,"a95":"3.134042","info":"\"93-11-12\" at \"11:48\""},{"visible":true,"include":true,"step":"180","x":-58.23369523809524,"y":16.102409523809524,"z":17.032342857142858,"a95":"5.358071","info":"\"93-11-12\" at \"14:28\""},{"visible":true,"include":true,"step":"220","x":-28.869409523809527,"y":29.18705714285714,"z":20.276533333333333,"a95":"6.644647","info":"\"93-11-15\" at \"11:59\""},{"visible":true,"include":false,"step":"260","x":-16.31771428571429,"y":22.431247619047618,"z":19.363733333333332,"a95":"9.744267","info":"\"93-11-15\" at \"15:03\""},{"visible":true,"include":false,"step":"300","x":-5.762479047619048,"y":23.79630476190476,"z":14.6706,"a95":"12.50621","info":"\"93-11-15\" at \"21:05\""},{"visible":true,"include":false,"step":"340","x":-3.2434342857142857,"y":20.294514285714286,"z":9.48514857142857,"a95":"11.81544","info":"\"93-11-16\" at \"09:38\""},{"visible":true,"include":false,"step":"380","x":-0.5542381904761905,"y":17.65412380952381,"z":10.1464,"a95":"12.56871","info":"\"93-11-16\" at \"12:28\""},{"visible":true,"include":false,"step":"420","x":-6.801126666666666,"y":23.36478095238095,"z":7.602101904761905,"a95":"10.27111","info":"\"93-11-16\" at \"15:17\""},{"visible":true,"include":false,"step":"460","x":2.3313200000000003,"y":21.272580952380952,"z":-0.4938025714285714,"a95":"23.82039","info":"\"93-11-16\" at \"17:08\""},{"visible":true,"include":false,"step":"500","x":4.960071428571429,"y":25.613866666666667,"z":-4.566613333333334,"a95":"14.7485","info":"\"93-11-17\" at \"11:45\""}],"demagType":"Unknown","patch":1.1,"format":"Unknown","strat":null},{"version":"v1.1.0","exported":"2016-10-11T12:28:25.712Z","info":"","GEO":[{"dec":151.30399313337455,"inc":-19.35149936931495,"MAD":4.961083934200588,"cm":[-80.81388387121743,121.22374603174605,-6.774499701240297],"intensity":53.16690374745937,"type":"dir","forced":false,"remark":"","origin":false,"nSteps":3,"minStep":"540","maxStep":"620","steps":["540","580","620"],"group":"None","version":"v1.1.0"}],"TECT":[{"dec":147.0302128891385,"inc":-37.82502343938472,"MAD":4.961083934200744,"cm":[-72.73259379276243,120.08799477864778,-39.50718396371052],"intensity":53.16690374745935,"type":"dir","forced":false,"remark":"","origin":false,"nSteps":3,"minStep":"540","maxStep":"620","steps":["540","580","620"],"group":"None","version":"v1.1.0"}],"interpreted":true,"name":"IN 031.1","coreAzi":0,"coreDip":77,"bedStrike":82,"bedDip":20,"data":[{"visible":false,"include":false,"step":"20","x":231.30638095238095,"y":186.28180952380953,"z":1113.8666666666668,"a95":"3.083027","info":"\"93-11-11\" at \"12:38\""},{"visible":false,"include":false,"step":"100","x":115.3704761904762,"y":228.41133333333332,"z":1008.9361904761905,"a95":"1.791714","info":"\"93-11-11\" at \"16:27\""},{"visible":true,"include":false,"step":"140","x":20.847895238095237,"y":192.32809523809524,"z":580.7417142857142,"a95":"2.657346","info":"\"93-11-12\" at \"11:49\""},{"visible":true,"include":false,"step":"180","x":-2.262669523809524,"y":177.4577142857143,"z":391.0182857142857,"a95":"2.010315","info":"\"93-11-12\" at \"14:29\""},{"visible":true,"include":false,"step":"220","x":-26.757380952380952,"y":170.4594285714286,"z":276.18780952380956,"a95":"2.703808","info":"\"93-11-15\" at \"12:00\""},{"visible":true,"include":false,"step":"260","x":-41.120533333333334,"y":155.47819047619046,"z":155.1615238095238,"a95":"3.705079","info":"\"93-11-15\" at \"15:04\""},{"visible":true,"include":false,"step":"300","x":-109.6495238095238,"y":157.1007619047619,"z":116.84990476190475,"a95":"3.086974","info":"\"93-11-15\" at \"21:06\""},{"visible":true,"include":false,"step":"340","x":-85.62138095238095,"y":155.71219047619047,"z":63.25404761904762,"a95":"4.508348","info":"\"93-11-16\" at \"09:39\""},{"visible":true,"include":false,"step":"380","x":-79.91275238095238,"y":148.77209523809523,"z":54.83429523809524,"a95":"4.455016","info":"\"93-11-16\" at \"12:29\""},{"visible":true,"include":false,"step":"420","x":-93.52540952380953,"y":169.24895238095237,"z":43.540800000000004,"a95":"3.741894","info":"\"93-11-16\" at \"15:18\""},{"visible":true,"include":false,"step":"460","x":-109.63914285714286,"y":141.536,"z":23.47689523809524,"a95":"3.756054","info":"\"93-11-16\" at \"17:09\""},{"visible":true,"include":false,"step":"500","x":-87.56599047619048,"y":143.62180952380953,"z":-10.287714285714285,"a95":"4.856813","info":"\"93-11-17\" at \"11:45\""},{"visible":true,"include":true,"step":"540","x":-95.00981904761905,"y":133.99161904761905,"z":-37.87298095238095,"a95":"4.358961","info":"\"93-11-17\" at \"15:08\""},{"visible":true,"include":true,"step":"580","x":-80.35733333333333,"y":120.04828571428573,"z":-25.6864,"a95":"4.35564","info":"\"93-11-17\" at \"17:36\""},{"visible":true,"include":true,"step":"620","x":-56.28894285714286,"y":109.63133333333333,"z":-10.780733333333334,"a95":"7.640694","info":"\"93-11-18\" at \"12:08\""},{"visible":true,"include":false,"step":"660","x":-58.09095238095239,"y":67.90068571428571,"z":-17.341628571428572,"a95":"4.55662","info":"\"93-11-18\" at \"15:03\""},{"visible":true,"include":false,"step":"700","x":-8.166219047619048,"y":-4.9108342857142855,"z":-21.178066666666666,"a95":"26.12042","info":"\"93-11-18\" at \"19:47\""}],"demagType":"Unknown","patch":1.1,"format":"Unknown","strat":null},{"version":"v1.1.0","exported":"2016-10-11T12:28:25.712Z","info":"","GEO":[{"dec":38.72292460671474,"inc":-15.480527506139447,"MAD":6.818797120089255,"cm":[-6.039613253960852e-14,-2.1316282072803006e-14,0],"intensity":1378.5800886350478,"type":"GC","origin":false,"forced":true,"remark":"","nSteps":4,"minStep":"140","maxStep":"260","steps":["140","180","220","260"],"group":"None","version":"v1.1.0"}],"TECT":[{"dec":36.575722409848424,"inc":-1.424299633660313,"MAD":6.818797120089238,"cm":[-7.105427357601002e-15,0,-1.4210854715202004e-14],"intensity":1378.580088635048,"type":"GC","origin":false,"forced":true,"remark":"","nSteps":4,"minStep":"140","maxStep":"260","steps":["140","180","220","260"],"group":"None","version":"v1.1.0"}],"interpreted":true,"name":"IN 032","coreAzi":99,"coreDip":44,"bedStrike":82,"bedDip":20,"data":[{"visible":false,"include":false,"step":"20","x":-961.7923809523809,"y":-527.1470476190476,"z":1143.1561904761904,"a95":"2.627447","info":"\"93-11-11\" at \"12:39\""},{"visible":false,"include":false,"step":"100","x":-811.0692380952381,"y":-120.68371428571429,"z":1109.9390476190476,"a95":"1.215456","info":"\"93-11-11\" at \"16:46\""},{"visible":true,"include":true,"step":"140","x":-393.6969523809524,"y":-84.88394285714286,"z":807.9233333333333,"a95":"2.049474","info":"\"93-11-12\" at \"11:51\""},{"visible":true,"include":true,"step":"180","x":-127.53657142857143,"y":18.2574,"z":689.0657142857142,"a95":"1.74753","info":"\"93-11-12\" at \"14:30\""},{"visible":true,"include":true,"step":"220","x":-84.78356190476191,"y":72.98267619047618,"z":589.1474285714286,"a95":"1.808414","info":"\"93-11-15\" at \"12:01\""},{"visible":true,"include":true,"step":"260","x":-6.060974285714286,"y":105.29019047619047,"z":511.2659047619048,"a95":"2.634254","info":"\"93-11-15\" at \"15:05\""},{"visible":true,"include":false,"step":"300","x":62.24250476190476,"y":93.16670476190477,"z":436.1925714285714,"a95":"2.227929","info":"\"93-11-15\" at \"21:07\""},{"visible":true,"include":false,"step":"340","x":76.60319047619048,"y":168.94819047619046,"z":369.8292380952381,"a95":"2.47268","info":"\"93-11-16\" at \"09:40\""},{"visible":true,"include":false,"step":"380","x":60.90133333333334,"y":176.1882857142857,"z":359.85542857142855,"a95":"1.810296","info":"\"93-11-16\" at \"12:30\""},{"visible":true,"include":false,"step":"420","x":98.43314285714285,"y":167.7292380952381,"z":333.294,"a95":"1.933251","info":"\"93-11-16\" at \"15:19\""},{"visible":true,"include":false,"step":"460","x":124.53733333333334,"y":165.73942857142856,"z":316.63447619047616,"a95":"2.02634","info":"\"93-11-16\" at \"17:10\""},{"visible":true,"include":false,"step":"500","x":91.35045714285714,"y":134.60847619047618,"z":287.9605714285714,"a95":"2.212199","info":"\"93-11-17\" at \"11:46\""},{"visible":true,"include":false,"step":"540","x":88.5586380952381,"y":144.02190476190475,"z":285.7227619047619,"a95":"2.109313","info":"\"93-11-17\" at \"15:09\""},{"visible":true,"include":false,"step":"580","x":131.5137142857143,"y":178.0667619047619,"z":203.20914285714284,"a95":"11.01917","info":"\"93-11-17\" at \"17:37\""},{"visible":true,"include":false,"step":"620","x":94.94304761904762,"y":146.84495238095238,"z":191.88123809523807,"a95":"4.44226","info":"\"93-11-18\" at \"12:09\""},{"visible":true,"include":false,"step":"660","x":97.72,"y":88.43924761904762,"z":163.50285714285715,"a95":"1.963565","info":"\"93-11-18\" at \"15:04\""},{"visible":true,"include":false,"step":"700","x":-18.64034285714286,"y":-37.664342857142856,"z":-12.236704761904761,"a95":"6.211071","info":"\"93-11-18\" at \"19:48\""}],"demagType":"Unknown","patch":1.1,"format":"Unknown","strat":null},{"version":"v1.1.0","exported":"2016-10-11T12:28:25.712Z","info":"","GEO":[{"dec":131.28476129428873,"inc":-18.91291630994704,"MAD":1.8627667818013145,"cm":[3.552713678800501e-15,-1.7763568394002505e-15,0],"intensity":269.43630074063384,"type":"dir","forced":true,"remark":"","origin":false,"nSteps":3,"minStep":"500","maxStep":"620","steps":["500","540","620"],"group":"None","version":"v1.1.0"}],"TECT":[{"dec":124.37281322494698,"inc":-33.35503883562164,"MAD":1.862766781801378,"cm":[1.7763568394002505e-15,-1.7763568394002505e-15,-1.7763568394002505e-15],"intensity":269.43630074063384,"type":"dir","forced":true,"remark":"","origin":false,"nSteps":3,"minStep":"500","maxStep":"620","steps":["500","540","620"],"group":"None","version":"v1.1.0"}],"interpreted":true,"name":"IN 033","coreAzi":16,"coreDip":68,"bedStrike":82,"bedDip":20,"data":[{"visible":false,"include":false,"step":"20","x":193.09657142857142,"y":200.08666666666664,"z":2204.147619047619,"a95":"5.249417","info":"\"93-11-11\" at \"12:40\""},{"visible":false,"include":false,"step":"100","x":237.31600000000003,"y":261.53371428571427,"z":2020.2923809523809,"a95":"1.341134","info":"\"93-11-11\" at \"16:47\""},{"visible":true,"include":false,"step":"140","x":85.61462857142858,"y":296.62161904761905,"z":1159.6390476190475,"a95":"1.624528","info":"\"93-11-12\" at \"11:52\""},{"visible":true,"include":false,"step":"180","x":49.65190476190477,"y":321.6149523809524,"z":534.1219047619047,"a95":"2.341029","info":"\"93-11-12\" at \"14:31\""},{"visible":true,"include":false,"step":"220","x":-17.406980952380952,"y":292.1775238095238,"z":332.03114285714287,"a95":"3.682796","info":"\"93-11-15\" at \"12:02\""},{"visible":true,"include":false,"step":"260","x":49.24199047619047,"y":226.66895238095236,"z":135.78990476190478,"a95":"5.255394","info":"\"93-11-15\" at \"15:06\""},{"visible":true,"include":false,"step":"300","x":-83.17682857142857,"y":186.49085714285715,"z":61.521504761904765,"a95":"7.420652","info":"\"93-11-15\" at \"21:08\""},{"visible":true,"include":false,"step":"340","x":-22.13272380952381,"y":197.48971428571426,"z":26.083514285714283,"a95":"7.618169","info":"\"93-11-16\" at \"09:41\""},{"visible":true,"include":false,"step":"380","x":-4.904001904761905,"y":207.90190476190475,"z":-1.4611761904761904,"a95":"5.285078","info":"\"93-11-16\" at \"12:31\""},{"visible":true,"include":false,"step":"420","x":-32.44197142857143,"y":208.59419047619048,"z":-32.556333333333335,"a95":"5.317783","info":"\"93-11-16\" at \"15:21\""},{"visible":true,"include":false,"step":"460","x":-52.55355238095238,"y":192.8162857142857,"z":-40.95067619047619,"a95":"5.740579","info":"\"93-11-16\" at \"17:11\""},{"visible":true,"include":true,"step":"500","x":-39.1045619047619,"y":126.39009523809524,"z":-65.39234285714285,"a95":"8.549006","info":"\"93-11-17\" at \"11:47\""},{"visible":true,"include":true,"step":"540","x":-28.73607619047619,"y":117.14847619047619,"z":-62.48756190476191,"a95":"10.77112","info":"\"93-11-17\" at \"15:10\""},{"visible":true,"include":true,"step":"580","x":-5.035305714285714,"y":212.42571428571426,"z":-54.538447619047616,"a95":"4.640178","info":"\"93-11-17\" at \"17:37\""},{"visible":true,"include":true,"step":"620","x":-35.00902857142857,"y":102.80952380952381,"z":-55.31652380952381,"a95":"6.061144","info":"\"93-11-18\" at \"12:10\""},{"visible":false,"include":false,"step":"660","x":-51.32886666666666,"y":27.154447619047616,"z":3.0073914285714287,"a95":"8.719349","info":"\"93-11-18\" at \"15:05\""},{"visible":false,"include":false,"step":"700","x":11.871885714285714,"y":-13.6662,"z":-14.954409523809524,"a95":"14.03653","info":"\"93-11-18\" at \"19:49\""}],"demagType":"Unknown","patch":1.1,"format":"Unknown","strat":null},{"version":"v1.1.0","exported":"2016-10-11T12:28:25.712Z","info":"","GEO":[],"TECT":[],"interpreted":false,"name":"IN 040","coreAzi":16,"coreDip":75,"bedStrike":82,"bedDip":20,"data":[{"visible":false,"include":false,"step":"20","x":-8.508158095238096,"y":-146.55457142857145,"z":55.78177142857143,"a95":"1.542185","info":"\"93-11-11\" at \"14:13\""},{"visible":false,"include":false,"step":"100","x":15.58172380952381,"y":-140.42114285714285,"z":58.59171428571428,"a95":".9678614","info":"\"93-11-12\" at \"09:07\""},{"visible":false,"include":false,"step":"140","x":-1.7138857142857142,"y":-140.50609523809524,"z":52.03707619047619,"a95":"1.114353","info":"\"93-11-12\" at \"12:18\""},{"visible":false,"include":false,"step":"180","x":6.18953142857143,"y":-119.83419047619047,"z":46.952323809523804,"a95":"1.439711","info":"\"93-11-12\" at \"16:25\""},{"visible":true,"include":false,"step":"220","x":11.667561904761905,"y":-104.52342857142858,"z":41.644466666666666,"a95":"1.036274","info":"\"93-11-15\" at \"12:35\""},{"visible":true,"include":true,"step":"260","x":6.906879047619047,"y":-80.70584761904762,"z":33.71318095238095,"a95":"1.46944","info":"\"93-11-15\" at \"15:35\""},{"visible":true,"include":true,"step":"300","x":-0.03740709523809524,"y":-33.41018095238095,"z":13.614695238095237,"a95":"2.040293","info":"\"93-11-15\" at \"21:43\""},{"visible":true,"include":true,"step":"340","x":3.109558095238095,"y":-22.290076190476192,"z":9.253148571428572,"a95":"3.029783","info":"\"93-11-16\" at \"10:00\""},{"visible":true,"include":true,"step":"380","x":3.5433695238095235,"y":-14.454657142857142,"z":6.0398723809523815,"a95":"10.59241","info":"\"93-11-16\" at \"13:17\""},{"visible":true,"include":true,"step":"420","x":0.6718774285714285,"y":-10.84892380952381,"z":3.4618095238095234,"a95":"5.799631","info":"\"93-11-16\" at \"15:39\""},{"visible":true,"include":true,"step":"460","x":0.49392057142857143,"y":-8.688925714285714,"z":0.7484282857142857,"a95":"12.62569","info":"\"93-11-17\" at \"09:24\""},{"visible":true,"include":false,"step":"500","x":-3.618722857142857,"y":-7.765327619047619,"z":-1.5060733333333334,"a95":"8.697628","info":"\"93-11-17\" at \"13:52\""},{"visible":false,"include":false,"step":"540","x":-1.031264761904762,"y":-6.307358095238095,"z":-9.090789523809523,"a95":"8.69584","info":"\"93-11-17\" at \"15:58\""},{"visible":false,"include":false,"step":"580","x":-3.58329619047619,"y":0.1520149523809524,"z":-0.771175619047619,"a95":"24.39147","info":"\"93-11-18\" at \"10:02\""},{"visible":false,"include":false,"step":"620","x":-5.652349523809524,"y":0.20308580952380956,"z":-7.658012380952381,"a95":"9.771002","info":"\"93-11-18\" at \"12:28\""},{"visible":false,"include":false,"step":"660","x":0.7957532380952381,"y":0.8743150476190477,"z":-0.2948374285714286,"a95":"97.31409","info":"\"93-11-18\" at \"15:07\""}],"demagType":"Unknown","patch":1.1,"format":"Unknown","strat":null},{"version":"v1.1.0","exported":"2016-10-11T12:28:25.712Z","info":"","GEO":[{"dec":147.72562059862378,"inc":-9.883499247045755,"MAD":11.116704459126977,"cm":[-1.0726350757107501,13.828554081215803,-4.468453196650119],"intensity":28.570564018061663,"type":"dir","forced":false,"remark":"","origin":false,"nSteps":5,"minStep":"300","maxStep":"540","steps":["300","340","420","460","540"],"group":"None","version":"v1.1.0"}],"TECT":[{"dec":144.71513225652416,"inc":-27.933592360925815,"MAD":11.116704459126968,"cm":[0.6191632649019194,13.590787330277974,-5.220504242691457],"intensity":28.57056401806167,"type":"dir","forced":false,"remark":"","origin":false,"nSteps":5,"minStep":"300","maxStep":"540","steps":["300","340","420","460","540"],"group":"None","version":"v1.1.0"}],"interpreted":true,"name":"IN 043","coreAzi":250,"coreDip":72,"bedStrike":82,"bedDip":20,"data":[{"visible":false,"include":false,"step":"20","x":-76.32911428571428,"y":49.148876190476194,"z":68.60148571428572,"a95":"7.636491","info":"\"93-11-11\" at \"14:14\""},{"visible":false,"include":false,"step":"100","x":-54.82008571428572,"y":34.82018095238095,"z":75.79379999999999,"a95":"2.273021","info":"\"93-11-12\" at \"09:08\""},{"visible":true,"include":false,"step":"140","x":-44.06619047619048,"y":15.034180952380954,"z":51.828219047619044,"a95":"3.252547","info":"\"93-11-12\" at \"12:19\""},{"visible":true,"include":false,"step":"180","x":-24.315733333333334,"y":-16.75950476190476,"z":11.999428571428572,"a95":"10.56655","info":"\"93-11-12\" at \"16:27\""},{"visible":true,"include":false,"step":"220","x":-15.783838095238096,"y":-17.029495238095237,"z":-10.626104761904761,"a95":"9.629109","info":"\"93-11-15\" at \"12:36\""},{"visible":true,"include":false,"step":"260","x":-15.045571428571428,"y":-17.901933333333336,"z":-13.32002857142857,"a95":"9.997509","info":"\"93-11-15\" at \"15:36\""},{"visible":true,"include":true,"step":"300","x":-13.893876190476192,"y":-21.416809523809523,"z":-12.060838095238095,"a95":"9.302725","info":"\"93-11-15\" at \"21:45\""},{"visible":true,"include":true,"step":"340","x":-10.519695238095238,"y":-8.651244761904762,"z":-7.916218095238095,"a95":"12.82654","info":"\"93-11-16\" at \"10:02\""},{"visible":false,"include":false,"step":"380","x":-4.599656190476191,"y":-13.89744761904762,"z":-3.05333619047619,"a95":"15.91731","info":"\"93-11-16\" at \"13:19\""},{"visible":true,"include":true,"step":"420","x":-10.52084761904762,"y":-4.633892380952381,"z":-8.567261904761905,"a95":"13.74533","info":"\"93-11-16\" at \"15:40\""},{"visible":true,"include":true,"step":"460","x":-6.7842819047619045,"y":-0.21057561904761904,"z":-6.9470809523809525,"a95":"26.27822","info":"\"93-11-17\" at \"09:25\""},{"visible":false,"include":false,"step":"500","x":-16.263304761904763,"y":-2.3624314285714285,"z":-20.47032380952381,"a95":"11.34392","info":"\"93-11-17\" at \"13:53\""},{"visible":true,"include":true,"step":"540","x":-11.425571428571429,"y":6.224565714285714,"z":-5.268270476190476,"a95":"27.48526","info":"\"93-11-17\" at \"16:03\""}],"demagType":"Unknown","patch":1.1,"format":"Unknown","strat":null},{"version":"v1.1.0","exported":"2016-10-11T12:28:25.712Z","info":"","GEO":[],"TECT":[],"interpreted":false,"name":"IN 044","coreAzi":125,"coreDip":13,"bedStrike":82,"bedDip":20,"data":[{"visible":true,"include":false,"step":"20","x":-132.2447619047619,"y":-32.562714285714286,"z":-15.525428571428572,"a95":"2.813735","info":"\"93-11-11\" at \"14:18\""},{"visible":true,"include":false,"step":"100","x":-61.591742857142854,"y":-43.91390476190476,"z":-5.31222380952381,"a95":"3.190694","info":"\"93-11-12\" at \"09:09\""},{"visible":true,"include":false,"step":"140","x":-43.424533333333336,"y":-9.038315238095239,"z":-1.4878961904761905,"a95":"5.687627","info":"\"93-11-12\" at \"12:20\""},{"visible":true,"include":false,"step":"180","x":-9.196425714285715,"y":-12.44730476190476,"z":4.298304761904761,"a95":"17.35286","info":"\"93-11-12\" at \"16:29\""},{"visible":true,"include":false,"step":"220","x":-2.928015238095238,"y":-1.2280619047619048,"z":5.4816457142857145,"a95":"45.19013","info":"\"93-11-15\" at \"12:38\""},{"visible":true,"include":false,"step":"260","x":-1.0407933333333335,"y":-2.555522857142857,"z":3.9934095238095235,"a95":"40.53844","info":"\"93-11-15\" at \"15:38\""},{"visible":true,"include":false,"step":"300","x":2.47644,"y":0.9943276190476191,"z":2.6550904761904763,"a95":"60.92453","info":"\"93-11-15\" at \"21:46\""},{"visible":true,"include":false,"step":"340","x":0.32494285714285714,"y":-0.42529628571428574,"z":2.3372647619047617,"a95":"71.94252","info":"\"93-11-16\" at \"10:04\""},{"visible":true,"include":false,"step":"380","x":1.6889180952380953,"y":0.3017573333333333,"z":-0.03786821904761904,"a95":"117.3934","info":"\"93-11-16\" at \"13:21\""},{"visible":true,"include":false,"step":"420","x":-1.430404761904762,"y":-1.0046676190476191,"z":0.4545777142857143,"a95":"110.7641","info":"\"93-11-16\" at \"15:41\""},{"visible":true,"include":false,"step":"460","x":-0.25232390476190475,"y":-5.826327619047619,"z":4.770035238095238,"a95":"27.10047","info":"\"93-11-17\" at \"09:26\""},{"visible":true,"include":false,"step":"500","x":-10.601704761904761,"y":-10.913276190476191,"z":-3.656027619047619,"a95":"17.00186","info":"\"93-11-17\" at \"13:53\""},{"visible":true,"include":false,"step":"540","x":3.0885571428571432,"y":0.31777723809523806,"z":-2.762297142857143,"a95":"52.43299","info":"\"93-11-17\" at \"16:05\""}],"demagType":"Unknown","patch":1.1,"format":"Unknown","strat":null},{"version":"v1.1.0","exported":"2016-10-11T12:28:25.712Z","info":"","GEO":[{"dec":144.26151940214913,"inc":-44.10719983607969,"MAD":2.74703062858529,"cm":[-18.224008259319415,11.819548379875211,-17.057419665663456],"intensity":62.46080221378202,"type":"dir","forced":false,"remark":"","origin":false,"nSteps":5,"minStep":"340","maxStep":"540","steps":["340","380","420","500","540"],"group":"None","version":"v1.1.0"}],"TECT":[{"dec":129.06066630406076,"inc":-60.620626360868876,"MAD":2.7470306285853163,"cm":[-11.270810403196514,10.842340149324816,-22.763660943091985],"intensity":62.46080221378201,"type":"dir","forced":false,"remark":"","origin":false,"nSteps":5,"minStep":"340","maxStep":"540","steps":["340","380","420","500","540"],"group":"None","version":"v1.1.0"}],"interpreted":true,"name":"IN 047","coreAzi":-30,"coreDip":75,"bedStrike":82,"bedDip":20,"data":[{"visible":false,"include":false,"step":"20","x":-29.272514285714287,"y":3.7012266666666664,"z":-48.34225714285714,"a95":"4.638101","info":"\"93-11-11\" at \"14:20\""},{"visible":false,"include":false,"step":"100","x":-42.675761904761906,"y":-0.34571104761904764,"z":-16.238704761904764,"a95":"2.27887","info":"\"93-11-12\" at \"09:10\""},{"visible":true,"include":false,"step":"140","x":-56.51180000000001,"y":-0.18206695238095238,"z":-52.15198095238096,"a95":"3.005161","info":"\"93-11-12\" at \"12:21\""},{"visible":true,"include":false,"step":"180","x":-82.0743619047619,"y":13.585504761904762,"z":-106.74190476190476,"a95":"3.995916","info":"\"93-11-12\" at \"16:30\""},{"visible":true,"include":false,"step":"220","x":-81.19157142857142,"y":5.427226666666667,"z":-105.32504761904762,"a95":"1.212397","info":"\"93-11-15\" at \"12:39\""},{"visible":true,"include":false,"step":"260","x":-67.92165714285714,"y":-2.0860619047619045,"z":-93.02584761904761,"a95":".9705426","info":"\"93-11-15\" at \"15:38\""},{"visible":true,"include":false,"step":"300","x":-49.224809523809526,"y":0.19491266666666668,"z":-72.31646666666667,"a95":"2.818378","info":"\"93-11-15\" at \"21:47\""},{"visible":true,"include":true,"step":"340","x":-36.91979047619048,"y":4.62331619047619,"z":-56.51122857142857,"a95":"6.518469","info":"\"93-11-16\" at \"10:05\""},{"visible":true,"include":true,"step":"380","x":-20.441666666666666,"y":0.07706009523809525,"z":-28.687885714285716,"a95":"4.257186","info":"\"93-11-16\" at \"13:22\""},{"visible":true,"include":true,"step":"420","x":-13.654228571428572,"y":1.0325380952380951,"z":-16.791561904761902,"a95":"3.909434","info":"\"93-11-16\" at \"15:43\""},{"visible":false,"include":false,"step":"460","x":-11.236771428571428,"y":-2.6821219047619045,"z":-0.6850669523809524,"a95":"12.69398","info":"\"93-11-17\" at \"09:27\""},{"visible":true,"include":true,"step":"500","x":-7.174433333333333,"y":0.9237698095238096,"z":-5.03918,"a95":"50.245","info":"\"93-11-17\" at \"13:54\""},{"visible":true,"include":true,"step":"540","x":-4.5013733333333334,"y":-1.0365590476190476,"z":-3.4229638095238095,"a95":"75.21772","info":"\"93-11-17\" at \"16:06\""},{"visible":false,"include":false,"step":"580","x":3.7285219047619043,"y":2.1090895238095237,"z":4.680609523809524,"a95":"12.83824","info":"\"93-11-18\" at \"10:05\""}],"demagType":"Unknown","patch":1.1,"format":"Unknown","strat":null},{"version":"v1.1.0","exported":"2016-10-11T12:28:25.712Z","info":"","GEO":[{"dec":20.614820861555643,"inc":-21.19566113891246,"MAD":9.516948626424387,"cm":[-2.7755575615628914e-16,0,0],"intensity":54.40497733369599,"type":"GC","origin":false,"forced":true,"remark":"","nSteps":5,"minStep":"100","maxStep":"260","steps":["100","140","180","220","260"],"group":"None","version":"v1.1.0"}],"TECT":[{"dec":18.571969972109343,"inc":-3.429213766509366,"MAD":9.516948626424439,"cm":[-1.9290125052862095e-15,-2.220446049250313e-16,-3.885780586188048e-16],"intensity":54.40497733369598,"type":"GC","origin":false,"forced":true,"remark":"","nSteps":5,"minStep":"100","maxStep":"260","steps":["100","140","180","220","260"],"group":"None","version":"v1.1.0"}],"interpreted":true,"name":"IN 049","coreAzi":173,"coreDip":75,"bedStrike":82,"bedDip":20,"data":[{"visible":true,"include":false,"step":"20","x":-39.11799047619048,"y":-33.55968571428572,"z":48.20570476190476,"a95":"4.953777","info":"\"93-11-11\" at \"14:22\""},{"visible":true,"include":true,"step":"100","x":-20.00862857142857,"y":-21.757485714285714,"z":41.80666666666667,"a95":"4.888951","info":"\"93-11-12\" at \"09:21\""},{"visible":true,"include":true,"step":"140","x":-8.508540952380953,"y":-19.367295238095238,"z":24.988361904761902,"a95":"6.944239","info":"\"93-11-12\" at \"12:22\""},{"visible":true,"include":true,"step":"180","x":8.133301904761904,"y":-13.890885714285714,"z":4.517796190476191,"a95":"14.51188","info":"\"93-11-12\" at \"16:31\""},{"visible":true,"include":true,"step":"220","x":4.461669523809523,"y":-11.743438095238096,"z":2.7707714285714284,"a95":"11.74935","info":"\"93-11-15\" at \"12:40\""},{"visible":true,"include":true,"step":"260","x":3.837541904761905,"y":-10.661209523809523,"z":-1.2181742857142857,"a95":"13.46271","info":"\"93-11-15\" at \"15:39\""},{"visible":true,"include":false,"step":"300","x":-1.1916,"y":-6.0150838095238095,"z":-0.38941371428571425,"a95":"30.62055","info":"\"93-11-15\" at \"21:49\""},{"visible":true,"include":false,"step":"340","x":0.9658333333333333,"y":-3.782241904761905,"z":-1.3645704761904762,"a95":"40.61698","info":"\"93-11-16\" at \"10:07\""},{"visible":true,"include":false,"step":"380","x":-0.9461709523809523,"y":-2.3063561904761904,"z":4.376002857142858,"a95":"34.71283","info":"\"93-11-16\" at \"13:24\""},{"visible":true,"include":false,"step":"420","x":-7.322795238095237,"y":-3.9826542857142857,"z":4.11653619047619,"a95":"17.36781","info":"\"93-11-16\" at \"15:44\""},{"visible":true,"include":false,"step":"460","x":-5.550075238095238,"y":-1.424669523809524,"z":1.6091485714285714,"a95":"31.43953","info":"\"93-11-17\" at \"09:28\""},{"visible":true,"include":false,"step":"500","x":-0.4366596190476191,"y":2.942411428571429,"z":-3.133109523809524,"a95":"38.59998","info":"\"93-11-17\" at \"13:55\""},{"visible":true,"include":false,"step":"540","x":-6.635475238095237,"y":2.459425714285714,"z":3.0138819047619045,"a95":"23.43931","info":"\"93-11-17\" at \"16:07\""}],"demagType":"Unknown","patch":1.1,"format":"Unknown","strat":null},{"version":"v1.1.0","exported":"2016-10-11T12:28:25.712Z","info":"","GEO":[],"TECT":[],"interpreted":false,"name":"IN 050","coreAzi":170,"coreDip":78,"bedStrike":82,"bedDip":20,"data":[{"visible":false,"include":false,"step":"20","x":145.6807619047619,"y":74.8627619047619,"z":579.2453333333333,"a95":"1.015853","info":"\"93-11-11\" at \"14:25\""},{"visible":false,"include":false,"step":"100","x":-107.38657142857143,"y":110.3975238095238,"z":597.2073333333333,"a95":"1.750444","info":"\"93-11-12\" at \"09:23\""},{"visible":true,"include":true,"step":"140","x":45.01813333333333,"y":84.60331428571428,"z":419.0125714285714,"a95":"1.967737","info":"\"93-11-12\" at \"12:24\""},{"visible":true,"include":true,"step":"180","x":-67.80502857142858,"y":65.57744761904762,"z":109.57457142857142,"a95":"4.777574","info":"\"93-11-12\" at \"16:32\""},{"visible":true,"include":true,"step":"220","x":-80.0372380952381,"y":63.303933333333326,"z":45.42098095238095,"a95":"6.810545","info":"\"93-11-15\" at \"12:42\""},{"visible":true,"include":false,"step":"260","x":-64.70835238095238,"y":65.9708,"z":-7.948859047619048,"a95":"7.153289","info":"\"93-11-15\" at \"15:40\""},{"visible":true,"include":false,"step":"300","x":-71.6659142857143,"y":27.64607619047619,"z":-34.690285714285714,"a95":"9.1232","info":"\"93-11-15\" at \"21:50\""},{"visible":true,"include":false,"step":"340","x":-71.58660952380953,"y":18.815942857142858,"z":-37.08261904761905,"a95":"8.679599","info":"\"93-11-16\" at \"10:08\""},{"visible":true,"include":false,"step":"380","x":-54.005628571428566,"y":20.498714285714286,"z":-48.82200952380952,"a95":"9.849229","info":"\"93-11-16\" at \"13:25\""},{"visible":true,"include":false,"step":"420","x":-83.99818095238095,"y":8.905438095238095,"z":-39.05813333333334,"a95":"7.500115","info":"\"93-11-16\" at \"15:47\""},{"visible":true,"include":false,"step":"460","x":-72.36763809523809,"y":39.2158380952381,"z":-40.34712380952381,"a95":"7.534206","info":"\"93-11-17\" at \"09:29\""},{"visible":true,"include":false,"step":"500","x":-54.33755238095238,"y":-16.821952380952382,"z":-55.72415238095238,"a95":"9.541531","info":"\"93-11-17\" at \"13:56\""},{"visible":true,"include":false,"step":"540","x":-24.2312,"y":24.06037142857143,"z":-56.586971428571424,"a95":"9.42558","info":"\"93-11-17\" at \"16:08\""},{"visible":true,"include":false,"step":"580","x":-34.49570476190476,"y":41.20565714285714,"z":-45.141285714285715,"a95":"7.18561","info":"\"93-11-18\" at \"10:06\""},{"visible":true,"include":false,"step":"620","x":-20.186095238095238,"y":-12.050209523809523,"z":-39.42414285714286,"a95":"11.3329","info":"\"93-11-18\" at \"12:29\""}],"demagType":"Unknown","patch":1.1,"format":"Unknown","strat":null},{"version":"v1.1.0","exported":"2016-10-11T12:28:25.713Z","info":"","GEO":[],"TECT":[],"interpreted":false,"name":"IN 051.2","coreAzi":258,"coreDip":12,"bedStrike":82,"bedDip":20,"data":[{"visible":true,"include":false,"step":"20","x":117.47914285714285,"y":-65.59627619047619,"z":-27.65828571428571,"a95":"5.28831","info":"\"93-11-11\" at \"14:27\""},{"visible":true,"include":false,"step":"100","x":86.60413333333334,"y":-36.097809523809524,"z":-13.533561904761903,"a95":"3.510012","info":"\"93-11-12\" at \"09:24\""},{"visible":true,"include":false,"step":"140","x":50.809380952380955,"y":-22.03744761904762,"z":-14.100457142857143,"a95":"4.745365","info":"\"93-11-12\" at \"12:24\""},{"visible":true,"include":false,"step":"180","x":8.652674285714287,"y":10.71464761904762,"z":-12.773047619047619,"a95":"15.69778","info":"\"93-11-12\" at \"16:33\""},{"visible":true,"include":false,"step":"220","x":-6.082600952380953,"y":14.645609523809522,"z":-8.83102761904762,"a95":"12.4358","info":"\"93-11-15\" at \"12:43\""},{"visible":true,"include":false,"step":"260","x":-2.1900104761904764,"y":12.950104761904763,"z":-2.284632380952381,"a95":"16.78793","info":"\"93-11-15\" at \"15:42\""},{"visible":true,"include":false,"step":"300","x":-6.327529523809524,"y":9.564219047619048,"z":-5.34866,"a95":"21.10385","info":"\"93-11-15\" at \"21:51\""},{"visible":true,"include":false,"step":"340","x":-3.157221904761905,"y":4.734976190476191,"z":-4.3022857142857145,"a95":"93.15335","info":"\"93-11-16\" at \"10:32\""},{"visible":true,"include":false,"step":"380","x":-2.4070847619047617,"y":5.82442,"z":-6.179693333333334,"a95":"25.44587","info":"\"93-11-16\" at \"13:26\""},{"visible":true,"include":false,"step":"420","x":-3.696031428571428,"y":0.1358915238095238,"z":-6.595163809523809,"a95":"28.98515","info":"\"93-11-16\" at \"15:47\""},{"visible":true,"include":false,"step":"460","x":-1.878752380952381,"y":0.32075657142857145,"z":-3.0577047619047617,"a95":"68.81365","info":"\"93-11-17\" at \"09:30\""},{"visible":true,"include":false,"step":"500","x":-2.1585714285714284,"y":7.832568571428571,"z":-7.625923809523809,"a95":"47.92841","info":"\"93-11-17\" at \"13:57\""},{"visible":true,"include":false,"step":"540","x":3.8197409523809527,"y":2.3258352380952383,"z":-10.403876190476192,"a95":"19.67075","info":"\"93-11-17\" at \"16:10\""}],"demagType":"Unknown","patch":1.1,"format":"Unknown","strat":null},{"version":"v1.1.0","exported":"2016-10-11T12:28:25.713Z","info":"","GEO":[],"TECT":[],"interpreted":false,"name":"IN 061","coreAzi":325,"coreDip":62,"bedStrike":82,"bedDip":20,"data":[{"visible":true,"include":false,"step":"20","x":43.45731428571429,"y":119.0432380952381,"z":658.2246666666667,"a95":"1.686134","info":"\"94-02-07\" at \"11:02\""},{"visible":true,"include":true,"step":"100","x":3.1712933333333333,"y":89.71564761904763,"z":464.99123809523815,"a95":"1.371175","info":"\"94-02-08\" at \"09:42\""},{"visible":true,"include":true,"step":"140","x":-21.66872380952381,"y":61.13597142857142,"z":249.20571428571427,"a95":"2.12968","info":"\"94-02-09\" at \"10:11\""},{"visible":true,"include":true,"step":"180","x":-4.789410476190476,"y":24.313133333333333,"z":136.4137142857143,"a95":"4.783453","info":"\"94-02-09\" at \"12:59\""},{"visible":true,"include":true,"step":"220","x":-37.52514285714286,"y":27.939190476190475,"z":79.05984761904763,"a95":"4.638076","info":"\"94-02-10\" at \"13:45\""},{"visible":true,"include":true,"step":"260","x":-32.186323809523806,"y":34.20512380952381,"z":49.850114285714284,"a95":"8.130479","info":"\"94-02-11\" at \"09:12\""},{"visible":true,"include":true,"step":"300","x":-33.55101904761905,"y":25.976657142857146,"z":26.980895238095236,"a95":"9.121327","info":"\"94-02-11\" at \"16:07\""},{"visible":true,"include":true,"step":"340","x":-25.333114285714288,"y":9.41989619047619,"z":28.301895238095238,"a95":"12.18645","info":"\"94-02-14\" at \"09:22\""},{"visible":true,"include":false,"step":"380","x":-30.06169523809524,"y":23.329161904761904,"z":5.270297142857143,"a95":"12.06844","info":"\"94-02-14\" at \"13:05\""},{"visible":true,"include":false,"step":"420","x":-42.38086666666667,"y":12.13227619047619,"z":-23.034590476190477,"a95":"11.20706","info":"\"94-02-16\" at \"13:00\""},{"visible":true,"include":false,"step":"460","x":-27.981219047619046,"y":8.592855238095238,"z":10.109466666666666,"a95":"16.43256","info":"\"94-02-16\" at \"15:49\""},{"visible":true,"include":false,"step":"500","x":-17.99944761904762,"y":-1.1452704761904762,"z":-7.912640952380952,"a95":"26.36484","info":"\"94-02-17\" at \"13:26\""},{"visible":true,"include":false,"step":"540","x":-35.001733333333334,"y":-6.845119047619048,"z":-9.104883809523809,"a95":"13.956","info":"\"94-02-18\" at \"09:58\""},{"visible":true,"include":false,"step":"580","x":-10.624342857142857,"y":13.067914285714286,"z":-3.4463733333333333,"a95":"24.45933","info":"\"94-02-18\" at \"15:17\""}],"demagType":"Unknown","patch":1.1,"format":"Unknown","strat":null},{"version":"v1.1.0","exported":"2016-10-11T12:28:25.713Z","info":"","GEO":[],"TECT":[],"interpreted":false,"name":"IN 062","coreAzi":17,"coreDip":70,"bedStrike":82,"bedDip":20,"data":[{"visible":true,"include":false,"step":"20","x":6.745062857142857,"y":-10.641295238095237,"z":-93.99965714285715,"a95":"2.450707","info":"\"94-02-07\" at \"11:02\""},{"visible":true,"include":false,"step":"100","x":7.370795238095238,"y":-5.303751428571429,"z":-55.87440952380952,"a95":"3.48865","info":"\"94-02-08\" at \"09:44\""},{"visible":true,"include":false,"step":"140","x":3.196750476190476,"y":-2.3430971428571428,"z":33.479980952380956,"a95":"4.52594","info":"\"94-02-09\" at \"10:11\""},{"visible":true,"include":false,"step":"180","x":1.8897828571428572,"y":1.1886171428571428,"z":6.198045714285715,"a95":"67.08973","info":"\"94-02-09\" at \"13:00\""},{"visible":true,"include":false,"step":"220","x":0.8244257142857143,"y":-0.7425017142857143,"z":5.036905714285714,"a95":"25.96576","info":"\"94-02-10\" at \"13:46\""},{"visible":true,"include":false,"step":"260","x":-2.1603590476190475,"y":-1.8676895238095237,"z":1.0034361904761906,"a95":"55.42035","info":"\"94-02-11\" at \"09:13\""},{"visible":true,"include":false,"step":"300","x":-2.7249809523809523,"y":-4.8706523809523805,"z":1.6158847619047618,"a95":"22.54476","info":"\"94-02-11\" at \"16:07\""},{"visible":true,"include":false,"step":"340","x":3.11357619047619,"y":-1.3839266666666667,"z":-3.6506295238095237,"a95":"31.2963","info":"\"94-02-14\" at \"09:25\""},{"visible":true,"include":false,"step":"380","x":1.0717133333333333,"y":2.9110561904761902,"z":-1.110327619047619,"a95":"47.4875","info":"\"94-02-14\" at \"13:06\""},{"visible":true,"include":false,"step":"420","x":-1.0384142857142857,"y":2.6853114285714286,"z":-5.591928571428571,"a95":"29.08893","info":"\"94-02-16\" at \"13:01\""},{"visible":true,"include":false,"step":"460","x":2.609442857142857,"y":-2.9545209523809524,"z":6.408906666666667,"a95":"20.20585","info":"\"94-02-16\" at \"15:51\""},{"visible":true,"include":false,"step":"500","x":5.818775238095238,"y":1.9122180952380952,"z":-0.364808,"a95":"24.68709","info":"\"94-02-17\" at \"13:26\""},{"visible":true,"include":false,"step":"540","x":-5.260457142857143,"y":7.915281904761905,"z":6.564377142857143,"a95":"19.09011","info":"\"94-02-18\" at \"09:59\""},{"visible":true,"include":false,"step":"620","x":4.964228571428571,"y":-10.52532380952381,"z":2.187390476190476,"a95":"16.65692","info":"\"94-02-21\" at \"09:45\""},{"visible":true,"include":false,"step":"660","x":-8.47466380952381,"y":2.2105209523809526,"z":6.834504761904761,"a95":"15.77275","info":"\"94-02-21\" at \"13:01\""}],"demagType":"Unknown","patch":1.1,"format":"Unknown","strat":null},{"version":"v1.1.0","exported":"2016-10-11T12:28:25.713Z","info":"","GEO":[],"TECT":[],"interpreted":false,"name":"IN 063.A","coreAzi":90,"coreDip":20,"bedStrike":82,"bedDip":20,"data":[{"visible":true,"include":false,"step":"20","x":-65.9812761904762,"y":-18.572809523809525,"z":16.22324761904762,"a95":"2.333501","info":"\"94-02-07\" at \"11:03\""},{"visible":true,"include":false,"step":"100","x":-82.88926666666667,"y":71.33403809523809,"z":4.728409523809524,"a95":"2.960151","info":"\"94-02-08\" at \"09:48\""},{"visible":true,"include":false,"step":"140","x":-36.756904761904764,"y":4.371166666666666,"z":1.7993590476190477,"a95":"13.08703","info":"\"94-02-09\" at \"10:12\""},{"visible":true,"include":false,"step":"180","x":-8.243613333333334,"y":-4.574779047619048,"z":0.7334775238095238,"a95":"25.60549","info":"\"94-02-09\" at \"13:01\""},{"visible":true,"include":false,"step":"220","x":-2.1607133333333333,"y":1.0238085714285714,"z":-3.9962723809523806,"a95":"110.0047","info":"\"94-02-10\" at \"13:47\""},{"visible":true,"include":false,"step":"260","x":-1.4968914285714285,"y":-1.1728285714285716,"z":-0.7267526666666667,"a95":"74.15813","info":"\"94-02-11\" at \"09:14\""}],"demagType":"Unknown","patch":1.1,"format":"Unknown","strat":null},{"version":"v1.1.0","exported":"2016-10-11T12:28:25.713Z","info":"","GEO":[{"dec":77.581171148659,"inc":-3.0295546686392383,"MAD":10.83402756342525,"cm":[0,-1.8041124150158794e-16,0],"intensity":19.41249353218897,"type":"GC","origin":false,"forced":true,"remark":"","nSteps":3,"minStep":"100","maxStep":"180","steps":["100","140","180"],"group":"None","version":"v1.1.0"}],"TECT":[{"dec":76.81339305574323,"inc":-1.3379248145931997,"MAD":10.834027563425163,"cm":[0,-2.7755575615628914e-16,0],"intensity":19.412493532188975,"type":"GC","origin":false,"forced":true,"remark":"","nSteps":3,"minStep":"100","maxStep":"180","steps":["100","140","180"],"group":"None","version":"v1.1.0"}],"interpreted":true,"name":"IN 063.B","coreAzi":-57,"coreDip":69,"bedStrike":82,"bedDip":20,"data":[{"visible":true,"include":false,"step":"20","x":-4.490713333333334,"y":1.3335790476190477,"z":10.534704761904763,"a95":"4.996337","info":"\"93-11-11\" at \"14:28\""},{"visible":true,"include":true,"step":"100","x":-4.382964761904762,"y":0.9120781904761905,"z":12.171266666666666,"a95":"4.483542","info":"\"93-11-12\" at \"09:25\""},{"visible":true,"include":true,"step":"140","x":-5.555450476190477,"y":-0.7562158095238095,"z":8.116670476190476,"a95":"9.283619","info":"\"93-11-12\" at \"12:25\""},{"visible":true,"include":true,"step":"180","x":-4.591830476190476,"y":-2.5465361904761905,"z":4.964266666666667,"a95":"51.88726","info":"\"93-11-12\" at \"16:40\""},{"visible":true,"include":false,"step":"220","x":-8.662643809523809,"y":3.0063780952380954,"z":4.00484,"a95":"9.345041","info":"\"93-11-15\" at \"12:44\""},{"visible":true,"include":false,"step":"260","x":-2.9237466666666667,"y":-0.7836928571428572,"z":2.10494,"a95":"24.63923","info":"\"93-11-15\" at \"15:45\""},{"visible":true,"include":false,"step":"300","x":-2.6638266666666666,"y":-0.8946693333333334,"z":0.5883714285714285,"a95":"28.06961","info":"\"93-11-15\" at \"21:52\""},{"visible":true,"include":false,"step":"340","x":-2.066064761904762,"y":-0.45597990476190475,"z":-2.628332380952381,"a95":"118.0715","info":"\"93-11-16\" at \"10:33\""},{"visible":true,"include":false,"step":"380","x":-0.9249021904761905,"y":-0.9326570476190477,"z":-0.6063608571428571,"a95":"63.16619","info":"\"93-11-16\" at \"13:27\""},{"visible":true,"include":false,"step":"420","x":-1.400887619047619,"y":-1.3541838095238095,"z":-1.0319704761904762,"a95":"32.8102","info":"\"93-11-16\" at \"15:48\""},{"visible":true,"include":false,"step":"460","x":-1.175615238095238,"y":-1.1070561904761906,"z":-3.8899638095238096,"a95":"43.02809","info":"\"93-11-17\" at \"09:31\""},{"visible":true,"include":false,"step":"500","x":-3.248805714285714,"y":2.439721904761905,"z":-1.0977866666666667,"a95":"23.19197","info":"\"93-11-17\" at \"13:57\""},{"visible":true,"include":false,"step":"540","x":0.07603174285714286,"y":-3.7933933333333334,"z":-3.4886466666666665,"a95":"79.87259","info":"\"93-11-17\" at \"16:11\""},{"visible":true,"include":false,"step":"580","x":-0.15289495238095238,"y":1.8973228571428573,"z":1.1523504761904761,"a95":"48.00882","info":"\"93-11-18\" at \"10:08\""}],"demagType":"Unknown","patch":1.1,"format":"Unknown","strat":null},{"version":"v1.1.0","exported":"2016-10-11T12:28:25.713Z","info":"","GEO":[],"TECT":[],"interpreted":false,"name":"IN 066","coreAzi":150,"coreDip":14,"bedStrike":82,"bedDip":20,"data":[{"visible":true,"include":false,"step":"20","x":-20.912714285714284,"y":1.801827619047619,"z":-4.025677142857143,"a95":"6.536937","info":"\"94-02-07\" at \"11:04\""},{"visible":true,"include":false,"step":"100","x":-9.858971428571428,"y":-7.239507619047619,"z":-4.3102857142857145,"a95":"9.546368","info":"\"94-02-08\" at \"09:50\""},{"visible":true,"include":false,"step":"140","x":-6.291042857142857,"y":1.8154228571428572,"z":-0.548716,"a95":"17.75157","info":"\"94-02-09\" at \"10:21\""},{"visible":true,"include":false,"step":"180","x":-2.1263504761904763,"y":-0.31721923809523805,"z":-0.9356312380952381,"a95":"70.5416","info":"\"94-02-09\" at \"13:02\""},{"visible":true,"include":false,"step":"220","x":-0.21996580952380954,"y":1.1613361904761905,"z":-0.217628,"a95":"71.85566","info":"\"94-02-10\" at \"13:49\""},{"visible":true,"include":false,"step":"260","x":-0.867709238095238,"y":-0.2699046666666667,"z":-0.23194371428571428,"a95":"94.37548","info":"\"94-02-11\" at \"09:15\""}],"demagType":"Unknown","patch":1.1,"format":"Unknown","strat":null},{"version":"v1.1.0","exported":"2016-10-11T12:28:25.713Z","info":"","GEO":[],"TECT":[],"interpreted":false,"name":"IN 097","coreAzi":135,"coreDip":81,"bedStrike":82,"bedDip":20,"data":[{"visible":false,"include":false,"step":"20","x":-844.2252380952381,"y":-180.49514285714287,"z":1245.335238095238,"a95":"1.98881","info":"\"94-02-07\" at \"11:05\""},{"visible":false,"include":false,"step":"100","x":-474.922380952381,"y":-315.75885714285715,"z":896.3039999999999,"a95":"1.510181","info":"\"94-02-08\" at \"09:51\""},{"visible":true,"include":false,"step":"140","x":-252.14742857142855,"y":-132.92904761904762,"z":558.6919047619048,"a95":"4.759164","info":"\"94-02-09\" at \"10:21\""},{"visible":true,"include":false,"step":"180","x":-201.23609523809523,"y":-115.51514285714286,"z":344.9494285714286,"a95":"5.766489","info":"\"94-02-09\" at \"13:03\""},{"visible":true,"include":false,"step":"220","x":-184.02514285714284,"y":-76.54382857142858,"z":233.62409523809524,"a95":"4.865959","info":"\"94-02-10\" at \"13:50\""},{"visible":true,"include":false,"step":"260","x":-131.57038095238096,"y":-9.892199999999999,"z":113.89152380952382,"a95":"6.632755","info":"\"94-02-11\" at \"09:16\""},{"visible":true,"include":false,"step":"300","x":-111.58171428571428,"y":-18.965533333333333,"z":70.95344761904762,"a95":"6.311307","info":"\"94-02-11\" at \"16:10\""},{"visible":true,"include":false,"step":"340","x":-85.30662857142858,"y":-33.198657142857144,"z":65.66618095238096,"a95":"6.748326","info":"\"94-02-14\" at \"09:26\""},{"visible":true,"include":false,"step":"380","x":-60.004371428571424,"y":-28.60130476190476,"z":57.18736190476191,"a95":"7.931915","info":"\"94-02-14\" at \"13:07\""},{"visible":true,"include":false,"step":"420","x":-63.5583619047619,"y":0.12026733333333334,"z":50.15922857142858,"a95":"8.795597","info":"\"94-02-16\" at \"13:02\""},{"visible":true,"include":false,"step":"460","x":-67.13566666666667,"y":18.820390476190475,"z":50.38525714285714,"a95":"7.897915","info":"\"94-02-16\" at \"15:52\""},{"visible":true,"include":false,"step":"500","x":-59.65908571428571,"y":-9.782704761904762,"z":11.184904761904763,"a95":"10.0038","info":"\"94-02-17\" at \"13:27\""},{"visible":true,"include":false,"step":"540","x":-20.39487619047619,"y":25.882561904761907,"z":16.06357142857143,"a95":"12.98589","info":"\"94-02-18\" at \"10:01\""}],"demagType":"Unknown","patch":1.1,"format":"Unknown","strat":null},{"version":"v1.1.0","exported":"2016-10-11T12:28:25.713Z","info":"","GEO":[],"TECT":[],"interpreted":false,"name":"IN 124.1","coreAzi":118,"coreDip":26,"bedStrike":82,"bedDip":20,"data":[{"visible":false,"include":false,"step":"20","x":-331.466,"y":-142.77257142857144,"z":68.01065714285714,"a95":"1.369639","info":"\"93-11-11\" at \"14:29\""},{"visible":true,"include":false,"step":"100","x":-276.6477142857143,"y":-141.84209523809525,"z":78.97067619047618,"a95":"1.761639","info":"\"93-11-12\" at \"09:26\""},{"visible":true,"include":false,"step":"140","x":-183.7822857142857,"y":-129.92961904761904,"z":62.98498095238095,"a95":"2.163022","info":"\"93-11-12\" at \"12:26\""},{"visible":true,"include":false,"step":"180","x":-91.7372380952381,"y":-62.68318095238095,"z":27.971095238095238,"a95":"7.433719","info":"\"93-11-12\" at \"16:41\""},{"visible":true,"include":false,"step":"220","x":-18.544104761904762,"y":-17.331076190476193,"z":13.405142857142856,"a95":"6.77686","info":"\"93-11-15\" at \"12:45\""},{"visible":true,"include":false,"step":"260","x":0.914798380952381,"y":-3.9625809523809528,"z":8.773357142857142,"a95":"19.29021","info":"\"93-11-15\" at \"15:46\""},{"visible":true,"include":false,"step":"300","x":1.8162580952380951,"y":-1.9688761904761907,"z":2.3859485714285715,"a95":"60.71163","info":"\"93-11-15\" at \"21:52\""},{"visible":true,"include":false,"step":"340","x":-1.15526,"y":-1.4897361904761905,"z":-4.529548571428571,"a95":"94.37354","info":"\"93-11-16\" at \"10:34\""},{"visible":true,"include":false,"step":"380","x":1.01808,"y":-3.8852257142857147,"z":12.446885714285713,"a95":"44.47197","info":"\"93-11-16\" at \"13:29\""},{"visible":true,"include":false,"step":"420","x":-2.933926666666667,"y":2.2216514285714286,"z":-8.95428,"a95":"22.47442","info":"\"93-11-16\" at \"15:49\""},{"visible":true,"include":false,"step":"460","x":-6.531552380952381,"y":-1.278997142857143,"z":0.8399405714285715,"a95":"43.52501","info":"\"93-11-17\" at \"09:32\""},{"visible":true,"include":false,"step":"500","x":1.6517314285714286,"y":-8.758294285714285,"z":-2.7121219047619047,"a95":"74.66277","info":"\"93-11-17\" at \"13:59\""},{"visible":true,"include":false,"step":"540","x":-8.889500952380953,"y":-6.949958095238095,"z":9.918609523809524,"a95":"21.90657","info":"\"93-11-17\" at \"16:12\""}],"demagType":"Unknown","patch":1.1,"format":"Unknown","strat":null},{"version":"v1.1.0","exported":"2016-10-11T12:28:25.714Z","info":"","GEO":[],"TECT":[],"interpreted":false,"name":"IN 124.2","coreAzi":118,"coreDip":26,"bedStrike":82,"bedDip":20,"data":[{"visible":true,"include":false,"step":"20","x":-121.48066666666666,"y":-130.51619047619047,"z":41.907695238095236,"a95":"1.904402","info":"\"93-11-11\" at \"14:30\""},{"visible":true,"include":false,"step":"100","x":-91.96539047619048,"y":-102.91952380952381,"z":50.53501904761905,"a95":"2.969779","info":"\"93-11-12\" at \"09:27\""},{"visible":true,"include":false,"step":"140","x":-61.401961904761905,"y":-71.56270476190477,"z":37.02704761904762,"a95":"7.542241","info":"\"93-11-12\" at \"12:27\""},{"visible":true,"include":false,"step":"180","x":-20.436209523809524,"y":-20.874285714285715,"z":15.797514285714286,"a95":"9.049387","info":"\"93-11-12\" at \"16:42\""},{"visible":true,"include":false,"step":"220","x":-4.474706666666667,"y":-3.386334285714286,"z":8.093477142857143,"a95":"18.19054","info":"\"93-11-15\" at \"12:46\""},{"visible":true,"include":false,"step":"260","x":2.930944761904762,"y":-0.41064733333333336,"z":3.205419047619048,"a95":"38.62621","info":"\"93-11-15\" at \"15:48\""},{"visible":true,"include":false,"step":"300","x":0.12389323809523808,"y":0.30038,"z":2.060724761904762,"a95":"108.6607","info":"\"93-11-15\" at \"21:53\""},{"visible":true,"include":false,"step":"340","x":2.0564580952380953,"y":-0.47161028571428576,"z":5.173549523809524,"a95":"77.7328","info":"\"93-11-16\" at \"10:36\""},{"visible":true,"include":false,"step":"380","x":2.418309523809524,"y":0.46349095238095234,"z":-0.5409444761904761,"a95":"88.09653","info":"\"93-11-16\" at \"13:30\""},{"visible":true,"include":false,"step":"420","x":-2.1380409523809525,"y":-0.5437324761904762,"z":-2.155695238095238,"a95":"69.13274","info":"\"93-11-16\" at \"15:50\""},{"visible":true,"include":false,"step":"460","x":-0.8434300952380953,"y":-7.4293676190476186,"z":12.121628571428571,"a95":"30.62781","info":"\"93-11-17\" at \"09:35\""},{"visible":true,"include":false,"step":"500","x":-11.223409523809524,"y":0.15062438095238095,"z":-5.33787619047619,"a95":"31.80806","info":"\"93-11-17\" at \"13:59\""},{"visible":true,"include":false,"step":"540","x":1.1470914285714287,"y":-3.754389523809524,"z":15.074495238095237,"a95":"46.30307","info":"\"93-11-17\" at \"16:13\""}],"demagType":"Unknown","patch":1.1,"format":"Unknown","strat":null},{"version":"v1.1.0","exported":"2016-10-11T12:28:25.714Z","info":"","GEO":[],"TECT":[],"interpreted":false,"name":"IN 124.3","coreAzi":121,"coreDip":19,"bedStrike":82,"bedDip":20,"data":[{"visible":true,"include":false,"step":"20","x":-196.91742857142856,"y":-136.79304761904763,"z":1.0140752380952383,"a95":"2.125069","info":"\"93-11-11\" at \"14:31\""},{"visible":true,"include":false,"step":"100","x":-163.77533333333335,"y":-123.80809523809523,"z":11.773133333333334,"a95":"4.032639","info":"\"93-11-12\" at \"09:28\""},{"visible":true,"include":false,"step":"140","x":-75.3426380952381,"y":-115.99933333333333,"z":5.875649523809524,"a95":"5.139347","info":"\"93-11-12\" at \"12:28\""},{"visible":true,"include":false,"step":"180","x":-36.89270476190476,"y":-38.515457142857144,"z":4.46236380952381,"a95":"6.383978","info":"\"93-11-12\" at \"16:43\""},{"visible":true,"include":false,"step":"220","x":-4.634029523809524,"y":-8.745426666666667,"z":5.729902857142857,"a95":"15.8202","info":"\"93-11-15\" at \"12:47\""},{"visible":true,"include":false,"step":"260","x":1.3795266666666666,"y":-3.4543742857142856,"z":2.2668961904761904,"a95":"49.91608","info":"\"93-11-15\" at \"15:49\""},{"visible":true,"include":false,"step":"300","x":-2.3203285714285715,"y":-0.9213293333333334,"z":0.887989619047619,"a95":"191.2957","info":"\"93-11-15\" at \"21:54\""},{"visible":true,"include":false,"step":"340","x":1.7871914285714285,"y":-1.5594685714285714,"z":0.5948195238095239,"a95":"83.27557","info":"\"93-11-16\" at \"10:37\""},{"visible":true,"include":false,"step":"380","x":1.4728323809523811,"y":1.6406838095238097,"z":-2.0537380952380953,"a95":"79.16525","info":"\"93-11-16\" at \"13:31\""},{"visible":true,"include":false,"step":"420","x":-5.623131428571428,"y":-0.5390132380952382,"z":-1.3905666666666665,"a95":"36.44734","info":"\"93-11-16\" at \"15:50\""},{"visible":true,"include":false,"step":"460","x":-2.423867619047619,"y":-5.3654142857142855,"z":-5.6638971428571425,"a95":"33.32835","info":"\"93-11-17\" at \"09:35\""},{"visible":true,"include":false,"step":"500","x":-6.122161904761906,"y":1.937950476190476,"z":-9.031013333333334,"a95":"49.63628","info":"\"93-11-17\" at \"14:00\""},{"visible":true,"include":false,"step":"540","x":-5.046228571428571,"y":-18.198409523809524,"z":1.1419638095238096,"a95":"15.07226","info":"\"93-11-17\" at \"16:14\""}],"demagType":"Unknown","patch":1.1,"format":"Unknown","strat":null},{"version":"v1.1.0","exported":"2016-10-11T12:28:25.714Z","info":"","GEO":[{"dec":115.87358413634524,"inc":-17.51690680284093,"MAD":10.39665643108328,"cm":[-1.3813302990118135,8.817340228150421,-4.426717477775444],"intensity":9.713397610767158,"type":"dir","forced":false,"remark":"","origin":false,"nSteps":3,"minStep":"220","maxStep":"300","steps":["220","260","300"],"group":"None","version":"v1.1.0"}],"TECT":[{"dec":108.60175969583264,"inc":-27.685942294587814,"MAD":10.396656431083292,"cm":[0.27293789510979327,8.584847995326951,-5.047304183870258],"intensity":9.71339761076716,"type":"dir","forced":false,"remark":"","origin":false,"nSteps":3,"minStep":"220","maxStep":"300","steps":["220","260","300"],"group":"None","version":"v1.1.0"}],"interpreted":true,"name":"IN 124.4","coreAzi":124,"coreDip":17,"bedStrike":82,"bedDip":20,"data":[{"visible":true,"include":false,"step":"20","x":-25.745019047619046,"y":-29.416266666666665,"z":-10.374009523809523,"a95":"6.604702","info":"\"93-11-11\" at \"14:32\""},{"visible":true,"include":false,"step":"100","x":-10.969942857142858,"y":-17.492247619047617,"z":19.271314285714286,"a95":"7.783734","info":"\"93-11-12\" at \"09:29\""},{"visible":true,"include":false,"step":"140","x":0.9360365714285714,"y":-9.420554285714285,"z":18.950838095238094,"a95":"11.3617","info":"\"93-11-12\" at \"12:29\""},{"visible":true,"include":false,"step":"180","x":7.7287333333333335,"y":-4.530104761904762,"z":11.060247619047619,"a95":"19.75286","info":"\"93-11-12\" at \"16:44\""},{"visible":true,"include":true,"step":"220","x":10.198666666666666,"y":-4.66322,"z":11.623333333333333,"a95":"10.87811","info":"\"93-11-15\" at \"12:48\""},{"visible":true,"include":true,"step":"260","x":4.52636380952381,"y":-2.474210476190476,"z":4.291446666666666,"a95":"25.90573","info":"\"93-11-15\" at \"15:51\""},{"visible":true,"include":true,"step":"300","x":5.063981904761905,"y":-4.2188276190476195,"z":3.390009523809524,"a95":"27.21542","info":"\"93-11-15\" at \"21:55\""},{"visible":true,"include":false,"step":"340","x":7.883311428571429,"y":-1.7470476190476192,"z":4.237917142857143,"a95":"18.85084","info":"\"93-11-16\" at \"10:38\""},{"visible":true,"include":false,"step":"380","x":6.151245714285714,"y":-1.4181438095238097,"z":3.2462342857142854,"a95":"28.54","info":"\"93-11-16\" at \"13:32\""},{"visible":true,"include":false,"step":"420","x":-12.407914285714284,"y":-6.34443619047619,"z":-12.522104761904762,"a95":"35.82729","info":"\"93-11-16\" at \"15:51\""},{"visible":true,"include":false,"step":"460","x":-7.53600380952381,"y":-5.569536190476191,"z":66.17097142857143,"a95":"30.91803","info":"\"93-11-17\" at \"09:36\""},{"visible":true,"include":false,"step":"500","x":2.0067771428571426,"y":43.003123809523814,"z":-0.2954801904761905,"a95":"28.59414","info":"\"93-11-17\" at \"14:01\""},{"visible":true,"include":false,"step":"540","x":-14.287342857142857,"y":-15.434466666666667,"z":-19.56657142857143,"a95":"27.41077","info":"\"93-11-17\" at \"16:15\""}],"demagType":"Unknown","patch":1.1,"format":"Unknown","strat":null},{"version":"v1.1.0","exported":"2016-10-11T12:28:25.714Z","info":"","GEO":[],"TECT":[],"interpreted":false,"name":"IN 124.5","coreAzi":113,"coreDip":18,"bedStrike":82,"bedDip":20,"data":[{"visible":true,"include":false,"step":"20","x":-301.6455238095238,"y":-113.90733333333334,"z":33.36118095238095,"a95":"1.987681","info":"\"93-11-11\" at \"14:34\""},{"visible":true,"include":false,"step":"100","x":-244.64228571428572,"y":-80.80279047619048,"z":57.65108571428571,"a95":"2.06735","info":"\"93-11-12\" at \"09:30\""},{"visible":true,"include":false,"step":"140","x":-177.95238095238096,"y":-65.85355238095238,"z":41.498980952380954,"a95":"2.12017","info":"\"93-11-12\" at \"12:30\""},{"visible":true,"include":false,"step":"180","x":-75.76492380952381,"y":-43.44186666666666,"z":22.47132380952381,"a95":"4.438008","info":"\"93-11-12\" at \"16:45\""},{"visible":true,"include":false,"step":"220","x":-15.143628571428573,"y":-10.589628571428571,"z":19.98004761904762,"a95":"6.330018","info":"\"93-11-15\" at \"12:49\""},{"visible":true,"include":false,"step":"260","x":-9.249468571428572,"y":-3.0985361904761906,"z":9.186860952380952,"a95":"14.27305","info":"\"93-11-15\" at \"15:53\""},{"visible":true,"include":false,"step":"300","x":-3.9294076190476193,"y":-8.731880952380951,"z":20.443114285714287,"a95":"9.41203","info":"\"93-11-15\" at \"21:57\""},{"visible":true,"include":false,"step":"340","x":-1.8708704761904762,"y":2.916654285714286,"z":8.59820380952381,"a95":"49.26745","info":"\"93-11-16\" at \"10:39\""},{"visible":true,"include":false,"step":"380","x":2.0283238095238096,"y":-5.390792380952381,"z":0.18873390476190477,"a95":"42.59165","info":"\"93-11-16\" at \"13:33\""},{"visible":true,"include":false,"step":"420","x":-3.0305847619047617,"y":-3.453090476190476,"z":3.1948533333333335,"a95":"38.30984","info":"\"93-11-16\" at \"15:53\""},{"visible":true,"include":false,"step":"460","x":-1.9729257142857144,"y":-6.254932380952381,"z":6.491695238095239,"a95":"27.06882","info":"\"93-11-17\" at \"09:37\""},{"visible":true,"include":false,"step":"500","x":9.115104761904762,"y":9.909266666666667,"z":-3.3374942857142855,"a95":"31.1839","info":"\"93-11-17\" at \"14:02\""},{"visible":true,"include":false,"step":"540","x":-7.476133333333332,"y":-21.211266666666667,"z":25.60851428571429,"a95":"9.535769","info":"\"93-11-17\" at \"16:17\""}],"demagType":"Unknown","patch":1.1,"format":"Unknown","strat":null},{"version":"v1.1.0","exported":"2016-10-11T12:28:25.714Z","info":"","GEO":[{"dec":55.46510073260191,"inc":-16.55754591550207,"MAD":3.482615657081794,"cm":[0,-2.55351295663786e-15,0],"intensity":60.030140142650104,"type":"GC","origin":false,"forced":true,"remark":"","nSteps":4,"minStep":"100","maxStep":"220","steps":["100","140","180","220"],"group":"None","version":"v1.1.0"}],"TECT":[{"dec":55.55500464312007,"inc":-36.556775472606574,"MAD":3.4826156570821984,"cm":[5.551115123125783e-15,-4.218847493575595e-15,1.9984014443252818e-15],"intensity":60.03014014265011,"type":"GC","origin":false,"forced":true,"remark":"","nSteps":4,"minStep":"100","maxStep":"220","steps":["100","140","180","220"],"group":"None","version":"v1.1.0"}],"interpreted":true,"name":"IN 125","coreAzi":44,"coreDip":0,"bedStrike":325,"bedDip":20,"data":[{"visible":true,"include":false,"step":"20","x":-93.25631428571428,"y":-34.08801904761905,"z":28.722447619047617,"a95":"3.969645","info":"\"94-02-07\" at \"11:06\""},{"visible":true,"include":true,"step":"100","x":-46.236399999999996,"y":-23.211438095238094,"z":18.719390476190476,"a95":"11.86889","info":"\"94-02-08\" at \"09:53\""},{"visible":true,"include":true,"step":"140","x":-35.004914285714285,"y":-2.9394419047619045,"z":11.463161904761906,"a95":"8.114854","info":"\"94-02-09\" at \"10:22\""},{"visible":true,"include":true,"step":"180","x":-18.693961904761903,"y":7.152327619047619,"z":3.4053390476190475,"a95":"14.92441","info":"\"94-02-09\" at \"13:04\""},{"visible":true,"include":true,"step":"220","x":-7.98624,"y":7.566919047619048,"z":1.744530476190476,"a95":"43.50528","info":"\"94-02-10\" at \"13:51\""},{"visible":true,"include":false,"step":"260","x":-0.5439225714285714,"y":13.741438095238095,"z":-0.5636107619047619,"a95":"17.46129","info":"\"94-02-11\" at \"09:17\""},{"visible":true,"include":false,"step":"300","x":-8.136481904761904,"y":2.070590476190476,"z":3.8804190476190477,"a95":"21.46537","info":"\"94-02-11\" at \"16:10\""},{"visible":true,"include":false,"step":"340","x":-2.052687619047619,"y":-3.5625590476190476,"z":9.12284,"a95":"19.15438","info":"\"94-02-14\" at \"09:28\""},{"visible":true,"include":false,"step":"380","x":-0.8899178095238095,"y":-0.9743780952380952,"z":-5.928109523809524,"a95":"31.19356","info":"\"94-02-14\" at \"13:08\""},{"visible":true,"include":false,"step":"420","x":0.2903043809523809,"y":-5.298141904761905,"z":0.02188312380952381,"a95":"44.35286","info":"\"94-02-16\" at \"13:03\""},{"visible":true,"include":false,"step":"460","x":-3.273709523809524,"y":2.0476695238095237,"z":6.459648571428572,"a95":"31.57829","info":"\"94-02-16\" at \"15:53\""},{"visible":true,"include":false,"step":"500","x":-5.302121904761905,"y":-6.850346666666667,"z":-5.32949619047619,"a95":"23.63694","info":"\"94-02-17\" at \"13:29\""},{"visible":true,"include":false,"step":"540","x":-8.679837142857142,"y":-5.172371428571428,"z":-6.18577619047619,"a95":"27.07202","info":"\"94-02-18\" at \"10:02\""}],"demagType":"Unknown","patch":1.1,"format":"Unknown","strat":null},{"version":"v1.1.0","exported":"2016-10-11T12:28:25.714Z","info":"","GEO":[{"dec":106.80882461375398,"inc":-21.003959243667428,"MAD":4.487107547435191,"cm":[5.329070518200751e-15,3.552713678800501e-15,0],"intensity":250.6296863681342,"type":"dir","forced":true,"remark":"","origin":false,"nSteps":4,"minStep":"340","maxStep":"460","steps":["340","380","420","460"],"group":"None","version":"v1.1.0"}],"TECT":[{"dec":98.15668900363823,"inc":-28.085580591981067,"MAD":4.487107547435203,"cm":[-7.327471962526033e-15,1.7763568394002505e-15,-8.881784197001252e-16],"intensity":250.6296863681342,"type":"dir","forced":true,"remark":"","origin":false,"nSteps":4,"minStep":"340","maxStep":"460","steps":["340","380","420","460"],"group":"None","version":"v1.1.0"}],"interpreted":true,"name":"IN 126.1","coreAzi":106,"coreDip":42,"bedStrike":82,"bedDip":20,"data":[{"visible":false,"include":false,"step":"20","x":-128.40685714285715,"y":-210.67542857142857,"z":234.3970476190476,"a95":"1.943883","info":"\"93-11-11\" at \"14:35\""},{"visible":false,"include":false,"step":"100","x":-61.90895238095238,"y":-171.9784761904762,"z":232.69180952380952,"a95":"2.200419","info":"\"93-11-12\" at \"09:30\""},{"visible":true,"include":false,"step":"140","x":35.07179047619048,"y":-120.32714285714285,"z":174.11371428571428,"a95":"2.170167","info":"\"93-11-12\" at \"12:31\""},{"visible":true,"include":false,"step":"180","x":91.96099047619047,"y":-55.739314285714286,"z":109.4567619047619,"a95":"5.555108","info":"\"93-11-12\" at \"16:46\""},{"visible":true,"include":false,"step":"220","x":111.06895238095237,"y":-42.6178,"z":90.22828571428572,"a95":"4.057432","info":"\"93-11-15\" at \"12:50\""},{"visible":true,"include":false,"step":"260","x":131.54685714285714,"y":4.350656190476191,"z":62.91266666666667,"a95":"2.594317","info":"\"93-11-15\" at \"15:54\""},{"visible":true,"include":false,"step":"300","x":131.55961904761904,"y":-11.477304761904762,"z":65.26447619047619,"a95":"2.364755","info":"\"93-11-15\" at \"21:58\""},{"visible":true,"include":true,"step":"340","x":121.69361904761904,"y":14.51804761904762,"z":56.94310476190476,"a95":"2.612983","info":"\"93-11-16\" at \"10:41\""},{"visible":true,"include":true,"step":"380","x":118.07742857142858,"y":1.330822857142857,"z":61.931038095238094,"a95":"4.20806","info":"\"93-11-16\" at \"13:34\""},{"visible":true,"include":true,"step":"420","x":102.13914285714286,"y":-6.262466666666667,"z":46.54807619047619,"a95":"3.489611","info":"\"93-11-16\" at \"15:54\""},{"visible":true,"include":true,"step":"460","x":99.82057142857143,"y":-5.275557142857143,"z":59.93837142857143,"a95":"3.265671","info":"\"93-11-17\" at \"09:38\""},{"visible":true,"include":false,"step":"500","x":101.60066666666667,"y":-2.1820819047619047,"z":37.506209523809524,"a95":"5.613585","info":"\"93-11-17\" at \"14:03\""},{"visible":true,"include":false,"step":"540","x":108.84695238095239,"y":-7.927091428571428,"z":64.92693333333334,"a95":"3.406868","info":"\"93-11-17\" at \"16:17\""},{"visible":true,"include":false,"step":"580","x":88.57581904761905,"y":16.368771428571428,"z":37.87080952380953,"a95":"2.324121","info":"\"93-11-18\" at \"10:10\""},{"visible":false,"include":false,"step":"620","x":66.17648571428572,"y":-3.838529523809524,"z":-8.887401904761905,"a95":"4.242786","info":"\"93-11-18\" at \"12:31\""},{"visible":false,"include":false,"step":"660","x":56.348200000000006,"y":18.61297142857143,"z":27.996085714285716,"a95":"3.999638","info":"\"93-11-18\" at \"15:08\""},{"visible":false,"include":false,"step":"700","x":-15.090190476190477,"y":16.297790476190478,"z":-0.21815,"a95":"13.12829","info":"\"93-11-18\" at \"19:54\""}],"demagType":"Unknown","patch":1.1,"format":"Unknown","strat":null},{"version":"v1.1.0","exported":"2016-10-11T12:28:25.714Z","info":"","GEO":[{"dec":51.46953042819723,"inc":-41.679972678267035,"MAD":11.228496490566778,"cm":[-1.3322676295501878e-14,8.881784197001252e-15,0],"intensity":326.249030524358,"type":"GC","origin":false,"forced":true,"remark":"","nSteps":5,"minStep":"140","maxStep":"300","steps":["140","180","220","260","300"],"group":"None","version":"v1.1.0"}],"TECT":[{"dec":39.76926940088151,"inc":-29.67645704954753,"MAD":11.228496490566675,"cm":[-1.7763568394002505e-15,2.930988785010413e-14,-7.105427357601002e-15],"intensity":326.249030524358,"type":"GC","origin":false,"forced":true,"remark":"","nSteps":5,"minStep":"140","maxStep":"300","steps":["140","180","220","260","300"],"group":"None","version":"v1.1.0"}],"interpreted":true,"name":"IN 126.2","coreAzi":111,"coreDip":42,"bedStrike":82,"bedDip":20,"data":[{"visible":true,"include":false,"step":"20","x":-246.6502857142857,"y":-380.03409523809523,"z":226.58504761904763,"a95":"3.320038","info":"\"93-11-11\" at \"14:36\""},{"visible":true,"include":false,"step":"100","x":-245.5627619047619,"y":-264.2729523809524,"z":260.50161904761904,"a95":"2.180954","info":"\"93-11-12\" at \"09:31\""},{"visible":true,"include":true,"step":"140","x":-112.77838095238096,"y":-192.13342857142857,"z":197.88266666666667,"a95":"2.372434","info":"\"93-11-12\" at \"12:32\""},{"visible":true,"include":true,"step":"180","x":-42.65754285714286,"y":-55.20379047619048,"z":127.49314285714287,"a95":"3.994593","info":"\"93-11-12\" at \"16:47\""},{"visible":true,"include":true,"step":"220","x":0.849846,"y":-20.23122857142857,"z":103.1,"a95":"4.21507","info":"\"93-11-15\" at \"12:51\""},{"visible":true,"include":true,"step":"260","x":24.1746,"y":-4.938272380952381,"z":80.1089238095238,"a95":"4.970567","info":"\"93-11-15\" at \"15:56\""},{"visible":true,"include":true,"step":"300","x":31.938638095238097,"y":11.252238095238095,"z":61.3187238095238,"a95":"6.84352","info":"\"93-11-15\" at \"21:59\""},{"visible":true,"include":false,"step":"340","x":48.16625714285714,"y":-2.7023885714285716,"z":32.781819047619045,"a95":"7.295533","info":"\"93-11-16\" at \"10:42\""},{"visible":true,"include":false,"step":"380","x":41.27148571428571,"y":-4.915029523809524,"z":28.78187619047619,"a95":"8.765766","info":"\"93-11-16\" at \"13:35\""},{"visible":true,"include":false,"step":"420","x":44.51517142857143,"y":-8.095110476190476,"z":17.918400000000002,"a95":"7.595742","info":"\"93-11-16\" at \"15:56\""},{"visible":true,"include":false,"step":"460","x":44.03888571428571,"y":13.46490476190476,"z":14.476399999999998,"a95":"8.498554","info":"\"93-11-17\" at \"09:39\""},{"visible":true,"include":false,"step":"500","x":41.23273333333333,"y":19.80990476190476,"z":26.19365714285714,"a95":"8.743551","info":"\"93-11-17\" at \"14:04\""},{"visible":true,"include":false,"step":"540","x":20.793885714285715,"y":-5.114028571428571,"z":7.940420952380952,"a95":"27.36879","info":"\"93-11-17\" at \"16:18\""},{"visible":true,"include":false,"step":"580","x":13.697019047619047,"y":28.04426666666667,"z":0.9162558095238095,"a95":"9.565862","info":"\"93-11-18\" at \"10:12\""},{"visible":true,"include":false,"step":"620","x":12.09364761904762,"y":16.860333333333333,"z":-0.6769437142857143,"a95":"15.51721","info":"\"93-11-18\" at \"12:33\""},{"visible":true,"include":false,"step":"660","x":-5.291311428571428,"y":7.281630476190476,"z":20.199952380952382,"a95":"13.11974","info":"\"93-11-18\" at \"15:09\""}],"demagType":"Unknown","patch":1.1,"format":"Unknown","strat":null},{"version":"v1.1.0","exported":"2016-10-11T12:28:25.714Z","info":"","GEO":[],"TECT":[],"interpreted":false,"name":"IN 127","coreAzi":72,"coreDip":83,"bedStrike":82,"bedDip":20,"data":[{"visible":false,"include":false,"step":"20","x":71.05145714285715,"y":181.7844761904762,"z":181.11266666666666,"a95":"2.861676","info":"\"93-11-11\" at \"14:37\""},{"visible":false,"include":false,"step":"100","x":52.86481904761905,"y":-157.0267619047619,"z":-161.28314285714285,"a95":"2.301603","info":"\"93-11-12\" at \"09:33\""},{"visible":true,"include":false,"step":"140","x":115.19028571428572,"y":-67.3651619047619,"z":116.08304761904762,"a95":"1.828792","info":"\"93-11-12\" at \"12:33\""},{"visible":true,"include":false,"step":"180","x":23.810076190476188,"y":96.26019047619047,"z":54.12264761904761,"a95":"4.88431","info":"\"93-11-12\" at \"16:50\""},{"visible":true,"include":false,"step":"220","x":-3.027447619047619,"y":80.00211428571428,"z":36.55186666666667,"a95":"3.013279","info":"\"93-11-15\" at \"12:53\""},{"visible":true,"include":false,"step":"260","x":-9.112330476190476,"y":61.97344761904761,"z":38.026828571428574,"a95":"4.144053","info":"\"93-11-15\" at \"15:57\""},{"visible":true,"include":false,"step":"300","x":-3.1494314285714284,"y":44.34832380952381,"z":19.570914285714284,"a95":"3.55245","info":"\"93-11-15\" at \"22:00\""},{"visible":true,"include":false,"step":"340","x":-8.525769523809524,"y":36.774723809523806,"z":15.453657142857143,"a95":"5.444953","info":"\"93-11-16\" at \"10:43\""},{"visible":true,"include":false,"step":"380","x":3.418830476190476,"y":35.85406666666667,"z":6.683106666666666,"a95":"4.475393","info":"\"93-11-16\" at \"13:36\""},{"visible":true,"include":false,"step":"420","x":-15.770304761904763,"y":18.07378095238095,"z":11.88572380952381,"a95":"8.085359","info":"\"93-11-16\" at \"15:59\""},{"visible":true,"include":false,"step":"460","x":21.49284761904762,"y":26.631514285714285,"z":0.7225122857142857,"a95":"11.68396","info":"\"93-11-17\" at \"09:40\""},{"visible":true,"include":false,"step":"500","x":-2.2386961904761904,"y":30.183809523809526,"z":-7.30134761904762,"a95":"6.636317","info":"\"93-11-17\" at \"14:04\""},{"visible":true,"include":false,"step":"540","x":8.906401904761903,"y":7.9154495238095235,"z":16.13727619047619,"a95":"31.97494","info":"\"93-11-17\" at \"16:19\""},{"visible":true,"include":false,"step":"580","x":-2.4539590476190476,"y":24.595380952380953,"z":-9.92152380952381,"a95":"4.465389","info":"\"93-11-18\" at \"10:13\""},{"visible":true,"include":false,"step":"620","x":1.566797142857143,"y":-0.514655619047619,"z":-30.740980952380955,"a95":"4.909317","info":"\"93-11-18\" at \"12:35\""}],"demagType":"Unknown","patch":1.1,"format":"Unknown","strat":null},{"version":"v1.1.0","exported":"2016-10-11T12:28:25.714Z","info":"","GEO":[{"dec":21.1792626088627,"inc":-12.912029339717947,"MAD":3.465473577630251,"cm":[-3.6415315207705135e-14,0,0],"intensity":1565.197709963319,"type":"GC","origin":false,"forced":true,"remark":"","nSteps":7,"minStep":"100","maxStep":"340","steps":["100","140","180","220","260","300","340"],"group":"None","version":"v1.1.0"}],"TECT":[{"dec":200.47569200388102,"inc":-4.6510933075289635,"MAD":3.465473577630036,"cm":[-4.1744385725905886e-14,3.197442310920451e-14,-1.509903313490213e-14],"intensity":1565.1977099633189,"type":"GC","origin":false,"forced":true,"remark":"","nSteps":7,"minStep":"100","maxStep":"340","steps":["100","140","180","220","260","300","340"],"group":"None","version":"v1.1.0"}],"interpreted":true,"name":"IN 128","coreAzi":110,"coreDip":15,"bedStrike":82,"bedDip":20,"data":[{"visible":true,"include":false,"step":"20","x":-1290.7152380952382,"y":-427.8444761904762,"z":650.9187619047619,"a95":"1.624367","info":"\"93-11-11\" at \"14:38\""},{"visible":true,"include":true,"step":"100","x":-1165.687619047619,"y":-285.41371428571426,"z":662.2159047619048,"a95":"2.444684","info":"\"93-11-12\" at \"09:34\""},{"visible":true,"include":true,"step":"140","x":-831.2585714285715,"y":-215.28638095238097,"z":594.6991428571429,"a95":"1.355985","info":"\"93-11-12\" at \"12:33\""},{"visible":true,"include":true,"step":"180","x":-387.3092380952381,"y":-116.70819047619047,"z":460.52352380952385,"a95":"1.97155","info":"\"93-11-12\" at \"16:50\""},{"visible":true,"include":true,"step":"220","x":-229.3187619047619,"y":-73.4752380952381,"z":430.7577142857143,"a95":"2.632553","info":"\"93-11-15\" at \"12:54\""},{"visible":true,"include":true,"step":"260","x":-130.53285714285715,"y":-28.707076190476194,"z":343.7632380952381,"a95":"2.643407","info":"\"93-11-15\" at \"15:58\""},{"visible":true,"include":true,"step":"300","x":-57.3046380952381,"y":-36.362076190476195,"z":291.46295238095234,"a95":"2.779585","info":"\"93-11-15\" at \"22:01\""},{"visible":true,"include":true,"step":"340","x":-59.389114285714285,"y":-9.272416190476191,"z":266.32647619047617,"a95":"3.373417","info":"\"93-11-16\" at \"10:44\""},{"visible":true,"include":false,"step":"380","x":2.8399571428571426,"y":34.45869523809524,"z":9.954857142857142,"a95":"6.995743","info":"\"93-11-16\" at \"13:38\""},{"visible":true,"include":false,"step":"420","x":-26.551266666666667,"y":-15.053819047619047,"z":210.03866666666667,"a95":"2.965693","info":"\"93-11-16\" at \"16:00\""},{"visible":true,"include":false,"step":"460","x":-8.532464761904762,"y":-40.037352380952385,"z":230.60161904761904,"a95":"3.125827","info":"\"93-11-17\" at \"09:41\""},{"visible":true,"include":false,"step":"500","x":-26.23881904761905,"y":-33.848390476190474,"z":149.68914285714285,"a95":"8.296907","info":"\"93-11-17\" at \"14:05\""},{"visible":true,"include":false,"step":"540","x":-18.92621904761905,"y":-24.20507619047619,"z":205.04685714285716,"a95":"3.232549","info":"\"93-11-17\" at \"16:20\""},{"visible":true,"include":false,"step":"580","x":20.071285714285715,"y":-6.2839752380952385,"z":166.2692380952381,"a95":"2.914544","info":"\"93-11-18\" at \"10:14\""},{"visible":true,"include":false,"step":"620","x":38.986961904761905,"y":27.551523809523808,"z":78.76971428571429,"a95":"4.927412","info":"\"93-11-18\" at \"12:36\""},{"visible":true,"include":false,"step":"660","x":16.952561904761904,"y":-0.8848244761904761,"z":119.3555238095238,"a95":"2.599235","info":"\"93-11-18\" at \"15:10\""}],"demagType":"Unknown","patch":1.1,"format":"Unknown","strat":null},{"version":"v1.1.0","exported":"2016-10-11T12:28:25.714Z","info":"","GEO":[{"dec":293.13065702757683,"inc":-9.244532617570732,"MAD":7.277103070739318,"cm":[-1.5543122344752192e-15,6.661338147750939e-16,0],"intensity":166.08089301714162,"type":"GC","origin":false,"forced":true,"remark":"","nSteps":5,"minStep":"140","maxStep":"300","steps":["140","180","220","260","300"],"group":"None","version":"v1.1.0"}],"TECT":[{"dec":114.31655563262996,"inc":-1.3502867603550892,"MAD":7.277103070739271,"cm":[2.220446049250313e-15,-5.773159728050814e-15,-4.440892098500626e-16],"intensity":166.08089301714162,"type":"GC","origin":false,"forced":true,"remark":"","nSteps":5,"minStep":"140","maxStep":"300","steps":["140","180","220","260","300"],"group":"None","version":"v1.1.0"}],"interpreted":true,"name":"IN 130","coreAzi":10,"coreDip":72,"bedStrike":82,"bedDip":20,"data":[{"visible":false,"include":false,"step":"20","x":-44.832523809523806,"y":16.329419047619048,"z":222.4782857142857,"a95":"2.058649","info":"\"93-11-11\" at \"14:40\""},{"visible":true,"include":false,"step":"100","x":-33.191019047619044,"y":15.841323809523809,"z":196.68399999999997,"a95":"1.864244","info":"\"93-11-12\" at \"09:36\""},{"visible":true,"include":true,"step":"140","x":-29.68272380952381,"y":-19.874314285714284,"z":134.35266666666666,"a95":"2.697859","info":"\"93-11-12\" at \"12:34\""},{"visible":true,"include":true,"step":"180","x":-36.24512380952381,"y":-12.40317142857143,"z":60.88657142857143,"a95":"4.197809","info":"\"93-11-12\" at \"16:51\""},{"visible":true,"include":true,"step":"220","x":-25.507019047619046,"y":-14.359209523809525,"z":43.82595238095238,"a95":"4.859745","info":"\"93-11-15\" at \"12:55\""},{"visible":true,"include":true,"step":"260","x":-30.86906666666667,"y":-10.404542857142857,"z":28.32913333333333,"a95":"6.830533","info":"\"93-11-15\" at \"16:03\""},{"visible":true,"include":true,"step":"300","x":-24.196733333333334,"y":-9.09125619047619,"z":20.0522,"a95":"6.823591","info":"\"93-11-15\" at \"22:02\""},{"visible":true,"include":false,"step":"340","x":15.357447619047619,"y":34.188495238095236,"z":-69.84597142857143,"a95":"9.495654","info":"\"93-11-16\" at \"10:47\""},{"visible":true,"include":false,"step":"380","x":-26.1436,"y":-17.709790476190477,"z":240.87580952380952,"a95":"3.423458","info":"\"93-11-16\" at \"13:39\""},{"visible":true,"include":false,"step":"420","x":-15.652219047619047,"y":-11.064485714285714,"z":5.0638838095238095,"a95":"7.577969","info":"\"93-11-16\" at \"16:02\""},{"visible":true,"include":false,"step":"460","x":-14.818904761904761,"y":1.35398,"z":6.526621904761904,"a95":"14.16468","info":"\"93-11-17\" at \"09:42\""},{"visible":false,"include":false,"step":"500","x":-21.71447619047619,"y":-11.0868,"z":-10.228819047619048,"a95":"10.88325","info":"\"93-11-17\" at \"14:06\""},{"visible":false,"include":false,"step":"540","x":-1.3303685714285716,"y":-7.465649523809524,"z":-1.5811314285714286,"a95":"29.70661","info":"\"93-11-17\" at \"16:21\""},{"visible":false,"include":false,"step":"580","x":-0.08702166666666666,"y":28.190895238095237,"z":1.7863285714285715,"a95":"7.73112","info":"\"93-11-18\" at \"10:16\""}],"demagType":"Unknown","patch":1.1,"format":"Unknown","strat":null},{"version":"v1.1.0","exported":"2016-10-11T12:28:25.714Z","info":"","GEO":[{"dec":64.96510807531138,"inc":-33.36341688454717,"MAD":4.383361984436546,"cm":[-1.021405182655144e-14,0,0],"intensity":546.0492540471215,"type":"GC","origin":false,"forced":true,"remark":"","nSteps":3,"minStep":"140","maxStep":"380","steps":["140","340","380"],"group":"None","version":"v1.1.0"}],"TECT":[{"dec":68.87992699426195,"inc":-52.95161816806152,"MAD":4.383361984435344,"cm":[-1.6209256159527285e-14,-1.0658141036401503e-14,0],"intensity":546.0492540471216,"type":"GC","origin":false,"forced":true,"remark":"","nSteps":3,"minStep":"140","maxStep":"380","steps":["140","340","380"],"group":"None","version":"v1.1.0"}],"interpreted":true,"name":"IN 131","coreAzi":85,"coreDip":88,"bedStrike":325,"bedDip":20,"data":[{"visible":false,"include":false,"step":"20","x":65.93453333333333,"y":-367.88580952380954,"z":993.0104761904762,"a95":"1.661867","info":"\"94-02-07\" at \"11:07\""},{"visible":false,"include":false,"step":"100","x":-23.539695238095238,"y":-273.5052380952381,"z":713.0317142857142,"a95":"1.314264","info":"\"94-02-08\" at \"09:55\""},{"visible":true,"include":true,"step":"140","x":199.3658095238095,"y":-185.16057142857142,"z":408.0684761904762,"a95":"2.004864","info":"\"94-02-09\" at \"10:23\""},{"visible":true,"include":false,"step":"180","x":161.8002857142857,"y":-54.67220952380953,"z":275.5005714285714,"a95":"3.64406","info":"\"94-02-09\" at \"13:04\""},{"visible":true,"include":false,"step":"220","x":110.36666666666666,"y":13.509742857142859,"z":190.01085714285713,"a95":"3.808457","info":"\"94-02-10\" at \"13:52\""},{"visible":false,"include":false,"step":"260","x":70.89686666666667,"y":3.2397285714285715,"z":110.6937142857143,"a95":"9.96598","info":"\"94-02-11\" at \"09:17\""},{"visible":true,"include":false,"step":"300","x":72.82953333333333,"y":28.94551428571429,"z":81.33339047619047,"a95":"5.588548","info":"\"94-02-11\" at \"16:11\""},{"visible":true,"include":true,"step":"340","x":60.812952380952375,"y":34.6022,"z":81.89174285714286,"a95":"5.557112","info":"\"94-02-14\" at \"09:29\""},{"visible":true,"include":true,"step":"380","x":48.289476190476186,"y":23.73018095238095,"z":51.03595238095239,"a95":"7.019517","info":"\"94-02-14\" at \"13:08\""},{"visible":true,"include":false,"step":"420","x":48.62274285714285,"y":4.593497142857143,"z":35.09155238095238,"a95":"10.90763","info":"\"94-02-16\" at \"13:04\""},{"visible":true,"include":false,"step":"460","x":49.94479047619048,"y":9.367013333333333,"z":51.29072380952381,"a95":"8.350705","info":"\"94-02-16\" at \"15:54\""},{"visible":true,"include":false,"step":"500","x":56.34173333333334,"y":41.344742857142855,"z":14.295342857142858,"a95":"7.709552","info":"\"94-02-17\" at \"13:30\""},{"visible":true,"include":false,"step":"540","x":41.34890476190476,"y":47.79429523809524,"z":-2.4732809523809522,"a95":"7.943428","info":"\"94-02-18\" at \"10:03\""},{"visible":true,"include":false,"step":"580","x":42.438942857142855,"y":16.09097142857143,"z":6.931903809523809,"a95":"10.69249","info":"\"94-02-18\" at \"15:19\""},{"visible":true,"include":false,"step":"620","x":45.65594285714286,"y":29.20745714285714,"z":-10.961733333333333,"a95":"6.878751","info":"\"94-02-21\" at \"09:46\""},{"visible":true,"include":false,"step":"660","x":42.43709523809524,"y":27.75301904761905,"z":10.958542857142858,"a95":"10.46504","info":"\"94-02-21\" at \"13:02\""},{"visible":true,"include":false,"step":"700","x":4.52166,"y":-24.854819047619046,"z":-3.3005980952380956,"a95":"10.00362","info":"\"94-02-21\" at \"15:30\""}],"demagType":"Unknown","patch":1.1,"format":"Unknown","strat":null},{"version":"v1.1.0","exported":"2016-10-11T12:28:25.715Z","info":"","GEO":[],"TECT":[],"interpreted":false,"name":"IN 133","coreAzi":15,"coreDip":82,"bedStrike":325,"bedDip":20,"data":[{"visible":true,"include":false,"step":"20","x":-15.005361904761903,"y":7.0873542857142855,"z":6.6482342857142855,"a95":"7.991037","info":"\"94-02-07\" at \"11:08\""},{"visible":true,"include":false,"step":"100","x":-10.609657142857142,"y":9.132521904761905,"z":-0.9280650476190476,"a95":"37.45887","info":"\"94-02-08\" at \"09:56\""},{"visible":true,"include":false,"step":"140","x":-7.440648571428572,"y":9.1171,"z":-0.6262143809523809,"a95":"6.713534","info":"\"94-02-09\" at \"10:24\""},{"visible":true,"include":false,"step":"180","x":-7.929415238095238,"y":8.370369523809524,"z":-3.1369838095238096,"a95":"10.07905","info":"\"94-02-09\" at \"13:05\""},{"visible":true,"include":false,"step":"220","x":-7.402767619047619,"y":6.981081904761905,"z":-3.606021904761905,"a95":"5.865502","info":"\"94-02-10\" at \"13:55\""}],"demagType":"Unknown","patch":1.1,"format":"Unknown","strat":null},{"version":"v1.1.0","exported":"2016-10-11T12:28:25.715Z","info":"","GEO":[{"dec":75.64604948394867,"inc":-58.41574326739251,"MAD":3.2908005580177315,"cm":[-1.0658141036401503e-14,9.769962616701378e-15,0],"intensity":560.6585024898153,"type":"dir","forced":true,"remark":"","origin":false,"nSteps":7,"minStep":"340","maxStep":"580","steps":["340","380","420","460","500","540","580"],"group":"None","version":"v1.1.0"}],"TECT":[{"dec":102.50342403490424,"inc":-75.49501730247236,"MAD":3.2908005580177555,"cm":[-1.3274104038174528e-14,1.1102230246251565e-14,0],"intensity":560.6585024898153,"type":"dir","forced":true,"remark":"","origin":false,"nSteps":7,"minStep":"340","maxStep":"580","steps":["340","380","420","460","500","540","580"],"group":"None","version":"v1.1.0"}],"interpreted":true,"name":"IN 136","coreAzi":139,"coreDip":71,"bedStrike":325,"bedDip":20,"data":[{"visible":true,"include":false,"step":"20","x":107.78190476190477,"y":-612.0671428571428,"z":-53.285733333333326,"a95":"2.060387","info":"\"94-02-07\" at \"11:09\""},{"visible":true,"include":false,"step":"100","x":232.80866666666665,"y":-447.5832380952381,"z":-180.4842857142857,"a95":"2.841736","info":"\"94-02-08\" at \"09:58\""},{"visible":false,"include":false,"step":"140","x":227.33990476190476,"y":-18.289933333333334,"z":59.58819047619048,"a95":"1.918703","info":"\"94-02-09\" at \"10:24\""},{"visible":true,"include":false,"step":"180","x":153.534,"y":-235.97571428571428,"z":-337.3164761904762,"a95":"4.631087","info":"\"94-02-09\" at \"13:06\""},{"visible":true,"include":false,"step":"220","x":193.0384761904762,"y":-251.13285714285715,"z":-304.1699047619048,"a95":"1.764279","info":"\"94-02-10\" at \"13:56\""},{"visible":true,"include":false,"step":"260","x":136.8769523809524,"y":-196.088,"z":-310.61504761904763,"a95":"2.645549","info":"\"94-02-11\" at \"09:31\""},{"visible":true,"include":false,"step":"300","x":200.1097142857143,"y":-188.14495238095236,"z":-280.32209523809524,"a95":"3.176669","info":"\"94-02-11\" at \"16:11\""},{"visible":true,"include":true,"step":"340","x":188.108,"y":-153.5929523809524,"z":-269.9604761904762,"a95":"3.262665","info":"\"94-02-14\" at \"09:30\""},{"visible":true,"include":true,"step":"380","x":149.20457142857143,"y":-165.83542857142857,"z":-243.3207619047619,"a95":"2.025439","info":"\"94-02-14\" at \"13:09\""},{"visible":true,"include":true,"step":"420","x":171.89219047619048,"y":-139.44609523809524,"z":-216.65085714285712,"a95":"5.070561","info":"\"94-02-16\" at \"13:04\""},{"visible":true,"include":true,"step":"460","x":139.28961904761906,"y":-147.99019047619046,"z":-197.75019047619048,"a95":"1.796928","info":"\"94-02-16\" at \"15:55\""},{"visible":true,"include":true,"step":"500","x":142.88790476190476,"y":-119.71895238095237,"z":-192.13571428571427,"a95":"2.950787","info":"\"94-02-17\" at \"13:32\""},{"visible":true,"include":true,"step":"540","x":109.70438095238094,"y":-114.88561904761904,"z":-178.97733333333332,"a95":"2.648592","info":"\"94-02-18\" at \"10:04\""},{"visible":true,"include":true,"step":"580","x":86.1190380952381,"y":-92.6663238095238,"z":-152.52485714285714,"a95":"2.406708","info":"\"94-02-18\" at \"15:20\""},{"visible":false,"include":false,"step":"620","x":65.04257142857143,"y":15.142533333333333,"z":7.070402857142858,"a95":"3.595053","info":"\"94-02-21\" at \"09:47\""},{"visible":false,"include":false,"step":"660","x":88.82744761904762,"y":-63.38312380952381,"z":-105.77495238095237,"a95":"4.365782","info":"\"94-02-21\" at \"13:03\""},{"visible":false,"include":false,"step":"700","x":9.185929523809524,"y":-17.401733333333333,"z":-0.9172406666666666,"a95":"12.28955","info":"\"94-02-21\" at \"15:31\""}],"demagType":"Unknown","patch":1.1,"format":"Unknown","strat":null},{"version":"v1.1.0","exported":"2016-10-11T12:28:25.715Z","info":"","GEO":[{"dec":118.45166589325305,"inc":-30.512812426367564,"MAD":15.958986017264154,"cm":[-61.134812061733136,70.50554522359585,-46.52526960474394],"intensity":112.29014132894082,"type":"dir","forced":false,"remark":"","origin":false,"nSteps":9,"minStep":"260","maxStep":"660","steps":["260","300","380","420","500","540","580","620","660"],"group":"None","version":"v1.1.0"}],"TECT":[{"dec":131.27822969399978,"inc":-37.50338044168459,"MAD":15.958986017264156,"cm":[-71.04673484877057,56.34985245230663,-51.47964122666188],"intensity":112.29014132894085,"type":"dir","forced":false,"remark":"","origin":false,"nSteps":9,"minStep":"260","maxStep":"660","steps":["260","300","380","420","500","540","580","620","660"],"group":"None","version":"v1.1.0"}],"interpreted":true,"name":"IN 137.A","coreAzi":127,"coreDip":48,"bedStrike":325,"bedDip":20,"data":[{"visible":false,"include":false,"step":"20","x":229.38561904761906,"y":-148.218,"z":167.36209523809524,"a95":"4.126148","info":"\"94-02-07\" at \"11:09\""},{"visible":true,"include":false,"step":"100","x":249.88400000000001,"y":-17.78575238095238,"z":108.98704761904762,"a95":"1.602264","info":"\"94-02-08\" at \"09:59\""},{"visible":false,"include":false,"step":"140","x":216.8217142857143,"y":-296.69571428571425,"z":-321.55266666666665,"a95":"3.230626","info":"\"94-02-09\" at \"10:25\""},{"visible":true,"include":false,"step":"180","x":189.63038095238093,"y":-28.766285714285715,"z":35.01752380952381,"a95":"2.541257","info":"\"94-02-09\" at \"13:07\""},{"visible":true,"include":false,"step":"220","x":173.38847619047618,"y":-10.354685714285713,"z":55.61429523809524,"a95":"3.711571","info":"\"94-02-10\" at \"13:56\""},{"visible":true,"include":true,"step":"260","x":156.21257142857144,"y":0.8363545714285714,"z":29.176000000000002,"a95":"3.919005","info":"\"94-02-11\" at \"09:32\""},{"visible":true,"include":true,"step":"300","x":157.21428571428572,"y":-4.171589523809524,"z":39.800599999999996,"a95":"1.378543","info":"\"94-02-11\" at \"16:12\""},{"visible":false,"include":false,"step":"340","x":144.61485714285715,"y":44.78248571428571,"z":44.364847619047616,"a95":"1.254121","info":"\"94-02-14\" at \"09:30\""},{"visible":true,"include":true,"step":"380","x":125.83209523809525,"y":-12.973714285714285,"z":42.94064761904762,"a95":"2.693984","info":"\"94-02-15\" at \"12:53\""},{"visible":true,"include":true,"step":"420","x":118.96723809523809,"y":21.239885714285712,"z":32.87448571428571,"a95":"1.911798","info":"\"94-02-16\" at \"13:05\""},{"visible":false,"include":false,"step":"460","x":119.40714285714287,"y":37.61397142857143,"z":33.40071428571429,"a95":"2.118088","info":"\"94-02-16\" at \"15:56\""},{"visible":true,"include":true,"step":"500","x":99.1552380952381,"y":14.679142857142857,"z":27.612142857142857,"a95":"2.616962","info":"\"94-02-17\" at \"13:33\""},{"visible":true,"include":true,"step":"540","x":73.79173333333334,"y":7.45604380952381,"z":28.210761904761906,"a95":"4.002386","info":"\"94-02-18\" at \"10:05\""},{"visible":true,"include":true,"step":"580","x":60.33324761904762,"y":11.609333333333334,"z":27.16395238095238,"a95":"4.464538","info":"\"94-02-18\" at \"15:21\""},{"visible":true,"include":true,"step":"620","x":66.12288571428572,"y":5.60217238095238,"z":4.318022857142857,"a95":"4.526091","info":"\"94-02-21\" at \"09:48\""},{"visible":true,"include":true,"step":"660","x":45.23562857142857,"y":13.260590476190476,"z":17.393285714285714,"a95":"5.804946","info":"\"94-02-21\" at \"13:03\""},{"visible":false,"include":false,"step":"700","x":2.2288457142857143,"y":1.4385171428571428,"z":-14.162809523809523,"a95":"14.61603","info":"\"94-02-21\" at \"15:32\""}],"demagType":"Unknown","patch":1.1,"format":"Unknown","strat":null},{"version":"v1.1.0","exported":"2016-10-11T12:28:25.715Z","info":"","GEO":[],"TECT":[],"interpreted":false,"name":"IN 143","coreAzi":72,"coreDip":72,"bedStrike":82,"bedDip":20,"data":[{"visible":true,"include":false,"step":"20","x":-62.03627619047619,"y":26.04878095238095,"z":-42.33717142857143,"a95":"2.877953","info":"\"93-11-11\" at \"14:42\""},{"visible":true,"include":false,"step":"100","x":-18.385638095238097,"y":51.4654380952381,"z":-14.815047619047618,"a95":"3.41466","info":"\"93-11-12\" at \"09:38\""},{"visible":true,"include":false,"step":"140","x":-12.616095238095237,"y":29.45272380952381,"z":-8.608434285714285,"a95":"5.277769","info":"\"93-11-12\" at \"12:36\""},{"visible":true,"include":false,"step":"180","x":-12.406047619047618,"y":-1.5014904761904764,"z":0.2591832380952381,"a95":"12.38062","info":"\"93-11-12\" at \"16:52\""},{"visible":true,"include":false,"step":"220","x":-8.932440952380952,"y":-7.890702857142857,"z":2.374344761904762,"a95":"12.59698","info":"\"93-11-15\" at \"12:56\""},{"visible":true,"include":false,"step":"260","x":-7.6903,"y":-7.2904180952380955,"z":1.4627457142857143,"a95":"12.51462","info":"\"93-11-15\" at \"16:05\""},{"visible":true,"include":false,"step":"300","x":-7.034471428571428,"y":-6.717964761904762,"z":2.0519228571428574,"a95":"11.79488","info":"\"93-11-15\" at \"22:03\""},{"visible":true,"include":false,"step":"340","x":-5.824872380952381,"y":-5.516244761904762,"z":3.413667619047619,"a95":"54.91688","info":"\"93-11-16\" at \"10:46\""},{"visible":true,"include":false,"step":"380","x":-10.431476190476191,"y":-17.123152380952384,"z":12.097228571428571,"a95":"11.42599","info":"\"93-11-16\" at \"13:40\""},{"visible":true,"include":false,"step":"420","x":-3.3126114285714285,"y":-2.089374285714286,"z":-4.182090476190476,"a95":"33.709","info":"\"93-11-16\" at \"16:03\""},{"visible":true,"include":false,"step":"460","x":-3.6911666666666667,"y":-11.532838095238096,"z":23.55804761904762,"a95":"26.34046","info":"\"93-11-17\" at \"09:43\""},{"visible":true,"include":false,"step":"500","x":-5.278873333333333,"y":5.395435238095239,"z":-28.91753333333333,"a95":"9.206894","info":"\"93-11-17\" at \"14:07\""},{"visible":true,"include":false,"step":"540","x":1.408612380952381,"y":-2.006205714285714,"z":9.362192380952381,"a95":"47.22598","info":"\"93-11-17\" at \"16:22\""},{"visible":true,"include":false,"step":"580","x":-14.661009523809522,"y":-9.905790476190477,"z":-3.515490476190476,"a95":"10.6879","info":"\"93-11-18\" at \"10:18\""}],"demagType":"Unknown","patch":1.1,"format":"Unknown","strat":null},{"version":"v1.1.0","exported":"2016-10-11T12:28:25.715Z","info":"","GEO":[{"dec":192.242215436334,"inc":-18.280774021894405,"MAD":5.529636838704306,"cm":[-1.1102230246251565e-16,-1.6653345369377348e-15,0],"intensity":182.997038462129,"type":"GC","origin":false,"forced":true,"remark":"","nSteps":5,"minStep":"220","maxStep":"420","steps":["220","260","300","340","420"],"group":"None","version":"v1.1.0"}],"TECT":[{"dec":196.2331880444234,"inc":-36.83109179380511,"MAD":5.529636838683752,"cm":[6.8833827526759706e-15,-2.9976021664879227e-15,1.7763568394002505e-15],"intensity":182.99703846212904,"type":"GC","origin":false,"forced":true,"remark":"","nSteps":5,"minStep":"220","maxStep":"420","steps":["220","260","300","340","420"],"group":"None","version":"v1.1.0"}],"interpreted":true,"name":"IN 144","coreAzi":-18,"coreDip":81,"bedStrike":82,"bedDip":20,"data":[{"visible":false,"include":false,"step":"20","x":123.22571428571428,"y":58.69826666666667,"z":5.435432380952381,"a95":"1.73521","info":"\"93-11-11\" at \"14:44\""},{"visible":true,"include":false,"step":"100","x":99.51838095238095,"y":44.60602857142857,"z":16.5808,"a95":"2.047647","info":"\"93-11-12\" at \"09:39\""},{"visible":true,"include":false,"step":"140","x":66.49600952380952,"y":62.342847619047625,"z":-50.483133333333335,"a95":"2.412132","info":"\"93-11-12\" at \"12:37\""},{"visible":true,"include":false,"step":"180","x":47.89242857142857,"y":80.81012380952382,"z":-128.15209523809523,"a95":"1.552215","info":"\"93-11-12\" at \"16:53\""},{"visible":true,"include":true,"step":"220","x":30.994542857142857,"y":71.01636190476191,"z":-131.22609523809524,"a95":"5.628358","info":"\"93-11-15\" at \"12:57\""},{"visible":true,"include":true,"step":"260","x":28.283742857142858,"y":59.41389523809524,"z":-113.73809523809524,"a95":"1.504117","info":"\"93-11-15\" at \"16:06\""},{"visible":true,"include":true,"step":"300","x":25.107190476190475,"y":40.19992380952381,"z":-89.03961904761906,"a95":"4.42935","info":"\"93-11-15\" at \"22:04\""},{"visible":true,"include":true,"step":"340","x":21.549714285714284,"y":31.54987619047619,"z":-71.10565714285715,"a95":"8.983769","info":"\"93-11-16\" at \"10:49\""},{"visible":false,"include":false,"step":"380","x":2.402149523809524,"y":-5.602670476190476,"z":5.168073333333333,"a95":"39.04678","info":"\"93-11-16\" at \"13:43\""},{"visible":true,"include":true,"step":"420","x":9.548609523809525,"y":10.990019047619048,"z":-27.264038095238096,"a95":"5.468487","info":"\"93-11-16\" at \"16:04\""},{"visible":true,"include":false,"step":"460","x":-0.6570245714285714,"y":4.775873333333333,"z":-8.745177142857143,"a95":"13.71969","info":"\"93-11-17\" at \"09:44\""},{"visible":true,"include":false,"step":"500","x":-7.526066666666667,"y":-6.221991428571429,"z":-10.740447619047618,"a95":"8.474417","info":"\"93-11-17\" at \"14:07\""},{"visible":true,"include":false,"step":"540","x":9.76584761904762,"y":2.014005714285714,"z":-0.4461005714285714,"a95":"47.57804","info":"\"93-11-17\" at \"16:23\""},{"visible":true,"include":false,"step":"580","x":7.657408571428571,"y":3.259444761904762,"z":-1.1117628571428573,"a95":"10.29566","info":"\"93-11-18\" at \"10:19\""}],"demagType":"Unknown","patch":1.1,"format":"Unknown","strat":null},{"version":"v1.1.0","exported":"2016-10-11T12:28:25.715Z","info":"","GEO":[{"dec":30.951894440490946,"inc":-13.309164615719705,"MAD":10.113443026660102,"cm":[1.1102230246251565e-15,1.9984014443252818e-15,0],"intensity":159.53004420490262,"type":"GC","origin":false,"forced":true,"remark":"","nSteps":5,"minStep":"100","maxStep":"260","steps":["100","140","180","220","260"],"group":"None","version":"v1.1.0"}],"TECT":[{"dec":209.75864657668353,"inc":-2.436618807133437,"MAD":10.11344302665944,"cm":[-1.554312234475219e-14,-9.325873406851315e-15,-1.7763568394002505e-15],"intensity":159.5300442049026,"type":"GC","origin":false,"forced":true,"remark":"","nSteps":5,"minStep":"100","maxStep":"260","steps":["100","140","180","220","260"],"group":"None","version":"v1.1.0"}],"interpreted":true,"name":"IN 145","coreAzi":99,"coreDip":52,"bedStrike":82,"bedDip":20,"data":[{"visible":true,"include":false,"step":"20","x":122.90980952380953,"y":80.5665238095238,"z":137.19409523809523,"a95":".964137","info":"\"93-11-11\" at \"14:44\""},{"visible":true,"include":true,"step":"100","x":94.75975238095238,"y":53.8404380952381,"z":128.4917142857143,"a95":"1.987023","info":"\"93-11-12\" at \"09:40\""},{"visible":true,"include":true,"step":"140","x":66.76080952380953,"y":32.48330476190476,"z":88.97945714285714,"a95":"1.976598","info":"\"93-11-12\" at \"12:37\""},{"visible":true,"include":true,"step":"180","x":2.0363971428571426,"y":-0.4739092380952381,"z":26.197161904761906,"a95":"7.927969","info":"\"93-11-12\" at \"16:54\""},{"visible":true,"include":true,"step":"220","x":-15.507209523809525,"y":-6.207804761904762,"z":9.054326666666666,"a95":"39.59249","info":"\"93-11-15\" at \"12:59\""},{"visible":true,"include":true,"step":"260","x":-16.857590476190477,"y":-5.86996,"z":2.1984590476190475,"a95":"12.34706","info":"\"93-11-15\" at \"16:07\""},{"visible":true,"include":false,"step":"300","x":-12.910971428571429,"y":-8.362505714285714,"z":0.9748209523809525,"a95":"14.02818","info":"\"93-11-15\" at \"22:05\""},{"visible":true,"include":false,"step":"340","x":-7.080754285714286,"y":-2.946961904761905,"z":-1.216929523809524,"a95":"56.35748","info":"\"93-11-16\" at \"10:50\""},{"visible":true,"include":false,"step":"380","x":13.513219047619048,"y":20.800428571428572,"z":-46.28387619047619,"a95":"2.530997","info":"\"93-11-16\" at \"13:44\""},{"visible":false,"include":false,"step":"420","x":-3.038870476190476,"y":-5.23462,"z":-3.3570523809523807,"a95":"38.20916","info":"\"93-11-16\" at \"16:05\""},{"visible":false,"include":false,"step":"460","x":-5.068264761904762,"y":2.324545714285714,"z":1.3150419047619049,"a95":"37.17012","info":"\"93-11-17\" at \"09:45\""},{"visible":false,"include":false,"step":"500","x":-1.8575085714285715,"y":-9.89147619047619,"z":-9.353879047619047,"a95":"34.85571","info":"\"93-11-17\" at \"14:08\""},{"visible":false,"include":false,"step":"540","x":-1.000935238095238,"y":-11.860609523809524,"z":-13.645685714285714,"a95":"25.85652","info":"\"93-11-17\" at \"16:24\""}],"demagType":"Unknown","patch":1.1,"format":"Unknown","strat":null},{"version":"v1.1.0","exported":"2016-10-11T12:28:25.715Z","info":"","GEO":[{"dec":125.76873049665846,"inc":-3.823102456531044,"MAD":9.694394771101466,"cm":[-10.71567539908954,21.39666019850982,0.48434158288386325],"intensity":55.00362036756784,"type":"dir","forced":false,"remark":"","origin":false,"nSteps":5,"minStep":"260","maxStep":"540","steps":["260","300","340","380","540"],"group":"None","version":"v1.1.0"}],"TECT":[{"dec":122.97428691114493,"inc":-17.380787978910963,"MAD":9.694394771101415,"cm":[-10.068162564993141,21.305658204325404,-4.192658431519318],"intensity":55.00362036756785,"type":"dir","forced":false,"remark":"","origin":false,"nSteps":5,"minStep":"260","maxStep":"540","steps":["260","300","340","380","540"],"group":"None","version":"v1.1.0"}],"interpreted":true,"name":"IN 146","coreAzi":171,"coreDip":67,"bedStrike":82,"bedDip":20,"data":[{"visible":false,"include":false,"step":"20","x":-132.82238095238094,"y":-62.82102857142858,"z":92.5604857142857,"a95":"2.670112","info":"\"93-11-11\" at \"14:46\""},{"visible":false,"include":false,"step":"100","x":-91.0518380952381,"y":-70.53225714285715,"z":125.92657142857144,"a95":"3.40908","info":"\"93-11-12\" at \"09:41\""},{"visible":true,"include":false,"step":"140","x":-49.28355238095238,"y":-60.920571428571435,"z":88.2421619047619,"a95":"4.012429","info":"\"93-11-12\" at \"12:38\""},{"visible":true,"include":false,"step":"180","x":44.652590476190475,"y":-58.49392380952381,"z":24.216085714285715,"a95":"3.47574","info":"\"93-11-12\" at \"16:55\""},{"visible":true,"include":true,"step":"220","x":41.393009523809525,"y":-56.88502857142858,"z":15.563809523809523,"a95":"7.550328","info":"\"93-11-15\" at \"13:00\""},{"visible":true,"include":true,"step":"260","x":29.60252380952381,"y":-43.52045714285715,"z":11.244247619047618,"a95":"5.718452","info":"\"93-11-15\" at \"16:08\""},{"visible":true,"include":true,"step":"300","x":26.543409523809526,"y":-26.399314285714283,"z":12.256238095238094,"a95":"5.254034","info":"\"93-11-15\" at \"22:06\""},{"visible":true,"include":true,"step":"340","x":15.996219047619046,"y":-21.971419047619047,"z":4.196147619047619,"a95":"15.13137","info":"\"93-11-16\" at \"10:51\""},{"visible":true,"include":true,"step":"380","x":-4.783016190476191,"y":-4.015129523809524,"z":0.8796409523809524,"a95":"33.14726","info":"\"93-11-16\" at \"13:45\""},{"visible":false,"include":false,"step":"420","x":6.674197142857143,"y":-10.741495238095238,"z":2.584192380952381,"a95":"15.15886","info":"\"93-11-16\" at \"16:06\""},{"visible":false,"include":false,"step":"460","x":3.6965485714285715,"y":-5.6080209523809526,"z":2.415394285714286,"a95":"27.15436","info":"\"93-11-17\" at \"09:45\""},{"visible":false,"include":false,"step":"500","x":3.2664580952380953,"y":-5.822808571428571,"z":1.0093857142857143,"a95":"34.82212","info":"\"93-11-17\" at \"14:09\""},{"visible":true,"include":true,"step":"540","x":-4.187962857142857,"y":-1.3783342857142857,"z":0.8691454285714286,"a95":"107.8512","info":"\"93-11-17\" at \"16:26\""},{"visible":true,"include":false,"step":"580","x":-4.4049257142857146,"y":-2.851302857142857,"z":7.841473333333333,"a95":"14.83026","info":"\"93-11-18\" at \"10:21\""}],"demagType":"Unknown","patch":1.1,"format":"Unknown","strat":null},{"version":"v1.1.0","exported":"2016-10-11T12:28:25.715Z","info":"","GEO":[{"dec":124.89182979703355,"inc":-27.112480436893428,"MAD":6.0572096246510005,"cm":[-10.865640922575905,15.423396319641641,-13.235358466483548],"intensity":32.18205233830614,"type":"dir","forced":false,"remark":"","origin":false,"nSteps":5,"minStep":"220","maxStep":"420","steps":["220","260","300","340","420"],"group":"None","version":"v1.1.0"}],"TECT":[{"dec":114.3725724269824,"inc":-39.45403968355618,"MAD":6.057209624650985,"cm":[-5.61215838978457,14.685067499388712,-16.851424010266232],"intensity":32.18205233830615,"type":"dir","forced":false,"remark":"","origin":false,"nSteps":5,"minStep":"220","maxStep":"420","steps":["220","260","300","340","420"],"group":"None","version":"v1.1.0"}],"interpreted":true,"name":"IN 147","coreAzi":118,"coreDip":63,"bedStrike":82,"bedDip":20,"data":[{"visible":false,"include":false,"step":"20","x":-23.42295238095238,"y":-80.87215238095239,"z":68.69421904761904,"a95":"3.221836","info":"\"93-11-11\" at \"14:47\""},{"visible":false,"include":false,"step":"100","x":-1.641747619047619,"y":-62.529419047619044,"z":85.86976190476192,"a95":"2.128476","info":"\"93-11-12\" at \"09:42\""},{"visible":true,"include":false,"step":"140","x":10.247552380952381,"y":-42.16644761904762,"z":56.27229523809524,"a95":"2.937364","info":"\"93-11-12\" at \"12:39\""},{"visible":true,"include":false,"step":"180","x":37.82089523809524,"y":-2.2033095238095237,"z":1.6875257142857143,"a95":"4.402891","info":"\"93-11-12\" at \"16:55\""},{"visible":true,"include":true,"step":"220","x":37.360980952380956,"y":2.9577780952380954,"z":-2.7048361904761906,"a95":"3.265206","info":"\"93-11-15\" at \"13:01\""},{"visible":true,"include":true,"step":"260","x":29.54564761904762,"y":3.110804761904762,"z":-4.057772380952382,"a95":"5.053599","info":"\"93-11-15\" at \"16:08\""},{"visible":true,"include":true,"step":"300","x":22.509552380952382,"y":3.065645714285714,"z":-2.8052714285714284,"a95":"8.373581","info":"\"93-11-15\" at \"22:07\""},{"visible":true,"include":true,"step":"340","x":18.644561904761904,"y":3.2407066666666666,"z":-4.154662857142857,"a95":"22.48298","info":"\"93-11-16\" at \"10:52\""},{"visible":false,"include":false,"step":"380","x":15.895047619047618,"y":-8.368446666666667,"z":5.536513333333334,"a95":"20.98458","info":"\"93-11-16\" at \"13:46\""},{"visible":true,"include":true,"step":"420","x":5.377360952380952,"y":-0.6102076190476191,"z":-2.7498066666666667,"a95":"44.52883","info":"\"93-11-16\" at \"16:07\""},{"visible":false,"include":false,"step":"460","x":1.5355180952380951,"y":2.934417142857143,"z":-2.676385714285714,"a95":"67.88645","info":"\"93-11-17\" at \"09:47\""},{"visible":false,"include":false,"step":"500","x":-0.7705579047619049,"y":9.628171428571429,"z":-7.580344761904762,"a95":"57.55497","info":"\"93-11-17\" at \"14:10\""},{"visible":false,"include":false,"step":"540","x":0.20869885714285713,"y":-3.271134285714286,"z":-4.308285714285715,"a95":"69.38179","info":"\"93-11-17\" at \"16:27\""},{"visible":false,"include":false,"step":"580","x":-1.8874828571428572,"y":-5.019527619047619,"z":3.9025104761904763,"a95":"22.47082","info":"\"93-11-18\" at \"10:22\""}],"demagType":"Unknown","patch":1.1,"format":"Unknown","strat":null},{"version":"v1.1.0","exported":"2016-10-11T12:28:25.715Z","info":"","GEO":[],"TECT":[],"interpreted":false,"name":"IN 148","coreAzi":-24,"coreDip":76,"bedStrike":82,"bedDip":20,"data":[{"visible":true,"include":false,"step":"20","x":15.20232380952381,"y":18.283428571428573,"z":70.07159047619048,"a95":"9.14071","info":"\"93-11-11\" at \"14:48\""},{"visible":true,"include":true,"step":"100","x":7.26034,"y":14.176152380952383,"z":68.03879047619047,"a95":"3.38079","info":"\"93-11-12\" at \"09:43\""},{"visible":true,"include":true,"step":"140","x":-6.519322857142857,"y":11.21612380952381,"z":37.282399999999996,"a95":"4.604436","info":"\"93-11-12\" at \"12:40\""},{"visible":true,"include":true,"step":"180","x":-8.13535238095238,"y":6.968182857142857,"z":-0.5029280952380952,"a95":"16.72704","info":"\"93-11-12\" at \"16:57\""},{"visible":true,"include":true,"step":"220","x":-6.534589523809524,"y":3.970907619047619,"z":0.7114100952380953,"a95":"16.86748","info":"\"93-11-15\" at \"13:02\""},{"visible":true,"include":true,"step":"260","x":-3.0310628571428575,"y":2.8890790476190475,"z":0.12097771428571427,"a95":"37.04324","info":"\"93-11-15\" at \"16:10\""},{"visible":true,"include":true,"step":"300","x":-1.4251466666666668,"y":1.1022990476190475,"z":-0.1327502857142857,"a95":"91.30314","info":"\"93-11-15\" at \"22:07\""},{"visible":true,"include":false,"step":"340","x":-4.09482,"y":0.7251523809523809,"z":-1.9010180952380953,"a95":"27.85701","info":"\"93-11-16\" at \"10:53\""},{"visible":true,"include":false,"step":"380","x":13.263514285714285,"y":0.9613161904761904,"z":-3.6260419047619044,"a95":"16.86405","info":"\"93-11-16\" at \"13:47\""},{"visible":false,"include":false,"step":"420","x":-2.179941904761905,"y":-2.6049361904761903,"z":2.045387619047619,"a95":"62.1178","info":"\"93-11-16\" at \"16:07\""},{"visible":false,"include":false,"step":"460","x":-6.8014866666666665,"y":-25.96729523809524,"z":7.328805714285714,"a95":"147.4264","info":"\"93-11-17\" at \"09:49\""},{"visible":false,"include":false,"step":"500","x":1.8923695238095237,"y":3.032123809523809,"z":-8.166837142857142,"a95":"28.33872","info":"\"93-11-17\" at \"14:10\""},{"visible":false,"include":false,"step":"540","x":0.5293336190476191,"y":-2.0691209523809526,"z":0.4528831428571428,"a95":"49.9408","info":"\"93-11-17\" at \"16:28\""}],"demagType":"Unknown","patch":1.1,"format":"Unknown","strat":null},{"version":"v1.1.0","exported":"2016-10-11T12:28:25.715Z","info":"","GEO":[],"TECT":[],"interpreted":false,"name":"IN 149","coreAzi":18,"coreDip":60,"bedStrike":82,"bedDip":20,"data":[{"visible":false,"include":false,"step":"20","x":-3.439228571428571,"y":-5.632357142857143,"z":48.551161904761905,"a95":"9.369622","info":"\"93-11-11\" at \"14:51\""},{"visible":true,"include":true,"step":"100","x":-0.3060147619047619,"y":1.0165028571428572,"z":42.59838095238096,"a95":"4.249657","info":"\"93-11-12\" at \"09:44\""},{"visible":true,"include":true,"step":"140","x":-0.8159575238095238,"y":0.5830644761904762,"z":16.473647619047618,"a95":"9.332527","info":"\"93-11-12\" at \"12:41\""},{"visible":true,"include":true,"step":"180","x":-1.6241590476190477,"y":1.2620561904761904,"z":2.3985380952380955,"a95":"54.36705","info":"\"93-11-12\" at \"16:59\""},{"visible":true,"include":true,"step":"220","x":-0.1593477142857143,"y":1.7569428571428571,"z":2.8498447619047615,"a95":"40.32988","info":"\"93-11-15\" at \"13:03\""},{"visible":true,"include":true,"step":"260","x":-0.8442850476190477,"y":0.28854599999999997,"z":0.14396133333333333,"a95":"150.008","info":"\"93-11-15\" at \"16:12\""},{"visible":true,"include":false,"step":"300","x":-1.5303619047619048,"y":-0.9641638095238095,"z":2.6805704761904763,"a95":"42.44644","info":"\"93-11-15\" at \"22:09\""},{"visible":true,"include":false,"step":"340","x":-1.5640361904761906,"y":-0.12930285714285714,"z":1.6003257142857141,"a95":"84.22196","info":"\"93-11-16\" at \"10:54\""},{"visible":true,"include":false,"step":"380","x":0.9048605714285713,"y":3.8637161904761905,"z":-1.8812714285714287,"a95":"31.51893","info":"\"93-11-16\" at \"13:47\""},{"visible":true,"include":false,"step":"420","x":-0.5956918095238095,"y":-0.4924999047619048,"z":2.560692380952381,"a95":"50.52248","info":"\"93-11-16\" at \"16:08\""},{"visible":true,"include":false,"step":"460","x":-0.30998419047619047,"y":-1.9112085714285714,"z":0.9423931428571428,"a95":"170.9236","info":"\"93-11-17\" at \"09:50\""},{"visible":true,"include":false,"step":"500","x":-0.779492380952381,"y":4.378759047619048,"z":0.6454041904761905,"a95":"91.85706","info":"\"93-11-17\" at \"14:11\""},{"visible":true,"include":false,"step":"540","x":0.640978380952381,"y":3.7443199999999996,"z":2.684973333333333,"a95":"55.63107","info":"\"93-11-17\" at \"16:29\""}],"demagType":"Unknown","patch":1.1,"format":"Unknown","strat":null},{"version":"v1.1.0","exported":"2016-10-11T12:28:25.715Z","info":"","GEO":[{"dec":143.67276387349273,"inc":-37.137451645077135,"MAD":6.819207317735115,"cm":[-3.1086244689504383e-15,-3.774758283725532e-15,0],"intensity":45.779309922481445,"type":"dir","forced":true,"remark":"","origin":false,"nSteps":4,"minStep":"220","maxStep":"340","steps":["220","260","300","340"],"group":"None","version":"v1.1.0"}],"TECT":[{"dec":158.35031380148484,"inc":-35.004114819146885,"MAD":6.819207317735151,"cm":[-1.9984014443252818e-15,-2.55351295663786e-15,6.661338147750939e-16],"intensity":45.779309922481445,"type":"dir","forced":true,"remark":"","origin":false,"nSteps":4,"minStep":"220","maxStep":"340","steps":["220","260","300","340"],"group":"None","version":"v1.1.0"}],"interpreted":true,"name":"IN 150","coreAzi":51,"coreDip":84,"bedStrike":325,"bedDip":20,"data":[{"visible":true,"include":false,"step":"20","x":27.458590476190476,"y":-0.05893485714285714,"z":39.483714285714285,"a95":"16.775","info":"\"94-02-07\" at \"11:10\""},{"visible":true,"include":false,"step":"100","x":21.122980952380953,"y":16.074942857142858,"z":18.780866666666665,"a95":"4.050068","info":"\"94-02-08\" at \"10:00\""},{"visible":true,"include":false,"step":"140","x":11.090304761904761,"y":28.146409523809524,"z":-5.289394285714286,"a95":"11.75916","info":"\"94-02-09\" at \"10:25\""},{"visible":true,"include":false,"step":"180","x":-1.60908,"y":33.83060952380953,"z":-18.09262857142857,"a95":"7.26536","info":"\"94-02-09\" at \"13:08\""},{"visible":true,"include":true,"step":"220","x":3.5123123809523813,"y":26.219904761904765,"z":-20.15892380952381,"a95":"2.819905","info":"\"94-02-10\" at \"13:57\""},{"visible":true,"include":true,"step":"260","x":-4.083110476190477,"y":22.516504761904763,"z":-16.033238095238094,"a95":"8.451735","info":"\"94-02-11\" at \"09:33\""},{"visible":true,"include":true,"step":"300","x":1.9857504761904763,"y":16.053038095238097,"z":-12.773885714285715,"a95":"7.334305","info":"\"94-02-11\" at \"16:13\""},{"visible":true,"include":true,"step":"340","x":1.4997666666666667,"y":9.582114285714287,"z":-7.927366666666667,"a95":"7.585815","info":"\"94-02-14\" at \"09:31\""},{"visible":true,"include":false,"step":"380","x":-2.133626666666667,"y":8.479694285714285,"z":-8.94037619047619,"a95":"5.765863","info":"\"94-02-15\" at \"12:54\""},{"visible":true,"include":false,"step":"420","x":-0.2616034285714286,"y":0.27791771428571427,"z":-1.868384761904762,"a95":"65.37639","info":"\"94-02-16\" at \"13:06\""},{"visible":false,"include":false,"step":"460","x":-1.0517085714285714,"y":1.8682409523809524,"z":0.0853798380952381,"a95":"43.93532","info":"\"94-02-16\" at \"15:57\""},{"visible":false,"include":false,"step":"500","x":-1.9853028571428573,"y":-0.9396501904761905,"z":0.5564791428571428,"a95":"56.5013","info":"\"94-02-17\" at \"13:34\""},{"visible":false,"include":false,"step":"540","x":-0.9946742857142856,"y":-2.072967619047619,"z":3.7023295238095235,"a95":"33.68972","info":"\"94-02-18\" at \"10:06\""},{"visible":false,"include":false,"step":"580","x":-1.8601885714285715,"y":-1.2900885714285715,"z":4.370300952380952,"a95":"38.92312","info":"\"94-02-18\" at \"15:22\""},{"visible":false,"include":false,"step":"620","x":-0.3508975238095238,"y":-4.017025714285714,"z":6.273337142857143,"a95":"26.54314","info":"\"94-02-21\" at \"09:50\""},{"visible":false,"include":false,"step":"660","x":-0.4738713333333333,"y":-2.670495238095238,"z":3.481839047619048,"a95":"33.97728","info":"\"94-02-21\" at \"13:04\""},{"visible":false,"include":false,"step":"700","x":1.4615314285714287,"y":-3.653413333333334,"z":0.501691619047619,"a95":"29.2479","info":"\"94-02-21\" at \"15:32\""}],"demagType":"Unknown","patch":1.1,"format":"Unknown","strat":null},{"version":"v1.1.0","exported":"2016-10-11T12:28:25.716Z","info":"","GEO":[],"TECT":[],"interpreted":false,"name":"IN 151","coreAzi":116,"coreDip":66,"bedStrike":82,"bedDip":20,"data":[{"visible":false,"include":false,"step":"20","x":22.973980952380952,"y":-63.971561904761906,"z":9.298932380952381,"a95":"2.410868","info":"\"93-11-11\" at \"14:52\""},{"visible":false,"include":false,"step":"100","x":23.59164761904762,"y":-53.5540380952381,"z":22.342485714285715,"a95":"2.895613","info":"\"93-11-12\" at \"09:45\""},{"visible":true,"include":false,"step":"140","x":8.339907619047619,"y":-32.08638095238095,"z":15.811885714285713,"a95":"4.969056","info":"\"93-11-12\" at \"12:43\""},{"visible":true,"include":false,"step":"180","x":10.053952380952381,"y":4.016013333333333,"z":11.23744761904762,"a95":"12.38335","info":"\"93-11-12\" at \"17:01\""},{"visible":true,"include":false,"step":"220","x":8.69794761904762,"y":4.672988571428571,"z":11.042361904761904,"a95":"4.12486","info":"\"93-11-15\" at \"13:04\""},{"visible":true,"include":false,"step":"260","x":5.473290476190476,"y":3.825629523809524,"z":8.587099047619049,"a95":"7.305398","info":"\"93-11-15\" at \"16:13\""},{"visible":true,"include":false,"step":"300","x":4.742421904761905,"y":2.180312380952381,"z":7.420986666666667,"a95":"11.26783","info":"\"93-11-15\" at \"22:10\""},{"visible":true,"include":false,"step":"340","x":3.6151057142857144,"y":3.489368571428572,"z":5.579431428571429,"a95":"12.20042","info":"\"93-11-16\" at \"10:56\""},{"visible":true,"include":false,"step":"380","x":1.2666057142857143,"y":-0.6687679047619047,"z":2.147209523809524,"a95":"50.90975","info":"\"93-11-16\" at \"13:48\""},{"visible":true,"include":false,"step":"420","x":1.406135238095238,"y":-0.5933829523809524,"z":1.156775238095238,"a95":"55.63379","info":"\"93-11-16\" at \"16:09\""},{"visible":true,"include":false,"step":"460","x":-0.5122775238095238,"y":-0.8577488571428572,"z":1.6753485714285712,"a95":"163.8698","info":"\"93-11-17\" at \"09:52\""},{"visible":true,"include":false,"step":"500","x":-3.710381904761905,"y":-4.464876190476191,"z":-0.16215619047619048,"a95":"23.66518","info":"\"93-11-17\" at \"14:12\""},{"visible":true,"include":false,"step":"540","x":4.584084761904762,"y":-2.5631438095238095,"z":1.5760857142857143,"a95":"19.93723","info":"\"93-11-17\" at \"16:30\""},{"visible":true,"include":false,"step":"580","x":0.10132657142857142,"y":1.2203514285714285,"z":3.2877638095238098,"a95":"27.4479","info":"\"93-11-18\" at \"10:23\""}],"demagType":"Unknown","patch":1.1,"format":"Unknown","strat":null},{"version":"v1.1.0","exported":"2016-10-11T12:28:25.716Z","info":"","GEO":[],"TECT":[],"interpreted":false,"name":"IN 152","coreAzi":-31,"coreDip":76,"bedStrike":82,"bedDip":20,"data":[{"visible":false,"include":false,"step":"20","x":-2.9230095238095237,"y":-35.4158380952381,"z":44.67965714285714,"a95":"3.230682","info":"\"93-11-11\" at \"14:54\""},{"visible":false,"include":false,"step":"100","x":4.4516076190476195,"y":-35.104390476190474,"z":50.912923809523804,"a95":"3.671004","info":"\"93-11-12\" at \"09:46\""},{"visible":true,"include":false,"step":"140","x":13.125514285714287,"y":-29.960952380952378,"z":18.158514285714286,"a95":"5.422153","info":"\"93-11-12\" at \"12:45\""},{"visible":true,"include":false,"step":"180","x":29.779571428571426,"y":-9.447586666666666,"z":-23.123438095238093,"a95":"5.173261","info":"\"93-11-12\" at \"17:02\""},{"visible":true,"include":false,"step":"220","x":26.880419047619046,"y":-7.190721904761904,"z":-19.39487619047619,"a95":"4.286095","info":"\"93-11-15\" at \"13:05\""},{"visible":true,"include":false,"step":"260","x":20.479238095238095,"y":-6.160778095238095,"z":-18.70867619047619,"a95":"3.578511","info":"\"93-11-15\" at \"16:15\""},{"visible":true,"include":false,"step":"300","x":16.26801904761905,"y":-5.567048571428571,"z":-11.456476190476192,"a95":"6.965848","info":"\"93-11-15\" at \"22:11\""},{"visible":true,"include":false,"step":"340","x":13.246333333333334,"y":-1.1069685714285715,"z":-9.509684761904762,"a95":"34.31356","info":"\"93-11-16\" at \"10:57\""},{"visible":true,"include":false,"step":"380","x":2.555569523809524,"y":1.4824038095238095,"z":4.243468571428572,"a95":"25.52636","info":"\"93-11-16\" at \"13:49\""},{"visible":true,"include":false,"step":"420","x":5.1246180952380955,"y":-1.037237142857143,"z":-6.555121904761904,"a95":"15.46791","info":"\"93-11-16\" at \"16:10\""},{"visible":true,"include":false,"step":"460","x":3.2063409523809527,"y":-0.580592380952381,"z":-1.172387619047619,"a95":"73.47966","info":"\"93-11-17\" at \"09:53\""},{"visible":true,"include":false,"step":"500","x":-1.716567619047619,"y":-2.5823171428571428,"z":-0.21128390476190478,"a95":"150.3058","info":"\"93-11-17\" at \"14:12\""},{"visible":true,"include":false,"step":"540","x":0.6514898095238095,"y":1.7040085714285713,"z":-1.908202857142857,"a95":"268.9342","info":"\"93-11-17\" at \"16:31\""}],"demagType":"Unknown","patch":1.1,"format":"Unknown","strat":null},{"version":"v1.1.0","exported":"2016-10-11T12:28:25.716Z","info":"","GEO":[],"TECT":[],"interpreted":false,"name":"IN 153","coreAzi":82,"coreDip":40,"bedStrike":82,"bedDip":20,"data":[{"visible":true,"include":false,"step":"20","x":8.621254285714285,"y":7.750065714285715,"z":20.125742857142857,"a95":"2.574553","info":"\"93-11-11\" at \"14:56\""},{"visible":true,"include":false,"step":"100","x":0.20731257142857146,"y":-10.236942857142857,"z":25.34561904761905,"a95":"4.088807","info":"\"93-11-12\" at \"09:47\""},{"visible":true,"include":false,"step":"140","x":5.672775238095238,"y":-5.7307009523809525,"z":16.80255238095238,"a95":"4.1471","info":"\"93-11-12\" at \"12:46\""},{"visible":true,"include":false,"step":"180","x":14.346980952380953,"y":4.891485714285714,"z":10.4668,"a95":"5.781782","info":"\"93-11-12\" at \"17:03\""},{"visible":true,"include":false,"step":"220","x":13.015009523809525,"y":-0.2658960952380952,"z":10.405819047619048,"a95":"4.294585","info":"\"93-11-15\" at \"13:06\""},{"visible":true,"include":false,"step":"260","x":10.403638095238096,"y":1.4724314285714286,"z":5.920098095238095,"a95":"5.420091","info":"\"93-11-15\" at \"16:15\""},{"visible":true,"include":false,"step":"300","x":6.247079047619048,"y":2.829595238095238,"z":5.136096190476191,"a95":"8.525649","info":"\"93-11-15\" at \"22:12\""},{"visible":true,"include":false,"step":"340","x":3.686161904761905,"y":4.43377619047619,"z":3.7411371428571427,"a95":"61.93076","info":"\"93-11-16\" at \"10:59\""},{"visible":true,"include":false,"step":"380","x":-1.3219733333333334,"y":3.371535238095238,"z":4.557801904761905,"a95":"26.20724","info":"\"93-11-16\" at \"13:54\""},{"visible":true,"include":false,"step":"420","x":-0.6881712380952381,"y":-2.0858285714285714,"z":1.9296600000000002,"a95":"59.4369","info":"\"93-11-16\" at \"16:11\""},{"visible":true,"include":false,"step":"460","x":0.24733942857142857,"y":-1.2568009523809525,"z":2.4474419047619045,"a95":"59.98594","info":"\"93-11-17\" at \"09:55\""},{"visible":true,"include":false,"step":"500","x":3.8499323809523807,"y":-1.6645533333333336,"z":-0.8993140000000001,"a95":"110.8918","info":"\"93-11-17\" at \"14:13\""},{"visible":true,"include":false,"step":"540","x":3.3653885714285714,"y":-3.5634038095238094,"z":6.420012380952381,"a95":"98.99888","info":"\"93-11-17\" at \"16:32\""},{"visible":true,"include":false,"step":"580","x":5.839634285714286,"y":-0.07685595238095237,"z":12.0856,"a95":"6.277858","info":"\"93-11-18\" at \"10:25\""}],"demagType":"Unknown","patch":1.1,"format":"Unknown","strat":null},{"version":"v1.1.0","exported":"2016-10-11T12:28:25.716Z","info":"","GEO":[{"dec":38.62895414834759,"inc":-24.678680251899618,"MAD":3.907355446943288,"cm":[-2.1316282072803006e-14,-1.4210854715202004e-14,0],"intensity":891.1945931589701,"type":"GC","origin":false,"forced":true,"remark":"","nSteps":6,"minStep":"100","maxStep":"300","steps":["100","140","180","220","260","300"],"group":"None","version":"v1.1.0"}],"TECT":[{"dec":34.17225926494439,"inc":-10.307390750609699,"MAD":3.9073554469453047,"cm":[-2.842170943040401e-14,-1.0658141036401503e-14,-2.6645352591003757e-15],"intensity":891.19459315897,"type":"GC","origin":false,"forced":true,"remark":"","nSteps":6,"minStep":"100","maxStep":"300","steps":["100","140","180","220","260","300"],"group":"None","version":"v1.1.0"}],"interpreted":true,"name":"IN 154","coreAzi":111,"coreDip":46,"bedStrike":82,"bedDip":20,"data":[{"visible":true,"include":false,"step":"20","x":-24.20057142857143,"y":-93.68962857142857,"z":500.38409523809526,"a95":"3.1424","info":"\"93-11-11\" at \"14:57\""},{"visible":true,"include":true,"step":"100","x":38.86175238095238,"y":-48.737695238095235,"z":529.6714285714286,"a95":"2.375952","info":"\"93-11-12\" at \"09:48\""},{"visible":true,"include":true,"step":"140","x":94.36974285714285,"y":0.2567824761904762,"z":487.6975238095238,"a95":"1.898372","info":"\"93-11-12\" at \"12:47\""},{"visible":true,"include":true,"step":"180","x":148.96485714285714,"y":30.73462857142857,"z":438.0873333333334,"a95":"2.424466","info":"\"93-11-12\" at \"17:04\""},{"visible":true,"include":true,"step":"220","x":132.20104761904764,"y":19.258085714285716,"z":408.3543809523809,"a95":"1.903929","info":"\"93-11-15\" at \"13:08\""},{"visible":true,"include":true,"step":"260","x":127.9070476190476,"y":21.132761904761907,"z":380.3723809523809,"a95":"2.332116","info":"\"93-11-15\" at \"16:16\""},{"visible":true,"include":true,"step":"300","x":132.1707619047619,"y":30.024361904761907,"z":344.7572380952381,"a95":"2.194561","info":"\"93-11-15\" at \"22:13\""},{"visible":true,"include":false,"step":"340","x":104.37428571428572,"y":28.998980952380954,"z":318.14619047619044,"a95":"1.453348","info":"\"93-11-16\" at \"11:00\""},{"visible":true,"include":false,"step":"380","x":107.54676190476191,"y":21.34962857142857,"z":307.18580952380955,"a95":"1.697787","info":"\"93-11-16\" at \"13:55\""},{"visible":true,"include":false,"step":"420","x":80.35968571428572,"y":14.85497142857143,"z":279.3566666666667,"a95":"1.390704","info":"\"93-11-16\" at \"16:11\""},{"visible":true,"include":false,"step":"460","x":103.65171428571429,"y":7.993641904761905,"z":254.13885714285715,"a95":"1.510068","info":"\"93-11-17\" at \"09:55\""},{"visible":true,"include":false,"step":"500","x":72.994,"y":29.164895238095237,"z":231.93676190476188,"a95":"2.197049","info":"\"93-11-17\" at \"14:14\""},{"visible":true,"include":false,"step":"540","x":80.53226666666667,"y":14.591361904761905,"z":223.7912380952381,"a95":"5.463517","info":"\"93-11-17\" at \"16:33\""},{"visible":true,"include":false,"step":"580","x":60.04231428571428,"y":-2.238144761904762,"z":205.56866666666667,"a95":"4.922997","info":"\"93-11-18\" at \"10:26\""},{"visible":true,"include":false,"step":"620","x":35.14742857142857,"y":37.98844761904762,"z":146.20314285714286,"a95":"1.901604","info":"\"93-11-18\" at \"12:38\""},{"visible":true,"include":false,"step":"660","x":30.057561904761904,"y":5.713585714285714,"z":169.89838095238096,"a95":"1.656524","info":"\"93-11-18\" at \"15:12\""},{"visible":true,"include":false,"step":"700","x":-11.142952380952382,"y":-3.1056438095238095,"z":-18.21858095238095,"a95":"12.42321","info":"\"93-11-18\" at \"19:57\""}],"demagType":"Unknown","patch":1.1,"format":"Unknown","strat":null},{"version":"v1.1.0","exported":"2016-10-11T12:28:25.716Z","info":"","GEO":[{"dec":56.782446839146814,"inc":-11.895447483157724,"MAD":2.8546039249277095,"cm":[1.7763568394002505e-14,2.930988785010413e-14,0],"intensity":1098.6535485479017,"type":"GC","origin":false,"forced":true,"remark":"","nSteps":9,"minStep":"100","maxStep":"420","steps":["100","140","180","220","260","300","340","380","420"],"group":"None","version":"v1.1.0"}],"TECT":[{"dec":54.42762357313643,"inc":-2.929369740818412,"MAD":2.8546039249274515,"cm":[-3.197442310920451e-14,-5.5067062021407764e-14,0],"intensity":1098.6535485479014,"type":"GC","origin":false,"forced":true,"remark":"","nSteps":9,"minStep":"100","maxStep":"420","steps":["100","140","180","220","260","300","340","380","420"],"group":"None","version":"v1.1.0"}],"interpreted":true,"name":"IN 155","coreAzi":115,"coreDip":36,"bedStrike":82,"bedDip":20,"data":[{"visible":true,"include":false,"step":"20","x":-394.5055238095238,"y":392.31066666666663,"z":536.2089523809524,"a95":"1.422859","info":"\"93-11-11\" at \"14:58\""},{"visible":true,"include":true,"step":"100","x":489.10114285714286,"y":489.327619047619,"z":606.1106666666667,"a95":"1.196891","info":"\"93-11-12\" at \"09:49\""},{"visible":true,"include":true,"step":"140","x":193.22723809523808,"y":315.5977142857143,"z":548.7832380952381,"a95":"1.257658","info":"\"93-11-12\" at \"12:48\""},{"visible":true,"include":true,"step":"180","x":-8.489745714285714,"y":163.11399999999998,"z":516.4479047619049,"a95":"1.8457","info":"\"93-11-12\" at \"17:05\""},{"visible":true,"include":true,"step":"220","x":-92.57965714285714,"y":125.53819047619048,"z":483.8929523809524,"a95":"2.051054","info":"\"93-11-15\" at \"13:09\""},{"visible":true,"include":true,"step":"260","x":-94.12759047619048,"y":79.49680000000001,"z":421.95885714285714,"a95":"6.851372","info":"\"93-11-15\" at \"16:17\""},{"visible":true,"include":true,"step":"300","x":-111.76666666666667,"y":80.90216190476191,"z":354.26971428571426,"a95":"2.309408","info":"\"93-11-15\" at \"22:14\""},{"visible":true,"include":true,"step":"340","x":-101.71038095238096,"y":57.64771428571429,"z":329.0295238095238,"a95":"1.965559","info":"\"93-11-16\" at \"11:00\""},{"visible":true,"include":true,"step":"380","x":-102.04685714285714,"y":48.91691428571429,"z":310.20447619047616,"a95":"2.09824","info":"\"93-11-16\" at \"13:56\""},{"visible":true,"include":true,"step":"420","x":-117.72580952380953,"y":43.93229523809524,"z":279.75266666666664,"a95":"2.715149","info":"\"93-11-16\" at \"16:12\""},{"visible":true,"include":false,"step":"460","x":-95.5915238095238,"y":37.89533333333333,"z":268.78761904761905,"a95":"4.052841","info":"\"93-11-17\" at \"09:56\""},{"visible":true,"include":false,"step":"500","x":-74.31931428571428,"y":25.367076190476194,"z":226.41409523809523,"a95":"4.179087","info":"\"93-11-17\" at \"14:15\""},{"visible":true,"include":false,"step":"540","x":-111.83590476190477,"y":-28.279133333333334,"z":218.71352380952382,"a95":"4.206215","info":"\"93-11-17\" at \"16:33\""},{"visible":true,"include":false,"step":"580","x":-69.99509523809523,"y":-9.194138095238095,"z":204.62009523809525,"a95":"5.103657","info":"\"93-11-18\" at \"10:27\""},{"visible":true,"include":false,"step":"620","x":-25.59061904761905,"y":33.60073333333334,"z":133.0212380952381,"a95":"3.387811","info":"\"93-11-18\" at \"12:39\""},{"visible":true,"include":false,"step":"660","x":-30.070104761904766,"y":31.055685714285715,"z":161.31495238095238,"a95":"1.899794","info":"\"93-11-18\" at \"15:13\""},{"visible":true,"include":false,"step":"700","x":-3.649499047619048,"y":-2.5373285714285716,"z":-0.7411603809523809,"a95":"52.02768","info":"\"93-11-18\" at \"19:59\""}],"demagType":"Unknown","patch":1.1,"format":"Unknown","strat":null},{"version":"v1.1.0","exported":"2016-10-11T12:28:25.716Z","info":"","GEO":[],"TECT":[],"interpreted":false,"name":"IN 156","coreAzi":182,"coreDip":206,"bedStrike":82,"bedDip":20,"data":[{"visible":true,"include":false,"step":"20","x":7.28931619047619,"y":-1.4275895238095238,"z":7.793910476190477,"a95":"4.940297","info":"\"93-11-11\" at \"15:04\""},{"visible":true,"include":false,"step":"100","x":3.52298,"y":-1.4027390476190476,"z":9.850047619047618,"a95":"8.65716","info":"\"93-11-12\" at \"09:58\""},{"visible":true,"include":false,"step":"140","x":-0.12610019047619048,"y":-2.1194571428571427,"z":6.342690476190476,"a95":"7.512296","info":"\"93-11-12\" at \"13:05\""},{"visible":true,"include":false,"step":"180","x":0.30440647619047617,"y":-2.9496561904761904,"z":2.5173495238095236,"a95":"31.30197","info":"\"93-11-15\" at \"09:19\""},{"visible":true,"include":false,"step":"220","x":0.6632549523809524,"y":-2.4667933333333334,"z":2.748178095238095,"a95":"8.981799","info":"\"93-11-15\" at \"13:41\""},{"visible":true,"include":false,"step":"260","x":-0.23494266666666666,"y":-1.3660895238095239,"z":1.5754657142857145,"a95":"22.71163","info":"\"93-11-15\" at \"16:23\""},{"visible":true,"include":false,"step":"300","x":-0.31756666666666666,"y":-1.63138,"z":0.8309803809523809,"a95":"33.44668","info":"\"93-11-15\" at \"22:24\""},{"visible":true,"include":false,"step":"340","x":-0.15988047619047618,"y":0.3925702857142857,"z":-0.31973723809523813,"a95":"154.6363","info":"\"93-11-16\" at \"11:13\""},{"visible":true,"include":false,"step":"380","x":-0.7844330476190476,"y":0.18118104761904763,"z":-0.056680971428571425,"a95":"131.9559","info":"\"93-11-16\" at \"14:08\""},{"visible":true,"include":false,"step":"420","x":-0.2720861904761905,"y":-0.9797209523809524,"z":-0.5181942857142857,"a95":"51.52751","info":"\"93-11-16\" at \"16:20\""},{"visible":true,"include":false,"step":"460","x":0.5545578095238095,"y":-1.2475561904761905,"z":-1.0416876190476192,"a95":"44.39675","info":"\"93-11-17\" at \"10:50\""},{"visible":true,"include":false,"step":"500","x":-0.9511551428571428,"y":-0.9273270476190476,"z":-0.4435423809523809,"a95":"34.61955","info":"\"93-11-17\" at \"14:18\""},{"visible":true,"include":false,"step":"540","x":-2.211110476190476,"y":0.43157419047619044,"z":-1.8326638095238095,"a95":"15.69668","info":"\"93-11-17\" at \"16:40\""},{"visible":true,"include":false,"step":"580","x":-3.3027657142857145,"y":0.03710641904761905,"z":2.182227619047619,"a95":"8.16278","info":"\"93-11-18\" at \"11:20\""}],"demagType":"Unknown","patch":1.1,"format":"Unknown","strat":null},{"version":"v1.1.0","exported":"2016-10-11T12:28:25.716Z","info":"","GEO":[],"TECT":[],"interpreted":false,"name":"IN 157","coreAzi":95,"coreDip":46,"bedStrike":82,"bedDip":20,"data":[{"visible":true,"include":false,"step":"20","x":-3.582338095238095,"y":-15.37807619047619,"z":22.168685714285715,"a95":"4.310729","info":"\"93-11-11\" at \"15:05\""},{"visible":true,"include":false,"step":"100","x":-1.6819019047619048,"y":-9.693638095238095,"z":34.48894285714285,"a95":"4.507981","info":"\"93-11-12\" at \"09:59\""},{"visible":true,"include":false,"step":"140","x":12.186333333333334,"y":6.932023809523809,"z":7.027529523809524,"a95":"4.772288","info":"\"93-11-12\" at \"13:06\""},{"visible":true,"include":false,"step":"180","x":21.966676190476193,"y":13.131933333333333,"z":-9.92172380952381,"a95":"4.044418","info":"\"93-11-15\" at \"09:20\""},{"visible":true,"include":false,"step":"220","x":20.757638095238093,"y":17.67447619047619,"z":-12.08955238095238,"a95":"2.62921","info":"\"93-11-15\" at \"13:43\""},{"visible":true,"include":false,"step":"260","x":18.36707619047619,"y":14.788019047619049,"z":-14.117333333333333,"a95":"3.778731","info":"\"93-11-15\" at \"16:24\""},{"visible":true,"include":false,"step":"300","x":18.352276190476193,"y":5.843068571428572,"z":-12.528714285714287,"a95":"4.658563","info":"\"93-11-15\" at \"22:25\""},{"visible":true,"include":false,"step":"340","x":9.696342857142858,"y":3.1542104761904763,"z":-9.350140952380952,"a95":"10.46408","info":"\"93-11-16\" at \"11:14\""},{"visible":true,"include":false,"step":"380","x":14.253761904761905,"y":-0.8302001904761905,"z":-10.119666666666667,"a95":"10.33894","info":"\"93-11-16\" at \"14:08\""},{"visible":true,"include":false,"step":"420","x":2.147164761904762,"y":7.614714285714285,"z":-9.650380952380951,"a95":"12.03154","info":"\"93-11-16\" at \"16:21\""},{"visible":true,"include":false,"step":"460","x":4.001485714285714,"y":1.3197619047619047,"z":4.851408571428571,"a95":"29.34745","info":"\"93-11-17\" at \"10:51\""},{"visible":true,"include":false,"step":"500","x":7.88294380952381,"y":8.575028571428572,"z":-6.596239047619047,"a95":"35.45967","info":"\"93-11-17\" at \"14:19\""},{"visible":true,"include":false,"step":"540","x":-10.397714285714287,"y":-1.229155238095238,"z":-14.52982857142857,"a95":"8.865984","info":"\"93-11-17\" at \"16:41\""},{"visible":true,"include":false,"step":"580","x":-4.610612380952381,"y":2.2787609523809524,"z":-6.065928571428572,"a95":"15.13679","info":"\"93-11-18\" at \"11:21\""}],"demagType":"Unknown","patch":1.1,"format":"Unknown","strat":null},{"version":"v1.1.0","exported":"2016-10-11T12:28:25.716Z","info":"","GEO":[{"dec":1.0931573572977413,"inc":-18.475604474127277,"MAD":6.679883648019892,"cm":[-3.064215547965432e-14,-3.552713678800501e-15,0],"intensity":346.9790907320176,"type":"GC","origin":false,"forced":true,"remark":"","nSteps":4,"minStep":"140","maxStep":"260","steps":["140","180","220","260"],"group":"None","version":"v1.1.0"}],"TECT":[{"dec":180.62301992893575,"inc":-1.2907451447095126,"MAD":6.679883648019883,"cm":[-2.7533531010703882e-14,-3.552713678800501e-15,-1.0658141036401503e-14],"intensity":346.97909073201754,"type":"GC","origin":false,"forced":true,"remark":"","nSteps":4,"minStep":"140","maxStep":"260","steps":["140","180","220","260"],"group":"None","version":"v1.1.0"}],"interpreted":true,"name":"IN 158","coreAzi":101,"coreDip":45,"bedStrike":82,"bedDip":20,"data":[{"visible":false,"include":false,"step":"20","x":188.8512380952381,"y":-195.5847619047619,"z":531.2179047619047,"a95":"2.318874","info":"\"93-11-11\" at \"15:08\""},{"visible":true,"include":false,"step":"100","x":32.252476190476195,"y":-192.6337142857143,"z":547.3217142857143,"a95":"3.617183","info":"\"93-11-12\" at \"10:02\""},{"visible":true,"include":true,"step":"140","x":134.32685714285714,"y":-75.08588571428571,"z":228.31600000000003,"a95":"19.39322","info":"\"93-11-12\" at \"13:07\""},{"visible":true,"include":true,"step":"180","x":164.9078095238095,"y":-5.696288571428572,"z":105.83704761904762,"a95":"3.550106","info":"\"93-11-15\" at \"09:21\""},{"visible":true,"include":true,"step":"220","x":162.1247619047619,"y":6.396990476190477,"z":41.72071428571429,"a95":"6.066325","info":"\"93-11-15\" at \"13:44\""},{"visible":true,"include":true,"step":"260","x":143.98104761904762,"y":15.935790476190475,"z":-29.719761904761906,"a95":"4.491519","info":"\"93-11-15\" at \"16:25\""},{"visible":true,"include":false,"step":"300","x":139.16847619047618,"y":-5.216204761904762,"z":-33.18422857142857,"a95":"4.754281","info":"\"93-11-15\" at \"22:27\""},{"visible":true,"include":false,"step":"340","x":142.7002857142857,"y":16.49012380952381,"z":-53.09780952380953,"a95":"3.207091","info":"\"93-11-16\" at \"11:16\""},{"visible":true,"include":false,"step":"380","x":139.39457142857142,"y":-16.460104761904763,"z":-40.131971428571426,"a95":"4.320481","info":"\"93-11-16\" at \"14:09\""},{"visible":true,"include":false,"step":"420","x":87.09994285714285,"y":32.37495238095238,"z":-49.10030476190476,"a95":"5.904577","info":"\"93-11-16\" at \"16:22\""},{"visible":true,"include":false,"step":"460","x":93.30121904761904,"y":-0.8626872380952381,"z":-2.5657114285714284,"a95":"6.327482","info":"\"93-11-17\" at \"10:52\""},{"visible":true,"include":false,"step":"500","x":90.11744761904762,"y":5.371714285714286,"z":-43.37521904761905,"a95":"6.940603","info":"\"93-11-17\" at \"14:20\""},{"visible":true,"include":false,"step":"540","x":56.44414285714286,"y":35.78361904761905,"z":-58.23599047619047,"a95":"5.928338","info":"\"93-11-17\" at \"16:42\""},{"visible":true,"include":false,"step":"580","x":50.09683809523809,"y":-26.912133333333333,"z":-29.658485714285717,"a95":"7.609395","info":"\"93-11-18\" at \"11:23\""},{"visible":true,"include":false,"step":"620","x":53.7764,"y":-17.499038095238095,"z":-35.91629523809524,"a95":"5.732376","info":"\"93-11-18\" at \"13:11\""},{"visible":true,"include":false,"step":"660","x":69.49538095238096,"y":-7.947238095238095,"z":6.038962857142857,"a95":"3.583416","info":"\"93-11-18\" at \"15:15\""}],"demagType":"Unknown","patch":1.1,"format":"Unknown","strat":null},{"version":"v1.1.0","exported":"2016-10-11T12:28:25.716Z","info":"","GEO":[{"dec":161.3536030108728,"inc":-31.194060188546377,"MAD":28.811066548582644,"cm":[-1.7763568394002505e-15,-4.218847493575595e-15,0],"intensity":439.25375717239643,"type":"GC","origin":false,"forced":true,"remark":"","nSteps":12,"minStep":"180","maxStep":"620","steps":["180","220","260","300","340","380","420","460","500","540","580","620"],"group":"None","version":"v1.1.0"}],"TECT":[{"dec":157.54005680459,"inc":-50.735881936711664,"MAD":28.811066548582897,"cm":[1.7763568394002505e-15,1.1546319456101628e-14,0],"intensity":439.2537571723964,"type":"GC","origin":false,"forced":true,"remark":"","nSteps":12,"minStep":"180","maxStep":"620","steps":["180","220","260","300","340","380","420","460","500","540","580","620"],"group":"None","version":"v1.1.0"}],"interpreted":true,"name":"IN 159","coreAzi":-22,"coreDip":72,"bedStrike":82,"bedDip":20,"data":[{"visible":false,"include":false,"step":"20","x":204.8814285714286,"y":-212.20847619047618,"z":111.69876190476191,"a95":"2.129515","info":"\"93-11-11\" at \"15:09\""},{"visible":false,"include":false,"step":"100","x":189.62771428571426,"y":-208.49476190476193,"z":109.60990476190476,"a95":"2.568726","info":"\"93-11-12\" at \"10:03\""},{"visible":true,"include":false,"step":"140","x":195.75857142857143,"y":-140.61666666666665,"z":-37.52095238095238,"a95":"9.405685","info":"\"93-11-12\" at \"13:09\""},{"visible":true,"include":true,"step":"180","x":235.48,"y":-96.97361904761904,"z":-148.95009523809526,"a95":"2.191087","info":"\"93-11-15\" at \"09:22\""},{"visible":true,"include":true,"step":"220","x":219.08285714285714,"y":-68.3128,"z":-189.084,"a95":"2.024595","info":"\"93-11-15\" at \"13:45\""},{"visible":true,"include":true,"step":"260","x":196.4332380952381,"y":-53.867285714285714,"z":-205.6192380952381,"a95":"2.277992","info":"\"93-11-15\" at \"16:26\""},{"visible":true,"include":true,"step":"300","x":188.27599999999998,"y":-50.32088571428571,"z":-188.704,"a95":"2.649717","info":"\"93-11-15\" at \"22:29\""},{"visible":true,"include":true,"step":"340","x":189.08971428571428,"y":-18.92985714285714,"z":-184.46838095238095,"a95":"4.464497","info":"\"93-11-16\" at \"11:17\""},{"visible":true,"include":true,"step":"380","x":196.57180952380952,"y":-25.31215238095238,"z":-149.51638095238096,"a95":"2.193753","info":"\"93-11-16\" at \"14:10\""},{"visible":true,"include":true,"step":"420","x":167.4727619047619,"y":-21.822733333333332,"z":-148.6875238095238,"a95":"2.384884","info":"\"93-11-16\" at \"16:24\""},{"visible":true,"include":true,"step":"460","x":148.50190476190477,"y":-2.6890190476190474,"z":-107.55028571428572,"a95":"3.052881","info":"\"93-11-17\" at \"10:53\""},{"visible":true,"include":true,"step":"500","x":174.04628571428572,"y":5.176790476190476,"z":-142.50980952380954,"a95":"2.0929","info":"\"93-11-17\" at \"14:21\""},{"visible":true,"include":true,"step":"540","x":141.26180952380952,"y":19.51595238095238,"z":-117.18980952380952,"a95":"6.031878","info":"\"93-11-17\" at \"16:43\""},{"visible":true,"include":true,"step":"580","x":163.42933333333335,"y":32.96961904761905,"z":-116.58095238095237,"a95":"2.331522","info":"\"93-11-18\" at \"11:24\""},{"visible":true,"include":true,"step":"620","x":111.39342857142859,"y":14.38097142857143,"z":-107.56723809523808,"a95":"2.639364","info":"\"93-11-18\" at \"13:12\""},{"visible":true,"include":false,"step":"660","x":128.4307619047619,"y":-3.0068638095238094,"z":-63.71629523809524,"a95":"2.086491","info":"\"93-11-18\" at \"15:16\""},{"visible":true,"include":false,"step":"700","x":-5.422900952380952,"y":10.054685714285714,"z":-23.08169523809524,"a95":"11.59377","info":"\"93-11-18\" at \"20:01\""}],"demagType":"Unknown","patch":1.1,"format":"Unknown","strat":null},{"version":"v1.1.0","exported":"2016-10-11T12:28:25.716Z","info":"","GEO":[{"dec":99.52842621380489,"inc":-9.677855905646519,"MAD":8.46796793523266,"cm":[2.3314683517128287e-15,4.440892098500626e-16,0],"intensity":102.23969778678848,"type":"dir","forced":true,"remark":"","origin":false,"nSteps":6,"minStep":"300","maxStep":"620","steps":["300","340","420","500","580","620"],"group":"None","version":"v1.1.0"}],"TECT":[{"dec":103.90779304327486,"inc":-23.47364913690071,"MAD":8.467967935232663,"cm":[2.3203661214665772e-14,5.329070518200751e-15,-1.887379141862766e-15],"intensity":102.23969778678851,"type":"dir","forced":true,"remark":"","origin":false,"nSteps":6,"minStep":"300","maxStep":"620","steps":["300","340","420","500","580","620"],"group":"None","version":"v1.1.0"}],"interpreted":true,"name":"IN 160","coreAzi":214,"coreDip":82,"bedStrike":325,"bedDip":20,"data":[{"visible":false,"include":false,"step":"20","x":-142.26333333333335,"y":-19.299200000000003,"z":119.19019047619048,"a95":"3.841028","info":"\"94-02-07\" at \"11:11\""},{"visible":true,"include":false,"step":"100","x":-102.65904761904763,"y":-37.9667619047619,"z":61.89344761904762,"a95":"2.705602","info":"\"94-02-08\" at \"10:01\""},{"visible":true,"include":false,"step":"140","x":-68.02954285714286,"y":-62.0292,"z":22.163609523809523,"a95":"11.00781","info":"\"94-02-09\" at \"10:26\""},{"visible":true,"include":false,"step":"180","x":-53.04592380952381,"y":-69.3547619047619,"z":-10.875933333333332,"a95":"9.677037","info":"\"94-02-09\" at \"13:09\""},{"visible":true,"include":false,"step":"220","x":-41.96515238095238,"y":-60.80742857142857,"z":-12.615685714285714,"a95":"2.91031","info":"\"94-02-10\" at \"13:58\""},{"visible":true,"include":false,"step":"260","x":-29.92742857142857,"y":-57.35809523809524,"z":-23.79295238095238,"a95":"9.168504","info":"\"94-02-11\" at \"09:34\""},{"visible":true,"include":true,"step":"300","x":-24.3656,"y":-61.31665714285714,"z":-19.667971428571427,"a95":"3.728188","info":"\"94-02-11\" at \"16:14\""},{"visible":true,"include":true,"step":"340","x":-26.917638095238097,"y":-58.00541904761905,"z":-21.281019047619047,"a95":"3.972505","info":"\"94-02-14\" at \"09:32\""},{"visible":true,"include":false,"step":"380","x":-31.18487619047619,"y":-22.343228571428572,"z":-31.050447619047617,"a95":"7.592601","info":"\"94-02-15\" at \"12:55\""},{"visible":true,"include":true,"step":"420","x":-24.98684761904762,"y":-40.61570476190476,"z":-11.689038095238095,"a95":"6.774672","info":"\"94-02-16\" at \"13:07\""},{"visible":true,"include":false,"step":"460","x":-32.54813333333333,"y":-31.540399999999998,"z":-8.258521904761905,"a95":"6.375523","info":"\"94-02-16\" at \"15:58\""},{"visible":true,"include":true,"step":"500","x":-12.40162857142857,"y":-40.502161904761905,"z":-5.3016104761904765,"a95":"7.200999","info":"\"94-02-17\" at \"13:35\""},{"visible":true,"include":false,"step":"540","x":-30.79581904761905,"y":-34.34213333333334,"z":-9.172044761904763,"a95":"6.485043","info":"\"94-02-18\" at \"10:07\""},{"visible":true,"include":true,"step":"580","x":-11.379057142857143,"y":-36.639133333333334,"z":4.042520952380952,"a95":"9.196614","info":"\"94-02-18\" at \"15:23\""},{"visible":true,"include":true,"step":"620","x":-11.629552380952381,"y":-31.62090476190476,"z":-3.13366,"a95":"8.992094","info":"\"94-02-21\" at \"09:51\""},{"visible":true,"include":false,"step":"660","x":-15.51344761904762,"y":-13.48805714285714,"z":-6.013231428571428,"a95":"11.07752","info":"\"94-02-21\" at \"13:05\""},{"visible":true,"include":false,"step":"700","x":-3.254570476190476,"y":-22.456809523809525,"z":5.345928571428571,"a95":"9.88156","info":"\"94-02-21\" at \"15:33\""}],"demagType":"Unknown","patch":1.1,"format":"Unknown","strat":null},{"version":"v1.1.0","exported":"2016-10-11T12:28:25.716Z","info":"","GEO":[{"dec":116.7813943913846,"inc":-18.62295200721305,"MAD":4.8410012556526345,"cm":[-1.2434497875801753e-14,3.552713678800501e-15,0],"intensity":773.9499796386903,"type":"dir","forced":true,"remark":"","origin":false,"nSteps":6,"minStep":"300","maxStep":"540","steps":["300","340","380","420","460","540"],"group":"None","version":"v1.1.0"}],"TECT":[{"dec":109.12717006719754,"inc":-29.010456235699117,"MAD":4.841001255652649,"cm":[-7.993605777301127e-15,-1.7763568394002505e-14,-8.881784197001252e-15],"intensity":773.9499796386903,"type":"dir","forced":true,"remark":"","origin":false,"nSteps":6,"minStep":"300","maxStep":"540","steps":["300","340","380","420","460","540"],"group":"None","version":"v1.1.0"}],"interpreted":true,"name":"IN 161.B","coreAzi":170,"coreDip":85,"bedStrike":82,"bedDip":20,"data":[{"visible":false,"include":false,"step":"20","x":-565.0141904761905,"y":-636.2379047619047,"z":1162.9304761904762,"a95":"2.440388","info":"\"93-11-11\" at \"15:10\""},{"visible":true,"include":false,"step":"100","x":-435.1389523809524,"y":-688.299238095238,"z":1065.2980952380951,"a95":"1.742833","info":"\"93-11-12\" at \"10:04\""},{"visible":true,"include":false,"step":"140","x":-94.1681619047619,"y":-606.17,"z":504.1043809523809,"a95":"2.003554","info":"\"93-11-12\" at \"13:10\""},{"visible":true,"include":false,"step":"180","x":53.069019047619044,"y":-616.395238095238,"z":58.449133333333336,"a95":"2.888805","info":"\"93-11-15\" at \"09:22\""},{"visible":false,"include":false,"step":"220","x":-239.85542857142858,"y":-558.6660952380952,"z":-83.9219142857143,"a95":"3.469677","info":"\"93-11-15\" at \"13:46\""},{"visible":true,"include":false,"step":"260","x":130.3284761904762,"y":-494.3862857142857,"z":-115.12419047619048,"a95":"3.791867","info":"\"93-11-15\" at \"16:26\""},{"visible":true,"include":true,"step":"300","x":305.828,"y":-394.7311428571428,"z":-98.26780952380952,"a95":"3.251759","info":"\"93-11-15\" at \"22:32\""},{"visible":true,"include":true,"step":"340","x":217.2524761904762,"y":-336.3285714285714,"z":-116.34619047619047,"a95":"3.173304","info":"\"93-11-16\" at \"11:18\""},{"visible":true,"include":true,"step":"380","x":249.22114285714287,"y":-315.68399999999997,"z":-139.79161904761904,"a95":"4.424726","info":"\"93-11-16\" at \"14:18\""},{"visible":true,"include":true,"step":"420","x":197.50866666666667,"y":-225.09180952380953,"z":-113.68228571428571,"a95":"3.428942","info":"\"93-11-16\" at \"16:24\""},{"visible":true,"include":true,"step":"460","x":189.4607619047619,"y":-225.98752380952382,"z":-58.195095238095234,"a95":"3.514422","info":"\"93-11-17\" at \"10:54\""},{"visible":false,"include":false,"step":"500","x":-294.6994285714286,"y":-44.295,"z":110.31409523809523,"a95":"3.236068","info":"\"93-11-17\" at \"14:21\""},{"visible":true,"include":true,"step":"540","x":174.68942857142858,"y":-182.96580952380953,"z":-87.11774285714286,"a95":"17.31662","info":"\"93-11-17\" at \"16:43\""},{"visible":true,"include":false,"step":"580","x":131.07209523809524,"y":-176.26057142857144,"z":-66.16513333333333,"a95":"3.683903","info":"\"93-11-18\" at \"11:26\""},{"visible":false,"include":false,"step":"620","x":96.96552380952382,"y":-130.7537142857143,"z":-91.09290476190476,"a95":"4.27557","info":"\"93-11-18\" at \"13:13\""},{"visible":false,"include":false,"step":"660","x":107.2767619047619,"y":-105.27076190476191,"z":19.91707619047619,"a95":"2.697461","info":"\"93-11-18\" at \"15:16\""},{"visible":false,"include":false,"step":"700","x":-11.372857142857143,"y":-6.836396190476191,"z":-3.6477514285714285,"a95":"19.20242","info":"\"93-11-18\" at \"20:02\""}],"demagType":"Unknown","patch":1.1,"format":"Unknown","strat":null},{"version":"v1.1.0","exported":"2016-10-11T12:28:25.716Z","info":"","GEO":[],"TECT":[],"interpreted":false,"name":"IN 162","coreAzi":48,"coreDip":83,"bedStrike":325,"bedDip":20,"data":[{"visible":true,"include":false,"step":"20","x":53.36793333333333,"y":-87.3932380952381,"z":215.19304761904763,"a95":"4.057374","info":"\"94-02-07\" at \"11:11\""},{"visible":true,"include":false,"step":"100","x":85.62594285714286,"y":-64.45012380952382,"z":140.33533333333332,"a95":"1.613095","info":"\"94-02-08\" at \"10:02\""},{"visible":true,"include":false,"step":"140","x":-45.85418095238096,"y":-50.70980952380952,"z":70.25934285714285,"a95":"6.351468","info":"\"94-02-09\" at \"10:27\""},{"visible":true,"include":false,"step":"180","x":106.48666666666665,"y":-26.801761904761904,"z":17.01789523809524,"a95":"5.112046","info":"\"94-02-09\" at \"13:09\""},{"visible":true,"include":false,"step":"220","x":101.26238095238097,"y":-28.54727619047619,"z":13.766133333333332,"a95":"2.572923","info":"\"94-02-10\" at \"13:59\""},{"visible":true,"include":false,"step":"260","x":74.5942,"y":-30.04287619047619,"z":2.0370561904761906,"a95":"4.253874","info":"\"94-02-11\" at \"09:35\""},{"visible":true,"include":false,"step":"300","x":101.49219047619047,"y":-18.626123809523808,"z":1.0871866666666665,"a95":"2.293648","info":"\"94-02-11\" at \"16:14\""},{"visible":true,"include":false,"step":"340","x":94.71857142857142,"y":0.554716380952381,"z":-3.692794285714286,"a95":"2.972812","info":"\"94-02-14\" at \"09:33\""},{"visible":true,"include":false,"step":"380","x":111.56476190476191,"y":-22.452133333333332,"z":-21.22419047619048,"a95":"3.722017","info":"\"94-02-15\" at \"12:56\""},{"visible":true,"include":false,"step":"420","x":83.3171619047619,"y":-0.5474549523809523,"z":-12.585542857142858,"a95":"4.439416","info":"\"94-02-16\" at \"13:07\""},{"visible":true,"include":false,"step":"460","x":75.67099047619047,"y":10.447609523809524,"z":-3.885671428571429,"a95":"4.185093","info":"\"94-02-16\" at \"15:59\""},{"visible":true,"include":false,"step":"500","x":61.22597142857143,"y":0.8721213333333333,"z":-17.33667619047619,"a95":"8.356961","info":"\"94-02-17\" at \"13:36\""},{"visible":true,"include":false,"step":"540","x":61.886580952380946,"y":-4.629880952380953,"z":-9.44392,"a95":"5.298377","info":"\"94-02-18\" at \"10:08\""},{"visible":true,"include":false,"step":"580","x":68.12182857142857,"y":-3.211093333333333,"z":-3.403657142857143,"a95":"4.99248","info":"\"94-02-18\" at \"15:24\""},{"visible":true,"include":false,"step":"620","x":59.692504761904765,"y":19.886971428571428,"z":-15.086457142857144,"a95":"5.344126","info":"\"94-02-21\" at \"09:51\""},{"visible":true,"include":false,"step":"660","x":52.79528571428572,"y":15.45369523809524,"z":-3.651377142857143,"a95":"9.546465","info":"\"94-02-21\" at \"13:06\""},{"visible":true,"include":false,"step":"700","x":57.48541904761905,"y":26.738142857142854,"z":-11.279371428571428,"a95":"3.372716","info":"\"94-02-21\" at \"15:34\""}],"demagType":"Unknown","patch":1.1,"format":"Unknown","strat":null},{"version":"v1.1.0","exported":"2016-10-11T12:28:25.717Z","info":"","GEO":[],"TECT":[],"interpreted":false,"name":"IN 163","coreAzi":104,"coreDip":31,"bedStrike":82,"bedDip":20,"data":[{"visible":true,"include":false,"step":"20","x":-27.762619047619047,"y":-5.483745714285714,"z":21.587238095238096,"a95":"4.473374","info":"\"93-11-11\" at \"15:11\""},{"visible":true,"include":false,"step":"100","x":-7.349803809523809,"y":-12.889733333333332,"z":31.17922857142857,"a95":"6.725178","info":"\"93-11-12\" at \"10:05\""},{"visible":true,"include":false,"step":"140","x":10.667409523809525,"y":-5.573159047619048,"z":22.093190476190475,"a95":"19.78847","info":"\"93-11-12\" at \"13:12\""},{"visible":true,"include":false,"step":"180","x":20.883742857142856,"y":-0.9442471428571428,"z":17.188638095238097,"a95":"4.560916","info":"\"93-11-15\" at \"09:23\""},{"visible":true,"include":false,"step":"220","x":18.125714285714285,"y":0.2081394285714286,"z":9.88864761904762,"a95":"5.758221","info":"\"93-11-15\" at \"13:47\""},{"visible":true,"include":false,"step":"260","x":13.856657142857143,"y":-0.3316864761904762,"z":10.927180952380953,"a95":"6.503685","info":"\"93-11-15\" at \"16:27\""},{"visible":true,"include":false,"step":"300","x":14.74387619047619,"y":-2.3990695238095237,"z":5.76391619047619,"a95":"7.649934","info":"\"93-11-15\" at \"22:33\""},{"visible":true,"include":false,"step":"340","x":8.307421904761904,"y":2.0723885714285712,"z":6.408468571428572,"a95":"13.7896","info":"\"93-11-16\" at \"11:19\""},{"visible":true,"include":false,"step":"380","x":4.735317142857143,"y":-2.9188733333333334,"z":4.1484523809523814,"a95":"57.8404","info":"\"93-11-16\" at \"14:19\""},{"visible":true,"include":false,"step":"420","x":-3.8403847619047617,"y":0.3641852380952381,"z":-0.05441488571428572,"a95":"48.34486","info":"\"93-11-16\" at \"16:25\""},{"visible":true,"include":false,"step":"460","x":2.3330219047619045,"y":-3.209971428571429,"z":0.9401124761904762,"a95":"67.10419","info":"\"93-11-17\" at \"10:54\""},{"visible":true,"include":false,"step":"500","x":4.535133333333333,"y":-4.687987619047619,"z":-5.360735238095238,"a95":"51.86761","info":"\"93-11-17\" at \"14:22\""},{"visible":true,"include":false,"step":"540","x":-2.9228476190476194,"y":-6.24259619047619,"z":-6.959775238095238,"a95":"22.08627","info":"\"93-11-17\" at \"16:44\""},{"visible":true,"include":false,"step":"580","x":-5.5008076190476185,"y":-3.302421904761905,"z":-2.9114885714285714,"a95":"27.96437","info":"\"93-11-18\" at \"11:27\""},{"visible":true,"include":false,"step":"620","x":-5.10121619047619,"y":-3.909604761904762,"z":-4.981501904761905,"a95":"21.50728","info":"\"93-11-18\" at \"13:13\""}],"demagType":"Unknown","patch":1.1,"format":"Unknown","strat":null},{"version":"v1.1.0","exported":"2016-10-11T12:28:25.717Z","info":"","GEO":[{"dec":110.35258443967143,"inc":-35.08107657873503,"MAD":10.614949113525777,"cm":[-2.636779683484747e-16,-1.942890293094024e-16,0],"intensity":20.618020527981315,"type":"dir","forced":true,"remark":"","origin":false,"nSteps":5,"minStep":"220","maxStep":"380","steps":["220","260","300","340","380"],"group":"None","version":"v1.1.0"}],"TECT":[{"dec":95.17761694230683,"inc":-42.29843065143991,"MAD":10.6149491135258,"cm":[-2.246466901389965e-16,3.3306690738754696e-16,1.1102230246251565e-16],"intensity":20.618020527981315,"type":"dir","forced":true,"remark":"","origin":false,"nSteps":5,"minStep":"220","maxStep":"380","steps":["220","260","300","340","380"],"group":"None","version":"v1.1.0"}],"interpreted":true,"name":"IN 163.B","coreAzi":42,"coreDip":26,"bedStrike":82,"bedDip":20,"data":[{"visible":false,"include":false,"step":"20","x":-36.738790476190474,"y":-0.2775505714285714,"z":38.878209523809524,"a95":"3.732381","info":"\"93-11-11\" at \"15:12\""},{"visible":true,"include":false,"step":"100","x":-23.28009523809524,"y":9.24582761904762,"z":45.19582857142857,"a95":"4.119259","info":"\"93-11-12\" at \"10:06\""},{"visible":true,"include":false,"step":"140","x":1.299675238095238,"y":17.218247619047617,"z":19.311914285714288,"a95":"8.393305","info":"\"93-11-12\" at \"13:13\""},{"visible":true,"include":false,"step":"180","x":9.255149523809523,"y":18.89222857142857,"z":5.064975238095238,"a95":"7.520645","info":"\"93-11-15\" at \"09:24\""},{"visible":true,"include":true,"step":"220","x":10.733799999999999,"y":13.515695238095239,"z":-0.18327914285714286,"a95":"9.428073","info":"\"93-11-15\" at \"13:48\""},{"visible":true,"include":true,"step":"260","x":8.140550476190477,"y":6.819596190476191,"z":-0.6461099047619048,"a95":"14.01853","info":"\"93-11-15\" at \"16:32\""},{"visible":true,"include":true,"step":"300","x":5.082570476190476,"y":5.750220952380952,"z":1.4081133333333333,"a95":"22.84278","info":"\"93-11-15\" at \"22:35\""},{"visible":true,"include":true,"step":"340","x":1.4729609523809524,"y":5.271633333333334,"z":2.3111609523809524,"a95":"106.2742","info":"\"93-11-16\" at \"11:20\""},{"visible":true,"include":true,"step":"380","x":2.7338733333333334,"y":2.0628285714285717,"z":-0.8336482857142856,"a95":"107.4371","info":"\"93-11-16\" at \"14:20\""},{"visible":true,"include":false,"step":"420","x":-1.5500980952380952,"y":5.243829523809524,"z":-4.490875238095238,"a95":"30.32194","info":"\"93-11-16\" at \"16:26\""},{"visible":false,"include":false,"step":"460","x":-2.658525714285714,"y":0.773199238095238,"z":-3.4941238095238094,"a95":"56.7796","info":"\"93-11-17\" at \"10:55\""},{"visible":false,"include":false,"step":"500","x":2.1647314285714283,"y":-4.264637142857143,"z":-3.133899047619048,"a95":"126.7169","info":"\"93-11-17\" at \"14:23\""},{"visible":false,"include":false,"step":"540","x":-8.839589523809524,"y":6.293290476190476,"z":-14.37184761904762,"a95":"12.22498","info":"\"93-11-17\" at \"16:45\""}],"demagType":"Unknown","patch":1.1,"format":"Unknown","strat":null},{"version":"v1.1.0","exported":"2016-10-11T12:28:25.717Z","info":"","GEO":[{"dec":161.0377009611401,"inc":-20.83783805468905,"MAD":5.844799921473552,"cm":[-15.581544621272247,10.371454436137288,-3.104921349893572],"intensity":17.893086259244107,"type":"dir","forced":false,"remark":"","origin":false,"nSteps":3,"minStep":"300","maxStep":"380","steps":["300","340","380"],"group":"None","version":"v1.1.0"}],"TECT":[{"dec":158.50459196416557,"inc":-40.3975693481885,"MAD":5.844799921473574,"cm":[-13.522250313769677,10.082039495262995,-8.688691648476645],"intensity":17.893086259244104,"type":"dir","forced":false,"remark":"","origin":false,"nSteps":3,"minStep":"300","maxStep":"380","steps":["300","340","380"],"group":"None","version":"v1.1.0"}],"interpreted":true,"name":"IN 164","coreAzi":245,"coreDip":78,"bedStrike":82,"bedDip":20,"data":[{"visible":false,"include":false,"step":"20","x":-61.277990476190475,"y":-19.6162,"z":56.43885714285714,"a95":"3.107131","info":"\"93-11-11\" at \"15:13\""},{"visible":true,"include":false,"step":"100","x":-46.24055238095238,"y":-26.10361904761905,"z":72.66315238095238,"a95":"6.912013","info":"\"93-11-12\" at \"10:07\""},{"visible":true,"include":false,"step":"140","x":-24.233733333333333,"y":-37.75843809523809,"z":31.27572380952381,"a95":"4.49883","info":"\"93-11-12\" at \"13:14\""},{"visible":true,"include":false,"step":"180","x":-4.681454285714286,"y":-43.29181904761905,"z":1.2349752380952381,"a95":"5.082734","info":"\"93-11-15\" at \"09:27\""},{"visible":true,"include":false,"step":"220","x":0.9230059047619047,"y":-37.11017142857143,"z":-6.399188571428572,"a95":"6.073054","info":"\"93-11-15\" at \"13:49\""},{"visible":false,"include":false,"step":"260","x":-8.165275238095237,"y":-30.071552380952383,"z":-7.256743809523809,"a95":"6.11786","info":"\"93-11-15\" at \"16:33\""},{"visible":true,"include":true,"step":"300","x":-0.659948380952381,"y":-27.92117142857143,"z":-6.706252380952381,"a95":"5.602948","info":"\"93-11-15\" at \"22:35\""},{"visible":true,"include":true,"step":"340","x":-1.677287619047619,"y":-16.171038095238096,"z":-3.5280390476190475,"a95":"12.29202","info":"\"93-11-16\" at \"11:21\""},{"visible":true,"include":true,"step":"380","x":-3.985646666666667,"y":-11.422314285714284,"z":-0.6325401904761905,"a95":"21.44801","info":"\"93-11-16\" at \"14:21\""},{"visible":true,"include":false,"step":"420","x":-5.9604228571428575,"y":-9.233557142857142,"z":-3.713921904761905,"a95":"22.98346","info":"\"93-11-16\" at \"16:27\""},{"visible":true,"include":false,"step":"460","x":-3.3526085714285716,"y":-15.725190476190475,"z":-5.725418095238095,"a95":"19.2681","info":"\"93-11-17\" at \"10:56\""},{"visible":true,"include":false,"step":"500","x":-9.066646666666665,"y":-8.067053333333334,"z":-5.148200952380952,"a95":"21.03519","info":"\"93-11-17\" at \"14:24\""},{"visible":true,"include":false,"step":"540","x":-3.6997638095238097,"y":-18.47002857142857,"z":-12.583790476190476,"a95":"12.00284","info":"\"93-11-17\" at \"16:46\""},{"visible":true,"include":false,"step":"580","x":-8.366953333333333,"y":-3.9788019047619048,"z":-10.392095238095239,"a95":"16.48954","info":"\"93-11-18\" at \"11:29\""}],"demagType":"Unknown","patch":1.1,"format":"Unknown","strat":null},{"version":"v1.1.0","exported":"2016-10-11T12:28:25.717Z","info":"","GEO":[{"dec":137.7323831044044,"inc":-22.2871424257016,"MAD":17.08324773353448,"cm":[2.7755575615628914e-16,-2.220446049250313e-16,0],"intensity":25.33598712188839,"type":"dir","forced":true,"remark":"","origin":false,"nSteps":5,"minStep":"220","maxStep":"420","steps":["220","300","340","380","420"],"group":"None","version":"v1.1.0"}],"TECT":[{"dec":130.49875436875425,"inc":-38.16386776997224,"MAD":17.083247733534503,"cm":[1.2212453270876722e-15,5.551115123125783e-16,2.7755575615628914e-16],"intensity":25.33598712188839,"type":"dir","forced":true,"remark":"","origin":false,"nSteps":5,"minStep":"220","maxStep":"420","steps":["220","300","340","380","420"],"group":"None","version":"v1.1.0"}],"interpreted":true,"name":"IN 165","coreAzi":11,"coreDip":76,"bedStrike":82,"bedDip":20,"data":[{"visible":false,"include":false,"step":"20","x":14.444933333333333,"y":9.801723809523809,"z":47.44009523809524,"a95":"2.25548","info":"\"93-11-11\" at \"15:14\""},{"visible":false,"include":false,"step":"100","x":12.18495238095238,"y":9.612695238095238,"z":52.46650476190476,"a95":"7.432315","info":"\"93-11-12\" at \"10:08\""},{"visible":true,"include":false,"step":"140","x":5.034055238095238,"y":14.758257142857143,"z":22.05102857142857,"a95":"4.256648","info":"\"93-11-12\" at \"13:15\""},{"visible":true,"include":false,"step":"180","x":-7.476522857142857,"y":16.82958095238095,"z":-2.105347619047619,"a95":"4.427548","info":"\"93-11-15\" at \"09:28\""},{"visible":true,"include":true,"step":"220","x":-6.5403714285714285,"y":15.765514285714286,"z":-7.589116190476191,"a95":"4.567276","info":"\"93-11-15\" at \"13:51\""},{"visible":false,"include":false,"step":"260","x":6.303705714285715,"y":14.029457142857144,"z":-8.193421904761905,"a95":"7.452951","info":"\"93-11-15\" at \"16:38\""},{"visible":true,"include":true,"step":"300","x":-6.982898095238095,"y":8.594682857142857,"z":-9.20026380952381,"a95":"7.349639","info":"\"93-11-15\" at \"22:37\""},{"visible":true,"include":true,"step":"340","x":-5.687515238095238,"y":1.635232380952381,"z":-7.20001238095238,"a95":"11.71158","info":"\"93-11-16\" at \"11:22\""},{"visible":true,"include":true,"step":"380","x":-3.1984371428571428,"y":5.734826666666667,"z":-2.211024761904762,"a95":"81.2223","info":"\"93-11-16\" at \"14:22\""},{"visible":true,"include":true,"step":"420","x":-3.018235238095238,"y":6.323028571428572,"z":-0.32552571428571425,"a95":"19.16664","info":"\"93-11-16\" at \"16:27\""},{"visible":false,"include":false,"step":"460","x":4.586261904761905,"y":-1.2546419047619048,"z":-1.0146857142857142,"a95":"36.95426","info":"\"93-11-17\" at \"10:57\""},{"visible":false,"include":false,"step":"500","x":0.3173778095238095,"y":-4.510927619047619,"z":-7.825187619047618,"a95":"11.52232","info":"\"93-11-17\" at \"14:25\""}],"demagType":"Unknown","patch":1.1,"format":"Unknown","strat":null},{"version":"v1.1.0","exported":"2016-10-11T12:28:25.717Z","info":"","GEO":[],"TECT":[],"interpreted":false,"name":"IN 168","coreAzi":51,"coreDip":63,"bedStrike":82,"bedDip":20,"data":[{"visible":true,"include":false,"step":"20","x":-27.671857142857146,"y":-3.68302,"z":17.837095238095237,"a95":"3.455136","info":"\"93-11-11\" at \"15:15\""},{"visible":true,"include":false,"step":"100","x":-23.70278095238095,"y":-8.065379047619048,"z":21.078019047619048,"a95":"4.594238","info":"\"93-11-12\" at \"10:08\""},{"visible":true,"include":false,"step":"140","x":-21.522466666666666,"y":-1.332410476190476,"z":16.141961904761907,"a95":"2.694858","info":"\"93-11-12\" at \"13:16\""},{"visible":true,"include":false,"step":"180","x":-19.63512380952381,"y":-2.1138190476190477,"z":11.818114285714286,"a95":"3.426359","info":"\"93-11-15\" at \"09:29\""},{"visible":true,"include":false,"step":"220","x":-17.101980952380952,"y":0.06733249523809524,"z":9.354434285714285,"a95":"2.684656","info":"\"93-11-15\" at \"13:52\""},{"visible":true,"include":false,"step":"260","x":-13.250495238095239,"y":-2.4764238095238094,"z":12.368523809523808,"a95":"20.84209","info":"\"93-11-15\" at \"16:39\""},{"visible":true,"include":false,"step":"300","x":-9.532342857142858,"y":-1.4602847619047619,"z":6.123179047619048,"a95":"8.349852","info":"\"93-11-15\" at \"22:38\""},{"visible":true,"include":false,"step":"340","x":-3.9969857142857146,"y":0.03693370476190476,"z":3.3417542857142855,"a95":"30.70577","info":"\"93-11-16\" at \"11:23\""},{"visible":true,"include":false,"step":"380","x":-1.7226752380952381,"y":0.3921451428571429,"z":2.572087619047619,"a95":"120.1097","info":"\"93-11-16\" at \"14:23\""},{"visible":true,"include":false,"step":"420","x":-2.4196504761904762,"y":-2.0637552380952378,"z":5.001781904761905,"a95":"33.57496","info":"\"93-11-16\" at \"16:28\""},{"visible":true,"include":false,"step":"460","x":-4.519418095238096,"y":-1.3049533333333332,"z":4.995514285714286,"a95":"64.14148","info":"\"93-11-17\" at \"10:58\""},{"visible":true,"include":false,"step":"500","x":-1.4553742857142857,"y":0.28701990476190475,"z":5.154640952380952,"a95":"78.90884","info":"\"93-11-17\" at \"14:26\""},{"visible":true,"include":false,"step":"540","x":-8.130785714285715,"y":-0.6755126666666667,"z":-2.215892380952381,"a95":"20.77871","info":"\"93-11-17\" at \"16:47\""},{"visible":true,"include":false,"step":"580","x":-5.063321904761905,"y":-3.592255238095238,"z":-3.1902723809523814,"a95":"21.31637","info":"\"93-11-18\" at \"11:30\""}],"demagType":"Unknown","patch":1.1,"format":"Unknown","strat":null},{"version":"v1.1.0","exported":"2016-10-11T12:28:25.717Z","info":"","GEO":[{"dec":28.338023998799315,"inc":-30.18122073452633,"MAD":10.39515747309717,"cm":[-5.551115123125783e-16,1.7763568394002505e-15,0],"intensity":139.3175030187479,"type":"GC","origin":false,"forced":true,"remark":"","nSteps":4,"minStep":"100","maxStep":"260","steps":["100","180","220","260"],"group":"None","version":"v1.1.0"}],"TECT":[{"dec":20.000710723395628,"inc":-47.44567283730463,"MAD":10.395157473096688,"cm":[0,2.220446049250313e-15,8.326672684688674e-17],"intensity":139.31750301874794,"type":"GC","origin":false,"forced":true,"remark":"","nSteps":4,"minStep":"100","maxStep":"260","steps":["100","180","220","260"],"group":"None","version":"v1.1.0"}],"interpreted":true,"name":"IN 170","coreAzi":176,"coreDip":61,"bedStrike":325,"bedDip":20,"data":[{"visible":true,"include":false,"step":"20","x":-125.83866666666667,"y":-79.93983809523809,"z":82.05944761904762,"a95":"2.739544","info":"\"94-02-07\" at \"11:12\""},{"visible":true,"include":true,"step":"100","x":-87.2469238095238,"y":-58.64429523809523,"z":77.18311428571428,"a95":"1.945837","info":"\"94-02-08\" at \"10:03\""},{"visible":false,"include":false,"step":"140","x":106.00866666666666,"y":-49.95308571428571,"z":59.13961904761905,"a95":"2.105808","info":"\"94-02-09\" at \"10:27\""},{"visible":true,"include":true,"step":"180","x":-33.997952380952384,"y":-28.85507619047619,"z":32.71581904761905,"a95":"8.302526","info":"\"94-02-09\" at \"13:11\""},{"visible":true,"include":true,"step":"220","x":-14.096276190476189,"y":-16.809133333333335,"z":20.823885714285716,"a95":"3.53447","info":"\"94-02-10\" at \"14:00\""},{"visible":true,"include":true,"step":"260","x":5.474430476190476,"y":-17.37461904761905,"z":6.146056190476191,"a95":"19.74975","info":"\"94-02-11\" at \"09:35\""},{"visible":true,"include":false,"step":"300","x":1.8850009523809523,"y":-9.38369619047619,"z":2.0894133333333333,"a95":"39.2297","info":"\"94-02-11\" at \"16:15\""},{"visible":true,"include":false,"step":"340","x":-9.497277142857143,"y":-9.202348571428573,"z":1.9639457142857144,"a95":"9.159853","info":"\"94-02-14\" at \"09:34\""},{"visible":true,"include":false,"step":"380","x":-1.316949523809524,"y":-0.8410038095238095,"z":-0.6087048571428572,"a95":"72.30557","info":"\"94-02-15\" at \"12:57\""},{"visible":true,"include":false,"step":"420","x":1.422597142857143,"y":0.2869552380952381,"z":1.7753466666666666,"a95":"75.80086","info":"\"94-02-16\" at \"13:08\""},{"visible":true,"include":false,"step":"460","x":-4.880044761904762,"y":-1.4391876190476192,"z":-2.6334133333333334,"a95":"24.62375","info":"\"94-02-16\" at \"16:00\""},{"visible":true,"include":false,"step":"500","x":10.93267619047619,"y":-4.122016190476191,"z":-5.463477142857142,"a95":"14.69925","info":"\"94-02-17\" at \"13:37\""},{"visible":true,"include":false,"step":"540","x":7.8671276190476185,"y":-8.697255238095238,"z":1.3333038095238094,"a95":"13.34986","info":"\"94-02-18\" at \"10:09\""},{"visible":true,"include":false,"step":"580","x":4.232681904761905,"y":-3.9540419047619046,"z":13.329371428571429,"a95":"11.48855","info":"\"94-02-18\" at \"15:25\""},{"visible":true,"include":false,"step":"620","x":6.849138095238095,"y":4.0474990476190476,"z":1.4030390476190475,"a95":"22.92764","info":"\"94-02-21\" at \"09:52\""},{"visible":true,"include":false,"step":"660","x":0.42123742857142854,"y":-6.88859619047619,"z":3.568387619047619,"a95":"18.84261","info":"\"94-02-21\" at \"13:07\""},{"visible":true,"include":false,"step":"700","x":1.417317142857143,"y":-1.150735238095238,"z":-9.200535238095238,"a95":"14.99126","info":"\"94-02-21\" at \"15:35\""}],"demagType":"Unknown","patch":1.1,"format":"Unknown","strat":null},{"version":"v1.1.0","exported":"2016-10-11T12:28:25.717Z","info":"","GEO":[],"TECT":[],"interpreted":false,"name":"IN 174","coreAzi":90,"coreDip":70,"bedStrike":82,"bedDip":20,"data":[{"visible":true,"include":false,"step":"20","x":-51.99970476190476,"y":10.332657142857144,"z":54.56313333333334,"a95":"2.545468","info":"\"93-11-11\" at \"15:16\""},{"visible":true,"include":true,"step":"100","x":-37.98865714285714,"y":7.837718095238095,"z":66.28555238095238,"a95":"3.231579","info":"\"93-11-12\" at \"10:10\""},{"visible":true,"include":true,"step":"140","x":-6.430213333333334,"y":9.262957142857143,"z":44.36273333333333,"a95":"4.03601","info":"\"93-11-12\" at \"13:17\""},{"visible":true,"include":true,"step":"180","x":18.9736,"y":7.597924761904762,"z":31.163209523809524,"a95":"4.202853","info":"\"93-11-15\" at \"09:31\""},{"visible":true,"include":false,"step":"220","x":14.032609523809523,"y":11.042047619047619,"z":36.2456380952381,"a95":"3.637171","info":"\"93-11-15\" at \"13:53\""},{"visible":true,"include":false,"step":"260","x":10.2518,"y":14.334857142857143,"z":11.796342857142857,"a95":"5.961702","info":"\"93-11-15\" at \"16:40\""},{"visible":true,"include":false,"step":"300","x":3.6971752380952383,"y":10.954057142857144,"z":13.059952380952382,"a95":"6.243037","info":"\"93-11-15\" at \"22:39\""},{"visible":true,"include":false,"step":"340","x":10.501552380952381,"y":7.714937142857143,"z":12.669552380952382,"a95":"8.366438","info":"\"93-11-16\" at \"11:24\""},{"visible":true,"include":false,"step":"380","x":5.517914285714285,"y":9.270599047619047,"z":22.632514285714286,"a95":"11.01771","info":"\"93-11-16\" at \"14:24\""},{"visible":true,"include":false,"step":"420","x":7.107546666666666,"y":-0.18526,"z":14.091695238095237,"a95":"8.050798","info":"\"93-11-16\" at \"16:29\""},{"visible":true,"include":false,"step":"460","x":18.590657142857143,"y":-6.157408571428571,"z":24.168780952380953,"a95":"5.956898","info":"\"93-11-17\" at \"10:59\""},{"visible":true,"include":false,"step":"500","x":27.47785714285714,"y":-14.613723809523808,"z":6.4336295238095245,"a95":"1.756696","info":"\"93-11-17\" at \"14:27\""}],"demagType":"Unknown","patch":1.1,"format":"Unknown","strat":null},{"version":"v1.1.0","exported":"2016-10-11T12:28:25.717Z","info":"","GEO":[{"dec":135.64671737919576,"inc":-30.705034890207415,"MAD":6.066935334924102,"cm":[-9.947598300641403e-14,-7.993605777301127e-14,0],"intensity":2266.400121272227,"type":"dir","forced":true,"remark":"","origin":false,"nSteps":7,"minStep":"260","maxStep":"500","steps":["260","300","340","380","420","460","500"],"group":"None","version":"v1.1.0"}],"TECT":[{"dec":125.04804163258541,"inc":-45.77964702937138,"MAD":6.066935334924055,"cm":[-1.0658141036401503e-14,-3.552713678800501e-14,-7.105427357601002e-15],"intensity":2266.400121272227,"type":"dir","forced":true,"remark":"","origin":false,"nSteps":7,"minStep":"260","maxStep":"500","steps":["260","300","340","380","420","460","500"],"group":"None","version":"v1.1.0"}],"interpreted":true,"name":"IN 176","coreAzi":42,"coreDip":58,"bedStrike":82,"bedDip":20,"data":[{"visible":false,"include":false,"step":"20","x":-582.9934285714286,"y":1695.0914285714284,"z":2355.4504761904764,"a95":"9.340778","info":"\"93-11-11\" at \"15:19\""},{"visible":false,"include":false,"step":"100","x":-442.72790476190477,"y":1785.6819047619047,"z":2234.8838095238093,"a95":"6.385117","info":"\"93-11-12\" at \"10:11\""},{"visible":false,"include":false,"step":"140","x":-48.609257142857146,"y":1720.762857142857,"z":1011.9047619047619,"a95":"2.411118","info":"\"93-11-12\" at \"13:19\""},{"visible":true,"include":false,"step":"180","x":643.9222857142857,"y":1798.9961904761903,"z":-812.8295238095237,"a95":"2.391118","info":"\"93-11-15\" at \"09:32\""},{"visible":true,"include":false,"step":"220","x":630.5978095238095,"y":1721.262857142857,"z":-980.4380952380952,"a95":"2.524091","info":"\"93-11-15\" at \"13:54\""},{"visible":true,"include":true,"step":"260","x":381.3050476190476,"y":1547.6009523809523,"z":-765.4135238095238,"a95":"3.296284","info":"\"93-11-15\" at \"16:41\""},{"visible":true,"include":true,"step":"300","x":310.03485714285716,"y":1320.5695238095238,"z":-663.9118095238094,"a95":"3.266796","info":"\"93-11-15\" at \"22:40\""},{"visible":true,"include":true,"step":"340","x":214.56219047619047,"y":1024.2542857142857,"z":-448.95885714285714,"a95":"4.12639","info":"\"93-11-16\" at \"11:25\""},{"visible":true,"include":true,"step":"380","x":343.1088571428571,"y":711.6091428571428,"z":-446.9033333333333,"a95":"4.547575","info":"\"93-11-16\" at \"14:25\""},{"visible":true,"include":true,"step":"420","x":188.11380952380952,"y":561.2230476190476,"z":-421.23590476190475,"a95":"5.305352","info":"\"93-11-16\" at \"16:30\""},{"visible":true,"include":true,"step":"460","x":122.83114285714286,"y":410.69923809523806,"z":-363.64695238095237,"a95":"5.489604","info":"\"93-11-17\" at \"11:00\""},{"visible":true,"include":true,"step":"500","x":45.2552380952381,"y":365.8089523809524,"z":-371.89838095238093,"a95":"5.453357","info":"\"93-11-17\" at \"14:28\""},{"visible":false,"include":false,"step":"540","x":-7.50517619047619,"y":18.371561904761904,"z":-156.5584761904762,"a95":"274.0392","info":"\"93-11-17\" at \"16:48\""},{"visible":false,"include":false,"step":"580","x":-10.358485714285715,"y":316.3561904761905,"z":-247.26961904761907,"a95":"6.448673","info":"\"93-11-18\" at \"11:32\""},{"visible":false,"include":false,"step":"620","x":-250.2884761904762,"y":44.28372380952381,"z":-252.68019047619046,"a95":"6.418076","info":"\"93-11-18\" at \"13:15\""},{"visible":false,"include":false,"step":"660","x":87.6598,"y":-76.09013333333334,"z":73.81714285714285,"a95":"12.04445","info":"\"93-11-18\" at \"15:18\""}],"demagType":"Unknown","patch":1.1,"format":"Unknown","strat":null},{"version":"v1.1.0","exported":"2016-10-11T12:28:25.717Z","info":"","GEO":[],"TECT":[],"interpreted":false,"name":"IN 178","coreAzi":60,"coreDip":15,"bedStrike":82,"bedDip":20,"data":[{"visible":true,"include":false,"step":"20","x":-1811.922857142857,"y":-1097.6571428571428,"z":1409.4038095238095,"a95":"1.168386","info":"\"93-11-11\" at \"15:20\""},{"visible":true,"include":false,"step":"100","x":-1852.0990476190477,"y":-788.0472380952381,"z":1549.047619047619,"a95":".991584","info":"\"93-11-12\" at \"10:11\""},{"visible":true,"include":true,"step":"140","x":-1546.2371428571428,"y":-301.3522857142857,"z":1144.435238095238,"a95":"1.306107","info":"\"93-11-12\" at \"13:20\""},{"visible":true,"include":true,"step":"180","x":-899.2789523809524,"y":-120.57276190476189,"z":566.7760000000001,"a95":"2.56211","info":"\"93-11-15\" at \"09:33\""},{"visible":true,"include":true,"step":"220","x":-125.66571428571429,"y":52.608723809523816,"z":84.92157142857143,"a95":"20.34528","info":"\"93-11-15\" at \"14:02\""},{"visible":true,"include":true,"step":"260","x":386.5484761904762,"y":123.10723809523809,"z":-90.03215238095238,"a95":"8.951462","info":"\"93-11-15\" at \"16:42\""},{"visible":true,"include":true,"step":"300","x":449.9754285714286,"y":170.16066666666666,"z":13.932276190476191,"a95":"7.10363","info":"\"93-11-15\" at \"22:42\""},{"visible":true,"include":true,"step":"340","x":436.3341904761905,"y":170.55304761904762,"z":-109.59619047619047,"a95":"6.547375","info":"\"93-11-16\" at \"11:27\""},{"visible":true,"include":true,"step":"380","x":422.0149523809524,"y":100.88219047619047,"z":-159.39019047619047,"a95":"7.639282","info":"\"93-11-16\" at \"14:27\""},{"visible":true,"include":true,"step":"420","x":304.34390476190475,"y":217.50695238095236,"z":-132.6792380952381,"a95":"7.189791","info":"\"93-11-16\" at \"16:30\""},{"visible":true,"include":false,"step":"460","x":253.28419047619047,"y":42.50366666666667,"z":-146.52466666666666,"a95":"9.232481","info":"\"93-11-17\" at \"11:00\""},{"visible":true,"include":false,"step":"500","x":146.72028571428572,"y":146.17542857142857,"z":-142.01733333333334,"a95":"9.495932","info":"\"93-11-17\" at \"14:29\""},{"visible":false,"include":false,"step":"540","x":-40.18052380952381,"y":50.8128380952381,"z":-82.22946666666667,"a95":"25.29268","info":"\"93-11-17\" at \"16:50\""},{"visible":false,"include":false,"step":"580","x":65.24018095238095,"y":40.87785714285714,"z":-151.95695238095237,"a95":"11.09576","info":"\"93-11-18\" at \"11:33\""},{"visible":false,"include":false,"step":"620","x":-220.10838095238094,"y":-40.334714285714284,"z":-114.56428571428572,"a95":"7.568382","info":"\"93-11-18\" at \"13:16\""},{"visible":false,"include":false,"step":"660","x":162.6335238095238,"y":84.35871428571429,"z":163.97933333333333,"a95":"5.625884","info":"\"93-11-18\" at \"15:19\""}],"demagType":"Unknown","patch":1.1,"format":"Unknown","strat":null},{"version":"v1.1.0","exported":"2016-10-11T12:28:25.717Z","info":"","GEO":[],"TECT":[],"interpreted":false,"name":"IN 180","coreAzi":-65,"coreDip":65,"bedStrike":82,"bedDip":20,"data":[{"visible":false,"include":false,"step":"20","x":757.1318095238096,"y":-192.13771428571428,"z":1790.195238095238,"a95":"1.416155","info":"\"93-11-11\" at \"15:21\""},{"visible":true,"include":false,"step":"100","x":251.7461904761905,"y":-685.5813333333333,"z":1851.2733333333333,"a95":"1.371759","info":"\"93-11-12\" at \"10:13\""},{"visible":true,"include":false,"step":"140","x":200.37352380952382,"y":-558.6805714285714,"z":1355.7533333333333,"a95":"1.433716","info":"\"93-11-12\" at \"13:21\""},{"visible":true,"include":false,"step":"180","x":30.828914285714283,"y":-210.7478095238095,"z":493.2293333333334,"a95":"4.632596","info":"\"93-11-15\" at \"09:34\""},{"visible":true,"include":false,"step":"220","x":104.48619047619047,"y":-28.970190476190478,"z":-122.32295238095239,"a95":"17.83039","info":"\"93-11-15\" at \"14:04\""},{"visible":true,"include":false,"step":"260","x":14.15155238095238,"y":166.32695238095238,"z":-392.87161904761905,"a95":"7.004941","info":"\"93-11-15\" at \"16:43\""},{"visible":true,"include":false,"step":"300","x":52.23439047619048,"y":-0.08908553333333333,"z":-308.7543809523809,"a95":"9.212926","info":"\"93-11-15\" at \"22:43\""},{"visible":true,"include":false,"step":"340","x":34.092104761904764,"y":84.06006666666667,"z":-333.66438095238095,"a95":"7.882896","info":"\"93-11-16\" at \"11:28\""},{"visible":true,"include":false,"step":"380","x":186.08466666666666,"y":-23.652361904761904,"z":-257.8780952380952,"a95":"8.500359","info":"\"93-11-16\" at \"14:28\""},{"visible":true,"include":false,"step":"420","x":101.30495238095239,"y":-22.101733333333332,"z":-283.2059047619047,"a95":"7.833071","info":"\"93-11-16\" at \"16:31\""},{"visible":true,"include":false,"step":"460","x":-124.97542857142857,"y":16.131038095238097,"z":-144.7889523809524,"a95":"10.99993","info":"\"93-11-17\" at \"11:01\""},{"visible":true,"include":false,"step":"500","x":-144.2035238095238,"y":50.40060952380953,"z":-294.2166666666667,"a95":"5.37444","info":"\"93-11-17\" at \"14:30\""},{"visible":true,"include":false,"step":"540","x":-133.74190476190475,"y":47.947028571428575,"z":-158.17580952380953,"a95":"12.53093","info":"\"93-11-17\" at \"16:51\""},{"visible":true,"include":false,"step":"580","x":53.77182857142857,"y":75.51459047619048,"z":-233.02914285714286,"a95":"5.839927","info":"\"93-11-18\" at \"11:35\""}],"demagType":"Unknown","patch":1.1,"format":"Unknown","strat":null},{"version":"v1.1.0","exported":"2016-10-11T12:28:25.717Z","info":"","GEO":[],"TECT":[],"interpreted":false,"name":"IN 181","coreAzi":198,"coreDip":86,"bedStrike":82,"bedDip":20,"data":[{"visible":true,"include":false,"step":"20","x":1957.5409523809524,"y":232.70752380952382,"z":2262.4714285714285,"a95":"6.128053","info":"\"93-11-11\" at \"15:22\""},{"visible":true,"include":false,"step":"100","x":1952.2542857142855,"y":193.16990476190477,"z":2337.2619047619046,"a95":"9.077129","info":"\"93-11-12\" at \"10:14\""},{"visible":true,"include":false,"step":"140","x":1272.924761904762,"y":-506.59152380952384,"z":2015.8638095238096,"a95":"1.628706","info":"\"93-11-12\" at \"13:22\""},{"visible":true,"include":false,"step":"180","x":645.7574285714286,"y":-60.02231428571428,"z":961.0914285714285,"a95":"4.879858","info":"\"93-11-15\" at \"09:35\""},{"visible":true,"include":false,"step":"220","x":-55.59393333333334,"y":-76.22933333333333,"z":273.3213333333333,"a95":"25.36639","info":"\"93-11-15\" at \"14:08\""},{"visible":true,"include":false,"step":"260","x":-333.6304761904762,"y":423.80095238095237,"z":-301.13495238095237,"a95":"11.34984","info":"\"93-11-15\" at \"16:46\""},{"visible":true,"include":false,"step":"300","x":-517.432761904762,"y":391.7035238095238,"z":-208.68180952380953,"a95":"9.588778","info":"\"93-11-15\" at \"22:45\""},{"visible":true,"include":false,"step":"340","x":-396.4879047619047,"y":519.6773333333333,"z":-219.93200000000002,"a95":"8.840178","info":"\"93-11-16\" at \"11:30\""},{"visible":true,"include":false,"step":"380","x":-250.41390476190477,"y":372.7962857142857,"z":-324.60380952380956,"a95":"10.09823","info":"\"93-11-16\" at \"14:29\""},{"visible":true,"include":false,"step":"420","x":-597.9111428571429,"y":433.37695238095233,"z":-232.964,"a95":"6.33626","info":"\"93-11-16\" at \"16:32\""},{"visible":true,"include":false,"step":"460","x":-308.57885714285715,"y":482.49209523809526,"z":-98.06114285714287,"a95":"7.731092","info":"\"93-11-17\" at \"11:02\""},{"visible":true,"include":false,"step":"500","x":-436.3378095238095,"y":223.3982857142857,"z":-235.4444761904762,"a95":"7.330665","info":"\"93-11-17\" at \"14:31\""},{"visible":true,"include":false,"step":"540","x":73.58564761904762,"y":23.969619047619048,"z":-149.53914285714285,"a95":"188.85","info":"\"93-11-17\" at \"16:52\""},{"visible":true,"include":false,"step":"580","x":-316.7340952380952,"y":63.2669238095238,"z":-271.7304761904762,"a95":"8.360141","info":"\"93-11-18\" at \"11:36\""},{"visible":true,"include":false,"step":"620","x":-87.74213333333334,"y":-208.06238095238098,"z":-204.21628571428573,"a95":"9.857594","info":"\"93-11-18\" at \"13:18\""},{"visible":true,"include":false,"step":"660","x":44.23461904761905,"y":-56.98763809523809,"z":142.73057142857144,"a95":"8.532536","info":"\"93-11-18\" at \"15:21\""}],"demagType":"Unknown","patch":1.1,"format":"Unknown","strat":null},{"version":"v1.1.0","exported":"2016-10-11T12:28:25.718Z","info":"","GEO":[],"TECT":[],"interpreted":false,"name":"IN 183","coreAzi":150,"coreDip":47,"bedStrike":82,"bedDip":20,"data":[{"visible":true,"include":false,"step":"20","x":-1125.555238095238,"y":-805.5017142857143,"z":-626.0302857142857,"a95":"3.334154","info":"\"93-11-11\" at \"15:23\""},{"visible":true,"include":false,"step":"100","x":-1208.1142857142859,"y":-324.1246666666667,"z":-357.42742857142855,"a95":"3.833904","info":"\"93-11-12\" at \"10:15\""},{"visible":true,"include":false,"step":"140","x":-738.7552380952382,"y":101.97352380952381,"z":-304.6575238095238,"a95":"5.715438","info":"\"93-11-12\" at \"13:23\""},{"visible":true,"include":false,"step":"180","x":-321.63780952380955,"y":153.5584761904762,"z":-325.55590476190474,"a95":"8.793654","info":"\"93-11-15\" at \"09:36\""},{"visible":true,"include":false,"step":"220","x":-202.02257142857144,"y":183.03028571428572,"z":-328.2983809523809,"a95":"10.66863","info":"\"93-11-15\" at \"14:10\""},{"visible":true,"include":false,"step":"260","x":-245.06057142857142,"y":99.65552380952381,"z":-277.60961904761905,"a95":"13.3897","info":"\"93-11-15\" at \"16:48\""},{"visible":true,"include":false,"step":"300","x":-317.8318095238095,"y":50.38979047619048,"z":-282.826380952381,"a95":"11.94613","info":"\"93-11-15\" at \"22:46\""},{"visible":true,"include":false,"step":"340","x":-197.47057142857142,"y":60.38741904761905,"z":-170.3521904761905,"a95":"17.05687","info":"\"93-11-16\" at \"11:32\""},{"visible":true,"include":false,"step":"380","x":-90.64348571428572,"y":92.71880952380953,"z":-161.78133333333332,"a95":"21.47364","info":"\"93-11-16\" at \"14:31\""},{"visible":true,"include":false,"step":"420","x":-296.73733333333337,"y":15.916704761904763,"z":-97.21485714285714,"a95":"13.77917","info":"\"93-11-16\" at \"16:33\""},{"visible":true,"include":false,"step":"460","x":-66.12695238095237,"y":46.51835238095238,"z":2.4769304761904762,"a95":"47.05416","info":"\"93-11-17\" at \"11:03\""},{"visible":true,"include":false,"step":"500","x":-137.67828571428572,"y":23.054780952380952,"z":-132.35114285714286,"a95":"16.78353","info":"\"93-11-17\" at \"14:33\""},{"visible":true,"include":false,"step":"540","x":-179.79838095238097,"y":28.685514285714287,"z":-134.6692380952381,"a95":"19.92106","info":"\"93-11-17\" at \"16:52\""},{"visible":true,"include":false,"step":"580","x":-80.88465714285715,"y":60.6771619047619,"z":-123.30457142857144,"a95":"16.8855","info":"\"93-11-18\" at \"11:38\""},{"visible":true,"include":false,"step":"620","x":41.666666666666664,"y":-10.466771428571429,"z":-176.32714285714286,"a95":"13.53591","info":"\"93-11-18\" at \"13:19\""},{"visible":true,"include":false,"step":"660","x":159.8272380952381,"y":29.822390476190478,"z":70.11628571428571,"a95":"9.54745","info":"\"93-11-18\" at \"15:22\""}],"demagType":"Unknown","patch":1.1,"format":"Unknown","strat":null},{"version":"v1.1.0","exported":"2016-10-11T12:28:25.718Z","info":"","GEO":[],"TECT":[],"interpreted":false,"name":"IN 184","coreAzi":90,"coreDip":75,"bedStrike":82,"bedDip":20,"data":[{"visible":false,"include":false,"step":"20","x":2239.557142857143,"y":-2244.224761904762,"z":2691.3314285714287,"a95":"15.39373","info":"\"93-11-11\" at \"15:24\""},{"visible":true,"include":false,"step":"100","x":-99.10428571428572,"y":-2271.8333333333335,"z":2748.565714285714,"a95":"19.99869","info":"\"93-11-12\" at \"10:17\""},{"visible":true,"include":false,"step":"140","x":-1114.512380952381,"y":-1965.1942857142858,"z":2584.8809523809523,"a95":"15.24848","info":"\"93-11-12\" at \"13:24\""},{"visible":true,"include":false,"step":"180","x":-1012.4809523809523,"y":-1649.1257142857144,"z":2330.1161904761907,"a95":"7.296658","info":"\"93-11-15\" at \"09:37\""},{"visible":true,"include":false,"step":"220","x":-821.7699047619049,"y":-1362.615238095238,"z":1986.8438095238096,"a95":"1.811255","info":"\"93-11-15\" at \"14:11\""},{"visible":true,"include":false,"step":"260","x":-361.6766666666667,"y":-856.8133333333334,"z":997.2580952380952,"a95":"3.290301","info":"\"93-11-15\" at \"16:49\""},{"visible":true,"include":true,"step":"300","x":-417.1260952380952,"y":-573.8865714285714,"z":511.6286666666666,"a95":"5.243938","info":"\"93-11-15\" at \"22:48\""},{"visible":true,"include":true,"step":"340","x":-287.89733333333334,"y":-481.32542857142863,"z":321.23723809523807,"a95":"6.100865","info":"\"93-11-16\" at \"11:33\""},{"visible":false,"include":false,"step":"380","x":81.33987619047619,"y":-271.74142857142857,"z":262.44190476190477,"a95":"8.802846","info":"\"93-11-16\" at \"14:32\""},{"visible":true,"include":true,"step":"420","x":-198.41847619047616,"y":-140.44019047619048,"z":224.20590476190475,"a95":"9.594629","info":"\"93-11-16\" at \"16:34\""},{"visible":true,"include":true,"step":"460","x":-199.82809523809524,"y":-231.27057142857143,"z":271.54114285714286,"a95":"7.498958","info":"\"93-11-17\" at \"11:04\""},{"visible":true,"include":true,"step":"500","x":-129.08142857142857,"y":-144.3349523809524,"z":34.51725714285714,"a95":"12.43171","info":"\"93-11-17\" at \"14:34\""},{"visible":true,"include":true,"step":"540","x":-219.09238095238092,"y":-163.2864761904762,"z":57.95046666666667,"a95":"9.070513","info":"\"93-11-17\" at \"16:53\""},{"visible":true,"include":false,"step":"580","x":-63.47309523809523,"y":-100.34819047619047,"z":63.98748571428572,"a95":"15.18911","info":"\"93-11-18\" at \"11:39\""},{"visible":true,"include":false,"step":"620","x":-4.902085714285714,"y":-102.52057142857142,"z":-149.9324761904762,"a95":"10.57245","info":"\"93-11-18\" at \"13:20\""}],"demagType":"Unknown","patch":1.1,"format":"Unknown","strat":null},{"version":"v1.1.0","exported":"2016-10-11T12:28:25.718Z","info":"","GEO":[],"TECT":[],"interpreted":false,"name":"IN 188","coreAzi":81,"coreDip":3,"bedStrike":82,"bedDip":20,"data":[{"visible":false,"include":false,"step":"20","x":-2032.86,"y":-872.2451428571429,"z":-676.5909523809523,"a95":"1.782511","info":"\"93-11-11\" at \"15:25\""},{"visible":true,"include":false,"step":"100","x":-1865.6685714285716,"y":-900.7679047619048,"z":-561.9066666666668,"a95":"1.424893","info":"\"93-11-12\" at \"10:18\""},{"visible":true,"include":false,"step":"140","x":-1496.1485714285714,"y":-381.94580952380954,"z":-561.0642857142857,"a95":"1.376118","info":"\"93-11-12\" at \"13:25\""},{"visible":true,"include":true,"step":"180","x":-750.0488571428572,"y":-377.44742857142853,"z":-596.2501904761905,"a95":"2.589584","info":"\"93-11-15\" at \"09:38\""},{"visible":true,"include":true,"step":"220","x":-492.9725714285715,"y":-238.12314285714288,"z":-485.5378095238095,"a95":"2.89191","info":"\"93-11-15\" at \"14:12\""},{"visible":true,"include":true,"step":"260","x":-359.1172380952381,"y":-177.26361904761904,"z":-335.6240952380952,"a95":"4.767795","info":"\"93-11-15\" at \"16:51\""},{"visible":true,"include":true,"step":"300","x":-304.61180952380954,"y":-124.32447619047619,"z":-290.3412380952381,"a95":"5.080746","info":"\"93-11-15\" at \"22:49\""},{"visible":true,"include":true,"step":"340","x":-176.37571428571428,"y":-109.67885714285714,"z":-187.14771428571427,"a95":"6.872675","info":"\"93-11-16\" at \"11:35\""},{"visible":true,"include":true,"step":"380","x":-134.65342857142858,"y":-79.25573333333334,"z":-97.02809523809523,"a95":"9.773774","info":"\"93-11-16\" at \"14:33\""},{"visible":true,"include":false,"step":"420","x":-180.16361904761905,"y":-19.857295238095237,"z":-146.3715238095238,"a95":"7.510817","info":"\"93-11-16\" at \"16:34\""},{"visible":true,"include":false,"step":"460","x":-191.63695238095238,"y":-99.87571428571428,"z":22.531076190476192,"a95":"8.709027","info":"\"93-11-17\" at \"11:04\""},{"visible":true,"include":false,"step":"500","x":-129.0997142857143,"y":-124.18304761904763,"z":-119.6570476190476,"a95":"11.14391","info":"\"93-11-17\" at \"14:35\""},{"visible":false,"include":false,"step":"540","x":-147.77761904761905,"y":-119.96161904761905,"z":-104.53866666666666,"a95":"6.721069","info":"\"93-11-17\" at \"16:54\""},{"visible":false,"include":false,"step":"580","x":-112.9555238095238,"y":-63.671104761904765,"z":-46.924638095238095,"a95":"8.221101","info":"\"93-11-18\" at \"11:40\""},{"visible":false,"include":false,"step":"620","x":-52.06691428571428,"y":-77.05352380952381,"z":-93.7184,"a95":"7.52853","info":"\"93-11-18\" at \"13:21\""},{"visible":false,"include":false,"step":"660","x":58.78785714285715,"y":-54.3992380952381,"z":53.731057142857146,"a95":"9.12443","info":"\"93-11-18\" at \"15:24\""}],"demagType":"Unknown","patch":1.1,"format":"Unknown","strat":null},{"version":"v1.1.0","exported":"2016-10-11T12:28:25.718Z","info":"","GEO":[{"dec":298.8612969773055,"inc":-13.702438982238146,"MAD":13.535398072273779,"cm":[-3.344546861683284e-15,-1.7763568394002505e-15,0],"intensity":130.39111347812232,"type":"GC","origin":false,"forced":true,"remark":"","nSteps":6,"minStep":"20","maxStep":"260","steps":["20","100","140","180","220","260"],"group":"None","version":"v1.1.0"}],"TECT":[{"dec":300.96510210937197,"inc":-1.332950376053226,"MAD":13.535398072273837,"cm":[0,-6.827871601444713e-15,-1.7763568394002505e-15],"intensity":130.39111347812232,"type":"GC","origin":false,"forced":true,"remark":"","nSteps":6,"minStep":"20","maxStep":"260","steps":["20","100","140","180","220","260"],"group":"None","version":"v1.1.0"}],"interpreted":true,"name":"IN 189","coreAzi":55,"coreDip":81,"bedStrike":82,"bedDip":20,"data":[{"visible":true,"include":true,"step":"20","x":-98.13371428571429,"y":35.5964,"z":14.025609523809525,"a95":"3.938063","info":"\"93-11-11\" at \"15:26\""},{"visible":true,"include":true,"step":"100","x":-67.43574285714286,"y":27.71622857142857,"z":34.93410476190476,"a95":"5.748306","info":"\"93-11-12\" at \"10:19\""},{"visible":true,"include":true,"step":"140","x":-63.90130476190476,"y":-10.707104761904763,"z":84.42449523809523,"a95":"3.463966","info":"\"93-11-12\" at \"13:27\""},{"visible":true,"include":true,"step":"180","x":-49.327057142857136,"y":-16.040838095238094,"z":89.82185714285714,"a95":"2.343301","info":"\"93-11-15\" at \"09:39\""},{"visible":true,"include":true,"step":"220","x":-52.240342857142856,"y":0.3951895238095238,"z":81.55550476190476,"a95":"2.642843","info":"\"93-11-15\" at \"14:13\""},{"visible":true,"include":true,"step":"260","x":-7.723797142857142,"y":1.1800657142857143,"z":52.63413333333334,"a95":"5.30706","info":"\"93-11-15\" at \"16:53\""},{"visible":true,"include":false,"step":"300","x":-8.725971428571428,"y":18.972409523809525,"z":76.34158095238095,"a95":"3.787761","info":"\"93-11-15\" at \"22:50\""},{"visible":true,"include":false,"step":"340","x":-34.04331428571428,"y":4.594244761904762,"z":76.06546666666667,"a95":"4.387343","info":"\"93-11-16\" at \"11:36\""},{"visible":true,"include":false,"step":"380","x":-49.44155238095238,"y":35.08458095238095,"z":24.889695238095236,"a95":"4.749063","info":"\"93-11-16\" at \"14:34\""},{"visible":true,"include":false,"step":"420","x":-75.96355238095238,"y":-5.6702,"z":-5.143051428571429,"a95":"3.211578","info":"\"93-11-16\" at \"16:35\""},{"visible":true,"include":false,"step":"460","x":-80.06920952380953,"y":5.060043809523809,"z":2.4811533333333333,"a95":"5.365201","info":"\"93-11-17\" at \"11:05\""},{"visible":true,"include":false,"step":"500","x":-61.86917142857143,"y":-46.2038380952381,"z":-24.71920952380952,"a95":"3.492411","info":"\"93-11-17\" at \"14:35\""}],"demagType":"Unknown","patch":1.1,"format":"Unknown","strat":null},{"version":"v1.1.0","exported":"2016-10-11T12:28:25.718Z","info":"","GEO":[],"TECT":[],"interpreted":false,"name":"IN 041","coreAzi":59,"coreDip":78,"bedStrike":82,"bedDip":20,"data":[{"visible":true,"include":false,"step":"100","x":-144.9144761904762,"y":-222.34,"z":46.26652380952381,"a95":"8.107059","info":"\"93-12-07\" at \"14:05\""},{"visible":true,"include":false,"step":"140","x":-145.77314285714286,"y":-176.35999999999999,"z":52.74575238095239,"a95":"4.59717","info":"\"93-12-20\" at \"11:49\""},{"visible":true,"include":false,"step":"180","x":110.90247619047621,"y":-189.4572380952381,"z":36.936952380952384,"a95":"2.209102","info":"\"93-12-20\" at \"14:50\""},{"visible":true,"include":false,"step":"220","x":111.01247619047619,"y":-185.43209523809523,"z":-57.7333238095238,"a95":"2.568394","info":"\"93-12-21\" at \"13:35\""},{"visible":true,"include":false,"step":"260","x":-62.46666666666666,"y":201.21857142857144,"z":-21.55522857142857,"a95":"3.407741","info":"\"93-12-22\" at \"09:47\""},{"visible":true,"include":false,"step":"300","x":-35.19135238095238,"y":-183.782,"z":-24.3462,"a95":"5.025621","info":"\"93-12-22\" at \"15:23\""},{"visible":true,"include":false,"step":"340","x":40.139942857142856,"y":-148.5364761904762,"z":18.821285714285715,"a95":"7.097594","info":"\"93-12-23\" at \"11:22\""},{"visible":true,"include":false,"step":"380","x":-13.9756,"y":-129.37314285714285,"z":23.605780952380954,"a95":"18.98593","info":"\"93-12-23\" at \"14:31\""},{"visible":true,"include":false,"step":"420","x":72.25229523809523,"y":-30.2514,"z":-7.585321904761905,"a95":"51.41985","info":"\"93-12-23\" at \"17:23\""},{"visible":true,"include":false,"step":"420","x":11.03855238095238,"y":97.748,"z":-7.269165714285714,"a95":"3.128343","info":"\"94-01-10\" at \"14:35\""},{"visible":true,"include":false,"step":"460","x":11.058809523809524,"y":-72.50409523809523,"z":-7.0313123809523805,"a95":"2.965449","info":"\"94-01-11\" at \"11:56\""}],"demagType":"Unknown","patch":1.1,"format":"Unknown","strat":null},{"version":"v1.1.0","exported":"2016-10-11T12:28:25.718Z","info":"","GEO":[{"dec":122.47592304385182,"inc":-12.688803728183386,"MAD":7.556316200673514,"cm":[-6.782768791069316e-16,2.7755575615628914e-17,0],"intensity":48.87005577961825,"type":"dir","forced":true,"remark":"","origin":false,"nSteps":6,"minStep":"260","maxStep":"460","steps":["260","300","380","420","420","460"],"group":"None","version":"v1.1.0"}],"TECT":[{"dec":117.01722283259238,"inc":-25.024234014399504,"MAD":7.5563162006734865,"cm":[-2.275957200481571e-15,-7.91033905045424e-16,-5.828670879282072e-16],"intensity":48.87005577961825,"type":"dir","forced":true,"remark":"","origin":false,"nSteps":6,"minStep":"260","maxStep":"460","steps":["260","300","380","420","420","460"],"group":"None","version":"v1.1.0"}],"interpreted":true,"name":"IN 045","coreAzi":151,"coreDip":33,"bedStrike":82,"bedDip":20,"data":[{"visible":false,"include":false,"step":"100","x":9.475800000000001,"y":-51.38447619047619,"z":36.01911428571428,"a95":"7.456563","info":"\"93-12-07\" at \"14:06\""},{"visible":false,"include":false,"step":"140","x":28.80202857142857,"y":-41.78179047619047,"z":35.257104761904756,"a95":"2.769082","info":"\"93-12-20\" at \"11:50\""},{"visible":true,"include":false,"step":"180","x":40.96826666666667,"y":-32.68472380952381,"z":33.41207619047619,"a95":"3.853643","info":"\"93-12-20\" at \"14:51\""},{"visible":true,"include":false,"step":"220","x":27.859819047619048,"y":-37.55619047619047,"z":34.66097142857143,"a95":"1.714156","info":"\"93-12-21\" at \"13:36\""},{"visible":true,"include":true,"step":"260","x":32.549590476190474,"y":-22.526580952380954,"z":29.012314285714286,"a95":"7.042663","info":"\"93-12-22\" at \"09:48\""},{"visible":true,"include":true,"step":"300","x":24.487133333333333,"y":-15.721504761904761,"z":23.770161904761906,"a95":"2.086903","info":"\"93-12-22\" at \"15:24\""},{"visible":true,"include":false,"step":"340","x":10.672580952380953,"y":-18.61529523809524,"z":20.573619047619047,"a95":"19.15119","info":"\"93-12-23\" at \"11:24\""},{"visible":true,"include":true,"step":"380","x":10.257828571428572,"y":-9.212306666666667,"z":8.843242857142858,"a95":"14.52458","info":"\"93-12-23\" at \"14:32\""},{"visible":true,"include":true,"step":"420","x":2.9893390476190476,"y":-4.942772380952381,"z":2.250547619047619,"a95":"8.517438","info":"\"93-12-23\" at \"17:24\""},{"visible":true,"include":true,"step":"420","x":1.0443,"y":-9.440269523809523,"z":2.7414247619047623,"a95":"4.990169","info":"\"94-01-10\" at \"14:36\""},{"visible":true,"include":true,"step":"460","x":1.382847619047619,"y":0.5850124761904761,"z":-1.5270533333333334,"a95":"65.90741","info":"\"94-01-11\" at \"11:58\""}],"demagType":"Unknown","patch":1.1,"format":"Unknown","strat":null},{"version":"v1.1.0","exported":"2016-10-11T12:28:25.718Z","info":"","GEO":[],"TECT":[],"interpreted":false,"name":"IN 046","coreAzi":-45,"coreDip":84,"bedStrike":82,"bedDip":20,"data":[{"visible":true,"include":false,"step":"100","x":10.941571428571429,"y":-8.052676190476191,"z":7.3942942857142855,"a95":"28.79299","info":"\"93-12-07\" at \"14:07\""},{"visible":true,"include":false,"step":"140","x":13.64487619047619,"y":-3.651317142857143,"z":-8.575821904761906,"a95":"7.406673","info":"\"93-12-20\" at \"11:50\""},{"visible":true,"include":false,"step":"180","x":13.933361904761904,"y":0.036478142857142855,"z":-13.38942857142857,"a95":"5.792475","info":"\"93-12-20\" at \"14:51\""},{"visible":true,"include":false,"step":"220","x":13.038019047619049,"y":0.7224438095238095,"z":-8.527004761904763,"a95":"3.113185","info":"\"93-12-21\" at \"13:38\""},{"visible":true,"include":false,"step":"260","x":10.02732380952381,"y":-1.1628580952380954,"z":-9.967485714285715,"a95":"5.100053","info":"\"93-12-22\" at \"09:48\""},{"visible":true,"include":false,"step":"300","x":6.180666666666667,"y":0.812885619047619,"z":-9.361389523809525,"a95":"2.938961","info":"\"93-12-22\" at \"15:25\""},{"visible":true,"include":false,"step":"340","x":5.8875,"y":-0.9763628571428572,"z":-4.214489523809523,"a95":"11.95917","info":"\"93-12-23\" at \"11:27\""},{"visible":true,"include":false,"step":"380","x":3.3471209523809526,"y":-0.3286587619047619,"z":-4.012349523809523,"a95":"19.70653","info":"\"93-12-23\" at \"14:33\""},{"visible":true,"include":false,"step":"420","x":-0.2330364761904762,"y":0.9012000952380952,"z":-4.640475238095238,"a95":"22.6382","info":"\"93-12-23\" at \"17:25\""},{"visible":true,"include":false,"step":"420","x":3.401528571428572,"y":-0.8975535238095238,"z":-3.976422857142857,"a95":"10.13192","info":"\"94-01-10\" at \"14:38\""},{"visible":true,"include":false,"step":"460","x":0.21182161904761906,"y":2.6347561904761907,"z":-3.7109228571428567,"a95":"35.3648","info":"\"94-01-11\" at \"11:59\""}],"demagType":"Unknown","patch":1.1,"format":"Unknown","strat":null},{"version":"v1.1.0","exported":"2016-10-11T12:28:25.718Z","info":"","GEO":[{"dec":207.61831152243326,"inc":-10.486476441368678,"MAD":5.526027319780981,"cm":[-1.0769163338864018e-14,0,0],"intensity":1307.1522844641709,"type":"GC","origin":false,"forced":true,"remark":"","nSteps":9,"minStep":"140","maxStep":"420","steps":["140","180","220","260","300","340","380","420","420"],"group":"None","version":"v1.1.0"}],"TECT":[{"dec":211.73614518274272,"inc":-26.386028330604432,"MAD":5.526027319781035,"cm":[-4.529709940470639e-14,-1.865174681370263e-14,3.552713678800501e-15],"intensity":1307.152284464171,"type":"GC","origin":false,"forced":true,"remark":"","nSteps":9,"minStep":"140","maxStep":"420","steps":["140","180","220","260","300","340","380","420","420"],"group":"None","version":"v1.1.0"}],"interpreted":true,"name":"IN 052.2","coreAzi":17,"coreDip":0,"bedStrike":82,"bedDip":20,"data":[{"visible":true,"include":false,"step":"100","x":378.9099047619048,"y":-1825.3685714285714,"z":320.18790476190475,"a95":"3.283262","info":"\"93-12-07\" at \"14:08\""},{"visible":true,"include":true,"step":"140","x":-278.36228571428575,"y":-1096.8771428571429,"z":152.61380952380952,"a95":"3.519271","info":"\"93-12-20\" at \"11:51\""},{"visible":true,"include":true,"step":"180","x":-459.76238095238097,"y":-662.354761904762,"z":39.85194285714286,"a95":"3.739666","info":"\"93-12-20\" at \"14:52\""},{"visible":true,"include":true,"step":"220","x":-390.45019047619047,"y":-460.6885714285714,"z":2.2253180952380953,"a95":"3.033181","info":"\"93-12-21\" at \"13:40\""},{"visible":true,"include":true,"step":"260","x":-389.51304761904765,"y":-259.8693333333334,"z":2.2449733333333333,"a95":"4.45988","info":"\"93-12-22\" at \"09:49\""},{"visible":true,"include":true,"step":"300","x":-323.6852380952381,"y":-212.64819047619048,"z":-39.41191428571429,"a95":"4.706389","info":"\"93-12-22\" at \"15:25\""},{"visible":true,"include":true,"step":"340","x":-295.591619047619,"y":-160.6047619047619,"z":6.635439047619048,"a95":"5.328264","info":"\"93-12-23\" at \"11:31\""},{"visible":true,"include":true,"step":"380","x":-255.76361904761904,"y":-131.57304761904763,"z":-45.19064761904762,"a95":"16.5958","info":"\"93-12-23\" at \"14:33\""},{"visible":true,"include":true,"step":"420","x":-303.33390476190476,"y":-109.00704761904763,"z":-41.17470476190476,"a95":"5.375258","info":"\"93-12-23\" at \"17:26\""},{"visible":true,"include":true,"step":"420","x":-240.22123809523808,"y":-97.79371428571429,"z":-40.90093333333333,"a95":"15.34276","info":"\"94-01-10\" at \"14:38\""},{"visible":true,"include":false,"step":"460","x":-250.93800000000002,"y":-77.00970476190476,"z":-50.39239047619047,"a95":"4.888025","info":"\"94-01-11\" at \"12:01\""},{"visible":true,"include":false,"step":"500","x":-203.13885714285715,"y":-70.70906666666667,"z":-19.142485714285716,"a95":"23.73752","info":"\"94-11-02\" at \"09:38\""},{"visible":true,"include":false,"step":"540","x":-229.71247619047622,"y":-77.25339047619048,"z":-100.33714285714285,"a95":"6.274014","info":"\"94-11-02\" at \"11:43\""},{"visible":true,"include":false,"step":"580","x":-198.01780952380952,"y":-59.383847619047614,"z":-19.05774285714286,"a95":"7.593697","info":"\"94-11-03\" at \"09:17\""},{"visible":true,"include":false,"step":"620","x":-38.66655238095238,"y":-36.94493333333334,"z":44.155257142857145,"a95":"15.58224","info":"\"94-11-03\" at \"11:49\""},{"visible":true,"include":false,"step":"660","x":51.09524761904762,"y":-71.47627619047618,"z":36.96232380952381,"a95":"9.757243","info":"\"94-11-04\" at \"09:07\""},{"visible":true,"include":false,"step":"700","x":50.88064761904762,"y":20.868771428571428,"z":18.53372380952381,"a95":"13.96073","info":"\"94-11-04\" at \"13:16\""}],"demagType":"Unknown","patch":1.1,"format":"Unknown","strat":null},{"version":"v1.1.0","exported":"2016-10-11T12:28:25.718Z","info":"","GEO":[],"TECT":[],"interpreted":false,"name":"IN 053","coreAzi":46,"coreDip":0,"bedStrike":82,"bedDip":20,"data":[{"visible":true,"include":false,"step":"100","x":20.35501904761905,"y":0.11409457142857143,"z":7.154576190476191,"a95":"4.839834","info":"\"93-12-07\" at \"14:08\""},{"visible":true,"include":false,"step":"140","x":7.149850476190476,"y":-2.634510476190476,"z":3.567811428571429,"a95":"7.756782","info":"\"93-12-20\" at \"11:52\""},{"visible":true,"include":false,"step":"180","x":0.46214180952380957,"y":-3.959038095238095,"z":3.37312,"a95":"18.17913","info":"\"93-12-20\" at \"14:54\""},{"visible":true,"include":false,"step":"220","x":-1.7634066666666666,"y":-5.775480952380953,"z":0.8430944761904762,"a95":"12.87668","info":"\"93-12-21\" at \"13:41\""},{"visible":true,"include":false,"step":"260","x":-2.364041904761905,"y":-3.5523076190476193,"z":3.8862361904761906,"a95":"9.845802","info":"\"93-12-22\" at \"09:54\""},{"visible":true,"include":false,"step":"300","x":-4.8915114285714285,"y":-1.0267285714285714,"z":-0.5006861904761905,"a95":"12.2891","info":"\"93-12-22\" at \"15:26\""},{"visible":true,"include":false,"step":"340","x":-2.8824457142857143,"y":-3.7882485714285714,"z":4.88082,"a95":"40.8331","info":"\"93-12-23\" at \"11:39\""},{"visible":true,"include":false,"step":"380","x":-0.5308120952380952,"y":-0.8026857142857143,"z":-5.362293333333334,"a95":"26.40489","info":"\"93-12-23\" at \"14:34\""},{"visible":true,"include":false,"step":"420","x":-7.33657238095238,"y":-4.054571428571428,"z":-3.2604476190476186,"a95":"57.76029","info":"\"93-12-23\" at \"17:28\""},{"visible":true,"include":false,"step":"420","x":7.138735238095238,"y":-7.638089523809524,"z":-0.3274878095238095,"a95":"15.25025","info":"\"94-01-10\" at \"14:40\""},{"visible":true,"include":false,"step":"460","x":-2.7333990476190477,"y":-0.7658520952380952,"z":-6.865386666666668,"a95":"40.95192","info":"\"94-01-11\" at \"12:02\""}],"demagType":"Unknown","patch":1.1,"format":"Unknown","strat":null},{"version":"v1.1.0","exported":"2016-10-11T12:28:25.719Z","info":"","GEO":[{"dec":162.12225880437552,"inc":-65.8256812055792,"MAD":7.042734599670213,"cm":[1.7763568394002505e-15,1.3766765505351941e-14,0],"intensity":1185.9603722282443,"type":"dir","forced":true,"remark":"","origin":false,"nSteps":7,"minStep":"140","maxStep":"420","steps":["140","180","260","300","340","380","420"],"group":"None","version":"v1.1.0"}],"TECT":[{"dec":125.68023650316212,"inc":-84.42561690496201,"MAD":7.042734599670214,"cm":[-9.992007221626409e-16,2.609024107869118e-15,0],"intensity":1185.9603722282443,"type":"dir","forced":true,"remark":"","origin":false,"nSteps":7,"minStep":"140","maxStep":"420","steps":["140","180","260","300","340","380","420"],"group":"None","version":"v1.1.0"}],"interpreted":true,"name":"IN 054","coreAzi":131,"coreDip":36,"bedStrike":82,"bedDip":20,"data":[{"visible":true,"include":false,"step":"100","x":675.2787619047618,"y":-87.43824761904762,"z":-175.9664761904762,"a95":"19.20194","info":"\"93-12-07\" at \"14:10\""},{"visible":true,"include":true,"step":"140","x":816.891619047619,"y":43.16595238095238,"z":-226.632,"a95":"1.09872","info":"\"93-12-20\" at \"11:52\""},{"visible":true,"include":true,"step":"180","x":896.5958095238095,"y":203.2607619047619,"z":-244.63314285714287,"a95":"1.037889","info":"\"93-12-20\" at \"14:55\""},{"visible":true,"include":false,"step":"220","x":789.3255238095238,"y":268.0610476190476,"z":-232.14238095238093,"a95":".8803231","info":"\"93-12-21\" at \"14:02\""},{"visible":true,"include":true,"step":"260","x":597.7342857142858,"y":195.54409523809525,"z":-142.31914285714288,"a95":"1.499539","info":"\"93-12-22\" at \"09:54\""},{"visible":true,"include":true,"step":"300","x":436.8457142857143,"y":198.82590476190475,"z":-104.7572380952381,"a95":"2.090761","info":"\"93-12-22\" at \"15:27\""},{"visible":true,"include":true,"step":"340","x":395.53657142857145,"y":70.60260952380952,"z":-96.74695238095238,"a95":"2.657458","info":"\"93-12-23\" at \"11:40\""},{"visible":true,"include":true,"step":"380","x":325.918,"y":156.50819047619046,"z":-88.6546761904762,"a95":"1.787204","info":"\"93-12-23\" at \"14:36\""},{"visible":true,"include":true,"step":"420","x":313.1565714285714,"y":82.63925714285715,"z":-110.51209523809523,"a95":"2.496566","info":"\"93-12-23\" at \"17:28\""},{"visible":true,"include":false,"step":"420","x":326.15171428571426,"y":17.2266,"z":-115.03599999999999,"a95":"2.624469","info":"\"94-01-10\" at \"14:41\""},{"visible":true,"include":false,"step":"460","x":280.5227619047619,"y":81.69049523809524,"z":-109.43657142857144,"a95":"3.236457","info":"\"94-01-11\" at \"12:03\""}],"demagType":"Unknown","patch":1.1,"format":"Unknown","strat":null},{"version":"v1.1.0","exported":"2016-10-11T12:28:25.719Z","info":"","GEO":[{"dec":145.19306428868106,"inc":-51.80760503099251,"MAD":3.863060952852432,"cm":[-8.881784197001252e-15,-7.993605777301127e-15,0],"intensity":492.5820443809409,"type":"dir","forced":true,"remark":"","origin":false,"nSteps":6,"minStep":"300","maxStep":"460","steps":["300","340","380","420","420","460"],"group":"None","version":"v1.1.0"}],"TECT":[{"dec":123.8513976708964,"inc":-68.01575333693648,"MAD":3.8630609528524666,"cm":[-4.884981308350689e-15,-3.552713678800501e-15,0],"intensity":492.58204438094083,"type":"dir","forced":true,"remark":"","origin":false,"nSteps":6,"minStep":"300","maxStep":"460","steps":["300","340","380","420","420","460"],"group":"None","version":"v1.1.0"}],"interpreted":true,"name":"IN 055","coreAzi":167,"coreDip":64,"bedStrike":82,"bedDip":20,"data":[{"visible":false,"include":false,"step":"100","x":-170.882,"y":-646.8698095238095,"z":513.1875238095238,"a95":"3.172606","info":"\"93-12-07\" at \"14:11\""},{"visible":false,"include":false,"step":"140","x":58.76730476190476,"y":-358.8267619047619,"z":111.11914285714286,"a95":"3.453408","info":"\"93-12-20\" at \"11:53\""},{"visible":true,"include":false,"step":"180","x":369.65171428571426,"y":-106.53599999999999,"z":-92.98069523809524,"a95":"2.35961","info":"\"93-12-20\" at \"14:56\""},{"visible":true,"include":false,"step":"220","x":338.51238095238097,"y":-169.35419047619047,"z":-113.0072380952381,"a95":"2.649888","info":"\"93-12-21\" at \"14:03\""},{"visible":true,"include":false,"step":"260","x":299.53238095238095,"y":-69.28789523809525,"z":-101.79599999999999,"a95":"2.883173","info":"\"93-12-22\" at \"09:55\""},{"visible":true,"include":true,"step":"300","x":243.70438095238097,"y":-95.70028571428571,"z":-116.57419047619048,"a95":"2.988011","info":"\"93-12-22\" at \"15:28\""},{"visible":true,"include":true,"step":"340","x":226.06219047619047,"y":-56.53113333333334,"z":-126.58152380952382,"a95":"4.822054","info":"\"93-12-23\" at \"11:41\""},{"visible":true,"include":true,"step":"380","x":212.888,"y":-56.98268571428572,"z":-108.0635238095238,"a95":"4.244755","info":"\"93-12-23\" at \"14:36\""},{"visible":true,"include":true,"step":"420","x":197.61238095238093,"y":-37.72677142857143,"z":-110.69066666666666,"a95":"3.767109","info":"\"93-12-23\" at \"17:30\""},{"visible":true,"include":true,"step":"420","x":197.40514285714283,"y":-41.8826,"z":-107.0152380952381,"a95":"4.390557","info":"\"94-01-10\" at \"14:43\""},{"visible":true,"include":true,"step":"460","x":178.95971428571428,"y":-38.857057142857144,"z":-97.63704761904762,"a95":"4.377532","info":"\"94-01-11\" at \"12:04\""}],"demagType":"Unknown","patch":1.1,"format":"Unknown","strat":null},{"version":"v1.1.0","exported":"2016-10-11T12:28:25.719Z","info":"","GEO":[],"TECT":[],"interpreted":false,"name":"IN 056","coreAzi":144,"coreDip":83,"bedStrike":82,"bedDip":20,"data":[{"visible":true,"include":false,"step":"100","x":-4.316051428571429,"y":-26.235409523809523,"z":52.85193333333333,"a95":"2.359444","info":"\"93-12-07\" at \"14:12\""},{"visible":true,"include":false,"step":"140","x":13.218904761904762,"y":-3.814067619047619,"z":18.354133333333333,"a95":"6.577362","info":"\"93-12-20\" at \"11:54\""},{"visible":true,"include":false,"step":"180","x":16.166638095238095,"y":5.781740952380953,"z":2.7591742857142854,"a95":"6.327517","info":"\"93-12-20\" at \"14:57\""},{"visible":true,"include":false,"step":"220","x":18.213485714285714,"y":3.9759399999999996,"z":9.286891428571428,"a95":"7.572521","info":"\"93-12-21\" at \"14:06\""},{"visible":true,"include":false,"step":"260","x":14.047657142857144,"y":6.327701904761905,"z":5.861267619047619,"a95":"12.07238","info":"\"93-12-22\" at \"09:56\""},{"visible":true,"include":false,"step":"300","x":8.085292380952382,"y":7.641024761904762,"z":1.773178095238095,"a95":"36.34092","info":"\"93-12-22\" at \"15:29\""},{"visible":true,"include":false,"step":"340","x":13.021828571428571,"y":-2.027192380952381,"z":15.869323809523811,"a95":"29.22533","info":"\"93-12-23\" at \"11:41\""},{"visible":true,"include":false,"step":"380","x":1.3805761904761904,"y":0.507838761904762,"z":6.197769523809525,"a95":"66.94898","info":"\"93-12-23\" at \"14:39\""},{"visible":true,"include":false,"step":"420","x":0.7724028571428571,"y":5.356377142857143,"z":2.9520580952380953,"a95":"85.23144","info":"\"93-12-23\" at \"17:30\""},{"visible":true,"include":false,"step":"420","x":0.27065619047619044,"y":-2.6745019047619047,"z":7.224155238095237,"a95":"30.11296","info":"\"94-01-10\" at \"14:44\""},{"visible":true,"include":false,"step":"460","x":-1.9165171428571428,"y":5.946573333333333,"z":-0.5500395238095238,"a95":"55.01868","info":"\"94-01-11\" at \"12:05\""}],"demagType":"Unknown","patch":1.1,"format":"Unknown","strat":null},{"version":"v1.1.0","exported":"2016-10-11T12:28:25.719Z","info":"","GEO":[{"dec":206.40233352610232,"inc":-38.61599746971339,"MAD":4.270909848165039,"cm":[1.609823385706477e-14,2.6645352591003757e-14,0],"intensity":863.2805865098228,"type":"GC","origin":false,"forced":true,"remark":"","nSteps":9,"minStep":"140","maxStep":"580","steps":["140","180","220","260","420","420","460","540","580"],"group":"None","version":"v1.1.0"}],"TECT":[{"dec":220.37092482111026,"inc":-53.7993962462464,"MAD":4.270909848164461,"cm":[-6.772360450213455e-14,-2.6645352591003757e-14,-4.440892098500626e-15],"intensity":863.2805865098228,"type":"GC","origin":false,"forced":true,"remark":"","nSteps":9,"minStep":"140","maxStep":"580","steps":["140","180","220","260","420","420","460","540","580"],"group":"None","version":"v1.1.0"}],"interpreted":true,"name":"IN 057.2?","coreAzi":109,"coreDip":16,"bedStrike":82,"bedDip":20,"data":[{"visible":true,"include":false,"step":"20","x":289.48352380952383,"y":554.8578095238095,"z":1798.8133333333335,"a95":".971144","info":"\"93-12-07\" at \"15:53\""},{"visible":true,"include":true,"step":"140","x":101.66695238095238,"y":223.91114285714286,"z":894.5665714285715,"a95":"2.948204","info":"\"93-12-20\" at \"11:55\""},{"visible":true,"include":true,"step":"180","x":-16.17246666666667,"y":202.11657142857143,"z":483.1391428571429,"a95":"2.316511","info":"\"93-12-20\" at \"14:58\""},{"visible":true,"include":true,"step":"220","x":-111.46219047619049,"y":182.51828571428572,"z":328.69571428571425,"a95":"3.957602","info":"\"93-12-21\" at \"14:07\""},{"visible":true,"include":true,"step":"260","x":-89.0368380952381,"y":126.81866666666667,"z":150.25219047619046,"a95":"5.958395","info":"\"93-12-22\" at \"09:57\""},{"visible":true,"include":false,"step":"300","x":-159.9847619047619,"y":55.89819047619048,"z":87.70475238095239,"a95":"7.566988","info":"\"93-12-22\" at \"15:29\""},{"visible":true,"include":false,"step":"340","x":-58.175038095238094,"y":95.11737142857143,"z":0.5398490476190476,"a95":"13.1707","info":"\"93-12-23\" at \"11:42\""},{"visible":true,"include":false,"step":"380","x":-174.82104761904762,"y":75.65306666666667,"z":24.91300952380952,"a95":"7.761453","info":"\"93-12-23\" at \"14:39\""},{"visible":true,"include":true,"step":"420","x":-94.03328571428571,"y":79.43962857142857,"z":-0.9797533333333333,"a95":"12.02671","info":"\"93-12-23\" at \"17:31\""},{"visible":true,"include":true,"step":"420","x":-126.77771428571428,"y":101.67009523809524,"z":0.030317190476190477,"a95":"8.056892","info":"\"94-01-10\" at \"14:45\""},{"visible":true,"include":true,"step":"460","x":-155.08219047619048,"y":98.02295238095238,"z":-49.0556,"a95":"8.224254","info":"\"94-01-11\" at \"12:06\""},{"visible":true,"include":true,"step":"540","x":-167.04038095238096,"y":77.7045619047619,"z":-96.14276190476191,"a95":"5.95274","info":"\"94-11-02\" at \"11:44\""},{"visible":true,"include":true,"step":"580","x":-103.13933333333333,"y":37.44613333333333,"z":-71.80076190476191,"a95":"8.3643","info":"\"94-11-03\" at \"09:18\""},{"visible":true,"include":false,"step":"620","x":18.462742857142857,"y":43.551761904761904,"z":16.42877142857143,"a95":"28.88267","info":"\"94-11-03\" at \"11:51\""},{"visible":true,"include":false,"step":"660","x":-85.72964761904761,"y":-70.3055238095238,"z":57.306352380952376,"a95":"15.66068","info":"\"94-11-04\" at \"09:08\""},{"visible":true,"include":false,"step":"700","x":-64.84991428571428,"y":-12.484380952380954,"z":5.365672380952381,"a95":"14.63736","info":"\"94-11-04\" at \"13:19\""}],"demagType":"Unknown","patch":1.1,"format":"Unknown","strat":null},{"version":"v1.1.0","exported":"2016-10-11T12:28:25.719Z","info":"","GEO":[],"TECT":[],"interpreted":false,"name":"IN 058","coreAzi":50,"coreDip":27,"bedStrike":82,"bedDip":20,"data":[{"visible":true,"include":false,"step":"20","x":112.18704761904762,"y":-3.387094285714286,"z":37.764847619047615,"a95":"1.719828","info":"\"93-12-07\" at \"15:54\""},{"visible":true,"include":false,"step":"140","x":46.309733333333334,"y":2.039709523809524,"z":20.713114285714283,"a95":"14.22029","info":"\"93-12-20\" at \"11:55\""},{"visible":true,"include":false,"step":"180","x":9.853,"y":-0.14492085714285713,"z":4.414614285714286,"a95":"14.09017","info":"\"93-12-20\" at \"14:58\""},{"visible":true,"include":false,"step":"220","x":8.416746666666667,"y":3.3635723809523808,"z":7.28874,"a95":"10.55249","info":"\"93-12-21\" at \"14:10\""},{"visible":true,"include":false,"step":"260","x":10.1768,"y":5.44855619047619,"z":-2.232731428571429,"a95":"11.4308","info":"\"93-12-22\" at \"10:23\""},{"visible":true,"include":false,"step":"300","x":10.678342857142857,"y":2.483827619047619,"z":-8.365337142857143,"a95":"49.10323","info":"\"93-12-22\" at \"15:31\""},{"visible":true,"include":false,"step":"340","x":-0.3904080952380952,"y":1.8992266666666668,"z":-8.931262857142858,"a95":"21.74565","info":"\"93-12-23\" at \"11:44\""},{"visible":true,"include":false,"step":"380","x":1.5598742857142855,"y":5.757117142857143,"z":-4.029017142857143,"a95":"24.85153","info":"\"93-12-23\" at \"14:40\""},{"visible":true,"include":false,"step":"420","x":6.647707619047618,"y":2.858570476190476,"z":2.976082857142857,"a95":"25.37322","info":"\"93-12-23\" at \"17:32\""},{"visible":true,"include":false,"step":"420","x":0.6246515238095238,"y":-2.0532009523809527,"z":2.9349361904761904,"a95":"39.63136","info":"\"94-01-10\" at \"14:46\""},{"visible":true,"include":false,"step":"460","x":5.153848571428571,"y":7.679911428571429,"z":-4.342743809523809,"a95":"18.64932","info":"\"94-01-11\" at \"12:07\""}],"demagType":"Unknown","patch":1.1,"format":"Unknown","strat":null},{"version":"v1.1.0","exported":"2016-10-11T12:28:25.719Z","info":"","GEO":[],"TECT":[],"interpreted":false,"name":"IN 065","coreAzi":-61,"coreDip":71,"bedStrike":82,"bedDip":20,"data":[{"visible":true,"include":false,"step":"100","x":-10.165838095238096,"y":39.095,"z":126.6302857142857,"a95":"4.482768","info":"\"93-12-07\" at \"14:20\""},{"visible":true,"include":false,"step":"140","x":4.122679047619048,"y":13.739485714285715,"z":50.67918095238095,"a95":"9.303776","info":"\"93-12-20\" at \"11:56\""},{"visible":true,"include":false,"step":"180","x":7.364369523809524,"y":2.1450914285714284,"z":9.380830476190477,"a95":"19.84041","info":"\"93-12-20\" at \"14:59\""},{"visible":true,"include":false,"step":"220","x":7.979081904761905,"y":-6.2071104761904765,"z":3.2200647619047618,"a95":"22.94936","info":"\"93-12-21\" at \"14:12\""},{"visible":true,"include":false,"step":"260","x":7.233693333333333,"y":-4.488203809523809,"z":-10.977857142857143,"a95":"19.33669","info":"\"93-12-22\" at \"10:23\""},{"visible":true,"include":false,"step":"300","x":9.32750761904762,"y":-0.26040895238095235,"z":-19.34004761904762,"a95":"12.9146","info":"\"93-12-22\" at \"15:32\""},{"visible":true,"include":false,"step":"340","x":14.178133333333331,"y":-6.068019047619048,"z":-31.91247619047619,"a95":"16.58108","info":"\"93-12-23\" at \"11:45\""},{"visible":true,"include":false,"step":"380","x":-0.3237353333333333,"y":-7.676795238095239,"z":-22.52792380952381,"a95":"10.47821","info":"\"93-12-23\" at \"14:41\""},{"visible":true,"include":false,"step":"420","x":-8.658909523809523,"y":-9.532133333333334,"z":-24.587380952380954,"a95":"10.89839","info":"\"93-12-23\" at \"17:34\""},{"visible":true,"include":false,"step":"420","x":1.221784761904762,"y":-9.385220952380953,"z":-19.17815238095238,"a95":"12.04995","info":"\"94-01-10\" at \"14:47\""},{"visible":true,"include":false,"step":"460","x":13.35937142857143,"y":-15.709542857142857,"z":-25.54175238095238,"a95":"12.12321","info":"\"94-01-11\" at \"12:09\""},{"visible":true,"include":false,"step":"500","x":8.611313333333333,"y":-18.76790476190476,"z":-10.933171428571429,"a95":"7.179333","info":"\"94-11-02\" at \"09:41\""},{"visible":true,"include":false,"step":"540","x":2.3793609523809525,"y":-18.28514285714286,"z":-30.99134285714286,"a95":"6.589365","info":"\"94-11-02\" at \"11:45\""},{"visible":true,"include":false,"step":"580","x":15.636638095238094,"y":7.589091428571429,"z":-40.67944761904762,"a95":"4.647404","info":"\"94-11-03\" at \"09:19\""},{"visible":true,"include":false,"step":"620","x":5.583407619047619,"y":-5.375697142857143,"z":-23.75422857142857,"a95":"8.352599","info":"\"94-11-03\" at \"11:52\""},{"visible":true,"include":false,"step":"660","x":1.3095104761904761,"y":-7.801111428571429,"z":-19.47041904761905,"a95":"12.77921","info":"\"94-11-04\" at \"09:09\""},{"visible":true,"include":false,"step":"700","x":3.1115866666666667,"y":1.910784761904762,"z":-3.675915238095238,"a95":"20.46116","info":"\"94-11-04\" at \"13:19\""}],"demagType":"Unknown","patch":1.1,"format":"Unknown","strat":null},{"version":"v1.1.0","exported":"2016-10-11T12:28:25.719Z","info":"","GEO":[],"TECT":[],"interpreted":false,"name":"IN 067","coreAzi":-53,"coreDip":60,"bedStrike":82,"bedDip":20,"data":[{"visible":true,"include":false,"step":"100","x":24.56205714285714,"y":40.650619047619045,"z":115.3527619047619,"a95":"5.643702","info":"\"93-12-07\" at \"14:21\""},{"visible":true,"include":false,"step":"140","x":28.59580952380952,"y":26.852638095238095,"z":78.30964761904762,"a95":"4.19606","info":"\"93-12-20\" at \"11:57\""},{"visible":true,"include":true,"step":"180","x":29.97910476190476,"y":22.00967619047619,"z":51.771095238095235,"a95":"9.543765","info":"\"93-12-20\" at \"15:00\""},{"visible":true,"include":true,"step":"220","x":25.642180952380954,"y":14.132190476190477,"z":39.922200000000004,"a95":"1.937939","info":"\"93-12-21\" at \"14:18\""},{"visible":true,"include":true,"step":"260","x":22.68835238095238,"y":11.775066666666666,"z":36.69544761904762,"a95":"3.88733","info":"\"93-12-22\" at \"10:24\""},{"visible":true,"include":true,"step":"300","x":13.68712380952381,"y":7.250248571428572,"z":21.654057142857145,"a95":"3.672763","info":"\"93-12-22\" at \"15:33\""},{"visible":true,"include":true,"step":"340","x":8.903638095238096,"y":11.953942857142858,"z":10.304533333333334,"a95":"12.92575","info":"\"93-12-23\" at \"11:46\""},{"visible":true,"include":true,"step":"380","x":6.820186666666666,"y":3.338769523809524,"z":12.751390476190476,"a95":"11.86328","info":"\"93-12-23\" at \"14:42\""},{"visible":true,"include":false,"step":"420","x":4.268632380952381,"y":3.801286666666667,"z":8.652012380952382,"a95":"35.35892","info":"\"93-12-23\" at \"17:34\""},{"visible":true,"include":false,"step":"420","x":2.685062857142857,"y":1.6518866666666665,"z":10.31135238095238,"a95":"11.76342","info":"\"94-01-10\" at \"14:48\""},{"visible":true,"include":false,"step":"460","x":2.848465714285714,"y":2.318852380952381,"z":3.2341142857142855,"a95":"37.61659","info":"\"94-01-11\" at \"12:10\""}],"demagType":"Unknown","patch":1.1,"format":"Unknown","strat":null},{"version":"v1.1.0","exported":"2016-10-11T12:28:25.719Z","info":"","GEO":[],"TECT":[],"interpreted":false,"name":"IN 068","coreAzi":157,"coreDip":6,"bedStrike":82,"bedDip":20,"data":[{"visible":true,"include":false,"step":"100","x":-68.73937142857143,"y":-2.004718095238095,"z":-23.837638095238095,"a95":"2.833271","info":"\"93-12-07\" at \"14:21\""},{"visible":true,"include":false,"step":"140","x":-40.79837142857143,"y":0.27969590476190476,"z":-18.46884761904762,"a95":"18.68285","info":"\"93-12-20\" at \"11:57\""},{"visible":true,"include":false,"step":"180","x":-28.20510476190476,"y":5.762572380952381,"z":-11.240095238095238,"a95":"13.8597","info":"\"93-12-20\" at \"15:01\""},{"visible":true,"include":false,"step":"220","x":-19.74412380952381,"y":6.146553333333333,"z":-6.16816,"a95":"4.768651","info":"\"93-12-21\" at \"14:19\""},{"visible":true,"include":false,"step":"260","x":-15.816609523809523,"y":5.768532380952381,"z":-4.345821904761904,"a95":"7.227861","info":"\"93-12-22\" at \"10:25\""},{"visible":true,"include":false,"step":"300","x":-10.665028571428572,"y":4.301101904761905,"z":-14.365819047619048,"a95":"6.732659","info":"\"93-12-22\" at \"15:34\""},{"visible":true,"include":false,"step":"340","x":-11.444333333333333,"y":9.237551428571429,"z":6.284462857142857,"a95":"43.40228","info":"\"93-12-23\" at \"11:47\""},{"visible":true,"include":false,"step":"380","x":-7.255913333333333,"y":0.5096785714285714,"z":-3.3352085714285713,"a95":"23.42772","info":"\"93-12-23\" at \"14:43\""},{"visible":true,"include":false,"step":"420","x":-5.168715238095238,"y":0.3587802857142857,"z":-5.393624761904762,"a95":"56.44183","info":"\"93-12-23\" at \"17:35\""},{"visible":true,"include":false,"step":"420","x":-3.353650476190476,"y":-0.25365885714285713,"z":0.01008992380952381,"a95":"38.18953","info":"\"94-01-10\" at \"14:49\""},{"visible":true,"include":false,"step":"460","x":-2.039987619047619,"y":0.44168095238095234,"z":-2.203125714285714,"a95":"53.57596","info":"\"94-01-11\" at \"12:11\""}],"demagType":"Unknown","patch":1.1,"format":"Unknown","strat":null},{"version":"v1.1.0","exported":"2016-10-11T12:28:25.719Z","info":"","GEO":[{"dec":198.65373261373628,"inc":-40.03829255253374,"MAD":4.731640257889314,"cm":[-5.551115123125783e-16,-1.887379141862766e-15,0],"intensity":44.13650200473163,"type":"GC","origin":false,"forced":true,"remark":"","nSteps":5,"minStep":"140","maxStep":"300","steps":["140","180","220","260","300"],"group":"None","version":"v1.1.0"}],"TECT":[{"dec":211.07677311766986,"inc":-56.98553136334264,"MAD":4.731640257889777,"cm":[0,3.3306690738754696e-16,-8.326672684688674e-17],"intensity":44.136502004731625,"type":"GC","origin":false,"forced":true,"remark":"","nSteps":5,"minStep":"140","maxStep":"300","steps":["140","180","220","260","300"],"group":"None","version":"v1.1.0"}],"interpreted":true,"name":"IN 069","coreAzi":195,"coreDip":75,"bedStrike":82,"bedDip":20,"data":[{"visible":true,"include":false,"step":"100","x":18.807580952380953,"y":-12.004133333333334,"z":47.13540952380953,"a95":"2.30132","info":"\"93-12-07\" at \"14:22\""},{"visible":true,"include":true,"step":"140","x":13.395704761904762,"y":-14.515828571428571,"z":27.41818095238095,"a95":"2.074293","info":"\"93-12-20\" at \"11:58\""},{"visible":true,"include":true,"step":"180","x":9.519099047619047,"y":-14.363676190476191,"z":17.393266666666666,"a95":"16.47955","info":"\"93-12-20\" at \"15:01\""},{"visible":true,"include":true,"step":"220","x":5.822386666666667,"y":-13.094104761904763,"z":11.639161904761906,"a95":"4.063648","info":"\"93-12-21\" at \"14:21\""},{"visible":true,"include":true,"step":"260","x":4.142686666666667,"y":-8.012675238095238,"z":7.896456190476191,"a95":"36.66262","info":"\"93-12-22\" at \"10:26\""},{"visible":true,"include":true,"step":"300","x":2.9715657142857146,"y":-10.036523809523809,"z":5.404452380952381,"a95":"6.469091","info":"\"93-12-22\" at \"15:35\""},{"visible":true,"include":false,"step":"340","x":4.5139361904761905,"y":-6.435808571428572,"z":0.2906722857142857,"a95":"19.21999","info":"\"93-12-23\" at \"11:48\""},{"visible":true,"include":false,"step":"380","x":1.0875257142857142,"y":-4.705711428571429,"z":4.365520952380952,"a95":"24.07273","info":"\"93-12-23\" at \"14:44\""},{"visible":true,"include":false,"step":"420","x":-0.12920571428571428,"y":-3.45008,"z":2.7203495238095234,"a95":"20.32758","info":"\"93-12-23\" at \"17:36\""},{"visible":true,"include":false,"step":"420","x":0.3853270476190476,"y":-2.639035238095238,"z":3.1720304761904763,"a95":"21.78804","info":"\"94-01-10\" at \"14:49\""},{"visible":true,"include":false,"step":"460","x":-0.6226814285714285,"y":-2.728799047619048,"z":0.17371390476190476,"a95":"48.54687","info":"\"94-01-11\" at \"12:12\""}],"demagType":"Unknown","patch":1.1,"format":"Unknown","strat":null},{"version":"v1.1.0","exported":"2016-10-11T12:28:25.719Z","info":"","GEO":[],"TECT":[],"interpreted":false,"name":"IN 070","coreAzi":94,"coreDip":10,"bedStrike":82,"bedDip":20,"data":[{"visible":true,"include":false,"step":"100","x":-48.77245714285715,"y":-39.41117142857143,"z":-16.342733333333335,"a95":"3.634857","info":"\"93-12-07\" at \"14:23\""},{"visible":true,"include":false,"step":"140","x":-30.046695238095236,"y":-19.820666666666664,"z":-8.255579047619047,"a95":"13.67405","info":"\"93-12-20\" at \"11:59\""},{"visible":true,"include":true,"step":"180","x":-19.66475238095238,"y":-10.573076190476192,"z":-10.676847619047619,"a95":"4.612984","info":"\"93-12-20\" at \"15:02\""},{"visible":true,"include":true,"step":"220","x":-13.20429523809524,"y":-10.841390476190476,"z":-11.184809523809523,"a95":"4.924148","info":"\"93-12-21\" at \"14:23\""},{"visible":true,"include":true,"step":"260","x":-5.553564761904762,"y":-6.627162857142857,"z":-10.245038095238096,"a95":"8.923265","info":"\"93-12-22\" at \"10:27\""},{"visible":true,"include":true,"step":"300","x":-8.450401904761904,"y":-8.829785714285714,"z":-13.467628571428572,"a95":"7.161924","info":"\"93-12-22\" at \"15:36\""},{"visible":true,"include":true,"step":"340","x":-9.737390476190475,"y":-7.726618095238096,"z":-13.741552380952381,"a95":"10.42897","info":"\"93-12-23\" at \"11:49\""},{"visible":true,"include":true,"step":"380","x":-3.832185714285714,"y":-3.253338095238095,"z":-5.400609523809524,"a95":"53.52896","info":"\"93-12-23\" at \"14:45\""},{"visible":true,"include":false,"step":"420","x":-1.8797533333333334,"y":-2.7256590476190476,"z":-0.9536,"a95":"27.85736","info":"\"93-12-23\" at \"17:37\""},{"visible":true,"include":false,"step":"420","x":-3.159247619047619,"y":-0.8050810476190475,"z":0.1418367619047619,"a95":"23.62836","info":"\"94-01-10\" at \"14:50\""},{"visible":true,"include":false,"step":"460","x":-3.7990714285714287,"y":-2.2359590476190476,"z":-1.6439533333333334,"a95":"30.14922","info":"\"94-01-11\" at \"12:13\""}],"demagType":"Unknown","patch":1.1,"format":"Unknown","strat":null},{"version":"v1.1.0","exported":"2016-10-11T12:28:25.719Z","info":"","GEO":[],"TECT":[],"interpreted":false,"name":"IN 071","coreAzi":48,"coreDip":76,"bedStrike":82,"bedDip":20,"data":[{"visible":true,"include":false,"step":"100","x":53.64712380952381,"y":-92.37775238095239,"z":-332.66066666666666,"a95":"5.438488","info":"\"93-12-07\" at \"14:24\""},{"visible":true,"include":false,"step":"140","x":34.228895238095234,"y":-54.07594285714286,"z":-181.88257142857142,"a95":"1.225738","info":"\"93-12-20\" at \"12:00\""},{"visible":true,"include":false,"step":"180","x":42.62069523809524,"y":-12.404142857142858,"z":-116.95771428571429,"a95":"2.128445","info":"\"93-12-20\" at \"15:03\""},{"visible":true,"include":false,"step":"220","x":8.625473333333334,"y":-34.491723809523805,"z":-86.61664761904761,"a95":"2.235677","info":"\"93-12-21\" at \"14:24\""},{"visible":true,"include":false,"step":"260","x":1.644870476190476,"y":-36.75873333333333,"z":-58.50561904761904,"a95":"4.290677","info":"\"93-12-22\" at \"10:28\""},{"visible":true,"include":false,"step":"300","x":5.911521904761905,"y":-19.512761904761902,"z":-55.49785714285714,"a95":"5.855495","info":"\"93-12-22\" at \"15:37\""},{"visible":true,"include":false,"step":"340","x":-1.560242857142857,"y":-20.971780952380954,"z":-30.24152380952381,"a95":"26.16951","info":"\"93-12-23\" at \"11:50\""},{"visible":true,"include":false,"step":"380","x":-0.4898973333333333,"y":-10.340780952380952,"z":-22.123619047619048,"a95":"24.68697","info":"\"93-12-23\" at \"14:46\""},{"visible":true,"include":false,"step":"420","x":0.13809219047619048,"y":-5.728279047619047,"z":-12.772009523809524,"a95":"14.50431","info":"\"93-12-23\" at \"17:38\""},{"visible":true,"include":false,"step":"420","x":1.3388209523809524,"y":-4.703781904761905,"z":-6.107304761904762,"a95":"29.61661","info":"\"94-01-10\" at \"14:51\""},{"visible":true,"include":false,"step":"460","x":-6.174068571428571,"y":-9.019319047619048,"z":-11.170104761904762,"a95":"16.85671","info":"\"94-01-11\" at \"12:14\""}],"demagType":"Unknown","patch":1.1,"format":"Unknown","strat":null},{"version":"v1.1.0","exported":"2016-10-11T12:28:25.720Z","info":"","GEO":[],"TECT":[],"interpreted":false,"name":"IN 072","coreAzi":232,"coreDip":81,"bedStrike":82,"bedDip":20,"data":[{"visible":true,"include":false,"step":"100","x":63.38738095238095,"y":193.01238095238097,"z":-48.24915238095238,"a95":"4.878882","info":"\"93-12-07\" at \"14:25\""},{"visible":true,"include":false,"step":"140","x":28.97186666666667,"y":102.75685714285713,"z":-17.59218095238095,"a95":"1.375528","info":"\"93-12-20\" at \"12:00\""},{"visible":true,"include":false,"step":"180","x":14.65515238095238,"y":40.53261904761904,"z":-9.433721904761905,"a95":"4.31872","info":"\"93-12-20\" at \"15:04\""},{"visible":true,"include":false,"step":"220","x":7.853245714285714,"y":21.124266666666667,"z":-9.84277142857143,"a95":"6.771535","info":"\"93-12-21\" at \"14:38\""},{"visible":true,"include":false,"step":"260","x":4.5489628571428575,"y":13.454942857142859,"z":0.8606378095238095,"a95":"13.68629","info":"\"93-12-22\" at \"10:28\""},{"visible":true,"include":false,"step":"300","x":7.132713333333333,"y":10.641142857142857,"z":-12.93512380952381,"a95":"11.77271","info":"\"93-12-22\" at \"15:38\""},{"visible":true,"include":false,"step":"340","x":4.832862857142858,"y":4.381412380952381,"z":3.5341847619047617,"a95":"73.42136","info":"\"93-12-23\" at \"11:55\""},{"visible":true,"include":false,"step":"380","x":3.6684914285714285,"y":2.3339161904761903,"z":-5.408227619047619,"a95":"53.60367","info":"\"93-12-23\" at \"14:47\""},{"visible":true,"include":false,"step":"420","x":4.177605714285714,"y":2.570642857142857,"z":-0.05462748571428572,"a95":"47.77736","info":"\"93-12-23\" at \"17:39\""},{"visible":true,"include":false,"step":"420","x":-0.11946542857142857,"y":5.698886666666667,"z":4.508026666666667,"a95":"33.98549","info":"\"94-01-10\" at \"14:51\""},{"visible":true,"include":false,"step":"460","x":-1.3414447619047618,"y":-1.2818142857142856,"z":-7.552365714285715,"a95":"53.6608","info":"\"94-01-11\" at \"12:15\""}],"demagType":"Unknown","patch":1.1,"format":"Unknown","strat":null},{"version":"v1.1.0","exported":"2016-10-11T12:28:25.720Z","info":"","GEO":[],"TECT":[],"interpreted":false,"name":"IN 073","coreAzi":25,"coreDip":79,"bedStrike":82,"bedDip":20,"data":[{"visible":true,"include":false,"step":"100","x":11.996247619047619,"y":7.603133333333333,"z":-47.08942857142857,"a95":"9.342047","info":"\"93-12-07\" at \"14:26\""},{"visible":true,"include":false,"step":"140","x":8.038853333333334,"y":-4.794355238095238,"z":23.68235238095238,"a95":"4.035036","info":"\"93-12-20\" at \"12:01\""},{"visible":true,"include":false,"step":"180","x":5.0078933333333335,"y":-2.4685685714285714,"z":12.591895238095239,"a95":"25.61215","info":"\"93-12-20\" at \"15:05\""},{"visible":true,"include":false,"step":"220","x":4.166805714285714,"y":-0.7693390476190477,"z":12.54327619047619,"a95":"7.491147","info":"\"93-12-21\" at \"14:40\""},{"visible":true,"include":false,"step":"260","x":1.9682657142857143,"y":-1.8211990476190476,"z":3.3579295238095237,"a95":"24.62282","info":"\"93-12-22\" at \"10:30\""},{"visible":true,"include":false,"step":"300","x":-1.5489561904761906,"y":-1.4871171428571428,"z":5.644955238095238,"a95":"13.66039","info":"\"93-12-22\" at \"15:40\""},{"visible":true,"include":false,"step":"340","x":-4.546825714285714,"y":-1.6450847619047617,"z":6.275529523809524,"a95":"55.69369","info":"\"93-12-23\" at \"11:58\""},{"visible":true,"include":false,"step":"380","x":0.7026619047619048,"y":-0.04016884761904762,"z":1.108872380952381,"a95":"76.50034","info":"\"93-12-23\" at \"14:49\""},{"visible":true,"include":false,"step":"420","x":-1.7124142857142859,"y":-2.1033066666666667,"z":1.5750828571428572,"a95":"215.9939","info":"\"93-12-23\" at \"17:40\""},{"visible":true,"include":false,"step":"420","x":-4.4224733333333335,"y":-4.726900952380952,"z":5.291022857142857,"a95":"14.29991","info":"\"94-01-10\" at \"14:53\""},{"visible":true,"include":false,"step":"460","x":-3.2703742857142855,"y":-4.282580952380952,"z":6.525968571428572,"a95":"17.11786","info":"\"94-01-11\" at \"12:17\""}],"demagType":"Unknown","patch":1.1,"format":"Unknown","strat":null},{"version":"v1.1.0","exported":"2016-10-11T12:28:25.720Z","info":"","GEO":[],"TECT":[],"interpreted":false,"name":"IN 074.1","coreAzi":-8,"coreDip":52,"bedStrike":82,"bedDip":20,"data":[{"visible":false,"include":false,"step":"100","x":6108.436190476191,"y":937.7794285714285,"z":7863.861904761905,"a95":"1.540594","info":"\"93-12-07\" at \"14:27\""},{"visible":false,"include":false,"step":"140","x":-3280.1285714285714,"y":-4921.549523809524,"z":6098.11619047619,"a95":".9216006","info":"\"93-12-20\" at \"12:02\""},{"visible":true,"include":false,"step":"180","x":-1199.0180952380954,"y":-4351.253333333334,"z":5333.545714285715,"a95":".8122003","info":"\"93-12-20\" at \"15:06\""},{"visible":true,"include":false,"step":"220","x":-786.94,"y":-4024.2057142857147,"z":4577.321904761904,"a95":"1.155794","info":"\"93-12-21\" at \"14:44\""},{"visible":true,"include":false,"step":"260","x":-483.2249523809524,"y":-3495.650476190476,"z":3742.744761904762,"a95":"2.89023","info":"\"93-12-22\" at \"10:31\""},{"visible":true,"include":false,"step":"300","x":-1468.0361904761903,"y":-2459.3961904761904,"z":2960.1961904761906,"a95":".9741764","info":"\"93-12-22\" at \"15:40\""},{"visible":true,"include":false,"step":"340","x":-983.6504761904762,"y":-2153.2114285714288,"z":2279.439047619048,"a95":"5.973205","info":"\"93-12-23\" at \"11:59\""},{"visible":true,"include":false,"step":"380","x":-1362.6866666666665,"y":-1790.7742857142857,"z":2067.960952380952,"a95":".8219037","info":"\"93-12-23\" at \"14:50\""},{"visible":true,"include":false,"step":"420","x":-752.0060952380952,"y":-1392.2514285714285,"z":1544.6066666666668,"a95":"1.176586","info":"\"93-12-23\" at \"17:41\""},{"visible":true,"include":false,"step":"420","x":-538.8638095238096,"y":-1213.0190476190478,"z":1318.6542857142858,"a95":".7541133","info":"\"94-01-10\" at \"14:54\""},{"visible":true,"include":false,"step":"460","x":-200.39619047619047,"y":-788.2205714285715,"z":858.7084761904762,"a95":"1.646979","info":"\"94-01-11\" at \"12:18\""},{"visible":true,"include":false,"step":"500","x":-110.80580952380953,"y":-510.44866666666667,"z":513.3905714285714,"a95":"1.599506","info":"\"94-11-02\" at \"09:42\""},{"visible":true,"include":false,"step":"540","x":-119.93161904761904,"y":-340.6197142857143,"z":359.9178095238095,"a95":"1.955629","info":"\"94-11-02\" at \"11:46\""},{"visible":true,"include":false,"step":"580","x":-19.46402857142857,"y":-170.7707619047619,"z":148.90219047619047,"a95":"3.099633","info":"\"94-11-03\" at \"09:21\""},{"visible":true,"include":false,"step":"620","x":-34.77126666666667,"y":-160.5337142857143,"z":99.40857142857142,"a95":"10.23069","info":"\"94-11-03\" at \"11:53\""},{"visible":true,"include":false,"step":"660","x":-4.896149523809524,"y":-45.24984761904762,"z":35.16080952380952,"a95":"12.0458","info":"\"94-11-04\" at \"09:10\""},{"visible":true,"include":false,"step":"700","x":0.6638189523809525,"y":-7.308386666666667,"z":-2.019282857142857,"a95":"28.03283","info":"\"94-11-04\" at \"13:20\""}],"demagType":"Unknown","patch":1.1,"format":"Unknown","strat":null},{"version":"v1.1.0","exported":"2016-10-11T12:28:25.720Z","info":"","GEO":[],"TECT":[],"interpreted":false,"name":"IN 075","coreAzi":-28,"coreDip":50,"bedStrike":82,"bedDip":20,"data":[{"visible":false,"include":false,"step":"100","x":-107.70961904761904,"y":-54.165476190476184,"z":209.60009523809524,"a95":"14.39793","info":"\"93-12-07\" at \"14:29\""},{"visible":false,"include":false,"step":"140","x":-48.51144761904762,"y":-12.052266666666666,"z":123.96809523809523,"a95":"5.610155","info":"\"93-12-20\" at \"12:03\""},{"visible":true,"include":false,"step":"180","x":-27.81233333333333,"y":-24.06295238095238,"z":45.93832380952381,"a95":"22.91305","info":"\"93-12-20\" at \"15:07\""},{"visible":true,"include":false,"step":"220","x":-8.438795238095238,"y":-23.20477142857143,"z":15.86007619047619,"a95":"13.12982","info":"\"93-12-21\" at \"14:45\""},{"visible":true,"include":false,"step":"260","x":13.622209523809524,"y":-28.0526380952381,"z":-21.895942857142856,"a95":"13.43724","info":"\"93-12-22\" at \"10:32\""},{"visible":true,"include":false,"step":"300","x":-31.222628571428572,"y":-15.628647619047618,"z":-47.21022857142857,"a95":"12.52782","info":"\"93-12-22\" at \"15:42\""},{"visible":true,"include":false,"step":"340","x":-17.728285714285715,"y":-12.024504761904762,"z":-34.82102857142857,"a95":"17.35667","info":"\"93-12-23\" at \"12:00\""},{"visible":true,"include":false,"step":"380","x":-20.15732380952381,"y":-25.41647619047619,"z":-36.76887619047619,"a95":"13.32018","info":"\"93-12-23\" at \"14:51\""},{"visible":true,"include":false,"step":"420","x":-17.554038095238095,"y":-7.576419047619048,"z":-17.200723809523808,"a95":"22.54719","info":"\"93-12-23\" at \"17:42\""},{"visible":true,"include":false,"step":"420","x":-24.74009523809524,"y":-28.658323809523807,"z":-18.102638095238095,"a95":"9.420069","info":"\"94-01-10\" at \"14:54\""},{"visible":true,"include":false,"step":"460","x":-20.68338095238095,"y":-12.796000000000001,"z":-29.37057142857143,"a95":"8.548227","info":"\"94-01-11\" at \"12:19\""}],"demagType":"Unknown","patch":1.1,"format":"Unknown","strat":null},{"version":"v1.1.0","exported":"2016-10-11T12:28:25.720Z","info":"","GEO":[],"TECT":[],"interpreted":false,"name":"IN 076","coreAzi":-37,"coreDip":68,"bedStrike":82,"bedDip":20,"data":[{"visible":true,"include":false,"step":"100","x":10.98672380952381,"y":1.072655238095238,"z":79.90959047619047,"a95":"2.882715","info":"\"93-12-07\" at \"14:30\""},{"visible":true,"include":false,"step":"140","x":4.931031428571428,"y":21.974809523809522,"z":38.07210476190476,"a95":"94.01335","info":"\"93-12-20\" at \"12:03\""},{"visible":true,"include":false,"step":"180","x":-0.5893401904761905,"y":-3.4194209523809524,"z":14.133742857142858,"a95":"30.18187","info":"\"93-12-20\" at \"15:10\""},{"visible":true,"include":false,"step":"220","x":1.8281857142857143,"y":-0.2465547619047619,"z":9.99935238095238,"a95":"6.286682","info":"\"93-12-21\" at \"14:48\""},{"visible":true,"include":false,"step":"260","x":2.3573409523809525,"y":0.7203368571428571,"z":4.779289523809524,"a95":"38.96931","info":"\"93-12-22\" at \"10:34\""},{"visible":true,"include":false,"step":"300","x":1.0942542857142858,"y":0.9494739999999999,"z":1.729455238095238,"a95":"193.0036","info":"\"93-12-22\" at \"15:46\""},{"visible":true,"include":false,"step":"340","x":0.9135369523809524,"y":-0.18377685714285713,"z":2.586074285714286,"a95":"44.58573","info":"\"93-12-23\" at \"12:04\""},{"visible":true,"include":false,"step":"380","x":0.2895559047619048,"y":-2.425284761904762,"z":0.08431726666666667,"a95":"49.55186","info":"\"93-12-23\" at \"14:55\""},{"visible":true,"include":false,"step":"420","x":0.6219913333333333,"y":0.5286306666666667,"z":0.6562520952380952,"a95":"108.4808","info":"\"93-12-23\" at \"17:43\""},{"visible":true,"include":false,"step":"420","x":-0.28103114285714287,"y":-3.6135466666666667,"z":3.8591390476190477,"a95":"21.5063","info":"\"94-01-10\" at \"14:55\""},{"visible":true,"include":false,"step":"460","x":0.41829390476190476,"y":0.8395472380952381,"z":-1.5153638095238096,"a95":"89.5951","info":"\"94-01-11\" at \"12:20\""}],"demagType":"Unknown","patch":1.1,"format":"Unknown","strat":null},{"version":"v1.1.0","exported":"2016-10-11T12:28:25.720Z","info":"","GEO":[],"TECT":[],"interpreted":false,"name":"IN 077","coreAzi":91,"coreDip":11,"bedStrike":82,"bedDip":20,"data":[{"visible":true,"include":false,"step":"100","x":-172.07,"y":-132.21028571428573,"z":-36.056961904761906,"a95":"14.94943","info":"\"93-12-07\" at \"14:32\""},{"visible":true,"include":true,"step":"140","x":-89.02219047619047,"y":-56.871409523809525,"z":-23.632495238095238,"a95":"40.6284","info":"\"93-12-20\" at \"12:04\""},{"visible":true,"include":true,"step":"180","x":-65.14565714285715,"y":-56.30101904761905,"z":-30.774714285714285,"a95":"7.182775","info":"\"93-12-20\" at \"15:11\""},{"visible":true,"include":true,"step":"220","x":-71.37864761904763,"y":-49.508961904761904,"z":-31.0907619047619,"a95":"2.419066","info":"\"93-12-21\" at \"14:53\""},{"visible":true,"include":true,"step":"260","x":-39.23970476190476,"y":-34.06335238095238,"z":-24.044885714285716,"a95":"11.4039","info":"\"93-12-22\" at \"10:34\""},{"visible":false,"include":false,"step":"300","x":-30.59872380952381,"y":-14.266504761904763,"z":-38.72082857142857,"a95":"70.6576","info":"\"93-12-22\" at \"15:47\""},{"visible":true,"include":true,"step":"340","x":-18.419590476190475,"y":-13.5486,"z":-11.058009523809524,"a95":"8.475183","info":"\"93-12-23\" at \"12:04\""},{"visible":true,"include":false,"step":"380","x":-17.872695238095236,"y":-2.845747619047619,"z":-21.712219047619048,"a95":"6.865466","info":"\"93-12-23\" at \"14:57\""},{"visible":true,"include":false,"step":"420","x":-6.889321904761904,"y":-3.3917523809523806,"z":3.112043809523809,"a95":"64.77651","info":"\"93-12-23\" at \"17:44\""},{"visible":true,"include":false,"step":"420","x":-3.9995161904761907,"y":-7.5934285714285705,"z":-0.8370101904761905,"a95":"19.80249","info":"\"94-01-10\" at \"14:56\""},{"visible":true,"include":false,"step":"460","x":-5.657199047619048,"y":-2.466749523809524,"z":-0.8042111428571429,"a95":"33.20708","info":"\"94-01-11\" at \"12:21\""}],"demagType":"Unknown","patch":1.1,"format":"Unknown","strat":null},{"version":"v1.1.0","exported":"2016-10-11T12:28:25.720Z","info":"","GEO":[],"TECT":[],"interpreted":false,"name":"IN 078","coreAzi":54,"coreDip":-10,"bedStrike":82,"bedDip":20,"data":[{"visible":true,"include":false,"step":"100","x":-972.1666666666666,"y":-1135.4485714285713,"z":-1.5137857142857143,"a95":"1.979967","info":"\"93-12-07\" at \"14:34\""},{"visible":true,"include":false,"step":"140","x":-651.2045714285714,"y":-720.7174285714286,"z":-70.30893333333333,"a95":"5.121706","info":"\"93-12-20\" at \"12:05\""},{"visible":true,"include":false,"step":"180","x":-378.0572380952381,"y":-544.3881904761905,"z":-119.29514285714285,"a95":"10.00196","info":"\"93-12-20\" at \"15:12\""},{"visible":true,"include":false,"step":"220","x":-290.516,"y":-471.30657142857143,"z":-69.14217142857143,"a95":"2.804538","info":"\"93-12-21\" at \"14:54\""},{"visible":true,"include":false,"step":"260","x":-215.17066666666665,"y":-409.0289523809524,"z":-96.11857142857143,"a95":"3.997754","info":"\"93-12-22\" at \"10:35\""},{"visible":true,"include":true,"step":"300","x":-164.32704761904762,"y":-369.9020952380953,"z":-142.70685714285713,"a95":"3.680869","info":"\"93-12-22\" at \"15:48\""},{"visible":true,"include":true,"step":"340","x":-139.36190476190475,"y":-292.4898095238095,"z":-85.30858095238095,"a95":"4.032375","info":"\"93-12-23\" at \"12:05\""},{"visible":true,"include":true,"step":"380","x":-161.78057142857142,"y":-252.4186666666667,"z":-136.48085714285713,"a95":"5.232266","info":"\"93-12-23\" at \"14:58\""},{"visible":true,"include":true,"step":"420","x":-138.09371428571427,"y":-223.8685714285714,"z":-85.31959047619047,"a95":"5.028997","info":"\"93-12-23\" at \"17:45\""},{"visible":true,"include":true,"step":"420","x":-144.0961904761905,"y":-233.8997142857143,"z":-98.20419047619048,"a95":"4.255459","info":"\"94-01-10\" at \"15:00\""},{"visible":true,"include":true,"step":"460","x":-125.51447619047619,"y":-187.68438095238093,"z":-95.67352380952381,"a95":"4.945692","info":"\"94-01-11\" at \"12:22\""},{"visible":true,"include":true,"step":"500","x":-84.72780952380953,"y":-166.85504761904764,"z":-85.44579047619047,"a95":"5.056554","info":"\"94-11-02\" at \"09:43\""},{"visible":true,"include":true,"step":"540","x":-106.10190476190476,"y":-155.29085714285716,"z":-121.13619047619048,"a95":"4.749526","info":"\"94-11-02\" at \"11:47\""},{"visible":true,"include":false,"step":"580","x":-35.93352380952381,"y":-53.74733333333333,"z":-79.28411428571428,"a95":"16.63332","info":"\"94-11-03\" at \"09:22\""},{"visible":true,"include":false,"step":"620","x":-33.55073333333333,"y":-44.07873333333333,"z":-31.398342857142854,"a95":"17.25202","info":"\"94-11-03\" at \"11:53\""},{"visible":true,"include":false,"step":"660","x":-19.495571428571427,"y":-52.847076190476194,"z":-10.241133333333332,"a95":"17.28391","info":"\"94-11-04\" at \"09:11\""},{"visible":true,"include":false,"step":"700","x":-10.680657142857143,"y":5.077586666666667,"z":10.474533333333333,"a95":"16.78922","info":"\"94-11-04\" at \"13:21\""}],"demagType":"Unknown","patch":1.1,"format":"Unknown","strat":null},{"version":"v1.1.0","exported":"2016-10-11T12:28:25.720Z","info":"","GEO":[],"TECT":[],"interpreted":false,"name":"IN 079.2","coreAzi":127,"coreDip":70,"bedStrike":82,"bedDip":20,"data":[{"visible":true,"include":false,"step":"100","x":-946.076,"y":-297.50685714285714,"z":760.1546666666667,"a95":"4.062209","info":"\"93-12-07\" at \"14:35\""},{"visible":true,"include":false,"step":"140","x":-654.1363809523809,"y":-181.29990476190474,"z":529.4641904761904,"a95":"2.27107","info":"\"93-12-20\" at \"12:06\""},{"visible":true,"include":false,"step":"180","x":-557.5254285714285,"y":-68.15700952380952,"z":345.70019047619047,"a95":"6.934973","info":"\"93-12-20\" at \"15:12\""},{"visible":true,"include":false,"step":"220","x":-469.216380952381,"y":-142.71742857142857,"z":309.2063809523809,"a95":"1.673774","info":"\"93-12-21\" at \"14:56\""},{"visible":true,"include":false,"step":"260","x":-433.72438095238095,"y":-57.1842,"z":218.03961904761906,"a95":"2.872065","info":"\"93-12-22\" at \"10:36\""},{"visible":true,"include":true,"step":"300","x":-394.1615238095238,"y":-49.15792380952381,"z":138.2464761904762,"a95":"3.538952","info":"\"93-12-22\" at \"15:49\""},{"visible":true,"include":true,"step":"340","x":-353.28266666666667,"y":-69.90475238095239,"z":146.85019047619048,"a95":"6.989872","info":"\"93-12-23\" at \"12:06\""},{"visible":true,"include":true,"step":"380","x":-355.14466666666664,"y":-83.10481904761905,"z":98.62438095238096,"a95":"2.60264","info":"\"93-12-23\" at \"14:59\""},{"visible":true,"include":true,"step":"420","x":-327.6151428571428,"y":-22.7488,"z":150.11676190476192,"a95":"2.809536","info":"\"93-12-23\" at \"17:45\""},{"visible":false,"include":false,"step":"420","x":-143.48809523809524,"y":-248.85228571428573,"z":-62.53479047619048,"a95":"4.109154","info":"\"94-01-10\" at \"15:03\""},{"visible":true,"include":true,"step":"460","x":-288.89733333333334,"y":-19.257142857142856,"z":106.03476190476191,"a95":"4.102825","info":"\"94-01-11\" at \"12:22\""},{"visible":true,"include":true,"step":"540","x":-236.41085714285714,"y":0.44441438095238095,"z":129.55390476190476,"a95":"3.700697","info":"\"94-11-02\" at \"11:47\""},{"visible":true,"include":true,"step":"580","x":-218.29857142857145,"y":17.103676190476193,"z":49.775419047619046,"a95":"4.434467","info":"\"94-11-03\" at \"09:22\""},{"visible":true,"include":false,"step":"620","x":-155.4381904761905,"y":-13.841038095238096,"z":76.37285714285714,"a95":"11.06876","info":"\"94-11-03\" at \"11:54\""},{"visible":true,"include":false,"step":"660","x":-101.11019047619047,"y":-20.770561904761905,"z":75.58404761904762,"a95":"10.6831","info":"\"94-11-04\" at \"09:11\""},{"visible":true,"include":false,"step":"700","x":33.16789523809524,"y":6.341072380952381,"z":20.80877142857143,"a95":"10.96128","info":"\"94-11-04\" at \"13:22\""}],"demagType":"Unknown","patch":1.1,"format":"Unknown","strat":null},{"version":"v1.1.0","exported":"2016-10-11T12:28:25.720Z","info":"","GEO":[],"TECT":[],"interpreted":false,"name":"IN 080","coreAzi":94,"coreDip":64,"bedStrike":82,"bedDip":20,"data":[{"visible":true,"include":false,"step":"100","x":-39.75373333333333,"y":-54.82313333333334,"z":38.640390476190476,"a95":"9.769793","info":"\"93-12-07\" at \"15:41\""},{"visible":true,"include":false,"step":"140","x":-26.295638095238093,"y":-69.0596761904762,"z":28.66061904761905,"a95":"59.98123","info":"\"93-12-20\" at \"12:06\""},{"visible":true,"include":true,"step":"180","x":-25.287742857142856,"y":-50.04201904761904,"z":7.895751428571428,"a95":"79.94568","info":"\"93-12-20\" at \"15:14\""},{"visible":true,"include":true,"step":"220","x":-15.853304761904761,"y":-22.985019047619048,"z":3.0167342857142856,"a95":"4.232344","info":"\"93-12-21\" at \"14:57\""},{"visible":true,"include":true,"step":"260","x":-9.086191428571428,"y":-20.405209523809525,"z":0.6955277142857144,"a95":"20.07285","info":"\"93-12-22\" at \"10:36\""},{"visible":false,"include":false,"step":"300","x":-4.21765619047619,"y":-13.9066,"z":-17.67144761904762,"a95":"16.12983","info":"\"93-12-22\" at \"15:49\""},{"visible":true,"include":true,"step":"340","x":-9.530514285714286,"y":-18.9798,"z":7.360114285714285,"a95":"12.0842","info":"\"93-12-23\" at \"12:09\""},{"visible":true,"include":false,"step":"380","x":6.2913580952380945,"y":-1.6721028571428571,"z":-18.825466666666664,"a95":"21.50978","info":"\"93-12-23\" at \"14:59\""},{"visible":true,"include":false,"step":"420","x":-3.923221904761905,"y":-4.76782380952381,"z":1.8807361904761906,"a95":"27.24794","info":"\"93-12-23\" at \"17:46\""},{"visible":true,"include":false,"step":"420","x":-5.008442857142858,"y":-4.642177142857143,"z":-3.158155238095238,"a95":"77.90999","info":"\"94-01-10\" at \"15:04\""},{"visible":true,"include":false,"step":"460","x":-0.9515902857142857,"y":-2.6765228571428574,"z":0.7142322857142857,"a95":"74.80452","info":"\"94-01-11\" at \"12:23\""}],"demagType":"Unknown","patch":1.1,"format":"Unknown","strat":null},{"version":"v1.1.0","exported":"2016-10-11T12:28:25.720Z","info":"","GEO":[],"TECT":[],"interpreted":false,"name":"IN 081.1","coreAzi":96,"coreDip":70,"bedStrike":82,"bedDip":20,"data":[{"visible":true,"include":false,"step":"100","x":-927.267619047619,"y":-1142.272380952381,"z":399.09704761904766,"a95":"1.652442","info":"\"93-12-07\" at \"15:43\""},{"visible":true,"include":false,"step":"140","x":-947.8729523809523,"y":-942.3881904761904,"z":203.38838095238094,"a95":"2.504244","info":"\"93-12-20\" at \"12:07\""},{"visible":true,"include":false,"step":"180","x":-894.5561904761905,"y":-786.2585714285715,"z":109.56857142857143,"a95":"2.098241","info":"\"93-12-20\" at \"15:15\""},{"visible":true,"include":false,"step":"220","x":-750.1377142857143,"y":-738.2546666666667,"z":44.02332380952381,"a95":"1.216759","info":"\"93-12-21\" at \"14:58\""},{"visible":true,"include":true,"step":"260","x":-561.1635238095238,"y":-470.5812380952381,"z":101.1087619047619,"a95":"7.479379","info":"\"93-12-22\" at \"10:38\""},{"visible":true,"include":true,"step":"300","x":-641.4107619047619,"y":-456.671619047619,"z":8.72401238095238,"a95":"5.197589","info":"\"93-12-22\" at \"15:50\""},{"visible":true,"include":true,"step":"340","x":-367.1657142857143,"y":-593.4531428571429,"z":-18.905714285714286,"a95":"2.413451","info":"\"93-12-23\" at \"12:12\""},{"visible":true,"include":true,"step":"380","x":-482.1971428571428,"y":-518.8321904761905,"z":49.75182857142857,"a95":"4.717957","info":"\"93-12-23\" at \"15:01\""},{"visible":true,"include":true,"step":"420","x":-541.5375238095238,"y":-361.4086666666667,"z":-36.775552380952384,"a95":"2.629105","info":"\"93-12-23\" at \"17:47\""},{"visible":true,"include":true,"step":"420","x":-257.115619047619,"y":-467.0655238095238,"z":-6.456048571428572,"a95":"3.176852","info":"\"94-01-10\" at \"15:05\""},{"visible":true,"include":true,"step":"460","x":-494.3446666666666,"y":-430.0312380952381,"z":-17.14077142857143,"a95":"3.577959","info":"\"94-01-11\" at \"12:24\""},{"visible":true,"include":true,"step":"580","x":-287.5145714285714,"y":-226.96066666666667,"z":-17.186085714285714,"a95":"2.573498","info":"\"94-11-03\" at \"09:23\""},{"visible":true,"include":false,"step":"620","x":-176.93990476190476,"y":-245.61933333333334,"z":-15.599142857142857,"a95":"15.19192","info":"\"94-11-03\" at \"11:55\""},{"visible":true,"include":false,"step":"660","x":-133.21904761904761,"y":-211.6353333333333,"z":-36.8780380952381,"a95":"10.77962","info":"\"94-11-04\" at \"09:12\""},{"visible":true,"include":false,"step":"700","x":13.686076190476191,"y":-21.398152380952382,"z":5.297760952380952,"a95":"8.723891","info":"\"94-11-04\" at \"13:23\""}],"demagType":"Unknown","patch":1.1,"format":"Unknown","strat":null},{"version":"v1.1.0","exported":"2016-10-11T12:28:25.721Z","info":"","GEO":[],"TECT":[],"interpreted":false,"name":"IN 082.1","coreAzi":10,"coreDip":60,"bedStrike":82,"bedDip":20,"data":[{"visible":true,"include":false,"step":"100","x":-2.5809638095238094,"y":199.2450476190476,"z":79.82180000000001,"a95":"1.986324","info":"\"93-12-07\" at \"15:44\""},{"visible":true,"include":false,"step":"140","x":-19.666238095238093,"y":141.3002857142857,"z":24.723980952380956,"a95":"25.80151","info":"\"93-12-20\" at \"12:08\""},{"visible":true,"include":false,"step":"180","x":96.60428571428572,"y":58.74489523809524,"z":22.959361904761902,"a95":"3.6723","info":"\"93-12-20\" at \"15:18\""},{"visible":true,"include":false,"step":"220","x":-1.290010476190476,"y":85.0261619047619,"z":19.986552380952382,"a95":"2.315646","info":"\"93-12-21\" at \"15:06\""},{"visible":true,"include":false,"step":"260","x":48.78159047619047,"y":66.7688380952381,"z":19.251838095238092,"a95":"7.141324","info":"\"93-12-22\" at \"10:41\""},{"visible":true,"include":false,"step":"300","x":-48.403685714285714,"y":-53.32446666666666,"z":6.099552380952381,"a95":"8.929306","info":"\"93-12-22\" at \"15:51\""},{"visible":true,"include":false,"step":"340","x":-5.571252380952381,"y":52.42263809523809,"z":10.41302857142857,"a95":"12.09566","info":"\"93-12-23\" at \"12:13\""},{"visible":true,"include":false,"step":"380","x":-44.49948571428571,"y":-36.44990476190476,"z":9.277880952380952,"a95":"4.442702","info":"\"93-12-23\" at \"15:08\""},{"visible":true,"include":false,"step":"420","x":-36.099180952380955,"y":-5.214158095238095,"z":23.123866666666668,"a95":"31.81546","info":"\"93-12-23\" at \"17:48\""},{"visible":true,"include":false,"step":"420","x":-1.724604761904762,"y":-41.896,"z":6.620716190476191,"a95":"7.047297","info":"\"94-01-10\" at \"15:06\""},{"visible":true,"include":false,"step":"460","x":-26.622790476190477,"y":17.386409523809522,"z":10.213190476190476,"a95":"13.25543","info":"\"94-01-11\" at \"12:25\""}],"demagType":"Unknown","patch":1.1,"format":"Unknown","strat":null},{"version":"v1.1.0","exported":"2016-10-11T12:28:25.721Z","info":"","GEO":[],"TECT":[],"interpreted":false,"name":"IN 083","coreAzi":74,"coreDip":76,"bedStrike":82,"bedDip":20,"data":[{"visible":true,"include":false,"step":"100","x":-3776.3380952380953,"y":-4403.079047619048,"z":2509.999047619048,"a95":"2.207309","info":"\"93-12-07\" at \"15:45\""},{"visible":true,"include":false,"step":"140","x":-1554.187619047619,"y":-3406.2933333333335,"z":1318.8495238095238,"a95":"2.942922","info":"\"93-12-20\" at \"12:09\""},{"visible":true,"include":false,"step":"180","x":-1715.5295238095239,"y":-2611.207619047619,"z":963.9219047619048,"a95":"2.160802","info":"\"93-12-20\" at \"15:19\""},{"visible":true,"include":true,"step":"220","x":-2120.487619047619,"y":-1286.0809523809523,"z":655.8557142857143,"a95":"3.706398","info":"\"93-12-21\" at \"15:07\""},{"visible":true,"include":true,"step":"260","x":-1845.6295238095238,"y":-632.336380952381,"z":513.8633333333333,"a95":"3.618872","info":"\"93-12-22\" at \"10:41\""},{"visible":true,"include":true,"step":"300","x":-1063.9342857142856,"y":-1151.2742857142857,"z":275.1758095238095,"a95":"2.673652","info":"\"93-12-22\" at \"15:52\""},{"visible":true,"include":true,"step":"340","x":-966.4942857142858,"y":-965.9657142857143,"z":319.6642857142857,"a95":"2.601318","info":"\"93-12-23\" at \"12:14\""},{"visible":false,"include":false,"step":"380","x":-641.5411428571429,"y":333.52542857142856,"z":-79.51773333333333,"a95":"2.943652","info":"\"93-12-23\" at \"15:09\""},{"visible":true,"include":true,"step":"420","x":-740.6936190476191,"y":-630.9591428571429,"z":281.9335238095238,"a95":"3.640234","info":"\"93-12-23\" at \"17:49\""},{"visible":true,"include":true,"step":"420","x":-156.48228571428572,"y":-252.83790476190475,"z":126.90742857142857,"a95":"2.832738","info":"\"94-01-10\" at \"15:06\""},{"visible":true,"include":false,"step":"460","x":-152.91552380952382,"y":-222.56419047619048,"z":119.20304761904762,"a95":"3.354256","info":"\"94-01-11\" at \"12:26\""}],"demagType":"Unknown","patch":1.1,"format":"Unknown","strat":null},{"version":"v1.1.0","exported":"2016-10-11T12:28:25.721Z","info":"","GEO":[],"TECT":[],"interpreted":false,"name":"IN 084","coreAzi":92,"coreDip":38,"bedStrike":82,"bedDip":20,"data":[{"visible":true,"include":false,"step":"20","x":-38.93647619047619,"y":-17.620019047619046,"z":18.30261904761905,"a95":"1.873061","info":"\"93-12-07\" at \"15:58\""},{"visible":true,"include":false,"step":"140","x":-21.57925714285714,"y":-11.84302857142857,"z":10.730380952380951,"a95":"3.463053","info":"\"93-12-20\" at \"12:49\""},{"visible":true,"include":true,"step":"180","x":-11.410247619047619,"y":-7.33464380952381,"z":4.1807847619047624,"a95":"6.765038","info":"\"93-12-20\" at \"15:53\""},{"visible":true,"include":true,"step":"220","x":-9.923342857142856,"y":-5.503521904761905,"z":-0.6911058095238095,"a95":"5.086189","info":"\"93-12-21\" at \"15:44\""},{"visible":true,"include":true,"step":"260","x":-6.556503809523809,"y":-6.149579999999999,"z":0.4920487619047619,"a95":"6.202378","info":"\"93-12-22\" at \"10:54\""},{"visible":true,"include":true,"step":"300","x":-5.150072380952381,"y":-2.5984161904761907,"z":0.8443433333333333,"a95":"12.41527","info":"\"93-12-22\" at \"15:56\""},{"visible":true,"include":true,"step":"340","x":-4.570913333333333,"y":0.3311441904761905,"z":-1.9107742857142858,"a95":"31.85848","info":"\"93-12-23\" at \"12:21\""},{"visible":true,"include":true,"step":"380","x":-1.2322,"y":-3.88818,"z":1.7240933333333333,"a95":"33.16555","info":"\"93-12-23\" at \"15:58\""},{"visible":true,"include":false,"step":"380","x":-5.113394285714286,"y":-0.5405061904761905,"z":-2.5781799999999997,"a95":"11.70438","info":"\"94-01-10\" at \"12:16\""},{"visible":true,"include":false,"step":"420","x":1.215952380952381,"y":0.17039342857142858,"z":-4.219730476190476,"a95":"19.18971","info":"\"94-01-10\" at \"15:36\""},{"visible":false,"include":false,"step":"460","x":1.863233333333333,"y":5.687829523809524,"z":-5.338769523809524,"a95":"12.52059","info":"\"94-01-11\" at \"13:01\""}],"demagType":"Unknown","patch":1.1,"format":"Unknown","strat":null},{"version":"v1.1.0","exported":"2016-10-11T12:28:25.721Z","info":"","GEO":[{"dec":346.0848343296087,"inc":-7.352198956934646,"MAD":10.644164723593045,"cm":[-1.2212453270876722e-15,0,0],"intensity":105.87598222467601,"type":"GC","origin":false,"forced":true,"remark":"","nSteps":4,"minStep":"140","maxStep":"260","steps":["140","180","220","260"],"group":"None","version":"v1.1.0"}],"TECT":[{"dec":165.98971138708612,"inc":-12.541768262808421,"MAD":10.644164723593025,"cm":[4.3298697960381105e-15,-2.220446049250313e-15,-4.440892098500626e-16],"intensity":105.87598222467601,"type":"GC","origin":false,"forced":true,"remark":"","nSteps":4,"minStep":"140","maxStep":"260","steps":["140","180","220","260"],"group":"None","version":"v1.1.0"}],"interpreted":true,"name":"IN 085","coreAzi":144,"coreDip":82,"bedStrike":82,"bedDip":20,"data":[{"visible":true,"include":false,"step":"20","x":-60.12445714285714,"y":50.559666666666665,"z":127.43761904761905,"a95":"3.168104","info":"\"93-12-07\" at \"15:59\""},{"visible":true,"include":true,"step":"140","x":-34.65786666666666,"y":32.480514285714285,"z":72.06566666666666,"a95":"3.178603","info":"\"93-12-20\" at \"12:50\""},{"visible":true,"include":true,"step":"180","x":-17.20912380952381,"y":25.291704761904764,"z":31.985761904761905,"a95":"5.18198","info":"\"93-12-20\" at \"15:54\""},{"visible":true,"include":true,"step":"220","x":-16.825714285714284,"y":20.13878095238095,"z":25.787657142857142,"a95":"6.344981","info":"\"93-12-21\" at \"15:45\""},{"visible":true,"include":true,"step":"260","x":-11.058380952380952,"y":16.55434285714286,"z":9.881457142857144,"a95":"9.654654","info":"\"93-12-22\" at \"10:55\""},{"visible":true,"include":false,"step":"300","x":-9.822590476190477,"y":11.896485714285713,"z":10.118933333333334,"a95":"13.70459","info":"\"93-12-22\" at \"15:57\""},{"visible":true,"include":false,"step":"340","x":-2.63496,"y":13.02669523809524,"z":3.3444961904761903,"a95":"21.87037","info":"\"93-12-23\" at \"12:22\""},{"visible":true,"include":false,"step":"380","x":-5.162165714285714,"y":4.822524761904762,"z":7.344050476190477,"a95":"20.23339","info":"\"93-12-23\" at \"16:03\""},{"visible":true,"include":false,"step":"380","x":-5.106601904761905,"y":-3.1431314285714285,"z":1.1871466666666666,"a95":"37.09814","info":"\"94-01-10\" at \"12:17\""},{"visible":true,"include":false,"step":"420","x":0.9433284761904762,"y":5.988274285714286,"z":1.1384933333333334,"a95":"34.76088","info":"\"94-01-10\" at \"15:36\""},{"visible":true,"include":false,"step":"460","x":11.366590476190476,"y":-3.795544761904762,"z":-10.382561904761905,"a95":"14.97536","info":"\"94-01-11\" at \"13:02\""}],"demagType":"Unknown","patch":1.1,"format":"Unknown","strat":null},{"version":"v1.1.0","exported":"2016-10-11T12:28:25.721Z","info":"","GEO":[],"TECT":[],"interpreted":false,"name":"IN 086","coreAzi":123,"coreDip":81,"bedStrike":82,"bedDip":20,"data":[{"visible":true,"include":false,"step":"20","x":-80.52508571428572,"y":-42.15553333333334,"z":78.80311428571429,"a95":"6.376974","info":"\"93-12-07\" at \"16:00\""},{"visible":true,"include":false,"step":"140","x":-51.13073333333333,"y":-26.89535238095238,"z":40.03534285714286,"a95":"3.456852","info":"\"93-12-20\" at \"12:51\""},{"visible":true,"include":true,"step":"180","x":-22.949504761904763,"y":-5.4930666666666665,"z":15.071514285714287,"a95":"24.84412","info":"\"93-12-20\" at \"15:54\""},{"visible":true,"include":true,"step":"220","x":-17.53239047619048,"y":0.06862288571428572,"z":6.905593333333333,"a95":"8.978059","info":"\"93-12-21\" at \"15:47\""},{"visible":true,"include":true,"step":"260","x":-16.499438095238094,"y":-2.01588,"z":6.589210476190477,"a95":"11.34792","info":"\"93-12-22\" at \"10:55\""},{"visible":true,"include":true,"step":"300","x":-10.951314285714286,"y":-0.4587546666666667,"z":3.6384819047619046,"a95":"18.29065","info":"\"93-12-22\" at \"15:58\""},{"visible":true,"include":true,"step":"340","x":-9.815085714285715,"y":-4.35406380952381,"z":0.5032412380952381,"a95":"22.94635","info":"\"93-12-23\" at \"12:23\""},{"visible":true,"include":true,"step":"380","x":-7.425253333333333,"y":-3.0208542857142855,"z":2.109877142857143,"a95":"73.69689","info":"\"93-12-23\" at \"16:05\""},{"visible":true,"include":true,"step":"380","x":-10.522028571428573,"y":0.10382095238095237,"z":-0.409416380952381,"a95":"15.79362","info":"\"94-01-10\" at \"12:18\""},{"visible":true,"include":false,"step":"420","x":-8.14404476190476,"y":-1.1125514285714284,"z":-2.135610476190476,"a95":"18.87482","info":"\"94-01-10\" at \"15:37\""},{"visible":true,"include":false,"step":"460","x":-3.466133333333333,"y":3.7325933333333334,"z":-4.300942857142857,"a95":"28.83535","info":"\"94-01-11\" at \"13:03\""}],"demagType":"Unknown","patch":1.1,"format":"Unknown","strat":null},{"version":"v1.1.0","exported":"2016-10-11T12:28:25.721Z","info":"","GEO":[],"TECT":[],"interpreted":false,"name":"IN 087.1","coreAzi":175,"coreDip":86,"bedStrike":82,"bedDip":20,"data":[{"visible":true,"include":false,"step":"20","x":-223.46695238095236,"y":171.44180952380952,"z":323.1459047619048,"a95":"1.186261","info":"\"93-12-07\" at \"16:02\""},{"visible":true,"include":false,"step":"140","x":-155.49314285714286,"y":116.26295238095238,"z":198.36599999999999,"a95":"1.967173","info":"\"93-12-20\" at \"12:52\""},{"visible":true,"include":true,"step":"180","x":-105.46466666666666,"y":116.18066666666667,"z":111.67780952380951,"a95":"3.452303","info":"\"93-12-20\" at \"15:55\""},{"visible":true,"include":true,"step":"220","x":-81.51677142857143,"y":92.8048380952381,"z":91.85976190476191,"a95":"3.521762","info":"\"93-12-21\" at \"15:48\""},{"visible":true,"include":true,"step":"260","x":-75.18199999999999,"y":70.76774285714285,"z":65.10679047619048,"a95":"2.497919","info":"\"93-12-22\" at \"10:56\""},{"visible":true,"include":true,"step":"300","x":-36.38147619047619,"y":47.33,"z":63.45397142857143,"a95":"7.480616","info":"\"93-12-22\" at \"15:59\""},{"visible":true,"include":true,"step":"340","x":-38.699961904761906,"y":42.823304761904765,"z":19.5824,"a95":"4.998928","info":"\"93-12-23\" at \"12:24\""},{"visible":true,"include":true,"step":"380","x":-24.20592380952381,"y":20.023009523809524,"z":21.72265714285714,"a95":"8.813488","info":"\"93-12-23\" at \"16:06\""},{"visible":true,"include":true,"step":"380","x":-21.250466666666664,"y":7.3583019047619045,"z":11.425514285714286,"a95":"21.29823","info":"\"94-01-10\" at \"12:19\""},{"visible":true,"include":true,"step":"420","x":-9.663961904761905,"y":14.808104761904762,"z":8.417734285714285,"a95":"21.94101","info":"\"94-01-10\" at \"15:38\""},{"visible":true,"include":false,"step":"460","x":-2.661135238095238,"y":-4.709178095238095,"z":9.459779047619048,"a95":"51.49916","info":"\"94-01-11\" at \"13:04\""}],"demagType":"Unknown","patch":1.1,"format":"Unknown","strat":null},{"version":"v1.1.0","exported":"2016-10-11T12:28:25.721Z","info":"","GEO":[],"TECT":[],"interpreted":false,"name":"IN 088","coreAzi":134,"coreDip":8,"bedStrike":82,"bedDip":20,"data":[{"visible":true,"include":false,"step":"20","x":-159.5687619047619,"y":-35.92715238095238,"z":-92.54986666666666,"a95":"1.55574","info":"\"93-12-07\" at \"16:02\""},{"visible":true,"include":false,"step":"140","x":-93.7957619047619,"y":-32.66289523809524,"z":-50.16359047619048,"a95":"2.645405","info":"\"93-12-20\" at \"12:52\""},{"visible":true,"include":true,"step":"180","x":-50.97271428571428,"y":-3.90816,"z":-38.89689523809524,"a95":"3.060972","info":"\"93-12-20\" at \"15:56\""},{"visible":true,"include":true,"step":"220","x":-36.52045714285715,"y":1.6431561904761902,"z":-21.755599999999998,"a95":"4.014726","info":"\"93-12-21\" at \"15:49\""},{"visible":true,"include":true,"step":"260","x":-30.663685714285716,"y":-3.9281247619047623,"z":-22.307895238095238,"a95":"5.158561","info":"\"93-12-22\" at \"10:57\""},{"visible":true,"include":true,"step":"300","x":-19.43069523809524,"y":3.3734838095238096,"z":-18.069780952380952,"a95":"6.856451","info":"\"93-12-22\" at \"15:59\""},{"visible":true,"include":true,"step":"340","x":-16.388390476190477,"y":-5.415399047619048,"z":-17.6126,"a95":"7.882422","info":"\"93-12-23\" at \"12:25\""},{"visible":true,"include":true,"step":"380","x":-12.585209523809525,"y":-2.180584761904762,"z":-10.089971428571427,"a95":"22.71709","info":"\"93-12-23\" at \"16:07\""},{"visible":true,"include":false,"step":"380","x":-12.522580952380952,"y":-2.7761428571428572,"z":-1.918837142857143,"a95":"21.47904","info":"\"94-01-10\" at \"12:20\""},{"visible":true,"include":false,"step":"420","x":-10.041304761904762,"y":1.0294180952380951,"z":-5.577177142857143,"a95":"15.11267","info":"\"94-01-10\" at \"15:38\""},{"visible":true,"include":false,"step":"460","x":-2.977327619047619,"y":-1.0062704761904762,"z":4.282753333333334,"a95":"40.95667","info":"\"94-01-11\" at \"13:05\""}],"demagType":"Unknown","patch":1.1,"format":"Unknown","strat":null},{"version":"v1.1.0","exported":"2016-10-11T12:28:25.721Z","info":"","GEO":[],"TECT":[],"interpreted":false,"name":"IN 089","coreAzi":6,"coreDip":53,"bedStrike":82,"bedDip":20,"data":[{"visible":false,"include":false,"step":"20","x":0.9421745714285714,"y":-0.6452097142857143,"z":83.42899047619048,"a95":"1.368639","info":"\"93-12-07\" at \"16:03\""},{"visible":true,"include":false,"step":"140","x":2.535342857142857,"y":-2.874160952380952,"z":48.98608571428571,"a95":"7.765465","info":"\"93-12-20\" at \"12:53\""},{"visible":true,"include":false,"step":"180","x":2.7073819047619048,"y":-3.0696000000000003,"z":18.552114285714286,"a95":"5.123557","info":"\"93-12-20\" at \"15:56\""},{"visible":true,"include":false,"step":"220","x":3.8199028571428575,"y":-3.5438628571428574,"z":6.520063809523809,"a95":"7.22329","info":"\"93-12-21\" at \"15:51\""},{"visible":true,"include":false,"step":"260","x":1.6191990476190476,"y":-0.9181627619047619,"z":8.650801904761906,"a95":"11.30134","info":"\"93-12-22\" at \"10:58\""},{"visible":true,"include":false,"step":"300","x":0.09919628571428571,"y":-1.4843619047619048,"z":5.2114400000000005,"a95":"13.15909","info":"\"93-12-22\" at \"16:00\""},{"visible":true,"include":false,"step":"340","x":-2.623152380952381,"y":-1.8989257142857143,"z":1.9604495238095239,"a95":"38.54805","info":"\"93-12-23\" at \"12:26\""},{"visible":true,"include":false,"step":"380","x":1.013944761904762,"y":-1.5332761904761905,"z":3.199061904761905,"a95":"20.65631","info":"\"93-12-23\" at \"16:08\""},{"visible":true,"include":false,"step":"380","x":-0.7231005714285714,"y":-3.7872761904761902,"z":-0.016144333333333333,"a95":"27.45872","info":"\"94-01-10\" at \"12:22\""},{"visible":true,"include":false,"step":"420","x":-1.6829657142857144,"y":-1.7156857142857145,"z":1.782150476190476,"a95":"30.06113","info":"\"94-01-10\" at \"15:39\""},{"visible":true,"include":false,"step":"460","x":1.9797685714285713,"y":-2.173294285714286,"z":6.290414285714286,"a95":"17.56981","info":"\"94-01-11\" at \"13:05\""}],"demagType":"Unknown","patch":1.1,"format":"Unknown","strat":null},{"version":"v1.1.0","exported":"2016-10-11T12:28:25.721Z","info":"","GEO":[],"TECT":[],"interpreted":false,"name":"IN 091","coreAzi":140,"coreDip":60,"bedStrike":82,"bedDip":20,"data":[{"visible":true,"include":false,"step":"20","x":111.48714285714286,"y":-26.197266666666668,"z":255.77752380952384,"a95":"1.103953","info":"\"93-12-07\" at \"16:04\""},{"visible":true,"include":false,"step":"140","x":104.93619047619048,"y":-9.155353333333332,"z":183.40114285714284,"a95":"4.52548","info":"\"93-12-20\" at \"12:54\""},{"visible":true,"include":false,"step":"180","x":98.34876190476191,"y":15.083457142857142,"z":122.49409523809524,"a95":"3.392467","info":"\"93-12-20\" at \"15:57\""},{"visible":true,"include":false,"step":"220","x":82.13154285714286,"y":-33.782085714285714,"z":100.326,"a95":"2.099859","info":"\"93-12-21\" at \"15:52\""},{"visible":true,"include":false,"step":"260","x":61.942485714285716,"y":-34.71093333333334,"z":93.3378,"a95":"3.013166","info":"\"93-12-22\" at \"10:58\""},{"visible":true,"include":false,"step":"300","x":48.996323809523815,"y":-16.95649523809524,"z":79.62500952380952,"a95":"3.85101","info":"\"93-12-22\" at \"16:01\""},{"visible":true,"include":false,"step":"340","x":54.549800000000005,"y":-11.065504761904762,"z":70.48092380952382,"a95":"4.115272","info":"\"93-12-23\" at \"12:27\""},{"visible":true,"include":false,"step":"380","x":56.124476190476194,"y":-13.234114285714286,"z":67.08321904761904,"a95":"3.823119","info":"\"93-12-23\" at \"16:09\""},{"visible":true,"include":false,"step":"380","x":54.0600380952381,"y":-12.467819047619049,"z":62.50130476190476,"a95":"5.339105","info":"\"94-01-10\" at \"12:23\""},{"visible":true,"include":false,"step":"420","x":50.118771428571435,"y":-7.601621904761905,"z":55.37139047619047,"a95":"4.545495","info":"\"94-01-10\" at \"15:40\""},{"visible":true,"include":false,"step":"460","x":49.16722857142857,"y":-14.67,"z":60.725361904761904,"a95":"4.155815","info":"\"94-01-11\" at \"13:06\""},{"visible":true,"include":false,"step":"500","x":49.29419047619048,"y":-15.788809523809524,"z":45.68658095238095,"a95":"3.812106","info":"\"94-11-02\" at \"09:48\""},{"visible":true,"include":false,"step":"540","x":20.887609523809523,"y":-24.198542857142858,"z":18.18797142857143,"a95":"7.924299","info":"\"94-11-02\" at \"11:50\""},{"visible":true,"include":false,"step":"580","x":38.63553333333333,"y":-14.767999999999999,"z":30.923066666666667,"a95":"7.388656","info":"\"94-11-03\" at \"09:27\""},{"visible":true,"include":false,"step":"620","x":25.51131428571429,"y":-19.061209523809524,"z":13.582438095238095,"a95":"7.882461","info":"\"94-11-03\" at \"11:57\""},{"visible":true,"include":false,"step":"660","x":14.251219047619047,"y":-37.033495238095234,"z":35.659800000000004,"a95":"5.905897","info":"\"94-11-04\" at \"09:14\""},{"visible":true,"include":false,"step":"700","x":-0.8065880000000001,"y":1.718755238095238,"z":-3.513950476190476,"a95":"68.95887","info":"\"94-11-04\" at \"13:25\""}],"demagType":"Unknown","patch":1.1,"format":"Unknown","strat":null},{"version":"v1.1.0","exported":"2016-10-11T12:28:25.721Z","info":"","GEO":[],"TECT":[],"interpreted":false,"name":"IN 092","coreAzi":-10,"coreDip":66,"bedStrike":82,"bedDip":20,"data":[{"visible":true,"include":false,"step":"20","x":20.9498,"y":27.576609523809523,"z":70.29022857142857,"a95":"1.986424","info":"\"93-12-07\" at \"16:05\""},{"visible":true,"include":false,"step":"140","x":15.597790476190477,"y":11.121161904761905,"z":40.47727619047619,"a95":"10.3499","info":"\"93-12-20\" at \"12:55\""},{"visible":true,"include":false,"step":"180","x":4.994631428571428,"y":2.95624,"z":12.22087619047619,"a95":"7.964182","info":"\"93-12-20\" at \"15:58\""},{"visible":true,"include":false,"step":"260","x":2.8573190476190478,"y":1.128404761904762,"z":0.4782423809523809,"a95":"29.86498","info":"\"93-12-22\" at \"10:52\""},{"visible":true,"include":false,"step":"300","x":1.0450761904761905,"y":1.5076038095238096,"z":1.7211133333333333,"a95":"49.94463","info":"\"93-12-22\" at \"16:01\""},{"visible":true,"include":false,"step":"340","x":0.5706393333333333,"y":-0.859561238095238,"z":1.5984285714285715,"a95":"90.40731","info":"\"93-12-23\" at \"12:29\""},{"visible":true,"include":false,"step":"380","x":2.0582057142857146,"y":0.698288,"z":1.2587076190476192,"a95":"31.39792","info":"\"93-12-23\" at \"16:11\""},{"visible":true,"include":false,"step":"380","x":2.9374838095238096,"y":0.0550898,"z":1.2327657142857142,"a95":"35.9945","info":"\"94-01-10\" at \"12:24\""},{"visible":true,"include":false,"step":"420","x":-0.3611550476190476,"y":0.10686914285714286,"z":-0.6367765714285715,"a95":"136.4028","info":"\"94-01-10\" at \"15:40\""},{"visible":true,"include":false,"step":"460","x":-0.06524914285714285,"y":-0.2976847619047619,"z":3.7665228571428573,"a95":"31.40484","info":"\"94-01-11\" at \"13:07\""}],"demagType":"Unknown","patch":1.1,"format":"Unknown","strat":null},{"version":"v1.1.0","exported":"2016-10-11T12:28:25.722Z","info":"","GEO":[],"TECT":[],"interpreted":false,"name":"IN 093","coreAzi":128,"coreDip":43,"bedStrike":82,"bedDip":20,"data":[{"visible":true,"include":false,"step":"20","x":383.2817142857143,"y":15.956561904761905,"z":-34.3312380952381,"a95":"1.566087","info":"\"93-12-07\" at \"16:06\""},{"visible":true,"include":true,"step":"140","x":214.87809523809523,"y":-9.349490476190477,"z":-11.047180952380952,"a95":"1.647856","info":"\"93-12-20\" at \"12:56\""},{"visible":true,"include":true,"step":"180","x":132.19790476190477,"y":-61.755714285714284,"z":-9.023055238095239,"a95":"2.2042","info":"\"93-12-20\" at \"15:59\""},{"visible":true,"include":true,"step":"220","x":105.39533333333334,"y":-45.12708571428571,"z":-12.477066666666666,"a95":"3.162061","info":"\"93-12-21\" at \"15:59\""},{"visible":false,"include":false,"step":"260","x":87.3626761904762,"y":-68.65701904761904,"z":-39.480914285714285,"a95":"3.629312","info":"\"93-12-22\" at \"11:16\""},{"visible":true,"include":true,"step":"300","x":67.00342857142857,"y":-29.65798095238095,"z":2.44684,"a95":"5.677994","info":"\"93-12-22\" at \"16:02\""},{"visible":true,"include":true,"step":"340","x":63.89164761904762,"y":-20.25129523809524,"z":3.30020380952381,"a95":"7.035793","info":"\"93-12-23\" at \"12:32\""},{"visible":true,"include":true,"step":"380","x":54.4469619047619,"y":-30.270523809523812,"z":1.0889971428571428,"a95":"8.819239","info":"\"93-12-23\" at \"16:12\""},{"visible":true,"include":true,"step":"380","x":49.647733333333335,"y":-26.540114285714285,"z":0.7224966666666667,"a95":"7.330628","info":"\"94-01-10\" at \"12:24\""},{"visible":true,"include":false,"step":"420","x":43.176790476190476,"y":-31.495066666666666,"z":1.6069371428571428,"a95":"7.333921","info":"\"94-01-10\" at \"15:41\""},{"visible":true,"include":false,"step":"460","x":35.516104761904764,"y":-18.35935238095238,"z":19.210371428571428,"a95":"10.24849","info":"\"94-01-11\" at \"13:08\""},{"visible":true,"include":false,"step":"500","x":17.996590476190477,"y":-34.353257142857146,"z":-6.983148571428571,"a95":"15.98745","info":"\"94-11-02\" at \"09:49\""},{"visible":true,"include":false,"step":"540","x":2.5900285714285713,"y":-45.795323809523815,"z":-9.983380952380953,"a95":"8.521077","info":"\"94-11-02\" at \"11:51\""},{"visible":true,"include":false,"step":"580","x":26.037590476190477,"y":-38.48478095238095,"z":-18.784409523809522,"a95":"8.068447","info":"\"94-11-03\" at \"09:32\""},{"visible":true,"include":false,"step":"620","x":1.5917390476190474,"y":-26.971990476190474,"z":0.9485025714285714,"a95":"17.78836","info":"\"94-11-03\" at \"12:06\""},{"visible":true,"include":false,"step":"660","x":16.696361904761904,"y":-16.51547619047619,"z":-3.421852380952381,"a95":"13.75027","info":"\"94-11-04\" at \"09:15\""},{"visible":true,"include":false,"step":"700","x":-7.182652380952381,"y":-18.47150476190476,"z":13.303914285714287,"a95":"12.64086","info":"\"94-11-04\" at \"13:26\""}],"demagType":"Unknown","patch":1.1,"format":"Unknown","strat":null},{"version":"v1.1.0","exported":"2016-10-11T12:28:25.722Z","info":"","GEO":[],"TECT":[],"interpreted":false,"name":"IN 094","coreAzi":105,"coreDip":74,"bedStrike":82,"bedDip":20,"data":[{"visible":true,"include":false,"step":"20","x":-677.8827619047619,"y":-952.6714285714285,"z":1691.2790476190476,"a95":".9282376","info":"\"93-12-07\" at \"16:07\""},{"visible":true,"include":false,"step":"140","x":-390.57504761904755,"y":-556.2111428571428,"z":979.9209523809524,"a95":"1.560846","info":"\"93-12-20\" at \"12:57\""},{"visible":true,"include":true,"step":"180","x":-247.83428571428573,"y":-352.9944761904762,"z":580.3977142857143,"a95":"2.554105","info":"\"93-12-20\" at \"15:59\""},{"visible":true,"include":true,"step":"220","x":-184.16114285714286,"y":-274.96914285714286,"z":514.1136190476191,"a95":"2.217297","info":"\"93-12-21\" at \"16:01\""},{"visible":true,"include":true,"step":"260","x":-159.15657142857143,"y":-210.92999999999998,"z":280.8558095238095,"a95":"4.35482","info":"\"93-12-22\" at \"11:02\""},{"visible":true,"include":true,"step":"300","x":-107.22180952380953,"y":-87.40149523809524,"z":160.49266666666668,"a95":"6.628428","info":"\"93-12-22\" at \"16:02\""},{"visible":true,"include":false,"step":"340","x":-109.35838095238094,"y":-74.96409523809524,"z":102.91009523809524,"a95":"7.250803","info":"\"93-12-23\" at \"12:33\""},{"visible":true,"include":false,"step":"380","x":-83.8542,"y":11.118952380952381,"z":-86.97746666666667,"a95":"9.669847","info":"\"93-12-23\" at \"16:13\""},{"visible":true,"include":false,"step":"380","x":-61.60459047619048,"y":-66.38237142857143,"z":104.98657142857142,"a95":"8.886703","info":"\"94-01-10\" at \"12:25\""},{"visible":true,"include":false,"step":"420","x":-70.03428571428572,"y":-50.33789523809524,"z":113.51361904761904,"a95":"8.32322","info":"\"94-01-10\" at \"15:42\""},{"visible":true,"include":false,"step":"460","x":-49.06111428571429,"y":-27.803485714285713,"z":76.21440952380952,"a95":"10.40939","info":"\"94-01-11\" at \"13:08\""}],"demagType":"Unknown","patch":1.1,"format":"Unknown","strat":null},{"version":"v1.1.0","exported":"2016-10-11T12:28:25.722Z","info":"","GEO":[],"TECT":[],"interpreted":false,"name":"IN 096","coreAzi":98,"coreDip":54,"bedStrike":82,"bedDip":20,"data":[{"visible":true,"include":false,"step":"20","x":-530.4312380952381,"y":-229.48171428571428,"z":175.08380952380952,"a95":"1.387493","info":"\"93-12-07\" at \"16:09\""},{"visible":true,"include":false,"step":"140","x":-341.6984761904762,"y":-107.19771428571428,"z":98.48704761904762,"a95":"1.785172","info":"\"93-12-20\" at \"12:58\""},{"visible":true,"include":true,"step":"180","x":-187.39438095238097,"y":-67.8627238095238,"z":45.77801904761905,"a95":"2.846254","info":"\"93-12-20\" at \"16:00\""},{"visible":true,"include":true,"step":"220","x":-137.43419047619048,"y":-68.64421904761905,"z":62.469695238095234,"a95":"2.919866","info":"\"93-12-21\" at \"16:02\""},{"visible":true,"include":true,"step":"260","x":-92.48152380952381,"y":-22.175876190476192,"z":10.71187619047619,"a95":"4.724397","info":"\"93-12-22\" at \"11:02\""},{"visible":true,"include":true,"step":"300","x":-60.61500952380952,"y":-20.252933333333335,"z":10.225209523809523,"a95":"5.284235","info":"\"93-12-22\" at \"16:03\""},{"visible":true,"include":true,"step":"340","x":-64.31300952380953,"y":-24.89083809523809,"z":-2.039182857142857,"a95":"6.736216","info":"\"93-12-23\" at \"12:34\""},{"visible":true,"include":true,"step":"380","x":-50.379666666666665,"y":-15.361771428571428,"z":11.154609523809524,"a95":"15.50423","info":"\"93-12-23\" at \"16:14\""},{"visible":true,"include":true,"step":"380","x":-52.455371428571425,"y":-21.725561904761907,"z":6.6879542857142855,"a95":"7.590186","info":"\"94-01-10\" at \"12:26\""},{"visible":true,"include":false,"step":"420","x":-51.644819047619045,"y":-17.861047619047618,"z":6.972859047619047,"a95":"7.415859","info":"\"94-01-10\" at \"15:43\""},{"visible":true,"include":false,"step":"460","x":-40.145942857142856,"y":-14.034009523809525,"z":10.330419047619047,"a95":"8.625013","info":"\"94-01-11\" at \"13:09\""},{"visible":true,"include":false,"step":"500","x":-27.334933333333332,"y":-25.864409523809524,"z":4.830649523809524,"a95":"10.50578","info":"\"94-11-02\" at \"09:50\""},{"visible":true,"include":false,"step":"540","x":-24.129438095238097,"y":6.4825485714285715,"z":-11.366847619047618,"a95":"14.58889","info":"\"94-11-02\" at \"11:52\""},{"visible":false,"include":false,"step":"580","x":-18.417123809523808,"y":13.126980952380952,"z":-26.950980952380952,"a95":"9.566459","info":"\"94-11-03\" at \"09:35\""},{"visible":false,"include":false,"step":"620","x":-28.197933333333335,"y":-16.47657142857143,"z":-2.573388571428571,"a95":"13.39508","info":"\"94-11-03\" at \"11:59\""},{"visible":false,"include":false,"step":"660","x":-15.191533333333334,"y":9.407249523809524,"z":8.515509523809524,"a95":"14.34242","info":"\"94-11-04\" at \"09:16\""},{"visible":false,"include":false,"step":"700","x":-4.520168571428572,"y":2.756122857142857,"z":-9.62132380952381,"a95":"22.00884","info":"\"94-11-04\" at \"13:27\""}],"demagType":"Unknown","patch":1.1,"format":"Unknown","strat":null},{"version":"v1.1.0","exported":"2016-10-11T12:28:25.722Z","info":"","GEO":[],"TECT":[],"interpreted":false,"name":"IN 098","coreAzi":190,"coreDip":62,"bedStrike":82,"bedDip":20,"data":[{"visible":true,"include":false,"step":"20","x":-241.52466666666666,"y":97.06942857142857,"z":47.70202857142857,"a95":"1.538374","info":"\"93-12-07\" at \"16:10\""},{"visible":true,"include":false,"step":"140","x":-175.64390476190476,"y":54.30414285714286,"z":48.1562,"a95":"2.971022","info":"\"93-12-20\" at \"12:59\""},{"visible":true,"include":false,"step":"180","x":-94.5066761904762,"y":60.05506666666667,"z":23.90057142857143,"a95":"4.860848","info":"\"93-12-20\" at \"16:01\""},{"visible":true,"include":true,"step":"220","x":-86.86088571428571,"y":60.67499047619047,"z":23.284714285714283,"a95":"3.315446","info":"\"93-12-21\" at \"16:04\""},{"visible":true,"include":true,"step":"260","x":-75.23835238095238,"y":44.993428571428566,"z":16.195095238095238,"a95":"3.79294","info":"\"93-12-22\" at \"11:03\""},{"visible":true,"include":true,"step":"300","x":-56.998847619047616,"y":34.563761904761904,"z":11.804857142857141,"a95":"5.639157","info":"\"93-12-22\" at \"16:04\""},{"visible":false,"include":false,"step":"340","x":-36.18501904761905,"y":24.19770476190476,"z":-12.652752380952382,"a95":"6.249469","info":"\"93-12-23\" at \"12:34\""},{"visible":true,"include":true,"step":"380","x":-32.25854285714286,"y":8.45616380952381,"z":9.9262,"a95":"18.1512","info":"\"93-12-23\" at \"16:14\""},{"visible":true,"include":true,"step":"380","x":-25.245561904761903,"y":13.842238095238097,"z":3.787182857142857,"a95":"7.139888","info":"\"94-01-10\" at \"12:27\""},{"visible":true,"include":true,"step":"420","x":-18.368190476190478,"y":8.360912380952382,"z":2.2445028571428574,"a95":"8.696388","info":"\"94-01-10\" at \"15:43\""},{"visible":true,"include":false,"step":"460","x":-4.426972380952381,"y":2.541862857142857,"z":-2.1686580952380954,"a95":"41.60426","info":"\"94-01-11\" at \"13:10\""}],"demagType":"Unknown","patch":1.1,"format":"Unknown","strat":null},{"version":"v1.1.0","exported":"2016-10-11T12:28:25.722Z","info":"","GEO":[],"TECT":[],"interpreted":false,"name":"IN 099","coreAzi":143,"coreDip":22,"bedStrike":82,"bedDip":20,"data":[{"visible":true,"include":false,"step":"20","x":-444.8259047619047,"y":21.97057142857143,"z":-226.2712380952381,"a95":"1.320279","info":"\"93-12-07\" at \"16:11\""},{"visible":true,"include":false,"step":"140","x":-193.35180952380952,"y":-2.5528657142857143,"z":-106.87647619047618,"a95":"3.723343","info":"\"93-12-20\" at \"13:00\""},{"visible":true,"include":true,"step":"180","x":-100.41266666666668,"y":3.2523085714285713,"z":-78.65379047619047,"a95":"2.48502","info":"\"93-12-20\" at \"16:02\""},{"visible":true,"include":true,"step":"220","x":-114.38571428571429,"y":17.542057142857143,"z":-87.1877619047619,"a95":"3.60033","info":"\"93-12-21\" at \"16:08\""},{"visible":true,"include":true,"step":"260","x":-59.625276190476185,"y":5.399809523809524,"z":-43.127809523809525,"a95":"6.080632","info":"\"93-12-22\" at \"11:04\""},{"visible":true,"include":true,"step":"300","x":-36.721152380952375,"y":5.007131428571428,"z":-45.52462857142857,"a95":"2.592247","info":"\"93-12-22\" at \"16:04\""},{"visible":false,"include":false,"step":"340","x":-28.311523809523813,"y":-1.2385161904761905,"z":-49.525733333333335,"a95":"27.26204","info":"\"93-12-23\" at \"12:52\""},{"visible":true,"include":true,"step":"380","x":-18.13922857142857,"y":-2.6958828571428572,"z":-22.639609523809526,"a95":"6.194582","info":"\"93-12-23\" at \"16:15\""},{"visible":true,"include":false,"step":"380","x":-16.296961904761904,"y":1.675150476190476,"z":-16.181933333333333,"a95":"6.60743","info":"\"94-01-10\" at \"12:27\""},{"visible":true,"include":false,"step":"420","x":-9.588057142857142,"y":4.15758761904762,"z":-22.878352380952382,"a95":"5.122742","info":"\"94-01-10\" at \"15:44\""},{"visible":true,"include":false,"step":"460","x":-8.03363619047619,"y":-1.6481942857142857,"z":-2.936499047619048,"a95":"17.48472","info":"\"94-01-11\" at \"13:11\""}],"demagType":"Unknown","patch":1.1,"format":"Unknown","strat":null},{"version":"v1.1.0","exported":"2016-10-11T12:28:25.722Z","info":"","GEO":[{"dec":9.658247975157451,"inc":-31.15028873443437,"MAD":26.922624230623526,"cm":[-9.769962616701378e-15,1.0658141036401503e-14,0],"intensity":938.9644582307493,"type":"GC","origin":false,"forced":true,"remark":"","nSteps":8,"minStep":"140","maxStep":"580","steps":["140","300","380","420","460","500","540","580"],"group":"None","version":"v1.1.0"}],"TECT":[{"dec":7.388262250110529,"inc":-11.95683024341038,"MAD":26.92262423062355,"cm":[-8.215650382226158e-14,-3.197442310920451e-14,-1.509903313490213e-14],"intensity":938.9644582307492,"type":"GC","origin":false,"forced":true,"remark":"","nSteps":8,"minStep":"140","maxStep":"580","steps":["140","300","380","420","460","500","540","580"],"group":"None","version":"v1.1.0"}],"interpreted":true,"name":"IN 100","coreAzi":94,"coreDip":19,"bedStrike":82,"bedDip":20,"data":[{"visible":true,"include":false,"step":"20","x":-673.0206666666667,"y":-295.8191428571429,"z":-301.1197142857143,"a95":"3.836869","info":"\"93-12-07\" at \"16:12\""},{"visible":true,"include":true,"step":"140","x":-489.3664761904762,"y":-240.60514285714285,"z":-318.01685714285713,"a95":"1.888892","info":"\"93-12-20\" at \"13:01\""},{"visible":true,"include":false,"step":"180","x":-400.8351428571429,"y":-178.63761904761904,"z":-330.8817142857143,"a95":"2.905711","info":"\"93-12-20\" at \"16:02\""},{"visible":true,"include":false,"step":"220","x":-341.8426666666667,"y":-135.2342857142857,"z":-319.96914285714286,"a95":"2.100259","info":"\"93-12-21\" at \"16:09\""},{"visible":true,"include":false,"step":"260","x":-298.8058095238095,"y":-154.18714285714285,"z":-349.4249523809524,"a95":"3.757797","info":"\"93-12-22\" at \"11:05\""},{"visible":true,"include":true,"step":"300","x":-236.8870476190476,"y":-172.72066666666666,"z":-316.7403809523809,"a95":"3.11236","info":"\"93-12-22\" at \"16:05\""},{"visible":false,"include":false,"step":"340","x":-234.93019047619046,"y":-54.03398095238096,"z":-346.9862857142857,"a95":"2.700984","info":"\"93-12-23\" at \"12:53\""},{"visible":true,"include":true,"step":"380","x":-227.82285714285712,"y":-180.0382857142857,"z":-302.97799999999995,"a95":"3.105357","info":"\"93-12-23\" at \"16:16\""},{"visible":false,"include":false,"step":"380","x":-223.41733333333335,"y":-198.69523809523812,"z":-289.35219047619046,"a95":"4.007219","info":"\"94-01-10\" at \"12:29\""},{"visible":true,"include":true,"step":"420","x":-250.57190476190476,"y":-76.46368571428572,"z":-312.84809523809525,"a95":"4.322437","info":"\"94-01-10\" at \"15:45\""},{"visible":true,"include":true,"step":"460","x":-233.28990476190475,"y":-75.17178095238096,"z":-292.25466666666665,"a95":"4.304938","info":"\"94-01-11\" at \"13:12\""},{"visible":true,"include":true,"step":"500","x":-205.62352380952382,"y":-84.89281904761904,"z":-278.9594285714286,"a95":"3.31914","info":"\"94-11-02\" at \"09:51\""},{"visible":true,"include":true,"step":"540","x":-200.11828571428572,"y":-75.37135238095237,"z":-267.69638095238093,"a95":"2.889119","info":"\"94-11-02\" at \"11:53\""},{"visible":true,"include":true,"step":"580","x":-163.50514285714286,"y":-63.62833333333333,"z":-284.3575238095238,"a95":"4.326025","info":"\"94-11-03\" at \"09:37\""},{"visible":true,"include":false,"step":"620","x":-211.66895238095236,"y":-4.532992380952381,"z":-225.27638095238095,"a95":"9.185199","info":"\"94-11-03\" at \"12:00\""},{"visible":true,"include":false,"step":"660","x":-171.3370476190476,"y":22.291761904761906,"z":-180.0324761904762,"a95":"23.64355","info":"\"94-11-04\" at \"09:17\""},{"visible":true,"include":false,"step":"700","x":-20.91934285714286,"y":-9.496764761904762,"z":5.241939047619048,"a95":"16.55956","info":"\"94-11-04\" at \"13:28\""}],"demagType":"Unknown","patch":1.1,"format":"Unknown","strat":null},{"version":"v1.1.0","exported":"2016-10-11T12:28:25.722Z","info":"","GEO":[{"dec":353.1503828382329,"inc":-35.232273589954225,"MAD":13.862964337917102,"cm":[-4.6629367034256575e-15,-4.440892098500626e-15,0],"intensity":119.66761658500417,"type":"GC","origin":false,"forced":true,"remark":"","nSteps":5,"minStep":"140","maxStep":"300","steps":["140","180","220","260","300"],"group":"None","version":"v1.1.0"}],"TECT":[{"dec":352.9738660668303,"inc":-15.235617317718244,"MAD":13.862964337917065,"cm":[-7.632783294297951e-16,-6.661338147750939e-15,-2.220446049250313e-15],"intensity":119.6676165850042,"type":"GC","origin":false,"forced":true,"remark":"","nSteps":5,"minStep":"140","maxStep":"300","steps":["140","180","220","260","300"],"group":"None","version":"v1.1.0"}],"interpreted":true,"name":"IN 101","coreAzi":-10,"coreDip":70,"bedStrike":82,"bedDip":20,"data":[{"visible":true,"include":false,"step":"20","x":43.96898095238095,"y":-22.189409523809523,"z":126.88428571428572,"a95":"1.463238","info":"\"93-12-07\" at \"16:12\""},{"visible":true,"include":true,"step":"140","x":25.13287619047619,"y":-25.82633333333333,"z":88.78685714285714,"a95":"7.658021","info":"\"93-12-20\" at \"13:02\""},{"visible":true,"include":true,"step":"180","x":14.324542857142857,"y":-24.864161904761904,"z":49.22813333333333,"a95":"3.649829","info":"\"93-12-20\" at \"16:03\""},{"visible":true,"include":true,"step":"220","x":15.488171428571428,"y":-23.795942857142858,"z":43.92361904761905,"a95":"3.42509","info":"\"93-12-21\" at \"16:10\""},{"visible":true,"include":true,"step":"260","x":9.158362857142857,"y":-21.531076190476192,"z":30.39085714285714,"a95":"5.202972","info":"\"93-12-22\" at \"11:05\""},{"visible":true,"include":true,"step":"300","x":3.2617980952380954,"y":-13.034542857142856,"z":20.775514285714287,"a95":"4.980277","info":"\"93-12-22\" at \"16:06\""},{"visible":true,"include":false,"step":"340","x":-8.464799047619048,"y":-10.991542857142857,"z":-12.29512380952381,"a95":"39.69585","info":"\"93-12-23\" at \"12:54\""},{"visible":true,"include":false,"step":"380","x":1.0050161904761905,"y":-11.48067619047619,"z":4.182637142857143,"a95":"42.37305","info":"\"93-12-23\" at \"16:17\""},{"visible":true,"include":false,"step":"380","x":-0.5451165714285714,"y":-15.087342857142858,"z":17.910409523809523,"a95":"11.87449","info":"\"94-01-10\" at \"12:30\""},{"visible":true,"include":false,"step":"420","x":-4.09508761904762,"y":-9.59267619047619,"z":-6.727151428571429,"a95":"20.64026","info":"\"94-01-10\" at \"15:45\""},{"visible":true,"include":false,"step":"460","x":-0.06579917142857143,"y":-3.167348571428571,"z":1.166852380952381,"a95":"56.44445","info":"\"94-01-11\" at \"13:12\""}],"demagType":"Unknown","patch":1.1,"format":"Unknown","strat":null},{"version":"v1.1.0","exported":"2016-10-11T12:28:25.722Z","info":"","GEO":[],"TECT":[],"interpreted":false,"name":"IN 102","coreAzi":134,"coreDip":36,"bedStrike":82,"bedDip":20,"data":[{"visible":true,"include":false,"step":"20","x":-113.59133333333334,"y":-12.236238095238097,"z":-4.05045619047619,"a95":"1.851245","info":"\"93-12-07\" at \"16:13\""},{"visible":true,"include":true,"step":"140","x":-71.06805714285714,"y":-12.57789523809524,"z":-0.2928837142857143,"a95":"2.258179","info":"\"93-12-20\" at \"13:03\""},{"visible":true,"include":true,"step":"180","x":-34.22107619047619,"y":-7.444193333333333,"z":-5.493189523809524,"a95":"3.356744","info":"\"93-12-20\" at \"16:04\""},{"visible":true,"include":true,"step":"220","x":-24.07077142857143,"y":-0.44707323809523813,"z":-3.8199476190476194,"a95":"4.750132","info":"\"93-12-21\" at \"16:32\""},{"visible":true,"include":true,"step":"260","x":-21.58649523809524,"y":-6.630985714285714,"z":-6.076810476190476,"a95":"6.296772","info":"\"93-12-22\" at \"11:06\""},{"visible":true,"include":false,"step":"300","x":-12.664285714285715,"y":1.4693809523809525,"z":-5.164170476190476,"a95":"7.582961","info":"\"93-12-22\" at \"16:06\""},{"visible":true,"include":false,"step":"340","x":-10.702933333333332,"y":-9.90367619047619,"z":-20.90757142857143,"a95":"7.721209","info":"\"93-12-23\" at \"12:54\""},{"visible":true,"include":true,"step":"380","x":-8.185399047619049,"y":-2.2216904761904765,"z":0.3775811428571429,"a95":"43.44459","info":"\"93-12-23\" at \"16:18\""},{"visible":true,"include":false,"step":"380","x":-10.893142857142857,"y":-0.012951571428571427,"z":2.1938390476190475,"a95":"12.21425","info":"\"94-01-10\" at \"12:30\""},{"visible":true,"include":false,"step":"420","x":-7.338073333333333,"y":-3.4675342857142857,"z":-4.476802857142857,"a95":"14.23176","info":"\"94-01-10\" at \"15:46\""},{"visible":true,"include":false,"step":"460","x":-1.0187685714285715,"y":-1.721404761904762,"z":-0.10700752380952382,"a95":"55.6674","info":"\"94-01-11\" at \"13:14\""}],"demagType":"Unknown","patch":1.1,"format":"Unknown","strat":null},{"version":"v1.1.0","exported":"2016-10-11T12:28:25.722Z","info":"","GEO":[],"TECT":[],"interpreted":false,"name":"IN 103","coreAzi":196,"coreDip":80,"bedStrike":82,"bedDip":20,"data":[{"visible":true,"include":false,"step":"20","x":-63.36559047619048,"y":32.4116,"z":67.50408571428572,"a95":"2.128855","info":"\"93-12-07\" at \"16:14\""},{"visible":true,"include":false,"step":"140","x":-26.53961904761905,"y":28.790961904761904,"z":34.94611428571428,"a95":"15.2295","info":"\"93-12-20\" at \"13:04\""},{"visible":true,"include":true,"step":"180","x":-10.517809523809523,"y":19.17562857142857,"z":18.991095238095237,"a95":"25.69663","info":"\"93-12-20\" at \"16:04\""},{"visible":true,"include":true,"step":"220","x":-2.643207619047619,"y":8.268627619047619,"z":5.859749523809524,"a95":"8.321012","info":"\"93-12-21\" at \"16:34\""},{"visible":true,"include":true,"step":"260","x":-6.226145714285714,"y":11.194857142857144,"z":12.102371428571429,"a95":"9.519443","info":"\"93-12-22\" at \"11:07\""},{"visible":true,"include":true,"step":"300","x":-3.7158323809523814,"y":8.801931428571429,"z":11.606114285714286,"a95":"25.96087","info":"\"93-12-22\" at \"16:07\""},{"visible":true,"include":false,"step":"340","x":-1.5964571428571428,"y":3.3070704761904763,"z":3.916266666666667,"a95":"42.59976","info":"\"93-12-23\" at \"12:55\""},{"visible":true,"include":false,"step":"380","x":-7.097794285714286,"y":2.438462857142857,"z":2.997969523809524,"a95":"25.17434","info":"\"93-12-23\" at \"16:20\""},{"visible":true,"include":false,"step":"380","x":-8.357497142857143,"y":5.020907619047619,"z":9.361930476190476,"a95":"12.3077","info":"\"94-01-10\" at \"12:31\""},{"visible":true,"include":false,"step":"420","x":-6.2249847619047625,"y":2.2984895238095238,"z":0.06645049523809524,"a95":"19.97691","info":"\"94-01-10\" at \"15:47\""},{"visible":true,"include":false,"step":"460","x":-1.8201542857142856,"y":-0.3502144761904762,"z":1.0980257142857144,"a95":"44.33649","info":"\"94-01-11\" at \"13:15\""}],"demagType":"Unknown","patch":1.1,"format":"Unknown","strat":null},{"version":"v1.1.0","exported":"2016-10-11T12:28:25.722Z","info":"","GEO":[],"TECT":[],"interpreted":false,"name":"IN 104","coreAzi":14,"coreDip":71,"bedStrike":82,"bedDip":20,"data":[{"visible":false,"include":false,"step":"20","x":31.80826666666667,"y":-10.429466666666666,"z":121.47923809523809,"a95":"1.522912","info":"\"93-12-07\" at \"16:15\""},{"visible":true,"include":false,"step":"140","x":14.889399999999998,"y":-3.855630476190476,"z":58.236,"a95":"7.513353","info":"\"93-12-20\" at \"13:05\""},{"visible":true,"include":false,"step":"180","x":6.231332380952381,"y":-4.862838095238096,"z":21.35427619047619,"a95":"21.91256","info":"\"93-12-20\" at \"16:05\""},{"visible":true,"include":false,"step":"220","x":5.036764761904761,"y":-5.425101904761904,"z":13.045961904761905,"a95":"12.5666","info":"\"93-12-21\" at \"16:35\""},{"visible":true,"include":true,"step":"260","x":0.5599677142857142,"y":-6.377472380952381,"z":10.58275238095238,"a95":"31.37087","info":"\"93-12-22\" at \"11:08\""},{"visible":true,"include":true,"step":"300","x":-1.5006847619047619,"y":-4.1781628571428575,"z":8.319524761904761,"a95":"20.60666","info":"\"93-12-22\" at \"16:08\""},{"visible":true,"include":true,"step":"340","x":1.7906257142857145,"y":-3.9079085714285715,"z":2.021752380952381,"a95":"48.78664","info":"\"93-12-23\" at \"12:56\""},{"visible":true,"include":true,"step":"380","x":0.07687052380952382,"y":-1.3173333333333335,"z":4.370209523809524,"a95":"28.27165","info":"\"93-12-23\" at \"16:28\""},{"visible":true,"include":true,"step":"380","x":1.921307619047619,"y":-5.9577495238095235,"z":3.8315542857142852,"a95":"56.64782","info":"\"94-01-10\" at \"12:32\""},{"visible":false,"include":false,"step":"420","x":-7.784019047619048,"y":-2.707129523809524,"z":2.0417438095238096,"a95":"26.22905","info":"\"94-01-10\" at \"15:48\""},{"visible":false,"include":false,"step":"460","x":-4.9189171428571425,"y":-0.7956295238095239,"z":2.894150476190476,"a95":"32.92471","info":"\"94-01-11\" at \"13:16\""}],"demagType":"Unknown","patch":1.1,"format":"Unknown","strat":null},{"version":"v1.1.0","exported":"2016-10-11T12:28:25.723Z","info":"","GEO":[],"TECT":[],"interpreted":false,"name":"IN 105","coreAzi":215,"coreDip":60,"bedStrike":82,"bedDip":20,"data":[{"visible":false,"include":false,"step":"20","x":-32.50213333333333,"y":6.768643809523811,"z":29.812466666666666,"a95":"5.21327","info":"\"93-12-07\" at \"16:16\""},{"visible":true,"include":false,"step":"140","x":-11.282247619047618,"y":7.432359999999999,"z":10.909990476190476,"a95":"30.56669","info":"\"93-12-20\" at \"13:05\""},{"visible":true,"include":false,"step":"180","x":-3.1018609523809526,"y":3.8497085714285713,"z":4.5085838095238095,"a95":"11.42398","info":"\"93-12-20\" at \"16:08\""},{"visible":true,"include":false,"step":"220","x":-3.1612733333333334,"y":1.80472,"z":-0.1730484761904762,"a95":"22.89422","info":"\"93-12-21\" at \"16:37\""},{"visible":true,"include":false,"step":"260","x":-2.5997438095238095,"y":1.2709733333333333,"z":1.924321904761905,"a95":"23.91761","info":"\"93-12-22\" at \"11:08\""},{"visible":true,"include":false,"step":"300","x":-1.4038780952380951,"y":0.7091125714285714,"z":1.2087057142857143,"a95":"57.11448","info":"\"93-12-22\" at \"16:08\""},{"visible":true,"include":false,"step":"340","x":-0.3801265714285714,"y":-0.13885390476190476,"z":-1.0541504761904763,"a95":"166.8131","info":"\"93-12-23\" at \"12:57\""},{"visible":true,"include":false,"step":"380","x":0.9699380952380953,"y":1.2793980952380952,"z":2.461112380952381,"a95":"21.2887","info":"\"93-12-23\" at \"16:30\""},{"visible":true,"include":false,"step":"380","x":1.30434,"y":-1.3580114285714284,"z":0.3095739047619047,"a95":"38.43547","info":"\"94-01-10\" at \"12:33\""},{"visible":true,"include":false,"step":"420","x":-2.2937066666666666,"y":-0.06285132380952381,"z":-1.2128009523809524,"a95":"51.84746","info":"\"94-01-10\" at \"15:48\""},{"visible":true,"include":false,"step":"460","x":-1.1589228571428571,"y":-1.5741638095238095,"z":-1.3307028571428572,"a95":"37.16671","info":"\"94-01-11\" at \"13:16\""}],"demagType":"Unknown","patch":1.1,"format":"Unknown","strat":null},{"version":"v1.1.0","exported":"2016-10-11T12:28:25.723Z","info":"","GEO":[],"TECT":[],"interpreted":false,"name":"IN 106","coreAzi":73,"coreDip":5,"bedStrike":82,"bedDip":20,"data":[{"visible":true,"include":false,"step":"20","x":-423.2057142857143,"y":135.25495238095237,"z":-30.944942857142856,"a95":"19.18836","info":"\"93-12-07\" at \"16:17\""},{"visible":true,"include":false,"step":"140","x":-357.5534285714286,"y":-3.332975238095238,"z":-9.893761904761906,"a95":"2.742288","info":"\"93-12-20\" at \"13:07\""},{"visible":true,"include":false,"step":"180","x":-219.93638095238094,"y":-127.38895238095239,"z":41.52385714285714,"a95":"2.098012","info":"\"93-12-20\" at \"16:09\""},{"visible":true,"include":false,"step":"220","x":-140.2822857142857,"y":107.93961904761905,"z":78.29252380952381,"a95":"2.952923","info":"\"93-12-21\" at \"16:43\""},{"visible":true,"include":false,"step":"260","x":-141.85180952380952,"y":9.521944761904761,"z":36.649457142857145,"a95":"17.23012","info":"\"93-12-22\" at \"11:09\""},{"visible":true,"include":false,"step":"300","x":-91.6354380952381,"y":19.655142857142856,"z":32.61807619047619,"a95":"6.813824","info":"\"93-12-22\" at \"16:09\""},{"visible":true,"include":false,"step":"340","x":-45.93928571428572,"y":45.417942857142855,"z":39.579390476190476,"a95":"8.378954","info":"\"93-12-23\" at \"12:58\""},{"visible":true,"include":false,"step":"380","x":-59.702628571428576,"y":15.043009523809525,"z":44.82444761904762,"a95":"6.524538","info":"\"93-12-23\" at \"16:31\""},{"visible":true,"include":false,"step":"380","x":-61.98360952380953,"y":-11.085133333333333,"z":17.04164761904762,"a95":"9.042769","info":"\"94-01-10\" at \"12:34\""},{"visible":true,"include":false,"step":"420","x":-36.416314285714286,"y":-21.681266666666666,"z":35.03563809523809,"a95":"9.731679","info":"\"94-01-10\" at \"15:49\""},{"visible":true,"include":false,"step":"460","x":-19.67200952380952,"y":23.0248,"z":38.55216190476191,"a95":"10.29203","info":"\"94-01-11\" at \"13:17\""}],"demagType":"Unknown","patch":1.1,"format":"Unknown","strat":null},{"version":"v1.1.0","exported":"2016-10-11T12:28:25.723Z","info":"","GEO":[],"TECT":[],"interpreted":false,"name":"IN 107","coreAzi":100,"coreDip":48,"bedStrike":82,"bedDip":20,"data":[{"visible":false,"include":false,"step":"20","x":-1651.1257142857144,"y":-1030.4561904761906,"z":131.2695238095238,"a95":"1.209011","info":"\"93-12-07\" at \"16:18\""},{"visible":true,"include":false,"step":"140","x":-990.32,"y":-650.1420952380953,"z":-64.35450476190476,"a95":"1.97427","info":"\"93-12-20\" at \"13:08\""},{"visible":true,"include":false,"step":"180","x":-653.0780000000001,"y":-523.6444761904762,"z":-222.63400000000001,"a95":"1.77915","info":"\"93-12-20\" at \"16:10\""},{"visible":true,"include":true,"step":"220","x":-695.6087619047619,"y":-338.9600952380953,"z":-248.58361904761907,"a95":"2.277616","info":"\"93-12-21\" at \"16:44\""},{"visible":true,"include":true,"step":"260","x":-676.6027619047619,"y":-331.84038095238094,"z":-280.7324761904762,"a95":"2.477865","info":"\"93-12-22\" at \"11:10\""},{"visible":true,"include":true,"step":"300","x":-487.7519047619048,"y":-216.94019047619045,"z":-223.48466666666667,"a95":"3.716346","info":"\"93-12-22\" at \"16:10\""},{"visible":true,"include":true,"step":"340","x":-419.6540952380953,"y":-176.92542857142857,"z":-251.20190476190476,"a95":"2.91855","info":"\"93-12-23\" at \"12:58\""},{"visible":true,"include":true,"step":"380","x":-353.7075238095238,"y":-187.51904761904763,"z":-246.50980952380954,"a95":"3.105282","info":"\"93-12-23\" at \"16:32\""},{"visible":true,"include":true,"step":"380","x":-368.16485714285716,"y":-200.7260952380952,"z":-189.26638095238096,"a95":"3.480513","info":"\"94-01-10\" at \"12:35\""},{"visible":true,"include":true,"step":"420","x":-316.3415238095238,"y":-178.52009523809525,"z":-198.8957142857143,"a95":"2.9573","info":"\"94-01-10\" at \"15:50\""},{"visible":true,"include":true,"step":"460","x":-321.1751428571429,"y":-211.36314285714286,"z":-201.43342857142858,"a95":"6.289967","info":"\"94-01-11\" at \"13:18\""},{"visible":true,"include":true,"step":"500","x":-277.9256190476191,"y":-130.5570476190476,"z":-185.63514285714285,"a95":"4.189775","info":"\"94-11-02\" at \"09:52\""},{"visible":true,"include":true,"step":"540","x":-258.1830476190476,"y":-120.50504761904763,"z":-222.35447619047622,"a95":"3.109265","info":"\"94-11-02\" at \"11:54\""},{"visible":true,"include":false,"step":"580","x":-202.0122857142857,"y":-22.448238095238096,"z":-161.198,"a95":"3.453143","info":"\"94-11-03\" at \"09:39\""},{"visible":true,"include":false,"step":"620","x":-236.60095238095238,"y":0.9250058095238096,"z":-120.70314285714286,"a95":"9.508995","info":"\"94-11-03\" at \"12:01\""},{"visible":true,"include":false,"step":"660","x":-92.66383809523809,"y":26.652857142857144,"z":-71.29718095238096,"a95":"6.64096","info":"\"94-11-04\" at \"09:18\""},{"visible":true,"include":false,"step":"700","x":-6.021753333333333,"y":-2.8160028571428573,"z":27.375266666666665,"a95":"13.80786","info":"\"94-11-04\" at \"13:29\""}],"demagType":"Unknown","patch":1.1,"format":"Unknown","strat":null},{"version":"v1.1.0","exported":"2016-10-11T12:28:25.723Z","info":"","GEO":[{"dec":314.28376856030025,"inc":-33.136690385630175,"MAD":10.388795034983477,"cm":[-1.7763568394002505e-14,-1.5987211554602254e-14,0],"intensity":597.6685610135581,"type":"GC","origin":false,"forced":true,"remark":"","nSteps":5,"minStep":"140","maxStep":"300","steps":["140","180","220","260","300"],"group":"None","version":"v1.1.0"}],"TECT":[{"dec":319.6711430025056,"inc":-16.685466073315453,"MAD":10.388795034983461,"cm":[-1.5987211554602254e-14,-3.375077994860476e-14,-5.329070518200751e-15],"intensity":597.6685610135581,"type":"GC","origin":false,"forced":true,"remark":"","nSteps":5,"minStep":"140","maxStep":"300","steps":["140","180","220","260","300"],"group":"None","version":"v1.1.0"}],"interpreted":true,"name":"IN 108","coreAzi":156,"coreDip":88,"bedStrike":82,"bedDip":20,"data":[{"visible":false,"include":false,"step":"20","x":-842.7081904761905,"y":-86.37975238095238,"z":1253.6590476190477,"a95":"1.233329","info":"\"93-12-07\" at \"16:19\""},{"visible":true,"include":true,"step":"140","x":-369.2726666666666,"y":43.89306666666667,"z":536.5445714285714,"a95":"2.075894","info":"\"93-12-20\" at \"13:09\""},{"visible":true,"include":true,"step":"180","x":-143.0947619047619,"y":144.88171428571428,"z":185.782,"a95":"5.288258","info":"\"93-12-20\" at \"16:11\""},{"visible":true,"include":true,"step":"220","x":21.319733333333335,"y":173.09180952380953,"z":108.12752380952381,"a95":"6.385228","info":"\"93-12-21\" at \"16:46\""},{"visible":true,"include":true,"step":"260","x":41.57521904761905,"y":190.81799999999998,"z":56.594942857142854,"a95":"5.89927","info":"\"93-12-22\" at \"11:11\""},{"visible":true,"include":true,"step":"300","x":92.01103809523809,"y":145.72361904761905,"z":-42.197314285714285,"a95":"6.200416","info":"\"93-12-22\" at \"16:10\""},{"visible":true,"include":false,"step":"340","x":82.88440952380952,"y":120.01571428571428,"z":-74.35186666666667,"a95":"8.892324","info":"\"93-12-23\" at \"12:59\""},{"visible":true,"include":false,"step":"380","x":33.13894285714286,"y":116.48228571428572,"z":-89.42576190476191,"a95":"11.07188","info":"\"93-12-23\" at \"16:32\""},{"visible":true,"include":false,"step":"380","x":69.34859047619048,"y":93.99882857142858,"z":-42.905590476190476,"a95":"9.066526","info":"\"94-01-10\" at \"12:36\""},{"visible":true,"include":false,"step":"420","x":50.01374285714286,"y":104.68723809523809,"z":-58.097,"a95":"8.293788","info":"\"94-01-10\" at \"15:51\""},{"visible":true,"include":false,"step":"460","x":44.65848571428572,"y":153.1087619047619,"z":-92.54884761904762,"a95":"5.476754","info":"\"94-01-11\" at \"13:19\""},{"visible":true,"include":false,"step":"500","x":83.93301904761904,"y":141.64847619047617,"z":-73.07010476190476,"a95":"5.319798","info":"\"94-11-02\" at \"09:52\""},{"visible":true,"include":false,"step":"540","x":
[truncated: 79,745 more chars]
