# Supplementary material for: Paleomagnetic constraints on the timing and distribution of Cenozoic rotations in Central and Eastern Anatolia
Source: Copernicus journal article supplement (doi:10.5194/se-9-295-2018), 2018-03-21
Supplement: Supplementary file 2 [file se-9-295-2018-supplement.zip › se-2017-66_DATA_dir files/dir files Sivas/KalKar_nor.dir]

[{"version":"v1.1.0","exported":"2016-10-10T13:19:08.933Z","info":"","GEO":[],"TECT":[],"interpreted":false,"name":"TK01.1","coreAzi":301,"coreDip":52,"bedStrike":194,"bedDip":53,"data":[{"visible":false,"include":false,"step":"20","x":211.62857142857143,"y":2073.942857142857,"z":4599.133333333333,"a95":".5","info":"dd at tt"},{"visible":true,"include":true,"step":"87","x":-40.67619047619048,"y":1932.047619047619,"z":4676.704761904762,"a95":".6","info":"dd at tt"},{"visible":true,"include":true,"step":"150","x":554.9142857142857,"y":1037.2,"z":3274.0190476190473,"a95":".4","info":"dd at tt"},{"visible":true,"include":true,"step":"200","x":887.8666666666667,"y":92.39047619047619,"z":1264.9809523809522,"a95":".5","info":"dd at tt"},{"visible":true,"include":true,"step":"250","x":901.2285714285714,"y":-61.590476190476195,"z":579.0285714285715,"a95":".7","info":"dd at tt"},{"visible":true,"include":true,"step":"300","x":685.4857142857143,"y":-305.1142857142857,"z":201.51428571428573,"a95":".7","info":"dd at tt"},{"visible":true,"include":true,"step":"350","x":606.047619047619,"y":-191.17142857142858,"z":-92.97142857142858,"a95":".9","info":"dd at tt"},{"visible":true,"include":true,"step":"400","x":666.4857142857143,"y":-374.7904761904762,"z":-128.1238095238095,"a95":".8","info":"dd at tt"},{"visible":true,"include":false,"step":"450","x":620.5809523809525,"y":-116.20952380952382,"z":-285.3047619047619,"a95":".7","info":"dd at tt"},{"visible":true,"include":false,"step":"500","x":430.68571428571425,"y":-106.1047619047619,"z":-201.24761904761903,"a95":".7","info":"dd at tt"},{"visible":true,"include":false,"step":"550","x":415.7523809523809,"y":-70.77142857142857,"z":-191.45714285714286,"a95":".8","info":"dd at tt"},{"visible":false,"include":false,"step":"590","x":106.80000000000001,"y":40.15238095238095,"z":-151.57142857142858,"a95":"1.1","info":"dd at tt"},{"visible":false,"include":false,"step":"610","x":-117.43809523809523,"y":-50.142857142857146,"z":-14.466666666666667,"a95":"1.5","info":"dd at tt"},{"visible":false,"include":false,"step":"630","x":28.990476190476187,"y":37.82857142857143,"z":-21.26666666666667,"a95":"1.8","info":"dd at tt"},{"visible":false,"include":false,"step":"650","x":-79.2,"y":-27.24761904761905,"z":-39.57142857142857,"a95":"1.6","info":"dd at tt"}],"demagType":"Unknown","patch":1.1,"format":"Unknown","strat":null},{"version":"v1.1.0","exported":"2016-10-10T13:19:08.934Z","info":"","GEO":[],"TECT":[],"interpreted":false,"name":"TK02.1","coreAzi":19,"coreDip":49,"bedStrike":194,"bedDip":53,"data":[{"visible":false,"include":false,"step":"20","x":-3391.5619047619048,"y":-5988.342857142857,"z":-2649.9523809523807,"a95":".7","info":"dd at tt"},{"visible":true,"include":false,"step":"87","x":-3646.190476190476,"y":-5744.419047619048,"z":-2326.5904761904762,"a95":".8","info":"dd at tt"},{"visible":true,"include":false,"step":"150","x":-3085.4571428571426,"y":-5244.695238095238,"z":-3773.733333333333,"a95":".5","info":"dd at tt"},{"visible":true,"include":false,"step":"200","x":-2094.7428571428572,"y":-4736.847619047619,"z":-5603.8,"a95":".6","info":"dd at tt"},{"visible":true,"include":false,"step":"250","x":-2525.8952380952383,"y":-3789.714285714286,"z":-6230.771428571428,"a95":".5","info":"dd at tt"},{"visible":true,"include":false,"step":"300","x":-1636.8666666666666,"y":-2962.2761904761905,"z":-4926.276190476191,"a95":".6","info":"dd at tt"},{"visible":true,"include":false,"step":"350","x":-805.9428571428571,"y":-1890.790476190476,"z":-3258.6190476190477,"a95":".4","info":"dd at tt"},{"visible":true,"include":true,"step":"400","x":-460.20000000000005,"y":-1436.9714285714285,"z":-2312.057142857143,"a95":".6","info":"dd at tt"},{"visible":true,"include":true,"step":"450","x":-432.8952380952381,"y":-1133.6571428571428,"z":-2149.0761904761903,"a95":".5","info":"dd at tt"},{"visible":true,"include":true,"step":"500","x":-368.9142857142857,"y":-930.8666666666667,"z":-1728.9619047619046,"a95":".6","info":"dd at tt"},{"visible":true,"include":true,"step":"550","x":-185.53333333333333,"y":-663.9238095238095,"z":-1302.952380952381,"a95":".5","info":"dd at tt"},{"visible":true,"include":true,"step":"590","x":-245.50476190476192,"y":-249.9142857142857,"z":-867.8190476190476,"a95":".6","info":"dd at tt"},{"visible":true,"include":true,"step":"610","x":-172.63809523809525,"y":-287.2190476190476,"z":-553.4095238095239,"a95":".6","info":"dd at tt"},{"visible":true,"include":false,"step":"630","x":-70.54285714285714,"y":-74.78095238095239,"z":-393.2952380952381,"a95":".6","info":"dd at tt"},{"visible":true,"include":false,"step":"650","x":-166.3047619047619,"y":-149.68571428571428,"z":-320.14285714285717,"a95":".7","info":"dd at tt"}],"demagType":"Unknown","patch":1.1,"format":"Unknown","strat":null},{"version":"v1.1.0","exported":"2016-10-10T13:19:08.934Z","info":"","GEO":[],"TECT":[],"interpreted":false,"name":"TK03.4","coreAzi":41,"coreDip":58,"bedStrike":194,"bedDip":53,"data":[{"visible":false,"include":false,"step":"20","x":66.36190476190475,"y":-3667.5714285714284,"z":2893.1238095238095,"a95":".5","info":"dd at tt"},{"visible":true,"include":false,"step":"87","x":-207.43809523809523,"y":-3200.514285714286,"z":3058.7333333333336,"a95":".5","info":"dd at tt"},{"visible":true,"include":true,"step":"150","x":-79.60952380952381,"y":-2549.1333333333337,"z":2155.1714285714284,"a95":".4","info":"dd at tt"},{"visible":true,"include":true,"step":"200","x":-12.2,"y":-1718.790476190476,"z":500.2952380952381,"a95":".5","info":"dd at tt"},{"visible":true,"include":true,"step":"250","x":75.54285714285714,"y":-1241.152380952381,"z":-180.71428571428572,"a95":".4","info":"dd at tt"},{"visible":true,"include":true,"step":"300","x":-148.75238095238097,"y":-865.2095238095238,"z":-520.6380952380953,"a95":".5","info":"dd at tt"},{"visible":true,"include":true,"step":"350","x":-125.51428571428572,"y":-556.0761904761905,"z":-567.1238095238095,"a95":".8","info":"dd at tt"},{"visible":true,"include":true,"step":"400","x":-43.58095238095238,"y":-476.4761904761905,"z":-381.4666666666667,"a95":".5","info":"dd at tt"},{"visible":true,"include":false,"step":"450","x":27.314285714285717,"y":-331.2095238095238,"z":-541.552380952381,"a95":".5","info":"dd at tt"},{"visible":true,"include":false,"step":"500","x":-31.02857142857143,"y":-389.7238095238095,"z":-422.99047619047616,"a95":".6","info":"dd at tt"},{"visible":true,"include":false,"step":"550","x":88.79047619047618,"y":-262.4666666666667,"z":-396.8952380952381,"a95":".5","info":"dd at tt"},{"visible":true,"include":false,"step":"590","x":-47.41904761904762,"y":-97.5047619047619,"z":-305.5809523809524,"a95":".6","info":"dd at tt"},{"visible":true,"include":false,"step":"610","x":-58.86666666666667,"y":-118.13333333333334,"z":-240.2095238095238,"a95":".7","info":"dd at tt"},{"visible":true,"include":false,"step":"630","x":-1.6857142857142857,"y":27.01904761904762,"z":-65.04761904761905,"a95":".9","info":"dd at tt"},{"visible":false,"include":false,"step":"650","x":-61.53333333333334,"y":-72.6952380952381,"z":6.133333333333334,"a95":"1","info":"dd at tt"}],"demagType":"Unknown","patch":1.1,"format":"Unknown","strat":null},{"version":"v1.1.0","exported":"2016-10-10T13:19:08.934Z","info":"","GEO":[],"TECT":[],"interpreted":false,"name":"TK04.2A","coreAzi":26,"coreDip":50,"bedStrike":194,"bedDip":53,"data":[{"visible":false,"include":false,"step":"20","x":502.152380952381,"y":-909.8285714285715,"z":-287.04761904761904,"a95":".4","info":"dd at tt"},{"visible":true,"include":false,"step":"87","x":274.84761904761905,"y":-658.9333333333334,"z":62.75238095238095,"a95":".3","info":"dd at tt"},{"visible":true,"include":false,"step":"150","x":359.0952380952381,"y":-408.4857142857143,"z":-90.64761904761905,"a95":".5","info":"dd at tt"},{"visible":true,"include":false,"step":"200","x":437.54285714285714,"y":-170.24761904761903,"z":-588.0380952380953,"a95":".6","info":"dd at tt"},{"visible":true,"include":false,"step":"250","x":438.7047619047619,"y":-23.81904761904762,"z":-845.4476190476191,"a95":".6","info":"dd at tt"},{"visible":true,"include":false,"step":"300","x":323.65714285714284,"y":-19.752380952380953,"z":-919.8285714285715,"a95":".5","info":"dd at tt"},{"visible":true,"include":false,"step":"350","x":256.247619047619,"y":10.457142857142857,"z":-765.552380952381,"a95":".6","info":"dd at tt"},{"visible":true,"include":false,"step":"400","x":159.7904761904762,"y":67.98095238095237,"z":-549.6857142857143,"a95":".6","info":"dd at tt"},{"visible":true,"include":false,"step":"450","x":168.5047619047619,"y":71.46666666666667,"z":-534.2857142857143,"a95":".6","info":"dd at tt"},{"visible":true,"include":true,"step":"500","x":75.47619047619048,"y":69.9047619047619,"z":-423.7714285714286,"a95":".7","info":"dd at tt"},{"visible":true,"include":true,"step":"550","x":47.06666666666666,"y":-13.828571428571427,"z":-333.2666666666667,"a95":".5","info":"dd at tt"},{"visible":true,"include":true,"step":"590","x":31.666666666666668,"y":21.61904761904762,"z":-288.15238095238095,"a95":".7","info":"dd at tt"},{"visible":true,"include":false,"step":"610","x":19.58095238095238,"y":-52.76190476190476,"z":-187.24761904761903,"a95":".5","info":"dd at tt"},{"visible":false,"include":false,"step":"630","x":-2.2095238095238097,"y":21.495238095238093,"z":-120.16190476190476,"a95":".5","info":"dd at tt"},{"visible":false,"include":false,"step":"650","x":-44.04761904761905,"y":8.714285714285714,"z":-75.88571428571429,"a95":".8","info":"dd at tt"}],"demagType":"Unknown","patch":1.1,"format":"Unknown","strat":null},{"version":"v1.1.0","exported":"2016-10-10T13:19:08.934Z","info":"","GEO":[],"TECT":[],"interpreted":false,"name":"TK05.2A","coreAzi":348,"coreDip":57,"bedStrike":194,"bedDip":53,"data":[{"visible":false,"include":false,"step":"20","x":485.3047619047619,"y":-94.01904761904763,"z":70.88571428571429,"a95":".9","info":"dd at tt"},{"visible":false,"include":false,"step":"87","x":346.8952380952381,"y":29.638095238095236,"z":262.0571428571428,"a95":".6","info":"dd at tt"},{"visible":true,"include":false,"step":"150","x":364.32380952380953,"y":91.80952380952381,"z":105.46666666666667,"a95":".5","info":"dd at tt"},{"visible":true,"include":true,"step":"200","x":382.9238095238095,"y":29.638095238095236,"z":-308.25714285714287,"a95":".4","info":"dd at tt"},{"visible":true,"include":true,"step":"250","x":378.85714285714283,"y":36.60952380952381,"z":-516.8571428571429,"a95":".6","info":"dd at tt"},{"visible":true,"include":true,"step":"300","x":377.6952380952381,"y":-1.1619047619047618,"z":-582.5142857142857,"a95":".7","info":"dd at tt"},{"visible":true,"include":true,"step":"350","x":266.70476190476194,"y":12.2,"z":-490.1333333333333,"a95":".6","info":"dd at tt"},{"visible":true,"include":false,"step":"400","x":213.82857142857142,"y":-2.3238095238095235,"z":-376.5333333333333,"a95":".7","info":"dd at tt"},{"visible":true,"include":false,"step":"450","x":187.68571428571428,"y":58.68571428571429,"z":-384.37142857142857,"a95":".7","info":"dd at tt"},{"visible":true,"include":false,"step":"500","x":161.47619047619048,"y":46.83809523809524,"z":-335.1047619047619,"a95":".8","info":"dd at tt"},{"visible":true,"include":false,"step":"550","x":156.88571428571427,"y":22.076190476190476,"z":-277.6,"a95":".7","info":"dd at tt"},{"visible":true,"include":false,"step":"590","x":80.94285714285714,"y":6.800000000000001,"z":-188.26666666666665,"a95":".7","info":"dd at tt"},{"visible":true,"include":false,"step":"610","x":43.80952380952381,"y":6.742857142857143,"z":-129.98095238095237,"a95":".7","info":"dd at tt"},{"visible":true,"include":false,"step":"630","x":3.5999999999999996,"y":13.19047619047619,"z":-36.89523809523809,"a95":"1","info":"dd at tt"},{"visible":false,"include":false,"step":"650","x":-17.142857142857142,"y":3.7142857142857144,"z":13.104761904761904,"a95":"2","info":"dd at tt"}],"demagType":"Unknown","patch":1.1,"format":"Unknown","strat":null},{"version":"v1.1.0","exported":"2016-10-10T13:19:08.934Z","info":"","GEO":[],"TECT":[],"interpreted":false,"name":"TK06.2A","coreAzi":340,"coreDip":53,"bedStrike":194,"bedDip":53,"data":[{"visible":false,"include":false,"step":"20","x":-234.63809523809522,"y":-193.38095238095238,"z":1401.8190476190478,"a95":".4","info":"dd at tt"},{"visible":false,"include":false,"step":"87","x":-417.7904761904762,"y":-99.36190476190475,"z":1622.6285714285714,"a95":".5","info":"dd at tt"},{"visible":true,"include":false,"step":"150","x":-241.14285714285714,"y":-303.31428571428575,"z":1178.4,"a95":".6","info":"dd at tt"},{"visible":true,"include":false,"step":"200","x":-205.69523809523812,"y":-428.2476190476191,"z":285.0095238095238,"a95":".9","info":"dd at tt"},{"visible":true,"include":false,"step":"250","x":-112.72380952380952,"y":-475.31428571428575,"z":-165.8952380952381,"a95":".6","info":"dd at tt"},{"visible":true,"include":false,"step":"300","x":-140.61904761904762,"y":-523.5428571428571,"z":-440.16190476190474,"a95":".6","info":"dd at tt"},{"visible":true,"include":false,"step":"350","x":-24.990476190476187,"y":-361.4190476190476,"z":-413.7142857142857,"a95":".6","info":"dd at tt"},{"visible":true,"include":true,"step":"400","x":-29.638095238095236,"y":-231.26666666666668,"z":-305.35238095238094,"a95":".6","info":"dd at tt"},{"visible":true,"include":true,"step":"450","x":-55.780952380952385,"y":-210.34285714285713,"z":-266.12380952380954,"a95":".7","info":"dd at tt"},{"visible":true,"include":true,"step":"500","x":-60.780952380952385,"y":-203.83809523809526,"z":-224.6095238095238,"a95":".7","info":"dd at tt"},{"visible":true,"include":true,"step":"550","x":-70.24761904761905,"y":-161.3047619047619,"z":-246.9238095238095,"a95":".6","info":"dd at tt"},{"visible":true,"include":true,"step":"590","x":-55.838095238095235,"y":-104.64761904761905,"z":-221.44761904761904,"a95":".7","info":"dd at tt"},{"visible":true,"include":true,"step":"610","x":-71.00952380952381,"y":-150.96190476190475,"z":-163.1904761904762,"a95":".6","info":"dd at tt"},{"visible":false,"include":false,"step":"630","x":-35.50476190476191,"y":-72.11428571428571,"z":-185.36190476190475,"a95":".5","info":"dd at tt"},{"visible":false,"include":false,"step":"650","x":-78.03809523809524,"y":-65.6,"z":-108.07619047619048,"a95":".8","info":"dd at tt"}],"demagType":"Unknown","patch":1.1,"format":"Unknown","strat":null},{"version":"v1.1.0","exported":"2016-10-10T13:19:08.934Z","info":"","GEO":[],"TECT":[],"interpreted":false,"name":"TK07.3","coreAzi":17,"coreDip":54,"bedStrike":194,"bedDip":53,"data":[{"visible":false,"include":false,"step":"20","x":-1503.104761904762,"y":-540.2761904761904,"z":5582.590476190476,"a95":".5","info":"dd at tt"},{"visible":false,"include":false,"step":"87","x":-1602,"y":-570.0285714285715,"z":4793.7904761904765,"a95":".5","info":"dd at tt"},{"visible":true,"include":true,"step":"150","x":-1440.4666666666667,"y":-810.0095238095239,"z":3745.8380952380953,"a95":".5","info":"dd at tt"},{"visible":true,"include":true,"step":"200","x":-1199.3238095238096,"y":-630.4571428571429,"z":2436.114285714286,"a95":".4","info":"dd at tt"},{"visible":true,"include":true,"step":"250","x":-1065.095238095238,"y":-396.8666666666667,"z":1608.390476190476,"a95":".5","info":"dd at tt"},{"visible":true,"include":true,"step":"300","x":-943.0666666666667,"y":-330.62857142857143,"z":1046.790476190476,"a95":".5","info":"dd at tt"},{"visible":true,"include":true,"step":"350","x":-606.6285714285715,"y":-172.58095238095237,"z":484.8952380952381,"a95":".5","info":"dd at tt"},{"visible":true,"include":false,"step":"400","x":-515.9904761904761,"y":-166.76190476190476,"z":324.81904761904764,"a95":".8","info":"dd at tt"},{"visible":true,"include":false,"step":"450","x":-371.8857142857143,"y":-121.43809523809523,"z":216.15238095238095,"a95":".7","info":"dd at tt"},{"visible":true,"include":false,"step":"500","x":-346.02857142857147,"y":-130.5047619047619,"z":195.1809523809524,"a95":".8","info":"dd at tt"},{"visible":true,"include":false,"step":"550","x":-300.70476190476194,"y":-59.209523809523816,"z":87.62857142857143,"a95":"1.3","info":"dd at tt"},{"visible":true,"include":false,"step":"590","x":-249.2761904761905,"y":-18.942857142857143,"z":30.24761904761905,"a95":".9","info":"dd at tt"},{"visible":true,"include":false,"step":"610","x":-280.7142857142857,"y":-59.15238095238095,"z":29.723809523809525,"a95":".8","info":"dd at tt"},{"visible":true,"include":false,"step":"630","x":-134.28571428571428,"y":-19.81904761904762,"z":31.35238095238095,"a95":".8","info":"dd at tt"},{"visible":true,"include":false,"step":"650","x":-170.31428571428572,"y":-22.142857142857142,"z":31.142857142857142,"a95":".8","info":"dd at tt"}],"demagType":"Unknown","patch":1.1,"format":"Unknown","strat":null},{"version":"v1.1.0","exported":"2016-10-10T13:19:08.934Z","info":"","GEO":[],"TECT":[],"interpreted":false,"name":"TK08.1","coreAzi":16,"coreDip":20,"bedStrike":194,"bedDip":53,"data":[{"visible":false,"include":false,"step":"20","x":-2622.8190476190475,"y":-587.3428571428572,"z":2758.32380952381,"a95":".6","info":"dd at tt"},{"visible":true,"include":false,"step":"87","x":-2804.2190476190476,"y":-488.6761904761905,"z":3075,"a95":".7","info":"dd at tt"},{"visible":true,"include":true,"step":"150","x":-2191.7809523809524,"y":-622.3238095238095,"z":2751.9238095238097,"a95":".4","info":"dd at tt"},{"visible":true,"include":true,"step":"200","x":-1459.6380952380953,"y":-461.3619047619048,"z":1673.7619047619048,"a95":".6","info":"dd at tt"},{"visible":true,"include":true,"step":"250","x":-957.5999999999999,"y":-267.2857142857143,"z":1058.1238095238095,"a95":".5","info":"dd at tt"},{"visible":true,"include":true,"step":"300","x":-645.5619047619048,"y":-173.16190476190476,"z":629.2952380952381,"a95":".6","info":"dd at tt"},{"visible":true,"include":true,"step":"350","x":-432.8952380952381,"y":-84.25714285714287,"z":302.7333333333333,"a95":".7","info":"dd at tt"},{"visible":true,"include":false,"step":"400","x":-251.60000000000002,"y":-52.2952380952381,"z":223.41904761904763,"a95":".7","info":"dd at tt"},{"visible":true,"include":false,"step":"450","x":-224.2952380952381,"y":-32.542857142857144,"z":119.4095238095238,"a95":".6","info":"dd at tt"},{"visible":true,"include":false,"step":"500","x":-180.24761904761903,"y":-111.80000000000001,"z":87.65714285714286,"a95":".6","info":"dd at tt"},{"visible":true,"include":false,"step":"550","x":-107.9047619047619,"y":-19.228571428571428,"z":-9.933333333333334,"a95":"1.3","info":"dd at tt"},{"visible":true,"include":false,"step":"590","x":-101.85714285714286,"y":34.4,"z":-45.58095238095238,"a95":".8","info":"dd at tt"},{"visible":true,"include":false,"step":"610","x":-143.9904761904762,"y":20.276190476190475,"z":-14.819047619047618,"a95":"1.2","info":"dd at tt"},{"visible":true,"include":false,"step":"630","x":-49.971428571428575,"y":-19.81904761904762,"z":-51.88571428571428,"a95":".7","info":"dd at tt"},{"visible":true,"include":false,"step":"650","x":-56.88571428571428,"y":-17.666666666666668,"z":-15.485714285714286,"a95":"1","info":"dd at tt"}],"demagType":"Unknown","patch":1.1,"format":"Unknown","strat":null},{"version":"v1.1.0","exported":"2016-10-10T13:19:08.934Z","info":"","GEO":[],"TECT":[],"interpreted":false,"name":"TK09.1","coreAzi":57,"coreDip":54,"bedStrike":194,"bedDip":53,"data":[{"visible":false,"include":false,"step":"20","x":-443.23809523809524,"y":-57.99047619047619,"z":903.2666666666667,"a95":".5","info":"dd at tt"},{"visible":false,"include":false,"step":"87","x":-763.5238095238095,"y":270.7809523809524,"z":1344.009523809524,"a95":".6","info":"dd at tt"},{"visible":true,"include":true,"step":"150","x":-644.4,"y":558.4,"z":985.2,"a95":".6","info":"dd at tt"},{"visible":true,"include":true,"step":"200","x":-430.57142857142856,"y":907.6285714285715,"z":130.74285714285713,"a95":".6","info":"dd at tt"},{"visible":true,"include":true,"step":"250","x":-351.54285714285714,"y":1126.6857142857143,"z":-425.6285714285715,"a95":".5","info":"dd at tt"},{"visible":true,"include":true,"step":"300","x":-139.45714285714286,"y":1170.847619047619,"z":-611.8666666666667,"a95":".4","info":"dd at tt"},{"visible":true,"include":false,"step":"350","x":-24.990476190476187,"y":872.1809523809524,"z":-518.3142857142857,"a95":".5","info":"dd at tt"},{"visible":true,"include":false,"step":"400","x":87.74285714285713,"y":555.495238095238,"z":-444.8095238095238,"a95":".6","info":"dd at tt"},{"visible":true,"include":false,"step":"450","x":-39.51428571428571,"y":498.552380952381,"z":-396.8666666666667,"a95":".6","info":"dd at tt"},{"visible":true,"include":false,"step":"500","x":-48.17142857142857,"y":426.9047619047619,"z":-318.68571428571425,"a95":".4","info":"dd at tt"},{"visible":true,"include":false,"step":"550","x":-2.4380952380952383,"y":342.247619047619,"z":-299.8,"a95":".7","info":"dd at tt"},{"visible":true,"include":false,"step":"590","x":-7.438095238095237,"y":298.2,"z":-253.78095238095236,"a95":".6","info":"dd at tt"},{"visible":true,"include":false,"step":"610","x":-63.91428571428572,"y":240.50476190476192,"z":-215.0857142857143,"a95":".4","info":"dd at tt"},{"visible":false,"include":false,"step":"630","x":-69.08571428571429,"y":47.00952380952381,"z":-82.27619047619048,"a95":".7","info":"dd at tt"},{"visible":false,"include":false,"step":"650","x":-58.62857142857143,"y":78.9047619047619,"z":-43.34285714285714,"a95":"1.1","info":"dd at tt"}],"demagType":"Unknown","patch":1.1,"format":"Unknown","strat":null},{"version":"v1.1.0","exported":"2016-10-10T13:19:08.935Z","info":"","GEO":[],"TECT":[],"interpreted":false,"name":"TK10.1","coreAzi":22,"coreDip":34,"bedStrike":194,"bedDip":53,"data":[{"visible":false,"include":false,"step":"20","x":-1494.3809523809523,"y":-794.2,"z":2020.3619047619047,"a95":".6","info":"dd at tt"},{"visible":false,"include":false,"step":"87","x":-1768.7619047619048,"y":-641.495238095238,"z":2465.1714285714284,"a95":".6","info":"dd at tt"},{"visible":true,"include":false,"step":"150","x":-1206.2952380952381,"y":-721.104761904762,"z":1856.5047619047618,"a95":".5","info":"dd at tt"},{"visible":true,"include":false,"step":"200","x":-721.6857142857143,"y":-438.7047619047619,"z":729.2380952380952,"a95":".6","info":"dd at tt"},{"visible":true,"include":false,"step":"250","x":-284.14285714285717,"y":-285.8857142857143,"z":-23.53333333333333,"a95":".9","info":"dd at tt"},{"visible":true,"include":false,"step":"300","x":-108.07619047619048,"y":-162.6952380952381,"z":-372.752380952381,"a95":".8","info":"dd at tt"},{"visible":true,"include":false,"step":"350","x":-78.44761904761906,"y":-98.78095238095239,"z":-388.15238095238095,"a95":".7","info":"dd at tt"},{"visible":true,"include":true,"step":"400","x":-62.171428571428564,"y":-127.83809523809524,"z":-357.35238095238094,"a95":".7","info":"dd at tt"},{"visible":true,"include":true,"step":"450","x":-30.799999999999997,"y":-122.60952380952382,"z":-353.2857142857143,"a95":".7","info":"dd at tt"},{"visible":true,"include":true,"step":"500","x":0.4666666666666667,"y":-129.58095238095237,"z":-306.6,"a95":".8","info":"dd at tt"},{"visible":true,"include":true,"step":"550","x":-14,"y":-80.71428571428571,"z":-297.5333333333333,"a95":".8","info":"dd at tt"},{"visible":true,"include":true,"step":"590","x":1.1047619047619048,"y":-43.75238095238095,"z":-227.78095238095236,"a95":".7","info":"dd at tt"},{"visible":true,"include":true,"step":"610","x":-15.685714285714285,"y":-53.04761904761905,"z":-209.8190476190476,"a95":".7","info":"dd at tt"},{"visible":false,"include":false,"step":"630","x":-21.561904761904763,"y":-64.43809523809524,"z":-111.61904761904762,"a95":".7","info":"dd at tt"},{"visible":false,"include":false,"step":"650","x":-12.961904761904762,"y":-9.761904761904763,"z":-67.42857142857143,"a95":"1.7","info":"dd at tt"}],"demagType":"Unknown","patch":1.1,"format":"Unknown","strat":null},{"version":"v1.1.0","exported":"2016-10-10T13:19:08.935Z","info":"","GEO":[],"TECT":[],"interpreted":false,"name":"TK11.2A","coreAzi":17,"coreDip":47,"bedStrike":198,"bedDip":43,"data":[{"visible":false,"include":false,"step":"20","x":-738.4190476190475,"y":-289.25714285714287,"z":3768.2095238095235,"a95":".5","info":"dd at tt"},{"visible":true,"include":false,"step":"87","x":-1102.2857142857142,"y":-123.77142857142856,"z":4246.428571428572,"a95":".5","info":"dd at tt"},{"visible":true,"include":true,"step":"150","x":-844.8666666666667,"y":-47.647619047619045,"z":3395.752380952381,"a95":".5","info":"dd at tt"},{"visible":true,"include":true,"step":"200","x":-500.87619047619046,"y":17.428571428571427,"z":2072.3714285714286,"a95":".4","info":"dd at tt"},{"visible":true,"include":true,"step":"250","x":-288.2095238095238,"y":146.42857142857142,"z":991.2952380952381,"a95":".4","info":"dd at tt"},{"visible":true,"include":true,"step":"300","x":-196.39999999999998,"y":116.20952380952382,"z":504.0761904761905,"a95":".6","info":"dd at tt"},{"visible":true,"include":true,"step":"350","x":-132.48571428571427,"y":51.13333333333333,"z":209.47619047619048,"a95":".7","info":"dd at tt"},{"visible":true,"include":false,"step":"400","x":-39.51428571428571,"y":-24.990476190476187,"z":116.79047619047618,"a95":".8","info":"dd at tt"},{"visible":true,"include":false,"step":"450","x":-10.457142857142857,"y":54.61904761904762,"z":70.3047619047619,"a95":"1.5","info":"dd at tt"},{"visible":true,"include":false,"step":"500","x":-21.61904761904762,"y":38.695238095238096,"z":36.89523809523809,"a95":"2.1","info":"dd at tt"},{"visible":true,"include":false,"step":"550","x":108.42857142857143,"y":-25.447619047619046,"z":8.485714285714286,"a95":"1.1","info":"dd at tt"},{"visible":true,"include":false,"step":"590","x":-97.15238095238095,"y":51.42857142857143,"z":-74.14285714285714,"a95":"1.5","info":"dd at tt"},{"visible":true,"include":false,"step":"610","x":-76.46666666666667,"y":41.6,"z":-61.095238095238095,"a95":"1","info":"dd at tt"},{"visible":true,"include":false,"step":"630","x":-30.219047619047622,"y":-0.9904761904761905,"z":-69.38095238095238,"a95":"1.3","info":"dd at tt"},{"visible":true,"include":false,"step":"650","x":13.304761904761904,"y":-4.238095238095238,"z":-43.93333333333334,"a95":"1.6","info":"dd at tt"}],"demagType":"Unknown","patch":1.1,"format":"Unknown","strat":null},{"version":"v1.1.0","exported":"2016-10-10T13:19:08.935Z","info":"","GEO":[],"TECT":[],"interpreted":false,"name":"TK12.1","coreAzi":32,"coreDip":40,"bedStrike":198,"bedDip":43,"data":[{"visible":false,"include":false,"step":"20","x":-2255,"y":-2195.7333333333336,"z":4975.085714285715,"a95":".4","info":"dd at tt"},{"visible":false,"include":false,"step":"87","x":-2393.4095238095238,"y":-1976.7809523809524,"z":5037.257142857143,"a95":".6","info":"dd at tt"},{"visible":true,"include":true,"step":"150","x":-1289.3809523809523,"y":-1543.895238095238,"z":3442.5238095238096,"a95":".3","info":"dd at tt"},{"visible":true,"include":true,"step":"200","x":-661.2571428571429,"y":-1139.4666666666667,"z":1864.9333333333332,"a95":".8","info":"dd at tt"},{"visible":true,"include":true,"step":"250","x":-346.31428571428575,"y":-723.4285714285714,"z":764.104761904762,"a95":".7","info":"dd at tt"},{"visible":true,"include":true,"step":"300","x":-227.2,"y":-452.06666666666666,"z":261.4761904761905,"a95":".8","info":"dd at tt"},{"visible":true,"include":true,"step":"350","x":-132.48571428571427,"y":-302.15238095238095,"z":10.752380952380953,"a95":"1.6","info":"dd at tt"},{"visible":true,"include":true,"step":"400","x":-49.39047619047619,"y":-274.84761904761905,"z":-114.46666666666667,"a95":"1.1","info":"dd at tt"},{"visible":true,"include":true,"step":"450","x":0,"y":-237.65714285714287,"z":-188.26666666666665,"a95":".9","info":"dd at tt"},{"visible":true,"include":true,"step":"500","x":-52.647619047619045,"y":-222.95238095238096,"z":-166.33333333333334,"a95":"1","info":"dd at tt"},{"visible":true,"include":true,"step":"550","x":-41.08571428571428,"y":-155.8952380952381,"z":-187.9142857142857,"a95":".8","info":"dd at tt"},{"visible":true,"include":true,"step":"590","x":-22.6,"y":-86.63809523809525,"z":-124.55238095238094,"a95":"1.1","info":"dd at tt"},{"visible":true,"include":false,"step":"610","x":-96.4,"y":-68.62857142857143,"z":-157.0285714285714,"a95":"1","info":"dd at tt"},{"visible":false,"include":false,"step":"630","x":-48.80952380952381,"y":-7.085714285714286,"z":-161.0095238095238,"a95":".8","info":"dd at tt"},{"visible":false,"include":false,"step":"650","x":-80.88571428571429,"y":-9.295238095238094,"z":-52.790476190476184,"a95":"1.8","info":"dd at tt"}],"demagType":"Unknown","patch":1.1,"format":"Unknown","strat":null},{"version":"v1.1.0","exported":"2016-10-10T13:19:08.935Z","info":"","GEO":[],"TECT":[],"interpreted":false,"name":"TK13.2","coreAzi":5,"coreDip":56,"bedStrike":198,"bedDip":43,"data":[{"visible":true,"include":false,"step":"20","x":28.476190476190474,"y":715.2952380952381,"z":2950.3619047619045,"a95":".5","info":"dd at tt"},{"visible":true,"include":false,"step":"100","x":25.571428571428573,"y":766.4285714285714,"z":3031.1333333333337,"a95":".5","info":"dd at tt"},{"visible":true,"include":true,"step":"150","x":-13.942857142857143,"y":725.7523809523809,"z":2211.247619047619,"a95":".5","info":"dd at tt"},{"visible":true,"include":true,"step":"200","x":72.62857142857143,"y":604.3047619047619,"z":1406.4666666666667,"a95":".5","info":"dd at tt"},{"visible":true,"include":true,"step":"250","x":30.799999999999997,"y":470.08571428571423,"z":676.9428571428571,"a95":"1","info":"dd at tt"},{"visible":true,"include":true,"step":"300","x":-40.095238095238095,"y":331.2095238095238,"z":449.16190476190474,"a95":".5","info":"dd at tt"},{"visible":true,"include":true,"step":"350","x":-44.16190476190476,"y":269.03809523809525,"z":282.9809523809524,"a95":".6","info":"dd at tt"},{"visible":true,"include":true,"step":"400","x":-11.619047619047619,"y":192.9142857142857,"z":228.64761904761906,"a95":".5","info":"dd at tt"},{"visible":true,"include":false,"step":"450","x":-14.457142857142859,"y":179.07619047619048,"z":153.98095238095237,"a95":".8","info":"dd at tt"},{"visible":true,"include":false,"step":"500","x":-52.7047619047619,"y":156.71428571428572,"z":129.83809523809524,"a95":".6","info":"dd at tt"},{"visible":true,"include":false,"step":"530","x":-98.78095238095239,"y":121.56190476190477,"z":116.91428571428571,"a95":".8","info":"dd at tt"},{"visible":true,"include":false,"step":"560","x":-75.88571428571429,"y":74.72380952380952,"z":48,"a95":".9","info":"dd at tt"},{"visible":true,"include":false,"step":"590","x":-31.085714285714282,"y":70.4857142857143,"z":2.4666666666666663,"a95":"1.2","info":"dd at tt"},{"visible":true,"include":false,"step":"610","x":-47.59047619047619,"y":21.26666666666667,"z":8.685714285714287,"a95":"1.1","info":"dd at tt"},{"visible":true,"include":false,"step":"630","x":6.800000000000001,"y":28.933333333333334,"z":-3.1714285714285713,"a95":"2.8","info":"dd at tt"},{"visible":true,"include":false,"step":"650","x":-9.761904761904763,"y":40.561904761904756,"z":5.866666666666667,"a95":"1","info":"dd at tt"}],"demagType":"Unknown","patch":1.1,"format":"Unknown","strat":null},{"version":"v1.1.0","exported":"2016-10-10T13:19:08.935Z","info":"","GEO":[{"dec":48.84217878386664,"inc":71.1180685958224,"MAD":2.945738617832853,"cm":[129.4486953897036,247.25607662200713,751.4291013796665],"intensity":1755.0067406631927,"type":"dir","forced":false,"remark":"","origin":false,"nSteps":7,"minStep":"250","maxStep":"610","steps":["250","300","350","400","450","590","610"],"group":"None","version":"v1.1.0"}],"TECT":[{"dec":315.9368876935554,"inc":53.62464890092988,"MAD":2.945738617832889,"cm":[304.012535658084,-289.99618075807837,682.654246213504],"intensity":1755.0067406631924,"type":"dir","forced":false,"remark":"","origin":false,"nSteps":7,"minStep":"250","maxStep":"610","steps":["250","300","350","400","450","590","610"],"group":"None","version":"v1.1.0"}],"interpreted":true,"name":"TK15.3A","coreAzi":350,"coreDip":55,"bedStrike":198,"bedDip":43,"data":[{"visible":false,"include":false,"step":"20","x":-886.7047619047619,"y":1211.5238095238096,"z":4166.238095238095,"a95":".5","info":"dd at tt"},{"visible":true,"include":false,"step":"100","x":-1207.4571428571428,"y":1374.2190476190476,"z":4161.009523809524,"a95":".6","info":"dd at tt"},{"visible":true,"include":false,"step":"150","x":-1013.3809523809524,"y":883.2190476190475,"z":3413.4666666666667,"a95":".5","info":"dd at tt"},{"visible":true,"include":false,"step":"200","x":-1005.8285714285715,"y":802.4476190476191,"z":2510.2,"a95":".6","info":"dd at tt"},{"visible":true,"include":true,"step":"250","x":-794.3142857142857,"y":541.552380952381,"z":1560.4476190476191,"a95":".4","info":"dd at tt"},{"visible":true,"include":true,"step":"300","x":-517.7333333333333,"y":398.60952380952375,"z":1082.2380952380952,"a95":".5","info":"dd at tt"},{"visible":true,"include":true,"step":"350","x":-423.0190476190476,"y":303.31428571428575,"z":753.0571428571429,"a95":".6","info":"dd at tt"},{"visible":true,"include":true,"step":"400","x":-336.43809523809523,"y":230.68571428571425,"z":575.8380952380952,"a95":".6","info":"dd at tt"},{"visible":true,"include":true,"step":"450","x":-266.4095238095238,"y":230.15238095238095,"z":495.2666666666667,"a95":".4","info":"dd at tt"},{"visible":true,"include":false,"step":"500","x":-285.5904761904762,"y":144.85714285714286,"z":426.0380952380952,"a95":".6","info":"dd at tt"},{"visible":true,"include":false,"step":"530","x":-240.2095238095238,"y":154.2761904761905,"z":326.2666666666667,"a95":".7","info":"dd at tt"},{"visible":true,"include":false,"step":"560","x":-203.8952380952381,"y":82.04761904761905,"z":250.40952380952382,"a95":".6","info":"dd at tt"},{"visible":true,"include":true,"step":"590","x":-127.07619047619048,"y":132.48571428571427,"z":132.4,"a95":".7","info":"dd at tt"},{"visible":true,"include":true,"step":"610","x":-67.22857142857143,"y":25.047619047619047,"z":48.95238095238095,"a95":".9","info":"dd at tt"},{"visible":false,"include":false,"step":"630","x":-31.495238095238093,"y":48,"z":5.057142857142857,"a95":"1.4","info":"dd at tt"},{"visible":false,"include":false,"step":"650","x":-12.723809523809523,"y":22.895238095238096,"z":13.390476190476189,"a95":"2.9","info":"dd at tt"}],"demagType":"Unknown","patch":1.1,"format":"Unknown","strat":null},{"version":"v1.1.0","exported":"2016-10-10T13:19:08.935Z","info":"","GEO":[{"dec":53.81320782076597,"inc":63.850088897693176,"MAD":7.016187110179943,"cm":[82.32840067315912,422.39252263027277,684.605441373913],"intensity":2027.9429923513026,"type":"dir","forced":false,"remark":"","origin":false,"nSteps":8,"minStep":"250","maxStep":"590","steps":["250","300","400","450","500","530","560","590"],"group":"None","version":"v1.1.0"}],"TECT":[{"dec":328.1554383942837,"inc":56.343267367074105,"MAD":7.016187110179956,"cm":[257.84559035904977,-117.79384255725944,757.3098977816971],"intensity":2027.9429923513028,"type":"dir","forced":false,"remark":"","origin":false,"nSteps":8,"minStep":"250","maxStep":"590","steps":["250","300","400","450","500","530","560","590"],"group":"None","version":"v1.1.0"}],"interpreted":true,"name":"TK16.1A","coreAzi":353,"coreDip":46,"bedStrike":198,"bedDip":43,"data":[{"visible":false,"include":false,"step":"20","x":-1948.3142857142857,"y":1125.5238095238096,"z":5512.571428571428,"a95":".5","info":"dd at tt"},{"visible":false,"include":false,"step":"100","x":-2355.057142857143,"y":1491.0190476190478,"z":5871.380952380952,"a95":".9","info":"dd at tt"},{"visible":true,"include":false,"step":"150","x":-1762.952380952381,"y":1117.3904761904762,"z":4679.609523809524,"a95":".5","info":"dd at tt"},{"visible":true,"include":false,"step":"200","x":-1596.7714285714285,"y":1083.6857142857143,"z":3095.6285714285714,"a95":".5","info":"dd at tt"},{"visible":true,"include":true,"step":"250","x":-1130.1714285714286,"y":894.8380952380952,"z":1630.4666666666667,"a95":".5","info":"dd at tt"},{"visible":true,"include":true,"step":"300","x":-600.2380952380952,"y":722.847619047619,"z":868.1142857142858,"a95":"13.3","info":"dd at tt"},{"visible":false,"include":false,"step":"350","x":-709.4857142857143,"y":468.34285714285716,"z":572.6380952380953,"a95":".7","info":"dd at tt"},{"visible":true,"include":true,"step":"400","x":-445.6761904761905,"y":452.06666666666666,"z":407.3238095238095,"a95":".7","info":"dd at tt"},{"visible":true,"include":true,"step":"450","x":-324.2190476190476,"y":389.42857142857144,"z":362.84761904761905,"a95":".5","info":"dd at tt"},{"visible":true,"include":true,"step":"500","x":-352.81904761904764,"y":328.9428571428572,"z":364.56190476190477,"a95":".4","info":"dd at tt"},{"visible":true,"include":true,"step":"530","x":-370.6,"y":263.9238095238095,"z":268.2190476190476,"a95":".9","info":"dd at tt"},{"visible":true,"include":true,"step":"560","x":-284.37142857142857,"y":216.21904761904764,"z":177.54285714285714,"a95":".8","info":"dd at tt"},{"visible":true,"include":true,"step":"590","x":-122.42857142857143,"y":165.95238095238096,"z":28.676190476190477,"a95":".5","info":"dd at tt"},{"visible":false,"include":false,"step":"610","x":-130.03809523809525,"y":21.038095238095238,"z":-0.2,"a95":".6","info":"dd at tt"},{"visible":false,"include":false,"step":"630","x":-58.92380952380953,"y":36.142857142857146,"z":-51.19047619047619,"a95":".9","info":"dd at tt"},{"visible":false,"include":false,"step":"650","x":-42.24761904761905,"y":86.80952380952381,"z":-16.561904761904763,"a95":"1.3","info":"dd at tt"}],"demagType":"Unknown","patch":1.1,"format":"Unknown","strat":null},{"version":"v1.1.0","exported":"2016-10-10T13:19:08.936Z","info":"","GEO":[{"dec":1.5678034356478747,"inc":61.22305752127081,"MAD":2.225456341527993,"cm":[367.31019037037396,-27.651896164489568,868.2193711894473],"intensity":2574.931365168555,"type":"dir","forced":false,"remark":"","origin":false,"nSteps":8,"minStep":"200","maxStep":"530","steps":["200","250","300","350","400","450","500","530"],"group":"None","version":"v1.1.0"}],"TECT":[{"dec":321.5092074908871,"inc":33.24073938662885,"MAD":2.225456341528022,"cm":[538.6806528089913,-555.0759471699326,539.6296201865613],"intensity":2574.931365168555,"type":"dir","forced":false,"remark":"","origin":false,"nSteps":8,"minStep":"200","maxStep":"530","steps":["200","250","300","350","400","450","500","530"],"group":"None","version":"v1.1.0"}],"interpreted":true,"name":"TK17.1","coreAzi":9,"coreDip":43,"bedStrike":198,"bedDip":43,"data":[{"visible":true,"include":false,"step":"20","x":-1595.0285714285715,"y":-604.3047619047619,"z":4229.580952380952,"a95":".3","info":"dd at tt"},{"visible":true,"include":false,"step":"100","x":-1614.7809523809524,"y":-398.60952380952375,"z":4355.380952380952,"a95":".5","info":"dd at tt"},{"visible":true,"include":false,"step":"150","x":-1269.6285714285714,"y":-514.8285714285714,"z":3540.7238095238095,"a95":".8","info":"dd at tt"},{"visible":true,"include":true,"step":"200","x":-969.8,"y":-228.36190476190478,"z":2638.3333333333335,"a95":".7","info":"dd at tt"},{"visible":true,"include":true,"step":"250","x":-626.3904761904762,"y":-89.4857142857143,"z":1522.3904761904762,"a95":".5","info":"dd at tt"},{"visible":true,"include":true,"step":"300","x":-453.8095238095238,"y":-72.62857142857143,"z":991.0095238095239,"a95":".4","info":"dd at tt"},{"visible":true,"include":true,"step":"350","x":-328.8857142857143,"y":-61.590476190476195,"z":541.2666666666667,"a95":".9","info":"dd at tt"},{"visible":true,"include":true,"step":"400","x":-199.30476190476188,"y":-77.28571428571429,"z":385.247619047619,"a95":".6","info":"dd at tt"},{"visible":true,"include":true,"step":"450","x":-173.55238095238096,"y":-64.27619047619048,"z":303.752380952381,"a95":".5","info":"dd at tt"},{"visible":true,"include":true,"step":"500","x":-181.1809523809524,"y":-47.06666666666666,"z":260.8952380952381,"a95":".6","info":"dd at tt"},{"visible":true,"include":true,"step":"530","x":-191.11428571428573,"y":-37.476190476190474,"z":191.4,"a95":".7","info":"dd at tt"},{"visible":true,"include":false,"step":"560","x":-148.05714285714285,"y":-28.009523809523813,"z":164.15238095238095,"a95":".8","info":"dd at tt"},{"visible":true,"include":false,"step":"590","x":-112.66666666666667,"y":3.4285714285714284,"z":59.93333333333333,"a95":"1.1","info":"dd at tt"},{"visible":true,"include":false,"step":"610","x":-118.13333333333334,"y":-31.83809523809524,"z":62.99047619047619,"a95":".8","info":"dd at tt"},{"visible":false,"include":false,"step":"630","x":-55.2,"y":12.085714285714285,"z":-3.7523809523809524,"a95":"1.1","info":"dd at tt"},{"visible":false,"include":false,"step":"650","x":-32.542857142857144,"y":-15.980952380952383,"z":-1.361904761904762,"a95":"2.1","info":"dd at tt"}],"demagType":"Unknown","patch":1.1,"format":"Unknown","strat":null},{"version":"v1.1.0","exported":"2016-10-10T13:19:08.936Z","info":"","GEO":[{"dec":345.1521333285039,"inc":51.86132671103226,"MAD":6.757490942105502,"cm":[290.60253861404243,-152.0259256021521,491.04455174964835],"intensity":1363.0626190981711,"type":"dir","forced":false,"remark":"","origin":false,"nSteps":9,"minStep":"300","maxStep":"610","steps":["300","350","400","450","500","530","560","590","610"],"group":"None","version":"v1.1.0"}],"TECT":[{"dec":321.58334833244334,"inc":20.289940014168334,"MAD":6.757490942105507,"cm":[374.6318452133976,-410.64153916323914,199.27613046419052],"intensity":1363.0626190981714,"type":"dir","forced":false,"remark":"","origin":false,"nSteps":9,"minStep":"300","maxStep":"610","steps":["300","350","400","450","500","530","560","590","610"],"group":"None","version":"v1.1.0"}],"interpreted":true,"name":"TK18.1","coreAzi":8,"coreDip":43,"bedStrike":198,"bedDip":43,"data":[{"visible":true,"include":false,"step":"20","x":-1593.8666666666666,"y":-957.5999999999999,"z":5569.5142857142855,"a95":".4","info":"dd at tt"},{"visible":true,"include":false,"step":"100","x":-1831.5238095238096,"y":-636.847619047619,"z":5647.666666666667,"a95":".6","info":"dd at tt"},{"visible":true,"include":false,"step":"150","x":-1267.304761904762,"y":-764.6857142857143,"z":4439.923809523809,"a95":".6","info":"dd at tt"},{"visible":true,"include":false,"step":"200","x":-618.8380952380952,"y":-558.4,"z":3404.4666666666667,"a95":".4","info":"dd at tt"},{"visible":true,"include":false,"step":"250","x":-386.4095238095238,"y":-432.31428571428575,"z":1991.0190476190478,"a95":".4","info":"dd at tt"},{"visible":true,"include":true,"step":"300","x":-369.56190476190477,"y":-389.31428571428575,"z":1386.4190476190477,"a95":".3","info":"dd at tt"},{"visible":true,"include":true,"step":"350","x":-274.84761904761905,"y":-268.447619047619,"z":918.952380952381,"a95":".5","info":"dd at tt"},{"visible":true,"include":true,"step":"400","x":-148.17142857142858,"y":-270.7809523809524,"z":625.2285714285714,"a95":".4","info":"dd at tt"},{"visible":true,"include":true,"step":"450","x":-112.13333333333334,"y":-186.9904761904762,"z":525.2285714285714,"a95":".4","info":"dd at tt"},{"visible":true,"include":true,"step":"500","x":-151.77142857142857,"y":-219.05714285714285,"z":450.2095238095238,"a95":".5","info":"dd at tt"},{"visible":true,"include":true,"step":"530","x":-160.0285714285714,"y":-113.07619047619048,"z":365.9238095238095,"a95":".7","info":"dd at tt"},{"visible":true,"include":true,"step":"560","x":-152.64761904761903,"y":-144.57142857142858,"z":275.1333333333333,"a95":".6","info":"dd at tt"},{"visible":true,"include":true,"step":"590","x":-77.16190476190476,"y":-70.54285714285714,"z":138.66666666666666,"a95":".6","info":"dd at tt"},{"visible":true,"include":true,"step":"610","x":-149.33333333333334,"y":-56.13333333333333,"z":83.18095238095238,"a95":"1.2","info":"dd at tt"},{"visible":true,"include":false,"step":"630","x":-22.01904761904762,"y":-39.16190476190476,"z":27.076190476190476,"a95":"1.2","info":"dd at tt"},{"visible":true,"include":false,"step":"650","x":-22.6,"y":-27.314285714285717,"z":21.79047619047619,"a95":"2.4","info":"dd at tt"}],"demagType":"Unknown","patch":1.1,"format":"Unknown","strat":null},{"version":"v1.1.0","exported":"2016-10-10T13:19:08.936Z","info":"","GEO":[{"dec":337.20932073666336,"inc":54.18420407615444,"MAD":2.9045009016048735,"cm":[284.94189330960336,-199.5438308670747,736.2892376061963],"intensity":1874.7414464817439,"type":"dir","forced":false,"remark":"","origin":false,"nSteps":8,"minStep":"250","maxStep":"560","steps":["250","300","350","400","450","500","530","560"],"group":"None","version":"v1.1.0"}],"TECT":[{"dec":316.0174277516488,"inc":19.41027915638082,"MAD":2.9045009016048926,"cm":[417.0498186096063,-606.1302176932722,349.0086996214904],"intensity":1874.741446481744,"type":"dir","forced":false,"remark":"","origin":false,"nSteps":8,"minStep":"250","maxStep":"560","steps":["250","300","350","400","450","500","530","560"],"group":"None","version":"v1.1.0"}],"interpreted":true,"name":"TK19.1","coreAzi":7,"coreDip":26,"bedStrike":198,"bedDip":43,"data":[{"visible":true,"include":false,"step":"20","x":-3839.1047619047617,"y":-2375.4,"z":5853.942857142857,"a95":".7","info":"dd at tt"},{"visible":true,"include":false,"step":"100","x":-3827.4761904761904,"y":-2199.9142857142856,"z":5734.533333333333,"a95":".7","info":"dd at tt"},{"visible":true,"include":false,"step":"150","x":-2857.1047619047617,"y":-1712.4,"z":4423.942857142857,"a95":".6","info":"dd at tt"},{"visible":true,"include":false,"step":"200","x":-2094.7428571428572,"y":-1303.9142857142858,"z":3090.1047619047617,"a95":".6","info":"dd at tt"},{"visible":true,"include":true,"step":"250","x":-1221.4,"y":-649.6285714285715,"z":1645.5809523809523,"a95":".5","info":"dd at tt"},{"visible":true,"include":true,"step":"300","x":-916.3428571428572,"y":-418.3714285714285,"z":1119.4190476190477,"a95":".4","info":"dd at tt"},{"visible":true,"include":true,"step":"350","x":-535.7428571428571,"y":-158.62857142857143,"z":545.6190476190476,"a95":".7","info":"dd at tt"},{"visible":true,"include":true,"step":"400","x":-420.6952380952381,"y":-177.22857142857143,"z":364.32380952380953,"a95":".6","info":"dd at tt"},{"visible":true,"include":true,"step":"450","x":-379.1904761904762,"y":-156.07619047619048,"z":284.2857142857143,"a95":".5","info":"dd at tt"},{"visible":true,"include":true,"step":"500","x":-336.84761904761905,"y":-90.29523809523809,"z":226.0952380952381,"a95":".7","info":"dd at tt"},{"visible":true,"include":true,"step":"530","x":-291,"y":-107.4952380952381,"z":140.73333333333335,"a95":".6","info":"dd at tt"},{"visible":true,"include":true,"step":"560","x":-286.4095238095238,"y":-104.53333333333333,"z":114.79047619047618,"a95":".7","info":"dd at tt"},{"visible":true,"include":false,"step":"590","x":-198.7238095238095,"y":58.86666666666667,"z":-37.27619047619047,"a95":"1","info":"dd at tt"},{"visible":true,"include":false,"step":"610","x":-172,"y":3.657142857142857,"z":-40.00952380952381,"a95":".8","info":"dd at tt"},{"visible":true,"include":false,"step":"630","x":-112.66666666666667,"y":24.990476190476187,"z":-61.67619047619048,"a95":".8","info":"dd at tt"},{"visible":true,"include":false,"step":"650","x":-60.37142857142857,"y":-8.428571428571429,"z":-109.15238095238094,"a95":".8","info":"dd at tt"}],"demagType":"Unknown","patch":1.1,"format":"Unknown","strat":null},{"version":"v1.1.0","exported":"2016-10-10T13:19:08.936Z","info":"","GEO":[],"TECT":[],"interpreted":false,"name":"TK51.1","coreAzi":316,"coreDip":54,"bedStrike":261,"bedDip":43,"data":[{"visible":false,"include":false,"step":"20","x":104.5904761904762,"y":273.1047619047619,"z":-16.847619047619048,"a95":".8","info":"dd at tt"},{"visible":true,"include":true,"step":"100","x":-136.55238095238096,"y":-309.70476190476194,"z":729.2380952380952,"a95":".5","info":"dd at tt"},{"visible":true,"include":true,"step":"150","x":-131.9047619047619,"y":-295.76190476190476,"z":519.1809523809524,"a95":".4","info":"dd at tt"},{"visible":true,"include":true,"step":"200","x":-145.84761904761905,"y":-281.23809523809524,"z":269.6190476190476,"a95":".8","info":"dd at tt"},{"visible":true,"include":true,"step":"250","x":-172,"y":-238.8190476190476,"z":23.81904761904762,"a95":"1.3","info":"dd at tt"},{"visible":true,"include":true,"step":"250","x":4.647619047619047,"y":30.219047619047622,"z":-365.7809523809524,"a95":".8","info":"dd at tt"},{"visible":true,"include":false,"step":"300","x":-61.00952380952381,"y":4.066666666666667,"z":-309.12380952380954,"a95":".5","info":"dd at tt"},{"visible":true,"include":false,"step":"350","x":-11.038095238095238,"y":67.4,"z":-249.2761904761905,"a95":".5","info":"dd at tt"},{"visible":true,"include":false,"step":"400","x":-45.32380952380952,"y":-24.4,"z":-260.6095238095238,"a95":".7","info":"dd at tt"},{"visible":true,"include":false,"step":"450","x":-21.371428571428574,"y":41.42857142857143,"z":-227.34285714285713,"a95":".6","info":"dd at tt"},{"visible":true,"include":false,"step":"500","x":-64.20952380952382,"y":7.380952380952381,"z":-190.2952380952381,"a95":".7","info":"dd at tt"},{"visible":true,"include":false,"step":"530","x":-90.64761904761905,"y":22.83809523809524,"z":-144.82857142857142,"a95":".7","info":"dd at tt"},{"visible":true,"include":false,"step":"560","x":-90.5904761904762,"y":14.180952380952382,"z":-154.9714285714286,"a95":".7","info":"dd at tt"},{"visible":true,"include":false,"step":"590","x":-65.25714285714287,"y":11.390476190476189,"z":-151.82857142857142,"a95":".8","info":"dd at tt"},{"visible":false,"include":false,"step":"610","x":-55.780952380952385,"y":4.876190476190477,"z":-65.07619047619048,"a95":".6","info":"dd at tt"},{"visible":false,"include":false,"step":"630","x":-57.05714285714286,"y":-6.333333333333333,"z":-80.5904761904762,"a95":"1","info":"dd at tt"},{"visible":false,"include":false,"step":"650","x":-77.98095238095237,"y":6.161904761904762,"z":-34.285714285714285,"a95":"1.4","info":"dd at tt"}],"demagType":"Unknown","patch":1.1,"format":"Unknown","strat":null},{"version":"v1.1.0","exported":"2016-10-10T13:19:08.936Z","info":"","GEO":[],"TECT":[],"interpreted":false,"name":"TK52.1","coreAzi":7,"coreDip":58,"bedStrike":261,"bedDip":43,"data":[{"visible":false,"include":false,"step":"20","x":-10.457142857142857,"y":-446.25714285714287,"z":606.9238095238095,"a95":".4","info":"dd at tt"},{"visible":false,"include":false,"step":"100","x":69.72380952380952,"y":278.3333333333333,"z":80.19047619047619,"a95":".5","info":"dd at tt"},{"visible":true,"include":false,"step":"150","x":89.4857142857143,"y":165.01904761904763,"z":-145.26666666666665,"a95":".4","info":"dd at tt"},{"visible":true,"include":false,"step":"200","x":91.22857142857143,"y":87.16190476190476,"z":-266.70476190476194,"a95":".6","info":"dd at tt"},{"visible":true,"include":false,"step":"250","x":-158.62857142857143,"y":-242.8857142857143,"z":17.142857142857142,"a95":".7","info":"dd at tt"},{"visible":true,"include":false,"step":"300","x":-170.24761904761903,"y":-274.2666666666667,"z":84.83809523809524,"a95":".7","info":"dd at tt"},{"visible":true,"include":false,"step":"350","x":-155.7238095238095,"y":-205.1142857142857,"z":-14.238095238095237,"a95":".9","info":"dd at tt"},{"visible":true,"include":false,"step":"400","x":-263.2190476190476,"y":-208.60000000000002,"z":79.31428571428572,"a95":".9","info":"dd at tt"},{"visible":true,"include":false,"step":"450","x":-223.17142857142858,"y":-193.38095238095238,"z":44.885714285714286,"a95":".6","info":"dd at tt"},{"visible":true,"include":false,"step":"500","x":-197.15238095238095,"y":-111.67619047619047,"z":61.219047619047615,"a95":".8","info":"dd at tt"},{"visible":true,"include":false,"step":"530","x":-245.32380952380953,"y":-150.0857142857143,"z":75.97142857142858,"a95":".8","info":"dd at tt"},{"visible":true,"include":false,"step":"560","x":-214.1809523809524,"y":-79.42857142857143,"z":18.59047619047619,"a95":".8","info":"dd at tt"},{"visible":true,"include":false,"step":"590","x":-149.9142857142857,"y":-73.15238095238095,"z":-54.857142857142854,"a95":".9","info":"dd at tt"},{"visible":true,"include":false,"step":"610","x":-192.9714285714286,"y":-5.866666666666667,"z":39.37142857142857,"a95":"1.1","info":"dd at tt"},{"visible":true,"include":false,"step":"630","x":-4.704761904761905,"y":20.628571428571426,"z":8.019047619047619,"a95":"4.6","info":"dd at tt"},{"visible":true,"include":false,"step":"650","x":-35.44761904761905,"y":26.38095238095238,"z":-60.285714285714285,"a95":".9","info":"dd at tt"}],"demagType":"Unknown","patch":1.1,"format":"Unknown","strat":null},{"version":"v1.1.0","exported":"2016-10-10T13:19:08.936Z","info":"","GEO":[],"TECT":[],"interpreted":false,"name":"TK53.1","coreAzi":19,"coreDip":29,"bedStrike":261,"bedDip":43,"data":[{"visible":false,"include":false,"step":"20","x":-6.39047619047619,"y":-254.50476190476192,"z":351.25714285714287,"a95":".4","info":"dd at tt"},{"visible":true,"include":false,"step":"100","x":-89.4857142857143,"y":-134.22857142857143,"z":487.79999999999995,"a95":".6","info":"dd at tt"},{"visible":true,"include":false,"step":"150","x":-18.59047619047619,"y":-90.64761904761905,"z":332.0761904761905,"a95":".3","info":"dd at tt"},{"visible":true,"include":false,"step":"200","x":26.73333333333333,"y":-47.647619047619045,"z":208.31428571428575,"a95":".5","info":"dd at tt"},{"visible":true,"include":false,"step":"250","x":45.32380952380952,"y":31.961904761904766,"z":67.11428571428571,"a95":"1","info":"dd at tt"},{"visible":true,"include":false,"step":"300","x":15.685714285714285,"y":34.86666666666667,"z":52.00952380952381,"a95":"1.4","info":"dd at tt"},{"visible":true,"include":false,"step":"350","x":-11.038095238095238,"y":37.77142857142857,"z":32.82857142857143,"a95":"1.3","info":"dd at tt"},{"visible":true,"include":false,"step":"400","x":8.714285714285714,"y":11.619047619047619,"z":18.00952380952381,"a95":"3.9","info":"dd at tt"},{"visible":true,"include":false,"step":"450","x":12.095238095238095,"y":28.933333333333334,"z":11.219047619047618,"a95":"2.3","info":"dd at tt"},{"visible":true,"include":false,"step":"500","x":-18.82857142857143,"y":39.4,"z":15.628571428571428,"a95":"1.9","info":"dd at tt"},{"visible":true,"include":false,"step":"530","x":-33.2952380952381,"y":11.333333333333334,"z":23.704761904761906,"a95":"1.2","info":"dd at tt"},{"visible":true,"include":false,"step":"560","x":-18.771428571428572,"y":36.60952380952381,"z":5.923809523809524,"a95":"3.5","info":"dd at tt"},{"visible":true,"include":false,"step":"590","x":-40.266666666666666,"y":15.342857142857142,"z":-8.82857142857143,"a95":"3","info":"dd at tt"},{"visible":true,"include":false,"step":"610","x":-11.857142857142858,"y":20.571428571428573,"z":30.19047619047619,"a95":".9","info":"dd at tt"},{"visible":true,"include":false,"step":"630","x":-63.8,"y":-10.285714285714286,"z":-37.53333333333334,"a95":"1.3","info":"dd at tt"},{"visible":true,"include":false,"step":"650","x":-26.552380952380954,"y":-29.75238095238095,"z":-25.94285714285714,"a95":"1.5","info":"dd at tt"}],"demagType":"Unknown","patch":1.1,"format":"Unknown","strat":null},{"version":"v1.1.0","exported":"2016-10-10T13:19:08.936Z","info":"","GEO":[],"TECT":[],"interpreted":false,"name":"TK55.1","coreAzi":332,"coreDip":46,"bedStrike":261,"bedDip":43,"data":[{"visible":false,"include":false,"step":"20","x":87.16190476190476,"y":120.27619047619048,"z":618.2571428571429,"a95":".5","info":"dd at tt"},{"visible":true,"include":false,"step":"100","x":10.457142857142857,"y":157.46666666666667,"z":648.7619047619048,"a95":".4","info":"dd at tt"},{"visible":true,"include":false,"step":"150","x":37.19047619047619,"y":95.87619047619049,"z":405,"a95":".3","info":"dd at tt"},{"visible":true,"include":false,"step":"200","x":56.36190476190476,"y":46.48571428571429,"z":153.98095238095237,"a95":".4","info":"dd at tt"},{"visible":true,"include":false,"step":"250","x":38.93333333333334,"y":40.095238095238095,"z":-2.038095238095238,"a95":"1.5","info":"dd at tt"},{"visible":true,"include":false,"step":"300","x":23.238095238095237,"y":15.685714285714285,"z":4.647619047619047,"a95":"2.2","info":"dd at tt"},{"visible":true,"include":false,"step":"350","x":-9.876190476190477,"y":41.25714285714285,"z":-34.57142857142857,"a95":"1.1","info":"dd at tt"},{"visible":true,"include":false,"step":"400","x":-40.095238095238095,"y":29.638095238095236,"z":-22.952380952380953,"a95":"1.4","info":"dd at tt"},{"visible":true,"include":false,"step":"450","x":-25.961904761904766,"y":41.714285714285715,"z":-32.51428571428571,"a95":".7","info":"dd at tt"},{"visible":true,"include":false,"step":"500","x":-60.2,"y":20.98095238095238,"z":-39.16190476190476,"a95":"1.1","info":"dd at tt"},{"visible":true,"include":false,"step":"530","x":-55.37142857142857,"y":18.59047619047619,"z":-24.580952380952382,"a95":".8","info":"dd at tt"},{"visible":true,"include":false,"step":"560","x":-81.17142857142856,"y":-4.647619047619047,"z":-22.485714285714284,"a95":"1.1","info":"dd at tt"},{"visible":true,"include":false,"step":"590","x":-41.6,"y":26.43809523809524,"z":-32.6,"a95":"1.2","info":"dd at tt"},{"visible":true,"include":false,"step":"610","x":-58.68571428571429,"y":29.923809523809524,"z":-11.914285714285715,"a95":".7","info":"dd at tt"},{"visible":true,"include":false,"step":"630","x":-74.02857142857142,"y":-26.02857142857143,"z":-37.304761904761904,"a95":".8","info":"dd at tt"},{"visible":true,"include":false,"step":"650","x":-41.542857142857144,"y":-8.714285714285714,"z":-31.495238095238093,"a95":"1.2","info":"dd at tt"}],"demagType":"Unknown","patch":1.1,"format":"Unknown","strat":null},{"version":"v1.1.0","exported":"2016-10-10T13:19:08.936Z","info":"","GEO":[],"TECT":[],"interpreted":false,"name":"TK56.1","coreAzi":34,"coreDip":41,"bedStrike":261,"bedDip":43,"data":[{"visible":false,"include":false,"step":"20","x":42.41904761904762,"y":-481.7047619047619,"z":927.6761904761905,"a95":".3","info":"dd at tt"},{"visible":true,"include":true,"step":"100","x":-11.038095238095238,"y":-305.0571428571428,"z":1016.5714285714286,"a95":".5","info":"dd at tt"},{"visible":true,"include":true,"step":"150","x":161.53333333333333,"y":-119.11428571428571,"z":579.3238095238095,"a95":".3","info":"dd at tt"},{"visible":true,"include":true,"step":"200","x":293.43809523809523,"y":-2.3238095238095235,"z":233.2952380952381,"a95":".6","info":"dd at tt"},{"visible":true,"include":true,"step":"250","x":272.5238095238095,"y":106.33333333333333,"z":54.333333333333336,"a95":".8","info":"dd at tt"},{"visible":true,"include":true,"step":"300","x":211.50476190476192,"y":75.54285714285714,"z":70.01904761904763,"a95":".7","info":"dd at tt"},{"visible":true,"include":true,"step":"350","x":202.7904761904762,"y":129.58095238095237,"z":-21.20952380952381,"a95":"1.4","info":"dd at tt"},{"visible":true,"include":false,"step":"400","x":112.72380952380952,"y":129,"z":-74.38095238095238,"a95":".9","info":"dd at tt"},{"visible":true,"include":false,"step":"450","x":124.18095238095239,"y":143.86666666666665,"z":-74.22857142857143,"a95":"1","info":"dd at tt"},{"visible":true,"include":false,"step":"500","x":100.52380952380952,"y":127.01904761904763,"z":-25.533333333333335,"a95":"1","info":"dd at tt"},{"visible":true,"include":false,"step":"530","x":43.46666666666666,"y":137.82857142857142,"z":-16.35238095238095,"a95":"1.2","info":"dd at tt"},{"visible":true,"include":false,"step":"560","x":0.17142857142857143,"y":131.14285714285714,"z":-54.12380952380952,"a95":".7","info":"dd at tt"},{"visible":true,"include":false,"step":"590","x":-29.866666666666667,"y":90.06666666666668,"z":-63.333333333333336,"a95":".9","info":"dd at tt"},{"visible":true,"include":false,"step":"610","x":3.7809523809523813,"y":22.83809523809524,"z":-59.00952380952381,"a95":".8","info":"dd at tt"},{"visible":true,"include":false,"step":"630","x":-52.590476190476195,"y":-70.6,"z":-79.11428571428571,"a95":"1.3","info":"dd at tt"},{"visible":true,"include":false,"step":"650","x":-8.019047619047619,"y":-5.466666666666667,"z":-23.333333333333332,"a95":"5.1","info":"dd at tt"}],"demagType":"Unknown","patch":1.1,"format":"Unknown","strat":null},{"version":"v1.1.0","exported":"2016-10-10T13:19:08.936Z","info":"","GEO":[],"TECT":[],"interpreted":false,"name":"TK57.2A","coreAzi":80,"coreDip":54,"bedStrike":261,"bedDip":43,"data":[{"visible":false,"include":false,"step":"20","x":98.19999999999999,"y":-966.3142857142857,"z":431.7333333333333,"a95":".3","info":"dd at tt"},{"visible":false,"include":false,"step":"100","x":-40.095238095238095,"y":-743.7619047619048,"z":551.1428571428571,"a95":".5","info":"dd at tt"},{"visible":true,"include":true,"step":"150","x":162.6952380952381,"y":-428.8285714285714,"z":207.73333333333332,"a95":".3","info":"dd at tt"},{"visible":true,"include":true,"step":"200","x":233.59047619047618,"y":-300.9904761904762,"z":67.98095238095237,"a95":".6","info":"dd at tt"},{"visible":true,"include":true,"step":"250","x":214.9904761904762,"y":-216.15238095238095,"z":1.1619047619047618,"a95":".5","info":"dd at tt"},{"visible":true,"include":true,"step":"300","x":175.48571428571427,"y":-195.8190476190476,"z":-21.79047619047619,"a95":".9","info":"dd at tt"},{"visible":true,"include":true,"step":"350","x":108.65714285714287,"y":-148.17142857142858,"z":-58.68571428571429,"a95":".9","info":"dd at tt"},{"visible":true,"include":false,"step":"400","x":61.590476190476195,"y":-169.0857142857143,"z":-17.428571428571427,"a95":".8","info":"dd at tt"},{"visible":true,"include":false,"step":"450","x":105.94285714285715,"y":-162.2952380952381,"z":-41.51428571428571,"a95":".7","info":"dd at tt"},{"visible":true,"include":false,"step":"500","x":-18.19047619047619,"y":-62.75238095238095,"z":-28.009523809523813,"a95":"1.7","info":"dd at tt"},{"visible":true,"include":false,"step":"530","x":-46.37142857142857,"y":-102.38095238095238,"z":-21.495238095238093,"a95":"1.3","info":"dd at tt"},{"visible":true,"include":false,"step":"560","x":-71.81904761904762,"y":-134.28571428571428,"z":-45.93333333333334,"a95":".9","info":"dd at tt"},{"visible":true,"include":false,"step":"590","x":2.9047619047619047,"y":-58.68571428571429,"z":0.9619047619047618,"a95":"1.3","info":"dd at tt"},{"visible":true,"include":false,"step":"610","x":-80.47619047619048,"y":-52.523809523809526,"z":-6.828571428571429,"a95":".6","info":"dd at tt"},{"visible":true,"include":false,"step":"630","x":-113.07619047619048,"y":-41.08571428571428,"z":-10.895238095238096,"a95":"1.3","info":"dd at tt"},{"visible":true,"include":false,"step":"650","x":-77.21904761904761,"y":-39.4,"z":-33,"a95":"1.4","info":"dd at tt"}],"demagType":"Unknown","patch":1.1,"format":"Unknown","strat":null},{"version":"v1.1.0","exported":"2016-10-10T13:19:08.936Z","info":"","GEO":[],"TECT":[],"interpreted":false,"name":"TK58.3","coreAzi":74,"coreDip":55,"bedStrike":261,"bedDip":43,"data":[{"visible":false,"include":false,"step":"20","x":165.6,"y":-418.3714285714285,"z":-447.4190476190476,"a95":".8","info":"dd at tt"},{"visible":true,"include":true,"step":"100","x":151.07619047619048,"y":-160.95238095238096,"z":-269.9047619047619,"a95":"1","info":"dd at tt"},{"visible":true,"include":true,"step":"150","x":248.1142857142857,"y":75.54285714285714,"z":-417.2095238095238,"a95":".8","info":"dd at tt"},{"visible":true,"include":true,"step":"200","x":289.37142857142857,"y":217.8952380952381,"z":-516.5714285714286,"a95":".7","info":"dd at tt"},{"visible":true,"include":true,"step":"250","x":213.82857142857142,"y":417.7904761904762,"z":-545.3333333333334,"a95":".7","info":"dd at tt"},{"visible":false,"include":false,"step":"300","x":158.62857142857143,"y":399.7714285714286,"z":-440.74285714285713,"a95":".6","info":"dd at tt"},{"visible":true,"include":false,"step":"350","x":112.14285714285714,"y":435.79999999999995,"z":-484.02857142857147,"a95":".6","info":"dd at tt"},{"visible":true,"include":false,"step":"400","x":-52.2952380952381,"y":437.54285714285714,"z":-438.4095238095238,"a95":".6","info":"dd at tt"},{"visible":true,"include":false,"step":"450","x":70.3047619047619,"y":574.0952380952381,"z":-437.8285714285714,"a95":".5","info":"dd at tt"},{"visible":true,"include":false,"step":"500","x":-104.0095238095238,"y":416.16190476190474,"z":-268.8857142857143,"a95":".6","info":"dd at tt"},{"visible":true,"include":false,"step":"530","x":-14.704761904761906,"y":398.9047619047619,"z":-177.75238095238097,"a95":".6","info":"dd at tt"},{"visible":true,"include":false,"step":"560","x":-136.2,"y":313.77142857142854,"z":-177.86666666666665,"a95":".5","info":"dd at tt"},{"visible":true,"include":false,"step":"590","x":-15.399999999999999,"y":207.03809523809525,"z":-78.73333333333333,"a95":".7","info":"dd at tt"},{"visible":false,"include":false,"step":"610","x":-88.84761904761905,"y":-10.866666666666665,"z":-59.15238095238095,"a95":"1.2","info":"dd at tt"},{"visible":false,"include":false,"step":"630","x":-18.066666666666666,"y":46.31428571428572,"z":-43.75238095238095,"a95":"1.8","info":"dd at tt"},{"visible":false,"include":false,"step":"650","x":-6.800000000000001,"y":42.304761904761904,"z":-29.228571428571428,"a95":"2.6","info":"dd at tt"}],"demagType":"Unknown","patch":1.1,"format":"Unknown","strat":null},{"version":"v1.1.0","exported":"2016-10-10T13:19:08.936Z","info":"","GEO":[],"TECT":[],"interpreted":false,"name":"TK59.2","coreAzi":44,"coreDip":23,"bedStrike":261,"bedDip":43,"data":[{"visible":false,"include":false,"step":"20","x":588.6190476190476,"y":-1231.857142857143,"z":453.8095238095238,"a95":".4","info":"dd at tt"},{"visible":true,"include":false,"step":"100","x":766.4285714285714,"y":-1014.5428571428572,"z":592.6857142857143,"a95":".4","info":"dd at tt"},{"visible":true,"include":false,"step":"150","x":1108.6761904761904,"y":-708.9047619047619,"z":355.32380952380953,"a95":".6","info":"dd at tt"},{"visible":true,"include":false,"step":"200","x":760.0380952380953,"y":-293.43809523809523,"z":217.8952380952381,"a95":"1.1","info":"dd at tt"},{"visible":true,"include":false,"step":"250","x":671.7142857142857,"y":-6.9714285714285715,"z":58.68571428571429,"a95":"1.1","info":"dd at tt"},{"visible":true,"include":true,"step":"300","x":501.45714285714286,"y":158.04761904761904,"z":37.19047619047619,"a95":"1.3","info":"dd at tt"},{"visible":true,"include":true,"step":"350","x":358.51428571428573,"y":99.94285714285715,"z":38.63809523809524,"a95":"1.5","info":"dd at tt"},{"visible":true,"include":true,"step":"400","x":208.0190476190476,"y":19.752380952380953,"z":77.86666666666667,"a95":"1.3","info":"dd at tt"},{"visible":false,"include":false,"step":"450","x":162.63809523809525,"y":18.82857142857143,"z":25.104761904761908,"a95":"2.3","info":"dd at tt"},{"visible":true,"include":true,"step":"500","x":39.98095238095238,"y":-70.01904761904763,"z":120.27619047619048,"a95":"1.4","info":"dd at tt"},{"visible":true,"include":false,"step":"530","x":78.20952380952382,"y":-60.2,"z":123.5904761904762,"a95":"1.3","info":"dd at tt"},{"visible":false,"include":false,"step":"560","x":45.67619047619048,"y":13.942857142857143,"z":96.45714285714286,"a95":"1.6","info":"dd at tt"},{"visible":false,"include":false,"step":"590","x":59.67619047619048,"y":33.76190476190476,"z":81.14285714285714,"a95":"1.5","info":"dd at tt"},{"visible":false,"include":false,"step":"610","x":2.1523809523809527,"y":32.01904761904762,"z":14.647619047619049,"a95":"1.7","info":"dd at tt"},{"visible":false,"include":false,"step":"630","x":-58.219047619047615,"y":89.01904761904763,"z":-34.95238095238095,"a95":"1.5","info":"dd at tt"},{"visible":false,"include":false,"step":"650","x":22.314285714285717,"y":84.01904761904763,"z":-18.885714285714286,"a95":"2","info":"dd at tt"}],"demagType":"Unknown","patch":1.1,"format":"Unknown","strat":null},{"version":"v1.1.0","exported":"2016-10-10T13:19:08.936Z","info":"","GEO":[],"TECT":[],"interpreted":false,"name":"TK65.1","coreAzi":336,"coreDip":41,"bedStrike":261,"bedDip":43,"data":[{"visible":false,"include":false,"step":"20","x":-208.60000000000002,"y":191.75238095238097,"z":1173.1714285714286,"a95":".4","info":"dd at tt"},{"visible":false,"include":false,"step":"100","x":-193.4952380952381,"y":224.87619047619046,"z":1223.142857142857,"a95":".5","info":"dd at tt"},{"visible":false,"include":false,"step":"150","x":-31.961904761904766,"y":86.58095238095238,"z":740.5714285714286,"a95":".7","info":"dd at tt"},{"visible":false,"include":false,"step":"200","x":97.03809523809524,"y":-15.104761904761904,"z":217.8952380952381,"a95":"1.1","info":"dd at tt"},{"visible":true,"include":false,"step":"250","x":139.45714285714286,"y":-48.80952380952381,"z":-74.38095238095238,"a95":"1","info":"dd at tt"},{"visible":true,"include":false,"step":"300","x":104.5904761904762,"y":-44.74285714285715,"z":-296.9238095238095,"a95":".8","info":"dd at tt"},{"visible":true,"include":true,"step":"350","x":101.68571428571428,"y":-31.961904761904766,"z":-286.752380952381,"a95":".6","info":"dd at tt"},{"visible":true,"include":true,"step":"400","x":41.25714285714285,"y":-41.83809523809524,"z":-262.0571428571428,"a95":".5","info":"dd at tt"},{"visible":true,"include":true,"step":"450","x":59.67619047619048,"y":-26.20952380952381,"z":-254.9142857142857,"a95":".8","info":"dd at tt"},{"visible":true,"include":true,"step":"500","x":35.03809523809524,"y":-41.48571428571429,"z":-227.8952380952381,"a95":".6","info":"dd at tt"},{"visible":true,"include":true,"step":"530","x":3.019047619047619,"y":-27.6,"z":-138.2095238095238,"a95":".9","info":"dd at tt"},{"visible":true,"include":false,"step":"560","x":8.304761904761905,"y":-42.476190476190474,"z":-162.8761904761905,"a95":".7","info":"dd at tt"},{"visible":true,"include":false,"step":"590","x":1.3904761904761904,"y":0.29523809523809524,"z":-156.71428571428572,"a95":".9","info":"dd at tt"},{"visible":false,"include":false,"step":"610","x":-38.05714285714286,"y":-27.485714285714288,"z":-49.91428571428572,"a95":".8","info":"dd at tt"},{"visible":false,"include":false,"step":"630","x":-36.08571428571428,"y":-33.87619047619047,"z":-50.2952380952381,"a95":"1.3","info":"dd at tt"},{"visible":false,"include":false,"step":"650","x":-46.31428571428572,"y":-8.77142857142857,"z":-63.857142857142854,"a95":".8","info":"dd at tt"}],"demagType":"Unknown","patch":1.1,"format":"Unknown","strat":null},{"version":"v1.1.0","exported":"2016-10-10T13:19:08.937Z","info":"","GEO":[],"TECT":[],"interpreted":false,"name":"TK67.1","coreAzi":299,"coreDip":40,"bedStrike":261,"bedDip":43,"data":[{"visible":false,"include":false,"step":"20","x":-155.7238095238095,"y":867.5333333333334,"z":1343.7142857142858,"a95":".6","info":"dd at tt"},{"visible":false,"include":false,"step":"100","x":-144.1047619047619,"y":855.3333333333334,"z":1516,"a95":".6","info":"dd at tt"},{"visible":true,"include":false,"step":"150","x":75.54285714285714,"y":594.4285714285714,"z":1061.0285714285715,"a95":".4","info":"dd at tt"},{"visible":true,"include":false,"step":"200","x":489.25714285714287,"y":214.40952380952382,"z":287.04761904761904,"a95":".8","info":"dd at tt"},{"visible":true,"include":false,"step":"250","x":590.9428571428571,"y":63.91428571428572,"z":-85.41904761904762,"a95":".8","info":"dd at tt"},{"visible":true,"include":false,"step":"300","x":612.447619047619,"y":-59.266666666666666,"z":-198.14285714285714,"a95":".8","info":"dd at tt"},{"visible":true,"include":false,"step":"350","x":526.447619047619,"y":-56.94285714285714,"z":-268.45714285714286,"a95":".7","info":"dd at tt"},{"visible":true,"include":true,"step":"400","x":486.35238095238094,"y":-87.16190476190476,"z":-192.03809523809525,"a95":".8","info":"dd at tt"},{"visible":true,"include":true,"step":"450","x":361.8857142857143,"y":-42.00952380952381,"z":-179.6095238095238,"a95":".8","info":"dd at tt"},{"visible":true,"include":true,"step":"500","x":313.48571428571427,"y":-113.94285714285715,"z":-171.9047619047619,"a95":".6","info":"dd at tt"},{"visible":true,"include":true,"step":"530","x":267.1714285714286,"y":-84.2,"z":-140.96190476190475,"a95":".6","info":"dd at tt"},{"visible":true,"include":true,"step":"560","x":198.8952380952381,"y":-96.74285714285713,"z":-145.59047619047618,"a95":".6","info":"dd at tt"},{"visible":true,"include":true,"step":"590","x":139.68571428571428,"y":-66.87619047619049,"z":-137.9142857142857,"a95":".6","info":"dd at tt"},{"visible":false,"include":false,"step":"610","x":71.81904761904762,"y":-7.723809523809523,"z":-42.91428571428572,"a95":".9","info":"dd at tt"},{"visible":false,"include":false,"step":"630","x":17.02857142857143,"y":-0.6952380952380952,"z":-82.21904761904761,"a95":"1","info":"dd at tt"},{"visible":false,"include":false,"step":"650","x":-23.238095238095237,"y":-20.571428571428573,"z":-102.9904761904762,"a95":".7","info":"dd at tt"}],"demagType":"Unknown","patch":1.1,"format":"Unknown","strat":null},{"version":"v1.1.0","exported":"2016-10-10T13:19:08.937Z","info":"","GEO":[],"TECT":[],"interpreted":false,"name":"TK68.2A","coreAzi":19,"coreDip":49,"bedStrike":261,"bedDip":43,"data":[{"visible":false,"include":false,"step":"20","x":253.9238095238095,"y":-909.952380952381,"z":1288.8,"a95":".4","info":"dd at tt"},{"visible":false,"include":false,"step":"100","x":300.9904761904762,"y":-844.8666666666667,"z":1228.0857142857142,"a95":".4","info":"dd at tt"},{"visible":true,"include":false,"step":"150","x":442.1904761904762,"y":-796.0571428571429,"z":766.1333333333333,"a95":".4","info":"dd at tt"},{"visible":true,"include":false,"step":"200","x":758.2952380952381,"y":-613.0285714285715,"z":-63.333333333333336,"a95":".5","info":"dd at tt"},{"visible":true,"include":false,"step":"250","x":839.6380952380953,"y":-560.7238095238096,"z":-324.81904761904764,"a95":".5","info":"dd at tt"},{"visible":true,"include":false,"step":"300","x":747.8285714285714,"y":-473.57142857142856,"z":-369.84761904761905,"a95":".7","info":"dd at tt"},{"visible":true,"include":true,"step":"350","x":600.8190476190476,"y":-294.6,"z":-368.9809523809524,"a95":".9","info":"dd at tt"},{"visible":true,"include":true,"step":"400","x":502.0380952380952,"y":-238.23809523809524,"z":-305.6380952380952,"a95":".9","info":"dd at tt"},{"visible":true,"include":true,"step":"450","x":425.45714285714286,"y":-225.21904761904764,"z":-313.74285714285713,"a95":".7","info":"dd at tt"},{"visible":true,"include":true,"step":"500","x":369.15238095238095,"y":-242.77142857142857,"z":-269.3809523809524,"a95":".7","info":"dd at tt"},{"visible":true,"include":true,"step":"530","x":257.5238095238095,"y":-167.6952380952381,"z":-197.7904761904762,"a95":".6","info":"dd at tt"},{"visible":true,"include":true,"step":"560","x":217.25714285714284,"y":-127.65714285714287,"z":-207.59047619047618,"a95":".7","info":"dd at tt"},{"visible":true,"include":true,"step":"590","x":212.2095238095238,"y":-78.20952380952382,"z":-192.74285714285713,"a95":".6","info":"dd at tt"},{"visible":true,"include":true,"step":"610","x":118.41904761904763,"y":-41.01904761904762,"z":-49.857142857142854,"a95":".7","info":"dd at tt"},{"visible":false,"include":false,"step":"630","x":54.03809523809524,"y":-20.047619047619047,"z":-68.47619047619048,"a95":".9","info":"dd at tt"},{"visible":false,"include":false,"step":"650","x":24.923809523809524,"y":-18.942857142857143,"z":-82.01904761904763,"a95":".9","info":"dd at tt"}],"demagType":"Unknown","patch":1.1,"format":"Unknown","strat":null},{"version":"v1.1.0","exported":"2016-10-10T13:19:08.937Z","info":"","GEO":[],"TECT":[],"interpreted":false,"name":"TK69.1A","coreAzi":357,"coreDip":51,"bedStrike":261,"bedDip":43,"data":[{"visible":false,"include":false,"step":"20","x":442.7714285714286,"y":173.74285714285713,"z":613.895238095238,"a95":".9","info":"dd at tt"},{"visible":false,"include":false,"step":"100","x":1180.142857142857,"y":2.9047619047619047,"z":-377.6952380952381,"a95":".8","info":"dd at tt"},{"visible":true,"include":true,"step":"100","x":342.8285714285714,"y":134.8095238095238,"z":590.6571428571428,"a95":".6","info":"dd at tt"},{"visible":true,"include":true,"step":"150","x":352.12380952380954,"y":127.25714285714287,"z":445.0952380952381,"a95":".5","info":"dd at tt"},{"visible":true,"include":true,"step":"200","x":293.43809523809523,"y":104.5904761904762,"z":182.16190476190476,"a95":".8","info":"dd at tt"},{"visible":true,"include":true,"step":"250","x":294.6,"y":94.13333333333333,"z":31.961904761904766,"a95":"1.2","info":"dd at tt"},{"visible":true,"include":true,"step":"300","x":251.60000000000002,"y":46.48571428571429,"z":7.552380952380952,"a95":".6","info":"dd at tt"},{"visible":true,"include":true,"step":"350","x":274.84761904761905,"y":60.42857142857143,"z":-40.96190476190476,"a95":"1.2","info":"dd at tt"},{"visible":true,"include":false,"step":"400","x":182.45714285714286,"y":18.00952380952381,"z":-51.714285714285715,"a95":".8","info":"dd at tt"},{"visible":true,"include":false,"step":"450","x":162.8190476190476,"y":58.51428571428571,"z":-63.48571428571429,"a95":".9","info":"dd at tt"},{"visible":true,"include":false,"step":"500","x":128.53333333333333,"y":8.714285714285714,"z":-108.74285714285713,"a95":".5","info":"dd at tt"},{"visible":true,"include":false,"step":"530","x":91.5142857142857,"y":3.657142857142857,"z":-88.9047619047619,"a95":".8","info":"dd at tt"},{"visible":true,"include":false,"step":"560","x":28.123809523809523,"y":32.13333333333333,"z":-79.08571428571429,"a95":".8","info":"dd at tt"},{"visible":true,"include":false,"step":"590","x":67.11428571428571,"y":5.6380952380952385,"z":-87.65714285714286,"a95":".7","info":"dd at tt"},{"visible":true,"include":false,"step":"610","x":11.857142857142858,"y":38.40952380952381,"z":-20.8,"a95":"1.1","info":"dd at tt"},{"visible":true,"include":false,"step":"630","x":-17.085714285714285,"y":31.961904761904766,"z":-51.019047619047626,"a95":".8","info":"dd at tt"},{"visible":true,"include":false,"step":"650","x":-37.59047619047619,"y":39.10476190476191,"z":-90.38095238095238,"a95":".4","info":"dd at tt"}],"demagType":"Unknown","patch":1.1,"format":"Unknown","strat":null},{"version":"v1.1.0","exported":"2016-10-10T13:19:08.937Z","info":"","GEO":[],"TECT":[],"interpreted":false,"name":"TK71.1","coreAzi":353,"coreDip":47,"bedStrike":261,"bedDip":43,"data":[{"visible":false,"include":false,"step":"20","x":1297.5238095238096,"y":-67.98095238095237,"z":-382.04761904761904,"a95":".8","info":"dd at tt"},{"visible":false,"include":false,"step":"100","x":-520.0571428571429,"y":-54.03809523809524,"z":1302.752380952381,"a95":".5","info":"dd at tt"},{"visible":true,"include":false,"step":"100","x":1179.5619047619048,"y":33.7047619047619,"z":-407.0380952380952,"a95":".9","info":"dd at tt"},{"visible":true,"include":false,"step":"150","x":1182.4666666666667,"y":185.94285714285715,"z":-561.6,"a95":".9","info":"dd at tt"},{"visible":true,"include":false,"step":"200","x":1109.257142857143,"y":88.32380952380952,"z":-801,"a95":".6","info":"dd at tt"},{"visible":true,"include":false,"step":"250","x":1124.942857142857,"y":84.83809523809524,"z":-831.2190476190475,"a95":".6","info":"dd at tt"},{"visible":true,"include":false,"step":"300","x":868.695238095238,"y":120.85714285714286,"z":-796.9333333333333,"a95":".6","info":"dd at tt"},{"visible":true,"include":true,"step":"350","x":797.8,"y":74.96190476190476,"z":-769.6190476190476,"a95":".6","info":"dd at tt"},{"visible":true,"include":true,"step":"400","x":661.2571428571429,"y":71.46666666666667,"z":-654.2761904761904,"a95":".8","info":"dd at tt"},{"visible":true,"include":true,"step":"450","x":530.8,"y":120.62857142857142,"z":-531.9047619047619,"a95":".8","info":"dd at tt"},{"visible":true,"include":true,"step":"500","x":468.79999999999995,"y":60.48571428571429,"z":-484.4380952380953,"a95":".7","info":"dd at tt"},{"visible":true,"include":true,"step":"530","x":309.70476190476194,"y":41.48571428571429,"z":-343.7904761904762,"a95":".7","info":"dd at tt"},{"visible":true,"include":true,"step":"560","x":254.56190476190477,"y":34.4,"z":-378.7142857142857,"a95":".8","info":"dd at tt"},{"visible":true,"include":true,"step":"590","x":222.0857142857143,"y":2.7904761904761903,"z":-318.1047619047619,"a95":".7","info":"dd at tt"},{"visible":true,"include":true,"step":"610","x":152.53333333333333,"y":46.65714285714286,"z":-117.86666666666666,"a95":".8","info":"dd at tt"},{"visible":false,"include":false,"step":"630","x":7.723809523809523,"y":-43.99047619047619,"z":-142.94285714285715,"a95":".7","info":"dd at tt"},{"visible":false,"include":false,"step":"650","x":1.4571428571428573,"y":9.295238095238094,"z":-152.59047619047618,"a95":".5","info":"dd at tt"}],"demagType":"Unknown","patch":1.1,"format":"Unknown","strat":null},{"version":"v1.1.0","exported":"2016-10-10T13:19:08.937Z","info":"","GEO":[],"TECT":[],"interpreted":false,"name":"TK72.4","coreAzi":12,"coreDip":38,"bedStrike":261,"bedDip":43,"data":[{"visible":false,"include":false,"step":"20","x":-572.3523809523809,"y":-210.9238095238095,"z":1201.0666666666668,"a95":".5","info":"dd at tt"},{"visible":true,"include":false,"step":"100","x":-513.6666666666666,"y":-44.16190476190476,"z":1301.5904761904762,"a95":".5","info":"dd at tt"},{"visible":true,"include":true,"step":"150","x":-355.6095238095238,"y":-33.12380952380953,"z":1013.9619047619047,"a95":".4","info":"dd at tt"},{"visible":true,"include":true,"step":"200","x":-155.7238095238095,"y":-9.876190476190477,"z":590.3619047619047,"a95":".4","info":"dd at tt"},{"visible":true,"include":true,"step":"250","x":-18.59047619047619,"y":38.352380952380955,"z":305.6380952380952,"a95":".6","info":"dd at tt"},{"visible":true,"include":true,"step":"300","x":38.352380952380955,"y":92.39047619047619,"z":159.7904761904762,"a95":"1.1","info":"dd at tt"},{"visible":true,"include":true,"step":"350","x":43,"y":112.72380952380952,"z":111.56190476190477,"a95":"1.7","info":"dd at tt"},{"visible":true,"include":true,"step":"400","x":55.780952380952385,"y":111.56190476190477,"z":136.83809523809524,"a95":"1.2","info":"dd at tt"},{"visible":true,"include":false,"step":"450","x":30.390476190476193,"y":103.83809523809524,"z":87.6,"a95":"1","info":"dd at tt"},{"visible":true,"include":false,"step":"500","x":43.17142857142857,"y":52.81904761904762,"z":74.66666666666667,"a95":"1.5","info":"dd at tt"},{"visible":true,"include":false,"step":"530","x":35.266666666666666,"y":51.19047619047619,"z":133.15238095238095,"a95":"1","info":"dd at tt"},{"visible":true,"include":false,"step":"560","x":40.38095238095238,"y":90.87619047619049,"z":139.98095238095237,"a95":".9","info":"dd at tt"},{"visible":true,"include":false,"step":"590","x":-29.114285714285714,"y":38.114285714285714,"z":98.55238095238094,"a95":".8","info":"dd at tt"},{"visible":true,"include":false,"step":"610","x":-24.695238095238096,"y":39.10476190476191,"z":65.04761904761905,"a95":"1","info":"dd at tt"},{"visible":false,"include":false,"step":"630","x":13.076190476190478,"y":-105.28571428571429,"z":-94.13333333333333,"a95":".8","info":"dd at tt"},{"visible":false,"include":false,"step":"650","x":-46.95238095238095,"y":-45.733333333333334,"z":-69.87619047619049,"a95":".9","info":"dd at tt"}],"demagType":"Unknown","patch":1.1,"format":"Unknown","strat":null},{"version":"v1.1.0","exported":"2016-10-10T13:19:08.937Z","info":"","GEO":[],"TECT":[],"interpreted":false,"name":"TK74.2","coreAzi":346,"coreDip":52,"bedStrike":261,"bedDip":43,"data":[{"visible":false,"include":false,"step":"20","x":612.447619047619,"y":0.5809523809523809,"z":2754.247619047619,"a95":".6","info":"dd at tt"},{"visible":false,"include":false,"step":"100","x":368.9809523809524,"y":158.04761904761904,"z":2737.980952380952,"a95":".4","info":"dd at tt"},{"visible":true,"include":true,"step":"150","x":534,"y":48.80952380952381,"z":1808.857142857143,"a95":".3","info":"dd at tt"},{"visible":true,"include":true,"step":"200","x":645.5619047619048,"y":34.285714285714285,"z":978.2285714285714,"a95":".5","info":"dd at tt"},{"visible":true,"include":true,"step":"250","x":670.552380952381,"y":50.55238095238095,"z":471.53333333333336,"a95":".7","info":"dd at tt"},{"visible":true,"include":true,"step":"300","x":549.6857142857143,"y":-6.9714285714285715,"z":-36.89523809523809,"a95":"1","info":"dd at tt"},{"visible":true,"include":true,"step":"350","x":454.39047619047625,"y":25.571428571428573,"z":-173.16190476190476,"a95":".6","info":"dd at tt"},{"visible":true,"include":true,"step":"400","x":323.65714285714284,"y":70.3047619047619,"z":-199.60000000000002,"a95":".8","info":"dd at tt"},{"visible":true,"include":true,"step":"450","x":346.25714285714287,"y":16.79047619047619,"z":-213.62857142857143,"a95":".8","info":"dd at tt"},{"visible":true,"include":false,"step":"500","x":275.77142857142854,"y":32.304761904761904,"z":-174.2952380952381,"a95":".7","info":"dd at tt"},{"visible":true,"include":false,"step":"530","x":218.0761904761905,"y":-69.4952380952381,"z":-90.00952380952381,"a95":".7","info":"dd at tt"},{"visible":true,"include":false,"step":"560","x":162.93333333333334,"y":43.80952380952381,"z":-172.95238095238096,"a95":".9","info":"dd at tt"},{"visible":true,"include":false,"step":"590","x":115.68571428571428,"y":-5.057142857142857,"z":-157.76190476190476,"a95":".7","info":"dd at tt"},{"visible":true,"include":false,"step":"610","x":57.2952380952381,"y":-2.4380952380952383,"z":-96.57142857142857,"a95":".8","info":"dd at tt"},{"visible":true,"include":false,"step":"630","x":-29.342857142857145,"y":-3.895238095238095,"z":-91.66666666666667,"a95":"1","info":"dd at tt"},{"visible":true,"include":false,"step":"650","x":-75.77142857142857,"y":-10.457142857142857,"z":-63.8,"a95":"1.2","info":"dd at tt"}],"demagType":"Unknown","patch":1.1,"format":"Unknown","strat":null},{"version":"v1.1.0","exported":"2016-10-10T13:19:08.937Z","info":"","GEO":[],"TECT":[],"interpreted":false,"name":"TK77.1","coreAzi":51,"coreDip":77,"bedStrike":261,"bedDip":43,"data":[{"visible":false,"include":false,"step":"20","x":278.3333333333333,"y":-2693.8190476190475,"z":2889.6380952380955,"a95":".4","info":"dd at tt"},{"visible":false,"include":false,"step":"100","x":201.04761904761904,"y":-2075.5714285714284,"z":2836.7619047619046,"a95":".7","info":"dd at tt"},{"visible":true,"include":false,"step":"150","x":398.60952380952375,"y":-1464.8666666666668,"z":1154.8666666666668,"a95":".3","info":"dd at tt"},{"visible":true,"include":false,"step":"200","x":413.1333333333333,"y":-882.0571428571429,"z":-129.58095238095237,"a95":".4","info":"dd at tt"},{"visible":true,"include":false,"step":"250","x":453.2285714285714,"y":-453.8095238095238,"z":-911.4000000000001,"a95":".5","info":"dd at tt"},{"visible":true,"include":false,"step":"300","x":393.9619047619048,"y":-220.8095238095238,"z":-1302.1714285714286,"a95":".6","info":"dd at tt"},{"visible":true,"include":false,"step":"350","x":386.9904761904762,"y":-63.91428571428572,"z":-1325.1238095238095,"a95":".6","info":"dd at tt"},{"visible":true,"include":true,"step":"400","x":319.5904761904762,"y":-45.32380952380952,"z":-1254.8095238095239,"a95":".5","info":"dd at tt"},{"visible":true,"include":true,"step":"450","x":317.32380952380953,"y":3.657142857142857,"z":-1253.9714285714285,"a95":".6","info":"dd at tt"},{"visible":true,"include":true,"step":"500","x":113.24761904761904,"y":-24.114285714285714,"z":-1052.7142857142858,"a95":".5","info":"dd at tt"},{"visible":true,"include":true,"step":"530","x":212.38095238095238,"y":-38,"z":-858.4952380952382,"a95":".5","info":"dd at tt"},{"visible":true,"include":true,"step":"560","x":162.9904761904762,"y":-42.82857142857143,"z":-806.952380952381,"a95":".6","info":"dd at tt"},{"visible":true,"include":true,"step":"590","x":154.33333333333334,"y":-34.34285714285714,"z":-710.1809523809524,"a95":".5","info":"dd at tt"},{"visible":true,"include":true,"step":"610","x":42.12380952380953,"y":-13.542857142857141,"z":-478.39047619047625,"a95":".6","info":"dd at tt"},{"visible":false,"include":false,"step":"630","x":-87.8,"y":-31.257142857142856,"z":-148.95238095238096,"a95":"1.1","info":"dd at tt"},{"visible":false,"include":false,"step":"650","x":-62.93333333333333,"y":5.809523809523809,"z":-107.58095238095237,"a95":"1.1","info":"dd at tt"}],"demagType":"Unknown","patch":1.1,"format":"Unknown","strat":null},{"version":"v1.1.0","exported":"2016-10-10T13:19:08.937Z","info":"","GEO":[],"TECT":[],"interpreted":false,"name":"TK78.3","coreAzi":20,"coreDip":31,"bedStrike":261,"bedDip":43,"data":[{"visible":false,"include":false,"step":"20","x":-1427.095238095238,"y":-1493.3428571428572,"z":2294.0476190476193,"a95":".5","info":"dd at tt"},{"visible":true,"include":true,"step":"100","x":-1161.5523809523809,"y":-1029.0666666666668,"z":2182.190476190476,"a95":".6","info":"dd at tt"},{"visible":true,"include":true,"step":"150","x":-284.14285714285717,"y":-969.8,"z":1161.5523809523809,"a95":".4","info":"dd at tt"},{"visible":true,"include":true,"step":"200","x":122.01904761904763,"y":-833.2476190476191,"z":531.3809523809524,"a95":".5","info":"dd at tt"},{"visible":true,"include":true,"step":"250","x":330.04761904761904,"y":-722.2666666666667,"z":179.25714285714287,"a95":".5","info":"dd at tt"},{"visible":true,"include":true,"step":"300","x":353.2857142857143,"y":-580.4857142857143,"z":-74.96190476190476,"a95":".4","info":"dd at tt"},{"visible":true,"include":true,"step":"350","x":350.96190476190475,"y":-421.85714285714283,"z":-132.48571428571427,"a95":".5","info":"dd at tt"},{"visible":true,"include":false,"step":"400","x":205.69523809523812,"y":-377.1142857142857,"z":-149.9142857142857,"a95":".6","info":"dd at tt"},{"visible":true,"include":false,"step":"450","x":205.9904761904762,"y":-258.62857142857143,"z":-173.53333333333333,"a95":".6","info":"dd at tt"},{"visible":true,"include":false,"step":"500","x":171.47619047619048,"y":-227.25714285714284,"z":-130.59047619047618,"a95":".6","info":"dd at tt"},{"visible":true,"include":false,"step":"530","x":152.64761904761903,"y":-241.6095238095238,"z":-120.16190476190476,"a95":".6","info":"dd at tt"},{"visible":true,"include":false,"step":"560","x":147.59047619047618,"y":-157.8761904761905,"z":-119,"a95":".7","info":"dd at tt"},{"visible":true,"include":false,"step":"590","x":170.48571428571427,"y":-161.71428571428572,"z":-93.22857142857143,"a95":".6","info":"dd at tt"},{"visible":true,"include":false,"step":"610","x":118.88571428571429,"y":-126.26666666666667,"z":-113.36190476190475,"a95":".6","info":"dd at tt"},{"visible":true,"include":false,"step":"630","x":53.400000000000006,"y":-84.25714285714287,"z":-60.51428571428571,"a95":".9","info":"dd at tt"},{"visible":true,"include":false,"step":"650","x":-15.457142857142859,"y":-69.4952380952381,"z":-7.723809523809523,"a95":"1","info":"dd at tt"}],"demagType":"Unknown","patch":1.1,"format":"Unknown","strat":null},{"version":"v1.1.0","exported":"2016-10-10T13:19:08.937Z","info":"","GEO":[],"TECT":[],"interpreted":false,"name":"TK80.1A","coreAzi":7,"coreDip":60,"bedStrike":261,"bedDip":43,"data":[{"visible":false,"include":false,"step":"20","x":223.13333333333335,"y":-1972.1333333333334,"z":2703.114285714286,"a95":".3","info":"dd at tt"},{"visible":true,"include":false,"step":"100","x":-761.7809523809524,"y":-1484.6190476190477,"z":2049.1238095238095,"a95":".5","info":"dd at tt"},{"visible":true,"include":false,"step":"150","x":-884.3809523809524,"y":-1084.847619047619,"z":-63.91428571428572,"a95":".7","info":"dd at tt"},{"visible":true,"include":false,"step":"200","x":-995.3619047619047,"y":-864.047619047619,"z":-929.4190476190475,"a95":".7","info":"dd at tt"},{"visible":true,"include":false,"step":"250","x":-1104.6095238095238,"y":-694.3714285714285,"z":-1410.5333333333333,"a95":".6","info":"dd at tt"},{"visible":true,"include":false,"step":"300","x":-1037.7809523809524,"y":-602.5619047619048,"z":-1554.9333333333332,"a95":".6","info":"dd at tt"},{"visible":true,"include":true,"step":"350","x":-804.1904761904761,"y":-370.7238095238095,"z":-1395.4285714285713,"a95":".5","info":"dd at tt"},{"visible":true,"include":true,"step":"400","x":-704.8285714285714,"y":-324.81904761904764,"z":-1190.6,"a95":".6","info":"dd at tt"},{"visible":true,"include":true,"step":"450","x":-517.152380952381,"y":-227.0761904761905,"z":-1023.8095238095239,"a95":".6","info":"dd at tt"},{"visible":true,"include":true,"step":"500","x":-529.4095238095239,"y":-175.82857142857142,"z":-912.2476190476191,"a95":".5","info":"dd at tt"},{"visible":true,"include":true,"step":"530","x":-383.67619047619047,"y":-241.78095238095236,"z":-691.0952380952381,"a95":".5","info":"dd at tt"},{"visible":true,"include":true,"step":"560","x":-431.4380952380953,"y":-160.6095238095238,"z":-645.8571428571429,"a95":".6","info":"dd at tt"},{"visible":true,"include":true,"step":"590","x":-262.6380952380952,"y":-82.8,"z":-564.7714285714286,"a95":".6","info":"dd at tt"},{"visible":true,"include":false,"step":"610","x":-326.67619047619047,"y":-102.26666666666667,"z":-432.2285714285714,"a95":".6","info":"dd at tt"},{"visible":true,"include":false,"step":"630","x":-254.61904761904762,"y":-36.142857142857146,"z":-325.37142857142857,"a95":".7","info":"dd at tt"},{"visible":true,"include":false,"step":"650","x":-262.81904761904764,"y":-28.295238095238098,"z":-156.44761904761904,"a95":"1.4","info":"dd at tt"}],"demagType":"Unknown","patch":1.1,"format":"Unknown","strat":null}]
