# Supplementary material for: Paleomagnetic constraints on the timing and distribution of Cenozoic rotations in Central and Eastern Anatolia
Source: Copernicus journal article supplement (doi:10.5194/se-9-295-2018), 2018-03-21
Supplement: Supplementary file 2 [file se-9-295-2018-supplement.zip › se-2017-66_DATA_dir files/dir files Sivas/SS01.dir]

[{"version":"v1.1.0","exported":"2016-10-11T13:56:57.873Z","info":"1","GEO":[{"dec":214.7299622745389,"inc":-65.93785898714283,"MAD":4.696727046194082,"cm":[-3.383536836952858e-15,-2.5376526277146434e-16,0],"intensity":518.0126745575513,"type":"dir","forced":true,"remark":"","origin":false,"nSteps":7,"minStep":"25.0","maxStep":"50.0","steps":["25.0","30.0","33.0","35.0","40.0","45.0","50.0"],"group":"None"}],"TECT":[{"dec":165.0960897592032,"inc":-40.59080132214084,"MAD":4.696727046194138,"cm":[-1.4887562082592576e-14,-3.789561257387201e-14,1.3534147347811431e-15],"intensity":518.0126745575513,"type":"dir","forced":true,"remark":"","origin":false,"nSteps":7,"minStep":"25.0","maxStep":"50.0","steps":["25.0","30.0","33.0","35.0","40.0","45.0","50.0"],"group":"None"}],"interpreted":true,"name":"SS1.1A","coreAzi":249,"coreDip":16,"bedStrike":223,"bedDip":41,"data":[{"visible":true,"include":false,"step":"0.0","x":357.84761904761905,"y":-9.30742857142857,"z":95.88571428571429,"a95":"0.99","info":"29/01/2015 at 18:51:30"},{"visible":true,"include":false,"step":"10.0","x":363.1142857142857,"y":-60.16761904761905,"z":87.18666666666667,"a95":"0.99","info":"29/01/2015 at 18:51:30"},{"visible":true,"include":false,"step":"15.0","x":382.54285714285714,"y":-64.97238095238096,"z":37.34857142857143,"a95":"0.99","info":"29/01/2015 at 18:51:30"},{"visible":true,"include":false,"step":"20.0","x":350.8857142857143,"y":-65.23142857142857,"z":53.23809523809524,"a95":"0.99","info":"29/01/2015 at 18:51:30"},{"visible":true,"include":false,"step":"23.0","x":340.32380952380953,"y":-58.462857142857146,"z":33.63047619047619,"a95":"0.99","info":"29/01/2015 at 18:51:30"},{"visible":true,"include":true,"step":"25.0","x":334.64761904761906,"y":-77.86380952380952,"z":27.685714285714283,"a95":"0.99","info":"29/01/2015 at 18:51:30"},{"visible":true,"include":true,"step":"30.0","x":279.8666666666667,"y":-62.925714285714285,"z":42.14952380952381,"a95":"0.99","info":"29/01/2015 at 18:51:30"},{"visible":true,"include":true,"step":"33.0","x":254.1904761904762,"y":-64.77238095238096,"z":37.38761904761905,"a95":"0.99","info":"29/01/2015 at 18:51:30"},{"visible":true,"include":true,"step":"35.0","x":257.77142857142854,"y":-57.80571428571429,"z":12.129523809523809,"a95":"0.99","info":"29/01/2015 at 18:51:30"},{"visible":true,"include":true,"step":"40.0","x":208.16190476190474,"y":-43.10476190476191,"z":7.449142857142856,"a95":"0.99","info":"29/01/2015 at 18:51:30"},{"visible":true,"include":true,"step":"45.0","x":208.8952380952381,"y":-39.04857142857143,"z":4.059809523809524,"a95":"0.99","info":"29/01/2015 at 18:51:30"},{"visible":true,"include":true,"step":"50.0","x":163.2952380952381,"y":-64.84761904761905,"z":-22.83904761904762,"a95":"0.99","info":"29/01/2015 at 18:51:30"},{"visible":true,"include":false,"step":"60.0","x":127.4095238095238,"y":-26.162857142857142,"z":-13.107619047619048,"a95":"0.99","info":"29/01/2015 at 18:51:30"},{"visible":true,"include":false,"step":"70.0","x":88.57333333333334,"y":-4.4093333333333335,"z":-11.719047619047618,"a95":"0.99","info":"29/01/2015 at 18:51:30"}],"demagType":"Unknown","patch":1.1,"format":"Unknown","strat":null},{"version":"v1.1.0","exported":"2016-10-11T13:56:57.873Z","info":"1","GEO":[{"dec":235.70088320890943,"inc":-54.919093129703256,"MAD":3.158485645179628,"cm":[-4.3985978880387156e-15,4.0602442043434294e-15,0],"intensity":264.0090242256169,"type":"dir","forced":true,"remark":"","origin":false,"nSteps":7,"minStep":"25.0","maxStep":"60.0","steps":["25.0","30.0","35.0","40.0","45.0","50.0","60.0"],"group":"None"}],"TECT":[{"dec":184.78040348034077,"inc":-44.467980517330204,"MAD":3.1584856451796797,"cm":[-4.0602442043434294e-15,1.4718385240744934e-14,2.7068294695622863e-15],"intensity":264.0090242256169,"type":"dir","forced":true,"remark":"","origin":false,"nSteps":7,"minStep":"25.0","maxStep":"60.0","steps":["25.0","30.0","35.0","40.0","45.0","50.0","60.0"],"group":"None"}],"interpreted":true,"name":"SS1.1B","coreAzi":249,"coreDip":16,"bedStrike":223,"bedDip":41,"data":[{"visible":true,"include":false,"step":"0.0","x":69.87619047619049,"y":17.540952380952383,"z":103.52380952380952,"a95":"0.99","info":"20/09/2014 at 18:17:18"},{"visible":true,"include":false,"step":"5.0","x":128.05714285714285,"y":1.4533333333333334,"z":101,"a95":"0.99","info":"20/09/2014 at 18:17:18"},{"visible":true,"include":false,"step":"10.0","x":177.4952380952381,"y":-16.812380952380952,"z":87.6704761904762,"a95":"0.99","info":"20/09/2014 at 18:17:18"},{"visible":true,"include":false,"step":"15.0","x":189.88571428571427,"y":-28.959047619047617,"z":75.63904761904762,"a95":"0.99","info":"20/09/2014 at 18:17:18"},{"visible":true,"include":false,"step":"20.0","x":189.4952380952381,"y":-24.515238095238097,"z":73.2,"a95":"0.99","info":"20/09/2014 at 18:17:18"},{"visible":true,"include":true,"step":"25.0","x":177.63809523809525,"y":-31.331428571428575,"z":58.462857142857146,"a95":"0.99","info":"20/09/2014 at 18:17:18"},{"visible":true,"include":true,"step":"30.0","x":155.53333333333333,"y":-26.200952380952383,"z":47.66190476190476,"a95":"0.99","info":"20/09/2014 at 18:17:18"},{"visible":true,"include":true,"step":"35.0","x":136.4952380952381,"y":-16.81904761904762,"z":47.45619047619048,"a95":"0.99","info":"20/09/2014 at 18:17:18"},{"visible":true,"include":true,"step":"40.0","x":114.22857142857144,"y":-19.76952380952381,"z":41.41809523809523,"a95":"0.99","info":"20/09/2014 at 18:17:18"},{"visible":true,"include":true,"step":"45.0","x":95.98095238095237,"y":2.5623809523809524,"z":32.298095238095236,"a95":"0.99","info":"20/09/2014 at 18:17:18"},{"visible":true,"include":true,"step":"50.0","x":97.81904761904761,"y":-9.365333333333334,"z":31.34,"a95":"0.99","info":"20/09/2014 at 18:17:18"},{"visible":true,"include":true,"step":"60.0","x":69.76571428571428,"y":-10.087619047619048,"z":23.857142857142858,"a95":"0.99","info":"20/09/2014 at 18:17:18"},{"visible":true,"include":false,"step":"70.0","x":42.04571428571429,"y":13.153333333333334,"z":3.7494285714285716,"a95":"0.99","info":"20/09/2014 at 18:17:18"},{"visible":false,"include":false,"step":"80.0","x":95.28571428571429,"y":10.577142857142857,"z":10.67142857142857,"a95":"0.99","info":"20/09/2014 at 18:17:18"},{"visible":false,"include":false,"step":"90.0","x":34.10476190476191,"y":4.7051428571428575,"z":15.751428571428571,"a95":"0.99","info":"20/09/2014 at 18:17:18"},{"visible":false,"include":false,"step":"100.0","x":11.704761904761906,"y":22.22,"z":-3.186571428571429,"a95":"0.99","info":"20/09/2014 at 18:17:18"}],"demagType":"Unknown","patch":1.1,"format":"Unknown","strat":null},{"version":"v1.1.0","exported":"2016-10-11T13:56:57.873Z","info":"","GEO":[{"dec":213.17982828388799,"inc":-47.80679580162715,"MAD":5.441766865652683,"cm":[-1.3534147347811431e-14,2.6391587328232294e-14,0],"intensity":437.70828666782984,"type":"dir","forced":true,"remark":"","origin":false,"nSteps":12,"minStep":"240","maxStep":"490","steps":["240","270","290","310","330","350","370","400","420","440","470","490"],"group":"None"}],"TECT":[{"dec":182.13688867294846,"inc":-28.946979659017355,"MAD":5.441766865652666,"cm":[-1.2180732613030288e-14,5.853518727928444e-14,1.1842378929335004e-14],"intensity":437.70828666782984,"type":"dir","forced":true,"remark":"","origin":false,"nSteps":12,"minStep":"240","maxStep":"490","steps":["240","270","290","310","330","350","370","400","420","440","470","490"],"group":"None"}],"interpreted":true,"name":"SS1.2A","coreAzi":240,"coreDip":20,"bedStrike":223,"bedDip":41,"data":[{"visible":true,"include":false,"step":"20","x":186.66666666666666,"y":9.142857142857142,"z":20.285714285714285,"a95":"2.2","info":"\"14-10-20\" at \"14:55\""},{"visible":true,"include":false,"step":"100","x":222.85714285714286,"y":-44.476190476190474,"z":90.57142857142857,"a95":"2.1","info":"\"14-10-20\" at \"17:55\""},{"visible":true,"include":false,"step":"150","x":303.3333333333333,"y":-112.76190476190476,"z":120.28571428571429,"a95":"2.1","info":"\"14-10-20\" at \"21:18\""},{"visible":true,"include":false,"step":"180","x":304.57142857142856,"y":-106.0952380952381,"z":92.76190476190476,"a95":"1.9","info":"\"14-10-21\" at \"00:13\""},{"visible":true,"include":false,"step":"210","x":311.8095238095238,"y":-106.0952380952381,"z":113.61904761904762,"a95":"1.9","info":"\"14-10-21\" at \"16:15\""},{"visible":true,"include":true,"step":"240","x":258.4761904761905,"y":-80.19047619047619,"z":69.33333333333333,"a95":"2","info":"\"14-10-21\" at \"19:13\""},{"visible":true,"include":true,"step":"270","x":267.42857142857144,"y":-84.19047619047619,"z":98,"a95":"2.1","info":"\"14-10-21\" at \"22:19\""},{"visible":true,"include":true,"step":"290","x":259.14285714285717,"y":-93.80952380952381,"z":70.57142857142857,"a95":"1.9","info":"\"14-10-22\" at \"14:49\""},{"visible":true,"include":true,"step":"310","x":265.23809523809524,"y":-100.19047619047619,"z":114.19047619047619,"a95":"2.2","info":"\"14-10-22\" at \"17:36\""},{"visible":true,"include":true,"step":"330","x":236.28571428571428,"y":-95.9047619047619,"z":65.14285714285714,"a95":"1.8","info":"\"14-10-22\" at \"20:45\""},{"visible":true,"include":true,"step":"350","x":254.0952380952381,"y":-95.52380952380952,"z":88.47619047619048,"a95":"2.1","info":"\"14-10-23\" at \"15:00\""},{"visible":true,"include":true,"step":"370","x":248.66666666666666,"y":-53.42857142857143,"z":50.57142857142857,"a95":"1.8","info":"\"14-10-23\" at \"17:59\""},{"visible":true,"include":true,"step":"400","x":204.76190476190476,"y":-46.285714285714285,"z":94.47619047619048,"a95":"2.6","info":"\"14-10-23\" at \"21:00\""},{"visible":true,"include":true,"step":"420","x":186,"y":-69.33333333333333,"z":67.9047619047619,"a95":"2","info":"\"14-10-24\" at \"15:33\""},{"visible":true,"include":true,"step":"440","x":186.85714285714286,"y":-66,"z":83.71428571428571,"a95":"2.2","info":"\"14-10-24\" at \"18:48\""},{"visible":true,"include":true,"step":"470","x":171.8095238095238,"y":-54.666666666666664,"z":47.61904761904762,"a95":"1.8","info":"\"14-10-24\" at \"21:28\""},{"visible":true,"include":true,"step":"490","x":127.33333333333333,"y":-58.476190476190474,"z":84,"a95":"3.6","info":"\"14-10-25\" at \"00:24\""},{"visible":false,"include":false,"step":"520","x":73.95238095238095,"y":-42.81904761904762,"z":15.19047619047619,"a95":"4.7","info":"\"14-10-25\" at \"03:04\""},{"visible":false,"include":false,"step":"550","x":33.142857142857146,"y":-87.23809523809524,"z":80,"a95":"5.5","info":"\"14-10-25\" at \"05:42\""}],"demagType":"Unknown","patch":1.1,"format":"Unknown","strat":null},{"version":"v1.1.0","exported":"2016-10-11T13:56:57.873Z","info":"2","GEO":[{"dec":219.62221156834266,"inc":-58.754411346135434,"MAD":1.4579852098193524,"cm":[-7.443781041296288e-15,6.090366306515144e-15,0],"intensity":335.3071658891271,"type":"dir","forced":true,"remark":"","origin":false,"nSteps":6,"minStep":"25.0","maxStep":"45.0","steps":["25.0","30.0","33.0","35.0","40.0","45.0"],"group":"None"}],"TECT":[{"dec":174.56369115938696,"inc":-38.6961266292619,"MAD":1.4579852098194845,"cm":[-1.2180732613030288e-14,8.374253671458324e-15,1.3534147347811431e-14],"intensity":335.3071658891271,"type":"dir","forced":true,"remark":"","origin":false,"nSteps":6,"minStep":"25.0","maxStep":"45.0","steps":["25.0","30.0","33.0","35.0","40.0","45.0"],"group":"None"}],"interpreted":true,"name":"SS1.2B","coreAzi":240,"coreDip":20,"bedStrike":223,"bedDip":41,"data":[{"visible":true,"include":false,"step":"0.0","x":122.13333333333334,"y":50.73238095238096,"z":44.205714285714286,"a95":"0.99","info":"29/01/2015 at 18:51:30"},{"visible":true,"include":false,"step":"10.0","x":201.28571428571428,"y":-2.3123809523809524,"z":58.04761904761905,"a95":"0.99","info":"29/01/2015 at 18:51:30"},{"visible":true,"include":false,"step":"15.0","x":216.68571428571425,"y":-20.50190476190476,"z":51.45238095238095,"a95":"0.99","info":"29/01/2015 at 18:51:30"},{"visible":true,"include":false,"step":"20.0","x":216.50476190476192,"y":-23.525714285714287,"z":38.33904761904762,"a95":"0.99","info":"29/01/2015 at 18:51:30"},{"visible":true,"include":false,"step":"23.0","x":201.16190476190474,"y":-30.169523809523806,"z":33.41428571428572,"a95":"0.99","info":"29/01/2015 at 18:51:30"},{"visible":true,"include":true,"step":"25.0","x":199.0095238095238,"y":-37.385714285714286,"z":34.80095238095238,"a95":"0.99","info":"29/01/2015 at 18:51:30"},{"visible":true,"include":true,"step":"30.0","x":178.33333333333334,"y":-34.79047619047619,"z":28.238095238095237,"a95":"0.99","info":"29/01/2015 at 18:51:30"},{"visible":true,"include":true,"step":"33.0","x":170.52380952380952,"y":-27.973333333333336,"z":26.948571428571427,"a95":"0.99","info":"29/01/2015 at 18:51:30"},{"visible":true,"include":true,"step":"35.0","x":159.16190476190476,"y":-31.798095238095236,"z":22.128571428571426,"a95":"0.99","info":"29/01/2015 at 18:51:30"},{"visible":true,"include":true,"step":"40.0","x":144.62857142857143,"y":-26.11047619047619,"z":32.11904761904762,"a95":"0.99","info":"29/01/2015 at 18:51:30"},{"visible":true,"include":true,"step":"45.0","x":125.6,"y":-24.01047619047619,"z":22.55809523809524,"a95":"0.99","info":"29/01/2015 at 18:51:30"},{"visible":false,"include":false,"step":"50.0","x":108.77142857142856,"y":-62.53619047619048,"z":-3.4617142857142857,"a95":"0.99","info":"29/01/2015 at 18:51:30"},{"visible":true,"include":false,"step":"60.0","x":77.51523809523809,"y":-10.477142857142857,"z":24.38285714285714,"a95":"0.99","info":"29/01/2015 at 18:51:30"},{"visible":true,"include":false,"step":"70.0","x":67.28857142857143,"y":3.9577142857142853,"z":16.540952380952383,"a95":"0.99","info":"29/01/2015 at 18:51:30"}],"demagType":"Unknown","patch":1.1,"format":"Unknown","strat":null},{"version":"v1.1.0","exported":"2016-10-11T13:56:57.873Z","info":"1","GEO":[],"TECT":[],"interpreted":false,"name":"SS1.3A","coreAzi":201,"coreDip":8,"bedStrike":223,"bedDip":41,"data":[{"visible":true,"include":false,"step":"0.0","x":-83.31142857142856,"y":250.94285714285715,"z":-18.806666666666665,"a95":"0.99","info":"08/10/2014 at 12:47:29"},{"visible":true,"include":false,"step":"4.0","x":-64.53238095238096,"y":271.32380952380953,"z":-23.700952380952383,"a95":"0.99","info":"08/10/2014 at 12:47:29"},{"visible":true,"include":false,"step":"8.0","x":-50.71047619047619,"y":281.18095238095236,"z":-16.412380952380953,"a95":"0.99","info":"08/10/2014 at 12:47:29"},{"visible":true,"include":false,"step":"12.0","x":-52.40571428571428,"y":270.04761904761904,"z":-26.81047619047619,"a95":"0.99","info":"08/10/2014 at 12:47:29"},{"visible":true,"include":false,"step":"16.0","x":-37.02095238095238,"y":273.8,"z":-19.234285714285715,"a95":"0.99","info":"08/10/2014 at 12:47:29"},{"visible":true,"include":false,"step":"20.0","x":-38.64190476190476,"y":292.4190476190476,"z":-35.417142857142856,"a95":"0.99","info":"08/10/2014 at 12:47:29"},{"visible":true,"include":false,"step":"25.0","x":-34.75142857142857,"y":236.58095238095237,"z":-20.63142857142857,"a95":"0.99","info":"08/10/2014 at 12:47:29"},{"visible":true,"include":false,"step":"30.0","x":-42.35047619047619,"y":231.64761904761906,"z":-16.930476190476192,"a95":"0.99","info":"08/10/2014 at 12:47:29"},{"visible":true,"include":false,"step":"35.0","x":-72.60285714285715,"y":212.38095238095238,"z":-34.48952380952381,"a95":"0.99","info":"08/10/2014 at 12:47:29"},{"visible":true,"include":false,"step":"40.0","x":-90.89047619047619,"y":243.33333333333334,"z":-22.89428571428571,"a95":"0.99","info":"08/10/2014 at 12:47:29"},{"visible":true,"include":false,"step":"45.0","x":-90.75428571428571,"y":248.54285714285712,"z":-46.831428571428575,"a95":"0.99","info":"08/10/2014 at 12:47:29"},{"visible":true,"include":false,"step":"50.0","x":-89.90095238095239,"y":188.55238095238096,"z":-19.186666666666667,"a95":"0.99","info":"08/10/2014 at 12:47:29"},{"visible":true,"include":false,"step":"60.0","x":-149.8761904761905,"y":216.16190476190474,"z":-47.465714285714284,"a95":"0.99","info":"08/10/2014 at 12:47:29"},{"visible":true,"include":false,"step":"70.0","x":-131.61904761904762,"y":194.25714285714287,"z":-34.61238095238095,"a95":"0.99","info":"08/10/2014 at 12:47:29"},{"visible":true,"include":false,"step":"80.0","x":-167.45714285714286,"y":151.3047619047619,"z":-52.41619047619048,"a95":"0.99","info":"08/10/2014 at 12:47:29"},{"visible":true,"include":false,"step":"90.0","x":-143.62857142857143,"y":184.26666666666665,"z":-36.44571428571429,"a95":"0.99","info":"08/10/2014 at 12:47:29"},{"visible":true,"include":false,"step":"100.0","x":-132.8952380952381,"y":155.67619047619047,"z":30.211428571428574,"a95":"0.99","info":"08/10/2014 at 12:47:29"}],"demagType":"Unknown","patch":1.1,"format":"Unknown","strat":null},{"version":"v1.1.0","exported":"2016-10-11T13:56:57.874Z","info":"2","GEO":[],"TECT":[],"interpreted":false,"name":"SS1.4A","coreAzi":197,"coreDip":5,"bedStrike":223,"bedDip":41,"data":[{"visible":true,"include":false,"step":"0.0","x":57.44571428571428,"y":208.30476190476188,"z":-188.74285714285713,"a95":"0.99","info":"08/10/2014 at 12:47:29"},{"visible":true,"include":false,"step":"4.0","x":61.15714285714286,"y":216.04761904761904,"z":-173.16190476190476,"a95":"0.99","info":"08/10/2014 at 12:47:29"},{"visible":true,"include":false,"step":"8.0","x":81.10285714285715,"y":191.8095238095238,"z":-166.51428571428573,"a95":"0.99","info":"08/10/2014 at 12:47:29"},{"visible":true,"include":false,"step":"12.0","x":71.73333333333333,"y":187.48571428571427,"z":-146.93333333333334,"a95":"0.99","info":"08/10/2014 at 12:47:29"},{"visible":true,"include":false,"step":"16.0","x":50.57904761904762,"y":161.07619047619048,"z":-143.92380952380952,"a95":"0.99","info":"08/10/2014 at 12:47:29"},{"visible":true,"include":false,"step":"20.0","x":54.05238095238095,"y":182.78095238095239,"z":-107.96190476190475,"a95":"0.99","info":"08/10/2014 at 12:47:29"},{"visible":true,"include":false,"step":"25.0","x":70.96666666666667,"y":137.16190476190476,"z":-127.74285714285713,"a95":"0.99","info":"08/10/2014 at 12:47:29"},{"visible":true,"include":false,"step":"30.0","x":60.26571428571428,"y":141,"z":-143.43809523809523,"a95":"0.99","info":"08/10/2014 at 12:47:29"},{"visible":true,"include":false,"step":"35.0","x":23.292380952380952,"y":67.49047619047619,"z":-156.46666666666667,"a95":"0.99","info":"08/10/2014 at 12:47:29"},{"visible":true,"include":false,"step":"40.0","x":-25.564761904761905,"y":115.27619047619048,"z":-120.58095238095237,"a95":"0.99","info":"08/10/2014 at 12:47:29"},{"visible":true,"include":false,"step":"45.0","x":46.52571428571429,"y":89.09714285714286,"z":-153.53333333333333,"a95":"0.99","info":"08/10/2014 at 12:47:29"},{"visible":true,"include":false,"step":"50.0","x":25.65904761904762,"y":26.815238095238094,"z":-163.8952380952381,"a95":"0.99","info":"08/10/2014 at 12:47:29"},{"visible":true,"include":false,"step":"60.0","x":-29.694285714285716,"y":80.27619047619048,"z":-140.32380952380953,"a95":"0.99","info":"08/10/2014 at 12:47:29"},{"visible":true,"include":false,"step":"70.0","x":11.963809523809525,"y":48.892380952380954,"z":-182.88571428571427,"a95":"0.99","info":"08/10/2014 at 12:47:29"},{"visible":true,"include":false,"step":"80.0","x":-10.941904761904762,"y":-35.90380952380953,"z":-176.85714285714286,"a95":"0.99","info":"08/10/2014 at 12:47:29"},{"visible":true,"include":false,"step":"90.0","x":-34.82857142857143,"y":47.26571428571429,"z":-175.53333333333333,"a95":"0.99","info":"08/10/2014 at 12:47:29"},{"visible":true,"include":false,"step":"100.0","x":-44.28857142857142,"y":-16.423809523809524,"z":-134.9142857142857,"a95":"0.99","info":"08/10/2014 at 12:47:29"}],"demagType":"Unknown","patch":1.1,"format":"Unknown","strat":null},{"version":"v1.1.0","exported":"2016-10-11T13:56:57.874Z","info":"2","GEO":[{"dec":214.47388041856956,"inc":-67.89605741425379,"MAD":7.0151139057132434,"cm":[0,-1.7763568394002505e-15,0],"intensity":838.3939600750052,"type":"dir","forced":true,"remark":"","origin":false,"nSteps":5,"minStep":"25.0","maxStep":"60.0","steps":["25.0","30.0","35.0","40.0","60.0"],"group":"None","version":"v1.1.0"}],"TECT":[{"dec":162.79353495815133,"inc":-41.50151914448221,"MAD":7.015113905713269,"cm":[-2.1316282072803006e-14,-1.5987211554602254e-14,2.1316282072803006e-14],"intensity":838.3939600750052,"type":"dir","forced":true,"remark":"","origin":false,"nSteps":5,"minStep":"25.0","maxStep":"60.0","steps":["25.0","30.0","35.0","40.0","60.0"],"group":"None","version":"v1.1.0"}],"interpreted":true,"name":"SS1.5A","coreAzi":141,"coreDip":55,"bedStrike":223,"bedDip":41,"data":[{"visible":true,"include":false,"step":"0.0","x":189.62857142857143,"y":60.13714285714286,"z":-173.92380952380952,"a95":"0.99","info":"20/09/2014 at 18:17:18"},{"visible":true,"include":false,"step":"5.0","x":251.2095238095238,"y":82.85809523809523,"z":-193.01904761904763,"a95":"0.99","info":"20/09/2014 at 18:17:18"},{"visible":true,"include":false,"step":"10.0","x":325.3047619047619,"y":109.01904761904763,"z":-214.0095238095238,"a95":"0.99","info":"20/09/2014 at 18:17:18"},{"visible":true,"include":false,"step":"15.0","x":356.54285714285714,"y":116.6,"z":-218.2761904761905,"a95":"0.99","info":"20/09/2014 at 18:17:18"},{"visible":true,"include":false,"step":"20.0","x":391.0761904761905,"y":158.93333333333334,"z":-214.43809523809523,"a95":"0.99","info":"20/09/2014 at 18:17:18"},{"visible":true,"include":true,"step":"25.0","x":361.18095238095236,"y":160.85714285714286,"z":-286.8,"a95":"0.99","info":"20/09/2014 at 18:17:18"},{"visible":true,"include":true,"step":"30.0","x":286.2,"y":182.1238095238095,"z":-311.9428571428572,"a95":"0.99","info":"20/09/2014 at 18:17:18"},{"visible":true,"include":true,"step":"35.0","x":204.0761904761905,"y":163.37142857142857,"z":-320.9047619047619,"a95":"0.99","info":"20/09/2014 at 18:17:18"},{"visible":true,"include":true,"step":"40.0","x":217.37142857142857,"y":148.71428571428572,"z":-314.7238095238095,"a95":"0.99","info":"20/09/2014 at 18:17:18"},{"visible":false,"include":false,"step":"45.0","x":262.3904761904762,"y":209.84761904761905,"z":-239.71428571428572,"a95":"0.99","info":"20/09/2014 at 18:17:18"},{"visible":false,"include":false,"step":"50.0","x":272.2190476190476,"y":198.15238095238095,"z":-255.85714285714286,"a95":"0.99","info":"20/09/2014 at 18:17:18"},{"visible":true,"include":true,"step":"60.0","x":227.7904761904762,"y":103.24761904761904,"z":-248.23809523809524,"a95":"0.99","info":"20/09/2014 at 18:17:18"},{"visible":false,"include":false,"step":"70.0","x":169.83809523809524,"y":185.55238095238096,"z":-126.74285714285713,"a95":"0.99","info":"20/09/2014 at 18:17:18"},{"visible":false,"include":false,"step":"80.0","x":114.51428571428572,"y":109.4,"z":-151.95238095238096,"a95":"0.99","info":"20/09/2014 at 18:17:18"},{"visible":false,"include":false,"step":"90.0","x":211.2095238095238,"y":138.9142857142857,"z":-165.14285714285714,"a95":"0.99","info":"20/09/2014 at 18:17:18"},{"visible":false,"include":false,"step":"100.0","x":274.04761904761904,"y":108.92380952380952,"z":-59.27142857142857,"a95":"0.99","info":"20/09/2014 at 18:17:18"}],"demagType":"Unknown","patch":1.1,"format":"Unknown","strat":null},{"version":"v1.1.0","exported":"2016-10-11T13:56:57.874Z","info":"","GEO":[{"dec":253.20389559219404,"inc":-56.94570529204658,"MAD":5.900355408752355,"cm":[-1.6071799975526075e-14,3.383536836952858e-15,0],"intensity":515.7278369586608,"type":"dir","forced":true,"remark":"","origin":false,"nSteps":10,"minStep":"240","maxStep":"440","steps":["240","270","290","310","330","350","370","400","420","440"],"group":"None"}],"TECT":[{"dec":186.9755502454997,"inc":-54.34905939621316,"MAD":5.900355408752373,"cm":[-2.165463575649829e-14,1.8947806286936004e-14,1.4887562082592576e-14],"intensity":515.7278369586608,"type":"dir","forced":true,"remark":"","origin":false,"nSteps":10,"minStep":"240","maxStep":"440","steps":["240","270","290","310","330","350","370","400","420","440"],"group":"None"}],"interpreted":true,"name":"SS1.6A","coreAzi":142,"coreDip":55,"bedStrike":223,"bedDip":41,"data":[{"visible":true,"include":false,"step":"20","x":-149.04761904761904,"y":125.14285714285714,"z":-188.95238095238096,"a95":"2.7","info":"\"14-10-13\" at \"16:55\""},{"visible":true,"include":false,"step":"100","x":-46.476190476190474,"y":130.95238095238096,"z":-191.04761904761904,"a95":"2.7","info":"\"14-10-13\" at \"19:49\""},{"visible":true,"include":false,"step":"150","x":100.38095238095238,"y":178.85714285714286,"z":-276.2857142857143,"a95":"2.7","info":"\"14-10-13\" at \"21:52\""},{"visible":true,"include":false,"step":"180","x":112,"y":186.85714285714286,"z":-273.5238095238095,"a95":"2.3","info":"\"14-10-14\" at \"14:59\""},{"visible":true,"include":false,"step":"210","x":118.19047619047619,"y":187.33333333333334,"z":-276.85714285714283,"a95":"2.6","info":"\"14-10-14\" at \"18:06\""},{"visible":true,"include":true,"step":"240","x":97.52380952380952,"y":184.0952380952381,"z":-259.8095238095238,"a95":"2.5","info":"\"14-10-14\" at \"21:13\""},{"visible":true,"include":true,"step":"270","x":127.9047619047619,"y":164.76190476190476,"z":-251.33333333333334,"a95":"2.5","info":"\"14-10-15\" at \"15:08\""},{"visible":true,"include":true,"step":"290","x":83.80952380952381,"y":176.38095238095238,"z":-290.3809523809524,"a95":"2.5","info":"\"14-10-15\" at \"18:14\""},{"visible":true,"include":true,"step":"310","x":132.95238095238096,"y":173.33333333333334,"z":-248.57142857142858,"a95":"2.6","info":"\"14-10-15\" at \"21:30\""},{"visible":true,"include":true,"step":"330","x":136.0952380952381,"y":167.8095238095238,"z":-255.23809523809524,"a95":"2.5","info":"\"14-10-16\" at \"14:52\""},{"visible":true,"include":true,"step":"350","x":116,"y":142.66666666666666,"z":-246.85714285714286,"a95":"2.7","info":"\"14-10-16\" at \"18:48\""},{"visible":true,"include":true,"step":"370","x":87.61904761904762,"y":135.42857142857142,"z":-235.8095238095238,"a95":"2.6","info":"\"14-10-16\" at \"21:57\""},{"visible":true,"include":true,"step":"400","x":74.38095238095238,"y":110.76190476190476,"z":-203.04761904761904,"a95":"2.5","info":"\"14-10-17\" at \"13:29\""},{"visible":false,"include":false,"step":"420","x":16.38095238095238,"y":139.42857142857142,"z":-210.57142857142858,"a95":"2.4","info":"\"14-10-17\" at \"16:44\""},{"visible":true,"include":true,"step":"440","x":40.476190476190474,"y":94.85714285714286,"z":-151.42857142857142,"a95":"2.8","info":"\"14-10-17\" at \"19:57\""},{"visible":false,"include":false,"step":"470","x":-11.428571428571429,"y":127.71428571428571,"z":-163.14285714285714,"a95":"2.4","info":"\"14-10-17\" at \"23:12\""},{"visible":true,"include":false,"step":"490","x":56.476190476190474,"y":63.333333333333336,"z":-96.28571428571429,"a95":"4.6","info":"\"14-10-18\" at \"11:32\""},{"visible":true,"include":false,"step":"520","x":68.19047619047619,"y":28.952380952380953,"z":-99.04761904761905,"a95":"3.6","info":"\"14-10-18\" at \"14:34\""},{"visible":true,"include":false,"step":"550","x":-29.61904761904762,"y":13.619047619047619,"z":-110.38095238095238,"a95":"4.1","info":"\"14-10-19\" at \"09:27\""},{"visible":false,"include":false,"step":"580","x":-163.04761904761904,"y":50.19047619047619,"z":-59.523809523809526,"a95":"3.6","info":"\"14-10-19\" at \"11:29\""},{"visible":false,"include":false,"step":"610","x":-82.60952380952381,"y":-23.64761904761905,"z":11.285714285714286,"a95":"6.9","info":"\"14-10-19\" at \"14:53\""},{"visible":false,"include":false,"step":"640","x":23.714285714285715,"y":175.23809523809524,"z":90.0952380952381,"a95":"4.1","info":"\"14-10-19\" at \"18:38\""}],"demagType":"Unknown","patch":1.1,"format":"Unknown","strat":null},{"version":"v1.1.0","exported":"2016-10-11T13:56:57.874Z","info":"3","GEO":[{"dec":255.41109166066468,"inc":-68.1741097534022,"MAD":9.3080794500919,"cm":[-4.567774729886359e-15,6.767073673905716e-16,0],"intensity":425.01537820490404,"type":"dir","forced":true,"remark":"","origin":false,"nSteps":7,"minStep":"25.0","maxStep":"50.0","steps":["25.0","30.0","33.0","35.0","40.0","45.0","50.0"],"group":"None"}],"TECT":[{"dec":167.38609368924585,"inc":-56.23727386112276,"MAD":9.308079450091894,"cm":[-1.7594391552154862e-14,9.473903143468002e-15,9.473903143468002e-15],"intensity":425.01537820490404,"type":"dir","forced":true,"remark":"","origin":false,"nSteps":7,"minStep":"25.0","maxStep":"50.0","steps":["25.0","30.0","33.0","35.0","40.0","45.0","50.0"],"group":"None"}],"interpreted":true,"name":"SS1.6B","coreAzi":142,"coreDip":55,"bedStrike":223,"bedDip":41,"data":[{"visible":true,"include":false,"step":"0.0","x":20.304761904761904,"y":80.6647619047619,"z":-202.7238095238095,"a95":"0.99","info":"29/01/2015 at 18:51:30"},{"visible":true,"include":false,"step":"10.0","x":80.2,"y":87.36380952380952,"z":-214.06666666666666,"a95":"0.99","info":"29/01/2015 at 18:51:30"},{"visible":true,"include":false,"step":"15.0","x":95.98095238095237,"y":105.98095238095237,"z":-234.28571428571428,"a95":"0.99","info":"29/01/2015 at 18:51:30"},{"visible":true,"include":false,"step":"20.0","x":92.23047619047618,"y":77.39809523809524,"z":-192.41904761904763,"a95":"0.99","info":"29/01/2015 at 18:51:30"},{"visible":true,"include":false,"step":"23.0","x":85.87142857142857,"y":109.61904761904762,"z":-214.87619047619046,"a95":"0.99","info":"29/01/2015 at 18:51:30"},{"visible":true,"include":true,"step":"25.0","x":64.95333333333333,"y":57.30571428571429,"z":-220.02857142857144,"a95":"0.99","info":"29/01/2015 at 18:51:30"},{"visible":true,"include":true,"step":"30.0","x":95.37142857142857,"y":69.9342857142857,"z":-184.46666666666667,"a95":"0.99","info":"29/01/2015 at 18:51:30"},{"visible":true,"include":true,"step":"33.0","x":90.59714285714286,"y":68.27047619047619,"z":-169.13333333333335,"a95":"0.99","info":"29/01/2015 at 18:51:30"},{"visible":true,"include":true,"step":"35.0","x":98.73333333333333,"y":45.11333333333333,"z":-156.73333333333335,"a95":"0.99","info":"29/01/2015 at 18:51:30"},{"visible":true,"include":true,"step":"40.0","x":97.47619047619048,"y":89.98761904761905,"z":-125.07619047619048,"a95":"0.99","info":"29/01/2015 at 18:51:30"},{"visible":true,"include":true,"step":"45.0","x":54.118095238095236,"y":107.67619047619047,"z":-177.54285714285714,"a95":"0.99","info":"29/01/2015 at 18:51:30"},{"visible":true,"include":true,"step":"50.0","x":93.26666666666667,"y":49.90380952380953,"z":-159.59047619047618,"a95":"0.99","info":"29/01/2015 at 18:51:30"},{"visible":true,"include":false,"step":"60.0","x":55.69047619047619,"y":59.078095238095244,"z":-118.74285714285713,"a95":"0.99","info":"29/01/2015 at 18:51:30"},{"visible":true,"include":false,"step":"70.0","x":56.26380952380952,"y":78.36285714285714,"z":-108.84761904761906,"a95":"0.99","info":"29/01/2015 at 18:51:30"}],"demagType":"Unknown","patch":1.1,"format":"Unknown","strat":null},{"version":"v1.1.0","exported":"2016-10-11T13:56:57.874Z","info":"","GEO":[{"dec":178.32819629004257,"inc":-76.68273236209102,"MAD":3.3646868291622516,"cm":[-3.383536836952858e-15,-2.7068294695622863e-15,0],"intensity":782.5340603165816,"type":"dir","forced":true,"remark":"","origin":false,"nSteps":13,"minStep":"240","maxStep":"520","steps":["240","270","290","310","330","350","370","400","420","440","470","490","520"],"group":"None"}],"TECT":[{"dec":145.15336584528256,"inc":-38.9153768944279,"MAD":3.3646868291622924,"cm":[9.473903143468002e-15,1.8271098919545435e-14,-1.3534147347811431e-15],"intensity":782.5340603165816,"type":"dir","forced":true,"remark":"","origin":false,"nSteps":13,"minStep":"240","maxStep":"520","steps":["240","270","290","310","330","350","370","400","420","440","470","490","520"],"group":"None"}],"interpreted":true,"name":"SS1.7A","coreAzi":140,"coreDip":62,"bedStrike":223,"bedDip":41,"data":[{"visible":true,"include":false,"step":"20","x":-17.047619047619047,"y":7.523809523809524,"z":-232.66666666666666,"a95":"3.8","info":"\"14-10-13\" at \"16:57\""},{"visible":true,"include":false,"step":"100","x":185.23809523809524,"y":28.571428571428573,"z":-325.6190476190476,"a95":"2.9","info":"\"14-10-13\" at \"19:51\""},{"visible":true,"include":false,"step":"150","x":287.8095238095238,"y":61.04761904761905,"z":-391.23809523809524,"a95":"2.6","info":"\"14-10-13\" at \"21:54\""},{"visible":true,"include":false,"step":"180","x":264.2857142857143,"y":65.23809523809524,"z":-397.23809523809524,"a95":"2.4","info":"\"14-10-14\" at \"15:01\""},{"visible":true,"include":false,"step":"210","x":269.14285714285717,"y":64.85714285714286,"z":-390.57142857142856,"a95":"2.4","info":"\"14-10-14\" at \"18:08\""},{"visible":true,"include":true,"step":"240","x":274.76190476190476,"y":59.04761904761905,"z":-373.04761904761904,"a95":"2.6","info":"\"14-10-14\" at \"21:15\""},{"visible":true,"include":true,"step":"270","x":271.14285714285717,"y":67.80952380952381,"z":-365.04761904761904,"a95":"2.5","info":"\"14-10-15\" at \"15:10\""},{"visible":true,"include":true,"step":"290","x":258.57142857142856,"y":66.47619047619048,"z":-388.6666666666667,"a95":"2.5","info":"\"14-10-15\" at \"18:16\""},{"visible":true,"include":true,"step":"310","x":264.1904761904762,"y":47.142857142857146,"z":-338.2857142857143,"a95":"2.6","info":"\"14-10-15\" at \"21:31\""},{"visible":true,"include":true,"step":"330","x":307.3333333333333,"y":68.57142857142857,"z":-358,"a95":"2.3","info":"\"14-10-16\" at \"14:54\""},{"visible":true,"include":true,"step":"350","x":271.42857142857144,"y":57.523809523809526,"z":-320.2857142857143,"a95":"2.4","info":"\"14-10-16\" at \"18:50\""},{"visible":true,"include":true,"step":"370","x":258.2857142857143,"y":70,"z":-329.14285714285717,"a95":"2.3","info":"\"14-10-16\" at \"21:59\""},{"visible":true,"include":true,"step":"400","x":266.6666666666667,"y":52.19047619047619,"z":-289.5238095238095,"a95":"2.4","info":"\"14-10-17\" at \"13:31\""},{"visible":true,"include":true,"step":"420","x":224.66666666666666,"y":48.76190476190476,"z":-315.42857142857144,"a95":"2.4","info":"\"14-10-17\" at \"16:46\""},{"visible":true,"include":true,"step":"440","x":236,"y":42.095238095238095,"z":-257.04761904761904,"a95":"2.2","info":"\"14-10-17\" at \"19:59\""},{"visible":true,"include":true,"step":"470","x":215.61904761904762,"y":86.38095238095238,"z":-277.3333333333333,"a95":"2.4","info":"\"14-10-17\" at \"23:13\""},{"visible":true,"include":true,"step":"490","x":214.76190476190476,"y":38.857142857142854,"z":-259.3333333333333,"a95":"2.7","info":"\"14-10-18\" at \"11:33\""},{"visible":true,"include":true,"step":"520","x":219.14285714285714,"y":57.80952380952381,"z":-222.57142857142858,"a95":"2.6","info":"\"14-10-18\" at \"14:36\""},{"visible":true,"include":false,"step":"550","x":249.04761904761904,"y":-4.476190476190476,"z":-177.52380952380952,"a95":"2.3","info":"\"14-10-19\" at \"09:29\""},{"visible":true,"include":false,"step":"580","x":88.28571428571429,"y":36.857142857142854,"z":-159.71428571428572,"a95":"3.6","info":"\"14-10-19\" at \"11:31\""},{"visible":true,"include":false,"step":"610","x":207.23809523809524,"y":-63.333333333333336,"z":-103.42857142857143,"a95":"3.2","info":"\"14-10-19\" at \"14:55\""},{"visible":true,"include":false,"step":"640","x":118.38095238095238,"y":54.095238095238095,"z":-101.61904761904762,"a95":"4.9","info":"\"14-10-19\" at \"18:40\""}],"demagType":"Unknown","patch":1.1,"format":"Unknown","strat":null},{"version":"v1.1.0","exported":"2016-10-11T13:56:57.875Z","info":"","GEO":[{"dec":200.6624510024849,"inc":-60.55281538525742,"MAD":19.917224907822654,"cm":[-65.32935250788898,32.3246638397717,-303.7822217293079],"intensity":202.79985777343433,"type":"dir","forced":false,"remark":"","origin":false,"nSteps":13,"minStep":"240","maxStep":"520","steps":["240","270","290","310","330","350","370","400","420","440","470","490","520"],"group":"None"}],"TECT":[{"dec":165.5534118002406,"inc":-32.318525624136726,"MAD":19.917224907822675,"cm":[-189.84276295283453,165.84894917939178,-184.5272279116934],"intensity":202.79985777343452,"type":"dir","forced":false,"remark":"","origin":false,"nSteps":13,"minStep":"240","maxStep":"520","steps":["240","270","290","310","330","350","370","400","420","440","470","490","520"],"group":"None"}],"interpreted":true,"name":"SS1.7B","coreAzi":140,"coreDip":62,"bedStrike":223,"bedDip":41,"data":[{"visible":true,"include":false,"step":"20","x":27.61904761904762,"y":0.38095238095238093,"z":-225.8095238095238,"a95":"2.8","info":"\"14-10-20\" at \"14:57\""},{"visible":true,"include":false,"step":"100","x":175.52380952380952,"y":42.095238095238095,"z":-259.9047619047619,"a95":"2.4","info":"\"14-10-20\" at \"17:57\""},{"visible":true,"include":false,"step":"150","x":240.28571428571428,"y":75.9047619047619,"z":-293.5238095238095,"a95":"2.3","info":"\"14-10-20\" at \"21:20\""},{"visible":true,"include":false,"step":"180","x":252.47619047619048,"y":74.76190476190476,"z":-327.14285714285717,"a95":"2.2","info":"\"14-10-21\" at \"00:15\""},{"visible":true,"include":false,"step":"210","x":246.57142857142858,"y":72.0952380952381,"z":-301.5238095238095,"a95":"2.1","info":"\"14-10-21\" at \"16:16\""},{"visible":true,"include":true,"step":"240","x":233.52380952380952,"y":75.14285714285714,"z":-289.14285714285717,"a95":"2.1","info":"\"14-10-21\" at \"19:16\""},{"visible":true,"include":true,"step":"270","x":244.57142857142858,"y":28.285714285714285,"z":-267.6190476190476,"a95":"2","info":"\"14-10-21\" at \"22:21\""},{"visible":true,"include":true,"step":"290","x":254.28571428571428,"y":41.80952380952381,"z":-268.95238095238096,"a95":"2.1","info":"\"14-10-22\" at \"14:51\""},{"visible":true,"include":true,"step":"310","x":227.33333333333334,"y":19.238095238095237,"z":-246.47619047619048,"a95":"2.3","info":"\"14-10-22\" at \"17:38\""},{"visible":true,"include":true,"step":"330","x":221.52380952380952,"y":20.19047619047619,"z":-276.6666666666667,"a95":"2.3","info":"\"14-10-22\" at \"20:47\""},{"visible":true,"include":true,"step":"350","x":247.42857142857142,"y":30.857142857142858,"z":-240.85714285714286,"a95":"2.3","info":"\"14-10-23\" at \"15:02\""},{"visible":true,"include":true,"step":"370","x":223.8095238095238,"y":17.333333333333332,"z":-243.14285714285714,"a95":"2.2","info":"\"14-10-23\" at \"18:01\""},{"visible":true,"include":true,"step":"400","x":182.47619047619048,"y":4.571428571428571,"z":-228.1904761904762,"a95":"2.4","info":"\"14-10-23\" at \"21:01\""},{"visible":true,"include":true,"step":"420","x":182.57142857142858,"y":19.714285714285715,"z":-259.8095238095238,"a95":"2.4","info":"\"14-10-24\" at \"15:36\""},{"visible":true,"include":true,"step":"440","x":190.38095238095238,"y":17.238095238095237,"z":-184.66666666666666,"a95":"2.3","info":"\"14-10-24\" at \"18:50\""},{"visible":true,"include":true,"step":"470","x":182.0952380952381,"y":13.428571428571429,"z":-222.28571428571428,"a95":"2.5","info":"\"14-10-24\" at \"21:29\""},{"visible":true,"include":true,"step":"490","x":157.33333333333334,"y":-24.571428571428573,"z":-160.47619047619048,"a95":"2.7","info":"\"14-10-25\" at \"00:26\""},{"visible":true,"include":true,"step":"520","x":119.61904761904762,"y":-39.23809523809524,"z":-166.38095238095238,"a95":"2.8","info":"\"14-10-25\" at \"03:06\""},{"visible":true,"include":false,"step":"550","x":85.71428571428571,"y":-97.9047619047619,"z":-95.61904761904762,"a95":"3.7","info":"\"14-10-25\" at \"05:46\""},{"visible":true,"include":false,"step":"580","x":52.95238095238095,"y":-6.761904761904762,"z":-87.52380952380952,"a95":"6.1","info":"\"14-10-26\" at \"04:41\""},{"visible":true,"include":false,"step":"610","x":2.857142857142857,"y":-148.95238095238096,"z":-82.47619047619048,"a95":"4.9","info":"\"14-10-26\" at \"06:32\""}],"demagType":"Unknown","patch":1.1,"format":"Unknown","strat":null},{"version":"v1.1.0","exported":"2016-10-11T13:56:57.875Z","info":"3","GEO":[{"dec":195.26630656371958,"inc":-56.24135404740262,"MAD":9.07484808209809,"cm":[-1.3534147347811431e-15,-4.144832625267251e-15,0],"intensity":452.61385049636175,"type":"dir","forced":true,"remark":"","origin":false,"nSteps":8,"minStep":"25.0","maxStep":"70.0","steps":["25.0","30.0","35.0","40.0","45.0","50.0","60.0","70.0"],"group":"None"}],"TECT":[{"dec":166.5892621991684,"inc":-27.245103057012546,"MAD":9.074848082098102,"cm":[-6.767073673905716e-16,2.0301221021717147e-15,-4.0602442043434294e-15],"intensity":452.61385049636175,"type":"dir","forced":true,"remark":"","origin":false,"nSteps":8,"minStep":"25.0","maxStep":"70.0","steps":["25.0","30.0","35.0","40.0","45.0","50.0","60.0","70.0"],"group":"None"}],"interpreted":true,"name":"SS1.8A","coreAzi":153,"coreDip":4,"bedStrike":223,"bedDip":41,"data":[{"visible":true,"include":false,"step":"0.0","x":246.52380952380952,"y":150.55238095238096,"z":129.2,"a95":"0.99","info":"08/10/2014 at 12:47:29"},{"visible":true,"include":false,"step":"4.0","x":262.752380952381,"y":162.48571428571427,"z":111.26666666666667,"a95":"0.99","info":"08/10/2014 at 12:47:29"},{"visible":true,"include":false,"step":"8.0","x":289.04761904761904,"y":159.54285714285714,"z":111.60952380952382,"a95":"0.99","info":"08/10/2014 at 12:47:29"},{"visible":true,"include":false,"step":"12.0","x":314.8095238095238,"y":149.07619047619048,"z":115.11428571428571,"a95":"0.99","info":"08/10/2014 at 12:47:29"},{"visible":true,"include":false,"step":"16.0","x":300.6190476190476,"y":174.13333333333335,"z":117.79047619047618,"a95":"0.99","info":"08/10/2014 at 12:47:29"},{"visible":true,"include":false,"step":"20.0","x":285.7333333333333,"y":302.7333333333333,"z":131.1809523809524,"a95":"0.99","info":"08/10/2014 at 12:47:29"},{"visible":true,"include":true,"step":"25.0","x":242.9047619047619,"y":142.54285714285714,"z":137.32380952380953,"a95":"0.99","info":"08/10/2014 at 12:47:29"},{"visible":true,"include":true,"step":"30.0","x":247.38095238095238,"y":142.01904761904763,"z":104.51428571428572,"a95":"0.99","info":"08/10/2014 at 12:47:29"},{"visible":true,"include":true,"step":"35.0","x":224.85714285714286,"y":102.8952380952381,"z":91.97333333333333,"a95":"0.99","info":"08/10/2014 at 12:47:29"},{"visible":true,"include":true,"step":"40.0","x":204.35238095238094,"y":96.42857142857143,"z":80.11142857142856,"a95":"0.99","info":"08/10/2014 at 12:47:29"},{"visible":true,"include":true,"step":"45.0","x":219.02857142857144,"y":92.72,"z":65.55619047619048,"a95":"0.99","info":"08/10/2014 at 12:47:29"},{"visible":true,"include":true,"step":"50.0","x":196.0952380952381,"y":24.84190476190476,"z":72.14952380952381,"a95":"0.99","info":"08/10/2014 at 12:47:29"},{"visible":true,"include":true,"step":"60.0","x":129.92380952380952,"y":37.08380952380952,"z":68.77238095238096,"a95":"0.99","info":"08/10/2014 at 12:47:29"},{"visible":true,"include":true,"step":"70.0","x":155.1904761904762,"y":4.4741904761904765,"z":20.046666666666667,"a95":"0.99","info":"08/10/2014 at 12:47:29"},{"visible":true,"include":false,"step":"80.0","x":173.51428571428573,"y":-61.026666666666664,"z":58.389523809523816,"a95":"0.99","info":"08/10/2014 at 12:47:29"},{"visible":true,"include":false,"step":"90.0","x":156.07619047619048,"y":20.606666666666666,"z":56.8552380952381,"a95":"0.99","info":"08/10/2014 at 12:47:29"},{"visible":true,"include":false,"step":"100.0","x":139.92380952380952,"y":31.75238095238095,"z":38.21809523809524,"a95":"0.99","info":"08/10/2014 at 12:47:29"}],"demagType":"Unknown","patch":1.1,"format":"Unknown","strat":null},{"version":"v1.1.0","exported":"2016-10-11T13:56:57.875Z","info":"3","GEO":[{"dec":193.39277020846166,"inc":-70.5266650756068,"MAD":5.338082830209297,"cm":[-1.522591576628786e-15,5.075305255429287e-15,0],"intensity":231.2770527653525,"type":"dir","forced":true,"remark":"","origin":false,"nSteps":9,"minStep":"25.0","maxStep":"90.0","steps":["25.0","30.0","35.0","40.0","45.0","50.0","60.0","70.0","90.0"],"group":"None"}],"TECT":[{"dec":154.31493638984205,"inc":-37.11983921309017,"MAD":5.338082830209315,"cm":[-1.3195793664116147e-14,-2.44460536469844e-14,-7.61295788314393e-16],"intensity":231.2770527653525,"type":"dir","forced":true,"remark":"","origin":false,"nSteps":9,"minStep":"25.0","maxStep":"90.0","steps":["25.0","30.0","35.0","40.0","45.0","50.0","60.0","70.0","90.0"],"group":"None"}],"interpreted":true,"name":"SS1.9A","coreAzi":240,"coreDip":19,"bedStrike":223,"bedDip":41,"data":[{"visible":true,"include":false,"step":"0.0","x":201.69523809523812,"y":-52.39809523809523,"z":-44.64952380952381,"a95":"0.99","info":"20/09/2014 at 18:17:18"},{"visible":true,"include":false,"step":"5.0","x":225.22857142857143,"y":-53.71333333333333,"z":-28.51238095238095,"a95":"0.99","info":"20/09/2014 at 18:17:18"},{"visible":true,"include":false,"step":"10.0","x":243.8190476190476,"y":-61.49142857142857,"z":-27.80857142857143,"a95":"0.99","info":"20/09/2014 at 18:17:18"},{"visible":true,"include":false,"step":"15.0","x":250.02857142857144,"y":-54.26380952380952,"z":-25.033333333333335,"a95":"0.99","info":"20/09/2014 at 18:17:18"},{"visible":true,"include":false,"step":"20.0","x":230.75238095238097,"y":-50.54761904761905,"z":-19.986666666666668,"a95":"0.99","info":"20/09/2014 at 18:17:18"},{"visible":true,"include":true,"step":"25.0","x":210.48571428571427,"y":-52.22380952380953,"z":-21.260952380952382,"a95":"0.99","info":"20/09/2014 at 18:17:18"},{"visible":true,"include":true,"step":"30.0","x":175.36190476190475,"y":-44.04857142857143,"z":-16.934285714285714,"a95":"0.99","info":"20/09/2014 at 18:17:18"},{"visible":true,"include":true,"step":"35.0","x":171.59047619047618,"y":-31.482857142857142,"z":-9.089333333333334,"a95":"0.99","info":"20/09/2014 at 18:17:18"},{"visible":true,"include":true,"step":"40.0","x":134.95238095238096,"y":-41.37809523809524,"z":-14.302857142857144,"a95":"0.99","info":"20/09/2014 at 18:17:18"},{"visible":true,"include":true,"step":"45.0","x":128.9142857142857,"y":-27.87047619047619,"z":-10.67047619047619,"a95":"0.99","info":"20/09/2014 at 18:17:18"},{"visible":true,"include":true,"step":"50.0","x":125.64761904761905,"y":-32.16761904761905,"z":-10.029523809523809,"a95":"0.99","info":"20/09/2014 at 18:17:18"},{"visible":true,"include":true,"step":"60.0","x":98.14285714285714,"y":-45.85047619047619,"z":-17.224761904761905,"a95":"0.99","info":"20/09/2014 at 18:17:18"},{"visible":true,"include":true,"step":"70.0","x":57.12,"y":4.168,"z":-6.811333333333334,"a95":"0.99","info":"20/09/2014 at 18:17:18"},{"visible":false,"include":false,"step":"80.0","x":52.99238095238095,"y":-49.605714285714285,"z":1.2315238095238095,"a95":"0.99","info":"20/09/2014 at 18:17:18"},{"visible":true,"include":true,"step":"90.0","x":6.393047619047619,"y":-24.93809523809524,"z":-1.071047619047619,"a95":"0.99","info":"20/09/2014 at 18:17:18"},{"visible":false,"include":false,"step":"100.0","x":62.47714285714286,"y":-36.52285714285714,"z":6.986952380952381,"a95":"0.99","info":"20/09/2014 at 18:17:18"}],"demagType":"Unknown","patch":1.1,"format":"Unknown","strat":null},{"version":"v1.1.0","exported":"2016-10-11T13:56:57.875Z","info":"4","GEO":[],"TECT":[],"interpreted":false,"name":"SS1.10A","coreAzi":249,"coreDip":20,"bedStrike":223,"bedDip":41,"data":[{"visible":true,"include":false,"step":"0.0","x":10.71047619047619,"y":-50.32952380952381,"z":-23.760952380952382,"a95":"0.99","info":"08/10/2014 at 12:47:29"},{"visible":true,"include":false,"step":"4.0","x":24.246666666666666,"y":-41.86857142857143,"z":-25.846666666666664,"a95":"0.99","info":"08/10/2014 at 12:47:29"},{"visible":true,"include":false,"step":"8.0","x":40.40761904761904,"y":-60.46857142857142,"z":-29.54190476190476,"a95":"0.99","info":"08/10/2014 at 12:47:29"},{"visible":true,"include":false,"step":"12.0","x":49.17238095238095,"y":-71.76571428571428,"z":-20.28857142857143,"a95":"0.99","info":"08/10/2014 at 12:47:29"},{"visible":true,"include":false,"step":"16.0","x":54.640952380952385,"y":-58.24285714285714,"z":-20.235238095238095,"a95":"0.99","info":"08/10/2014 at 12:47:29"},{"visible":false,"include":false,"step":"20.0","x":58.52761904761904,"y":155.1047619047619,"z":-19.685714285714283,"a95":"0.99","info":"08/10/2014 at 12:47:29"},{"visible":true,"include":false,"step":"25.0","x":51.666666666666664,"y":-45.07238095238095,"z":7.626666666666667,"a95":"0.99","info":"08/10/2014 at 12:47:29"},{"visible":true,"include":false,"step":"30.0","x":53.50380952380952,"y":-49.78000000000001,"z":-15.326666666666668,"a95":"0.99","info":"08/10/2014 at 12:47:29"},{"visible":true,"include":false,"step":"35.0","x":45.086666666666666,"y":-41.11523809523809,"z":-24.943809523809527,"a95":"0.99","info":"08/10/2014 at 12:47:29"},{"visible":true,"include":false,"step":"40.0","x":25.453333333333333,"y":-39.042857142857144,"z":-14.619047619047619,"a95":"0.99","info":"08/10/2014 at 12:47:29"},{"visible":true,"include":false,"step":"45.0","x":27.608571428571427,"y":-4.014857142857143,"z":-9.10504761904762,"a95":"0.99","info":"08/10/2014 at 12:47:29"},{"visible":true,"include":false,"step":"50.0","x":13.371428571428572,"y":-6.764095238095238,"z":-0.547152380952381,"a95":"0.99","info":"08/10/2014 at 12:47:29"},{"visible":true,"include":false,"step":"60.0","x":6.719904761904762,"y":-27.637142857142855,"z":-9.876190476190477,"a95":"0.99","info":"08/10/2014 at 12:47:29"},{"visible":true,"include":false,"step":"70.0","x":4.558952380952381,"y":-30.32857142857143,"z":-20.074285714285715,"a95":"0.99","info":"08/10/2014 at 12:47:29"},{"visible":true,"include":false,"step":"80.0","x":2.4005714285714284,"y":-48.08571428571428,"z":-11.395238095238096,"a95":"0.99","info":"08/10/2014 at 12:47:29"},{"visible":true,"include":false,"step":"90.0","x":9.604761904761904,"y":-42.817142857142855,"z":-22.548571428571428,"a95":"0.99","info":"08/10/2014 at 12:47:29"},{"visible":true,"include":false,"step":"100.0","x":18.99904761904762,"y":-12.176190476190476,"z":-2.8856190476190475,"a95":"0.99","info":"08/10/2014 at 12:47:29"}],"demagType":"Unknown","patch":1.1,"format":"Unknown","strat":null},{"version":"v1.1.0","exported":"2016-10-11T13:56:57.875Z","info":"5","GEO":[{"dec":182.06305977098503,"inc":-66.61058721665134,"MAD":7.259596289985619,"cm":[2.114710523095536e-17,-1.691768418476429e-16,0],"intensity":143.54430505866648,"type":"dir","forced":true,"remark":"","origin":false,"nSteps":7,"minStep":"25.0","maxStep":"60.0","steps":["25.0","30.0","35.0","40.0","45.0","50.0","60.0"],"group":"None"}],"TECT":[{"dec":153.58548822262856,"inc":-31.46954085155902,"MAD":7.259596289985631,"cm":[-5.582835780972216e-15,-6.597896832058073e-15,3.383536836952858e-16],"intensity":143.5443050586665,"type":"dir","forced":true,"remark":"","origin":false,"nSteps":7,"minStep":"25.0","maxStep":"60.0","steps":["25.0","30.0","35.0","40.0","45.0","50.0","60.0"],"group":"None"}],"interpreted":true,"name":"SS1.11B","coreAzi":255,"coreDip":16,"bedStrike":223,"bedDip":41,"data":[{"visible":true,"include":false,"step":"0.0","x":80.31714285714285,"y":-51.15714285714286,"z":-14.052380952380954,"a95":"0.99","info":"08/10/2014 at 12:47:29"},{"visible":true,"include":false,"step":"4.0","x":88.9342857142857,"y":-35.668571428571425,"z":-28.972380952380952,"a95":"0.99","info":"08/10/2014 at 12:47:29"},{"visible":true,"include":false,"step":"8.0","x":111.83809523809524,"y":-56.58190476190477,"z":-20.13142857142857,"a95":"0.99","info":"08/10/2014 at 12:47:29"},{"visible":true,"include":false,"step":"12.0","x":112.38095238095238,"y":-63.72857142857143,"z":-12.64,"a95":"0.99","info":"08/10/2014 at 12:47:29"},{"visible":true,"include":false,"step":"16.0","x":113.45714285714286,"y":-58.36380952380953,"z":-14.235238095238095,"a95":"0.99","info":"08/10/2014 at 12:47:29"},{"visible":false,"include":false,"step":"20.0","x":108.56190476190477,"y":198.9047619047619,"z":-12.795238095238094,"a95":"0.99","info":"08/10/2014 at 12:47:29"},{"visible":true,"include":true,"step":"25.0","x":99.19999999999999,"y":-29.390476190476193,"z":-19.900952380952383,"a95":"0.99","info":"08/10/2014 at 12:47:29"},{"visible":true,"include":true,"step":"30.0","x":98.19999999999999,"y":-39.95809523809524,"z":-13.732380952380952,"a95":"0.99","info":"08/10/2014 at 12:47:29"},{"visible":true,"include":true,"step":"35.0","x":87.95523809523809,"y":-50.521904761904764,"z":-17.584761904761905,"a95":"0.99","info":"08/10/2014 at 12:47:29"},{"visible":true,"include":true,"step":"40.0","x":73.84380952380953,"y":-37.163809523809526,"z":-14.45047619047619,"a95":"0.99","info":"08/10/2014 at 12:47:29"},{"visible":true,"include":true,"step":"45.0","x":72.49714285714286,"y":-32.61714285714286,"z":-5.016285714285714,"a95":"0.99","info":"08/10/2014 at 12:47:29"},{"visible":true,"include":true,"step":"50.0","x":54.394285714285715,"y":-19.17047619047619,"z":1.7484761904761907,"a95":"0.99","info":"08/10/2014 at 12:47:29"},{"visible":true,"include":true,"step":"60.0","x":39.00380952380952,"y":2.333142857142857,"z":-7.894285714285714,"a95":"0.99","info":"08/10/2014 at 12:47:29"},{"visible":true,"include":false,"step":"70.0","x":44.526666666666664,"y":-23.09714285714286,"z":-12.146666666666667,"a95":"0.99","info":"08/10/2014 at 12:47:29"},{"visible":true,"include":false,"step":"80.0","x":7.6924761904761905,"y":-45.68571428571428,"z":-26.54285714285714,"a95":"0.99","info":"08/10/2014 at 12:47:29"},{"visible":true,"include":false,"step":"90.0","x":24.59047619047619,"y":19.14095238095238,"z":-20.00190476190476,"a95":"0.99","info":"08/10/2014 at 12:47:29"},{"visible":true,"include":false,"step":"100.0","x":21.38190476190476,"y":6.422380952380952,"z":22.225714285714286,"a95":"0.99","info":"08/10/2014 at 12:47:29"}],"demagType":"Unknown","patch":1.1,"format":"Unknown","strat":null},{"version":"v1.1.0","exported":"2016-10-11T13:56:57.875Z","info":"","GEO":[{"dec":179.70457699082476,"inc":-67.68107800412739,"MAD":12.216053493439567,"cm":[6.6824852529818945e-15,6.38642577974852e-15,0],"intensity":903.8933575450477,"type":"dir","forced":true,"remark":"","origin":false,"nSteps":9,"minStep":"290","maxStep":"470","steps":["290","310","330","350","370","400","420","440","470"],"group":"None"}],"TECT":[{"dec":151.9840023326093,"inc":-31.824256145024403,"MAD":12.216053493439556,"cm":[-2.7068294695622863e-15,-6.767073673905716e-15,-2.7068294695622863e-15],"intensity":903.8933575450477,"type":"dir","forced":true,"remark":"","origin":false,"nSteps":9,"minStep":"290","maxStep":"470","steps":["290","310","330","350","370","400","420","440","470"],"group":"None"}],"interpreted":true,"name":"SS1.12A","coreAzi":163,"coreDip":66,"bedStrike":223,"bedDip":41,"data":[{"visible":true,"include":false,"step":"20","x":-631.8095238095239,"y":162.85714285714286,"z":287.7142857142857,"a95":"2.1","info":"\"14-10-20\" at \"14:59\""},{"visible":true,"include":false,"step":"100","x":-336,"y":57.23809523809524,"z":-59.42857142857143,"a95":"2.5","info":"\"14-10-20\" at \"17:59\""},{"visible":true,"include":false,"step":"150","x":-92.85714285714286,"y":43.23809523809524,"z":-206.76190476190476,"a95":"3.2","info":"\"14-10-20\" at \"21:21\""},{"visible":true,"include":false,"step":"180","x":88.66666666666667,"y":67.9047619047619,"z":-376.76190476190476,"a95":"2.9","info":"\"14-10-21\" at \"00:17\""},{"visible":true,"include":false,"step":"210","x":162.1904761904762,"y":85.14285714285714,"z":-364.2857142857143,"a95":"2.8","info":"\"14-10-21\" at \"16:18\""},{"visible":true,"include":false,"step":"240","x":264.6666666666667,"y":88.47619047619048,"z":-466.2857142857143,"a95":"2.4","info":"\"14-10-21\" at \"19:17\""},{"visible":true,"include":false,"step":"270","x":291.14285714285717,"y":129.04761904761904,"z":-471.7142857142857,"a95":"2.4","info":"\"14-10-21\" at \"22:22\""},{"visible":true,"include":true,"step":"290","x":433.5238095238095,"y":142.57142857142858,"z":-433.9047619047619,"a95":"2.2","info":"\"14-10-22\" at \"14:53\""},{"visible":true,"include":true,"step":"310","x":240,"y":78,"z":-307.8095238095238,"a95":"2.7","info":"\"14-10-22\" at \"17:40\""},{"visible":true,"include":true,"step":"330","x":251.33333333333334,"y":4.9523809523809526,"z":-381.6190476190476,"a95":"2.8","info":"\"14-10-22\" at \"20:49\""},{"visible":true,"include":true,"step":"350","x":374.3809523809524,"y":103.71428571428571,"z":-247.52380952380952,"a95":"2.6","info":"\"14-10-23\" at \"15:04\""},{"visible":true,"include":true,"step":"370","x":412.0952380952381,"y":43.333333333333336,"z":-274.76190476190476,"a95":"2.3","info":"\"14-10-23\" at \"18:04\""},{"visible":true,"include":true,"step":"400","x":344.2857142857143,"y":-60.285714285714285,"z":-249.33333333333334,"a95":"2.8","info":"\"14-10-23\" at \"21:03\""},{"visible":true,"include":true,"step":"420","x":166.28571428571428,"y":42.19047619047619,"z":-203.8095238095238,"a95":"3.5","info":"\"14-10-24\" at \"15:38\""},{"visible":true,"include":true,"step":"440","x":174.28571428571428,"y":-24.666666666666668,"z":-203.14285714285714,"a95":"3","info":"\"14-10-24\" at \"18:51\""},{"visible":true,"include":true,"step":"470","x":112.19047619047619,"y":3.9047619047619047,"z":-271.6190476190476,"a95":"3.4","info":"\"14-10-24\" at \"21:31\""},{"visible":false,"include":false,"step":"490","x":97.80952380952381,"y":112.76190476190476,"z":82.66666666666667,"a95":"5.2","info":"\"14-10-25\" at \"00:28\""},{"visible":false,"include":false,"step":"520","x":147.04761904761904,"y":55.80952380952381,"z":9.238095238095237,"a95":"5.8","info":"\"14-10-25\" at \"03:08\""},{"visible":false,"include":false,"step":"550","x":151.8095238095238,"y":154.47619047619048,"z":-132.28571428571428,"a95":"4.3","info":"\"14-10-25\" at \"05:48\""}],"demagType":"Unknown","patch":1.1,"format":"Unknown","strat":null},{"version":"v1.1.0","exported":"2016-10-11T13:56:57.875Z","info":"","GEO":[],"TECT":[],"interpreted":false,"name":"SS1.13A","coreAzi":229,"coreDip":67,"bedStrike":223,"bedDip":41,"data":[{"visible":true,"include":false,"step":"20","x":-2052,"y":2414.190476190476,"z":2161.1428571428573,"a95":"2","info":"\"14-10-20\" at \"15:02\""},{"visible":true,"include":false,"step":"100","x":-1428.857142857143,"y":1406.857142857143,"z":1549.8095238095239,"a95":"2.1","info":"\"14-10-20\" at \"18:01\""},{"visible":true,"include":false,"step":"150","x":-902.1904761904761,"y":916.3809523809524,"z":1012.5714285714286,"a95":"2.1","info":"\"14-10-20\" at \"21:23\""},{"visible":true,"include":false,"step":"180","x":-504.6666666666667,"y":537.5238095238095,"z":544.2857142857143,"a95":"2.2","info":"\"14-10-21\" at \"00:18\""},{"visible":true,"include":false,"step":"210","x":-393.3333333333333,"y":396.76190476190476,"z":405.8095238095238,"a95":"2.3","info":"\"14-10-21\" at \"16:20\""},{"visible":true,"include":false,"step":"240","x":-303.23809523809524,"y":267.5238095238095,"z":166.1904761904762,"a95":"2.8","info":"\"14-10-21\" at \"19:19\""},{"visible":true,"include":false,"step":"270","x":-183.61904761904762,"y":256.85714285714283,"z":170,"a95":"2.9","info":"\"14-10-21\" at \"22:24\""},{"visible":true,"include":false,"step":"290","x":-268.2857142857143,"y":118.95238095238095,"z":117.14285714285714,"a95":"3.2","info":"\"14-10-22\" at \"14:55\""},{"visible":true,"include":false,"step":"310","x":-250.47619047619048,"y":120.47619047619048,"z":126.47619047619048,"a95":"2.5","info":"\"14-10-22\" at \"17:41\""},{"visible":true,"include":false,"step":"330","x":-216.28571428571428,"y":134.28571428571428,"z":58.476190476190474,"a95":"3.1","info":"\"14-10-22\" at \"20:51\""},{"visible":true,"include":false,"step":"350","x":-125.52380952380952,"y":147.42857142857142,"z":68.38095238095238,"a95":"4.7","info":"\"14-10-23\" at \"15:06\""},{"visible":true,"include":false,"step":"370","x":-159.61904761904762,"y":168.38095238095238,"z":-35.904761904761905,"a95":"3.6","info":"\"14-10-23\" at \"18:05\""},{"visible":true,"include":false,"step":"400","x":-132,"y":27.333333333333332,"z":50.38095238095238,"a95":"5","info":"\"14-10-23\" at \"21:05\""},{"visible":true,"include":false,"step":"420","x":-163.8095238095238,"y":104,"z":5.619047619047619,"a95":"3.7","info":"\"14-10-24\" at \"15:40\""},{"visible":true,"include":false,"step":"440","x":-64.13333333333333,"y":11,"z":55.161904761904765,"a95":"8.3","info":"\"14-10-24\" at \"18:53\""},{"visible":true,"include":false,"step":"470","x":-63.23809523809524,"y":77.71428571428571,"z":-87.80952380952381,"a95":"5.6","info":"\"14-10-24\" at \"21:33\""},{"visible":true,"include":false,"step":"490","x":34.095238095238095,"y":97.42857142857143,"z":157.61904761904762,"a95":"3","info":"\"14-10-25\" at \"00:30\""},{"visible":true,"include":false,"step":"520","x":47.80952380952381,"y":123.9047619047619,"z":60.76190476190476,"a95":"4.1","info":"\"14-10-25\" at \"03:10\""},{"visible":true,"include":false,"step":"550","x":-141.42857142857142,"y":-52.857142857142854,"z":88,"a95":"4","info":"\"14-10-25\" at \"05:49\""}],"demagType":"Unknown","patch":1.1,"format":"Unknown","strat":null},{"version":"v1.1.0","exported":"2016-10-11T13:56:57.875Z","info":"4","GEO":[],"TECT":[],"interpreted":false,"name":"SS1.13B","coreAzi":229,"coreDip":67,"bedStrike":223,"bedDip":41,"data":[{"visible":true,"include":false,"step":"0.0","x":-2690.095238095238,"y":2016.7619047619048,"z":2821.904761904762,"a95":"0.99","info":"20/09/2014 at 18:17:18"},{"visible":true,"include":false,"step":"5.0","x":-2223.1428571428573,"y":1658.4761904761904,"z":2351.1428571428573,"a95":"0.99","info":"20/09/2014 at 18:17:18"},{"visible":true,"include":false,"step":"10.0","x":-1470.2857142857142,"y":1116.3809523809523,"z":1592.2857142857142,"a95":"0.99","info":"20/09/2014 at 18:17:18"},{"visible":true,"include":false,"step":"15.0","x":-1058.857142857143,"y":797.8857142857142,"z":1125.4285714285713,"a95":"0.99","info":"20/09/2014 at 18:17:18"},{"visible":true,"include":false,"step":"20.0","x":-703.5619047619048,"y":541.6,"z":830.2476190476191,"a95":"0.99","info":"20/09/2014 at 18:17:18"},{"visible":true,"include":false,"step":"25.0","x":-522.6571428571428,"y":368.1904761904762,"z":543.6095238095238,"a95":"0.99","info":"20/09/2014 at 18:17:18"},{"visible":true,"include":false,"step":"30.0","x":-318.25714285714287,"y":274.42857142857144,"z":431.53333333333336,"a95":"0.99","info":"20/09/2014 at 18:17:18"},{"visible":true,"include":false,"step":"35.0","x":-100.18095238095239,"y":236.02857142857144,"z":411.7714285714286,"a95":"0.99","info":"20/09/2014 at 18:17:18"},{"visible":true,"include":false,"step":"40.0","x":-95.82857142857144,"y":20.337142857142858,"z":348.68571428571425,"a95":"0.99","info":"20/09/2014 at 18:17:18"},{"visible":true,"include":false,"step":"45.0","x":-99.84761904761906,"y":52.712380952380954,"z":181.9714285714286,"a95":"0.99","info":"20/09/2014 at 18:17:18"},{"visible":true,"include":false,"step":"50.0","x":49.25619047619048,"y":35.436190476190475,"z":159.04761904761904,"a95":"0.99","info":"20/09/2014 at 18:17:18"},{"visible":true,"include":false,"step":"60.0","x":61.24761904761905,"y":-90.9504761904762,"z":63.50285714285714,"a95":"0.99","info":"20/09/2014 at 18:17:18"},{"visible":true,"include":false,"step":"70.0","x":30.83809523809524,"y":-76.12285714285714,"z":159.17142857142858,"a95":"0.99","info":"20/09/2014 at 18:17:18"},{"visible":true,"include":false,"step":"80.0","x":255.0095238095238,"y":-144.59047619047618,"z":51.404761904761905,"a95":"0.99","info":"20/09/2014 at 18:17:18"},{"visible":true,"include":false,"step":"90.0","x":286.0952380952381,"y":-234.75238095238097,"z":33.873333333333335,"a95":"0.99","info":"20/09/2014 at 18:17:18"},{"visible":true,"include":false,"step":"100.0","x":409.447619047619,"y":-295.96190476190475,"z":105.02857142857142,"a95":"0.99","info":"20/09/2014 at 18:17:18"}],"demagType":"Unknown","patch":1.1,"format":"Unknown","strat":null},{"version":"v1.1.0","exported":"2016-10-11T13:56:57.875Z","info":"","GEO":[],"TECT":[],"interpreted":false,"name":"SS1.14A","coreAzi":155,"coreDip":60,"bedStrike":223,"bedDip":41,"data":[{"visible":true,"include":false,"step":"20","x":-2995.904761904762,"y":-329.23809523809524,"z":1029.8095238095239,"a95":"1.9","info":"\"14-10-20\" at \"15:03\""},{"visible":true,"include":false,"step":"100","x":-1663.7142857142858,"y":-269.23809523809524,"z":322.76190476190476,"a95":"1.9","info":"\"14-10-20\" at \"18:03\""},{"visible":true,"include":false,"step":"150","x":-889.9047619047619,"y":-148.95238095238096,"z":-54.57142857142857,"a95":"2","info":"\"14-10-20\" at \"21:25\""},{"visible":true,"include":false,"step":"180","x":-407.23809523809524,"y":-43.333333333333336,"z":-271.7142857142857,"a95":"2.7","info":"\"14-10-21\" at \"00:20\""},{"visible":true,"include":false,"step":"210","x":-256.95238095238096,"y":-13.714285714285714,"z":-246.1904761904762,"a95":"3","info":"\"14-10-21\" at \"16:22\""},{"visible":true,"include":false,"step":"240","x":-243.33333333333334,"y":-3.619047619047619,"z":-324,"a95":"2.9","info":"\"14-10-21\" at \"19:21\""},{"visible":true,"include":false,"step":"270","x":-254,"y":-17.714285714285715,"z":-276.85714285714283,"a95":"3.3","info":"\"14-10-21\" at \"22:26\""},{"visible":true,"include":false,"step":"290","x":-160.85714285714286,"y":-16.095238095238095,"z":-225.9047619047619,"a95":"3.3","info":"\"14-10-22\" at \"14:57\""},{"visible":true,"include":false,"step":"310","x":-88.0952380952381,"y":-4.190476190476191,"z":-206.47619047619048,"a95":"4","info":"\"14-10-22\" at \"17:43\""},{"visible":true,"include":false,"step":"330","x":-28.19047619047619,"y":-60.19047619047619,"z":-215.14285714285714,"a95":"3.8","info":"\"14-10-22\" at \"20:53\""},{"visible":true,"include":false,"step":"350","x":-9.904761904761905,"y":-33.523809523809526,"z":-230.1904761904762,"a95":"4.2","info":"\"14-10-23\" at \"15:07\""},{"visible":true,"include":false,"step":"370","x":-29.238095238095237,"y":-34.76190476190476,"z":-252.76190476190476,"a95":"4.1","info":"\"14-10-23\" at \"18:08\""},{"visible":true,"include":false,"step":"400","x":23.333333333333332,"y":-47.904761904761905,"z":-149.71428571428572,"a95":"4.7","info":"\"14-10-23\" at \"21:07\""},{"visible":true,"include":false,"step":"420","x":-20.666666666666668,"y":38.19047619047619,"z":-291.8095238095238,"a95":"3.5","info":"\"14-10-24\" at \"15:41\""},{"visible":true,"include":false,"step":"440","x":-35.714285714285715,"y":10.571428571428571,"z":-242.1904761904762,"a95":"3.3","info":"\"14-10-24\" at \"18:55\""},{"visible":true,"include":false,"step":"470","x":-5.714285714285714,"y":55.42857142857143,"z":-290.85714285714283,"a95":"3.5","info":"\"14-10-24\" at \"21:35\""},{"visible":true,"include":false,"step":"490","x":-90.19047619047619,"y":35.904761904761905,"z":-213.8095238095238,"a95":"4","info":"\"14-10-25\" at \"00:32\""},{"visible":true,"include":false,"step":"520","x":-127.23809523809524,"y":97.9047619047619,"z":-105.80952380952381,"a95":"3.7","info":"\"14-10-25\" at \"03:11\""},{"visible":true,"include":false,"step":"550","x":-29.61904761904762,"y":-11.047619047619047,"z":-226,"a95":"5","info":"\"14-10-25\" at \"05:51\""}],"demagType":"Unknown","patch":1.1,"format":"Unknown","strat":null},{"version":"v1.1.0","exported":"2016-10-11T13:56:57.875Z","info":"","GEO":[{"dec":305.6557112540738,"inc":-17.024941849840587,"MAD":6.679639587354125,"cm":[-2.571487996084172e-14,-5.819683359558915e-14,0],"intensity":2873.7460710239557,"type":"GC","origin":false,"forced":true,"remark":"","nSteps":6,"minStep":"100","maxStep":"270","steps":["100","150","180","210","240","270"],"group":"None"}],"TECT":[{"dec":299.8608797107129,"inc":-57.4723666353422,"MAD":6.679639587353583,"cm":[-4.7031162033644724e-14,-1.3534147347811431e-14,-1.8947806286936004e-14],"intensity":2873.7460710239557,"type":"GC","origin":false,"forced":true,"remark":"","nSteps":6,"minStep":"100","maxStep":"270","steps":["100","150","180","210","240","270"],"group":"None"}],"interpreted":true,"name":"SS1.15A","coreAzi":156,"coreDip":61,"bedStrike":223,"bedDip":41,"data":[{"visible":true,"include":false,"step":"20","x":-3177.809523809524,"y":-45.714285714285715,"z":2450.7619047619046,"a95":"2.3","info":"\"14-10-13\" at \"16:59\""},{"visible":true,"include":true,"step":"100","x":-1941.5238095238096,"y":42.857142857142854,"z":1746.2857142857142,"a95":"2.4","info":"\"14-10-13\" at \"19:53\""},{"visible":true,"include":true,"step":"150","x":-569.9047619047619,"y":223.42857142857142,"z":701.047619047619,"a95":"2.8","info":"\"14-10-13\" at \"21:56\""},{"visible":true,"include":true,"step":"180","x":-396.4761904761905,"y":191.61904761904762,"z":458.76190476190476,"a95":"2.9","info":"\"14-10-14\" at \"15:03\""},{"visible":true,"include":true,"step":"210","x":-340.4761904761905,"y":194.85714285714286,"z":441.9047619047619,"a95":"2.7","info":"\"14-10-14\" at \"18:10\""},{"visible":true,"include":true,"step":"240","x":-184.66666666666666,"y":158.95238095238096,"z":232.0952380952381,"a95":"3.5","info":"\"14-10-14\" at \"21:17\""},{"visible":true,"include":true,"step":"270","x":-110.19047619047619,"y":171.23809523809524,"z":254.47619047619048,"a95":"3.3","info":"\"14-10-15\" at \"15:12\""},{"visible":true,"include":false,"step":"290","x":-198.38095238095238,"y":143.9047619047619,"z":97.42857142857143,"a95":"4.5","info":"\"14-10-15\" at \"18:18\""},{"visible":true,"include":false,"step":"310","x":-174.38095238095238,"y":210.57142857142858,"z":243.04761904761904,"a95":"3.2","info":"\"14-10-15\" at \"21:33\""},{"visible":true,"include":false,"step":"330","x":-126,"y":206.66666666666666,"z":136.66666666666666,"a95":"3.7","info":"\"14-10-16\" at \"14:55\""},{"visible":true,"include":false,"step":"350","x":-78.57142857142857,"y":303.04761904761904,"z":58.285714285714285,"a95":"2.9","info":"\"14-10-16\" at \"18:51\""},{"visible":true,"include":false,"step":"370","x":-52.285714285714285,"y":188.0952380952381,"z":93.04761904761905,"a95":"4.1","info":"\"14-10-16\" at \"22:00\""},{"visible":true,"include":false,"step":"400","x":-41.23809523809524,"y":250.47619047619048,"z":157.42857142857142,"a95":"3.3","info":"\"14-10-17\" at \"13:33\""},{"visible":true,"include":false,"step":"420","x":-153.04761904761904,"y":169.8095238095238,"z":35.80952380952381,"a95":"3.5","info":"\"14-10-17\" at \"16:48\""},{"visible":true,"include":false,"step":"440","x":-90.95238095238095,"y":203.9047619047619,"z":59.04761904761905,"a95":"3.6","info":"\"14-10-17\" at \"20:00\""},{"visible":true,"include":false,"step":"470","x":-83.52380952380952,"y":172.38095238095238,"z":30.761904761904763,"a95":"4.7","info":"\"14-10-17\" at \"23:15\""},{"visible":true,"include":false,"step":"490","x":20.46666666666667,"y":56.980952380952374,"z":-0.21904761904761902,"a95":"14.1","info":"\"14-10-18\" at \"11:35\""},{"visible":true,"include":false,"step":"520","x":-13.523809523809524,"y":168.85714285714286,"z":-95.80952380952381,"a95":"4.4","info":"\"14-10-18\" at \"14:38\""},{"visible":true,"include":false,"step":"550","x":216.28571428571428,"y":135.33333333333334,"z":-15.238095238095237,"a95":"3.3","info":"\"14-10-19\" at \"09:31\""},{"visible":true,"include":false,"step":"580","x":-5.0476190476190474,"y":306.2857142857143,"z":-72.38095238095238,"a95":"3.4","info":"\"14-10-19\" at \"11:33\""},{"visible":true,"include":false,"step":"610","x":71.61904761904762,"y":269.7142857142857,"z":103.23809523809524,"a95":"3.3","info":"\"14-10-19\" at \"14:57\""},{"visible":true,"include":false,"step":"640","x":-249.61904761904762,"y":201.04761904761904,"z":-18.38095238095238,"a95":"3","info":"\"14-10-19\" at \"18:42\""}],"demagType":"Unknown","patch":1.1,"format":"Unknown","strat":null},{"version":"v1.1.0","exported":"2016-10-11T13:56:57.876Z","info":"5","GEO":[{"dec":58.73335209347738,"inc":-21.616275393521743,"MAD":4.894916993006921,"cm":[-1.2316074086508402e-13,-2.4361465226060577e-13,0],"intensity":1852.9296391197224,"type":"GC","origin":false,"forced":true,"remark":"","nSteps":5,"minStep":"10.0","maxStep":"30.0","steps":["10.0","15.0","20.0","25.0","30.0"],"group":"None"}],"TECT":[{"dec":68.76661294935542,"inc":-6.467531503934471,"MAD":4.8949169930069925,"cm":[-9.203220196511774e-14,2.7068294695622863e-15,-5.4136589391245725e-14],"intensity":1852.9296391197224,"type":"GC","origin":false,"forced":true,"remark":"","nSteps":5,"minStep":"10.0","maxStep":"30.0","steps":["10.0","15.0","20.0","25.0","30.0"],"group":"None"}],"interpreted":true,"name":"SS1.16A","coreAzi":230,"coreDip":7,"bedStrike":223,"bedDip":41,"data":[{"visible":true,"include":false,"step":"0.0","x":-843.3142857142857,"y":-280.35238095238094,"z":-1786.952380952381,"a95":"0.99","info":"20/09/2014 at 18:17:18"},{"visible":true,"include":false,"step":"5.0","x":-1988.857142857143,"y":1607.6190476190477,"z":-1049.5238095238096,"a95":"0.99","info":"20/09/2014 at 18:17:18"},{"visible":true,"include":true,"step":"10.0","x":-1090.3809523809523,"y":1408.4761904761904,"z":-494.847619047619,"a95":"0.99","info":"20/09/2014 at 18:17:18"},{"visible":true,"include":true,"step":"15.0","x":-232.7238095238095,"y":867.0761904761904,"z":-186.16190476190476,"a95":"0.99","info":"20/09/2014 at 18:17:18"},{"visible":true,"include":true,"step":"20.0","x":170.6095238095238,"y":591.4190476190475,"z":-40.9847619047619,"a95":"0.99","info":"20/09/2014 at 18:17:18"},{"visible":true,"include":true,"step":"25.0","x":447.3714285714285,"y":405.49523809523805,"z":4.029047619047619,"a95":"0.99","info":"20/09/2014 at 18:17:18"},{"visible":true,"include":true,"step":"30.0","x":447.81904761904764,"y":291.4095238095238,"z":133.11428571428573,"a95":"0.99","info":"20/09/2014 at 18:17:18"},{"visible":true,"include":false,"step":"35.0","x":518.0190476190476,"y":71.58857142857143,"z":38.58095238095238,"a95":"0.99","info":"20/09/2014 at 18:17:18"},{"visible":true,"include":false,"step":"40.0","x":619.047619047619,"y":75.48190476190476,"z":182.36190476190475,"a95":"0.99","info":"20/09/2014 at 18:17:18"},{"visible":true,"include":false,"step":"45.0","x":560.0761904761905,"y":106.47619047619048,"z":105.9904761904762,"a95":"0.99","info":"20/09/2014 at 18:17:18"},{"visible":true,"include":false,"step":"50.0","x":583.1428571428571,"y":68.53428571428572,"z":59.17333333333334,"a95":"0.99","info":"20/09/2014 at 18:17:18"},{"visible":true,"include":false,"step":"60.0","x":439.74285714285713,"y":-190.6,"z":49.20095238095238,"a95":"0.99","info":"20/09/2014 at 18:17:18"},{"visible":true,"include":false,"step":"70.0","x":134.68571428571428,"y":105.91428571428571,"z":23.569523809523808,"a95":"0.99","info":"20/09/2014 at 18:17:18"},{"visible":true,"include":false,"step":"80.0","x":183.2952380952381,"y":74.81904761904762,"z":165.14285714285714,"a95":"0.99","info":"20/09/2014 at 18:17:18"},{"visible":true,"include":false,"step":"90.0","x":9.532380952380953,"y":-103.4,"z":-204.3904761904762,"a95":"0.99","info":"20/09/2014 at 18:17:18"},{"visible":true,"include":false,"step":"100.0","x":383.03809523809525,"y":80.79238095238095,"z":-94.22380952380952,"a95":"0.99","info":"20/09/2014 at 18:17:18"}],"demagType":"Unknown","patch":1.1,"format":"Unknown","strat":null}]
