# Supplementary material for: Paleomagnetic constraints on the timing and distribution of Cenozoic rotations in Central and Eastern Anatolia
Source: Copernicus journal article supplement (doi:10.5194/se-9-295-2018), 2018-03-21
Supplement: Supplementary file 2 [file se-9-295-2018-supplement.zip › se-2017-66_DATA_dir files/dir files Sivas/SS02.dir]

[{"version":"v1.1.0","exported":"2017-05-22T15:08:20.826Z","volume":10.5,"added":"2017-05-22T15:03:39.955Z","format":"Utrecht","demagType":"Unknown","strat":null,"patch":1.1,"GEO":[{"dec":337.7751298062683,"inc":-25.33673552966423,"MAD":7.187442258085112,"cm":[-1.3642420526593924e-12,3.296918293926865e-12,0],"intensity":62690.442325927215,"type":"GC","origin":false,"forced":true,"remark":"","nSteps":5,"minStep":"100","maxStep":"240","steps":["100","150","180","210","240"],"group":"None","version":"v1.1.0"}],"TECT":[{"dec":330.5925899922362,"inc":-35.93194841266638,"MAD":7.18744225807443,"cm":[-2.2737367544323206e-13,1.1368683772161603e-12,-4.547473508864641e-13],"intensity":62690.442325927215,"type":"GC","origin":false,"forced":true,"remark":"","nSteps":5,"minStep":"100","maxStep":"240","steps":["100","150","180","210","240"],"group":"None","version":"v1.1.0"}],"interpreted":true,"name":"SS2.1A","coreAzi":240,"coreDip":54,"bedStrike":293,"bedDip":16,"data":[{"visible":true,"include":false,"step":"20","x":-45848.19047619047,"y":23853.714285714286,"z":26365.428571428572,"a95":2,"info":"\"14-10-13\" at \"15:18\""},{"visible":true,"include":true,"step":"100","x":-39666.19047619047,"y":17719.619047619046,"z":23748.95238095238,"a95":2.1,"info":"\"14-10-13\" at \"18:21\""},{"visible":true,"include":true,"step":"150","x":-27088.380952380954,"y":11377.238095238095,"z":13901.238095238095,"a95":2.1,"info":"\"14-10-13\" at \"23:17\""},{"visible":true,"include":true,"step":"180","x":-16981.52380952381,"y":6458.476190476191,"z":6896.0952380952385,"a95":2,"info":"\"14-10-14\" at \"16:31\""},{"visible":true,"include":true,"step":"210","x":-14925.42857142857,"y":5258,"z":6646.0952380952385,"a95":2.3,"info":"\"14-10-14\" at \"19:39\""},{"visible":true,"include":true,"step":"240","x":-12585.42857142857,"y":3611.1428571428573,"z":3543.1428571428573,"a95":2.3,"info":"\"14-10-14\" at \"22:49\""},{"visible":true,"include":false,"step":"270","x":-9685.047619047618,"y":2096.190476190476,"z":3379.714285714286,"a95":2.1,"info":"\"14-10-15\" at \"16:40\""},{"visible":true,"include":false,"step":"300","x":-8412.761904761905,"y":1385.8095238095239,"z":226.47619047619048,"a95":2.6,"info":"\"14-10-15\" at \"19:51\""},{"visible":true,"include":false,"step":"320","x":-6272.857142857143,"y":1421.3333333333333,"z":956.4761904761905,"a95":2.5,"info":"\"14-10-15\" at \"23:05\""},{"visible":true,"include":false,"step":"340","x":-4296.190476190476,"y":128.85714285714286,"z":102.95238095238095,"a95":2.7,"info":"\"14-10-16\" at \"17:12\""},{"visible":true,"include":false,"step":"370","x":-3649.5238095238096,"y":-26.571428571428573,"z":1011.2380952380952,"a95":3.2,"info":"\"14-10-16\" at \"20:21\""},{"visible":true,"include":false,"step":"400","x":-3673.6190476190477,"y":138.1904761904762,"z":-419.6190476190476,"a95":3.2,"info":"\"14-10-16\" at \"23:31\""},{"visible":true,"include":false,"step":"420","x":-4492.476190476191,"y":847.6190476190476,"z":551.2380952380952,"a95":2.7,"info":"\"14-10-17\" at \"15:08\""},{"visible":true,"include":false,"step":"440","x":-4203.047619047619,"y":703.5238095238095,"z":-617.7142857142857,"a95":2.5,"info":"\"14-10-17\" at \"18:23\""},{"visible":true,"include":false,"step":"470","x":-3044.285714285714,"y":965.4285714285714,"z":375.42857142857144,"a95":3.6,"info":"\"14-10-17\" at \"21:32\""},{"visible":true,"include":false,"step":"490","x":-2349.5238095238096,"y":675.3333333333334,"z":-631.8095238095239,"a95":3.1,"info":"\"14-10-18\" at \"09:34\""},{"visible":true,"include":false,"step":"520","x":-2346.5714285714284,"y":507.9047619047619,"z":-971.2380952380952,"a95":3.7,"info":"\"14-10-18\" at \"12:56\""},{"visible":true,"include":false,"step":"550","x":-2486.6666666666665,"y":1033.4285714285713,"z":-731.1428571428571,"a95":3.2,"info":"\"14-10-18\" at \"16:08\""},{"visible":true,"include":false,"step":"580","x":-932.6666666666666,"y":1584.5714285714287,"z":-98,"a95":3.3,"info":"\"14-10-19\" at \"09:56\""},{"visible":true,"include":false,"step":"610","x":438.6666666666667,"y":1990.952380952381,"z":-2939.6190476190477,"a95":2.6,"info":"\"14-10-19\" at \"13:09\""},{"visible":true,"include":false,"step":"640","x":1460.6666666666667,"y":720.2857142857143,"z":2126.4761904761904,"a95":3.2,"info":"\"14-10-19\" at \"16:52\""}]},{"version":"v1.1.0","exported":"2017-05-22T15:08:20.826Z","volume":10.5,"added":"2017-05-22T15:03:39.956Z","format":"Utrecht","demagType":"Unknown","strat":null,"patch":1.1,"GEO":[{"dec":348.62892344028864,"inc":-29.623281307046657,"MAD":15.17399747211729,"cm":[-1.1368683772161603e-13,4.547473508864641e-13,0],"intensity":57644.28346379562,"type":"GC","origin":false,"forced":true,"remark":"","nSteps":7,"minStep":"100","maxStep":"300","steps":["100","150","180","210","240","270","300"],"group":"None","version":"v1.1.0"}],"TECT":[{"dec":341.4368196455732,"inc":-42.292886947372,"MAD":15.173997472115529,"cm":[5.684341886080802e-14,5.115907697472721e-13,-1.1368683772161603e-13],"intensity":57644.283463795626,"type":"GC","origin":false,"forced":true,"remark":"","nSteps":7,"minStep":"100","maxStep":"300","steps":["100","150","180","210","240","270","300"],"group":"None","version":"v1.1.0"}],"interpreted":true,"name":"SS2.2A","coreAzi":241,"coreDip":56,"bedStrike":293,"bedDip":16,"data":[{"visible":true,"include":false,"step":"20","x":-43729.42857142857,"y":23812.47619047619,"z":25772.47619047619,"a95":2,"info":"\"14-10-20\" at \"16:28\""},{"visible":true,"include":true,"step":"100","x":-38557.04761904762,"y":19957.619047619046,"z":25110.666666666668,"a95":2.1,"info":"\"14-10-20\" at \"19:48\""},{"visible":true,"include":true,"step":"150","x":-20427.904761904763,"y":9924.857142857143,"z":13841.904761904761,"a95":2,"info":"\"14-10-20\" at \"22:46\""},{"visible":true,"include":true,"step":"180","x":-15946.57142857143,"y":6736.285714285715,"z":6475.142857142857,"a95":1.9,"info":"\"14-10-21\" at \"14:48\""},{"visible":true,"include":true,"step":"210","x":-13812,"y":4922.380952380952,"z":6748.761904761905,"a95":1.9,"info":"\"14-10-21\" at \"17:39\""},{"visible":true,"include":true,"step":"240","x":-10538.380952380952,"y":3218.5714285714284,"z":4170.0952380952385,"a95":2.1,"info":"\"14-10-21\" at \"20:44\""},{"visible":true,"include":true,"step":"270","x":-8849.238095238095,"y":2872.095238095238,"z":3980.8571428571427,"a95":2.1,"info":"\"14-10-21\" at \"23:43\""},{"visible":true,"include":true,"step":"300","x":-7712.285714285715,"y":1422.7619047619048,"z":1813.142857142857,"a95":2.2,"info":"\"14-10-22\" at \"16:04\""},{"visible":true,"include":false,"step":"330","x":-5577.9047619047615,"y":371.04761904761904,"z":2336.285714285714,"a95":2.4,"info":"\"14-10-22\" at \"19:10\""},{"visible":true,"include":false,"step":"360","x":-5644.476190476191,"y":708,"z":460.2857142857143,"a95":2.5,"info":"\"14-10-22\" at \"22:16\""},{"visible":true,"include":false,"step":"390","x":-3751.1428571428573,"y":586,"z":672.1904761904761,"a95":3.4,"info":"\"14-10-23\" at \"16:27\""},{"visible":true,"include":false,"step":"420","x":-3771.714285714286,"y":-425.04761904761904,"z":-959.9047619047619,"a95":2.6,"info":"\"14-10-23\" at \"19:31\""},{"visible":true,"include":false,"step":"450","x":-3238.190476190476,"y":511.5238095238095,"z":1730.1904761904761,"a95":2.6,"info":"\"14-10-24\" at \"14:09\""},{"visible":true,"include":false,"step":"480","x":-2785.904761904762,"y":454.76190476190476,"z":-1464,"a95":3.1,"info":"\"14-10-24\" at \"17:13\""},{"visible":true,"include":false,"step":"510","x":-2502.4761904761904,"y":1094.2857142857142,"z":-229.23809523809524,"a95":3.3,"info":"\"14-10-24\" at \"20:05\""},{"visible":true,"include":false,"step":"540","x":-1898,"y":517.6190476190476,"z":-555.6190476190476,"a95":3.6,"info":"\"14-10-24\" at \"23:03\""},{"visible":true,"include":false,"step":"570","x":-791.2380952380952,"y":1022.6666666666666,"z":-87.33333333333333,"a95":6.1,"info":"\"14-10-25\" at \"02:01\""},{"visible":true,"include":false,"step":"600","x":-2852.5714285714284,"y":-110.57142857142857,"z":1053.8095238095239,"a95":4.1,"info":"\"14-10-25\" at \"04:38\""},{"visible":true,"include":false,"step":"630","x":52.38095238095238,"y":1536.952380952381,"z":-558.4761904761905,"a95":2.9,"info":"\"14-10-25\" at \"22:58\""},{"visible":true,"include":false,"step":"660","x":-1307.7142857142858,"y":-807.7142857142857,"z":1613.047619047619,"a95":4.3,"info":"\"14-10-26\" at \"01:43\""},{"visible":true,"include":false,"step":"680","x":-1894.952380952381,"y":-1061.6190476190477,"z":-28,"a95":3.3,"info":"\"14-10-26\" at \"02:39\""}]},{"version":"v1.1.0","exported":"2017-05-22T15:08:20.826Z","volume":10.5,"added":"2017-05-22T15:03:39.956Z","format":"Utrecht","demagType":"Unknown","strat":"6","patch":1.1,"GEO":[{"dec":12.686542823938566,"inc":-37.194564543012206,"MAD":4.464995930616007,"cm":[-6.252776074688882e-13,9.379164112033322e-13,0],"intensity":47723.936295995285,"type":"GC","origin":false,"forced":true,"remark":"","nSteps":10,"minStep":"5.0","maxStep":"50.0","steps":["5.0","10.0","15.0","20.0","25.0","30.0","35.0","40.0","45.0","50.0"],"group":"None","version":"v1.1.0"}],"TECT":[{"dec":9.338088258751839,"inc":-52.85661682065854,"MAD":4.464995930618506,"cm":[-1.7479351299698465e-12,2.8421709430404007e-12,4.263256414560601e-14],"intensity":47723.93629599529,"type":"GC","origin":false,"forced":true,"remark":"","nSteps":10,"minStep":"5.0","maxStep":"50.0","steps":["5.0","10.0","15.0","20.0","25.0","30.0","35.0","40.0","45.0","50.0"],"group":"None","version":"v1.1.0"}],"interpreted":true,"name":"SS2.3A","coreAzi":241,"coreDip":38,"bedStrike":293,"bedDip":16,"data":[{"visible":true,"include":false,"step":"0.0","x":-46882.857142857145,"y":19591.428571428572,"z":4689.047619047619,"a95":0.99,"info":"20/09/2014 at 18:17:18"},{"visible":true,"include":true,"step":"5.0","x":-40060,"y":15594.285714285714,"z":3739.6190476190477,"a95":0.99,"info":"20/09/2014 at 18:17:18"},{"visible":true,"include":true,"step":"10.0","x":-28547.619047619046,"y":9514.380952380952,"z":1827.904761904762,"a95":0.99,"info":"20/09/2014 at 18:17:18"},{"visible":true,"include":true,"step":"15.0","x":-21205.714285714286,"y":5756.761904761905,"z":787.5523809523809,"a95":0.99,"info":"20/09/2014 at 18:17:18"},{"visible":true,"include":true,"step":"20.0","x":-16980.95238095238,"y":3520.095238095238,"z":-255.67619047619047,"a95":0.99,"info":"20/09/2014 at 18:17:18"},{"visible":true,"include":true,"step":"25.0","x":-13632.380952380952,"y":1771.4285714285713,"z":-1148.6666666666667,"a95":0.99,"info":"20/09/2014 at 18:17:18"},{"visible":true,"include":true,"step":"30.0","x":-10982.857142857143,"y":1138,"z":-1208.4761904761904,"a95":0.99,"info":"20/09/2014 at 18:17:18"},{"visible":true,"include":true,"step":"35.0","x":-9206.761904761905,"y":-58.31714285714286,"z":-1712.5714285714287,"a95":0.99,"info":"20/09/2014 at 18:17:18"},{"visible":true,"include":true,"step":"40.0","x":-8182.666666666667,"y":-789.0380952380953,"z":-2293.904761904762,"a95":0.99,"info":"20/09/2014 at 18:17:18"},{"visible":true,"include":true,"step":"45.0","x":-6707.809523809524,"y":-708.9238095238095,"z":-2036.4761904761904,"a95":0.99,"info":"20/09/2014 at 18:17:18"},{"visible":true,"include":true,"step":"50.0","x":-5290.380952380952,"y":-821.4666666666666,"z":-2102.285714285714,"a95":0.99,"info":"20/09/2014 at 18:17:18"},{"visible":true,"include":false,"step":"60.0","x":-4130.380952380952,"y":-3059.1428571428573,"z":-2074.7619047619046,"a95":0.99,"info":"20/09/2014 at 18:17:18"},{"visible":true,"include":false,"step":"70.0","x":-3444.6666666666665,"y":-2791.5238095238096,"z":-1384.857142857143,"a95":0.99,"info":"20/09/2014 at 18:17:18"},{"visible":true,"include":false,"step":"80.0","x":-1595.7142857142858,"y":-2535.4285714285716,"z":-2916.095238095238,"a95":0.99,"info":"20/09/2014 at 18:17:18"},{"visible":true,"include":false,"step":"90.0","x":-2013.047619047619,"y":-3603.1428571428573,"z":-1608.2857142857142,"a95":0.99,"info":"20/09/2014 at 18:17:18"},{"visible":true,"include":false,"step":"100.0","x":-1550.5714285714287,"y":-3909.714285714286,"z":-1679.142857142857,"a95":0.99,"info":"20/09/2014 at 18:17:18"}]},{"version":"v1.1.0","exported":"2017-05-22T15:08:20.826Z","volume":10.5,"added":"2017-05-22T15:03:39.958Z","format":"Utrecht","demagType":"Unknown","strat":"6","patch":1.1,"GEO":[{"dec":0.04442816004905126,"inc":-34.95043959371089,"MAD":2.472002968337856,"cm":[4.689582056016661e-13,-6.821210263296962e-13,0],"intensity":36482.4361195277,"type":"GC","origin":false,"forced":true,"remark":"","nSteps":8,"minStep":"4.0","maxStep":"35.0","steps":["4.0","8.0","12.0","16.0","20.0","25.0","30.0","35.0"],"group":"None","version":"v1.1.0"}],"TECT":[{"dec":353.6113141592291,"inc":-49.3505809015744,"MAD":2.472002968339603,"cm":[-1.9895196601282805e-13,2.8421709430404007e-13,-1.2789769243681803e-13],"intensity":36482.43611952771,"type":"GC","origin":false,"forced":true,"remark":"","nSteps":8,"minStep":"4.0","maxStep":"35.0","steps":["4.0","8.0","12.0","16.0","20.0","25.0","30.0","35.0"],"group":"None","version":"v1.1.0"}],"interpreted":true,"name":"SS2.3B","coreAzi":241,"coreDip":38,"bedStrike":293,"bedDip":16,"data":[{"visible":true,"include":false,"step":"0.0","x":-32197.14285714286,"y":13183.809523809523,"z":4683.523809523809,"a95":0.99,"info":"08/10/2014 at 12:47:29"},{"visible":true,"include":true,"step":"4.0","x":-29407.619047619046,"y":11423.809523809523,"z":3342,"a95":0.99,"info":"08/10/2014 at 12:47:29"},{"visible":true,"include":true,"step":"8.0","x":-23219.04761904762,"y":7577.619047619048,"z":978.5714285714286,"a95":0.99,"info":"08/10/2014 at 12:47:29"},{"visible":true,"include":true,"step":"12.0","x":-17718.095238095237,"y":4498.285714285715,"z":-681.8095238095239,"a95":0.99,"info":"08/10/2014 at 12:47:29"},{"visible":true,"include":true,"step":"16.0","x":-13857.142857142857,"y":2595.6190476190477,"z":-1875.5238095238096,"a95":0.99,"info":"08/10/2014 at 12:47:29"},{"visible":true,"include":true,"step":"20.0","x":-11691.42857142857,"y":1064.7619047619048,"z":-2686.3809523809523,"a95":0.99,"info":"08/10/2014 at 12:47:29"},{"visible":true,"include":true,"step":"25.0","x":-9207.42857142857,"y":-127.07619047619048,"z":-2939.809523809524,"a95":0.99,"info":"08/10/2014 at 12:47:29"},{"visible":true,"include":true,"step":"30.0","x":-7332.0952380952385,"y":-856.104761904762,"z":-3233.2380952380954,"a95":0.99,"info":"08/10/2014 at 12:47:29"},{"visible":true,"include":true,"step":"35.0","x":-5895.714285714285,"y":-2234.5714285714284,"z":-3790,"a95":0.99,"info":"08/10/2014 at 12:47:29"},{"visible":true,"include":false,"step":"40.0","x":-4690.190476190476,"y":-1448.4761904761904,"z":-2794.7619047619046,"a95":0.99,"info":"08/10/2014 at 12:47:29"},{"visible":true,"include":false,"step":"45.0","x":-4682,"y":-1932.095238095238,"z":-4008.4761904761904,"a95":0.99,"info":"08/10/2014 at 12:47:29"},{"visible":true,"include":false,"step":"50.0","x":-3823.809523809524,"y":-2226,"z":-3232.095238095238,"a95":0.99,"info":"08/10/2014 at 12:47:29"},{"visible":true,"include":false,"step":"60.0","x":-2859.904761904762,"y":-2434.5714285714284,"z":-2956.190476190476,"a95":0.99,"info":"08/10/2014 at 12:47:29"},{"visible":true,"include":false,"step":"70.0","x":-2238.4761904761904,"y":-1982.5714285714287,"z":-3628.7619047619046,"a95":0.99,"info":"08/10/2014 at 12:47:29"},{"visible":true,"include":false,"step":"80.0","x":-638.8666666666667,"y":-4160.761904761905,"z":-2322.285714285714,"a95":0.99,"info":"08/10/2014 at 12:47:29"},{"visible":true,"include":false,"step":"90.0","x":-2463.714285714286,"y":-4207.523809523809,"z":-2388.4761904761904,"a95":0.99,"info":"08/10/2014 at 12:47:29"},{"visible":true,"include":false,"step":"100.0","x":-1290.2857142857142,"y":-4870.571428571428,"z":-2297.3333333333335,"a95":0.99,"info":"08/10/2014 at 12:47:29"}]},{"version":"v1.1.0","exported":"2017-05-22T15:08:20.826Z","volume":10.5,"added":"2017-05-22T15:03:39.959Z","format":"Utrecht","demagType":"Unknown","strat":null,"patch":1.1,"GEO":[{"dec":6.6928798038509285,"inc":-30.69162163985646,"MAD":9.12890308975869,"cm":[-1.4219736499399005e-12,3.979039320256561e-13,0],"intensity":34787.62526011363,"type":"GC","origin":false,"forced":true,"remark":"","nSteps":8,"minStep":"100","maxStep":"320","steps":["100","150","180","210","240","270","300","320"],"group":"None","version":"v1.1.0"}],"TECT":[{"dec":2.698045050127348,"inc":-45.90087481522548,"MAD":9.12890308975941,"cm":[-4.227729277772596e-13,-2.8421709430404007e-13,3.126388037344441e-13],"intensity":34787.62526011363,"type":"GC","origin":false,"forced":true,"remark":"","nSteps":8,"minStep":"100","maxStep":"320","steps":["100","150","180","210","240","270","300","320"],"group":"None","version":"v1.1.0"}],"interpreted":true,"name":"SS2.4A","coreAzi":217,"coreDip":58,"bedStrike":293,"bedDip":16,"data":[{"visible":true,"include":false,"step":"20","x":-45717.619047619046,"y":1548.857142857143,"z":18380,"a95":2,"info":"\"14-10-13\" at \"15:20\""},{"visible":true,"include":true,"step":"100","x":-28709.14285714286,"y":-1178.095238095238,"z":12119.904761904761,"a95":2,"info":"\"14-10-13\" at \"18:25\""},{"visible":true,"include":true,"step":"150","x":-18251.238095238095,"y":-2984.7619047619046,"z":6130.285714285715,"a95":2,"info":"\"14-10-13\" at \"23:19\""},{"visible":true,"include":true,"step":"180","x":-11705.809523809523,"y":-4279.523809523809,"z":2056.3809523809523,"a95":2,"info":"\"14-10-14\" at \"16:33\""},{"visible":true,"include":true,"step":"210","x":-10295.047619047618,"y":-4287.142857142857,"z":2568.7619047619046,"a95":2,"info":"\"14-10-14\" at \"19:41\""},{"visible":true,"include":true,"step":"240","x":-7664.857142857143,"y":-4340.666666666667,"z":392.2857142857143,"a95":2.1,"info":"\"14-10-14\" at \"22:51\""},{"visible":true,"include":true,"step":"270","x":-5186.571428571428,"y":-4705.428571428572,"z":1001.7142857142857,"a95":2.2,"info":"\"14-10-15\" at \"16:42\""},{"visible":true,"include":true,"step":"300","x":-5366.190476190476,"y":-4869.619047619048,"z":-646.5714285714286,"a95":2.2,"info":"\"14-10-15\" at \"19:53\""},{"visible":true,"include":true,"step":"320","x":-3447.904761904762,"y":-3881.714285714286,"z":148,"a95":2.2,"info":"\"14-10-15\" at \"23:07\""},{"visible":true,"include":false,"step":"340","x":-3514.3809523809523,"y":-3697.809523809524,"z":-1530.095238095238,"a95":2.3,"info":"\"14-10-16\" at \"17:14\""},{"visible":true,"include":false,"step":"370","x":-2845.2380952380954,"y":-3438.4761904761904,"z":-219.9047619047619,"a95":2.2,"info":"\"14-10-16\" at \"20:23\""},{"visible":true,"include":false,"step":"400","x":-2550.095238095238,"y":-2575.904761904762,"z":-192,"a95":2.7,"info":"\"14-10-16\" at \"23:33\""},{"visible":true,"include":false,"step":"420","x":-1295.2380952380952,"y":-2127.4285714285716,"z":629.4285714285714,"a95":3.5,"info":"\"14-10-17\" at \"15:10\""},{"visible":true,"include":false,"step":"440","x":-1657.3333333333333,"y":-1215.4285714285713,"z":-517.1428571428571,"a95":3.4,"info":"\"14-10-17\" at \"18:25\""},{"visible":true,"include":false,"step":"470","x":-1305.8095238095239,"y":-1914.2857142857142,"z":633.8095238095239,"a95":3.8,"info":"\"14-10-17\" at \"21:34\""},{"visible":true,"include":false,"step":"490","x":-920.1904761904761,"y":-1707.142857142857,"z":-262.1904761904762,"a95":2.9,"info":"\"14-10-18\" at \"09:36\""}]},{"version":"v1.1.0","exported":"2017-05-22T15:08:20.826Z","volume":10.5,"added":"2017-05-22T15:03:39.959Z","format":"Utrecht","demagType":"Unknown","strat":"7","patch":1.1,"GEO":[{"dec":6.167165119550077,"inc":-30.744393918858265,"MAD":8.780599727539926,"cm":[-1.5631940186722204e-13,3.694822225952521e-13,0],"intensity":20221.875703748858,"type":"GC","origin":false,"forced":true,"remark":"","nSteps":13,"minStep":"4.0","maxStep":"70.0","steps":["4.0","8.0","12.0","16.0","20.0","25.0","30.0","35.0","40.0","45.0","50.0","60.0","70.0"],"group":"None","version":"v1.1.0"}],"TECT":[{"dec":2.0441776379503267,"inc":-45.90225695069068,"MAD":8.780599727540814,"cm":[-4.973799150320701e-13,6.252776074688882e-13,7.105427357601002e-14],"intensity":20221.875703748858,"type":"GC","origin":false,"forced":true,"remark":"","nSteps":13,"minStep":"4.0","maxStep":"70.0","steps":["4.0","8.0","12.0","16.0","20.0","25.0","30.0","35.0","40.0","45.0","50.0","60.0","70.0"],"group":"None","version":"v1.1.0"}],"interpreted":true,"name":"SS2.5A","coreAzi":197,"coreDip":12,"bedStrike":293,"bedDip":16,"data":[{"visible":true,"include":false,"step":"0.0","x":-18808.571428571428,"y":1817.142857142857,"z":-5662,"a95":0.99,"info":"08/10/2014 at 12:47:29"},{"visible":true,"include":true,"step":"4.0","x":-17303.809523809523,"y":1343.3333333333333,"z":-5738.476190476191,"a95":0.99,"info":"08/10/2014 at 12:47:29"},{"visible":true,"include":true,"step":"8.0","x":-14232.380952380952,"y":549.4571428571429,"z":-5014.666666666667,"a95":0.99,"info":"08/10/2014 at 12:47:29"},{"visible":true,"include":true,"step":"12.0","x":-11410.47619047619,"y":-80.5952380952381,"z":-3900.7619047619046,"a95":0.99,"info":"08/10/2014 at 12:47:29"},{"visible":true,"include":true,"step":"16.0","x":-9338.190476190477,"y":-625.9714285714285,"z":-3314.6666666666665,"a95":0.99,"info":"08/10/2014 at 12:47:29"},{"visible":true,"include":true,"step":"20.0","x":-7821.238095238095,"y":-904.7047619047619,"z":-2911.809523809524,"a95":0.99,"info":"08/10/2014 at 12:47:29"},{"visible":true,"include":true,"step":"25.0","x":-6462.380952380952,"y":-792.6095238095238,"z":-2244.190476190476,"a95":0.99,"info":"08/10/2014 at 12:47:29"},{"visible":true,"include":true,"step":"30.0","x":-4956,"y":-1105.7142857142858,"z":-2205.714285714286,"a95":0.99,"info":"08/10/2014 at 12:47:29"},{"visible":true,"include":true,"step":"35.0","x":-4109.809523809524,"y":-1109.7142857142858,"z":-1775.7142857142858,"a95":0.99,"info":"08/10/2014 at 12:47:29"},{"visible":true,"include":true,"step":"40.0","x":-3684.190476190476,"y":-1148.4761904761904,"z":-1120.2857142857142,"a95":0.99,"info":"08/10/2014 at 12:47:29"},{"visible":true,"include":true,"step":"45.0","x":-3185.4285714285716,"y":-1220.6666666666667,"z":-1225.4285714285713,"a95":0.99,"info":"08/10/2014 at 12:47:29"},{"visible":true,"include":true,"step":"50.0","x":-2915.904761904762,"y":-1260.5714285714287,"z":-1419.047619047619,"a95":0.99,"info":"08/10/2014 at 12:47:29"},{"visible":true,"include":true,"step":"60.0","x":-2510.285714285714,"y":-1319.047619047619,"z":-945.5904761904762,"a95":0.99,"info":"08/10/2014 at 12:47:29"},{"visible":true,"include":true,"step":"70.0","x":-1796.1904761904761,"y":-1038.2857142857142,"z":-896.3714285714285,"a95":0.99,"info":"08/10/2014 at 12:47:29"},{"visible":true,"include":false,"step":"80.0","x":-1334.095238095238,"y":-1427.3333333333333,"z":-1045.3333333333333,"a95":0.99,"info":"08/10/2014 at 12:47:29"},{"visible":true,"include":false,"step":"90.0","x":-1265.047619047619,"y":-942.0380952380953,"z":-254.54285714285712,"a95":0.99,"info":"08/10/2014 at 12:47:29"},{"visible":true,"include":false,"step":"100.0","x":-1365.2380952380952,"y":-1450.4761904761904,"z":-276.93333333333334,"a95":0.99,"info":"08/10/2014 at 12:47:29"}]},{"version":"v1.1.0","exported":"2017-05-22T15:08:20.826Z","volume":10.5,"added":"2017-05-22T15:03:39.970Z","format":"Utrecht","demagType":"Unknown","strat":null,"patch":1.1,"GEO":[{"dec":344.63110023133424,"inc":-34.587676864939475,"MAD":16.597022624626593,"cm":[-1.1368683772161603e-13,-7.958078640513122e-13,0],"intensity":37413.389119483625,"type":"GC","origin":false,"forced":true,"remark":"","nSteps":5,"minStep":"100","maxStep":"240","steps":["100","150","180","210","240"],"group":"None","version":"v1.1.0"}],"TECT":[{"dec":335.23846958361685,"inc":-46.35160120779882,"MAD":16.59702262462675,"cm":[0,3.979039320256561e-13,-1.9895196601282805e-13],"intensity":37413.389119483625,"type":"GC","origin":false,"forced":true,"remark":"","nSteps":5,"minStep":"100","maxStep":"240","steps":["100","150","180","210","240"],"group":"None","version":"v1.1.0"}],"interpreted":true,"name":"SS2.6A","coreAzi":196,"coreDip":10,"bedStrike":293,"bedDip":16,"data":[{"visible":true,"include":false,"step":"20","x":-45093.42857142857,"y":4078.6666666666665,"z":-14048.380952380952,"a95":1.9,"info":"\"14-10-13\" at \"15:22\""},{"visible":true,"include":true,"step":"100","x":-27591.619047619046,"y":2243.2380952380954,"z":-14341.42857142857,"a95":2.1,"info":"\"14-10-13\" at \"18:27\""},{"visible":true,"include":true,"step":"150","x":-17562.571428571428,"y":634,"z":-9636,"a95":2.3,"info":"\"14-10-13\" at \"23:21\""},{"visible":true,"include":true,"step":"180","x":-11517.238095238095,"y":-1723.5238095238096,"z":-6730.571428571428,"a95":2.2,"info":"\"14-10-14\" at \"16:35\""},{"visible":true,"include":true,"step":"210","x":-9599.047619047618,"y":-1427.142857142857,"z":-4811.809523809524,"a95":2.4,"info":"\"14-10-14\" at \"19:43\""},{"visible":true,"include":true,"step":"240","x":-4472.761904761905,"y":-2784.7619047619046,"z":-4928.857142857143,"a95":2.6,"info":"\"14-10-14\" at \"22:54\""},{"visible":true,"include":false,"step":"270","x":-3379.0476190476193,"y":-3204.3809523809523,"z":-2463.904761904762,"a95":2.9,"info":"\"14-10-15\" at \"16:44\""},{"visible":true,"include":false,"step":"300","x":-3249.5238095238096,"y":-2740.285714285714,"z":-2005.2380952380952,"a95":3.1,"info":"\"14-10-15\" at \"19:55\""},{"visible":true,"include":false,"step":"320","x":-2182.4761904761904,"y":-2500.3809523809523,"z":-1743.6190476190477,"a95":3.4,"info":"\"14-10-15\" at \"23:09\""},{"visible":true,"include":false,"step":"340","x":-2302.4761904761904,"y":-2866.9523809523807,"z":-2590.285714285714,"a95":3.6,"info":"\"14-10-16\" at \"17:17\""},{"visible":true,"include":false,"step":"370","x":-816.4761904761905,"y":-1536.095238095238,"z":-1218.6666666666667,"a95":5.6,"info":"\"14-10-16\" at \"20:25\""},{"visible":true,"include":false,"step":"400","x":-900,"y":-1661.047619047619,"z":-2040.5714285714287,"a95":4.3,"info":"\"14-10-16\" at \"23:35\""},{"visible":true,"include":false,"step":"420","x":-1560,"y":-1148.2857142857142,"z":-1152.095238095238,"a95":4.2,"info":"\"14-10-17\" at \"15:11\""},{"visible":true,"include":false,"step":"440","x":-498.85714285714283,"y":-227.33333333333334,"z":-1213.2380952380952,"a95":6.5,"info":"\"14-10-17\" at \"18:26\""},{"visible":true,"include":false,"step":"470","x":-414.85714285714283,"y":120.76190476190476,"z":-289.3333333333333,"a95":18.8,"info":"\"14-10-17\" at \"21:36\""},{"visible":true,"include":false,"step":"490","x":-775.7142857142857,"y":-498.95238095238096,"z":-1595.047619047619,"a95":4.5,"info":"\"14-10-18\" at \"09:38\""}]},{"version":"v1.1.0","exported":"2017-05-22T15:08:20.826Z","volume":10.5,"added":"2017-05-22T15:03:39.970Z","format":"Utrecht","demagType":"Unknown","strat":"7","patch":1.1,"GEO":[{"dec":337.8445606152461,"inc":-30.188511470225457,"MAD":6.454991102347467,"cm":[-6.821210263296962e-13,5.684341886080801e-13,0],"intensity":38422.59051111064,"type":"GC","origin":false,"forced":true,"remark":"","nSteps":6,"minStep":"5.0","maxStep":"30.0","steps":["5.0","10.0","15.0","20.0","25.0","30.0"],"group":"None","version":"v1.1.0"}],"TECT":[{"dec":329.1258026496532,"inc":-40.64578298415161,"MAD":6.454991102346353,"cm":[5.684341886080801e-13,6.252776074688882e-13,-1.7053025658242404e-13],"intensity":38422.59051111064,"type":"GC","origin":false,"forced":true,"remark":"","nSteps":6,"minStep":"5.0","maxStep":"30.0","steps":["5.0","10.0","15.0","20.0","25.0","30.0"],"group":"None","version":"v1.1.0"}],"interpreted":true,"name":"SS2.6B","coreAzi":196,"coreDip":10,"bedStrike":293,"bedDip":16,"data":[{"visible":true,"include":false,"step":"0.0","x":-32827.619047619046,"y":1908.6666666666667,"z":-13206.666666666666,"a95":0.99,"info":"20/09/2014 at 18:17:18"},{"visible":true,"include":true,"step":"5.0","x":-27882.85714285714,"y":887.4952380952382,"z":-13047.619047619048,"a95":0.99,"info":"20/09/2014 at 18:17:18"},{"visible":true,"include":true,"step":"10.0","x":-19466.666666666668,"y":-338.25714285714287,"z":-10285.714285714286,"a95":0.99,"info":"20/09/2014 at 18:17:18"},{"visible":true,"include":true,"step":"15.0","x":-14139.047619047618,"y":-1393.142857142857,"z":-8136.761904761905,"a95":0.99,"info":"20/09/2014 at 18:17:18"},{"visible":true,"include":true,"step":"20.0","x":-10838.095238095239,"y":-2260.5714285714284,"z":-6971.333333333333,"a95":0.99,"info":"20/09/2014 at 18:17:18"},{"visible":true,"include":true,"step":"25.0","x":-8289.52380952381,"y":-1947.142857142857,"z":-5648.285714285715,"a95":0.99,"info":"20/09/2014 at 18:17:18"},{"visible":true,"include":true,"step":"30.0","x":-6486.285714285715,"y":-1869.5238095238096,"z":-4101.523809523809,"a95":0.99,"info":"20/09/2014 at 18:17:18"},{"visible":true,"include":false,"step":"35.0","x":-4972.666666666667,"y":-1780.857142857143,"z":-3942.9523809523807,"a95":0.99,"info":"20/09/2014 at 18:17:18"},{"visible":true,"include":false,"step":"40.0","x":-3615.3333333333335,"y":-1278.2857142857142,"z":-3059.4285714285716,"a95":0.99,"info":"20/09/2014 at 18:17:18"},{"visible":true,"include":false,"step":"45.0","x":-2813.904761904762,"y":-938.4571428571428,"z":-1778.7619047619048,"a95":0.99,"info":"20/09/2014 at 18:17:18"},{"visible":true,"include":false,"step":"50.0","x":-1336.1904761904761,"y":-1574.857142857143,"z":-2914,"a95":0.99,"info":"20/09/2014 at 18:17:18"},{"visible":true,"include":false,"step":"60.0","x":-691.6571428571428,"y":-2713.714285714286,"z":-1665.5238095238096,"a95":0.99,"info":"20/09/2014 at 18:17:18"},{"visible":true,"include":false,"step":"70.0","x":517.7619047619048,"y":-1567.6190476190477,"z":-504.6666666666667,"a95":0.99,"info":"20/09/2014 at 18:17:18"},{"visible":true,"include":false,"step":"80.0","x":1849.5238095238096,"y":-1523.8095238095239,"z":-1050.095238095238,"a95":0.99,"info":"20/09/2014 at 18:17:18"},{"visible":true,"include":false,"step":"90.0","x":-36.19333333333333,"y":-2346.7619047619046,"z":-1264,"a95":0.99,"info":"20/09/2014 at 18:17:18"},{"visible":true,"include":false,"step":"100.0","x":149.61904761904762,"y":-2305.2380952380954,"z":205.38095238095238,"a95":0.99,"info":"20/09/2014 at 18:17:18"}]},{"version":"v1.1.0","exported":"2017-05-22T15:08:20.826Z","volume":10.5,"added":"2017-05-22T15:03:39.970Z","format":"Utrecht","demagType":"Unknown","strat":null,"patch":1.1,"GEO":[{"dec":330.8796298027441,"inc":-28.060979280928365,"MAD":9.068200147441807,"cm":[-6.252776074688882e-13,7.958078640513122e-13,0],"intensity":37549.00249793021,"type":"GC","origin":false,"forced":true,"remark":"","nSteps":7,"minStep":"100","maxStep":"300","steps":["100","150","180","210","240","270","300"],"group":"None","version":"v1.1.0"}],"TECT":[{"dec":322.3191950124178,"inc":-36.97996997952093,"MAD":9.068200147442417,"cm":[-1.5347723092418164e-12,4.433786671143025e-12,-2.5579538487363607e-13],"intensity":37549.00249793021,"type":"GC","origin":false,"forced":true,"remark":"","nSteps":7,"minStep":"100","maxStep":"300","steps":["100","150","180","210","240","270","300"],"group":"None","version":"v1.1.0"}],"interpreted":true,"name":"SS2.7A","coreAzi":197,"coreDip":77,"bedStrike":293,"bedDip":16,"data":[{"visible":true,"include":false,"step":"20","x":-48353.04761904762,"y":629.8095238095239,"z":52536.95238095238,"a95":2.5,"info":"\"14-10-13\" at \"15:24\""},{"visible":true,"include":true,"step":"100","x":-24752.571428571428,"y":472.95238095238096,"z":20990.761904761905,"a95":2.4,"info":"\"14-10-13\" at \"18:29\""},{"visible":true,"include":true,"step":"150","x":-15821.42857142857,"y":-197.61904761904762,"z":11784.380952380952,"a95":2.4,"info":"\"14-10-13\" at \"23:23\""},{"visible":true,"include":true,"step":"180","x":-12926.666666666666,"y":-3263.0476190476193,"z":8063.142857142857,"a95":2.2,"info":"\"14-10-14\" at \"16:37\""},{"visible":true,"include":true,"step":"210","x":-10241.714285714286,"y":-2651.904761904762,"z":6571.047619047619,"a95":2.5,"info":"\"14-10-14\" at \"19:45\""},{"visible":true,"include":true,"step":"240","x":-8009.142857142857,"y":-2703.4285714285716,"z":2966.3809523809523,"a95":2.5,"info":"\"14-10-14\" at \"22:56\""},{"visible":true,"include":true,"step":"270","x":-5835.428571428572,"y":-3203.2380952380954,"z":1334.2857142857142,"a95":3,"info":"\"14-10-15\" at \"16:46\""},{"visible":true,"include":true,"step":"300","x":-5473.047619047619,"y":-2436.285714285714,"z":1201.2380952380952,"a95":3.4,"info":"\"14-10-15\" at \"19:57\""},{"visible":true,"include":false,"step":"320","x":-4145.9047619047615,"y":-1355.5238095238096,"z":378.76190476190476,"a95":3.5,"info":"\"14-10-15\" at \"23:11\""},{"visible":true,"include":false,"step":"340","x":-3221.714285714286,"y":-2125.4285714285716,"z":-1813.7142857142858,"a95":4.3,"info":"\"14-10-16\" at \"17:18\""},{"visible":true,"include":false,"step":"370","x":-5594.285714285715,"y":-2377.714285714286,"z":-118.47619047619048,"a95":3.7,"info":"\"14-10-16\" at \"20:30\""},{"visible":true,"include":false,"step":"400","x":-3445.1428571428573,"y":-2468.095238095238,"z":-68.57142857142857,"a95":4.1,"info":"\"14-10-16\" at \"23:38\""},{"visible":true,"include":false,"step":"420","x":-1615.8095238095239,"y":-3377.2380952380954,"z":-559.5238095238095,"a95":3.5,"info":"\"14-10-17\" at \"15:13\""},{"visible":true,"include":false,"step":"440","x":-2080.3809523809523,"y":-2612.5714285714284,"z":-1057.047619047619,"a95":3.7,"info":"\"14-10-17\" at \"18:28\""},{"visible":true,"include":false,"step":"470","x":-1603.4285714285713,"y":-1514.6666666666667,"z":463.9047619047619,"a95":6.5,"info":"\"14-10-17\" at \"21:38\""},{"visible":true,"include":false,"step":"490","x":-1042.2857142857142,"y":-2528.8571428571427,"z":-275.3333333333333,"a95":3.5,"info":"\"14-10-18\" at \"09:40\""}]},{"version":"v1.1.0","exported":"2017-05-22T15:08:20.826Z","volume":10.5,"added":"2017-05-22T15:03:39.971Z","format":"Utrecht","demagType":"Unknown","strat":"1","patch":1.1,"GEO":[{"dec":349.05644722353986,"inc":-35.42336391647102,"MAD":7.381665190138554,"cm":[-5.684341886080802e-14,6.821210263296962e-13,0],"intensity":41229.635402664484,"type":"GC","origin":false,"forced":true,"remark":"","nSteps":9,"minStep":"4.0","maxStep":"40.0","steps":["4.0","8.0","12.0","16.0","20.0","25.0","30.0","35.0","40.0"],"group":"None","version":"v1.1.0"}],"TECT":[{"dec":340.1243695040422,"inc":-48.03023448779281,"MAD":7.3816651901341155,"cm":[-7.958078640513122e-13,7.389644451905042e-13,4.547473508864641e-13],"intensity":41229.63540266448,"type":"GC","origin":false,"forced":true,"remark":"","nSteps":9,"minStep":"4.0","maxStep":"40.0","steps":["4.0","8.0","12.0","16.0","20.0","25.0","30.0","35.0","40.0"],"group":"None","version":"v1.1.0"}],"interpreted":true,"name":"SS2.7B","coreAzi":197,"coreDip":77,"bedStrike":293,"bedDip":16,"data":[{"visible":true,"include":false,"step":"0.0","x":-30228.571428571428,"y":-299.76190476190476,"z":22465.714285714286,"a95":0.99,"info":"27/10/2014 at 17:03:38"},{"visible":true,"include":true,"step":"4.0","x":-27396.190476190477,"y":-112.16190476190476,"z":21026.666666666668,"a95":0.99,"info":"27/10/2014 at 17:03:38"},{"visible":true,"include":true,"step":"8.0","x":-21811.428571428572,"y":-875.4666666666666,"z":16604.761904761905,"a95":0.99,"info":"27/10/2014 at 17:03:38"},{"visible":true,"include":true,"step":"12.0","x":-16243.809523809523,"y":-1278.095238095238,"z":12518.095238095239,"a95":0.99,"info":"27/10/2014 at 17:03:38"},{"visible":true,"include":true,"step":"16.0","x":-13161.904761904761,"y":-2084.7619047619046,"z":9720,"a95":0.99,"info":"27/10/2014 at 17:03:38"},{"visible":true,"include":true,"step":"20.0","x":-10662.857142857143,"y":-2219.3333333333335,"z":7378.952380952381,"a95":0.99,"info":"27/10/2014 at 17:03:38"},{"visible":true,"include":true,"step":"25.0","x":-8832.761904761905,"y":-2393.1428571428573,"z":6074.857142857143,"a95":0.99,"info":"27/10/2014 at 17:03:38"},{"visible":true,"include":true,"step":"30.0","x":-6956.0952380952385,"y":-2651.6190476190477,"z":3932.095238095238,"a95":0.99,"info":"27/10/2014 at 17:03:38"},{"visible":true,"include":true,"step":"35.0","x":-6166.190476190476,"y":-3364.7619047619046,"z":2633.3333333333335,"a95":0.99,"info":"27/10/2014 at 17:03:38"},{"visible":true,"include":true,"step":"40.0","x":-5926.571428571428,"y":-2524.6666666666665,"z":3108.8571428571427,"a95":0.99,"info":"27/10/2014 at 17:03:38"},{"visible":true,"include":false,"step":"45.0","x":-4165.714285714285,"y":-2368.3809523809523,"z":2374.190476190476,"a95":0.99,"info":"27/10/2014 at 17:03:38"},{"visible":true,"include":false,"step":"50.0","x":-3606.7619047619046,"y":-2270.8571428571427,"z":1060.6666666666667,"a95":0.99,"info":"27/10/2014 at 17:03:38"},{"visible":true,"include":false,"step":"60.0","x":-1944,"y":-2042.857142857143,"z":358.3904761904762,"a95":0.99,"info":"27/10/2014 at 17:03:38"},{"visible":true,"include":false,"step":"70.0","x":-399.3047619047619,"y":-2129.3333333333335,"z":-454.152380952381,"a95":0.99,"info":"27/10/2014 at 17:03:38"},{"visible":true,"include":false,"step":"80.0","x":-116.36190476190475,"y":-2208.095238095238,"z":-765.6095238095238,"a95":0.99,"info":"27/10/2014 at 17:03:38"},{"visible":true,"include":false,"step":"90.0","x":-1023.8095238095239,"y":-642.7428571428571,"z":-1542.857142857143,"a95":0.99,"info":"27/10/2014 at 17:03:38"},{"visible":true,"include":false,"step":"100.0","x":512.3904761904762,"y":-1540.6666666666667,"z":-923,"a95":0.99,"info":"27/10/2014 at 17:03:38"}]},{"version":"v1.1.0","exported":"2017-05-22T15:08:20.826Z","volume":10.5,"added":"2017-05-22T15:03:39.971Z","format":"Utrecht","demagType":"Unknown","strat":null,"patch":1.1,"GEO":[{"dec":358.1483170406483,"inc":-40.13669102642647,"MAD":4.767134679922242,"cm":[-1.4210854715202004e-13,-1.1368683772161603e-13,0],"intensity":21801.531715312736,"type":"GC","origin":false,"forced":true,"remark":"","nSteps":5,"minStep":"100","maxStep":"240","steps":["100","150","180","210","240"],"group":"None","version":"v1.1.0"}],"TECT":[{"dec":349.7015009245,"inc":-54.17961840932756,"MAD":4.767134679922019,"cm":[-2.6005864128819667e-12,2.0463630789890885e-12,-1.865174681370263e-14],"intensity":21801.531715312733,"type":"GC","origin":false,"forced":true,"remark":"","nSteps":5,"minStep":"100","maxStep":"240","steps":["100","150","180","210","240"],"group":"None","version":"v1.1.0"}],"interpreted":true,"name":"SS2.9A","coreAzi":260,"coreDip":0,"bedStrike":293,"bedDip":16,"data":[{"visible":true,"include":false,"step":"20","x":-29982.571428571428,"y":24572.285714285714,"z":-12550.380952380952,"a95":1.9,"info":"\"14-10-13\" at \"15:26\""},{"visible":true,"include":true,"step":"100","x":-11785.52380952381,"y":8500.666666666666,"z":-9335.238095238095,"a95":2.3,"info":"\"14-10-13\" at \"18:31\""},{"visible":true,"include":true,"step":"150","x":-4701.619047619048,"y":3173.3333333333335,"z":-8373.142857142857,"a95":2.9,"info":"\"14-10-13\" at \"23:25\""},{"visible":true,"include":true,"step":"180","x":-3189.0476190476193,"y":1340,"z":-8761.714285714286,"a95":2.7,"info":"\"14-10-14\" at \"16:39\""},{"visible":true,"include":true,"step":"210","x":-2472.8571428571427,"y":1364.952380952381,"z":-8343.238095238095,"a95":2.7,"info":"\"14-10-14\" at \"19:46\""},{"visible":true,"include":true,"step":"240","x":-771.6190476190476,"y":-881.6190476190476,"z":-6776.0952380952385,"a95":2.8,"info":"\"14-10-14\" at \"22:58\""},{"visible":true,"include":false,"step":"270","x":788.6666666666666,"y":-1163.3333333333333,"z":-5146.666666666667,"a95":3.1,"info":"\"14-10-15\" at \"16:48\""},{"visible":true,"include":false,"step":"300","x":-38.857142857142854,"y":-1122.3809523809523,"z":-5773.619047619048,"a95":3,"info":"\"14-10-15\" at \"19:58\""},{"visible":true,"include":false,"step":"320","x":495.6190476190476,"y":-1339.047619047619,"z":-4330.476190476191,"a95":2.8,"info":"\"14-10-15\" at \"23:13\""},{"visible":true,"include":false,"step":"340","x":995.8095238095239,"y":-1704.4761904761904,"z":-4457.333333333333,"a95":2.9,"info":"\"14-10-16\" at \"17:20\""},{"visible":true,"include":false,"step":"370","x":370.1904761904762,"y":-1230.952380952381,"z":-3998.095238095238,"a95":3.5,"info":"\"14-10-16\" at \"20:32\""},{"visible":true,"include":false,"step":"400","x":265.5238095238095,"y":-1546.095238095238,"z":-3444,"a95":3.3,"info":"\"14-10-16\" at \"23:40\""},{"visible":true,"include":false,"step":"420","x":970.4761904761905,"y":-1071.5238095238096,"z":-3318.6666666666665,"a95":2.8,"info":"\"14-10-17\" at \"15:15\""},{"visible":true,"include":false,"step":"440","x":800.952380952381,"y":-735.9047619047619,"z":-3136,"a95":3.2,"info":"\"14-10-17\" at \"18:30\""},{"visible":true,"include":false,"step":"470","x":577.9047619047619,"y":-473.6190476190476,"z":-2705.6190476190477,"a95":3.4,"info":"\"14-10-17\" at \"21:40\""},{"visible":true,"include":false,"step":"490","x":1180.3809523809523,"y":-1288.857142857143,"z":-3082.4761904761904,"a95":2.6,"info":"\"14-10-18\" at \"09:44\""},{"visible":true,"include":false,"step":"520","x":872.8571428571429,"y":-312.3809523809524,"z":-2921.5238095238096,"a95":3.3,"info":"\"14-10-18\" at \"12:58\""},{"visible":true,"include":false,"step":"550","x":-70.76190476190476,"y":-676.952380952381,"z":-3705.3333333333335,"a95":3.3,"info":"\"14-10-18\" at \"16:10\""},{"visible":true,"include":false,"step":"580","x":1541.904761904762,"y":-897.2380952380952,"z":-1813.142857142857,"a95":2.8,"info":"\"14-10-19\" at \"09:58\""},{"visible":true,"include":false,"step":"610","x":-687.5238095238095,"y":1348.857142857143,"z":-2418,"a95":3.2,"info":"\"14-10-19\" at \"13:11\""},{"visible":true,"include":false,"step":"640","x":1251.142857142857,"y":976,"z":-555.1428571428571,"a95":3.3,"info":"\"14-10-19\" at \"16:54\""}]},{"version":"v1.1.0","exported":"2017-05-22T15:08:20.826Z","volume":10.5,"added":"2017-05-22T15:03:39.971Z","format":"Utrecht","demagType":"Unknown","strat":null,"patch":1.1,"GEO":[{"dec":2.617773380375013,"inc":-26.539753996602013,"MAD":4.372106525826139,"cm":[5.400124791776761e-13,2.2737367544323206e-13,0],"intensity":43745.84536764269,"type":"GC","origin":false,"forced":true,"remark":"","nSteps":8,"minStep":"100","maxStep":"330","steps":["100","150","180","210","240","270","300","330"],"group":"None","version":"v1.1.0"}],"TECT":[{"dec":358.4766975390397,"inc":-41.35041780249123,"MAD":4.372106525825312,"cm":[4.405364961712621e-13,2.2737367544323206e-13,2.8421709430404007e-13],"intensity":43745.84536764268,"type":"GC","origin":false,"forced":true,"remark":"","nSteps":8,"minStep":"100","maxStep":"330","steps":["100","150","180","210","240","270","300","330"],"group":"None","version":"v1.1.0"}],"interpreted":true,"name":"SS2.10A","coreAzi":256,"coreDip":12,"bedStrike":293,"bedDip":16,"data":[{"visible":true,"include":false,"step":"20","x":-47731.52380952381,"y":20250.47619047619,"z":-6191.9047619047615,"a95":1.8,"info":"\"14-10-20\" at \"16:30\""},{"visible":true,"include":true,"step":"100","x":-36327.52380952381,"y":13788.47619047619,"z":-6940.761904761905,"a95":1.8,"info":"\"14-10-20\" at \"19:50\""},{"visible":true,"include":true,"step":"150","x":-15838.666666666666,"y":2856.6666666666665,"z":-8251.714285714286,"a95":2.1,"info":"\"14-10-20\" at \"22:48\""},{"visible":true,"include":true,"step":"180","x":-11484.952380952382,"y":1472,"z":-10090.190476190477,"a95":2.1,"info":"\"14-10-21\" at \"14:50\""},{"visible":true,"include":true,"step":"210","x":-9761.52380952381,"y":783.9047619047619,"z":-8439.52380952381,"a95":2.3,"info":"\"14-10-21\" at \"17:40\""},{"visible":true,"include":true,"step":"240","x":-7994.571428571428,"y":-228.47619047619048,"z":-10007.904761904761,"a95":2.4,"info":"\"14-10-21\" at \"20:46\""},{"visible":true,"include":true,"step":"270","x":-6652.380952380952,"y":205.04761904761904,"z":-6502.190476190476,"a95":3,"info":"\"14-10-21\" at \"23:45\""},{"visible":true,"include":true,"step":"300","x":-6423.619047619048,"y":-1925.7142857142858,"z":-11154.952380952382,"a95":2.5,"info":"\"14-10-22\" at \"16:05\""},{"visible":true,"include":true,"step":"330","x":-2832.095238095238,"y":-855.3333333333334,"z":-7652.285714285715,"a95":2.6,"info":"\"14-10-22\" at \"19:12\""},{"visible":true,"include":false,"step":"360","x":-3054.190476190476,"y":-529.1428571428571,"z":-7593.9047619047615,"a95":2.8,"info":"\"14-10-22\" at \"22:18\""},{"visible":true,"include":false,"step":"390","x":-2078.095238095238,"y":-811.4285714285714,"z":-4215.619047619048,"a95":4.2,"info":"\"14-10-23\" at \"16:29\""},{"visible":true,"include":false,"step":"420","x":-2735.1428571428573,"y":-891.3333333333334,"z":-1344.095238095238,"a95":7.7,"info":"\"14-10-23\" at \"19:33\""},{"visible":true,"include":false,"step":"450","x":-1598.4761904761904,"y":-1868.952380952381,"z":-5292.285714285715,"a95":2.6,"info":"\"14-10-24\" at \"14:11\""},{"visible":true,"include":false,"step":"480","x":-2244.6666666666665,"y":-1741.3333333333333,"z":-6846.952380952381,"a95":2.8,"info":"\"14-10-24\" at \"17:16\""},{"visible":true,"include":false,"step":"510","x":-1104.6666666666667,"y":-668,"z":-5755.333333333333,"a95":3.2,"info":"\"14-10-24\" at \"20:07\""},{"visible":true,"include":false,"step":"540","x":-1359.8095238095239,"y":-3072.4761904761904,"z":-5640.761904761905,"a95":2.6,"info":"\"14-10-24\" at \"23:05\""},{"visible":true,"include":false,"step":"570","x":-1691.2380952380952,"y":-1920.857142857143,"z":-3642.6666666666665,"a95":3.3,"info":"\"14-10-25\" at \"02:03\""},{"visible":true,"include":false,"step":"600","x":-1727.4285714285713,"y":-1681.904761904762,"z":-3547.2380952380954,"a95":3.1,"info":"\"14-10-25\" at \"04:40\""},{"visible":true,"include":false,"step":"630","x":1687.142857142857,"y":466.95238095238096,"z":-3003.4285714285716,"a95":2.8,"info":"\"14-10-25\" at \"23:00\""},{"visible":true,"include":false,"step":"660","x":1017.4285714285714,"y":-1398.952380952381,"z":-1426.5714285714287,"a95":3.8,"info":"\"14-10-26\" at \"01:45\""},{"visible":true,"include":false,"step":"680","x":-1902.4761904761904,"y":-589.4285714285714,"z":-973.3333333333334,"a95":3.8,"info":"\"14-10-26\" at \"02:42\""}]},{"version":"v1.1.0","exported":"2017-05-22T15:08:20.826Z","volume":10.5,"added":"2017-05-22T15:03:39.971Z","format":"Utrecht","demagType":"Unknown","strat":"8","patch":1.1,"GEO":[{"dec":356.9865167026901,"inc":-34.15863631300596,"MAD":3.464225254910401,"cm":[-5.684341886080802e-14,1.1368683772161603e-13,0],"intensity":30932.9102847875,"type":"GC","origin":false,"forced":true,"remark":"","nSteps":8,"minStep":"5.0","maxStep":"40.0","steps":["5.0","10.0","15.0","20.0","25.0","30.0","35.0","40.0"],"group":"None","version":"v1.1.0"}],"TECT":[{"dec":350.0575286302378,"inc":-48.13453971100213,"MAD":3.464225254910252,"cm":[-2.0747847884194925e-12,2.6716406864579767e-12,2.1316282072803006e-14],"intensity":30932.910284787496,"type":"GC","origin":false,"forced":true,"remark":"","nSteps":8,"minStep":"5.0","maxStep":"40.0","steps":["5.0","10.0","15.0","20.0","25.0","30.0","35.0","40.0"],"group":"None","version":"v1.1.0"}],"interpreted":true,"name":"SS2.11A","coreAzi":259,"coreDip":6,"bedStrike":293,"bedDip":16,"data":[{"visible":true,"include":false,"step":"0.0","x":-28679.04761904762,"y":18328.571428571428,"z":-7128.190476190476,"a95":0.99,"info":"20/09/2014 at 18:17:18"},{"visible":true,"include":true,"step":"5.0","x":-23061.904761904763,"y":14010.47619047619,"z":-6390,"a95":0.99,"info":"20/09/2014 at 18:17:18"},{"visible":true,"include":true,"step":"10.0","x":-14656.190476190477,"y":8443.904761904761,"z":-6242.285714285715,"a95":0.99,"info":"20/09/2014 at 18:17:18"},{"visible":true,"include":true,"step":"15.0","x":-9809.52380952381,"y":5517.238095238095,"z":-5706.380952380952,"a95":0.99,"info":"20/09/2014 at 18:17:18"},{"visible":true,"include":true,"step":"20.0","x":-6761.047619047619,"y":3375.2380952380954,"z":-4997.619047619048,"a95":0.99,"info":"20/09/2014 at 18:17:18"},{"visible":true,"include":true,"step":"25.0","x":-5101.238095238095,"y":2328.5714285714284,"z":-4992.476190476191,"a95":0.99,"info":"20/09/2014 at 18:17:18"},{"visible":true,"include":true,"step":"30.0","x":-3707.6190476190477,"y":1192.857142857143,"z":-4196,"a95":0.99,"info":"20/09/2014 at 18:17:18"},{"visible":true,"include":true,"step":"35.0","x":-2275.904761904762,"y":925.3142857142857,"z":-4088.8571428571427,"a95":0.99,"info":"20/09/2014 at 18:17:18"},{"visible":true,"include":true,"step":"40.0","x":-2144.190476190476,"y":649.895238095238,"z":-3933.3333333333335,"a95":0.99,"info":"20/09/2014 at 18:17:18"},{"visible":true,"include":false,"step":"45.0","x":-1638.095238095238,"y":-138.33333333333334,"z":-3304.9523809523807,"a95":0.99,"info":"20/09/2014 at 18:17:18"},{"visible":true,"include":false,"step":"50.0","x":-911.7904761904762,"y":539.0666666666666,"z":-3122,"a95":0.99,"info":"20/09/2014 at 18:17:18"},{"visible":true,"include":false,"step":"60.0","x":-565.0095238095239,"y":-1170.6666666666667,"z":-3557.1428571428573,"a95":0.99,"info":"20/09/2014 at 18:17:18"},{"visible":true,"include":false,"step":"70.0","x":-262.752380952381,"y":-668.1809523809524,"z":-1263.047619047619,"a95":0.99,"info":"20/09/2014 at 18:17:18"},{"visible":true,"include":false,"step":"80.0","x":417.447619047619,"y":-1343.904761904762,"z":-2866.6666666666665,"a95":0.99,"info":"20/09/2014 at 18:17:18"},{"visible":true,"include":false,"step":"90.0","x":299.45714285714286,"y":-2995.714285714286,"z":-3346.6666666666665,"a95":0.99,"info":"20/09/2014 at 18:17:18"},{"visible":true,"include":false,"step":"100.0","x":742.2380952380952,"y":-1784.1904761904761,"z":-1801.8095238095239,"a95":0.99,"info":"20/09/2014 at 18:17:18"}]},{"version":"v1.1.0","exported":"2017-05-22T15:08:20.826Z","volume":10.5,"added":"2017-05-22T15:03:39.972Z","format":"Utrecht","demagType":"Unknown","strat":"2","patch":1.1,"GEO":[{"dec":344.3163107538692,"inc":-34.998421283042056,"MAD":8.373482149050277,"cm":[-1.1368683772161603e-12,9.663381206337363e-13,0],"intensity":64084.79785727783,"type":"GC","origin":false,"forced":true,"remark":"","nSteps":8,"minStep":"4.0","maxStep":"35.0","steps":["4.0","8.0","12.0","16.0","20.0","25.0","30.0","35.0"],"group":"None","version":"v1.1.0"}],"TECT":[{"dec":334.7257441934138,"inc":-46.68485661696247,"MAD":8.373482149054555,"cm":[-1.1368683772161603e-12,3.069544618483633e-12,-1.9895196601282805e-13],"intensity":64084.797857277845,"type":"GC","origin":false,"forced":true,"remark":"","nSteps":8,"minStep":"4.0","maxStep":"35.0","steps":["4.0","8.0","12.0","16.0","20.0","25.0","30.0","35.0"],"group":"None","version":"v1.1.0"}],"interpreted":true,"name":"SS2.13A","coreAzi":256,"coreDip":2,"bedStrike":293,"bedDip":16,"data":[{"visible":true,"include":false,"step":"0.0","x":-49863.80952380953,"y":35656.19047619047,"z":-13270.47619047619,"a95":0.99,"info":"27/10/2014 at 17:03:38"},{"visible":true,"include":true,"step":"4.0","x":-44577.142857142855,"y":31451.428571428572,"z":-13388.57142857143,"a95":0.99,"info":"27/10/2014 at 17:03:38"},{"visible":true,"include":true,"step":"8.0","x":-33080,"y":23280,"z":-11653.333333333334,"a95":0.99,"info":"27/10/2014 at 17:03:38"},{"visible":true,"include":true,"step":"12.0","x":-23616.190476190477,"y":16138.095238095239,"z":-9978.095238095239,"a95":0.99,"info":"27/10/2014 at 17:03:38"},{"visible":true,"include":true,"step":"16.0","x":-17340.95238095238,"y":12245.714285714286,"z":-8751.333333333334,"a95":0.99,"info":"27/10/2014 at 17:03:38"},{"visible":true,"include":true,"step":"20.0","x":-13639.047619047618,"y":9281.42857142857,"z":-8459.142857142857,"a95":0.99,"info":"27/10/2014 at 17:03:38"},{"visible":true,"include":true,"step":"25.0","x":-9640,"y":7132.380952380952,"z":-6396.857142857143,"a95":0.99,"info":"27/10/2014 at 17:03:38"},{"visible":true,"include":true,"step":"30.0","x":-6587.9047619047615,"y":5829.9047619047615,"z":-7454.190476190476,"a95":0.99,"info":"27/10/2014 at 17:03:38"},{"visible":true,"include":true,"step":"35.0","x":-5402.571428571428,"y":2973.4285714285716,"z":-7198.285714285715,"a95":0.99,"info":"27/10/2014 at 17:03:38"},{"visible":true,"include":false,"step":"40.0","x":-4929.142857142857,"y":2420.190476190476,"z":-4570.380952380952,"a95":0.99,"info":"27/10/2014 at 17:03:38"},{"visible":true,"include":false,"step":"45.0","x":-2774,"y":1934.2857142857142,"z":-5618.476190476191,"a95":0.99,"info":"27/10/2014 at 17:03:38"},{"visible":true,"include":false,"step":"50.0","x":-2484.4761904761904,"y":802.3428571428572,"z":-5950.0952380952385,"a95":0.99,"info":"27/10/2014 at 17:03:38"},{"visible":true,"include":false,"step":"60.0","x":-463.0952380952381,"y":-83.33047619047619,"z":-4452.476190476191,"a95":0.99,"info":"27/10/2014 at 17:03:38"},{"visible":true,"include":false,"step":"70.0","x":702.3904761904762,"y":-740.495238095238,"z":-5918.0952380952385,"a95":0.99,"info":"27/10/2014 at 17:03:38"},{"visible":true,"include":false,"step":"80.0","x":965.2380952380952,"y":-2384.6666666666665,"z":-4380.666666666667,"a95":0.99,"info":"27/10/2014 at 17:03:38"},{"visible":true,"include":false,"step":"90.0","x":2706.9523809523807,"y":-334.37142857142857,"z":-3873.2380952380954,"a95":0.99,"info":"27/10/2014 at 17:03:38"},{"visible":true,"include":false,"step":"100.0","x":1060.5714285714287,"y":-2500.190476190476,"z":-5204.761904761905,"a95":0.99,"info":"27/10/2014 at 17:03:38"}]},{"version":"v1.1.0","exported":"2017-05-22T15:08:20.826Z","volume":10.5,"added":"2017-05-22T15:03:39.972Z","format":"Utrecht","demagType":"Unknown","strat":null,"patch":1.1,"GEO":[{"dec":353.2176986219007,"inc":-37.22569936601118,"MAD":7.474534011512552,"cm":[-3.268496584496461e-13,3.694822225952521e-13,0],"intensity":80356.4464962561,"type":"GC","origin":false,"forced":true,"remark":"","nSteps":10,"minStep":"100","maxStep":"370","steps":["100","150","180","210","240","270","300","320","340","370"],"group":"None","version":"v1.1.0"}],"TECT":[{"dec":344.5195381769338,"inc":-50.5348201821158,"MAD":7.47453401151151,"cm":[-9.094947017729282e-13,1.9610979506978765e-12,-4.476419235288631e-13],"intensity":80356.4464962561,"type":"GC","origin":false,"forced":true,"remark":"","nSteps":10,"minStep":"100","maxStep":"370","steps":["100","150","180","210","240","270","300","320","340","370"],"group":"None","version":"v1.1.0"}],"interpreted":true,"name":"SS2.14A","coreAzi":191,"coreDip":39,"bedStrike":293,"bedDip":16,"data":[{"visible":true,"include":false,"step":"20","x":-97929.04761904762,"y":11160.761904761905,"z":-6087.238095238095,"a95":1.7,"info":"\"14-10-13\" at \"15:27\""},{"visible":true,"include":true,"step":"100","x":-77335.71428571429,"y":1583.4285714285713,"z":799.047619047619,"a95":1.7,"info":"\"14-10-13\" at \"18:33\""},{"visible":true,"include":true,"step":"150","x":-26796.095238095237,"y":-4352,"z":-643.8095238095239,"a95":2,"info":"\"14-10-13\" at \"23:27\""},{"visible":true,"include":true,"step":"180","x":-26472.95238095238,"y":-4280.666666666667,"z":-296,"a95":1.9,"info":"\"14-10-14\" at \"16:40\""},{"visible":true,"include":true,"step":"210","x":-15558.190476190477,"y":-4731.333333333333,"z":-2521.904761904762,"a95":2.2,"info":"\"14-10-14\" at \"19:48\""},{"visible":true,"include":true,"step":"240","x":-15582.190476190477,"y":-7094.857142857143,"z":-1646.1904761904761,"a95":2,"info":"\"14-10-14\" at \"23:00\""},{"visible":true,"include":true,"step":"270","x":-12668.761904761905,"y":-6739.809523809524,"z":-426.76190476190476,"a95":2.2,"info":"\"14-10-15\" at \"16:49\""},{"visible":true,"include":true,"step":"300","x":-5320.761904761905,"y":-5697.714285714285,"z":-1509.3333333333333,"a95":3.2,"info":"\"14-10-15\" at \"20:00\""},{"visible":true,"include":true,"step":"320","x":-3563.904761904762,"y":-4587.714285714285,"z":-883.1428571428571,"a95":3.4,"info":"\"14-10-15\" at \"23:15\""},{"visible":true,"include":true,"step":"340","x":-3859.2380952380954,"y":-6146.666666666667,"z":-2138.190476190476,"a95":2.5,"info":"\"14-10-16\" at \"17:22\""},{"visible":true,"include":true,"step":"370","x":-3003.1428571428573,"y":-3255.4285714285716,"z":-974.952380952381,"a95":4.5,"info":"\"14-10-16\" at \"20:34\""},{"visible":true,"include":false,"step":"400","x":-2834.285714285714,"y":-3881.0476190476193,"z":-231.33333333333334,"a95":3.2,"info":"\"14-10-16\" at \"23:41\""},{"visible":true,"include":false,"step":"420","x":-741.2380952380952,"y":-3707.714285714286,"z":-568.4761904761905,"a95":3.6,"info":"\"14-10-17\" at \"15:17\""},{"visible":true,"include":false,"step":"440","x":-913.8095238095239,"y":-3105.3333333333335,"z":-673.1428571428571,"a95":3.9,"info":"\"14-10-17\" at \"18:32\""},{"visible":true,"include":false,"step":"470","x":-1766.4761904761904,"y":-3982.6666666666665,"z":-675.047619047619,"a95":4.4,"info":"\"14-10-17\" at \"21:44\""},{"visible":true,"include":false,"step":"490","x":-1333.4285714285713,"y":-2703.1428571428573,"z":531.1428571428571,"a95":4,"info":"\"14-10-18\" at \"10:07\""},{"visible":true,"include":false,"step":"520","x":-1405.3333333333333,"y":-3188.7619047619046,"z":-2504.7619047619046,"a95":4.1,"info":"\"14-10-18\" at \"12:59\""},{"visible":true,"include":false,"step":"550","x":-1979.047619047619,"y":-520.1904761904761,"z":-3926.8571428571427,"a95":4.2,"info":"\"14-10-18\" at \"16:11\""},{"visible":true,"include":false,"step":"580","x":-21.714285714285715,"y":-1790.3809523809523,"z":-394.95238095238096,"a95":5.5,"info":"\"14-10-19\" at \"10:00\""},{"visible":true,"include":false,"step":"610","x":-445.5238095238095,"y":3350.7619047619046,"z":-3486.4761904761904,"a95":2.9,"info":"\"14-10-19\" at \"13:13\""},{"visible":true,"include":false,"step":"640","x":689.7142857142857,"y":2368.285714285714,"z":-936.2857142857143,"a95":3.4,"info":"\"14-10-19\" at \"16:56\""}]},{"version":"v1.1.0","exported":"2017-05-22T15:08:20.826Z","volume":10.5,"added":"2017-05-22T15:03:39.972Z","format":"Utrecht","demagType":"Unknown","strat":"3","patch":1.1,"GEO":[{"dec":345.08418910889475,"inc":-35.345809407382156,"MAD":5.1983590665771615,"cm":[-1.0231815394945443e-12,2.6147972675971687e-12,0],"intensity":88966.06475803349,"type":"GC","origin":false,"forced":true,"remark":"","nSteps":8,"minStep":"4.0","maxStep":"35.0","steps":["4.0","8.0","12.0","16.0","20.0","25.0","30.0","35.0"],"group":"None","version":"v1.1.0"}],"TECT":[{"dec":335.48844062139074,"inc":-47.17822452103853,"MAD":5.19835906657338,"cm":[-3.751665644813329e-12,7.16227077646181e-12,5.115907697472721e-13],"intensity":88966.0647580335,"type":"GC","origin":false,"forced":true,"remark":"","nSteps":8,"minStep":"4.0","maxStep":"35.0","steps":["4.0","8.0","12.0","16.0","20.0","25.0","30.0","35.0"],"group":"None","version":"v1.1.0"}],"interpreted":true,"name":"SS2.14B","coreAzi":191,"coreDip":39,"bedStrike":293,"bedDip":16,"data":[{"visible":true,"include":false,"step":"0.0","x":-86340.95238095238,"y":-4947.238095238095,"z":-680.4190476190475,"a95":0.99,"info":"27/10/2014 at 17:03:38"},{"visible":true,"include":true,"step":"4.0","x":-75588.57142857143,"y":-7080.0952380952385,"z":-2121.904761904762,"a95":0.99,"info":"27/10/2014 at 17:03:38"},{"visible":true,"include":true,"step":"8.0","x":-55103.80952380953,"y":-9165.333333333334,"z":-2683.2380952380954,"a95":0.99,"info":"27/10/2014 at 17:03:38"},{"visible":true,"include":true,"step":"12.0","x":-38469.52380952381,"y":-9918.095238095239,"z":-2576.095238095238,"a95":0.99,"info":"27/10/2014 at 17:03:38"},{"visible":true,"include":true,"step":"16.0","x":-29753.333333333332,"y":-9043.238095238095,"z":-2632.190476190476,"a95":0.99,"info":"27/10/2014 at 17:03:38"},{"visible":true,"include":true,"step":"20.0","x":-23137.14285714286,"y":-8853.904761904761,"z":-3516,"a95":0.99,"info":"27/10/2014 at 17:03:38"},{"visible":true,"include":true,"step":"25.0","x":-17734.285714285714,"y":-7585.523809523809,"z":-2254.095238095238,"a95":0.99,"info":"27/10/2014 at 17:03:38"},{"visible":true,"include":true,"step":"30.0","x":-13258.095238095239,"y":-7632.190476190476,"z":-3423.4285714285716,"a95":0.99,"info":"27/10/2014 at 17:03:38"},{"visible":true,"include":true,"step":"35.0","x":-11873.333333333334,"y":-8280.095238095239,"z":-3304,"a95":0.99,"info":"27/10/2014 at 17:03:38"},{"visible":true,"include":false,"step":"40.0","x":-11474.285714285714,"y":-7686.761904761905,"z":-659.6095238095238,"a95":0.99,"info":"27/10/2014 at 17:03:38"},{"visible":true,"include":false,"step":"45.0","x":-7572.857142857143,"y":-7374.571428571428,"z":-1039.8095238095239,"a95":0.99,"info":"27/10/2014 at 17:03:38"},{"visible":true,"include":false,"step":"50.0","x":-7358,"y":-9685.714285714286,"z":-2652,"a95":0.99,"info":"27/10/2014 at 17:03:38"},{"visible":true,"include":false,"step":"60.0","x":-7034.571428571428,"y":-9776.190476190477,"z":-2019.4285714285713,"a95":0.99,"info":"27/10/2014 at 17:03:38"},{"visible":true,"include":false,"step":"70.0","x":-5811.047619047619,"y":-9336.47619047619,"z":-4276.761904761905,"a95":0.99,"info":"27/10/2014 at 17:03:38"},{"visible":true,"include":false,"step":"80.0","x":-2963.714285714286,"y":-11540,"z":-3114.9523809523807,"a95":0.99,"info":"27/10/2014 at 17:03:38"},{"visible":true,"include":false,"step":"90.0","x":-5540.0952380952385,"y":-9642.857142857143,"z":-818.0571428571429,"a95":0.99,"info":"27/10/2014 at 17:03:38"},{"visible":true,"include":false,"step":"100.0","x":-3185.1428571428573,"y":-10555.238095238095,"z":-2265.5238095238096,"a95":0.99,"info":"27/10/2014 at 17:03:38"}]},{"version":"v1.1.0","exported":"2017-05-22T15:08:20.826Z","volume":10.5,"added":"2017-05-22T15:03:39.972Z","format":"Utrecht","demagType":"Unknown","strat":"1","patch":1.1,"GEO":[{"dec":12.515607141102805,"inc":-34.83271454371811,"MAD":12.478204499873149,"cm":[-1.7053025658242404e-13,2.1316282072803006e-12,0],"intensity":74034.78885489656,"type":"GC","origin":false,"forced":true,"remark":"","nSteps":9,"minStep":"5.0","maxStep":"45.0","steps":["5.0","10.0","15.0","20.0","25.0","30.0","35.0","40.0","45.0"],"group":"None","version":"v1.1.0"}],"TECT":[{"dec":9.421593505747069,"inc":-50.49129095417753,"MAD":12.478204499873886,"cm":[-5.684341886080801e-13,3.979039320256561e-13,-3.410605131648481e-13],"intensity":74034.78885489656,"type":"GC","origin":false,"forced":true,"remark":"","nSteps":9,"minStep":"5.0","maxStep":"45.0","steps":["5.0","10.0","15.0","20.0","25.0","30.0","35.0","40.0","45.0"],"group":"None","version":"v1.1.0"}],"interpreted":true,"name":"SS2.15A","coreAzi":192,"coreDip":24,"bedStrike":293,"bedDip":16,"data":[{"visible":true,"include":false,"step":"0.0","x":-79928.57142857143,"y":16232.380952380952,"z":-16347.619047619048,"a95":0.99,"info":"20/09/2014 at 22:25:28"},{"visible":true,"include":true,"step":"5.0","x":-64598.09523809524,"y":10640,"z":-13366.666666666666,"a95":0.99,"info":"20/09/2014 at 22:25:28"},{"visible":true,"include":true,"step":"10.0","x":-39779.04761904762,"y":4645.809523809524,"z":-7279.714285714285,"a95":0.99,"info":"20/09/2014 at 22:25:28"},{"visible":true,"include":true,"step":"15.0","x":-28793.333333333332,"y":1796.6666666666667,"z":-4234.952380952381,"a95":0.99,"info":"20/09/2014 at 22:25:28"},{"visible":true,"include":true,"step":"20.0","x":-21376.190476190477,"y":490.0761904761905,"z":-3376.4761904761904,"a95":0.99,"info":"20/09/2014 at 22:25:28"},{"visible":true,"include":true,"step":"25.0","x":-17156.190476190477,"y":-1707.142857142857,"z":-2547.6190476190477,"a95":0.99,"info":"20/09/2014 at 22:25:28"},{"visible":true,"include":true,"step":"30.0","x":-13317.142857142857,"y":-2417.714285714286,"z":-2756,"a95":0.99,"info":"20/09/2014 at 22:25:28"},{"visible":true,"include":true,"step":"35.0","x":-10929.52380952381,"y":-3950.190476190476,"z":-2893.6190476190477,"a95":0.99,"info":"20/09/2014 at 22:25:28"},{"visible":true,"include":true,"step":"40.0","x":-10144.761904761905,"y":-2862.9523809523807,"z":-1959.4285714285713,"a95":0.99,"info":"20/09/2014 at 22:25:28"},{"visible":true,"include":true,"step":"45.0","x":-7394.380952380952,"y":-3258.4761904761904,"z":-2245.714285714286,"a95":0.99,"info":"20/09/2014 at 22:25:28"},{"visible":true,"include":false,"step":"50.0","x":-6060.190476190476,"y":-3788.6666666666665,"z":-2544.9523809523807,"a95":0.99,"info":"20/09/2014 at 22:25:28"},{"visible":true,"include":false,"step":"60.0","x":-4155.333333333333,"y":-4147.523809523809,"z":612.8380952380952,"a95":0.99,"info":"20/09/2014 at 22:25:28"},{"visible":true,"include":false,"step":"70.0","x":-3427.5238095238096,"y":-3280.9523809523807,"z":-714.7428571428571,"a95":0.99,"info":"20/09/2014 at 22:25:28"},{"visible":true,"include":false,"step":"80.0","x":-4145.238095238095,"y":-4783.619047619048,"z":-2928.3809523809523,"a95":0.99,"info":"20/09/2014 at 22:25:28"},{"visible":true,"include":false,"step":"90.0","x":-3246.190476190476,"y":-4348.476190476191,"z":-413.74285714285713,"a95":0.99,"info":"20/09/2014 at 22:25:28"},{"visible":true,"include":false,"step":"100.0","x":-3706.3809523809523,"y":-4965.9047619047615,"z":-1599.8095238095239,"a95":0.99,"info":"20/09/2014 at 22:25:28"}]},{"version":"v1.1.0","exported":"2017-05-22T15:08:20.826Z","volume":10.5,"added":"2017-05-22T15:03:39.972Z","format":"Utrecht","demagType":"Unknown","strat":"4","patch":1.1,"GEO":[{"dec":345.10604357846614,"inc":-32.45256765726756,"MAD":9.291388100284902,"cm":[-5.684341886080801e-13,2.0747847884194925e-12,0],"intensity":50546.74600285551,"type":"GC","origin":false,"forced":true,"remark":"","nSteps":6,"minStep":"4.0","maxStep":"25.0","steps":["4.0","8.0","12.0","16.0","20.0","25.0"],"group":"None","version":"v1.1.0"}],"TECT":[{"dec":336.521733857594,"inc":-44.376038255223335,"MAD":9.291388100285122,"cm":[0,6.252776074688882e-13,0],"intensity":50546.7460028555,"type":"GC","origin":false,"forced":true,"remark":"","nSteps":6,"minStep":"4.0","maxStep":"25.0","steps":["4.0","8.0","12.0","16.0","20.0","25.0"],"group":"None","version":"v1.1.0"}],"interpreted":true,"name":"SS2.16A","coreAzi":198,"coreDip":41,"bedStrike":293,"bedDip":16,"data":[{"visible":true,"include":false,"step":"0.0","x":-45420,"y":5405.9047619047615,"z":6984.571428571428,"a95":0.99,"info":"27/10/2014 at 17:03:38"},{"visible":true,"include":true,"step":"4.0","x":-40091.42857142857,"y":3353.1428571428573,"z":4555.333333333333,"a95":0.99,"info":"27/10/2014 at 17:03:38"},{"visible":true,"include":true,"step":"8.0","x":-30417.14285714286,"y":1600.2857142857142,"z":2580.190476190476,"a95":0.99,"info":"27/10/2014 at 17:03:38"},{"visible":true,"include":true,"step":"12.0","x":-21786.666666666668,"y":162.85714285714286,"z":1589.7142857142858,"a95":0.99,"info":"27/10/2014 at 17:03:38"},{"visible":true,"include":true,"step":"16.0","x":-16632.380952380954,"y":-561.5714285714286,"z":1001.1428571428571,"a95":0.99,"info":"27/10/2014 at 17:03:38"},{"visible":true,"include":true,"step":"20.0","x":-13980.952380952382,"y":-1323.7142857142858,"z":-13.217142857142857,"a95":0.99,"info":"27/10/2014 at 17:03:38"},{"visible":true,"include":true,"step":"25.0","x":-10107.619047619048,"y":-753.8095238095239,"z":761.8666666666667,"a95":0.99,"info":"27/10/2014 at 17:03:38"},{"visible":true,"include":false,"step":"30.0","x":-8200.857142857143,"y":-623.9714285714285,"z":-984.4761904761905,"a95":0.99,"info":"27/10/2014 at 17:03:38"},{"visible":true,"include":false,"step":"35.0","x":-6893.619047619048,"y":-2183.1428571428573,"z":-674.8857142857144,"a95":0.99,"info":"27/10/2014 at 17:03:38"},{"visible":true,"include":false,"step":"40.0","x":-6318.666666666667,"y":-1684.4761904761904,"z":-1153.8095238095239,"a95":0.99,"info":"27/10/2014 at 17:03:38"},{"visible":true,"include":false,"step":"45.0","x":-4639.142857142857,"y":-1227.904761904762,"z":-1601.6190476190477,"a95":0.99,"info":"27/10/2014 at 17:03:38"},{"visible":true,"include":false,"step":"50.0","x":-4515.714285714285,"y":-3211.1428571428573,"z":-1692.952380952381,"a95":0.99,"info":"27/10/2014 at 17:03:38"},{"visible":true,"include":false,"step":"60.0","x":-4586.857142857143,"y":-2552.190476190476,"z":-606.1333333333333,"a95":0.99,"info":"27/10/2014 at 17:03:38"},{"visible":true,"include":false,"step":"70.0","x":-4357.9047619047615,"y":-2953.3333333333335,"z":-1408.6666666666667,"a95":0.99,"info":"27/10/2014 at 17:03:38"},{"visible":true,"include":false,"step":"80.0","x":-3001.2380952380954,"y":-4203.238095238095,"z":-1435.5238095238096,"a95":0.99,"info":"27/10/2014 at 17:03:38"},{"visible":true,"include":false,"step":"90.0","x":-2284.8571428571427,"y":-3307.1428571428573,"z":-390.1333333333333,"a95":0.99,"info":"27/10/2014 at 17:03:38"},{"visible":true,"include":false,"step":"100.0","x":-2580.8571428571427,"y":-1392.1904761904761,"z":-3458.3809523809523,"a95":0.99,"info":"27/10/2014 at 17:03:38"}]},{"version":"v1.1.0","exported":"2017-05-22T15:08:20.826Z","volume":10.5,"added":"2017-05-22T15:03:39.973Z","format":"Utrecht","demagType":"Unknown","strat":null,"patch":1.1,"GEO":[{"dec":347.40095224766014,"inc":-36.81942260318265,"MAD":4.971396176378031,"cm":[-5.115907697472721e-13,1.5916157281026244e-12,0],"intensity":92805.295741118,"type":"GC","origin":false,"forced":true,"remark":"","nSteps":7,"minStep":"100","maxStep":"300","steps":["100","150","180","210","240","270","300"],"group":"None","version":"v1.1.0"}],"TECT":[{"dec":337.66107288805074,"inc":-49.068781852736244,"MAD":4.97139617637858,"cm":[-1.5347723092418164e-12,9.094947017729282e-13,9.237055564881302e-14],"intensity":92805.29574111798,"type":"GC","origin":false,"forced":true,"remark":"","nSteps":7,"minStep":"100","maxStep":"300","steps":["100","150","180","210","240","270","300"],"group":"None","version":"v1.1.0"}],"interpreted":true,"name":"SS2.16B","coreAzi":198,"coreDip":41,"bedStrike":293,"bedDip":16,"data":[{"visible":true,"include":false,"step":"20","x":-112836.38095238095,"y":23915.428571428572,"z":-2769.904761904762,"a95":1.7,"info":"\"14-10-13\" at \"15:29\""},{"visible":true,"include":true,"step":"100","x":-84857.80952380953,"y":8683.42857142857,"z":3799.6190476190477,"a95":1.8,"info":"\"14-10-13\" at \"18:35\""},{"visible":true,"include":true,"step":"150","x":-35338.57142857143,"y":-3343.3333333333335,"z":-1378.952380952381,"a95":2,"info":"\"14-10-13\" at \"23:30\""},{"visible":true,"include":true,"step":"180","x":-32720.47619047619,"y":-1937.6190476190477,"z":-1504.6666666666667,"a95":1.9,"info":"\"14-10-14\" at \"16:42\""},{"visible":true,"include":true,"step":"210","x":-20496.85714285714,"y":-5643.238095238095,"z":-1535.3333333333333,"a95":2.4,"info":"\"14-10-14\" at \"19:50\""},{"visible":true,"include":true,"step":"240","x":-19666.190476190477,"y":-8196.952380952382,"z":-3349.1428571428573,"a95":2,"info":"\"14-10-14\" at \"23:02\""},{"visible":true,"include":true,"step":"270","x":-16987.619047619046,"y":-6269.9047619047615,"z":-2582,"a95":2.3,"info":"\"14-10-15\" at \"16:51\""},{"visible":true,"include":true,"step":"300","x":-7929.809523809524,"y":-6932.380952380952,"z":-4262.761904761905,"a95":3,"info":"\"14-10-15\" at \"20:02\""},{"visible":true,"include":false,"step":"320","x":-6402.285714285715,"y":-5348.380952380952,"z":-4058.5714285714284,"a95":3.2,"info":"\"14-10-15\" at \"23:17\""},{"visible":true,"include":false,"step":"340","x":-4974.666666666667,"y":-6762.952380952381,"z":-3729.809523809524,"a95":3.3,"info":"\"14-10-16\" at \"17:24\""},{"visible":true,"include":false,"step":"370","x":-5592.666666666667,"y":-5938.571428571428,"z":-5616.857142857143,"a95":3.2,"info":"\"14-10-16\" at \"20:36\""},{"visible":true,"include":false,"step":"400","x":-4867.523809523809,"y":-7263.714285714285,"z":-2771.714285714286,"a95":3,"info":"\"14-10-16\" at \"23:43\""},{"visible":true,"include":false,"step":"420","x":-4861.333333333333,"y":-3942.8571428571427,"z":-3933.904761904762,"a95":3.4,"info":"\"14-10-17\" at \"15:19\""},{"visible":true,"include":false,"step":"440","x":-4532.285714285715,"y":-4744.761904761905,"z":-4065.4285714285716,"a95":3.4,"info":"\"14-10-17\" at \"18:34\""},{"visible":true,"include":false,"step":"470","x":-2165.904761904762,"y":-7179.809523809524,"z":-2193.714285714286,"a95":3.3,"info":"\"14-10-17\" at \"21:46\""},{"visible":true,"include":false,"step":"490","x":-1602.7619047619048,"y":-6276.857142857143,"z":-450,"a95":3.2,"info":"\"14-10-18\" at \"10:09\""},{"visible":true,"include":false,"step":"520","x":643.4285714285714,"y":-5505.333333333333,"z":-2536.8571428571427,"a95":4.3,"info":"\"14-10-18\" at \"13:02\""},{"visible":true,"include":false,"step":"550","x":170.0952380952381,"y":-1187.904761904762,"z":-4879.142857142857,"a95":4.2,"info":"\"14-10-18\" at \"16:13\""},{"visible":true,"include":false,"step":"580","x":670.4761904761905,"y":-1592.7619047619048,"z":-3197.0476190476193,"a95":4.1,"info":"\"14-10-19\" at \"10:02\""},{"visible":true,"include":false,"step":"610","x":1157.047619047619,"y":683.8095238095239,"z":-1772.3809523809523,"a95":5.2,"info":"\"14-10-19\" at \"13:15\""},{"visible":true,"include":false,"step":"640","x":1695.904761904762,"y":1232.7619047619048,"z":604.952380952381,"a95":4.2,"info":"\"14-10-19\" at \"16:59\""}]},{"version":"v1.1.0","exported":"2017-05-22T15:08:20.826Z","volume":10.5,"added":"2017-05-22T15:03:39.973Z","format":"Utrecht","demagType":"Unknown","strat":null,"patch":1.1,"GEO":[{"dec":7.097077741422652,"inc":-44.82553761308082,"MAD":5.639111892292976,"cm":[-4.476419235288631e-13,2.2737367544323206e-13,0],"intensity":31059.909566459522,"type":"GC","origin":false,"forced":true,"remark":"","nSteps":9,"minStep":"100","maxStep":"360","steps":["100","150","180","210","240","270","300","330","360"],"group":"None","version":"v1.1.0"}],"TECT":[{"dec":0.15809815275775918,"inc":-59.95783640670506,"MAD":5.639111892293337,"cm":[-1.5205614545266144e-12,1.1084466677857563e-12,-1.4921397450962104e-13],"intensity":31059.90956645952,"type":"GC","origin":false,"forced":true,"remark":"","nSteps":9,"minStep":"100","maxStep":"360","steps":["100","150","180","210","240","270","300","330","360"],"group":"None","version":"v1.1.0"}],"interpreted":true,"name":"SS2.17A","coreAzi":270,"coreDip":7,"bedStrike":293,"bedDip":16,"data":[{"visible":true,"include":false,"step":"20","x":-36440.95238095238,"y":35556.28571428572,"z":12895.52380952381,"a95":1.8,"info":"\"14-10-20\" at \"16:32\""},{"visible":true,"include":true,"step":"100","x":-22617.904761904763,"y":21628,"z":-1314.7619047619048,"a95":1.7,"info":"\"14-10-20\" at \"19:53\""},{"visible":true,"include":true,"step":"150","x":-8659.42857142857,"y":7818.285714285715,"z":-3442.5714285714284,"a95":2,"info":"\"14-10-20\" at \"22:49\""},{"visible":true,"include":true,"step":"180","x":-5585.142857142857,"y":5227.809523809524,"z":-4270.952380952381,"a95":2.1,"info":"\"14-10-21\" at \"14:52\""},{"visible":true,"include":true,"step":"210","x":-4563.809523809524,"y":3687.3333333333335,"z":-4098.380952380952,"a95":2.4,"info":"\"14-10-21\" at \"17:42\""},{"visible":true,"include":true,"step":"240","x":-3011.904761904762,"y":1720.7619047619048,"z":-4842.285714285715,"a95":3,"info":"\"14-10-21\" at \"20:48\""},{"visible":true,"include":true,"step":"270","x":-2900.9523809523807,"y":1113.047619047619,"z":-3560.6666666666665,"a95":3.5,"info":"\"14-10-21\" at \"23:47\""},{"visible":true,"include":true,"step":"300","x":-2257.4285714285716,"y":359.42857142857144,"z":-4946,"a95":3.2,"info":"\"14-10-22\" at \"16:09\""},{"visible":true,"include":true,"step":"330","x":-926.4761904761905,"y":208.1904761904762,"z":-3837.904761904762,"a95":3.1,"info":"\"14-10-22\" at \"19:14\""},{"visible":true,"include":true,"step":"360","x":139.14285714285714,"y":-748.8571428571429,"z":-3531.3333333333335,"a95":3.7,"info":"\"14-10-22\" at \"22:19\""},{"visible":true,"include":false,"step":"390","x":583.9047619047619,"y":-949.4285714285714,"z":-2036.857142857143,"a95":4.3,"info":"\"14-10-23\" at \"16:31\""},{"visible":true,"include":false,"step":"420","x":-205.42857142857142,"y":-1366.857142857143,"z":-2969.3333333333335,"a95":3.4,"info":"\"14-10-23\" at \"19:35\""},{"visible":true,"include":false,"step":"450","x":1104.4761904761904,"y":-1597.3333333333333,"z":-1772,"a95":2.6,"info":"\"14-10-24\" at \"14:13\""},{"visible":true,"include":false,"step":"480","x":440.2857142857143,"y":-851.1428571428571,"z":-2249.6190476190477,"a95":4.3,"info":"\"14-10-24\" at \"17:18\""},{"visible":true,"include":false,"step":"510","x":1684.857142857143,"y":-1996.952380952381,"z":-1745.3333333333333,"a95":3.2,"info":"\"14-10-24\" at \"20:09\""},{"visible":true,"include":false,"step":"540","x":304.0952380952381,"y":-810.8571428571429,"z":-1905.7142857142858,"a95":3.6,"info":"\"14-10-24\" at \"23:06\""},{"visible":true,"include":false,"step":"570","x":-1352.4761904761904,"y":-1335.6190476190477,"z":-3823.3333333333335,"a95":2.7,"info":"\"14-10-25\" at \"02:05\""},{"visible":true,"include":false,"step":"600","x":-993.4285714285714,"y":101.52380952380952,"z":-1488.4761904761904,"a95":4.3,"info":"\"14-10-25\" at \"04:41\""},{"visible":true,"include":false,"step":"630","x":1337.142857142857,"y":366.2857142857143,"z":-3247.714285714286,"a95":2.6,"info":"\"14-10-25\" at \"23:01\""},{"visible":true,"include":false,"step":"660","x":-1112.3809523809523,"y":-2457.904761904762,"z":-786,"a95":3,"info":"\"14-10-26\" at \"01:47\""},{"visible":true,"include":false,"step":"680","x":1709.8095238095239,"y":-186.66666666666666,"z":-1087.142857142857,"a95":2.6,"info":"\"14-10-26\" at \"02:44\""}]},{"version":"v1.1.0","exported":"2017-05-22T15:08:20.826Z","volume":10.5,"added":"2017-05-22T15:03:39.973Z","format":"Utrecht","demagType":"Unknown","strat":"8","patch":1.1,"GEO":[{"dec":6.061699549559933,"inc":-38.42408183514084,"MAD":6.339950840163536,"cm":[-1.1368683772161603e-13,1.1368683772161603e-13,0],"intensity":51225.78238744968,"type":"GC","origin":false,"forced":true,"remark":"","nSteps":7,"minStep":"4.0","maxStep":"30.0","steps":["4.0","8.0","12.0","16.0","20.0","25.0","30.0"],"group":"None","version":"v1.1.0"}],"TECT":[{"dec":0.4290524450148041,"inc":-53.51162563858573,"MAD":6.339950840166203,"cm":[5.684341886080801e-13,-2.1600499167107046e-12,0],"intensity":51225.78238744968,"type":"GC","origin":false,"forced":true,"remark":"","nSteps":7,"minStep":"4.0","maxStep":"30.0","steps":["4.0","8.0","12.0","16.0","20.0","25.0","30.0"],"group":"None","version":"v1.1.0"}],"interpreted":true,"name":"SS2.18A","coreAzi":242,"coreDip":55,"bedStrike":293,"bedDip":16,"data":[{"visible":true,"include":false,"step":"0.0","x":-41732.380952380954,"y":20823.809523809523,"z":17865.714285714286,"a95":0.99,"info":"08/10/2014 at 12:47:29"},{"visible":true,"include":true,"step":"4.0","x":-36121.90476190476,"y":17508.571428571428,"z":14862.857142857143,"a95":0.99,"info":"08/10/2014 at 12:47:29"},{"visible":true,"include":true,"step":"8.0","x":-27877.14285714286,"y":11780.952380952382,"z":10124.761904761905,"a95":0.99,"info":"08/10/2014 at 12:47:29"},{"visible":true,"include":true,"step":"12.0","x":-20611.428571428572,"y":7732.380952380952,"z":7245.047619047619,"a95":0.99,"info":"08/10/2014 at 12:47:29"},{"visible":true,"include":true,"step":"16.0","x":-16786.666666666668,"y":5228.761904761905,"z":4558.380952380952,"a95":0.99,"info":"08/10/2014 at 12:47:29"},{"visible":true,"include":true,"step":"20.0","x":-13565.714285714286,"y":3323.809523809524,"z":2578,"a95":0.99,"info":"08/10/2014 at 12:47:29"},{"visible":true,"include":true,"step":"25.0","x":-11060.952380952382,"y":2054.4761904761904,"z":2175.809523809524,"a95":0.99,"info":"08/10/2014 at 12:47:29"},{"visible":true,"include":true,"step":"30.0","x":-8894.857142857143,"y":1300.5714285714287,"z":750.8571428571429,"a95":0.99,"info":"08/10/2014 at 12:47:29"},{"visible":true,"include":false,"step":"35.0","x":-7322.380952380952,"y":-505,"z":-284.8285714285714,"a95":0.99,"info":"08/10/2014 at 12:47:29"},{"visible":true,"include":false,"step":"40.0","x":-5283.619047619048,"y":837.9619047619047,"z":57.80666666666667,"a95":0.99,"info":"08/10/2014 at 12:47:29"},{"visible":true,"include":false,"step":"45.0","x":-4388.666666666667,"y":442.5619047619047,"z":-813.0571428571429,"a95":0.99,"info":"08/10/2014 at 12:47:29"},{"visible":true,"include":false,"step":"50.0","x":-4181.142857142857,"y":-1799.5238095238096,"z":-975.1428571428571,"a95":0.99,"info":"08/10/2014 at 12:47:29"},{"visible":true,"include":false,"step":"60.0","x":-2402.5714285714284,"y":-2135.4285714285716,"z":-933.0857142857143,"a95":0.99,"info":"08/10/2014 at 12:47:29"},{"visible":true,"include":false,"step":"70.0","x":-1833.142857142857,"y":-2870.5714285714284,"z":-2131.1428571428573,"a95":0.99,"info":"08/10/2014 at 12:47:29"},{"visible":true,"include":false,"step":"80.0","x":-1322.1904761904761,"y":-3934.190476190476,"z":-1803.904761904762,"a95":0.99,"info":"08/10/2014 at 12:47:29"},{"visible":true,"include":false,"step":"90.0","x":-372.68571428571425,"y":-3608.7619047619046,"z":-937.152380952381,"a95":0.99,"info":"08/10/2014 at 12:47:29"},{"visible":true,"include":false,"step":"100.0","x":-765.447619047619,"y":-2946.9523809523807,"z":-2870.4761904761904,"a95":0.99,"info":"08/10/2014 at 12:47:29"}]},{"version":"v1.1.0","exported":"2017-05-22T15:08:20.827Z","volume":10.5,"added":"2017-05-22T15:03:39.974Z","format":"Utrecht","demagType":"Unknown","strat":"2","patch":1.1,"GEO":[{"dec":359.4760511004363,"inc":-35.01957767925622,"MAD":5.8430293135840765,"cm":[3.979039320256561e-13,-3.922195901395753e-12,0],"intensity":60599.145228445515,"type":"GC","origin":false,"forced":true,"remark":"","nSteps":6,"minStep":"5.0","maxStep":"30.0","steps":["5.0","10.0","15.0","20.0","25.0","30.0"],"group":"None","version":"v1.1.0"}],"TECT":[{"dec":352.8888485005266,"inc":-49.34100904269346,"MAD":5.843029313581203,"cm":[-4.547473508864641e-13,5.684341886080802e-14,2.2737367544323206e-13],"intensity":60599.14522844551,"type":"GC","origin":false,"forced":true,"remark":"","nSteps":6,"minStep":"5.0","maxStep":"30.0","steps":["5.0","10.0","15.0","20.0","25.0","30.0"],"group":"None","version":"v1.1.0"}],"interpreted":true,"name":"SS2.19A","coreAzi":215,"coreDip":58,"bedStrike":293,"bedDip":16,"data":[{"visible":true,"include":false,"step":"0.0","x":-53242.857142857145,"y":23963.809523809523,"z":29793.333333333332,"a95":0.99,"info":"20/09/2014 at 22:25:28"},{"visible":true,"include":true,"step":"5.0","x":-42549.52380952381,"y":17706.666666666668,"z":23115.238095238095,"a95":0.99,"info":"20/09/2014 at 22:25:28"},{"visible":true,"include":true,"step":"10.0","x":-26670.47619047619,"y":9627.619047619048,"z":13997.142857142857,"a95":0.99,"info":"20/09/2014 at 22:25:28"},{"visible":true,"include":true,"step":"15.0","x":-19265.714285714286,"y":5759.142857142857,"z":9005.619047619048,"a95":0.99,"info":"20/09/2014 at 22:25:28"},{"visible":true,"include":true,"step":"20.0","x":-14614.285714285714,"y":3507.714285714286,"z":6902.952380952381,"a95":0.99,"info":"20/09/2014 at 22:25:28"},{"visible":true,"include":true,"step":"25.0","x":-11821.904761904761,"y":1402.2857142857142,"z":4636.952380952381,"a95":0.99,"info":"20/09/2014 at 22:25:28"},{"visible":true,"include":true,"step":"30.0","x":-9284.095238095239,"y":202.2,"z":2668.5714285714284,"a95":0.99,"info":"20/09/2014 at 22:25:28"},{"visible":true,"include":false,"step":"35.0","x":-7883.9047619047615,"y":-1215.6190476190477,"z":2622,"a95":0.99,"info":"20/09/2014 at 22:25:28"},{"visible":true,"include":false,"step":"40.0","x":-5570.761904761905,"y":-838.352380952381,"z":2190.7619047619046,"a95":0.99,"info":"20/09/2014 at 22:25:28"},{"visible":true,"include":false,"step":"45.0","x":-5322.761904761905,"y":-281.70476190476194,"z":1220.2857142857142,"a95":0.99,"info":"20/09/2014 at 22:25:28"},{"visible":true,"include":false,"step":"50.0","x":-4833.333333333333,"y":-1804.952380952381,"z":242.15238095238095,"a95":0.99,"info":"20/09/2014 at 22:25:28"},{"visible":true,"include":false,"step":"60.0","x":-3751.6190476190477,"y":-1731.904761904762,"z":1059.8095238095239,"a95":0.99,"info":"20/09/2014 at 22:25:28"},{"visible":true,"include":false,"step":"70.0","x":-3071.904761904762,"y":-2741.3333333333335,"z":-929.7523809523809,"a95":0.99,"info":"20/09/2014 at 22:25:28"},{"visible":true,"include":false,"step":"80.0","x":-2537.6190476190477,"y":-4449.428571428572,"z":-1112.3809523809523,"a95":0.99,"info":"20/09/2014 at 22:25:28"},{"visible":true,"include":false,"step":"90.0","x":-1742.3809523809523,"y":-2836.3809523809523,"z":153.23809523809524,"a95":0.99,"info":"20/09/2014 at 22:25:28"},{"visible":true,"include":false,"step":"100.0","x":-2704.6666666666665,"y":-3183.714285714286,"z":-1378.6666666666667,"a95":0.99,"info":"20/09/2014 at 22:25:28"}]},{"version":"v1.1.0","exported":"2017-05-22T15:08:20.827Z","volume":10.5,"added":"2017-05-22T15:03:39.974Z","format":"Utrecht","demagType":"Unknown","strat":"2","patch":1.1,"GEO":[{"dec":18.220098767766558,"inc":-35.69144788054573,"MAD":4.663668568013251,"cm":[-5.684341886080802e-14,1.2505552149377763e-12,0],"intensity":70163.49375061448,"type":"GC","origin":false,"forced":true,"remark":"","nSteps":8,"minStep":"4.0","maxStep":"35.0","steps":["4.0","8.0","12.0","16.0","20.0","25.0","30.0","35.0"],"group":"None","version":"v1.1.0"}],"TECT":[{"dec":16.74225133315508,"inc":-51.61954355465298,"MAD":4.663668568006973,"cm":[-3.439026841078885e-12,4.547473508864641e-12,-4.547473508864641e-13],"intensity":70163.49375061446,"type":"GC","origin":false,"forced":true,"remark":"","nSteps":8,"minStep":"4.0","maxStep":"35.0","steps":["4.0","8.0","12.0","16.0","20.0","25.0","30.0","35.0"],"group":"None","version":"v1.1.0"}],"interpreted":true,"name":"SS2.20A","coreAzi":215,"coreDip":54,"bedStrike":293,"bedDip":16,"data":[{"visible":true,"include":false,"step":"0.0","x":-67010.47619047618,"y":15356.190476190477,"z":23656.190476190477,"a95":0.99,"info":"08/10/2014 at 18:22:35"},{"visible":true,"include":true,"step":"4.0","x":-57442.857142857145,"y":10290.47619047619,"z":20027.619047619046,"a95":0.99,"info":"08/10/2014 at 18:22:35"},{"visible":true,"include":true,"step":"8.0","x":-41979.04761904762,"y":3668.7619047619046,"z":13924.761904761905,"a95":0.99,"info":"08/10/2014 at 18:22:35"},{"visible":true,"include":true,"step":"12.0","x":-30000.95238095238,"y":-113.4,"z":10146.666666666666,"a95":0.99,"info":"08/10/2014 at 18:22:35"},{"visible":true,"include":true,"step":"16.0","x":-23760.95238095238,"y":-1715.8095238095239,"z":6417.047619047619,"a95":0.99,"info":"08/10/2014 at 18:22:35"},{"visible":true,"include":true,"step":"20.0","x":-18279.04761904762,"y":-3744.7619047619046,"z":4282.761904761905,"a95":0.99,"info":"08/10/2014 at 18:22:35"},{"visible":true,"include":true,"step":"25.0","x":-14200.952380952382,"y":-4491.428571428572,"z":3601.4285714285716,"a95":0.99,"info":"08/10/2014 at 18:22:35"},{"visible":true,"include":true,"step":"30.0","x":-10883.809523809523,"y":-4992.380952380952,"z":1918.2857142857142,"a95":0.99,"info":"08/10/2014 at 18:22:35"},{"visible":true,"include":true,"step":"35.0","x":-9307.904761904761,"y":-6192,"z":1196.2857142857142,"a95":0.99,"info":"08/10/2014 at 18:22:35"},{"visible":true,"include":false,"step":"40.0","x":-7739.9047619047615,"y":-7108,"z":2536.285714285714,"a95":0.99,"info":"08/10/2014 at 18:22:35"},{"visible":true,"include":false,"step":"45.0","x":-6417.238095238095,"y":-6140.0952380952385,"z":40.413333333333334,"a95":0.99,"info":"08/10/2014 at 18:22:35"},{"visible":true,"include":false,"step":"50.0","x":-5703.238095238095,"y":-8104.666666666667,"z":491.5238095238095,"a95":0.99,"info":"08/10/2014 at 18:22:35"},{"visible":true,"include":false,"step":"60.0","x":-3577.714285714286,"y":-6976.190476190476,"z":786.4571428571428,"a95":0.99,"info":"08/10/2014 at 18:22:35"},{"visible":true,"include":false,"step":"70.0","x":-3204.8571428571427,"y":-5413.047619047619,"z":-1743.904761904762,"a95":0.99,"info":"08/10/2014 at 18:22:35"},{"visible":true,"include":false,"step":"80.0","x":-4623.238095238095,"y":-8538.190476190477,"z":493.2285714285714,"a95":0.99,"info":"08/10/2014 at 18:22:35"},{"visible":true,"include":false,"step":"90.0","x":-4529.523809523809,"y":-7355.619047619048,"z":1911.4285714285713,"a95":0.99,"info":"08/10/2014 at 18:22:35"},{"visible":true,"include":false,"step":"100.0","x":-3150.6666666666665,"y":-5579.428571428572,"z":-2337.0476190476193,"a95":0.99,"info":"08/10/2014 at 18:22:35"}]},{"version":"v1.1.0","exported":"2017-05-22T15:08:20.827Z","volume":10.5,"added":"2017-05-22T15:03:39.974Z","format":"Utrecht","demagType":"Unknown","strat":"3","patch":1.1,"GEO":[{"dec":6.432342032223346,"inc":-41.081519550057834,"MAD":3.658734736865275,"cm":[0,1.0231815394945443e-12,0],"intensity":77514.89611312507,"type":"GC","origin":false,"forced":true,"remark":"","nSteps":8,"minStep":"5.0","maxStep":"40.0","steps":["5.0","10.0","15.0","20.0","25.0","30.0","35.0","40.0"],"group":"None","version":"v1.1.0"}],"TECT":[{"dec":0.281721918549124,"inc":-56.182944160668086,"MAD":3.6587347368604655,"cm":[1.1368683772161603e-12,-2.7853275241795927e-12,5.684341886080802e-14],"intensity":77514.89611312507,"type":"GC","origin":false,"forced":true,"remark":"","nSteps":8,"minStep":"5.0","maxStep":"40.0","steps":["5.0","10.0","15.0","20.0","25.0","30.0","35.0","40.0"],"group":"None","version":"v1.1.0"}],"interpreted":true,"name":"SS2.20B","coreAzi":215,"coreDip":54,"bedStrike":293,"bedDip":16,"data":[{"visible":true,"include":false,"step":"0.0","x":-79553.33333333333,"y":32844.76190476191,"z":25691.428571428572,"a95":0.99,"info":"20/09/2014 at 22:25:28"},{"visible":true,"include":true,"step":"5.0","x":-63059.04761904762,"y":23887.619047619046,"z":19769.52380952381,"a95":0.99,"info":"20/09/2014 at 22:25:28"},{"visible":true,"include":true,"step":"10.0","x":-38190.47619047619,"y":11256.190476190477,"z":10391.42857142857,"a95":0.99,"info":"20/09/2014 at 22:25:28"},{"visible":true,"include":true,"step":"15.0","x":-26448.571428571428,"y":6188.761904761905,"z":6290.0952380952385,"a95":0.99,"info":"20/09/2014 at 22:25:28"},{"visible":true,"include":true,"step":"20.0","x":-20120,"y":3329.4285714285716,"z":4833.809523809524,"a95":0.99,"info":"20/09/2014 at 22:25:28"},{"visible":true,"include":true,"step":"25.0","x":-15048.57142857143,"y":1252.952380952381,"z":2899.0476190476193,"a95":0.99,"info":"20/09/2014 at 22:25:28"},{"visible":true,"include":true,"step":"30.0","x":-12017.142857142857,"y":-1037.5238095238096,"z":1354.7619047619048,"a95":0.99,"info":"20/09/2014 at 22:25:28"},{"visible":true,"include":true,"step":"35.0","x":-9182.285714285714,"y":-1853.3333333333333,"z":972.7619047619048,"a95":0.99,"info":"20/09/2014 at 22:25:28"},{"visible":true,"include":true,"step":"40.0","x":-8169.809523809524,"y":-1483.047619047619,"z":1040.1904761904761,"a95":0.99,"info":"20/09/2014 at 22:25:28"},{"visible":true,"include":false,"step":"45.0","x":-7103.428571428572,"y":-1782.5714285714287,"z":-775.7238095238096,"a95":0.99,"info":"20/09/2014 at 22:25:28"},{"visible":true,"include":false,"step":"50.0","x":-7637.619047619048,"y":-4040.095238095238,"z":-761.2857142857143,"a95":0.99,"info":"20/09/2014 at 22:25:28"},{"visible":true,"include":false,"step":"60.0","x":-4736.571428571428,"y":-1758.7619047619048,"z":284.6952380952381,"a95":0.99,"info":"20/09/2014 at 22:25:28"},{"visible":true,"include":false,"step":"70.0","x":-3878.6666666666665,"y":-4192,"z":-1809.8095238095239,"a95":0.99,"info":"20/09/2014 at 22:25:28"},{"visible":true,"include":false,"step":"80.0","x":-1859.047619047619,"y":-5144.857142857143,"z":-1307.5238095238096,"a95":0.99,"info":"20/09/2014 at 22:25:28"},{"visible":true,"include":false,"step":"90.0","x":-2039.2380952380952,"y":-2421.2380952380954,"z":-636.5428571428571,"a95":0.99,"info":"20/09/2014 at 22:25:28"},{"visible":true,"include":false,"step":"100.0","x":-1427.7142857142858,"y":-3189.809523809524,"z":-588.152380952381,"a95":0.99,"info":"20/09/2014 at 22:25:28"}]},{"version":"v1.1.0","exported":"2017-05-22T15:08:20.827Z","volume":10.5,"added":"2017-05-22T15:03:39.974Z","format":"Utrecht","demagType":"Unknown","strat":null,"patch":1.1,"GEO":[{"dec":346.6337289280269,"inc":-42.35575865006842,"MAD":5.062403475672579,"cm":[5.684341886080802e-14,-4.547473508864641e-13,0],"intensity":44585.47620174146,"type":"GC","origin":false,"forced":true,"remark":"","nSteps":7,"minStep":"100","maxStep":"300","steps":["100","150","180","210","240","270","300"],"group":"None","version":"v1.1.0"}],"TECT":[{"dec":334.3998083000471,"inc":-54.2576670196467,"MAD":5.062403475672487,"cm":[-1.6484591469634324e-12,1.0231815394945443e-12,-9.947598300641403e-14],"intensity":44585.47620174146,"type":"GC","origin":false,"forced":true,"remark":"","nSteps":7,"minStep":"100","maxStep":"300","steps":["100","150","180","210","240","270","300"],"group":"None","version":"v1.1.0"}],"interpreted":true,"name":"SS2.21A","coreAzi":242,"coreDip":8,"bedStrike":293,"bedDip":16,"data":[{"visible":true,"include":false,"step":"20","x":-61320.09523809524,"y":41872.380952380954,"z":-39684.95238095238,"a95":1.9,"info":"\"14-10-20\" at \"16:34\""},{"visible":true,"include":true,"step":"100","x":-29760.285714285714,"y":19781.809523809523,"z":-18265.238095238095,"a95":1.9,"info":"\"14-10-20\" at \"19:55\""},{"visible":true,"include":true,"step":"150","x":-12724.666666666666,"y":6481.619047619048,"z":-12977.142857142857,"a95":2.4,"info":"\"14-10-20\" at \"22:51\""},{"visible":true,"include":true,"step":"180","x":-8100.666666666667,"y":2507.5238095238096,"z":-11295.142857142857,"a95":2.5,"info":"\"14-10-21\" at \"14:53\""},{"visible":true,"include":true,"step":"210","x":-6476.380952380952,"y":647.5238095238095,"z":-10024.761904761905,"a95":2.9,"info":"\"14-10-21\" at \"17:44\""},{"visible":true,"include":true,"step":"240","x":-2422.190476190476,"y":-941.047619047619,"z":-9091.904761904761,"a95":3.1,"info":"\"14-10-21\" at \"20:50\""},{"visible":true,"include":true,"step":"270","x":-2845.809523809524,"y":-608.6666666666666,"z":-7786.952380952381,"a95":3.9,"info":"\"14-10-21\" at \"23:49\""},{"visible":true,"include":true,"step":"300","x":-930.0952380952381,"y":-1355.6190476190477,"z":-8313.714285714286,"a95":3.1,"info":"\"14-10-22\" at \"16:11\""},{"visible":true,"include":false,"step":"330","x":1846.095238095238,"y":-3030.095238095238,"z":-4176.952380952381,"a95":3.7,"info":"\"14-10-22\" at \"19:16\""},{"visible":true,"include":false,"step":"360","x":1101.7142857142858,"y":-4218.476190476191,"z":-4355.142857142857,"a95":3.7,"info":"\"14-10-22\" at \"22:22\""},{"visible":true,"include":false,"step":"390","x":906.2857142857143,"y":-3776.190476190476,"z":-4362.857142857143,"a95":4.3,"info":"\"14-10-23\" at \"16:33\""},{"visible":true,"include":false,"step":"420","x":1120.5714285714287,"y":-3782.4761904761904,"z":-4176.571428571428,"a95":3.9,"info":"\"14-10-23\" at \"19:37\""},{"visible":true,"include":false,"step":"450","x":1069.4285714285713,"y":-2402.9523809523807,"z":-3656.4761904761904,"a95":3.4,"info":"\"14-10-24\" at \"14:15\""},{"visible":true,"include":false,"step":"480","x":1599.904761904762,"y":-2535.809523809524,"z":-8240.952380952382,"a95":2.8,"info":"\"14-10-24\" at \"17:20\""},{"visible":true,"include":false,"step":"510","x":1386.5714285714287,"y":-2532.5714285714284,"z":-2767.714285714286,"a95":3.7,"info":"\"14-10-24\" at \"20:11\""},{"visible":true,"include":false,"step":"540","x":1285.7142857142858,"y":-3847.809523809524,"z":-1264.2857142857142,"a95":3.8,"info":"\"14-10-24\" at \"23:08\""},{"visible":true,"include":false,"step":"570","x":2876.9523809523807,"y":-2786.6666666666665,"z":-2339.5238095238096,"a95":2.9,"info":"\"14-10-25\" at \"02:08\""},{"visible":true,"include":false,"step":"600","x":-1196.4761904761904,"y":1272.952380952381,"z":-596.3809523809524,"a95":6.9,"info":"\"14-10-25\" at \"04:43\""},{"visible":true,"include":false,"step":"630","x":3566.3809523809523,"y":-1013.5238095238095,"z":-2425.4285714285716,"a95":2.5,"info":"\"14-10-25\" at \"23:03\""},{"visible":true,"include":false,"step":"660","x":-2563.3333333333335,"y":-307.14285714285717,"z":-124.28571428571429,"a95":5.3,"info":"\"14-10-26\" at \"01:49\""},{"visible":true,"include":false,"step":"680","x":-268,"y":-3102.3809523809523,"z":-2421.2380952380954,"a95":2.6,"info":"\"14-10-26\" at \"02:47\""}]},{"version":"v1.1.0","exported":"2017-05-22T15:08:20.827Z","volume":10.5,"added":"2017-05-22T15:03:39.974Z","format":"Utrecht","demagType":"Unknown","strat":"3","patch":1.1,"GEO":[{"dec":340.2679037952788,"inc":-36.58120484724039,"MAD":6.712218767010791,"cm":[2.842170943040401e-14,-2.842170943040401e-14,0],"intensity":46025.482247161846,"type":"GC","origin":false,"forced":true,"remark":"","nSteps":9,"minStep":"4.0","maxStep":"40.0","steps":["4.0","8.0","12.0","16.0","20.0","25.0","30.0","35.0","40.0"],"group":"None","version":"v1.1.0"}],"TECT":[{"dec":329.4671149817377,"inc":-47.34585618120622,"MAD":6.712218767009952,"cm":[1.4210854715202004e-12,-2.6147972675971687e-12,-2.842170943040401e-14],"intensity":46025.482247161846,"type":"GC","origin":false,"forced":true,"remark":"","nSteps":9,"minStep":"4.0","maxStep":"40.0","steps":["4.0","8.0","12.0","16.0","20.0","25.0","30.0","35.0","40.0"],"group":"None","version":"v1.1.0"}],"interpreted":true,"name":"SS2.21B","coreAzi":242,"coreDip":8,"bedStrike":293,"bedDip":16,"data":[{"visible":true,"include":false,"step":"0.0","x":-40599.04761904762,"y":26749.52380952381,"z":-12949.52380952381,"a95":0.99,"info":"08/10/2014 at 18:22:35"},{"visible":true,"include":true,"step":"4.0","x":-34800.95238095238,"y":21816.190476190477,"z":-12452.380952380952,"a95":0.99,"info":"08/10/2014 at 18:22:35"},{"visible":true,"include":true,"step":"8.0","x":-24037.14285714286,"y":14751.42857142857,"z":-11426.666666666666,"a95":0.99,"info":"08/10/2014 at 18:22:35"},{"visible":true,"include":true,"step":"12.0","x":-15779.047619047618,"y":9313.142857142857,"z":-8331.42857142857,"a95":0.99,"info":"08/10/2014 at 18:22:35"},{"visible":true,"include":true,"step":"16.0","x":-11251.42857142857,"y":6732.190476190476,"z":-7840.952380952381,"a95":0.99,"info":"08/10/2014 at 18:22:35"},{"visible":true,"include":true,"step":"20.0","x":-7825.333333333333,"y":4345.428571428572,"z":-6263.142857142857,"a95":0.99,"info":"08/10/2014 at 18:22:35"},{"visible":true,"include":true,"step":"25.0","x":-5648.571428571428,"y":2246.4761904761904,"z":-4748.571428571428,"a95":0.99,"info":"08/10/2014 at 18:22:35"},{"visible":true,"include":true,"step":"30.0","x":-4060.3809523809523,"y":1759.142857142857,"z":-4081.0476190476193,"a95":0.99,"info":"08/10/2014 at 18:22:35"},{"visible":true,"include":true,"step":"35.0","x":-3342.7619047619046,"y":969.2380952380952,"z":-4102.476190476191,"a95":0.99,"info":"08/10/2014 at 18:22:35"},{"visible":true,"include":true,"step":"40.0","x":-2008.952380952381,"y":637.7904761904762,"z":-3647.1428571428573,"a95":0.99,"info":"08/10/2014 at 18:22:35"},{"visible":true,"include":false,"step":"45.0","x":-1454.2857142857142,"y":-126.79047619047618,"z":-4115.619047619048,"a95":0.99,"info":"08/10/2014 at 18:22:35"},{"visible":true,"include":false,"step":"50.0","x":-693.2857142857143,"y":-1369.4285714285713,"z":-3916.6666666666665,"a95":0.99,"info":"08/10/2014 at 18:22:35"},{"visible":true,"include":false,"step":"60.0","x":-83.33428571428571,"y":-1873.904761904762,"z":-1280.952380952381,"a95":0.99,"info":"08/10/2014 at 18:22:35"},{"visible":true,"include":false,"step":"70.0","x":694.504761904762,"y":-1718.7619047619048,"z":-3614.8571428571427,"a95":0.99,"info":"08/10/2014 at 18:22:35"},{"visible":true,"include":false,"step":"80.0","x":2493.1428571428573,"y":-4521.238095238095,"z":-3176.9523809523807,"a95":0.99,"info":"08/10/2014 at 18:22:35"},{"visible":true,"include":false,"step":"90.0","x":2368.5714285714284,"y":-3066.4761904761904,"z":-1341.3333333333333,"a95":0.99,"info":"08/10/2014 at 18:22:35"},{"visible":true,"include":false,"step":"100.0","x":1526.5714285714287,"y":-2537.0476190476193,"z":-2871.714285714286,"a95":0.99,"info":"08/10/2014 at 18:22:35"}]},{"version":"v1.1.0","exported":"2017-05-22T15:08:20.827Z","volume":10.5,"added":"2017-05-22T15:03:39.977Z","format":"Utrecht","demagType":"Unknown","strat":null,"patch":1.1,"GEO":[{"dec":1.2898295032911165,"inc":-34.062497811467615,"MAD":6.141989622630185,"cm":[-1.3500311979441904e-12,1.1368683772161603e-12,0],"intensity":75676.90261317992,"type":"GC","origin":false,"forced":true,"remark":"","nSteps":9,"minStep":"100","maxStep":"340","steps":["100","150","180","210","240","270","300","320","340"],"group":"None","version":"v1.1.0"}],"TECT":[{"dec":355.371485658497,"inc":-48.63786005993512,"MAD":6.141989622631377,"cm":[-2.0605739337042905e-12,0,-3.979039320256561e-13],"intensity":75676.9026131799,"type":"GC","origin":false,"forced":true,"remark":"","nSteps":9,"minStep":"100","maxStep":"340","steps":["100","150","180","210","240","270","300","320","340"],"group":"None","version":"v1.1.0"}],"interpreted":true,"name":"SS2.22A","coreAzi":215,"coreDip":74,"bedStrike":293,"bedDip":16,"data":[{"visible":true,"include":false,"step":"20","x":-83185.14285714286,"y":15860.952380952382,"z":53141.04761904762,"a95":2.2,"info":"\"14-10-13\" at \"15:31\""},{"visible":true,"include":true,"step":"100","x":-57663.42857142857,"y":-3682.3809523809523,"z":39246.857142857145,"a95":2.3,"info":"\"14-10-13\" at \"18:37\""},{"visible":true,"include":true,"step":"150","x":-41375.90476190476,"y":-5146.952380952381,"z":24558.95238095238,"a95":2.3,"info":"\"14-10-13\" at \"23:32\""},{"visible":true,"include":true,"step":"180","x":-27982.380952380954,"y":-9415.809523809523,"z":13274.761904761905,"a95":2.1,"info":"\"14-10-14\" at \"16:44\""},{"visible":true,"include":true,"step":"210","x":-23527.714285714286,"y":-9502,"z":10175.142857142857,"a95":2.2,"info":"\"14-10-14\" at \"19:52\""},{"visible":true,"include":true,"step":"240","x":-19724.190476190477,"y":-11994.952380952382,"z":4016,"a95":2.2,"info":"\"14-10-14\" at \"23:05\""},{"visible":true,"include":true,"step":"270","x":-14757.42857142857,"y":-13476.380952380952,"z":885.3333333333334,"a95":2.2,"info":"\"14-10-15\" at \"16:53\""},{"visible":true,"include":true,"step":"300","x":-10585.619047619048,"y":-13059.238095238095,"z":174.95238095238096,"a95":2.2,"info":"\"14-10-15\" at \"20:04\""},{"visible":true,"include":true,"step":"320","x":-7692.0952380952385,"y":-9096.666666666666,"z":243.71428571428572,"a95":2.8,"info":"\"14-10-15\" at \"23:19\""},{"visible":true,"include":true,"step":"340","x":-5796,"y":-12192.285714285714,"z":-1195.7142857142858,"a95":2.5,"info":"\"14-10-16\" at \"17:26\""},{"visible":true,"include":false,"step":"370","x":-811.7142857142857,"y":-9098.857142857143,"z":-44.76190476190476,"a95":2.8,"info":"\"14-10-16\" at \"20:38\""},{"visible":true,"include":false,"step":"400","x":-3158,"y":-10027.333333333334,"z":-3124.8571428571427,"a95":2.6,"info":"\"14-10-16\" at \"23:45\""},{"visible":true,"include":false,"step":"420","x":-1478.3809523809523,"y":-6913.142857142857,"z":-1739.3333333333333,"a95":3.3,"info":"\"14-10-17\" at \"15:21\""},{"visible":true,"include":false,"step":"440","x":-2626.8571428571427,"y":-9502.952380952382,"z":-1980.3809523809523,"a95":2.8,"info":"\"14-10-17\" at \"18:35\""},{"visible":true,"include":false,"step":"470","x":-1667.2380952380952,"y":-7673.619047619048,"z":-622.5714285714286,"a95":2.9,"info":"\"14-10-17\" at \"21:48\""},{"visible":true,"include":false,"step":"490","x":-2598.6666666666665,"y":-6332.476190476191,"z":-1311.142857142857,"a95":3.2,"info":"\"14-10-18\" at \"10:11\""},{"visible":true,"include":false,"step":"520","x":-983.047619047619,"y":-6616,"z":-580.6666666666666,"a95":4,"info":"\"14-10-18\" at \"13:04\""},{"visible":true,"include":false,"step":"550","x":-2751.809523809524,"y":-6012.857142857143,"z":-2772.4761904761904,"a95":3.4,"info":"\"14-10-18\" at \"16:15\""},{"visible":true,"include":false,"step":"580","x":1630.7619047619048,"y":-6672.380952380952,"z":-1788.952380952381,"a95":2.5,"info":"\"14-10-19\" at \"10:04\""},{"visible":true,"include":false,"step":"610","x":-526.6666666666666,"y":-3559.904761904762,"z":-1199.4285714285713,"a95":4.2,"info":"\"14-10-19\" at \"13:16\""},{"visible":true,"include":false,"step":"640","x":4282.380952380952,"y":543.047619047619,"z":-850.952380952381,"a95":2.9,"info":"\"14-10-19\" at \"17:01\""}]},{"version":"v1.1.0","exported":"2017-05-22T15:08:20.827Z","volume":10.5,"added":"2017-05-22T15:03:39.977Z","format":"Utrecht","demagType":"Unknown","strat":"5","patch":1.1,"GEO":[{"dec":6.686359943397235,"inc":-38.878560615411246,"MAD":5.951063807291557,"cm":[-1.6058265828178264e-12,1.7053025658242404e-12,0],"intensity":34480.17097981635,"type":"GC","origin":false,"forced":true,"remark":"","nSteps":6,"minStep":"4.0","maxStep":"25.0","steps":["4.0","8.0","12.0","16.0","20.0","25.0"],"group":"None","version":"v1.1.0"}],"TECT":[{"dec":1.1444657866790635,"inc":-54.027134578498405,"MAD":5.951063807292255,"cm":[-5.6417093219351955e-12,4.320099833421409e-12,3.765876499528531e-13],"intensity":34480.17097981635,"type":"GC","origin":false,"forced":true,"remark":"","nSteps":6,"minStep":"4.0","maxStep":"25.0","steps":["4.0","8.0","12.0","16.0","20.0","25.0"],"group":"None","version":"v1.1.0"}],"interpreted":true,"name":"SS2.22B","coreAzi":215,"coreDip":74,"bedStrike":293,"bedDip":16,"data":[{"visible":true,"include":false,"step":"0.0","x":-32277.14285714286,"y":-15.797142857142857,"z":17430.47619047619,"a95":0.99,"info":"27/10/2014 at 17:03:38"},{"visible":true,"include":true,"step":"4.0","x":-26003.809523809523,"y":-2484.5714285714284,"z":14531.42857142857,"a95":0.99,"info":"27/10/2014 at 17:03:38"},{"visible":true,"include":true,"step":"8.0","x":-17649.52380952381,"y":-4109.333333333333,"z":8963.047619047618,"a95":0.99,"info":"27/10/2014 at 17:03:38"},{"visible":true,"include":true,"step":"12.0","x":-11140.952380952382,"y":-4792.857142857143,"z":5552.952380952381,"a95":0.99,"info":"27/10/2014 at 17:03:38"},{"visible":true,"include":true,"step":"16.0","x":-8910.190476190477,"y":-5096.0952380952385,"z":2654.8571428571427,"a95":0.99,"info":"27/10/2014 at 17:03:38"},{"visible":true,"include":true,"step":"20.0","x":-6017.809523809524,"y":-5782,"z":793.8666666666667,"a95":0.99,"info":"27/10/2014 at 17:03:38"},{"visible":true,"include":true,"step":"25.0","x":-4265.619047619048,"y":-4826.857142857143,"z":273.5333333333333,"a95":0.99,"info":"27/10/2014 at 17:03:38"},{"visible":true,"include":false,"step":"30.0","x":-3130.190476190476,"y":-3851.3333333333335,"z":-290.7333333333333,"a95":0.99,"info":"27/10/2014 at 17:03:38"},{"visible":true,"include":false,"step":"35.0","x":-2756.7619047619046,"y":-3766.7619047619046,"z":-511.97142857142853,"a95":0.99,"info":"27/10/2014 at 17:03:38"},{"visible":true,"include":false,"step":"40.0","x":-1749.5238095238096,"y":-2231.5238095238096,"z":-170.71428571428572,"a95":0.99,"info":"27/10/2014 at 17:03:38"},{"visible":true,"include":false,"step":"45.0","x":-2567.2380952380954,"y":-2039.142857142857,"z":-573.7619047619048,"a95":0.99,"info":"27/10/2014 at 17:03:38"},{"visible":true,"include":false,"step":"50.0","x":-1862.095238095238,"y":-3920.8571428571427,"z":-1510.6666666666667,"a95":0.99,"info":"27/10/2014 at 17:03:38"},{"visible":true,"include":false,"step":"60.0","x":-1847.8095238095239,"y":-1866.6666666666667,"z":-1078.5714285714287,"a95":0.99,"info":"27/10/2014 at 17:03:38"},{"visible":true,"include":false,"step":"70.0","x":-1614.1904761904761,"y":-2278.285714285714,"z":-837.7619047619048,"a95":0.99,"info":"27/10/2014 at 17:03:38"},{"visible":true,"include":false,"step":"80.0","x":-2445.5238095238096,"y":-4172.952380952381,"z":-1998.952380952381,"a95":0.99,"info":"27/10/2014 at 17:03:38"},{"visible":true,"include":false,"step":"90.0","x":-2731.714285714286,"y":-993.2380952380952,"z":-1114,"a95":0.99,"info":"27/10/2014 at 17:03:38"},{"visible":true,"include":false,"step":"100.0","x":-2248.6666666666665,"y":-970.8571428571429,"z":-1337.3333333333333,"a95":0.99,"info":"27/10/2014 at 17:03:38"}]}]
