# Supplementary material for: Paleomagnetic constraints on the timing and distribution of Cenozoic rotations in Central and Eastern Anatolia
Source: Copernicus journal article supplement (doi:10.5194/se-9-295-2018), 2018-03-21
Supplement: Supplementary file 2 [file se-9-295-2018-supplement.zip › se-2017-66_DATA_dir files/dir files Sivas/SS03.dir]

[{"version":"v1.1.0","exported":"2017-05-22T15:13:07.389Z","volume":10.5,"added":"2017-05-22T15:08:42.632Z","format":"Utrecht","demagType":"Unknown","strat":null,"patch":1.1,"GEO":[{"dec":49.240977002724435,"inc":-28.93693090652115,"MAD":4.6821109760452515,"cm":[-1.4495071809506044e-12,4.547473508864641e-13,0],"intensity":29025.373708856456,"type":"GC","origin":false,"forced":true,"remark":"","nSteps":7,"minStep":"100","maxStep":"300","steps":["100","150","180","210","240","270","300"],"group":"None","version":"v1.1.0"}],"TECT":[{"dec":75.50314506002127,"inc":-31.06187442400173,"MAD":4.682110976044753,"cm":[-1.3358203432289883e-12,1.2505552149377763e-12,5.115907697472721e-13],"intensity":29025.373708856452,"type":"GC","origin":false,"forced":true,"remark":"","nSteps":7,"minStep":"100","maxStep":"300","steps":["100","150","180","210","240","270","300"],"group":"None","version":"v1.1.0"}],"interpreted":true,"name":"SS3.1A","coreAzi":347,"coreDip":54,"bedStrike":245,"bedDip":43,"data":[{"visible":true,"include":false,"step":"20","x":-10016.952380952382,"y":18540.095238095237,"z":37006.666666666664,"a95":2.8,"info":"\"14-10-13\" at \"15:35\""},{"visible":true,"include":true,"step":"100","x":-9126.952380952382,"y":12251.047619047618,"z":24138.761904761905,"a95":2.7,"info":"\"14-10-13\" at \"18:39\""},{"visible":true,"include":true,"step":"150","x":-8918,"y":9142.47619047619,"z":13409.714285714286,"a95":2.5,"info":"\"14-10-13\" at \"23:34\""},{"visible":true,"include":true,"step":"180","x":-7013.523809523809,"y":6956.857142857143,"z":6898,"a95":2.2,"info":"\"14-10-14\" at \"16:47\""},{"visible":true,"include":true,"step":"210","x":-6239.809523809524,"y":6273.523809523809,"z":5382.666666666667,"a95":2.1,"info":"\"14-10-14\" at \"19:54\""},{"visible":true,"include":true,"step":"240","x":-6279.142857142857,"y":4475.047619047619,"z":157.23809523809524,"a95":2.2,"info":"\"14-10-14\" at \"23:07\""},{"visible":true,"include":true,"step":"270","x":-4068.9523809523807,"y":3690.190476190476,"z":-1013.047619047619,"a95":2.3,"info":"\"14-10-15\" at \"16:55\""},{"visible":true,"include":true,"step":"300","x":-3287.809523809524,"y":2318.190476190476,"z":-2319.4285714285716,"a95":3.4,"info":"\"14-10-15\" at \"20:06\""},{"visible":true,"include":false,"step":"320","x":-2708.5714285714284,"y":2386.095238095238,"z":-1251.8095238095239,"a95":2.9,"info":"\"14-10-15\" at \"23:21\""},{"visible":true,"include":false,"step":"340","x":-2004.952380952381,"y":1433.047619047619,"z":-2612,"a95":4.5,"info":"\"14-10-16\" at \"17:29\""},{"visible":true,"include":false,"step":"370","x":-1680,"y":1146.4761904761904,"z":-2901.809523809524,"a95":3.9,"info":"\"14-10-16\" at \"20:41\""},{"visible":true,"include":false,"step":"400","x":-1767.142857142857,"y":613.7142857142857,"z":-2395.5238095238096,"a95":3.9,"info":"\"14-10-16\" at \"23:47\""},{"visible":true,"include":false,"step":"420","x":-1279.6190476190477,"y":802.2857142857143,"z":-1492.6666666666667,"a95":4.3,"info":"\"14-10-17\" at \"15:24\""},{"visible":true,"include":false,"step":"440","x":-1716.095238095238,"y":852.2857142857143,"z":-1357.4285714285713,"a95":3.7,"info":"\"14-10-17\" at \"18:38\""},{"visible":true,"include":false,"step":"470","x":-962.2857142857143,"y":582.6666666666666,"z":99.52380952380952,"a95":7.5,"info":"\"14-10-17\" at \"21:50\""},{"visible":true,"include":false,"step":"490","x":-143.61904761904762,"y":920,"z":-1070.095238095238,"a95":4.9,"info":"\"14-10-18\" at \"10:14\""},{"visible":true,"include":false,"step":"520","x":-880.6666666666666,"y":353.23809523809524,"z":544.5714285714286,"a95":8.400001,"info":"\"14-10-18\" at \"13:06\""},{"visible":true,"include":false,"step":"550","x":-911.9047619047619,"y":1434.1904761904761,"z":-974.6666666666666,"a95":4.3,"info":"\"14-10-18\" at \"16:18\""},{"visible":true,"include":false,"step":"580","x":1396.7619047619048,"y":40.38095238095238,"z":629.5238095238095,"a95":4.2,"info":"\"14-10-19\" at \"10:06\""},{"visible":true,"include":false,"step":"610","x":280.76190476190476,"y":1577.8095238095239,"z":33.523809523809526,"a95":5.4,"info":"\"14-10-19\" at \"13:18\""},{"visible":true,"include":false,"step":"640","x":-903.047619047619,"y":2521.5238095238096,"z":-174,"a95":3.6,"info":"\"14-10-19\" at \"17:03\""}]},{"version":"v1.1.0","exported":"2017-05-22T15:13:07.389Z","volume":10.5,"added":"2017-05-22T15:08:42.633Z","format":"Utrecht","demagType":"Unknown","strat":"4","patch":1.1,"GEO":[{"dec":301.6565189170006,"inc":-15.868330650222944,"MAD":24.756349976398294,"cm":[-6.750155989720952e-13,3.410605131648481e-13,0],"intensity":36054.0299959359,"type":"GC","origin":false,"forced":true,"remark":"","nSteps":7,"minStep":"4.0","maxStep":"30.0","steps":["4.0","8.0","12.0","16.0","20.0","25.0","30.0"],"group":"None","version":"v1.1.0"}],"TECT":[{"dec":282.19264048548735,"inc":-48.417089888341124,"MAD":24.756349976397768,"cm":[-1.1937117960769683e-12,1.4210854715202004e-13,4.547473508864641e-13],"intensity":36054.0299959359,"type":"GC","origin":false,"forced":true,"remark":"","nSteps":7,"minStep":"4.0","maxStep":"30.0","steps":["4.0","8.0","12.0","16.0","20.0","25.0","30.0"],"group":"None","version":"v1.1.0"}],"interpreted":true,"name":"SS3.1B","coreAzi":347,"coreDip":54,"bedStrike":245,"bedDip":43,"data":[{"visible":true,"include":false,"step":"0.0","x":-20550.47619047619,"y":-13669.52380952381,"z":23080.95238095238,"a95":0.99,"info":"08/10/2014 at 18:22:35"},{"visible":true,"include":true,"step":"4.0","x":-16273.333333333334,"y":-11453.333333333334,"z":24041.904761904763,"a95":0.99,"info":"08/10/2014 at 18:22:35"},{"visible":true,"include":true,"step":"8.0","x":-12264.761904761905,"y":-7528.857142857143,"z":20143.809523809523,"a95":0.99,"info":"08/10/2014 at 18:22:35"},{"visible":true,"include":true,"step":"12.0","x":-9334.857142857143,"y":-5350.190476190476,"z":14646.666666666666,"a95":0.99,"info":"08/10/2014 at 18:22:35"},{"visible":true,"include":true,"step":"16.0","x":-7346.761904761905,"y":-4635.047619047619,"z":9962.857142857143,"a95":0.99,"info":"08/10/2014 at 18:22:35"},{"visible":true,"include":true,"step":"20.0","x":-5589.142857142857,"y":-3351.5238095238096,"z":7499.809523809524,"a95":0.99,"info":"08/10/2014 at 18:22:35"},{"visible":true,"include":true,"step":"25.0","x":-4690,"y":-2717.809523809524,"z":5305.523809523809,"a95":0.99,"info":"08/10/2014 at 18:22:35"},{"visible":true,"include":true,"step":"30.0","x":-2743.5238095238096,"y":-1824.3809523809523,"z":3561.6190476190477,"a95":0.99,"info":"08/10/2014 at 18:22:35"},{"visible":true,"include":false,"step":"35.0","x":-3422.190476190476,"y":-2323.4285714285716,"z":2156.190476190476,"a95":0.99,"info":"08/10/2014 at 18:22:35"},{"visible":true,"include":false,"step":"40.0","x":-2677.809523809524,"y":-1381.6190476190477,"z":1743.142857142857,"a95":0.99,"info":"08/10/2014 at 18:22:35"},{"visible":true,"include":false,"step":"45.0","x":-2565.5238095238096,"y":-414.65714285714284,"z":1079.6190476190477,"a95":0.99,"info":"08/10/2014 at 18:22:35"},{"visible":true,"include":false,"step":"50.0","x":-2813.809523809524,"y":-823.8857142857142,"z":457.3047619047619,"a95":0.99,"info":"08/10/2014 at 18:22:35"},{"visible":true,"include":false,"step":"60.0","x":-953.3333333333334,"y":128.62857142857143,"z":74.59714285714286,"a95":0.99,"info":"08/10/2014 at 18:22:35"},{"visible":true,"include":false,"step":"70.0","x":99.72380952380952,"y":551.8571428571429,"z":-311.6380952380952,"a95":0.99,"info":"08/10/2014 at 18:22:35"},{"visible":true,"include":false,"step":"80.0","x":1662.4761904761904,"y":-109.01904761904763,"z":-520.8095238095239,"a95":0.99,"info":"08/10/2014 at 18:22:35"},{"visible":true,"include":false,"step":"90.0","x":1740.3809523809523,"y":878.2857142857143,"z":-1011.3333333333334,"a95":0.99,"info":"08/10/2014 at 18:22:35"},{"visible":true,"include":false,"step":"100.0","x":1895.047619047619,"y":480.7142857142857,"z":-884.9809523809523,"a95":0.99,"info":"08/10/2014 at 18:22:35"}]},{"version":"v1.1.0","exported":"2017-05-22T15:13:07.389Z","volume":10.5,"added":"2017-05-22T15:08:42.633Z","format":"Utrecht","demagType":"Unknown","strat":null,"patch":1.1,"GEO":[{"dec":52.36704216391746,"inc":-21.542453625343626,"MAD":2.8788070242719495,"cm":[-1.5916157281026244e-12,-1.7053025658242404e-12,0],"intensity":34751.39950812402,"type":"GC","origin":false,"forced":true,"remark":"","nSteps":8,"minStep":"100","maxStep":"330","steps":["100","150","180","210","240","270","300","330"],"group":"None","version":"v1.1.0"}],"TECT":[{"dec":71.38998520553673,"inc":-24.034278452860647,"MAD":2.8788070242717834,"cm":[-4.092726157978177e-12,-3.467448550509289e-12,4.547473508864641e-13],"intensity":34751.39950812403,"type":"GC","origin":false,"forced":true,"remark":"","nSteps":8,"minStep":"100","maxStep":"330","steps":["100","150","180","210","240","270","300","330"],"group":"None","version":"v1.1.0"}],"interpreted":true,"name":"SS3.2A","coreAzi":351,"coreDip":65,"bedStrike":245,"bedDip":43,"data":[{"visible":true,"include":false,"step":"20","x":-24134.285714285714,"y":20755.809523809523,"z":19837.809523809523,"a95":2.1,"info":"\"14-10-20\" at \"16:38\""},{"visible":true,"include":true,"step":"100","x":-23104.095238095237,"y":16302.190476190477,"z":3499.6190476190477,"a95":1.8,"info":"\"14-10-20\" at \"19:57\""},{"visible":true,"include":true,"step":"150","x":-18390.380952380954,"y":11940.190476190477,"z":-4992,"a95":1.8,"info":"\"14-10-20\" at \"22:53\""},{"visible":true,"include":true,"step":"180","x":-17297.904761904763,"y":11022.190476190477,"z":-6994.190476190476,"a95":1.8,"info":"\"14-10-21\" at \"14:55\""},{"visible":true,"include":true,"step":"210","x":-14981.52380952381,"y":8911.809523809523,"z":-6953.238095238095,"a95":1.8,"info":"\"14-10-21\" at \"17:47\""},{"visible":true,"include":true,"step":"240","x":-11509.047619047618,"y":6369.714285714285,"z":-6561.047619047619,"a95":1.9,"info":"\"14-10-21\" at \"20:52\""},{"visible":true,"include":true,"step":"270","x":-9633.42857142857,"y":5369.809523809524,"z":-5616.952380952381,"a95":2.1,"info":"\"14-10-21\" at \"23:51\""},{"visible":true,"include":true,"step":"300","x":-7248.761904761905,"y":3869.3333333333335,"z":-4985.523809523809,"a95":2.2,"info":"\"14-10-22\" at \"16:13\""},{"visible":true,"include":true,"step":"330","x":-5593.619047619048,"y":3270.285714285714,"z":-4509.142857142857,"a95":2.2,"info":"\"14-10-22\" at \"19:18\""},{"visible":true,"include":false,"step":"360","x":-5020,"y":3019.2380952380954,"z":-4210.761904761905,"a95":2.4,"info":"\"14-10-22\" at \"22:24\""},{"visible":true,"include":false,"step":"390","x":-3984.9523809523807,"y":2779.4285714285716,"z":-3465.5238095238096,"a95":2.6,"info":"\"14-10-23\" at \"16:35\""},{"visible":true,"include":false,"step":"420","x":-3665.5238095238096,"y":1889.6190476190477,"z":-3063.2380952380954,"a95":2.9,"info":"\"14-10-23\" at \"19:40\""},{"visible":true,"include":false,"step":"450","x":-2679.809523809524,"y":2116.7619047619046,"z":-2128.7619047619046,"a95":2.6,"info":"\"14-10-24\" at \"14:17\""},{"visible":true,"include":false,"step":"480","x":-2623.2380952380954,"y":2139.4285714285716,"z":-3149.1428571428573,"a95":2.5,"info":"\"14-10-24\" at \"17:22\""},{"visible":true,"include":false,"step":"510","x":-2595.3333333333335,"y":1205.4285714285713,"z":-576.5714285714286,"a95":3,"info":"\"14-10-24\" at \"20:13\""},{"visible":true,"include":false,"step":"540","x":-3308.8571428571427,"y":323.5238095238095,"z":-775.1428571428571,"a95":3.1,"info":"\"14-10-24\" at \"23:10\""},{"visible":true,"include":false,"step":"570","x":-2310.8571428571427,"y":1902.3809523809523,"z":-1302.095238095238,"a95":3,"info":"\"14-10-25\" at \"02:09\""},{"visible":true,"include":false,"step":"600","x":-722.5714285714286,"y":-494.2857142857143,"z":130.38095238095238,"a95":7.9,"info":"\"14-10-25\" at \"04:44\""},{"visible":true,"include":false,"step":"630","x":414.0952380952381,"y":863.7142857142857,"z":-760.7619047619048,"a95":4.1,"info":"\"14-10-25\" at \"23:05\""},{"visible":true,"include":false,"step":"660","x":-489.8095238095238,"y":1165.7142857142858,"z":352.85714285714283,"a95":4.2,"info":"\"14-10-26\" at \"01:51\""},{"visible":true,"include":false,"step":"680","x":438.6666666666667,"y":-1391.142857142857,"z":-1027.8095238095239,"a95":3.1,"info":"\"14-10-26\" at \"02:50\""}]},{"version":"v1.1.0","exported":"2017-05-22T15:13:07.389Z","volume":10.5,"added":"2017-05-22T15:08:42.636Z","format":"Utrecht","demagType":"Unknown","strat":null,"patch":1.1,"GEO":[{"dec":3.034795173899738,"inc":-32.652315705670425,"MAD":4.909011707432917,"cm":[-1.8758328224066645e-12,-1.4210854715202004e-12,0],"intensity":48927.79763883562,"type":"GC","origin":false,"forced":true,"remark":"","nSteps":8,"minStep":"100","maxStep":"320","steps":["100","150","180","210","240","270","300","320"],"group":"None","version":"v1.1.0"}],"TECT":[{"dec":41.077021407382404,"inc":-64.3470369534548,"MAD":4.909011707433172,"cm":[-3.069544618483633e-12,-4.433786671143025e-12,6.536993168992922e-13],"intensity":48927.79763883562,"type":"GC","origin":false,"forced":true,"remark":"","nSteps":8,"minStep":"100","maxStep":"320","steps":["100","150","180","210","240","270","300","320"],"group":"None","version":"v1.1.0"}],"interpreted":true,"name":"SS3.3A","coreAzi":340,"coreDip":63,"bedStrike":245,"bedDip":43,"data":[{"visible":true,"include":false,"step":"20","x":-13566.666666666666,"y":20835.428571428572,"z":-35671.142857142855,"a95":2.6,"info":"\"14-10-13\" at \"15:37\""},{"visible":true,"include":true,"step":"100","x":-9016.095238095239,"y":14197.619047619048,"z":-30389.04761904762,"a95":2.8,"info":"\"14-10-13\" at \"18:41\""},{"visible":true,"include":true,"step":"150","x":-7396.666666666667,"y":9592.666666666666,"z":-27598,"a95":2.8,"info":"\"14-10-13\" at \"23:36\""},{"visible":true,"include":true,"step":"180","x":-5909.238095238095,"y":7258.380952380952,"z":-24008.666666666668,"a95":2.4,"info":"\"14-10-14\" at \"16:48\""},{"visible":true,"include":true,"step":"210","x":-5605.714285714285,"y":6508.571428571428,"z":-22631.714285714286,"a95":2.5,"info":"\"14-10-14\" at \"19:56\""},{"visible":true,"include":true,"step":"240","x":-4719.238095238095,"y":5296.761904761905,"z":-20124.666666666668,"a95":2.6,"info":"\"14-10-14\" at \"23:09\""},{"visible":true,"include":true,"step":"270","x":-3043.904761904762,"y":3462.6666666666665,"z":-15895.52380952381,"a95":2.7,"info":"\"14-10-15\" at \"16:57\""},{"visible":true,"include":true,"step":"300","x":-3224.3809523809523,"y":2951.4285714285716,"z":-16212.47619047619,"a95":2.6,"info":"\"14-10-15\" at \"20:08\""},{"visible":true,"include":true,"step":"320","x":-2902.285714285714,"y":2999.2380952380954,"z":-13839.333333333334,"a95":2.6,"info":"\"14-10-15\" at \"23:23\""},{"visible":true,"include":false,"step":"340","x":-2687.809523809524,"y":2501.3333333333335,"z":-12731.238095238095,"a95":2.7,"info":"\"14-10-16\" at \"17:31\""},{"visible":true,"include":false,"step":"370","x":-2082.9523809523807,"y":2370.6666666666665,"z":-10876.952380952382,"a95":2.7,"info":"\"14-10-16\" at \"20:43\""},{"visible":true,"include":false,"step":"400","x":-2060,"y":1420.3809523809523,"z":-9030.380952380952,"a95":2.7,"info":"\"14-10-16\" at \"23:49\""},{"visible":true,"include":false,"step":"420","x":-1672.1904761904761,"y":1472.952380952381,"z":-7264.952380952381,"a95":2.6,"info":"\"14-10-17\" at \"15:28\""},{"visible":true,"include":false,"step":"440","x":-1248.1904761904761,"y":1446.095238095238,"z":-6414.857142857143,"a95":2.6,"info":"\"14-10-17\" at \"18:40\""},{"visible":true,"include":false,"step":"470","x":-1112.7619047619048,"y":1344.1904761904761,"z":-4603.619047619048,"a95":2.6,"info":"\"14-10-17\" at \"21:52\""},{"visible":true,"include":false,"step":"490","x":-955.5238095238095,"y":1187.6190476190477,"z":-3378.095238095238,"a95":2.7,"info":"\"14-10-18\" at \"10:17\""},{"visible":true,"include":false,"step":"520","x":-914.6666666666666,"y":283.23809523809524,"z":-3361.2380952380954,"a95":2.9,"info":"\"14-10-18\" at \"13:08\""},{"visible":true,"include":false,"step":"550","x":-1099.6190476190477,"y":955.8095238095239,"z":-2542.8571428571427,"a95":2.9,"info":"\"14-10-18\" at \"16:20\""},{"visible":true,"include":false,"step":"580","x":663.3333333333334,"y":-160.47619047619048,"z":-1214.6666666666667,"a95":3.5,"info":"\"14-10-19\" at \"10:08\""},{"visible":true,"include":false,"step":"610","x":-451.8095238095238,"y":-644.3809523809524,"z":-860.0952380952381,"a95":5,"info":"\"14-10-19\" at \"13:20\""},{"visible":true,"include":false,"step":"640","x":679.7142857142857,"y":1702.7619047619048,"z":335.8095238095238,"a95":3.1,"info":"\"14-10-19\" at \"17:05\""}]},{"version":"v1.1.0","exported":"2017-05-22T15:13:07.389Z","volume":10.5,"added":"2017-05-22T15:08:42.637Z","format":"Utrecht","demagType":"Unknown","strat":"4","patch":1.1,"GEO":[],"TECT":[],"interpreted":false,"name":"SS3.3B","coreAzi":340,"coreDip":63,"bedStrike":245,"bedDip":43,"data":[{"visible":true,"include":false,"step":"0.0","x":-12040.952380952382,"y":-16386.666666666668,"z":11549.52380952381,"a95":0.99,"info":"20/09/2014 at 22:25:28"},{"visible":true,"include":false,"step":"5.0","x":-2382.8571428571427,"y":-8598.47619047619,"z":-7128.571428571428,"a95":0.99,"info":"20/09/2014 at 22:25:28"},{"visible":true,"include":false,"step":"10.0","x":36.639047619047616,"y":-4343.714285714285,"z":-9905.714285714286,"a95":0.99,"info":"20/09/2014 at 22:25:28"},{"visible":true,"include":true,"step":"15.0","x":297.2095238095238,"y":-3137.3333333333335,"z":-7615.428571428572,"a95":0.99,"info":"20/09/2014 at 22:25:28"},{"visible":true,"include":true,"step":"20.0","x":265.2666666666667,"y":-2390,"z":-5850.952380952381,"a95":0.99,"info":"20/09/2014 at 22:25:28"},{"visible":true,"include":true,"step":"25.0","x":362.87619047619046,"y":-1736,"z":-4273.047619047619,"a95":0.99,"info":"20/09/2014 at 22:25:28"},{"visible":true,"include":true,"step":"30.0","x":407.8952380952381,"y":-1207.047619047619,"z":-3965.0476190476193,"a95":0.99,"info":"20/09/2014 at 22:25:28"},{"visible":true,"include":false,"step":"35.0","x":-97.29523809523809,"y":-1243.047619047619,"z":-2963.904761904762,"a95":0.99,"info":"20/09/2014 at 22:25:28"},{"visible":true,"include":false,"step":"40.0","x":72.46761904761904,"y":-521.0380952380953,"z":-2297.5238095238096,"a95":0.99,"info":"20/09/2014 at 22:25:28"},{"visible":true,"include":false,"step":"45.0","x":-388.5238095238095,"y":-247.24761904761903,"z":-2013.3333333333333,"a95":0.99,"info":"20/09/2014 at 22:25:28"},{"visible":true,"include":false,"step":"50.0","x":-834.5714285714286,"y":-239.33333333333334,"z":-1515.2380952380952,"a95":0.99,"info":"20/09/2014 at 22:25:28"},{"visible":true,"include":false,"step":"60.0","x":-512.6190476190476,"y":291.03809523809525,"z":-979.9047619047619,"a95":0.99,"info":"20/09/2014 at 22:25:28"},{"visible":true,"include":false,"step":"70.0","x":-265.9904761904762,"y":595.4190476190475,"z":-838.5809523809525,"a95":0.99,"info":"20/09/2014 at 22:25:28"},{"visible":true,"include":false,"step":"80.0","x":1238,"y":51.00095238095238,"z":-248.7238095238095,"a95":0.99,"info":"20/09/2014 at 22:25:28"},{"visible":true,"include":false,"step":"90.0","x":-431.27619047619044,"y":921.1142857142858,"z":-361.65714285714284,"a95":0.99,"info":"20/09/2014 at 22:25:28"},{"visible":true,"include":false,"step":"100.0","x":-241.49523809523808,"y":1007.4285714285714,"z":-263.9047619047619,"a95":0.99,"info":"20/09/2014 at 22:25:28"}]},{"version":"v1.1.0","exported":"2017-05-22T15:13:07.389Z","volume":10.5,"added":"2017-05-22T15:08:42.637Z","format":"Utrecht","demagType":"Unknown","strat":null,"patch":1.1,"GEO":[{"dec":309.7026788066571,"inc":-21.000457235303045,"MAD":3.90970369615668,"cm":[-2.8421709430404007e-13,-1.7053025658242404e-13,0],"intensity":36165.02817242119,"type":"GC","origin":false,"forced":true,"remark":"","nSteps":9,"minStep":"100","maxStep":"360","steps":["100","150","180","210","240","270","300","330","360"],"group":"None","version":"v1.1.0"}],"TECT":[{"dec":288.06731299096725,"inc":-56.902210134319255,"MAD":3.909703696155699,"cm":[8.810729923425242e-13,-5.684341886080801e-13,-3.979039320256561e-13],"intensity":36165.028172421196,"type":"GC","origin":false,"forced":true,"remark":"","nSteps":9,"minStep":"100","maxStep":"360","steps":["100","150","180","210","240","270","300","330","360"],"group":"None","version":"v1.1.0"}],"interpreted":true,"name":"SS3.4A","coreAzi":334,"coreDip":28,"bedStrike":245,"bedDip":43,"data":[{"visible":true,"include":false,"step":"20","x":-27268.380952380954,"y":-20589.619047619046,"z":21040.380952380954,"a95":2,"info":"\"14-10-20\" at \"16:40\""},{"visible":true,"include":true,"step":"100","x":-17857.04761904762,"y":-21205.14285714286,"z":8435.333333333334,"a95":1.8,"info":"\"14-10-20\" at \"19:59\""},{"visible":true,"include":true,"step":"150","x":-15736.857142857143,"y":-19876.190476190477,"z":5955.714285714285,"a95":1.8,"info":"\"14-10-20\" at \"22:55\""},{"visible":true,"include":true,"step":"180","x":-13043.809523809523,"y":-20028,"z":2612.5714285714284,"a95":1.7,"info":"\"14-10-21\" at \"14:57\""},{"visible":true,"include":true,"step":"210","x":-8164.952380952381,"y":-16387.04761904762,"z":-1543.3333333333333,"a95":1.9,"info":"\"14-10-21\" at \"17:48\""},{"visible":true,"include":true,"step":"240","x":-7788.190476190476,"y":-16197.238095238095,"z":-1142.857142857143,"a95":1.8,"info":"\"14-10-21\" at \"20:54\""},{"visible":true,"include":true,"step":"270","x":-5293.9047619047615,"y":-12349.619047619048,"z":-1553.904761904762,"a95":2,"info":"\"14-10-21\" at \"23:53\""},{"visible":true,"include":true,"step":"300","x":-3458.3809523809523,"y":-9612.095238095239,"z":-1850.095238095238,"a95":1.9,"info":"\"14-10-22\" at \"16:15\""},{"visible":true,"include":true,"step":"330","x":-2162.7619047619046,"y":-7884.571428571428,"z":-1825.7142857142858,"a95":2,"info":"\"14-10-22\" at \"19:20\""},{"visible":true,"include":true,"step":"360","x":-2689.809523809524,"y":-7668.666666666667,"z":-1221.5238095238096,"a95":1.9,"info":"\"14-10-22\" at \"22:26\""},{"visible":true,"include":false,"step":"390","x":-1957.5238095238096,"y":-5985.619047619048,"z":-1738,"a95":2.4,"info":"\"14-10-23\" at \"16:37\""},{"visible":true,"include":false,"step":"420","x":-2077.904761904762,"y":-5327.714285714285,"z":-862.952380952381,"a95":2.2,"info":"\"14-10-23\" at \"19:41\""},{"visible":true,"include":false,"step":"450","x":-308.3809523809524,"y":-4256.952380952381,"z":-912.6666666666666,"a95":2,"info":"\"14-10-24\" at \"14:19\""},{"visible":true,"include":false,"step":"480","x":-581.4285714285714,"y":-3025.809523809524,"z":-1384,"a95":2.8,"info":"\"14-10-24\" at \"17:24\""},{"visible":true,"include":false,"step":"510","x":-523.8095238095239,"y":-4109.428571428572,"z":-559.1428571428571,"a95":2.7,"info":"\"14-10-24\" at \"20:15\""},{"visible":true,"include":false,"step":"540","x":-1288.857142857143,"y":-2327.714285714286,"z":270.76190476190476,"a95":3.6,"info":"\"14-10-24\" at \"23:12\""},{"visible":true,"include":false,"step":"570","x":-555.9047619047619,"y":-1310.1904761904761,"z":-578.6666666666666,"a95":6,"info":"\"14-10-25\" at \"02:11\""},{"visible":true,"include":false,"step":"600","x":-1972,"y":-1919.4285714285713,"z":934.7619047619048,"a95":3.1,"info":"\"14-10-25\" at \"04:46\""},{"visible":true,"include":false,"step":"630","x":1389.6190476190477,"y":-111.80952380952381,"z":-689.9047619047619,"a95":4,"info":"\"14-10-25\" at \"23:07\""},{"visible":true,"include":false,"step":"660","x":-1198.4761904761904,"y":-816.6666666666666,"z":467.14285714285717,"a95":5.4,"info":"\"14-10-26\" at \"01:53\""},{"visible":true,"include":false,"step":"680","x":900.6666666666666,"y":-556.8571428571429,"z":-821.1428571428571,"a95":5.2,"info":"\"14-10-26\" at \"02:52\""}]},{"version":"v1.1.0","exported":"2017-05-22T15:13:07.390Z","volume":10.5,"added":"2017-05-22T15:08:42.641Z","format":"Utrecht","demagType":"Unknown","strat":null,"patch":1.1,"GEO":[{"dec":299.6986506292819,"inc":-21.840616068375883,"MAD":7.876940391160229,"cm":[-1.8189894035458565e-12,5.9117155615240335e-12,0],"intensity":144788.5838628092,"type":"GC","origin":false,"forced":true,"remark":"","nSteps":8,"minStep":"100","maxStep":"320","steps":["100","150","180","210","240","270","300","320"],"group":"None","version":"v1.1.0"}],"TECT":[{"dec":274.2430458039881,"inc":-52.066674087120056,"MAD":7.876940391164615,"cm":[-1.000444171950221e-11,3.183231456205249e-12,3.637978807091713e-12],"intensity":144788.58386280923,"type":"GC","origin":false,"forced":true,"remark":"","nSteps":8,"minStep":"100","maxStep":"320","steps":["100","150","180","210","240","270","300","320"],"group":"None","version":"v1.1.0"}],"interpreted":true,"name":"SS3.5A","coreAzi":335,"coreDip":31,"bedStrike":245,"bedDip":43,"data":[{"visible":true,"include":false,"step":"20","x":-80077.33333333333,"y":-86927.33333333333,"z":11582.761904761905,"a95":1.8,"info":"\"14-10-13\" at \"15:41\""},{"visible":true,"include":true,"step":"100","x":-63202.380952380954,"y":-82223.52380952382,"z":3213.3333333333335,"a95":1.7,"info":"\"14-10-13\" at \"18:43\""},{"visible":true,"include":true,"step":"150","x":-54881.04761904762,"y":-72429.90476190476,"z":-2409.809523809524,"a95":1.7,"info":"\"14-10-13\" at \"23:38\""},{"visible":true,"include":true,"step":"180","x":-47355.90476190476,"y":-67148.76190476191,"z":-5953.809523809524,"a95":1.7,"info":"\"14-10-14\" at \"16:50\""},{"visible":true,"include":true,"step":"210","x":-44626.666666666664,"y":-65549.52380952382,"z":-5945.428571428572,"a95":1.7,"info":"\"14-10-14\" at \"19:58\""},{"visible":true,"include":true,"step":"240","x":-39918.76190476191,"y":-59124.76190476191,"z":-8949.238095238095,"a95":1.7,"info":"\"14-10-14\" at \"23:13\""},{"visible":true,"include":true,"step":"270","x":-28506.666666666668,"y":-42743.90476190476,"z":-6991.047619047619,"a95":1.8,"info":"\"14-10-15\" at \"16:59\""},{"visible":true,"include":true,"step":"300","x":-26095.14285714286,"y":-42442.19047619047,"z":-7927.714285714285,"a95":1.7,"info":"\"14-10-15\" at \"20:12\""},{"visible":true,"include":true,"step":"320","x":-21378,"y":-35242.857142857145,"z":-6610.761904761905,"a95":1.7,"info":"\"14-10-15\" at \"23:25\""},{"visible":true,"include":false,"step":"340","x":-18459.619047619046,"y":-28647.52380952381,"z":-6880.0952380952385,"a95":1.9,"info":"\"14-10-16\" at \"17:33\""},{"visible":true,"include":false,"step":"370","x":-15409.52380952381,"y":-25691.428571428572,"z":-6168.380952380952,"a95":1.8,"info":"\"14-10-16\" at \"20:44\""},{"visible":true,"include":false,"step":"400","x":-13740.666666666666,"y":-21369.714285714286,"z":-5680.857142857143,"a95":1.9,"info":"\"14-10-16\" at \"23:51\""},{"visible":true,"include":false,"step":"420","x":-12522.57142857143,"y":-18814.190476190477,"z":-4529.523809523809,"a95":1.9,"info":"\"14-10-17\" at \"15:30\""},{"visible":true,"include":false,"step":"440","x":-10889.904761904761,"y":-16913.619047619046,"z":-4680.285714285715,"a95":1.9,"info":"\"14-10-17\" at \"18:42\""},{"visible":true,"include":false,"step":"470","x":-9872.57142857143,"y":-14560.47619047619,"z":-4109.333333333333,"a95":2,"info":"\"14-10-17\" at \"21:53\""},{"visible":true,"include":false,"step":"490","x":-8673.142857142857,"y":-12782.952380952382,"z":-3420.6666666666665,"a95":1.9,"info":"\"14-10-18\" at \"10:18\""},{"visible":true,"include":false,"step":"520","x":-7387.047619047619,"y":-9930.380952380952,"z":-2829.714285714286,"a95":2,"info":"\"14-10-18\" at \"13:10\""},{"visible":true,"include":false,"step":"550","x":-5008.190476190476,"y":-5303.238095238095,"z":-1536.6666666666667,"a95":2.3,"info":"\"14-10-18\" at \"16:24\""},{"visible":true,"include":false,"step":"580","x":-1028.2857142857142,"y":-2529.2380952380954,"z":-543.8095238095239,"a95":2.8,"info":"\"14-10-19\" at \"10:10\""},{"visible":true,"include":false,"step":"610","x":-1940.2857142857142,"y":1219.2380952380952,"z":-202.85714285714286,"a95":3.3,"info":"\"14-10-19\" at \"13:22\""},{"visible":true,"include":false,"step":"640","x":463.3333333333333,"y":-688,"z":968.0952380952381,"a95":5.1,"info":"\"14-10-19\" at \"17:07\""}]},{"version":"v1.1.0","exported":"2017-05-22T15:13:07.390Z","volume":10.5,"added":"2017-05-22T15:08:42.641Z","format":"Utrecht","demagType":"Unknown","strat":"5","patch":1.1,"GEO":[],"TECT":[],"interpreted":false,"name":"SS3.5B","coreAzi":335,"coreDip":31,"bedStrike":245,"bedDip":43,"data":[{"visible":true,"include":false,"step":"0.0","x":-62543.80952380953,"y":-66955.23809523809,"z":15013.333333333334,"a95":0.99,"info":"20/09/2014 at 22:25:28"},{"visible":true,"include":false,"step":"5.0","x":-53034.28571428572,"y":-56506.666666666664,"z":10917.142857142857,"a95":0.99,"info":"20/09/2014 at 22:25:28"},{"visible":true,"include":false,"step":"10.0","x":-32244.761904761905,"y":-34602.857142857145,"z":6317.238095238095,"a95":0.99,"info":"20/09/2014 at 22:25:28"},{"visible":true,"include":false,"step":"15.0","x":-22483.809523809523,"y":-24308.571428571428,"z":3580.285714285714,"a95":0.99,"info":"20/09/2014 at 22:25:28"},{"visible":true,"include":false,"step":"20.0","x":-16796.190476190477,"y":-18414.285714285714,"z":2874.6666666666665,"a95":0.99,"info":"20/09/2014 at 22:25:28"},{"visible":true,"include":false,"step":"25.0","x":-11991.42857142857,"y":-15577.142857142857,"z":2048.4761904761904,"a95":0.99,"info":"20/09/2014 at 22:25:28"},{"visible":true,"include":false,"step":"30.0","x":-9561.904761904761,"y":-11807.619047619048,"z":1951.904761904762,"a95":0.99,"info":"20/09/2014 at 22:25:28"},{"visible":true,"include":false,"step":"35.0","x":-7697.428571428572,"y":-10078.095238095239,"z":677.8380952380952,"a95":0.99,"info":"20/09/2014 at 22:25:28"},{"visible":true,"include":false,"step":"40.0","x":-6310.666666666667,"y":-8002.952380952381,"z":881.2095238095238,"a95":0.99,"info":"20/09/2014 at 22:25:28"},{"visible":true,"include":false,"step":"45.0","x":-4812.952380952381,"y":-6287.9047619047615,"z":240.8095238095238,"a95":0.99,"info":"20/09/2014 at 22:25:28"},{"visible":true,"include":false,"step":"50.0","x":-3994.5714285714284,"y":-5628.190476190476,"z":865.7333333333333,"a95":0.99,"info":"20/09/2014 at 22:25:28"},{"visible":true,"include":false,"step":"60.0","x":-3238.3809523809523,"y":-3162,"z":1437.047619047619,"a95":0.99,"info":"20/09/2014 at 22:25:28"},{"visible":true,"include":false,"step":"70.0","x":-2342,"y":-2245.809523809524,"z":707.9714285714285,"a95":0.99,"info":"20/09/2014 at 22:25:28"},{"visible":true,"include":false,"step":"80.0","x":-1220.6666666666667,"y":-822.9047619047619,"z":22.108571428571427,"a95":0.99,"info":"20/09/2014 at 22:25:28"},{"visible":true,"include":false,"step":"90.0","x":-1259.5238095238096,"y":-96.3047619047619,"z":124.44761904761906,"a95":0.99,"info":"20/09/2014 at 22:25:28"},{"visible":true,"include":false,"step":"100.0","x":-408.8095238095238,"y":1193.904761904762,"z":-2.8503809523809522,"a95":0.99,"info":"20/09/2014 at 22:25:28"}]},{"version":"v1.1.0","exported":"2017-05-22T15:13:07.390Z","volume":10.5,"added":"2017-05-22T15:08:42.641Z","format":"Utrecht","demagType":"Unknown","strat":null,"patch":1.1,"GEO":[{"dec":312.24873485034703,"inc":-19.795552378001304,"MAD":8.861282671512841,"cm":[-8.29913915367797e-12,4.774847184307873e-12,0],"intensity":130218.17748592206,"type":"GC","origin":false,"forced":true,"remark":"","nSteps":9,"minStep":"100","maxStep":"340","steps":["100","150","180","210","240","270","300","320","340"],"group":"None","version":"v1.1.0"}],"TECT":[{"dec":292.96451904977096,"inc":-57.08229731635282,"MAD":8.861282671513205,"cm":[-2.0335733097454067e-11,0,3.524291969370097e-12],"intensity":130218.17748592206,"type":"GC","origin":false,"forced":true,"remark":"","nSteps":9,"minStep":"100","maxStep":"340","steps":["100","150","180","210","240","270","300","320","340"],"group":"None","version":"v1.1.0"}],"interpreted":true,"name":"SS3.6A","coreAzi":328,"coreDip":51,"bedStrike":245,"bedDip":43,"data":[{"visible":true,"include":false,"step":"20","x":-46989.333333333336,"y":-75287.33333333333,"z":78047.80952380953,"a95":2.3,"info":"\"14-10-13\" at \"15:43\""},{"visible":true,"include":true,"step":"100","x":-39771.52380952381,"y":-68529.14285714286,"z":60361.142857142855,"a95":2.3,"info":"\"14-10-13\" at \"18:47\""},{"visible":true,"include":true,"step":"150","x":-32453.04761904762,"y":-61552.09523809524,"z":47260.47619047619,"a95":2.2,"info":"\"14-10-13\" at \"23:40\""},{"visible":true,"include":true,"step":"180","x":-28745.14285714286,"y":-56792.380952380954,"z":41184,"a95":1.9,"info":"\"14-10-14\" at \"16:53\""},{"visible":true,"include":true,"step":"210","x":-28229.04761904762,"y":-54034.47619047619,"z":39016.380952380954,"a95":2,"info":"\"14-10-14\" at \"20:00\""},{"visible":true,"include":true,"step":"240","x":-23431.904761904763,"y":-48397.04761904762,"z":31396.47619047619,"a95":2,"info":"\"14-10-14\" at \"23:15\""},{"visible":true,"include":true,"step":"270","x":-17562.190476190477,"y":-34774.47619047619,"z":22630.190476190477,"a95":2,"info":"\"14-10-15\" at \"17:01\""},{"visible":true,"include":true,"step":"300","x":-16751.904761904763,"y":-33175.23809523809,"z":20800.85714285714,"a95":1.9,"info":"\"14-10-15\" at \"20:14\""},{"visible":true,"include":true,"step":"320","x":-14357.619047619048,"y":-27603.333333333332,"z":18217.809523809523,"a95":2,"info":"\"14-10-15\" at \"23:26\""},{"visible":true,"include":true,"step":"340","x":-12457.809523809523,"y":-24356.666666666668,"z":14479.333333333334,"a95":1.9,"info":"\"14-10-16\" at \"17:35\""},{"visible":true,"include":false,"step":"370","x":-11354.952380952382,"y":-21707.333333333332,"z":13287.42857142857,"a95":2.1,"info":"\"14-10-16\" at \"20:46\""},{"visible":true,"include":false,"step":"400","x":-10013.52380952381,"y":-18432.666666666668,"z":10800.857142857143,"a95":1.9,"info":"\"14-10-16\" at \"23:53\""},{"visible":true,"include":false,"step":"420","x":-9064.285714285714,"y":-16481.714285714286,"z":9278,"a95":1.9,"info":"\"14-10-17\" at \"15:32\""},{"visible":true,"include":false,"step":"440","x":-7630.0952380952385,"y":-14559.619047619048,"z":8755.42857142857,"a95":1.9,"info":"\"14-10-17\" at \"18:44\""},{"visible":true,"include":false,"step":"470","x":-6726,"y":-13270.761904761905,"z":7513.333333333333,"a95":1.9,"info":"\"14-10-17\" at \"21:55\""},{"visible":true,"include":false,"step":"490","x":-6376.190476190476,"y":-11332,"z":5987.333333333333,"a95":1.9,"info":"\"14-10-18\" at \"10:20\""},{"visible":true,"include":false,"step":"520","x":-5346.190476190476,"y":-8571.047619047618,"z":5372.476190476191,"a95":2,"info":"\"14-10-18\" at \"13:12\""},{"visible":true,"include":false,"step":"550","x":-3364.3809523809523,"y":-5138.476190476191,"z":3051.1428571428573,"a95":2.1,"info":"\"14-10-18\" at \"16:26\""},{"visible":true,"include":false,"step":"580","x":-232.47619047619048,"y":-2487.0476190476193,"z":2103.3333333333335,"a95":2.5,"info":"\"14-10-19\" at \"10:12\""},{"visible":true,"include":false,"step":"610","x":-543.2380952380952,"y":-238.47619047619048,"z":-153.61904761904762,"a95":8.1,"info":"\"14-10-19\" at \"13:24\""},{"visible":true,"include":false,"step":"640","x":787.1428571428571,"y":965.1428571428571,"z":682.7619047619048,"a95":2.8,"info":"\"14-10-19\" at \"17:09\""}]},{"version":"v1.1.0","exported":"2017-05-22T15:13:07.390Z","volume":10.5,"added":"2017-05-22T15:08:42.642Z","format":"Utrecht","demagType":"Unknown","strat":null,"patch":1.1,"GEO":[{"dec":314.6309695655026,"inc":-31.345757295542587,"MAD":5.625333382606259,"cm":[-5.6843418860808015e-12,-2.2737367544323206e-13,0],"intensity":211697.05687458327,"type":"GC","origin":false,"forced":true,"remark":"","nSteps":11,"minStep":"100","maxStep":"400","steps":["100","150","180","210","240","270","300","320","340","370","400"],"group":"None","version":"v1.1.0"}],"TECT":[{"dec":282.82335346261846,"inc":-67.89361532263824,"MAD":5.625333382602491,"cm":[-2.276578925375361e-11,-7.048583938740194e-12,2.9558577807620168e-12],"intensity":211697.05687458327,"type":"GC","origin":false,"forced":true,"remark":"","nSteps":11,"minStep":"100","maxStep":"400","steps":["100","150","180","210","240","270","300","320","340","370","400"],"group":"None","version":"v1.1.0"}],"interpreted":true,"name":"SS3.7A","coreAzi":292,"coreDip":40,"bedStrike":245,"bedDip":43,"data":[{"visible":true,"include":false,"step":"20","x":-58188,"y":-41424.28571428572,"z":208570.19047619047,"a95":3,"info":"\"14-10-13\" at \"15:45\""},{"visible":true,"include":true,"step":"100","x":-31516,"y":-51711.04761904762,"z":169408.57142857142,"a95":2.9,"info":"\"14-10-13\" at \"18:49\""},{"visible":true,"include":true,"step":"150","x":-24965.52380952381,"y":-48200.57142857143,"z":138646.38095238095,"a95":2.8,"info":"\"14-10-13\" at \"23:42\""},{"visible":true,"include":true,"step":"180","x":-18352.380952380954,"y":-46457.619047619046,"z":121172.76190476191,"a95":2.5,"info":"\"14-10-14\" at \"16:55\""},{"visible":true,"include":true,"step":"210","x":-16937.809523809523,"y":-43102.76190476191,"z":112435.23809523809,"a95":2.6,"info":"\"14-10-14\" at \"20:01\""},{"visible":true,"include":true,"step":"240","x":-12560.666666666666,"y":-40452.76190476191,"z":91191.14285714286,"a95":2.6,"info":"\"14-10-14\" at \"23:17\""},{"visible":true,"include":true,"step":"270","x":-7854.476190476191,"y":-29773.904761904763,"z":63450.95238095238,"a95":2.7,"info":"\"14-10-15\" at \"17:03\""},{"visible":true,"include":true,"step":"300","x":-7960.666666666667,"y":-27838,"z":57832.666666666664,"a95":2.7,"info":"\"14-10-15\" at \"20:16\""},{"visible":true,"include":true,"step":"320","x":-6408,"y":-22587.904761904763,"z":46735.71428571428,"a95":2.6,"info":"\"14-10-15\" at \"23:28\""},{"visible":true,"include":true,"step":"340","x":-4397.9047619047615,"y":-19441.619047619046,"z":38484.76190476191,"a95":2.7,"info":"\"14-10-16\" at \"17:37\""},{"visible":true,"include":true,"step":"370","x":-3745.5238095238096,"y":-16985.904761904763,"z":34298.09523809524,"a95":2.6,"info":"\"14-10-16\" at \"20:49\""},{"visible":true,"include":true,"step":"400","x":-3048.9523809523807,"y":-14658.761904761905,"z":28621.619047619046,"a95":2.6,"info":"\"14-10-16\" at \"23:55\""},{"visible":true,"include":false,"step":"420","x":-4179.809523809524,"y":-12439.238095238095,"z":25602.190476190477,"a95":2.6,"info":"\"14-10-17\" at \"15:34\""},{"visible":true,"include":false,"step":"440","x":-3148.8571428571427,"y":-10818.666666666666,"z":20037.52380952381,"a95":2.5,"info":"\"14-10-17\" at \"18:45\""},{"visible":true,"include":false,"step":"470","x":-1762.5714285714287,"y":-10668.095238095239,"z":18669.04761904762,"a95":2.4,"info":"\"14-10-17\" at \"21:57\""},{"visible":true,"include":false,"step":"490","x":-1017.8095238095239,"y":-8711.333333333334,"z":16800.95238095238,"a95":2.3,"info":"\"14-10-18\" at \"10:22\""},{"visible":true,"include":false,"step":"520","x":-1307.6190476190477,"y":-7920.0952380952385,"z":11740.761904761905,"a95":2.5,"info":"\"14-10-18\" at \"13:14\""},{"visible":true,"include":false,"step":"550","x":-2071.1428571428573,"y":-3657.2380952380954,"z":5601.142857142857,"a95":3.2,"info":"\"14-10-18\" at \"16:27\""},{"visible":true,"include":false,"step":"580","x":-692.4761904761905,"y":-2356.7619047619046,"z":4008,"a95":4.1,"info":"\"14-10-19\" at \"10:14\""},{"visible":true,"include":false,"step":"610","x":-2202,"y":-468.1904761904762,"z":-2152.9523809523807,"a95":5.3,"info":"\"14-10-19\" at \"13:26\""},{"visible":true,"include":false,"step":"640","x":336.3809523809524,"y":-2182.7619047619046,"z":4597.238095238095,"a95":3.6,"info":"\"14-10-19\" at \"17:13\""}]},{"version":"v1.1.0","exported":"2017-05-22T15:13:07.390Z","volume":10.5,"added":"2017-05-22T15:08:42.642Z","format":"Utrecht","demagType":"Unknown","strat":"6","patch":1.1,"GEO":[{"dec":282.2156510250512,"inc":-28.892989861651724,"MAD":9.740132055286017,"cm":[-2.2737367544323206e-13,2.5011104298755527e-12,0],"intensity":169082.43074709724,"type":"GC","origin":false,"forced":true,"remark":"","nSteps":7,"minStep":"5.0","maxStep":"35.0","steps":["5.0","10.0","15.0","20.0","25.0","30.0","35.0"],"group":"None","version":"v1.1.0"}],"TECT":[{"dec":249.73482645354034,"inc":-45.60317905021035,"MAD":9.740132055283476,"cm":[2.1600499167107046e-12,2.6716406864579767e-12,4.547473508864641e-13],"intensity":169082.4307470973,"type":"GC","origin":false,"forced":true,"remark":"","nSteps":7,"minStep":"5.0","maxStep":"35.0","steps":["5.0","10.0","15.0","20.0","25.0","30.0","35.0"],"group":"None","version":"v1.1.0"}],"interpreted":true,"name":"SS3.7C","coreAzi":292,"coreDip":40,"bedStrike":245,"bedDip":43,"data":[{"visible":true,"include":false,"step":"0.0","x":-68018.09523809524,"y":22127.619047619046,"z":213895.2380952381,"a95":0.99,"info":"20/09/2014 at 22:25:28"},{"visible":true,"include":true,"step":"5.0","x":-50321.90476190476,"y":28629.52380952381,"z":146209.52380952382,"a95":0.99,"info":"20/09/2014 at 22:25:28"},{"visible":true,"include":true,"step":"10.0","x":-24581.904761904763,"y":24129.52380952381,"z":70703.80952380953,"a95":0.99,"info":"20/09/2014 at 22:25:28"},{"visible":true,"include":true,"step":"15.0","x":-14700,"y":17493.333333333332,"z":44880.95238095238,"a95":0.99,"info":"20/09/2014 at 22:25:28"},{"visible":true,"include":true,"step":"20.0","x":-8629.714285714286,"y":13677.142857142857,"z":31535.238095238095,"a95":0.99,"info":"20/09/2014 at 22:25:28"},{"visible":true,"include":true,"step":"25.0","x":-5557.428571428572,"y":9635.238095238095,"z":20364.761904761905,"a95":0.99,"info":"20/09/2014 at 22:25:28"},{"visible":true,"include":true,"step":"30.0","x":-3220.9523809523807,"y":7581.142857142857,"z":14353.333333333334,"a95":0.99,"info":"20/09/2014 at 22:25:28"},{"visible":true,"include":true,"step":"35.0","x":-2101.1428571428573,"y":5053.428571428572,"z":10972.380952380952,"a95":0.99,"info":"20/09/2014 at 22:25:28"},{"visible":true,"include":false,"step":"40.0","x":-1749.5238095238096,"y":5024.666666666667,"z":11040.952380952382,"a95":0.99,"info":"20/09/2014 at 22:25:28"},{"visible":true,"include":false,"step":"45.0","x":-1004.3809523809524,"y":2935.3333333333335,"z":7143.619047619048,"a95":0.99,"info":"20/09/2014 at 22:25:28"},{"visible":true,"include":false,"step":"50.0","x":-2410.6666666666665,"y":2266.8571428571427,"z":6176.761904761905,"a95":0.99,"info":"20/09/2014 at 22:25:28"},{"visible":true,"include":false,"step":"60.0","x":49.68,"y":3722.8571428571427,"z":4578.285714285715,"a95":0.99,"info":"20/09/2014 at 22:25:28"},{"visible":true,"include":false,"step":"70.0","x":517.1238095238095,"y":2168,"z":1733.6190476190477,"a95":0.99,"info":"20/09/2014 at 22:25:28"},{"visible":true,"include":false,"step":"80.0","x":271.2,"y":1539.904761904762,"z":1421.904761904762,"a95":0.99,"info":"20/09/2014 at 22:25:28"},{"visible":true,"include":false,"step":"90.0","x":1811.142857142857,"y":845.8571428571429,"z":2506,"a95":0.99,"info":"20/09/2014 at 22:25:28"},{"visible":true,"include":false,"step":"100.0","x":41.53523809523809,"y":1662.952380952381,"z":375.9142857142857,"a95":0.99,"info":"20/09/2014 at 22:25:28"}]},{"version":"v1.1.0","exported":"2017-05-22T15:13:07.390Z","volume":10.5,"added":"2017-05-22T15:08:42.642Z","format":"Utrecht","demagType":"Unknown","strat":null,"patch":1.1,"GEO":[{"dec":302.60145978983417,"inc":-29.180762593999905,"MAD":13.08983641021997,"cm":[-1.7053025658242404e-13,-5.684341886080802e-14,0],"intensity":42914.7201866494,"type":"GC","origin":false,"forced":true,"remark":"","nSteps":8,"minStep":"100","maxStep":"320","steps":["100","150","180","210","240","270","300","320"],"group":"None","version":"v1.1.0"}],"TECT":[{"dec":268.8302955996919,"inc":-59.24266687383106,"MAD":13.089836410218297,"cm":[-1.3642420526593924e-12,-1.0231815394945443e-12,5.684341886080801e-13],"intensity":42914.7201866494,"type":"GC","origin":false,"forced":true,"remark":"","nSteps":8,"minStep":"100","maxStep":"320","steps":["100","150","180","210","240","270","300","320"],"group":"None","version":"v1.1.0"}],"interpreted":true,"name":"SS3.8A","coreAzi":317,"coreDip":48,"bedStrike":245,"bedDip":43,"data":[{"visible":true,"include":false,"step":"20","x":-13698,"y":2883.809523809524,"z":50334.47619047619,"a95":3,"info":"\"14-10-13\" at \"15:47\""},{"visible":true,"include":true,"step":"100","x":-7455.047619047619,"y":-647.8095238095239,"z":33705.80952380953,"a95":2.9,"info":"\"14-10-13\" at \"18:51\""},{"visible":true,"include":true,"step":"150","x":-5144.952380952381,"y":-1639.8095238095239,"z":22995.619047619046,"a95":2.9,"info":"\"14-10-13\" at \"23:44\""},{"visible":true,"include":true,"step":"180","x":-4239.9047619047615,"y":-1717.047619047619,"z":19202.380952380954,"a95":2.6,"info":"\"14-10-14\" at \"16:57\""},{"visible":true,"include":true,"step":"210","x":-3904.190476190476,"y":-1466.5714285714287,"z":17035.904761904763,"a95":2.5,"info":"\"14-10-14\" at \"20:03\""},{"visible":true,"include":true,"step":"240","x":-3548.8571428571427,"y":-1819.3333333333333,"z":13121.238095238095,"a95":2.5,"info":"\"14-10-14\" at \"23:19\""},{"visible":true,"include":true,"step":"270","x":-2137.6190476190477,"y":-2135.1428571428573,"z":9619.333333333334,"a95":2.6,"info":"\"14-10-15\" at \"17:05\""},{"visible":true,"include":true,"step":"300","x":-2414.7619047619046,"y":-2036.6666666666667,"z":8891.047619047618,"a95":2.6,"info":"\"14-10-15\" at \"20:18\""},{"visible":true,"include":true,"step":"320","x":-2476.095238095238,"y":-1528.2857142857142,"z":7987.238095238095,"a95":2.6,"info":"\"14-10-15\" at \"23:30\""},{"visible":true,"include":false,"step":"340","x":-2163.809523809524,"y":-2187.1428571428573,"z":7105.809523809524,"a95":2.6,"info":"\"14-10-16\" at \"17:38\""},{"visible":true,"include":false,"step":"370","x":-1732.3809523809523,"y":-1803.8095238095239,"z":6696.190476190476,"a95":2.5,"info":"\"14-10-16\" at \"20:51\""},{"visible":true,"include":false,"step":"400","x":-1430.4761904761904,"y":-1603.904761904762,"z":5290.761904761905,"a95":2.6,"info":"\"14-10-16\" at \"23:57\""},{"visible":true,"include":false,"step":"420","x":-1061.047619047619,"y":-1441.142857142857,"z":5160.0952380952385,"a95":2.5,"info":"\"14-10-17\" at \"15:36\""},{"visible":true,"include":false,"step":"440","x":-1081.142857142857,"y":-1149.5238095238096,"z":4101.142857142857,"a95":2.6,"info":"\"14-10-17\" at \"18:47\""},{"visible":true,"include":false,"step":"470","x":-655.1428571428571,"y":-1251.7142857142858,"z":4270.571428571428,"a95":2.5,"info":"\"14-10-17\" at \"21:59\""},{"visible":true,"include":false,"step":"490","x":-527.3333333333334,"y":-344.4761904761905,"z":3114.095238095238,"a95":2.8,"info":"\"14-10-18\" at \"10:24\""},{"visible":true,"include":false,"step":"520","x":-1810,"y":-608.2857142857143,"z":2635.904761904762,"a95":2.8,"info":"\"14-10-18\" at \"13:16\""},{"visible":true,"include":false,"step":"550","x":-1304.6666666666667,"y":-610.0952380952381,"z":1361.047619047619,"a95":3.2,"info":"\"14-10-18\" at \"16:30\""},{"visible":true,"include":false,"step":"580","x":-17.61904761904762,"y":-481.5238095238095,"z":1676.095238095238,"a95":3.5,"info":"\"14-10-19\" at \"10:16\""},{"visible":true,"include":false,"step":"610","x":-749.2380952380952,"y":474.1904761904762,"z":-776.8571428571429,"a95":4.6,"info":"\"14-10-19\" at \"13:28\""},{"visible":true,"include":false,"step":"640","x":889.8095238095239,"y":820.8571428571429,"z":463.3333333333333,"a95":3.4,"info":"\"14-10-19\" at \"17:15\""}]},{"version":"v1.1.0","exported":"2017-05-22T15:13:07.390Z","volume":10.5,"added":"2017-05-22T15:08:42.642Z","format":"Utrecht","demagType":"Unknown","strat":"5","patch":1.1,"GEO":[{"dec":303.6158024920783,"inc":-31.72924568902012,"MAD":5.430531725004375,"cm":[9.094947017729282e-13,1.7905676941154525e-12,0],"intensity":29590.446798802204,"type":"GC","origin":false,"forced":true,"remark":"","nSteps":5,"minStep":"4.0","maxStep":"20.0","steps":["4.0","8.0","12.0","16.0","20.0"],"group":"None","version":"v1.1.0"}],"TECT":[{"dec":266.2636429585094,"inc":-61.62122521262586,"MAD":5.430531725004847,"cm":[2.9558577807620168e-12,4.234834705130197e-12,-7.105427357601002e-14],"intensity":29590.44679880221,"type":"GC","origin":false,"forced":true,"remark":"","nSteps":5,"minStep":"4.0","maxStep":"20.0","steps":["4.0","8.0","12.0","16.0","20.0"],"group":"None","version":"v1.1.0"}],"interpreted":true,"name":"SS3.8B","coreAzi":317,"coreDip":48,"bedStrike":245,"bedDip":43,"data":[{"visible":true,"include":false,"step":"0.0","x":-3805.714285714286,"y":1858.857142857143,"z":30223.809523809523,"a95":0.99,"info":"08/10/2014 at 18:22:35"},{"visible":true,"include":true,"step":"4.0","x":-3168.190476190476,"y":3493.6190476190477,"z":23185.714285714286,"a95":0.99,"info":"08/10/2014 at 18:22:35"},{"visible":true,"include":true,"step":"8.0","x":-1829.142857142857,"y":3684.5714285714284,"z":14927.619047619048,"a95":0.99,"info":"08/10/2014 at 18:22:35"},{"visible":true,"include":true,"step":"12.0","x":-1204.095238095238,"y":3141.714285714286,"z":10339.047619047618,"a95":0.99,"info":"08/10/2014 at 18:22:35"},{"visible":true,"include":true,"step":"16.0","x":-611.3428571428572,"y":2405.2380952380954,"z":7396.380952380952,"a95":0.99,"info":"08/10/2014 at 18:22:35"},{"visible":true,"include":true,"step":"20.0","x":-531.9809523809524,"y":1775.2380952380952,"z":5695.809523809524,"a95":0.99,"info":"08/10/2014 at 18:22:35"},{"visible":true,"include":false,"step":"25.0","x":232.05714285714285,"y":1014.1904761904761,"z":4122.761904761905,"a95":0.99,"info":"08/10/2014 at 18:22:35"},{"visible":true,"include":false,"step":"30.0","x":-244.0190476190476,"y":923.952380952381,"z":3265.904761904762,"a95":0.99,"info":"08/10/2014 at 18:22:35"},{"visible":true,"include":false,"step":"35.0","x":-125.60952380952382,"y":612.3428571428572,"z":2142.190476190476,"a95":0.99,"info":"08/10/2014 at 18:22:35"},{"visible":true,"include":false,"step":"40.0","x":-45.80285714285714,"y":651.7142857142857,"z":2233.714285714286,"a95":0.99,"info":"08/10/2014 at 18:22:35"},{"visible":true,"include":false,"step":"45.0","x":-30.006666666666668,"y":175.6,"z":2042,"a95":0.99,"info":"08/10/2014 at 18:22:35"},{"visible":true,"include":false,"step":"50.0","x":303.67619047619047,"y":105.8952380952381,"z":1199.5238095238096,"a95":0.99,"info":"08/10/2014 at 18:22:35"},{"visible":true,"include":false,"step":"60.0","x":110.47619047619048,"y":51.364761904761906,"z":816.2666666666667,"a95":0.99,"info":"08/10/2014 at 18:22:35"},{"visible":true,"include":false,"step":"70.0","x":-195.66666666666666,"y":209.1047619047619,"z":486.2285714285714,"a95":0.99,"info":"08/10/2014 at 18:22:35"},{"visible":true,"include":false,"step":"80.0","x":56.44380952380952,"y":-119.11428571428571,"z":437.95238095238096,"a95":0.99,"info":"08/10/2014 at 18:22:35"},{"visible":true,"include":false,"step":"90.0","x":-568.5333333333334,"y":206.82857142857142,"z":152.43809523809523,"a95":0.99,"info":"08/10/2014 at 18:22:35"},{"visible":true,"include":false,"step":"100.0","x":-40.98095238095238,"y":-167.14285714285714,"z":-20.887619047619047,"a95":0.99,"info":"08/10/2014 at 18:22:35"}]},{"version":"v1.1.0","exported":"2017-05-22T15:13:07.390Z","volume":10.5,"added":"2017-05-22T15:08:42.642Z","format":"Utrecht","demagType":"Unknown","strat":null,"patch":1.1,"GEO":[],"TECT":[],"interpreted":false,"name":"SS3.9A","coreAzi":318,"coreDip":46,"bedStrike":245,"bedDip":43,"data":[{"visible":true,"include":false,"step":"20","x":-7694.666666666667,"y":8087.714285714285,"z":36461.619047619046,"a95":2.7,"info":"\"14-10-20\" at \"16:41\""},{"visible":true,"include":true,"step":"100","x":-6894.666666666667,"y":7324.0952380952385,"z":31200,"a95":2.6,"info":"\"14-10-20\" at \"20:00\""},{"visible":true,"include":true,"step":"150","x":-3412.5714285714284,"y":3504.095238095238,"z":18702.85714285714,"a95":2.6,"info":"\"14-10-20\" at \"22:56\""},{"visible":true,"include":true,"step":"180","x":-3026.9523809523807,"y":2876,"z":15425.52380952381,"a95":2.5,"info":"\"14-10-21\" at \"14:59\""},{"visible":true,"include":true,"step":"210","x":-1764.1904761904761,"y":2123.4285714285716,"z":10358,"a95":2.5,"info":"\"14-10-21\" at \"17:50\""},{"visible":true,"include":true,"step":"240","x":-1834.857142857143,"y":2111.714285714286,"z":9987.52380952381,"a95":2.5,"info":"\"14-10-21\" at \"20:55\""},{"visible":true,"include":false,"step":"270","x":-1354,"y":1268.6666666666667,"z":6976.571428571428,"a95":2.5,"info":"\"14-10-21\" at \"23:55\""},{"visible":true,"include":false,"step":"300","x":-1276.5714285714287,"y":1347.047619047619,"z":6775.142857142857,"a95":2.6,"info":"\"14-10-22\" at \"16:17\""},{"visible":true,"include":false,"step":"330","x":-877.3333333333334,"y":1366.6666666666667,"z":5637.523809523809,"a95":2.5,"info":"\"14-10-22\" at \"19:22\""},{"visible":true,"include":false,"step":"360","x":-959.9047619047619,"y":1225.7142857142858,"z":5309.142857142857,"a95":2.5,"info":"\"14-10-22\" at \"22:29\""},{"visible":true,"include":false,"step":"390","x":-584.5714285714286,"y":858,"z":4531.238095238095,"a95":2.8,"info":"\"14-10-23\" at \"16:41\""},{"visible":true,"include":false,"step":"420","x":-642.0952380952381,"y":868.7619047619048,"z":4049.904761904762,"a95":2.6,"info":"\"14-10-23\" at \"19:43\""},{"visible":true,"include":false,"step":"450","x":-540.2857142857143,"y":1339.6190476190477,"z":3362.5714285714284,"a95":2.5,"info":"\"14-10-24\" at \"14:21\""},{"visible":true,"include":false,"step":"480","x":-181.23809523809524,"y":1217.904761904762,"z":2175.714285714286,"a95":2.8,"info":"\"14-10-24\" at \"17:26\""},{"visible":true,"include":false,"step":"510","x":-56.19047619047619,"y":949.047619047619,"z":2171.5238095238096,"a95":2.8,"info":"\"14-10-24\" at \"20:17\""},{"visible":true,"include":false,"step":"540","x":-562.952380952381,"y":179.52380952380952,"z":2020.952380952381,"a95":3.2,"info":"\"14-10-24\" at \"23:13\""},{"visible":true,"include":false,"step":"570","x":517.2380952380952,"y":406.85714285714283,"z":1262,"a95":3.4,"info":"\"14-10-25\" at \"02:13\""},{"visible":true,"include":false,"step":"600","x":-665.047619047619,"y":23.714285714285715,"z":1614.5714285714287,"a95":3.3,"info":"\"14-10-25\" at \"04:48\""},{"visible":true,"include":false,"step":"630","x":-187.71428571428572,"y":866.952380952381,"z":-676.7619047619048,"a95":3.4,"info":"\"14-10-25\" at \"23:09\""},{"visible":true,"include":false,"step":"660","x":-260.0952380952381,"y":750.2857142857143,"z":234.0952380952381,"a95":5,"info":"\"14-10-26\" at \"01:55\""},{"visible":true,"include":false,"step":"680","x":-518.0952380952381,"y":-280.3809523809524,"z":-686,"a95":3.9,"info":"\"14-10-26\" at \"02:55\""}]},{"version":"v1.1.0","exported":"2017-05-22T15:13:07.390Z","volume":10.5,"added":"2017-05-22T15:08:42.642Z","format":"Utrecht","demagType":"Unknown","strat":"7","patch":1.1,"GEO":[{"dec":4.273736859963378,"inc":-31.058467025279363,"MAD":10.214319154162752,"cm":[5.684341886080802e-14,-1.4210854715202004e-14,0],"intensity":31591.651581992424,"type":"GC","origin":false,"forced":true,"remark":"","nSteps":7,"minStep":"5.0","maxStep":"35.0","steps":["5.0","10.0","15.0","20.0","25.0","30.0","35.0"],"group":"None","version":"v1.1.0"}],"TECT":[{"dec":40.076564147341514,"inc":-62.49031416337021,"MAD":10.214319154157211,"cm":[7.958078640513122e-13,3.2032154706485017e-12,2.842170943040401e-14],"intensity":31591.651581992424,"type":"GC","origin":false,"forced":true,"remark":"","nSteps":7,"minStep":"5.0","maxStep":"35.0","steps":["5.0","10.0","15.0","20.0","25.0","30.0","35.0"],"group":"None","version":"v1.1.0"}],"interpreted":true,"name":"SS3.9B","coreAzi":318,"coreDip":46,"bedStrike":245,"bedDip":43,"data":[{"visible":true,"include":false,"step":"0.0","x":-11351.42857142857,"y":10994.285714285714,"z":33817.142857142855,"a95":0.99,"info":"20/09/2014 at 22:25:28"},{"visible":true,"include":true,"step":"5.0","x":-9419.238095238095,"y":10214.285714285714,"z":23719.04761904762,"a95":0.99,"info":"20/09/2014 at 22:25:28"},{"visible":true,"include":true,"step":"10.0","x":-6328.476190476191,"y":7167.047619047619,"z":14604.761904761905,"a95":0.99,"info":"20/09/2014 at 22:25:28"},{"visible":true,"include":true,"step":"15.0","x":-4598.190476190476,"y":5449.238095238095,"z":10394.285714285714,"a95":0.99,"info":"20/09/2014 at 22:25:28"},{"visible":true,"include":true,"step":"20.0","x":-3575.3333333333335,"y":4308.190476190476,"z":7795.809523809524,"a95":0.99,"info":"20/09/2014 at 22:25:28"},{"visible":true,"include":true,"step":"25.0","x":-3300.190476190476,"y":3631.4285714285716,"z":5706.761904761905,"a95":0.99,"info":"20/09/2014 at 22:25:28"},{"visible":true,"include":true,"step":"30.0","x":-2447.2380952380954,"y":2663.1428571428573,"z":3894.285714285714,"a95":0.99,"info":"20/09/2014 at 22:25:28"},{"visible":true,"include":true,"step":"35.0","x":-1864.952380952381,"y":1920.095238095238,"z":3178.095238095238,"a95":0.99,"info":"20/09/2014 at 22:25:28"},{"visible":true,"include":false,"step":"40.0","x":-1546.857142857143,"y":2129.3333333333335,"z":2813.2380952380954,"a95":0.99,"info":"20/09/2014 at 22:25:28"},{"visible":true,"include":false,"step":"45.0","x":-1431.904761904762,"y":2186.4761904761904,"z":1764.095238095238,"a95":0.99,"info":"20/09/2014 at 22:25:28"},{"visible":true,"include":false,"step":"50.0","x":-1684.1904761904761,"y":1257.904761904762,"z":1142.6666666666667,"a95":0.99,"info":"20/09/2014 at 22:25:28"},{"visible":true,"include":false,"step":"60.0","x":-1522.095238095238,"y":1662.4761904761904,"z":1344.5714285714287,"a95":0.99,"info":"20/09/2014 at 22:25:28"},{"visible":true,"include":false,"step":"70.0","x":-1203.3333333333333,"y":942.5047619047618,"z":412.60952380952375,"a95":0.99,"info":"20/09/2014 at 22:25:28"},{"visible":true,"include":false,"step":"80.0","x":-720.4761904761905,"y":1155.047619047619,"z":314.70476190476194,"a95":0.99,"info":"20/09/2014 at 22:25:28"},{"visible":true,"include":false,"step":"90.0","x":-404.2285714285714,"y":795.4476190476191,"z":830.6285714285715,"a95":0.99,"info":"20/09/2014 at 22:25:28"},{"visible":true,"include":false,"step":"100.0","x":-510.2095238095238,"y":955.6190476190476,"z":322.247619047619,"a95":0.99,"info":"20/09/2014 at 22:25:28"}]},{"version":"v1.1.0","exported":"2017-05-22T15:13:07.390Z","volume":10.5,"added":"2017-05-22T15:08:42.643Z","format":"Utrecht","demagType":"Unknown","strat":null,"patch":1.1,"GEO":[{"dec":274.19350186459263,"inc":-15.161269283895628,"MAD":9.558518931380988,"cm":[-5.684341886080801e-13,-2.41229258790554e-12,0],"intensity":15488.688534443672,"type":"GC","origin":false,"forced":true,"remark":"","nSteps":5,"minStep":"150","maxStep":"270","steps":["150","180","210","240","270"],"group":"None","version":"v1.1.0"}],"TECT":[{"dec":256.141346271349,"inc":-30.820450318706033,"MAD":9.558518931379957,"cm":[-5.684341886080802e-14,-1.3784529073745944e-12,-4.760636329592671e-13],"intensity":15488.68853444367,"type":"GC","origin":false,"forced":true,"remark":"","nSteps":5,"minStep":"150","maxStep":"270","steps":["150","180","210","240","270"],"group":"None","version":"v1.1.0"}],"interpreted":true,"name":"SS3.10A","coreAzi":335,"coreDip":60,"bedStrike":245,"bedDip":43,"data":[{"visible":true,"include":false,"step":"20","x":3705.5238095238096,"y":6597.333333333333,"z":35365.71428571428,"a95":3.1,"info":"\"14-10-13\" at \"15:50\""},{"visible":true,"include":false,"step":"100","x":3563.904761904762,"y":3005.0476190476193,"z":19905.714285714286,"a95":3,"info":"\"14-10-13\" at \"18:53\""},{"visible":true,"include":true,"step":"150","x":2866.190476190476,"y":1873.142857142857,"z":11429.714285714286,"a95":2.9,"info":"\"14-10-13\" at \"23:46\""},{"visible":true,"include":true,"step":"180","x":2506.095238095238,"y":1710.2857142857142,"z":9338.190476190477,"a95":2.6,"info":"\"14-10-14\" at \"16:59\""},{"visible":true,"include":true,"step":"210","x":2376,"y":1780.7619047619048,"z":8000.190476190476,"a95":2.6,"info":"\"14-10-14\" at \"20:05\""},{"visible":true,"include":true,"step":"240","x":2086.6666666666665,"y":1282.6666666666667,"z":5351.619047619048,"a95":2.6,"info":"\"14-10-14\" at \"23:21\""},{"visible":true,"include":true,"step":"270","x":1594.7619047619048,"y":1039.8095238095239,"z":3113.809523809524,"a95":2.7,"info":"\"14-10-15\" at \"17:07\""},{"visible":true,"include":false,"step":"300","x":1139.4285714285713,"y":1249.047619047619,"z":2440.3809523809523,"a95":2.8,"info":"\"14-10-15\" at \"20:20\""},{"visible":true,"include":false,"step":"320","x":1185.6190476190477,"y":1383.4285714285713,"z":2336.5714285714284,"a95":2.8,"info":"\"14-10-15\" at \"23:32\""},{"visible":true,"include":false,"step":"340","x":746.5714285714286,"y":752.0952380952381,"z":2334.8571428571427,"a95":3.4,"info":"\"14-10-16\" at \"17:40\""},{"visible":true,"include":false,"step":"370","x":828.2857142857143,"y":871.1428571428571,"z":2075.0476190476193,"a95":3.3,"info":"\"14-10-16\" at \"20:53\""},{"visible":true,"include":false,"step":"400","x":629.6190476190476,"y":777.9047619047619,"z":1673.3333333333333,"a95":3.9,"info":"\"14-10-16\" at \"23:59\""},{"visible":true,"include":false,"step":"420","x":910,"y":667.5238095238095,"z":2256.190476190476,"a95":3.2,"info":"\"14-10-17\" at \"15:38\""},{"visible":true,"include":false,"step":"440","x":755.3333333333334,"y":853.6190476190476,"z":956.8571428571429,"a95":3.3,"info":"\"14-10-17\" at \"18:49\""},{"visible":true,"include":false,"step":"470","x":740.3809523809524,"y":398.1904761904762,"z":1147.142857142857,"a95":3.9,"info":"\"14-10-17\" at \"22:01\""},{"visible":true,"include":false,"step":"490","x":833.047619047619,"y":468.76190476190476,"z":710,"a95":4,"info":"\"14-10-18\" at \"10:26\""},{"visible":true,"include":false,"step":"520","x":-60.285714285714285,"y":608.7619047619048,"z":60.38095238095238,"a95":8,"info":"\"14-10-18\" at \"13:18\""},{"visible":true,"include":false,"step":"550","x":-167.33333333333334,"y":892.0952380952381,"z":-160.95238095238096,"a95":4.6,"info":"\"14-10-18\" at \"16:31\""},{"visible":true,"include":false,"step":"580","x":-326.76190476190476,"y":33.333333333333336,"z":310.95238095238096,"a95":9.3,"info":"\"14-10-19\" at \"10:18\""},{"visible":true,"include":false,"step":"610","x":-17.333333333333332,"y":1339.8095238095239,"z":-823.8095238095239,"a95":2.6,"info":"\"14-10-19\" at \"13:31\""},{"visible":true,"include":false,"step":"640","x":1012.1904761904761,"y":145.52380952380952,"z":772,"a95":3.7,"info":"\"14-10-19\" at \"17:17\""}]},{"version":"v1.1.0","exported":"2017-05-22T15:13:07.390Z","volume":10.5,"added":"2017-05-22T15:08:42.643Z","format":"Utrecht","demagType":"Unknown","strat":"8","patch":1.1,"GEO":[],"TECT":[],"interpreted":false,"name":"SS3.10B","coreAzi":335,"coreDip":60,"bedStrike":245,"bedDip":43,"data":[{"visible":true,"include":false,"step":"0.0","x":5762.571428571428,"y":7897.714285714285,"z":33646.666666666664,"a95":0.99,"info":"20/09/2014 at 22:25:28"},{"visible":true,"include":true,"step":"5.0","x":2953.3333333333335,"y":7490.190476190476,"z":25840,"a95":0.99,"info":"20/09/2014 at 22:25:28"},{"visible":true,"include":true,"step":"10.0","x":1861.8095238095239,"y":5304.571428571428,"z":17149.52380952381,"a95":0.99,"info":"20/09/2014 at 22:25:28"},{"visible":true,"include":true,"step":"15.0","x":1232.6666666666667,"y":3904.8571428571427,"z":12882.857142857143,"a95":0.99,"info":"20/09/2014 at 22:25:28"},{"visible":true,"include":true,"step":"20.0","x":1093.047619047619,"y":3104,"z":10246.666666666666,"a95":0.99,"info":"20/09/2014 at 22:25:28"},{"visible":true,"include":true,"step":"25.0","x":342.4190476190476,"y":2826.8571428571427,"z":8089.619047619048,"a95":0.99,"info":"20/09/2014 at 22:25:28"},{"visible":true,"include":false,"step":"30.0","x":444.5904761904762,"y":2052.4761904761904,"z":6393.523809523809,"a95":0.99,"info":"20/09/2014 at 22:25:28"},{"visible":true,"include":false,"step":"35.0","x":523.4571428571429,"y":1722.1904761904761,"z":4706.857142857143,"a95":0.99,"info":"20/09/2014 at 22:25:28"},{"visible":true,"include":false,"step":"40.0","x":384.15238095238095,"y":2012.3809523809523,"z":4470.666666666667,"a95":0.99,"info":"20/09/2014 at 22:25:28"},{"visible":true,"include":false,"step":"45.0","x":519.5142857142857,"y":1389.7142857142858,"z":3500.5714285714284,"a95":0.99,"info":"20/09/2014 at 22:25:28"},{"visible":true,"include":false,"step":"50.0","x":381.3619047619048,"y":251.26666666666668,"z":2545.904761904762,"a95":0.99,"info":"20/09/2014 at 22:25:28"},{"visible":true,"include":false,"step":"60.0","x":222.2952380952381,"y":1140.1904761904761,"z":2240.7619047619046,"a95":0.99,"info":"20/09/2014 at 22:25:28"},{"visible":true,"include":false,"step":"70.0","x":866.8190476190476,"y":656.0761904761905,"z":1278.5714285714287,"a95":0.99,"info":"20/09/2014 at 22:25:28"},{"visible":true,"include":false,"step":"80.0","x":-94.55428571428573,"y":345.43809523809523,"z":933.3428571428572,"a95":0.99,"info":"20/09/2014 at 22:25:28"},{"visible":true,"include":false,"step":"90.0","x":-32.02571428571429,"y":733.8571428571429,"z":1031.2380952380952,"a95":0.99,"info":"20/09/2014 at 22:25:28"},{"visible":true,"include":false,"step":"100.0","x":500.6285714285715,"y":177.93333333333334,"z":1053.6190476190477,"a95":0.99,"info":"20/09/2014 at 22:25:28"}]},{"version":"v1.1.0","exported":"2017-05-22T15:13:07.390Z","volume":10.5,"added":"2017-05-22T15:08:42.643Z","format":"Utrecht","demagType":"Unknown","strat":null,"patch":1.1,"GEO":[{"dec":62.183191410518646,"inc":-24.21310952658754,"MAD":11.001384496008992,"cm":[-5.684341886080802e-14,-1.1368683772161603e-13,0],"intensity":35774.43359582428,"type":"GC","origin":false,"forced":true,"remark":"","nSteps":8,"minStep":"100","maxStep":"320","steps":["100","150","180","210","240","270","300","320"],"group":"None","version":"v1.1.0"}],"TECT":[{"dec":80.16705104801235,"inc":-19.300230173290156,"MAD":11.001384496006672,"cm":[-3.126388037344441e-13,-2.5508484213787597e-12,5.684341886080802e-14],"intensity":35774.433595824274,"type":"GC","origin":false,"forced":true,"remark":"","nSteps":8,"minStep":"100","maxStep":"320","steps":["100","150","180","210","240","270","300","320"],"group":"None","version":"v1.1.0"}],"interpreted":true,"name":"SS3.12A","coreAzi":318,"coreDip":13,"bedStrike":245,"bedDip":43,"data":[{"visible":true,"include":false,"step":"20","x":-38708.57142857143,"y":30636,"z":33088,"a95":2.2,"info":"\"14-10-13\" at \"15:52\""},{"visible":true,"include":true,"step":"100","x":-19841.14285714286,"y":14957.238095238095,"z":19997.428571428572,"a95":2.3,"info":"\"14-10-13\" at \"18:55\""},{"visible":true,"include":true,"step":"150","x":-10921.809523809523,"y":8283.52380952381,"z":11896.47619047619,"a95":2.3,"info":"\"14-10-13\" at \"23:48\""},{"visible":true,"include":true,"step":"180","x":-9140.285714285714,"y":6466.285714285715,"z":8786,"a95":2.2,"info":"\"14-10-14\" at \"17:00\""},{"visible":true,"include":true,"step":"210","x":-6453.238095238095,"y":5685.9047619047615,"z":7815.047619047619,"a95":2.2,"info":"\"14-10-14\" at \"20:07\""},{"visible":true,"include":true,"step":"240","x":-4091.1428571428573,"y":3488.5714285714284,"z":5398.190476190476,"a95":2.5,"info":"\"14-10-14\" at \"23:23\""},{"visible":true,"include":true,"step":"270","x":-1953.047619047619,"y":2059.4285714285716,"z":3932,"a95":2.7,"info":"\"14-10-15\" at \"17:09\""},{"visible":true,"include":true,"step":"300","x":-1836.7619047619048,"y":1815.6190476190477,"z":3635.809523809524,"a95":3.1,"info":"\"14-10-15\" at \"20:24\""},{"visible":true,"include":true,"step":"320","x":-1476.5714285714287,"y":1810.4761904761904,"z":3330.8571428571427,"a95":3.2,"info":"\"14-10-15\" at \"23:35\""},{"visible":true,"include":false,"step":"340","x":-1133.904761904762,"y":1196.2857142857142,"z":2996.3809523809523,"a95":3.4,"info":"\"14-10-16\" at \"17:43\""},{"visible":true,"include":false,"step":"370","x":-936,"y":1177.2380952380952,"z":3646.095238095238,"a95":3.1,"info":"\"14-10-16\" at \"20:55\""},{"visible":true,"include":false,"step":"400","x":-806,"y":1597.6190476190477,"z":2335.6190476190477,"a95":3.4,"info":"\"14-10-17\" at \"00:11\""},{"visible":true,"include":false,"step":"420","x":-674,"y":1825.7142857142858,"z":3435.4285714285716,"a95":3,"info":"\"14-10-17\" at \"15:39\""},{"visible":true,"include":false,"step":"440","x":-1038.5714285714287,"y":1167.4285714285713,"z":1993.6190476190477,"a95":3.5,"info":"\"14-10-17\" at \"18:51\""},{"visible":true,"include":false,"step":"470","x":-219.42857142857142,"y":647.5238095238095,"z":2212.095238095238,"a95":3.4,"info":"\"14-10-17\" at \"22:03\""},{"visible":true,"include":false,"step":"490","x":-654.8571428571429,"y":465.6190476190476,"z":1800.4761904761904,"a95":3.5,"info":"\"14-10-18\" at \"10:28\""},{"visible":true,"include":false,"step":"520","x":-844.952380952381,"y":760.952380952381,"z":2396.4761904761904,"a95":3.4,"info":"\"14-10-18\" at \"13:20\""},{"visible":true,"include":false,"step":"550","x":-1077.142857142857,"y":319.7142857142857,"z":1313.047619047619,"a95":4,"info":"\"14-10-18\" at \"16:34\""},{"visible":true,"include":false,"step":"580","x":-193.23809523809524,"y":-858.7619047619048,"z":2077.3333333333335,"a95":3.5,"info":"\"14-10-19\" at \"10:20\""},{"visible":true,"include":false,"step":"610","x":-511.6190476190476,"y":291.5238095238095,"z":158.66666666666666,"a95":8.8,"info":"\"14-10-19\" at \"13:32\""},{"visible":true,"include":false,"step":"640","x":1156.1904761904761,"y":-301.3333333333333,"z":933.9047619047619,"a95":3.3,"info":"\"14-10-19\" at \"17:19\""}]},{"version":"v1.1.0","exported":"2017-05-22T15:13:07.390Z","volume":10.5,"added":"2017-05-22T15:08:42.643Z","format":"Utrecht","demagType":"Unknown","strat":null,"patch":1.1,"GEO":[{"dec":342.94692809723574,"inc":-34.571636659894175,"MAD":18.447662133550534,"cm":[-1.1368683772161603e-13,-2.842170943040401e-14,0],"intensity":60995.97369783468,"type":"GC","origin":false,"forced":true,"remark":"","nSteps":5,"minStep":"100","maxStep":"240","steps":["100","150","180","210","240"],"group":"None","version":"v1.1.0"}],"TECT":[{"dec":3.5270391581379954,"inc":-76.2092697036707,"MAD":18.447662133547727,"cm":[-2.7284841053187847e-12,-7.187139772213413e-12,-1.0800249583553523e-12],"intensity":60995.97369783468,"type":"GC","origin":false,"forced":true,"remark":"","nSteps":5,"minStep":"100","maxStep":"240","steps":["100","150","180","210","240"],"group":"None","version":"v1.1.0"}],"interpreted":true,"name":"SS3.13A","coreAzi":307,"coreDip":50,"bedStrike":245,"bedDip":43,"data":[{"visible":true,"include":false,"step":"20","x":-15139.142857142857,"y":28536.571428571428,"z":57546.666666666664,"a95":2.5,"info":"\"14-10-20\" at \"16:43\""},{"visible":true,"include":true,"step":"100","x":-13340.095238095239,"y":24366.285714285714,"z":43102.76190476191,"a95":2.5,"info":"\"14-10-20\" at \"20:02\""},{"visible":true,"include":true,"step":"150","x":-5504.857142857143,"y":12082.857142857143,"z":17459.904761904763,"a95":2.4,"info":"\"14-10-20\" at \"22:58\""},{"visible":true,"include":true,"step":"180","x":-5286.285714285715,"y":9315.714285714286,"z":13188.190476190477,"a95":2.3,"info":"\"14-10-21\" at \"15:01\""},{"visible":true,"include":true,"step":"210","x":-5051.9047619047615,"y":8345.619047619048,"z":11408.095238095239,"a95":2.2,"info":"\"14-10-21\" at \"17:52\""},{"visible":true,"include":true,"step":"240","x":-3359.4285714285716,"y":5939.619047619048,"z":7128.571428571428,"a95":2.3,"info":"\"14-10-21\" at \"20:57\""},{"visible":true,"include":false,"step":"270","x":-1494.6666666666667,"y":2043.904761904762,"z":2809.3333333333335,"a95":3.4,"info":"\"14-10-21\" at \"23:56\""},{"visible":true,"include":false,"step":"300","x":-1173.2380952380952,"y":1879.047619047619,"z":1321.6190476190477,"a95":3.3,"info":"\"14-10-22\" at \"16:19\""},{"visible":true,"include":false,"step":"330","x":-526.8571428571429,"y":2364.7619047619046,"z":1014.952380952381,"a95":3.4,"info":"\"14-10-22\" at \"19:24\""},{"visible":true,"include":false,"step":"360","x":-706.3809523809524,"y":1272.857142857143,"z":1316.3809523809523,"a95":3.1,"info":"\"14-10-22\" at \"22:31\""},{"visible":true,"include":false,"step":"390","x":-66,"y":730,"z":494.85714285714283,"a95":6.7,"info":"\"14-10-23\" at \"16:43\""},{"visible":true,"include":false,"step":"420","x":-246.95238095238096,"y":1377.4285714285713,"z":-602.7619047619048,"a95":4.3,"info":"\"14-10-23\" at \"19:45\""},{"visible":true,"include":false,"step":"450","x":-64.57142857142857,"y":1267.6190476190477,"z":-185.33333333333334,"a95":5,"info":"\"14-10-24\" at \"14:22\""},{"visible":true,"include":false,"step":"480","x":-255.52380952380952,"y":1945.3333333333333,"z":-796.7619047619048,"a95":3.9,"info":"\"14-10-24\" at \"17:27\""},{"visible":true,"include":false,"step":"510","x":507.3333333333333,"y":1225.904761904762,"z":-350.3809523809524,"a95":4.4,"info":"\"14-10-24\" at \"20:19\""},{"visible":true,"include":false,"step":"540","x":-50.095238095238095,"y":-653.8095238095239,"z":-516.7619047619048,"a95":9.2,"info":"\"14-10-24\" at \"23:15\""},{"visible":true,"include":false,"step":"570","x":841.4285714285714,"y":1711.8095238095239,"z":-1260.2857142857142,"a95":3.4,"info":"\"14-10-25\" at \"02:15\""},{"visible":true,"include":false,"step":"600","x":-935.9047619047619,"y":-386.1904761904762,"z":-447.04761904761904,"a95":7.2,"info":"\"14-10-25\" at \"04:50\""},{"visible":true,"include":false,"step":"630","x":1584.095238095238,"y":1640.2857142857142,"z":-2399.6190476190477,"a95":2.4,"info":"\"14-10-25\" at \"23:11\""},{"visible":true,"include":false,"step":"660","x":-803.7142857142857,"y":-132.95238095238096,"z":168.28571428571428,"a95":7.9,"info":"\"14-10-26\" at \"01:56\""},{"visible":true,"include":false,"step":"680","x":-414.57142857142856,"y":-854.2857142857143,"z":-1023.7142857142857,"a95":4,"info":"\"14-10-26\" at \"02:58\""}]},{"version":"v1.1.0","exported":"2017-05-22T15:13:07.390Z","volume":10.5,"added":"2017-05-22T15:08:42.643Z","format":"Utrecht","demagType":"Unknown","strat":"6","patch":1.1,"GEO":[{"dec":280.0368302743701,"inc":-7.5527291903107425,"MAD":9.969889019930203,"cm":[-2.2737367544323206e-13,4.369837824924616e-13,0],"intensity":34303.416850038506,"type":"GC","origin":false,"forced":true,"remark":"","nSteps":9,"minStep":"4.0","maxStep":"40.0","steps":["4.0","8.0","12.0","16.0","20.0","25.0","30.0","35.0","40.0"],"group":"None","version":"v1.1.0"}],"TECT":[{"dec":266.91795893619053,"inc":-28.96455413692491,"MAD":9.969889019929905,"cm":[5.115907697472721e-13,1.177946629127291e-12,3.694822225952521e-13],"intensity":34303.416850038506,"type":"GC","origin":false,"forced":true,"remark":"","nSteps":9,"minStep":"4.0","maxStep":"40.0","steps":["4.0","8.0","12.0","16.0","20.0","25.0","30.0","35.0","40.0"],"group":"None","version":"v1.1.0"}],"interpreted":true,"name":"SS3.13B","coreAzi":307,"coreDip":50,"bedStrike":245,"bedDip":43,"data":[{"visible":true,"include":false,"step":"0.0","x":-9482,"y":15101.904761904761,"z":28673.333333333332,"a95":0.99,"info":"08/10/2014 at 18:22:35"},{"visible":true,"include":true,"step":"4.0","x":-8144.285714285715,"y":13762.857142857143,"z":26380.95238095238,"a95":0.99,"info":"08/10/2014 at 18:22:35"},{"visible":true,"include":true,"step":"8.0","x":-5993.142857142857,"y":10864.761904761905,"z":20273.333333333332,"a95":0.99,"info":"08/10/2014 at 18:22:35"},{"visible":true,"include":true,"step":"12.0","x":-3774.6666666666665,"y":8010.190476190476,"z":14227.619047619048,"a95":0.99,"info":"08/10/2014 at 18:22:35"},{"visible":true,"include":true,"step":"16.0","x":-2616.6666666666665,"y":5918.0952380952385,"z":10304.761904761905,"a95":0.99,"info":"08/10/2014 at 18:22:35"},{"visible":true,"include":true,"step":"20.0","x":-2301.4285714285716,"y":4874.666666666667,"z":7799.047619047619,"a95":0.99,"info":"08/10/2014 at 18:22:35"},{"visible":true,"include":true,"step":"25.0","x":-1333.8095238095239,"y":3711.904761904762,"z":5377.523809523809,"a95":0.99,"info":"08/10/2014 at 18:22:35"},{"visible":true,"include":true,"step":"30.0","x":-472.6190476190476,"y":3209.5238095238096,"z":4038.095238095238,"a95":0.99,"info":"08/10/2014 at 18:22:35"},{"visible":true,"include":true,"step":"35.0","x":-260.29523809523806,"y":2343.714285714286,"z":2507.2380952380954,"a95":0.99,"info":"08/10/2014 at 18:22:35"},{"visible":true,"include":true,"step":"40.0","x":51.68095238095238,"y":2705.1428571428573,"z":2602.4761904761904,"a95":0.99,"info":"08/10/2014 at 18:22:35"},{"visible":true,"include":false,"step":"45.0","x":609.4857142857143,"y":1997.2380952380952,"z":1684.5714285714287,"a95":0.99,"info":"08/10/2014 at 18:22:35"},{"visible":true,"include":false,"step":"50.0","x":-8.893238095238095,"y":1920.857142857143,"z":232.42857142857142,"a95":0.99,"info":"08/10/2014 at 18:22:35"},{"visible":true,"include":false,"step":"60.0","x":242.45714285714288,"y":1320.5714285714287,"z":185.37142857142857,"a95":0.99,"info":"08/10/2014 at 18:22:35"},{"visible":true,"include":false,"step":"70.0","x":694.8285714285714,"y":1113.047619047619,"z":235.1047619047619,"a95":0.99,"info":"08/10/2014 at 18:22:35"},{"visible":true,"include":false,"step":"80.0","x":539.9428571428571,"y":665.0380952380953,"z":-374.9047619047619,"a95":0.99,"info":"08/10/2014 at 18:22:35"},{"visible":true,"include":false,"step":"90.0","x":382.5333333333333,"y":1122.3809523809523,"z":-626.6666666666666,"a95":0.99,"info":"08/10/2014 at 18:22:35"},{"visible":true,"include":false,"step":"100.0","x":521.5904761904761,"y":1167.3333333333333,"z":-723.0285714285715,"a95":0.99,"info":"08/10/2014 at 18:22:35"}]},{"version":"v1.1.0","exported":"2017-05-22T15:13:07.390Z","volume":10.5,"added":"2017-05-22T15:08:42.644Z","format":"Utrecht","demagType":"Unknown","strat":"1","patch":1.1,"GEO":[{"dec":273.427561070479,"inc":-2.2178960667800185,"MAD":6.43798469555716,"cm":[0,1.4956924587750109e-12,0],"intensity":71755.59044546892,"type":"GC","origin":false,"forced":true,"remark":"","nSteps":7,"minStep":"5.0","maxStep":"35.0","steps":["5.0","10.0","15.0","20.0","25.0","30.0","35.0"],"group":"None","version":"v1.1.0"}],"TECT":[{"dec":265.09563179625115,"inc":-20.653992910474766,"MAD":6.437984695556473,"cm":[1.1368683772161603e-12,5.95790083934844e-12,1.3073986337985843e-12],"intensity":71755.59044546892,"type":"GC","origin":false,"forced":true,"remark":"","nSteps":7,"minStep":"5.0","maxStep":"35.0","steps":["5.0","10.0","15.0","20.0","25.0","30.0","35.0"],"group":"None","version":"v1.1.0"}],"interpreted":true,"name":"SS3.14A","coreAzi":307,"coreDip":48,"bedStrike":245,"bedDip":43,"data":[{"visible":true,"include":false,"step":"0.0","x":-20961.904761904763,"y":38372.380952380954,"z":64249.52380952381,"a95":0.99,"info":"21/09/2014 at 03:34:28"},{"visible":true,"include":true,"step":"5.0","x":-16928.571428571428,"y":30664.761904761905,"z":52271.42857142857,"a95":0.99,"info":"21/09/2014 at 03:34:28"},{"visible":true,"include":true,"step":"10.0","x":-10414.285714285714,"y":20521.904761904763,"z":34776.19047619047,"a95":0.99,"info":"21/09/2014 at 03:34:28"},{"visible":true,"include":true,"step":"15.0","x":-6862.285714285715,"y":14349.52380952381,"z":23492.380952380954,"a95":0.99,"info":"21/09/2014 at 03:34:28"},{"visible":true,"include":true,"step":"20.0","x":-3946.7619047619046,"y":11331.42857142857,"z":16945.714285714286,"a95":0.99,"info":"21/09/2014 at 03:34:28"},{"visible":true,"include":true,"step":"25.0","x":-2451.809523809524,"y":9014.952380952382,"z":11897.142857142857,"a95":0.99,"info":"21/09/2014 at 03:34:28"},{"visible":true,"include":true,"step":"30.0","x":-1053.8095238095239,"y":6962.952380952381,"z":8937.619047619048,"a95":0.99,"info":"21/09/2014 at 03:34:28"},{"visible":true,"include":true,"step":"35.0","x":106.48571428571428,"y":6684.190476190476,"z":6643.238095238095,"a95":0.99,"info":"21/09/2014 at 03:34:28"},{"visible":true,"include":false,"step":"40.0","x":685.5142857142857,"y":4479.619047619048,"z":5007.523809523809,"a95":0.99,"info":"21/09/2014 at 03:34:28"},{"visible":true,"include":false,"step":"45.0","x":531.1904761904761,"y":4743.238095238095,"z":4759.714285714285,"a95":0.99,"info":"21/09/2014 at 03:34:28"},{"visible":true,"include":false,"step":"50.0","x":919.4571428571428,"y":3854.6666666666665,"z":3184.6666666666665,"a95":0.99,"info":"21/09/2014 at 03:34:28"},{"visible":true,"include":false,"step":"60.0","x":1519.4285714285713,"y":1508.2857142857142,"z":1981.142857142857,"a95":0.99,"info":"21/09/2014 at 03:34:28"},{"visible":true,"include":false,"step":"70.0","x":848.6666666666666,"y":3427.5238095238096,"z":700.0095238095239,"a95":0.99,"info":"21/09/2014 at 03:34:28"},{"visible":true,"include":false,"step":"80.0","x":49.764761904761905,"y":1739.5238095238096,"z":174.56190476190477,"a95":0.99,"info":"21/09/2014 at 03:34:28"},{"visible":true,"include":false,"step":"90.0","x":1116.952380952381,"y":1264.7619047619048,"z":-349.552380952381,"a95":0.99,"info":"21/09/2014 at 03:34:28"},{"visible":true,"include":false,"step":"100.0","x":1483.6190476190477,"y":2001.4285714285713,"z":627.7619047619048,"a95":0.99,"info":"21/09/2014 at 03:34:28"}]},{"version":"v1.1.0","exported":"2017-05-22T15:13:07.390Z","volume":10.5,"added":"2017-05-22T15:08:42.644Z","format":"Utrecht","demagType":"Unknown","strat":"7","patch":1.1,"GEO":[{"dec":320.57380962831746,"inc":-29.244665945594036,"MAD":14.467216561247339,"cm":[8.526512829121202e-14,-1.2789769243681803e-13,0],"intensity":39879.02753930599,"type":"GC","origin":false,"forced":true,"remark":"","nSteps":10,"minStep":"4.0","maxStep":"45.0","steps":["4.0","8.0","12.0","16.0","20.0","25.0","30.0","35.0","40.0","45.0"],"group":"None","version":"v1.1.0"}],"TECT":[{"dec":297.6498053046395,"inc":-69.00383796991255,"MAD":14.467216561238503,"cm":[-8.526512829121202e-14,-2.1813661987835076e-12,-9.947598300641403e-14],"intensity":39879.02753930599,"type":"GC","origin":false,"forced":true,"remark":"","nSteps":10,"minStep":"4.0","maxStep":"45.0","steps":["4.0","8.0","12.0","16.0","20.0","25.0","30.0","35.0","40.0","45.0"],"group":"None","version":"v1.1.0"}],"interpreted":true,"name":"SS3.14B","coreAzi":307,"coreDip":48,"bedStrike":245,"bedDip":43,"data":[{"visible":true,"include":false,"step":"0.0","x":-12144.761904761905,"y":20388.571428571428,"z":34903.80952380953,"a95":0.99,"info":"08/10/2014 at 18:22:35"},{"visible":true,"include":true,"step":"4.0","x":-10421.904761904761,"y":18323.809523809523,"z":30780,"a95":0.99,"info":"08/10/2014 at 18:22:35"},{"visible":true,"include":true,"step":"8.0","x":-7835.142857142857,"y":14157.142857142857,"z":22840,"a95":0.99,"info":"08/10/2014 at 18:22:35"},{"visible":true,"include":true,"step":"12.0","x":-5767.523809523809,"y":10526.666666666666,"z":16770.47619047619,"a95":0.99,"info":"08/10/2014 at 18:22:35"},{"visible":true,"include":true,"step":"16.0","x":-4372.571428571428,"y":8033.333333333333,"z":11457.142857142857,"a95":0.99,"info":"08/10/2014 at 18:22:35"},{"visible":true,"include":true,"step":"20.0","x":-3664.4761904761904,"y":6321.9047619047615,"z":8414.666666666666,"a95":0.99,"info":"08/10/2014 at 18:22:35"},{"visible":true,"include":true,"step":"25.0","x":-2568.6666666666665,"y":5200.952380952381,"z":6961.9047619047615,"a95":0.99,"info":"08/10/2014 at 18:22:35"},{"visible":true,"include":true,"step":"30.0","x":-1741.2380952380952,"y":4081.714285714286,"z":5042,"a95":0.99,"info":"08/10/2014 at 18:22:35"},{"visible":true,"include":true,"step":"35.0","x":-1411.6190476190477,"y":2621.0476190476193,"z":3316.7619047619046,"a95":0.99,"info":"08/10/2014 at 18:22:35"},{"visible":true,"include":true,"step":"40.0","x":-1152.2857142857142,"y":3421.1428571428573,"z":2895.3333333333335,"a95":0.99,"info":"08/10/2014 at 18:22:35"},{"visible":true,"include":true,"step":"45.0","x":-575.8571428571429,"y":2402.095238095238,"z":1466.2857142857142,"a95":0.99,"info":"08/10/2014 at 18:22:35"},{"visible":true,"include":false,"step":"50.0","x":-509.02857142857147,"y":1797.6190476190477,"z":1340.095238095238,"a95":0.99,"info":"08/10/2014 at 18:22:35"},{"visible":true,"include":false,"step":"60.0","x":-263.83809523809526,"y":1863.7142857142858,"z":1796.095238095238,"a95":0.99,"info":"08/10/2014 at 18:22:35"},{"visible":true,"include":false,"step":"70.0","x":543.6,"y":1509.142857142857,"z":23.215238095238096,"a95":0.99,"info":"08/10/2014 at 18:22:35"},{"visible":true,"include":false,"step":"80.0","x":-1408.5714285714287,"y":-4.810666666666667,"z":-1062.1904761904761,"a95":0.99,"info":"08/10/2014 at 18:22:35"},{"visible":true,"include":false,"step":"90.0","x":96.83809523809524,"y":1514.4761904761904,"z":158.78095238095239,"a95":0.99,"info":"08/10/2014 at 18:22:35"},{"visible":true,"include":false,"step":"100.0","x":810.1333333333333,"y":1473.4285714285713,"z":-318.9809523809524,"a95":0.99,"info":"08/10/2014 at 18:22:35"}]}]
