# Supplementary material for: Paleomagnetic constraints on the timing and distribution of Cenozoic rotations in Central and Eastern Anatolia
Source: Copernicus journal article supplement (doi:10.5194/se-9-295-2018), 2018-03-21
Supplement: Supplementary file 2 [file se-9-295-2018-supplement.zip › se-2017-66_DATA_dir files/dir files Sivas/SS04.dir]

[{"info":"2","GEO":[{"dec":351.8289756727459,"inc":44.455276713626795,"MAD":7.12809293412187,"cm":[7.105427357601002e-15,2.3203661214665772e-14,0],"intensity":42.323322733152736,"type":"dir","forced":true,"remark":"","origin":false,"nSteps":4,"minStep":"25.0","maxStep":"40.0","steps":["25.0","30.0","35.0","40.0"]}],"TECT":[{"dec":11.003866708971316,"inc":45.33189663375367,"MAD":7.128092934121875,"cm":[1.4210854715202004e-14,-1.0658141036401503e-14,-7.105427357601002e-15],"intensity":42.32332273315274,"type":"dir","forced":true,"remark":"","origin":false,"nSteps":4,"minStep":"25.0","maxStep":"40.0","steps":["25.0","30.0","35.0","40.0"]}],"interpreted":true,"name":"SS4.1A","coreAzi":79,"coreDip":79,"bedStrike":4,"bedDip":19,"data":[{"visible":true,"include":false,"step":"0.0","x":-62.9,"y":-265.69,"z":224.72,"a95":"0.99","info":"21/09/2014 at 03:34:28"},{"visible":true,"include":false,"step":"5.0","x":-36.417,"y":-285.62,"z":200.21,"a95":"0.99","info":"21/09/2014 at 03:34:28"},{"visible":true,"include":false,"step":"10.0","x":-44.465,"y":-231.43,"z":157.73,"a95":"0.99","info":"21/09/2014 at 03:34:28"},{"visible":true,"include":false,"step":"15.0","x":-31.015,"y":-169.15,"z":146.74,"a95":"0.99","info":"21/09/2014 at 03:34:28"},{"visible":true,"include":false,"step":"20.0","x":-38.97,"y":-166.41,"z":118.87,"a95":"0.99","info":"21/09/2014 at 03:34:28"},{"visible":true,"include":true,"step":"25.0","x":-34.558,"y":-169.65,"z":120.48,"a95":"0.99","info":"21/09/2014 at 03:34:28"},{"visible":true,"include":true,"step":"30.0","x":-39.812,"y":-186.37,"z":160.17,"a95":"0.99","info":"21/09/2014 at 03:34:28"},{"visible":true,"include":true,"step":"35.0","x":-20.378,"y":-151.8,"z":176.7,"a95":"0.99","info":"21/09/2014 at 03:34:28"},{"visible":true,"include":true,"step":"40.0","x":2.257,"y":-153.56,"z":182.8,"a95":"0.99","info":"21/09/2014 at 03:34:28"},{"visible":true,"include":false,"step":"45.0","x":11.146,"y":-107.56,"z":189.86,"a95":"0.99","info":"21/09/2014 at 03:34:28"},{"visible":true,"include":false,"step":"50.0","x":-15.152,"y":-88.581,"z":144.28,"a95":"0.99","info":"21/09/2014 at 03:34:28"},{"visible":true,"include":false,"step":"60.0","x":8.7505,"y":-66.744,"z":123.01,"a95":"0.99","info":"21/09/2014 at 03:34:28"},{"visible":true,"include":false,"step":"70.0","x":3.0895,"y":-79.906,"z":130.01,"a95":"0.99","info":"21/09/2014 at 03:34:28"},{"visible":true,"include":false,"step":"80.0","x":11.599,"y":-73.866,"z":115.27,"a95":"0.99","info":"21/09/2014 at 03:34:28"},{"visible":true,"include":false,"step":"90.0","x":-5.069,"y":-58.451,"z":6.9152,"a95":"0.99","info":"21/09/2014 at 03:34:28"},{"visible":true,"include":false,"step":"100.0","x":0.37925,"y":-57.034,"z":38.913,"a95":"0.99","info":"21/09/2014 at 03:34:28"}]},{"info":"8","GEO":[],"TECT":[],"interpreted":false,"name":"SS4.2A","coreAzi":88,"coreDip":26,"bedStrike":4,"bedDip":19,"data":[{"visible":true,"include":false,"step":"0.0","x":65.564,"y":-154.22,"z":-102.18,"a95":"0.99","info":"08/10/2014 at 18:22:35"},{"visible":true,"include":false,"step":"4.0","x":71.789,"y":-232.64,"z":-57.556,"a95":"0.99","info":"08/10/2014 at 18:22:35"},{"visible":true,"include":false,"step":"8.0","x":-5.0505,"y":-343.4,"z":-77.945,"a95":"0.99","info":"08/10/2014 at 18:22:35"},{"visible":true,"include":false,"step":"12.0","x":-50.542,"y":-25.606,"z":-107.36,"a95":"0.99","info":"08/10/2014 at 18:22:35"},{"visible":true,"include":false,"step":"16.0","x":88.393,"y":-119.37,"z":-61.9,"a95":"0.99","info":"08/10/2014 at 18:22:35"},{"visible":true,"include":false,"step":"20.0","x":9.916,"y":-133.94,"z":-111.59,"a95":"0.99","info":"08/10/2014 at 18:22:35"},{"visible":true,"include":false,"step":"25.0","x":0.74,"y":-139.29,"z":-177.65,"a95":"0.99","info":"08/10/2014 at 18:22:35"},{"visible":true,"include":false,"step":"30.0","x":23.338,"y":-19.202,"z":-52.34,"a95":"0.99","info":"08/10/2014 at 18:22:35"},{"visible":true,"include":false,"step":"35.0","x":-47.841,"y":-0.02725,"z":-21.202,"a95":"0.99","info":"08/10/2014 at 18:22:35"},{"visible":true,"include":false,"step":"40.0","x":-63.122,"y":227.2,"z":75.168,"a95":"0.99","info":"08/10/2014 at 18:22:35"},{"visible":true,"include":false,"step":"45.0","x":21.173,"y":-23.471,"z":32.97,"a95":"0.99","info":"08/10/2014 at 18:22:35"},{"visible":true,"include":false,"step":"50.0","x":23.985,"y":24.035,"z":-117.09,"a95":"0.99","info":"08/10/2014 at 18:22:35"},{"visible":true,"include":false,"step":"60.0","x":44.169,"y":4.4417,"z":-37.637,"a95":"0.99","info":"08/10/2014 at 18:22:35"},{"visible":true,"include":false,"step":"70.0","x":161.87,"y":88.463,"z":-3.9931,"a95":"0.99","info":"08/10/2014 at 18:22:35"},{"visible":true,"include":false,"step":"80.0","x":-44.455,"y":-69.524,"z":-80.318,"a95":"0.99","info":"08/10/2014 at 18:22:35"},{"visible":true,"include":false,"step":"90.0","x":100.21,"y":233.05,"z":142.43,"a95":"0.99","info":"08/10/2014 at 18:22:35"},{"visible":true,"include":false,"step":"100.0","x":37.842,"y":-11.663,"z":-156.47,"a95":"0.99","info":"08/10/2014 at 18:22:35"}]},{"info":"3","GEO":[{"dec":27.632698019818406,"inc":53.30925394297856,"MAD":5.980230145259546,"cm":[-2.6645352591003757e-14,4.085620730620576e-14,0],"intensity":82.23102837169044,"type":"dir","forced":true,"remark":"","origin":false,"nSteps":7,"minStep":"25.0","maxStep":"60.0","steps":["25.0","30.0","35.0","40.0","45.0","50.0","60.0"]}],"TECT":[{"dec":45.69011731870222,"inc":42.85967914749085,"MAD":5.980230145259553,"cm":[-5.1514348342607263e-14,9.059419880941277e-14,-2.1316282072803006e-14],"intensity":82.23102837169047,"type":"dir","forced":true,"remark":"","origin":false,"nSteps":7,"minStep":"25.0","maxStep":"60.0","steps":["25.0","30.0","35.0","40.0","45.0","50.0","60.0"]}],"interpreted":true,"name":"SS4.3B","coreAzi":134,"coreDip":21,"bedStrike":4,"bedDip":19,"data":[{"visible":true,"include":false,"step":"0.0","x":-680.26,"y":-462.62,"z":92.542,"a95":"0.99","info":"21/09/2014 at 03:34:28"},{"visible":true,"include":false,"step":"5.0","x":-650.99,"y":-438.73,"z":117.29,"a95":"0.99","info":"21/09/2014 at 03:34:28"},{"visible":true,"include":false,"step":"10.0","x":-580.89,"y":-384.23,"z":54.859,"a95":"0.99","info":"21/09/2014 at 03:34:28"},{"visible":true,"include":false,"step":"15.0","x":-523.59,"y":-378.48,"z":57.318,"a95":"0.99","info":"21/09/2014 at 03:34:28"},{"visible":true,"include":false,"step":"20.0","x":-477.58,"y":-358.17,"z":75.287,"a95":"0.99","info":"21/09/2014 at 03:34:28"},{"visible":true,"include":true,"step":"25.0","x":-440.95,"y":-318.53,"z":48.334,"a95":"0.99","info":"21/09/2014 at 03:34:28"},{"visible":true,"include":true,"step":"30.0","x":-434.43,"y":-298.69,"z":102.42,"a95":"0.99","info":"21/09/2014 at 03:34:28"},{"visible":true,"include":true,"step":"35.0","x":-360.11,"y":-225.66,"z":65.629,"a95":"0.99","info":"21/09/2014 at 03:34:28"},{"visible":true,"include":true,"step":"40.0","x":-280.91,"y":-204.51,"z":70.17,"a95":"0.99","info":"21/09/2014 at 03:34:28"},{"visible":true,"include":true,"step":"45.0","x":-333.8,"y":-219.01,"z":37.267,"a95":"0.99","info":"21/09/2014 at 03:34:28"},{"visible":true,"include":true,"step":"50.0","x":-271.64,"y":-146.93,"z":3.7088,"a95":"0.99","info":"21/09/2014 at 03:34:28"},{"visible":true,"include":true,"step":"60.0","x":-202.91,"y":-250.29,"z":37.644,"a95":"0.99","info":"21/09/2014 at 03:34:28"},{"visible":true,"include":false,"step":"70.0","x":-188.92,"y":-104.94,"z":48.373,"a95":"0.99","info":"21/09/2014 at 03:34:28"},{"visible":true,"include":false,"step":"80.0","x":-123.96,"y":-130.5,"z":25.823,"a95":"0.99","info":"21/09/2014 at 03:34:28"},{"visible":true,"include":false,"step":"90.0","x":-140.97,"y":-89.761,"z":-50.139,"a95":"0.99","info":"21/09/2014 at 03:34:28"},{"visible":true,"include":false,"step":"100.0","x":-90.215,"y":-146.74,"z":-35.878,"a95":"0.99","info":"21/09/2014 at 03:34:28"}]},{"info":"","GEO":[],"TECT":[],"interpreted":false,"name":"SS4.4A","coreAzi":117,"coreDip":19,"bedStrike":4,"bedDip":19,"data":[{"visible":true,"include":false,"step":"20","x":-129.3,"y":-42.9,"z":-2.5,"a95":"17.8","info":"\"14-10-13\" at \"15:59\""},{"visible":true,"include":false,"step":"100","x":-63.3,"y":-11.1,"z":-17.1,"a95":"33.8","info":"\"14-10-13\" at \"18:58\""},{"visible":true,"include":false,"step":"150","x":-47.1,"y":-8.2,"z":-16.4,"a95":"40.7","info":"\"14-10-13\" at \"21:58\""},{"visible":true,"include":false,"step":"180","x":-28.5,"y":-7.7,"z":-3.4,"a95":"103.5","info":"\"14-10-14\" at \"15:07\""},{"visible":true,"include":false,"step":"210","x":-59.5,"y":9.900001,"z":-9.8,"a95":"39.4","info":"\"14-10-14\" at \"18:12\""},{"visible":true,"include":false,"step":"240","x":-19.9,"y":10.7,"z":-30.6,"a95":"90.7","info":"\"14-10-14\" at \"21:21\""},{"visible":true,"include":false,"step":"270","x":-22.2,"y":7.8,"z":-16.7,"a95":"13.6","info":"\"14-10-15\" at \"15:14\""},{"visible":true,"include":false,"step":"290","x":-57.5,"y":13.4,"z":-25.7,"a95":"35.9","info":"\"14-10-15\" at \"18:21\""},{"visible":true,"include":false,"step":"310","x":81.3,"y":9.900001,"z":1.3,"a95":"15.9","info":"\"14-10-15\" at \"21:36\""},{"visible":true,"include":false,"step":"330","x":-10.5,"y":0.8,"z":-11.6,"a95":"39.6","info":"\"14-10-16\" at \"14:58\""},{"visible":true,"include":false,"step":"350","x":-8.900001,"y":21,"z":-4.3,"a95":"51.3","info":"\"14-10-16\" at \"18:53\""},{"visible":true,"include":false,"step":"370","x":-65.2,"y":9.7,"z":0.7,"a95":"7.1","info":"\"14-10-16\" at \"22:02\""},{"visible":true,"include":false,"step":"400","x":-20.3,"y":6.5,"z":56.8,"a95":"10.9","info":"\"14-10-17\" at \"13:35\""}]},{"info":"4","GEO":[{"dec":354.02645291333266,"inc":45.557167109855655,"MAD":10.542732563334079,"cm":[-1.1546319456101628e-14,-1.7486012637846216e-14,0],"intensity":40.32543383697923,"type":"dir","forced":true,"remark":"","origin":false,"nSteps":7,"minStep":"15.0","maxStep":"45.0","steps":["15.0","20.0","25.0","30.0","35.0","40.0","45.0"]}],"TECT":[{"dec":13.691794501853394,"inc":45.6050191866088,"MAD":10.542732563334082,"cm":[-5.329070518200751e-15,-1.4654943925052066e-14,5.329070518200751e-15],"intensity":40.32543383697923,"type":"dir","forced":true,"remark":"","origin":false,"nSteps":7,"minStep":"15.0","maxStep":"45.0","steps":["15.0","20.0","25.0","30.0","35.0","40.0","45.0"]}],"interpreted":true,"name":"SS4.5A","coreAzi":115,"coreDip":12,"bedStrike":4,"bedDip":19,"data":[{"visible":true,"include":false,"step":"0.0","x":-285.47,"y":-271.98,"z":-104.44,"a95":"0.99","info":"21/09/2014 at 03:34:28"},{"visible":true,"include":false,"step":"5.0","x":-245,"y":-218.64,"z":-74.031,"a95":"0.99","info":"21/09/2014 at 03:34:28"},{"visible":true,"include":false,"step":"10.0","x":-220.38,"y":-203.39,"z":-75.625,"a95":"0.99","info":"21/09/2014 at 03:34:28"},{"visible":true,"include":true,"step":"15.0","x":-206.14,"y":-170.71,"z":-80.299,"a95":"0.99","info":"21/09/2014 at 03:34:28"},{"visible":true,"include":true,"step":"20.0","x":-190.91,"y":-121.82,"z":-91.643,"a95":"0.99","info":"21/09/2014 at 03:34:28"},{"visible":true,"include":true,"step":"25.0","x":-156.11,"y":-140.48,"z":-65.999,"a95":"0.99","info":"21/09/2014 at 03:34:28"},{"visible":true,"include":true,"step":"30.0","x":-160.13,"y":-102.81,"z":-0.90572,"a95":"0.99","info":"21/09/2014 at 03:34:28"},{"visible":true,"include":true,"step":"35.0","x":-131.83,"y":-109.45,"z":21.44,"a95":"0.99","info":"21/09/2014 at 03:34:28"},{"visible":true,"include":true,"step":"40.0","x":-94.553,"y":-88.117,"z":0.85944,"a95":"0.99","info":"21/09/2014 at 03:34:28"},{"visible":true,"include":true,"step":"45.0","x":-114.32,"y":-89.625,"z":-13.579,"a95":"0.99","info":"21/09/2014 at 03:34:28"},{"visible":true,"include":false,"step":"50.0","x":-90.909,"y":10.21,"z":-35.832,"a95":"0.99","info":"21/09/2014 at 03:34:28"},{"visible":true,"include":false,"step":"60.0","x":-79.735,"y":-39.067,"z":-17.916,"a95":"0.99","info":"21/09/2014 at 03:34:28"},{"visible":true,"include":false,"step":"70.0","x":-125.86,"y":-58.524,"z":13.982,"a95":"0.99","info":"21/09/2014 at 03:34:28"},{"visible":true,"include":false,"step":"80.0","x":-105.51,"y":-15.623,"z":41.035,"a95":"0.99","info":"21/09/2014 at 03:34:28"},{"visible":true,"include":false,"step":"90.0","x":-46.102,"y":6.1312,"z":-46.86,"a95":"0.99","info":"21/09/2014 at 03:34:28"},{"visible":true,"include":false,"step":"100.0","x":-53.52,"y":-80.878,"z":-8.9845,"a95":"0.99","info":"21/09/2014 at 03:34:28"}]},{"info":"5","GEO":[{"dec":354.8562882235724,"inc":66.30714373980642,"MAD":4.2891569919006125,"cm":[8.881784197001252e-16,2.7755575615628914e-15,0],"intensity":30.395013151812684,"type":"dir","forced":true,"remark":"","origin":false,"nSteps":4,"minStep":"10.0","maxStep":"25.0","steps":["10.0","15.0","20.0","25.0"]}],"TECT":[{"dec":34.93331976028935,"inc":62.45065380656258,"MAD":4.289156991900606,"cm":[2.6645352591003757e-15,4.440892098500626e-15,-3.552713678800501e-15],"intensity":30.39501315181269,"type":"dir","forced":true,"remark":"","origin":false,"nSteps":4,"minStep":"10.0","maxStep":"25.0","steps":["10.0","15.0","20.0","25.0"]}],"interpreted":true,"name":"SS4.6A","coreAzi":107,"coreDip":37,"bedStrike":4,"bedDip":19,"data":[{"visible":true,"include":false,"step":"0.0","x":-186.64,"y":-130.72,"z":115.86,"a95":"0.99","info":"21/09/2014 at 03:34:28"},{"visible":true,"include":false,"step":"5.0","x":-163.01,"y":-83.912,"z":116.4,"a95":"0.99","info":"21/09/2014 at 03:34:28"},{"visible":true,"include":true,"step":"10.0","x":-146.17,"y":-82.731,"z":83.181,"a95":"0.99","info":"21/09/2014 at 03:34:28"},{"visible":true,"include":true,"step":"15.0","x":-125.2,"y":-41.02,"z":66.792,"a95":"0.99","info":"21/09/2014 at 03:34:28"},{"visible":true,"include":true,"step":"20.0","x":-128.44,"y":-52.883,"z":57.371,"a95":"0.99","info":"21/09/2014 at 03:34:28"},{"visible":true,"include":true,"step":"25.0","x":-108.54,"y":-49.014,"z":56.895,"a95":"0.99","info":"21/09/2014 at 03:34:28"},{"visible":true,"include":false,"step":"30.0","x":-75.804,"y":-13.198,"z":78.077,"a95":"0.99","info":"21/09/2014 at 03:34:28"},{"visible":true,"include":false,"step":"35.0","x":-84.869,"y":-39.83,"z":86.672,"a95":"0.99","info":"21/09/2014 at 03:34:28"},{"visible":true,"include":false,"step":"40.0","x":-51.633,"y":-36.96,"z":83.631,"a95":"0.99","info":"21/09/2014 at 03:34:28"},{"visible":true,"include":false,"step":"45.0","x":-76.488,"y":-29.157,"z":68.557,"a95":"0.99","info":"21/09/2014 at 03:34:28"},{"visible":true,"include":false,"step":"50.0","x":-36.214,"y":-23.698,"z":124.07,"a95":"0.99","info":"21/09/2014 at 03:34:28"},{"visible":true,"include":false,"step":"60.0","x":-40.062,"y":-69.088,"z":47.309,"a95":"0.99","info":"21/09/2014 at 03:34:28"},{"visible":true,"include":false,"step":"70.0","x":-82.602,"y":-15.215,"z":45.339,"a95":"0.99","info":"21/09/2014 at 03:34:28"},{"visible":true,"include":false,"step":"80.0","x":-51.254,"y":4.4236,"z":34.53,"a95":"0.99","info":"21/09/2014 at 03:34:28"},{"visible":true,"include":false,"step":"90.0","x":-35.233,"y":-31.229,"z":-10.736,"a95":"0.99","info":"21/09/2014 at 03:34:28"},{"visible":true,"include":false,"step":"100.0","x":-42.8,"y":-63.084,"z":23.979,"a95":"0.99","info":"21/09/2014 at 03:34:28"}]},{"info":"1","GEO":[{"dec":0.7023218723364266,"inc":64.08064861399,"MAD":1.396962289163605,"cm":[0,3.3639757646142243e-14,0],"intensity":298.0679270662616,"type":"dir","forced":true,"remark":"","origin":false,"nSteps":8,"minStep":"25.0","maxStep":"70.0","steps":["25.0","30.0","35.0","40.0","45.0","50.0","60.0","70.0"]}],"TECT":[{"dec":35.6553484532476,"inc":59.159204383348204,"MAD":1.3969622891635602,"cm":[3.197442310920451e-14,5.684341886080802e-14,-1.4210854715202004e-14],"intensity":298.06792706626163,"type":"dir","forced":true,"remark":"","origin":false,"nSteps":8,"minStep":"25.0","maxStep":"70.0","steps":["25.0","30.0","35.0","40.0","45.0","50.0","60.0","70.0"]}],"interpreted":true,"name":"SS4.7A","coreAzi":16,"coreDip":30,"bedStrike":4,"bedDip":19,"data":[{"visible":true,"include":false,"step":"0.0","x":-1450.9,"y":-362.05,"z":2454.7,"a95":"0.99","info":"08/10/2014 at 23:54:54"},{"visible":true,"include":false,"step":"4.0","x":-1477.3,"y":-333.97,"z":2120.1,"a95":"0.99","info":"08/10/2014 at 23:54:54"},{"visible":true,"include":false,"step":"8.0","x":-1416.2,"y":-316.13,"z":2108.4,"a95":"0.99","info":"08/10/2014 at 23:54:54"},{"visible":true,"include":false,"step":"12.0","x":-1438.9,"y":-347.69,"z":2028.1,"a95":"0.99","info":"08/10/2014 at 23:54:54"},{"visible":true,"include":false,"step":"16.0","x":-1369.3,"y":-276.77,"z":1913,"a95":"0.99","info":"08/10/2014 at 23:54:54"},{"visible":true,"include":false,"step":"20.0","x":-1315.1,"y":-305.49,"z":1850.3,"a95":"0.99","info":"08/10/2014 at 23:54:54"},{"visible":true,"include":true,"step":"25.0","x":-1230.5,"y":-241.86,"z":1707.9,"a95":"0.99","info":"08/10/2014 at 23:54:54"},{"visible":true,"include":true,"step":"30.0","x":-1116.3,"y":-224.46,"z":1582.2,"a95":"0.99","info":"08/10/2014 at 23:54:54"},{"visible":true,"include":true,"step":"35.0","x":-960.99,"y":-244.25,"z":1389.3,"a95":"0.99","info":"08/10/2014 at 23:54:54"},{"visible":true,"include":true,"step":"40.0","x":-901.26,"y":-199.59,"z":1316.8,"a95":"0.99","info":"08/10/2014 at 23:54:54"},{"visible":true,"include":true,"step":"45.0","x":-830.2,"y":-112.2,"z":1205.3,"a95":"0.99","info":"08/10/2014 at 23:54:54"},{"visible":true,"include":true,"step":"50.0","x":-664.05,"y":-173.95,"z":1031.6,"a95":"0.99","info":"08/10/2014 at 23:54:54"},{"visible":true,"include":true,"step":"60.0","x":-702.03,"y":-102.83,"z":1000.8,"a95":"0.99","info":"08/10/2014 at 23:54:54"},{"visible":true,"include":true,"step":"70.0","x":-579.99,"y":-110.95,"z":820.49,"a95":"0.99","info":"08/10/2014 at 23:54:54"},{"visible":true,"include":false,"step":"80.0","x":-524.81,"y":-77.862,"z":703.46,"a95":"0.99","info":"08/10/2014 at 23:54:54"},{"visible":true,"include":false,"step":"90.0","x":-412.12,"y":-111.49,"z":659.02,"a95":"0.99","info":"08/10/2014 at 23:54:54"},{"visible":true,"include":false,"step":"100.0","x":-453.65,"y":-144.97,"z":586.21,"a95":"0.99","info":"08/10/2014 at 23:54:54"}]},{"info":"","GEO":[],"TECT":[],"interpreted":false,"name":"SS4.8A","coreAzi":116,"coreDip":42,"bedStrike":4,"bedDip":19,"data":[{"visible":true,"include":false,"step":"20","x":-142.8,"y":-85.1,"z":141.9,"a95":"16.9","info":"\"14-10-13\" at \"16:01\""},{"visible":true,"include":false,"step":"100","x":-40,"y":-33.1,"z":47.9,"a95":"37","info":"\"14-10-13\" at \"19:00\""},{"visible":true,"include":false,"step":"150","x":-33.3,"y":-12.7,"z":12.7,"a95":"53","info":"\"14-10-13\" at \"22:00\""},{"visible":true,"include":false,"step":"180","x":-10.5,"y":-13.1,"z":7.5,"a95":"29.4","info":"\"14-10-14\" at \"15:09\""},{"visible":true,"include":false,"step":"210","x":-42.7,"y":-7.6,"z":1.1,"a95":"49.5","info":"\"14-10-14\" at \"18:14\""},{"visible":true,"include":false,"step":"240","x":-18.7,"y":-8.400001,"z":-7.1,"a95":"243.5","info":"\"14-10-14\" at \"21:23\""},{"visible":true,"include":false,"step":"270","x":-0.1,"y":6,"z":6.8,"a95":"37.7","info":"\"14-10-15\" at \"15:16\""},{"visible":true,"include":false,"step":"290","x":-91.3,"y":-20.9,"z":10,"a95":"16.2","info":"\"14-10-15\" at \"18:22\""},{"visible":true,"include":false,"step":"310","x":79.8,"y":11.4,"z":20.6,"a95":"11.9","info":"\"14-10-15\" at \"21:37\""},{"visible":true,"include":false,"step":"330","x":-38.2,"y":-17.2,"z":7.6,"a95":"9.3","info":"\"14-10-16\" at \"14:59\""},{"visible":true,"include":false,"step":"350","x":-24.4,"y":9,"z":12.9,"a95":"71.8","info":"\"14-10-16\" at \"18:55\""},{"visible":true,"include":false,"step":"370","x":-50.1,"y":7.1,"z":-24.8,"a95":"38.5","info":"\"14-10-16\" at \"22:05\""},{"visible":true,"include":false,"step":"400","x":5.9,"y":-8.8,"z":35.5,"a95":"14","info":"\"14-10-17\" at \"13:37\""}]},{"info":"6","GEO":[{"dec":1.9431614217594415,"inc":53.45721530087079,"MAD":6.887773248326073,"cm":[0,2.886579864025407e-15,0],"intensity":34.144909564399164,"type":"dir","forced":true,"remark":"","origin":false,"nSteps":5,"minStep":"20.0","maxStep":"40.0","steps":["20.0","25.0","30.0","35.0","40.0"]}],"TECT":[{"dec":26.078434397149408,"inc":50.04944623088775,"MAD":6.887773248326051,"cm":[-8.881784197001252e-16,6.661338147750939e-15,-3.552713678800501e-15],"intensity":34.144909564399164,"type":"dir","forced":true,"remark":"","origin":false,"nSteps":5,"minStep":"20.0","maxStep":"40.0","steps":["20.0","25.0","30.0","35.0","40.0"]}],"interpreted":true,"name":"SS4.9A","coreAzi":115,"coreDip":42,"bedStrike":4,"bedDip":19,"data":[{"visible":true,"include":false,"step":"0.0","x":-274.61,"y":-227.1,"z":163.9,"a95":"0.99","info":"21/09/2014 at 03:34:28"},{"visible":true,"include":false,"step":"5.0","x":-190.92,"y":-1.9075,"z":90.777,"a95":"0.99","info":"21/09/2014 at 03:34:28"},{"visible":true,"include":false,"step":"10.0","x":-205.32,"y":-21.664,"z":144.82,"a95":"0.99","info":"21/09/2014 at 03:34:28"},{"visible":true,"include":false,"step":"15.0","x":-171.05,"y":-60.604,"z":79.175,"a95":"0.99","info":"21/09/2014 at 03:34:28"},{"visible":true,"include":true,"step":"20.0","x":-141.89,"y":-122.68,"z":74.058,"a95":"0.99","info":"21/09/2014 at 03:34:28"},{"visible":true,"include":true,"step":"25.0","x":-145.72,"y":-81.968,"z":52.519,"a95":"0.99","info":"21/09/2014 at 03:34:28"},{"visible":true,"include":true,"step":"30.0","x":-136.75,"y":-128.87,"z":62.753,"a95":"0.99","info":"21/09/2014 at 03:34:28"},{"visible":true,"include":true,"step":"35.0","x":-119.41,"y":-78.616,"z":77.528,"a95":"0.99","info":"21/09/2014 at 03:34:28"},{"visible":true,"include":true,"step":"40.0","x":-130.34,"y":-68.288,"z":59.956,"a95":"0.99","info":"21/09/2014 at 03:34:28"},{"visible":true,"include":false,"step":"45.0","x":-98.762,"y":-49.704,"z":78.52,"a95":"0.99","info":"21/09/2014 at 03:34:28"},{"visible":true,"include":false,"step":"50.0","x":-77.173,"y":-93.331,"z":34.847,"a95":"0.99","info":"21/09/2014 at 03:34:28"},{"visible":true,"include":false,"step":"60.0","x":-116.61,"y":-102.54,"z":68.207,"a95":"0.99","info":"21/09/2014 at 03:34:28"},{"visible":true,"include":false,"step":"70.0","x":-114.69,"y":-66.572,"z":29.869,"a95":"0.99","info":"21/09/2014 at 03:34:28"},{"visible":true,"include":false,"step":"80.0","x":-88.162,"y":-55.154,"z":77.528,"a95":"0.99","info":"21/09/2014 at 03:34:28"},{"visible":true,"include":false,"step":"90.0","x":-96.459,"y":-1.5532,"z":105.24,"a95":"0.99","info":"21/09/2014 at 03:34:28"},{"visible":true,"include":false,"step":"100.0","x":-86.275,"y":-74.065,"z":-29.155,"a95":"0.99","info":"21/09/2014 at 03:34:28"}]},{"info":"","GEO":[],"TECT":[],"interpreted":false,"name":"SS4.11A","coreAzi":314,"coreDip":70,"bedStrike":4,"bedDip":19,"data":[{"visible":true,"include":false,"step":"20","x":5,"y":116.1,"z":309.2,"a95":"5.2","info":"\"14-10-13\" at \"16:03\""},{"visible":true,"include":false,"step":"100","x":9.900001,"y":43.8,"z":113.9,"a95":"19.4","info":"\"14-10-13\" at \"19:02\""},{"visible":true,"include":false,"step":"150","x":-40.1,"y":12.5,"z":19.3,"a95":"61.5","info":"\"14-10-13\" at \"22:02\""},{"visible":true,"include":false,"step":"180","x":-8.8,"y":4.9,"z":1.9,"a95":"206","info":"\"14-10-14\" at \"15:11\""},{"visible":true,"include":false,"step":"210","x":-85.6,"y":13.9,"z":18.6,"a95":"25.7","info":"\"14-10-14\" at \"18:16\""},{"visible":true,"include":false,"step":"240","x":-49.5,"y":21.7,"z":7.3,"a95":"50.2","info":"\"14-10-14\" at \"21:25\""},{"visible":true,"include":false,"step":"270","x":-78.6,"y":-30.1,"z":59,"a95":"17.7","info":"\"14-10-15\" at \"15:18\""},{"visible":true,"include":false,"step":"290","x":-166.6,"y":50.3,"z":26.7,"a95":"19.5","info":"\"14-10-15\" at \"18:24\""},{"visible":true,"include":false,"step":"310","x":7.3,"y":3,"z":34.7,"a95":"58.2","info":"\"14-10-15\" at \"21:39\""},{"visible":true,"include":false,"step":"330","x":-122.4,"y":22.6,"z":-35.9,"a95":"18.8","info":"\"14-10-16\" at \"15:01\""},{"visible":true,"include":false,"step":"350","x":-77.1,"y":40,"z":61.9,"a95":"27.4","info":"\"14-10-16\" at \"18:57\""},{"visible":true,"include":false,"step":"370","x":-119.5,"y":2.8,"z":-24,"a95":"17.6","info":"\"14-10-16\" at \"22:06\""},{"visible":true,"include":false,"step":"400","x":-22.5,"y":-13.9,"z":115.7,"a95":"15.2","info":"\"14-10-17\" at \"13:39\""}]}]
