# Supplementary material for: Paleomagnetic constraints on the timing and distribution of Cenozoic rotations in Central and Eastern Anatolia
Source: Copernicus journal article supplement (doi:10.5194/se-9-295-2018), 2018-03-21
Supplement: Supplementary file 2 [file se-9-295-2018-supplement.zip › se-2017-66_DATA_dir files/dir files Sivas/SS05.dir]

[{"version":"v1.1.0","exported":"2016-10-11T14:42:10.628Z","volume":10.5,"added":"2016-10-11T14:35:29.530Z","format":"Utrecht","demagType":"Unknown","strat":"2","patch":1.1,"GEO":[],"TECT":[],"interpreted":false,"name":"SS5.1B","coreAzi":34,"coreDip":7,"bedStrike":235,"bedDip":22,"data":[{"visible":true,"include":false,"step":"0.0","x":-5888.190476190476,"y":2959.5238095238096,"z":-3898.3809523809523,"a95":0.99,"info":"08/10/2014 at 23:54:54"},{"visible":true,"include":true,"step":"4.0","x":-5434,"y":2619.6190476190477,"z":-3857.6190476190477,"a95":0.99,"info":"08/10/2014 at 23:54:54"},{"visible":true,"include":true,"step":"8.0","x":-4288.666666666667,"y":2118.5714285714284,"z":-3043.1428571428573,"a95":0.99,"info":"08/10/2014 at 23:54:54"},{"visible":true,"include":true,"step":"12.0","x":-2976,"y":1513.904761904762,"z":-2320.095238095238,"a95":0.99,"info":"08/10/2014 at 23:54:54"},{"visible":true,"include":true,"step":"16.0","x":-2261.809523809524,"y":1066.2857142857142,"z":-1971.5238095238096,"a95":0.99,"info":"08/10/2014 at 23:54:54"},{"visible":true,"include":true,"step":"20.0","x":-1612.1904761904761,"y":710.7714285714286,"z":-1671.5238095238096,"a95":0.99,"info":"08/10/2014 at 23:54:54"},{"visible":true,"include":true,"step":"25.0","x":-1335.047619047619,"y":482.9238095238095,"z":-1176.1904761904761,"a95":0.99,"info":"08/10/2014 at 23:54:54"},{"visible":true,"include":true,"step":"30.0","x":-859.4380952380952,"y":631.5904761904761,"z":-1152.6666666666667,"a95":0.99,"info":"08/10/2014 at 23:54:54"},{"visible":true,"include":false,"step":"35.0","x":-889.6571428571428,"y":466.6190476190476,"z":-802.1809523809524,"a95":0.99,"info":"08/10/2014 at 23:54:54"},{"visible":true,"include":false,"step":"40.0","x":-522.4095238095239,"y":406.87619047619046,"z":-303.4761904761905,"a95":0.99,"info":"08/10/2014 at 23:54:54"},{"visible":true,"include":false,"step":"45.0","x":-594.7904761904762,"y":426.00952380952384,"z":-35.71619047619048,"a95":0.99,"info":"08/10/2014 at 23:54:54"},{"visible":true,"include":false,"step":"50.0","x":-471.8095238095238,"y":459.7142857142857,"z":-534.152380952381,"a95":0.99,"info":"08/10/2014 at 23:54:54"},{"visible":true,"include":false,"step":"60.0","x":-307.50476190476195,"y":82.39809523809524,"z":-214.30476190476188,"a95":0.99,"info":"08/10/2014 at 23:54:54"},{"visible":true,"include":false,"step":"70.0","x":-588.9142857142857,"y":-41.205714285714286,"z":-117.6,"a95":0.99,"info":"08/10/2014 at 23:54:54"},{"visible":true,"include":false,"step":"80.0","x":-189.56190476190477,"y":184.5047619047619,"z":193.96190476190475,"a95":0.99,"info":"08/10/2014 at 23:54:54"},{"visible":true,"include":false,"step":"90.0","x":-266.31428571428575,"y":120.48571428571428,"z":175.67619047619047,"a95":0.99,"info":"08/10/2014 at 23:54:54"},{"visible":true,"include":false,"step":"100.0","x":-308.1904761904762,"y":687.2476190476191,"z":164.71428571428572,"a95":0.99,"info":"08/10/2014 at 23:54:54"}]},{"version":"v1.1.0","exported":"2016-10-11T14:42:10.628Z","volume":10.5,"added":"2016-10-11T14:35:29.531Z","format":"Utrecht","demagType":"Unknown","strat":"6","patch":1.1,"GEO":[{"dec":359.4803051180648,"inc":56.69799716496083,"MAD":1.9692482158037627,"cm":[-2.1316282072803006e-14,-4.827249711070181e-13,0],"intensity":5752.358918761019,"type":"dir","forced":true,"remark":"","origin":false,"nSteps":6,"minStep":"4.0","maxStep":"25.0","steps":["4.0","8.0","12.0","16.0","20.0","25.0"],"group":"None","version":"v1.1.0"}],"TECT":[{"dec":347.9870964194345,"inc":37.25649462773671,"MAD":1.969248215803773,"cm":[-1.5631940186722204e-13,-1.0107470416187425e-12,-2.842170943040401e-14],"intensity":5752.35891876102,"type":"dir","forced":true,"remark":"","origin":false,"nSteps":6,"minStep":"4.0","maxStep":"25.0","steps":["4.0","8.0","12.0","16.0","20.0","25.0"],"group":"None","version":"v1.1.0"}],"interpreted":true,"name":"SS5.3A","coreAzi":6,"coreDip":18,"bedStrike":235,"bedDip":22,"data":[{"visible":true,"include":false,"step":"0.0","x":-3404.8571428571427,"y":-195.31428571428575,"z":3913.714285714286,"a95":0.99,"info":"27/10/2014 at 17:03:38"},{"visible":true,"include":true,"step":"4.0","x":-3083.4285714285716,"y":-279.3047619047619,"z":3602.190476190476,"a95":0.99,"info":"27/10/2014 at 17:03:38"},{"visible":true,"include":true,"step":"8.0","x":-2312.8571428571427,"y":-308.56190476190477,"z":3002.095238095238,"a95":0.99,"info":"27/10/2014 at 17:03:38"},{"visible":true,"include":true,"step":"12.0","x":-1601.047619047619,"y":-89.33809523809524,"z":2089.5238095238096,"a95":0.99,"info":"27/10/2014 at 17:03:38"},{"visible":true,"include":true,"step":"16.0","x":-1070.4761904761904,"y":-80.55904761904762,"z":1439.8095238095239,"a95":0.99,"info":"27/10/2014 at 17:03:38"},{"visible":true,"include":true,"step":"20.0","x":-845.5714285714286,"y":-113.23809523809524,"z":999.1428571428571,"a95":0.99,"info":"27/10/2014 at 17:03:38"},{"visible":true,"include":true,"step":"25.0","x":-554.7238095238096,"y":-81.22857142857143,"z":838.9238095238096,"a95":0.99,"info":"27/10/2014 at 17:03:38"},{"visible":true,"include":true,"step":"30.0","x":-642.8571428571429,"y":-97.74285714285713,"z":407.12380952380954,"a95":0.99,"info":"27/10/2014 at 17:03:38"},{"visible":true,"include":false,"step":"35.0","x":-474.81904761904764,"y":-17.164761904761903,"z":354.65714285714284,"a95":0.99,"info":"27/10/2014 at 17:03:38"},{"visible":true,"include":false,"step":"40.0","x":-615.0571428571429,"y":-199.02857142857144,"z":667.8285714285714,"a95":0.99,"info":"27/10/2014 at 17:03:38"},{"visible":true,"include":false,"step":"45.0","x":-100.38095238095238,"y":-166.31428571428572,"z":232.0761904761905,"a95":0.99,"info":"27/10/2014 at 17:03:38"},{"visible":true,"include":false,"step":"50.0","x":-570.4190476190475,"y":-258.2190476190476,"z":390.8666666666667,"a95":0.99,"info":"27/10/2014 at 17:03:38"},{"visible":true,"include":false,"step":"60.0","x":-137.8190476190476,"y":-315.4761904761905,"z":494.2476190476191,"a95":0.99,"info":"27/10/2014 at 17:03:38"},{"visible":true,"include":false,"step":"70.0","x":119.4952380952381,"y":-110.51428571428572,"z":115.42857142857143,"a95":0.99,"info":"27/10/2014 at 17:03:38"},{"visible":true,"include":false,"step":"80.0","x":-29.795238095238098,"y":-598.8285714285714,"z":17.74952380952381,"a95":0.99,"info":"27/10/2014 at 17:03:38"},{"visible":true,"include":false,"step":"90.0","x":-621.7428571428571,"y":83.13333333333333,"z":82.57238095238095,"a95":0.99,"info":"27/10/2014 at 17:03:38"},{"visible":true,"include":false,"step":"100.0","x":-61.58952380952381,"y":-672.5142857142857,"z":4.565428571428571,"a95":0.99,"info":"27/10/2014 at 17:03:38"}]},{"version":"v1.1.0","exported":"2016-10-11T14:42:10.628Z","volume":10.5,"added":"2016-10-11T14:35:29.531Z","format":"Utrecht","demagType":"Unknown","strat":"3","patch":1.1,"GEO":[{"dec":333.6648801125863,"inc":48.59113030276757,"MAD":6.559165199215795,"cm":[-4.263256414560601e-14,-1.2523315717771766e-13,0],"intensity":3310.3743423014566,"type":"dir","forced":true,"remark":"","origin":false,"nSteps":8,"minStep":"20.0","maxStep":"60.0","steps":["20.0","25.0","30.0","35.0","40.0","45.0","50.0","60.0"],"group":"None","version":"v1.1.0"}],"TECT":[{"dec":331.40824243966426,"inc":26.772473548097445,"MAD":6.559165199215811,"cm":[3.552713678800501e-14,1.2434497875801753e-14,-1.4210854715202004e-14],"intensity":3310.374342301457,"type":"dir","forced":true,"remark":"","origin":false,"nSteps":8,"minStep":"20.0","maxStep":"60.0","steps":["20.0","25.0","30.0","35.0","40.0","45.0","50.0","60.0"],"group":"None","version":"v1.1.0"}],"interpreted":true,"name":"SS5.4A","coreAzi":7,"coreDip":21,"bedStrike":235,"bedDip":22,"data":[{"visible":true,"include":false,"step":"0.0","x":-3254.3809523809523,"y":-691.847619047619,"z":5542.380952380952,"a95":0.99,"info":"08/10/2014 at 23:54:54"},{"visible":true,"include":false,"step":"4.0","x":-3038.4761904761904,"y":-803.2761904761904,"z":5178.476190476191,"a95":0.99,"info":"08/10/2014 at 23:54:54"},{"visible":true,"include":false,"step":"8.0","x":-2560.285714285714,"y":-775.3428571428572,"z":4254.190476190476,"a95":0.99,"info":"08/10/2014 at 23:54:54"},{"visible":true,"include":false,"step":"12.0","x":-1954.2857142857142,"y":-621.2,"z":3312.6666666666665,"a95":0.99,"info":"08/10/2014 at 23:54:54"},{"visible":true,"include":false,"step":"16.0","x":-1641.3333333333333,"y":-645.3523809523809,"z":2431.1428571428573,"a95":0.99,"info":"08/10/2014 at 23:54:54"},{"visible":true,"include":true,"step":"20.0","x":-1279.4285714285713,"y":-794.7809523809525,"z":1992.952380952381,"a95":0.99,"info":"08/10/2014 at 23:54:54"},{"visible":true,"include":true,"step":"25.0","x":-1157.904761904762,"y":-633.6571428571428,"z":1482.1904761904761,"a95":0.99,"info":"08/10/2014 at 23:54:54"},{"visible":true,"include":true,"step":"30.0","x":-738.4666666666666,"y":-498.1904761904762,"z":1248.7619047619048,"a95":0.99,"info":"08/10/2014 at 23:54:54"},{"visible":true,"include":true,"step":"35.0","x":-540.0857142857143,"y":-472.20000000000005,"z":1082.2857142857142,"a95":0.99,"info":"08/10/2014 at 23:54:54"},{"visible":true,"include":true,"step":"40.0","x":-600.2666666666667,"y":-603.4,"z":1115.3333333333333,"a95":0.99,"info":"08/10/2014 at 23:54:54"},{"visible":true,"include":true,"step":"45.0","x":-519.8380952380952,"y":-643.8761904761905,"z":732.104761904762,"a95":0.99,"info":"08/10/2014 at 23:54:54"},{"visible":true,"include":true,"step":"50.0","x":-602.2952380952381,"y":-612.152380952381,"z":810.1238095238094,"a95":0.99,"info":"08/10/2014 at 23:54:54"},{"visible":true,"include":true,"step":"60.0","x":-315.93333333333334,"y":-173.40952380952382,"z":741.2761904761904,"a95":0.99,"info":"08/10/2014 at 23:54:54"},{"visible":false,"include":false,"step":"70.0","x":-620.504761904762,"y":-454.25714285714287,"z":276.85714285714283,"a95":0.99,"info":"08/10/2014 at 23:54:54"},{"visible":false,"include":false,"step":"80.0","x":-480.60952380952375,"y":-586.0285714285715,"z":458.7523809523809,"a95":0.99,"info":"08/10/2014 at 23:54:54"},{"visible":false,"include":false,"step":"90.0","x":-184.03809523809525,"y":-641.0095238095239,"z":354.03809523809525,"a95":0.99,"info":"08/10/2014 at 23:54:54"},{"visible":false,"include":false,"step":"100.0","x":-489.7142857142857,"y":-157.68571428571428,"z":157.5047619047619,"a95":0.99,"info":"08/10/2014 at 23:54:54"}]},{"version":"v1.1.0","exported":"2016-10-11T14:42:10.628Z","volume":10.5,"added":"2016-10-11T14:35:29.531Z","format":"Utrecht","demagType":"Unknown","strat":"7","patch":1.1,"GEO":[{"dec":335.3694439774859,"inc":40.399497850413645,"MAD":4.3212901024913055,"cm":[-4.973799150320701e-14,-1.1551870571224754e-13,0],"intensity":2648.0490628054727,"type":"dir","forced":true,"remark":"","origin":false,"nSteps":8,"minStep":"12.0","maxStep":"45.0","steps":["12.0","16.0","20.0","25.0","30.0","35.0","40.0","45.0"],"group":"None","version":"v1.1.0"}],"TECT":[{"dec":333.3197324747001,"inc":18.681069631244583,"MAD":4.321290102491378,"cm":[-4.263256414560601e-14,-1.176836406102666e-13,3.552713678800501e-15],"intensity":2648.049062805473,"type":"dir","forced":true,"remark":"","origin":false,"nSteps":8,"minStep":"12.0","maxStep":"45.0","steps":["12.0","16.0","20.0","25.0","30.0","35.0","40.0","45.0"],"group":"None","version":"v1.1.0"}],"interpreted":true,"name":"SS5.4B","coreAzi":7,"coreDip":21,"bedStrike":235,"bedDip":22,"data":[{"visible":true,"include":false,"step":"0.0","x":-1931.7142857142858,"y":-1104.7619047619048,"z":3597.5238095238096,"a95":0.99,"info":"27/10/2014 at 17:03:38"},{"visible":true,"include":false,"step":"4.0","x":-1664.1904761904761,"y":-1084.3809523809523,"z":3289.0476190476193,"a95":0.99,"info":"27/10/2014 at 17:03:38"},{"visible":true,"include":false,"step":"8.0","x":-1362.5714285714287,"y":-1069.8095238095239,"z":2598.9523809523807,"a95":0.99,"info":"27/10/2014 at 17:03:38"},{"visible":true,"include":true,"step":"12.0","x":-851.6380952380953,"y":-855.047619047619,"z":1943.5238095238096,"a95":0.99,"info":"27/10/2014 at 17:03:38"},{"visible":true,"include":true,"step":"16.0","x":-680.2571428571429,"y":-739.7809523809524,"z":1387.142857142857,"a95":0.99,"info":"27/10/2014 at 17:03:38"},{"visible":true,"include":true,"step":"20.0","x":-484.16190476190474,"y":-527.0571428571429,"z":1197.904761904762,"a95":0.99,"info":"27/10/2014 at 17:03:38"},{"visible":true,"include":true,"step":"25.0","x":-381.76190476190476,"y":-401.81904761904764,"z":850.3904761904762,"a95":0.99,"info":"27/10/2014 at 17:03:38"},{"visible":true,"include":true,"step":"30.0","x":-308.43809523809523,"y":-355.6,"z":626.5428571428571,"a95":0.99,"info":"27/10/2014 at 17:03:38"},{"visible":true,"include":true,"step":"35.0","x":-61.37142857142857,"y":-319.8,"z":286.8666666666667,"a95":0.99,"info":"27/10/2014 at 17:03:38"},{"visible":true,"include":true,"step":"40.0","x":-228.42857142857142,"y":-287.3904761904762,"z":505.79999999999995,"a95":0.99,"info":"27/10/2014 at 17:03:38"},{"visible":true,"include":true,"step":"45.0","x":-122.47619047619048,"y":-28.604761904761908,"z":354.8285714285714,"a95":0.99,"info":"27/10/2014 at 17:03:38"},{"visible":false,"include":false,"step":"50.0","x":-95.8,"y":-361.12380952380954,"z":158.33333333333334,"a95":0.99,"info":"27/10/2014 at 17:03:38"},{"visible":false,"include":false,"step":"60.0","x":-22.69904761904762,"y":125.4,"z":339.0571428571428,"a95":0.99,"info":"27/10/2014 at 17:03:38"},{"visible":false,"include":false,"step":"70.0","x":-138.1047619047619,"y":-228.7238095238095,"z":215.58095238095237,"a95":0.99,"info":"27/10/2014 at 17:03:38"},{"visible":false,"include":false,"step":"80.0","x":-36.936190476190475,"y":-45.714285714285715,"z":152.06666666666666,"a95":0.99,"info":"27/10/2014 at 17:03:38"},{"visible":false,"include":false,"step":"90.0","x":-88.73047619047618,"y":-109.32380952380953,"z":81.55904761904762,"a95":0.99,"info":"27/10/2014 at 17:03:38"},{"visible":false,"include":false,"step":"100.0","x":53.35619047619048,"y":20.871428571428574,"z":5.86,"a95":0.99,"info":"27/10/2014 at 17:03:38"}]},{"version":"v1.1.0","exported":"2016-10-11T14:42:10.628Z","volume":10.5,"added":"2016-10-11T14:35:29.531Z","format":"Utrecht","demagType":"Unknown","strat":null,"patch":1.1,"GEO":[{"dec":335.65021559659044,"inc":44.62449196843299,"MAD":5.728965618805841,"cm":[-1.4210854715202004e-14,-1.9539925233402755e-14,0],"intensity":3142.652520034311,"type":"dir","forced":true,"remark":"","origin":false,"nSteps":8,"minStep":"180","maxStep":"350","steps":["180","210","240","270","290","310","330","350"],"group":"None","version":"v1.1.0"}],"TECT":[{"dec":333.2099225175081,"inc":22.9098768757056,"MAD":5.728965618805875,"cm":[-6.750155989720952e-14,7.105427357601002e-15,0],"intensity":3142.6525200343103,"type":"dir","forced":true,"remark":"","origin":false,"nSteps":8,"minStep":"180","maxStep":"350","steps":["180","210","240","270","290","310","330","350"],"group":"None","version":"v1.1.0"}],"interpreted":true,"name":"SS5.5A","coreAzi":6,"coreDip":16,"bedStrike":235,"bedDip":22,"data":[{"visible":true,"include":false,"step":"20","x":-5095.619047619048,"y":-1972.4761904761904,"z":5577.523809523809,"a95":2.2,"info":"\"14-10-20\" at \"15:09\""},{"visible":true,"include":false,"step":"100","x":-3047.3333333333335,"y":-1535.142857142857,"z":3857.714285714286,"a95":2.2,"info":"\"14-10-20\" at \"18:05\""},{"visible":true,"include":false,"step":"150","x":-2305.0476190476193,"y":-1273.7142857142858,"z":2962.6666666666665,"a95":2.2,"info":"\"14-10-20\" at \"21:28\""},{"visible":true,"include":true,"step":"180","x":-1441.142857142857,"y":-1041.2380952380952,"z":1978.095238095238,"a95":2.2,"info":"\"14-10-21\" at \"00:22\""},{"visible":true,"include":true,"step":"210","x":-999.8095238095239,"y":-700.8571428571429,"z":1696,"a95":2.2,"info":"\"14-10-21\" at \"16:24\""},{"visible":true,"include":true,"step":"240","x":-717.9047619047619,"y":-272.3809523809524,"z":1148.952380952381,"a95":2.2,"info":"\"14-10-21\" at \"19:23\""},{"visible":true,"include":true,"step":"270","x":-540.1904761904761,"y":-442.85714285714283,"z":1110,"a95":2.2,"info":"\"14-10-21\" at \"22:29\""},{"visible":true,"include":true,"step":"290","x":-373.14285714285717,"y":-446.3809523809524,"z":595.6190476190476,"a95":2.5,"info":"\"14-10-22\" at \"15:00\""},{"visible":true,"include":true,"step":"310","x":-319.14285714285717,"y":-386.0952380952381,"z":551.3333333333334,"a95":2.3,"info":"\"14-10-22\" at \"17:46\""},{"visible":true,"include":true,"step":"330","x":-241.8095238095238,"y":-160.38095238095238,"z":315.3333333333333,"a95":2.4,"info":"\"14-10-22\" at \"20:55\""},{"visible":true,"include":true,"step":"350","x":-310.57142857142856,"y":-144.0952380952381,"z":346.2857142857143,"a95":2.5,"info":"\"14-10-23\" at \"15:10\""},{"visible":true,"include":false,"step":"370","x":-284.2857142857143,"y":-75.14285714285714,"z":345.7142857142857,"a95":2.4,"info":"\"14-10-23\" at \"18:10\""},{"visible":true,"include":false,"step":"400","x":-270.76190476190476,"y":-8.095238095238095,"z":316,"a95":2.5,"info":"\"14-10-23\" at \"21:09\""},{"visible":true,"include":false,"step":"420","x":-308.1904761904762,"y":20.476190476190474,"z":237.14285714285714,"a95":2.4,"info":"\"14-10-24\" at \"15:43\""},{"visible":true,"include":false,"step":"440","x":-257.14285714285717,"y":-4.190476190476191,"z":265.42857142857144,"a95":2.4,"info":"\"14-10-24\" at \"18:57\""},{"visible":true,"include":false,"step":"470","x":-331.23809523809524,"y":-2.5714285714285716,"z":187.04761904761904,"a95":2.7,"info":"\"14-10-24\" at \"21:38\""},{"visible":true,"include":false,"step":"490","x":-366.2857142857143,"y":-47.23809523809524,"z":228.85714285714286,"a95":2.5,"info":"\"14-10-25\" at \"00:34\""},{"visible":false,"include":false,"step":"520","x":-321.8095238095238,"y":-72.28571428571429,"z":206.47619047619048,"a95":2.4,"info":"\"14-10-25\" at \"03:13\""},{"visible":false,"include":false,"step":"550","x":-253.42857142857142,"y":-217.52380952380952,"z":224.95238095238096,"a95":2.5,"info":"\"14-10-25\" at \"05:53\""},{"visible":false,"include":false,"step":"580","x":-245.9047619047619,"y":-139.52380952380952,"z":138.47619047619048,"a95":3.4,"info":"\"14-10-26\" at \"04:42\""},{"visible":false,"include":false,"step":"610","x":-222.38095238095238,"y":-110.0952380952381,"z":96.66666666666667,"a95":4.1,"info":"\"14-10-26\" at \"06:35\""}]},{"version":"v1.1.0","exported":"2016-10-11T14:42:10.628Z","volume":10.5,"added":"2016-10-11T14:35:29.531Z","format":"Utrecht","demagType":"Unknown","strat":"8","patch":1.1,"GEO":[{"dec":324.6610174573926,"inc":50.33171435677659,"MAD":7.8292335075582615,"cm":[1.4210854715202004e-14,2.1316282072803006e-14,0],"intensity":2319.2725415320992,"type":"dir","forced":true,"remark":"","origin":false,"nSteps":4,"minStep":"16.0","maxStep":"30.0","steps":["16.0","20.0","25.0","30.0"],"group":"None","version":"v1.1.0"}],"TECT":[{"dec":324.75416603257383,"inc":28.33198677828268,"MAD":7.829233507558243,"cm":[1.7053025658242404e-13,2.7711166694643907e-13,0],"intensity":2319.2725415320992,"type":"dir","forced":true,"remark":"","origin":false,"nSteps":4,"minStep":"16.0","maxStep":"30.0","steps":["16.0","20.0","25.0","30.0"],"group":"None","version":"v1.1.0"}],"interpreted":true,"name":"SS5.5B","coreAzi":6,"coreDip":16,"bedStrike":235,"bedDip":22,"data":[{"visible":true,"include":false,"step":"0.0","x":-1492.095238095238,"y":2973.1428571428573,"z":3771.809523809524,"a95":0.99,"info":"27/10/2014 at 17:03:38"},{"visible":true,"include":false,"step":"4.0","x":-1158.1904761904761,"y":2610,"z":3288.3809523809523,"a95":0.99,"info":"27/10/2014 at 17:03:38"},{"visible":true,"include":false,"step":"8.0","x":-1057.5238095238096,"y":1255.904761904762,"z":2443.714285714286,"a95":0.99,"info":"27/10/2014 at 17:03:38"},{"visible":true,"include":false,"step":"12.0","x":-1259.3333333333333,"y":-518.8857142857144,"z":1638.2857142857142,"a95":0.99,"info":"27/10/2014 at 17:03:38"},{"visible":true,"include":true,"step":"16.0","x":-942.6285714285715,"y":-488.3047619047619,"z":1064.1904761904761,"a95":0.99,"info":"27/10/2014 at 17:03:38"},{"visible":true,"include":true,"step":"20.0","x":-682.5142857142857,"y":-583.9142857142857,"z":731.447619047619,"a95":0.99,"info":"27/10/2014 at 17:03:38"},{"visible":true,"include":true,"step":"25.0","x":-375.5333333333333,"y":-417.4095238095238,"z":641.952380952381,"a95":0.99,"info":"27/10/2014 at 17:03:38"},{"visible":true,"include":true,"step":"30.0","x":-596.7809523809524,"y":-400.4,"z":425.5904761904762,"a95":0.99,"info":"27/10/2014 at 17:03:38"},{"visible":false,"include":false,"step":"35.0","x":-591.9714285714285,"y":-618.7047619047619,"z":161.0285714285714,"a95":0.99,"info":"27/10/2014 at 17:03:38"},{"visible":true,"include":false,"step":"40.0","x":-577.7333333333333,"y":-294.9142857142857,"z":466.53333333333336,"a95":0.99,"info":"27/10/2014 at 17:03:38"},{"visible":true,"include":false,"step":"45.0","x":-376.0761904761905,"y":-287.2190476190476,"z":388.6952380952381,"a95":0.99,"info":"27/10/2014 at 17:03:38"},{"visible":true,"include":false,"step":"50.0","x":-201.69523809523812,"y":-460.68571428571425,"z":461.5904761904762,"a95":0.99,"info":"27/10/2014 at 17:03:38"},{"visible":true,"include":false,"step":"60.0","x":-505.53333333333336,"y":-262.29523809523806,"z":329.0857142857143,"a95":0.99,"info":"27/10/2014 at 17:03:38"},{"visible":false,"include":false,"step":"70.0","x":-110.06666666666668,"y":-184.2,"z":48.31238095238095,"a95":0.99,"info":"27/10/2014 at 17:03:38"},{"visible":false,"include":false,"step":"80.0","x":-752.5238095238095,"y":-127.23809523809524,"z":-103.0095238095238,"a95":0.99,"info":"27/10/2014 at 17:03:38"},{"visible":false,"include":false,"step":"90.0","x":-407.06666666666666,"y":-372.8095238095238,"z":554.7809523809524,"a95":0.99,"info":"27/10/2014 at 17:03:38"},{"visible":false,"include":false,"step":"100.0","x":141.03809523809525,"y":-284.2095238095238,"z":299.9238095238095,"a95":0.99,"info":"27/10/2014 at 17:03:38"}]},{"version":"v1.1.0","exported":"2016-10-11T14:42:10.628Z","volume":10.5,"added":"2016-10-11T14:35:29.531Z","format":"Utrecht","demagType":"Unknown","strat":null,"patch":1.1,"GEO":[{"dec":348.7895379842806,"inc":62.168610567614614,"MAD":4.89103803114916,"cm":[-7.105427357601002e-14,-2.2737367544323206e-13,0],"intensity":5054.370307151431,"type":"dir","forced":true,"remark":"","origin":false,"nSteps":6,"minStep":"180","maxStep":"310","steps":["180","210","240","270","290","310"],"group":"None","version":"v1.1.0"}],"TECT":[{"dec":339.51588135122375,"inc":41.29218737755354,"MAD":4.891038031149116,"cm":[-7.815970093361102e-14,1.4210854715202004e-13,7.105427357601002e-14],"intensity":5054.370307151431,"type":"dir","forced":true,"remark":"","origin":false,"nSteps":6,"minStep":"180","maxStep":"310","steps":["180","210","240","270","290","310"],"group":"None","version":"v1.1.0"}],"interpreted":true,"name":"SS5.6A","coreAzi":21,"coreDip":18,"bedStrike":235,"bedDip":22,"data":[{"visible":true,"include":false,"step":"20","x":-7350.476190476191,"y":-1881.142857142857,"z":7240.761904761905,"a95":2.2,"info":"\"14-10-20\" at \"15:10\""},{"visible":true,"include":false,"step":"100","x":-6825.9047619047615,"y":-1912.1904761904761,"z":7078.285714285715,"a95":2.1,"info":"\"14-10-20\" at \"18:07\""},{"visible":true,"include":false,"step":"150","x":-3613.2380952380954,"y":-993.9047619047619,"z":3590.4761904761904,"a95":2.1,"info":"\"14-10-20\" at \"21:30\""},{"visible":true,"include":true,"step":"180","x":-2697.714285714286,"y":-1041.6190476190477,"z":2572.5714285714284,"a95":2.1,"info":"\"14-10-21\" at \"00:23\""},{"visible":true,"include":true,"step":"210","x":-1902.7619047619048,"y":-757.6190476190476,"z":1877.7142857142858,"a95":2.1,"info":"\"14-10-21\" at \"16:28\""},{"visible":true,"include":true,"step":"240","x":-1290.3809523809523,"y":-271.6190476190476,"z":1003.6190476190476,"a95":2,"info":"\"14-10-21\" at \"19:25\""},{"visible":true,"include":true,"step":"270","x":-1218,"y":-151.42857142857142,"z":1064.1904761904761,"a95":2,"info":"\"14-10-21\" at \"22:31\""},{"visible":true,"include":true,"step":"290","x":-1049.5238095238096,"y":-326.57142857142856,"z":663.1428571428571,"a95":2.1,"info":"\"14-10-22\" at \"15:02\""},{"visible":true,"include":true,"step":"310","x":-954.952380952381,"y":-394.76190476190476,"z":612,"a95":2,"info":"\"14-10-22\" at \"17:47\""},{"visible":true,"include":false,"step":"330","x":-703.047619047619,"y":-150.95238095238096,"z":575.9047619047619,"a95":2.3,"info":"\"14-10-22\" at \"20:56\""},{"visible":true,"include":false,"step":"350","x":-871.7142857142857,"y":-225.9047619047619,"z":436.4761904761905,"a95":1.9,"info":"\"14-10-23\" at \"15:12\""},{"visible":true,"include":false,"step":"370","x":-959.047619047619,"y":-235.52380952380952,"z":515.3333333333334,"a95":2,"info":"\"14-10-23\" at \"18:12\""},{"visible":true,"include":false,"step":"400","x":-966.2857142857143,"y":-221.52380952380952,"z":540.6666666666666,"a95":2,"info":"\"14-10-23\" at \"21:11\""},{"visible":true,"include":false,"step":"420","x":-921.8095238095239,"y":-270.85714285714283,"z":563.7142857142857,"a95":2.2,"info":"\"14-10-24\" at \"15:45\""},{"visible":true,"include":false,"step":"440","x":-883.3333333333334,"y":-257.8095238095238,"z":613.6190476190476,"a95":2.2,"info":"\"14-10-24\" at \"18:59\""},{"visible":true,"include":false,"step":"470","x":-758.3809523809524,"y":-312.6666666666667,"z":413.7142857142857,"a95":2.3,"info":"\"14-10-24\" at \"21:40\""},{"visible":true,"include":false,"step":"490","x":-661.6190476190476,"y":-287.04761904761904,"z":437.7142857142857,"a95":2.2,"info":"\"14-10-25\" at \"00:35\""},{"visible":true,"include":false,"step":"520","x":-649.3333333333334,"y":-234.57142857142858,"z":418.4761904761905,"a95":2,"info":"\"14-10-25\" at \"03:15\""},{"visible":false,"include":false,"step":"550","x":-605.1428571428571,"y":-273.7142857142857,"z":449.5238095238095,"a95":2.3,"info":"\"14-10-25\" at \"05:54\""},{"visible":false,"include":false,"step":"580","x":-607.8095238095239,"y":-315.14285714285717,"z":428.76190476190476,"a95":2.2,"info":"\"14-10-26\" at \"04:44\""},{"visible":false,"include":false,"step":"610","x":-542.2857142857143,"y":-12.571428571428571,"z":80.76190476190476,"a95":2.6,"info":"\"14-10-26\" at \"06:37\""}]},{"version":"v1.1.0","exported":"2016-10-11T14:42:10.628Z","volume":10.5,"added":"2016-10-11T14:35:29.532Z","format":"Utrecht","demagType":"Unknown","strat":"1","patch":1.1,"GEO":[{"dec":342.222584837454,"inc":49.88630881833206,"MAD":7.8646778349888296,"cm":[7.105427357601002e-15,-4.973799150320701e-14,0],"intensity":4150.882174466514,"type":"dir","forced":true,"remark":"","origin":false,"nSteps":9,"minStep":"16.0","maxStep":"60.0","steps":["16.0","20.0","25.0","30.0","35.0","40.0","45.0","50.0","60.0"],"group":"None","version":"v1.1.0"}],"TECT":[{"dec":337.5481986613268,"inc":28.590145878154207,"MAD":7.86467783498882,"cm":[-1.7763568394002505e-13,-2.8421709430404007e-13,1.4210854715202004e-14],"intensity":4150.882174466515,"type":"dir","forced":true,"remark":"","origin":false,"nSteps":9,"minStep":"16.0","maxStep":"60.0","steps":["16.0","20.0","25.0","30.0","35.0","40.0","45.0","50.0","60.0"],"group":"None","version":"v1.1.0"}],"interpreted":true,"name":"SS5.6B","coreAzi":21,"coreDip":18,"bedStrike":235,"bedDip":22,"data":[{"visible":true,"include":false,"step":"0.0","x":-4126.952380952381,"y":-1373.142857142857,"z":4865.238095238095,"a95":0.99,"info":"27/10/2014 at 22:37:38"},{"visible":true,"include":false,"step":"4.0","x":-3840.5714285714284,"y":-1283.7142857142858,"z":4410.380952380952,"a95":0.99,"info":"27/10/2014 at 22:37:38"},{"visible":true,"include":false,"step":"8.0","x":-3195.3333333333335,"y":-1183.4285714285713,"z":3530.4761904761904,"a95":0.99,"info":"27/10/2014 at 22:37:38"},{"visible":true,"include":false,"step":"12.0","x":-2375.2380952380954,"y":-956.1904761904761,"z":2589.3333333333335,"a95":0.99,"info":"27/10/2014 at 22:37:38"},{"visible":true,"include":true,"step":"16.0","x":-1996.4761904761904,"y":-1049.3333333333333,"z":2028.857142857143,"a95":0.99,"info":"27/10/2014 at 22:37:38"},{"visible":true,"include":true,"step":"20.0","x":-1458,"y":-701.6,"z":1670.3809523809523,"a95":0.99,"info":"27/10/2014 at 22:37:38"},{"visible":true,"include":true,"step":"25.0","x":-974.7619047619048,"y":-652.495238095238,"z":1604.1904761904761,"a95":0.99,"info":"27/10/2014 at 22:37:38"},{"visible":true,"include":true,"step":"30.0","x":-1051.904761904762,"y":-882.9904761904761,"z":1254.857142857143,"a95":0.99,"info":"27/10/2014 at 22:37:38"},{"visible":true,"include":true,"step":"35.0","x":-832.2190476190475,"y":-842.5619047619048,"z":1322.952380952381,"a95":0.99,"info":"27/10/2014 at 22:37:38"},{"visible":true,"include":true,"step":"40.0","x":-640.2952380952381,"y":-700.0095238095239,"z":1195.142857142857,"a95":0.99,"info":"27/10/2014 at 22:37:38"},{"visible":true,"include":true,"step":"45.0","x":-755.9904761904761,"y":-855.4000000000001,"z":937.5333333333334,"a95":0.99,"info":"27/10/2014 at 22:37:38"},{"visible":true,"include":true,"step":"50.0","x":-883.2666666666667,"y":-559.7333333333333,"z":961.5238095238095,"a95":0.99,"info":"27/10/2014 at 22:37:38"},{"visible":true,"include":true,"step":"60.0","x":-484.81904761904764,"y":-734.552380952381,"z":780.1904761904761,"a95":0.99,"info":"27/10/2014 at 22:37:38"},{"visible":false,"include":false,"step":"70.0","x":-556.9809523809524,"y":-598.1714285714286,"z":387.7809523809524,"a95":0.99,"info":"27/10/2014 at 22:37:38"},{"visible":false,"include":false,"step":"80.0","x":-697.104761904762,"y":-679.3142857142857,"z":678.895238095238,"a95":0.99,"info":"27/10/2014 at 22:37:38"},{"visible":false,"include":false,"step":"90.0","x":-532.104761904762,"y":-868.5999999999999,"z":225.2095238095238,"a95":0.99,"info":"27/10/2014 at 22:37:38"},{"visible":false,"include":false,"step":"100.0","x":-461.0952380952381,"y":-31.30952380952381,"z":286.48571428571427,"a95":0.99,"info":"27/10/2014 at 22:37:38"}]},{"version":"v1.1.0","exported":"2016-10-11T14:42:10.628Z","volume":10.5,"added":"2016-10-11T14:35:29.532Z","format":"Utrecht","demagType":"Unknown","strat":"4","patch":1.1,"GEO":[{"dec":356.0492350294229,"inc":52.539786854421465,"MAD":4.603886340664955,"cm":[2.1316282072803006e-14,-1.0302869668521453e-13,0],"intensity":6957.240581758811,"type":"dir","forced":true,"remark":"","origin":false,"nSteps":9,"minStep":"8.0","maxStep":"45.0","steps":["8.0","12.0","16.0","20.0","25.0","30.0","35.0","40.0","45.0"],"group":"None","version":"v1.1.0"}],"TECT":[{"dec":346.8967371819809,"inc":32.736781374169425,"MAD":4.603886340664971,"cm":[-1.1368683772161603e-13,-2.3803181647963356e-13,7.105427357601002e-15],"intensity":6957.240581758811,"type":"dir","forced":true,"remark":"","origin":false,"nSteps":9,"minStep":"8.0","maxStep":"45.0","steps":["8.0","12.0","16.0","20.0","25.0","30.0","35.0","40.0","45.0"],"group":"None","version":"v1.1.0"}],"interpreted":true,"name":"SS5.8A","coreAzi":8,"coreDip":18,"bedStrike":235,"bedDip":22,"data":[{"visible":true,"include":false,"step":"0.0","x":-5251.333333333333,"y":-885.3333333333334,"z":7563.333333333333,"a95":0.99,"info":"08/10/2014 at 23:54:54"},{"visible":true,"include":false,"step":"4.0","x":-4680.380952380952,"y":-899.4761904761905,"z":6799.619047619048,"a95":0.99,"info":"08/10/2014 at 23:54:54"},{"visible":true,"include":true,"step":"8.0","x":-3417.0476190476193,"y":-765.8,"z":5027.809523809524,"a95":0.99,"info":"08/10/2014 at 23:54:54"},{"visible":true,"include":true,"step":"12.0","x":-2402.5714285714284,"y":-601.7523809523809,"z":3472.4761904761904,"a95":0.99,"info":"08/10/2014 at 23:54:54"},{"visible":true,"include":true,"step":"16.0","x":-1626.5714285714287,"y":-167.0857142857143,"z":2546.4761904761904,"a95":0.99,"info":"08/10/2014 at 23:54:54"},{"visible":true,"include":true,"step":"20.0","x":-1400.857142857143,"y":-89.0495238095238,"z":2060.095238095238,"a95":0.99,"info":"08/10/2014 at 23:54:54"},{"visible":true,"include":true,"step":"25.0","x":-1247.2380952380952,"y":-252.9142857142857,"z":1495.7142857142858,"a95":0.99,"info":"08/10/2014 at 23:54:54"},{"visible":true,"include":true,"step":"30.0","x":-1141.047619047619,"y":-291.8952380952381,"z":1133.8095238095239,"a95":0.99,"info":"08/10/2014 at 23:54:54"},{"visible":true,"include":true,"step":"35.0","x":-864.2095238095238,"y":-351.97142857142853,"z":846.8857142857142,"a95":0.99,"info":"08/10/2014 at 23:54:54"},{"visible":true,"include":true,"step":"40.0","x":-726.7904761904762,"y":-455.8857142857143,"z":801.1428571428571,"a95":0.99,"info":"08/10/2014 at 23:54:54"},{"visible":true,"include":true,"step":"45.0","x":-542.047619047619,"y":-351.62857142857143,"z":582.9047619047619,"a95":0.99,"info":"08/10/2014 at 23:54:54"},{"visible":true,"include":false,"step":"50.0","x":-443.6666666666667,"y":-828.104761904762,"z":526.5904761904761,"a95":0.99,"info":"08/10/2014 at 23:54:54"},{"visible":true,"include":false,"step":"60.0","x":-404.3809523809524,"y":-659.847619047619,"z":525.9047619047619,"a95":0.99,"info":"08/10/2014 at 23:54:54"},{"visible":false,"include":false,"step":"70.0","x":-419.06666666666666,"y":-208.2095238095238,"z":116.75238095238096,"a95":0.99,"info":"08/10/2014 at 23:54:54"},{"visible":false,"include":false,"step":"80.0","x":-251.8952380952381,"y":-118.07619047619048,"z":523.8761904761905,"a95":0.99,"info":"08/10/2014 at 23:54:54"},{"visible":false,"include":false,"step":"90.0","x":-321.43809523809523,"y":-214.56190476190477,"z":395.552380952381,"a95":0.99,"info":"08/10/2014 at 23:54:54"},{"visible":false,"include":false,"step":"100.0","x":-355.42857142857144,"y":-183.22857142857143,"z":459.60952380952375,"a95":0.99,"info":"08/10/2014 at 23:54:54"}]},{"version":"v1.1.0","exported":"2016-10-11T14:42:10.628Z","volume":10.5,"added":"2016-10-11T14:35:29.532Z","format":"Utrecht","demagType":"Unknown","strat":"5","patch":1.1,"GEO":[{"dec":10.232445057219877,"inc":37.06047397804551,"MAD":5.289980178442209,"cm":[-2.1316282072803006e-14,1.4566126083082054e-13,0],"intensity":4097.107467982139,"type":"dir","forced":true,"remark":"","origin":false,"nSteps":8,"minStep":"12.0","maxStep":"45.0","steps":["12.0","16.0","20.0","25.0","30.0","35.0","40.0","45.0"],"group":"None","version":"v1.1.0"}],"TECT":[{"dec":2.184987978515437,"inc":20.38056075518032,"MAD":5.289980178442235,"cm":[2.842170943040401e-14,2.2382096176443156e-13,2.6645352591003757e-14],"intensity":4097.107467982139,"type":"dir","forced":true,"remark":"","origin":false,"nSteps":8,"minStep":"12.0","maxStep":"45.0","steps":["12.0","16.0","20.0","25.0","30.0","35.0","40.0","45.0"],"group":"None","version":"v1.1.0"}],"interpreted":true,"name":"SS5.9B","coreAzi":7,"coreDip":25,"bedStrike":235,"bedDip":22,"data":[{"visible":true,"include":false,"step":"0.0","x":-2973.5238095238096,"y":-215.85714285714286,"z":7604.285714285715,"a95":0.99,"info":"08/10/2014 at 23:54:54"},{"visible":true,"include":false,"step":"4.0","x":-2542.3809523809523,"y":-282.29523809523806,"z":6686.285714285715,"a95":0.99,"info":"08/10/2014 at 23:54:54"},{"visible":true,"include":false,"step":"8.0","x":-1548.095238095238,"y":-286.49523809523805,"z":4710.857142857143,"a95":0.99,"info":"08/10/2014 at 23:54:54"},{"visible":true,"include":true,"step":"12.0","x":-759.7904761904762,"y":127.44761904761906,"z":2984.095238095238,"a95":0.99,"info":"08/10/2014 at 23:54:54"},{"visible":true,"include":true,"step":"16.0","x":-580.6,"y":12.964761904761904,"z":2404.7619047619046,"a95":0.99,"info":"08/10/2014 at 23:54:54"},{"visible":true,"include":true,"step":"20.0","x":-323.70476190476194,"y":48.22095238095238,"z":1813.7142857142858,"a95":0.99,"info":"08/10/2014 at 23:54:54"},{"visible":true,"include":true,"step":"25.0","x":-367.6,"y":248.82857142857142,"z":1527.4285714285713,"a95":0.99,"info":"08/10/2014 at 23:54:54"},{"visible":true,"include":true,"step":"30.0","x":-234.94285714285715,"y":181.82857142857142,"z":1440.857142857143,"a95":0.99,"info":"08/10/2014 at 23:54:54"},{"visible":true,"include":true,"step":"35.0","x":-286.6952380952381,"y":-160.1238095238095,"z":1339.142857142857,"a95":0.99,"info":"08/10/2014 at 23:54:54"},{"visible":true,"include":true,"step":"40.0","x":-63.222857142857144,"y":26.174285714285713,"z":1097.3333333333333,"a95":0.99,"info":"08/10/2014 at 23:54:54"},{"visible":true,"include":true,"step":"45.0","x":-43.50952380952381,"y":259.04761904761904,"z":1014.8571428571429,"a95":0.99,"info":"08/10/2014 at 23:54:54"},{"visible":false,"include":false,"step":"50.0","x":212.2,"y":-281.9428571428572,"z":1020,"a95":0.99,"info":"08/10/2014 at 23:54:54"},{"visible":false,"include":false,"step":"60.0","x":170.1238095238095,"y":171.96190476190475,"z":651.8285714285714,"a95":0.99,"info":"08/10/2014 at 23:54:54"},{"visible":false,"include":false,"step":"70.0","x":29.506666666666668,"y":-94.18476190476191,"z":353,"a95":0.99,"info":"08/10/2014 at 23:54:54"},{"visible":false,"include":false,"step":"80.0","x":55.483809523809526,"y":-306.1904761904762,"z":100.05714285714285,"a95":0.99,"info":"08/10/2014 at 23:54:54"},{"visible":false,"include":false,"step":"90.0","x":-95.68571428571428,"y":208.74285714285716,"z":139.85714285714286,"a95":0.99,"info":"08/10/2014 at 23:54:54"},{"visible":false,"include":false,"step":"100.0","x":251.49523809523808,"y":94.0847619047619,"z":194.75238095238097,"a95":0.99,"info":"08/10/2014 at 23:54:54"}]},{"version":"v1.1.0","exported":"2016-10-11T14:42:10.628Z","volume":10.5,"added":"2016-10-11T14:35:29.532Z","format":"Utrecht","demagType":"Unknown","strat":null,"patch":1.1,"GEO":[{"dec":334.9940715773666,"inc":60.61455804735061,"MAD":4.9303865498849095,"cm":[-2.4868995751603507e-14,-1.0302869668521453e-13,0],"intensity":2513.803945546269,"type":"dir","forced":true,"remark":"","origin":false,"nSteps":7,"minStep":"240","maxStep":"400","steps":["240","270","290","330","350","370","400"],"group":"None","version":"v1.1.0"}],"TECT":[{"dec":331.2747899198127,"inc":38.81937969931783,"MAD":4.930386549884942,"cm":[2.1316282072803006e-14,4.263256414560601e-14,-4.263256414560601e-14],"intensity":2513.803945546269,"type":"dir","forced":true,"remark":"","origin":false,"nSteps":7,"minStep":"240","maxStep":"400","steps":["240","270","290","330","350","370","400"],"group":"None","version":"v1.1.0"}],"interpreted":true,"name":"SS5.10A","coreAzi":308,"coreDip":29,"bedStrike":235,"bedDip":22,"data":[{"visible":false,"include":false,"step":"20","x":-5408.952380952381,"y":5373.809523809524,"z":8366.857142857143,"a95":2.3,"info":"\"14-10-20\" at \"15:12\""},{"visible":false,"include":false,"step":"100","x":-4839.428571428572,"y":4938.571428571428,"z":7959.333333333333,"a95":2.3,"info":"\"14-10-20\" at \"18:09\""},{"visible":true,"include":false,"step":"150","x":-2115.809523809524,"y":2260.190476190476,"z":3566.6666666666665,"a95":2.3,"info":"\"14-10-20\" at \"21:32\""},{"visible":true,"include":false,"step":"180","x":-1719.8095238095239,"y":1443.142857142857,"z":2138.6666666666665,"a95":2.3,"info":"\"14-10-21\" at \"00:25\""},{"visible":true,"include":false,"step":"210","x":-1457.904761904762,"y":1104.095238095238,"z":1727.5238095238096,"a95":2.1,"info":"\"14-10-21\" at \"16:29\""},{"visible":true,"include":true,"step":"240","x":-1011.7142857142857,"y":396.85714285714283,"z":1123.047619047619,"a95":2.1,"info":"\"14-10-21\" at \"19:27\""},{"visible":true,"include":true,"step":"270","x":-756.6666666666666,"y":308.6666666666667,"z":1155.047619047619,"a95":2.2,"info":"\"14-10-21\" at \"22:32\""},{"visible":true,"include":true,"step":"290","x":-640.6666666666666,"y":289.42857142857144,"z":1032.095238095238,"a95":2.2,"info":"\"14-10-22\" at \"15:04\""},{"visible":false,"include":false,"step":"310","x":-512.4761904761905,"y":428.4761904761905,"z":1013.8095238095239,"a95":2.2,"info":"\"14-10-22\" at \"17:49\""},{"visible":true,"include":true,"step":"330","x":-604,"y":288.76190476190476,"z":937.8095238095239,"a95":2.3,"info":"\"14-10-22\" at \"20:59\""},{"visible":true,"include":true,"step":"350","x":-497.23809523809524,"y":148.76190476190476,"z":775.1428571428571,"a95":2.5,"info":"\"14-10-23\" at \"15:14\""},{"visible":true,"include":true,"step":"370","x":-408.76190476190476,"y":203.9047619047619,"z":792.1904761904761,"a95":2.6,"info":"\"14-10-23\" at \"18:13\""},{"visible":true,"include":true,"step":"400","x":-496.95238095238096,"y":140.85714285714286,"z":814.4761904761905,"a95":2.5,"info":"\"14-10-23\" at \"21:13\""},{"visible":true,"include":false,"step":"420","x":-509.7142857142857,"y":18.476190476190474,"z":818.3809523809524,"a95":2.6,"info":"\"14-10-24\" at \"15:49\""},{"visible":true,"include":false,"step":"440","x":-412.76190476190476,"y":23.80952380952381,"z":848.2857142857143,"a95":2.6,"info":"\"14-10-24\" at \"19:02\""},{"visible":true,"include":false,"step":"470","x":-477.23809523809524,"y":13.80952380952381,"z":725.2380952380952,"a95":2.7,"info":"\"14-10-24\" at \"21:42\""},{"visible":true,"include":false,"step":"490","x":-511.23809523809524,"y":36.95238095238095,"z":661.047619047619,"a95":2.4,"info":"\"14-10-25\" at \"00:37\""},{"visible":false,"include":false,"step":"520","x":-504.76190476190476,"y":190.95238095238096,"z":447.23809523809524,"a95":2.4,"info":"\"14-10-25\" at \"03:17\""},{"visible":false,"include":false,"step":"550","x":-536.5714285714286,"y":110,"z":588.8571428571429,"a95":2.7,"info":"\"14-10-25\" at \"05:56\""},{"visible":false,"include":false,"step":"580","x":-481.42857142857144,"y":191.33333333333334,"z":509.04761904761904,"a95":2.7,"info":"\"14-10-26\" at \"04:46\""},{"visible":false,"include":false,"step":"610","x":-301.5238095238095,"y":240.1904761904762,"z":295.04761904761904,"a95":3.4,"info":"\"14-10-26\" at \"06:39\""}]},{"version":"v1.1.0","exported":"2016-10-11T14:42:10.628Z","volume":10.5,"added":"2016-10-11T14:35:29.532Z","format":"Utrecht","demagType":"Unknown","strat":"6","patch":1.1,"GEO":[{"dec":347.87644841118305,"inc":54.925504186564,"MAD":3.341915313183609,"cm":[2.842170943040401e-14,-3.552713678800501e-15,0],"intensity":8733.67084406763,"type":"dir","forced":true,"remark":"","origin":false,"nSteps":8,"minStep":"8.0","maxStep":"45.0","steps":["8.0","12.0","16.0","20.0","30.0","35.0","40.0","45.0"],"group":"None","version":"v1.1.0"}],"TECT":[{"dec":340.648716049427,"inc":34.08897815722888,"MAD":3.341915313183585,"cm":[-5.684341886080802e-14,-2.7000623958883807e-13,-7.105427357601002e-14],"intensity":8733.67084406763,"type":"dir","forced":true,"remark":"","origin":false,"nSteps":8,"minStep":"8.0","maxStep":"45.0","steps":["8.0","12.0","16.0","20.0","30.0","35.0","40.0","45.0"],"group":"None","version":"v1.1.0"}],"interpreted":true,"name":"SS5.10B","coreAzi":308,"coreDip":29,"bedStrike":235,"bedDip":22,"data":[{"visible":true,"include":false,"step":"0.0","x":-5025.428571428572,"y":3836.5714285714284,"z":7901.428571428572,"a95":0.99,"info":"08/10/2014 at 23:54:54"},{"visible":true,"include":false,"step":"4.0","x":-4640.380952380952,"y":3560.285714285714,"z":7191.047619047619,"a95":0.99,"info":"08/10/2014 at 23:54:54"},{"visible":true,"include":true,"step":"8.0","x":-3724.9523809523807,"y":2808,"z":5776.666666666667,"a95":0.99,"info":"08/10/2014 at 23:54:54"},{"visible":true,"include":true,"step":"12.0","x":-2964.190476190476,"y":1962.952380952381,"z":4288.571428571428,"a95":0.99,"info":"08/10/2014 at 23:54:54"},{"visible":true,"include":true,"step":"16.0","x":-2150.095238095238,"y":1647.2380952380952,"z":3376.3809523809523,"a95":0.99,"info":"08/10/2014 at 23:54:54"},{"visible":true,"include":true,"step":"20.0","x":-1684.095238095238,"y":1440.095238095238,"z":3052.190476190476,"a95":0.99,"info":"08/10/2014 at 23:54:54"},{"visible":false,"include":false,"step":"25.0","x":-1398.952380952381,"y":1350.952380952381,"z":2147.3333333333335,"a95":0.99,"info":"08/10/2014 at 23:54:54"},{"visible":true,"include":true,"step":"30.0","x":-1115.5238095238096,"y":1170.2857142857142,"z":2266.190476190476,"a95":0.99,"info":"08/10/2014 at 23:54:54"},{"visible":true,"include":true,"step":"35.0","x":-1178.4761904761904,"y":495.4761904761905,"z":1383.3333333333333,"a95":0.99,"info":"08/10/2014 at 23:54:54"},{"visible":true,"include":true,"step":"40.0","x":-1029.5238095238096,"y":458.64761904761906,"z":1243.7142857142858,"a95":0.99,"info":"08/10/2014 at 23:54:54"},{"visible":true,"include":true,"step":"45.0","x":-588.1238095238095,"y":256.16190476190474,"z":1172.095238095238,"a95":0.99,"info":"08/10/2014 at 23:54:54"},{"visible":false,"include":false,"step":"50.0","x":-885.6761904761905,"y":-193.63809523809525,"z":582.0952380952381,"a95":0.99,"info":"08/10/2014 at 23:54:54"},{"visible":true,"include":false,"step":"60.0","x":-691.8571428571429,"y":-49.37142857142857,"z":703.1142857142856,"a95":0.99,"info":"08/10/2014 at 23:54:54"},{"visible":true,"include":false,"step":"70.0","x":-358.5238095238095,"y":152.6952380952381,"z":978,"a95":0.99,"info":"08/10/2014 at 23:54:54"},{"visible":true,"include":false,"step":"80.0","x":-205.0095238095238,"y":70.69714285714286,"z":624.5238095238095,"a95":0.99,"info":"08/10/2014 at 23:54:54"},{"visible":false,"include":false,"step":"90.0","x":155.82857142857142,"y":563.7523809523809,"z":950.7809523809525,"a95":0.99,"info":"08/10/2014 at 23:54:54"},{"visible":true,"include":false,"step":"100.0","x":-162.61904761904762,"y":-13.197142857142856,"z":246.0952380952381,"a95":0.99,"info":"08/10/2014 at 23:54:54"}]},{"version":"v1.1.0","exported":"2016-10-11T14:42:10.628Z","volume":10.5,"added":"2016-10-11T14:35:29.533Z","format":"Utrecht","demagType":"Unknown","strat":"2","patch":1.1,"GEO":[{"dec":340.75032471121347,"inc":59.52580346429295,"MAD":3.2271391461702397,"cm":[4.263256414560601e-14,-3.907985046680551e-14,0],"intensity":7794.668306150204,"type":"dir","forced":true,"remark":"","origin":false,"nSteps":9,"minStep":"4.0","maxStep":"45.0","steps":["4.0","8.0","12.0","16.0","20.0","25.0","30.0","35.0","45.0"],"group":"None","version":"v1.1.0"}],"TECT":[{"dec":335.0670389979349,"inc":38.042932796723434,"MAD":3.227139146170204,"cm":[-5.826450433232822e-13,-1.1546319456101628e-12,0],"intensity":7794.668306150204,"type":"dir","forced":true,"remark":"","origin":false,"nSteps":9,"minStep":"4.0","maxStep":"45.0","steps":["4.0","8.0","12.0","16.0","20.0","25.0","30.0","35.0","45.0"],"group":"None","version":"v1.1.0"}],"interpreted":true,"name":"SS5.11A","coreAzi":286,"coreDip":26,"bedStrike":235,"bedDip":22,"data":[{"visible":true,"include":false,"step":"0.0","x":-5074.285714285715,"y":3204.095238095238,"z":4687.714285714285,"a95":0.99,"info":"27/10/2014 at 22:37:38"},{"visible":true,"include":true,"step":"4.0","x":-4588,"y":2938.095238095238,"z":4312.380952380952,"a95":0.99,"info":"27/10/2014 at 22:37:38"},{"visible":true,"include":true,"step":"8.0","x":-3388.7619047619046,"y":2214.285714285714,"z":3206.190476190476,"a95":0.99,"info":"27/10/2014 at 22:37:38"},{"visible":true,"include":true,"step":"12.0","x":-2287.5238095238096,"y":1390.1904761904761,"z":2475.2380952380954,"a95":0.99,"info":"27/10/2014 at 22:37:38"},{"visible":true,"include":true,"step":"16.0","x":-1617.904761904762,"y":1079.8095238095239,"z":1633.142857142857,"a95":0.99,"info":"27/10/2014 at 22:37:38"},{"visible":true,"include":true,"step":"20.0","x":-1091.5238095238096,"y":646.9333333333334,"z":1295.2380952380952,"a95":0.99,"info":"27/10/2014 at 22:37:38"},{"visible":true,"include":true,"step":"25.0","x":-962.0952380952381,"y":663.8666666666667,"z":1138.2857142857142,"a95":0.99,"info":"27/10/2014 at 22:37:38"},{"visible":true,"include":true,"step":"30.0","x":-784.4571428571428,"y":560,"z":1094.1904761904761,"a95":0.99,"info":"27/10/2014 at 22:37:38"},{"visible":true,"include":true,"step":"35.0","x":-494.54285714285714,"y":312.2761904761905,"z":948.4000000000001,"a95":0.99,"info":"27/10/2014 at 22:37:38"},{"visible":false,"include":false,"step":"40.0","x":-462.0380952380952,"y":28.200000000000003,"z":1083.904761904762,"a95":0.99,"info":"27/10/2014 at 22:37:38"},{"visible":true,"include":true,"step":"45.0","x":-583.3333333333334,"y":253.7047619047619,"z":568.8666666666667,"a95":0.99,"info":"27/10/2014 at 22:37:38"},{"visible":true,"include":false,"step":"50.0","x":-270.8666666666667,"y":21.400952380952383,"z":454.04761904761904,"a95":0.99,"info":"27/10/2014 at 22:37:38"},{"visible":true,"include":false,"step":"60.0","x":-461.3238095238095,"y":152.33333333333334,"z":428.06666666666666,"a95":0.99,"info":"27/10/2014 at 22:37:38"},{"visible":true,"include":false,"step":"70.0","x":-179.2761904761905,"y":232.82857142857142,"z":636.1714285714286,"a95":0.99,"info":"27/10/2014 at 22:37:38"},{"visible":true,"include":false,"step":"80.0","x":41.46476190476191,"y":75.55142857142857,"z":585.5714285714286,"a95":0.99,"info":"27/10/2014 at 22:37:38"},{"visible":true,"include":false,"step":"90.0","x":133.46666666666667,"y":128.0857142857143,"z":203.73333333333332,"a95":0.99,"info":"27/10/2014 at 22:37:38"},{"visible":true,"include":false,"step":"100.0","x":4.221523809523809,"y":162.42857142857142,"z":33,"a95":0.99,"info":"27/10/2014 at 22:37:38"}]},{"version":"v1.1.0","exported":"2016-10-11T14:42:10.628Z","volume":10.5,"added":"2016-10-11T14:35:29.533Z","format":"Utrecht","demagType":"Unknown","strat":"7","patch":1.1,"GEO":[{"dec":5.563792180787004,"inc":59.026373767740786,"MAD":5.969104279930439,"cm":[1.4210854715202004e-14,-1.7408297026122455e-13,0],"intensity":4654.410529569052,"type":"dir","forced":true,"remark":"","origin":false,"nSteps":7,"minStep":"12.0","maxStep":"40.0","steps":["12.0","16.0","20.0","25.0","30.0","35.0","40.0"],"group":"None","version":"v1.1.0"}],"TECT":[{"dec":351.0821037834308,"inc":40.42959155217427,"MAD":5.969104279930408,"cm":[-2.842170943040401e-14,-2.842170943040401e-14,7.105427357601002e-15],"intensity":4654.4105295690515,"type":"dir","forced":true,"remark":"","origin":false,"nSteps":7,"minStep":"12.0","maxStep":"40.0","steps":["12.0","16.0","20.0","25.0","30.0","35.0","40.0"],"group":"None","version":"v1.1.0"}],"interpreted":true,"name":"SS5.12A","coreAzi":6,"coreDip":12,"bedStrike":235,"bedDip":22,"data":[{"visible":true,"include":false,"step":"0.0","x":-5508.476190476191,"y":-44.18761904761905,"z":6098.666666666667,"a95":0.99,"info":"08/10/2014 at 23:54:54"},{"visible":true,"include":false,"step":"4.0","x":-4958.476190476191,"y":-75.5495238095238,"z":5406.666666666667,"a95":0.99,"info":"08/10/2014 at 23:54:54"},{"visible":true,"include":false,"step":"8.0","x":-3686.190476190476,"y":-89.66,"z":3758.9523809523807,"a95":0.99,"info":"08/10/2014 at 23:54:54"},{"visible":true,"include":true,"step":"12.0","x":-2550.6666666666665,"y":88.79809523809524,"z":2626.9523809523807,"a95":0.99,"info":"08/10/2014 at 23:54:54"},{"visible":true,"include":true,"step":"16.0","x":-1966.3809523809523,"y":-66.54380952380953,"z":1849.904761904762,"a95":0.99,"info":"08/10/2014 at 23:54:54"},{"visible":true,"include":true,"step":"20.0","x":-1630.1904761904761,"y":76.75809523809524,"z":1394.5714285714287,"a95":0.99,"info":"08/10/2014 at 23:54:54"},{"visible":true,"include":true,"step":"25.0","x":-1236.857142857143,"y":-160.68571428571428,"z":1154.952380952381,"a95":0.99,"info":"08/10/2014 at 23:54:54"},{"visible":true,"include":true,"step":"30.0","x":-949.8285714285715,"y":7.258857142857143,"z":757.6380952380953,"a95":0.99,"info":"08/10/2014 at 23:54:54"},{"visible":true,"include":true,"step":"35.0","x":-901.8571428571429,"y":179.96190476190475,"z":450.6190476190476,"a95":0.99,"info":"08/10/2014 at 23:54:54"},{"visible":true,"include":true,"step":"40.0","x":-811.3428571428572,"y":-346.62857142857143,"z":581.4666666666666,"a95":0.99,"info":"08/10/2014 at 23:54:54"},{"visible":true,"include":false,"step":"45.0","x":-683.6476190476191,"y":-38.25238095238095,"z":487.45714285714286,"a95":0.99,"info":"08/10/2014 at 23:54:54"},{"visible":true,"include":false,"step":"50.0","x":-725.3809523809524,"y":-196.55238095238096,"z":450.7333333333333,"a95":0.99,"info":"08/10/2014 at 23:54:54"},{"visible":true,"include":false,"step":"60.0","x":-580.2285714285714,"y":-218.05714285714285,"z":86.5352380952381,"a95":0.99,"info":"08/10/2014 at 23:54:54"},{"visible":false,"include":false,"step":"70.0","x":-310.6095238095238,"y":-89.73428571428572,"z":-156.65714285714287,"a95":0.99,"info":"08/10/2014 at 23:54:54"},{"visible":false,"include":false,"step":"80.0","x":-242.23809523809524,"y":-125.57142857142857,"z":232.6095238095238,"a95":0.99,"info":"08/10/2014 at 23:54:54"},{"visible":false,"include":false,"step":"90.0","x":-60.83047619047619,"y":-248.82857142857142,"z":397.5619047619047,"a95":0.99,"info":"08/10/2014 at 23:54:54"},{"visible":false,"include":false,"step":"100.0","x":-126.4095238095238,"y":-178.7904761904762,"z":69.2104761904762,"a95":0.99,"info":"08/10/2014 at 23:54:54"}]},{"version":"v1.1.0","exported":"2016-10-11T14:42:10.628Z","volume":10.5,"added":"2016-10-11T14:35:29.533Z","format":"Utrecht","demagType":"Unknown","strat":null,"patch":1.1,"GEO":[{"dec":349.1682747390105,"inc":51.18871623651029,"MAD":8.450018545412073,"cm":[-6.836198274129401e-14,-2.984279490192421e-13,0],"intensity":3636.209813114291,"type":"dir","forced":true,"remark":"","origin":false,"nSteps":9,"minStep":"150","maxStep":"370","steps":["150","180","210","270","290","310","330","350","370"],"group":"None","version":"v1.1.0"}],"TECT":[{"dec":342.33530853108147,"inc":30.548502124416736,"MAD":8.4500185454121,"cm":[-2.042810365310288e-13,-4.227729277772596e-13,-1.0658141036401503e-14],"intensity":3636.2098131142907,"type":"dir","forced":true,"remark":"","origin":false,"nSteps":9,"minStep":"150","maxStep":"370","steps":["150","180","210","270","290","310","330","350","370"],"group":"None","version":"v1.1.0"}],"interpreted":true,"name":"SS5.13A","coreAzi":356,"coreDip":10,"bedStrike":235,"bedDip":22,"data":[{"visible":true,"include":false,"step":"20","x":-5738.0952380952385,"y":495.42857142857144,"z":8413.619047619048,"a95":2.4,"info":"\"14-10-20\" at \"15:16\""},{"visible":true,"include":false,"step":"100","x":-4851.333333333333,"y":286.6666666666667,"z":6331.333333333333,"a95":2.3,"info":"\"14-10-20\" at \"18:10\""},{"visible":true,"include":true,"step":"150","x":-2044.952380952381,"y":-138.66666666666666,"z":2587.4285714285716,"a95":2.2,"info":"\"14-10-20\" at \"21:33\""},{"visible":true,"include":true,"step":"180","x":-1391.6190476190477,"y":-149.61904761904762,"z":1574.5714285714287,"a95":2.3,"info":"\"14-10-21\" at \"00:27\""},{"visible":true,"include":true,"step":"210","x":-909.6190476190476,"y":-110.38095238095238,"z":1017.1428571428571,"a95":2.1,"info":"\"14-10-21\" at \"16:31\""},{"visible":false,"include":false,"step":"240","x":-713.1428571428571,"y":-523.7142857142857,"z":647.2380952380952,"a95":1.8,"info":"\"14-10-21\" at \"19:29\""},{"visible":true,"include":true,"step":"270","x":-472.4761904761905,"y":-126.57142857142857,"z":341.9047619047619,"a95":2.2,"info":"\"14-10-21\" at \"22:34\""},{"visible":true,"include":true,"step":"290","x":-616.4761904761905,"y":-115.61904761904762,"z":415.6190476190476,"a95":2,"info":"\"14-10-22\" at \"15:05\""},{"visible":true,"include":true,"step":"310","x":-558.2857142857143,"y":-203.04761904761904,"z":377.14285714285717,"a95":1.8,"info":"\"14-10-22\" at \"17:51\""},{"visible":true,"include":true,"step":"330","x":-391.6190476190476,"y":-85.23809523809524,"z":162.0952380952381,"a95":2.2,"info":"\"14-10-22\" at \"21:02\""},{"visible":true,"include":true,"step":"350","x":-420.6666666666667,"y":-156.47619047619048,"z":66.47619047619048,"a95":1.8,"info":"\"14-10-23\" at \"15:16\""},{"visible":true,"include":true,"step":"370","x":-373.3333333333333,"y":-308.1904761904762,"z":91.04761904761905,"a95":1.9,"info":"\"14-10-23\" at \"18:15\""},{"visible":true,"include":false,"step":"400","x":-365.04761904761904,"y":-363.5238095238095,"z":159.8095238095238,"a95":1.7,"info":"\"14-10-23\" at \"21:16\""},{"visible":true,"include":false,"step":"420","x":-316.4761904761905,"y":-322.6666666666667,"z":169.14285714285714,"a95":2.1,"info":"\"14-10-24\" at \"15:51\""},{"visible":true,"include":false,"step":"440","x":-290,"y":-408,"z":164.47619047619048,"a95":2,"info":"\"14-10-24\" at \"19:04\""},{"visible":true,"include":false,"step":"470","x":-342.76190476190476,"y":-409.3333333333333,"z":166.85714285714286,"a95":2,"info":"\"14-10-24\" at \"21:44\""},{"visible":false,"include":false,"step":"490","x":-310.57142857142856,"y":-325.7142857142857,"z":198.76190476190476,"a95":2.5,"info":"\"14-10-25\" at \"00:39\""},{"visible":false,"include":false,"step":"520","x":-191.8095238095238,"y":-287.9047619047619,"z":52.095238095238095,"a95":2.1,"info":"\"14-10-25\" at \"03:18\""},{"visible":false,"include":false,"step":"550","x":-141.71428571428572,"y":-235.61904761904762,"z":21.047619047619047,"a95":3,"info":"\"14-10-25\" at \"05:58\""},{"visible":false,"include":false,"step":"580","x":-256.76190476190476,"y":-281.23809523809524,"z":-14.095238095238095,"a95":2.5,"info":"\"14-10-26\" at \"04:47\""},{"visible":false,"include":false,"step":"610","x":-130.47619047619048,"y":-200.0952380952381,"z":9.714285714285714,"a95":4.3,"info":"\"14-10-26\" at \"06:41\""}]},{"version":"v1.1.0","exported":"2016-10-11T14:42:10.628Z","volume":10.5,"added":"2016-10-11T14:35:29.533Z","format":"Utrecht","demagType":"Unknown","strat":"3","patch":1.1,"GEO":[{"dec":356.75927329538325,"inc":53.60780699548833,"MAD":20.57759294463539,"cm":[247.12817677746224,-289.69754735190224,559.7070055161381],"intensity":831.1218007667412,"type":"dir","forced":false,"remark":"","origin":false,"nSteps":10,"minStep":"12.0","maxStep":"60.0","steps":["12.0","16.0","20.0","25.0","30.0","35.0","40.0","45.0","50.0","60.0"],"group":"None","version":"v1.1.0"}],"TECT":[{"dec":334.87254019250406,"inc":41.359379698110736,"MAD":20.577592944635406,"cm":[302.95009152731853,-472.2828033802681,378.7335902686305],"intensity":831.1218007667412,"type":"dir","forced":false,"remark":"","origin":false,"nSteps":10,"minStep":"12.0","maxStep":"60.0","steps":["12.0","16.0","20.0","25.0","30.0","35.0","40.0","45.0","50.0","60.0"],"group":"None","version":"v1.1.0"}],"interpreted":true,"name":"SS5.14B","coreAzi":30,"coreDip":38,"bedStrike":197,"bedDip":23,"data":[{"visible":true,"include":false,"step":"0.0","x":-1280.4761904761904,"y":-881.5428571428572,"z":2475.809523809524,"a95":0.99,"info":"27/10/2014 at 22:37:38"},{"visible":true,"include":false,"step":"4.0","x":-1129.8095238095239,"y":-842.9809523809523,"z":2172,"a95":0.99,"info":"27/10/2014 at 22:37:38"},{"visible":true,"include":false,"step":"8.0","x":-895.895238095238,"y":-731.9047619047619,"z":1549.7142857142858,"a95":0.99,"info":"27/10/2014 at 22:37:38"},{"visible":true,"include":true,"step":"12.0","x":-591.6190476190476,"y":-665.3619047619047,"z":939.5809523809525,"a95":0.99,"info":"27/10/2014 at 22:37:38"},{"visible":true,"include":true,"step":"16.0","x":-439.23809523809524,"y":-388.29523809523806,"z":764.6380952380953,"a95":0.99,"info":"27/10/2014 at 22:37:38"},{"visible":true,"include":true,"step":"20.0","x":-380.1047619047619,"y":-297.9238095238095,"z":379.31428571428575,"a95":0.99,"info":"27/10/2014 at 22:37:38"},{"visible":true,"include":true,"step":"25.0","x":-524.8380952380952,"y":-278.02857142857147,"z":385.9238095238095,"a95":0.99,"info":"27/10/2014 at 22:37:38"},{"visible":true,"include":true,"step":"30.0","x":-346,"y":-439.4095238095238,"z":328.6190476190476,"a95":0.99,"info":"27/10/2014 at 22:37:38"},{"visible":true,"include":true,"step":"35.0","x":-321.2666666666667,"y":-346.51428571428573,"z":277.32380952380953,"a95":0.99,"info":"27/10/2014 at 22:37:38"},{"visible":true,"include":true,"step":"40.0","x":-478.8666666666667,"y":-319.31428571428575,"z":302.6095238095238,"a95":0.99,"info":"27/10/2014 at 22:37:38"},{"visible":true,"include":true,"step":"45.0","x":-172.94285714285715,"y":-288.6,"z":117.15238095238094,"a95":0.99,"info":"27/10/2014 at 22:37:38"},{"visible":true,"include":true,"step":"50.0","x":-415.42857142857144,"y":-406.57142857142856,"z":256.7904761904762,"a95":0.99,"info":"27/10/2014 at 22:37:38"},{"visible":true,"include":true,"step":"60.0","x":-314.3904761904762,"y":-314.4761904761905,"z":239.0190476190476,"a95":0.99,"info":"27/10/2014 at 22:37:38"},{"visible":false,"include":false,"step":"70.0","x":-612.0761904761905,"y":-257.62857142857143,"z":-54.87428571428571,"a95":0.99,"info":"27/10/2014 at 22:37:38"},{"visible":false,"include":false,"step":"80.0","x":-372.4190476190476,"y":-457.2095238095238,"z":16.400952380952383,"a95":0.99,"info":"27/10/2014 at 22:37:38"},{"visible":false,"include":false,"step":"90.0","x":-479.8857142857143,"y":-338.56190476190477,"z":124.81904761904761,"a95":0.99,"info":"27/10/2014 at 22:37:38"},{"visible":false,"include":false,"step":"100.0","x":-218.75238095238097,"y":108.37142857142858,"z":-34.434285714285714,"a95":0.99,"info":"27/10/2014 at 22:37:38"}]},{"version":"v1.1.0","exported":"2016-10-11T14:42:10.628Z","volume":10.5,"added":"2016-10-11T14:35:29.533Z","format":"Utrecht","demagType":"Unknown","strat":"8","patch":1.1,"GEO":[{"dec":1.4416163422358181,"inc":52.71934416271135,"MAD":7.222262595494877,"cm":[571.866970522259,135.84491829013055,571.2923837066328],"intensity":1492.134967693626,"type":"dir","forced":false,"remark":"","origin":false,"nSteps":9,"minStep":"0.0","maxStep":"45.0","steps":["0.0","4.0","8.0","12.0","16.0","20.0","25.0","40.0","45.0"],"group":"None","version":"v1.1.0"}],"TECT":[{"dec":338.7237707113002,"inc":41.9856808010684,"MAD":7.222262595494887,"cm":[636.2640186103329,-74.7883350713958,511.30760315082676],"intensity":1492.134967693626,"type":"dir","forced":false,"remark":"","origin":false,"nSteps":9,"minStep":"0.0","maxStep":"45.0","steps":["0.0","4.0","8.0","12.0","16.0","20.0","25.0","40.0","45.0"],"group":"None","version":"v1.1.0"}],"interpreted":true,"name":"SS5.15A","coreAzi":50,"coreDip":17,"bedStrike":197,"bedDip":23,"data":[{"visible":true,"include":false,"step":"0.0","x":-1065.142857142857,"y":-822.6857142857143,"z":1242.5714285714287,"a95":0.99,"info":"08/10/2014 at 23:54:54"},{"visible":true,"include":true,"step":"4.0","x":-902.4952380952382,"y":-681.4,"z":1020.952380952381,"a95":0.99,"info":"08/10/2014 at 23:54:54"},{"visible":true,"include":true,"step":"8.0","x":-589.3428571428572,"y":-450.8666666666667,"z":845.2190476190475,"a95":0.99,"info":"08/10/2014 at 23:54:54"},{"visible":true,"include":true,"step":"12.0","x":-345.0190476190476,"y":-327.84761904761905,"z":605.2857142857143,"a95":0.99,"info":"08/10/2014 at 23:54:54"},{"visible":true,"include":true,"step":"16.0","x":-285.3904761904762,"y":-263.32380952380953,"z":518.9619047619047,"a95":0.99,"info":"08/10/2014 at 23:54:54"},{"visible":true,"include":true,"step":"20.0","x":-137.4952380952381,"y":-223.40952380952382,"z":464.8666666666667,"a95":0.99,"info":"08/10/2014 at 23:54:54"},{"visible":true,"include":true,"step":"25.0","x":-66.02952380952381,"y":-210.23809523809524,"z":357.23809523809524,"a95":0.99,"info":"08/10/2014 at 23:54:54"},{"visible":true,"include":false,"step":"30.0","x":-133.94285714285715,"y":-210.1142857142857,"z":209.31428571428575,"a95":0.99,"info":"08/10/2014 at 23:54:54"},{"visible":false,"include":false,"step":"35.0","x":-263.6095238095238,"y":-143.2761904761905,"z":339.34285714285716,"a95":0.99,"info":"08/10/2014 at 23:54:54"},{"visible":true,"include":true,"step":"40.0","x":-99.61904761904762,"y":-34.09047619047619,"z":260.1714285714286,"a95":0.99,"info":"08/10/2014 at 23:54:54"},{"visible":true,"include":true,"step":"45.0","x":-185.35238095238097,"y":-142.94285714285715,"z":247.3904761904762,"a95":0.99,"info":"08/10/2014 at 23:54:54"},{"visible":false,"include":false,"step":"50.0","x":7.988476190476191,"y":-324.8666666666667,"z":118.76190476190476,"a95":0.99,"info":"08/10/2014 at 23:54:54"},{"visible":false,"include":false,"step":"60.0","x":-194.8,"y":-260.7142857142857,"z":162.5047619047619,"a95":0.99,"info":"08/10/2014 at 23:54:54"},{"visible":false,"include":false,"step":"70.0","x":-238.54285714285712,"y":-210.45714285714288,"z":-63.640952380952385,"a95":0.99,"info":"08/10/2014 at 23:54:54"},{"visible":false,"include":false,"step":"80.0","x":-131.7238095238095,"y":-336.1333333333333,"z":-9.35504761904762,"a95":0.99,"info":"08/10/2014 at 23:54:54"},{"visible":false,"include":false,"step":"90.0","x":-46.72,"y":-36.166666666666664,"z":-55.595238095238095,"a95":0.99,"info":"08/10/2014 at 23:54:54"},{"visible":false,"include":false,"step":"100.0","x":-195.62857142857143,"y":-251.1904761904762,"z":-68.1257142857143,"a95":0.99,"info":"08/10/2014 at 23:54:54"}]},{"version":"v1.1.0","exported":"2016-10-11T14:42:10.628Z","volume":10.5,"added":"2016-10-11T14:35:29.533Z","format":"Utrecht","demagType":"Unknown","strat":"1","patch":1.1,"GEO":[{"dec":333.54128019362815,"inc":34.00552789869174,"MAD":7.4137807246004535,"cm":[5.329070518200751e-15,3.375077994860476e-14,0],"intensity":780.8805440246805,"type":"dir","forced":true,"remark":"","origin":false,"nSteps":7,"minStep":"16.0","maxStep":"50.0","steps":["16.0","20.0","25.0","30.0","35.0","45.0","50.0"],"group":"None","version":"v1.1.0"}],"TECT":[{"dec":325.98800290978653,"inc":16.97881044256267,"MAD":7.413780724600447,"cm":[1.7763568394002505e-14,3.730349362740526e-14,6.217248937900877e-15],"intensity":780.8805440246805,"type":"dir","forced":true,"remark":"","origin":false,"nSteps":7,"minStep":"16.0","maxStep":"50.0","steps":["16.0","20.0","25.0","30.0","35.0","45.0","50.0"],"group":"None","version":"v1.1.0"}],"interpreted":true,"name":"SS5.16A","coreAzi":7,"coreDip":12,"bedStrike":197,"bedDip":23,"data":[{"visible":true,"include":false,"step":"0.0","x":-729.4666666666666,"y":-158.84761904761905,"z":960.7619047619048,"a95":0.99,"info":"09/10/2014 at 05:24:56"},{"visible":true,"include":false,"step":"4.0","x":-635.5428571428571,"y":-179.88571428571427,"z":941.8857142857142,"a95":0.99,"info":"09/10/2014 at 05:24:56"},{"visible":true,"include":false,"step":"8.0","x":-435.9047619047619,"y":-176.88571428571427,"z":743.4190476190475,"a95":0.99,"info":"09/10/2014 at 05:24:56"},{"visible":true,"include":false,"step":"12.0","x":-282.95238095238096,"y":-179.07619047619048,"z":520.8285714285714,"a95":0.99,"info":"09/10/2014 at 05:24:56"},{"visible":true,"include":true,"step":"16.0","x":-208.03809523809525,"y":-173.9904761904762,"z":443.0571428571429,"a95":0.99,"info":"09/10/2014 at 05:24:56"},{"visible":true,"include":true,"step":"20.0","x":-183.01904761904763,"y":-206.36190476190478,"z":360.8285714285714,"a95":0.99,"info":"09/10/2014 at 05:24:56"},{"visible":true,"include":true,"step":"25.0","x":-157.62857142857143,"y":-176.05714285714285,"z":284.18095238095236,"a95":0.99,"info":"09/10/2014 at 05:24:56"},{"visible":true,"include":true,"step":"30.0","x":-139.59047619047618,"y":-154.48571428571427,"z":234.41904761904763,"a95":0.99,"info":"09/10/2014 at 05:24:56"},{"visible":true,"include":true,"step":"35.0","x":-60.13047619047619,"y":-86.42095238095237,"z":157.4952380952381,"a95":0.99,"info":"09/10/2014 at 05:24:56"},{"visible":false,"include":false,"step":"40.0","x":-60.308571428571426,"y":-191.43809523809523,"z":300.68571428571425,"a95":0.99,"info":"09/10/2014 at 05:24:56"},{"visible":true,"include":true,"step":"45.0","x":-57.01523809523809,"y":-132.05714285714285,"z":158.94285714285715,"a95":0.99,"info":"09/10/2014 at 05:24:56"},{"visible":true,"include":true,"step":"50.0","x":-111.53333333333333,"y":-189.7238095238095,"z":169.6095238095238,"a95":0.99,"info":"09/10/2014 at 05:24:56"},{"visible":false,"include":false,"step":"60.0","x":28.962857142857143,"y":-69.64952380952381,"z":244.58095238095237,"a95":0.99,"info":"09/10/2014 at 05:24:56"},{"visible":false,"include":false,"step":"70.0","x":76.29047619047618,"y":-1.5675238095238095,"z":197.41904761904763,"a95":0.99,"info":"09/10/2014 at 05:24:56"},{"visible":false,"include":false,"step":"80.0","x":-2.6164761904761904,"y":-78.28285714285714,"z":127.54285714285714,"a95":0.99,"info":"09/10/2014 at 05:24:56"},{"visible":false,"include":false,"step":"90.0","x":45.55142857142857,"y":-50.58190476190477,"z":199.56190476190477,"a95":0.99,"info":"09/10/2014 at 05:24:56"},{"visible":false,"include":false,"step":"100.0","x":-56.02,"y":-74.74476190476192,"z":137.85714285714286,"a95":0.99,"info":"09/10/2014 at 05:24:56"}]},{"version":"v1.1.0","exported":"2016-10-11T14:42:10.628Z","volume":10.5,"added":"2016-10-11T14:35:29.534Z","format":"Utrecht","demagType":"Unknown","strat":"4","patch":1.1,"GEO":[{"dec":343.65686615958816,"inc":46.282249544523005,"MAD":13.556482535882148,"cm":[77.75005423304842,-81.32955758889794,105.14833346063546],"intensity":128.51129093040285,"type":"dir","forced":false,"remark":"","origin":false,"nSteps":4,"minStep":"12.0","maxStep":"30.0","steps":["12.0","16.0","25.0","30.0"],"group":"None","version":"v1.1.0"}],"TECT":[{"dec":329.40912251106425,"inc":31.122630562250464,"MAD":13.556482535882113,"cm":[87.42605135774458,-112.9783181206555,57.51804133502632],"intensity":128.51129093040282,"type":"dir","forced":false,"remark":"","origin":false,"nSteps":4,"minStep":"12.0","maxStep":"30.0","steps":["12.0","16.0","25.0","30.0"],"group":"None","version":"v1.1.0"}],"interpreted":true,"name":"SS5.17A","coreAzi":11,"coreDip":21,"bedStrike":197,"bedDip":23,"data":[{"visible":true,"include":false,"step":"0.0","x":-219.9238095238095,"y":-74.44857142857143,"z":242.41904761904763,"a95":0.99,"info":"27/10/2014 at 22:37:38"},{"visible":true,"include":false,"step":"4.0","x":-196.7238095238095,"y":-80.16285714285715,"z":232.61904761904762,"a95":0.99,"info":"27/10/2014 at 22:37:38"},{"visible":true,"include":false,"step":"8.0","x":-168.1809523809524,"y":-109.3047619047619,"z":177.92380952380952,"a95":0.99,"info":"27/10/2014 at 22:37:38"},{"visible":true,"include":true,"step":"12.0","x":-110.71428571428571,"y":-123,"z":153.5047619047619,"a95":0.99,"info":"27/10/2014 at 22:37:38"},{"visible":true,"include":true,"step":"16.0","x":-82.95238095238095,"y":-86.83333333333333,"z":113.4095238095238,"a95":0.99,"info":"27/10/2014 at 22:37:38"},{"visible":false,"include":false,"step":"20.0","x":-85.31809523809524,"y":-134.95238095238096,"z":51.513333333333335,"a95":0.99,"info":"27/10/2014 at 22:37:38"},{"visible":true,"include":true,"step":"25.0","x":-57.57333333333333,"y":-99.08571428571429,"z":59.80571428571429,"a95":0.99,"info":"27/10/2014 at 22:37:38"},{"visible":true,"include":true,"step":"30.0","x":-54.258095238095244,"y":-69.76380952380953,"z":51.06571428571429,"a95":0.99,"info":"27/10/2014 at 22:37:38"},{"visible":false,"include":false,"step":"35.0","x":-91.01809523809524,"y":-69.46666666666667,"z":38.43523809523809,"a95":0.99,"info":"27/10/2014 at 22:37:38"},{"visible":false,"include":false,"step":"40.0","x":-79.81142857142856,"y":-12.293333333333335,"z":50.679047619047616,"a95":0.99,"info":"27/10/2014 at 22:37:38"},{"visible":false,"include":false,"step":"45.0","x":-62.647619047619045,"y":-86.95904761904762,"z":9.645714285714286,"a95":0.99,"info":"27/10/2014 at 22:37:38"},{"visible":false,"include":false,"step":"50.0","x":-140.31428571428572,"y":-60.72380952380953,"z":51.798095238095236,"a95":0.99,"info":"27/10/2014 at 22:37:38"},{"visible":false,"include":false,"step":"60.0","x":-97.6952380952381,"y":-14.42952380952381,"z":-6.793714285714286,"a95":0.99,"info":"27/10/2014 at 22:37:38"},{"visible":false,"include":false,"step":"70.0","x":-52.44380952380952,"y":-9.617142857142857,"z":23.94952380952381,"a95":0.99,"info":"27/10/2014 at 22:37:38"},{"visible":false,"include":false,"step":"80.0","x":-111.19047619047619,"y":-69.29428571428572,"z":83.19142857142857,"a95":0.99,"info":"27/10/2014 at 22:37:38"},{"visible":false,"include":false,"step":"90.0","x":-66.71523809523809,"y":-51.10476190476191,"z":104.5047619047619,"a95":0.99,"info":"27/10/2014 at 22:37:38"},{"visible":false,"include":false,"step":"100.0","x":-58.13333333333333,"y":-140.44761904761904,"z":45.73047619047619,"a95":0.99,"info":"27/10/2014 at 22:37:38"}]},{"version":"v1.1.0","exported":"2016-10-11T14:42:10.628Z","volume":10.5,"added":"2016-10-11T14:35:29.534Z","format":"Utrecht","demagType":"Unknown","strat":null,"patch":1.1,"GEO":[{"dec":6.751191904255961,"inc":43.9229355218783,"MAD":15.95320306923071,"cm":[52.50972273695295,-158.81241847945586,310.05781741791196],"intensity":459.7636482421135,"type":"dir","forced":false,"remark":"","origin":false,"nSteps":13,"minStep":"180","maxStep":"520","steps":["180","210","240","270","290","330","350","370","400","420","440","490","520"],"group":"None","version":"v1.1.0"}],"TECT":[{"dec":348.239969363783,"inc":36.048632487407566,"MAD":15.953203069230735,"cm":[84.04365742803334,-261.95527133488383,220.06954549221823],"intensity":459.76364824211356,"type":"dir","forced":false,"remark":"","origin":false,"nSteps":13,"minStep":"180","maxStep":"520","steps":["180","210","240","270","290","330","350","370","400","420","440","490","520"],"group":"None","version":"v1.1.0"}],"interpreted":true,"name":"SS5.18A","coreAzi":75,"coreDip":57,"bedStrike":197,"bedDip":23,"data":[{"visible":true,"include":false,"step":"20","x":-550.8571428571429,"y":-666.3809523809524,"z":869.6190476190476,"a95":2.2,"info":"\"14-10-20\" at \"15:20\""},{"visible":true,"include":false,"step":"100","x":-501.9047619047619,"y":-575.6190476190476,"z":770.7619047619048,"a95":2.2,"info":"\"14-10-20\" at \"18:12\""},{"visible":true,"include":false,"step":"150","x":-393.6190476190476,"y":-349.7142857142857,"z":490.57142857142856,"a95":2,"info":"\"14-10-20\" at \"21:35\""},{"visible":true,"include":true,"step":"180","x":-337.23809523809524,"y":-288,"z":387.5238095238095,"a95":2.1,"info":"\"14-10-21\" at \"00:28\""},{"visible":true,"include":true,"step":"210","x":-301.04761904761904,"y":-231.33333333333334,"z":345.23809523809524,"a95":2,"info":"\"14-10-21\" at \"16:33\""},{"visible":true,"include":true,"step":"240","x":-295.3333333333333,"y":-213.14285714285714,"z":293.7142857142857,"a95":2,"info":"\"14-10-21\" at \"19:31\""},{"visible":true,"include":true,"step":"270","x":-303.9047619047619,"y":-138.47619047619048,"z":239.71428571428572,"a95":2,"info":"\"14-10-21\" at \"22:36\""},{"visible":true,"include":true,"step":"290","x":-310.2857142857143,"y":-78.47619047619048,"z":181.33333333333334,"a95":2.2,"info":"\"14-10-22\" at \"15:07\""},{"visible":false,"include":false,"step":"310","x":-282,"y":-59.333333333333336,"z":226.57142857142858,"a95":2.1,"info":"\"14-10-22\" at \"17:53\""},{"visible":true,"include":true,"step":"330","x":-290.2857142857143,"y":-61.714285714285715,"z":152.38095238095238,"a95":2,"info":"\"14-10-22\" at \"21:03\""},{"visible":true,"include":true,"step":"350","x":-265.14285714285717,"y":-16,"z":125.04761904761905,"a95":2,"info":"\"14-10-23\" at \"15:17\""},{"visible":true,"include":true,"step":"370","x":-294.4761904761905,"y":-43.61904761904762,"z":96.57142857142857,"a95":2,"info":"\"14-10-23\" at \"18:17\""},{"visible":true,"include":true,"step":"400","x":-297.3333333333333,"y":-26.095238095238095,"z":97.04761904761905,"a95":3.1,"info":"\"14-10-23\" at \"21:18\""},{"visible":true,"include":true,"step":"420","x":-309.04761904761904,"y":-32.57142857142857,"z":115.23809523809524,"a95":4.8,"info":"\"14-10-24\" at \"15:52\""},{"visible":true,"include":true,"step":"440","x":-318.4761904761905,"y":-28.952380952380953,"z":135.8095238095238,"a95":4.5,"info":"\"14-10-24\" at \"19:06\""},{"visible":false,"include":false,"step":"470","x":-224,"y":105.80952380952381,"z":-123.04761904761905,"a95":5,"info":"\"14-10-24\" at \"21:45\""},{"visible":true,"include":true,"step":"490","x":-196.76190476190476,"y":-32.285714285714285,"z":167.23809523809524,"a95":6.5,"info":"\"14-10-25\" at \"00:41\""},{"visible":true,"include":true,"step":"520","x":-200.28571428571428,"y":-3.0476190476190474,"z":53.714285714285715,"a95":4.8,"info":"\"14-10-25\" at \"03:20\""},{"visible":false,"include":false,"step":"550","x":-164.85714285714286,"y":-85.42857142857143,"z":39.80952380952381,"a95":4.8,"info":"\"14-10-25\" at \"06:00\""},{"visible":true,"include":false,"step":"580","x":-162.76190476190476,"y":42.095238095238095,"z":20.285714285714285,"a95":5.3,"info":"\"14-10-26\" at \"04:49\""},{"visible":false,"include":false,"step":"610","x":-50.438095238095244,"y":36.8,"z":-52.2,"a95":11.2,"info":"\"14-10-26\" at \"06:43\""}]},{"version":"v1.1.0","exported":"2016-10-11T14:42:10.628Z","volume":10.5,"added":"2016-10-11T14:35:29.534Z","format":"Utrecht","demagType":"Unknown","strat":"5","patch":1.1,"GEO":[],"TECT":[],"interpreted":false,"name":"SS5.18B","coreAzi":75,"coreDip":57,"bedStrike":197,"bedDip":23,"data":[{"visible":true,"include":false,"step":"0.0","x":-95.81904761904762,"y":-246.84761904761905,"z":384.45714285714286,"a95":0.99,"info":"27/10/2014 at 22:37:38"},{"visible":true,"include":false,"step":"4.0","x":-82.80285714285714,"y":-243.52380952380952,"z":360.35238095238094,"a95":0.99,"info":"27/10/2014 at 22:37:38"},{"visible":true,"include":false,"step":"8.0","x":-53.913333333333334,"y":-230.58095238095237,"z":266.16190476190474,"a95":0.99,"info":"27/10/2014 at 22:37:38"},{"visible":true,"include":false,"step":"12.0","x":-14.218095238095238,"y":-176.04761904761904,"z":181.74285714285713,"a95":0.99,"info":"27/10/2014 at 22:37:38"},{"visible":true,"include":false,"step":"16.0","x":-51.603809523809524,"y":-89.07714285714285,"z":201.6095238095238,"a95":0.99,"info":"27/10/2014 at 22:37:38"},{"visible":true,"include":false,"step":"20.0","x":9.814285714285713,"y":-174.9142857142857,"z":121.42857142857143,"a95":0.99,"info":"27/10/2014 at 22:37:38"},{"visible":true,"include":false,"step":"25.0","x":-16.82095238095238,"y":-82.20285714285714,"z":111.6952380952381,"a95":0.99,"info":"27/10/2014 at 22:37:38"},{"visible":true,"include":false,"step":"30.0","x":-24.798095238095236,"y":-106.21904761904761,"z":60.27809523809523,"a95":0.99,"info":"27/10/2014 at 22:37:38"},{"visible":true,"include":false,"step":"35.0","x":2.781142857142857,"y":-50.40190476190477,"z":110.38095238095238,"a95":0.99,"info":"27/10/2014 at 22:37:38"},{"visible":true,"include":false,"step":"40.0","x":-42.875238095238096,"y":-79.56952380952382,"z":20.091428571428573,"a95":0.99,"info":"27/10/2014 at 22:37:38"},{"visible":true,"include":false,"step":"45.0","x":-21.697142857142858,"y":-2.155809523809524,"z":64.79142857142857,"a95":0.99,"info":"27/10/2014 at 22:37:38"},{"visible":true,"include":false,"step":"50.0","x":25.26666666666667,"y":-123.19999999999999,"z":49.01714285714285,"a95":0.99,"info":"27/10/2014 at 22:37:38"},{"visible":true,"include":false,"step":"60.0","x":-70.33904761904762,"y":-94.7647619047619,"z":79.37809523809524,"a95":0.99,"info":"27/10/2014 at 22:37:38"},{"visible":true,"include":false,"step":"70.0","x":-1.1848571428571428,"y":-16.231428571428573,"z":62.78952380952381,"a95":0.99,"info":"27/10/2014 at 22:37:38"},{"visible":true,"include":false,"step":"80.0","x":-108.4,"y":-118.4,"z":41.764761904761905,"a95":0.99,"info":"27/10/2014 at 22:37:38"},{"visible":true,"include":false,"step":"90.0","x":-139.35238095238097,"y":89.23904761904762,"z":22.023809523809526,"a95":0.99,"info":"27/10/2014 at 22:37:38"},{"visible":true,"include":false,"step":"100.0","x":-197.6095238095238,"y":-40.87714285714286,"z":-23.676190476190477,"a95":0.99,"info":"27/10/2014 at 22:37:38"}]}]
