# Supplementary material for: Paleomagnetic constraints on the timing and distribution of Cenozoic rotations in Central and Eastern Anatolia
Source: Copernicus journal article supplement (doi:10.5194/se-9-295-2018), 2018-03-21
Supplement: Supplementary file 2 [file se-9-295-2018-supplement.zip › se-2017-66_DATA_dir files/dir files Sivas/SS06.dir]

[{"version":"v1.1.0","exported":"2017-05-22T10:37:48.388Z","volume":10.5,"added":"2017-05-22T10:34:27.042Z","format":"Utrecht","demagType":"Unknown","strat":null,"patch":1.1,"GEO":[{"dec":103.52953265699392,"inc":-21.20157801807622,"MAD":11.399435072596455,"cm":[1.0658141036401503e-14,7.283063041541027e-14,0],"intensity":2311.780264413057,"type":"GC","origin":false,"forced":true,"remark":"","nSteps":13,"minStep":"100","maxStep":"420","steps":["100","150","180","210","240","270","290","310","330","350","370","400","420"],"group":"None","version":"v1.1.0"}],"TECT":[{"dec":68.72173316120978,"inc":-29.351603811077315,"MAD":11.399435072596358,"cm":[7.815970093361102e-14,1.8829382497642655e-13,3.552713678800501e-15],"intensity":2311.7802644130575,"type":"GC","origin":false,"forced":true,"remark":"","nSteps":13,"minStep":"100","maxStep":"420","steps":["100","150","180","210","240","270","290","310","330","350","370","400","420"],"group":"None","version":"v1.1.0"}],"interpreted":true,"name":"SS6.1A","coreAzi":117,"coreDip":51,"bedStrike":80,"bedDip":65,"data":[{"visible":true,"include":false,"step":"20","x":-168.28571428571428,"y":-974.5714285714286,"z":-719.5238095238095,"a95":2.3,"info":"\"14-10-13\" at \"17:01\""},{"visible":true,"include":true,"step":"100","x":294.76190476190476,"y":-459.5238095238095,"z":-1369.2380952380952,"a95":2.9,"info":"\"14-10-13\" at \"19:55\""},{"visible":true,"include":true,"step":"150","x":409.23809523809524,"y":-406.0952380952381,"z":-1593.904761904762,"a95":2.9,"info":"\"14-10-13\" at \"22:04\""},{"visible":true,"include":true,"step":"180","x":439.6190476190476,"y":-332.85714285714283,"z":-1614.4761904761904,"a95":2.5,"info":"\"14-10-14\" at \"15:13\""},{"visible":true,"include":true,"step":"210","x":365.3333333333333,"y":-464.1904761904762,"z":-1446.7619047619048,"a95":2.6,"info":"\"14-10-14\" at \"18:18\""},{"visible":true,"include":true,"step":"240","x":283.6190476190476,"y":-466.4761904761905,"z":-1381.7142857142858,"a95":2.6,"info":"\"14-10-14\" at \"21:27\""},{"visible":true,"include":true,"step":"270","x":318.76190476190476,"y":-433.9047619047619,"z":-1363.7142857142858,"a95":2.5,"info":"\"14-10-15\" at \"15:20\""},{"visible":true,"include":true,"step":"290","x":244.0952380952381,"y":-519.4285714285714,"z":-1275.7142857142858,"a95":2.6,"info":"\"14-10-15\" at \"18:27\""},{"visible":true,"include":true,"step":"310","x":241.71428571428572,"y":-570.8571428571429,"z":-1184.6666666666667,"a95":2.6,"info":"\"14-10-15\" at \"21:41\""},{"visible":true,"include":true,"step":"330","x":250.76190476190476,"y":-528.7619047619048,"z":-1077.2380952380952,"a95":2.6,"info":"\"14-10-16\" at \"15:03\""},{"visible":true,"include":true,"step":"350","x":151.14285714285714,"y":-495.9047619047619,"z":-951.3333333333334,"a95":2.7,"info":"\"14-10-16\" at \"18:59\""},{"visible":true,"include":true,"step":"370","x":218.57142857142858,"y":-572.1904761904761,"z":-919.4285714285714,"a95":2.5,"info":"\"14-10-16\" at \"22:08\""},{"visible":true,"include":true,"step":"400","x":132.38095238095238,"y":-420.1904761904762,"z":-758.3809523809524,"a95":2.7,"info":"\"14-10-17\" at \"13:42\""},{"visible":true,"include":true,"step":"420","x":83.52380952380952,"y":-435.8095238095238,"z":-728.2857142857143,"a95":2.6,"info":"\"14-10-17\" at \"16:50\""},{"visible":true,"include":false,"step":"440","x":115.71428571428571,"y":-437.8095238095238,"z":-765.4285714285714,"a95":2.6,"info":"\"14-10-17\" at \"20:02\""},{"visible":true,"include":false,"step":"470","x":31.80952380952381,"y":-412.76190476190476,"z":-733.3333333333334,"a95":2.6,"info":"\"14-10-17\" at \"23:17\""},{"visible":true,"include":false,"step":"490","x":75.14285714285714,"y":-424.76190476190476,"z":-650.2857142857143,"a95":2.5,"info":"\"14-10-18\" at \"11:38\""},{"visible":true,"include":false,"step":"520","x":100.28571428571429,"y":-459.8095238095238,"z":-609.6190476190476,"a95":2.6,"info":"\"14-10-18\" at \"14:40\""},{"visible":true,"include":false,"step":"550","x":86.66666666666667,"y":-295.9047619047619,"z":-530.5714285714286,"a95":2.6,"info":"\"14-10-19\" at \"09:33\""},{"visible":true,"include":false,"step":"580","x":-39.04761904761905,"y":-202.0952380952381,"z":-421.9047619047619,"a95":2.8,"info":"\"14-10-19\" at \"11:36\""},{"visible":true,"include":false,"step":"610","x":4.285714285714286,"y":76,"z":-84.47619047619048,"a95":4.3,"info":"\"14-10-19\" at \"15:00\""},{"visible":true,"include":false,"step":"640","x":-39.23809523809524,"y":272.95238095238096,"z":42.76190476190476,"a95":2.3,"info":"\"14-10-19\" at \"18:46\""}]},{"version":"v1.1.0","exported":"2017-05-22T10:37:48.389Z","volume":10.5,"added":"2017-05-22T10:34:27.043Z","format":"Utrecht","demagType":"Unknown","strat":null,"patch":1.1,"GEO":[{"dec":60.39528703140121,"inc":-18.59827136072042,"MAD":10.376079008826814,"cm":[-7.460698725481052e-14,-5.3290705182007514e-14,0],"intensity":2475.3139730761673,"type":"GC","origin":false,"forced":true,"remark":"","nSteps":11,"minStep":"150","maxStep":"400","steps":["150","180","210","240","270","290","310","330","350","370","400"],"group":"None","version":"v1.1.0"}],"TECT":[{"dec":234.6264159723355,"inc":-8.82554059981581,"MAD":10.376079008826965,"cm":[0,-5.3290705182007514e-14,-4.707345624410664e-14],"intensity":2475.3139730761673,"type":"GC","origin":false,"forced":true,"remark":"","nSteps":11,"minStep":"150","maxStep":"400","steps":["150","180","210","240","270","290","310","330","350","370","400"],"group":"None","version":"v1.1.0"}],"interpreted":true,"name":"SS6.2A","coreAzi":96,"coreDip":52,"bedStrike":80,"bedDip":65,"data":[{"visible":true,"include":false,"step":"20","x":-614.3809523809524,"y":-928.2857142857143,"z":-525.8095238095239,"a95":2.1,"info":"\"14-10-20\" at \"15:22\""},{"visible":true,"include":false,"step":"100","x":-103.9047619047619,"y":-446.0952380952381,"z":-1031.6190476190477,"a95":2.5,"info":"\"14-10-20\" at \"18:14\""},{"visible":true,"include":true,"step":"150","x":363.9047619047619,"y":-111.14285714285714,"z":-1505.3333333333333,"a95":2.5,"info":"\"14-10-20\" at \"21:37\""},{"visible":true,"include":true,"step":"180","x":244.76190476190476,"y":-201.33333333333334,"z":-1363.2380952380952,"a95":2.6,"info":"\"14-10-21\" at \"00:31\""},{"visible":true,"include":true,"step":"210","x":222.28571428571428,"y":-136,"z":-1340.095238095238,"a95":2.4,"info":"\"14-10-21\" at \"16:35\""},{"visible":true,"include":true,"step":"240","x":165.42857142857142,"y":-315.9047619047619,"z":-1209.5238095238096,"a95":2.4,"info":"\"14-10-21\" at \"19:33\""},{"visible":true,"include":true,"step":"270","x":96.66666666666667,"y":-295.8095238095238,"z":-1061.3333333333333,"a95":2.4,"info":"\"14-10-21\" at \"22:38\""},{"visible":true,"include":true,"step":"290","x":121.14285714285714,"y":-282.1904761904762,"z":-1062.952380952381,"a95":2.6,"info":"\"14-10-22\" at \"15:10\""},{"visible":true,"include":true,"step":"310","x":65.61904761904762,"y":-256,"z":-1012.1904761904761,"a95":2.5,"info":"\"14-10-22\" at \"17:55\""},{"visible":true,"include":true,"step":"330","x":69.04761904761905,"y":-306.76190476190476,"z":-1049.904761904762,"a95":2.4,"info":"\"14-10-22\" at \"21:06\""},{"visible":true,"include":true,"step":"350","x":96.38095238095238,"y":-331.5238095238095,"z":-1062.095238095238,"a95":2.6,"info":"\"14-10-23\" at \"15:20\""},{"visible":true,"include":true,"step":"370","x":50.38095238095238,"y":-316.0952380952381,"z":-973.8095238095239,"a95":2.5,"info":"\"14-10-23\" at \"18:19\""},{"visible":true,"include":true,"step":"400","x":12.952380952380953,"y":-308,"z":-904.952380952381,"a95":2.6,"info":"\"14-10-23\" at \"21:20\""},{"visible":true,"include":false,"step":"420","x":-69.80952380952381,"y":-230.28571428571428,"z":-850,"a95":2.5,"info":"\"14-10-24\" at \"15:54\""},{"visible":true,"include":false,"step":"440","x":-107.80952380952381,"y":-283.04761904761904,"z":-798.5714285714286,"a95":2.4,"info":"\"14-10-24\" at \"19:08\""},{"visible":true,"include":false,"step":"470","x":-152.28571428571428,"y":-200.95238095238096,"z":-760.3809523809524,"a95":2.5,"info":"\"14-10-24\" at \"21:47\""},{"visible":true,"include":false,"step":"490","x":-6.571428571428571,"y":-254.76190476190476,"z":-625.047619047619,"a95":2.4,"info":"\"14-10-25\" at \"00:43\""},{"visible":true,"include":false,"step":"520","x":12.857142857142858,"y":-200.28571428571428,"z":-649.9047619047619,"a95":2.7,"info":"\"14-10-25\" at \"03:22\""},{"visible":true,"include":false,"step":"550","x":-65.9047619047619,"y":-165.52380952380952,"z":-641.6190476190476,"a95":2.6,"info":"\"14-10-25\" at \"06:01\""},{"visible":true,"include":false,"step":"580","x":28.095238095238095,"y":-302.85714285714283,"z":-459.42857142857144,"a95":2.5,"info":"\"14-10-26\" at \"04:51\""},{"visible":true,"include":false,"step":"610","x":56.285714285714285,"y":-75.04761904761905,"z":-436.4761904761905,"a95":2.7,"info":"\"14-10-26\" at \"06:45\""}]},{"version":"v1.1.0","exported":"2017-05-22T10:37:48.389Z","volume":10.5,"added":"2017-05-22T10:34:27.043Z","format":"Utrecht","demagType":"Unknown","strat":null,"patch":1.1,"GEO":[{"dec":58.88056208199822,"inc":-12.972772569236264,"MAD":9.778776618441338,"cm":[0,2.1316282072803006e-14,0],"intensity":3127.2192975785047,"type":"GC","origin":false,"forced":true,"remark":"","nSteps":10,"minStep":"100","maxStep":"350","steps":["100","150","180","210","240","270","290","310","330","350"],"group":"None","version":"v1.1.0"}],"TECT":[{"dec":238.84071550158365,"inc":-12.905713287999676,"MAD":9.778776618442036,"cm":[-1.2079226507921703e-13,-1.4921397450962104e-13,-1.7763568394002505e-15],"intensity":3127.2192975785038,"type":"GC","origin":false,"forced":true,"remark":"","nSteps":10,"minStep":"100","maxStep":"350","steps":["100","150","180","210","240","270","290","310","330","350"],"group":"None","version":"v1.1.0"}],"interpreted":true,"name":"SS6.3A","coreAzi":26,"coreDip":51,"bedStrike":80,"bedDip":65,"data":[{"visible":true,"include":false,"step":"20","x":214.85714285714286,"y":-213.61904761904762,"z":1042.4761904761904,"a95":2.9,"info":"\"14-10-13\" at \"17:03\""},{"visible":true,"include":true,"step":"100","x":818.7619047619048,"y":-136.1904761904762,"z":-1633.6190476190477,"a95":2.8,"info":"\"14-10-13\" at \"19:57\""},{"visible":true,"include":true,"step":"150","x":983.7142857142857,"y":34.857142857142854,"z":-2153.3333333333335,"a95":2.9,"info":"\"14-10-13\" at \"22:06\""},{"visible":true,"include":true,"step":"180","x":914.8571428571429,"y":-83.9047619047619,"z":-2233.2380952380954,"a95":2.6,"info":"\"14-10-14\" at \"15:15\""},{"visible":true,"include":true,"step":"210","x":1043.8095238095239,"y":-87.80952380952381,"z":-2306.7619047619046,"a95":2.6,"info":"\"14-10-14\" at \"18:20\""},{"visible":true,"include":true,"step":"240","x":944.0952380952381,"y":-166.76190476190476,"z":-1707.8095238095239,"a95":2.6,"info":"\"14-10-14\" at \"21:29\""},{"visible":true,"include":true,"step":"270","x":881.6190476190476,"y":-222,"z":-1499.142857142857,"a95":2.6,"info":"\"14-10-15\" at \"15:22\""},{"visible":true,"include":true,"step":"290","x":809.8095238095239,"y":-418,"z":-1290.5714285714287,"a95":2.5,"info":"\"14-10-15\" at \"18:29\""},{"visible":true,"include":true,"step":"310","x":849.047619047619,"y":-466.3809523809524,"z":-1158,"a95":2.5,"info":"\"14-10-15\" at \"21:43\""},{"visible":true,"include":true,"step":"330","x":717.5238095238095,"y":-435.6190476190476,"z":-1062,"a95":2.5,"info":"\"14-10-16\" at \"15:05\""},{"visible":true,"include":true,"step":"350","x":764.1904761904761,"y":-508.2857142857143,"z":-985.2380952380952,"a95":2.6,"info":"\"14-10-16\" at \"19:01\""},{"visible":true,"include":false,"step":"370","x":541.9047619047619,"y":-516.4761904761905,"z":-837.3333333333334,"a95":2.6,"info":"\"14-10-16\" at \"22:10\""},{"visible":true,"include":false,"step":"400","x":324.6666666666667,"y":-477.42857142857144,"z":-593.3333333333334,"a95":2.7,"info":"\"14-10-17\" at \"13:44\""},{"visible":true,"include":false,"step":"420","x":243.42857142857142,"y":-487.7142857142857,"z":-542.1904761904761,"a95":2.6,"info":"\"14-10-17\" at \"16:52\""},{"visible":true,"include":false,"step":"440","x":394.0952380952381,"y":-671.5238095238095,"z":-504.6666666666667,"a95":2.3,"info":"\"14-10-17\" at \"20:04\""},{"visible":true,"include":false,"step":"470","x":341.04761904761904,"y":-633.2380952380952,"z":-397.3333333333333,"a95":2.6,"info":"\"14-10-17\" at \"23:19\""},{"visible":true,"include":false,"step":"490","x":424.6666666666667,"y":-421.23809523809524,"z":-375.3333333333333,"a95":2.3,"info":"\"14-10-18\" at \"11:40\""},{"visible":true,"include":false,"step":"520","x":442.1904761904762,"y":-478.6666666666667,"z":-287.23809523809524,"a95":2.3,"info":"\"14-10-18\" at \"14:42\""},{"visible":true,"include":false,"step":"550","x":410.0952380952381,"y":-678.2857142857143,"z":-396.0952380952381,"a95":2.4,"info":"\"14-10-19\" at \"09:35\""},{"visible":true,"include":false,"step":"580","x":197.42857142857142,"y":-191.23809523809524,"z":-332.76190476190476,"a95":3.5,"info":"\"14-10-19\" at \"11:38\""},{"visible":true,"include":false,"step":"610","x":66.76190476190476,"y":-702.1904761904761,"z":34.76190476190476,"a95":2,"info":"\"14-10-19\" at \"15:02\""},{"visible":true,"include":false,"step":"640","x":-351.42857142857144,"y":186.1904761904762,"z":-310.76190476190476,"a95":2.2,"info":"\"14-10-19\" at \"18:49\""}]},{"version":"v1.1.0","exported":"2017-05-22T10:37:48.389Z","volume":10.5,"added":"2017-05-22T10:34:27.045Z","format":"Utrecht","demagType":"Unknown","strat":"7","patch":1.1,"GEO":[{"dec":170.50695305447266,"inc":-19.54530294604152,"MAD":14.32318385970092,"cm":[-5.861977570020827e-14,1.0658141036401503e-14,0],"intensity":953.9187302149357,"type":"GC","origin":false,"forced":true,"remark":"","nSteps":14,"minStep":"10.0","maxStep":"100.0","steps":["10.0","15.0","20.0","25.0","30.0","35.0","40.0","45.0","50.0","60.0","70.0","80.0","90.0","100.0"],"group":"None","version":"v1.1.0"}],"TECT":[{"dec":175.01367142820732,"inc":-84.5251892805831,"MAD":14.323183859700913,"cm":[-1.9539925233402755e-14,-2.1316282072803006e-14,-4.796163466380676e-14],"intensity":953.9187302149362,"type":"GC","origin":false,"forced":true,"remark":"","nSteps":14,"minStep":"10.0","maxStep":"100.0","steps":["10.0","15.0","20.0","25.0","30.0","35.0","40.0","45.0","50.0","60.0","70.0","80.0","90.0","100.0"],"group":"None","version":"v1.1.0"}],"interpreted":true,"name":"SS6.4B","coreAzi":26,"coreDip":50,"bedStrike":80,"bedDip":65,"data":[{"visible":true,"include":false,"step":"0.0","x":39.6552380952381,"y":-778.7428571428571,"z":2254.3809523809523,"a95":0.99,"info":"21/09/2014 at 03:34:28"},{"visible":true,"include":false,"step":"5.0","x":334.552380952381,"y":-514.8285714285714,"z":-220.50476190476192,"a95":0.99,"info":"21/09/2014 at 03:34:28"},{"visible":true,"include":true,"step":"10.0","x":331.8,"y":-550.5904761904761,"z":-618.0857142857143,"a95":0.99,"info":"21/09/2014 at 03:34:28"},{"visible":true,"include":true,"step":"15.0","x":381.7809523809524,"y":-371.54285714285714,"z":-343.4761904761905,"a95":0.99,"info":"21/09/2014 at 03:34:28"},{"visible":true,"include":true,"step":"20.0","x":266.7142857142857,"y":-126.26666666666667,"z":-204.8,"a95":0.99,"info":"21/09/2014 at 03:34:28"},{"visible":true,"include":true,"step":"25.0","x":260.0857142857143,"y":-248.49523809523808,"z":-210.96190476190475,"a95":0.99,"info":"21/09/2014 at 03:34:28"},{"visible":true,"include":true,"step":"30.0","x":278.6,"y":-57.56952380952381,"z":-121.60952380952382,"a95":0.99,"info":"21/09/2014 at 03:34:28"},{"visible":true,"include":true,"step":"35.0","x":384.2190476190476,"y":35.798095238095236,"z":-285.4761904761905,"a95":0.99,"info":"21/09/2014 at 03:34:28"},{"visible":true,"include":true,"step":"40.0","x":211.2952380952381,"y":-171.47619047619048,"z":-329.06666666666666,"a95":0.99,"info":"21/09/2014 at 03:34:28"},{"visible":true,"include":true,"step":"45.0","x":498.1904761904762,"y":229.24761904761903,"z":-188.05714285714285,"a95":0.99,"info":"21/09/2014 at 03:34:28"},{"visible":true,"include":true,"step":"50.0","x":327.56190476190477,"y":65.71619047619048,"z":-231.9238095238095,"a95":0.99,"info":"21/09/2014 at 03:34:28"},{"visible":true,"include":true,"step":"60.0","x":327.6095238095238,"y":34.065714285714286,"z":-180.98095238095237,"a95":0.99,"info":"21/09/2014 at 03:34:28"},{"visible":true,"include":true,"step":"70.0","x":466.2666666666667,"y":378.8285714285714,"z":61.13238095238095,"a95":0.99,"info":"21/09/2014 at 03:34:28"},{"visible":true,"include":true,"step":"80.0","x":902.5904761904762,"y":140.44761904761904,"z":-188.07619047619048,"a95":0.99,"info":"21/09/2014 at 03:34:28"},{"visible":true,"include":true,"step":"90.0","x":565.6380952380953,"y":432.847619047619,"z":-62.272380952380956,"a95":0.99,"info":"21/09/2014 at 03:34:28"},{"visible":true,"include":true,"step":"100.0","x":480.99047619047616,"y":413.9619047619048,"z":137.8095238095238,"a95":0.99,"info":"21/09/2014 at 03:34:28"}]},{"version":"v1.1.0","exported":"2017-05-22T10:37:48.389Z","volume":10.5,"added":"2017-05-22T10:34:27.045Z","format":"Utrecht","demagType":"Unknown","strat":null,"patch":1.1,"GEO":[{"dec":325.9005640807021,"inc":-28.827926961100978,"MAD":8.082258678128126,"cm":[-4.618527782440651e-14,9.237055564881302e-14,0],"intensity":4208.679861532682,"type":"GC","origin":false,"forced":true,"remark":"","nSteps":10,"minStep":"150","maxStep":"370","steps":["150","180","210","240","270","290","310","330","350","370"],"group":"None","version":"v1.1.0"}],"TECT":[{"dec":145.22258982506617,"inc":-31.399797407146206,"MAD":8.08225867812295,"cm":[-5.684341886080802e-14,0,-4.973799150320701e-14],"intensity":4208.679861532682,"type":"GC","origin":false,"forced":true,"remark":"","nSteps":10,"minStep":"150","maxStep":"370","steps":["150","180","210","240","270","290","310","330","350","370"],"group":"None","version":"v1.1.0"}],"interpreted":true,"name":"SS6.5A","coreAzi":50,"coreDip":62,"bedStrike":80,"bedDip":65,"data":[{"visible":true,"include":false,"step":"20","x":-666.3809523809524,"y":-2763.904761904762,"z":6944.857142857143,"a95":2.8,"info":"\"14-10-13\" at \"17:06\""},{"visible":true,"include":false,"step":"100","x":-438.0952380952381,"y":-1742.1904761904761,"z":3942.285714285714,"a95":2.8,"info":"\"14-10-13\" at \"19:59\""},{"visible":true,"include":true,"step":"150","x":-272.1904761904762,"y":-1501.2380952380952,"z":3323.4285714285716,"a95":2.8,"info":"\"14-10-13\" at \"22:08\""},{"visible":true,"include":true,"step":"180","x":-297.8095238095238,"y":-1219.047619047619,"z":2542.6666666666665,"a95":2.5,"info":"\"14-10-14\" at \"15:17\""},{"visible":true,"include":true,"step":"210","x":-221.14285714285714,"y":-1121.904761904762,"z":2261.6190476190477,"a95":2.4,"info":"\"14-10-14\" at \"18:22\""},{"visible":true,"include":true,"step":"240","x":-223.71428571428572,"y":-888.5714285714286,"z":1788.6666666666667,"a95":2.4,"info":"\"14-10-14\" at \"21:31\""},{"visible":true,"include":true,"step":"270","x":-232.38095238095238,"y":-851.7142857142857,"z":1619.904761904762,"a95":2.6,"info":"\"14-10-15\" at \"15:24\""},{"visible":true,"include":true,"step":"290","x":-463.8095238095238,"y":-664.4761904761905,"z":1206.3809523809523,"a95":2.6,"info":"\"14-10-15\" at \"18:30\""},{"visible":true,"include":true,"step":"310","x":-390.3809523809524,"y":-580.5714285714286,"z":1072.2857142857142,"a95":2.6,"info":"\"14-10-15\" at \"21:45\""},{"visible":true,"include":true,"step":"330","x":-359.3333333333333,"y":-432.57142857142856,"z":670.1904761904761,"a95":2.8,"info":"\"14-10-16\" at \"15:08\""},{"visible":true,"include":true,"step":"350","x":-349.3333333333333,"y":-398.57142857142856,"z":588.8571428571429,"a95":2.7,"info":"\"14-10-16\" at \"19:03\""},{"visible":true,"include":true,"step":"370","x":-349.6190476190476,"y":-306.95238095238096,"z":425.8095238095238,"a95":2.7,"info":"\"14-10-16\" at \"22:12\""},{"visible":true,"include":false,"step":"400","x":-395.8095238095238,"y":-137.61904761904762,"z":342.57142857142856,"a95":2.6,"info":"\"14-10-17\" at \"13:45\""},{"visible":true,"include":false,"step":"420","x":-340.0952380952381,"y":-118,"z":216,"a95":3.3,"info":"\"14-10-17\" at \"16:53\""},{"visible":true,"include":false,"step":"440","x":-279.9047619047619,"y":-112.47619047619048,"z":327.14285714285717,"a95":3.4,"info":"\"14-10-17\" at \"20:06\""},{"visible":true,"include":false,"step":"470","x":-304.57142857142856,"y":-120.85714285714286,"z":138,"a95":4.4,"info":"\"14-10-17\" at \"23:21\""},{"visible":true,"include":false,"step":"490","x":-189.33333333333334,"y":-130.38095238095238,"z":108.57142857142857,"a95":5,"info":"\"14-10-18\" at \"11:41\""},{"visible":true,"include":false,"step":"520","x":-361.04761904761904,"y":-86.85714285714286,"z":269.7142857142857,"a95":3.5,"info":"\"14-10-18\" at \"14:44\""},{"visible":true,"include":false,"step":"550","x":-207.52380952380952,"y":-19.714285714285715,"z":211.61904761904762,"a95":3.7,"info":"\"14-10-19\" at \"09:37\""},{"visible":true,"include":false,"step":"580","x":-283.23809523809524,"y":65.23809523809524,"z":-38.666666666666664,"a95":4.6,"info":"\"14-10-19\" at \"11:40\""},{"visible":true,"include":false,"step":"610","x":-371.7142857142857,"y":-387.42857142857144,"z":287.7142857142857,"a95":2.6,"info":"\"14-10-19\" at \"15:04\""},{"visible":true,"include":false,"step":"640","x":-416,"y":297.5238095238095,"z":-128.0952380952381,"a95":2.5,"info":"\"14-10-19\" at \"18:50\""}]},{"version":"v1.1.0","exported":"2017-05-22T10:37:48.389Z","volume":10.5,"added":"2017-05-22T10:34:27.052Z","format":"Utrecht","demagType":"Unknown","strat":null,"patch":1.1,"GEO":[],"TECT":[],"interpreted":false,"name":"SS6.6A","coreAzi":347,"coreDip":39,"bedStrike":80,"bedDip":65,"data":[{"visible":true,"include":false,"step":"20","x":-313.23809523809524,"y":941.5238095238095,"z":4804.190476190476,"a95":2.7,"info":"\"14-10-20\" at \"15:26\""},{"visible":true,"include":false,"step":"100","x":-75.23809523809524,"y":530.4761904761905,"z":3430.3809523809523,"a95":2.6,"info":"\"14-10-20\" at \"18:16\""},{"visible":true,"include":false,"step":"150","x":263.6190476190476,"y":247.61904761904762,"z":1744,"a95":2.6,"info":"\"14-10-20\" at \"21:39\""},{"visible":true,"include":false,"step":"180","x":264.0952380952381,"y":193.52380952380952,"z":1255.904761904762,"a95":2.7,"info":"\"14-10-21\" at \"00:32\""},{"visible":true,"include":false,"step":"210","x":205.9047619047619,"y":231.71428571428572,"z":1106,"a95":2.5,"info":"\"14-10-21\" at \"16:37\""},{"visible":true,"include":false,"step":"240","x":203.8095238095238,"y":64.57142857142857,"z":974.7619047619048,"a95":2.6,"info":"\"14-10-21\" at \"19:35\""},{"visible":true,"include":false,"step":"270","x":120.57142857142857,"y":81.52380952380952,"z":977.6190476190476,"a95":2.5,"info":"\"14-10-21\" at \"22:40\""},{"visible":true,"include":false,"step":"290","x":110.66666666666667,"y":-107.61904761904762,"z":826.5714285714286,"a95":2.7,"info":"\"14-10-22\" at \"15:12\""},{"visible":true,"include":false,"step":"310","x":172.38095238095238,"y":-98.85714285714286,"z":865.7142857142857,"a95":2.4,"info":"\"14-10-22\" at \"17:57\""},{"visible":true,"include":false,"step":"330","x":93.9047619047619,"y":-12.285714285714286,"z":681.8095238095239,"a95":2.4,"info":"\"14-10-22\" at \"21:08\""},{"visible":true,"include":false,"step":"350","x":112.38095238095238,"y":42.76190476190476,"z":596.7619047619048,"a95":2.8,"info":"\"14-10-23\" at \"15:22\""},{"visible":true,"include":false,"step":"370","x":0.7619047619047619,"y":117.04761904761905,"z":541.1428571428571,"a95":2.7,"info":"\"14-10-23\" at \"18:21\""},{"visible":true,"include":false,"step":"400","x":95.80952380952381,"y":201.61904761904762,"z":526.0952380952381,"a95":2.7,"info":"\"14-10-23\" at \"21:22\""},{"visible":true,"include":false,"step":"420","x":71.52380952380952,"y":100.57142857142857,"z":424.85714285714283,"a95":2.6,"info":"\"14-10-24\" at \"15:56\""},{"visible":true,"include":false,"step":"440","x":85.9047619047619,"y":123.71428571428571,"z":428.2857142857143,"a95":2.6,"info":"\"14-10-24\" at \"19:11\""},{"visible":true,"include":false,"step":"470","x":100.57142857142857,"y":112.57142857142857,"z":409.7142857142857,"a95":2.5,"info":"\"14-10-24\" at \"21:49\""},{"visible":true,"include":false,"step":"490","x":200.57142857142858,"y":-0.38095238095238093,"z":533.2380952380952,"a95":2.7,"info":"\"14-10-25\" at \"00:44\""},{"visible":true,"include":false,"step":"520","x":182,"y":54.095238095238095,"z":223.71428571428572,"a95":2.5,"info":"\"14-10-25\" at \"03:23\""},{"visible":true,"include":false,"step":"550","x":162,"y":26.666666666666668,"z":396.85714285714283,"a95":2.5,"info":"\"14-10-25\" at \"06:04\""},{"visible":true,"include":false,"step":"580","x":261.3333333333333,"y":-40.95238095238095,"z":223.14285714285714,"a95":3.1,"info":"\"14-10-26\" at \"04:52\""},{"visible":true,"include":false,"step":"610","x":133.04761904761904,"y":7.619047619047619,"z":275.6190476190476,"a95":3.5,"info":"\"14-10-26\" at \"06:47\""}]},{"version":"v1.1.0","exported":"2017-05-22T10:37:48.389Z","volume":10.5,"added":"2017-05-22T10:34:27.055Z","format":"Utrecht","demagType":"Unknown","strat":null,"patch":1.1,"GEO":[{"dec":206.98274211994067,"inc":-45.83712489075977,"MAD":15.313046958760902,"cm":[-1.4210854715202004e-14,6.394884621840902e-14,0],"intensity":1339.0158365123389,"type":"dir","forced":true,"remark":"","origin":false,"nSteps":7,"minStep":"150","maxStep":"310","steps":["150","180","210","240","270","290","310"],"group":"None","version":"v1.1.0"}],"TECT":[{"dec":304.71364891282064,"inc":-53.858532565413135,"MAD":15.313046958760872,"cm":[7.105427357601002e-15,8.881784197001252e-14,-6.750155989720952e-14],"intensity":1339.0158365123389,"type":"dir","forced":true,"remark":"","origin":false,"nSteps":7,"minStep":"150","maxStep":"310","steps":["150","180","210","240","270","290","310"],"group":"None","version":"v1.1.0"}],"interpreted":true,"name":"SS6.7A","coreAzi":17,"coreDip":68,"bedStrike":80,"bedDip":65,"data":[{"visible":true,"include":false,"step":"20","x":-322.95238095238096,"y":-291.42857142857144,"z":1311.4285714285713,"a95":2.6,"info":"\"14-10-20\" at \"15:29\""},{"visible":true,"include":false,"step":"100","x":-455.3333333333333,"y":-18.857142857142858,"z":-63.80952380952381,"a95":3.5,"info":"\"14-10-20\" at \"18:19\""},{"visible":true,"include":true,"step":"150","x":-382.6666666666667,"y":119.23809523809524,"z":-992.952380952381,"a95":2.8,"info":"\"14-10-20\" at \"21:41\""},{"visible":true,"include":true,"step":"180","x":-287.7142857142857,"y":-43.04761904761905,"z":-647.7142857142857,"a95":3.2,"info":"\"14-10-21\" at \"00:34\""},{"visible":true,"include":true,"step":"210","x":-282.0952380952381,"y":-144.47619047619048,"z":-566.7619047619048,"a95":3,"info":"\"14-10-21\" at \"16:39\""},{"visible":true,"include":true,"step":"240","x":-193.23809523809524,"y":-145.14285714285714,"z":-523.1428571428571,"a95":3,"info":"\"14-10-21\" at \"19:37\""},{"visible":true,"include":true,"step":"270","x":-223.04761904761904,"y":-170.47619047619048,"z":-367.14285714285717,"a95":3.1,"info":"\"14-10-21\" at \"22:42\""},{"visible":true,"include":true,"step":"290","x":-64.28571428571429,"y":-271.8095238095238,"z":-368.95238095238096,"a95":2.7,"info":"\"14-10-22\" at \"15:14\""},{"visible":true,"include":true,"step":"310","x":9.333333333333334,"y":-236.38095238095238,"z":-287.6190476190476,"a95":2.9,"info":"\"14-10-22\" at \"17:59\""},{"visible":true,"include":false,"step":"330","x":-63.80952380952381,"y":-330.0952380952381,"z":-337.04761904761904,"a95":2.8,"info":"\"14-10-22\" at \"21:09\""},{"visible":true,"include":false,"step":"350","x":-114.38095238095238,"y":-59.904761904761905,"z":-230,"a95":4,"info":"\"14-10-23\" at \"15:24\""},{"visible":true,"include":false,"step":"370","x":-200,"y":-121.23809523809524,"z":-318.57142857142856,"a95":2.8,"info":"\"14-10-23\" at \"18:23\""},{"visible":true,"include":false,"step":"400","x":-146.28571428571428,"y":-119.61904761904762,"z":-167.61904761904762,"a95":3.3,"info":"\"14-10-23\" at \"21:24\""},{"visible":true,"include":false,"step":"420","x":-276.2857142857143,"y":-274.4761904761905,"z":-394.4761904761905,"a95":2.6,"info":"\"14-10-24\" at \"15:58\""},{"visible":true,"include":false,"step":"440","x":-130.85714285714286,"y":-227.8095238095238,"z":-204.95238095238096,"a95":2.9,"info":"\"14-10-24\" at \"19:13\""},{"visible":true,"include":false,"step":"470","x":-135.42857142857142,"y":-112.28571428571429,"z":-289.42857142857144,"a95":3.2,"info":"\"14-10-24\" at \"21:51\""},{"visible":true,"include":false,"step":"490","x":-100.19047619047619,"y":-190.28571428571428,"z":-110.47619047619048,"a95":3.3,"info":"\"14-10-25\" at \"00:46\""},{"visible":true,"include":false,"step":"520","x":-126.76190476190476,"y":48.38095238095238,"z":-177.9047619047619,"a95":4.1,"info":"\"14-10-25\" at \"03:25\""},{"visible":true,"include":false,"step":"550","x":128,"y":86.66666666666667,"z":116.28571428571429,"a95":4,"info":"\"14-10-25\" at \"06:06\""}]},{"version":"v1.1.0","exported":"2017-05-22T10:37:48.389Z","volume":10.5,"added":"2017-05-22T10:34:27.055Z","format":"Utrecht","demagType":"Unknown","strat":null,"patch":1.1,"GEO":[{"dec":159.11872072987455,"inc":-35.1578128560427,"MAD":16.625610689055087,"cm":[-275.0372523684666,123.33441572011753,-344.371864473431],"intensity":599.792208917014,"type":"dir","forced":false,"remark":"","origin":false,"nSteps":6,"minStep":"150","maxStep":"290","steps":["150","180","210","240","270","290"],"group":"None","version":"v1.1.0"}],"TECT":[{"dec":30.20928183443266,"inc":-76.16860535889909,"MAD":16.625610689055133,"cm":[198.51888594682316,39.833691655022164,-410.42950462154926],"intensity":599.792208917014,"type":"dir","forced":false,"remark":"","origin":false,"nSteps":6,"minStep":"150","maxStep":"290","steps":["150","180","210","240","270","290"],"group":"None","version":"v1.1.0"}],"interpreted":true,"name":"SS6.8A","coreAzi":9,"coreDip":61,"bedStrike":80,"bedDip":65,"data":[{"visible":true,"include":false,"step":"20","x":-61.80952380952381,"y":349.7142857142857,"z":1482.6666666666667,"a95":2.7,"info":"\"14-10-20\" at \"15:30\""},{"visible":true,"include":false,"step":"100","x":-208,"y":364,"z":84.47619047619048,"a95":2.9,"info":"\"14-10-20\" at \"18:20\""},{"visible":true,"include":true,"step":"150","x":-186.38095238095238,"y":311.42857142857144,"z":-647.7142857142857,"a95":2.4,"info":"\"14-10-20\" at \"21:42\""},{"visible":true,"include":true,"step":"180","x":-72,"y":222.47619047619048,"z":-586.0952380952381,"a95":2.6,"info":"\"14-10-21\" at \"00:36\""},{"visible":true,"include":true,"step":"210","x":-76.47619047619048,"y":230.0952380952381,"z":-412.0952380952381,"a95":2.5,"info":"\"14-10-21\" at \"16:41\""},{"visible":true,"include":true,"step":"240","x":-33.04761904761905,"y":91.9047619047619,"z":-492.0952380952381,"a95":2.4,"info":"\"14-10-21\" at \"19:39\""},{"visible":true,"include":true,"step":"270","x":-19.047619047619047,"y":55.61904761904762,"z":-247.61904761904762,"a95":3.1,"info":"\"14-10-21\" at \"22:45\""},{"visible":true,"include":true,"step":"290","x":64.38095238095238,"y":77.52380952380952,"z":-155.61904761904762,"a95":3,"info":"\"14-10-22\" at \"15:15\""},{"visible":true,"include":false,"step":"310","x":164.95238095238096,"y":99.52380952380952,"z":-47.04761904761905,"a95":2.1,"info":"\"14-10-22\" at \"18:01\""},{"visible":true,"include":false,"step":"330","x":72,"y":85.33333333333333,"z":-59.714285714285715,"a95":3.3,"info":"\"14-10-22\" at \"21:11\""},{"visible":true,"include":false,"step":"350","x":127.23809523809524,"y":99.80952380952381,"z":3.238095238095238,"a95":3,"info":"\"14-10-23\" at \"15:26\""},{"visible":true,"include":false,"step":"370","x":229.04761904761904,"y":135.52380952380952,"z":-27.333333333333332,"a95":2.3,"info":"\"14-10-23\" at \"18:25\""},{"visible":true,"include":false,"step":"400","x":198.1904761904762,"y":31.904761904761905,"z":54.285714285714285,"a95":3.1,"info":"\"14-10-23\" at \"21:26\""},{"visible":true,"include":false,"step":"420","x":112,"y":-28.666666666666668,"z":75.80952380952381,"a95":3.6,"info":"\"14-10-24\" at \"16:00\""},{"visible":true,"include":false,"step":"440","x":134.0952380952381,"y":34.095238095238095,"z":-53.23809523809524,"a95":2.5,"info":"\"14-10-24\" at \"19:15\""},{"visible":true,"include":false,"step":"470","x":92.66666666666667,"y":-22.857142857142858,"z":-95.04761904761905,"a95":4,"info":"\"14-10-24\" at \"21:53\""},{"visible":true,"include":false,"step":"490","x":187.33333333333334,"y":-133.14285714285714,"z":-44.666666666666664,"a95":3,"info":"\"14-10-25\" at \"00:48\""},{"visible":true,"include":false,"step":"520","x":83.42857142857143,"y":123.42857142857143,"z":-137.14285714285714,"a95":2.9,"info":"\"14-10-25\" at \"03:27\""},{"visible":true,"include":false,"step":"550","x":-110.95238095238095,"y":14.857142857142858,"z":67.71428571428571,"a95":4.5,"info":"\"14-10-25\" at \"06:08\""}]},{"version":"v1.1.0","exported":"2017-05-22T10:37:48.389Z","volume":10.5,"added":"2017-05-22T10:34:27.055Z","format":"Utrecht","demagType":"Unknown","strat":null,"patch":1.1,"GEO":[{"dec":170.35359512244736,"inc":-7.540945232357838,"MAD":22.481496341249784,"cm":[7.105427357601002e-15,1.4210854715202004e-14,0],"intensity":3067.9429479657524,"type":"GC","origin":false,"forced":true,"remark":"","nSteps":11,"minStep":"150","maxStep":"400","steps":["150","180","210","240","270","290","310","330","350","370","400"],"group":"None","version":"v1.1.0"}],"TECT":[{"dec":171.168224263178,"inc":-72.53767810381854,"MAD":22.481496341249557,"cm":[-2.4868995751603507e-14,-2.842170943040401e-14,3.552713678800501e-15],"intensity":3067.9429479657524,"type":"GC","origin":false,"forced":true,"remark":"","nSteps":11,"minStep":"150","maxStep":"400","steps":["150","180","210","240","270","290","310","330","350","370","400"],"group":"None","version":"v1.1.0"}],"interpreted":true,"name":"SS6.9A","coreAzi":27,"coreDip":64,"bedStrike":80,"bedDip":65,"data":[{"visible":true,"include":false,"step":"20","x":-1455.904761904762,"y":-630.1904761904761,"z":7408,"a95":2.9,"info":"\"14-10-13\" at \"17:08\""},{"visible":true,"include":false,"step":"100","x":-1396.3809523809523,"y":-284.6666666666667,"z":4914.571428571428,"a95":2.9,"info":"\"14-10-13\" at \"20:01\""},{"visible":true,"include":true,"step":"150","x":-1344.6666666666667,"y":120.66666666666667,"z":2243.2380952380954,"a95":2.9,"info":"\"14-10-13\" at \"22:10\""},{"visible":true,"include":true,"step":"180","x":-1196.7619047619048,"y":94.19047619047619,"z":1673.3333333333333,"a95":2.4,"info":"\"14-10-14\" at \"15:19\""},{"visible":true,"include":true,"step":"210","x":-1137.142857142857,"y":144.85714285714286,"z":1556.3809523809523,"a95":2.5,"info":"\"14-10-14\" at \"18:24\""},{"visible":true,"include":true,"step":"240","x":-1031.7142857142858,"y":48.19047619047619,"z":1417.2380952380952,"a95":2.5,"info":"\"14-10-14\" at \"21:33\""},{"visible":true,"include":true,"step":"270","x":-821.047619047619,"y":-8.285714285714286,"z":1250.952380952381,"a95":2.6,"info":"\"14-10-15\" at \"15:26\""},{"visible":true,"include":true,"step":"290","x":-728.2857142857143,"y":-111.61904761904762,"z":952.8571428571429,"a95":2.6,"info":"\"14-10-15\" at \"18:32\""},{"visible":true,"include":true,"step":"310","x":-513.5238095238095,"y":-113.71428571428571,"z":831.9047619047619,"a95":2.7,"info":"\"14-10-15\" at \"21:47\""},{"visible":true,"include":true,"step":"330","x":-711.2380952380952,"y":-141.52380952380952,"z":634.4761904761905,"a95":2.5,"info":"\"14-10-16\" at \"15:10\""},{"visible":true,"include":true,"step":"350","x":-481.23809523809524,"y":-143.61904761904762,"z":482.3809523809524,"a95":2.8,"info":"\"14-10-16\" at \"19:05\""},{"visible":true,"include":true,"step":"370","x":-458.95238095238096,"y":-271.3333333333333,"z":347.5238095238095,"a95":2.5,"info":"\"14-10-16\" at \"22:14\""},{"visible":true,"include":true,"step":"400","x":-333.8095238095238,"y":-196.47619047619048,"z":323.7142857142857,"a95":2.8,"info":"\"14-10-17\" at \"13:47\""},{"visible":true,"include":false,"step":"420","x":-321.04761904761904,"y":-152.1904761904762,"z":203.71428571428572,"a95":3.3,"info":"\"14-10-17\" at \"16:55\""},{"visible":true,"include":false,"step":"440","x":-263.5238095238095,"y":-143.71428571428572,"z":233.04761904761904,"a95":3.8,"info":"\"14-10-17\" at \"20:08\""},{"visible":true,"include":false,"step":"470","x":-424.3809523809524,"y":-168.47619047619048,"z":194,"a95":2.7,"info":"\"14-10-17\" at \"23:23\""},{"visible":true,"include":false,"step":"490","x":-158.76190476190476,"y":-149.14285714285714,"z":43.61904761904762,"a95":4.7,"info":"\"14-10-18\" at \"11:43\""},{"visible":true,"include":false,"step":"520","x":-129.9047619047619,"y":-38.76190476190476,"z":431.3333333333333,"a95":3.2,"info":"\"14-10-18\" at \"14:46\""},{"visible":true,"include":false,"step":"550","x":-221.04761904761904,"y":-453.14285714285717,"z":170.47619047619048,"a95":2.5,"info":"\"14-10-19\" at \"09:39\""},{"visible":true,"include":false,"step":"580","x":-255.33333333333334,"y":206.38095238095238,"z":-361.5238095238095,"a95":3.4,"info":"\"14-10-19\" at \"11:42\""},{"visible":true,"include":false,"step":"610","x":-76.28571428571429,"y":-703.4285714285714,"z":212.47619047619048,"a95":2.1,"info":"\"14-10-19\" at \"15:06\""},{"visible":true,"include":false,"step":"640","x":-364.95238095238096,"y":53.42857142857143,"z":87.42857142857143,"a95":2.9,"info":"\"14-10-19\" at \"18:52\""}]},{"version":"v1.1.0","exported":"2017-05-22T10:37:48.389Z","volume":10.5,"added":"2017-05-22T10:34:27.056Z","format":"Utrecht","demagType":"Unknown","strat":"8","patch":1.1,"GEO":[],"TECT":[],"interpreted":false,"name":"SS6.10A","coreAzi":20,"coreDip":58,"bedStrike":80,"bedDip":65,"data":[{"visible":true,"include":false,"step":"0.0","x":-429.3809523809524,"y":-313.9904761904762,"z":2849.4285714285716,"a95":0.99,"info":"21/09/2014 at 03:34:28"},{"visible":true,"include":false,"step":"5.0","x":-335.9904761904762,"y":-214.69523809523812,"z":1881.047619047619,"a95":0.99,"info":"21/09/2014 at 03:34:28"},{"visible":true,"include":false,"step":"10.0","x":-274.70476190476194,"y":-177.0857142857143,"z":1393.2380952380952,"a95":0.99,"info":"21/09/2014 at 03:34:28"},{"visible":true,"include":false,"step":"15.0","x":-183.55238095238096,"y":-147.9714285714286,"z":1052.5714285714287,"a95":0.99,"info":"21/09/2014 at 03:34:28"},{"visible":true,"include":false,"step":"20.0","x":-112.81904761904761,"y":-120.01904761904763,"z":815.7904761904762,"a95":0.99,"info":"21/09/2014 at 03:34:28"},{"visible":true,"include":false,"step":"25.0","x":-95.63809523809525,"y":-82.93238095238095,"z":551.3238095238095,"a95":0.99,"info":"21/09/2014 at 03:34:28"},{"visible":true,"include":false,"step":"30.0","x":30.43904761904762,"y":-49.92285714285715,"z":508.57142857142856,"a95":0.99,"info":"21/09/2014 at 03:34:28"},{"visible":true,"include":false,"step":"35.0","x":-125.32380952380953,"y":10.514285714285714,"z":464.2952380952381,"a95":0.99,"info":"21/09/2014 at 03:34:28"},{"visible":true,"include":false,"step":"40.0","x":-26.335238095238093,"y":-83.60095238095238,"z":386.6380952380952,"a95":0.99,"info":"21/09/2014 at 03:34:28"},{"visible":true,"include":false,"step":"45.0","x":-36.93523809523809,"y":226.47619047619048,"z":415.53333333333336,"a95":0.99,"info":"21/09/2014 at 03:34:28"},{"visible":true,"include":false,"step":"50.0","x":-15.516190476190475,"y":200.8190476190476,"z":318.04761904761904,"a95":0.99,"info":"21/09/2014 at 03:34:28"},{"visible":true,"include":false,"step":"60.0","x":48.915238095238095,"y":113.51428571428572,"z":175.8,"a95":0.99,"info":"21/09/2014 at 03:34:28"},{"visible":true,"include":false,"step":"70.0","x":38.21904761904762,"y":523.2761904761904,"z":110.42857142857143,"a95":0.99,"info":"21/09/2014 at 03:34:28"},{"visible":true,"include":false,"step":"80.0","x":186.58095238095237,"y":540.6476190476191,"z":40.523809523809526,"a95":0.99,"info":"21/09/2014 at 03:34:28"},{"visible":true,"include":false,"step":"90.0","x":130.7047619047619,"y":406.8857142857143,"z":182.16190476190476,"a95":0.99,"info":"21/09/2014 at 03:34:28"},{"visible":true,"include":false,"step":"100.0","x":53.241904761904756,"y":602.447619047619,"z":98.98095238095237,"a95":0.99,"info":"21/09/2014 at 03:34:28"}]},{"version":"v1.1.0","exported":"2017-05-22T10:37:48.389Z","volume":10.5,"added":"2017-05-22T10:34:27.057Z","format":"Utrecht","demagType":"Unknown","strat":"1","patch":1.1,"GEO":[],"TECT":[],"interpreted":false,"name":"SS6.11A","coreAzi":27,"coreDip":61,"bedStrike":80,"bedDip":65,"data":[{"visible":true,"include":false,"step":"0.0","x":-171.65714285714287,"y":-286.95238095238096,"z":1105.142857142857,"a95":0.99,"info":"21/09/2014 at 08:43:29"},{"visible":true,"include":true,"step":"5.0","x":-107.18095238095239,"y":-226.63809523809522,"z":656.9142857142857,"a95":0.99,"info":"21/09/2014 at 08:43:29"},{"visible":true,"include":true,"step":"10.0","x":14.930476190476192,"y":-261.1904761904762,"z":265.34285714285716,"a95":0.99,"info":"21/09/2014 at 08:43:29"},{"visible":true,"include":true,"step":"15.0","x":84.89904761904762,"y":-148.59047619047618,"z":209.51428571428573,"a95":0.99,"info":"21/09/2014 at 08:43:29"},{"visible":true,"include":true,"step":"20.0","x":97.4857142857143,"y":-165.96190476190475,"z":122.02857142857142,"a95":0.99,"info":"21/09/2014 at 08:43:29"},{"visible":true,"include":true,"step":"25.0","x":143.7238095238095,"y":-131.71428571428572,"z":125.79047619047618,"a95":0.99,"info":"21/09/2014 at 08:43:29"},{"visible":true,"include":true,"step":"30.0","x":40.62571428571429,"y":-16.71238095238095,"z":-6.850380952380952,"a95":0.99,"info":"21/09/2014 at 08:43:29"},{"visible":true,"include":true,"step":"35.0","x":138.66666666666666,"y":-68.09428571428572,"z":27.23619047619048,"a95":0.99,"info":"21/09/2014 at 08:43:29"},{"visible":true,"include":false,"step":"40.0","x":88.84190476190477,"y":-3.027809523809524,"z":29.701904761904764,"a95":0.99,"info":"21/09/2014 at 08:43:29"},{"visible":true,"include":false,"step":"45.0","x":70.36761904761904,"y":146.13333333333335,"z":19.48,"a95":0.99,"info":"21/09/2014 at 08:43:29"},{"visible":true,"include":false,"step":"50.0","x":65.20285714285714,"y":98.52380952380952,"z":60.55809523809524,"a95":0.99,"info":"21/09/2014 at 08:43:29"},{"visible":true,"include":false,"step":"60.0","x":69.68666666666667,"y":37.97142857142857,"z":59.05619047619048,"a95":0.99,"info":"21/09/2014 at 08:43:29"},{"visible":true,"include":false,"step":"70.0","x":28.208571428571428,"y":265.8952380952381,"z":14.320000000000002,"a95":0.99,"info":"21/09/2014 at 08:43:29"},{"visible":true,"include":false,"step":"80.0","x":167.17142857142858,"y":-17.28,"z":34.796190476190475,"a95":0.99,"info":"21/09/2014 at 08:43:29"},{"visible":true,"include":false,"step":"90.0","x":125.74285714285713,"y":-122.95238095238095,"z":89.24761904761905,"a95":0.99,"info":"21/09/2014 at 08:43:29"},{"visible":true,"include":false,"step":"100.0","x":255.37142857142857,"y":160.40952380952382,"z":69.80666666666667,"a95":0.99,"info":"21/09/2014 at 08:43:29"}]},{"version":"v1.1.0","exported":"2017-05-22T10:37:48.389Z","volume":10.5,"added":"2017-05-22T10:34:27.057Z","format":"Utrecht","demagType":"Unknown","strat":"2","patch":1.1,"GEO":[{"dec":155.09290980798664,"inc":-44.78241285435422,"MAD":20.38106887770485,"cm":[-460.2794707263015,241.69209172684697,-379.6673097187347],"intensity":603.9817744393247,"type":"dir","forced":false,"remark":"","origin":false,"nSteps":5,"minStep":"10.0","maxStep":"30.0","steps":["10.0","15.0","20.0","25.0","30.0"],"group":"None","version":"v1.1.0"}],"TECT":[{"dec":17.648983144426552,"inc":-66.82897587791147,"MAD":20.38106887770487,"cm":[160.196009731556,132.28552365407882,-609.3088733492217],"intensity":603.9817744393248,"type":"dir","forced":false,"remark":"","origin":false,"nSteps":5,"minStep":"10.0","maxStep":"30.0","steps":["10.0","15.0","20.0","25.0","30.0"],"group":"None","version":"v1.1.0"}],"interpreted":true,"name":"SS6.12A","coreAzi":77,"coreDip":62,"bedStrike":80,"bedDip":65,"data":[{"visible":true,"include":false,"step":"0.0","x":-386.8952380952381,"y":140.38095238095238,"z":1566.6666666666667,"a95":0.99,"info":"21/09/2014 at 08:43:29"},{"visible":true,"include":false,"step":"5.0","x":235.32380952380953,"y":1186.6666666666667,"z":-452.7809523809524,"a95":0.99,"info":"21/09/2014 at 08:43:29"},{"visible":true,"include":true,"step":"10.0","x":453.34285714285716,"y":827.5619047619048,"z":-496.68571428571425,"a95":0.99,"info":"21/09/2014 at 08:43:29"},{"visible":true,"include":true,"step":"15.0","x":400.2190476190476,"y":464.42857142857144,"z":-328.4761904761905,"a95":0.99,"info":"21/09/2014 at 08:43:29"},{"visible":true,"include":true,"step":"20.0","x":310.3333333333333,"y":444.27619047619044,"z":-249.26666666666668,"a95":0.99,"info":"21/09/2014 at 08:43:29"},{"visible":true,"include":true,"step":"25.0","x":204.05714285714285,"y":308.37142857142857,"z":-135.7047619047619,"a95":0.99,"info":"21/09/2014 at 08:43:29"},{"visible":true,"include":true,"step":"30.0","x":105.81904761904761,"y":469.6190476190476,"z":-156.24761904761903,"a95":0.99,"info":"21/09/2014 at 08:43:29"},{"visible":true,"include":false,"step":"35.0","x":18.701904761904764,"y":189.82857142857142,"z":-352.9142857142857,"a95":0.99,"info":"21/09/2014 at 08:43:29"},{"visible":true,"include":false,"step":"40.0","x":-10.857142857142858,"y":-147.11428571428573,"z":-153.33333333333334,"a95":0.99,"info":"21/09/2014 at 08:43:29"},{"visible":true,"include":false,"step":"45.0","x":280.7142857142857,"y":217.36190476190478,"z":-229.77142857142857,"a95":0.99,"info":"21/09/2014 at 08:43:29"},{"visible":true,"include":false,"step":"50.0","x":53.902857142857144,"y":294.2190476190476,"z":-245.57142857142858,"a95":0.99,"info":"21/09/2014 at 08:43:29"},{"visible":true,"include":false,"step":"60.0","x":429.65714285714284,"y":29.097142857142856,"z":-140.0857142857143,"a95":0.99,"info":"21/09/2014 at 08:43:29"},{"visible":true,"include":false,"step":"70.0","x":308.67619047619047,"y":335.7142857142857,"z":22.604761904761904,"a95":0.99,"info":"21/09/2014 at 08:43:29"},{"visible":true,"include":false,"step":"80.0","x":101.78095238095239,"y":248.0761904761905,"z":-293.7809523809524,"a95":0.99,"info":"21/09/2014 at 08:43:29"},{"visible":true,"include":false,"step":"90.0","x":9.978095238095237,"y":-72.55333333333333,"z":-253.06666666666666,"a95":0.99,"info":"21/09/2014 at 08:43:29"},{"visible":true,"include":false,"step":"100.0","x":180.35238095238097,"y":-167.85714285714286,"z":363.447619047619,"a95":0.99,"info":"21/09/2014 at 08:43:29"}]},{"version":"v1.1.0","exported":"2017-05-22T10:37:48.389Z","volume":10.5,"added":"2017-05-22T10:34:27.058Z","format":"Utrecht","demagType":"Unknown","strat":null,"patch":1.1,"GEO":[{"dec":191.77207590972688,"inc":-33.04660286420073,"MAD":5.0075075274151395,"cm":[0,2.842170943040401e-14,0],"intensity":2138.6986888368942,"type":"dir","forced":true,"remark":"","origin":false,"nSteps":8,"minStep":"180","maxStep":"350","steps":["180","210","240","270","290","310","330","350"],"group":"None","version":"v1.1.0"}],"TECT":[{"dec":287.99049796665605,"inc":-69.38432055264242,"MAD":5.00750752741519,"cm":[-1.3145040611561853e-13,1.2434497875801753e-14,-2.1316282072803006e-14],"intensity":2138.6986888368942,"type":"dir","forced":true,"remark":"","origin":false,"nSteps":8,"minStep":"180","maxStep":"350","steps":["180","210","240","270","290","310","330","350"],"group":"None","version":"v1.1.0"}],"interpreted":true,"name":"SS6.13A","coreAzi":77,"coreDip":61,"bedStrike":80,"bedDip":65,"data":[{"visible":true,"include":false,"step":"20","x":-85.23809523809524,"y":408,"z":1649.142857142857,"a95":2.9,"info":"\"14-10-13\" at \"17:12\""},{"visible":true,"include":false,"step":"100","x":-297.42857142857144,"y":904.5714285714286,"z":-48.76190476190476,"a95":1.8,"info":"\"14-10-13\" at \"20:03\""},{"visible":true,"include":false,"step":"150","x":-286.95238095238096,"y":1271.6190476190477,"z":-1080.095238095238,"a95":2.4,"info":"\"14-10-13\" at \"22:12\""},{"visible":true,"include":true,"step":"180","x":-132.0952380952381,"y":1155.6190476190477,"z":-1054.952380952381,"a95":2.2,"info":"\"14-10-14\" at \"15:21\""},{"visible":true,"include":true,"step":"210","x":-125.80952380952381,"y":1150.952380952381,"z":-1008.3809523809524,"a95":2.2,"info":"\"14-10-14\" at \"18:26\""},{"visible":true,"include":true,"step":"240","x":-109.33333333333333,"y":968.2857142857143,"z":-717.5238095238095,"a95":2.1,"info":"\"14-10-14\" at \"21:35\""},{"visible":true,"include":true,"step":"270","x":51.61904761904762,"y":913.3333333333334,"z":-754.8571428571429,"a95":2.3,"info":"\"14-10-15\" at \"15:28\""},{"visible":true,"include":true,"step":"290","x":-38.666666666666664,"y":660.6666666666666,"z":-433.42857142857144,"a95":2.1,"info":"\"14-10-15\" at \"18:34\""},{"visible":true,"include":true,"step":"310","x":36.666666666666664,"y":587.8095238095239,"z":-471.3333333333333,"a95":2.4,"info":"\"14-10-15\" at \"21:49\""},{"visible":true,"include":true,"step":"330","x":17.047619047619047,"y":457.9047619047619,"z":-471.5238095238095,"a95":2.6,"info":"\"14-10-16\" at \"15:12\""},{"visible":true,"include":true,"step":"350","x":92.28571428571429,"y":378.85714285714283,"z":-434.2857142857143,"a95":2.7,"info":"\"14-10-16\" at \"19:06\""},{"visible":true,"include":false,"step":"370","x":-23.047619047619047,"y":520.4761904761905,"z":-404,"a95":2.5,"info":"\"14-10-16\" at \"22:15\""},{"visible":true,"include":false,"step":"400","x":76.57142857142857,"y":545.5238095238095,"z":-242.28571428571428,"a95":2,"info":"\"14-10-17\" at \"13:49\""},{"visible":true,"include":false,"step":"420","x":-1.5238095238095237,"y":451.04761904761904,"z":-159.8095238095238,"a95":2.1,"info":"\"14-10-17\" at \"16:57\""},{"visible":true,"include":false,"step":"440","x":58.857142857142854,"y":465.42857142857144,"z":-71.71428571428571,"a95":1.9,"info":"\"14-10-17\" at \"20:10\""},{"visible":true,"include":false,"step":"470","x":-42.285714285714285,"y":495.23809523809524,"z":-44.476190476190474,"a95":2.1,"info":"\"14-10-17\" at \"23:25\""},{"visible":true,"include":false,"step":"490","x":36.666666666666664,"y":274.85714285714283,"z":-166.38095238095238,"a95":2.5,"info":"\"14-10-18\" at \"11:45\""},{"visible":true,"include":false,"step":"520","x":107.80952380952381,"y":259.04761904761904,"z":-225.61904761904762,"a95":3,"info":"\"14-10-18\" at \"14:48\""},{"visible":true,"include":false,"step":"550","x":7.428571428571429,"y":-103.23809523809524,"z":-266.1904761904762,"a95":3.7,"info":"\"14-10-19\" at \"09:41\""},{"visible":true,"include":false,"step":"580","x":189.61904761904762,"y":226.1904761904762,"z":-263.7142857142857,"a95":2.8,"info":"\"14-10-19\" at \"11:44\""},{"visible":true,"include":false,"step":"610","x":160,"y":198.28571428571428,"z":-13.428571428571429,"a95":2.8,"info":"\"14-10-19\" at \"15:08\""},{"visible":true,"include":false,"step":"640","x":-186.0952380952381,"y":128.95238095238096,"z":-307.7142857142857,"a95":2.9,"info":"\"14-10-19\" at \"18:55\""}]},{"version":"v1.1.0","exported":"2017-05-22T10:37:48.389Z","volume":10.5,"added":"2017-05-22T10:34:27.058Z","format":"Utrecht","demagType":"Unknown","strat":"3","patch":1.1,"GEO":[],"TECT":[],"interpreted":false,"name":"SS6.13B","coreAzi":77,"coreDip":61,"bedStrike":80,"bedDip":65,"data":[{"visible":true,"include":false,"step":"0.0","x":-194.04761904761904,"y":146.8190476190476,"z":945.0952380952381,"a95":0.99,"info":"21/09/2014 at 08:43:29"},{"visible":true,"include":false,"step":"5.0","x":10.261904761904763,"y":474.35238095238094,"z":-24.30952380952381,"a95":0.99,"info":"21/09/2014 at 08:43:29"},{"visible":true,"include":false,"step":"10.0","x":28.386666666666667,"y":236.0761904761905,"z":-127.18095238095239,"a95":0.99,"info":"21/09/2014 at 08:43:29"},{"visible":true,"include":false,"step":"15.0","x":0.15064761904761906,"y":44.58571428571428,"z":-26.633333333333333,"a95":0.99,"info":"21/09/2014 at 08:43:29"},{"visible":true,"include":false,"step":"20.0","x":70.64857142857143,"y":32.2952380952381,"z":12.802857142857144,"a95":0.99,"info":"21/09/2014 at 08:43:29"},{"visible":true,"include":false,"step":"25.0","x":18.899047619047618,"y":-198.8857142857143,"z":-110.15238095238094,"a95":0.99,"info":"21/09/2014 at 08:43:29"},{"visible":true,"include":false,"step":"30.0","x":39.214285714285715,"y":-237.48571428571427,"z":61.62095238095238,"a95":0.99,"info":"21/09/2014 at 08:43:29"},{"visible":true,"include":false,"step":"35.0","x":226.74285714285716,"y":-85.54190476190476,"z":3.904285714285714,"a95":0.99,"info":"21/09/2014 at 08:43:29"},{"visible":true,"include":false,"step":"40.0","x":307.4190476190476,"y":-319.2095238095238,"z":-144.96190476190475,"a95":0.99,"info":"21/09/2014 at 08:43:29"},{"visible":true,"include":false,"step":"45.0","x":242.52380952380952,"y":-129.17142857142858,"z":134.7047619047619,"a95":0.99,"info":"21/09/2014 at 08:43:29"},{"visible":true,"include":false,"step":"50.0","x":156.8095238095238,"y":-248.06666666666666,"z":-91.41428571428571,"a95":0.99,"info":"21/09/2014 at 08:43:29"},{"visible":true,"include":false,"step":"60.0","x":229.22857142857143,"y":-138.84761904761905,"z":75.27047619047619,"a95":0.99,"info":"21/09/2014 at 08:43:29"},{"visible":true,"include":false,"step":"70.0","x":178.9047619047619,"y":-182.63809523809525,"z":201.33333333333334,"a95":0.99,"info":"21/09/2014 at 08:43:29"},{"visible":true,"include":false,"step":"80.0","x":425.6380952380952,"y":-91.00952380952381,"z":-26.91333333333333,"a95":0.99,"info":"21/09/2014 at 08:43:29"},{"visible":true,"include":false,"step":"90.0","x":323.50476190476195,"y":-416.552380952381,"z":-176.59047619047618,"a95":0.99,"info":"21/09/2014 at 08:43:29"},{"visible":true,"include":false,"step":"100.0","x":307.8095238095238,"y":-252.74285714285716,"z":26.725714285714286,"a95":0.99,"info":"21/09/2014 at 08:43:29"}]},{"version":"v1.1.0","exported":"2017-05-22T10:37:48.389Z","volume":10.5,"added":"2017-05-22T10:34:27.083Z","format":"Utrecht","demagType":"Unknown","strat":"4","patch":1.1,"GEO":[{"dec":202.79260216622765,"inc":-51.58402732147953,"MAD":8.241931611343682,"cm":[-1.7763568394002505e-14,3.674838211509268e-14,0],"intensity":1020.3871276829412,"type":"dir","forced":true,"remark":"","origin":false,"nSteps":5,"minStep":"10.0","maxStep":"30.0","steps":["10.0","15.0","20.0","25.0","30.0"],"group":"None","version":"v1.1.0"}],"TECT":[{"dec":315.4837180079172,"inc":-53.565240850124255,"MAD":8.241931611343718,"cm":[1.4210854715202004e-14,7.37188088351104e-14,-2.842170943040401e-14],"intensity":1020.3871276829412,"type":"dir","forced":true,"remark":"","origin":false,"nSteps":5,"minStep":"10.0","maxStep":"30.0","steps":["10.0","15.0","20.0","25.0","30.0"],"group":"None","version":"v1.1.0"}],"interpreted":true,"name":"SS6.14A","coreAzi":85,"coreDip":64,"bedStrike":80,"bedDip":65,"data":[{"visible":true,"include":false,"step":"0.0","x":-151.71428571428572,"y":200.22857142857143,"z":120.33333333333333,"a95":0.99,"info":"21/09/2014 at 08:43:29"},{"visible":true,"include":false,"step":"5.0","x":160.98095238095237,"y":595.6380952380953,"z":-649.495238095238,"a95":0.99,"info":"21/09/2014 at 08:43:29"},{"visible":true,"include":true,"step":"10.0","x":63.26571428571428,"y":344.96190476190475,"z":-622.4857142857143,"a95":0.99,"info":"21/09/2014 at 08:43:29"},{"visible":true,"include":true,"step":"15.0","x":51.98,"y":261.9238095238095,"z":-425.8952380952381,"a95":0.99,"info":"21/09/2014 at 08:43:29"},{"visible":true,"include":true,"step":"20.0","x":31.972380952380952,"y":308.04761904761904,"z":-353.84761904761905,"a95":0.99,"info":"21/09/2014 at 08:43:29"},{"visible":true,"include":true,"step":"25.0","x":-69.96285714285715,"y":178.58095238095237,"z":-239.76190476190476,"a95":0.99,"info":"21/09/2014 at 08:43:29"},{"visible":true,"include":true,"step":"30.0","x":99.25714285714287,"y":203.15238095238095,"z":-222.7047619047619,"a95":0.99,"info":"21/09/2014 at 08:43:29"},{"visible":true,"include":true,"step":"35.0","x":179.51428571428573,"y":190.85714285714286,"z":-128.6,"a95":0.99,"info":"21/09/2014 at 08:43:29"},{"visible":true,"include":false,"step":"40.0","x":44.76761904761905,"y":125.42857142857143,"z":-6.600380952380952,"a95":0.99,"info":"21/09/2014 at 08:43:29"},{"visible":true,"include":false,"step":"45.0","x":167.14285714285714,"y":211.85714285714286,"z":-59.48476190476191,"a95":0.99,"info":"21/09/2014 at 08:43:29"},{"visible":true,"include":false,"step":"50.0","x":114.16190476190476,"y":120.91428571428571,"z":-71.95142857142858,"a95":0.99,"info":"21/09/2014 at 08:43:29"},{"visible":true,"include":false,"step":"60.0","x":89.75428571428571,"y":-91.9695238095238,"z":59.50380952380952,"a95":0.99,"info":"21/09/2014 at 08:43:29"},{"visible":true,"include":false,"step":"70.0","x":-134.64761904761903,"y":-149.77142857142857,"z":223.45714285714288,"a95":0.99,"info":"21/09/2014 at 08:43:29"},{"visible":true,"include":false,"step":"80.0","x":-196.0857142857143,"y":60.76190476190476,"z":75.43047619047618,"a95":0.99,"info":"21/09/2014 at 08:43:29"},{"visible":true,"include":false,"step":"90.0","x":109.55238095238094,"y":-240.8857142857143,"z":-0.8827428571428572,"a95":0.99,"info":"21/09/2014 at 08:43:29"},{"visible":true,"include":false,"step":"100.0","x":171.67619047619047,"y":48.98761904761905,"z":188.05714285714285,"a95":0.99,"info":"21/09/2014 at 08:43:29"}]}]
