# Supplementary material for: Paleomagnetic constraints on the timing and distribution of Cenozoic rotations in Central and Eastern Anatolia
Source: Copernicus journal article supplement (doi:10.5194/se-9-295-2018), 2018-03-21
Supplement: Supplementary file 2 [file se-9-295-2018-supplement.zip › se-2017-66_DATA_dir files/dir files Sivas/SS11.dir]

[{"version":"v1.1.0","exported":"2017-05-22T11:02:37.957Z","volume":10.5,"added":"2017-05-22T11:02:24.792Z","format":"Utrecht","demagType":"Unknown","strat":"6","patch":1.1,"GEO":[],"TECT":[],"interpreted":false,"name":"SS11.1A","coreAzi":261,"coreDip":24,"bedStrike":253,"bedDip":57,"data":[{"visible":true,"include":false,"step":"0.0","x":-60.51047619047619,"y":44.8352380952381,"z":33.875238095238096,"a95":0.99,"info":"27/10/2014 at 22:37:38"},{"visible":true,"include":false,"step":"4.0","x":-43.26380952380952,"y":32.10285714285714,"z":28.82857142857143,"a95":0.99,"info":"27/10/2014 at 22:37:38"},{"visible":true,"include":false,"step":"8.0","x":-19.065714285714286,"y":24.584761904761905,"z":11.607619047619048,"a95":0.99,"info":"27/10/2014 at 22:37:38"},{"visible":true,"include":false,"step":"12.0","x":-31.94190476190476,"y":22.677142857142858,"z":8.025904761904762,"a95":0.99,"info":"27/10/2014 at 22:37:38"},{"visible":true,"include":false,"step":"16.0","x":-39.18857142857143,"y":23.814285714285717,"z":15.52095238095238,"a95":0.99,"info":"27/10/2014 at 22:37:38"},{"visible":true,"include":false,"step":"20.0","x":-17.746666666666666,"y":14.637142857142857,"z":9.006190476190476,"a95":0.99,"info":"27/10/2014 at 22:37:38"},{"visible":true,"include":false,"step":"25.0","x":-9.733333333333334,"y":22.28761904761905,"z":5.360666666666667,"a95":0.99,"info":"27/10/2014 at 22:37:38"},{"visible":true,"include":false,"step":"30.0","x":-8.55495238095238,"y":15.324761904761905,"z":9.236666666666666,"a95":0.99,"info":"27/10/2014 at 22:37:38"},{"visible":true,"include":false,"step":"35.0","x":-10.264761904761905,"y":4.7570476190476185,"z":19.606666666666666,"a95":0.99,"info":"27/10/2014 at 22:37:38"},{"visible":true,"include":false,"step":"40.0","x":-25.395238095238092,"y":28.33238095238095,"z":16.759999999999998,"a95":0.99,"info":"27/10/2014 at 22:37:38"},{"visible":true,"include":false,"step":"45.0","x":-26.62190476190476,"y":20.65047619047619,"z":9.66952380952381,"a95":0.99,"info":"27/10/2014 at 22:37:38"},{"visible":true,"include":false,"step":"50.0","x":-27.089523809523808,"y":12.28095238095238,"z":-6.58847619047619,"a95":0.99,"info":"27/10/2014 at 22:37:38"},{"visible":true,"include":false,"step":"60.0","x":-28.794285714285714,"y":15.875238095238094,"z":-2.8408571428571427,"a95":0.99,"info":"27/10/2014 at 22:37:38"},{"visible":true,"include":false,"step":"70.0","x":-29.78190476190476,"y":5.533047619047619,"z":20.36952380952381,"a95":0.99,"info":"27/10/2014 at 22:37:38"},{"visible":true,"include":false,"step":"80.0","x":-30.847619047619045,"y":16.9,"z":11.348571428571429,"a95":0.99,"info":"27/10/2014 at 22:37:38"},{"visible":true,"include":false,"step":"90.0","x":-28.61714285714286,"y":35.266666666666666,"z":-9.533333333333333,"a95":0.99,"info":"27/10/2014 at 22:37:38"},{"visible":true,"include":false,"step":"100.0","x":-4.072666666666667,"y":13.300952380952381,"z":11.886666666666667,"a95":0.99,"info":"27/10/2014 at 22:37:38"}]},{"version":"v1.1.0","exported":"2017-05-22T11:02:37.957Z","volume":10.5,"added":"2017-05-22T11:02:24.793Z","format":"Utrecht","demagType":"Unknown","strat":"6","patch":1.1,"GEO":[],"TECT":[],"interpreted":false,"name":"SS11.1B","coreAzi":261,"coreDip":24,"bedStrike":253,"bedDip":57,"data":[{"visible":true,"include":false,"step":"0.0","x":-66.64,"y":204.30476190476188,"z":-116.06666666666668,"a95":0.99,"info":"09/10/2014 at 05:24:56"},{"visible":true,"include":false,"step":"4.0","x":-54.389523809523816,"y":190.6952380952381,"z":-122.46666666666667,"a95":0.99,"info":"09/10/2014 at 05:24:56"},{"visible":true,"include":false,"step":"8.0","x":-41.55904761904762,"y":193.82857142857142,"z":-117.43809523809523,"a95":0.99,"info":"09/10/2014 at 05:24:56"},{"visible":true,"include":false,"step":"12.0","x":-34.73238095238095,"y":184.53333333333333,"z":-107.01904761904763,"a95":0.99,"info":"09/10/2014 at 05:24:56"},{"visible":true,"include":false,"step":"16.0","x":-36.68,"y":179.73333333333335,"z":-97.65714285714287,"a95":0.99,"info":"09/10/2014 at 05:24:56"},{"visible":true,"include":false,"step":"20.0","x":-38.70761904761905,"y":158.77142857142857,"z":-106.42857142857143,"a95":0.99,"info":"09/10/2014 at 05:24:56"},{"visible":true,"include":false,"step":"25.0","x":-18.93904761904762,"y":150.63809523809525,"z":-100.16190476190476,"a95":0.99,"info":"09/10/2014 at 05:24:56"},{"visible":true,"include":false,"step":"30.0","x":-11.549523809523809,"y":93.46761904761904,"z":-85.67619047619048,"a95":0.99,"info":"09/10/2014 at 05:24:56"},{"visible":true,"include":false,"step":"35.0","x":-24.42,"y":180.6095238095238,"z":-71.22952380952381,"a95":0.99,"info":"09/10/2014 at 05:24:56"},{"visible":true,"include":false,"step":"40.0","x":-10.51047619047619,"y":130.65714285714287,"z":-64.09714285714286,"a95":0.99,"info":"09/10/2014 at 05:24:56"},{"visible":true,"include":false,"step":"45.0","x":-18.717142857142857,"y":112.18095238095239,"z":-64.96285714285715,"a95":0.99,"info":"09/10/2014 at 05:24:56"},{"visible":true,"include":false,"step":"50.0","x":-10.827619047619047,"y":106.23809523809524,"z":-54.511428571428574,"a95":0.99,"info":"09/10/2014 at 05:24:56"},{"visible":true,"include":false,"step":"60.0","x":-6.1921904761904765,"y":81.12190476190476,"z":-44.885714285714286,"a95":0.99,"info":"09/10/2014 at 05:24:56"},{"visible":true,"include":false,"step":"70.0","x":-27.303809523809523,"y":47.50095238095238,"z":-26.51047619047619,"a95":0.99,"info":"09/10/2014 at 05:24:56"},{"visible":true,"include":false,"step":"80.0","x":-24.570476190476192,"y":37.86190476190476,"z":-40.04666666666667,"a95":0.99,"info":"09/10/2014 at 05:24:56"},{"visible":true,"include":false,"step":"90.0","x":-13.428571428571429,"y":20.580000000000002,"z":-18.615238095238094,"a95":0.99,"info":"09/10/2014 at 05:24:56"},{"visible":true,"include":false,"step":"100.0","x":-15.28095238095238,"y":22.56,"z":-7.965428571428571,"a95":0.99,"info":"09/10/2014 at 05:24:56"}]},{"version":"v1.1.0","exported":"2017-05-22T11:02:37.957Z","volume":10.5,"added":"2017-05-22T11:02:24.793Z","format":"Utrecht","demagType":"Unknown","strat":"7","patch":1.1,"GEO":[],"TECT":[],"interpreted":false,"name":"SS11.2A","coreAzi":354,"coreDip":56,"bedStrike":253,"bedDip":57,"data":[{"visible":true,"include":false,"step":"0.0","x":-27.30857142857143,"y":20.967619047619046,"z":7.066380952380952,"a95":0.99,"info":"27/10/2014 at 22:37:38"},{"visible":true,"include":false,"step":"4.0","x":-19.684761904761906,"y":15.459047619047618,"z":-14.294285714285715,"a95":0.99,"info":"27/10/2014 at 22:37:38"},{"visible":true,"include":false,"step":"8.0","x":-4.506952380952381,"y":1.7162857142857144,"z":-28.39428571428571,"a95":0.99,"info":"27/10/2014 at 22:37:38"},{"visible":true,"include":false,"step":"12.0","x":-6.359619047619047,"y":0.9715238095238096,"z":-34.61619047619048,"a95":0.99,"info":"27/10/2014 at 22:37:38"},{"visible":true,"include":false,"step":"16.0","x":-5.056666666666667,"y":8.08504761904762,"z":-36.80666666666667,"a95":0.99,"info":"27/10/2014 at 22:37:38"},{"visible":true,"include":false,"step":"20.0","x":-8.598952380952381,"y":5.616095238095238,"z":-38.611428571428576,"a95":0.99,"info":"27/10/2014 at 22:37:38"},{"visible":true,"include":false,"step":"25.0","x":-12.192380952380953,"y":20.58095238095238,"z":-19.652380952380952,"a95":0.99,"info":"27/10/2014 at 22:37:38"},{"visible":true,"include":false,"step":"30.0","x":-11.887619047619047,"y":29.836190476190474,"z":-17.00761904761905,"a95":0.99,"info":"27/10/2014 at 22:37:38"},{"visible":true,"include":false,"step":"35.0","x":-7.969142857142858,"y":20.357142857142858,"z":-22.430476190476192,"a95":0.99,"info":"27/10/2014 at 22:37:38"},{"visible":true,"include":false,"step":"40.0","x":9.797142857142857,"y":23.739047619047618,"z":-26.90095238095238,"a95":0.99,"info":"27/10/2014 at 22:37:38"},{"visible":true,"include":false,"step":"45.0","x":13.377142857142857,"y":20.784761904761904,"z":-11.838095238095239,"a95":0.99,"info":"27/10/2014 at 22:37:38"},{"visible":true,"include":false,"step":"50.0","x":23.475238095238097,"y":5.482857142857143,"z":-3.952190476190476,"a95":0.99,"info":"27/10/2014 at 22:37:38"},{"visible":true,"include":false,"step":"60.0","x":10.832380952380952,"y":2.917047619047619,"z":-16.380000000000003,"a95":0.99,"info":"27/10/2014 at 22:37:38"},{"visible":true,"include":false,"step":"70.0","x":9.59142857142857,"y":14.692380952380953,"z":-13.306666666666667,"a95":0.99,"info":"27/10/2014 at 22:37:38"},{"visible":true,"include":false,"step":"80.0","x":4.838190476190476,"y":11.28190476190476,"z":-4.368380952380953,"a95":0.99,"info":"27/10/2014 at 22:37:38"},{"visible":true,"include":false,"step":"90.0","x":-16.66761904761905,"y":9.533333333333333,"z":1.081047619047619,"a95":0.99,"info":"27/10/2014 at 22:37:38"},{"visible":true,"include":false,"step":"100.0","x":-4.800285714285714,"y":20.094285714285714,"z":0.46151428571428577,"a95":0.99,"info":"27/10/2014 at 22:37:38"}]},{"version":"v1.1.0","exported":"2017-05-22T11:02:37.957Z","volume":10.5,"added":"2017-05-22T11:02:24.794Z","format":"Utrecht","demagType":"Unknown","strat":"8","patch":1.1,"GEO":[],"TECT":[],"interpreted":false,"name":"SS11.3A","coreAzi":323,"coreDip":56,"bedStrike":253,"bedDip":57,"data":[{"visible":true,"include":false,"step":"0.0","x":-39.203809523809525,"y":29.107619047619046,"z":55.94666666666667,"a95":0.99,"info":"27/10/2014 at 22:37:38"},{"visible":true,"include":false,"step":"4.0","x":-19.773333333333333,"y":37.37714285714286,"z":35.7552380952381,"a95":0.99,"info":"27/10/2014 at 22:37:38"},{"visible":true,"include":false,"step":"8.0","x":-8.493238095238095,"y":25.546666666666667,"z":5.2989523809523815,"a95":0.99,"info":"27/10/2014 at 22:37:38"},{"visible":true,"include":false,"step":"12.0","x":-2.0738095238095235,"y":19.915238095238095,"z":4.777619047619048,"a95":0.99,"info":"27/10/2014 at 22:37:38"},{"visible":true,"include":false,"step":"16.0","x":-5.8345714285714285,"y":20.50952380952381,"z":-7.274095238095238,"a95":0.99,"info":"27/10/2014 at 22:37:38"},{"visible":true,"include":false,"step":"20.0","x":14.757142857142856,"y":5.346190476190476,"z":-2.164,"a95":0.99,"info":"27/10/2014 at 22:37:38"},{"visible":true,"include":false,"step":"25.0","x":11.077142857142857,"y":14.311428571428573,"z":7.548,"a95":0.99,"info":"27/10/2014 at 22:37:38"},{"visible":true,"include":false,"step":"30.0","x":16.81142857142857,"y":8.790952380952382,"z":11.057142857142857,"a95":0.99,"info":"27/10/2014 at 22:37:38"},{"visible":true,"include":false,"step":"35.0","x":15.298095238095238,"y":10.17047619047619,"z":13.482857142857142,"a95":0.99,"info":"27/10/2014 at 22:37:38"},{"visible":true,"include":false,"step":"40.0","x":7.2810476190476185,"y":13.67904761904762,"z":14.426666666666666,"a95":0.99,"info":"27/10/2014 at 22:37:38"},{"visible":true,"include":false,"step":"45.0","x":9.57047619047619,"y":5.245809523809524,"z":6.196190476190476,"a95":0.99,"info":"27/10/2014 at 22:37:38"},{"visible":true,"include":false,"step":"50.0","x":-4.079714285714286,"y":6.431904761904762,"z":13.082857142857144,"a95":0.99,"info":"27/10/2014 at 22:37:38"},{"visible":true,"include":false,"step":"60.0","x":8.793619047619048,"y":-3.5087619047619047,"z":16.128571428571426,"a95":0.99,"info":"27/10/2014 at 22:37:38"},{"visible":true,"include":false,"step":"70.0","x":4.074380952380952,"y":-12.11047619047619,"z":8.301047619047619,"a95":0.99,"info":"27/10/2014 at 22:37:38"},{"visible":true,"include":false,"step":"80.0","x":-24.506666666666668,"y":-5.3911428571428575,"z":8.469142857142858,"a95":0.99,"info":"27/10/2014 at 22:37:38"},{"visible":true,"include":false,"step":"90.0","x":-6.7321904761904765,"y":10.574285714285715,"z":5.110666666666667,"a95":0.99,"info":"27/10/2014 at 22:37:38"},{"visible":true,"include":false,"step":"100.0","x":-15.399047619047618,"y":5.593619047619048,"z":-4.600095238095238,"a95":0.99,"info":"27/10/2014 at 22:37:38"}]},{"version":"v1.1.0","exported":"2017-05-22T11:02:37.957Z","volume":10.5,"added":"2017-05-22T11:02:24.795Z","format":"Utrecht","demagType":"Unknown","strat":"7","patch":1.1,"GEO":[],"TECT":[],"interpreted":false,"name":"SS11.3B","coreAzi":323,"coreDip":56,"bedStrike":253,"bedDip":57,"data":[{"visible":true,"include":false,"step":"0.0","x":-29.848571428571432,"y":-43.256190476190476,"z":76.15904761904761,"a95":0.99,"info":"09/10/2014 at 05:24:56"},{"visible":true,"include":false,"step":"4.0","x":-11.59142857142857,"y":-58.647619047619045,"z":42.67523809523809,"a95":0.99,"info":"09/10/2014 at 05:24:56"},{"visible":true,"include":false,"step":"8.0","x":-9.428,"y":-57.697142857142865,"z":20.780952380952378,"a95":0.99,"info":"09/10/2014 at 05:24:56"},{"visible":true,"include":false,"step":"12.0","x":2.8163809523809524,"y":-45.904761904761905,"z":25.94285714285714,"a95":0.99,"info":"09/10/2014 at 05:24:56"},{"visible":true,"include":false,"step":"16.0","x":17.260952380952382,"y":-45.184761904761906,"z":6.444285714285715,"a95":0.99,"info":"09/10/2014 at 05:24:56"},{"visible":true,"include":false,"step":"20.0","x":7.804380952380952,"y":-58.72095238095238,"z":5.7730476190476185,"a95":0.99,"info":"09/10/2014 at 05:24:56"},{"visible":true,"include":false,"step":"25.0","x":17.005714285714287,"y":-42.36666666666667,"z":-14.741904761904761,"a95":0.99,"info":"09/10/2014 at 05:24:56"},{"visible":true,"include":false,"step":"30.0","x":16.786666666666665,"y":-106.32380952380953,"z":-7.653142857142858,"a95":0.99,"info":"09/10/2014 at 05:24:56"},{"visible":true,"include":false,"step":"35.0","x":16.562857142857144,"y":3.807238095238095,"z":-11.162857142857142,"a95":0.99,"info":"09/10/2014 at 05:24:56"},{"visible":true,"include":false,"step":"40.0","x":19.907619047619047,"y":-31.54380952380952,"z":11.415238095238095,"a95":0.99,"info":"09/10/2014 at 05:24:56"},{"visible":true,"include":false,"step":"45.0","x":11.514285714285714,"y":-10.227619047619047,"z":-0.26444761904761904,"a95":0.99,"info":"09/10/2014 at 05:24:56"},{"visible":true,"include":false,"step":"50.0","x":12.835238095238097,"y":-43.62761904761904,"z":11.57047619047619,"a95":0.99,"info":"09/10/2014 at 05:24:56"},{"visible":true,"include":false,"step":"60.0","x":10.727619047619047,"y":-33.450476190476195,"z":3.3225714285714285,"a95":0.99,"info":"09/10/2014 at 05:24:56"},{"visible":true,"include":false,"step":"70.0","x":0.9241238095238096,"y":-25.07238095238095,"z":-3.947142857142857,"a95":0.99,"info":"09/10/2014 at 05:24:56"},{"visible":true,"include":false,"step":"80.0","x":8.82447619047619,"y":-15.678095238095239,"z":3.3811428571428572,"a95":0.99,"info":"09/10/2014 at 05:24:56"},{"visible":true,"include":false,"step":"90.0","x":-3.9678095238095237,"y":5.960380952380953,"z":-1.3751428571428572,"a95":0.99,"info":"09/10/2014 at 05:24:56"},{"visible":true,"include":false,"step":"100.0","x":-6.468857142857143,"y":-17.46,"z":1.536952380952381,"a95":0.99,"info":"09/10/2014 at 05:24:56"}]},{"version":"v1.1.0","exported":"2017-05-22T11:02:37.958Z","volume":10.5,"added":"2017-05-22T11:02:24.795Z","format":"Utrecht","demagType":"Unknown","strat":"1","patch":1.1,"GEO":[],"TECT":[],"interpreted":false,"name":"SS11.4A","coreAzi":322,"coreDip":57,"bedStrike":253,"bedDip":57,"data":[{"visible":true,"include":false,"step":"0.0","x":-2.9036190476190478,"y":21.412380952380953,"z":39.892380952380954,"a95":0.99,"info":"28/10/2014 at 04:10:16"},{"visible":true,"include":false,"step":"4.0","x":-7.363047619047618,"y":24.45619047619048,"z":39.94952380952381,"a95":0.99,"info":"28/10/2014 at 04:10:16"},{"visible":true,"include":false,"step":"8.0","x":-7.5365714285714285,"y":22.38857142857143,"z":32.881904761904764,"a95":0.99,"info":"28/10/2014 at 04:10:16"},{"visible":true,"include":false,"step":"12.0","x":-4.9016190476190475,"y":18.15809523809524,"z":48.8352380952381,"a95":0.99,"info":"28/10/2014 at 04:10:16"},{"visible":true,"include":false,"step":"16.0","x":2.850761904761905,"y":26.45714285714286,"z":35.973333333333336,"a95":0.99,"info":"28/10/2014 at 04:10:16"},{"visible":true,"include":false,"step":"20.0","x":-2.669238095238095,"y":11.191428571428572,"z":42.139047619047616,"a95":0.99,"info":"28/10/2014 at 04:10:16"},{"visible":true,"include":false,"step":"25.0","x":-2.412952380952381,"y":11.904761904761905,"z":53.15714285714286,"a95":0.99,"info":"28/10/2014 at 04:10:16"},{"visible":true,"include":false,"step":"30.0","x":-9.536190476190475,"y":16.677142857142858,"z":15.373333333333331,"a95":0.99,"info":"28/10/2014 at 04:10:16"},{"visible":true,"include":false,"step":"35.0","x":-4.592380952380952,"y":0.11851428571428571,"z":28.197142857142858,"a95":0.99,"info":"28/10/2014 at 04:10:16"},{"visible":true,"include":false,"step":"40.0","x":-0.3893809523809524,"y":-2.417047619047619,"z":2.7426666666666666,"a95":0.99,"info":"28/10/2014 at 04:10:16"},{"visible":true,"include":false,"step":"45.0","x":5.793142857142858,"y":-9.094571428571427,"z":0.31166666666666665,"a95":0.99,"info":"28/10/2014 at 04:10:16"},{"visible":true,"include":false,"step":"50.0","x":-6.453904761904762,"y":14.319047619047618,"z":11.613333333333333,"a95":0.99,"info":"28/10/2014 at 04:10:16"},{"visible":true,"include":false,"step":"60.0","x":8.163809523809524,"y":2.3357142857142854,"z":-0.013221904761904763,"a95":0.99,"info":"28/10/2014 at 04:10:16"},{"visible":true,"include":false,"step":"70.0","x":14.310476190476189,"y":4.873904761904762,"z":-11.457142857142857,"a95":0.99,"info":"28/10/2014 at 04:10:16"},{"visible":true,"include":false,"step":"80.0","x":37.46380952380952,"y":-14.755238095238095,"z":-12.850476190476192,"a95":0.99,"info":"28/10/2014 at 04:10:16"},{"visible":true,"include":false,"step":"90.0","x":13.55142857142857,"y":-3.6661904761904758,"z":-7.508952380952381,"a95":0.99,"info":"28/10/2014 at 04:10:16"},{"visible":true,"include":false,"step":"100.0","x":18.582857142857144,"y":-7.805619047619048,"z":-17.964761904761904,"a95":0.99,"info":"28/10/2014 at 04:10:16"}]},{"version":"v1.1.0","exported":"2017-05-22T11:02:37.958Z","volume":10.5,"added":"2017-05-22T11:02:24.796Z","format":"Utrecht","demagType":"Unknown","strat":"8","patch":1.1,"GEO":[],"TECT":[],"interpreted":false,"name":"SS11.5A","coreAzi":255,"coreDip":64,"bedStrike":253,"bedDip":57,"data":[{"visible":true,"include":false,"step":"0.0","x":-77.6152380952381,"y":14.19809523809524,"z":33.64,"a95":0.99,"info":"09/10/2014 at 05:24:56"},{"visible":true,"include":false,"step":"4.0","x":-45.406666666666666,"y":-2.264761904761905,"z":-2.5613333333333332,"a95":0.99,"info":"09/10/2014 at 05:24:56"},{"visible":true,"include":false,"step":"8.0","x":-32.08380952380952,"y":-4.308095238095238,"z":-12.040952380952382,"a95":0.99,"info":"09/10/2014 at 05:24:56"},{"visible":true,"include":false,"step":"12.0","x":-11.986666666666666,"y":3.6826666666666665,"z":-9.437523809523809,"a95":0.99,"info":"09/10/2014 at 05:24:56"},{"visible":true,"include":false,"step":"16.0","x":-7.2026666666666666,"y":-0.6522666666666667,"z":-6.8050476190476195,"a95":0.99,"info":"09/10/2014 at 05:24:56"},{"visible":true,"include":false,"step":"20.0","x":-3.5387619047619046,"y":-3.41447619047619,"z":-4.720952380952381,"a95":0.99,"info":"09/10/2014 at 05:24:56"},{"visible":true,"include":false,"step":"25.0","x":-6.125238095238095,"y":-13.342857142857142,"z":-24.09047619047619,"a95":0.99,"info":"09/10/2014 at 05:24:56"},{"visible":true,"include":false,"step":"30.0","x":-3.138857142857143,"y":-60.56,"z":-16.85142857142857,"a95":0.99,"info":"09/10/2014 at 05:24:56"},{"visible":true,"include":false,"step":"35.0","x":-7.302190476190477,"y":39.01428571428571,"z":-23.556190476190476,"a95":0.99,"info":"09/10/2014 at 05:24:56"},{"visible":true,"include":false,"step":"40.0","x":4.8240952380952375,"y":8.604952380952382,"z":25.376190476190477,"a95":0.99,"info":"09/10/2014 at 05:24:56"},{"visible":true,"include":false,"step":"45.0","x":-9.481714285714286,"y":4.100476190476191,"z":-19.908571428571427,"a95":0.99,"info":"09/10/2014 at 05:24:56"},{"visible":true,"include":false,"step":"50.0","x":-4.357142857142857,"y":1.8236190476190477,"z":-8.180190476190475,"a95":0.99,"info":"09/10/2014 at 05:24:56"},{"visible":true,"include":false,"step":"60.0","x":-2.989047619047619,"y":4.848761904761905,"z":-3.0619047619047617,"a95":0.99,"info":"09/10/2014 at 05:24:56"},{"visible":true,"include":false,"step":"70.0","x":2.8525714285714288,"y":-3.080571428571428,"z":2.913904761904762,"a95":0.99,"info":"09/10/2014 at 05:24:56"},{"visible":true,"include":false,"step":"80.0","x":-2.1724761904761904,"y":7.245904761904761,"z":7.209904761904761,"a95":0.99,"info":"09/10/2014 at 05:24:56"},{"visible":true,"include":false,"step":"90.0","x":-16.12095238095238,"y":-19.956190476190475,"z":13.926666666666666,"a95":0.99,"info":"09/10/2014 at 05:24:56"},{"visible":true,"include":false,"step":"100.0","x":-0.9549523809523809,"y":-20.23333333333333,"z":8.081333333333333,"a95":0.99,"info":"09/10/2014 at 05:24:56"}]},{"version":"v1.1.0","exported":"2017-05-22T11:02:37.958Z","volume":10.5,"added":"2017-05-22T11:02:24.801Z","format":"Utrecht","demagType":"Unknown","strat":"2","patch":1.1,"GEO":[],"TECT":[],"interpreted":false,"name":"SS11.6A","coreAzi":4,"coreDip":61,"bedStrike":253,"bedDip":57,"data":[{"visible":true,"include":false,"step":"0.0","x":18.073333333333334,"y":-17.786666666666665,"z":-1.4519047619047618,"a95":0.99,"info":"28/10/2014 at 04:10:16"},{"visible":true,"include":false,"step":"4.0","x":19.247619047619047,"y":-17.732380952380954,"z":-33.666666666666664,"a95":0.99,"info":"28/10/2014 at 04:10:16"},{"visible":true,"include":false,"step":"8.0","x":26.33809523809524,"y":-21.752380952380953,"z":-46.079047619047614,"a95":0.99,"info":"28/10/2014 at 04:10:16"},{"visible":true,"include":false,"step":"12.0","x":25.12190476190476,"y":-24.708571428571428,"z":-54.179047619047616,"a95":0.99,"info":"28/10/2014 at 04:10:16"},{"visible":true,"include":false,"step":"16.0","x":20.900952380952383,"y":-25.564761904761905,"z":-51.41142857142857,"a95":0.99,"info":"28/10/2014 at 04:10:16"},{"visible":true,"include":false,"step":"20.0","x":21.071428571428573,"y":-31.05809523809524,"z":-52.521904761904764,"a95":0.99,"info":"28/10/2014 at 04:10:16"},{"visible":true,"include":false,"step":"25.0","x":14.947619047619046,"y":-23.83238095238095,"z":-59.599999999999994,"a95":0.99,"info":"28/10/2014 at 04:10:16"},{"visible":true,"include":false,"step":"30.0","x":-0.24225714285714284,"y":-29.313333333333336,"z":-47.50476190476191,"a95":0.99,"info":"28/10/2014 at 04:10:16"},{"visible":true,"include":false,"step":"35.0","x":7.282857142857143,"y":-21.243809523809524,"z":-48.626666666666665,"a95":0.99,"info":"28/10/2014 at 04:10:16"},{"visible":true,"include":false,"step":"40.0","x":8.886190476190476,"y":-19.977142857142855,"z":-40.53333333333334,"a95":0.99,"info":"28/10/2014 at 04:10:16"},{"visible":true,"include":false,"step":"45.0","x":-2.32047619047619,"y":-24.923809523809524,"z":-39.28666666666667,"a95":0.99,"info":"28/10/2014 at 04:10:16"},{"visible":true,"include":false,"step":"50.0","x":3.552,"y":-25.419047619047618,"z":-29.535238095238096,"a95":0.99,"info":"28/10/2014 at 04:10:16"},{"visible":true,"include":false,"step":"60.0","x":8.081904761904761,"y":-22.03333333333333,"z":-25.826666666666668,"a95":0.99,"info":"28/10/2014 at 04:10:16"},{"visible":true,"include":false,"step":"70.0","x":9.219142857142858,"y":-18.84952380952381,"z":-25.345714285714287,"a95":0.99,"info":"28/10/2014 at 04:10:16"},{"visible":true,"include":false,"step":"80.0","x":6.661714285714285,"y":-13.075238095238095,"z":-36.37714285714286,"a95":0.99,"info":"28/10/2014 at 04:10:16"},{"visible":true,"include":false,"step":"90.0","x":21.37904761904762,"y":-28.36952380952381,"z":-18.735238095238095,"a95":0.99,"info":"28/10/2014 at 04:10:16"},{"visible":true,"include":false,"step":"100.0","x":12.285714285714286,"y":-8.020190476190477,"z":-14.265714285714285,"a95":0.99,"info":"28/10/2014 at 04:10:16"}]},{"version":"v1.1.0","exported":"2017-05-22T11:02:37.958Z","volume":10.5,"added":"2017-05-22T11:02:24.801Z","format":"Utrecht","demagType":"Unknown","strat":"6","patch":1.1,"GEO":[],"TECT":[],"interpreted":false,"name":"SS11.7A","coreAzi":349,"coreDip":68,"bedStrike":253,"bedDip":57,"data":[{"visible":true,"include":false,"step":"0.0","x":67.96380952380953,"y":-116.25714285714287,"z":304.752380952381,"a95":0.99,"info":"29/01/2015 at 23:20:58"},{"visible":true,"include":false,"step":"10.0","x":43.58380952380952,"y":-78.38952380952381,"z":165.03809523809525,"a95":0.99,"info":"29/01/2015 at 23:20:58"},{"visible":true,"include":false,"step":"15.0","x":64.3247619047619,"y":-60.539047619047615,"z":133.2761904761905,"a95":0.99,"info":"29/01/2015 at 23:20:58"},{"visible":true,"include":false,"step":"20.0","x":50.43333333333333,"y":-66.16,"z":87.37238095238095,"a95":0.99,"info":"29/01/2015 at 23:20:58"},{"visible":true,"include":false,"step":"23.0","x":66.84571428571428,"y":-70.76952380952382,"z":86.13904761904762,"a95":0.99,"info":"29/01/2015 at 23:20:58"},{"visible":true,"include":false,"step":"25.0","x":43.2447619047619,"y":-59.46476190476191,"z":80.6895238095238,"a95":0.99,"info":"29/01/2015 at 23:20:58"},{"visible":true,"include":false,"step":"30.0","x":49.149523809523814,"y":-36.86761904761905,"z":62.77142857142857,"a95":0.99,"info":"29/01/2015 at 23:20:58"},{"visible":true,"include":false,"step":"33.0","x":48.49142857142857,"y":-47.15047619047619,"z":33.018095238095235,"a95":0.99,"info":"29/01/2015 at 23:20:58"},{"visible":true,"include":false,"step":"35.0","x":36.888571428571424,"y":-20.956190476190475,"z":43.28380952380952,"a95":0.99,"info":"29/01/2015 at 23:20:58"},{"visible":true,"include":false,"step":"40.0","x":51.59142857142857,"y":-48.98285714285715,"z":45.099047619047624,"a95":0.99,"info":"29/01/2015 at 23:20:58"},{"visible":true,"include":false,"step":"45.0","x":17.664761904761903,"y":-35.406666666666666,"z":18.64,"a95":0.99,"info":"29/01/2015 at 23:20:58"},{"visible":true,"include":false,"step":"50.0","x":28.81238095238095,"y":-44.03333333333334,"z":-14.414285714285715,"a95":0.99,"info":"29/01/2015 at 23:20:58"},{"visible":true,"include":false,"step":"60.0","x":20.239047619047618,"y":-29.11047619047619,"z":-14.82952380952381,"a95":0.99,"info":"29/01/2015 at 23:20:58"},{"visible":true,"include":false,"step":"70.0","x":12.477142857142857,"y":8.346285714285713,"z":-18.836190476190477,"a95":0.99,"info":"29/01/2015 at 23:20:58"}]},{"version":"v1.1.0","exported":"2017-05-22T11:02:37.958Z","volume":10.5,"added":"2017-05-22T11:02:24.801Z","format":"Utrecht","demagType":"Unknown","strat":"7","patch":1.1,"GEO":[],"TECT":[],"interpreted":false,"name":"SS11.8A","coreAzi":233,"coreDip":67,"bedStrike":253,"bedDip":57,"data":[{"visible":true,"include":false,"step":"0.0","x":-346.68571428571425,"y":274.77142857142854,"z":382.6380952380952,"a95":0.99,"info":"29/01/2015 at 23:20:58"},{"visible":true,"include":false,"step":"10.0","x":-253.56190476190477,"y":168.9142857142857,"z":304.6666666666667,"a95":0.99,"info":"29/01/2015 at 23:20:58"},{"visible":true,"include":false,"step":"15.0","x":-193.2,"y":131.7238095238095,"z":230.40952380952382,"a95":0.99,"info":"29/01/2015 at 23:20:58"},{"visible":true,"include":false,"step":"20.0","x":-145.03809523809525,"y":89.42857142857143,"z":168.0285714285714,"a95":0.99,"info":"29/01/2015 at 23:20:58"},{"visible":true,"include":false,"step":"23.0","x":-102.23809523809524,"y":76.41047619047619,"z":134.44761904761904,"a95":0.99,"info":"29/01/2015 at 23:20:58"},{"visible":true,"include":false,"step":"25.0","x":-99.54285714285714,"y":74.66190476190476,"z":104.8952380952381,"a95":0.99,"info":"29/01/2015 at 23:20:58"},{"visible":true,"include":false,"step":"30.0","x":-80.74476190476192,"y":66.08380952380952,"z":79.10190476190476,"a95":0.99,"info":"29/01/2015 at 23:20:58"},{"visible":true,"include":false,"step":"33.0","x":-42.42857142857143,"y":61.709523809523816,"z":70.81523809523809,"a95":0.99,"info":"29/01/2015 at 23:20:58"},{"visible":true,"include":false,"step":"35.0","x":-44.74285714285715,"y":45.285714285714285,"z":62.17619047619048,"a95":0.99,"info":"29/01/2015 at 23:20:58"},{"visible":true,"include":false,"step":"40.0","x":-51.881904761904764,"y":39.256190476190476,"z":41.36761904761905,"a95":0.99,"info":"29/01/2015 at 23:20:58"},{"visible":true,"include":false,"step":"45.0","x":-42.65809523809524,"y":37.73619047619048,"z":18.032380952380954,"a95":0.99,"info":"29/01/2015 at 23:20:58"},{"visible":true,"include":false,"step":"50.0","x":-41.392380952380954,"y":-7.524476190476191,"z":10.865714285714287,"a95":0.99,"info":"29/01/2015 at 23:20:58"},{"visible":true,"include":false,"step":"60.0","x":-18.655238095238094,"y":16.036190476190477,"z":-18.90952380952381,"a95":0.99,"info":"29/01/2015 at 23:20:58"},{"visible":true,"include":false,"step":"70.0","x":10.125714285714285,"y":33.086666666666666,"z":-49.98,"a95":0.99,"info":"29/01/2015 at 23:20:58"}]},{"version":"v1.1.0","exported":"2017-05-22T11:02:37.958Z","volume":10.5,"added":"2017-05-22T11:02:24.801Z","format":"Utrecht","demagType":"Unknown","strat":"1","patch":1.1,"GEO":[],"TECT":[],"interpreted":false,"name":"SS11.8B","coreAzi":233,"coreDip":67,"bedStrike":253,"bedDip":57,"data":[{"visible":true,"include":false,"step":"0.0","x":-209.30476190476188,"y":130.82857142857142,"z":175.86666666666665,"a95":0.99,"info":"09/10/2014 at 10:55:29"},{"visible":true,"include":false,"step":"4.0","x":-196.87619047619046,"y":129.9142857142857,"z":182.23809523809524,"a95":0.99,"info":"09/10/2014 at 10:55:29"},{"visible":true,"include":false,"step":"8.0","x":-184.11428571428573,"y":135.66666666666666,"z":189.59047619047618,"a95":0.99,"info":"09/10/2014 at 10:55:29"},{"visible":true,"include":false,"step":"12.0","x":-176.0857142857143,"y":112.28571428571429,"z":173.9714285714286,"a95":0.99,"info":"09/10/2014 at 10:55:29"},{"visible":true,"include":false,"step":"16.0","x":-162.38095238095238,"y":102.62857142857142,"z":153.68571428571428,"a95":0.99,"info":"09/10/2014 at 10:55:29"},{"visible":true,"include":false,"step":"20.0","x":-152.8761904761905,"y":88.19047619047619,"z":142.65714285714287,"a95":0.99,"info":"09/10/2014 at 10:55:29"},{"visible":true,"include":false,"step":"25.0","x":-139.6095238095238,"y":86.52380952380952,"z":141.24761904761903,"a95":0.99,"info":"09/10/2014 at 10:55:29"},{"visible":true,"include":false,"step":"30.0","x":-131.26666666666665,"y":86.92761904761905,"z":129.88571428571427,"a95":0.99,"info":"09/10/2014 at 10:55:29"},{"visible":true,"include":false,"step":"35.0","x":-109.56190476190477,"y":43.73238095238095,"z":113.72380952380952,"a95":0.99,"info":"09/10/2014 at 10:55:29"},{"visible":true,"include":false,"step":"40.0","x":-107.19999999999999,"y":65.88190476190476,"z":117.55238095238094,"a95":0.99,"info":"09/10/2014 at 10:55:29"},{"visible":true,"include":false,"step":"45.0","x":-105.3047619047619,"y":41.455238095238094,"z":104.73333333333333,"a95":0.99,"info":"09/10/2014 at 10:55:29"},{"visible":true,"include":false,"step":"50.0","x":-87.88380952380952,"y":46.20761904761905,"z":108.5904761904762,"a95":0.99,"info":"09/10/2014 at 10:55:29"},{"visible":true,"include":false,"step":"60.0","x":-64.04380952380953,"y":35.77904761904762,"z":89.70666666666666,"a95":0.99,"info":"09/10/2014 at 10:55:29"},{"visible":true,"include":false,"step":"70.0","x":-69.02095238095238,"y":32.733333333333334,"z":75.5352380952381,"a95":0.99,"info":"09/10/2014 at 10:55:29"},{"visible":true,"include":false,"step":"80.0","x":-67.12857142857143,"y":30.35904761904762,"z":88.37714285714286,"a95":0.99,"info":"09/10/2014 at 10:55:29"},{"visible":true,"include":false,"step":"90.0","x":-33.22380952380953,"y":11.291428571428572,"z":77.01523809523809,"a95":0.99,"info":"09/10/2014 at 10:55:29"},{"visible":true,"include":false,"step":"100.0","x":-55.516190476190474,"y":22.20952380952381,"z":72.3952380952381,"a95":0.99,"info":"09/10/2014 at 10:55:29"}]},{"version":"v1.1.0","exported":"2017-05-22T11:02:37.958Z","volume":10.5,"added":"2017-05-22T11:02:24.802Z","format":"Utrecht","demagType":"Unknown","strat":"3","patch":1.1,"GEO":[],"TECT":[],"interpreted":false,"name":"SS11.9A","coreAzi":154,"coreDip":42,"bedStrike":253,"bedDip":57,"data":[{"visible":true,"include":false,"step":"0.0","x":17.239047619047618,"y":27.652380952380955,"z":10.526666666666667,"a95":0.99,"info":"28/10/2014 at 04:10:16"},{"visible":true,"include":false,"step":"4.0","x":44.12285714285714,"y":31.24952380952381,"z":-10.343809523809524,"a95":0.99,"info":"28/10/2014 at 04:10:16"},{"visible":true,"include":false,"step":"8.0","x":56.84285714285714,"y":25.16095238095238,"z":-22.259047619047617,"a95":0.99,"info":"28/10/2014 at 04:10:16"},{"visible":true,"include":false,"step":"12.0","x":62.35333333333334,"y":27.846666666666664,"z":-23.646666666666665,"a95":0.99,"info":"28/10/2014 at 04:10:16"},{"visible":true,"include":false,"step":"16.0","x":64.0047619047619,"y":27.504761904761907,"z":-20.713333333333335,"a95":0.99,"info":"28/10/2014 at 04:10:16"},{"visible":true,"include":false,"step":"20.0","x":61.478095238095236,"y":28.132380952380952,"z":-25.082857142857144,"a95":0.99,"info":"28/10/2014 at 04:10:16"},{"visible":true,"include":false,"step":"25.0","x":63.56380952380952,"y":27.756190476190476,"z":-17.22095238095238,"a95":0.99,"info":"28/10/2014 at 04:10:16"},{"visible":true,"include":false,"step":"30.0","x":57.02,"y":14.006666666666666,"z":0.23044761904761907,"a95":0.99,"info":"28/10/2014 at 04:10:16"},{"visible":true,"include":false,"step":"35.0","x":67.18190476190476,"y":24.016190476190474,"z":-17.177142857142858,"a95":0.99,"info":"28/10/2014 at 04:10:16"},{"visible":true,"include":false,"step":"40.0","x":61.467619047619046,"y":25.65904761904762,"z":-15.600000000000001,"a95":0.99,"info":"28/10/2014 at 04:10:16"},{"visible":true,"include":false,"step":"45.0","x":45.32,"y":27.255238095238095,"z":-11.798095238095238,"a95":0.99,"info":"28/10/2014 at 04:10:16"},{"visible":true,"include":false,"step":"50.0","x":53.859047619047615,"y":25.181904761904764,"z":-16.419999999999998,"a95":0.99,"info":"28/10/2014 at 04:10:16"},{"visible":true,"include":false,"step":"60.0","x":52.17047619047619,"y":23.17809523809524,"z":-13.940000000000001,"a95":0.99,"info":"28/10/2014 at 04:10:16"},{"visible":true,"include":false,"step":"70.0","x":38.8552380952381,"y":14.442857142857143,"z":1.1635238095238096,"a95":0.99,"info":"28/10/2014 at 04:10:16"},{"visible":true,"include":false,"step":"80.0","x":22.52,"y":14.421904761904763,"z":-13.216190476190476,"a95":0.99,"info":"28/10/2014 at 04:10:16"},{"visible":true,"include":false,"step":"90.0","x":15.553333333333333,"y":-0.6280476190476191,"z":22.69904761904762,"a95":0.99,"info":"28/10/2014 at 04:10:16"},{"visible":true,"include":false,"step":"100.0","x":-14.34,"y":-11.473333333333333,"z":16.763809523809524,"a95":0.99,"info":"28/10/2014 at 04:10:16"}]},{"version":"v1.1.0","exported":"2017-05-22T11:02:37.958Z","volume":10.5,"added":"2017-05-22T11:02:24.802Z","format":"Utrecht","demagType":"Unknown","strat":"8","patch":1.1,"GEO":[],"TECT":[],"interpreted":false,"name":"SS11.10A","coreAzi":350,"coreDip":56,"bedStrike":253,"bedDip":57,"data":[{"visible":true,"include":false,"step":"0.0","x":-13.996190476190478,"y":83.04285714285714,"z":228.95238095238096,"a95":0.99,"info":"29/01/2015 at 23:20:58"},{"visible":true,"include":false,"step":"10.0","x":-3.988095238095238,"y":65.11619047619048,"z":169.28571428571428,"a95":0.99,"info":"29/01/2015 at 23:20:58"},{"visible":true,"include":false,"step":"15.0","x":12.74095238095238,"y":39.49047619047619,"z":120.72380952380952,"a95":0.99,"info":"29/01/2015 at 23:20:58"},{"visible":true,"include":false,"step":"20.0","x":6.094476190476191,"y":28.076190476190476,"z":72.77619047619048,"a95":0.99,"info":"29/01/2015 at 23:20:58"},{"visible":true,"include":false,"step":"23.0","x":20.125714285714285,"y":25.771428571428572,"z":60.387619047619054,"a95":0.99,"info":"29/01/2015 at 23:20:58"},{"visible":true,"include":false,"step":"25.0","x":4.950952380952381,"y":22.078095238095237,"z":33.89333333333333,"a95":0.99,"info":"29/01/2015 at 23:20:58"},{"visible":true,"include":false,"step":"30.0","x":8.126761904761905,"y":28.45619047619048,"z":20.48,"a95":0.99,"info":"29/01/2015 at 23:20:58"},{"visible":true,"include":false,"step":"33.0","x":15.24095238095238,"y":18.553333333333335,"z":-3.2362857142857147,"a95":0.99,"info":"29/01/2015 at 23:20:58"},{"visible":true,"include":false,"step":"35.0","x":10.948571428571428,"y":12.518095238095238,"z":-25.83904761904762,"a95":0.99,"info":"29/01/2015 at 23:20:58"},{"visible":true,"include":false,"step":"40.0","x":19.01809523809524,"y":9.409428571428572,"z":-30.007619047619045,"a95":0.99,"info":"29/01/2015 at 23:20:58"},{"visible":true,"include":false,"step":"45.0","x":18.214285714285715,"y":10.132380952380952,"z":-36.56666666666666,"a95":0.99,"info":"29/01/2015 at 23:20:58"},{"visible":true,"include":false,"step":"50.0","x":15.474285714285713,"y":-4.509619047619047,"z":-44.20095238095238,"a95":0.99,"info":"29/01/2015 at 23:20:58"},{"visible":true,"include":false,"step":"60.0","x":20,"y":5.70952380952381,"z":-50.13904761904762,"a95":0.99,"info":"29/01/2015 at 23:20:58"},{"visible":true,"include":false,"step":"70.0","x":9.574285714285715,"y":19.23333333333333,"z":-49.28857142857142,"a95":0.99,"info":"29/01/2015 at 23:20:58"}]},{"version":"v1.1.0","exported":"2017-05-22T11:02:37.958Z","volume":10.5,"added":"2017-05-22T11:02:24.802Z","format":"Utrecht","demagType":"Unknown","strat":"1","patch":1.1,"GEO":[],"TECT":[],"interpreted":false,"name":"SS11.10B","coreAzi":350,"coreDip":56,"bedStrike":253,"bedDip":57,"data":[{"visible":true,"include":false,"step":"0.0","x":-15.452380952380953,"y":66.95809523809524,"z":304.03809523809525,"a95":0.99,"info":"30/01/2015 at 03:55:23"},{"visible":true,"include":false,"step":"10.0","x":-6.941047619047619,"y":33.53619047619048,"z":169.1809523809524,"a95":0.99,"info":"30/01/2015 at 03:55:23"},{"visible":true,"include":false,"step":"15.0","x":-7.418476190476191,"y":24.71809523809524,"z":121.04761904761905,"a95":0.99,"info":"30/01/2015 at 03:55:23"},{"visible":true,"include":false,"step":"20.0","x":-7.993809523809524,"y":23.075238095238095,"z":88.23047619047618,"a95":0.99,"info":"30/01/2015 at 03:55:23"},{"visible":true,"include":false,"step":"23.0","x":-11.167619047619048,"y":20.959047619047617,"z":64.20666666666666,"a95":0.99,"info":"30/01/2015 at 03:55:23"},{"visible":true,"include":false,"step":"25.0","x":-1.6174285714285714,"y":15.645714285714286,"z":47.41904761904762,"a95":0.99,"info":"30/01/2015 at 03:55:23"},{"visible":true,"include":false,"step":"30.0","x":-2.449904761904762,"y":13.144761904761905,"z":39.703809523809525,"a95":0.99,"info":"30/01/2015 at 03:55:23"},{"visible":true,"include":false,"step":"33.0","x":-6.245047619047618,"y":-0.06142095238095239,"z":23.617142857142856,"a95":0.99,"info":"30/01/2015 at 03:55:23"},{"visible":true,"include":false,"step":"35.0","x":-6.973619047619048,"y":7.282190476190475,"z":11.82095238095238,"a95":0.99,"info":"30/01/2015 at 03:55:23"},{"visible":true,"include":false,"step":"40.0","x":-16.895238095238096,"y":8.867904761904763,"z":4.459619047619047,"a95":0.99,"info":"30/01/2015 at 03:55:23"},{"visible":true,"include":false,"step":"45.0","x":-13.08095238095238,"y":3.195619047619048,"z":6.264857142857143,"a95":0.99,"info":"30/01/2015 at 03:55:23"},{"visible":true,"include":false,"step":"50.0","x":-10.406666666666666,"y":-2.3919047619047618,"z":0.014481904761904762,"a95":0.99,"info":"30/01/2015 at 03:55:23"},{"visible":true,"include":false,"step":"60.0","x":-19.60952380952381,"y":3.66447619047619,"z":-2.225714285714286,"a95":0.99,"info":"30/01/2015 at 03:55:23"},{"visible":true,"include":false,"step":"70.0","x":-13.667619047619047,"y":-6.809904761904763,"z":-11.122857142857143,"a95":0.99,"info":"30/01/2015 at 03:55:23"}]},{"version":"v1.1.0","exported":"2017-05-22T11:02:37.958Z","volume":10.5,"added":"2017-05-22T11:02:24.802Z","format":"Utrecht","demagType":"Unknown","strat":"2","patch":1.1,"GEO":[],"TECT":[],"interpreted":false,"name":"SS11.11A","coreAzi":268,"coreDip":19,"bedStrike":253,"bedDip":57,"data":[{"visible":true,"include":false,"step":"0.0","x":-10.876190476190477,"y":13.348571428571429,"z":-0.874552380952381,"a95":0.99,"info":"09/10/2014 at 10:55:29"},{"visible":true,"include":false,"step":"4.0","x":9.472857142857142,"y":-0.5657619047619048,"z":-1.7995238095238095,"a95":0.99,"info":"09/10/2014 at 10:55:29"},{"visible":true,"include":false,"step":"8.0","x":23.383809523809525,"y":2.6505714285714284,"z":2.1243809523809523,"a95":0.99,"info":"09/10/2014 at 10:55:29"},{"visible":true,"include":false,"step":"12.0","x":23.41142857142857,"y":-9.975238095238094,"z":-7.687809523809523,"a95":0.99,"info":"09/10/2014 at 10:55:29"},{"visible":true,"include":false,"step":"16.0","x":27.52952380952381,"y":-17.347619047619048,"z":-5.888285714285714,"a95":0.99,"info":"09/10/2014 at 10:55:29"},{"visible":true,"include":false,"step":"20.0","x":25.60380952380952,"y":-9.378285714285713,"z":-8.756857142857143,"a95":0.99,"info":"09/10/2014 at 10:55:29"},{"visible":true,"include":false,"step":"25.0","x":18.801904761904762,"y":-10.555238095238096,"z":-10.14,"a95":0.99,"info":"09/10/2014 at 10:55:29"},{"visible":true,"include":false,"step":"30.0","x":15.293333333333335,"y":-7.3652380952380945,"z":-6.728190476190476,"a95":0.99,"info":"09/10/2014 at 10:55:29"},{"visible":true,"include":false,"step":"35.0","x":24.31714285714286,"y":-22.516190476190474,"z":-8.138,"a95":0.99,"info":"09/10/2014 at 10:55:29"},{"visible":true,"include":false,"step":"40.0","x":16.880000000000003,"y":-15.791428571428572,"z":-6.400190476190476,"a95":0.99,"info":"09/10/2014 at 10:55:29"},{"visible":true,"include":false,"step":"45.0","x":15.75904761904762,"y":-15.46952380952381,"z":-7.976190476190476,"a95":0.99,"info":"09/10/2014 at 10:55:29"},{"visible":true,"include":false,"step":"50.0","x":2.6569523809523807,"y":-9.16552380952381,"z":0.6585904761904762,"a95":0.99,"info":"09/10/2014 at 10:55:29"},{"visible":true,"include":false,"step":"60.0","x":6.230952380952381,"y":-2.9127619047619047,"z":-2.463142857142857,"a95":0.99,"info":"09/10/2014 at 10:55:29"},{"visible":true,"include":false,"step":"70.0","x":2.151333333333333,"y":-2.744857142857143,"z":-14.158095238095237,"a95":0.99,"info":"09/10/2014 at 10:55:29"},{"visible":true,"include":false,"step":"80.0","x":-3.736952380952381,"y":-6.386857142857143,"z":-6.160952380952381,"a95":0.99,"info":"09/10/2014 at 10:55:29"},{"visible":true,"include":false,"step":"90.0","x":1.007809523809524,"y":-3.1791428571428573,"z":4.628380952380953,"a95":0.99,"info":"09/10/2014 at 10:55:29"},{"visible":true,"include":false,"step":"100.0","x":4.313142857142857,"y":-0.10035238095238096,"z":-5.717047619047619,"a95":0.99,"info":"09/10/2014 at 10:55:29"}]},{"version":"v1.1.0","exported":"2017-05-22T11:02:37.958Z","volume":10.5,"added":"2017-05-22T11:02:24.802Z","format":"Utrecht","demagType":"Unknown","strat":"2","patch":1.1,"GEO":[],"TECT":[],"interpreted":false,"name":"SS11.12A","coreAzi":295,"coreDip":56,"bedStrike":253,"bedDip":57,"data":[{"visible":true,"include":false,"step":"0.0","x":-227.95238095238096,"y":304.5904761904762,"z":499.8285714285714,"a95":0.99,"info":"30/01/2015 at 03:55:23"},{"visible":true,"include":false,"step":"10.0","x":-184.38095238095238,"y":215.14285714285714,"z":351.23809523809524,"a95":0.99,"info":"30/01/2015 at 03:55:23"},{"visible":true,"include":false,"step":"15.0","x":-147.9714285714286,"y":143.78095238095239,"z":281.81904761904764,"a95":0.99,"info":"30/01/2015 at 03:55:23"},{"visible":true,"include":false,"step":"20.0","x":-114.85714285714286,"y":105.88571428571429,"z":215.47619047619048,"a95":0.99,"info":"30/01/2015 at 03:55:23"},{"visible":true,"include":false,"step":"23.0","x":-91.6,"y":89.45809523809524,"z":177.54285714285714,"a95":0.99,"info":"30/01/2015 at 03:55:23"},{"visible":true,"include":false,"step":"25.0","x":-79.53142857142858,"y":62.01428571428571,"z":155.59047619047618,"a95":0.99,"info":"30/01/2015 at 03:55:23"},{"visible":true,"include":false,"step":"30.0","x":-70.46095238095238,"y":64.83714285714285,"z":119.02857142857142,"a95":0.99,"info":"30/01/2015 at 03:55:23"},{"visible":true,"include":false,"step":"33.0","x":-37.076190476190476,"y":54.27619047619047,"z":93.67904761904762,"a95":0.99,"info":"30/01/2015 at 03:55:23"},{"visible":true,"include":false,"step":"35.0","x":-38.21619047619048,"y":40.81809523809524,"z":89.35333333333334,"a95":0.99,"info":"30/01/2015 at 03:55:23"},{"visible":true,"include":false,"step":"40.0","x":-29.571428571428573,"y":53.79904761904762,"z":58.70666666666666,"a95":0.99,"info":"30/01/2015 at 03:55:23"},{"visible":true,"include":false,"step":"45.0","x":-10.535238095238096,"y":50.27904761904762,"z":53.45428571428571,"a95":0.99,"info":"30/01/2015 at 03:55:23"},{"visible":true,"include":false,"step":"50.0","x":-5.994857142857143,"y":27.324761904761907,"z":26.730476190476192,"a95":0.99,"info":"30/01/2015 at 03:55:23"},{"visible":true,"include":false,"step":"60.0","x":-34.03333333333334,"y":63.76761904761904,"z":26.415238095238095,"a95":0.99,"info":"30/01/2015 at 03:55:23"},{"visible":true,"include":false,"step":"70.0","x":-18.757142857142856,"y":51.07142857142857,"z":6.570190476190476,"a95":0.99,"info":"30/01/2015 at 03:55:23"}]},{"version":"v1.1.0","exported":"2017-05-22T11:02:37.958Z","volume":10.5,"added":"2017-05-22T11:02:24.803Z","format":"Utrecht","demagType":"Unknown","strat":"4","patch":1.1,"GEO":[],"TECT":[],"interpreted":false,"name":"SS11.12B","coreAzi":295,"coreDip":56,"bedStrike":253,"bedDip":57,"data":[{"visible":true,"include":false,"step":"0.0","x":-38.492380952380955,"y":26.330476190476194,"z":118.70476190476191,"a95":0.99,"info":"28/10/2014 at 04:10:16"},{"visible":true,"include":false,"step":"4.0","x":-28.611428571428572,"y":21.05142857142857,"z":94.65904761904761,"a95":0.99,"info":"28/10/2014 at 04:10:16"},{"visible":true,"include":false,"step":"8.0","x":-20.86952380952381,"y":12.24095238095238,"z":75.46666666666667,"a95":0.99,"info":"28/10/2014 at 04:10:16"},{"visible":true,"include":false,"step":"12.0","x":-8.00695238095238,"y":12.767619047619048,"z":65.85238095238095,"a95":0.99,"info":"28/10/2014 at 04:10:16"},{"visible":true,"include":false,"step":"16.0","x":-13.024761904761904,"y":9.124,"z":57.43714285714286,"a95":0.99,"info":"28/10/2014 at 04:10:16"},{"visible":true,"include":false,"step":"20.0","x":-20.976190476190474,"y":6.078952380952381,"z":49.973333333333336,"a95":0.99,"info":"28/10/2014 at 04:10:16"},{"visible":true,"include":false,"step":"25.0","x":-5.314761904761904,"y":13.243809523809524,"z":36.92761904761905,"a95":0.99,"info":"28/10/2014 at 04:10:16"},{"visible":true,"include":false,"step":"30.0","x":-20.686666666666667,"y":-5.691333333333334,"z":53.11142857142857,"a95":0.99,"info":"28/10/2014 at 04:10:16"},{"visible":true,"include":false,"step":"35.0","x":-15.975238095238096,"y":-7.9267619047619045,"z":27.089523809523808,"a95":0.99,"info":"28/10/2014 at 04:10:16"},{"visible":true,"include":false,"step":"40.0","x":-11.071428571428571,"y":12.66095238095238,"z":35.444761904761904,"a95":0.99,"info":"28/10/2014 at 04:10:16"},{"visible":true,"include":false,"step":"45.0","x":-27.61809523809524,"y":-14.025714285714287,"z":17.549523809523812,"a95":0.99,"info":"28/10/2014 at 04:10:16"},{"visible":true,"include":false,"step":"50.0","x":-21.422857142857143,"y":-18.098095238095237,"z":9.082380952380952,"a95":0.99,"info":"28/10/2014 at 04:10:16"},{"visible":true,"include":false,"step":"60.0","x":-21.418095238095237,"y":17.759047619047617,"z":-12.944761904761904,"a95":0.99,"info":"28/10/2014 at 04:10:16"},{"visible":true,"include":false,"step":"70.0","x":-30.393333333333334,"y":-18.219047619047622,"z":-2.286857142857143,"a95":0.99,"info":"28/10/2014 at 04:10:16"},{"visible":true,"include":false,"step":"80.0","x":-18.929523809523808,"y":-28.88380952380952,"z":-24.928571428571427,"a95":0.99,"info":"28/10/2014 at 04:10:16"},{"visible":true,"include":false,"step":"90.0","x":-26.078095238095237,"y":40.34857142857143,"z":-31.32190476190476,"a95":0.99,"info":"28/10/2014 at 04:10:16"},{"visible":true,"include":false,"step":"100.0","x":-14.627619047619048,"y":-5.2570476190476185,"z":-45.75238095238095,"a95":0.99,"info":"28/10/2014 at 04:10:16"}]},{"version":"v1.1.0","exported":"2017-05-22T11:02:37.958Z","volume":10.5,"added":"2017-05-22T11:02:24.803Z","format":"Utrecht","demagType":"Unknown","strat":"5","patch":1.1,"GEO":[],"TECT":[],"interpreted":false,"name":"SS11.13A","coreAzi":296,"coreDip":49,"bedStrike":253,"bedDip":57,"data":[{"visible":true,"include":false,"step":"0.0","x":15.546666666666667,"y":33.362857142857145,"z":-23.54285714285714,"a95":0.99,"info":"28/10/2014 at 04:10:16"},{"visible":true,"include":false,"step":"4.0","x":18.312380952380952,"y":30.59904761904762,"z":-55.87619047619048,"a95":0.99,"info":"28/10/2014 at 04:10:16"},{"visible":true,"include":false,"step":"8.0","x":26.134285714285717,"y":16.878095238095238,"z":-59.917142857142856,"a95":0.99,"info":"28/10/2014 at 04:10:16"},{"visible":true,"include":false,"step":"12.0","x":25.48190476190476,"y":29.01047619047619,"z":-74.3352380952381,"a95":0.99,"info":"28/10/2014 at 04:10:16"},{"visible":true,"include":false,"step":"16.0","x":24.61619047619048,"y":32.84857142857143,"z":-71.59238095238095,"a95":0.99,"info":"28/10/2014 at 04:10:16"},{"visible":true,"include":false,"step":"20.0","x":2.352095238095238,"y":24.277142857142856,"z":-75.30952380952381,"a95":0.99,"info":"28/10/2014 at 04:10:16"},{"visible":true,"include":false,"step":"25.0","x":2.2701904761904763,"y":19.565714285714286,"z":-75.03619047619047,"a95":0.99,"info":"28/10/2014 at 04:10:16"},{"visible":true,"include":false,"step":"30.0","x":-12.843809523809526,"y":8.579904761904762,"z":-74.20285714285714,"a95":0.99,"info":"28/10/2014 at 04:10:16"},{"visible":true,"include":false,"step":"35.0","x":8.411333333333333,"y":16.467619047619046,"z":-71.13142857142857,"a95":0.99,"info":"28/10/2014 at 04:10:16"},{"visible":true,"include":false,"step":"40.0","x":45.172380952380955,"y":37.27619047619047,"z":-54.03142857142858,"a95":0.99,"info":"28/10/2014 at 04:10:16"},{"visible":true,"include":false,"step":"45.0","x":18.278095238095236,"y":2.456,"z":-58.921904761904756,"a95":0.99,"info":"28/10/2014 at 04:10:16"},{"visible":true,"include":false,"step":"50.0","x":24.293333333333333,"y":-16.43904761904762,"z":-60.57523809523809,"a95":0.99,"info":"28/10/2014 at 04:10:16"},{"visible":true,"include":false,"step":"60.0","x":53.36952380952381,"y":3.4413333333333336,"z":-15.17904761904762,"a95":0.99,"info":"28/10/2014 at 04:10:16"},{"visible":true,"include":false,"step":"70.0","x":91.98285714285714,"y":-22.391428571428573,"z":-33.815238095238094,"a95":0.99,"info":"28/10/2014 at 04:10:16"},{"visible":true,"include":false,"step":"80.0","x":104.56190476190477,"y":7.816,"z":-42.73714285714286,"a95":0.99,"info":"28/10/2014 at 04:10:16"},{"visible":true,"include":false,"step":"90.0","x":119.43809523809523,"y":16.977142857142855,"z":-20.62952380952381,"a95":0.99,"info":"28/10/2014 at 04:10:16"},{"visible":true,"include":false,"step":"100.0","x":132.54285714285714,"y":-16.706666666666667,"z":-13.16952380952381,"a95":0.99,"info":"28/10/2014 at 04:10:16"}]},{"version":"v1.1.0","exported":"2017-05-22T11:02:37.958Z","volume":10.5,"added":"2017-05-22T11:02:24.803Z","format":"Utrecht","demagType":"Unknown","strat":"3","patch":1.1,"GEO":[],"TECT":[],"interpreted":false,"name":"SS11.13B","coreAzi":296,"coreDip":49,"bedStrike":253,"bedDip":57,"data":[{"visible":true,"include":false,"step":"0.0","x":-113.65714285714287,"y":193.42857142857142,"z":286.22857142857146,"a95":0.99,"info":"30/01/2015 at 03:55:23"},{"visible":true,"include":false,"step":"10.0","x":-69.22666666666666,"y":95.34285714285714,"z":147.2,"a95":0.99,"info":"30/01/2015 at 03:55:23"},{"visible":true,"include":false,"step":"15.0","x":-37.39904761904762,"y":61.50952380952381,"z":112.19047619047619,"a95":0.99,"info":"30/01/2015 at 03:55:23"},{"visible":true,"include":false,"step":"20.0","x":6.448571428571428,"y":38.362857142857145,"z":62.724761904761905,"a95":0.99,"info":"30/01/2015 at 03:55:23"},{"visible":true,"include":false,"step":"23.0","x":-12.136190476190476,"y":42.097142857142856,"z":14.977142857142857,"a95":0.99,"info":"30/01/2015 at 03:55:23"},{"visible":true,"include":false,"step":"25.0","x":1.9900952380952381,"y":48.603809523809524,"z":-33.50666666666667,"a95":0.99,"info":"30/01/2015 at 03:55:23"},{"visible":true,"include":false,"step":"30.0","x":17.974285714285713,"y":34.093333333333334,"z":-51.95428571428571,"a95":0.99,"info":"30/01/2015 at 03:55:23"},{"visible":true,"include":false,"step":"33.0","x":-37.24095238095238,"y":12.132380952380952,"z":-75.68190476190476,"a95":0.99,"info":"30/01/2015 at 03:55:23"},{"visible":true,"include":false,"step":"35.0","x":11.062857142857142,"y":50.37333333333333,"z":-21.854285714285716,"a95":0.99,"info":"30/01/2015 at 03:55:23"},{"visible":true,"include":false,"step":"40.0","x":7.606190476190475,"y":7.583333333333333,"z":-86.66571428571429,"a95":0.99,"info":"30/01/2015 at 03:55:23"},{"visible":true,"include":false,"step":"45.0","x":-23.799047619047617,"y":19.23333333333333,"z":-66.68190476190476,"a95":0.99,"info":"30/01/2015 at 03:55:23"},{"visible":true,"include":false,"step":"50.0","x":-71.81428571428572,"y":-37.15904761904762,"z":-80.71809523809523,"a95":0.99,"info":"30/01/2015 at 03:55:23"},{"visible":true,"include":false,"step":"60.0","x":-76.08761904761904,"y":-1.2379047619047618,"z":-98.95238095238095,"a95":0.99,"info":"30/01/2015 at 03:55:23"},{"visible":true,"include":false,"step":"70.0","x":-88.09142857142858,"y":-2.834,"z":-66.99333333333333,"a95":0.99,"info":"30/01/2015 at 03:55:23"}]},{"version":"v1.1.0","exported":"2017-05-22T11:02:37.958Z","volume":10.5,"added":"2017-05-22T11:02:24.803Z","format":"Utrecht","demagType":"Unknown","strat":"3","patch":1.1,"GEO":[],"TECT":[],"interpreted":false,"name":"SS11.14A","coreAzi":10,"coreDip":64,"bedStrike":253,"bedDip":57,"data":[{"visible":true,"include":false,"step":"0.0","x":40.327619047619045,"y":-46.65714285714286,"z":101.61904761904762,"a95":0.99,"info":"09/10/2014 at 10:55:29"},{"visible":true,"include":false,"step":"4.0","x":45.205714285714286,"y":-48.948571428571434,"z":79.68285714285715,"a95":0.99,"info":"09/10/2014 at 10:55:29"},{"visible":true,"include":false,"step":"8.0","x":49.41904761904762,"y":-46.023809523809526,"z":69.20857142857143,"a95":0.99,"info":"09/10/2014 at 10:55:29"},{"visible":true,"include":false,"step":"12.0","x":44.944761904761904,"y":-48.35142857142857,"z":46.007619047619045,"a95":0.99,"info":"09/10/2014 at 10:55:29"},{"visible":true,"include":false,"step":"16.0","x":40.359047619047615,"y":-38.34952380952381,"z":41.99714285714286,"a95":0.99,"info":"09/10/2014 at 10:55:29"},{"visible":true,"include":false,"step":"20.0","x":29.01047619047619,"y":-46.195238095238096,"z":34.94095238095238,"a95":0.99,"info":"09/10/2014 at 10:55:29"},{"visible":true,"include":false,"step":"25.0","x":23.093333333333334,"y":-42.42190476190476,"z":34.034285714285716,"a95":0.99,"info":"09/10/2014 at 10:55:29"},{"visible":true,"include":false,"step":"30.0","x":21.877142857142857,"y":-44.30095238095238,"z":28.537142857142857,"a95":0.99,"info":"09/10/2014 at 10:55:29"},{"visible":true,"include":false,"step":"35.0","x":22.81809523809524,"y":-43.62380952380953,"z":30.953333333333333,"a95":0.99,"info":"09/10/2014 at 10:55:29"},{"visible":true,"include":false,"step":"40.0","x":22.445714285714285,"y":-44.061904761904756,"z":22.88952380952381,"a95":0.99,"info":"09/10/2014 at 10:55:29"},{"visible":true,"include":false,"step":"45.0","x":19.82095238095238,"y":-44.98095238095238,"z":29.380000000000003,"a95":0.99,"info":"09/10/2014 at 10:55:29"},{"visible":true,"include":false,"step":"50.0","x":15.505714285714285,"y":-31.682857142857145,"z":36.73904761904762,"a95":0.99,"info":"09/10/2014 at 10:55:29"},{"visible":true,"include":false,"step":"60.0","x":18.42095238095238,"y":-36.94857142857143,"z":37.354285714285716,"a95":0.99,"info":"09/10/2014 at 10:55:29"},{"visible":true,"include":false,"step":"70.0","x":12.621904761904762,"y":-30.491428571428575,"z":36.574285714285715,"a95":0.99,"info":"09/10/2014 at 10:55:29"},{"visible":true,"include":false,"step":"80.0","x":18.053333333333335,"y":-30.122857142857146,"z":31.22190476190476,"a95":0.99,"info":"09/10/2014 at 10:55:29"},{"visible":true,"include":false,"step":"90.0","x":8.647428571428572,"y":-25.459047619047617,"z":31.64095238095238,"a95":0.99,"info":"09/10/2014 at 10:55:29"},{"visible":true,"include":false,"step":"100.0","x":8.09504761904762,"y":-20.665714285714287,"z":30.580952380952382,"a95":0.99,"info":"09/10/2014 at 10:55:29"}]}]
