# Supplementary material for: Paleomagnetic constraints on the timing and distribution of Cenozoic rotations in Central and Eastern Anatolia
Source: Copernicus journal article supplement (doi:10.5194/se-9-295-2018), 2018-03-21
Supplement: Supplementary file 2 [file se-9-295-2018-supplement.zip › se-2017-66_DATA_dir files/dir files Sivas/SS12.dir]

[{"version":"v1.1.0","exported":"2017-05-22T13:58:18.173Z","info":"","GEO":[{"dec":0.7504090457742905,"inc":-16.680813077843798,"MAD":4.730184105293555,"cm":[-2.291500322826323e-13,-2.842170943040401e-14,0],"intensity":5195.543333532332,"type":"GC","origin":false,"forced":true,"remark":"","nSteps":7,"minStep":"100","maxStep":"320","steps":["100","150","180","210","240","300","320"],"group":"None","version":"v1.1.0"}],"TECT":[{"dec":59.45458616558557,"inc":-43.62261382559958,"MAD":4.730184105294103,"cm":[-1.0729195309977513e-12,2.842170943040401e-14,1.4210854715202004e-13],"intensity":5195.543333532332,"type":"GC","origin":false,"forced":true,"remark":"","nSteps":7,"minStep":"100","maxStep":"320","steps":["100","150","180","210","240","300","320"],"group":"None","version":"v1.1.0"}],"interpreted":true,"name":"SS12.1A","coreAzi":105,"coreDip":40,"bedStrike":224,"bedDip":82,"data":[{"visible":true,"include":false,"step":"20","x":-4471.523809523809,"y":-351.42857142857144,"z":-659.2380952380952,"a95":"2.1","info":"\"14-09-29\" at \"16:25\""},{"visible":true,"include":true,"step":"100","x":-3309.5238095238096,"y":73.9047619047619,"z":-833.8095238095239,"a95":"2.1","info":"\"14-09-29\" at \"19:17\""},{"visible":true,"include":true,"step":"150","x":-2295.809523809524,"y":318.57142857142856,"z":-1220.3809523809523,"a95":"2.4","info":"\"14-09-29\" at \"22:13\""},{"visible":true,"include":true,"step":"180","x":-2000.952380952381,"y":432.4761904761905,"z":-1298.1904761904761,"a95":"2.4","info":"\"14-09-30\" at \"16:51\""},{"visible":true,"include":true,"step":"210","x":-1765.5238095238096,"y":360.6666666666667,"z":-1428.1904761904761,"a95":"2.5","info":"\"14-09-30\" at \"19:55\""},{"visible":true,"include":true,"step":"240","x":-1561.904761904762,"y":481.04761904761904,"z":-1447.3333333333333,"a95":"2.5","info":"\"14-09-30\" at \"23:03\""},{"visible":false,"include":false,"step":"270","x":-1173.3333333333333,"y":432.95238095238096,"z":-1443.6190476190477,"a95":"2.7","info":"\"14-10-01\" at \"17:23\""},{"visible":true,"include":true,"step":"300","x":-1382.095238095238,"y":488.85714285714283,"z":-1422.4761904761904,"a95":"2.5","info":"\"14-10-01\" at \"20:31\""},{"visible":true,"include":true,"step":"320","x":-1388,"y":368,"z":-1341.4285714285713,"a95":"2.4","info":"\"14-10-01\" at \"23:38\""},{"visible":true,"include":false,"step":"340","x":-1222,"y":444.3809523809524,"z":-1113.047619047619,"a95":"2.4","info":"\"14-10-02\" at \"17:14\""},{"visible":true,"include":false,"step":"370","x":-1114,"y":374.85714285714283,"z":-1154.4761904761904,"a95":"2.4","info":"\"14-10-02\" at \"20:03\""},{"visible":true,"include":false,"step":"400","x":-1075.3333333333333,"y":302.3809523809524,"z":-1088.1904761904761,"a95":"2.3","info":"\"14-10-02\" at \"23:15\""},{"visible":true,"include":false,"step":"420","x":-956.0952380952381,"y":216,"z":-1107.4285714285713,"a95":"2.4","info":"\"14-10-03\" at \"16:58\""},{"visible":true,"include":false,"step":"440","x":-872.4761904761905,"y":252.0952380952381,"z":-1049.6190476190477,"a95":"2.6","info":"\"14-10-03\" at \"20:15\""},{"visible":true,"include":false,"step":"460","x":-932.3809523809524,"y":235.23809523809524,"z":-1112.4761904761904,"a95":"2.5","info":"\"14-10-03\" at \"23:33\""},{"visible":true,"include":false,"step":"480","x":-889.9047619047619,"y":378.76190476190476,"z":-962.6666666666666,"a95":"2.4","info":"\"14-10-04\" at \"10:28\""},{"visible":true,"include":false,"step":"510","x":-881.7142857142857,"y":113.9047619047619,"z":-963.5238095238095,"a95":"2.6","info":"\"14-10-04\" at \"13:20\""},{"visible":true,"include":false,"step":"540","x":-801.3333333333334,"y":286.3809523809524,"z":-903.3333333333334,"a95":"2.9","info":"\"14-10-04\" at \"16:45\""},{"visible":true,"include":false,"step":"570","x":-591.8095238095239,"y":289.5238095238095,"z":-684.2857142857143,"a95":"3.3","info":"\"14-10-05\" at \"10:49\""},{"visible":true,"include":false,"step":"600","x":-818.3809523809524,"y":388.95238095238096,"z":-478.4761904761905,"a95":"2.9","info":"\"14-10-05\" at \"14:08\""},{"visible":false,"include":false,"step":"630","x":-208.0952380952381,"y":217.61904761904762,"z":-540.7619047619048,"a95":"4","info":"\"14-10-05\" at \"17:35\""},{"visible":false,"include":false,"step":"660","x":11.238095238095237,"y":138.1904761904762,"z":-714.4761904761905,"a95":"4.2","info":"\"14-10-11\" at \"08:10\""},{"visible":false,"include":false,"step":"680","x":-338,"y":683.9047619047619,"z":-219.8095238095238,"a95":"3.8","info":"\"14-10-11\" at \"11:14\""}],"demagType":"Unknown","patch":1.1,"format":"Unknown","strat":null},{"version":"v1.1.0","exported":"2017-05-22T13:58:18.174Z","info":"","GEO":[{"dec":269.4808631372147,"inc":-5.200271083973715,"MAD":2.4225896232162203,"cm":[-9.769962616701378e-14,0,0],"intensity":4703.036525730827,"type":"dir","forced":true,"remark":"","origin":false,"nSteps":7,"minStep":"300","maxStep":"480","steps":["300","330","360","390","420","450","480"],"group":"None","version":"v1.1.0"}],"TECT":[{"dec":224.74411646901527,"inc":-45.707595733269024,"MAD":2.422589623216226,"cm":[0,-1.7053025658242404e-13,1.4210854715202004e-13],"intensity":4703.036525730827,"type":"dir","forced":true,"remark":"","origin":false,"nSteps":7,"minStep":"300","maxStep":"480","steps":["300","330","360","390","420","450","480"],"group":"None","version":"v1.1.0"}],"interpreted":true,"name":"SS12.1B","coreAzi":105,"coreDip":40,"bedStrike":224,"bedDip":82,"data":[{"visible":true,"include":false,"step":"20","x":-4903.523809523809,"y":-980.6666666666666,"z":-1298.2857142857142,"a95":"1.9","info":"\"14-10-20\" at \"16:46\""},{"visible":true,"include":false,"step":"100","x":-3778.285714285714,"y":-332.1904761904762,"z":-1276.5714285714287,"a95":"1.9","info":"\"14-10-20\" at \"20:04\""},{"visible":true,"include":false,"step":"150","x":-2293.0476190476193,"y":322,"z":-1814.952380952381,"a95":"2.1","info":"\"14-10-20\" at \"23:00\""},{"visible":true,"include":false,"step":"180","x":-2057.4285714285716,"y":555.2380952380952,"z":-2066.285714285714,"a95":"2.1","info":"\"14-10-21\" at \"15:03\""},{"visible":true,"include":false,"step":"210","x":-2042.4761904761904,"y":426.76190476190476,"z":-2002,"a95":"2.1","info":"\"14-10-21\" at \"17:55\""},{"visible":true,"include":false,"step":"240","x":-1750.095238095238,"y":642.4761904761905,"z":-2166.7619047619046,"a95":"2.1","info":"\"14-10-21\" at \"21:00\""},{"visible":true,"include":false,"step":"270","x":-1813.5238095238096,"y":664.952380952381,"z":-2180.8571428571427,"a95":"2.1","info":"\"14-10-21\" at \"23:59\""},{"visible":true,"include":true,"step":"300","x":-1512.2857142857142,"y":799.1428571428571,"z":-2223.809523809524,"a95":"2.3","info":"\"14-10-22\" at \"16:21\""},{"visible":true,"include":true,"step":"330","x":-1427.5238095238096,"y":763.047619047619,"z":-2024.7619047619048,"a95":"2.2","info":"\"14-10-22\" at \"19:26\""},{"visible":true,"include":true,"step":"360","x":-1257.8095238095239,"y":586.3809523809524,"z":-1681.4285714285713,"a95":"2.4","info":"\"14-10-22\" at \"22:34\""},{"visible":true,"include":true,"step":"390","x":-1067.3333333333333,"y":489.6190476190476,"z":-1499.6190476190477,"a95":"2.5","info":"\"14-10-23\" at \"16:46\""},{"visible":true,"include":true,"step":"420","x":-1122.1904761904761,"y":496.4761904761905,"z":-1613.142857142857,"a95":"2.4","info":"\"14-10-23\" at \"19:48\""},{"visible":true,"include":true,"step":"450","x":-979.1428571428571,"y":317.3333333333333,"z":-1502.952380952381,"a95":"2.4","info":"\"14-10-24\" at \"14:25\""},{"visible":true,"include":true,"step":"480","x":-957.8095238095239,"y":545.4285714285714,"z":-1545.7142857142858,"a95":"2.5","info":"\"14-10-24\" at \"17:29\""},{"visible":true,"include":false,"step":"510","x":-598.4761904761905,"y":627.9047619047619,"z":-1505.3333333333333,"a95":"2.6","info":"\"14-10-24\" at \"20:21\""},{"visible":true,"include":false,"step":"540","x":-617.2380952380952,"y":245.52380952380952,"z":-1147.7142857142858,"a95":"2.7","info":"\"14-10-24\" at \"23:17\""},{"visible":true,"include":false,"step":"570","x":-508.1904761904762,"y":850.5714285714286,"z":-999.1428571428571,"a95":"2.7","info":"\"14-10-25\" at \"02:17\""},{"visible":true,"include":false,"step":"600","x":-778.8571428571429,"y":560.8571428571429,"z":-933.8095238095239,"a95":"2.9","info":"\"14-10-25\" at \"04:51\""},{"visible":true,"include":false,"step":"630","x":-685.7142857142857,"y":484.6666666666667,"z":-920.4761904761905,"a95":"2.8","info":"\"14-10-25\" at \"23:14\""},{"visible":false,"include":false,"step":"660","x":-641.6190476190476,"y":-66.19047619047619,"z":-497.3333333333333,"a95":"4","info":"\"14-10-26\" at \"01:58\""},{"visible":false,"include":false,"step":"680","x":133.71428571428572,"y":-167.71428571428572,"z":-259.14285714285717,"a95":"6.3","info":"\"14-10-26\" at \"03:00\""}],"demagType":"Unknown","patch":1.1,"format":"Unknown","strat":null},{"version":"v1.1.0","exported":"2017-05-22T13:58:18.174Z","info":"5","GEO":[{"dec":7.246296794382886,"inc":-27.29471636150289,"MAD":6.4500636743622115,"cm":[-1.2992781453898974e-13,-2.165463575649829e-14,0],"intensity":3843.706721431453,"type":"GC","origin":false,"forced":true,"remark":"","nSteps":9,"minStep":"10.0","maxStep":"50.0","steps":["10.0","15.0","20.0","25.0","30.0","35.0","40.0","45.0","50.0"],"group":"None"}],"TECT":[{"dec":72.09515199190292,"inc":-36.18526854689686,"MAD":6.450063674363367,"cm":[1.8677123339979776e-13,2.165463575649829e-14,-4.330927151299658e-14],"intensity":3843.7067214314525,"type":"GC","origin":false,"forced":true,"remark":"","nSteps":9,"minStep":"10.0","maxStep":"50.0","steps":["10.0","15.0","20.0","25.0","30.0","35.0","40.0","45.0","50.0"],"group":"None"}],"interpreted":true,"name":"SS12.1C","coreAzi":105,"coreDip":40,"bedStrike":224,"bedDip":82,"data":[{"visible":true,"include":false,"step":"0.0","x":-3323.4285714285716,"y":-654.495238095238,"z":-6.7244761904761905,"a95":"0.99","info":"21/09/2014 at 19:03:10"},{"visible":true,"include":false,"step":"5.0","x":-2835.0476190476193,"y":-726.1809523809524,"z":-317.76190476190476,"a95":"0.99","info":"21/09/2014 at 19:03:10"},{"visible":true,"include":true,"step":"10.0","x":-2359.6190476190477,"y":-432.64761904761906,"z":-706.7142857142857,"a95":"0.99","info":"21/09/2014 at 19:03:10"},{"visible":true,"include":true,"step":"15.0","x":-2032.5714285714287,"y":-231.13333333333335,"z":-891.647619047619,"a95":"0.99","info":"21/09/2014 at 19:03:10"},{"visible":true,"include":true,"step":"20.0","x":-1824.857142857143,"y":-124.9904761904762,"z":-980,"a95":"0.99","info":"21/09/2014 at 19:03:10"},{"visible":true,"include":true,"step":"25.0","x":-1645.047619047619,"y":-105.47619047619048,"z":-954.7619047619048,"a95":"0.99","info":"21/09/2014 at 19:03:10"},{"visible":true,"include":true,"step":"30.0","x":-1468.4761904761904,"y":-7.127428571428571,"z":-1006.6666666666666,"a95":"0.99","info":"21/09/2014 at 19:03:10"},{"visible":true,"include":true,"step":"35.0","x":-1401.047619047619,"y":52.75523809523809,"z":-1034.2857142857142,"a95":"0.99","info":"21/09/2014 at 19:03:10"},{"visible":true,"include":true,"step":"40.0","x":-1290.095238095238,"y":-28.890476190476193,"z":-1076,"a95":"0.99","info":"21/09/2014 at 19:03:10"},{"visible":true,"include":true,"step":"45.0","x":-1300.4761904761904,"y":110.45714285714286,"z":-1060.1904761904761,"a95":"0.99","info":"21/09/2014 at 19:03:10"},{"visible":true,"include":true,"step":"50.0","x":-1079.4285714285713,"y":92.78666666666666,"z":-976,"a95":"0.99","info":"21/09/2014 at 19:03:10"},{"visible":true,"include":false,"step":"60.0","x":-1183.8095238095239,"y":-51.494285714285716,"z":-1015.2380952380952,"a95":"0.99","info":"21/09/2014 at 19:03:10"},{"visible":true,"include":false,"step":"70.0","x":-948.2761904761904,"y":164.6095238095238,"z":-1175.8095238095239,"a95":"0.99","info":"21/09/2014 at 19:03:10"},{"visible":true,"include":false,"step":"80.0","x":-1205.142857142857,"y":107.44761904761906,"z":-941.7047619047619,"a95":"0.99","info":"21/09/2014 at 19:03:10"},{"visible":true,"include":false,"step":"90.0","x":-1254.095238095238,"y":34.78190476190476,"z":-1249.142857142857,"a95":"0.99","info":"21/09/2014 at 19:03:10"},{"visible":true,"include":false,"step":"100.0","x":-1162.4761904761904,"y":145.8761904761905,"z":-897.695238095238,"a95":"0.99","info":"21/09/2014 at 19:03:10"}],"demagType":"Unknown","patch":1.1,"format":"Unknown","strat":null},{"version":"v1.1.0","exported":"2017-05-22T13:58:18.174Z","info":"4","GEO":[{"dec":4.344724394333753,"inc":-30.31475397794951,"MAD":6.1174778820461,"cm":[5.4136589391245725e-14,4.330927151299658e-14,0],"intensity":4826.383823636618,"type":"GC","origin":false,"forced":true,"remark":"","nSteps":8,"minStep":"8.0","maxStep":"40.0","steps":["8.0","12.0","16.0","20.0","25.0","30.0","35.0","40.0"],"group":"None"}],"TECT":[{"dec":76.48482072639752,"inc":-38.0096271373758,"MAD":6.1174778820457165,"cm":[-3.2481953634747435e-14,6.496390726949487e-14,4.330927151299658e-14],"intensity":4826.383823636618,"type":"GC","origin":false,"forced":true,"remark":"","nSteps":8,"minStep":"8.0","maxStep":"40.0","steps":["8.0","12.0","16.0","20.0","25.0","30.0","35.0","40.0"],"group":"None"}],"interpreted":true,"name":"SS12.2B","coreAzi":56,"coreDip":39,"bedStrike":224,"bedDip":82,"data":[{"visible":true,"include":false,"step":"0.0","x":-2510.5714285714284,"y":-2103.0476190476193,"z":-258.8857142857143,"a95":"0.99","info":"09/10/2014 at 10:55:29"},{"visible":true,"include":false,"step":"4.0","x":-2154.095238095238,"y":-2192.9523809523807,"z":-187.1047619047619,"a95":"0.99","info":"09/10/2014 at 10:55:29"},{"visible":true,"include":true,"step":"8.0","x":-1882.5714285714287,"y":-2068.7619047619046,"z":-449.27619047619044,"a95":"0.99","info":"09/10/2014 at 10:55:29"},{"visible":true,"include":true,"step":"12.0","x":-1657.904761904762,"y":-1930.857142857143,"z":-629.7809523809524,"a95":"0.99","info":"09/10/2014 at 10:55:29"},{"visible":true,"include":true,"step":"16.0","x":-1535.047619047619,"y":-1735.2380952380952,"z":-769.8761904761905,"a95":"0.99","info":"09/10/2014 at 10:55:29"},{"visible":true,"include":true,"step":"20.0","x":-1463.3333333333333,"y":-1649.8095238095239,"z":-855.7333333333333,"a95":"0.99","info":"09/10/2014 at 10:55:29"},{"visible":true,"include":true,"step":"25.0","x":-1322.3809523809523,"y":-1589.7142857142858,"z":-847.7047619047619,"a95":"0.99","info":"09/10/2014 at 10:55:29"},{"visible":true,"include":true,"step":"30.0","x":-1201.8095238095239,"y":-1439.3333333333333,"z":-823.2761904761904,"a95":"0.99","info":"09/10/2014 at 10:55:29"},{"visible":true,"include":true,"step":"35.0","x":-1234.1904761904761,"y":-1435.904761904762,"z":-942.0190476190477,"a95":"0.99","info":"09/10/2014 at 10:55:29"},{"visible":true,"include":true,"step":"40.0","x":-1207.5238095238096,"y":-1433.904761904762,"z":-765.8857142857144,"a95":"0.99","info":"09/10/2014 at 10:55:29"},{"visible":true,"include":false,"step":"45.0","x":-1097.3333333333333,"y":-1256.3809523809523,"z":-863.2857142857143,"a95":"0.99","info":"09/10/2014 at 10:55:29"},{"visible":true,"include":false,"step":"50.0","x":-1010.7619047619048,"y":-1304.7619047619048,"z":-830.1333333333333,"a95":"0.99","info":"09/10/2014 at 10:55:29"},{"visible":true,"include":false,"step":"60.0","x":-994.0952380952381,"y":-1183.142857142857,"z":-813.9428571428571,"a95":"0.99","info":"09/10/2014 at 10:55:29"},{"visible":true,"include":false,"step":"70.0","x":-891.4952380952382,"y":-1046.5714285714287,"z":-780.3714285714285,"a95":"0.99","info":"09/10/2014 at 10:55:29"},{"visible":true,"include":false,"step":"80.0","x":-1324.952380952381,"y":-1011.047619047619,"z":-831.6190476190476,"a95":"0.99","info":"09/10/2014 at 10:55:29"},{"visible":true,"include":false,"step":"90.0","x":-1057.3333333333333,"y":-1019.047619047619,"z":-639.6952380952381,"a95":"0.99","info":"09/10/2014 at 10:55:29"},{"visible":true,"include":false,"step":"100.0","x":-1030.2857142857142,"y":-924.8666666666667,"z":-678.552380952381,"a95":"0.99","info":"09/10/2014 at 10:55:29"}],"demagType":"Unknown","patch":1.1,"format":"Unknown","strat":null},{"version":"v1.1.0","exported":"2017-05-22T13:58:18.174Z","info":"6","GEO":[{"dec":276.7727607680172,"inc":-3.196827987104621,"MAD":3.2281108108781913,"cm":[-1.0150610510858574e-14,-2.165463575649829e-14,0],"intensity":2575.1788690886024,"type":"dir","forced":true,"remark":"","origin":false,"nSteps":8,"minStep":"20.0","maxStep":"60.0","steps":["20.0","25.0","30.0","35.0","40.0","45.0","50.0","60.0"],"group":"None"}],"TECT":[{"dec":229.24213862286464,"inc":-52.65785922588913,"MAD":3.228110810878144,"cm":[-1.3534147347811432e-13,7.579122514774402e-14,5.4136589391245725e-14],"intensity":2575.178869088603,"type":"dir","forced":true,"remark":"","origin":false,"nSteps":8,"minStep":"20.0","maxStep":"60.0","steps":["20.0","25.0","30.0","35.0","40.0","45.0","50.0","60.0"],"group":"None"}],"interpreted":true,"name":"SS12.3B","coreAzi":50,"coreDip":29,"bedStrike":224,"bedDip":82,"data":[{"visible":true,"include":false,"step":"0.0","x":-1388.3809523809523,"y":-1725.904761904762,"z":-765.9428571428571,"a95":"0.99","info":"21/09/2014 at 19:03:10"},{"visible":true,"include":false,"step":"5.0","x":-1003.2380952380952,"y":-1655.6190476190477,"z":-597.495238095238,"a95":"0.99","info":"21/09/2014 at 19:03:10"},{"visible":true,"include":false,"step":"10.0","x":-742.447619047619,"y":-1424,"z":-750.4285714285714,"a95":"0.99","info":"21/09/2014 at 19:03:10"},{"visible":true,"include":false,"step":"15.0","x":-532,"y":-1280.095238095238,"z":-851.6571428571428,"a95":"0.99","info":"21/09/2014 at 19:03:10"},{"visible":true,"include":true,"step":"20.0","x":-424.4761904761905,"y":-1083.2380952380952,"z":-899.2095238095238,"a95":"0.99","info":"21/09/2014 at 19:03:10"},{"visible":true,"include":true,"step":"25.0","x":-347.2,"y":-1048.5714285714287,"z":-858.2285714285714,"a95":"0.99","info":"21/09/2014 at 19:03:10"},{"visible":true,"include":true,"step":"30.0","x":-398.0571428571429,"y":-952.6666666666666,"z":-697.3142857142857,"a95":"0.99","info":"21/09/2014 at 19:03:10"},{"visible":true,"include":true,"step":"35.0","x":-334.1333333333333,"y":-849.0190476190477,"z":-758.4761904761905,"a95":"0.99","info":"21/09/2014 at 19:03:10"},{"visible":true,"include":true,"step":"40.0","x":-373.76190476190476,"y":-865.0380952380953,"z":-824.9047619047619,"a95":"0.99","info":"21/09/2014 at 19:03:10"},{"visible":true,"include":true,"step":"45.0","x":-379.76190476190476,"y":-789.7714285714286,"z":-656.7428571428571,"a95":"0.99","info":"21/09/2014 at 19:03:10"},{"visible":true,"include":true,"step":"50.0","x":-225.67619047619047,"y":-790.9238095238096,"z":-753.6285714285715,"a95":"0.99","info":"21/09/2014 at 19:03:10"},{"visible":true,"include":true,"step":"60.0","x":-305.8095238095238,"y":-777.5142857142857,"z":-724.3142857142857,"a95":"0.99","info":"21/09/2014 at 19:03:10"},{"visible":true,"include":false,"step":"70.0","x":-274.45714285714286,"y":-718.2380952380952,"z":-529.8857142857144,"a95":"0.99","info":"21/09/2014 at 19:03:10"},{"visible":true,"include":false,"step":"80.0","x":-151.73333333333335,"y":-512.895238095238,"z":-600.4761904761905,"a95":"0.99","info":"21/09/2014 at 19:03:10"},{"visible":true,"include":false,"step":"90.0","x":-343.247619047619,"y":-563.8857142857144,"z":-571.3333333333334,"a95":"0.99","info":"21/09/2014 at 19:03:10"},{"visible":true,"include":false,"step":"100.0","x":-192.66666666666666,"y":-533.895238095238,"z":-549.9047619047619,"a95":"0.99","info":"21/09/2014 at 19:03:10"}],"demagType":"Unknown","patch":1.1,"format":"Unknown","strat":null},{"version":"v1.1.0","exported":"2017-05-22T13:58:18.174Z","info":"","GEO":[],"TECT":[],"interpreted":false,"name":"SS12.4B","coreAzi":97,"coreDip":57,"bedStrike":224,"bedDip":82,"data":[{"visible":true,"include":false,"step":"20","x":-4463.523809523809,"y":-906,"z":2004.1904761904761,"a95":"2.1","info":"\"14-10-13\" at \"17:31\""},{"visible":true,"include":false,"step":"100","x":-3319.0476190476193,"y":-455.5238095238095,"z":1471.142857142857,"a95":"2.1","info":"\"14-10-13\" at \"20:26\""},{"visible":true,"include":true,"step":"150","x":-2814.8571428571427,"y":-29.61904761904762,"z":1224.1904761904761,"a95":"2.2","info":"\"14-10-13\" at \"23:50\""},{"visible":true,"include":true,"step":"180","x":-2348.285714285714,"y":179.9047619047619,"z":883.3333333333334,"a95":"2","info":"\"14-10-14\" at \"17:04\""},{"visible":true,"include":true,"step":"210","x":-2209.6190476190477,"y":187.61904761904762,"z":829.047619047619,"a95":"2.2","info":"\"14-10-14\" at \"20:09\""},{"visible":true,"include":true,"step":"240","x":-1917.4285714285713,"y":182.1904761904762,"z":620.3809523809524,"a95":"2.1","info":"\"14-10-14\" at \"23:25\""},{"visible":false,"include":false,"step":"270","x":-1794.5714285714287,"y":348.6666666666667,"z":1632.857142857143,"a95":"2.6","info":"\"14-10-15\" at \"17:11\""},{"visible":true,"include":false,"step":"300","x":-1530.095238095238,"y":358.57142857142856,"z":-453.8095238095238,"a95":"2.3","info":"\"14-10-15\" at \"20:26\""},{"visible":true,"include":false,"step":"320","x":-1540,"y":-159.23809523809524,"z":1165.7142857142858,"a95":"2.4","info":"\"14-10-15\" at \"23:38\""},{"visible":true,"include":false,"step":"340","x":-1502.857142857143,"y":294.57142857142856,"z":316.2857142857143,"a95":"2.3","info":"\"14-10-16\" at \"17:45\""},{"visible":true,"include":false,"step":"370","x":-1480.5714285714287,"y":86.19047619047619,"z":336.0952380952381,"a95":"2.3","info":"\"14-10-16\" at \"20:57\""},{"visible":true,"include":false,"step":"400","x":-1364.857142857143,"y":103.23809523809524,"z":177.9047619047619,"a95":"2.4","info":"\"14-10-17\" at \"00:13\""},{"visible":true,"include":false,"step":"420","x":-1080.7619047619048,"y":123.23809523809524,"z":216.66666666666666,"a95":"2.3","info":"\"14-10-17\" at \"15:42\""},{"visible":true,"include":false,"step":"440","x":-1226.7619047619048,"y":254.0952380952381,"z":116.0952380952381,"a95":"2.3","info":"\"14-10-17\" at \"18:54\""},{"visible":true,"include":false,"step":"470","x":-1153.4285714285713,"y":71.33333333333333,"z":229.8095238095238,"a95":"2.4","info":"\"14-10-17\" at \"22:05\""},{"visible":true,"include":false,"step":"490","x":-1081.904761904762,"y":81.33333333333333,"z":130.66666666666666,"a95":"3.1","info":"\"14-10-18\" at \"10:31\""},{"visible":true,"include":false,"step":"520","x":-880.0952380952381,"y":324.0952380952381,"z":235.14285714285714,"a95":"3.2","info":"\"14-10-18\" at \"13:23\""},{"visible":true,"include":false,"step":"550","x":-976,"y":386.95238095238096,"z":-92.95238095238095,"a95":"2.9","info":"\"14-10-18\" at \"16:36\""},{"visible":true,"include":false,"step":"580","x":-851.6190476190476,"y":35.04761904761905,"z":199.61904761904762,"a95":"3.5","info":"\"14-10-19\" at \"10:22\""},{"visible":true,"include":false,"step":"610","x":-716.952380952381,"y":-36,"z":-270.57142857142856,"a95":"2.9","info":"\"14-10-19\" at \"13:35\""},{"visible":true,"include":false,"step":"640","x":-24.666666666666668,"y":-479.8095238095238,"z":576,"a95":"3.4","info":"\"14-10-19\" at \"18:10\""}],"demagType":"Unknown","patch":1.1,"format":"Unknown","strat":null},{"version":"v1.1.0","exported":"2017-05-22T13:58:18.174Z","info":"","GEO":[{"dec":251.76272617176326,"inc":-5.105839169897065,"MAD":4.645854814980939,"cm":[-8.120488408686859e-15,2.165463575649829e-14,0],"intensity":1962.059695685406,"type":"dir","forced":true,"remark":"","origin":false,"nSteps":7,"minStep":"340","maxStep":"480","steps":["340","370","400","420","440","460","480"],"group":"None"}],"TECT":[{"dec":222.46888271651247,"inc":-28.153366435730025,"MAD":4.645854814980943,"cm":[1.6240976817373718e-14,9.203220196511774e-14,-8.12048840868686e-14],"intensity":1962.059695685406,"type":"dir","forced":true,"remark":"","origin":false,"nSteps":7,"minStep":"340","maxStep":"480","steps":["340","370","400","420","440","460","480"],"group":"None"}],"interpreted":true,"name":"SS12.5A","coreAzi":56,"coreDip":46,"bedStrike":224,"bedDip":82,"data":[{"visible":false,"include":false,"step":"20","x":-2476.5714285714284,"y":-1871.3333333333333,"z":1242.095238095238,"a95":"2.2","info":"\"14-09-29\" at \"16:27\""},{"visible":true,"include":false,"step":"100","x":-1922.2857142857142,"y":-1123.904761904762,"z":516.1904761904761,"a95":"2.3","info":"\"14-09-29\" at \"19:19\""},{"visible":true,"include":false,"step":"150","x":-1446.7619047619048,"y":-691.7142857142857,"z":-278.85714285714283,"a95":"2.3","info":"\"14-09-29\" at \"22:15\""},{"visible":true,"include":false,"step":"180","x":-1412.2857142857142,"y":-582.0952380952381,"z":-448.2857142857143,"a95":"2.4","info":"\"14-09-30\" at \"16:53\""},{"visible":true,"include":false,"step":"210","x":-1239.4285714285713,"y":-572.6666666666666,"z":-685.4285714285714,"a95":"2.5","info":"\"14-09-30\" at \"19:57\""},{"visible":true,"include":false,"step":"240","x":-1055.7142857142858,"y":-316.95238095238096,"z":-712.1904761904761,"a95":"2.6","info":"\"14-09-30\" at \"23:05\""},{"visible":true,"include":false,"step":"270","x":-955.1428571428571,"y":-337.9047619047619,"z":-810,"a95":"2.7","info":"\"14-10-01\" at \"17:25\""},{"visible":true,"include":false,"step":"300","x":-992.5714285714286,"y":-514.3809523809524,"z":-751.8095238095239,"a95":"2.5","info":"\"14-10-01\" at \"20:33\""},{"visible":true,"include":false,"step":"320","x":-850.4761904761905,"y":-332.6666666666667,"z":-773.047619047619,"a95":"2.7","info":"\"14-10-01\" at \"23:40\""},{"visible":true,"include":true,"step":"340","x":-726.6666666666666,"y":-232.38095238095238,"z":-677.3333333333334,"a95":"3","info":"\"14-10-02\" at \"17:16\""},{"visible":true,"include":true,"step":"370","x":-695.047619047619,"y":-318.95238095238096,"z":-854.3809523809524,"a95":"2.7","info":"\"14-10-02\" at \"20:05\""},{"visible":true,"include":true,"step":"400","x":-717.047619047619,"y":-315.7142857142857,"z":-756.8571428571429,"a95":"2.8","info":"\"14-10-02\" at \"23:17\""},{"visible":true,"include":true,"step":"420","x":-655.5238095238095,"y":-288.4761904761905,"z":-750.1904761904761,"a95":"2.9","info":"\"14-10-03\" at \"17:00\""},{"visible":true,"include":true,"step":"440","x":-536.8571428571429,"y":-192.66666666666666,"z":-625.4285714285714,"a95":"2.9","info":"\"14-10-03\" at \"20:17\""},{"visible":true,"include":true,"step":"460","x":-413.04761904761904,"y":-236.0952380952381,"z":-725.3333333333334,"a95":"3.1","info":"\"14-10-03\" at \"23:35\""},{"visible":true,"include":true,"step":"480","x":-586.7619047619048,"y":-284.2857142857143,"z":-685.6190476190476,"a95":"3.3","info":"\"14-10-04\" at \"10:30\""},{"visible":true,"include":false,"step":"510","x":-532.1904761904761,"y":-44.095238095238095,"z":-927.5238095238095,"a95":"3.1","info":"\"14-10-04\" at \"13:22\""},{"visible":true,"include":false,"step":"540","x":-385.8095238095238,"y":-241.33333333333334,"z":-519.9047619047619,"a95":"4.8","info":"\"14-10-04\" at \"16:47\""},{"visible":true,"include":false,"step":"570","x":-496.4761904761905,"y":-114.0952380952381,"z":-580.8571428571429,"a95":"3.5","info":"\"14-10-05\" at \"10:51\""},{"visible":true,"include":false,"step":"600","x":-608.0952380952381,"y":-47.714285714285715,"z":-459.8095238095238,"a95":"4","info":"\"14-10-05\" at \"14:10\""},{"visible":true,"include":false,"step":"630","x":-522.4761904761905,"y":188.0952380952381,"z":-365.42857142857144,"a95":"4.4","info":"\"14-10-05\" at \"17:37\""},{"visible":false,"include":false,"step":"660","x":-614.2857142857143,"y":34.476190476190474,"z":-294.0952380952381,"a95":"4.8","info":"\"14-10-11\" at \"08:12\""},{"visible":false,"include":false,"step":"680","x":-7.142857142857143,"y":408.2857142857143,"z":-179.23809523809524,"a95":"7.1","info":"\"14-10-11\" at \"11:16\""}],"demagType":"Unknown","patch":1.1,"format":"Unknown","strat":null},{"version":"v1.1.0","exported":"2017-05-22T13:58:18.174Z","info":"","GEO":[{"dec":358.84135441715625,"inc":-27.548096550483205,"MAD":8.823774539094698,"cm":[-5.5067062021407764e-14,-1.4210854715202004e-14,0],"intensity":2243.816899090474,"type":"GC","origin":false,"forced":true,"remark":"","nSteps":7,"minStep":"150","maxStep":"330","steps":["150","180","210","240","270","300","330"],"group":"None","version":"v1.1.0"}],"TECT":[{"dec":74.65134018775507,"inc":-43.38671286789449,"MAD":8.82377453909509,"cm":[1.9539925233402755e-14,6.394884621840902e-14,1.4210854715202004e-14],"intensity":2243.8168990904746,"type":"GC","origin":false,"forced":true,"remark":"","nSteps":7,"minStep":"150","maxStep":"330","steps":["150","180","210","240","270","300","330"],"group":"None","version":"v1.1.0"}],"interpreted":true,"name":"SS12.5B","coreAzi":56,"coreDip":46,"bedStrike":224,"bedDip":82,"data":[{"visible":false,"include":false,"step":"20","x":-2420.095238095238,"y":-2073.714285714286,"z":2734.8571428571427,"a95":"2.1","info":"\"14-10-20\" at \"16:48\""},{"visible":true,"include":false,"step":"100","x":-1828,"y":-1586.7619047619048,"z":1341.8095238095239,"a95":"2","info":"\"14-10-20\" at \"20:07\""},{"visible":true,"include":true,"step":"150","x":-1153.7142857142858,"y":-993.5238095238095,"z":564.3809523809524,"a95":"2.5","info":"\"14-10-20\" at \"23:02\""},{"visible":true,"include":true,"step":"180","x":-990.3809523809524,"y":-807.047619047619,"z":-30.571428571428573,"a95":"2.3","info":"\"14-10-21\" at \"15:05\""},{"visible":true,"include":true,"step":"210","x":-894,"y":-878.0952380952381,"z":67.52380952380952,"a95":"2.2","info":"\"14-10-21\" at \"17:57\""},{"visible":true,"include":true,"step":"240","x":-795.9047619047619,"y":-700.7619047619048,"z":-207.52380952380952,"a95":"2.3","info":"\"14-10-21\" at \"21:02\""},{"visible":true,"include":true,"step":"270","x":-667.8095238095239,"y":-671.7142857142857,"z":166.28571428571428,"a95":"3.3","info":"\"14-10-22\" at \"00:05\""},{"visible":true,"include":true,"step":"300","x":-628.1904761904761,"y":-513.8095238095239,"z":-414,"a95":"2.7","info":"\"14-10-22\" at \"16:23\""},{"visible":true,"include":true,"step":"330","x":-493.5238095238095,"y":-509.6190476190476,"z":-315.6190476190476,"a95":"2.6","info":"\"14-10-22\" at \"19:28\""},{"visible":true,"include":false,"step":"360","x":-393.6190476190476,"y":-391.5238095238095,"z":-429.5238095238095,"a95":"2.7","info":"\"14-10-22\" at \"22:36\""},{"visible":true,"include":false,"step":"390","x":-375.7142857142857,"y":-321.6190476190476,"z":-280.6666666666667,"a95":"4","info":"\"14-10-23\" at \"16:48\""},{"visible":true,"include":false,"step":"420","x":-299.04761904761904,"y":-178.66666666666666,"z":-467.7142857142857,"a95":"3.5","info":"\"14-10-23\" at \"19:50\""},{"visible":true,"include":false,"step":"450","x":-354.57142857142856,"y":-282.57142857142856,"z":-296.95238095238096,"a95":"3.3","info":"\"14-10-24\" at \"14:27\""},{"visible":true,"include":false,"step":"480","x":-379.04761904761904,"y":-76.28571428571429,"z":-343.23809523809524,"a95":"4.5","info":"\"14-10-24\" at \"17:31\""},{"visible":true,"include":false,"step":"510","x":-309.3333333333333,"y":-360.3809523809524,"z":-243.61904761904762,"a95":"4.1","info":"\"14-10-24\" at \"20:23\""},{"visible":true,"include":false,"step":"540","x":-458.85714285714283,"y":-365.04761904761904,"z":-358.6666666666667,"a95":"3.9","info":"\"14-10-24\" at \"23:19\""},{"visible":false,"include":false,"step":"570","x":-188.57142857142858,"y":37.333333333333336,"z":-156.1904761904762,"a95":"10.4","info":"\"14-10-25\" at \"02:18\""},{"visible":false,"include":false,"step":"600","x":-490.4761904761905,"y":-76,"z":-127.61904761904762,"a95":"5.5","info":"\"14-10-25\" at \"04:53\""},{"visible":false,"include":false,"step":"630","x":-326.85714285714283,"y":193.04761904761904,"z":-332.0952380952381,"a95":"4.9","info":"\"14-10-25\" at \"23:15\""},{"visible":false,"include":false,"step":"660","x":-406,"y":43.23809523809524,"z":-51.61904761904762,"a95":"6.2","info":"\"14-10-26\" at \"02:00\""},{"visible":false,"include":false,"step":"680","x":-48,"y":-337.42857142857144,"z":-67.61904761904762,"a95":"6.2","info":"\"14-10-26\" at \"03:03\""}],"demagType":"Unknown","patch":1.1,"format":"Unknown","strat":null},{"version":"v1.1.0","exported":"2017-05-22T13:58:18.174Z","info":"5","GEO":[],"TECT":[],"interpreted":false,"name":"SS12.5C","coreAzi":56,"coreDip":46,"bedStrike":224,"bedDip":82,"data":[{"visible":true,"include":false,"step":"0.0","x":-1745.5238095238096,"y":-1128.5714285714287,"z":1976.6666666666667,"a95":"0.99","info":"09/10/2014 at 10:55:29"},{"visible":true,"include":true,"step":"4.0","x":-1404,"y":-1171.8095238095239,"z":1951.047619047619,"a95":"0.99","info":"09/10/2014 at 10:55:29"},{"visible":true,"include":true,"step":"8.0","x":-1153.047619047619,"y":-1037.3333333333333,"z":1697.7142857142858,"a95":"0.99","info":"09/10/2014 at 10:55:29"},{"visible":true,"include":true,"step":"12.0","x":-968.4761904761905,"y":-947.1428571428571,"z":1503.8095238095239,"a95":"0.99","info":"09/10/2014 at 10:55:29"},{"visible":true,"include":true,"step":"16.0","x":-860.152380952381,"y":-848.6095238095238,"z":1389.6190476190477,"a95":"0.99","info":"09/10/2014 at 10:55:29"},{"visible":true,"include":true,"step":"20.0","x":-841.9333333333333,"y":-802.1333333333333,"z":1228.7619047619048,"a95":"0.99","info":"09/10/2014 at 10:55:29"},{"visible":true,"include":true,"step":"25.0","x":-861.7619047619048,"y":-664.495238095238,"z":1163.6190476190477,"a95":"0.99","info":"09/10/2014 at 10:55:29"},{"visible":true,"include":true,"step":"30.0","x":-631.3619047619047,"y":-610.2952380952381,"z":1183.142857142857,"a95":"0.99","info":"09/10/2014 at 10:55:29"},{"visible":true,"include":true,"step":"35.0","x":-627.4857142857143,"y":-656.895238095238,"z":1100.7619047619048,"a95":"0.99","info":"09/10/2014 at 10:55:29"},{"visible":true,"include":true,"step":"40.0","x":-677.2380952380952,"y":-533.3523809523809,"z":1089.4285714285713,"a95":"0.99","info":"09/10/2014 at 10:55:29"},{"visible":true,"include":true,"step":"45.0","x":-549.6476190476191,"y":-574.9809523809524,"z":1002.2857142857143,"a95":"0.99","info":"09/10/2014 at 10:55:29"},{"visible":true,"include":true,"step":"50.0","x":-627.8380952380952,"y":-669.0857142857143,"z":1016.4761904761905,"a95":"0.99","info":"09/10/2014 at 10:55:29"},{"visible":true,"include":false,"step":"60.0","x":-761.0285714285715,"y":-450.35238095238094,"z":946.7619047619048,"a95":"0.99","info":"09/10/2014 at 10:55:29"},{"visible":true,"include":false,"step":"70.0","x":-449.91428571428577,"y":-547.0571428571429,"z":851.0571428571429,"a95":"0.99","info":"09/10/2014 at 10:55:29"},{"visible":true,"include":false,"step":"80.0","x":-459.23809523809524,"y":-417.2952380952381,"z":957.5238095238095,"a95":"0.99","info":"09/10/2014 at 10:55:29"},{"visible":true,"include":false,"step":"90.0","x":-675.6285714285715,"y":-601.6190476190476,"z":1036.1904761904761,"a95":"0.99","info":"09/10/2014 at 10:55:29"},{"visible":true,"include":false,"step":"100.0","x":-359.1142857142857,"y":-378.5904761904762,"z":892.9047619047619,"a95":"0.99","info":"09/10/2014 at 10:55:29"}],"demagType":"Unknown","patch":1.1,"format":"Unknown","strat":null},{"version":"v1.1.0","exported":"2017-05-22T13:58:18.174Z","info":"7","GEO":[{"dec":342.17549309833817,"inc":-25.825202442386143,"MAD":15.991763748227264,"cm":[-1.4432899320127035e-13,-7.815970093361102e-14,0],"intensity":4853.109844129192,"type":"GC","origin":false,"forced":true,"remark":"","nSteps":12,"minStep":"5.0","maxStep":"70.0","steps":["5.0","10.0","15.0","20.0","25.0","30.0","35.0","40.0","45.0","50.0","60.0","70.0"],"group":"None","version":"v1.1.0"}],"TECT":[{"dec":81.05888939889252,"inc":-57.81931023670406,"MAD":15.991763748226633,"cm":[-4.3165471197426086e-13,-4.405364961712621e-13,2.1316282072803006e-14],"intensity":4853.1098441291915,"type":"GC","origin":false,"forced":true,"remark":"","nSteps":12,"minStep":"5.0","maxStep":"70.0","steps":["5.0","10.0","15.0","20.0","25.0","30.0","35.0","40.0","45.0","50.0","60.0","70.0"],"group":"None","version":"v1.1.0"}],"interpreted":true,"name":"SS12.6A","coreAzi":43,"coreDip":52,"bedStrike":224,"bedDip":82,"data":[{"visible":true,"include":false,"step":"0.0","x":-2771.2380952380954,"y":-1803.5238095238096,"z":2783.5238095238096,"a95":"0.99","info":"21/09/2014 at 19:03:10"},{"visible":true,"include":true,"step":"5.0","x":-2080.4761904761904,"y":-1819.2380952380952,"z":2710.095238095238,"a95":"0.99","info":"21/09/2014 at 19:03:10"},{"visible":true,"include":true,"step":"10.0","x":-1663.6190476190477,"y":-1482.3809523809523,"z":1961.047619047619,"a95":"0.99","info":"21/09/2014 at 19:03:10"},{"visible":true,"include":true,"step":"15.0","x":-1492.095238095238,"y":-1327.047619047619,"z":1654.5714285714287,"a95":"0.99","info":"21/09/2014 at 19:03:10"},{"visible":true,"include":true,"step":"20.0","x":-1269.5238095238096,"y":-1102.857142857143,"z":1344.4761904761904,"a95":"0.99","info":"21/09/2014 at 19:03:10"},{"visible":true,"include":true,"step":"25.0","x":-1071.2380952380952,"y":-974.8571428571429,"z":991.3333333333334,"a95":"0.99","info":"21/09/2014 at 19:03:10"},{"visible":true,"include":true,"step":"30.0","x":-854.7904761904762,"y":-969.4285714285714,"z":919.4571428571428,"a95":"0.99","info":"21/09/2014 at 19:03:10"},{"visible":true,"include":true,"step":"35.0","x":-945.8857142857142,"y":-805.5523809523809,"z":846.895238095238,"a95":"0.99","info":"21/09/2014 at 19:03:11"},{"visible":true,"include":true,"step":"40.0","x":-882.2476190476191,"y":-838.4190476190475,"z":449.0952380952381,"a95":"0.99","info":"21/09/2014 at 19:03:11"},{"visible":true,"include":true,"step":"45.0","x":-815.1238095238094,"y":-641.9238095238095,"z":526.6095238095238,"a95":"0.99","info":"21/09/2014 at 19:03:11"},{"visible":true,"include":true,"step":"50.0","x":-796.257142857143,"y":-520.6571428571428,"z":330.77142857142854,"a95":"0.99","info":"21/09/2014 at 19:03:11"},{"visible":true,"include":true,"step":"60.0","x":-830.352380952381,"y":-695.7333333333333,"z":296.3904761904762,"a95":"0.99","info":"21/09/2014 at 19:03:11"},{"visible":true,"include":true,"step":"70.0","x":-790.695238095238,"y":-511.7047619047619,"z":432.4761904761905,"a95":"0.99","info":"21/09/2014 at 19:03:11"},{"visible":false,"include":false,"step":"80.0","x":-87.41333333333334,"y":-384.6952380952381,"z":184.54285714285714,"a95":"0.99","info":"21/09/2014 at 19:03:11"},{"visible":false,"include":false,"step":"90.0","x":-650.8761904761905,"y":-640.0761904761905,"z":121.79047619047618,"a95":"0.99","info":"21/09/2014 at 19:03:11"},{"visible":false,"include":false,"step":"100.0","x":-468.65714285714284,"y":-319.3619047619048,"z":406.25714285714287,"a95":"0.99","info":"21/09/2014 at 19:03:11"}],"demagType":"Unknown","patch":1.1,"format":"Unknown","strat":null},{"version":"v1.1.0","exported":"2017-05-22T13:58:18.174Z","info":"","GEO":[],"TECT":[],"interpreted":false,"name":"SS12.6B","coreAzi":43,"coreDip":52,"bedStrike":224,"bedDip":82,"data":[{"visible":true,"include":false,"step":"20","x":-3123.714285714286,"y":-2673.1428571428573,"z":2798.095238095238,"a95":"2.3","info":"\"14-10-13\" at \"17:33\""},{"visible":true,"include":false,"step":"100","x":-2263.4285714285716,"y":-1774.095238095238,"z":1343.6190476190477,"a95":"2.1","info":"\"14-10-13\" at \"20:27\""},{"visible":true,"include":false,"step":"150","x":-1732.6666666666667,"y":-1289.4285714285713,"z":688.4761904761905,"a95":"2.1","info":"\"14-10-13\" at \"23:52\""},{"visible":true,"include":false,"step":"180","x":-1413.8095238095239,"y":-1138.5714285714287,"z":353.42857142857144,"a95":"2","info":"\"14-10-14\" at \"17:06\""},{"visible":true,"include":false,"step":"210","x":-1343.6190476190477,"y":-1014.5714285714286,"z":243.71428571428572,"a95":"2.2","info":"\"14-10-14\" at \"20:11\""},{"visible":true,"include":false,"step":"240","x":-1193.6190476190477,"y":-962.952380952381,"z":-529.3333333333334,"a95":"2.1","info":"\"14-10-14\" at \"23:27\""},{"visible":true,"include":false,"step":"270","x":-750.5714285714286,"y":-855.3333333333334,"z":679.2380952380952,"a95":"2.5","info":"\"14-10-15\" at \"17:13\""},{"visible":true,"include":false,"step":"300","x":-859.5238095238095,"y":-529.9047619047619,"z":-633.3333333333334,"a95":"2.6","info":"\"14-10-15\" at \"20:28\""},{"visible":true,"include":false,"step":"320","x":-1005.3333333333334,"y":-803.7142857142857,"z":202.1904761904762,"a95":"2.2","info":"\"14-10-15\" at \"23:40\""},{"visible":true,"include":false,"step":"340","x":-943.3333333333334,"y":-538.2857142857143,"z":-211.14285714285714,"a95":"2.3","info":"\"14-10-16\" at \"17:47\""},{"visible":true,"include":false,"step":"370","x":-917.8095238095239,"y":-340.95238095238096,"z":917.3333333333334,"a95":"2.7","info":"\"14-10-16\" at \"20:59\""},{"visible":true,"include":false,"step":"400","x":-624.7619047619048,"y":-306.95238095238096,"z":-849.5238095238095,"a95":"2.8","info":"\"14-10-17\" at \"00:15\""},{"visible":true,"include":false,"step":"420","x":-639.2380952380952,"y":-309.42857142857144,"z":-45.142857142857146,"a95":"2.9","info":"\"14-10-17\" at \"15:44\""},{"visible":true,"include":false,"step":"440","x":-897.9047619047619,"y":-109.9047619047619,"z":-1485.5238095238096,"a95":"2.7","info":"\"14-10-17\" at \"18:56\""},{"visible":true,"include":false,"step":"470","x":-1005.4285714285714,"y":-286.0952380952381,"z":777.1428571428571,"a95":"3.1","info":"\"14-10-17\" at \"22:07\""},{"visible":true,"include":false,"step":"490","x":-690.8571428571429,"y":-295.6190476190476,"z":-362.85714285714283,"a95":"3.2","info":"\"14-10-18\" at \"10:34\""}],"demagType":"Unknown","patch":1.1,"format":"Unknown","strat":null},{"version":"v1.1.0","exported":"2017-05-22T13:58:18.174Z","info":"","GEO":[],"TECT":[],"interpreted":false,"name":"SS12.7A","coreAzi":45,"coreDip":44,"bedStrike":224,"bedDip":82,"data":[{"visible":true,"include":false,"step":"20","x":-2862.7619047619046,"y":-2298.8571428571427,"z":1378.4761904761904,"a95":"2","info":"\"14-10-13\" at \"17:35\""},{"visible":true,"include":false,"step":"100","x":-1645.7142857142858,"y":-1445.6190476190477,"z":409.8095238095238,"a95":"1.9","info":"\"14-10-13\" at \"20:29\""},{"visible":true,"include":false,"step":"150","x":-1185.4285714285713,"y":-1025.8095238095239,"z":-3.4285714285714284,"a95":"2.3","info":"\"14-10-13\" at \"23:54\""},{"visible":true,"include":false,"step":"180","x":-1202.952380952381,"y":-864.3809523809524,"z":-866.1904761904761,"a95":"2.1","info":"\"14-10-14\" at \"17:08\""},{"visible":true,"include":false,"step":"210","x":-660.0952380952381,"y":-432.57142857142856,"z":252.95238095238096,"a95":"2.9","info":"\"14-10-14\" at \"20:13\""},{"visible":true,"include":false,"step":"240","x":-789.4285714285714,"y":-742.5714285714286,"z":-535.2380952380952,"a95":"2.3","info":"\"14-10-14\" at \"23:30\""},{"visible":true,"include":false,"step":"270","x":-555.8095238095239,"y":-848.7619047619048,"z":-198.66666666666666,"a95":"2.1","info":"\"14-10-15\" at \"17:15\""},{"visible":true,"include":false,"step":"300","x":-552.8571428571429,"y":-478.4761904761905,"z":-586.5714285714286,"a95":"2.7","info":"\"14-10-15\" at \"20:30\""},{"visible":true,"include":false,"step":"320","x":-537.3333333333334,"y":-498.57142857142856,"z":-339.3333333333333,"a95":"2.8","info":"\"14-10-15\" at \"23:41\""},{"visible":true,"include":false,"step":"340","x":-665.8095238095239,"y":-510.85714285714283,"z":-1865.2380952380952,"a95":"2.8","info":"\"14-10-16\" at \"17:50\""},{"visible":true,"include":false,"step":"370","x":-589.6190476190476,"y":-294.95238095238096,"z":60,"a95":"3.1","info":"\"14-10-16\" at \"21:01\""},{"visible":true,"include":false,"step":"400","x":-450.0952380952381,"y":-193.33333333333334,"z":-863.4285714285714,"a95":"2.9","info":"\"14-10-17\" at \"00:16\""},{"visible":true,"include":false,"step":"420","x":-838.3809523809524,"y":-533.7142857142857,"z":581.9047619047619,"a95":"2.9","info":"\"14-10-17\" at \"15:46\""},{"visible":true,"include":false,"step":"440","x":-840.6666666666666,"y":-457.9047619047619,"z":-919.9047619047619,"a95":"2.6","info":"\"14-10-17\" at \"18:57\""},{"visible":true,"include":false,"step":"470","x":-647.4285714285714,"y":-590.3809523809524,"z":-116,"a95":"3","info":"\"14-10-17\" at \"22:09\""},{"visible":true,"include":false,"step":"490","x":-519.5238095238095,"y":-396.4761904761905,"z":-560.6666666666666,"a95":"3","info":"\"14-10-18\" at \"10:36\""}],"demagType":"Unknown","patch":1.1,"format":"Unknown","strat":null},{"version":"v1.1.0","exported":"2017-05-22T13:58:18.174Z","info":"","GEO":[{"dec":256.9151688095973,"inc":-3.684250585187709,"MAD":10.579655547255577,"cm":[-1.2180732613030289e-13,3.789561257387201e-14,0],"intensity":2706.1610817638916,"type":"dir","forced":true,"remark":"","origin":false,"nSteps":12,"minStep":"320","maxStep":"600","steps":["320","340","370","400","420","440","460","480","510","540","570","600"],"group":"None"}],"TECT":[{"dec":224.80953438979773,"inc":-33.088875766108906,"MAD":10.579655547255575,"cm":[-1.6240976817373718e-14,-5.4136589391245725e-14,5.4136589391245725e-15],"intensity":2706.1610817638916,"type":"dir","forced":true,"remark":"","origin":false,"nSteps":12,"minStep":"320","maxStep":"600","steps":["320","340","370","400","420","440","460","480","510","540","570","600"],"group":"None"}],"interpreted":true,"name":"SS12.8A","coreAzi":104,"coreDip":39,"bedStrike":224,"bedDip":82,"data":[{"visible":true,"include":false,"step":"20","x":-4543.333333333333,"y":-4.380952380952381,"z":-460.4761904761905,"a95":"2.1","info":"\"14-09-29\" at \"16:29\""},{"visible":true,"include":false,"step":"100","x":-2538.5714285714284,"y":376.2857142857143,"z":-613.5238095238095,"a95":"2.2","info":"\"14-09-29\" at \"19:21\""},{"visible":true,"include":false,"step":"150","x":-1639.5238095238096,"y":749.4285714285714,"z":-1093.3333333333333,"a95":"2.4","info":"\"14-09-29\" at \"22:17\""},{"visible":true,"include":false,"step":"180","x":-1312.5714285714287,"y":644.8571428571429,"z":-1113.3333333333333,"a95":"2.5","info":"\"14-09-30\" at \"16:55\""},{"visible":true,"include":false,"step":"210","x":-1184.952380952381,"y":725.9047619047619,"z":-1226.1904761904761,"a95":"2.6","info":"\"14-09-30\" at \"19:58\""},{"visible":true,"include":false,"step":"240","x":-1035.4285714285713,"y":861.5238095238095,"z":-1147.047619047619,"a95":"2.6","info":"\"14-09-30\" at \"23:07\""},{"visible":true,"include":false,"step":"270","x":-813.4285714285714,"y":744.1904761904761,"z":-1148.857142857143,"a95":"2.7","info":"\"14-10-01\" at \"17:27\""},{"visible":true,"include":false,"step":"300","x":-965.9047619047619,"y":651.5238095238095,"z":-865.6190476190476,"a95":"2.7","info":"\"14-10-01\" at \"20:35\""},{"visible":true,"include":true,"step":"320","x":-835.047619047619,"y":763.5238095238095,"z":-1111.047619047619,"a95":"2.5","info":"\"14-10-01\" at \"23:42\""},{"visible":true,"include":true,"step":"340","x":-624.7619047619048,"y":688.0952380952381,"z":-828.1904761904761,"a95":"2.6","info":"\"14-10-02\" at \"17:18\""},{"visible":true,"include":true,"step":"370","x":-605.7142857142857,"y":665.9047619047619,"z":-1115.5238095238096,"a95":"2.7","info":"\"14-10-02\" at \"20:07\""},{"visible":true,"include":true,"step":"400","x":-461.04761904761904,"y":491.42857142857144,"z":-939.4285714285714,"a95":"2.8","info":"\"14-10-02\" at \"23:19\""},{"visible":true,"include":true,"step":"420","x":-746.6666666666666,"y":130.47619047619048,"z":-900.0952380952381,"a95":"3","info":"\"14-10-03\" at \"17:02\""},{"visible":true,"include":true,"step":"440","x":-472.1904761904762,"y":530.1904761904761,"z":-775.6190476190476,"a95":"2.6","info":"\"14-10-03\" at \"20:19\""},{"visible":true,"include":true,"step":"460","x":-431.5238095238095,"y":374.2857142857143,"z":-750.0952380952381,"a95":"3.3","info":"\"14-10-03\" at \"23:37\""},{"visible":true,"include":true,"step":"480","x":-620.0952380952381,"y":482.95238095238096,"z":-833.2380952380952,"a95":"2.9","info":"\"14-10-04\" at \"10:32\""},{"visible":true,"include":true,"step":"510","x":-538.4761904761905,"y":625.2380952380952,"z":-915.2380952380952,"a95":"2.8","info":"\"14-10-04\" at \"13:24\""},{"visible":true,"include":true,"step":"540","x":-594.4761904761905,"y":410.85714285714283,"z":-409.23809523809524,"a95":"4.1","info":"\"14-10-04\" at \"16:49\""},{"visible":true,"include":true,"step":"570","x":-726.1904761904761,"y":225.61904761904762,"z":-725.2380952380952,"a95":"3.2","info":"\"14-10-05\" at \"10:53\""},{"visible":true,"include":true,"step":"600","x":-437.6190476190476,"y":795.5238095238095,"z":-698.0952380952381,"a95":"3","info":"\"14-10-05\" at \"14:12\""},{"visible":true,"include":false,"step":"630","x":-226.47619047619048,"y":425.5238095238095,"z":-283.5238095238095,"a95":"4.8","info":"\"14-10-05\" at \"17:39\""},{"visible":false,"include":false,"step":"660","x":-59.42857142857143,"y":-62.38095238095238,"z":-236.76190476190476,"a95":"12.2","info":"\"14-10-11\" at \"08:14\""},{"visible":false,"include":false,"step":"680","x":-112.0952380952381,"y":584.7619047619048,"z":-241.23809523809524,"a95":"5.1","info":"\"14-10-11\" at \"11:18\""}],"demagType":"Unknown","patch":1.1,"format":"Unknown","strat":null},{"version":"v1.1.0","exported":"2017-05-22T13:58:18.174Z","info":"","GEO":[{"dec":14.227243763864863,"inc":-21.733710810721394,"MAD":26.214098086115335,"cm":[9.237055564881302e-14,2.984279490192421e-13,0],"intensity":11468.219155304992,"type":"GC","origin":false,"forced":true,"remark":"","nSteps":8,"minStep":"100","maxStep":"320","steps":["100","150","180","210","240","270","300","320"],"group":"None","version":"v1.1.0"}],"TECT":[{"dec":64.56426205977164,"inc":-30.551262306231994,"MAD":26.214098086115424,"cm":[2.5934809855243657e-13,-2.842170943040401e-14,2.4158453015843406e-13],"intensity":11468.219155304992,"type":"GC","origin":false,"forced":true,"remark":"","nSteps":8,"minStep":"100","maxStep":"320","steps":["100","150","180","210","240","270","300","320"],"group":"None","version":"v1.1.0"}],"interpreted":true,"name":"SS12.9A","coreAzi":105,"coreDip":48,"bedStrike":224,"bedDip":82,"data":[{"visible":false,"include":false,"step":"20","x":-14033.047619047618,"y":-7911.523809523809,"z":13850,"a95":"2.4","info":"\"14-10-13\" at \"17:37\""},{"visible":true,"include":true,"step":"100","x":-8302.857142857143,"y":-3857.4285714285716,"z":4390.190476190476,"a95":"2.1","info":"\"14-10-13\" at \"20:32\""},{"visible":true,"include":true,"step":"150","x":-5366.761904761905,"y":-2201.2380952380954,"z":1973.5238095238096,"a95":"2.1","info":"\"14-10-13\" at \"23:56\""},{"visible":true,"include":true,"step":"180","x":-4709.809523809524,"y":-1824.952380952381,"z":-506.57142857142856,"a95":"2","info":"\"14-10-14\" at \"17:12\""},{"visible":true,"include":true,"step":"210","x":-4485.619047619048,"y":-245.42857142857142,"z":2055.0476190476193,"a95":"2.5","info":"\"14-10-14\" at \"20:17\""},{"visible":true,"include":true,"step":"240","x":-2947.714285714286,"y":-535.6190476190476,"z":-837.7142857142857,"a95":"2.3","info":"\"14-10-14\" at \"23:32\""},{"visible":true,"include":true,"step":"270","x":-1978.857142857143,"y":-57.42857142857143,"z":-308.2857142857143,"a95":"2.6","info":"\"14-10-15\" at \"17:17\""},{"visible":true,"include":true,"step":"300","x":-1923.2380952380952,"y":-48.285714285714285,"z":-758.7619047619048,"a95":"2.8","info":"\"14-10-15\" at \"20:32\""},{"visible":true,"include":true,"step":"320","x":-1822.095238095238,"y":173.14285714285714,"z":-461.9047619047619,"a95":"3.1","info":"\"14-10-15\" at \"23:43\""},{"visible":true,"include":false,"step":"340","x":-1060.7619047619048,"y":1115.142857142857,"z":-3028.8571428571427,"a95":"2.7","info":"\"14-10-16\" at \"17:52\""},{"visible":true,"include":false,"step":"370","x":-1908.3809523809523,"y":-53.333333333333336,"z":-252.38095238095238,"a95":"3.2","info":"\"14-10-16\" at \"21:04\""},{"visible":true,"include":false,"step":"400","x":-1152.6666666666667,"y":412.85714285714283,"z":-1524.5714285714287,"a95":"2.9","info":"\"14-10-17\" at \"00:18\""},{"visible":true,"include":false,"step":"420","x":-1355.7142857142858,"y":-226,"z":1941.7142857142858,"a95":"2.8","info":"\"14-10-17\" at \"15:48\""},{"visible":true,"include":false,"step":"440","x":-1317.904761904762,"y":214.0952380952381,"z":-1342.5714285714287,"a95":"2.8","info":"\"14-10-17\" at \"18:59\""},{"visible":true,"include":false,"step":"470","x":-841.8095238095239,"y":473.6190476190476,"z":-318.85714285714283,"a95":"3.7","info":"\"14-10-17\" at \"22:11\""},{"visible":true,"include":false,"step":"490","x":-800.2857142857143,"y":411.04761904761904,"z":-519.6190476190476,"a95":"3.5","info":"\"14-10-18\" at \"10:38\""}],"demagType":"Unknown","patch":1.1,"format":"Unknown","strat":null},{"version":"v1.1.0","exported":"2017-05-22T13:58:18.174Z","info":"","GEO":[{"dec":2.041833910260948,"inc":-31.11962920902955,"MAD":12.025264558523347,"cm":[-4.263256414560601e-14,1.1368683772161603e-13,0],"intensity":9925.670083333143,"type":"GC","origin":false,"forced":true,"remark":"","nSteps":9,"minStep":"100","maxStep":"340","steps":["100","150","180","210","240","270","300","320","340"],"group":"None","version":"v1.1.0"}],"TECT":[{"dec":78.16882184252768,"inc":-39.69714599342873,"MAD":12.025264558523363,"cm":[-5.826450433232822e-13,-1.8474111129762605e-13,9.947598300641403e-14],"intensity":9925.670083333147,"type":"GC","origin":false,"forced":true,"remark":"","nSteps":9,"minStep":"100","maxStep":"340","steps":["100","150","180","210","240","270","300","320","340"],"group":"None","version":"v1.1.0"}],"interpreted":true,"name":"SS12.10A","coreAzi":82,"coreDip":41,"bedStrike":224,"bedDip":82,"data":[{"visible":true,"include":false,"step":"20","x":-11714.761904761905,"y":-7850.761904761905,"z":6926.476190476191,"a95":"2.1","info":"\"14-10-13\" at \"17:39\""},{"visible":true,"include":true,"step":"100","x":-6814,"y":-4694.952380952381,"z":3319.904761904762,"a95":"1.9","info":"\"14-10-13\" at \"20:33\""},{"visible":true,"include":true,"step":"150","x":-4561.9047619047615,"y":-2915.5238095238096,"z":849.3333333333334,"a95":"2","info":"\"14-10-13\" at \"23:58\""},{"visible":true,"include":true,"step":"180","x":-3587.0476190476193,"y":-2705.809523809524,"z":-347.8095238095238,"a95":"1.9","info":"\"14-10-14\" at \"17:14\""},{"visible":true,"include":true,"step":"210","x":-3584.8571428571427,"y":-1830.1904761904761,"z":829.9047619047619,"a95":"2.3","info":"\"14-10-14\" at \"20:21\""},{"visible":true,"include":true,"step":"240","x":-2857.5238095238096,"y":-1654.857142857143,"z":-768.2857142857143,"a95":"2.1","info":"\"14-10-14\" at \"23:34\""},{"visible":true,"include":true,"step":"270","x":-2120.4761904761904,"y":-808.3809523809524,"z":-855.2380952380952,"a95":"2.4","info":"\"14-10-15\" at \"17:19\""},{"visible":true,"include":true,"step":"300","x":-1940.952380952381,"y":-721.6190476190476,"z":-1237.3333333333333,"a95":"2.4","info":"\"14-10-15\" at \"20:34\""},{"visible":true,"include":true,"step":"320","x":-1757.8095238095239,"y":-815.2380952380952,"z":-1002.2857142857143,"a95":"2.4","info":"\"14-10-15\" at \"23:45\""},{"visible":true,"include":true,"step":"340","x":-1789.5238095238096,"y":-74.0952380952381,"z":-1995.3333333333333,"a95":"2.5","info":"\"14-10-16\" at \"17:54\""},{"visible":true,"include":false,"step":"370","x":-1646,"y":-431.9047619047619,"z":-951.2380952380952,"a95":"2.7","info":"\"14-10-16\" at \"21:06\""},{"visible":true,"include":false,"step":"400","x":-1190.4761904761904,"y":-439.7142857142857,"z":-1454,"a95":"2.6","info":"\"14-10-17\" at \"00:20\""},{"visible":true,"include":false,"step":"420","x":-1256.3809523809523,"y":101.23809523809524,"z":201.61904761904762,"a95":"3.3","info":"\"14-10-17\" at \"15:49\""},{"visible":true,"include":false,"step":"440","x":-987.3333333333334,"y":-435.8095238095238,"z":-1353.047619047619,"a95":"2.7","info":"\"14-10-17\" at \"19:01\""},{"visible":true,"include":false,"step":"470","x":-1026.095238095238,"y":-275.3333333333333,"z":-858.3809523809524,"a95":"2.8","info":"\"14-10-17\" at \"22:13\""},{"visible":true,"include":false,"step":"490","x":-891.8095238095239,"y":-144.0952380952381,"z":-1204.3809523809523,"a95":"2.8","info":"\"14-10-18\" at \"10:40\""}],"demagType":"Unknown","patch":1.1,"format":"Unknown","strat":null},{"version":"v1.1.0","exported":"2017-05-22T13:58:18.174Z","info":"6","GEO":[{"dec":25.02940209787903,"inc":-31.841660800588055,"MAD":12.707340639933406,"cm":[-2.842170943040401e-14,-7.105427357601002e-14,0],"intensity":10225.380208617851,"type":"GC","origin":false,"forced":true,"remark":"","nSteps":7,"minStep":"8.0","maxStep":"35.0","steps":["8.0","12.0","16.0","20.0","25.0","30.0","35.0"],"group":"None","version":"v1.1.0"}],"TECT":[{"dec":75.06768298663405,"inc":-20.297665264555665,"MAD":12.707340639933012,"cm":[-1.1368683772161603e-13,-2.4158453015843406e-13,-8.526512829121202e-14],"intensity":10225.380208617851,"type":"GC","origin":false,"forced":true,"remark":"","nSteps":7,"minStep":"8.0","maxStep":"35.0","steps":["8.0","12.0","16.0","20.0","25.0","30.0","35.0"],"group":"None","version":"v1.1.0"}],"interpreted":true,"name":"SS12.10B","coreAzi":82,"coreDip":41,"bedStrike":224,"bedDip":82,"data":[{"visible":false,"include":false,"step":"0.0","x":-6427.809523809524,"y":-5543.142857142857,"z":4242.380952380952,"a95":"0.99","info":"09/10/2014 at 10:55:29"},{"visible":true,"include":false,"step":"4.0","x":-5550.285714285715,"y":-5510.952380952381,"z":3467.3333333333335,"a95":"0.99","info":"09/10/2014 at 10:55:29"},{"visible":true,"include":true,"step":"8.0","x":-4667.047619047619,"y":-4646,"z":2455.714285714286,"a95":"0.99","info":"09/10/2014 at 10:55:29"},{"visible":true,"include":true,"step":"12.0","x":-4015.5238095238096,"y":-3993.5238095238096,"z":1704.952380952381,"a95":"0.99","info":"09/10/2014 at 10:55:29"},{"visible":true,"include":true,"step":"16.0","x":-3453.5238095238096,"y":-3310.9523809523807,"z":1255.3333333333333,"a95":"0.99","info":"09/10/2014 at 10:55:29"},{"visible":true,"include":true,"step":"20.0","x":-3195.809523809524,"y":-2877.714285714286,"z":757.3428571428572,"a95":"0.99","info":"09/10/2014 at 10:55:29"},{"visible":true,"include":true,"step":"25.0","x":-2752.3809523809523,"y":-2768.8571428571427,"z":684.1333333333333,"a95":"0.99","info":"09/10/2014 at 10:55:29"},{"visible":true,"include":true,"step":"30.0","x":-2543.4285714285716,"y":-2495.5238095238096,"z":372.6095238095238,"a95":"0.99","info":"09/10/2014 at 10:55:29"},{"visible":true,"include":true,"step":"35.0","x":-2217.1428571428573,"y":-2410.5714285714284,"z":259.2666666666667,"a95":"0.99","info":"09/10/2014 at 10:55:29"},{"visible":true,"include":false,"step":"40.0","x":-2077.3333333333335,"y":-2105.2380952380954,"z":332.1333333333333,"a95":"0.99","info":"09/10/2014 at 10:55:29"},{"visible":true,"include":false,"step":"45.0","x":-1984.2857142857142,"y":-1946.7619047619048,"z":179.01904761904763,"a95":"0.99","info":"09/10/2014 at 10:55:29"},{"visible":true,"include":false,"step":"50.0","x":-1449.8095238095239,"y":-1965.047619047619,"z":146.82857142857142,"a95":"0.99","info":"09/10/2014 at 10:55:29"},{"visible":false,"include":false,"step":"60.0","x":-1286.5714285714287,"y":-1536.1904761904761,"z":-90.72380952380952,"a95":"0.99","info":"09/10/2014 at 10:55:29"},{"visible":false,"include":false,"step":"70.0","x":-1291.8095238095239,"y":-1383.5238095238096,"z":-224.8190476190476,"a95":"0.99","info":"09/10/2014 at 10:55:29"},{"visible":false,"include":false,"step":"80.0","x":-1634.7619047619048,"y":-1385.2380952380952,"z":-742.4666666666666,"a95":"0.99","info":"09/10/2014 at 10:55:29"},{"visible":false,"include":false,"step":"90.0","x":-1236.4761904761904,"y":-982.4761904761905,"z":-353.4190476190476,"a95":"0.99","info":"09/10/2014 at 10:55:29"},{"visible":false,"include":false,"step":"100.0","x":-1349.3333333333333,"y":-791.2380952380952,"z":-382.8,"a95":"0.99","info":"09/10/2014 at 10:55:29"}],"demagType":"Unknown","patch":1.1,"format":"Unknown","strat":null},{"version":"v1.1.0","exported":"2017-05-22T13:58:18.174Z","info":"8","GEO":[{"dec":348.23091674127244,"inc":-36.403640534312885,"MAD":21.565428908192658,"cm":[-4.330927151299658e-13,-9.74458609042423e-13,0],"intensity":13208.602851474561,"type":"GC","origin":false,"forced":true,"remark":"","nSteps":6,"minStep":"10.0","maxStep":"35.0","steps":["10.0","15.0","20.0","25.0","30.0","35.0"],"group":"None"}],"TECT":[{"dec":91.55699092549264,"inc":-47.86410721901371,"MAD":21.565428908189585,"cm":[-3.897834436169692e-13,4.330927151299658e-14,-5.19711258155959e-13],"intensity":13208.602851474561,"type":"GC","origin":false,"forced":true,"remark":"","nSteps":6,"minStep":"10.0","maxStep":"35.0","steps":["10.0","15.0","20.0","25.0","30.0","35.0"],"group":"None"}],"interpreted":true,"name":"SS12.10C","coreAzi":82,"coreDip":41,"bedStrike":224,"bedDip":82,"data":[{"visible":true,"include":false,"step":"0.0","x":-9969.52380952381,"y":-7040.476190476191,"z":6527.523809523809,"a95":"0.99","info":"21/09/2014 at 19:03:11"},{"visible":true,"include":false,"step":"5.0","x":-8384.666666666666,"y":-6453.333333333333,"z":5368.666666666667,"a95":"0.99","info":"21/09/2014 at 19:03:11"},{"visible":true,"include":true,"step":"10.0","x":-6528.571428571428,"y":-5151.714285714285,"z":3532.7619047619046,"a95":"0.99","info":"21/09/2014 at 19:03:11"},{"visible":true,"include":true,"step":"15.0","x":-5534.476190476191,"y":-4231.142857142857,"z":2758.095238095238,"a95":"0.99","info":"21/09/2014 at 19:03:11"},{"visible":true,"include":true,"step":"20.0","x":-4646.190476190476,"y":-3686.285714285714,"z":2160.5714285714284,"a95":"0.99","info":"21/09/2014 at 19:03:11"},{"visible":true,"include":true,"step":"25.0","x":-4126.0952380952385,"y":-3222.095238095238,"z":1717.4285714285713,"a95":"0.99","info":"21/09/2014 at 19:03:11"},{"visible":true,"include":true,"step":"30.0","x":-3614,"y":-2761.1428571428573,"z":1500.857142857143,"a95":"0.99","info":"21/09/2014 at 19:03:11"},{"visible":true,"include":true,"step":"35.0","x":-3437.809523809524,"y":-2166.285714285714,"z":1113.2380952380952,"a95":"0.99","info":"21/09/2014 at 19:03:11"},{"visible":true,"include":false,"step":"40.0","x":-3092.9523809523807,"y":-1994.1904761904761,"z":1173.047619047619,"a95":"0.99","info":"21/09/2014 at 19:03:11"},{"visible":true,"include":false,"step":"45.0","x":-2730.9523809523807,"y":-2042.1904761904761,"z":1191.8095238095239,"a95":"0.99","info":"21/09/2014 at 19:03:11"},{"visible":true,"include":false,"step":"50.0","x":-2553.714285714286,"y":-1652.4761904761904,"z":1074,"a95":"0.99","info":"21/09/2014 at 19:03:11"},{"visible":true,"include":false,"step":"60.0","x":-2216.5714285714284,"y":-1602.3809523809523,"z":684.552380952381,"a95":"0.99","info":"21/09/2014 at 19:03:11"},{"visible":true,"include":false,"step":"70.0","x":-2316.6666666666665,"y":-836.742857142857,"z":897.5619047619048,"a95":"0.99","info":"21/09/2014 at 19:03:11"},{"visible":true,"include":false,"step":"80.0","x":-1435.7142857142858,"y":-707.2476190476191,"z":652.9142857142857,"a95":"0.99","info":"21/09/2014 at 19:03:11"},{"visible":true,"include":false,"step":"90.0","x":-1592,"y":-969.4285714285714,"z":467.5619047619047,"a95":"0.99","info":"21/09/2014 at 19:03:11"},{"visible":true,"include":false,"step":"100.0","x":-1692.952380952381,"y":-487.31428571428575,"z":157.4,"a95":"0.99","info":"21/09/2014 at 19:03:11"}],"demagType":"Unknown","patch":1.1,"format":"Unknown","strat":null},{"version":"v1.1.0","exported":"2017-05-22T13:58:18.174Z","info":"","GEO":[{"dec":11.982647065779418,"inc":-27.462730557907566,"MAD":10.807322841679616,"cm":[1.3534147347811432e-13,4.330927151299658e-13,0],"intensity":11909.596029940389,"type":"GC","origin":false,"forced":true,"remark":"","nSteps":8,"minStep":"100","maxStep":"330","steps":["100","150","180","210","240","270","300","330"],"group":"None"}],"TECT":[{"dec":71.4741508603758,"inc":-32.00785633302038,"MAD":10.807322841679465,"cm":[4.4392003300821496e-13,4.1143807937346754e-13,9.74458609042423e-14],"intensity":11909.59602994039,"type":"GC","origin":false,"forced":true,"remark":"","nSteps":8,"minStep":"100","maxStep":"330","steps":["100","150","180","210","240","270","300","330"],"group":"None"}],"interpreted":true,"name":"SS12.11A","coreAzi":97,"coreDip":48,"bedStrike":224,"bedDip":82,"data":[{"visible":true,"include":false,"step":"20","x":-9984.857142857143,"y":-6461.333333333333,"z":6016.285714285715,"a95":"2","info":"\"14-10-20\" at \"16:49\""},{"visible":true,"include":true,"step":"100","x":-7592,"y":-4887.047619047619,"z":5259.9047619047615,"a95":"2","info":"\"14-10-20\" at \"20:08\""},{"visible":true,"include":true,"step":"150","x":-4090.6666666666665,"y":-2319.714285714286,"z":2319.0476190476193,"a95":"2.2","info":"\"14-10-20\" at \"23:03\""},{"visible":true,"include":true,"step":"180","x":-3708.6666666666665,"y":-1888.952380952381,"z":1139.904761904762,"a95":"2","info":"\"14-10-21\" at \"15:07\""},{"visible":true,"include":true,"step":"210","x":-3517.2380952380954,"y":-1973.5238095238096,"z":1214.7619047619048,"a95":"2","info":"\"14-10-21\" at \"17:59\""},{"visible":true,"include":true,"step":"240","x":-2948.285714285714,"y":-1250.7619047619048,"z":249.52380952380952,"a95":"2.2","info":"\"14-10-21\" at \"21:04\""},{"visible":true,"include":true,"step":"270","x":-2512.9523809523807,"y":-1512.7619047619048,"z":863.2380952380952,"a95":"2.2","info":"\"14-10-22\" at \"00:07\""},{"visible":true,"include":true,"step":"300","x":-1920.2857142857142,"y":-879.047619047619,"z":-349.23809523809524,"a95":"2.3","info":"\"14-10-22\" at \"16:25\""},{"visible":true,"include":true,"step":"330","x":-1711.7142857142858,"y":-336.4761904761905,"z":31.047619047619047,"a95":"2.6","info":"\"14-10-22\" at \"19:30\""},{"visible":true,"include":false,"step":"360","x":-1422.952380952381,"y":-169.33333333333334,"z":-192.28571428571428,"a95":"2.5","info":"\"14-10-22\" at \"22:38\""},{"visible":true,"include":false,"step":"390","x":-1280.3809523809523,"y":-311.9047619047619,"z":84.19047619047619,"a95":"2.6","info":"\"14-10-23\" at \"16:50\""},{"visible":true,"include":false,"step":"420","x":-1298.3809523809523,"y":170.38095238095238,"z":-160.85714285714286,"a95":"2.8","info":"\"14-10-23\" at \"19:52\""},{"visible":true,"include":false,"step":"450","x":-1336.095238095238,"y":200.95238095238096,"z":-120.95238095238095,"a95":"2.5","info":"\"14-10-24\" at \"14:29\""},{"visible":true,"include":false,"step":"480","x":-1496.4761904761904,"y":289.9047619047619,"z":-281.04761904761904,"a95":"2.6","info":"\"14-10-24\" at \"17:33\""},{"visible":true,"include":false,"step":"510","x":-857.3333333333334,"y":73.23809523809524,"z":-151.14285714285714,"a95":"4.1","info":"\"14-10-24\" at \"20:25\""},{"visible":true,"include":false,"step":"540","x":-786.1904761904761,"y":-49.142857142857146,"z":-204.95238095238096,"a95":"3.9","info":"\"14-10-24\" at \"23:21\""},{"visible":true,"include":false,"step":"570","x":-223.33333333333334,"y":301.3333333333333,"z":-207.61904761904762,"a95":"8.1","info":"\"14-10-25\" at \"02:20\""},{"visible":true,"include":false,"step":"600","x":-1030.095238095238,"y":114.28571428571429,"z":-53.04761904761905,"a95":"3.3","info":"\"14-10-25\" at \"04:55\""},{"visible":true,"include":false,"step":"630","x":-634.952380952381,"y":582.1904761904761,"z":-150.76190476190476,"a95":"3.3","info":"\"14-10-25\" at \"23:17\""},{"visible":true,"include":false,"step":"660","x":-542.2857142857143,"y":388.0952380952381,"z":-26.952380952380953,"a95":"4","info":"\"14-10-26\" at \"02:01\""},{"visible":true,"include":false,"step":"680","x":-10,"y":-259.8095238095238,"z":-324.95238095238096,"a95":"5.4","info":"\"14-10-26\" at \"03:05\""}],"demagType":"Unknown","patch":1.1,"format":"Unknown","strat":null},{"version":"v1.1.0","exported":"2017-05-22T13:58:18.174Z","info":"","GEO":[{"dec":352.48476013600293,"inc":-28.655720227950383,"MAD":9.127688510044472,"cm":[-2.8954616482224083e-13,-1.1368683772161603e-13,0],"intensity":9305.809391738807,"type":"GC","origin":false,"forced":true,"remark":"","nSteps":9,"minStep":"100","maxStep":"340","steps":["100","150","180","210","240","270","300","320","340"],"group":"None","version":"v1.1.0"}],"TECT":[{"dec":78.78176618232192,"inc":-48.3270580331072,"MAD":9.127688510044646,"cm":[-1.7319479184152442e-13,-1.7053025658242404e-13,9.947598300641403e-14],"intensity":9305.809391738805,"type":"GC","origin":false,"forced":true,"remark":"","nSteps":9,"minStep":"100","maxStep":"340","steps":["100","150","180","210","240","270","300","320","340"],"group":"None","version":"v1.1.0"}],"interpreted":true,"name":"SS12.11B","coreAzi":97,"coreDip":48,"bedStrike":224,"bedDip":82,"data":[{"visible":false,"include":false,"step":"20","x":-11571.904761904761,"y":-7287.333333333333,"z":7775.428571428572,"a95":"2.3","info":"\"14-09-29\" at \"16:33\""},{"visible":true,"include":true,"step":"100","x":-6485.238095238095,"y":-3220,"z":3767.2380952380954,"a95":"2.3","info":"\"14-09-29\" at \"19:23\""},{"visible":true,"include":true,"step":"150","x":-4689.047619047619,"y":-2102.190476190476,"z":1425.5238095238096,"a95":"2.6","info":"\"14-09-29\" at \"22:19\""},{"visible":true,"include":true,"step":"180","x":-4098.380952380952,"y":-1416.7619047619048,"z":832.5714285714286,"a95":"2.2","info":"\"14-09-30\" at \"16:56\""},{"visible":true,"include":true,"step":"210","x":-3634.3809523809523,"y":-642.1904761904761,"z":-40.666666666666664,"a95":"2.4","info":"\"14-09-30\" at \"20:00\""},{"visible":true,"include":true,"step":"240","x":-2767.904761904762,"y":-166.28571428571428,"z":-3.619047619047619,"a95":"2.4","info":"\"14-09-30\" at \"23:09\""},{"visible":true,"include":true,"step":"270","x":-2729.6190476190477,"y":24.285714285714285,"z":-486.76190476190476,"a95":"2.3","info":"\"14-10-01\" at \"17:29\""},{"visible":true,"include":true,"step":"300","x":-2252.3809523809523,"y":-163.8095238095238,"z":-640.3809523809524,"a95":"2.7","info":"\"14-10-01\" at \"20:37\""},{"visible":true,"include":true,"step":"320","x":-1804.6666666666667,"y":95.33333333333333,"z":-915.5238095238095,"a95":"2.6","info":"\"14-10-01\" at \"23:44\""},{"visible":true,"include":true,"step":"340","x":-1517.7142857142858,"y":-73.61904761904762,"z":-346.2857142857143,"a95":"2.4","info":"\"14-10-02\" at \"17:19\""},{"visible":true,"include":false,"step":"370","x":-1394.5714285714287,"y":-38.95238095238095,"z":-854.7619047619048,"a95":"2.4","info":"\"14-10-02\" at \"20:09\""},{"visible":true,"include":false,"step":"400","x":-1336.857142857143,"y":-74.66666666666667,"z":-500.1904761904762,"a95":"2.7","info":"\"14-10-02\" at \"23:21\""},{"visible":true,"include":false,"step":"420","x":-1313.2380952380952,"y":-360.0952380952381,"z":-896.8571428571429,"a95":"2.5","info":"\"14-10-03\" at \"17:04\""},{"visible":true,"include":false,"step":"440","x":-1421.3333333333333,"y":-28.19047619047619,"z":-767.7142857142857,"a95":"2.4","info":"\"14-10-03\" at \"20:21\""},{"visible":true,"include":false,"step":"460","x":-936.0952380952381,"y":-243.8095238095238,"z":-675.4285714285714,"a95":"3.1","info":"\"14-10-03\" at \"23:39\""},{"visible":true,"include":false,"step":"480","x":-1247.3333333333333,"y":-72.28571428571429,"z":-564.8571428571429,"a95":"2.6","info":"\"14-10-04\" at \"10:33\""},{"visible":true,"include":false,"step":"510","x":-1258.857142857143,"y":174.28571428571428,"z":-938.0952380952381,"a95":"2.9","info":"\"14-10-04\" at \"13:26\""},{"visible":true,"include":false,"step":"540","x":-815.6190476190476,"y":186.95238095238096,"z":-522.5714285714286,"a95":"3.7","info":"\"14-10-04\" at \"16:51\""},{"visible":true,"include":false,"step":"570","x":-1065.5238095238096,"y":90.76190476190476,"z":-1006.6666666666666,"a95":"2.8","info":"\"14-10-05\" at \"10:55\""},{"visible":true,"include":false,"step":"600","x":-1084.6666666666667,"y":42.57142857142857,"z":-281.5238095238095,"a95":"2.9","info":"\"14-10-05\" at \"14:13\""},{"visible":true,"include":false,"step":"630","x":-678,"y":7.238095238095238,"z":-611.6190476190476,"a95":"3.8","info":"\"14-10-05\" at \"17:41\""},{"visible":false,"include":false,"step":"660","x":-2094.3809523809523,"y":-337.04761904761904,"z":-1668.6666666666667,"a95":"2.6","info":"\"14-10-11\" at \"08:16\""},{"visible":false,"include":false,"step":"680","x":12.095238095238095,"y":661.6190476190476,"z":-259.7142857142857,"a95":"3.9","info":"\"14-10-11\" at \"11:20\""}],"demagType":"Unknown","patch":1.1,"format":"Unknown","strat":null},{"version":"v1.1.0","exported":"2017-05-22T13:58:18.174Z","info":"1","GEO":[{"dec":2.9886923586993817,"inc":-37.42119210061145,"MAD":17.579543740307024,"cm":[1.2992781453898974e-13,4.872293045212115e-13,0],"intensity":12641.746712601793,"type":"GC","origin":false,"forced":true,"remark":"","nSteps":6,"minStep":"10.0","maxStep":"35.0","steps":["10.0","15.0","20.0","25.0","30.0","35.0"],"group":"None"}],"TECT":[{"dec":85.44778608707963,"inc":-36.91669256247703,"MAD":17.57954374030123,"cm":[-5.19711258155959e-13,-8.012215229904368e-13,8.661854302599316e-14],"intensity":12641.746712601791,"type":"GC","origin":false,"forced":true,"remark":"","nSteps":6,"minStep":"10.0","maxStep":"35.0","steps":["10.0","15.0","20.0","25.0","30.0","35.0"],"group":"None"}],"interpreted":true,"name":"SS12.12A","coreAzi":58,"coreDip":28,"bedStrike":224,"bedDip":82,"data":[{"visible":true,"include":false,"step":"0.0","x":-8404.57142857143,"y":-8150,"z":7523.809523809524,"a95":"0.99","info":"22/09/2014 at 00:14:40"},{"visible":true,"include":false,"step":"5.0","x":-6974.0952380952385,"y":-6869.9047619047615,"z":6327.238095238095,"a95":"0.99","info":"22/09/2014 at 00:14:40"},{"visible":true,"include":true,"step":"10.0","x":-5173.523809523809,"y":-5203.047619047619,"z":4377.619047619048,"a95":"0.99","info":"22/09/2014 at 00:14:40"},{"visible":true,"include":true,"step":"15.0","x":-4143.047619047619,"y":-4123.333333333333,"z":3413.5238095238096,"a95":"0.99","info":"22/09/2014 at 00:14:40"},{"visible":true,"include":true,"step":"20.0","x":-3530.285714285714,"y":-3664,"z":2791.0476190476193,"a95":"0.99","info":"22/09/2014 at 00:14:40"},{"visible":true,"include":true,"step":"25.0","x":-3225.1428571428573,"y":-3350.8571428571427,"z":2352.095238095238,"a95":"0.99","info":"22/09/2014 at 00:14:40"},{"visible":true,"include":true,"step":"30.0","x":-2998.190476190476,"y":-2927.2380952380954,"z":2189.809523809524,"a95":"0.99","info":"22/09/2014 at 00:14:40"},{"visible":true,"include":true,"step":"35.0","x":-2532.285714285714,"y":-2542.4761904761904,"z":1981.7142857142858,"a95":"0.99","info":"22/09/2014 at 00:14:40"},{"visible":true,"include":false,"step":"40.0","x":-2528.8571428571427,"y":-2446.7619047619046,"z":1621.047619047619,"a95":"0.99","info":"22/09/2014 at 00:14:40"},{"visible":true,"include":false,"step":"45.0","x":-2268.5714285714284,"y":-2088.5714285714284,"z":1806.5714285714287,"a95":"0.99","info":"22/09/2014 at 00:14:40"},{"visible":true,"include":false,"step":"50.0","x":-2024.4761904761904,"y":-1939.047619047619,"z":1402.7619047619048,"a95":"0.99","info":"22/09/2014 at 00:14:40"},{"visible":true,"include":false,"step":"60.0","x":-1927.6190476190477,"y":-1878.952380952381,"z":1389.7142857142858,"a95":"0.99","info":"22/09/2014 at 00:14:40"},{"visible":true,"include":false,"step":"70.0","x":-2136.6666666666665,"y":-1223.047619047619,"z":1411.2380952380952,"a95":"0.99","info":"22/09/2014 at 00:14:40"},{"visible":true,"include":false,"step":"80.0","x":-1212.952380952381,"y":-1159.8095238095239,"z":808.1904761904761,"a95":"0.99","info":"22/09/2014 at 00:14:40"},{"visible":true,"include":false,"step":"90.0","x":-1897.5238095238096,"y":-1700,"z":1097.2380952380952,"a95":"0.99","info":"22/09/2014 at 00:14:40"},{"visible":true,"include":false,"step":"100.0","x":-1845.3333333333333,"y":-1425.142857142857,"z":1061.8095238095239,"a95":"0.99","info":"22/09/2014 at 00:14:40"}],"demagType":"Unknown","patch":1.1,"format":"Unknown","strat":null},{"version":"v1.1.0","exported":"2017-05-22T13:58:18.174Z","info":"","GEO":[{"dec":351.576275875803,"inc":-27.94110095653056,"MAD":5.724054831938924,"cm":[-2.9504441218228923e-13,4.330927151299658e-14,0],"intensity":13141.981310362027,"type":"GC","origin":false,"forced":true,"remark":"","nSteps":8,"minStep":"100","maxStep":"320","steps":["100","150","180","210","240","270","300","320"],"group":"None"},{"dec":268.97901078081827,"inc":8.22668694637549,"MAD":7.194163491402491,"cm":[-6.090366306515144e-14,-5.4136589391245725e-15,0],"intensity":4029.235671907669,"type":"dir","forced":true,"remark":"","origin":false,"nSteps":10,"minStep":"340","maxStep":"610","steps":["340","370","400","440","470","490","520","550","580","610"],"group":"None"}],"TECT":[{"dec":78.23199575037859,"inc":-49.33679488879345,"MAD":5.724054831938983,"cm":[9.419766554076758e-13,4.547473508864641e-13,8.661854302599316e-14],"intensity":13141.981310362027,"type":"GC","origin":false,"forced":true,"remark":"","nSteps":8,"minStep":"100","maxStep":"320","steps":["100","150","180","210","240","270","300","320"],"group":"None"},{"dec":242.8535443641836,"inc":-42.28753147122938,"MAD":7.1941634914025165,"cm":[-1.2180732613030289e-13,1.4616879135636348e-13,-5.684341886080802e-14],"intensity":4029.2356719076697,"type":"dir","forced":true,"remark":"","origin":false,"nSteps":10,"minStep":"340","maxStep":"610","steps":["340","370","400","440","470","490","520","550","580","610"],"group":"None"}],"interpreted":true,"name":"SS12.13B","coreAzi":56,"coreDip":26,"bedStrike":224,"bedDip":82,"data":[{"visible":true,"include":false,"step":"20","x":-15316.952380952382,"y":-9102,"z":6594,"a95":"2","info":"\"14-10-13\" at \"17:40\""},{"visible":true,"include":false,"step":"100","x":-8993.42857142857,"y":-6113.714285714285,"z":3152.8571428571427,"a95":"1.9","info":"\"14-10-13\" at \"20:35\""},{"visible":true,"include":false,"step":"150","x":-6119.523809523809,"y":-4114.857142857143,"z":214.38095238095238,"a95":"2","info":"\"14-10-14\" at \"00:00\""},{"visible":true,"include":false,"step":"180","x":-4985.9047619047615,"y":-4092.190476190476,"z":-899.3333333333334,"a95":"1.9","info":"\"14-10-14\" at \"17:15\""},{"visible":true,"include":false,"step":"210","x":-4150.0952380952385,"y":-3442.285714285714,"z":-801.8095238095239,"a95":"2","info":"\"14-10-14\" at \"20:23\""},{"visible":true,"include":false,"step":"240","x":-3410.8571428571427,"y":-2929.6190476190477,"z":-1460,"a95":"2","info":"\"14-10-14\" at \"23:37\""},{"visible":true,"include":false,"step":"270","x":-2537.6190476190477,"y":-1997.5238095238096,"z":-1808.857142857143,"a95":"2.6","info":"\"14-10-15\" at \"17:21\""},{"visible":true,"include":false,"step":"300","x":-2130.8571428571427,"y":-1725.7142857142858,"z":-1865.4285714285713,"a95":"2.8","info":"\"14-10-15\" at \"20:38\""},{"visible":true,"include":false,"step":"320","x":-1641.6190476190477,"y":-1482.7619047619048,"z":-1774.095238095238,"a95":"2.7","info":"\"14-10-15\" at \"23:47\""},{"visible":true,"include":true,"step":"340","x":-1860.857142857143,"y":-1438.5714285714287,"z":-2239.1428571428573,"a95":"2.7","info":"\"14-10-16\" at \"17:55\""},{"visible":true,"include":true,"step":"370","x":-1406.7619047619048,"y":-1835.4285714285713,"z":-1612.6666666666667,"a95":"2.6","info":"\"14-10-16\" at \"21:08\""},{"visible":true,"include":true,"step":"400","x":-1260.5714285714287,"y":-1809.3333333333333,"z":-1910.952380952381,"a95":"2.7","info":"\"14-10-17\" at \"00:22\""},{"visible":false,"include":false,"step":"420","x":-1304.857142857143,"y":-1016.1904761904761,"z":-835.5238095238095,"a95":"2.9","info":"\"14-10-17\" at \"15:51\""},{"visible":true,"include":true,"step":"440","x":-1293.5238095238096,"y":-1376.2857142857142,"z":-2188,"a95":"2.7","info":"\"14-10-17\" at \"19:03\""},{"visible":true,"include":true,"step":"470","x":-865.5238095238095,"y":-1038.6666666666667,"z":-1361.8095238095239,"a95":"3.1","info":"\"14-10-17\" at \"22:14\""},{"visible":true,"include":true,"step":"490","x":-879.9047619047619,"y":-1352.5714285714287,"z":-1531.3333333333333,"a95":"2.9","info":"\"14-10-18\" at \"10:42\""},{"visible":true,"include":true,"step":"520","x":-1085.6190476190477,"y":-1024.2857142857142,"z":-1723.7142857142858,"a95":"3.1","info":"\"14-10-18\" at \"13:25\""},{"visible":true,"include":true,"step":"550","x":-1049.4285714285713,"y":-838.6666666666666,"z":-1100.095238095238,"a95":"3.5","info":"\"14-10-18\" at \"16:38\""},{"visible":true,"include":true,"step":"580","x":-712,"y":-830.1904761904761,"z":-732.0952380952381,"a95":"4.1","info":"\"14-10-19\" at \"10:25\""},{"visible":true,"include":true,"step":"610","x":-499.14285714285717,"y":-220.47619047619048,"z":-573.8095238095239,"a95":"5.4","info":"\"14-10-19\" at \"13:37\""},{"visible":false,"include":false,"step":"640","x":713.7142857142857,"y":-495.8095238095238,"z":103.23809523809524,"a95":"3.6","info":"\"14-10-19\" at \"18:12\""}],"demagType":"Unknown","patch":1.1,"format":"Unknown","strat":null},{"version":"v1.1.0","exported":"2017-05-22T13:58:18.174Z","info":"","GEO":[],"TECT":[],"interpreted":false,"name":"SS12.14A","coreAzi":76,"coreDip":53,"bedStrike":224,"bedDip":82,"data":[{"visible":true,"include":false,"step":"20","x":-3955.6190476190477,"y":-4706.952380952381,"z":11015.238095238095,"a95":"2.7","info":"\"14-09-29\" at \"16:35\""},{"visible":true,"include":false,"step":"100","x":-1611.4285714285713,"y":-2026.095238095238,"z":4788.666666666667,"a95":"2.7","info":"\"14-09-29\" at \"19:25\""},{"visible":true,"include":false,"step":"150","x":-1040.4761904761904,"y":-1233.2380952380952,"z":3368.5714285714284,"a95":"2.8","info":"\"14-09-29\" at \"22:22\""},{"visible":true,"include":false,"step":"180","x":-799.5238095238095,"y":-1030.7619047619048,"z":2849.904761904762,"a95":"2.7","info":"\"14-09-30\" at \"16:58\""},{"visible":true,"include":false,"step":"210","x":-727.8095238095239,"y":-899.047619047619,"z":2379.2380952380954,"a95":"2.7","info":"\"14-09-30\" at \"20:02\""},{"visible":true,"include":false,"step":"240","x":-693.8095238095239,"y":-560.6666666666666,"z":1984.7619047619048,"a95":"2.9","info":"\"14-09-30\" at \"23:10\""},{"visible":true,"include":false,"step":"270","x":-634.4761904761905,"y":-547.3333333333334,"z":1964.3809523809523,"a95":"2.8","info":"\"14-10-01\" at \"17:31\""},{"visible":true,"include":false,"step":"300","x":-584.1904761904761,"y":-438.57142857142856,"z":1819.2380952380952,"a95":"2.9","info":"\"14-10-01\" at \"20:38\""},{"visible":true,"include":false,"step":"320","x":-301.9047619047619,"y":-580.0952380952381,"z":1363.2380952380952,"a95":"2.7","info":"\"14-10-01\" at \"23:45\""},{"visible":true,"include":false,"step":"340","x":-459.3333333333333,"y":-340.85714285714283,"z":1343.5238095238096,"a95":"2.7","info":"\"14-10-02\" at \"17:21\""},{"visible":true,"include":false,"step":"370","x":-452.6666666666667,"y":-281.6190476190476,"z":986.5714285714286,"a95":"2.8","info":"\"14-10-02\" at \"20:11\""},{"visible":true,"include":false,"step":"400","x":-348.85714285714283,"y":-307.7142857142857,"z":776.4761904761905,"a95":"2.8","info":"\"14-10-02\" at \"23:23\""},{"visible":true,"include":false,"step":"420","x":-320.76190476190476,"y":-38.666666666666664,"z":410.0952380952381,"a95":"3.7","info":"\"14-10-03\" at \"17:05\""},{"visible":true,"include":false,"step":"440","x":-403.3333333333333,"y":-315.3333333333333,"z":692.6666666666666,"a95":"2.7","info":"\"14-10-03\" at \"20:23\""},{"visible":true,"include":false,"step":"460","x":-321.9047619047619,"y":-297.04761904761904,"z":527.2380952380952,"a95":"3.3","info":"\"14-10-03\" at \"23:40\""},{"visible":true,"include":false,"step":"480","x":-540.6666666666666,"y":-381.7142857142857,"z":735.6190476190476,"a95":"2.6","info":"\"14-10-04\" at \"10:35\""},{"visible":true,"include":false,"step":"510","x":-662.952380952381,"y":-113.23809523809524,"z":1121.2380952380952,"a95":"2.7","info":"\"14-10-04\" at \"13:27\""},{"visible":false,"include":false,"step":"540","x":7.809523809523809,"y":-329.14285714285717,"z":634.6666666666666,"a95":"3.1","info":"\"14-10-04\" at \"16:52\""},{"visible":false,"include":false,"step":"570","x":-86,"y":-75.42857142857143,"z":342.76190476190476,"a95":"4.8","info":"\"14-10-05\" at \"10:56\""},{"visible":false,"include":false,"step":"600","x":-622.2857142857143,"y":180.85714285714286,"z":396.1904761904762,"a95":"2.9","info":"\"14-10-05\" at \"14:15\""},{"visible":false,"include":false,"step":"630","x":-449.3333333333333,"y":138.76190476190476,"z":125.33333333333333,"a95":"3.6","info":"\"14-10-05\" at \"17:43\""},{"visible":false,"include":false,"step":"660","x":142.0952380952381,"y":-318.76190476190476,"z":119.71428571428571,"a95":"5.4","info":"\"14-10-11\" at \"08:18\""},{"visible":false,"include":false,"step":"680","x":-149.8095238095238,"y":441.04761904761904,"z":-143.8095238095238,"a95":"4.3","info":"\"14-10-11\" at \"11:21\""}],"demagType":"Unknown","patch":1.1,"format":"Unknown","strat":null},{"version":"v1.1.0","exported":"2017-05-22T13:58:18.174Z","info":"","GEO":[{"dec":29.441641104336895,"inc":-27.466366687532393,"MAD":8.052730245922643,"cm":[8.526512829121202e-14,-1.8474111129762605e-13,0],"intensity":11497.373913311434,"type":"GC","origin":false,"forced":true,"remark":"","nSteps":8,"minStep":"100","maxStep":"330","steps":["100","150","180","210","240","270","300","330"],"group":"None","version":"v1.1.0"}],"TECT":[{"dec":70.36736892139402,"inc":-16.56198203242368,"MAD":8.052730245921742,"cm":[3.126388037344441e-13,5.684341886080801e-13,-3.197442310920451e-13],"intensity":11497.373913311436,"type":"GC","origin":false,"forced":true,"remark":"","nSteps":8,"minStep":"100","maxStep":"330","steps":["100","150","180","210","240","270","300","330"],"group":"None","version":"v1.1.0"}],"interpreted":true,"name":"SS12.14B","coreAzi":76,"coreDip":53,"bedStrike":224,"bedDip":82,"data":[{"visible":true,"include":false,"step":"20","x":-4421.619047619048,"y":-4812.0952380952385,"z":10163.42857142857,"a95":"2.3","info":"\"14-10-20\" at \"16:51\""},{"visible":true,"include":true,"step":"100","x":-2822,"y":-3338.190476190476,"z":8548,"a95":"2.4","info":"\"14-10-20\" at \"20:10\""},{"visible":true,"include":true,"step":"150","x":-1248.1904761904761,"y":-1480.2857142857142,"z":4908.476190476191,"a95":"2.5","info":"\"14-10-20\" at \"23:05\""},{"visible":true,"include":true,"step":"180","x":-905.5238095238095,"y":-1142,"z":3825.3333333333335,"a95":"2.4","info":"\"14-10-21\" at \"15:09\""},{"visible":true,"include":true,"step":"210","x":-784.4761904761905,"y":-1061.3333333333333,"z":3638.285714285714,"a95":"2.3","info":"\"14-10-21\" at \"18:00\""},{"visible":true,"include":true,"step":"240","x":-545.3333333333334,"y":-612.1904761904761,"z":2699.6190476190477,"a95":"2.3","info":"\"14-10-21\" at \"21:06\""},{"visible":true,"include":true,"step":"270","x":-450.95238095238096,"y":-590.2857142857143,"z":2887.5238095238096,"a95":"2.5","info":"\"14-10-22\" at \"00:09\""},{"visible":true,"include":true,"step":"300","x":-435.3333333333333,"y":-378.1904761904762,"z":2030.2857142857142,"a95":"2.6","info":"\"14-10-22\" at \"16:27\""},{"visible":true,"include":true,"step":"330","x":-313.42857142857144,"y":-304.2857142857143,"z":1896.6666666666667,"a95":"2.5","info":"\"14-10-22\" at \"19:32\""},{"visible":true,"include":false,"step":"360","x":-175.71428571428572,"y":-379.3333333333333,"z":1575.5238095238096,"a95":"2.6","info":"\"14-10-22\" at \"22:39\""},{"visible":true,"include":false,"step":"390","x":24.19047619047619,"y":-323.14285714285717,"z":1604,"a95":"2.8","info":"\"14-10-23\" at \"16:52\""},{"visible":true,"include":false,"step":"420","x":110.38095238095238,"y":-216.66666666666666,"z":1344.7619047619048,"a95":"2.9","info":"\"14-10-23\" at \"19:54\""},{"visible":true,"include":false,"step":"450","x":271.8095238095238,"y":-2.5714285714285716,"z":1426.952380952381,"a95":"2.6","info":"\"14-10-24\" at \"14:31\""},{"visible":true,"include":false,"step":"480","x":105.23809523809524,"y":-181.8095238095238,"z":1232.095238095238,"a95":"2.6","info":"\"14-10-24\" at \"17:35\""},{"visible":true,"include":false,"step":"510","x":17.142857142857142,"y":-209.71428571428572,"z":1053.5238095238096,"a95":"3","info":"\"14-10-24\" at \"20:26\""},{"visible":true,"include":false,"step":"540","x":-131.33333333333334,"y":-436.76190476190476,"z":1192.952380952381,"a95":"2.8","info":"\"14-10-24\" at \"23:23\""},{"visible":true,"include":false,"step":"570","x":286.85714285714283,"y":-343.9047619047619,"z":630.0952380952381,"a95":"3.6","info":"\"14-10-25\" at \"02:22\""},{"visible":true,"include":false,"step":"600","x":-397.04761904761904,"y":91.61904761904762,"z":663.2380952380952,"a95":"3.6","info":"\"14-10-25\" at \"04:56\""},{"visible":true,"include":false,"step":"630","x":116.76190476190476,"y":274.3809523809524,"z":246.95238095238096,"a95":"4.6","info":"\"14-10-25\" at \"23:19\""},{"visible":true,"include":false,"step":"660","x":-93.33333333333333,"y":-181.9047619047619,"z":169.9047619047619,"a95":"8.1","info":"\"14-10-26\" at \"02:03\""},{"visible":true,"include":false,"step":"680","x":147.71428571428572,"y":-117.04761904761905,"z":-42.57142857142857,"a95":"8","info":"\"14-10-26\" at \"03:08\""}],"demagType":"Unknown","patch":1.1,"format":"Unknown","strat":null},{"version":"v1.1.0","exported":"2017-05-22T13:58:18.174Z","info":"","GEO":[],"TECT":[],"interpreted":false,"name":"SS12.15A","coreAzi":60,"coreDip":17,"bedStrike":224,"bedDip":82,"data":[{"visible":true,"include":false,"step":"20","x":-7450.380952380952,"y":-4187.047619047619,"z":8939.333333333334,"a95":"2.5","info":"\"14-10-13\" at \"17:42\""},{"visible":true,"include":false,"step":"100","x":-3842.6666666666665,"y":-2048.190476190476,"z":4364.761904761905,"a95":"2.4","info":"\"14-10-13\" at \"20:37\""},{"visible":true,"include":false,"step":"150","x":-2217.6190476190477,"y":-1294.6666666666667,"z":2773.5238095238096,"a95":"2.6","info":"\"14-10-14\" at \"00:02\""},{"visible":true,"include":false,"step":"180","x":-2083.714285714286,"y":-1182.095238095238,"z":2755.3333333333335,"a95":"2.3","info":"\"14-10-14\" at \"17:17\""},{"visible":true,"include":false,"step":"210","x":-1513.3333333333333,"y":-863.7142857142857,"z":2399.6190476190477,"a95":"2.5","info":"\"14-10-14\" at \"20:25\""},{"visible":true,"include":false,"step":"240","x":-1288.857142857143,"y":-742.5714285714286,"z":2001.3333333333333,"a95":"2.4","info":"\"14-10-14\" at \"23:39\""},{"visible":true,"include":false,"step":"270","x":-1068.3809523809523,"y":-669.8095238095239,"z":1856.1904761904761,"a95":"2.7","info":"\"14-10-15\" at \"17:23\""},{"visible":true,"include":false,"step":"300","x":-803.7142857142857,"y":-308.4761904761905,"z":1243.904761904762,"a95":"2.9","info":"\"14-10-15\" at \"20:39\""},{"visible":true,"include":false,"step":"320","x":-800.3809523809524,"y":-256.95238095238096,"z":1343.6190476190477,"a95":"2.8","info":"\"14-10-15\" at \"23:49\""},{"visible":true,"include":false,"step":"340","x":-590.4761904761905,"y":-152.57142857142858,"z":888.952380952381,"a95":"2.8","info":"\"14-10-16\" at \"17:57\""},{"visible":true,"include":false,"step":"370","x":-428.2857142857143,"y":-268.2857142857143,"z":1166.952380952381,"a95":"2.8","info":"\"14-10-16\" at \"21:10\""},{"visible":true,"include":false,"step":"400","x":-809.6190476190476,"y":-388.4761904761905,"z":1093.904761904762,"a95":"2.5","info":"\"14-10-17\" at \"00:24\""},{"visible":true,"include":false,"step":"420","x":-683.5238095238095,"y":-127.52380952380952,"z":1146.5714285714287,"a95":"2.4","info":"\"14-10-17\" at \"15:53\""},{"visible":true,"include":false,"step":"440","x":-616.1904761904761,"y":-135.61904761904762,"z":841.2380952380952,"a95":"2.7","info":"\"14-10-17\" at \"19:05\""},{"visible":true,"include":false,"step":"470","x":-937.6190476190476,"y":-182.0952380952381,"z":1202.2857142857142,"a95":"2.4","info":"\"14-10-17\" at \"22:16\""},{"visible":true,"include":false,"step":"490","x":-513.6190476190476,"y":-147.71428571428572,"z":880.8571428571429,"a95":"3.1","info":"\"14-10-18\" at \"10:44\""},{"visible":true,"include":false,"step":"520","x":-369.7142857142857,"y":-256.2857142857143,"z":1023.047619047619,"a95":"3.2","info":"\"14-10-18\" at \"13:27\""},{"visible":true,"include":false,"step":"550","x":-377.8095238095238,"y":275.14285714285717,"z":504.95238095238096,"a95":"3.7","info":"\"14-10-18\" at \"16:39\""},{"visible":true,"include":false,"step":"580","x":6.380952380952381,"y":18.571428571428573,"z":868.7619047619048,"a95":"3.4","info":"\"14-10-19\" at \"10:27\""},{"visible":true,"include":false,"step":"610","x":-258.4761904761905,"y":237.14285714285714,"z":547.1428571428571,"a95":"4.2","info":"\"14-10-19\" at \"13:39\""},{"visible":true,"include":false,"step":"640","x":543.4285714285714,"y":-73.04761904761905,"z":538.952380952381,"a95":"2.5","info":"\"14-10-19\" at \"18:14\""}],"demagType":"Unknown","patch":1.1,"format":"Unknown","strat":null},{"version":"v1.1.0","exported":"2017-05-22T13:58:18.175Z","info":"","GEO":[{"dec":343.8399656456239,"inc":-27.797574992014113,"MAD":10.577768555029891,"cm":[-2.1316282072803006e-14,1.5631940186722204e-13,0],"intensity":7711.499303944676,"type":"GC","origin":false,"forced":true,"remark":"","nSteps":12,"minStep":"100","maxStep":"420","steps":["100","150","180","210","240","270","300","320","340","370","400","420"],"group":"None","version":"v1.1.0"}],"TECT":[{"dec":82.88873351751658,"inc":-55.56364667180212,"MAD":10.577768555028292,"cm":[-8.526512829121202e-14,-3.979039320256561e-13,1.7763568394002505e-13],"intensity":7711.499303944676,"type":"GC","origin":false,"forced":true,"remark":"","nSteps":12,"minStep":"100","maxStep":"420","steps":["100","150","180","210","240","270","300","320","340","370","400","420"],"group":"None","version":"v1.1.0"}],"interpreted":true,"name":"SS12.16A","coreAzi":60,"coreDip":19,"bedStrike":224,"bedDip":82,"data":[{"visible":true,"include":false,"step":"20","x":-6069.333333333333,"y":-3871.1428571428573,"z":7151.238095238095,"a95":"2.6","info":"\"14-09-29\" at \"16:37\""},{"visible":true,"include":true,"step":"100","x":-2864.7619047619046,"y":-1512.952380952381,"z":4831.238095238095,"a95":"2.7","info":"\"14-09-29\" at \"19:27\""},{"visible":true,"include":true,"step":"150","x":-1792.7619047619048,"y":-892.1904761904761,"z":3669.0476190476193,"a95":"2.8","info":"\"14-09-29\" at \"22:24\""},{"visible":true,"include":true,"step":"180","x":-1595.7142857142858,"y":-763.5238095238095,"z":3404.9523809523807,"a95":"2.7","info":"\"14-09-30\" at \"17:00\""},{"visible":true,"include":true,"step":"210","x":-1500.2857142857142,"y":-578.4761904761905,"z":3222.8571428571427,"a95":"2.9","info":"\"14-09-30\" at \"20:04\""},{"visible":true,"include":true,"step":"240","x":-1433.047619047619,"y":-588.952380952381,"z":3130.190476190476,"a95":"2.9","info":"\"14-09-30\" at \"23:12\""},{"visible":true,"include":true,"step":"270","x":-1230.6666666666667,"y":-438.3809523809524,"z":2774.5714285714284,"a95":"2.9","info":"\"14-10-01\" at \"17:33\""},{"visible":true,"include":true,"step":"300","x":-1030.2857142857142,"y":-434.85714285714283,"z":2888.6666666666665,"a95":"2.8","info":"\"14-10-01\" at \"20:40\""},{"visible":true,"include":true,"step":"320","x":-989.047619047619,"y":-511.23809523809524,"z":2474.7619047619046,"a95":"2.7","info":"\"14-10-01\" at \"23:47\""},{"visible":true,"include":true,"step":"340","x":-679.7142857142857,"y":-352,"z":2556.4761904761904,"a95":"2.6","info":"\"14-10-02\" at \"17:23\""},{"visible":true,"include":true,"step":"370","x":-536.5714285714286,"y":-181.71428571428572,"z":2029.904761904762,"a95":"2.7","info":"\"14-10-02\" at \"20:13\""},{"visible":true,"include":true,"step":"400","x":-444.1904761904762,"y":-233.52380952380952,"z":2159.714285714286,"a95":"2.8","info":"\"14-10-02\" at \"23:25\""},{"visible":true,"include":true,"step":"420","x":-412.3809523809524,"y":-142.66666666666666,"z":1950.095238095238,"a95":"2.7","info":"\"14-10-03\" at \"17:07\""},{"visible":true,"include":false,"step":"440","x":-392,"y":-177.04761904761904,"z":1813.904761904762,"a95":"2.8","info":"\"14-10-03\" at \"20:25\""},{"visible":true,"include":false,"step":"460","x":-310.76190476190476,"y":-18.571428571428573,"z":1445.8095238095239,"a95":"2.9","info":"\"14-10-03\" at \"23:42\""},{"visible":true,"include":false,"step":"480","x":-387.3333333333333,"y":115.23809523809524,"z":1660.5714285714287,"a95":"2.8","info":"\"14-10-04\" at \"10:37\""},{"visible":true,"include":false,"step":"510","x":-515.9047619047619,"y":140.85714285714286,"z":1660.4761904761904,"a95":"2.8","info":"\"14-10-04\" at \"13:29\""},{"visible":true,"include":false,"step":"540","x":-54.38095238095238,"y":231.9047619047619,"z":1469.6190476190477,"a95":"2.8","info":"\"14-10-04\" at \"16:54\""},{"visible":true,"include":false,"step":"570","x":-412.4761904761905,"y":-67.71428571428571,"z":848.5714285714286,"a95":"2.9","info":"\"14-10-05\" at \"10:59\""},{"visible":true,"include":false,"step":"600","x":-468.6666666666667,"y":105.04761904761905,"z":1081.3333333333333,"a95":"3.1","info":"\"14-10-05\" at \"14:17\""},{"visible":true,"include":false,"step":"630","x":-351.3333333333333,"y":456.2857142857143,"z":607.4285714285714,"a95":"2.7","info":"\"14-10-05\" at \"17:45\""},{"visible":true,"include":false,"step":"660","x":4.761904761904762,"y":-296.85714285714283,"z":656.3809523809524,"a95":"3.7","info":"\"14-10-11\" at \"08:21\""},{"visible":true,"include":false,"step":"680","x":-8,"y":379.5238095238095,"z":-26.571428571428573,"a95":"5.1","info":"\"14-10-11\" at \"11:24\""}],"demagType":"Unknown","patch":1.1,"format":"Unknown","strat":null},{"version":"v1.1.0","exported":"2017-05-22T13:58:18.175Z","info":"","GEO":[{"dec":341.96108439609986,"inc":-24.698387310989432,"MAD":4.721356399214749,"cm":[-7.815970093361102e-14,9.237055564881302e-14,0],"intensity":9426.923505338855,"type":"GC","origin":false,"forced":true,"remark":"","nSteps":11,"minStep":"100","maxStep":"420","steps":["100","150","180","210","240","270","300","330","360","390","420"],"group":"None","version":"v1.1.0"}],"TECT":[{"dec":79.34328231218791,"inc":-58.518383866142926,"MAD":4.72135639921371,"cm":[0,-2.5579538487363607e-13,6.039613253960852e-14],"intensity":9426.923505338853,"type":"GC","origin":false,"forced":true,"remark":"","nSteps":11,"minStep":"100","maxStep":"420","steps":["100","150","180","210","240","270","300","330","360","390","420"],"group":"None","version":"v1.1.0"}],"interpreted":true,"name":"SS12.16B","coreAzi":60,"coreDip":19,"bedStrike":224,"bedDip":82,"data":[{"visible":true,"include":false,"step":"20","x":-7158.285714285715,"y":-3286.9523809523807,"z":6835.047619047619,"a95":"2.1","info":"\"14-10-20\" at \"16:53\""},{"visible":true,"include":true,"step":"100","x":-4471.142857142857,"y":-2065.4285714285716,"z":6093.809523809524,"a95":"2.2","info":"\"14-10-20\" at \"20:12\""},{"visible":true,"include":true,"step":"150","x":-2184.3809523809523,"y":-938.952380952381,"z":4094.6666666666665,"a95":"2.5","info":"\"14-10-20\" at \"23:07\""},{"visible":true,"include":true,"step":"180","x":-1778.6666666666667,"y":-652.3809523809524,"z":3578.095238095238,"a95":"2.3","info":"\"14-10-21\" at \"15:11\""},{"visible":true,"include":true,"step":"210","x":-1634.1904761904761,"y":-615.1428571428571,"z":3545.0476190476193,"a95":"2.3","info":"\"14-10-21\" at \"18:02\""},{"visible":true,"include":true,"step":"240","x":-1169.904761904762,"y":-421.7142857142857,"z":2937.2380952380954,"a95":"2.3","info":"\"14-10-21\" at \"21:08\""},{"visible":true,"include":true,"step":"270","x":-1044.7619047619048,"y":-391.23809523809524,"z":2921.3333333333335,"a95":"2.4","info":"\"14-10-22\" at \"00:11\""},{"visible":true,"include":true,"step":"300","x":-691.7142857142857,"y":-169.14285714285714,"z":2510.7619047619046,"a95":"2.5","info":"\"14-10-22\" at \"16:28\""},{"visible":true,"include":true,"step":"330","x":-544.4761904761905,"y":-188.76190476190476,"z":2465.5238095238096,"a95":"2.5","info":"\"14-10-22\" at \"19:34\""},{"visible":true,"include":true,"step":"360","x":-393.6190476190476,"y":-142.38095238095238,"z":1949.2380952380952,"a95":"2.4","info":"\"14-10-22\" at \"22:41\""},{"visible":true,"include":true,"step":"390","x":-188.95238095238096,"y":-104.19047619047619,"z":2059.2380952380954,"a95":"2.7","info":"\"14-10-23\" at \"16:54\""},{"visible":true,"include":true,"step":"420","x":-252.57142857142858,"y":-104,"z":1770.4761904761904,"a95":"2.7","info":"\"14-10-23\" at \"19:56\""},{"visible":true,"include":false,"step":"450","x":-224.95238095238096,"y":-8.095238095238095,"z":1915.2380952380952,"a95":"2.6","info":"\"14-10-24\" at \"14:32\""},{"visible":true,"include":false,"step":"480","x":-331.5238095238095,"y":197.8095238095238,"z":1434.6666666666667,"a95":"2.7","info":"\"14-10-24\" at \"17:37\""},{"visible":true,"include":false,"step":"510","x":8.095238095238095,"y":290,"z":1557.8095238095239,"a95":"2.6","info":"\"14-10-24\" at \"20:28\""},{"visible":true,"include":false,"step":"540","x":126.57142857142857,"y":-225.9047619047619,"z":1192.5714285714287,"a95":"2.7","info":"\"14-10-24\" at \"23:24\""},{"visible":true,"include":false,"step":"570","x":53.333333333333336,"y":-4.476190476190476,"z":1010.0952380952381,"a95":"2.7","info":"\"14-10-25\" at \"02:23\""},{"visible":true,"include":false,"step":"600","x":-219.14285714285714,"y":109.80952380952381,"z":849.4285714285714,"a95":"3.3","info":"\"14-10-25\" at \"04:58\""},{"visible":true,"include":false,"step":"630","x":236.47619047619048,"y":303.3333333333333,"z":752.2857142857143,"a95":"3.3","info":"\"14-10-25\" at \"23:21\""},{"visible":true,"include":false,"step":"660","x":-41.42857142857143,"y":-119.14285714285714,"z":416.2857142857143,"a95":"4.9","info":"\"14-10-26\" at \"02:05\""},{"visible":true,"include":false,"step":"680","x":200.85714285714286,"y":174.47619047619048,"z":217.23809523809524,"a95":"4.3","info":"\"14-10-26\" at \"03:10\""}],"demagType":"Unknown","patch":1.1,"format":"Unknown","strat":null},{"version":"v1.1.0","exported":"2017-05-22T13:58:18.175Z","info":"","GEO":[{"dec":5.122157368465423,"inc":-32.61031567146727,"MAD":2.4260916363525697,"cm":[-4.263256414560601e-14,2.842170943040401e-14,0],"intensity":11488.333098351772,"type":"GC","origin":false,"forced":true,"remark":"","nSteps":6,"minStep":"100","maxStep":"270","steps":["100","150","180","210","240","270"],"group":"None","version":"v1.1.0"}],"TECT":[{"dec":79.05422383814505,"inc":-36.76773597317786,"MAD":2.4260916363585014,"cm":[-2.8421709430404007e-13,-1.1297629498585593e-12,-1.1368683772161603e-13],"intensity":11488.333098351772,"type":"GC","origin":false,"forced":true,"remark":"","nSteps":6,"minStep":"100","maxStep":"270","steps":["100","150","180","210","240","270"],"group":"None","version":"v1.1.0"}],"interpreted":true,"name":"SS12.17A","coreAzi":38,"coreDip":16,"bedStrike":224,"bedDip":82,"data":[{"visible":true,"include":false,"step":"20","x":-8631.52380952381,"y":-3084.190476190476,"z":6852.666666666667,"a95":"2","info":"\"14-10-20\" at \"16:55\""},{"visible":true,"include":true,"step":"100","x":-5658.761904761905,"y":-1557.904761904762,"z":6238,"a95":"2.2","info":"\"14-10-20\" at \"20:14\""},{"visible":true,"include":true,"step":"150","x":-3242.285714285714,"y":-552,"z":3935.714285714286,"a95":"2.3","info":"\"14-10-20\" at \"23:08\""},{"visible":true,"include":true,"step":"180","x":-2730.285714285714,"y":-336.2857142857143,"z":3360.095238095238,"a95":"2.2","info":"\"14-10-21\" at \"15:12\""},{"visible":true,"include":true,"step":"210","x":-2547.714285714286,"y":-261.7142857142857,"z":3173.0476190476193,"a95":"2.2","info":"\"14-10-21\" at \"18:04\""},{"visible":true,"include":true,"step":"240","x":-1975.4285714285713,"y":-61.523809523809526,"z":2573.6190476190477,"a95":"2.2","info":"\"14-10-21\" at \"21:10\""},{"visible":true,"include":true,"step":"270","x":-1764.4761904761904,"y":24.571428571428573,"z":2394.8571428571427,"a95":"2.3","info":"\"14-10-22\" at \"00:13\""},{"visible":true,"include":false,"step":"300","x":-1558.4761904761904,"y":85.52380952380952,"z":1898.2857142857142,"a95":"2.3","info":"\"14-10-22\" at \"16:30\""},{"visible":true,"include":false,"step":"330","x":-1387.904761904762,"y":39.61904761904762,"z":1882.952380952381,"a95":"2.4","info":"\"14-10-22\" at \"19:36\""},{"visible":true,"include":false,"step":"360","x":-1316.6666666666667,"y":194.57142857142858,"z":1493.2380952380952,"a95":"2.4","info":"\"14-10-22\" at \"22:43\""},{"visible":true,"include":false,"step":"390","x":-1073.142857142857,"y":223.61904761904762,"z":1632.095238095238,"a95":"2.5","info":"\"14-10-23\" at \"16:56\""},{"visible":true,"include":false,"step":"420","x":-970.7619047619048,"y":207.8095238095238,"z":1421.7142857142858,"a95":"2.6","info":"\"14-10-23\" at \"19:58\""},{"visible":true,"include":false,"step":"450","x":-791.9047619047619,"y":366.76190476190476,"z":1770.2857142857142,"a95":"2.4","info":"\"14-10-24\" at \"14:34\""},{"visible":true,"include":false,"step":"480","x":-765.9047619047619,"y":449.7142857142857,"z":1305.8095238095239,"a95":"2.4","info":"\"14-10-24\" at \"17:38\""},{"visible":true,"include":false,"step":"510","x":-427.3333333333333,"y":487.8095238095238,"z":1184.1904761904761,"a95":"2.7","info":"\"14-10-24\" at \"20:30\""},{"visible":true,"include":false,"step":"540","x":-229.71428571428572,"y":133.71428571428572,"z":879.2380952380952,"a95":"3.3","info":"\"14-10-24\" at \"23:26\""},{"visible":true,"include":false,"step":"570","x":-131.8095238095238,"y":339.8095238095238,"z":765.5238095238095,"a95":"3.4","info":"\"14-10-25\" at \"02:25\""},{"visible":true,"include":false,"step":"600","x":-453.23809523809524,"y":399.04761904761904,"z":481.7142857142857,"a95":"3.5","info":"\"14-10-25\" at \"05:00\""},{"visible":true,"include":false,"step":"630","x":70.85714285714286,"y":390,"z":92,"a95":"4.6","info":"\"14-10-25\" at \"23:22\""},{"visible":true,"include":false,"step":"660","x":-239.04761904761904,"y":186.0952380952381,"z":180.66666666666666,"a95":"5.4","info":"\"14-10-26\" at \"02:07\""},{"visible":true,"include":false,"step":"680","x":-68.44761904761906,"y":-36.76190476190476,"z":24.45714285714286,"a95":"20.3","info":"\"14-10-26\" at \"03:13\""}],"demagType":"Unknown","patch":1.1,"format":"Unknown","strat":null},{"version":"v1.1.0","exported":"2017-05-22T13:58:18.175Z","info":"","GEO":[{"dec":36.89137197334469,"inc":-36.557055645298135,"MAD":9.946275383478719,"cm":[-1.0658141036401503e-13,1.9895196601282805e-13,0],"intensity":9299.680035458467,"type":"GC","origin":false,"forced":true,"remark":"","nSteps":8,"minStep":"100","maxStep":"320","steps":["100","150","180","210","240","270","300","320"],"group":"None","version":"v1.1.0"}],"TECT":[{"dec":79.85258153880704,"inc":-10.44735252532407,"MAD":9.946275383479538,"cm":[2.842170943040401e-14,-1.4566126083082054e-13,1.1368683772161603e-13],"intensity":9299.680035458467,"type":"GC","origin":false,"forced":true,"remark":"","nSteps":8,"minStep":"100","maxStep":"320","steps":["100","150","180","210","240","270","300","320"],"group":"None","version":"v1.1.0"}],"interpreted":true,"name":"SS12.17B","coreAzi":38,"coreDip":16,"bedStrike":224,"bedDip":82,"data":[{"visible":true,"include":false,"step":"20","x":-8664.47619047619,"y":-2269.809523809524,"z":8738.857142857143,"a95":"2.5","info":"\"14-09-29\" at \"16:39\""},{"visible":true,"include":true,"step":"100","x":-4195.9047619047615,"y":-745.3333333333334,"z":5330.666666666667,"a95":"2.6","info":"\"14-09-29\" at \"19:29\""},{"visible":true,"include":true,"step":"150","x":-2928.095238095238,"y":-316.85714285714283,"z":3935.904761904762,"a95":"2.6","info":"\"14-09-29\" at \"22:26\""},{"visible":true,"include":true,"step":"180","x":-2643.904761904762,"y":-68.47619047619048,"z":3546.285714285714,"a95":"2.5","info":"\"14-09-30\" at \"17:02\""},{"visible":true,"include":true,"step":"210","x":-2574.8571428571427,"y":-99.52380952380952,"z":3408.5714285714284,"a95":"2.5","info":"\"14-09-30\" at \"20:06\""},{"visible":true,"include":true,"step":"240","x":-2351.3333333333335,"y":109.23809523809524,"z":3094.3809523809523,"a95":"2.6","info":"\"14-09-30\" at \"23:14\""},{"visible":true,"include":true,"step":"270","x":-1717.904761904762,"y":316.1904761904762,"z":2200.4761904761904,"a95":"2.6","info":"\"14-10-01\" at \"17:35\""},{"visible":true,"include":true,"step":"300","x":-1728.3809523809523,"y":361.7142857142857,"z":2112.7619047619046,"a95":"2.6","info":"\"14-10-01\" at \"20:42\""},{"visible":true,"include":true,"step":"320","x":-1488.4761904761904,"y":319.23809523809524,"z":2017.142857142857,"a95":"2.6","info":"\"14-10-01\" at \"23:49\""},{"visible":true,"include":false,"step":"340","x":-1239.904761904762,"y":377.3333333333333,"z":1913.904761904762,"a95":"2.5","info":"\"14-10-02\" at \"17:25\""},{"visible":true,"include":false,"step":"370","x":-1218.4761904761904,"y":416.4761904761905,"z":1542.5714285714287,"a95":"2.4","info":"\"14-10-02\" at \"20:15\""},{"visible":true,"include":false,"step":"400","x":-1077.3333333333333,"y":538.8571428571429,"z":1733.2380952380952,"a95":"2.5","info":"\"14-10-02\" at \"23:26\""},{"visible":true,"include":false,"step":"420","x":-1050.6666666666667,"y":699.5238095238095,"z":1414.4761904761904,"a95":"2.4","info":"\"14-10-03\" at \"17:09\""},{"visible":true,"include":false,"step":"440","x":-888.4761904761905,"y":616.1904761904761,"z":1451.2380952380952,"a95":"2.6","info":"\"14-10-03\" at \"20:27\""},{"visible":true,"include":false,"step":"460","x":-811.047619047619,"y":485.14285714285717,"z":1053.7142857142858,"a95":"2.6","info":"\"14-10-03\" at \"23:44\""},{"visible":true,"include":false,"step":"480","x":-864.5714285714286,"y":571.3333333333334,"z":1312.1904761904761,"a95":"2.6","info":"\"14-10-04\" at \"10:39\""},{"visible":true,"include":false,"step":"510","x":-691.047619047619,"y":791.9047619047619,"z":1019.4285714285714,"a95":"2.6","info":"\"14-10-04\" at \"13:31\""},{"visible":true,"include":false,"step":"540","x":-479.5238095238095,"y":325.23809523809524,"z":753.047619047619,"a95":"3.1","info":"\"14-10-04\" at \"16:56\""},{"visible":true,"include":false,"step":"570","x":107.52380952380952,"y":363.04761904761904,"z":462.3809523809524,"a95":"3.3","info":"\"14-10-05\" at \"11:01\""},{"visible":true,"include":false,"step":"600","x":-735.3333333333334,"y":504.6666666666667,"z":620.8571428571429,"a95":"3.1","info":"\"14-10-05\" at \"14:18\""},{"visible":true,"include":false,"step":"630","x":-461.7142857142857,"y":638.5714285714286,"z":68.38095238095238,"a95":"3","info":"\"14-10-05\" at \"17:47\""},{"visible":true,"include":false,"step":"660","x":-534.0952380952381,"y":24.19047619047619,"z":68.76190476190476,"a95":"3.8","info":"\"14-10-11\" at \"08:23\""},{"visible":true,"include":false,"step":"680","x":105.14285714285714,"y":362.76190476190476,"z":-156.85714285714286,"a95":"6","info":"\"14-10-11\" at \"11:26\""}],"demagType":"Unknown","patch":1.1,"format":"Unknown","strat":null},{"version":"v1.1.0","exported":"2017-05-22T13:58:18.175Z","info":"2","GEO":[],"TECT":[],"interpreted":false,"name":"SS12.17C","coreAzi":38,"coreDip":16,"bedStrike":224,"bedDip":82,"data":[{"visible":true,"include":false,"step":"0.0","x":-7907.142857142857,"y":-2556,"z":8955.42857142857,"a95":"0.99","info":"22/09/2014 at 00:14:40"},{"visible":true,"include":false,"step":"5.0","x":-6777.333333333333,"y":-2312.5714285714284,"z":7344.285714285715,"a95":"0.99","info":"22/09/2014 at 00:14:40"},{"visible":true,"include":false,"step":"10.0","x":-5033.238095238095,"y":-1558.5714285714287,"z":5493.428571428572,"a95":"0.99","info":"22/09/2014 at 00:14:40"},{"visible":true,"include":false,"step":"15.0","x":-3883.904761904762,"y":-1093.142857142857,"z":4331.809523809524,"a95":"0.99","info":"22/09/2014 at 00:14:40"},{"visible":true,"include":false,"step":"20.0","x":-3142,"y":-733.3619047619047,"z":3672.190476190476,"a95":"0.99","info":"22/09/2014 at 00:14:40"},{"visible":true,"include":false,"step":"25.0","x":-2628.190476190476,"y":-687.495238095238,"z":3089.4285714285716,"a95":"0.99","info":"22/09/2014 at 00:14:40"},{"visible":true,"include":false,"step":"30.0","x":-2078.5714285714284,"y":-494.45714285714286,"z":2930.3809523809523,"a95":"0.99","info":"22/09/2014 at 00:14:40"},{"visible":true,"include":false,"step":"35.0","x":-1740.3809523809523,"y":-332.5333333333333,"z":2276.5714285714284,"a95":"0.99","info":"22/09/2014 at 00:14:40"},{"visible":true,"include":false,"step":"40.0","x":-1644.7619047619048,"y":-354.48571428571427,"z":2032.952380952381,"a95":"0.99","info":"22/09/2014 at 00:14:40"},{"visible":true,"include":false,"step":"45.0","x":-1595.8095238095239,"y":-157.35238095238097,"z":2007.904761904762,"a95":"0.99","info":"22/09/2014 at 00:14:40"},{"visible":true,"include":false,"step":"50.0","x":-1282.2857142857142,"y":-446.3714285714285,"z":1831.8095238095239,"a95":"0.99","info":"22/09/2014 at 00:14:40"},{"visible":true,"include":false,"step":"60.0","x":-1155.8095238095239,"y":-45.91428571428572,"z":1506.2857142857142,"a95":"0.99","info":"22/09/2014 at 00:14:40"},{"visible":true,"include":false,"step":"70.0","x":-1098.5714285714287,"y":-237.54285714285712,"z":1644.1904761904761,"a95":"0.99","info":"22/09/2014 at 00:14:40"},{"visible":true,"include":false,"step":"80.0","x":-1324.095238095238,"y":-368.3904761904762,"z":1296.7619047619048,"a95":"0.99","info":"22/09/2014 at 00:14:40"},{"visible":true,"include":false,"step":"90.0","x":-696.4,"y":-305.1714285714286,"z":1387.142857142857,"a95":"0.99","info":"22/09/2014 at 00:14:40"},{"visible":true,"include":false,"step":"100.0","x":-729.6952380952381,"y":63.51428571428571,"z":1236.6666666666667,"a95":"0.99","info":"22/09/2014 at 00:14:40"}],"demagType":"Unknown","patch":1.1,"format":"Unknown","strat":null},{"version":"v1.1.0","exported":"2017-05-22T13:58:18.175Z","info":"7","GEO":[],"TECT":[],"interpreted":false,"name":"SS12.18C","coreAzi":73,"coreDip":43,"bedStrike":224,"bedDip":82,"data":[{"visible":true,"include":false,"step":"0.0","x":-4169.142857142857,"y":-3277.2380952380954,"z":10092.380952380952,"a95":"0.99","info":"09/10/2014 at 10:55:29"},{"visible":true,"include":false,"step":"4.0","x":-3690.6666666666665,"y":-2989.1428571428573,"z":8870.57142857143,"a95":"0.99","info":"09/10/2014 at 10:55:29"},{"visible":true,"include":false,"step":"8.0","x":-2711.4285714285716,"y":-2245.4285714285716,"z":7191.428571428572,"a95":"0.99","info":"09/10/2014 at 10:55:29"},{"visible":true,"include":false,"step":"12.0","x":-1875.3333333333333,"y":-1713.142857142857,"z":5958.476190476191,"a95":"0.99","info":"09/10/2014 at 10:55:29"},{"visible":true,"include":false,"step":"16.0","x":-1517.5238095238096,"y":-1174.4761904761904,"z":4869.523809523809,"a95":"0.99","info":"09/10/2014 at 10:55:29"},{"visible":true,"include":false,"step":"20.0","x":-1133.142857142857,"y":-988,"z":4032.9523809523807,"a95":"0.99","info":"09/10/2014 at 10:55:29"},{"visible":true,"include":false,"step":"25.0","x":-865.6380952380953,"y":-837.8380952380952,"z":3546.4761904761904,"a95":"0.99","info":"09/10/2014 at 10:55:29"},{"visible":true,"include":false,"step":"30.0","x":-1028.1904761904761,"y":-549.7619047619048,"z":3135.3333333333335,"a95":"0.99","info":"09/10/2014 at 10:55:29"},{"visible":true,"include":false,"step":"35.0","x":-672.6476190476191,"y":-512.3619047619047,"z":2825.714285714286,"a95":"0.99","info":"09/10/2014 at 10:55:29"},{"visible":true,"include":false,"step":"40.0","x":-678.5238095238095,"y":-490.8857142857143,"z":2655.904761904762,"a95":"0.99","info":"09/10/2014 at 10:55:29"},{"visible":true,"include":false,"step":"45.0","x":-346.93333333333334,"y":-448.6190476190476,"z":2283.1428571428573,"a95":"0.99","info":"09/10/2014 at 10:55:29"},{"visible":true,"include":false,"step":"50.0","x":-340.6952380952381,"y":-526.9619047619047,"z":2222.5714285714284,"a95":"0.99","info":"09/10/2014 at 10:55:29"},{"visible":true,"include":false,"step":"60.0","x":-524.952380952381,"y":-285.4,"z":2046.2857142857142,"a95":"0.99","info":"09/10/2014 at 10:55:29"},{"visible":true,"include":false,"step":"70.0","x":-120.93333333333332,"y":-534.4095238095239,"z":1832.095238095238,"a95":"0.99","info":"09/10/2014 at 10:55:29"},{"visible":true,"include":false,"step":"80.0","x":-25.45619047619048,"y":-415.25714285714287,"z":1679.142857142857,"a95":"0.99","info":"09/10/2014 at 10:55:29"},{"visible":true,"include":false,"step":"90.0","x":-382.8666666666667,"y":-158.94285714285715,"z":1795.8095238095239,"a95":"0.99","info":"09/10/2014 at 10:55:29"},{"visible":true,"include":false,"step":"100.0","x":-683.3904761904762,"y":-87.74571428571429,"z":1424.1904761904761,"a95":"0.99","info":"09/10/2014 at 10:55:29"}],"demagType":"Unknown","patch":1.1,"format":"Unknown","strat":null},{"version":"v1.1.0","exported":"2017-05-22T13:58:18.175Z","info":"8","GEO":[{"dec":348.8316130229345,"inc":-30.940523715919948,"MAD":7.721794927709141,"cm":[-2.8949065367100957e-13,-8.526512829121202e-14,0],"intensity":5669.389338113954,"type":"GC","origin":false,"forced":true,"remark":"","nSteps":9,"minStep":"8.0","maxStep":"45.0","steps":["8.0","12.0","16.0","20.0","25.0","30.0","35.0","40.0","45.0"],"group":"None","version":"v1.1.0"}],"TECT":[{"dec":84.00654493764307,"inc":-50.24040104799389,"MAD":7.721794927710876,"cm":[2.0605739337042905e-13,-5.684341886080802e-14,8.526512829121202e-14],"intensity":5669.389338113955,"type":"GC","origin":false,"forced":true,"remark":"","nSteps":9,"minStep":"8.0","maxStep":"45.0","steps":["8.0","12.0","16.0","20.0","25.0","30.0","35.0","40.0","45.0"],"group":"None","version":"v1.1.0"}],"interpreted":true,"name":"SS12.19A","coreAzi":94,"coreDip":20,"bedStrike":224,"bedDip":82,"data":[{"visible":true,"include":false,"step":"0.0","x":-3264.8571428571427,"y":-255.64761904761906,"z":-2113.809523809524,"a95":"0.99","info":"09/10/2014 at 10:55:29"},{"visible":true,"include":false,"step":"4.0","x":-2925.714285714286,"y":-519.0285714285715,"z":-2032.857142857143,"a95":"0.99","info":"09/10/2014 at 10:55:29"},{"visible":true,"include":true,"step":"8.0","x":-2613.1428571428573,"y":-328.1714285714286,"z":-2067.5238095238096,"a95":"0.99","info":"09/10/2014 at 10:55:29"},{"visible":true,"include":true,"step":"12.0","x":-2364.4761904761904,"y":-196.78095238095236,"z":-2016.5714285714287,"a95":"0.99","info":"09/10/2014 at 10:55:29"},{"visible":true,"include":true,"step":"16.0","x":-2220.095238095238,"y":-124.95238095238095,"z":-2024.952380952381,"a95":"0.99","info":"09/10/2014 at 10:55:29"},{"visible":true,"include":true,"step":"20.0","x":-2037.904761904762,"y":-133.14285714285714,"z":-2066.9523809523807,"a95":"0.99","info":"09/10/2014 at 10:55:29"},{"visible":true,"include":true,"step":"25.0","x":-1910.2857142857142,"y":-23.94952380952381,"z":-1844.095238095238,"a95":"0.99","info":"09/10/2014 at 10:55:29"},{"visible":true,"include":true,"step":"30.0","x":-1768.6666666666667,"y":31.944761904761908,"z":-1857.3333333333333,"a95":"0.99","info":"09/10/2014 at 10:55:29"},{"visible":true,"include":true,"step":"35.0","x":-1710.7619047619048,"y":21.643809523809523,"z":-1887.3333333333333,"a95":"0.99","info":"09/10/2014 at 10:55:29"},{"visible":true,"include":true,"step":"40.0","x":-1637.047619047619,"y":138.53333333333333,"z":-1971.142857142857,"a95":"0.99","info":"09/10/2014 at 10:55:29"},{"visible":true,"include":true,"step":"45.0","x":-1441.8095238095239,"y":164.5047619047619,"z":-1891.3333333333333,"a95":"0.99","info":"09/10/2014 at 10:55:29"},{"visible":true,"include":false,"step":"50.0","x":-1329.6190476190477,"y":96.01904761904763,"z":-1842.2857142857142,"a95":"0.99","info":"09/10/2014 at 10:55:29"},{"visible":true,"include":false,"step":"60.0","x":-1134.7619047619048,"y":210.2,"z":-1729.4285714285713,"a95":"0.99","info":"09/10/2014 at 10:55:29"},{"visible":true,"include":false,"step":"70.0","x":-1268.4761904761904,"y":178.03809523809525,"z":-1647.142857142857,"a95":"0.99","info":"09/10/2014 at 10:55:29"},{"visible":true,"include":false,"step":"80.0","x":-1126.952380952381,"y":-51.38857142857143,"z":-1781.2380952380952,"a95":"0.99","info":"09/10/2014 at 10:55:29"},{"visible":true,"include":false,"step":"90.0","x":-1057.7142857142858,"y":75.54190476190476,"z":-1669.047619047619,"a95":"0.99","info":"09/10/2014 at 10:55:29"},{"visible":true,"include":false,"step":"100.0","x":-1006.6666666666666,"y":323.1047619047619,"z":-1481.904761904762,"a95":"0.99","info":"09/10/2014 at 10:55:29"}],"demagType":"Unknown","patch":1.1,"format":"Unknown","strat":null},{"version":"v1.1.0","exported":"2017-05-22T13:58:18.175Z","info":"","GEO":[{"dec":345.366336547267,"inc":-34.838930461641674,"MAD":10.985913504403635,"cm":[-2.842170943040401e-14,5.3290705182007514e-14,0],"intensity":3718.875243856007,"type":"GC","origin":false,"forced":true,"remark":"","nSteps":11,"minStep":"100","maxStep":"470","steps":["100","150","180","210","240","270","300","400","420","440","470"],"group":"None","version":"v1.1.0"}],"TECT":[{"dec":91.61949427390198,"inc":-50.669043455149996,"MAD":10.985913504403143,"cm":[-4.440892098500626e-14,1.0658141036401503e-14,6.927791673660977e-14],"intensity":3718.8752438560073,"type":"GC","origin":false,"forced":true,"remark":"","nSteps":11,"minStep":"100","maxStep":"470","steps":["100","150","180","210","240","270","300","400","420","440","470"],"group":"None","version":"v1.1.0"}],"interpreted":true,"name":"SS12.19B","coreAzi":94,"coreDip":20,"bedStrike":224,"bedDip":82,"data":[{"visible":true,"include":false,"step":"20","x":-3902,"y":-1674.095238095238,"z":-1852.6666666666667,"a95":"2","info":"\"14-10-13\" at \"17:44\""},{"visible":true,"include":true,"step":"100","x":-2886.285714285714,"y":-993.2380952380952,"z":-1292.1904761904761,"a95":"2.1","info":"\"14-10-13\" at \"20:39\""},{"visible":true,"include":true,"step":"150","x":-2190.190476190476,"y":-498.57142857142856,"z":-1230.095238095238,"a95":"2.3","info":"\"14-10-14\" at \"00:04\""},{"visible":true,"include":true,"step":"180","x":-1697.5238095238096,"y":-193.33333333333334,"z":-1182.095238095238,"a95":"2.3","info":"\"14-10-14\" at \"17:19\""},{"visible":true,"include":true,"step":"210","x":-1460.857142857143,"y":-50.476190476190474,"z":-1282.7619047619048,"a95":"2.4","info":"\"14-10-14\" at \"20:27\""},{"visible":true,"include":true,"step":"240","x":-1228.952380952381,"y":-1.0476190476190477,"z":-1319.142857142857,"a95":"2.4","info":"\"14-10-14\" at \"23:41\""},{"visible":true,"include":true,"step":"270","x":-1081.6190476190477,"y":-11.619047619047619,"z":-1136.4761904761904,"a95":"2.6","info":"\"14-10-15\" at \"17:25\""},{"visible":true,"include":true,"step":"300","x":-763.8095238095239,"y":63.333333333333336,"z":-1199.047619047619,"a95":"2.8","info":"\"14-10-15\" at \"20:41\""},{"visible":true,"include":false,"step":"320","x":-708.5714285714286,"y":78.28571428571429,"z":-1131.5238095238096,"a95":"2.7","info":"\"14-10-15\" at \"23:51\""},{"visible":true,"include":false,"step":"340","x":-661.4285714285714,"y":96.0952380952381,"z":-1120.7619047619048,"a95":"2.9","info":"\"14-10-16\" at \"17:59\""},{"visible":true,"include":false,"step":"370","x":-604,"y":109.9047619047619,"z":-1014.7619047619048,"a95":"2.8","info":"\"14-10-16\" at \"21:12\""},{"visible":true,"include":true,"step":"400","x":-592.952380952381,"y":30.857142857142858,"z":-838.6666666666666,"a95":"2.8","info":"\"14-10-17\" at \"00:25\""},{"visible":true,"include":true,"step":"420","x":-378.57142857142856,"y":156.28571428571428,"z":-696.6666666666666,"a95":"3.1","info":"\"14-10-17\" at \"15:55\""},{"visible":true,"include":true,"step":"440","x":-454.3809523809524,"y":290.57142857142856,"z":-734.4761904761905,"a95":"2.8","info":"\"14-10-17\" at \"19:07\""},{"visible":true,"include":true,"step":"470","x":-338.76190476190476,"y":221.14285714285714,"z":-390.95238095238096,"a95":"3.7","info":"\"14-10-17\" at \"22:18\""},{"visible":false,"include":false,"step":"490","x":-562.4761904761905,"y":303.42857142857144,"z":-733.9047619047619,"a95":"3","info":"\"14-10-18\" at \"10:46\""},{"visible":false,"include":false,"step":"520","x":-601.1428571428571,"y":-56.57142857142857,"z":-132.38095238095238,"a95":"4.4","info":"\"14-10-18\" at \"13:29\""},{"visible":false,"include":false,"step":"550","x":-642.952380952381,"y":445.23809523809524,"z":-410,"a95":"3.2","info":"\"14-10-18\" at \"16:41\""}],"demagType":"Unknown","patch":1.1,"format":"Unknown","strat":null}]
