# Supplementary material for: Paleomagnetic constraints on the timing and distribution of Cenozoic rotations in Central and Eastern Anatolia
Source: Copernicus journal article supplement (doi:10.5194/se-9-295-2018), 2018-03-21
Supplement: Supplementary file 2 [file se-9-295-2018-supplement.zip › se-2017-66_DATA_dir files/dir files Sivas/SS13.dir]

[{"version":"v1.1.0","exported":"2017-05-22T14:07:08.773Z","info":"","GEO":[],"TECT":[],"interpreted":false,"name":"SS13.1A","coreAzi":55,"coreDip":14,"bedStrike":236,"bedDip":18,"data":[{"visible":true,"include":false,"step":"20","x":-10032.57142857143,"y":-5842.380952380952,"z":6795.9047619047615,"a95":"2.3","info":"\"14-09-29\" at \"16:43\""},{"visible":true,"include":false,"step":"100","x":-8432.57142857143,"y":-5673.142857142857,"z":6974.380952380952,"a95":"2.4","info":"\"14-09-29\" at \"19:31\""},{"visible":true,"include":false,"step":"150","x":-5883.142857142857,"y":-4288.761904761905,"z":4660,"a95":"2.4","info":"\"14-09-29\" at \"22:29\""},{"visible":true,"include":false,"step":"180","x":-4693.238095238095,"y":-3136.095238095238,"z":3526.3809523809523,"a95":"2.4","info":"\"14-09-30\" at \"17:05\""},{"visible":true,"include":false,"step":"210","x":-4084.6666666666665,"y":-2356.3809523809523,"z":2401.3333333333335,"a95":"2.5","info":"\"14-09-30\" at \"20:09\""},{"visible":true,"include":false,"step":"240","x":-1964.3809523809523,"y":-1209.904761904762,"z":1183.904761904762,"a95":"2.7","info":"\"14-09-30\" at \"23:16\""},{"visible":true,"include":false,"step":"270","x":-1291.6190476190477,"y":-353.3333333333333,"z":-85.9047619047619,"a95":"2.8","info":"\"14-10-01\" at \"17:37\""},{"visible":true,"include":false,"step":"300","x":-1172.1904761904761,"y":-443.04761904761904,"z":472.3809523809524,"a95":"3.7","info":"\"14-10-01\" at \"20:44\""},{"visible":true,"include":false,"step":"320","x":-865.047619047619,"y":-686.5714285714286,"z":-305.3333333333333,"a95":"3","info":"\"14-10-01\" at \"23:51\""},{"visible":true,"include":false,"step":"340","x":-540.952380952381,"y":-401.5238095238095,"z":-9.047619047619047,"a95":"3.7","info":"\"14-10-02\" at \"17:27\""},{"visible":true,"include":false,"step":"370","x":-562.3809523809524,"y":-160.0952380952381,"z":-175.33333333333334,"a95":"3.2","info":"\"14-10-02\" at \"20:17\""},{"visible":true,"include":false,"step":"400","x":-621.4285714285714,"y":-15.80952380952381,"z":30,"a95":"4.5","info":"\"14-10-02\" at \"23:29\""},{"visible":true,"include":false,"step":"420","x":-132.0952380952381,"y":-93.23809523809524,"z":-375.9047619047619,"a95":"5.4","info":"\"14-10-03\" at \"17:11\""},{"visible":true,"include":false,"step":"440","x":-160.28571428571428,"y":-345.8095238095238,"z":-57.42857142857143,"a95":"4.5","info":"\"14-10-03\" at \"20:29\""},{"visible":true,"include":false,"step":"460","x":-150.28571428571428,"y":-171.61904761904762,"z":-468.2857142857143,"a95":"4.9","info":"\"14-10-03\" at \"23:46\""},{"visible":true,"include":false,"step":"480","x":50.857142857142854,"y":-169.42857142857142,"z":-426.57142857142856,"a95":"6.1","info":"\"14-10-04\" at \"10:41\""},{"visible":true,"include":false,"step":"510","x":-438.95238095238096,"y":286.0952380952381,"z":-16.476190476190474,"a95":"5.2","info":"\"14-10-04\" at \"13:33\""},{"visible":true,"include":false,"step":"540","x":-250.28571428571428,"y":219.33333333333334,"z":-168.57142857142858,"a95":"7.8","info":"\"14-10-04\" at \"16:58\""},{"visible":true,"include":false,"step":"570","x":-425.8095238095238,"y":-37.333333333333336,"z":-15.428571428571429,"a95":"5.6","info":"\"14-10-05\" at \"11:03\""},{"visible":true,"include":false,"step":"600","x":-151.04761904761904,"y":-348.76190476190476,"z":-55.04761904761905,"a95":"5.9","info":"\"14-10-05\" at \"14:21\""},{"visible":true,"include":false,"step":"630","x":-195.14285714285714,"y":-317.9047619047619,"z":-162.38095238095238,"a95":"4.4","info":"\"14-10-05\" at \"17:49\""},{"visible":true,"include":false,"step":"660","x":102.95238095238095,"y":-301.14285714285717,"z":-648.8571428571429,"a95":"3.9","info":"\"14-10-11\" at \"08:25\""},{"visible":true,"include":false,"step":"680","x":-158.28571428571428,"y":407.14285714285717,"z":-667.1428571428571,"a95":"3.9","info":"\"14-10-11\" at \"11:28\""}],"demagType":"Unknown","patch":1.1,"format":"Unknown","strat":null},{"version":"v1.1.0","exported":"2017-05-22T14:07:08.773Z","info":"4","GEO":[{"dec":352.9832384910203,"inc":-21.57735897352154,"MAD":7.991918141140486,"cm":[3.992573467604372e-14,0,0],"intensity":1846.0045801200051,"type":"GC","origin":false,"forced":true,"remark":"","nSteps":6,"minStep":"10.0","maxStep":"30.0","steps":["10.0","15.0","20.0","23.0","25.0","30.0"],"group":"None"}],"TECT":[{"dec":358.02849448411826,"inc":-37.28910096160094,"MAD":7.991918141140481,"cm":[-1.529358650302692e-13,-4.330927151299658e-14,-5.4136589391245725e-15],"intensity":1846.0045801200051,"type":"GC","origin":false,"forced":true,"remark":"","nSteps":6,"minStep":"10.0","maxStep":"30.0","steps":["10.0","15.0","20.0","23.0","25.0","30.0"],"group":"None"}],"interpreted":true,"name":"SS13.2A","coreAzi":80,"coreDip":27,"bedStrike":236,"bedDip":18,"data":[{"visible":true,"include":false,"step":"0.0","x":-1750.095238095238,"y":-757.847619047619,"z":647.0380952380953,"a95":"0.99","info":"30/01/2015 at 03:55:23"},{"visible":true,"include":true,"step":"10.0","x":-1070.2857142857142,"y":-363.3047619047619,"z":-76.97238095238096,"a95":"0.99","info":"30/01/2015 at 03:55:23"},{"visible":true,"include":true,"step":"15.0","x":-861.4095238095238,"y":-325.18095238095236,"z":-283.37142857142857,"a95":"0.99","info":"30/01/2015 at 03:55:23"},{"visible":true,"include":true,"step":"20.0","x":-754.3904761904762,"y":-259.57142857142856,"z":-317.3047619047619,"a95":"0.99","info":"30/01/2015 at 03:55:23"},{"visible":true,"include":true,"step":"23.0","x":-665.6380952380953,"y":-215.0761904761905,"z":-374.04761904761904,"a95":"0.99","info":"30/01/2015 at 03:55:23"},{"visible":true,"include":true,"step":"25.0","x":-613.4666666666666,"y":-133.9714285714286,"z":-462.02857142857147,"a95":"0.99","info":"30/01/2015 at 03:55:23"},{"visible":true,"include":true,"step":"30.0","x":-628.4857142857143,"y":-175.6,"z":-404.16190476190474,"a95":"0.99","info":"30/01/2015 at 03:55:23"},{"visible":true,"include":false,"step":"33.0","x":-507.99047619047616,"y":-76.69333333333333,"z":-513.4380952380952,"a95":"0.99","info":"30/01/2015 at 03:55:23"},{"visible":true,"include":false,"step":"35.0","x":-526.8,"y":-184.8190476190476,"z":-464.25714285714287,"a95":"0.99","info":"30/01/2015 at 03:55:23"},{"visible":true,"include":false,"step":"40.0","x":-565.152380952381,"y":-95.26666666666667,"z":-412.16190476190474,"a95":"0.99","info":"30/01/2015 at 03:55:23"},{"visible":true,"include":false,"step":"45.0","x":-316.3904761904762,"y":-144.8190476190476,"z":-388.8095238095238,"a95":"0.99","info":"30/01/2015 at 03:55:23"},{"visible":true,"include":false,"step":"50.0","x":-550,"y":-270.4095238095238,"z":-501.27619047619044,"a95":"0.99","info":"30/01/2015 at 03:55:23"},{"visible":true,"include":false,"step":"60.0","x":-524.6476190476191,"y":-18.50952380952381,"z":-279.0761904761905,"a95":"0.99","info":"30/01/2015 at 03:55:23"},{"visible":true,"include":false,"step":"70.0","x":-428.4,"y":-19.64857142857143,"z":-443.93333333333334,"a95":"0.99","info":"30/01/2015 at 03:55:23"}],"demagType":"Unknown","patch":1.1,"format":"Unknown","strat":null},{"version":"v1.1.0","exported":"2017-05-22T14:07:08.773Z","info":"1","GEO":[{"dec":340.6231269820181,"inc":-38.72992163747509,"MAD":16.30590981196032,"cm":[-5.684341886080802e-14,-1.3677947663381929e-13,0],"intensity":4614.815450185887,"type":"GC","origin":false,"forced":true,"remark":"","nSteps":7,"minStep":"12.0","maxStep":"40.0","steps":["12.0","16.0","20.0","25.0","30.0","35.0","40.0"],"group":"None","version":"v1.1.0"}],"TECT":[{"dec":346.57877834468457,"inc":-55.92298932921098,"MAD":16.305909811958205,"cm":[1.4210854715202004e-14,-1.1723955140041653e-13,-1.4210854715202004e-14],"intensity":4614.815450185887,"type":"GC","origin":false,"forced":true,"remark":"","nSteps":7,"minStep":"12.0","maxStep":"40.0","steps":["12.0","16.0","20.0","25.0","30.0","35.0","40.0"],"group":"None","version":"v1.1.0"}],"interpreted":true,"name":"SS13.3A","coreAzi":78,"coreDip":32,"bedStrike":236,"bedDip":18,"data":[{"visible":true,"include":false,"step":"0.0","x":-3649.5238095238096,"y":-4015.809523809524,"z":3439.1428571428573,"a95":"0.99","info":"09/10/2014 at 16:26:07"},{"visible":true,"include":false,"step":"4.0","x":-3203.5238095238096,"y":-3433.5238095238096,"z":3257.2380952380954,"a95":"0.99","info":"09/10/2014 at 16:26:07"},{"visible":true,"include":false,"step":"8.0","x":-2333.3333333333335,"y":-2616.5714285714284,"z":2394.095238095238,"a95":"0.99","info":"09/10/2014 at 16:26:07"},{"visible":true,"include":true,"step":"12.0","x":-1761.3333333333333,"y":-2117.5238095238096,"z":1788.4761904761904,"a95":"0.99","info":"09/10/2014 at 16:26:07"},{"visible":true,"include":true,"step":"16.0","x":-1561.904761904762,"y":-1748.6666666666667,"z":1572.6666666666667,"a95":"0.99","info":"09/10/2014 at 16:26:07"},{"visible":true,"include":true,"step":"20.0","x":-1362.5714285714287,"y":-1364.4761904761904,"z":1082.5714285714287,"a95":"0.99","info":"09/10/2014 at 16:26:07"},{"visible":true,"include":true,"step":"25.0","x":-1215.8095238095239,"y":-1215.3333333333333,"z":832.0285714285714,"a95":"0.99","info":"09/10/2014 at 16:26:07"},{"visible":true,"include":true,"step":"30.0","x":-1142.095238095238,"y":-1048.7619047619048,"z":758.8380952380952,"a95":"0.99","info":"09/10/2014 at 16:26:07"},{"visible":true,"include":true,"step":"35.0","x":-1131.5238095238096,"y":-1090.2857142857142,"z":698.9809523809524,"a95":"0.99","info":"09/10/2014 at 16:26:07"},{"visible":true,"include":true,"step":"40.0","x":-824.0761904761904,"y":-906.5904761904762,"z":549.6666666666666,"a95":"0.99","info":"09/10/2014 at 16:26:07"},{"visible":true,"include":false,"step":"45.0","x":-602.3523809523809,"y":-1020.952380952381,"z":685.9619047619047,"a95":"0.99","info":"09/10/2014 at 16:26:07"},{"visible":true,"include":false,"step":"50.0","x":-708.3238095238095,"y":-874.7619047619048,"z":744.847619047619,"a95":"0.99","info":"09/10/2014 at 16:26:07"},{"visible":true,"include":false,"step":"60.0","x":-567.8,"y":-860,"z":648.3047619047619,"a95":"0.99","info":"09/10/2014 at 16:26:07"},{"visible":true,"include":false,"step":"70.0","x":-443.8857142857143,"y":-741.3428571428572,"z":350.8,"a95":"0.99","info":"09/10/2014 at 16:26:07"},{"visible":true,"include":false,"step":"80.0","x":-188.0857142857143,"y":-992.0952380952381,"z":266.0571428571428,"a95":"0.99","info":"09/10/2014 at 16:26:07"},{"visible":true,"include":false,"step":"90.0","x":-301.76190476190476,"y":-733.0857142857143,"z":450.2666666666667,"a95":"0.99","info":"09/10/2014 at 16:26:07"},{"visible":true,"include":false,"step":"100.0","x":-438.0380952380952,"y":-649.0380952380953,"z":244.52380952380952,"a95":"0.99","info":"09/10/2014 at 16:26:07"}],"demagType":"Unknown","patch":1.1,"format":"Unknown","strat":null},{"version":"v1.1.0","exported":"2017-05-22T14:07:08.773Z","info":"","GEO":[],"TECT":[],"interpreted":false,"name":"SS13.4A","coreAzi":33,"coreDip":26,"bedStrike":236,"bedDip":18,"data":[{"visible":true,"include":false,"step":"20","x":-12646.47619047619,"y":-4497.523809523809,"z":18763.14285714286,"a95":"2.6","info":"\"14-09-29\" at \"16:45\""},{"visible":true,"include":false,"step":"100","x":-10340.47619047619,"y":-4137.619047619048,"z":17094.285714285714,"a95":"2.6","info":"\"14-09-29\" at \"19:33\""},{"visible":true,"include":false,"step":"150","x":-6310.0952380952385,"y":-2305.809523809524,"z":10052.190476190477,"a95":"2.6","info":"\"14-09-29\" at \"22:31\""},{"visible":true,"include":false,"step":"180","x":-4500.857142857143,"y":-1655.3333333333333,"z":7745.142857142857,"a95":"2.5","info":"\"14-09-30\" at \"17:07\""},{"visible":true,"include":false,"step":"210","x":-2873.3333333333335,"y":-787.5238095238095,"z":5317.809523809524,"a95":"2.6","info":"\"14-09-30\" at \"20:11\""},{"visible":true,"include":false,"step":"240","x":-1765.8095238095239,"y":-827.5238095238095,"z":2856.5714285714284,"a95":"2.8","info":"\"14-09-30\" at \"23:17\""},{"visible":true,"include":false,"step":"270","x":-696.5714285714286,"y":-454.57142857142856,"z":1748.5714285714287,"a95":"3.4","info":"\"14-10-01\" at \"17:39\""},{"visible":true,"include":false,"step":"300","x":-471.14285714285717,"y":-341.8095238095238,"z":2103.3333333333335,"a95":"3.3","info":"\"14-10-01\" at \"20:46\""},{"visible":true,"include":false,"step":"320","x":-254.38095238095238,"y":-927.3333333333334,"z":486.85714285714283,"a95":"3.6","info":"\"14-10-01\" at \"23:53\""},{"visible":true,"include":false,"step":"340","x":233.33333333333334,"y":-330.6666666666667,"z":173.61904761904762,"a95":"5.9","info":"\"14-10-02\" at \"17:28\""},{"visible":true,"include":false,"step":"370","x":532,"y":-475.8095238095238,"z":-99.71428571428571,"a95":"3.5","info":"\"14-10-02\" at \"20:19\""},{"visible":true,"include":false,"step":"400","x":119.04761904761905,"y":-290.95238095238096,"z":766.2857142857143,"a95":"5.2","info":"\"14-10-02\" at \"23:31\""},{"visible":true,"include":false,"step":"420","x":469.04761904761904,"y":-1.5238095238095237,"z":-219.61904761904762,"a95":"5.6","info":"\"14-10-03\" at \"17:13\""},{"visible":true,"include":false,"step":"440","x":341.14285714285717,"y":-387.5238095238095,"z":-482.2857142857143,"a95":"3.6","info":"\"14-10-03\" at \"20:31\""},{"visible":true,"include":false,"step":"460","x":168.85714285714286,"y":-17.428571428571427,"z":-754,"a95":"4.4","info":"\"14-10-03\" at \"23:48\""},{"visible":true,"include":false,"step":"480","x":584.6666666666666,"y":-584.5714285714286,"z":-153.71428571428572,"a95":"4","info":"\"14-10-04\" at \"10:43\""},{"visible":true,"include":false,"step":"510","x":345.8095238095238,"y":-134.28571428571428,"z":-223.33333333333334,"a95":"6.9","info":"\"14-10-04\" at \"13:35\""},{"visible":true,"include":false,"step":"540","x":582.7619047619048,"y":-448.6666666666667,"z":-345.14285714285717,"a95":"4.2","info":"\"14-10-04\" at \"17:00\""},{"visible":true,"include":false,"step":"570","x":-465.7142857142857,"y":-10.666666666666666,"z":-643.7142857142857,"a95":"4.6","info":"\"14-10-05\" at \"11:05\""},{"visible":true,"include":false,"step":"600","x":-107.52380952380952,"y":-96.47619047619048,"z":-603.6190476190476,"a95":"6.4","info":"\"14-10-05\" at \"14:23\""},{"visible":true,"include":false,"step":"630","x":536.8571428571429,"y":768.7619047619048,"z":-468.4761904761905,"a95":"2.4","info":"\"14-10-05\" at \"17:52\""},{"visible":true,"include":false,"step":"660","x":190.1904761904762,"y":726.5714285714286,"z":-838.7619047619048,"a95":"3.6","info":"\"14-10-11\" at \"08:27\""},{"visible":true,"include":false,"step":"680","x":73.33333333333333,"y":498.76190476190476,"z":-65.42857142857143,"a95":"6.3","info":"\"14-10-11\" at \"11:30\""}],"demagType":"Unknown","patch":1.1,"format":"Unknown","strat":null},{"version":"v1.1.0","exported":"2017-05-22T14:07:08.773Z","info":"5","GEO":[{"dec":305.2509527202809,"inc":-20.747861359613232,"MAD":8.8007618374769,"cm":[-8.797195776077431e-15,-8.391171355643088e-14,0],"intensity":1883.2679755560814,"type":"GC","origin":false,"forced":true,"remark":"","nSteps":5,"minStep":"10.0","maxStep":"25.0","steps":["10.0","15.0","20.0","23.0","25.0"],"group":"None"}],"TECT":[{"dec":301.3580173916356,"inc":-37.38383223797419,"MAD":8.800761837476971,"cm":[-2.842170943040401e-14,-2.192531870345452e-13,-2.165463575649829e-14],"intensity":1883.2679755560816,"type":"GC","origin":false,"forced":true,"remark":"","nSteps":5,"minStep":"10.0","maxStep":"25.0","steps":["10.0","15.0","20.0","23.0","25.0"],"group":"None"}],"interpreted":true,"name":"SS13.6A","coreAzi":358,"coreDip":28,"bedStrike":236,"bedDip":18,"data":[{"visible":true,"include":false,"step":"0.0","x":-1795.4285714285713,"y":196.25714285714284,"z":2878.095238095238,"a95":"0.99","info":"30/01/2015 at 03:55:23"},{"visible":true,"include":true,"step":"10.0","x":-813.3904761904762,"y":-36.55238095238095,"z":1344.6666666666667,"a95":"0.99","info":"30/01/2015 at 03:55:23"},{"visible":true,"include":true,"step":"15.0","x":-600.2761904761904,"y":-116.54285714285714,"z":730.8666666666667,"a95":"0.99","info":"30/01/2015 at 03:55:23"},{"visible":true,"include":true,"step":"20.0","x":-534.0285714285715,"y":-197.59047619047618,"z":404.6380952380952,"a95":"0.99","info":"30/01/2015 at 03:55:23"},{"visible":true,"include":true,"step":"23.0","x":-317.9904761904762,"y":-134.83809523809524,"z":355.7904761904762,"a95":"0.99","info":"30/01/2015 at 03:55:23"},{"visible":true,"include":true,"step":"25.0","x":-273.2761904761905,"y":-168.6,"z":179.7238095238095,"a95":"0.99","info":"30/01/2015 at 03:55:23"},{"visible":true,"include":false,"step":"30.0","x":-187.94285714285715,"y":-80.99714285714286,"z":-37.67333333333333,"a95":"0.99","info":"30/01/2015 at 03:55:23"},{"visible":true,"include":false,"step":"33.0","x":-191.63809523809525,"y":-27.27714285714286,"z":-29.008571428571425,"a95":"0.99","info":"30/01/2015 at 03:55:23"},{"visible":true,"include":false,"step":"35.0","x":-167.0952380952381,"y":-75.4695238095238,"z":-53.836190476190474,"a95":"0.99","info":"30/01/2015 at 03:55:23"},{"visible":true,"include":false,"step":"40.0","x":-86.51238095238095,"y":-116.06666666666668,"z":-33.444761904761904,"a95":"0.99","info":"30/01/2015 at 03:55:23"},{"visible":true,"include":false,"step":"45.0","x":-160.62857142857143,"y":-108.6952380952381,"z":-183.8190476190476,"a95":"0.99","info":"30/01/2015 at 03:55:23"},{"visible":true,"include":false,"step":"50.0","x":-147.78095238095239,"y":-151.01904761904763,"z":-166.7047619047619,"a95":"0.99","info":"30/01/2015 at 03:55:23"},{"visible":true,"include":false,"step":"60.0","x":-64.22190476190477,"y":5.164571428571429,"z":-108.57142857142857,"a95":"0.99","info":"30/01/2015 at 03:55:23"},{"visible":true,"include":false,"step":"70.0","x":-53.513333333333335,"y":88.52095238095238,"z":-344.42857142857144,"a95":"0.99","info":"30/01/2015 at 03:55:23"}],"demagType":"Unknown","patch":1.1,"format":"Unknown","strat":null},{"version":"v1.1.0","exported":"2017-05-22T14:07:08.773Z","info":"6","GEO":[{"dec":349.49723251478906,"inc":-32.43321671930534,"MAD":15.30554585541975,"cm":[-2.3008050491279435e-14,6.496390726949487e-14,0],"intensity":2103.42053290142,"type":"GC","origin":false,"forced":true,"remark":"","nSteps":6,"minStep":"10.0","maxStep":"30.0","steps":["10.0","15.0","20.0","23.0","25.0","30.0"],"group":"None"}],"TECT":[{"dec":356.5382326581611,"inc":-48.52594085339594,"MAD":15.305545855419412,"cm":[2.977512416518515e-14,-5.4136589391245725e-15,0],"intensity":2103.42053290142,"type":"GC","origin":false,"forced":true,"remark":"","nSteps":6,"minStep":"10.0","maxStep":"30.0","steps":["10.0","15.0","20.0","23.0","25.0","30.0"],"group":"None"}],"interpreted":true,"name":"SS13.6B","coreAzi":358,"coreDip":28,"bedStrike":236,"bedDip":18,"data":[{"visible":true,"include":false,"step":"0.0","x":-1947.4285714285713,"y":-29.75142857142857,"z":3378.4761904761904,"a95":"0.99","info":"30/01/2015 at 03:55:23"},{"visible":true,"include":true,"step":"10.0","x":-885.104761904762,"y":-250.84761904761905,"z":1521.4285714285713,"a95":"0.99","info":"30/01/2015 at 03:55:23"},{"visible":true,"include":true,"step":"15.0","x":-594.2380952380952,"y":-319.93333333333334,"z":1021.4285714285714,"a95":"0.99","info":"30/01/2015 at 03:55:23"},{"visible":true,"include":true,"step":"20.0","x":-404.1047619047619,"y":-442.64761904761906,"z":711.7142857142857,"a95":"0.99","info":"30/01/2015 at 03:55:23"},{"visible":true,"include":true,"step":"23.0","x":-409.72380952380956,"y":-334.1714285714286,"z":522.447619047619,"a95":"0.99","info":"30/01/2015 at 03:55:23"},{"visible":true,"include":true,"step":"25.0","x":-350.4,"y":-225.13333333333335,"z":404.35238095238094,"a95":"0.99","info":"30/01/2015 at 03:55:23"},{"visible":true,"include":true,"step":"30.0","x":-139.77142857142857,"y":-328.97142857142853,"z":221.50476190476192,"a95":"0.99","info":"30/01/2015 at 03:55:23"},{"visible":true,"include":false,"step":"33.0","x":-167.63809523809525,"y":-209.50476190476192,"z":111.47619047619048,"a95":"0.99","info":"30/01/2015 at 03:55:23"},{"visible":true,"include":false,"step":"35.0","x":-166.66666666666666,"y":-410.12380952380954,"z":244.46666666666667,"a95":"0.99","info":"30/01/2015 at 03:55:23"},{"visible":true,"include":false,"step":"40.0","x":-113.52380952380952,"y":-317.51428571428573,"z":315.57142857142856,"a95":"0.99","info":"30/01/2015 at 03:55:23"},{"visible":true,"include":false,"step":"45.0","x":-222.24761904761903,"y":-229.26666666666668,"z":-61.19809523809524,"a95":"0.99","info":"30/01/2015 at 03:55:23"},{"visible":true,"include":false,"step":"50.0","x":-170.96190476190475,"y":-391.8285714285714,"z":-54.19428571428571,"a95":"0.99","info":"30/01/2015 at 03:55:23"},{"visible":true,"include":false,"step":"60.0","x":49.87619047619048,"y":-292.9428571428572,"z":156.56190476190477,"a95":"0.99","info":"30/01/2015 at 03:55:23"},{"visible":true,"include":false,"step":"70.0","x":-242.67619047619047,"y":-12.371428571428572,"z":-69.65809523809523,"a95":"0.99","info":"30/01/2015 at 03:55:23"}],"demagType":"Unknown","patch":1.1,"format":"Unknown","strat":null},{"version":"v1.1.0","exported":"2017-05-22T14:07:08.773Z","info":"","GEO":[{"dec":336.64858436503164,"inc":-31.135762841212575,"MAD":18.007502003052412,"cm":[-2.1316282072803006e-14,-5.3290705182007514e-14,0],"intensity":7193.048119656971,"type":"GC","origin":false,"forced":true,"remark":"","nSteps":5,"minStep":"150","maxStep":"270","steps":["150","180","210","240","270"],"group":"None","version":"v1.1.0"}],"TECT":[{"dec":339.87635470289445,"inc":-48.73846257775819,"MAD":18.00750200305621,"cm":[-2.913225216616411e-13,5.826450433232822e-13,2.1316282072803006e-13],"intensity":7193.04811965697,"type":"GC","origin":false,"forced":true,"remark":"","nSteps":5,"minStep":"150","maxStep":"270","steps":["150","180","210","240","270"],"group":"None","version":"v1.1.0"}],"interpreted":true,"name":"SS13.7A","coreAzi":63,"coreDip":12,"bedStrike":236,"bedDip":18,"data":[{"visible":true,"include":false,"step":"20","x":-10611.52380952381,"y":-7230.571428571428,"z":10044,"a95":"2.3","info":"\"14-09-29\" at \"16:46\""},{"visible":true,"include":false,"step":"100","x":-7279.142857142857,"y":-5050.190476190476,"z":5789.809523809524,"a95":"2.3","info":"\"14-09-29\" at \"19:35\""},{"visible":true,"include":true,"step":"150","x":-4398.380952380952,"y":-2921.2380952380954,"z":3772,"a95":"2.3","info":"\"14-09-29\" at \"22:33\""},{"visible":true,"include":true,"step":"180","x":-2991.5238095238096,"y":-2013.5238095238096,"z":2812,"a95":"2.5","info":"\"14-09-30\" at \"17:09\""},{"visible":true,"include":true,"step":"210","x":-1925.3333333333333,"y":-1162.7619047619048,"z":1917.8095238095239,"a95":"2.5","info":"\"14-09-30\" at \"20:13\""},{"visible":true,"include":true,"step":"240","x":-994.5714285714286,"y":-779.3333333333334,"z":1351.3333333333333,"a95":"2.8","info":"\"14-09-30\" at \"23:19\""},{"visible":true,"include":true,"step":"270","x":-412.3809523809524,"y":-235.42857142857142,"z":544.4761904761905,"a95":"3.4","info":"\"14-10-01\" at \"17:41\""},{"visible":true,"include":false,"step":"300","x":-354.2857142857143,"y":-364.76190476190476,"z":1150.095238095238,"a95":"3.2","info":"\"14-10-01\" at \"20:48\""},{"visible":true,"include":false,"step":"320","x":-214,"y":-226.76190476190476,"z":110.47619047619048,"a95":"6.3","info":"\"14-10-01\" at \"23:55\""},{"visible":true,"include":false,"step":"340","x":-66.66666666666667,"y":-101.71428571428571,"z":230.0952380952381,"a95":"7.2","info":"\"14-10-02\" at \"17:30\""},{"visible":true,"include":false,"step":"370","x":-22.571428571428573,"y":57.142857142857146,"z":-82.0952380952381,"a95":"14.4","info":"\"14-10-02\" at \"20:21\""},{"visible":true,"include":false,"step":"400","x":170.66666666666666,"y":400.3809523809524,"z":-201.8095238095238,"a95":"4.2","info":"\"14-10-02\" at \"23:32\""},{"visible":true,"include":false,"step":"420","x":25.047619047619047,"y":426.1904761904762,"z":-453.8095238095238,"a95":"3.5","info":"\"14-10-03\" at \"17:15\""},{"visible":true,"include":false,"step":"440","x":241.71428571428572,"y":291.8095238095238,"z":-420.76190476190476,"a95":"3.7","info":"\"14-10-03\" at \"20:33\""},{"visible":true,"include":false,"step":"460","x":143.33333333333334,"y":565.047619047619,"z":-554.3809523809524,"a95":"3.2","info":"\"14-10-03\" at \"23:50\""},{"visible":true,"include":false,"step":"480","x":280,"y":221.9047619047619,"z":-38.95238095238095,"a95":"6.2","info":"\"14-10-04\" at \"10:45\""},{"visible":true,"include":false,"step":"510","x":-81.14285714285714,"y":461.9047619047619,"z":-165.33333333333334,"a95":"5.3","info":"\"14-10-04\" at \"13:37\""},{"visible":true,"include":false,"step":"540","x":515.4285714285714,"y":-99.23809523809524,"z":-133.14285714285714,"a95":"4.6","info":"\"14-10-04\" at \"17:02\""},{"visible":true,"include":false,"step":"570","x":-387.23809523809524,"y":-130.57142857142858,"z":-503.42857142857144,"a95":"4.9","info":"\"14-10-05\" at \"11:07\""},{"visible":true,"include":false,"step":"600","x":-220.28571428571428,"y":271.42857142857144,"z":51.904761904761905,"a95":"8.8","info":"\"14-10-05\" at \"14:24\""},{"visible":true,"include":false,"step":"630","x":392.2857142857143,"y":900.3809523809524,"z":170.95238095238096,"a95":"2.6","info":"\"14-10-05\" at \"17:53\""},{"visible":true,"include":false,"step":"660","x":57.42857142857143,"y":624.7619047619048,"z":-346.95238095238096,"a95":"4.9","info":"\"14-10-11\" at \"08:29\""},{"visible":true,"include":false,"step":"680","x":31.333333333333332,"y":422,"z":-137.14285714285714,"a95":"6.6","info":"\"14-10-11\" at \"11:31\""}],"demagType":"Unknown","patch":1.1,"format":"Unknown","strat":null},{"version":"v1.1.0","exported":"2017-05-22T14:07:08.773Z","info":"2","GEO":[{"dec":352.5156728050416,"inc":-40.56417878910579,"MAD":10.658691843915685,"cm":[-2.842170943040401e-14,-9.947598300641403e-14,0],"intensity":7132.867104409068,"type":"GC","origin":false,"forced":true,"remark":"","nSteps":9,"minStep":"8.0","maxStep":"45.0","steps":["8.0","12.0","16.0","20.0","25.0","30.0","35.0","40.0","45.0"],"group":"None","version":"v1.1.0"}],"TECT":[{"dec":3.2786746672446725,"inc":-55.94820405516266,"MAD":10.65869184391177,"cm":[1.8474111129762605e-13,1.3500311979441904e-13,-4.263256414560601e-14],"intensity":7132.867104409068,"type":"GC","origin":false,"forced":true,"remark":"","nSteps":9,"minStep":"8.0","maxStep":"45.0","steps":["8.0","12.0","16.0","20.0","25.0","30.0","35.0","40.0","45.0"],"group":"None","version":"v1.1.0"}],"interpreted":true,"name":"SS13.8A","coreAzi":68,"coreDip":0,"bedStrike":236,"bedDip":18,"data":[{"visible":true,"include":false,"step":"0.0","x":-6545.9047619047615,"y":-5721.047619047619,"z":959.5238095238095,"a95":"0.99","info":"09/10/2014 at 16:26:07"},{"visible":true,"include":false,"step":"4.0","x":-5765.619047619048,"y":-5020.666666666667,"z":1026.857142857143,"a95":"0.99","info":"09/10/2014 at 16:26:07"},{"visible":true,"include":true,"step":"8.0","x":-4340.476190476191,"y":-3606.4761904761904,"z":605.8095238095239,"a95":"0.99","info":"09/10/2014 at 16:26:07"},{"visible":true,"include":true,"step":"12.0","x":-3088.5714285714284,"y":-2788.7619047619046,"z":332.2761904761905,"a95":"0.99","info":"09/10/2014 at 16:26:07"},{"visible":true,"include":true,"step":"16.0","x":-2521.714285714286,"y":-2222.8571428571427,"z":171.2,"a95":"0.99","info":"09/10/2014 at 16:26:07"},{"visible":true,"include":true,"step":"20.0","x":-2240.6666666666665,"y":-1959.6190476190477,"z":29.44,"a95":"0.99","info":"09/10/2014 at 16:26:07"},{"visible":true,"include":true,"step":"25.0","x":-2000.6666666666667,"y":-1670.7619047619048,"z":115.82857142857144,"a95":"0.99","info":"09/10/2014 at 16:26:07"},{"visible":true,"include":true,"step":"30.0","x":-1739.6190476190477,"y":-1504.095238095238,"z":72.88952380952381,"a95":"0.99","info":"09/10/2014 at 16:26:07"},{"visible":true,"include":true,"step":"35.0","x":-1542,"y":-1333.047619047619,"z":-99.93333333333332,"a95":"0.99","info":"09/10/2014 at 16:26:07"},{"visible":true,"include":true,"step":"40.0","x":-1328.2857142857142,"y":-1282.1904761904761,"z":-200.93333333333334,"a95":"0.99","info":"09/10/2014 at 16:26:07"},{"visible":true,"include":true,"step":"45.0","x":-1064.7619047619048,"y":-1046.3809523809523,"z":-495.74285714285713,"a95":"0.99","info":"09/10/2014 at 16:26:07"},{"visible":true,"include":false,"step":"50.0","x":-1345.5238095238096,"y":-921.5999999999999,"z":-313.56190476190477,"a95":"0.99","info":"09/10/2014 at 16:26:07"},{"visible":true,"include":false,"step":"60.0","x":-757.6857142857143,"y":-869.6190476190476,"z":-144.44761904761904,"a95":"0.99","info":"09/10/2014 at 16:26:07"},{"visible":true,"include":false,"step":"70.0","x":-894.847619047619,"y":-845.2380952380952,"z":-397.18095238095236,"a95":"0.99","info":"09/10/2014 at 16:26:07"},{"visible":true,"include":false,"step":"80.0","x":-767.3904761904762,"y":-895.2952380952381,"z":-510.152380952381,"a95":"0.99","info":"09/10/2014 at 16:26:07"},{"visible":true,"include":false,"step":"90.0","x":-562.7333333333333,"y":-32.862857142857145,"z":-291.247619047619,"a95":"0.99","info":"09/10/2014 at 16:26:07"},{"visible":true,"include":false,"step":"100.0","x":-286.15238095238095,"y":-148.93333333333334,"z":-404.91428571428577,"a95":"0.99","info":"09/10/2014 at 16:26:07"}],"demagType":"Unknown","patch":1.1,"format":"Unknown","strat":null},{"version":"v1.1.0","exported":"2017-05-22T14:07:08.773Z","info":"","GEO":[{"dec":8.41243656886013,"inc":-37.878019879847834,"MAD":15.757544408012993,"cm":[8.881784197001252e-14,1.4921397450962104e-13,0],"intensity":4342.838605850163,"type":"GC","origin":false,"forced":true,"remark":"","nSteps":6,"minStep":"150","maxStep":"300","steps":["150","180","210","240","270","300"],"group":"None","version":"v1.1.0"}],"TECT":[{"dec":21.600781266069816,"inc":-49.8194681566104,"MAD":15.757544408013365,"cm":[8.526512829121202e-14,2.7000623958883807e-13,-7.105427357601002e-15],"intensity":4342.838605850163,"type":"GC","origin":false,"forced":true,"remark":"","nSteps":6,"minStep":"150","maxStep":"300","steps":["150","180","210","240","270","300"],"group":"None","version":"v1.1.0"}],"interpreted":true,"name":"SS13.9A","coreAzi":353,"coreDip":33,"bedStrike":236,"bedDip":18,"data":[{"visible":false,"include":false,"step":"20","x":-4741.238095238095,"y":-588.952380952381,"z":12254.666666666666,"a95":"2.7","info":"\"14-09-29\" at \"16:48\""},{"visible":false,"include":false,"step":"100","x":-3204.6666666666665,"y":-104.66666666666667,"z":8793.52380952381,"a95":"2.8","info":"\"14-09-29\" at \"19:36\""},{"visible":true,"include":true,"step":"150","x":-1496.7619047619048,"y":-308.0952380952381,"z":4363.428571428572,"a95":"2.8","info":"\"14-09-29\" at \"22:35\""},{"visible":true,"include":true,"step":"180","x":-661.5238095238095,"y":-537.047619047619,"z":3080.285714285714,"a95":"2.8","info":"\"14-09-30\" at \"17:11\""},{"visible":true,"include":true,"step":"210","x":-286.95238095238096,"y":-505.9047619047619,"z":1325.142857142857,"a95":"3.2","info":"\"14-09-30\" at \"20:15\""},{"visible":true,"include":true,"step":"240","x":-152.0952380952381,"y":-734.7619047619048,"z":284,"a95":"4.7","info":"\"14-09-30\" at \"23:21\""},{"visible":true,"include":true,"step":"270","x":210.38095238095238,"y":-447.9047619047619,"z":-335.04761904761904,"a95":"4.2","info":"\"14-10-01\" at \"17:43\""},{"visible":true,"include":true,"step":"300","x":314.0952380952381,"y":-638,"z":-293.23809523809524,"a95":"3.9","info":"\"14-10-01\" at \"20:49\""},{"visible":true,"include":false,"step":"320","x":353.7142857142857,"y":-602.1904761904761,"z":-933.7142857142857,"a95":"3.2","info":"\"14-10-01\" at \"23:57\""},{"visible":true,"include":false,"step":"340","x":572.6666666666666,"y":-767.047619047619,"z":-1155.7142857142858,"a95":"2.7","info":"\"14-10-02\" at \"17:32\""},{"visible":true,"include":false,"step":"370","x":348.4761904761905,"y":-555.2380952380952,"z":-1283.8095238095239,"a95":"2.8","info":"\"14-10-02\" at \"20:23\""},{"visible":true,"include":false,"step":"400","x":726.952380952381,"y":-219.14285714285714,"z":-1314.6666666666667,"a95":"2.7","info":"\"14-10-02\" at \"23:34\""},{"visible":true,"include":false,"step":"420","x":487.9047619047619,"y":-287.7142857142857,"z":-1352.7619047619048,"a95":"2.9","info":"\"14-10-03\" at \"17:17\""},{"visible":true,"include":false,"step":"440","x":597.047619047619,"y":-423.9047619047619,"z":-838.3809523809524,"a95":"2.7","info":"\"14-10-03\" at \"20:34\""},{"visible":true,"include":false,"step":"460","x":465.7142857142857,"y":-284.76190476190476,"z":-876.4761904761905,"a95":"3.3","info":"\"14-10-03\" at \"23:52\""},{"visible":true,"include":false,"step":"480","x":492.1904761904762,"y":-396.2857142857143,"z":-886.4761904761905,"a95":"3.6","info":"\"14-10-04\" at \"10:46\""},{"visible":true,"include":false,"step":"510","x":158.47619047619048,"y":-773.3333333333334,"z":-1199.5238095238096,"a95":"3","info":"\"14-10-04\" at \"13:38\""},{"visible":false,"include":false,"step":"540","x":554,"y":-204.85714285714286,"z":-1132.952380952381,"a95":"3.4","info":"\"14-10-04\" at \"17:04\""},{"visible":false,"include":false,"step":"570","x":142.85714285714286,"y":-744.1904761904761,"z":-1093.3333333333333,"a95":"3.1","info":"\"14-10-05\" at \"11:09\""},{"visible":false,"include":false,"step":"600","x":163.52380952380952,"y":-9.80952380952381,"z":-579.7142857142857,"a95":"5.5","info":"\"14-10-05\" at \"14:26\""},{"visible":false,"include":false,"step":"630","x":-140.0952380952381,"y":184.1904761904762,"z":-383.42857142857144,"a95":"7.4","info":"\"14-10-05\" at \"17:55\""},{"visible":false,"include":false,"step":"660","x":429.23809523809524,"y":62.095238095238095,"z":-729.4285714285714,"a95":"3.7","info":"\"14-10-11\" at \"08:31\""},{"visible":false,"include":false,"step":"680","x":-138.76190476190476,"y":505.5238095238095,"z":-186.28571428571428,"a95":"6","info":"\"14-10-11\" at \"11:33\""}],"demagType":"Unknown","patch":1.1,"format":"Unknown","strat":null},{"version":"v1.1.0","exported":"2017-05-22T14:07:08.774Z","info":"","GEO":[{"dec":23.999762128577572,"inc":-40.190127053238335,"MAD":19.772831099066394,"cm":[-3.907985046680551e-14,3.197442310920451e-14,0],"intensity":3441.963013711086,"type":"GC","origin":false,"forced":true,"remark":"","nSteps":12,"minStep":"180","maxStep":"480","steps":["180","210","240","270","320","340","370","400","420","440","460","480"],"group":"None","version":"v1.1.0"}],"TECT":[{"dec":40.01467658005163,"inc":-47.63229531983521,"MAD":19.77283109906636,"cm":[-9.769962616701378e-14,1.4210854715202004e-14,2.4868995751603507e-14],"intensity":3441.9630137110858,"type":"GC","origin":false,"forced":true,"remark":"","nSteps":12,"minStep":"180","maxStep":"480","steps":["180","210","240","270","320","340","370","400","420","440","460","480"],"group":"None","version":"v1.1.0"}],"interpreted":true,"name":"SS13.10A","coreAzi":4,"coreDip":35,"bedStrike":236,"bedDip":18,"data":[{"visible":false,"include":false,"step":"20","x":-5368.571428571428,"y":-1629.047619047619,"z":14220.47619047619,"a95":"2.6","info":"\"14-09-29\" at \"16:50\""},{"visible":false,"include":false,"step":"100","x":-2901.4285714285716,"y":-1004.0952380952381,"z":8868.47619047619,"a95":"2.7","info":"\"14-09-29\" at \"19:38\""},{"visible":true,"include":false,"step":"150","x":-1365.3333333333333,"y":-924.4761904761905,"z":4661.619047619048,"a95":"2.7","info":"\"14-09-29\" at \"22:37\""},{"visible":true,"include":true,"step":"180","x":-785.5238095238095,"y":-764.7619047619048,"z":3667.809523809524,"a95":"2.9","info":"\"14-09-30\" at \"17:13\""},{"visible":true,"include":true,"step":"210","x":-409.7142857142857,"y":-791.8095238095239,"z":1975.7142857142858,"a95":"3","info":"\"14-09-30\" at \"20:16\""},{"visible":true,"include":true,"step":"240","x":261.14285714285717,"y":-688.8571428571429,"z":1273.2380952380952,"a95":"3.2","info":"\"14-09-30\" at \"23:23\""},{"visible":true,"include":true,"step":"270","x":213.52380952380952,"y":-494.4761904761905,"z":37.904761904761905,"a95":"3.8","info":"\"14-10-01\" at \"17:45\""},{"visible":true,"include":false,"step":"300","x":386.95238095238096,"y":-320.3809523809524,"z":163.61904761904762,"a95":"5.2","info":"\"14-10-01\" at \"20:51\""},{"visible":true,"include":true,"step":"320","x":68.47619047619048,"y":-545.4285714285714,"z":-852,"a95":"3.7","info":"\"14-10-01\" at \"23:58\""},{"visible":true,"include":true,"step":"340","x":300.0952380952381,"y":-515.7142857142857,"z":-216.66666666666666,"a95":"4","info":"\"14-10-02\" at \"17:34\""},{"visible":true,"include":true,"step":"370","x":60.476190476190474,"y":-311.9047619047619,"z":-752.7619047619048,"a95":"3.1","info":"\"14-10-02\" at \"20:25\""},{"visible":true,"include":true,"step":"400","x":468.4761904761905,"y":-491.23809523809524,"z":-299.8095238095238,"a95":"3.2","info":"\"14-10-02\" at \"23:36\""},{"visible":true,"include":true,"step":"420","x":175.14285714285714,"y":-105.23809523809524,"z":-711.6190476190476,"a95":"3.8","info":"\"14-10-03\" at \"17:18\""},{"visible":true,"include":true,"step":"440","x":165.8095238095238,"y":-485.3333333333333,"z":-760,"a95":"3.1","info":"\"14-10-03\" at \"20:36\""},{"visible":true,"include":true,"step":"460","x":200.1904761904762,"y":-546.6666666666666,"z":-846.7619047619048,"a95":"2.8","info":"\"14-10-03\" at \"23:53\""},{"visible":true,"include":true,"step":"480","x":332.4761904761905,"y":-544.1904761904761,"z":-516.8571428571429,"a95":"3.3","info":"\"14-10-04\" at \"10:48\""},{"visible":true,"include":false,"step":"510","x":-153.9047619047619,"y":-425.9047619047619,"z":-580.3809523809524,"a95":"4","info":"\"14-10-04\" at \"13:40\""},{"visible":false,"include":false,"step":"540","x":-98.28571428571429,"y":-19.523809523809526,"z":-657.3333333333334,"a95":"5.2","info":"\"14-10-04\" at \"17:06\""},{"visible":false,"include":false,"step":"570","x":-452.3809523809524,"y":208.1904761904762,"z":-459.5238095238095,"a95":"4.1","info":"\"14-10-05\" at \"11:11\""},{"visible":false,"include":false,"step":"600","x":-426.95238095238096,"y":-455.7142857142857,"z":-679.4285714285714,"a95":"3.6","info":"\"14-10-05\" at \"14:28\""},{"visible":false,"include":false,"step":"630","x":-525.7142857142857,"y":14.571428571428571,"z":-497.9047619047619,"a95":"4.2","info":"\"14-10-05\" at \"17:57\""},{"visible":false,"include":false,"step":"660","x":166.1904761904762,"y":261.7142857142857,"z":-181.14285714285714,"a95":"7.5","info":"\"14-10-11\" at \"08:33\""},{"visible":false,"include":false,"step":"680","x":160.0952380952381,"y":71.33333333333333,"z":-100.0952380952381,"a95":"10.5","info":"\"14-10-11\" at \"11:36\""}],"demagType":"Unknown","patch":1.1,"format":"Unknown","strat":null},{"version":"v1.1.0","exported":"2017-05-22T14:07:08.774Z","info":"3","GEO":[{"dec":10.376282045097241,"inc":-39.90945294498035,"MAD":5.045611136108612,"cm":[-1.0827317878249145e-13,-5.630205296689556e-13,0],"intensity":9926.724912229809,"type":"GC","origin":false,"forced":true,"remark":"","nSteps":4,"minStep":"8.0","maxStep":"20.0","steps":["8.0","12.0","16.0","20.0"],"group":"None"}],"TECT":[{"dec":24.9343176415195,"inc":-51.223823082031565,"MAD":5.045611136107082,"cm":[-6.929483442079453e-13,-1.6457523174938702e-12,-8.661854302599316e-14],"intensity":9926.724912229809,"type":"GC","origin":false,"forced":true,"remark":"","nSteps":4,"minStep":"8.0","maxStep":"20.0","steps":["8.0","12.0","16.0","20.0"],"group":"None"}],"interpreted":true,"name":"SS13.11A","coreAzi":71,"coreDip":11,"bedStrike":236,"bedDip":18,"data":[{"visible":true,"include":false,"step":"0.0","x":-9435.333333333334,"y":-8033.9047619047615,"z":3163.904761904762,"a95":"0.99","info":"09/10/2014 at 16:26:07"},{"visible":true,"include":false,"step":"4.0","x":-8041.9047619047615,"y":-7067.047619047619,"z":2569.4285714285716,"a95":"0.99","info":"09/10/2014 at 16:26:07"},{"visible":true,"include":true,"step":"8.0","x":-5378,"y":-5170.0952380952385,"z":1098.2857142857142,"a95":"0.99","info":"09/10/2014 at 16:26:07"},{"visible":true,"include":true,"step":"12.0","x":-3361.2380952380954,"y":-3638,"z":122.22857142857144,"a95":"0.99","info":"09/10/2014 at 16:26:07"},{"visible":true,"include":true,"step":"16.0","x":-2140.190476190476,"y":-2386.8571428571427,"z":-482.7904761904762,"a95":"0.99","info":"09/10/2014 at 16:26:07"},{"visible":true,"include":true,"step":"20.0","x":-1579.904761904762,"y":-1904.1904761904761,"z":-812.0857142857143,"a95":"0.99","info":"09/10/2014 at 16:26:07"},{"visible":true,"include":false,"step":"25.0","x":-767.7619047619048,"y":-1159.5238095238096,"z":-677.5238095238095,"a95":"0.99","info":"09/10/2014 at 16:26:07"},{"visible":true,"include":false,"step":"30.0","x":-299.4666666666667,"y":-634.2952380952381,"z":-1062.2857142857142,"a95":"0.99","info":"09/10/2014 at 16:26:07"},{"visible":true,"include":false,"step":"35.0","x":-74.32285714285715,"y":-820.257142857143,"z":-1168.2857142857142,"a95":"0.99","info":"09/10/2014 at 16:26:07"},{"visible":true,"include":false,"step":"40.0","x":216.31428571428575,"y":-556.847619047619,"z":-1532.5714285714287,"a95":"0.99","info":"09/10/2014 at 16:26:07"},{"visible":true,"include":false,"step":"45.0","x":408.6285714285715,"y":-397.8666666666667,"z":-1438.2857142857142,"a95":"0.99","info":"09/10/2014 at 16:26:07"},{"visible":true,"include":false,"step":"50.0","x":219.86666666666665,"y":-774.8761904761905,"z":-1480.5714285714287,"a95":"0.99","info":"09/10/2014 at 16:26:07"},{"visible":true,"include":false,"step":"60.0","x":718.7333333333333,"y":-147.98095238095237,"z":-1352,"a95":"0.99","info":"09/10/2014 at 16:26:07"},{"visible":true,"include":false,"step":"70.0","x":436.9619047619048,"y":10.357142857142858,"z":-1395.4285714285713,"a95":"0.99","info":"09/10/2014 at 16:26:07"},{"visible":true,"include":false,"step":"80.0","x":12.730476190476189,"y":-281.6190476190476,"z":-1873.3333333333333,"a95":"0.99","info":"09/10/2014 at 16:26:07"},{"visible":true,"include":false,"step":"90.0","x":624.2,"y":-311.35238095238094,"z":-1304.7619047619048,"a95":"0.99","info":"09/10/2014 at 16:26:07"},{"visible":true,"include":false,"step":"100.0","x":963.6190476190476,"y":-118.02857142857142,"z":-1410.2857142857142,"a95":"0.99","info":"09/10/2014 at 16:26:07"}],"demagType":"Unknown","patch":1.1,"format":"Unknown","strat":null},{"version":"v1.1.0","exported":"2017-05-22T14:07:08.774Z","info":"7","GEO":[{"dec":23.9544936376505,"inc":-30.084812942379607,"MAD":12.382167587696538,"cm":[-1.8829382497642655e-13,0,0],"intensity":3441.149750497858,"type":"GC","origin":false,"forced":true,"remark":"","nSteps":11,"minStep":"10.0","maxStep":"50.0","steps":["10.0","15.0","20.0","23.0","25.0","30.0","33.0","35.0","40.0","45.0","50.0"],"group":"None","version":"v1.1.0"}],"TECT":[{"dec":34.98653194608596,"inc":-38.215488850854584,"MAD":12.382167587696516,"cm":[-4.263256414560601e-14,3.552713678800501e-14,4.973799150320701e-14],"intensity":3441.1497504978574,"type":"GC","origin":false,"forced":true,"remark":"","nSteps":11,"minStep":"10.0","maxStep":"50.0","steps":["10.0","15.0","20.0","23.0","25.0","30.0","33.0","35.0","40.0","45.0","50.0"],"group":"None","version":"v1.1.0"}],"interpreted":true,"name":"SS13.12A","coreAzi":350,"coreDip":39,"bedStrike":236,"bedDip":18,"data":[{"visible":true,"include":false,"step":"0.0","x":-2886.8571428571427,"y":256.6095238095238,"z":9017.42857142857,"a95":"0.99","info":"30/01/2015 at 03:55:23"},{"visible":true,"include":true,"step":"10.0","x":-512.8380952380952,"y":-967.8095238095239,"z":3526.9523809523807,"a95":"0.99","info":"30/01/2015 at 03:55:23"},{"visible":true,"include":true,"step":"15.0","x":61.70285714285714,"y":-1236.5714285714287,"z":1286,"a95":"0.99","info":"30/01/2015 at 03:55:23"},{"visible":true,"include":true,"step":"20.0","x":508,"y":-926.3714285714285,"z":1010.0952380952381,"a95":"0.99","info":"30/01/2015 at 03:55:23"},{"visible":true,"include":true,"step":"23.0","x":744.5428571428571,"y":-1112.952380952381,"z":279.62857142857143,"a95":"0.99","info":"30/01/2015 at 03:55:23"},{"visible":true,"include":true,"step":"25.0","x":734.9809523809524,"y":-1606.6666666666667,"z":26.814285714285717,"a95":"0.99","info":"30/01/2015 at 03:55:23"},{"visible":true,"include":true,"step":"30.0","x":847.9714285714286,"y":-847.7142857142857,"z":222.44761904761904,"a95":"0.99","info":"30/01/2015 at 03:55:23"},{"visible":true,"include":true,"step":"33.0","x":646.504761904762,"y":-1365.3333333333333,"z":55.955238095238094,"a95":"0.99","info":"30/01/2015 at 03:55:23"},{"visible":true,"include":true,"step":"35.0","x":820.5047619047618,"y":-1205.4285714285713,"z":-621.952380952381,"a95":"0.99","info":"30/01/2015 at 03:55:23"},{"visible":true,"include":true,"step":"40.0","x":823.0190476190477,"y":-926.7142857142857,"z":-209.49523809523808,"a95":"0.99","info":"30/01/2015 at 03:55:23"},{"visible":true,"include":true,"step":"45.0","x":713.9142857142857,"y":-785.742857142857,"z":-459.9238095238095,"a95":"0.99","info":"30/01/2015 at 03:55:23"},{"visible":true,"include":true,"step":"50.0","x":716.104761904762,"y":-1347.7142857142858,"z":-989.5238095238095,"a95":"0.99","info":"30/01/2015 at 03:55:23"},{"visible":true,"include":false,"step":"60.0","x":875.5428571428572,"y":-866.5142857142857,"z":-815.7142857142857,"a95":"0.99","info":"30/01/2015 at 03:55:23"},{"visible":true,"include":false,"step":"70.0","x":783.5904761904762,"y":-856.695238095238,"z":-1196.2857142857142,"a95":"0.99","info":"30/01/2015 at 03:55:23"}],"demagType":"Unknown","patch":1.1,"format":"Unknown","strat":null},{"version":"v1.1.0","exported":"2017-05-22T14:07:08.774Z","info":"4","GEO":[{"dec":53.55694483759629,"inc":-28.30040919208801,"MAD":10.390009010209344,"cm":[-1.0827317878249145e-13,-5.19711258155959e-13,0],"intensity":5358.977148918137,"type":"GC","origin":false,"forced":true,"remark":"","nSteps":5,"minStep":"12.0","maxStep":"30.0","steps":["12.0","16.0","20.0","25.0","30.0"],"group":"None"}],"TECT":[{"dec":63.17948898691782,"inc":-27.5478042455337,"MAD":10.390009010208802,"cm":[-3.0316490059097606e-13,-1.115213741459662e-12,-5.684341886080802e-14],"intensity":5358.977148918137,"type":"GC","origin":false,"forced":true,"remark":"","nSteps":5,"minStep":"12.0","maxStep":"30.0","steps":["12.0","16.0","20.0","25.0","30.0"],"group":"None"}],"interpreted":true,"name":"SS13.12B","coreAzi":350,"coreDip":39,"bedStrike":236,"bedDip":18,"data":[{"visible":true,"include":false,"step":"0.0","x":-1877.047619047619,"y":849.1333333333333,"z":8974.47619047619,"a95":"0.99","info":"09/10/2014 at 16:26:07"},{"visible":true,"include":false,"step":"4.0","x":-1362.5714285714287,"y":490.97142857142853,"z":8089.333333333333,"a95":"0.99","info":"09/10/2014 at 16:26:07"},{"visible":true,"include":false,"step":"8.0","x":-599.1142857142856,"y":117.76190476190476,"z":5766.761904761905,"a95":"0.99","info":"09/10/2014 at 16:26:07"},{"visible":true,"include":true,"step":"12.0","x":-109,"y":92.19619047619047,"z":4137.523809523809,"a95":"0.99","info":"09/10/2014 at 16:26:07"},{"visible":true,"include":true,"step":"16.0","x":-3.041904761904762,"y":-68.00761904761904,"z":3015.809523809524,"a95":"0.99","info":"09/10/2014 at 16:26:07"},{"visible":true,"include":true,"step":"20.0","x":195.48571428571427,"y":-181.3047619047619,"z":2371.1428571428573,"a95":"0.99","info":"09/10/2014 at 16:26:07"},{"visible":true,"include":true,"step":"25.0","x":222.37142857142857,"y":-251.46666666666667,"z":1752.857142857143,"a95":"0.99","info":"09/10/2014 at 16:26:07"},{"visible":true,"include":true,"step":"30.0","x":318.85714285714283,"y":-171.06666666666666,"z":1216.7619047619048,"a95":"0.99","info":"09/10/2014 at 16:26:07"},{"visible":true,"include":false,"step":"35.0","x":137.43809523809523,"y":-313.0095238095238,"z":1054.3809523809523,"a95":"0.99","info":"09/10/2014 at 16:26:07"},{"visible":true,"include":false,"step":"40.0","x":272.23809523809524,"y":-205.85714285714286,"z":638.4380952380952,"a95":"0.99","info":"09/10/2014 at 16:26:07"},{"visible":true,"include":false,"step":"45.0","x":407.4857142857143,"y":-164.88571428571427,"z":546.3142857142857,"a95":"0.99","info":"09/10/2014 at 16:26:07"},{"visible":true,"include":false,"step":"50.0","x":315.85714285714283,"y":-487.7809523809524,"z":765.5142857142857,"a95":"0.99","info":"09/10/2014 at 16:26:07"},{"visible":true,"include":false,"step":"60.0","x":42.955238095238094,"y":-697.1809523809524,"z":758.6380952380953,"a95":"0.99","info":"09/10/2014 at 16:26:07"},{"visible":true,"include":false,"step":"70.0","x":395.76190476190476,"y":-396.2952380952381,"z":138.52380952380952,"a95":"0.99","info":"09/10/2014 at 16:26:07"},{"visible":false,"include":false,"step":"80.0","x":-15.033333333333333,"y":-1088.4761904761904,"z":-109.0095238095238,"a95":"0.99","info":"09/10/2014 at 16:26:07"},{"visible":false,"include":false,"step":"90.0","x":419.39047619047625,"y":-104.14285714285714,"z":326.12380952380954,"a95":"0.99","info":"09/10/2014 at 16:26:07"},{"visible":false,"include":false,"step":"100.0","x":239.0761904761905,"y":-374.3904761904762,"z":118.94285714285715,"a95":"0.99","info":"09/10/2014 at 16:26:07"}],"demagType":"Unknown","patch":1.1,"format":"Unknown","strat":null},{"version":"v1.1.0","exported":"2017-05-22T14:07:08.774Z","info":"5","GEO":[{"dec":328.2818841124296,"inc":-31.16785654809232,"MAD":6.803942019990325,"cm":[-8.526512829121202e-14,4.263256414560601e-14,0],"intensity":2243.4979635137292,"type":"GC","origin":false,"forced":true,"remark":"","nSteps":4,"minStep":"4.0","maxStep":"16.0","steps":["4.0","8.0","12.0","16.0"],"group":"None","version":"v1.1.0"}],"TECT":[{"dec":328.98564309901815,"inc":-49.149486826046,"MAD":6.803942019990264,"cm":[-1.7053025658242404e-13,4.263256414560601e-14,1.1657341758564144e-14],"intensity":2243.4979635137297,"type":"GC","origin":false,"forced":true,"remark":"","nSteps":4,"minStep":"4.0","maxStep":"16.0","steps":["4.0","8.0","12.0","16.0"],"group":"None","version":"v1.1.0"}],"interpreted":true,"name":"SS13.14A","coreAzi":42,"coreDip":12,"bedStrike":236,"bedDip":18,"data":[{"visible":true,"include":false,"step":"0.0","x":-1201.4285714285713,"y":-650.1428571428571,"z":-605.2666666666667,"a95":"0.99","info":"09/10/2014 at 16:26:07"},{"visible":true,"include":true,"step":"4.0","x":-924.3428571428572,"y":-693.7428571428571,"z":-587.6761904761905,"a95":"0.99","info":"09/10/2014 at 16:26:07"},{"visible":true,"include":true,"step":"8.0","x":-555.3714285714285,"y":-539.8761904761905,"z":-872.7142857142857,"a95":"0.99","info":"09/10/2014 at 16:26:07"},{"visible":true,"include":true,"step":"12.0","x":-256.51428571428573,"y":-387.8666666666667,"z":-969.6190476190476,"a95":"0.99","info":"09/10/2014 at 16:26:07"},{"visible":true,"include":true,"step":"16.0","x":-230.21904761904764,"y":-254.7904761904762,"z":-1085.8095238095239,"a95":"0.99","info":"09/10/2014 at 16:26:07"},{"visible":true,"include":false,"step":"20.0","x":79.80380952380953,"y":-284,"z":-1029.3333333333333,"a95":"0.99","info":"09/10/2014 at 16:26:07"},{"visible":true,"include":false,"step":"25.0","x":197.0095238095238,"y":-216.74285714285716,"z":-1049.2380952380952,"a95":"0.99","info":"09/10/2014 at 16:26:07"},{"visible":true,"include":false,"step":"30.0","x":159.38095238095238,"y":-161.15238095238095,"z":-1171.047619047619,"a95":"0.99","info":"09/10/2014 at 16:26:07"},{"visible":true,"include":false,"step":"35.0","x":24.102857142857143,"y":-246.36190476190478,"z":-1134.6666666666667,"a95":"0.99","info":"09/10/2014 at 16:26:07"},{"visible":true,"include":false,"step":"40.0","x":152.13333333333335,"y":-227.63809523809522,"z":-1084.1904761904761,"a95":"0.99","info":"09/10/2014 at 16:26:07"},{"visible":true,"include":false,"step":"45.0","x":233.32380952380953,"y":-101.87619047619049,"z":-1044.6666666666667,"a95":"0.99","info":"09/10/2014 at 16:26:07"},{"visible":true,"include":false,"step":"50.0","x":174.37142857142857,"y":-205.97142857142856,"z":-1343.047619047619,"a95":"0.99","info":"09/10/2014 at 16:26:07"},{"visible":true,"include":false,"step":"60.0","x":123.91428571428571,"y":-358.96190476190475,"z":-959.3333333333334,"a95":"0.99","info":"09/10/2014 at 16:26:07"},{"visible":true,"include":false,"step":"70.0","x":154.93333333333334,"y":-366.1142857142857,"z":-1112.4761904761904,"a95":"0.99","info":"09/10/2014 at 16:26:07"},{"visible":true,"include":false,"step":"80.0","x":76.63809523809525,"y":-433.4095238095238,"z":-993.7142857142857,"a95":"0.99","info":"09/10/2014 at 16:26:07"},{"visible":true,"include":false,"step":"90.0","x":32.839999999999996,"y":-227.8857142857143,"z":-1195.6190476190477,"a95":"0.99","info":"09/10/2014 at 16:26:07"},{"visible":true,"include":false,"step":"100.0","x":173.2,"y":-282.2761904761905,"z":-1294.6666666666667,"a95":"0.99","info":"09/10/2014 at 16:26:07"}],"demagType":"Unknown","patch":1.1,"format":"Unknown","strat":null},{"version":"v1.1.0","exported":"2017-05-22T14:07:08.774Z","info":"8","GEO":[{"dec":52.75360797461218,"inc":-3.147246175824448,"MAD":8.009030628327265,"cm":[-2.842170943040401e-14,-9.237055564881302e-14,0],"intensity":2863.5586947775805,"type":"GC","origin":false,"forced":true,"remark":"","nSteps":5,"minStep":"10.0","maxStep":"25.0","steps":["10.0","15.0","20.0","23.0","25.0"],"group":"None","version":"v1.1.0"}],"TECT":[{"dec":53.885246966052364,"inc":-3.996084272501024,"MAD":8.0090306283273,"cm":[-1.4210854715202004e-14,4.263256414560601e-14,8.881784197001252e-16],"intensity":2863.55869477758,"type":"GC","origin":false,"forced":true,"remark":"","nSteps":5,"minStep":"10.0","maxStep":"25.0","steps":["10.0","15.0","20.0","23.0","25.0"],"group":"None","version":"v1.1.0"}],"interpreted":true,"name":"SS13.15A","coreAzi":24,"coreDip":28,"bedStrike":236,"bedDip":18,"data":[{"visible":true,"include":false,"step":"0.0","x":-2350.285714285714,"y":-1432.3809523809523,"z":2674.5714285714284,"a95":"0.99","info":"30/01/2015 at 03:55:23"},{"visible":true,"include":true,"step":"10.0","x":-1117.3333333333333,"y":-1054.2857142857142,"z":1325.3333333333333,"a95":"0.99","info":"30/01/2015 at 03:55:23"},{"visible":true,"include":true,"step":"15.0","x":-610.1904761904761,"y":-855.9904761904761,"z":934.8571428571429,"a95":"0.99","info":"30/01/2015 at 03:55:23"},{"visible":true,"include":true,"step":"20.0","x":-312.752380952381,"y":-739.1238095238095,"z":776.2285714285714,"a95":"0.99","info":"30/01/2015 at 03:55:23"},{"visible":true,"include":true,"step":"23.0","x":-71.16285714285715,"y":-790.6190476190476,"z":545.7904761904762,"a95":"0.99","info":"30/01/2015 at 03:55:23"},{"visible":true,"include":true,"step":"25.0","x":-14.50095238095238,"y":-844.3142857142857,"z":495.1714285714286,"a95":"0.99","info":"30/01/2015 at 03:55:23"},{"visible":true,"include":false,"step":"30.0","x":-39.754285714285714,"y":-625.7142857142857,"z":482.60952380952375,"a95":"0.99","info":"30/01/2015 at 03:55:23"},{"visible":true,"include":false,"step":"33.0","x":107.95238095238095,"y":-575.8190476190476,"z":286.2761904761905,"a95":"0.99","info":"30/01/2015 at 03:55:23"},{"visible":true,"include":false,"step":"35.0","x":-55.57523809523809,"y":-772.1238095238095,"z":353.77142857142854,"a95":"0.99","info":"30/01/2015 at 03:55:23"},{"visible":true,"include":false,"step":"40.0","x":-29.122857142857146,"y":-564.1428571428571,"z":241.8857142857143,"a95":"0.99","info":"30/01/2015 at 03:55:23"},{"visible":true,"include":false,"step":"45.0","x":-258.12380952380954,"y":-730.8761904761905,"z":289.8666666666667,"a95":"0.99","info":"30/01/2015 at 03:55:23"},{"visible":true,"include":false,"step":"50.0","x":-215.60000000000002,"y":-949.6666666666666,"z":-167.24761904761903,"a95":"0.99","info":"30/01/2015 at 03:55:23"},{"visible":true,"include":false,"step":"60.0","x":-31.133333333333333,"y":-881.1142857142858,"z":-86.78666666666666,"a95":"0.99","info":"30/01/2015 at 03:55:23"},{"visible":true,"include":false,"step":"70.0","x":142.65714285714287,"y":-378.49523809523805,"z":30.151428571428568,"a95":"0.99","info":"30/01/2015 at 03:55:23"}],"demagType":"Unknown","patch":1.1,"format":"Unknown","strat":null},{"version":"v1.1.0","exported":"2017-05-22T14:07:08.774Z","info":"","GEO":[{"dec":2.0351046240210167,"inc":-39.86256658336332,"MAD":6.138047133621516,"cm":[-7.105427357601002e-15,2.842170943040401e-14,0],"intensity":1774.2573036602776,"type":"GC","origin":false,"forced":true,"remark":"","nSteps":5,"minStep":"150","maxStep":"270","steps":["150","180","210","240","270"],"group":"None","version":"v1.1.0"}],"TECT":[{"dec":15.01897469014881,"inc":-53.26290884733532,"MAD":6.138047133621352,"cm":[-1.2789769243681803e-13,8.526512829121202e-14,2.842170943040401e-14],"intensity":1774.2573036602766,"type":"GC","origin":false,"forced":true,"remark":"","nSteps":5,"minStep":"150","maxStep":"270","steps":["150","180","210","240","270"],"group":"None","version":"v1.1.0"}],"interpreted":true,"name":"SS13.16A","coreAzi":29,"coreDip":30,"bedStrike":236,"bedDip":18,"data":[{"visible":false,"include":false,"step":"20","x":-3340,"y":-3058.4761904761904,"z":5045.523809523809,"a95":"2.4","info":"\"14-09-29\" at \"16:52\""},{"visible":true,"include":false,"step":"100","x":-1343.8095238095239,"y":-1767.3333333333333,"z":2044.857142857143,"a95":"2.3","info":"\"14-09-29\" at \"19:40\""},{"visible":true,"include":true,"step":"150","x":-758.4761904761905,"y":-1286.7619047619048,"z":754.8571428571429,"a95":"2.1","info":"\"14-09-29\" at \"22:39\""},{"visible":true,"include":true,"step":"180","x":-562.3809523809524,"y":-1189.142857142857,"z":218.95238095238096,"a95":"2.2","info":"\"14-09-30\" at \"17:15\""},{"visible":true,"include":true,"step":"210","x":-261.6190476190476,"y":-1033.2380952380952,"z":-70.28571428571429,"a95":"2.2","info":"\"14-09-30\" at \"20:18\""},{"visible":true,"include":true,"step":"240","x":-170.95238095238096,"y":-702.8571428571429,"z":-453.5238095238095,"a95":"3","info":"\"14-09-30\" at \"23:24\""},{"visible":true,"include":true,"step":"270","x":105.14285714285714,"y":-356.2857142857143,"z":-901.6190476190476,"a95":"3","info":"\"14-10-01\" at \"17:47\""},{"visible":true,"include":false,"step":"300","x":208.76190476190476,"y":-298.6666666666667,"z":-488.1904761904762,"a95":"4.1","info":"\"14-10-01\" at \"20:53\""},{"visible":true,"include":false,"step":"320","x":-66.47619047619048,"y":-667.6190476190476,"z":-1116,"a95":"2.9","info":"\"14-10-02\" at \"00:04\""},{"visible":true,"include":false,"step":"340","x":134.76190476190476,"y":-417.14285714285717,"z":-869.6190476190476,"a95":"3.1","info":"\"14-10-02\" at \"17:36\""},{"visible":true,"include":false,"step":"370","x":214.66666666666666,"y":-489.04761904761904,"z":-896.952380952381,"a95":"2.6","info":"\"14-10-02\" at \"20:27\""},{"visible":true,"include":false,"step":"400","x":77.9047619047619,"y":-433.04761904761904,"z":-486.57142857142856,"a95":"3.9","info":"\"14-10-02\" at \"23:38\""},{"visible":true,"include":false,"step":"420","x":55.80952380952381,"y":-318.6666666666667,"z":-645.9047619047619,"a95":"3.3","info":"\"14-10-03\" at \"17:20\""},{"visible":true,"include":false,"step":"440","x":143.9047619047619,"y":-491.8095238095238,"z":-988.0952380952381,"a95":"2.9","info":"\"14-10-03\" at \"20:38\""},{"visible":true,"include":false,"step":"460","x":-39.142857142857146,"y":-551.9047619047619,"z":-789.5238095238095,"a95":"2.9","info":"\"14-10-03\" at \"23:56\""},{"visible":true,"include":false,"step":"480","x":42.857142857142854,"y":-555.6190476190476,"z":-797.7142857142857,"a95":"2.9","info":"\"14-10-04\" at \"10:51\""},{"visible":true,"include":false,"step":"510","x":58.95238095238095,"y":-491.5238095238095,"z":-658.7619047619048,"a95":"3","info":"\"14-10-04\" at \"13:42\""},{"visible":false,"include":false,"step":"540","x":145.14285714285714,"y":26,"z":-740.6666666666666,"a95":"3.5","info":"\"14-10-04\" at \"17:07\""},{"visible":false,"include":false,"step":"570","x":-194,"y":-297.6190476190476,"z":-624.952380952381,"a95":"3.2","info":"\"14-10-05\" at \"11:13\""},{"visible":false,"include":false,"step":"600","x":-174.85714285714286,"y":-514.5714285714286,"z":-588.7619047619048,"a95":"2.8","info":"\"14-10-05\" at \"14:30\""},{"visible":false,"include":false,"step":"630","x":-192.47619047619048,"y":-308.2857142857143,"z":-812.3809523809524,"a95":"3.1","info":"\"14-10-05\" at \"17:59\""},{"visible":false,"include":false,"step":"660","x":-128.1904761904762,"y":-24.38095238095238,"z":-516.8571428571429,"a95":"5.3","info":"\"14-10-11\" at \"08:35\""},{"visible":false,"include":false,"step":"680","x":-249.04761904761904,"y":201.52380952380952,"z":-111.04761904761905,"a95":"5.3","info":"\"14-10-11\" at \"11:38\""}],"demagType":"Unknown","patch":1.1,"format":"Unknown","strat":null},{"version":"v1.1.0","exported":"2017-05-22T14:07:08.774Z","info":"","GEO":[],"TECT":[],"interpreted":false,"name":"SS13.17A","coreAzi":44,"coreDip":13,"bedStrike":236,"bedDip":18,"data":[{"visible":true,"include":false,"step":"20","x":-18004.571428571428,"y":-10432,"z":13398.095238095239,"a95":"2.3","info":"\"14-09-29\" at \"16:54\""},{"visible":true,"include":false,"step":"100","x":-9626.952380952382,"y":-5084.190476190476,"z":7137.428571428572,"a95":"2.4","info":"\"14-09-29\" at \"19:42\""},{"visible":true,"include":false,"step":"150","x":-5776.571428571428,"y":-2971.714285714286,"z":3611.3333333333335,"a95":"2.4","info":"\"14-09-29\" at \"22:41\""},{"visible":true,"include":false,"step":"180","x":-4571.619047619048,"y":-2993.4285714285716,"z":3182.190476190476,"a95":"2.4","info":"\"14-09-30\" at \"17:17\""},{"visible":true,"include":false,"step":"210","x":-3380.4761904761904,"y":-2086.6666666666665,"z":1961.904761904762,"a95":"2.7","info":"\"14-09-30\" at \"20:21\""},{"visible":true,"include":false,"step":"240","x":-2388.095238095238,"y":-1430.3809523809523,"z":1620.4761904761904,"a95":"3","info":"\"14-09-30\" at \"23:26\""},{"visible":true,"include":false,"step":"270","x":-1550.952380952381,"y":-887.2380952380952,"z":158.95238095238096,"a95":"3.2","info":"\"14-10-01\" at \"17:49\""},{"visible":true,"include":false,"step":"300","x":-1467.047619047619,"y":-823.1428571428571,"z":1246.6666666666667,"a95":"3.7","info":"\"14-10-01\" at \"20:55\""},{"visible":true,"include":false,"step":"320","x":-1186.6666666666667,"y":-954.6666666666666,"z":-977.1428571428571,"a95":"3.8","info":"\"14-10-02\" at \"00:07\""},{"visible":true,"include":false,"step":"340","x":-518.3809523809524,"y":-831.4285714285714,"z":-716.952380952381,"a95":"3.6","info":"\"14-10-02\" at \"17:38\""},{"visible":true,"include":false,"step":"370","x":-454.85714285714283,"y":-938.6666666666666,"z":-583.1428571428571,"a95":"3.3","info":"\"14-10-02\" at \"20:29\""},{"visible":true,"include":false,"step":"400","x":-579.4285714285714,"y":-293.7142857142857,"z":464.95238095238096,"a95":"5.8","info":"\"14-10-02\" at \"23:40\""},{"visible":true,"include":false,"step":"420","x":-253.04761904761904,"y":-476.76190476190476,"z":-782.5714285714286,"a95":"4.1","info":"\"14-10-03\" at \"17:22\""},{"visible":true,"include":false,"step":"440","x":-1098.4761904761904,"y":-847.5238095238095,"z":-195.33333333333334,"a95":"3.2","info":"\"14-10-03\" at \"20:40\""},{"visible":true,"include":false,"step":"460","x":-448.57142857142856,"y":-455.7142857142857,"z":-633.9047619047619,"a95":"4.4","info":"\"14-10-03\" at \"23:57\""},{"visible":true,"include":false,"step":"480","x":-537.3333333333334,"y":-347.9047619047619,"z":-870.5714285714286,"a95":"4.7","info":"\"14-10-04\" at \"10:52\""},{"visible":true,"include":false,"step":"510","x":-145.8095238095238,"y":-228.1904761904762,"z":-1741.4285714285713,"a95":"3.2","info":"\"14-10-04\" at \"13:44\""},{"visible":true,"include":false,"step":"540","x":-442.3809523809524,"y":737.9047619047619,"z":-518.6666666666666,"a95":"4","info":"\"14-10-04\" at \"17:09\""},{"visible":true,"include":false,"step":"570","x":-914,"y":310.2857142857143,"z":-1075.2380952380952,"a95":"3.1","info":"\"14-10-05\" at \"11:15\""},{"visible":true,"include":false,"step":"600","x":-598.3809523809524,"y":526.1904761904761,"z":-550.952380952381,"a95":"4","info":"\"14-10-05\" at \"14:32\""},{"visible":true,"include":false,"step":"630","x":-753.9047619047619,"y":618.4761904761905,"z":-744.952380952381,"a95":"3.3","info":"\"14-10-05\" at \"18:01\""},{"visible":true,"include":false,"step":"660","x":-32.857142857142854,"y":1298.7619047619048,"z":233.52380952380952,"a95":"2.5","info":"\"14-10-11\" at \"08:37\""},{"visible":true,"include":false,"step":"680","x":156.0952380952381,"y":191.42857142857142,"z":-453.7142857142857,"a95":"5.3","info":"\"14-10-11\" at \"11:41\""}],"demagType":"Unknown","patch":1.1,"format":"Unknown","strat":null},{"version":"v1.1.0","exported":"2017-05-22T14:07:08.774Z","info":"1","GEO":[{"dec":358.2979562202877,"inc":-39.061007927653556,"MAD":7.553125108516336,"cm":[-5.684341886080802e-14,5.4136589391245725e-15,0],"intensity":1076.2858718933312,"type":"GC","origin":false,"forced":true,"remark":"","nSteps":8,"minStep":"10.0","maxStep":"35.0","steps":["10.0","15.0","20.0","23.0","25.0","30.0","33.0","35.0"],"group":"None"}],"TECT":[{"dec":10.009275913707597,"inc":-53.333610448872605,"MAD":7.553125108516396,"cm":[-1.7729733025632976e-13,1.0827317878249145e-14,1.6240976817373718e-14],"intensity":1076.2858718933312,"type":"GC","origin":false,"forced":true,"remark":"","nSteps":8,"minStep":"10.0","maxStep":"35.0","steps":["10.0","15.0","20.0","23.0","25.0","30.0","33.0","35.0"],"group":"None"}],"interpreted":true,"name":"SS13.18A","coreAzi":25,"coreDip":43,"bedStrike":236,"bedDip":18,"data":[{"visible":true,"include":false,"step":"0.0","x":-323,"y":-475.25714285714287,"z":525.1142857142856,"a95":"0.99","info":"30/01/2015 at 08:29:19"},{"visible":true,"include":true,"step":"10.0","x":-190.93333333333334,"y":-525.5238095238095,"z":-38.653333333333336,"a95":"0.99","info":"30/01/2015 at 08:29:19"},{"visible":true,"include":true,"step":"15.0","x":-193.1904761904762,"y":-538.4571428571429,"z":-109.62857142857142,"a95":"0.99","info":"30/01/2015 at 08:29:19"},{"visible":true,"include":true,"step":"20.0","x":-182.47619047619048,"y":-515.2761904761904,"z":-240.9047619047619,"a95":"0.99","info":"30/01/2015 at 08:29:19"},{"visible":true,"include":true,"step":"23.0","x":-135.75238095238097,"y":-394.7333333333333,"z":-251.50476190476192,"a95":"0.99","info":"30/01/2015 at 08:29:19"},{"visible":true,"include":true,"step":"25.0","x":-161.78095238095239,"y":-517.8285714285714,"z":-168.96190476190475,"a95":"0.99","info":"30/01/2015 at 08:29:19"},{"visible":true,"include":true,"step":"30.0","x":-178.67619047619047,"y":-463.152380952381,"z":-194.82857142857142,"a95":"0.99","info":"30/01/2015 at 08:29:19"},{"visible":true,"include":true,"step":"33.0","x":-107.20952380952382,"y":-357.2857142857143,"z":-176.46666666666667,"a95":"0.99","info":"30/01/2015 at 08:29:19"},{"visible":true,"include":true,"step":"35.0","x":-126.28571428571429,"y":-440.83809523809526,"z":-313.35238095238094,"a95":"0.99","info":"30/01/2015 at 08:29:19"},{"visible":true,"include":false,"step":"40.0","x":-7.094285714285713,"y":-411.42857142857144,"z":-331.0571428571428,"a95":"0.99","info":"30/01/2015 at 08:29:19"},{"visible":true,"include":false,"step":"45.0","x":-135.47619047619048,"y":-533.5333333333334,"z":-385.0190476190476,"a95":"0.99","info":"30/01/2015 at 08:29:19"},{"visible":true,"include":false,"step":"50.0","x":-282.3904761904762,"y":-452.552380952381,"z":-339.45714285714286,"a95":"0.99","info":"30/01/2015 at 08:29:19"},{"visible":true,"include":false,"step":"60.0","x":-146.9904761904762,"y":-358.25714285714287,"z":-260.3047619047619,"a95":"0.99","info":"30/01/2015 at 08:29:19"},{"visible":true,"include":false,"step":"70.0","x":-147.83809523809524,"y":-355.552380952381,"z":-461.0761904761905,"a95":"0.99","info":"30/01/2015 at 08:29:19"}],"demagType":"Unknown","patch":1.1,"format":"Unknown","strat":null},{"version":"v1.1.0","exported":"2017-05-22T14:07:08.774Z","info":"2","GEO":[{"dec":346.58704351303277,"inc":-37.529392728006755,"MAD":9.434077510295914,"cm":[6.90241514738383e-14,-2.165463575649829e-14,0],"intensity":1939.180238799053,"type":"GC","origin":false,"forced":true,"remark":"","nSteps":7,"minStep":"10.0","maxStep":"33.0","steps":["10.0","15.0","20.0","23.0","25.0","30.0","33.0"],"group":"None"}],"TECT":[{"dec":354.3035011767286,"inc":-53.975607973092636,"MAD":9.434077510295822,"cm":[7.037756620861945e-14,-1.0827317878249145e-14,0],"intensity":1939.1802387990526,"type":"GC","origin":false,"forced":true,"remark":"","nSteps":7,"minStep":"10.0","maxStep":"33.0","steps":["10.0","15.0","20.0","23.0","25.0","30.0","33.0"],"group":"None"}],"interpreted":true,"name":"SS13.19A","coreAzi":64,"coreDip":29,"bedStrike":236,"bedDip":18,"data":[{"visible":true,"include":false,"step":"0.0","x":-1478.5714285714287,"y":-925.104761904762,"z":107.02857142857142,"a95":"0.99","info":"30/01/2015 at 08:29:19"},{"visible":true,"include":true,"step":"10.0","x":-849.8571428571429,"y":-556.2380952380952,"z":-347.4,"a95":"0.99","info":"30/01/2015 at 08:29:19"},{"visible":true,"include":true,"step":"15.0","x":-749.3047619047619,"y":-534.6952380952381,"z":-567.1238095238095,"a95":"0.99","info":"30/01/2015 at 08:29:19"},{"visible":true,"include":true,"step":"20.0","x":-578.3619047619047,"y":-386.9809523809524,"z":-734.1714285714286,"a95":"0.99","info":"30/01/2015 at 08:29:19"},{"visible":true,"include":true,"step":"23.0","x":-543.6095238095238,"y":-300.0190476190476,"z":-749.0095238095239,"a95":"0.99","info":"30/01/2015 at 08:29:19"},{"visible":true,"include":true,"step":"25.0","x":-598,"y":-337.9428571428572,"z":-815.7523809523809,"a95":"0.99","info":"30/01/2015 at 08:29:19"},{"visible":true,"include":true,"step":"30.0","x":-415.6761904761905,"y":-122.54285714285714,"z":-705,"a95":"0.99","info":"30/01/2015 at 08:29:19"},{"visible":true,"include":true,"step":"33.0","x":-534.8285714285714,"y":-275.62857142857143,"z":-725.4761904761905,"a95":"0.99","info":"30/01/2015 at 08:29:19"},{"visible":true,"include":false,"step":"35.0","x":-476.6666666666667,"y":-247.65714285714287,"z":-852.0857142857143,"a95":"0.99","info":"30/01/2015 at 08:29:19"},{"visible":true,"include":false,"step":"40.0","x":-530.3428571428572,"y":-62.54857142857143,"z":-858.0190476190477,"a95":"0.99","info":"30/01/2015 at 08:29:19"},{"visible":true,"include":false,"step":"45.0","x":-509.4190476190476,"y":-104.0952380952381,"z":-860.8761904761906,"a95":"0.99","info":"30/01/2015 at 08:29:19"},{"visible":true,"include":false,"step":"50.0","x":-611,"y":-159.44761904761904,"z":-1021.7142857142857,"a95":"0.99","info":"30/01/2015 at 08:29:19"},{"visible":true,"include":false,"step":"60.0","x":-313.8952380952381,"y":-151.03809523809525,"z":-1027.4285714285713,"a95":"0.99","info":"30/01/2015 at 08:29:19"},{"visible":true,"include":false,"step":"70.0","x":-57.29904761904762,"y":-43.00095238095238,"z":-984.8571428571429,"a95":"0.99","info":"30/01/2015 at 08:29:19"}],"demagType":"Unknown","patch":1.1,"format":"Unknown","strat":null},{"version":"v1.1.0","exported":"2017-05-22T14:07:08.774Z","info":"6","GEO":[{"dec":44.543906357449885,"inc":-36.83951738796231,"MAD":3.765035705355441,"cm":[1.5987211554602254e-14,4.263256414560601e-14,0],"intensity":1253.5526589238004,"type":"GC","origin":false,"forced":true,"remark":"","nSteps":5,"minStep":"4.0","maxStep":"20.0","steps":["4.0","8.0","12.0","16.0","20.0"],"group":"None","version":"v1.1.0"}],"TECT":[{"dec":58.48948484079858,"inc":-38.26873696749295,"MAD":3.765035705355385,"cm":[-7.815970093361102e-14,-9.947598300641403e-14,2.842170943040401e-14],"intensity":1253.5526589238007,"type":"GC","origin":false,"forced":true,"remark":"","nSteps":5,"minStep":"4.0","maxStep":"20.0","steps":["4.0","8.0","12.0","16.0","20.0"],"group":"None","version":"v1.1.0"}],"interpreted":true,"name":"SS13.19B","coreAzi":64,"coreDip":29,"bedStrike":236,"bedDip":18,"data":[{"visible":true,"include":false,"step":"0.0","x":-567.9809523809524,"y":-894.1809523809524,"z":193.93333333333334,"a95":"0.99","info":"09/10/2014 at 16:26:07"},{"visible":true,"include":true,"step":"4.0","x":-256.2857142857143,"y":-815.7523809523809,"z":8.885333333333334,"a95":"0.99","info":"09/10/2014 at 16:26:07"},{"visible":true,"include":true,"step":"8.0","x":-36.78095238095238,"y":-616.4380952380952,"z":-337.48571428571427,"a95":"0.99","info":"09/10/2014 at 16:26:07"},{"visible":true,"include":true,"step":"12.0","x":128.9904761904762,"y":-412.8095238095238,"z":-532.0761904761905,"a95":"0.99","info":"09/10/2014 at 16:26:07"},{"visible":true,"include":true,"step":"16.0","x":184.9047619047619,"y":-264.1142857142857,"z":-748.1238095238095,"a95":"0.99","info":"09/10/2014 at 16:26:07"},{"visible":true,"include":true,"step":"20.0","x":330.8666666666667,"y":-117.37142857142858,"z":-842.6190476190476,"a95":"0.99","info":"09/10/2014 at 16:26:07"},{"visible":true,"include":false,"step":"25.0","x":479.152380952381,"y":-98.12380952380951,"z":-794.7047619047619,"a95":"0.99","info":"09/10/2014 at 16:26:07"},{"visible":true,"include":false,"step":"30.0","x":567.1238095238095,"y":39.336190476190474,"z":-907.5714285714286,"a95":"0.99","info":"09/10/2014 at 16:26:07"},{"visible":true,"include":false,"step":"35.0","x":479.0952380952381,"y":-86.63142857142857,"z":-979.4285714285714,"a95":"0.99","info":"09/10/2014 at 16:26:07"},{"visible":true,"include":false,"step":"40.0","x":578.6571428571428,"y":-115.07619047619048,"z":-1030.7619047619048,"a95":"0.99","info":"09/10/2014 at 16:26:07"},{"visible":true,"include":false,"step":"45.0","x":558.7619047619048,"y":-56.23904761904762,"z":-972,"a95":"0.99","info":"09/10/2014 at 16:26:07"},{"visible":true,"include":false,"step":"50.0","x":315.5809523809524,"y":27.58761904761905,"z":-1013.047619047619,"a95":"0.99","info":"09/10/2014 at 16:26:07"},{"visible":true,"include":false,"step":"60.0","x":362.49523809523805,"y":216.0857142857143,"z":-955.6190476190476,"a95":"0.99","info":"09/10/2014 at 16:26:07"},{"visible":true,"include":false,"step":"70.0","x":524.3428571428572,"y":137.24761904761903,"z":-1038.2857142857142,"a95":"0.99","info":"09/10/2014 at 16:26:07"},{"visible":false,"include":false,"step":"80.0","x":396.81904761904764,"y":6.552952380952381,"z":-960.5714285714286,"a95":"0.99","info":"09/10/2014 at 16:26:07"},{"visible":false,"include":false,"step":"90.0","x":425.39047619047625,"y":150.01904761904763,"z":-694.4095238095239,"a95":"0.99","info":"09/10/2014 at 16:26:07"},{"visible":false,"include":false,"step":"100.0","x":477.0571428571429,"y":-6.264857142857143,"z":-650,"a95":"0.99","info":"09/10/2014 at 16:26:07"}],"demagType":"Unknown","patch":1.1,"format":"Unknown","strat":null}]
