# Supplementary material for: Paleomagnetic constraints on the timing and distribution of Cenozoic rotations in Central and Eastern Anatolia
Source: Copernicus journal article supplement (doi:10.5194/se-9-295-2018), 2018-03-21
Supplement: Supplementary file 2 [file se-9-295-2018-supplement.zip › se-2017-66_DATA_dir files/dir files Sivas/SS14.dir]

[{"version":"v1.1.0","exported":"2017-05-22T12:12:50.519Z","info":"","GEO":[],"TECT":[],"interpreted":false,"name":"SS14.1A","coreAzi":170,"coreDip":46,"bedStrike":259,"bedDip":32,"data":[{"visible":true,"include":false,"step":"20","x":-489.5238095238095,"y":-42.857142857142854,"z":64.0952380952381,"a95":"2","info":"\"14-10-20\" at \"16:01\""},{"visible":true,"include":false,"step":"100","x":-303.5238095238095,"y":-51.04761904761905,"z":61.142857142857146,"a95":"2.5","info":"\"14-10-20\" at \"18:50\""},{"visible":true,"include":false,"step":"150","x":-199.71428571428572,"y":-21.80952380952381,"z":65.9047619047619,"a95":"3","info":"\"14-10-20\" at \"21:56\""},{"visible":true,"include":false,"step":"180","x":-147.42857142857142,"y":1.7142857142857142,"z":-3.142857142857143,"a95":"4.3","info":"\"14-10-21\" at \"00:49\""},{"visible":true,"include":false,"step":"210","x":-136,"y":-16.666666666666668,"z":17.047619047619047,"a95":"6.3","info":"\"14-10-21\" at \"16:57\""},{"visible":true,"include":false,"step":"240","x":-131.42857142857142,"y":-26.285714285714285,"z":-41.80952380952381,"a95":"5.2","info":"\"14-10-21\" at \"19:56\""},{"visible":true,"include":false,"step":"270","x":-57.23809523809524,"y":-67.80952380952381,"z":53.80952380952381,"a95":"9.3","info":"\"14-10-21\" at \"23:00\""},{"visible":true,"include":false,"step":"290","x":-199.33333333333334,"y":36.38095238095238,"z":-42.095238095238095,"a95":"9.1","info":"\"14-10-22\" at \"15:29\""},{"visible":true,"include":false,"step":"310","x":-127.61904761904762,"y":9.238095238095237,"z":84.19047619047619,"a95":"14.7","info":"\"14-10-22\" at \"18:16\""},{"visible":true,"include":false,"step":"330","x":-190.47619047619048,"y":28.571428571428573,"z":-23.238095238095237,"a95":"9.7","info":"\"14-10-22\" at \"21:27\""},{"visible":true,"include":false,"step":"350","x":-170.85714285714286,"y":-53.04761904761905,"z":36.57142857142857,"a95":"12.6","info":"\"14-10-23\" at \"15:42\""},{"visible":true,"include":false,"step":"370","x":-237.33333333333334,"y":18.38095238095238,"z":-14.571428571428571,"a95":"11.5","info":"\"14-10-23\" at \"18:41\""},{"visible":true,"include":false,"step":"400","x":-93.23809523809524,"y":19.714285714285715,"z":12.952380952380953,"a95":"38.2","info":"\"14-10-23\" at \"21:40\""}],"demagType":"Unknown","patch":1.1,"format":"Unknown","strat":null},{"version":"v1.1.0","exported":"2017-05-22T12:12:50.519Z","info":"","GEO":[],"TECT":[],"interpreted":false,"name":"SS14.2A","coreAzi":166,"coreDip":54,"bedStrike":259,"bedDip":32,"data":[{"visible":true,"include":false,"step":"20","x":-637.9047619047619,"y":-114.19047619047619,"z":979.9047619047619,"a95":"2.7","info":"\"14-10-13\" at \"16:23\""},{"visible":true,"include":false,"step":"100","x":-311.5238095238095,"y":-37.714285714285715,"z":323.42857142857144,"a95":"3","info":"\"14-10-13\" at \"19:20\""},{"visible":true,"include":false,"step":"150","x":-220.76190476190476,"y":-33.904761904761905,"z":250.85714285714286,"a95":"2.9","info":"\"14-10-13\" at \"22:46\""},{"visible":true,"include":false,"step":"180","x":-181.8095238095238,"y":-11.047619047619047,"z":182.0952380952381,"a95":"3.3","info":"\"14-10-14\" at \"15:56\""},{"visible":true,"include":false,"step":"210","x":-154.38095238095238,"y":9.428571428571429,"z":154.47619047619048,"a95":"3","info":"\"14-10-14\" at \"19:04\""},{"visible":true,"include":false,"step":"240","x":-148.28571428571428,"y":-22.761904761904763,"z":179.8095238095238,"a95":"5.5","info":"\"14-10-14\" at \"22:10\""},{"visible":true,"include":false,"step":"270","x":-165.04761904761904,"y":-29.80952380952381,"z":130,"a95":"7.8","info":"\"14-10-15\" at \"16:03\""},{"visible":true,"include":false,"step":"290","x":-174.47619047619048,"y":28,"z":51.904761904761905,"a95":"12.2","info":"\"14-10-15\" at \"19:07\""},{"visible":true,"include":false,"step":"310","x":-164.57142857142858,"y":-4,"z":29.904761904761905,"a95":"10.9","info":"\"14-10-15\" at \"22:26\""},{"visible":true,"include":false,"step":"330","x":-171.14285714285714,"y":-14.285714285714286,"z":30.666666666666668,"a95":"13.9","info":"\"14-10-16\" at \"15:48\""},{"visible":true,"include":false,"step":"350","x":-101.04761904761905,"y":-49.333333333333336,"z":148.85714285714286,"a95":"13.3","info":"\"14-10-16\" at \"19:39\""},{"visible":true,"include":false,"step":"370","x":-180,"y":4.761904761904762,"z":39.904761904761905,"a95":"16.9","info":"\"14-10-16\" at \"22:48\""},{"visible":true,"include":false,"step":"400","x":-106.28571428571429,"y":17.80952380952381,"z":72.47619047619048,"a95":"29.1","info":"\"14-10-17\" at \"14:25\""},{"visible":true,"include":false,"step":"420","x":-154.66666666666666,"y":214.1904761904762,"z":-59.904761904761905,"a95":"16.6","info":"\"14-10-17\" at \"17:18\""}],"demagType":"Unknown","patch":1.1,"format":"Unknown","strat":null},{"version":"v1.1.0","exported":"2017-05-22T12:12:50.519Z","info":"7","GEO":[{"dec":37.79996976428026,"inc":-8.152224642249651,"MAD":15.551562304131037,"cm":[-1.0150610510858574e-15,-1.3534147347811431e-15,0],"intensity":390.289729396848,"type":"GC","origin":false,"forced":true,"remark":"","nSteps":7,"minStep":"4.0","maxStep":"30.0","steps":["4.0","8.0","12.0","16.0","20.0","25.0","30.0"],"group":"None"}],"TECT":[{"dec":46.31900852838771,"inc":-27.760808172114473,"MAD":15.55156230413132,"cm":[-1.860945260324072e-15,1.1165671561944431e-14,-6.767073673905716e-16],"intensity":390.289729396848,"type":"GC","origin":false,"forced":true,"remark":"","nSteps":7,"minStep":"4.0","maxStep":"30.0","steps":["4.0","8.0","12.0","16.0","20.0","25.0","30.0"],"group":"None"}],"interpreted":true,"name":"SS14.3A","coreAzi":160,"coreDip":62,"bedStrike":259,"bedDip":32,"data":[{"visible":true,"include":false,"step":"0.0","x":-296.0952380952381,"y":-1.9905714285714287,"z":214.63809523809522,"a95":"0.99","info":"09/10/2014 at 16:26:07"},{"visible":true,"include":true,"step":"4.0","x":-212.97142857142856,"y":-17.214285714285715,"z":241.51428571428573,"a95":"0.99","info":"09/10/2014 at 16:26:07"},{"visible":true,"include":true,"step":"8.0","x":-143.32380952380953,"y":-21.102857142857143,"z":193.2095238095238,"a95":"0.99","info":"09/10/2014 at 16:26:07"},{"visible":true,"include":true,"step":"12.0","x":-87.6952380952381,"y":2.2163809523809523,"z":145.46666666666667,"a95":"0.99","info":"09/10/2014 at 16:26:07"},{"visible":true,"include":true,"step":"16.0","x":-54.60952380952381,"y":-6.692285714285715,"z":93.89142857142858,"a95":"0.99","info":"09/10/2014 at 16:26:07"},{"visible":true,"include":true,"step":"20.0","x":-16.01047619047619,"y":-38.19904761904762,"z":88.16666666666667,"a95":"0.99","info":"09/10/2014 at 16:26:07"},{"visible":true,"include":true,"step":"25.0","x":-21.99238095238095,"y":-31.096190476190475,"z":90.86666666666667,"a95":"0.99","info":"09/10/2014 at 16:26:07"},{"visible":true,"include":true,"step":"30.0","x":-0.6369238095238096,"y":-37.820952380952384,"z":80.46190476190476,"a95":"0.99","info":"09/10/2014 at 16:26:07"},{"visible":true,"include":false,"step":"35.0","x":-35.90857142857143,"y":-19.022857142857145,"z":65.02380952380952,"a95":"0.99","info":"09/10/2014 at 16:26:07"},{"visible":true,"include":false,"step":"40.0","x":4.892857142857143,"y":2.9715238095238097,"z":49.19523809523809,"a95":"0.99","info":"09/10/2014 at 16:26:07"},{"visible":true,"include":false,"step":"45.0","x":-13.769523809523811,"y":-4.699142857142857,"z":29.818095238095236,"a95":"0.99","info":"09/10/2014 at 16:26:07"},{"visible":true,"include":false,"step":"50.0","x":-38.521904761904764,"y":-26.49809523809524,"z":45.30095238095238,"a95":"0.99","info":"09/10/2014 at 16:26:07"},{"visible":true,"include":false,"step":"60.0","x":-60.50952380952381,"y":-47.82857142857143,"z":71.19714285714286,"a95":"0.99","info":"09/10/2014 at 16:26:07"},{"visible":true,"include":false,"step":"70.0","x":-49.607619047619046,"y":-25.700000000000003,"z":55.22666666666667,"a95":"0.99","info":"09/10/2014 at 16:26:07"},{"visible":true,"include":false,"step":"80.0","x":208.7047619047619,"y":-74.11142857142856,"z":83.96571428571428,"a95":"0.99","info":"09/10/2014 at 16:26:07"},{"visible":true,"include":false,"step":"90.0","x":-32.52285714285714,"y":-30.707619047619048,"z":18.228571428571428,"a95":"0.99","info":"09/10/2014 at 16:26:07"},{"visible":true,"include":false,"step":"100.0","x":-32.65142857142857,"y":-0.955904761904762,"z":79.9857142857143,"a95":"0.99","info":"09/10/2014 at 16:26:07"}],"demagType":"Unknown","patch":1.1,"format":"Unknown","strat":null},{"version":"v1.1.0","exported":"2017-05-22T12:12:50.519Z","info":"3","GEO":[],"TECT":[],"interpreted":false,"name":"SS14.4A","coreAzi":106,"coreDip":25,"bedStrike":259,"bedDip":32,"data":[{"visible":true,"include":false,"step":"0.0","x":-213.55238095238096,"y":-168.36190476190475,"z":67.60190476190476,"a95":"0.99","info":"30/01/2015 at 08:29:19"},{"visible":true,"include":false,"step":"10.0","x":-119.0952380952381,"y":-136.0857142857143,"z":-2.497142857142857,"a95":"0.99","info":"30/01/2015 at 08:29:19"},{"visible":true,"include":false,"step":"15.0","x":-121.54285714285714,"y":-110.05714285714285,"z":-14.827619047619047,"a95":"0.99","info":"30/01/2015 at 08:29:19"},{"visible":true,"include":false,"step":"20.0","x":-97.87619047619049,"y":-87.78666666666666,"z":-41.67809523809524,"a95":"0.99","info":"30/01/2015 at 08:29:19"},{"visible":true,"include":false,"step":"23.0","x":-89.12,"y":-94.05428571428573,"z":-17.614285714285714,"a95":"0.99","info":"30/01/2015 at 08:29:19"},{"visible":true,"include":false,"step":"25.0","x":-105.37142857142858,"y":-127.27619047619048,"z":-13.903809523809525,"a95":"0.99","info":"30/01/2015 at 08:29:19"},{"visible":true,"include":false,"step":"30.0","x":-80.20571428571428,"y":-30.74095238095238,"z":-2.976857142857143,"a95":"0.99","info":"30/01/2015 at 08:29:19"},{"visible":true,"include":false,"step":"33.0","x":-57.915238095238095,"y":-97.20952380952382,"z":-18.284761904761904,"a95":"0.99","info":"30/01/2015 at 08:29:19"},{"visible":true,"include":false,"step":"35.0","x":-51.82380952380952,"y":-82.61904761904762,"z":-30.237142857142857,"a95":"0.99","info":"30/01/2015 at 08:29:19"},{"visible":true,"include":false,"step":"40.0","x":-46.37714285714286,"y":-122.57142857142857,"z":-13.161904761904761,"a95":"0.99","info":"30/01/2015 at 08:29:19"},{"visible":true,"include":false,"step":"45.0","x":-63.68,"y":-82.50285714285714,"z":16.73333333333333,"a95":"0.99","info":"30/01/2015 at 08:29:19"},{"visible":true,"include":false,"step":"50.0","x":-98.98095238095237,"y":-79.49428571428572,"z":-56.70095238095238,"a95":"0.99","info":"30/01/2015 at 08:29:19"},{"visible":true,"include":false,"step":"60.0","x":-46.049523809523805,"y":-104.4952380952381,"z":43.15904761904762,"a95":"0.99","info":"30/01/2015 at 08:29:19"},{"visible":true,"include":false,"step":"70.0","x":-32.375238095238096,"y":-149.83809523809524,"z":-15.649523809523808,"a95":"0.99","info":"30/01/2015 at 08:29:19"}],"demagType":"Unknown","patch":1.1,"format":"Unknown","strat":null},{"version":"v1.1.0","exported":"2017-05-22T12:12:50.519Z","info":"","GEO":[],"TECT":[],"interpreted":false,"name":"SS14.6A","coreAzi":142,"coreDip":75,"bedStrike":259,"bedDip":32,"data":[{"visible":true,"include":false,"step":"20","x":-399.5238095238095,"y":-145.9047619047619,"z":442.6666666666667,"a95":"2.7","info":"\"14-10-13\" at \"16:25\""},{"visible":true,"include":false,"step":"100","x":-197.71428571428572,"y":-103.71428571428571,"z":258.95238095238096,"a95":"3.2","info":"\"14-10-13\" at \"19:21\""},{"visible":true,"include":false,"step":"150","x":-140.95238095238096,"y":-87.04761904761905,"z":194.47619047619048,"a95":"3.3","info":"\"14-10-13\" at \"22:48\""},{"visible":true,"include":false,"step":"180","x":-114.76190476190476,"y":-55.333333333333336,"z":162.47619047619048,"a95":"3.1","info":"\"14-10-14\" at \"15:57\""},{"visible":true,"include":false,"step":"210","x":-97.71428571428571,"y":-51.523809523809526,"z":148.66666666666666,"a95":"3.5","info":"\"14-10-14\" at \"19:06\""},{"visible":true,"include":false,"step":"240","x":-82,"y":-56.38095238095238,"z":114.19047619047619,"a95":"3.8","info":"\"14-10-14\" at \"22:13\""},{"visible":true,"include":false,"step":"270","x":-63.61904761904762,"y":-53.333333333333336,"z":104.85714285714286,"a95":"4.9","info":"\"14-10-15\" at \"16:04\""},{"visible":true,"include":false,"step":"290","x":-39.00952380952381,"y":-14.628571428571428,"z":69.00952380952381,"a95":"5.4","info":"\"14-10-15\" at \"19:09\""},{"visible":true,"include":false,"step":"310","x":-68.28571428571429,"y":25.238095238095237,"z":68.19047619047619,"a95":"5.3","info":"\"14-10-15\" at \"22:28\""},{"visible":true,"include":false,"step":"330","x":-48.7047619047619,"y":3.961904761904762,"z":32.2,"a95":"10.3","info":"\"14-10-16\" at \"15:50\""},{"visible":true,"include":false,"step":"350","x":-37.51428571428571,"y":34.2,"z":32.904761904761905,"a95":"12.6","info":"\"14-10-16\" at \"19:41\""},{"visible":true,"include":false,"step":"370","x":-79.9047619047619,"y":31.523809523809526,"z":44.38095238095238,"a95":"8.7","info":"\"14-10-16\" at \"22:50\""},{"visible":true,"include":false,"step":"400","x":-22.39047619047619,"y":12.476190476190476,"z":43.31428571428572,"a95":"21.8","info":"\"14-10-17\" at \"14:27\""},{"visible":true,"include":false,"step":"420","x":-38.285714285714285,"y":31.714285714285715,"z":83.71428571428571,"a95":"16.8","info":"\"14-10-17\" at \"17:20\""}],"demagType":"Unknown","patch":1.1,"format":"Unknown","strat":null},{"version":"v1.1.0","exported":"2017-05-22T12:12:50.519Z","info":"4","GEO":[{"dec":122.24189639739916,"inc":-51.548597500514965,"MAD":9.495420705919162,"cm":[-2.7068294695622863e-15,-7.443781041296288e-15,0],"intensity":352.2862369825806,"type":"dir","forced":true,"remark":"","origin":false,"nSteps":7,"minStep":"23.0","maxStep":"45.0","steps":["23.0","25.0","30.0","33.0","35.0","40.0","45.0"],"group":"None"}],"TECT":[{"dec":138.73436678720998,"inc":-26.000696247770147,"MAD":9.495420705919173,"cm":[-1.556426944998315e-14,-1.2180732613030288e-14,1.691768418476429e-15],"intensity":352.2862369825806,"type":"dir","forced":true,"remark":"","origin":false,"nSteps":7,"minStep":"23.0","maxStep":"45.0","steps":["23.0","25.0","30.0","33.0","35.0","40.0","45.0"],"group":"None"}],"interpreted":true,"name":"SS14.8A","coreAzi":174,"coreDip":61,"bedStrike":259,"bedDip":32,"data":[{"visible":true,"include":false,"step":"0.0","x":71.28857142857143,"y":-36.28666666666667,"z":-1.2623809523809524,"a95":"0.99","info":"30/01/2015 at 08:29:19"},{"visible":true,"include":false,"step":"10.0","x":153.06666666666666,"y":-135.07619047619048,"z":-123.71428571428571,"a95":"0.99","info":"30/01/2015 at 08:29:19"},{"visible":true,"include":false,"step":"15.0","x":189.8190476190476,"y":-136.6952380952381,"z":-110.36190476190475,"a95":"0.99","info":"30/01/2015 at 08:29:19"},{"visible":true,"include":false,"step":"20.0","x":215.74285714285716,"y":-105.19047619047619,"z":-141.1904761904762,"a95":"0.99","info":"30/01/2015 at 08:29:19"},{"visible":true,"include":true,"step":"23.0","x":200.14285714285714,"y":-86.25333333333333,"z":-126.34285714285713,"a95":"0.99","info":"30/01/2015 at 08:29:19"},{"visible":true,"include":true,"step":"25.0","x":114.37142857142858,"y":-111.79047619047618,"z":-123.02857142857142,"a95":"0.99","info":"30/01/2015 at 08:29:19"},{"visible":true,"include":true,"step":"30.0","x":141.63809523809525,"y":-73.5657142857143,"z":-90.29523809523809,"a95":"0.99","info":"30/01/2015 at 08:29:19"},{"visible":true,"include":true,"step":"33.0","x":138.77142857142857,"y":-96.86666666666667,"z":-70.91809523809523,"a95":"0.99","info":"30/01/2015 at 08:29:19"},{"visible":true,"include":true,"step":"35.0","x":128.2952380952381,"y":-119.4952380952381,"z":-89.32380952380952,"a95":"0.99","info":"30/01/2015 at 08:29:19"},{"visible":true,"include":true,"step":"40.0","x":57.957142857142856,"y":-78.27428571428571,"z":-64.66761904761904,"a95":"0.99","info":"30/01/2015 at 08:29:19"},{"visible":true,"include":true,"step":"45.0","x":82.24095238095238,"y":-46.03619047619048,"z":-37.56095238095238,"a95":"0.99","info":"30/01/2015 at 08:29:19"},{"visible":false,"include":false,"step":"50.0","x":-15.729523809523808,"y":-53.478095238095236,"z":-48.96190476190476,"a95":"0.99","info":"30/01/2015 at 08:29:19"},{"visible":false,"include":false,"step":"60.0","x":-30.802857142857142,"y":-25.80761904761905,"z":1.084857142857143,"a95":"0.99","info":"30/01/2015 at 08:29:19"},{"visible":false,"include":false,"step":"70.0","x":-35.145714285714284,"y":-36.28095238095238,"z":39.794285714285714,"a95":"0.99","info":"30/01/2015 at 08:29:19"}],"demagType":"Unknown","patch":1.1,"format":"Unknown","strat":null},{"version":"v1.1.0","exported":"2017-05-22T12:12:50.519Z","info":"8","GEO":[{"dec":2.836960590397041,"inc":-27.73056908747849,"MAD":4.932268152055398,"cm":[-2.2648549702353193e-14,-2.6645352591003757e-15,0],"intensity":162.09925653907715,"type":"GC","origin":false,"forced":true,"remark":"","nSteps":7,"minStep":"4.0","maxStep":"30.0","steps":["4.0","8.0","12.0","16.0","20.0","25.0","30.0"],"group":"None","version":"v1.1.0"}],"TECT":[{"dec":12.69837733270856,"inc":-58.21740283334916,"MAD":4.932268152055388,"cm":[-6.661338147750939e-15,-3.552713678800501e-15,8.659739592076221e-15],"intensity":162.09925653907715,"type":"GC","origin":false,"forced":true,"remark":"","nSteps":7,"minStep":"4.0","maxStep":"30.0","steps":["4.0","8.0","12.0","16.0","20.0","25.0","30.0"],"group":"None","version":"v1.1.0"}],"interpreted":true,"name":"SS14.8B","coreAzi":174,"coreDip":61,"bedStrike":259,"bedDip":32,"data":[{"visible":true,"include":false,"step":"0.0","x":-108.16190476190476,"y":-91.84285714285714,"z":39.0152380952381,"a95":"0.99","info":"09/10/2014 at 16:26:07"},{"visible":true,"include":true,"step":"4.0","x":-40.76380952380952,"y":-87.57333333333334,"z":35.494285714285716,"a95":"0.99","info":"09/10/2014 at 16:26:07"},{"visible":true,"include":true,"step":"8.0","x":12.03047619047619,"y":-83.77619047619048,"z":12.37047619047619,"a95":"0.99","info":"09/10/2014 at 16:26:07"},{"visible":true,"include":true,"step":"12.0","x":43.049523809523805,"y":-73.60380952380953,"z":-13.006666666666666,"a95":"0.99","info":"09/10/2014 at 16:26:07"},{"visible":true,"include":true,"step":"16.0","x":68.73809523809524,"y":-70.8952380952381,"z":-32.52095238095238,"a95":"0.99","info":"09/10/2014 at 16:26:07"},{"visible":true,"include":true,"step":"20.0","x":77.78190476190477,"y":-86.14666666666666,"z":-41.75238095238095,"a95":"0.99","info":"09/10/2014 at 16:26:07"},{"visible":true,"include":true,"step":"25.0","x":74.29142857142857,"y":-47.89809523809524,"z":-42.2552380952381,"a95":"0.99","info":"09/10/2014 at 16:26:07"},{"visible":true,"include":true,"step":"30.0","x":54.44,"y":-73.24666666666667,"z":-20.459047619047617,"a95":"0.99","info":"09/10/2014 at 16:26:07"},{"visible":true,"include":false,"step":"35.0","x":29.2647619047619,"y":-57.417142857142856,"z":-24.463809523809523,"a95":"0.99","info":"09/10/2014 at 16:26:07"},{"visible":true,"include":false,"step":"40.0","x":21.078095238095237,"y":-78.32190476190476,"z":-40.45904761904762,"a95":"0.99","info":"09/10/2014 at 16:26:07"},{"visible":true,"include":false,"step":"45.0","x":38.38761904761905,"y":-38.272380952380956,"z":-1.0822857142857143,"a95":"0.99","info":"09/10/2014 at 16:26:07"},{"visible":false,"include":false,"step":"50.0","x":4.104380952380952,"y":-39.42857142857143,"z":-16.956190476190475,"a95":"0.99","info":"09/10/2014 at 16:26:07"},{"visible":false,"include":false,"step":"60.0","x":-10.27142857142857,"y":-15.248571428571429,"z":-30.565714285714286,"a95":"0.99","info":"09/10/2014 at 16:26:07"},{"visible":false,"include":false,"step":"70.0","x":45.082857142857144,"y":15.022857142857143,"z":-12.294285714285715,"a95":"0.99","info":"09/10/2014 at 16:26:07"},{"visible":false,"include":false,"step":"80.0","x":-113.8952380952381,"y":-8.544380952380951,"z":27.076190476190476,"a95":"0.99","info":"09/10/2014 at 16:26:07"},{"visible":false,"include":false,"step":"90.0","x":-45.20095238095238,"y":-9.713333333333333,"z":-10.812380952380952,"a95":"0.99","info":"09/10/2014 at 16:26:07"},{"visible":false,"include":false,"step":"100.0","x":-3.4973333333333336,"y":28.862857142857145,"z":7.109142857142857,"a95":"0.99","info":"09/10/2014 at 16:26:07"}],"demagType":"Unknown","patch":1.1,"format":"Unknown","strat":null},{"version":"v1.1.0","exported":"2017-05-22T12:12:50.519Z","info":"","GEO":[],"TECT":[],"interpreted":false,"name":"SS14.9A","coreAzi":177,"coreDip":64,"bedStrike":259,"bedDip":32,"data":[{"visible":true,"include":false,"step":"20","x":-169.71428571428572,"y":-134.95238095238096,"z":-102.95238095238095,"a95":"3.2","info":"\"14-10-13\" at \"16:27\""},{"visible":true,"include":false,"step":"100","x":22.285714285714285,"y":-127.9047619047619,"z":-113.80952380952381,"a95":"4.9","info":"\"14-10-13\" at \"19:23\""},{"visible":true,"include":false,"step":"150","x":57.904761904761905,"y":-96.0952380952381,"z":-114.28571428571429,"a95":"5.1","info":"\"14-10-13\" at \"22:50\""},{"visible":true,"include":false,"step":"180","x":63.904761904761905,"y":-57.142857142857146,"z":-131.14285714285714,"a95":"5","info":"\"14-10-14\" at \"15:59\""},{"visible":true,"include":false,"step":"210","x":48.857142857142854,"y":-48.666666666666664,"z":-119.42857142857143,"a95":"5.8","info":"\"14-10-14\" at \"19:07\""},{"visible":true,"include":false,"step":"240","x":26.857142857142858,"y":-60,"z":-93.04761904761905,"a95":"6.9","info":"\"14-10-14\" at \"22:15\""},{"visible":true,"include":false,"step":"270","x":1.5238095238095237,"y":-113.04761904761905,"z":-74.0952380952381,"a95":"5.4","info":"\"14-10-15\" at \"16:06\""},{"visible":true,"include":false,"step":"290","x":50.285714285714285,"y":10.095238095238095,"z":-167.52380952380952,"a95":"6.3","info":"\"14-10-15\" at \"19:11\""},{"visible":true,"include":false,"step":"310","x":-36.25714285714285,"y":-42.6,"z":-50.523809523809526,"a95":"12.8","info":"\"14-10-15\" at \"22:30\""},{"visible":true,"include":false,"step":"330","x":52.95238095238095,"y":-15.904761904761905,"z":-104.66666666666667,"a95":"8.900001","info":"\"14-10-16\" at \"15:52\""},{"visible":true,"include":false,"step":"350","x":45.266666666666666,"y":-53.828571428571436,"z":-39.42857142857143,"a95":"14.4","info":"\"14-10-16\" at \"19:43\""},{"visible":true,"include":false,"step":"370","x":-18.142857142857142,"y":16.847619047619048,"z":-90.11428571428571,"a95":"20.6","info":"\"14-10-16\" at \"22:52\""},{"visible":true,"include":false,"step":"400","x":19.495238095238093,"y":-76.08571428571429,"z":-14.533333333333333,"a95":"28.4","info":"\"14-10-17\" at \"14:29\""}],"demagType":"Unknown","patch":1.1,"format":"Unknown","strat":null},{"version":"v1.1.0","exported":"2017-05-22T12:12:50.519Z","info":"5","GEO":[{"dec":341.6517923370419,"inc":-44.43291192814897,"MAD":3.5337533040183455,"cm":[-2.9753977059954195e-14,1.4210854715202004e-14,0],"intensity":405.4089252278092,"type":"GC","origin":false,"forced":true,"remark":"","nSteps":4,"minStep":"10.0","maxStep":"23.0","steps":["10.0","15.0","20.0","23.0"],"group":"None","version":"v1.1.0"}],"TECT":[{"dec":327.30948854090235,"inc":-75.69361084183454,"MAD":3.5337533040183513,"cm":[-1.8207657603852567e-14,3.552713678800501e-14,1.3433698597964394e-14],"intensity":405.4089252278091,"type":"GC","origin":false,"forced":true,"remark":"","nSteps":4,"minStep":"10.0","maxStep":"23.0","steps":["10.0","15.0","20.0","23.0"],"group":"None","version":"v1.1.0"}],"interpreted":true,"name":"SS14.10A","coreAzi":178,"coreDip":66,"bedStrike":259,"bedDip":32,"data":[{"visible":true,"include":false,"step":"0.0","x":-517.3809523809524,"y":-133.55238095238096,"z":160.06666666666666,"a95":"0.99","info":"30/01/2015 at 08:29:19"},{"visible":true,"include":true,"step":"10.0","x":-244.73333333333332,"y":-182.9714285714286,"z":51.526666666666664,"a95":"0.99","info":"30/01/2015 at 08:29:19"},{"visible":true,"include":true,"step":"15.0","x":-104.48571428571428,"y":-213.93333333333334,"z":-9.539047619047619,"a95":"0.99","info":"30/01/2015 at 08:29:19"},{"visible":true,"include":true,"step":"20.0","x":-19.776190476190475,"y":-167.9142857142857,"z":-34.60285714285714,"a95":"0.99","info":"30/01/2015 at 08:29:19"},{"visible":true,"include":true,"step":"23.0","x":-9.101142857142857,"y":-131.23809523809524,"z":-16.931428571428572,"a95":"0.99","info":"30/01/2015 at 08:29:19"},{"visible":true,"include":false,"step":"25.0","x":-98.41904761904763,"y":-137.63809523809525,"z":-25.115238095238094,"a95":"0.99","info":"30/01/2015 at 08:29:19"},{"visible":true,"include":false,"step":"30.0","x":-56.44095238095238,"y":-79.56380952380952,"z":-27.6,"a95":"0.99","info":"30/01/2015 at 08:29:19"},{"visible":true,"include":false,"step":"33.0","x":-12.940000000000001,"y":-89.30857142857143,"z":-4.5906666666666665,"a95":"0.99","info":"30/01/2015 at 08:29:19"},{"visible":true,"include":false,"step":"35.0","x":-21.445714285714285,"y":-127.92380952380952,"z":1.9493333333333334,"a95":"0.99","info":"30/01/2015 at 08:29:19"},{"visible":true,"include":false,"step":"40.0","x":-17.06095238095238,"y":-58.96476190476191,"z":4.42504761904762,"a95":"0.99","info":"30/01/2015 at 08:29:19"},{"visible":true,"include":false,"step":"45.0","x":-40.537142857142854,"y":-26.246666666666663,"z":45.561904761904756,"a95":"0.99","info":"30/01/2015 at 08:29:19"},{"visible":true,"include":false,"step":"50.0","x":-89.49904761904762,"y":-48.35142857142857,"z":42.94952380952381,"a95":"0.99","info":"30/01/2015 at 08:29:19"},{"visible":true,"include":false,"step":"60.0","x":-36.67714285714286,"y":6.141238095238096,"z":86.62380952380951,"a95":"0.99","info":"30/01/2015 at 08:29:19"},{"visible":true,"include":false,"step":"70.0","x":-119.81904761904761,"y":24.462857142857143,"z":59.831428571428575,"a95":"0.99","info":"30/01/2015 at 08:29:19"}],"demagType":"Unknown","patch":1.1,"format":"Unknown","strat":null},{"version":"v1.1.0","exported":"2017-05-22T12:12:50.519Z","info":"1","GEO":[{"dec":59.24728061956063,"inc":-0.9821346589909947,"MAD":22.928589038971076,"cm":[-1.3534147347811431e-15,3.552713678800501e-15,0],"intensity":289.72454935327653,"type":"GC","origin":false,"forced":true,"remark":"","nSteps":6,"minStep":"4.0","maxStep":"25.0","steps":["4.0","8.0","12.0","16.0","20.0","25.0"],"group":"None"}],"TECT":[{"dec":62.570615204860985,"inc":-11.163069628463825,"MAD":22.928589038971143,"cm":[-8.797195776077431e-15,-5.582835780972216e-15,2.7068294695622863e-15],"intensity":289.72454935327664,"type":"GC","origin":false,"forced":true,"remark":"","nSteps":6,"minStep":"4.0","maxStep":"25.0","steps":["4.0","8.0","12.0","16.0","20.0","25.0"],"group":"None"}],"interpreted":true,"name":"SS14.11A","coreAzi":192,"coreDip":38,"bedStrike":259,"bedDip":32,"data":[{"visible":true,"include":false,"step":"0.0","x":-108.82857142857144,"y":-129.85714285714286,"z":266.3904761904762,"a95":"0.99","info":"09/10/2014 at 21:54:39"},{"visible":true,"include":true,"step":"4.0","x":-68.20857142857143,"y":-100.52380952380952,"z":194.24761904761903,"a95":"0.99","info":"09/10/2014 at 21:54:39"},{"visible":true,"include":true,"step":"8.0","x":-52.62,"y":-76.61238095238095,"z":143.52380952380952,"a95":"0.99","info":"09/10/2014 at 21:54:39"},{"visible":true,"include":true,"step":"12.0","x":-3.2965714285714283,"y":-95.0552380952381,"z":109.21904761904761,"a95":"0.99","info":"09/10/2014 at 21:54:39"},{"visible":true,"include":true,"step":"16.0","x":14.887619047619047,"y":-65.5304761904762,"z":70.31428571428572,"a95":"0.99","info":"09/10/2014 at 21:54:39"},{"visible":true,"include":true,"step":"20.0","x":13.502857142857144,"y":-73.95619047619047,"z":70.7,"a95":"0.99","info":"09/10/2014 at 21:54:39"},{"visible":true,"include":true,"step":"25.0","x":32.95238095238095,"y":-25.87809523809524,"z":64.05428571428573,"a95":"0.99","info":"09/10/2014 at 21:54:39"},{"visible":true,"include":false,"step":"30.0","x":37.51714285714286,"y":-47.85142857142857,"z":39.843809523809526,"a95":"0.99","info":"09/10/2014 at 21:54:39"},{"visible":true,"include":false,"step":"35.0","x":-4.672571428571429,"y":-53.36952380952381,"z":49.028571428571425,"a95":"0.99","info":"09/10/2014 at 21:54:39"},{"visible":true,"include":false,"step":"40.0","x":30.651428571428568,"y":-29.60380952380952,"z":31.79047619047619,"a95":"0.99","info":"09/10/2014 at 21:54:39"},{"visible":true,"include":false,"step":"45.0","x":25.31238095238095,"y":-28.380000000000003,"z":39.43333333333334,"a95":"0.99","info":"09/10/2014 at 21:54:39"},{"visible":true,"include":false,"step":"50.0","x":29.59142857142857,"y":-36.73619047619048,"z":36.85619047619048,"a95":"0.99","info":"09/10/2014 at 21:54:39"},{"visible":true,"include":false,"step":"60.0","x":27.406666666666666,"y":4.306380952380953,"z":39.81047619047619,"a95":"0.99","info":"09/10/2014 at 21:54:39"},{"visible":true,"include":false,"step":"70.0","x":-39.93904761904762,"y":21.717142857142857,"z":28.863809523809522,"a95":"0.99","info":"09/10/2014 at 21:54:39"},{"visible":true,"include":false,"step":"80.0","x":10.661904761904761,"y":18.595238095238095,"z":35.254285714285714,"a95":"0.99","info":"09/10/2014 at 21:54:39"},{"visible":true,"include":false,"step":"90.0","x":-29.376190476190477,"y":22.582857142857144,"z":57.57047619047619,"a95":"0.99","info":"09/10/2014 at 21:54:39"},{"visible":true,"include":false,"step":"100.0","x":8.105619047619047,"y":-15.470476190476191,"z":39.91047619047619,"a95":"0.99","info":"09/10/2014 at 21:54:39"}],"demagType":"Unknown","patch":1.1,"format":"Unknown","strat":null},{"version":"v1.1.0","exported":"2017-05-22T12:12:50.520Z","info":"2","GEO":[{"dec":4.4429412555428485,"inc":-33.499695454051476,"MAD":4.5109230998666225,"cm":[-7.66053886991358e-15,3.552713678800501e-15,0],"intensity":282.1871450589271,"type":"GC","origin":false,"forced":true,"remark":"","nSteps":5,"minStep":"4.0","maxStep":"25.0","steps":["4.0","8.0","12.0","20.0","25.0"],"group":"None","version":"v1.1.0"}],"TECT":[{"dec":18.707802440367345,"inc":-63.38090774388332,"MAD":4.510923099866843,"cm":[-1.5987211554602254e-14,-7.105427357601002e-15,7.993605777301127e-15],"intensity":282.1871450589272,"type":"GC","origin":false,"forced":true,"remark":"","nSteps":5,"minStep":"4.0","maxStep":"25.0","steps":["4.0","8.0","12.0","20.0","25.0"],"group":"None","version":"v1.1.0"}],"interpreted":true,"name":"SS14.12A","coreAzi":193,"coreDip":36,"bedStrike":259,"bedDip":32,"data":[{"visible":true,"include":false,"step":"0.0","x":-255.59047619047618,"y":-45.992380952380955,"z":35.04095238095238,"a95":"0.99","info":"09/10/2014 at 21:54:39"},{"visible":true,"include":true,"step":"4.0","x":-216.64761904761906,"y":-41.42952380952381,"z":2.7697142857142856,"a95":"0.99","info":"09/10/2014 at 21:54:39"},{"visible":true,"include":true,"step":"8.0","x":-168.66666666666666,"y":-29.377142857142854,"z":1.9556190476190476,"a95":"0.99","info":"09/10/2014 at 21:54:39"},{"visible":true,"include":true,"step":"12.0","x":-104.29523809523809,"y":-49.787619047619046,"z":1.7364761904761905,"a95":"0.99","info":"09/10/2014 at 21:54:39"},{"visible":true,"include":false,"step":"16.0","x":-69.58666666666666,"y":-46.126666666666665,"z":-25.85904761904762,"a95":"0.99","info":"09/10/2014 at 21:54:39"},{"visible":true,"include":true,"step":"20.0","x":-43.16095238095238,"y":-40.53238095238095,"z":-8.12095238095238,"a95":"0.99","info":"09/10/2014 at 21:54:39"},{"visible":true,"include":true,"step":"25.0","x":-37.294285714285714,"y":-81.5047619047619,"z":-8.270190476190477,"a95":"0.99","info":"09/10/2014 at 21:54:39"},{"visible":true,"include":false,"step":"30.0","x":-5.171142857142857,"y":-50.201904761904764,"z":-20.64,"a95":"0.99","info":"09/10/2014 at 21:54:39"},{"visible":true,"include":false,"step":"35.0","x":5.211714285714286,"y":-41.89142857142857,"z":-18.376190476190477,"a95":"0.99","info":"09/10/2014 at 21:54:39"},{"visible":true,"include":false,"step":"40.0","x":-19.281904761904762,"y":-18.16952380952381,"z":-9.734285714285713,"a95":"0.99","info":"09/10/2014 at 21:54:39"},{"visible":true,"include":false,"step":"45.0","x":-25.132380952380952,"y":-26.893333333333334,"z":-12.144761904761904,"a95":"0.99","info":"09/10/2014 at 21:54:39"},{"visible":true,"include":false,"step":"50.0","x":-13.60190476190476,"y":-57.45809523809523,"z":-19.45809523809524,"a95":"0.99","info":"09/10/2014 at 21:54:39"},{"visible":true,"include":false,"step":"60.0","x":-11.977142857142857,"y":-44.25238095238095,"z":3.6090476190476193,"a95":"0.99","info":"09/10/2014 at 21:54:39"},{"visible":true,"include":false,"step":"70.0","x":-44.69047619047619,"y":-37.24952380952381,"z":-2.2591428571428573,"a95":"0.99","info":"09/10/2014 at 21:54:39"},{"visible":true,"include":false,"step":"80.0","x":-188.71428571428572,"y":-101.34285714285713,"z":-64.9647619047619,"a95":"0.99","info":"09/10/2014 at 21:54:39"},{"visible":true,"include":false,"step":"90.0","x":55.91809523809523,"y":-59.27142857142857,"z":-48.16571428571429,"a95":"0.99","info":"09/10/2014 at 21:54:39"},{"visible":true,"include":false,"step":"100.0","x":52.00857142857143,"y":-66.12380952380951,"z":-26.100952380952382,"a95":"0.99","info":"09/10/2014 at 21:54:39"}],"demagType":"Unknown","patch":1.1,"format":"Unknown","strat":null},{"version":"v1.1.0","exported":"2017-05-22T12:12:50.520Z","info":"6","GEO":[{"dec":57.483692780773936,"inc":-6.020928629439509,"MAD":15.775888003867982,"cm":[-3.552713678800501e-15,-2.1316282072803006e-14,0],"intensity":641.8301883607194,"type":"GC","origin":false,"forced":true,"remark":"","nSteps":7,"minStep":"10.0","maxStep":"33.0","steps":["10.0","15.0","20.0","23.0","25.0","30.0","33.0"],"group":"None","version":"v1.1.0"}],"TECT":[{"dec":63.66345744282722,"inc":-16.39378960073884,"MAD":15.775888003867985,"cm":[-7.105427357601002e-15,-4.440892098500626e-14,-1.7763568394002505e-15],"intensity":641.8301883607195,"type":"GC","origin":false,"forced":true,"remark":"","nSteps":7,"minStep":"10.0","maxStep":"33.0","steps":["10.0","15.0","20.0","23.0","25.0","30.0","33.0"],"group":"None","version":"v1.1.0"}],"interpreted":true,"name":"SS14.13A","coreAzi":140,"coreDip":44,"bedStrike":259,"bedDip":32,"data":[{"visible":true,"include":false,"step":"0.0","x":-311.3904761904762,"y":160.53333333333333,"z":-483.95238095238096,"a95":"0.99","info":"30/01/2015 at 08:29:19"},{"visible":true,"include":true,"step":"10.0","x":137.46666666666667,"y":31.04380952380952,"z":-315.16190476190474,"a95":"0.99","info":"30/01/2015 at 08:29:19"},{"visible":true,"include":true,"step":"15.0","x":300.3333333333333,"y":18.145714285714284,"z":-184.92380952380952,"a95":"0.99","info":"30/01/2015 at 08:29:19"},{"visible":true,"include":true,"step":"20.0","x":327.48571428571427,"y":41.88952380952381,"z":-167.21904761904761,"a95":"0.99","info":"30/01/2015 at 08:29:19"},{"visible":true,"include":true,"step":"23.0","x":397.4761904761905,"y":68.07333333333334,"z":-130.41904761904763,"a95":"0.99","info":"30/01/2015 at 08:29:19"},{"visible":true,"include":true,"step":"25.0","x":255.7047619047619,"y":1.673904761904762,"z":-75.05714285714286,"a95":"0.99","info":"30/01/2015 at 08:29:19"},{"visible":true,"include":true,"step":"30.0","x":268.2761904761905,"y":103.35238095238095,"z":-80.78761904761905,"a95":"0.99","info":"30/01/2015 at 08:29:19"},{"visible":true,"include":true,"step":"33.0","x":405.83809523809526,"y":70.56666666666668,"z":-11.09142857142857,"a95":"0.99","info":"30/01/2015 at 08:29:19"},{"visible":true,"include":false,"step":"35.0","x":359.0761904761905,"y":-13.838095238095239,"z":-35.33714285714286,"a95":"0.99","info":"30/01/2015 at 08:29:19"},{"visible":true,"include":false,"step":"40.0","x":215.26666666666668,"y":93.34,"z":-118.86666666666666,"a95":"0.99","info":"30/01/2015 at 08:29:19"},{"visible":true,"include":false,"step":"45.0","x":368.6952380952381,"y":145.25714285714287,"z":48.14952380952381,"a95":"0.99","info":"30/01/2015 at 08:29:19"},{"visible":true,"include":false,"step":"50.0","x":266.77142857142854,"y":23.50761904761905,"z":-41.67809523809524,"a95":"0.99","info":"30/01/2015 at 08:29:19"},{"visible":true,"include":false,"step":"60.0","x":309.0857142857143,"y":193.2,"z":-15.16,"a95":"0.99","info":"30/01/2015 at 08:29:19"},{"visible":false,"include":false,"step":"70.0","x":280.447619047619,"y":177.1904761904762,"z":81.17904761904762,"a95":"0.99","info":"30/01/2015 at 08:29:19"}],"demagType":"Unknown","patch":1.1,"format":"Unknown","strat":null},{"version":"v1.1.0","exported":"2017-05-22T12:12:50.520Z","info":"7","GEO":[],"TECT":[],"interpreted":false,"name":"SS14.14A","coreAzi":135,"coreDip":38,"bedStrike":259,"bedDip":32,"data":[{"visible":true,"include":false,"step":"0.0","x":-512.1714285714286,"y":-14.595238095238095,"z":-63.65428571428571,"a95":"0.99","info":"30/01/2015 at 08:29:19"},{"visible":true,"include":false,"step":"10.0","x":-301.3904761904762,"y":-53.29428571428572,"z":-86.78857142857143,"a95":"0.99","info":"30/01/2015 at 08:29:19"},{"visible":true,"include":false,"step":"15.0","x":-237.65714285714287,"y":-89.43142857142857,"z":-52.49142857142857,"a95":"0.99","info":"30/01/2015 at 08:29:19"},{"visible":true,"include":false,"step":"20.0","x":-171.71428571428572,"y":-89.3,"z":-53.97904761904762,"a95":"0.99","info":"30/01/2015 at 08:29:19"},{"visible":true,"include":false,"step":"23.0","x":-129.52380952380952,"y":-77.40380952380953,"z":-50.97428571428571,"a95":"0.99","info":"30/01/2015 at 08:29:19"},{"visible":true,"include":true,"step":"25.0","x":-256.87619047619046,"y":-82.45809523809524,"z":-35.31809523809524,"a95":"0.99","info":"30/01/2015 at 08:29:19"},{"visible":true,"include":true,"step":"30.0","x":-158.0095238095238,"y":-3.473333333333333,"z":-36.75238095238095,"a95":"0.99","info":"30/01/2015 at 08:29:19"},{"visible":true,"include":true,"step":"33.0","x":-100.60952380952382,"y":-54.055238095238096,"z":-8.837523809523809,"a95":"0.99","info":"30/01/2015 at 08:29:19"},{"visible":false,"include":false,"step":"35.0","x":-89.39047619047619,"y":-63.27619047619047,"z":-87.14190476190477,"a95":"0.99","info":"30/01/2015 at 08:29:19"},{"visible":true,"include":true,"step":"40.0","x":-97.87619047619049,"y":-51.465714285714284,"z":-18.867619047619048,"a95":"0.99","info":"30/01/2015 at 08:29:19"},{"visible":true,"include":true,"step":"45.0","x":-57.37809523809524,"y":-23.205714285714286,"z":20.125714285714285,"a95":"0.99","info":"30/01/2015 at 08:29:19"},{"visible":true,"include":true,"step":"50.0","x":-89.49428571428572,"y":-48.770476190476195,"z":-44.87619047619047,"a95":"0.99","info":"30/01/2015 at 08:29:19"},{"visible":true,"include":true,"step":"60.0","x":-66.6,"y":2.8098095238095238,"z":-16.23047619047619,"a95":"0.99","info":"30/01/2015 at 08:29:19"},{"visible":false,"include":false,"step":"70.0","x":-44.97142857142857,"y":-40.60285714285714,"z":-55.766666666666666,"a95":"0.99","info":"30/01/2015 at 08:29:19"}],"demagType":"Unknown","patch":1.1,"format":"Unknown","strat":null},{"version":"v1.1.0","exported":"2017-05-22T12:12:50.520Z","info":"3","GEO":[{"dec":146.41208857251058,"inc":-48.87119304538246,"MAD":6.1006903049900005,"cm":[-1.1504025245639717e-14,-1.4210854715202004e-14,0],"intensity":641.8808467567065,"type":"dir","forced":true,"remark":"","origin":false,"nSteps":10,"minStep":"16.0","maxStep":"70.0","steps":["16.0","20.0","25.0","30.0","35.0","40.0","45.0","50.0","60.0","70.0"],"group":"None"}],"TECT":[{"dec":153.5511329169982,"inc":-18.479082403036422,"MAD":6.100690304990022,"cm":[-2.7068294695622863e-14,-4.53393936151683e-14,6.597896832058073e-15],"intensity":641.8808467567065,"type":"dir","forced":true,"remark":"","origin":false,"nSteps":10,"minStep":"16.0","maxStep":"70.0","steps":["16.0","20.0","25.0","30.0","35.0","40.0","45.0","50.0","60.0","70.0"],"group":"None"}],"interpreted":true,"name":"SS14.14B","coreAzi":135,"coreDip":38,"bedStrike":259,"bedDip":32,"data":[{"visible":true,"include":false,"step":"0.0","x":262.9238095238095,"y":65.08571428571429,"z":358.1333333333333,"a95":"0.99","info":"09/10/2014 at 21:54:39"},{"visible":true,"include":false,"step":"4.0","x":350.81904761904764,"y":40.25714285714285,"z":246.94285714285715,"a95":"0.99","info":"09/10/2014 at 21:54:39"},{"visible":true,"include":false,"step":"8.0","x":385.0190476190476,"y":65.06285714285714,"z":128.35238095238097,"a95":"0.99","info":"09/10/2014 at 21:54:39"},{"visible":true,"include":false,"step":"12.0","x":438.2666666666667,"y":58.09142857142857,"z":95.67619047619048,"a95":"0.99","info":"09/10/2014 at 21:54:39"},{"visible":true,"include":true,"step":"16.0","x":470.7523809523809,"y":73.95428571428572,"z":31.14952380952381,"a95":"0.99","info":"09/10/2014 at 21:54:39"},{"visible":true,"include":true,"step":"20.0","x":443.0952380952381,"y":47.99142857142857,"z":40.388571428571424,"a95":"0.99","info":"09/10/2014 at 21:54:39"},{"visible":true,"include":true,"step":"25.0","x":398.16190476190474,"y":16.549523809523812,"z":-0.15678095238095238,"a95":"0.99","info":"09/10/2014 at 21:54:39"},{"visible":true,"include":true,"step":"30.0","x":348.1142857142857,"y":61.19523809523809,"z":3.5076190476190474,"a95":"0.99","info":"09/10/2014 at 21:54:39"},{"visible":true,"include":true,"step":"35.0","x":297.0095238095238,"y":15.42095238095238,"z":-3.545428571428571,"a95":"0.99","info":"09/10/2014 at 21:54:39"},{"visible":true,"include":true,"step":"40.0","x":260.29523809523806,"y":59.661904761904765,"z":31.95619047619048,"a95":"0.99","info":"09/10/2014 at 21:54:39"},{"visible":true,"include":true,"step":"45.0","x":248.78095238095236,"y":73.45523809523809,"z":-27.224761904761905,"a95":"0.99","info":"09/10/2014 at 21:54:39"},{"visible":true,"include":true,"step":"50.0","x":186.21904761904761,"y":-2.0035238095238093,"z":2.5745714285714287,"a95":"0.99","info":"09/10/2014 at 21:54:39"},{"visible":true,"include":true,"step":"60.0","x":96.41904761904762,"y":48.679047619047616,"z":20.12952380952381,"a95":"0.99","info":"09/10/2014 at 21:54:39"},{"visible":true,"include":true,"step":"70.0","x":160.77142857142857,"y":11.95142857142857,"z":45.06666666666666,"a95":"0.99","info":"09/10/2014 at 21:54:39"},{"visible":false,"include":false,"step":"80.0","x":94.74095238095238,"y":-35.72095238095238,"z":64.62285714285714,"a95":"0.99","info":"09/10/2014 at 21:54:39"},{"visible":false,"include":false,"step":"90.0","x":157.6952380952381,"y":-67.09238095238095,"z":-156.93333333333334,"a95":"0.99","info":"09/10/2014 at 21:54:39"},{"visible":false,"include":false,"step":"100.0","x":117.86666666666666,"y":0.9342857142857144,"z":-22.19047619047619,"a95":"0.99","info":"09/10/2014 at 21:54:39"}],"demagType":"Unknown","patch":1.1,"format":"Unknown","strat":null},{"version":"v1.1.0","exported":"2017-05-22T12:12:50.520Z","info":"","GEO":[{"dec":53.20270040403125,"inc":-5.7003100049076005,"MAD":13.782946114899183,"cm":[-1.7763568394002505e-15,-3.552713678800501e-15,0],"intensity":667.9753753251808,"type":"GC","origin":false,"forced":true,"remark":"","nSteps":5,"minStep":"100","maxStep":"240","steps":["100","150","180","210","240"],"group":"None","version":"v1.1.0"}],"TECT":[{"dec":59.65065728735942,"inc":-18.28277210342048,"MAD":13.782946114899124,"cm":[1.7763568394002505e-15,3.552713678800501e-15,-3.552713678800501e-15],"intensity":667.9753753251808,"type":"GC","origin":false,"forced":true,"remark":"","nSteps":5,"minStep":"100","maxStep":"240","steps":["100","150","180","210","240"],"group":"None","version":"v1.1.0"}],"interpreted":true,"name":"SS14.15A","coreAzi":162,"coreDip":46,"bedStrike":259,"bedDip":32,"data":[{"visible":true,"include":false,"step":"20","x":-802.0952380952381,"y":-80.76190476190476,"z":125.42857142857143,"a95":"1.9","info":"\"14-10-13\" at \"16:29\""},{"visible":true,"include":true,"step":"100","x":-380.0952380952381,"y":-24.857142857142858,"z":240.76190476190476,"a95":"3.3","info":"\"14-10-13\" at \"19:25\""},{"visible":true,"include":true,"step":"150","x":-246.76190476190476,"y":-21.80952380952381,"z":196,"a95":"4.3","info":"\"14-10-13\" at \"22:52\""},{"visible":true,"include":true,"step":"180","x":-207.71428571428572,"y":7.809523809523809,"z":153.61904761904762,"a95":"4.1","info":"\"14-10-14\" at \"16:01\""},{"visible":true,"include":true,"step":"210","x":-225.61904761904762,"y":-22.476190476190474,"z":241.23809523809524,"a95":"3.6","info":"\"14-10-14\" at \"19:10\""},{"visible":true,"include":true,"step":"240","x":-111.14285714285714,"y":-55.04761904761905,"z":204.76190476190476,"a95":"4.3","info":"\"14-10-14\" at \"22:17\""},{"visible":true,"include":false,"step":"270","x":-216.66666666666666,"y":-16.952380952380953,"z":160.47619047619048,"a95":"4.7","info":"\"14-10-15\" at \"16:08\""},{"visible":true,"include":false,"step":"290","x":-210.47619047619048,"y":-70.76190476190476,"z":56.76190476190476,"a95":"6.3","info":"\"14-10-15\" at \"19:13\""},{"visible":true,"include":false,"step":"310","x":-120.28571428571429,"y":39.523809523809526,"z":82.0952380952381,"a95":"6.8","info":"\"14-10-15\" at \"22:31\""},{"visible":true,"include":false,"step":"330","x":-99.04761904761905,"y":40.38095238095238,"z":43.80952380952381,"a95":"10.9","info":"\"14-10-16\" at \"15:53\""},{"visible":true,"include":false,"step":"350","x":-69.07619047619048,"y":-35.733333333333334,"z":39.17142857142857,"a95":"15.8","info":"\"14-10-16\" at \"19:45\""},{"visible":true,"include":false,"step":"370","x":-116.19047619047619,"y":-19.428571428571427,"z":-21.61904761904762,"a95":"21.4","info":"\"14-10-16\" at \"22:53\""},{"visible":true,"include":false,"step":"400","x":-153.04761904761904,"y":-160.1904761904762,"z":77.14285714285714,"a95":"16.2","info":"\"14-10-17\" at \"14:31\""}],"demagType":"Unknown","patch":1.1,"format":"Unknown","strat":null},{"version":"v1.1.0","exported":"2017-05-22T12:12:50.520Z","info":"8","GEO":[{"dec":90.88324442518297,"inc":-2.3525913215710808,"MAD":14.425493741970284,"cm":[0,-1.554312234475219e-14,0],"intensity":751.82471046951,"type":"GC","origin":false,"forced":true,"remark":"","nSteps":5,"minStep":"10.0","maxStep":"25.0","steps":["10.0","15.0","20.0","23.0","25.0"],"group":"None","version":"v1.1.0"}],"TECT":[{"dec":270.3485202240926,"inc":-4.256204923143327,"MAD":14.42549374197024,"cm":[-1.3322676295501878e-14,-2.7533531010703882e-14,0],"intensity":751.82471046951,"type":"GC","origin":false,"forced":true,"remark":"","nSteps":5,"minStep":"10.0","maxStep":"25.0","steps":["10.0","15.0","20.0","23.0","25.0"],"group":"None","version":"v1.1.0"}],"interpreted":true,"name":"SS14.15B","coreAzi":162,"coreDip":46,"bedStrike":259,"bedDip":32,"data":[{"visible":true,"include":false,"step":"0.0","x":-267.4761904761905,"y":94.27428571428571,"z":623.7904761904762,"a95":"0.99","info":"30/01/2015 at 08:29:19"},{"visible":true,"include":true,"step":"10.0","x":-18.994285714285713,"y":90.30190476190475,"z":477.6285714285715,"a95":"0.99","info":"30/01/2015 at 08:29:19"},{"visible":true,"include":true,"step":"15.0","x":44.65142857142857,"y":62.31047619047619,"z":362.23809523809524,"a95":"0.99","info":"30/01/2015 at 08:29:19"},{"visible":true,"include":true,"step":"20.0","x":89.96285714285715,"y":90.61142857142856,"z":310.7142857142857,"a95":"0.99","info":"30/01/2015 at 08:29:19"},{"visible":true,"include":true,"step":"23.0","x":130.77142857142857,"y":97.56190476190477,"z":257.8666666666667,"a95":"0.99","info":"30/01/2015 at 08:29:19"},{"visible":true,"include":true,"step":"25.0","x":-18.984761904761903,"y":76.74380952380952,"z":254.41904761904763,"a95":"0.99","info":"30/01/2015 at 08:29:19"},{"visible":true,"include":false,"step":"30.0","x":49.48476190476191,"y":120.44761904761906,"z":227.8095238095238,"a95":"0.99","info":"30/01/2015 at 08:29:19"},{"visible":true,"include":false,"step":"33.0","x":85.14666666666666,"y":107.8952380952381,"z":264.67619047619047,"a95":"0.99","info":"30/01/2015 at 08:29:19"},{"visible":true,"include":false,"step":"35.0","x":41.55142857142857,"y":42.76571428571429,"z":206.61904761904762,"a95":"0.99","info":"30/01/2015 at 08:29:19"},{"visible":true,"include":false,"step":"40.0","x":40.99714285714286,"y":112.46666666666667,"z":182.9714285714286,"a95":"0.99","info":"30/01/2015 at 08:29:19"},{"visible":true,"include":false,"step":"45.0","x":46.80666666666667,"y":119.70476190476191,"z":134.74285714285713,"a95":"0.99","info":"30/01/2015 at 08:29:19"},{"visible":true,"include":false,"step":"50.0","x":-22.221904761904764,"y":57.80476190476191,"z":132.8761904761905,"a95":"0.99","info":"30/01/2015 at 08:29:19"},{"visible":true,"include":false,"step":"60.0","x":-31.437142857142856,"y":104.65714285714287,"z":151.28571428571428,"a95":"0.99","info":"30/01/2015 at 08:29:19"},{"visible":true,"include":false,"step":"70.0","x":11.857142857142858,"y":110.35238095238095,"z":128.0285714285714,"a95":"0.99","info":"30/01/2015 at 08:29:19"}],"demagType":"Unknown","patch":1.1,"format":"Unknown","strat":null},{"version":"v1.1.0","exported":"2017-05-22T12:12:50.520Z","info":"","GEO":[{"dec":74.49974382906066,"inc":-7.628905457270112,"MAD":8.84360042819994,"cm":[1.4210854715202004e-14,1.687538997430238e-14,0],"intensity":337.22993225822097,"type":"GC","origin":false,"forced":true,"remark":"","nSteps":3,"minStep":"100","maxStep":"180","steps":["100","150","180"],"group":"None","version":"v1.1.0"}],"TECT":[{"dec":79.25503915168599,"inc":-8.846926194964228,"MAD":8.84360042819996,"cm":[3.197442310920451e-14,8.881784197001252e-16,1.0658141036401503e-14],"intensity":337.22993225822097,"type":"GC","origin":false,"forced":true,"remark":"","nSteps":3,"minStep":"100","maxStep":"180","steps":["100","150","180"],"group":"None","version":"v1.1.0"}],"interpreted":true,"name":"SS14.16A","coreAzi":167,"coreDip":40,"bedStrike":259,"bedDip":32,"data":[{"visible":true,"include":false,"step":"20","x":-656.8571428571429,"y":-55.142857142857146,"z":-123.61904761904762,"a95":"2.5","info":"\"14-10-20\" at \"16:02\""},{"visible":true,"include":true,"step":"100","x":-182.38095238095238,"y":-22.19047619047619,"z":121.9047619047619,"a95":"5.7","info":"\"14-10-20\" at \"18:58\""},{"visible":true,"include":true,"step":"150","x":6.9523809523809526,"y":-42,"z":191.42857142857142,"a95":"6.2","info":"\"14-10-20\" at \"21:59\""},{"visible":true,"include":true,"step":"180","x":75.04761904761905,"y":-2.1904761904761907,"z":196.85714285714286,"a95":"5.2","info":"\"14-10-21\" at \"00:51\""},{"visible":true,"include":false,"step":"210","x":54.476190476190474,"y":25.61904761904762,"z":201.04761904761904,"a95":"6.4","info":"\"14-10-21\" at \"16:59\""},{"visible":true,"include":false,"step":"240","x":40.857142857142854,"y":29.523809523809526,"z":136.95238095238096,"a95":"6.3","info":"\"14-10-21\" at \"19:59\""},{"visible":true,"include":false,"step":"270","x":11.80952380952381,"y":-56.095238095238095,"z":186.66666666666666,"a95":"6.2","info":"\"14-10-21\" at \"23:02\""},{"visible":true,"include":false,"step":"290","x":105.9047619047619,"y":39.23809523809524,"z":109.14285714285714,"a95":"6.3","info":"\"14-10-22\" at \"15:31\""},{"visible":true,"include":false,"step":"310","x":116.76190476190476,"y":21.333333333333332,"z":160.85714285714286,"a95":"6.3","info":"\"14-10-22\" at \"18:18\""},{"visible":true,"include":false,"step":"330","x":125.14285714285714,"y":43.523809523809526,"z":68.76190476190476,"a95":"8.8","info":"\"14-10-22\" at \"21:29\""},{"visible":true,"include":false,"step":"350","x":52.095238095238095,"y":-38.095238095238095,"z":108.76190476190476,"a95":"12","info":"\"14-10-23\" at \"15:43\""},{"visible":true,"include":false,"step":"370","x":175.33333333333334,"y":58.57142857142857,"z":89.14285714285714,"a95":"10.7","info":"\"14-10-23\" at \"18:43\""},{"visible":true,"include":false,"step":"400","x":-167.8095238095238,"y":-105.33333333333333,"z":201.71428571428572,"a95":"17.1","info":"\"14-10-23\" at \"21:42\""}],"demagType":"Unknown","patch":1.1,"format":"Unknown","strat":null},{"version":"v1.1.0","exported":"2017-05-22T12:12:50.520Z","info":"","GEO":[],"TECT":[],"interpreted":false,"name":"SS14.17A","coreAzi":171,"coreDip":42,"bedStrike":259,"bedDip":32,"data":[{"visible":true,"include":false,"step":"20","x":-828.8571428571429,"y":-186.28571428571428,"z":108.38095238095238,"a95":"2.1","info":"\"14-10-20\" at \"16:04\""},{"visible":true,"include":false,"step":"100","x":-519.047619047619,"y":-50.666666666666664,"z":301.3333333333333,"a95":"2.6","info":"\"14-10-20\" at \"19:01\""},{"visible":true,"include":false,"step":"150","x":-326,"y":8.571428571428571,"z":268.1904761904762,"a95":"3","info":"\"14-10-20\" at \"22:00\""},{"visible":true,"include":false,"step":"180","x":-250,"y":19.142857142857142,"z":180.95238095238096,"a95":"3","info":"\"14-10-21\" at \"00:53\""},{"visible":true,"include":false,"step":"210","x":-244.66666666666666,"y":-8.857142857142858,"z":197.9047619047619,"a95":"4","info":"\"14-10-21\" at \"17:01\""},{"visible":true,"include":false,"step":"240","x":-212.0952380952381,"y":-14.476190476190476,"z":183.9047619047619,"a95":"3.7","info":"\"14-10-21\" at \"20:01\""},{"visible":true,"include":false,"step":"270","x":-175.33333333333334,"y":4.190476190476191,"z":152,"a95":"3.9","info":"\"14-10-21\" at \"23:03\""},{"visible":true,"include":false,"step":"290","x":-118.85714285714286,"y":2.5714285714285716,"z":114.57142857142857,"a95":"5.3","info":"\"14-10-22\" at \"15:33\""},{"visible":true,"include":false,"step":"310","x":-130.1904761904762,"y":-6.666666666666667,"z":182.95238095238096,"a95":"4.1","info":"\"14-10-22\" at \"18:20\""},{"visible":true,"include":false,"step":"330","x":-157.9047619047619,"y":93.04761904761905,"z":71.71428571428571,"a95":"6.2","info":"\"14-10-22\" at \"21:31\""},{"visible":true,"include":false,"step":"350","x":-121.23809523809524,"y":1.5238095238095237,"z":124.95238095238095,"a95":"8.1","info":"\"14-10-23\" at \"15:45\""},{"visible":true,"include":false,"step":"370","x":-123.23809523809524,"y":46.57142857142857,"z":62.666666666666664,"a95":"12.6","info":"\"14-10-23\" at \"18:45\""},{"visible":true,"include":false,"step":"400","x":-210.76190476190476,"y":-41.904761904761905,"z":147.33333333333334,"a95":"12.9","info":"\"14-10-23\" at \"21:44\""},{"visible":true,"include":false,"step":"420","x":-103.9047619047619,"y":237.42857142857142,"z":-192.57142857142858,"a95":"10.6","info":"\"14-10-24\" at \"16:11\""},{"visible":true,"include":false,"step":"440","x":-61.333333333333336,"y":192.47619047619048,"z":261.9047619047619,"a95":"11.3","info":"\"14-10-24\" at \"19:24\""}],"demagType":"Unknown","patch":1.1,"format":"Unknown","strat":null},{"version":"v1.1.0","exported":"2017-05-22T12:12:50.520Z","info":"4","GEO":[{"dec":255.79242048182158,"inc":-1.574655516967129,"MAD":3.5752991416951483,"cm":[3.552713678800501e-15,-6.128431095930864e-14,0],"intensity":805.7674277307545,"type":"GC","origin":false,"forced":true,"remark":"","nSteps":5,"minStep":"4.0","maxStep":"20.0","steps":["4.0","8.0","12.0","16.0","20.0"],"group":"None","version":"v1.1.0"}],"TECT":[{"dec":75.44557966128116,"inc":-0.36301582199282584,"MAD":3.5752991416951696,"cm":[-1.4210854715202004e-14,-5.950795411990839e-14,0],"intensity":805.7674277307545,"type":"GC","origin":false,"forced":true,"remark":"","nSteps":5,"minStep":"4.0","maxStep":"20.0","steps":["4.0","8.0","12.0","16.0","20.0"],"group":"None","version":"v1.1.0"}],"interpreted":true,"name":"SS14.17B","coreAzi":171,"coreDip":42,"bedStrike":259,"bedDip":32,"data":[{"visible":true,"include":false,"step":"0.0","x":-145.59047619047618,"y":18.176190476190477,"z":645.6571428571428,"a95":"0.99","info":"09/10/2014 at 21:54:39"},{"visible":true,"include":true,"step":"4.0","x":-51.55619047619048,"y":-23.570476190476192,"z":538.3047619047619,"a95":"0.99","info":"09/10/2014 at 21:54:39"},{"visible":true,"include":true,"step":"8.0","x":-0.3814476190476191,"y":-16.08095238095238,"z":454.4380952380953,"a95":"0.99","info":"09/10/2014 at 21:54:39"},{"visible":true,"include":true,"step":"12.0","x":92.43809523809524,"y":-35.203809523809525,"z":364.83809523809526,"a95":"0.99","info":"09/10/2014 at 21:54:39"},{"visible":true,"include":true,"step":"16.0","x":134.46666666666667,"y":-25.935238095238095,"z":299.8857142857143,"a95":"0.99","info":"09/10/2014 at 21:54:39"},{"visible":true,"include":true,"step":"20.0","x":158.31428571428572,"y":-20.14190476190476,"z":259.16190476190474,"a95":"0.99","info":"09/10/2014 at 21:54:39"},{"visible":true,"include":false,"step":"25.0","x":128.9142857142857,"y":24.625714285714285,"z":242.16190476190474,"a95":"0.99","info":"09/10/2014 at 21:54:39"},{"visible":true,"include":false,"step":"30.0","x":113.15238095238094,"y":13.936190476190477,"z":181.16190476190476,"a95":"0.99","info":"09/10/2014 at 21:54:39"},{"visible":true,"include":false,"step":"35.0","x":93.57809523809524,"y":1.5095238095238095,"z":210.77142857142857,"a95":"0.99","info":"09/10/2014 at 21:54:39"},{"visible":true,"include":false,"step":"40.0","x":30.802857142857142,"y":32.829523809523806,"z":197.61904761904762,"a95":"0.99","info":"09/10/2014 at 21:54:39"},{"visible":true,"include":false,"step":"45.0","x":0.3902666666666667,"y":41.73619047619048,"z":149.2095238095238,"a95":"0.99","info":"09/10/2014 at 21:54:39"},{"visible":true,"include":false,"step":"50.0","x":-16.967619047619046,"y":-32.30095238095238,"z":132.71428571428572,"a95":"0.99","info":"09/10/2014 at 21:54:39"},{"visible":true,"include":false,"step":"60.0","x":-68.69619047619047,"y":21.483809523809526,"z":97.72380952380952,"a95":"0.99","info":"09/10/2014 at 21:54:39"},{"visible":false,"include":false,"step":"70.0","x":55.790476190476184,"y":-8.390380952380953,"z":90.7895238095238,"a95":"0.99","info":"09/10/2014 at 21:54:39"},{"visible":false,"include":false,"step":"80.0","x":-36.76380952380952,"y":-32.68190476190476,"z":235.76190476190476,"a95":"0.99","info":"09/10/2014 at 21:54:39"},{"visible":false,"include":false,"step":"90.0","x":-108.44761904761906,"y":-135.76190476190476,"z":305.2095238095238,"a95":"0.99","info":"09/10/2014 at 21:54:39"},{"visible":false,"include":false,"step":"100.0","x":-160.33333333333334,"y":-162.8761904761905,"z":69.07142857142857,"a95":"0.99","info":"09/10/2014 at 21:54:39"}],"demagType":"Unknown","patch":1.1,"format":"Unknown","strat":null},{"version":"v1.1.0","exported":"2017-05-22T12:12:50.520Z","info":"","GEO":[{"dec":286.51617699134954,"inc":-3.931184999226154,"MAD":19.935256493033904,"cm":[-7.105427357601002e-15,1.5987211554602254e-14,0],"intensity":753.0556107184032,"type":"GC","origin":false,"forced":true,"remark":"","nSteps":6,"minStep":"100","maxStep":"270","steps":["100","150","180","210","240","270"],"group":"None","version":"v1.1.0"}],"TECT":[{"dec":280.836441970419,"inc":-17.6010215867447,"MAD":19.93525649303389,"cm":[-4.440892098500626e-15,-5.329070518200751e-15,0],"intensity":753.0556107184032,"type":"GC","origin":false,"forced":true,"remark":"","nSteps":6,"minStep":"100","maxStep":"270","steps":["100","150","180","210","240","270"],"group":"None","version":"v1.1.0"}],"interpreted":true,"name":"SS14.18A","coreAzi":175,"coreDip":44,"bedStrike":259,"bedDip":32,"data":[{"visible":true,"include":false,"step":"20","x":-558.3809523809524,"y":98.57142857142857,"z":223.04761904761904,"a95":"2.3","info":"\"14-10-20\" at \"16:06\""},{"visible":true,"include":true,"step":"100","x":-345.9047619047619,"y":30.952380952380953,"z":332.76190476190476,"a95":"2.9","info":"\"14-10-20\" at \"19:03\""},{"visible":true,"include":true,"step":"150","x":-188.28571428571428,"y":45.714285714285715,"z":301.9047619047619,"a95":"3.3","info":"\"14-10-20\" at \"22:02\""},{"visible":true,"include":true,"step":"180","x":-149.23809523809524,"y":37.714285714285715,"z":283.8095238095238,"a95":"3.4","info":"\"14-10-21\" at \"00:55\""},{"visible":true,"include":true,"step":"210","x":-192,"y":80.95238095238095,"z":276.4761904761905,"a95":"4","info":"\"14-10-21\" at \"17:03\""},{"visible":true,"include":true,"step":"240","x":-108.28571428571429,"y":52.666666666666664,"z":258.85714285714283,"a95":"3.4","info":"\"14-10-21\" at \"20:03\""},{"visible":true,"include":true,"step":"270","x":-134.66666666666666,"y":74.57142857142857,"z":237.33333333333334,"a95":"4.1","info":"\"14-10-21\" at \"23:06\""},{"visible":true,"include":false,"step":"290","x":-147.9047619047619,"y":44.38095238095238,"z":187.61904761904762,"a95":"4.4","info":"\"14-10-22\" at \"15:35\""},{"visible":true,"include":false,"step":"310","x":-60.476190476190474,"y":44.38095238095238,"z":150.38095238095238,"a95":"4.8","info":"\"14-10-22\" at \"18:22\""},{"visible":true,"include":false,"step":"330","x":-37.80952380952381,"y":80.66666666666667,"z":87.33333333333333,"a95":"8.2","info":"\"14-10-22\" at \"21:32\""},{"visible":true,"include":false,"step":"350","x":-96.57142857142857,"y":37.333333333333336,"z":116.38095238095238,"a95":"7.3","info":"\"14-10-23\" at \"15:47\""},{"visible":true,"include":false,"step":"370","x":-29.61904761904762,"y":54.57142857142857,"z":87.04761904761905,"a95":"16.9","info":"\"14-10-23\" at \"18:47\""},{"visible":true,"include":false,"step":"400","x":-91.23809523809524,"y":-13.238095238095237,"z":127.61904761904762,"a95":"16.6","info":"\"14-10-23\" at \"21:45\""},{"visible":true,"include":false,"step":"420","x":7.523809523809524,"y":128.1904761904762,"z":48.857142857142854,"a95":"19.6","info":"\"14-10-24\" at \"16:13\""},{"visible":true,"include":false,"step":"440","x":-45.42857142857143,"y":-46.476190476190474,"z":183.33333333333334,"a95":"19.1","info":"\"14-10-24\" at \"19:26\""}],"demagType":"Unknown","patch":1.1,"format":"Unknown","strat":null},{"version":"v1.1.0","exported":"2017-05-22T12:12:50.520Z","info":"","GEO":[],"TECT":[],"interpreted":false,"name":"SS14.19A","coreAzi":180,"coreDip":42,"bedStrike":259,"bedDip":32,"data":[{"visible":true,"include":false,"step":"20","x":-811.3333333333334,"y":371.5238095238095,"z":562.8571428571429,"a95":"2.4","info":"\"14-10-13\" at \"16:30\""},{"visible":true,"include":false,"step":"100","x":-438.6666666666667,"y":137.04761904761904,"z":426.1904761904762,"a95":"2.9","info":"\"14-10-13\" at \"19:27\""},{"visible":true,"include":false,"step":"150","x":-319.04761904761904,"y":97.71428571428571,"z":279.42857142857144,"a95":"3.2","info":"\"14-10-13\" at \"22:53\""},{"visible":true,"include":false,"step":"180","x":-274.6666666666667,"y":134.38095238095238,"z":225.9047619047619,"a95":"3.3","info":"\"14-10-14\" at \"16:03\""},{"visible":true,"include":false,"step":"210","x":-226.1904761904762,"y":136.76190476190476,"z":237.8095238095238,"a95":"2.9","info":"\"14-10-14\" at \"19:12\""},{"visible":true,"include":false,"step":"240","x":-192.28571428571428,"y":136.57142857142858,"z":184.47619047619048,"a95":"3","info":"\"14-10-14\" at \"22:19\""},{"visible":true,"include":false,"step":"270","x":-203.61904761904762,"y":127.61904761904762,"z":183.42857142857142,"a95":"4.6","info":"\"14-10-15\" at \"16:10\""},{"visible":true,"include":false,"step":"290","x":-154.76190476190476,"y":83.9047619047619,"z":98.19047619047619,"a95":"4.4","info":"\"14-10-15\" at \"19:15\""},{"visible":true,"include":false,"step":"310","x":-171.71428571428572,"y":80.28571428571429,"z":113.23809523809524,"a95":"4.7","info":"\"14-10-15\" at \"22:33\""},{"visible":true,"include":false,"step":"330","x":-98.19047619047619,"y":108.66666666666667,"z":116.0952380952381,"a95":"6.7","info":"\"14-10-16\" at \"15:55\""},{"visible":true,"include":false,"step":"350","x":-59.714285714285715,"y":105.23809523809524,"z":109.33333333333333,"a95":"8.3","info":"\"14-10-16\" at \"19:47\""},{"visible":true,"include":false,"step":"370","x":-160.1904761904762,"y":68.0952380952381,"z":58.285714285714285,"a95":"13.1","info":"\"14-10-16\" at \"22:55\""},{"visible":true,"include":false,"step":"400","x":-170.0952380952381,"y":-21.714285714285715,"z":102,"a95":"16.2","info":"\"14-10-17\" at \"14:33\""},{"visible":true,"include":false,"step":"420","x":-238,"y":-120.0952380952381,"z":-8.476190476190476,"a95":"14.9","info":"\"14-10-17\" at \"17:22\""}],"demagType":"Unknown","patch":1.1,"format":"Unknown","strat":null},{"version":"v1.1.0","exported":"2017-05-22T12:12:50.520Z","info":"","GEO":[],"TECT":[],"interpreted":false,"name":"SS14.20A","coreAzi":195,"coreDip":44,"bedStrike":259,"bedDip":32,"data":[{"visible":true,"include":false,"step":"20","x":-797.1428571428571,"y":259.6190476190476,"z":1307.6190476190477,"a95":"2.8","info":"\"14-10-13\" at \"16:32\""},{"visible":true,"include":false,"step":"100","x":-239.14285714285714,"y":-68.28571428571429,"z":595.7142857142857,"a95":"3.3","info":"\"14-10-13\" at \"19:28\""},{"visible":true,"include":false,"step":"150","x":-138.76190476190476,"y":-106.47619047619048,"z":418.1904761904762,"a95":"3.4","info":"\"14-10-13\" at \"22:55\""},{"visible":true,"include":false,"step":"180","x":-92.47619047619048,"y":-84.19047619047619,"z":342.85714285714283,"a95":"3.2","info":"\"14-10-14\" at \"16:05\""},{"visible":true,"include":false,"step":"210","x":-121.61904761904762,"y":-71.80952380952381,"z":339.14285714285717,"a95":"3.4","info":"\"14-10-14\" at \"19:14\""},{"visible":true,"include":false,"step":"240","x":-123.52380952380952,"y":-31.238095238095237,"z":250.28571428571428,"a95":"3.8","info":"\"14-10-14\" at \"22:21\""},{"visible":true,"include":false,"step":"270","x":-57.61904761904762,"y":-9.238095238095237,"z":236.57142857142858,"a95":"5.2","info":"\"14-10-15\" at \"16:12\""},{"visible":true,"include":false,"step":"290","x":-65.61904761904762,"y":-89.80952380952381,"z":157.23809523809524,"a95":"7","info":"\"14-10-15\" at \"19:17\""},{"visible":true,"include":false,"step":"310","x":-66.47619047619048,"y":-54.857142857142854,"z":184.85714285714286,"a95":"5.5","info":"\"14-10-15\" at \"22:35\""},{"visible":true,"include":false,"step":"330","x":-120.0952380952381,"y":-46.19047619047619,"z":104.47619047619048,"a95":"9.1","info":"\"14-10-16\" at \"15:57\""},{"visible":true,"include":false,"step":"350","x":-133.04761904761904,"y":-124.19047619047619,"z":130.95238095238096,"a95":"8.3","info":"\"14-10-16\" at \"19:49\""},{"visible":true,"include":false,"step":"370","x":-194.95238095238096,"y":0,"z":100,"a95":"17","info":"\"14-10-16\" at \"22:57\""},{"visible":true,"include":false,"step":"400","x":-46.285714285714285,"y":-94.85714285714286,"z":140.66666666666666,"a95":"25.4","info":"\"14-10-17\" at \"14:35\""}],"demagType":"Unknown","patch":1.1,"format":"Unknown","strat":null},{"version":"v1.1.0","exported":"2017-05-22T12:12:50.520Z","info":"5","GEO":[{"dec":247.780521053141,"inc":-0.631759354423779,"MAD":6.933054952163576,"cm":[-1.0658141036401503e-14,-3.108624468950438e-14,0],"intensity":595.6554758379139,"type":"GC","origin":false,"forced":true,"remark":"","nSteps":6,"minStep":"4.0","maxStep":"25.0","steps":["4.0","8.0","12.0","16.0","20.0","25.0"],"group":"None","version":"v1.1.0"}],"TECT":[{"dec":69.119636305558,"inc":-5.379284059216366,"MAD":6.933054952163678,"cm":[-2.4868995751603507e-14,-6.661338147750939e-14,3.552713678800501e-15],"intensity":595.6554758379139,"type":"GC","origin":false,"forced":true,"remark":"","nSteps":6,"minStep":"4.0","maxStep":"25.0","steps":["4.0","8.0","12.0","16.0","20.0","25.0"],"group":"None","version":"v1.1.0"}],"interpreted":true,"name":"SS14.20B","coreAzi":195,"coreDip":44,"bedStrike":259,"bedDip":32,"data":[{"visible":true,"include":false,"step":"0.0","x":-205.8,"y":-111.86666666666666,"z":408.4095238095238,"a95":"0.99","info":"09/10/2014 at 21:54:39"},{"visible":true,"include":true,"step":"4.0","x":-115.18095238095239,"y":-134.74285714285713,"z":377.84761904761905,"a95":"0.99","info":"09/10/2014 at 21:54:39"},{"visible":true,"include":true,"step":"8.0","x":-31.214285714285715,"y":-138.8095238095238,"z":291.552380952381,"a95":"0.99","info":"09/10/2014 at 21:54:39"},{"visible":true,"include":true,"step":"12.0","x":55.15238095238095,"y":-177.43809523809523,"z":234.0952380952381,"a95":"0.99","info":"09/10/2014 at 21:54:39"},{"visible":true,"include":true,"step":"16.0","x":112.4952380952381,"y":-176.9904761904762,"z":207.8952380952381,"a95":"0.99","info":"09/10/2014 at 21:54:39"},{"visible":true,"include":true,"step":"20.0","x":124.4952380952381,"y":-156.85714285714286,"z":161.37142857142857,"a95":"0.99","info":"09/10/2014 at 21:54:39"},{"visible":true,"include":true,"step":"25.0","x":117.86666666666666,"y":-120.58095238095237,"z":160.3047619047619,"a95":"0.99","info":"09/10/2014 at 21:54:39"},{"visible":true,"include":false,"step":"30.0","x":133.92380952380952,"y":-100.11428571428571,"z":155.98095238095237,"a95":"0.99","info":"09/10/2014 at 21:54:39"},{"visible":true,"include":false,"step":"35.0","x":47.59809523809523,"y":-150.0952380952381,"z":125.86666666666666,"a95":"0.99","info":"09/10/2014 at 21:54:39"},{"visible":true,"include":false,"step":"40.0","x":37.98571428571429,"y":-65.57619047619048,"z":168.42857142857142,"a95":"0.99","info":"09/10/2014 at 21:54:39"},{"visible":true,"include":false,"step":"45.0","x":69.0247619047619,"y":-72.37238095238095,"z":155.2,"a95":"0.99","info":"09/10/2014 at 21:54:39"},{"visible":true,"include":false,"step":"50.0","x":-28.82761904761905,"y":-112.18095238095239,"z":106.5047619047619,"a95":"0.99","info":"09/10/2014 at 21:54:39"},{"visible":true,"include":false,"step":"60.0","x":-91.92952380952381,"y":-80.72571428571429,"z":120.91428571428571,"a95":"0.99","info":"09/10/2014 at 21:54:39"},{"visible":false,"include":false,"step":"70.0","x":-160.7238095238095,"y":-136.2095238095238,"z":290.31428571428575,"a95":"0.99","info":"09/10/2014 at 21:54:39"},{"visible":false,"include":false,"step":"80.0","x":-319.35238095238094,"y":-127.55238095238094,"z":68.19047619047619,"a95":"0.99","info":"09/10/2014 at 21:54:39"},{"visible":false,"include":false,"step":"90.0","x":87.36857142857143,"y":-45.79714285714286,"z":101.36190476190475,"a95":"0.99","info":"09/10/2014 at 21:54:39"},{"visible":false,"include":false,"step":"100.0","x":44.381904761904764,"y":-72.07238095238095,"z":136.21904761904761,"a95":"0.99","info":"09/10/2014 at 21:54:39"}],"demagType":"Unknown","patch":1.1,"format":"Unknown","strat":null},{"version":"v1.1.0","exported":"2017-05-22T12:12:50.520Z","info":"","GEO":[{"dec":73.33966214153031,"inc":-31.558420235019405,"MAD":9.209965942067951,"cm":[-3.552713678800501e-15,0,0],"intensity":405.33532491454866,"type":"GC","origin":false,"forced":true,"remark":"","nSteps":4,"minStep":"100","maxStep":"210","steps":["100","150","180","210"],"group":"None","version":"v1.1.0"}],"TECT":[{"dec":92.65922017100019,"inc":-29.233997333214777,"MAD":9.209965942067845,"cm":[-1.5987211554602254e-14,-1.3322676295501878e-14,0],"intensity":405.3353249145487,"type":"GC","origin":false,"forced":true,"remark":"","nSteps":4,"minStep":"100","maxStep":"210","steps":["100","150","180","210"],"group":"None","version":"v1.1.0"}],"interpreted":true,"name":"SS14.21A","coreAzi":180,"coreDip":42,"bedStrike":259,"bedDip":32,"data":[{"visible":true,"include":false,"step":"20","x":-703.6190476190476,"y":-146.0952380952381,"z":351.8095238095238,"a95":"2.3","info":"\"14-10-13\" at \"16:34\""},{"visible":true,"include":true,"step":"100","x":-98.85714285714286,"y":-146.85714285714286,"z":191.52380952380952,"a95":"3.9","info":"\"14-10-13\" at \"19:30\""},{"visible":true,"include":true,"step":"150","x":-3.5238095238095237,"y":-118.0952380952381,"z":158.85714285714286,"a95":"5.4","info":"\"14-10-13\" at \"22:57\""},{"visible":true,"include":true,"step":"180","x":24.19047619047619,"y":-82.76190476190476,"z":131.14285714285714,"a95":"5.1","info":"\"14-10-14\" at \"16:07\""},{"visible":true,"include":true,"step":"210","x":38,"y":-70.95238095238095,"z":144.85714285714286,"a95":"5.5","info":"\"14-10-14\" at \"19:15\""},{"visible":true,"include":false,"step":"240","x":-16.952380952380953,"y":-80.85714285714286,"z":96.57142857142857,"a95":"5.1","info":"\"14-10-14\" at \"22:23\""},{"visible":true,"include":false,"step":"270","x":2.0952380952380953,"y":-4.857142857142857,"z":140.76190476190476,"a95":"7.5","info":"\"14-10-15\" at \"16:14\""},{"visible":true,"include":false,"step":"290","x":44.49523809523809,"y":-29.98095238095238,"z":53.209523809523816,"a95":"11.3","info":"\"14-10-15\" at \"19:19\""},{"visible":true,"include":false,"step":"310","x":-26,"y":-41.714285714285715,"z":95.42857142857143,"a95":"8.7","info":"\"14-10-15\" at \"22:37\""},{"visible":true,"include":false,"step":"330","x":-14.295238095238094,"y":-59.91428571428572,"z":66.86666666666667,"a95":"11.9","info":"\"14-10-16\" at \"15:59\""},{"visible":true,"include":false,"step":"350","x":7.809523809523809,"y":-99.52380952380952,"z":85.52380952380952,"a95":"11.1","info":"\"14-10-16\" at \"19:51\""},{"visible":true,"include":false,"step":"370","x":-11.019047619047619,"y":-4.066666666666667,"z":57.46666666666666,"a95":"44.1","info":"\"14-10-16\" at \"22:59\""},{"visible":true,"include":false,"step":"400","x":-110.66666666666667,"y":-91.71428571428571,"z":61.23809523809524,"a95":"22.7","info":"\"14-10-17\" at \"14:37\""}],"demagType":"Unknown","patch":1.1,"format":"Unknown","strat":null},{"version":"v1.1.0","exported":"2017-05-22T12:12:50.520Z","info":"6","GEO":[{"dec":341.64623749916143,"inc":-6.522022826107343,"MAD":14.857798101481045,"cm":[-1.1324274851176597e-14,3.552713678800501e-15,0],"intensity":433.254993984195,"type":"GC","origin":false,"forced":true,"remark":"","nSteps":13,"minStep":"4.0","maxStep":"70.0","steps":["4.0","8.0","12.0","16.0","20.0","25.0","30.0","35.0","40.0","45.0","50.0","60.0","70.0"],"group":"None","version":"v1.1.0"}],"TECT":[{"dec":339.6867607570659,"inc":-38.20557855091308,"MAD":14.857798101480876,"cm":[-1.865174681370263e-14,9.992007221626409e-15,-8.881784197001252e-16],"intensity":433.25499398419504,"type":"GC","origin":false,"forced":true,"remark":"","nSteps":13,"minStep":"4.0","maxStep":"70.0","steps":["4.0","8.0","12.0","16.0","20.0","25.0","30.0","35.0","40.0","45.0","50.0","60.0","70.0"],"group":"None","version":"v1.1.0"}],"interpreted":true,"name":"SS14.21B","coreAzi":180,"coreDip":42,"bedStrike":259,"bedDip":32,"data":[{"visible":true,"include":false,"step":"0.0","x":-401.64761904761906,"y":21.062857142857144,"z":226.37142857142857,"a95":"0.99","info":"09/10/2014 at 21:54:39"},{"visible":true,"include":true,"step":"4.0","x":-320.84761904761905,"y":-26.10285714285714,"z":211.2095238095238,"a95":"0.99","info":"09/10/2014 at 21:54:39"},{"visible":true,"include":true,"step":"8.0","x":-273.96190476190475,"y":-3.742285714285714,"z":169.58095238095237,"a95":"0.99","info":"09/10/2014 at 21:54:39"},{"visible":true,"include":true,"step":"12.0","x":-218.40952380952382,"y":-38.25333333333334,"z":155.24761904761903,"a95":"0.99","info":"09/10/2014 at 21:54:39"},{"visible":true,"include":true,"step":"16.0","x":-186.44761904761904,"y":-48.97714285714286,"z":117.43809523809523,"a95":"0.99","info":"09/10/2014 at 21:54:39"},{"visible":true,"include":true,"step":"20.0","x":-181.65714285714287,"y":-77.17999999999999,"z":85.25333333333333,"a95":"0.99","info":"09/10/2014 at 21:54:39"},{"visible":true,"include":true,"step":"25.0","x":-141.64761904761903,"y":-52.07619047619047,"z":93.65142857142857,"a95":"0.99","info":"09/10/2014 at 21:54:39"},{"visible":true,"include":true,"step":"30.0","x":-98.58095238095237,"y":-82.30285714285714,"z":62.41238095238096,"a95":"0.99","info":"09/10/2014 at 21:54:39"},{"visible":true,"include":true,"step":"35.0","x":-101.96190476190475,"y":-74.26571428571428,"z":69.43142857142857,"a95":"0.99","info":"09/10/2014 at 21:54:39"},{"visible":true,"include":true,"step":"40.0","x":-120.77142857142856,"y":-57.808571428571426,"z":52.76571428571428,"a95":"0.99","info":"09/10/2014 at 21:54:39"},{"visible":true,"include":true,"step":"45.0","x":-86.91047619047619,"y":-75.31619047619049,"z":17.115238095238094,"a95":"0.99","info":"09/10/2014 at 21:54:39"},{"visible":true,"include":true,"step":"50.0","x":-92.5952380952381,"y":-99.3047619047619,"z":21.15714285714286,"a95":"0.99","info":"09/10/2014 at 21:54:39"},{"visible":true,"include":true,"step":"60.0","x":-64.99047619047619,"y":-72.3552380952381,"z":-7.889904761904761,"a95":"0.99","info":"09/10/2014 at 21:54:39"},{"visible":true,"include":true,"step":"70.0","x":-45.98571428571429,"y":-45.118095238095236,"z":8.040952380952382,"a95":"0.99","info":"09/10/2014 at 21:54:39"},{"visible":true,"include":false,"step":"80.0","x":71.7352380952381,"y":-110.55238095238094,"z":-13.957142857142859,"a95":"0.99","info":"09/10/2014 at 21:54:39"},{"visible":true,"include":false,"step":"90.0","x":-41.701904761904764,"y":-82.59619047619047,"z":10.303809523809523,"a95":"0.99","info":"09/10/2014 at 21:54:39"},{"visible":true,"include":false,"step":"100.0","x":16.412380952380953,"y":-50.4752380952381,"z":30.798095238095236,"a95":"0.99","info":"09/10/2014 at 21:54:39"}],"demagType":"Unknown","patch":1.1,"format":"Unknown","strat":null},{"version":"v1.1.0","exported":"2017-05-22T12:12:50.520Z","info":"","GEO":[{"dec":140.12462929301688,"inc":-29.13838508124795,"MAD":9.076993462016649,"cm":[-8.120488408686859e-15,6.767073673905716e-15,0],"intensity":316.3539881287869,"type":"dir","forced":true,"remark":"","origin":false,"nSteps":5,"minStep":"240","maxStep":"350","steps":["240","270","290","330","350"],"group":"None"}],"TECT":[{"dec":144.05142326276604,"inc":-0.4367142777423055,"MAD":9.076993462016613,"cm":[-1.8947806286936004e-14,-2.030122102171715e-14,8.797195776077431e-15],"intensity":316.3539881287869,"type":"dir","forced":true,"remark":"","origin":false,"nSteps":5,"minStep":"240","maxStep":"350","steps":["240","270","290","330","350"],"group":"None"}],"interpreted":true,"name":"SS14.22A","coreAzi":189,"coreDip":54,"bedStrike":259,"bedDip":32,"data":[{"visible":false,"include":false,"step":"20","x":-399.23809523809524,"y":-43.61904761904762,"z":-78.57142857142857,"a95":"4.6","info":"\"14-10-20\" at \"16:08\""},{"visible":true,"include":false,"step":"100","x":-49.61904761904762,"y":-103.33333333333333,"z":69.71428571428571,"a95":"11","info":"\"14-10-20\" at \"19:04\""},{"visible":true,"include":false,"step":"150","x":187.8095238095238,"y":-123.04761904761905,"z":21.61904761904762,"a95":"6.7","info":"\"14-10-20\" at \"22:04\""},{"visible":true,"include":false,"step":"180","x":217.9047619047619,"y":-59.714285714285715,"z":25.047619047619047,"a95":"6.7","info":"\"14-10-21\" at \"00:56\""},{"visible":true,"include":false,"step":"210","x":147.52380952380952,"y":-124.76190476190476,"z":47.04761904761905,"a95":"8.7","info":"\"14-10-21\" at \"17:05\""},{"visible":true,"include":true,"step":"240","x":116.57142857142857,"y":-112.95238095238095,"z":-6.666666666666667,"a95":"8.6","info":"\"14-10-21\" at \"20:05\""},{"visible":true,"include":true,"step":"270","x":158.57142857142858,"y":-148.1904761904762,"z":-27.523809523809526,"a95":"6.6","info":"\"14-10-21\" at \"23:07\""},{"visible":true,"include":true,"step":"290","x":187.52380952380952,"y":-192.57142857142858,"z":-38.285714285714285,"a95":"5","info":"\"14-10-22\" at \"15:36\""},{"visible":true,"include":false,"step":"310","x":239.14285714285714,"y":-36,"z":79.42857142857143,"a95":"5.6","info":"\"14-10-22\" at \"18:24\""},{"visible":true,"include":true,"step":"330","x":193.14285714285714,"y":-103.04761904761905,"z":7.523809523809524,"a95":"6.6","info":"\"14-10-22\" at \"21:34\""},{"visible":true,"include":true,"step":"350","x":106.38095238095238,"y":-110.76190476190476,"z":24.666666666666668,"a95":"13.2","info":"\"14-10-23\" at \"15:49\""},{"visible":false,"include":false,"step":"370","x":67.71428571428571,"y":-71.61904761904762,"z":-116.0952380952381,"a95":"15.9","info":"\"14-10-23\" at \"18:49\""},{"visible":false,"include":false,"step":"400","x":66.38095238095238,"y":-127.52380952380952,"z":6.190476190476191,"a95":"24.8","info":"\"14-10-23\" at \"21:47\""}],"demagType":"Unknown","patch":1.1,"format":"Unknown","strat":null},{"version":"v1.1.0","exported":"2017-05-22T12:12:50.520Z","info":"1","GEO":[{"dec":87.1106408889978,"inc":-9.828641279481937,"MAD":7.189122450804202,"cm":[0,-3.552713678800501e-14,0],"intensity":540.1813592269136,"type":"GC","origin":false,"forced":true,"remark":"","nSteps":4,"minStep":"10.0","maxStep":"23.0","steps":["10.0","15.0","20.0","23.0"],"group":"None","version":"v1.1.0"}],"TECT":[{"dec":91.05659381381838,"inc":-4.07700826909884,"MAD":7.189122450804296,"cm":[-2.842170943040401e-14,-8.43769498715119e-14,-3.552713678800501e-15],"intensity":540.1813592269136,"type":"GC","origin":false,"forced":true,"remark":"","nSteps":4,"minStep":"10.0","maxStep":"23.0","steps":["10.0","15.0","20.0","23.0"],"group":"None","version":"v1.1.0"}],"interpreted":true,"name":"SS14.22B","coreAzi":189,"coreDip":54,"bedStrike":259,"bedDip":32,"data":[{"visible":true,"include":false,"step":"0.0","x":-109.07619047619048,"y":53.63714285714286,"z":346.8095238095238,"a95":"0.99","info":"30/01/2015 at 13:11:03"},{"visible":true,"include":true,"step":"10.0","x":-33.05047619047619,"y":-90.67238095238095,"z":337.0857142857143,"a95":"0.99","info":"30/01/2015 at 13:11:03"},{"visible":true,"include":true,"step":"15.0","x":21.071428571428573,"y":-71.90095238095239,"z":266.8857142857143,"a95":"0.99","info":"30/01/2015 at 13:11:03"},{"visible":true,"include":true,"step":"20.0","x":38.301904761904765,"y":-50.05904761904762,"z":211.37142857142857,"a95":"0.99","info":"30/01/2015 at 13:11:03"},{"visible":true,"include":true,"step":"23.0","x":73.72952380952381,"y":-59.05619047619048,"z":180.33333333333334,"a95":"0.99","info":"30/01/2015 at 13:11:03"},{"visible":true,"include":false,"step":"25.0","x":36.18,"y":-97.97142857142858,"z":112.78095238095239,"a95":"0.99","info":"30/01/2015 at 13:11:03"},{"visible":true,"include":false,"step":"30.0","x":20.384761904761906,"y":-56.44380952380952,"z":105.44761904761906,"a95":"0.99","info":"30/01/2015 at 13:11:03"},{"visible":true,"include":false,"step":"33.0","x":52.957142857142856,"y":-70.54761904761905,"z":109.06666666666668,"a95":"0.99","info":"30/01/2015 at 13:11:03"},{"visible":true,"include":false,"step":"35.0","x":-39.710476190476186,"y":-79.63619047619048,"z":73.76761904761904,"a95":"0.99","info":"30/01/2015 at 13:11:03"},{"visible":true,"include":false,"step":"40.0","x":-35.62285714285714,"y":0.49482857142857145,"z":114.92380952380952,"a95":"0.99","info":"30/01/2015 at 13:11:03"},{"visible":true,"include":false,"step":"45.0","x":-34.19238095238095,"y":-8.572095238095239,"z":77.99809523809525,"a95":"0.99","info":"30/01/2015 at 13:11:03"},{"visible":true,"include":false,"step":"50.0","x":-89.10095238095238,"y":-46.08190476190477,"z":102.75238095238096,"a95":"0.99","info":"30/01/2015 at 13:11:03"},{"visible":true,"include":false,"step":"60.0","x":-137.82857142857142,"y":-1.8738095238095238,"z":129.42857142857142,"a95":"0.99","info":"30/01/2015 at 13:11:03"},{"visible":true,"include":false,"step":"70.0","x":-89.99047619047619,"y":-49.37142857142857,"z":71.52095238095238,"a95":"0.99","info":"30/01/2015 at 13:11:03"}],"demagType":"Unknown","patch":1.1,"format":"Unknown","strat":null},{"version":"v1.1.0","exported":"2017-05-22T12:12:50.520Z","info":"","GEO":[{"dec":160.59397273076843,"inc":-13.5304840413502,"MAD":11.970643689342667,"cm":[7.105427357601002e-15,-1.9539925233402755e-14,0],"intensity":962.7822918482655,"type":"GC","origin":false,"forced":true,"remark":"","nSteps":5,"minStep":"100","maxStep":"240","steps":["100","150","180","210","240"],"group":"None","version":"v1.1.0"}],"TECT":[{"dec":340.39860588285444,"inc":-18.135489007567436,"MAD":11.970643689342594,"cm":[-5.329070518200751e-15,-1.2434497875801753e-14,-7.105427357601002e-15],"intensity":962.7822918482656,"type":"GC","origin":false,"forced":true,"remark":"","nSteps":5,"minStep":"100","maxStep":"240","steps":["100","150","180","210","240"],"group":"None","version":"v1.1.0"}],"interpreted":true,"name":"SS14.23A","coreAzi":187,"coreDip":51,"bedStrike":259,"bedDip":32,"data":[{"visible":true,"include":false,"step":"20","x":-786.7619047619048,"y":-142.66666666666666,"z":1793.3333333333333,"a95":"3","info":"\"14-10-13\" at \"16:36\""},{"visible":true,"include":true,"step":"100","x":-268.57142857142856,"y":-14.476190476190476,"z":593.9047619047619,"a95":"3.5","info":"\"14-10-13\" at \"19:32\""},{"visible":true,"include":true,"step":"150","x":-126.38095238095238,"y":81.14285714285714,"z":378.0952380952381,"a95":"3.9","info":"\"14-10-13\" at \"22:59\""},{"visible":true,"include":true,"step":"180","x":-117.52380952380952,"y":28.095238095238095,"z":314.2857142857143,"a95":"3.9","info":"\"14-10-14\" at \"16:09\""},{"visible":true,"include":true,"step":"210","x":-134.85714285714286,"y":77.42857142857143,"z":336.76190476190476,"a95":"4.6","info":"\"14-10-14\" at \"19:18\""},{"visible":true,"include":true,"step":"240","x":-71.04761904761905,"y":88.95238095238095,"z":303.9047619047619,"a95":"3.8","info":"\"14-10-14\" at \"22:25\""},{"visible":true,"include":false,"step":"270","x":9.523809523809524,"y":1.9047619047619047,"z":194,"a95":"5.7","info":"\"14-10-15\" at \"16:16\""},{"visible":true,"include":false,"step":"290","x":36.19047619047619,"y":-5.619047619047619,"z":136.57142857142858,"a95":"9.6","info":"\"14-10-15\" at \"19:21\""},{"visible":true,"include":false,"step":"310","x":9.047619047619047,"y":6.380952380952381,"z":182.57142857142858,"a95":"6.1","info":"\"14-10-15\" at \"22:39\""},{"visible":true,"include":false,"step":"330","x":-7.942857142857143,"y":57.2,"z":68.81904761904762,"a95":"14.4","info":"\"14-10-16\" at \"16:01\""},{"visible":true,"include":false,"step":"350","x":-23.904761904761905,"y":4.666666666666667,"z":180.0952380952381,"a95":"10","info":"\"14-10-16\" at \"19:53\""},{"visible":true,"include":false,"step":"370","x":-86.85714285714286,"y":42.476190476190474,"z":131.14285714285714,"a95":"18.6","info":"\"14-10-16\" at \"23:01\""},{"visible":true,"include":false,"step":"400","x":-173.33333333333334,"y":38.95238095238095,"z":142.66666666666666,"a95":"17.6","info":"\"14-10-17\" at \"14:39\""},{"visible":true,"include":false,"step":"420","x":-139.33333333333334,"y":106,"z":45.333333333333336,"a95":"27","info":"\"14-10-17\" at \"17:24\""}],"demagType":"Unknown","patch":1.1,"format":"Unknown","strat":null},{"version":"v1.1.0","exported":"2017-05-22T12:12:50.520Z","info":"7","GEO":[{"dec":152.92958676364253,"inc":-27.198730727187883,"MAD":5.583979808817255,"cm":[2.7068294695622863e-15,1.1504025245639717e-14,0],"intensity":243.01372186932173,"type":"dir","forced":true,"remark":"","origin":false,"nSteps":3,"minStep":"16.0","maxStep":"25.0","steps":["16.0","20.0","25.0"],"group":"None"}],"TECT":[{"dec":154.7155501342329,"inc":3.743022973030137,"MAD":5.583979808817218,"cm":[-5.4136589391245725e-15,-3.654219783909087e-14,2.0301221021717147e-15],"intensity":243.01372186932173,"type":"dir","forced":true,"remark":"","origin":false,"nSteps":3,"minStep":"16.0","maxStep":"25.0","steps":["16.0","20.0","25.0"],"group":"None"}],"interpreted":true,"name":"SS14.24A","coreAzi":202,"coreDip":34,"bedStrike":259,"bedDip":32,"data":[{"visible":true,"include":false,"step":"0.0","x":-483.7142857142857,"y":32.21904761904762,"z":-66.70095238095239,"a95":"0.99","info":"09/10/2014 at 21:54:39"},{"visible":true,"include":false,"step":"4.0","x":-271.1142857142857,"y":-48.40952380952381,"z":-84.38095238095238,"a95":"0.99","info":"09/10/2014 at 21:54:39"},{"visible":true,"include":false,"step":"8.0","x":-117.31428571428572,"y":-54.99619047619048,"z":-64.20380952380953,"a95":"0.99","info":"09/10/2014 at 21:54:39"},{"visible":true,"include":false,"step":"12.0","x":38.315238095238094,"y":-106.13333333333334,"z":27.446666666666665,"a95":"0.99","info":"09/10/2014 at 21:54:39"},{"visible":true,"include":true,"step":"16.0","x":101.88571428571429,"y":-95.8,"z":35.12380952380953,"a95":"0.99","info":"09/10/2014 at 21:54:39"},{"visible":true,"include":true,"step":"20.0","x":126.23809523809524,"y":-126.6952380952381,"z":29.08761904761905,"a95":"0.99","info":"09/10/2014 at 21:54:39"},{"visible":true,"include":true,"step":"25.0","x":70.56285714285714,"y":-57.555238095238096,"z":41.02952380952381,"a95":"0.99","info":"09/10/2014 at 21:54:39"},{"visible":true,"include":false,"step":"30.0","x":83.1247619047619,"y":-2.7483809523809524,"z":44.4847619047619,"a95":"0.99","info":"09/10/2014 at 21:54:39"},{"visible":false,"include":false,"step":"35.0","x":-85.10761904761905,"y":-65.30190476190475,"z":28.768571428571427,"a95":"0.99","info":"09/10/2014 at 21:54:39"},{"visible":false,"include":false,"step":"40.0","x":-128.96190476190475,"y":-45.78285714285715,"z":103.4,"a95":"0.99","info":"09/10/2014 at 21:54:39"},{"visible":false,"include":false,"step":"45.0","x":-220.82857142857142,"y":88.21428571428571,"z":33.6552380952381,"a95":"0.99","info":"09/10/2014 at 21:54:39"},{"visible":false,"include":false,"step":"50.0","x":-355.03809523809525,"y":-13.252380952380953,"z":52.09809523809523,"a95":"0.99","info":"09/10/2014 at 21:54:39"},{"visible":false,"include":false,"step":"60.0","x":-357,"y":124.67619047619047,"z":6.466285714285714,"a95":"0.99","info":"09/10/2014 at 21:54:39"},{"visible":false,"include":false,"step":"70.0","x":-486.2190476190476,"y":90.41047619047619,"z":147.6952380952381,"a95":"0.99","info":"09/10/2014 at 21:54:39"},{"visible":false,"include":false,"step":"80.0","x":-507.42857142857144,"y":-173.74285714285713,"z":-18.01238095238095,"a95":"0.99","info":"09/10/2014 at 21:54:39"},{"visible":false,"include":false,"step":"90.0","x":-228.30476190476188,"y":136.54285714285714,"z":-21.256190476190476,"a95":"0.99","info":"09/10/2014 at 21:54:39"},{"visible":false,"include":false,"step":"100.0","x":-438.1904761904762,"y":104.19047619047619,"z":293.0095238095238,"a95":"0.99","info":"09/10/2014 at 21:54:39"}],"demagType":"Unknown","patch":1.1,"format":"Unknown","strat":null},{"version":"v1.1.0","exported":"2017-05-22T12:12:50.520Z","info":"","GEO":[{"dec":150.91025589887522,"inc":-30.871925113228805,"MAD":4.664482207809518,"cm":[-1.4210854715202004e-14,-5.1514348342607263e-14,0],"intensity":602.0768364642529,"type":"dir","forced":true,"remark":"","origin":false,"nSteps":4,"minStep":"310","maxStep":"370","steps":["310","330","350","370"],"group":"None","version":"v1.1.0"}],"TECT":[{"dec":153.54308422429926,"inc":-0.16012530747572923,"MAD":4.664482207809522,"cm":[-2.1316282072803006e-14,-5.684341886080802e-14,1.0658141036401503e-14],"intensity":602.0768364642529,"type":"dir","forced":true,"remark":"","origin":false,"nSteps":4,"minStep":"310","maxStep":"370","steps":["310","330","350","370"],"group":"None","version":"v1.1.0"}],"interpreted":true,"name":"SS14.24B","coreAzi":202,"coreDip":34,"bedStrike":259,"bedDip":32,"data":[{"visible":false,"include":false,"step":"20","x":-434.4761904761905,"y":-292.76190476190476,"z":-248.1904761904762,"a95":"3.4","info":"\"14-10-20\" at \"16:10\""},{"visible":true,"include":false,"step":"100","x":-52.19047619047619,"y":-371.14285714285717,"z":150.66666666666666,"a95":"4.3","info":"\"14-10-20\" at \"19:06\""},{"visible":true,"include":false,"step":"150","x":229.33333333333334,"y":-388.57142857142856,"z":199.33333333333334,"a95":"3.5","info":"\"14-10-20\" at \"22:06\""},{"visible":true,"include":false,"step":"180","x":180.57142857142858,"y":-284.76190476190476,"z":134.85714285714286,"a95":"4.3","info":"\"14-10-21\" at \"00:58\""},{"visible":true,"include":false,"step":"210","x":142.47619047619048,"y":-259.04761904761904,"z":164.57142857142858,"a95":"5","info":"\"14-10-21\" at \"17:07\""},{"visible":true,"include":false,"step":"240","x":213.8095238095238,"y":-188.1904761904762,"z":115.61904761904762,"a95":"5.7","info":"\"14-10-21\" at \"20:07\""},{"visible":true,"include":false,"step":"270","x":240.38095238095238,"y":-231.33333333333334,"z":145.04761904761904,"a95":"4.6","info":"\"14-10-21\" at \"23:09\""},{"visible":true,"include":false,"step":"290","x":171.61904761904762,"y":-278.3809523809524,"z":65.42857142857143,"a95":"5.5","info":"\"14-10-22\" at \"15:38\""},{"visible":true,"include":true,"step":"310","x":283.7142857142857,"y":-272.3809523809524,"z":97.04761904761905,"a95":"4.8","info":"\"14-10-22\" at \"18:26\""},{"visible":true,"include":true,"step":"330","x":211.42857142857142,"y":-197.71428571428572,"z":27.61904761904762,"a95":"5.8","info":"\"14-10-22\" at \"21:36\""},{"visible":true,"include":true,"step":"350","x":224.28571428571428,"y":-191.52380952380952,"z":40.19047619047619,"a95":"6.8","info":"\"14-10-23\" at \"15:52\""},{"visible":true,"include":true,"step":"370","x":150.95238095238096,"y":-131.71428571428572,"z":4.285714285714286,"a95":"12.4","info":"\"14-10-23\" at \"18:51\""},{"visible":false,"include":false,"step":"400","x":94.85714285714286,"y":-218.0952380952381,"z":32.95238095238095,"a95":"12.8","info":"\"14-10-23\" at \"21:49\""},{"visible":false,"include":false,"step":"420","x":200.38095238095238,"y":-65.71428571428571,"z":20.476190476190474,"a95":"23.2","info":"\"14-10-24\" at \"16:15\""},{"visible":false,"include":false,"step":"440","x":-19.428571428571427,"y":-373.42857142857144,"z":338.2857142857143,"a95":"13.6","info":"\"14-10-24\" at \"19:29\""}],"demagType":"Unknown","patch":1.1,"format":"Unknown","strat":null},{"version":"v1.1.0","exported":"2017-05-22T12:12:50.520Z","info":"2","GEO":[{"dec":177.75361231967634,"inc":-34.55138649891223,"MAD":5.901987551856217,"cm":[8.120488408686859e-15,-3.1805246267356866e-14,0],"intensity":710.5458739022805,"type":"dir","forced":true,"remark":"","origin":false,"nSteps":5,"minStep":"20.0","maxStep":"35.0","steps":["20.0","23.0","25.0","30.0","35.0"],"group":"None"}],"TECT":[{"dec":176.20947644116666,"inc":-2.8429911103851553,"MAD":5.901987551856189,"cm":[6.767073673905716e-15,4.330927151299658e-14,1.3534147347811431e-15],"intensity":710.5458739022805,"type":"dir","forced":true,"remark":"","origin":false,"nSteps":5,"minStep":"20.0","maxStep":"35.0","steps":["20.0","23.0","25.0","30.0","35.0"],"group":"None"}],"interpreted":true,"name":"SS14.25A","coreAzi":231,"coreDip":27,"bedStrike":259,"bedDip":32,"data":[{"visible":true,"include":false,"step":"0.0","x":123.25714285714287,"y":-247.47619047619048,"z":411.46666666666664,"a95":"0.99","info":"30/01/2015 at 13:11:03"},{"visible":true,"include":false,"step":"10.0","x":407.12380952380954,"y":-420.95238095238096,"z":309.447619047619,"a95":"0.99","info":"30/01/2015 at 13:11:03"},{"visible":true,"include":false,"step":"15.0","x":480.45714285714286,"y":-451.552380952381,"z":172.74285714285713,"a95":"0.99","info":"30/01/2015 at 13:11:03"},{"visible":true,"include":true,"step":"20.0","x":452.6285714285715,"y":-437.42857142857144,"z":115.6952380952381,"a95":"0.99","info":"30/01/2015 at 13:11:03"},{"visible":true,"include":true,"step":"23.0","x":488.0952380952381,"y":-344.1333333333333,"z":124.87619047619049,"a95":"0.99","info":"30/01/2015 at 13:11:03"},{"visible":true,"include":true,"step":"25.0","x":368,"y":-353.6666666666667,"z":83.44,"a95":"0.99","info":"30/01/2015 at 13:11:03"},{"visible":true,"include":true,"step":"30.0","x":239.47619047619048,"y":-284.83809523809526,"z":56.741904761904756,"a95":"0.99","info":"30/01/2015 at 13:11:03"},{"visible":true,"include":false,"step":"33.0","x":116.97142857142858,"y":-41.275238095238095,"z":70.60285714285715,"a95":"0.99","info":"30/01/2015 at 13:11:03"},{"visible":true,"include":true,"step":"35.0","x":6.238952380952381,"y":-86.75714285714287,"z":24.10952380952381,"a95":"0.99","info":"30/01/2015 at 13:11:03"},{"visible":true,"include":false,"step":"40.0","x":-16.522857142857145,"y":-114.81904761904761,"z":46.76571428571429,"a95":"0.99","info":"30/01/2015 at 13:11:03"},{"visible":true,"include":false,"step":"45.0","x":-217.23809523809524,"y":220.25714285714284,"z":60.74476190476191,"a95":"0.99","info":"30/01/2015 at 13:11:03"},{"visible":false,"include":false,"step":"50.0","x":-188.13333333333335,"y":179.83809523809524,"z":-123.0952380952381,"a95":"0.99","info":"30/01/2015 at 13:11:03"},{"visible":false,"include":false,"step":"60.0","x":-599.495238095238,"y":293.7333333333333,"z":9.741904761904763,"a95":"0.99","info":"30/01/2015 at 13:11:03"},{"visible":false,"include":false,"step":"70.0","x":-559.0095238095239,"y":432.83809523809526,"z":136.9714285714286,"a95":"0.99","info":"30/01/2015 at 13:11:03"}],"demagType":"Unknown","patch":1.1,"format":"Unknown","strat":null}]
