# Supplementary material for: Paleomagnetic constraints on the timing and distribution of Cenozoic rotations in Central and Eastern Anatolia
Source: Copernicus journal article supplement (doi:10.5194/se-9-295-2018), 2018-03-21
Supplement: Supplementary file 2 [file se-9-295-2018-supplement.zip › se-2017-66_DATA_dir files/dir files Sivas/SS15.dir]

[{"version":"v1.1.0","exported":"2017-05-22T12:17:40.976Z","info":"","GEO":[{"dec":320.1174721751071,"inc":-25.738290945641094,"MAD":4.646816374211274,"cm":[-1.7323708605198632e-13,-8.661854302599316e-14,0],"intensity":7386.93954038089,"type":"GC","origin":false,"forced":true,"remark":"","nSteps":6,"minStep":"100","maxStep":"270","steps":["100","150","180","210","240","270"],"group":"None"}],"TECT":[{"dec":306.23688272547076,"inc":-34.54814761733078,"MAD":4.646816374211128,"cm":[-2.0842586915629605e-13,-1.948917218084846e-13,0],"intensity":7386.939540380889,"type":"GC","origin":false,"forced":true,"remark":"","nSteps":6,"minStep":"100","maxStep":"270","steps":["100","150","180","210","240","270"],"group":"None"}],"interpreted":true,"name":"SS15.1A","coreAzi":347,"coreDip":21,"bedStrike":293,"bedDip":25,"data":[{"visible":true,"include":false,"step":"20","x":-7261.523809523809,"y":-534.5714285714286,"z":6854.857142857143,"a95":"2.3","info":"\"14-09-29\" at \"16:56\""},{"visible":true,"include":true,"step":"100","x":-4390.285714285715,"y":-967.8095238095239,"z":4495.809523809524,"a95":"2.5","info":"\"14-09-29\" at \"19:44\""},{"visible":true,"include":true,"step":"150","x":-2357.3333333333335,"y":-1388.5714285714287,"z":1652.6666666666667,"a95":"2.2","info":"\"14-09-29\" at \"22:43\""},{"visible":true,"include":true,"step":"180","x":-1952.3809523809523,"y":-1631.8095238095239,"z":1210.095238095238,"a95":"2.3","info":"\"14-09-30\" at \"17:19\""},{"visible":true,"include":true,"step":"210","x":-1713.6190476190477,"y":-1615.3333333333333,"z":817.4285714285714,"a95":"2.5","info":"\"14-09-30\" at \"20:23\""},{"visible":true,"include":true,"step":"240","x":-1265.5238095238096,"y":-1824.1904761904761,"z":470.85714285714283,"a95":"2.4","info":"\"14-09-30\" at \"23:29\""},{"visible":true,"include":true,"step":"270","x":-961.9047619047619,"y":-1342.5714285714287,"z":41.04761904761905,"a95":"2.2","info":"\"14-10-01\" at \"17:51\""},{"visible":true,"include":false,"step":"300","x":-374,"y":-1349.3333333333333,"z":38.95238095238095,"a95":"2.4","info":"\"14-10-01\" at \"20:57\""},{"visible":true,"include":false,"step":"320","x":-498,"y":-1707.142857142857,"z":-43.23809523809524,"a95":"1.9","info":"\"14-10-02\" at \"00:09\""},{"visible":true,"include":false,"step":"340","x":-351.3333333333333,"y":-1453.6190476190477,"z":240.95238095238096,"a95":"2.3","info":"\"14-10-02\" at \"17:40\""},{"visible":true,"include":false,"step":"370","x":-492.0952380952381,"y":-1378.2857142857142,"z":-86.66666666666667,"a95":"2.1","info":"\"14-10-02\" at \"20:31\""},{"visible":true,"include":false,"step":"400","x":-510.1904761904762,"y":-1599.6190476190477,"z":-30.476190476190474,"a95":"2.1","info":"\"14-10-02\" at \"23:42\""},{"visible":true,"include":false,"step":"420","x":-508.3809523809524,"y":-1335.5238095238096,"z":-230,"a95":"1.8","info":"\"14-10-03\" at \"17:24\""},{"visible":true,"include":false,"step":"440","x":-449.7142857142857,"y":-1436.2857142857142,"z":-81.61904761904762,"a95":"1.8","info":"\"14-10-03\" at \"20:42\""},{"visible":true,"include":false,"step":"460","x":-366.85714285714283,"y":-1315.7142857142858,"z":-271.14285714285717,"a95":"2.3","info":"\"14-10-04\" at \"00:05\""},{"visible":true,"include":false,"step":"480","x":-631.8095238095239,"y":-1328.4761904761904,"z":-191.42857142857142,"a95":"2.4","info":"\"14-10-04\" at \"10:54\""},{"visible":true,"include":false,"step":"510","x":-518.6666666666666,"y":-1271.047619047619,"z":-180,"a95":"2.5","info":"\"14-10-04\" at \"13:46\""},{"visible":true,"include":false,"step":"540","x":-538.3809523809524,"y":-1089.142857142857,"z":-259.3333333333333,"a95":"2.7","info":"\"14-10-04\" at \"17:11\""},{"visible":true,"include":false,"step":"570","x":-476.57142857142856,"y":-1065.2380952380952,"z":-386.1904761904762,"a95":"3.2","info":"\"14-10-05\" at \"11:17\""},{"visible":true,"include":false,"step":"600","x":-484.3809523809524,"y":-1170.1904761904761,"z":-10.19047619047619,"a95":"3","info":"\"14-10-05\" at \"14:34\""},{"visible":true,"include":false,"step":"630","x":-139.9047619047619,"y":-656.2857142857143,"z":-91.42857142857143,"a95":"4.3","info":"\"14-10-05\" at \"18:04\""},{"visible":false,"include":false,"step":"660","x":-110.28571428571429,"y":-656.0952380952381,"z":183.33333333333334,"a95":"4.9","info":"\"14-10-11\" at \"08:39\""},{"visible":false,"include":false,"step":"680","x":-36.476190476190474,"y":80.76190476190476,"z":-408.3809523809524,"a95":"7.6","info":"\"14-10-11\" at \"11:43\""}],"demagType":"Unknown","patch":1.1,"format":"Unknown","strat":null},{"version":"v1.1.0","exported":"2017-05-22T12:17:40.976Z","info":"","GEO":[{"dec":357.6724476985555,"inc":-37.024925318118136,"MAD":10.574070375387777,"cm":[-2.5173514066929265e-13,-1.948917218084846e-13,0],"intensity":6826.408830032028,"type":"GC","origin":false,"forced":true,"remark":"","nSteps":6,"minStep":"100","maxStep":"270","steps":["100","150","180","210","240","270"],"group":"None"}],"TECT":[{"dec":342.4749005547186,"inc":-58.28997146576572,"MAD":10.574070375387995,"cm":[-3.5188783104309725e-14,9.74458609042423e-14,1.0285951984336688e-13],"intensity":6826.408830032027,"type":"GC","origin":false,"forced":true,"remark":"","nSteps":6,"minStep":"100","maxStep":"270","steps":["100","150","180","210","240","270"],"group":"None"}],"interpreted":true,"name":"SS15.2B","coreAzi":341,"coreDip":7,"bedStrike":293,"bedDip":25,"data":[{"visible":true,"include":false,"step":"20","x":-8642.761904761905,"y":494.95238095238096,"z":6951.333333333333,"a95":"2.3","info":"\"14-09-29\" at \"16:58\""},{"visible":true,"include":true,"step":"100","x":-4408.380952380952,"y":-56.857142857142854,"z":4344.476190476191,"a95":"2.3","info":"\"14-09-29\" at \"19:46\""},{"visible":true,"include":true,"step":"150","x":-1904,"y":-700.6666666666666,"z":2318.5714285714284,"a95":"2.6","info":"\"14-09-29\" at \"22:45\""},{"visible":true,"include":true,"step":"180","x":-1497.8095238095239,"y":-734.8571428571429,"z":1847.142857142857,"a95":"2.6","info":"\"14-09-30\" at \"17:21\""},{"visible":true,"include":true,"step":"210","x":-1050.6666666666667,"y":-631.3333333333334,"z":1498.6666666666667,"a95":"2.7","info":"\"14-09-30\" at \"20:25\""},{"visible":true,"include":true,"step":"240","x":-877.3333333333334,"y":-1037.3333333333333,"z":920.4761904761905,"a95":"2.8","info":"\"14-09-30\" at \"23:30\""},{"visible":true,"include":true,"step":"270","x":-223.33333333333334,"y":-1052.7619047619048,"z":545.9047619047619,"a95":"2.8","info":"\"14-10-01\" at \"17:53\""},{"visible":true,"include":false,"step":"300","x":3.3333333333333335,"y":-1359.4285714285713,"z":188.0952380952381,"a95":"2.3","info":"\"14-10-01\" at \"20:59\""},{"visible":true,"include":false,"step":"320","x":-85.52380952380952,"y":-1259.904761904762,"z":620.2857142857143,"a95":"2.3","info":"\"14-10-02\" at \"00:11\""},{"visible":true,"include":false,"step":"340","x":-136.38095238095238,"y":-1553.142857142857,"z":841.7142857142857,"a95":"2.1","info":"\"14-10-02\" at \"17:42\""},{"visible":true,"include":false,"step":"370","x":-277.14285714285717,"y":-1346.4761904761904,"z":389.23809523809524,"a95":"2.1","info":"\"14-10-02\" at \"20:33\""},{"visible":true,"include":false,"step":"400","x":-130.0952380952381,"y":-1267.6190476190477,"z":563.047619047619,"a95":"2.4","info":"\"14-10-02\" at \"23:44\""},{"visible":true,"include":false,"step":"420","x":-159.61904761904762,"y":-1222.5714285714287,"z":446,"a95":"2.3","info":"\"14-10-03\" at \"17:27\""},{"visible":true,"include":false,"step":"440","x":-84.95238095238095,"y":-1296.6666666666667,"z":519.7142857142857,"a95":"2.1","info":"\"14-10-03\" at \"20:44\""},{"visible":true,"include":false,"step":"460","x":-32.76190476190476,"y":-1150.2857142857142,"z":548.8571428571429,"a95":"2.5","info":"\"14-10-04\" at \"00:07\""},{"visible":true,"include":false,"step":"480","x":-99.52380952380952,"y":-1111.047619047619,"z":690.2857142857143,"a95":"2.8","info":"\"14-10-04\" at \"10:56\""},{"visible":true,"include":false,"step":"510","x":-132.38095238095238,"y":-1256.3809523809523,"z":646.7619047619048,"a95":"2.9","info":"\"14-10-04\" at \"13:48\""},{"visible":true,"include":false,"step":"540","x":79.42857142857143,"y":-1130.4761904761904,"z":581.8095238095239,"a95":"4.5","info":"\"14-10-04\" at \"17:13\""},{"visible":true,"include":false,"step":"570","x":-64.0952380952381,"y":-940.4761904761905,"z":457.3333333333333,"a95":"4","info":"\"14-10-05\" at \"11:19\""},{"visible":true,"include":false,"step":"600","x":-97.42857142857143,"y":-960.2857142857143,"z":522.6666666666666,"a95":"2.4","info":"\"14-10-05\" at \"14:36\""},{"visible":false,"include":false,"step":"630","x":153.9047619047619,"y":-305.23809523809524,"z":611.2380952380952,"a95":"4","info":"\"14-10-05\" at \"18:06\""},{"visible":false,"include":false,"step":"660","x":85.52380952380952,"y":-575.2380952380952,"z":398.57142857142856,"a95":"3.9","info":"\"14-10-11\" at \"08:41\""},{"visible":false,"include":false,"step":"680","x":-80.0952380952381,"y":235.33333333333334,"z":76.0952380952381,"a95":"12.5","info":"\"14-10-11\" at \"11:45\""}],"demagType":"Unknown","patch":1.1,"format":"Unknown","strat":null},{"version":"v1.1.0","exported":"2017-05-22T12:17:40.976Z","info":"","GEO":[{"dec":36.36878694628723,"inc":-31.313956745809158,"MAD":8.058361199948083,"cm":[0,-2.165463575649829e-14,0],"intensity":2969.7789621283646,"type":"GC","origin":false,"forced":true,"remark":"","nSteps":5,"minStep":"100","maxStep":"270","steps":["100","150","180","240","270"],"group":"None"}],"TECT":[{"dec":43.31228344210865,"inc":-55.31623743491222,"MAD":8.058361199948012,"cm":[-8.661854302599316e-14,-9.74458609042423e-14,6.767073673905716e-15],"intensity":2969.7789621283664,"type":"GC","origin":false,"forced":true,"remark":"","nSteps":5,"minStep":"100","maxStep":"270","steps":["100","150","180","240","270"],"group":"None"}],"interpreted":true,"name":"SS15.4A","coreAzi":340,"coreDip":23,"bedStrike":293,"bedDip":25,"data":[{"visible":true,"include":false,"step":"20","x":-4155.142857142857,"y":2192.095238095238,"z":3891.904761904762,"a95":"2.1","info":"\"14-10-20\" at \"16:57\""},{"visible":true,"include":true,"step":"100","x":-1879.5238095238096,"y":1065.904761904762,"z":2132.095238095238,"a95":"2.3","info":"\"14-10-20\" at \"20:16\""},{"visible":true,"include":true,"step":"150","x":109.23809523809524,"y":229.04761904761904,"z":-461.6190476190476,"a95":"5.5","info":"\"14-10-20\" at \"23:10\""},{"visible":true,"include":true,"step":"180","x":-18.666666666666668,"y":42.095238095238095,"z":-410.4761904761905,"a95":"5.4","info":"\"14-10-21\" at \"15:15\""},{"visible":false,"include":false,"step":"210","x":-144.76190476190476,"y":-85.33333333333333,"z":-238.57142857142858,"a95":"8.900001","info":"\"14-10-21\" at \"18:06\""},{"visible":true,"include":true,"step":"240","x":50.666666666666664,"y":165.33333333333334,"z":-431.14285714285717,"a95":"4.9","info":"\"14-10-21\" at \"21:15\""},{"visible":true,"include":true,"step":"270","x":-315.9047619047619,"y":544.1904761904761,"z":-945.8095238095239,"a95":"2.9","info":"\"14-10-22\" at \"00:15\""},{"visible":true,"include":false,"step":"300","x":-245.42857142857142,"y":351.9047619047619,"z":-472.95238095238096,"a95":"3.3","info":"\"14-10-22\" at \"16:32\""},{"visible":true,"include":false,"step":"330","x":-27.333333333333332,"y":332.2857142857143,"z":74.66666666666667,"a95":"4.7","info":"\"14-10-22\" at \"19:38\""},{"visible":true,"include":false,"step":"360","x":-225.52380952380952,"y":432.4761904761905,"z":164.57142857142858,"a95":"5","info":"\"14-10-22\" at \"22:46\""},{"visible":true,"include":false,"step":"390","x":-137.14285714285714,"y":566.8571428571429,"z":271.14285714285717,"a95":"3.5","info":"\"14-10-23\" at \"16:58\""},{"visible":true,"include":false,"step":"420","x":-221.9047619047619,"y":569.8095238095239,"z":788.3809523809524,"a95":"2.6","info":"\"14-10-23\" at \"20:00\""}],"demagType":"Unknown","patch":1.1,"format":"Unknown","strat":null},{"version":"v1.1.0","exported":"2017-05-22T12:17:40.976Z","info":"3","GEO":[{"dec":325.02068042473644,"inc":-19.57368909087264,"MAD":18.758985511673217,"cm":[-4.263256414560601e-14,6.039613253960852e-14,0],"intensity":9114.06021685644,"type":"GC","origin":false,"forced":true,"remark":"","nSteps":11,"minStep":"5.0","maxStep":"60.0","steps":["5.0","10.0","15.0","20.0","25.0","30.0","35.0","40.0","45.0","50.0","60.0"],"group":"None","version":"v1.1.0"}],"TECT":[{"dec":314.2831537046484,"inc":-30.981663855167916,"MAD":18.758985511672357,"cm":[-1.7053025658242404e-13,4.565237077258644e-13,1.4210854715202004e-14],"intensity":9114.06021685644,"type":"GC","origin":false,"forced":true,"remark":"","nSteps":11,"minStep":"5.0","maxStep":"60.0","steps":["5.0","10.0","15.0","20.0","25.0","30.0","35.0","40.0","45.0","50.0","60.0"],"group":"None","version":"v1.1.0"}],"interpreted":true,"name":"SS15.4B","coreAzi":340,"coreDip":23,"bedStrike":293,"bedDip":25,"data":[{"visible":true,"include":false,"step":"0.0","x":-4820.666666666667,"y":1912.7619047619048,"z":5461.238095238095,"a95":"0.99","info":"22/09/2014 at 00:14:40"},{"visible":true,"include":true,"step":"5.0","x":-4403.9047619047615,"y":1874.2857142857142,"z":4580.190476190476,"a95":"0.99","info":"22/09/2014 at 00:14:40"},{"visible":true,"include":true,"step":"10.0","x":-3237.714285714286,"y":1597.2380952380952,"z":3594.190476190476,"a95":"0.99","info":"22/09/2014 at 00:14:40"},{"visible":true,"include":true,"step":"15.0","x":-2752.6666666666665,"y":1335.5238095238096,"z":3305.2380952380954,"a95":"0.99","info":"22/09/2014 at 00:14:40"},{"visible":true,"include":true,"step":"20.0","x":-2519.4285714285716,"y":1233.4285714285713,"z":2574.3809523809523,"a95":"0.99","info":"22/09/2014 at 00:14:40"},{"visible":true,"include":true,"step":"25.0","x":-1991.2380952380952,"y":779.4761904761905,"z":2396.4761904761904,"a95":"0.99","info":"22/09/2014 at 00:14:40"},{"visible":true,"include":true,"step":"30.0","x":-2242.8571428571427,"y":243.23809523809524,"z":2570.9523809523807,"a95":"0.99","info":"22/09/2014 at 00:14:40"},{"visible":true,"include":true,"step":"35.0","x":-2369.2380952380954,"y":81.07523809523809,"z":1980.095238095238,"a95":"0.99","info":"22/09/2014 at 00:14:40"},{"visible":true,"include":true,"step":"40.0","x":-2072.6666666666665,"y":-66.21714285714286,"z":1831.904761904762,"a95":"0.99","info":"22/09/2014 at 00:14:40"},{"visible":true,"include":true,"step":"45.0","x":-2112.5714285714284,"y":242.7047619047619,"z":1782.095238095238,"a95":"0.99","info":"22/09/2014 at 00:14:40"},{"visible":true,"include":true,"step":"50.0","x":-1715.6190476190477,"y":65.04476190476191,"z":1640.2857142857142,"a95":"0.99","info":"22/09/2014 at 00:14:40"},{"visible":true,"include":true,"step":"60.0","x":-1745.047619047619,"y":-63.98571428571429,"z":1898.952380952381,"a95":"0.99","info":"22/09/2014 at 00:14:40"},{"visible":true,"include":false,"step":"70.0","x":-2044,"y":-158.15238095238095,"z":1128.7619047619048,"a95":"0.99","info":"22/09/2014 at 00:14:40"},{"visible":true,"include":false,"step":"80.0","x":-1582.6666666666667,"y":161.94285714285715,"z":-294.35238095238094,"a95":"0.99","info":"22/09/2014 at 00:14:40"},{"visible":true,"include":false,"step":"90.0","x":-1805.6190476190477,"y":-902.5619047619048,"z":655.1333333333333,"a95":"0.99","info":"22/09/2014 at 00:14:40"},{"visible":true,"include":false,"step":"100.0","x":-516.0761904761905,"y":-114.53333333333333,"z":902.5714285714286,"a95":"0.99","info":"22/09/2014 at 00:14:40"}],"demagType":"Unknown","patch":1.1,"format":"Unknown","strat":null},{"version":"v1.1.0","exported":"2017-05-22T12:17:40.976Z","info":"","GEO":[],"TECT":[],"interpreted":false,"name":"SS15.5A","coreAzi":343,"coreDip":21,"bedStrike":293,"bedDip":25,"data":[{"visible":true,"include":false,"step":"20","x":-3928.7619047619046,"y":1283.142857142857,"z":7490.476190476191,"a95":"2.6","info":"\"14-09-29\" at \"17:00\""},{"visible":true,"include":false,"step":"100","x":-481.8095238095238,"y":915.5238095238095,"z":1461.047619047619,"a95":"2.8","info":"\"14-09-29\" at \"19:48\""},{"visible":true,"include":false,"step":"150","x":459.8095238095238,"y":233.33333333333334,"z":-322.3809523809524,"a95":"3.4","info":"\"14-09-29\" at \"22:49\""},{"visible":true,"include":false,"step":"180","x":548.4761904761905,"y":-87.14285714285714,"z":-150.95238095238096,"a95":"3.7","info":"\"14-09-30\" at \"17:23\""},{"visible":true,"include":false,"step":"210","x":403.9047619047619,"y":197.61904761904762,"z":-243.23809523809524,"a95":"4.7","info":"\"14-09-30\" at \"20:27\""},{"visible":true,"include":false,"step":"240","x":438.95238095238096,"y":408.76190476190476,"z":-16.666666666666668,"a95":"3.4","info":"\"14-09-30\" at \"23:32\""},{"visible":true,"include":false,"step":"270","x":492.1904761904762,"y":-105.04761904761905,"z":-362.57142857142856,"a95":"3.6","info":"\"14-10-01\" at \"17:55\""},{"visible":true,"include":false,"step":"300","x":415.14285714285717,"y":-75.04761904761905,"z":640.6666666666666,"a95":"3.4","info":"\"14-10-01\" at \"21:01\""},{"visible":true,"include":false,"step":"320","x":205.9047619047619,"y":141.33333333333334,"z":635.047619047619,"a95":"4","info":"\"14-10-02\" at \"00:13\""},{"visible":true,"include":false,"step":"340","x":37.80952380952381,"y":214.1904761904762,"z":684.1904761904761,"a95":"3.5","info":"\"14-10-02\" at \"17:43\""},{"visible":true,"include":false,"step":"370","x":129.14285714285714,"y":67.33333333333333,"z":634.6666666666666,"a95":"3.3","info":"\"14-10-02\" at \"20:35\""},{"visible":true,"include":false,"step":"400","x":40.285714285714285,"y":145.42857142857142,"z":811.8095238095239,"a95":"3.1","info":"\"14-10-02\" at \"23:46\""},{"visible":true,"include":false,"step":"420","x":51.523809523809526,"y":175.52380952380952,"z":582,"a95":"3.9","info":"\"14-10-03\" at \"17:30\""},{"visible":true,"include":false,"step":"440","x":-113.23809523809524,"y":35.904761904761905,"z":798.5714285714286,"a95":"3.5","info":"\"14-10-03\" at \"20:46\""},{"visible":true,"include":false,"step":"460","x":-288.3809523809524,"y":62.19047619047619,"z":828.952380952381,"a95":"3.1","info":"\"14-10-04\" at \"00:09\""},{"visible":true,"include":false,"step":"480","x":-403.23809523809524,"y":-143.71428571428572,"z":897.5238095238095,"a95":"3","info":"\"14-10-04\" at \"10:58\""},{"visible":true,"include":false,"step":"510","x":-51.80952380952381,"y":183.14285714285714,"z":451.14285714285717,"a95":"5.9","info":"\"14-10-04\" at \"13:49\""},{"visible":true,"include":false,"step":"540","x":-455.9047619047619,"y":135.14285714285714,"z":735.1428571428571,"a95":"4.6","info":"\"14-10-04\" at \"17:15\""},{"visible":true,"include":false,"step":"570","x":-185.9047619047619,"y":-10.571428571428571,"z":454.6666666666667,"a95":"8","info":"\"14-10-05\" at \"11:21\""},{"visible":true,"include":false,"step":"600","x":-5.809523809523809,"y":182.85714285714286,"z":1010.1904761904761,"a95":"3.1","info":"\"14-10-05\" at \"14:37\""},{"visible":true,"include":false,"step":"630","x":-350.0952380952381,"y":322.6666666666667,"z":791.8095238095239,"a95":"3.1","info":"\"14-10-05\" at \"18:08\""},{"visible":true,"include":false,"step":"660","x":-234.0952380952381,"y":92.57142857142857,"z":728.1904761904761,"a95":"4","info":"\"14-10-11\" at \"08:43\""},{"visible":true,"include":false,"step":"680","x":14.571428571428571,"y":336,"z":-353.14285714285717,"a95":"5.4","info":"\"14-10-11\" at \"11:47\""}],"demagType":"Unknown","patch":1.1,"format":"Unknown","strat":null},{"version":"v1.1.0","exported":"2017-05-22T12:17:40.976Z","info":"","GEO":[{"dec":142.2396664196105,"inc":-46.781843090199985,"MAD":27.450204267178645,"cm":[-637.1987165667636,405.0241299616324,647.1122749305015],"intensity":1134.642321297294,"type":"dir","forced":false,"remark":"","origin":false,"nSteps":6,"minStep":"210","maxStep":"360","steps":["210","240","270","300","330","360"],"group":"None","version":"v1.1.0"}],"TECT":[{"dec":158.64503178183725,"inc":-31.27270465543775,"MAD":27.450204267178695,"cm":[-348.5202878981425,527.5608529144228,767.4856363521338],"intensity":1134.6423212972943,"type":"dir","forced":false,"remark":"","origin":false,"nSteps":6,"minStep":"210","maxStep":"360","steps":["210","240","270","300","330","360"],"group":"None","version":"v1.1.0"}],"interpreted":true,"name":"SS15.6A","coreAzi":344,"coreDip":25,"bedStrike":293,"bedDip":25,"data":[{"visible":true,"include":false,"step":"20","x":-4167.142857142857,"y":1542.095238095238,"z":3354.6666666666665,"a95":"2.1","info":"\"14-10-20\" at \"16:59\""},{"visible":true,"include":false,"step":"100","x":-2326,"y":1195.142857142857,"z":1580.6666666666667,"a95":"2.2","info":"\"14-10-20\" at \"20:18\""},{"visible":true,"include":false,"step":"150","x":-705.4285714285714,"y":590.5714285714286,"z":-1246.2857142857142,"a95":"2.8","info":"\"14-10-20\" at \"23:12\""},{"visible":true,"include":false,"step":"180","x":-674.1904761904761,"y":502.85714285714283,"z":-1246.6666666666667,"a95":"2.5","info":"\"14-10-21\" at \"15:17\""},{"visible":true,"include":true,"step":"210","x":-781.2380952380952,"y":393.6190476190476,"z":-999.7142857142857,"a95":"2.9","info":"\"14-10-21\" at \"18:08\""},{"visible":true,"include":true,"step":"240","x":-569.9047619047619,"y":374.0952380952381,"z":-910.3809523809524,"a95":"2.9","info":"\"14-10-21\" at \"21:17\""},{"visible":true,"include":true,"step":"270","x":-770.4761904761905,"y":136.66666666666666,"z":-134.76190476190476,"a95":"3.3","info":"\"14-10-22\" at \"00:17\""},{"visible":true,"include":true,"step":"300","x":-804.7619047619048,"y":-171.04761904761904,"z":-122.0952380952381,"a95":"3.2","info":"\"14-10-22\" at \"16:34\""},{"visible":true,"include":true,"step":"330","x":-1147.7142857142858,"y":383.3333333333333,"z":-123.04761904761905,"a95":"2.2","info":"\"14-10-22\" at \"19:40\""},{"visible":true,"include":true,"step":"360","x":-1281.047619047619,"y":165.52380952380952,"z":-6.9523809523809526,"a95":"2.4","info":"\"14-10-22\" at \"22:48\""},{"visible":true,"include":false,"step":"390","x":-1083.4285714285713,"y":233.71428571428572,"z":162.85714285714286,"a95":"2.5","info":"\"14-10-23\" at \"17:00\""},{"visible":true,"include":false,"step":"420","x":-1602.6666666666667,"y":33.714285714285715,"z":250.57142857142858,"a95":"2.1","info":"\"14-10-23\" at \"20:02\""}],"demagType":"Unknown","patch":1.1,"format":"Unknown","strat":null},{"version":"v1.1.0","exported":"2017-05-22T12:17:40.976Z","info":"","GEO":[{"dec":93.30358439371435,"inc":-0.9281291213295758,"MAD":11.452582290609124,"cm":[-3.552713678800501e-15,-1.4876988529977098e-14,0],"intensity":1917.043173904084,"type":"GC","origin":false,"forced":true,"remark":"","nSteps":7,"minStep":"150","maxStep":"330","steps":["150","180","210","240","270","300","330"],"group":"None","version":"v1.1.0"}],"TECT":[{"dec":95.40257743947029,"inc":-9.038585838187705,"MAD":11.452582290609095,"cm":[-2.0872192862952943e-14,5.329070518200751e-15,7.105427357601002e-15],"intensity":1917.0431739040841,"type":"GC","origin":false,"forced":true,"remark":"","nSteps":7,"minStep":"150","maxStep":"330","steps":["150","180","210","240","270","300","330"],"group":"None","version":"v1.1.0"}],"interpreted":true,"name":"SS15.7A","coreAzi":329,"coreDip":22,"bedStrike":293,"bedDip":25,"data":[{"visible":true,"include":false,"step":"20","x":-3036,"y":2542.3809523809523,"z":1299.7142857142858,"a95":"1.9","info":"\"14-10-20\" at \"17:01\""},{"visible":true,"include":false,"step":"100","x":-1802.095238095238,"y":1027.3333333333333,"z":1225.2380952380952,"a95":"2.4","info":"\"14-10-20\" at \"20:20\""},{"visible":true,"include":true,"step":"150","x":-1120.1904761904761,"y":367.23809523809524,"z":873.2380952380952,"a95":"2.6","info":"\"14-10-20\" at \"23:14\""},{"visible":true,"include":true,"step":"180","x":-974.0952380952381,"y":203.8095238095238,"z":671.5238095238095,"a95":"2.4","info":"\"14-10-21\" at \"15:19\""},{"visible":true,"include":true,"step":"210","x":-951.7142857142857,"y":134.0952380952381,"z":661.8095238095239,"a95":"2.7","info":"\"14-10-21\" at \"18:10\""},{"visible":true,"include":true,"step":"240","x":-748.1904761904761,"y":51.714285714285715,"z":484.6666666666667,"a95":"2.7","info":"\"14-10-21\" at \"21:22\""},{"visible":true,"include":true,"step":"270","x":-721.3333333333334,"y":13.428571428571429,"z":266.2857142857143,"a95":"3.2","info":"\"14-10-22\" at \"00:19\""},{"visible":true,"include":true,"step":"300","x":-679.1428571428571,"y":-76.95238095238095,"z":113.04761904761905,"a95":"2.6","info":"\"14-10-22\" at \"16:36\""},{"visible":true,"include":true,"step":"330","x":-567.3333333333334,"y":-106.28571428571429,"z":-1.9047619047619047,"a95":"3","info":"\"14-10-22\" at \"19:42\""},{"visible":true,"include":false,"step":"360","x":-318.3809523809524,"y":-122.66666666666667,"z":-507.23809523809524,"a95":"2.8","info":"\"14-10-22\" at \"22:50\""},{"visible":true,"include":false,"step":"390","x":-440.1904761904762,"y":-194.85714285714286,"z":26.666666666666668,"a95":"3.6","info":"\"14-10-23\" at \"17:02\""},{"visible":true,"include":false,"step":"420","x":-403.7142857142857,"y":-122.47619047619048,"z":2.761904761904762,"a95":"3.5","info":"\"14-10-23\" at \"20:05\""},{"visible":true,"include":false,"step":"450","x":-375.5238095238095,"y":-155.23809523809524,"z":33.23809523809524,"a95":"3.6","info":"\"14-10-24\" at \"14:38\""},{"visible":true,"include":false,"step":"480","x":-337.23809523809524,"y":-110.85714285714286,"z":-45.904761904761905,"a95":"4.4","info":"\"14-10-24\" at \"17:40\""},{"visible":true,"include":false,"step":"510","x":-323.14285714285717,"y":-14.666666666666666,"z":-208.76190476190476,"a95":"5.1","info":"\"14-10-24\" at \"20:32\""},{"visible":true,"include":false,"step":"540","x":-317.42857142857144,"y":-187.23809523809524,"z":-119.80952380952381,"a95":"6.9","info":"\"14-10-24\" at \"23:28\""},{"visible":true,"include":false,"step":"570","x":-265.5238095238095,"y":28.952380952380953,"z":-29.238095238095237,"a95":"9","info":"\"14-10-25\" at \"02:27\""},{"visible":true,"include":false,"step":"600","x":-318.76190476190476,"y":-253.8095238095238,"z":-26.285714285714285,"a95":"4.7","info":"\"14-10-25\" at \"05:01\""},{"visible":true,"include":false,"step":"630","x":-113.52380952380952,"y":-93.52380952380952,"z":-56.476190476190474,"a95":"11.9","info":"\"14-10-25\" at \"23:24\""},{"visible":true,"include":false,"step":"660","x":-75.14285714285714,"y":-56.857142857142854,"z":79.42857142857143,"a95":"9.1","info":"\"14-10-26\" at \"02:09\""},{"visible":true,"include":false,"step":"680","x":-14.866666666666665,"y":-54.81904761904762,"z":32.304761904761904,"a95":"22.2","info":"\"14-10-26\" at \"03:16\""}],"demagType":"Unknown","patch":1.1,"format":"Unknown","strat":null},{"version":"v1.1.0","exported":"2017-05-22T12:17:40.976Z","info":"8","GEO":[],"TECT":[],"interpreted":false,"name":"SS15.9A","coreAzi":10,"coreDip":30,"bedStrike":293,"bedDip":25,"data":[{"visible":true,"include":false,"step":"0.0","x":-2424,"y":825,"z":-2528.190476190476,"a95":"0.99","info":"09/10/2014 at 21:54:39"},{"visible":true,"include":false,"step":"4.0","x":-2245.1428571428573,"y":820.5523809523809,"z":-2616.5714285714284,"a95":"0.99","info":"09/10/2014 at 21:54:39"},{"visible":true,"include":false,"step":"8.0","x":-2111.0476190476193,"y":825.9904761904761,"z":-2469.6190476190477,"a95":"0.99","info":"09/10/2014 at 21:54:39"},{"visible":true,"include":false,"step":"12.0","x":-1942.095238095238,"y":685.5142857142857,"z":-1963.6190476190477,"a95":"0.99","info":"09/10/2014 at 21:54:39"},{"visible":true,"include":false,"step":"16.0","x":-1769.6190476190477,"y":705.6476190476191,"z":-1695.142857142857,"a95":"0.99","info":"09/10/2014 at 21:54:39"},{"visible":true,"include":false,"step":"20.0","x":-1656.7619047619048,"y":461.02857142857147,"z":-1392.1904761904761,"a95":"0.99","info":"09/10/2014 at 21:54:39"},{"visible":true,"include":false,"step":"25.0","x":-1643.142857142857,"y":347.8857142857143,"z":-1437.5238095238096,"a95":"0.99","info":"09/10/2014 at 21:54:39"},{"visible":true,"include":false,"step":"30.0","x":-1376.1904761904761,"y":590.495238095238,"z":-1513.5238095238096,"a95":"0.99","info":"09/10/2014 at 21:54:39"},{"visible":true,"include":false,"step":"35.0","x":-1500.6666666666667,"y":324.32380952380953,"z":-1548.857142857143,"a95":"0.99","info":"09/10/2014 at 21:54:39"},{"visible":true,"include":false,"step":"40.0","x":-1306.6666666666667,"y":359.62857142857143,"z":-1204.5714285714287,"a95":"0.99","info":"09/10/2014 at 21:54:39"},{"visible":true,"include":false,"step":"45.0","x":-1086.952380952381,"y":508.34285714285716,"z":-1142.2857142857142,"a95":"0.99","info":"09/10/2014 at 21:54:39"},{"visible":true,"include":false,"step":"50.0","x":-1081.2380952380952,"y":498.0952380952381,"z":-1128.1904761904761,"a95":"0.99","info":"09/10/2014 at 21:54:39"},{"visible":true,"include":false,"step":"60.0","x":-423.91428571428577,"y":777.4285714285714,"z":-1031.2380952380952,"a95":"0.99","info":"09/10/2014 at 21:54:39"},{"visible":true,"include":false,"step":"70.0","x":-457.39047619047625,"y":1069.047619047619,"z":-813.8380952380952,"a95":"0.99","info":"09/10/2014 at 21:54:39"},{"visible":true,"include":false,"step":"80.0","x":-275.04761904761904,"y":472.4380952380953,"z":-1187.2380952380952,"a95":"0.99","info":"09/10/2014 at 21:54:39"},{"visible":true,"include":false,"step":"90.0","x":-139,"y":1525.4285714285713,"z":-640.7523809523809,"a95":"0.99","info":"09/10/2014 at 21:54:39"},{"visible":true,"include":false,"step":"100.0","x":-506.8095238095238,"y":1033.7142857142858,"z":-573.8571428571429,"a95":"0.99","info":"09/10/2014 at 21:54:39"}],"demagType":"Unknown","patch":1.1,"format":"Unknown","strat":null},{"version":"v1.1.0","exported":"2017-05-22T12:17:40.976Z","info":"","GEO":[],"TECT":[],"interpreted":false,"name":"SS15.10A","coreAzi":10,"coreDip":32,"bedStrike":293,"bedDip":25,"data":[{"visible":true,"include":false,"step":"20","x":-3747.3333333333335,"y":-1037.904761904762,"z":5932.761904761905,"a95":"2.3","info":"\"14-10-20\" at \"17:03\""},{"visible":true,"include":false,"step":"100","x":-2568.4761904761904,"y":-1215.6190476190477,"z":3676.8571428571427,"a95":"2.2","info":"\"14-10-20\" at \"20:21\""},{"visible":true,"include":false,"step":"150","x":-1636.857142857143,"y":-1124.952380952381,"z":2720.9523809523807,"a95":"2.5","info":"\"14-10-20\" at \"23:16\""},{"visible":true,"include":false,"step":"180","x":-1725.2380952380952,"y":-1188.3809523809523,"z":820.952380952381,"a95":"1.8","info":"\"14-10-21\" at \"15:21\""},{"visible":true,"include":false,"step":"210","x":-1490.7619047619048,"y":-1221.4285714285713,"z":2280.5714285714284,"a95":"2.2","info":"\"14-10-21\" at \"18:13\""},{"visible":true,"include":false,"step":"240","x":-1629.5238095238096,"y":-1022,"z":-218.85714285714286,"a95":"1.9","info":"\"14-10-21\" at \"21:24\""},{"visible":true,"include":false,"step":"270","x":-1409.047619047619,"y":-812.2857142857143,"z":681.5238095238095,"a95":"2","info":"\"14-10-22\" at \"00:21\""},{"visible":true,"include":false,"step":"300","x":-1157.142857142857,"y":-341.14285714285717,"z":-1004.6666666666666,"a95":"2.4","info":"\"14-10-22\" at \"16:38\""},{"visible":true,"include":false,"step":"330","x":-840,"y":-362.1904761904762,"z":1097.2380952380952,"a95":"2.6","info":"\"14-10-22\" at \"19:44\""},{"visible":true,"include":false,"step":"360","x":-884.0952380952381,"y":-1067.142857142857,"z":40.38095238095238,"a95":"1.8","info":"\"14-10-22\" at \"22:52\""},{"visible":true,"include":false,"step":"390","x":-1036.2857142857142,"y":-739.7142857142857,"z":621.047619047619,"a95":"2.2","info":"\"14-10-23\" at \"17:04\""},{"visible":true,"include":false,"step":"420","x":-819.3333333333334,"y":-854.952380952381,"z":-463.42857142857144,"a95":"2","info":"\"14-10-23\" at \"20:06\""},{"visible":true,"include":false,"step":"450","x":-752.6666666666666,"y":-723.4285714285714,"z":0.38095238095238093,"a95":"2","info":"\"14-10-24\" at \"14:40\""},{"visible":true,"include":false,"step":"480","x":-751.1428571428571,"y":-696.5714285714286,"z":-144.0952380952381,"a95":"2.2","info":"\"14-10-24\" at \"17:42\""},{"visible":true,"include":false,"step":"510","x":-729.9047619047619,"y":-664.952380952381,"z":-122.66666666666667,"a95":"2.7","info":"\"14-10-24\" at \"20:34\""},{"visible":true,"include":false,"step":"540","x":-437.42857142857144,"y":-181.61904761904762,"z":-1244.5714285714287,"a95":"3.5","info":"\"14-10-24\" at \"23:30\""},{"visible":true,"include":false,"step":"570","x":-822.8571428571429,"y":-455.04761904761904,"z":-33.42857142857143,"a95":"4.3","info":"\"14-10-25\" at \"02:28\""},{"visible":true,"include":false,"step":"600","x":-638.3809523809524,"y":-312.85714285714283,"z":-161.71428571428572,"a95":"3.2","info":"\"14-10-25\" at \"05:03\""},{"visible":true,"include":false,"step":"630","x":-396.6666666666667,"y":-536,"z":-116.95238095238095,"a95":"3.3","info":"\"14-10-25\" at \"23:26\""},{"visible":true,"include":false,"step":"660","x":-360.57142857142856,"y":-257.23809523809524,"z":-38.095238095238095,"a95":"3.5","info":"\"14-10-26\" at \"02:10\""},{"visible":true,"include":false,"step":"680","x":-41.04761904761905,"y":-271.9047619047619,"z":129.71428571428572,"a95":"4.2","info":"\"14-10-26\" at \"03:19\""}],"demagType":"Unknown","patch":1.1,"format":"Unknown","strat":null},{"version":"v1.1.0","exported":"2017-05-22T12:17:40.976Z","info":"","GEO":[{"dec":298.43011522698447,"inc":-19.88775728319675,"MAD":9.305361859056678,"cm":[-8.120488408686859e-15,1.6240976817373718e-14,0],"intensity":5562.5004451068635,"type":"GC","origin":false,"forced":true,"remark":"","nSteps":6,"minStep":"100","maxStep":"270","steps":["100","150","180","210","240","270"],"group":"None"}],"TECT":[{"dec":289.1429115301431,"inc":-20.23762530484023,"MAD":9.305361859056752,"cm":[-2.165463575649829e-14,-2.4632148173016805e-13,0],"intensity":5562.5004451068635,"type":"GC","origin":false,"forced":true,"remark":"","nSteps":6,"minStep":"100","maxStep":"270","steps":["100","150","180","210","240","270"],"group":"None"}],"interpreted":true,"name":"SS15.11A","coreAzi":14,"coreDip":24,"bedStrike":293,"bedDip":25,"data":[{"visible":true,"include":false,"step":"20","x":-4118.571428571428,"y":-676.3809523809524,"z":5073.619047619048,"a95":"2.4","info":"\"14-09-29\" at \"17:02\""},{"visible":true,"include":true,"step":"100","x":-2417.714285714286,"y":-791.5238095238095,"z":3366.8571428571427,"a95":"2.6","info":"\"14-09-29\" at \"19:50\""},{"visible":true,"include":true,"step":"150","x":-1910,"y":-634.4761904761905,"z":1476.5714285714287,"a95":"2.6","info":"\"14-09-29\" at \"22:51\""},{"visible":true,"include":true,"step":"180","x":-1524.7619047619048,"y":-576.6666666666666,"z":1420.2857142857142,"a95":"2.8","info":"\"14-09-30\" at \"17:25\""},{"visible":true,"include":true,"step":"210","x":-1402.1904761904761,"y":-681.1428571428571,"z":1109.142857142857,"a95":"2.8","info":"\"14-09-30\" at \"20:29\""},{"visible":true,"include":true,"step":"240","x":-1382,"y":-547.6190476190476,"z":882,"a95":"2.6","info":"\"14-09-30\" at \"23:34\""},{"visible":true,"include":true,"step":"270","x":-1260.2857142857142,"y":-469.42857142857144,"z":611.047619047619,"a95":"2.8","info":"\"14-10-01\" at \"17:57\""},{"visible":true,"include":false,"step":"300","x":-1274,"y":-287.8095238095238,"z":506.3809523809524,"a95":"2.7","info":"\"14-10-01\" at \"21:03\""},{"visible":true,"include":false,"step":"320","x":-1697.2380952380952,"y":-272.0952380952381,"z":191.61904761904762,"a95":"2.7","info":"\"14-10-02\" at \"00:15\""},{"visible":true,"include":false,"step":"340","x":-1081.3333333333333,"y":-227.71428571428572,"z":313.3333333333333,"a95":"2.7","info":"\"14-10-02\" at \"17:45\""},{"visible":true,"include":false,"step":"370","x":-1198.2857142857142,"y":-532.5714285714286,"z":-9.80952380952381,"a95":"2.2","info":"\"14-10-02\" at \"20:38\""},{"visible":true,"include":false,"step":"400","x":-970.3809523809524,"y":-270.76190476190476,"z":312.6666666666667,"a95":"3.2","info":"\"14-10-02\" at \"23:48\""},{"visible":true,"include":false,"step":"420","x":-1020.952380952381,"y":-281.14285714285717,"z":269.9047619047619,"a95":"2.5","info":"\"14-10-03\" at \"17:32\""},{"visible":true,"include":false,"step":"440","x":-957.1428571428571,"y":-390.4761904761905,"z":276,"a95":"2.4","info":"\"14-10-03\" at \"20:48\""},{"visible":true,"include":false,"step":"460","x":-839.8095238095239,"y":-560.8571428571429,"z":102.85714285714286,"a95":"2.5","info":"\"14-10-04\" at \"00:11\""},{"visible":true,"include":false,"step":"480","x":-826.8571428571429,"y":-352.3809523809524,"z":313.42857142857144,"a95":"3.2","info":"\"14-10-04\" at \"11:01\""},{"visible":true,"include":false,"step":"510","x":-769.5238095238095,"y":-114.0952380952381,"z":131.9047619047619,"a95":"3.9","info":"\"14-10-04\" at \"13:51\""},{"visible":true,"include":false,"step":"540","x":-962.6666666666666,"y":-249.14285714285714,"z":199.9047619047619,"a95":"4.5","info":"\"14-10-04\" at \"17:17\""},{"visible":true,"include":false,"step":"570","x":-886.2857142857143,"y":13.142857142857142,"z":57.61904761904762,"a95":"4.3","info":"\"14-10-05\" at \"11:23\""},{"visible":true,"include":false,"step":"600","x":-706.5714285714286,"y":79.04761904761905,"z":182.76190476190476,"a95":"3.9","info":"\"14-10-05\" at \"14:39\""},{"visible":true,"include":false,"step":"630","x":-792.6666666666666,"y":-205.52380952380952,"z":-88.66666666666667,"a95":"2.7","info":"\"14-10-05\" at \"18:09\""},{"visible":true,"include":false,"step":"660","x":-1159.904761904762,"y":-92,"z":287.6190476190476,"a95":"2.9","info":"\"14-10-11\" at \"08:45\""},{"visible":true,"include":false,"step":"680","x":-360.1904761904762,"y":172.76190476190476,"z":-779.8095238095239,"a95":"3.2","info":"\"14-10-11\" at \"11:49\""}],"demagType":"Unknown","patch":1.1,"format":"Unknown","strat":null},{"version":"v1.1.0","exported":"2017-05-22T12:17:40.977Z","info":"4","GEO":[],"TECT":[],"interpreted":false,"name":"SS15.12A","coreAzi":353,"coreDip":46,"bedStrike":293,"bedDip":25,"data":[{"visible":true,"include":false,"step":"0.0","x":-1406.857142857143,"y":232.87619047619046,"z":3529.714285714286,"a95":"0.99","info":"22/09/2014 at 00:14:40"},{"visible":true,"include":false,"step":"5.0","x":-1354.952380952381,"y":193.25714285714287,"z":3470.3809523809523,"a95":"0.99","info":"22/09/2014 at 00:14:40"},{"visible":true,"include":false,"step":"10.0","x":-1235.904761904762,"y":170.28571428571428,"z":3289.904761904762,"a95":"0.99","info":"22/09/2014 at 00:14:40"},{"visible":true,"include":false,"step":"15.0","x":-1174.2857142857142,"y":195.25714285714284,"z":2976.7619047619046,"a95":"0.99","info":"22/09/2014 at 00:14:40"},{"visible":true,"include":false,"step":"20.0","x":-1067.7142857142858,"y":172.75238095238097,"z":2755.4285714285716,"a95":"0.99","info":"22/09/2014 at 00:14:40"},{"visible":true,"include":false,"step":"25.0","x":-959.6190476190476,"y":284.8095238095238,"z":2541.0476190476193,"a95":"0.99","info":"22/09/2014 at 00:14:40"},{"visible":true,"include":true,"step":"30.0","x":-1001.1428571428571,"y":218.1904761904762,"z":2334.5714285714284,"a95":"0.99","info":"22/09/2014 at 00:14:40"},{"visible":true,"include":true,"step":"35.0","x":-983.3333333333334,"y":130.98095238095237,"z":2239.0476190476193,"a95":"0.99","info":"22/09/2014 at 00:14:40"},{"visible":true,"include":true,"step":"40.0","x":-847.7619047619048,"y":259.5809523809524,"z":2207.809523809524,"a95":"0.99","info":"22/09/2014 at 00:14:40"},{"visible":true,"include":true,"step":"45.0","x":-771.2190476190476,"y":374.4666666666667,"z":2154.7619047619046,"a95":"0.99","info":"22/09/2014 at 00:14:40"},{"visible":true,"include":true,"step":"50.0","x":-847.8285714285715,"y":76.46666666666667,"z":1911.142857142857,"a95":"0.99","info":"22/09/2014 at 00:14:40"},{"visible":true,"include":true,"step":"60.0","x":-1013.047619047619,"y":164.54285714285714,"z":1772,"a95":"0.99","info":"22/09/2014 at 00:14:40"},{"visible":true,"include":true,"step":"70.0","x":-834.2476190476191,"y":-20.708571428571428,"z":1573.5238095238096,"a95":"0.99","info":"22/09/2014 at 00:14:40"},{"visible":true,"include":false,"step":"80.0","x":-854.2666666666667,"y":-156.94285714285715,"z":1219.5238095238096,"a95":"0.99","info":"22/09/2014 at 00:14:40"},{"visible":true,"include":false,"step":"90.0","x":-935.847619047619,"y":59.52285714285714,"z":1262.1904761904761,"a95":"0.99","info":"22/09/2014 at 00:14:40"},{"visible":true,"include":false,"step":"100.0","x":-665.6285714285715,"y":137.1238095238095,"z":1059.4285714285713,"a95":"0.99","info":"22/09/2014 at 00:14:40"}],"demagType":"Unknown","patch":1.1,"format":"Unknown","strat":null},{"version":"v1.1.0","exported":"2017-05-22T12:17:40.977Z","info":"","GEO":[],"TECT":[],"interpreted":false,"name":"SS15.13A","coreAzi":342,"coreDip":23,"bedStrike":293,"bedDip":25,"data":[{"visible":true,"include":false,"step":"20","x":-4586.952380952381,"y":1736.952380952381,"z":8617.619047619048,"a95":"2.5","info":"\"14-10-20\" at \"17:05\""},{"visible":true,"include":false,"step":"100","x":-2891.5238095238096,"y":1132.1904761904761,"z":4581.238095238095,"a95":"2.4","info":"\"14-10-20\" at \"20:23\""},{"visible":true,"include":false,"step":"150","x":-973.047619047619,"y":390.4761904761905,"z":2351.0476190476193,"a95":"2.4","info":"\"14-10-20\" at \"23:18\""},{"visible":true,"include":false,"step":"180","x":-558.3809523809524,"y":214.47619047619048,"z":1085.6190476190477,"a95":"2.4","info":"\"14-10-21\" at \"15:23\""},{"visible":true,"include":false,"step":"210","x":-421.7142857142857,"y":261.6190476190476,"z":2048.4761904761904,"a95":"2.4","info":"\"14-10-21\" at \"18:15\""},{"visible":true,"include":false,"step":"240","x":-854.5714285714286,"y":-27.428571428571427,"z":408.57142857142856,"a95":"2.6","info":"\"14-10-21\" at \"21:26\""},{"visible":true,"include":false,"step":"270","x":-390.4761904761905,"y":211.61904761904762,"z":1960.952380952381,"a95":"2.5","info":"\"14-10-22\" at \"00:23\""},{"visible":true,"include":false,"step":"300","x":-316.0952380952381,"y":151.42857142857142,"z":-168.28571428571428,"a95":"4.3","info":"\"14-10-22\" at \"16:40\""},{"visible":true,"include":false,"step":"330","x":-37.80952380952381,"y":-393.23809523809524,"z":479.9047619047619,"a95":"2.7","info":"\"14-10-22\" at \"19:46\""},{"visible":true,"include":false,"step":"360","x":-6,"y":-343.3333333333333,"z":-162.47619047619048,"a95":"3.2","info":"\"14-10-22\" at \"22:54\""},{"visible":true,"include":false,"step":"390","x":92.66666666666667,"y":-306.2857142857143,"z":61.42857142857143,"a95":"3.2","info":"\"14-10-23\" at \"17:06\""},{"visible":true,"include":false,"step":"420","x":314.3809523809524,"y":-361.23809523809524,"z":-438.95238095238096,"a95":"2.2","info":"\"14-10-23\" at \"20:08\""}],"demagType":"Unknown","patch":1.1,"format":"Unknown","strat":null},{"version":"v1.1.0","exported":"2017-05-22T12:17:40.977Z","info":"1","GEO":[],"TECT":[],"interpreted":false,"name":"SS15.14A","coreAzi":35,"coreDip":37,"bedStrike":293,"bedDip":25,"data":[{"visible":true,"include":false,"step":"0.0","x":-1203.4285714285713,"y":-849.5523809523809,"z":1948.6666666666667,"a95":"0.99","info":"10/10/2014 at 03:25:56"},{"visible":true,"include":false,"step":"4.0","x":-1193.8095238095239,"y":-847.8190476190476,"z":1899.142857142857,"a95":"0.99","info":"10/10/2014 at 03:25:56"},{"visible":true,"include":false,"step":"8.0","x":-1176.7619047619048,"y":-806.8095238095239,"z":1853.8095238095239,"a95":"0.99","info":"10/10/2014 at 03:25:56"},{"visible":true,"include":false,"step":"12.0","x":-1175.7142857142858,"y":-737.3333333333334,"z":1739.7142857142858,"a95":"0.99","info":"10/10/2014 at 03:25:56"},{"visible":true,"include":false,"step":"16.0","x":-1215.8095238095239,"y":-777.1428571428571,"z":1673.142857142857,"a95":"0.99","info":"10/10/2014 at 03:25:56"},{"visible":true,"include":false,"step":"20.0","x":-1130.2857142857142,"y":-800.2476190476191,"z":1636.857142857143,"a95":"0.99","info":"10/10/2014 at 03:25:56"},{"visible":true,"include":true,"step":"25.0","x":-1041.5238095238096,"y":-881.2095238095238,"z":1678.095238095238,"a95":"0.99","info":"10/10/2014 at 03:25:56"},{"visible":true,"include":true,"step":"30.0","x":-866.5999999999999,"y":-807.7714285714286,"z":1648.095238095238,"a95":"0.99","info":"10/10/2014 at 03:25:56"},{"visible":true,"include":true,"step":"35.0","x":-850.7142857142857,"y":-943.0761904761904,"z":1489.047619047619,"a95":"0.99","info":"10/10/2014 at 03:25:56"},{"visible":true,"include":true,"step":"40.0","x":-999.3333333333334,"y":-898.1238095238094,"z":1421.8095238095239,"a95":"0.99","info":"10/10/2014 at 03:25:56"},{"visible":true,"include":true,"step":"45.0","x":-859.0095238095239,"y":-824.152380952381,"z":1236.952380952381,"a95":"0.99","info":"10/10/2014 at 03:25:56"},{"visible":true,"include":true,"step":"50.0","x":-892.0571428571429,"y":-778.4857142857143,"z":1149.047619047619,"a95":"0.99","info":"10/10/2014 at 03:25:56"},{"visible":true,"include":true,"step":"60.0","x":-916.952380952381,"y":-664.2571428571429,"z":1366.857142857143,"a95":"0.99","info":"10/10/2014 at 03:25:56"},{"visible":true,"include":true,"step":"70.0","x":-727.2952380952381,"y":-795.1809523809524,"z":1142.3809523809523,"a95":"0.99","info":"10/10/2014 at 03:25:56"},{"visible":true,"include":true,"step":"80.0","x":-905.8666666666667,"y":-747.5809523809525,"z":1179.4285714285713,"a95":"0.99","info":"10/10/2014 at 03:25:56"},{"visible":true,"include":false,"step":"90.0","x":-983.1428571428571,"y":-537.7428571428571,"z":1153.7142857142858,"a95":"0.99","info":"10/10/2014 at 03:25:56"},{"visible":true,"include":false,"step":"100.0","x":-1044.6666666666667,"y":-295.76190476190476,"z":813.2666666666667,"a95":"0.99","info":"10/10/2014 at 03:25:56"}],"demagType":"Unknown","patch":1.1,"format":"Unknown","strat":null},{"version":"v1.1.0","exported":"2017-05-22T12:17:40.977Z","info":"","GEO":[],"TECT":[],"interpreted":false,"name":"SS15.14B","coreAzi":35,"coreDip":37,"bedStrike":293,"bedDip":25,"data":[{"visible":true,"include":false,"step":"20","x":-1685.4285714285713,"y":-1820.3809523809523,"z":6381.047619047619,"a95":"2.7","info":"\"14-09-29\" at \"17:04\""},{"visible":true,"include":false,"step":"100","x":-823.6190476190476,"y":-1081.5238095238096,"z":3155.714285714286,"a95":"2.8","info":"\"14-09-29\" at \"19:53\""},{"visible":true,"include":false,"step":"150","x":-296.3809523809524,"y":-471.14285714285717,"z":1200,"a95":"3","info":"\"14-09-29\" at \"22:53\""},{"visible":true,"include":false,"step":"180","x":126.28571428571429,"y":-227.33333333333334,"z":1223.142857142857,"a95":"3.1","info":"\"14-09-30\" at \"17:27\""},{"visible":true,"include":false,"step":"210","x":-120.66666666666667,"y":-267.6190476190476,"z":710.1904761904761,"a95":"3.1","info":"\"14-09-30\" at \"20:31\""},{"visible":true,"include":false,"step":"240","x":-67.04761904761905,"y":-481.6190476190476,"z":991.1428571428571,"a95":"3","info":"\"14-09-30\" at \"23:36\""},{"visible":true,"include":false,"step":"270","x":16.952380952380953,"y":-215.9047619047619,"z":586.5714285714286,"a95":"3.3","info":"\"14-10-01\" at \"17:59\""},{"visible":true,"include":false,"step":"300","x":63.142857142857146,"y":380,"z":596.8571428571429,"a95":"2.7","info":"\"14-10-01\" at \"21:06\""},{"visible":true,"include":false,"step":"320","x":378.85714285714283,"y":-523.3333333333334,"z":61.80952380952381,"a95":"2.3","info":"\"14-10-02\" at \"00:17\""},{"visible":true,"include":false,"step":"340","x":600.952380952381,"y":-154.1904761904762,"z":375.8095238095238,"a95":"2.4","info":"\"14-10-02\" at \"17:47\""},{"visible":true,"include":false,"step":"370","x":213.42857142857142,"y":-241.8095238095238,"z":-43.23809523809524,"a95":"2.7","info":"\"14-10-02\" at \"20:40\""},{"visible":true,"include":false,"step":"400","x":655.3333333333334,"y":150.28571428571428,"z":216.0952380952381,"a95":"2.2","info":"\"14-10-02\" at \"23:49\""},{"visible":true,"include":false,"step":"420","x":193.9047619047619,"y":-422.6666666666667,"z":67.61904761904762,"a95":"2.5","info":"\"14-10-03\" at \"17:34\""},{"visible":true,"include":false,"step":"440","x":321.23809523809524,"y":-454.95238095238096,"z":143.52380952380952,"a95":"2.6","info":"\"14-10-03\" at \"20:51\""},{"visible":true,"include":false,"step":"460","x":115.52380952380952,"y":-338.0952380952381,"z":-10.19047619047619,"a95":"3.3","info":"\"14-10-04\" at \"00:13\""},{"visible":true,"include":false,"step":"480","x":304,"y":-72.28571428571429,"z":265.8095238095238,"a95":"4","info":"\"14-10-04\" at \"11:03\""},{"visible":true,"include":false,"step":"510","x":322.95238095238096,"y":-736.3809523809524,"z":-95.42857142857143,"a95":"3","info":"\"14-10-04\" at \"13:53\""},{"visible":true,"include":false,"step":"540","x":886.8571428571429,"y":-15.047619047619047,"z":235.14285714285714,"a95":"2.7","info":"\"14-10-04\" at \"17:19\""},{"visible":true,"include":false,"step":"570","x":405.6190476190476,"y":-324.6666666666667,"z":13.333333333333334,"a95":"4","info":"\"14-10-05\" at \"11:25\""},{"visible":true,"include":false,"step":"600","x":165.42857142857142,"y":-179.9047619047619,"z":192.1904761904762,"a95":"5.7","info":"\"14-10-05\" at \"14:41\""},{"visible":true,"include":false,"step":"630","x":263.6190476190476,"y":-235.33333333333334,"z":-234.95238095238096,"a95":"3.7","info":"\"14-10-05\" at \"18:12\""},{"visible":true,"include":false,"step":"660","x":270.1904761904762,"y":-57.523809523809526,"z":-70.28571428571429,"a95":"4.9","info":"\"14-10-11\" at \"08:47\""},{"visible":true,"include":false,"step":"680","x":-341.6190476190476,"y":403.04761904761904,"z":-374.85714285714283,"a95":"3","info":"\"14-10-11\" at \"11:51\""}],"demagType":"Unknown","patch":1.1,"format":"Unknown","strat":null},{"version":"v1.1.0","exported":"2017-05-22T12:17:40.977Z","info":"","GEO":[{"dec":335.3768700057725,"inc":-28.69896046655476,"MAD":4.953896998099717,"cm":[-2.842170943040401e-14,-1.2079226507921703e-13,0],"intensity":5800.8745966593515,"type":"GC","origin":false,"forced":true,"remark":"","nSteps":4,"minStep":"100","maxStep":"240","steps":["100","150","180","240"],"group":"None","version":"v1.1.0"}],"TECT":[{"dec":320.189822724009,"inc":-43.24114098100113,"MAD":4.953896998094289,"cm":[-1.9895196601282805e-13,9.556799795973347e-13,7.105427357601002e-14],"intensity":5800.8745966593515,"type":"GC","origin":false,"forced":true,"remark":"","nSteps":4,"minStep":"100","maxStep":"240","steps":["100","150","180","240"],"group":"None","version":"v1.1.0"}],"interpreted":true,"name":"SS15.15A","coreAzi":35,"coreDip":39,"bedStrike":293,"bedDip":25,"data":[{"visible":true,"include":false,"step":"20","x":-2848.5714285714284,"y":-1793.3333333333333,"z":8022.380952380952,"a95":"2.5","info":"\"14-10-20\" at \"17:06\""},{"visible":true,"include":true,"step":"100","x":-1870,"y":-1360.952380952381,"z":4223.714285714285,"a95":"2.4","info":"\"14-10-20\" at \"20:25\""},{"visible":true,"include":true,"step":"150","x":-947.1428571428571,"y":-754.2857142857143,"z":1901.5238095238096,"a95":"2.5","info":"\"14-10-20\" at \"23:20\""},{"visible":true,"include":true,"step":"180","x":-761.1428571428571,"y":-568.5714285714286,"z":1104.952380952381,"a95":"2.4","info":"\"14-10-21\" at \"15:25\""},{"visible":true,"include":false,"step":"210","x":-585.9047619047619,"y":-652.5714285714286,"z":1228.952380952381,"a95":"2.4","info":"\"14-10-21\" at \"18:17\""},{"visible":true,"include":true,"step":"240","x":-623.8095238095239,"y":-502.4761904761905,"z":671.047619047619,"a95":"2.5","info":"\"14-10-21\" at \"21:28\""},{"visible":true,"include":false,"step":"270","x":-565.9047619047619,"y":-348.76190476190476,"z":846.8571428571429,"a95":"2.6","info":"\"14-10-22\" at \"00:25\""},{"visible":true,"include":false,"step":"300","x":-480.95238095238096,"y":-241.9047619047619,"z":196.85714285714286,"a95":"3","info":"\"14-10-22\" at \"16:41\""},{"visible":true,"include":false,"step":"330","x":-225.71428571428572,"y":-261.9047619047619,"z":394.2857142857143,"a95":"3","info":"\"14-10-22\" at \"19:48\""},{"visible":true,"include":false,"step":"360","x":-283.9047619047619,"y":-139.8095238095238,"z":99.71428571428571,"a95":"4","info":"\"14-10-22\" at \"22:56\""},{"visible":true,"include":false,"step":"390","x":-222.0952380952381,"y":-158.1904761904762,"z":246,"a95":"3.8","info":"\"14-10-23\" at \"17:08\""},{"visible":true,"include":false,"step":"420","x":-191.04761904761904,"y":-60.857142857142854,"z":-121.52380952380952,"a95":"4.3","info":"\"14-10-23\" at \"20:10\""},{"visible":true,"include":false,"step":"450","x":-322.57142857142856,"y":-67.80952380952381,"z":173.52380952380952,"a95":"3.4","info":"\"14-10-24\" at \"14:42\""},{"visible":true,"include":false,"step":"480","x":-203.23809523809524,"y":-92.85714285714286,"z":-100.28571428571429,"a95":"6.9","info":"\"14-10-24\" at \"17:45\""},{"visible":false,"include":false,"step":"510","x":-153.04761904761904,"y":-240.0952380952381,"z":-96.38095238095238,"a95":"6.5","info":"\"14-10-24\" at \"20:36\""},{"visible":false,"include":false,"step":"540","x":-264.3809523809524,"y":38.476190476190474,"z":-158.47619047619048,"a95":"8.8","info":"\"14-10-24\" at \"23:32\""},{"visible":false,"include":false,"step":"570","x":-339.9047619047619,"y":-87.61904761904762,"z":268.3809523809524,"a95":"6","info":"\"14-10-25\" at \"02:30\""},{"visible":false,"include":false,"step":"600","x":-412.76190476190476,"y":27.428571428571427,"z":-15.238095238095237,"a95":"4.8","info":"\"14-10-25\" at \"05:06\""},{"visible":false,"include":false,"step":"630","x":-274.4761904761905,"y":5.0476190476190474,"z":-220.76190476190476,"a95":"4.5","info":"\"14-10-25\" at \"23:58\""},{"visible":false,"include":false,"step":"660","x":-171.42857142857142,"y":-352.57142857142856,"z":-160.28571428571428,"a95":"3.5","info":"\"14-10-26\" at \"02:12\""},{"visible":false,"include":false,"step":"680","x":61.80952380952381,"y":209.52380952380952,"z":66.47619047619048,"a95":"4.3","info":"\"14-10-26\" at \"03:22\""}],"demagType":"Unknown","patch":1.1,"format":"Unknown","strat":null},{"version":"v1.1.0","exported":"2017-05-22T12:17:40.977Z","info":"5","GEO":[],"TECT":[],"interpreted":false,"name":"SS15.15B","coreAzi":35,"coreDip":39,"bedStrike":293,"bedDip":25,"data":[{"visible":true,"include":false,"step":"0.0","x":-2190.7619047619046,"y":-992.2857142857143,"z":4213.047619047619,"a95":"0.99","info":"22/09/2014 at 00:14:40"},{"visible":true,"include":false,"step":"5.0","x":-2137.0476190476193,"y":-974.4761904761905,"z":4099.428571428572,"a95":"0.99","info":"22/09/2014 at 00:14:40"},{"visible":true,"include":false,"step":"10.0","x":-1967.047619047619,"y":-950.4952380952382,"z":3817.904761904762,"a95":"0.99","info":"22/09/2014 at 00:14:40"},{"visible":true,"include":false,"step":"15.0","x":-1818.2857142857142,"y":-965.047619047619,"z":3564.7619047619046,"a95":"0.99","info":"22/09/2014 at 00:14:40"},{"visible":true,"include":false,"step":"20.0","x":-1644.1904761904761,"y":-737.0095238095239,"z":3341.1428571428573,"a95":"0.99","info":"22/09/2014 at 00:14:40"},{"visible":true,"include":true,"step":"25.0","x":-1525.4285714285713,"y":-684.152380952381,"z":3138.9523809523807,"a95":"0.99","info":"22/09/2014 at 00:14:40"},{"visible":true,"include":true,"step":"30.0","x":-1674.857142857143,"y":-867.1809523809524,"z":3032,"a95":"0.99","info":"22/09/2014 at 00:14:40"},{"visible":true,"include":true,"step":"35.0","x":-1469.3333333333333,"y":-696.1333333333333,"z":2860.4761904761904,"a95":"0.99","info":"22/09/2014 at 00:14:40"},{"visible":true,"include":true,"step":"40.0","x":-1341.142857142857,"y":-578.8571428571429,"z":2805.714285714286,"a95":"0.99","info":"22/09/2014 at 00:14:40"},{"visible":true,"include":true,"step":"45.0","x":-1374.1904761904761,"y":-620.0380952380953,"z":2671.1428571428573,"a95":"0.99","info":"22/09/2014 at 00:14:40"},{"visible":true,"include":true,"step":"50.0","x":-1227.047619047619,"y":-784.0666666666667,"z":2469.714285714286,"a95":"0.99","info":"22/09/2014 at 00:14:40"},{"visible":true,"include":true,"step":"60.0","x":-1246.857142857143,"y":-827.6666666666666,"z":2231.0476190476193,"a95":"0.99","info":"22/09/2014 at 00:14:40"},{"visible":true,"include":false,"step":"70.0","x":-1056.3809523809523,"y":-473.14285714285717,"z":2194,"a95":"0.99","info":"22/09/2014 at 00:14:40"},{"visible":true,"include":false,"step":"80.0","x":-1072,"y":-483.4761904761905,"z":1899.142857142857,"a95":"0.99","info":"22/09/2014 at 00:14:40"},{"visible":true,"include":false,"step":"90.0","x":-828.4857142857143,"y":-601.5904761904761,"z":1717.3333333333333,"a95":"0.99","info":"22/09/2014 at 00:14:40"},{"visible":true,"include":false,"step":"100.0","x":-894.7333333333333,"y":-578.104761904762,"z":1708.857142857143,"a95":"0.99","info":"22/09/2014 at 00:14:40"}],"demagType":"Unknown","patch":1.1,"format":"Unknown","strat":null},{"version":"v1.1.0","exported":"2017-05-22T12:17:40.977Z","info":"","GEO":[{"dec":311.173543018353,"inc":-15.373028171453043,"MAD":6.2024765179201875,"cm":[2.165463575649829e-14,-1.3534147347811431e-14,0],"intensity":3922.932977682933,"type":"GC","origin":false,"forced":true,"remark":"","nSteps":6,"minStep":"100","maxStep":"270","steps":["100","150","180","210","240","270"],"group":"None"}],"TECT":[{"dec":302.93848552851534,"inc":-21.55295739993874,"MAD":6.202476517919465,"cm":[-3.5188783104309725e-14,-2.977512416518515e-14,0],"intensity":3922.9329776829336,"type":"GC","origin":false,"forced":true,"remark":"","nSteps":6,"minStep":"100","maxStep":"270","steps":["100","150","180","210","240","270"],"group":"None"}],"interpreted":true,"name":"SS15.16A","coreAzi":35,"coreDip":49,"bedStrike":293,"bedDip":25,"data":[{"visible":true,"include":false,"step":"20","x":-1517.4285714285713,"y":-1316,"z":6082.380952380952,"a95":"2.7","info":"\"14-09-29\" at \"17:06\""},{"visible":true,"include":true,"step":"100","x":-980.7619047619048,"y":-720.6666666666666,"z":3506.7619047619046,"a95":"2.7","info":"\"14-09-29\" at \"19:55\""},{"visible":true,"include":true,"step":"150","x":-597.047619047619,"y":-342.2857142857143,"z":1125.5238095238096,"a95":"2.8","info":"\"14-09-29\" at \"22:55\""},{"visible":true,"include":true,"step":"180","x":-427.3333333333333,"y":-297.3333333333333,"z":1043.142857142857,"a95":"3","info":"\"14-09-30\" at \"17:29\""},{"visible":true,"include":true,"step":"210","x":-528.3809523809524,"y":-201.9047619047619,"z":197.04761904761904,"a95":"2.9","info":"\"14-09-30\" at \"20:33\""},{"visible":true,"include":true,"step":"240","x":-543.5238095238095,"y":-203.71428571428572,"z":581.4285714285714,"a95":"3","info":"\"14-09-30\" at \"23:38\""},{"visible":true,"include":true,"step":"270","x":-485.3333333333333,"y":-80.28571428571429,"z":42.666666666666664,"a95":"2.5","info":"\"14-10-01\" at \"18:01\""},{"visible":true,"include":false,"step":"300","x":-649.9047619047619,"y":192.95238095238096,"z":-101.23809523809524,"a95":"2.2","info":"\"14-10-01\" at \"21:08\""},{"visible":true,"include":false,"step":"320","x":-399.6190476190476,"y":-301.5238095238095,"z":-528,"a95":"2.4","info":"\"14-10-02\" at \"00:19\""},{"visible":true,"include":false,"step":"340","x":-528.0952380952381,"y":54.857142857142854,"z":-20.571428571428573,"a95":"2.7","info":"\"14-10-02\" at \"17:49\""},{"visible":true,"include":false,"step":"370","x":-274,"y":-243.8095238095238,"z":-241.23809523809524,"a95":"2.3","info":"\"14-10-02\" at \"20:42\""},{"visible":true,"include":false,"step":"400","x":114.0952380952381,"y":-218.38095238095238,"z":-221.8095238095238,"a95":"3.8","info":"\"14-10-02\" at \"23:51\""},{"visible":true,"include":false,"step":"420","x":6.285714285714286,"y":-152.0952380952381,"z":-726.4761904761905,"a95":"2.8","info":"\"14-10-03\" at \"17:36\""},{"visible":true,"include":false,"step":"440","x":-113.80952380952381,"y":-267.6190476190476,"z":-328.0952380952381,"a95":"2.8","info":"\"14-10-03\" at \"20:53\""},{"visible":true,"include":false,"step":"460","x":26.761904761904763,"y":-195.71428571428572,"z":-449.23809523809524,"a95":"3","info":"\"14-10-04\" at \"00:15\""},{"visible":true,"include":false,"step":"480","x":-261.04761904761904,"y":-162.47619047619048,"z":-377.8095238095238,"a95":"3.4","info":"\"14-10-04\" at \"11:04\""},{"visible":true,"include":false,"step":"510","x":3.7142857142857144,"y":90.38095238095238,"z":-484.1904761904762,"a95":"3.5","info":"\"14-10-04\" at \"13:55\""},{"visible":true,"include":false,"step":"540","x":-351.04761904761904,"y":230,"z":-141.52380952380952,"a95":"4.5","info":"\"14-10-04\" at \"17:21\""},{"visible":true,"include":false,"step":"570","x":-29.142857142857142,"y":-315.6190476190476,"z":-754.0952380952381,"a95":"3.2","info":"\"14-10-05\" at \"11:26\""},{"visible":true,"include":false,"step":"600","x":-310.57142857142856,"y":-2.0952380952380953,"z":-421.7142857142857,"a95":"3.2","info":"\"14-10-05\" at \"14:43\""},{"visible":true,"include":false,"step":"630","x":268.6666666666667,"y":-16.476190476190474,"z":-602.1904761904761,"a95":"2.7","info":"\"14-10-05\" at \"18:14\""},{"visible":true,"include":false,"step":"660","x":-139.8095238095238,"y":-336.6666666666667,"z":-281.6190476190476,"a95":"3.5","info":"\"14-10-11\" at \"08:49\""},{"visible":true,"include":false,"step":"680","x":222.38095238095238,"y":394.3809523809524,"z":-283.6190476190476,"a95":"3.4","info":"\"14-10-11\" at \"11:54\""}],"demagType":"Unknown","patch":1.1,"format":"Unknown","strat":null},{"version":"v1.1.0","exported":"2017-05-22T12:17:40.977Z","info":"2","GEO":[],"TECT":[],"interpreted":false,"name":"SS15.16B","coreAzi":35,"coreDip":49,"bedStrike":293,"bedDip":25,"data":[{"visible":true,"include":false,"step":"0.0","x":-1029.7142857142858,"y":-1485.2380952380952,"z":3682.095238095238,"a95":"0.99","info":"10/10/2014 at 03:25:56"},{"visible":true,"include":false,"step":"4.0","x":-999.2380952380952,"y":-1472.2857142857142,"z":3589.2380952380954,"a95":"0.99","info":"10/10/2014 at 03:25:56"},{"visible":true,"include":false,"step":"8.0","x":-986,"y":-1445.6190476190477,"z":3398.4761904761904,"a95":"0.99","info":"10/10/2014 at 03:25:56"},{"visible":true,"include":false,"step":"12.0","x":-820.9428571428571,"y":-1295.047619047619,"z":3113.1428571428573,"a95":"0.99","info":"10/10/2014 at 03:25:56"},{"visible":true,"include":true,"step":"16.0","x":-818.8666666666667,"y":-1181.142857142857,"z":2911.714285714286,"a95":"0.99","info":"10/10/2014 at 03:25:56"},{"visible":true,"include":true,"step":"20.0","x":-762.9428571428571,"y":-1130.1904761904761,"z":2736.285714285714,"a95":"0.99","info":"10/10/2014 at 03:25:56"},{"visible":true,"include":true,"step":"25.0","x":-662.7047619047619,"y":-1010.4761904761905,"z":2638,"a95":"0.99","info":"10/10/2014 at 03:25:56"},{"visible":true,"include":true,"step":"30.0","x":-654.152380952381,"y":-1072.7619047619048,"z":2475.714285714286,"a95":"0.99","info":"10/10/2014 at 03:25:56"},{"visible":true,"include":true,"step":"35.0","x":-574.0857142857143,"y":-958.5714285714286,"z":2248.6666666666665,"a95":"0.99","info":"10/10/2014 at 03:25:56"},{"visible":true,"include":true,"step":"40.0","x":-668.5142857142857,"y":-1012,"z":2120.190476190476,"a95":"0.99","info":"10/10/2014 at 03:25:56"},{"visible":true,"include":true,"step":"45.0","x":-646.9238095238095,"y":-773.2190476190476,"z":2184.7619047619046,"a95":"0.99","info":"10/10/2014 at 03:25:56"},{"visible":true,"include":false,"step":"50.0","x":-796.9428571428571,"y":-898.5714285714286,"z":1889.2380952380952,"a95":"0.99","info":"10/10/2014 at 03:25:56"},{"visible":true,"include":false,"step":"60.0","x":-832.5904761904762,"y":-1241.5238095238096,"z":1683.3333333333333,"a95":"0.99","info":"10/10/2014 at 03:25:56"},{"visible":true,"include":false,"step":"70.0","x":-515.6285714285715,"y":-1047.4285714285713,"z":1728.952380952381,"a95":"0.99","info":"10/10/2014 at 03:25:56"},{"visible":true,"include":false,"step":"80.0","x":-440.9238095238095,"y":-1354.857142857143,"z":1624.095238095238,"a95":"0.99","info":"10/10/2014 at 03:25:56"},{"visible":true,"include":false,"step":"90.0","x":-628.9904761904761,"y":-828.7238095238096,"z":1684.5714285714287,"a95":"0.99","info":"10/10/2014 at 03:25:56"},{"visible":true,"include":false,"step":"100.0","x":-475.79999999999995,"y":-1239.4285714285713,"z":1015.9047619047619,"a95":"0.99","info":"10/10/2014 at 03:25:56"}],"demagType":"Unknown","patch":1.1,"format":"Unknown","strat":null},{"version":"v1.1.0","exported":"2017-05-22T12:17:40.977Z","info":"","GEO":[],"TECT":[],"interpreted":false,"name":"SS15.17A","coreAzi":349,"coreDip":17,"bedStrike":293,"bedDip":25,"data":[{"visible":true,"include":false,"step":"20","x":-3897.4285714285716,"y":975.9047619047619,"z":3986.5714285714284,"a95":"2.2","info":"\"14-10-20\" at \"17:08\""},{"visible":true,"include":false,"step":"100","x":-2410.285714285714,"y":603.8095238095239,"z":2920.4761904761904,"a95":"2.4","info":"\"14-10-20\" at \"20:27\""},{"visible":true,"include":false,"step":"150","x":-978.7619047619048,"y":280.3809523809524,"z":1111.4285714285713,"a95":"2.6","info":"\"14-10-20\" at \"23:21\""},{"visible":true,"include":false,"step":"180","x":-687.4285714285714,"y":202.0952380952381,"z":516.1904761904761,"a95":"2.4","info":"\"14-10-21\" at \"15:26\""},{"visible":true,"include":false,"step":"210","x":-451.5238095238095,"y":203.8095238095238,"z":482.2857142857143,"a95":"2.7","info":"\"14-10-21\" at \"18:19\""},{"visible":true,"include":false,"step":"240","x":-346.2857142857143,"y":136.38095238095238,"z":317.42857142857144,"a95":"3.1","info":"\"14-10-21\" at \"21:29\""},{"visible":true,"include":false,"step":"270","x":-197.71428571428572,"y":131.61904761904762,"z":349.42857142857144,"a95":"3","info":"\"14-10-22\" at \"00:27\""},{"visible":true,"include":false,"step":"300","x":-261.9047619047619,"y":-11.904761904761905,"z":133.42857142857142,"a95":"4.3","info":"\"14-10-22\" at \"16:43\""},{"visible":true,"include":false,"step":"330","x":-340.57142857142856,"y":-96.66666666666667,"z":77.23809523809524,"a95":"3.4","info":"\"14-10-22\" at \"19:51\""},{"visible":true,"include":false,"step":"360","x":-227.42857142857142,"y":-91.71428571428571,"z":134.95238095238096,"a95":"4.3","info":"\"14-10-22\" at \"22:58\""},{"visible":true,"include":false,"step":"390","x":19.523809523809526,"y":-278,"z":-37.714285714285715,"a95":"4.7","info":"\"14-10-23\" at \"17:10\""},{"visible":true,"include":false,"step":"420","x":57.714285714285715,"y":-216.47619047619048,"z":-74.0952380952381,"a95":"4.1","info":"\"14-10-23\" at \"20:12\""},{"visible":true,"include":false,"step":"450","x":42.76190476190476,"y":-245.61904761904762,"z":61.714285714285715,"a95":"4.8","info":"\"14-10-24\" at \"14:44\""},{"visible":true,"include":false,"step":"480","x":143.33333333333334,"y":0.7619047619047619,"z":-687.4285714285714,"a95":"2.7","info":"\"14-10-24\" at \"17:47\""},{"visible":true,"include":false,"step":"510","x":-313.6190476190476,"y":159.8095238095238,"z":647.7142857142857,"a95":"5","info":"\"14-10-24\" at \"20:38\""},{"visible":true,"include":false,"step":"540","x":-97.23809523809524,"y":55.42857142857143,"z":-29.238095238095237,"a95":"22.8","info":"\"14-10-24\" at \"23:34\""}],"demagType":"Unknown","patch":1.1,"format":"Unknown","strat":null},{"version":"v1.1.0","exported":"2017-05-22T12:17:40.977Z","info":"","GEO":[{"dec":272.645605275888,"inc":-1.7459302863245922,"MAD":4.396565064756705,"cm":[7.105427357601002e-15,-3.0542235407438056e-13,0],"intensity":9153.721803074013,"type":"GC","origin":false,"forced":true,"remark":"","nSteps":5,"minStep":"100","maxStep":"270","steps":["100","150","180","210","270"],"group":"None","version":"v1.1.0"}],"TECT":[{"dec":93.71138414432033,"inc":-6.852650908185557,"MAD":4.396565064757244,"cm":[-6.750155989720952e-14,0,8.526512829121202e-14],"intensity":9153.721803074013,"type":"GC","origin":false,"forced":true,"remark":"","nSteps":5,"minStep":"100","maxStep":"270","steps":["100","150","180","210","270"],"group":"None","version":"v1.1.0"}],"interpreted":true,"name":"SS15.18A","coreAzi":337,"coreDip":28,"bedStrike":293,"bedDip":25,"data":[{"visible":true,"include":false,"step":"20","x":-5423.333333333333,"y":2021.904761904762,"z":7436,"a95":"2.5","info":"\"14-09-29\" at \"17:08\""},{"visible":true,"include":true,"step":"100","x":-4718.666666666667,"y":1549.4285714285713,"z":6682.380952380952,"a95":"2.5","info":"\"14-09-29\" at \"19:58\""},{"visible":true,"include":true,"step":"150","x":-3575.714285714286,"y":1036.095238095238,"z":4847.428571428572,"a95":"2.4","info":"\"14-09-29\" at \"22:57\""},{"visible":true,"include":true,"step":"180","x":-1296.857142857143,"y":136,"z":1217.047619047619,"a95":"2.5","info":"\"14-09-30\" at \"17:31\""},{"visible":true,"include":true,"step":"210","x":-1215.047619047619,"y":74,"z":997.2380952380952,"a95":"2.5","info":"\"14-09-30\" at \"20:35\""},{"visible":true,"include":false,"step":"240","x":-1040.095238095238,"y":-37.42857142857143,"z":1094.3809523809523,"a95":"2.6","info":"\"14-09-30\" at \"23:39\""},{"visible":true,"include":true,"step":"270","x":-942,"y":-51.142857142857146,"z":353.42857142857144,"a95":"2.7","info":"\"14-10-01\" at \"18:03\""},{"visible":true,"include":false,"step":"300","x":-854.1904761904761,"y":209.33333333333334,"z":566.8571428571429,"a95":"2.7","info":"\"14-10-01\" at \"21:10\""},{"visible":true,"include":false,"step":"320","x":-568.4761904761905,"y":0,"z":-43.142857142857146,"a95":"3.7","info":"\"14-10-02\" at \"00:21\""},{"visible":true,"include":false,"step":"340","x":-640.6666666666666,"y":-197.9047619047619,"z":103.52380952380952,"a95":"2.5","info":"\"14-10-02\" at \"17:51\""},{"visible":true,"include":false,"step":"370","x":-230.95238095238096,"y":-200.28571428571428,"z":-53.904761904761905,"a95":"4.2","info":"\"14-10-02\" at \"20:44\""},{"visible":true,"include":false,"step":"400","x":-436.0952380952381,"y":-76.85714285714286,"z":145.8095238095238,"a95":"3.1","info":"\"14-10-02\" at \"23:54\""},{"visible":true,"include":false,"step":"420","x":-317.8095238095238,"y":22.571428571428573,"z":-383.3333333333333,"a95":"3.5","info":"\"14-10-03\" at \"17:38\""},{"visible":true,"include":false,"step":"440","x":-383.42857142857144,"y":-8,"z":-130.38095238095238,"a95":"3.7","info":"\"14-10-03\" at \"20:55\""},{"visible":true,"include":false,"step":"460","x":-269.42857142857144,"y":-33.904761904761905,"z":-306.0952380952381,"a95":"4","info":"\"14-10-04\" at \"00:17\""},{"visible":true,"include":false,"step":"480","x":-369.7142857142857,"y":0.8571428571428571,"z":-161.8095238095238,"a95":"5.1","info":"\"14-10-04\" at \"11:06\""},{"visible":true,"include":false,"step":"510","x":-224,"y":98.28571428571429,"z":-419.23809523809524,"a95":"4.8","info":"\"14-10-04\" at \"13:57\""},{"visible":true,"include":false,"step":"540","x":-639.8095238095239,"y":114.57142857142857,"z":119.23809523809524,"a95":"5.1","info":"\"14-10-04\" at \"17:23\""},{"visible":true,"include":false,"step":"570","x":-598.0952380952381,"y":234.38095238095238,"z":-509.42857142857144,"a95":"3.1","info":"\"14-10-05\" at \"11:28\""},{"visible":true,"include":false,"step":"600","x":-327.3333333333333,"y":528.5714285714286,"z":-148.57142857142858,"a95":"3.4","info":"\"14-10-05\" at \"14:45\""},{"visible":true,"include":false,"step":"630","x":-144,"y":574,"z":-448.76190476190476,"a95":"2.7","info":"\"14-10-05\" at \"18:16\""},{"visible":true,"include":false,"step":"660","x":-200.76190476190476,"y":-186,"z":-93.04761904761905,"a95":"5.6","info":"\"14-10-11\" at \"08:51\""},{"visible":true,"include":false,"step":"680","x":-262.2857142857143,"y":169.14285714285714,"z":-124.38095238095238,"a95":"4.1","info":"\"14-10-11\" at \"11:55\""}],"demagType":"Unknown","patch":1.1,"format":"Unknown","strat":null},{"version":"v1.1.0","exported":"2017-05-22T12:17:40.977Z","info":"","GEO":[{"dec":355.9726481693317,"inc":-32.85927796365356,"MAD":6.79690653616772,"cm":[-5.4136589391245725e-15,-5.4136589391245725e-15,0],"intensity":332.37316009422364,"type":"GC","origin":false,"forced":true,"remark":"","nSteps":6,"minStep":"100","maxStep":"270","steps":["100","150","180","210","240","270"],"group":"None"}],"TECT":[{"dec":342.62195702347,"inc":-53.89847251251795,"MAD":6.796906536167778,"cm":[-1.1504025245639717e-14,9.473903143468002e-15,-8.458842092382145e-16],"intensity":332.37316009422364,"type":"GC","origin":false,"forced":true,"remark":"","nSteps":6,"minStep":"100","maxStep":"270","steps":["100","150","180","210","240","270"],"group":"None"}],"interpreted":true,"name":"SS15.20A","coreAzi":341,"coreDip":20,"bedStrike":293,"bedDip":25,"data":[{"visible":true,"include":false,"step":"20","x":-380.0952380952381,"y":266.4761904761905,"z":464.57142857142856,"a95":"2.2","info":"\"14-10-20\" at \"17:12\""},{"visible":true,"include":true,"step":"100","x":-159.71428571428572,"y":137.42857142857142,"z":166.57142857142858,"a95":"2.1","info":"\"14-10-20\" at \"20:29\""},{"visible":true,"include":true,"step":"150","x":-41.80952380952381,"y":116.57142857142857,"z":18.571428571428573,"a95":"2.4","info":"\"14-10-20\" at \"23:23\""},{"visible":true,"include":true,"step":"180","x":-41.83809523809524,"y":78.08571428571429,"z":10.095238095238095,"a95":"2.5","info":"\"14-10-21\" at \"15:28\""},{"visible":true,"include":true,"step":"210","x":-19.695238095238096,"y":77.74285714285713,"z":9.838095238095239,"a95":"2.1","info":"\"14-10-21\" at \"18:21\""},{"visible":true,"include":true,"step":"240","x":-16.64761904761905,"y":72.64761904761905,"z":-13.076190476190478,"a95":"2.2","info":"\"14-10-21\" at \"21:31\""},{"visible":true,"include":true,"step":"270","x":-19.60952380952381,"y":88.5047619047619,"z":-1.438095238095238,"a95":"2.4","info":"\"14-10-22\" at \"00:29\""},{"visible":true,"include":false,"step":"300","x":6.523809523809524,"y":63.62857142857143,"z":-20.40952380952381,"a95":"5","info":"\"14-10-22\" at \"16:45\""},{"visible":true,"include":false,"step":"330","x":21.35238095238095,"y":61.05714285714286,"z":18.65714285714286,"a95":"3.8","info":"\"14-10-22\" at \"19:52\""},{"visible":true,"include":false,"step":"360","x":19.2,"y":42.25714285714285,"z":-13.314285714285715,"a95":"3.8","info":"\"14-10-22\" at \"23:00\""},{"visible":true,"include":false,"step":"390","x":23.18095238095238,"y":66.86666666666667,"z":-15.380952380952381,"a95":"4.7","info":"\"14-10-23\" at \"17:12\""},{"visible":true,"include":false,"step":"420","x":50.095238095238095,"y":81.14285714285714,"z":-27.047619047619047,"a95":"3.3","info":"\"14-10-23\" at \"20:14\""},{"visible":true,"include":false,"step":"450","x":18.961904761904762,"y":75.45714285714286,"z":-26.123809523809523,"a95":"3.7","info":"\"14-10-24\" at \"14:46\""},{"visible":true,"include":false,"step":"480","x":8.19047619047619,"y":96.95238095238095,"z":-99.52380952380952,"a95":"4.3","info":"\"14-10-24\" at \"17:49\""},{"visible":true,"include":false,"step":"510","x":3.9428571428571426,"y":-23.057142857142857,"z":63.12380952380952,"a95":"14.4","info":"\"14-10-24\" at \"20:40\""},{"visible":true,"include":false,"step":"540","x":-27.676190476190477,"y":51.828571428571436,"z":-70.44761904761906,"a95":"15.1","info":"\"14-10-24\" at \"23:36\""}],"demagType":"Unknown","patch":1.1,"format":"Unknown","strat":null}]
