# Supplementary material for: Paleomagnetic constraints on the timing and distribution of Cenozoic rotations in Central and Eastern Anatolia
Source: Copernicus journal article supplement (doi:10.5194/se-9-295-2018), 2018-03-21
Supplement: Supplementary file 2 [file se-9-295-2018-supplement.zip › se-2017-66_DATA_dir files/dir files Sivas/SS16.dir]

[{"version":"v1.1.0","exported":"2017-05-22T12:22:08.424Z","info":"3","GEO":[],"TECT":[],"interpreted":false,"name":"SS16.2A","coreAzi":15,"coreDip":18,"bedStrike":261,"bedDip":12,"data":[{"visible":true,"include":false,"step":"0.0","x":-792.2095238095238,"y":-495.0190476190476,"z":835.7619047619048,"a95":"0.99","info":"10/10/2014 at 03:25:56"},{"visible":true,"include":false,"step":"4.0","x":-561.2476190476191,"y":-410.6190476190476,"z":618.152380952381,"a95":"0.99","info":"10/10/2014 at 03:25:56"},{"visible":true,"include":true,"step":"8.0","x":-514.9333333333334,"y":-447.60952380952375,"z":537.104761904762,"a95":"0.99","info":"10/10/2014 at 03:25:56"},{"visible":true,"include":true,"step":"12.0","x":-476.9619047619048,"y":-439.50476190476195,"z":452.50476190476195,"a95":"0.99","info":"10/10/2014 at 03:25:56"},{"visible":true,"include":true,"step":"16.0","x":-474.27619047619044,"y":-424.79999999999995,"z":403.8095238095238,"a95":"0.99","info":"10/10/2014 at 03:25:56"},{"visible":true,"include":true,"step":"20.0","x":-453.95238095238096,"y":-477.8285714285714,"z":363.4190476190476,"a95":"0.99","info":"10/10/2014 at 03:25:56"},{"visible":true,"include":true,"step":"25.0","x":-465.2095238095238,"y":-421.7333333333333,"z":398.74285714285713,"a95":"0.99","info":"10/10/2014 at 03:25:56"},{"visible":true,"include":true,"step":"30.0","x":-481.95238095238096,"y":-495.447619047619,"z":374.85714285714283,"a95":"0.99","info":"10/10/2014 at 03:25:56"},{"visible":true,"include":true,"step":"35.0","x":-467,"y":-503.72380952380956,"z":394.35238095238094,"a95":"0.99","info":"10/10/2014 at 03:25:56"},{"visible":true,"include":true,"step":"40.0","x":-443.3333333333333,"y":-452.04761904761904,"z":475.8095238095238,"a95":"0.99","info":"10/10/2014 at 03:25:56"},{"visible":true,"include":true,"step":"45.0","x":-495.81904761904764,"y":-505.8095238095238,"z":358.02857142857147,"a95":"0.99","info":"10/10/2014 at 03:25:56"},{"visible":true,"include":false,"step":"50.0","x":-434.6952380952381,"y":-486.2285714285714,"z":470.12380952380954,"a95":"0.99","info":"10/10/2014 at 03:25:56"},{"visible":true,"include":false,"step":"60.0","x":-480.4380952380953,"y":-478.42857142857144,"z":539.6666666666666,"a95":"0.99","info":"10/10/2014 at 03:25:56"},{"visible":true,"include":false,"step":"70.0","x":-496.3047619047619,"y":-594.1142857142856,"z":242.8,"a95":"0.99","info":"10/10/2014 at 03:25:56"},{"visible":true,"include":false,"step":"80.0","x":-529.8190476190476,"y":-471.8666666666667,"z":134.88571428571427,"a95":"0.99","info":"10/10/2014 at 03:25:56"},{"visible":true,"include":false,"step":"90.0","x":-485.4095238095238,"y":-512.8571428571429,"z":322.5333333333333,"a95":"0.99","info":"10/10/2014 at 03:25:56"},{"visible":true,"include":false,"step":"100.0","x":-477.72380952380956,"y":-510.9047619047619,"z":194.15238095238095,"a95":"0.99","info":"10/10/2014 at 03:25:56"}],"demagType":"Unknown","patch":1.1,"format":"Unknown","strat":null},{"version":"v1.1.0","exported":"2017-05-22T12:22:08.424Z","info":"3","GEO":[],"TECT":[],"interpreted":false,"name":"SS16.3A","coreAzi":339,"coreDip":41,"bedStrike":261,"bedDip":12,"data":[{"visible":true,"include":false,"step":"0.0","x":-417.4380952380953,"y":761.047619047619,"z":554.8761904761905,"a95":"0.99","info":"30/01/2015 at 13:11:03"},{"visible":true,"include":true,"step":"10.0","x":-231.32380952380953,"y":622.9047619047619,"z":254.53333333333333,"a95":"0.99","info":"30/01/2015 at 13:11:03"},{"visible":true,"include":false,"step":"15.0","x":-189.5047619047619,"y":574.4095238095239,"z":218.47619047619048,"a95":"0.99","info":"30/01/2015 at 13:11:03"},{"visible":true,"include":false,"step":"20.0","x":-203.8952380952381,"y":583.2761904761904,"z":333.0571428571428,"a95":"0.99","info":"30/01/2015 at 13:11:03"},{"visible":true,"include":false,"step":"23.0","x":-118.77142857142856,"y":648.4380952380952,"z":331.4761904761905,"a95":"0.99","info":"30/01/2015 at 13:11:03"},{"visible":true,"include":false,"step":"25.0","x":-138.7904761904762,"y":566.1904761904761,"z":368.70476190476194,"a95":"0.99","info":"30/01/2015 at 13:11:03"},{"visible":true,"include":false,"step":"30.0","x":-181.28571428571428,"y":517.8285714285714,"z":380.49523809523805,"a95":"0.99","info":"30/01/2015 at 13:11:03"},{"visible":true,"include":false,"step":"33.0","x":-165.46666666666667,"y":542.6476190476191,"z":399.7809523809524,"a95":"0.99","info":"30/01/2015 at 13:11:03"},{"visible":true,"include":false,"step":"35.0","x":-192.96190476190475,"y":508.0761904761905,"z":341.42857142857144,"a95":"0.99","info":"30/01/2015 at 13:11:03"},{"visible":true,"include":false,"step":"40.0","x":-116.26666666666667,"y":510.7523809523809,"z":414.31428571428575,"a95":"0.99","info":"30/01/2015 at 13:11:03"},{"visible":true,"include":false,"step":"45.0","x":-164.25714285714287,"y":667.3333333333334,"z":444.5809523809524,"a95":"0.99","info":"30/01/2015 at 13:11:03"},{"visible":true,"include":false,"step":"50.0","x":-10.901904761904762,"y":503.8952380952381,"z":411.1904761904762,"a95":"0.99","info":"30/01/2015 at 13:11:03"},{"visible":true,"include":false,"step":"60.0","x":-43.881904761904764,"y":534.8857142857144,"z":495.45714285714286,"a95":"0.99","info":"30/01/2015 at 13:11:03"},{"visible":true,"include":false,"step":"70.0","x":-238.9904761904762,"y":424.3619047619048,"z":410.91428571428577,"a95":"0.99","info":"30/01/2015 at 13:11:03"}],"demagType":"Unknown","patch":1.1,"format":"Unknown","strat":null},{"version":"v1.1.0","exported":"2017-05-22T12:22:08.424Z","info":"","GEO":[],"TECT":[],"interpreted":false,"name":"SS16.4A","coreAzi":350,"coreDip":36,"bedStrike":261,"bedDip":12,"data":[{"visible":true,"include":false,"step":"20","x":-125.04761904761905,"y":491.6190476190476,"z":678.2857142857143,"a95":"2.6","info":"\"14-10-20\" at \"17:15\""},{"visible":true,"include":true,"step":"100","x":210.1904761904762,"y":433.14285714285717,"z":-57.333333333333336,"a95":"2.7","info":"\"14-10-20\" at \"20:31\""},{"visible":true,"include":true,"step":"150","x":260.95238095238096,"y":413.3333333333333,"z":-47.904761904761905,"a95":"2.7","info":"\"14-10-20\" at \"23:25\""},{"visible":true,"include":true,"step":"180","x":293.5238095238095,"y":339.7142857142857,"z":-43.80952380952381,"a95":"2.5","info":"\"14-10-21\" at \"15:31\""},{"visible":true,"include":true,"step":"210","x":284.76190476190476,"y":185.71428571428572,"z":73.9047619047619,"a95":"3.4","info":"\"14-10-21\" at \"18:23\""},{"visible":true,"include":false,"step":"240","x":271.14285714285717,"y":152.85714285714286,"z":6.666666666666667,"a95":"3.5","info":"\"14-10-21\" at \"21:36\""},{"visible":true,"include":false,"step":"270","x":208.57142857142858,"y":135.52380952380952,"z":120,"a95":"4.1","info":"\"14-10-22\" at \"00:31\""},{"visible":true,"include":false,"step":"300","x":170.95238095238096,"y":129.52380952380952,"z":95.80952380952381,"a95":"4.7","info":"\"14-10-22\" at \"16:48\""},{"visible":true,"include":false,"step":"330","x":152.47619047619048,"y":56.285714285714285,"z":132.76190476190476,"a95":"4","info":"\"14-10-22\" at \"19:55\""},{"visible":true,"include":false,"step":"360","x":250.47619047619048,"y":87.14285714285714,"z":31.523809523809526,"a95":"3.7","info":"\"14-10-22\" at \"23:03\""},{"visible":true,"include":false,"step":"390","x":295.5238095238095,"y":28,"z":123.71428571428571,"a95":"3.3","info":"\"14-10-23\" at \"17:15\""},{"visible":true,"include":false,"step":"420","x":269.14285714285717,"y":23.904761904761905,"z":12.761904761904763,"a95":"3.7","info":"\"14-10-23\" at \"20:16\""},{"visible":true,"include":false,"step":"450","x":237.14285714285714,"y":87.42857142857143,"z":211.52380952380952,"a95":"3.2","info":"\"14-10-24\" at \"14:48\""},{"visible":true,"include":false,"step":"480","x":291.9047619047619,"y":107.52380952380952,"z":-162.38095238095238,"a95":"4","info":"\"14-10-24\" at \"17:51\""},{"visible":true,"include":false,"step":"510","x":251.42857142857142,"y":264.1904761904762,"z":163.61904761904762,"a95":"5.5","info":"\"14-10-24\" at \"20:42\""},{"visible":true,"include":false,"step":"540","x":290.1904761904762,"y":176.85714285714286,"z":27.333333333333332,"a95":"6.3","info":"\"14-10-24\" at \"23:38\""}],"demagType":"Unknown","patch":1.1,"format":"Unknown","strat":null},{"version":"v1.1.0","exported":"2017-05-22T12:22:08.424Z","info":"","GEO":[],"TECT":[],"interpreted":false,"name":"SS16.5A","coreAzi":341,"coreDip":48,"bedStrike":261,"bedDip":12,"data":[{"visible":true,"include":false,"step":"20","x":-389.8095238095238,"y":1170.5714285714287,"z":889.3333333333334,"a95":"2.2","info":"\"14-09-29\" at \"17:12\""},{"visible":true,"include":false,"step":"100","x":-194.47619047619048,"y":926.2857142857143,"z":-172.38095238095238,"a95":"2.1","info":"\"14-09-29\" at \"20:01\""},{"visible":true,"include":false,"step":"150","x":-114.19047619047619,"y":772.8571428571429,"z":-422,"a95":"2.5","info":"\"14-09-29\" at \"23:00\""},{"visible":true,"include":false,"step":"180","x":-32.19047619047619,"y":618.7619047619048,"z":-470.3809523809524,"a95":"2.6","info":"\"14-09-30\" at \"17:33\""},{"visible":true,"include":true,"step":"210","x":-83.33333333333333,"y":481.3333333333333,"z":-505.9047619047619,"a95":"2.8","info":"\"14-09-30\" at \"20:37\""},{"visible":true,"include":true,"step":"240","x":-84,"y":421.7142857142857,"z":-358.95238095238096,"a95":"3.3","info":"\"14-09-30\" at \"23:42\""},{"visible":true,"include":true,"step":"270","x":-62.19047619047619,"y":358.4761904761905,"z":-118.66666666666667,"a95":"2.5","info":"\"14-10-01\" at \"18:06\""},{"visible":true,"include":true,"step":"300","x":-54.285714285714285,"y":300.1904761904762,"z":56,"a95":"3.3","info":"\"14-10-01\" at \"21:12\""},{"visible":true,"include":true,"step":"320","x":-66.19047619047619,"y":318.95238095238096,"z":17.523809523809526,"a95":"3.5","info":"\"14-10-02\" at \"00:23\""},{"visible":true,"include":true,"step":"340","x":-3.619047619047619,"y":390.1904761904762,"z":82.28571428571429,"a95":"3.1","info":"\"14-10-02\" at \"17:53\""},{"visible":true,"include":true,"step":"370","x":-42.19047619047619,"y":358.76190476190476,"z":-57.23809523809524,"a95":"3.2","info":"\"14-10-02\" at \"20:47\""},{"visible":true,"include":true,"step":"400","x":62,"y":355.23809523809524,"z":177.9047619047619,"a95":"2.7","info":"\"14-10-02\" at \"23:56\""},{"visible":false,"include":false,"step":"420","x":117.80952380952381,"y":184.0952380952381,"z":102.76190476190476,"a95":"3.5","info":"\"14-10-03\" at \"17:40\""},{"visible":false,"include":false,"step":"440","x":-29.80952380952381,"y":328.3809523809524,"z":130.66666666666666,"a95":"2.9","info":"\"14-10-03\" at \"20:57\""},{"visible":false,"include":false,"step":"460","x":-47.904761904761905,"y":398.76190476190476,"z":-69.61904761904762,"a95":"2.7","info":"\"14-10-04\" at \"00:19\""},{"visible":false,"include":false,"step":"480","x":-87.52380952380952,"y":483.9047619047619,"z":5.142857142857143,"a95":"3","info":"\"14-10-04\" at \"11:09\""},{"visible":false,"include":false,"step":"510","x":-151.14285714285714,"y":538.952380952381,"z":-102.57142857142857,"a95":"5.1","info":"\"14-10-04\" at \"13:59\""},{"visible":false,"include":false,"step":"540","x":-271.42857142857144,"y":423.14285714285717,"z":400.57142857142856,"a95":"5.9","info":"\"14-10-04\" at \"17:26\""},{"visible":false,"include":false,"step":"570","x":-207.71428571428572,"y":682.2857142857143,"z":-90.95238095238095,"a95":"4","info":"\"14-10-05\" at \"11:30\""},{"visible":false,"include":false,"step":"600","x":104.47619047619048,"y":483.7142857142857,"z":181.9047619047619,"a95":"3.5","info":"\"14-10-05\" at \"14:47\""},{"visible":false,"include":false,"step":"630","x":31.80952380952381,"y":404.1904761904762,"z":155.8095238095238,"a95":"3.7","info":"\"14-10-05\" at \"18:18\""},{"visible":false,"include":false,"step":"660","x":-336.6666666666667,"y":43.523809523809526,"z":-65.14285714285714,"a95":"5.9","info":"\"14-10-11\" at \"08:53\""},{"visible":false,"include":false,"step":"680","x":-407.23809523809524,"y":354.1904761904762,"z":-117.61904761904762,"a95":"5.1","info":"\"14-10-11\" at \"11:57\""}],"demagType":"Unknown","patch":1.1,"format":"Unknown","strat":null},{"version":"v1.1.0","exported":"2017-05-22T12:22:08.424Z","info":"","GEO":[],"TECT":[],"interpreted":false,"name":"SS16.6A","coreAzi":1,"coreDip":45,"bedStrike":261,"bedDip":12,"data":[{"visible":true,"include":false,"step":"20","x":598.7619047619048,"y":40.76190476190476,"z":1200.857142857143,"a95":"2.6","info":"\"14-10-20\" at \"17:17\""},{"visible":true,"include":true,"step":"100","x":397.04761904761904,"y":37.714285714285715,"z":667.1428571428571,"a95":"2.7","info":"\"14-10-20\" at \"20:33\""},{"visible":true,"include":true,"step":"150","x":304.0952380952381,"y":45.23809523809524,"z":138.76190476190476,"a95":"3.4","info":"\"14-10-20\" at \"23:26\""},{"visible":true,"include":true,"step":"180","x":198.57142857142858,"y":101.33333333333333,"z":-4.095238095238095,"a95":"3.6","info":"\"14-10-21\" at \"15:33\""},{"visible":true,"include":false,"step":"210","x":182.76190476190476,"y":132.66666666666666,"z":19.80952380952381,"a95":"4.3","info":"\"14-10-21\" at \"18:25\""},{"visible":true,"include":false,"step":"240","x":164.66666666666666,"y":129.61904761904762,"z":95.80952380952381,"a95":"4","info":"\"14-10-21\" at \"21:38\""},{"visible":true,"include":false,"step":"270","x":146.66666666666666,"y":199.42857142857142,"z":113.42857142857143,"a95":"3.4","info":"\"14-10-22\" at \"00:33\""},{"visible":true,"include":false,"step":"300","x":46.19047619047619,"y":250,"z":212.1904761904762,"a95":"3.2","info":"\"14-10-22\" at \"16:50\""},{"visible":true,"include":false,"step":"330","x":52.476190476190474,"y":246,"z":339.23809523809524,"a95":"3.2","info":"\"14-10-22\" at \"19:58\""},{"visible":true,"include":false,"step":"360","x":-2.761904761904762,"y":258.4761904761905,"z":123.33333333333333,"a95":"3.4","info":"\"14-10-22\" at \"23:05\""},{"visible":true,"include":false,"step":"390","x":-14.095238095238095,"y":83.52380952380952,"z":254.85714285714286,"a95":"4.1","info":"\"14-10-23\" at \"17:17\""},{"visible":true,"include":false,"step":"420","x":38.285714285714285,"y":145.61904761904762,"z":92.57142857142857,"a95":"4.7","info":"\"14-10-23\" at \"20:18\""},{"visible":true,"include":false,"step":"450","x":47.04761904761905,"y":71.42857142857143,"z":387.6190476190476,"a95":"3.2","info":"\"14-10-24\" at \"14:50\""},{"visible":true,"include":false,"step":"480","x":-60,"y":168.38095238095238,"z":138.47619047619048,"a95":"5.5","info":"\"14-10-24\" at \"17:53\""},{"visible":true,"include":false,"step":"510","x":-36.76190476190476,"y":-4.761904761904762,"z":157.9047619047619,"a95":"13.8","info":"\"14-10-24\" at \"20:44\""},{"visible":true,"include":false,"step":"540","x":29.428571428571427,"y":41.23809523809524,"z":183.14285714285714,"a95":"16.5","info":"\"14-10-24\" at \"23:40\""}],"demagType":"Unknown","patch":1.1,"format":"Unknown","strat":null},{"version":"v1.1.0","exported":"2017-05-22T12:22:08.424Z","info":"","GEO":[],"TECT":[],"interpreted":false,"name":"SS16.7A","coreAzi":335,"coreDip":34,"bedStrike":261,"bedDip":12,"data":[{"visible":true,"include":false,"step":"20","x":-511.14285714285717,"y":530.0952380952381,"z":1482.4761904761904,"a95":"2.6","info":"\"14-09-29\" at \"17:14\""},{"visible":true,"include":false,"step":"100","x":-198,"y":198.1904761904762,"z":60,"a95":"3.2","info":"\"14-09-29\" at \"20:03\""},{"visible":true,"include":true,"step":"150","x":-74.85714285714286,"y":-6.571428571428571,"z":-131.8095238095238,"a95":"5.7","info":"\"14-09-29\" at \"23:02\""},{"visible":true,"include":true,"step":"180","x":-59.23809523809524,"y":-105.61904761904762,"z":-180,"a95":"4.7","info":"\"14-09-30\" at \"17:35\""},{"visible":true,"include":true,"step":"210","x":-69.52380952380952,"y":-168.85714285714286,"z":-192,"a95":"3.8","info":"\"14-09-30\" at \"20:39\""},{"visible":true,"include":true,"step":"240","x":-75.04761904761905,"y":-263.3333333333333,"z":10.857142857142858,"a95":"3.6","info":"\"14-09-30\" at \"23:44\""},{"visible":true,"include":true,"step":"270","x":-14.857142857142858,"y":-273.23809523809524,"z":104.28571428571429,"a95":"3.1","info":"\"14-10-01\" at \"18:08\""},{"visible":true,"include":true,"step":"300","x":-38,"y":-228.1904761904762,"z":135.61904761904762,"a95":"3.4","info":"\"14-10-01\" at \"21:14\""},{"visible":true,"include":true,"step":"320","x":-72,"y":-227.42857142857142,"z":207.42857142857142,"a95":"3.2","info":"\"14-10-02\" at \"00:25\""},{"visible":true,"include":true,"step":"340","x":34.285714285714285,"y":-142.95238095238096,"z":226.28571428571428,"a95":"3.7","info":"\"14-10-02\" at \"17:55\""},{"visible":true,"include":true,"step":"370","x":23.047619047619047,"y":-104.76190476190476,"z":186.1904761904762,"a95":"3.5","info":"\"14-10-02\" at \"20:49\""},{"visible":true,"include":false,"step":"400","x":132.28571428571428,"y":-98.38095238095238,"z":338.76190476190476,"a95":"3.1","info":"\"14-10-02\" at \"23:58\""},{"visible":true,"include":false,"step":"420","x":105.14285714285714,"y":-66.38095238095238,"z":85.61904761904762,"a95":"4.9","info":"\"14-10-03\" at \"17:42\""},{"visible":true,"include":false,"step":"440","x":51.23809523809524,"y":2.0952380952380953,"z":258.85714285714283,"a95":"3.7","info":"\"14-10-03\" at \"20:59\""},{"visible":true,"include":false,"step":"460","x":18.666666666666668,"y":-148.66666666666666,"z":200.57142857142858,"a95":"3.9","info":"\"14-10-04\" at \"00:21\""},{"visible":true,"include":false,"step":"480","x":-153.8095238095238,"y":-44.857142857142854,"z":231.71428571428572,"a95":"5.9","info":"\"14-10-04\" at \"11:11\""},{"visible":true,"include":false,"step":"510","x":-283.5238095238095,"y":24,"z":130.95238095238096,"a95":"9.7","info":"\"14-10-04\" at \"14:01\""},{"visible":true,"include":false,"step":"540","x":-326,"y":194.76190476190476,"z":202.1904761904762,"a95":"9","info":"\"14-10-04\" at \"17:29\""},{"visible":true,"include":false,"step":"570","x":-504.6666666666667,"y":-121.71428571428571,"z":-208.66666666666666,"a95":"6.6","info":"\"14-10-05\" at \"11:32\""},{"visible":true,"include":false,"step":"600","x":202.95238095238096,"y":160.66666666666666,"z":124.95238095238095,"a95":"7.1","info":"\"14-10-05\" at \"14:49\""},{"visible":true,"include":false,"step":"630","x":328.57142857142856,"y":202.95238095238096,"z":34.666666666666664,"a95":"3.8","info":"\"14-10-05\" at \"18:20\""},{"visible":true,"include":false,"step":"660","x":-220.47619047619048,"y":-114.0952380952381,"z":235.04761904761904,"a95":"5.2","info":"\"14-10-11\" at \"08:55\""},{"visible":true,"include":false,"step":"680","x":-224.0952380952381,"y":322.0952380952381,"z":-98.57142857142857,"a95":"4.3","info":"\"14-10-11\" at \"11:59\""}],"demagType":"Unknown","patch":1.1,"format":"Unknown","strat":null},{"version":"v1.1.0","exported":"2017-05-22T12:22:08.424Z","info":"4","GEO":[],"TECT":[],"interpreted":false,"name":"SS16.7B","coreAzi":335,"coreDip":34,"bedStrike":261,"bedDip":12,"data":[{"visible":true,"include":false,"step":"0.0","x":-345.56190476190477,"y":876.8380952380952,"z":-12.72095238095238,"a95":"0.99","info":"30/01/2015 at 13:11:03"},{"visible":true,"include":false,"step":"10.0","x":-87.12095238095237,"y":657.2666666666667,"z":-136.46666666666667,"a95":"0.99","info":"30/01/2015 at 13:11:03"},{"visible":true,"include":false,"step":"15.0","x":-140.23809523809524,"y":603,"z":-142.43809523809523,"a95":"0.99","info":"30/01/2015 at 13:11:03"},{"visible":true,"include":false,"step":"20.0","x":-130.84761904761905,"y":549.3428571428572,"z":-68.74666666666667,"a95":"0.99","info":"30/01/2015 at 13:11:03"},{"visible":true,"include":false,"step":"23.0","x":-189.6,"y":611.8666666666667,"z":-88.0647619047619,"a95":"0.99","info":"30/01/2015 at 13:11:03"},{"visible":true,"include":false,"step":"25.0","x":-209.34285714285713,"y":508.7523809523809,"z":-44.11714285714286,"a95":"0.99","info":"30/01/2015 at 13:11:03"},{"visible":true,"include":false,"step":"30.0","x":-231.58095238095237,"y":537.7428571428571,"z":-19.10952380952381,"a95":"0.99","info":"30/01/2015 at 13:11:03"},{"visible":true,"include":false,"step":"33.0","x":-213.04761904761904,"y":579.8380952380952,"z":-82.79142857142857,"a95":"0.99","info":"30/01/2015 at 13:11:03"},{"visible":true,"include":false,"step":"35.0","x":-226.71428571428572,"y":504.65714285714284,"z":-65.30190476190475,"a95":"0.99","info":"30/01/2015 at 13:11:03"},{"visible":true,"include":false,"step":"40.0","x":-181.41904761904763,"y":497.39047619047625,"z":-10.933333333333334,"a95":"0.99","info":"30/01/2015 at 13:11:03"},{"visible":true,"include":false,"step":"45.0","x":-317.7904761904762,"y":433.57142857142856,"z":89.37619047619049,"a95":"0.99","info":"30/01/2015 at 13:11:03"},{"visible":true,"include":false,"step":"50.0","x":-277.22857142857146,"y":355.9428571428572,"z":49.241904761904756,"a95":"0.99","info":"30/01/2015 at 13:11:03"},{"visible":true,"include":false,"step":"60.0","x":-174.4952380952381,"y":562.5904761904761,"z":-1.9877142857142855,"a95":"0.99","info":"30/01/2015 at 13:11:03"},{"visible":true,"include":false,"step":"70.0","x":-560.5714285714286,"y":292.6666666666667,"z":6.841523809523809,"a95":"0.99","info":"30/01/2015 at 13:11:03"}],"demagType":"Unknown","patch":1.1,"format":"Unknown","strat":null},{"version":"v1.1.0","exported":"2017-05-22T12:22:08.424Z","info":"","GEO":[],"TECT":[],"interpreted":false,"name":"SS16.8A","coreAzi":9,"coreDip":11,"bedStrike":261,"bedDip":12,"data":[{"visible":true,"include":false,"step":"20","x":-525.9047619047619,"y":-1412.4761904761904,"z":969.8095238095239,"a95":"2.4","info":"\"14-09-29\" at \"17:16\""},{"visible":true,"include":false,"step":"100","x":-161.9047619047619,"y":-1489.8095238095239,"z":451.8095238095238,"a95":"2","info":"\"14-09-29\" at \"20:04\""},{"visible":true,"include":false,"step":"150","x":-129.9047619047619,"y":-1543.3333333333333,"z":372.57142857142856,"a95":"2","info":"\"14-09-29\" at \"23:04\""},{"visible":true,"include":false,"step":"180","x":-141.9047619047619,"y":-1620.857142857143,"z":317.3333333333333,"a95":"1.8","info":"\"14-09-30\" at \"17:37\""},{"visible":true,"include":false,"step":"210","x":-160.76190476190476,"y":-1623.7142857142858,"z":317.7142857142857,"a95":"2","info":"\"14-09-30\" at \"20:41\""},{"visible":true,"include":false,"step":"240","x":-155.9047619047619,"y":-1566.2857142857142,"z":362,"a95":"2","info":"\"14-09-30\" at \"23:46\""},{"visible":true,"include":false,"step":"270","x":-206.76190476190476,"y":-1501.8095238095239,"z":345.6190476190476,"a95":"2.1","info":"\"14-10-01\" at \"18:10\""},{"visible":true,"include":false,"step":"300","x":-121.71428571428571,"y":-1528.4761904761904,"z":350.3809523809524,"a95":"1.9","info":"\"14-10-01\" at \"21:16\""},{"visible":true,"include":false,"step":"320","x":-169.71428571428572,"y":-1473.3333333333333,"z":305.9047619047619,"a95":"1.9","info":"\"14-10-02\" at \"00:27\""},{"visible":true,"include":false,"step":"340","x":-63.333333333333336,"y":-1417.142857142857,"z":372,"a95":"1.9","info":"\"14-10-02\" at \"17:57\""},{"visible":true,"include":false,"step":"370","x":-58.476190476190474,"y":-1268,"z":303.6190476190476,"a95":"1.8","info":"\"14-10-02\" at \"20:51\""},{"visible":true,"include":false,"step":"400","x":-260.0952380952381,"y":-1256.2857142857142,"z":313.8095238095238,"a95":"2","info":"\"14-10-03\" at \"00:06\""},{"visible":true,"include":false,"step":"420","x":-166.47619047619048,"y":-1290.6666666666667,"z":220.0952380952381,"a95":"1.8","info":"\"14-10-03\" at \"17:45\""},{"visible":true,"include":false,"step":"440","x":-96.28571428571429,"y":-1232.3809523809523,"z":217.14285714285714,"a95":"1.8","info":"\"14-10-03\" at \"21:01\""},{"visible":true,"include":false,"step":"460","x":-198.1904761904762,"y":-1296.5714285714287,"z":86.85714285714286,"a95":"1.9","info":"\"14-10-04\" at \"00:23\""},{"visible":true,"include":false,"step":"480","x":-66.0952380952381,"y":-1232.857142857143,"z":369.23809523809524,"a95":"2.1","info":"\"14-10-04\" at \"11:12\""},{"visible":true,"include":false,"step":"510","x":-80.76190476190476,"y":-1093.7142857142858,"z":83.23809523809524,"a95":"2.5","info":"\"14-10-04\" at \"14:03\""},{"visible":true,"include":false,"step":"540","x":-279.9047619047619,"y":-1120.6666666666667,"z":274.0952380952381,"a95":"3.1","info":"\"14-10-04\" at \"17:31\""},{"visible":true,"include":false,"step":"570","x":-288.3809523809524,"y":-828.952380952381,"z":104.0952380952381,"a95":"4.2","info":"\"14-10-05\" at \"11:34\""},{"visible":true,"include":false,"step":"600","x":-298.6666666666667,"y":-587.047619047619,"z":266.85714285714283,"a95":"3.7","info":"\"14-10-05\" at \"14:51\""},{"visible":true,"include":false,"step":"630","x":131.42857142857142,"y":-622.952380952381,"z":9.80952380952381,"a95":"2.6","info":"\"14-10-05\" at \"18:22\""},{"visible":true,"include":false,"step":"660","x":-123.61904761904762,"y":-153.04761904761904,"z":151.71428571428572,"a95":"8.1","info":"\"14-10-11\" at \"08:58\""},{"visible":true,"include":false,"step":"680","x":-18.857142857142858,"y":326.0952380952381,"z":-173.52380952380952,"a95":"5.7","info":"\"14-10-11\" at \"12:01\""}],"demagType":"Unknown","patch":1.1,"format":"Unknown","strat":null},{"version":"v1.1.0","exported":"2017-05-22T12:22:08.424Z","info":"4","GEO":[],"TECT":[],"interpreted":false,"name":"SS16.9B","coreAzi":21,"coreDip":14,"bedStrike":261,"bedDip":12,"data":[{"visible":true,"include":false,"step":"0.0","x":-176.16190476190476,"y":-408.5809523809524,"z":84.3247619047619,"a95":"0.99","info":"10/10/2014 at 03:25:56"},{"visible":true,"include":true,"step":"4.0","x":-114.48571428571428,"y":-417.97142857142853,"z":19.081904761904763,"a95":"0.99","info":"10/10/2014 at 03:25:56"},{"visible":true,"include":true,"step":"8.0","x":-78.39142857142858,"y":-431.42857142857144,"z":-25.651428571428568,"a95":"0.99","info":"10/10/2014 at 03:25:56"},{"visible":true,"include":true,"step":"12.0","x":-47.92285714285714,"y":-466.08571428571423,"z":-57.29714285714286,"a95":"0.99","info":"10/10/2014 at 03:25:56"},{"visible":true,"include":true,"step":"16.0","x":-34.59238095238096,"y":-461.4095238095238,"z":-51.74571428571429,"a95":"0.99","info":"10/10/2014 at 03:25:56"},{"visible":true,"include":true,"step":"20.0","x":-68.93238095238095,"y":-460.0571428571429,"z":-64.4095238095238,"a95":"0.99","info":"10/10/2014 at 03:25:56"},{"visible":true,"include":false,"step":"25.0","x":-94.37238095238095,"y":-452.68571428571425,"z":-89.31714285714285,"a95":"0.99","info":"10/10/2014 at 03:25:56"},{"visible":true,"include":false,"step":"30.0","x":-94.48857142857143,"y":-428.9809523809524,"z":-90.0047619047619,"a95":"0.99","info":"10/10/2014 at 03:25:56"},{"visible":true,"include":false,"step":"35.0","x":-127.56190476190477,"y":-456.42857142857144,"z":-137.38095238095238,"a95":"0.99","info":"10/10/2014 at 03:25:56"},{"visible":true,"include":false,"step":"40.0","x":-101.62857142857142,"y":-502.9047619047619,"z":-115.80000000000001,"a95":"0.99","info":"10/10/2014 at 03:25:56"},{"visible":true,"include":false,"step":"45.0","x":-122.27619047619048,"y":-505.1714285714286,"z":-124.29523809523809,"a95":"0.99","info":"10/10/2014 at 03:25:56"},{"visible":true,"include":false,"step":"50.0","x":-60.645714285714284,"y":-494.6952380952381,"z":-112.39047619047618,"a95":"0.99","info":"10/10/2014 at 03:25:56"},{"visible":true,"include":false,"step":"60.0","x":-127.6952380952381,"y":-361.22857142857146,"z":-87.25619047619048,"a95":"0.99","info":"10/10/2014 at 03:25:56"},{"visible":true,"include":false,"step":"70.0","x":-56.448571428571434,"y":-295.1904761904762,"z":-90.38190476190476,"a95":"0.99","info":"10/10/2014 at 03:25:56"},{"visible":true,"include":false,"step":"80.0","x":-110.45714285714286,"y":-399.1904761904762,"z":-106.74285714285713,"a95":"0.99","info":"10/10/2014 at 03:25:56"},{"visible":true,"include":false,"step":"90.0","x":-80.60571428571428,"y":-253.0761904761905,"z":-50.49809523809524,"a95":"0.99","info":"10/10/2014 at 03:25:56"},{"visible":true,"include":false,"step":"100.0","x":-24.061904761904763,"y":-371.8095238095238,"z":-48.8495238095238,"a95":"0.99","info":"10/10/2014 at 03:25:56"}],"demagType":"Unknown","patch":1.1,"format":"Unknown","strat":null},{"version":"v1.1.0","exported":"2017-05-22T12:22:08.425Z","info":"6","GEO":[],"TECT":[],"interpreted":false,"name":"SS16.10B","coreAzi":12,"coreDip":13,"bedStrike":261,"bedDip":12,"data":[{"visible":true,"include":false,"step":"0.0","x":-37.896190476190476,"y":-348.1047619047619,"z":510.1904761904762,"a95":"0.99","info":"22/09/2014 at 00:14:40"},{"visible":true,"include":true,"step":"5.0","x":-4.662,"y":-338,"z":393.7523809523809,"a95":"0.99","info":"22/09/2014 at 00:14:40"},{"visible":true,"include":true,"step":"10.0","x":26.32,"y":-367.95238095238096,"z":345.97142857142853,"a95":"0.99","info":"22/09/2014 at 00:14:40"},{"visible":true,"include":true,"step":"15.0","x":27.097142857142856,"y":-373.2761904761905,"z":332.87619047619046,"a95":"0.99","info":"22/09/2014 at 00:14:40"},{"visible":true,"include":true,"step":"20.0","x":-1.7600952380952382,"y":-392.9619047619048,"z":323.50476190476195,"a95":"0.99","info":"22/09/2014 at 00:14:40"},{"visible":true,"include":true,"step":"25.0","x":14.773333333333333,"y":-389.5238095238095,"z":354.97142857142853,"a95":"0.99","info":"22/09/2014 at 00:14:40"},{"visible":true,"include":true,"step":"30.0","x":36.17523809523809,"y":-400.3238095238095,"z":327.35238095238094,"a95":"0.99","info":"22/09/2014 at 00:14:40"},{"visible":true,"include":true,"step":"35.0","x":-15.711428571428572,"y":-465.3809523809524,"z":311.03809523809525,"a95":"0.99","info":"22/09/2014 at 00:14:40"},{"visible":true,"include":true,"step":"40.0","x":-28.77809523809524,"y":-480.12380952380954,"z":271.2,"a95":"0.99","info":"22/09/2014 at 00:14:40"},{"visible":true,"include":true,"step":"45.0","x":-33.5752380952381,"y":-445.3047619047619,"z":310.57142857142856,"a95":"0.99","info":"22/09/2014 at 00:14:40"},{"visible":true,"include":false,"step":"50.0","x":45.85333333333333,"y":-458.9047619047619,"z":282.4095238095238,"a95":"0.99","info":"22/09/2014 at 00:14:40"},{"visible":true,"include":false,"step":"60.0","x":19.31904761904762,"y":-436.23809523809524,"z":207.16190476190474,"a95":"0.99","info":"22/09/2014 at 00:14:40"},{"visible":true,"include":false,"step":"70.0","x":-0.7479333333333333,"y":-335.9047619047619,"z":218.62857142857143,"a95":"0.99","info":"22/09/2014 at 00:14:40"},{"visible":true,"include":false,"step":"80.0","x":-84.95428571428572,"y":-302.43809523809523,"z":263.0571428571428,"a95":"0.99","info":"22/09/2014 at 00:14:40"},{"visible":true,"include":false,"step":"90.0","x":-77.11809523809524,"y":-362.0095238095238,"z":183.40952380952382,"a95":"0.99","info":"22/09/2014 at 00:14:40"},{"visible":true,"include":false,"step":"100.0","x":-170.9047619047619,"y":-313.6190476190476,"z":155.6095238095238,"a95":"0.99","info":"22/09/2014 at 00:14:40"}],"demagType":"Unknown","patch":1.1,"format":"Unknown","strat":null},{"version":"v1.1.0","exported":"2017-05-22T12:22:08.425Z","info":"5","GEO":[],"TECT":[],"interpreted":false,"name":"SS16.11A","coreAzi":25,"coreDip":29,"bedStrike":261,"bedDip":12,"data":[{"visible":true,"include":false,"step":"0.0","x":-448.85714285714283,"y":-204.62857142857143,"z":354.51428571428573,"a95":"0.99","info":"30/01/2015 at 13:11:03"},{"visible":true,"include":false,"step":"10.0","x":-237.76190476190476,"y":-267.02857142857147,"z":44.78476190476191,"a95":"0.99","info":"30/01/2015 at 13:11:03"},{"visible":true,"include":false,"step":"15.0","x":-238.48571428571427,"y":-324.5904761904762,"z":-34.618095238095236,"a95":"0.99","info":"30/01/2015 at 13:11:03"},{"visible":true,"include":false,"step":"20.0","x":-264.2761904761905,"y":-306.22857142857146,"z":64.85333333333334,"a95":"0.99","info":"30/01/2015 at 13:11:03"},{"visible":true,"include":false,"step":"23.0","x":-322.43809523809523,"y":-287.5238095238095,"z":74.67428571428572,"a95":"0.99","info":"30/01/2015 at 13:11:03"},{"visible":true,"include":false,"step":"25.0","x":-316.5904761904762,"y":-361.1333333333333,"z":70.45619047619047,"a95":"0.99","info":"30/01/2015 at 13:11:03"},{"visible":true,"include":false,"step":"30.0","x":-311.62857142857143,"y":-352.2190476190476,"z":97.1047619047619,"a95":"0.99","info":"30/01/2015 at 13:11:03"},{"visible":true,"include":false,"step":"33.0","x":-299.16190476190474,"y":-398.0571428571429,"z":34.21714285714285,"a95":"0.99","info":"30/01/2015 at 13:11:03"},{"visible":true,"include":false,"step":"35.0","x":-314.2857142857143,"y":-409.3714285714285,"z":39.10476190476191,"a95":"0.99","info":"30/01/2015 at 13:11:03"},{"visible":true,"include":false,"step":"40.0","x":-244.43809523809523,"y":-406.42857142857144,"z":83.86380952380952,"a95":"0.99","info":"30/01/2015 at 13:11:03"},{"visible":true,"include":false,"step":"45.0","x":-346.2666666666667,"y":-311.5333333333333,"z":44.94571428571429,"a95":"0.99","info":"30/01/2015 at 13:11:03"},{"visible":true,"include":false,"step":"50.0","x":-298.6666666666667,"y":-385.6666666666667,"z":91.47238095238096,"a95":"0.99","info":"30/01/2015 at 13:11:03"},{"visible":true,"include":false,"step":"60.0","x":-274.37142857142857,"y":-367.23809523809524,"z":79.68380952380951,"a95":"0.99","info":"30/01/2015 at 13:11:03"},{"visible":true,"include":false,"step":"70.0","x":-147.05714285714285,"y":-300.2857142857143,"z":89.54857142857142,"a95":"0.99","info":"30/01/2015 at 13:11:03"}],"demagType":"Unknown","patch":1.1,"format":"Unknown","strat":null},{"version":"v1.1.0","exported":"2017-05-22T12:22:08.425Z","info":"5","GEO":[],"TECT":[],"interpreted":false,"name":"SS16.11B","coreAzi":25,"coreDip":29,"bedStrike":261,"bedDip":12,"data":[{"visible":true,"include":false,"step":"0.0","x":-388.0857142857143,"y":-140.14285714285714,"z":229.9809523809524,"a95":"0.99","info":"10/10/2014 at 03:25:56"},{"visible":true,"include":false,"step":"4.0","x":-337.15238095238095,"y":-141.2,"z":177.8095238095238,"a95":"0.99","info":"10/10/2014 at 03:25:56"},{"visible":true,"include":true,"step":"8.0","x":-327.752380952381,"y":-168.06666666666666,"z":202.14285714285714,"a95":"0.99","info":"10/10/2014 at 03:25:56"},{"visible":true,"include":true,"step":"12.0","x":-292.1333333333333,"y":-203.41904761904763,"z":242.1904761904762,"a95":"0.99","info":"10/10/2014 at 03:25:56"},{"visible":true,"include":true,"step":"16.0","x":-288.2857142857143,"y":-208.0190476190476,"z":290.03809523809525,"a95":"0.99","info":"10/10/2014 at 03:25:56"},{"visible":true,"include":true,"step":"20.0","x":-317.8095238095238,"y":-266.0571428571428,"z":323.96190476190475,"a95":"0.99","info":"10/10/2014 at 03:25:56"},{"visible":true,"include":true,"step":"25.0","x":-360.8666666666667,"y":-242.9047619047619,"z":372.25714285714287,"a95":"0.99","info":"10/10/2014 at 03:25:56"},{"visible":true,"include":false,"step":"30.0","x":-315.9142857142857,"y":-189.95238095238096,"z":451.1714285714286,"a95":"0.99","info":"10/10/2014 at 03:25:56"},{"visible":true,"include":false,"step":"35.0","x":-288.04761904761904,"y":-276.9142857142857,"z":472.27619047619044,"a95":"0.99","info":"10/10/2014 at 03:25:56"},{"visible":true,"include":false,"step":"40.0","x":-299.1333333333333,"y":-256.9809523809524,"z":561.1238095238095,"a95":"0.99","info":"10/10/2014 at 03:25:56"},{"visible":true,"include":false,"step":"45.0","x":-344.57142857142856,"y":-230.35238095238094,"z":507.12380952380954,"a95":"0.99","info":"10/10/2014 at 03:25:56"},{"visible":true,"include":false,"step":"50.0","x":-320.76190476190476,"y":-176.31428571428572,"z":535,"a95":"0.99","info":"10/10/2014 at 03:25:56"},{"visible":true,"include":false,"step":"60.0","x":-336.752380952381,"y":-185.42857142857142,"z":483.9047619047619,"a95":"0.99","info":"10/10/2014 at 03:25:56"},{"visible":true,"include":false,"step":"70.0","x":-184.1904761904762,"y":-220.96190476190475,"z":406.54285714285714,"a95":"0.99","info":"10/10/2014 at 03:25:56"},{"visible":true,"include":false,"step":"80.0","x":-148.04761904761904,"y":-365.04761904761904,"z":420.18095238095236,"a95":"0.99","info":"10/10/2014 at 03:25:56"},{"visible":true,"include":false,"step":"90.0","x":-96.4952380952381,"y":-386.42857142857144,"z":631.7523809523809,"a95":"0.99","info":"10/10/2014 at 03:25:56"},{"visible":true,"include":false,"step":"100.0","x":-224.61904761904762,"y":-152.0952380952381,"z":422.45714285714286,"a95":"0.99","info":"10/10/2014 at 03:25:56"}],"demagType":"Unknown","patch":1.1,"format":"Unknown","strat":null},{"version":"v1.1.0","exported":"2017-05-22T12:22:08.425Z","info":"6","GEO":[],"TECT":[],"interpreted":false,"name":"SS16.12A","coreAzi":349,"coreDip":6,"bedStrike":261,"bedDip":12,"data":[{"visible":true,"include":false,"step":"0.0","x":109.53333333333333,"y":164.40952380952382,"z":11.73904761904762,"a95":"0.99","info":"30/01/2015 at 13:11:03"},{"visible":true,"include":false,"step":"10.0","x":203.96190476190475,"y":114.6952380952381,"z":-68.56857142857143,"a95":"0.99","info":"30/01/2015 at 13:11:03"},{"visible":true,"include":false,"step":"15.0","x":157.25714285714287,"y":68.6704761904762,"z":-86.67333333333333,"a95":"0.99","info":"30/01/2015 at 13:11:03"},{"visible":true,"include":false,"step":"20.0","x":188.96190476190475,"y":52.52761904761904,"z":-44.645714285714284,"a95":"0.99","info":"30/01/2015 at 13:11:03"},{"visible":true,"include":false,"step":"23.0","x":193.86666666666665,"y":43.86952380952381,"z":-73.01714285714286,"a95":"0.99","info":"30/01/2015 at 13:11:03"},{"visible":true,"include":true,"step":"25.0","x":167.1904761904762,"y":2.932571428571429,"z":-48.64666666666667,"a95":"0.99","info":"30/01/2015 at 13:11:03"},{"visible":true,"include":true,"step":"30.0","x":175.3904761904762,"y":74.14380952380952,"z":-32.06761904761905,"a95":"0.99","info":"30/01/2015 at 13:11:03"},{"visible":true,"include":true,"step":"33.0","x":209.73333333333332,"y":77.17714285714285,"z":-30.54285714285714,"a95":"0.99","info":"30/01/2015 at 13:11:03"},{"visible":true,"include":true,"step":"35.0","x":196.03809523809525,"y":4.910190476190476,"z":-27.445714285714285,"a95":"0.99","info":"30/01/2015 at 13:11:03"},{"visible":true,"include":true,"step":"40.0","x":231.49523809523808,"y":74.50380952380952,"z":-57.27142857142857,"a95":"0.99","info":"30/01/2015 at 13:11:03"},{"visible":true,"include":true,"step":"45.0","x":260.8857142857143,"y":59.4752380952381,"z":-39.19619047619047,"a95":"0.99","info":"30/01/2015 at 13:11:03"},{"visible":true,"include":false,"step":"50.0","x":289.04761904761904,"y":20.977142857142855,"z":-66.31904761904762,"a95":"0.99","info":"30/01/2015 at 13:11:03"},{"visible":true,"include":false,"step":"60.0","x":232.44761904761904,"y":90.29047619047618,"z":-64.26952380952382,"a95":"0.99","info":"30/01/2015 at 13:11:03"},{"visible":true,"include":false,"step":"70.0","x":322.5809523809524,"y":-33.15142857142857,"z":-82.00761904761904,"a95":"0.99","info":"30/01/2015 at 13:11:03"}],"demagType":"Unknown","patch":1.1,"format":"Unknown","strat":null},{"version":"v1.1.0","exported":"2017-05-22T12:22:08.425Z","info":"","GEO":[],"TECT":[],"interpreted":false,"name":"SS16.12B","coreAzi":349,"coreDip":6,"bedStrike":261,"bedDip":12,"data":[{"visible":true,"include":false,"step":"20","x":76.38095238095238,"y":769.8095238095239,"z":-139.04761904761904,"a95":"1.9","info":"\"14-09-29\" at \"17:18\""},{"visible":true,"include":true,"step":"100","x":113.71428571428571,"y":288,"z":-50.38095238095238,"a95":"2.6","info":"\"14-09-29\" at \"20:07\""},{"visible":true,"include":true,"step":"150","x":72.0952380952381,"y":83.14285714285714,"z":-31.714285714285715,"a95":"2.4","info":"\"14-09-29\" at \"23:06\""},{"visible":true,"include":true,"step":"180","x":71.2,"y":41.82857142857143,"z":-6.152380952380952,"a95":"3.8","info":"\"14-09-30\" at \"17:39\""},{"visible":true,"include":true,"step":"210","x":67.20952380952382,"y":28.095238095238095,"z":-14.380952380952381,"a95":"3.7","info":"\"14-09-30\" at \"20:43\""},{"visible":true,"include":true,"step":"240","x":68.83809523809524,"y":0.6190476190476191,"z":26.780952380952378,"a95":"5.3","info":"\"14-09-30\" at \"23:48\""},{"visible":true,"include":true,"step":"270","x":109.61904761904762,"y":-20.857142857142858,"z":28.857142857142858,"a95":"2.8","info":"\"14-10-01\" at \"18:12\""},{"visible":true,"include":true,"step":"300","x":112.66666666666667,"y":-25.904761904761905,"z":34.857142857142854,"a95":"2.9","info":"\"14-10-01\" at \"21:18\""},{"visible":true,"include":false,"step":"320","x":86.8952380952381,"y":-1.9142857142857144,"z":24.514285714285712,"a95":"2.1","info":"\"14-10-02\" at \"00:29\""},{"visible":true,"include":false,"step":"340","x":96,"y":20.38095238095238,"z":28.571428571428573,"a95":"2.2","info":"\"14-10-02\" at \"17:58\""},{"visible":true,"include":false,"step":"370","x":104.76190476190476,"y":25.714285714285715,"z":71.9047619047619,"a95":"2.5","info":"\"14-10-02\" at \"20:53\""},{"visible":true,"include":false,"step":"400","x":115.80952380952381,"y":40.19047619047619,"z":72.38095238095238,"a95":"2.5","info":"\"14-10-03\" at \"00:08\""},{"visible":true,"include":false,"step":"420","x":51.733333333333334,"y":-38.904761904761905,"z":54.13333333333333,"a95":"3","info":"\"14-10-03\" at \"17:47\""},{"visible":true,"include":false,"step":"440","x":84.17142857142856,"y":0.5619047619047619,"z":7.533333333333333,"a95":"3.8","info":"\"14-10-03\" at \"21:03\""},{"visible":true,"include":false,"step":"460","x":17.80952380952381,"y":-85.14285714285714,"z":72.66666666666667,"a95":"4.4","info":"\"14-10-04\" at \"00:24\""},{"visible":true,"include":false,"step":"480","x":78.76190476190476,"y":28.476190476190474,"z":80.0952380952381,"a95":"4.4","info":"\"14-10-04\" at \"11:14\""},{"visible":true,"include":false,"step":"510","x":11.82857142857143,"y":28.18095238095238,"z":46.076190476190476,"a95":"6.5","info":"\"14-10-04\" at \"14:05\""},{"visible":true,"include":false,"step":"540","x":-58.53333333333334,"y":39.68571428571428,"z":-14.857142857142858,"a95":"8.2","info":"\"14-10-04\" at \"17:33\""},{"visible":true,"include":false,"step":"570","x":-23.085714285714285,"y":34.24761904761905,"z":-69.55238095238094,"a95":"8.3","info":"\"14-10-05\" at \"11:36\""},{"visible":true,"include":false,"step":"600","x":-11.619047619047619,"y":114.0952380952381,"z":70.38095238095238,"a95":"5.7","info":"\"14-10-05\" at \"14:53\""},{"visible":true,"include":false,"step":"630","x":-0.2857142857142857,"y":159.42857142857142,"z":40.476190476190474,"a95":"4.7","info":"\"14-10-05\" at \"18:24\""},{"visible":true,"include":false,"step":"660","x":-193.14285714285714,"y":110.95238095238095,"z":-94.28571428571429,"a95":"4.2","info":"\"14-10-11\" at \"09:00\""},{"visible":true,"include":false,"step":"680","x":-159.52380952380952,"y":184.38095238095238,"z":-96.95238095238095,"a95":"5.1","info":"\"14-10-11\" at \"12:03\""}],"demagType":"Unknown","patch":1.1,"format":"Unknown","strat":null},{"version":"v1.1.0","exported":"2017-05-22T12:22:08.425Z","info":"7","GEO":[],"TECT":[],"interpreted":false,"name":"SS16.13A","coreAzi":345,"coreDip":18,"bedStrike":261,"bedDip":12,"data":[{"visible":true,"include":false,"step":"0.0","x":241.65714285714287,"y":550.2857142857143,"z":-399.2666666666667,"a95":"0.99","info":"30/01/2015 at 13:11:03"},{"visible":true,"include":false,"step":"10.0","x":358.3809523809524,"y":597.2666666666667,"z":-447.7333333333333,"a95":"0.99","info":"30/01/2015 at 13:11:03"},{"visible":true,"include":false,"step":"15.0","x":359.5809523809524,"y":549.6476190476191,"z":-449.8666666666667,"a95":"0.99","info":"30/01/2015 at 13:11:03"},{"visible":true,"include":false,"step":"20.0","x":317.31428571428575,"y":523.4190476190475,"z":-416.08571428571423,"a95":"0.99","info":"30/01/2015 at 13:11:03"},{"visible":true,"include":false,"step":"23.0","x":295.35238095238094,"y":554.7809523809524,"z":-402.95238095238096,"a95":"0.99","info":"30/01/2015 at 13:11:03"},{"visible":true,"include":true,"step":"25.0","x":285.2857142857143,"y":495.99047619047616,"z":-405.5809523809524,"a95":"0.99","info":"30/01/2015 at 13:11:03"},{"visible":true,"include":true,"step":"30.0","x":270.1904761904762,"y":520.6666666666666,"z":-376.70476190476194,"a95":"0.99","info":"30/01/2015 at 13:11:03"},{"visible":true,"include":true,"step":"33.0","x":319.9428571428572,"y":495.4380952380953,"z":-384.57142857142856,"a95":"0.99","info":"30/01/2015 at 13:11:03"},{"visible":true,"include":true,"step":"35.0","x":271.0761904761905,"y":517.7238095238096,"z":-429.2666666666667,"a95":"0.99","info":"30/01/2015 at 13:11:03"},{"visible":true,"include":true,"step":"40.0","x":293.4,"y":534.6476190476191,"z":-364.64761904761906,"a95":"0.99","info":"30/01/2015 at 13:11:03"},{"visible":true,"include":true,"step":"45.0","x":361.0857142857143,"y":537.8571428571429,"z":-327.35238095238094,"a95":"0.99","info":"30/01/2015 at 13:11:03"},{"visible":true,"include":false,"step":"50.0","x":311.0095238095238,"y":558.9619047619047,"z":-348.1047619047619,"a95":"0.99","info":"30/01/2015 at 13:11:03"},{"visible":true,"include":false,"step":"60.0","x":292.0857142857143,"y":590.3142857142857,"z":-349.4095238095238,"a95":"0.99","info":"30/01/2015 at 13:11:03"},{"visible":true,"include":false,"step":"70.0","x":336.48571428571427,"y":492.97142857142853,"z":-426.27619047619044,"a95":"0.99","info":"30/01/2015 at 13:11:03"}],"demagType":"Unknown","patch":1.1,"format":"Unknown","strat":null},{"version":"v1.1.0","exported":"2017-05-22T12:22:08.425Z","info":"","GEO":[],"TECT":[],"interpreted":false,"name":"SS16.14A","coreAzi":18,"coreDip":31,"bedStrike":261,"bedDip":12,"data":[{"visible":true,"include":false,"step":"20","x":-465.23809523809524,"y":-140.85714285714286,"z":926.8571428571429,"a95":"2.7","info":"\"14-09-29\" at \"17:19\""},{"visible":true,"include":true,"step":"100","x":-495.04761904761904,"y":-341.04761904761904,"z":619.6190476190476,"a95":"2.6","info":"\"14-09-29\" at \"20:09\""},{"visible":true,"include":true,"step":"150","x":-333.9047619047619,"y":-290,"z":305.8095238095238,"a95":"2.3","info":"\"14-09-29\" at \"23:08\""},{"visible":true,"include":true,"step":"180","x":-290.4761904761905,"y":-239.33333333333334,"z":192.95238095238096,"a95":"2.3","info":"\"14-09-30\" at \"17:41\""},{"visible":true,"include":true,"step":"210","x":-233.14285714285714,"y":-215.14285714285714,"z":47.61904761904762,"a95":"2.1","info":"\"14-09-30\" at \"20:45\""},{"visible":true,"include":true,"step":"240","x":-183.8095238095238,"y":-199.71428571428572,"z":16.285714285714285,"a95":"2","info":"\"14-09-30\" at \"23:50\""},{"visible":true,"include":false,"step":"270","x":-146.47619047619048,"y":-206.1904761904762,"z":42,"a95":"2.9","info":"\"14-10-01\" at \"18:13\""},{"visible":true,"include":false,"step":"300","x":-156.76190476190476,"y":-215.14285714285714,"z":34.95238095238095,"a95":"2.1","info":"\"14-10-01\" at \"21:20\""},{"visible":true,"include":false,"step":"320","x":-150.76190476190476,"y":-171.52380952380952,"z":13.714285714285714,"a95":"2","info":"\"14-10-02\" at \"00:31\""},{"visible":true,"include":false,"step":"340","x":-138.38095238095238,"y":-122.76190476190476,"z":0.2857142857142857,"a95":"1.7","info":"\"14-10-02\" at \"18:00\""},{"visible":true,"include":false,"step":"370","x":-138.47619047619048,"y":-125.33333333333333,"z":11.428571428571429,"a95":"2.2","info":"\"14-10-02\" at \"20:55\""},{"visible":true,"include":false,"step":"400","x":-107.61904761904762,"y":-114.85714285714286,"z":-26.666666666666668,"a95":"2.7","info":"\"14-10-03\" at \"00:10\""},{"visible":true,"include":false,"step":"420","x":-151.04761904761904,"y":-104.66666666666667,"z":4,"a95":"2.2","info":"\"14-10-03\" at \"17:49\""},{"visible":true,"include":false,"step":"440","x":-68.76190476190476,"y":-109.52380952380952,"z":-15.047619047619047,"a95":"3.4","info":"\"14-10-03\" at \"21:05\""},{"visible":true,"include":false,"step":"460","x":-129.52380952380952,"y":-56.95238095238095,"z":-8.571428571428571,"a95":"4.2","info":"\"14-10-04\" at \"00:26\""},{"visible":true,"include":false,"step":"480","x":-88.19047619047619,"y":-50.76190476190476,"z":7.428571428571429,"a95":"5.9","info":"\"14-10-04\" at \"11:16\""},{"visible":true,"include":false,"step":"510","x":-105.52380952380952,"y":52.666666666666664,"z":-79.04761904761905,"a95":"6","info":"\"14-10-04\" at \"14:07\""},{"visible":true,"include":false,"step":"540","x":-146.85714285714286,"y":70,"z":-29.142857142857142,"a95":"6.8","info":"\"14-10-04\" at \"17:35\""},{"visible":true,"include":false,"step":"570","x":-141.14285714285714,"y":97.14285714285714,"z":-172.38095238095238,"a95":"6.7","info":"\"14-10-05\" at \"11:38\""},{"visible":true,"include":false,"step":"600","x":-138.1904761904762,"y":128.57142857142858,"z":-1.1428571428571428,"a95":"9.400001","info":"\"14-10-05\" at \"14:55\""},{"visible":true,"include":false,"step":"630","x":-68.66666666666667,"y":179.23809523809524,"z":-60.857142857142854,"a95":"12.6","info":"\"14-10-05\" at \"18:26\""},{"visible":true,"include":false,"step":"660","x":-308.2857142857143,"y":78.47619047619048,"z":-49.333333333333336,"a95":"10.6","info":"\"14-10-11\" at \"09:02\""},{"visible":true,"include":false,"step":"680","x":-242.57142857142858,"y":265.42857142857144,"z":-164.95238095238096,"a95":"9.8","info":"\"14-10-11\" at \"12:05\""}],"demagType":"Unknown","patch":1.1,"format":"Unknown","strat":null},{"version":"v1.1.0","exported":"2017-05-22T12:22:08.425Z","info":"","GEO":[],"TECT":[],"interpreted":false,"name":"SS16.15A","coreAzi":353,"coreDip":26,"bedStrike":261,"bedDip":12,"data":[{"visible":true,"include":false,"step":"20","x":-743.8095238095239,"y":653.2380952380952,"z":1670.1904761904761,"a95":"2.5","info":"\"14-10-20\" at \"17:19\""},{"visible":true,"include":false,"step":"100","x":-475.42857142857144,"y":608.1904761904761,"z":946.8571428571429,"a95":"2.3","info":"\"14-10-20\" at \"20:34\""},{"visible":true,"include":false,"step":"150","x":-499.7142857142857,"y":74.85714285714286,"z":861.9047619047619,"a95":"2.4","info":"\"14-10-20\" at \"23:28\""},{"visible":true,"include":false,"step":"180","x":-333.42857142857144,"y":13.619047619047619,"z":566.2857142857143,"a95":"2.3","info":"\"14-10-21\" at \"15:34\""},{"visible":true,"include":false,"step":"210","x":-206.38095238095238,"y":6.666666666666667,"z":355.04761904761904,"a95":"2.3","info":"\"14-10-21\" at \"18:26\""},{"visible":true,"include":false,"step":"240","x":-165.61904761904762,"y":-23.61904761904762,"z":200.76190476190476,"a95":"2.4","info":"\"14-10-21\" at \"21:39\""},{"visible":true,"include":false,"step":"270","x":-96.95238095238095,"y":-0.19047619047619047,"z":156.0952380952381,"a95":"2.3","info":"\"14-10-22\" at \"00:35\""},{"visible":true,"include":false,"step":"300","x":-85.61904761904762,"y":19.238095238095237,"z":107.23809523809524,"a95":"3.4","info":"\"14-10-22\" at \"16:52\""},{"visible":true,"include":false,"step":"330","x":-63.714285714285715,"y":44.38095238095238,"z":135.33333333333334,"a95":"2.8","info":"\"14-10-22\" at \"20:00\""},{"visible":true,"include":false,"step":"360","x":-6.285714285714286,"y":61.80952380952381,"z":75.23809523809524,"a95":"3.1","info":"\"14-10-22\" at \"23:06\""},{"visible":true,"include":false,"step":"390","x":72.28571428571429,"y":72,"z":110.47619047619048,"a95":"2.5","info":"\"14-10-23\" at \"17:19\""},{"visible":true,"include":false,"step":"420","x":58,"y":70.19047619047619,"z":112.57142857142857,"a95":"3","info":"\"14-10-23\" at \"20:20\""},{"visible":true,"include":false,"step":"450","x":41.23809523809524,"y":54,"z":101.04761904761905,"a95":"2.7","info":"\"14-10-24\" at \"14:52\""},{"visible":true,"include":false,"step":"480","x":4.571428571428571,"y":125.80952380952381,"z":7.619047619047619,"a95":"4.2","info":"\"14-10-24\" at \"17:54\""},{"visible":true,"include":false,"step":"510","x":16.761904761904763,"y":32.95238095238095,"z":110.28571428571429,"a95":"7.1","info":"\"14-10-24\" at \"20:46\""},{"visible":true,"include":false,"step":"540","x":91.33333333333333,"y":55.23809523809524,"z":81.23809523809524,"a95":"5.3","info":"\"14-10-24\" at \"23:42\""}],"demagType":"Unknown","patch":1.1,"format":"Unknown","strat":null},{"version":"v1.1.0","exported":"2017-05-22T12:22:08.425Z","info":"7","GEO":[{"dec":27.284131315538048,"inc":-28.781870983452233,"MAD":7.693301888802365,"cm":[-3.907985046680551e-14,-2.842170943040401e-14,0],"intensity":1427.8541155888927,"type":"GC","origin":false,"forced":true,"remark":"","nSteps":7,"minStep":"5.0","maxStep":"35.0","steps":["5.0","10.0","15.0","20.0","25.0","30.0","35.0"],"group":"None","version":"v1.1.0"}],"TECT":[{"dec":32.2729370879004,"inc":-38.15900752727759,"MAD":7.693301888801829,"cm":[-1.7053025658242404e-13,-1.2079226507921703e-13,1.6431300764452317e-14],"intensity":1427.8541155888927,"type":"GC","origin":false,"forced":true,"remark":"","nSteps":7,"minStep":"5.0","maxStep":"35.0","steps":["5.0","10.0","15.0","20.0","25.0","30.0","35.0"],"group":"None","version":"v1.1.0"}],"interpreted":true,"name":"SS16.16A","coreAzi":16,"coreDip":18,"bedStrike":261,"bedDip":12,"data":[{"visible":true,"include":false,"step":"0.0","x":-337.2095238095238,"y":-617.495238095238,"z":627.2095238095238,"a95":"0.99","info":"22/09/2014 at 00:14:40"},{"visible":true,"include":true,"step":"5.0","x":-287.2761904761905,"y":-603.9047619047619,"z":492.7809523809524,"a95":"0.99","info":"22/09/2014 at 00:14:40"},{"visible":true,"include":true,"step":"10.0","x":-244.9238095238095,"y":-633.495238095238,"z":422.7523809523809,"a95":"0.99","info":"22/09/2014 at 00:14:40"},{"visible":true,"include":true,"step":"15.0","x":-185.61904761904762,"y":-659.5619047619048,"z":350.5238095238095,"a95":"0.99","info":"22/09/2014 at 00:14:40"},{"visible":true,"include":true,"step":"20.0","x":-155.9714285714286,"y":-628.7047619047619,"z":293.77142857142854,"a95":"0.99","info":"22/09/2014 at 00:14:40"},{"visible":true,"include":true,"step":"25.0","x":-71.11714285714285,"y":-619.2476190476191,"z":259.25714285714287,"a95":"0.99","info":"22/09/2014 at 00:14:40"},{"visible":true,"include":true,"step":"30.0","x":-56.86285714285714,"y":-628.3047619047619,"z":203.05714285714285,"a95":"0.99","info":"22/09/2014 at 00:14:40"},{"visible":true,"include":true,"step":"35.0","x":0.5197619047619048,"y":-617.1809523809524,"z":189.48571428571427,"a95":"0.99","info":"22/09/2014 at 00:14:40"},{"visible":true,"include":false,"step":"40.0","x":24.992380952380955,"y":-554.2476190476191,"z":180.7238095238095,"a95":"0.99","info":"22/09/2014 at 00:14:40"},{"visible":true,"include":false,"step":"45.0","x":-0.5743809523809523,"y":-520.2952380952381,"z":135.74285714285713,"a95":"0.99","info":"22/09/2014 at 00:14:40"},{"visible":true,"include":false,"step":"50.0","x":-32.505714285714284,"y":-490.99047619047616,"z":167.54285714285714,"a95":"0.99","info":"22/09/2014 at 00:14:40"},{"visible":true,"include":false,"step":"60.0","x":35.10857142857143,"y":-635.152380952381,"z":185.67619047619047,"a95":"0.99","info":"22/09/2014 at 00:14:40"},{"visible":true,"include":false,"step":"70.0","x":-105.92380952380952,"y":-593.1333333333333,"z":109.62857142857142,"a95":"0.99","info":"22/09/2014 at 00:14:40"},{"visible":true,"include":false,"step":"80.0","x":-27.54952380952381,"y":-461.4857142857143,"z":130.86666666666665,"a95":"0.99","info":"22/09/2014 at 00:14:40"},{"visible":true,"include":false,"step":"90.0","x":33.492380952380955,"y":-297.7142857142857,"z":170.34285714285713,"a95":"0.99","info":"22/09/2014 at 00:14:40"},{"visible":true,"include":false,"step":"100.0","x":-53.808571428571426,"y":-476.46666666666664,"z":268.447619047619,"a95":"0.99","info":"22/09/2014 at 00:14:40"}],"demagType":"Unknown","patch":1.1,"format":"Unknown","strat":null},{"version":"v1.1.0","exported":"2017-05-22T12:22:08.425Z","info":"8","GEO":[{"dec":346.7539790432758,"inc":-35.24828879886047,"MAD":8.120598533450298,"cm":[-1.4955232819331632e-13,2.165463575649829e-14,0],"intensity":2117.88467952333,"type":"GC","origin":false,"forced":true,"remark":"","nSteps":9,"minStep":"10.0","maxStep":"40.0","steps":["10.0","15.0","20.0","23.0","25.0","30.0","33.0","35.0","40.0"],"group":"None"}],"TECT":[{"dec":345.89351838443,"inc":-47.20896866868187,"MAD":8.120598533450227,"cm":[-9.03404335466413e-14,1.0827317878249145e-14,0],"intensity":2117.88467952333,"type":"GC","origin":false,"forced":true,"remark":"","nSteps":9,"minStep":"10.0","maxStep":"40.0","steps":["10.0","15.0","20.0","23.0","25.0","30.0","33.0","35.0","40.0"],"group":"None"}],"interpreted":true,"name":"SS16.17A","coreAzi":347,"coreDip":32,"bedStrike":261,"bedDip":12,"data":[{"visible":true,"include":false,"step":"0.0","x":-149.45714285714286,"y":1073.2380952380952,"z":436.31428571428575,"a95":"0.99","info":"30/01/2015 at 13:11:03"},{"visible":true,"include":true,"step":"10.0","x":13.871428571428572,"y":1076.1904761904761,"z":35.561904761904756,"a95":"0.99","info":"30/01/2015 at 13:11:03"},{"visible":true,"include":true,"step":"15.0","x":25.754285714285714,"y":1042.4761904761904,"z":-78.52761904761904,"a95":"0.99","info":"30/01/2015 at 13:11:03"},{"visible":true,"include":true,"step":"20.0","x":61.74857142857143,"y":1056.6666666666667,"z":-135.3047619047619,"a95":"0.99","info":"30/01/2015 at 13:11:03"},{"visible":true,"include":true,"step":"23.0","x":89.82857142857144,"y":1106.095238095238,"z":-197.78095238095236,"a95":"0.99","info":"30/01/2015 at 13:11:03"},{"visible":true,"include":true,"step":"25.0","x":57.68666666666667,"y":1059.047619047619,"z":-233.77142857142857,"a95":"0.99","info":"30/01/2015 at 13:11:03"},{"visible":true,"include":true,"step":"30.0","x":98.47619047619048,"y":1026.5714285714287,"z":-249.9809523809524,"a95":"0.99","info":"30/01/2015 at 13:11:03"},{"visible":true,"include":true,"step":"33.0","x":141.4952380952381,"y":1013.8095238095239,"z":-327.85714285714283,"a95":"0.99","info":"30/01/2015 at 13:11:03"},{"visible":true,"include":true,"step":"35.0","x":159.6952380952381,"y":960.3809523809524,"z":-310.6952380952381,"a95":"0.99","info":"30/01/2015 at 13:11:03"},{"visible":true,"include":true,"step":"40.0","x":162.36190476190475,"y":1011.4285714285714,"z":-345.76190476190476,"a95":"0.99","info":"30/01/2015 at 13:11:03"},{"visible":true,"include":false,"step":"45.0","x":165.2952380952381,"y":1026,"z":-404.00952380952384,"a95":"0.99","info":"30/01/2015 at 13:11:03"},{"visible":true,"include":false,"step":"50.0","x":202.2,"y":992.8571428571429,"z":-416.447619047619,"a95":"0.99","info":"30/01/2015 at 13:11:03"},{"visible":true,"include":false,"step":"60.0","x":146.16190476190476,"y":963.3333333333334,"z":-394.53333333333336,"a95":"0.99","info":"30/01/2015 at 13:11:03"},{"visible":true,"include":false,"step":"70.0","x":228.65714285714287,"y":971.3333333333334,"z":-395.4190476190476,"a95":"0.99","info":"30/01/2015 at 13:11:03"}],"demagType":"Unknown","patch":1.1,"format":"Unknown","strat":null},{"version":"v1.1.0","exported":"2017-05-22T12:22:08.425Z","info":"8","GEO":[{"dec":336.0784243611794,"inc":-26.40789861808376,"MAD":7.407684469831247,"cm":[-3.3983398106145265e-14,1.3534147347811431e-14,0],"intensity":1263.387610113643,"type":"GC","origin":false,"forced":true,"remark":"","nSteps":15,"minStep":"5.0","maxStep":"100.0","steps":["5.0","10.0","15.0","20.0","25.0","30.0","35.0","40.0","45.0","50.0","60.0","70.0","80.0","90.0","100.0"],"group":"None"}],"TECT":[{"dec":333.99402534634044,"inc":-37.9502090925698,"MAD":7.407684469831211,"cm":[-7.84980546173063e-14,3.2481953634747435e-14,5.4136589391245725e-15],"intensity":1263.387610113643,"type":"GC","origin":false,"forced":true,"remark":"","nSteps":15,"minStep":"5.0","maxStep":"100.0","steps":["5.0","10.0","15.0","20.0","25.0","30.0","35.0","40.0","45.0","50.0","60.0","70.0","80.0","90.0","100.0"],"group":"None"}],"interpreted":true,"name":"SS16.18A","coreAzi":17,"coreDip":14,"bedStrike":261,"bedDip":12,"data":[{"visible":true,"include":false,"step":"0.0","x":-1290.857142857143,"y":12.546666666666667,"z":1555.047619047619,"a95":"0.99","info":"22/09/2014 at 00:14:40"},{"visible":true,"include":true,"step":"5.0","x":-673.4857142857143,"y":276.5238095238095,"z":1019.4285714285714,"a95":"0.99","info":"22/09/2014 at 00:14:40"},{"visible":true,"include":true,"step":"10.0","x":-486.847619047619,"y":314.12380952380954,"z":858.9619047619047,"a95":"0.99","info":"22/09/2014 at 00:14:40"},{"visible":true,"include":true,"step":"15.0","x":-339.2,"y":344.5904761904762,"z":763.8761904761905,"a95":"0.99","info":"22/09/2014 at 00:14:40"},{"visible":true,"include":true,"step":"20.0","x":-234.61904761904762,"y":400.5619047619047,"z":632.2666666666667,"a95":"0.99","info":"22/09/2014 at 00:14:40"},{"visible":true,"include":true,"step":"25.0","x":-108.27619047619048,"y":311.43809523809523,"z":574.2,"a95":"0.99","info":"22/09/2014 at 00:14:40"},{"visible":true,"include":true,"step":"30.0","x":-17.263809523809524,"y":394.552380952381,"z":441.8285714285714,"a95":"0.99","info":"22/09/2014 at 00:14:40"},{"visible":true,"include":true,"step":"35.0","x":29.793333333333333,"y":455.34285714285716,"z":355.752380952381,"a95":"0.99","info":"22/09/2014 at 00:14:40"},{"visible":true,"include":true,"step":"40.0","x":77.98666666666666,"y":408.53333333333336,"z":424.60952380952375,"a95":"0.99","info":"22/09/2014 at 00:14:40"},{"visible":true,"include":true,"step":"45.0","x":140.88571428571427,"y":500.1904761904762,"z":368.50476190476195,"a95":"0.99","info":"22/09/2014 at 00:14:40"},{"visible":true,"include":true,"step":"50.0","x":114.56190476190477,"y":457.31428571428575,"z":284.04761904761904,"a95":"0.99","info":"22/09/2014 at 00:14:40"},{"visible":true,"include":true,"step":"60.0","x":333.76190476190476,"y":341.12380952380954,"z":148.6,"a95":"0.99","info":"22/09/2014 at 00:14:40"},{"visible":true,"include":true,"step":"70.0","x":316.5904761904762,"y":442.8666666666667,"z":160.25714285714287,"a95":"0.99","info":"22/09/2014 at 00:14:40"},{"visible":true,"include":true,"step":"80.0","x":226.46666666666667,"y":448.6666666666667,"z":111.71428571428571,"a95":"0.99","info":"22/09/2014 at 00:14:40"},{"visible":true,"include":true,"step":"90.0","x":343.6095238095238,"y":518.3333333333334,"z":119.63809523809525,"a95":"0.99","info":"22/09/2014 at 00:14:40"},{"visible":true,"include":true,"step":"100.0","x":464.45714285714286,"y":419.99047619047616,"z":13.684761904761904,"a95":"0.99","info":"22/09/2014 at 00:14:40"}],"demagType":"Unknown","patch":1.1,"format":"Unknown","strat":null},{"version":"v1.1.0","exported":"2017-05-22T12:22:08.425Z","info":"","GEO":[{"dec":5.376049622699952,"inc":-33.65376433761905,"MAD":5.448555629864746,"cm":[-6.767073673905716e-15,1.191004966607406e-13,0],"intensity":2273.9289422642737,"type":"GC","origin":false,"forced":true,"remark":"","nSteps":5,"minStep":"100","maxStep":"240","steps":["100","150","180","210","240"],"group":"None"}],"TECT":[{"dec":8.05942454030179,"inc":-45.21130010739587,"MAD":5.448555629864405,"cm":[-1.2992781453898974e-13,-7.579122514774402e-14,0],"intensity":2273.9289422642732,"type":"GC","origin":false,"forced":true,"remark":"","nSteps":5,"minStep":"100","maxStep":"240","steps":["100","150","180","210","240"],"group":"None"}],"interpreted":true,"name":"SS16.19A","coreAzi":22,"coreDip":25,"bedStrike":261,"bedDip":12,"data":[{"visible":true,"include":false,"step":"20","x":-2359.3333333333335,"y":-1481.6190476190477,"z":3404.3809523809523,"a95":"2.6","info":"\"14-09-29\" at \"17:21\""},{"visible":true,"include":true,"step":"100","x":-1273.4285714285713,"y":-949.9047619047619,"z":1744.857142857143,"a95":"2.5","info":"\"14-09-29\" at \"20:11\""},{"visible":true,"include":true,"step":"150","x":-510,"y":-719.4285714285714,"z":553.9047619047619,"a95":"2.4","info":"\"14-09-29\" at \"23:10\""},{"visible":true,"include":true,"step":"180","x":-287.9047619047619,"y":-568.6666666666666,"z":83.23809523809524,"a95":"2.7","info":"\"14-09-30\" at \"17:43\""},{"visible":true,"include":true,"step":"210","x":-14.095238095238095,"y":-504.76190476190476,"z":-232.95238095238096,"a95":"3.5","info":"\"14-09-30\" at \"20:47\""},{"visible":true,"include":true,"step":"240","x":137.23809523809524,"y":-431.6190476190476,"z":-340.85714285714283,"a95":"4","info":"\"14-09-30\" at \"23:52\""},{"visible":true,"include":false,"step":"270","x":251.14285714285714,"y":-346.3809523809524,"z":-466,"a95":"4","info":"\"14-10-01\" at \"18:15\""},{"visible":true,"include":false,"step":"300","x":165.71428571428572,"y":-348,"z":-445.23809523809524,"a95":"3.8","info":"\"14-10-01\" at \"21:22\""},{"visible":true,"include":false,"step":"320","x":140.57142857142858,"y":-309.23809523809524,"z":-525.8095238095239,"a95":"4","info":"\"14-10-02\" at \"00:33\""},{"visible":true,"include":false,"step":"340","x":204.95238095238096,"y":-243.23809523809524,"z":-531.047619047619,"a95":"3.8","info":"\"14-10-02\" at \"18:02\""},{"visible":true,"include":false,"step":"370","x":164.1904761904762,"y":-214.1904761904762,"z":-605.2380952380952,"a95":"3.9","info":"\"14-10-02\" at \"20:57\""},{"visible":true,"include":false,"step":"400","x":200.47619047619048,"y":-98.47619047619048,"z":-447.23809523809524,"a95":"4.8","info":"\"14-10-03\" at \"00:12\""},{"visible":true,"include":false,"step":"420","x":283.04761904761904,"y":-139.42857142857142,"z":-522.0952380952381,"a95":"4.3","info":"\"14-10-03\" at \"17:51\""},{"visible":true,"include":false,"step":"440","x":112.95238095238095,"y":-75.61904761904762,"z":-564.3809523809524,"a95":"4.3","info":"\"14-10-03\" at \"21:07\""},{"visible":true,"include":false,"step":"460","x":245.04761904761904,"y":-215.9047619047619,"z":-566.7619047619048,"a95":"4.1","info":"\"14-10-04\" at \"00:28\""},{"visible":true,"include":false,"step":"480","x":258.57142857142856,"y":-173.9047619047619,"z":-426.0952380952381,"a95":"5.3","info":"\"14-10-04\" at \"11:18\""},{"visible":true,"include":false,"step":"510","x":238.66666666666666,"y":-293.04761904761904,"z":-617.1428571428571,"a95":"5.4","info":"\"14-10-04\" at \"14:09\""},{"visible":true,"include":false,"step":"540","x":140.0952380952381,"y":-201.71428571428572,"z":-460.95238095238096,"a95":"7.4","info":"\"14-10-04\" at \"17:37\""},{"visible":true,"include":false,"step":"570","x":296.85714285714283,"y":-60.95238095238095,"z":-253.42857142857142,"a95":"10.1","info":"\"14-10-05\" at \"11:40\""},{"visible":true,"include":false,"step":"600","x":-59.80952380952381,"y":122.47619047619048,"z":-197.71428571428572,"a95":"9.3","info":"\"14-10-05\" at \"14:56\""},{"visible":true,"include":false,"step":"630","x":124.28571428571429,"y":149.33333333333334,"z":-271.42857142857144,"a95":"6.2","info":"\"14-10-05\" at \"18:28\""},{"visible":true,"include":false,"step":"660","x":121.71428571428571,"y":-79.71428571428571,"z":-160,"a95":"7.8","info":"\"14-10-11\" at \"09:04\""},{"visible":true,"include":false,"step":"680","x":107.80952380952381,"y":157.71428571428572,"z":-340.85714285714283,"a95":"4.8","info":"\"14-10-11\" at \"12:07\""}],"demagType":"Unknown","patch":1.1,"format":"Unknown","strat":null},{"version":"v1.1.0","exported":"2017-05-22T12:22:08.425Z","info":"","GEO":[{"dec":10.355304466218627,"inc":-37.71835911582875,"MAD":3.735687966549812,"cm":[-1.3534147347811431e-14,5.95502483303703e-14,0],"intensity":1711.384648454574,"type":"GC","origin":false,"forced":true,"remark":"","nSteps":7,"minStep":"100","maxStep":"300","steps":["100","150","180","210","240","270","300"],"group":"None"}],"TECT":[{"dec":14.504414499094082,"inc":-48.901472403442604,"MAD":3.735687966550123,"cm":[-1.3534147347811432e-13,1.4616879135636348e-13,5.4136589391245725e-15],"intensity":1711.384648454574,"type":"GC","origin":false,"forced":true,"remark":"","nSteps":7,"minStep":"100","maxStep":"300","steps":["100","150","180","210","240","270","300"],"group":"None"}],"interpreted":true,"name":"SS16.20A","coreAzi":18,"coreDip":17,"bedStrike":261,"bedDip":12,"data":[{"visible":true,"include":false,"step":"20","x":-1498.7619047619048,"y":-323.14285714285717,"z":1974.7619047619048,"a95":"2.8","info":"\"14-09-29\" at \"17:23\""},{"visible":true,"include":true,"step":"100","x":-848.0952380952381,"y":-96.0952380952381,"z":1174.2857142857142,"a95":"2.7","info":"\"14-09-29\" at \"20:13\""},{"visible":true,"include":true,"step":"150","x":-530,"y":-1.2380952380952381,"z":771.047619047619,"a95":"2.6","info":"\"14-09-29\" at \"23:12\""},{"visible":true,"include":true,"step":"180","x":-371.5238095238095,"y":110.0952380952381,"z":577.4285714285714,"a95":"2.8","info":"\"14-09-30\" at \"17:45\""},{"visible":true,"include":true,"step":"210","x":-234.85714285714286,"y":242.66666666666666,"z":374.76190476190476,"a95":"3.1","info":"\"14-09-30\" at \"20:49\""},{"visible":true,"include":true,"step":"240","x":-176.66666666666666,"y":272.0952380952381,"z":282.1904761904762,"a95":"2.8","info":"\"14-09-30\" at \"23:53\""},{"visible":true,"include":true,"step":"270","x":-149.61904761904762,"y":332.76190476190476,"z":246.47619047619048,"a95":"3.2","info":"\"14-10-01\" at \"18:17\""},{"visible":true,"include":true,"step":"300","x":-101.14285714285714,"y":291.9047619047619,"z":236.1904761904762,"a95":"3.3","info":"\"14-10-01\" at \"21:24\""},{"visible":true,"include":false,"step":"320","x":-158.76190476190476,"y":378.0952380952381,"z":145.04761904761904,"a95":"3.1","info":"\"14-10-02\" at \"00:35\""},{"visible":true,"include":false,"step":"340","x":-234.57142857142858,"y":485.6190476190476,"z":429.23809523809524,"a95":"2.6","info":"\"14-10-02\" at \"18:04\""},{"visible":true,"include":false,"step":"370","x":-104.19047619047619,"y":355.42857142857144,"z":343.7142857142857,"a95":"3.1","info":"\"14-10-02\" at \"21:00\""},{"visible":true,"include":false,"step":"400","x":-93.9047619047619,"y":465.3333333333333,"z":175.04761904761904,"a95":"2.5","info":"\"14-10-03\" at \"00:15\""},{"visible":true,"include":false,"step":"420","x":-15.904761904761905,"y":430.6666666666667,"z":143.61904761904762,"a95":"2.5","info":"\"14-10-03\" at \"17:53\""},{"visible":true,"include":false,"step":"440","x":-57.23809523809524,"y":354.85714285714283,"z":87.80952380952381,"a95":"2.6","info":"\"14-10-03\" at \"21:09\""},{"visible":true,"include":false,"step":"460","x":9.80952380952381,"y":447.6190476190476,"z":-62.57142857142857,"a95":"2.6","info":"\"14-10-04\" at \"00:30\""},{"visible":true,"include":false,"step":"480","x":-118.57142857142857,"y":599.6190476190476,"z":76.19047619047619,"a95":"2.3","info":"\"14-10-04\" at \"11:20\""},{"visible":true,"include":false,"step":"510","x":-219.33333333333334,"y":493.5238095238095,"z":43.61904761904762,"a95":"4.6","info":"\"14-10-04\" at \"14:12\""},{"visible":true,"include":false,"step":"540","x":-255.23809523809524,"y":598.3809523809524,"z":107.80952380952381,"a95":"4","info":"\"14-10-04\" at \"17:39\""},{"visible":true,"include":false,"step":"570","x":-358.85714285714283,"y":491.42857142857144,"z":46.666666666666664,"a95":"3.5","info":"\"14-10-05\" at \"11:42\""},{"visible":true,"include":false,"step":"600","x":-178.85714285714286,"y":469.14285714285717,"z":-25.80952380952381,"a95":"2.7","info":"\"14-10-05\" at \"14:58\""},{"visible":true,"include":false,"step":"630","x":-6,"y":142.76190476190476,"z":-219.23809523809524,"a95":"4.1","info":"\"14-10-05\" at \"18:31\""},{"visible":true,"include":false,"step":"660","x":-28.476190476190474,"y":287.5238095238095,"z":-20,"a95":"4.4","info":"\"14-10-11\" at \"09:06\""},{"visible":true,"include":false,"step":"680","x":127.9047619047619,"y":168.47619047619048,"z":-188.95238095238096,"a95":"5.4","info":"\"14-10-11\" at \"12:08\""}],"demagType":"Unknown","patch":1.1,"format":"Unknown","strat":null}]
