# Supplementary material for: Paleomagnetic constraints on the timing and distribution of Cenozoic rotations in Central and Eastern Anatolia
Source: Copernicus journal article supplement (doi:10.5194/se-9-295-2018), 2018-03-21
Supplement: Supplementary file 2 [file se-9-295-2018-supplement.zip › se-2017-66_DATA_dir files/dir files Sivas/SS17.dir]

[{"info":"","GEO":[],"TECT":[],"interpreted":false,"name":"SS17.1A","coreAzi":50,"coreDip":42,"bedStrike":340,"bedDip":45,"data":[{"visible":true,"include":false,"step":"20","x":-9453,"y":-12051,"z":27028,"a95":"2.7","info":"\"14-09-29\" at \"15:13\""},{"visible":true,"include":false,"step":"100","x":-6883,"y":-8879,"z":19329,"a95":"2.8","info":"\"14-09-29\" at \"17:52\""},{"visible":true,"include":false,"step":"150","x":-5855,"y":-6760,"z":14905,"a95":"2.7","info":"\"14-09-29\" at \"20:46\""},{"visible":true,"include":false,"step":"180","x":-4409,"y":-6315,"z":12618,"a95":"2.5","info":"\"14-09-30\" at \"15:10\""},{"visible":true,"include":false,"step":"210","x":-3198,"y":-4465,"z":9235,"a95":"2.6","info":"\"14-09-30\" at \"18:25\""},{"visible":true,"include":false,"step":"240","x":-419,"y":-894,"z":896,"a95":"3.9","info":"\"14-09-30\" at \"21:28\""},{"visible":true,"include":false,"step":"270","x":-413.4,"y":-165.5,"z":-290.5,"a95":"5.5","info":"\"14-10-01\" at \"15:21\""},{"visible":true,"include":false,"step":"300","x":-342.1,"y":-536.2,"z":6.3,"a95":"9","info":"\"14-10-01\" at \"18:59\""},{"visible":true,"include":false,"step":"320","x":-621.3,"y":-284.5,"z":-296.2,"a95":"6.5","info":"\"14-10-01\" at \"22:05\""},{"visible":true,"include":false,"step":"340","x":-335.2,"y":-82.1,"z":42.7,"a95":"9.1","info":"\"14-10-02\" at \"15:42\""},{"visible":true,"include":false,"step":"370","x":-422,"y":-199.3,"z":-176,"a95":"7.6","info":"\"14-10-02\" at \"18:26\""},{"visible":true,"include":false,"step":"400","x":-484.3,"y":71.8,"z":-84,"a95":"6.6","info":"\"14-10-02\" at \"21:39\""},{"visible":true,"include":false,"step":"420","x":-221.8,"y":-16.3,"z":-368.3,"a95":"9.6","info":"\"14-10-03\" at \"15:02\""},{"visible":true,"include":false,"step":"440","x":-556.2,"y":-116.4,"z":199.7,"a95":"7","info":"\"14-10-03\" at \"18:36\""},{"visible":true,"include":false,"step":"460","x":-325.6,"y":-104.8,"z":118.5,"a95":"13.3","info":"\"14-10-03\" at \"21:55\""},{"visible":true,"include":false,"step":"480","x":-968,"y":444,"z":276,"a95":"3.1","info":"\"14-10-04\" at \"09:18\""}]},{"info":"1","GEO":[],"TECT":[],"interpreted":false,"name":"SS17.1B","coreAzi":50,"coreDip":42,"bedStrike":340,"bedDip":45,"data":[{"visible":true,"include":false,"step":"0.0","x":-5924.7,"y":-10188,"z":21535,"a95":"0.99","info":"22/09/2014 at 05:24:00"},{"visible":true,"include":false,"step":"5.0","x":-5260.6,"y":-8977.9,"z":19981,"a95":"0.99","info":"22/09/2014 at 05:24:00"},{"visible":true,"include":false,"step":"10.0","x":-4534.4,"y":-7706.8,"z":17217,"a95":"0.99","info":"22/09/2014 at 05:24:00"},{"visible":true,"include":false,"step":"15.0","x":-3978.4,"y":-6573.5,"z":15425,"a95":"0.99","info":"22/09/2014 at 05:24:00"},{"visible":true,"include":false,"step":"20.0","x":-3447.7,"y":-5490.3,"z":13584,"a95":"0.99","info":"22/09/2014 at 05:24:00"},{"visible":true,"include":false,"step":"25.0","x":-3057.2,"y":-4893.3,"z":11923,"a95":"0.99","info":"22/09/2014 at 05:24:00"},{"visible":true,"include":false,"step":"30.0","x":-2479.8,"y":-4248.3,"z":10560,"a95":"0.99","info":"22/09/2014 at 05:24:00"},{"visible":true,"include":false,"step":"35.0","x":-2274.1,"y":-3701.4,"z":9375.6,"a95":"0.99","info":"22/09/2014 at 05:24:00"},{"visible":true,"include":false,"step":"40.0","x":-2184,"y":-3200.1,"z":8589.3,"a95":"0.99","info":"22/09/2014 at 05:24:00"},{"visible":true,"include":false,"step":"45.0","x":-1742,"y":-2930.5,"z":7612.8,"a95":"0.99","info":"22/09/2014 at 05:24:00"},{"visible":true,"include":false,"step":"50.0","x":-1375.6,"y":-2316.3,"z":6936.2,"a95":"0.99","info":"22/09/2014 at 05:24:00"},{"visible":true,"include":false,"step":"60.0","x":-1298.4,"y":-2348.5,"z":6115.8,"a95":"0.99","info":"22/09/2014 at 05:24:00"},{"visible":true,"include":false,"step":"70.0","x":-910.72,"y":-1824.4,"z":5120.3,"a95":"0.99","info":"22/09/2014 at 05:24:00"},{"visible":true,"include":false,"step":"80.0","x":475.76,"y":-1505.3,"z":4518.6,"a95":"0.99","info":"22/09/2014 at 05:24:00"},{"visible":true,"include":false,"step":"90.0","x":-695.88,"y":-1473.3,"z":3952.6,"a95":"0.99","info":"22/09/2014 at 05:24:00"},{"visible":true,"include":false,"step":"100.0","x":-30.497,"y":-696.5,"z":3345.9,"a95":"0.99","info":"22/09/2014 at 05:24:00"}]},{"info":"","GEO":[],"TECT":[],"interpreted":false,"name":"SS17.2A","coreAzi":56,"coreDip":34,"bedStrike":340,"bedDip":45,"data":[{"visible":true,"include":false,"step":"20","x":-12609,"y":-11346,"z":21843,"a95":"2.5","info":"\"14-09-29\" at \"15:15\""},{"visible":true,"include":false,"step":"100","x":-7528,"y":-6659,"z":14509,"a95":"2.7","info":"\"14-09-29\" at \"17:54\""},{"visible":true,"include":false,"step":"150","x":-5384,"y":-4729,"z":9840,"a95":"2.7","info":"\"14-09-29\" at \"20:48\""},{"visible":true,"include":false,"step":"180","x":-1963,"y":-2214,"z":4270,"a95":"2.7","info":"\"14-09-30\" at \"15:12\""},{"visible":true,"include":false,"step":"210","x":-594,"y":-841,"z":990,"a95":"3.2","info":"\"14-09-30\" at \"18:26\""},{"visible":true,"include":false,"step":"240","x":-387.4,"y":-227.1,"z":98.6,"a95":"9.900001","info":"\"14-09-30\" at \"21:30\""},{"visible":true,"include":false,"step":"270","x":-254.4,"y":-176,"z":-438,"a95":"5.1","info":"\"14-10-01\" at \"15:23\""},{"visible":true,"include":false,"step":"300","x":-317.5,"y":-359.9,"z":-44,"a95":"12.4","info":"\"14-10-01\" at \"19:00\""},{"visible":true,"include":false,"step":"320","x":-353.3,"y":-271.6,"z":-190.4,"a95":"7.5","info":"\"14-10-01\" at \"22:08\""},{"visible":true,"include":false,"step":"340","x":-460.8,"y":-72.1,"z":152.3,"a95":"7.1","info":"\"14-10-02\" at \"15:43\""},{"visible":true,"include":false,"step":"370","x":-366.3,"y":6.6,"z":-53.3,"a95":"8.2","info":"\"14-10-02\" at \"18:28\""},{"visible":true,"include":false,"step":"400","x":-266.2,"y":-12.2,"z":225.5,"a95":"9.900001","info":"\"14-10-02\" at \"21:41\""},{"visible":true,"include":false,"step":"420","x":-258.4,"y":383,"z":-246.1,"a95":"4.9","info":"\"14-10-03\" at \"15:04\""},{"visible":true,"include":false,"step":"440","x":-224,"y":221.7,"z":378.4,"a95":"8.8","info":"\"14-10-03\" at \"18:38\""},{"visible":true,"include":false,"step":"460","x":-659.6,"y":28.7,"z":-66.1,"a95":"6.7","info":"\"14-10-03\" at \"21:57\""},{"visible":true,"include":false,"step":"480","x":-940.8,"y":-146.4,"z":-139.6,"a95":"5.7","info":"\"14-10-04\" at \"09:20\""}]},{"info":"6","GEO":[],"TECT":[],"interpreted":false,"name":"SS17.2B","coreAzi":56,"coreDip":34,"bedStrike":340,"bedDip":45,"data":[{"visible":true,"include":false,"step":"0.0","x":-4629.2,"y":-6362.8,"z":9730.8,"a95":"0.99","info":"10/10/2014 at 03:25:56"},{"visible":true,"include":false,"step":"4.0","x":-4262,"y":-6116.6,"z":9267.5,"a95":"0.99","info":"10/10/2014 at 03:25:56"},{"visible":true,"include":false,"step":"8.0","x":-3855.4,"y":-5770,"z":8737.4,"a95":"0.99","info":"10/10/2014 at 03:25:56"},{"visible":true,"include":false,"step":"12.0","x":-3545.9,"y":-5207,"z":8099.7,"a95":"0.99","info":"10/10/2014 at 03:25:56"},{"visible":true,"include":false,"step":"16.0","x":-3246,"y":-4693.7,"z":7425.3,"a95":"0.99","info":"10/10/2014 at 03:25:56"},{"visible":true,"include":false,"step":"20.0","x":-2918.5,"y":-4382.8,"z":6827.1,"a95":"0.99","info":"10/10/2014 at 03:25:56"},{"visible":true,"include":false,"step":"25.0","x":-2528.4,"y":-3865.2,"z":6231.4,"a95":"0.99","info":"10/10/2014 at 03:25:56"},{"visible":true,"include":false,"step":"30.0","x":-2138.8,"y":-3348.3,"z":5719.5,"a95":"0.99","info":"10/10/2014 at 03:25:56"},{"visible":true,"include":false,"step":"35.0","x":-2016.5,"y":-2996.7,"z":5176.8,"a95":"0.99","info":"10/10/2014 at 03:25:56"},{"visible":true,"include":false,"step":"40.0","x":-1815,"y":-2661,"z":4865.5,"a95":"0.99","info":"10/10/2014 at 03:25:56"},{"visible":true,"include":false,"step":"45.0","x":-1579.8,"y":-2079.5,"z":4394,"a95":"0.99","info":"10/10/2014 at 03:25:56"},{"visible":true,"include":false,"step":"50.0","x":-1385.4,"y":-2022.8,"z":4068.7,"a95":"0.99","info":"10/10/2014 at 03:25:56"},{"visible":true,"include":false,"step":"60.0","x":-1345.8,"y":-1321.7,"z":3520.4,"a95":"0.99","info":"10/10/2014 at 03:25:56"},{"visible":true,"include":false,"step":"70.0","x":-762.4,"y":-641.85,"z":3266.2,"a95":"0.99","info":"10/10/2014 at 03:25:56"},{"visible":true,"include":false,"step":"80.0","x":-1289.8,"y":-1121.1,"z":2377,"a95":"0.99","info":"10/10/2014 at 03:25:56"},{"visible":true,"include":false,"step":"90.0","x":-497.89,"y":-508.92,"z":1991.5,"a95":"0.99","info":"10/10/2014 at 03:25:56"},{"visible":true,"include":false,"step":"100.0","x":-400.54,"y":-187.13,"z":1976.8,"a95":"0.99","info":"10/10/2014 at 03:25:56"}]},{"info":"6","GEO":[],"TECT":[],"interpreted":false,"name":"SS17.3B","coreAzi":47,"coreDip":72,"bedStrike":340,"bedDip":45,"data":[{"visible":true,"include":false,"step":"0.0","x":2538.8,"y":-4672.1,"z":11490,"a95":"0.99","info":"28/10/2014 at 04:10:16"},{"visible":true,"include":false,"step":"4.0","x":2879,"y":-4502.6,"z":11241,"a95":"0.99","info":"28/10/2014 at 04:10:16"},{"visible":true,"include":false,"step":"8.0","x":2995,"y":-4357.9,"z":10761,"a95":"0.99","info":"28/10/2014 at 04:10:16"},{"visible":true,"include":false,"step":"12.0","x":2961.7,"y":-4273.8,"z":10069,"a95":"0.99","info":"28/10/2014 at 04:10:16"},{"visible":true,"include":false,"step":"16.0","x":2895.5,"y":-3922.6,"z":9579.9,"a95":"0.99","info":"28/10/2014 at 04:10:16"},{"visible":true,"include":false,"step":"20.0","x":2748.2,"y":-3827.2,"z":9056.9,"a95":"0.99","info":"28/10/2014 at 04:10:16"},{"visible":true,"include":false,"step":"25.0","x":2620.6,"y":-3452.5,"z":8423.2,"a95":"0.99","info":"28/10/2014 at 04:10:16"},{"visible":true,"include":false,"step":"30.0","x":2476.6,"y":-3368.8,"z":7799.6,"a95":"0.99","info":"28/10/2014 at 04:10:16"},{"visible":true,"include":false,"step":"35.0","x":2322.5,"y":-3170.2,"z":7119.5,"a95":"0.99","info":"28/10/2014 at 04:10:16"},{"visible":true,"include":false,"step":"40.0","x":2192.6,"y":-2826.2,"z":6777.1,"a95":"0.99","info":"28/10/2014 at 04:10:16"},{"visible":true,"include":false,"step":"45.0","x":2117.5,"y":-2744,"z":6148,"a95":"0.99","info":"28/10/2014 at 04:10:16"},{"visible":true,"include":false,"step":"50.0","x":2099.9,"y":-2604.5,"z":5588.8,"a95":"0.99","info":"28/10/2014 at 04:10:16"},{"visible":true,"include":false,"step":"60.0","x":1943.7,"y":-2336.9,"z":4893.9,"a95":"0.99","info":"28/10/2014 at 04:10:16"},{"visible":true,"include":false,"step":"70.0","x":1912.9,"y":-2236.4,"z":4197.6,"a95":"0.99","info":"28/10/2014 at 04:10:16"},{"visible":true,"include":false,"step":"80.0","x":2045.3,"y":-2337.2,"z":3583.4,"a95":"0.99","info":"28/10/2014 at 04:10:16"},{"visible":true,"include":false,"step":"90.0","x":1887.1,"y":-2347,"z":3424.5,"a95":"0.99","info":"28/10/2014 at 04:10:16"},{"visible":true,"include":false,"step":"100.0","x":1997.9,"y":-2377.2,"z":2687.1,"a95":"0.99","info":"28/10/2014 at 04:10:16"}]},{"info":"7","GEO":[],"TECT":[],"interpreted":false,"name":"SS17.4A","coreAzi":47,"coreDip":46,"bedStrike":340,"bedDip":45,"data":[{"visible":true,"include":false,"step":"0.0","x":-758.37,"y":-1219.5,"z":2173.8,"a95":"0.99","info":"28/10/2014 at 04:10:16"},{"visible":true,"include":false,"step":"4.0","x":-498.06,"y":-1118.5,"z":1986.5,"a95":"0.99","info":"28/10/2014 at 04:10:16"},{"visible":true,"include":false,"step":"8.0","x":-298.36,"y":-1093.4,"z":1699.6,"a95":"0.99","info":"28/10/2014 at 04:10:16"},{"visible":true,"include":false,"step":"12.0","x":-292.34,"y":-899.45,"z":1592.5,"a95":"0.99","info":"28/10/2014 at 04:10:16"},{"visible":true,"include":false,"step":"16.0","x":-280.48,"y":-790.4,"z":1435.8,"a95":"0.99","info":"28/10/2014 at 04:10:16"},{"visible":true,"include":false,"step":"20.0","x":-197.61,"y":-752.99,"z":1309.3,"a95":"0.99","info":"28/10/2014 at 04:10:16"},{"visible":true,"include":false,"step":"25.0","x":-195.58,"y":-622.04,"z":1329.2,"a95":"0.99","info":"28/10/2014 at 04:10:16"},{"visible":true,"include":false,"step":"30.0","x":-337.2,"y":-639.86,"z":1200.6,"a95":"0.99","info":"28/10/2014 at 04:10:16"},{"visible":true,"include":false,"step":"35.0","x":-201.68,"y":-474.27,"z":764.35,"a95":"0.99","info":"28/10/2014 at 04:10:16"},{"visible":true,"include":false,"step":"40.0","x":-89.892,"y":-275.92,"z":953.73,"a95":"0.99","info":"28/10/2014 at 04:10:16"},{"visible":true,"include":false,"step":"45.0","x":-295.73,"y":-448.71,"z":795.69,"a95":"0.99","info":"28/10/2014 at 04:10:16"},{"visible":true,"include":false,"step":"50.0","x":-244.92,"y":-356.2,"z":682.17,"a95":"0.99","info":"28/10/2014 at 04:10:16"},{"visible":true,"include":false,"step":"60.0","x":-110.42,"y":-130.31,"z":656.09,"a95":"0.99","info":"28/10/2014 at 04:10:16"},{"visible":true,"include":false,"step":"70.0","x":-244.65,"y":-79.706,"z":449.57,"a95":"0.99","info":"28/10/2014 at 04:10:16"},{"visible":true,"include":false,"step":"80.0","x":374.36,"y":-243.91,"z":423.2,"a95":"0.99","info":"28/10/2014 at 04:10:16"},{"visible":true,"include":false,"step":"90.0","x":104.03,"y":-267.59,"z":317.98,"a95":"0.99","info":"28/10/2014 at 04:10:16"},{"visible":true,"include":false,"step":"100.0","x":-90.456,"y":-162.18,"z":609.13,"a95":"0.99","info":"28/10/2014 at 04:10:16"}]},{"info":"","GEO":[],"TECT":[],"interpreted":false,"name":"SS17.5A","coreAzi":52,"coreDip":47,"bedStrike":340,"bedDip":45,"data":[{"visible":true,"include":false,"step":"20","x":-994,"y":-703,"z":-1386,"a95":"2.8","info":"\"14-09-29\" at \"15:17\""},{"visible":true,"include":false,"step":"100","x":-29.4,"y":-211.6,"z":-653.7,"a95":"4.9","info":"\"14-09-29\" at \"17:56\""},{"visible":true,"include":false,"step":"150","x":-581.3,"y":-31.9,"z":-388.3,"a95":"6.8","info":"\"14-09-29\" at \"20:50\""},{"visible":true,"include":false,"step":"180","x":-180.1,"y":-6.9,"z":-406.3,"a95":"6.3","info":"\"14-09-30\" at \"15:14\""},{"visible":true,"include":false,"step":"210","x":-84.9,"y":93.9,"z":-578.4,"a95":"7.8","info":"\"14-09-30\" at \"18:28\""},{"visible":true,"include":false,"step":"240","x":-257.5,"y":116.4,"z":-249.4,"a95":"10.5","info":"\"14-09-30\" at \"21:31\""},{"visible":true,"include":false,"step":"270","x":-288.3,"y":51.2,"z":-356.1,"a95":"4.8","info":"\"14-10-01\" at \"15:25\""},{"visible":true,"include":false,"step":"300","x":-201.6,"y":-10.8,"z":-165.9,"a95":"22.2","info":"\"14-10-01\" at \"19:02\""},{"visible":true,"include":false,"step":"320","x":-353.3,"y":142.2,"z":-77.7,"a95":"6.1","info":"\"14-10-01\" at \"22:09\""},{"visible":true,"include":false,"step":"340","x":-279.6,"y":85.9,"z":311.2,"a95":"13.4","info":"\"14-10-02\" at \"15:46\""},{"visible":true,"include":false,"step":"370","x":-1181,"y":183,"z":-249,"a95":"10.8","info":"\"14-10-02\" at \"18:30\""},{"visible":true,"include":false,"step":"400","x":-529.7,"y":398.2,"z":461.1,"a95":"19","info":"\"14-10-02\" at \"21:43\""},{"visible":true,"include":false,"step":"420","x":-2932,"y":21,"z":-1948,"a95":"17.5","info":"\"14-10-03\" at \"15:06\""},{"visible":true,"include":false,"step":"440","x":-3333,"y":692,"z":690,"a95":"18.8","info":"\"14-10-03\" at \"18:40\""},{"visible":true,"include":false,"step":"460","x":-6163,"y":192,"z":654,"a95":"13.3","info":"\"14-10-03\" at \"21:59\""},{"visible":true,"include":false,"step":"480","x":-3891,"y":-855,"z":873,"a95":"11.9","info":"\"14-10-04\" at \"09:23\""}]},{"info":"2","GEO":[],"TECT":[],"interpreted":false,"name":"SS17.5B","coreAzi":52,"coreDip":47,"bedStrike":340,"bedDip":45,"data":[{"visible":true,"include":false,"step":"0.0","x":-614.63,"y":-1660.1,"z":2168.1,"a95":"0.99","info":"22/09/2014 at 05:24:00"},{"visible":true,"include":false,"step":"5.0","x":-257.64,"y":-1430.8,"z":1912.3,"a95":"0.99","info":"22/09/2014 at 05:24:00"},{"visible":true,"include":false,"step":"10.0","x":-163.7,"y":-1004.8,"z":1392.5,"a95":"0.99","info":"22/09/2014 at 05:24:00"},{"visible":true,"include":false,"step":"15.0","x":287.19,"y":-514.72,"z":831.41,"a95":"0.99","info":"22/09/2014 at 05:24:00"},{"visible":true,"include":false,"step":"20.0","x":15.596,"y":-576.84,"z":920.04,"a95":"0.99","info":"22/09/2014 at 05:24:00"},{"visible":true,"include":false,"step":"25.0","x":-54.621,"y":-431.49,"z":675.16,"a95":"0.99","info":"22/09/2014 at 05:24:00"},{"visible":true,"include":false,"step":"30.0","x":-645.5,"y":444.19,"z":13.89,"a95":"0.99","info":"22/09/2014 at 05:24:00"},{"visible":true,"include":false,"step":"35.0","x":-60.023,"y":-393.89,"z":499.25,"a95":"0.99","info":"22/09/2014 at 05:24:00"},{"visible":true,"include":false,"step":"40.0","x":1047.5,"y":-426.8,"z":344.95,"a95":"0.99","info":"22/09/2014 at 05:24:00"},{"visible":true,"include":false,"step":"45.0","x":157.69,"y":-208.54,"z":627.3,"a95":"0.99","info":"22/09/2014 at 05:24:00"},{"visible":true,"include":false,"step":"50.0","x":-58.386,"y":-7.4756,"z":290.86,"a95":"0.99","info":"22/09/2014 at 05:24:00"},{"visible":true,"include":false,"step":"60.0","x":128.06,"y":-166.42,"z":444.76,"a95":"0.99","info":"22/09/2014 at 05:24:00"},{"visible":true,"include":false,"step":"70.0","x":-90.752,"y":184.03,"z":209.59,"a95":"0.99","info":"22/09/2014 at 05:24:00"},{"visible":true,"include":false,"step":"80.0","x":639.67,"y":191.06,"z":143.69,"a95":"0.99","info":"22/09/2014 at 05:24:00"},{"visible":true,"include":false,"step":"90.0","x":163.02,"y":-232.67,"z":141.51,"a95":"0.99","info":"22/09/2014 at 05:24:00"},{"visible":true,"include":false,"step":"100.0","x":-40.099,"y":124.03,"z":149.23,"a95":"0.99","info":"22/09/2014 at 05:24:00"}]},{"info":"7","GEO":[{"dec":63.259750275331214,"inc":-22.165450488649007,"MAD":17.329131604582738,"cm":[-2.3092638912203256e-14,-8.881784197001252e-15,0],"intensity":97.15107797787444,"type":"GC","origin":false,"forced":true,"remark":"","nSteps":10,"minStep":"8.0","maxStep":"50.0","steps":["8.0","12.0","16.0","20.0","25.0","30.0","35.0","40.0","45.0","50.0"]},{"dec":218.27043225296768,"inc":-65.0103663446797,"MAD":7.219152298519223,"cm":[-7.105427357601002e-15,1.7763568394002505e-15,0],"intensity":82.0324177486381,"type":"dir","forced":true,"remark":"","origin":false,"nSteps":6,"minStep":"25.0","maxStep":"50.0","steps":["25.0","30.0","35.0","40.0","45.0","50.0"]}],"TECT":[{"dec":54.17755866381401,"inc":-66.50620842248604,"MAD":17.329131604582695,"cm":[2.4868995751603507e-14,-4.618527782440651e-14,1.7763568394002505e-14],"intensity":97.15107797787442,"type":"GC","origin":false,"forced":true,"remark":"","nSteps":10,"minStep":"8.0","maxStep":"50.0","steps":["8.0","12.0","16.0","20.0","25.0","30.0","35.0","40.0","45.0","50.0"]},{"dec":236.05856040610814,"inc":-22.757827169583603,"MAD":7.219152298519201,"cm":[8.171241461241152e-14,-6.394884621840902e-14,1.7763568394002505e-15],"intensity":82.0324177486381,"type":"dir","forced":true,"remark":"","origin":false,"nSteps":6,"minStep":"25.0","maxStep":"50.0","steps":["25.0","30.0","35.0","40.0","45.0","50.0"]}],"interpreted":true,"name":"SS17.6A","coreAzi":126,"coreDip":50,"bedStrike":340,"bedDip":45,"data":[{"visible":true,"include":false,"step":"0.0","x":-484.32,"y":64.855,"z":-637.87,"a95":"0.99","info":"10/10/2014 at 03:25:56"},{"visible":true,"include":false,"step":"4.0","x":-214.02,"y":64.319,"z":-818.02,"a95":"0.99","info":"10/10/2014 at 03:25:56"},{"visible":true,"include":false,"step":"8.0","x":17.076,"y":70.805,"z":-768.66,"a95":"0.99","info":"10/10/2014 at 03:25:56"},{"visible":true,"include":false,"step":"12.0","x":206.02,"y":128.22,"z":-589.64,"a95":"0.99","info":"10/10/2014 at 03:25:56"},{"visible":true,"include":false,"step":"16.0","x":232.77,"y":212.31,"z":-614.17,"a95":"0.99","info":"10/10/2014 at 03:25:56"},{"visible":true,"include":false,"step":"20.0","x":299.96,"y":136.82,"z":-593.35,"a95":"0.99","info":"10/10/2014 at 03:25:56"},{"visible":true,"include":true,"step":"25.0","x":343.81,"y":199.5,"z":-416.83,"a95":"0.99","info":"10/10/2014 at 03:25:56"},{"visible":true,"include":true,"step":"30.0","x":269.08,"y":181.4,"z":-312.28,"a95":"0.99","info":"10/10/2014 at 03:25:56"},{"visible":true,"include":true,"step":"35.0","x":250.97,"y":182.06,"z":-328.59,"a95":"0.99","info":"10/10/2014 at 03:25:56"},{"visible":true,"include":true,"step":"40.0","x":161.24,"y":124.6,"z":-233.29,"a95":"0.99","info":"10/10/2014 at 03:25:56"},{"visible":true,"include":true,"step":"45.0","x":225.81,"y":277.34,"z":-245.44,"a95":"0.99","info":"10/10/2014 at 03:25:56"},{"visible":true,"include":true,"step":"50.0","x":152.76,"y":91.424,"z":-224.02,"a95":"0.99","info":"10/10/2014 at 03:25:56"},{"visible":false,"include":false,"step":"60.0","x":18.685,"y":117.91,"z":-131.16,"a95":"0.99","info":"10/10/2014 at 03:25:56"},{"visible":false,"include":false,"step":"70.0","x":121.32,"y":406.31,"z":-88.662,"a95":"0.99","info":"10/10/2014 at 03:25:56"},{"visible":false,"include":false,"step":"80.0","x":69.726,"y":-109.61,"z":-187.42,"a95":"0.99","info":"10/10/2014 at 03:25:56"},{"visible":false,"include":false,"step":"90.0","x":-419.31,"y":-145.26,"z":14.531,"a95":"0.99","info":"10/10/2014 at 03:25:56"},{"visible":false,"include":false,"step":"100.0","x":25.761,"y":1.526,"z":-136.96,"a95":"0.99","info":"10/10/2014 at 03:25:56"}]},{"info":"1","GEO":[{"dec":217.11114383396853,"inc":-70.92147657528,"MAD":7.748065079110151,"cm":[-3.108624468950438e-14,2.9531932455029164e-14,0],"intensity":87.93034192639377,"type":"dir","forced":true,"remark":"","origin":false,"nSteps":7,"minStep":"20.0","maxStep":"45.0","steps":["20.0","23.0","25.0","30.0","33.0","40.0","45.0"]}],"TECT":[{"dec":238.36968433314019,"inc":-28.306155175240903,"MAD":7.7480650791101695,"cm":[-4.618527782440651e-14,4.618527782440651e-14,-1.9539925233402755e-14],"intensity":87.93034192639375,"type":"dir","forced":true,"remark":"","origin":false,"nSteps":7,"minStep":"20.0","maxStep":"45.0","steps":["20.0","23.0","25.0","30.0","33.0","40.0","45.0"]}],"interpreted":true,"name":"SS17.7A","coreAzi":99,"coreDip":67,"bedStrike":340,"bedDip":45,"data":[{"visible":false,"include":false,"step":"0.0","x":-45.27,"y":-133.84,"z":-726.88,"a95":"0.99","info":"30/01/2015 at 17:42:41"},{"visible":true,"include":false,"step":"10.0","x":75.276,"y":72.458,"z":-779.61,"a95":"0.99","info":"30/01/2015 at 17:42:41"},{"visible":true,"include":false,"step":"15.0","x":28.027,"y":78.68,"z":-697.29,"a95":"0.99","info":"30/01/2015 at 17:42:41"},{"visible":true,"include":true,"step":"20.0","x":183.87,"y":168.83,"z":-575.05,"a95":"0.99","info":"30/01/2015 at 17:42:41"},{"visible":true,"include":true,"step":"23.0","x":111.72,"y":162.62,"z":-514.44,"a95":"0.99","info":"30/01/2015 at 17:42:41"},{"visible":true,"include":true,"step":"25.0","x":68.691,"y":127.82,"z":-490.71,"a95":"0.99","info":"30/01/2015 at 17:42:41"},{"visible":true,"include":true,"step":"30.0","x":22.283,"y":81.877,"z":-481.12,"a95":"0.99","info":"30/01/2015 at 17:42:41"},{"visible":true,"include":true,"step":"33.0","x":126.01,"y":167.73,"z":-512.74,"a95":"0.99","info":"30/01/2015 at 17:42:41"},{"visible":true,"include":false,"step":"35.0","x":75.461,"y":20.083,"z":-449.3,"a95":"0.99","info":"30/01/2015 at 17:42:41"},{"visible":true,"include":true,"step":"40.0","x":173.2,"y":195.59,"z":-358.08,"a95":"0.99","info":"30/01/2015 at 17:42:41"},{"visible":true,"include":true,"step":"45.0","x":114.35,"y":104.19,"z":-254.98,"a95":"0.99","info":"30/01/2015 at 17:42:41"},{"visible":true,"include":false,"step":"50.0","x":113.5,"y":21.909,"z":33.353,"a95":"0.99","info":"30/01/2015 at 17:42:41"},{"visible":true,"include":false,"step":"60.0","x":-74.897,"y":2.3617,"z":-113.86,"a95":"0.99","info":"30/01/2015 at 17:42:41"},{"visible":true,"include":false,"step":"70.0","x":76.146,"y":46.398,"z":-89.931,"a95":"0.99","info":"30/01/2015 at 17:42:41"}]},{"info":"3","GEO":[],"TECT":[],"interpreted":false,"name":"SS17.7B","coreAzi":99,"coreDip":67,"bedStrike":340,"bedDip":45,"data":[{"visible":true,"include":false,"step":"0.0","x":-510.16,"y":53.737,"z":826.55,"a95":"0.99","info":"22/09/2014 at 05:24:00"},{"visible":true,"include":false,"step":"5.0","x":-277.19,"y":-561.08,"z":878.7,"a95":"0.99","info":"22/09/2014 at 05:24:00"},{"visible":true,"include":false,"step":"10.0","x":-207.54,"y":-501.37,"z":461.92,"a95":"0.99","info":"22/09/2014 at 05:24:00"},{"visible":true,"include":false,"step":"15.0","x":222.08,"y":-115.13,"z":56.604,"a95":"0.99","info":"22/09/2014 at 05:24:00"},{"visible":true,"include":false,"step":"20.0","x":18.814,"y":-257.49,"z":142.34,"a95":"0.99","info":"22/09/2014 at 05:24:00"},{"visible":true,"include":false,"step":"25.0","x":36.741,"y":-176.47,"z":80.166,"a95":"0.99","info":"22/09/2014 at 05:24:00"},{"visible":true,"include":false,"step":"30.0","x":-512.13,"y":561.49,"z":-464.48,"a95":"0.99","info":"22/09/2014 at 05:24:00"},{"visible":true,"include":false,"step":"35.0","x":93.823,"y":-380.41,"z":41.69,"a95":"0.99","info":"22/09/2014 at 05:24:00"},{"visible":true,"include":false,"step":"40.0","x":1100.1,"y":-212.69,"z":-19.179,"a95":"0.99","info":"22/09/2014 at 05:24:00"},{"visible":true,"include":false,"step":"45.0","x":123.9,"y":-153.85,"z":173.84,"a95":"0.99","info":"22/09/2014 at 05:24:00"},{"visible":true,"include":false,"step":"50.0","x":34.549,"y":-33.327,"z":155.99,"a95":"0.99","info":"22/09/2014 at 05:24:00"},{"visible":true,"include":false,"step":"60.0","x":117.33,"y":-317.08,"z":67.552,"a95":"0.99","info":"22/09/2014 at 05:24:00"},{"visible":true,"include":false,"step":"70.0","x":-227.66,"y":-147.01,"z":35.323,"a95":"0.99","info":"22/09/2014 at 05:24:00"},{"visible":true,"include":false,"step":"80.0","x":540.6,"y":-39.185,"z":154.58,"a95":"0.99","info":"22/09/2014 at 05:24:00"},{"visible":true,"include":false,"step":"90.0","x":-37.851,"y":-457.45,"z":-171.72,"a95":"0.99","info":"22/09/2014 at 05:24:00"},{"visible":true,"include":false,"step":"100.0","x":-60.356,"y":-296.48,"z":-171.66,"a95":"0.99","info":"22/09/2014 at 05:24:00"}]},{"info":"","GEO":[],"TECT":[],"interpreted":false,"name":"SS17.8A","coreAzi":27,"coreDip":53,"bedStrike":340,"bedDip":45,"data":[{"visible":true,"include":false,"step":"20","x":367,"y":-652,"z":-2015,"a95":"2.9","info":"\"14-09-29\" at \"15:20\""},{"visible":true,"include":false,"step":"100","x":193,"y":-148,"z":-1224,"a95":"3.3","info":"\"14-09-29\" at \"17:58\""},{"visible":true,"include":false,"step":"150","x":-585,"y":-82,"z":-949,"a95":"5.4","info":"\"14-09-29\" at \"20:52\""},{"visible":true,"include":false,"step":"180","x":-54.8,"y":-84.3,"z":-790.6,"a95":"4.3","info":"\"14-09-30\" at \"15:16\""},{"visible":true,"include":false,"step":"210","x":-93.6,"y":-33.4,"z":-636.3,"a95":"8.400001","info":"\"14-09-30\" at \"18:30\""},{"visible":true,"include":false,"step":"240","x":-168.1,"y":33.6,"z":-582.2,"a95":"6.7","info":"\"14-09-30\" at \"21:33\""},{"visible":true,"include":false,"step":"270","x":-350.4,"y":193.6,"z":-441.7,"a95":"4.7","info":"\"14-10-01\" at \"15:27\""},{"visible":true,"include":false,"step":"300","x":-401.3,"y":216.9,"z":-250.5,"a95":"11","info":"\"14-10-01\" at \"19:04\""},{"visible":true,"include":false,"step":"320","x":-530.8,"y":179.2,"z":-454.1,"a95":"4.7","info":"\"14-10-01\" at \"22:11\""},{"visible":true,"include":false,"step":"340","x":-95.9,"y":56.3,"z":-281.8,"a95":"10.1","info":"\"14-10-02\" at \"15:48\""},{"visible":true,"include":false,"step":"370","x":-1010,"y":680,"z":-551,"a95":"7.9","info":"\"14-10-02\" at \"18:32\""},{"visible":true,"include":false,"step":"400","x":-479.5,"y":65.7,"z":-324.8,"a95":"19","info":"\"14-10-02\" at \"21:45\""},{"visible":true,"include":false,"step":"420","x":-737.5,"y":27.7,"z":-290.4,"a95":"18.4","info":"\"14-10-03\" at \"15:09\""},{"visible":true,"include":false,"step":"440","x":-2600,"y":234,"z":1207,"a95":"11.2","info":"\"14-10-03\" at \"18:42\""},{"visible":true,"include":false,"step":"460","x":-3353,"y":720,"z":436,"a95":"13.3","info":"\"14-10-03\" at \"22:01\""},{"visible":true,"include":false,"step":"480","x":-2667,"y":-250,"z":290,"a95":"10","info":"\"14-10-04\" at \"09:25\""}]},{"info":"8","GEO":[{"dec":173.85256114462288,"inc":-56.01888782379344,"MAD":12.073320965368847,"cm":[5.329070518200751e-15,-4.618527782440651e-14,0],"intensity":101.6336762218476,"type":"dir","forced":true,"remark":"","origin":false,"nSteps":9,"minStep":"16.0","maxStep":"70.0","steps":["16.0","20.0","25.0","30.0","35.0","40.0","50.0","60.0","70.0"]}],"TECT":[{"dec":211.44884801313535,"inc":-29.453968557536786,"MAD":12.07332096536889,"cm":[5.329070518200751e-15,-5.1514348342607263e-14,4.440892098500626e-14],"intensity":101.63367622184758,"type":"dir","forced":true,"remark":"","origin":false,"nSteps":9,"minStep":"16.0","maxStep":"70.0","steps":["16.0","20.0","25.0","30.0","35.0","40.0","50.0","60.0","70.0"]}],"interpreted":true,"name":"SS17.8B","coreAzi":27,"coreDip":53,"bedStrike":340,"bedDip":45,"data":[{"visible":false,"include":false,"step":"0.0","x":-352.13,"y":-113.9,"z":-138.33,"a95":"0.99","info":"28/10/2014 at 04:10:16"},{"visible":true,"include":false,"step":"4.0","x":-28.582,"y":-90.515,"z":-363.95,"a95":"0.99","info":"28/10/2014 at 04:10:16"},{"visible":true,"include":false,"step":"8.0","x":172.29,"y":26.033,"z":-617.53,"a95":"0.99","info":"28/10/2014 at 04:10:16"},{"visible":true,"include":false,"step":"12.0","x":118.4,"y":34.399,"z":-792.9,"a95":"0.99","info":"28/10/2014 at 04:10:16"},{"visible":true,"include":true,"step":"16.0","x":113.26,"y":229.78,"z":-845.45,"a95":"0.99","info":"28/10/2014 at 04:10:16"},{"visible":true,"include":true,"step":"20.0","x":-13.93,"y":345.44,"z":-646.48,"a95":"0.99","info":"28/10/2014 at 04:10:16"},{"visible":true,"include":true,"step":"25.0","x":148.8,"y":162.11,"z":-518.58,"a95":"0.99","info":"28/10/2014 at 04:10:16"},{"visible":true,"include":true,"step":"30.0","x":125.27,"y":22.4,"z":-628.49,"a95":"0.99","info":"28/10/2014 at 04:10:16"},{"visible":true,"include":true,"step":"35.0","x":86.016,"y":72.821,"z":-453.56,"a95":"0.99","info":"28/10/2014 at 04:10:16"},{"visible":true,"include":true,"step":"40.0","x":-7.6497,"y":203.1,"z":-424.12,"a95":"0.99","info":"28/10/2014 at 04:10:16"},{"visible":false,"include":false,"step":"45.0","x":-237.23,"y":238.88,"z":-472.25,"a95":"0.99","info":"28/10/2014 at 04:10:16"},{"visible":true,"include":true,"step":"50.0","x":94.655,"y":174.2,"z":-321.45,"a95":"0.99","info":"28/10/2014 at 04:10:16"},{"visible":true,"include":true,"step":"60.0","x":39.072,"y":108.65,"z":-334.79,"a95":"0.99","info":"28/10/2014 at 04:10:16"},{"visible":true,"include":true,"step":"70.0","x":16.326,"y":230.7,"z":-108.48,"a95":"0.99","info":"28/10/2014 at 04:10:16"},{"visible":false,"include":false,"step":"80.0","x":143.1,"y":227.94,"z":-166.26,"a95":"0.99","info":"28/10/2014 at 04:10:16"},{"visible":false,"include":false,"step":"90.0","x":53.262,"y":-13.007,"z":-175.93,"a95":"0.99","info":"28/10/2014 at 04:10:16"},{"visible":false,"include":false,"step":"100.0","x":-103.79,"y":241.86,"z":-3.5568,"a95":"0.99","info":"28/10/2014 at 04:10:16"}]},{"info":"2","GEO":[{"dec":175.16959619380088,"inc":-55.112856780855566,"MAD":8.405076077045008,"cm":[-1.7763568394002505e-14,5.684341886080802e-14,0],"intensity":145.84553924448542,"type":"dir","forced":true,"remark":"","origin":false,"nSteps":7,"minStep":"23.0","maxStep":"45.0","steps":["23.0","25.0","30.0","33.0","35.0","40.0","45.0"]}],"TECT":[{"dec":211.1701683649115,"inc":-28.30685529503606,"MAD":8.405076077045013,"cm":[7.105427357601002e-15,7.194245199571014e-14,-2.842170943040401e-14],"intensity":145.84553924448542,"type":"dir","forced":true,"remark":"","origin":false,"nSteps":7,"minStep":"23.0","maxStep":"45.0","steps":["23.0","25.0","30.0","33.0","35.0","40.0","45.0"]}],"interpreted":true,"name":"SS17.9A","coreAzi":57,"coreDip":61,"bedStrike":340,"bedDip":45,"data":[{"visible":true,"include":false,"step":"0.0","x":-213.42,"y":186.35,"z":-941.16,"a95":"0.99","info":"30/01/2015 at 17:42:41"},{"visible":true,"include":false,"step":"10.0","x":117.17,"y":223.07,"z":-1041.4,"a95":"0.99","info":"30/01/2015 at 17:42:41"},{"visible":true,"include":false,"step":"15.0","x":176.85,"y":281.86,"z":-910.36,"a95":"0.99","info":"30/01/2015 at 17:42:41"},{"visible":true,"include":false,"step":"20.0","x":115.66,"y":335.37,"z":-867.83,"a95":"0.99","info":"30/01/2015 at 17:42:41"},{"visible":true,"include":true,"step":"23.0","x":153.6,"y":426.69,"z":-899.82,"a95":"0.99","info":"30/01/2015 at 17:42:41"},{"visible":true,"include":true,"step":"25.0","x":146.37,"y":374.42,"z":-819.4,"a95":"0.99","info":"30/01/2015 at 17:42:41"},{"visible":true,"include":true,"step":"30.0","x":26.501,"y":554.03,"z":-779.17,"a95":"0.99","info":"30/01/2015 at 17:42:41"},{"visible":true,"include":true,"step":"33.0","x":192.09,"y":421.22,"z":-578.23,"a95":"0.99","info":"30/01/2015 at 17:42:41"},{"visible":true,"include":true,"step":"35.0","x":99.225,"y":258.77,"z":-571.88,"a95":"0.99","info":"30/01/2015 at 17:42:41"},{"visible":true,"include":true,"step":"40.0","x":216.27,"y":326.6,"z":-471.09,"a95":"0.99","info":"30/01/2015 at 17:42:41"},{"visible":true,"include":true,"step":"45.0","x":92.666,"y":392.96,"z":-370.08,"a95":"0.99","info":"30/01/2015 at 17:42:41"},{"visible":true,"include":false,"step":"50.0","x":111.19,"y":368.69,"z":-64.61,"a95":"0.99","info":"30/01/2015 at 17:42:41"},{"visible":true,"include":false,"step":"60.0","x":138.5,"y":235.01,"z":-170.24,"a95":"0.99","info":"30/01/2015 at 17:42:41"},{"visible":true,"include":false,"step":"70.0","x":115,"y":230.63,"z":-150.11,"a95":"0.99","info":"30/01/2015 at 17:42:41"}]},{"info":"","GEO":[],"TECT":[],"interpreted":false,"name":"SS17.10A","coreAzi":47,"coreDip":48,"bedStrike":340,"bedDip":45,"data":[{"visible":true,"include":false,"step":"20","x":198,"y":-838,"z":2417,"a95":"2.8","info":"\"14-09-29\" at \"15:22\""},{"visible":true,"include":false,"step":"100","x":322.9,"y":-216.4,"z":-672.5,"a95":"5.4","info":"\"14-09-29\" at \"18:00\""},{"visible":true,"include":false,"step":"150","x":-172.4,"y":-177.5,"z":-657.1,"a95":"5.2","info":"\"14-09-29\" at \"20:54\""},{"visible":true,"include":false,"step":"180","x":170.4,"y":-143.3,"z":-633.7,"a95":"4.1","info":"\"14-09-30\" at \"15:20\""},{"visible":true,"include":false,"step":"210","x":119.5,"y":-71.4,"z":-706.5,"a95":"5.1","info":"\"14-09-30\" at \"18:32\""},{"visible":true,"include":false,"step":"240","x":-72.6,"y":-27.1,"z":-357.4,"a95":"7.1","info":"\"14-09-30\" at \"21:35\""},{"visible":true,"include":false,"step":"270","x":26.2,"y":104.3,"z":-728.6,"a95":"4","info":"\"14-10-01\" at \"15:29\""},{"visible":true,"include":false,"step":"300","x":50.7,"y":141.3,"z":-142,"a95":"25.7","info":"\"14-10-01\" at \"19:06\""},{"visible":true,"include":false,"step":"320","x":-129,"y":111,"z":-541.9,"a95":"5.4","info":"\"14-10-01\" at \"22:13\""},{"visible":true,"include":false,"step":"340","x":65.8,"y":-1.3,"z":-198.7,"a95":"12.5","info":"\"14-10-02\" at \"15:50\""},{"visible":true,"include":false,"step":"370","x":-134.8,"y":136.5,"z":-476.1,"a95":"8.5","info":"\"14-10-02\" at \"18:33\""},{"visible":true,"include":false,"step":"400","x":-306,"y":148.4,"z":226,"a95":"33.9","info":"\"14-10-02\" at \"21:47\""},{"visible":true,"include":false,"step":"420","x":-2709,"y":1127,"z":335,"a95":"8.7","info":"\"14-10-03\" at \"15:12\""},{"visible":true,"include":false,"step":"440","x":-3084,"y":1049,"z":-63,"a95":"12","info":"\"14-10-03\" at \"18:44\""},{"visible":true,"include":false,"step":"460","x":-3220,"y":82,"z":-561,"a95":"13.9","info":"\"14-10-03\" at \"22:03\""},{"visible":true,"include":false,"step":"480","x":392.5,"y":-15.5,"z":164.5,"a95":"46","info":"\"14-10-04\" at \"09:27\""}]},{"info":"1","GEO":[{"dec":72.97762975920136,"inc":-6.663120008417633,"MAD":17.76974806669703,"cm":[-1.532107773982716e-14,-8.881784197001252e-15,0],"intensity":157.30830672477782,"type":"GC","origin":false,"forced":true,"remark":"","nSteps":4,"minStep":"8.0","maxStep":"20.0","steps":["8.0","12.0","16.0","20.0"]}],"TECT":[{"dec":74.7621594789627,"inc":-51.57561698867963,"MAD":17.769748066696714,"cm":[-7.815970093361102e-14,-1.4210854715202004e-14,1.4210854715202004e-14],"intensity":157.30830672477782,"type":"GC","origin":false,"forced":true,"remark":"","nSteps":4,"minStep":"8.0","maxStep":"20.0","steps":["8.0","12.0","16.0","20.0"]}],"interpreted":true,"name":"SS17.10B","coreAzi":47,"coreDip":48,"bedStrike":340,"bedDip":45,"data":[{"visible":true,"include":false,"step":"0.0","x":317.28,"y":-284.04,"z":-175.19,"a95":"0.99","info":"28/10/2014 at 09:38:21"},{"visible":true,"include":false,"step":"4.0","x":442.24,"y":-255.75,"z":-325.5,"a95":"0.99","info":"28/10/2014 at 09:38:21"},{"visible":true,"include":true,"step":"8.0","x":579.49,"y":-326.77,"z":-496.38,"a95":"0.99","info":"28/10/2014 at 09:38:21"},{"visible":true,"include":true,"step":"12.0","x":533.31,"y":-291.23,"z":-643.02,"a95":"0.99","info":"28/10/2014 at 09:38:21"},{"visible":true,"include":true,"step":"16.0","x":565.56,"y":-137.22,"z":-644.55,"a95":"0.99","info":"28/10/2014 at 09:38:21"},{"visible":true,"include":true,"step":"20.0","x":512.09,"y":-80.587,"z":-674.41,"a95":"0.99","info":"28/10/2014 at 09:38:21"},{"visible":true,"include":false,"step":"25.0","x":408.79,"y":60.395,"z":-516.76,"a95":"0.99","info":"28/10/2014 at 09:38:21"},{"visible":true,"include":false,"step":"30.0","x":318.46,"y":-79.352,"z":-447.2,"a95":"0.99","info":"28/10/2014 at 09:38:21"},{"visible":true,"include":false,"step":"35.0","x":389.1,"y":18.793,"z":-280.67,"a95":"0.99","info":"28/10/2014 at 09:38:21"},{"visible":true,"include":false,"step":"40.0","x":169.07,"y":58.342,"z":-310.54,"a95":"0.99","info":"28/10/2014 at 09:38:21"},{"visible":true,"include":false,"step":"45.0","x":200.12,"y":-2.0619,"z":-221.68,"a95":"0.99","info":"28/10/2014 at 09:38:21"},{"visible":true,"include":false,"step":"50.0","x":135.55,"y":40.939,"z":-265.98,"a95":"0.99","info":"28/10/2014 at 09:38:21"},{"visible":true,"include":false,"step":"60.0","x":87.468,"y":202.93,"z":-354.45,"a95":"0.99","info":"28/10/2014 at 09:38:21"},{"visible":true,"include":false,"step":"70.0","x":394.18,"y":171.36,"z":-186.19,"a95":"0.99","info":"28/10/2014 at 09:38:21"},{"visible":true,"include":false,"step":"80.0","x":-193.73,"y":-1.6804,"z":-346.73,"a95":"0.99","info":"28/10/2014 at 09:38:21"},{"visible":true,"include":false,"step":"90.0","x":-43.29,"y":10.691,"z":-244.69,"a95":"0.99","info":"28/10/2014 at 09:38:21"},{"visible":true,"include":false,"step":"100.0","x":113.28,"y":110.48,"z":52.393,"a95":"0.99","info":"28/10/2014 at 09:38:21"}]},{"info":"3","GEO":[{"dec":182.30306818292803,"inc":-66.55764570807135,"MAD":11.856957780085487,"cm":[-1.7763568394002505e-14,-1.1546319456101628e-14,0],"intensity":92.50973226242365,"type":"dir","forced":true,"remark":"","origin":false,"nSteps":8,"minStep":"30.0","maxStep":"70.0","steps":["30.0","33.0","35.0","40.0","45.0","50.0","60.0","70.0"]}],"TECT":[{"dec":224.02557127083864,"inc":-32.81891433586493,"MAD":11.8569577800855,"cm":[3.197442310920451e-14,-6.483702463810914e-14,0],"intensity":92.50973226242364,"type":"dir","forced":true,"remark":"","origin":false,"nSteps":8,"minStep":"30.0","maxStep":"70.0","steps":["30.0","33.0","35.0","40.0","45.0","50.0","60.0","70.0"]}],"interpreted":true,"name":"SS17.11A","coreAzi":66,"coreDip":47,"bedStrike":340,"bedDip":45,"data":[{"visible":true,"include":false,"step":"0.0","x":124.85,"y":-29.321,"z":-755.43,"a95":"0.99","info":"30/01/2015 at 17:42:41"},{"visible":true,"include":false,"step":"10.0","x":346.79,"y":-24.852,"z":-781.29,"a95":"0.99","info":"30/01/2015 at 17:42:41"},{"visible":true,"include":false,"step":"15.0","x":351.73,"y":-56.298,"z":-812.49,"a95":"0.99","info":"30/01/2015 at 17:42:41"},{"visible":true,"include":false,"step":"20.0","x":563.19,"y":132.9,"z":-613.15,"a95":"0.99","info":"30/01/2015 at 17:42:41"},{"visible":true,"include":false,"step":"23.0","x":375.87,"y":185.22,"z":-552.22,"a95":"0.99","info":"30/01/2015 at 17:42:41"},{"visible":true,"include":false,"step":"25.0","x":344.93,"y":93.985,"z":-479.67,"a95":"0.99","info":"30/01/2015 at 17:42:41"},{"visible":true,"include":true,"step":"30.0","x":272.48,"y":180.4,"z":-654.58,"a95":"0.99","info":"30/01/2015 at 17:42:41"},{"visible":true,"include":true,"step":"33.0","x":290.71,"y":194.27,"z":-504.6,"a95":"0.99","info":"30/01/2015 at 17:42:41"},{"visible":true,"include":true,"step":"35.0","x":267.43,"y":271.57,"z":-541.13,"a95":"0.99","info":"30/01/2015 at 17:42:41"},{"visible":true,"include":true,"step":"40.0","x":258.94,"y":161.51,"z":-209.78,"a95":"0.99","info":"30/01/2015 at 17:42:41"},{"visible":true,"include":true,"step":"45.0","x":332.22,"y":212.66,"z":-301.39,"a95":"0.99","info":"30/01/2015 at 17:42:41"},{"visible":true,"include":true,"step":"50.0","x":206.04,"y":127.04,"z":-266.46,"a95":"0.99","info":"30/01/2015 at 17:42:41"},{"visible":true,"include":true,"step":"60.0","x":166.17,"y":14.115,"z":-175.92,"a95":"0.99","info":"30/01/2015 at 17:42:41"},{"visible":true,"include":true,"step":"70.0","x":168.83,"y":199.36,"z":-122.95,"a95":"0.99","info":"30/01/2015 at 17:42:41"}]},{"info":"4","GEO":[],"TECT":[],"interpreted":false,"name":"SS17.11B","coreAzi":66,"coreDip":47,"bedStrike":340,"bedDip":45,"data":[{"visible":true,"include":false,"step":"0.0","x":-71.928,"y":-573.39,"z":370.68,"a95":"0.99","info":"22/09/2014 at 05:24:00"},{"visible":true,"include":false,"step":"5.0","x":280.09,"y":-581.74,"z":508.84,"a95":"0.99","info":"22/09/2014 at 05:24:00"},{"visible":true,"include":false,"step":"10.0","x":379.81,"y":-330.32,"z":46.932,"a95":"0.99","info":"22/09/2014 at 05:24:00"},{"visible":true,"include":false,"step":"15.0","x":541.25,"y":109.02,"z":-332.7,"a95":"0.99","info":"22/09/2014 at 05:24:00"},{"visible":true,"include":false,"step":"20.0","x":352.04,"y":44.209,"z":-340.53,"a95":"0.99","info":"22/09/2014 at 05:24:00"},{"visible":true,"include":false,"step":"25.0","x":259.39,"y":-9.2559,"z":-340.19,"a95":"0.99","info":"22/09/2014 at 05:24:00"},{"visible":true,"include":false,"step":"30.0","x":-262.78,"y":757.59,"z":-803.79,"a95":"0.99","info":"22/09/2014 at 05:24:00"},{"visible":true,"include":false,"step":"35.0","x":339.74,"y":-51.539,"z":-431.94,"a95":"0.99","info":"22/09/2014 at 05:24:00"},{"visible":true,"include":false,"step":"40.0","x":1114.1,"y":11.808,"z":-338.03,"a95":"0.99","info":"22/09/2014 at 05:24:00"},{"visible":true,"include":false,"step":"45.0","x":268.19,"y":139.55,"z":-24.005,"a95":"0.99","info":"22/09/2014 at 05:24:00"},{"visible":true,"include":false,"step":"50.0","x":247.95,"y":288.01,"z":-269.72,"a95":"0.99","info":"22/09/2014 at 05:24:00"},{"visible":true,"include":false,"step":"60.0","x":202.83,"y":131.16,"z":-85.217,"a95":"0.99","info":"22/09/2014 at 05:24:00"},{"visible":true,"include":false,"step":"70.0","x":32.615,"y":83.076,"z":-15.715,"a95":"0.99","info":"22/09/2014 at 05:24:00"},{"visible":true,"include":false,"step":"80.0","x":832.13,"y":171.28,"z":-149.58,"a95":"0.99","info":"22/09/2014 at 05:24:00"},{"visible":true,"include":false,"step":"90.0","x":375.83,"y":-162.86,"z":-73.681,"a95":"0.99","info":"22/09/2014 at 05:24:00"},{"visible":true,"include":false,"step":"100.0","x":-114.33,"y":101.41,"z":-46.41,"a95":"0.99","info":"22/09/2014 at 05:24:00"}]},{"info":"4","GEO":[{"dec":172.0317136262271,"inc":-55.33503344713068,"MAD":10.333870820054047,"cm":[-7.105427357601002e-15,1.2434497875801753e-14,0],"intensity":94.19918492649671,"type":"dir","forced":true,"remark":"","origin":false,"nSteps":7,"minStep":"25.0","maxStep":"50.0","steps":["25.0","30.0","33.0","35.0","40.0","45.0","50.0"]}],"TECT":[{"dec":210.10511355587508,"inc":-29.85143555728108,"MAD":10.333870820054047,"cm":[-4.973799150320701e-14,1.270095140171179e-13,-4.263256414560601e-14],"intensity":94.19918492649671,"type":"dir","forced":true,"remark":"","origin":false,"nSteps":7,"minStep":"25.0","maxStep":"50.0","steps":["25.0","30.0","33.0","35.0","40.0","45.0","50.0"]}],"interpreted":true,"name":"SS17.12A","coreAzi":50,"coreDip":20,"bedStrike":340,"bedDip":45,"data":[{"visible":true,"include":false,"step":"0.0","x":367.46,"y":265.7,"z":-359.43,"a95":"0.99","info":"30/01/2015 at 17:42:41"},{"visible":true,"include":false,"step":"10.0","x":615.87,"y":106.3,"z":-484.25,"a95":"0.99","info":"30/01/2015 at 17:42:41"},{"visible":true,"include":false,"step":"15.0","x":568.07,"y":86.146,"z":-473.88,"a95":"0.99","info":"30/01/2015 at 17:42:41"},{"visible":true,"include":false,"step":"20.0","x":643.99,"y":227.09,"z":-427.67,"a95":"0.99","info":"30/01/2015 at 17:42:41"},{"visible":true,"include":false,"step":"23.0","x":435.4,"y":250.8,"z":-553.11,"a95":"0.99","info":"30/01/2015 at 17:42:41"},{"visible":true,"include":true,"step":"25.0","x":382.4,"y":244.12,"z":-414.05,"a95":"0.99","info":"30/01/2015 at 17:42:41"},{"visible":true,"include":true,"step":"30.0","x":314.91,"y":220.17,"z":-387.07,"a95":"0.99","info":"30/01/2015 at 17:42:41"},{"visible":true,"include":true,"step":"33.0","x":435.79,"y":289.73,"z":-384.09,"a95":"0.99","info":"30/01/2015 at 17:42:41"},{"visible":true,"include":true,"step":"35.0","x":360.62,"y":240.73,"z":-314.27,"a95":"0.99","info":"30/01/2015 at 17:42:41"},{"visible":true,"include":true,"step":"40.0","x":383.35,"y":261.21,"z":-251.56,"a95":"0.99","info":"30/01/2015 at 17:42:41"},{"visible":true,"include":true,"step":"45.0","x":292.89,"y":326.41,"z":-106.37,"a95":"0.99","info":"30/01/2015 at 17:42:41"},{"visible":true,"include":true,"step":"50.0","x":289.24,"y":229.64,"z":-136.18,"a95":"0.99","info":"30/01/2015 at 17:42:41"},{"visible":true,"include":false,"step":"60.0","x":158.2,"y":266.39,"z":-202.49,"a95":"0.99","info":"30/01/2015 at 17:42:41"},{"visible":true,"include":false,"step":"70.0","x":251.47,"y":323.67,"z":-75.076,"a95":"0.99","info":"30/01/2015 at 17:42:41"}]},{"info":"","GEO":[],"TECT":[],"interpreted":false,"name":"SS17.13A","coreAzi":52,"coreDip":42,"bedStrike":340,"bedDip":45,"data":[{"visible":true,"include":false,"step":"20","x":32,"y":48,"z":2407,"a95":"3.2","info":"\"14-09-29\" at \"15:24\""},{"visible":true,"include":false,"step":"100","x":489.7,"y":-148.8,"z":-63.5,"a95":"9.400001","info":"\"14-09-29\" at \"18:02\""},{"visible":true,"include":false,"step":"150","x":-32.2,"y":-126.1,"z":-103.3,"a95":"20.7","info":"\"14-09-29\" at \"20:58\""},{"visible":true,"include":false,"step":"180","x":283.3,"y":-209.4,"z":-71.3,"a95":"6.9","info":"\"14-09-30\" at \"15:22\""},{"visible":true,"include":false,"step":"210","x":222,"y":-115,"z":-87.4,"a95":"14.6","info":"\"14-09-30\" at \"18:34\""},{"visible":true,"include":false,"step":"240","x":222.2,"y":-146.5,"z":-127.9,"a95":"8.6","info":"\"14-09-30\" at \"21:37\""},{"visible":true,"include":false,"step":"270","x":34,"y":-114.7,"z":-109,"a95":"14.7","info":"\"14-10-01\" at \"15:31\""},{"visible":true,"include":false,"step":"300","x":51,"y":1,"z":-143,"a95":"37","info":"\"14-10-01\" at \"19:08\""},{"visible":true,"include":false,"step":"320","x":29.9,"y":-173.2,"z":-157,"a95":"12.8","info":"\"14-10-01\" at \"22:15\""},{"visible":true,"include":false,"step":"340","x":-186.8,"y":-211.6,"z":60,"a95":"17.1","info":"\"14-10-02\" at \"15:51\""},{"visible":true,"include":false,"step":"370","x":-355.7,"y":27.9,"z":95,"a95":"19.6","info":"\"14-10-02\" at \"18:35\""},{"visible":true,"include":false,"step":"400","x":-1336,"y":737,"z":631,"a95":"17.1","info":"\"14-10-02\" at \"21:49\""},{"visible":true,"include":false,"step":"420","x":-2518,"y":-885,"z":-298,"a95":"17.4","info":"\"14-10-03\" at \"15:14\""},{"visible":true,"include":false,"step":"440","x":-4539,"y":-811,"z":3105,"a95":"13.8","info":"\"14-10-03\" at \"18:46\""},{"visible":true,"include":false,"step":"460","x":-4122,"y":857,"z":1286,"a95":"14.2","info":"\"14-10-03\" at \"22:04\""},{"visible":true,"include":false,"step":"480","x":-4152,"y":-373,"z":3511,"a95":"8.3","info":"\"14-10-04\" at \"09:29\""}]},{"info":"8","GEO":[],"TECT":[],"interpreted":false,"name":"SS17.14A","coreAzi":58,"coreDip":42,"bedStrike":340,"bedDip":45,"data":[{"visible":true,"include":false,"step":"0.0","x":-498.45,"y":-297.19,"z":-188.45,"a95":"0.99","info":"10/10/2014 at 03:25:56"},{"visible":true,"include":false,"step":"4.0","x":-303.1,"y":-356.77,"z":-322.97,"a95":"0.99","info":"10/10/2014 at 03:25:56"},{"visible":true,"include":false,"step":"8.0","x":-144.14,"y":-443.45,"z":-364.58,"a95":"0.99","info":"10/10/2014 at 03:25:56"},{"visible":true,"include":false,"step":"12.0","x":31.663,"y":-519.26,"z":-370.47,"a95":"0.99","info":"10/10/2014 at 03:25:56"},{"visible":true,"include":false,"step":"16.0","x":82.584,"y":-506.07,"z":-455.9,"a95":"0.99","info":"10/10/2014 at 03:25:56"},{"visible":true,"include":false,"step":"20.0","x":169.21,"y":-496.77,"z":-355.2,"a95":"0.99","info":"10/10/2014 at 03:25:56"},{"visible":true,"include":false,"step":"25.0","x":242.71,"y":-407.71,"z":-361.21,"a95":"0.99","info":"10/10/2014 at 03:25:56"},{"visible":true,"include":false,"step":"30.0","x":191.82,"y":-398.29,"z":-289,"a95":"0.99","info":"10/10/2014 at 03:25:56"},{"visible":true,"include":false,"step":"35.0","x":190.75,"y":-315.8,"z":-259.97,"a95":"0.99","info":"10/10/2014 at 03:25:56"},{"visible":true,"include":false,"step":"40.0","x":220.6,"y":-101.08,"z":-221.57,"a95":"0.99","info":"10/10/2014 at 03:25:56"},{"visible":true,"include":false,"step":"45.0","x":187.75,"y":-204.64,"z":-222.47,"a95":"0.99","info":"10/10/2014 at 03:25:56"},{"visible":true,"include":false,"step":"50.0","x":272.23,"y":-259.67,"z":-235.86,"a95":"0.99","info":"10/10/2014 at 03:25:56"},{"visible":true,"include":false,"step":"60.0","x":171.43,"y":-122,"z":-67.546,"a95":"0.99","info":"10/10/2014 at 03:25:56"},{"visible":true,"include":false,"step":"70.0","x":638.58,"y":116.95,"z":-133.73,"a95":"0.99","info":"10/10/2014 at 03:25:56"},{"visible":true,"include":false,"step":"80.0","x":-139.3,"y":-65.473,"z":-278.66,"a95":"0.99","info":"10/10/2014 at 03:25:56"},{"visible":true,"include":false,"step":"90.0","x":268.82,"y":-95.357,"z":-122.8,"a95":"0.99","info":"10/10/2014 at 03:25:56"},{"visible":true,"include":false,"step":"100.0","x":237.45,"y":-20.002,"z":89.673,"a95":"0.99","info":"10/10/2014 at 03:25:56"}]},{"info":"","GEO":[],"TECT":[],"interpreted":false,"name":"SS17.15A","coreAzi":27,"coreDip":54,"bedStrike":340,"bedDip":45,"data":[{"visible":true,"include":false,"step":"20","x":213,"y":-4907,"z":23584,"a95":"2.7","info":"\"14-09-29\" at \"15:26\""},{"visible":true,"include":false,"step":"100","x":154,"y":-3814,"z":19219,"a95":"2.8","info":"\"14-09-29\" at \"18:04\""},{"visible":true,"include":false,"step":"150","x":-190,"y":-2573,"z":14127,"a95":"2.8","info":"\"14-09-29\" at \"21:00\""},{"visible":true,"include":false,"step":"180","x":264,"y":-1638,"z":9281,"a95":"2.7","info":"\"14-09-30\" at \"15:24\""},{"visible":true,"include":false,"step":"210","x":271,"y":-1175,"z":5838,"a95":"2.8","info":"\"14-09-30\" at \"18:36\""},{"visible":true,"include":false,"step":"240","x":353,"y":-700,"z":2697,"a95":"3","info":"\"14-09-30\" at \"21:40\""},{"visible":true,"include":false,"step":"270","x":38.9,"y":-136.7,"z":-406.9,"a95":"6.4","info":"\"14-10-01\" at \"15:33\""},{"visible":true,"include":false,"step":"300","x":-20.8,"y":-416.1,"z":210.1,"a95":"7.9","info":"\"14-10-01\" at \"19:10\""},{"visible":true,"include":false,"step":"320","x":-157.9,"y":40.1,"z":84.6,"a95":"15","info":"\"14-10-01\" at \"22:17\""},{"visible":true,"include":false,"step":"340","x":-29.4,"y":-360.2,"z":381.1,"a95":"6.1","info":"\"14-10-02\" at \"15:53\""},{"visible":true,"include":false,"step":"370","x":-213.7,"y":333,"z":22.7,"a95":"7.7","info":"\"14-10-02\" at \"18:37\""},{"visible":true,"include":false,"step":"400","x":122.3,"y":88.9,"z":441.4,"a95":"7.4","info":"\"14-10-02\" at \"21:51\""},{"visible":true,"include":false,"step":"420","x":-167.3,"y":337.8,"z":-253.4,"a95":"6.4","info":"\"14-10-03\" at \"15:16\""},{"visible":true,"include":false,"step":"440","x":-368.5,"y":-545.4,"z":484.9,"a95":"4.2","info":"\"14-10-03\" at \"18:48\""},{"visible":true,"include":false,"step":"460","x":-457.9,"y":200.3,"z":317.3,"a95":"11","info":"\"14-10-03\" at \"22:06\""},{"visible":true,"include":false,"step":"480","x":226.6,"y":477.5,"z":-54,"a95":"10.6","info":"\"14-10-04\" at \"09:32\""}]},{"info":"5","GEO":[],"TECT":[],"interpreted":false,"name":"SS17.15B","coreAzi":27,"coreDip":54,"bedStrike":340,"bedDip":45,"data":[{"visible":true,"include":false,"step":"0.0","x":-1191.4,"y":-2966.9,"z":20662,"a95":"0.99","info":"22/09/2014 at 05:24:00"},{"visible":true,"include":false,"step":"5.0","x":-690.93,"y":-2640.4,"z":18777,"a95":"0.99","info":"22/09/2014 at 05:24:00"},{"visible":true,"include":false,"step":"10.0","x":-439,"y":-2198.3,"z":15244,"a95":"0.99","info":"22/09/2014 at 05:24:00"},{"visible":true,"include":false,"step":"15.0","x":-57.322,"y":-1508,"z":12680,"a95":"0.99","info":"22/09/2014 at 05:24:00"},{"visible":true,"include":false,"step":"20.0","x":-200.6,"y":-1426.4,"z":10739,"a95":"0.99","info":"22/09/2014 at 05:24:00"},{"visible":true,"include":false,"step":"25.0","x":-173.39,"y":-1309.3,"z":9172,"a95":"0.99","info":"22/09/2014 at 05:24:00"},{"visible":true,"include":false,"step":"30.0","x":-424.61,"y":-326.03,"z":7443.2,"a95":"0.99","info":"22/09/2014 at 05:24:00"},{"visible":true,"include":false,"step":"35.0","x":196.22,"y":-1075.3,"z":6776.9,"a95":"0.99","info":"22/09/2014 at 05:24:00"},{"visible":true,"include":false,"step":"40.0","x":907.03,"y":-1078.3,"z":6197.2,"a95":"0.99","info":"22/09/2014 at 05:24:00"},{"visible":true,"include":false,"step":"45.0","x":272.11,"y":-889.93,"z":5460.3,"a95":"0.99","info":"22/09/2014 at 05:24:00"},{"visible":true,"include":false,"step":"50.0","x":300.01,"y":-620.16,"z":4877.1,"a95":"0.99","info":"22/09/2014 at 05:24:00"},{"visible":true,"include":false,"step":"60.0","x":633.25,"y":-912.78,"z":4067.4,"a95":"0.99","info":"22/09/2014 at 05:24:00"},{"visible":true,"include":false,"step":"70.0","x":388.63,"y":-462.07,"z":3499,"a95":"0.99","info":"22/09/2014 at 05:24:00"},{"visible":true,"include":false,"step":"80.0","x":-98.781,"y":-637.75,"z":2945.2,"a95":"0.99","info":"22/09/2014 at 05:24:00"},{"visible":true,"include":false,"step":"90.0","x":1140.5,"y":-1140.6,"z":2585.6,"a95":"0.99","info":"22/09/2014 at 05:24:00"},{"visible":true,"include":false,"step":"100.0","x":954.66,"y":-603.11,"z":2085.3,"a95":"0.99","info":"22/09/2014 at 05:24:00"}]},{"info":"6","GEO":[],"TECT":[],"interpreted":false,"name":"SS17.16A","coreAzi":26,"coreDip":32,"bedStrike":340,"bedDip":45,"data":[{"visible":true,"include":false,"step":"0.0","x":-15109,"y":-4828.8,"z":25067,"a95":"0.99","info":"22/09/2014 at 05:24:00"},{"visible":true,"include":false,"step":"5.0","x":-13327,"y":-4454.5,"z":23025,"a95":"0.99","info":"22/09/2014 at 05:24:00"},{"visible":true,"include":false,"step":"10.0","x":-10719,"y":-3678.9,"z":18848,"a95":"0.99","info":"22/09/2014 at 05:24:00"},{"visible":true,"include":false,"step":"15.0","x":-8791.1,"y":-2641.7,"z":15615,"a95":"0.99","info":"22/09/2014 at 05:24:00"},{"visible":true,"include":false,"step":"20.0","x":-7594.3,"y":-2067.7,"z":13217,"a95":"0.99","info":"22/09/2014 at 05:24:00"},{"visible":true,"include":false,"step":"25.0","x":-6305.5,"y":-1716.8,"z":11162,"a95":"0.99","info":"22/09/2014 at 05:24:00"},{"visible":true,"include":false,"step":"30.0","x":-5613.6,"y":-712.72,"z":9083.3,"a95":"0.99","info":"22/09/2014 at 05:24:00"},{"visible":true,"include":false,"step":"35.0","x":-4687.7,"y":-898.73,"z":8452.8,"a95":"0.99","info":"22/09/2014 at 05:24:00"},{"visible":true,"include":false,"step":"40.0","x":-3692.7,"y":-792.76,"z":7299.4,"a95":"0.99","info":"22/09/2014 at 05:24:00"},{"visible":true,"include":false,"step":"45.0","x":-3531.1,"y":-32.7,"z":6438.6,"a95":"0.99","info":"22/09/2014 at 05:24:00"},{"visible":true,"include":false,"step":"50.0","x":-3072.3,"y":72.24,"z":5725.1,"a95":"0.99","info":"22/09/2014 at 05:24:00"},{"visible":true,"include":false,"step":"60.0","x":-2486.6,"y":-104.59,"z":4763.3,"a95":"0.99","info":"22/09/2014 at 05:24:00"},{"visible":true,"include":false,"step":"70.0","x":-1962.6,"y":951.6,"z":3959.3,"a95":"0.99","info":"22/09/2014 at 05:24:00"},{"visible":true,"include":false,"step":"80.0","x":-1705.1,"y":856.77,"z":3505.3,"a95":"0.99","info":"22/09/2014 at 05:24:00"},{"visible":true,"include":false,"step":"90.0","x":-1580.1,"y":602.06,"z":2996.3,"a95":"0.99","info":"22/09/2014 at 05:24:00"},{"visible":false,"include":false,"step":"100.0","x":-1088,"y":1615.8,"z":2373.2,"a95":"0.99","info":"22/09/2014 at 05:24:00"}]},{"info":"2","GEO":[],"TECT":[],"interpreted":false,"name":"SS17.16B","coreAzi":26,"coreDip":32,"bedStrike":340,"bedDip":45,"data":[{"visible":true,"include":false,"step":"0.0","x":-6507,"y":-3543.6,"z":15672,"a95":"0.99","info":"28/10/2014 at 09:38:21"},{"visible":true,"include":false,"step":"4.0","x":-5917.6,"y":-3256.7,"z":15105,"a95":"0.99","info":"28/10/2014 at 09:38:21"},{"visible":true,"include":false,"step":"8.0","x":-5513.2,"y":-3071.5,"z":14149,"a95":"0.99","info":"28/10/2014 at 09:38:21"},{"visible":true,"include":false,"step":"12.0","x":-4866.2,"y":-2906.6,"z":13106,"a95":"0.99","info":"28/10/2014 at 09:38:21"},{"visible":true,"include":false,"step":"16.0","x":-4541.8,"y":-2579.3,"z":11985,"a95":"0.99","info":"28/10/2014 at 09:38:21"},{"visible":true,"include":false,"step":"20.0","x":-4215.5,"y":-2349,"z":11250,"a95":"0.99","info":"28/10/2014 at 09:38:21"},{"visible":true,"include":false,"step":"25.0","x":-3682,"y":-1887.2,"z":10174,"a95":"0.99","info":"28/10/2014 at 09:38:21"},{"visible":true,"include":false,"step":"30.0","x":-3348.3,"y":-1640.3,"z":9340.6,"a95":"0.99","info":"28/10/2014 at 09:38:21"},{"visible":true,"include":false,"step":"35.0","x":-2988.1,"y":-1762.4,"z":8390.7,"a95":"0.99","info":"28/10/2014 at 09:38:21"},{"visible":true,"include":false,"step":"40.0","x":-2770.8,"y":-1116.1,"z":7874.6,"a95":"0.99","info":"28/10/2014 at 09:38:21"},{"visible":true,"include":false,"step":"45.0","x":-2338.3,"y":-921.6,"z":7322.4,"a95":"0.99","info":"28/10/2014 at 09:38:21"},{"visible":true,"include":false,"step":"50.0","x":-2162.2,"y":-1113.1,"z":6646.8,"a95":"0.99","info":"28/10/2014 at 09:38:21"},{"visible":true,"include":false,"step":"60.0","x":-1759.9,"y":-224.92,"z":5686.8,"a95":"0.99","info":"28/10/2014 at 09:38:21"},{"visible":true,"include":false,"step":"70.0","x":-904.2,"y":-191.85,"z":4772.9,"a95":"0.99","info":"28/10/2014 at 09:38:21"},{"visible":true,"include":false,"step":"80.0","x":-1221,"y":-727.5,"z":3915.8,"a95":"0.99","info":"28/10/2014 at 09:38:21"},{"visible":true,"include":false,"step":"90.0","x":-804.69,"y":607.2,"z":3782.4,"a95":"0.99","info":"28/10/2014 at 09:38:21"},{"visible":false,"include":false,"step":"100.0","x":-258.88,"y":-76.854,"z":3148.3,"a95":"0.99","info":"28/10/2014 at 09:38:21"}]},{"info":"1","GEO":[{"dec":54.03829677906214,"inc":-26.48710941598426,"MAD":5.61789139175303,"cm":[-1.9895196601282805e-13,8.100187187665142e-13,0],"intensity":1477.5261132083954,"type":"GC","origin":false,"forced":true,"remark":"","nSteps":6,"minStep":"30.0","maxStep":"60.0","steps":["30.0","35.0","40.0","45.0","50.0","60.0"]}],"TECT":[{"dec":29.979928637229364,"inc":-67.49584998940522,"MAD":5.617891391763424,"cm":[-6.821210263296962e-13,1.7053025658242404e-12,-7.389644451905042e-13],"intensity":1477.5261132083954,"type":"GC","origin":false,"forced":true,"remark":"","nSteps":6,"minStep":"30.0","maxStep":"60.0","steps":["30.0","35.0","40.0","45.0","50.0","60.0"]}],"interpreted":true,"name":"SS17.17A","coreAzi":32,"coreDip":28,"bedStrike":340,"bedDip":45,"data":[{"visible":true,"include":false,"step":"0.0","x":-7857.6,"y":-4403.7,"z":13512,"a95":"0.99","info":"10/10/2014 at 08:56:25"},{"visible":true,"include":false,"step":"4.0","x":-7604.6,"y":-4161.1,"z":13328,"a95":"0.99","info":"10/10/2014 at 08:56:25"},{"visible":true,"include":false,"step":"8.0","x":-7069.5,"y":-3852,"z":12698,"a95":"0.99","info":"10/10/2014 at 08:56:25"},{"visible":true,"include":false,"step":"12.0","x":-6689.6,"y":-3433.5,"z":11950,"a95":"0.99","info":"10/10/2014 at 08:56:25"},{"visible":true,"include":false,"step":"16.0","x":-6111.6,"y":-3023.8,"z":11043,"a95":"0.99","info":"10/10/2014 at 08:56:25"},{"visible":true,"include":false,"step":"20.0","x":-5794.6,"y":-2875,"z":10197,"a95":"0.99","info":"10/10/2014 at 08:56:25"},{"visible":true,"include":false,"step":"25.0","x":-5417.9,"y":-2020.2,"z":9217.4,"a95":"0.99","info":"10/10/2014 at 08:56:25"},{"visible":true,"include":true,"step":"30.0","x":-4772.9,"y":-2039.2,"z":8496,"a95":"0.99","info":"10/10/2014 at 08:56:25"},{"visible":true,"include":true,"step":"35.0","x":-4419,"y":-1723,"z":7597.6,"a95":"0.99","info":"10/10/2014 at 08:56:25"},{"visible":true,"include":true,"step":"40.0","x":-4013.7,"y":-1259.5,"z":6820.9,"a95":"0.99","info":"10/10/2014 at 08:56:25"},{"visible":true,"include":true,"step":"45.0","x":-3673,"y":-1118.1,"z":6364.1,"a95":"0.99","info":"10/10/2014 at 08:56:25"},{"visible":true,"include":true,"step":"50.0","x":-3509.5,"y":-903.66,"z":5788.7,"a95":"0.99","info":"10/10/2014 at 08:56:25"},{"visible":true,"include":true,"step":"60.0","x":-3118.1,"y":-64.401,"z":4694.6,"a95":"0.99","info":"10/10/2014 at 08:56:25"},{"visible":true,"include":false,"step":"70.0","x":-2282.3,"y":154.47,"z":4114.9,"a95":"0.99","info":"10/10/2014 at 08:56:25"},{"visible":true,"include":false,"step":"80.0","x":-2785,"y":244.24,"z":3557.3,"a95":"0.99","info":"10/10/2014 at 08:56:25"},{"visible":true,"include":false,"step":"90.0","x":-2211.1,"y":864.67,"z":2853.5,"a95":"0.99","info":"10/10/2014 at 08:56:25"},{"visible":true,"include":false,"step":"100.0","x":-2129.8,"y":712.9,"z":2761,"a95":"0.99","info":"10/10/2014 at 08:56:25"}]},{"info":"3","GEO":[{"dec":28.815253681666775,"inc":-39.54573460363637,"MAD":35.44887480477552,"cm":[-1.1368683772161603e-13,1.3073986337985843e-12,0],"intensity":2763.0806074498273,"type":"GC","origin":false,"forced":true,"remark":"","nSteps":7,"minStep":"8.0","maxStep":"35.0","steps":["8.0","12.0","16.0","20.0","25.0","30.0","35.0"]}],"TECT":[{"dec":335.5124040863215,"inc":-59.38056432043362,"MAD":35.448874804746126,"cm":[-2.5011104298755527e-12,4.661160346586257e-12,-1.3926637620897964e-12],"intensity":2763.0806074498273,"type":"GC","origin":false,"forced":true,"remark":"","nSteps":7,"minStep":"8.0","maxStep":"35.0","steps":["8.0","12.0","16.0","20.0","25.0","30.0","35.0"]}],"interpreted":true,"name":"SS17.17B","coreAzi":32,"coreDip":28,"bedStrike":340,"bedDip":45,"data":[{"visible":true,"include":false,"step":"0.0","x":-7819.8,"y":-4480,"z":17974,"a95":"0.99","info":"28/10/2014 at 09:38:21"},{"visible":true,"include":false,"step":"4.0","x":-7428.6,"y":-4129.5,"z":17392,"a95":"0.99","info":"28/10/2014 at 09:38:21"},{"visible":true,"include":true,"step":"8.0","x":-6932.6,"y":-4137.5,"z":16251,"a95":"0.99","info":"28/10/2014 at 09:38:21"},{"visible":true,"include":true,"step":"12.0","x":-6383.7,"y":-3841.3,"z":15135,"a95":"0.99","info":"28/10/2014 at 09:38:21"},{"visible":true,"include":true,"step":"16.0","x":-5879.4,"y":-3496.3,"z":13955,"a95":"0.99","info":"28/10/2014 at 09:38:21"},{"visible":true,"include":true,"step":"20.0","x":-5555.8,"y":-3172.7,"z":12973,"a95":"0.99","info":"28/10/2014 at 09:38:21"},{"visible":true,"include":true,"step":"25.0","x":-5119.5,"y":-2713,"z":11701,"a95":"0.99","info":"28/10/2014 at 09:38:21"},{"visible":true,"include":true,"step":"30.0","x":-4476.4,"y":-2500.7,"z":10830,"a95":"0.99","info":"28/10/2014 at 09:38:21"},{"visible":true,"include":true,"step":"35.0","x":-4039.7,"y":-2285.3,"z":9827.2,"a95":"0.99","info":"28/10/2014 at 09:38:21"},{"visible":true,"include":false,"step":"40.0","x":-3846.3,"y":-1574.2,"z":9004.7,"a95":"0.99","info":"28/10/2014 at 09:38:21"},{"visible":true,"include":false,"step":"45.0","x":-3642.7,"y":-1420.5,"z":8298.4,"a95":"0.99","info":"28/10/2014 at 09:38:21"},{"visible":true,"include":false,"step":"50.0","x":-3175,"y":-1629.8,"z":7336.6,"a95":"0.99","info":"28/10/2014 at 09:38:21"},{"visible":true,"include":false,"step":"60.0","x":-2764.5,"y":-352.02,"z":6351.2,"a95":"0.99","info":"28/10/2014 at 09:38:21"},{"visible":true,"include":false,"step":"70.0","x":-2206.1,"y":-498.89,"z":5516.6,"a95":"0.99","info":"28/10/2014 at 09:38:21"},{"visible":true,"include":false,"step":"80.0","x":-1586,"y":-541.81,"z":4805.9,"a95":"0.99","info":"28/10/2014 at 09:38:21"},{"visible":true,"include":false,"step":"90.0","x":-2062.6,"y":952.82,"z":4046.2,"a95":"0.99","info":"28/10/2014 at 09:38:21"},{"visible":false,"include":false,"step":"100.0","x":-1589.4,"y":383.84,"z":3586.9,"a95":"0.99","info":"28/10/2014 at 09:38:21"}]},{"info":"2","GEO":[{"dec":206.34188722923022,"inc":-58.20490589856579,"MAD":8.669311524689808,"cm":[-1.3322676295501878e-14,2.4868995751603507e-14,0],"intensity":54.48513279660742,"type":"dir","forced":true,"remark":"","origin":false,"nSteps":11,"minStep":"4.0","maxStep":"60.0","steps":["4.0","8.0","12.0","16.0","20.0","30.0","35.0","40.0","45.0","50.0","60.0"]}],"TECT":[{"dec":227.3233735459383,"inc":-19.357306005837696,"MAD":8.66931152468984,"cm":[4.884981308350689e-14,-3.730349362740526e-14,-5.995204332975845e-15],"intensity":54.48513279660742,"type":"dir","forced":true,"remark":"","origin":false,"nSteps":11,"minStep":"4.0","maxStep":"60.0","steps":["4.0","8.0","12.0","16.0","20.0","30.0","35.0","40.0","45.0","50.0","60.0"]}],"interpreted":true,"name":"SS17.18A","coreAzi":255,"coreDip":68,"bedStrike":340,"bedDip":45,"data":[{"visible":false,"include":false,"step":"0.0","x":200.5,"y":-4.5962,"z":-85.151,"a95":"0.99","info":"10/10/2014 at 08:56:25"},{"visible":true,"include":true,"step":"4.0","x":234.4,"y":-85.065,"z":-260.02,"a95":"0.99","info":"10/10/2014 at 08:56:25"},{"visible":true,"include":true,"step":"8.0","x":347.83,"y":-149.38,"z":-450.9,"a95":"0.99","info":"10/10/2014 at 08:56:25"},{"visible":true,"include":true,"step":"12.0","x":378.2,"y":-208.25,"z":-453.09,"a95":"0.99","info":"10/10/2014 at 08:56:25"},{"visible":true,"include":true,"step":"16.0","x":456.56,"y":-238.04,"z":-417.64,"a95":"0.99","info":"10/10/2014 at 08:56:25"},{"visible":true,"include":true,"step":"20.0","x":450.05,"y":-276.2,"z":-436.81,"a95":"0.99","info":"10/10/2014 at 08:56:25"},{"visible":false,"include":false,"step":"25.0","x":363.5,"y":412.89,"z":-412.78,"a95":"0.99","info":"10/10/2014 at 08:56:25"},{"visible":true,"include":true,"step":"30.0","x":290.26,"y":-288.19,"z":-400.46,"a95":"0.99","info":"10/10/2014 at 08:56:25"},{"visible":true,"include":true,"step":"35.0","x":288.55,"y":-171.27,"z":-188.46,"a95":"0.99","info":"10/10/2014 at 08:56:25"},{"visible":true,"include":true,"step":"40.0","x":297.45,"y":-249.17,"z":-195.57,"a95":"0.99","info":"10/10/2014 at 08:56:25"},{"visible":true,"include":true,"step":"45.0","x":245.78,"y":-231.68,"z":-213.13,"a95":"0.99","info":"10/10/2014 at 08:56:25"},{"visible":true,"include":true,"step":"50.0","x":223.5,"y":-128.59,"z":-245.44,"a95":"0.99","info":"10/10/2014 at 08:56:25"},{"visible":true,"include":true,"step":"60.0","x":173.32,"y":-60.622,"z":-113.92,"a95":"0.99","info":"10/10/2014 at 08:56:25"},{"visible":false,"include":false,"step":"70.0","x":342.05,"y":-54.028,"z":-39.554,"a95":"0.99","info":"10/10/2014 at 08:56:25"},{"visible":false,"include":false,"step":"80.0","x":486.35,"y":-6.0223,"z":-55.13,"a95":"0.99","info":"10/10/2014 at 08:56:25"},{"visible":false,"include":false,"step":"90.0","x":211.24,"y":0.89925,"z":-164.66,"a95":"0.99","info":"10/10/2014 at 08:56:25"},{"visible":false,"include":false,"step":"100.0","x":341.67,"y":144.44,"z":174.33,"a95":"0.99","info":"10/10/2014 at 08:56:25"}]},{"info":"3","GEO":[],"TECT":[],"interpreted":false,"name":"SS17.19A","coreAzi":266,"coreDip":70,"bedStrike":340,"bedDip":45,"data":[{"visible":true,"include":false,"step":"0.0","x":-398.71,"y":1133.4,"z":736.63,"a95":"0.99","info":"10/10/2014 at 08:56:25"},{"visible":true,"include":false,"step":"4.0","x":-346.15,"y":1067.4,"z":720.78,"a95":"0.99","info":"10/10/2014 at 08:56:25"},{"visible":true,"include":false,"step":"8.0","x":-205.82,"y":1040.1,"z":599.84,"a95":"0.99","info":"10/10/2014 at 08:56:25"},{"visible":true,"include":false,"step":"12.0","x":-155.51,"y":898.21,"z":672.51,"a95":"0.99","info":"10/10/2014 at 08:56:25"},{"visible":true,"include":false,"step":"16.0","x":-89.633,"y":882.68,"z":545,"a95":"0.99","info":"10/10/2014 at 08:56:25"},{"visible":true,"include":false,"step":"20.0","x":-148.1,"y":806.19,"z":551.45,"a95":"0.99","info":"10/10/2014 at 08:56:25"},{"visible":true,"include":false,"step":"25.0","x":-234.1,"y":935.63,"z":523.14,"a95":"0.99","info":"10/10/2014 at 08:56:25"},{"visible":true,"include":false,"step":"30.0","x":-201.77,"y":673.18,"z":430.92,"a95":"0.99","info":"10/10/2014 at 08:56:25"},{"visible":true,"include":false,"step":"35.0","x":-230.63,"y":623.1,"z":515.27,"a95":"0.99","info":"10/10/2014 at 08:56:25"},{"visible":true,"include":false,"step":"40.0","x":-72.844,"y":597.59,"z":550.36,"a95":"0.99","info":"10/10/2014 at 08:56:25"},{"visible":true,"include":false,"step":"45.0","x":25.058,"y":431.89,"z":294.11,"a95":"0.99","info":"10/10/2014 at 08:56:25"},{"visible":true,"include":false,"step":"50.0","x":-32.967,"y":347.68,"z":281.91,"a95":"0.99","info":"10/10/2014 at 08:56:25"},{"visible":true,"include":false,"step":"60.0","x":85.192,"y":519.09,"z":239.88,"a95":"0.99","info":"10/10/2014 at 08:56:25"},{"visible":true,"include":false,"step":"70.0","x":80.17,"y":370.06,"z":271.4,"a95":"0.99","info":"10/10/2014 at 08:56:25"},{"visible":true,"include":false,"step":"80.0","x":486.43,"y":403.35,"z":407.61,"a95":"0.99","info":"10/10/2014 at 08:56:25"},{"visible":true,"include":false,"step":"90.0","x":250.39,"y":378.91,"z":197.12,"a95":"0.99","info":"10/10/2014 at 08:56:25"},{"visible":true,"include":false,"step":"100.0","x":468.34,"y":242.99,"z":218.09,"a95":"0.99","info":"10/10/2014 at 08:56:25"}]},{"info":"4","GEO":[],"TECT":[],"interpreted":false,"name":"SS17.20A","coreAzi":264,"coreDip":62,"bedStrike":340,"bedDip":45,"data":[{"visible":true,"include":false,"step":"0.0","x":74.666,"y":1040.8,"z":612.48,"a95":"0.99","info":"10/10/2014 at 08:56:25"},{"visible":true,"include":false,"step":"4.0","x":160.53,"y":990.56,"z":598.57,"a95":"0.99","info":"10/10/2014 at 08:56:25"},{"visible":true,"include":false,"step":"8.0","x":235.62,"y":943.2,"z":522.87,"a95":"0.99","info":"10/10/2014 at 08:56:25"},{"visible":true,"include":false,"step":"12.0","x":160.17,"y":758.65,"z":528.91,"a95":"0.99","info":"10/10/2014 at 08:56:25"},{"visible":true,"include":false,"step":"16.0","x":281.92,"y":644.72,"z":507.09,"a95":"0.99","info":"10/10/2014 at 08:56:25"},{"visible":true,"include":false,"step":"20.0","x":244.84,"y":697.65,"z":464.77,"a95":"0.99","info":"10/10/2014 at 08:56:25"},{"visible":true,"include":false,"step":"25.0","x":83.722,"y":832.41,"z":496.53,"a95":"0.99","info":"10/10/2014 at 08:56:25"},{"visible":true,"include":false,"step":"30.0","x":267.82,"y":490.38,"z":350.05,"a95":"0.99","info":"10/10/2014 at 08:56:25"},{"visible":true,"include":false,"step":"35.0","x":192.91,"y":423.87,"z":341.79,"a95":"0.99","info":"10/10/2014 at 08:56:25"},{"visible":true,"include":false,"step":"40.0","x":121.88,"y":524.51,"z":401.94,"a95":"0.99","info":"10/10/2014 at 08:56:25"},{"visible":true,"include":false,"step":"45.0","x":189.62,"y":461.15,"z":285.12,"a95":"0.99","info":"10/10/2014 at 08:56:25"},{"visible":true,"include":false,"step":"50.0","x":112.67,"y":242.23,"z":286.61,"a95":"0.99","info":"10/10/2014 at 08:56:25"},{"visible":true,"include":false,"step":"60.0","x":122.36,"y":268.87,"z":260.25,"a95":"0.99","info":"10/10/2014 at 08:56:25"},{"visible":true,"include":false,"step":"70.0","x":191.17,"y":200.63,"z":224.46,"a95":"0.99","info":"10/10/2014 at 08:56:25"},{"visible":true,"include":false,"step":"80.0","x":-428.32,"y":0.3815,"z":119.05,"a95":"0.99","info":"10/10/2014 at 08:56:25"},{"visible":true,"include":false,"step":"90.0","x":235.17,"y":242.8,"z":173.34,"a95":"0.99","info":"10/10/2014 at 08:56:25"},{"visible":true,"include":false,"step":"100.0","x":277.57,"y":58.842,"z":421.01,"a95":"0.99","info":"10/10/2014 at 08:56:25"}]},{"info":"7","GEO":[],"TECT":[],"interpreted":false,"name":"SS17.21A","coreAzi":305,"coreDip":36,"bedStrike":340,"bedDip":45,"data":[{"visible":true,"include":false,"step":"0.0","x":-3534.5,"y":2811.4,"z":4989.6,"a95":"0.99","info":"22/09/2014 at 05:24:00"},{"visible":true,"include":false,"step":"5.0","x":-3231.7,"y":2820.2,"z":4721.4,"a95":"0.99","info":"22/09/2014 at 05:24:00"},{"visible":true,"include":false,"step":"10.0","x":-2872.2,"y":2511.1,"z":4263.4,"a95":"0.99","info":"22/09/2014 at 05:24:00"},{"visible":true,"include":false,"step":"15.0","x":-2458.9,"y":2400.5,"z":3994,"a95":"0.99","info":"22/09/2014 at 05:24:00"},{"visible":true,"include":false,"step":"20.0","x":-2223.7,"y":1960.1,"z":3513.9,"a95":"0.99","info":"22/09/2014 at 05:24:00"},{"visible":true,"include":false,"step":"25.0","x":-2035,"y":1864.1,"z":3202.6,"a95":"0.99","info":"22/09/2014 at 05:24:00"},{"visible":true,"include":false,"step":"30.0","x":-2048.9,"y":1906.6,"z":2443.6,"a95":"0.99","info":"22/09/2014 at 05:24:00"},{"visible":true,"include":false,"step":"35.0","x":-1503.7,"y":1340.1,"z":2577.3,"a95":"0.99","info":"22/09/2014 at 05:24:00"},{"visible":true,"include":false,"step":"40.0","x":-988.67,"y":1258,"z":2177.5,"a95":"0.99","info":"22/09/2014 at 05:24:00"},{"visible":true,"include":false,"step":"45.0","x":-1230.7,"y":1033.5,"z":2094.8,"a95":"0.99","info":"22/09/2014 at 05:24:00"},{"visible":true,"include":false,"step":"50.0","x":-1119.7,"y":1043.7,"z":1812.7,"a95":"0.99","info":"22/09/2014 at 05:24:00"},{"visible":true,"include":false,"step":"60.0","x":-706.48,"y":601.99,"z":1633.3,"a95":"0.99","info":"22/09/2014 at 05:24:00"},{"visible":true,"include":false,"step":"70.0","x":-445.79,"y":477.74,"z":1236.7,"a95":"0.99","info":"22/09/2014 at 05:24:00"},{"visible":true,"include":false,"step":"80.0","x":73.944,"y":85.665,"z":1006.1,"a95":"0.99","info":"22/09/2014 at 05:24:00"},{"visible":true,"include":false,"step":"90.0","x":-537.9,"y":221.39,"z":749.5,"a95":"0.99","info":"22/09/2014 at 05:24:00"},{"visible":true,"include":false,"step":"100.0","x":-246.11,"y":-27.65,"z":650.57,"a95":"0.99","info":"22/09/2014 at 05:24:00"}]},{"info":"4","GEO":[],"TECT":[],"interpreted":false,"name":"SS17.21B","coreAzi":305,"coreDip":36,"bedStrike":340,"bedDip":45,"data":[{"visible":true,"include":false,"step":"0.0","x":5.8183,"y":680.91,"z":1867.7,"a95":"0.99","info":"28/10/2014 at 09:38:21"},{"visible":true,"include":false,"step":"4.0","x":163.24,"y":696.86,"z":1487.6,"a95":"0.99","info":"28/10/2014 at 09:38:21"},{"visible":true,"include":false,"step":"8.0","x":238.39,"y":597.68,"z":1150.5,"a95":"0.99","info":"28/10/2014 at 09:38:21"},{"visible":true,"include":false,"step":"12.0","x":348.02,"y":548.32,"z":919.43,"a95":"0.99","info":"28/10/2014 at 09:38:21"},{"visible":true,"include":false,"step":"16.0","x":240.36,"y":523.02,"z":806.99,"a95":"0.99","info":"28/10/2014 at 09:38:21"},{"visible":true,"include":false,"step":"20.0","x":287.54,"y":461.96,"z":679.77,"a95":"0.99","info":"28/10/2014 at 09:38:21"},{"visible":true,"include":false,"step":"25.0","x":173.06,"y":344.34,"z":654.5,"a95":"0.99","info":"28/10/2014 at 09:38:21"},{"visible":true,"include":false,"step":"30.0","x":72.705,"y":305.69,"z":581.58,"a95":"0.99","info":"28/10/2014 at 09:38:21"},{"visible":true,"include":false,"step":"35.0","x":112.85,"y":219.71,"z":554.9,"a95":"0.99","info":"28/10/2014 at 09:38:21"},{"visible":true,"include":false,"step":"40.0","x":-103.35,"y":23.844,"z":406.69,"a95":"0.99","info":"28/10/2014 at 09:38:21"},{"visible":true,"include":false,"step":"45.0","x":114.68,"y":186.64,"z":325.64,"a95":"0.99","info":"28/10/2014 at 09:38:21"},{"visible":true,"include":false,"step":"50.0","x":35.622,"y":112.74,"z":333.6,"a95":"0.99","info":"28/10/2014 at 09:38:21"},{"visible":true,"include":false,"step":"60.0","x":-56.388,"y":232.12,"z":303.42,"a95":"0.99","info":"28/10/2014 at 09:38:21"},{"visible":true,"include":false,"step":"70.0","x":173.29,"y":-127.41,"z":250.68,"a95":"0.99","info":"28/10/2014 at 09:38:21"},{"visible":true,"include":false,"step":"80.0","x":221.32,"y":-127.06,"z":264.16,"a95":"0.99","info":"28/10/2014 at 09:38:21"},{"visible":true,"include":false,"step":"90.0","x":-97.902,"y":-111.09,"z":123.18,"a95":"0.99","info":"28/10/2014 at 09:38:21"},{"visible":true,"include":false,"step":"100.0","x":234.4,"y":20.092,"z":131.15,"a95":"0.99","info":"28/10/2014 at 09:38:21"}]}]
