# Supplementary material for: Paleomagnetic constraints on the timing and distribution of Cenozoic rotations in Central and Eastern Anatolia
Source: Copernicus journal article supplement (doi:10.5194/se-9-295-2018), 2018-03-21
Supplement: Supplementary file 2 [file se-9-295-2018-supplement.zip › se-2017-66_DATA_dir files/dir files Sivas/SS18.dir]

[{"version":"v1.1.0","exported":"2017-05-22T11:26:16.889Z","info":"","GEO":[{"dec":92.50915790988455,"inc":-4.262804528735977,"MAD":5.440876301460741,"cm":[-2.0301221021717147e-15,8.966372617925073e-15,0],"intensity":341.3945727908775,"type":"GC","origin":false,"forced":true,"remark":"","nSteps":5,"minStep":"100","maxStep":"240","steps":["100","150","180","210","240"],"group":"None"}],"TECT":[{"dec":105.63070443848602,"inc":-51.8575576389471,"MAD":5.4408763014606585,"cm":[-2.097792838910772e-14,9.135549459772717e-15,-2.0301221021717147e-15],"intensity":341.3945727908776,"type":"GC","origin":false,"forced":true,"remark":"","nSteps":5,"minStep":"100","maxStep":"240","steps":["100","150","180","210","240"],"group":"None"}],"interpreted":true,"name":"SS18.1A","coreAzi":34,"coreDip":52,"bedStrike":343,"bedDip":52,"data":[{"visible":true,"include":false,"step":"20","x":-135.04761904761904,"y":-125.04761904761905,"z":683.8095238095239,"a95":"2.8","info":"\"14-09-29\" at \"15:29\""},{"visible":true,"include":true,"step":"100","x":-125.71428571428571,"y":-23.333333333333332,"z":287.14285714285717,"a95":"2.7","info":"\"14-09-29\" at \"18:07\""},{"visible":true,"include":true,"step":"150","x":-91.04761904761905,"y":26.952380952380953,"z":93.52380952380952,"a95":"3.2","info":"\"14-09-29\" at \"21:02\""},{"visible":true,"include":true,"step":"180","x":-85.61904761904762,"y":31.333333333333332,"z":41.04761904761905,"a95":"3","info":"\"14-09-30\" at \"15:26\""},{"visible":true,"include":true,"step":"210","x":-71,"y":39,"z":14.504761904761907,"a95":"4.2","info":"\"14-09-30\" at \"18:38\""},{"visible":true,"include":true,"step":"240","x":-65.98095238095237,"y":27.304761904761904,"z":-4.6761904761904765,"a95":"3.7","info":"\"14-09-30\" at \"21:42\""},{"visible":true,"include":false,"step":"270","x":-65.17142857142856,"y":26.35238095238095,"z":2.7047619047619045,"a95":"2.7","info":"\"14-10-01\" at \"15:39\""},{"visible":true,"include":false,"step":"300","x":-68.14285714285714,"y":11.685714285714287,"z":10.133333333333335,"a95":"7.6","info":"\"14-10-01\" at \"19:12\""},{"visible":true,"include":false,"step":"320","x":-66.4952380952381,"y":7.742857142857143,"z":17.41904761904762,"a95":"4.1","info":"\"14-10-01\" at \"22:19\""},{"visible":true,"include":false,"step":"340","x":-43.41904761904762,"y":-12.180952380952382,"z":18.685714285714283,"a95":"4.5","info":"\"14-10-02\" at \"15:55\""},{"visible":true,"include":false,"step":"370","x":-46.55238095238095,"y":-0.9047619047619048,"z":20.142857142857142,"a95":"4.8","info":"\"14-10-02\" at \"18:39\""},{"visible":true,"include":false,"step":"400","x":-34.60952380952381,"y":-3.542857142857143,"z":20.904761904761905,"a95":"8.3","info":"\"14-10-02\" at \"21:53\""},{"visible":true,"include":false,"step":"420","x":-57.019047619047626,"y":5.542857142857143,"z":13.666666666666666,"a95":"2.7","info":"\"14-10-03\" at \"15:20\""},{"visible":true,"include":false,"step":"440","x":-39.666666666666664,"y":2.876190476190476,"z":27.714285714285715,"a95":"11.2","info":"\"14-10-03\" at \"18:50\""},{"visible":true,"include":false,"step":"460","x":-32.75238095238095,"y":-8.238095238095237,"z":5.457142857142857,"a95":"10.4","info":"\"14-10-03\" at \"22:08\""},{"visible":true,"include":false,"step":"480","x":-52.285714285714285,"y":1.9714285714285713,"z":11.961904761904762,"a95":"6.5","info":"\"14-10-04\" at \"09:35\""}],"demagType":"Unknown","patch":1.1,"format":"Unknown","strat":null},{"version":"v1.1.0","exported":"2017-05-22T11:26:16.889Z","info":"","GEO":[{"dec":290.41328491355097,"inc":-8.14185051984842,"MAD":0.9384261951399528,"cm":[0,-4.0602442043434294e-15,0],"intensity":248.6255551359648,"type":"GC","origin":false,"forced":true,"remark":"","nSteps":4,"minStep":"100","maxStep":"210","steps":["100","150","180","210"],"group":"None"}],"TECT":[{"dec":118.27566992815048,"inc":-32.16741094491496,"MAD":0.9384261951402562,"cm":[-4.0602442043434294e-15,-1.691768418476429e-15,-2.7068294695622863e-15],"intensity":248.62555513596485,"type":"GC","origin":false,"forced":true,"remark":"","nSteps":4,"minStep":"100","maxStep":"210","steps":["100","150","180","210"],"group":"None"}],"interpreted":true,"name":"SS18.2A","coreAzi":37,"coreDip":48,"bedStrike":343,"bedDip":52,"data":[{"visible":true,"include":false,"step":"20","x":-157.52380952380952,"y":-107.04761904761905,"z":335.42857142857144,"a95":"2.8","info":"\"14-09-29\" at \"15:31\""},{"visible":true,"include":true,"step":"100","x":-147.42857142857142,"y":-25.142857142857142,"z":139.9047619047619,"a95":"2.8","info":"\"14-09-29\" at \"18:09\""},{"visible":true,"include":true,"step":"150","x":-113.23809523809524,"y":12.952380952380953,"z":-2.5714285714285716,"a95":"2.8","info":"\"14-09-29\" at \"21:04\""},{"visible":true,"include":true,"step":"180","x":-97.33333333333333,"y":26.38095238095238,"z":-42.19047619047619,"a95":"3.1","info":"\"14-09-30\" at \"15:28\""},{"visible":true,"include":true,"step":"210","x":-87.52380952380952,"y":28.666666666666668,"z":-58.666666666666664,"a95":"4.5","info":"\"14-09-30\" at \"18:40\""},{"visible":true,"include":false,"step":"240","x":-84.0952380952381,"y":29.428571428571427,"z":-35.80952380952381,"a95":"3.3","info":"\"14-09-30\" at \"21:44\""},{"visible":true,"include":false,"step":"270","x":-78.88571428571429,"y":14.8,"z":-33.97142857142857,"a95":"3.3","info":"\"14-10-01\" at \"15:41\""},{"visible":true,"include":false,"step":"300","x":-75.02857142857142,"y":2.038095238095238,"z":-14.828571428571427,"a95":"7.6","info":"\"14-10-01\" at \"19:14\""},{"visible":true,"include":false,"step":"320","x":-69.27619047619048,"y":1.0571428571428572,"z":-6.9714285714285715,"a95":"3.2","info":"\"14-10-01\" at \"22:21\""},{"visible":true,"include":false,"step":"340","x":-47.95238095238095,"y":-19.628571428571426,"z":4.8,"a95":"3.7","info":"\"14-10-02\" at \"15:57\""},{"visible":true,"include":false,"step":"370","x":-36.20952380952381,"y":-2.4666666666666663,"z":-0.3047619047619048,"a95":"7.6","info":"\"14-10-02\" at \"18:41\""},{"visible":true,"include":false,"step":"400","x":-32.34285714285714,"y":-12.22857142857143,"z":11.895238095238096,"a95":"6.5","info":"\"14-10-02\" at \"21:55\""},{"visible":true,"include":false,"step":"420","x":-49.48571428571429,"y":5.9714285714285715,"z":-3.8190476190476192,"a95":"4","info":"\"14-10-03\" at \"15:22\""},{"visible":true,"include":false,"step":"440","x":-20.228571428571428,"y":-3.3714285714285714,"z":12.752380952380953,"a95":"13.1","info":"\"14-10-03\" at \"18:52\""},{"visible":true,"include":false,"step":"460","x":-51.53333333333334,"y":-8.79047619047619,"z":1.7999999999999998,"a95":"4.8","info":"\"14-10-03\" at \"22:10\""},{"visible":true,"include":false,"step":"480","x":-50.77142857142857,"y":14.571428571428571,"z":10.114285714285714,"a95":"3.7","info":"\"14-10-04\" at \"09:37\""}],"demagType":"Unknown","patch":1.1,"format":"Unknown","strat":null},{"version":"v1.1.0","exported":"2017-05-22T11:26:16.889Z","info":"5","GEO":[{"dec":270.2373020764833,"inc":-2.9433381465909805,"MAD":8.713464863716114,"cm":[0,-2.220446049250313e-16,0],"intensity":405.2734903248554,"type":"GC","origin":false,"forced":true,"remark":"","nSteps":7,"minStep":"12.0","maxStep":"40.0","steps":["12.0","16.0","20.0","25.0","30.0","35.0","40.0"],"group":"None","version":"v1.1.0"}],"TECT":[{"dec":98.24238125077773,"inc":-46.05544671806352,"MAD":8.713464863715483,"cm":[1.0658141036401503e-14,-1.1546319456101628e-14,3.552713678800501e-15],"intensity":405.27349032485546,"type":"GC","origin":false,"forced":true,"remark":"","nSteps":7,"minStep":"12.0","maxStep":"40.0","steps":["12.0","16.0","20.0","25.0","30.0","35.0","40.0"],"group":"None","version":"v1.1.0"}],"interpreted":true,"name":"SS18.3A","coreAzi":66,"coreDip":38,"bedStrike":343,"bedDip":52,"data":[{"visible":true,"include":false,"step":"0.0","x":-223.2,"y":-90.87619047619049,"z":296.8857142857143,"a95":"0.99","info":"28/10/2014 at 09:38:21"},{"visible":true,"include":false,"step":"4.0","x":-202.35238095238094,"y":-94.28666666666666,"z":256.93333333333334,"a95":"0.99","info":"28/10/2014 at 09:38:21"},{"visible":true,"include":false,"step":"8.0","x":-183.77142857142857,"y":-97.88571428571429,"z":205.65714285714287,"a95":"0.99","info":"28/10/2014 at 09:38:21"},{"visible":true,"include":true,"step":"12.0","x":-161.5047619047619,"y":-112.9047619047619,"z":170.11428571428573,"a95":"0.99","info":"28/10/2014 at 09:38:21"},{"visible":true,"include":true,"step":"16.0","x":-140.55238095238096,"y":-112.08571428571429,"z":162.04761904761904,"a95":"0.99","info":"28/10/2014 at 09:38:21"},{"visible":true,"include":true,"step":"20.0","x":-130.68571428571428,"y":-107.46666666666667,"z":151.73333333333335,"a95":"0.99","info":"28/10/2014 at 09:38:21"},{"visible":true,"include":true,"step":"25.0","x":-122.26666666666667,"y":-117.4095238095238,"z":146.05714285714285,"a95":"0.99","info":"28/10/2014 at 09:38:21"},{"visible":true,"include":true,"step":"30.0","x":-91.42666666666666,"y":-105.68571428571428,"z":127.86666666666666,"a95":"0.99","info":"28/10/2014 at 09:38:21"},{"visible":true,"include":true,"step":"35.0","x":-89.74,"y":-123.78095238095239,"z":125.12380952380951,"a95":"0.99","info":"28/10/2014 at 09:38:21"},{"visible":true,"include":true,"step":"40.0","x":-66.67619047619048,"y":-89.8752380952381,"z":96.45714285714286,"a95":"0.99","info":"28/10/2014 at 09:38:21"},{"visible":true,"include":false,"step":"45.0","x":-81.17714285714285,"y":-87.70666666666666,"z":99.0952380952381,"a95":"0.99","info":"28/10/2014 at 09:38:21"},{"visible":true,"include":false,"step":"50.0","x":-40.07809523809524,"y":-113.51428571428572,"z":100.0095238095238,"a95":"0.99","info":"28/10/2014 at 09:38:21"},{"visible":true,"include":false,"step":"60.0","x":-72.13904761904762,"y":-74.81523809523809,"z":106.39047619047618,"a95":"0.99","info":"28/10/2014 at 09:38:21"},{"visible":true,"include":false,"step":"70.0","x":-33.20095238095238,"y":-71.73333333333333,"z":110.86666666666666,"a95":"0.99","info":"28/10/2014 at 09:38:21"},{"visible":true,"include":false,"step":"80.0","x":-39.88476190476191,"y":-90.11809523809524,"z":76.70571428571428,"a95":"0.99","info":"28/10/2014 at 09:38:21"},{"visible":true,"include":false,"step":"90.0","x":-34.94952380952381,"y":-29.04190476190476,"z":92.7,"a95":"0.99","info":"28/10/2014 at 09:38:21"},{"visible":true,"include":false,"step":"100.0","x":-37.61047619047619,"y":-50.6447619047619,"z":63.6752380952381,"a95":"0.99","info":"28/10/2014 at 09:38:21"}],"demagType":"Unknown","patch":1.1,"format":"Unknown","strat":null},{"version":"v1.1.0","exported":"2017-05-22T11:26:16.889Z","info":"5","GEO":[],"TECT":[],"interpreted":false,"name":"SS18.3B","coreAzi":66,"coreDip":38,"bedStrike":343,"bedDip":52,"data":[{"visible":true,"include":false,"step":"0.0","x":-146.1904761904762,"y":-37.25142857142857,"z":171.8190476190476,"a95":"0.99","info":"10/10/2014 at 08:56:25"},{"visible":true,"include":true,"step":"4.0","x":-136.15238095238095,"y":-40.60952380952381,"z":161.03809523809525,"a95":"0.99","info":"10/10/2014 at 08:56:25"},{"visible":true,"include":true,"step":"8.0","x":-114.13333333333334,"y":-25.642857142857142,"z":133.67619047619047,"a95":"0.99","info":"10/10/2014 at 08:56:25"},{"visible":true,"include":true,"step":"12.0","x":-104.86666666666666,"y":-35.86190476190476,"z":135.64761904761903,"a95":"0.99","info":"10/10/2014 at 08:56:25"},{"visible":true,"include":true,"step":"16.0","x":-94.87714285714286,"y":-31.216190476190473,"z":130.48571428571427,"a95":"0.99","info":"10/10/2014 at 08:56:25"},{"visible":true,"include":true,"step":"20.0","x":-88.98190476190476,"y":-28.697142857142858,"z":125.63809523809525,"a95":"0.99","info":"10/10/2014 at 08:56:25"},{"visible":true,"include":true,"step":"25.0","x":-93.28476190476191,"y":-17.053333333333335,"z":130.13333333333335,"a95":"0.99","info":"10/10/2014 at 08:56:25"},{"visible":true,"include":true,"step":"30.0","x":-85.21714285714286,"y":-38.364761904761906,"z":109.91428571428571,"a95":"0.99","info":"10/10/2014 at 08:56:25"},{"visible":true,"include":true,"step":"35.0","x":-78.25714285714287,"y":-34.13238095238095,"z":124.42857142857143,"a95":"0.99","info":"10/10/2014 at 08:56:25"},{"visible":true,"include":true,"step":"40.0","x":-72.83142857142857,"y":-24.447619047619046,"z":120.22857142857144,"a95":"0.99","info":"10/10/2014 at 08:56:25"},{"visible":true,"include":true,"step":"45.0","x":-71.17999999999999,"y":-20.982857142857142,"z":115.80952380952381,"a95":"0.99","info":"10/10/2014 at 08:56:25"},{"visible":true,"include":true,"step":"50.0","x":-61.47238095238096,"y":-25.451428571428572,"z":101.63809523809525,"a95":"0.99","info":"10/10/2014 at 08:56:25"},{"visible":true,"include":true,"step":"60.0","x":-54.277142857142856,"y":-12.082857142857144,"z":74.16,"a95":"0.99","info":"10/10/2014 at 08:56:25"},{"visible":true,"include":false,"step":"70.0","x":-42.317142857142855,"y":-24.277142857142856,"z":74.40666666666667,"a95":"0.99","info":"10/10/2014 at 08:56:25"},{"visible":true,"include":false,"step":"80.0","x":-63.60285714285715,"y":-33.203809523809525,"z":84.25809523809524,"a95":"0.99","info":"10/10/2014 at 08:56:25"},{"visible":true,"include":false,"step":"90.0","x":-55.41238095238096,"y":-25.824761904761907,"z":66.80285714285714,"a95":"0.99","info":"10/10/2014 at 08:56:25"},{"visible":true,"include":false,"step":"100.0","x":-30.788571428571426,"y":-17.057142857142857,"z":97.71428571428571,"a95":"0.99","info":"10/10/2014 at 08:56:25"}],"demagType":"Unknown","patch":1.1,"format":"Unknown","strat":null},{"version":"v1.1.0","exported":"2017-05-22T11:26:16.889Z","info":"5","GEO":[],"TECT":[],"interpreted":false,"name":"SS18.4A","coreAzi":60,"coreDip":37,"bedStrike":343,"bedDip":52,"data":[{"visible":true,"include":false,"step":"0.0","x":-234.49523809523808,"y":-27.009523809523813,"z":297.2190476190476,"a95":"0.99","info":"30/01/2015 at 17:42:41"},{"visible":true,"include":false,"step":"10.0","x":-153.52380952380952,"y":-67.97999999999999,"z":200.33333333333334,"a95":"0.99","info":"30/01/2015 at 17:42:41"},{"visible":true,"include":false,"step":"15.0","x":-138.82857142857142,"y":-68.58285714285714,"z":189.23809523809524,"a95":"0.99","info":"30/01/2015 at 17:42:41"},{"visible":true,"include":true,"step":"20.0","x":-102.5047619047619,"y":-68.74666666666667,"z":175.9047619047619,"a95":"0.99","info":"30/01/2015 at 17:42:41"},{"visible":true,"include":true,"step":"23.0","x":-100.04761904761905,"y":-60.921904761904756,"z":157.01904761904763,"a95":"0.99","info":"30/01/2015 at 17:42:41"},{"visible":true,"include":true,"step":"25.0","x":-95.15428571428572,"y":-71.35809523809523,"z":163.6952380952381,"a95":"0.99","info":"30/01/2015 at 17:42:41"},{"visible":true,"include":true,"step":"30.0","x":-81.97047619047619,"y":-58.12190476190476,"z":142.1809523809524,"a95":"0.99","info":"30/01/2015 at 17:42:41"},{"visible":true,"include":true,"step":"33.0","x":-79.1247619047619,"y":-52.438095238095244,"z":157.88571428571427,"a95":"0.99","info":"30/01/2015 at 17:42:41"},{"visible":true,"include":true,"step":"35.0","x":-66.10666666666667,"y":-51.438095238095244,"z":161.84761904761905,"a95":"0.99","info":"30/01/2015 at 17:42:41"},{"visible":true,"include":true,"step":"40.0","x":-57.16285714285715,"y":-45.77428571428571,"z":133.96190476190475,"a95":"0.99","info":"30/01/2015 at 17:42:41"},{"visible":true,"include":true,"step":"45.0","x":-56.36571428571429,"y":-52.83238095238095,"z":146.1238095238095,"a95":"0.99","info":"30/01/2015 at 17:42:41"},{"visible":true,"include":true,"step":"50.0","x":-51.8,"y":-30.559047619047618,"z":126.96190476190475,"a95":"0.99","info":"30/01/2015 at 17:42:41"},{"visible":true,"include":true,"step":"60.0","x":-38.46380952380952,"y":-21.562857142857144,"z":117.70476190476191,"a95":"0.99","info":"30/01/2015 at 17:42:41"},{"visible":true,"include":false,"step":"70.0","x":-61.91142857142857,"y":9.216571428571429,"z":123.05714285714285,"a95":"0.99","info":"30/01/2015 at 17:42:41"}],"demagType":"Unknown","patch":1.1,"format":"Unknown","strat":null},{"version":"v1.1.0","exported":"2017-05-22T11:26:16.889Z","info":"6","GEO":[{"dec":221.65078707074198,"inc":-0.8562592622022713,"MAD":4.536385546523924,"cm":[-1.8207657603852567e-14,1.9539925233402755e-14,0],"intensity":407.882852531567,"type":"dir","forced":true,"remark":"","origin":false,"nSteps":12,"minStep":"8.0","maxStep":"70.0","steps":["8.0","12.0","16.0","20.0","25.0","30.0","35.0","40.0","45.0","50.0","60.0","70.0"],"group":"None","version":"v1.1.0"}],"TECT":[{"dec":208.93733751154343,"inc":41.58230841714258,"MAD":4.536385546523927,"cm":[1.3322676295501878e-15,-2.6645352591003757e-15,4.440892098500626e-16],"intensity":407.8828525315669,"type":"dir","forced":true,"remark":"","origin":false,"nSteps":12,"minStep":"8.0","maxStep":"70.0","steps":["8.0","12.0","16.0","20.0","25.0","30.0","35.0","40.0","45.0","50.0","60.0","70.0"],"group":"None","version":"v1.1.0"}],"interpreted":true,"name":"SS18.5A","coreAzi":41,"coreDip":37,"bedStrike":343,"bedDip":52,"data":[{"visible":true,"include":false,"step":"0.0","x":-230.67619047619047,"y":3.5606666666666666,"z":-218.40952380952382,"a95":"0.99","info":"28/10/2014 at 09:38:21"},{"visible":true,"include":false,"step":"4.0","x":-206.51428571428573,"y":-1.6868571428571428,"z":-243.47619047619048,"a95":"0.99","info":"28/10/2014 at 09:38:21"},{"visible":true,"include":true,"step":"8.0","x":-183.37142857142857,"y":-1.3806666666666667,"z":-228.83809523809526,"a95":"0.99","info":"28/10/2014 at 09:38:21"},{"visible":true,"include":true,"step":"12.0","x":-156.44761904761904,"y":2.9144761904761904,"z":-207.45714285714288,"a95":"0.99","info":"28/10/2014 at 09:38:21"},{"visible":true,"include":true,"step":"16.0","x":-154.07619047619048,"y":2.1306666666666665,"z":-193.17142857142858,"a95":"0.99","info":"28/10/2014 at 09:38:21"},{"visible":true,"include":true,"step":"20.0","x":-139.6,"y":0.5553809523809524,"z":-189.96190476190475,"a95":"0.99","info":"28/10/2014 at 09:38:21"},{"visible":true,"include":true,"step":"25.0","x":-132.7047619047619,"y":8.312571428571427,"z":-174.07619047619048,"a95":"0.99","info":"28/10/2014 at 09:38:21"},{"visible":true,"include":true,"step":"30.0","x":-107.67619047619047,"y":4.344380952380952,"z":-160.6952380952381,"a95":"0.99","info":"28/10/2014 at 09:38:21"},{"visible":true,"include":true,"step":"35.0","x":-100.44761904761906,"y":-12.82095238095238,"z":-139.16190476190476,"a95":"0.99","info":"28/10/2014 at 09:38:21"},{"visible":true,"include":true,"step":"40.0","x":-91.71523809523809,"y":6.586761904761905,"z":-146.78095238095239,"a95":"0.99","info":"28/10/2014 at 09:38:21"},{"visible":true,"include":true,"step":"45.0","x":-83.89714285714285,"y":-9.602857142857143,"z":-118.66666666666667,"a95":"0.99","info":"28/10/2014 at 09:38:21"},{"visible":true,"include":true,"step":"50.0","x":-58.415238095238095,"y":-18.228571428571428,"z":-109.92380952380952,"a95":"0.99","info":"28/10/2014 at 09:38:21"},{"visible":true,"include":true,"step":"60.0","x":-68.77238095238096,"y":-6.991619047619048,"z":-92.21714285714286,"a95":"0.99","info":"28/10/2014 at 09:38:21"},{"visible":true,"include":true,"step":"70.0","x":-49.971428571428575,"y":-31.30857142857143,"z":-104.1047619047619,"a95":"0.99","info":"28/10/2014 at 09:38:21"},{"visible":true,"include":false,"step":"80.0","x":-1.139047619047619,"y":-28.288571428571426,"z":-96.88571428571429,"a95":"0.99","info":"28/10/2014 at 09:38:21"},{"visible":true,"include":false,"step":"90.0","x":-45.52571428571429,"y":3.0104761904761905,"z":-77.85809523809523,"a95":"0.99","info":"28/10/2014 at 09:38:21"},{"visible":true,"include":false,"step":"100.0","x":-34.41047619047619,"y":-24.613333333333333,"z":-68.14571428571428,"a95":"0.99","info":"28/10/2014 at 09:38:21"}],"demagType":"Unknown","patch":1.1,"format":"Unknown","strat":null},{"version":"v1.1.0","exported":"2017-05-22T11:26:16.889Z","info":"6","GEO":[],"TECT":[],"interpreted":false,"name":"SS18.6A","coreAzi":76,"coreDip":26,"bedStrike":343,"bedDip":52,"data":[{"visible":true,"include":false,"step":"0.0","x":-285.85714285714283,"y":-68.45428571428572,"z":121.05714285714285,"a95":"0.99","info":"30/01/2015 at 17:42:41"},{"visible":true,"include":false,"step":"10.0","x":-219.59047619047618,"y":-99.34285714285713,"z":100.83809523809524,"a95":"0.99","info":"30/01/2015 at 17:42:41"},{"visible":true,"include":false,"step":"15.0","x":-214.8952380952381,"y":-99.81904761904761,"z":103.5904761904762,"a95":"0.99","info":"30/01/2015 at 17:42:41"},{"visible":true,"include":false,"step":"20.0","x":-186.37142857142857,"y":-103.77142857142856,"z":105.82857142857144,"a95":"0.99","info":"30/01/2015 at 17:42:41"},{"visible":true,"include":false,"step":"23.0","x":-191.05714285714285,"y":-111.60952380952382,"z":93.81714285714285,"a95":"0.99","info":"30/01/2015 at 17:42:41"},{"visible":true,"include":false,"step":"25.0","x":-199.36190476190478,"y":-123.53333333333333,"z":100.94285714285715,"a95":"0.99","info":"30/01/2015 at 17:42:41"},{"visible":true,"include":false,"step":"30.0","x":-187.01904761904763,"y":-107.60952380952382,"z":91.68857142857144,"a95":"0.99","info":"30/01/2015 at 17:42:41"},{"visible":true,"include":false,"step":"33.0","x":-178.41904761904763,"y":-104.15238095238094,"z":100.19999999999999,"a95":"0.99","info":"30/01/2015 at 17:42:41"},{"visible":true,"include":false,"step":"35.0","x":-179.53333333333333,"y":-110.01904761904763,"z":117.95238095238095,"a95":"0.99","info":"30/01/2015 at 17:42:41"},{"visible":true,"include":false,"step":"40.0","x":-165.6952380952381,"y":-112.36190476190475,"z":96.27619047619048,"a95":"0.99","info":"30/01/2015 at 17:42:41"},{"visible":true,"include":false,"step":"45.0","x":-169.9142857142857,"y":-91.96000000000001,"z":94.07428571428571,"a95":"0.99","info":"30/01/2015 at 17:42:41"},{"visible":true,"include":false,"step":"50.0","x":-151.26666666666665,"y":-87.55047619047619,"z":72.55809523809523,"a95":"0.99","info":"30/01/2015 at 17:42:41"},{"visible":true,"include":false,"step":"60.0","x":-148.40952380952382,"y":-73.82190476190476,"z":106.64761904761905,"a95":"0.99","info":"30/01/2015 at 17:42:41"},{"visible":true,"include":false,"step":"70.0","x":-120.55238095238094,"y":-34.55047619047619,"z":119.84761904761906,"a95":"0.99","info":"30/01/2015 at 17:42:41"}],"demagType":"Unknown","patch":1.1,"format":"Unknown","strat":null},{"version":"v1.1.0","exported":"2017-05-22T11:26:16.889Z","info":"6","GEO":[],"TECT":[],"interpreted":false,"name":"SS18.6B","coreAzi":76,"coreDip":26,"bedStrike":343,"bedDip":52,"data":[{"visible":true,"include":false,"step":"0.0","x":-65.7247619047619,"y":13.838095238095239,"z":45.82476190476191,"a95":"0.99","info":"10/10/2014 at 08:56:25"},{"visible":true,"include":false,"step":"4.0","x":-52.80476190476191,"y":13.502857142857144,"z":26.423809523809524,"a95":"0.99","info":"10/10/2014 at 08:56:25"},{"visible":true,"include":false,"step":"8.0","x":-30.862857142857145,"y":25.959999999999997,"z":0.11711428571428571,"a95":"0.99","info":"10/10/2014 at 08:56:25"},{"visible":true,"include":false,"step":"12.0","x":-23.93619047619048,"y":14.08952380952381,"z":5.050857142857143,"a95":"0.99","info":"10/10/2014 at 08:56:25"},{"visible":true,"include":false,"step":"16.0","x":-15.36,"y":6.700857142857142,"z":0.942552380952381,"a95":"0.99","info":"10/10/2014 at 08:56:25"},{"visible":true,"include":false,"step":"20.0","x":-9.498380952380952,"y":10.552380952380952,"z":6.312666666666667,"a95":"0.99","info":"10/10/2014 at 08:56:25"},{"visible":true,"include":false,"step":"25.0","x":-22.564761904761905,"y":24.664761904761907,"z":5.630761904761904,"a95":"0.99","info":"10/10/2014 at 08:56:25"},{"visible":true,"include":false,"step":"30.0","x":-12.038095238095238,"y":-1.795904761904762,"z":-17.177142857142858,"a95":"0.99","info":"10/10/2014 at 08:56:25"},{"visible":true,"include":false,"step":"35.0","x":-15.608571428571427,"y":4.017428571428572,"z":3.0202857142857145,"a95":"0.99","info":"10/10/2014 at 08:56:25"},{"visible":true,"include":false,"step":"40.0","x":-8.031619047619047,"y":8.82895238095238,"z":5.164190476190476,"a95":"0.99","info":"10/10/2014 at 08:56:25"},{"visible":true,"include":false,"step":"45.0","x":-4.677809523809524,"y":20.164761904761903,"z":-13.41904761904762,"a95":"0.99","info":"10/10/2014 at 08:56:25"},{"visible":true,"include":false,"step":"50.0","x":-0.6105047619047619,"y":15.135238095238094,"z":4.255619047619048,"a95":"0.99","info":"10/10/2014 at 08:56:25"},{"visible":true,"include":false,"step":"60.0","x":-3.3009523809523804,"y":16.663809523809523,"z":-5.982095238095238,"a95":"0.99","info":"10/10/2014 at 08:56:25"},{"visible":true,"include":false,"step":"70.0","x":-7.777904761904763,"y":42.925714285714285,"z":13.943809523809524,"a95":"0.99","info":"10/10/2014 at 08:56:25"},{"visible":true,"include":false,"step":"80.0","x":31.301904761904762,"y":37.20761904761905,"z":13.924761904761905,"a95":"0.99","info":"10/10/2014 at 08:56:25"},{"visible":true,"include":false,"step":"90.0","x":-16.259047619047617,"y":29.546666666666667,"z":27.885714285714286,"a95":"0.99","info":"10/10/2014 at 08:56:25"},{"visible":true,"include":false,"step":"100.0","x":-4.619714285714285,"y":32.84571428571429,"z":50.233333333333334,"a95":"0.99","info":"10/10/2014 at 08:56:25"}],"demagType":"Unknown","patch":1.1,"format":"Unknown","strat":null},{"version":"v1.1.0","exported":"2017-05-22T11:26:16.889Z","info":"","GEO":[{"dec":289.4235137018345,"inc":-2.148531165925321,"MAD":2.9469016752072843,"cm":[2.6645352591003757e-15,-8.43769498715119e-15,0],"intensity":403.58633668208165,"type":"GC","origin":false,"forced":true,"remark":"","nSteps":4,"minStep":"100","maxStep":"210","steps":["100","150","180","210"],"group":"None","version":"v1.1.0"}],"TECT":[{"dec":121.51891426860914,"inc":-37.62899333766795,"MAD":2.9469016752082107,"cm":[-1.6431300764452317e-14,-5.329070518200751e-15,5.329070518200751e-15],"intensity":403.5863366820816,"type":"GC","origin":false,"forced":true,"remark":"","nSteps":4,"minStep":"100","maxStep":"210","steps":["100","150","180","210"],"group":"None","version":"v1.1.0"}],"interpreted":true,"name":"SS18.8A","coreAzi":41,"coreDip":35,"bedStrike":343,"bedDip":52,"data":[{"visible":true,"include":false,"step":"20","x":-291.3333333333333,"y":-136.85714285714286,"z":510.6666666666667,"a95":"2.6","info":"\"14-09-29\" at \"15:33\""},{"visible":true,"include":true,"step":"100","x":-216.0952380952381,"y":-55.714285714285715,"z":277.7142857142857,"a95":"2.7","info":"\"14-09-29\" at \"18:11\""},{"visible":true,"include":true,"step":"150","x":-124.85714285714286,"y":-1.8095238095238095,"z":86.38095238095238,"a95":"2.8","info":"\"14-09-29\" at \"21:06\""},{"visible":true,"include":true,"step":"180","x":-79.4,"y":11.857142857142858,"z":8.961904761904762,"a95":"3.4","info":"\"14-09-30\" at \"15:30\""},{"visible":true,"include":true,"step":"210","x":-73.78095238095239,"y":11.609523809523811,"z":-0.3904761904761904,"a95":"3.5","info":"\"14-09-30\" at \"18:41\""},{"visible":true,"include":false,"step":"240","x":-73.00952380952381,"y":8.038095238095238,"z":2.4952380952380953,"a95":"4.7","info":"\"14-09-30\" at \"21:46\""},{"visible":true,"include":false,"step":"270","x":-65.83809523809524,"y":-1.1047619047619048,"z":-5.057142857142857,"a95":"2.9","info":"\"14-10-01\" at \"15:44\""},{"visible":true,"include":false,"step":"300","x":-72.24761904761905,"y":-9.323809523809524,"z":6.542857142857143,"a95":"5.6","info":"\"14-10-01\" at \"19:17\""},{"visible":true,"include":false,"step":"320","x":-55.67619047619048,"y":-11.657142857142858,"z":2.961904761904762,"a95":"4.5","info":"\"14-10-01\" at \"22:23\""},{"visible":true,"include":false,"step":"340","x":-56.24761904761905,"y":-15.257142857142856,"z":26.876190476190477,"a95":"3.4","info":"\"14-10-02\" at \"15:59\""},{"visible":true,"include":false,"step":"370","x":-49.542857142857144,"y":0.5047619047619047,"z":3.9047619047619047,"a95":"5.2","info":"\"14-10-02\" at \"18:43\""},{"visible":true,"include":false,"step":"400","x":-27.876190476190477,"y":7.495238095238095,"z":17.361904761904764,"a95":"11.9","info":"\"14-10-02\" at \"21:57\""},{"visible":true,"include":false,"step":"420","x":-71.5904761904762,"y":2.4571428571428573,"z":17.123809523809523,"a95":"4.5","info":"\"14-10-03\" at \"15:24\""},{"visible":true,"include":false,"step":"440","x":-48.18095238095238,"y":-9.304761904761905,"z":23.685714285714283,"a95":"7.7","info":"\"14-10-03\" at \"18:54\""},{"visible":true,"include":false,"step":"460","x":-61.08571428571428,"y":22.152380952380952,"z":32.99047619047619,"a95":"7.5","info":"\"14-10-03\" at \"22:12\""},{"visible":true,"include":false,"step":"480","x":-100.38095238095238,"y":56.19047619047619,"z":34.666666666666664,"a95":"4.7","info":"\"14-10-04\" at \"09:39\""}],"demagType":"Unknown","patch":1.1,"format":"Unknown","strat":null},{"version":"v1.1.0","exported":"2017-05-22T11:26:16.890Z","info":"7","GEO":[{"dec":36.142400489857835,"inc":-12.246105007775446,"MAD":8.712215119009809,"cm":[0,-3.552713678800501e-15,0],"intensity":501.94202497979416,"type":"GC","origin":false,"forced":true,"remark":"","nSteps":5,"minStep":"4.0","maxStep":"20.0","steps":["4.0","8.0","12.0","16.0","20.0"],"group":"None","version":"v1.1.0"}],"TECT":[{"dec":11.1959600036908,"inc":-48.309792568235444,"MAD":8.712215119009036,"cm":[3.730349362740526e-14,-4.263256414560601e-14,0],"intensity":501.9420249797941,"type":"GC","origin":false,"forced":true,"remark":"","nSteps":5,"minStep":"4.0","maxStep":"20.0","steps":["4.0","8.0","12.0","16.0","20.0"],"group":"None","version":"v1.1.0"}],"interpreted":true,"name":"SS18.9A","coreAzi":65,"coreDip":38,"bedStrike":343,"bedDip":52,"data":[{"visible":true,"include":false,"step":"0.0","x":-259.6,"y":-60.270476190476195,"z":260.7333333333333,"a95":"0.99","info":"28/10/2014 at 09:38:21"},{"visible":true,"include":true,"step":"4.0","x":-226.56190476190477,"y":-70.12666666666667,"z":232.9047619047619,"a95":"0.99","info":"28/10/2014 at 09:38:21"},{"visible":true,"include":true,"step":"8.0","x":-193.04761904761904,"y":-75.55714285714286,"z":169.84761904761905,"a95":"0.99","info":"28/10/2014 at 09:38:21"},{"visible":true,"include":true,"step":"12.0","x":-157.05714285714285,"y":-75.43619047619048,"z":136.07619047619048,"a95":"0.99","info":"28/10/2014 at 09:38:21"},{"visible":true,"include":true,"step":"16.0","x":-134.65714285714287,"y":-66.83142857142857,"z":116.55238095238094,"a95":"0.99","info":"28/10/2014 at 09:38:21"},{"visible":true,"include":true,"step":"20.0","x":-122.92380952380952,"y":-72.75333333333333,"z":97.83809523809524,"a95":"0.99","info":"28/10/2014 at 09:38:21"},{"visible":true,"include":false,"step":"25.0","x":-98.41904761904763,"y":-48.049523809523805,"z":102.79047619047618,"a95":"0.99","info":"28/10/2014 at 09:38:21"},{"visible":true,"include":false,"step":"30.0","x":-79.91714285714286,"y":-44.99142857142857,"z":78.25523809523808,"a95":"0.99","info":"28/10/2014 at 09:38:21"},{"visible":true,"include":false,"step":"35.0","x":-70.61047619047619,"y":-52.03047619047619,"z":70.73428571428572,"a95":"0.99","info":"28/10/2014 at 09:38:21"},{"visible":true,"include":false,"step":"40.0","x":-49.77333333333333,"y":-17.51238095238095,"z":69.06761904761905,"a95":"0.99","info":"28/10/2014 at 09:38:21"},{"visible":true,"include":false,"step":"45.0","x":-42.27333333333333,"y":-22.995238095238093,"z":53.71142857142858,"a95":"0.99","info":"28/10/2014 at 09:38:21"},{"visible":true,"include":false,"step":"50.0","x":-38.195238095238096,"y":-36.50380952380952,"z":60.50095238095238,"a95":"0.99","info":"28/10/2014 at 09:38:21"},{"visible":true,"include":false,"step":"60.0","x":-37.346666666666664,"y":5.483714285714286,"z":52.99619047619048,"a95":"0.99","info":"28/10/2014 at 09:38:21"},{"visible":true,"include":false,"step":"70.0","x":-25.472380952380952,"y":-28.084761904761905,"z":23.50761904761905,"a95":"0.99","info":"28/10/2014 at 09:38:21"},{"visible":true,"include":false,"step":"80.0","x":-38.205714285714286,"y":-13.709523809523809,"z":22.81809523809524,"a95":"0.99","info":"28/10/2014 at 09:38:21"},{"visible":true,"include":false,"step":"90.0","x":-47.46857142857143,"y":32.37619047619047,"z":13.656190476190474,"a95":"0.99","info":"28/10/2014 at 09:38:21"},{"visible":true,"include":false,"step":"100.0","x":-18.04,"y":11.102857142857143,"z":31.30761904761905,"a95":"0.99","info":"28/10/2014 at 09:38:21"}],"demagType":"Unknown","patch":1.1,"format":"Unknown","strat":null},{"version":"v1.1.0","exported":"2017-05-22T11:26:16.890Z","info":"","GEO":[{"dec":297.3999183389815,"inc":-4.066584547967921,"MAD":24.692172065419896,"cm":[2.220446049250313e-15,-6.217248937900877e-15,0],"intensity":178.02497544470035,"type":"GC","origin":false,"forced":true,"remark":"","nSteps":6,"minStep":"150","maxStep":"310","steps":["150","180","210","270","290","310"],"group":"None","version":"v1.1.0"}],"TECT":[{"dec":127.67225796202467,"inc":-31.193862182894048,"MAD":24.692172065419832,"cm":[-1.5543122344752192e-15,-1.532107773982716e-14,2.6645352591003757e-15],"intensity":178.02497544470035,"type":"GC","origin":false,"forced":true,"remark":"","nSteps":6,"minStep":"150","maxStep":"310","steps":["150","180","210","270","290","310"],"group":"None","version":"v1.1.0"}],"interpreted":true,"name":"SS18.10A","coreAzi":63,"coreDip":38,"bedStrike":343,"bedDip":52,"data":[{"visible":false,"include":false,"step":"20","x":-334.1904761904762,"y":-195.71428571428572,"z":562,"a95":"2.3","info":"\"14-10-20\" at \"16:12\""},{"visible":true,"include":false,"step":"100","x":-160.85714285714286,"y":-12.571428571428571,"z":122.57142857142857,"a95":"2.3","info":"\"14-10-20\" at \"19:08\""},{"visible":true,"include":true,"step":"150","x":-112.0952380952381,"y":27.80952380952381,"z":41.04761904761905,"a95":"2.4","info":"\"14-10-20\" at \"22:08\""},{"visible":true,"include":true,"step":"180","x":-69.06666666666668,"y":45.19047619047619,"z":-20.114285714285714,"a95":"3.3","info":"\"14-10-21\" at \"01:00\""},{"visible":true,"include":true,"step":"210","x":-66.31428571428572,"y":47.16190476190476,"z":-22.97142857142857,"a95":"3.4","info":"\"14-10-21\" at \"17:09\""},{"visible":true,"include":false,"step":"240","x":-61.15238095238095,"y":38.114285714285714,"z":-32.438095238095244,"a95":"2.5","info":"\"14-10-21\" at \"20:09\""},{"visible":true,"include":true,"step":"270","x":-65.72380952380952,"y":27.94285714285714,"z":-15.647619047619049,"a95":"3.8","info":"\"14-10-21\" at \"23:12\""},{"visible":true,"include":true,"step":"290","x":-63.65714285714286,"y":0.8857142857142858,"z":-6.133333333333334,"a95":"4.8","info":"\"14-10-22\" at \"15:41\""},{"visible":true,"include":true,"step":"310","x":-56.733333333333334,"y":15.066666666666666,"z":-4.285714285714286,"a95":"5","info":"\"14-10-22\" at \"18:28\""},{"visible":true,"include":false,"step":"330","x":-30.504761904761907,"y":-4.076190476190476,"z":-17.314285714285717,"a95":"10","info":"\"14-10-22\" at \"21:39\""},{"visible":true,"include":false,"step":"350","x":-53.2,"y":-1.3714285714285714,"z":-8.628571428571428,"a95":"5.3","info":"\"14-10-23\" at \"15:54\""},{"visible":true,"include":false,"step":"370","x":-34.83809523809524,"y":9.704761904761906,"z":-4.6380952380952385,"a95":"6.2","info":"\"14-10-23\" at \"18:53\""},{"visible":true,"include":false,"step":"400","x":-41.59047619047619,"y":-8.285714285714286,"z":9.428571428571429,"a95":"5.3","info":"\"14-10-23\" at \"21:52\""},{"visible":true,"include":false,"step":"420","x":-28.285714285714285,"y":3.161904761904762,"z":-32.20952380952381,"a95":"10.4","info":"\"14-10-24\" at \"16:17\""},{"visible":true,"include":false,"step":"440","x":-20.79047619047619,"y":-11.40952380952381,"z":-10.895238095238096,"a95":"9.900001","info":"\"14-10-24\" at \"19:31\""},{"visible":true,"include":false,"step":"470","x":-29.895238095238092,"y":4.390476190476191,"z":-15.628571428571428,"a95":"8.8","info":"\"14-10-24\" at \"21:59\""},{"visible":true,"include":false,"step":"490","x":-9.59047619047619,"y":0.6952380952380952,"z":14.961904761904762,"a95":"26","info":"\"14-10-25\" at \"00:52\""}],"demagType":"Unknown","patch":1.1,"format":"Unknown","strat":null},{"version":"v1.1.0","exported":"2017-05-22T11:26:16.890Z","info":"","GEO":[{"dec":198.89255741484135,"inc":-38.72664126598295,"MAD":19.518133484181657,"cm":[-41.12234165289516,-38.13849460636328,22.459377637757214],"intensity":63.64569159775796,"type":"dir","forced":false,"remark":"","origin":false,"nSteps":5,"minStep":"210","maxStep":"320","steps":["210","240","270","300","320"],"group":"None"}],"TECT":[{"dec":213.78748073994387,"inc":-1.4181322032171215,"MAD":19.518133484181657,"cm":[-30.498506888846627,-3.389496850032364,52.04198099983341],"intensity":63.645691597757974,"type":"dir","forced":false,"remark":"","origin":false,"nSteps":5,"minStep":"210","maxStep":"320","steps":["210","240","270","300","320"],"group":"None"}],"interpreted":true,"name":"SS18.11A","coreAzi":54,"coreDip":54,"bedStrike":343,"bedDip":52,"data":[{"visible":false,"include":false,"step":"20","x":-175.61904761904762,"y":-285.8095238095238,"z":722.2857142857143,"a95":"2.7","info":"\"14-09-29\" at \"15:35\""},{"visible":true,"include":false,"step":"100","x":-117.42857142857143,"y":-64.0952380952381,"z":216.66666666666666,"a95":"3.1","info":"\"14-09-29\" at \"18:13\""},{"visible":true,"include":false,"step":"150","x":-83.52380952380952,"y":-3.9047619047619047,"z":57.142857142857146,"a95":"3.2","info":"\"14-09-29\" at \"21:07\""},{"visible":true,"include":false,"step":"180","x":-64.4952380952381,"y":30.876190476190477,"z":-31.133333333333333,"a95":"3.2","info":"\"14-09-30\" at \"15:32\""},{"visible":true,"include":true,"step":"210","x":-57.94285714285714,"y":26.285714285714285,"z":-42.695238095238096,"a95":"3.8","info":"\"14-09-30\" at \"18:43\""},{"visible":true,"include":true,"step":"240","x":-63.55238095238095,"y":15.514285714285714,"z":-25.895238095238092,"a95":"3.8","info":"\"14-09-30\" at \"21:48\""},{"visible":true,"include":true,"step":"270","x":-60.666666666666664,"y":16.514285714285716,"z":-22.704761904761906,"a95":"3.9","info":"\"14-10-01\" at \"15:45\""},{"visible":true,"include":true,"step":"300","x":-63.666666666666664,"y":-8.17142857142857,"z":5.428571428571429,"a95":"7.5","info":"\"14-10-01\" at \"19:18\""},{"visible":true,"include":true,"step":"320","x":-42.76190476190476,"y":4.114285714285715,"z":15,"a95":"5","info":"\"14-10-01\" at \"22:25\""},{"visible":true,"include":false,"step":"340","x":-38.72380952380953,"y":-12.361904761904762,"z":31.428571428571427,"a95":"3.5","info":"\"14-10-02\" at \"16:01\""},{"visible":true,"include":false,"step":"370","x":-39.6,"y":-0.7333333333333334,"z":34.67619047619048,"a95":"6.3","info":"\"14-10-02\" at \"18:44\""},{"visible":true,"include":false,"step":"400","x":-15.095238095238095,"y":-12.057142857142857,"z":40.666666666666664,"a95":"6.6","info":"\"14-10-02\" at \"21:59\""},{"visible":true,"include":false,"step":"420","x":-37.4,"y":13.047619047619047,"z":23.238095238095237,"a95":"6.2","info":"\"14-10-03\" at \"15:27\""},{"visible":true,"include":false,"step":"440","x":-23.123809523809523,"y":-7.704761904761905,"z":32.86666666666667,"a95":"6","info":"\"14-10-03\" at \"18:56\""},{"visible":true,"include":false,"step":"460","x":-18.8,"y":-7.819047619047619,"z":17.219047619047622,"a95":"11.8","info":"\"14-10-03\" at \"22:14\""},{"visible":true,"include":false,"step":"480","x":-20.666666666666668,"y":7.447619047619048,"z":26.476190476190474,"a95":"8.7","info":"\"14-10-04\" at \"09:41\""}],"demagType":"Unknown","patch":1.1,"format":"Unknown","strat":null},{"version":"v1.1.0","exported":"2017-05-22T11:26:16.890Z","info":"8","GEO":[{"dec":85.44462470688097,"inc":-1.352434272436793,"MAD":13.537023970867825,"cm":[0,1.0824674490095276e-14,0],"intensity":675.9180742584836,"type":"GC","origin":false,"forced":true,"remark":"","nSteps":6,"minStep":"0.0","maxStep":"20.0","steps":["0.0","4.0","8.0","12.0","16.0","20.0"],"group":"None","version":"v1.1.0"}],"TECT":[{"dec":93.29900416968121,"inc":-51.61101547012196,"MAD":13.537023970866622,"cm":[3.019806626980426e-14,-3.552713678800501e-14,0],"intensity":675.9180742584836,"type":"GC","origin":false,"forced":true,"remark":"","nSteps":6,"minStep":"0.0","maxStep":"20.0","steps":["0.0","4.0","8.0","12.0","16.0","20.0"],"group":"None","version":"v1.1.0"}],"interpreted":true,"name":"SS18.12A","coreAzi":52,"coreDip":54,"bedStrike":343,"bedDip":52,"data":[{"visible":true,"include":true,"step":"0.0","x":-175.26666666666665,"y":-109.26666666666667,"z":383.6,"a95":"0.99","info":"28/10/2014 at 09:38:21"},{"visible":true,"include":true,"step":"4.0","x":-143.93333333333334,"y":-114.6,"z":354.9238095238095,"a95":"0.99","info":"28/10/2014 at 09:38:21"},{"visible":true,"include":true,"step":"8.0","x":-127.11428571428571,"y":-108.37142857142858,"z":297.12380952380954,"a95":"0.99","info":"28/10/2014 at 09:38:21"},{"visible":true,"include":true,"step":"12.0","x":-97.78095238095239,"y":-95.78095238095239,"z":256.97142857142853,"a95":"0.99","info":"28/10/2014 at 09:38:21"},{"visible":true,"include":true,"step":"16.0","x":-82.89809523809524,"y":-93.72761904761904,"z":226.28571428571428,"a95":"0.99","info":"28/10/2014 at 09:38:21"},{"visible":true,"include":true,"step":"20.0","x":-73.67428571428572,"y":-84.89714285714285,"z":214.05714285714285,"a95":"0.99","info":"28/10/2014 at 09:38:21"},{"visible":true,"include":false,"step":"25.0","x":-48.80380952380953,"y":-66.09904761904761,"z":201.82857142857142,"a95":"0.99","info":"28/10/2014 at 09:38:21"},{"visible":true,"include":false,"step":"30.0","x":-45.39333333333333,"y":-60.731428571428566,"z":179.7238095238095,"a95":"0.99","info":"28/10/2014 at 09:38:21"},{"visible":true,"include":false,"step":"35.0","x":-33.735238095238095,"y":-67.69619047619047,"z":157.05714285714285,"a95":"0.99","info":"28/10/2014 at 09:38:21"},{"visible":true,"include":false,"step":"40.0","x":-21.28761904761905,"y":-62.93714285714286,"z":149.22857142857143,"a95":"0.99","info":"28/10/2014 at 09:38:21"},{"visible":true,"include":false,"step":"45.0","x":-17.02952380952381,"y":-47.381904761904764,"z":135.54285714285714,"a95":"0.99","info":"28/10/2014 at 09:38:21"},{"visible":true,"include":false,"step":"50.0","x":-14.955238095238096,"y":-60.08857142857143,"z":128.8190476190476,"a95":"0.99","info":"28/10/2014 at 09:38:21"},{"visible":true,"include":false,"step":"60.0","x":1.6914285714285715,"y":-21.49142857142857,"z":104.60952380952382,"a95":"0.99","info":"28/10/2014 at 09:38:21"},{"visible":true,"include":false,"step":"70.0","x":-4.970285714285715,"y":-54.174285714285716,"z":83.3352380952381,"a95":"0.99","info":"28/10/2014 at 09:38:21"},{"visible":true,"include":false,"step":"80.0","x":-22.37333333333333,"y":-24.886666666666667,"z":62.17047619047619,"a95":"0.99","info":"28/10/2014 at 09:38:21"},{"visible":true,"include":false,"step":"90.0","x":-4.61447619047619,"y":14.366666666666665,"z":62.25619047619048,"a95":"0.99","info":"28/10/2014 at 09:38:21"},{"visible":true,"include":false,"step":"100.0","x":0.7875714285714286,"y":-0.7820285714285714,"z":54.80476190476191,"a95":"0.99","info":"28/10/2014 at 09:38:21"}],"demagType":"Unknown","patch":1.1,"format":"Unknown","strat":null},{"version":"v1.1.0","exported":"2017-05-22T11:26:16.890Z","info":"","GEO":[{"dec":300.47455949877093,"inc":-10.618586418816735,"MAD":2.881639202719006,"cm":[-6.767073673905716e-15,-1.1504025245639717e-14,0],"intensity":347.97298719669914,"type":"GC","origin":false,"forced":true,"remark":"","nSteps":4,"minStep":"100","maxStep":"210","steps":["100","150","180","210"],"group":"None"}],"TECT":[{"dec":125.57981630756143,"inc":-24.208681914587668,"MAD":2.881639202718644,"cm":[0,-5.4136589391245725e-15,1.0827317878249145e-14],"intensity":347.97298719669914,"type":"GC","origin":false,"forced":true,"remark":"","nSteps":4,"minStep":"100","maxStep":"210","steps":["100","150","180","210"],"group":"None"}],"interpreted":true,"name":"SS18.13A","coreAzi":55,"coreDip":54,"bedStrike":343,"bedDip":52,"data":[{"visible":true,"include":false,"step":"20","x":-243.33333333333334,"y":-259.42857142857144,"z":807.3333333333334,"a95":"2.4","info":"\"14-10-20\" at \"16:14\""},{"visible":true,"include":true,"step":"100","x":-134.76190476190476,"y":-80.85714285714286,"z":263.23809523809524,"a95":"2.4","info":"\"14-10-20\" at \"19:10\""},{"visible":true,"include":true,"step":"150","x":-96.0952380952381,"y":-24.285714285714285,"z":109.04761904761905,"a95":"2.8","info":"\"14-10-20\" at \"22:09\""},{"visible":true,"include":true,"step":"180","x":-70.94285714285714,"y":15.523809523809524,"z":13.638095238095238,"a95":"3.4","info":"\"14-10-21\" at \"01:02\""},{"visible":true,"include":true,"step":"210","x":-73.6952380952381,"y":12.076190476190476,"z":6.761904761904762,"a95":"3.4","info":"\"14-10-21\" at \"17:11\""},{"visible":true,"include":false,"step":"240","x":-69.4857142857143,"y":7.704761904761905,"z":0.6761904761904761,"a95":"3","info":"\"14-10-21\" at \"20:11\""},{"visible":true,"include":false,"step":"270","x":-51.523809523809526,"y":-8.504761904761905,"z":7.057142857142857,"a95":"5.5","info":"\"14-10-21\" at \"23:14\""},{"visible":true,"include":false,"step":"290","x":-61.11428571428572,"y":-11.333333333333334,"z":1.0952380952380953,"a95":"3.7","info":"\"14-10-22\" at \"15:42\""},{"visible":true,"include":false,"step":"310","x":-38.82857142857143,"y":-16.628571428571426,"z":21.780952380952378,"a95":"4.7","info":"\"14-10-22\" at \"18:30\""},{"visible":true,"include":false,"step":"330","x":-50.86666666666667,"y":2.0952380952380953,"z":10.476190476190476,"a95":"6.5","info":"\"14-10-22\" at \"21:41\""},{"visible":true,"include":false,"step":"350","x":-48.48571428571429,"y":7.295238095238095,"z":19.4,"a95":"5.6","info":"\"14-10-23\" at \"15:56\""},{"visible":true,"include":false,"step":"370","x":-38,"y":-11.238095238095237,"z":-5.466666666666667,"a95":"4.8","info":"\"14-10-23\" at \"18:55\""},{"visible":true,"include":false,"step":"400","x":-42.438095238095244,"y":-16.371428571428574,"z":16.238095238095237,"a95":"4.3","info":"\"14-10-23\" at \"21:54\""},{"visible":true,"include":false,"step":"420","x":-29.45714285714286,"y":12.704761904761906,"z":7.733333333333333,"a95":"10.8","info":"\"14-10-24\" at \"16:19\""},{"visible":true,"include":false,"step":"440","x":-23.40952380952381,"y":-5.3619047619047615,"z":8.609523809523811,"a95":"9.5","info":"\"14-10-24\" at \"19:34\""},{"visible":true,"include":false,"step":"470","x":-43.733333333333334,"y":3.457142857142857,"z":11.857142857142858,"a95":"6.3","info":"\"14-10-24\" at \"22:01\""},{"visible":true,"include":false,"step":"490","x":-23.333333333333332,"y":-30.638095238095236,"z":2.257142857142857,"a95":"15.3","info":"\"14-10-25\" at \"00:54\""}],"demagType":"Unknown","patch":1.1,"format":"Unknown","strat":null},{"version":"v1.1.0","exported":"2017-05-22T11:26:16.890Z","info":"","GEO":[{"dec":296.7780020172237,"inc":-16.50314916450029,"MAD":0.8513571535625406,"cm":[6.767073673905716e-15,-1.3534147347811431e-15,0],"intensity":235.1338479247709,"type":"GC","origin":false,"forced":true,"remark":"","nSteps":3,"minStep":"100","maxStep":"180","steps":["100","150","180"],"group":"None"}],"TECT":[{"dec":118.58035704885344,"inc":-21.7548127841503,"MAD":0.8513571535623894,"cm":[-1.2180732613030288e-14,-3.383536836952858e-16,-6.767073673905716e-15],"intensity":235.13384792477095,"type":"GC","origin":false,"forced":true,"remark":"","nSteps":3,"minStep":"100","maxStep":"180","steps":["100","150","180"],"group":"None"}],"interpreted":true,"name":"SS18.14A","coreAzi":38,"coreDip":29,"bedStrike":343,"bedDip":52,"data":[{"visible":true,"include":false,"step":"20","x":-426,"y":-170.28571428571428,"z":243.9047619047619,"a95":"2.2","info":"\"14-09-29\" at \"15:37\""},{"visible":true,"include":true,"step":"100","x":-164.38095238095238,"y":-41.523809523809526,"z":42.57142857142857,"a95":"2.4","info":"\"14-09-29\" at \"18:15\""},{"visible":true,"include":true,"step":"150","x":-104.85714285714286,"y":-10.380952380952381,"z":-20,"a95":"3.5","info":"\"14-09-29\" at \"21:09\""},{"visible":true,"include":true,"step":"180","x":-67.61904761904762,"y":3.9047619047619047,"z":-49.55238095238095,"a95":"3.1","info":"\"14-09-30\" at \"15:34\""},{"visible":true,"include":false,"step":"210","x":-66.4857142857143,"y":2.1333333333333333,"z":-48.05714285714286,"a95":"3.1","info":"\"14-09-30\" at \"18:45\""},{"visible":true,"include":false,"step":"240","x":-66.9047619047619,"y":-4.0095238095238095,"z":-33.285714285714285,"a95":"5","info":"\"14-09-30\" at \"21:50\""},{"visible":true,"include":false,"step":"270","x":-64.74285714285713,"y":-4.552380952380952,"z":-23.79047619047619,"a95":"3.5","info":"\"14-10-01\" at \"15:47\""},{"visible":true,"include":false,"step":"300","x":-64.70476190476191,"y":-31.895238095238092,"z":-10.942857142857143,"a95":"3.9","info":"\"14-10-01\" at \"19:21\""},{"visible":true,"include":false,"step":"320","x":-55.87619047619048,"y":-0.0380952380952381,"z":-6.647619047619047,"a95":"4.6","info":"\"14-10-01\" at \"22:27\""},{"visible":true,"include":false,"step":"340","x":-38.83809523809524,"y":-9.666666666666666,"z":5.714285714285714,"a95":"4.1","info":"\"14-10-02\" at \"16:03\""},{"visible":true,"include":false,"step":"370","x":-40.42857142857143,"y":-7.133333333333334,"z":-2.780952380952381,"a95":"5.1","info":"\"14-10-02\" at \"18:46\""},{"visible":true,"include":false,"step":"400","x":-31.24761904761905,"y":6.371428571428572,"z":6.419047619047619,"a95":"9","info":"\"14-10-02\" at \"22:00\""},{"visible":true,"include":false,"step":"420","x":-75.33333333333333,"y":-5.161904761904762,"z":17.65714285714286,"a95":"3.5","info":"\"14-10-03\" at \"15:29\""},{"visible":false,"include":false,"step":"440","x":-17.20952380952381,"y":5.438095238095238,"z":6.323809523809524,"a95":"18.8","info":"\"14-10-03\" at \"18:58\""},{"visible":false,"include":false,"step":"460","x":-22.228571428571428,"y":11.076190476190476,"z":-4.504761904761905,"a95":"9.900001","info":"\"14-10-03\" at \"22:16\""},{"visible":false,"include":false,"step":"480","x":-36.31428571428572,"y":25.98095238095238,"z":15.819047619047618,"a95":"8.5","info":"\"14-10-04\" at \"09:43\""}],"demagType":"Unknown","patch":1.1,"format":"Unknown","strat":null},{"version":"v1.1.0","exported":"2017-05-22T11:26:16.890Z","info":"","GEO":[{"dec":286.61097540465323,"inc":-2.518269632589656,"MAD":3.312842962439507,"cm":[-6.767073673905716e-16,0,0],"intensity":249.2222141345763,"type":"GC","origin":false,"forced":true,"remark":"","nSteps":5,"minStep":"100","maxStep":"240","steps":["100","150","180","210","240"],"group":"None"}],"TECT":[{"dec":118.32067263037584,"inc":-38.94563138491217,"MAD":3.312842962439693,"cm":[-1.1504025245639717e-14,-8.120488408686859e-15,-6.767073673905716e-16],"intensity":249.22221413457632,"type":"GC","origin":false,"forced":true,"remark":"","nSteps":5,"minStep":"100","maxStep":"240","steps":["100","150","180","210","240"],"group":"None"}],"interpreted":true,"name":"SS18.15A","coreAzi":47,"coreDip":36,"bedStrike":343,"bedDip":52,"data":[{"visible":true,"include":false,"step":"20","x":-369.5238095238095,"y":-217.71428571428572,"z":695.6190476190476,"a95":"2.5","info":"\"14-09-29\" at \"15:39\""},{"visible":true,"include":true,"step":"100","x":-161.14285714285714,"y":-22.285714285714285,"z":143.23809523809524,"a95":"3","info":"\"14-09-29\" at \"18:17\""},{"visible":true,"include":true,"step":"150","x":-107.80952380952381,"y":10.19047619047619,"z":40,"a95":"3","info":"\"14-09-29\" at \"21:11\""},{"visible":true,"include":true,"step":"180","x":-61.68571428571429,"y":26.200000000000003,"z":-18.45714285714286,"a95":"3.3","info":"\"14-09-30\" at \"15:36\""},{"visible":true,"include":true,"step":"210","x":-58.06666666666667,"y":34.86666666666667,"z":-23.26666666666667,"a95":"4.4","info":"\"14-09-30\" at \"18:47\""},{"visible":true,"include":true,"step":"240","x":-56.60952380952381,"y":25.904761904761905,"z":-22.066666666666666,"a95":"5.5","info":"\"14-09-30\" at \"21:52\""},{"visible":true,"include":false,"step":"270","x":-53.733333333333334,"y":22.438095238095237,"z":-21.742857142857144,"a95":"4.4","info":"\"14-10-01\" at \"15:49\""},{"visible":true,"include":false,"step":"300","x":-59.92380952380953,"y":14.00952380952381,"z":2.1619047619047618,"a95":"6.5","info":"\"14-10-01\" at \"19:23\""},{"visible":true,"include":false,"step":"320","x":-44.41904761904762,"y":-13.133333333333335,"z":-9.561904761904762,"a95":"4.2","info":"\"14-10-01\" at \"22:29\""},{"visible":true,"include":false,"step":"340","x":-54.06666666666667,"y":-9.495238095238095,"z":10.380952380952381,"a95":"4","info":"\"14-10-02\" at \"16:04\""},{"visible":true,"include":false,"step":"370","x":-32.97142857142857,"y":9.095238095238095,"z":5.038095238095238,"a95":"7.7","info":"\"14-10-02\" at \"18:48\""},{"visible":true,"include":false,"step":"400","x":-29.990476190476187,"y":1.3714285714285714,"z":13.304761904761904,"a95":"6","info":"\"14-10-02\" at \"22:02\""},{"visible":true,"include":false,"step":"420","x":-46.59047619047619,"y":9.476190476190476,"z":15.438095238095238,"a95":"5.7","info":"\"14-10-03\" at \"15:31\""},{"visible":true,"include":false,"step":"440","x":-19.304761904761904,"y":-9.533333333333333,"z":-3.2,"a95":"9.8","info":"\"14-10-03\" at \"19:00\""},{"visible":true,"include":false,"step":"460","x":-35.86666666666667,"y":9.780952380952382,"z":17.323809523809523,"a95":"9.1","info":"\"14-10-03\" at \"22:18\""},{"visible":true,"include":false,"step":"480","x":-24.83809523809524,"y":6.419047619047619,"z":6.457142857142857,"a95":"15.6","info":"\"14-10-04\" at \"09:45\""}],"demagType":"Unknown","patch":1.1,"format":"Unknown","strat":null},{"version":"v1.1.0","exported":"2017-05-22T11:26:16.890Z","info":"7","GEO":[],"TECT":[],"interpreted":false,"name":"SS18.15B","coreAzi":47,"coreDip":36,"bedStrike":343,"bedDip":52,"data":[{"visible":true,"include":false,"step":"0.0","x":-160.22857142857143,"y":-103.01904761904763,"z":-1.535047619047619,"a95":"0.99","info":"10/10/2014 at 08:56:25"},{"visible":true,"include":false,"step":"4.0","x":-107.27619047619048,"y":-69.57619047619048,"z":20.54190476190476,"a95":"0.99","info":"10/10/2014 at 08:56:25"},{"visible":true,"include":false,"step":"8.0","x":-66.52190476190476,"y":-47.864761904761906,"z":21.891428571428573,"a95":"0.99","info":"10/10/2014 at 08:56:25"},{"visible":true,"include":false,"step":"12.0","x":-45.51047619047619,"y":-64.70380952380953,"z":37.603809523809524,"a95":"0.99","info":"10/10/2014 at 08:56:25"},{"visible":true,"include":false,"step":"16.0","x":-31.153333333333336,"y":-54.618095238095236,"z":36.137142857142855,"a95":"0.99","info":"10/10/2014 at 08:56:25"},{"visible":true,"include":false,"step":"20.0","x":-10.203809523809523,"y":-58.62952380952381,"z":41.668571428571425,"a95":"0.99","info":"10/10/2014 at 08:56:25"},{"visible":true,"include":false,"step":"25.0","x":-29.418095238095237,"y":-33.724761904761905,"z":42.201904761904764,"a95":"0.99","info":"10/10/2014 at 08:56:25"},{"visible":true,"include":false,"step":"30.0","x":-3.286857142857143,"y":-38.34285714285714,"z":40.28095238095238,"a95":"0.99","info":"10/10/2014 at 08:56:25"},{"visible":true,"include":false,"step":"35.0","x":-15.334285714285713,"y":-40.859047619047615,"z":35.23714285714286,"a95":"0.99","info":"10/10/2014 at 08:56:25"},{"visible":true,"include":false,"step":"40.0","x":-6.184285714285714,"y":-29.43047619047619,"z":34.61714285714286,"a95":"0.99","info":"10/10/2014 at 08:56:25"},{"visible":true,"include":false,"step":"45.0","x":4.239142857142857,"y":-17.035238095238096,"z":36.83904761904762,"a95":"0.99","info":"10/10/2014 at 08:56:25"},{"visible":true,"include":false,"step":"50.0","x":3.9986666666666664,"y":-40.34571428571429,"z":29.285714285714285,"a95":"0.99","info":"10/10/2014 at 08:56:25"},{"visible":true,"include":false,"step":"60.0","x":-1.8226666666666669,"y":-4.114285714285715,"z":22.16,"a95":"0.99","info":"10/10/2014 at 08:56:25"},{"visible":true,"include":false,"step":"70.0","x":8.288,"y":-15.751428571428571,"z":27.022857142857145,"a95":"0.99","info":"10/10/2014 at 08:56:25"},{"visible":true,"include":false,"step":"80.0","x":-6.112952380952382,"y":-31.729523809523812,"z":27.9,"a95":"0.99","info":"10/10/2014 at 08:56:25"},{"visible":true,"include":false,"step":"90.0","x":10.470476190476191,"y":9.6,"z":20.543809523809525,"a95":"0.99","info":"10/10/2014 at 08:56:25"},{"visible":true,"include":false,"step":"100.0","x":2.131904761904762,"y":6.136,"z":54.168571428571425,"a95":"0.99","info":"10/10/2014 at 08:56:25"}],"demagType":"Unknown","patch":1.1,"format":"Unknown","strat":null},{"version":"v1.1.0","exported":"2017-05-22T11:26:16.890Z","info":"8","GEO":[],"TECT":[],"interpreted":false,"name":"SS18.16A","coreAzi":49,"coreDip":33,"bedStrike":343,"bedDip":52,"data":[{"visible":true,"include":false,"step":"0.0","x":-121.3047619047619,"y":-23.106666666666666,"z":13.773333333333333,"a95":"0.99","info":"10/10/2014 at 08:56:25"},{"visible":true,"include":false,"step":"4.0","x":-102.03809523809525,"y":-23.98952380952381,"z":0.765,"a95":"0.99","info":"10/10/2014 at 08:56:25"},{"visible":true,"include":false,"step":"8.0","x":-82.59619047619047,"y":-11.109523809523811,"z":-9.811428571428571,"a95":"0.99","info":"10/10/2014 at 08:56:25"},{"visible":true,"include":false,"step":"12.0","x":-67.18666666666667,"y":-18.777142857142856,"z":2.036857142857143,"a95":"0.99","info":"10/10/2014 at 08:56:25"},{"visible":true,"include":false,"step":"16.0","x":-51.37809523809524,"y":-18.655238095238094,"z":4.754952380952381,"a95":"0.99","info":"10/10/2014 at 08:56:25"},{"visible":true,"include":false,"step":"20.0","x":-39.45238095238095,"y":-18.53904761904762,"z":0.621447619047619,"a95":"0.99","info":"10/10/2014 at 08:56:25"},{"visible":true,"include":false,"step":"25.0","x":-45.436190476190475,"y":1.032857142857143,"z":3.270952380952381,"a95":"0.99","info":"10/10/2014 at 08:56:25"},{"visible":true,"include":false,"step":"30.0","x":-29.484761904761903,"y":-12.44095238095238,"z":-0.6617428571428571,"a95":"0.99","info":"10/10/2014 at 08:56:25"},{"visible":true,"include":false,"step":"35.0","x":-20.84095238095238,"y":-28.503809523809526,"z":5.7214285714285715,"a95":"0.99","info":"10/10/2014 at 08:56:25"},{"visible":true,"include":false,"step":"40.0","x":-30.168571428571425,"y":-5.239809523809524,"z":5.278190476190476,"a95":"0.99","info":"10/10/2014 at 08:56:25"},{"visible":true,"include":false,"step":"45.0","x":-25.82857142857143,"y":-6.734666666666667,"z":-0.028333333333333332,"a95":"0.99","info":"10/10/2014 at 08:56:25"},{"visible":true,"include":false,"step":"50.0","x":-13.14,"y":-10.424761904761905,"z":-8.137333333333332,"a95":"0.99","info":"10/10/2014 at 08:56:25"},{"visible":true,"include":false,"step":"60.0","x":-12.84,"y":16.66761904761905,"z":0.6957428571428571,"a95":"0.99","info":"10/10/2014 at 08:56:25"},{"visible":true,"include":false,"step":"70.0","x":-20.624761904761904,"y":-11.877142857142857,"z":4.708380952380953,"a95":"0.99","info":"10/10/2014 at 08:56:25"},{"visible":true,"include":false,"step":"80.0","x":-38.691428571428574,"y":2.135904761904762,"z":0.23107619047619046,"a95":"0.99","info":"10/10/2014 at 08:56:25"},{"visible":true,"include":false,"step":"90.0","x":-7.280190476190476,"y":25.902857142857144,"z":-4.535238095238095,"a95":"0.99","info":"10/10/2014 at 08:56:25"},{"visible":true,"include":false,"step":"100.0","x":2.1759999999999997,"y":17.942857142857143,"z":49.955238095238094,"a95":"0.99","info":"10/10/2014 at 08:56:25"}],"demagType":"Unknown","patch":1.1,"format":"Unknown","strat":null},{"version":"v1.1.0","exported":"2017-05-22T11:26:16.890Z","info":"7","GEO":[],"TECT":[],"interpreted":false,"name":"SS18.16B","coreAzi":49,"coreDip":33,"bedStrike":343,"bedDip":52,"data":[{"visible":true,"include":false,"step":"0.0","x":-157.38095238095238,"y":-36.854285714285716,"z":83.67904761904762,"a95":"0.99","info":"30/01/2015 at 17:42:41"},{"visible":true,"include":false,"step":"10.0","x":-92.9895238095238,"y":-48.89904761904762,"z":37.65714285714286,"a95":"0.99","info":"30/01/2015 at 17:42:41"},{"visible":true,"include":false,"step":"15.0","x":-86.52666666666667,"y":-45.27333333333333,"z":40.43904761904762,"a95":"0.99","info":"30/01/2015 at 17:42:41"},{"visible":true,"include":false,"step":"20.0","x":-65.49238095238096,"y":-27.268571428571427,"z":52.45238095238095,"a95":"0.99","info":"30/01/2015 at 17:42:41"},{"visible":true,"include":false,"step":"23.0","x":-72.58571428571429,"y":-31.185714285714283,"z":32.09619047619047,"a95":"0.99","info":"30/01/2015 at 17:42:41"},{"visible":true,"include":false,"step":"25.0","x":-71.99333333333333,"y":-39.34952380952381,"z":43.83428571428571,"a95":"0.99","info":"30/01/2015 at 17:42:41"},{"visible":true,"include":false,"step":"30.0","x":-61.6152380952381,"y":-25.607619047619046,"z":43.45904761904762,"a95":"0.99","info":"30/01/2015 at 17:42:41"},{"visible":true,"include":false,"step":"33.0","x":-59.87142857142857,"y":-28.5,"z":48.473333333333336,"a95":"0.99","info":"30/01/2015 at 17:42:41"},{"visible":true,"include":false,"step":"35.0","x":-51.03523809523809,"y":-20.68190476190476,"z":49.62571428571429,"a95":"0.99","info":"30/01/2015 at 17:42:41"},{"visible":true,"include":false,"step":"40.0","x":-34.488571428571426,"y":-20.298095238095236,"z":42.71809523809524,"a95":"0.99","info":"30/01/2015 at 17:42:41"},{"visible":true,"include":false,"step":"45.0","x":-43.275238095238095,"y":-19.961904761904762,"z":46.766666666666666,"a95":"0.99","info":"30/01/2015 at 17:42:41"},{"visible":true,"include":false,"step":"50.0","x":-34.724761904761905,"y":-12.706666666666665,"z":43.11714285714286,"a95":"0.99","info":"30/01/2015 at 17:42:41"},{"visible":true,"include":false,"step":"60.0","x":-41.320952380952384,"y":-7.8229523809523815,"z":56.21999999999999,"a95":"0.99","info":"30/01/2015 at 17:42:41"},{"visible":true,"include":false,"step":"70.0","x":-36.99714285714286,"y":11.801904761904762,"z":41.19047619047619,"a95":"0.99","info":"30/01/2015 at 17:42:41"}],"demagType":"Unknown","patch":1.1,"format":"Unknown","strat":null},{"version":"v1.1.0","exported":"2017-05-22T11:26:16.890Z","info":"","GEO":[{"dec":315.52709918375956,"inc":-22.38768657406418,"MAD":2.4527069170185527,"cm":[-1.1504025245639717e-14,0,0],"intensity":361.22650051069314,"type":"GC","origin":false,"forced":true,"remark":"","nSteps":4,"minStep":"100","maxStep":"210","steps":["100","150","180","210"],"group":"None"}],"TECT":[{"dec":128.55076358721362,"inc":-5.833849280340629,"MAD":2.4527069170186633,"cm":[3.654219783909087e-14,-2.334640417497472e-14,-1.3534147347811431e-15],"intensity":361.2265005106932,"type":"GC","origin":false,"forced":true,"remark":"","nSteps":4,"minStep":"100","maxStep":"210","steps":["100","150","180","210"],"group":"None"}],"interpreted":true,"name":"SS18.17A","coreAzi":50,"coreDip":31,"bedStrike":343,"bedDip":52,"data":[{"visible":false,"include":false,"step":"20","x":-459.9047619047619,"y":-249.61904761904762,"z":277.5238095238095,"a95":"2.2","info":"\"14-09-29\" at \"15:40\""},{"visible":true,"include":true,"step":"100","x":-254.85714285714286,"y":-114.76190476190476,"z":120.85714285714286,"a95":"2.4","info":"\"14-09-29\" at \"18:19\""},{"visible":true,"include":true,"step":"150","x":-123.23809523809524,"y":-26.761904761904763,"z":-25.523809523809526,"a95":"2.4","info":"\"14-09-29\" at \"21:13\""},{"visible":true,"include":true,"step":"180","x":-81.04761904761905,"y":-10.380952380952381,"z":-60.476190476190474,"a95":"3.4","info":"\"14-09-30\" at \"15:38\""},{"visible":true,"include":true,"step":"210","x":-76.91428571428571,"y":-11.476190476190476,"z":-53.95238095238095,"a95":"3.5","info":"\"14-09-30\" at \"18:49\""},{"visible":true,"include":false,"step":"240","x":-70.80952380952381,"y":-13.685714285714285,"z":-46.923809523809524,"a95":"4","info":"\"14-09-30\" at \"21:54\""},{"visible":true,"include":false,"step":"270","x":-56.285714285714285,"y":-14.209523809523809,"z":-35.523809523809526,"a95":"3.5","info":"\"14-10-01\" at \"15:51\""},{"visible":true,"include":false,"step":"300","x":-64.04761904761905,"y":-6.190476190476191,"z":-2.619047619047619,"a95":"8.400001","info":"\"14-10-01\" at \"19:25\""},{"visible":true,"include":false,"step":"320","x":-55.69523809523809,"y":8.514285714285714,"z":5.257142857142857,"a95":"5.6","info":"\"14-10-01\" at \"22:31\""},{"visible":true,"include":false,"step":"340","x":-50.63809523809524,"y":-1.4666666666666668,"z":23.257142857142856,"a95":"3.9","info":"\"14-10-02\" at \"16:06\""},{"visible":true,"include":false,"step":"370","x":-49.780952380952385,"y":4.038095238095238,"z":5.019047619047619,"a95":"6","info":"\"14-10-02\" at \"18:50\""},{"visible":true,"include":false,"step":"400","x":-41.266666666666666,"y":5.914285714285715,"z":6.019047619047619,"a95":"7.1","info":"\"14-10-02\" at \"22:04\""},{"visible":true,"include":false,"step":"420","x":-54.019047619047626,"y":2.8095238095238093,"z":8.40952380952381,"a95":"3.8","info":"\"14-10-03\" at \"15:35\""},{"visible":false,"include":false,"step":"440","x":-17.323809523809523,"y":20.676190476190477,"z":15.723809523809523,"a95":"9.3","info":"\"14-10-03\" at \"19:02\""},{"visible":false,"include":false,"step":"460","x":-50.10476190476191,"y":10.076190476190476,"z":22.095238095238095,"a95":"8.8","info":"\"14-10-03\" at \"22:20\""},{"visible":false,"include":false,"step":"480","x":-19.41904761904762,"y":-5.038095238095238,"z":6.180952380952381,"a95":"19.5","info":"\"14-10-04\" at \"09:47\""}],"demagType":"Unknown","patch":1.1,"format":"Unknown","strat":null},{"version":"v1.1.0","exported":"2017-05-22T11:26:16.890Z","info":"8","GEO":[{"dec":148.5990380251826,"inc":-34.54902809157046,"MAD":5.5492053179073615,"cm":[5.4136589391245725e-15,8.120488408686859e-15,0],"intensity":277.5930047819197,"type":"dir","forced":true,"remark":"","origin":false,"nSteps":6,"minStep":"23.0","maxStep":"40.0","steps":["23.0","25.0","30.0","33.0","35.0","40.0"],"group":"None"}],"TECT":[{"dec":184.90474259237084,"inc":-30.701692309600787,"MAD":5.549205317907326,"cm":[4.0602442043434294e-15,1.6071799975526075e-14,-9.473903143468002e-15],"intensity":277.5930047819197,"type":"dir","forced":true,"remark":"","origin":false,"nSteps":6,"minStep":"23.0","maxStep":"40.0","steps":["23.0","25.0","30.0","33.0","35.0","40.0"],"group":"None"}],"interpreted":true,"name":"SS18.18A","coreAzi":47,"coreDip":24,"bedStrike":343,"bedDip":52,"data":[{"visible":true,"include":false,"step":"0.0","x":28.414285714285718,"y":116.0952380952381,"z":-14.849523809523808,"a95":"0.99","info":"30/01/2015 at 17:42:41"},{"visible":true,"include":false,"step":"10.0","x":50.90761904761904,"y":114.43809523809523,"z":-50.56571428571429,"a95":"0.99","info":"30/01/2015 at 17:42:41"},{"visible":true,"include":false,"step":"15.0","x":47.565714285714286,"y":122.37142857142858,"z":-52.27428571428571,"a95":"0.99","info":"30/01/2015 at 17:42:41"},{"visible":true,"include":false,"step":"20.0","x":65.55619047619048,"y":140.43809523809523,"z":-58.23809523809524,"a95":"0.99","info":"30/01/2015 at 17:42:41"},{"visible":true,"include":true,"step":"23.0","x":57.13333333333333,"y":108.9904761904762,"z":-73.04285714285714,"a95":"0.99","info":"30/01/2015 at 17:42:41"},{"visible":true,"include":true,"step":"25.0","x":58.179047619047616,"y":121.5047619047619,"z":-65.01809523809524,"a95":"0.99","info":"30/01/2015 at 17:42:41"},{"visible":true,"include":true,"step":"30.0","x":65.43714285714286,"y":121.97142857142858,"z":-51.80952380952381,"a95":"0.99","info":"30/01/2015 at 17:42:41"},{"visible":true,"include":true,"step":"33.0","x":61.409523809523805,"y":108.56190476190477,"z":-48.10095238095238,"a95":"0.99","info":"30/01/2015 at 17:42:41"},{"visible":true,"include":true,"step":"35.0","x":59.61904761904762,"y":104.53333333333333,"z":-34.950476190476195,"a95":"0.99","info":"30/01/2015 at 17:42:41"},{"visible":true,"include":true,"step":"40.0","x":74.89809523809524,"y":106.05714285714285,"z":-42.62952380952381,"a95":"0.99","info":"30/01/2015 at 17:42:41"},{"visible":true,"include":false,"step":"45.0","x":86.50380952380952,"y":111.83809523809524,"z":-38.60476190476191,"a95":"0.99","info":"30/01/2015 at 17:42:41"},{"visible":true,"include":false,"step":"50.0","x":47.87047619047619,"y":96.28571428571429,"z":-39.114285714285714,"a95":"0.99","info":"30/01/2015 at 17:42:41"},{"visible":true,"include":false,"step":"60.0","x":61.06285714285714,"y":96.82857142857144,"z":-43.936190476190475,"a95":"0.99","info":"30/01/2015 at 17:42:41"},{"visible":true,"include":false,"step":"70.0","x":65.15142857142857,"y":71.57714285714285,"z":-14.685714285714285,"a95":"0.99","info":"30/01/2015 at 17:42:41"}],"demagType":"Unknown","patch":1.1,"format":"Unknown","strat":null},{"version":"v1.1.0","exported":"2017-05-22T11:26:16.890Z","info":"1","GEO":[],"TECT":[],"interpreted":false,"name":"SS18.18B","coreAzi":47,"coreDip":24,"bedStrike":343,"bedDip":52,"data":[{"visible":true,"include":false,"step":"0.0","x":-18.756190476190476,"y":-39.61523809523809,"z":101.8952380952381,"a95":"0.99","info":"28/10/2014 at 15:13:46"},{"visible":true,"include":false,"step":"4.0","x":-16.79047619047619,"y":-42.03142857142857,"z":98.15238095238094,"a95":"0.99","info":"28/10/2014 at 15:13:46"},{"visible":true,"include":false,"step":"8.0","x":-11.484761904761905,"y":-35.074285714285715,"z":80.91714285714286,"a95":"0.99","info":"28/10/2014 at 15:13:46"},{"visible":true,"include":false,"step":"12.0","x":-6.140190476190476,"y":-41.829523809523806,"z":77.31142857142856,"a95":"0.99","info":"28/10/2014 at 15:13:46"},{"visible":true,"include":false,"step":"16.0","x":2.7556190476190476,"y":-47.89904761904762,"z":64.48380952380953,"a95":"0.99","info":"28/10/2014 at 15:13:46"},{"visible":true,"include":false,"step":"20.0","x":-7.9065714285714295,"y":-38.63238095238095,"z":52.790476190476184,"a95":"0.99","info":"28/10/2014 at 15:13:46"},{"visible":true,"include":false,"step":"25.0","x":4.445333333333333,"y":-23.791428571428572,"z":66.07428571428571,"a95":"0.99","info":"28/10/2014 at 15:13:46"},{"visible":true,"include":false,"step":"30.0","x":-2.4023809523809527,"y":-29.22285714285714,"z":49.82380952380952,"a95":"0.99","info":"28/10/2014 at 15:13:46"},{"visible":true,"include":false,"step":"35.0","x":-8.170857142857143,"y":-7.821142857142857,"z":36.82380952380952,"a95":"0.99","info":"28/10/2014 at 15:13:46"},{"visible":true,"include":false,"step":"40.0","x":14.608571428571427,"y":3.7526666666666664,"z":24.278095238095236,"a95":"0.99","info":"28/10/2014 at 15:13:46"},{"visible":true,"include":false,"step":"45.0","x":0.9038571428571429,"y":-1.3512380952380953,"z":23.232380952380954,"a95":"0.99","info":"28/10/2014 at 15:13:46"},{"visible":true,"include":false,"step":"50.0","x":10.676190476190476,"y":17.236190476190476,"z":17.366666666666667,"a95":"0.99","info":"28/10/2014 at 15:13:46"},{"visible":true,"include":false,"step":"60.0","x":32.80952380952381,"y":7.880857142857143,"z":0.6976285714285714,"a95":"0.99","info":"28/10/2014 at 15:13:46"},{"visible":true,"include":false,"step":"70.0","x":25.993333333333332,"y":25.122857142857146,"z":-26.92761904761905,"a95":"0.99","info":"28/10/2014 at 15:13:46"},{"visible":true,"include":false,"step":"80.0","x":22.38190476190476,"y":32.042857142857144,"z":-19.774285714285714,"a95":"0.99","info":"28/10/2014 at 15:13:46"},{"visible":true,"include":false,"step":"90.0","x":53.080000000000005,"y":65.20761904761905,"z":-39.39523809523809,"a95":"0.99","info":"28/10/2014 at 15:13:46"},{"visible":true,"include":false,"step":"100.0","x":38.51904761904762,"y":51.55809523809524,"z":-28.98952380952381,"a95":"0.99","info":"28/10/2014 at 15:13:46"}],"demagType":"Unknown","patch":1.1,"format":"Unknown","strat":null},{"version":"v1.1.0","exported":"2017-05-22T11:26:16.890Z","info":"1","GEO":[{"dec":66.78094299099365,"inc":-42.503070047572336,"MAD":7.458299707438083,"cm":[-4.736951571734001e-15,1.3534147347811431e-14,0],"intensity":681.9266429483539,"type":"GC","origin":false,"forced":true,"remark":"","nSteps":9,"minStep":"16.0","maxStep":"60.0","steps":["16.0","20.0","25.0","30.0","35.0","40.0","45.0","50.0","60.0"],"group":"None"}],"TECT":[{"dec":297.53099481177594,"inc":-83.46081715401105,"MAD":7.458299707437375,"cm":[-4.432433256408244e-14,-8.255829882164973e-14,6.6824852529818945e-15],"intensity":681.9266429483539,"type":"GC","origin":false,"forced":true,"remark":"","nSteps":9,"minStep":"16.0","maxStep":"60.0","steps":["16.0","20.0","25.0","30.0","35.0","40.0","45.0","50.0","60.0"],"group":"None"}],"interpreted":true,"name":"SS18.19A","coreAzi":355,"coreDip":51,"bedStrike":343,"bedDip":52,"data":[{"visible":true,"include":false,"step":"0.0","x":438.81904761904764,"y":-117.6952380952381,"z":502.18095238095236,"a95":"0.99","info":"10/10/2014 at 14:29:45"},{"visible":true,"include":false,"step":"4.0","x":436.6285714285715,"y":-118.71428571428571,"z":502.7714285714286,"a95":"0.99","info":"10/10/2014 at 14:29:45"},{"visible":true,"include":false,"step":"8.0","x":442.99047619047616,"y":-122.21904761904761,"z":494.5809523809524,"a95":"0.99","info":"10/10/2014 at 14:29:45"},{"visible":true,"include":false,"step":"12.0","x":426.95238095238096,"y":-114.48571428571428,"z":475.50476190476195,"a95":"0.99","info":"10/10/2014 at 14:29:45"},{"visible":true,"include":true,"step":"16.0","x":414.16190476190474,"y":-106.4952380952381,"z":439.91428571428577,"a95":"0.99","info":"10/10/2014 at 14:29:45"},{"visible":true,"include":true,"step":"20.0","x":359.6095238095238,"y":-112.55238095238094,"z":385.3047619047619,"a95":"0.99","info":"10/10/2014 at 14:29:45"},{"visible":true,"include":true,"step":"25.0","x":297.18095238095236,"y":-106.46666666666667,"z":300.35238095238094,"a95":"0.99","info":"10/10/2014 at 14:29:45"},{"visible":true,"include":true,"step":"30.0","x":243.06666666666666,"y":-86.76666666666667,"z":216.0190476190476,"a95":"0.99","info":"10/10/2014 at 14:29:45"},{"visible":true,"include":true,"step":"35.0","x":213.84761904761905,"y":-90.62952380952382,"z":159.82857142857142,"a95":"0.99","info":"10/10/2014 at 14:29:45"},{"visible":true,"include":true,"step":"40.0","x":167.24761904761903,"y":-78.63904761904762,"z":111.95238095238095,"a95":"0.99","info":"10/10/2014 at 14:29:45"},{"visible":true,"include":true,"step":"45.0","x":143.51428571428573,"y":-78.20190476190476,"z":84.01238095238095,"a95":"0.99","info":"10/10/2014 at 14:29:45"},{"visible":true,"include":true,"step":"50.0","x":107.76190476190476,"y":-69.93714285714286,"z":48.63238095238095,"a95":"0.99","info":"10/10/2014 at 14:29:45"},{"visible":true,"include":true,"step":"60.0","x":69.37809523809524,"y":-57.476190476190474,"z":12.11047619047619,"a95":"0.99","info":"10/10/2014 at 14:29:45"},{"visible":true,"include":false,"step":"70.0","x":42.69428571428572,"y":-46.404761904761905,"z":-20.33238095238095,"a95":"0.99","info":"10/10/2014 at 14:29:45"},{"visible":true,"include":false,"step":"80.0","x":29.888571428571428,"y":-32.56476190476191,"z":-15.76,"a95":"0.99","info":"10/10/2014 at 14:29:45"},{"visible":true,"include":false,"step":"90.0","x":9.581904761904761,"y":-38.0152380952381,"z":-27.067619047619047,"a95":"0.99","info":"10/10/2014 at 14:29:45"},{"visible":true,"include":false,"step":"100.0","x":1.4192380952380952,"y":-28.932380952380953,"z":-41.256190476190476,"a95":"0.99","info":"10/10/2014 at 14:29:45"}],"demagType":"Unknown","patch":1.1,"format":"Unknown","strat":null},{"version":"v1.1.0","exported":"2017-05-22T11:26:16.890Z","info":"","GEO":[],"TECT":[],"interpreted":false,"name":"SS18.19B","coreAzi":355,"coreDip":51,"bedStrike":343,"bedDip":52,"data":[{"visible":true,"include":false,"step":"20","x":-250.0952380952381,"y":38.857142857142854,"z":364.3809523809524,"a95":"2.7","info":"\"14-10-20\" at \"16:16\""},{"visible":true,"include":false,"step":"100","x":-204.38095238095238,"y":64.19047619047619,"z":257.04761904761904,"a95":"2.5","info":"\"14-10-20\" at \"19:13\""},{"visible":true,"include":false,"step":"150","x":-202.1904761904762,"y":64.66666666666667,"z":249.61904761904762,"a95":"2.7","info":"\"14-10-20\" at \"22:11\""},{"visible":true,"include":false,"step":"180","x":-185.52380952380952,"y":70.0952380952381,"z":252.95238095238096,"a95":"2.7","info":"\"14-10-21\" at \"01:03\""},{"visible":true,"include":false,"step":"210","x":-214.66666666666666,"y":58.666666666666664,"z":251.42857142857142,"a95":"2.5","info":"\"14-10-21\" at \"17:13\""},{"visible":true,"include":false,"step":"240","x":-206,"y":49.333333333333336,"z":259.14285714285717,"a95":"2.4","info":"\"14-10-21\" at \"20:13\""},{"visible":true,"include":false,"step":"270","x":-192.28571428571428,"y":49.42857142857143,"z":263.04761904761904,"a95":"2.6","info":"\"14-10-21\" at \"23:16\""},{"visible":true,"include":false,"step":"290","x":-184.66666666666666,"y":52.57142857142857,"z":266.2857142857143,"a95":"2.6","info":"\"14-10-22\" at \"15:44\""},{"visible":true,"include":false,"step":"310","x":-184.38095238095238,"y":43.61904761904762,"z":254.1904761904762,"a95":"2.4","info":"\"14-10-22\" at \"18:32\""},{"visible":true,"include":false,"step":"330","x":-188.47619047619048,"y":70.28571428571429,"z":272.1904761904762,"a95":"2.6","info":"\"14-10-22\" at \"21:43\""},{"visible":true,"include":false,"step":"350","x":-192.28571428571428,"y":56.95238095238095,"z":266.6666666666667,"a95":"2.7","info":"\"14-10-23\" at \"15:58\""},{"visible":true,"include":false,"step":"370","x":-197.23809523809524,"y":66.57142857142857,"z":262.1904761904762,"a95":"2.5","info":"\"14-10-23\" at \"18:58\""},{"visible":true,"include":false,"step":"400","x":-195.52380952380952,"y":53.142857142857146,"z":265.6190476190476,"a95":"2.7","info":"\"14-10-23\" at \"21:56\""},{"visible":true,"include":false,"step":"420","x":-182.57142857142858,"y":57.333333333333336,"z":243.42857142857142,"a95":"2.8","info":"\"14-10-24\" at \"16:21\""},{"visible":true,"include":false,"step":"440","x":-155.33333333333334,"y":67.14285714285714,"z":263.42857142857144,"a95":"2.8","info":"\"14-10-24\" at \"19:35\""},{"visible":true,"include":false,"step":"470","x":-151.23809523809524,"y":91.14285714285714,"z":212.0952380952381,"a95":"3.1","info":"\"14-10-24\" at \"22:02\""},{"visible":true,"include":false,"step":"490","x":-140.66666666666666,"y":27.047619047619047,"z":211.8095238095238,"a95":"4.1","info":"\"14-10-25\" at \"00:55\""},{"visible":true,"include":false,"step":"520","x":-172,"y":84.85714285714286,"z":115.33333333333333,"a95":"4.1","info":"\"14-10-25\" at \"03:31\""},{"visible":true,"include":false,"step":"550","x":-101.33333333333333,"y":10.19047619047619,"z":23.80952380952381,"a95":"6.4","info":"\"14-10-25\" at \"06:12\""},{"visible":true,"include":false,"step":"580","x":-86.98095238095237,"y":-28.771428571428572,"z":-23.83809523809524,"a95":"7.5","info":"\"14-10-26\" at \"04:54\""},{"visible":true,"include":false,"step":"610","x":-12.352380952380951,"y":-28.219047619047622,"z":-40.2952380952381,"a95":"11.3","info":"\"14-10-26\" at \"06:50\""}],"demagType":"Unknown","patch":1.1,"format":"Unknown","strat":null},{"version":"v1.1.0","exported":"2017-05-22T11:26:16.890Z","info":"1","GEO":[],"TECT":[],"interpreted":false,"name":"SS18.20A","coreAzi":4,"coreDip":36,"bedStrike":343,"bedDip":52,"data":[{"visible":true,"include":false,"step":"0.0","x":147.06666666666666,"y":-42.36571428571428,"z":-17.813333333333333,"a95":"0.99","info":"30/01/2015 at 22:14:23"},{"visible":true,"include":false,"step":"10.0","x":158.68571428571428,"y":-31.55714285714286,"z":-31.323809523809523,"a95":"0.99","info":"30/01/2015 at 22:14:23"},{"visible":true,"include":false,"step":"15.0","x":150.61904761904762,"y":-42.21142857142858,"z":-36.51238095238095,"a95":"0.99","info":"30/01/2015 at 22:14:23"},{"visible":true,"include":false,"step":"20.0","x":146.56190476190477,"y":-31.800952380952385,"z":-26.940952380952382,"a95":"0.99","info":"30/01/2015 at 22:14:23"},{"visible":true,"include":false,"step":"23.0","x":140.86666666666665,"y":-23.655238095238094,"z":-41.74761904761905,"a95":"0.99","info":"30/01/2015 at 22:14:23"},{"visible":true,"include":false,"step":"25.0","x":135.5047619047619,"y":-28.845714285714287,"z":-37.02571428571429,"a95":"0.99","info":"30/01/2015 at 22:14:23"},{"visible":true,"include":false,"step":"30.0","x":114.12380952380951,"y":-17.133333333333333,"z":-36.52761904761905,"a95":"0.99","info":"30/01/2015 at 22:14:23"},{"visible":true,"include":false,"step":"33.0","x":91.14285714285714,"y":-18.22952380952381,"z":-24.208571428571428,"a95":"0.99","info":"30/01/2015 at 22:14:23"},{"visible":true,"include":false,"step":"35.0","x":103.15238095238094,"y":-8.439714285714286,"z":-33.74666666666666,"a95":"0.99","info":"30/01/2015 at 22:14:23"},{"visible":true,"include":false,"step":"40.0","x":86.24190476190476,"y":-10.944761904761904,"z":-16.174285714285716,"a95":"0.99","info":"30/01/2015 at 22:14:23"},{"visible":true,"include":false,"step":"45.0","x":69.1704761904762,"y":-1.424761904761905,"z":-20.66190476190476,"a95":"0.99","info":"30/01/2015 at 22:14:23"},{"visible":true,"include":false,"step":"50.0","x":61.48,"y":6.660285714285715,"z":-11.687619047619048,"a95":"0.99","info":"30/01/2015 at 22:14:23"},{"visible":true,"include":false,"step":"60.0","x":31.432380952380953,"y":8.562571428571427,"z":8.529619047619049,"a95":"0.99","info":"30/01/2015 at 22:14:23"},{"visible":true,"include":false,"step":"70.0","x":25.54952380952381,"y":2.905809523809524,"z":-0.07555523809523809,"a95":"0.99","info":"30/01/2015 at 22:14:23"}],"demagType":"Unknown","patch":1.1,"format":"Unknown","strat":null},{"version":"v1.1.0","exported":"2017-05-22T11:26:16.890Z","info":"2","GEO":[],"TECT":[],"interpreted":false,"name":"SS18.20B","coreAzi":4,"coreDip":36,"bedStrike":343,"bedDip":52,"data":[{"visible":false,"include":false,"step":"0.0","x":-32.20666666666667,"y":-83.1704761904762,"z":-85.32190476190476,"a95":"0.99","info":"10/10/2014 at 14:29:45"},{"visible":true,"include":false,"step":"4.0","x":-24.064761904761905,"y":-80.83047619047619,"z":-54.18380952380952,"a95":"0.99","info":"10/10/2014 at 14:29:45"},{"visible":true,"include":true,"step":"8.0","x":-12.104761904761904,"y":-78.6704761904762,"z":-84.77047619047619,"a95":"0.99","info":"10/10/2014 at 14:29:45"},{"visible":true,"include":true,"step":"12.0","x":-6.605428571428571,"y":-64.54571428571428,"z":-75.65333333333334,"a95":"0.99","info":"10/10/2014 at 14:29:45"},{"visible":true,"include":true,"step":"16.0","x":0.7831714285714286,"y":-60.80571428571429,"z":-74.95904761904762,"a95":"0.99","info":"10/10/2014 at 14:29:45"},{"visible":true,"include":true,"step":"20.0","x":-9.893333333333333,"y":-62.39714285714285,"z":-71.51238095238095,"a95":"0.99","info":"10/10/2014 at 14:29:45"},{"visible":true,"include":true,"step":"25.0","x":-7.840476190476191,"y":-51.21523809523809,"z":-62.44952380952381,"a95":"0.99","info":"10/10/2014 at 14:29:45"},{"visible":true,"include":true,"step":"30.0","x":-17.398095238095237,"y":-52.457142857142856,"z":-61.18571428571429,"a95":"0.99","info":"10/10/2014 at 14:29:45"},{"visible":true,"include":true,"step":"35.0","x":-15.544761904761904,"y":-41.41904761904762,"z":-61.31047619047619,"a95":"0.99","info":"10/10/2014 at 14:29:45"},{"visible":false,"include":false,"step":"40.0","x":-15.404761904761905,"y":-21.036190476190477,"z":-68.4647619047619,"a95":"0.99","info":"10/10/2014 at 14:29:45"},{"visible":true,"include":true,"step":"45.0","x":3.010190476190476,"y":-25.548571428571428,"z":-48.18190476190476,"a95":"0.99","info":"10/10/2014 at 14:29:45"},{"visible":true,"include":false,"step":"50.0","x":-8.276571428571428,"y":-26.685714285714283,"z":-54.584761904761905,"a95":"0.99","info":"10/10/2014 at 14:29:45"},{"visible":true,"include":false,"step":"60.0","x":-0.27045714285714284,"y":-13.379047619047618,"z":-38.91619047619048,"a95":"0.99","info":"10/10/2014 at 14:29:45"},{"visible":false,"include":false,"step":"70.0","x":1.5521904761904761,"y":-4.861714285714286,"z":-46.73428571428571,"a95":"0.99","info":"10/10/2014 at 14:29:45"},{"visible":false,"include":false,"step":"80.0","x":36.23809523809524,"y":-6.176666666666667,"z":-21.67047619047619,"a95":"0.99","info":"10/10/2014 at 14:29:45"},{"visible":false,"include":false,"step":"90.0","x":2.728285714285714,"y":8.764095238095237,"z":-24.53142857142857,"a95":"0.99","info":"10/10/2014 at 14:29:45"},{"visible":false,"include":false,"step":"100.0","x":-6.7868571428571425,"y":8.656,"z":-35.42761904761905,"a95":"0.99","info":"10/10/2014 at 14:29:45"}],"demagType":"Unknown","patch":1.1,"format":"Unknown","strat":null},{"version":"v1.1.0","exported":"2017-05-22T11:26:16.890Z","info":"2","GEO":[],"TECT":[],"interpreted":false,"name":"SS18.21A","coreAzi":62,"coreDip":37,"bedStrike":343,"bedDip":52,"data":[{"visible":true,"include":false,"step":"0.0","x":-36.42666666666667,"y":1.109904761904762,"z":-13.47142857142857,"a95":"0.99","info":"28/10/2014 at 15:13:46"},{"visible":true,"include":false,"step":"4.0","x":-36.925714285714285,"y":3.5494285714285714,"z":-19.96666666666667,"a95":"0.99","info":"28/10/2014 at 15:13:46"},{"visible":true,"include":false,"step":"8.0","x":-28.139047619047616,"y":5.3409523809523805,"z":-20.06095238095238,"a95":"0.99","info":"28/10/2014 at 15:13:46"},{"visible":true,"include":false,"step":"12.0","x":-18.63142857142857,"y":-1.8149523809523809,"z":-23.34,"a95":"0.99","info":"28/10/2014 at 15:13:46"},{"visible":true,"include":false,"step":"16.0","x":-17.695238095238096,"y":-14.062857142857142,"z":-42.26095238095238,"a95":"0.99","info":"28/10/2014 at 15:13:46"},{"visible":true,"include":false,"step":"20.0","x":-26.334285714285713,"y":-5.862666666666667,"z":-49.86761904761905,"a95":"0.99","info":"28/10/2014 at 15:13:46"},{"visible":true,"include":false,"step":"25.0","x":-33.36857142857143,"y":-12.96,"z":-38.055238095238096,"a95":"0.99","info":"28/10/2014 at 15:13:46"},{"visible":true,"include":false,"step":"30.0","x":-12.392380952380952,"y":-2.0935238095238096,"z":-40.70952380952381,"a95":"0.99","info":"28/10/2014 at 15:13:46"},{"visible":true,"include":false,"step":"35.0","x":-1.4914285714285715,"y":3.697333333333334,"z":-35.58857142857143,"a95":"0.99","info":"28/10/2014 at 15:13:46"},{"visible":true,"include":false,"step":"40.0","x":-1.664095238095238,"y":5.333238095238095,"z":-33.304761904761904,"a95":"0.99","info":"28/10/2014 at 15:13:46"},{"visible":true,"include":false,"step":"45.0","x":6.295333333333334,"y":-10.744761904761905,"z":-11.99904761904762,"a95":"0.99","info":"28/10/2014 at 15:13:46"},{"visible":true,"include":false,"step":"50.0","x":6.129619047619048,"y":-13.262857142857142,"z":-8.350761904761905,"a95":"0.99","info":"28/10/2014 at 15:13:46"},{"visible":true,"include":false,"step":"60.0","x":7.962,"y":-11.698095238095238,"z":-17.20285714285714,"a95":"0.99","info":"28/10/2014 at 15:13:46"},{"visible":true,"include":false,"step":"70.0","x":0.08633333333333333,"y":-24.295238095238094,"z":-5.098761904761905,"a95":"0.99","info":"28/10/2014 at 15:13:46"},{"visible":true,"include":false,"step":"80.0","x":-0.5091904761904762,"y":-28.767619047619046,"z":-7.712952380952381,"a95":"0.99","info":"28/10/2014 at 15:13:46"},{"visible":true,"include":false,"step":"90.0","x":-10.620000000000001,"y":0.1141904761904762,"z":2.7187619047619047,"a95":"0.99","info":"28/10/2014 at 15:13:46"},{"visible":true,"include":false,"step":"100.0","x":0.34445714285714285,"y":-0.41091428571428573,"z":17.52952380952381,"a95":"0.99","info":"28/10/2014 at 15:13:46"}],"demagType":"Unknown","patch":1.1,"format":"Unknown","strat":null},{"version":"v1.1.0","exported":"2017-05-22T11:26:16.890Z","info":"","GEO":[],"TECT":[],"interpreted":false,"name":"SS18.21B","coreAzi":62,"coreDip":37,"bedStrike":343,"bedDip":52,"data":[{"visible":true,"include":false,"step":"20","x":-44.285714285714285,"y":-38.57142857142857,"z":105.9047619047619,"a95":"2.7","info":"\"14-10-20\" at \"16:18\""},{"visible":true,"include":false,"step":"100","x":6.428571428571429,"y":-26.01904761904762,"z":41.04761904761905,"a95":"3.9","info":"\"14-10-20\" at \"19:14\""},{"visible":true,"include":false,"step":"150","x":15.714285714285714,"y":-47.67619047619048,"z":64.56190476190476,"a95":"2.5","info":"\"14-10-20\" at \"22:13\""},{"visible":true,"include":false,"step":"180","x":13.123809523809525,"y":-35.904761904761905,"z":85.91428571428571,"a95":"3.1","info":"\"14-10-21\" at \"01:05\""},{"visible":true,"include":false,"step":"210","x":-4.514285714285714,"y":-29.609523809523807,"z":52.780952380952385,"a95":"3.6","info":"\"14-10-21\" at \"17:15\""},{"visible":true,"include":false,"step":"240","x":9.380952380952381,"y":-20.45714285714286,"z":56.666666666666664,"a95":"3","info":"\"14-10-21\" at \"20:15\""},{"visible":true,"include":false,"step":"270","x":10.152380952380952,"y":-29.523809523809526,"z":32.65714285714286,"a95":"4.4","info":"\"14-10-21\" at \"23:17\""},{"visible":true,"include":false,"step":"290","x":17.81904761904762,"y":-30.257142857142856,"z":41.01904761904762,"a95":"5.3","info":"\"14-10-22\" at \"15:46\""},{"visible":true,"include":false,"step":"310","x":26.504761904761907,"y":-38.83809523809524,"z":41.04761904761905,"a95":"2.8","info":"\"14-10-22\" at \"18:34\""},{"visible":true,"include":false,"step":"330","x":40.58095238095238,"y":-23.885714285714286,"z":31.75238095238095,"a95":"3","info":"\"14-10-22\" at \"21:46\""},{"visible":true,"include":false,"step":"350","x":0.7047619047619048,"y":-8.82857142857143,"z":77.94285714285714,"a95":"4.1","info":"\"14-10-23\" at \"16:00\""},{"visible":true,"include":false,"step":"370","x":16.428571428571427,"y":-32.6,"z":34.97142857142857,"a95":"4.3","info":"\"14-10-23\" at \"18:59\""},{"visible":true,"include":false,"step":"400","x":-13.723809523809523,"y":-31.990476190476187,"z":63.095238095238095,"a95":"6.3","info":"\"14-10-23\" at \"21:57\""}],"demagType":"Unknown","patch":1.1,"format":"Unknown","strat":null},{"version":"v1.1.0","exported":"2017-05-22T11:26:16.890Z","info":"3","GEO":[],"TECT":[],"interpreted":false,"name":"SS18.21C","coreAzi":62,"coreDip":37,"bedStrike":343,"bedDip":52,"data":[{"visible":true,"include":false,"step":"0.0","x":-79.17238095238095,"y":-75.45619047619047,"z":5.152857142857142,"a95":"0.99","info":"10/10/2014 at 14:29:45"},{"visible":true,"include":false,"step":"4.0","x":-50.45238095238095,"y":-67.93333333333332,"z":58.419999999999995,"a95":"0.99","info":"10/10/2014 at 14:29:45"},{"visible":true,"include":false,"step":"8.0","x":-20.69047619047619,"y":-81.83333333333333,"z":5.181238095238095,"a95":"0.99","info":"10/10/2014 at 14:29:45"},{"visible":true,"include":false,"step":"12.0","x":-7.64047619047619,"y":-41.97238095238095,"z":13.55809523809524,"a95":"0.99","info":"10/10/2014 at 14:29:45"},{"visible":true,"include":false,"step":"16.0","x":-6.052095238095238,"y":-41.44571428571429,"z":-10.460952380952381,"a95":"0.99","info":"10/10/2014 at 14:29:45"},{"visible":true,"include":false,"step":"20.0","x":-17.400952380952383,"y":-48.98761904761905,"z":-21.973333333333333,"a95":"0.99","info":"10/10/2014 at 14:29:45"},{"visible":true,"include":false,"step":"25.0","x":-13.449523809523809,"y":-37.61047619047619,"z":-25.384761904761906,"a95":"0.99","info":"10/10/2014 at 14:29:45"},{"visible":true,"include":false,"step":"30.0","x":-18.077142857142857,"y":-9.194952380952381,"z":-37.06761904761905,"a95":"0.99","info":"10/10/2014 at 14:29:45"},{"visible":true,"include":false,"step":"35.0","x":-3.292952380952381,"y":-14.157142857142858,"z":-19.88857142857143,"a95":"0.99","info":"10/10/2014 at 14:29:45"},{"visible":true,"include":false,"step":"40.0","x":-7.500380952380953,"y":-24.410476190476192,"z":-23.210476190476193,"a95":"0.99","info":"10/10/2014 at 14:29:45"},{"visible":true,"include":false,"step":"45.0","x":11.361904761904762,"y":-36.34857142857143,"z":-3.864666666666667,"a95":"0.99","info":"10/10/2014 at 14:29:45"},{"visible":true,"include":false,"step":"50.0","x":3.2719047619047616,"y":-18.86,"z":-8.337523809523809,"a95":"0.99","info":"10/10/2014 at 14:29:45"},{"visible":true,"include":false,"step":"60.0","x":-9.178666666666667,"y":6.931904761904762,"z":-5.696857142857143,"a95":"0.99","info":"10/10/2014 at 14:29:45"},{"visible":true,"include":false,"step":"70.0","x":10.415238095238095,"y":-21.813333333333333,"z":11.235238095238095,"a95":"0.99","info":"10/10/2014 at 14:29:45"},{"visible":true,"include":false,"step":"80.0","x":-9.599047619047619,"y":-1.0433333333333334,"z":12.679999999999998,"a95":"0.99","info":"10/10/2014 at 14:29:45"},{"visible":true,"include":false,"step":"90.0","x":10.050476190476191,"y":-38.43047619047619,"z":7.396857142857143,"a95":"0.99","info":"10/10/2014 at 14:29:45"},{"visible":true,"include":false,"step":"100.0","x":7.230857142857143,"y":-14.405714285714286,"z":11.081904761904761,"a95":"0.99","info":"10/10/2014 at 14:29:45"}],"demagType":"Unknown","patch":1.1,"format":"Unknown","strat":null},{"version":"v1.1.0","exported":"2017-05-22T11:26:16.890Z","info":"","GEO":[],"TECT":[],"interpreted":false,"name":"SS18.22A","coreAzi":57,"coreDip":34,"bedStrike":343,"bedDip":52,"data":[{"visible":true,"include":false,"step":"20","x":-59.87619047619048,"y":33.93333333333334,"z":-5.219047619047619,"a95":"3.1","info":"\"14-10-20\" at \"16:19\""},{"visible":true,"include":false,"step":"100","x":-28.18095238095238,"y":45.94285714285714,"z":-49.58095238095238,"a95":"3.1","info":"\"14-10-20\" at \"19:16\""},{"visible":true,"include":false,"step":"150","x":-28.847619047619045,"y":41.27619047619047,"z":-46.18095238095238,"a95":"3.3","info":"\"14-10-20\" at \"22:15\""},{"visible":true,"include":false,"step":"180","x":-19.076190476190476,"y":36.49523809523809,"z":-36.98095238095238,"a95":"3.5","info":"\"14-10-21\" at \"01:07\""},{"visible":true,"include":false,"step":"210","x":-30.419047619047618,"y":34.60952380952381,"z":-35.8,"a95":"3.7","info":"\"14-10-21\" at \"17:17\""},{"visible":true,"include":false,"step":"240","x":-33.37142857142857,"y":41.81904761904762,"z":-41.438095238095244,"a95":"3.3","info":"\"14-10-21\" at \"20:17\""},{"visible":true,"include":false,"step":"270","x":-21.16190476190476,"y":23.16190476190476,"z":-49.04761904761905,"a95":"3.7","info":"\"14-10-21\" at \"23:20\""},{"visible":true,"include":false,"step":"290","x":-20.82857142857143,"y":22.45714285714286,"z":-52.91428571428572,"a95":"3.6","info":"\"14-10-22\" at \"15:48\""},{"visible":true,"include":false,"step":"310","x":-16.38095238095238,"y":31.54285714285714,"z":-56.80952380952381,"a95":"4.1","info":"\"14-10-22\" at \"18:36\""},{"visible":true,"include":false,"step":"330","x":1.6285714285714288,"y":14.59047619047619,"z":-50.74285714285714,"a95":"5.3","info":"\"14-10-22\" at \"21:48\""},{"visible":true,"include":false,"step":"350","x":11.438095238095238,"y":17.20952380952381,"z":-36.00952380952381,"a95":"6.5","info":"\"14-10-23\" at \"16:02\""},{"visible":true,"include":false,"step":"370","x":4.447619047619048,"y":8.266666666666666,"z":-28.123809523809523,"a95":"9.6","info":"\"14-10-23\" at \"19:02\""},{"visible":true,"include":false,"step":"400","x":-23.371428571428574,"y":13.8,"z":-40.352380952380955,"a95":"9.2","info":"\"14-10-23\" at \"21:59\""},{"visible":true,"include":false,"step":"420","x":-11.59047619047619,"y":15.942857142857143,"z":-49.61904761904762,"a95":"12.4","info":"\"14-10-24\" at \"16:25\""},{"visible":true,"include":false,"step":"440","x":-5.723809523809524,"y":-3.895238095238095,"z":-21.514285714285716,"a95":"36.5","info":"\"14-10-24\" at \"19:37\""}],"demagType":"Unknown","patch":1.1,"format":"Unknown","strat":null},{"version":"v1.1.0","exported":"2017-05-22T11:26:16.890Z","info":"3","GEO":[],"TECT":[],"interpreted":false,"name":"SS18.22B","coreAzi":57,"coreDip":34,"bedStrike":343,"bedDip":52,"data":[{"visible":true,"include":false,"step":"0.0","x":-50.457142857142856,"y":-11.715238095238096,"z":16.064761904761905,"a95":"0.99","info":"28/10/2014 at 15:13:46"},{"visible":true,"include":false,"step":"4.0","x":-51.50380952380952,"y":-8.522761904761905,"z":4.185809523809524,"a95":"0.99","info":"28/10/2014 at 15:13:46"},{"visible":true,"include":false,"step":"8.0","x":-43.92190476190476,"y":-12.753333333333334,"z":-5.09247619047619,"a95":"0.99","info":"28/10/2014 at 15:13:46"},{"visible":true,"include":false,"step":"12.0","x":-27.475238095238097,"y":-7.323714285714286,"z":1.2599047619047619,"a95":"0.99","info":"28/10/2014 at 15:13:46"},{"visible":true,"include":false,"step":"16.0","x":-6.979809523809523,"y":-36.75142857142857,"z":-23.235238095238095,"a95":"0.99","info":"28/10/2014 at 15:13:46"},{"visible":true,"include":false,"step":"20.0","x":-20.35809523809524,"y":-18.794285714285714,"z":-22.70285714285714,"a95":"0.99","info":"28/10/2014 at 15:13:46"},{"visible":true,"include":false,"step":"25.0","x":-10.307619047619047,"y":-20.775238095238095,"z":-44.08857142857143,"a95":"0.99","info":"28/10/2014 at 15:13:46"},{"visible":true,"include":false,"step":"30.0","x":-2.743333333333333,"y":-17.80095238095238,"z":-23.356190476190477,"a95":"0.99","info":"28/10/2014 at 15:13:46"},{"visible":true,"include":false,"step":"35.0","x":-11.375238095238094,"y":3.490571428571429,"z":-29.466666666666665,"a95":"0.99","info":"28/10/2014 at 15:13:46"},{"visible":true,"include":false,"step":"40.0","x":-11.895238095238096,"y":9.592380952380953,"z":-19.833333333333332,"a95":"0.99","info":"28/10/2014 at 15:13:46"},{"visible":true,"include":false,"step":"45.0","x":3.425142857142857,"y":-9.418095238095239,"z":-33.3352380952381,"a95":"0.99","info":"28/10/2014 at 15:13:46"},{"visible":true,"include":false,"step":"50.0","x":3.8506666666666667,"y":-12.057142857142857,"z":-35.473333333333336,"a95":"0.99","info":"28/10/2014 at 15:13:46"},{"visible":true,"include":false,"step":"60.0","x":-0.1955714285714286,"y":12.773333333333333,"z":-26.846666666666664,"a95":"0.99","info":"28/10/2014 at 15:13:46"},{"visible":true,"include":false,"step":"70.0","x":-0.35414285714285715,"y":-13.716190476190476,"z":-26.937142857142856,"a95":"0.99","info":"28/10/2014 at 15:13:46"},{"visible":true,"include":false,"step":"80.0","x":-10.65047619047619,"y":-20.408571428571427,"z":-10.113333333333333,"a95":"0.99","info":"28/10/2014 at 15:13:46"},{"visible":true,"include":false,"step":"90.0","x":4.648761904761905,"y":7.777904761904763,"z":-8.926857142857143,"a95":"0.99","info":"28/10/2014 at 15:13:46"},{"visible":true,"include":false,"step":"100.0","x":2.53447619047619,"y":-13.162857142857144,"z":-17.885714285714286,"a95":"0.99","info":"28/10/2014 at 15:13:46"}],"demagType":"Unknown","patch":1.1,"format":"Unknown","strat":null}]
