# Supplementary material for: Paleomagnetic constraints on the timing and distribution of Cenozoic rotations in Central and Eastern Anatolia
Source: Copernicus journal article supplement (doi:10.5194/se-9-295-2018), 2018-03-21
Supplement: Supplementary file 2 [file se-9-295-2018-supplement.zip › se-2017-66_DATA_dir files/dir files Sivas/SS19.dir]

[{"version":"v1.1.0","exported":"2017-05-22T11:30:44.773Z","info":"4","GEO":[{"dec":192.46216965496995,"inc":-23.88330780873232,"MAD":1.2259875030286844,"cm":[1.3534147347811431e-15,6.090366306515144e-15,0],"intensity":342.66211966728287,"type":"dir","forced":true,"remark":"","origin":false,"nSteps":7,"minStep":"25.0","maxStep":"60.0","steps":["25.0","30.0","35.0","40.0","45.0","50.0","60.0"],"group":"None"}],"TECT":[{"dec":180.99464248743791,"inc":-24.65338966881203,"MAD":1.2259875030284801,"cm":[0,4.786118591395972e-14,5.4136589391245725e-15],"intensity":342.66211966728287,"type":"dir","forced":true,"remark":"","origin":false,"nSteps":7,"minStep":"25.0","maxStep":"60.0","steps":["25.0","30.0","35.0","40.0","45.0","50.0","60.0"],"group":"None"}],"interpreted":true,"name":"SS19.1A","coreAzi":288,"coreDip":40,"bedStrike":185,"bedDip":25,"data":[{"visible":true,"include":false,"step":"0.0","x":53.90095238095238,"y":-258.37142857142857,"z":-44.24952380952381,"a95":"0.99","info":"28/10/2014 at 15:13:46"},{"visible":true,"include":false,"step":"4.0","x":60.663809523809526,"y":-267.81904761904764,"z":-71.5647619047619,"a95":"0.99","info":"28/10/2014 at 15:13:46"},{"visible":true,"include":false,"step":"8.0","x":75.17714285714285,"y":-278.14285714285717,"z":-78.55809523809523,"a95":"0.99","info":"28/10/2014 at 15:13:46"},{"visible":true,"include":false,"step":"12.0","x":84.75047619047619,"y":-244.7904761904762,"z":-79.72190476190477,"a95":"0.99","info":"28/10/2014 at 15:13:46"},{"visible":true,"include":false,"step":"16.0","x":39.17714285714286,"y":-231.7904761904762,"z":-77.85333333333334,"a95":"0.99","info":"28/10/2014 at 15:13:46"},{"visible":true,"include":false,"step":"20.0","x":72.50761904761904,"y":-255.26666666666668,"z":-83.03619047619047,"a95":"0.99","info":"28/10/2014 at 15:13:46"},{"visible":true,"include":true,"step":"25.0","x":59.63619047619047,"y":-214.51428571428573,"z":-79.02190476190476,"a95":"0.99","info":"28/10/2014 at 15:13:46"},{"visible":true,"include":true,"step":"30.0","x":58.57619047619047,"y":-194.62857142857143,"z":-70.29619047619047,"a95":"0.99","info":"28/10/2014 at 15:13:46"},{"visible":true,"include":true,"step":"35.0","x":51.19333333333333,"y":-183.58095238095237,"z":-60.21809523809524,"a95":"0.99","info":"28/10/2014 at 15:13:46"},{"visible":true,"include":true,"step":"40.0","x":39.239999999999995,"y":-140.73333333333335,"z":-52.63047619047619,"a95":"0.99","info":"28/10/2014 at 15:13:46"},{"visible":true,"include":true,"step":"45.0","x":36.12285714285714,"y":-133.8,"z":-47.86,"a95":"0.99","info":"28/10/2014 at 15:13:46"},{"visible":true,"include":true,"step":"50.0","x":28.513333333333332,"y":-123.8952380952381,"z":-47.0752380952381,"a95":"0.99","info":"28/10/2014 at 15:13:46"},{"visible":true,"include":true,"step":"60.0","x":27.174285714285713,"y":-96.34285714285714,"z":-36.082857142857144,"a95":"0.99","info":"28/10/2014 at 15:13:46"},{"visible":true,"include":false,"step":"70.0","x":25.163809523809526,"y":-74.75714285714287,"z":-27.594285714285714,"a95":"0.99","info":"28/10/2014 at 15:13:46"},{"visible":true,"include":false,"step":"80.0","x":26.580952380952382,"y":-83.00190476190475,"z":-17.386666666666667,"a95":"0.99","info":"28/10/2014 at 15:13:46"},{"visible":false,"include":false,"step":"90.0","x":23.239047619047618,"y":-29.5752380952381,"z":-26.459999999999997,"a95":"0.99","info":"28/10/2014 at 15:13:46"},{"visible":false,"include":false,"step":"100.0","x":25.56857142857143,"y":-44.43714285714285,"z":-34.55047619047619,"a95":"0.99","info":"28/10/2014 at 15:13:46"}],"demagType":"Unknown","patch":1.1,"format":"Unknown","strat":null},{"version":"v1.1.0","exported":"2017-05-22T11:30:44.773Z","info":"8","GEO":[{"dec":188.38604435603048,"inc":-14.393394827781867,"MAD":8.828361998022963,"cm":[4.0602442043434294e-15,1.0150610510858574e-15,0],"intensity":299.5462490315035,"type":"dir","forced":true,"remark":"","origin":false,"nSteps":5,"minStep":"40.0","maxStep":"70.0","steps":["40.0","45.0","50.0","60.0","70.0"],"group":"None"}],"TECT":[{"dec":181.85049915393168,"inc":-14.44592062551409,"MAD":8.828361998022952,"cm":[2.7068294695622863e-15,-4.2294210461910725e-15,4.0602442043434294e-15],"intensity":299.5462490315035,"type":"dir","forced":true,"remark":"","origin":false,"nSteps":5,"minStep":"40.0","maxStep":"70.0","steps":["40.0","45.0","50.0","60.0","70.0"],"group":"None"}],"interpreted":true,"name":"SS19.2A","coreAzi":288,"coreDip":38,"bedStrike":185,"bedDip":25,"data":[{"visible":false,"include":false,"step":"0.0","x":-241.14285714285714,"y":-21.938095238095237,"z":342.12380952380954,"a95":"0.99","info":"22/09/2014 at 05:24:00"},{"visible":true,"include":false,"step":"5.0","x":-166.36190476190475,"y":-90.19142857142857,"z":260.0857142857143,"a95":"0.99","info":"22/09/2014 at 05:24:00"},{"visible":true,"include":false,"step":"10.0","x":-79.24857142857142,"y":-182.31428571428572,"z":122.20952380952382,"a95":"0.99","info":"22/09/2014 at 05:24:00"},{"visible":true,"include":false,"step":"15.0","x":-36.95428571428571,"y":-223.64761904761906,"z":56.473333333333336,"a95":"0.99","info":"22/09/2014 at 05:24:00"},{"visible":true,"include":false,"step":"20.0","x":-16.473333333333333,"y":-235.56190476190477,"z":4.950190476190476,"a95":"0.99","info":"22/09/2014 at 05:24:00"},{"visible":true,"include":false,"step":"25.0","x":-2.524857142857143,"y":-239.54285714285712,"z":-24.22,"a95":"0.99","info":"22/09/2014 at 05:24:00"},{"visible":false,"include":false,"step":"30.0","x":-16.556190476190476,"y":-177.47619047619048,"z":-77.20380952380953,"a95":"0.99","info":"22/09/2014 at 05:24:00"},{"visible":true,"include":false,"step":"35.0","x":5.978095238095238,"y":-194.25714285714287,"z":-47.53142857142857,"a95":"0.99","info":"22/09/2014 at 05:24:00"},{"visible":true,"include":true,"step":"40.0","x":19.84952380952381,"y":-186.68571428571428,"z":-48.13428571428572,"a95":"0.99","info":"22/09/2014 at 05:24:00"},{"visible":true,"include":true,"step":"45.0","x":-0.06430952380952382,"y":-160.84761904761905,"z":-50.086666666666666,"a95":"0.99","info":"22/09/2014 at 05:24:00"},{"visible":true,"include":true,"step":"50.0","x":10.185714285714287,"y":-133.0095238095238,"z":-35.78666666666667,"a95":"0.99","info":"22/09/2014 at 05:24:00"},{"visible":true,"include":true,"step":"60.0","x":2.2825714285714285,"y":-117.67619047619047,"z":-23.853333333333335,"a95":"0.99","info":"22/09/2014 at 05:24:00"},{"visible":true,"include":true,"step":"70.0","x":48.986666666666665,"y":-87.60952380952381,"z":-50.61619047619048,"a95":"0.99","info":"22/09/2014 at 05:24:00"},{"visible":false,"include":false,"step":"80.0","x":-11.178095238095239,"y":-115.51428571428572,"z":-7.701047619047619,"a95":"0.99","info":"22/09/2014 at 05:24:00"},{"visible":false,"include":false,"step":"90.0","x":-0.825447619047619,"y":-98.5904761904762,"z":-37.15428571428571,"a95":"0.99","info":"22/09/2014 at 05:24:00"},{"visible":false,"include":false,"step":"100.0","x":1.6280000000000001,"y":-70.27428571428571,"z":-17.57238095238095,"a95":"0.99","info":"22/09/2014 at 05:24:00"}],"demagType":"Unknown","patch":1.1,"format":"Unknown","strat":null},{"version":"v1.1.0","exported":"2017-05-22T11:30:44.773Z","info":"5","GEO":[{"dec":191.121266692915,"inc":-31.538401301973238,"MAD":2.105962543571061,"cm":[-2.7068294695622863e-15,1.7932745235850147e-14,0],"intensity":380.825691730595,"type":"dir","forced":true,"remark":"","origin":false,"nSteps":7,"minStep":"25.0","maxStep":"60.0","steps":["25.0","30.0","35.0","40.0","45.0","50.0","60.0"],"group":"None"}],"TECT":[{"dec":175.70530176712782,"inc":-30.828553575045433,"MAD":2.1059625435709988,"cm":[-4.0602442043434294e-15,-5.24448209727693e-15,2.7068294695622863e-15],"intensity":380.825691730595,"type":"dir","forced":true,"remark":"","origin":false,"nSteps":7,"minStep":"25.0","maxStep":"60.0","steps":["25.0","30.0","35.0","40.0","45.0","50.0","60.0"],"group":"None"}],"interpreted":true,"name":"SS19.3A","coreAzi":290,"coreDip":45,"bedStrike":185,"bedDip":25,"data":[{"visible":true,"include":false,"step":"0.0","x":70.52952380952381,"y":-241.9238095238095,"z":-105.13333333333334,"a95":"0.99","info":"28/10/2014 at 15:13:46"},{"visible":true,"include":false,"step":"4.0","x":79.00571428571428,"y":-243.17142857142858,"z":-129.0857142857143,"a95":"0.99","info":"28/10/2014 at 15:13:46"},{"visible":true,"include":false,"step":"8.0","x":83.08571428571429,"y":-262.3619047619048,"z":-134.07619047619048,"a95":"0.99","info":"28/10/2014 at 15:13:46"},{"visible":true,"include":false,"step":"12.0","x":90.0904761904762,"y":-224.69523809523812,"z":-130.47619047619048,"a95":"0.99","info":"28/10/2014 at 15:13:46"},{"visible":true,"include":false,"step":"16.0","x":55.24476190476191,"y":-218.32380952380953,"z":-122.35238095238095,"a95":"0.99","info":"28/10/2014 at 15:13:46"},{"visible":true,"include":false,"step":"20.0","x":74.76571428571428,"y":-236.87619047619046,"z":-124.35238095238095,"a95":"0.99","info":"28/10/2014 at 15:13:46"},{"visible":true,"include":true,"step":"25.0","x":64.70761904761905,"y":-215.58095238095237,"z":-120.31428571428572,"a95":"0.99","info":"28/10/2014 at 15:13:46"},{"visible":true,"include":true,"step":"30.0","x":66.28285714285714,"y":-177.58095238095237,"z":-103.11428571428571,"a95":"0.99","info":"28/10/2014 at 15:13:46"},{"visible":true,"include":true,"step":"35.0","x":53.31333333333333,"y":-166.1809523809524,"z":-85.72761904761904,"a95":"0.99","info":"28/10/2014 at 15:13:46"},{"visible":true,"include":true,"step":"40.0","x":43.8352380952381,"y":-151.4,"z":-84.87714285714286,"a95":"0.99","info":"28/10/2014 at 15:13:46"},{"visible":true,"include":true,"step":"45.0","x":44.772380952380956,"y":-131.83809523809524,"z":-79.70190476190476,"a95":"0.99","info":"28/10/2014 at 15:13:46"},{"visible":true,"include":true,"step":"50.0","x":45.69047619047619,"y":-128.3047619047619,"z":-62.50190476190476,"a95":"0.99","info":"28/10/2014 at 15:13:46"},{"visible":true,"include":true,"step":"60.0","x":38.82285714285714,"y":-107.51428571428572,"z":-52.65714285714286,"a95":"0.99","info":"28/10/2014 at 15:13:46"},{"visible":true,"include":false,"step":"70.0","x":38.89904761904762,"y":-79.16571428571429,"z":-64.74380952380952,"a95":"0.99","info":"28/10/2014 at 15:13:46"},{"visible":true,"include":false,"step":"80.0","x":13.173333333333332,"y":-82.49904761904762,"z":-26.626666666666665,"a95":"0.99","info":"28/10/2014 at 15:13:46"},{"visible":true,"include":false,"step":"90.0","x":27.907619047619043,"y":-58.76952380952381,"z":-37.992380952380955,"a95":"0.99","info":"28/10/2014 at 15:13:46"},{"visible":true,"include":false,"step":"100.0","x":-5.810761904761905,"y":-60.70857142857143,"z":-27.69238095238095,"a95":"0.99","info":"28/10/2014 at 15:13:46"}],"demagType":"Unknown","patch":1.1,"format":"Unknown","strat":null},{"version":"v1.1.0","exported":"2017-05-22T11:30:44.773Z","info":"4","GEO":[{"dec":177.37099250124265,"inc":-33.34989526691967,"MAD":2.1954643169729966,"cm":[-2.7068294695622863e-15,-3.3497014685833295e-14,0],"intensity":593.5906261224214,"type":"dir","forced":true,"remark":"","origin":false,"nSteps":8,"minStep":"20.0","maxStep":"60.0","steps":["20.0","25.0","30.0","35.0","40.0","45.0","50.0","60.0"],"group":"None"}],"TECT":[{"dec":163.09919816429704,"inc":-26.832009027829724,"MAD":2.195464316972885,"cm":[-6.767073673905716e-15,-7.511451778035345e-14,-2.3684757858670007e-14],"intensity":593.5906261224212,"type":"dir","forced":true,"remark":"","origin":false,"nSteps":8,"minStep":"20.0","maxStep":"60.0","steps":["20.0","25.0","30.0","35.0","40.0","45.0","50.0","60.0"],"group":"None"}],"interpreted":true,"name":"SS19.4A","coreAzi":288,"coreDip":39,"bedStrike":185,"bedDip":25,"data":[{"visible":true,"include":false,"step":"0.0","x":64.15619047619047,"y":-352.7809523809524,"z":-291.6,"a95":"0.99","info":"10/10/2014 at 14:29:45"},{"visible":true,"include":false,"step":"4.0","x":84.06285714285714,"y":-354.8666666666667,"z":-218.94285714285715,"a95":"0.99","info":"10/10/2014 at 14:29:45"},{"visible":true,"include":false,"step":"8.0","x":104.84761904761906,"y":-366.87619047619046,"z":-255.94285714285715,"a95":"0.99","info":"10/10/2014 at 14:29:45"},{"visible":true,"include":false,"step":"12.0","x":102.4952380952381,"y":-332.93333333333334,"z":-247.93333333333334,"a95":"0.99","info":"10/10/2014 at 14:29:45"},{"visible":true,"include":false,"step":"16.0","x":106.67619047619047,"y":-326.02857142857147,"z":-247.28571428571428,"a95":"0.99","info":"10/10/2014 at 14:29:45"},{"visible":true,"include":true,"step":"20.0","x":98.41904761904763,"y":-327.2095238095238,"z":-225.62857142857143,"a95":"0.99","info":"10/10/2014 at 14:29:45"},{"visible":true,"include":true,"step":"25.0","x":97.22857142857143,"y":-296.77142857142854,"z":-207.75238095238097,"a95":"0.99","info":"10/10/2014 at 14:29:45"},{"visible":true,"include":true,"step":"30.0","x":82.91142857142857,"y":-259.83809523809526,"z":-197.35238095238094,"a95":"0.99","info":"10/10/2014 at 14:29:45"},{"visible":true,"include":true,"step":"35.0","x":70.77714285714285,"y":-247.15238095238095,"z":-179.83809523809524,"a95":"0.99","info":"10/10/2014 at 14:29:45"},{"visible":true,"include":true,"step":"40.0","x":64.66571428571429,"y":-198.8857142857143,"z":-165.8761904761905,"a95":"0.99","info":"10/10/2014 at 14:29:45"},{"visible":true,"include":true,"step":"45.0","x":67.11047619047619,"y":-186.96190476190475,"z":-158.76190476190476,"a95":"0.99","info":"10/10/2014 at 14:29:45"},{"visible":true,"include":true,"step":"50.0","x":50.76095238095238,"y":-194.6952380952381,"z":-130.2761904761905,"a95":"0.99","info":"10/10/2014 at 14:29:45"},{"visible":true,"include":true,"step":"60.0","x":40.124761904761904,"y":-142.66666666666666,"z":-109.5904761904762,"a95":"0.99","info":"10/10/2014 at 14:29:45"},{"visible":true,"include":false,"step":"70.0","x":41.145714285714284,"y":-111.05714285714285,"z":-98.81904761904761,"a95":"0.99","info":"10/10/2014 at 14:29:45"},{"visible":true,"include":false,"step":"80.0","x":93.54190476190476,"y":-132.66666666666666,"z":-43.78285714285715,"a95":"0.99","info":"10/10/2014 at 14:29:45"},{"visible":true,"include":false,"step":"90.0","x":25.15904761904762,"y":-86.20095238095239,"z":-60.07904761904762,"a95":"0.99","info":"10/10/2014 at 14:29:45"},{"visible":true,"include":false,"step":"100.0","x":29.177142857142858,"y":-83.88666666666666,"z":-50.00095238095238,"a95":"0.99","info":"10/10/2014 at 14:29:45"}],"demagType":"Unknown","patch":1.1,"format":"Unknown","strat":null},{"version":"v1.1.0","exported":"2017-05-22T11:30:44.773Z","info":"1","GEO":[{"dec":198.79069893145314,"inc":-25.557974792398685,"MAD":3.0279584669228248,"cm":[-1.3534147347811431e-15,7.020838936677181e-15,0],"intensity":156.95198830568083,"type":"dir","forced":true,"remark":"","origin":false,"nSteps":8,"minStep":"25.0","maxStep":"70.0","steps":["25.0","30.0","35.0","40.0","45.0","50.0","60.0","70.0"],"group":"None"}],"TECT":[{"dec":185.82224291075372,"inc":-28.808741282815213,"MAD":3.0279584669227937,"cm":[-1.691768418476429e-15,-4.10253841480534e-15,0],"intensity":156.95198830568083,"type":"dir","forced":true,"remark":"","origin":false,"nSteps":8,"minStep":"25.0","maxStep":"70.0","steps":["25.0","30.0","35.0","40.0","45.0","50.0","60.0","70.0"],"group":"None"}],"interpreted":true,"name":"SS19.6A","coreAzi":289,"coreDip":44,"bedStrike":185,"bedDip":25,"data":[{"visible":false,"include":false,"step":"0.0","x":-60.00095238095238,"y":22.557142857142857,"z":94.93714285714286,"a95":"0.99","info":"22/09/2014 at 10:31:41"},{"visible":true,"include":false,"step":"5.0","x":-31.83809523809524,"y":-3.2119999999999997,"z":74.1447619047619,"a95":"0.99","info":"22/09/2014 at 10:31:41"},{"visible":true,"include":false,"step":"10.0","x":7.2617142857142865,"y":-55.60952380952381,"z":27.803809523809523,"a95":"0.99","info":"22/09/2014 at 10:31:41"},{"visible":true,"include":false,"step":"15.0","x":29.331428571428575,"y":-80.28380952380952,"z":3.2338095238095237,"a95":"0.99","info":"22/09/2014 at 10:31:41"},{"visible":true,"include":false,"step":"20.0","x":35.52095238095238,"y":-89.60761904761905,"z":-17.163809523809523,"a95":"0.99","info":"22/09/2014 at 10:31:41"},{"visible":true,"include":true,"step":"25.0","x":36.73428571428571,"y":-100.86666666666666,"z":-29.41333333333333,"a95":"0.99","info":"22/09/2014 at 10:31:41"},{"visible":true,"include":true,"step":"30.0","x":29.343809523809526,"y":-94.03809523809524,"z":-31.164761904761907,"a95":"0.99","info":"22/09/2014 at 10:31:41"},{"visible":true,"include":true,"step":"35.0","x":33.679047619047616,"y":-85.19714285714286,"z":-34.08190476190477,"a95":"0.99","info":"22/09/2014 at 10:31:41"},{"visible":true,"include":true,"step":"40.0","x":24.077142857142857,"y":-88.12190476190476,"z":-29.944761904761908,"a95":"0.99","info":"22/09/2014 at 10:31:41"},{"visible":true,"include":true,"step":"45.0","x":25.81142857142857,"y":-73.53428571428572,"z":-23.871428571428574,"a95":"0.99","info":"22/09/2014 at 10:31:41"},{"visible":true,"include":true,"step":"50.0","x":30.076190476190476,"y":-70.7,"z":-24.492380952380955,"a95":"0.99","info":"22/09/2014 at 10:31:41"},{"visible":true,"include":true,"step":"60.0","x":15.362857142857143,"y":-60.68571428571429,"z":-17.972380952380952,"a95":"0.99","info":"22/09/2014 at 10:31:41"},{"visible":true,"include":true,"step":"70.0","x":13.402857142857142,"y":-40.92285714285714,"z":-15.485714285714286,"a95":"0.99","info":"22/09/2014 at 10:31:41"},{"visible":false,"include":false,"step":"80.0","x":37.99904761904762,"y":-34.25142857142857,"z":-9.004285714285714,"a95":"0.99","info":"22/09/2014 at 10:31:41"},{"visible":false,"include":false,"step":"90.0","x":-3.183809523809524,"y":-41.68380952380952,"z":-5.747904761904762,"a95":"0.99","info":"22/09/2014 at 10:31:41"},{"visible":false,"include":false,"step":"100.0","x":12.071428571428571,"y":-31.813333333333336,"z":-4.9237142857142855,"a95":"0.99","info":"22/09/2014 at 10:31:41"}],"demagType":"Unknown","patch":1.1,"format":"Unknown","strat":null},{"version":"v1.1.0","exported":"2017-05-22T11:30:44.774Z","info":"5","GEO":[{"dec":206.90834600349967,"inc":-39.320360555836146,"MAD":7.673497628199166,"cm":[6.767073673905716e-16,-2.246879930789007e-15,0],"intensity":198.91746566205535,"type":"dir","forced":true,"remark":"","origin":false,"nSteps":11,"minStep":"20.0","maxStep":"100.0","steps":["20.0","25.0","30.0","35.0","40.0","45.0","50.0","60.0","80.0","90.0","100.0"],"group":"None"}],"TECT":[{"dec":184.5062334822069,"inc":-44.129101830927446,"MAD":7.673497628199152,"cm":[2.8760063114099294e-15,3.383536836952858e-15,-1.7763568394002505e-15],"intensity":198.91746566205535,"type":"dir","forced":true,"remark":"","origin":false,"nSteps":11,"minStep":"20.0","maxStep":"100.0","steps":["20.0","25.0","30.0","35.0","40.0","45.0","50.0","60.0","80.0","90.0","100.0"],"group":"None"}],"interpreted":true,"name":"SS19.6B","coreAzi":289,"coreDip":44,"bedStrike":185,"bedDip":25,"data":[{"visible":false,"include":false,"step":"0.0","x":81.69809523809525,"y":-126.5047619047619,"z":-81.4152380952381,"a95":"0.99","info":"10/10/2014 at 14:29:45"},{"visible":true,"include":false,"step":"4.0","x":94.15523809523809,"y":-133.0095238095238,"z":-18.951428571428572,"a95":"0.99","info":"10/10/2014 at 14:29:45"},{"visible":true,"include":false,"step":"8.0","x":106.52380952380952,"y":-139.48571428571427,"z":-54.63904761904762,"a95":"0.99","info":"10/10/2014 at 14:29:45"},{"visible":true,"include":false,"step":"12.0","x":101.96190476190475,"y":-123.28571428571429,"z":-65.15428571428572,"a95":"0.99","info":"10/10/2014 at 14:29:45"},{"visible":true,"include":false,"step":"16.0","x":102.56190476190477,"y":-119,"z":-67.7,"a95":"0.99","info":"10/10/2014 at 14:29:45"},{"visible":true,"include":true,"step":"20.0","x":98.22857142857144,"y":-134.76190476190476,"z":-59.62190476190476,"a95":"0.99","info":"10/10/2014 at 14:29:45"},{"visible":true,"include":true,"step":"25.0","x":87.6647619047619,"y":-116,"z":-51.465714285714284,"a95":"0.99","info":"10/10/2014 at 14:29:45"},{"visible":true,"include":true,"step":"30.0","x":78.53809523809524,"y":-103.17142857142856,"z":-50.67619047619048,"a95":"0.99","info":"10/10/2014 at 14:29:45"},{"visible":true,"include":true,"step":"35.0","x":57.35619047619048,"y":-103.08571428571429,"z":-36.227619047619044,"a95":"0.99","info":"10/10/2014 at 14:29:45"},{"visible":true,"include":true,"step":"40.0","x":57.79142857142857,"y":-55.24952380952381,"z":-51.79333333333334,"a95":"0.99","info":"10/10/2014 at 14:29:45"},{"visible":true,"include":true,"step":"45.0","x":46.88666666666667,"y":-68.61619047619048,"z":-39.54,"a95":"0.99","info":"10/10/2014 at 14:29:45"},{"visible":true,"include":true,"step":"50.0","x":36.97714285714286,"y":-68.27238095238096,"z":-26.39428571428571,"a95":"0.99","info":"10/10/2014 at 14:29:45"},{"visible":true,"include":true,"step":"60.0","x":24.183809523809526,"y":-47.735238095238095,"z":-25.31238095238095,"a95":"0.99","info":"10/10/2014 at 14:29:45"},{"visible":true,"include":false,"step":"70.0","x":31.52,"y":-40.96190476190476,"z":-52.58380952380952,"a95":"0.99","info":"10/10/2014 at 14:29:45"},{"visible":true,"include":true,"step":"80.0","x":-0.6906666666666667,"y":-39.25047619047619,"z":-18.51047619047619,"a95":"0.99","info":"10/10/2014 at 14:29:45"},{"visible":true,"include":true,"step":"90.0","x":1.5205714285714285,"y":-22.643809523809523,"z":-12.482857142857142,"a95":"0.99","info":"10/10/2014 at 14:29:45"},{"visible":true,"include":true,"step":"100.0","x":-1.6253333333333333,"y":-24.934285714285714,"z":-9.175619047619048,"a95":"0.99","info":"10/10/2014 at 14:29:45"}],"demagType":"Unknown","patch":1.1,"format":"Unknown","strat":null},{"version":"v1.1.0","exported":"2017-05-22T11:30:44.774Z","info":"","GEO":[{"dec":62.713546640211916,"inc":-30.26796777834528,"MAD":8.686957435620812,"cm":[-1.5543122344752192e-15,6.217248937900877e-15,0],"intensity":299.8860900900181,"type":"GC","origin":false,"forced":true,"remark":"","nSteps":6,"minStep":"100","maxStep":"270","steps":["100","150","180","210","240","270"],"group":"None","version":"v1.1.0"}],"TECT":[{"dec":67.19329870795895,"inc":-8.525416741726804,"MAD":8.686957435620194,"cm":[9.769962616701378e-15,3.186340080674199e-14,1.7763568394002505e-15],"intensity":299.8860900900181,"type":"GC","origin":false,"forced":true,"remark":"","nSteps":6,"minStep":"100","maxStep":"270","steps":["100","150","180","210","240","270"],"group":"None","version":"v1.1.0"}],"interpreted":true,"name":"SS19.7A","coreAzi":20,"coreDip":55,"bedStrike":185,"bedDip":25,"data":[{"visible":true,"include":false,"step":"20","x":87.80952380952381,"y":-207.61904761904762,"z":888.7619047619048,"a95":"2.7","info":"\"14-09-29\" at \"15:43\""},{"visible":true,"include":true,"step":"100","x":42.38095238095238,"y":-40,"z":240,"a95":"3.1","info":"\"14-09-29\" at \"18:21\""},{"visible":true,"include":true,"step":"150","x":22.857142857142858,"y":-20.476190476190474,"z":148,"a95":"3.8","info":"\"14-09-29\" at \"21:15\""},{"visible":true,"include":true,"step":"180","x":6.571428571428571,"y":6,"z":91.13333333333333,"a95":"5.4","info":"\"14-09-30\" at \"15:40\""},{"visible":true,"include":true,"step":"210","x":-1.2285714285714286,"y":18.02857142857143,"z":79.62857142857143,"a95":"5.5","info":"\"14-09-30\" at \"18:52\""},{"visible":true,"include":true,"step":"240","x":-10.4,"y":12.847619047619048,"z":77.4095238095238,"a95":"6","info":"\"14-09-30\" at \"21:56\""},{"visible":true,"include":true,"step":"270","x":-17.685714285714283,"y":24.34285714285714,"z":58.457142857142856,"a95":"4.5","info":"\"14-10-01\" at \"15:54\""},{"visible":true,"include":false,"step":"300","x":-41.142857142857146,"y":5.333333333333333,"z":92.38095238095238,"a95":"7","info":"\"14-10-01\" at \"19:27\""},{"visible":true,"include":false,"step":"320","x":-45.95238095238095,"y":12.952380952380953,"z":81.4857142857143,"a95":"4.9","info":"\"14-10-01\" at \"22:33\""},{"visible":true,"include":false,"step":"340","x":-45.523809523809526,"y":9.80952380952381,"z":88.47619047619048,"a95":"4.9","info":"\"14-10-02\" at \"16:08\""},{"visible":true,"include":false,"step":"370","x":-59.590476190476195,"y":12.628571428571428,"z":50.57142857142857,"a95":"7.3","info":"\"14-10-02\" at \"18:52\""},{"visible":true,"include":false,"step":"400","x":-56.95238095238095,"y":-0.8571428571428571,"z":48.12380952380953,"a95":"5.7","info":"\"14-10-02\" at \"22:06\""},{"visible":true,"include":false,"step":"420","x":-57.12380952380952,"y":11.41904761904762,"z":48.38095238095238,"a95":"5.7","info":"\"14-10-03\" at \"15:38\""},{"visible":true,"include":false,"step":"440","x":-63.94285714285714,"y":-11.552380952380952,"z":46.25714285714285,"a95":"7.3","info":"\"14-10-03\" at \"19:04\""}],"demagType":"Unknown","patch":1.1,"format":"Unknown","strat":null},{"version":"v1.1.0","exported":"2017-05-22T11:30:44.774Z","info":"6","GEO":[],"TECT":[],"interpreted":false,"name":"SS19.8A","coreAzi":332,"coreDip":43,"bedStrike":185,"bedDip":25,"data":[{"visible":true,"include":false,"step":"0.0","x":-119.86666666666666,"y":60.86571428571429,"z":44.95142857142857,"a95":"0.99","info":"10/10/2014 at 14:29:45"},{"visible":true,"include":false,"step":"4.0","x":-89.12285714285714,"y":39.69428571428572,"z":33.85047619047619,"a95":"0.99","info":"10/10/2014 at 14:29:45"},{"visible":true,"include":false,"step":"8.0","x":-77.24285714285713,"y":32.9,"z":19.706666666666667,"a95":"0.99","info":"10/10/2014 at 14:29:45"},{"visible":true,"include":true,"step":"12.0","x":-49.857142857142854,"y":45.36,"z":8.722857142857142,"a95":"0.99","info":"10/10/2014 at 14:29:45"},{"visible":true,"include":true,"step":"16.0","x":-39.02952380952381,"y":46.98952380952381,"z":2.0853333333333333,"a95":"0.99","info":"10/10/2014 at 14:29:45"},{"visible":true,"include":true,"step":"20.0","x":-26.848571428571432,"y":5.971619047619048,"z":7.551809523809523,"a95":"0.99","info":"10/10/2014 at 14:29:45"},{"visible":true,"include":true,"step":"25.0","x":-29.96761904761905,"y":-7.936285714285715,"z":12.92952380952381,"a95":"0.99","info":"10/10/2014 at 14:29:45"},{"visible":true,"include":true,"step":"30.0","x":-39.492380952380955,"y":-12.620952380952382,"z":-4.1687619047619044,"a95":"0.99","info":"10/10/2014 at 14:29:45"},{"visible":true,"include":true,"step":"35.0","x":-25.859999999999996,"y":-38.785714285714285,"z":0.032111428571428575,"a95":"0.99","info":"10/10/2014 at 14:29:45"},{"visible":true,"include":false,"step":"40.0","x":-29.026666666666664,"y":-15.078095238095237,"z":-34.860952380952384,"a95":"0.99","info":"10/10/2014 at 14:29:45"},{"visible":true,"include":false,"step":"45.0","x":-45.85047619047619,"y":-27.58761904761905,"z":-45.71904761904762,"a95":"0.99","info":"10/10/2014 at 14:29:45"},{"visible":true,"include":false,"step":"50.0","x":-45.98285714285714,"y":-46.96095238095238,"z":-5.2454285714285716,"a95":"0.99","info":"10/10/2014 at 14:29:45"},{"visible":true,"include":false,"step":"60.0","x":-51.24476190476191,"y":-51.099999999999994,"z":-19.36095238095238,"a95":"0.99","info":"10/10/2014 at 14:29:45"},{"visible":true,"include":false,"step":"70.0","x":-56.567619047619054,"y":-53.86380952380953,"z":-51.70666666666666,"a95":"0.99","info":"10/10/2014 at 14:29:45"},{"visible":true,"include":false,"step":"80.0","x":-45.037142857142854,"y":-91.3104761904762,"z":-4.27647619047619,"a95":"0.99","info":"10/10/2014 at 14:29:45"},{"visible":true,"include":false,"step":"90.0","x":-75.9447619047619,"y":-85.24571428571429,"z":-19.036190476190477,"a95":"0.99","info":"10/10/2014 at 14:29:45"},{"visible":true,"include":false,"step":"100.0","x":-50.78285714285715,"y":-70.31809523809524,"z":-3.993142857142857,"a95":"0.99","info":"10/10/2014 at 14:29:45"}],"demagType":"Unknown","patch":1.1,"format":"Unknown","strat":null},{"version":"v1.1.0","exported":"2017-05-22T11:30:44.774Z","info":"6","GEO":[{"dec":97.03400648655054,"inc":-11.240158408436024,"MAD":4.297709378280024,"cm":[-1.7763568394002505e-15,8.881784197001252e-15,0],"intensity":281.6916099328767,"type":"GC","origin":false,"forced":true,"remark":"","nSteps":3,"minStep":"0.0","maxStep":"8.0","steps":["0.0","4.0","8.0"],"group":"None","version":"v1.1.0"}],"TECT":[{"dec":277.05381051657423,"inc":-13.744436111768058,"MAD":4.297709378280112,"cm":[-8.881784197001252e-15,2.6645352591003757e-15,5.329070518200751e-15],"intensity":281.6916099328767,"type":"GC","origin":false,"forced":true,"remark":"","nSteps":3,"minStep":"0.0","maxStep":"8.0","steps":["0.0","4.0","8.0"],"group":"None","version":"v1.1.0"}],"interpreted":true,"name":"SS19.9A","coreAzi":6,"coreDip":28,"bedStrike":185,"bedDip":25,"data":[{"visible":true,"include":true,"step":"0.0","x":-91.70952380952382,"y":31.140000000000004,"z":140.9904761904762,"a95":"0.99","info":"28/10/2014 at 15:13:46"},{"visible":true,"include":true,"step":"4.0","x":-56.84761904761905,"y":20.200952380952383,"z":108.4952380952381,"a95":"0.99","info":"28/10/2014 at 15:13:46"},{"visible":true,"include":true,"step":"8.0","x":-41.51619047619048,"y":18.732380952380954,"z":102.14285714285714,"a95":"0.99","info":"28/10/2014 at 15:13:46"},{"visible":true,"include":false,"step":"12.0","x":-5.951714285714286,"y":36.582857142857144,"z":95.91428571428571,"a95":"0.99","info":"28/10/2014 at 15:13:46"},{"visible":true,"include":false,"step":"16.0","x":-58.486666666666665,"y":16.204761904761906,"z":76.56380952380952,"a95":"0.99","info":"28/10/2014 at 15:13:46"},{"visible":true,"include":false,"step":"20.0","x":-21.235238095238095,"y":-11.538095238095238,"z":61.55333333333333,"a95":"0.99","info":"28/10/2014 at 15:13:46"},{"visible":true,"include":false,"step":"25.0","x":-19.900952380952383,"y":-15.14857142857143,"z":43.44285714285714,"a95":"0.99","info":"28/10/2014 at 15:13:46"},{"visible":true,"include":false,"step":"30.0","x":-16.594285714285714,"y":-24.14095238095238,"z":37.137142857142855,"a95":"0.99","info":"28/10/2014 at 15:13:46"},{"visible":true,"include":false,"step":"35.0","x":-4.886666666666667,"y":-37.90380952380953,"z":20.121904761904762,"a95":"0.99","info":"28/10/2014 at 15:13:46"},{"visible":true,"include":false,"step":"40.0","x":-48.36952380952381,"y":-52.896190476190476,"z":47.294285714285714,"a95":"0.99","info":"28/10/2014 at 15:13:46"},{"visible":true,"include":false,"step":"45.0","x":-55.07142857142857,"y":-33.885714285714286,"z":3.4094285714285713,"a95":"0.99","info":"28/10/2014 at 15:13:46"},{"visible":true,"include":false,"step":"50.0","x":-29.11904761904762,"y":-66.35238095238095,"z":-6.51095238095238,"a95":"0.99","info":"28/10/2014 at 15:13:46"},{"visible":true,"include":false,"step":"60.0","x":-39.684761904761906,"y":-85.94380952380952,"z":28.886666666666667,"a95":"0.99","info":"28/10/2014 at 15:13:46"},{"visible":true,"include":false,"step":"70.0","x":-29.06857142857143,"y":-78.84095238095239,"z":-18.28857142857143,"a95":"0.99","info":"28/10/2014 at 15:13:46"},{"visible":true,"include":false,"step":"80.0","x":-81.42380952380952,"y":-114.08571428571429,"z":22.426666666666666,"a95":"0.99","info":"28/10/2014 at 15:13:46"},{"visible":true,"include":false,"step":"90.0","x":-46.21809523809524,"y":-84.35809523809523,"z":-29.95809523809524,"a95":"0.99","info":"28/10/2014 at 15:13:46"},{"visible":true,"include":false,"step":"100.0","x":-49.02,"y":-81.76857142857143,"z":-17.950476190476188,"a95":"0.99","info":"28/10/2014 at 15:13:46"}],"demagType":"Unknown","patch":1.1,"format":"Unknown","strat":null},{"version":"v1.1.0","exported":"2017-05-22T11:30:44.774Z","info":"2","GEO":[{"dec":283.55426305949993,"inc":-33.13786003839463,"MAD":6.7091112244192015,"cm":[-7.993605777301127e-15,-5.773159728050814e-15,0],"intensity":492.34094892944245,"type":"GC","origin":false,"forced":true,"remark":"","nSteps":11,"minStep":"5.0","maxStep":"60.0","steps":["5.0","10.0","15.0","20.0","25.0","30.0","35.0","40.0","45.0","50.0","60.0"],"group":"None","version":"v1.1.0"}],"TECT":[{"dec":288.48418421742844,"inc":-57.71309031424711,"MAD":6.709111224419524,"cm":[-1.2434497875801753e-14,-1.199040866595169e-14,-2.220446049250313e-16],"intensity":492.3409489294425,"type":"GC","origin":false,"forced":true,"remark":"","nSteps":11,"minStep":"5.0","maxStep":"60.0","steps":["5.0","10.0","15.0","20.0","25.0","30.0","35.0","40.0","45.0","50.0","60.0"],"group":"None","version":"v1.1.0"}],"interpreted":true,"name":"SS19.10A","coreAzi":327,"coreDip":56,"bedStrike":185,"bedDip":25,"data":[{"visible":true,"include":false,"step":"0.0","x":143.92380952380952,"y":182.01904761904763,"z":585.2190476190476,"a95":"0.99","info":"22/09/2014 at 10:31:41"},{"visible":true,"include":true,"step":"5.0","x":137.53333333333333,"y":118.3047619047619,"z":472.3619047619048,"a95":"0.99","info":"22/09/2014 at 10:31:41"},{"visible":true,"include":true,"step":"10.0","x":104.06666666666668,"y":57.24761904761905,"z":344.23809523809524,"a95":"0.99","info":"22/09/2014 at 10:31:41"},{"visible":true,"include":true,"step":"15.0","x":59.13047619047619,"y":39.829523809523806,"z":258.84761904761905,"a95":"0.99","info":"22/09/2014 at 10:31:41"},{"visible":true,"include":true,"step":"20.0","x":27.64095238095238,"y":1.0709523809523809,"z":193.03809523809525,"a95":"0.99","info":"22/09/2014 at 10:31:41"},{"visible":true,"include":true,"step":"25.0","x":30.304761904761904,"y":-13.292380952380952,"z":140.48571428571427,"a95":"0.99","info":"22/09/2014 at 10:31:41"},{"visible":true,"include":true,"step":"30.0","x":-7.635238095238096,"y":-20.045714285714286,"z":108.86666666666666,"a95":"0.99","info":"22/09/2014 at 10:31:41"},{"visible":true,"include":true,"step":"35.0","x":-9.494,"y":-37.98285714285714,"z":71.98476190476191,"a95":"0.99","info":"22/09/2014 at 10:31:41"},{"visible":true,"include":true,"step":"40.0","x":-43.007619047619045,"y":-65.65619047619047,"z":52.12952380952381,"a95":"0.99","info":"22/09/2014 at 10:31:41"},{"visible":true,"include":true,"step":"45.0","x":-50.01238095238095,"y":-70.58190476190477,"z":37.55238095238095,"a95":"0.99","info":"22/09/2014 at 10:31:41"},{"visible":true,"include":true,"step":"50.0","x":-38.670476190476194,"y":-64.11142857142856,"z":21.11142857142857,"a95":"0.99","info":"22/09/2014 at 10:31:41"},{"visible":true,"include":true,"step":"60.0","x":-84.80095238095238,"y":-117.79047619047618,"z":17.146666666666665,"a95":"0.99","info":"22/09/2014 at 10:31:41"},{"visible":false,"include":false,"step":"70.0","x":-89.8,"y":-86.44666666666667,"z":28.845714285714287,"a95":"0.99","info":"22/09/2014 at 10:31:41"},{"visible":false,"include":false,"step":"80.0","x":-55.56095238095238,"y":-83.97999999999999,"z":-19.345714285714287,"a95":"0.99","info":"22/09/2014 at 10:31:41"},{"visible":false,"include":false,"step":"90.0","x":-95.64761904761905,"y":-122.91428571428571,"z":-9.34247619047619,"a95":"0.99","info":"22/09/2014 at 10:31:41"},{"visible":false,"include":false,"step":"100.0","x":-102.51428571428572,"y":-131.59047619047618,"z":11.119047619047619,"a95":"0.99","info":"22/09/2014 at 10:31:41"}],"demagType":"Unknown","patch":1.1,"format":"Unknown","strat":null},{"version":"v1.1.0","exported":"2017-05-22T11:30:44.774Z","info":"7","GEO":[{"dec":325.5088573252355,"inc":-29.989176935749082,"MAD":17.38548186325254,"cm":[-8.881784197001252e-16,-1.7763568394002505e-15,0],"intensity":99.27800192953211,"type":"GC","origin":false,"forced":true,"remark":"","nSteps":5,"minStep":"16.0","maxStep":"35.0","steps":["16.0","20.0","25.0","30.0","35.0"],"group":"None","version":"v1.1.0"}],"TECT":[{"dec":341.69212178138395,"inc":-43.297830409618044,"MAD":17.385481863252448,"cm":[-1.199040866595169e-14,-4.440892098500626e-15,0],"intensity":99.27800192953208,"type":"GC","origin":false,"forced":true,"remark":"","nSteps":5,"minStep":"16.0","maxStep":"35.0","steps":["16.0","20.0","25.0","30.0","35.0"],"group":"None","version":"v1.1.0"}],"interpreted":true,"name":"SS19.11A","coreAzi":335,"coreDip":49,"bedStrike":185,"bedDip":25,"data":[{"visible":true,"include":false,"step":"0.0","x":-75.06666666666668,"y":51.11714285714286,"z":176.54285714285714,"a95":"0.99","info":"10/10/2014 at 14:29:45"},{"visible":true,"include":false,"step":"4.0","x":-40.79047619047619,"y":49.796190476190475,"z":142.22857142857143,"a95":"0.99","info":"10/10/2014 at 14:29:45"},{"visible":true,"include":false,"step":"8.0","x":-24.596190476190475,"y":33.52857142857143,"z":121.11428571428571,"a95":"0.99","info":"10/10/2014 at 14:29:45"},{"visible":true,"include":false,"step":"12.0","x":-21.898095238095237,"y":33.06095238095238,"z":110.76190476190476,"a95":"0.99","info":"10/10/2014 at 14:29:45"},{"visible":true,"include":true,"step":"16.0","x":-22.64190476190476,"y":28.961904761904766,"z":73.79714285714286,"a95":"0.99","info":"10/10/2014 at 14:29:45"},{"visible":true,"include":true,"step":"20.0","x":-10.99047619047619,"y":-9.215714285714286,"z":78.66380952380953,"a95":"0.99","info":"10/10/2014 at 14:29:45"},{"visible":true,"include":true,"step":"25.0","x":-2.3794285714285714,"y":-22.14190476190476,"z":61.457142857142856,"a95":"0.99","info":"10/10/2014 at 14:29:45"},{"visible":true,"include":true,"step":"30.0","x":-10.462857142857143,"y":-27.097142857142856,"z":26.472380952380952,"a95":"0.99","info":"10/10/2014 at 14:29:45"},{"visible":true,"include":true,"step":"35.0","x":-20.554285714285715,"y":-61.05619047619048,"z":9.630476190476191,"a95":"0.99","info":"10/10/2014 at 14:29:45"},{"visible":true,"include":false,"step":"40.0","x":-52.18571428571429,"y":-24.16,"z":-8.534,"a95":"0.99","info":"10/10/2014 at 14:29:45"},{"visible":true,"include":false,"step":"45.0","x":-44.22285714285714,"y":-56.60666666666667,"z":-21.52952380952381,"a95":"0.99","info":"10/10/2014 at 14:29:45"},{"visible":true,"include":false,"step":"50.0","x":-48.507619047619045,"y":-96.5047619047619,"z":-7.125523809523809,"a95":"0.99","info":"10/10/2014 at 14:29:45"},{"visible":true,"include":false,"step":"60.0","x":-57.14,"y":-95.19238095238094,"z":-23.082857142857144,"a95":"0.99","info":"10/10/2014 at 14:29:45"},{"visible":false,"include":false,"step":"70.0","x":-63.94190476190476,"y":-76.89619047619047,"z":-35.296190476190475,"a95":"0.99","info":"10/10/2014 at 14:29:45"},{"visible":false,"include":false,"step":"80.0","x":-101.64761904761905,"y":-146.14285714285714,"z":-38.36190476190476,"a95":"0.99","info":"10/10/2014 at 14:29:45"},{"visible":false,"include":false,"step":"90.0","x":-115.05714285714285,"y":-131.21904761904761,"z":-19.28857142857143,"a95":"0.99","info":"10/10/2014 at 14:29:45"},{"visible":false,"include":false,"step":"100.0","x":-95.61904761904762,"y":-147.58095238095237,"z":-17.085714285714285,"a95":"0.99","info":"10/10/2014 at 14:29:45"}],"demagType":"Unknown","patch":1.1,"format":"Unknown","strat":null},{"version":"v1.1.0","exported":"2017-05-22T11:30:44.774Z","info":"","GEO":[{"dec":252.85318190386948,"inc":-4.468374814595281,"MAD":16.997897729973456,"cm":[1.1102230246251565e-16,1.1657341758564144e-15,0],"intensity":108.73936802616686,"type":"GC","origin":false,"forced":true,"remark":"","nSteps":10,"minStep":"180","maxStep":"420","steps":["180","210","240","270","300","320","340","370","400","420"],"group":"None","version":"v1.1.0"}],"TECT":[{"dec":249.94495167403147,"inc":-27.442451522729716,"MAD":16.997897729973374,"cm":[-1.9984014443252818e-15,-2.886579864025407e-15,-4.440892098500626e-16],"intensity":108.73936802616686,"type":"GC","origin":false,"forced":true,"remark":"","nSteps":10,"minStep":"180","maxStep":"420","steps":["180","210","240","270","300","320","340","370","400","420"],"group":"None","version":"v1.1.0"}],"interpreted":true,"name":"SS19.12A","coreAzi":336,"coreDip":50,"bedStrike":185,"bedDip":25,"data":[{"visible":true,"include":false,"step":"20","x":110.47619047619048,"y":144.95238095238096,"z":1132.857142857143,"a95":"2.6","info":"\"14-09-29\" at \"15:44\""},{"visible":true,"include":false,"step":"100","x":32,"y":36.285714285714285,"z":235.8095238095238,"a95":"3","info":"\"14-09-29\" at \"18:23\""},{"visible":true,"include":false,"step":"150","x":32.57142857142857,"y":12.666666666666666,"z":152.95238095238096,"a95":"3.7","info":"\"14-09-29\" at \"21:17\""},{"visible":true,"include":true,"step":"180","x":11.552380952380952,"y":-1.2952380952380953,"z":65.23809523809524,"a95":"8.7","info":"\"14-09-30\" at \"15:42\""},{"visible":true,"include":true,"step":"210","x":-0.42857142857142855,"y":2.619047619047619,"z":42.23809523809524,"a95":"7.6","info":"\"14-09-30\" at \"18:53\""},{"visible":true,"include":true,"step":"240","x":-13.857142857142858,"y":-13.266666666666667,"z":54.13333333333333,"a95":"7.2","info":"\"14-09-30\" at \"21:58\""},{"visible":true,"include":true,"step":"270","x":-33.72380952380953,"y":3.7714285714285714,"z":36.62857142857143,"a95":"8.7","info":"\"14-10-01\" at \"15:56\""},{"visible":true,"include":true,"step":"300","x":-25.45714285714286,"y":-0.34285714285714286,"z":80.39047619047619,"a95":"7.8","info":"\"14-10-01\" at \"19:29\""},{"visible":true,"include":true,"step":"320","x":-31.914285714285718,"y":2.6476190476190475,"z":54.4952380952381,"a95":"5.4","info":"\"14-10-01\" at \"22:35\""},{"visible":true,"include":true,"step":"340","x":-33.41904761904762,"y":3.1523809523809527,"z":83.76190476190476,"a95":"5.2","info":"\"14-10-02\" at \"16:10\""},{"visible":true,"include":true,"step":"370","x":-54.51428571428571,"y":-11.219047619047618,"z":39.15238095238095,"a95":"5.5","info":"\"14-10-02\" at \"18:54\""},{"visible":true,"include":true,"step":"400","x":-37.17142857142857,"y":-9.723809523809523,"z":42.36190476190476,"a95":"7.8","info":"\"14-10-02\" at \"22:08\""},{"visible":true,"include":true,"step":"420","x":-46.2,"y":-9.133333333333335,"z":37.304761904761904,"a95":"7.7","info":"\"14-10-03\" at \"15:40\""},{"visible":true,"include":false,"step":"440","x":-41.03809523809524,"y":-26.45714285714286,"z":30.952380952380953,"a95":"6.8","info":"\"14-10-03\" at \"19:06\""}],"demagType":"Unknown","patch":1.1,"format":"Unknown","strat":null},{"version":"v1.1.0","exported":"2017-05-22T11:30:44.774Z","info":"","GEO":[],"TECT":[],"interpreted":false,"name":"SS19.13A","coreAzi":4,"coreDip":40,"bedStrike":185,"bedDip":25,"data":[{"visible":true,"include":false,"step":"20","x":-9.80952380952381,"y":-130.76190476190476,"z":693.5238095238095,"a95":"2.5","info":"\"14-09-29\" at \"15:46\""},{"visible":true,"include":false,"step":"100","x":9.77142857142857,"y":-29.047619047619047,"z":77.74285714285713,"a95":"3.2","info":"\"14-09-29\" at \"18:25\""},{"visible":true,"include":false,"step":"150","x":1.7523809523809522,"y":-27.771428571428572,"z":50.88571428571428,"a95":"4.2","info":"\"14-09-29\" at \"21:19\""},{"visible":true,"include":false,"step":"180","x":11.742857142857142,"y":-10.952380952380953,"z":9.019047619047619,"a95":"11.3","info":"\"14-09-30\" at \"15:44\""},{"visible":true,"include":false,"step":"210","x":2.4952380952380953,"y":-5.723809523809524,"z":-7.038095238095239,"a95":"18.9","info":"\"14-09-30\" at \"18:55\""},{"visible":true,"include":false,"step":"240","x":-8.923809523809524,"y":2.6761904761904765,"z":-0.8380952380952381,"a95":"30.1","info":"\"14-09-30\" at \"22:00\""},{"visible":true,"include":false,"step":"270","x":-12.428571428571429,"y":-0.9523809523809523,"z":3.4380952380952383,"a95":"13.8","info":"\"14-10-01\" at \"15:58\""},{"visible":true,"include":false,"step":"300","x":-20.295238095238094,"y":-11.819047619047618,"z":15.457142857142859,"a95":"18.1","info":"\"14-10-01\" at \"19:31\""},{"visible":true,"include":false,"step":"320","x":-15.600000000000001,"y":-13.866666666666665,"z":16.323809523809523,"a95":"9.400001","info":"\"14-10-01\" at \"22:37\""},{"visible":true,"include":false,"step":"340","x":-17.02857142857143,"y":-4.238095238095238,"z":20.333333333333332,"a95":"7","info":"\"14-10-02\" at \"16:12\""},{"visible":true,"include":false,"step":"370","x":-26.904761904761905,"y":-4.761904761904762,"z":11.00952380952381,"a95":"6.4","info":"\"14-10-02\" at \"18:56\""},{"visible":true,"include":false,"step":"400","x":-26.62857142857143,"y":-12.323809523809524,"z":17,"a95":"6.9","info":"\"14-10-02\" at \"22:10\""},{"visible":true,"include":false,"step":"420","x":-28.638095238095236,"y":4.2,"z":6.038095238095238,"a95":"9.5","info":"\"14-10-03\" at \"15:43\""},{"visible":true,"include":false,"step":"440","x":-20.60952380952381,"y":-28.095238095238095,"z":19.685714285714283,"a95":"5.6","info":"\"14-10-03\" at \"19:08\""}],"demagType":"Unknown","patch":1.1,"format":"Unknown","strat":null},{"version":"v1.1.0","exported":"2017-05-22T11:30:44.774Z","info":"3","GEO":[],"TECT":[],"interpreted":false,"name":"SS19.13B","coreAzi":4,"coreDip":40,"bedStrike":185,"bedDip":25,"data":[{"visible":true,"include":false,"step":"0.0","x":-0.777,"y":-112.61904761904762,"z":560.3333333333334,"a95":"0.99","info":"22/09/2014 at 10:31:41"},{"visible":true,"include":false,"step":"5.0","x":-5.827523809523809,"y":-92.73333333333333,"z":441.93333333333334,"a95":"0.99","info":"22/09/2014 at 10:31:41"},{"visible":true,"include":false,"step":"10.0","x":16.298095238095236,"y":-72.27238095238096,"z":354.3333333333333,"a95":"0.99","info":"22/09/2014 at 10:31:41"},{"visible":true,"include":false,"step":"15.0","x":1.945142857142857,"y":-38.913333333333334,"z":263.37142857142857,"a95":"0.99","info":"22/09/2014 at 10:31:41"},{"visible":true,"include":false,"step":"20.0","x":-1.3372380952380953,"y":-46.89047619047619,"z":197.9238095238095,"a95":"0.99","info":"22/09/2014 at 10:31:41"},{"visible":true,"include":false,"step":"25.0","x":-6.332285714285715,"y":-29.212380952380954,"z":141.03809523809525,"a95":"0.99","info":"22/09/2014 at 10:31:41"},{"visible":true,"include":true,"step":"30.0","x":-18.132380952380952,"y":-24.696190476190477,"z":108.73333333333333,"a95":"0.99","info":"22/09/2014 at 10:31:41"},{"visible":true,"include":true,"step":"35.0","x":-15.069523809523808,"y":-35.1552380952381,"z":80.41333333333334,"a95":"0.99","info":"22/09/2014 at 10:31:41"},{"visible":true,"include":true,"step":"40.0","x":-13.230476190476189,"y":-66.74952380952381,"z":67.50095238095238,"a95":"0.99","info":"22/09/2014 at 10:31:41"},{"visible":true,"include":true,"step":"45.0","x":-22.218095238095238,"y":-33.11523809523809,"z":70.0304761904762,"a95":"0.99","info":"22/09/2014 at 10:31:41"},{"visible":true,"include":true,"step":"50.0","x":-20.915238095238095,"y":-38.51047619047619,"z":23.938095238095237,"a95":"0.99","info":"22/09/2014 at 10:31:41"},{"visible":true,"include":true,"step":"60.0","x":-11.813333333333334,"y":-61.494285714285716,"z":9.244190476190475,"a95":"0.99","info":"22/09/2014 at 10:31:41"},{"visible":true,"include":false,"step":"70.0","x":-20.706666666666667,"y":-52.06571428571429,"z":58.31333333333333,"a95":"0.99","info":"22/09/2014 at 10:31:41"},{"visible":true,"include":false,"step":"80.0","x":-53.12952380952381,"y":-44.266666666666666,"z":-7.706666666666667,"a95":"0.99","info":"22/09/2014 at 10:31:41"},{"visible":true,"include":false,"step":"90.0","x":-27.509523809523813,"y":-63.2952380952381,"z":-27.200000000000003,"a95":"0.99","info":"22/09/2014 at 10:31:41"},{"visible":true,"include":false,"step":"100.0","x":-28.98952380952381,"y":-60.09238095238096,"z":1.123904761904762,"a95":"0.99","info":"22/09/2014 at 10:31:41"}],"demagType":"Unknown","patch":1.1,"format":"Unknown","strat":null},{"version":"v1.1.0","exported":"2017-05-22T11:30:44.774Z","info":"","GEO":[{"dec":204.2416329632106,"inc":-23.944157268775886,"MAD":2.8857160113779408,"cm":[6.767073673905716e-15,-9.473903143468002e-15,0],"intensity":131.27307606232975,"type":"dir","forced":true,"remark":"","origin":false,"nSteps":2,"minStep":"210","maxStep":"240","steps":["210","240"],"group":"None"}],"TECT":[{"dec":191.7058173466002,"inc":-29.67704827205305,"MAD":2.885716011377955,"cm":[0,3.383536836952858e-15,-1.3534147347811431e-15],"intensity":131.27307606232975,"type":"dir","forced":true,"remark":"","origin":false,"nSteps":2,"minStep":"210","maxStep":"240","steps":["210","240"],"group":"None"}],"interpreted":true,"name":"SS19.14A","coreAzi":16,"coreDip":47,"bedStrike":185,"bedDip":25,"data":[{"visible":false,"include":false,"step":"20","x":-94.57142857142857,"y":-107.71428571428571,"z":447.14285714285717,"a95":"2.7","info":"\"14-09-29\" at \"15:49\""},{"visible":true,"include":false,"step":"100","x":-29.18095238095238,"y":-46.542857142857144,"z":60.523809523809526,"a95":"3.7","info":"\"14-09-29\" at \"18:27\""},{"visible":true,"include":false,"step":"150","x":-17.685714285714283,"y":-38.48571428571429,"z":33.333333333333336,"a95":"5.3","info":"\"14-09-29\" at \"21:21\""},{"visible":true,"include":false,"step":"180","x":-16.676190476190477,"y":-22,"z":-16.17142857142857,"a95":"7.1","info":"\"14-09-30\" at \"15:46\""},{"visible":true,"include":true,"step":"210","x":-27.914285714285718,"y":-7.352380952380953,"z":-69.54285714285714,"a95":"5.7","info":"\"14-09-30\" at \"18:58\""},{"visible":true,"include":true,"step":"240","x":-22.942857142857143,"y":-10.704761904761906,"z":-50.12380952380952,"a95":"4.9","info":"\"14-09-30\" at \"22:02\""},{"visible":true,"include":false,"step":"270","x":-32.72380952380953,"y":-15.923809523809522,"z":-33.076190476190476,"a95":"4.6","info":"\"14-10-01\" at \"16:00\""},{"visible":true,"include":false,"step":"300","x":-22.933333333333334,"y":-12.285714285714286,"z":8.904761904761905,"a95":"17.5","info":"\"14-10-01\" at \"19:33\""},{"visible":true,"include":false,"step":"320","x":-32.99047619047619,"y":-14.819047619047618,"z":9.82857142857143,"a95":"11.4","info":"\"14-10-01\" at \"22:39\""},{"visible":true,"include":false,"step":"340","x":-35.57142857142857,"y":-28.238095238095237,"z":23.514285714285716,"a95":"5.4","info":"\"14-10-02\" at \"16:14\""},{"visible":true,"include":false,"step":"370","x":-47.91428571428572,"y":-14.561904761904762,"z":2.2285714285714286,"a95":"6.5","info":"\"14-10-02\" at \"18:58\""},{"visible":true,"include":false,"step":"400","x":-39.46666666666666,"y":-1.9714285714285713,"z":5.609523809523809,"a95":"7.5","info":"\"14-10-02\" at \"22:12\""},{"visible":true,"include":false,"step":"420","x":-22.780952380952378,"y":-10.761904761904763,"z":-30.933333333333334,"a95":"8.1","info":"\"14-10-03\" at \"15:45\""},{"visible":true,"include":false,"step":"440","x":-16.8,"y":-24.390476190476193,"z":4.104761904761905,"a95":"10.2","info":"\"14-10-03\" at \"19:09\""}],"demagType":"Unknown","patch":1.1,"format":"Unknown","strat":null},{"version":"v1.1.0","exported":"2017-05-22T11:30:44.774Z","info":"7","GEO":[],"TECT":[],"interpreted":false,"name":"SS19.14B","coreAzi":16,"coreDip":47,"bedStrike":185,"bedDip":25,"data":[{"visible":true,"include":false,"step":"0.0","x":-92.26190476190476,"y":-58.264761904761905,"z":206.44761904761904,"a95":"0.99","info":"28/10/2014 at 15:13:46"},{"visible":true,"include":false,"step":"4.0","x":-59.438095238095244,"y":-36.4752380952381,"z":142.26666666666665,"a95":"0.99","info":"28/10/2014 at 15:13:46"},{"visible":true,"include":false,"step":"8.0","x":-27.20952380952381,"y":-58.53333333333334,"z":118.01904761904763,"a95":"0.99","info":"28/10/2014 at 15:13:46"},{"visible":true,"include":false,"step":"12.0","x":-12.67047619047619,"y":-45.56857142857143,"z":120.14285714285714,"a95":"0.99","info":"28/10/2014 at 15:13:46"},{"visible":true,"include":false,"step":"16.0","x":-19.306666666666665,"y":-29.085714285714282,"z":77.2247619047619,"a95":"0.99","info":"28/10/2014 at 15:13:46"},{"visible":true,"include":false,"step":"20.0","x":-7.956761904761906,"y":-33.86761904761905,"z":62.34571428571429,"a95":"0.99","info":"28/10/2014 at 15:13:46"},{"visible":true,"include":false,"step":"25.0","x":-9.612380952380953,"y":-40.42666666666667,"z":49.38285714285714,"a95":"0.99","info":"28/10/2014 at 15:13:46"},{"visible":true,"include":false,"step":"30.0","x":-1.3081904761904763,"y":-26.013333333333332,"z":47.860952380952384,"a95":"0.99","info":"28/10/2014 at 15:13:46"},{"visible":true,"include":false,"step":"35.0","x":-36.74761904761905,"y":-42.446666666666665,"z":36.308571428571426,"a95":"0.99","info":"28/10/2014 at 15:13:46"},{"visible":true,"include":false,"step":"40.0","x":-5.986952380952381,"y":-24.136190476190478,"z":51.75523809523809,"a95":"0.99","info":"28/10/2014 at 15:13:46"},{"visible":true,"include":false,"step":"45.0","x":-19.33809523809524,"y":-45.24190476190476,"z":26.788571428571426,"a95":"0.99","info":"28/10/2014 at 15:13:46"},{"visible":true,"include":false,"step":"50.0","x":-23.953333333333333,"y":-59.73619047619048,"z":21.871428571428574,"a95":"0.99","info":"28/10/2014 at 15:13:46"},{"visible":true,"include":false,"step":"60.0","x":-28.196190476190477,"y":-80.68666666666667,"z":4.809714285714286,"a95":"0.99","info":"28/10/2014 at 15:13:46"},{"visible":false,"include":false,"step":"70.0","x":-67.68571428571428,"y":-53.08761904761904,"z":-18.383809523809525,"a95":"0.99","info":"28/10/2014 at 15:13:46"},{"visible":false,"include":false,"step":"80.0","x":-121.31428571428572,"y":-171.54285714285714,"z":7.0329523809523815,"a95":"0.99","info":"28/10/2014 at 15:13:46"},{"visible":false,"include":false,"step":"90.0","x":-54.037142857142854,"y":-63.38857142857143,"z":23.86952380952381,"a95":"0.99","info":"28/10/2014 at 15:13:46"},{"visible":false,"include":false,"step":"100.0","x":-59.68952380952381,"y":-82.56190476190476,"z":24.56857142857143,"a95":"0.99","info":"28/10/2014 at 15:13:46"}],"demagType":"Unknown","patch":1.1,"format":"Unknown","strat":null},{"version":"v1.1.0","exported":"2017-05-22T11:30:44.774Z","info":"","GEO":[],"TECT":[],"interpreted":false,"name":"SS19.15A","coreAzi":4,"coreDip":56,"bedStrike":185,"bedDip":25,"data":[{"visible":true,"include":false,"step":"20","x":93.42857142857143,"y":-84.76190476190476,"z":794.5714285714286,"a95":"2.7","info":"\"14-09-29\" at \"15:51\""},{"visible":true,"include":false,"step":"100","x":20.857142857142858,"y":-7.238095238095238,"z":130.38095238095238,"a95":"3.4","info":"\"14-09-29\" at \"18:29\""},{"visible":true,"include":false,"step":"150","x":21.20952380952381,"y":4.190476190476191,"z":79.86666666666667,"a95":"3.9","info":"\"14-09-29\" at \"21:23\""},{"visible":true,"include":false,"step":"180","x":11.238095238095237,"y":-7.523809523809524,"z":100.85714285714286,"a95":"4.2","info":"\"14-09-30\" at \"15:48\""},{"visible":true,"include":false,"step":"210","x":-15.600000000000001,"y":12.742857142857144,"z":0.13333333333333333,"a95":"14.9","info":"\"14-09-30\" at \"19:00\""},{"visible":true,"include":false,"step":"240","x":-16.00952380952381,"y":12.180952380952382,"z":-6.533333333333333,"a95":"15.8","info":"\"14-09-30\" at \"22:04\""},{"visible":true,"include":false,"step":"270","x":-17.45714285714286,"y":-14.21904761904762,"z":-46.87619047619047,"a95":"5.6","info":"\"14-10-01\" at \"16:03\""},{"visible":true,"include":false,"step":"300","x":4.219047619047619,"y":18.40952380952381,"z":9.361904761904762,"a95":"25.7","info":"\"14-10-01\" at \"19:35\""},{"visible":true,"include":false,"step":"320","x":-7.133333333333334,"y":11.104761904761904,"z":-31.552380952380954,"a95":"6.5","info":"\"14-10-01\" at \"22:41\""},{"visible":true,"include":false,"step":"340","x":13.095238095238095,"y":17.314285714285717,"z":21.666666666666668,"a95":"9.5","info":"\"14-10-02\" at \"16:16\""},{"visible":true,"include":false,"step":"370","x":-2.380952380952381,"y":-1.3714285714285714,"z":-22.104761904761904,"a95":"10.9","info":"\"14-10-02\" at \"19:00\""},{"visible":true,"include":false,"step":"400","x":-37.457142857142856,"y":18.895238095238096,"z":66.29523809523809,"a95":"4.2","info":"\"14-10-02\" at \"22:14\""},{"visible":true,"include":false,"step":"420","x":-38.83809523809524,"y":-32.89523809523809,"z":32.81904761904762,"a95":"5.7","info":"\"14-10-03\" at \"15:47\""},{"visible":true,"include":false,"step":"440","x":-12.123809523809523,"y":14.104761904761904,"z":51.74285714285714,"a95":"8.3","info":"\"14-10-03\" at \"19:11\""}],"demagType":"Unknown","patch":1.1,"format":"Unknown","strat":null},{"version":"v1.1.0","exported":"2017-05-22T11:30:44.774Z","info":"","GEO":[],"TECT":[],"interpreted":false,"name":"SS19.16A","coreAzi":4,"coreDip":60,"bedStrike":185,"bedDip":25,"data":[{"visible":true,"include":false,"step":"20","x":14.095238095238095,"y":-34,"z":356.0952380952381,"a95":"2.9","info":"\"14-09-29\" at \"15:52\""},{"visible":true,"include":false,"step":"100","x":-31.56190476190476,"y":-20.923809523809524,"z":75.3047619047619,"a95":"4.5","info":"\"14-09-29\" at \"18:31\""},{"visible":true,"include":false,"step":"150","x":-20.704761904761906,"y":-14.895238095238096,"z":40.25714285714285,"a95":"6.2","info":"\"14-09-29\" at \"21:25\""},{"visible":true,"include":false,"step":"180","x":-25.676190476190477,"y":-17.4,"z":53.7047619047619,"a95":"6.2","info":"\"14-09-30\" at \"15:50\""},{"visible":true,"include":false,"step":"210","x":38.923809523809524,"y":-14.714285714285714,"z":-21.723809523809525,"a95":"7.9","info":"\"14-09-30\" at \"19:02\""},{"visible":true,"include":false,"step":"240","x":-19.152380952380952,"y":-14.428571428571429,"z":58,"a95":"5.9","info":"\"14-09-30\" at \"22:06\""},{"visible":true,"include":false,"step":"270","x":-40.41904761904762,"y":30.02857142857143,"z":-61.714285714285715,"a95":"5","info":"\"14-10-01\" at \"16:05\""},{"visible":true,"include":false,"step":"300","x":-30.657142857142855,"y":-40.44761904761905,"z":59.409523809523805,"a95":"7.1","info":"\"14-10-01\" at \"19:37\""},{"visible":true,"include":false,"step":"320","x":-36.333333333333336,"y":27.580952380952382,"z":2.5333333333333337,"a95":"7.1","info":"\"14-10-01\" at \"22:43\""},{"visible":true,"include":false,"step":"340","x":-33.80952380952381,"y":16.98095238095238,"z":70.56190476190476,"a95":"5","info":"\"14-10-02\" at \"16:17\""},{"visible":true,"include":false,"step":"370","x":-40.095238095238095,"y":19.304761904761904,"z":16.057142857142857,"a95":"7.1","info":"\"14-10-02\" at \"19:01\""},{"visible":true,"include":false,"step":"400","x":-38.857142857142854,"y":26.095238095238095,"z":88.38095238095238,"a95":"4.3","info":"\"14-10-02\" at \"22:16\""},{"visible":true,"include":false,"step":"420","x":-58.24761904761905,"y":34.80952380952381,"z":43.13333333333333,"a95":"4.9","info":"\"14-10-03\" at \"15:49\""},{"visible":true,"include":false,"step":"440","x":-22.4,"y":-7.057142857142857,"z":27.62857142857143,"a95":"10.3","info":"\"14-10-03\" at \"19:13\""}],"demagType":"Unknown","patch":1.1,"format":"Unknown","strat":null},{"version":"v1.1.0","exported":"2017-05-22T11:30:44.774Z","info":"4","GEO":[{"dec":303.1707509254567,"inc":-31.633504334801298,"MAD":13.356562884298816,"cm":[-1.5543122344752192e-15,-5.773159728050814e-15,0],"intensity":350.6541316116587,"type":"GC","origin":false,"forced":true,"remark":"","nSteps":10,"minStep":"10.0","maxStep":"60.0","steps":["10.0","15.0","20.0","25.0","30.0","35.0","40.0","45.0","50.0","60.0"],"group":"None","version":"v1.1.0"}],"TECT":[{"dec":316.2349338224885,"inc":-52.42410800729924,"MAD":13.35656288429838,"cm":[1.2434497875801753e-14,3.1086244689504383e-15,-6.439293542825908e-15],"intensity":350.65413161165867,"type":"GC","origin":false,"forced":true,"remark":"","nSteps":10,"minStep":"10.0","maxStep":"60.0","steps":["10.0","15.0","20.0","25.0","30.0","35.0","40.0","45.0","50.0","60.0"],"group":"None","version":"v1.1.0"}],"interpreted":true,"name":"SS19.17A","coreAzi":1,"coreDip":53,"bedStrike":185,"bedDip":25,"data":[{"visible":true,"include":false,"step":"0.0","x":68.72,"y":-17.37904761904762,"z":574.3142857142857,"a95":"0.99","info":"22/09/2014 at 10:31:41"},{"visible":true,"include":false,"step":"5.0","x":59.6647619047619,"y":-28.24857142857143,"z":452.8095238095238,"a95":"0.99","info":"22/09/2014 at 10:31:41"},{"visible":true,"include":true,"step":"10.0","x":46.584761904761905,"y":-38.32285714285714,"z":324.2857142857143,"a95":"0.99","info":"22/09/2014 at 10:31:41"},{"visible":true,"include":true,"step":"15.0","x":21.286666666666665,"y":-12.299047619047618,"z":247.83809523809526,"a95":"0.99","info":"22/09/2014 at 10:31:41"},{"visible":true,"include":true,"step":"20.0","x":4.158095238095238,"y":-27.015238095238097,"z":163.76190476190476,"a95":"0.99","info":"22/09/2014 at 10:31:41"},{"visible":true,"include":true,"step":"25.0","x":5.997523809523809,"y":-22.085714285714285,"z":110.5904761904762,"a95":"0.99","info":"22/09/2014 at 10:31:41"},{"visible":true,"include":true,"step":"30.0","x":-6.271523809523809,"y":-15.878095238095238,"z":79.14857142857143,"a95":"0.99","info":"22/09/2014 at 10:31:41"},{"visible":true,"include":true,"step":"35.0","x":-19.099047619047617,"y":-19.854285714285716,"z":49.05238095238095,"a95":"0.99","info":"22/09/2014 at 10:31:41"},{"visible":true,"include":true,"step":"40.0","x":-23.91142857142857,"y":-24.5,"z":37.39809523809524,"a95":"0.99","info":"22/09/2014 at 10:31:41"},{"visible":true,"include":true,"step":"45.0","x":-22.570476190476192,"y":-31.166666666666668,"z":36.38476190476191,"a95":"0.99","info":"22/09/2014 at 10:31:41"},{"visible":true,"include":true,"step":"50.0","x":-27.113333333333333,"y":-19.13047619047619,"z":29.85809523809524,"a95":"0.99","info":"22/09/2014 at 10:31:41"},{"visible":true,"include":true,"step":"60.0","x":-45.06095238095238,"y":-56.203809523809525,"z":13.383809523809523,"a95":"0.99","info":"22/09/2014 at 10:31:41"},{"visible":true,"include":false,"step":"70.0","x":-23.85047619047619,"y":-29.737142857142857,"z":24.559047619047618,"a95":"0.99","info":"22/09/2014 at 10:31:41"},{"visible":true,"include":false,"step":"80.0","x":-65.92857142857143,"y":-50.8552380952381,"z":1.5583809523809524,"a95":"0.99","info":"22/09/2014 at 10:31:41"},{"visible":true,"include":false,"step":"90.0","x":-62.67714285714286,"y":-68.9152380952381,"z":17.48,"a95":"0.99","info":"22/09/2014 at 10:31:41"},{"visible":true,"include":false,"step":"100.0","x":-56.457142857142856,"y":-50.820952380952384,"z":-9.307809523809524,"a95":"0.99","info":"22/09/2014 at 10:31:41"}],"demagType":"Unknown","patch":1.1,"format":"Unknown","strat":null},{"version":"v1.1.0","exported":"2017-05-22T11:30:44.774Z","info":"8","GEO":[{"dec":340.94915972661477,"inc":-33.874437294072,"MAD":21.391693895574825,"cm":[-1.2434497875801753e-14,0,0],"intensity":117.78866429256959,"type":"GC","origin":false,"forced":true,"remark":"","nSteps":9,"minStep":"12.0","maxStep":"50.0","steps":["12.0","16.0","20.0","25.0","30.0","35.0","40.0","45.0","50.0"],"group":"None","version":"v1.1.0"}],"TECT":[{"dec":359.6418104834261,"inc":-40.40261156674648,"MAD":21.391693895574818,"cm":[-2.020605904817785e-14,0,4.440892098500626e-16],"intensity":117.78866429256958,"type":"GC","origin":false,"forced":true,"remark":"","nSteps":9,"minStep":"12.0","maxStep":"50.0","steps":["12.0","16.0","20.0","25.0","30.0","35.0","40.0","45.0","50.0"],"group":"None","version":"v1.1.0"}],"interpreted":true,"name":"SS19.18A","coreAzi":10,"coreDip":28,"bedStrike":185,"bedDip":25,"data":[{"visible":true,"include":false,"step":"0.0","x":-126.95238095238095,"y":-17.406666666666666,"z":175.21904761904761,"a95":"0.99","info":"28/10/2014 at 15:13:46"},{"visible":true,"include":false,"step":"4.0","x":-80.41428571428571,"y":-5.352285714285714,"z":107.8952380952381,"a95":"0.99","info":"28/10/2014 at 15:13:46"},{"visible":true,"include":false,"step":"8.0","x":-36.39523809523809,"y":-2.935238095238095,"z":85.28095238095239,"a95":"0.99","info":"28/10/2014 at 15:13:46"},{"visible":true,"include":true,"step":"12.0","x":-24.741904761904763,"y":14.088571428571429,"z":56.58095238095238,"a95":"0.99","info":"28/10/2014 at 15:13:46"},{"visible":true,"include":true,"step":"16.0","x":-21.64952380952381,"y":-10.953333333333333,"z":38.77904761904762,"a95":"0.99","info":"28/10/2014 at 15:13:46"},{"visible":true,"include":true,"step":"20.0","x":-13.532380952380953,"y":-22.562857142857144,"z":31.037142857142857,"a95":"0.99","info":"28/10/2014 at 15:13:46"},{"visible":true,"include":true,"step":"25.0","x":-36.103809523809524,"y":-39.576190476190476,"z":22.399047619047618,"a95":"0.99","info":"28/10/2014 at 15:13:46"},{"visible":true,"include":true,"step":"30.0","x":-4.360761904761905,"y":-50.55714285714286,"z":17.32095238095238,"a95":"0.99","info":"28/10/2014 at 15:13:46"},{"visible":true,"include":true,"step":"35.0","x":-43.817142857142855,"y":-93.52571428571429,"z":10.203809523809523,"a95":"0.99","info":"28/10/2014 at 15:13:46"},{"visible":true,"include":true,"step":"40.0","x":-47.89333333333333,"y":-53.02095238095238,"z":5.9424761904761905,"a95":"0.99","info":"28/10/2014 at 15:13:46"},{"visible":true,"include":true,"step":"45.0","x":-31.801904761904762,"y":-66.17428571428572,"z":-3.642380952380952,"a95":"0.99","info":"28/10/2014 at 15:13:46"},{"visible":true,"include":true,"step":"50.0","x":-44.82476190476191,"y":-101.65714285714287,"z":-19.616190476190475,"a95":"0.99","info":"28/10/2014 at 15:13:46"},{"visible":true,"include":false,"step":"60.0","x":-72.08761904761904,"y":-77.39904761904762,"z":-28.634285714285717,"a95":"0.99","info":"28/10/2014 at 15:13:46"},{"visible":true,"include":false,"step":"70.0","x":-132.41904761904763,"y":-90.49904761904762,"z":-15.232380952380952,"a95":"0.99","info":"28/10/2014 at 15:13:46"},{"visible":true,"include":false,"step":"80.0","x":-121.92380952380952,"y":-164.95238095238096,"z":-19.67142857142857,"a95":"0.99","info":"28/10/2014 at 15:13:46"},{"visible":true,"include":false,"step":"90.0","x":-79.27619047619048,"y":-140.54285714285714,"z":-14.14857142857143,"a95":"0.99","info":"28/10/2014 at 15:13:46"},{"visible":true,"include":false,"step":"100.0","x":-55.28000000000001,"y":-135.04761904761904,"z":-4.789619047619047,"a95":"0.99","info":"28/10/2014 at 15:13:46"}],"demagType":"Unknown","patch":1.1,"format":"Unknown","strat":null},{"version":"v1.1.0","exported":"2017-05-22T11:30:44.774Z","info":"8","GEO":[{"dec":322.164059811942,"inc":-32.272212363423925,"MAD":13.311103975287935,"cm":[-7.327471962526033e-15,4.440892098500626e-15,0],"intensity":174.26741561760997,"type":"GC","origin":false,"forced":true,"remark":"","nSteps":11,"minStep":"8.0","maxStep":"70.0","steps":["8.0","12.0","16.0","20.0","25.0","30.0","35.0","45.0","50.0","60.0","70.0"],"group":"None","version":"v1.1.0"}],"TECT":[{"dec":339.5286041596203,"inc":-46.62438485916209,"MAD":13.311103975287823,"cm":[-7.327471962526033e-15,-7.549516567451064e-15,2.3314683517128287e-15],"intensity":174.26741561761,"type":"GC","origin":false,"forced":true,"remark":"","nSteps":11,"minStep":"8.0","maxStep":"70.0","steps":["8.0","12.0","16.0","20.0","25.0","30.0","35.0","45.0","50.0","60.0","70.0"],"group":"None","version":"v1.1.0"}],"interpreted":true,"name":"SS19.18B","coreAzi":10,"coreDip":28,"bedStrike":185,"bedDip":25,"data":[{"visible":true,"include":false,"step":"0.0","x":-131.78095238095239,"y":-11.770476190476192,"z":301.35238095238094,"a95":"0.99","info":"10/10/2014 at 14:29:45"},{"visible":true,"include":false,"step":"4.0","x":-80.08571428571429,"y":-10.701904761904762,"z":236.38095238095238,"a95":"0.99","info":"10/10/2014 at 14:29:45"},{"visible":true,"include":true,"step":"8.0","x":-45.486666666666665,"y":-7.503714285714286,"z":164.13333333333335,"a95":"0.99","info":"10/10/2014 at 14:29:45"},{"visible":true,"include":true,"step":"12.0","x":-33.31142857142857,"y":13.886666666666667,"z":116.34285714285713,"a95":"0.99","info":"10/10/2014 at 14:29:45"},{"visible":true,"include":true,"step":"16.0","x":-41.86952380952381,"y":12.047619047619047,"z":55.55047619047619,"a95":"0.99","info":"10/10/2014 at 14:29:45"},{"visible":true,"include":true,"step":"20.0","x":-29.724761904761905,"y":-14.491428571428571,"z":50.60857142857143,"a95":"0.99","info":"10/10/2014 at 14:29:45"},{"visible":true,"include":true,"step":"25.0","x":-27.738095238095237,"y":-10.622857142857143,"z":46.864761904761906,"a95":"0.99","info":"10/10/2014 at 14:29:45"},{"visible":true,"include":true,"step":"30.0","x":-27.324761904761907,"y":-17.25047619047619,"z":0.3387428571428571,"a95":"0.99","info":"10/10/2014 at 14:29:45"},{"visible":true,"include":true,"step":"35.0","x":-44.147619047619045,"y":-53.320952380952384,"z":20.475238095238097,"a95":"0.99","info":"10/10/2014 at 14:29:45"},{"visible":true,"include":false,"step":"40.0","x":-53.31142857142857,"y":4.129904761904761,"z":-21.00095238095238,"a95":"0.99","info":"10/10/2014 at 14:29:45"},{"visible":true,"include":true,"step":"45.0","x":-35.33238095238095,"y":-44.64190476190476,"z":-3.9364761904761902,"a95":"0.99","info":"10/10/2014 at 14:29:45"},{"visible":true,"include":true,"step":"50.0","x":-43.19904761904762,"y":-62.63047619047619,"z":-3.491904761904762,"a95":"0.99","info":"10/10/2014 at 14:29:45"},{"visible":true,"include":true,"step":"60.0","x":-47.03619047619048,"y":-46.12857142857143,"z":-13.708571428571428,"a95":"0.99","info":"10/10/2014 at 14:29:45"},{"visible":true,"include":true,"step":"70.0","x":-46.563809523809525,"y":-71.25333333333333,"z":-38.860952380952384,"a95":"0.99","info":"10/10/2014 at 14:29:45"},{"visible":true,"include":false,"step":"80.0","x":-34.65428571428571,"y":-94.77047619047619,"z":30.322857142857142,"a95":"0.99","info":"10/10/2014 at 14:29:45"},{"visible":true,"include":false,"step":"90.0","x":-73.68476190476191,"y":-86.62666666666667,"z":13.518095238095238,"a95":"0.99","info":"10/10/2014 at 14:29:45"},{"visible":true,"include":false,"step":"100.0","x":-48.68952380952381,"y":-85.5952380952381,"z":3.2664761904761908,"a95":"0.99","info":"10/10/2014 at 14:29:45"}],"demagType":"Unknown","patch":1.1,"format":"Unknown","strat":null}]
