# Supplementary material for: Paleomagnetic constraints on the timing and distribution of Cenozoic rotations in Central and Eastern Anatolia
Source: Copernicus journal article supplement (doi:10.5194/se-9-295-2018), 2018-03-21
Supplement: Supplementary file 2 [file se-9-295-2018-supplement.zip › se-2017-66_DATA_dir files/dir files Sivas/SS20.dir]

[{"info":"5","GEO":[],"TECT":[],"interpreted":false,"name":"SS20.1A","coreAzi":50,"coreDip":34,"bedStrike":260,"bedDip":47,"data":[{"visible":true,"include":false,"step":"0.0","x":-10826,"y":-5332.6,"z":9834,"a95":"0.99","info":"22/09/2014 at 10:31:41"},{"visible":true,"include":false,"step":"5.0","x":-9641.6,"y":-5235.9,"z":8780,"a95":"0.99","info":"22/09/2014 at 10:31:41"},{"visible":true,"include":false,"step":"10.0","x":-7693.1,"y":-4324.1,"z":7449.6,"a95":"0.99","info":"22/09/2014 at 10:31:41"},{"visible":true,"include":false,"step":"15.0","x":-6342.4,"y":-3654.3,"z":6499.4,"a95":"0.99","info":"22/09/2014 at 10:31:41"},{"visible":true,"include":false,"step":"20.0","x":-5252.4,"y":-3098.6,"z":5354.3,"a95":"0.99","info":"22/09/2014 at 10:31:41"},{"visible":true,"include":false,"step":"25.0","x":-4691.5,"y":-2586.2,"z":4660.9,"a95":"0.99","info":"22/09/2014 at 10:31:41"},{"visible":true,"include":false,"step":"30.0","x":-3906.4,"y":-2260,"z":3897.5,"a95":"0.99","info":"22/09/2014 at 10:31:41"},{"visible":true,"include":false,"step":"35.0","x":-3426,"y":-1977.9,"z":3291.3,"a95":"0.99","info":"22/09/2014 at 10:31:41"},{"visible":true,"include":false,"step":"40.0","x":-3303.1,"y":-2081.9,"z":3066.1,"a95":"0.99","info":"22/09/2014 at 10:31:41"},{"visible":true,"include":false,"step":"45.0","x":-2990.4,"y":-1869.8,"z":2788.6,"a95":"0.99","info":"22/09/2014 at 10:31:41"},{"visible":true,"include":false,"step":"50.0","x":-2493.1,"y":-1149.7,"z":2353.1,"a95":"0.99","info":"22/09/2014 at 10:31:41"},{"visible":true,"include":false,"step":"60.0","x":-2195.9,"y":-1504.1,"z":1862.8,"a95":"0.99","info":"22/09/2014 at 10:31:41"},{"visible":true,"include":false,"step":"70.0","x":-2458.4,"y":-1534.2,"z":2142.2,"a95":"0.99","info":"22/09/2014 at 10:31:41"},{"visible":true,"include":false,"step":"80.0","x":-2703.3,"y":-853.48,"z":1507.3,"a95":"0.99","info":"22/09/2014 at 10:31:41"},{"visible":true,"include":false,"step":"90.0","x":-2180.8,"y":-1613.8,"z":1136.7,"a95":"0.99","info":"22/09/2014 at 10:31:41"},{"visible":true,"include":false,"step":"100.0","x":-1667.8,"y":-1668.6,"z":713.97,"a95":"0.99","info":"22/09/2014 at 10:31:41"}]},{"info":"1","GEO":[],"TECT":[],"interpreted":false,"name":"SS20.3A","coreAzi":57,"coreDip":44,"bedStrike":260,"bedDip":47,"data":[{"visible":true,"include":false,"step":"0.0","x":-2509.6,"y":-1662.5,"z":3384.8,"a95":"0.99","info":"10/10/2014 at 19:59:19"},{"visible":true,"include":false,"step":"4.0","x":-2366,"y":-1630.6,"z":3244.5,"a95":"0.99","info":"10/10/2014 at 19:59:19"},{"visible":true,"include":false,"step":"8.0","x":-2279.4,"y":-1378.5,"z":2860.7,"a95":"0.99","info":"10/10/2014 at 19:59:19"},{"visible":true,"include":false,"step":"12.0","x":-2056.9,"y":-1452.4,"z":2641.5,"a95":"0.99","info":"10/10/2014 at 19:59:19"},{"visible":true,"include":false,"step":"16.0","x":-1952.4,"y":-1151.2,"z":2375.2,"a95":"0.99","info":"10/10/2014 at 19:59:19"},{"visible":true,"include":false,"step":"20.0","x":-1859.7,"y":-1320.4,"z":2211,"a95":"0.99","info":"10/10/2014 at 19:59:19"},{"visible":true,"include":false,"step":"25.0","x":-1742.2,"y":-1354.2,"z":1845.5,"a95":"0.99","info":"10/10/2014 at 19:59:19"},{"visible":true,"include":false,"step":"30.0","x":-1415.2,"y":-1186.7,"z":1757.2,"a95":"0.99","info":"10/10/2014 at 19:59:19"},{"visible":true,"include":false,"step":"35.0","x":-1356.7,"y":-1227,"z":1498,"a95":"0.99","info":"10/10/2014 at 19:59:19"},{"visible":true,"include":false,"step":"40.0","x":-1771.4,"y":-1120.4,"z":1563.8,"a95":"0.99","info":"10/10/2014 at 19:59:19"},{"visible":true,"include":false,"step":"45.0","x":-1341.8,"y":-904.56,"z":1126.6,"a95":"0.99","info":"10/10/2014 at 19:59:19"},{"visible":true,"include":false,"step":"50.0","x":-1481.8,"y":-1144.7,"z":1374.7,"a95":"0.99","info":"10/10/2014 at 19:59:19"},{"visible":true,"include":false,"step":"60.0","x":-1450.8,"y":-1014.9,"z":908.83,"a95":"0.99","info":"10/10/2014 at 19:59:19"},{"visible":true,"include":false,"step":"70.0","x":-1228.5,"y":-827.67,"z":1268.1,"a95":"0.99","info":"10/10/2014 at 19:59:19"},{"visible":true,"include":false,"step":"80.0","x":-202.29,"y":-1553.1,"z":1231.6,"a95":"0.99","info":"10/10/2014 at 19:59:19"},{"visible":true,"include":false,"step":"90.0","x":-1169.1,"y":-1547.2,"z":-0.46939,"a95":"0.99","info":"10/10/2014 at 19:59:19"},{"visible":true,"include":false,"step":"100.0","x":-2233.8,"y":-970.88,"z":1281.6,"a95":"0.99","info":"10/10/2014 at 19:59:19"}]},{"info":"6","GEO":[],"TECT":[],"interpreted":false,"name":"SS20.4A","coreAzi":54,"coreDip":38,"bedStrike":260,"bedDip":47,"data":[{"visible":true,"include":false,"step":"0.0","x":-9152.8,"y":-4652,"z":10909,"a95":"0.99","info":"22/09/2014 at 10:31:41"},{"visible":true,"include":false,"step":"5.0","x":-8027,"y":-4538.3,"z":9737.3,"a95":"0.99","info":"22/09/2014 at 10:31:41"},{"visible":true,"include":false,"step":"10.0","x":-6440.4,"y":-3855.5,"z":8103.6,"a95":"0.99","info":"22/09/2014 at 10:31:41"},{"visible":true,"include":false,"step":"15.0","x":-5419.4,"y":-3401,"z":6974.9,"a95":"0.99","info":"22/09/2014 at 10:31:41"},{"visible":true,"include":false,"step":"20.0","x":-4566.4,"y":-3006.7,"z":5675.5,"a95":"0.99","info":"22/09/2014 at 10:31:41"},{"visible":true,"include":false,"step":"25.0","x":-3971.6,"y":-2586.7,"z":4793.1,"a95":"0.99","info":"22/09/2014 at 10:31:41"},{"visible":true,"include":false,"step":"30.0","x":-3305.4,"y":-2135.4,"z":4084.3,"a95":"0.99","info":"22/09/2014 at 10:31:41"},{"visible":true,"include":false,"step":"35.0","x":-3088.6,"y":-1895.3,"z":3723.9,"a95":"0.99","info":"22/09/2014 at 10:31:41"},{"visible":true,"include":false,"step":"40.0","x":-2900,"y":-2043.7,"z":3171.4,"a95":"0.99","info":"22/09/2014 at 10:31:41"},{"visible":true,"include":false,"step":"45.0","x":-2944.1,"y":-1792.8,"z":2975,"a95":"0.99","info":"22/09/2014 at 10:31:41"},{"visible":true,"include":false,"step":"50.0","x":-2441.1,"y":-1586.6,"z":2681.1,"a95":"0.99","info":"22/09/2014 at 10:31:41"},{"visible":true,"include":false,"step":"60.0","x":-2686.9,"y":-1885.7,"z":2200.6,"a95":"0.99","info":"22/09/2014 at 10:31:41"},{"visible":true,"include":false,"step":"70.0","x":-2585.6,"y":-1657.1,"z":2090.5,"a95":"0.99","info":"22/09/2014 at 10:31:41"},{"visible":true,"include":false,"step":"80.0","x":-2364.2,"y":-1161.2,"z":1024.1,"a95":"0.99","info":"22/09/2014 at 10:31:41"},{"visible":true,"include":false,"step":"90.0","x":-2659.9,"y":-2262.4,"z":1432,"a95":"0.99","info":"22/09/2014 at 10:31:41"},{"visible":true,"include":false,"step":"100.0","x":-2345,"y":-1924.9,"z":717.25,"a95":"0.99","info":"22/09/2014 at 10:31:41"}]},{"info":"","GEO":[],"TECT":[],"interpreted":false,"name":"SS20.5A","coreAzi":66,"coreDip":67,"bedStrike":260,"bedDip":47,"data":[{"visible":true,"include":false,"step":"20","x":415,"y":-114,"z":2558,"a95":"3.2","info":"\"14-09-29\" at \"15:55\""},{"visible":true,"include":false,"step":"100","x":131.6,"y":391.1,"z":815.6,"a95":"4.8","info":"\"14-09-29\" at \"18:33\""},{"visible":true,"include":false,"step":"150","x":203.9,"y":504.8,"z":150.6,"a95":"4.3","info":"\"14-09-29\" at \"21:27\""},{"visible":true,"include":false,"step":"180","x":128.6,"y":451.8,"z":120.7,"a95":"5.9","info":"\"14-09-30\" at \"15:52\""},{"visible":true,"include":false,"step":"210","x":98,"y":223.8,"z":-399.9,"a95":"7.3","info":"\"14-09-30\" at \"19:04\""},{"visible":true,"include":false,"step":"240","x":21.7,"y":230.2,"z":301.2,"a95":"10.6","info":"\"14-09-30\" at \"22:08\""},{"visible":true,"include":false,"step":"270","x":-44.6,"y":273.5,"z":29,"a95":"11.8","info":"\"14-10-01\" at \"16:07\""},{"visible":true,"include":false,"step":"300","x":7.5,"y":200.8,"z":451.7,"a95":"10.9","info":"\"14-10-01\" at \"19:39\""},{"visible":true,"include":false,"step":"320","x":-114.3,"y":157.7,"z":218,"a95":"12.5","info":"\"14-10-01\" at \"22:45\""},{"visible":true,"include":false,"step":"340","x":-136.2,"y":168.3,"z":507.8,"a95":"6.2","info":"\"14-10-02\" at \"16:19\""},{"visible":true,"include":false,"step":"370","x":-234.4,"y":47.5,"z":405.9,"a95":"8.3","info":"\"14-10-02\" at \"19:03\""},{"visible":true,"include":false,"step":"400","x":-71.9,"y":-74.2,"z":397,"a95":"10","info":"\"14-10-02\" at \"22:19\""},{"visible":true,"include":false,"step":"420","x":-541.5,"y":33.9,"z":-146.6,"a95":"8.900001","info":"\"14-10-03\" at \"15:51\""},{"visible":true,"include":false,"step":"440","x":-238.9,"y":-115.3,"z":155.2,"a95":"24.1","info":"\"14-10-03\" at \"19:15\""}]},{"info":"2","GEO":[{"dec":172.73577432427146,"inc":-25.836989268495216,"MAD":3.044254863184766,"cm":[-5.684341886080802e-14,-2.957634137601417e-13,0],"intensity":137.27335550720912,"type":"dir","forced":true,"remark":"","origin":false,"nSteps":4,"minStep":"15.0","maxStep":"30.0","steps":["15.0","20.0","25.0","30.0"]}],"TECT":[{"dec":172.63948391412544,"inc":21.116924570452557,"MAD":3.044254863184756,"cm":[-7.105427357601002e-14,-3.055333763768431e-13,-1.0658141036401503e-14],"intensity":137.2733555072091,"type":"dir","forced":true,"remark":"","origin":false,"nSteps":4,"minStep":"15.0","maxStep":"30.0","steps":["15.0","20.0","25.0","30.0"]}],"interpreted":true,"name":"SS20.5B","coreAzi":66,"coreDip":67,"bedStrike":260,"bedDip":47,"data":[{"visible":true,"include":false,"step":"0.0","x":-214.73,"y":736,"z":121.55,"a95":"0.99","info":"30/01/2015 at 22:14:23"},{"visible":true,"include":false,"step":"10.0","x":-21.293,"y":756.4,"z":-268.78,"a95":"0.99","info":"30/01/2015 at 22:14:23"},{"visible":true,"include":true,"step":"15.0","x":-32.44,"y":719.54,"z":-375.26,"a95":"0.99","info":"30/01/2015 at 22:14:23"},{"visible":true,"include":true,"step":"20.0","x":-66.175,"y":681.38,"z":-385.29,"a95":"0.99","info":"30/01/2015 at 22:14:23"},{"visible":true,"include":false,"step":"23.0","x":-62.28,"y":599.75,"z":-445.68,"a95":"0.99","info":"30/01/2015 at 22:14:23"},{"visible":true,"include":true,"step":"25.0","x":-69.893,"y":504.23,"z":-312.6,"a95":"0.99","info":"30/01/2015 at 22:14:23"},{"visible":true,"include":true,"step":"30.0","x":-29.286,"y":520.25,"z":-357.31,"a95":"0.99","info":"30/01/2015 at 22:14:23"},{"visible":true,"include":false,"step":"33.0","x":-129.11,"y":474.81,"z":-194.1,"a95":"0.99","info":"30/01/2015 at 22:14:23"},{"visible":true,"include":false,"step":"35.0","x":-224.37,"y":477.17,"z":-507.09,"a95":"0.99","info":"30/01/2015 at 22:14:23"},{"visible":true,"include":false,"step":"40.0","x":-169.77,"y":354.01,"z":-385.17,"a95":"0.99","info":"30/01/2015 at 22:14:23"},{"visible":true,"include":false,"step":"45.0","x":-253.54,"y":201.76,"z":-476.2,"a95":"0.99","info":"30/01/2015 at 22:14:23"},{"visible":true,"include":false,"step":"50.0","x":-171.21,"y":163.9,"z":-670.57,"a95":"0.99","info":"30/01/2015 at 22:14:23"},{"visible":true,"include":false,"step":"60.0","x":-323.27,"y":129.13,"z":-235.36,"a95":"0.99","info":"30/01/2015 at 22:14:23"},{"visible":true,"include":false,"step":"70.0","x":-258.08,"y":46.307,"z":-311.05,"a95":"0.99","info":"30/01/2015 at 22:14:23"}]},{"info":"","GEO":[],"TECT":[],"interpreted":false,"name":"SS20.6A","coreAzi":43,"coreDip":64,"bedStrike":260,"bedDip":47,"data":[{"visible":true,"include":false,"step":"20","x":-288,"y":247,"z":2515,"a95":"3.1","info":"\"14-09-29\" at \"15:57\""},{"visible":true,"include":false,"step":"100","x":-732.2,"y":434.7,"z":210.2,"a95":"3.4","info":"\"14-09-29\" at \"18:35\""},{"visible":true,"include":false,"step":"150","x":-772,"y":558,"z":-528,"a95":"3.6","info":"\"14-09-29\" at \"21:29\""},{"visible":true,"include":false,"step":"180","x":-815,"y":453,"z":-528,"a95":"4","info":"\"14-09-30\" at \"15:54\""},{"visible":true,"include":false,"step":"210","x":-786,"y":348,"z":-639,"a95":"4.5","info":"\"14-09-30\" at \"19:06\""},{"visible":true,"include":false,"step":"240","x":-762.5,"y":379.2,"z":-355.2,"a95":"4.6","info":"\"14-09-30\" at \"22:10\""},{"visible":true,"include":false,"step":"270","x":-741.7,"y":194.5,"z":-352.4,"a95":"3.8","info":"\"14-10-01\" at \"16:09\""},{"visible":true,"include":false,"step":"300","x":-746.9,"y":119.5,"z":-33.2,"a95":"8.5","info":"\"14-10-01\" at \"19:41\""},{"visible":true,"include":false,"step":"320","x":-748.1,"y":91.1,"z":-98.3,"a95":"5.2","info":"\"14-10-01\" at \"22:47\""},{"visible":true,"include":false,"step":"340","x":-717.7,"y":-70.5,"z":-30.6,"a95":"8.3","info":"\"14-10-02\" at \"16:21\""},{"visible":true,"include":false,"step":"370","x":-803.8,"y":-34.1,"z":-567.9,"a95":"6.5","info":"\"14-10-02\" at \"19:05\""},{"visible":true,"include":false,"step":"400","x":-599.5,"y":-424,"z":406.4,"a95":"13.7","info":"\"14-10-02\" at \"22:20\""},{"visible":true,"include":false,"step":"420","x":-1212,"y":679,"z":-522,"a95":"8.2","info":"\"14-10-03\" at \"15:53\""},{"visible":true,"include":false,"step":"440","x":-992,"y":-494,"z":117,"a95":"14.2","info":"\"14-10-03\" at \"19:17\""}]},{"info":"7","GEO":[],"TECT":[],"interpreted":false,"name":"SS20.7A","coreAzi":35,"coreDip":59,"bedStrike":260,"bedDip":47,"data":[{"visible":true,"include":false,"step":"0.0","x":-1168.6,"y":68.961,"z":1254.3,"a95":"0.99","info":"22/09/2014 at 10:31:41"},{"visible":true,"include":false,"step":"5.0","x":-850.7,"y":-85.583,"z":964.75,"a95":"0.99","info":"22/09/2014 at 10:31:41"},{"visible":true,"include":false,"step":"10.0","x":-737.24,"y":-212.3,"z":807.11,"a95":"0.99","info":"22/09/2014 at 10:31:41"},{"visible":true,"include":false,"step":"15.0","x":-562.26,"y":-93.25,"z":779.97,"a95":"0.99","info":"22/09/2014 at 10:31:41"},{"visible":true,"include":false,"step":"20.0","x":-468.55,"y":-95.039,"z":421.72,"a95":"0.99","info":"22/09/2014 at 10:31:41"},{"visible":true,"include":false,"step":"25.0","x":-474.96,"y":-51.067,"z":363.43,"a95":"0.99","info":"22/09/2014 at 10:31:41"},{"visible":true,"include":false,"step":"30.0","x":-429.82,"y":-52.184,"z":115.45,"a95":"0.99","info":"22/09/2014 at 10:31:41"},{"visible":true,"include":false,"step":"35.0","x":-338.29,"y":-131.57,"z":48.724,"a95":"0.99","info":"22/09/2014 at 10:31:41"},{"visible":true,"include":false,"step":"40.0","x":-297.75,"y":-171.52,"z":19.853,"a95":"0.99","info":"22/09/2014 at 10:31:41"},{"visible":true,"include":false,"step":"45.0","x":-228.03,"y":-137.79,"z":114.48,"a95":"0.99","info":"22/09/2014 at 10:31:41"},{"visible":true,"include":false,"step":"50.0","x":-112.11,"y":38.304,"z":21.506,"a95":"0.99","info":"22/09/2014 at 10:31:41"},{"visible":true,"include":false,"step":"60.0","x":-272.59,"y":-485.2,"z":-78.771,"a95":"0.99","info":"22/09/2014 at 10:31:41"},{"visible":true,"include":false,"step":"70.0","x":-217.94,"y":-265.1,"z":397.02,"a95":"0.99","info":"22/09/2014 at 10:31:41"},{"visible":true,"include":false,"step":"80.0","x":-554.14,"y":-134.61,"z":206.05,"a95":"0.99","info":"22/09/2014 at 10:31:41"},{"visible":true,"include":false,"step":"90.0","x":-470.19,"y":-758.58,"z":68.227,"a95":"0.99","info":"22/09/2014 at 10:31:41"},{"visible":true,"include":false,"step":"100.0","x":-416.68,"y":-612.78,"z":-93.428,"a95":"0.99","info":"22/09/2014 at 10:31:41"}]},{"info":"2","GEO":[{"dec":188.50559171441074,"inc":-20.01449374943591,"MAD":9.899552473201457,"cm":[-7.105427357601002e-15,6.750155989720952e-14,0],"intensity":76.9829207079442,"type":"dir","forced":true,"remark":"","origin":false,"nSteps":4,"minStep":"16.0","maxStep":"30.0","steps":["16.0","20.0","25.0","30.0"]}],"TECT":[{"dec":189.16698286380554,"inc":24.72305640706255,"MAD":9.89955247320146,"cm":[-1.4210854715202004e-14,6.394884621840902e-14,3.552713678800501e-15],"intensity":76.9829207079442,"type":"dir","forced":true,"remark":"","origin":false,"nSteps":4,"minStep":"16.0","maxStep":"30.0","steps":["16.0","20.0","25.0","30.0"]}],"interpreted":true,"name":"SS20.7B","coreAzi":35,"coreDip":59,"bedStrike":260,"bedDip":47,"data":[{"visible":false,"include":false,"step":"0.0","x":-360.74,"y":287.66,"z":-165.63,"a95":"0.99","info":"10/10/2014 at 19:59:19"},{"visible":true,"include":false,"step":"4.0","x":-286.96,"y":262.37,"z":85.792,"a95":"0.99","info":"10/10/2014 at 19:59:19"},{"visible":true,"include":false,"step":"8.0","x":-229.64,"y":233.02,"z":-134.15,"a95":"0.99","info":"10/10/2014 at 19:59:19"},{"visible":true,"include":false,"step":"12.0","x":-294.78,"y":284.01,"z":-255.05,"a95":"0.99","info":"10/10/2014 at 19:59:19"},{"visible":true,"include":true,"step":"16.0","x":-245.3,"y":226,"z":-261.52,"a95":"0.99","info":"10/10/2014 at 19:59:19"},{"visible":true,"include":true,"step":"20.0","x":-197.81,"y":147.42,"z":-222.33,"a95":"0.99","info":"10/10/2014 at 19:59:19"},{"visible":true,"include":true,"step":"25.0","x":-131.24,"y":91.941,"z":-321.1,"a95":"0.99","info":"10/10/2014 at 19:59:19"},{"visible":true,"include":true,"step":"30.0","x":-226.37,"y":146.3,"z":-279.13,"a95":"0.99","info":"10/10/2014 at 19:59:19"},{"visible":true,"include":false,"step":"35.0","x":-197.47,"y":32.809,"z":-221.14,"a95":"0.99","info":"10/10/2014 at 19:59:19"},{"visible":true,"include":false,"step":"40.0","x":-131.86,"y":165.12,"z":-172.83,"a95":"0.99","info":"10/10/2014 at 19:59:19"},{"visible":true,"include":false,"step":"45.0","x":-103.84,"y":62.457,"z":-185.24,"a95":"0.99","info":"10/10/2014 at 19:59:19"},{"visible":false,"include":false,"step":"50.0","x":-285.7,"y":-141.85,"z":15.417,"a95":"0.99","info":"10/10/2014 at 19:59:19"},{"visible":false,"include":false,"step":"60.0","x":-283.97,"y":-68.025,"z":-162.32,"a95":"0.99","info":"10/10/2014 at 19:59:19"},{"visible":false,"include":false,"step":"70.0","x":-159.25,"y":-368.85,"z":-265.01,"a95":"0.99","info":"10/10/2014 at 19:59:19"},{"visible":false,"include":false,"step":"80.0","x":-683.38,"y":-282.22,"z":-488.25,"a95":"0.99","info":"10/10/2014 at 19:59:19"},{"visible":false,"include":false,"step":"90.0","x":-447.42,"y":-138.97,"z":-429.04,"a95":"0.99","info":"10/10/2014 at 19:59:19"},{"visible":false,"include":false,"step":"100.0","x":-177.71,"y":-439.69,"z":-23.251,"a95":"0.99","info":"10/10/2014 at 19:59:19"}]},{"info":"3","GEO":[{"dec":188.85971419582143,"inc":-34.39610132195303,"MAD":6.648079723009441,"cm":[-1.4210854715202004e-14,-1.6342482922482304e-13,0],"intensity":331.1844048452439,"type":"dir","forced":true,"remark":"","origin":false,"nSteps":9,"minStep":"25.0","maxStep":"70.0","steps":["25.0","30.0","33.0","35.0","40.0","45.0","50.0","60.0","70.0"]}],"TECT":[{"dec":185.7511299503706,"inc":10.708398939560578,"MAD":6.648079723009462,"cm":[2.842170943040401e-14,-4.0589753780295723e-13,2.398081733190338e-14],"intensity":331.18440484524393,"type":"dir","forced":true,"remark":"","origin":false,"nSteps":9,"minStep":"25.0","maxStep":"70.0","steps":["25.0","30.0","33.0","35.0","40.0","45.0","50.0","60.0","70.0"]}],"interpreted":true,"name":"SS20.8A","coreAzi":30,"coreDip":50,"bedStrike":260,"bedDip":47,"data":[{"visible":true,"include":false,"step":"0.0","x":-1321.3,"y":1818,"z":-1739.5,"a95":"0.99","info":"30/01/2015 at 22:14:23"},{"visible":true,"include":false,"step":"10.0","x":-727.33,"y":1481.8,"z":-2313.1,"a95":"0.99","info":"30/01/2015 at 22:14:23"},{"visible":true,"include":false,"step":"15.0","x":-389.19,"y":1135.3,"z":-2381.4,"a95":"0.99","info":"30/01/2015 at 22:14:23"},{"visible":true,"include":false,"step":"20.0","x":-501.86,"y":837.88,"z":-2008.8,"a95":"0.99","info":"30/01/2015 at 22:14:23"},{"visible":false,"include":false,"step":"23.0","x":-420.47,"y":987.79,"z":-2310.6,"a95":"0.99","info":"30/01/2015 at 22:14:23"},{"visible":true,"include":true,"step":"25.0","x":-537.82,"y":605.2,"z":-2130.3,"a95":"0.99","info":"30/01/2015 at 22:14:23"},{"visible":true,"include":true,"step":"30.0","x":-278.53,"y":658.61,"z":-1706.8,"a95":"0.99","info":"30/01/2015 at 22:14:23"},{"visible":true,"include":true,"step":"33.0","x":-457.82,"y":765.48,"z":-1529.2,"a95":"0.99","info":"30/01/2015 at 22:14:23"},{"visible":true,"include":true,"step":"35.0","x":-415.89,"y":877.26,"z":-1709.7,"a95":"0.99","info":"30/01/2015 at 22:14:23"},{"visible":true,"include":true,"step":"40.0","x":-380.04,"y":239.91,"z":-1717.7,"a95":"0.99","info":"30/01/2015 at 22:14:23"},{"visible":true,"include":true,"step":"45.0","x":-571.12,"y":481.67,"z":-1746.7,"a95":"0.99","info":"30/01/2015 at 22:14:23"},{"visible":true,"include":true,"step":"50.0","x":-430.01,"y":398.15,"z":-1590.2,"a95":"0.99","info":"30/01/2015 at 22:14:23"},{"visible":true,"include":true,"step":"60.0","x":-281.52,"y":242.74,"z":-1279.9,"a95":"0.99","info":"30/01/2015 at 22:14:23"},{"visible":true,"include":true,"step":"70.0","x":-142.33,"y":335.72,"z":-1147.6,"a95":"0.99","info":"30/01/2015 at 22:14:23"}]},{"info":"4","GEO":[],"TECT":[],"interpreted":false,"name":"SS20.9A","coreAzi":62,"coreDip":46,"bedStrike":260,"bedDip":47,"data":[{"visible":true,"include":false,"step":"0.0","x":-1178.1,"y":368.96,"z":1659.3,"a95":"0.99","info":"30/01/2015 at 22:14:23"},{"visible":true,"include":false,"step":"10.0","x":-592.62,"y":279.35,"z":1396.8,"a95":"0.99","info":"30/01/2015 at 22:14:23"},{"visible":true,"include":false,"step":"15.0","x":-478.13,"y":223.45,"z":1162.7,"a95":"0.99","info":"30/01/2015 at 22:14:23"},{"visible":true,"include":false,"step":"20.0","x":-534.45,"y":163.97,"z":963.61,"a95":"0.99","info":"30/01/2015 at 22:14:23"},{"visible":true,"include":false,"step":"23.0","x":-500.93,"y":180.31,"z":778.86,"a95":"0.99","info":"30/01/2015 at 22:14:23"},{"visible":true,"include":false,"step":"25.0","x":-574.1,"y":13.325,"z":799.83,"a95":"0.99","info":"30/01/2015 at 22:14:23"},{"visible":true,"include":false,"step":"30.0","x":-562.15,"y":305.07,"z":781.8,"a95":"0.99","info":"30/01/2015 at 22:14:23"},{"visible":true,"include":false,"step":"33.0","x":-648,"y":122.64,"z":869.74,"a95":"0.99","info":"30/01/2015 at 22:14:23"},{"visible":true,"include":false,"step":"35.0","x":-776.99,"y":-81.913,"z":737.45,"a95":"0.99","info":"30/01/2015 at 22:14:23"},{"visible":true,"include":false,"step":"40.0","x":-809,"y":81.169,"z":796.77,"a95":"0.99","info":"30/01/2015 at 22:14:23"},{"visible":true,"include":false,"step":"45.0","x":-1196.3,"y":-88.944,"z":253.89,"a95":"0.99","info":"30/01/2015 at 22:14:23"},{"visible":true,"include":false,"step":"50.0","x":-1030.9,"y":-134.58,"z":401.02,"a95":"0.99","info":"30/01/2015 at 22:14:23"},{"visible":true,"include":false,"step":"60.0","x":-1262,"y":22.245,"z":568.34,"a95":"0.99","info":"30/01/2015 at 22:14:23"},{"visible":true,"include":false,"step":"70.0","x":-1283.4,"y":-141.44,"z":746.17,"a95":"0.99","info":"30/01/2015 at 22:14:23"}]},{"info":"","GEO":[{"dec":166.42252762412613,"inc":-36.04550089236708,"MAD":8.488763861747753,"cm":[-280.16384739781176,-270.76014209315184,51.04935570615048],"intensity":56.929064346315556,"type":"dir","forced":false,"remark":"","origin":false,"nSteps":7,"minStep":"180","maxStep":"340","steps":["180","210","240","270","300","320","340"]}],"TECT":[{"dec":167.05503356436952,"inc":10.887258678754963,"MAD":8.488763861747763,"cm":[-171.71416142588524,-289.88274777936294,202.2155086998833],"intensity":56.929064346315585,"type":"dir","forced":false,"remark":"","origin":false,"nSteps":7,"minStep":"180","maxStep":"340","steps":["180","210","240","270","300","320","340"]}],"interpreted":true,"name":"SS20.11A","coreAzi":295,"coreDip":36,"bedStrike":260,"bedDip":47,"data":[{"visible":true,"include":false,"step":"20","x":-455,"y":-116,"z":2168,"a95":"2.9","info":"\"14-09-29\" at \"15:58\""},{"visible":true,"include":false,"step":"100","x":-6.9,"y":-552.3,"z":309.8,"a95":"3.8","info":"\"14-09-29\" at \"18:37\""},{"visible":true,"include":false,"step":"150","x":62.7,"y":-627.1,"z":-120.1,"a95":"2.8","info":"\"14-09-29\" at \"21:31\""},{"visible":true,"include":true,"step":"180","x":44.4,"y":-584.4,"z":-75.5,"a95":"5.1","info":"\"14-09-30\" at \"15:56\""},{"visible":true,"include":true,"step":"210","x":93,"y":-501.9,"z":-49.3,"a95":"9.2","info":"\"14-09-30\" at \"19:08\""},{"visible":true,"include":true,"step":"240","x":78.6,"y":-465.7,"z":2.4,"a95":"6.5","info":"\"14-09-30\" at \"22:12\""},{"visible":true,"include":true,"step":"270","x":50.5,"y":-354.5,"z":116.9,"a95":"6","info":"\"14-10-01\" at \"16:11\""},{"visible":true,"include":true,"step":"300","x":15.3,"y":-254,"z":284.5,"a95":"14.4","info":"\"14-10-01\" at \"19:43\""},{"visible":true,"include":true,"step":"320","x":14.3,"y":-220.5,"z":282.9,"a95":"9.7","info":"\"14-10-01\" at \"22:49\""},{"visible":true,"include":true,"step":"340","x":-62.7,"y":-197.4,"z":367.3,"a95":"8.1","info":"\"14-10-02\" at \"16:23\""},{"visible":false,"include":false,"step":"370","x":-199.3,"y":-149.4,"z":36.7,"a95":"11.4","info":"\"14-10-02\" at \"19:07\""},{"visible":false,"include":false,"step":"400","x":-61.3,"y":-82.3,"z":316.5,"a95":"22","info":"\"14-10-02\" at \"22:23\""},{"visible":false,"include":false,"step":"420","x":-663,"y":983,"z":509,"a95":"11.2","info":"\"14-10-03\" at \"15:55\""},{"visible":false,"include":false,"step":"440","x":-92.1,"y":204.3,"z":466.5,"a95":"33.4","info":"\"14-10-03\" at \"19:19\""}]},{"info":"8","GEO":[],"TECT":[],"interpreted":false,"name":"SS20.11B","coreAzi":295,"coreDip":36,"bedStrike":260,"bedDip":47,"data":[{"visible":true,"include":false,"step":"0.0","x":-1814.6,"y":1356.7,"z":2560.3,"a95":"0.99","info":"22/09/2014 at 10:31:41"},{"visible":true,"include":false,"step":"5.0","x":-1495.3,"y":1138.9,"z":2056.5,"a95":"0.99","info":"22/09/2014 at 10:31:41"},{"visible":true,"include":false,"step":"10.0","x":-1176.5,"y":847.63,"z":1685,"a95":"0.99","info":"22/09/2014 at 10:31:41"},{"visible":true,"include":false,"step":"15.0","x":-988.88,"y":814.45,"z":1621,"a95":"0.99","info":"22/09/2014 at 10:31:41"},{"visible":true,"include":false,"step":"20.0","x":-754.42,"y":697.84,"z":1149.8,"a95":"0.99","info":"22/09/2014 at 10:31:41"},{"visible":true,"include":false,"step":"25.0","x":-665.18,"y":717.98,"z":1057.8,"a95":"0.99","info":"22/09/2014 at 10:31:41"},{"visible":true,"include":false,"step":"30.0","x":-590.49,"y":596.31,"z":873.44,"a95":"0.99","info":"22/09/2014 at 10:31:41"},{"visible":true,"include":false,"step":"35.0","x":-521.29,"y":555.06,"z":769.3,"a95":"0.99","info":"22/09/2014 at 10:31:41"},{"visible":true,"include":false,"step":"40.0","x":-492.65,"y":396.28,"z":732.52,"a95":"0.99","info":"22/09/2014 at 10:31:41"},{"visible":true,"include":false,"step":"45.0","x":-526.94,"y":376.44,"z":817.33,"a95":"0.99","info":"22/09/2014 at 10:31:41"},{"visible":true,"include":false,"step":"50.0","x":-338.94,"y":375.7,"z":607.03,"a95":"0.99","info":"22/09/2014 at 10:31:41"},{"visible":true,"include":false,"step":"60.0","x":-299.67,"y":200.73,"z":597.06,"a95":"0.99","info":"22/09/2014 at 10:31:41"},{"visible":true,"include":false,"step":"70.0","x":28.185,"y":326.11,"z":894.15,"a95":"0.99","info":"22/09/2014 at 10:31:41"},{"visible":true,"include":false,"step":"80.0","x":-260.29,"y":79.397,"z":510.81,"a95":"0.99","info":"22/09/2014 at 10:31:41"},{"visible":true,"include":false,"step":"90.0","x":43.086,"y":-180.84,"z":533.26,"a95":"0.99","info":"22/09/2014 at 10:31:41"},{"visible":true,"include":false,"step":"100.0","x":-31.848,"y":25.188,"z":80.735,"a95":"0.99","info":"22/09/2014 at 10:31:41"}]},{"info":"5","GEO":[],"TECT":[],"interpreted":false,"name":"SS20.12A","coreAzi":64,"coreDip":42,"bedStrike":260,"bedDip":47,"data":[{"visible":true,"include":false,"step":"0.0","x":-598.93,"y":717.75,"z":62.786,"a95":"0.99","info":"30/01/2015 at 22:14:23"},{"visible":true,"include":false,"step":"10.0","x":-339.11,"y":513.05,"z":-174.95,"a95":"0.99","info":"30/01/2015 at 22:14:23"},{"visible":true,"include":false,"step":"15.0","x":-334.14,"y":386.98,"z":-212.49,"a95":"0.99","info":"30/01/2015 at 22:14:23"},{"visible":true,"include":false,"step":"20.0","x":-307.63,"y":434.19,"z":-88.483,"a95":"0.99","info":"30/01/2015 at 22:14:23"},{"visible":true,"include":false,"step":"23.0","x":-302.43,"y":307.16,"z":-144.71,"a95":"0.99","info":"30/01/2015 at 22:14:23"},{"visible":true,"include":false,"step":"25.0","x":-380.19,"y":130.64,"z":-172.52,"a95":"0.99","info":"30/01/2015 at 22:14:23"},{"visible":true,"include":false,"step":"30.0","x":-329.79,"y":28.549,"z":-42.576,"a95":"0.99","info":"30/01/2015 at 22:14:23"},{"visible":true,"include":false,"step":"33.0","x":-413.94,"y":246.29,"z":-85.356,"a95":"0.99","info":"30/01/2015 at 22:14:23"},{"visible":true,"include":false,"step":"35.0","x":-422.39,"y":234.46,"z":-157.21,"a95":"0.99","info":"30/01/2015 at 22:14:23"},{"visible":true,"include":false,"step":"40.0","x":-412.53,"y":180.59,"z":40.81,"a95":"0.99","info":"30/01/2015 at 22:14:23"},{"visible":true,"include":false,"step":"45.0","x":-925.4,"y":50.93,"z":-427.34,"a95":"0.99","info":"30/01/2015 at 22:14:23"},{"visible":true,"include":false,"step":"50.0","x":-487.5,"y":-32.845,"z":-265.3,"a95":"0.99","info":"30/01/2015 at 22:14:23"},{"visible":true,"include":false,"step":"60.0","x":-441.87,"y":-13.661,"z":56.591,"a95":"0.99","info":"30/01/2015 at 22:14:23"},{"visible":true,"include":false,"step":"70.0","x":-549.93,"y":-203.3,"z":-162.36,"a95":"0.99","info":"30/01/2015 at 22:14:23"}]},{"info":"","GEO":[],"TECT":[],"interpreted":false,"name":"SS20.13A","coreAzi":49,"coreDip":32,"bedStrike":260,"bedDip":47,"data":[{"visible":true,"include":false,"step":"20","x":-4257,"y":-2626,"z":4330,"a95":"2.5","info":"\"14-09-29\" at \"16:00\""},{"visible":true,"include":false,"step":"100","x":-2190,"y":-1253,"z":2430,"a95":"2.6","info":"\"14-09-29\" at \"18:39\""},{"visible":true,"include":false,"step":"150","x":-731,"y":-372,"z":590,"a95":"4.6","info":"\"14-09-29\" at \"21:33\""},{"visible":true,"include":false,"step":"180","x":-191.7,"y":45.5,"z":-230.7,"a95":"13.9","info":"\"14-09-30\" at \"16:00\""},{"visible":true,"include":false,"step":"210","x":81.7,"y":170.8,"z":-447.7,"a95":"8.8","info":"\"14-09-30\" at \"19:10\""},{"visible":true,"include":false,"step":"240","x":-9.8,"y":56.7,"z":-388.4,"a95":"11.6","info":"\"14-09-30\" at \"22:14\""},{"visible":true,"include":false,"step":"270","x":-231.1,"y":-149.8,"z":-204.3,"a95":"8.5","info":"\"14-10-01\" at \"16:13\""},{"visible":true,"include":false,"step":"300","x":-270.2,"y":-326.5,"z":-65.7,"a95":"14.4","info":"\"14-10-01\" at \"19:45\""},{"visible":true,"include":false,"step":"320","x":-350,"y":-339.8,"z":-131.6,"a95":"5.2","info":"\"14-10-01\" at \"22:51\""},{"visible":true,"include":false,"step":"340","x":-234.2,"y":-522.4,"z":47.4,"a95":"6.2","info":"\"14-10-02\" at \"16:25\""},{"visible":true,"include":false,"step":"370","x":-232.6,"y":-327.9,"z":-280.4,"a95":"4.9","info":"\"14-10-02\" at \"19:09\""},{"visible":true,"include":false,"step":"400","x":-74.7,"y":-416.6,"z":-198.6,"a95":"9.2","info":"\"14-10-02\" at \"22:24\""},{"visible":true,"include":false,"step":"420","x":-377.9,"y":-281.5,"z":-112.3,"a95":"10.4","info":"\"14-10-03\" at \"15:57\""},{"visible":true,"include":false,"step":"440","x":-201.2,"y":-305,"z":-121.4,"a95":"15.6","info":"\"14-10-03\" at \"19:21\""}]},{"info":"3","GEO":[],"TECT":[],"interpreted":false,"name":"SS20.13B","coreAzi":49,"coreDip":32,"bedStrike":260,"bedDip":47,"data":[{"visible":true,"include":false,"step":"0.0","x":-1895,"y":-1446.6,"z":3563.5,"a95":"0.99","info":"10/10/2014 at 19:59:19"},{"visible":true,"include":true,"step":"4.0","x":-1785.5,"y":-1468.2,"z":2982.6,"a95":"0.99","info":"10/10/2014 at 19:59:19"},{"visible":true,"include":true,"step":"8.0","x":-1716.1,"y":-1339.3,"z":2735.5,"a95":"0.99","info":"10/10/2014 at 19:59:19"},{"visible":true,"include":true,"step":"12.0","x":-1663.6,"y":-1337.4,"z":2437,"a95":"0.99","info":"10/10/2014 at 19:59:19"},{"visible":true,"include":true,"step":"16.0","x":-1504,"y":-1298.5,"z":2205.5,"a95":"0.99","info":"10/10/2014 at 19:59:19"},{"visible":true,"include":true,"step":"20.0","x":-1496.2,"y":-1284.5,"z":2035.9,"a95":"0.99","info":"10/10/2014 at 19:59:19"},{"visible":true,"include":true,"step":"25.0","x":-1347.2,"y":-1128.4,"z":1767,"a95":"0.99","info":"10/10/2014 at 19:59:19"},{"visible":true,"include":true,"step":"30.0","x":-1335,"y":-1199.7,"z":1735.1,"a95":"0.99","info":"10/10/2014 at 19:59:19"},{"visible":true,"include":true,"step":"35.0","x":-1422.4,"y":-1217.7,"z":1572.1,"a95":"0.99","info":"10/10/2014 at 19:59:19"},{"visible":true,"include":true,"step":"40.0","x":-1322.1,"y":-1087.7,"z":1578.3,"a95":"0.99","info":"10/10/2014 at 19:59:19"},{"visible":true,"include":false,"step":"45.0","x":-1114.3,"y":-973.89,"z":1353.7,"a95":"0.99","info":"10/10/2014 at 19:59:19"},{"visible":true,"include":false,"step":"50.0","x":-1283.6,"y":-1122.6,"z":1408.6,"a95":"0.99","info":"10/10/2014 at 19:59:19"},{"visible":true,"include":false,"step":"60.0","x":-1255.4,"y":-1023.3,"z":1100.2,"a95":"0.99","info":"10/10/2014 at 19:59:19"},{"visible":true,"include":false,"step":"70.0","x":-1086,"y":-953.97,"z":942.78,"a95":"0.99","info":"10/10/2014 at 19:59:19"},{"visible":false,"include":false,"step":"80.0","x":-1535,"y":-1363,"z":447.78,"a95":"0.99","info":"10/10/2014 at 19:59:19"},{"visible":false,"include":false,"step":"90.0","x":-1520.9,"y":-997.3,"z":733.89,"a95":"0.99","info":"10/10/2014 at 19:59:19"},{"visible":false,"include":false,"step":"100.0","x":-765.65,"y":-1028.6,"z":609.36,"a95":"0.99","info":"10/10/2014 at 19:59:19"}]},{"info":"4","GEO":[{"dec":73.38841435660504,"inc":-28.083745118365737,"MAD":1.1397963277200613,"cm":[0,3.9968028886505635e-14,0],"intensity":234.77023816176236,"type":"GC","origin":false,"forced":true,"remark":"","nSteps":5,"minStep":"4.0","maxStep":"20.0","steps":["4.0","8.0","12.0","16.0","20.0"]}],"TECT":[{"dec":97.4220093534226,"inc":-23.28785473636958,"MAD":1.1397963277196805,"cm":[0,-9.14823772291129e-14,-1.4210854715202004e-14],"intensity":234.77023816176236,"type":"GC","origin":false,"forced":true,"remark":"","nSteps":5,"minStep":"4.0","maxStep":"20.0","steps":["4.0","8.0","12.0","16.0","20.0"]}],"interpreted":true,"name":"SS20.14A","coreAzi":29,"coreDip":55,"bedStrike":260,"bedDip":47,"data":[{"visible":true,"include":false,"step":"0.0","x":-798.07,"y":808.06,"z":-967.21,"a95":"0.99","info":"10/10/2014 at 19:59:19"},{"visible":true,"include":true,"step":"4.0","x":-627.21,"y":759.94,"z":-965.22,"a95":"0.99","info":"10/10/2014 at 19:59:19"},{"visible":true,"include":true,"step":"8.0","x":-541.62,"y":645.73,"z":-1058.6,"a95":"0.99","info":"10/10/2014 at 19:59:19"},{"visible":true,"include":true,"step":"12.0","x":-488.33,"y":593.28,"z":-942.72,"a95":"0.99","info":"10/10/2014 at 19:59:19"},{"visible":true,"include":true,"step":"16.0","x":-387.21,"y":451.43,"z":-983.32,"a95":"0.99","info":"10/10/2014 at 19:59:19"},{"visible":true,"include":true,"step":"20.0","x":-343.09,"y":400.87,"z":-980.98,"a95":"0.99","info":"10/10/2014 at 19:59:19"},{"visible":true,"include":false,"step":"25.0","x":-269.72,"y":282.96,"z":-943.44,"a95":"0.99","info":"10/10/2014 at 19:59:19"},{"visible":true,"include":false,"step":"30.0","x":-185.17,"y":292.43,"z":-901.7,"a95":"0.99","info":"10/10/2014 at 19:59:19"},{"visible":true,"include":false,"step":"35.0","x":-397.44,"y":139.6,"z":-865.49,"a95":"0.99","info":"10/10/2014 at 19:59:19"},{"visible":true,"include":false,"step":"40.0","x":-249.23,"y":151.53,"z":-742.76,"a95":"0.99","info":"10/10/2014 at 19:59:19"},{"visible":true,"include":false,"step":"45.0","x":-298.01,"y":25.751,"z":-1001.9,"a95":"0.99","info":"10/10/2014 at 19:59:19"},{"visible":true,"include":false,"step":"50.0","x":-384.74,"y":108.87,"z":-552.5,"a95":"0.99","info":"10/10/2014 at 19:59:19"},{"visible":true,"include":false,"step":"60.0","x":-281.63,"y":17.967,"z":-700.09,"a95":"0.99","info":"10/10/2014 at 19:59:19"},{"visible":true,"include":false,"step":"70.0","x":-119.78,"y":-216.95,"z":-548.95,"a95":"0.99","info":"10/10/2014 at 19:59:19"},{"visible":false,"include":false,"step":"80.0","x":-1786.6,"y":-476.8,"z":-1130.4,"a95":"0.99","info":"10/10/2014 at 19:59:19"},{"visible":false,"include":false,"step":"90.0","x":-142.76,"y":-141.57,"z":-505.78,"a95":"0.99","info":"10/10/2014 at 19:59:19"},{"visible":false,"include":false,"step":"100.0","x":-57.72,"y":-241.81,"z":-337.64,"a95":"0.99","info":"10/10/2014 at 19:59:19"}]},{"info":"1","GEO":[],"TECT":[],"interpreted":false,"name":"SS20.14B","coreAzi":29,"coreDip":55,"bedStrike":260,"bedDip":47,"data":[{"visible":true,"include":false,"step":"0.0","x":-292.09,"y":-1501.4,"z":6344.4,"a95":"0.99","info":"22/09/2014 at 15:39:26"},{"visible":true,"include":false,"step":"5.0","x":-267.9,"y":-1473.1,"z":5807.6,"a95":"0.99","info":"22/09/2014 at 15:39:26"},{"visible":true,"include":false,"step":"10.0","x":-300.92,"y":-1206.1,"z":4725.3,"a95":"0.99","info":"22/09/2014 at 15:39:26"},{"visible":true,"include":false,"step":"15.0","x":-127.5,"y":-1043.4,"z":3955.2,"a95":"0.99","info":"22/09/2014 at 15:39:26"},{"visible":true,"include":false,"step":"20.0","x":-127.38,"y":-892.41,"z":3388.2,"a95":"0.99","info":"22/09/2014 at 15:39:26"},{"visible":true,"include":false,"step":"25.0","x":-151.98,"y":-935.51,"z":2917.7,"a95":"0.99","info":"22/09/2014 at 15:39:26"},{"visible":true,"include":false,"step":"30.0","x":-228.3,"y":-716.28,"z":2628,"a95":"0.99","info":"22/09/2014 at 15:39:26"},{"visible":true,"include":false,"step":"35.0","x":-201.8,"y":-729.64,"z":2392.8,"a95":"0.99","info":"22/09/2014 at 15:39:26"},{"visible":true,"include":false,"step":"40.0","x":-269.15,"y":-544.9,"z":1951.8,"a95":"0.99","info":"22/09/2014 at 15:39:26"},{"visible":true,"include":false,"step":"45.0","x":-387.65,"y":-697.61,"z":1969.3,"a95":"0.99","info":"22/09/2014 at 15:39:26"},{"visible":true,"include":false,"step":"50.0","x":-298.65,"y":-630.37,"z":1662.3,"a95":"0.99","info":"22/09/2014 at 15:39:26"},{"visible":true,"include":false,"step":"60.0","x":-401.06,"y":-898.01,"z":1323.3,"a95":"0.99","info":"22/09/2014 at 15:39:26"},{"visible":true,"include":false,"step":"70.0","x":-650.96,"y":-754.94,"z":1087.2,"a95":"0.99","info":"22/09/2014 at 15:39:26"},{"visible":true,"include":false,"step":"80.0","x":-258.75,"y":-762.45,"z":1200.9,"a95":"0.99","info":"22/09/2014 at 15:39:26"},{"visible":true,"include":false,"step":"90.0","x":-668.26,"y":-1117.2,"z":899.24,"a95":"0.99","info":"22/09/2014 at 15:39:26"},{"visible":true,"include":false,"step":"100.0","x":-695.8,"y":-848.72,"z":823.36,"a95":"0.99","info":"22/09/2014 at 15:39:26"}]},{"info":"","GEO":[{"dec":184.01711399196967,"inc":-21.248808266153112,"MAD":5.811935486394487,"cm":[0,9.592326932761353e-14,0],"intensity":125.6283754073219,"type":"dir","forced":true,"remark":"","origin":false,"nSteps":4,"minStep":"150","maxStep":"240","steps":["150","180","210","240"]}],"TECT":[{"dec":184.36018500136487,"inc":24.466888074713623,"MAD":5.811935486394489,"cm":[-1.4210854715202004e-14,9.947598300641403e-14,2.1316282072803006e-14],"intensity":125.62837540732187,"type":"dir","forced":true,"remark":"","origin":false,"nSteps":4,"minStep":"150","maxStep":"240","steps":["150","180","210","240"]}],"interpreted":true,"name":"SS20.15B","coreAzi":37,"coreDip":49,"bedStrike":260,"bedDip":47,"data":[{"visible":true,"include":false,"step":"20","x":-992,"y":-171,"z":806,"a95":"4.3","info":"\"14-09-29\" at \"16:03\""},{"visible":true,"include":false,"step":"100","x":-396.2,"y":242.5,"z":33.9,"a95":"6.9","info":"\"14-09-29\" at \"18:41\""},{"visible":true,"include":true,"step":"150","x":-255.4,"y":380.6,"z":-504,"a95":"5.9","info":"\"14-09-29\" at \"21:35\""},{"visible":true,"include":true,"step":"180","x":-202.8,"y":429.4,"z":-597,"a95":"5.4","info":"\"14-09-30\" at \"16:02\""},{"visible":true,"include":true,"step":"210","x":-251.3,"y":365,"z":-632.9,"a95":"4.4","info":"\"14-09-30\" at \"19:12\""},{"visible":true,"include":true,"step":"240","x":-308.5,"y":263,"z":-499.9,"a95":"5.9","info":"\"14-09-30\" at \"22:16\""},{"visible":true,"include":false,"step":"270","x":-379.9,"y":139,"z":-356,"a95":"5.2","info":"\"14-10-01\" at \"16:15\""},{"visible":true,"include":false,"step":"300","x":-414.1,"y":102.4,"z":-229,"a95":"11.5","info":"\"14-10-01\" at \"19:47\""},{"visible":true,"include":false,"step":"320","x":-424.3,"y":57.2,"z":-405.4,"a95":"7.4","info":"\"14-10-01\" at \"22:53\""},{"visible":false,"include":false,"step":"340","x":-308.9,"y":193.7,"z":-145.4,"a95":"13.1","info":"\"14-10-02\" at \"16:26\""},{"visible":false,"include":false,"step":"370","x":-504.8,"y":282.9,"z":-433.6,"a95":"7.6","info":"\"14-10-02\" at \"19:11\""},{"visible":false,"include":false,"step":"400","x":-662.3,"y":-230.2,"z":122.4,"a95":"19.9","info":"\"14-10-02\" at \"22:27\""},{"visible":false,"include":false,"step":"420","x":-941,"y":915,"z":-573,"a95":"12","info":"\"14-10-03\" at \"15:59\""},{"visible":false,"include":false,"step":"440","x":-680.8,"y":154.5,"z":-406,"a95":"24.2","info":"\"14-10-03\" at \"19:23\""}]},{"info":"5","GEO":[{"dec":183.09429872755027,"inc":-34.78600549968845,"MAD":9.806015165132639,"cm":[0,-1.305622276959184e-13,0],"intensity":194.96037376166464,"type":"dir","forced":true,"remark":"","origin":false,"nSteps":4,"minStep":"12.0","maxStep":"25.0","steps":["12.0","16.0","20.0","25.0"]}],"TECT":[{"dec":180.93789039878146,"inc":11.29997222881127,"MAD":9.806015165132631,"cm":[0,-2.1760371282653068e-13,-6.217248937900877e-15],"intensity":194.96037376166464,"type":"dir","forced":true,"remark":"","origin":false,"nSteps":4,"minStep":"12.0","maxStep":"25.0","steps":["12.0","16.0","20.0","25.0"]}],"interpreted":true,"name":"SS20.16A","coreAzi":24,"coreDip":48,"bedStrike":260,"bedDip":47,"data":[{"visible":false,"include":false,"step":"0.0","x":-1063.9,"y":780.09,"z":-1473.4,"a95":"0.99","info":"10/10/2014 at 19:59:19"},{"visible":true,"include":false,"step":"4.0","x":-717.28,"y":673.06,"z":-832.99,"a95":"0.99","info":"10/10/2014 at 19:59:19"},{"visible":true,"include":false,"step":"8.0","x":-338.67,"y":781.46,"z":-836.55,"a95":"0.99","info":"10/10/2014 at 19:59:19"},{"visible":true,"include":true,"step":"12.0","x":-315.37,"y":402.76,"z":-994.71,"a95":"0.99","info":"10/10/2014 at 19:59:19"},{"visible":true,"include":true,"step":"16.0","x":-226.51,"y":397.38,"z":-911.51,"a95":"0.99","info":"10/10/2014 at 19:59:19"},{"visible":true,"include":true,"step":"20.0","x":-221.01,"y":100.58,"z":-842.28,"a95":"0.99","info":"10/10/2014 at 19:59:19"},{"visible":true,"include":true,"step":"25.0","x":43.114,"y":212.44,"z":-938.67,"a95":"0.99","info":"10/10/2014 at 19:59:19"},{"visible":true,"include":false,"step":"30.0","x":222.13,"y":312.36,"z":-583,"a95":"0.99","info":"10/10/2014 at 19:59:19"},{"visible":true,"include":false,"step":"35.0","x":137.2,"y":15.151,"z":-924.98,"a95":"0.99","info":"10/10/2014 at 19:59:19"},{"visible":true,"include":false,"step":"40.0","x":136.35,"y":-145.48,"z":-583.79,"a95":"0.99","info":"10/10/2014 at 19:59:19"},{"visible":true,"include":false,"step":"45.0","x":207.6,"y":-50.44,"z":-877.42,"a95":"0.99","info":"10/10/2014 at 19:59:19"},{"visible":true,"include":false,"step":"50.0","x":-319.8,"y":-377.83,"z":-204.93,"a95":"0.99","info":"10/10/2014 at 19:59:19"},{"visible":true,"include":false,"step":"60.0","x":-274.56,"y":-184.66,"z":-660.38,"a95":"0.99","info":"10/10/2014 at 19:59:19"},{"visible":true,"include":false,"step":"70.0","x":21.96,"y":-54.545,"z":-748.15,"a95":"0.99","info":"10/10/2014 at 19:59:19"},{"visible":true,"include":false,"step":"80.0","x":-592.36,"y":-741.93,"z":-971.47,"a95":"0.99","info":"10/10/2014 at 19:59:19"},{"visible":true,"include":false,"step":"90.0","x":-574.77,"y":-191.39,"z":-656.31,"a95":"0.99","info":"10/10/2014 at 19:59:19"},{"visible":true,"include":false,"step":"100.0","x":-257.63,"y":-66.39,"z":-469.48,"a95":"0.99","info":"10/10/2014 at 19:59:19"}]},{"info":"6","GEO":[],"TECT":[],"interpreted":false,"name":"SS20.16B","coreAzi":24,"coreDip":48,"bedStrike":260,"bedDip":47,"data":[{"visible":true,"include":false,"step":"0.0","x":-756.33,"y":203.42,"z":618.01,"a95":"0.99","info":"30/01/2015 at 22:14:23"},{"visible":true,"include":false,"step":"10.0","x":-126.07,"y":43.873,"z":-19.218,"a95":"0.99","info":"30/01/2015 at 22:14:23"},{"visible":true,"include":false,"step":"15.0","x":120.55,"y":-159.9,"z":-145.34,"a95":"0.99","info":"30/01/2015 at 22:14:23"},{"visible":true,"include":false,"step":"20.0","x":3.441,"y":24.498,"z":64.002,"a95":"0.99","info":"30/01/2015 at 22:14:23"},{"visible":true,"include":false,"step":"23.0","x":160.64,"y":-71.449,"z":-23.106,"a95":"0.99","info":"30/01/2015 at 22:14:23"},{"visible":true,"include":false,"step":"25.0","x":115.99,"y":-12.017,"z":260.05,"a95":"0.99","info":"30/01/2015 at 22:14:23"},{"visible":true,"include":false,"step":"30.0","x":142,"y":-251.57,"z":125.33,"a95":"0.99","info":"30/01/2015 at 22:14:23"},{"visible":true,"include":false,"step":"33.0","x":151.38,"y":-70.278,"z":59.936,"a95":"0.99","info":"30/01/2015 at 22:14:23"},{"visible":true,"include":false,"step":"35.0","x":4.884,"y":-367.63,"z":32.467,"a95":"0.99","info":"30/01/2015 at 22:14:23"},{"visible":true,"include":false,"step":"40.0","x":126.29,"y":-261.16,"z":72.332,"a95":"0.99","info":"30/01/2015 at 22:14:23"},{"visible":true,"include":false,"step":"45.0","x":-126.85,"y":-50.521,"z":-594.13,"a95":"0.99","info":"30/01/2015 at 22:14:23"},{"visible":true,"include":false,"step":"50.0","x":114.83,"y":-552.82,"z":42.523,"a95":"0.99","info":"30/01/2015 at 22:14:23"},{"visible":true,"include":false,"step":"60.0","x":223.58,"y":-52.593,"z":196.55,"a95":"0.99","info":"30/01/2015 at 22:14:23"},{"visible":true,"include":false,"step":"70.0","x":203.77,"y":-293.37,"z":117.99,"a95":"0.99","info":"30/01/2015 at 22:14:23"}]},{"info":"2","GEO":[],"TECT":[],"interpreted":false,"name":"SS20.18A","coreAzi":21,"coreDip":42,"bedStrike":260,"bedDip":47,"data":[{"visible":true,"include":false,"step":"0.0","x":-422.84,"y":516.78,"z":1687.3,"a95":"0.99","info":"22/09/2014 at 15:39:26"},{"visible":true,"include":false,"step":"5.0","x":-241.84,"y":447.51,"z":878.56,"a95":"0.99","info":"22/09/2014 at 15:39:26"},{"visible":true,"include":false,"step":"10.0","x":-29.415,"y":378.72,"z":152.47,"a95":"0.99","info":"22/09/2014 at 15:39:26"},{"visible":true,"include":false,"step":"15.0","x":50.274,"y":298.44,"z":-89.19,"a95":"0.99","info":"22/09/2014 at 15:39:26"},{"visible":true,"include":false,"step":"20.0","x":118.78,"y":229.91,"z":-144.79,"a95":"0.99","info":"22/09/2014 at 15:39:26"},{"visible":true,"include":false,"step":"25.0","x":66.424,"y":216.14,"z":-323.39,"a95":"0.99","info":"22/09/2014 at 15:39:26"},{"visible":true,"include":false,"step":"30.0","x":183.59,"y":78.825,"z":-191.55,"a95":"0.99","info":"22/09/2014 at 15:39:26"},{"visible":true,"include":false,"step":"35.0","x":131.29,"y":-52.193,"z":-79.578,"a95":"0.99","info":"22/09/2014 at 15:39:26"},{"visible":true,"include":false,"step":"40.0","x":25.974,"y":236.02,"z":-156.82,"a95":"0.99","info":"22/09/2014 at 15:39:26"},{"visible":true,"include":false,"step":"45.0","x":171.92,"y":-112.72,"z":-202.22,"a95":"0.99","info":"22/09/2014 at 15:39:26"},{"visible":true,"include":false,"step":"50.0","x":-83.49,"y":236.91,"z":-422.36,"a95":"0.99","info":"22/09/2014 at 15:39:26"},{"visible":true,"include":false,"step":"60.0","x":-140.7,"y":-234.52,"z":81.859,"a95":"0.99","info":"22/09/2014 at 15:39:26"},{"visible":true,"include":false,"step":"70.0","x":69.791,"y":66.09,"z":-149.29,"a95":"0.99","info":"22/09/2014 at 15:39:26"},{"visible":true,"include":false,"step":"80.0","x":-99.669,"y":-77.181,"z":-6.0359,"a95":"0.99","info":"22/09/2014 at 15:39:26"},{"visible":true,"include":false,"step":"90.0","x":-335.18,"y":-430.06,"z":106.95,"a95":"0.99","info":"22/09/2014 at 15:39:26"},{"visible":true,"include":false,"step":"100.0","x":-579.34,"y":-159.88,"z":201.53,"a95":"0.99","info":"22/09/2014 at 15:39:26"}]},{"info":"6","GEO":[],"TECT":[],"interpreted":false,"name":"SS20.18B","coreAzi":21,"coreDip":42,"bedStrike":260,"bedDip":47,"data":[{"visible":true,"include":false,"step":"0.0","x":-697.61,"y":291.3,"z":755.99,"a95":"0.99","info":"10/10/2014 at 19:59:19"},{"visible":true,"include":false,"step":"4.0","x":-545.95,"y":268.74,"z":1393.6,"a95":"0.99","info":"10/10/2014 at 19:59:19"},{"visible":true,"include":false,"step":"8.0","x":-360.75,"y":128.29,"z":1027.5,"a95":"0.99","info":"10/10/2014 at 19:59:19"},{"visible":true,"include":false,"step":"12.0","x":-300.75,"y":165.24,"z":789.41,"a95":"0.99","info":"10/10/2014 at 19:59:19"},{"visible":true,"include":false,"step":"16.0","x":-302.34,"y":246.37,"z":509.28,"a95":"0.99","info":"10/10/2014 at 19:59:19"},{"visible":true,"include":false,"step":"20.0","x":-169.11,"y":76.191,"z":428.66,"a95":"0.99","info":"10/10/2014 at 19:59:19"},{"visible":true,"include":false,"step":"25.0","x":-110.33,"y":25.833,"z":464.24,"a95":"0.99","info":"10/10/2014 at 19:59:19"},{"visible":true,"include":false,"step":"30.0","x":-40.654,"y":52.048,"z":539.49,"a95":"0.99","info":"10/10/2014 at 19:59:19"},{"visible":true,"include":false,"step":"35.0","x":-301.03,"y":-205.93,"z":687.3,"a95":"0.99","info":"10/10/2014 at 19:59:19"},{"visible":true,"include":false,"step":"40.0","x":-186.37,"y":-117.12,"z":550.97,"a95":"0.99","info":"10/10/2014 at 19:59:19"},{"visible":true,"include":false,"step":"45.0","x":-173.08,"y":-150.58,"z":604.18,"a95":"0.99","info":"10/10/2014 at 19:59:19"},{"visible":true,"include":false,"step":"50.0","x":-412.28,"y":-379.43,"z":988.49,"a95":"0.99","info":"10/10/2014 at 19:59:19"},{"visible":true,"include":false,"step":"60.0","x":-402.6,"y":-481.86,"z":567.25,"a95":"0.99","info":"10/10/2014 at 19:59:19"},{"visible":true,"include":false,"step":"70.0","x":-48.84,"y":-133.8,"z":492.36,"a95":"0.99","info":"10/10/2014 at 19:59:19"},{"visible":true,"include":false,"step":"80.0","x":-414.03,"y":-673.51,"z":-33.122,"a95":"0.99","info":"10/10/2014 at 19:59:19"},{"visible":true,"include":false,"step":"90.0","x":-621.49,"y":-415.18,"z":276.54,"a95":"0.99","info":"10/10/2014 at 19:59:19"},{"visible":true,"include":false,"step":"100.0","x":-180.15,"y":-483.01,"z":792.88,"a95":"0.99","info":"10/10/2014 at 19:59:19"}]},{"info":"","GEO":[],"TECT":[],"interpreted":false,"name":"SS20.19A","coreAzi":58,"coreDip":40,"bedStrike":260,"bedDip":47,"data":[{"visible":true,"include":false,"step":"20","x":-717,"y":0,"z":4698,"a95":"2.7","info":"\"14-09-29\" at \"16:05\""},{"visible":true,"include":false,"step":"100","x":6,"y":1073,"z":416,"a95":"3.9","info":"\"14-09-29\" at \"18:43\""},{"visible":true,"include":false,"step":"150","x":-34,"y":1158,"z":-198,"a95":"3.4","info":"\"14-09-29\" at \"21:37\""},{"visible":true,"include":false,"step":"180","x":-115,"y":920.8,"z":-8.1,"a95":"4.3","info":"\"14-09-30\" at \"16:04\""},{"visible":true,"include":false,"step":"210","x":-260.5,"y":809.8,"z":-92.2,"a95":"4.2","info":"\"14-09-30\" at \"19:14\""},{"visible":true,"include":false,"step":"240","x":-251.4,"y":687.5,"z":166.2,"a95":"6.5","info":"\"14-09-30\" at \"22:17\""},{"visible":true,"include":false,"step":"270","x":-465.3,"y":527.6,"z":33.4,"a95":"5.2","info":"\"14-10-01\" at \"16:17\""},{"visible":true,"include":false,"step":"300","x":-665.5,"y":166.3,"z":272.3,"a95":"12.7","info":"\"14-10-01\" at \"19:49\""},{"visible":true,"include":false,"step":"320","x":-604.9,"y":540.9,"z":-46.1,"a95":"6.1","info":"\"14-10-01\" at \"22:55\""},{"visible":true,"include":false,"step":"340","x":-676.2,"y":152.6,"z":239.9,"a95":"12.3","info":"\"14-10-02\" at \"16:28\""},{"visible":true,"include":false,"step":"370","x":-627.2,"y":660.9,"z":-286.2,"a95":"15.2","info":"\"14-10-02\" at \"19:13\""},{"visible":true,"include":false,"step":"400","x":-1442,"y":914,"z":2320,"a95":"13.7","info":"\"14-10-02\" at \"22:29\""},{"visible":true,"include":false,"step":"420","x":-1542,"y":2281,"z":-959,"a95":"12.3","info":"\"14-10-03\" at \"16:01\""},{"visible":true,"include":false,"step":"440","x":-1595,"y":-658,"z":1007,"a95":"24.5","info":"\"14-10-03\" at \"19:25\""}]},{"info":"","GEO":[{"dec":169.58259412824236,"inc":-42.232294431308546,"MAD":4.505570238894793,"cm":[2.842170943040401e-14,2.220446049250313e-14,0],"intensity":167.10765142725475,"type":"dir","forced":true,"remark":"","origin":false,"nSteps":3,"minStep":"210","maxStep":"270","steps":["210","240","270"]}],"TECT":[{"dec":169.68987040156264,"inc":4.766879384904922,"MAD":4.505570238894753,"cm":[-8.526512829121202e-14,-2.9665159217984183e-13,-1.4210854715202004e-14],"intensity":167.10765142725475,"type":"dir","forced":true,"remark":"","origin":false,"nSteps":3,"minStep":"210","maxStep":"270","steps":["210","240","270"]}],"interpreted":true,"name":"SS20.20B","coreAzi":38,"coreDip":29,"bedStrike":260,"bedDip":47,"data":[{"visible":true,"include":false,"step":"20","x":832,"y":44,"z":2603,"a95":"3","info":"\"14-09-29\" at \"16:07\""},{"visible":true,"include":false,"step":"100","x":740,"y":816,"z":-330,"a95":"3.1","info":"\"14-09-29\" at \"18:45\""},{"visible":true,"include":false,"step":"150","x":591,"y":721,"z":-680,"a95":"3.1","info":"\"14-09-29\" at \"21:39\""},{"visible":true,"include":false,"step":"180","x":431.7,"y":597,"z":-671.3,"a95":"4","info":"\"14-09-30\" at \"16:06\""},{"visible":true,"include":true,"step":"210","x":366.6,"y":555.4,"z":-702.7,"a95":"3.5","info":"\"14-09-30\" at \"19:16\""},{"visible":true,"include":true,"step":"240","x":254.6,"y":426.7,"z":-504.6,"a95":"5.9","info":"\"14-09-30\" at \"22:19\""},{"visible":true,"include":true,"step":"270","x":233.3,"y":379.7,"z":-655.4,"a95":"3.8","info":"\"14-10-01\" at \"16:19\""},{"visible":true,"include":false,"step":"300","x":-91.2,"y":278.3,"z":-203.9,"a95":"18.8","info":"\"14-10-01\" at \"19:51\""},{"visible":true,"include":false,"step":"320","x":-145.5,"y":304.4,"z":-295.9,"a95":"11.8","info":"\"14-10-01\" at \"22:57\""},{"visible":true,"include":false,"step":"340","x":-239.5,"y":44.3,"z":-39.4,"a95":"36.8","info":"\"14-10-02\" at \"16:30\""},{"visible":false,"include":false,"step":"370","x":-342,"y":119,"z":-630,"a95":"13.8","info":"\"14-10-02\" at \"19:15\""},{"visible":false,"include":false,"step":"400","x":-425,"y":437,"z":1063,"a95":"18.2","info":"\"14-10-02\" at \"22:31\""},{"visible":false,"include":false,"step":"420","x":-78,"y":1094,"z":-1154,"a95":"18.1","info":"\"14-10-03\" at \"16:03\""},{"visible":false,"include":false,"step":"440","x":-396,"y":145,"z":1026,"a95":"28.4","info":"\"14-10-03\" at \"19:26\""}]},{"info":"7","GEO":[{"dec":188.09955158893402,"inc":-54.747694770061884,"MAD":6.507586964920227,"cm":[3.552713678800501e-15,-5.329070518200751e-15,0],"intensity":126.6693746577699,"type":"dir","forced":true,"remark":"","origin":false,"nSteps":5,"minStep":"25.0","maxStep":"45.0","steps":["25.0","30.0","35.0","40.0","45.0"]}],"TECT":[{"dec":180.45860428750183,"inc":-8.957303467487593,"MAD":6.507586964920242,"cm":[0,1.4077627952246985e-13,1.4210854715202004e-14],"intensity":126.6693746577699,"type":"dir","forced":true,"remark":"","origin":false,"nSteps":5,"minStep":"25.0","maxStep":"45.0","steps":["25.0","30.0","35.0","40.0","45.0"]}],"interpreted":true,"name":"SS20.20C","coreAzi":38,"coreDip":29,"bedStrike":260,"bedDip":47,"data":[{"visible":false,"include":false,"step":"0.0","x":132.8,"y":301.68,"z":-1018.7,"a95":"0.99","info":"10/10/2014 at 19:59:19"},{"visible":true,"include":false,"step":"4.0","x":309.69,"y":360.81,"z":-171.77,"a95":"0.99","info":"10/10/2014 at 19:59:19"},{"visible":true,"include":false,"step":"8.0","x":427.28,"y":325.49,"z":-394.74,"a95":"0.99","info":"10/10/2014 at 19:59:19"},{"visible":true,"include":false,"step":"12.0","x":471.94,"y":381.19,"z":-484.59,"a95":"0.99","info":"10/10/2014 at 19:59:19"},{"visible":true,"include":false,"step":"16.0","x":426.62,"y":425.63,"z":-699.41,"a95":"0.99","info":"10/10/2014 at 19:59:19"},{"visible":true,"include":false,"step":"20.0","x":438.07,"y":373.16,"z":-647.92,"a95":"0.99","info":"10/10/2014 at 19:59:19"},{"visible":true,"include":true,"step":"25.0","x":447.92,"y":279.29,"z":-588.78,"a95":"0.99","info":"10/10/2014 at 19:59:19"},{"visible":true,"include":true,"step":"30.0","x":336.59,"y":294.75,"z":-692.2,"a95":"0.99","info":"10/10/2014 at 19:59:19"},{"visible":true,"include":true,"step":"35.0","x":322.59,"y":137.64,"z":-612.58,"a95":"0.99","info":"10/10/2014 at 19:59:19"},{"visible":true,"include":true,"step":"40.0","x":213.44,"y":109.07,"z":-480.3,"a95":"0.99","info":"10/10/2014 at 19:59:19"},{"visible":true,"include":true,"step":"45.0","x":266.93,"y":116.25,"z":-460.75,"a95":"0.99","info":"10/10/2014 at 19:59:19"},{"visible":false,"include":false,"step":"50.0","x":-41.394,"y":-147.39,"z":-12.799,"a95":"0.99","info":"10/10/2014 at 19:59:19"},{"visible":true,"include":false,"step":"60.0","x":-76.257,"y":-145.34,"z":-344.56,"a95":"0.99","info":"10/10/2014 at 19:59:19"},{"visible":false,"include":false,"step":"70.0","x":2.738,"y":30.075,"z":-325.64,"a95":"0.99","info":"10/10/2014 at 19:59:19"},{"visible":false,"include":false,"step":"80.0","x":-113.82,"y":-276.13,"z":-972.47,"a95":"0.99","info":"10/10/2014 at 19:59:19"},{"visible":false,"include":false,"step":"90.0","x":-46.417,"y":55.009,"z":-233.37,"a95":"0.99","info":"10/10/2014 at 19:59:19"},{"visible":false,"include":false,"step":"100.0","x":145.91,"y":51.048,"z":0.046278,"a95":"0.99","info":"10/10/2014 at 19:59:19"}]}]
