# Supplementary material for: Paleomagnetic constraints on the timing and distribution of Cenozoic rotations in Central and Eastern Anatolia
Source: Copernicus journal article supplement (doi:10.5194/se-9-295-2018), 2018-03-21
Supplement: Supplementary file 2 [file se-9-295-2018-supplement.zip › se-2017-66_DATA_dir files/dir files Sivas/SS21.dir]

[{"version":"v1.1.0","exported":"2017-05-22T11:07:23.721Z","volume":10.5,"added":"2017-05-22T11:07:17.727Z","format":"Utrecht","demagType":"Unknown","strat":"8","patch":1.1,"GEO":[{"dec":262.8372658582553,"inc":-11.803096368717146,"MAD":8.644908574412112,"cm":[-1.7763568394002505e-15,5.218048215738236e-15,0],"intensity":184.36315981890928,"type":"GC","origin":false,"forced":true,"remark":"","nSteps":4,"minStep":"4.0","maxStep":"16.0","steps":["4.0","8.0","12.0","16.0"],"group":"None","version":"v1.1.0"}],"TECT":[{"dec":83.6162830962827,"inc":-17.185317261175964,"MAD":8.644908574412105,"cm":[-1.7763568394002505e-15,2.6645352591003757e-15,8.881784197001252e-16],"intensity":184.36315981890928,"type":"GC","origin":false,"forced":true,"remark":"","nSteps":4,"minStep":"4.0","maxStep":"16.0","steps":["4.0","8.0","12.0","16.0"],"group":"None","version":"v1.1.0"}],"interpreted":true,"name":"SS21.1A","coreAzi":10,"coreDip":25,"bedStrike":324,"bedDip":33,"data":[{"visible":true,"include":false,"step":"0.0","x":-191.33333333333334,"y":-51.98476190476191,"z":113.06666666666668,"a95":0.99,"info":"10/10/2014 at 19:59:19"},{"visible":true,"include":true,"step":"4.0","x":-139.22857142857143,"y":-31.035238095238096,"z":49.275238095238095,"a95":0.99,"info":"10/10/2014 at 19:59:19"},{"visible":true,"include":true,"step":"8.0","x":-76.12857142857143,"y":4.584095238095238,"z":2.9032380952380956,"a95":0.99,"info":"10/10/2014 at 19:59:19"},{"visible":true,"include":true,"step":"12.0","x":-59.25428571428571,"y":2.3702857142857146,"z":-34.86857142857143,"a95":0.99,"info":"10/10/2014 at 19:59:19"},{"visible":true,"include":true,"step":"16.0","x":-44.40952380952381,"y":20.804761904761904,"z":-62.00952380952381,"a95":0.99,"info":"10/10/2014 at 19:59:19"},{"visible":true,"include":false,"step":"20.0","x":-15.582857142857144,"y":7.461333333333333,"z":-82.38857142857144,"a95":0.99,"info":"10/10/2014 at 19:59:19"},{"visible":true,"include":false,"step":"25.0","x":20.17238095238095,"y":24.133333333333333,"z":-89.24,"a95":0.99,"info":"10/10/2014 at 19:59:19"},{"visible":true,"include":false,"step":"30.0","x":16.36857142857143,"y":-3.828857142857143,"z":-67.62761904761905,"a95":0.99,"info":"10/10/2014 at 19:59:19"},{"visible":true,"include":false,"step":"35.0","x":28.88380952380952,"y":-23.71238095238095,"z":-82.80285714285714,"a95":0.99,"info":"10/10/2014 at 19:59:19"},{"visible":true,"include":false,"step":"40.0","x":14.552380952380954,"y":-12.105714285714285,"z":-52.40380952380953,"a95":0.99,"info":"10/10/2014 at 19:59:19"},{"visible":true,"include":false,"step":"45.0","x":20.239047619047618,"y":0.6773523809523809,"z":-47.599047619047624,"a95":0.99,"info":"10/10/2014 at 19:59:19"},{"visible":true,"include":false,"step":"50.0","x":-1.4677142857142857,"y":7.486380952380952,"z":-28.036190476190477,"a95":0.99,"info":"10/10/2014 at 19:59:19"},{"visible":true,"include":false,"step":"60.0","x":-31.611428571428572,"y":-30.539047619047622,"z":-31.684761904761906,"a95":0.99,"info":"10/10/2014 at 19:59:19"},{"visible":true,"include":false,"step":"70.0","x":-22.584761904761905,"y":-3.5545714285714287,"z":-36.48761904761905,"a95":0.99,"info":"10/10/2014 at 19:59:19"},{"visible":true,"include":false,"step":"80.0","x":-5.297142857142857,"y":-16.862857142857145,"z":-102.5904761904762,"a95":0.99,"info":"10/10/2014 at 19:59:19"},{"visible":true,"include":false,"step":"90.0","x":-21.524761904761903,"y":23.617142857142856,"z":-25.01904761904762,"a95":0.99,"info":"10/10/2014 at 19:59:19"},{"visible":true,"include":false,"step":"100.0","x":-21.515238095238097,"y":7.032190476190475,"z":-42.925714285714285,"a95":0.99,"info":"10/10/2014 at 19:59:19"}]},{"version":"v1.1.0","exported":"2017-05-22T11:07:23.721Z","volume":10.5,"added":"2017-05-22T11:07:17.727Z","format":"Utrecht","demagType":"Unknown","strat":null,"patch":1.1,"GEO":[{"dec":110.63963295492749,"inc":-13.640197854249543,"MAD":25.08047988877518,"cm":[-8.881784197001252e-16,3.1086244689504383e-15,0],"intensity":167.66380517161673,"type":"GC","origin":false,"forced":true,"remark":"","nSteps":6,"minStep":"100","maxStep":"270","steps":["100","150","180","210","240","270"],"group":"None","version":"v1.1.0"}],"TECT":[{"dec":122.49906545514887,"inc":-29.263723175073125,"MAD":25.08047988877524,"cm":[-5.329070518200751e-15,-3.885780586188048e-15,-4.440892098500626e-15],"intensity":167.66380517161673,"type":"GC","origin":false,"forced":true,"remark":"","nSteps":6,"minStep":"100","maxStep":"270","steps":["100","150","180","210","240","270"],"group":"None","version":"v1.1.0"}],"interpreted":true,"name":"SS21.2A","coreAzi":86,"coreDip":51,"bedStrike":324,"bedDip":33,"data":[{"visible":true,"include":false,"step":"20","x":-44.2,"y":39.81904761904762,"z":-20.219047619047622,"a95":8.8,"info":"\"14-10-13\" at \"16:40\""},{"visible":true,"include":true,"step":"100","x":-26.38095238095238,"y":74.47619047619048,"z":-15.085714285714285,"a95":8.1,"info":"\"14-10-13\" at \"19:34\""},{"visible":true,"include":true,"step":"150","x":-47.904761904761905,"y":94.76190476190476,"z":0.38095238095238093,"a95":5,"info":"\"14-10-13\" at \"23:02\""},{"visible":true,"include":true,"step":"180","x":-56.857142857142854,"y":99.42857142857143,"z":-4.285714285714286,"a95":3.7,"info":"\"14-10-14\" at \"16:11\""},{"visible":true,"include":true,"step":"210","x":-52.57142857142857,"y":101.61904761904762,"z":13.619047619047619,"a95":4.5,"info":"\"14-10-14\" at \"19:21\""},{"visible":true,"include":true,"step":"240","x":-52.95238095238095,"y":116.28571428571429,"z":18.38095238095238,"a95":3.6,"info":"\"14-10-14\" at \"22:27\""},{"visible":true,"include":true,"step":"270","x":-52.2,"y":73.54285714285714,"z":20.238095238095237,"a95":3.7,"info":"\"14-10-15\" at \"16:18\""},{"visible":true,"include":false,"step":"290","x":-99.80952380952381,"y":89.14285714285714,"z":-14.476190476190476,"a95":4,"info":"\"14-10-15\" at \"19:23\""},{"visible":true,"include":false,"step":"310","x":-91.52380952380952,"y":70.66666666666667,"z":26.38095238095238,"a95":4.1,"info":"\"14-10-15\" at \"22:42\""},{"visible":true,"include":false,"step":"330","x":-53.171428571428564,"y":56.07619047619047,"z":-3.066666666666667,"a95":7.4,"info":"\"14-10-16\" at \"16:03\""},{"visible":true,"include":false,"step":"350","x":-19.80952380952381,"y":87.42857142857143,"z":132.47619047619048,"a95":7.5,"info":"\"14-10-16\" at \"19:55\""},{"visible":true,"include":false,"step":"370","x":-108.57142857142857,"y":105.33333333333333,"z":-35.23809523809524,"a95":10.4,"info":"\"14-10-16\" at \"23:03\""},{"visible":true,"include":false,"step":"400","x":-107.42857142857143,"y":48.095238095238095,"z":57.714285714285715,"a95":17.5,"info":"\"14-10-17\" at \"14:42\""}]},{"version":"v1.1.0","exported":"2017-05-22T11:07:23.721Z","volume":10.5,"added":"2017-05-22T11:07:17.728Z","format":"Utrecht","demagType":"Unknown","strat":"7","patch":1.1,"GEO":[],"TECT":[],"interpreted":false,"name":"SS21.3A","coreAzi":44,"coreDip":39,"bedStrike":324,"bedDip":33,"data":[{"visible":true,"include":false,"step":"0.0","x":-210.8952380952381,"y":4.351333333333334,"z":108.44761904761906,"a95":0.99,"info":"30/01/2015 at 22:14:23"},{"visible":true,"include":false,"step":"10.0","x":-118.94285714285715,"y":-23.953333333333333,"z":22.776190476190475,"a95":0.99,"info":"30/01/2015 at 22:14:23"},{"visible":true,"include":false,"step":"15.0","x":-77.58380952380952,"y":-8.771904761904763,"z":15.928571428571429,"a95":0.99,"info":"30/01/2015 at 22:14:23"},{"visible":true,"include":false,"step":"20.0","x":-31.905714285714286,"y":14.256190476190476,"z":35.294285714285714,"a95":0.99,"info":"30/01/2015 at 22:14:23"},{"visible":true,"include":false,"step":"23.0","x":-34.63142857142857,"y":8.289142857142858,"z":-0.5301523809523809,"a95":0.99,"info":"30/01/2015 at 22:14:23"},{"visible":true,"include":false,"step":"25.0","x":-38.79047619047619,"y":22.874285714285715,"z":2.7187619047619047,"a95":0.99,"info":"30/01/2015 at 22:14:23"},{"visible":true,"include":false,"step":"30.0","x":-52.235238095238095,"y":-6.95952380952381,"z":-26.711428571428574,"a95":0.99,"info":"30/01/2015 at 22:14:23"},{"visible":true,"include":false,"step":"33.0","x":-39.96857142857143,"y":-6.922380952380952,"z":41.63428571428572,"a95":0.99,"info":"30/01/2015 at 22:14:23"},{"visible":true,"include":false,"step":"35.0","x":-48.775238095238095,"y":-36.00095238095238,"z":-5.800190476190476,"a95":0.99,"info":"30/01/2015 at 22:14:23"},{"visible":true,"include":false,"step":"40.0","x":-48.95619047619047,"y":-0.04238857142857143,"z":-27.14666666666667,"a95":0.99,"info":"30/01/2015 at 22:14:23"},{"visible":true,"include":false,"step":"45.0","x":-102.4952380952381,"y":-33.2447619047619,"z":-72.07714285714285,"a95":0.99,"info":"30/01/2015 at 22:14:23"},{"visible":true,"include":false,"step":"50.0","x":-40.36761904761905,"y":-9.925714285714285,"z":-22.85904761904762,"a95":0.99,"info":"30/01/2015 at 22:14:23"},{"visible":true,"include":false,"step":"60.0","x":-59.61428571428572,"y":-12.99047619047619,"z":2.927142857142857,"a95":0.99,"info":"30/01/2015 at 22:14:23"},{"visible":true,"include":false,"step":"70.0","x":-10.037142857142857,"y":4.364285714285715,"z":-32.71523809523809,"a95":0.99,"info":"30/01/2015 at 22:14:23"}]},{"version":"v1.1.0","exported":"2017-05-22T11:07:23.721Z","volume":10.5,"added":"2017-05-22T11:07:17.728Z","format":"Utrecht","demagType":"Unknown","strat":null,"patch":1.1,"GEO":[],"TECT":[],"interpreted":false,"name":"SS21.4A","coreAzi":45,"coreDip":41,"bedStrike":324,"bedDip":33,"data":[{"visible":true,"include":false,"step":"20","x":-169.52380952380952,"y":34,"z":-48.476190476190474,"a95":2.7,"info":"\"14-09-29\" at \"16:09\""},{"visible":true,"include":false,"step":"100","x":-124.19047619047619,"y":0.6666666666666666,"z":-9.047619047619047,"a95":2.9,"info":"\"14-09-29\" at \"18:47\""},{"visible":true,"include":false,"step":"150","x":-119.23809523809524,"y":-6.095238095238095,"z":12.095238095238095,"a95":3.9,"info":"\"14-09-29\" at \"21:41\""},{"visible":true,"include":false,"step":"180","x":-129.04761904761904,"y":-1.1428571428571428,"z":23.61904761904762,"a95":3.3,"info":"\"14-09-30\" at \"16:09\""},{"visible":true,"include":false,"step":"210","x":-143.8095238095238,"y":-7.619047619047619,"z":5.619047619047619,"a95":3.7,"info":"\"14-09-30\" at \"19:18\""},{"visible":true,"include":false,"step":"240","x":-172.38095238095238,"y":-10.666666666666666,"z":-9.904761904761905,"a95":3.2,"info":"\"14-09-30\" at \"22:22\""},{"visible":true,"include":false,"step":"270","x":-125.04761904761905,"y":19.238095238095237,"z":-2.380952380952381,"a95":2.9,"info":"\"14-10-01\" at \"16:21\""},{"visible":true,"include":false,"step":"300","x":-155.23809523809524,"y":19.61904761904762,"z":24.38095238095238,"a95":4.7,"info":"\"14-10-01\" at \"19:53\""},{"visible":true,"include":false,"step":"320","x":-162.76190476190476,"y":36,"z":-11.714285714285714,"a95":3.5,"info":"\"14-10-01\" at \"23:00\""},{"visible":true,"include":false,"step":"340","x":-150,"y":27.80952380952381,"z":53.42857142857143,"a95":5.9,"info":"\"14-10-02\" at \"16:32\""},{"visible":true,"include":false,"step":"370","x":-203.52380952380952,"y":23.904761904761905,"z":-4.476190476190476,"a95":7.3,"info":"\"14-10-02\" at \"19:17\""},{"visible":true,"include":false,"step":"400","x":-86.66666666666667,"y":-68.47619047619048,"z":193.8095238095238,"a95":9.2,"info":"\"14-10-02\" at \"22:34\""},{"visible":true,"include":false,"step":"420","x":-238.38095238095238,"y":219.33333333333334,"z":-179.9047619047619,"a95":14.9,"info":"\"14-10-03\" at \"16:06\""},{"visible":true,"include":false,"step":"440","x":-171.42857142857142,"y":240,"z":-131.42857142857142,"a95":20,"info":"\"14-10-03\" at \"19:28\""}]},{"version":"v1.1.0","exported":"2017-05-22T11:07:23.721Z","volume":10.5,"added":"2017-05-22T11:07:17.729Z","format":"Utrecht","demagType":"Unknown","strat":"3","patch":1.1,"GEO":[],"TECT":[],"interpreted":false,"name":"SS21.4B","coreAzi":45,"coreDip":41,"bedStrike":324,"bedDip":33,"data":[{"visible":true,"include":false,"step":"0.0","x":-151.16190476190476,"y":-1.1704761904761904,"z":233.8095238095238,"a95":0.99,"info":"22/09/2014 at 15:39:26"},{"visible":true,"include":false,"step":"5.0","x":-101.27619047619048,"y":-0.968,"z":151.17142857142858,"a95":0.99,"info":"22/09/2014 at 15:39:26"},{"visible":true,"include":false,"step":"10.0","x":-61.62095238095238,"y":11.367619047619048,"z":63.8447619047619,"a95":0.99,"info":"22/09/2014 at 15:39:26"},{"visible":true,"include":false,"step":"15.0","x":-36.03238095238095,"y":18.545714285714286,"z":39.1,"a95":0.99,"info":"22/09/2014 at 15:39:26"},{"visible":true,"include":false,"step":"20.0","x":-25.960952380952378,"y":9.272761904761905,"z":32.43238095238095,"a95":0.99,"info":"22/09/2014 at 15:39:26"},{"visible":true,"include":false,"step":"25.0","x":0.7162190476190476,"y":8.714857142857143,"z":18.968571428571426,"a95":0.99,"info":"22/09/2014 at 15:39:26"},{"visible":true,"include":false,"step":"30.0","x":-1.5143809523809524,"y":12.49904761904762,"z":-32.88380952380952,"a95":0.99,"info":"22/09/2014 at 15:39:26"},{"visible":true,"include":false,"step":"35.0","x":-6.929619047619047,"y":-10.516190476190477,"z":20.361904761904764,"a95":0.99,"info":"22/09/2014 at 15:39:26"},{"visible":true,"include":false,"step":"40.0","x":21.85904761904762,"y":34.78380952380952,"z":-19.278095238095236,"a95":0.99,"info":"22/09/2014 at 15:39:26"},{"visible":true,"include":false,"step":"45.0","x":20.453333333333333,"y":32.15238095238095,"z":-12.92,"a95":0.99,"info":"22/09/2014 at 15:39:26"},{"visible":true,"include":false,"step":"50.0","x":4.794190476190476,"y":36.1647619047619,"z":-38.16285714285714,"a95":0.99,"info":"22/09/2014 at 15:39:26"},{"visible":true,"include":false,"step":"60.0","x":15.621904761904762,"y":-10.796190476190477,"z":-18.780952380952378,"a95":0.99,"info":"22/09/2014 at 15:39:26"},{"visible":true,"include":false,"step":"70.0","x":-5.423142857142857,"y":23.71238095238095,"z":-25.843809523809526,"a95":0.99,"info":"22/09/2014 at 15:39:26"},{"visible":true,"include":false,"step":"80.0","x":-22.091428571428573,"y":25.601904761904763,"z":-46.37428571428571,"a95":0.99,"info":"22/09/2014 at 15:39:26"},{"visible":true,"include":false,"step":"90.0","x":-21.473333333333333,"y":-4.912761904761905,"z":-12.168571428571429,"a95":0.99,"info":"22/09/2014 at 15:39:26"},{"visible":true,"include":false,"step":"100.0","x":20.32095238095238,"y":42.79333333333333,"z":-23.187619047619048,"a95":0.99,"info":"22/09/2014 at 15:39:26"}]},{"version":"v1.1.0","exported":"2017-05-22T11:07:23.721Z","volume":10.5,"added":"2017-05-22T11:07:17.729Z","format":"Utrecht","demagType":"Unknown","strat":null,"patch":1.1,"GEO":[],"TECT":[],"interpreted":false,"name":"SS21.5A","coreAzi":50,"coreDip":36,"bedStrike":324,"bedDip":33,"data":[{"visible":true,"include":false,"step":"20","x":-156.47619047619048,"y":-77.61904761904762,"z":-100.19047619047619,"a95":2.7,"info":"\"14-10-13\" at \"16:42\""},{"visible":true,"include":false,"step":"100","x":-87.8,"y":-27.26666666666667,"z":6.476190476190476,"a95":5.9,"info":"\"14-10-13\" at \"19:36\""},{"visible":true,"include":false,"step":"150","x":-110.47619047619048,"y":-7.0476190476190474,"z":3.5238095238095237,"a95":4.5,"info":"\"14-10-13\" at \"23:04\""},{"visible":true,"include":false,"step":"180","x":-83.63809523809525,"y":15.457142857142859,"z":-17.361904761904764,"a95":4.1,"info":"\"14-10-14\" at \"16:13\""},{"visible":true,"include":false,"step":"210","x":-96.76190476190476,"y":4,"z":23.142857142857142,"a95":4.5,"info":"\"14-10-14\" at \"19:23\""},{"visible":true,"include":false,"step":"240","x":-111.23809523809524,"y":30.571428571428573,"z":10.761904761904763,"a95":4.6,"info":"\"14-10-14\" at \"22:29\""},{"visible":true,"include":false,"step":"270","x":-77.42857142857143,"y":-12.761904761904763,"z":68.66666666666667,"a95":3.9,"info":"\"14-10-15\" at \"16:20\""},{"visible":true,"include":false,"step":"290","x":-112.38095238095238,"y":-31.904761904761905,"z":-4.476190476190476,"a95":3.6,"info":"\"14-10-15\" at \"19:25\""},{"visible":true,"include":false,"step":"310","x":-100.19047619047619,"y":-24.095238095238095,"z":90.57142857142857,"a95":5,"info":"\"14-10-15\" at \"22:44\""},{"visible":true,"include":false,"step":"330","x":-100.57142857142857,"y":-20.476190476190474,"z":45.333333333333336,"a95":5.8,"info":"\"14-10-16\" at \"16:05\""},{"visible":true,"include":false,"step":"350","x":-93.14285714285714,"y":16,"z":139.9047619047619,"a95":7.6,"info":"\"14-10-16\" at \"19:57\""},{"visible":true,"include":false,"step":"370","x":-136.66666666666666,"y":11.904761904761905,"z":47.80952380952381,"a95":12.6,"info":"\"14-10-16\" at \"23:05\""},{"visible":true,"include":false,"step":"400","x":-174.57142857142858,"y":-23.61904761904762,"z":96.66666666666667,"a95":14.3,"info":"\"14-10-17\" at \"14:43\""}]},{"version":"v1.1.0","exported":"2017-05-22T11:07:23.721Z","volume":10.5,"added":"2017-05-22T11:07:17.730Z","format":"Utrecht","demagType":"Unknown","strat":null,"patch":1.1,"GEO":[{"dec":256.75416609747623,"inc":-6.7906893386232055,"MAD":6.230852148639525,"cm":[-8.881784197001252e-16,-9.159339953157541e-15,0],"intensity":511.75551312655097,"type":"GC","origin":false,"forced":true,"remark":"","nSteps":9,"minStep":"100","maxStep":"340","steps":["100","150","180","210","240","270","300","320","340"],"group":"None","version":"v1.1.0"}],"TECT":[{"dec":78.7690363107813,"inc":-23.550756738871193,"MAD":6.230852148639263,"cm":[5.2735593669694936e-15,7.105427357601002e-15,-1.7763568394002505e-15],"intensity":511.75551312655097,"type":"GC","origin":false,"forced":true,"remark":"","nSteps":9,"minStep":"100","maxStep":"340","steps":["100","150","180","210","240","270","300","320","340"],"group":"None","version":"v1.1.0"}],"interpreted":true,"name":"SS21.6A","coreAzi":42,"coreDip":72,"bedStrike":324,"bedDip":33,"data":[{"visible":true,"include":false,"step":"20","x":-473.3333333333333,"y":408.3809523809524,"z":239.71428571428572,"a95":2.4,"info":"\"14-09-29\" at \"16:11\""},{"visible":true,"include":true,"step":"100","x":-258.3809523809524,"y":224.76190476190476,"z":168.95238095238096,"a95":2.4,"info":"\"14-09-29\" at \"18:49\""},{"visible":true,"include":true,"step":"150","x":-189.8095238095238,"y":152.28571428571428,"z":141.61904761904762,"a95":2.5,"info":"\"14-09-29\" at \"21:43\""},{"visible":true,"include":true,"step":"180","x":-148.95238095238096,"y":116.47619047619048,"z":148.1904761904762,"a95":3,"info":"\"14-09-30\" at \"16:11\""},{"visible":true,"include":true,"step":"210","x":-149.71428571428572,"y":104.0952380952381,"z":128.76190476190476,"a95":2.6,"info":"\"14-09-30\" at \"19:20\""},{"visible":true,"include":true,"step":"240","x":-128.85714285714286,"y":83.71428571428571,"z":144.47619047619048,"a95":2.5,"info":"\"14-09-30\" at \"22:24\""},{"visible":true,"include":true,"step":"270","x":-116.66666666666667,"y":76.19047619047619,"z":126.95238095238095,"a95":2.6,"info":"\"14-10-01\" at \"16:25\""},{"visible":true,"include":true,"step":"300","x":-99.9047619047619,"y":40.95238095238095,"z":129.9047619047619,"a95":5,"info":"\"14-10-01\" at \"19:55\""},{"visible":true,"include":true,"step":"320","x":-94.85714285714286,"y":31.047619047619047,"z":133.14285714285714,"a95":3.2,"info":"\"14-10-01\" at \"23:02\""},{"visible":true,"include":true,"step":"340","x":-80.76190476190476,"y":24.571428571428573,"z":122.0952380952381,"a95":3.6,"info":"\"14-10-02\" at \"16:34\""},{"visible":true,"include":false,"step":"370","x":-104.38095238095238,"y":9.523809523809524,"z":70,"a95":5,"info":"\"14-10-02\" at \"19:19\""},{"visible":true,"include":false,"step":"400","x":-85.71428571428571,"y":8.761904761904763,"z":124.85714285714286,"a95":10.6,"info":"\"14-10-02\" at \"22:36\""},{"visible":true,"include":false,"step":"420","x":-154.1904761904762,"y":88.28571428571429,"z":49.61904761904762,"a95":7.4,"info":"\"14-10-03\" at \"16:08\""},{"visible":true,"include":false,"step":"440","x":-87.04761904761905,"y":-46,"z":140.38095238095238,"a95":11.8,"info":"\"14-10-03\" at \"19:30\""}]},{"version":"v1.1.0","exported":"2017-05-22T11:07:23.721Z","volume":10.5,"added":"2017-05-22T11:07:17.731Z","format":"Utrecht","demagType":"Unknown","strat":null,"patch":1.1,"GEO":[{"dec":333.1355202866931,"inc":-16.131054924527405,"MAD":10.003156093807448,"cm":[-4.3298697960381105e-15,-8.881784197001252e-16,0],"intensity":148.32502950081366,"type":"GC","origin":false,"forced":true,"remark":"","nSteps":7,"minStep":"100","maxStep":"300","steps":["100","150","180","210","240","270","300"],"group":"None","version":"v1.1.0"}],"TECT":[{"dec":322.58628527300965,"inc":-18.42603977229659,"MAD":10.003156093807476,"cm":[1.3322676295501878e-15,2.6645352591003757e-15,8.881784197001252e-16],"intensity":148.32502950081363,"type":"GC","origin":false,"forced":true,"remark":"","nSteps":7,"minStep":"100","maxStep":"300","steps":["100","150","180","210","240","270","300"],"group":"None","version":"v1.1.0"}],"interpreted":true,"name":"SS21.7A","coreAzi":53,"coreDip":65,"bedStrike":324,"bedDip":33,"data":[{"visible":true,"include":false,"step":"20","x":-103.9047619047619,"y":-47.142857142857146,"z":-32.76190476190476,"a95":2.6,"info":"\"14-09-29\" at \"16:12\""},{"visible":true,"include":true,"step":"100","x":-69.92380952380952,"y":-17.714285714285715,"z":4.066666666666667,"a95":3,"info":"\"14-09-29\" at \"18:51\""},{"visible":true,"include":true,"step":"150","x":-64.67619047619048,"y":-21.257142857142856,"z":20.65714285714286,"a95":3.4,"info":"\"14-09-29\" at \"21:45\""},{"visible":true,"include":true,"step":"180","x":-61.8,"y":-29.666666666666668,"z":40.15238095238095,"a95":3.6,"info":"\"14-09-30\" at \"16:13\""},{"visible":true,"include":true,"step":"210","x":-60.36190476190476,"y":-30.961904761904766,"z":39.08571428571428,"a95":3.6,"info":"\"14-09-30\" at \"19:22\""},{"visible":true,"include":true,"step":"240","x":-56.74285714285714,"y":-26.80952380952381,"z":57.31428571428571,"a95":4.1,"info":"\"14-09-30\" at \"22:26\""},{"visible":true,"include":true,"step":"270","x":-60.37142857142857,"y":-24.38095238095238,"z":59.409523809523805,"a95":2.8,"info":"\"14-10-01\" at \"16:28\""},{"visible":true,"include":true,"step":"300","x":-53.04761904761905,"y":-25.990476190476187,"z":66.41904761904762,"a95":5.4,"info":"\"14-10-01\" at \"19:57\""},{"visible":true,"include":false,"step":"320","x":-59.171428571428564,"y":-20.723809523809525,"z":57.91428571428572,"a95":4.5,"info":"\"14-10-01\" at \"23:04\""},{"visible":true,"include":false,"step":"340","x":-63.457142857142856,"y":-12.666666666666666,"z":52.87619047619048,"a95":4.9,"info":"\"14-10-02\" at \"16:36\""},{"visible":true,"include":false,"step":"370","x":-77.56190476190476,"y":-7.523809523809524,"z":41.81904761904762,"a95":8.3,"info":"\"14-10-02\" at \"19:21\""},{"visible":true,"include":false,"step":"400","x":-88.19047619047619,"y":-40.76190476190476,"z":77.9047619047619,"a95":9.7,"info":"\"14-10-02\" at \"22:38\""},{"visible":true,"include":false,"step":"420","x":-93.0952380952381,"y":16.561904761904763,"z":0.42857142857142855,"a95":13.4,"info":"\"14-10-03\" at \"16:10\""},{"visible":true,"include":false,"step":"440","x":-122,"y":-21.047619047619047,"z":126.57142857142857,"a95":12.9,"info":"\"14-10-03\" at \"19:32\""}]},{"version":"v1.1.0","exported":"2017-05-22T11:07:23.721Z","volume":10.5,"added":"2017-05-22T11:07:17.733Z","format":"Utrecht","demagType":"Unknown","strat":"4","patch":1.1,"GEO":[{"dec":30.321241476315095,"inc":-16.270189464495903,"MAD":5.636356997455268,"cm":[-8.881784197001252e-16,-3.3306690738754696e-15,0],"intensity":158.56029768455298,"type":"GC","origin":false,"forced":true,"remark":"","nSteps":4,"minStep":"0.0","maxStep":"15.0","steps":["0.0","5.0","10.0","15.0"],"group":"None","version":"v1.1.0"}],"TECT":[{"dec":20.60160884506911,"inc":-45.54322003650737,"MAD":5.6363569974547225,"cm":[5.329070518200751e-15,-1.3933298959045715e-14,2.6645352591003757e-15],"intensity":158.56029768455295,"type":"GC","origin":false,"forced":true,"remark":"","nSteps":4,"minStep":"0.0","maxStep":"15.0","steps":["0.0","5.0","10.0","15.0"],"group":"None","version":"v1.1.0"}],"interpreted":true,"name":"SS21.7B","coreAzi":53,"coreDip":65,"bedStrike":324,"bedDip":33,"data":[{"visible":true,"include":true,"step":"0.0","x":-27.299999999999997,"y":-28.59047619047619,"z":119.72380952380952,"a95":0.99,"info":"22/09/2014 at 15:39:26"},{"visible":true,"include":true,"step":"5.0","x":-22.073333333333334,"y":-31.771428571428572,"z":78.59809523809524,"a95":0.99,"info":"22/09/2014 at 15:39:26"},{"visible":true,"include":true,"step":"10.0","x":-18.677142857142858,"y":-27.387619047619047,"z":43.360952380952384,"a95":0.99,"info":"22/09/2014 at 15:39:26"},{"visible":true,"include":true,"step":"15.0","x":-11.76,"y":-24.459999999999997,"z":24.502857142857142,"a95":0.99,"info":"22/09/2014 at 15:39:26"},{"visible":true,"include":false,"step":"20.0","x":-0.3603047619047619,"y":-18.01142857142857,"z":18.718095238095238,"a95":0.99,"info":"22/09/2014 at 15:39:26"},{"visible":true,"include":false,"step":"25.0","x":-6.2970476190476194,"y":-6.6273333333333335,"z":11.536190476190475,"a95":0.99,"info":"22/09/2014 at 15:39:26"},{"visible":true,"include":false,"step":"30.0","x":-12.276190476190477,"y":-8.848857142857142,"z":11.442857142857143,"a95":0.99,"info":"22/09/2014 at 15:39:26"},{"visible":true,"include":false,"step":"35.0","x":-5.795809523809524,"y":-20.14095238095238,"z":9.441333333333333,"a95":0.99,"info":"22/09/2014 at 15:39:26"},{"visible":true,"include":false,"step":"40.0","x":-6.33495238095238,"y":-13.568571428571428,"z":9.34247619047619,"a95":0.99,"info":"22/09/2014 at 15:39:26"},{"visible":true,"include":false,"step":"45.0","x":-4.438285714285714,"y":-22.031428571428574,"z":-1.9908571428571429,"a95":0.99,"info":"22/09/2014 at 15:39:26"},{"visible":true,"include":false,"step":"50.0","x":-9.369809523809524,"y":0.24914285714285717,"z":-18.744761904761905,"a95":0.99,"info":"22/09/2014 at 15:39:26"},{"visible":true,"include":false,"step":"60.0","x":0.10130476190476191,"y":-31.879047619047622,"z":-7.02352380952381,"a95":0.99,"info":"22/09/2014 at 15:39:26"},{"visible":true,"include":false,"step":"70.0","x":13.396190476190476,"y":-20.757142857142856,"z":9.076761904761904,"a95":0.99,"info":"22/09/2014 at 15:39:26"},{"visible":true,"include":false,"step":"80.0","x":51.30190476190476,"y":-32.24190476190476,"z":-37.166666666666664,"a95":0.99,"info":"22/09/2014 at 15:39:26"},{"visible":true,"include":false,"step":"90.0","x":18.081904761904763,"y":-67.35714285714286,"z":3.3993333333333333,"a95":0.99,"info":"22/09/2014 at 15:39:26"},{"visible":true,"include":false,"step":"100.0","x":9.522190476190477,"y":-43.21523809523809,"z":-5.117047619047619,"a95":0.99,"info":"22/09/2014 at 15:39:26"}]},{"version":"v1.1.0","exported":"2017-05-22T11:07:23.721Z","volume":10.5,"added":"2017-05-22T11:07:17.734Z","format":"Utrecht","demagType":"Unknown","strat":null,"patch":1.1,"GEO":[{"dec":134.68622598175295,"inc":-5.174826955305724,"MAD":7.043816948975194,"cm":[-2.220446049250313e-16,1.887379141862766e-15,0],"intensity":115.55442062934732,"type":"GC","origin":false,"forced":true,"remark":"","nSteps":6,"minStep":"100","maxStep":"270","steps":["100","150","180","210","240","270"],"group":"None","version":"v1.1.0"}],"TECT":[{"dec":138.99589333074414,"inc":-9.406019138897982,"MAD":7.043816948975259,"cm":[-1.7069679003611782e-15,4.440892098500626e-16,-8.881784197001252e-16],"intensity":115.55442062934732,"type":"GC","origin":false,"forced":true,"remark":"","nSteps":6,"minStep":"100","maxStep":"270","steps":["100","150","180","210","240","270"],"group":"None","version":"v1.1.0"}],"interpreted":true,"name":"SS21.8A","coreAzi":56,"coreDip":64,"bedStrike":324,"bedDip":33,"data":[{"visible":true,"include":false,"step":"20","x":-71.32380952380952,"y":13.914285714285715,"z":-34.37142857142857,"a95":3.3,"info":"\"14-09-29\" at \"16:14\""},{"visible":true,"include":true,"step":"100","x":-61.42857142857143,"y":13.095238095238095,"z":-2.7047619047619045,"a95":3.5,"info":"\"14-09-29\" at \"18:53\""},{"visible":true,"include":true,"step":"150","x":-56.30476190476191,"y":12.819047619047618,"z":9.847619047619048,"a95":3.9,"info":"\"14-09-29\" at \"21:47\""},{"visible":true,"include":true,"step":"180","x":-49.34285714285714,"y":14.552380952380954,"z":32.06666666666666,"a95":4.1,"info":"\"14-09-30\" at \"16:15\""},{"visible":true,"include":true,"step":"210","x":-53.41904761904762,"y":9.761904761904763,"z":31.923809523809524,"a95":5.3,"info":"\"14-09-30\" at \"19:24\""},{"visible":true,"include":true,"step":"240","x":-52.36190476190476,"y":8.533333333333333,"z":43.74285714285715,"a95":4.7,"info":"\"14-09-30\" at \"22:28\""},{"visible":true,"include":true,"step":"270","x":-43.74285714285715,"y":10.628571428571428,"z":44.285714285714285,"a95":3.9,"info":"\"14-10-01\" at \"16:31\""},{"visible":true,"include":false,"step":"300","x":-51.99047619047619,"y":-0.37142857142857144,"z":46.19047619047619,"a95":7.6,"info":"\"14-10-01\" at \"19:59\""},{"visible":true,"include":false,"step":"320","x":-53.77142857142857,"y":4.838095238095238,"z":42.44761904761905,"a95":4.1,"info":"\"14-10-01\" at \"23:06\""},{"visible":true,"include":false,"step":"340","x":-44.19047619047619,"y":18.885714285714286,"z":46.99047619047619,"a95":5.5,"info":"\"14-10-02\" at \"16:38\""},{"visible":true,"include":false,"step":"370","x":-53.41904761904762,"y":30.990476190476187,"z":27.799999999999997,"a95":6.4,"info":"\"14-10-02\" at \"19:23\""},{"visible":true,"include":false,"step":"400","x":-62.266666666666666,"y":38.476190476190474,"z":48.18095238095238,"a95":9.900001,"info":"\"14-10-02\" at \"22:40\""},{"visible":true,"include":false,"step":"420","x":-126.76190476190476,"y":48,"z":-13.238095238095237,"a95":9.5,"info":"\"14-10-03\" at \"16:12\""},{"visible":true,"include":false,"step":"440","x":-112.95238095238095,"y":-18.476190476190474,"z":50.57142857142857,"a95":14.5,"info":"\"14-10-03\" at \"19:34\""}]},{"version":"v1.1.0","exported":"2017-05-22T11:07:23.722Z","volume":10.5,"added":"2017-05-22T11:07:17.734Z","format":"Utrecht","demagType":"Unknown","strat":"8","patch":1.1,"GEO":[{"dec":307.4856300374283,"inc":-1.9772923204362691,"MAD":4.860606943136178,"cm":[-2.6645352591003757e-15,2.220446049250313e-15,0],"intensity":103.06808475487718,"type":"GC","origin":false,"forced":true,"remark":"","nSteps":4,"minStep":"10.0","maxStep":"25.0","steps":["10.0","15.0","20.0","25.0"],"group":"None","version":"v1.1.0"}],"TECT":[{"dec":128.9830396156642,"inc":-7.226242893683339,"MAD":4.860606943136252,"cm":[8.881784197001252e-16,1.7763568394002505e-15,0],"intensity":103.06808475487718,"type":"GC","origin":false,"forced":true,"remark":"","nSteps":4,"minStep":"10.0","maxStep":"25.0","steps":["10.0","15.0","20.0","25.0"],"group":"None","version":"v1.1.0"}],"interpreted":true,"name":"SS21.8B","coreAzi":56,"coreDip":64,"bedStrike":324,"bedDip":33,"data":[{"visible":true,"include":false,"step":"0.0","x":-86.10666666666667,"y":15.13904761904762,"z":126.64761904761905,"a95":0.99,"info":"30/01/2015 at 22:14:23"},{"visible":true,"include":true,"step":"10.0","x":-46.105714285714285,"y":4.221619047619048,"z":56.2,"a95":0.99,"info":"30/01/2015 at 22:14:23"},{"visible":true,"include":true,"step":"15.0","x":-32.695238095238096,"y":2.09952380952381,"z":28.880000000000003,"a95":0.99,"info":"30/01/2015 at 22:14:23"},{"visible":true,"include":true,"step":"20.0","x":-37.640952380952385,"y":8.132571428571428,"z":9.674285714285714,"a95":0.99,"info":"30/01/2015 at 22:14:23"},{"visible":true,"include":false,"step":"23.0","x":-29.283809523809527,"y":2.1124761904761904,"z":0.22225714285714285,"a95":0.99,"info":"30/01/2015 at 22:14:23"},{"visible":true,"include":true,"step":"25.0","x":-37.35333333333333,"y":11.39809523809524,"z":2.226380952380952,"a95":0.99,"info":"30/01/2015 at 22:14:23"},{"visible":true,"include":false,"step":"30.0","x":-27.726666666666667,"y":15.147619047619049,"z":-6.748380952380953,"a95":0.99,"info":"30/01/2015 at 22:14:23"},{"visible":true,"include":false,"step":"33.0","x":-12.634285714285713,"y":13.893333333333333,"z":3.462952380952381,"a95":0.99,"info":"30/01/2015 at 22:14:23"},{"visible":true,"include":false,"step":"35.0","x":-19.047619047619047,"y":8.548666666666666,"z":-14.069523809523808,"a95":0.99,"info":"30/01/2015 at 22:14:23"},{"visible":true,"include":false,"step":"40.0","x":-17.603809523809524,"y":14.915238095238097,"z":-17.32761904761905,"a95":0.99,"info":"30/01/2015 at 22:14:23"},{"visible":true,"include":false,"step":"45.0","x":-69.6704761904762,"y":26.51047619047619,"z":-69.24571428571429,"a95":0.99,"info":"30/01/2015 at 22:14:23"},{"visible":true,"include":false,"step":"50.0","x":-27.276190476190475,"y":-13.239047619047618,"z":-6.201809523809524,"a95":0.99,"info":"30/01/2015 at 22:14:23"},{"visible":true,"include":false,"step":"60.0","x":-6.156095238095237,"y":-23.16857142857143,"z":-17.261904761904763,"a95":0.99,"info":"30/01/2015 at 22:14:23"},{"visible":true,"include":false,"step":"70.0","x":0.16297142857142857,"y":-40.00476190476191,"z":-22.34190476190476,"a95":0.99,"info":"30/01/2015 at 22:14:23"}]},{"version":"v1.1.0","exported":"2017-05-22T11:07:23.722Z","volume":10.5,"added":"2017-05-22T11:07:17.734Z","format":"Utrecht","demagType":"Unknown","strat":"1","patch":1.1,"GEO":[],"TECT":[],"interpreted":false,"name":"SS21.9B","coreAzi":27,"coreDip":26,"bedStrike":324,"bedDip":33,"data":[{"visible":true,"include":false,"step":"0.0","x":-155.54285714285714,"y":-122.3047619047619,"z":213.83809523809526,"a95":0.99,"info":"11/10/2014 at 01:32:58"},{"visible":true,"include":false,"step":"4.0","x":-147.71428571428572,"y":-105.06666666666668,"z":198.78095238095236,"a95":0.99,"info":"11/10/2014 at 01:32:58"},{"visible":true,"include":false,"step":"8.0","x":-130.7047619047619,"y":-89.26952380952382,"z":187.28571428571428,"a95":0.99,"info":"11/10/2014 at 01:32:58"},{"visible":true,"include":false,"step":"12.0","x":-128.2,"y":-74.24857142857142,"z":166.84761904761905,"a95":0.99,"info":"11/10/2014 at 01:32:58"},{"visible":true,"include":false,"step":"16.0","x":-117.67619047619047,"y":-75.75619047619048,"z":157.44761904761904,"a95":0.99,"info":"11/10/2014 at 01:32:58"},{"visible":true,"include":false,"step":"20.0","x":-102.33333333333333,"y":-78.06857142857143,"z":138.82857142857142,"a95":0.99,"info":"11/10/2014 at 01:32:58"},{"visible":true,"include":false,"step":"25.0","x":-100.94285714285715,"y":-64.25428571428571,"z":138.8190476190476,"a95":0.99,"info":"11/10/2014 at 01:32:58"},{"visible":true,"include":false,"step":"30.0","x":-95.88571428571429,"y":-58.26952380952381,"z":122.31428571428572,"a95":0.99,"info":"11/10/2014 at 01:32:58"},{"visible":true,"include":false,"step":"35.0","x":-82.84380952380953,"y":-60.05428571428572,"z":110.75238095238096,"a95":0.99,"info":"11/10/2014 at 01:32:58"},{"visible":true,"include":false,"step":"40.0","x":-68.42857142857143,"y":-58.41904761904762,"z":104.92380952380952,"a95":0.99,"info":"11/10/2014 at 01:32:58"},{"visible":true,"include":false,"step":"45.0","x":-65.23142857142857,"y":-46.360952380952384,"z":92.10380952380953,"a95":0.99,"info":"11/10/2014 at 01:32:58"},{"visible":true,"include":false,"step":"50.0","x":-66.62666666666667,"y":-61.06380952380952,"z":78.36380952380952,"a95":0.99,"info":"11/10/2014 at 01:32:58"},{"visible":true,"include":false,"step":"60.0","x":-64.81619047619049,"y":-46.794285714285714,"z":83.10190476190476,"a95":0.99,"info":"11/10/2014 at 01:32:58"},{"visible":true,"include":false,"step":"70.0","x":-32.41809523809523,"y":-41.41428571428572,"z":48.74952380952381,"a95":0.99,"info":"11/10/2014 at 01:32:58"},{"visible":true,"include":false,"step":"80.0","x":-30.42761904761905,"y":-49.25333333333333,"z":54.94571428571428,"a95":0.99,"info":"11/10/2014 at 01:32:58"},{"visible":true,"include":false,"step":"90.0","x":-37.18190476190476,"y":-40.018095238095235,"z":45.99047619047619,"a95":0.99,"info":"11/10/2014 at 01:32:58"},{"visible":true,"include":false,"step":"100.0","x":-13.853333333333333,"y":-46.256190476190476,"z":27.429523809523808,"a95":0.99,"info":"11/10/2014 at 01:32:58"}]},{"version":"v1.1.0","exported":"2017-05-22T11:07:23.722Z","volume":10.5,"added":"2017-05-22T11:07:17.734Z","format":"Utrecht","demagType":"Unknown","strat":"2","patch":1.1,"GEO":[],"TECT":[],"interpreted":false,"name":"SS21.10A","coreAzi":77,"coreDip":40,"bedStrike":324,"bedDip":33,"data":[{"visible":true,"include":false,"step":"0.0","x":-77.10285714285715,"y":-69.13714285714286,"z":13.430476190476192,"a95":0.99,"info":"11/10/2014 at 01:32:58"},{"visible":true,"include":false,"step":"4.0","x":-57.88666666666666,"y":-74.27428571428571,"z":-0.3104095238095238,"a95":0.99,"info":"11/10/2014 at 01:32:58"},{"visible":true,"include":false,"step":"8.0","x":-51.955238095238094,"y":-45.97904761904762,"z":0.9721904761904762,"a95":0.99,"info":"11/10/2014 at 01:32:58"},{"visible":true,"include":false,"step":"12.0","x":-38.026666666666664,"y":-41.607619047619046,"z":-2.619238095238095,"a95":0.99,"info":"11/10/2014 at 01:32:58"},{"visible":true,"include":false,"step":"16.0","x":-32.09428571428572,"y":-20.50190476190476,"z":-11.82952380952381,"a95":0.99,"info":"11/10/2014 at 01:32:58"},{"visible":true,"include":false,"step":"20.0","x":-35.92857142857143,"y":-35.8552380952381,"z":-27.98,"a95":0.99,"info":"11/10/2014 at 01:32:58"},{"visible":true,"include":false,"step":"25.0","x":-11.055238095238096,"y":-2.0926666666666667,"z":-21.08095238095238,"a95":0.99,"info":"11/10/2014 at 01:32:58"},{"visible":true,"include":false,"step":"30.0","x":-7.220285714285715,"y":-17.16190476190476,"z":-28.767619047619046,"a95":0.99,"info":"11/10/2014 at 01:32:58"},{"visible":true,"include":false,"step":"35.0","x":1.1848571428571428,"y":4.874761904761905,"z":-17.608571428571427,"a95":0.99,"info":"11/10/2014 at 01:32:58"},{"visible":true,"include":false,"step":"40.0","x":1.931904761904762,"y":-6.3505714285714285,"z":-11.480952380952381,"a95":0.99,"info":"11/10/2014 at 01:32:58"},{"visible":true,"include":false,"step":"45.0","x":-8.274761904761906,"y":-9.625714285714285,"z":2.3693333333333335,"a95":0.99,"info":"11/10/2014 at 01:32:58"},{"visible":true,"include":false,"step":"50.0","x":-18.875238095238096,"y":-19.502857142857142,"z":-0.20525714285714283,"a95":0.99,"info":"11/10/2014 at 01:32:58"},{"visible":true,"include":false,"step":"60.0","x":-16.602857142857143,"y":-19.124761904761904,"z":-1.4323809523809523,"a95":0.99,"info":"11/10/2014 at 01:32:58"},{"visible":true,"include":false,"step":"70.0","x":-0.8765523809523809,"y":-30.61714285714286,"z":-25.63142857142857,"a95":0.99,"info":"11/10/2014 at 01:32:58"},{"visible":true,"include":false,"step":"80.0","x":-10.619047619047619,"y":-79.34571428571428,"z":-15.512380952380951,"a95":0.99,"info":"11/10/2014 at 01:32:58"},{"visible":true,"include":false,"step":"90.0","x":-24.200952380952383,"y":-2.6393333333333335,"z":-31.036190476190477,"a95":0.99,"info":"11/10/2014 at 01:32:58"},{"visible":true,"include":false,"step":"100.0","x":-10.16,"y":-29.09904761904762,"z":18.11047619047619,"a95":0.99,"info":"11/10/2014 at 01:32:58"}]},{"version":"v1.1.0","exported":"2017-05-22T11:07:23.722Z","volume":10.5,"added":"2017-05-22T11:07:17.734Z","format":"Utrecht","demagType":"Unknown","strat":null,"patch":1.1,"GEO":[],"TECT":[],"interpreted":false,"name":"SS21.11A","coreAzi":37,"coreDip":37,"bedStrike":324,"bedDip":33,"data":[{"visible":false,"include":false,"step":"20","x":32.476190476190474,"y":3.619047619047619,"z":298.76190476190476,"a95":2.8,"info":"\"14-09-29\" at \"16:16\""},{"visible":true,"include":false,"step":"100","x":17.076190476190476,"y":-2.380952380952381,"z":74.57142857142857,"a95":3.7,"info":"\"14-09-29\" at \"18:55\""},{"visible":true,"include":false,"step":"150","x":11.838095238095239,"y":-3.142857142857143,"z":58.171428571428564,"a95":4.2,"info":"\"14-09-29\" at \"21:49\""},{"visible":true,"include":false,"step":"180","x":19.914285714285715,"y":-2.6095238095238096,"z":67.47619047619048,"a95":3.6,"info":"\"14-09-30\" at \"16:17\""},{"visible":true,"include":false,"step":"210","x":2.1523809523809527,"y":-24.02857142857143,"z":65.35238095238095,"a95":5.7,"info":"\"14-09-30\" at \"19:26\""},{"visible":true,"include":false,"step":"240","x":4.257142857142857,"y":-14.676190476190476,"z":75.25714285714287,"a95":5.4,"info":"\"14-09-30\" at \"22:30\""},{"visible":true,"include":false,"step":"270","x":-9.876190476190477,"y":-31.285714285714285,"z":81.82857142857144,"a95":3.2,"info":"\"14-10-01\" at \"16:33\""},{"visible":true,"include":false,"step":"300","x":-23.714285714285715,"y":-35.333333333333336,"z":89.42857142857143,"a95":6,"info":"\"14-10-01\" at \"20:01\""},{"visible":true,"include":false,"step":"320","x":-24.676190476190477,"y":-30.56190476190476,"z":71.47619047619048,"a95":4.7,"info":"\"14-10-01\" at \"23:08\""},{"visible":true,"include":false,"step":"340","x":-17,"y":-35.285714285714285,"z":62.209523809523816,"a95":7.9,"info":"\"14-10-02\" at \"16:40\""},{"visible":true,"include":false,"step":"370","x":-56.561904761904756,"y":-11.542857142857143,"z":49.476190476190474,"a95":9.1,"info":"\"14-10-02\" at \"19:25\""},{"visible":true,"include":false,"step":"400","x":-81.42857142857143,"y":-35.714285714285715,"z":98.66666666666667,"a95":11.3,"info":"\"14-10-02\" at \"22:42\""},{"visible":true,"include":false,"step":"420","x":-199.23809523809524,"y":1.7142857142857142,"z":-64.57142857142857,"a95":16.1,"info":"\"14-10-03\" at \"16:14\""},{"visible":true,"include":false,"step":"440","x":-264.4761904761905,"y":-54.095238095238095,"z":165.8095238095238,"a95":17.6,"info":"\"14-10-03\" at \"19:36\""}]},{"version":"v1.1.0","exported":"2017-05-22T11:07:23.722Z","volume":10.5,"added":"2017-05-22T11:07:17.735Z","format":"Utrecht","demagType":"Unknown","strat":null,"patch":1.1,"GEO":[{"dec":340.40125637363906,"inc":-19.415502779234597,"MAD":13.021576147357884,"cm":[9.992007221626409e-16,8.881784197001252e-16,0],"intensity":148.76267239604397,"type":"GC","origin":false,"forced":true,"remark":"","nSteps":6,"minStep":"100","maxStep":"270","steps":["100","150","180","210","240","270"],"group":"None","version":"v1.1.0"}],"TECT":[{"dec":326.6765177390654,"inc":-25.076506134535403,"MAD":13.021576147357827,"cm":[1.3322676295501878e-15,0,0],"intensity":148.76267239604394,"type":"GC","origin":false,"forced":true,"remark":"","nSteps":6,"minStep":"100","maxStep":"270","steps":["100","150","180","210","240","270"],"group":"None","version":"v1.1.0"}],"interpreted":true,"name":"SS21.11B","coreAzi":37,"coreDip":37,"bedStrike":324,"bedDip":33,"data":[{"visible":true,"include":false,"step":"20","x":-63.714285714285715,"y":-73.42857142857143,"z":-133.8095238095238,"a95":2.8,"info":"\"14-10-20\" at \"16:22\""},{"visible":true,"include":true,"step":"100","x":-58.857142857142854,"y":-58.857142857142854,"z":-55.904761904761905,"a95":3.3,"info":"\"14-10-20\" at \"19:18\""},{"visible":true,"include":true,"step":"150","x":-38.20952380952381,"y":-45.86666666666667,"z":-31.552380952380954,"a95":3.8,"info":"\"14-10-20\" at \"22:17\""},{"visible":true,"include":true,"step":"180","x":-44.59047619047619,"y":-28.18095238095238,"z":-23.8,"a95":4.2,"info":"\"14-10-21\" at \"01:09\""},{"visible":true,"include":true,"step":"210","x":-41.12380952380953,"y":-28.866666666666667,"z":-7.780952380952381,"a95":4.7,"info":"\"14-10-21\" at \"17:20\""},{"visible":true,"include":true,"step":"240","x":-42.142857142857146,"y":-30.81904761904762,"z":0.45714285714285713,"a95":4.5,"info":"\"14-10-21\" at \"20:19\""},{"visible":true,"include":true,"step":"270","x":-51.37142857142857,"y":-34.86666666666667,"z":21.323809523809523,"a95":5.1,"info":"\"14-10-21\" at \"23:22\""},{"visible":true,"include":false,"step":"290","x":-33.666666666666664,"y":-38.15238095238095,"z":22.904761904761905,"a95":4.3,"info":"\"14-10-22\" at \"15:50\""},{"visible":true,"include":false,"step":"310","x":-39.79047619047619,"y":-25.333333333333332,"z":5.266666666666667,"a95":6.6,"info":"\"14-10-22\" at \"18:39\""},{"visible":true,"include":false,"step":"330","x":-57.476190476190474,"y":-14.247619047619047,"z":21.99047619047619,"a95":7.3,"info":"\"14-10-22\" at \"21:50\""},{"visible":true,"include":false,"step":"350","x":-65.44761904761906,"y":-17.676190476190477,"z":32.10476190476191,"a95":8.2,"info":"\"14-10-23\" at \"16:05\""},{"visible":true,"include":false,"step":"370","x":-102,"y":-26.19047619047619,"z":1.5238095238095237,"a95":9.5,"info":"\"14-10-23\" at \"19:04\""},{"visible":true,"include":false,"step":"400","x":-139.9047619047619,"y":-10.19047619047619,"z":31.142857142857142,"a95":15.9,"info":"\"14-10-23\" at \"22:01\""},{"visible":true,"include":false,"step":"420","x":-188,"y":98.66666666666667,"z":75.52380952380952,"a95":15.3,"info":"\"14-10-24\" at \"16:29\""},{"visible":true,"include":false,"step":"440","x":-170.76190476190476,"y":60,"z":172.66666666666666,"a95":19.8,"info":"\"14-10-24\" at \"19:40\""}]},{"version":"v1.1.0","exported":"2017-05-22T11:07:23.722Z","volume":10.5,"added":"2017-05-22T11:07:17.735Z","format":"Utrecht","demagType":"Unknown","strat":null,"patch":1.1,"GEO":[],"TECT":[],"interpreted":false,"name":"SS21.12A","coreAzi":48,"coreDip":38,"bedStrike":324,"bedDip":33,"data":[{"visible":true,"include":false,"step":"20","x":-131.04761904761904,"y":26.761904761904763,"z":-171.52380952380952,"a95":2.8,"info":"\"14-10-13\" at \"16:44\""},{"visible":true,"include":true,"step":"100","x":-62.438095238095244,"y":12.152380952380952,"z":-65.54285714285714,"a95":4,"info":"\"14-10-13\" at \"19:38\""},{"visible":true,"include":true,"step":"150","x":-46.21904761904762,"y":-7.038095238095239,"z":-23.65714285714286,"a95":6.2,"info":"\"14-10-13\" at \"23:06\""},{"visible":true,"include":true,"step":"180","x":-53.34285714285714,"y":1.8952380952380952,"z":-12.238095238095237,"a95":4.2,"info":"\"14-10-14\" at \"16:15\""},{"visible":true,"include":true,"step":"210","x":-57.48571428571429,"y":-0.42857142857142855,"z":2.8666666666666667,"a95":5.8,"info":"\"14-10-14\" at \"19:25\""},{"visible":true,"include":true,"step":"240","x":-79.75238095238095,"y":-4.038095238095238,"z":-28.94285714285714,"a95":4.4,"info":"\"14-10-14\" at \"22:32\""},{"visible":true,"include":true,"step":"270","x":-55.72380952380953,"y":-4.8,"z":22.847619047619048,"a95":5.2,"info":"\"14-10-15\" at \"16:22\""},{"visible":true,"include":false,"step":"290","x":-86.6,"y":0.1523809523809524,"z":-7.6571428571428575,"a95":4.2,"info":"\"14-10-15\" at \"19:27\""},{"visible":true,"include":false,"step":"310","x":-96.85714285714286,"y":-4.9523809523809526,"z":14.380952380952381,"a95":5,"info":"\"14-10-15\" at \"22:46\""},{"visible":true,"include":false,"step":"330","x":-75.9047619047619,"y":-31.20952380952381,"z":5.276190476190476,"a95":5.8,"info":"\"14-10-16\" at \"16:07\""},{"visible":true,"include":false,"step":"350","x":-92.57142857142857,"y":-31.142857142857142,"z":52.285714285714285,"a95":10.6,"info":"\"14-10-16\" at \"19:59\""},{"visible":true,"include":false,"step":"370","x":-133.23809523809524,"y":11.523809523809524,"z":0.38095238095238093,"a95":11.1,"info":"\"14-10-16\" at \"23:07\""},{"visible":true,"include":false,"step":"400","x":-177.42857142857142,"y":2.2857142857142856,"z":116.38095238095238,"a95":10.3,"info":"\"14-10-17\" at \"14:45\""}]},{"version":"v1.1.0","exported":"2017-05-22T11:07:23.722Z","volume":10.5,"added":"2017-05-22T11:07:17.735Z","format":"Utrecht","demagType":"Unknown","strat":"5","patch":1.1,"GEO":[],"TECT":[],"interpreted":false,"name":"SS21.12B","coreAzi":48,"coreDip":38,"bedStrike":324,"bedDip":33,"data":[{"visible":true,"include":false,"step":"0.0","x":-97.73333333333333,"y":11.725714285714286,"z":172.35238095238097,"a95":0.99,"info":"22/09/2014 at 15:39:26"},{"visible":true,"include":false,"step":"5.0","x":-69.05809523809523,"y":4.661904761904762,"z":95.86666666666667,"a95":0.99,"info":"22/09/2014 at 15:39:26"},{"visible":true,"include":false,"step":"10.0","x":-34.29333333333333,"y":7.471714285714286,"z":60.05047619047619,"a95":0.99,"info":"22/09/2014 at 15:39:26"},{"visible":true,"include":false,"step":"15.0","x":-21.23047619047619,"y":3.7812380952380957,"z":24.984761904761903,"a95":0.99,"info":"22/09/2014 at 15:39:26"},{"visible":true,"include":false,"step":"20.0","x":-2.731809523809524,"y":9.571428571428571,"z":9.332380952380952,"a95":0.99,"info":"22/09/2014 at 15:39:26"},{"visible":true,"include":false,"step":"25.0","x":9.460571428571429,"y":-2.4274285714285715,"z":5.310952380952381,"a95":0.99,"info":"22/09/2014 at 15:39:26"},{"visible":true,"include":false,"step":"30.0","x":3.2295238095238092,"y":9.456190476190477,"z":-10.30952380952381,"a95":0.99,"info":"22/09/2014 at 15:39:26"},{"visible":true,"include":false,"step":"35.0","x":-8.404285714285715,"y":-36.06476190476191,"z":-18.14,"a95":0.99,"info":"22/09/2014 at 15:39:26"},{"visible":true,"include":false,"step":"40.0","x":4.685809523809524,"y":-19.16190476190476,"z":-15.042857142857141,"a95":0.99,"info":"22/09/2014 at 15:39:26"},{"visible":true,"include":false,"step":"45.0","x":5.920857142857143,"y":-6.56504761904762,"z":-33.12571428571429,"a95":0.99,"info":"22/09/2014 at 15:39:26"},{"visible":true,"include":false,"step":"50.0","x":12.573333333333334,"y":-9.74,"z":-27.835238095238093,"a95":0.99,"info":"22/09/2014 at 15:39:26"},{"visible":true,"include":false,"step":"60.0","x":-1.0606666666666666,"y":-38.33238095238095,"z":-14.136190476190476,"a95":0.99,"info":"22/09/2014 at 15:39:26"},{"visible":true,"include":false,"step":"70.0","x":-13.396190476190476,"y":-33.04190476190476,"z":6.965619047619048,"a95":0.99,"info":"22/09/2014 at 15:39:26"},{"visible":true,"include":false,"step":"80.0","x":-48.11523809523809,"y":-19.921904761904763,"z":-7.8773333333333335,"a95":0.99,"info":"22/09/2014 at 15:39:26"},{"visible":true,"include":false,"step":"90.0","x":16.598095238095237,"y":-27.169523809523806,"z":1.9386666666666668,"a95":0.99,"info":"22/09/2014 at 15:39:26"},{"visible":true,"include":false,"step":"100.0","x":-51.64666666666666,"y":-15.489523809523808,"z":-32.674285714285716,"a95":0.99,"info":"22/09/2014 at 15:39:26"}]},{"version":"v1.1.0","exported":"2017-05-22T11:07:23.722Z","volume":10.5,"added":"2017-05-22T11:07:17.735Z","format":"Utrecht","demagType":"Unknown","strat":"3","patch":1.1,"GEO":[],"TECT":[],"interpreted":false,"name":"SS21.13B","coreAzi":87,"coreDip":44,"bedStrike":324,"bedDip":33,"data":[{"visible":true,"include":false,"step":"0.0","x":-70.3742857142857,"y":-33.15904761904762,"z":58.62,"a95":0.99,"info":"11/10/2014 at 01:32:58"},{"visible":true,"include":false,"step":"4.0","x":-49.656190476190474,"y":-26.2352380952381,"z":18.882857142857144,"a95":0.99,"info":"11/10/2014 at 01:32:58"},{"visible":true,"include":false,"step":"8.0","x":-23.462857142857143,"y":-13.713333333333335,"z":7.952190476190476,"a95":0.99,"info":"11/10/2014 at 01:32:58"},{"visible":true,"include":false,"step":"12.0","x":-1.5751428571428572,"y":3.817619047619048,"z":-10.836190476190476,"a95":0.99,"info":"11/10/2014 at 01:32:58"},{"visible":true,"include":false,"step":"16.0","x":10.05904761904762,"y":-0.025952380952380956,"z":-10.468571428571428,"a95":0.99,"info":"11/10/2014 at 01:32:58"},{"visible":true,"include":false,"step":"20.0","x":3.2321904761904765,"y":1.0718095238095238,"z":-21.606666666666666,"a95":0.99,"info":"11/10/2014 at 01:32:58"},{"visible":true,"include":false,"step":"25.0","x":8.015809523809523,"y":22.347619047619048,"z":-17.18857142857143,"a95":0.99,"info":"11/10/2014 at 01:32:58"},{"visible":true,"include":false,"step":"30.0","x":-4.289333333333333,"y":31.38952380952381,"z":-8.738,"a95":0.99,"info":"11/10/2014 at 01:32:58"},{"visible":true,"include":false,"step":"35.0","x":10.36,"y":27.356190476190477,"z":-5.5362857142857145,"a95":0.99,"info":"11/10/2014 at 01:32:58"},{"visible":true,"include":false,"step":"40.0","x":-7.540095238095239,"y":39.87809523809524,"z":-15.037142857142856,"a95":0.99,"info":"11/10/2014 at 01:32:58"},{"visible":true,"include":false,"step":"45.0","x":-20.185714285714283,"y":12.792380952380952,"z":-1.5035238095238097,"a95":0.99,"info":"11/10/2014 at 01:32:58"},{"visible":true,"include":false,"step":"50.0","x":-2.8225714285714285,"y":-3.340095238095238,"z":-18.197142857142858,"a95":0.99,"info":"11/10/2014 at 01:32:58"},{"visible":true,"include":false,"step":"60.0","x":2.9811428571428573,"y":26.466666666666665,"z":-39.420952380952386,"a95":0.99,"info":"11/10/2014 at 01:32:58"},{"visible":true,"include":false,"step":"70.0","x":-9.834285714285715,"y":34.5247619047619,"z":-29.462857142857143,"a95":0.99,"info":"11/10/2014 at 01:32:58"},{"visible":true,"include":false,"step":"80.0","x":-21.399047619047618,"y":-20.089523809523808,"z":-30.86857142857143,"a95":0.99,"info":"11/10/2014 at 01:32:58"},{"visible":true,"include":false,"step":"90.0","x":-7.373619047619048,"y":6.454380952380952,"z":-4.822285714285714,"a95":0.99,"info":"11/10/2014 at 01:32:58"},{"visible":true,"include":false,"step":"100.0","x":5.211714285714286,"y":-2.6757142857142857,"z":-11.399047619047618,"a95":0.99,"info":"11/10/2014 at 01:32:58"}]},{"version":"v1.1.0","exported":"2017-05-22T11:07:23.722Z","volume":10.5,"added":"2017-05-22T11:07:17.735Z","format":"Utrecht","demagType":"Unknown","strat":"6","patch":1.1,"GEO":[{"dec":217.33619810671956,"inc":-4.1976222054817205,"MAD":7.515072746285965,"cm":[-1.3766765505351941e-14,-7.993605777301127e-15,0],"intensity":157.8205504294941,"type":"GC","origin":false,"forced":true,"remark":"","nSteps":4,"minStep":"5.0","maxStep":"25.0","steps":["5.0","10.0","15.0","25.0"],"group":"None","version":"v1.1.0"}],"TECT":[{"dec":35.22247736168117,"inc":-27.321221562937097,"MAD":7.515072746286289,"cm":[-9.325873406851315e-15,-1.3322676295501878e-15,6.661338147750939e-15],"intensity":157.8205504294941,"type":"GC","origin":false,"forced":true,"remark":"","nSteps":4,"minStep":"5.0","maxStep":"25.0","steps":["5.0","10.0","15.0","25.0"],"group":"None","version":"v1.1.0"}],"interpreted":true,"name":"SS21.14A","coreAzi":89,"coreDip":49,"bedStrike":324,"bedDip":33,"data":[{"visible":true,"include":false,"step":"0.0","x":-147.64761904761903,"y":-11.870476190476191,"z":28.663809523809526,"a95":0.99,"info":"22/09/2014 at 15:39:26"},{"visible":true,"include":true,"step":"5.0","x":-109.3047619047619,"y":-46.31428571428572,"z":18.246666666666666,"a95":0.99,"info":"22/09/2014 at 15:39:26"},{"visible":true,"include":true,"step":"10.0","x":-70.50857142857143,"y":-37.30095238095238,"z":5.85552380952381,"a95":0.99,"info":"22/09/2014 at 15:39:26"},{"visible":true,"include":true,"step":"15.0","x":-58.79333333333334,"y":-31.267619047619046,"z":-0.2833333333333333,"a95":0.99,"info":"22/09/2014 at 15:39:26"},{"visible":true,"include":false,"step":"20.0","x":-28.215238095238096,"y":-27.14095238095238,"z":-0.030221904761904762,"a95":0.99,"info":"22/09/2014 at 15:39:26"},{"visible":true,"include":true,"step":"25.0","x":-32.12095238095238,"y":-23.49238095238095,"z":-12.491428571428571,"a95":0.99,"info":"22/09/2014 at 15:39:26"},{"visible":true,"include":false,"step":"30.0","x":-25.316190476190474,"y":-16.695238095238096,"z":-22.728571428571428,"a95":0.99,"info":"22/09/2014 at 15:39:26"},{"visible":true,"include":false,"step":"35.0","x":-10.742857142857142,"y":-64.24285714285713,"z":-0.9821904761904763,"a95":0.99,"info":"22/09/2014 at 15:39:26"},{"visible":true,"include":false,"step":"40.0","x":-32.52285714285714,"y":-18.846666666666664,"z":-21.777142857142856,"a95":0.99,"info":"22/09/2014 at 15:39:26"},{"visible":true,"include":false,"step":"45.0","x":-16.44952380952381,"y":-29.879047619047622,"z":-12.234285714285715,"a95":0.99,"info":"22/09/2014 at 15:39:26"},{"visible":true,"include":false,"step":"50.0","x":-2.6375238095238096,"y":-19.48761904761905,"z":-26.07428571428571,"a95":0.99,"info":"22/09/2014 at 15:39:26"},{"visible":true,"include":false,"step":"60.0","x":-17.366666666666667,"y":-22.845714285714287,"z":-39.48952380952381,"a95":0.99,"info":"22/09/2014 at 15:39:26"},{"visible":true,"include":false,"step":"70.0","x":-27.464761904761904,"y":-25.316190476190474,"z":-7.646190476190476,"a95":0.99,"info":"22/09/2014 at 15:39:26"},{"visible":true,"include":false,"step":"80.0","x":-12.040952380952382,"y":-54.5647619047619,"z":-13.442857142857143,"a95":0.99,"info":"22/09/2014 at 15:39:26"},{"visible":true,"include":false,"step":"90.0","x":-15.418095238095237,"y":-29.25904761904762,"z":2.0475238095238093,"a95":0.99,"info":"22/09/2014 at 15:39:26"},{"visible":true,"include":false,"step":"100.0","x":-2.457809523809524,"y":-25.23619047619048,"z":-0.884,"a95":0.99,"info":"22/09/2014 at 15:39:26"}]},{"version":"v1.1.0","exported":"2017-05-22T11:07:23.722Z","volume":10.5,"added":"2017-05-22T11:07:17.736Z","format":"Utrecht","demagType":"Unknown","strat":"7","patch":1.1,"GEO":[],"TECT":[],"interpreted":false,"name":"SS21.15A","coreAzi":69,"coreDip":40,"bedStrike":324,"bedDip":33,"data":[{"visible":true,"include":false,"step":"0.0","x":-41.90952380952381,"y":-39.19714285714286,"z":48.54761904761905,"a95":0.99,"info":"22/09/2014 at 15:39:26"},{"visible":true,"include":false,"step":"5.0","x":-52.915238095238095,"y":-39.18666666666667,"z":24.69142857142857,"a95":0.99,"info":"22/09/2014 at 15:39:26"},{"visible":true,"include":false,"step":"10.0","x":-39.1647619047619,"y":-29.11619047619048,"z":12.016190476190477,"a95":0.99,"info":"22/09/2014 at 15:39:26"},{"visible":true,"include":false,"step":"15.0","x":-22.19904761904762,"y":-28.695238095238096,"z":13.09047619047619,"a95":0.99,"info":"22/09/2014 at 15:39:26"},{"visible":true,"include":false,"step":"20.0","x":-2.559142857142857,"y":-24.613333333333333,"z":24.61809523809524,"a95":0.99,"info":"22/09/2014 at 15:39:26"},{"visible":true,"include":false,"step":"25.0","x":8.96809523809524,"y":-7.348857142857143,"z":3.48,"a95":0.99,"info":"22/09/2014 at 15:39:26"},{"visible":true,"include":false,"step":"30.0","x":-6.963904761904762,"y":-10.465714285714286,"z":-2.6954285714285713,"a95":0.99,"info":"22/09/2014 at 15:39:26"},{"visible":true,"include":false,"step":"35.0","x":1.4984761904761905,"y":-23.345714285714287,"z":-26.976190476190474,"a95":0.99,"info":"22/09/2014 at 15:39:26"},{"visible":true,"include":false,"step":"40.0","x":4.979142857142857,"y":-38.54761904761905,"z":-13.256190476190476,"a95":0.99,"info":"22/09/2014 at 15:39:26"},{"visible":true,"include":false,"step":"45.0","x":20.138095238095236,"y":-45.95238095238095,"z":-6.626190476190477,"a95":0.99,"info":"22/09/2014 at 15:39:26"},{"visible":true,"include":false,"step":"50.0","x":13.921904761904763,"y":-16.397142857142857,"z":-12.753333333333334,"a95":0.99,"info":"22/09/2014 at 15:39:26"},{"visible":true,"include":false,"step":"60.0","x":8.103904761904762,"y":-39.63142857142857,"z":-0.3897428571428571,"a95":0.99,"info":"22/09/2014 at 15:39:26"},{"visible":true,"include":false,"step":"70.0","x":-8.12152380952381,"y":-32.51619047619048,"z":3.972952380952381,"a95":0.99,"info":"22/09/2014 at 15:39:26"},{"visible":true,"include":false,"step":"80.0","x":-48.481904761904765,"y":-48.16190476190476,"z":-20.289523809523807,"a95":0.99,"info":"22/09/2014 at 15:39:26"},{"visible":true,"include":false,"step":"90.0","x":7.835238095238095,"y":-41.90571428571428,"z":-3.578190476190476,"a95":0.99,"info":"22/09/2014 at 15:39:26"},{"visible":true,"include":false,"step":"100.0","x":-0.3092190476190476,"y":-38.89904761904762,"z":-6.958666666666667,"a95":0.99,"info":"22/09/2014 at 15:39:26"}]},{"version":"v1.1.0","exported":"2017-05-22T11:07:23.722Z","volume":10.5,"added":"2017-05-22T11:07:17.736Z","format":"Utrecht","demagType":"Unknown","strat":null,"patch":1.1,"GEO":[],"TECT":[],"interpreted":false,"name":"SS21.15B","coreAzi":69,"coreDip":40,"bedStrike":324,"bedDip":33,"data":[{"visible":true,"include":false,"step":"20","x":-53.523809523809526,"y":-75.61904761904762,"z":258,"a95":2.9,"info":"\"14-09-29\" at \"16:18\""},{"visible":true,"include":false,"step":"100","x":-30.514285714285712,"y":-0.6,"z":36.91428571428572,"a95":7.3,"info":"\"14-09-29\" at \"18:56\""},{"visible":true,"include":false,"step":"150","x":-28.533333333333335,"y":-0.6476190476190476,"z":13.085714285714285,"a95":7,"info":"\"14-09-29\" at \"21:51\""},{"visible":true,"include":false,"step":"180","x":-25.780952380952378,"y":3.2952380952380955,"z":14.399999999999999,"a95":7.8,"info":"\"14-09-30\" at \"16:19\""},{"visible":true,"include":false,"step":"210","x":-34.49523809523809,"y":1.4571428571428573,"z":9.742857142857142,"a95":6.6,"info":"\"14-09-30\" at \"19:28\""},{"visible":true,"include":false,"step":"240","x":-37.95238095238095,"y":-5.523809523809524,"z":36.25714285714285,"a95":4.5,"info":"\"14-09-30\" at \"22:32\""},{"visible":true,"include":false,"step":"270","x":-34.87619047619047,"y":2.3047619047619046,"z":12.561904761904762,"a95":5.3,"info":"\"14-10-01\" at \"16:36\""},{"visible":true,"include":false,"step":"300","x":-40.666666666666664,"y":-9.552380952380952,"z":25.133333333333333,"a95":8.8,"info":"\"14-10-01\" at \"20:03\""},{"visible":true,"include":false,"step":"320","x":-39.18095238095238,"y":-14.666666666666666,"z":13.180952380952382,"a95":8.8,"info":"\"14-10-01\" at \"23:10\""},{"visible":true,"include":false,"step":"340","x":-36.91428571428572,"y":-20.942857142857143,"z":19.961904761904762,"a95":11.6,"info":"\"14-10-02\" at \"16:41\""},{"visible":true,"include":false,"step":"370","x":-65.81904761904762,"y":-3.2095238095238097,"z":13.504761904761907,"a95":8.3,"info":"\"14-10-02\" at \"19:27\""},{"visible":true,"include":false,"step":"400","x":-112.38095238095238,"y":-3.5238095238095237,"z":51.04761904761905,"a95":13.5,"info":"\"14-10-02\" at \"22:44\""},{"visible":true,"include":false,"step":"420","x":-225.71428571428572,"y":4.190476190476191,"z":-165.14285714285714,"a95":12,"info":"\"14-10-03\" at \"16:16\""},{"visible":true,"include":false,"step":"440","x":-120.47619047619048,"y":110.57142857142857,"z":94.19047619047619,"a95":23,"info":"\"14-10-03\" at \"19:38\""}]},{"version":"v1.1.0","exported":"2017-05-22T11:07:23.722Z","volume":10.5,"added":"2017-05-22T11:07:17.736Z","format":"Utrecht","demagType":"Unknown","strat":null,"patch":1.1,"GEO":[],"TECT":[],"interpreted":false,"name":"SS21.16A","coreAzi":63,"coreDip":42,"bedStrike":324,"bedDip":33,"data":[{"visible":true,"include":false,"step":"20","x":903.3333333333334,"y":14.476190476190476,"z":-211.52380952380952,"a95":2.5,"info":"\"14-10-13\" at \"16:46\""},{"visible":true,"include":false,"step":"100","x":574.7619047619048,"y":9.523809523809524,"z":-103.23809523809524,"a95":2.3,"info":"\"14-10-13\" at \"19:40\""},{"visible":true,"include":false,"step":"150","x":432,"y":-3.9047619047619047,"z":-70.47619047619048,"a95":2.8,"info":"\"14-10-13\" at \"23:07\""},{"visible":true,"include":false,"step":"180","x":373.14285714285717,"y":6.285714285714286,"z":-59.142857142857146,"a95":2.8,"info":"\"14-10-14\" at \"16:17\""},{"visible":true,"include":false,"step":"210","x":332.2857142857143,"y":-0.9523809523809523,"z":-42.857142857142854,"a95":2.8,"info":"\"14-10-14\" at \"19:27\""},{"visible":true,"include":false,"step":"240","x":268.2857142857143,"y":-6.190476190476191,"z":-43.523809523809526,"a95":2.8,"info":"\"14-10-14\" at \"22:33\""},{"visible":true,"include":false,"step":"270","x":244,"y":-12.666666666666666,"z":-0.19047619047619047,"a95":2.8,"info":"\"14-10-15\" at \"16:24\""},{"visible":true,"include":false,"step":"290","x":187.04761904761904,"y":-17.61904761904762,"z":1.0476190476190477,"a95":3,"info":"\"14-10-15\" at \"19:29\""},{"visible":true,"include":false,"step":"310","x":175.23809523809524,"y":-12.666666666666666,"z":17.80952380952381,"a95":3.1,"info":"\"14-10-15\" at \"22:48\""},{"visible":true,"include":false,"step":"330","x":149.23809523809524,"y":-26.095238095238095,"z":-2.0952380952380953,"a95":3.5,"info":"\"14-10-16\" at \"16:09\""},{"visible":true,"include":false,"step":"350","x":95.33333333333333,"y":-28.38095238095238,"z":1.5238095238095237,"a95":10.8,"info":"\"14-10-16\" at \"20:00\""},{"visible":true,"include":false,"step":"370","x":86.23809523809524,"y":23.914285714285715,"z":-19.333333333333332,"a95":14.4,"info":"\"14-10-16\" at \"23:09\""},{"visible":true,"include":false,"step":"400","x":24.476190476190474,"y":-70.0952380952381,"z":87.61904761904762,"a95":20.3,"info":"\"14-10-17\" at \"14:47\""}]},{"version":"v1.1.0","exported":"2017-05-22T11:07:23.722Z","volume":10.5,"added":"2017-05-22T11:07:17.737Z","format":"Utrecht","demagType":"Unknown","strat":"4","patch":1.1,"GEO":[{"dec":161.75269114214814,"inc":-36.93824695038139,"MAD":4.844919542463759,"cm":[-5.329070518200751e-15,-7.771561172376096e-16,0],"intensity":232.75578561126957,"type":"GC","origin":false,"forced":true,"remark":"","nSteps":4,"minStep":"4.0","maxStep":"16.0","steps":["4.0","8.0","12.0","16.0"],"group":"None","version":"v1.1.0"}],"TECT":[{"dec":178.93329352406113,"inc":-21.79390256494783,"MAD":4.844919542463809,"cm":[4.463096558993129e-14,-1.9984014443252818e-15,2.220446049250313e-15],"intensity":232.7557856112696,"type":"GC","origin":false,"forced":true,"remark":"","nSteps":4,"minStep":"4.0","maxStep":"16.0","steps":["4.0","8.0","12.0","16.0"],"group":"None","version":"v1.1.0"}],"interpreted":true,"name":"SS21.16B","coreAzi":63,"coreDip":42,"bedStrike":324,"bedDip":33,"data":[{"visible":true,"include":false,"step":"0.0","x":87.28285714285714,"y":111.36190476190475,"z":260.552380952381,"a95":0.99,"info":"11/10/2014 at 01:32:58"},{"visible":true,"include":true,"step":"4.0","x":75.78095238095239,"y":84.98476190476191,"z":191.43809523809523,"a95":0.99,"info":"11/10/2014 at 01:32:58"},{"visible":true,"include":true,"step":"8.0","x":15.565714285714286,"y":44.385714285714286,"z":84.51904761904763,"a95":0.99,"info":"11/10/2014 at 01:32:58"},{"visible":true,"include":true,"step":"12.0","x":-14.733333333333333,"y":27.676190476190477,"z":36.72285714285714,"a95":0.99,"info":"11/10/2014 at 01:32:58"},{"visible":true,"include":true,"step":"16.0","x":-16.069523809523808,"y":16.76666666666667,"z":9.202,"a95":0.99,"info":"11/10/2014 at 01:32:58"},{"visible":true,"include":false,"step":"20.0","x":-5.400190476190476,"y":8.031428571428572,"z":-6.4788571428571435,"a95":0.99,"info":"11/10/2014 at 01:32:58"},{"visible":true,"include":false,"step":"25.0","x":-5.7297142857142855,"y":-0.004325428571428571,"z":-7.964190476190476,"a95":0.99,"info":"11/10/2014 at 01:32:58"},{"visible":true,"include":false,"step":"30.0","x":-13.14,"y":9.596190476190477,"z":-10.836190476190476,"a95":0.99,"info":"11/10/2014 at 01:32:58"},{"visible":true,"include":false,"step":"35.0","x":5.580857142857143,"y":15.627619047619048,"z":9.170571428571428,"a95":0.99,"info":"11/10/2014 at 01:32:58"},{"visible":true,"include":false,"step":"40.0","x":-7.902190476190476,"y":6.778761904761906,"z":-16.876190476190477,"a95":0.99,"info":"11/10/2014 at 01:32:58"},{"visible":true,"include":false,"step":"45.0","x":-7.732952380952381,"y":13.004761904761907,"z":5.248571428571428,"a95":0.99,"info":"11/10/2014 at 01:32:58"},{"visible":true,"include":false,"step":"50.0","x":-12.743809523809524,"y":-8.587619047619048,"z":7.743809523809524,"a95":0.99,"info":"11/10/2014 at 01:32:58"},{"visible":true,"include":false,"step":"60.0","x":4.963238095238095,"y":-16.038095238095238,"z":0.7051809523809524,"a95":0.99,"info":"11/10/2014 at 01:32:58"},{"visible":true,"include":false,"step":"70.0","x":9.457904761904762,"y":-9.746666666666666,"z":22.55047619047619,"a95":0.99,"info":"11/10/2014 at 01:32:58"},{"visible":true,"include":false,"step":"80.0","x":18.261904761904763,"y":-33.33428571428571,"z":-12.671428571428573,"a95":0.99,"info":"11/10/2014 at 01:32:58"},{"visible":true,"include":false,"step":"90.0","x":-10.383809523809523,"y":8.836761904761905,"z":-5.689333333333333,"a95":0.99,"info":"11/10/2014 at 01:32:58"},{"visible":true,"include":false,"step":"100.0","x":15.588571428571429,"y":7.015809523809524,"z":-10.450476190476191,"a95":0.99,"info":"11/10/2014 at 01:32:58"}]},{"version":"v1.1.0","exported":"2017-05-22T11:07:23.722Z","volume":10.5,"added":"2017-05-22T11:07:17.737Z","format":"Utrecht","demagType":"Unknown","strat":null,"patch":1.1,"GEO":[],"TECT":[],"interpreted":false,"name":"SS21.17A","coreAzi":60,"coreDip":44,"bedStrike":324,"bedDip":33,"data":[{"visible":true,"include":false,"step":"20","x":-41.61904761904762,"y":29.047619047619047,"z":291.3333333333333,"a95":3.2,"info":"\"14-10-13\" at \"16:48\""},{"visible":true,"include":false,"step":"100","x":-34.8,"y":24.704761904761902,"z":42.34285714285714,"a95":5.2,"info":"\"14-10-13\" at \"19:42\""},{"visible":true,"include":false,"step":"150","x":-35.38095238095238,"y":13.352380952380951,"z":13.104761904761904,"a95":9.8,"info":"\"14-10-13\" at \"23:09\""},{"visible":true,"include":false,"step":"180","x":-41.05714285714286,"y":15.97142857142857,"z":15.457142857142859,"a95":6.4,"info":"\"14-10-14\" at \"16:19\""},{"visible":true,"include":false,"step":"210","x":-44.20952380952381,"y":-7.066666666666667,"z":35.86666666666667,"a95":7.9,"info":"\"14-10-14\" at \"19:29\""},{"visible":true,"include":false,"step":"240","x":-41.15238095238095,"y":18.00952380952381,"z":10.314285714285713,"a95":10,"info":"\"14-10-14\" at \"22:35\""},{"visible":true,"include":false,"step":"270","x":-39.38095238095238,"y":8.41904761904762,"z":30.80952380952381,"a95":5.3,"info":"\"14-10-15\" at \"16:26\""},{"visible":true,"include":false,"step":"290","x":-61.22857142857143,"y":-6.238095238095238,"z":27.26666666666667,"a95":4.5,"info":"\"14-10-15\" at \"19:31\""},{"visible":true,"include":false,"step":"310","x":-60.44761904761905,"y":-1.1047619047619048,"z":15.542857142857141,"a95":4.2,"info":"\"14-10-15\" at \"22:50\""},{"visible":true,"include":false,"step":"330","x":-57.00952380952381,"y":13.333333333333334,"z":-2.2476190476190476,"a95":7.7,"info":"\"14-10-16\" at \"16:11\""},{"visible":true,"include":false,"step":"350","x":-79.11428571428571,"y":2.619047619047619,"z":43.01904761904762,"a95":9,"info":"\"14-10-16\" at \"20:02\""},{"visible":true,"include":false,"step":"370","x":-96.95238095238095,"y":-4.190476190476191,"z":23.142857142857142,"a95":11.5,"info":"\"14-10-16\" at \"23:10\""},{"visible":true,"include":false,"step":"400","x":-185.14285714285714,"y":-43.523809523809526,"z":78.66666666666667,"a95":11.9,"info":"\"14-10-17\" at \"14:49\""}]},{"version":"v1.1.0","exported":"2017-05-22T11:07:23.722Z","volume":10.5,"added":"2017-05-22T11:07:17.738Z","format":"Utrecht","demagType":"Unknown","strat":"8","patch":1.1,"GEO":[],"TECT":[],"interpreted":false,"name":"SS21.17B","coreAzi":60,"coreDip":44,"bedStrike":324,"bedDip":33,"data":[{"visible":true,"include":false,"step":"0.0","x":-111.9904761904762,"y":67.59428571428572,"z":206.57142857142858,"a95":0.99,"info":"22/09/2014 at 15:39:26"},{"visible":true,"include":false,"step":"5.0","x":-79.0952380952381,"y":12.795238095238094,"z":136.2952380952381,"a95":0.99,"info":"22/09/2014 at 15:39:26"},{"visible":true,"include":false,"step":"10.0","x":-54.90761904761904,"y":5.431809523809524,"z":72.57714285714285,"a95":0.99,"info":"22/09/2014 at 15:39:26"},{"visible":true,"include":false,"step":"15.0","x":-31.48,"y":5.338380952380952,"z":39.360952380952384,"a95":0.99,"info":"22/09/2014 at 15:39:26"},{"visible":true,"include":false,"step":"20.0","x":-17.291428571428572,"y":-1.3209523809523809,"z":34.653333333333336,"a95":0.99,"info":"22/09/2014 at 15:39:26"},{"visible":true,"include":false,"step":"25.0","x":-15.646666666666667,"y":0.9074666666666666,"z":29.419047619047618,"a95":0.99,"info":"22/09/2014 at 15:39:26"},{"visible":true,"include":false,"step":"30.0","x":-26.43904761904762,"y":6.944000000000001,"z":5.02447619047619,"a95":0.99,"info":"22/09/2014 at 15:39:26"},{"visible":true,"include":false,"step":"35.0","x":-16.142857142857142,"y":-1.9992380952380953,"z":-18.613333333333333,"a95":0.99,"info":"22/09/2014 at 15:39:26"},{"visible":true,"include":false,"step":"40.0","x":-20.54285714285714,"y":-7.657714285714286,"z":5.158571428571428,"a95":0.99,"info":"22/09/2014 at 15:39:26"},{"visible":true,"include":false,"step":"45.0","x":-12.951428571428572,"y":-21.765714285714285,"z":-17.93904761904762,"a95":0.99,"info":"22/09/2014 at 15:39:26"},{"visible":true,"include":false,"step":"50.0","x":-7.140095238095238,"y":-0.7162857142857143,"z":2.709904761904762,"a95":0.99,"info":"22/09/2014 at 15:39:26"},{"visible":true,"include":false,"step":"60.0","x":-16.193333333333335,"y":-38.68,"z":-14.05809523809524,"a95":0.99,"info":"22/09/2014 at 15:39:26"},{"visible":true,"include":false,"step":"70.0","x":-26.304761904761904,"y":1.6566666666666667,"z":-3.884190476190476,"a95":0.99,"info":"22/09/2014 at 15:39:26"},{"visible":true,"include":false,"step":"80.0","x":70.9695238095238,"y":-31.620952380952378,"z":-14.596190476190475,"a95":0.99,"info":"22/09/2014 at 15:39:26"},{"visible":true,"include":false,"step":"90.0","x":-7.444095238095238,"y":-33.04,"z":-3.0669523809523813,"a95":0.99,"info":"22/09/2014 at 15:39:26"},{"visible":true,"include":false,"step":"100.0","x":9.228857142857143,"y":-11.516190476190477,"z":-37.037142857142854,"a95":0.99,"info":"22/09/2014 at 15:39:26"}]},{"version":"v1.1.0","exported":"2017-05-22T11:07:23.722Z","volume":10.5,"added":"2017-05-22T11:07:17.738Z","format":"Utrecht","demagType":"Unknown","strat":null,"patch":1.1,"GEO":[{"dec":28.90011861401331,"inc":-46.753314352987886,"MAD":5.8515650000032196,"cm":[-1.3322676295501878e-15,9.992007221626409e-16,0],"intensity":25.581301632193743,"type":"GC","origin":false,"forced":true,"remark":"","nSteps":5,"minStep":"100","maxStep":"240","steps":["100","150","180","210","240"],"group":"None","version":"v1.1.0"}],"TECT":[{"dec":347.04324756680086,"inc":-71.58872786589369,"MAD":5.851565000003165,"cm":[4.884981308350689e-15,-9.547918011776346e-15,-2.220446049250313e-16],"intensity":25.581301632193757,"type":"GC","origin":false,"forced":true,"remark":"","nSteps":5,"minStep":"100","maxStep":"240","steps":["100","150","180","210","240"],"group":"None","version":"v1.1.0"}],"interpreted":true,"name":"SS21.18A","coreAzi":71,"coreDip":51,"bedStrike":324,"bedDip":33,"data":[{"visible":true,"include":false,"step":"20","x":-40.95238095238095,"y":24,"z":-101.80952380952381,"a95":4.3,"info":"\"14-09-29\" at \"16:20\""},{"visible":true,"include":true,"step":"100","x":-11.295238095238094,"y":7.3047619047619055,"z":-43.19047619047619,"a95":8.1,"info":"\"14-09-29\" at \"18:58\""},{"visible":true,"include":true,"step":"150","x":-14.723809523809523,"y":-8.971428571428572,"z":-35.62857142857143,"a95":7.4,"info":"\"14-09-29\" at \"21:53\""},{"visible":true,"include":true,"step":"180","x":-15.866666666666665,"y":-23.752380952380953,"z":-22.552380952380954,"a95":8.400001,"info":"\"14-09-30\" at \"16:21\""},{"visible":true,"include":true,"step":"210","x":-22.666666666666668,"y":-29.56190476190476,"z":-17.695238095238096,"a95":9.3,"info":"\"14-09-30\" at \"19:29\""},{"visible":true,"include":true,"step":"240","x":-5.266666666666667,"y":-24.295238095238094,"z":33.62857142857143,"a95":7.7,"info":"\"14-09-30\" at \"22:34\""},{"visible":true,"include":false,"step":"270","x":-19.02857142857143,"y":-52.42857142857143,"z":11.866666666666665,"a95":4.5,"info":"\"14-10-01\" at \"16:38\""},{"visible":true,"include":false,"step":"300","x":-18.295238095238094,"y":-54.666666666666664,"z":24.01904761904762,"a95":8.5,"info":"\"14-10-01\" at \"20:05\""},{"visible":true,"include":false,"step":"320","x":-25.857142857142858,"y":-27.79047619047619,"z":23.438095238095237,"a95":8.1,"info":"\"14-10-01\" at \"23:12\""},{"visible":true,"include":false,"step":"340","x":-35.93333333333334,"y":-54.62857142857143,"z":25.94285714285714,"a95":9,"info":"\"14-10-02\" at \"16:44\""},{"visible":true,"include":false,"step":"370","x":-37.46666666666666,"y":8.904761904761905,"z":29.895238095238092,"a95":16,"info":"\"14-10-02\" at \"19:29\""},{"visible":true,"include":false,"step":"400","x":-87.9047619047619,"y":13.047619047619047,"z":98.95238095238095,"a95":10.5,"info":"\"14-10-02\" at \"22:46\""},{"visible":true,"include":false,"step":"420","x":-160.0952380952381,"y":84.76190476190476,"z":-225.14285714285714,"a95":11.9,"info":"\"14-10-03\" at \"16:18\""},{"visible":true,"include":false,"step":"440","x":-389.5238095238095,"y":-4.285714285714286,"z":-124.76190476190476,"a95":9.3,"info":"\"14-10-03\" at \"19:40\""}]},{"version":"v1.1.0","exported":"2017-05-22T11:07:23.722Z","volume":10.5,"added":"2017-05-22T11:07:17.738Z","format":"Utrecht","demagType":"Unknown","strat":null,"patch":1.1,"GEO":[],"TECT":[],"interpreted":false,"name":"SS21.18B","coreAzi":71,"coreDip":51,"bedStrike":324,"bedDip":33,"data":[{"visible":true,"include":false,"step":"20","x":-16.571428571428573,"y":56.666666666666664,"z":-162,"a95":2.8,"info":"\"14-10-20\" at \"16:24\""},{"visible":true,"include":false,"step":"100","x":-21.714285714285715,"y":53.04761904761905,"z":-76.85714285714286,"a95":3.8,"info":"\"14-10-20\" at \"19:20\""},{"visible":true,"include":false,"step":"150","x":-26.723809523809525,"y":55.171428571428564,"z":-49.04761904761905,"a95":3.5,"info":"\"14-10-20\" at \"22:19\""},{"visible":true,"include":false,"step":"180","x":-26.476190476190474,"y":43.87619047619047,"z":-41.95238095238095,"a95":4.6,"info":"\"14-10-21\" at \"01:10\""},{"visible":true,"include":false,"step":"210","x":-33.96190476190476,"y":-1.6,"z":-1.2,"a95":8,"info":"\"14-10-21\" at \"17:21\""},{"visible":true,"include":false,"step":"240","x":-29.314285714285717,"y":59.37142857142857,"z":-13.723809523809523,"a95":3.8,"info":"\"14-10-21\" at \"20:21\""},{"visible":true,"include":false,"step":"270","x":-55.80952380952381,"y":46.114285714285714,"z":2.9047619047619047,"a95":4.2,"info":"\"14-10-21\" at \"23:24\""},{"visible":true,"include":false,"step":"290","x":-36.80952380952381,"y":42.15238095238095,"z":-4.571428571428571,"a95":5.2,"info":"\"14-10-22\" at \"15:52\""},{"visible":true,"include":false,"step":"310","x":-36.22857142857143,"y":37.19047619047619,"z":-7.266666666666667,"a95":5.4,"info":"\"14-10-22\" at \"18:42\""},{"visible":true,"include":false,"step":"330","x":-33.42857142857143,"y":16.60952380952381,"z":-8.180952380952382,"a95":8,"info":"\"14-10-22\" at \"21:52\""},{"visible":true,"include":false,"step":"350","x":-60.542857142857144,"y":33.65714285714286,"z":-7.742857142857143,"a95":10,"info":"\"14-10-23\" at \"16:07\""},{"visible":true,"include":false,"step":"370","x":-93.80952380952381,"y":32.666666666666664,"z":-8.380952380952381,"a95":11.5,"info":"\"14-10-23\" at \"19:06\""},{"visible":true,"include":false,"step":"400","x":-120,"y":47.714285714285715,"z":82.28571428571429,"a95":11.4,"info":"\"14-10-23\" at \"22:04\""},{"visible":true,"include":false,"step":"420","x":-320.76190476190476,"y":-27.904761904761905,"z":-12.476190476190476,"a95":10.1,"info":"\"14-10-24\" at \"16:33\""},{"visible":true,"include":false,"step":"440","x":-305.9047619047619,"y":-103.04761904761905,"z":108.57142857142857,"a95":16.6,"info":"\"14-10-24\" at \"19:41\""}]}]
