# Supplementary material for: Paleomagnetic constraints on the timing and distribution of Cenozoic rotations in Central and Eastern Anatolia
Source: Copernicus journal article supplement (doi:10.5194/se-9-295-2018), 2018-03-21
Supplement: Supplementary file 2 [file se-9-295-2018-supplement.zip › se-2017-66_DATA_dir files/dir files Sivas/SS22.dir]

[{"version":"v1.1.0","exported":"2017-05-22T14:15:12.721Z","info":"5","GEO":[{"dec":54.0098634916385,"inc":71.69431939574072,"MAD":8.860656216517324,"cm":[-5.684341886080802e-14,4.618527782440651e-14,0],"intensity":7634.9560684740245,"type":"dir","forced":true,"remark":"","origin":false,"nSteps":7,"minStep":"20.0","maxStep":"50.0","steps":["20.0","25.0","30.0","35.0","40.0","45.0","50.0"],"group":"None","version":"v1.1.0"}],"TECT":[{"dec":19.72102523666507,"inc":43.343308148353564,"MAD":8.860656216517327,"cm":[5.684341886080802e-14,-4.654054919228656e-13,1.1368683772161603e-13],"intensity":7634.9560684740245,"type":"dir","forced":true,"remark":"","origin":false,"nSteps":7,"minStep":"20.0","maxStep":"50.0","steps":["20.0","25.0","30.0","35.0","40.0","45.0","50.0"],"group":"None","version":"v1.1.0"}],"interpreted":true,"name":"SS22.1A","coreAzi":62,"coreDip":55,"bedStrike":269,"bedDip":34,"data":[{"visible":true,"include":false,"step":"0.0","x":-7433.809523809524,"y":-5718.190476190476,"z":22161.904761904763,"a95":"0.99","info":"11/10/2014 at 01:32:58"},{"visible":true,"include":false,"step":"4.0","x":-6015.714285714285,"y":-4138,"z":19206.666666666668,"a95":"0.99","info":"11/10/2014 at 01:32:58"},{"visible":true,"include":false,"step":"8.0","x":-4605.428571428572,"y":-2157.5238095238096,"z":14247.619047619048,"a95":"0.99","info":"11/10/2014 at 01:32:58"},{"visible":true,"include":false,"step":"12.0","x":-3002.9523809523807,"y":-1539.904761904762,"z":9898.095238095239,"a95":"0.99","info":"11/10/2014 at 01:32:58"},{"visible":true,"include":false,"step":"16.0","x":-1980.857142857143,"y":-865.7904761904762,"z":7510.285714285715,"a95":"0.99","info":"11/10/2014 at 01:32:58"},{"visible":true,"include":true,"step":"20.0","x":-1733.2380952380952,"y":-652,"z":6055.714285714285,"a95":"0.99","info":"11/10/2014 at 01:32:58"},{"visible":true,"include":true,"step":"25.0","x":-890.6666666666666,"y":423.74285714285713,"z":4927.333333333333,"a95":"0.99","info":"11/10/2014 at 01:32:58"},{"visible":true,"include":true,"step":"30.0","x":-1120.2857142857142,"y":-211.2,"z":3182.3809523809523,"a95":"0.99","info":"11/10/2014 at 01:32:58"},{"visible":true,"include":true,"step":"35.0","x":-766.5333333333334,"y":-344.83809523809526,"z":2581.1428571428573,"a95":"0.99","info":"11/10/2014 at 01:32:58"},{"visible":true,"include":true,"step":"40.0","x":-1298.2857142857142,"y":188.63809523809525,"z":2063.714285714286,"a95":"0.99","info":"11/10/2014 at 01:32:58"},{"visible":true,"include":true,"step":"45.0","x":-968.3809523809524,"y":-77.20571428571428,"z":1456.7619047619048,"a95":"0.99","info":"11/10/2014 at 01:32:58"},{"visible":true,"include":true,"step":"50.0","x":-858.5142857142857,"y":-563.4380952380952,"z":1022.2857142857143,"a95":"0.99","info":"11/10/2014 at 01:32:58"},{"visible":false,"include":false,"step":"60.0","x":-822.1333333333333,"y":161.57142857142858,"z":1617.7142857142858,"a95":"0.99","info":"11/10/2014 at 01:32:58"},{"visible":false,"include":false,"step":"70.0","x":-2131.6190476190477,"y":-365.8095238095238,"z":538.4285714285714,"a95":"0.99","info":"11/10/2014 at 01:32:58"},{"visible":false,"include":false,"step":"80.0","x":-1534.952380952381,"y":-441.23809523809524,"z":1355.8095238095239,"a95":"0.99","info":"11/10/2014 at 01:32:58"},{"visible":false,"include":false,"step":"90.0","x":-464.152380952381,"y":-1086.095238095238,"z":1068.1904761904761,"a95":"0.99","info":"11/10/2014 at 01:32:58"},{"visible":false,"include":false,"step":"100.0","x":-1242.7619047619048,"y":-1024.3809523809523,"z":548.2857142857143,"a95":"0.99","info":"11/10/2014 at 01:32:58"}],"demagType":"Unknown","patch":1.1,"format":"Unknown","strat":null},{"version":"v1.1.0","exported":"2017-05-22T14:15:12.721Z","info":"","GEO":[{"dec":42.08307245196778,"inc":66.04345572495244,"MAD":1.2893819422059076,"cm":[-2.8421709430404007e-13,3.126388037344441e-13,0],"intensity":36477.510322633985,"type":"dir","forced":true,"remark":"","origin":false,"nSteps":9,"minStep":"210","maxStep":"420","steps":["210","240","270","300","320","340","370","400","420"],"group":"None","version":"v1.1.0"}],"TECT":[{"dec":19.124881356150468,"inc":36.2837764242382,"MAD":1.2893819422058261,"cm":[-7.958078640513122e-13,1.6200374375330284e-12,3.979039320256561e-13],"intensity":36477.51032263398,"type":"dir","forced":true,"remark":"","origin":false,"nSteps":9,"minStep":"210","maxStep":"420","steps":["210","240","270","300","320","340","370","400","420"],"group":"None","version":"v1.1.0"}],"interpreted":true,"name":"SS22.1B","coreAzi":62,"coreDip":55,"bedStrike":269,"bedDip":34,"data":[{"visible":true,"include":false,"step":"20","x":-16028.380952380952,"y":-13287.047619047618,"z":50086.57142857143,"a95":"2.8","info":"\"14-10-13\" at \"17:46\""},{"visible":true,"include":false,"step":"100","x":-12149.714285714286,"y":-9765.047619047618,"z":43948.57142857143,"a95":"2.9","info":"\"14-10-13\" at \"20:41\""},{"visible":true,"include":false,"step":"150","x":-8096.952380952381,"y":-5309.333333333333,"z":32110.85714285714,"a95":"2.9","info":"\"14-10-14\" at \"00:06\""},{"visible":true,"include":false,"step":"180","x":-6718.476190476191,"y":-4183.9047619047615,"z":28163.714285714286,"a95":"2.6","info":"\"14-10-14\" at \"17:21\""},{"visible":true,"include":true,"step":"210","x":-5934.0952380952385,"y":-3356.190476190476,"z":25109.809523809523,"a95":"2.6","info":"\"14-10-14\" at \"20:29\""},{"visible":true,"include":true,"step":"240","x":-5072,"y":-2945.4285714285716,"z":22334.666666666668,"a95":"2.5","info":"\"14-10-14\" at \"23:44\""},{"visible":true,"include":true,"step":"270","x":-3121.904761904762,"y":-2254.6666666666665,"z":15721.619047619048,"a95":"2.6","info":"\"14-10-15\" at \"17:30\""},{"visible":true,"include":true,"step":"300","x":-3128.095238095238,"y":-2105.4285714285716,"z":14738.47619047619,"a95":"2.6","info":"\"14-10-15\" at \"20:44\""},{"visible":true,"include":true,"step":"320","x":-3202.7619047619046,"y":-1905.142857142857,"z":13799.142857142857,"a95":"2.6","info":"\"14-10-15\" at \"23:53\""},{"visible":true,"include":true,"step":"340","x":-2607.6190476190477,"y":-1896.7619047619048,"z":13057.52380952381,"a95":"2.7","info":"\"14-10-16\" at \"18:01\""},{"visible":true,"include":true,"step":"370","x":-2582.190476190476,"y":-2092.285714285714,"z":12041.047619047618,"a95":"2.6","info":"\"14-10-16\" at \"21:15\""},{"visible":true,"include":true,"step":"400","x":-1956.952380952381,"y":-1855.7142857142858,"z":10493.142857142857,"a95":"2.6","info":"\"14-10-17\" at \"00:28\""},{"visible":true,"include":true,"step":"420","x":-1777.3333333333333,"y":-1814.857142857143,"z":10166.285714285714,"a95":"2.7","info":"\"14-10-17\" at \"15:57\""},{"visible":true,"include":false,"step":"440","x":-1694,"y":-1191.4285714285713,"z":9105.809523809523,"a95":"2.6","info":"\"14-10-17\" at \"19:09\""},{"visible":true,"include":false,"step":"470","x":-800,"y":-134.95238095238096,"z":11485.809523809523,"a95":"2.7","info":"\"14-10-17\" at \"22:21\""},{"visible":true,"include":false,"step":"490","x":-1623.047619047619,"y":-2096.6666666666665,"z":12991.52380952381,"a95":"2.5","info":"\"14-10-18\" at \"10:48\""},{"visible":true,"include":false,"step":"520","x":84.19047619047619,"y":645.7142857142857,"z":7854.0952380952385,"a95":"2.7","info":"\"14-10-18\" at \"13:32\""},{"visible":false,"include":false,"step":"550","x":-712.952380952381,"y":278.57142857142856,"z":-2423.2380952380954,"a95":"3.7","info":"\"14-10-18\" at \"16:44\""},{"visible":false,"include":false,"step":"580","x":420.6666666666667,"y":-595.047619047619,"z":2621.3333333333335,"a95":"2.9","info":"\"14-10-19\" at \"10:29\""},{"visible":false,"include":false,"step":"610","x":-1748.5714285714287,"y":2500.3809523809523,"z":-890.2857142857143,"a95":"2.1","info":"\"14-10-19\" at \"13:41\""}],"demagType":"Unknown","patch":1.1,"format":"Unknown","strat":null},{"version":"v1.1.0","exported":"2017-05-22T14:15:12.721Z","info":"","GEO":[{"dec":27.74074418610337,"inc":60.513250595924234,"MAD":2.699721273244244,"cm":[0,1.4210854715202004e-13,0],"intensity":16577.160881569078,"type":"dir","forced":true,"remark":"","origin":false,"nSteps":7,"minStep":"240","maxStep":"400","steps":["240","270","300","320","340","370","400"],"group":"None","version":"v1.1.0"}],"TECT":[{"dec":14.655283082581377,"inc":28.705911891486796,"MAD":2.6997212732442315,"cm":[-2.2737367544323206e-13,1.2363443602225743e-12,1.7053025658242404e-13],"intensity":16577.160881569078,"type":"dir","forced":true,"remark":"","origin":false,"nSteps":7,"minStep":"240","maxStep":"400","steps":["240","270","300","320","340","370","400"],"group":"None","version":"v1.1.0"}],"interpreted":true,"name":"SS22.2A","coreAzi":105,"coreDip":39,"bedStrike":269,"bedDip":34,"data":[{"visible":true,"include":false,"step":"20","x":-24829.428571428572,"y":-20749.619047619046,"z":21548.85714285714,"a95":"2.3","info":"\"14-09-29\" at \"17:26\""},{"visible":true,"include":false,"step":"100","x":-12682.47619047619,"y":-10935.047619047618,"z":11230.095238095239,"a95":"2.3","info":"\"14-09-29\" at \"20:15\""},{"visible":true,"include":false,"step":"150","x":-9772.095238095239,"y":-8190,"z":9267.52380952381,"a95":"2.4","info":"\"14-09-29\" at \"23:14\""},{"visible":true,"include":false,"step":"180","x":-8902.380952380952,"y":-7058.571428571428,"z":8665.809523809523,"a95":"2.4","info":"\"14-09-30\" at \"17:47\""},{"visible":true,"include":false,"step":"210","x":-7517.238095238095,"y":-6386,"z":7306.380952380952,"a95":"2.5","info":"\"14-09-30\" at \"20:51\""},{"visible":true,"include":true,"step":"240","x":-6905.809523809524,"y":-5217.238095238095,"z":6487.619047619048,"a95":"2.4","info":"\"14-09-30\" at \"23:56\""},{"visible":true,"include":true,"step":"270","x":-5254.952380952381,"y":-3951.714285714286,"z":5572.190476190476,"a95":"2.5","info":"\"14-10-01\" at \"18:20\""},{"visible":true,"include":true,"step":"300","x":-4502.761904761905,"y":-4020.9523809523807,"z":5452.571428571428,"a95":"2.5","info":"\"14-10-01\" at \"21:27\""},{"visible":true,"include":true,"step":"320","x":-4345.238095238095,"y":-3435.2380952380954,"z":4248,"a95":"2.6","info":"\"14-10-02\" at \"00:37\""},{"visible":true,"include":true,"step":"340","x":-4214.190476190476,"y":-3302,"z":4405.142857142857,"a95":"2.3","info":"\"14-10-02\" at \"18:06\""},{"visible":true,"include":true,"step":"370","x":-3838.7619047619046,"y":-2969.5238095238096,"z":3643.714285714286,"a95":"2.2","info":"\"14-10-02\" at \"21:02\""},{"visible":true,"include":true,"step":"400","x":-3191.5238095238096,"y":-2683.904761904762,"z":4020.3809523809523,"a95":"2.2","info":"\"14-10-03\" at \"00:17\""},{"visible":true,"include":false,"step":"420","x":-3282.7619047619046,"y":-2844.190476190476,"z":3619.3333333333335,"a95":"2.4","info":"\"14-10-03\" at \"17:55\""},{"visible":true,"include":false,"step":"440","x":-3105.0476190476193,"y":-2509.4285714285716,"z":3686.7619047619046,"a95":"2.4","info":"\"14-10-03\" at \"21:12\""},{"visible":true,"include":false,"step":"460","x":-2481.714285714286,"y":-2407.0476190476193,"z":3625.3333333333335,"a95":"2.5","info":"\"14-10-04\" at \"00:33\""},{"visible":true,"include":false,"step":"480","x":-2633.809523809524,"y":-1815.6190476190477,"z":3826.095238095238,"a95":"2.4","info":"\"14-10-04\" at \"11:22\""},{"visible":true,"include":false,"step":"510","x":-1796.6666666666667,"y":-1528.7619047619048,"z":2635.714285714286,"a95":"2.6","info":"\"14-10-04\" at \"14:15\""},{"visible":true,"include":false,"step":"540","x":-1933.5238095238096,"y":-2055.2380952380954,"z":1941.8095238095239,"a95":"2.6","info":"\"14-10-04\" at \"17:41\""},{"visible":false,"include":false,"step":"570","x":-206.85714285714286,"y":89.61904761904762,"z":564.2857142857143,"a95":"5.3","info":"\"14-10-05\" at \"11:44\""},{"visible":false,"include":false,"step":"600","x":6.761904761904762,"y":-1576.095238095238,"z":1718.2857142857142,"a95":"3","info":"\"14-10-05\" at \"15:00\""},{"visible":false,"include":false,"step":"630","x":475.9047619047619,"y":50.95238095238095,"z":2.5714285714285716,"a95":"6.7","info":"\"14-10-05\" at \"18:33\""},{"visible":false,"include":false,"step":"660","x":-772.0952380952381,"y":98.38095238095238,"z":3.3333333333333335,"a95":"4.5","info":"\"14-10-11\" at \"09:08\""},{"visible":false,"include":false,"step":"680","x":-672.6666666666666,"y":851.047619047619,"z":-602.2857142857143,"a95":"3.6","info":"\"14-10-11\" at \"12:10\""}],"demagType":"Unknown","patch":1.1,"format":"Unknown","strat":null},{"version":"v1.1.0","exported":"2017-05-22T14:15:12.721Z","info":"","GEO":[{"dec":27.0674911714201,"inc":55.58865044725655,"MAD":1.8500850235729425,"cm":[-2.5579538487363607e-13,4.831690603168681e-13,0],"intensity":20646.56228186564,"type":"dir","forced":true,"remark":"","origin":false,"nSteps":8,"minStep":"210","maxStep":"420","steps":["210","240","270","300","330","360","390","420"],"group":"None","version":"v1.1.0"}],"TECT":[{"dec":15.907861372054413,"inc":23.89776138129255,"MAD":1.850085023573044,"cm":[-1.0231815394945443e-12,2.3732127374387346e-12,3.410605131648481e-13],"intensity":20646.562281865645,"type":"dir","forced":true,"remark":"","origin":false,"nSteps":8,"minStep":"210","maxStep":"420","steps":["210","240","270","300","330","360","390","420"],"group":"None","version":"v1.1.0"}],"interpreted":true,"name":"SS22.2B","coreAzi":105,"coreDip":39,"bedStrike":269,"bedDip":34,"data":[{"visible":true,"include":false,"step":"20","x":-22702.095238095237,"y":-19819.04761904762,"z":15836.666666666666,"a95":"1.9","info":"\"14-10-20\" at \"17:21\""},{"visible":true,"include":false,"step":"100","x":-17869.238095238095,"y":-15838.095238095239,"z":14662.57142857143,"a95":"1.9","info":"\"14-10-20\" at \"20:36\""},{"visible":true,"include":false,"step":"150","x":-10422,"y":-10445.52380952381,"z":10562.857142857143,"a95":"2.1","info":"\"14-10-20\" at \"23:30\""},{"visible":true,"include":false,"step":"180","x":-9026.952380952382,"y":-8679.809523809523,"z":9214.857142857143,"a95":"1.9","info":"\"14-10-21\" at \"15:36\""},{"visible":true,"include":true,"step":"210","x":-8636.380952380952,"y":-8126.380952380952,"z":9056.47619047619,"a95":"2","info":"\"14-10-21\" at \"18:29\""},{"visible":true,"include":true,"step":"240","x":-7322.761904761905,"y":-6992.0952380952385,"z":7433.714285714285,"a95":"1.9","info":"\"14-10-21\" at \"21:41\""},{"visible":true,"include":true,"step":"270","x":-6620.666666666667,"y":-6464.0952380952385,"z":7777.809523809524,"a95":"2","info":"\"14-10-22\" at \"00:37\""},{"visible":true,"include":true,"step":"300","x":-5795.619047619048,"y":-5595.619047619048,"z":6391.619047619048,"a95":"2.1","info":"\"14-10-22\" at \"16:54\""},{"visible":true,"include":true,"step":"330","x":-4771.809523809524,"y":-5007.523809523809,"z":5617.238095238095,"a95":"2.1","info":"\"14-10-22\" at \"20:03\""},{"visible":true,"include":true,"step":"360","x":-4074.7619047619046,"y":-4205.238095238095,"z":3977.5238095238096,"a95":"2.1","info":"\"14-10-22\" at \"23:09\""},{"visible":true,"include":true,"step":"390","x":-3632,"y":-3792.285714285714,"z":4080.5714285714284,"a95":"2.3","info":"\"14-10-23\" at \"17:22\""},{"visible":true,"include":true,"step":"420","x":-3353.3333333333335,"y":-3312.095238095238,"z":3259.714285714286,"a95":"2.2","info":"\"14-10-23\" at \"20:22\""},{"visible":true,"include":false,"step":"450","x":-2912.3809523809523,"y":-3170.3809523809523,"z":3297.1428571428573,"a95":"2.1","info":"\"14-10-24\" at \"14:54\""},{"visible":true,"include":false,"step":"480","x":-2608.4761904761904,"y":-2809.2380952380954,"z":2361.809523809524,"a95":"2.2","info":"\"14-10-24\" at \"17:56\""},{"visible":true,"include":false,"step":"510","x":-1683.6190476190477,"y":-1464.1904761904761,"z":2964,"a95":"2.4","info":"\"14-10-24\" at \"20:48\""},{"visible":true,"include":false,"step":"540","x":-2072.8571428571427,"y":-2879.3333333333335,"z":2458.4761904761904,"a95":"2.2","info":"\"14-10-24\" at \"23:44\""},{"visible":false,"include":false,"step":"570","x":32.57142857142857,"y":296.3809523809524,"z":1587.7142857142858,"a95":"4","info":"\"14-10-25\" at \"02:33\""},{"visible":false,"include":false,"step":"600","x":-1473.3333333333333,"y":-1410.7619047619048,"z":362.85714285714283,"a95":"2.4","info":"\"14-10-25\" at \"05:08\""},{"visible":false,"include":false,"step":"630","x":-1276,"y":-1730.7619047619048,"z":234.28571428571428,"a95":"3.1","info":"\"14-10-25\" at \"23:29\""},{"visible":false,"include":false,"step":"660","x":-360.1904761904762,"y":-841.1428571428571,"z":-1097.904761904762,"a95":"3.1","info":"\"14-10-26\" at \"02:14\""},{"visible":false,"include":false,"step":"680","x":-943.6190476190476,"y":-199.9047619047619,"z":715.8095238095239,"a95":"3.6","info":"\"14-10-26\" at \"03:25\""}],"demagType":"Unknown","patch":1.1,"format":"Unknown","strat":null},{"version":"v1.1.0","exported":"2017-05-22T14:15:12.721Z","info":"","GEO":[{"dec":31.106945638890977,"inc":58.555963965546965,"MAD":1.7749270289571537,"cm":[-1.4210854715202004e-13,3.552713678800501e-13,0],"intensity":11838.914433212032,"type":"dir","forced":true,"remark":"","origin":false,"nSteps":6,"minStep":"270","maxStep":"400","steps":["270","300","320","340","370","400"],"group":"None","version":"v1.1.0"}],"TECT":[{"dec":17.197939484081303,"inc":27.39981790612703,"MAD":1.7749270289571366,"cm":[-5.684341886080801e-13,1.0942358130705543e-12,1.9895196601282805e-13],"intensity":11838.914433212029,"type":"dir","forced":true,"remark":"","origin":false,"nSteps":6,"minStep":"270","maxStep":"400","steps":["270","300","320","340","370","400"],"group":"None","version":"v1.1.0"}],"interpreted":true,"name":"SS22.3A","coreAzi":79,"coreDip":35,"bedStrike":269,"bedDip":34,"data":[{"visible":true,"include":false,"step":"20","x":-18752.47619047619,"y":-16615.428571428572,"z":21404.761904761905,"a95":"2.4","info":"\"14-10-13\" at \"17:48\""},{"visible":true,"include":false,"step":"100","x":-13772.57142857143,"y":-12120.57142857143,"z":16298.952380952382,"a95":"2.3","info":"\"14-10-13\" at \"20:43\""},{"visible":true,"include":false,"step":"150","x":-8786.190476190477,"y":-7182.952380952381,"z":10855.333333333334,"a95":"2.4","info":"\"14-10-14\" at \"00:08\""},{"visible":true,"include":false,"step":"180","x":-7466.857142857143,"y":-5800.285714285715,"z":9343.333333333334,"a95":"2.3","info":"\"14-10-14\" at \"17:23\""},{"visible":true,"include":false,"step":"210","x":-6376.666666666667,"y":-5225.142857142857,"z":8506.285714285714,"a95":"2.3","info":"\"14-10-14\" at \"20:31\""},{"visible":true,"include":false,"step":"240","x":-5675.714285714285,"y":-4501.9047619047615,"z":7321.047619047619,"a95":"2.2","info":"\"14-10-14\" at \"23:46\""},{"visible":true,"include":true,"step":"270","x":-3431.5238095238096,"y":-2653.5238095238096,"z":5782,"a95":"2.4","info":"\"14-10-15\" at \"17:32\""},{"visible":true,"include":true,"step":"300","x":-3263.4285714285716,"y":-2658.285714285714,"z":5114.666666666667,"a95":"2.4","info":"\"14-10-15\" at \"20:46\""},{"visible":true,"include":true,"step":"320","x":-3242.7619047619046,"y":-2461.809523809524,"z":5009.714285714285,"a95":"2.4","info":"\"14-10-15\" at \"23:55\""},{"visible":true,"include":true,"step":"340","x":-2873.3333333333335,"y":-2211.6190476190477,"z":4228,"a95":"2.4","info":"\"14-10-16\" at \"18:03\""},{"visible":true,"include":true,"step":"370","x":-2609.4285714285716,"y":-2148.6666666666665,"z":4203.428571428572,"a95":"2.5","info":"\"14-10-16\" at \"21:16\""},{"visible":true,"include":true,"step":"400","x":-2546.8571428571427,"y":-1782.5714285714287,"z":3423.4285714285716,"a95":"2.3","info":"\"14-10-17\" at \"00:29\""},{"visible":true,"include":false,"step":"420","x":-2437.809523809524,"y":-1947.142857142857,"z":4106.761904761905,"a95":"2.4","info":"\"14-10-17\" at \"15:59\""},{"visible":true,"include":false,"step":"440","x":-2396.285714285714,"y":-1529.142857142857,"z":3119.2380952380954,"a95":"2.3","info":"\"14-10-17\" at \"19:10\""},{"visible":true,"include":false,"step":"470","x":-2273.904761904762,"y":-1464.1904761904761,"z":3754.9523809523807,"a95":"2.4","info":"\"14-10-17\" at \"22:23\""},{"visible":true,"include":false,"step":"490","x":-1819.6190476190477,"y":-1056.2857142857142,"z":3457.904761904762,"a95":"2.6","info":"\"14-10-18\" at \"10:50\""},{"visible":false,"include":false,"step":"520","x":-1019.3333333333334,"y":-363.42857142857144,"z":5309.714285714285,"a95":"2.7","info":"\"14-10-18\" at \"13:36\""},{"visible":false,"include":false,"step":"550","x":-262.85714285714283,"y":1810.095238095238,"z":-5274.761904761905,"a95":"2.6","info":"\"14-10-18\" at \"16:46\""},{"visible":false,"include":false,"step":"580","x":-345.7142857142857,"y":310,"z":1485.3333333333333,"a95":"3","info":"\"14-10-19\" at \"10:31\""},{"visible":false,"include":false,"step":"610","x":-1346.5714285714287,"y":2058.4761904761904,"z":-497.42857142857144,"a95":"2","info":"\"14-10-19\" at \"13:43\""}],"demagType":"Unknown","patch":1.1,"format":"Unknown","strat":null},{"version":"v1.1.0","exported":"2017-05-22T14:15:12.721Z","info":"","GEO":[{"dec":18.67944947418397,"inc":56.201852631194555,"MAD":1.5510555051972876,"cm":[6.496390726949487e-14,1.5158245029548803e-13,0],"intensity":17383.325018227737,"type":"dir","forced":true,"remark":"","origin":false,"nSteps":9,"minStep":"180","maxStep":"420","steps":["180","210","240","270","300","330","360","390","420"],"group":"None"}],"TECT":[{"dec":10.771480310148434,"inc":23.330814279323715,"MAD":1.5510555051972754,"cm":[4.330927151299658e-14,-7.903942051121877e-13,1.0827317878249145e-13],"intensity":17383.32501822774,"type":"dir","forced":true,"remark":"","origin":false,"nSteps":9,"minStep":"180","maxStep":"420","steps":["180","210","240","270","300","330","360","390","420"],"group":"None"}],"interpreted":true,"name":"SS22.3B","coreAzi":79,"coreDip":35,"bedStrike":269,"bedDip":34,"data":[{"visible":true,"include":false,"step":"20","x":-18543.904761904763,"y":-17786.095238095237,"z":19015.04761904762,"a95":"2","info":"\"14-10-20\" at \"17:23\""},{"visible":true,"include":false,"step":"100","x":-13956.857142857143,"y":-13296.952380952382,"z":15789.42857142857,"a95":"2","info":"\"14-10-20\" at \"20:38\""},{"visible":true,"include":false,"step":"150","x":-7822.761904761905,"y":-7656.857142857143,"z":9996.285714285714,"a95":"2.1","info":"\"14-10-20\" at \"23:32\""},{"visible":true,"include":true,"step":"180","x":-6959.9047619047615,"y":-6000.285714285715,"z":8707.52380952381,"a95":"2","info":"\"14-10-21\" at \"15:38\""},{"visible":true,"include":true,"step":"210","x":-6336.571428571428,"y":-5820.761904761905,"z":8423.904761904761,"a95":"2","info":"\"14-10-21\" at \"18:31\""},{"visible":true,"include":true,"step":"240","x":-5417.809523809524,"y":-5191.333333333333,"z":7070.666666666667,"a95":"2","info":"\"14-10-21\" at \"21:43\""},{"visible":true,"include":true,"step":"270","x":-4792.190476190476,"y":-4741.238095238095,"z":6918.380952380952,"a95":"2","info":"\"14-10-22\" at \"00:39\""},{"visible":true,"include":true,"step":"300","x":-4141.9047619047615,"y":-3880.190476190476,"z":5664.285714285715,"a95":"2.2","info":"\"14-10-22\" at \"16:56\""},{"visible":true,"include":true,"step":"330","x":-3535.2380952380954,"y":-3089.0476190476193,"z":5040.285714285715,"a95":"2.1","info":"\"14-10-22\" at \"20:05\""},{"visible":true,"include":true,"step":"360","x":-2775.904761904762,"y":-2609.1428571428573,"z":3854.9523809523807,"a95":"2.3","info":"\"14-10-22\" at \"23:11\""},{"visible":true,"include":true,"step":"390","x":-2799.1428571428573,"y":-2794.3809523809523,"z":4090.095238095238,"a95":"2.3","info":"\"14-10-23\" at \"17:24\""},{"visible":true,"include":true,"step":"420","x":-2340.285714285714,"y":-2268.285714285714,"z":3429.904761904762,"a95":"2.3","info":"\"14-10-23\" at \"20:24\""},{"visible":true,"include":false,"step":"450","x":-1884.5714285714287,"y":-2016.5714285714287,"z":3904.095238095238,"a95":"2.3","info":"\"14-10-24\" at \"14:56\""},{"visible":true,"include":false,"step":"480","x":-2064.6666666666665,"y":-1636.3809523809523,"z":2158.190476190476,"a95":"2.4","info":"\"14-10-24\" at \"17:58\""},{"visible":false,"include":false,"step":"510","x":-719.3333333333334,"y":-2229.1428571428573,"z":3876,"a95":"2.4","info":"\"14-10-24\" at \"20:50\""},{"visible":false,"include":false,"step":"540","x":-1550.6666666666667,"y":-2619.0476190476193,"z":2258.285714285714,"a95":"2.3","info":"\"14-10-24\" at \"23:46\""},{"visible":false,"include":false,"step":"570","x":-6.9523809523809526,"y":-1887.8095238095239,"z":1383.7142857142858,"a95":"2.7","info":"\"14-10-25\" at \"02:34\""},{"visible":false,"include":false,"step":"600","x":-2358,"y":-1164.857142857143,"z":1198.7619047619048,"a95":"2.3","info":"\"14-10-25\" at \"05:10\""},{"visible":false,"include":false,"step":"630","x":-1474.3809523809523,"y":724.5714285714286,"z":715.7142857142857,"a95":"3","info":"\"14-10-25\" at \"23:31\""},{"visible":false,"include":false,"step":"660","x":-326.6666666666667,"y":-558.2857142857143,"z":479.42857142857144,"a95":"4.5","info":"\"14-10-26\" at \"02:16\""},{"visible":false,"include":false,"step":"680","x":-445.8095238095238,"y":375.8095238095238,"z":518.3809523809524,"a95":"3.8","info":"\"14-10-26\" at \"03:28\""}],"demagType":"Unknown","patch":1.1,"format":"Unknown","strat":null},{"version":"v1.1.0","exported":"2017-05-22T14:15:12.721Z","info":"1","GEO":[{"dec":5.114353615774007,"inc":58.81379069747188,"MAD":3.0356347566797504,"cm":[3.2481953634747435e-14,-2.287270901780132e-13,0],"intensity":14898.990812264621,"type":"dir","forced":true,"remark":"","origin":false,"nSteps":6,"minStep":"10.0","maxStep":"35.0","steps":["10.0","15.0","20.0","25.0","30.0","35.0"],"group":"None"}],"TECT":[{"dec":2.4866479860164645,"inc":24.917813645537866,"MAD":3.03563475667969,"cm":[-1.7323708605198632e-13,-5.345988202385516e-13,1.948917218084846e-13],"intensity":14898.990812264621,"type":"dir","forced":true,"remark":"","origin":false,"nSteps":6,"minStep":"10.0","maxStep":"35.0","steps":["10.0","15.0","20.0","25.0","30.0","35.0"],"group":"None"}],"interpreted":true,"name":"SS22.4A","coreAzi":88,"coreDip":28,"bedStrike":269,"bedDip":34,"data":[{"visible":true,"include":false,"step":"0.0","x":-18570.47619047619,"y":-16651.428571428572,"z":12240.952380952382,"a95":"0.99","info":"22/09/2014 at 20:51:18"},{"visible":true,"include":false,"step":"5.0","x":-14298.095238095239,"y":-11796.190476190477,"z":9601.904761904761,"a95":"0.99","info":"22/09/2014 at 20:51:18"},{"visible":true,"include":true,"step":"10.0","x":-9178.666666666666,"y":-6762.476190476191,"z":5970.666666666667,"a95":"0.99","info":"22/09/2014 at 20:51:18"},{"visible":true,"include":true,"step":"15.0","x":-6248.761904761905,"y":-4404.761904761905,"z":3850.8571428571427,"a95":"0.99","info":"22/09/2014 at 20:51:18"},{"visible":true,"include":true,"step":"20.0","x":-4373.523809523809,"y":-3022.285714285714,"z":3136.9523809523807,"a95":"0.99","info":"22/09/2014 at 20:51:18"},{"visible":true,"include":true,"step":"25.0","x":-3260.7619047619046,"y":-2169.714285714286,"z":1273.7142857142858,"a95":"0.99","info":"22/09/2014 at 20:51:18"},{"visible":true,"include":true,"step":"30.0","x":-2490.285714285714,"y":-1234.1904761904761,"z":1421.8095238095239,"a95":"0.99","info":"22/09/2014 at 20:51:18"},{"visible":true,"include":true,"step":"35.0","x":-1558.3809523809523,"y":-875.257142857143,"z":983.5238095238095,"a95":"0.99","info":"22/09/2014 at 20:51:18"},{"visible":true,"include":false,"step":"40.0","x":-1453.904761904762,"y":-763.3809523809524,"z":335.3333333333333,"a95":"0.99","info":"22/09/2014 at 20:51:18"},{"visible":true,"include":false,"step":"45.0","x":-1168.2857142857142,"y":-763.3428571428572,"z":1095.6190476190477,"a95":"0.99","info":"22/09/2014 at 20:51:18"},{"visible":false,"include":false,"step":"50.0","x":-260.65714285714284,"y":-78.96380952380953,"z":487.447619047619,"a95":"0.99","info":"22/09/2014 at 20:51:18"},{"visible":false,"include":false,"step":"60.0","x":-223.33333333333334,"y":-16.322857142857142,"z":176.28571428571428,"a95":"0.99","info":"22/09/2014 at 20:51:18"},{"visible":false,"include":false,"step":"70.0","x":-196.87619047619046,"y":-186.28571428571428,"z":-474.3809523809524,"a95":"0.99","info":"22/09/2014 at 20:51:18"},{"visible":false,"include":false,"step":"80.0","x":-1894.3809523809523,"y":-286.9142857142857,"z":-920.9142857142857,"a95":"0.99","info":"22/09/2014 at 20:51:18"},{"visible":false,"include":false,"step":"90.0","x":-128.35238095238097,"y":-159.94285714285715,"z":-655.4761904761905,"a95":"0.99","info":"22/09/2014 at 20:51:18"},{"visible":false,"include":false,"step":"100.0","x":164.0285714285714,"y":-341.85714285714283,"z":-939.5238095238095,"a95":"0.99","info":"22/09/2014 at 20:51:18"}],"demagType":"Unknown","patch":1.1,"format":"Unknown","strat":null},{"version":"v1.1.0","exported":"2017-05-22T14:15:12.721Z","info":"","GEO":[{"dec":7.126116708666757,"inc":61.08006824204156,"MAD":2.3658629195946506,"cm":[2.165463575649829e-14,2.4361465226060576e-14,0],"intensity":16099.480024842254,"type":"dir","forced":true,"remark":"","origin":false,"nSteps":10,"minStep":"150","maxStep":"400","steps":["150","180","210","240","270","300","320","340","370","400"],"group":"None"}],"TECT":[{"dec":3.410000480933661,"inc":27.254928084472777,"MAD":2.3658629195948526,"cm":[-4.330927151299658e-14,5.278317465646459e-13,2.165463575649829e-14],"intensity":16099.480024842258,"type":"dir","forced":true,"remark":"","origin":false,"nSteps":10,"minStep":"150","maxStep":"400","steps":["150","180","210","240","270","300","320","340","370","400"],"group":"None"}],"interpreted":true,"name":"SS22.4B","coreAzi":88,"coreDip":28,"bedStrike":269,"bedDip":34,"data":[{"visible":true,"include":false,"step":"20","x":-23190.85714285714,"y":-16264.857142857143,"z":11474.380952380952,"a95":"2.2","info":"\"14-09-29\" at \"17:28\""},{"visible":true,"include":false,"step":"100","x":-11098.190476190477,"y":-7737.809523809524,"z":6436.761904761905,"a95":"2.2","info":"\"14-09-29\" at \"20:17\""},{"visible":true,"include":true,"step":"150","x":-8839.238095238095,"y":-5397.238095238095,"z":5155.9047619047615,"a95":"2.2","info":"\"14-09-29\" at \"23:16\""},{"visible":true,"include":true,"step":"180","x":-7554.952380952381,"y":-4930.190476190476,"z":5046.571428571428,"a95":"2.2","info":"\"14-09-30\" at \"17:49\""},{"visible":true,"include":true,"step":"210","x":-6596.380952380952,"y":-4118.666666666667,"z":4239.047619047619,"a95":"2.1","info":"\"14-09-30\" at \"20:53\""},{"visible":true,"include":true,"step":"240","x":-5470.285714285715,"y":-3684.3809523809523,"z":3562.095238095238,"a95":"2.3","info":"\"14-09-30\" at \"23:57\""},{"visible":true,"include":true,"step":"270","x":-4274.761904761905,"y":-2695.5238095238096,"z":2968.6666666666665,"a95":"2.5","info":"\"14-10-01\" at \"18:22\""},{"visible":true,"include":true,"step":"300","x":-4211.809523809524,"y":-2806.3809523809523,"z":2637.809523809524,"a95":"2.3","info":"\"14-10-01\" at \"21:29\""},{"visible":true,"include":true,"step":"320","x":-3603.2380952380954,"y":-2743.904761904762,"z":2345.6190476190477,"a95":"2.2","info":"\"14-10-02\" at \"00:39\""},{"visible":true,"include":true,"step":"340","x":-3168,"y":-2459.714285714286,"z":2530.7619047619046,"a95":"2.1","info":"\"14-10-02\" at \"18:08\""},{"visible":true,"include":true,"step":"370","x":-3055.1428571428573,"y":-2035.2380952380952,"z":2463.714285714286,"a95":"2.2","info":"\"14-10-02\" at \"21:04\""},{"visible":true,"include":true,"step":"400","x":-3318.4761904761904,"y":-2050.3809523809523,"z":2321.809523809524,"a95":"2.4","info":"\"14-10-03\" at \"00:21\""},{"visible":true,"include":false,"step":"420","x":-3245.4285714285716,"y":-2111.5238095238096,"z":2311.904761904762,"a95":"2.3","info":"\"14-10-03\" at \"17:57\""},{"visible":true,"include":false,"step":"440","x":-2952.095238095238,"y":-2277.714285714286,"z":2281.809523809524,"a95":"2.4","info":"\"14-10-03\" at \"21:16\""},{"visible":true,"include":false,"step":"460","x":-2970.190476190476,"y":-2301.904761904762,"z":2182.285714285714,"a95":"2.2","info":"\"14-10-04\" at \"00:36\""},{"visible":true,"include":false,"step":"480","x":-1591.047619047619,"y":-1469.6190476190477,"z":1954.2857142857142,"a95":"2.5","info":"\"14-10-04\" at \"11:24\""},{"visible":true,"include":false,"step":"510","x":-1574.857142857143,"y":-1793.142857142857,"z":1758.5714285714287,"a95":"2.3","info":"\"14-10-04\" at \"14:17\""},{"visible":false,"include":false,"step":"540","x":-1983.5238095238096,"y":-354.85714285714283,"z":2043.2380952380952,"a95":"2.9","info":"\"14-10-04\" at \"17:43\""},{"visible":false,"include":false,"step":"570","x":-1483.2380952380952,"y":327.42857142857144,"z":-258,"a95":"2.9","info":"\"14-10-05\" at \"11:45\""},{"visible":false,"include":false,"step":"600","x":-72.76190476190476,"y":-272.3809523809524,"z":1119.6190476190477,"a95":"3.6","info":"\"14-10-05\" at \"15:02\""},{"visible":false,"include":false,"step":"630","x":-663.6190476190476,"y":407.3333333333333,"z":54,"a95":"4.5","info":"\"14-10-05\" at \"18:35\""},{"visible":false,"include":false,"step":"660","x":-594.952380952381,"y":44.19047619047619,"z":423.7142857142857,"a95":"4.8","info":"\"14-10-11\" at \"09:11\""},{"visible":false,"include":false,"step":"680","x":-186.95238095238096,"y":433.6190476190476,"z":-617.9047619047619,"a95":"3.8","info":"\"14-10-11\" at \"12:12\""}],"demagType":"Unknown","patch":1.1,"format":"Unknown","strat":null},{"version":"v1.1.0","exported":"2017-05-22T14:15:12.721Z","info":"","GEO":[{"dec":37.579701862028,"inc":58.41282619986379,"MAD":2.3687347673992853,"cm":[-2.382009933214812e-13,2.9233758271272696e-13,0],"intensity":19600.541610592587,"type":"dir","forced":true,"remark":"","origin":false,"nSteps":9,"minStep":"180","maxStep":"400","steps":["180","210","240","270","300","320","340","370","400"],"group":"None"}],"TECT":[{"dec":20.820466441074018,"inc":28.50508654000026,"MAD":2.368734767399255,"cm":[-1.2992781453898974e-13,5.4136589391245725e-14,3.248195363474744e-13],"intensity":19600.541610592587,"type":"dir","forced":true,"remark":"","origin":false,"nSteps":9,"minStep":"180","maxStep":"400","steps":["180","210","240","270","300","320","340","370","400"],"group":"None"}],"interpreted":true,"name":"SS22.5A","coreAzi":110,"coreDip":36,"bedStrike":269,"bedDip":34,"data":[{"visible":true,"include":false,"step":"20","x":-25820.190476190477,"y":-18053.238095238095,"z":14232.190476190477,"a95":"2","info":"\"14-10-13\" at \"17:50\""},{"visible":true,"include":false,"step":"100","x":-17282.095238095237,"y":-13985.238095238095,"z":13203.142857142857,"a95":"2","info":"\"14-10-13\" at \"20:45\""},{"visible":true,"include":false,"step":"150","x":-10798.761904761905,"y":-8763.238095238095,"z":9727.904761904761,"a95":"2.3","info":"\"14-10-14\" at \"00:10\""},{"visible":true,"include":true,"step":"180","x":-9003.714285714286,"y":-7544.761904761905,"z":8768.095238095239,"a95":"2.2","info":"\"14-10-14\" at \"17:25\""},{"visible":true,"include":true,"step":"210","x":-7950.952380952381,"y":-6691.238095238095,"z":8471.904761904761,"a95":"2.1","info":"\"14-10-14\" at \"20:33\""},{"visible":true,"include":true,"step":"240","x":-6819.333333333333,"y":-5825.238095238095,"z":6867.428571428572,"a95":"2.1","info":"\"14-10-14\" at \"23:48\""},{"visible":true,"include":true,"step":"270","x":-4632.571428571428,"y":-3720.190476190476,"z":5361.9047619047615,"a95":"2.3","info":"\"14-10-15\" at \"17:33\""},{"visible":true,"include":true,"step":"300","x":-4515.047619047619,"y":-3723.2380952380954,"z":4975.047619047619,"a95":"2.4","info":"\"14-10-15\" at \"20:48\""},{"visible":true,"include":true,"step":"320","x":-4189.142857142857,"y":-3282.285714285714,"z":4902.761904761905,"a95":"2.2","info":"\"14-10-15\" at \"23:57\""},{"visible":true,"include":true,"step":"340","x":-3905.6190476190477,"y":-3078.8571428571427,"z":3825.3333333333335,"a95":"2.1","info":"\"14-10-16\" at \"18:05\""},{"visible":true,"include":true,"step":"370","x":-3119.714285714286,"y":-2893.714285714286,"z":4168.571428571428,"a95":"2.3","info":"\"14-10-16\" at \"21:18\""},{"visible":true,"include":true,"step":"400","x":-2817.2380952380954,"y":-2591.1428571428573,"z":3136.095238095238,"a95":"2.3","info":"\"14-10-17\" at \"00:31\""},{"visible":true,"include":false,"step":"420","x":-2711.904761904762,"y":-2636,"z":3675.2380952380954,"a95":"2.3","info":"\"14-10-17\" at \"16:01\""},{"visible":true,"include":false,"step":"440","x":-2722.6666666666665,"y":-2456.6666666666665,"z":3041.0476190476193,"a95":"2.1","info":"\"14-10-17\" at \"19:12\""},{"visible":true,"include":false,"step":"470","x":-2433.3333333333335,"y":-2311.904761904762,"z":4150.571428571428,"a95":"2.6","info":"\"14-10-17\" at \"22:25\""},{"visible":true,"include":false,"step":"490","x":-2407.904761904762,"y":-1012.5714285714286,"z":3495.904761904762,"a95":"2.5","info":"\"14-10-18\" at \"10:51\""},{"visible":false,"include":false,"step":"520","x":48,"y":535.4285714285714,"z":7809.523809523809,"a95":"2.6","info":"\"14-10-18\" at \"13:38\""},{"visible":false,"include":false,"step":"550","x":-2282.9523809523807,"y":2186.7619047619046,"z":-1306.6666666666667,"a95":"1.8","info":"\"14-10-18\" at \"16:48\""},{"visible":false,"include":false,"step":"580","x":1368.095238095238,"y":627.7142857142857,"z":1671.142857142857,"a95":"2.6","info":"\"14-10-19\" at \"10:33\""},{"visible":false,"include":false,"step":"610","x":-960.5714285714286,"y":2339.3333333333335,"z":-152,"a95":"2.3","info":"\"14-10-19\" at \"13:45\""}],"demagType":"Unknown","patch":1.1,"format":"Unknown","strat":null},{"version":"v1.1.0","exported":"2017-05-22T14:15:12.721Z","info":"","GEO":[{"dec":22.673233328070978,"inc":61.530397046668526,"MAD":3.828350492343662,"cm":[-1.0827317878249145e-13,3.139922184692252e-13,0],"intensity":16036.7234282108,"type":"dir","forced":true,"remark":"","origin":false,"nSteps":9,"minStep":"180","maxStep":"400","steps":["180","210","240","270","300","320","340","370","400"],"group":"None"}],"TECT":[{"dec":11.63959700010082,"inc":28.989566212369777,"MAD":3.828350492343773,"cm":[3.4647417210397264e-13,-7.903942051121877e-13,-6.496390726949487e-14],"intensity":16036.723428210804,"type":"dir","forced":true,"remark":"","origin":false,"nSteps":9,"minStep":"180","maxStep":"400","steps":["180","210","240","270","300","320","340","370","400"],"group":"None"}],"interpreted":true,"name":"SS22.6A","coreAzi":128,"coreDip":39,"bedStrike":269,"bedDip":34,"data":[{"visible":true,"include":false,"step":"20","x":-30162.285714285714,"y":-15203.809523809523,"z":10816.952380952382,"a95":"2","info":"\"14-09-29\" at \"17:30\""},{"visible":true,"include":false,"step":"100","x":-14374.47619047619,"y":-7428.666666666667,"z":6574,"a95":"2.1","info":"\"14-09-29\" at \"20:18\""},{"visible":true,"include":false,"step":"150","x":-10719.42857142857,"y":-5467.523809523809,"z":5527.9047619047615,"a95":"2.2","info":"\"14-09-29\" at \"23:18\""},{"visible":true,"include":true,"step":"180","x":-9027.238095238095,"y":-4874,"z":5087.428571428572,"a95":"2.2","info":"\"14-09-30\" at \"17:51\""},{"visible":true,"include":true,"step":"210","x":-7929.142857142857,"y":-4256.666666666667,"z":4050.9523809523807,"a95":"2.1","info":"\"14-09-30\" at \"20:55\""},{"visible":true,"include":true,"step":"240","x":-6238.0952380952385,"y":-3612.4761904761904,"z":3610.285714285714,"a95":"2.2","info":"\"14-10-01\" at \"00:07\""},{"visible":true,"include":true,"step":"270","x":-4701.047619047619,"y":-3082.8571428571427,"z":2988.7619047619046,"a95":"2.3","info":"\"14-10-01\" at \"18:24\""},{"visible":true,"include":true,"step":"300","x":-4348.952380952381,"y":-2907.4285714285716,"z":2834.6666666666665,"a95":"2.2","info":"\"14-10-01\" at \"21:31\""},{"visible":true,"include":true,"step":"320","x":-3871.1428571428573,"y":-2709.2380952380954,"z":2594.9523809523807,"a95":"2.2","info":"\"14-10-02\" at \"00:40\""},{"visible":true,"include":true,"step":"340","x":-3519.5238095238096,"y":-2749.3333333333335,"z":2610,"a95":"2.1","info":"\"14-10-02\" at \"18:10\""},{"visible":true,"include":true,"step":"370","x":-3368.9523809523807,"y":-2323.4285714285716,"z":2142.095238095238,"a95":"2.2","info":"\"14-10-02\" at \"21:06\""},{"visible":true,"include":true,"step":"400","x":-2980.6666666666665,"y":-2453.904761904762,"z":2612.4761904761904,"a95":"2.1","info":"\"14-10-03\" at \"00:24\""},{"visible":true,"include":false,"step":"420","x":-3163.4285714285716,"y":-2222.190476190476,"z":1948.7619047619048,"a95":"2","info":"\"14-10-03\" at \"17:59\""},{"visible":true,"include":false,"step":"440","x":-2879.4285714285716,"y":-2350.4761904761904,"z":2258.3809523809523,"a95":"2.2","info":"\"14-10-03\" at \"21:18\""},{"visible":true,"include":false,"step":"460","x":-2736.095238095238,"y":-2832.7619047619046,"z":1948,"a95":"2","info":"\"14-10-04\" at \"00:39\""},{"visible":true,"include":false,"step":"480","x":-2497.904761904762,"y":-1870.4761904761904,"z":2192.5714285714284,"a95":"2.3","info":"\"14-10-04\" at \"11:26\""},{"visible":true,"include":false,"step":"510","x":-1677.4285714285713,"y":-2480.8571428571427,"z":1999.8095238095239,"a95":"2","info":"\"14-10-04\" at \"14:19\""},{"visible":false,"include":false,"step":"540","x":-1868.857142857143,"y":-372,"z":1588.7619047619048,"a95":"2.7","info":"\"14-10-04\" at \"17:46\""},{"visible":false,"include":false,"step":"570","x":-1468.5714285714287,"y":-961.4285714285714,"z":237.71428571428572,"a95":"2.8","info":"\"14-10-05\" at \"11:48\""},{"visible":false,"include":false,"step":"600","x":91.52380952380952,"y":98.28571428571429,"z":981.4285714285714,"a95":"4.7","info":"\"14-10-05\" at \"15:04\""},{"visible":false,"include":false,"step":"630","x":-14.666666666666666,"y":546.3809523809524,"z":220.0952380952381,"a95":"4.4","info":"\"14-10-05\" at \"18:38\""},{"visible":false,"include":false,"step":"660","x":117.61904761904762,"y":334.3809523809524,"z":65.33333333333333,"a95":"8","info":"\"14-10-11\" at \"09:13\""},{"visible":false,"include":false,"step":"680","x":113.23809523809524,"y":274.3809523809524,"z":-739.8095238095239,"a95":"4.1","info":"\"14-10-11\" at \"12:14\""}],"demagType":"Unknown","patch":1.1,"format":"Unknown","strat":null},{"version":"v1.1.0","exported":"2017-05-22T14:15:12.721Z","info":"","GEO":[{"dec":12.865588026528314,"inc":56.02560755512418,"MAD":3.0248286852709025,"cm":[-2.165463575649829e-13,8.499444534425579e-13,0],"intensity":18455.91696897049,"type":"dir","forced":true,"remark":"","origin":false,"nSteps":9,"minStep":"180","maxStep":"400","steps":["180","210","240","270","300","320","340","370","400"],"group":"None"}],"TECT":[{"dec":7.339995610811172,"inc":22.58953589758139,"MAD":3.0248286852709967,"cm":[-3.4647417210397264e-13,1.824403062484981e-12,1.7323708605198632e-13],"intensity":18455.91696897049,"type":"dir","forced":true,"remark":"","origin":false,"nSteps":9,"minStep":"180","maxStep":"400","steps":["180","210","240","270","300","320","340","370","400"],"group":"None"}],"interpreted":true,"name":"SS22.7A","coreAzi":137,"coreDip":46,"bedStrike":269,"bedDip":34,"data":[{"visible":true,"include":false,"step":"20","x":-32535.04761904762,"y":-13737.809523809523,"z":17413.238095238095,"a95":"2","info":"\"14-10-13\" at \"17:52\""},{"visible":true,"include":false,"step":"100","x":-20369.904761904763,"y":-8680.952380952382,"z":8657.42857142857,"a95":"1.9","info":"\"14-10-13\" at \"20:46\""},{"visible":true,"include":false,"step":"150","x":-12886.47619047619,"y":-6249.523809523809,"z":5981.619047619048,"a95":"2.2","info":"\"14-10-14\" at \"00:12\""},{"visible":true,"include":true,"step":"180","x":-10977.904761904761,"y":-5752.952380952381,"z":5102,"a95":"2","info":"\"14-10-14\" at \"17:27\""},{"visible":true,"include":true,"step":"210","x":-9772.47619047619,"y":-5623.619047619048,"z":4980.190476190476,"a95":"2","info":"\"14-10-14\" at \"20:35\""},{"visible":true,"include":true,"step":"240","x":-8509.047619047618,"y":-4718,"z":4082.190476190476,"a95":"2.1","info":"\"14-10-14\" at \"23:51\""},{"visible":true,"include":true,"step":"270","x":-6396.0952380952385,"y":-3445.2380952380954,"z":3244.9523809523807,"a95":"2","info":"\"14-10-15\" at \"17:36\""},{"visible":true,"include":true,"step":"300","x":-5754.761904761905,"y":-3658.6666666666665,"z":2633.2380952380954,"a95":"1.9","info":"\"14-10-15\" at \"20:50\""},{"visible":true,"include":true,"step":"320","x":-5449.428571428572,"y":-3252.4761904761904,"z":2731.3333333333335,"a95":"2.1","info":"\"14-10-15\" at \"23:59\""},{"visible":true,"include":true,"step":"340","x":-4935.142857142857,"y":-3414.190476190476,"z":1888.7619047619048,"a95":"1.9","info":"\"14-10-16\" at \"18:07\""},{"visible":true,"include":true,"step":"370","x":-4454.285714285715,"y":-2901.1428571428573,"z":1950.2857142857142,"a95":"2","info":"\"14-10-16\" at \"21:20\""},{"visible":true,"include":true,"step":"400","x":-3964.095238095238,"y":-2944,"z":1357.142857142857,"a95":"1.9","info":"\"14-10-17\" at \"00:33\""},{"visible":true,"include":false,"step":"420","x":-3920.190476190476,"y":-2800.5714285714284,"z":2033.047619047619,"a95":"2.1","info":"\"14-10-17\" at \"16:04\""},{"visible":true,"include":false,"step":"440","x":-3323.0476190476193,"y":-2372.3809523809523,"z":1360.095238095238,"a95":"2","info":"\"14-10-17\" at \"19:14\""},{"visible":true,"include":false,"step":"470","x":-3222.5714285714284,"y":-2645.2380952380954,"z":1963.3333333333333,"a95":"2.1","info":"\"14-10-17\" at \"22:28\""},{"visible":true,"include":false,"step":"490","x":-3103.2380952380954,"y":-1760.4761904761904,"z":1429.8095238095239,"a95":"2.1","info":"\"14-10-18\" at \"10:53\""},{"visible":false,"include":false,"step":"520","x":-1328.095238095238,"y":-2183.5238095238096,"z":2123.3333333333335,"a95":"2.5","info":"\"14-10-18\" at \"13:40\""},{"visible":false,"include":false,"step":"550","x":-3233.809523809524,"y":35.333333333333336,"z":-393.04761904761904,"a95":"2.5","info":"\"14-10-18\" at \"16:50\""},{"visible":false,"include":false,"step":"580","x":829.8095238095239,"y":-1945.904761904762,"z":1025.3333333333333,"a95":"2.5","info":"\"14-10-19\" at \"10:35\""},{"visible":false,"include":false,"step":"610","x":-1195.5238095238096,"y":1422.857142857143,"z":-86.0952380952381,"a95":"2.8","info":"\"14-10-19\" at \"13:47\""}],"demagType":"Unknown","patch":1.1,"format":"Unknown","strat":null},{"version":"v1.1.0","exported":"2017-05-22T14:15:12.721Z","info":"","GEO":[{"dec":23.822396501881713,"inc":49.02857275071262,"MAD":2.159767426528846,"cm":[0,2.598556290779795e-13,0],"intensity":19560.31627366039,"type":"dir","forced":true,"remark":"","origin":false,"nSteps":7,"minStep":"240","maxStep":"420","steps":["240","270","300","330","360","390","420"],"group":"None"}],"TECT":[{"dec":15.732943299894089,"inc":17.048105815710816,"MAD":2.159767426528749,"cm":[-6.929483442079453e-13,1.7323708605198632e-12,2.382009933214812e-13],"intensity":19560.31627366039,"type":"dir","forced":true,"remark":"","origin":false,"nSteps":7,"minStep":"240","maxStep":"420","steps":["240","270","300","330","360","390","420"],"group":"None"}],"interpreted":true,"name":"SS22.7B","coreAzi":137,"coreDip":46,"bedStrike":269,"bedDip":34,"data":[{"visible":true,"include":false,"step":"20","x":-32506.666666666668,"y":-18646,"z":10439.047619047618,"a95":"1.8","info":"\"14-10-20\" at \"17:25\""},{"visible":true,"include":false,"step":"100","x":-22805.904761904763,"y":-13784.47619047619,"z":9248.47619047619,"a95":"1.8","info":"\"14-10-20\" at \"20:40\""},{"visible":true,"include":false,"step":"150","x":-13698.095238095239,"y":-9546.285714285714,"z":6222.380952380952,"a95":"1.8","info":"\"14-10-20\" at \"23:33\""},{"visible":true,"include":false,"step":"180","x":-11827.904761904761,"y":-8728.47619047619,"z":5575.809523809524,"a95":"1.8","info":"\"14-10-21\" at \"15:40\""},{"visible":true,"include":false,"step":"210","x":-10956.761904761905,"y":-8246.190476190477,"z":5542.761904761905,"a95":"1.8","info":"\"14-10-21\" at \"18:33\""},{"visible":true,"include":true,"step":"240","x":-9405.238095238095,"y":-7747.523809523809,"z":4563.428571428572,"a95":"1.7","info":"\"14-10-21\" at \"21:45\""},{"visible":true,"include":true,"step":"270","x":-8368.857142857143,"y":-6805.523809523809,"z":4642.857142857143,"a95":"1.8","info":"\"14-10-22\" at \"00:41\""},{"visible":true,"include":true,"step":"300","x":-7457.428571428572,"y":-6161.333333333333,"z":3638.4761904761904,"a95":"1.8","info":"\"14-10-22\" at \"16:58\""},{"visible":true,"include":true,"step":"330","x":-6089.619047619048,"y":-5748.476190476191,"z":3340.6666666666665,"a95":"1.9","info":"\"14-10-22\" at \"20:07\""},{"visible":true,"include":true,"step":"360","x":-5540.285714285715,"y":-4769.142857142857,"z":2551.4285714285716,"a95":"1.9","info":"\"14-10-22\" at \"23:12\""},{"visible":true,"include":true,"step":"390","x":-5419.333333333333,"y":-4566.571428571428,"z":3147.4285714285716,"a95":"2","info":"\"14-10-23\" at \"17:26\""},{"visible":true,"include":true,"step":"420","x":-4524.285714285715,"y":-4272.761904761905,"z":2076.3809523809523,"a95":"1.9","info":"\"14-10-23\" at \"20:26\""},{"visible":true,"include":false,"step":"450","x":-3940.8571428571427,"y":-3972.4761904761904,"z":2613.2380952380954,"a95":"2","info":"\"14-10-24\" at \"14:58\""},{"visible":true,"include":false,"step":"480","x":-4013.5238095238096,"y":-3434.7619047619046,"z":1183.6190476190477,"a95":"1.8","info":"\"14-10-24\" at \"18:00\""},{"visible":true,"include":false,"step":"510","x":-2943.2380952380954,"y":-3368.4761904761904,"z":2181.6190476190477,"a95":"2.2","info":"\"14-10-24\" at \"20:52\""},{"visible":false,"include":false,"step":"540","x":-2490.3809523809523,"y":-3441.904761904762,"z":1126.095238095238,"a95":"2","info":"\"14-10-24\" at \"23:48\""},{"visible":false,"include":false,"step":"570","x":17.714285714285715,"y":-1945.142857142857,"z":511.8095238095238,"a95":"3.5","info":"\"14-10-25\" at \"02:36\""},{"visible":false,"include":false,"step":"600","x":-1866.095238095238,"y":-2311.2380952380954,"z":736.5714285714286,"a95":"2.7","info":"\"14-10-25\" at \"05:12\""},{"visible":false,"include":false,"step":"630","x":122.47619047619048,"y":-947.5238095238095,"z":-296.6666666666667,"a95":"4.1","info":"\"14-10-25\" at \"23:33\""},{"visible":false,"include":false,"step":"660","x":-1275.047619047619,"y":-1338.857142857143,"z":80.66666666666667,"a95":"2.6","info":"\"14-10-26\" at \"02:17\""},{"visible":false,"include":false,"step":"680","x":-963.5238095238095,"y":888.952380952381,"z":-260.4761904761905,"a95":"3.1","info":"\"14-10-26\" at \"03:30\""}],"demagType":"Unknown","patch":1.1,"format":"Unknown","strat":null},{"version":"v1.1.0","exported":"2017-05-22T14:15:12.721Z","info":"6","GEO":[{"dec":6.9039358897848615,"inc":60.62481296668572,"MAD":4.681866634487558,"cm":[1467.956574554568,-206.62633311294798,2855.145605528715],"intensity":8077.154978637853,"type":"dir","forced":false,"remark":"","origin":false,"nSteps":8,"minStep":"8.0","maxStep":"40.0","steps":["8.0","12.0","16.0","20.0","25.0","30.0","35.0","40.0"],"group":"None"}],"TECT":[{"dec":3.333720159417396,"inc":26.79194876370421,"MAD":4.6818666344875375,"cm":[2812.785172129375,-230.10040360093907,1544.2605851330354],"intensity":8077.154978637854,"type":"dir","forced":false,"remark":"","origin":false,"nSteps":8,"minStep":"8.0","maxStep":"40.0","steps":["8.0","12.0","16.0","20.0","25.0","30.0","35.0","40.0"],"group":"None"}],"interpreted":true,"name":"SS22.8A","coreAzi":72,"coreDip":54,"bedStrike":269,"bedDip":34,"data":[{"visible":true,"include":false,"step":"0.0","x":-5577.9047619047615,"y":-7332.190476190476,"z":12217.142857142857,"a95":"0.99","info":"11/10/2014 at 01:32:58"},{"visible":true,"include":false,"step":"4.0","x":-4879.428571428572,"y":-5467.142857142857,"z":9996.190476190477,"a95":"0.99","info":"11/10/2014 at 01:32:58"},{"visible":true,"include":true,"step":"8.0","x":-3427.4285714285716,"y":-3708.3809523809523,"z":7120.0952380952385,"a95":"0.99","info":"11/10/2014 at 01:32:58"},{"visible":true,"include":true,"step":"12.0","x":-2374.190476190476,"y":-2803.2380952380954,"z":4558.666666666667,"a95":"0.99","info":"11/10/2014 at 01:32:58"},{"visible":true,"include":true,"step":"16.0","x":-1802.952380952381,"y":-1954,"z":3181.0476190476193,"a95":"0.99","info":"11/10/2014 at 01:32:58"},{"visible":true,"include":true,"step":"20.0","x":-1083.6190476190477,"y":-1490.952380952381,"z":2044.4761904761904,"a95":"0.99","info":"11/10/2014 at 01:32:58"},{"visible":true,"include":true,"step":"25.0","x":-1038.952380952381,"y":-974,"z":1344.2857142857142,"a95":"0.99","info":"11/10/2014 at 01:32:58"},{"visible":true,"include":true,"step":"30.0","x":-834.7714285714286,"y":-316.1904761904762,"z":673.7238095238096,"a95":"0.99","info":"11/10/2014 at 01:32:58"},{"visible":true,"include":true,"step":"35.0","x":-384.1333333333333,"y":-290.7142857142857,"z":405.7714285714286,"a95":"0.99","info":"11/10/2014 at 01:32:58"},{"visible":true,"include":true,"step":"40.0","x":-815.5999999999999,"y":-142.2095238095238,"z":359.8285714285714,"a95":"0.99","info":"11/10/2014 at 01:32:58"},{"visible":true,"include":false,"step":"45.0","x":-612.5333333333334,"y":53.63619047619047,"z":-323.7142857142857,"a95":"0.99","info":"11/10/2014 at 01:32:58"},{"visible":true,"include":false,"step":"50.0","x":-524.7333333333333,"y":-571.047619047619,"z":-200.30476190476188,"a95":"0.99","info":"11/10/2014 at 01:32:58"},{"visible":false,"include":false,"step":"60.0","x":-152.64761904761903,"y":-285.8666666666667,"z":-698.8285714285714,"a95":"0.99","info":"11/10/2014 at 01:32:58"},{"visible":false,"include":false,"step":"70.0","x":-79.9095238095238,"y":34.565714285714286,"z":-928.8285714285715,"a95":"0.99","info":"11/10/2014 at 01:32:58"},{"visible":false,"include":false,"step":"80.0","x":211.58095238095237,"y":-631.1428571428571,"z":-852.9714285714286,"a95":"0.99","info":"11/10/2014 at 01:32:58"},{"visible":false,"include":false,"step":"90.0","x":-505.5142857142857,"y":-65.4,"z":-814.0857142857143,"a95":"0.99","info":"11/10/2014 at 01:32:58"},{"visible":false,"include":false,"step":"100.0","x":-261.76190476190476,"y":-214.06666666666666,"z":-695.7523809523809,"a95":"0.99","info":"11/10/2014 at 01:32:58"}],"demagType":"Unknown","patch":1.1,"format":"Unknown","strat":null},{"version":"v1.1.0","exported":"2017-05-22T14:15:12.721Z","info":"","GEO":[{"dec":323.51652177550164,"inc":52.36944020841208,"MAD":3.0205264430317165,"cm":[-2.5579538487363607e-13,-7.815970093361102e-14,0],"intensity":24216.28565754086,"type":"dir","forced":true,"remark":"","origin":false,"nSteps":10,"minStep":"240","maxStep":"510","steps":["240","270","300","330","360","390","420","450","480","510"],"group":"None","version":"v1.1.0"}],"TECT":[{"dec":336.48587152635355,"inc":22.243979316013526,"MAD":3.0205264430317684,"cm":[5.115907697472721e-13,6.608047442568932e-13,-9.947598300641403e-14],"intensity":24216.28565754086,"type":"dir","forced":true,"remark":"","origin":false,"nSteps":10,"minStep":"240","maxStep":"510","steps":["240","270","300","330","360","390","420","450","480","510"],"group":"None","version":"v1.1.0"}],"interpreted":true,"name":"SS22.9B","coreAzi":112,"coreDip":47,"bedStrike":269,"bedDip":34,"data":[{"visible":true,"include":false,"step":"20","x":-52937.142857142855,"y":-20036.190476190477,"z":11162,"a95":"1.9","info":"\"14-10-20\" at \"17:27\""},{"visible":true,"include":false,"step":"100","x":-37901.52380952381,"y":-13030,"z":9566.761904761905,"a95":"1.9","info":"\"14-10-20\" at \"20:42\""},{"visible":true,"include":false,"step":"150","x":-24999.14285714286,"y":-8492.952380952382,"z":5234.666666666667,"a95":"2","info":"\"14-10-20\" at \"23:35\""},{"visible":true,"include":false,"step":"180","x":-21951.619047619046,"y":-7236.571428571428,"z":4792.285714285715,"a95":"2","info":"\"14-10-21\" at \"15:42\""},{"visible":true,"include":false,"step":"210","x":-20353.809523809523,"y":-6194.952380952381,"z":4479.619047619048,"a95":"2","info":"\"14-10-21\" at \"18:35\""},{"visible":true,"include":true,"step":"240","x":-17809.04761904762,"y":-5723.9047619047615,"z":3798.6666666666665,"a95":"2.1","info":"\"14-10-21\" at \"21:47\""},{"visible":true,"include":true,"step":"270","x":-15597.619047619048,"y":-5527.047619047619,"z":3702.7619047619046,"a95":"2.1","info":"\"14-10-22\" at \"00:43\""},{"visible":true,"include":true,"step":"300","x":-13197.333333333334,"y":-4634.476190476191,"z":2872.3809523809523,"a95":"2.1","info":"\"14-10-22\" at \"17:00\""},{"visible":true,"include":true,"step":"330","x":-11078.666666666666,"y":-3527.809523809524,"z":2871.1428571428573,"a95":"2","info":"\"14-10-22\" at \"20:09\""},{"visible":true,"include":true,"step":"360","x":-9021.333333333334,"y":-2903.4285714285716,"z":2164.8571428571427,"a95":"2.2","info":"\"14-10-22\" at \"23:14\""},{"visible":true,"include":true,"step":"390","x":-8360.761904761905,"y":-2794.095238095238,"z":2664.9523809523807,"a95":"2.1","info":"\"14-10-23\" at \"17:28\""},{"visible":true,"include":true,"step":"420","x":-7689.333333333333,"y":-2892.9523809523807,"z":1875.2380952380952,"a95":"2.1","info":"\"14-10-23\" at \"20:27\""},{"visible":true,"include":true,"step":"450","x":-6857.047619047619,"y":-2443.1428571428573,"z":2547.0476190476193,"a95":"2.2","info":"\"14-10-24\" at \"15:00\""},{"visible":true,"include":true,"step":"480","x":-5936.857142857143,"y":-2678.3809523809523,"z":1293.3333333333333,"a95":"2.2","info":"\"14-10-24\" at \"18:02\""},{"visible":true,"include":true,"step":"510","x":-4239.047619047619,"y":-2641.1428571428573,"z":1709.142857142857,"a95":"2.5","info":"\"14-10-24\" at \"20:54\""},{"visible":true,"include":false,"step":"540","x":-2875.5238095238096,"y":-2449.0476190476193,"z":1932.095238095238,"a95":"2.5","info":"\"14-10-24\" at \"23:49\""},{"visible":true,"include":false,"step":"570","x":-975.4285714285714,"y":-1111.5238095238096,"z":664.1904761904761,"a95":"3.8","info":"\"14-10-25\" at \"02:38\""},{"visible":false,"include":false,"step":"600","x":-1681.4285714285713,"y":-2006,"z":1746.857142857143,"a95":"2.3","info":"\"14-10-25\" at \"05:13\""},{"visible":false,"include":false,"step":"630","x":55.142857142857146,"y":800.5714285714286,"z":856.8571428571429,"a95":"3.2","info":"\"14-10-25\" at \"23:34\""},{"visible":false,"include":false,"step":"660","x":-1300.857142857143,"y":97.42857142857143,"z":836.0952380952381,"a95":"2.7","info":"\"14-10-26\" at \"02:19\""},{"visible":false,"include":false,"step":"680","x":365.04761904761904,"y":556.2857142857143,"z":139.71428571428572,"a95":"3.3","info":"\"14-10-26\" at \"03:33\""}],"demagType":"Unknown","patch":1.1,"format":"Unknown","strat":null},{"version":"v1.1.0","exported":"2017-05-22T14:15:12.721Z","info":"","GEO":[{"dec":29.72139451408026,"inc":54.36193594755234,"MAD":1.829286478543578,"cm":[-8.661854302599316e-14,1.0827317878249145e-13,0],"intensity":21812.492675657762,"type":"dir","forced":true,"remark":"","origin":false,"nSteps":7,"minStep":"240","maxStep":"420","steps":["240","270","300","330","360","390","420"],"group":"None"}],"TECT":[{"dec":17.89344362765189,"inc":23.183331884545055,"MAD":1.829286478543436,"cm":[8.661854302599316e-14,-1.0827317878249145e-13,4.330927151299658e-14],"intensity":21812.492675657762,"type":"dir","forced":true,"remark":"","origin":false,"nSteps":7,"minStep":"240","maxStep":"420","steps":["240","270","300","330","360","390","420"],"group":"None"}],"interpreted":true,"name":"SS22.10A","coreAzi":96,"coreDip":47,"bedStrike":269,"bedDip":34,"data":[{"visible":true,"include":false,"step":"20","x":-20733.428571428572,"y":-24995.809523809523,"z":23558.095238095237,"a95":"2","info":"\"14-10-20\" at \"17:29\""},{"visible":true,"include":false,"step":"100","x":-13236.761904761905,"y":-16650.380952380954,"z":19233.809523809523,"a95":"2.1","info":"\"14-10-20\" at \"20:44\""},{"visible":true,"include":false,"step":"150","x":-8401.238095238095,"y":-10936.47619047619,"z":13620.761904761905,"a95":"2.1","info":"\"14-10-20\" at \"23:37\""},{"visible":true,"include":false,"step":"180","x":-7020.380952380952,"y":-9925.333333333334,"z":12403.714285714286,"a95":"1.9","info":"\"14-10-21\" at \"15:43\""},{"visible":true,"include":false,"step":"210","x":-6570.285714285715,"y":-9018.666666666666,"z":11814.47619047619,"a95":"2.2","info":"\"14-10-21\" at \"18:36\""},{"visible":true,"include":true,"step":"240","x":-5744.666666666667,"y":-7634.476190476191,"z":10316.47619047619,"a95":"2.1","info":"\"14-10-21\" at \"21:48\""},{"visible":true,"include":true,"step":"270","x":-5227.142857142857,"y":-7114.476190476191,"z":9748.285714285714,"a95":"2.1","info":"\"14-10-22\" at \"00:45\""},{"visible":true,"include":true,"step":"300","x":-4280.761904761905,"y":-6214.857142857143,"z":8546.285714285714,"a95":"2.2","info":"\"14-10-22\" at \"17:02\""},{"visible":true,"include":true,"step":"330","x":-3661.714285714286,"y":-5212.952380952381,"z":8070.190476190476,"a95":"2.2","info":"\"14-10-22\" at \"20:11\""},{"visible":true,"include":true,"step":"360","x":-3179.4285714285716,"y":-4558,"z":6705.9047619047615,"a95":"2.6","info":"\"14-10-22\" at \"23:16\""},{"visible":true,"include":true,"step":"390","x":-3326.4761904761904,"y":-4580.476190476191,"z":7111.619047619048,"a95":"2.5","info":"\"14-10-23\" at \"17:29\""},{"visible":true,"include":true,"step":"420","x":-2809.0476190476193,"y":-4276.190476190476,"z":5831.428571428572,"a95":"2.3","info":"\"14-10-23\" at \"20:29\""},{"visible":true,"include":false,"step":"450","x":-2704.7619047619046,"y":-4199.714285714285,"z":5828.190476190476,"a95":"2.3","info":"\"14-10-24\" at \"15:02\""},{"visible":true,"include":false,"step":"480","x":-1976.7619047619048,"y":-4024.285714285714,"z":4010.7619047619046,"a95":"2.2","info":"\"14-10-24\" at \"18:04\""},{"visible":true,"include":false,"step":"510","x":-1640.857142857143,"y":-3802.7619047619046,"z":5031.142857142857,"a95":"2.4","info":"\"14-10-24\" at \"20:56\""},{"visible":true,"include":false,"step":"540","x":-628,"y":-2707.714285714286,"z":3303.0476190476193,"a95":"2.3","info":"\"14-10-24\" at \"23:51\""},{"visible":false,"include":false,"step":"570","x":-746.5714285714286,"y":-2659.714285714286,"z":1593.8095238095239,"a95":"2.6","info":"\"14-10-25\" at \"02:39\""},{"visible":false,"include":false,"step":"600","x":-491.7142857142857,"y":-2622.7619047619046,"z":1560.3809523809523,"a95":"2.4","info":"\"14-10-25\" at \"05:15\""},{"visible":false,"include":false,"step":"630","x":1322.5714285714287,"y":-264.0952380952381,"z":232.47619047619048,"a95":"3.5","info":"\"14-10-25\" at \"23:36\""},{"visible":false,"include":false,"step":"660","x":-1263.4285714285713,"y":-483.3333333333333,"z":795.7142857142857,"a95":"3.1","info":"\"14-10-26\" at \"02:21\""},{"visible":false,"include":false,"step":"680","x":-900.0952380952381,"y":73.9047619047619,"z":87.71428571428571,"a95":"4.1","info":"\"14-10-26\" at \"03:35\""}],"demagType":"Unknown","patch":1.1,"format":"Unknown","strat":null},{"version":"v1.1.0","exported":"2017-05-22T14:15:12.721Z","info":"2","GEO":[{"dec":20.516606679703045,"inc":57.788244228272994,"MAD":1.741446497396464,"cm":[-2.165463575649829e-13,5.630205296689556e-13,0],"intensity":23718.572319785373,"type":"dir","forced":true,"remark":"","origin":false,"nSteps":6,"minStep":"15.0","maxStep":"40.0","steps":["15.0","20.0","25.0","30.0","35.0","40.0"],"group":"None"}],"TECT":[{"dec":11.467547982944836,"inc":25.095620765154962,"MAD":1.7414464973964712,"cm":[-4.330927151299658e-13,6.712937084514471e-13,8.661854302599316e-14],"intensity":23718.572319785373,"type":"dir","forced":true,"remark":"","origin":false,"nSteps":6,"minStep":"15.0","maxStep":"40.0","steps":["15.0","20.0","25.0","30.0","35.0","40.0"],"group":"None"}],"interpreted":true,"name":"SS22.10B","coreAzi":96,"coreDip":47,"bedStrike":269,"bedDip":34,"data":[{"visible":true,"include":false,"step":"0.0","x":-21577.14285714286,"y":-22505.714285714286,"z":26926.666666666668,"a95":"0.99","info":"22/09/2014 at 20:51:18"},{"visible":true,"include":false,"step":"5.0","x":-16934.285714285714,"y":-16909.52380952381,"z":22192.380952380954,"a95":"0.99","info":"22/09/2014 at 20:51:18"},{"visible":true,"include":false,"step":"10.0","x":-11066.666666666666,"y":-11357.142857142857,"z":15546.666666666666,"a95":"0.99","info":"22/09/2014 at 20:51:18"},{"visible":true,"include":true,"step":"15.0","x":-7911.809523809524,"y":-8336.952380952382,"z":11772.380952380952,"a95":"0.99","info":"22/09/2014 at 20:51:18"},{"visible":true,"include":true,"step":"20.0","x":-6140.761904761905,"y":-6585.238095238095,"z":8749.142857142857,"a95":"0.99","info":"22/09/2014 at 20:51:18"},{"visible":true,"include":true,"step":"25.0","x":-5088.857142857143,"y":-5050.380952380952,"z":7217.333333333333,"a95":"0.99","info":"22/09/2014 at 20:51:18"},{"visible":true,"include":true,"step":"30.0","x":-4263.047619047619,"y":-4350.761904761905,"z":6257.333333333333,"a95":"0.99","info":"22/09/2014 at 20:51:18"},{"visible":true,"include":true,"step":"35.0","x":-2978.285714285714,"y":-4030.5714285714284,"z":5106.571428571428,"a95":"0.99","info":"22/09/2014 at 20:51:18"},{"visible":true,"include":true,"step":"40.0","x":-3245.714285714286,"y":-4026.9523809523807,"z":5115.9047619047615,"a95":"0.99","info":"22/09/2014 at 20:51:18"},{"visible":true,"include":false,"step":"45.0","x":-3567.6190476190477,"y":-3351.5238095238096,"z":4460.285714285715,"a95":"0.99","info":"22/09/2014 at 20:51:18"},{"visible":true,"include":false,"step":"50.0","x":-3009.0476190476193,"y":-3063.5238095238096,"z":3790.9523809523807,"a95":"0.99","info":"22/09/2014 at 20:51:18"},{"visible":true,"include":false,"step":"60.0","x":-2831.904761904762,"y":-2690.3809523809523,"z":3052.8571428571427,"a95":"0.99","info":"22/09/2014 at 20:51:18"},{"visible":true,"include":false,"step":"70.0","x":-2769.714285714286,"y":-2620.095238095238,"z":3249.3333333333335,"a95":"0.99","info":"22/09/2014 at 20:51:18"},{"visible":false,"include":false,"step":"80.0","x":110.5047619047619,"y":-2860,"z":2735.809523809524,"a95":"0.99","info":"22/09/2014 at 20:51:18"},{"visible":false,"include":false,"step":"90.0","x":-511.6666666666667,"y":-3223.2380952380954,"z":3069.714285714286,"a95":"0.99","info":"22/09/2014 at 20:51:18"},{"visible":false,"include":false,"step":"100.0","x":-2339.4285714285716,"y":-3031.809523809524,"z":2813.1428571428573,"a95":"0.99","info":"22/09/2014 at 20:51:18"}],"demagType":"Unknown","patch":1.1,"format":"Unknown","strat":null},{"version":"v1.1.0","exported":"2017-05-22T14:15:12.721Z","info":"","GEO":[{"dec":25.06783128665512,"inc":55.788694404159564,"MAD":1.8284013115411908,"cm":[8.661854302599316e-14,-1.0827317878249145e-14,0],"intensity":23262.923047946788,"type":"dir","forced":true,"remark":"","origin":false,"nSteps":10,"minStep":"150","maxStep":"420","steps":["150","180","210","240","270","300","330","360","390","420"],"group":"None"}],"TECT":[{"dec":14.663401975539614,"inc":23.776348681743205,"MAD":1.8284013115412672,"cm":[-1.039422516311918e-12,3.1290948668140033e-12,-4.330927151299658e-14],"intensity":23262.923047946788,"type":"dir","forced":true,"remark":"","origin":false,"nSteps":10,"minStep":"150","maxStep":"420","steps":["150","180","210","240","270","300","330","360","390","420"],"group":"None"}],"interpreted":true,"name":"SS22.11A","coreAzi":91,"coreDip":39,"bedStrike":269,"bedDip":34,"data":[{"visible":true,"include":false,"step":"20","x":-21029.333333333332,"y":-21698.380952380954,"z":28584.095238095237,"a95":"2.1","info":"\"14-10-20\" at \"17:31\""},{"visible":true,"include":false,"step":"100","x":-13024.190476190477,"y":-13453.42857142857,"z":15699.619047619048,"a95":"2","info":"\"14-10-20\" at \"20:45\""},{"visible":true,"include":true,"step":"150","x":-8709.238095238095,"y":-8573.238095238095,"z":11307.42857142857,"a95":"2.1","info":"\"14-10-20\" at \"23:38\""},{"visible":true,"include":true,"step":"180","x":-7410.0952380952385,"y":-7719.142857142857,"z":10255.142857142857,"a95":"2","info":"\"14-10-21\" at \"15:45\""},{"visible":true,"include":true,"step":"210","x":-6771.809523809524,"y":-7196.761904761905,"z":9758.857142857143,"a95":"2.1","info":"\"14-10-21\" at \"18:38\""},{"visible":true,"include":true,"step":"240","x":-5909.333333333333,"y":-6097.428571428572,"z":8142.952380952381,"a95":"2","info":"\"14-10-21\" at \"21:50\""},{"visible":true,"include":true,"step":"270","x":-5394.285714285715,"y":-5596.190476190476,"z":7489.9047619047615,"a95":"2.1","info":"\"14-10-22\" at \"00:47\""},{"visible":true,"include":true,"step":"300","x":-4694.0952380952385,"y":-4895.428571428572,"z":6456,"a95":"2.1","info":"\"14-10-22\" at \"17:04\""},{"visible":true,"include":true,"step":"330","x":-3749.6190476190477,"y":-4237.619047619048,"z":6238.380952380952,"a95":"2.1","info":"\"14-10-22\" at \"20:13\""},{"visible":true,"include":true,"step":"360","x":-3756.7619047619046,"y":-3442,"z":5162.0952380952385,"a95":"2.2","info":"\"14-10-22\" at \"23:18\""},{"visible":true,"include":true,"step":"390","x":-3278.3809523809523,"y":-3528.190476190476,"z":5608.666666666667,"a95":"2.4","info":"\"14-10-23\" at \"17:31\""},{"visible":true,"include":true,"step":"420","x":-3199.0476190476193,"y":-3294.190476190476,"z":4771.142857142857,"a95":"2.3","info":"\"14-10-23\" at \"20:31\""},{"visible":true,"include":false,"step":"450","x":-2737.714285714286,"y":-2964.190476190476,"z":4857.714285714285,"a95":"2.3","info":"\"14-10-24\" at \"15:04\""},{"visible":true,"include":false,"step":"480","x":-3889.3333333333335,"y":-2835.2380952380954,"z":4073.809523809524,"a95":"2.2","info":"\"14-10-24\" at \"18:05\""},{"visible":true,"include":false,"step":"510","x":-1418.857142857143,"y":-2468.6666666666665,"z":3412.3809523809523,"a95":"2.5","info":"\"14-10-24\" at \"20:58\""},{"visible":true,"include":false,"step":"540","x":-1432,"y":-2130,"z":2930.5714285714284,"a95":"2.5","info":"\"14-10-24\" at \"23:53\""},{"visible":false,"include":false,"step":"570","x":-96.95238095238095,"y":-1443.8095238095239,"z":2043.047619047619,"a95":"3","info":"\"14-10-25\" at \"02:41\""},{"visible":false,"include":false,"step":"600","x":263.3333333333333,"y":1213.5238095238096,"z":1769.904761904762,"a95":"2.8","info":"\"14-10-25\" at \"05:17\""},{"visible":false,"include":false,"step":"630","x":-1939.6190476190477,"y":-1014.1904761904761,"z":67.9047619047619,"a95":"2.6","info":"\"14-10-25\" at \"23:38\""},{"visible":false,"include":false,"step":"660","x":-1310.095238095238,"y":206.47619047619048,"z":609.047619047619,"a95":"3","info":"\"14-10-26\" at \"02:22\""},{"visible":false,"include":false,"step":"680","x":-369.6190476190476,"y":-1190.1904761904761,"z":360.76190476190476,"a95":"2.5","info":"\"14-10-26\" at \"03:38\""}],"demagType":"Unknown","patch":1.1,"format":"Unknown","strat":null},{"version":"v1.1.0","exported":"2017-05-22T14:15:12.721Z","info":"","GEO":[{"dec":37.272170068643106,"inc":48.61159608656554,"MAD":2.4455146476801275,"cm":[-1.5158245029548803e-13,3.248195363474744e-13,0],"intensity":10843.765906664932,"type":"dir","forced":true,"remark":"","origin":false,"nSteps":7,"minStep":"270","maxStep":"420","steps":["270","300","320","340","370","400","420"],"group":"None"}],"TECT":[{"dec":24.728144634963712,"inc":19.37354355924234,"MAD":2.445514647680094,"cm":[-3.897834436169692e-13,9.311493375294265e-13,-3.2481953634747435e-14],"intensity":10843.765906664932,"type":"dir","forced":true,"remark":"","origin":false,"nSteps":7,"minStep":"270","maxStep":"420","steps":["270","300","320","340","370","400","420"],"group":"None"}],"interpreted":true,"name":"SS22.12A","coreAzi":89,"coreDip":32,"bedStrike":269,"bedDip":34,"data":[{"visible":false,"include":false,"step":"20","x":-18709.238095238095,"y":-20887.333333333332,"z":16629.238095238095,"a95":"2.1","info":"\"14-09-29\" at \"17:32\""},{"visible":true,"include":false,"step":"100","x":-7472.476190476191,"y":-9462.190476190477,"z":10199.047619047618,"a95":"2.3","info":"\"14-09-29\" at \"20:20\""},{"visible":true,"include":false,"step":"150","x":-5347.142857142857,"y":-7096.857142857143,"z":8153.523809523809,"a95":"2.3","info":"\"14-09-29\" at \"23:21\""},{"visible":true,"include":false,"step":"180","x":-4540,"y":-5912.761904761905,"z":7891.619047619048,"a95":"2.4","info":"\"14-09-30\" at \"17:53\""},{"visible":true,"include":false,"step":"210","x":-4016,"y":-5165.238095238095,"z":6436,"a95":"2.4","info":"\"14-09-30\" at \"20:57\""},{"visible":true,"include":false,"step":"240","x":-3579.5238095238096,"y":-4132.571428571428,"z":5836.0952380952385,"a95":"2.4","info":"\"14-10-01\" at \"00:09\""},{"visible":true,"include":true,"step":"270","x":-2851.3333333333335,"y":-3273.904761904762,"z":4823.619047619048,"a95":"2.4","info":"\"14-10-01\" at \"18:25\""},{"visible":true,"include":true,"step":"300","x":-2573.5238095238096,"y":-2867.3333333333335,"z":4539.9047619047615,"a95":"2.5","info":"\"14-10-01\" at \"21:33\""},{"visible":true,"include":true,"step":"320","x":-2072,"y":-2701.1428571428573,"z":3635.0476190476193,"a95":"2.3","info":"\"14-10-02\" at \"00:42\""},{"visible":true,"include":true,"step":"340","x":-1849.8095238095239,"y":-2424.5714285714284,"z":3644.5714285714284,"a95":"2.3","info":"\"14-10-02\" at \"18:12\""},{"visible":true,"include":true,"step":"370","x":-1928.2857142857142,"y":-2350.3809523809523,"z":3220.095238095238,"a95":"2.4","info":"\"14-10-02\" at \"21:09\""},{"visible":true,"include":true,"step":"400","x":-1902.095238095238,"y":-2277.809523809524,"z":3285.1428571428573,"a95":"2.5","info":"\"14-10-03\" at \"00:26\""},{"visible":true,"include":true,"step":"420","x":-1570.3809523809523,"y":-2577.0476190476193,"z":3164,"a95":"2.4","info":"\"14-10-03\" at \"18:01\""},{"visible":true,"include":false,"step":"440","x":-1746.095238095238,"y":-1901.047619047619,"z":2987.0476190476193,"a95":"2.5","info":"\"14-10-03\" at \"21:20\""},{"visible":true,"include":false,"step":"460","x":-1351.4285714285713,"y":-1820.5714285714287,"z":2552,"a95":"2.5","info":"\"14-10-04\" at \"00:41\""},{"visible":true,"include":false,"step":"480","x":-2608.6666666666665,"y":-1439.047619047619,"z":2541.0476190476193,"a95":"2.6","info":"\"14-10-04\" at \"11:28\""},{"visible":false,"include":false,"step":"510","x":-1784.7619047619048,"y":964.5714285714286,"z":1634.2857142857142,"a95":"3.8","info":"\"14-10-04\" at \"14:21\""},{"visible":false,"include":false,"step":"540","x":-531.5238095238095,"y":-270,"z":1952.7619047619048,"a95":"3.8","info":"\"14-10-04\" at \"17:48\""},{"visible":false,"include":false,"step":"570","x":-585.047619047619,"y":118.95238095238095,"z":700.4761904761905,"a95":"8.400001","info":"\"14-10-05\" at \"11:50\""},{"visible":false,"include":false,"step":"600","x":-271.5238095238095,"y":135.23809523809524,"z":1553.5238095238096,"a95":"4.5","info":"\"14-10-05\" at \"15:06\""},{"visible":false,"include":false,"step":"630","x":-475.8095238095238,"y":854.2857142857143,"z":37.523809523809526,"a95":"7.4","info":"\"14-10-05\" at \"18:40\""},{"visible":false,"include":false,"step":"660","x":-173.52380952380952,"y":247.33333333333334,"z":-185.42857142857142,"a95":"19.1","info":"\"14-10-11\" at \"09:15\""},{"visible":false,"include":false,"step":"680","x":-737.5238095238095,"y":171.42857142857142,"z":-1248.4761904761904,"a95":"8.3","info":"\"14-10-11\" at \"12:16\""}],"demagType":"Unknown","patch":1.1,"format":"Unknown","strat":null},{"version":"v1.1.0","exported":"2017-05-22T14:15:12.721Z","info":"","GEO":[{"dec":14.507336300660882,"inc":40.69131036373447,"MAD":2.6501487273567856,"cm":[1.2992781453898974e-13,-2.165463575649829e-13,0],"intensity":15896.74512100439,"type":"dir","forced":true,"remark":"","origin":false,"nSteps":7,"minStep":"240","maxStep":"420","steps":["240","270","300","330","360","390","420"],"group":"None"}],"TECT":[{"dec":10.80086791181941,"inc":7.582593884548677,"MAD":2.650148727356746,"cm":[8.661854302599316e-14,3.0316490059097606e-13,-8.661854302599316e-14],"intensity":15896.74512100439,"type":"dir","forced":true,"remark":"","origin":false,"nSteps":7,"minStep":"240","maxStep":"420","steps":["240","270","300","330","360","390","420"],"group":"None"}],"interpreted":true,"name":"SS22.13A","coreAzi":84,"coreDip":40,"bedStrike":269,"bedDip":34,"data":[{"visible":true,"include":false,"step":"20","x":-15115.42857142857,"y":-26902.47619047619,"z":25994.47619047619,"a95":"2.2","info":"\"14-10-20\" at \"17:32\""},{"visible":true,"include":false,"step":"100","x":-9491.714285714286,"y":-17034.47619047619,"z":13338.47619047619,"a95":"2.1","info":"\"14-10-20\" at \"20:47\""},{"visible":true,"include":false,"step":"150","x":-5864.0952380952385,"y":-11964.380952380952,"z":9064.47619047619,"a95":"2.2","info":"\"14-10-20\" at \"23:40\""},{"visible":true,"include":false,"step":"180","x":-5168.761904761905,"y":-10148.285714285714,"z":8077.523809523809,"a95":"2.2","info":"\"14-10-21\" at \"15:47\""},{"visible":true,"include":false,"step":"210","x":-4261.9047619047615,"y":-9051.047619047618,"z":7437.809523809524,"a95":"2.2","info":"\"14-10-21\" at \"18:40\""},{"visible":true,"include":true,"step":"240","x":-3848.7619047619046,"y":-7518.190476190476,"z":6296.380952380952,"a95":"2.2","info":"\"14-10-21\" at \"21:52\""},{"visible":true,"include":true,"step":"270","x":-2979.2380952380954,"y":-6493.809523809524,"z":5552.476190476191,"a95":"2.3","info":"\"14-10-22\" at \"00:48\""},{"visible":true,"include":true,"step":"300","x":-2861.904761904762,"y":-5569.714285714285,"z":4851.523809523809,"a95":"2.5","info":"\"14-10-22\" at \"17:07\""},{"visible":true,"include":true,"step":"330","x":-1953.4285714285713,"y":-4772.571428571428,"z":4597.238095238095,"a95":"2.4","info":"\"14-10-22\" at \"20:15\""},{"visible":true,"include":true,"step":"360","x":-1657.142857142857,"y":-3995.3333333333335,"z":3839.4285714285716,"a95":"2.5","info":"\"14-10-22\" at \"23:19\""},{"visible":true,"include":true,"step":"390","x":-1800.2857142857142,"y":-4288.952380952381,"z":4019.4285714285716,"a95":"2.6","info":"\"14-10-23\" at \"17:33\""},{"visible":true,"include":true,"step":"420","x":-1517.3333333333333,"y":-4038.4761904761904,"z":3209.1428571428573,"a95":"2.4","info":"\"14-10-23\" at \"20:33\""},{"visible":true,"include":false,"step":"450","x":-1100.095238095238,"y":-3582,"z":3981.3333333333335,"a95":"2.4","info":"\"14-10-24\" at \"15:05\""},{"visible":true,"include":false,"step":"480","x":-1296.857142857143,"y":-3732.8571428571427,"z":2713.6190476190477,"a95":"2.4","info":"\"14-10-24\" at \"18:07\""},{"visible":false,"include":false,"step":"510","x":-793.6190476190476,"y":-4095.904761904762,"z":3028.4761904761904,"a95":"2.3","info":"\"14-10-24\" at \"21:00\""},{"visible":false,"include":false,"step":"540","x":-505.42857142857144,"y":-3351.1428571428573,"z":2563.4285714285716,"a95":"2.3","info":"\"14-10-24\" at \"23:55\""},{"visible":false,"include":false,"step":"570","x":-1074.2857142857142,"y":-2218.3809523809523,"z":1897.4285714285713,"a95":"2.7","info":"\"14-10-25\" at \"02:43\""},{"visible":false,"include":false,"step":"600","x":-1519.8095238095239,"y":-1446.1904761904761,"z":1908.095238095238,"a95":"2.5","info":"\"14-10-25\" at \"05:18\""},{"visible":false,"include":false,"step":"630","x":-1443.7142857142858,"y":-1026.2857142857142,"z":348.1904761904762,"a95":"2.6","info":"\"14-10-25\" at \"23:40\""},{"visible":false,"include":false,"step":"660","x":-305.04761904761904,"y":377.9047619047619,"z":489.3333333333333,"a95":"4.6","info":"\"14-10-26\" at \"02:25\""},{"visible":false,"include":false,"step":"680","x":-516.8571428571429,"y":529.5238095238095,"z":-195.23809523809524,"a95":"3.1","info":"\"14-10-26\" at \"03:41\""}],"demagType":"Unknown","patch":1.1,"format":"Unknown","strat":null},{"version":"v1.1.0","exported":"2017-05-22T14:15:12.721Z","info":"","GEO":[{"dec":25.0316504384175,"inc":38.73772457153287,"MAD":2.797309093893341,"cm":[-1.7323708605198632e-13,2.598556290779795e-13,0],"intensity":21436.57295287003,"type":"dir","forced":true,"remark":"","origin":false,"nSteps":8,"minStep":"240","maxStep":"420","steps":["240","270","300","320","340","370","400","420"],"group":"None"}],"TECT":[{"dec":19.188661172985917,"inc":7.2872845584988895,"MAD":2.797309093893421,"cm":[3.4647417210397264e-13,-1.5374791387113787e-12,5.4136589391245725e-14],"intensity":21436.57295287003,"type":"dir","forced":true,"remark":"","origin":false,"nSteps":8,"minStep":"240","maxStep":"420","steps":["240","270","300","320","340","370","400","420"],"group":"None"}],"interpreted":true,"name":"SS22.13B","coreAzi":84,"coreDip":40,"bedStrike":269,"bedDip":34,"data":[{"visible":true,"include":false,"step":"20","x":-14270.095238095239,"y":-29529.238095238095,"z":27020.380952380954,"a95":"2.2","info":"\"14-10-13\" at \"17:54\""},{"visible":true,"include":false,"step":"100","x":-8820.57142857143,"y":-20012.47619047619,"z":18840.190476190477,"a95":"2.2","info":"\"14-10-13\" at \"20:48\""},{"visible":true,"include":false,"step":"150","x":-5668.857142857143,"y":-14510.47619047619,"z":14101.619047619048,"a95":"2.2","info":"\"14-10-14\" at \"00:13\""},{"visible":true,"include":false,"step":"180","x":-5065.333333333333,"y":-12990.857142857143,"z":13033.904761904761,"a95":"2.1","info":"\"14-10-14\" at \"17:29\""},{"visible":true,"include":false,"step":"210","x":-3930.190476190476,"y":-11745.047619047618,"z":11917.42857142857,"a95":"2.2","info":"\"14-10-14\" at \"20:37\""},{"visible":true,"include":true,"step":"240","x":-3642.190476190476,"y":-9842.095238095239,"z":9367.42857142857,"a95":"2","info":"\"14-10-14\" at \"23:53\""},{"visible":true,"include":true,"step":"270","x":-2544.190476190476,"y":-7273.142857142857,"z":7884.952380952381,"a95":"2.1","info":"\"14-10-15\" at \"17:38\""},{"visible":true,"include":true,"step":"300","x":-2446.7619047619046,"y":-6967.238095238095,"z":7402.857142857143,"a95":"2.1","info":"\"14-10-15\" at \"20:52\""},{"visible":true,"include":true,"step":"320","x":-1988.3809523809523,"y":-6474.0952380952385,"z":6977.428571428572,"a95":"2.1","info":"\"14-10-16\" at \"00:12\""},{"visible":true,"include":true,"step":"340","x":-1903.904761904762,"y":-5638.190476190476,"z":6202.761904761905,"a95":"2.2","info":"\"14-10-16\" at \"18:09\""},{"visible":true,"include":true,"step":"370","x":-1384,"y":-5293.333333333333,"z":6102.285714285715,"a95":"2.2","info":"\"14-10-16\" at \"21:22\""},{"visible":true,"include":true,"step":"400","x":-1159.4285714285713,"y":-4696.285714285715,"z":5172.380952380952,"a95":"2.1","info":"\"14-10-17\" at \"00:34\""},{"visible":true,"include":true,"step":"420","x":-1303.142857142857,"y":-4614.952380952381,"z":5668,"a95":"2.2","info":"\"14-10-17\" at \"16:06\""},{"visible":true,"include":false,"step":"440","x":-1240.7619047619048,"y":-4196.476190476191,"z":4918.476190476191,"a95":"2.1","info":"\"14-10-17\" at \"19:16\""},{"visible":true,"include":false,"step":"470","x":-1325.2380952380952,"y":-3898.4761904761904,"z":5128.285714285715,"a95":"2.2","info":"\"14-10-17\" at \"22:30\""},{"visible":true,"include":false,"step":"490","x":-2018.6666666666667,"y":-3278.7619047619046,"z":4366.0952380952385,"a95":"2.2","info":"\"14-10-18\" at \"10:55\""},{"visible":false,"include":false,"step":"520","x":-1027.3333333333333,"y":-3697.4285714285716,"z":4054.8571428571427,"a95":"2.1","info":"\"14-10-18\" at \"13:42\""},{"visible":false,"include":false,"step":"550","x":-1274.4761904761904,"y":-370.85714285714283,"z":1275.904761904762,"a95":"2.9","info":"\"14-10-18\" at \"16:52\""},{"visible":false,"include":false,"step":"580","x":1848.7619047619048,"y":-1434.1904761904761,"z":2049.714285714286,"a95":"2.3","info":"\"14-10-19\" at \"10:37\""},{"visible":false,"include":false,"step":"610","x":-1780.095238095238,"y":1204.095238095238,"z":758.3809523809524,"a95":"2.1","info":"\"14-10-19\" at \"13:50\""}],"demagType":"Unknown","patch":1.1,"format":"Unknown","strat":null},{"version":"v1.1.0","exported":"2017-05-22T14:15:12.721Z","info":"","GEO":[{"dec":10.193210669148868,"inc":56.2615039757438,"MAD":4.506856875909956,"cm":[-3.2481953634747435e-14,-1.8000415972589204e-13,0],"intensity":8615.302195417602,"type":"dir","forced":true,"remark":"","origin":false,"nSteps":8,"minStep":"210","maxStep":"420","steps":["210","240","270","300","330","360","390","420"],"group":"None"}],"TECT":[{"dec":5.707746141152597,"inc":22.62773649107762,"MAD":4.506856875909906,"cm":[-4.330927151299658e-14,-2.8421709430404007e-13,0],"intensity":8615.3021954176,"type":"dir","forced":true,"remark":"","origin":false,"nSteps":8,"minStep":"210","maxStep":"420","steps":["210","240","270","300","330","360","390","420"],"group":"None"}],"interpreted":true,"name":"SS22.14A","coreAzi":96,"coreDip":34,"bedStrike":269,"bedDip":34,"data":[{"visible":true,"include":false,"step":"20","x":-17909.809523809523,"y":-14829.714285714286,"z":10473.619047619048,"a95":"1.8","info":"\"14-10-20\" at \"17:34\""},{"visible":true,"include":false,"step":"100","x":-9916.47619047619,"y":-8031.714285714285,"z":6172.857142857143,"a95":"1.8","info":"\"14-10-20\" at \"20:49\""},{"visible":true,"include":false,"step":"150","x":-5768.571428571428,"y":-4596.666666666667,"z":3698.190476190476,"a95":"1.9","info":"\"14-10-20\" at \"23:42\""},{"visible":true,"include":false,"step":"180","x":-4674.0952380952385,"y":-3732.6666666666665,"z":3070.190476190476,"a95":"1.9","info":"\"14-10-21\" at \"15:49\""},{"visible":true,"include":true,"step":"210","x":-3987.6190476190477,"y":-3404.4761904761904,"z":2803.6190476190477,"a95":"1.9","info":"\"14-10-21\" at \"18:42\""},{"visible":true,"include":true,"step":"240","x":-3051.4285714285716,"y":-2544.5714285714284,"z":2090.4761904761904,"a95":"1.9","info":"\"14-10-21\" at \"21:54\""},{"visible":true,"include":true,"step":"270","x":-2666.5714285714284,"y":-1888.2857142857142,"z":1665.6190476190477,"a95":"1.9","info":"\"14-10-22\" at \"00:50\""},{"visible":true,"include":true,"step":"300","x":-2015.047619047619,"y":-1822.6666666666667,"z":1476.095238095238,"a95":"2.1","info":"\"14-10-22\" at \"17:09\""},{"visible":true,"include":true,"step":"330","x":-1688.7619047619048,"y":-1525.047619047619,"z":1603.6190476190477,"a95":"2.1","info":"\"14-10-22\" at \"20:17\""},{"visible":true,"include":true,"step":"360","x":-1710.5714285714287,"y":-1335.4285714285713,"z":1804.7619047619048,"a95":"2.3","info":"\"14-10-22\" at \"23:21\""},{"visible":true,"include":true,"step":"390","x":-1693.7142857142858,"y":-1436.857142857143,"z":1734.3809523809523,"a95":"2.4","info":"\"14-10-23\" at \"17:35\""},{"visible":true,"include":true,"step":"420","x":-1842.095238095238,"y":-1518.952380952381,"z":1196.095238095238,"a95":"2.1","info":"\"14-10-23\" at \"20:35\""},{"visible":true,"include":false,"step":"450","x":-1364.2857142857142,"y":-1174.4761904761904,"z":1547.5238095238096,"a95":"2.2","info":"\"14-10-24\" at \"15:07\""},{"visible":true,"include":false,"step":"480","x":-1319.4285714285713,"y":-1515.5238095238096,"z":-36.76190476190476,"a95":"2.3","info":"\"14-10-24\" at \"18:09\""},{"visible":false,"include":false,"step":"510","x":-1144.7619047619048,"y":-1520,"z":975.9047619047619,"a95":"2.9","info":"\"14-10-24\" at \"21:02\""},{"visible":false,"include":false,"step":"540","x":-1033.142857142857,"y":-959.5238095238095,"z":41.714285714285715,"a95":"3.5","info":"\"14-10-24\" at \"23:56\""},{"visible":false,"include":false,"step":"570","x":97.52380952380952,"y":-834.7619047619048,"z":-40.857142857142854,"a95":"4.2","info":"\"14-10-25\" at \"02:44\""},{"visible":false,"include":false,"step":"600","x":-1099.2380952380952,"y":-878.6666666666666,"z":204.85714285714286,"a95":"2.7","info":"\"14-10-25\" at \"05:20\""},{"visible":false,"include":false,"step":"630","x":-835.7142857142857,"y":-627.1428571428571,"z":-394.95238095238096,"a95":"3.1","info":"\"14-10-25\" at \"23:41\""},{"visible":false,"include":false,"step":"660","x":-640.2857142857143,"y":-74.57142857142857,"z":200.28571428571428,"a95":"4.3","info":"\"14-10-26\" at \"02:27\""},{"visible":false,"include":false,"step":"680","x":-554.8571428571429,"y":305.8095238095238,"z":-310.0952380952381,"a95":"3.7","info":"\"14-10-26\" at \"03:43\""}],"demagType":"Unknown","patch":1.1,"format":"Unknown","strat":null},{"version":"v1.1.0","exported":"2017-05-22T14:15:12.722Z","info":"","GEO":[{"dec":30.235371155264147,"inc":58.59240561475323,"MAD":2.1145192668523127,"cm":[-8.661854302599316e-14,-2.165463575649829e-14,0],"intensity":26773.594560275327,"type":"dir","forced":true,"remark":"","origin":false,"nSteps":8,"minStep":"240","maxStep":"420","steps":["240","270","300","320","340","370","400","420"],"group":"None"}],"TECT":[{"dec":16.70154787452219,"inc":27.284010162177722,"MAD":2.114519266852232,"cm":[1.2126596023639042e-12,-2.317046025945317e-12,-3.4647417210397264e-13],"intensity":26773.59456027533,"type":"dir","forced":true,"remark":"","origin":false,"nSteps":8,"minStep":"240","maxStep":"420","steps":["240","270","300","320","340","370","400","420"],"group":"None"}],"interpreted":true,"name":"SS22.15A","coreAzi":79,"coreDip":40,"bedStrike":269,"bedDip":34,"data":[{"visible":true,"include":false,"step":"20","x":-29156.761904761905,"y":-28361.14285714286,"z":38199.23809523809,"a95":"2.5","info":"\"14-09-29\" at \"17:33\""},{"visible":true,"include":false,"step":"100","x":-15083.714285714286,"y":-14966,"z":24576.571428571428,"a95":"2.6","info":"\"14-09-29\" at \"20:22\""},{"visible":true,"include":false,"step":"150","x":-11248.380952380952,"y":-11782.47619047619,"z":20097.333333333332,"a95":"2.5","info":"\"14-09-29\" at \"23:23\""},{"visible":true,"include":false,"step":"180","x":-10018.285714285714,"y":-10093.904761904761,"z":17768.380952380954,"a95":"2.5","info":"\"14-09-30\" at \"17:54\""},{"visible":true,"include":false,"step":"210","x":-9059.904761904761,"y":-8828.761904761905,"z":16076.57142857143,"a95":"2.6","info":"\"14-09-30\" at \"20:58\""},{"visible":true,"include":true,"step":"240","x":-7348.571428571428,"y":-7494.476190476191,"z":14562.095238095239,"a95":"2.6","info":"\"14-10-01\" at \"00:11\""},{"visible":true,"include":true,"step":"270","x":-6331.333333333333,"y":-5530.857142857143,"z":11558.857142857143,"a95":"2.5","info":"\"14-10-01\" at \"18:27\""},{"visible":true,"include":true,"step":"300","x":-5998.285714285715,"y":-5341.142857142857,"z":10432,"a95":"2.5","info":"\"14-10-01\" at \"21:35\""},{"visible":true,"include":true,"step":"320","x":-5152.380952380952,"y":-4532.666666666667,"z":9296.952380952382,"a95":"2.6","info":"\"14-10-02\" at \"00:44\""},{"visible":true,"include":true,"step":"340","x":-4553.9047619047615,"y":-4497.333333333333,"z":9285.238095238095,"a95":"2.4","info":"\"14-10-02\" at \"18:14\""},{"visible":true,"include":true,"step":"370","x":-4226.666666666667,"y":-3594.8571428571427,"z":8071.714285714285,"a95":"2.4","info":"\"14-10-02\" at \"21:11\""},{"visible":true,"include":true,"step":"400","x":-3848.8571428571427,"y":-3237.0476190476193,"z":7693.619047619048,"a95":"2.5","info":"\"14-10-03\" at \"00:28\""},{"visible":true,"include":true,"step":"420","x":-4365.142857142857,"y":-2892.285714285714,"z":7157.238095238095,"a95":"2.4","info":"\"14-10-03\" at \"18:04\""},{"visible":true,"include":false,"step":"440","x":-3432.190476190476,"y":-3402.285714285714,"z":7144.857142857143,"a95":"2.5","info":"\"14-10-03\" at \"21:21\""},{"visible":true,"include":false,"step":"460","x":-2385.0476190476193,"y":-4394.285714285715,"z":7003.238095238095,"a95":"2.6","info":"\"14-10-04\" at \"00:43\""},{"visible":true,"include":false,"step":"480","x":-3499.0476190476193,"y":-1671.7142857142858,"z":6044.190476190476,"a95":"2.6","info":"\"14-10-04\" at \"11:30\""},{"visible":false,"include":false,"step":"510","x":-1907.904761904762,"y":-1343.2380952380952,"z":3894.190476190476,"a95":"2.4","info":"\"14-10-04\" at \"14:23\""},{"visible":false,"include":false,"step":"540","x":-2507.2380952380954,"y":-1314.857142857143,"z":3584.3809523809523,"a95":"2.6","info":"\"14-10-04\" at \"17:50\""},{"visible":false,"include":false,"step":"570","x":-2033.142857142857,"y":462,"z":1605.047619047619,"a95":"2.7","info":"\"14-10-05\" at \"11:52\""},{"visible":false,"include":false,"step":"600","x":-784.5714285714286,"y":-845.7142857142857,"z":2425.3333333333335,"a95":"3.1","info":"\"14-10-05\" at \"15:09\""},{"visible":false,"include":false,"step":"630","x":-186,"y":-71.23809523809524,"z":392.3809523809524,"a95":"6.4","info":"\"14-10-05\" at \"18:43\""},{"visible":false,"include":false,"step":"660","x":-388.2857142857143,"y":-10,"z":400.95238095238096,"a95":"5.6","info":"\"14-10-11\" at \"09:17\""},{"visible":false,"include":false,"step":"680","x":-469.04761904761904,"y":509.5238095238095,"z":-486.57142857142856,"a95":"4.7","info":"\"14-10-11\" at \"12:18\""}],"demagType":"Unknown","patch":1.1,"format":"Unknown","strat":null},{"version":"v1.1.0","exported":"2017-05-22T14:15:12.722Z","info":"","GEO":[{"dec":37.21264516309941,"inc":54.99905005654409,"MAD":2.6561402280861603,"cm":[1.0827317878249145e-13,1.948917218084846e-13,0],"intensity":24593.72426134529,"type":"dir","forced":true,"remark":"","origin":false,"nSteps":8,"minStep":"240","maxStep":"420","steps":["240","270","300","320","340","370","400","420"],"group":"None"}],"TECT":[{"dec":22.10386442953319,"inc":25.282525703550018,"MAD":2.6561402280861346,"cm":[3.4647417210397264e-13,-1.3209327811463957e-12,0],"intensity":24593.724261345287,"type":"dir","forced":true,"remark":"","origin":false,"nSteps":8,"minStep":"240","maxStep":"420","steps":["240","270","300","320","340","370","400","420"],"group":"None"}],"interpreted":true,"name":"SS22.16A","coreAzi":106,"coreDip":43,"bedStrike":269,"bedDip":34,"data":[{"visible":true,"include":false,"step":"20","x":-32966.380952380954,"y":-34040.57142857143,"z":33614.857142857145,"a95":"2.2","info":"\"14-10-13\" at \"17:56\""},{"visible":true,"include":false,"step":"100","x":-19744.761904761905,"y":-21426.380952380954,"z":23185.238095238095,"a95":"2.2","info":"\"14-10-13\" at \"20:50\""},{"visible":true,"include":false,"step":"150","x":-13147.809523809523,"y":-15016.190476190477,"z":16911.14285714286,"a95":"2.4","info":"\"14-10-14\" at \"00:15\""},{"visible":true,"include":false,"step":"180","x":-11709.52380952381,"y":-13162.47619047619,"z":15477.52380952381,"a95":"2.2","info":"\"14-10-14\" at \"17:31\""},{"visible":true,"include":false,"step":"210","x":-10060.761904761905,"y":-11312.57142857143,"z":13905.238095238095,"a95":"2.3","info":"\"14-10-14\" at \"20:39\""},{"visible":true,"include":true,"step":"240","x":-8081.809523809524,"y":-9686.095238095239,"z":12254.57142857143,"a95":"2.3","info":"\"14-10-14\" at \"23:55\""},{"visible":true,"include":true,"step":"270","x":-5740.380952380952,"y":-6330.190476190476,"z":8942.57142857143,"a95":"2.3","info":"\"14-10-15\" at \"17:40\""},{"visible":true,"include":true,"step":"300","x":-5758.476190476191,"y":-6344.857142857143,"z":8136.476190476191,"a95":"2.2","info":"\"14-10-15\" at \"20:53\""},{"visible":true,"include":true,"step":"320","x":-4504.285714285715,"y":-5945.619047619048,"z":8542.761904761905,"a95":"2.3","info":"\"14-10-16\" at \"00:14\""},{"visible":true,"include":true,"step":"340","x":-4036.9523809523807,"y":-5175.142857142857,"z":5933.047619047619,"a95":"2.5","info":"\"14-10-16\" at \"18:11\""},{"visible":true,"include":true,"step":"370","x":-3978.4761904761904,"y":-4642.0952380952385,"z":5934.190476190476,"a95":"2.9","info":"\"14-10-16\" at \"21:24\""},{"visible":true,"include":true,"step":"400","x":-3152.9523809523807,"y":-3636.285714285714,"z":5245.714285714285,"a95":"2.4","info":"\"14-10-17\" at \"00:36\""},{"visible":true,"include":true,"step":"420","x":-3457.4285714285716,"y":-3135.6190476190477,"z":5275.428571428572,"a95":"2.3","info":"\"14-10-17\" at \"16:08\""},{"visible":true,"include":false,"step":"440","x":-3196.095238095238,"y":-2754.5714285714284,"z":3986.9523809523807,"a95":"2.4","info":"\"14-10-17\" at \"19:18\""},{"visible":true,"include":false,"step":"470","x":-2640.7619047619046,"y":-2901.2380952380954,"z":4735.714285714285,"a95":"2.4","info":"\"14-10-17\" at \"22:32\""},{"visible":true,"include":false,"step":"490","x":-2620.6666666666665,"y":-2046.7619047619048,"z":4043.5238095238096,"a95":"2.4","info":"\"14-10-18\" at \"10:57\""},{"visible":false,"include":false,"step":"520","x":-1612.3809523809523,"y":-2553.3333333333335,"z":4013.714285714286,"a95":"2.4","info":"\"14-10-18\" at \"13:43\""},{"visible":false,"include":false,"step":"550","x":-1220.952380952381,"y":299.04761904761904,"z":1185.904761904762,"a95":"3.7","info":"\"14-10-18\" at \"16:55\""},{"visible":false,"include":false,"step":"580","x":1046.6666666666667,"y":-2415.1428571428573,"z":1502.3809523809523,"a95":"2","info":"\"14-10-19\" at \"10:39\""},{"visible":false,"include":false,"step":"610","x":-1902.3809523809523,"y":651.4285714285714,"z":71.14285714285714,"a95":"2.4","info":"\"14-10-19\" at \"13:52\""}],"demagType":"Unknown","patch":1.1,"format":"Unknown","strat":null},{"version":"v1.1.0","exported":"2017-05-22T14:15:12.722Z","info":"3","GEO":[{"dec":31.23209989495109,"inc":63.806777394766364,"MAD":1.2879568335301423,"cm":[1.2992781453898974e-13,-3.0316490059097606e-13,0],"intensity":26871.689089477455,"type":"dir","forced":true,"remark":"","origin":false,"nSteps":6,"minStep":"20.0","maxStep":"45.0","steps":["20.0","25.0","30.0","35.0","40.0","45.0"],"group":"None"}],"TECT":[{"dec":15.181256847068369,"inc":32.35164938643325,"MAD":1.287956833530152,"cm":[-1.1260410593379112e-12,4.071071522221679e-12,-2.598556290779795e-13],"intensity":26871.689089477455,"type":"dir","forced":true,"remark":"","origin":false,"nSteps":6,"minStep":"20.0","maxStep":"45.0","steps":["20.0","25.0","30.0","35.0","40.0","45.0"],"group":"None"}],"interpreted":true,"name":"SS22.17A","coreAzi":72,"coreDip":47,"bedStrike":269,"bedDip":34,"data":[{"visible":true,"include":false,"step":"0.0","x":-15634.285714285714,"y":-16020.952380952382,"z":31706.666666666668,"a95":"0.99","info":"22/09/2014 at 20:51:18"},{"visible":true,"include":false,"step":"5.0","x":-13322.857142857143,"y":-12100.952380952382,"z":26823.809523809523,"a95":"0.99","info":"22/09/2014 at 20:51:18"},{"visible":true,"include":false,"step":"10.0","x":-9099.42857142857,"y":-7669.9047619047615,"z":20220,"a95":"0.99","info":"22/09/2014 at 20:51:18"},{"visible":true,"include":false,"step":"15.0","x":-7436.952380952381,"y":-6209.714285714285,"z":16752.380952380954,"a95":"0.99","info":"22/09/2014 at 20:51:18"},{"visible":true,"include":true,"step":"20.0","x":-5917.142857142857,"y":-4682.0952380952385,"z":14020,"a95":"0.99","info":"22/09/2014 at 20:51:18"},{"visible":true,"include":true,"step":"25.0","x":-5242.285714285715,"y":-3955.2380952380954,"z":12409.52380952381,"a95":"0.99","info":"22/09/2014 at 20:51:18"},{"visible":true,"include":true,"step":"30.0","x":-4956.285714285715,"y":-3459.0476190476193,"z":11456.190476190477,"a95":"0.99","info":"22/09/2014 at 20:51:18"},{"visible":true,"include":true,"step":"35.0","x":-4444.476190476191,"y":-3225.3333333333335,"z":10352.380952380952,"a95":"0.99","info":"22/09/2014 at 20:51:18"},{"visible":true,"include":true,"step":"40.0","x":-3669.5238095238096,"y":-3483.1428571428573,"z":9900.952380952382,"a95":"0.99","info":"22/09/2014 at 20:51:18"},{"visible":true,"include":true,"step":"45.0","x":-3855.2380952380954,"y":-3337.3333333333335,"z":9692.380952380952,"a95":"0.99","info":"22/09/2014 at 20:51:18"},{"visible":true,"include":false,"step":"50.0","x":-3363.6190476190477,"y":-2639.6190476190477,"z":8677.238095238095,"a95":"0.99","info":"22/09/2014 at 20:51:18"},{"visible":true,"include":false,"step":"60.0","x":-3691.3333333333335,"y":-3020.285714285714,"z":8132.190476190476,"a95":"0.99","info":"22/09/2014 at 20:51:18"},{"visible":true,"include":false,"step":"70.0","x":-2934.5714285714284,"y":-2896.9523809523807,"z":7835.333333333333,"a95":"0.99","info":"22/09/2014 at 20:51:18"},{"visible":true,"include":false,"step":"80.0","x":-5196.476190476191,"y":-3084.6666666666665,"z":7484,"a95":"0.99","info":"22/09/2014 at 20:51:18"},{"visible":true,"include":false,"step":"90.0","x":-3494.8571428571427,"y":-3101.5238095238096,"z":7551.047619047619,"a95":"0.99","info":"22/09/2014 at 20:51:18"},{"visible":false,"include":false,"step":"100.0","x":-3550.6666666666665,"y":-2297.4285714285716,"z":7721.238095238095,"a95":"0.99","info":"22/09/2014 at 20:51:18"}],"demagType":"Unknown","patch":1.1,"format":"Unknown","strat":null},{"version":"v1.1.0","exported":"2017-05-22T14:15:12.722Z","info":"","GEO":[{"dec":29.301747475267177,"inc":58.85945412785679,"MAD":2.4714004796781586,"cm":[-1.5158245029548803e-13,-8.661854302599316e-14,0],"intensity":25829.737086528457,"type":"dir","forced":true,"remark":"","origin":false,"nSteps":8,"minStep":"240","maxStep":"420","steps":["240","270","300","320","340","370","400","420"],"group":"None"}],"TECT":[{"dec":16.088230323670814,"inc":27.380759952957376,"MAD":2.471400479678151,"cm":[-8.661854302599316e-13,3.4430870852832282e-12,4.330927151299658e-14],"intensity":25829.737086528457,"type":"dir","forced":true,"remark":"","origin":false,"nSteps":8,"minStep":"240","maxStep":"420","steps":["240","270","300","320","340","370","400","420"],"group":"None"}],"interpreted":true,"name":"SS22.18A","coreAzi":89,"coreDip":49,"bedStrike":269,"bedDip":34,"data":[{"visible":true,"include":false,"step":"20","x":-23592,"y":-27381.619047619046,"z":44282,"a95":"2.6","info":"\"14-09-29\" at \"17:35\""},{"visible":true,"include":false,"step":"100","x":-14170.285714285714,"y":-15556.666666666666,"z":25912.95238095238,"a95":"2.6","info":"\"14-09-29\" at \"20:24\""},{"visible":true,"include":false,"step":"150","x":-10361.619047619048,"y":-11578.857142857143,"z":20181.14285714286,"a95":"2.5","info":"\"14-09-29\" at \"23:25\""},{"visible":true,"include":false,"step":"180","x":-8965.52380952381,"y":-10194.380952380952,"z":18488.761904761905,"a95":"2.5","info":"\"14-09-30\" at \"17:56\""},{"visible":true,"include":false,"step":"210","x":-8324.285714285714,"y":-9207.42857142857,"z":16584,"a95":"2.6","info":"\"14-09-30\" at \"21:00\""},{"visible":true,"include":true,"step":"240","x":-6642.952380952381,"y":-8215.714285714286,"z":13860,"a95":"2.5","info":"\"14-10-01\" at \"00:13\""},{"visible":true,"include":true,"step":"270","x":-5593.619047619048,"y":-6288.285714285715,"z":11839.904761904761,"a95":"2.6","info":"\"14-10-01\" at \"18:29\""},{"visible":true,"include":true,"step":"300","x":-4575.809523809524,"y":-5733.9047619047615,"z":10282,"a95":"2.5","info":"\"14-10-01\" at \"21:37\""},{"visible":true,"include":true,"step":"320","x":-3696.5714285714284,"y":-4981.619047619048,"z":9147.904761904761,"a95":"2.5","info":"\"14-10-02\" at \"00:46\""},{"visible":true,"include":true,"step":"340","x":-3733.6190476190477,"y":-5068.285714285715,"z":8810.47619047619,"a95":"2.3","info":"\"14-10-02\" at \"18:16\""},{"visible":true,"include":true,"step":"370","x":-3723.6190476190477,"y":-4248.952380952381,"z":8069.9047619047615,"a95":"2.5","info":"\"14-10-02\" at \"21:15\""},{"visible":true,"include":true,"step":"400","x":-2479.4285714285716,"y":-3688.3809523809523,"z":7580.952380952381,"a95":"2.4","info":"\"14-10-03\" at \"00:30\""},{"visible":true,"include":true,"step":"420","x":-3276.8571428571427,"y":-3069.5238095238096,"z":7149.9047619047615,"a95":"2.4","info":"\"14-10-03\" at \"18:06\""},{"visible":true,"include":false,"step":"440","x":-2597.809523809524,"y":-3522.5714285714284,"z":6728,"a95":"2.4","info":"\"14-10-03\" at \"21:24\""},{"visible":true,"include":false,"step":"460","x":-1859.904761904762,"y":-2312.8571428571427,"z":5818.952380952381,"a95":"2.6","info":"\"14-10-04\" at \"00:45\""},{"visible":true,"include":false,"step":"480","x":-3546.285714285714,"y":-2186.7619047619046,"z":4907.523809523809,"a95":"2.3","info":"\"14-10-04\" at \"11:31\""},{"visible":false,"include":false,"step":"510","x":-1179.4285714285713,"y":-638.6666666666666,"z":2747.904761904762,"a95":"2.7","info":"\"14-10-04\" at \"14:25\""},{"visible":false,"include":false,"step":"540","x":-1104,"y":-2162.5714285714284,"z":3821.1428571428573,"a95":"2.7","info":"\"14-10-04\" at \"17:52\""},{"visible":false,"include":false,"step":"570","x":-1386.7619047619048,"y":-1296.5714285714287,"z":1278.6666666666667,"a95":"2.6","info":"\"14-10-05\" at \"11:54\""},{"visible":false,"include":false,"step":"600","x":-611.1428571428571,"y":-498.4761904761905,"z":1886.6666666666667,"a95":"3","info":"\"14-10-05\" at \"15:11\""},{"visible":false,"include":false,"step":"630","x":253.33333333333334,"y":-424.57142857142856,"z":-148.95238095238096,"a95":"6.1","info":"\"14-10-05\" at \"18:45\""},{"visible":false,"include":false,"step":"660","x":-26.571428571428573,"y":-209.14285714285714,"z":455.23809523809524,"a95":"6.8","info":"\"14-10-11\" at \"09:19\""},{"visible":false,"include":false,"step":"680","x":-94.19047619047619,"y":-101.9047619047619,"z":37.523809523809526,"a95":"15.7","info":"\"14-10-11\" at \"12:20\""}],"demagType":"Unknown","patch":1.1,"format":"Unknown","strat":null},{"version":"v1.1.0","exported":"2017-05-22T14:15:12.722Z","info":"","GEO":[{"dec":325.3734721306012,"inc":64.2453460275023,"MAD":1.8701579296872581,"cm":[0,-5.684341886080801e-13,0],"intensity":30185.88584616096,"type":"dir","forced":true,"remark":"","origin":false,"nSteps":2,"minStep":"210","maxStep":"450","steps":["210","450"],"group":"None","version":"v1.1.0"}],"TECT":[{"dec":342.33037407261594,"inc":32.981131659128955,"MAD":1.8701579296872757,"cm":[-1.1368683772161603e-12,-1.4210854715202004e-12,0],"intensity":30185.885846160963,"type":"dir","forced":true,"remark":"","origin":false,"nSteps":2,"minStep":"210","maxStep":"450","steps":["210","450"],"group":"None","version":"v1.1.0"}],"interpreted":true,"name":"SS22.19A","coreAzi":126,"coreDip":37,"bedStrike":269,"bedDip":34,"data":[{"visible":true,"include":false,"step":"20","x":-55070.857142857145,"y":-8542.285714285714,"z":8206.666666666666,"a95":"1.7","info":"\"14-10-20\" at \"17:37\""},{"visible":true,"include":false,"step":"100","x":-37364.76190476191,"y":-6391.809523809524,"z":7328.857142857143,"a95":"1.7","info":"\"14-10-20\" at \"20:51\""},{"visible":true,"include":false,"step":"150","x":-26268.285714285714,"y":-4104.761904761905,"z":5095.9047619047615,"a95":"1.8","info":"\"14-10-20\" at \"23:43\""},{"visible":true,"include":false,"step":"180","x":-23069.14285714286,"y":-3940.095238095238,"z":4759.238095238095,"a95":"1.7","info":"\"14-10-21\" at \"15:50\""},{"visible":true,"include":true,"step":"210","x":-21286.95238095238,"y":-3107.1428571428573,"z":4462.571428571428,"a95":"1.7","info":"\"14-10-21\" at \"18:43\""},{"visible":true,"include":false,"step":"240","x":-18116.95238095238,"y":-2762.3809523809523,"z":3850.4761904761904,"a95":"1.7","info":"\"14-10-21\" at \"21:56\""},{"visible":true,"include":false,"step":"270","x":-15582.190476190477,"y":-2362.9523809523807,"z":3330.3809523809523,"a95":"1.7","info":"\"14-10-22\" at \"00:52\""},{"visible":true,"include":false,"step":"300","x":-13143.714285714286,"y":-1876.2857142857142,"z":3116.5714285714284,"a95":"1.7","info":"\"14-10-22\" at \"17:11\""},{"visible":true,"include":false,"step":"330","x":-11658.761904761905,"y":-2234.9523809523807,"z":3029.5238095238096,"a95":"1.8","info":"\"14-10-22\" at \"20:20\""},{"visible":true,"include":false,"step":"360","x":-10707.333333333334,"y":-1689.6190476190477,"z":2809.5238095238096,"a95":"1.9","info":"\"14-10-22\" at \"23:23\""},{"visible":true,"include":false,"step":"390","x":-9401.333333333334,"y":-1843.3333333333333,"z":2939.6190476190477,"a95":"1.9","info":"\"14-10-23\" at \"17:39\""},{"visible":true,"include":false,"step":"420","x":-8579.619047619048,"y":-1767.904761904762,"z":2368.3809523809523,"a95":"1.9","info":"\"14-10-23\" at \"20:37\""},{"visible":true,"include":true,"step":"450","x":-7760.0952380952385,"y":-1342.952380952381,"z":2440.5714285714284,"a95":"1.9","info":"\"14-10-24\" at \"15:09\""},{"visible":true,"include":false,"step":"480","x":-7306.380952380952,"y":-2695.4285714285716,"z":1663.142857142857,"a95":"1.8","info":"\"14-10-24\" at \"18:11\""},{"visible":true,"include":false,"step":"510","x":-6025.619047619048,"y":-1865.047619047619,"z":2003.5238095238096,"a95":"2","info":"\"14-10-24\" at \"21:04\""},{"visible":false,"include":false,"step":"540","x":-4014.190476190476,"y":-1576.4761904761904,"z":1879.142857142857,"a95":"2.2","info":"\"14-10-24\" at \"23:58\""},{"visible":false,"include":false,"step":"570","x":-2603.6190476190477,"y":-1174.952380952381,"z":1145.047619047619,"a95":"2.5","info":"\"14-10-25\" at \"02:46\""},{"visible":false,"include":false,"step":"600","x":-1384,"y":-1577.7142857142858,"z":1047.904761904762,"a95":"2.4","info":"\"14-10-25\" at \"05:22\""},{"visible":false,"include":false,"step":"630","x":-846.6666666666666,"y":-989.1428571428571,"z":-168.76190476190476,"a95":"2.9","info":"\"14-10-25\" at \"23:43\""},{"visible":false,"include":false,"step":"660","x":-155.23809523809524,"y":-752.5714285714286,"z":675.2380952380952,"a95":"3.5","info":"\"14-10-26\" at \"02:28\""},{"visible":true,"include":false,"step":"680","x":-552.0952380952381,"y":-131.42857142857142,"z":140.1904761904762,"a95":"4.3","info":"\"14-10-26\" at \"03:46\""}],"demagType":"Unknown","patch":1.1,"format":"Unknown","strat":null},{"version":"v1.1.0","exported":"2017-05-22T14:15:12.722Z","info":"","GEO":[{"dec":18.980578557738113,"inc":60.07335796939445,"MAD":2.9853205077488174,"cm":[1.2992781453898974e-13,-1.624097681737372e-13,0],"intensity":13856.59220211746,"type":"dir","forced":true,"remark":"","origin":false,"nSteps":7,"minStep":"240","maxStep":"420","steps":["240","270","300","330","360","390","420"],"group":"None"}],"TECT":[{"dec":10.04502156464173,"inc":27.149481750959904,"MAD":2.9853205077488236,"cm":[-1.2992781453898974e-13,6.604663905731979e-13,-8.661854302599316e-14],"intensity":13856.59220211746,"type":"dir","forced":true,"remark":"","origin":false,"nSteps":7,"minStep":"240","maxStep":"420","steps":["240","270","300","330","360","390","420"],"group":"None"}],"interpreted":true,"name":"SS22.20A","coreAzi":111,"coreDip":42,"bedStrike":269,"bedDip":34,"data":[{"visible":true,"include":false,"step":"20","x":-26830.666666666668,"y":-18454.666666666668,"z":12075.904761904761,"a95":"1.8","info":"\"14-10-20\" at \"17:39\""},{"visible":true,"include":false,"step":"100","x":-15078.952380952382,"y":-10344,"z":9703.238095238095,"a95":"1.8","info":"\"14-10-20\" at \"20:53\""},{"visible":true,"include":false,"step":"150","x":-9708.857142857143,"y":-6603.047619047619,"z":6932.285714285715,"a95":"1.9","info":"\"14-10-20\" at \"23:45\""},{"visible":true,"include":false,"step":"180","x":-8160.857142857143,"y":-5961.333333333333,"z":6195.333333333333,"a95":"1.9","info":"\"14-10-21\" at \"15:52\""},{"visible":true,"include":false,"step":"210","x":-7324,"y":-5303.619047619048,"z":5868.952380952381,"a95":"1.9","info":"\"14-10-21\" at \"18:45\""},{"visible":true,"include":true,"step":"240","x":-6076.857142857143,"y":-4459.333333333333,"z":4974.761904761905,"a95":"2","info":"\"14-10-21\" at \"21:58\""},{"visible":true,"include":true,"step":"270","x":-5140.571428571428,"y":-3826.095238095238,"z":4369.809523809524,"a95":"1.9","info":"\"14-10-22\" at \"00:54\""},{"visible":true,"include":true,"step":"300","x":-4412.0952380952385,"y":-3298.4761904761904,"z":3814.3809523809523,"a95":"2.1","info":"\"14-10-22\" at \"17:13\""},{"visible":true,"include":true,"step":"330","x":-3879.6190476190477,"y":-2929.3333333333335,"z":3813.6190476190477,"a95":"2.1","info":"\"14-10-22\" at \"20:22\""},{"visible":true,"include":true,"step":"360","x":-3683.4285714285716,"y":-3212.7619047619046,"z":2949.3333333333335,"a95":"2.1","info":"\"14-10-22\" at \"23:25\""},{"visible":true,"include":true,"step":"390","x":-3473.714285714286,"y":-2430,"z":3513.2380952380954,"a95":"2.3","info":"\"14-10-23\" at \"17:41\""},{"visible":true,"include":true,"step":"420","x":-3161.3333333333335,"y":-2692.190476190476,"z":2476.190476190476,"a95":"2.2","info":"\"14-10-23\" at \"20:39\""},{"visible":true,"include":false,"step":"450","x":-2787.5238095238096,"y":-2268.7619047619046,"z":3235.0476190476193,"a95":"2.3","info":"\"14-10-24\" at \"15:11\""},{"visible":true,"include":false,"step":"480","x":-3302.6666666666665,"y":-2162,"z":1766.857142857143,"a95":"2.1","info":"\"14-10-24\" at \"18:13\""},{"visible":false,"include":false,"step":"510","x":-1622.1904761904761,"y":-3010.6666666666665,"z":2440.190476190476,"a95":"2.2","info":"\"14-10-24\" at \"21:05\""},{"visible":false,"include":false,"step":"540","x":-1409.142857142857,"y":-2265.4285714285716,"z":1495.2380952380952,"a95":"2.4","info":"\"14-10-25\" at \"00:07\""},{"visible":false,"include":false,"step":"570","x":-1849.8095238095239,"y":-1502.952380952381,"z":1278.1904761904761,"a95":"2.7","info":"\"14-10-25\" at \"02:48\""},{"visible":false,"include":false,"step":"600","x":906.4761904761905,"y":30.38095238095238,"z":1259.6190476190477,"a95":"3.1","info":"\"14-10-25\" at \"05:23\""},{"visible":false,"include":false,"step":"630","x":-1003.9047619047619,"y":-844.3809523809524,"z":-42.19047619047619,"a95":"3","info":"\"14-10-25\" at \"23:45\""},{"visible":false,"include":false,"step":"660","x":-416.76190476190476,"y":-811.9047619047619,"z":603.3333333333334,"a95":"3.1","info":"\"14-10-26\" at \"02:30\""},{"visible":false,"include":false,"step":"680","x":-600.8571428571429,"y":-345.9047619047619,"z":-274.76190476190476,"a95":"3.8","info":"\"14-10-26\" at \"03:49\""}],"demagType":"Unknown","patch":1.1,"format":"Unknown","strat":null},{"version":"v1.1.0","exported":"2017-05-22T14:15:12.722Z","info":"7","GEO":[{"dec":8.754673697086503,"inc":67.07846350663664,"MAD":3.792608815819112,"cm":[-6.496390726949487e-14,1.8406440393023548e-13,0],"intensity":35040.589384915715,"type":"dir","forced":true,"remark":"","origin":false,"nSteps":8,"minStep":"12.0","maxStep":"45.0","steps":["12.0","16.0","20.0","25.0","30.0","35.0","40.0","45.0"],"group":"None"}],"TECT":[{"dec":3.527965881859359,"inc":33.29403353072106,"MAD":3.7926088158190945,"cm":[-4.330927151299658e-13,4.244308608273665e-12,4.330927151299658e-14],"intensity":35040.589384915715,"type":"dir","forced":true,"remark":"","origin":false,"nSteps":8,"minStep":"12.0","maxStep":"45.0","steps":["12.0","16.0","20.0","25.0","30.0","35.0","40.0","45.0"],"group":"None"}],"interpreted":true,"name":"SS22.21B","coreAzi":95,"coreDip":14,"bedStrike":269,"bedDip":34,"data":[{"visible":true,"include":false,"step":"0.0","x":-53623.80952380953,"y":-26143.809523809523,"z":17827.619047619046,"a95":"0.99","info":"11/10/2014 at 01:32:58"},{"visible":true,"include":false,"step":"4.0","x":-47476.19047619047,"y":-22524.761904761905,"z":15045.714285714286,"a95":"0.99","info":"11/10/2014 at 01:32:58"},{"visible":true,"include":false,"step":"8.0","x":-35279.04761904762,"y":-16463.809523809523,"z":10477.142857142857,"a95":"0.99","info":"11/10/2014 at 01:32:58"},{"visible":true,"include":true,"step":"12.0","x":-25399.04761904762,"y":-11850.47619047619,"z":8303.904761904761,"a95":"0.99","info":"11/10/2014 at 01:32:58"},{"visible":true,"include":true,"step":"16.0","x":-20160.95238095238,"y":-8807.714285714286,"z":4639.619047619048,"a95":"0.99","info":"11/10/2014 at 01:32:58"},{"visible":true,"include":true,"step":"20.0","x":-15623.809523809523,"y":-6718.666666666667,"z":3479.809523809524,"a95":"0.99","info":"11/10/2014 at 01:32:58"},{"visible":true,"include":true,"step":"25.0","x":-12654.285714285714,"y":-5011.9047619047615,"z":4687.9047619047615,"a95":"0.99","info":"11/10/2014 at 01:32:58"},{"visible":true,"include":true,"step":"30.0","x":-9570.47619047619,"y":-4043.3333333333335,"z":2147.714285714286,"a95":"0.99","info":"11/10/2014 at 01:32:58"},{"visible":true,"include":true,"step":"35.0","x":-8609.619047619048,"y":-3835.2380952380954,"z":1491.904761904762,"a95":"0.99","info":"11/10/2014 at 01:32:58"},{"visible":true,"include":true,"step":"40.0","x":-7548.190476190476,"y":-2845.1428571428573,"z":2998.8571428571427,"a95":"0.99","info":"11/10/2014 at 01:32:58"},{"visible":true,"include":true,"step":"45.0","x":-5859.809523809524,"y":-1501.6190476190477,"z":207.75238095238097,"a95":"0.99","info":"11/10/2014 at 01:32:58"},{"visible":true,"include":false,"step":"50.0","x":-4911.619047619048,"y":-2514.9523809523807,"z":-102.13333333333334,"a95":"0.99","info":"11/10/2014 at 01:32:58"},{"visible":true,"include":false,"step":"60.0","x":-3765.714285714286,"y":-2108,"z":1411.5238095238096,"a95":"0.99","info":"11/10/2014 at 01:32:58"},{"visible":false,"include":false,"step":"70.0","x":-2315.904761904762,"y":-764.4095238095239,"z":-125.25714285714287,"a95":"0.99","info":"11/10/2014 at 01:32:58"},{"visible":false,"include":false,"step":"80.0","x":-7503.523809523809,"y":-2580.190476190476,"z":-2147.4285714285716,"a95":"0.99","info":"11/10/2014 at 01:32:58"},{"visible":false,"include":false,"step":"90.0","x":-2500.285714285714,"y":-2062.095238095238,"z":824.8190476190476,"a95":"0.99","info":"11/10/2014 at 01:32:58"},{"visible":false,"include":false,"step":"100.0","x":-1533.3333333333333,"y":-1652,"z":-450.6190476190476,"a95":"0.99","info":"11/10/2014 at 01:32:58"}],"demagType":"Unknown","patch":1.1,"format":"Unknown","strat":null},{"version":"v1.1.0","exported":"2017-05-22T14:15:12.722Z","info":"","GEO":[{"dec":28.69940951001638,"inc":65.58497980031979,"MAD":2.067678303496365,"cm":[-4.330927151299658e-14,2.490283111997304e-13,0],"intensity":21829.776340675144,"type":"dir","forced":true,"remark":"","origin":false,"nSteps":8,"minStep":"210","maxStep":"400","steps":["210","240","270","300","320","340","370","400"],"group":"None"}],"TECT":[{"dec":13.241807245777522,"inc":33.650519580042555,"MAD":2.067678303496338,"cm":[-2.598556290779795e-13,1.1260410593379112e-12,-4.330927151299658e-14],"intensity":21829.776340675147,"type":"dir","forced":true,"remark":"","origin":false,"nSteps":8,"minStep":"210","maxStep":"400","steps":["210","240","270","300","320","340","370","400"],"group":"None"}],"interpreted":true,"name":"SS22.22A","coreAzi":86,"coreDip":25,"bedStrike":269,"bedDip":34,"data":[{"visible":true,"include":false,"step":"20","x":-32858,"y":-18212.285714285714,"z":21379.238095238095,"a95":"2.4","info":"\"14-09-29\" at \"17:37\""},{"visible":true,"include":false,"step":"100","x":-19765.904761904763,"y":-10470,"z":14716.761904761905,"a95":"2.3","info":"\"14-09-29\" at \"20:26\""},{"visible":true,"include":false,"step":"150","x":-14104.952380952382,"y":-7121.9047619047615,"z":11166.761904761905,"a95":"2.4","info":"\"14-09-29\" at \"23:27\""},{"visible":true,"include":false,"step":"180","x":-12668.57142857143,"y":-5587.9047619047615,"z":9992.857142857143,"a95":"2.3","info":"\"14-09-30\" at \"17:58\""},{"visible":true,"include":true,"step":"210","x":-11482.857142857143,"y":-5913.714285714285,"z":9264.666666666666,"a95":"2.4","info":"\"14-09-30\" at \"21:02\""},{"visible":true,"include":true,"step":"240","x":-9457.52380952381,"y":-4506.571428571428,"z":7629.809523809524,"a95":"2.3","info":"\"14-10-01\" at \"00:15\""},{"visible":true,"include":true,"step":"270","x":-7899.619047619048,"y":-3626.8571428571427,"z":6041.238095238095,"a95":"2.3","info":"\"14-10-01\" at \"18:31\""},{"visible":true,"include":true,"step":"300","x":-6312.380952380952,"y":-3232.7619047619046,"z":5657.333333333333,"a95":"2.3","info":"\"14-10-01\" at \"21:39\""},{"visible":true,"include":true,"step":"320","x":-5755.523809523809,"y":-2627.5238095238096,"z":4508.190476190476,"a95":"2.3","info":"\"14-10-02\" at \"00:48\""},{"visible":true,"include":true,"step":"340","x":-5467.809523809524,"y":-2398.9523809523807,"z":4350.952380952381,"a95":"2.1","info":"\"14-10-02\" at \"18:18\""},{"visible":true,"include":true,"step":"370","x":-5109.523809523809,"y":-2318.6666666666665,"z":4213.333333333333,"a95":"2.1","info":"\"14-10-02\" at \"21:18\""},{"visible":true,"include":true,"step":"400","x":-4732.857142857143,"y":-1458,"z":3354.6666666666665,"a95":"2.1","info":"\"14-10-03\" at \"00:32\""},{"visible":true,"include":false,"step":"420","x":-5097.714285714285,"y":-2250.8571428571427,"z":3973.6190476190477,"a95":"2.1","info":"\"14-10-03\" at \"18:08\""},{"visible":true,"include":false,"step":"440","x":-4280.761904761905,"y":-1751.7142857142858,"z":2978.095238095238,"a95":"2.2","info":"\"14-10-03\" at \"21:26\""},{"visible":false,"include":false,"step":"460","x":-2414.4761904761904,"y":1015.6190476190476,"z":5396.190476190476,"a95":"2.7","info":"\"14-10-04\" at \"00:47\""},{"visible":false,"include":false,"step":"480","x":-7410.190476190476,"y":464.6666666666667,"z":-2731.4285714285716,"a95":"1.9","info":"\"14-10-04\" at \"11:33\""},{"visible":false,"include":false,"step":"510","x":1709.4285714285713,"y":1203.8095238095239,"z":-4810.476190476191,"a95":"2.5","info":"\"14-10-04\" at \"14:27\""},{"visible":false,"include":false,"step":"540","x":-2711.3333333333335,"y":-2372.3809523809523,"z":-527.6190476190476,"a95":"1.9","info":"\"14-10-04\" at \"17:54\""},{"visible":false,"include":false,"step":"570","x":-1115.6190476190477,"y":252.0952380952381,"z":-37.04761904761905,"a95":"3.3","info":"\"14-10-05\" at \"11:56\""},{"visible":false,"include":false,"step":"600","x":-361.8095238095238,"y":171.33333333333334,"z":1491.5238095238096,"a95":"3.4","info":"\"14-10-05\" at \"15:13\""},{"visible":false,"include":false,"step":"630","x":-458.2857142857143,"y":270.6666666666667,"z":-549.3333333333334,"a95":"4.1","info":"\"14-10-05\" at \"18:47\""},{"visible":false,"include":false,"step":"660","x":-246.47619047619048,"y":-202,"z":638,"a95":"4.9","info":"\"14-10-11\" at \"09:20\""},{"visible":false,"include":false,"step":"680","x":-300.95238095238096,"y":-155.61904761904762,"z":-426.95238095238096,"a95":"5","info":"\"14-10-11\" at \"12:22\""}],"demagType":"Unknown","patch":1.1,"format":"Unknown","strat":null},{"version":"v1.1.0","exported":"2017-05-22T14:15:12.722Z","info":"4","GEO":[{"dec":17.057440764466662,"inc":60.194837270836764,"MAD":1.7735381891297572,"cm":[-8.661854302599316e-14,8.661854302599316e-14,0],"intensity":20654.426467208967,"type":"dir","forced":true,"remark":"","origin":false,"nSteps":7,"minStep":"20.0","maxStep":"50.0","steps":["20.0","25.0","30.0","35.0","40.0","45.0","50.0"],"group":"None"}],"TECT":[{"dec":8.96402613940387,"inc":27.07233300531569,"MAD":1.7735381891297606,"cm":[-2.598556290779795e-13,1.3858966884158906e-12,2.598556290779795e-13],"intensity":20654.426467208967,"type":"dir","forced":true,"remark":"","origin":false,"nSteps":7,"minStep":"20.0","maxStep":"50.0","steps":["20.0","25.0","30.0","35.0","40.0","45.0","50.0"],"group":"None"}],"interpreted":true,"name":"SS22.22B","coreAzi":86,"coreDip":25,"bedStrike":269,"bedDip":34,"data":[{"visible":true,"include":false,"step":"0.0","x":-24028.571428571428,"y":-15149.52380952381,"z":16556.190476190477,"a95":"0.99","info":"22/09/2014 at 20:51:18"},{"visible":true,"include":false,"step":"5.0","x":-20622.85714285714,"y":-12954.285714285714,"z":13903.809523809523,"a95":"0.99","info":"22/09/2014 at 20:51:18"},{"visible":true,"include":false,"step":"10.0","x":-14941.904761904761,"y":-9305.52380952381,"z":10190.47619047619,"a95":"0.99","info":"22/09/2014 at 20:51:18"},{"visible":true,"include":false,"step":"15.0","x":-11181.904761904761,"y":-7364.571428571428,"z":8254.095238095239,"a95":"0.99","info":"22/09/2014 at 20:51:18"},{"visible":true,"include":true,"step":"20.0","x":-9710.47619047619,"y":-6269.9047619047615,"z":6742.761904761905,"a95":"0.99","info":"22/09/2014 at 20:51:18"},{"visible":true,"include":true,"step":"25.0","x":-7788.857142857143,"y":-5293.428571428572,"z":5844.0952380952385,"a95":"0.99","info":"22/09/2014 at 20:51:18"},{"visible":true,"include":true,"step":"30.0","x":-7173.238095238095,"y":-4713.523809523809,"z":5159.047619047619,"a95":"0.99","info":"22/09/2014 at 20:51:18"},{"visible":true,"include":true,"step":"35.0","x":-6158.380952380952,"y":-4129.333333333333,"z":4621.9047619047615,"a95":"0.99","info":"22/09/2014 at 20:51:18"},{"visible":true,"include":true,"step":"40.0","x":-5491.428571428572,"y":-3587.714285714286,"z":4317.714285714285,"a95":"0.99","info":"22/09/2014 at 20:51:18"},{"visible":true,"include":true,"step":"45.0","x":-5428.190476190476,"y":-3190.5714285714284,"z":4221.809523809524,"a95":"0.99","info":"22/09/2014 at 20:51:18"},{"visible":true,"include":true,"step":"50.0","x":-4979.809523809524,"y":-3228.3809523809523,"z":4238.285714285715,"a95":"0.99","info":"22/09/2014 at 20:51:18"},{"visible":true,"include":false,"step":"60.0","x":-4607.047619047619,"y":-3529.5238095238096,"z":3792.3809523809523,"a95":"0.99","info":"22/09/2014 at 20:51:18"},{"visible":true,"include":false,"step":"70.0","x":-4497.809523809524,"y":-2995.5238095238096,"z":3828.6666666666665,"a95":"0.99","info":"22/09/2014 at 20:51:18"},{"visible":true,"include":false,"step":"80.0","x":-3663.714285714286,"y":-2950.285714285714,"z":3210.095238095238,"a95":"0.99","info":"22/09/2014 at 20:51:18"},{"visible":true,"include":false,"step":"90.0","x":-4202.761904761905,"y":-2688.6666666666665,"z":3337.4285714285716,"a95":"0.99","info":"22/09/2014 at 20:51:18"},{"visible":true,"include":false,"step":"100.0","x":-3743.1428571428573,"y":-2631.809523809524,"z":3223.6190476190477,"a95":"0.99","info":"22/09/2014 at 20:51:18"}],"demagType":"Unknown","patch":1.1,"format":"Unknown","strat":null},{"version":"v1.1.0","exported":"2017-05-22T14:15:12.722Z","info":"","GEO":[{"dec":22.115757706314753,"inc":63.42402249911607,"MAD":3.2378236781017327,"cm":[-1.2992781453898974e-13,1.5970293870417489e-13,0],"intensity":16372.921807299284,"type":"dir","forced":true,"remark":"","origin":false,"nSteps":8,"minStep":"210","maxStep":"400","steps":["210","240","270","300","320","340","370","400"],"group":"None"}],"TECT":[{"dec":10.793246273786849,"inc":30.754099096972475,"MAD":3.2378236781017606,"cm":[-1.7323708605198632e-13,1.4948465745657727e-12,6.496390726949487e-14],"intensity":16372.921807299284,"type":"dir","forced":true,"remark":"","origin":false,"nSteps":8,"minStep":"210","maxStep":"400","steps":["210","240","270","300","320","340","370","400"],"group":"None"}],"interpreted":true,"name":"SS22.23A","coreAzi":94,"coreDip":29,"bedStrike":269,"bedDip":34,"data":[{"visible":true,"include":false,"step":"20","x":-27039.619047619046,"y":-18774.190476190477,"z":15543.904761904761,"a95":"2","info":"\"14-10-13\" at \"17:57\""},{"visible":true,"include":false,"step":"100","x":-16623.714285714286,"y":-10762.857142857143,"z":11691.238095238095,"a95":"2.4","info":"\"14-10-13\" at \"20:52\""},{"visible":true,"include":false,"step":"150","x":-11388.095238095239,"y":-6947.238095238095,"z":8481.047619047618,"a95":"2.4","info":"\"14-10-14\" at \"00:17\""},{"visible":true,"include":false,"step":"180","x":-10098.380952380952,"y":-6474.190476190476,"z":7758.857142857143,"a95":"2","info":"\"14-10-14\" at \"17:33\""},{"visible":true,"include":true,"step":"210","x":-8736,"y":-5513.142857142857,"z":6831.809523809524,"a95":"2.2","info":"\"14-10-14\" at \"20:41\""},{"visible":true,"include":true,"step":"240","x":-7071.9047619047615,"y":-4521.142857142857,"z":5416.476190476191,"a95":"2.4","info":"\"14-10-14\" at \"23:57\""},{"visible":true,"include":true,"step":"270","x":-5112.952380952381,"y":-2821.4285714285716,"z":4308.571428571428,"a95":"2.3","info":"\"14-10-15\" at \"17:41\""},{"visible":true,"include":true,"step":"300","x":-4998.571428571428,"y":-2619.5238095238096,"z":3468,"a95":"2.2","info":"\"14-10-15\" at \"20:56\""},{"visible":true,"include":true,"step":"320","x":-4138.571428571428,"y":-2516.6666666666665,"z":4048.4761904761904,"a95":"2.2","info":"\"14-10-16\" at \"00:16\""},{"visible":true,"include":true,"step":"340","x":-3919.3333333333335,"y":-1995.047619047619,"z":2659.5238095238096,"a95":"2.2","info":"\"14-10-16\" at \"18:12\""},{"visible":true,"include":true,"step":"370","x":-3693.1428571428573,"y":-1940.6666666666667,"z":2891.3333333333335,"a95":"2.6","info":"\"14-10-16\" at \"21:26\""},{"visible":true,"include":true,"step":"400","x":-3161.809523809524,"y":-1772.095238095238,"z":1737.904761904762,"a95":"2","info":"\"14-10-17\" at \"00:38\""},{"visible":true,"include":false,"step":"420","x":-2985.5238095238096,"y":-1737.2380952380952,"z":2439.2380952380954,"a95":"2.2","info":"\"14-10-17\" at \"16:09\""},{"visible":true,"include":false,"step":"440","x":-3032.095238095238,"y":-1410.7619047619048,"z":1394.1904761904761,"a95":"2","info":"\"14-10-17\" at \"19:19\""},{"visible":true,"include":false,"step":"470","x":-2647.4285714285716,"y":-1301.047619047619,"z":1793.7142857142858,"a95":"2.2","info":"\"14-10-17\" at \"22:34\""},{"visible":true,"include":false,"step":"490","x":-1881.6190476190477,"y":-960.6666666666666,"z":988.4761904761905,"a95":"2.2","info":"\"14-10-18\" at \"10:59\""},{"visible":true,"include":false,"step":"520","x":-1437.142857142857,"y":-950.3809523809524,"z":912,"a95":"2.5","info":"\"14-10-18\" at \"13:45\""},{"visible":false,"include":false,"step":"550","x":-1350.5714285714287,"y":358.1904761904762,"z":94.19047619047619,"a95":"3","info":"\"14-10-18\" at \"16:57\""},{"visible":false,"include":false,"step":"580","x":431.42857142857144,"y":1318.5714285714287,"z":787.2380952380952,"a95":"2.4","info":"\"14-10-19\" at \"10:41\""},{"visible":false,"include":false,"step":"610","x":-1832.7619047619048,"y":405.9047619047619,"z":105.33333333333333,"a95":"2.2","info":"\"14-10-19\" at \"13:54\""}],"demagType":"Unknown","patch":1.1,"format":"Unknown","strat":null},{"version":"v1.1.0","exported":"2017-05-22T14:15:12.722Z","info":"","GEO":[{"dec":14.154040277810964,"inc":61.51839285775609,"MAD":7.553577564927698,"cm":[1865.7088010659743,920.0765744234261,7086.562540645208],"intensity":9961.887230249527,"type":"dir","forced":false,"remark":"","origin":false,"nSteps":7,"minStep":"210","maxStep":"370","steps":["210","240","270","300","320","340","370"],"group":"None"}],"TECT":[{"dec":7.12572958444315,"inc":28.11912120081862,"MAD":7.553577564927728,"cm":[5511.73660384361,856.4349223958563,4840.87365143989],"intensity":9961.887230249527,"type":"dir","forced":false,"remark":"","origin":false,"nSteps":7,"minStep":"210","maxStep":"370","steps":["210","240","270","300","320","340","370"],"group":"None"}],"interpreted":true,"name":"SS22.24A","coreAzi":57,"coreDip":32,"bedStrike":269,"bedDip":34,"data":[{"visible":true,"include":false,"step":"20","x":-34025.333333333336,"y":-25208,"z":39999.04761904762,"a95":"2.4","info":"\"14-10-13\" at \"17:59\""},{"visible":true,"include":false,"step":"100","x":-17345.619047619046,"y":-12661.714285714286,"z":24900.85714285714,"a95":"2.5","info":"\"14-10-13\" at \"20:54\""},{"visible":true,"include":false,"step":"150","x":-11568.857142857143,"y":-6697.238095238095,"z":15936.761904761905,"a95":"2.6","info":"\"14-10-14\" at \"00:19\""},{"visible":true,"include":false,"step":"180","x":-10064.190476190477,"y":-5382.571428571428,"z":13992.47619047619,"a95":"2.4","info":"\"14-10-14\" at \"17:35\""},{"visible":true,"include":true,"step":"210","x":-8964,"y":-3185.809523809524,"z":10262.57142857143,"a95":"2.4","info":"\"14-10-14\" at \"20:43\""},{"visible":true,"include":true,"step":"240","x":-7092.190476190476,"y":-2333.1428571428573,"z":7969.523809523809,"a95":"2.6","info":"\"14-10-14\" at \"23:59\""},{"visible":true,"include":true,"step":"270","x":-4540.285714285715,"y":-1068.7619047619048,"z":5449.047619047619,"a95":"2.6","info":"\"14-10-15\" at \"17:44\""},{"visible":true,"include":true,"step":"300","x":-4592.666666666667,"y":-479.23809523809524,"z":4387.714285714285,"a95":"2.5","info":"\"14-10-15\" at \"20:59\""},{"visible":true,"include":true,"step":"320","x":-3340.9523809523807,"y":-449.9047619047619,"z":3906.4761904761904,"a95":"2.6","info":"\"14-10-16\" at \"00:18\""},{"visible":true,"include":true,"step":"340","x":-3659.809523809524,"y":-201.14285714285714,"z":2050.5714285714284,"a95":"3.1","info":"\"14-10-16\" at \"18:14\""},{"visible":true,"include":true,"step":"370","x":-3246.6666666666665,"y":272.76190476190476,"z":2874.095238095238,"a95":"3","info":"\"14-10-16\" at \"21:27\""},{"visible":true,"include":false,"step":"400","x":-2997.714285714286,"y":96.76190476190476,"z":1401.6190476190477,"a95":"3.1","info":"\"14-10-17\" at \"00:40\""},{"visible":true,"include":false,"step":"420","x":-2953.809523809524,"y":351.04761904761904,"z":2623.2380952380954,"a95":"3","info":"\"14-10-17\" at \"16:11\""},{"visible":true,"include":false,"step":"440","x":-3296.7619047619046,"y":549.5238095238095,"z":1602.6666666666667,"a95":"2.8","info":"\"14-10-17\" at \"19:21\""},{"visible":true,"include":false,"step":"470","x":-2888.9523809523807,"y":590.3809523809524,"z":1487.5238095238096,"a95":"3.2","info":"\"14-10-17\" at \"22:36\""},{"visible":false,"include":false,"step":"490","x":-2809.6190476190477,"y":1960.2857142857142,"z":-585.047619047619,"a95":"2.6","info":"\"14-10-18\" at \"11:01\""},{"visible":false,"include":false,"step":"520","x":-2550.7619047619046,"y":-101.71428571428571,"z":2118.6666666666665,"a95":"3","info":"\"14-10-18\" at \"13:48\""},{"visible":false,"include":false,"step":"550","x":-327.04761904761904,"y":2096.9523809523807,"z":-809.1428571428571,"a95":"2.8","info":"\"14-10-18\" at \"16:59\""},{"visible":false,"include":false,"step":"580","x":1375.7142857142858,"y":1121.904761904762,"z":994.4761904761905,"a95":"3.2","info":"\"14-10-19\" at \"10:43\""},{"visible":false,"include":false,"step":"610","x":-570,"y":3465.0476190476193,"z":-1077.904761904762,"a95":"2.5","info":"\"14-10-19\" at \"13:56\""}],"demagType":"Unknown","patch":1.1,"format":"Unknown","strat":null},{"version":"v1.1.0","exported":"2017-05-22T14:15:12.722Z","info":"8","GEO":[{"dec":6.786142466164279,"inc":61.984255412370445,"MAD":3.4604400055134397,"cm":[0,2.6137822065460827e-14,0],"intensity":17574.218173454068,"type":"dir","forced":true,"remark":"","origin":false,"nSteps":8,"minStep":"25.0","maxStep":"70.0","steps":["25.0","30.0","35.0","40.0","45.0","50.0","60.0","70.0"],"group":"None"}],"TECT":[{"dec":3.1384068211768863,"inc":28.14148629884206,"MAD":3.4604400055133313,"cm":[-2.598556290779795e-13,1.7303407384176916e-12,1.2992781453898974e-13],"intensity":17574.218173454068,"type":"dir","forced":true,"remark":"","origin":false,"nSteps":8,"minStep":"25.0","maxStep":"70.0","steps":["25.0","30.0","35.0","40.0","45.0","50.0","60.0","70.0"],"group":"None"}],"interpreted":true,"name":"SS22.25B","coreAzi":76,"coreDip":14,"bedStrike":269,"bedDip":34,"data":[{"visible":true,"include":false,"step":"0.0","x":-31349.52380952381,"y":-19068.571428571428,"z":16723.809523809523,"a95":"0.99","info":"11/10/2014 at 01:32:58"},{"visible":true,"include":false,"step":"4.0","x":-27078.095238095237,"y":-16783.809523809523,"z":14216.190476190477,"a95":"0.99","info":"11/10/2014 at 01:32:58"},{"visible":true,"include":false,"step":"8.0","x":-20794.285714285714,"y":-12678.095238095239,"z":10168.57142857143,"a95":"0.99","info":"11/10/2014 at 01:32:58"},{"visible":true,"include":false,"step":"12.0","x":-16097.142857142857,"y":-9760.952380952382,"z":8247.904761904761,"a95":"0.99","info":"11/10/2014 at 01:32:58"},{"visible":true,"include":false,"step":"16.0","x":-13404.761904761905,"y":-7560.857142857143,"z":6599.523809523809,"a95":"0.99","info":"11/10/2014 at 01:32:58"},{"visible":true,"include":false,"step":"20.0","x":-11455.238095238095,"y":-6917.333333333333,"z":4776.952380952381,"a95":"0.99","info":"11/10/2014 at 01:32:58"},{"visible":true,"include":true,"step":"25.0","x":-9670.47619047619,"y":-5535.238095238095,"z":5108.761904761905,"a95":"0.99","info":"11/10/2014 at 01:32:58"},{"visible":true,"include":true,"step":"30.0","x":-8550.952380952382,"y":-4497.9047619047615,"z":3597.4285714285716,"a95":"0.99","info":"11/10/2014 at 01:32:58"},{"visible":true,"include":true,"step":"35.0","x":-7622.476190476191,"y":-4740.571428571428,"z":3476.9523809523807,"a95":"0.99","info":"11/10/2014 at 01:32:58"},{"visible":true,"include":true,"step":"40.0","x":-6975.523809523809,"y":-3412.095238095238,"z":2974.3809523809523,"a95":"0.99","info":"11/10/2014 at 01:32:58"},{"visible":true,"include":true,"step":"45.0","x":-6048.857142857143,"y":-2824.6666666666665,"z":2528.6666666666665,"a95":"0.99","info":"11/10/2014 at 01:32:58"},{"visible":true,"include":true,"step":"50.0","x":-5819.809523809524,"y":-3380.6666666666665,"z":2370.3809523809523,"a95":"0.99","info":"11/10/2014 at 01:32:58"},{"visible":true,"include":true,"step":"60.0","x":-5144,"y":-2118.5714285714284,"z":2940.8571428571427,"a95":"0.99","info":"11/10/2014 at 01:32:58"},{"visible":true,"include":true,"step":"70.0","x":-4538,"y":-2252.285714285714,"z":1697.6190476190477,"a95":"0.99","info":"11/10/2014 at 01:32:58"},{"visible":false,"include":false,"step":"80.0","x":-6817.333333333333,"y":-2018,"z":1580.3809523809523,"a95":"0.99","info":"11/10/2014 at 01:32:58"},{"visible":false,"include":false,"step":"90.0","x":-4211.238095238095,"y":-1301.8095238095239,"z":2015.047619047619,"a95":"0.99","info":"11/10/2014 at 01:32:58"},{"visible":false,"include":false,"step":"100.0","x":-3831.6190476190477,"y":-1035.3333333333333,"z":1795.047619047619,"a95":"0.99","info":"11/10/2014 at 01:32:58"}],"demagType":"Unknown","patch":1.1,"format":"Unknown","strat":null}]
