# Supplementary material for: Paleomagnetic constraints on the timing and distribution of Cenozoic rotations in Central and Eastern Anatolia
Source: Copernicus journal article supplement (doi:10.5194/se-9-295-2018), 2018-03-21
Supplement: Supplementary file 2 [file se-9-295-2018-supplement.zip › se-2017-66_DATA_dir files/dir files Sivas/SS23.dir]

[{"version":"v1.1.0","exported":"2016-10-17T10:09:47.466Z","volume":10.5,"added":"2016-10-17T09:58:26.288Z","format":"Utrecht","demagType":"Unknown","strat":null,"patch":1.1,"GEO":[],"TECT":[],"interpreted":false,"name":"SS23.1A","coreAzi":241,"coreDip":41,"bedStrike":215,"bedDip":20,"data":[{"visible":true,"include":false,"step":"20","x":9425.52380952381,"y":-1095.5238095238096,"z":1843.142857142857,"a95":1.7,"info":"\"14-10-13\" at \"18:01\""},{"visible":true,"include":false,"step":"100","x":11040.095238095239,"y":-1864.4761904761904,"z":1482,"a95":1.6,"info":"\"14-10-13\" at \"20:56\""},{"visible":true,"include":false,"step":"150","x":11210.380952380952,"y":-1917.8095238095239,"z":1255.2380952380952,"a95":1.7,"info":"\"14-10-14\" at \"00:21\""},{"visible":true,"include":false,"step":"180","x":11165.714285714286,"y":-1831.142857142857,"z":1246.6666666666667,"a95":1.7,"info":"\"14-10-14\" at \"17:37\""},{"visible":true,"include":false,"step":"210","x":10941.52380952381,"y":-2037.142857142857,"z":1269.3333333333333,"a95":1.7,"info":"\"14-10-14\" at \"20:45\""},{"visible":true,"include":false,"step":"240","x":10736.285714285714,"y":-1928.6666666666667,"z":1222.095238095238,"a95":1.7,"info":"\"14-10-15\" at \"00:14\""},{"visible":true,"include":false,"step":"270","x":10669.809523809523,"y":-2230.285714285714,"z":1212.7619047619048,"a95":1.7,"info":"\"14-10-15\" at \"17:46\""},{"visible":true,"include":false,"step":"300","x":10290.190476190477,"y":-2252.285714285714,"z":1041.047619047619,"a95":1.7,"info":"\"14-10-15\" at \"21:01\""},{"visible":true,"include":false,"step":"320","x":10186.285714285714,"y":-1972,"z":1005.4285714285714,"a95":1.7,"info":"\"14-10-16\" at \"00:20\""},{"visible":true,"include":false,"step":"340","x":10064.952380952382,"y":-1840.857142857143,"z":936.5714285714286,"a95":1.7,"info":"\"14-10-16\" at \"18:16\""},{"visible":true,"include":true,"step":"370","x":9676.47619047619,"y":-2218.4761904761904,"z":871.2380952380952,"a95":1.7,"info":"\"14-10-16\" at \"21:29\""},{"visible":true,"include":true,"step":"400","x":9637.238095238095,"y":-1695.904761904762,"z":598.7619047619048,"a95":1.7,"info":"\"14-10-17\" at \"00:42\""},{"visible":true,"include":true,"step":"420","x":9371.904761904761,"y":-2003.7142857142858,"z":908.0952380952381,"a95":1.7,"info":"\"14-10-17\" at \"16:13\""},{"visible":true,"include":true,"step":"440","x":9320.285714285714,"y":-1822.1904761904761,"z":782,"a95":1.7,"info":"\"14-10-17\" at \"19:24\""},{"visible":true,"include":true,"step":"470","x":9094.952380952382,"y":-2102.190476190476,"z":863.2380952380952,"a95":1.7,"info":"\"14-10-17\" at \"22:38\""},{"visible":true,"include":true,"step":"490","x":8848.761904761905,"y":-2050.285714285714,"z":700.3809523809524,"a95":1.7,"info":"\"14-10-18\" at \"11:03\""},{"visible":true,"include":true,"step":"520","x":8587.333333333334,"y":-1444.7619047619048,"z":627.6190476190476,"a95":1.7,"info":"\"14-10-18\" at \"13:50\""},{"visible":true,"include":true,"step":"550","x":8140.666666666667,"y":-1602.2857142857142,"z":408.95238095238096,"a95":1.7,"info":"\"14-10-18\" at \"17:01\""},{"visible":true,"include":true,"step":"580","x":7523.047619047619,"y":-2048.190476190476,"z":433.5238095238095,"a95":1.7,"info":"\"14-10-19\" at \"10:45\""},{"visible":true,"include":true,"step":"610","x":6465.714285714285,"y":-1364.857142857143,"z":404.85714285714283,"a95":1.7,"info":"\"14-10-19\" at \"13:59\""},{"visible":true,"include":true,"step":"640","x":6152.285714285715,"y":-1041.7142857142858,"z":471.3333333333333,"a95":1.7,"info":"\"14-10-19\" at \"18:16\""},{"visible":true,"include":false,"step":"660","x":3449.3333333333335,"y":-315.04761904761904,"z":282.4761904761905,"a95":1.7,"info":"\"14-10-20\" at \"22:24\""},{"visible":true,"include":false,"step":"680","x":3518.190476190476,"y":-384.6666666666667,"z":447.9047619047619,"a95":1.8,"info":"\"14-10-26\" at \"04:10\""}]},{"version":"v1.1.0","exported":"2016-10-17T10:09:47.466Z","volume":10.5,"added":"2016-10-17T09:58:26.288Z","format":"Utrecht","demagType":"Unknown","strat":"5","patch":1.1,"GEO":[],"TECT":[],"interpreted":false,"name":"SS23.2A","coreAzi":235,"coreDip":50,"bedStrike":215,"bedDip":20,"data":[{"visible":true,"include":false,"step":"0.0","x":-57.06952380952381,"y":1303.047619047619,"z":539.9047619047619,"a95":0.99,"info":"22/09/2014 at 20:51:18"},{"visible":true,"include":false,"step":"5.0","x":347.76190476190476,"y":976.7619047619048,"z":337.8285714285714,"a95":0.99,"info":"22/09/2014 at 20:51:18"},{"visible":true,"include":false,"step":"10.0","x":900.5904761904762,"y":683.4095238095239,"z":103.96190476190475,"a95":0.99,"info":"22/09/2014 at 20:51:18"},{"visible":true,"include":false,"step":"15.0","x":1086.857142857143,"y":437.91428571428577,"z":-86.06666666666668,"a95":0.99,"info":"22/09/2014 at 20:51:18"},{"visible":true,"include":false,"step":"20.0","x":1310,"y":304.4095238095238,"z":-175.2095238095238,"a95":0.99,"info":"22/09/2014 at 20:51:18"},{"visible":true,"include":false,"step":"25.0","x":1382.2857142857142,"y":181.92380952380952,"z":-212.32380952380953,"a95":0.99,"info":"22/09/2014 at 20:51:18"},{"visible":true,"include":false,"step":"30.0","x":1456.2857142857142,"y":135.32380952380953,"z":-283.2761904761905,"a95":0.99,"info":"22/09/2014 at 20:51:18"},{"visible":true,"include":true,"step":"35.0","x":1511.7142857142858,"y":62.859047619047615,"z":-469.7047619047619,"a95":0.99,"info":"22/09/2014 at 20:51:18"},{"visible":true,"include":true,"step":"40.0","x":1561.7142857142858,"y":-22.567619047619047,"z":-409.64761904761906,"a95":0.99,"info":"22/09/2014 at 20:51:18"},{"visible":true,"include":true,"step":"45.0","x":1536,"y":24.85809523809524,"z":-408.95238095238096,"a95":0.99,"info":"22/09/2014 at 20:51:18"},{"visible":true,"include":true,"step":"50.0","x":1537.4285714285713,"y":-2.5113333333333334,"z":-530.8285714285714,"a95":0.99,"info":"22/09/2014 at 20:51:18"},{"visible":true,"include":true,"step":"60.0","x":1532.1904761904761,"y":-100.35238095238095,"z":-617.8571428571429,"a95":0.99,"info":"22/09/2014 at 20:51:18"},{"visible":true,"include":true,"step":"70.0","x":1501.8095238095239,"y":214.13333333333335,"z":-621.0952380952381,"a95":0.99,"info":"22/09/2014 at 20:51:18"},{"visible":true,"include":true,"step":"80.0","x":1474.1904761904761,"y":77.41428571428571,"z":-439.0571428571429,"a95":0.99,"info":"22/09/2014 at 20:51:18"},{"visible":true,"include":true,"step":"90.0","x":1503.142857142857,"y":144,"z":-320.45714285714286,"a95":0.99,"info":"22/09/2014 at 20:51:18"},{"visible":true,"include":true,"step":"100.0","x":1517.3333333333333,"y":144.2952380952381,"z":-728.7238095238096,"a95":0.99,"info":"22/09/2014 at 20:51:18"}]},{"version":"v1.1.0","exported":"2016-10-17T10:09:47.466Z","volume":10.5,"added":"2016-10-17T09:58:26.289Z","format":"Utrecht","demagType":"Unknown","strat":null,"patch":1.1,"GEO":[],"TECT":[],"interpreted":false,"name":"SS23.2B","coreAzi":235,"coreDip":50,"bedStrike":215,"bedDip":20,"data":[{"visible":true,"include":false,"step":"20","x":-2487.2380952380954,"y":1050.5714285714287,"z":2342.6666666666665,"a95":2.6,"info":"\"14-10-20\" at \"17:42\""},{"visible":true,"include":true,"step":"100","x":-1099.142857142857,"y":411.14285714285717,"z":1076.6666666666667,"a95":2.6,"info":"\"14-10-20\" at \"20:55\""},{"visible":true,"include":true,"step":"150","x":-605.6190476190476,"y":119.61904761904762,"z":858.5714285714286,"a95":3,"info":"\"14-10-20\" at \"23:47\""},{"visible":true,"include":true,"step":"180","x":-396.3809523809524,"y":92.76190476190476,"z":742.3809523809524,"a95":3.4,"info":"\"14-10-21\" at \"15:55\""},{"visible":true,"include":true,"step":"210","x":-208.38095238095238,"y":26.19047619047619,"z":854.6666666666666,"a95":3.3,"info":"\"14-10-21\" at \"18:48\""},{"visible":true,"include":true,"step":"240","x":-179.61904761904762,"y":16.38095238095238,"z":705.1428571428571,"a95":3.2,"info":"\"14-10-21\" at \"22:00\""},{"visible":true,"include":true,"step":"270","x":-12.761904761904763,"y":-60.857142857142854,"z":872.952380952381,"a95":3.4,"info":"\"14-10-22\" at \"00:56\""},{"visible":true,"include":false,"step":"300","x":-85.9047619047619,"y":-129.52380952380952,"z":624.6666666666666,"a95":3.3,"info":"\"14-10-22\" at \"17:15\""},{"visible":true,"include":false,"step":"330","x":21.333333333333332,"y":-233.8095238095238,"z":471.04761904761904,"a95":3.5,"info":"\"14-10-22\" at \"20:25\""},{"visible":true,"include":false,"step":"360","x":79.23809523809524,"y":-77.9047619047619,"z":571.1428571428571,"a95":4.1,"info":"\"14-10-22\" at \"23:28\""},{"visible":true,"include":false,"step":"390","x":141.42857142857142,"y":-184.95238095238096,"z":518.3809523809524,"a95":4.1,"info":"\"14-10-23\" at \"17:44\""},{"visible":true,"include":false,"step":"420","x":371.42857142857144,"y":-82.57142857142857,"z":485.14285714285717,"a95":3.3,"info":"\"14-10-23\" at \"20:41\""},{"visible":true,"include":false,"step":"450","x":404.2857142857143,"y":-240,"z":322.57142857142856,"a95":3.3,"info":"\"14-10-24\" at \"15:14\""},{"visible":true,"include":false,"step":"480","x":411.8095238095238,"y":-125.61904761904762,"z":7.238095238095238,"a95":3,"info":"\"14-10-24\" at \"18:15\""},{"visible":true,"include":false,"step":"510","x":476,"y":27.142857142857142,"z":329.9047619047619,"a95":3.3,"info":"\"14-10-24\" at \"21:08\""},{"visible":true,"include":false,"step":"540","x":424.76190476190476,"y":-384.4761904761905,"z":150.95238095238096,"a95":2.7,"info":"\"14-10-25\" at \"00:09\""},{"visible":true,"include":false,"step":"570","x":718.3809523809524,"y":-235.8095238095238,"z":183.42857142857142,"a95":2.8,"info":"\"14-10-25\" at \"02:50\""},{"visible":true,"include":false,"step":"600","x":313.5238095238095,"y":-426.1904761904762,"z":388.2857142857143,"a95":3.4,"info":"\"14-10-25\" at \"05:25\""},{"visible":true,"include":false,"step":"630","x":505.6190476190476,"y":-540.0952380952381,"z":112.57142857142857,"a95":2.7,"info":"\"14-10-25\" at \"23:48\""},{"visible":true,"include":false,"step":"660","x":303.8095238095238,"y":-700.4761904761905,"z":177.14285714285714,"a95":2.5,"info":"\"14-10-26\" at \"02:32\""},{"visible":true,"include":false,"step":"680","x":0.8571428571428571,"y":-452.76190476190476,"z":254.28571428571428,"a95":4.1,"info":"\"14-10-26\" at \"03:52\""}]},{"version":"v1.1.0","exported":"2016-10-17T10:09:47.466Z","volume":10.5,"added":"2016-10-17T09:58:26.290Z","format":"Utrecht","demagType":"Unknown","strat":"6","patch":1.1,"GEO":[],"TECT":[],"interpreted":false,"name":"SS23.4A","coreAzi":251,"coreDip":25,"bedStrike":215,"bedDip":20,"data":[{"visible":true,"include":false,"step":"0.0","x":11184.761904761905,"y":-3689.0476190476193,"z":4842.285714285715,"a95":0.99,"info":"22/09/2014 at 20:51:18"},{"visible":true,"include":false,"step":"5.0","x":11440,"y":-3819.904761904762,"z":4671.714285714285,"a95":0.99,"info":"22/09/2014 at 20:51:18"},{"visible":true,"include":false,"step":"10.0","x":11635.238095238095,"y":-3901.4285714285716,"z":4546.0952380952385,"a95":0.99,"info":"22/09/2014 at 20:51:18"},{"visible":true,"include":true,"step":"15.0","x":11631.42857142857,"y":-3904,"z":4436.952380952381,"a95":0.99,"info":"22/09/2014 at 20:51:18"},{"visible":true,"include":true,"step":"20.0","x":11562.857142857143,"y":-3898.190476190476,"z":4370.857142857143,"a95":0.99,"info":"22/09/2014 at 20:51:18"},{"visible":true,"include":true,"step":"25.0","x":11319.047619047618,"y":-3821.0476190476193,"z":4345.428571428572,"a95":0.99,"info":"22/09/2014 at 20:51:18"},{"visible":true,"include":true,"step":"30.0","x":11252.380952380952,"y":-3855.4285714285716,"z":4231.238095238095,"a95":0.99,"info":"22/09/2014 at 20:51:18"},{"visible":true,"include":true,"step":"35.0","x":11090.47619047619,"y":-3776.3809523809523,"z":4145.809523809524,"a95":0.99,"info":"22/09/2014 at 20:51:18"},{"visible":true,"include":true,"step":"40.0","x":11060,"y":-3825.5238095238096,"z":4155.238095238095,"a95":0.99,"info":"22/09/2014 at 20:51:18"},{"visible":true,"include":true,"step":"45.0","x":10860,"y":-3868.3809523809523,"z":4116.666666666667,"a95":0.99,"info":"22/09/2014 at 20:51:18"},{"visible":true,"include":true,"step":"50.0","x":10828.57142857143,"y":-3705.1428571428573,"z":4106,"a95":0.99,"info":"22/09/2014 at 20:51:18"},{"visible":true,"include":true,"step":"60.0","x":10608.57142857143,"y":-3560.3809523809523,"z":4039.714285714286,"a95":0.99,"info":"22/09/2014 at 20:51:18"},{"visible":true,"include":true,"step":"70.0","x":10569.52380952381,"y":-3626.8571428571427,"z":3945.4285714285716,"a95":0.99,"info":"22/09/2014 at 20:51:18"},{"visible":true,"include":true,"step":"80.0","x":10512.380952380952,"y":-3433.5238095238096,"z":3940.4761904761904,"a95":0.99,"info":"22/09/2014 at 20:51:18"},{"visible":true,"include":false,"step":"90.0","x":10254.285714285714,"y":-3622.6666666666665,"z":3804.9523809523807,"a95":0.99,"info":"22/09/2014 at 20:51:18"},{"visible":true,"include":false,"step":"100.0","x":10206.666666666666,"y":-3579.2380952380954,"z":3757.0476190476193,"a95":0.99,"info":"22/09/2014 at 20:51:18"}]},{"version":"v1.1.0","exported":"2016-10-17T10:09:47.466Z","volume":10.5,"added":"2016-10-17T09:58:26.291Z","format":"Utrecht","demagType":"Unknown","strat":null,"patch":1.1,"GEO":[],"TECT":[],"interpreted":false,"name":"SS23.7A","coreAzi":268,"coreDip":24,"bedStrike":215,"bedDip":20,"data":[{"visible":true,"include":false,"step":"20","x":-2135.3333333333335,"y":608.6666666666666,"z":1832.095238095238,"a95":2.3,"info":"\"14-10-13\" at \"18:03\""},{"visible":true,"include":true,"step":"100","x":-762,"y":-71.14285714285714,"z":1336.7619047619048,"a95":3.1,"info":"\"14-10-13\" at \"20:58\""},{"visible":true,"include":true,"step":"150","x":-286.0952380952381,"y":-454.6666666666667,"z":977.047619047619,"a95":3.5,"info":"\"14-10-14\" at \"00:23\""},{"visible":true,"include":true,"step":"180","x":-249.61904761904762,"y":-503.42857142857144,"z":871.7142857142857,"a95":3.3,"info":"\"14-10-14\" at \"17:39\""},{"visible":true,"include":true,"step":"210","x":-125.52380952380952,"y":-711.8095238095239,"z":730.1904761904761,"a95":3.2,"info":"\"14-10-14\" at \"20:47\""},{"visible":true,"include":false,"step":"240","x":73.42857142857143,"y":-646.5714285714286,"z":592.2857142857143,"a95":3.4,"info":"\"14-10-15\" at \"00:16\""},{"visible":true,"include":false,"step":"270","x":-62.76190476190476,"y":-707.2380952380952,"z":649.7142857142857,"a95":3.3,"info":"\"14-10-15\" at \"17:50\""},{"visible":true,"include":false,"step":"300","x":17.523809523809526,"y":-672.1904761904761,"z":560.8571428571429,"a95":3.5,"info":"\"14-10-15\" at \"21:03\""},{"visible":true,"include":false,"step":"320","x":26.285714285714285,"y":-719.8095238095239,"z":406.6666666666667,"a95":3.3,"info":"\"14-10-16\" at \"00:22\""},{"visible":true,"include":false,"step":"340","x":-55.04761904761905,"y":-413.6190476190476,"z":482.57142857142856,"a95":3.9,"info":"\"14-10-16\" at \"18:19\""},{"visible":true,"include":false,"step":"370","x":-30.571428571428573,"y":-697.6190476190476,"z":412.57142857142856,"a95":3.2,"info":"\"14-10-16\" at \"21:31\""},{"visible":true,"include":false,"step":"400","x":59.80952380952381,"y":-441.14285714285717,"z":203.61904761904762,"a95":4.3,"info":"\"14-10-17\" at \"00:44\""},{"visible":true,"include":false,"step":"420","x":15.523809523809524,"y":-502.95238095238096,"z":337.23809523809524,"a95":4,"info":"\"14-10-17\" at \"16:15\""},{"visible":true,"include":false,"step":"440","x":148.76190476190476,"y":-649.6190476190476,"z":88,"a95":3.2,"info":"\"14-10-17\" at \"19:26\""},{"visible":true,"include":false,"step":"470","x":228.76190476190476,"y":-802.3809523809524,"z":33.04761904761905,"a95":3.1,"info":"\"14-10-17\" at \"22:40\""},{"visible":true,"include":false,"step":"490","x":-60.19047619047619,"y":-685.5238095238095,"z":7.809523809523809,"a95":3.4,"info":"\"14-10-18\" at \"11:05\""},{"visible":true,"include":false,"step":"520","x":426.95238095238096,"y":-733.9047619047619,"z":93.42857142857143,"a95":2.8,"info":"\"14-10-18\" at \"13:52\""},{"visible":true,"include":false,"step":"550","x":473.14285714285717,"y":-781.5238095238095,"z":251.33333333333334,"a95":3.1,"info":"\"14-10-18\" at \"17:03\""},{"visible":true,"include":false,"step":"580","x":73.9047619047619,"y":-594.3809523809524,"z":627.6190476190476,"a95":3.3,"info":"\"14-10-19\" at \"10:48\""},{"visible":true,"include":false,"step":"610","x":-45.04761904761905,"y":-1107.142857142857,"z":452.4761904761905,"a95":2.3,"info":"\"14-10-19\" at \"14:01\""},{"visible":true,"include":false,"step":"640","x":494,"y":-458.95238095238096,"z":262.3809523809524,"a95":2.7,"info":"\"14-10-19\" at \"18:19\""}]},{"version":"v1.1.0","exported":"2016-10-17T10:09:47.467Z","volume":10.5,"added":"2016-10-17T09:58:26.291Z","format":"Utrecht","demagType":"Unknown","strat":null,"patch":1.1,"GEO":[],"TECT":[],"interpreted":false,"name":"SS23.8A","coreAzi":271,"coreDip":20,"bedStrike":215,"bedDip":20,"data":[{"visible":false,"include":false,"step":"20","x":-2843.0476190476193,"y":1809.5238095238096,"z":817.2380952380952,"a95":2.3,"info":"\"14-10-13\" at \"18:05\""},{"visible":true,"include":true,"step":"100","x":-1004.1904761904761,"y":684.2857142857143,"z":362,"a95":2.3,"info":"\"14-10-13\" at \"21:00\""},{"visible":true,"include":true,"step":"150","x":-260.57142857142856,"y":235.42857142857142,"z":60.857142857142854,"a95":6.1,"info":"\"14-10-14\" at \"00:25\""},{"visible":true,"include":false,"step":"180","x":-199.04761904761904,"y":149.33333333333334,"z":-162,"a95":7.8,"info":"\"14-10-14\" at \"17:41\""},{"visible":true,"include":false,"step":"210","x":-126.85714285714286,"y":99.9047619047619,"z":88.95238095238095,"a95":10.5,"info":"\"14-10-14\" at \"20:49\""},{"visible":true,"include":false,"step":"240","x":176.66666666666666,"y":-226.1904761904762,"z":-475.04761904761904,"a95":4.1,"info":"\"14-10-15\" at \"00:19\""},{"visible":true,"include":false,"step":"270","x":15.142857142857142,"y":-241.04761904761904,"z":-333.14285714285717,"a95":5.8,"info":"\"14-10-15\" at \"17:52\""},{"visible":true,"include":false,"step":"300","x":60.19047619047619,"y":-56.57142857142857,"z":-543.7142857142857,"a95":4.2,"info":"\"14-10-15\" at \"21:06\""},{"visible":true,"include":false,"step":"320","x":296.95238095238096,"y":-271.23809523809524,"z":-597.7142857142857,"a95":3.4,"info":"\"14-10-16\" at \"00:24\""},{"visible":true,"include":false,"step":"340","x":6,"y":178.57142857142858,"z":-657.047619047619,"a95":3.5,"info":"\"14-10-16\" at \"18:21\""},{"visible":true,"include":false,"step":"370","x":179.04761904761904,"y":-338,"z":-471.6190476190476,"a95":4.1,"info":"\"14-10-16\" at \"21:33\""},{"visible":true,"include":false,"step":"400","x":332.0952380952381,"y":-41.61904761904762,"z":-497.14285714285717,"a95":4,"info":"\"14-10-17\" at \"00:46\""},{"visible":true,"include":false,"step":"420","x":10.666666666666666,"y":32.95238095238095,"z":-671.9047619047619,"a95":3.7,"info":"\"14-10-17\" at \"16:17\""},{"visible":true,"include":false,"step":"440","x":87.9047619047619,"y":-252.76190476190476,"z":-890.3809523809524,"a95":3.3,"info":"\"14-10-17\" at \"19:28\""},{"visible":true,"include":false,"step":"470","x":236.28571428571428,"y":298.95238095238096,"z":-474.0952380952381,"a95":3.3,"info":"\"14-10-17\" at \"22:42\""},{"visible":true,"include":false,"step":"490","x":-36.76190476190476,"y":-8.095238095238095,"z":-407.23809523809524,"a95":5,"info":"\"14-10-18\" at \"11:07\""}]},{"version":"v1.1.0","exported":"2016-10-17T10:09:47.467Z","volume":10.5,"added":"2016-10-17T09:58:26.297Z","format":"Utrecht","demagType":"Unknown","strat":null,"patch":1.1,"GEO":[{"dec":34.99721588645099,"inc":68.88707395766856,"MAD":9.07270708471862,"cm":[3.552713678800501e-14,-2.042810365310288e-14,0],"intensity":2925.9882901206047,"type":"dir","forced":true,"remark":"","origin":false,"nSteps":13,"minStep":"210","maxStep":"570","steps":["210","240","270","300","330","360","390","420","450","480","510","540","570"],"group":"None","version":"v1.1.0"}],"TECT":[{"dec":353.4649461107869,"inc":61.23576467297635,"MAD":9.072707084718632,"cm":[1.4210854715202004e-14,1.5987211554602254e-14,0],"intensity":2925.9882901206047,"type":"dir","forced":true,"remark":"","origin":false,"nSteps":13,"minStep":"210","maxStep":"570","steps":["210","240","270","300","330","360","390","420","450","480","510","540","570"],"group":"None","version":"v1.1.0"}],"interpreted":true,"name":"SS23.10A","coreAzi":265,"coreDip":27,"bedStrike":215,"bedDip":20,"data":[{"visible":true,"include":false,"step":"20","x":-2968.3809523809523,"y":1770.7619047619048,"z":-57.333333333333336,"a95":1.8,"info":"\"14-10-20\" at \"17:44\""},{"visible":true,"include":false,"step":"100","x":-1850.952380952381,"y":984.5714285714286,"z":550.4761904761905,"a95":2,"info":"\"14-10-20\" at \"20:57\""},{"visible":true,"include":false,"step":"150","x":-1283.142857142857,"y":694.3809523809524,"z":494.4761904761905,"a95":2.2,"info":"\"14-10-20\" at \"23:49\""},{"visible":true,"include":false,"step":"180","x":-1282.3809523809523,"y":776.0952380952381,"z":284.0952380952381,"a95":2.1,"info":"\"14-10-21\" at \"15:57\""},{"visible":true,"include":true,"step":"210","x":-1301.904761904762,"y":567.1428571428571,"z":204.1904761904762,"a95":2.1,"info":"\"14-10-21\" at \"18:50\""},{"visible":true,"include":true,"step":"240","x":-1227.6190476190477,"y":533.5238095238095,"z":134,"a95":2.1,"info":"\"14-10-21\" at \"22:02\""},{"visible":true,"include":true,"step":"270","x":-1116.4761904761904,"y":441.7142857142857,"z":374.6666666666667,"a95":2,"info":"\"14-10-22\" at \"00:58\""},{"visible":true,"include":true,"step":"300","x":-1171.4285714285713,"y":438.57142857142856,"z":260.57142857142856,"a95":2.1,"info":"\"14-10-22\" at \"17:17\""},{"visible":true,"include":true,"step":"330","x":-1084.5714285714287,"y":202.76190476190476,"z":444,"a95":2.1,"info":"\"14-10-22\" at \"20:27\""},{"visible":true,"include":true,"step":"360","x":-1291.8095238095239,"y":390.85714285714283,"z":212.1904761904762,"a95":2.1,"info":"\"14-10-22\" at \"23:30\""},{"visible":true,"include":true,"step":"390","x":-1385.6190476190477,"y":149.52380952380952,"z":363.5238095238095,"a95":2,"info":"\"14-10-23\" at \"17:46\""},{"visible":true,"include":true,"step":"420","x":-1408.095238095238,"y":251.14285714285714,"z":282.76190476190476,"a95":2,"info":"\"14-10-23\" at \"20:43\""},{"visible":true,"include":true,"step":"450","x":-1273.3333333333333,"y":338.4761904761905,"z":503.14285714285717,"a95":2,"info":"\"14-10-24\" at \"15:16\""},{"visible":true,"include":true,"step":"480","x":-889.7142857142857,"y":411.7142857142857,"z":-3.3333333333333335,"a95":2.2,"info":"\"14-10-24\" at \"18:17\""},{"visible":true,"include":true,"step":"510","x":-934.3809523809524,"y":119.14285714285714,"z":134.1904761904762,"a95":2.1,"info":"\"14-10-24\" at \"21:10\""},{"visible":true,"include":true,"step":"540","x":-1067.142857142857,"y":81.42857142857143,"z":80.28571428571429,"a95":2.3,"info":"\"14-10-25\" at \"00:11\""},{"visible":true,"include":true,"step":"570","x":-1304.3809523809523,"y":571.6190476190476,"z":482.76190476190476,"a95":2.6,"info":"\"14-10-25\" at \"02:52\""},{"visible":true,"include":false,"step":"600","x":-1209.904761904762,"y":597.3333333333334,"z":426.3809523809524,"a95":2,"info":"\"14-10-25\" at \"05:27\""},{"visible":true,"include":false,"step":"630","x":-863.3333333333334,"y":508.3809523809524,"z":409.14285714285717,"a95":2.2,"info":"\"14-10-25\" at \"23:49\""},{"visible":true,"include":false,"step":"660","x":-184.76190476190476,"y":522.4761904761905,"z":1198.7619047619048,"a95":2.6,"info":"\"14-10-26\" at \"02:34\""},{"visible":true,"include":false,"step":"680","x":369.14285714285717,"y":-214.47619047619048,"z":-468.95238095238096,"a95":2.8,"info":"\"14-10-26\" at \"03:55\""}]},{"version":"v1.1.0","exported":"2016-10-17T10:09:47.467Z","volume":10.5,"added":"2016-10-17T09:58:26.297Z","format":"Utrecht","demagType":"Unknown","strat":null,"patch":1.1,"GEO":[],"TECT":[],"interpreted":false,"name":"SS23.11A","coreAzi":265,"coreDip":38,"bedStrike":215,"bedDip":20,"data":[{"visible":true,"include":false,"step":"20","x":-1258.1904761904761,"y":2092,"z":-34.095238095238095,"a95":1.6,"info":"\"14-10-20\" at \"17:46\""},{"visible":true,"include":true,"step":"100","x":-578,"y":1583.5238095238096,"z":-55.23809523809524,"a95":1.6,"info":"\"14-10-20\" at \"20:59\""},{"visible":true,"include":true,"step":"150","x":-248,"y":1320.6666666666667,"z":-265.42857142857144,"a95":1.7,"info":"\"14-10-20\" at \"23:51\""},{"visible":true,"include":true,"step":"180","x":-158.47619047619048,"y":1232.3809523809523,"z":-364.57142857142856,"a95":1.5,"info":"\"14-10-21\" at \"15:58\""},{"visible":true,"include":false,"step":"210","x":-102.28571428571429,"y":1154.3809523809523,"z":-308.4761904761905,"a95":1.6,"info":"\"14-10-21\" at \"18:51\""},{"visible":true,"include":false,"step":"240","x":16.19047619047619,"y":1070.7619047619048,"z":-441.3333333333333,"a95":1.6,"info":"\"14-10-21\" at \"22:04\""},{"visible":true,"include":false,"step":"270","x":-19.523809523809526,"y":1049.904761904762,"z":-328.57142857142856,"a95":1.5,"info":"\"14-10-22\" at \"01:00\""},{"visible":true,"include":false,"step":"300","x":-52.57142857142857,"y":1123.8095238095239,"z":-351.14285714285717,"a95":1.5,"info":"\"14-10-22\" at \"17:20\""},{"visible":true,"include":false,"step":"330","x":-44.95238095238095,"y":1172.857142857143,"z":-196,"a95":1.4,"info":"\"14-10-22\" at \"20:29\""},{"visible":true,"include":false,"step":"360","x":-23.714285714285715,"y":1121.8095238095239,"z":-264.1904761904762,"a95":1.6,"info":"\"14-10-22\" at \"23:32\""},{"visible":true,"include":false,"step":"390","x":126.66666666666667,"y":1074.6666666666667,"z":-334.1904761904762,"a95":1.7,"info":"\"14-10-23\" at \"17:48\""},{"visible":true,"include":false,"step":"420","x":-17.333333333333332,"y":1084.6666666666667,"z":-281.7142857142857,"a95":1.6,"info":"\"14-10-23\" at \"20:45\""},{"visible":true,"include":false,"step":"450","x":215.33333333333334,"y":909.4285714285714,"z":-180.28571428571428,"a95":1.5,"info":"\"14-10-24\" at \"15:18\""},{"visible":true,"include":false,"step":"480","x":239.52380952380952,"y":1066.952380952381,"z":-116.95238095238095,"a95":1.5,"info":"\"14-10-24\" at \"18:19\""},{"visible":true,"include":false,"step":"510","x":284.85714285714283,"y":670.8571428571429,"z":-150.38095238095238,"a95":1.5,"info":"\"14-10-24\" at \"21:12\""},{"visible":true,"include":false,"step":"540","x":178.95238095238096,"y":965.2380952380952,"z":-269.9047619047619,"a95":1.9,"info":"\"14-10-25\" at \"00:13\""},{"visible":true,"include":false,"step":"570","x":113.52380952380952,"y":885.7142857142857,"z":-331.8095238095238,"a95":1.7,"info":"\"14-10-25\" at \"02:54\""},{"visible":true,"include":false,"step":"600","x":38,"y":818.3809523809524,"z":-327.42857142857144,"a95":1.8,"info":"\"14-10-25\" at \"05:29\""},{"visible":true,"include":false,"step":"630","x":30.761904761904763,"y":614.2857142857143,"z":-335.42857142857144,"a95":2,"info":"\"14-10-25\" at \"23:51\""},{"visible":true,"include":false,"step":"660","x":142,"y":213.23809523809524,"z":-193.71428571428572,"a95":4.5,"info":"\"14-10-26\" at \"02:35\""},{"visible":true,"include":false,"step":"680","x":258.4761904761905,"y":-214.66666666666666,"z":-20.285714285714285,"a95":3.4,"info":"\"14-10-26\" at \"03:57\""}]},{"version":"v1.1.0","exported":"2016-10-17T10:09:47.467Z","volume":10.5,"added":"2016-10-17T09:58:26.297Z","format":"Utrecht","demagType":"Unknown","strat":null,"patch":1.1,"GEO":[{"dec":65.53699573346296,"inc":40.3832352669095,"MAD":5.89730467363166,"cm":[-5.3290705182007514e-14,2.1316282072803006e-14,0],"intensity":1675.8347160340284,"type":"dir","forced":true,"remark":"","origin":false,"nSteps":11,"minStep":"210","maxStep":"470","steps":["210","240","270","300","320","340","370","400","420","440","470"],"group":"None","version":"v1.1.0"}],"TECT":[{"dec":47.22055033430456,"inc":47.83340298299373,"MAD":5.8973046736316395,"cm":[-7.283063041541027e-14,5.684341886080802e-14,3.552713678800501e-15],"intensity":1675.8347160340284,"type":"dir","forced":true,"remark":"","origin":false,"nSteps":11,"minStep":"210","maxStep":"470","steps":["210","240","270","300","320","340","370","400","420","440","470"],"group":"None","version":"v1.1.0"}],"interpreted":true,"name":"SS23.12A","coreAzi":240,"coreDip":34,"bedStrike":215,"bedDip":20,"data":[{"visible":true,"include":false,"step":"20","x":-2650.4761904761904,"y":-109.9047619047619,"z":588.5714285714286,"a95":1.9,"info":"\"14-10-13\" at \"18:07\""},{"visible":true,"include":false,"step":"100","x":-1634.4761904761904,"y":-114.57142857142857,"z":0.8571428571428571,"a95":2,"info":"\"14-10-13\" at \"21:02\""},{"visible":true,"include":false,"step":"150","x":-1218.952380952381,"y":-100.38095238095238,"z":-160.66666666666666,"a95":2.2,"info":"\"14-10-14\" at \"00:27\""},{"visible":true,"include":false,"step":"180","x":-1124,"y":-128.95238095238096,"z":-150.57142857142858,"a95":2.2,"info":"\"14-10-14\" at \"17:43\""},{"visible":true,"include":true,"step":"210","x":-1029.3333333333333,"y":-147.04761904761904,"z":-173.61904761904762,"a95":2.2,"info":"\"14-10-14\" at \"20:51\""},{"visible":true,"include":true,"step":"240","x":-866.3809523809524,"y":-70.66666666666667,"z":-217.9047619047619,"a95":2.2,"info":"\"14-10-15\" at \"00:22\""},{"visible":true,"include":true,"step":"270","x":-893.9047619047619,"y":-98.47619047619048,"z":-149.71428571428572,"a95":2.3,"info":"\"14-10-15\" at \"17:54\""},{"visible":true,"include":true,"step":"300","x":-850.7619047619048,"y":-29.904761904761905,"z":-283.6190476190476,"a95":2.5,"info":"\"14-10-15\" at \"21:08\""},{"visible":true,"include":true,"step":"320","x":-743.2380952380952,"y":-73.23809523809524,"z":-200,"a95":2.4,"info":"\"14-10-16\" at \"00:25\""},{"visible":true,"include":true,"step":"340","x":-727.2380952380952,"y":-47.42857142857143,"z":-298.76190476190476,"a95":2.3,"info":"\"14-10-16\" at \"18:23\""},{"visible":true,"include":true,"step":"370","x":-742.8571428571429,"y":-70.66666666666667,"z":-153.04761904761904,"a95":2.4,"info":"\"14-10-16\" at \"21:35\""},{"visible":true,"include":true,"step":"400","x":-710,"y":-21.714285714285715,"z":-229.23809523809524,"a95":2.5,"info":"\"14-10-17\" at \"00:48\""},{"visible":true,"include":true,"step":"420","x":-698.952380952381,"y":-54.095238095238095,"z":-185.9047619047619,"a95":2.4,"info":"\"14-10-17\" at \"16:19\""},{"visible":true,"include":true,"step":"440","x":-648.6666666666666,"y":15.80952380952381,"z":-352.2857142857143,"a95":2.2,"info":"\"14-10-17\" at \"19:30\""},{"visible":true,"include":true,"step":"470","x":-600.3809523809524,"y":-18.095238095238095,"z":-180.1904761904762,"a95":2.4,"info":"\"14-10-17\" at \"22:44\""},{"visible":false,"include":false,"step":"490","x":-544.7619047619048,"y":-56.666666666666664,"z":-399.14285714285717,"a95":2.5,"info":"\"14-10-18\" at \"11:09\""},{"visible":false,"include":false,"step":"520","x":-367.9047619047619,"y":-185.71428571428572,"z":-148.38095238095238,"a95":2.5,"info":"\"14-10-18\" at \"13:54\""},{"visible":false,"include":false,"step":"550","x":-247.23809523809524,"y":-33.61904761904762,"z":-202,"a95":2.8,"info":"\"14-10-18\" at \"17:05\""},{"visible":false,"include":false,"step":"580","x":-266.1904761904762,"y":-196.38095238095238,"z":-14.476190476190476,"a95":3.1,"info":"\"14-10-19\" at \"10:50\""},{"visible":false,"include":false,"step":"610","x":-236.76190476190476,"y":20.19047619047619,"z":-110.57142857142857,"a95":3.8,"info":"\"14-10-19\" at \"14:03\""},{"visible":true,"include":false,"step":"640","x":-317.5238095238095,"y":-36.857142857142854,"z":0.6666666666666666,"a95":3.9,"info":"\"14-10-19\" at \"18:21\""},{"visible":true,"include":false,"step":"660","x":-324,"y":301.42857142857144,"z":-159.61904761904762,"a95":4.1,"info":"\"14-10-20\" at \"22:27\""}]},{"version":"v1.1.0","exported":"2016-10-17T10:09:47.467Z","volume":10.5,"added":"2016-10-17T09:58:26.298Z","format":"Utrecht","demagType":"Unknown","strat":null,"patch":1.1,"GEO":[{"dec":22.27470240259015,"inc":61.825587106310614,"MAD":7.351765479916845,"cm":[-2.842170943040401e-14,6.572520305780927e-14,0],"intensity":2282.0931892153394,"type":"dir","forced":true,"remark":"","origin":false,"nSteps":14,"minStep":"210","maxStep":"550","steps":["210","240","270","300","320","340","370","400","420","440","470","490","520","550"],"group":"None","version":"v1.1.0"}],"TECT":[{"dec":354.0801510327537,"inc":52.446133081024115,"MAD":7.3517654799168675,"cm":[-3.019806626980426e-14,-1.0658141036401503e-14,3.552713678800501e-14],"intensity":2282.0931892153394,"type":"dir","forced":true,"remark":"","origin":false,"nSteps":14,"minStep":"210","maxStep":"550","steps":["210","240","270","300","320","340","370","400","420","440","470","490","520","550"],"group":"None","version":"v1.1.0"}],"interpreted":true,"name":"SS23.13A","coreAzi":215,"coreDip":49,"bedStrike":215,"bedDip":20,"data":[{"visible":true,"include":false,"step":"20","x":-3546.3809523809523,"y":635.6190476190476,"z":2005.8095238095239,"a95":2,"info":"\"14-10-13\" at \"18:09\""},{"visible":true,"include":false,"step":"100","x":-2111.809523809524,"y":423.8095238095238,"z":890.2857142857143,"a95":1.9,"info":"\"14-10-13\" at \"21:04\""},{"visible":true,"include":false,"step":"150","x":-1637.3333333333333,"y":212.38095238095238,"z":629.3333333333334,"a95":2,"info":"\"14-10-14\" at \"00:29\""},{"visible":true,"include":false,"step":"180","x":-1550,"y":316.4761904761905,"z":592.3809523809524,"a95":1.9,"info":"\"14-10-14\" at \"17:45\""},{"visible":true,"include":true,"step":"210","x":-1519.3333333333333,"y":273.6190476190476,"z":582.7619047619048,"a95":1.9,"info":"\"14-10-14\" at \"20:53\""},{"visible":true,"include":true,"step":"240","x":-1396.4761904761904,"y":370.76190476190476,"z":609.3333333333334,"a95":1.9,"info":"\"14-10-15\" at \"00:24\""},{"visible":true,"include":true,"step":"270","x":-1362.952380952381,"y":177.33333333333334,"z":664.6666666666666,"a95":2,"info":"\"14-10-15\" at \"17:56\""},{"visible":true,"include":true,"step":"300","x":-1313.4285714285713,"y":197.23809523809524,"z":550.4761904761905,"a95":2,"info":"\"14-10-15\" at \"21:10\""},{"visible":true,"include":true,"step":"320","x":-1212.5714285714287,"y":215.23809523809524,"z":655.8095238095239,"a95":2,"info":"\"14-10-16\" at \"00:27\""},{"visible":true,"include":true,"step":"340","x":-1264.3809523809523,"y":192.57142857142858,"z":421.04761904761904,"a95":1.9,"info":"\"14-10-16\" at \"18:24\""},{"visible":true,"include":true,"step":"370","x":-1052.5714285714287,"y":10.19047619047619,"z":514,"a95":2,"info":"\"14-10-16\" at \"21:37\""},{"visible":true,"include":true,"step":"400","x":-1100.1904761904761,"y":37.142857142857146,"z":468.95238095238096,"a95":2,"info":"\"14-10-17\" at \"00:49\""},{"visible":true,"include":true,"step":"420","x":-1051.7142857142858,"y":27.523809523809526,"z":384,"a95":1.9,"info":"\"14-10-17\" at \"16:21\""},{"visible":true,"include":true,"step":"440","x":-1029.5238095238096,"y":141.8095238095238,"z":327.5238095238095,"a95":1.9,"info":"\"14-10-17\" at \"19:32\""},{"visible":true,"include":true,"step":"470","x":-1022.5714285714286,"y":58.76190476190476,"z":366.76190476190476,"a95":1.9,"info":"\"14-10-17\" at \"22:46\""},{"visible":true,"include":true,"step":"490","x":-1259.142857142857,"y":92,"z":241.52380952380952,"a95":1.8,"info":"\"14-10-18\" at \"11:10\""},{"visible":true,"include":true,"step":"520","x":-802.7619047619048,"y":-215.8095238095238,"z":211.52380952380952,"a95":1.9,"info":"\"14-10-18\" at \"13:56\""},{"visible":true,"include":true,"step":"550","x":-644.7619047619048,"y":-115.52380952380952,"z":124.0952380952381,"a95":2,"info":"\"14-10-18\" at \"17:07\""},{"visible":true,"include":false,"step":"580","x":-974.4761904761905,"y":-117.14285714285714,"z":212.66666666666666,"a95":1.9,"info":"\"14-10-19\" at \"10:52\""},{"visible":true,"include":false,"step":"610","x":-1137.8095238095239,"y":-375.3333333333333,"z":16.38095238095238,"a95":2,"info":"\"14-10-19\" at \"14:05\""},{"visible":true,"include":false,"step":"640","x":-1378.095238095238,"y":-515.047619047619,"z":305.14285714285717,"a95":2.1,"info":"\"14-10-19\" at \"18:26\""},{"visible":true,"include":false,"step":"660","x":-585.047619047619,"y":-192.66666666666666,"z":16.666666666666668,"a95":3.3,"info":"\"14-10-20\" at \"22:29\""}]},{"version":"v1.1.0","exported":"2016-10-17T10:09:47.468Z","volume":10.5,"added":"2016-10-17T09:58:26.298Z","format":"Utrecht","demagType":"Unknown","strat":null,"patch":1.1,"GEO":[],"TECT":[],"interpreted":false,"name":"SS23.14A","coreAzi":261,"coreDip":31,"bedStrike":215,"bedDip":20,"data":[{"visible":true,"include":false,"step":"20","x":-4714.0952380952385,"y":682,"z":-46.857142857142854,"a95":1.7,"info":"\"14-10-13\" at \"18:11\""},{"visible":true,"include":false,"step":"100","x":-3520,"y":32.19047619047619,"z":28.285714285714285,"a95":1.7,"info":"\"14-10-13\" at \"21:05\""},{"visible":true,"include":false,"step":"150","x":-3207.2380952380954,"y":-157.14285714285714,"z":-65.04761904761905,"a95":1.9,"info":"\"14-10-14\" at \"00:30\""},{"visible":true,"include":false,"step":"180","x":-3103.904761904762,"y":-106,"z":-74.76190476190476,"a95":1.9,"info":"\"14-10-14\" at \"17:47\""},{"visible":true,"include":false,"step":"210","x":-3047.809523809524,"y":-322.76190476190476,"z":-275.3333333333333,"a95":1.9,"info":"\"14-10-14\" at \"20:55\""},{"visible":true,"include":false,"step":"240","x":-3086.4761904761904,"y":-84.38095238095238,"z":-355.5238095238095,"a95":1.9,"info":"\"14-10-15\" at \"00:26\""},{"visible":true,"include":false,"step":"270","x":-2748,"y":-319.42857142857144,"z":-267.6190476190476,"a95":1.9,"info":"\"14-10-15\" at \"17:57\""},{"visible":true,"include":false,"step":"300","x":-2821.2380952380954,"y":-544.5714285714286,"z":-534.0952380952381,"a95":2,"info":"\"14-10-15\" at \"21:11\""},{"visible":true,"include":false,"step":"320","x":-2754.7619047619046,"y":-461.7142857142857,"z":-404.4761904761905,"a95":1.9,"info":"\"14-10-16\" at \"00:30\""},{"visible":true,"include":false,"step":"340","x":-2724.190476190476,"y":-356.0952380952381,"z":-606.7619047619048,"a95":1.9,"info":"\"14-10-16\" at \"18:26\""},{"visible":true,"include":false,"step":"370","x":-2602.9523809523807,"y":-504.2857142857143,"z":-521.2380952380952,"a95":2,"info":"\"14-10-16\" at \"21:38\""},{"visible":true,"include":false,"step":"400","x":-2608.3809523809523,"y":-415.23809523809524,"z":-510.95238095238096,"a95":1.9,"info":"\"14-10-17\" at \"00:51\""},{"visible":true,"include":false,"step":"420","x":-2937.0476190476193,"y":-453.23809523809524,"z":-418.0952380952381,"a95":1.9,"info":"\"14-10-17\" at \"16:33\""},{"visible":true,"include":false,"step":"440","x":-2526.190476190476,"y":-339.3333333333333,"z":-706.5714285714286,"a95":1.9,"info":"\"14-10-17\" at \"19:34\""},{"visible":true,"include":false,"step":"470","x":-2394.8571428571427,"y":-421.04761904761904,"z":-554.4761904761905,"a95":2,"info":"\"14-10-17\" at \"22:48\""},{"visible":true,"include":false,"step":"490","x":-2323.1428571428573,"y":-157.9047619047619,"z":-682.4761904761905,"a95":2,"info":"\"14-10-18\" at \"11:12\""},{"visible":true,"include":false,"step":"520","x":-2269.904761904762,"y":-128.1904761904762,"z":-836.1904761904761,"a95":2,"info":"\"14-10-18\" at \"13:58\""},{"visible":true,"include":false,"step":"550","x":-2101.714285714286,"y":-71.71428571428571,"z":-375.14285714285717,"a95":1.8,"info":"\"14-10-18\" at \"17:09\""},{"visible":true,"include":false,"step":"580","x":-2013.2380952380952,"y":-235.52380952380952,"z":-786.3809523809524,"a95":2,"info":"\"14-10-19\" at \"10:54\""},{"visible":true,"include":false,"step":"610","x":-2077.5238095238096,"y":-197.8095238095238,"z":-432.1904761904762,"a95":2,"info":"\"14-10-19\" at \"14:07\""},{"visible":true,"include":false,"step":"640","x":-1676.4761904761904,"y":-191.8095238095238,"z":222.95238095238096,"a95":2.2,"info":"\"14-10-19\" at \"18:29\""},{"visible":true,"include":false,"step":"660","x":-681.4285714285714,"y":-759.9047619047619,"z":-158.1904761904762,"a95":3,"info":"\"14-10-20\" at \"22:31\""}]},{"version":"v1.1.0","exported":"2016-10-17T10:09:47.468Z","volume":10.5,"added":"2016-10-17T09:58:26.298Z","format":"Utrecht","demagType":"Unknown","strat":"7","patch":1.1,"GEO":[],"TECT":[],"interpreted":false,"name":"SS23.14B","coreAzi":261,"coreDip":31,"bedStrike":215,"bedDip":20,"data":[{"visible":true,"include":false,"step":"0.0","x":-2696.6666666666665,"y":233.35238095238094,"z":1608.5714285714287,"a95":0.99,"info":"22/09/2014 at 20:51:18"},{"visible":true,"include":false,"step":"5.0","x":-2430.285714285714,"y":132.1047619047619,"z":1230.6666666666667,"a95":0.99,"info":"22/09/2014 at 20:51:18"},{"visible":true,"include":false,"step":"10.0","x":-2037.5238095238096,"y":27.63142857142857,"z":986.2857142857143,"a95":0.99,"info":"22/09/2014 at 20:51:18"},{"visible":true,"include":false,"step":"15.0","x":-1694.6666666666667,"y":-194.3047619047619,"z":1011.2380952380952,"a95":0.99,"info":"22/09/2014 at 20:51:18"},{"visible":true,"include":false,"step":"20.0","x":-1412.2857142857142,"y":-191.85714285714286,"z":749.1619047619048,"a95":0.99,"info":"22/09/2014 at 20:51:18"},{"visible":true,"include":false,"step":"25.0","x":-1385.4285714285713,"y":-151.21904761904761,"z":740.6380952380953,"a95":0.99,"info":"22/09/2014 at 20:51:18"},{"visible":true,"include":false,"step":"30.0","x":-1414.952380952381,"y":-356.0761904761905,"z":892.047619047619,"a95":0.99,"info":"22/09/2014 at 20:51:18"},{"visible":true,"include":false,"step":"35.0","x":-1324.5714285714287,"y":-271.0190476190476,"z":626.7714285714286,"a95":0.99,"info":"22/09/2014 at 20:51:18"},{"visible":true,"include":false,"step":"40.0","x":-1507.904761904762,"y":-509.6380952380952,"z":589.495238095238,"a95":0.99,"info":"22/09/2014 at 20:51:18"},{"visible":true,"include":false,"step":"45.0","x":-1315.142857142857,"y":-319.3047619047619,"z":630.4761904761905,"a95":0.99,"info":"22/09/2014 at 20:51:18"},{"visible":true,"include":false,"step":"50.0","x":-1091.904761904762,"y":-201.74285714285716,"z":579.6285714285715,"a95":0.99,"info":"22/09/2014 at 20:51:18"},{"visible":true,"include":false,"step":"60.0","x":-945.0952380952381,"y":-38.07142857142857,"z":360.552380952381,"a95":0.99,"info":"22/09/2014 at 20:51:18"},{"visible":true,"include":false,"step":"70.0","x":-988,"y":-81.96285714285715,"z":435.2666666666667,"a95":0.99,"info":"22/09/2014 at 20:51:18"},{"visible":true,"include":false,"step":"80.0","x":-1010.6666666666666,"y":-304.0190476190476,"z":255.62857142857143,"a95":0.99,"info":"22/09/2014 at 20:51:18"},{"visible":true,"include":false,"step":"90.0","x":-665.8761904761905,"y":-676.0666666666666,"z":391.02857142857147,"a95":0.99,"info":"22/09/2014 at 20:51:18"},{"visible":true,"include":false,"step":"100.0","x":-515.7714285714286,"y":-269.23809523809524,"z":310.50476190476195,"a95":0.99,"info":"22/09/2014 at 20:51:18"}]},{"version":"v1.1.0","exported":"2016-10-17T10:09:47.468Z","volume":10.5,"added":"2016-10-17T09:58:26.298Z","format":"Utrecht","demagType":"Unknown","strat":null,"patch":1.1,"GEO":[{"dec":26.323824727942394,"inc":54.853624290630144,"MAD":4.697783507826831,"cm":[-1.4210854715202004e-14,4.618527782440651e-14,0],"intensity":4669.890664765256,"type":"dir","forced":true,"remark":"","origin":false,"nSteps":11,"minStep":"330","maxStep":"630","steps":["330","360","390","420","450","480","510","540","570","600","630"],"group":"None","version":"v1.1.0"}],"TECT":[{"dec":2.591556467803457,"inc":47.618316977615095,"MAD":4.697783507826824,"cm":[-1.4210854715202004e-13,2.7711166694643907e-13,7.105427357601002e-14],"intensity":4669.890664765255,"type":"dir","forced":true,"remark":"","origin":false,"nSteps":11,"minStep":"330","maxStep":"630","steps":["330","360","390","420","450","480","510","540","570","600","630"],"group":"None","version":"v1.1.0"}],"interpreted":true,"name":"SS23.15B","coreAzi":241,"coreDip":40,"bedStrike":215,"bedDip":20,"data":[{"visible":true,"include":false,"step":"20","x":-4770.190476190476,"y":1325.4285714285713,"z":2688.190476190476,"a95":2,"info":"\"14-10-20\" at \"17:47\""},{"visible":true,"include":false,"step":"100","x":-4080.7619047619046,"y":1084.2857142857142,"z":1584.5714285714287,"a95":2,"info":"\"14-10-20\" at \"21:01\""},{"visible":true,"include":false,"step":"150","x":-3624.285714285714,"y":916.8571428571429,"z":1220.2857142857142,"a95":2,"info":"\"14-10-20\" at \"23:52\""},{"visible":true,"include":false,"step":"180","x":-3458.4761904761904,"y":877.8095238095239,"z":1047.7142857142858,"a95":1.9,"info":"\"14-10-21\" at \"16:00\""},{"visible":true,"include":false,"step":"210","x":-3305.3333333333335,"y":915.5238095238095,"z":896,"a95":1.8,"info":"\"14-10-21\" at \"18:53\""},{"visible":true,"include":false,"step":"240","x":-3134.9523809523807,"y":852.0952380952381,"z":837.8095238095239,"a95":1.8,"info":"\"14-10-21\" at \"22:06\""},{"visible":true,"include":false,"step":"270","x":-2481.809523809524,"y":441.8095238095238,"z":799.3333333333334,"a95":78.6,"info":"\"14-10-22\" at \"01:02\""},{"visible":true,"include":false,"step":"300","x":-2959.809523809524,"y":913.4285714285714,"z":785.5238095238095,"a95":1.8,"info":"\"14-10-22\" at \"17:22\""},{"visible":true,"include":true,"step":"330","x":-2854.9523809523807,"y":877.1428571428571,"z":713.047619047619,"a95":1.8,"info":"\"14-10-22\" at \"20:31\""},{"visible":true,"include":true,"step":"360","x":-2807.809523809524,"y":895.7142857142857,"z":657.9047619047619,"a95":1.8,"info":"\"14-10-22\" at \"23:34\""},{"visible":true,"include":true,"step":"390","x":-2799.5238095238096,"y":816.3809523809524,"z":576.5714285714286,"a95":1.8,"info":"\"14-10-23\" at \"17:50\""},{"visible":true,"include":true,"step":"420","x":-2727.0476190476193,"y":886.3809523809524,"z":499.5238095238095,"a95":1.8,"info":"\"14-10-23\" at \"20:47\""},{"visible":true,"include":true,"step":"450","x":-2657.4285714285716,"y":792.8571428571429,"z":425.5238095238095,"a95":1.8,"info":"\"14-10-24\" at \"15:20\""},{"visible":true,"include":true,"step":"480","x":-2400.095238095238,"y":1004.7619047619048,"z":272.1904761904762,"a95":1.8,"info":"\"14-10-24\" at \"18:21\""},{"visible":true,"include":true,"step":"510","x":-2383.1428571428573,"y":905.5238095238095,"z":374.57142857142856,"a95":1.8,"info":"\"14-10-24\" at \"21:13\""},{"visible":true,"include":true,"step":"540","x":-2242.8571428571427,"y":769.8095238095239,"z":420.85714285714283,"a95":1.9,"info":"\"14-10-25\" at \"00:15\""},{"visible":true,"include":true,"step":"570","x":-1958.5714285714287,"y":1008.3809523809524,"z":288.85714285714283,"a95":1.8,"info":"\"14-10-25\" at \"02:55\""},{"visible":true,"include":true,"step":"600","x":-1780.2857142857142,"y":672.7619047619048,"z":113.33333333333333,"a95":1.8,"info":"\"14-10-25\" at \"05:31\""},{"visible":true,"include":true,"step":"630","x":-1451.7142857142858,"y":790.2857142857143,"z":-20.095238095238095,"a95":2,"info":"\"14-10-25\" at \"23:53\""},{"visible":true,"include":false,"step":"660","x":-1232.6666666666667,"y":485.8095238095238,"z":-10.19047619047619,"a95":2,"info":"\"14-10-26\" at \"02:37\""},{"visible":true,"include":false,"step":"680","x":-640.4761904761905,"y":381.3333333333333,"z":246.38095238095238,"a95":2.2,"info":"\"14-10-26\" at \"04:00\""}]},{"version":"v1.1.0","exported":"2016-10-17T10:09:47.468Z","volume":10.5,"added":"2016-10-17T09:58:26.299Z","format":"Utrecht","demagType":"Unknown","strat":null,"patch":1.1,"GEO":[{"dec":3.403864654732047,"inc":58.378824726530006,"MAD":2.9896385967969334,"cm":[-3.552713678800501e-15,1.5853984791647235e-13,0],"intensity":4771.448134167672,"type":"dir","forced":true,"remark":"","origin":false,"nSteps":16,"minStep":"180","maxStep":"630","steps":["180","210","240","270","300","330","360","390","420","450","480","510","540","570","600","630"],"group":"None","version":"v1.1.0"}],"TECT":[{"dec":344.1073814639436,"inc":44.92883058680104,"MAD":2.9896385967970525,"cm":[-2.1316282072803006e-14,2.2382096176443156e-13,3.552713678800501e-14],"intensity":4771.448134167672,"type":"dir","forced":true,"remark":"","origin":false,"nSteps":16,"minStep":"180","maxStep":"630","steps":["180","210","240","270","300","330","360","390","420","450","480","510","540","570","600","630"],"group":"None","version":"v1.1.0"}],"interpreted":true,"name":"SS23.16B","coreAzi":247,"coreDip":34,"bedStrike":215,"bedDip":20,"data":[{"visible":true,"include":false,"step":"20","x":-4006,"y":1952.5714285714287,"z":2163.1428571428573,"a95":1.9,"info":"\"14-10-20\" at \"17:50\""},{"visible":true,"include":false,"step":"100","x":-3038.9523809523807,"y":1625.6190476190477,"z":1304.4761904761904,"a95":1.9,"info":"\"14-10-20\" at \"21:03\""},{"visible":true,"include":false,"step":"150","x":-2677.3333333333335,"y":1405.142857142857,"z":1059.142857142857,"a95":1.9,"info":"\"14-10-20\" at \"23:54\""},{"visible":true,"include":true,"step":"180","x":-2693.5238095238096,"y":1350.857142857143,"z":1010,"a95":1.8,"info":"\"14-10-21\" at \"16:02\""},{"visible":true,"include":true,"step":"210","x":-2586.285714285714,"y":1444.7619047619048,"z":954.1904761904761,"a95":1.8,"info":"\"14-10-21\" at \"18:56\""},{"visible":true,"include":true,"step":"240","x":-2562.4761904761904,"y":1374.7619047619048,"z":890.0952380952381,"a95":1.8,"info":"\"14-10-21\" at \"22:08\""},{"visible":true,"include":true,"step":"270","x":-2565.1428571428573,"y":1364.857142857143,"z":999.5238095238095,"a95":1.8,"info":"\"14-10-22\" at \"01:03\""},{"visible":true,"include":true,"step":"300","x":-2555.714285714286,"y":1474,"z":897.9047619047619,"a95":1.7,"info":"\"14-10-22\" at \"17:24\""},{"visible":true,"include":true,"step":"330","x":-2605.5238095238096,"y":1410.6666666666667,"z":842.4761904761905,"a95":1.7,"info":"\"14-10-22\" at \"20:33\""},{"visible":true,"include":true,"step":"360","x":-2559.5238095238096,"y":1508.857142857143,"z":775.7142857142857,"a95":1.8,"info":"\"14-10-22\" at \"23:36\""},{"visible":true,"include":true,"step":"390","x":-2495.714285714286,"y":1482.3809523809523,"z":748.4761904761905,"a95":2,"info":"\"14-10-23\" at \"17:51\""},{"visible":true,"include":true,"step":"420","x":-2456.285714285714,"y":1387.904761904762,"z":744,"a95":1.8,"info":"\"14-10-23\" at \"20:49\""},{"visible":true,"include":true,"step":"450","x":-2494.7619047619046,"y":1462,"z":765.3333333333334,"a95":1.8,"info":"\"14-10-24\" at \"15:21\""},{"visible":true,"include":true,"step":"480","x":-2434.095238095238,"y":1488.952380952381,"z":690.5714285714286,"a95":1.8,"info":"\"14-10-24\" at \"18:24\""},{"visible":true,"include":true,"step":"510","x":-2304.190476190476,"y":1244.1904761904761,"z":714.7619047619048,"a95":1.8,"info":"\"14-10-24\" at \"21:15\""},{"visible":true,"include":true,"step":"540","x":-2191.0476190476193,"y":1336.4761904761904,"z":612.8571428571429,"a95":1.8,"info":"\"14-10-25\" at \"00:17\""},{"visible":true,"include":true,"step":"570","x":-1810.6666666666667,"y":1207.142857142857,"z":796.8571428571429,"a95":1.9,"info":"\"14-10-25\" at \"02:57\""},{"visible":true,"include":true,"step":"600","x":-1696.952380952381,"y":697.9047619047619,"z":654.4761904761905,"a95":1.9,"info":"\"14-10-25\" at \"05:32\""},{"visible":true,"include":true,"step":"630","x":-1299.7142857142858,"y":655.9047619047619,"z":661.4285714285714,"a95":2.3,"info":"\"14-10-25\" at \"23:55\""},{"visible":true,"include":false,"step":"660","x":-1174.952380952381,"y":480.57142857142856,"z":340.0952380952381,"a95":2.5,"info":"\"14-10-26\" at \"02:39\""},{"visible":true,"include":false,"step":"680","x":-282,"y":53.333333333333336,"z":-15.80952380952381,"a95":6.9,"info":"\"14-10-26\" at \"04:03\""}]},{"version":"v1.1.0","exported":"2016-10-17T10:09:47.468Z","volume":10.5,"added":"2016-10-17T09:58:26.299Z","format":"Utrecht","demagType":"Unknown","strat":null,"patch":1.1,"GEO":[{"dec":63.20767859595526,"inc":57.06544319400996,"MAD":2.2605518081857867,"cm":[-2.7000623958883807e-13,1.3500311979441904e-13,0],"intensity":4791.530268392884,"type":"dir","forced":true,"remark":"","origin":false,"nSteps":13,"minStep":"210","maxStep":"520","steps":["210","240","270","300","320","340","370","400","420","440","470","490","520"],"group":"None","version":"v1.1.0"}],"TECT":[{"dec":29.56655927871202,"inc":61.23124535835033,"MAD":2.2605518081856797,"cm":[-2.2026824808563106e-13,1.3500311979441904e-13,5.684341886080802e-14],"intensity":4791.530268392884,"type":"dir","forced":true,"remark":"","origin":false,"nSteps":13,"minStep":"210","maxStep":"520","steps":["210","240","270","300","320","340","370","400","420","440","470","490","520"],"group":"None","version":"v1.1.0"}],"interpreted":true,"name":"SS23.17A","coreAzi":248,"coreDip":35,"bedStrike":215,"bedDip":20,"data":[{"visible":true,"include":false,"step":"20","x":-4024.285714285714,"y":1199.5238095238096,"z":384.6666666666667,"a95":1.7,"info":"\"14-10-13\" at \"18:12\""},{"visible":true,"include":false,"step":"100","x":-2935.5238095238096,"y":477.14285714285717,"z":326.85714285714283,"a95":1.8,"info":"\"14-10-13\" at \"21:07\""},{"visible":true,"include":false,"step":"150","x":-2602.6666666666665,"y":223.14285714285714,"z":180.1904761904762,"a95":1.9,"info":"\"14-10-14\" at \"00:32\""},{"visible":true,"include":false,"step":"180","x":-2598.190476190476,"y":154.57142857142858,"z":164.66666666666666,"a95":1.8,"info":"\"14-10-14\" at \"17:49\""},{"visible":true,"include":true,"step":"210","x":-2578.095238095238,"y":129.23809523809524,"z":87.04761904761905,"a95":1.9,"info":"\"14-10-14\" at \"20:57\""},{"visible":true,"include":true,"step":"240","x":-2652.4761904761904,"y":149.9047619047619,"z":26.666666666666668,"a95":1.8,"info":"\"14-10-15\" at \"00:28\""},{"visible":true,"include":true,"step":"270","x":-2548.6666666666665,"y":169.42857142857142,"z":78.66666666666667,"a95":1.8,"info":"\"14-10-15\" at \"17:59\""},{"visible":true,"include":true,"step":"300","x":-2520.4761904761904,"y":135.71428571428572,"z":88.19047619047619,"a95":1.8,"info":"\"14-10-15\" at \"21:14\""},{"visible":true,"include":true,"step":"320","x":-2437.2380952380954,"y":205.33333333333334,"z":210.0952380952381,"a95":1.8,"info":"\"14-10-16\" at \"00:32\""},{"visible":true,"include":true,"step":"340","x":-2392.5714285714284,"y":95.71428571428571,"z":71.9047619047619,"a95":1.8,"info":"\"14-10-16\" at \"18:28\""},{"visible":true,"include":true,"step":"370","x":-2360.4761904761904,"y":-0.8571428571428571,"z":130.1904761904762,"a95":1.9,"info":"\"14-10-16\" at \"21:40\""},{"visible":true,"include":true,"step":"400","x":-2393.904761904762,"y":43.714285714285715,"z":73.04761904761905,"a95":1.8,"info":"\"14-10-17\" at \"00:53\""},{"visible":true,"include":true,"step":"420","x":-2365.714285714286,"y":27.714285714285715,"z":132.57142857142858,"a95":1.9,"info":"\"14-10-17\" at \"16:25\""},{"visible":true,"include":true,"step":"440","x":-2389.0476190476193,"y":87.23809523809524,"z":69.04761904761905,"a95":1.8,"info":"\"14-10-17\" at \"19:36\""},{"visible":true,"include":true,"step":"470","x":-2339.809523809524,"y":-10.380952380952381,"z":160.57142857142858,"a95":1.8,"info":"\"14-10-17\" at \"22:50\""},{"visible":true,"include":true,"step":"490","x":-2186.190476190476,"y":166.47619047619048,"z":106,"a95":1.8,"info":"\"14-10-18\" at \"11:14\""},{"visible":true,"include":true,"step":"520","x":-2200,"y":227.52380952380952,"z":-51.142857142857146,"a95":1.8,"info":"\"14-10-18\" at \"14:00\""},{"visible":true,"include":false,"step":"550","x":-2035.5238095238096,"y":66.76190476190476,"z":11.904761904761905,"a95":1.7,"info":"\"14-10-18\" at \"17:11\""},{"visible":true,"include":false,"step":"580","x":-1996.2857142857142,"y":-6.571428571428571,"z":211.52380952380952,"a95":1.8,"info":"\"14-10-19\" at \"10:56\""},{"visible":true,"include":false,"step":"610","x":-1711.142857142857,"y":106.38095238095238,"z":217.71428571428572,"a95":1.9,"info":"\"14-10-19\" at \"14:09\""},{"visible":true,"include":false,"step":"640","x":-1190.3809523809523,"y":151.04761904761904,"z":456.76190476190476,"a95":2.2,"info":"\"14-10-19\" at \"18:31\""},{"visible":true,"include":false,"step":"660","x":-1403.047619047619,"y":406.6666666666667,"z":272.4761904761905,"a95":2.1,"info":"\"14-10-20\" at \"22:33\""}]},{"version":"v1.1.0","exported":"2016-10-17T10:09:47.468Z","volume":10.5,"added":"2016-10-17T09:58:26.299Z","format":"Utrecht","demagType":"Unknown","strat":null,"patch":1.1,"GEO":[{"dec":24.272855839572344,"inc":13.724638975703048,"MAD":3.580167614155573,"cm":[1.4210854715202004e-14,-7.105427357601002e-14,0],"intensity":3574.220985799395,"type":"dir","forced":true,"remark":"","origin":false,"nSteps":16,"minStep":"270","maxStep":"660","steps":["270","300","320","340","370","400","420","440","470","490","520","550","580","610","640","660"],"group":"None","version":"v1.1.0"}],"TECT":[{"dec":20.263025897203136,"inc":9.271005646906952,"MAD":3.5801676141555943,"cm":[-1.2789769243681803e-13,2.602362769721367e-13,-7.105427357601002e-15],"intensity":3574.220985799395,"type":"dir","forced":true,"remark":"","origin":false,"nSteps":16,"minStep":"270","maxStep":"660","steps":["270","300","320","340","370","400","420","440","470","490","520","550","580","610","640","660"],"group":"None","version":"v1.1.0"}],"interpreted":true,"name":"SS23.19A","coreAzi":239,"coreDip":30,"bedStrike":215,"bedDip":20,"data":[{"visible":true,"include":false,"step":"20","x":-3006,"y":2008.2857142857142,"z":-745.6190476190476,"a95":1.8,"info":"\"14-10-13\" at \"18:14\""},{"visible":true,"include":false,"step":"100","x":-1818.857142857143,"y":1602.7619047619048,"z":-1033.3333333333333,"a95":2.1,"info":"\"14-10-13\" at \"21:09\""},{"visible":true,"include":false,"step":"150","x":-1397.3333333333333,"y":1484.7619047619048,"z":-1203.6190476190477,"a95":2.2,"info":"\"14-10-14\" at \"00:34\""},{"visible":true,"include":false,"step":"180","x":-1452.1904761904761,"y":1347.904761904762,"z":-1334.7619047619048,"a95":2,"info":"\"14-10-14\" at \"17:51\""},{"visible":true,"include":false,"step":"210","x":-1383.6190476190477,"y":1430.2857142857142,"z":-1304.7619047619048,"a95":2.1,"info":"\"14-10-14\" at \"20:59\""},{"visible":true,"include":false,"step":"240","x":-1577.6190476190477,"y":1404.095238095238,"z":-1351.904761904762,"a95":2.1,"info":"\"14-10-15\" at \"00:31\""},{"visible":true,"include":true,"step":"270","x":-1495.7142857142858,"y":1282.4761904761904,"z":-1349.2380952380952,"a95":2.1,"info":"\"14-10-15\" at \"18:01\""},{"visible":true,"include":true,"step":"300","x":-1501.142857142857,"y":1277.047619047619,"z":-1348.095238095238,"a95":2.2,"info":"\"14-10-15\" at \"21:16\""},{"visible":true,"include":true,"step":"320","x":-1438,"y":1405.047619047619,"z":-1336.857142857143,"a95":2.1,"info":"\"14-10-16\" at \"00:34\""},{"visible":true,"include":true,"step":"340","x":-1324.095238095238,"y":1271.3333333333333,"z":-1406.4761904761904,"a95":2.2,"info":"\"14-10-16\" at \"18:30\""},{"visible":true,"include":true,"step":"370","x":-1406.857142857143,"y":1232.857142857143,"z":-1175.142857142857,"a95":2.2,"info":"\"14-10-16\" at \"21:42\""},{"visible":true,"include":true,"step":"400","x":-1462.857142857143,"y":1214.7619047619048,"z":-1332.1904761904761,"a95":2.1,"info":"\"14-10-17\" at \"00:55\""},{"visible":true,"include":true,"step":"420","x":-1321.2380952380952,"y":1070.6666666666667,"z":-1195.4285714285713,"a95":2.1,"info":"\"14-10-17\" at \"16:27\""},{"visible":true,"include":true,"step":"440","x":-1287.047619047619,"y":1119.4285714285713,"z":-1399.047619047619,"a95":2.1,"info":"\"14-10-17\" at \"19:38\""},{"visible":true,"include":true,"step":"470","x":-1269.904761904762,"y":1138.3809523809523,"z":-1118,"a95":1.9,"info":"\"14-10-17\" at \"22:51\""},{"visible":true,"include":true,"step":"490","x":-1196,"y":1104.095238095238,"z":-1169.7142857142858,"a95":2,"info":"\"14-10-18\" at \"11:16\""},{"visible":true,"include":true,"step":"520","x":-893.5238095238095,"y":1110,"z":-992,"a95":1.8,"info":"\"14-10-18\" at \"14:02\""},{"visible":true,"include":true,"step":"550","x":-967.5238095238095,"y":1120.2857142857142,"z":-1223.047619047619,"a95":2,"info":"\"14-10-18\" at \"17:13\""},{"visible":true,"include":true,"step":"580","x":-1123.4285714285713,"y":970.4761904761905,"z":-1003.6190476190476,"a95":2,"info":"\"14-10-19\" at \"10:58\""},{"visible":true,"include":true,"step":"610","x":-1034.1904761904761,"y":972.3809523809524,"z":-983.6190476190476,"a95":2,"info":"\"14-10-19\" at \"14:11\""},{"visible":true,"include":true,"step":"640","x":-598.3809523809524,"y":594.1904761904761,"z":-443.7142857142857,"a95":2,"info":"\"14-10-19\" at \"18:32\""},{"visible":true,"include":true,"step":"660","x":-793.7142857142857,"y":729.2380952380952,"z":-518,"a95":2,"info":"\"14-10-20\" at \"22:35\""},{"visible":true,"include":false,"step":"680","x":-685.8095238095239,"y":357.5238095238095,"z":-309.14285714285717,"a95":2.3,"info":"\"14-10-26\" at \"04:12\""}]},{"version":"v1.1.0","exported":"2016-10-17T10:09:47.468Z","volume":10.5,"added":"2016-10-17T09:58:26.299Z","format":"Utrecht","demagType":"Unknown","strat":"8","patch":1.1,"GEO":[],"TECT":[],"interpreted":false,"name":"SS23.19B","coreAzi":239,"coreDip":30,"bedStrike":215,"bedDip":20,"data":[{"visible":true,"include":false,"step":"0.0","x":-3824.095238095238,"y":2167.6190476190477,"z":584.4190476190475,"a95":0.99,"info":"22/09/2014 at 20:51:18"},{"visible":true,"include":false,"step":"5.0","x":-3495.4285714285716,"y":2076.8571428571427,"z":302.2095238095238,"a95":0.99,"info":"22/09/2014 at 20:51:18"},{"visible":true,"include":false,"step":"10.0","x":-3082.5714285714284,"y":2040,"z":98.20952380952382,"a95":0.99,"info":"22/09/2014 at 20:51:18"},{"visible":true,"include":false,"step":"15.0","x":-2805.1428571428573,"y":1916.3809523809523,"z":0.9488476190476189,"a95":0.99,"info":"22/09/2014 at 20:51:18"},{"visible":true,"include":false,"step":"20.0","x":-2675.714285714286,"y":1950.3809523809523,"z":-150.04761904761904,"a95":0.99,"info":"22/09/2014 at 20:51:18"},{"visible":true,"include":true,"step":"25.0","x":-2435.3333333333335,"y":1826,"z":-182.9142857142857,"a95":0.99,"info":"22/09/2014 at 20:51:18"},{"visible":true,"include":true,"step":"30.0","x":-2372.6666666666665,"y":1730.095238095238,"z":-87.02095238095238,"a95":0.99,"info":"22/09/2014 at 20:51:18"},{"visible":true,"include":true,"step":"35.0","x":-2262.285714285714,"y":1822.2857142857142,"z":-130.22857142857143,"a95":0.99,"info":"22/09/2014 at 20:51:18"},{"visible":true,"include":true,"step":"40.0","x":-2191.0476190476193,"y":1671.904761904762,"z":-148.48571428571427,"a95":0.99,"info":"22/09/2014 at 20:51:18"},{"visible":true,"include":true,"step":"45.0","x":-2168.095238095238,"y":1746.2857142857142,"z":-174.8095238095238,"a95":0.99,"info":"22/09/2014 at 20:51:18"},{"visible":true,"include":true,"step":"50.0","x":-2105.2380952380954,"y":1642.3809523809523,"z":-221.44761904761904,"a95":0.99,"info":"22/09/2014 at 20:51:18"},{"visible":true,"include":true,"step":"60.0","x":-2109.0476190476193,"y":1591.047619047619,"z":-278.56190476190477,"a95":0.99,"info":"22/09/2014 at 20:51:18"},{"visible":true,"include":true,"step":"70.0","x":-1891.3333333333333,"y":1522.7619047619048,"z":-139.92380952380952,"a95":0.99,"info":"22/09/2014 at 20:51:18"},{"visible":true,"include":false,"step":"80.0","x":-1915.047619047619,"y":1448.4761904761904,"z":51.53619047619048,"a95":0.99,"info":"22/09/2014 at 20:51:18"},{"visible":true,"include":false,"step":"90.0","x":-1862,"y":1433.3333333333333,"z":69.53428571428572,"a95":0.99,"info":"22/09/2014 at 20:51:18"},{"visible":true,"include":false,"step":"100.0","x":-1723.8095238095239,"y":1266.5714285714287,"z":183.35238095238097,"a95":0.99,"info":"22/09/2014 at 20:51:18"}]}]
