# Supplementary material for: Paleomagnetic constraints on the timing and distribution of Cenozoic rotations in Central and Eastern Anatolia
Source: Copernicus journal article supplement (doi:10.5194/se-9-295-2018), 2018-03-21
Supplement: Supplementary file 2 [file se-9-295-2018-supplement.zip › se-2017-66_DATA_dir files/dir files Sivas/SS24.dir]

[{"version":"v1.1.0","exported":"2016-10-11T16:20:08.746Z","info":"1","GEO":[],"TECT":[],"interpreted":false,"name":"SS24.01A","coreAzi":360,"coreDip":44,"bedStrike":95,"bedDip":5,"data":[{"visible":true,"include":false,"step":"0.0","x":-35.87809523809524,"y":-3.546,"z":106.81904761904761,"a95":"0.99","info":"25/06/2015 at 18:34:11"},{"visible":true,"include":true,"step":"10.0","x":-24.484761904761903,"y":-1.0441904761904763,"z":100.41904761904763,"a95":"0.99","info":"25/06/2015 at 18:34:11"},{"visible":true,"include":true,"step":"15.0","x":-21.99809523809524,"y":1.2681904761904763,"z":95.32380952380952,"a95":"0.99","info":"25/06/2015 at 18:34:11"},{"visible":true,"include":true,"step":"20.0","x":-20.00952380952381,"y":-1.0026666666666668,"z":84.56380952380952,"a95":"0.99","info":"25/06/2015 at 18:34:11"},{"visible":true,"include":true,"step":"23.0","x":-17.25142857142857,"y":4.745809523809524,"z":78.30095238095238,"a95":"0.99","info":"25/06/2015 at 18:34:11"},{"visible":true,"include":true,"step":"25.0","x":-19.322857142857142,"y":-0.1418761904761905,"z":75.8952380952381,"a95":"0.99","info":"25/06/2015 at 18:34:11"},{"visible":true,"include":true,"step":"30.0","x":-20.19904761904762,"y":-1.3546666666666667,"z":65.82761904761905,"a95":"0.99","info":"25/06/2015 at 18:34:11"},{"visible":true,"include":true,"step":"33.0","x":-15.582857142857144,"y":-5.463809523809523,"z":62.857142857142854,"a95":"0.99","info":"25/06/2015 at 18:34:11"},{"visible":false,"include":false,"step":"35.0","x":-15.119047619047619,"y":-20.06380952380952,"z":71.04380952380953,"a95":"0.99","info":"25/06/2015 at 18:34:11"},{"visible":true,"include":true,"step":"40.0","x":-13.27904761904762,"y":-3.315809523809524,"z":59.5647619047619,"a95":"0.99","info":"25/06/2015 at 18:34:11"},{"visible":false,"include":false,"step":"45.0","x":-30.199047619047615,"y":-2.3503809523809522,"z":56.4952380952381,"a95":"0.99","info":"25/06/2015 at 18:34:11"},{"visible":true,"include":true,"step":"50.0","x":-12.518095238095238,"y":-6.331523809523809,"z":54.69428571428571,"a95":"0.99","info":"25/06/2015 at 18:34:11"},{"visible":true,"include":true,"step":"55.0","x":-9.065904761904761,"y":-0.15225714285714287,"z":47.785714285714285,"a95":"0.99","info":"25/06/2015 at 18:34:11"},{"visible":false,"include":false,"step":"60.0","x":-31.887619047619047,"y":9.770476190476192,"z":33.59238095238096,"a95":"0.99","info":"25/06/2015 at 18:34:11"},{"visible":true,"include":true,"step":"65.0","x":-10.877142857142857,"y":-7.019238095238095,"z":48.94285714285714,"a95":"0.99","info":"25/06/2015 at 18:34:11"},{"visible":true,"include":true,"step":"70.0","x":-11.02095238095238,"y":-1.5614285714285714,"z":35.481904761904765,"a95":"0.99","info":"25/06/2015 at 18:34:11"},{"visible":true,"include":false,"step":"80.0","x":-12.997142857142856,"y":3.246666666666667,"z":33.14190476190476,"a95":"0.99","info":"25/06/2015 at 18:34:11"}],"demagType":"Unknown","patch":1.1,"format":"Unknown","strat":null},{"version":"v1.1.0","exported":"2016-10-11T16:20:08.746Z","info":"0","GEO":[],"TECT":[],"interpreted":false,"name":"SS24.02A","coreAzi":25,"coreDip":49,"bedStrike":95,"bedDip":5,"data":[{"visible":true,"include":false,"step":"20","x":-21.714285714285715,"y":-38.095238095238095,"z":186.95238095238096,"a95":"2.5","info":"\"15-06-15\" at \"08:11\""},{"visible":true,"include":true,"step":"100","x":-21.80952380952381,"y":-28.476190476190474,"z":123.80952380952381,"a95":"2.4","info":"\"15-06-15\" at \"12:15\""},{"visible":true,"include":true,"step":"150","x":-18.6,"y":-16.18095238095238,"z":77.41904761904762,"a95":"3.3","info":"\"15-06-16\" at \"07:12\""},{"visible":true,"include":false,"step":"180","x":0.7142857142857143,"y":3.6476190476190475,"z":3.9714285714285715,"a95":"21.3","info":"\"15-06-16\" at \"09:54\""},{"visible":true,"include":false,"step":"210","x":-4.3238095238095235,"y":-1.6476190476190478,"z":4.314285714285714,"a95":"11.1","info":"\"15-06-16\" at \"13:16\""},{"visible":true,"include":false,"step":"240","x":-3.9523809523809526,"y":-0.13333333333333333,"z":1.3714285714285714,"a95":"25.5","info":"\"15-06-22\" at \"20:44\""},{"visible":true,"include":false,"step":"270","x":-4.857142857142857,"y":1.5904761904761904,"z":1.4761904761904763,"a95":"11.8","info":"\"15-06-25\" at \"09:03\""}],"demagType":"Unknown","patch":1.1,"format":"Unknown","strat":null},{"version":"v1.1.0","exported":"2016-10-11T16:20:08.746Z","info":"2","GEO":[],"TECT":[],"interpreted":false,"name":"SS24.03A","coreAzi":29,"coreDip":44,"bedStrike":95,"bedDip":5,"data":[{"visible":true,"include":false,"step":"0.0","x":-35.23047619047619,"y":-38.84952380952381,"z":108.62857142857142,"a95":"0.99","info":"25/06/2015 at 18:34:11"},{"visible":true,"include":true,"step":"10.0","x":-25.993333333333332,"y":-27.01047619047619,"z":91.69904761904762,"a95":"0.99","info":"25/06/2015 at 18:34:11"},{"visible":true,"include":true,"step":"15.0","x":-20.496190476190478,"y":-24.09047619047619,"z":79.59428571428572,"a95":"0.99","info":"25/06/2015 at 18:34:11"},{"visible":true,"include":true,"step":"20.0","x":-19.77047619047619,"y":-21.454285714285714,"z":71.28666666666666,"a95":"0.99","info":"25/06/2015 at 18:34:11"},{"visible":true,"include":true,"step":"23.0","x":-19.312380952380952,"y":-7.823809523809524,"z":61.22095238095238,"a95":"0.99","info":"25/06/2015 at 18:34:11"},{"visible":true,"include":true,"step":"25.0","x":-21.36952380952381,"y":-17.871428571428574,"z":57.8247619047619,"a95":"0.99","info":"25/06/2015 at 18:34:11"},{"visible":true,"include":true,"step":"30.0","x":-19.99047619047619,"y":-16.599047619047617,"z":48.49714285714286,"a95":"0.99","info":"25/06/2015 at 18:34:11"},{"visible":true,"include":true,"step":"33.0","x":-18.13142857142857,"y":-22.17809523809524,"z":51.260000000000005,"a95":"0.99","info":"25/06/2015 at 18:34:11"},{"visible":true,"include":true,"step":"35.0","x":-13.143809523809523,"y":-31.81238095238095,"z":53.790476190476184,"a95":"0.99","info":"25/06/2015 at 18:34:11"},{"visible":true,"include":true,"step":"40.0","x":-14.745714285714287,"y":-11.964761904761904,"z":42.60666666666667,"a95":"0.99","info":"25/06/2015 at 18:34:11"},{"visible":false,"include":false,"step":"45.0","x":-44.34285714285714,"y":-11.630476190476191,"z":37.74285714285715,"a95":"0.99","info":"25/06/2015 at 18:34:11"},{"visible":false,"include":false,"step":"50.0","x":-15.514285714285714,"y":-19.156190476190474,"z":41.796190476190475,"a95":"0.99","info":"25/06/2015 at 18:34:11"},{"visible":false,"include":false,"step":"55.0","x":2.530095238095238,"y":-11.033333333333333,"z":37.873333333333335,"a95":"0.99","info":"25/06/2015 at 18:34:11"},{"visible":false,"include":false,"step":"60.0","x":-23.204761904761906,"y":3.2293333333333334,"z":17.760952380952382,"a95":"0.99","info":"25/06/2015 at 18:34:11"},{"visible":false,"include":false,"step":"65.0","x":-6.808857142857143,"y":-12.566666666666666,"z":28.917142857142856,"a95":"0.99","info":"25/06/2015 at 18:34:11"},{"visible":false,"include":false,"step":"70.0","x":-19.798095238095236,"y":-8.923333333333332,"z":16.602857142857143,"a95":"0.99","info":"25/06/2015 at 18:34:11"},{"visible":false,"include":false,"step":"80.0","x":-12.00952380952381,"y":7.186190476190476,"z":19.66952380952381,"a95":"0.99","info":"25/06/2015 at 18:34:11"}],"demagType":"Unknown","patch":1.1,"format":"Unknown","strat":null},{"version":"v1.1.0","exported":"2016-10-11T16:20:08.746Z","info":"0","GEO":[],"TECT":[],"interpreted":false,"name":"SS24.04A","coreAzi":96,"coreDip":42,"bedStrike":95,"bedDip":5,"data":[{"visible":true,"include":false,"step":"0.0","x":-180.22857142857143,"y":-158.38095238095238,"z":99.85714285714286,"a95":"0.99","info":"06/10/2015 at 00:02:39"},{"visible":true,"include":true,"step":"10.0","x":-106.25714285714287,"y":-79.01238095238095,"z":62.542857142857144,"a95":"0.99","info":"06/10/2015 at 00:02:39"},{"visible":true,"include":true,"step":"15.0","x":-80.92190476190476,"y":-61.41904761904762,"z":48.48952380952381,"a95":"0.99","info":"06/10/2015 at 00:02:39"},{"visible":true,"include":true,"step":"20.0","x":-65.23619047619047,"y":-47.71619047619048,"z":36.53523809523809,"a95":"0.99","info":"06/10/2015 at 00:02:39"},{"visible":true,"include":true,"step":"23.0","x":-52.28666666666667,"y":-35.656190476190474,"z":32.739999999999995,"a95":"0.99","info":"06/10/2015 at 00:02:39"},{"visible":true,"include":true,"step":"25.0","x":-49.542857142857144,"y":-33.294285714285714,"z":33.59619047619047,"a95":"0.99","info":"06/10/2015 at 00:02:39"},{"visible":true,"include":true,"step":"30.0","x":-43.32190476190476,"y":-30.844761904761906,"z":26.604761904761908,"a95":"0.99","info":"06/10/2015 at 00:02:39"},{"visible":true,"include":true,"step":"33.0","x":-35.10285714285714,"y":-25.983809523809523,"z":24.23047619047619,"a95":"0.99","info":"06/10/2015 at 00:02:39"},{"visible":true,"include":true,"step":"35.0","x":-37.184761904761906,"y":-22.791428571428572,"z":18.32,"a95":"0.99","info":"06/10/2015 at 00:02:39"},{"visible":true,"include":true,"step":"40.0","x":-31.48190476190476,"y":-16.66190476190476,"z":20.98761904761905,"a95":"0.99","info":"06/10/2015 at 00:02:39"},{"visible":true,"include":true,"step":"45.0","x":-27.773333333333333,"y":-17.60571428571429,"z":14.72,"a95":"0.99","info":"06/10/2015 at 00:02:39"},{"visible":true,"include":true,"step":"50.0","x":-23.225714285714286,"y":-14.78,"z":14.136190476190476,"a95":"0.99","info":"06/10/2015 at 00:02:39"},{"visible":false,"include":false,"step":"60.0","x":-21.299047619047617,"y":-14.029523809523809,"z":12.918095238095237,"a95":"0.99","info":"06/10/2015 at 00:02:39"},{"visible":false,"include":false,"step":"70.0","x":-15.495238095238093,"y":-12.840952380952382,"z":7.893714285714286,"a95":"0.99","info":"06/10/2015 at 00:02:39"}],"demagType":"Unknown","patch":1.1,"format":"Unknown","strat":null},{"version":"v1.1.0","exported":"2016-10-11T16:20:08.746Z","info":"0","GEO":[],"TECT":[],"interpreted":false,"name":"SS24.05A","coreAzi":45,"coreDip":20,"bedStrike":95,"bedDip":5,"data":[{"visible":false,"include":false,"step":"20","x":-148.95238095238096,"y":-88.38095238095238,"z":202.38095238095238,"a95":"2","info":"\"15-06-15\" at \"08:13\""},{"visible":true,"include":true,"step":"100","x":-64.19047619047619,"y":-47.23809523809524,"z":99.42857142857143,"a95":"2.1","info":"\"15-06-15\" at \"12:17\""},{"visible":true,"include":true,"step":"150","x":-31.79047619047619,"y":-24.742857142857144,"z":59.285714285714285,"a95":"2.7","info":"\"15-06-16\" at \"07:14\""},{"visible":true,"include":true,"step":"180","x":5.819047619047619,"y":1.0952380952380953,"z":19.19047619047619,"a95":"5.5","info":"\"15-06-16\" at \"09:56\""},{"visible":true,"include":true,"step":"210","x":2.3047619047619046,"y":-6.79047619047619,"z":23.219047619047622,"a95":"4.8","info":"\"15-06-16\" at \"13:18\""},{"visible":true,"include":false,"step":"230","x":2.2857142857142856,"y":-13.180952380952382,"z":16.780952380952378,"a95":"5.4","info":"\"15-06-17\" at \"17:01\""},{"visible":true,"include":false,"step":"240","x":7.266666666666667,"y":-9.619047619047619,"z":21.35238095238095,"a95":"5.1","info":"\"15-06-22\" at \"20:46\""},{"visible":true,"include":false,"step":"270","x":1.580952380952381,"y":-5.428571428571429,"z":18.219047619047622,"a95":"3.9","info":"\"15-06-25\" at \"09:04\""}],"demagType":"Unknown","patch":1.1,"format":"Unknown","strat":null},{"version":"v1.1.0","exported":"2016-10-11T16:20:08.746Z","info":"0","GEO":[],"TECT":[],"interpreted":false,"name":"SS24.07A","coreAzi":53,"coreDip":23,"bedStrike":95,"bedDip":5,"data":[{"visible":true,"include":false,"step":"0.0","x":-97.15238095238095,"y":-88.67428571428572,"z":86.43714285714286,"a95":"0.99","info":"06/10/2015 at 00:02:39"},{"visible":true,"include":true,"step":"10.0","x":-60.5247619047619,"y":-45.17714285714286,"z":45.89809523809524,"a95":"0.99","info":"06/10/2015 at 00:02:39"},{"visible":true,"include":true,"step":"15.0","x":-43.59047619047619,"y":-33.65809523809524,"z":34.51904761904762,"a95":"0.99","info":"06/10/2015 at 00:02:39"},{"visible":true,"include":true,"step":"20.0","x":-45.013333333333335,"y":-28.494285714285713,"z":26.460952380952378,"a95":"0.99","info":"06/10/2015 at 00:02:39"},{"visible":true,"include":true,"step":"23.0","x":-28.39619047619048,"y":-22.76666666666667,"z":24.571428571428573,"a95":"0.99","info":"06/10/2015 at 00:02:39"},{"visible":true,"include":true,"step":"25.0","x":-27.705714285714286,"y":-20.68285714285714,"z":24.01809523809524,"a95":"0.99","info":"06/10/2015 at 00:02:39"},{"visible":true,"include":true,"step":"30.0","x":-20.14952380952381,"y":-14.531428571428572,"z":15.124761904761906,"a95":"0.99","info":"06/10/2015 at 00:02:39"},{"visible":true,"include":true,"step":"33.0","x":-20.404761904761905,"y":-14.415238095238097,"z":18.50190476190476,"a95":"0.99","info":"06/10/2015 at 00:02:39"},{"visible":true,"include":true,"step":"35.0","x":-17.44,"y":-14.942857142857143,"z":13.813333333333333,"a95":"0.99","info":"06/10/2015 at 00:02:39"},{"visible":true,"include":true,"step":"40.0","x":-11.34095238095238,"y":-12.094285714285714,"z":12.49904761904762,"a95":"0.99","info":"06/10/2015 at 00:02:39"},{"visible":true,"include":true,"step":"45.0","x":-13.483809523809525,"y":-7.335904761904762,"z":8.982285714285714,"a95":"0.99","info":"06/10/2015 at 00:02:39"},{"visible":true,"include":false,"step":"50.0","x":-11.03047619047619,"y":-8.755428571428572,"z":12.988571428571428,"a95":"0.99","info":"06/10/2015 at 00:02:39"},{"visible":true,"include":false,"step":"60.0","x":-10.860952380952382,"y":-9.711428571428572,"z":4.539619047619047,"a95":"0.99","info":"06/10/2015 at 00:02:39"},{"visible":true,"include":false,"step":"70.0","x":-10.522857142857143,"y":-6.648095238095239,"z":6.367428571428571,"a95":"0.99","info":"06/10/2015 at 00:02:39"}],"demagType":"Unknown","patch":1.1,"format":"Unknown","strat":null},{"version":"v1.1.0","exported":"2016-10-11T16:20:08.746Z","info":"3","GEO":[],"TECT":[],"interpreted":false,"name":"SS24.08A","coreAzi":40,"coreDip":32,"bedStrike":95,"bedDip":5,"data":[{"visible":true,"include":false,"step":"0.0","x":-24.298095238095236,"y":-22.759999999999998,"z":48.364761904761906,"a95":"0.99","info":"25/06/2015 at 18:34:11"},{"visible":true,"include":true,"step":"10.0","x":-22.022857142857145,"y":-14.53047619047619,"z":42.41142857142857,"a95":"0.99","info":"25/06/2015 at 18:34:11"},{"visible":true,"include":true,"step":"15.0","x":-15.973333333333333,"y":-11.221904761904762,"z":39.50190476190476,"a95":"0.99","info":"25/06/2015 at 18:34:11"},{"visible":true,"include":true,"step":"20.0","x":-16.914285714285715,"y":-11.167619047619048,"z":29.71047619047619,"a95":"0.99","info":"25/06/2015 at 18:34:11"},{"visible":true,"include":true,"step":"23.0","x":-10.161904761904761,"y":7.58847619047619,"z":25.152380952380955,"a95":"0.99","info":"25/06/2015 at 18:34:11"},{"visible":true,"include":true,"step":"25.0","x":-16.137142857142855,"y":-3.2051428571428575,"z":25.317142857142855,"a95":"0.99","info":"25/06/2015 at 18:34:11"},{"visible":true,"include":false,"step":"30.0","x":-12.519047619047617,"y":-5.644666666666667,"z":22.96095238095238,"a95":"0.99","info":"25/06/2015 at 18:34:11"},{"visible":true,"include":false,"step":"33.0","x":-10.904761904761905,"y":-8.55904761904762,"z":23.025714285714287,"a95":"0.99","info":"25/06/2015 at 18:34:11"},{"visible":true,"include":false,"step":"35.0","x":-3.089523809523809,"y":-33.486666666666665,"z":23.175238095238097,"a95":"0.99","info":"25/06/2015 at 18:34:11"},{"visible":true,"include":false,"step":"40.0","x":-8.790190476190476,"y":-5.283904761904762,"z":18.922857142857143,"a95":"0.99","info":"25/06/2015 at 18:34:11"},{"visible":true,"include":false,"step":"45.0","x":-56.42476190476191,"y":-2.9637142857142855,"z":17.205714285714286,"a95":"0.99","info":"25/06/2015 at 18:34:11"},{"visible":true,"include":false,"step":"50.0","x":-7.64847619047619,"y":-13.895238095238096,"z":16.363809523809522,"a95":"0.99","info":"25/06/2015 at 18:34:11"},{"visible":true,"include":false,"step":"55.0","x":2.2094285714285715,"y":2.673047619047619,"z":15.562857142857142,"a95":"0.99","info":"25/06/2015 at 18:34:11"},{"visible":true,"include":false,"step":"60.0","x":-21.38857142857143,"y":10.36,"z":4.444571428571429,"a95":"0.99","info":"25/06/2015 at 18:34:11"},{"visible":true,"include":false,"step":"65.0","x":-3.8189523809523807,"y":0.4853047619047619,"z":14.16095238095238,"a95":"0.99","info":"25/06/2015 at 18:34:11"},{"visible":true,"include":false,"step":"70.0","x":-23.301904761904762,"y":0.8901714285714286,"z":4.22352380952381,"a95":"0.99","info":"25/06/2015 at 18:34:11"},{"visible":true,"include":false,"step":"80.0","x":-13.637142857142857,"y":18.156190476190474,"z":5.551428571428572,"a95":"0.99","info":"25/06/2015 at 18:34:11"}],"demagType":"Unknown","patch":1.1,"format":"Unknown","strat":null},{"version":"v1.1.0","exported":"2016-10-11T16:20:08.746Z","info":"0","GEO":[],"TECT":[],"interpreted":false,"name":"SS24.09A","coreAzi":40,"coreDip":40,"bedStrike":95,"bedDip":5,"data":[{"visible":true,"include":false,"step":"0.0","x":-62.46380952380952,"y":-63.925714285714285,"z":100.67619047619047,"a95":"0.99","info":"06/10/2015 at 00:02:39"},{"visible":true,"include":true,"step":"10.0","x":-31.72095238095238,"y":-30.814285714285717,"z":62.10285714285715,"a95":"0.99","info":"06/10/2015 at 00:02:39"},{"visible":true,"include":true,"step":"15.0","x":-27.03238095238095,"y":-23.50190476190476,"z":46.82,"a95":"0.99","info":"06/10/2015 at 00:02:39"},{"visible":true,"include":true,"step":"20.0","x":-17.559047619047618,"y":-22.772380952380953,"z":37.34761904761905,"a95":"0.99","info":"06/10/2015 at 00:02:39"},{"visible":true,"include":true,"step":"23.0","x":-20.465714285714284,"y":-17.133333333333333,"z":32.90380952380953,"a95":"0.99","info":"06/10/2015 at 00:02:39"},{"visible":true,"include":true,"step":"25.0","x":-17.04,"y":-19.252380952380953,"z":28.238095238095237,"a95":"0.99","info":"06/10/2015 at 00:02:39"},{"visible":true,"include":true,"step":"30.0","x":-12.596190476190475,"y":-11.85142857142857,"z":25.805714285714284,"a95":"0.99","info":"06/10/2015 at 00:02:39"},{"visible":true,"include":true,"step":"33.0","x":-9.449047619047619,"y":-13.46,"z":24.00952380952381,"a95":"0.99","info":"06/10/2015 at 00:02:39"},{"visible":true,"include":true,"step":"35.0","x":-13.385714285714286,"y":-12.357142857142858,"z":16.038095238095238,"a95":"0.99","info":"06/10/2015 at 00:02:39"},{"visible":true,"include":true,"step":"40.0","x":-8.421904761904763,"y":-12.571428571428571,"z":19.044761904761906,"a95":"0.99","info":"06/10/2015 at 00:02:39"},{"visible":true,"include":true,"step":"45.0","x":-5.3781904761904755,"y":-5.746761904761905,"z":11.959999999999999,"a95":"0.99","info":"06/10/2015 at 00:02:39"},{"visible":true,"include":false,"step":"50.0","x":-4.385428571428571,"y":-5.666285714285714,"z":15.784761904761906,"a95":"0.99","info":"06/10/2015 at 00:02:39"},{"visible":true,"include":false,"step":"60.0","x":-7.170952380952381,"y":-11.480952380952381,"z":10.112380952380953,"a95":"0.99","info":"06/10/2015 at 00:02:39"},{"visible":true,"include":false,"step":"70.0","x":-3.3071428571428574,"y":-5.118666666666667,"z":10.134285714285713,"a95":"0.99","info":"06/10/2015 at 00:02:39"}],"demagType":"Unknown","patch":1.1,"format":"Unknown","strat":null},{"version":"v1.1.0","exported":"2016-10-11T16:20:08.746Z","info":"0","GEO":[],"TECT":[],"interpreted":false,"name":"SS24.10B","coreAzi":86,"coreDip":38,"bedStrike":95,"bedDip":5,"data":[{"visible":true,"include":false,"step":"20","x":-91.61904761904762,"y":-73.23809523809524,"z":78.76190476190476,"a95":"1.8","info":"\"15-06-15\" at \"08:15\""},{"visible":true,"include":true,"step":"100","x":-43.36190476190476,"y":-34.87619047619047,"z":40.79047619047619,"a95":"2.1","info":"\"15-06-15\" at \"12:18\""},{"visible":true,"include":true,"step":"150","x":-24.057142857142857,"y":-15.2,"z":20.81904761904762,"a95":"3.4","info":"\"15-06-16\" at \"07:15\""},{"visible":true,"include":true,"step":"180","x":3.7333333333333334,"y":2.142857142857143,"z":1.1904761904761905,"a95":"14.1","info":"\"15-06-16\" at \"09:58\""},{"visible":true,"include":true,"step":"210","x":-0.7619047619047619,"y":2.961904761904762,"z":3.7904761904761903,"a95":"12","info":"\"15-06-16\" at \"13:19\""},{"visible":true,"include":true,"step":"240","x":-2.238095238095238,"y":-0.5714285714285714,"z":1.3714285714285714,"a95":"43.3","info":"\"15-06-22\" at \"20:51\""},{"visible":true,"include":false,"step":"270","x":-0.9523809523809523,"y":-1.0857142857142859,"z":4.180952380952381,"a95":"11.2","info":"\"15-06-25\" at \"09:06\""}],"demagType":"Unknown","patch":1.1,"format":"Unknown","strat":null},{"version":"v1.1.0","exported":"2016-10-11T16:20:08.746Z","info":"4","GEO":[],"TECT":[],"interpreted":false,"name":"SS24.11A","coreAzi":54,"coreDip":44,"bedStrike":95,"bedDip":5,"data":[{"visible":true,"include":false,"step":"0.0","x":-10.932380952380953,"y":-26.656190476190474,"z":16.36952380952381,"a95":"0.99","info":"25/06/2015 at 18:34:11"},{"visible":true,"include":false,"step":"10.0","x":-2.8771428571428572,"y":-22.239047619047618,"z":20.255238095238095,"a95":"0.99","info":"25/06/2015 at 18:34:11"},{"visible":true,"include":false,"step":"15.0","x":0.251952380952381,"y":-19.117142857142856,"z":18.014285714285716,"a95":"0.99","info":"25/06/2015 at 18:34:11"},{"visible":true,"include":false,"step":"20.0","x":-0.9601904761904763,"y":-22.906666666666666,"z":18.49047619047619,"a95":"0.99","info":"25/06/2015 at 18:34:11"},{"visible":true,"include":false,"step":"23.0","x":3.5396190476190474,"y":-2.2172380952380952,"z":3.193523809523809,"a95":"0.99","info":"25/06/2015 at 18:34:11"},{"visible":true,"include":false,"step":"25.0","x":-1.050095238095238,"y":-10.447619047619048,"z":11.117142857142857,"a95":"0.99","info":"25/06/2015 at 18:34:11"},{"visible":true,"include":false,"step":"30.0","x":-6.546380952380952,"y":-20.46095238095238,"z":11.166666666666666,"a95":"0.99","info":"25/06/2015 at 18:34:11"},{"visible":true,"include":false,"step":"33.0","x":-2.353047619047619,"y":-14.302857142857144,"z":10.946666666666667,"a95":"0.99","info":"25/06/2015 at 18:34:11"},{"visible":true,"include":false,"step":"35.0","x":6.528761904761906,"y":-43.73238095238095,"z":12.363809523809524,"a95":"0.99","info":"25/06/2015 at 18:34:11"},{"visible":true,"include":false,"step":"40.0","x":-2.486,"y":-18.759999999999998,"z":12.17047619047619,"a95":"0.99","info":"25/06/2015 at 18:34:11"},{"visible":false,"include":false,"step":"45.0","x":-61.80761904761905,"y":-12.555238095238096,"z":6.862952380952382,"a95":"0.99","info":"25/06/2015 at 18:34:11"},{"visible":true,"include":false,"step":"50.0","x":-6.1411428571428575,"y":-23.83904761904762,"z":14.962857142857144,"a95":"0.99","info":"25/06/2015 at 18:34:11"},{"visible":true,"include":false,"step":"55.0","x":5.091904761904762,"y":-13.369523809523809,"z":9.124,"a95":"0.99","info":"25/06/2015 at 18:34:11"},{"visible":false,"include":false,"step":"60.0","x":-15.781904761904762,"y":-0.9455333333333333,"z":1.6401904761904764,"a95":"0.99","info":"25/06/2015 at 18:34:11"},{"visible":false,"include":false,"step":"65.0","x":-2.700095238095238,"y":-2.1973333333333334,"z":10.375238095238094,"a95":"0.99","info":"25/06/2015 at 18:34:11"},{"visible":false,"include":false,"step":"70.0","x":-30.374285714285715,"y":-4.315047619047619,"z":-7.65695238095238,"a95":"0.99","info":"25/06/2015 at 18:34:11"},{"visible":false,"include":false,"step":"80.0","x":-12.347619047619048,"y":13.523809523809524,"z":0.46025714285714286,"a95":"0.99","info":"25/06/2015 at 18:34:11"}],"demagType":"Unknown","patch":1.1,"format":"Unknown","strat":null},{"version":"v1.1.0","exported":"2016-10-11T16:20:08.747Z","info":"0","GEO":[],"TECT":[],"interpreted":false,"name":"SS24.12A","coreAzi":65,"coreDip":39,"bedStrike":95,"bedDip":5,"data":[{"visible":true,"include":true,"step":"20","x":-65.61904761904762,"y":-48,"z":96.0952380952381,"a95":"2","info":"\"15-06-15\" at \"08:17\""},{"visible":true,"include":true,"step":"100","x":-25.228571428571428,"y":-10.371428571428572,"z":26.514285714285712,"a95":"2.1","info":"\"15-06-15\" at \"12:20\""},{"visible":true,"include":false,"step":"150","x":-13.342857142857142,"y":-2.5238095238095237,"z":11.80952380952381,"a95":"5.2","info":"\"15-06-16\" at \"07:17\""},{"visible":true,"include":false,"step":"180","x":-3.2476190476190476,"y":-2.657142857142857,"z":-1.8095238095238095,"a95":"21.7","info":"\"15-06-16\" at \"09:59\""},{"visible":true,"include":false,"step":"210","x":0.3619047619047619,"y":2.5333333333333337,"z":2.4095238095238094,"a95":"12.9","info":"\"15-06-16\" at \"13:21\""},{"visible":true,"include":false,"step":"240","x":-2.723809523809524,"y":-1.8761904761904762,"z":2.4285714285714284,"a95":"44","info":"\"15-06-22\" at \"20:54\""},{"visible":true,"include":false,"step":"270","x":-0.8380952380952381,"y":3.238095238095238,"z":1.9904761904761903,"a95":"11.4","info":"\"15-06-25\" at \"09:08\""}],"demagType":"Unknown","patch":1.1,"format":"Unknown","strat":null},{"version":"v1.1.0","exported":"2016-10-11T16:20:08.747Z","info":"5","GEO":[],"TECT":[],"interpreted":false,"name":"SS24.13A","coreAzi":73,"coreDip":38,"bedStrike":95,"bedDip":5,"data":[{"visible":true,"include":false,"step":"0.0","x":-13.796190476190478,"y":-13.292380952380952,"z":35.62285714285714,"a95":"0.99","info":"25/06/2015 at 18:34:11"},{"visible":true,"include":false,"step":"10.0","x":-11.703809523809523,"y":-10.414285714285715,"z":29.079047619047618,"a95":"0.99","info":"25/06/2015 at 18:34:11"},{"visible":true,"include":false,"step":"15.0","x":-10.868571428571428,"y":-8.654285714285715,"z":23.663809523809523,"a95":"0.99","info":"25/06/2015 at 18:34:11"},{"visible":true,"include":false,"step":"20.0","x":-9.529523809523809,"y":-16.69142857142857,"z":22.196190476190477,"a95":"0.99","info":"25/06/2015 at 18:34:11"},{"visible":true,"include":false,"step":"23.0","x":-4.427619047619048,"y":10.135238095238096,"z":8.394857142857143,"a95":"0.99","info":"25/06/2015 at 18:34:11"},{"visible":true,"include":false,"step":"25.0","x":-13.697142857142856,"y":-6.447428571428571,"z":11.84952380952381,"a95":"0.99","info":"25/06/2015 at 18:34:11"},{"visible":true,"include":false,"step":"30.0","x":-9.636190476190476,"y":-11.858095238095238,"z":17.954285714285714,"a95":"0.99","info":"25/06/2015 at 18:34:11"},{"visible":true,"include":false,"step":"33.0","x":-7.169238095238096,"y":-9.59142857142857,"z":17.636190476190478,"a95":"0.99","info":"25/06/2015 at 18:34:11"},{"visible":true,"include":false,"step":"35.0","x":-1.1848571428571428,"y":-41.52857142857143,"z":13.35142857142857,"a95":"0.99","info":"25/06/2015 at 18:34:11"},{"visible":true,"include":false,"step":"40.0","x":-1.8112380952380953,"y":-9.572380952380954,"z":17.216190476190476,"a95":"0.99","info":"25/06/2015 at 18:34:11"},{"visible":true,"include":false,"step":"45.0","x":-81.25523809523808,"y":-9.019333333333334,"z":7.519047619047619,"a95":"0.99","info":"25/06/2015 at 18:34:11"},{"visible":true,"include":false,"step":"50.0","x":-3.6189523809523814,"y":-13.703809523809522,"z":12.831428571428571,"a95":"0.99","info":"25/06/2015 at 18:34:11"},{"visible":true,"include":false,"step":"55.0","x":0.10131428571428572,"y":-6.608380952380953,"z":11.933333333333334,"a95":"0.99","info":"25/06/2015 at 18:34:11"},{"visible":true,"include":false,"step":"60.0","x":-12.094285714285714,"y":1.8798095238095238,"z":5.754857142857143,"a95":"0.99","info":"25/06/2015 at 18:34:11"},{"visible":true,"include":false,"step":"65.0","x":-4.1739999999999995,"y":2.430857142857143,"z":9.961904761904762,"a95":"0.99","info":"25/06/2015 at 18:34:11"},{"visible":true,"include":false,"step":"70.0","x":-41.79142857142857,"y":-3.712095238095238,"z":-11.258095238095237,"a95":"0.99","info":"25/06/2015 at 18:34:11"},{"visible":true,"include":false,"step":"80.0","x":-14.736190476190476,"y":22.99142857142857,"z":-2.109238095238095,"a95":"0.99","info":"25/06/2015 at 18:34:11"}],"demagType":"Unknown","patch":1.1,"format":"Unknown","strat":null},{"version":"v1.1.0","exported":"2016-10-11T16:20:08.747Z","info":"0","GEO":[{"dec":34.281487387142306,"inc":-24.330140295642067,"MAD":15.210229164296978,"cm":[1.1102230246251565e-16,8.881784197001252e-16,0],"intensity":141.56485364259052,"type":"GC","origin":false,"forced":true,"remark":"","nSteps":12,"minStep":"10.0","maxStep":"60.0","steps":["10.0","15.0","20.0","23.0","25.0","30.0","33.0","35.0","40.0","45.0","50.0","60.0"],"group":"None","version":"v1.1.0"}],"TECT":[{"dec":33.30112420855255,"inc":-19.947436234977285,"MAD":15.210229164298623,"cm":[-1.887379141862766e-15,1.2212453270876722e-15,1.5543122344752192e-15],"intensity":141.56485364259052,"type":"GC","origin":false,"forced":true,"remark":"","nSteps":12,"minStep":"10.0","maxStep":"60.0","steps":["10.0","15.0","20.0","23.0","25.0","30.0","33.0","35.0","40.0","45.0","50.0","60.0"],"group":"None","version":"v1.1.0"}],"interpreted":true,"name":"SS24.14A","coreAzi":71,"coreDip":36,"bedStrike":95,"bedDip":5,"data":[{"visible":true,"include":false,"step":"0.0","x":-113.75238095238096,"y":-91.04285714285714,"z":95.66666666666667,"a95":"0.99","info":"06/10/2015 at 04:28:54"},{"visible":true,"include":true,"step":"10.0","x":-69.06,"y":-60.3552380952381,"z":59.341904761904765,"a95":"0.99","info":"06/10/2015 at 04:28:54"},{"visible":true,"include":true,"step":"15.0","x":-57.39047619047619,"y":-50.27333333333333,"z":46.01047619047619,"a95":"0.99","info":"06/10/2015 at 04:28:54"},{"visible":true,"include":true,"step":"20.0","x":-48.1552380952381,"y":-41.02095238095238,"z":34.87142857142857,"a95":"0.99","info":"06/10/2015 at 04:28:54"},{"visible":true,"include":true,"step":"23.0","x":-42.63333333333333,"y":-41.72285714285714,"z":31.447619047619046,"a95":"0.99","info":"06/10/2015 at 04:28:54"},{"visible":true,"include":true,"step":"25.0","x":-40.60095238095238,"y":-39.105714285714285,"z":27.656190476190474,"a95":"0.99","info":"06/10/2015 at 04:28:54"},{"visible":true,"include":true,"step":"30.0","x":-36.647619047619045,"y":-33.51619047619048,"z":23.895238095238096,"a95":"0.99","info":"06/10/2015 at 04:28:54"},{"visible":true,"include":true,"step":"33.0","x":-33.55809523809524,"y":-32.28857142857142,"z":22.259999999999998,"a95":"0.99","info":"06/10/2015 at 04:28:54"},{"visible":true,"include":true,"step":"35.0","x":-32.03333333333334,"y":-33.126666666666665,"z":19.592380952380953,"a95":"0.99","info":"06/10/2015 at 04:28:54"},{"visible":true,"include":true,"step":"40.0","x":-29.965714285714284,"y":-29.58761904761905,"z":21.075238095238095,"a95":"0.99","info":"06/10/2015 at 04:28:54"},{"visible":true,"include":true,"step":"45.0","x":-28.064761904761905,"y":-27.16095238095238,"z":16.64190476190476,"a95":"0.99","info":"06/10/2015 at 04:28:54"},{"visible":true,"include":true,"step":"50.0","x":-23.942857142857143,"y":-23.443809523809524,"z":18.267619047619046,"a95":"0.99","info":"06/10/2015 at 04:28:54"},{"visible":true,"include":true,"step":"60.0","x":-20.03904761904762,"y":-22.132380952380952,"z":13.443809523809524,"a95":"0.99","info":"06/10/2015 at 04:28:54"},{"visible":true,"include":false,"step":"70.0","x":-20.34857142857143,"y":-12.483809523809525,"z":11.287619047619048,"a95":"0.99","info":"06/10/2015 at 04:28:54"}],"demagType":"Unknown","patch":1.1,"format":"Unknown","strat":null},{"version":"v1.1.0","exported":"2016-10-11T16:20:08.747Z","info":"0","GEO":[{"dec":312.65389645979997,"inc":-27.002369401967595,"MAD":2.500372892174378,"cm":[3.3306690738754696e-16,-1.1657341758564144e-14,0],"intensity":163.81119766586662,"type":"GC","origin":false,"forced":true,"remark":"","nSteps":4,"minStep":"20","maxStep":"240","steps":["20","150","180","240"],"group":"None","version":"v1.1.0"}],"TECT":[{"dec":314.5145781058982,"inc":-23.882425871711426,"MAD":2.5003728921710264,"cm":[-3.3306690738754696e-16,-1.2212453270876722e-15,-2.7755575615628914e-17],"intensity":163.8111976658666,"type":"GC","origin":false,"forced":true,"remark":"","nSteps":4,"minStep":"20","maxStep":"240","steps":["20","150","180","240"],"group":"None","version":"v1.1.0"}],"interpreted":true,"name":"SS24.15A","coreAzi":62,"coreDip":35,"bedStrike":95,"bedDip":5,"data":[{"visible":true,"include":true,"step":"20","x":-92.57142857142857,"y":-87.33333333333333,"z":108.95238095238095,"a95":"1.8","info":"\"15-06-15\" at \"08:18\""},{"visible":true,"include":false,"step":"100","x":-34.48571428571429,"y":-17.314285714285717,"z":13.923809523809522,"a95":"2.3","info":"\"15-06-15\" at \"12:21\""},{"visible":true,"include":true,"step":"150","x":-19.295238095238094,"y":-4.980952380952381,"z":-0.24761904761904763,"a95":"4.7","info":"\"15-06-16\" at \"07:19\""},{"visible":true,"include":true,"step":"180","x":-3.342857142857143,"y":3.619047619047619,"z":-6.60952380952381,"a95":"15.3","info":"\"15-06-16\" at \"10:01\""},{"visible":true,"include":false,"step":"210","x":-0.4,"y":2.4380952380952383,"z":-5.257142857142857,"a95":"10.2","info":"\"15-06-16\" at \"13:23\""},{"visible":true,"include":false,"step":"230","x":-6.428571428571429,"y":2.5619047619047617,"z":-6.095238095238095,"a95":"13.6","info":"\"15-06-17\" at \"17:03\""},{"visible":true,"include":true,"step":"240","x":-3.0571428571428574,"y":3.3523809523809525,"z":-5.819047619047619,"a95":"12.6","info":"\"15-06-22\" at \"20:56\""},{"visible":true,"include":false,"step":"270","x":0.6380952380952382,"y":6.800000000000001,"z":-5.904761904761905,"a95":"6.8","info":"\"15-06-25\" at \"09:10\""}],"demagType":"Unknown","patch":1.1,"format":"Unknown","strat":null},{"version":"v1.1.0","exported":"2016-10-11T16:20:08.747Z","info":"0","GEO":[{"dec":318.3662753236805,"inc":-26.028318160634395,"MAD":0,"cm":[0,-4.440892098500626e-16,0],"intensity":39.68587365184498,"type":"GC","origin":false,"forced":true,"remark":"","nSteps":2,"minStep":"23.0","maxStep":"33.0","steps":["23.0","33.0"],"group":"None","version":"v1.1.0"}],"TECT":[{"dec":319.98540949782773,"inc":-22.542518922500584,"MAD":0.0000011787102824864881,"cm":[-4.440892098500626e-16,0,0],"intensity":39.68587365184498,"type":"GC","origin":false,"forced":true,"remark":"","nSteps":2,"minStep":"23.0","maxStep":"33.0","steps":["23.0","33.0"],"group":"None","version":"v1.1.0"}],"interpreted":true,"name":"SS24.17A","coreAzi":61,"coreDip":49,"bedStrike":95,"bedDip":5,"data":[{"visible":true,"include":false,"step":"0.0","x":-71.4095238095238,"y":-105.06666666666668,"z":176.2761904761905,"a95":"0.99","info":"06/10/2015 at 04:28:54"},{"visible":true,"include":false,"step":"10.0","x":-24.367619047619048,"y":-36.5152380952381,"z":78.4,"a95":"0.99","info":"06/10/2015 at 04:28:54"},{"visible":true,"include":false,"step":"15.0","x":-13.39809523809524,"y":-21.599047619047617,"z":49.53333333333334,"a95":"0.99","info":"06/10/2015 at 04:28:54"},{"visible":true,"include":false,"step":"20.0","x":-5.029333333333334,"y":-14.517142857142858,"z":33.05142857142857,"a95":"0.99","info":"06/10/2015 at 04:28:54"},{"visible":true,"include":true,"step":"23.0","x":-1.034190476190476,"y":-12.704761904761906,"z":23.897142857142857,"a95":"0.99","info":"06/10/2015 at 04:28:54"},{"visible":true,"include":false,"step":"25.0","x":0.11276190476190476,"y":-8.397333333333332,"z":20.25809523809524,"a95":"0.99","info":"06/10/2015 at 04:28:54"},{"visible":true,"include":false,"step":"30.0","x":3.3581904761904764,"y":-4.887714285714286,"z":12.300952380952381,"a95":"0.99","info":"06/10/2015 at 04:28:54"},{"visible":true,"include":true,"step":"33.0","x":9.196285714285715,"y":-4.315047619047619,"z":11.012380952380951,"a95":"0.99","info":"06/10/2015 at 04:28:54"},{"visible":true,"include":false,"step":"35.0","x":8.947809523809523,"y":-9.090285714285713,"z":8.132285714285715,"a95":"0.99","info":"06/10/2015 at 04:28:54"},{"visible":true,"include":false,"step":"40.0","x":7.184190476190476,"y":-3.0087619047619047,"z":6.279904761904762,"a95":"0.99","info":"06/10/2015 at 04:28:54"},{"visible":true,"include":false,"step":"45.0","x":11.105714285714285,"y":-2.686952380952381,"z":2.265428571428571,"a95":"0.99","info":"06/10/2015 at 04:28:54"},{"visible":true,"include":false,"step":"50.0","x":15.036190476190475,"y":0.3642,"z":0.6491523809523809,"a95":"0.99","info":"06/10/2015 at 04:28:54"},{"visible":true,"include":false,"step":"60.0","x":10.237142857142857,"y":6.264857142857143,"z":1.2063809523809523,"a95":"0.99","info":"06/10/2015 at 04:28:54"},{"visible":true,"include":false,"step":"70.0","x":9.586666666666666,"y":3.0061904761904765,"z":-3.6676190476190476,"a95":"0.99","info":"06/10/2015 at 04:28:54"}],"demagType":"Unknown","patch":1.1,"format":"Unknown","strat":null},{"version":"v1.1.0","exported":"2016-10-11T16:20:08.747Z","info":"0","GEO":[{"dec":308.05455688690023,"inc":-18.98516255773099,"MAD":13.943592586001813,"cm":[-6.661338147750939e-16,4.440892098500626e-16,0],"intensity":43.383163973211204,"type":"GC","origin":false,"forced":true,"remark":"","nSteps":3,"minStep":"30.0","maxStep":"35.0","steps":["30.0","33.0","35.0"],"group":"None","version":"v1.1.0"}],"TECT":[{"dec":309.37450370887393,"inc":-16.20848232507762,"MAD":13.943592586002438,"cm":[2.220446049250313e-15,-1.3322676295501878e-15,0],"intensity":43.38316397321121,"type":"GC","origin":false,"forced":true,"remark":"","nSteps":3,"minStep":"30.0","maxStep":"35.0","steps":["30.0","33.0","35.0"],"group":"None","version":"v1.1.0"}],"interpreted":true,"name":"SS24.18A","coreAzi":68,"coreDip":48,"bedStrike":95,"bedDip":5,"data":[{"visible":true,"include":false,"step":"0.0","x":-70.16285714285715,"y":-112.03809523809525,"z":142.25714285714287,"a95":"0.99","info":"06/10/2015 at 04:28:54"},{"visible":true,"include":false,"step":"10.0","x":-15.005714285714285,"y":-41.093333333333334,"z":60.28380952380952,"a95":"0.99","info":"06/10/2015 at 04:28:54"},{"visible":true,"include":false,"step":"15.0","x":0.9567619047619047,"y":-24.208571428571428,"z":35.69238095238095,"a95":"0.99","info":"06/10/2015 at 04:28:54"},{"visible":true,"include":false,"step":"20.0","x":10.117142857142857,"y":-18.205714285714286,"z":22.034285714285716,"a95":"0.99","info":"06/10/2015 at 04:28:54"},{"visible":true,"include":false,"step":"23.0","x":12.553333333333333,"y":-6.545142857142857,"z":13.711428571428572,"a95":"0.99","info":"06/10/2015 at 04:28:54"},{"visible":true,"include":false,"step":"25.0","x":15.685714285714285,"y":-6.363523809523809,"z":8.609523809523811,"a95":"0.99","info":"06/10/2015 at 04:28:54"},{"visible":true,"include":true,"step":"30.0","x":17.953333333333333,"y":-5.3773333333333335,"z":4.480476190476191,"a95":"0.99","info":"06/10/2015 at 04:28:54"},{"visible":true,"include":true,"step":"33.0","x":19.974285714285713,"y":-6.106571428571429,"z":3.024095238095238,"a95":"0.99","info":"06/10/2015 at 04:28:54"},{"visible":true,"include":true,"step":"35.0","x":23.922857142857143,"y":-4.448285714285714,"z":1.1711428571428573,"a95":"0.99","info":"06/10/2015 at 04:28:54"},{"visible":true,"include":false,"step":"40.0","x":22.094285714285714,"y":-1.7258095238095237,"z":2.687904761904762,"a95":"0.99","info":"06/10/2015 at 04:28:54"},{"visible":true,"include":false,"step":"45.0","x":25.18952380952381,"y":1.3105714285714285,"z":-1.7585714285714285,"a95":"0.99","info":"06/10/2015 at 04:28:54"},{"visible":true,"include":false,"step":"50.0","x":23.02952380952381,"y":5.898952380952381,"z":-3.964761904761905,"a95":"0.99","info":"06/10/2015 at 04:28:54"},{"visible":true,"include":false,"step":"60.0","x":26.35238095238095,"y":9.864761904761904,"z":-7.330761904761904,"a95":"0.99","info":"06/10/2015 at 04:28:54"},{"visible":true,"include":false,"step":"70.0","x":25.757142857142856,"y":5.198285714285714,"z":-8.195904761904762,"a95":"0.99","info":"06/10/2015 at 04:28:54"}],"demagType":"Unknown","patch":1.1,"format":"Unknown","strat":null},{"version":"v1.1.0","exported":"2016-10-11T16:20:08.747Z","info":"6","GEO":[],"TECT":[],"interpreted":false,"name":"SS24.19A","coreAzi":108,"coreDip":53,"bedStrike":95,"bedDip":5,"data":[{"visible":true,"include":false,"step":"0.0","x":-34.579047619047614,"y":-16.9,"z":26.066666666666666,"a95":"0.99","info":"25/06/2015 at 18:34:11"},{"visible":true,"include":true,"step":"10.0","x":-30.884761904761906,"y":-9.8,"z":24.115238095238094,"a95":"0.99","info":"25/06/2015 at 18:34:11"},{"visible":true,"include":true,"step":"15.0","x":-28.157142857142855,"y":-9.923809523809524,"z":21.227619047619047,"a95":"0.99","info":"25/06/2015 at 18:34:11"},{"visible":true,"include":true,"step":"20.0","x":-28.048571428571428,"y":-17.483809523809526,"z":19.425714285714285,"a95":"0.99","info":"25/06/2015 at 18:34:11"},{"visible":false,"include":false,"step":"23.0","x":-21.6,"y":-28.68,"z":3.639904761904762,"a95":"0.99","info":"25/06/2015 at 18:34:11"},{"visible":true,"include":false,"step":"25.0","x":-32.36952380952381,"y":-3.770857142857143,"z":8.513238095238094,"a95":"0.99","info":"25/06/2015 at 18:34:11"},{"visible":true,"include":false,"step":"30.0","x":-30.627619047619046,"y":-11.421904761904763,"z":13.294285714285715,"a95":"0.99","info":"25/06/2015 at 18:34:11"},{"visible":true,"include":false,"step":"33.0","x":-22.625714285714285,"y":-4.93352380952381,"z":12.470476190476191,"a95":"0.99","info":"25/06/2015 at 18:34:11"},{"visible":false,"include":false,"step":"35.0","x":-15.550476190476191,"y":-24.276190476190475,"z":14.304761904761904,"a95":"0.99","info":"25/06/2015 at 18:34:11"},{"visible":true,"include":true,"step":"40.0","x":-19.65714285714286,"y":-7.437904761904762,"z":15.088571428571429,"a95":"0.99","info":"25/06/2015 at 18:34:11"},{"visible":false,"include":false,"step":"45.0","x":-66.56285714285714,"y":-5.265714285714286,"z":-11.442857142857143,"a95":"0.99","info":"25/06/2015 at 18:34:11"},{"visible":true,"include":false,"step":"50.0","x":-19.316190476190474,"y":-11.945714285714287,"z":10.564761904761905,"a95":"0.99","info":"25/06/2015 at 18:34:11"},{"visible":false,"include":false,"step":"55.0","x":-13.658095238095237,"y":1.7414285714285715,"z":8.498095238095239,"a95":"0.99","info":"25/06/2015 at 18:34:11"},{"visible":false,"include":false,"step":"60.0","x":-23.60571428571429,"y":2.1124761904761904,"z":-4.8185714285714285,"a95":"0.99","info":"25/06/2015 at 18:34:11"},{"visible":false,"include":false,"step":"65.0","x":-13.504761904761907,"y":6.093619047619048,"z":6.7942857142857145,"a95":"0.99","info":"25/06/2015 at 18:34:11"},{"visible":false,"include":false,"step":"70.0","x":11.884761904761906,"y":1.756952380952381,"z":10.843809523809524,"a95":"0.99","info":"25/06/2015 at 18:34:11"},{"visible":false,"include":false,"step":"80.0","x":-19.40952380952381,"y":32.450476190476195,"z":-2.865428571428571,"a95":"0.99","info":"25/06/2015 at 18:34:11"}],"demagType":"Unknown","patch":1.1,"format":"Unknown","strat":null}]
