# Supplementary material for: Paleomagnetic constraints on the timing and distribution of Cenozoic rotations in Central and Eastern Anatolia
Source: Copernicus journal article supplement (doi:10.5194/se-9-295-2018), 2018-03-21
Supplement: Supplementary file 2 [file se-9-295-2018-supplement.zip › se-2017-66_DATA_dir files/dir files Sivas/SS25.dir]

[{"version":"v1.1.0","exported":"2016-10-11T08:41:23.457Z","volume":10.5,"added":"2016-10-11T08:35:02.011Z","format":"Utrecht","demagType":"Unknown","strat":"1","patch":1.1,"GEO":[{"dec":133.93629334051525,"inc":-19.426363101181096,"MAD":1.0405573312863166,"cm":[-8.526512829121202e-14,-1.4210854715202004e-13,0],"intensity":17020.657892217332,"type":"dir","forced":true,"remark":"","origin":false,"nSteps":10,"minStep":"10.0","maxStep":"45.0","steps":["10.0","15.0","20.0","23.0","25.0","30.0","33.0","35.0","40.0","45.0"],"group":"None","version":"v1.1.0"}],"TECT":[{"dec":125.86015931921565,"inc":-7.971312384790062,"MAD":1.04055733128601,"cm":[-9.663381206337363e-13,-7.958078640513122e-13,-1.3500311979441904e-13],"intensity":17020.657892217332,"type":"dir","forced":true,"remark":"","origin":false,"nSteps":10,"minStep":"10.0","maxStep":"45.0","steps":["10.0","15.0","20.0","23.0","25.0","30.0","33.0","35.0","40.0","45.0"],"group":"None","version":"v1.1.0"}],"interpreted":true,"name":"SS25.01A","coreAzi":174,"coreDip":-2,"bedStrike":149,"bedDip":34,"data":[{"visible":true,"include":false,"step":"0.0","x":3336,"y":-6978.285714285715,"z":8121.238095238095,"a95":0.99,"info":"27/06/2015 at 10:00:48"},{"visible":true,"include":true,"step":"10.0","x":3299.6190476190477,"y":-6797.523809523809,"z":7955.238095238095,"a95":0.99,"info":"27/06/2015 at 10:00:48"},{"visible":true,"include":true,"step":"15.0","x":3116.095238095238,"y":-6387.809523809524,"z":7607.238095238095,"a95":0.99,"info":"27/06/2015 at 10:00:48"},{"visible":true,"include":true,"step":"20.0","x":2906.095238095238,"y":-5890.952380952381,"z":7051.523809523809,"a95":0.99,"info":"27/06/2015 at 10:00:48"},{"visible":true,"include":true,"step":"23.0","x":2844.8571428571427,"y":-5650.666666666667,"z":6747.9047619047615,"a95":0.99,"info":"27/06/2015 at 10:00:48"},{"visible":true,"include":true,"step":"25.0","x":2707.6190476190477,"y":-5370.571428571428,"z":6434.761904761905,"a95":0.99,"info":"27/06/2015 at 10:00:48"},{"visible":true,"include":true,"step":"30.0","x":2460.095238095238,"y":-4839.714285714285,"z":5858.190476190476,"a95":0.99,"info":"27/06/2015 at 10:00:48"},{"visible":true,"include":true,"step":"33.0","x":2364.7619047619046,"y":-4551.047619047619,"z":5473.619047619048,"a95":0.99,"info":"27/06/2015 at 10:00:48"},{"visible":true,"include":true,"step":"35.0","x":2223.2380952380954,"y":-4395.809523809524,"z":5398.476190476191,"a95":0.99,"info":"27/06/2015 at 10:00:48"},{"visible":true,"include":true,"step":"40.0","x":2147.4285714285716,"y":-3903.6190476190477,"z":5015.619047619048,"a95":0.99,"info":"27/06/2015 at 10:00:48"},{"visible":true,"include":true,"step":"45.0","x":2051.809523809524,"y":-3391.714285714286,"z":4584.476190476191,"a95":0.99,"info":"27/06/2015 at 10:00:48"},{"visible":true,"include":false,"step":"50.0","x":1841.4285714285713,"y":-3455.5238095238096,"z":4186.190476190476,"a95":0.99,"info":"27/06/2015 at 10:00:48"},{"visible":true,"include":false,"step":"55.0","x":1678,"y":-2832.190476190476,"z":3850.9523809523807,"a95":0.99,"info":"27/06/2015 at 10:00:48"},{"visible":true,"include":false,"step":"60.0","x":1794.3809523809523,"y":-2463.3333333333335,"z":3724.8571428571427,"a95":0.99,"info":"27/06/2015 at 10:00:48"},{"visible":true,"include":false,"step":"65.0","x":1610.2857142857142,"y":-2781.904761904762,"z":3522.6666666666665,"a95":0.99,"info":"27/06/2015 at 10:00:48"},{"visible":true,"include":false,"step":"70.0","x":1495.6190476190477,"y":-2497.4285714285716,"z":3320.190476190476,"a95":0.99,"info":"27/06/2015 at 10:00:48"},{"visible":true,"include":false,"step":"80.0","x":889.152380952381,"y":-2355.4285714285716,"z":3652.7619047619046,"a95":0.99,"info":"27/06/2015 at 10:00:48"}]},{"version":"v1.1.0","exported":"2016-10-11T08:41:23.457Z","volume":10.5,"added":"2016-10-11T08:35:02.011Z","format":"Utrecht","demagType":"Unknown","strat":"0","patch":1.1,"GEO":[{"dec":129.8947853784507,"inc":-16.156770740022974,"MAD":0.8940349338620925,"cm":[0,1.1368683772161603e-13,0],"intensity":18098.31781762229,"type":"dir","forced":true,"remark":"","origin":false,"nSteps":10,"minStep":"10.0","maxStep":"45.0","steps":["10.0","15.0","20.0","23.0","25.0","30.0","33.0","35.0","40.0","45.0"],"group":"None","version":"v1.1.0"}],"TECT":[{"dec":124.36328616973549,"inc":-3.1469008548616832,"MAD":0.8940349338624738,"cm":[3.694822225952521e-13,2.2737367544323206e-13,2.1316282072803006e-13],"intensity":18098.31781762229,"type":"dir","forced":true,"remark":"","origin":false,"nSteps":10,"minStep":"10.0","maxStep":"45.0","steps":["10.0","15.0","20.0","23.0","25.0","30.0","33.0","35.0","40.0","45.0"],"group":"None","version":"v1.1.0"}],"interpreted":true,"name":"SS25.02A","coreAzi":170,"coreDip":-1,"bedStrike":149,"bedDip":34,"data":[{"visible":true,"include":false,"step":"0.0","x":2968.9523809523807,"y":-7510.761904761905,"z":8601.238095238095,"a95":0.99,"info":"06/10/2015 at 08:57:48"},{"visible":true,"include":true,"step":"10.0","x":3088.4761904761904,"y":-7369.333333333333,"z":8593.809523809523,"a95":0.99,"info":"06/10/2015 at 08:57:48"},{"visible":true,"include":true,"step":"15.0","x":2924.4761904761904,"y":-7029.047619047619,"z":8182.761904761905,"a95":0.99,"info":"06/10/2015 at 08:57:48"},{"visible":true,"include":true,"step":"20.0","x":2758.3809523809523,"y":-6535.333333333333,"z":7695.428571428572,"a95":0.99,"info":"06/10/2015 at 08:57:48"},{"visible":true,"include":true,"step":"23.0","x":2646.7619047619046,"y":-6138.0952380952385,"z":7322.857142857143,"a95":0.99,"info":"06/10/2015 at 08:57:48"},{"visible":true,"include":true,"step":"25.0","x":2528.285714285714,"y":-5904.476190476191,"z":7035.619047619048,"a95":0.99,"info":"06/10/2015 at 08:57:48"},{"visible":true,"include":true,"step":"30.0","x":2247.0476190476193,"y":-5292.857142857143,"z":6343.047619047619,"a95":0.99,"info":"06/10/2015 at 08:57:48"},{"visible":true,"include":true,"step":"33.0","x":2125.6190476190477,"y":-4869.047619047619,"z":5971.9047619047615,"a95":0.99,"info":"06/10/2015 at 08:57:48"},{"visible":true,"include":true,"step":"35.0","x":2066.9523809523807,"y":-4774.571428571428,"z":5711.428571428572,"a95":0.99,"info":"06/10/2015 at 08:57:48"},{"visible":true,"include":true,"step":"40.0","x":1882.6666666666667,"y":-4279.619047619048,"z":5384.857142857143,"a95":0.99,"info":"06/10/2015 at 08:57:48"},{"visible":true,"include":true,"step":"45.0","x":1836.095238095238,"y":-3674.190476190476,"z":4872.380952380952,"a95":0.99,"info":"06/10/2015 at 08:57:48"},{"visible":true,"include":false,"step":"50.0","x":1613.6190476190477,"y":-3599.714285714286,"z":4464.476190476191,"a95":0.99,"info":"06/10/2015 at 08:57:48"},{"visible":true,"include":false,"step":"60.0","x":1315.142857142857,"y":-2817.904761904762,"z":3937.904761904762,"a95":0.99,"info":"06/10/2015 at 08:57:48"},{"visible":true,"include":false,"step":"70.0","x":1483.904761904762,"y":-2348.285714285714,"z":3339.2380952380954,"a95":0.99,"info":"06/10/2015 at 08:57:48"}]},{"version":"v1.1.0","exported":"2016-10-11T08:41:23.457Z","volume":10.5,"added":"2016-10-11T08:35:02.011Z","format":"Utrecht","demagType":"Unknown","strat":"2","patch":1.1,"GEO":[{"dec":136.33725300528715,"inc":-26.712398005112888,"MAD":0.7413820575441632,"cm":[-4.831690603168681e-13,-4.831690603168681e-13,0],"intensity":19230.732604556084,"type":"dir","forced":true,"remark":"","origin":false,"nSteps":10,"minStep":"10.0","maxStep":"45.0","steps":["10.0","15.0","20.0","23.0","25.0","30.0","33.0","35.0","40.0","45.0"],"group":"None","version":"v1.1.0"}],"TECT":[{"dec":123.6073989962444,"inc":-15.257856228351482,"MAD":0.7413820575446948,"cm":[-2.5579538487363607e-13,-3.410605131648481e-13,-3.836930773104541e-13],"intensity":19230.732604556088,"type":"dir","forced":true,"remark":"","origin":false,"nSteps":10,"minStep":"10.0","maxStep":"45.0","steps":["10.0","15.0","20.0","23.0","25.0","30.0","33.0","35.0","40.0","45.0"],"group":"None","version":"v1.1.0"}],"interpreted":true,"name":"SS25.03A","coreAzi":175,"coreDip":-1,"bedStrike":149,"bedDip":34,"data":[{"visible":true,"include":false,"step":"0.0","x":5504.857142857143,"y":-7119.619047619048,"z":9037.047619047618,"a95":0.99,"info":"27/06/2015 at 10:00:48"},{"visible":true,"include":true,"step":"10.0","x":5416.761904761905,"y":-6985.9047619047615,"z":8767.42857142857,"a95":0.99,"info":"27/06/2015 at 10:00:48"},{"visible":true,"include":true,"step":"15.0","x":5098.476190476191,"y":-6627.238095238095,"z":8356.57142857143,"a95":0.99,"info":"27/06/2015 at 10:00:48"},{"visible":true,"include":true,"step":"20.0","x":4718.761904761905,"y":-6147.523809523809,"z":7754.761904761905,"a95":0.99,"info":"27/06/2015 at 10:00:48"},{"visible":true,"include":true,"step":"23.0","x":4518.857142857143,"y":-5848.666666666667,"z":7443.238095238095,"a95":0.99,"info":"27/06/2015 at 10:00:48"},{"visible":true,"include":true,"step":"25.0","x":4371.619047619048,"y":-5638.761904761905,"z":7043.523809523809,"a95":0.99,"info":"27/06/2015 at 10:00:48"},{"visible":true,"include":true,"step":"30.0","x":3932.8571428571427,"y":-4932.857142857143,"z":6399.9047619047615,"a95":0.99,"info":"27/06/2015 at 10:00:48"},{"visible":true,"include":true,"step":"33.0","x":3733.3333333333335,"y":-4635.714285714285,"z":5934.190476190476,"a95":0.99,"info":"27/06/2015 at 10:00:48"},{"visible":true,"include":true,"step":"35.0","x":3554.285714285714,"y":-4681.428571428572,"z":5736.761904761905,"a95":0.99,"info":"27/06/2015 at 10:00:48"},{"visible":true,"include":true,"step":"40.0","x":3318.6666666666665,"y":-3971.2380952380954,"z":5141.714285714285,"a95":0.99,"info":"27/06/2015 at 10:00:48"},{"visible":true,"include":true,"step":"45.0","x":3210.3809523809523,"y":-3719.0476190476193,"z":4678.666666666667,"a95":0.99,"info":"27/06/2015 at 10:00:48"},{"visible":true,"include":false,"step":"50.0","x":2776.9523809523807,"y":-3685.2380952380954,"z":4262.190476190476,"a95":0.99,"info":"27/06/2015 at 10:00:48"},{"visible":true,"include":false,"step":"55.0","x":2439.3333333333335,"y":-2806.5714285714284,"z":4010.9523809523807,"a95":0.99,"info":"27/06/2015 at 10:00:48"},{"visible":true,"include":false,"step":"60.0","x":2494.5714285714284,"y":-2872.285714285714,"z":3641.1428571428573,"a95":0.99,"info":"27/06/2015 at 10:00:48"},{"visible":true,"include":false,"step":"65.0","x":2261.1428571428573,"y":-3143.904761904762,"z":3426.7619047619046,"a95":0.99,"info":"27/06/2015 at 10:00:48"},{"visible":true,"include":false,"step":"70.0","x":2014.857142857143,"y":-2271.3333333333335,"z":3241.1428571428573,"a95":0.99,"info":"27/06/2015 at 10:00:48"},{"visible":true,"include":false,"step":"80.0","x":2576.5714285714284,"y":-2516.9523809523807,"z":2986,"a95":0.99,"info":"27/06/2015 at 10:00:48"}]},{"version":"v1.1.0","exported":"2016-10-11T08:41:23.457Z","volume":10.5,"added":"2016-10-11T08:35:02.012Z","format":"Utrecht","demagType":"Unknown","strat":"0","patch":1.1,"GEO":[{"dec":147.87040150474445,"inc":-0.754766646083195,"MAD":2.93052135166598,"cm":[-1.7053025658242404e-13,-4.547473508864641e-13,0],"intensity":12798.890420657566,"type":"dir","forced":true,"remark":"","origin":false,"nSteps":12,"minStep":"180","maxStep":"450","steps":["180","210","230","250","280","300","320","340","360","390","420","450"],"group":"None","version":"v1.1.0"}],"TECT":[{"dec":147.64148708005666,"inc":0.00585592942387672,"MAD":2.9305213516661044,"cm":[-2.5579538487363607e-13,-4.973799150320701e-13,-4.0945025148175773e-13],"intensity":12798.890420657568,"type":"dir","forced":true,"remark":"","origin":false,"nSteps":12,"minStep":"180","maxStep":"450","steps":["180","210","230","250","280","300","320","340","360","390","420","450"],"group":"None","version":"v1.1.0"}],"interpreted":true,"name":"SS25.04A","coreAzi":184,"coreDip":23,"bedStrike":149,"bedDip":34,"data":[{"visible":true,"include":false,"step":"20","x":1075.904761904762,"y":-5371.428571428572,"z":5747.428571428572,"a95":1.9,"info":"\"15-06-15\" at \"08:22\""},{"visible":true,"include":false,"step":"100","x":1466.4761904761904,"y":-5162,"z":6072.190476190476,"a95":1.9,"info":"\"15-06-15\" at \"12:23\""},{"visible":true,"include":false,"step":"150","x":1814.1904761904761,"y":-4937.047619047619,"z":6142.761904761905,"a95":2.1,"info":"\"15-06-16\" at \"07:21\""},{"visible":true,"include":true,"step":"180","x":1768.5714285714287,"y":-4475.238095238095,"z":5677.619047619048,"a95":2.2,"info":"\"15-06-16\" at \"10:06\""},{"visible":true,"include":true,"step":"210","x":2059.809523809524,"y":-4487.333333333333,"z":5714,"a95":2,"info":"\"15-06-16\" at \"13:25\""},{"visible":true,"include":true,"step":"230","x":2391.0476190476193,"y":-4248.571428571428,"z":5320.666666666667,"a95":1.9,"info":"\"15-06-17\" at \"17:05\""},{"visible":true,"include":true,"step":"250","x":2077.809523809524,"y":-3868.190476190476,"z":4954.571428571428,"a95":5.8,"info":"\"15-06-17\" at \"20:00\""},{"visible":true,"include":true,"step":"280","x":2435.2380952380954,"y":-4038,"z":4836.476190476191,"a95":1.9,"info":"\"15-06-18\" at \"05:57\""},{"visible":true,"include":true,"step":"300","x":2304.9523809523807,"y":-3912.285714285714,"z":4960.380952380952,"a95":2,"info":"\"15-06-18\" at \"08:36\""},{"visible":true,"include":true,"step":"320","x":2531.0476190476193,"y":-3671.714285714286,"z":4379.619047619048,"a95":1.9,"info":"\"15-06-18\" at \"12:44\""},{"visible":true,"include":true,"step":"340","x":2322.095238095238,"y":-3680.6666666666665,"z":4604.952380952381,"a95":2,"info":"\"15-06-19\" at \"08:16\""},{"visible":true,"include":true,"step":"360","x":2367.2380952380954,"y":-3666.5714285714284,"z":4539.619047619048,"a95":2,"info":"\"15-06-19\" at \"11:35\""},{"visible":true,"include":true,"step":"390","x":2082.095238095238,"y":-3423.714285714286,"z":4222.571428571428,"a95":2,"info":"\"15-06-20\" at \"08:24\""},{"visible":true,"include":true,"step":"420","x":1735.4285714285713,"y":-3242.095238095238,"z":4121.523809523809,"a95":2,"info":"\"15-06-20\" at \"11:08\""},{"visible":true,"include":true,"step":"450","x":1577.047619047619,"y":-3122.5714285714284,"z":4063.6190476190477,"a95":2.1,"info":"\"15-06-20\" at \"14:44\""},{"visible":true,"include":false,"step":"470","x":1862.7619047619048,"y":-3242.095238095238,"z":3770.4761904761904,"a95":2,"info":"\"15-06-21\" at \"17:59\""},{"visible":true,"include":false,"step":"490","x":1728.2857142857142,"y":-3117.3333333333335,"z":3687.0476190476193,"a95":1.9,"info":"\"15-06-21\" at \"22:42\""},{"visible":true,"include":false,"step":"510","x":1371.2380952380952,"y":-3047.5238095238096,"z":3188.095238095238,"a95":1.9,"info":"\"15-06-29\" at \"08:38\""},{"visible":true,"include":false,"step":"540","x":1747.6190476190477,"y":-3107.904761904762,"z":3639.1428571428573,"a95":2.1,"info":"\"15-06-29\" at \"12:12\""},{"visible":true,"include":false,"step":"560","x":1211.4285714285713,"y":-2072.5714285714284,"z":2741.5238095238096,"a95":2.2,"info":"\"15-06-30\" at \"05:19\""},{"visible":true,"include":false,"step":"580","x":1130.6666666666667,"y":-2225.6190476190477,"z":2670.9523809523807,"a95":2.1,"info":"\"15-06-30\" at \"09:10\""}]},{"version":"v1.1.0","exported":"2016-10-11T08:41:23.457Z","volume":10.5,"added":"2016-10-11T08:35:02.012Z","format":"Utrecht","demagType":"Unknown","strat":"0","patch":1.1,"GEO":[{"dec":132.31368473089947,"inc":-15.556474068228807,"MAD":2.768855269350939,"cm":[-7.958078640513122e-13,-6.821210263296962e-13,0],"intensity":20018.673948757612,"type":"dir","forced":true,"remark":"","origin":false,"nSteps":14,"minStep":"150","maxStep":"490","steps":["150","180","210","230","280","300","320","340","360","390","420","450","470","490"],"group":"None","version":"v1.1.0"}],"TECT":[{"dec":126.65624249584818,"inc":-3.8794745657460505,"MAD":2.7688552693508046,"cm":[-7.389644451905042e-13,-5.684341886080801e-13,-5.542233338928781e-13],"intensity":20018.673948757616,"type":"dir","forced":true,"remark":"","origin":false,"nSteps":14,"minStep":"150","maxStep":"490","steps":["150","180","210","230","280","300","320","340","360","390","420","450","470","490"],"group":"None","version":"v1.1.0"}],"interpreted":true,"name":"SS25.05A","coreAzi":181,"coreDip":23,"bedStrike":149,"bedDip":34,"data":[{"visible":true,"include":false,"step":"20","x":5687.333333333333,"y":-9538.47619047619,"z":5317.047619047619,"a95":1.6,"info":"\"15-06-15\" at \"08:24\""},{"visible":true,"include":false,"step":"100","x":5633.714285714285,"y":-9616.190476190477,"z":5519.047619047619,"a95":1.7,"info":"\"15-06-15\" at \"12:25\""},{"visible":true,"include":true,"step":"150","x":6001.142857142857,"y":-9065.619047619048,"z":5589.333333333333,"a95":1.7,"info":"\"15-06-16\" at \"07:23\""},{"visible":true,"include":true,"step":"180","x":4732.380952380952,"y":-8921.619047619048,"z":5691.333333333333,"a95":1.7,"info":"\"15-06-16\" at \"10:08\""},{"visible":true,"include":true,"step":"210","x":5377.9047619047615,"y":-8201.714285714286,"z":5454.0952380952385,"a95":1.7,"info":"\"15-06-16\" at \"13:26\""},{"visible":true,"include":true,"step":"230","x":5595.238095238095,"y":-7604.857142857143,"z":5060.476190476191,"a95":1.6,"info":"\"15-06-17\" at \"17:06\""},{"visible":true,"include":false,"step":"250","x":4376.666666666667,"y":-8327.904761904761,"z":4967.809523809524,"a95":1.7,"info":"\"15-06-17\" at \"20:02\""},{"visible":true,"include":true,"step":"280","x":5486.952380952381,"y":-6512.285714285715,"z":4942,"a95":1.6,"info":"\"15-06-18\" at \"05:58\""},{"visible":true,"include":true,"step":"300","x":4807.428571428572,"y":-7158.0952380952385,"z":4777.428571428572,"a95":1.7,"info":"\"15-06-18\" at \"08:38\""},{"visible":true,"include":true,"step":"320","x":4824.380952380952,"y":-6680.857142857143,"z":4543.047619047619,"a95":1.6,"info":"\"15-06-18\" at \"12:47\""},{"visible":true,"include":true,"step":"340","x":4540.761904761905,"y":-6813.142857142857,"z":4585.238095238095,"a95":1.7,"info":"\"15-06-19\" at \"08:18\""},{"visible":true,"include":true,"step":"360","x":4708.476190476191,"y":-6701.809523809524,"z":4252.761904761905,"a95":1.7,"info":"\"15-06-19\" at \"11:37\""},{"visible":true,"include":true,"step":"390","x":4554.857142857143,"y":-5963.9047619047615,"z":3980.8571428571427,"a95":1.7,"info":"\"15-06-20\" at \"08:26\""},{"visible":true,"include":true,"step":"420","x":3989.904761904762,"y":-6251.9047619047615,"z":4129.047619047619,"a95":1.7,"info":"\"15-06-20\" at \"11:10\""},{"visible":true,"include":true,"step":"450","x":3908.7619047619046,"y":-5674.285714285715,"z":3581.5238095238096,"a95":1.7,"info":"\"15-06-20\" at \"14:46\""},{"visible":true,"include":true,"step":"470","x":3714.9523809523807,"y":-5602.476190476191,"z":3828.285714285714,"a95":1.7,"info":"\"15-06-21\" at \"18:01\""},{"visible":true,"include":true,"step":"490","x":4229.333333333333,"y":-5317.619047619048,"z":3855.6190476190477,"a95":1.6,"info":"\"15-06-21\" at \"22:43\""},{"visible":true,"include":false,"step":"510","x":3477.904761904762,"y":-5079.9047619047615,"z":3430.8571428571427,"a95":1.8,"info":"\"15-06-29\" at \"08:39\""},{"visible":true,"include":false,"step":"540","x":3640.6666666666665,"y":-5321.142857142857,"z":3525.4285714285716,"a95":1.7,"info":"\"15-06-29\" at \"12:16\""},{"visible":true,"include":false,"step":"560","x":2783.714285714286,"y":-3636.4761904761904,"z":2704.3809523809523,"a95":1.9,"info":"\"15-06-30\" at \"05:21\""},{"visible":true,"include":false,"step":"580","x":2746.9523809523807,"y":-3819.3333333333335,"z":2715.809523809524,"a95":1.7,"info":"\"15-06-30\" at \"09:12\""}]},{"version":"v1.1.0","exported":"2016-10-11T08:41:23.457Z","volume":10.5,"added":"2016-10-11T08:35:02.012Z","format":"Utrecht","demagType":"Unknown","strat":"0","patch":1.1,"GEO":[{"dec":118.2646229723673,"inc":-7.603637461766295,"MAD":1.022761082434362,"cm":[-6.110667527536862e-13,-2.2737367544323206e-13,0],"intensity":12623.483277205489,"type":"dir","forced":true,"remark":"","origin":false,"nSteps":10,"minStep":"10.0","maxStep":"45.0","steps":["10.0","15.0","20.0","23.0","25.0","30.0","33.0","35.0","40.0","45.0"],"group":"None","version":"v1.1.0"}],"TECT":[{"dec":118.89542878852637,"inc":9.995929784500555,"MAD":1.0227610824341742,"cm":[-5.826450433232822e-13,-1.1368683772161603e-13,-4.511946372076636e-13],"intensity":12623.483277205489,"type":"dir","forced":true,"remark":"","origin":false,"nSteps":10,"minStep":"10.0","maxStep":"45.0","steps":["10.0","15.0","20.0","23.0","25.0","30.0","33.0","35.0","40.0","45.0"],"group":"None","version":"v1.1.0"}],"interpreted":true,"name":"SS25.06A","coreAzi":184,"coreDip":22,"bedStrike":149,"bedDip":34,"data":[{"visible":true,"include":false,"step":"0.0","x":1507.142857142857,"y":-7572.952380952381,"z":2373.809523809524,"a95":0.99,"info":"06/10/2015 at 08:57:48"},{"visible":true,"include":true,"step":"10.0","x":2066.190476190476,"y":-7257.428571428572,"z":2658.4761904761904,"a95":0.99,"info":"06/10/2015 at 08:57:48"},{"visible":true,"include":true,"step":"15.0","x":2003.047619047619,"y":-6880.857142857143,"z":2539.809523809524,"a95":0.99,"info":"06/10/2015 at 08:57:48"},{"visible":true,"include":true,"step":"20.0","x":2011.4285714285713,"y":-6264.666666666667,"z":2368.095238095238,"a95":0.99,"info":"06/10/2015 at 08:57:48"},{"visible":true,"include":true,"step":"23.0","x":1882.5714285714287,"y":-6032.571428571428,"z":2258.095238095238,"a95":0.99,"info":"06/10/2015 at 08:57:48"},{"visible":true,"include":true,"step":"25.0","x":1813.8095238095239,"y":-5980.0952380952385,"z":2101.2380952380954,"a95":0.99,"info":"06/10/2015 at 08:57:48"},{"visible":true,"include":true,"step":"30.0","x":1602.3809523809523,"y":-5217.428571428572,"z":1882.095238095238,"a95":0.99,"info":"06/10/2015 at 08:57:48"},{"visible":true,"include":true,"step":"33.0","x":1538.6666666666667,"y":-4918.0952380952385,"z":1793.047619047619,"a95":0.99,"info":"06/10/2015 at 08:57:48"},{"visible":true,"include":true,"step":"35.0","x":1433.3333333333333,"y":-4852.285714285715,"z":1669.3333333333333,"a95":0.99,"info":"06/10/2015 at 08:57:48"},{"visible":true,"include":true,"step":"40.0","x":1317.6190476190477,"y":-4460.380952380952,"z":1569.5238095238096,"a95":0.99,"info":"06/10/2015 at 08:57:48"},{"visible":true,"include":true,"step":"45.0","x":1488.095238095238,"y":-4146.571428571428,"z":1424.1904761904761,"a95":0.99,"info":"06/10/2015 at 08:57:48"},{"visible":true,"include":false,"step":"50.0","x":1374.5714285714287,"y":-4061.714285714286,"z":1280.3809523809523,"a95":0.99,"info":"06/10/2015 at 08:57:48"},{"visible":true,"include":false,"step":"60.0","x":1382.857142857143,"y":-3724.5714285714284,"z":1111.3333333333333,"a95":0.99,"info":"06/10/2015 at 08:57:48"},{"visible":true,"include":false,"step":"70.0","x":1513.2380952380952,"y":-3501.809523809524,"z":811.0380952380953,"a95":0.99,"info":"06/10/2015 at 08:57:48"}]},{"version":"v1.1.0","exported":"2016-10-11T08:41:23.457Z","volume":10.5,"added":"2016-10-11T08:35:02.012Z","format":"Utrecht","demagType":"Unknown","strat":"0","patch":1.1,"GEO":[{"dec":128.5475275349392,"inc":2.583650786495828,"MAD":5.387534043466029,"cm":[-1.7763568394002505e-13,-1.3500311979441904e-13,0],"intensity":3399.1156446247724,"type":"dir","forced":true,"remark":"","origin":false,"nSteps":12,"minStep":"280","maxStep":"540","steps":["280","300","320","340","360","390","420","450","470","490","510","540"],"group":"None","version":"v1.1.0"}],"TECT":[{"dec":133.2382636139053,"inc":13.44852026950436,"MAD":5.387534043466059,"cm":[-1.9184653865522705e-13,-1.3500311979441904e-13,-1.4033219031261979e-13],"intensity":3399.115644624772,"type":"dir","forced":true,"remark":"","origin":false,"nSteps":12,"minStep":"280","maxStep":"540","steps":["280","300","320","340","360","390","420","450","470","490","510","540"],"group":"None","version":"v1.1.0"}],"interpreted":true,"name":"SS25.08A","coreAzi":180,"coreDip":-1,"bedStrike":149,"bedDip":34,"data":[{"visible":false,"include":false,"step":"20","x":-2712,"y":-2085.6190476190477,"z":-1202,"a95":1.6,"info":"\"15-06-15\" at \"08:26\""},{"visible":false,"include":false,"step":"100","x":-2380.190476190476,"y":-2007.7142857142858,"z":-408.57142857142856,"a95":1.4,"info":"\"15-06-15\" at \"12:26\""},{"visible":false,"include":false,"step":"150","x":-2040.3809523809523,"y":-2066.3809523809523,"z":-93.80952380952381,"a95":1.4,"info":"\"15-06-16\" at \"07:25\""},{"visible":false,"include":false,"step":"180","x":-1679.7142857142858,"y":-1928.1904761904761,"z":172.38095238095238,"a95":1.4,"info":"\"15-06-16\" at \"10:10\""},{"visible":true,"include":false,"step":"210","x":-1128,"y":-2160.095238095238,"z":449.9047619047619,"a95":1.3,"info":"\"15-06-16\" at \"13:28\""},{"visible":true,"include":false,"step":"230","x":-826.0952380952381,"y":-2008.3809523809523,"z":798.3809523809524,"a95":1.5,"info":"\"15-06-17\" at \"17:08\""},{"visible":true,"include":false,"step":"250","x":-922.8571428571429,"y":-2000.3809523809523,"z":775.5238095238095,"a95":1.6,"info":"\"15-06-17\" at \"20:04\""},{"visible":true,"include":true,"step":"280","x":-42.285714285714285,"y":-1730.3809523809523,"z":1275.3333333333333,"a95":1.8,"info":"\"15-06-18\" at \"06:00\""},{"visible":true,"include":true,"step":"300","x":-125.23809523809524,"y":-1771.142857142857,"z":1303.6190476190477,"a95":1.8,"info":"\"15-06-18\" at \"08:40\""},{"visible":true,"include":true,"step":"320","x":-31.142857142857142,"y":-1451.5238095238096,"z":1301.8095238095239,"a95":2,"info":"\"15-06-18\" at \"12:50\""},{"visible":true,"include":true,"step":"340","x":-47.333333333333336,"y":-1541.2380952380952,"z":1189.7142857142858,"a95":1.8,"info":"\"15-06-19\" at \"08:20\""},{"visible":true,"include":true,"step":"360","x":-102.19047619047619,"y":-1491.904761904762,"z":1278.2857142857142,"a95":1.9,"info":"\"15-06-19\" at \"11:44\""},{"visible":true,"include":true,"step":"390","x":-4.095238095238095,"y":-1420.952380952381,"z":1105.904761904762,"a95":1.8,"info":"\"15-06-20\" at \"08:28\""},{"visible":true,"include":true,"step":"420","x":-492.2857142857143,"y":-1326.7619047619048,"z":934.952380952381,"a95":1.8,"info":"\"15-06-20\" at \"11:12\""},{"visible":true,"include":true,"step":"450","x":-207.04761904761904,"y":-1281.3333333333333,"z":979.2380952380952,"a95":2.1,"info":"\"15-06-20\" at \"14:47\""},{"visible":true,"include":true,"step":"470","x":-36,"y":-1159.3333333333333,"z":1026,"a95":2,"info":"\"15-06-21\" at \"18:03\""},{"visible":true,"include":true,"step":"490","x":-167.61904761904762,"y":-1150.5714285714287,"z":942.0952380952381,"a95":2.1,"info":"\"15-06-21\" at \"22:45\""},{"visible":true,"include":true,"step":"510","x":4.190476190476191,"y":-1066.6666666666667,"z":733.1428571428571,"a95":2.1,"info":"\"15-06-29\" at \"08:41\""},{"visible":true,"include":true,"step":"540","x":70.85714285714286,"y":-854.1904761904761,"z":932.1904761904761,"a95":2.3,"info":"\"15-06-29\" at \"12:18\""},{"visible":true,"include":false,"step":"560","x":-35.23809523809524,"y":-742.0952380952381,"z":488.6666666666667,"a95":2,"info":"\"15-06-30\" at \"05:23\""},{"visible":true,"include":false,"step":"580","x":-40.285714285714285,"y":-438.85714285714283,"z":713.5238095238095,"a95":2.9,"info":"\"15-06-30\" at \"09:14\""}]},{"version":"v1.1.0","exported":"2016-10-11T08:41:23.457Z","volume":10.5,"added":"2016-10-11T08:35:02.012Z","format":"Utrecht","demagType":"Unknown","strat":"3","patch":1.1,"GEO":[{"dec":135.8039128492968,"inc":2.2818661781465517,"MAD":7.809264291642516,"cm":[-2.2737367544323206e-13,-1.4210854715202004e-13,0],"intensity":7753.263903509304,"type":"dir","forced":true,"remark":"","origin":false,"nSteps":9,"minStep":"20.0","maxStep":"50.0","steps":["20.0","23.0","25.0","30.0","33.0","35.0","40.0","45.0","50.0"],"group":"None","version":"v1.1.0"}],"TECT":[{"dec":139.26829532691067,"inc":9.239539639403878,"MAD":7.809264291642498,"cm":[5.684341886080802e-14,-2.842170943040401e-14,2.1316282072803006e-14],"intensity":7753.263903509303,"type":"dir","forced":true,"remark":"","origin":false,"nSteps":9,"minStep":"20.0","maxStep":"50.0","steps":["20.0","23.0","25.0","30.0","33.0","35.0","40.0","45.0","50.0"],"group":"None","version":"v1.1.0"}],"interpreted":true,"name":"SS25.09A","coreAzi":147,"coreDip":49,"bedStrike":149,"bedDip":34,"data":[{"visible":true,"include":false,"step":"0.0","x":-15.11142857142857,"y":-2146.285714285714,"z":5319.333333333333,"a95":0.99,"info":"27/06/2015 at 10:00:48"},{"visible":true,"include":false,"step":"10.0","x":1733.904761904762,"y":-1433.904761904762,"z":4681.9047619047615,"a95":0.99,"info":"27/06/2015 at 10:00:48"},{"visible":true,"include":false,"step":"15.0","x":2519.5238095238096,"y":-1158.952380952381,"z":4092.4761904761904,"a95":0.99,"info":"27/06/2015 at 10:00:48"},{"visible":true,"include":true,"step":"20.0","x":2849.1428571428573,"y":-854.9619047619047,"z":3577.714285714286,"a95":0.99,"info":"27/06/2015 at 10:00:48"},{"visible":true,"include":true,"step":"23.0","x":2861.2380952380954,"y":-796.8857142857142,"z":3446,"a95":0.99,"info":"27/06/2015 at 10:00:48"},{"visible":true,"include":true,"step":"25.0","x":2941.3333333333335,"y":-745.5333333333334,"z":3065.0476190476193,"a95":0.99,"info":"27/06/2015 at 10:00:48"},{"visible":true,"include":true,"step":"30.0","x":2804.095238095238,"y":-644.4571428571429,"z":2762.9523809523807,"a95":0.99,"info":"27/06/2015 at 10:00:48"},{"visible":true,"include":true,"step":"33.0","x":3018.285714285714,"y":-636.4666666666666,"z":2373.714285714286,"a95":0.99,"info":"27/06/2015 at 10:00:48"},{"visible":true,"include":true,"step":"35.0","x":2706,"y":-719.3428571428572,"z":2633.2380952380954,"a95":0.99,"info":"27/06/2015 at 10:00:48"},{"visible":true,"include":true,"step":"40.0","x":2630.6666666666665,"y":-491.46666666666664,"z":1997.047619047619,"a95":0.99,"info":"27/06/2015 at 10:00:48"},{"visible":true,"include":true,"step":"45.0","x":2864.095238095238,"y":-708.5714285714286,"z":1697.8095238095239,"a95":0.99,"info":"27/06/2015 at 10:00:48"},{"visible":true,"include":true,"step":"50.0","x":2555.0476190476193,"y":-1336.2857142857142,"z":1531.7142857142858,"a95":0.99,"info":"27/06/2015 at 10:00:48"},{"visible":true,"include":false,"step":"55.0","x":2404.9523809523807,"y":-1064.5714285714287,"z":1267.4285714285713,"a95":0.99,"info":"27/06/2015 at 10:00:48"},{"visible":true,"include":false,"step":"60.0","x":2343.2380952380954,"y":-1293.6190476190477,"z":1246.5714285714287,"a95":0.99,"info":"27/06/2015 at 10:00:48"},{"visible":true,"include":false,"step":"65.0","x":2146.285714285714,"y":-1891.4285714285713,"z":1055.142857142857,"a95":0.99,"info":"27/06/2015 at 10:00:48"},{"visible":true,"include":false,"step":"70.0","x":1618.3809523809523,"y":-1326.2857142857142,"z":765.4380952380952,"a95":0.99,"info":"27/06/2015 at 10:00:48"},{"visible":true,"include":false,"step":"80.0","x":1125.6190476190477,"y":-2334.095238095238,"z":155.74285714285713,"a95":0.99,"info":"27/06/2015 at 10:00:48"}]},{"version":"v1.1.0","exported":"2016-10-11T08:41:23.457Z","volume":10.5,"added":"2016-10-11T08:35:02.012Z","format":"Utrecht","demagType":"Unknown","strat":"0","patch":1.1,"GEO":[{"dec":132.58869279315536,"inc":-3.105503958020321,"MAD":5.434492867480486,"cm":[-3.694822225952521e-13,-3.126388037344441e-13,0],"intensity":11847.022012502406,"type":"dir","forced":true,"remark":"","origin":false,"nSteps":9,"minStep":"20.0","maxStep":"50.0","steps":["20.0","23.0","25.0","30.0","33.0","35.0","40.0","45.0","50.0"],"group":"None","version":"v1.1.0"}],"TECT":[{"dec":133.580928028166,"inc":6.479303112614304,"MAD":5.434492867480592,"cm":[-6.536993168992922e-13,-6.536993168992922e-13,-1.9539925233402755e-13],"intensity":11847.022012502404,"type":"dir","forced":true,"remark":"","origin":false,"nSteps":9,"minStep":"20.0","maxStep":"50.0","steps":["20.0","23.0","25.0","30.0","33.0","35.0","40.0","45.0","50.0"],"group":"None","version":"v1.1.0"}],"interpreted":true,"name":"SS25.10A","coreAzi":139,"coreDip":55,"bedStrike":149,"bedDip":34,"data":[{"visible":true,"include":false,"step":"0.0","x":2774.190476190476,"y":-3342.5714285714284,"z":6793.333333333333,"a95":0.99,"info":"06/10/2015 at 08:57:48"},{"visible":true,"include":false,"step":"10.0","x":5222.857142857143,"y":-1789.8095238095239,"z":5783.142857142857,"a95":0.99,"info":"06/10/2015 at 08:57:48"},{"visible":true,"include":false,"step":"15.0","x":5800,"y":-1330.2857142857142,"z":5147.238095238095,"a95":0.99,"info":"06/10/2015 at 08:57:48"},{"visible":true,"include":true,"step":"20.0","x":5746.952380952381,"y":-904.0571428571429,"z":4476.190476190476,"a95":0.99,"info":"06/10/2015 at 08:57:48"},{"visible":true,"include":true,"step":"23.0","x":5766.285714285715,"y":-772.7904761904762,"z":4069.4285714285716,"a95":0.99,"info":"06/10/2015 at 08:57:48"},{"visible":true,"include":true,"step":"25.0","x":5630.0952380952385,"y":-707.5904761904761,"z":3830.4761904761904,"a95":0.99,"info":"06/10/2015 at 08:57:48"},{"visible":true,"include":true,"step":"30.0","x":5062.0952380952385,"y":-404.83809523809526,"z":3208.3809523809523,"a95":0.99,"info":"06/10/2015 at 08:57:48"},{"visible":true,"include":true,"step":"33.0","x":5207.714285714285,"y":-287.0095238095238,"z":3004,"a95":0.99,"info":"06/10/2015 at 08:57:48"},{"visible":true,"include":true,"step":"35.0","x":4635.809523809524,"y":-682.9238095238095,"z":2510.9523809523807,"a95":0.99,"info":"06/10/2015 at 08:57:48"},{"visible":true,"include":true,"step":"40.0","x":4506.285714285715,"y":-560.2095238095238,"z":2494.7619047619046,"a95":0.99,"info":"06/10/2015 at 08:57:48"},{"visible":true,"include":true,"step":"45.0","x":4422.666666666667,"y":-485.65714285714284,"z":1992.4761904761904,"a95":0.99,"info":"06/10/2015 at 08:57:48"},{"visible":true,"include":true,"step":"50.0","x":4131.238095238095,"y":-1297.142857142857,"z":1682.3809523809523,"a95":0.99,"info":"06/10/2015 at 08:57:48"},{"visible":true,"include":false,"step":"60.0","x":3680.8571428571427,"y":-1004.6666666666666,"z":1027.904761904762,"a95":0.99,"info":"06/10/2015 at 08:57:48"},{"visible":true,"include":false,"step":"70.0","x":2556.285714285714,"y":-1416.952380952381,"z":908.4095238095238,"a95":0.99,"info":"06/10/2015 at 08:57:48"}]},{"version":"v1.1.0","exported":"2016-10-11T08:41:23.457Z","volume":10.5,"added":"2016-10-11T08:35:02.012Z","format":"Utrecht","demagType":"Unknown","strat":"0","patch":1.1,"GEO":[{"dec":158.9308529414359,"inc":-17.523773782575642,"MAD":0.9313725191872164,"cm":[-4.263256414560601e-13,-1.0089706847793423e-12,0],"intensity":15296.635658963833,"type":"dir","forced":true,"remark":"","origin":false,"nSteps":10,"minStep":"15.0","maxStep":"50.0","steps":["15.0","20.0","23.0","25.0","30.0","33.0","35.0","40.0","45.0","50.0"],"group":"None","version":"v1.1.0"}],"TECT":[{"dec":147.0467693689696,"inc":-19.973599314206066,"MAD":0.9313725191872502,"cm":[-8.526512829121202e-14,-6.963318810448982e-13,-4.405364961712621e-13],"intensity":15296.635658963834,"type":"dir","forced":true,"remark":"","origin":false,"nSteps":10,"minStep":"15.0","maxStep":"50.0","steps":["15.0","20.0","23.0","25.0","30.0","33.0","35.0","40.0","45.0","50.0"],"group":"None","version":"v1.1.0"}],"interpreted":true,"name":"SS25.11A","coreAzi":79,"coreDip":11,"bedStrike":149,"bedDip":34,"data":[{"visible":true,"include":false,"step":"0.0","x":2864.190476190476,"y":10960.952380952382,"z":1740.5714285714287,"a95":0.99,"info":"06/10/2015 at 08:57:48"},{"visible":true,"include":false,"step":"10.0","x":3727.4285714285716,"y":11220.952380952382,"z":1521.3333333333333,"a95":0.99,"info":"06/10/2015 at 08:57:48"},{"visible":true,"include":true,"step":"15.0","x":3639.4285714285716,"y":10528.57142857143,"z":1330.2857142857142,"a95":0.99,"info":"06/10/2015 at 08:57:48"},{"visible":true,"include":true,"step":"20.0","x":3332.3809523809523,"y":9604.761904761905,"z":1201.142857142857,"a95":0.99,"info":"06/10/2015 at 08:57:48"},{"visible":true,"include":true,"step":"23.0","x":3212.7619047619046,"y":8896.47619047619,"z":1051.6190476190477,"a95":0.99,"info":"06/10/2015 at 08:57:48"},{"visible":true,"include":true,"step":"25.0","x":2917.904761904762,"y":8314.857142857143,"z":923.9904761904761,"a95":0.99,"info":"06/10/2015 at 08:57:48"},{"visible":true,"include":true,"step":"30.0","x":2481.809523809524,"y":7270.380952380952,"z":723.4095238095239,"a95":0.99,"info":"06/10/2015 at 08:57:48"},{"visible":true,"include":true,"step":"33.0","x":2298.190476190476,"y":6769.142857142857,"z":686.6571428571428,"a95":0.99,"info":"06/10/2015 at 08:57:48"},{"visible":true,"include":true,"step":"35.0","x":1944,"y":6039.047619047619,"z":533.0857142857143,"a95":0.99,"info":"06/10/2015 at 08:57:48"},{"visible":true,"include":true,"step":"40.0","x":1927.904761904762,"y":5538.666666666667,"z":590.7428571428571,"a95":0.99,"info":"06/10/2015 at 08:57:48"},{"visible":true,"include":true,"step":"45.0","x":1767.7142857142858,"y":4779.047619047619,"z":412.74285714285713,"a95":0.99,"info":"06/10/2015 at 08:57:48"},{"visible":true,"include":true,"step":"50.0","x":1486,"y":3772.3809523809523,"z":458.5142857142857,"a95":0.99,"info":"06/10/2015 at 08:57:48"},{"visible":true,"include":false,"step":"60.0","x":1271.4285714285713,"y":2901.4285714285716,"z":554.7904761904762,"a95":0.99,"info":"06/10/2015 at 08:57:48"},{"visible":true,"include":false,"step":"70.0","x":857.4285714285714,"y":1960.2857142857142,"z":425.31428571428575,"a95":0.99,"info":"06/10/2015 at 08:57:48"}]},{"version":"v1.1.0","exported":"2016-10-11T08:41:23.457Z","volume":10.5,"added":"2016-10-11T08:35:02.012Z","format":"Utrecht","demagType":"Unknown","strat":"4","patch":1.1,"GEO":[{"dec":145.21389021296454,"inc":-20.385551175062812,"MAD":6.520162591807477,"cm":[-1.7763568394002505e-13,-1.5631940186722204e-13,0],"intensity":2344.3629312413823,"type":"dir","forced":true,"remark":"","origin":false,"nSteps":7,"minStep":"15.0","maxStep":"35.0","steps":["15.0","20.0","23.0","25.0","30.0","33.0","35.0"],"group":"None","version":"v1.1.0"}],"TECT":[{"dec":134.2585354813474,"inc":-14.724488029465656,"MAD":6.520162591807463,"cm":[-2.7000623958883807e-13,-2.8421709430404007e-13,-8.704148513061227e-14],"intensity":2344.362931241382,"type":"dir","forced":true,"remark":"","origin":false,"nSteps":7,"minStep":"15.0","maxStep":"35.0","steps":["15.0","20.0","23.0","25.0","30.0","33.0","35.0"],"group":"None","version":"v1.1.0"}],"interpreted":true,"name":"SS25.12A","coreAzi":97,"coreDip":12,"bedStrike":149,"bedDip":34,"data":[{"visible":true,"include":false,"step":"0.0","x":785.5333333333334,"y":1391.904761904762,"z":846.1142857142858,"a95":0.99,"info":"27/06/2015 at 10:00:48"},{"visible":true,"include":false,"step":"10.0","x":947.4476190476191,"y":1340.5714285714287,"z":808.2,"a95":0.99,"info":"27/06/2015 at 10:00:48"},{"visible":true,"include":true,"step":"15.0","x":824.0190476190477,"y":1182.3809523809523,"z":765.8380952380952,"a95":0.99,"info":"27/06/2015 at 10:00:48"},{"visible":true,"include":true,"step":"20.0","x":733.8095238095239,"y":1043.7142857142858,"z":712.5142857142857,"a95":0.99,"info":"27/06/2015 at 10:00:48"},{"visible":true,"include":true,"step":"23.0","x":634.104761904762,"y":900.352380952381,"z":678.7142857142857,"a95":0.99,"info":"27/06/2015 at 10:00:48"},{"visible":true,"include":true,"step":"25.0","x":601.4380952380952,"y":823.5619047619048,"z":666.4190476190475,"a95":0.99,"info":"27/06/2015 at 10:00:48"},{"visible":true,"include":true,"step":"30.0","x":363.9809523809524,"y":615.2666666666667,"z":598.3333333333334,"a95":0.99,"info":"27/06/2015 at 10:00:48"},{"visible":true,"include":true,"step":"33.0","x":278.4761904761905,"y":612.0380952380953,"z":500.39047619047625,"a95":0.99,"info":"27/06/2015 at 10:00:48"},{"visible":true,"include":true,"step":"35.0","x":231.45714285714288,"y":399.76190476190476,"z":604.8666666666667,"a95":0.99,"info":"27/06/2015 at 10:00:48"},{"visible":true,"include":false,"step":"40.0","x":114.21904761904761,"y":220.53333333333333,"z":452.23809523809524,"a95":0.99,"info":"27/06/2015 at 10:00:48"},{"visible":true,"include":false,"step":"45.0","x":122.18095238095239,"y":213.0761904761905,"z":515.6285714285715,"a95":0.99,"info":"27/06/2015 at 10:00:48"},{"visible":true,"include":false,"step":"50.0","x":21.307619047619045,"y":-193.0857142857143,"z":395.8952380952381,"a95":0.99,"info":"27/06/2015 at 10:00:48"},{"visible":true,"include":false,"step":"55.0","x":-52.80476190476191,"y":-160.9904761904762,"z":456.5904761904762,"a95":0.99,"info":"27/06/2015 at 10:00:48"},{"visible":true,"include":false,"step":"60.0","x":-154.0952380952381,"y":-130.45714285714286,"z":202.51428571428573,"a95":0.99,"info":"27/06/2015 at 10:00:48"},{"visible":true,"include":false,"step":"65.0","x":-34.68857142857143,"y":-395.3333333333333,"z":368.1333333333333,"a95":0.99,"info":"27/06/2015 at 10:00:48"},{"visible":true,"include":false,"step":"70.0","x":-420.8952380952381,"y":-553.9142857142857,"z":248.39999999999998,"a95":0.99,"info":"27/06/2015 at 10:00:48"},{"visible":true,"include":false,"step":"80.0","x":-115.68571428571428,"y":-468.4,"z":112.67619047619047,"a95":0.99,"info":"27/06/2015 at 10:00:48"}]},{"version":"v1.1.0","exported":"2016-10-11T08:41:23.457Z","volume":10.5,"added":"2016-10-11T08:35:02.012Z","format":"Utrecht","demagType":"Unknown","strat":"0","patch":1.1,"GEO":[{"dec":152.00139004512084,"inc":-38.276594820910915,"MAD":2.6796898643788767,"cm":[0,2.6645352591003757e-14,0],"intensity":3935.59156764286,"type":"dir","forced":true,"remark":"","origin":false,"nSteps":8,"minStep":"15.0","maxStep":"40.0","steps":["15.0","20.0","23.0","25.0","30.0","33.0","35.0","40.0"],"group":"None","version":"v1.1.0"}],"TECT":[{"dec":127.27810335291952,"inc":-32.4483778977696,"MAD":2.6796898643789677,"cm":[6.394884621840902e-14,6.394884621840902e-14,7.105427357601002e-14],"intensity":3935.5915676428594,"type":"dir","forced":true,"remark":"","origin":false,"nSteps":8,"minStep":"15.0","maxStep":"40.0","steps":["15.0","20.0","23.0","25.0","30.0","33.0","35.0","40.0"],"group":"None","version":"v1.1.0"}],"interpreted":true,"name":"SS25.13A","coreAzi":65,"coreDip":32,"bedStrike":149,"bedDip":34,"data":[{"visible":true,"include":false,"step":"0.0","x":1441.6190476190477,"y":2735.5238095238096,"z":-822.2,"a95":0.99,"info":"06/10/2015 at 08:57:48"},{"visible":true,"include":false,"step":"10.0","x":1847.4285714285713,"y":2786.5714285714284,"z":-972.0952380952381,"a95":0.99,"info":"06/10/2015 at 08:57:48"},{"visible":true,"include":true,"step":"15.0","x":1593.047619047619,"y":2394.6666666666665,"z":-851.6571428571428,"a95":0.99,"info":"06/10/2015 at 08:57:48"},{"visible":true,"include":true,"step":"20.0","x":1424.5714285714287,"y":2067.714285714286,"z":-708.447619047619,"a95":0.99,"info":"06/10/2015 at 08:57:48"},{"visible":true,"include":true,"step":"23.0","x":1349.6190476190477,"y":1841.8095238095239,"z":-614,"a95":0.99,"info":"06/10/2015 at 08:57:48"},{"visible":true,"include":true,"step":"25.0","x":1095.4285714285713,"y":1528.1904761904761,"z":-549.9714285714285,"a95":0.99,"info":"06/10/2015 at 08:57:48"},{"visible":true,"include":true,"step":"30.0","x":837.8190476190476,"y":1184.6666666666667,"z":-484.9428571428571,"a95":0.99,"info":"06/10/2015 at 08:57:48"},{"visible":true,"include":true,"step":"33.0","x":721.9238095238095,"y":1049.142857142857,"z":-502.5809523809524,"a95":0.99,"info":"06/10/2015 at 08:57:48"},{"visible":true,"include":true,"step":"35.0","x":653.8095238095239,"y":912.4857142857143,"z":-497.31428571428575,"a95":0.99,"info":"06/10/2015 at 08:57:48"},{"visible":true,"include":true,"step":"40.0","x":528.2666666666667,"y":680.6095238095238,"z":-385.9142857142857,"a95":0.99,"info":"06/10/2015 at 08:57:48"},{"visible":true,"include":false,"step":"45.0","x":439.2190476190476,"y":450.152380952381,"z":-371.1142857142857,"a95":0.99,"info":"06/10/2015 at 08:57:48"},{"visible":true,"include":false,"step":"50.0","x":243.56190476190477,"y":-5.725047619047619,"z":-273.70476190476194,"a95":0.99,"info":"06/10/2015 at 08:57:48"},{"visible":true,"include":false,"step":"60.0","x":83.22095238095238,"y":-636.5714285714286,"z":27.443809523809527,"a95":0.99,"info":"06/10/2015 at 08:57:48"},{"visible":true,"include":false,"step":"70.0","x":-42.74285714285715,"y":-774.9142857142857,"z":51.028571428571425,"a95":0.99,"info":"06/10/2015 at 08:57:48"}]},{"version":"v1.1.0","exported":"2016-10-11T08:41:23.457Z","volume":10.5,"added":"2016-10-11T08:35:02.013Z","format":"Utrecht","demagType":"Unknown","strat":"5","patch":1.1,"GEO":[{"dec":155.19306534270936,"inc":-16.043474505914734,"MAD":2.574817379065155,"cm":[0,-8.526512829121202e-14,0],"intensity":6271.021752188174,"type":"dir","forced":true,"remark":"","origin":false,"nSteps":10,"minStep":"15.0","maxStep":"50.0","steps":["15.0","20.0","23.0","25.0","30.0","33.0","35.0","40.0","45.0","50.0"],"group":"None","version":"v1.1.0"}],"TECT":[{"dec":144.89386839014622,"inc":-16.684057823369614,"MAD":2.574817379065154,"cm":[-1.4210854715202004e-14,-3.055333763768431e-13,-1.376676550535194e-13],"intensity":6271.021752188175,"type":"dir","forced":true,"remark":"","origin":false,"nSteps":10,"minStep":"15.0","maxStep":"50.0","steps":["15.0","20.0","23.0","25.0","30.0","33.0","35.0","40.0","45.0","50.0"],"group":"None","version":"v1.1.0"}],"interpreted":true,"name":"SS25.14A","coreAzi":79,"coreDip":28,"bedStrike":149,"bedDip":34,"data":[{"visible":true,"include":false,"step":"0.0","x":1865.6190476190477,"y":5746.571428571428,"z":278.0095238095238,"a95":0.99,"info":"27/06/2015 at 10:00:48"},{"visible":true,"include":false,"step":"10.0","x":2138.9523809523807,"y":5566.476190476191,"z":211.60000000000002,"a95":0.99,"info":"27/06/2015 at 10:00:48"},{"visible":true,"include":true,"step":"15.0","x":1939.2380952380952,"y":5042.761904761905,"z":296.4190476190476,"a95":0.99,"info":"27/06/2015 at 10:00:48"},{"visible":true,"include":true,"step":"20.0","x":1600.1904761904761,"y":4427.523809523809,"z":343.1333333333333,"a95":0.99,"info":"27/06/2015 at 10:00:48"},{"visible":true,"include":true,"step":"23.0","x":1490.6666666666667,"y":4042.7619047619046,"z":268.2,"a95":0.99,"info":"27/06/2015 at 10:00:48"},{"visible":true,"include":true,"step":"25.0","x":1445.047619047619,"y":3727.5238095238096,"z":220.0095238095238,"a95":0.99,"info":"27/06/2015 at 10:00:48"},{"visible":true,"include":true,"step":"30.0","x":977.6190476190476,"y":3219.1428571428573,"z":214.82857142857142,"a95":0.99,"info":"27/06/2015 at 10:00:48"},{"visible":true,"include":true,"step":"33.0","x":1075.6190476190477,"y":2720.285714285714,"z":301.76190476190476,"a95":0.99,"info":"27/06/2015 at 10:00:48"},{"visible":true,"include":true,"step":"35.0","x":939.4952380952382,"y":2261.714285714286,"z":427.4761904761905,"a95":0.99,"info":"27/06/2015 at 10:00:48"},{"visible":true,"include":true,"step":"40.0","x":818.8666666666667,"y":1978,"z":252.48571428571427,"a95":0.99,"info":"27/06/2015 at 10:00:48"},{"visible":true,"include":true,"step":"45.0","x":701.6285714285715,"y":1472.7619047619048,"z":41.86,"a95":0.99,"info":"27/06/2015 at 10:00:48"},{"visible":true,"include":true,"step":"50.0","x":422.4761904761905,"y":741.0380952380953,"z":247.34285714285713,"a95":0.99,"info":"27/06/2015 at 10:00:48"},{"visible":true,"include":false,"step":"55.0","x":360.54285714285714,"y":748.6857142857143,"z":271.5333333333333,"a95":0.99,"info":"27/06/2015 at 10:00:48"},{"visible":true,"include":false,"step":"60.0","x":254.52380952380952,"y":55.005714285714284,"z":24.092380952380953,"a95":0.99,"info":"27/06/2015 at 10:00:48"},{"visible":true,"include":false,"step":"65.0","x":307.96190476190475,"y":-604.447619047619,"z":392.5142857142857,"a95":0.99,"info":"27/06/2015 at 10:00:48"},{"visible":true,"include":false,"step":"70.0","x":-21.68285714285714,"y":-558.7619047619048,"z":200.58095238095237,"a95":0.99,"info":"27/06/2015 at 10:00:48"},{"visible":true,"include":false,"step":"80.0","x":208.45714285714288,"y":-1034.1904761904761,"z":472.74285714285713,"a95":0.99,"info":"27/06/2015 at 10:00:48"}]},{"version":"v1.1.0","exported":"2016-10-11T08:41:23.457Z","volume":10.5,"added":"2016-10-11T08:35:02.013Z","format":"Utrecht","demagType":"Unknown","strat":"0","patch":1.1,"GEO":[{"dec":140.06515139595524,"inc":9.319220572245687,"MAD":6.685660580282662,"cm":[-2.1316282072803006e-14,-2.842170943040401e-14,0],"intensity":10338.736250882219,"type":"dir","forced":true,"remark":"","origin":false,"nSteps":13,"minStep":"150","maxStep":"450","steps":["150","180","210","230","250","280","300","320","340","360","390","420","450"],"group":"None","version":"v1.1.0"}],"TECT":[{"dec":146.85531455987189,"inc":12.706258373609241,"MAD":6.685660580282668,"cm":[2.842170943040401e-14,2.4158453015843406e-13,4.263256414560601e-14],"intensity":10338.73625088222,"type":"dir","forced":true,"remark":"","origin":false,"nSteps":13,"minStep":"150","maxStep":"450","steps":["150","180","210","230","250","280","300","320","340","360","390","420","450"],"group":"None","version":"v1.1.0"}],"interpreted":true,"name":"SS25.15A","coreAzi":164,"coreDip":36,"bedStrike":149,"bedDip":34,"data":[{"visible":true,"include":false,"step":"20","x":3039.4285714285716,"y":-3934.9523809523807,"z":5939.238095238095,"a95":1.9,"info":"\"15-06-15\" at \"08:28\""},{"visible":true,"include":false,"step":"100","x":3612.7619047619046,"y":-3391.5238095238096,"z":6354.285714285715,"a95":2.1,"info":"\"15-06-15\" at \"12:28\""},{"visible":true,"include":true,"step":"150","x":4224.476190476191,"y":-2738.6666666666665,"z":6037.047619047619,"a95":2,"info":"\"15-06-16\" at \"07:27\""},{"visible":true,"include":true,"step":"180","x":3333.904761904762,"y":-2961.5238095238096,"z":5842.190476190476,"a95":2.2,"info":"\"15-06-16\" at \"10:12\""},{"visible":true,"include":true,"step":"210","x":2647.1428571428573,"y":-2387.6190476190477,"z":5091.523809523809,"a95":2.2,"info":"\"15-06-16\" at \"13:30\""},{"visible":true,"include":true,"step":"230","x":1937.6190476190477,"y":-2565.904761904762,"z":4742.666666666667,"a95":2.1,"info":"\"15-06-17\" at \"17:10\""},{"visible":true,"include":true,"step":"250","x":2239.5238095238096,"y":-2290.3809523809523,"z":4461.714285714285,"a95":2.1,"info":"\"15-06-17\" at \"20:05\""},{"visible":true,"include":true,"step":"280","x":1125.142857142857,"y":-1868,"z":3634.9523809523807,"a95":2.2,"info":"\"15-06-18\" at \"06:03\""},{"visible":true,"include":true,"step":"300","x":1434.095238095238,"y":-1510.4761904761904,"z":3626.5714285714284,"a95":2.3,"info":"\"15-06-18\" at \"08:44\""},{"visible":true,"include":true,"step":"320","x":1225.3333333333333,"y":-1411.3333333333333,"z":3303.3333333333335,"a95":2.1,"info":"\"15-06-18\" at \"12:52\""},{"visible":true,"include":true,"step":"340","x":1291.8095238095239,"y":-1701.6190476190477,"z":3617.5238095238096,"a95":2.2,"info":"\"15-06-19\" at \"08:23\""},{"visible":true,"include":true,"step":"360","x":1048.1904761904761,"y":-1369.6190476190477,"z":3019.0476190476193,"a95":2.2,"info":"\"15-06-19\" at \"11:47\""},{"visible":true,"include":true,"step":"390","x":952.7619047619048,"y":-1380.1904761904761,"z":2673.714285714286,"a95":2.2,"info":"\"15-06-20\" at \"08:30\""},{"visible":true,"include":true,"step":"420","x":373.04761904761904,"y":-1311.2380952380952,"z":3226.190476190476,"a95":2.3,"info":"\"15-06-20\" at \"11:13\""},{"visible":true,"include":true,"step":"450","x":1044.1904761904761,"y":-1430.3809523809523,"z":1821.047619047619,"a95":2.1,"info":"\"15-06-20\" at \"14:49\""},{"visible":true,"include":false,"step":"470","x":216.95238095238096,"y":-1442.4761904761904,"z":2370.095238095238,"a95":2.2,"info":"\"15-06-21\" at \"18:07\""},{"visible":true,"include":false,"step":"490","x":632.3809523809524,"y":-1473.7142857142858,"z":2620.8571428571427,"a95":2.1,"info":"\"15-06-21\" at \"22:47\""},{"visible":true,"include":false,"step":"510","x":327.42857142857144,"y":-1521.5238095238096,"z":1686.5714285714287,"a95":2,"info":"\"15-06-29\" at \"08:43\""},{"visible":true,"include":false,"step":"540","x":475.14285714285717,"y":-363.3333333333333,"z":1877.2380952380952,"a95":2.6,"info":"\"15-06-29\" at \"12:22\""},{"visible":true,"include":false,"step":"560","x":546,"y":-501.3333333333333,"z":1179.4285714285713,"a95":2.7,"info":"\"15-06-30\" at \"05:25\""},{"visible":true,"include":false,"step":"580","x":1049.2380952380952,"y":-886.5714285714286,"z":1668.095238095238,"a95":2.3,"info":"\"15-06-30\" at \"09:15\""}]},{"version":"v1.1.0","exported":"2016-10-11T08:41:23.457Z","volume":10.5,"added":"2016-10-11T08:35:02.013Z","format":"Utrecht","demagType":"Unknown","strat":"6","patch":1.1,"GEO":[{"dec":136.77232010122043,"inc":16.024724867001705,"MAD":2.6931740689213113,"cm":[3.126388037344441e-13,4.405364961712621e-13,0],"intensity":10595.700364875473,"type":"dir","forced":true,"remark":"","origin":false,"nSteps":9,"minStep":"15.0","maxStep":"45.0","steps":["15.0","20.0","23.0","25.0","30.0","33.0","35.0","40.0","45.0"],"group":"None","version":"v1.1.0"}],"TECT":[{"dec":148.1218266396511,"inc":20.04090188141465,"MAD":2.6931740689211523,"cm":[2.2737367544323206e-13,0,2.4158453015843406e-13],"intensity":10595.700364875473,"type":"dir","forced":true,"remark":"","origin":false,"nSteps":9,"minStep":"15.0","maxStep":"45.0","steps":["15.0","20.0","23.0","25.0","30.0","33.0","35.0","40.0","45.0"],"group":"None","version":"v1.1.0"}],"interpreted":true,"name":"SS25.16A","coreAzi":168,"coreDip":40,"bedStrike":149,"bedDip":34,"data":[{"visible":true,"include":false,"step":"0.0","x":2725.3333333333335,"y":-4046,"z":7526.0952380952385,"a95":0.99,"info":"27/06/2015 at 10:00:48"},{"visible":true,"include":false,"step":"10.0","x":2848.5714285714284,"y":-4031.809523809524,"z":6907.714285714285,"a95":0.99,"info":"27/06/2015 at 10:00:48"},{"visible":true,"include":true,"step":"15.0","x":2668.5714285714284,"y":-3707.1428571428573,"z":6219.9047619047615,"a95":0.99,"info":"27/06/2015 at 10:00:49"},{"visible":true,"include":true,"step":"20.0","x":2200.190476190476,"y":-3076,"z":5562,"a95":0.99,"info":"27/06/2015 at 10:00:49"},{"visible":true,"include":true,"step":"23.0","x":1999.7142857142858,"y":-2972.095238095238,"z":5118.476190476191,"a95":0.99,"info":"27/06/2015 at 10:00:49"},{"visible":true,"include":true,"step":"25.0","x":1849.8095238095239,"y":-3003.809523809524,"z":4621.523809523809,"a95":0.99,"info":"27/06/2015 at 10:00:49"},{"visible":true,"include":true,"step":"30.0","x":1510.6666666666667,"y":-2393.6190476190477,"z":3889.2380952380954,"a95":0.99,"info":"27/06/2015 at 10:00:49"},{"visible":true,"include":true,"step":"33.0","x":1233.3333333333333,"y":-2339.714285714286,"z":3393.809523809524,"a95":0.99,"info":"27/06/2015 at 10:00:49"},{"visible":true,"include":true,"step":"35.0","x":1198.7619047619048,"y":-2234.9523809523807,"z":3370.190476190476,"a95":0.99,"info":"27/06/2015 at 10:00:49"},{"visible":true,"include":true,"step":"40.0","x":842,"y":-1982.095238095238,"z":2802,"a95":0.99,"info":"27/06/2015 at 10:00:49"},{"visible":true,"include":true,"step":"45.0","x":824.5714285714286,"y":-1748.952380952381,"z":2164.4761904761904,"a95":0.99,"info":"27/06/2015 at 10:00:49"},{"visible":true,"include":false,"step":"50.0","x":888.8285714285715,"y":-1848.3809523809523,"z":1792.4761904761904,"a95":0.99,"info":"27/06/2015 at 10:00:49"},{"visible":true,"include":false,"step":"55.0","x":612.8666666666667,"y":-1392.1904761904761,"z":1691.5238095238096,"a95":0.99,"info":"27/06/2015 at 10:00:49"},{"visible":true,"include":false,"step":"60.0","x":686.5238095238095,"y":-1510.5714285714287,"z":1208.6666666666667,"a95":0.99,"info":"27/06/2015 at 10:00:49"},{"visible":true,"include":false,"step":"65.0","x":595.8761904761905,"y":-1929.6190476190477,"z":1288.4761904761904,"a95":0.99,"info":"27/06/2015 at 10:00:49"},{"visible":true,"include":false,"step":"70.0","x":588.5238095238095,"y":-1574.857142857143,"z":1170.3809523809523,"a95":0.99,"info":"27/06/2015 at 10:00:49"},{"visible":true,"include":false,"step":"80.0","x":1744.6666666666667,"y":-1697.7142857142858,"z":897.9904761904761,"a95":0.99,"info":"27/06/2015 at 10:00:49"}]},{"version":"v1.1.0","exported":"2016-10-11T08:41:23.457Z","volume":10.5,"added":"2016-10-11T08:35:02.013Z","format":"Utrecht","demagType":"Unknown","strat":"0","patch":1.1,"GEO":[{"dec":137.20433352717794,"inc":5.815205882634533,"MAD":1.8130260556976214,"cm":[-3.979039320256561e-13,-4.831690603168681e-13,0],"intensity":8158.4676938203975,"type":"dir","forced":true,"remark":"","origin":false,"nSteps":9,"minStep":"15.0","maxStep":"45.0","steps":["15.0","20.0","23.0","25.0","30.0","33.0","35.0","40.0","45.0"],"group":"None","version":"v1.1.0"}],"TECT":[{"dec":142.4426158403818,"inc":11.403746342481009,"MAD":1.813026055697635,"cm":[-1.1368683772161603e-13,-2.7000623958883807e-13,-2.4158453015843406e-13],"intensity":8158.467693820397,"type":"dir","forced":true,"remark":"","origin":false,"nSteps":9,"minStep":"15.0","maxStep":"45.0","steps":["15.0","20.0","23.0","25.0","30.0","33.0","35.0","40.0","45.0"],"group":"None","version":"v1.1.0"}],"interpreted":true,"name":"SS25.17A","coreAzi":119,"coreDip":36,"bedStrike":149,"bedDip":34,"data":[{"visible":true,"include":false,"step":"0.0","x":1448.3809523809523,"y":1212.095238095238,"z":4485.428571428572,"a95":0.99,"info":"06/10/2015 at 08:57:48"},{"visible":true,"include":false,"step":"10.0","x":1982.1904761904761,"y":1498.7619047619048,"z":4250.952380952381,"a95":0.99,"info":"06/10/2015 at 08:57:48"},{"visible":true,"include":true,"step":"15.0","x":2082.3809523809523,"y":1437.5238095238096,"z":4079.6190476190477,"a95":0.99,"info":"06/10/2015 at 08:57:48"},{"visible":true,"include":true,"step":"20.0","x":2080.4761904761904,"y":1443.047619047619,"z":3809.904761904762,"a95":0.99,"info":"06/10/2015 at 08:57:48"},{"visible":true,"include":true,"step":"23.0","x":2080,"y":1459.5238095238096,"z":3744.9523809523807,"a95":0.99,"info":"06/10/2015 at 08:57:48"},{"visible":true,"include":true,"step":"25.0","x":2073.714285714286,"y":1384.5714285714287,"z":3569.1428571428573,"a95":0.99,"info":"06/10/2015 at 08:57:48"},{"visible":true,"include":true,"step":"30.0","x":1931.3333333333333,"y":1226.7619047619048,"z":3365.904761904762,"a95":0.99,"info":"06/10/2015 at 08:57:48"},{"visible":true,"include":true,"step":"33.0","x":1946,"y":1299.904761904762,"z":3284.285714285714,"a95":0.99,"info":"06/10/2015 at 08:57:48"},{"visible":true,"include":true,"step":"35.0","x":1826.3809523809523,"y":1113.3333333333333,"z":2973.3333333333335,"a95":0.99,"info":"06/10/2015 at 08:57:48"},{"visible":true,"include":true,"step":"40.0","x":1760.1904761904761,"y":1062.3809523809523,"z":2835.3333333333335,"a95":0.99,"info":"06/10/2015 at 08:57:48"},{"visible":true,"include":true,"step":"45.0","x":1788.1904761904761,"y":1022.1904761904761,"z":2667.904761904762,"a95":0.99,"info":"06/10/2015 at 08:57:48"},{"visible":true,"include":false,"step":"50.0","x":1737.904761904762,"y":538.047619047619,"z":2214,"a95":0.99,"info":"06/10/2015 at 08:57:48"},{"visible":true,"include":false,"step":"60.0","x":1662.5714285714287,"y":-121.47619047619048,"z":2113.809523809524,"a95":0.99,"info":"06/10/2015 at 08:57:48"},{"visible":true,"include":false,"step":"70.0","x":1451.047619047619,"y":-79.45809523809524,"z":1795.5238095238096,"a95":0.99,"info":"06/10/2015 at 08:57:48"}]},{"version":"v1.1.0","exported":"2016-10-11T08:41:23.457Z","volume":10.5,"added":"2016-10-11T08:35:02.013Z","format":"Utrecht","demagType":"Unknown","strat":"0","patch":1.1,"GEO":[{"dec":158.8523001918627,"inc":5.9944352145201325,"MAD":4.125077629743803,"cm":[-1.2789769243681803e-13,-3.481659405224491e-13,0],"intensity":4856.815340031525,"type":"dir","forced":true,"remark":"","origin":false,"nSteps":13,"minStep":"180","maxStep":"470","steps":["180","210","230","250","280","300","320","340","360","390","420","450","470"],"group":"None","version":"v1.1.0"}],"TECT":[{"dec":160.50684302816921,"inc":-0.4917045700599252,"MAD":4.125077629743788,"cm":[-1.6342482922482304e-13,-4.689582056016661e-13,-1.4921397450962104e-13],"intensity":4856.815340031525,"type":"dir","forced":true,"remark":"","origin":false,"nSteps":13,"minStep":"180","maxStep":"470","steps":["180","210","230","250","280","300","320","340","360","390","420","450","470"],"group":"None","version":"v1.1.0"}],"interpreted":true,"name":"SS25.20A","coreAzi":170,"coreDip":45,"bedStrike":149,"bedDip":34,"data":[{"visible":true,"include":false,"step":"20","x":1907.3333333333333,"y":-1355.3333333333333,"z":2805.809523809524,"a95":2,"info":"\"15-06-15\" at \"08:35\""},{"visible":true,"include":false,"step":"100","x":2053.809523809524,"y":-646.952380952381,"z":2882.4761904761904,"a95":2.3,"info":"\"15-06-15\" at \"12:30\""},{"visible":true,"include":false,"step":"150","x":2140.285714285714,"y":-609.3333333333334,"z":2746.8571428571427,"a95":2.3,"info":"\"15-06-16\" at \"07:29\""},{"visible":true,"include":true,"step":"180","x":1976.5714285714287,"y":-551.8095238095239,"z":2622.8571428571427,"a95":2.4,"info":"\"15-06-16\" at \"10:14\""},{"visible":true,"include":true,"step":"210","x":1845.904761904762,"y":-511.04761904761904,"z":2284.190476190476,"a95":2.3,"info":"\"15-06-16\" at \"13:32\""},{"visible":true,"include":true,"step":"230","x":1665.142857142857,"y":-541.6190476190476,"z":2348.7619047619046,"a95":2.2,"info":"\"15-06-17\" at \"17:11\""},{"visible":true,"include":true,"step":"250","x":1733.5238095238096,"y":-504.6666666666667,"z":2225.6190476190477,"a95":2,"info":"\"15-06-17\" at \"20:08\""},{"visible":true,"include":true,"step":"280","x":1425.8095238095239,"y":-320.4761904761905,"z":1654.095238095238,"a95":2.2,"info":"\"15-06-18\" at \"06:05\""},{"visible":true,"include":true,"step":"300","x":1304.095238095238,"y":-408.6666666666667,"z":1655.047619047619,"a95":2.3,"info":"\"15-06-18\" at \"08:45\""},{"visible":true,"include":true,"step":"320","x":1379.047619047619,"y":-492,"z":1685.4285714285713,"a95":2.1,"info":"\"15-06-18\" at \"12:54\""},{"visible":true,"include":true,"step":"340","x":1222.4761904761904,"y":-542,"z":1528,"a95":2.2,"info":"\"15-06-19\" at \"08:25\""},{"visible":true,"include":true,"step":"360","x":1335.7142857142858,"y":-379.23809523809524,"z":1438.4761904761904,"a95":2.1,"info":"\"15-06-19\" at \"11:49\""},{"visible":true,"include":true,"step":"390","x":1327.6190476190477,"y":-277.9047619047619,"z":1194.857142857143,"a95":2.1,"info":"\"15-06-20\" at \"08:31\""},{"visible":true,"include":true,"step":"420","x":853.6190476190476,"y":-318.3809523809524,"z":1284.952380952381,"a95":2.6,"info":"\"15-06-20\" at \"11:15\""},{"visible":true,"include":true,"step":"450","x":1025.6190476190477,"y":-468.95238095238096,"z":896.952380952381,"a95":2,"info":"\"15-06-20\" at \"14:50\""},{"visible":true,"include":true,"step":"470","x":920.952380952381,"y":-474.4761904761905,"z":1137.4285714285713,"a95":2.3,"info":"\"15-06-21\" at \"18:09\""},{"visible":true,"include":false,"step":"490","x":1009.3333333333334,"y":-486.0952380952381,"z":1233.3333333333333,"a95":2.1,"info":"\"15-06-21\" at \"22:48\""},{"visible":true,"include":false,"step":"510","x":646.7619047619048,"y":-236.57142857142858,"z":853.3333333333334,"a95":2.4,"info":"\"15-06-29\" at \"08:45\""},{"visible":true,"include":false,"step":"540","x":540.5714285714286,"y":-206,"z":903.8095238095239,"a95":2.5,"info":"\"15-06-29\" at \"12:23\""},{"visible":true,"include":false,"step":"560","x":656.952380952381,"y":-47.80952380952381,"z":546.7619047619048,"a95":2.2,"info":"\"15-06-30\" at \"05:27\""},{"visible":true,"include":false,"step":"580","x":488.2857142857143,"y":-383.6190476190476,"z":798.6666666666666,"a95":2.3,"info":"\"15-06-30\" at \"09:17\""}]},{"version":"v1.1.0","exported":"2016-10-11T08:41:23.457Z","volume":10.5,"added":"2016-10-11T08:35:02.013Z","format":"Utrecht","demagType":"Unknown","strat":"0","patch":1.1,"GEO":[],"TECT":[],"interpreted":false,"name":"SS25.21A","coreAzi":188,"coreDip":38,"bedStrike":149,"bedDip":34,"data":[{"visible":true,"include":false,"step":"0.0","x":31.025714285714283,"y":913.6190476190476,"z":2089.4285714285716,"a95":0.99,"info":"06/10/2015 at 13:24:17"},{"visible":true,"include":false,"step":"10.0","x":681.6952380952381,"y":502.1333333333333,"z":1803.7142857142858,"a95":0.99,"info":"06/10/2015 at 13:24:17"},{"visible":true,"include":true,"step":"15.0","x":421.3047619047619,"y":430.552380952381,"z":1573.8095238095239,"a95":0.99,"info":"06/10/2015 at 13:24:17"},{"visible":true,"include":true,"step":"20.0","x":595.5238095238095,"y":266.1047619047619,"z":1280.3809523809523,"a95":0.99,"info":"06/10/2015 at 13:24:17"},{"visible":true,"include":true,"step":"23.0","x":673.2285714285714,"y":242.74285714285716,"z":1153.8095238095239,"a95":0.99,"info":"06/10/2015 at 13:24:17"},{"visible":true,"include":true,"step":"25.0","x":624.552380952381,"y":115.93333333333332,"z":1053.6190476190477,"a95":0.99,"info":"06/10/2015 at 13:24:17"},{"visible":true,"include":true,"step":"30.0","x":330.0761904761905,"y":150.8952380952381,"z":998.4761904761905,"a95":0.99,"info":"06/10/2015 at 13:24:17"},{"visible":true,"include":true,"step":"33.0","x":606,"y":122.08571428571429,"z":793.5333333333334,"a95":0.99,"info":"06/10/2015 at 13:24:17"},{"visible":true,"include":true,"step":"35.0","x":631.2476190476191,"y":-112.19047619047619,"z":778.8857142857144,"a95":0.99,"info":"06/10/2015 at 13:24:17"},{"visible":true,"include":true,"step":"40.0","x":591.6095238095238,"y":-60.82285714285714,"z":724.6952380952381,"a95":0.99,"info":"06/10/2015 at 13:24:17"},{"visible":true,"include":false,"step":"45.0","x":606.104761904762,"y":89.3847619047619,"z":621.6952380952381,"a95":0.99,"info":"06/10/2015 at 13:24:17"},{"visible":true,"include":false,"step":"50.0","x":496.34285714285716,"y":-189.6952380952381,"z":634.0571428571429,"a95":0.99,"info":"06/10/2015 at 13:24:17"},{"visible":true,"include":false,"step":"60.0","x":582.4666666666666,"y":-232.47619047619048,"z":635.152380952381,"a95":0.99,"info":"06/10/2015 at 13:24:17"},{"visible":true,"include":false,"step":"70.0","x":565.6571428571428,"y":-205.0095238095238,"z":592.1238095238095,"a95":0.99,"info":"06/10/2015 at 13:24:17"}]},{"version":"v1.1.0","exported":"2016-10-11T08:41:23.457Z","volume":10.5,"added":"2016-10-11T08:35:02.013Z","format":"Utrecht","demagType":"Unknown","strat":"0","patch":1.1,"GEO":[{"dec":167.31735833514153,"inc":0.7591121170612444,"MAD":6.294244366622826,"cm":[-1.4210854715202004e-14,-1.2079226507921703e-13,0],"intensity":2944.1084408636552,"type":"dir","forced":true,"remark":"","origin":false,"nSteps":8,"minStep":"15.0","maxStep":"40.0","steps":["15.0","20.0","23.0","25.0","30.0","33.0","35.0","40.0"],"group":"None","version":"v1.1.0"}],"TECT":[{"dec":164.76231786023357,"inc":-9.482372733356739,"MAD":6.2942443666228485,"cm":[-1.4210854715202004e-14,-9.947598300641403e-14,-6.394884621840902e-14],"intensity":2944.108440863656,"type":"dir","forced":true,"remark":"","origin":false,"nSteps":8,"minStep":"15.0","maxStep":"40.0","steps":["15.0","20.0","23.0","25.0","30.0","33.0","35.0","40.0"],"group":"None","version":"v1.1.0"}],"interpreted":true,"name":"SS25.21B","coreAzi":188,"coreDip":38,"bedStrike":149,"bedDip":34,"data":[{"visible":true,"include":false,"step":"0.0","x":12.723809523809523,"y":-499.20000000000005,"z":1887.7142857142858,"a95":0.99,"info":"06/10/2015 at 08:57:48"},{"visible":true,"include":false,"step":"10.0","x":709.8190476190476,"y":-736.6571428571428,"z":1521.8095238095239,"a95":0.99,"info":"06/10/2015 at 08:57:48"},{"visible":true,"include":true,"step":"15.0","x":715.9142857142857,"y":-665.2952380952381,"z":1334.6666666666667,"a95":0.99,"info":"06/10/2015 at 08:57:48"},{"visible":true,"include":true,"step":"20.0","x":809.5238095238095,"y":-592.3904761904762,"z":1176.7619047619048,"a95":0.99,"info":"06/10/2015 at 08:57:48"},{"visible":true,"include":true,"step":"23.0","x":869.304761904762,"y":-439.04761904761904,"z":1098.3809523809523,"a95":0.99,"info":"06/10/2015 at 08:57:48"},{"visible":true,"include":true,"step":"25.0","x":772.9904761904761,"y":-457.4857142857143,"z":1037.6190476190477,"a95":0.99,"info":"06/10/2015 at 08:57:48"},{"visible":true,"include":true,"step":"30.0","x":862.6380952380953,"y":-468.4,"z":1069.7142857142858,"a95":0.99,"info":"06/10/2015 at 08:57:48"},{"visible":true,"include":true,"step":"33.0","x":739.9904761904761,"y":-272.84761904761905,"z":931.2380952380952,"a95":0.99,"info":"06/10/2015 at 08:57:48"},{"visible":true,"include":true,"step":"35.0","x":646.8857142857144,"y":-404.2095238095238,"z":750,"a95":0.99,"info":"06/10/2015 at 08:57:48"},{"visible":true,"include":true,"step":"40.0","x":895.2380952380952,"y":-579.6380952380953,"z":791.8571428571429,"a95":0.99,"info":"06/10/2015 at 08:57:48"},{"visible":true,"include":false,"step":"45.0","x":712.8761904761905,"y":-396.3047619047619,"z":705.1619047619048,"a95":0.99,"info":"06/10/2015 at 08:57:48"},{"visible":true,"include":false,"step":"50.0","x":515.1238095238095,"y":-430.2190476190476,"z":622.6380952380953,"a95":0.99,"info":"06/10/2015 at 08:57:48"},{"visible":true,"include":false,"step":"60.0","x":695.6380952380953,"y":-953.1428571428571,"z":534.5619047619048,"a95":0.99,"info":"06/10/2015 at 08:57:48"},{"visible":true,"include":false,"step":"70.0","x":810.3333333333334,"y":-493.64761904761906,"z":317.2190476190476,"a95":0.99,"info":"06/10/2015 at 08:57:48"}]}]
