# Supplementary material for: Paleomagnetic constraints on the timing and distribution of Cenozoic rotations in Central and Eastern Anatolia
Source: Copernicus journal article supplement (doi:10.5194/se-9-295-2018), 2018-03-21
Supplement: Supplementary file 2 [file se-9-295-2018-supplement.zip › se-2017-66_DATA_dir files/dir files Sivas/SS26.dir]

[{"version":"v1.1.0","exported":"2016-10-11T14:31:51.944Z","volume":10.5,"added":"2016-10-11T14:25:31.551Z","format":"Utrecht","demagType":"Unknown","strat":"0","patch":1.1,"GEO":[{"dec":46.081182390549316,"inc":-37.688558044589314,"MAD":11.196716123752685,"cm":[-7.958078640513122e-13,-2.8421709430404007e-13,0],"intensity":13443.410363260187,"type":"GC","origin":false,"forced":true,"remark":"","nSteps":5,"minStep":"100","maxStep":"250","steps":["100","150","180","210","250"],"group":"None","version":"v1.1.0"}],"TECT":[{"dec":47.59316794639574,"inc":-32.09205601216704,"MAD":11.196716123752736,"cm":[3.410605131648481e-13,1.7053025658242404e-13,-3.552713678800501e-15],"intensity":13443.410363260187,"type":"GC","origin":false,"forced":true,"remark":"","nSteps":5,"minStep":"100","maxStep":"250","steps":["100","150","180","210","250"],"group":"None","version":"v1.1.0"}],"interpreted":true,"name":"SS26.01A","coreAzi":210,"coreDip":2,"bedStrike":158,"bedDip":6,"data":[{"visible":false,"include":false,"step":"20","x":-30832.85714285714,"y":3164.7619047619046,"z":-28074.85714285714,"a95":1.9,"info":"\"15-06-15\" at \"08:38\""},{"visible":true,"include":true,"step":"100","x":-10583.809523809523,"y":-3794,"z":-6257.714285714285,"a95":1.9,"info":"\"15-06-15\" at \"12:32\""},{"visible":true,"include":true,"step":"150","x":-3378.5714285714284,"y":-2866.3809523809523,"z":-2620.9523809523807,"a95":2.2,"info":"\"15-06-16\" at \"07:31\""},{"visible":true,"include":true,"step":"180","x":-2300.7619047619046,"y":-3704.285714285714,"z":-1564.2857142857142,"a95":2.6,"info":"\"15-06-16\" at \"10:16\""},{"visible":true,"include":true,"step":"210","x":-238.76190476190476,"y":-4065.5238095238096,"z":1215.7142857142858,"a95":3,"info":"\"15-06-16\" at \"14:58\""},{"visible":false,"include":false,"step":"230","x":-381.04761904761904,"y":-4658.761904761905,"z":85.42857142857143,"a95":2.3,"info":"\"15-06-17\" at \"17:15\""},{"visible":true,"include":true,"step":"250","x":459.7142857142857,"y":-3958.095238095238,"z":1999.4285714285713,"a95":3.3,"info":"\"15-06-17\" at \"20:11\""},{"visible":true,"include":false,"step":"280","x":2309.1428571428573,"y":-3547.904761904762,"z":2334.3809523809523,"a95":2.1,"info":"\"15-06-18\" at \"06:08\""},{"visible":true,"include":false,"step":"300","x":2488.3809523809523,"y":-4117.428571428572,"z":2621.714285714286,"a95":2.7,"info":"\"15-06-18\" at \"08:47\""},{"visible":true,"include":false,"step":"320","x":3135.6190476190477,"y":-2459.4285714285716,"z":1085.4285714285713,"a95":2.4,"info":"\"15-06-18\" at \"12:56\""},{"visible":true,"include":false,"step":"340","x":2813.809523809524,"y":-3635.5238095238096,"z":420.57142857142856,"a95":1.7,"info":"\"15-06-19\" at \"08:29\""},{"visible":true,"include":false,"step":"360","x":2693.6190476190477,"y":-3061.809523809524,"z":1015.3333333333334,"a95":1.8,"info":"\"15-06-19\" at \"11:51\""},{"visible":true,"include":false,"step":"390","x":1966.3809523809523,"y":-2051.0476190476193,"z":153.23809523809524,"a95":1.9,"info":"\"15-06-20\" at \"08:33\""},{"visible":false,"include":false,"step":"420","x":991.6190476190476,"y":-1652.7619047619048,"z":2458.5714285714284,"a95":3.7,"info":"\"15-06-20\" at \"11:17\""},{"visible":false,"include":false,"step":"450","x":212,"y":-3600.285714285714,"z":-938.952380952381,"a95":2.8,"info":"\"15-06-20\" at \"14:52\""},{"visible":false,"include":false,"step":"470","x":2419.0476190476193,"y":-780.952380952381,"z":862.2857142857143,"a95":1.7,"info":"\"15-06-21\" at \"18:12\""},{"visible":false,"include":false,"step":"490","x":3021.4285714285716,"y":-2795.714285714286,"z":-176.85714285714286,"a95":1.7,"info":"\"15-06-21\" at \"22:51\""},{"visible":false,"include":false,"step":"510","x":2218.285714285714,"y":-1468.2857142857142,"z":-747.4285714285714,"a95":2.4,"info":"\"15-06-29\" at \"08:48\""},{"visible":false,"include":false,"step":"540","x":208,"y":-1057.047619047619,"z":-240,"a95":4.4,"info":"\"15-06-29\" at \"12:27\""},{"visible":false,"include":false,"step":"560","x":3368.3809523809523,"y":-1257.047619047619,"z":358.1904761904762,"a95":2,"info":"\"15-06-30\" at \"05:30\""},{"visible":false,"include":false,"step":"580","x":1285.5238095238096,"y":-315.7142857142857,"z":1612.2857142857142,"a95":6.3,"info":"\"15-06-30\" at \"09:18\""}]},{"version":"v1.1.0","exported":"2016-10-11T14:31:51.945Z","volume":10.5,"added":"2016-10-11T14:25:31.551Z","format":"Utrecht","demagType":"Unknown","strat":"0","patch":1.1,"GEO":[{"dec":343.3921707576684,"inc":-42.08285056944887,"MAD":1.8030556523445016,"cm":[-5.542233338928781e-13,5.115907697472721e-13,0],"intensity":15367.913562015916,"type":"GC","origin":false,"forced":true,"remark":"","nSteps":5,"minStep":"10.0","maxStep":"25.0","steps":["10.0","15.0","20.0","23.0","25.0"],"group":"None","version":"v1.1.0"}],"TECT":[{"dec":348.6851945539563,"inc":-41.24215152017732,"MAD":1.8030556523447139,"cm":[-6.821210263296962e-13,7.958078640513122e-13,5.684341886080802e-14],"intensity":15367.913562015918,"type":"GC","origin":false,"forced":true,"remark":"","nSteps":5,"minStep":"10.0","maxStep":"25.0","steps":["10.0","15.0","20.0","23.0","25.0"],"group":"None","version":"v1.1.0"}],"interpreted":true,"name":"SS26.02A","coreAzi":213,"coreDip":6,"bedStrike":158,"bedDip":6,"data":[{"visible":true,"include":false,"step":"0.0","x":-25980.95238095238,"y":8750.761904761905,"z":-19909.52380952381,"a95":0.99,"info":"06/10/2015 at 13:24:17"},{"visible":true,"include":true,"step":"10.0","x":-8613.047619047618,"y":719.104761904762,"z":-8982.57142857143,"a95":0.99,"info":"06/10/2015 at 13:24:17"},{"visible":true,"include":true,"step":"15.0","x":-3615.6190476190477,"y":-1701.2380952380952,"z":-5684.0952380952385,"a95":0.99,"info":"06/10/2015 at 13:24:17"},{"visible":true,"include":true,"step":"20.0","x":-1584.3809523809523,"y":-2741.809523809524,"z":-4512,"a95":0.99,"info":"06/10/2015 at 13:24:17"},{"visible":true,"include":true,"step":"23.0","x":-829.4380952380952,"y":-2874.190476190476,"z":-4158.0952380952385,"a95":0.99,"info":"06/10/2015 at 13:24:17"},{"visible":true,"include":true,"step":"25.0","x":-57.64380952380952,"y":-3344.285714285714,"z":-3431.1428571428573,"a95":0.99,"info":"06/10/2015 at 13:24:17"},{"visible":true,"include":false,"step":"30.0","x":172.37142857142857,"y":-3034.5714285714284,"z":-2443.809523809524,"a95":0.99,"info":"06/10/2015 at 13:24:17"},{"visible":true,"include":false,"step":"33.0","x":635.9904761904761,"y":-2997.5238095238096,"z":-2436.095238095238,"a95":0.99,"info":"06/10/2015 at 13:24:17"},{"visible":true,"include":false,"step":"35.0","x":709.8190476190476,"y":-3139.0476190476193,"z":-2973.4285714285716,"a95":0.99,"info":"06/10/2015 at 13:24:17"},{"visible":true,"include":false,"step":"40.0","x":1168.7619047619048,"y":-2922.4761904761904,"z":-1845.904761904762,"a95":0.99,"info":"06/10/2015 at 13:24:17"},{"visible":true,"include":false,"step":"45.0","x":1678.095238095238,"y":-2099.1428571428573,"z":-1820.6666666666667,"a95":0.99,"info":"06/10/2015 at 13:24:17"},{"visible":true,"include":false,"step":"50.0","x":1145.5238095238096,"y":-3033.6190476190477,"z":-1669.7142857142858,"a95":0.99,"info":"06/10/2015 at 13:24:17"},{"visible":true,"include":false,"step":"60.0","x":1422.952380952381,"y":-1440.2857142857142,"z":-132.05714285714285,"a95":0.99,"info":"06/10/2015 at 13:24:17"},{"visible":true,"include":false,"step":"70.0","x":1573.2380952380952,"y":-1069.142857142857,"z":-405.447619047619,"a95":0.99,"info":"06/10/2015 at 13:24:17"}]},{"version":"v1.1.0","exported":"2016-10-11T14:31:51.945Z","volume":10.5,"added":"2016-10-11T14:25:31.552Z","format":"Utrecht","demagType":"Unknown","strat":"1","patch":1.1,"GEO":[{"dec":343.0370476060775,"inc":-28.661082144506285,"MAD":4.053601794111672,"cm":[-5.115907697472721e-13,2.2737367544323206e-13,0],"intensity":13462.931791018422,"type":"GC","origin":false,"forced":true,"remark":"","nSteps":4,"minStep":"10.0","maxStep":"23.0","steps":["10.0","15.0","20.0","23.0"],"group":"None","version":"v1.1.0"}],"TECT":[{"dec":346.2511913670578,"inc":-27.965969887696147,"MAD":4.053601794111564,"cm":[-1.9895196601282805e-12,7.958078640513122e-13,0],"intensity":13462.931791018422,"type":"GC","origin":false,"forced":true,"remark":"","nSteps":4,"minStep":"10.0","maxStep":"23.0","steps":["10.0","15.0","20.0","23.0"],"group":"None","version":"v1.1.0"}],"interpreted":true,"name":"SS26.03A","coreAzi":177,"coreDip":11,"bedStrike":158,"bedDip":6,"data":[{"visible":true,"include":false,"step":"0.0","x":-15231.42857142857,"y":-8398.952380952382,"z":-7042.571428571428,"a95":0.99,"info":"27/06/2015 at 17:26:15"},{"visible":true,"include":true,"step":"10.0","x":-5815.619047619048,"y":-7024.476190476191,"z":-3580.4761904761904,"a95":0.99,"info":"27/06/2015 at 17:26:15"},{"visible":true,"include":true,"step":"15.0","x":-2194.3809523809523,"y":-6123.9047619047615,"z":-2082.6666666666665,"a95":0.99,"info":"27/06/2015 at 17:26:15"},{"visible":true,"include":true,"step":"20.0","x":33.99523809523809,"y":-5035.142857142857,"z":-926.647619047619,"a95":0.99,"info":"27/06/2015 at 17:26:15"},{"visible":true,"include":true,"step":"23.0","x":855.104761904762,"y":-4626.190476190476,"z":-991.8095238095239,"a95":0.99,"info":"27/06/2015 at 17:26:15"},{"visible":true,"include":false,"step":"25.0","x":1242.7619047619048,"y":-4850.857142857143,"z":-644.0666666666666,"a95":0.99,"info":"27/06/2015 at 17:26:15"},{"visible":true,"include":false,"step":"30.0","x":1610.952380952381,"y":-4036.095238095238,"z":-265.0571428571428,"a95":0.99,"info":"27/06/2015 at 17:26:15"},{"visible":true,"include":false,"step":"33.0","x":2508.285714285714,"y":-3803.4285714285716,"z":-270.2190476190476,"a95":0.99,"info":"27/06/2015 at 17:26:15"},{"visible":true,"include":false,"step":"35.0","x":2045.904761904762,"y":-3972.6666666666665,"z":-114.70476190476191,"a95":0.99,"info":"27/06/2015 at 17:26:15"},{"visible":true,"include":false,"step":"40.0","x":2554,"y":-3182,"z":211.25714285714284,"a95":0.99,"info":"27/06/2015 at 17:26:15"},{"visible":true,"include":false,"step":"45.0","x":3108.8571428571427,"y":-3551.4285714285716,"z":-294.31428571428575,"a95":0.99,"info":"27/06/2015 at 17:26:15"},{"visible":true,"include":false,"step":"50.0","x":2801.904761904762,"y":-4061.4285714285716,"z":-121.32380952380953,"a95":0.99,"info":"27/06/2015 at 17:26:15"},{"visible":true,"include":false,"step":"55.0","x":2831.1428571428573,"y":-3501.904761904762,"z":-219.16190476190474,"a95":0.99,"info":"27/06/2015 at 17:26:15"},{"visible":true,"include":false,"step":"60.0","x":3733.904761904762,"y":-3488.095238095238,"z":-381.4666666666667,"a95":0.99,"info":"27/06/2015 at 17:26:15"},{"visible":true,"include":false,"step":"65.0","x":2981.809523809524,"y":-4296,"z":431.1714285714286,"a95":0.99,"info":"27/06/2015 at 17:26:15"},{"visible":true,"include":false,"step":"70.0","x":2459.3333333333335,"y":-3578.190476190476,"z":473.7333333333333,"a95":0.99,"info":"27/06/2015 at 17:26:15"},{"visible":true,"include":false,"step":"80.0","x":2306.4761904761904,"y":-2807.714285714286,"z":143.95238095238096,"a95":0.99,"info":"27/06/2015 at 17:26:15"}]},{"version":"v1.1.0","exported":"2016-10-11T14:31:51.945Z","volume":10.5,"added":"2016-10-11T14:25:31.553Z","format":"Utrecht","demagType":"Unknown","strat":"0","patch":1.1,"GEO":[{"dec":335.3685820516924,"inc":-25.517368658916066,"MAD":2.5176386351889004,"cm":[1.2505552149377763e-12,-9.094947017729282e-13,0],"intensity":27968.983841961926,"type":"GC","origin":false,"forced":true,"remark":"","nSteps":5,"minStep":"10.0","maxStep":"25.0","steps":["10.0","15.0","20.0","23.0","25.0"],"group":"None","version":"v1.1.0"}],"TECT":[{"dec":338.24302626471564,"inc":-25.642569238128843,"MAD":2.5176386351878737,"cm":[3.410605131648481e-12,-3.410605131648481e-12,5.115907697472721e-13],"intensity":27968.983841961926,"type":"GC","origin":false,"forced":true,"remark":"","nSteps":5,"minStep":"10.0","maxStep":"25.0","steps":["10.0","15.0","20.0","23.0","25.0"],"group":"None","version":"v1.1.0"}],"interpreted":true,"name":"SS26.04A","coreAzi":176,"coreDip":15,"bedStrike":158,"bedDip":6,"data":[{"visible":true,"include":false,"step":"0.0","x":-32746.666666666668,"y":-15138.095238095239,"z":-13663.809523809523,"a95":0.99,"info":"06/10/2015 at 13:24:17"},{"visible":true,"include":true,"step":"10.0","x":-15331.42857142857,"y":-11966.666666666666,"z":-7466.857142857143,"a95":0.99,"info":"06/10/2015 at 13:24:17"},{"visible":true,"include":true,"step":"15.0","x":-8656.57142857143,"y":-10087.619047619048,"z":-5120.666666666667,"a95":0.99,"info":"06/10/2015 at 13:24:17"},{"visible":true,"include":true,"step":"20.0","x":-4768.952380952381,"y":-8435.238095238095,"z":-3810.6666666666665,"a95":0.99,"info":"06/10/2015 at 13:24:17"},{"visible":true,"include":true,"step":"23.0","x":-2945.5238095238096,"y":-7484.857142857143,"z":-3322.3809523809523,"a95":0.99,"info":"06/10/2015 at 13:24:17"},{"visible":true,"include":true,"step":"25.0","x":-2174.8571428571427,"y":-7173.619047619048,"z":-2994.6666666666665,"a95":0.99,"info":"06/10/2015 at 13:24:17"},{"visible":true,"include":false,"step":"30.0","x":-1442.4761904761904,"y":-6105.9047619047615,"z":-2108.6666666666665,"a95":0.99,"info":"06/10/2015 at 13:24:17"},{"visible":true,"include":false,"step":"33.0","x":-285.03809523809525,"y":-5990.0952380952385,"z":-1824.7619047619048,"a95":0.99,"info":"06/10/2015 at 13:24:17"},{"visible":true,"include":false,"step":"35.0","x":6.144666666666668,"y":-7128.476190476191,"z":-2040.1904761904761,"a95":0.99,"info":"06/10/2015 at 13:24:17"},{"visible":true,"include":false,"step":"40.0","x":561.2190476190476,"y":-5624,"z":-1629.6190476190477,"a95":0.99,"info":"06/10/2015 at 13:24:17"},{"visible":true,"include":false,"step":"45.0","x":573.3714285714285,"y":-4981.523809523809,"z":-1454.857142857143,"a95":0.99,"info":"06/10/2015 at 13:24:17"},{"visible":true,"include":false,"step":"50.0","x":1007.9047619047619,"y":-5905.428571428572,"z":-1157.3333333333333,"a95":0.99,"info":"06/10/2015 at 13:24:17"},{"visible":true,"include":false,"step":"60.0","x":1057.142857142857,"y":-4484.380952380952,"z":-331.4,"a95":0.99,"info":"06/10/2015 at 13:24:17"},{"visible":true,"include":false,"step":"70.0","x":1936.7619047619048,"y":-4926.571428571428,"z":-1016.8571428571429,"a95":0.99,"info":"06/10/2015 at 13:24:17"}]},{"version":"v1.1.0","exported":"2016-10-11T14:31:51.945Z","volume":10.5,"added":"2016-10-11T14:25:31.554Z","format":"Utrecht","demagType":"Unknown","strat":"0","patch":1.1,"GEO":[{"dec":61.99870494770397,"inc":-35.92987217020109,"MAD":8.524041154082058,"cm":[-7.673861546209082e-13,8.526512829121202e-13,0],"intensity":36419.59801337437,"type":"GC","origin":false,"forced":true,"remark":"","nSteps":6,"minStep":"20","maxStep":"230","steps":["20","100","150","180","210","230"],"group":"None","version":"v1.1.0"}],"TECT":[{"dec":62.39230544924601,"inc":-29.960544588125483,"MAD":8.524041154082063,"cm":[-3.410605131648481e-13,1.8189894035458565e-12,0],"intensity":36419.598013374365,"type":"GC","origin":false,"forced":true,"remark":"","nSteps":6,"minStep":"20","maxStep":"230","steps":["20","100","150","180","210","230"],"group":"None","version":"v1.1.0"}],"interpreted":true,"name":"SS26.06A","coreAzi":170,"coreDip":19,"bedStrike":158,"bedDip":6,"data":[{"visible":true,"include":true,"step":"20","x":-29963.14285714286,"y":-11765.52380952381,"z":-12139.52380952381,"a95":1.6,"info":"\"15-06-15\" at \"08:40\""},{"visible":true,"include":true,"step":"100","x":-10792,"y":-6550.476190476191,"z":2068.285714285714,"a95":1.7,"info":"\"15-06-15\" at \"12:33\""},{"visible":true,"include":true,"step":"150","x":-4556.952380952381,"y":-6133.619047619048,"z":3421.714285714286,"a95":1.9,"info":"\"15-06-16\" at \"07:33\""},{"visible":true,"include":true,"step":"180","x":-4406.761904761905,"y":-5452.190476190476,"z":3107.714285714286,"a95":2,"info":"\"15-06-16\" at \"10:18\""},{"visible":true,"include":true,"step":"210","x":-3220.190476190476,"y":-4663.9047619047615,"z":7336.952380952381,"a95":2.6,"info":"\"15-06-16\" at \"13:44\""},{"visible":true,"include":true,"step":"230","x":-1774.7619047619048,"y":-4215.428571428572,"z":4158.190476190476,"a95":2.2,"info":"\"15-06-17\" at \"17:17\""},{"visible":true,"include":false,"step":"250","x":-695.2380952380952,"y":-4298.476190476191,"z":5306.285714285715,"a95":2.6,"info":"\"15-06-17\" at \"20:13\""},{"visible":true,"include":false,"step":"280","x":490.3809523809524,"y":-2310.4761904761904,"z":4630.666666666667,"a95":2.2,"info":"\"15-06-18\" at \"06:10\""},{"visible":true,"include":false,"step":"300","x":-231.04761904761904,"y":-2054.5714285714284,"z":4497.238095238095,"a95":2.2,"info":"\"15-06-18\" at \"08:49\""},{"visible":true,"include":false,"step":"320","x":-172.85714285714286,"y":-2442.7619047619046,"z":4437.714285714285,"a95":2.9,"info":"\"15-06-18\" at \"12:58\""},{"visible":true,"include":false,"step":"340","x":350.85714285714283,"y":-1766.095238095238,"z":5433.238095238095,"a95":2.8,"info":"\"15-06-19\" at \"08:31\""},{"visible":true,"include":false,"step":"360","x":294.2857142857143,"y":-1916.952380952381,"z":4077.1428571428573,"a95":2.9,"info":"\"15-06-19\" at \"11:54\""},{"visible":true,"include":false,"step":"390","x":62.095238095238095,"y":-1454.857142857143,"z":3076,"a95":2.7,"info":"\"15-06-20\" at \"08:35\""},{"visible":true,"include":false,"step":"420","x":-713.7142857142857,"y":-1648.5714285714287,"z":4176.380952380952,"a95":2.4,"info":"\"15-06-20\" at \"11:21\""},{"visible":true,"include":false,"step":"450","x":183.9047619047619,"y":-3147.904761904762,"z":4062.3809523809523,"a95":2.8,"info":"\"15-06-20\" at \"14:55\""},{"visible":true,"include":false,"step":"470","x":123.80952380952381,"y":-2152.7619047619046,"z":2170.8571428571427,"a95":2.8,"info":"\"15-06-21\" at \"18:15\""},{"visible":true,"include":false,"step":"490","x":9.428571428571429,"y":-1058.095238095238,"z":3140.9523809523807,"a95":3,"info":"\"15-06-21\" at \"22:52\""},{"visible":true,"include":false,"step":"510","x":-528,"y":-1564.4761904761904,"z":3757.4285714285716,"a95":3.7,"info":"\"15-06-29\" at \"08:50\""},{"visible":true,"include":false,"step":"540","x":70.57142857142857,"y":-2026.7619047619048,"z":4008.4761904761904,"a95":3.1,"info":"\"15-06-29\" at \"12:29\""},{"visible":true,"include":false,"step":"560","x":1251.047619047619,"y":-1540.4761904761904,"z":3219.3333333333335,"a95":2.2,"info":"\"15-06-30\" at \"05:33\""},{"visible":true,"include":false,"step":"580","x":1351.4285714285713,"y":-332.57142857142856,"z":4649.428571428572,"a95":3.3,"info":"\"15-06-30\" at \"09:21\""}]},{"version":"v1.1.0","exported":"2016-10-11T14:31:51.945Z","volume":10.5,"added":"2016-10-11T14:25:31.554Z","format":"Utrecht","demagType":"Unknown","strat":"2","patch":1.1,"GEO":[{"dec":54.98802238175307,"inc":-25.659119274861354,"MAD":1.8714415469616397,"cm":[1.1368683772161603e-13,3.410605131648481e-13,0],"intensity":22182.124816587904,"type":"GC","origin":false,"forced":true,"remark":"","nSteps":4,"minStep":"0.0","maxStep":"20.0","steps":["0.0","10.0","15.0","20.0"],"group":"None","version":"v1.1.0"}],"TECT":[{"dec":55.5426825082813,"inc":-19.806382543744363,"MAD":1.871441546960829,"cm":[-5.684341886080802e-14,-2.2737367544323206e-13,-1.1368683772161603e-13],"intensity":22182.124816587904,"type":"GC","origin":false,"forced":true,"remark":"","nSteps":4,"minStep":"0.0","maxStep":"20.0","steps":["0.0","10.0","15.0","20.0"],"group":"None","version":"v1.1.0"}],"interpreted":true,"name":"SS26.07A","coreAzi":163,"coreDip":16,"bedStrike":158,"bedDip":6,"data":[{"visible":true,"include":true,"step":"0.0","x":-16461.904761904763,"y":-7147.9047619047615,"z":1399.2380952380952,"a95":0.99,"info":"27/06/2015 at 17:26:15"},{"visible":true,"include":true,"step":"10.0","x":-7505.047619047619,"y":-4707.238095238095,"z":3969.0476190476193,"a95":0.99,"info":"27/06/2015 at 17:26:15"},{"visible":true,"include":true,"step":"15.0","x":-4016.7619047619046,"y":-3799.2380952380954,"z":4470.666666666667,"a95":0.99,"info":"27/06/2015 at 17:26:15"},{"visible":true,"include":true,"step":"20.0","x":-2300.6666666666665,"y":-2940.4761904761904,"z":4784.380952380952,"a95":0.99,"info":"27/06/2015 at 17:26:15"},{"visible":true,"include":false,"step":"23.0","x":-1166.5714285714287,"y":-2470.7619047619046,"z":4028.285714285714,"a95":0.99,"info":"27/06/2015 at 17:26:15"},{"visible":true,"include":false,"step":"25.0","x":-656.104761904762,"y":-2680.5714285714284,"z":4258.190476190476,"a95":0.99,"info":"27/06/2015 at 17:26:15"},{"visible":true,"include":false,"step":"30.0","x":-168.96190476190475,"y":-2384.6666666666665,"z":4211.619047619048,"a95":0.99,"info":"27/06/2015 at 17:26:15"},{"visible":true,"include":false,"step":"33.0","x":162.45714285714286,"y":-1857.8095238095239,"z":3705.2380952380954,"a95":0.99,"info":"27/06/2015 at 17:26:15"},{"visible":true,"include":false,"step":"35.0","x":170.63809523809525,"y":-2347.4285714285716,"z":3626.190476190476,"a95":0.99,"info":"27/06/2015 at 17:26:15"},{"visible":true,"include":false,"step":"40.0","x":748.6190476190476,"y":-1995.5238095238096,"z":3703.809523809524,"a95":0.99,"info":"27/06/2015 at 17:26:15"},{"visible":true,"include":false,"step":"45.0","x":1329.8095238095239,"y":-2076.5714285714284,"z":3101.714285714286,"a95":0.99,"info":"27/06/2015 at 17:26:15"},{"visible":true,"include":false,"step":"50.0","x":1456.1904761904761,"y":-2744.285714285714,"z":3238.095238095238,"a95":0.99,"info":"27/06/2015 at 17:26:15"},{"visible":true,"include":false,"step":"55.0","x":1266.6666666666667,"y":-2010.6666666666667,"z":2747.5238095238096,"a95":0.99,"info":"27/06/2015 at 17:26:15"},{"visible":true,"include":false,"step":"60.0","x":1960.7619047619048,"y":-1705.047619047619,"z":2704.4761904761904,"a95":0.99,"info":"27/06/2015 at 17:26:15"},{"visible":true,"include":false,"step":"65.0","x":2134,"y":-2976.285714285714,"z":2563.5238095238096,"a95":0.99,"info":"27/06/2015 at 17:26:15"},{"visible":true,"include":false,"step":"70.0","x":1695.5238095238096,"y":-2214.5714285714284,"z":2679.6190476190477,"a95":0.99,"info":"27/06/2015 at 17:26:15"},{"visible":true,"include":false,"step":"80.0","x":2582.9523809523807,"y":-2396,"z":2303.5238095238096,"a95":0.99,"info":"27/06/2015 at 17:26:15"}]},{"version":"v1.1.0","exported":"2016-10-11T14:31:51.945Z","volume":10.5,"added":"2016-10-11T14:25:31.555Z","format":"Utrecht","demagType":"Unknown","strat":"0","patch":1.1,"GEO":[{"dec":49.752947983340675,"inc":-38.85761776721023,"MAD":1.5772071781107524,"cm":[-1.0942358130705543e-12,1.9326762412674725e-12,0],"intensity":33283.971874144176,"type":"GC","origin":false,"forced":true,"remark":"","nSteps":4,"minStep":"0.0","maxStep":"20.0","steps":["0.0","10.0","15.0","20.0"],"group":"None","version":"v1.1.0"}],"TECT":[{"dec":51.07128632998922,"inc":-33.13723522765232,"MAD":1.5772071781090655,"cm":[-1.0906830993917538e-12,1.0800249583553523e-12,0],"intensity":33283.97187414418,"type":"GC","origin":false,"forced":true,"remark":"","nSteps":4,"minStep":"0.0","maxStep":"20.0","steps":["0.0","10.0","15.0","20.0"],"group":"None","version":"v1.1.0"}],"interpreted":true,"name":"SS26.09A","coreAzi":132,"coreDip":4,"bedStrike":158,"bedDip":6,"data":[{"visible":true,"include":true,"step":"0.0","x":-21270.47619047619,"y":-17895.238095238095,"z":-6185.714285714285,"a95":0.99,"info":"06/10/2015 at 13:24:17"},{"visible":true,"include":true,"step":"10.0","x":-10236.190476190477,"y":-8486.761904761905,"z":395.9047619047619,"a95":0.99,"info":"06/10/2015 at 13:24:17"},{"visible":true,"include":true,"step":"15.0","x":-6583.333333333333,"y":-5301.523809523809,"z":2225.3333333333335,"a95":0.99,"info":"06/10/2015 at 13:24:17"},{"visible":true,"include":true,"step":"20.0","x":-4351.142857142857,"y":-3153.3333333333335,"z":3302.4761904761904,"a95":0.99,"info":"06/10/2015 at 13:24:17"},{"visible":true,"include":false,"step":"23.0","x":-3249.1428571428573,"y":-2460.6666666666665,"z":3240,"a95":0.99,"info":"06/10/2015 at 13:24:17"},{"visible":true,"include":false,"step":"25.0","x":-3041.6190476190477,"y":-2597.5238095238096,"z":3061.4285714285716,"a95":0.99,"info":"06/10/2015 at 13:24:17"},{"visible":true,"include":false,"step":"30.0","x":-1926.2857142857142,"y":-2078.4761904761904,"z":2888.7619047619046,"a95":0.99,"info":"06/10/2015 at 13:24:17"},{"visible":true,"include":false,"step":"33.0","x":-1358.952380952381,"y":-1530.1904761904761,"z":2385.6190476190477,"a95":0.99,"info":"06/10/2015 at 13:24:17"},{"visible":true,"include":false,"step":"35.0","x":-2073.6190476190477,"y":-1294.1904761904761,"z":2607.2380952380954,"a95":0.99,"info":"06/10/2015 at 13:24:17"},{"visible":true,"include":false,"step":"40.0","x":-1264.952380952381,"y":-597.7238095238096,"z":3008.9523809523807,"a95":0.99,"info":"06/10/2015 at 13:24:17"},{"visible":true,"include":false,"step":"45.0","x":-1031.6190476190477,"y":-860.5142857142857,"z":2510,"a95":0.99,"info":"06/10/2015 at 13:24:17"},{"visible":true,"include":false,"step":"50.0","x":-831.7809523809525,"y":-2430.285714285714,"z":2220.4761904761904,"a95":0.99,"info":"06/10/2015 at 13:24:17"},{"visible":true,"include":false,"step":"60.0","x":-406.16190476190474,"y":-954.8571428571429,"z":2514.8571428571427,"a95":0.99,"info":"06/10/2015 at 13:24:17"},{"visible":true,"include":false,"step":"70.0","x":900.4190476190475,"y":-465.6190476190476,"z":2720.4761904761904,"a95":0.99,"info":"06/10/2015 at 13:24:17"}]},{"version":"v1.1.0","exported":"2016-10-11T14:31:51.945Z","volume":10.5,"added":"2016-10-11T14:25:31.563Z","format":"Utrecht","demagType":"Unknown","strat":"3","patch":1.1,"GEO":[{"dec":51.15985809248173,"inc":-25.97308768479728,"MAD":4.119735874296419,"cm":[-5.684341886080802e-14,-2.5579538487363607e-13,0],"intensity":11909.800524060112,"type":"GC","origin":false,"forced":true,"remark":"","nSteps":6,"minStep":"10.0","maxStep":"30.0","steps":["10.0","15.0","20.0","23.0","25.0","30.0"],"group":"None","version":"v1.1.0"}],"TECT":[{"dec":51.88625638839005,"inc":-20.218945754451365,"MAD":4.1197358742960635,"cm":[-7.673861546209082e-13,-3.410605131648481e-13,-9.947598300641403e-14],"intensity":11909.800524060112,"type":"GC","origin":false,"forced":true,"remark":"","nSteps":6,"minStep":"10.0","maxStep":"30.0","steps":["10.0","15.0","20.0","23.0","25.0","30.0"],"group":"None","version":"v1.1.0"}],"interpreted":true,"name":"SS26.09B","coreAzi":132,"coreDip":4,"bedStrike":158,"bedDip":6,"data":[{"visible":true,"include":false,"step":"0.0","x":-14381.904761904761,"y":-6257.9047619047615,"z":3522.190476190476,"a95":0.99,"info":"27/06/2015 at 17:26:15"},{"visible":true,"include":true,"step":"10.0","x":-6793.809523809524,"y":-2658.8571428571427,"z":5137.047619047619,"a95":0.99,"info":"27/06/2015 at 17:26:15"},{"visible":true,"include":true,"step":"15.0","x":-3712,"y":-1440.2857142857142,"z":4999.333333333333,"a95":0.99,"info":"27/06/2015 at 17:26:15"},{"visible":true,"include":true,"step":"20.0","x":-2136,"y":-602.0952380952381,"z":4721.428571428572,"a95":0.99,"info":"27/06/2015 at 17:26:15"},{"visible":true,"include":true,"step":"23.0","x":-1652.6666666666667,"y":-223.33333333333334,"z":4346.285714285715,"a95":0.99,"info":"27/06/2015 at 17:26:15"},{"visible":true,"include":true,"step":"25.0","x":-1562.4761904761904,"y":-216.60000000000002,"z":3980.3809523809523,"a95":0.99,"info":"27/06/2015 at 17:26:15"},{"visible":true,"include":true,"step":"30.0","x":-705.5619047619048,"y":254.06666666666666,"z":3797.1428571428573,"a95":0.99,"info":"27/06/2015 at 17:26:15"},{"visible":true,"include":false,"step":"33.0","x":-582.8571428571429,"y":-109.18095238095239,"z":3943.1428571428573,"a95":0.99,"info":"27/06/2015 at 17:26:15"},{"visible":true,"include":false,"step":"35.0","x":-453.74285714285713,"y":296.0190476190476,"z":3432,"a95":0.99,"info":"27/06/2015 at 17:26:15"},{"visible":true,"include":false,"step":"40.0","x":-646.8285714285714,"y":90.23904761904762,"z":3557.904761904762,"a95":0.99,"info":"27/06/2015 at 17:26:15"},{"visible":true,"include":false,"step":"45.0","x":41.10666666666667,"y":-148.01904761904763,"z":2858.4761904761904,"a95":0.99,"info":"27/06/2015 at 17:26:15"},{"visible":true,"include":false,"step":"50.0","x":530.9809523809524,"y":-207.48571428571427,"z":3333.2380952380954,"a95":0.99,"info":"27/06/2015 at 17:26:15"},{"visible":true,"include":false,"step":"55.0","x":596.9714285714285,"y":114.88571428571429,"z":3278.095238095238,"a95":0.99,"info":"27/06/2015 at 17:26:15"},{"visible":true,"include":false,"step":"60.0","x":1127.4285714285713,"y":-519.9142857142857,"z":3047.3333333333335,"a95":0.99,"info":"27/06/2015 at 17:26:15"},{"visible":true,"include":false,"step":"65.0","x":715.1428571428571,"y":-1024.6666666666667,"z":2616.285714285714,"a95":0.99,"info":"27/06/2015 at 17:26:15"},{"visible":true,"include":false,"step":"70.0","x":852.9714285714286,"y":-406.8857142857143,"z":2247.3333333333335,"a95":0.99,"info":"27/06/2015 at 17:26:15"},{"visible":true,"include":false,"step":"80.0","x":430.31428571428575,"y":-770.8285714285714,"z":1600.7619047619048,"a95":0.99,"info":"27/06/2015 at 17:26:15"}]},{"version":"v1.1.0","exported":"2016-10-11T14:31:51.946Z","volume":10.5,"added":"2016-10-11T14:25:31.563Z","format":"Utrecht","demagType":"Unknown","strat":"0","patch":1.1,"GEO":[{"dec":63.01901634371916,"inc":-18.52883397614662,"MAD":1.600701255959988,"cm":[-2.2737367544323206e-13,-2.8421709430404007e-13,0],"intensity":25714.247056276057,"type":"GC","origin":false,"forced":true,"remark":"","nSteps":4,"minStep":"0.0","maxStep":"20.0","steps":["0.0","10.0","15.0","20.0"],"group":"None","version":"v1.1.0"}],"TECT":[{"dec":63.161936216471986,"inc":-12.550802837084133,"MAD":1.6007012559598188,"cm":[-6.252776074688882e-13,5.684341886080802e-14,0],"intensity":25714.247056276057,"type":"GC","origin":false,"forced":true,"remark":"","nSteps":4,"minStep":"0.0","maxStep":"20.0","steps":["0.0","10.0","15.0","20.0"],"group":"None","version":"v1.1.0"}],"interpreted":true,"name":"SS26.10A","coreAzi":135,"coreDip":16,"bedStrike":158,"bedDip":6,"data":[{"visible":true,"include":true,"step":"0.0","x":-19520.95238095238,"y":-8593.238095238095,"z":-901.2380952380952,"a95":0.99,"info":"06/10/2015 at 13:24:17"},{"visible":true,"include":true,"step":"10.0","x":-9509.42857142857,"y":-3235.3333333333335,"z":3702.5714285714284,"a95":0.99,"info":"06/10/2015 at 13:24:17"},{"visible":true,"include":true,"step":"15.0","x":-6180.761904761905,"y":-1434.095238095238,"z":4891.142857142857,"a95":0.99,"info":"06/10/2015 at 13:24:17"},{"visible":true,"include":true,"step":"20.0","x":-3979.809523809524,"y":-623.1904761904761,"z":5799.619047619048,"a95":0.99,"info":"06/10/2015 at 13:24:17"},{"visible":true,"include":false,"step":"23.0","x":-3061.5238095238096,"y":-328.62857142857143,"z":5048.857142857143,"a95":0.99,"info":"06/10/2015 at 13:24:17"},{"visible":true,"include":false,"step":"25.0","x":-2683.809523809524,"y":-112.58095238095237,"z":5175.047619047619,"a95":0.99,"info":"06/10/2015 at 13:24:17"},{"visible":true,"include":false,"step":"30.0","x":-1576.2857142857142,"y":-133.55238095238096,"z":4873.9047619047615,"a95":0.99,"info":"06/10/2015 at 13:24:17"},{"visible":true,"include":false,"step":"33.0","x":-781.2190476190475,"y":-435.91428571428577,"z":5014.666666666667,"a95":0.99,"info":"06/10/2015 at 13:24:17"},{"visible":true,"include":false,"step":"35.0","x":-992.8571428571429,"y":-370.15238095238095,"z":4687.523809523809,"a95":0.99,"info":"06/10/2015 at 13:24:17"},{"visible":true,"include":false,"step":"40.0","x":-348.70476190476194,"y":278.18095238095236,"z":4485.809523809524,"a95":0.99,"info":"06/10/2015 at 13:24:17"},{"visible":true,"include":false,"step":"45.0","x":-10.599047619047619,"y":149.67619047619047,"z":4202.857142857143,"a95":0.99,"info":"06/10/2015 at 13:24:17"},{"visible":true,"include":false,"step":"50.0","x":338.9428571428572,"y":-969.8095238095239,"z":4351.047619047619,"a95":0.99,"info":"06/10/2015 at 13:24:17"},{"visible":true,"include":false,"step":"60.0","x":1353.904761904762,"y":-393.7142857142857,"z":4317.9047619047615,"a95":0.99,"info":"06/10/2015 at 13:24:17"},{"visible":true,"include":false,"step":"70.0","x":1818.7619047619048,"y":-452.6285714285715,"z":3077.1428571428573,"a95":0.99,"info":"06/10/2015 at 13:24:17"}]},{"version":"v1.1.0","exported":"2016-10-11T14:31:51.946Z","volume":10.5,"added":"2016-10-11T14:25:31.563Z","format":"Utrecht","demagType":"Unknown","strat":"0","patch":1.1,"GEO":[{"dec":47.063808301822974,"inc":-28.281819619717627,"MAD":7.516114836392376,"cm":[-8.668621376273222e-13,6.252776074688882e-13,0],"intensity":35225.534932924114,"type":"GC","origin":false,"forced":true,"remark":"","nSteps":4,"minStep":"20","maxStep":"180","steps":["20","100","150","180"],"group":"None","version":"v1.1.0"}],"TECT":[{"dec":48.06268042432106,"inc":-22.65863100303869,"MAD":7.516114836392124,"cm":[-3.979039320256561e-13,-2.2737367544323206e-13,0],"intensity":35225.53493292412,"type":"GC","origin":false,"forced":true,"remark":"","nSteps":4,"minStep":"20","maxStep":"180","steps":["20","100","150","180"],"group":"None","version":"v1.1.0"}],"interpreted":true,"name":"SS26.11A","coreAzi":138,"coreDip":11,"bedStrike":158,"bedDip":6,"data":[{"visible":true,"include":true,"step":"20","x":-26811.428571428572,"y":-13986.190476190477,"z":278.95238095238096,"a95":1.5,"info":"\"15-06-15\" at \"08:42\""},{"visible":true,"include":true,"step":"100","x":-7846.380952380952,"y":-5252.476190476191,"z":3452.8571428571427,"a95":1.7,"info":"\"15-06-15\" at \"12:35\""},{"visible":true,"include":true,"step":"150","x":-4380.571428571428,"y":-2872.5714285714284,"z":4738.571428571428,"a95":2.1,"info":"\"15-06-16\" at \"07:34\""},{"visible":true,"include":true,"step":"180","x":-4245.9047619047615,"y":-2065.904761904762,"z":4035.0476190476193,"a95":2.2,"info":"\"15-06-16\" at \"10:19\""},{"visible":true,"include":false,"step":"210","x":-853.4285714285714,"y":-221.8095238095238,"z":3797.1428571428573,"a95":2.8,"info":"\"15-06-16\" at \"13:47\""},{"visible":true,"include":false,"step":"230","x":-1654.6666666666667,"y":-290.57142857142856,"z":5350.571428571428,"a95":2.5,"info":"\"15-06-17\" at \"17:19\""},{"visible":true,"include":false,"step":"250","x":-223.52380952380952,"y":360.76190476190476,"z":4890.571428571428,"a95":2.5,"info":"\"15-06-17\" at \"20:15\""},{"visible":true,"include":false,"step":"280","x":-154.1904761904762,"y":-118.76190476190476,"z":3563.904761904762,"a95":2.7,"info":"\"15-06-18\" at \"06:12\""},{"visible":true,"include":false,"step":"300","x":228.57142857142858,"y":180.95238095238096,"z":3684.8571428571427,"a95":2.5,"info":"\"15-06-18\" at \"08:51\""},{"visible":true,"include":false,"step":"320","x":108.0952380952381,"y":971.047619047619,"z":2733.809523809524,"a95":2.6,"info":"\"15-06-18\" at \"12:59\""},{"visible":true,"include":false,"step":"340","x":-28.38095238095238,"y":299.14285714285717,"z":2786.5714285714284,"a95":2.7,"info":"\"15-06-19\" at \"08:33\""},{"visible":true,"include":false,"step":"360","x":255.23809523809524,"y":204.57142857142858,"z":2757.1428571428573,"a95":2.7,"info":"\"15-06-19\" at \"11:59\""},{"visible":true,"include":false,"step":"390","x":254.28571428571428,"y":290.76190476190476,"z":2970.095238095238,"a95":2.6,"info":"\"15-06-20\" at \"08:42\""},{"visible":true,"include":false,"step":"420","x":5.0476190476190474,"y":469.14285714285717,"z":3647.1428571428573,"a95":2.7,"info":"\"15-06-20\" at \"11:24\""},{"visible":true,"include":false,"step":"450","x":781.5238095238095,"y":81.80952380952381,"z":2606.190476190476,"a95":2.6,"info":"\"15-06-20\" at \"14:57\""},{"visible":true,"include":false,"step":"470","x":-16.857142857142858,"y":-56.095238095238095,"z":2824,"a95":2.8,"info":"\"15-06-21\" at \"18:19\""},{"visible":true,"include":false,"step":"490","x":424.3809523809524,"y":391.14285714285717,"z":2672,"a95":2.9,"info":"\"15-06-21\" at \"22:54\""},{"visible":true,"include":false,"step":"510","x":-18.571428571428573,"y":361.23809523809524,"z":2262.3809523809523,"a95":2.8,"info":"\"15-06-29\" at \"08:52\""},{"visible":true,"include":false,"step":"540","x":-310.0952380952381,"y":554.4761904761905,"z":3076.095238095238,"a95":3.4,"info":"\"15-06-29\" at \"12:31\""},{"visible":true,"include":false,"step":"560","x":-29.714285714285715,"y":273.3333333333333,"z":2134.190476190476,"a95":4.2,"info":"\"15-06-30\" at \"05:35\""},{"visible":true,"include":false,"step":"580","x":-89.52380952380952,"y":1098.5714285714287,"z":1634.4761904761904,"a95":5.6,"info":"\"15-06-30\" at \"09:23\""}]},{"version":"v1.1.0","exported":"2016-10-11T14:31:51.946Z","volume":10.5,"added":"2016-10-11T14:25:31.563Z","format":"Utrecht","demagType":"Unknown","strat":"0","patch":1.1,"GEO":[{"dec":49.078519271493576,"inc":-24.781748496234023,"MAD":6.427336671686336,"cm":[-7.105427357601002e-14,4.547473508864641e-13,0],"intensity":34251.13533633103,"type":"GC","origin":false,"forced":true,"remark":"","nSteps":4,"minStep":"0.0","maxStep":"20.0","steps":["0.0","10.0","15.0","20.0"],"group":"None","version":"v1.1.0"}],"TECT":[{"dec":49.84747271422839,"inc":-19.092384207641697,"MAD":6.427336671686545,"cm":[-7.389644451905042e-13,9.663381206337363e-13,0],"intensity":34251.13533633103,"type":"GC","origin":false,"forced":true,"remark":"","nSteps":4,"minStep":"0.0","maxStep":"20.0","steps":["0.0","10.0","15.0","20.0"],"group":"None","version":"v1.1.0"}],"interpreted":true,"name":"SS26.13A","coreAzi":229,"coreDip":12,"bedStrike":158,"bedDip":6,"data":[{"visible":true,"include":true,"step":"0.0","x":-26647.619047619046,"y":1663.904761904762,"z":-6028.666666666667,"a95":0.99,"info":"06/10/2015 at 13:24:17"},{"visible":true,"include":true,"step":"10.0","x":-13961.904761904761,"y":-750.9047619047619,"z":-3154.9523809523807,"a95":0.99,"info":"06/10/2015 at 13:24:17"},{"visible":true,"include":true,"step":"15.0","x":-9487.238095238095,"y":-818.5047619047618,"z":-2338.5714285714284,"a95":0.99,"info":"06/10/2015 at 13:24:17"},{"visible":true,"include":true,"step":"20.0","x":-6788.857142857143,"y":-1054.7619047619048,"z":-1372.095238095238,"a95":0.99,"info":"06/10/2015 at 13:24:17"},{"visible":true,"include":false,"step":"23.0","x":-6036.857142857143,"y":-987.5238095238095,"z":-1566.3809523809523,"a95":0.99,"info":"06/10/2015 at 13:24:17"},{"visible":true,"include":false,"step":"25.0","x":-5420.476190476191,"y":-808.6095238095238,"z":-1479.904761904762,"a95":0.99,"info":"06/10/2015 at 13:24:17"},{"visible":true,"include":false,"step":"30.0","x":-4491.523809523809,"y":-967.2380952380952,"z":-1136.3809523809523,"a95":0.99,"info":"06/10/2015 at 13:24:17"},{"visible":true,"include":false,"step":"33.0","x":-4002.285714285714,"y":-490.7523809523809,"z":-939.7714285714286,"a95":0.99,"info":"06/10/2015 at 13:24:17"},{"visible":true,"include":false,"step":"35.0","x":-3754.6666666666665,"y":-1350.1904761904761,"z":-970.4761904761905,"a95":0.99,"info":"06/10/2015 at 13:24:17"},{"visible":true,"include":false,"step":"40.0","x":-3101.5238095238096,"y":-486.6666666666667,"z":-552.5714285714286,"a95":0.99,"info":"06/10/2015 at 13:24:17"},{"visible":true,"include":false,"step":"45.0","x":-2857.4285714285716,"y":-818.6285714285715,"z":-974.2857142857143,"a95":0.99,"info":"06/10/2015 at 13:24:17"},{"visible":true,"include":false,"step":"50.0","x":-2721.4285714285716,"y":-740.9714285714285,"z":-1112,"a95":0.99,"info":"06/10/2015 at 13:24:17"},{"visible":true,"include":false,"step":"60.0","x":-2240.095238095238,"y":-135.2095238095238,"z":-154.92380952380952,"a95":0.99,"info":"06/10/2015 at 13:24:17"},{"visible":true,"include":false,"step":"70.0","x":-1796.7619047619048,"y":-168.56190476190477,"z":-126.79047619047618,"a95":0.99,"info":"06/10/2015 at 13:24:17"}]},{"version":"v1.1.0","exported":"2016-10-11T14:31:51.946Z","volume":10.5,"added":"2016-10-11T14:25:31.564Z","format":"Utrecht","demagType":"Unknown","strat":"0","patch":1.1,"GEO":[{"dec":25.157275945830747,"inc":-28.849528899205303,"MAD":13.071326321049414,"cm":[-1.9895196601282805e-13,-5.684341886080802e-14,0],"intensity":13617.812047515241,"type":"GC","origin":false,"forced":true,"remark":"","nSteps":6,"minStep":"100","maxStep":"300","steps":["100","150","210","250","280","300"],"group":"None","version":"v1.1.0"}],"TECT":[{"dec":27.164543071188632,"inc":-24.376899014140616,"MAD":13.07132632105025,"cm":[2.8421709430404007e-13,-4.547473508864641e-13,0],"intensity":13617.812047515241,"type":"GC","origin":false,"forced":true,"remark":"","nSteps":6,"minStep":"100","maxStep":"300","steps":["100","150","210","250","280","300"],"group":"None","version":"v1.1.0"}],"interpreted":true,"name":"SS26.16A","coreAzi":254,"coreDip":6,"bedStrike":158,"bedDip":6,"data":[{"visible":true,"include":false,"step":"20","x":-34177.52380952381,"y":19567.714285714286,"z":-10496.666666666666,"a95":1.5,"info":"\"15-06-15\" at \"08:43\""},{"visible":true,"include":true,"step":"100","x":-11494.857142857143,"y":4816.666666666667,"z":-3149.2380952380954,"a95":2.9,"info":"\"15-06-15\" at \"12:37\""},{"visible":true,"include":true,"step":"150","x":-7203.523809523809,"y":2005.3333333333333,"z":-1820.1904761904761,"a95":1.8,"info":"\"15-06-16\" at \"07:36\""},{"visible":false,"include":false,"step":"180","x":-6552.0952380952385,"y":1672.3809523809523,"z":-3420.190476190476,"a95":2,"info":"\"15-06-16\" at \"10:21\""},{"visible":true,"include":true,"step":"210","x":-3670.8571428571427,"y":798.952380952381,"z":-1635.5238095238096,"a95":2.1,"info":"\"15-06-16\" at \"13:49\""},{"visible":true,"include":false,"step":"230","x":-2872.8571428571427,"y":1013.2380952380952,"z":-3588.095238095238,"a95":2.3,"info":"\"15-06-17\" at \"17:23\""},{"visible":true,"include":true,"step":"250","x":-1298.2857142857142,"y":-363.3333333333333,"z":-1284.3809523809523,"a95":4.3,"info":"\"15-06-17\" at \"20:18\""},{"visible":true,"include":true,"step":"280","x":-742.8571428571429,"y":-419.6190476190476,"z":-1352.095238095238,"a95":3.3,"info":"\"15-06-18\" at \"06:14\""},{"visible":true,"include":true,"step":"300","x":-690,"y":-1333.7142857142858,"z":-1835.047619047619,"a95":2.3,"info":"\"15-06-18\" at \"08:58\""},{"visible":true,"include":false,"step":"320","x":-1063.8095238095239,"y":-571.4285714285714,"z":-1502.2857142857142,"a95":3,"info":"\"15-06-18\" at \"13:01\""},{"visible":true,"include":false,"step":"340","x":-529.047619047619,"y":-280.76190476190476,"z":-1081.5238095238096,"a95":2.9,"info":"\"15-06-19\" at \"08:39\""},{"visible":true,"include":false,"step":"360","x":-1094.2857142857142,"y":-454.1904761904762,"z":-1922.952380952381,"a95":2.5,"info":"\"15-06-19\" at \"12:03\""},{"visible":true,"include":false,"step":"390","x":-110.57142857142857,"y":-331.9047619047619,"z":-1286.7619047619048,"a95":2.9,"info":"\"15-06-20\" at \"08:46\""},{"visible":true,"include":false,"step":"420","x":-499.3333333333333,"y":-667.2380952380952,"z":-1415.4285714285713,"a95":2.7,"info":"\"15-06-20\" at \"11:26\""},{"visible":true,"include":false,"step":"450","x":-247.23809523809524,"y":-740.3809523809524,"z":-1181.142857142857,"a95":3.2,"info":"\"15-06-20\" at \"15:00\""},{"visible":true,"include":false,"step":"470","x":-68.0952380952381,"y":-1094.095238095238,"z":716.1904761904761,"a95":4.4,"info":"\"15-06-21\" at \"18:21\""},{"visible":true,"include":false,"step":"490","x":-695.9047619047619,"y":-933.5238095238095,"z":-695.7142857142857,"a95":6.8,"info":"\"15-06-21\" at \"22:56\""},{"visible":true,"include":false,"step":"510","x":-1421.142857142857,"y":-1673.142857142857,"z":-2998,"a95":2.6,"info":"\"15-06-29\" at \"08:54\""},{"visible":true,"include":false,"step":"540","x":-1162.952380952381,"y":-510.0952380952381,"z":-349.6190476190476,"a95":5.2,"info":"\"15-06-29\" at \"12:33\""},{"visible":true,"include":false,"step":"560","x":102.57142857142857,"y":-277.6190476190476,"z":-567.3333333333334,"a95":15.5,"info":"\"15-06-30\" at \"05:38\""},{"visible":true,"include":false,"step":"580","x":-1258.857142857143,"y":-2036.3809523809523,"z":-339.5238095238095,"a95":4.7,"info":"\"15-06-30\" at \"09:24\""}]},{"version":"v1.1.0","exported":"2016-10-11T14:31:51.946Z","volume":10.5,"added":"2016-10-11T14:25:31.564Z","format":"Utrecht","demagType":"Unknown","strat":null,"patch":1.1,"GEO":[{"dec":28.780930225360464,"inc":-29.483230910168864,"MAD":4.471475360471623,"cm":[-7.247535904753022e-13,1.4210854715202004e-13,0],"intensity":14508.469042569024,"type":"GC","origin":false,"forced":true,"remark":"","nSteps":5,"minStep":"100","maxStep":"210","steps":["100","120","150","180","210"],"group":"None","version":"v1.1.0"}],"TECT":[{"dec":30.686466014805887,"inc":-24.77008415283725,"MAD":4.47147536047213,"cm":[-1.7763568394002505e-13,-2.8421709430404007e-13,-7.105427357601002e-14],"intensity":14508.469042569024,"type":"GC","origin":false,"forced":true,"remark":"","nSteps":5,"minStep":"100","maxStep":"210","steps":["100","120","150","180","210"],"group":"None","version":"v1.1.0"}],"interpreted":true,"name":"SS26.17A","coreAzi":261,"coreDip":13,"bedStrike":158,"bedDip":6,"data":[{"visible":true,"include":false,"step":"20","x":-19700.47619047619,"y":1308,"z":-4908,"a95":1.6,"info":"\"16-03-14\" at \"10:44\""},{"visible":true,"include":true,"step":"100","x":-12143.333333333334,"y":4194.952380952381,"z":-2314.4761904761904,"a95":1.7,"info":"\"16-03-14\" at \"12:55\""},{"visible":true,"include":true,"step":"120","x":-5698.285714285715,"y":1407.3333333333333,"z":-1876.2857142857142,"a95":2.2,"info":"\"16-03-15\" at \"08:49\""},{"visible":true,"include":true,"step":"150","x":-3336,"y":32.095238095238095,"z":-1831.2380952380952,"a95":2.5,"info":"\"16-03-15\" at \"13:44\""},{"visible":true,"include":true,"step":"180","x":-1832,"y":-16.285714285714285,"z":-799.047619047619,"a95":3.6,"info":"\"16-03-16\" at \"14:14\""},{"visible":true,"include":true,"step":"210","x":-1375.3333333333333,"y":-799.4285714285714,"z":-1711.904761904762,"a95":2.8,"info":"\"16-03-17\" at \"21:31\""},{"visible":true,"include":false,"step":"240","x":-991.2380952380952,"y":-1062.095238095238,"z":-1682.3809523809523,"a95":2.7,"info":"\"16-04-20\" at \"11:18\""},{"visible":true,"include":false,"step":"270","x":-14.857142857142858,"y":-1988,"z":-4064.095238095238,"a95":2.3,"info":"\"16-04-21\" at \"11:48\""}]},{"version":"v1.1.0","exported":"2016-10-11T14:31:51.947Z","volume":10.5,"added":"2016-10-11T14:25:31.564Z","format":"Utrecht","demagType":"Unknown","strat":"4","patch":1.1,"GEO":[{"dec":13.076095379450408,"inc":-31.796194950013575,"MAD":10.816145452561656,"cm":[-1.8474111129762605e-13,1.4210854715202004e-13,0],"intensity":5874.148267688533,"type":"GC","origin":false,"forced":true,"remark":"","nSteps":5,"minStep":"10.0","maxStep":"25.0","steps":["10.0","15.0","20.0","23.0","25.0"],"group":"None","version":"v1.1.0"}],"TECT":[{"dec":15.865881677510117,"inc":-28.226534982120263,"MAD":10.816145452561301,"cm":[-7.123190925995004e-13,6.821210263296962e-13,0],"intensity":5874.148267688533,"type":"GC","origin":false,"forced":true,"remark":"","nSteps":5,"minStep":"10.0","maxStep":"25.0","steps":["10.0","15.0","20.0","23.0","25.0"],"group":"None","version":"v1.1.0"}],"interpreted":true,"name":"SS26.17B","coreAzi":261,"coreDip":13,"bedStrike":158,"bedDip":6,"data":[{"visible":true,"include":false,"step":"0.0","x":-8320.57142857143,"y":4969.809523809524,"z":-174.95238095238096,"a95":0.99,"info":"27/06/2015 at 17:26:15"},{"visible":true,"include":true,"step":"10.0","x":-4257.333333333333,"y":1795.4285714285713,"z":-1050,"a95":0.99,"info":"27/06/2015 at 17:26:15"},{"visible":true,"include":true,"step":"15.0","x":-2611.1428571428573,"y":860.4952380952382,"z":-1095.142857142857,"a95":0.99,"info":"27/06/2015 at 17:26:15"},{"visible":true,"include":true,"step":"20.0","x":-1721.7142857142858,"y":528.3904761904762,"z":-905.7047619047619,"a95":0.99,"info":"27/06/2015 at 17:26:15"},{"visible":true,"include":true,"step":"23.0","x":-1219.904761904762,"y":247.37142857142857,"z":-1071.2380952380952,"a95":0.99,"info":"27/06/2015 at 17:26:15"},{"visible":true,"include":true,"step":"25.0","x":-1038.6666666666667,"y":-59.22666666666667,"z":-805.695238095238,"a95":0.99,"info":"27/06/2015 at 17:26:15"},{"visible":true,"include":false,"step":"30.0","x":-608.847619047619,"y":-71.8742857142857,"z":-610.7904761904762,"a95":0.99,"info":"27/06/2015 at 17:26:15"},{"visible":true,"include":false,"step":"33.0","x":-332.76190476190476,"y":-397.2666666666667,"z":-1195.5238095238096,"a95":0.99,"info":"27/06/2015 at 17:26:15"},{"visible":true,"include":false,"step":"35.0","x":-399.3809523809524,"y":-799.0190476190477,"z":-1329.8095238095239,"a95":0.99,"info":"27/06/2015 at 17:26:15"},{"visible":true,"include":false,"step":"40.0","x":-449.00952380952384,"y":-471.95238095238096,"z":-1070.3809523809523,"a95":0.99,"info":"27/06/2015 at 17:26:15"},{"visible":true,"include":false,"step":"45.0","x":95.38095238095238,"y":-782.9333333333333,"z":-1042.952380952381,"a95":0.99,"info":"27/06/2015 at 17:26:15"},{"visible":true,"include":false,"step":"50.0","x":-94.1152380952381,"y":-1187.5238095238096,"z":-833.6666666666666,"a95":0.99,"info":"27/06/2015 at 17:26:15"},{"visible":true,"include":false,"step":"55.0","x":66.96571428571428,"y":-893.6285714285715,"z":-651.0952380952381,"a95":0.99,"info":"27/06/2015 at 17:26:15"},{"visible":true,"include":false,"step":"60.0","x":262.81904761904764,"y":-977.8095238095239,"z":-991.5238095238095,"a95":0.99,"info":"27/06/2015 at 17:26:15"},{"visible":true,"include":false,"step":"65.0","x":-198.76190476190476,"y":-1711.904761904762,"z":-1156.2857142857142,"a95":0.99,"info":"27/06/2015 at 17:26:15"},{"visible":true,"include":false,"step":"70.0","x":-154.45714285714286,"y":-625.847619047619,"z":-577.3904761904762,"a95":0.99,"info":"27/06/2015 at 17:26:15"},{"visible":true,"include":false,"step":"80.0","x":278.0190476190476,"y":-894.257142857143,"z":-1233.904761904762,"a95":0.99,"info":"27/06/2015 at 17:26:15"}]},{"version":"v1.1.0","exported":"2016-10-11T14:31:51.947Z","volume":10.5,"added":"2016-10-11T14:25:31.564Z","format":"Utrecht","demagType":"Unknown","strat":"0","patch":1.1,"GEO":[{"dec":25.275363283580532,"inc":-35.1863158963704,"MAD":2.0162435881113434,"cm":[-4.547473508864641e-13,1.0231815394945443e-12,0],"intensity":29169.019818932535,"type":"GC","origin":false,"forced":true,"remark":"","nSteps":5,"minStep":"0.0","maxStep":"23.0","steps":["0.0","10.0","15.0","20.0","23.0"],"group":"None","version":"v1.1.0"}],"TECT":[{"dec":27.85027430052469,"inc":-30.685289555419057,"MAD":2.016243588115704,"cm":[-5.115907697472721e-13,2.2737367544323206e-12,-1.1368683772161603e-13],"intensity":29169.01981893253,"type":"GC","origin":false,"forced":true,"remark":"","nSteps":5,"minStep":"0.0","maxStep":"23.0","steps":["0.0","10.0","15.0","20.0","23.0"],"group":"None","version":"v1.1.0"}],"interpreted":true,"name":"SS26.18A","coreAzi":265,"coreDip":9,"bedStrike":158,"bedDip":6,"data":[{"visible":true,"include":true,"step":"0.0","x":-21121.904761904763,"y":12957.142857142857,"z":-3045.4285714285716,"a95":0.99,"info":"06/10/2015 at 13:24:17"},{"visible":true,"include":true,"step":"10.0","x":-10998.095238095239,"y":5738.190476190476,"z":-3008.6666666666665,"a95":0.99,"info":"06/10/2015 at 13:24:17"},{"visible":true,"include":true,"step":"15.0","x":-6873.809523809524,"y":2921.4285714285716,"z":-2882.285714285714,"a95":0.99,"info":"06/10/2015 at 13:24:17"},{"visible":true,"include":true,"step":"20.0","x":-4711.523809523809,"y":1462.5714285714287,"z":-2523.4285714285716,"a95":0.99,"info":"06/10/2015 at 13:24:17"},{"visible":true,"include":true,"step":"23.0","x":-3790,"y":1284.3809523809523,"z":-2189.809523809524,"a95":0.99,"info":"06/10/2015 at 13:24:17"},{"visible":true,"include":false,"step":"25.0","x":-3397.714285714286,"y":827.895238095238,"z":-2152.4761904761904,"a95":0.99,"info":"06/10/2015 at 13:24:17"},{"visible":true,"include":false,"step":"30.0","x":-2184.5714285714284,"y":74.79047619047618,"z":-1884.095238095238,"a95":0.99,"info":"06/10/2015 at 13:24:17"},{"visible":true,"include":false,"step":"33.0","x":-2123.4285714285716,"y":270.4761904761905,"z":-1832.952380952381,"a95":0.99,"info":"06/10/2015 at 13:24:17"},{"visible":true,"include":false,"step":"35.0","x":-1735.3333333333333,"y":-662.895238095238,"z":-2239.1428571428573,"a95":0.99,"info":"06/10/2015 at 13:24:17"},{"visible":true,"include":false,"step":"40.0","x":-1687.7142857142858,"y":-296.96190476190475,"z":-1748,"a95":0.99,"info":"06/10/2015 at 13:24:17"},{"visible":true,"include":false,"step":"45.0","x":-1116.4761904761904,"y":132.14285714285714,"z":-1385.6190476190477,"a95":0.99,"info":"06/10/2015 at 13:24:17"},{"visible":true,"include":false,"step":"50.0","x":-1310.4761904761904,"y":-535.2761904761904,"z":-2065.904761904762,"a95":0.99,"info":"06/10/2015 at 13:24:17"},{"visible":true,"include":false,"step":"60.0","x":-838.0571428571429,"y":-175.2095238095238,"z":-1568,"a95":0.99,"info":"06/10/2015 at 13:24:17"},{"visible":true,"include":false,"step":"70.0","x":-487.85714285714283,"y":-123.31428571428572,"z":-1811.047619047619,"a95":0.99,"info":"06/10/2015 at 13:24:17"}]},{"version":"v1.1.0","exported":"2016-10-11T14:31:51.947Z","volume":10.5,"added":"2016-10-11T14:25:31.564Z","format":"Utrecht","demagType":"Unknown","strat":"0","patch":1.1,"GEO":[{"dec":16.196082852598238,"inc":-37.76697131425733,"MAD":9.140729558529575,"cm":[-4.263256414560601e-14,5.684341886080801e-13,0],"intensity":21209.312627297684,"type":"GC","origin":false,"forced":true,"remark":"","nSteps":5,"minStep":"20","maxStep":"210","steps":["20","100","150","180","210"],"group":"None","version":"v1.1.0"}],"TECT":[{"dec":19.526428651691674,"inc":-33.91769119409193,"MAD":9.140729558529904,"cm":[8.384404281969182e-13,-1.1937117960769683e-12,1.7763568394002505e-14],"intensity":21209.312627297684,"type":"GC","origin":false,"forced":true,"remark":"","nSteps":5,"minStep":"20","maxStep":"210","steps":["20","100","150","180","210"],"group":"None","version":"v1.1.0"}],"interpreted":true,"name":"SS26.19A","coreAzi":265,"coreDip":18,"bedStrike":158,"bedDip":6,"data":[{"visible":true,"include":true,"step":"20","x":-17312.95238095238,"y":9793.52380952381,"z":-3219.4285714285716,"a95":1.5,"info":"\"15-06-15\" at \"08:45\""},{"visible":true,"include":true,"step":"100","x":-5759.523809523809,"y":1005.3333333333334,"z":-2919.6190476190477,"a95":1.7,"info":"\"15-06-15\" at \"12:39\""},{"visible":true,"include":true,"step":"150","x":-2404.9523809523807,"y":163.42857142857142,"z":-2846.190476190476,"a95":2.4,"info":"\"15-06-16\" at \"07:37\""},{"visible":true,"include":true,"step":"180","x":-2668.5714285714284,"y":36.285714285714285,"z":-3357.3333333333335,"a95":2.2,"info":"\"15-06-16\" at \"10:27\""},{"visible":true,"include":true,"step":"210","x":-954.8571428571429,"y":-926.4761904761905,"z":-2904.095238095238,"a95":2.8,"info":"\"15-06-16\" at \"13:52\""},{"visible":true,"include":false,"step":"230","x":-420.2857142857143,"y":-1177.2380952380952,"z":-3827.0476190476193,"a95":2.4,"info":"\"15-06-17\" at \"17:25\""},{"visible":true,"include":false,"step":"250","x":644.6666666666666,"y":-2079.809523809524,"z":-1846,"a95":2.4,"info":"\"15-06-17\" at \"20:20\""},{"visible":true,"include":false,"step":"280","x":299.42857142857144,"y":-1110.3809523809523,"z":-1988.095238095238,"a95":2.4,"info":"\"15-06-18\" at \"06:16\""},{"visible":true,"include":false,"step":"300","x":343.42857142857144,"y":-1070.095238095238,"z":-1043.5238095238096,"a95":3.9,"info":"\"15-06-18\" at \"09:00\""},{"visible":true,"include":false,"step":"320","x":-93.14285714285714,"y":-1616.5714285714287,"z":-2048.285714285714,"a95":2.4,"info":"\"15-06-18\" at \"13:03\""},{"visible":true,"include":false,"step":"340","x":212.38095238095238,"y":-1277.142857142857,"z":-1421.047619047619,"a95":2.8,"info":"\"15-06-19\" at \"08:40\""},{"visible":true,"include":false,"step":"360","x":740.7619047619048,"y":-1095.2380952380952,"z":-1018.8571428571429,"a95":2.3,"info":"\"15-06-19\" at \"12:06\""},{"visible":true,"include":false,"step":"390","x":354,"y":-1160.7619047619048,"z":-1834.1904761904761,"a95":2.3,"info":"\"15-06-20\" at \"08:50\""},{"visible":true,"include":false,"step":"420","x":142.47619047619048,"y":-1408.4761904761904,"z":-1144.5714285714287,"a95":2.6,"info":"\"15-06-20\" at \"11:28\""},{"visible":true,"include":false,"step":"450","x":601.8095238095239,"y":-1517.5238095238096,"z":-1298.3809523809523,"a95":2.3,"info":"\"15-06-20\" at \"15:01\""},{"visible":true,"include":false,"step":"470","x":273.04761904761904,"y":-1167.6190476190477,"z":-1564.857142857143,"a95":2.2,"info":"\"15-06-21\" at \"18:24\""},{"visible":true,"include":false,"step":"490","x":408.95238095238096,"y":-1472,"z":-1072.6666666666667,"a95":2.2,"info":"\"15-06-21\" at \"22:58\""},{"visible":true,"include":false,"step":"510","x":182.0952380952381,"y":-837.2380952380952,"z":-1842.952380952381,"a95":2.4,"info":"\"15-06-29\" at \"08:56\""},{"visible":true,"include":false,"step":"540","x":385.3333333333333,"y":-57.523809523809526,"z":-1116.095238095238,"a95":3.4,"info":"\"15-06-29\" at \"12:34\""},{"visible":true,"include":false,"step":"560","x":428.76190476190476,"y":-241.61904761904762,"z":-910.0952380952381,"a95":4.9,"info":"\"15-06-30\" at \"05:40\""},{"visible":true,"include":false,"step":"580","x":-177.14285714285714,"y":-598.8571428571429,"z":-93.71428571428571,"a95":6.7,"info":"\"15-06-30\" at \"09:26\""}]},{"version":"v1.1.0","exported":"2016-10-11T14:31:51.947Z","volume":10.5,"added":"2016-10-11T14:25:31.565Z","format":"Utrecht","demagType":"Unknown","strat":"0","patch":1.1,"GEO":[{"dec":5.783342242630056,"inc":-38.85271187586163,"MAD":2.890334942713073,"cm":[8.526512829121202e-14,0,0],"intensity":23093.641109212043,"type":"GC","origin":false,"forced":true,"remark":"","nSteps":4,"minStep":"0.0","maxStep":"20.0","steps":["0.0","10.0","15.0","20.0"],"group":"None","version":"v1.1.0"}],"TECT":[{"dec":9.763963642153044,"inc":-35.86941087555148,"MAD":2.8903349427130705,"cm":[-1.3926637620897964e-12,1.7053025658242404e-12,5.684341886080802e-14],"intensity":23093.64110921204,"type":"GC","origin":false,"forced":true,"remark":"","nSteps":4,"minStep":"0.0","maxStep":"20.0","steps":["0.0","10.0","15.0","20.0"],"group":"None","version":"v1.1.0"}],"interpreted":true,"name":"SS26.20B","coreAzi":307,"coreDip":19,"bedStrike":158,"bedDip":6,"data":[{"visible":true,"include":true,"step":"0.0","x":-13123.809523809523,"y":12093.333333333334,"z":8397.714285714286,"a95":0.99,"info":"06/10/2015 at 13:24:17"},{"visible":true,"include":true,"step":"10.0","x":-6509.523809523809,"y":6275.333333333333,"z":2448.7619047619046,"a95":0.99,"info":"06/10/2015 at 13:24:17"},{"visible":true,"include":true,"step":"15.0","x":-3999.2380952380954,"y":4186,"z":552.7809523809524,"a95":0.99,"info":"06/10/2015 at 13:24:17"},{"visible":true,"include":true,"step":"20.0","x":-2465.809523809524,"y":2918.8571428571427,"z":-340.7809523809524,"a95":0.99,"info":"06/10/2015 at 13:24:17"},{"visible":true,"include":false,"step":"23.0","x":-1586.2857142857142,"y":2616.9523809523807,"z":-952.3809523809524,"a95":0.99,"info":"06/10/2015 at 13:24:17"},{"visible":true,"include":false,"step":"25.0","x":-1734.4761904761904,"y":2106.190476190476,"z":-1297.047619047619,"a95":0.99,"info":"06/10/2015 at 13:24:17"},{"visible":true,"include":false,"step":"30.0","x":-1247.047619047619,"y":1761.047619047619,"z":-1129.047619047619,"a95":0.99,"info":"06/10/2015 at 13:24:17"},{"visible":true,"include":false,"step":"33.0","x":-810.7714285714286,"y":1593.904761904762,"z":-1394.5714285714287,"a95":0.99,"info":"06/10/2015 at 13:24:17"},{"visible":true,"include":false,"step":"35.0","x":-685.5142857142857,"y":894.5904761904762,"z":-1980.6666666666667,"a95":0.99,"info":"06/10/2015 at 13:24:17"},{"visible":true,"include":false,"step":"40.0","x":-192.07619047619048,"y":614.9047619047619,"z":-1474.1904761904761,"a95":0.99,"info":"06/10/2015 at 13:24:17"},{"visible":true,"include":false,"step":"45.0","x":-131.95238095238096,"y":1172.095238095238,"z":-1924,"a95":0.99,"info":"06/10/2015 at 13:24:17"},{"visible":true,"include":false,"step":"50.0","x":67.40095238095239,"y":73.25714285714287,"z":-1952.6666666666667,"a95":0.99,"info":"06/10/2015 at 13:24:17"},{"visible":true,"include":false,"step":"60.0","x":505.9047619047619,"y":534.8761904761905,"z":-996.7619047619048,"a95":0.99,"info":"06/10/2015 at 13:24:17"},{"visible":true,"include":false,"step":"70.0","x":944.1333333333333,"y":139.66666666666666,"z":-1575.4285714285713,"a95":0.99,"info":"06/10/2015 at 13:24:17"}]},{"version":"v1.1.0","exported":"2016-10-11T14:31:51.947Z","volume":10.5,"added":"2016-10-11T14:25:31.565Z","format":"Utrecht","demagType":"Unknown","strat":"5","patch":1.1,"GEO":[{"dec":33.509262604073626,"inc":-23.07903869971317,"MAD":5.424290319886163,"cm":[-5.968558980384842e-13,2.2737367544323206e-13,0],"intensity":15398.346311096613,"type":"GC","origin":false,"forced":true,"remark":"","nSteps":4,"minStep":"0.0","maxStep":"20.0","steps":["0.0","10.0","15.0","20.0"],"group":"None","version":"v1.1.0"}],"TECT":[{"dec":34.76619664221181,"inc":-18.0950494173789,"MAD":5.424290319886145,"cm":[-4.547473508864641e-13,-2.2737367544323206e-13,0],"intensity":15398.34631109661,"type":"GC","origin":false,"forced":true,"remark":"","nSteps":4,"minStep":"0.0","maxStep":"20.0","steps":["0.0","10.0","15.0","20.0"],"group":"None","version":"v1.1.0"}],"interpreted":true,"name":"SS26.21A","coreAzi":246,"coreDip":14,"bedStrike":158,"bedDip":6,"data":[{"visible":true,"include":true,"step":"0.0","x":-14154.285714285714,"y":3143.1428571428573,"z":-1512.857142857143,"a95":0.99,"info":"27/06/2015 at 17:26:15"},{"visible":true,"include":true,"step":"10.0","x":-5109.523809523809,"y":-1727.5238095238096,"z":-1703.2380952380952,"a95":0.99,"info":"27/06/2015 at 17:26:15"},{"visible":true,"include":true,"step":"15.0","x":-2223.1428571428573,"y":-2351.0476190476193,"z":-1991.047619047619,"a95":0.99,"info":"27/06/2015 at 17:26:15"},{"visible":true,"include":true,"step":"20.0","x":-817.647619047619,"y":-2709.904761904762,"z":-2059.6190476190477,"a95":0.99,"info":"27/06/2015 at 17:26:15"},{"visible":true,"include":false,"step":"23.0","x":-89.15714285714286,"y":-2919.809523809524,"z":-1892.095238095238,"a95":0.99,"info":"27/06/2015 at 17:26:15"},{"visible":true,"include":false,"step":"25.0","x":227.9904761904762,"y":-2866.9523809523807,"z":-1933.142857142857,"a95":0.99,"info":"27/06/2015 at 17:26:15"},{"visible":true,"include":false,"step":"30.0","x":340.3047619047619,"y":-2864.095238095238,"z":-1771.047619047619,"a95":0.99,"info":"27/06/2015 at 17:26:15"},{"visible":true,"include":false,"step":"33.0","x":986.952380952381,"y":-3137.3333333333335,"z":-1918.857142857143,"a95":0.99,"info":"27/06/2015 at 17:26:15"},{"visible":true,"include":false,"step":"35.0","x":765.9047619047619,"y":-3191.714285714286,"z":-1806.095238095238,"a95":0.99,"info":"27/06/2015 at 17:26:15"},{"visible":true,"include":false,"step":"40.0","x":534.1142857142856,"y":-2618.3809523809523,"z":-1229.8095238095239,"a95":0.99,"info":"27/06/2015 at 17:26:15"},{"visible":true,"include":false,"step":"45.0","x":952.2190476190475,"y":-2530.4761904761904,"z":-1448.5714285714287,"a95":0.99,"info":"27/06/2015 at 17:26:15"},{"visible":true,"include":false,"step":"50.0","x":702.8380952380952,"y":-2933.0476190476193,"z":-1540.3809523809523,"a95":0.99,"info":"27/06/2015 at 17:26:15"},{"visible":true,"include":false,"step":"55.0","x":335.9047619047619,"y":-2021.4285714285713,"z":-996.2857142857143,"a95":0.99,"info":"27/06/2015 at 17:26:15"},{"visible":true,"include":false,"step":"60.0","x":906.2857142857143,"y":-2796.3809523809523,"z":-1211.7142857142858,"a95":0.99,"info":"27/06/2015 at 17:26:15"},{"visible":true,"include":false,"step":"65.0","x":410.6285714285715,"y":-3743.1428571428573,"z":-1253.047619047619,"a95":0.99,"info":"27/06/2015 at 17:26:15"},{"visible":true,"include":false,"step":"70.0","x":160.4,"y":-2113.6190476190477,"z":-785.5904761904762,"a95":0.99,"info":"27/06/2015 at 17:26:15"},{"visible":true,"include":false,"step":"80.0","x":-416.4857142857143,"y":-2831.809523809524,"z":-727.0380952380953,"a95":0.99,"info":"27/06/2015 at 17:26:15"}]},{"version":"v1.1.0","exported":"2016-10-11T14:31:51.947Z","volume":10.5,"added":"2016-10-11T14:25:31.565Z","format":"Utrecht","demagType":"Unknown","strat":"0","patch":1.1,"GEO":[{"dec":8.890781977741938,"inc":-39.07514009254188,"MAD":3.9472521357020995,"cm":[-1.0231815394945443e-12,-4.547473508864641e-13,0],"intensity":11309.624072939021,"type":"GC","origin":false,"forced":true,"remark":"","nSteps":4,"minStep":"100","maxStep":"210","steps":["100","150","180","210"],"group":"None","version":"v1.1.0"}],"TECT":[{"dec":12.756548911306538,"inc":-35.81885607818895,"MAD":3.947252135702001,"cm":[-3.410605131648481e-13,-3.410605131648481e-13,-1.9895196601282805e-13],"intensity":11309.624072939023,"type":"GC","origin":false,"forced":true,"remark":"","nSteps":4,"minStep":"100","maxStep":"210","steps":["100","150","180","210"],"group":"None","version":"v1.1.0"}],"interpreted":true,"name":"SS26.23A","coreAzi":297,"coreDip":25,"bedStrike":158,"bedDip":6,"data":[{"visible":true,"include":false,"step":"20","x":-14482.47619047619,"y":16630.095238095237,"z":7707.523809523809,"a95":1.5,"info":"\"15-06-15\" at \"08:47\""},{"visible":true,"include":true,"step":"100","x":-4930.666666666667,"y":4179.333333333333,"z":-2912.6666666666665,"a95":1.9,"info":"\"15-06-15\" at \"12:40\""},{"visible":true,"include":true,"step":"150","x":-1831.4285714285713,"y":1340.5714285714287,"z":-5258.0952380952385,"a95":2.5,"info":"\"15-06-16\" at \"07:39\""},{"visible":true,"include":true,"step":"180","x":-1839.142857142857,"y":1646.3809523809523,"z":-5773.333333333333,"a95":2.4,"info":"\"15-06-16\" at \"10:32\""},{"visible":true,"include":true,"step":"210","x":-376.57142857142856,"y":-322.57142857142856,"z":-6299.619047619048,"a95":2.5,"info":"\"15-06-16\" at \"15:01\""},{"visible":true,"include":false,"step":"230","x":71.71428571428571,"y":-49.04761904761905,"z":-6614.190476190476,"a95":2.4,"info":"\"15-06-17\" at \"17:27\""},{"visible":true,"include":false,"step":"250","x":294.57142857142856,"y":-1551.5238095238096,"z":-6281.809523809524,"a95":2.7,"info":"\"15-06-17\" at \"20:22\""},{"visible":true,"include":false,"step":"280","x":1030.1904761904761,"y":-1482.1904761904761,"z":-6730.666666666667,"a95":2.4,"info":"\"15-06-18\" at \"06:18\""},{"visible":true,"include":false,"step":"300","x":593.9047619047619,"y":-669.8095238095239,"z":-5863.047619047619,"a95":2.6,"info":"\"15-06-18\" at \"09:03\""},{"visible":true,"include":false,"step":"320","x":580.952380952381,"y":-1115.6190476190477,"z":-6305.428571428572,"a95":2.4,"info":"\"15-06-18\" at \"13:05\""},{"visible":true,"include":false,"step":"340","x":1049.142857142857,"y":-1285.6190476190477,"z":-6365.714285714285,"a95":2.4,"info":"\"15-06-19\" at \"08:43\""},{"visible":true,"include":false,"step":"360","x":1340.5714285714287,"y":-710.8571428571429,"z":-6503.428571428572,"a95":2.5,"info":"\"15-06-19\" at \"12:09\""},{"visible":true,"include":false,"step":"390","x":1622.6666666666667,"y":-1098,"z":-5915.809523809524,"a95":2.2,"info":"\"15-06-20\" at \"08:52\""},{"visible":true,"include":false,"step":"420","x":1023.3333333333334,"y":-1539.4285714285713,"z":-5445.9047619047615,"a95":2.4,"info":"\"15-06-20\" at \"11:30\""},{"visible":true,"include":false,"step":"450","x":2172.8571428571427,"y":-1693.5238095238096,"z":-4889.9047619047615,"a95":2.3,"info":"\"15-06-20\" at \"15:04\""},{"visible":true,"include":false,"step":"470","x":1485.7142857142858,"y":-1118.3809523809523,"z":-4957.9047619047615,"a95":2.2,"info":"\"15-06-21\" at \"18:29\""},{"visible":true,"include":false,"step":"490","x":628.8571428571429,"y":-1764,"z":-4263.619047619048,"a95":2.3,"info":"\"15-06-21\" at \"23:00\""},{"visible":true,"include":false,"step":"510","x":533.9047619047619,"y":-1999.142857142857,"z":-3942.3809523809523,"a95":2.7,"info":"\"15-06-29\" at \"08:58\""},{"visible":true,"include":false,"step":"540","x":744.0952380952381,"y":-591.9047619047619,"z":-4476.952380952381,"a95":2.3,"info":"\"15-06-29\" at \"12:36\""},{"visible":true,"include":false,"step":"560","x":2107.1428571428573,"y":-1017.6190476190476,"z":-3764.4761904761904,"a95":2.7,"info":"\"15-06-30\" at \"05:41\""},{"visible":true,"include":false,"step":"580","x":416.0952380952381,"y":-1944.3809523809523,"z":-3673.5238095238096,"a95":2.7,"info":"\"15-06-30\" at \"09:28\""}]},{"version":"v1.1.0","exported":"2016-10-11T14:31:51.947Z","volume":10.5,"added":"2016-10-11T14:25:31.565Z","format":"Utrecht","demagType":"Unknown","strat":null,"patch":1.1,"GEO":[{"dec":36.881325372035235,"inc":-27.134758055968252,"MAD":5.697552833222003,"cm":[-1.9895196601282805e-13,-5.684341886080802e-14,0],"intensity":15451.580934312662,"type":"GC","origin":false,"forced":true,"remark":"","nSteps":5,"minStep":"100","maxStep":"210","steps":["100","120","150","180","210"],"group":"None","version":"v1.1.0"}],"TECT":[{"dec":38.270316431432605,"inc":-21.959365808618646,"MAD":5.697552833222013,"cm":[1.2221335055073723e-12,-7.389644451905042e-13,0],"intensity":15451.58093431266,"type":"GC","origin":false,"forced":true,"remark":"","nSteps":5,"minStep":"100","maxStep":"210","steps":["100","120","150","180","210"],"group":"None","version":"v1.1.0"}],"interpreted":true,"name":"SS26.24A","coreAzi":295,"coreDip":26,"bedStrike":158,"bedDip":6,"data":[{"visible":false,"include":false,"step":"20","x":-13446.857142857143,"y":1996.5714285714287,"z":3930.7619047619046,"a95":1.6,"info":"\"16-03-14\" at \"10:46\""},{"visible":true,"include":true,"step":"100","x":-11952.095238095239,"y":6200,"z":4038.8571428571427,"a95":1.7,"info":"\"16-03-14\" at \"12:57\""},{"visible":true,"include":true,"step":"120","x":-6931.333333333333,"y":2716.285714285714,"z":-389.8095238095238,"a95":1.8,"info":"\"16-03-15\" at \"08:50\""},{"visible":true,"include":true,"step":"150","x":-4274.857142857143,"y":311.14285714285717,"z":-1930.1904761904761,"a95":2.3,"info":"\"16-03-15\" at \"13:46\""},{"visible":true,"include":true,"step":"180","x":-2802.285714285714,"y":-306.95238095238096,"z":-2814.5714285714284,"a95":2.8,"info":"\"16-03-16\" at \"14:15\""},{"visible":true,"include":true,"step":"210","x":-2335.3333333333335,"y":-320.3809523809524,"z":-3813.4285714285716,"a95":3.4,"info":"\"16-03-17\" at \"21:32\""},{"visible":true,"include":false,"step":"240","x":-1755.047619047619,"y":-854.7619047619048,"z":-4934,"a95":2.4,"info":"\"16-04-20\" at \"11:23\""},{"visible":true,"include":false,"step":"270","x":-893.3333333333334,"y":-1658.857142857143,"z":-6343.619047619048,"a95":2.3,"info":"\"16-04-21\" at \"11:52\""},{"visible":true,"include":false,"step":"300","x":10,"y":-2070.8571428571427,"z":-6030,"a95":2.5,"info":"\"16-05-14\" at \"15:50\""},{"visible":true,"include":false,"step":"320","x":-472.76190476190476,"y":-2491.809523809524,"z":-3002.095238095238,"a95":4.4,"info":"\"16-05-14\" at \"19:39\""},{"visible":true,"include":false,"step":"350","x":186.57142857142858,"y":-2543.0476190476193,"z":-4941.9047619047615,"a95":2.5,"info":"\"16-05-15\" at \"16:05\""},{"visible":true,"include":false,"step":"380","x":1472.095238095238,"y":-3070,"z":-4583.428571428572,"a95":2.7,"info":"\"16-05-15\" at \"19:18\""}]},{"version":"v1.1.0","exported":"2016-10-11T14:31:51.947Z","volume":10.5,"added":"2016-10-11T14:25:31.566Z","format":"Utrecht","demagType":"Unknown","strat":"6","patch":1.1,"GEO":[{"dec":29.9673016927826,"inc":-34.63717643236553,"MAD":6.549696946379361,"cm":[-3.552713678800501e-13,1.7053025658242404e-13,0],"intensity":10643.18153847155,"type":"GC","origin":false,"forced":true,"remark":"","nSteps":7,"minStep":"10.0","maxStep":"33.0","steps":["10.0","15.0","20.0","23.0","25.0","30.0","33.0"],"group":"None","version":"v1.1.0"}],"TECT":[{"dec":32.241160757452576,"inc":-29.83627783630989,"MAD":6.549696946379244,"cm":[0,1.4210854715202004e-13,2.1316282072803006e-14],"intensity":10643.181538471552,"type":"GC","origin":false,"forced":true,"remark":"","nSteps":7,"minStep":"10.0","maxStep":"33.0","steps":["10.0","15.0","20.0","23.0","25.0","30.0","33.0"],"group":"None","version":"v1.1.0"}],"interpreted":true,"name":"SS26.25B","coreAzi":285,"coreDip":29,"bedStrike":158,"bedDip":6,"data":[{"visible":true,"include":false,"step":"0.0","x":-14488.57142857143,"y":10657.142857142857,"z":7079.047619047619,"a95":0.99,"info":"27/06/2015 at 17:26:15"},{"visible":true,"include":true,"step":"10.0","x":-8138.380952380952,"y":4990.476190476191,"z":2078.5714285714284,"a95":0.99,"info":"27/06/2015 at 17:26:15"},{"visible":true,"include":true,"step":"15.0","x":-5660.380952380952,"y":2987.904761904762,"z":-6.888761904761904,"a95":0.99,"info":"27/06/2015 at 17:26:15"},{"visible":true,"include":true,"step":"20.0","x":-4020.190476190476,"y":1860.4761904761904,"z":-791.8190476190476,"a95":0.99,"info":"27/06/2015 at 17:26:15"},{"visible":true,"include":true,"step":"23.0","x":-3284.285714285714,"y":1149.904761904762,"z":-1148.5714285714287,"a95":0.99,"info":"27/06/2015 at 17:26:15"},{"visible":true,"include":true,"step":"25.0","x":-2796.6666666666665,"y":334.77142857142854,"z":-1515.142857142857,"a95":0.99,"info":"27/06/2015 at 17:26:15"},{"visible":true,"include":true,"step":"30.0","x":-1974.5714285714287,"y":62.21333333333333,"z":-1434.4761904761904,"a95":0.99,"info":"27/06/2015 at 17:26:15"},{"visible":true,"include":true,"step":"33.0","x":-1556.952380952381,"y":-602.3904761904762,"z":-1928.4761904761904,"a95":0.99,"info":"27/06/2015 at 17:26:15"},{"visible":true,"include":false,"step":"35.0","x":-1502.7619047619048,"y":-1704.857142857143,"z":-1756.1904761904761,"a95":0.99,"info":"27/06/2015 at 17:26:15"},{"visible":true,"include":false,"step":"40.0","x":-1463.904761904762,"y":-1427.6190476190477,"z":-1986.095238095238,"a95":0.99,"info":"27/06/2015 at 17:26:15"},{"visible":true,"include":false,"step":"45.0","x":-1107.3333333333333,"y":-1714,"z":-2275.0476190476193,"a95":0.99,"info":"27/06/2015 at 17:26:15"},{"visible":true,"include":false,"step":"50.0","x":-961.1428571428571,"y":-2828.7619047619046,"z":-1964.2857142857142,"a95":0.99,"info":"27/06/2015 at 17:26:15"},{"visible":true,"include":false,"step":"55.0","x":-896.1809523809524,"y":-2338.9523809523807,"z":-1899.5238095238096,"a95":0.99,"info":"27/06/2015 at 17:26:15"},{"visible":true,"include":false,"step":"60.0","x":-566.6666666666666,"y":-2336.095238095238,"z":-2274.190476190476,"a95":0.99,"info":"27/06/2015 at 17:26:15"},{"visible":true,"include":false,"step":"65.0","x":-229.44761904761904,"y":-4242.857142857143,"z":-1977.047619047619,"a95":0.99,"info":"27/06/2015 at 17:26:15"},{"visible":true,"include":false,"step":"70.0","x":-555.7904761904762,"y":-3148.7619047619046,"z":-1624.3809523809523,"a95":0.99,"info":"27/06/2015 at 17:26:15"},{"visible":true,"include":false,"step":"80.0","x":285.87619047619046,"y":-3963.2380952380954,"z":-2110.3809523809523,"a95":0.99,"info":"27/06/2015 at 17:26:15"}]}]
