# Supplementary material for: Paleomagnetic constraints on the timing and distribution of Cenozoic rotations in Central and Eastern Anatolia
Source: Copernicus journal article supplement (doi:10.5194/se-9-295-2018), 2018-03-21
Supplement: Supplementary file 2 [file se-9-295-2018-supplement.zip › se-2017-66_DATA_dir files/dir files Sivas/SS27.dir]

[{"version":"v1.1.0","exported":"2016-10-11T13:52:36.741Z","info":"0","GEO":[{"dec":2.0977890327197883,"inc":59.144224811197844,"MAD":0,"cm":[0,2.097792838910772e-14,0],"intensity":411.4845200054088,"type":"dir","forced":true,"remark":"","origin":false,"nSteps":1,"minStep":"150","maxStep":"150","steps":["150"],"group":"None"}],"TECT":[{"dec":341.53446284800225,"inc":39.30602966373036,"MAD":4.695365787687732e-8,"cm":[0,-5.4136589391245725e-15,0],"intensity":411.4845200054088,"type":"dir","forced":true,"remark":"","origin":false,"nSteps":1,"minStep":"150","maxStep":"150","steps":["150"],"group":"None"}],"interpreted":true,"name":"SS27.01A","coreAzi":129,"coreDip":57,"bedStrike":220,"bedDip":26,"data":[{"visible":true,"include":false,"step":"20","x":-280,"y":-144.76190476190476,"z":213.61904761904762,"a95":"1.7","info":"\"15-06-15\" at \"08:52\""},{"visible":true,"include":false,"step":"100","x":-196.66666666666666,"y":-117.61904761904762,"z":162.38095238095238,"a95":"1.7","info":"\"15-06-15\" at \"12:43\""},{"visible":true,"include":true,"step":"150","x":-149.33333333333334,"y":-84.38095238095238,"z":113.61904761904762,"a95":"1.9","info":"\"15-06-16\" at \"07:42\""},{"visible":true,"include":false,"step":"180","x":-54.68571428571429,"y":-16.97142857142857,"z":-10.314285714285713,"a95":"2.3","info":"\"15-06-16\" at \"10:35\""},{"visible":true,"include":false,"step":"210","x":-41.96190476190476,"y":-14.380952380952381,"z":10.82857142857143,"a95":"2.5","info":"\"15-06-16\" at \"14:04\""},{"visible":true,"include":false,"step":"230","x":-19.638095238095236,"y":-13.685714285714285,"z":11.523809523809524,"a95":"5.3","info":"\"15-06-17\" at \"17:35\""},{"visible":true,"include":false,"step":"250","x":-19.780952380952378,"y":-9.047619047619047,"z":14.40952380952381,"a95":"4.5","info":"\"15-06-17\" at \"20:24\""},{"visible":true,"include":false,"step":"270","x":-27.514285714285712,"y":-6.428571428571429,"z":14.904761904761905,"a95":"3.5","info":"\"15-06-25\" at \"09:12\""},{"visible":true,"include":false,"step":"300","x":-23.361904761904764,"y":-1.619047619047619,"z":-2.1904761904761907,"a95":"3.4","info":"\"15-06-25\" at \"12:37\""},{"visible":true,"include":false,"step":"320","x":-36.84761904761905,"y":-0.6190476190476191,"z":15.438095238095238,"a95":"3.7","info":"\"15-06-25\" at \"16:09\""}],"demagType":"Unknown","patch":1.1,"format":"Unknown","strat":null},{"version":"v1.1.0","exported":"2016-10-11T13:52:36.741Z","info":"0","GEO":[{"dec":4.194333546238113,"inc":57.93550682522738,"MAD":8.819134949844695,"cm":[106.86121386749706,24.321128191022233,126.95852920141385],"intensity":191.03602165103305,"type":"dir","forced":false,"remark":"","origin":false,"nSteps":11,"minStep":"10.0","maxStep":"50.0","steps":["10.0","15.0","20.0","23.0","25.0","30.0","33.0","35.0","40.0","45.0","50.0"],"group":"None"}],"TECT":[{"dec":343.4931425235741,"inc":38.72140554545048,"MAD":8.819134949844667,"cm":[139.37906030336978,-14.432132122355895,92.16558768899493],"intensity":191.0360216510331,"type":"dir","forced":false,"remark":"","origin":false,"nSteps":11,"minStep":"10.0","maxStep":"50.0","steps":["10.0","15.0","20.0","23.0","25.0","30.0","33.0","35.0","40.0","45.0","50.0"],"group":"None"}],"interpreted":true,"name":"SS27.02A","coreAzi":126,"coreDip":58,"bedStrike":220,"bedDip":26,"data":[{"visible":false,"include":false,"step":"0.0","x":-311.51428571428573,"y":-254.55238095238096,"z":226.1047619047619,"a95":"0.99","info":"04/10/2015 at 16:56:03"},{"visible":true,"include":true,"step":"10.0","x":-186.84761904761905,"y":-154.51428571428573,"z":154.6952380952381,"a95":"0.99","info":"04/10/2015 at 16:56:03"},{"visible":true,"include":true,"step":"15.0","x":-153.8761904761905,"y":-141.83809523809524,"z":129.54285714285714,"a95":"0.99","info":"04/10/2015 at 16:56:03"},{"visible":true,"include":true,"step":"20.0","x":-136.3047619047619,"y":-118.13333333333334,"z":112.34285714285713,"a95":"0.99","info":"04/10/2015 at 16:56:03"},{"visible":true,"include":true,"step":"23.0","x":-105.94285714285715,"y":-112.17142857142856,"z":96.84761904761905,"a95":"0.99","info":"04/10/2015 at 16:56:03"},{"visible":true,"include":true,"step":"25.0","x":-111.81904761904761,"y":-97.35238095238095,"z":83.71333333333334,"a95":"0.99","info":"04/10/2015 at 16:56:03"},{"visible":true,"include":true,"step":"30.0","x":-92.7104761904762,"y":-88.95714285714286,"z":81.49714285714286,"a95":"0.99","info":"04/10/2015 at 16:56:03"},{"visible":true,"include":true,"step":"33.0","x":-89.21333333333334,"y":-85.66666666666667,"z":64.46666666666667,"a95":"0.99","info":"04/10/2015 at 16:56:03"},{"visible":true,"include":true,"step":"35.0","x":-92.96380952380953,"y":-84.21714285714286,"z":55.235238095238095,"a95":"0.99","info":"04/10/2015 at 16:56:03"},{"visible":true,"include":true,"step":"40.0","x":-75.0142857142857,"y":-82.25428571428571,"z":51.52095238095238,"a95":"0.99","info":"04/10/2015 at 16:56:03"},{"visible":true,"include":true,"step":"45.0","x":-45.67523809523809,"y":-71.0647619047619,"z":55.729523809523805,"a95":"0.99","info":"04/10/2015 at 16:56:03"},{"visible":true,"include":true,"step":"50.0","x":-52.07619047619047,"y":-72.06,"z":47.304761904761904,"a95":"0.99","info":"04/10/2015 at 16:56:03"},{"visible":false,"include":false,"step":"60.0","x":-42.561904761904756,"y":-59.179047619047616,"z":37.20285714285714,"a95":"0.99","info":"04/10/2015 at 16:56:03"},{"visible":false,"include":false,"step":"70.0","x":-42.670476190476194,"y":-54.83047619047619,"z":41.698095238095235,"a95":"0.99","info":"04/10/2015 at 16:56:03"}],"demagType":"Unknown","patch":1.1,"format":"Unknown","strat":null},{"version":"v1.1.0","exported":"2016-10-11T13:52:36.742Z","info":"7","GEO":[{"dec":358.0745460502323,"inc":59.146359744935474,"MAD":5.9325857422916615,"cm":[0,-2.749123680024197e-16,0],"intensity":154.50483162058174,"type":"dir","forced":true,"remark":"","origin":false,"nSteps":9,"minStep":"10.0","maxStep":"50.0","steps":["10.0","15.0","20.0","25.0","30.0","33.0","35.0","40.0","50.0"],"group":"None"}],"TECT":[{"dec":339.14337399581905,"inc":38.417144040604896,"MAD":5.9325857422916535,"cm":[6.767073673905716e-16,3.214359995105215e-15,2.3684757858670005e-15],"intensity":154.5048316205817,"type":"dir","forced":true,"remark":"","origin":false,"nSteps":9,"minStep":"10.0","maxStep":"50.0","steps":["10.0","15.0","20.0","25.0","30.0","33.0","35.0","40.0","50.0"],"group":"None"}],"interpreted":true,"name":"SS27.02B","coreAzi":126,"coreDip":58,"bedStrike":220,"bedDip":26,"data":[{"visible":true,"include":false,"step":"0.0","x":-87.53619047619047,"y":-42.06666666666666,"z":69.0352380952381,"a95":"0.99","info":"25/06/2015 at 18:34:11"},{"visible":true,"include":true,"step":"10.0","x":-69.23714285714286,"y":-35.142857142857146,"z":56.75047619047619,"a95":"0.99","info":"25/06/2015 at 18:34:11"},{"visible":true,"include":true,"step":"15.0","x":-57.988571428571426,"y":-27.62190476190476,"z":43.92761904761905,"a95":"0.99","info":"25/06/2015 at 18:34:11"},{"visible":true,"include":true,"step":"20.0","x":-50.5247619047619,"y":-42.170476190476194,"z":46.78380952380952,"a95":"0.99","info":"25/06/2015 at 18:34:11"},{"visible":false,"include":false,"step":"23.0","x":-41.254285714285714,"y":-48.14,"z":28.27809523809524,"a95":"0.99","info":"25/06/2015 at 18:34:11"},{"visible":true,"include":true,"step":"25.0","x":-55.25238095238095,"y":-20.138095238095236,"z":29.107619047619046,"a95":"0.99","info":"25/06/2015 at 18:34:11"},{"visible":true,"include":true,"step":"30.0","x":-48.96380952380952,"y":-27.241904761904763,"z":37.233333333333334,"a95":"0.99","info":"25/06/2015 at 18:34:11"},{"visible":true,"include":true,"step":"33.0","x":-43.90952380952381,"y":-22.091428571428573,"z":29.523809523809526,"a95":"0.99","info":"25/06/2015 at 18:34:11"},{"visible":true,"include":true,"step":"35.0","x":-38.233333333333334,"y":-29.157142857142855,"z":33.074285714285715,"a95":"0.99","info":"25/06/2015 at 18:34:11"},{"visible":true,"include":true,"step":"40.0","x":-44.21142857142858,"y":-25.975238095238097,"z":30.294285714285714,"a95":"0.99","info":"25/06/2015 at 18:34:11"},{"visible":false,"include":false,"step":"45.0","x":-104.9904761904762,"y":-20.953333333333333,"z":13.284761904761906,"a95":"0.99","info":"25/06/2015 at 18:34:11"},{"visible":true,"include":true,"step":"50.0","x":-39.049523809523805,"y":-21.025714285714287,"z":38.06952380952381,"a95":"0.99","info":"25/06/2015 at 18:34:11"},{"visible":true,"include":false,"step":"55.0","x":-30.985714285714288,"y":-9.17847619047619,"z":36.404761904761905,"a95":"0.99","info":"25/06/2015 at 18:34:11"},{"visible":true,"include":false,"step":"60.0","x":-39.96952380952381,"y":-6.522666666666667,"z":20.194285714285712,"a95":"0.99","info":"25/06/2015 at 18:34:11"},{"visible":true,"include":false,"step":"65.0","x":-13.281904761904762,"y":-7.138666666666667,"z":29.31904761904762,"a95":"0.99","info":"25/06/2015 at 18:34:11"},{"visible":true,"include":false,"step":"70.0","x":-12.995238095238093,"y":-9.918095238095239,"z":31.51904761904762,"a95":"0.99","info":"25/06/2015 at 18:34:11"},{"visible":true,"include":false,"step":"80.0","x":-44.25238095238095,"y":26.417142857142856,"z":14.120952380952382,"a95":"0.99","info":"25/06/2015 at 18:34:11"}],"demagType":"Unknown","patch":1.1,"format":"Unknown","strat":null},{"version":"v1.1.0","exported":"2016-10-11T13:52:36.742Z","info":"0","GEO":[{"dec":10.851789066144192,"inc":57.394528689968155,"MAD":2.225824216634674,"cm":[2.7068294695622863e-15,2.1147105230955362e-15,0],"intensity":472.01863469979116,"type":"dir","forced":true,"remark":"","origin":false,"nSteps":11,"minStep":"10.0","maxStep":"50.0","steps":["10.0","15.0","20.0","23.0","25.0","30.0","33.0","35.0","40.0","45.0","50.0"],"group":"None"}],"TECT":[{"dec":347.8700687458222,"inc":39.94789638085609,"MAD":2.2258242166345354,"cm":[-4.0602442043434294e-15,1.1165671561944431e-14,-3.383536836952858e-15],"intensity":472.01863469979105,"type":"dir","forced":true,"remark":"","origin":false,"nSteps":11,"minStep":"10.0","maxStep":"50.0","steps":["10.0","15.0","20.0","23.0","25.0","30.0","33.0","35.0","40.0","45.0","50.0"],"group":"None"}],"interpreted":true,"name":"SS27.04A","coreAzi":131,"coreDip":56,"bedStrike":220,"bedDip":26,"data":[{"visible":true,"include":false,"step":"0.0","x":-338.03809523809525,"y":-240.36190476190478,"z":254.93333333333334,"a95":"0.99","info":"04/10/2015 at 16:56:03"},{"visible":true,"include":true,"step":"10.0","x":-226.57142857142858,"y":-151.9904761904762,"z":168.59047619047618,"a95":"0.99","info":"04/10/2015 at 16:56:03"},{"visible":true,"include":true,"step":"15.0","x":-196.64761904761906,"y":-130.2095238095238,"z":149.76190476190476,"a95":"0.99","info":"04/10/2015 at 16:56:03"},{"visible":true,"include":true,"step":"20.0","x":-167.8761904761905,"y":-106.63809523809525,"z":145.45714285714286,"a95":"0.99","info":"04/10/2015 at 16:56:03"},{"visible":true,"include":true,"step":"23.0","x":-154.59047619047618,"y":-103.35238095238095,"z":133.8761904761905,"a95":"0.99","info":"04/10/2015 at 16:56:03"},{"visible":true,"include":true,"step":"25.0","x":-146.9714285714286,"y":-104.83809523809524,"z":113.17142857142856,"a95":"0.99","info":"04/10/2015 at 16:56:03"},{"visible":true,"include":true,"step":"30.0","x":-135.1238095238095,"y":-97.42857142857143,"z":112.75238095238096,"a95":"0.99","info":"04/10/2015 at 16:56:03"},{"visible":true,"include":true,"step":"33.0","x":-119.55238095238094,"y":-88.6247619047619,"z":98.83809523809524,"a95":"0.99","info":"04/10/2015 at 16:56:03"},{"visible":true,"include":true,"step":"35.0","x":-128.52380952380952,"y":-78.71142857142857,"z":105.29523809523809,"a95":"0.99","info":"04/10/2015 at 16:56:03"},{"visible":true,"include":true,"step":"40.0","x":-126.19047619047619,"y":-81.05333333333333,"z":89.53809523809524,"a95":"0.99","info":"04/10/2015 at 16:56:03"},{"visible":true,"include":true,"step":"45.0","x":-113.33333333333333,"y":-81.47809523809524,"z":84.64952380952381,"a95":"0.99","info":"04/10/2015 at 16:56:03"},{"visible":true,"include":true,"step":"50.0","x":-112.0095238095238,"y":-66.25523809523808,"z":77.4447619047619,"a95":"0.99","info":"04/10/2015 at 16:56:03"},{"visible":true,"include":false,"step":"60.0","x":-91.63238095238096,"y":-62.66761904761905,"z":80.9342857142857,"a95":"0.99","info":"04/10/2015 at 16:56:03"},{"visible":true,"include":false,"step":"70.0","x":-92.57238095238095,"y":-51.735238095238095,"z":51.04,"a95":"0.99","info":"04/10/2015 at 16:56:03"}],"demagType":"Unknown","patch":1.1,"format":"Unknown","strat":null},{"version":"v1.1.0","exported":"2016-10-11T13:52:36.742Z","info":"0","GEO":[{"dec":1.3675707966048094,"inc":60.28081624702074,"MAD":0.981729659912054,"cm":[0,2.393852312144147e-14,0],"intensity":479.7082068495606,"type":"dir","forced":true,"remark":"","origin":false,"nSteps":2,"minStep":"100","maxStep":"150","steps":["100","150"],"group":"None"}],"TECT":[{"dec":340.4447921451585,"inc":40.1576274878327,"MAD":0.981729659911991,"cm":[-2.7068294695622863e-14,-1.3534147347811431e-14,1.0827317878249145e-14],"intensity":479.7082068495606,"type":"dir","forced":true,"remark":"","origin":false,"nSteps":2,"minStep":"100","maxStep":"150","steps":["100","150"],"group":"None"}],"interpreted":true,"name":"SS27.06A","coreAzi":124,"coreDip":56,"bedStrike":220,"bedDip":26,"data":[{"visible":true,"include":false,"step":"20","x":-323.7142857142857,"y":-193.9047619047619,"z":216.1904761904762,"a95":"1.7","info":"\"15-06-15\" at \"08:53\""},{"visible":true,"include":true,"step":"100","x":-199.52380952380952,"y":-120.76190476190476,"z":164.57142857142858,"a95":"1.8","info":"\"15-06-15\" at \"12:44\""},{"visible":true,"include":true,"step":"150","x":-140.85714285714286,"y":-78.76190476190476,"z":108.28571428571429,"a95":"2","info":"\"15-06-16\" at \"07:44\""},{"visible":true,"include":false,"step":"180","x":-62.58095238095238,"y":-20.83809523809524,"z":9.17142857142857,"a95":"2.3","info":"\"15-06-16\" at \"10:37\""},{"visible":true,"include":false,"step":"210","x":-44.34285714285714,"y":-17.34285714285714,"z":24.133333333333333,"a95":"2.6","info":"\"15-06-16\" at \"14:06\""},{"visible":true,"include":false,"step":"230","x":-43.15238095238095,"y":13.2,"z":-20.38095238095238,"a95":"3.5","info":"\"15-06-17\" at \"17:39\""},{"visible":true,"include":false,"step":"250","x":-31.419047619047618,"y":14.314285714285715,"z":-5.828571428571429,"a95":"3.9","info":"\"15-06-17\" at \"20:26\""},{"visible":true,"include":false,"step":"270","x":3.5714285714285716,"y":14.876190476190475,"z":-30.133333333333333,"a95":"2.9","info":"\"15-06-25\" at \"09:13\""},{"visible":true,"include":false,"step":"300","x":-10,"y":19.714285714285715,"z":-27.580952380952382,"a95":"2.9","info":"\"15-06-25\" at \"12:39\""}],"demagType":"Unknown","patch":1.1,"format":"Unknown","strat":null},{"version":"v1.1.0","exported":"2016-10-11T13:52:36.742Z","info":"8","GEO":[{"dec":9.93452382066414,"inc":56.45827875971316,"MAD":5.535913147538518,"cm":[-6.767073673905716e-16,2.1992989440193578e-15,0],"intensity":326.906281577989,"type":"dir","forced":true,"remark":"","origin":false,"nSteps":8,"minStep":"15.0","maxStep":"40.0","steps":["15.0","20.0","23.0","25.0","30.0","33.0","35.0","40.0"],"group":"None"}],"TECT":[{"dec":347.90444233880453,"inc":38.88658749201396,"MAD":5.535913147538512,"cm":[2.7068294695622863e-15,1.5056738924440218e-14,1.3534147347811431e-15],"intensity":326.906281577989,"type":"dir","forced":true,"remark":"","origin":false,"nSteps":8,"minStep":"15.0","maxStep":"40.0","steps":["15.0","20.0","23.0","25.0","30.0","33.0","35.0","40.0"],"group":"None"}],"interpreted":true,"name":"SS27.04B","coreAzi":131,"coreDip":56,"bedStrike":220,"bedDip":26,"data":[{"visible":true,"include":false,"step":"0.0","x":-188.2095238095238,"y":-103.88571428571429,"z":144.21904761904761,"a95":"0.99","info":"25/06/2015 at 18:34:11"},{"visible":true,"include":false,"step":"10.0","x":-150.85714285714286,"y":-88.08666666666666,"z":106.98095238095237,"a95":"0.99","info":"25/06/2015 at 18:34:11"},{"visible":true,"include":true,"step":"15.0","x":-138.24761904761903,"y":-80.68285714285715,"z":105.12380952380951,"a95":"0.99","info":"25/06/2015 at 18:34:11"},{"visible":true,"include":true,"step":"20.0","x":-120.39047619047618,"y":-85.08380952380952,"z":95.37142857142857,"a95":"0.99","info":"25/06/2015 at 18:34:11"},{"visible":true,"include":true,"step":"23.0","x":-108.76190476190476,"y":-93.57333333333334,"z":80.00857142857143,"a95":"0.99","info":"25/06/2015 at 18:34:11"},{"visible":true,"include":true,"step":"25.0","x":-119.53333333333333,"y":-43.09238095238096,"z":77.24095238095238,"a95":"0.99","info":"25/06/2015 at 18:34:11"},{"visible":true,"include":true,"step":"30.0","x":-101,"y":-81.44666666666667,"z":69.66761904761904,"a95":"0.99","info":"25/06/2015 at 18:34:11"},{"visible":true,"include":true,"step":"33.0","x":-101.29523809523809,"y":-71.42,"z":75.38666666666666,"a95":"0.99","info":"25/06/2015 at 18:34:11"},{"visible":true,"include":true,"step":"35.0","x":-86.38285714285715,"y":-63.71809523809524,"z":74.07333333333334,"a95":"0.99","info":"25/06/2015 at 18:34:11"},{"visible":true,"include":true,"step":"40.0","x":-89.38,"y":-65.23714285714286,"z":78.61714285714285,"a95":"0.99","info":"25/06/2015 at 18:34:11"},{"visible":false,"include":false,"step":"45.0","x":-175.62857142857143,"y":-57.59142857142857,"z":38.09238095238096,"a95":"0.99","info":"25/06/2015 at 18:34:11"},{"visible":true,"include":false,"step":"50.0","x":-73.27714285714285,"y":-73.62761904761905,"z":63.54666666666667,"a95":"0.99","info":"25/06/2015 at 18:34:11"},{"visible":true,"include":false,"step":"55.0","x":-71.94,"y":-45.962857142857146,"z":64.68095238095238,"a95":"0.99","info":"25/06/2015 at 18:34:11"},{"visible":true,"include":false,"step":"60.0","x":-62.1447619047619,"y":-47.83428571428571,"z":49.277142857142856,"a95":"0.99","info":"25/06/2015 at 18:34:11"},{"visible":true,"include":false,"step":"65.0","x":-51.56857142857143,"y":-52.471428571428575,"z":64.44095238095238,"a95":"0.99","info":"25/06/2015 at 18:34:11"},{"visible":true,"include":false,"step":"70.0","x":-53.859047619047615,"y":-47.89333333333333,"z":43.09238095238096,"a95":"0.99","info":"25/06/2015 at 18:34:11"},{"visible":true,"include":false,"step":"80.0","x":-59.44571428571428,"y":1.4403809523809525,"z":28.51142857142857,"a95":"0.99","info":"25/06/2015 at 18:34:11"}],"demagType":"Unknown","patch":1.1,"format":"Unknown","strat":null},{"version":"v1.1.0","exported":"2016-10-11T13:52:36.742Z","info":"1","GEO":[{"dec":351.3779871865547,"inc":53.837656016312586,"MAD":3.6576074277703015,"cm":[-4.0602442043434294e-15,-2.3684757858670007e-14,0],"intensity":474.0461263136911,"type":"dir","forced":true,"remark":"","origin":false,"nSteps":7,"minStep":"10.0","maxStep":"33.0","steps":["10.0","15.0","20.0","23.0","25.0","30.0","33.0"],"group":"None"}],"TECT":[{"dec":339.68936893810735,"inc":37.22288104109338,"MAD":3.657607427770327,"cm":[-1.0827317878249145e-14,-5.210646728907401e-14,-1.2180732613030288e-14],"intensity":474.046126313691,"type":"dir","forced":true,"remark":"","origin":false,"nSteps":7,"minStep":"10.0","maxStep":"33.0","steps":["10.0","15.0","20.0","23.0","25.0","30.0","33.0"],"group":"None"}],"interpreted":true,"name":"SS27.08A","coreAzi":30,"coreDip":49,"bedStrike":221,"bedDip":20,"data":[{"visible":true,"include":false,"step":"0.0","x":-81.03904761904762,"y":-142.6,"z":395.7142857142857,"a95":"0.99","info":"25/06/2015 at 23:58:53"},{"visible":true,"include":true,"step":"10.0","x":-47.111428571428576,"y":-121.56190476190477,"z":286.2190476190476,"a95":"0.99","info":"25/06/2015 at 23:58:53"},{"visible":true,"include":true,"step":"15.0","x":-39.37904761904762,"y":-94.77904761904762,"z":262.8666666666667,"a95":"0.99","info":"25/06/2015 at 23:58:53"},{"visible":true,"include":true,"step":"20.0","x":-46.97238095238095,"y":-84.77904761904762,"z":198.8857142857143,"a95":"0.99","info":"25/06/2015 at 23:58:53"},{"visible":true,"include":true,"step":"23.0","x":-58.14857142857142,"y":-69.37619047619049,"z":198.15238095238095,"a95":"0.99","info":"25/06/2015 at 23:58:53"},{"visible":true,"include":true,"step":"25.0","x":-36.465714285714284,"y":-70.51523809523809,"z":193.45714285714286,"a95":"0.99","info":"25/06/2015 at 23:58:53"},{"visible":true,"include":true,"step":"30.0","x":-48.513333333333335,"y":-77.34571428571428,"z":164.9142857142857,"a95":"0.99","info":"25/06/2015 at 23:58:53"},{"visible":true,"include":true,"step":"33.0","x":-19.6,"y":-71.4152380952381,"z":141.6,"a95":"0.99","info":"25/06/2015 at 23:58:53"},{"visible":true,"include":false,"step":"35.0","x":-52.320952380952384,"y":-85.29333333333334,"z":153.5047619047619,"a95":"0.99","info":"25/06/2015 at 23:58:53"},{"visible":true,"include":false,"step":"40.0","x":-39.01428571428571,"y":-61.48761904761905,"z":145.9047619047619,"a95":"0.99","info":"25/06/2015 at 23:58:53"},{"visible":false,"include":false,"step":"45.0","x":-47.90761904761904,"y":-81.41047619047619,"z":82.03714285714285,"a95":"0.99","info":"25/06/2015 at 23:58:53"},{"visible":false,"include":false,"step":"50.0","x":-88.0495238095238,"y":-137.4,"z":111.9047619047619,"a95":"0.99","info":"25/06/2015 at 23:58:53"},{"visible":false,"include":false,"step":"55.0","x":-65.82761904761905,"y":-83.19619047619047,"z":111.16190476190476,"a95":"0.99","info":"25/06/2015 at 23:58:53"},{"visible":false,"include":false,"step":"60.0","x":-88.62857142857143,"y":-94.19904761904762,"z":95.87619047619049,"a95":"0.99","info":"25/06/2015 at 23:58:53"},{"visible":false,"include":false,"step":"65.0","x":-85,"y":-118.8952380952381,"z":65.08571428571429,"a95":"0.99","info":"25/06/2015 at 23:58:53"},{"visible":false,"include":false,"step":"70.0","x":-75.01904761904763,"y":-111.4095238095238,"z":101.43809523809523,"a95":"0.99","info":"25/06/2015 at 23:58:53"},{"visible":false,"include":false,"step":"80.0","x":-112.04761904761905,"y":-125.36190476190475,"z":65.84285714285714,"a95":"0.99","info":"25/06/2015 at 23:58:53"}],"demagType":"Unknown","patch":1.1,"format":"Unknown","strat":null},{"version":"v1.1.0","exported":"2016-10-11T13:52:36.742Z","info":"0","GEO":[{"dec":354.94298609994206,"inc":53.205244989506035,"MAD":2.782897288331111,"cm":[-5.4136589391245725e-15,-4.9907168345054655e-14,0],"intensity":456.8864107126382,"type":"dir","forced":true,"remark":"","origin":false,"nSteps":8,"minStep":"20.0","maxStep":"45.0","steps":["20.0","23.0","25.0","30.0","33.0","35.0","40.0","45.0"],"group":"None"}],"TECT":[{"dec":335.43053763566655,"inc":32.248573345831,"MAD":2.7828972883312098,"cm":[-8.120488408686859e-15,-4.872293045212115e-14,-2.571487996084172e-14],"intensity":456.8864107126382,"type":"dir","forced":true,"remark":"","origin":false,"nSteps":8,"minStep":"20.0","maxStep":"45.0","steps":["20.0","23.0","25.0","30.0","33.0","35.0","40.0","45.0"],"group":"None"}],"interpreted":true,"name":"SS27.11A","coreAzi":5,"coreDip":10,"bedStrike":210,"bedDip":29,"data":[{"visible":true,"include":false,"step":"0.0","x":-290.7904761904762,"y":-62.260000000000005,"z":367.5809523809524,"a95":"0.99","info":"04/10/2015 at 16:56:03"},{"visible":true,"include":false,"step":"10.0","x":-226.84761904761905,"y":-46.49333333333333,"z":271.06666666666666,"a95":"0.99","info":"04/10/2015 at 16:56:03"},{"visible":true,"include":false,"step":"15.0","x":-198.95238095238096,"y":-43.48571428571429,"z":245.71428571428572,"a95":"0.99","info":"04/10/2015 at 16:56:03"},{"visible":true,"include":true,"step":"20.0","x":-190.8095238095238,"y":-19.58857142857143,"z":206.1809523809524,"a95":"0.99","info":"04/10/2015 at 16:56:03"},{"visible":true,"include":true,"step":"23.0","x":-184.7238095238095,"y":-24.992380952380955,"z":202.84761904761905,"a95":"0.99","info":"04/10/2015 at 16:56:03"},{"visible":true,"include":true,"step":"25.0","x":-170.57142857142858,"y":-18.273333333333333,"z":183.15238095238095,"a95":"0.99","info":"04/10/2015 at 16:56:03"},{"visible":true,"include":true,"step":"30.0","x":-158.8,"y":-37.62857142857143,"z":177.8952380952381,"a95":"0.99","info":"04/10/2015 at 16:56:03"},{"visible":true,"include":true,"step":"33.0","x":-152.86666666666665,"y":-17.385714285714286,"z":145.8190476190476,"a95":"0.99","info":"04/10/2015 at 16:56:03"},{"visible":true,"include":true,"step":"35.0","x":-157.36190476190475,"y":-37.446666666666665,"z":160.1047619047619,"a95":"0.99","info":"04/10/2015 at 16:56:03"},{"visible":true,"include":true,"step":"40.0","x":-143.1904761904762,"y":-14.951428571428572,"z":141.85714285714286,"a95":"0.99","info":"04/10/2015 at 16:56:03"},{"visible":true,"include":true,"step":"45.0","x":-125.52380952380952,"y":-29.552380952380954,"z":119.80000000000001,"a95":"0.99","info":"04/10/2015 at 16:56:03"},{"visible":true,"include":false,"step":"50.0","x":-126.44761904761906,"y":-30.094285714285714,"z":99.39047619047618,"a95":"0.99","info":"04/10/2015 at 16:56:03"},{"visible":true,"include":false,"step":"60.0","x":-115.85714285714286,"y":-17.04285714285714,"z":101.22857142857144,"a95":"0.99","info":"04/10/2015 at 16:56:03"},{"visible":true,"include":false,"step":"70.0","x":-87.03714285714285,"y":-2.8600000000000003,"z":71.61904761904762,"a95":"0.99","info":"04/10/2015 at 16:56:03"}],"demagType":"Unknown","patch":1.1,"format":"Unknown","strat":null},{"version":"v1.1.0","exported":"2016-10-11T13:52:36.742Z","info":"2","GEO":[{"dec":354.0573999904159,"inc":45.02734991209612,"MAD":5.751856518024337,"cm":[-3.383536836952858e-15,-1.1842378929335004e-14,0],"intensity":354.8206041160376,"type":"dir","forced":true,"remark":"","origin":false,"nSteps":16,"minStep":"0.0","maxStep":"80.0","steps":["0.0","10.0","20.0","23.0","25.0","30.0","33.0","35.0","40.0","45.0","50.0","55.0","60.0","65.0","70.0","80.0"],"group":"None"}],"TECT":[{"dec":339.0316185440026,"inc":24.684340486860407,"MAD":5.751856518024401,"cm":[2.0301221021717147e-15,-5.075305255429287e-15,-3.721890520648144e-15],"intensity":354.82060411603754,"type":"dir","forced":true,"remark":"","origin":false,"nSteps":16,"minStep":"0.0","maxStep":"80.0","steps":["0.0","10.0","20.0","23.0","25.0","30.0","33.0","35.0","40.0","45.0","50.0","55.0","60.0","65.0","70.0","80.0"],"group":"None"}],"interpreted":true,"name":"SS27.11B","coreAzi":5,"coreDip":10,"bedStrike":210,"bedDip":29,"data":[{"visible":true,"include":true,"step":"0.0","x":-149.15238095238095,"y":-11.025714285714285,"z":197,"a95":"0.99","info":"25/06/2015 at 23:58:53"},{"visible":true,"include":true,"step":"10.0","x":-129.84761904761905,"y":-23.565714285714286,"z":178.53333333333333,"a95":"0.99","info":"25/06/2015 at 23:58:53"},{"visible":true,"include":false,"step":"15.0","x":-119.95238095238095,"y":-9.061714285714285,"z":172.86666666666665,"a95":"0.99","info":"25/06/2015 at 23:58:53"},{"visible":true,"include":true,"step":"20.0","x":-102.91428571428571,"y":-16.871428571428574,"z":145.59047619047618,"a95":"0.99","info":"25/06/2015 at 23:58:53"},{"visible":true,"include":true,"step":"23.0","x":-92.01142857142857,"y":-41.38380952380952,"z":140.31428571428572,"a95":"0.99","info":"25/06/2015 at 23:58:53"},{"visible":true,"include":true,"step":"25.0","x":-89.86571428571429,"y":-31.096190476190475,"z":128.92380952380952,"a95":"0.99","info":"25/06/2015 at 23:58:53"},{"visible":true,"include":true,"step":"30.0","x":-80.79619047619047,"y":-36.93238095238095,"z":137.46666666666667,"a95":"0.99","info":"25/06/2015 at 23:58:53"},{"visible":true,"include":true,"step":"33.0","x":-61.53523809523809,"y":-41.49047619047619,"z":119.56190476190477,"a95":"0.99","info":"25/06/2015 at 23:58:53"},{"visible":true,"include":true,"step":"35.0","x":-88.76,"y":-12.895238095238096,"z":108.75238095238096,"a95":"0.99","info":"25/06/2015 at 23:58:53"},{"visible":true,"include":true,"step":"40.0","x":-87.73428571428572,"y":-15.033333333333333,"z":100.01904761904763,"a95":"0.99","info":"25/06/2015 at 23:58:53"},{"visible":true,"include":true,"step":"45.0","x":-85.68285714285715,"y":-14.82095238095238,"z":118.44761904761906,"a95":"0.99","info":"25/06/2015 at 23:58:53"},{"visible":true,"include":true,"step":"50.0","x":-76.11142857142856,"y":-28.54380952380952,"z":92.26952380952382,"a95":"0.99","info":"25/06/2015 at 23:58:53"},{"visible":true,"include":true,"step":"55.0","x":-80.1352380952381,"y":-9.292666666666666,"z":104.8952380952381,"a95":"0.99","info":"25/06/2015 at 23:58:53"},{"visible":true,"include":true,"step":"60.0","x":-71.4895238095238,"y":-23.185714285714283,"z":77.5657142857143,"a95":"0.99","info":"25/06/2015 at 23:58:53"},{"visible":true,"include":true,"step":"65.0","x":-72.12095238095237,"y":-18.284761904761904,"z":93.76857142857143,"a95":"0.99","info":"25/06/2015 at 23:58:53"},{"visible":true,"include":true,"step":"70.0","x":-54.99047619047619,"y":-14.75904761904762,"z":98.21904761904761,"a95":"0.99","info":"25/06/2015 at 23:58:53"},{"visible":true,"include":true,"step":"80.0","x":-57.338095238095235,"y":3.2051428571428575,"z":91.44095238095238,"a95":"0.99","info":"25/06/2015 at 23:58:53"}],"demagType":"Unknown","patch":1.1,"format":"Unknown","strat":null},{"version":"v1.1.0","exported":"2016-10-11T13:52:36.743Z","info":"0","GEO":[{"dec":8.435913384972139,"inc":51.391452269458185,"MAD":1.6295760213544053,"cm":[226.49119253800487,21.810397549645455,156.56514586872333],"intensity":322.85573816241686,"type":"dir","forced":false,"remark":"","origin":false,"nSteps":4,"minStep":"100","maxStep":"210","steps":["100","150","180","210"],"group":"None"}],"TECT":[{"dec":345.04387085831576,"inc":34.90820527314566,"MAD":1.6295760213544552,"cm":[258.5280679319812,-33.67909834847478,91.18966534233172],"intensity":322.8557381624168,"type":"dir","forced":false,"remark":"","origin":false,"nSteps":4,"minStep":"100","maxStep":"210","steps":["100","150","180","210"],"group":"None"}],"interpreted":true,"name":"SS27.12A","coreAzi":25,"coreDip":8,"bedStrike":210,"bedDip":29,"data":[{"visible":true,"include":false,"step":"20","x":-351.7142857142857,"y":-115.42857142857143,"z":442.57142857142856,"a95":"1.9","info":"\"15-06-15\" at \"08:55\""},{"visible":true,"include":true,"step":"100","x":-256.4761904761905,"y":-110.95238095238095,"z":363.42857142857144,"a95":"2.1","info":"\"15-06-15\" at \"12:46\""},{"visible":true,"include":true,"step":"150","x":-178.0952380952381,"y":-87.80952380952381,"z":294,"a95":"2.2","info":"\"15-06-16\" at \"07:45\""},{"visible":true,"include":true,"step":"180","x":-36.38095238095238,"y":-53.523809523809526,"z":138,"a95":"2.4","info":"\"15-06-16\" at \"10:38\""},{"visible":true,"include":true,"step":"210","x":-29.80952380952381,"y":-51.523809523809526,"z":141.33333333333334,"a95":"2.3","info":"\"15-06-16\" at \"14:08\""},{"visible":true,"include":false,"step":"230","x":-28.761904761904763,"y":-33.333333333333336,"z":118.85714285714286,"a95":"2.4","info":"\"15-06-17\" at \"17:41\""},{"visible":true,"include":false,"step":"250","x":-32.333333333333336,"y":-11.561904761904762,"z":60.733333333333334,"a95":"2.7","info":"\"15-06-17\" at \"20:28\""},{"visible":true,"include":false,"step":"270","x":-1.0285714285714287,"y":-10.238095238095237,"z":48.13333333333333,"a95":"2.8","info":"\"15-06-25\" at \"09:15\""},{"visible":true,"include":false,"step":"300","x":-19.257142857142856,"y":-11.59047619047619,"z":66.04761904761905,"a95":"2.6","info":"\"15-06-25\" at \"12:41\""},{"visible":true,"include":false,"step":"320","x":-39.67619047619048,"y":3.619047619047619,"z":54.46666666666666,"a95":"3","info":"\"15-06-25\" at \"16:12\""}],"demagType":"Unknown","patch":1.1,"format":"Unknown","strat":null},{"version":"v1.1.0","exported":"2016-10-11T13:52:36.743Z","info":"0","GEO":[{"dec":359.42278072091034,"inc":46.68282375164436,"MAD":3.1422023219601045,"cm":[-2.7068294695622863e-15,1.3111205243192326e-14,0],"intensity":567.5433799237182,"type":"dir","forced":true,"remark":"","origin":false,"nSteps":9,"minStep":"20.0","maxStep":"50.0","steps":["20.0","23.0","25.0","30.0","33.0","35.0","40.0","45.0","50.0"],"group":"None"}],"TECT":[{"dec":341.9136954438518,"inc":27.84962979343156,"MAD":3.142202321960129,"cm":[-1.3534147347811431e-14,-1.048896419455386e-14,5.4136589391245725e-15],"intensity":567.5433799237184,"type":"dir","forced":true,"remark":"","origin":false,"nSteps":9,"minStep":"20.0","maxStep":"50.0","steps":["20.0","23.0","25.0","30.0","33.0","35.0","40.0","45.0","50.0"],"group":"None"}],"interpreted":true,"name":"SS27.13A","coreAzi":28,"coreDip":4,"bedStrike":210,"bedDip":29,"data":[{"visible":true,"include":false,"step":"0.0","x":-496.27619047619044,"y":-195.35238095238094,"z":356.49523809523805,"a95":"0.99","info":"04/10/2015 at 16:56:03"},{"visible":true,"include":false,"step":"10.0","x":-344.3047619047619,"y":-133.43809523809523,"z":283.6,"a95":"0.99","info":"04/10/2015 at 16:56:03"},{"visible":true,"include":false,"step":"15.0","x":-298.5238095238095,"y":-123.95238095238095,"z":263.74285714285713,"a95":"0.99","info":"04/10/2015 at 16:56:03"},{"visible":true,"include":true,"step":"20.0","x":-247.24761904761903,"y":-107.31428571428572,"z":225.60000000000002,"a95":"0.99","info":"04/10/2015 at 16:56:03"},{"visible":true,"include":true,"step":"23.0","x":-229.7904761904762,"y":-103.20952380952382,"z":223.40952380952382,"a95":"0.99","info":"04/10/2015 at 16:56:03"},{"visible":true,"include":true,"step":"25.0","x":-220.2761904761905,"y":-98.87619047619049,"z":212.39999999999998,"a95":"0.99","info":"04/10/2015 at 16:56:03"},{"visible":true,"include":true,"step":"30.0","x":-205.57142857142858,"y":-94.96761904761904,"z":201.32380952380953,"a95":"0.99","info":"04/10/2015 at 16:56:03"},{"visible":true,"include":true,"step":"33.0","x":-193.6952380952381,"y":-101.6,"z":178.77142857142857,"a95":"0.99","info":"04/10/2015 at 16:56:03"},{"visible":true,"include":true,"step":"35.0","x":-179.7047619047619,"y":-82.72,"z":151.82857142857142,"a95":"0.99","info":"04/10/2015 at 16:56:03"},{"visible":true,"include":true,"step":"40.0","x":-167.3904761904762,"y":-93.6704761904762,"z":147.78095238095239,"a95":"0.99","info":"04/10/2015 at 16:56:03"},{"visible":true,"include":true,"step":"45.0","x":-150.6952380952381,"y":-87.62952380952382,"z":140.63809523809525,"a95":"0.99","info":"04/10/2015 at 16:56:03"},{"visible":true,"include":true,"step":"50.0","x":-125.87619047619049,"y":-67.29047619047618,"z":164.78095238095239,"a95":"0.99","info":"04/10/2015 at 16:56:03"},{"visible":true,"include":false,"step":"60.0","x":-110.23809523809524,"y":-77.42857142857143,"z":106.19999999999999,"a95":"0.99","info":"04/10/2015 at 16:56:03"},{"visible":true,"include":false,"step":"70.0","x":-92.41142857142857,"y":-56.98952380952381,"z":78.11619047619048,"a95":"0.99","info":"04/10/2015 at 16:56:03"}],"demagType":"Unknown","patch":1.1,"format":"Unknown","strat":null},{"version":"v1.1.0","exported":"2016-10-11T13:52:36.743Z","info":"0","GEO":[{"dec":7.600692576049823,"inc":46.915228027566926,"MAD":2.732857170291655,"cm":[-5.4136589391245725e-15,4.1109972568977224e-14,0],"intensity":553.8702858408411,"type":"dir","forced":true,"remark":"","origin":false,"nSteps":9,"minStep":"20.0","maxStep":"50.0","steps":["20.0","23.0","25.0","30.0","33.0","35.0","40.0","45.0","50.0"],"group":"None"}],"TECT":[{"dec":347.35071467762236,"inc":30.8358480263535,"MAD":2.732857170291606,"cm":[-1.2180732613030288e-14,3.7557258890176723e-14,1.3534147347811431e-14],"intensity":553.8702858408411,"type":"dir","forced":true,"remark":"","origin":false,"nSteps":9,"minStep":"20.0","maxStep":"50.0","steps":["20.0","23.0","25.0","30.0","33.0","35.0","40.0","45.0","50.0"],"group":"None"}],"interpreted":true,"name":"SS27.14A","coreAzi":38,"coreDip":1,"bedStrike":210,"bedDip":29,"data":[{"visible":true,"include":false,"step":"0.0","x":-405.25714285714287,"y":-180.34285714285713,"z":269.7904761904762,"a95":"0.99","info":"04/10/2015 at 16:56:03"},{"visible":true,"include":false,"step":"10.0","x":-293.37142857142857,"y":-161.3047619047619,"z":223.45714285714288,"a95":"0.99","info":"04/10/2015 at 16:56:03"},{"visible":true,"include":false,"step":"15.0","x":-277.2761904761905,"y":-141.23809523809524,"z":202.93333333333334,"a95":"0.99","info":"04/10/2015 at 16:56:03"},{"visible":true,"include":true,"step":"20.0","x":-244.6095238095238,"y":-131.5047619047619,"z":187.47619047619048,"a95":"0.99","info":"04/10/2015 at 16:56:03"},{"visible":true,"include":true,"step":"23.0","x":-225.31428571428575,"y":-106.71428571428571,"z":179.55238095238096,"a95":"0.99","info":"04/10/2015 at 16:56:03"},{"visible":true,"include":true,"step":"25.0","x":-205.02857142857144,"y":-106.62857142857142,"z":167.1047619047619,"a95":"0.99","info":"04/10/2015 at 16:56:03"},{"visible":true,"include":true,"step":"30.0","x":-185.51428571428573,"y":-83.38761904761905,"z":148.93333333333334,"a95":"0.99","info":"04/10/2015 at 16:56:03"},{"visible":true,"include":true,"step":"33.0","x":-174.03809523809525,"y":-75.16285714285715,"z":152.14285714285714,"a95":"0.99","info":"04/10/2015 at 16:56:03"},{"visible":true,"include":true,"step":"35.0","x":-161.26666666666665,"y":-74.90190476190476,"z":152.68571428571428,"a95":"0.99","info":"04/10/2015 at 16:56:03"},{"visible":true,"include":true,"step":"40.0","x":-167.73333333333335,"y":-74.63333333333333,"z":160.76190476190476,"a95":"0.99","info":"04/10/2015 at 16:56:03"},{"visible":true,"include":true,"step":"45.0","x":-153.71428571428572,"y":-65.33619047619047,"z":124.12380952380951,"a95":"0.99","info":"04/10/2015 at 16:56:03"},{"visible":true,"include":true,"step":"50.0","x":-154.48571428571427,"y":-77.20476190476191,"z":134.9142857142857,"a95":"0.99","info":"04/10/2015 at 16:56:03"},{"visible":true,"include":false,"step":"60.0","x":-113.75238095238096,"y":-37.89333333333333,"z":115.47619047619048,"a95":"0.99","info":"04/10/2015 at 16:56:03"},{"visible":true,"include":false,"step":"70.0","x":-113.45714285714286,"y":-31.65809523809524,"z":109.11428571428571,"a95":"0.99","info":"04/10/2015 at 16:56:03"}],"demagType":"Unknown","patch":1.1,"format":"Unknown","strat":null},{"version":"v1.1.0","exported":"2016-10-11T13:52:36.743Z","info":"3","GEO":[{"dec":356.49410990660715,"inc":59.95107559978565,"MAD":5.415073295785041,"cm":[0,6.259543148362787e-15,0],"intensity":272.8547731867516,"type":"dir","forced":true,"remark":"","origin":false,"nSteps":8,"minStep":"20.0","maxStep":"45.0","steps":["20.0","23.0","25.0","30.0","33.0","35.0","40.0","45.0"],"group":"None"}],"TECT":[{"dec":335.3357900108075,"inc":41.19345556173827,"MAD":5.415073295784997,"cm":[-5.4136589391245725e-15,4.3985978880387156e-15,4.736951571734001e-15],"intensity":272.8547731867516,"type":"dir","forced":true,"remark":"","origin":false,"nSteps":8,"minStep":"20.0","maxStep":"45.0","steps":["20.0","23.0","25.0","30.0","33.0","35.0","40.0","45.0"],"group":"None"}],"interpreted":true,"name":"SS27.15B","coreAzi":144,"coreDip":59,"bedStrike":213,"bedDip":25,"data":[{"visible":true,"include":false,"step":"0.0","x":-226.23809523809524,"y":-64.32285714285715,"z":146.45714285714286,"a95":"0.99","info":"25/06/2015 at 23:58:53"},{"visible":true,"include":false,"step":"10.0","x":-174.59047619047618,"y":-62.62571428571429,"z":116.4,"a95":"0.99","info":"25/06/2015 at 23:58:53"},{"visible":true,"include":false,"step":"15.0","x":-171.48571428571427,"y":-52.011428571428574,"z":115.56190476190477,"a95":"0.99","info":"25/06/2015 at 23:58:53"},{"visible":true,"include":true,"step":"20.0","x":-137.11428571428573,"y":-54.46857142857142,"z":88.74380952380952,"a95":"0.99","info":"25/06/2015 at 23:58:53"},{"visible":true,"include":true,"step":"23.0","x":-123.72380952380952,"y":-44.81428571428572,"z":82.72190476190477,"a95":"0.99","info":"25/06/2015 at 23:58:53"},{"visible":true,"include":true,"step":"25.0","x":-116.77142857142856,"y":-52.45238095238095,"z":74.03904761904762,"a95":"0.99","info":"25/06/2015 at 23:58:53"},{"visible":true,"include":true,"step":"30.0","x":-110.28571428571429,"y":-11.763809523809524,"z":76.47333333333333,"a95":"0.99","info":"25/06/2015 at 23:58:53"},{"visible":true,"include":true,"step":"33.0","x":-88.00190476190475,"y":-37.49333333333333,"z":65.70476190476191,"a95":"0.99","info":"25/06/2015 at 23:58:53"},{"visible":true,"include":true,"step":"35.0","x":-106.19047619047619,"y":-34.25238095238095,"z":54.98,"a95":"0.99","info":"25/06/2015 at 23:58:53"},{"visible":true,"include":true,"step":"40.0","x":-90.42761904761905,"y":-17.068571428571428,"z":58.49904761904762,"a95":"0.99","info":"25/06/2015 at 23:58:53"},{"visible":true,"include":true,"step":"45.0","x":-81.60380952380953,"y":-25.505714285714287,"z":53.44,"a95":"0.99","info":"25/06/2015 at 23:58:53"},{"visible":true,"include":false,"step":"50.0","x":-86.73047619047618,"y":-27.657142857142855,"z":42.553333333333335,"a95":"0.99","info":"25/06/2015 at 23:58:53"},{"visible":true,"include":false,"step":"55.0","x":-52.8495238095238,"y":-22.97809523809524,"z":44.78380952380952,"a95":"0.99","info":"25/06/2015 at 23:58:53"},{"visible":true,"include":false,"step":"60.0","x":-70.77809523809523,"y":-0.21800000000000003,"z":38.22190476190476,"a95":"0.99","info":"25/06/2015 at 23:58:53"},{"visible":true,"include":false,"step":"65.0","x":-67.9,"y":-12.693333333333333,"z":31.01904761904762,"a95":"0.99","info":"25/06/2015 at 23:58:53"},{"visible":true,"include":false,"step":"70.0","x":-59.097142857142856,"y":-20.53904761904762,"z":36.96190476190476,"a95":"0.99","info":"25/06/2015 at 23:58:53"},{"visible":true,"include":false,"step":"80.0","x":-53.409523809523805,"y":-10.16,"z":28.565714285714286,"a95":"0.99","info":"25/06/2015 at 23:58:53"}],"demagType":"Unknown","patch":1.1,"format":"Unknown","strat":null},{"version":"v1.1.0","exported":"2016-10-11T13:52:36.743Z","info":"0","GEO":[{"dec":359.8951867591025,"inc":58.67909012957019,"MAD":1.5045142613920206,"cm":[109.88762003173545,-20.48862134505533,211.59021487648118],"intensity":367.4579333598822,"type":"dir","forced":false,"remark":"","origin":false,"nSteps":4,"minStep":"100","maxStep":"210","steps":["100","150","180","210"],"group":"None"}],"TECT":[{"dec":338.1537550050959,"inc":40.86221359312961,"MAD":1.5045142613920341,"cm":[154.6594338956118,-89.43116888046654,159.2106064685954],"intensity":367.45793335988213,"type":"dir","forced":false,"remark":"","origin":false,"nSteps":4,"minStep":"100","maxStep":"210","steps":["100","150","180","210"],"group":"None"}],"interpreted":true,"name":"SS27.17A","coreAzi":128,"coreDip":55,"bedStrike":213,"bedDip":25,"data":[{"visible":true,"include":false,"step":"20","x":-566.8571428571429,"y":-343.9047619047619,"z":355.5238095238095,"a95":"1.6","info":"\"15-06-15\" at \"08:57\""},{"visible":true,"include":true,"step":"100","x":-352.4761904761905,"y":-164.95238095238096,"z":238.57142857142858,"a95":"1.7","info":"\"15-06-15\" at \"12:47\""},{"visible":true,"include":true,"step":"150","x":-255.71428571428572,"y":-105.52380952380952,"z":167.14285714285714,"a95":"1.9","info":"\"15-06-16\" at \"07:47\""},{"visible":true,"include":true,"step":"180","x":-73.6,"y":-16.39047619047619,"z":45.2,"a95":"2.2","info":"\"15-06-16\" at \"10:40\""},{"visible":true,"include":true,"step":"210","x":-78.23809523809524,"y":-9.047619047619047,"z":50.12380952380952,"a95":"2.1","info":"\"15-06-16\" at \"14:09\""},{"visible":true,"include":false,"step":"230","x":-47.142857142857146,"y":-4.161904761904762,"z":16.628571428571426,"a95":"4.2","info":"\"15-06-17\" at \"17:42\""},{"visible":true,"include":false,"step":"250","x":-25.914285714285718,"y":-14.552380952380954,"z":10,"a95":"5.4","info":"\"15-06-17\" at \"20:29\""},{"visible":true,"include":false,"step":"270","x":-23.047619047619047,"y":-14.142857142857142,"z":11.638095238095238,"a95":"4.9","info":"\"15-06-25\" at \"09:17\""},{"visible":true,"include":false,"step":"300","x":-38.67619047619048,"y":8.923809523809524,"z":23.114285714285714,"a95":"2.6","info":"\"15-06-25\" at \"12:43\""},{"visible":true,"include":false,"step":"320","x":-22.447619047619046,"y":-2.2857142857142856,"z":10.295238095238094,"a95":"8.1","info":"\"15-06-25\" at \"16:14\""},{"visible":true,"include":false,"step":"340","x":-29.24761904761905,"y":1.8666666666666667,"z":32.41904761904762,"a95":"3.6","info":"\"15-06-25\" at \"19:53\""}],"demagType":"Unknown","patch":1.1,"format":"Unknown","strat":null},{"version":"v1.1.0","exported":"2016-10-11T13:52:36.743Z","info":"4","GEO":[{"dec":2.3634727077904927,"inc":56.73716183196592,"MAD":3.02414852519255,"cm":[0,-9.098542025618544e-15,0],"intensity":370.7162314644475,"type":"dir","forced":true,"remark":"","origin":false,"nSteps":8,"minStep":"20.0","maxStep":"45.0","steps":["20.0","23.0","25.0","30.0","33.0","35.0","40.0","45.0"],"group":"None"}],"TECT":[{"dec":340.87800404082077,"inc":39.76940652896645,"MAD":3.024148525192461,"cm":[2.7068294695622863e-15,-1.4210854715202004e-14,-4.0602442043434294e-15],"intensity":370.71623146444745,"type":"dir","forced":true,"remark":"","origin":false,"nSteps":8,"minStep":"20.0","maxStep":"45.0","steps":["20.0","23.0","25.0","30.0","33.0","35.0","40.0","45.0"],"group":"None"}],"interpreted":true,"name":"SS27.18B","coreAzi":135,"coreDip":55,"bedStrike":213,"bedDip":25,"data":[{"visible":true,"include":false,"step":"0.0","x":-303.22857142857146,"y":-115.68571428571428,"z":147.13333333333335,"a95":"0.99","info":"25/06/2015 at 23:58:53"},{"visible":true,"include":false,"step":"10.0","x":-225.6095238095238,"y":-109.45714285714286,"z":123.62857142857142,"a95":"0.99","info":"25/06/2015 at 23:58:53"},{"visible":true,"include":false,"step":"15.0","x":-218.0952380952381,"y":-90.46857142857142,"z":110.58095238095237,"a95":"0.99","info":"25/06/2015 at 23:58:53"},{"visible":true,"include":true,"step":"20.0","x":-181.16190476190476,"y":-81.22095238095238,"z":106.92380952380952,"a95":"0.99","info":"25/06/2015 at 23:58:53"},{"visible":true,"include":true,"step":"23.0","x":-170.57142857142858,"y":-88.32666666666667,"z":90.20190476190476,"a95":"0.99","info":"25/06/2015 at 23:58:53"},{"visible":true,"include":true,"step":"25.0","x":-165.31428571428572,"y":-90.7895238095238,"z":96.03809523809524,"a95":"0.99","info":"25/06/2015 at 23:58:53"},{"visible":true,"include":true,"step":"30.0","x":-137.3047619047619,"y":-70.30761904761906,"z":94.39238095238095,"a95":"0.99","info":"25/06/2015 at 23:58:53"},{"visible":true,"include":true,"step":"33.0","x":-128.8,"y":-71.79333333333334,"z":80.50666666666667,"a95":"0.99","info":"25/06/2015 at 23:58:53"},{"visible":true,"include":true,"step":"35.0","x":-128.64761904761903,"y":-73.89809523809524,"z":69.81428571428572,"a95":"0.99","info":"25/06/2015 at 23:58:53"},{"visible":true,"include":true,"step":"40.0","x":-115.77142857142856,"y":-64.30095238095238,"z":77.98380952380953,"a95":"0.99","info":"25/06/2015 at 23:58:53"},{"visible":true,"include":true,"step":"45.0","x":-113.60952380952382,"y":-48.48380952380952,"z":76.69809523809525,"a95":"0.99","info":"25/06/2015 at 23:58:53"},{"visible":true,"include":false,"step":"50.0","x":-108.1047619047619,"y":-72.82285714285715,"z":67.47142857142858,"a95":"0.99","info":"25/06/2015 at 23:58:53"},{"visible":true,"include":false,"step":"55.0","x":-95.21619047619048,"y":-51.34,"z":67.97904761904762,"a95":"0.99","info":"25/06/2015 at 23:58:53"},{"visible":true,"include":false,"step":"60.0","x":-90.87238095238095,"y":-31.75047619047619,"z":58.52,"a95":"0.99","info":"25/06/2015 at 23:58:53"},{"visible":true,"include":false,"step":"65.0","x":-77.86380952380952,"y":-47.703809523809525,"z":46.635238095238094,"a95":"0.99","info":"25/06/2015 at 23:58:53"},{"visible":true,"include":false,"step":"70.0","x":-72.20952380952382,"y":-37.98095238095238,"z":54.00857142857143,"a95":"0.99","info":"25/06/2015 at 23:58:53"},{"visible":true,"include":false,"step":"80.0","x":-64.5847619047619,"y":-43.93238095238095,"z":42.82476190476191,"a95":"0.99","info":"25/06/2015 at 23:58:53"}],"demagType":"Unknown","patch":1.1,"format":"Unknown","strat":null},{"version":"v1.1.0","exported":"2016-10-11T13:52:36.743Z","info":"0","GEO":[{"dec":357.1078281465977,"inc":58.62240237977403,"MAD":3.4333348947223303,"cm":[-2.7068294695622863e-15,-1.979369049617422e-14,0],"intensity":930.7772439235371,"type":"dir","forced":true,"remark":"","origin":false,"nSteps":8,"minStep":"20.0","maxStep":"45.0","steps":["20.0","23.0","25.0","30.0","33.0","35.0","40.0","45.0"],"group":"None"}],"TECT":[{"dec":336.4926316796325,"inc":40.14761631058322,"MAD":3.433334894722365,"cm":[-1.8947806286936004e-14,-5.887354096297974e-14,-1.7594391552154862e-14],"intensity":930.7772439235371,"type":"dir","forced":true,"remark":"","origin":false,"nSteps":8,"minStep":"20.0","maxStep":"45.0","steps":["20.0","23.0","25.0","30.0","33.0","35.0","40.0","45.0"],"group":"None"}],"interpreted":true,"name":"SS27.19A","coreAzi":308,"coreDip":31,"bedStrike":213,"bedDip":25,"data":[{"visible":true,"include":false,"step":"0.0","x":-700.2380952380952,"y":564.1238095238095,"z":1012.2857142857143,"a95":"0.99","info":"04/10/2015 at 16:56:03"},{"visible":true,"include":false,"step":"10.0","x":-518.9047619047619,"y":378.6666666666667,"z":735.7428571428571,"a95":"0.99","info":"04/10/2015 at 16:56:03"},{"visible":true,"include":false,"step":"15.0","x":-415.91428571428577,"y":314.1333333333333,"z":609.0666666666666,"a95":"0.99","info":"04/10/2015 at 16:56:03"},{"visible":true,"include":true,"step":"20.0","x":-368.4095238095238,"y":298.76190476190476,"z":482.8857142857143,"a95":"0.99","info":"04/10/2015 at 16:56:03"},{"visible":true,"include":true,"step":"23.0","x":-329.3809523809524,"y":230.66666666666666,"z":425.02857142857147,"a95":"0.99","info":"04/10/2015 at 16:56:03"},{"visible":true,"include":true,"step":"25.0","x":-316.1333333333333,"y":198.78095238095236,"z":390.447619047619,"a95":"0.99","info":"04/10/2015 at 16:56:03"},{"visible":true,"include":true,"step":"30.0","x":-216.61904761904762,"y":178.22857142857143,"z":331.51428571428573,"a95":"0.99","info":"04/10/2015 at 16:56:03"},{"visible":true,"include":true,"step":"33.0","x":-222.06666666666666,"y":169.36190476190475,"z":304.8285714285714,"a95":"0.99","info":"04/10/2015 at 16:56:03"},{"visible":true,"include":true,"step":"35.0","x":-227.34285714285713,"y":137.7904761904762,"z":274.34285714285716,"a95":"0.99","info":"04/10/2015 at 16:56:03"},{"visible":true,"include":true,"step":"40.0","x":-165.44761904761904,"y":77.4,"z":253.66666666666666,"a95":"0.99","info":"04/10/2015 at 16:56:03"},{"visible":true,"include":true,"step":"45.0","x":-157.8095238095238,"y":89.15142857142857,"z":179.65714285714287,"a95":"0.99","info":"04/10/2015 at 16:56:03"},{"visible":true,"include":false,"step":"50.0","x":-149.56190476190477,"y":-0.6124761904761905,"z":152.0857142857143,"a95":"0.99","info":"04/10/2015 at 16:56:03"},{"visible":true,"include":false,"step":"60.0","x":-117.07619047619048,"y":34.70095238095238,"z":135.37142857142857,"a95":"0.99","info":"04/10/2015 at 16:56:03"},{"visible":true,"include":false,"step":"70.0","x":-90.79238095238095,"y":18.906666666666666,"z":90.61714285714285,"a95":"0.99","info":"04/10/2015 at 16:56:03"}],"demagType":"Unknown","patch":1.1,"format":"Unknown","strat":null},{"version":"v1.1.0","exported":"2016-10-11T13:52:36.744Z","info":"0","GEO":[{"dec":355.6516484372775,"inc":51.839626247659346,"MAD":2.9897469299970347,"cm":[2.7068294695622863e-15,-5.075305255429287e-16,0],"intensity":992.7066369880787,"type":"dir","forced":true,"remark":"","origin":false,"nSteps":6,"minStep":"100","maxStep":"250","steps":["100","150","180","210","230","250"],"group":"None"}],"TECT":[{"dec":339.16333678455754,"inc":33.655919023383966,"MAD":2.9897469299969783,"cm":[1.2180732613030288e-14,0,1.3534147347811431e-15],"intensity":992.7066369880789,"type":"dir","forced":true,"remark":"","origin":false,"nSteps":6,"minStep":"100","maxStep":"250","steps":["100","150","180","210","230","250"],"group":"None"}],"interpreted":true,"name":"SS27.20A","coreAzi":315,"coreDip":35,"bedStrike":213,"bedDip":25,"data":[{"visible":true,"include":false,"step":"20","x":-535.8095238095239,"y":548.2857142857143,"z":1009.8095238095239,"a95":"2","info":"\"15-06-15\" at \"08:59\""},{"visible":true,"include":true,"step":"100","x":-294.2857142857143,"y":315.42857142857144,"z":685.1428571428571,"a95":"2.2","info":"\"15-06-15\" at \"12:49\""},{"visible":true,"include":true,"step":"150","x":-226.66666666666666,"y":238.28571428571428,"z":476.85714285714283,"a95":"2.3","info":"\"15-06-16\" at \"07:48\""},{"visible":true,"include":true,"step":"180","x":-86.57142857142857,"y":93.23809523809524,"z":214.66666666666666,"a95":"2.5","info":"\"15-06-16\" at \"10:42\""},{"visible":true,"include":true,"step":"210","x":-112,"y":110.95238095238095,"z":217.23809523809524,"a95":"2.3","info":"\"15-06-16\" at \"14:12\""},{"visible":true,"include":true,"step":"230","x":-72.95238095238095,"y":114.19047619047619,"z":124.76190476190476,"a95":"2.6","info":"\"15-06-17\" at \"17:44\""},{"visible":true,"include":true,"step":"250","x":-67.33333333333333,"y":66.95238095238095,"z":156.57142857142858,"a95":"2.7","info":"\"15-06-17\" at \"20:31\""},{"visible":true,"include":false,"step":"270","x":-64.95238095238095,"y":90.76190476190476,"z":163.9047619047619,"a95":"2.4","info":"\"15-06-25\" at \"09:19\""},{"visible":true,"include":false,"step":"300","x":-61.61904761904762,"y":80.47619047619048,"z":128.1904761904762,"a95":"2.3","info":"\"15-06-25\" at \"12:45\""},{"visible":true,"include":false,"step":"320","x":-34,"y":67.71428571428571,"z":164.95238095238096,"a95":"2.5","info":"\"15-06-25\" at \"16:15\""},{"visible":true,"include":false,"step":"340","x":-62.57142857142857,"y":64.0952380952381,"z":202.0952380952381,"a95":"2.5","info":"\"15-06-25\" at \"19:55\""}],"demagType":"Unknown","patch":1.1,"format":"Unknown","strat":null}]
