# Supplementary material for: Paleomagnetic constraints on the timing and distribution of Cenozoic rotations in Central and Eastern Anatolia
Source: Copernicus journal article supplement (doi:10.5194/se-9-295-2018), 2018-03-21
Supplement: Supplementary file 2 [file se-9-295-2018-supplement.zip › se-2017-66_DATA_dir files/dir files Sivas/SS28.dir]

[{"info":"0","GEO":[{"dec":1.770628569194173,"inc":62.7648798085518,"MAD":1.7877745024311353,"cm":[4.547473508864641e-13,-1.8758328224066645e-12,0],"intensity":11806.498769630178,"type":"dir","forced":true,"remark":"","origin":false,"nSteps":5,"minStep":"100","maxStep":"230","steps":["100","150","180","210","230"]}],"TECT":[{"dec":332.5362136913412,"inc":41.43586216395824,"MAD":1.7877745024311769,"cm":[3.183231456205249e-12,3.979039320256561e-12,-9.094947017729282e-13],"intensity":11806.498769630178,"type":"dir","forced":true,"remark":"","origin":false,"nSteps":5,"minStep":"100","maxStep":"230","steps":["100","150","180","210","230"]}],"interpreted":true,"name":"SS28.01A","coreAzi":273,"coreDip":51,"bedStrike":210,"bedDip":30,"data":[{"visible":true,"include":false,"step":"20","x":-102138,"y":100322,"z":106401,"a95":"1.8","info":"\"15-06-15\" at \"09:03\""},{"visible":true,"include":true,"step":"100","x":-54419,"y":46243,"z":70302,"a95":"2","info":"\"15-06-15\" at \"12:51\""},{"visible":true,"include":true,"step":"150","x":-33812,"y":28979,"z":43833,"a95":"2","info":"\"15-06-16\" at \"07:50\""},{"visible":true,"include":true,"step":"180","x":-22312,"y":16235,"z":24618,"a95":"2.2","info":"\"15-06-16\" at \"10:43\""},{"visible":true,"include":true,"step":"210","x":-19552,"y":16297,"z":24063,"a95":"2","info":"\"15-06-16\" at \"14:14\""},{"visible":true,"include":true,"step":"230","x":-15266,"y":8773,"z":16216,"a95":"2.1","info":"\"15-06-17\" at \"17:46\""},{"visible":true,"include":false,"step":"250","x":-13032,"y":8412,"z":13505,"a95":"2.2","info":"\"15-06-17\" at \"20:32\""},{"visible":true,"include":false,"step":"280","x":-10302,"y":8801,"z":7053,"a95":"2.3","info":"\"15-06-18\" at \"06:24\""},{"visible":true,"include":false,"step":"300","x":-9425,"y":7177,"z":14503,"a95":"2.3","info":"\"15-06-18\" at \"09:06\""},{"visible":true,"include":false,"step":"320","x":-7097,"y":4467,"z":9931,"a95":"2.3","info":"\"15-06-18\" at \"13:08\""},{"visible":true,"include":false,"step":"340","x":-9891,"y":3945,"z":6485,"a95":"2.6","info":"\"15-06-19\" at \"08:45\""},{"visible":true,"include":false,"step":"360","x":-8599,"y":6052,"z":8238,"a95":"2.1","info":"\"15-06-19\" at \"12:11\""},{"visible":true,"include":false,"step":"390","x":-10211,"y":7087,"z":5759,"a95":"2","info":"\"15-06-20\" at \"08:56\""},{"visible":true,"include":false,"step":"420","x":-10205,"y":7506,"z":5751,"a95":"2.2","info":"\"15-06-20\" at \"11:32\""},{"visible":true,"include":false,"step":"450","x":-6510,"y":-1630,"z":10750,"a95":"3.9","info":"\"15-06-20\" at \"15:08\""}]},{"info":"0","GEO":[{"dec":352.7361531784952,"inc":53.18824337042199,"MAD":2.982068458707056,"cm":[2.7000623958883807e-12,1.453592801681225e-11,0],"intensity":35385.65142479887,"type":"dir","forced":true,"remark":"","origin":false,"nSteps":6,"minStep":"100","maxStep":"250","steps":["100","150","180","210","230","250"]}],"TECT":[{"dec":333.71975234904846,"inc":30.793619357495874,"MAD":2.9820684587070514,"cm":[3.510081114654895e-12,-3.410605131648481e-12,-1.5916157281026244e-12],"intensity":35385.65142479887,"type":"dir","forced":true,"remark":"","origin":false,"nSteps":6,"minStep":"100","maxStep":"250","steps":["100","150","180","210","230","250"]}],"interpreted":true,"name":"SS28.06A","coreAzi":332,"coreDip":53,"bedStrike":210,"bedDip":30,"data":[{"visible":true,"include":false,"step":"20","x":7334,"y":135060,"z":601248,"a95":"2.3","info":"\"15-06-15\" at \"09:07\""},{"visible":true,"include":true,"step":"100","x":-19835,"y":81930,"z":355076,"a95":"2.4","info":"\"15-06-15\" at \"12:52\""},{"visible":true,"include":true,"step":"150","x":-3937,"y":39525,"z":196394,"a95":"2.5","info":"\"15-06-16\" at \"07:52\""},{"visible":true,"include":true,"step":"180","x":4715,"y":12246,"z":111416,"a95":"2.4","info":"\"15-06-16\" at \"10:45\""},{"visible":true,"include":true,"step":"210","x":6757,"y":18421,"z":86628,"a95":"2.4","info":"\"15-06-16\" at \"14:17\""},{"visible":true,"include":true,"step":"230","x":5714,"y":14946,"z":41630,"a95":"2.6","info":"\"15-06-17\" at \"17:48\""},{"visible":true,"include":true,"step":"250","x":-6621,"y":-813,"z":6544,"a95":"11.1","info":"\"15-06-17\" at \"20:34\""},{"visible":true,"include":false,"step":"280","x":1590,"y":3283,"z":2212,"a95":"10.2","info":"\"15-06-18\" at \"06:27\""},{"visible":true,"include":false,"step":"300","x":2315,"y":610,"z":7355,"a95":"6.3","info":"\"15-06-18\" at \"09:08\""},{"visible":true,"include":false,"step":"320","x":9808,"y":-3562,"z":16960,"a95":"3.9","info":"\"15-06-18\" at \"13:10\""},{"visible":true,"include":false,"step":"340","x":-3485,"y":-2262,"z":-60,"a95":"4.6","info":"\"15-06-19\" at \"08:51\""},{"visible":true,"include":false,"step":"360","x":3546,"y":3689,"z":6239,"a95":"2.8","info":"\"15-06-19\" at \"12:14\""},{"visible":true,"include":false,"step":"390","x":827,"y":690,"z":-3423,"a95":"4.9","info":"\"15-06-20\" at \"09:01\""},{"visible":true,"include":false,"step":"420","x":-6912,"y":1695,"z":-4992,"a95":"4.2","info":"\"15-06-20\" at \"11:36\""},{"visible":true,"include":false,"step":"450","x":-3152,"y":-5103,"z":-22520,"a95":"3.3","info":"\"15-06-20\" at \"15:09\""}]},{"info":"0","GEO":[{"dec":359.00208776503194,"inc":53.87035627347303,"MAD":4.311901516715087,"cm":[65148.469943219956,13799.799526439701,105143.50065151013],"intensity":26010.82139934225,"type":"dir","forced":false,"remark":"","origin":false,"nSteps":6,"minStep":"100","maxStep":"250","steps":["100","150","180","210","230","250"]}],"TECT":[{"dec":337.1600987820133,"inc":33.20580306885236,"MAD":4.3119015167151025,"cm":[90052.84877352108,-29335.849938584637,80745.3135997431],"intensity":26010.821399342258,"type":"dir","forced":false,"remark":"","origin":false,"nSteps":6,"minStep":"100","maxStep":"250","steps":["100","150","180","210","230","250"]}],"interpreted":true,"name":"SS28.10A","coreAzi":6,"coreDip":40,"bedStrike":210,"bedDip":30,"data":[{"visible":true,"include":false,"step":"20","x":-119020,"y":-15509,"z":572024,"a95":"2.4","info":"\"15-06-15\" at \"09:11\""},{"visible":true,"include":true,"step":"100","x":-81406,"y":-7216,"z":288239,"a95":"2.4","info":"\"15-06-15\" at \"12:54\""},{"visible":true,"include":true,"step":"150","x":-50486,"y":902,"z":179088,"a95":"2.6","info":"\"15-06-16\" at \"07:53\""},{"visible":true,"include":true,"step":"180","x":-37246,"y":9145,"z":110148,"a95":"2.6","info":"\"15-06-16\" at \"10:47\""},{"visible":true,"include":true,"step":"210","x":-26003,"y":22245,"z":64763,"a95":"2.6","info":"\"15-06-16\" at \"14:18\""},{"visible":true,"include":true,"step":"230","x":-20552,"y":14548,"z":43487,"a95":"2.8","info":"\"15-06-17\" at \"17:50\""},{"visible":true,"include":true,"step":"250","x":-12128,"y":1862,"z":24214,"a95":"3.9","info":"\"15-06-17\" at \"20:35\""},{"visible":true,"include":false,"step":"280","x":-4239,"y":7284,"z":6509,"a95":"4.2","info":"\"15-06-18\" at \"06:29\""},{"visible":true,"include":false,"step":"300","x":-4087,"y":-6553,"z":10888,"a95":"5","info":"\"15-06-18\" at \"09:14\""},{"visible":true,"include":false,"step":"320","x":-11453,"y":6028,"z":5536,"a95":"3.2","info":"\"15-06-18\" at \"13:12\""},{"visible":true,"include":false,"step":"340","x":-10160,"y":2331,"z":7956,"a95":"3.8","info":"\"15-06-19\" at \"08:53\""},{"visible":true,"include":false,"step":"360","x":-8497,"y":11388,"z":-1286,"a95":"2.8","info":"\"15-06-19\" at \"12:16\""},{"visible":true,"include":false,"step":"390","x":-6905,"y":8814,"z":1883,"a95":"2.1","info":"\"15-06-20\" at \"09:04\""},{"visible":true,"include":false,"step":"420","x":-10038,"y":12262,"z":-4569,"a95":"2.6","info":"\"15-06-20\" at \"11:38\""},{"visible":true,"include":false,"step":"450","x":-12934,"y":13401,"z":-16460,"a95":"2.5","info":"\"15-06-20\" at \"15:11\""}]},{"info":"0","GEO":[{"dec":9.577688595385155,"inc":45.15282110102751,"MAD":4.10402723599387,"cm":[0,2.7284841053187847e-12,0],"intensity":38236.64940693001,"type":"dir","forced":true,"remark":"","origin":false,"nSteps":8,"minStep":"100","maxStep":"300","steps":["100","150","180","210","230","250","280","300"]}],"TECT":[{"dec":14.188430602149367,"inc":1.1817050933127184,"MAD":4.104027235993914,"cm":[-8.640199666842818e-12,8.284928298962768e-12,4.547473508864641e-13],"intensity":38236.64940693,"type":"dir","forced":true,"remark":"","origin":false,"nSteps":8,"minStep":"100","maxStep":"300","steps":["100","150","180","210","230","250","280","300"]}],"interpreted":true,"name":"SS28.16A","coreAzi":345,"coreDip":29,"bedStrike":295,"bedDip":45,"data":[{"visible":true,"include":false,"step":"20","x":-286243,"y":150576,"z":544484,"a95":"2.2","info":"\"15-06-15\" at \"09:14\""},{"visible":true,"include":true,"step":"100","x":-114209,"y":94104,"z":321137,"a95":"2.3","info":"\"15-06-15\" at \"12:57\""},{"visible":true,"include":true,"step":"150","x":-75534,"y":65230,"z":214166,"a95":"2.3","info":"\"15-06-16\" at \"07:55\""},{"visible":true,"include":true,"step":"180","x":-42972,"y":60150,"z":132098,"a95":"2.3","info":"\"15-06-16\" at \"10:48\""},{"visible":true,"include":true,"step":"210","x":-37475,"y":46448,"z":92601,"a95":"2.4","info":"\"15-06-16\" at \"14:20\""},{"visible":true,"include":true,"step":"230","x":-25622,"y":45565,"z":115819,"a95":"2.4","info":"\"15-06-17\" at \"17:51\""},{"visible":true,"include":true,"step":"250","x":-14047,"y":19998,"z":41344,"a95":"3.1","info":"\"15-06-17\" at \"20:39\""},{"visible":true,"include":true,"step":"280","x":-14042,"y":12740,"z":67464,"a95":"2.7","info":"\"15-06-18\" at \"06:34\""},{"visible":true,"include":true,"step":"300","x":-14825,"y":3414,"z":46328,"a95":"2.9","info":"\"15-06-18\" at \"09:17\""},{"visible":true,"include":false,"step":"320","x":-1826,"y":-146,"z":25448,"a95":"3.2","info":"\"15-06-18\" at \"13:15\""},{"visible":true,"include":false,"step":"340","x":-976,"y":-406,"z":15512,"a95":"4.1","info":"\"15-06-19\" at \"08:55\""},{"visible":true,"include":false,"step":"360","x":-2765,"y":-2996,"z":24716,"a95":"3.4","info":"\"15-06-19\" at \"12:18\""},{"visible":true,"include":false,"step":"390","x":-4347,"y":10302,"z":14156,"a95":"3.7","info":"\"15-06-20\" at \"09:06\""},{"visible":true,"include":false,"step":"420","x":-16448,"y":11709,"z":16093,"a95":"2.9","info":"\"15-06-20\" at \"11:40\""},{"visible":true,"include":false,"step":"450","x":-14144,"y":6236,"z":-916,"a95":"5.6","info":"\"15-06-20\" at \"15:13\""}]},{"info":"0","GEO":[{"dec":357.48187287931904,"inc":49.193636986166844,"MAD":5.056214368302275,"cm":[-1.4708234630234074e-12,-1.1574741165532032e-11,0],"intensity":29582.003707898984,"type":"dir","forced":true,"remark":"","origin":false,"nSteps":9,"minStep":"100","maxStep":"320","steps":["100","150","180","210","230","250","280","300","320"]}],"TECT":[{"dec":7.240394158170375,"inc":8.156715673806062,"MAD":5.056214368302295,"cm":[1.5916157281026244e-12,-2.4158453015843406e-11,7.275957614183426e-12],"intensity":29582.00370789899,"type":"dir","forced":true,"remark":"","origin":false,"nSteps":9,"minStep":"100","maxStep":"320","steps":["100","150","180","210","230","250","280","300","320"]}],"interpreted":true,"name":"SS28.18A","coreAzi":345,"coreDip":22,"bedStrike":295,"bedDip":44,"data":[{"visible":true,"include":false,"step":"20","x":-321218,"y":78118,"z":522193,"a95":"2.1","info":"\"15-06-15\" at \"09:16\""},{"visible":true,"include":true,"step":"100","x":-131987,"y":37043,"z":257784,"a95":"2.3","info":"\"15-06-15\" at \"12:59\""},{"visible":true,"include":true,"step":"150","x":-86616,"y":23905,"z":160169,"a95":"2.3","info":"\"15-06-16\" at \"07:56\""},{"visible":true,"include":true,"step":"180","x":-65974,"y":23500,"z":109261,"a95":"2.4","info":"\"15-06-16\" at \"10:50\""},{"visible":true,"include":true,"step":"210","x":-35611,"y":24058,"z":62300,"a95":"2.8","info":"\"15-06-16\" at \"14:23\""},{"visible":true,"include":true,"step":"230","x":-29695,"y":1982,"z":60736,"a95":"2.4","info":"\"15-06-17\" at \"17:54\""},{"visible":true,"include":true,"step":"250","x":-2663,"y":6941,"z":31120,"a95":"4.7","info":"\"15-06-17\" at \"20:41\""},{"visible":true,"include":true,"step":"280","x":-6317,"y":10787,"z":17478,"a95":"5.4","info":"\"15-06-18\" at \"06:37\""},{"visible":true,"include":true,"step":"300","x":-1412,"y":17284,"z":12453,"a95":"4.3","info":"\"15-06-18\" at \"09:19\""},{"visible":true,"include":true,"step":"320","x":-23616,"y":554,"z":8399,"a95":"3.7","info":"\"15-06-18\" at \"13:27\""},{"visible":true,"include":false,"step":"340","x":-3653,"y":1167,"z":3039,"a95":"7.7","info":"\"15-06-19\" at \"08:58\""},{"visible":true,"include":false,"step":"360","x":-3001,"y":7626,"z":9345,"a95":"4.2","info":"\"15-06-19\" at \"12:21\""},{"visible":true,"include":false,"step":"390","x":419,"y":10025,"z":-8206,"a95":"4.4","info":"\"15-06-20\" at \"09:07\""},{"visible":true,"include":false,"step":"420","x":-7202,"y":10584,"z":-49,"a95":"3.9","info":"\"15-06-20\" at \"11:47\""},{"visible":true,"include":false,"step":"450","x":-12797,"y":6717,"z":8320,"a95":"8.1","info":"\"15-06-20\" at \"15:19\""}]}]
