# Supplementary material for: Paleomagnetic constraints on the timing and distribution of Cenozoic rotations in Central and Eastern Anatolia
Source: Copernicus journal article supplement (doi:10.5194/se-9-295-2018), 2018-03-21
Supplement: Supplementary file 2 [file se-9-295-2018-supplement.zip › se-2017-66_DATA_dir files/dir files Sivas/SS29.dir]

[{"version":"v1.1.0","exported":"2017-05-22T11:43:56.908Z","info":"0","GEO":[{"dec":173.2418585662433,"inc":-17.86617095849458,"MAD":9.02083957635801,"cm":[-3.552713678800501e-15,-5.773159728050814e-15,0],"intensity":138.92125373472925,"type":"dir","forced":true,"remark":"","origin":false,"nSteps":3,"minStep":"180","maxStep":"230","steps":["180","210","230"],"group":"None","version":"v1.1.0"}],"TECT":[{"dec":196.04622947213406,"inc":-31.58301174732338,"MAD":9.020839576358041,"cm":[-5.329070518200751e-15,-1.2378986724570495e-14,5.329070518200751e-15],"intensity":138.92125373472925,"type":"dir","forced":true,"remark":"","origin":false,"nSteps":3,"minStep":"180","maxStep":"230","steps":["180","210","230"],"group":"None","version":"v1.1.0"}],"interpreted":true,"name":"SS29.01A","coreAzi":199,"coreDip":30,"bedStrike":20,"bedDip":48,"data":[{"visible":false,"include":false,"step":"20","x":68,"y":75.33333333333333,"z":67.52380952380952,"a95":"2.2","info":"\"15-06-15\" at \"09:23\""},{"visible":true,"include":false,"step":"100","x":79.80952380952381,"y":-19.61904761904762,"z":74.19047619047619,"a95":"2.5","info":"\"15-06-15\" at \"13:01\""},{"visible":true,"include":false,"step":"150","x":61.523809523809526,"y":-32.476190476190474,"z":80,"a95":"2.9","info":"\"15-06-16\" at \"07:59\""},{"visible":true,"include":true,"step":"180","x":65.4095238095238,"y":-26.676190476190477,"z":52.333333333333336,"a95":"2.8","info":"\"15-06-16\" at \"10:52\""},{"visible":true,"include":true,"step":"210","x":36.48571428571429,"y":-25.571428571428573,"z":33.2952380952381,"a95":"4.1","info":"\"15-06-16\" at \"14:25\""},{"visible":true,"include":true,"step":"230","x":29.885714285714286,"y":-34.46666666666666,"z":28.16190476190476,"a95":"5.8","info":"\"15-06-17\" at \"17:56\""},{"visible":true,"include":false,"step":"250","x":-12.97142857142857,"y":-24.16190476190476,"z":40.00952380952381,"a95":"8.5","info":"\"15-06-17\" at \"20:45\""}],"demagType":"Unknown","patch":1.1,"format":"Unknown","strat":null},{"version":"v1.1.0","exported":"2017-05-22T11:43:56.908Z","info":"5","GEO":[{"dec":178.21775815026933,"inc":-28.296600381653313,"MAD":12.86877138624829,"cm":[-3.383536836952858e-16,-2.1992989440193578e-15,0],"intensity":86.94507784304865,"type":"dir","forced":true,"remark":"","origin":false,"nSteps":10,"minStep":"10.0","maxStep":"50.0","steps":["10.0","15.0","20.0","23.0","25.0","30.0","33.0","40.0","45.0","50.0"],"group":"None"}],"TECT":[{"dec":209.28318267794253,"inc":-34.05618757552827,"MAD":12.86877138624832,"cm":[-2.3684757858670005e-15,-5.392511833893617e-16,1.3534147347811431e-15],"intensity":86.94507784304865,"type":"dir","forced":true,"remark":"","origin":false,"nSteps":10,"minStep":"10.0","maxStep":"50.0","steps":["10.0","15.0","20.0","23.0","25.0","30.0","33.0","40.0","45.0","50.0"],"group":"None"}],"interpreted":true,"name":"SS29.04A","coreAzi":189,"coreDip":34,"bedStrike":20,"bedDip":48,"data":[{"visible":false,"include":false,"step":"0.0","x":47.11523809523809,"y":12.599047619047619,"z":18.316190476190474,"a95":"0.99","info":"25/06/2015 at 23:58:53"},{"visible":true,"include":true,"step":"10.0","x":69.12095238095237,"y":-5.352285714285714,"z":20.163809523809523,"a95":"0.99","info":"25/06/2015 at 23:58:53"},{"visible":true,"include":true,"step":"15.0","x":52.55904761904762,"y":2.552,"z":26.04190476190476,"a95":"0.99","info":"25/06/2015 at 23:58:53"},{"visible":true,"include":true,"step":"20.0","x":44.65238095238095,"y":-14.69142857142857,"z":23.45714285714286,"a95":"0.99","info":"25/06/2015 at 23:58:53"},{"visible":true,"include":true,"step":"23.0","x":55.24666666666667,"y":-6.931904761904762,"z":15.35142857142857,"a95":"0.99","info":"25/06/2015 at 23:58:53"},{"visible":true,"include":true,"step":"25.0","x":44.375238095238096,"y":-11.242857142857142,"z":24.867619047619048,"a95":"0.99","info":"25/06/2015 at 23:58:53"},{"visible":true,"include":true,"step":"30.0","x":27.17238095238095,"y":-8.040095238095239,"z":30.801904761904762,"a95":"0.99","info":"25/06/2015 at 23:58:53"},{"visible":true,"include":true,"step":"33.0","x":40.39142857142857,"y":-15.032380952380953,"z":26.792380952380952,"a95":"0.99","info":"25/06/2015 at 23:58:53"},{"visible":false,"include":false,"step":"35.0","x":19.575238095238095,"y":-17.607619047619046,"z":11.332380952380952,"a95":"0.99","info":"25/06/2015 at 23:58:53"},{"visible":true,"include":true,"step":"40.0","x":25.959047619047617,"y":-10.644761904761904,"z":22.12952380952381,"a95":"0.99","info":"25/06/2015 at 23:58:53"},{"visible":true,"include":true,"step":"45.0","x":23.823809523809523,"y":-9.005428571428572,"z":27.800952380952385,"a95":"0.99","info":"25/06/2015 at 23:58:53"},{"visible":true,"include":true,"step":"50.0","x":12.672380952380953,"y":-10.662857142857142,"z":4.591238095238095,"a95":"0.99","info":"25/06/2015 at 23:58:53"},{"visible":false,"include":false,"step":"55.0","x":7.835238095238095,"y":1.4256190476190476,"z":17.428571428571427,"a95":"0.99","info":"25/06/2015 at 23:58:53"},{"visible":false,"include":false,"step":"60.0","x":14.932380952380951,"y":15.399999999999999,"z":12.97142857142857,"a95":"0.99","info":"25/06/2015 at 23:58:53"},{"visible":false,"include":false,"step":"65.0","x":1.0042857142857142,"y":5.155047619047619,"z":-5.336095238095238,"a95":"0.99","info":"25/06/2015 at 23:58:53"},{"visible":false,"include":false,"step":"70.0","x":-1.2245714285714286,"y":3.7942857142857145,"z":1.1906666666666668,"a95":"0.99","info":"25/06/2015 at 23:58:53"},{"visible":false,"include":false,"step":"80.0","x":-4.941238095238096,"y":-9.026190476190477,"z":10.872380952380952,"a95":"0.99","info":"25/06/2015 at 23:58:53"}],"demagType":"Unknown","patch":1.1,"format":"Unknown","strat":null},{"version":"v1.1.0","exported":"2017-05-22T11:43:56.908Z","info":"0","GEO":[],"TECT":[],"interpreted":false,"name":"SS29.08A","coreAzi":163,"coreDip":41,"bedStrike":20,"bedDip":48,"data":[{"visible":false,"include":false,"step":"20","x":-2466,"y":-398.57142857142856,"z":658.1904761904761,"a95":"2.2","info":"\"15-06-15\" at \"09:26\""},{"visible":true,"include":true,"step":"100","x":-580.8571428571429,"y":-45.80952380952381,"z":265.04761904761904,"a95":"1.7","info":"\"15-06-15\" at \"13:03\""},{"visible":true,"include":true,"step":"150","x":-359.04761904761904,"y":-36.476190476190474,"z":225.71428571428572,"a95":"2","info":"\"15-06-16\" at \"08:01\""},{"visible":true,"include":true,"step":"180","x":-361.04761904761904,"y":-65.42857142857143,"z":179.14285714285714,"a95":"1.8","info":"\"15-06-16\" at \"10:54\""},{"visible":true,"include":true,"step":"210","x":50.57142857142857,"y":32,"z":83.33333333333333,"a95":"2.6","info":"\"15-06-16\" at \"14:27\""},{"visible":true,"include":true,"step":"230","x":61.62857142857143,"y":20.16190476190476,"z":66.25714285714287,"a95":"3.6","info":"\"15-06-17\" at \"17:57\""},{"visible":false,"include":false,"step":"250","x":7.876190476190477,"y":24.304761904761904,"z":72.66666666666667,"a95":"4.4","info":"\"15-06-17\" at \"20:47\""}],"demagType":"Unknown","patch":1.1,"format":"Unknown","strat":null},{"version":"v1.1.0","exported":"2017-05-22T11:43:56.908Z","info":"6","GEO":[],"TECT":[],"interpreted":false,"name":"SS29.11A","coreAzi":273,"coreDip":37,"bedStrike":20,"bedDip":48,"data":[{"visible":true,"include":false,"step":"0.0","x":-378.2190476190476,"y":168.94285714285715,"z":216.63809523809522,"a95":"0.99","info":"25/06/2015 at 23:58:53"},{"visible":true,"include":false,"step":"10.0","x":-318.447619047619,"y":132.2761904761905,"z":175.4,"a95":"0.99","info":"25/06/2015 at 23:58:53"},{"visible":true,"include":false,"step":"15.0","x":-286.8952380952381,"y":138.93333333333334,"z":153.74285714285713,"a95":"0.99","info":"25/06/2015 at 23:58:53"},{"visible":true,"include":false,"step":"20.0","x":-225.2761904761905,"y":130.88571428571427,"z":130.8190476190476,"a95":"0.99","info":"25/06/2015 at 23:58:53"},{"visible":true,"include":true,"step":"23.0","x":-226.6095238095238,"y":114.35238095238095,"z":112.80952380952381,"a95":"0.99","info":"25/06/2015 at 23:58:53"},{"visible":true,"include":true,"step":"25.0","x":-207.74285714285716,"y":88.74952380952381,"z":109.81904761904761,"a95":"0.99","info":"25/06/2015 at 23:58:53"},{"visible":true,"include":true,"step":"30.0","x":-184.25714285714287,"y":88.12666666666667,"z":94.41047619047619,"a95":"0.99","info":"25/06/2015 at 23:58:53"},{"visible":true,"include":true,"step":"33.0","x":-192.33333333333334,"y":88.95714285714286,"z":91.84,"a95":"0.99","info":"25/06/2015 at 23:58:53"},{"visible":false,"include":false,"step":"35.0","x":-180.0952380952381,"y":58.87809523809524,"z":75.96000000000001,"a95":"0.99","info":"25/06/2015 at 23:58:53"},{"visible":true,"include":true,"step":"40.0","x":-194.8190476190476,"y":90.47999999999999,"z":78.7647619047619,"a95":"0.99","info":"25/06/2015 at 23:58:53"},{"visible":true,"include":true,"step":"45.0","x":-164.8952380952381,"y":78.1447619047619,"z":75.67428571428572,"a95":"0.99","info":"25/06/2015 at 23:58:53"},{"visible":false,"include":false,"step":"50.0","x":-139.58095238095237,"y":16.454285714285714,"z":75.84666666666666,"a95":"0.99","info":"25/06/2015 at 23:58:53"},{"visible":true,"include":true,"step":"55.0","x":-136.84761904761905,"y":68.32190476190476,"z":75.21333333333334,"a95":"0.99","info":"25/06/2015 at 23:58:53"},{"visible":true,"include":true,"step":"60.0","x":-135.16190476190476,"y":65.59428571428572,"z":54.354285714285716,"a95":"0.99","info":"25/06/2015 at 23:58:53"},{"visible":false,"include":false,"step":"65.0","x":-114.4,"y":27.089523809523808,"z":43.78095238095238,"a95":"0.99","info":"25/06/2015 at 23:58:53"},{"visible":true,"include":true,"step":"70.0","x":-98.84761904761906,"y":41.79333333333333,"z":59.671428571428564,"a95":"0.99","info":"25/06/2015 at 23:58:53"},{"visible":false,"include":false,"step":"80.0","x":-158.53333333333333,"y":26.946666666666665,"z":34.084761904761905,"a95":"0.99","info":"25/06/2015 at 23:58:53"}],"demagType":"Unknown","patch":1.1,"format":"Unknown","strat":null},{"version":"v1.1.0","exported":"2017-05-22T11:43:56.908Z","info":"7","GEO":[{"dec":190.09593077175558,"inc":-43.63952231802571,"MAD":8.893642131697344,"cm":[-2.7068294695622863e-15,0,0],"intensity":1101.6784698683316,"type":"dir","forced":true,"remark":"","origin":false,"nSteps":12,"minStep":"20.0","maxStep":"65.0","steps":["20.0","23.0","25.0","30.0","33.0","35.0","40.0","45.0","50.0","55.0","60.0","65.0"],"group":"None"}],"TECT":[{"dec":231.07129045356268,"inc":-33.66132047270108,"MAD":8.893642131697314,"cm":[2.4361465226060576e-14,-6.767073673905716e-15,1.3534147347811431e-15],"intensity":1101.6784698683316,"type":"dir","forced":true,"remark":"","origin":false,"nSteps":12,"minStep":"20.0","maxStep":"65.0","steps":["20.0","23.0","25.0","30.0","33.0","35.0","40.0","45.0","50.0","55.0","60.0","65.0"],"group":"None"}],"interpreted":true,"name":"SS29.15A","coreAzi":265,"coreDip":35,"bedStrike":20,"bedDip":48,"data":[{"visible":true,"include":false,"step":"0.0","x":155.4952380952381,"y":-720.5714285714286,"z":7.670761904761905,"a95":"0.99","info":"25/06/2015 at 23:58:53"},{"visible":true,"include":false,"step":"10.0","x":482.3619047619048,"y":-631.1428571428571,"z":-287.1047619047619,"a95":"0.99","info":"25/06/2015 at 23:58:53"},{"visible":true,"include":false,"step":"15.0","x":545.9428571428571,"y":-582.3428571428572,"z":-298.83809523809526,"a95":"0.99","info":"25/06/2015 at 23:58:53"},{"visible":true,"include":true,"step":"20.0","x":524.8190476190476,"y":-537.6,"z":-214.48571428571427,"a95":"0.99","info":"25/06/2015 at 23:58:53"},{"visible":true,"include":true,"step":"23.0","x":435.53333333333336,"y":-565.5809523809525,"z":-298.76190476190476,"a95":"0.99","info":"25/06/2015 at 23:58:53"},{"visible":true,"include":true,"step":"25.0","x":478.08571428571423,"y":-619.0761904761905,"z":-214.2,"a95":"0.99","info":"25/06/2015 at 23:58:53"},{"visible":true,"include":true,"step":"30.0","x":442.0190476190476,"y":-394.6,"z":-135.59047619047618,"a95":"0.99","info":"25/06/2015 at 23:58:53"},{"visible":true,"include":true,"step":"33.0","x":496.447619047619,"y":-411.74285714285713,"z":-87.15333333333334,"a95":"0.99","info":"25/06/2015 at 23:58:53"},{"visible":true,"include":true,"step":"35.0","x":441.60952380952375,"y":-419.1714285714286,"z":-137.75238095238097,"a95":"0.99","info":"25/06/2015 at 23:58:53"},{"visible":true,"include":true,"step":"40.0","x":330.35238095238094,"y":-396.4190476190476,"z":-27.533333333333335,"a95":"0.99","info":"25/06/2015 at 23:58:53"},{"visible":true,"include":true,"step":"45.0","x":381.2857142857143,"y":-251.86666666666665,"z":-154.64761904761903,"a95":"0.99","info":"25/06/2015 at 23:58:53"},{"visible":true,"include":true,"step":"50.0","x":278.9047619047619,"y":-269.9904761904762,"z":-136.9904761904762,"a95":"0.99","info":"25/06/2015 at 23:58:53"},{"visible":true,"include":true,"step":"55.0","x":242.36190476190478,"y":-190.5047619047619,"z":-42.57142857142857,"a95":"0.99","info":"25/06/2015 at 23:58:53"},{"visible":true,"include":true,"step":"60.0","x":254.0857142857143,"y":-186.26666666666665,"z":-64.05047619047619,"a95":"0.99","info":"25/06/2015 at 23:58:53"},{"visible":true,"include":true,"step":"65.0","x":166.67619047619047,"y":-303.7809523809524,"z":48.329523809523806,"a95":"0.99","info":"25/06/2015 at 23:58:53"},{"visible":false,"include":false,"step":"70.0","x":172.98095238095237,"y":-39.118095238095236,"z":28.800952380952385,"a95":"0.99","info":"25/06/2015 at 23:58:53"},{"visible":false,"include":false,"step":"80.0","x":109.17142857142856,"y":118.78095238095239,"z":-7.4667619047619045,"a95":"0.99","info":"25/06/2015 at 23:58:53"}],"demagType":"Unknown","patch":1.1,"format":"Unknown","strat":null},{"version":"v1.1.0","exported":"2017-05-22T11:43:56.908Z","info":"0","GEO":[{"dec":91.28102990411486,"inc":-24.751215342370436,"MAD":7.306529232452757,"cm":[-1.021405182655144e-14,5.329070518200751e-15,0],"intensity":720.8450759925926,"type":"GC","origin":false,"forced":true,"remark":"","nSteps":6,"minStep":"100","maxStep":"250","steps":["100","150","180","210","230","250"],"group":"None","version":"v1.1.0"}],"TECT":[{"dec":62.212175665133145,"inc":-66.82804870861277,"MAD":7.3065292324526565,"cm":[1.7541523789077473e-14,-7.993605777301127e-14,-7.993605777301127e-15],"intensity":720.8450759925925,"type":"GC","origin":false,"forced":true,"remark":"","nSteps":6,"minStep":"100","maxStep":"250","steps":["100","150","180","210","230","250"],"group":"None","version":"v1.1.0"}],"interpreted":true,"name":"SS29.18A","coreAzi":265,"coreDip":29,"bedStrike":20,"bedDip":48,"data":[{"visible":true,"include":false,"step":"20","x":-683.6190476190476,"y":-140.85714285714286,"z":209.61904761904762,"a95":"2","info":"\"15-06-15\" at \"09:28\""},{"visible":true,"include":true,"step":"100","x":246.95238095238096,"y":-753.8095238095239,"z":67.33333333333333,"a95":"1.5","info":"\"15-06-15\" at \"13:05\""},{"visible":true,"include":true,"step":"150","x":86.57142857142857,"y":-481.23809523809524,"z":18.857142857142858,"a95":"1.7","info":"\"15-06-16\" at \"08:02\""},{"visible":true,"include":true,"step":"180","x":80.19047619047619,"y":-491.3333333333333,"z":42.666666666666664,"a95":"1.7","info":"\"15-06-16\" at \"10:55\""},{"visible":true,"include":true,"step":"210","x":-98.66666666666667,"y":-162.76190476190476,"z":36.666666666666664,"a95":"3.6","info":"\"15-06-16\" at \"14:28\""},{"visible":true,"include":true,"step":"230","x":-99.52380952380952,"y":-152.66666666666666,"z":32,"a95":"4.2","info":"\"15-06-17\" at \"17:59\""},{"visible":true,"include":true,"step":"250","x":-167.23809523809524,"y":40.19047619047619,"z":-4,"a95":"4.9","info":"\"15-06-17\" at \"20:50\""}],"demagType":"Unknown","patch":1.1,"format":"Unknown","strat":null},{"version":"v1.1.0","exported":"2017-05-22T11:43:56.908Z","info":"8","GEO":[],"TECT":[],"interpreted":false,"name":"SS29.19A","coreAzi":215,"coreDip":17,"bedStrike":20,"bedDip":48,"data":[{"visible":true,"include":false,"step":"0.0","x":-861.9428571428571,"y":69.46095238095238,"z":-56.574285714285715,"a95":"0.99","info":"25/06/2015 at 23:58:53"},{"visible":true,"include":false,"step":"10.0","x":-732.0666666666666,"y":44.36190476190476,"z":-83.2752380952381,"a95":"0.99","info":"25/06/2015 at 23:58:53"},{"visible":true,"include":true,"step":"15.0","x":-651.3523809523809,"y":34.026666666666664,"z":-70.74857142857142,"a95":"0.99","info":"25/06/2015 at 23:58:53"},{"visible":true,"include":true,"step":"20.0","x":-552.7714285714286,"y":30.963809523809523,"z":-56.56952380952381,"a95":"0.99","info":"25/06/2015 at 23:58:53"},{"visible":true,"include":true,"step":"23.0","x":-511.06666666666666,"y":21.15142857142857,"z":-66.6,"a95":"0.99","info":"25/06/2015 at 23:58:53"},{"visible":true,"include":true,"step":"25.0","x":-490.49523809523805,"y":-9.732380952380952,"z":-55.1752380952381,"a95":"0.99","info":"25/06/2015 at 23:58:53"},{"visible":true,"include":true,"step":"30.0","x":-441.2190476190476,"y":3.148,"z":-48.42190476190476,"a95":"0.99","info":"25/06/2015 at 23:58:53"},{"visible":true,"include":true,"step":"33.0","x":-406.7714285714286,"y":2.7137142857142855,"z":-58.51428571428571,"a95":"0.99","info":"25/06/2015 at 23:58:53"},{"visible":true,"include":true,"step":"35.0","x":-392.99047619047616,"y":-6.819428571428571,"z":-48.39809523809524,"a95":"0.99","info":"25/06/2015 at 23:58:53"},{"visible":true,"include":true,"step":"40.0","x":-378.96190476190475,"y":2.191238095238095,"z":-46.287619047619046,"a95":"0.99","info":"25/06/2015 at 23:58:53"},{"visible":true,"include":true,"step":"45.0","x":-355.37142857142857,"y":9.431047619047618,"z":-44.80761904761905,"a95":"0.99","info":"25/06/2015 at 23:58:53"},{"visible":true,"include":true,"step":"50.0","x":-341.2,"y":-44.486666666666665,"z":-43.80571428571428,"a95":"0.99","info":"25/06/2015 at 23:58:53"},{"visible":true,"include":true,"step":"55.0","x":-320.95238095238096,"y":-4.46295238095238,"z":-29.253333333333337,"a95":"0.99","info":"25/06/2015 at 23:58:53"},{"visible":true,"include":true,"step":"60.0","x":-290.9047619047619,"y":-35.11333333333333,"z":-55.493333333333325,"a95":"0.99","info":"25/06/2015 at 23:58:53"},{"visible":true,"include":true,"step":"65.0","x":-283.4761904761905,"y":-31.144761904761904,"z":-50.77142857142857,"a95":"0.99","info":"25/06/2015 at 23:58:53"},{"visible":true,"include":true,"step":"70.0","x":-303.18095238095236,"y":-18.33238095238095,"z":-44.88666666666667,"a95":"0.99","info":"25/06/2015 at 23:58:53"},{"visible":true,"include":true,"step":"80.0","x":-299.81904761904764,"y":-27.626666666666665,"z":-59.67714285714286,"a95":"0.99","info":"25/06/2015 at 23:58:53"}],"demagType":"Unknown","patch":1.1,"format":"Unknown","strat":null},{"version":"v1.1.0","exported":"2017-05-22T11:43:56.908Z","info":"0","GEO":[],"TECT":[],"interpreted":false,"name":"SS29.20A","coreAzi":211,"coreDip":14,"bedStrike":20,"bedDip":48,"data":[{"visible":true,"include":false,"step":"0.0","x":-1561.904761904762,"y":113.8952380952381,"z":-408.31428571428575,"a95":"0.99","info":"04/10/2015 at 16:56:03"},{"visible":true,"include":true,"step":"10.0","x":-1044.3809523809523,"y":18.50761904761905,"z":-283.93333333333334,"a95":"0.99","info":"04/10/2015 at 16:56:03"},{"visible":true,"include":true,"step":"15.0","x":-832.7523809523809,"y":-6.940571428571429,"z":-217.9238095238095,"a95":"0.99","info":"04/10/2015 at 16:56:03"},{"visible":true,"include":true,"step":"20.0","x":-699.552380952381,"y":-24.82857142857143,"z":-184.6,"a95":"0.99","info":"04/10/2015 at 16:56:03"},{"visible":true,"include":true,"step":"23.0","x":-622.7333333333333,"y":-35.946666666666665,"z":-166.11428571428573,"a95":"0.99","info":"04/10/2015 at 16:56:03"},{"visible":true,"include":true,"step":"25.0","x":-570.7428571428571,"y":-43.24666666666666,"z":-141.47619047619048,"a95":"0.99","info":"04/10/2015 at 16:56:03"},{"visible":true,"include":true,"step":"30.0","x":-510.6666666666667,"y":-62.21333333333333,"z":-118.13333333333334,"a95":"0.99","info":"04/10/2015 at 16:56:03"},{"visible":true,"include":true,"step":"33.0","x":-470.0571428571429,"y":-53.93904761904762,"z":-111.46666666666667,"a95":"0.99","info":"04/10/2015 at 16:56:03"},{"visible":true,"include":true,"step":"35.0","x":-456.49523809523805,"y":-87.73904761904762,"z":-89.97999999999999,"a95":"0.99","info":"04/10/2015 at 16:56:03"},{"visible":true,"include":true,"step":"40.0","x":-422.23809523809524,"y":-78.3352380952381,"z":-85.63333333333333,"a95":"0.99","info":"04/10/2015 at 16:56:03"},{"visible":true,"include":true,"step":"45.0","x":-383.50476190476195,"y":-68.24095238095238,"z":-84.67809523809524,"a95":"0.99","info":"04/10/2015 at 16:56:03"},{"visible":true,"include":true,"step":"50.0","x":-362.2190476190476,"y":-100.58095238095237,"z":-84.69238095238094,"a95":"0.99","info":"04/10/2015 at 16:56:03"},{"visible":true,"include":false,"step":"60.0","x":-333.87619047619046,"y":-91.54476190476191,"z":-65.40190476190476,"a95":"0.99","info":"04/10/2015 at 16:56:03"},{"visible":true,"include":false,"step":"70.0","x":-285.16190476190474,"y":-81.31523809523809,"z":-66.57809523809524,"a95":"0.99","info":"04/10/2015 at 16:56:03"}],"demagType":"Unknown","patch":1.1,"format":"Unknown","strat":null},{"version":"v1.1.0","exported":"2017-05-22T11:43:56.908Z","info":"0","GEO":[],"TECT":[],"interpreted":false,"name":"SS29.21A","coreAzi":214,"coreDip":13,"bedStrike":20,"bedDip":48,"data":[{"visible":true,"include":false,"step":"0.0","x":-1583.2380952380952,"y":-188.1047619047619,"z":-383.74285714285713,"a95":"0.99","info":"04/10/2015 at 16:56:03"},{"visible":true,"include":true,"step":"10.0","x":-952.5714285714286,"y":-104.16190476190476,"z":-261.65714285714284,"a95":"0.99","info":"04/10/2015 at 16:56:03"},{"visible":true,"include":true,"step":"15.0","x":-744.0190476190476,"y":-102.4,"z":-199.44761904761904,"a95":"0.99","info":"04/10/2015 at 16:56:03"},{"visible":true,"include":true,"step":"20.0","x":-601.4095238095239,"y":-94.99333333333333,"z":-174.59047619047618,"a95":"0.99","info":"04/10/2015 at 16:56:03"},{"visible":true,"include":true,"step":"23.0","x":-535.3047619047619,"y":-96.13333333333333,"z":-161.86666666666665,"a95":"0.99","info":"04/10/2015 at 16:56:03"},{"visible":true,"include":true,"step":"25.0","x":-491.9238095238095,"y":-104.54285714285714,"z":-154.2,"a95":"0.99","info":"04/10/2015 at 16:56:03"},{"visible":true,"include":true,"step":"30.0","x":-438.0952380952381,"y":-104.98095238095237,"z":-131.71428571428572,"a95":"0.99","info":"04/10/2015 at 16:56:03"},{"visible":true,"include":true,"step":"33.0","x":-388.54285714285714,"y":-90.30666666666667,"z":-117.5047619047619,"a95":"0.99","info":"04/10/2015 at 16:56:03"},{"visible":true,"include":true,"step":"35.0","x":-375.447619047619,"y":-103.32380952380953,"z":-105.56190476190477,"a95":"0.99","info":"04/10/2015 at 16:56:03"},{"visible":true,"include":true,"step":"40.0","x":-356.1142857142857,"y":-111.31428571428572,"z":-93.10857142857142,"a95":"0.99","info":"04/10/2015 at 16:56:03"},{"visible":true,"include":true,"step":"45.0","x":-327.6380952380952,"y":-85.29619047619047,"z":-87.9895238095238,"a95":"0.99","info":"04/10/2015 at 16:56:03"},{"visible":true,"include":false,"step":"50.0","x":-307.49523809523805,"y":-126.66666666666667,"z":-95.4,"a95":"0.99","info":"04/10/2015 at 16:56:03"},{"visible":true,"include":false,"step":"60.0","x":-289.1047619047619,"y":-78.02095238095238,"z":-72.86857142857143,"a95":"0.99","info":"04/10/2015 at 16:56:03"},{"visible":true,"include":false,"step":"70.0","x":-237.8857142857143,"y":-90.51333333333334,"z":-55.30380952380953,"a95":"0.99","info":"04/10/2015 at 16:56:03"}],"demagType":"Unknown","patch":1.1,"format":"Unknown","strat":null},{"version":"v1.1.0","exported":"2017-05-22T11:43:56.908Z","info":"0","GEO":[],"TECT":[],"interpreted":false,"name":"SS29.22A","coreAzi":227,"coreDip":20,"bedStrike":20,"bedDip":48,"data":[{"visible":false,"include":false,"step":"20","x":-1744.1904761904761,"y":221.71428571428572,"z":-259.23809523809524,"a95":"1.4","info":"\"15-06-15\" at \"09:30\""},{"visible":true,"include":true,"step":"100","x":-435.9047619047619,"y":-9.047619047619047,"z":2.380952380952381,"a95":"1.5","info":"\"15-06-15\" at \"13:06\""},{"visible":true,"include":true,"step":"150","x":-223.61904761904762,"y":-77.23809523809524,"z":37.523809523809526,"a95":"2.1","info":"\"15-06-16\" at \"08:04\""},{"visible":true,"include":true,"step":"180","x":-205.52380952380952,"y":-60.857142857142854,"z":4.761904761904762,"a95":"2","info":"\"15-06-16\" at \"10:57\""},{"visible":true,"include":true,"step":"210","x":25.523809523809526,"y":-77.14285714285714,"z":72.19047619047619,"a95":"3.1","info":"\"15-06-16\" at \"14:30\""},{"visible":true,"include":true,"step":"230","x":30,"y":-86.85714285714286,"z":67.42857142857143,"a95":"3.1","info":"\"15-06-17\" at \"18:01\""},{"visible":true,"include":false,"step":"250","x":-27.047619047619047,"y":-33.76190476190476,"z":28.228571428571428,"a95":"6.9","info":"\"15-06-17\" at \"20:52\""}],"demagType":"Unknown","patch":1.1,"format":"Unknown","strat":null},{"version":"v1.1.0","exported":"2017-05-22T11:43:56.908Z","info":"0","GEO":[],"TECT":[],"interpreted":false,"name":"SS29.23A","coreAzi":229,"coreDip":23,"bedStrike":20,"bedDip":48,"data":[{"visible":true,"include":false,"step":"0.0","x":-1384.7619047619048,"y":244.16190476190474,"z":40.84190476190476,"a95":"0.99","info":"04/10/2015 at 21:22:24"},{"visible":true,"include":true,"step":"10.0","x":-871.1333333333333,"y":115.19999999999999,"z":-15.703809523809522,"a95":"0.99","info":"04/10/2015 at 21:22:24"},{"visible":true,"include":true,"step":"15.0","x":-716.0285714285715,"y":55.03809523809524,"z":-13.473333333333333,"a95":"0.99","info":"04/10/2015 at 21:22:24"},{"visible":true,"include":true,"step":"20.0","x":-596.9904761904761,"y":27.899047619047618,"z":-12.006666666666666,"a95":"0.99","info":"04/10/2015 at 21:22:24"},{"visible":true,"include":true,"step":"23.0","x":-539.1619047619048,"y":22.549523809523812,"z":2.6362857142857146,"a95":"0.99","info":"04/10/2015 at 21:22:24"},{"visible":true,"include":true,"step":"25.0","x":-503.42857142857144,"y":8.274476190476191,"z":-16.424761904761905,"a95":"0.99","info":"04/10/2015 at 21:22:24"},{"visible":true,"include":true,"step":"30.0","x":-448.8285714285714,"y":2.468095238095238,"z":-20.049523809523812,"a95":"0.99","info":"04/10/2015 at 21:22:24"},{"visible":true,"include":true,"step":"33.0","x":-415.3333333333333,"y":3.3884761904761906,"z":-24.85809523809524,"a95":"0.99","info":"04/10/2015 at 21:22:24"},{"visible":true,"include":true,"step":"35.0","x":-400.0190476190476,"y":-20.96095238095238,"z":-34.359047619047615,"a95":"0.99","info":"04/10/2015 at 21:22:24"},{"visible":true,"include":true,"step":"40.0","x":-372.48571428571427,"y":-17.98857142857143,"z":-27.24,"a95":"0.99","info":"04/10/2015 at 21:22:24"},{"visible":true,"include":true,"step":"45.0","x":-355.65714285714284,"y":-13.825714285714284,"z":-13.944761904761904,"a95":"0.99","info":"04/10/2015 at 21:22:24"},{"visible":true,"include":true,"step":"50.0","x":-354.0761904761905,"y":-49.57238095238095,"z":-21.465714285714284,"a95":"0.99","info":"04/10/2015 at 21:22:24"},{"visible":true,"include":true,"step":"60.0","x":-326.8952380952381,"y":-54.16571428571429,"z":-42.086666666666666,"a95":"0.99","info":"04/10/2015 at 21:22:24"},{"visible":true,"include":false,"step":"70.0","x":-315.37142857142857,"y":-59.85142857142858,"z":-35.87809523809524,"a95":"0.99","info":"04/10/2015 at 21:22:24"}],"demagType":"Unknown","patch":1.1,"format":"Unknown","strat":null},{"version":"v1.1.0","exported":"2017-05-22T11:43:56.908Z","info":"0","GEO":[{"dec":167.82689979602094,"inc":-18.08113320027284,"MAD":14.877315950881185,"cm":[-415.6978784714602,597.3741292356923,314.501283528499],"intensity":145.4789883605939,"type":"dir","forced":false,"remark":"","origin":false,"nSteps":4,"minStep":"210","maxStep":"280","steps":["210","230","250","280"],"group":"None"}],"TECT":[{"dec":192.35132552402584,"inc":-35.72120515660808,"MAD":14.877315950881169,"cm":[-416.02111323097677,598.2622094386469,-312.3786098478821],"intensity":145.47898836059352,"type":"dir","forced":false,"remark":"","origin":false,"nSteps":4,"minStep":"210","maxStep":"280","steps":["210","230","250","280"],"group":"None"}],"interpreted":true,"name":"SS29.24A","coreAzi":165,"coreDip":27,"bedStrike":20,"bedDip":48,"data":[{"visible":true,"include":false,"step":"20","x":-954.4761904761905,"y":-678.952380952381,"z":543.8095238095239,"a95":"1.7","info":"\"15-06-15\" at \"09:32\""},{"visible":true,"include":false,"step":"100","x":-88.47619047619048,"y":-484,"z":753.047619047619,"a95":"2.2","info":"\"15-06-15\" at \"13:08\""},{"visible":true,"include":false,"step":"150","x":-22.952380952380953,"y":-462.4761904761905,"z":736.952380952381,"a95":"2.2","info":"\"15-06-16\" at \"08:05\""},{"visible":true,"include":false,"step":"180","x":-19.333333333333332,"y":-477.3333333333333,"z":684.2857142857143,"a95":"2.1","info":"\"15-06-16\" at \"10:59\""},{"visible":true,"include":true,"step":"210","x":28.857142857142858,"y":-466.4761904761905,"z":686.1904761904761,"a95":"2.1","info":"\"15-06-16\" at \"14:32\""},{"visible":true,"include":true,"step":"230","x":38,"y":-458.57142857142856,"z":716.5714285714286,"a95":"2","info":"\"15-06-17\" at \"18:02\""},{"visible":true,"include":true,"step":"250","x":-117.04761904761905,"y":-450.6666666666667,"z":573.2380952380952,"a95":"2","info":"\"15-06-17\" at \"20:54\""},{"visible":true,"include":true,"step":"280","x":-60.76190476190476,"y":-502,"z":577.2380952380952,"a95":"2","info":"\"15-06-18\" at \"06:40\""},{"visible":true,"include":false,"step":"300","x":-143.52380952380952,"y":-520.5714285714286,"z":603.2380952380952,"a95":"1.9","info":"\"15-06-18\" at \"09:27\""},{"visible":true,"include":false,"step":"320","x":-129.9047619047619,"y":-499.3333333333333,"z":495.5238095238095,"a95":"1.8","info":"\"15-06-18\" at \"13:31\""},{"visible":true,"include":false,"step":"340","x":-143.42857142857142,"y":-468.6666666666667,"z":534.952380952381,"a95":"1.9","info":"\"15-06-19\" at \"09:02\""},{"visible":true,"include":false,"step":"360","x":-126.28571428571429,"y":-451.42857142857144,"z":533.6190476190476,"a95":"2","info":"\"15-06-19\" at \"12:24\""},{"visible":true,"include":false,"step":"390","x":-139.42857142857142,"y":-488.0952380952381,"z":482.76190476190476,"a95":"1.8","info":"\"15-06-20\" at \"09:13\""},{"visible":true,"include":false,"step":"420","x":-65.80952380952381,"y":-436.3809523809524,"z":491.04761904761904,"a95":"1.9","info":"\"15-06-20\" at \"11:49\""},{"visible":true,"include":false,"step":"450","x":-123.33333333333333,"y":-361.6190476190476,"z":416.3809523809524,"a95":"2","info":"\"15-06-20\" at \"15:22\""},{"visible":true,"include":false,"step":"470","x":-134,"y":-366.76190476190476,"z":463.5238095238095,"a95":"2.2","info":"\"15-06-21\" at \"19:05\""},{"visible":true,"include":false,"step":"490","x":-93.9047619047619,"y":-334.4761904761905,"z":408.57142857142856,"a95":"2.1","info":"\"15-06-21\" at \"23:02\""}],"demagType":"Unknown","patch":1.1,"format":"Unknown","strat":null},{"version":"v1.1.0","exported":"2017-05-22T11:43:56.908Z","info":"0","GEO":[],"TECT":[],"interpreted":false,"name":"SS29.27A","coreAzi":171,"coreDip":11,"bedStrike":20,"bedDip":48,"data":[{"visible":true,"include":false,"step":"0.0","x":-1097.7142857142858,"y":17.107619047619046,"z":390.2285714285714,"a95":"0.99","info":"04/10/2015 at 21:22:24"},{"visible":true,"include":true,"step":"10.0","x":-790.0857142857143,"y":-129.65714285714287,"z":468.12380952380954,"a95":"0.99","info":"04/10/2015 at 21:22:24"},{"visible":true,"include":true,"step":"15.0","x":-708.5238095238095,"y":-191.95238095238096,"z":471.1904761904762,"a95":"0.99","info":"04/10/2015 at 21:22:24"},{"visible":true,"include":true,"step":"20.0","x":-644.6380952380953,"y":-214.82857142857142,"z":470.0380952380952,"a95":"0.99","info":"04/10/2015 at 21:22:24"},{"visible":true,"include":true,"step":"23.0","x":-609.8,"y":-230.22857142857143,"z":469.9619047619048,"a95":"0.99","info":"04/10/2015 at 21:22:24"},{"visible":true,"include":true,"step":"25.0","x":-591.0285714285715,"y":-232.9238095238095,"z":463.54285714285714,"a95":"0.99","info":"04/10/2015 at 21:22:24"},{"visible":true,"include":true,"step":"30.0","x":-571.7047619047619,"y":-248.66666666666666,"z":463.552380952381,"a95":"0.99","info":"04/10/2015 at 21:22:24"},{"visible":true,"include":true,"step":"33.0","x":-549.7047619047619,"y":-246.33333333333334,"z":447.9047619047619,"a95":"0.99","info":"04/10/2015 at 21:22:24"},{"visible":true,"include":true,"step":"35.0","x":-542.7238095238096,"y":-262.6190476190476,"z":425.64761904761906,"a95":"0.99","info":"04/10/2015 at 21:22:24"},{"visible":true,"include":true,"step":"40.0","x":-516.2857142857143,"y":-240.7238095238095,"z":406.83809523809526,"a95":"0.99","info":"04/10/2015 at 21:22:24"},{"visible":true,"include":true,"step":"45.0","x":-493.76190476190476,"y":-228.7047619047619,"z":430.5142857142857,"a95":"0.99","info":"04/10/2015 at 21:22:24"},{"visible":true,"include":true,"step":"50.0","x":-496.4857142857143,"y":-232.06666666666666,"z":405.34285714285716,"a95":"0.99","info":"04/10/2015 at 21:22:24"},{"visible":true,"include":false,"step":"60.0","x":-424.93333333333334,"y":-240.2,"z":388.02857142857147,"a95":"0.99","info":"04/10/2015 at 21:22:24"},{"visible":true,"include":false,"step":"70.0","x":-335.5333333333333,"y":-222.54285714285712,"z":396.6952380952381,"a95":"0.99","info":"04/10/2015 at 21:22:24"}],"demagType":"Unknown","patch":1.1,"format":"Unknown","strat":null},{"version":"v1.1.0","exported":"2017-05-22T11:43:56.908Z","info":"1","GEO":[],"TECT":[],"interpreted":false,"name":"SS29.25A","coreAzi":171,"coreDip":21,"bedStrike":20,"bedDip":48,"data":[{"visible":true,"include":false,"step":"0.0","x":-655.2571428571429,"y":-627.7238095238096,"z":526.2476190476191,"a95":"0.99","info":"26/06/2015 at 05:23:32"},{"visible":true,"include":false,"step":"10.0","x":-438.7714285714286,"y":-700.8571428571429,"z":541.4857142857143,"a95":"0.99","info":"26/06/2015 at 05:23:32"},{"visible":true,"include":true,"step":"15.0","x":-349.8857142857143,"y":-718.9333333333334,"z":540.7333333333333,"a95":"0.99","info":"26/06/2015 at 05:23:32"},{"visible":true,"include":true,"step":"20.0","x":-292.6190476190476,"y":-696.1904761904761,"z":548.9047619047619,"a95":"0.99","info":"26/06/2015 at 05:23:32"},{"visible":true,"include":true,"step":"23.0","x":-259.25714285714287,"y":-690.8761904761905,"z":549.0666666666666,"a95":"0.99","info":"26/06/2015 at 05:23:32"},{"visible":true,"include":true,"step":"25.0","x":-255.58095238095237,"y":-690.6,"z":517.6476190476191,"a95":"0.99","info":"26/06/2015 at 05:23:32"},{"visible":true,"include":true,"step":"30.0","x":-229.47619047619048,"y":-654.2,"z":523.2952380952381,"a95":"0.99","info":"26/06/2015 at 05:23:32"},{"visible":true,"include":true,"step":"33.0","x":-213.33333333333334,"y":-640.1333333333333,"z":529.895238095238,"a95":"0.99","info":"26/06/2015 at 05:23:32"},{"visible":true,"include":true,"step":"35.0","x":-216.41904761904763,"y":-661.5619047619048,"z":520.0380952380953,"a95":"0.99","info":"26/06/2015 at 05:23:32"},{"visible":true,"include":true,"step":"40.0","x":-202.56190476190477,"y":-640.504761904762,"z":489.1333333333333,"a95":"0.99","info":"26/06/2015 at 05:23:32"},{"visible":true,"include":true,"step":"45.0","x":-144.9142857142857,"y":-577.8571428571429,"z":477.31428571428575,"a95":"0.99","info":"26/06/2015 at 05:23:32"},{"visible":true,"include":true,"step":"50.0","x":-150.26666666666665,"y":-604.7809523809524,"z":460.2285714285714,"a95":"0.99","info":"26/06/2015 at 05:23:32"},{"visible":true,"include":true,"step":"55.0","x":-163.93333333333334,"y":-559.3238095238095,"z":463.79999999999995,"a95":"0.99","info":"26/06/2015 at 05:23:32"},{"visible":true,"include":false,"step":"60.0","x":-142.2,"y":-540.952380952381,"z":452.50476190476195,"a95":"0.99","info":"26/06/2015 at 05:23:32"},{"visible":true,"include":false,"step":"65.0","x":-129.9714285714286,"y":-562.3523809523809,"z":478.9047619047619,"a95":"0.99","info":"26/06/2015 at 05:23:32"},{"visible":true,"include":false,"step":"70.0","x":-109.14285714285714,"y":-507.02857142857147,"z":457.1714285714286,"a95":"0.99","info":"26/06/2015 at 05:23:32"},{"visible":true,"include":false,"step":"80.0","x":24.947619047619046,"y":-491.3809523809524,"z":472.7142857142857,"a95":"0.99","info":"26/06/2015 at 05:23:32"}],"demagType":"Unknown","patch":1.1,"format":"Unknown","strat":null},{"version":"v1.1.0","exported":"2017-05-22T11:43:56.908Z","info":"2","GEO":[],"TECT":[],"interpreted":false,"name":"SS29.28A","coreAzi":221,"coreDip":41,"bedStrike":20,"bedDip":48,"data":[{"visible":true,"include":false,"step":"0.0","x":-880.4190476190475,"y":483.4,"z":220.23809523809524,"a95":"0.99","info":"26/06/2015 at 05:23:32"},{"visible":true,"include":false,"step":"10.0","x":-457.0761904761905,"y":333.18095238095236,"z":150.17142857142858,"a95":"0.99","info":"26/06/2015 at 05:23:32"},{"visible":true,"include":false,"step":"15.0","x":-366.4666666666667,"y":279.7904761904762,"z":79.5047619047619,"a95":"0.99","info":"26/06/2015 at 05:23:32"},{"visible":true,"include":true,"step":"20.0","x":-323.0857142857143,"y":245.0952380952381,"z":68.44,"a95":"0.99","info":"26/06/2015 at 05:23:32"},{"visible":true,"include":true,"step":"23.0","x":-331.64761904761906,"y":222.47619047619048,"z":45.41047619047619,"a95":"0.99","info":"26/06/2015 at 05:23:32"},{"visible":true,"include":true,"step":"25.0","x":-283.0857142857143,"y":207.2952380952381,"z":-8.42952380952381,"a95":"0.99","info":"26/06/2015 at 05:23:32"},{"visible":true,"include":true,"step":"30.0","x":-334.9428571428572,"y":197.9238095238095,"z":39.43523809523809,"a95":"0.99","info":"26/06/2015 at 05:23:32"},{"visible":true,"include":true,"step":"33.0","x":-320.54285714285714,"y":200.46666666666667,"z":19.531428571428574,"a95":"0.99","info":"26/06/2015 at 05:23:32"},{"visible":true,"include":true,"step":"35.0","x":-339.0571428571428,"y":124.1047619047619,"z":34.055238095238096,"a95":"0.99","info":"26/06/2015 at 05:23:32"},{"visible":true,"include":false,"step":"40.0","x":-309.7238095238095,"y":155.66666666666666,"z":83.13333333333333,"a95":"0.99","info":"26/06/2015 at 05:23:32"},{"visible":true,"include":false,"step":"45.0","x":-303.22857142857146,"y":90.88285714285715,"z":68.77714285714285,"a95":"0.99","info":"26/06/2015 at 05:23:32"},{"visible":false,"include":false,"step":"50.0","x":-417.60952380952375,"y":16.537142857142857,"z":69.1504761904762,"a95":"0.99","info":"26/06/2015 at 05:23:32"},{"visible":false,"include":false,"step":"55.0","x":-373.3047619047619,"y":68.61809523809524,"z":45.701904761904764,"a95":"0.99","info":"26/06/2015 at 05:23:32"},{"visible":false,"include":false,"step":"60.0","x":-483.9809523809524,"y":119.22857142857144,"z":3.0341904761904765,"a95":"0.99","info":"26/06/2015 at 05:23:32"},{"visible":false,"include":false,"step":"65.0","x":-526.847619047619,"y":-12.36095238095238,"z":2.927142857142857,"a95":"0.99","info":"26/06/2015 at 05:23:32"},{"visible":false,"include":false,"step":"70.0","x":-544.5809523809525,"y":74.77809523809523,"z":21.077142857142857,"a95":"0.99","info":"26/06/2015 at 05:23:32"},{"visible":false,"include":false,"step":"80.0","x":-545.104761904762,"y":197.57142857142858,"z":138.61904761904762,"a95":"0.99","info":"26/06/2015 at 05:23:32"}],"demagType":"Unknown","patch":1.1,"format":"Unknown","strat":null},{"version":"v1.1.0","exported":"2017-05-22T11:43:56.908Z","info":"0","GEO":[],"TECT":[],"interpreted":false,"name":"SS29.29A","coreAzi":210,"coreDip":43,"bedStrike":20,"bedDip":48,"data":[{"visible":false,"include":false,"step":"0.0","x":-1887.6190476190477,"y":599.9714285714285,"z":72.32000000000001,"a95":"0.99","info":"04/10/2015 at 21:22:24"},{"visible":true,"include":false,"step":"10.0","x":-866.0952380952381,"y":425.4857142857143,"z":-7.06,"a95":"0.99","info":"04/10/2015 at 21:22:24"},{"visible":true,"include":false,"step":"15.0","x":-607.1904761904761,"y":331.2666666666667,"z":-28.982857142857142,"a95":"0.99","info":"04/10/2015 at 21:22:24"},{"visible":true,"include":false,"step":"20.0","x":-509.1714285714286,"y":252.2095238095238,"z":-24.36952380952381,"a95":"0.99","info":"04/10/2015 at 21:22:24"},{"visible":true,"include":false,"step":"23.0","x":-485.20000000000005,"y":224.30476190476188,"z":-29.166666666666668,"a95":"0.99","info":"04/10/2015 at 21:22:24"},{"visible":true,"include":false,"step":"25.0","x":-441.3238095238095,"y":236.75238095238097,"z":-65.37238095238095,"a95":"0.99","info":"04/10/2015 at 21:22:24"},{"visible":true,"include":true,"step":"30.0","x":-454.0761904761905,"y":193.77142857142857,"z":-31.16,"a95":"0.99","info":"04/10/2015 at 21:22:24"},{"visible":true,"include":true,"step":"33.0","x":-402.4,"y":182.64761904761903,"z":-30.20952380952381,"a95":"0.99","info":"04/10/2015 at 21:22:24"},{"visible":true,"include":true,"step":"35.0","x":-443.18095238095236,"y":121.83809523809524,"z":-25.634285714285717,"a95":"0.99","info":"04/10/2015 at 21:22:24"},{"visible":true,"include":false,"step":"40.0","x":-453.31428571428575,"y":137.21904761904761,"z":-61.86285714285714,"a95":"0.99","info":"04/10/2015 at 21:22:24"},{"visible":true,"include":false,"step":"45.0","x":-438.2666666666667,"y":183.0857142857143,"z":-37.96380952380952,"a95":"0.99","info":"04/10/2015 at 21:22:24"},{"visible":true,"include":false,"step":"50.0","x":-441.81904761904764,"y":84.1447619047619,"z":-53.71142857142858,"a95":"0.99","info":"04/10/2015 at 21:22:24"},{"visible":false,"include":false,"step":"60.0","x":-494.68571428571425,"y":-10.14,"z":-37.62952380952381,"a95":"0.99","info":"04/10/2015 at 21:22:24"},{"visible":false,"include":false,"step":"70.0","x":-525.6380952380953,"y":38.69238095238095,"z":0.12592380952380952,"a95":"0.99","info":"04/10/2015 at 21:22:24"}],"demagType":"Unknown","patch":1.1,"format":"Unknown","strat":null},{"version":"v1.1.0","exported":"2017-05-22T11:43:56.908Z","info":"0","GEO":[],"TECT":[],"interpreted":false,"name":"SS29.30A","coreAzi":210,"coreDip":50,"bedStrike":20,"bedDip":48,"data":[{"visible":false,"include":false,"step":"20","x":-1807.2380952380952,"y":59.23809523809524,"z":380.57142857142856,"a95":"1.6","info":"\"15-06-15\" at \"09:34\""},{"visible":true,"include":false,"step":"100","x":-138.47619047619048,"y":182.38095238095238,"z":16.38095238095238,"a95":"2.8","info":"\"15-06-15\" at \"13:10\""},{"visible":true,"include":false,"step":"150","x":-152,"y":187.04761904761904,"z":29.142857142857142,"a95":"2.6","info":"\"15-06-16\" at \"08:09\""},{"visible":true,"include":false,"step":"180","x":-186.47619047619048,"y":172.47619047619048,"z":-129.23809523809524,"a95":"2.4","info":"\"15-06-16\" at \"11:00\""},{"visible":true,"include":false,"step":"210","x":-166.28571428571428,"y":168.38095238095238,"z":-54.38095238095238,"a95":"3","info":"\"15-06-16\" at \"14:34\""},{"visible":true,"include":false,"step":"230","x":-168.38095238095238,"y":139.42857142857142,"z":19.142857142857142,"a95":"2.9","info":"\"15-06-17\" at \"18:04\""},{"visible":true,"include":true,"step":"250","x":-242.57142857142858,"y":177.14285714285714,"z":-25.142857142857142,"a95":"2.5","info":"\"15-06-17\" at \"20:56\""},{"visible":true,"include":false,"step":"280","x":-267.9047619047619,"y":110.47619047619048,"z":-67.14285714285714,"a95":"2.1","info":"\"15-06-18\" at \"06:42\""},{"visible":true,"include":false,"step":"300","x":-246.28571428571428,"y":71.80952380952381,"z":45.04761904761905,"a95":"2.1","info":"\"15-06-18\" at \"09:29\""},{"visible":true,"include":true,"step":"320","x":-247.52380952380952,"y":172,"z":-58.19047619047619,"a95":"1.9","info":"\"15-06-18\" at \"13:33\""},{"visible":true,"include":true,"step":"340","x":-250.1904761904762,"y":169.52380952380952,"z":-57.42857142857143,"a95":"2.1","info":"\"15-06-19\" at \"09:04\""},{"visible":true,"include":true,"step":"360","x":-258.1904761904762,"y":145.8095238095238,"z":-44.285714285714285,"a95":"1.6","info":"\"15-06-19\" at \"12:26\""},{"visible":true,"include":false,"step":"390","x":-250.95238095238096,"y":194.66666666666666,"z":-31.904761904761905,"a95":"2.4","info":"\"15-06-20\" at \"09:15\""},{"visible":true,"include":false,"step":"420","x":-163.14285714285714,"y":134.47619047619048,"z":-13.523809523809524,"a95":"2.5","info":"\"15-06-20\" at \"11:51\""},{"visible":true,"include":false,"step":"450","x":-176.95238095238096,"y":126.47619047619048,"z":-52.95238095238095,"a95":"2.5","info":"\"15-06-21\" at \"15:47\""}],"demagType":"Unknown","patch":1.1,"format":"Unknown","strat":null}]
