# Supplementary material for: Paleomagnetic constraints on the timing and distribution of Cenozoic rotations in Central and Eastern Anatolia
Source: Copernicus journal article supplement (doi:10.5194/se-9-295-2018), 2018-03-21
Supplement: Supplementary file 2 [file se-9-295-2018-supplement.zip › se-2017-66_DATA_dir files/dir files Sivas/SS30.dir]

[{"version":"v1.1.0","exported":"2016-10-11T08:51:04.183Z","volume":10.5,"added":"2016-10-11T08:43:52.325Z","format":"Utrecht","demagType":"Unknown","strat":"0","patch":1.1,"GEO":[{"dec":40.47421471437099,"inc":23.271829380842508,"MAD":3.0393862894432893,"cm":[3.552713678800501e-14,-2.4868995751603507e-14,0],"intensity":3843.522134107484,"type":"dir","forced":true,"remark":"","origin":false,"nSteps":9,"minStep":"10.0","maxStep":"40.0","steps":["10.0","15.0","20.0","23.0","25.0","30.0","33.0","35.0","40.0"],"group":"None","version":"v1.1.0"}],"TECT":[{"dec":35.04537987394207,"inc":-13.333813477742389,"MAD":3.0393862894433292,"cm":[-1.4210854715202004e-14,-3.907985046680551e-14,-4.440892098500626e-14],"intensity":3843.522134107484,"type":"dir","forced":true,"remark":"","origin":false,"nSteps":9,"minStep":"10.0","maxStep":"40.0","steps":["10.0","15.0","20.0","23.0","25.0","30.0","33.0","35.0","40.0"],"group":"None","version":"v1.1.0"}],"interpreted":true,"name":"SS30.01A","coreAzi":5,"coreDip":0,"bedStrike":249,"bedDip":65,"data":[{"visible":true,"include":false,"step":"0.0","x":-1859.4285714285713,"y":2737.809523809524,"z":3292.6666666666665,"a95":0.99,"info":"04/10/2015 at 21:22:24"},{"visible":true,"include":true,"step":"10.0","x":-1063.3333333333333,"y":1660.5714285714287,"z":2180,"a95":0.99,"info":"04/10/2015 at 21:22:24"},{"visible":true,"include":true,"step":"15.0","x":-834.6095238095238,"y":1192,"z":1676.952380952381,"a95":0.99,"info":"04/10/2015 at 21:22:24"},{"visible":true,"include":true,"step":"20.0","x":-669.9714285714285,"y":932.3238095238095,"z":1231.5238095238096,"a95":0.99,"info":"04/10/2015 at 21:22:24"},{"visible":true,"include":true,"step":"23.0","x":-657.847619047619,"y":852.5714285714286,"z":1181.142857142857,"a95":0.99,"info":"04/10/2015 at 21:22:24"},{"visible":true,"include":true,"step":"25.0","x":-598.6761904761905,"y":644.9428571428571,"z":1013.047619047619,"a95":0.99,"info":"04/10/2015 at 21:22:24"},{"visible":true,"include":true,"step":"30.0","x":-569.3523809523809,"y":586.2285714285714,"z":969.3333333333334,"a95":0.99,"info":"04/10/2015 at 21:22:24"},{"visible":true,"include":true,"step":"33.0","x":-410.68571428571425,"y":544.7714285714286,"z":850.8666666666667,"a95":0.99,"info":"04/10/2015 at 21:22:24"},{"visible":true,"include":true,"step":"35.0","x":-494.46666666666664,"y":495.91428571428577,"z":797.7904761904762,"a95":0.99,"info":"04/10/2015 at 21:22:24"},{"visible":true,"include":true,"step":"40.0","x":-452.1142857142857,"y":431.9619047619048,"z":665.5904761904761,"a95":0.99,"info":"04/10/2015 at 21:22:24"},{"visible":true,"include":false,"step":"45.0","x":-295.67619047619047,"y":383.74285714285713,"z":758.2952380952381,"a95":0.99,"info":"04/10/2015 at 21:22:24"},{"visible":true,"include":false,"step":"50.0","x":-317.7142857142857,"y":275.56190476190477,"z":707.3333333333334,"a95":0.99,"info":"04/10/2015 at 21:22:24"},{"visible":true,"include":false,"step":"60.0","x":-285.2,"y":361.06666666666666,"z":489.81904761904764,"a95":0.99,"info":"04/10/2015 at 21:22:24"},{"visible":true,"include":false,"step":"70.0","x":-234.13333333333335,"y":272.6,"z":484.5142857142857,"a95":0.99,"info":"04/10/2015 at 21:22:24"}]},{"version":"v1.1.0","exported":"2016-10-11T08:51:04.183Z","volume":10.5,"added":"2016-10-11T08:43:52.325Z","format":"Utrecht","demagType":"Unknown","strat":"1","patch":1.1,"GEO":[{"dec":294.6914901316196,"inc":-29.616636644828265,"MAD":2.3046499814337604,"cm":[-1.4210854715202004e-14,1.2079226507921703e-13,0],"intensity":2006.3212489447812,"type":"GC","origin":false,"forced":true,"remark":"","nSteps":6,"minStep":"10.0","maxStep":"33.0","steps":["10.0","15.0","20.0","23.0","25.0","33.0"],"group":"None","version":"v1.1.0"}],"TECT":[{"dec":232.0583655026117,"inc":-50.594091626393194,"MAD":2.304649981434023,"cm":[-4.085620730620576e-14,7.105427357601002e-14,1.1368683772161603e-13],"intensity":2006.3212489447812,"type":"GC","origin":false,"forced":true,"remark":"","nSteps":6,"minStep":"10.0","maxStep":"33.0","steps":["10.0","15.0","20.0","23.0","25.0","33.0"],"group":"None","version":"v1.1.0"}],"interpreted":true,"name":"SS30.02A","coreAzi":263,"coreDip":48,"bedStrike":249,"bedDip":65,"data":[{"visible":false,"include":false,"step":"0.0","x":-1858.3809523809523,"y":2676.3809523809523,"z":138.7238095238095,"a95":0.99,"info":"26/06/2015 at 10:49:56"},{"visible":true,"include":true,"step":"10.0","x":-769.8761904761905,"y":1484.2857142857142,"z":-98.19999999999999,"a95":0.99,"info":"26/06/2015 at 10:49:56"},{"visible":true,"include":true,"step":"15.0","x":-489.57142857142856,"y":1092.7619047619048,"z":-336.7809523809524,"a95":0.99,"info":"26/06/2015 at 10:49:56"},{"visible":true,"include":true,"step":"20.0","x":-300.4761904761905,"y":730.6857142857143,"z":-528.5238095238095,"a95":0.99,"info":"26/06/2015 at 10:49:56"},{"visible":true,"include":true,"step":"23.0","x":-243.8190476190476,"y":607,"z":-592.552380952381,"a95":0.99,"info":"26/06/2015 at 10:49:56"},{"visible":true,"include":true,"step":"25.0","x":-166.07619047619048,"y":464.8285714285714,"z":-572.8857142857144,"a95":0.99,"info":"26/06/2015 at 10:49:56"},{"visible":false,"include":false,"step":"30.0","x":-226.60000000000002,"y":352.0952380952381,"z":-456.53333333333336,"a95":0.99,"info":"26/06/2015 at 10:49:56"},{"visible":true,"include":true,"step":"33.0","x":-39.892380952380954,"y":240.2,"z":-530.8857142857144,"a95":0.99,"info":"26/06/2015 at 10:49:56"},{"visible":true,"include":false,"step":"35.0","x":-145.78095238095239,"y":-18.32952380952381,"z":-462.16190476190474,"a95":0.99,"info":"26/06/2015 at 10:49:56"},{"visible":true,"include":false,"step":"40.0","x":5.194095238095238,"y":-8.87742857142857,"z":-443.3238095238095,"a95":0.99,"info":"26/06/2015 at 10:49:56"},{"visible":true,"include":false,"step":"45.0","x":-106.07619047619048,"y":-0.07353142857142857,"z":-415.87619047619046,"a95":0.99,"info":"26/06/2015 at 10:49:56"},{"visible":false,"include":false,"step":"50.0","x":-249.22857142857143,"y":-14.582857142857144,"z":-686.5904761904761,"a95":0.99,"info":"26/06/2015 at 10:49:56"},{"visible":false,"include":false,"step":"55.0","x":99.15238095238094,"y":-88.75238095238095,"z":-384,"a95":0.99,"info":"26/06/2015 at 10:49:56"},{"visible":false,"include":false,"step":"60.0","x":4.0470476190476194,"y":236.69523809523812,"z":-201.7238095238095,"a95":0.99,"info":"26/06/2015 at 10:49:56"},{"visible":false,"include":false,"step":"65.0","x":-383.42857142857144,"y":-38.126666666666665,"z":-334.7142857142857,"a95":0.99,"info":"26/06/2015 at 10:49:56"},{"visible":false,"include":false,"step":"70.0","x":-266.35238095238094,"y":105.34285714285713,"z":-191.59047619047618,"a95":0.99,"info":"26/06/2015 at 10:49:56"},{"visible":false,"include":false,"step":"80.0","x":-250.57142857142858,"y":183.82857142857142,"z":-42.66952380952381,"a95":0.99,"info":"26/06/2015 at 10:49:56"}]},{"version":"v1.1.0","exported":"2016-10-11T08:51:04.183Z","volume":10.5,"added":"2016-10-11T08:43:52.325Z","format":"Utrecht","demagType":"Unknown","strat":"0","patch":1.1,"GEO":[{"dec":290.10768386517213,"inc":-17.892140685881973,"MAD":9.915701430243912,"cm":[-2.1316282072803006e-14,3.730349362740526e-14,0],"intensity":825.928582651561,"type":"GC","origin":false,"forced":true,"remark":"","nSteps":9,"minStep":"10.0","maxStep":"40.0","steps":["10.0","15.0","20.0","23.0","25.0","30.0","33.0","35.0","40.0"],"group":"None","version":"v1.1.0"}],"TECT":[{"dec":247.87999305529496,"inc":-44.17854766738099,"MAD":9.915701430242704,"cm":[1.9317880628477724e-14,4.440892098500626e-14,3.375077994860476e-14],"intensity":825.9285826515611,"type":"GC","origin":false,"forced":true,"remark":"","nSteps":9,"minStep":"10.0","maxStep":"40.0","steps":["10.0","15.0","20.0","23.0","25.0","30.0","33.0","35.0","40.0"],"group":"None","version":"v1.1.0"}],"interpreted":true,"name":"SS30.03A","coreAzi":286,"coreDip":66,"bedStrike":249,"bedDip":65,"data":[{"visible":true,"include":false,"step":"0.0","x":-290.447619047619,"y":1402.4761904761904,"z":438.6761904761905,"a95":0.99,"info":"04/10/2015 at 21:22:24"},{"visible":true,"include":true,"step":"10.0","x":-16.324761904761903,"y":547.2476190476191,"z":-229.74285714285716,"a95":0.99,"info":"04/10/2015 at 21:22:24"},{"visible":true,"include":true,"step":"15.0","x":14.72857142857143,"y":390.5238095238095,"z":-320.93333333333334,"a95":0.99,"info":"04/10/2015 at 21:22:24"},{"visible":true,"include":true,"step":"20.0","x":3.5387619047619046,"y":331.0190476190476,"z":-299.3333333333333,"a95":0.99,"info":"04/10/2015 at 21:22:24"},{"visible":true,"include":true,"step":"23.0","x":9.398,"y":289.02857142857147,"z":-271.7809523809524,"a95":0.99,"info":"04/10/2015 at 21:22:24"},{"visible":true,"include":true,"step":"25.0","x":2.185619047619048,"y":277.8952380952381,"z":-255.60000000000002,"a95":0.99,"info":"04/10/2015 at 21:22:24"},{"visible":true,"include":true,"step":"30.0","x":-8.67647619047619,"y":254.0857142857143,"z":-206.75238095238097,"a95":0.99,"info":"04/10/2015 at 21:22:24"},{"visible":true,"include":true,"step":"33.0","x":14.395238095238096,"y":233.26666666666668,"z":-180.03809523809525,"a95":0.99,"info":"04/10/2015 at 21:22:24"},{"visible":true,"include":true,"step":"35.0","x":0.45985714285714285,"y":196.55238095238096,"z":-171.1238095238095,"a95":0.99,"info":"04/10/2015 at 21:22:24"},{"visible":true,"include":true,"step":"40.0","x":21.031428571428574,"y":192.07619047619048,"z":-138.40952380952382,"a95":0.99,"info":"04/10/2015 at 21:22:24"},{"visible":true,"include":false,"step":"45.0","x":20.24190476190476,"y":169.54285714285714,"z":-100.28571428571429,"a95":0.99,"info":"04/10/2015 at 21:22:24"},{"visible":true,"include":false,"step":"50.0","x":19.475238095238097,"y":125.76190476190476,"z":-78.75333333333333,"a95":0.99,"info":"04/10/2015 at 21:22:24"},{"visible":true,"include":false,"step":"60.0","x":8.420095238095238,"y":119.44761904761906,"z":-64.55238095238094,"a95":0.99,"info":"04/10/2015 at 21:22:24"},{"visible":false,"include":false,"step":"70.0","x":74.66095238095238,"y":38.936190476190475,"z":-21.07238095238095,"a95":0.99,"info":"04/10/2015 at 21:22:24"}]},{"version":"v1.1.0","exported":"2016-10-11T08:51:04.183Z","volume":10.5,"added":"2016-10-11T08:43:52.325Z","format":"Utrecht","demagType":"Unknown","strat":"0","patch":1.1,"GEO":[{"dec":98.96697061539851,"inc":-5.453115454175634,"MAD":13.334184755552574,"cm":[5.684341886080802e-14,-3.552713678800501e-13,0],"intensity":7015.30396772921,"type":"GC","origin":false,"forced":true,"remark":"","nSteps":5,"minStep":"150","maxStep":"250","steps":["150","180","210","230","250"],"group":"None","version":"v1.1.0"}],"TECT":[{"dec":267.95987394876573,"inc":-24.23565985327049,"MAD":13.334184755552585,"cm":[-3.126388037344441e-13,7.105427357601002e-15,-3.552713678800501e-13],"intensity":7015.30396772921,"type":"GC","origin":false,"forced":true,"remark":"","nSteps":5,"minStep":"150","maxStep":"250","steps":["150","180","210","230","250"],"group":"None","version":"v1.1.0"}],"interpreted":true,"name":"SS30.04A","coreAzi":27,"coreDip":71,"bedStrike":249,"bedDip":65,"data":[{"visible":false,"include":false,"step":"20","x":3801.4285714285716,"y":-3402.6666666666665,"z":15464.666666666666,"a95":2.3,"info":"\"15-06-15\" at \"09:39\""},{"visible":true,"include":false,"step":"100","x":3007.904761904762,"y":-2280.6666666666665,"z":10935.047619047618,"a95":2.3,"info":"\"15-06-15\" at \"13:11\""},{"visible":true,"include":true,"step":"150","x":2270.4761904761904,"y":-800.6666666666666,"z":4708.476190476191,"a95":2.2,"info":"\"15-06-16\" at \"08:10\""},{"visible":true,"include":true,"step":"180","x":1847.047619047619,"y":-775.2380952380952,"z":2731.3333333333335,"a95":2,"info":"\"15-06-16\" at \"11:03\""},{"visible":true,"include":true,"step":"210","x":2160.7619047619046,"y":-720.6666666666666,"z":3121.5238095238096,"a95":2.1,"info":"\"15-06-16\" at \"14:36\""},{"visible":true,"include":true,"step":"230","x":1467.4285714285713,"y":-566.7619047619048,"z":2148.5714285714284,"a95":2,"info":"\"15-06-17\" at \"18:06\""},{"visible":true,"include":true,"step":"250","x":1161.5238095238096,"y":-303.14285714285717,"z":1309.6190476190477,"a95":1.9,"info":"\"15-06-17\" at \"21:02\""},{"visible":true,"include":false,"step":"280","x":1216.1904761904761,"y":-292.57142857142856,"z":1452.7619047619048,"a95":1.9,"info":"\"15-06-18\" at \"06:44\""},{"visible":true,"include":false,"step":"300","x":1207.4285714285713,"y":-426.2857142857143,"z":1097.047619047619,"a95":1.8,"info":"\"15-06-18\" at \"09:30\""},{"visible":true,"include":false,"step":"320","x":1155.7142857142858,"y":-424,"z":1167.5238095238096,"a95":1.7,"info":"\"15-06-18\" at \"13:35\""},{"visible":true,"include":false,"step":"340","x":973.8095238095239,"y":-376.76190476190476,"z":917.9047619047619,"a95":1.8,"info":"\"15-06-19\" at \"09:06\""},{"visible":true,"include":false,"step":"360","x":959.6190476190476,"y":-424.95238095238096,"z":1042.095238095238,"a95":2,"info":"\"15-06-19\" at \"12:28\""},{"visible":true,"include":false,"step":"390","x":1097.6190476190477,"y":-436.57142857142856,"z":836.2857142857143,"a95":1.5,"info":"\"15-06-20\" at \"09:17\""},{"visible":true,"include":false,"step":"420","x":842.4761904761905,"y":-325.42857142857144,"z":958.3809523809524,"a95":1.8,"info":"\"15-06-20\" at \"11:54\""},{"visible":true,"include":false,"step":"450","x":801.7142857142857,"y":-265.14285714285717,"z":490.57142857142856,"a95":1.5,"info":"\"15-06-21\" at \"15:49\""},{"visible":false,"include":false,"step":"470","x":862.4761904761905,"y":193.61904761904762,"z":1266.2857142857142,"a95":2.1,"info":"\"15-06-21\" at \"19:11\""},{"visible":true,"include":false,"step":"490","x":815.5238095238095,"y":-300.1904761904762,"z":600.3809523809524,"a95":1.9,"info":"\"15-06-21\" at \"23:04\""},{"visible":true,"include":false,"step":"510","x":739.5238095238095,"y":-196.0952380952381,"z":289.6190476190476,"a95":1.6,"info":"\"15-06-29\" at \"09:01\""},{"visible":true,"include":false,"step":"540","x":631.4285714285714,"y":-142.1904761904762,"z":331.23809523809524,"a95":2,"info":"\"15-06-29\" at \"12:38\""},{"visible":true,"include":false,"step":"560","x":645.7142857142857,"y":-207.14285714285714,"z":398,"a95":2.9,"info":"\"15-06-30\" at \"05:43\""},{"visible":false,"include":false,"step":"580","x":366.95238095238096,"y":-343.42857142857144,"z":-304.3809523809524,"a95":3.9,"info":"\"15-06-30\" at \"09:30\""}]},{"version":"v1.1.0","exported":"2016-10-11T08:51:04.183Z","volume":10.5,"added":"2016-10-11T08:43:52.326Z","format":"Utrecht","demagType":"Unknown","strat":"0","patch":1.1,"GEO":[{"dec":333.481342904297,"inc":-19.496162300405924,"MAD":18.284833979387788,"cm":[-1.5543122344752192e-15,1.0658141036401503e-14,0],"intensity":1193.6732081650975,"type":"GC","origin":false,"forced":true,"remark":"","nSteps":16,"minStep":"150","maxStep":"580","steps":["150","180","210","230","250","300","320","340","360","390","420","490","510","540","560","580"],"group":"None","version":"v1.1.0"}],"TECT":[{"dec":295.0575743920462,"inc":-82.49340855492007,"MAD":18.284833979387468,"cm":[-4.1744385725905886e-14,4.973799150320701e-14,3.8191672047105385e-14],"intensity":1193.6732081650978,"type":"GC","origin":false,"forced":true,"remark":"","nSteps":16,"minStep":"150","maxStep":"580","steps":["150","180","210","230","250","300","320","340","360","390","420","490","510","540","560","580"],"group":"None","version":"v1.1.0"}],"interpreted":true,"name":"SS30.08A","coreAzi":8,"coreDip":65,"bedStrike":249,"bedDip":65,"data":[{"visible":false,"include":false,"step":"20","x":76.28571428571429,"y":358.76190476190476,"z":2304.6666666666665,"a95":2.4,"info":"\"15-06-15\" at \"09:41\""},{"visible":true,"include":false,"step":"100","x":267.7142857142857,"y":436.3809523809524,"z":1441.2380952380952,"a95":2.3,"info":"\"15-06-15\" at \"13:13\""},{"visible":true,"include":true,"step":"150","x":221.14285714285714,"y":449.23809523809524,"z":902.0952380952381,"a95":2.2,"info":"\"15-06-16\" at \"08:12\""},{"visible":true,"include":true,"step":"180","x":233.61904761904762,"y":457.5238095238095,"z":830.5714285714286,"a95":2.1,"info":"\"15-06-16\" at \"11:05\""},{"visible":true,"include":true,"step":"210","x":199.42857142857142,"y":440.0952380952381,"z":704.2857142857143,"a95":2.1,"info":"\"15-06-16\" at \"14:38\""},{"visible":true,"include":true,"step":"230","x":212.76190476190476,"y":433.04761904761904,"z":684.3809523809524,"a95":2,"info":"\"15-06-17\" at \"18:08\""},{"visible":true,"include":true,"step":"250","x":220.1904761904762,"y":356.95238095238096,"z":646.952380952381,"a95":2,"info":"\"15-06-17\" at \"21:04\""},{"visible":false,"include":false,"step":"280","x":303.5238095238095,"y":345.14285714285717,"z":618.0952380952381,"a95":2,"info":"\"15-06-18\" at \"06:45\""},{"visible":true,"include":true,"step":"300","x":215.23809523809524,"y":351.9047619047619,"z":560.952380952381,"a95":2.2,"info":"\"15-06-18\" at \"09:32\""},{"visible":true,"include":true,"step":"320","x":243.23809523809524,"y":335.6190476190476,"z":567.4285714285714,"a95":2,"info":"\"15-06-18\" at \"13:38\""},{"visible":true,"include":true,"step":"340","x":263.7142857142857,"y":324.3809523809524,"z":520.1904761904761,"a95":2,"info":"\"15-06-19\" at \"09:08\""},{"visible":true,"include":true,"step":"360","x":207.14285714285714,"y":313.3333333333333,"z":451.14285714285717,"a95":2,"info":"\"15-06-19\" at \"12:31\""},{"visible":true,"include":true,"step":"390","x":220.76190476190476,"y":319.42857142857144,"z":431.23809523809524,"a95":1.9,"info":"\"15-06-20\" at \"09:18\""},{"visible":true,"include":true,"step":"420","x":204.85714285714286,"y":321.8095238095238,"z":383.42857142857144,"a95":1.9,"info":"\"15-06-20\" at \"11:58\""},{"visible":true,"include":false,"step":"450","x":205.8095238095238,"y":356.57142857142856,"z":196.0952380952381,"a95":1.6,"info":"\"15-06-21\" at \"15:51\""},{"visible":false,"include":false,"step":"470","x":328,"y":362.6666666666667,"z":372.6666666666667,"a95":1.7,"info":"\"15-06-21\" at \"19:14\""},{"visible":true,"include":true,"step":"490","x":223.8095238095238,"y":296.6666666666667,"z":190.0952380952381,"a95":1.6,"info":"\"15-06-21\" at \"23:06\""},{"visible":true,"include":true,"step":"510","x":169.14285714285714,"y":233.71428571428572,"z":146.76190476190476,"a95":2.2,"info":"\"15-06-29\" at \"09:03\""},{"visible":true,"include":true,"step":"540","x":206.76190476190476,"y":270.85714285714283,"z":173.8095238095238,"a95":1.9,"info":"\"15-06-29\" at \"12:39\""},{"visible":true,"include":true,"step":"560","x":129.42857142857142,"y":315.8095238095238,"z":18.666666666666668,"a95":2.7,"info":"\"15-06-30\" at \"05:44\""},{"visible":true,"include":true,"step":"580","x":69.33333333333333,"y":244.85714285714286,"z":24.571428571428573,"a95":3.6,"info":"\"15-06-30\" at \"09:36\""}]},{"version":"v1.1.0","exported":"2016-10-11T08:51:04.183Z","volume":10.5,"added":"2016-10-11T08:43:52.326Z","format":"Utrecht","demagType":"Unknown","strat":"0","patch":1.1,"GEO":[{"dec":11.530022494338766,"inc":58.085662171369876,"MAD":7.515212356973098,"cm":[670.4150931721513,-42.03149060626054,833.0541079182699],"intensity":787.1412232287944,"type":"dir","forced":false,"remark":"","origin":false,"nSteps":8,"minStep":"10.0","maxStep":"35.0","steps":["10.0","15.0","20.0","23.0","25.0","30.0","33.0","35.0"],"group":"None","version":"v1.1.0"}],"TECT":[{"dec":355.5330565527963,"inc":-2.591568362824132,"MAD":7.5152123569731,"cm":[1029.7792261981858,-179.97845675663794,-228.83332464760844],"intensity":787.1412232287942,"type":"dir","forced":false,"remark":"","origin":false,"nSteps":8,"minStep":"10.0","maxStep":"35.0","steps":["10.0","15.0","20.0","23.0","25.0","30.0","33.0","35.0"],"group":"None","version":"v1.1.0"}],"interpreted":true,"name":"SS30.08B","coreAzi":8,"coreDip":65,"bedStrike":249,"bedDip":65,"data":[{"visible":true,"include":false,"step":"0.0","x":362.0095238095238,"y":-120.37142857142858,"z":2048.3809523809523,"a95":0.99,"info":"04/10/2015 at 21:22:24"},{"visible":true,"include":true,"step":"10.0","x":306,"y":-137.62857142857143,"z":1512.4761904761904,"a95":0.99,"info":"04/10/2015 at 21:22:24"},{"visible":true,"include":true,"step":"15.0","x":286.16190476190474,"y":-111.82857142857144,"z":1275.142857142857,"a95":0.99,"info":"04/10/2015 at 21:22:24"},{"visible":true,"include":true,"step":"20.0","x":252.8,"y":-131.88571428571427,"z":1131.7142857142858,"a95":0.99,"info":"04/10/2015 at 21:22:24"},{"visible":true,"include":true,"step":"23.0","x":207.57142857142858,"y":-127.51428571428572,"z":1019.9047619047619,"a95":0.99,"info":"04/10/2015 at 21:22:24"},{"visible":true,"include":true,"step":"25.0","x":252.43809523809523,"y":-137.7904761904762,"z":979.7142857142857,"a95":0.99,"info":"04/10/2015 at 21:22:24"},{"visible":true,"include":true,"step":"30.0","x":183.0285714285714,"y":-104.12380952380951,"z":836.2857142857143,"a95":0.99,"info":"04/10/2015 at 21:22:24"},{"visible":true,"include":true,"step":"33.0","x":243.8857142857143,"y":-133.67619047619047,"z":777.7333333333333,"a95":0.99,"info":"04/10/2015 at 21:22:24"},{"visible":true,"include":true,"step":"35.0","x":222.7047619047619,"y":-194.96190476190475,"z":731.8571428571429,"a95":0.99,"info":"04/10/2015 at 21:22:24"},{"visible":true,"include":false,"step":"40.0","x":119.87619047619049,"y":-149.9142857142857,"z":649.4095238095239,"a95":0.99,"info":"04/10/2015 at 21:22:24"},{"visible":true,"include":false,"step":"45.0","x":216.6095238095238,"y":-145.38095238095238,"z":564.504761904762,"a95":0.99,"info":"04/10/2015 at 21:22:24"},{"visible":true,"include":false,"step":"50.0","x":65.25142857142858,"y":-177.62857142857143,"z":504.50476190476195,"a95":0.99,"info":"04/10/2015 at 21:22:24"},{"visible":true,"include":false,"step":"60.0","x":-24.565714285714286,"y":-147.22857142857143,"z":344.9142857142857,"a95":0.99,"info":"04/10/2015 at 21:22:24"},{"visible":true,"include":false,"step":"70.0","x":0.5928761904761904,"y":-193.43809523809523,"z":301.35238095238094,"a95":0.99,"info":"04/10/2015 at 21:22:24"}]},{"version":"v1.1.0","exported":"2016-10-11T08:51:04.183Z","volume":10.5,"added":"2016-10-11T08:43:52.326Z","format":"Utrecht","demagType":"Unknown","strat":"2","patch":1.1,"GEO":[{"dec":67.93670341438633,"inc":56.796620980553314,"MAD":18.03168517188911,"cm":[3.2997506145572117,180.20990571802096,515.7965644733935],"intensity":388.1473511678188,"type":"dir","forced":false,"remark":"","origin":false,"nSteps":12,"minStep":"10.0","maxStep":"55.0","steps":["10.0","15.0","20.0","23.0","25.0","30.0","33.0","35.0","40.0","45.0","50.0","55.0"],"group":"None","version":"v1.1.0"}],"TECT":[{"dec":14.675815141777832,"inc":20.14568094363503,"MAD":18.031685171889112,"cm":[472.87196181771225,-0.04197801492451747,273.7237665240019],"intensity":388.14735116781895,"type":"dir","forced":false,"remark":"","origin":false,"nSteps":12,"minStep":"10.0","maxStep":"55.0","steps":["10.0","15.0","20.0","23.0","25.0","30.0","33.0","35.0","40.0","45.0","50.0","55.0"],"group":"None","version":"v1.1.0"}],"interpreted":true,"name":"SS30.09B","coreAzi":37,"coreDip":66,"bedStrike":249,"bedDip":65,"data":[{"visible":true,"include":false,"step":"0.0","x":-119.24761904761904,"y":253.54285714285712,"z":990.952380952381,"a95":0.99,"info":"26/06/2015 at 10:49:56"},{"visible":true,"include":true,"step":"10.0","x":-63.48571428571429,"y":180.64761904761903,"z":783.4857142857143,"a95":0.99,"info":"26/06/2015 at 10:49:56"},{"visible":true,"include":true,"step":"15.0","x":-105.20952380952382,"y":174.58095238095237,"z":690.9428571428571,"a95":0.99,"info":"26/06/2015 at 10:49:56"},{"visible":true,"include":true,"step":"20.0","x":-110.66666666666667,"y":206.9904761904762,"z":557.1619047619048,"a95":0.99,"info":"26/06/2015 at 10:49:56"},{"visible":true,"include":true,"step":"23.0","x":-98.20952380952382,"y":202,"z":542.8380952380952,"a95":0.99,"info":"26/06/2015 at 10:49:56"},{"visible":true,"include":true,"step":"25.0","x":-107.72380952380952,"y":163.47619047619048,"z":514.2761904761904,"a95":0.99,"info":"26/06/2015 at 10:49:56"},{"visible":true,"include":true,"step":"30.0","x":-161.14285714285714,"y":148.46666666666667,"z":501.5904761904762,"a95":0.99,"info":"26/06/2015 at 10:49:56"},{"visible":true,"include":true,"step":"33.0","x":-99.17142857142856,"y":158.52380952380952,"z":446.3809523809524,"a95":0.99,"info":"26/06/2015 at 10:49:56"},{"visible":true,"include":true,"step":"35.0","x":-127.95238095238095,"y":119.04761904761905,"z":451.16190476190474,"a95":0.99,"info":"26/06/2015 at 10:49:56"},{"visible":true,"include":true,"step":"40.0","x":-121.02857142857142,"y":103.79047619047618,"z":421.76190476190476,"a95":0.99,"info":"26/06/2015 at 10:49:56"},{"visible":true,"include":true,"step":"45.0","x":-90.92857142857143,"y":82.68476190476191,"z":413.25714285714287,"a95":0.99,"info":"26/06/2015 at 10:49:56"},{"visible":true,"include":true,"step":"50.0","x":-98.44761904761906,"y":83.69619047619047,"z":461.3333333333333,"a95":0.99,"info":"26/06/2015 at 10:49:56"},{"visible":true,"include":true,"step":"55.0","x":-115.74285714285713,"y":79.3295238095238,"z":412.45714285714286,"a95":0.99,"info":"26/06/2015 at 10:49:56"},{"visible":true,"include":false,"step":"60.0","x":-35.06857142857143,"y":166.05714285714285,"z":384.447619047619,"a95":0.99,"info":"26/06/2015 at 10:49:56"},{"visible":true,"include":false,"step":"65.0","x":-29.219047619047622,"y":98.19047619047619,"z":354.4095238095238,"a95":0.99,"info":"26/06/2015 at 10:49:56"},{"visible":true,"include":false,"step":"70.0","x":-1.2482857142857142,"y":121.47619047619048,"z":353.68571428571425,"a95":0.99,"info":"26/06/2015 at 10:49:56"},{"visible":true,"include":false,"step":"80.0","x":-81.5847619047619,"y":168.45714285714286,"z":300.447619047619,"a95":0.99,"info":"26/06/2015 at 10:49:56"}]},{"version":"v1.1.0","exported":"2016-10-11T08:51:04.183Z","volume":10.5,"added":"2016-10-11T08:43:52.326Z","format":"Utrecht","demagType":"Unknown","strat":"0","patch":1.1,"GEO":[{"dec":308.3735217872485,"inc":-21.54627948881576,"MAD":2.507325110345857,"cm":[1.0658141036401503e-14,-1.0658141036401503e-14,0],"intensity":636.9412593014001,"type":"GC","origin":false,"forced":true,"remark":"","nSteps":4,"minStep":"100","maxStep":"210","steps":["100","150","180","210"],"group":"None","version":"v1.1.0"}],"TECT":[{"dec":249.65406507511233,"inc":-61.71413141893297,"MAD":2.507325110346179,"cm":[6.217248937900877e-15,-1.2434497875801753e-13,-1.9539925233402755e-14],"intensity":636.9412593014002,"type":"GC","origin":false,"forced":true,"remark":"","nSteps":4,"minStep":"100","maxStep":"210","steps":["100","150","180","210"],"group":"None","version":"v1.1.0"}],"interpreted":true,"name":"SS30.11A","coreAzi":339,"coreDip":63,"bedStrike":249,"bedDip":65,"data":[{"visible":false,"include":false,"step":"20","x":66.95238095238095,"y":425.8095238095238,"z":1091.2380952380952,"a95":2.4,"info":"\"15-06-15\" at \"09:44\""},{"visible":true,"include":true,"step":"100","x":159.9047619047619,"y":325.7142857142857,"z":337.9047619047619,"a95":2,"info":"\"15-06-15\" at \"13:15\""},{"visible":true,"include":true,"step":"150","x":139.71428571428572,"y":242.57142857142858,"z":26.952380952380953,"a95":1.7,"info":"\"15-06-16\" at \"08:14\""},{"visible":true,"include":true,"step":"180","x":118.19047619047619,"y":230.76190476190476,"z":-6.857142857142857,"a95":2.2,"info":"\"15-06-16\" at \"11:07\""},{"visible":true,"include":true,"step":"210","x":105.9047619047619,"y":195.23809523809524,"z":-85.61904761904762,"a95":2.3,"info":"\"15-06-16\" at \"14:40\""},{"visible":true,"include":false,"step":"230","x":150.28571428571428,"y":196.38095238095238,"z":-146,"a95":2.5,"info":"\"15-06-17\" at \"18:10\""},{"visible":true,"include":false,"step":"250","x":171.61904761904762,"y":240.76190476190476,"z":74.0952380952381,"a95":2.1,"info":"\"15-06-17\" at \"21:05\""},{"visible":true,"include":false,"step":"280","x":213.14285714285714,"y":255.61904761904762,"z":66,"a95":2.4,"info":"\"15-06-18\" at \"06:47\""},{"visible":true,"include":false,"step":"300","x":128.47619047619048,"y":206.85714285714286,"z":26.285714285714285,"a95":1.8,"info":"\"15-06-18\" at \"09:33\""},{"visible":true,"include":false,"step":"320","x":130.38095238095238,"y":252.1904761904762,"z":24.19047619047619,"a95":1.5,"info":"\"15-06-18\" at \"13:40\""},{"visible":true,"include":false,"step":"340","x":116.47619047619048,"y":237.9047619047619,"z":-13.047619047619047,"a95":1.8,"info":"\"15-06-19\" at \"09:10\""},{"visible":true,"include":false,"step":"360","x":87.52380952380952,"y":235.71428571428572,"z":-24.666666666666668,"a95":1.8,"info":"\"15-06-19\" at \"12:33\""},{"visible":true,"include":false,"step":"390","x":71.14285714285714,"y":239.61904761904762,"z":-24.095238095238095,"a95":1.8,"info":"\"15-06-20\" at \"09:20\""},{"visible":true,"include":false,"step":"420","x":94.57142857142857,"y":234.95238095238096,"z":42.19047619047619,"a95":1.6,"info":"\"15-06-20\" at \"12:00\""},{"visible":true,"include":false,"step":"450","x":44.19047619047619,"y":183.61904761904762,"z":-28.761904761904763,"a95":2.1,"info":"\"15-06-21\" at \"15:53\""},{"visible":true,"include":false,"step":"470","x":100.28571428571429,"y":208.57142857142858,"z":160.1904761904762,"a95":1.9,"info":"\"15-06-21\" at \"19:16\""},{"visible":true,"include":false,"step":"490","x":111.14285714285714,"y":222.66666666666666,"z":24.952380952380953,"a95":1.7,"info":"\"15-06-21\" at \"23:07\""},{"visible":true,"include":false,"step":"510","x":-41.80952380952381,"y":159.9047619047619,"z":38.76190476190476,"a95":3,"info":"\"15-06-29\" at \"09:07\""},{"visible":true,"include":false,"step":"540","x":22.19047619047619,"y":101.42857142857143,"z":-4.9523809523809526,"a95":4.9,"info":"\"15-06-29\" at \"12:43\""},{"visible":true,"include":false,"step":"560","x":-35.53333333333334,"y":69.12380952380951,"z":31.94285714285714,"a95":13.9,"info":"\"15-06-30\" at \"05:46\""},{"visible":true,"include":false,"step":"580","x":32.38095238095238,"y":243.52380952380952,"z":-253.8095238095238,"a95":5.2,"info":"\"15-06-30\" at \"09:38\""}]},{"version":"v1.1.0","exported":"2016-10-11T08:51:04.183Z","volume":10.5,"added":"2016-10-11T08:43:52.326Z","format":"Utrecht","demagType":"Unknown","strat":"3","patch":1.1,"GEO":[{"dec":294.70105043534494,"inc":-6.672922120915375,"MAD":8.98038763678357,"cm":[-1.0658141036401503e-14,1.2434497875801753e-14,0],"intensity":430.5415001592408,"type":"GC","origin":false,"forced":true,"remark":"","nSteps":4,"minStep":"10.0","maxStep":"23.0","steps":["10.0","15.0","20.0","23.0"],"group":"None","version":"v1.1.0"}],"TECT":[{"dec":264.7095601471974,"inc":-43.89700443290727,"MAD":8.980387636783494,"cm":[-5.329070518200751e-15,1.4210854715202004e-14,1.0658141036401503e-14],"intensity":430.54150015924074,"type":"GC","origin":false,"forced":true,"remark":"","nSteps":4,"minStep":"10.0","maxStep":"23.0","steps":["10.0","15.0","20.0","23.0"],"group":"None","version":"v1.1.0"}],"interpreted":true,"name":"SS30.12A","coreAzi":30,"coreDip":54,"bedStrike":249,"bedDip":65,"data":[{"visible":true,"include":false,"step":"0.0","x":163.2952380952381,"y":39.140952380952385,"z":184.05714285714285,"a95":0.99,"info":"26/06/2015 at 10:49:56"},{"visible":true,"include":true,"step":"10.0","x":189.3904761904762,"y":-0.5527904761904762,"z":6.505333333333333,"a95":0.99,"info":"26/06/2015 at 10:49:56"},{"visible":true,"include":true,"step":"15.0","x":196.9809523809524,"y":-0.15052380952380953,"z":-75.98095238095237,"a95":0.99,"info":"26/06/2015 at 10:49:56"},{"visible":true,"include":true,"step":"20.0","x":224.87619047619046,"y":18.717142857142857,"z":-98.44761904761906,"a95":0.99,"info":"26/06/2015 at 10:49:56"},{"visible":true,"include":true,"step":"23.0","x":229.37142857142857,"y":16.737142857142857,"z":-105.20952380952382,"a95":0.99,"info":"26/06/2015 at 10:49:56"},{"visible":true,"include":true,"step":"25.0","x":183.4,"y":-11.891428571428571,"z":-104.52380952380952,"a95":0.99,"info":"26/06/2015 at 10:49:56"},{"visible":true,"include":false,"step":"30.0","x":162.64761904761903,"y":-26.82190476190476,"z":-44.54190476190476,"a95":0.99,"info":"26/06/2015 at 10:49:56"},{"visible":true,"include":false,"step":"33.0","x":148.78095238095239,"y":-54.75714285714286,"z":-70.91428571428571,"a95":0.99,"info":"26/06/2015 at 10:49:56"},{"visible":true,"include":false,"step":"35.0","x":102.39047619047618,"y":-52.52761904761904,"z":-86.47333333333333,"a95":0.99,"info":"26/06/2015 at 10:49:56"},{"visible":true,"include":false,"step":"40.0","x":89.15142857142857,"y":-19.710476190476193,"z":-34.2,"a95":0.99,"info":"26/06/2015 at 10:49:56"},{"visible":true,"include":false,"step":"45.0","x":117.28571428571429,"y":11.107619047619048,"z":-40.73238095238095,"a95":0.99,"info":"26/06/2015 at 10:49:56"},{"visible":true,"include":false,"step":"50.0","x":36.23904761904762,"y":-29.539047619047622,"z":-6.750857142857143,"a95":0.99,"info":"26/06/2015 at 10:49:56"},{"visible":true,"include":false,"step":"55.0","x":19.88190476190476,"y":52.013333333333335,"z":-58.287619047619046,"a95":0.99,"info":"26/06/2015 at 10:49:56"},{"visible":true,"include":false,"step":"60.0","x":25.682857142857145,"y":5.572,"z":-36.27047619047619,"a95":0.99,"info":"26/06/2015 at 10:49:56"},{"visible":true,"include":false,"step":"65.0","x":31.16761904761905,"y":1.1834285714285715,"z":29.859999999999996,"a95":0.99,"info":"26/06/2015 at 10:49:56"},{"visible":true,"include":false,"step":"70.0","x":54.29714285714286,"y":17.421904761904763,"z":-4.497428571428571,"a95":0.99,"info":"26/06/2015 at 10:49:56"},{"visible":true,"include":false,"step":"80.0","x":118.24761904761904,"y":26.414285714285718,"z":52.75142857142857,"a95":0.99,"info":"26/06/2015 at 10:49:56"}]},{"version":"v1.1.0","exported":"2016-10-11T08:51:04.183Z","volume":10.5,"added":"2016-10-11T08:43:52.326Z","format":"Utrecht","demagType":"Unknown","strat":"0","patch":1.1,"GEO":[{"dec":6.99407896014776,"inc":-32.46145947348883,"MAD":3.5954175985909096,"cm":[6.750155989720952e-14,-1.4210854715202004e-14,0],"intensity":1968.639930155633,"type":"GC","origin":false,"forced":true,"remark":"","nSteps":3,"minStep":"100","maxStep":"180","steps":["100","150","180"],"group":"None","version":"v1.1.0"}],"TECT":[{"dec":92.42423534702726,"inc":-64.43012740119356,"MAD":3.5954175985906995,"cm":[0,3.552713678800501e-14,-3.552713678800501e-15],"intensity":1968.6399301556326,"type":"GC","origin":false,"forced":true,"remark":"","nSteps":3,"minStep":"100","maxStep":"180","steps":["100","150","180"],"group":"None","version":"v1.1.0"}],"interpreted":true,"name":"SS30.13A","coreAzi":22,"coreDip":59,"bedStrike":249,"bedDip":65,"data":[{"visible":true,"include":false,"step":"20","x":333.9047619047619,"y":134.38095238095238,"z":4414.380952380952,"a95":2.5,"info":"\"15-06-15\" at \"09:59\""},{"visible":true,"include":true,"step":"100","x":151.04761904761904,"y":400.1904761904762,"z":1503.3333333333333,"a95":2.5,"info":"\"15-06-15\" at \"13:16\""},{"visible":true,"include":true,"step":"150","x":128.47619047619048,"y":425.7142857142857,"z":356.85714285714283,"a95":2.2,"info":"\"15-06-16\" at \"08:16\""},{"visible":true,"include":true,"step":"180","x":81.80952380952381,"y":398.76190476190476,"z":280.76190476190476,"a95":2.5,"info":"\"15-06-16\" at \"11:08\""},{"visible":true,"include":false,"step":"210","x":115.9047619047619,"y":483.6190476190476,"z":-253.14285714285714,"a95":1.9,"info":"\"15-06-16\" at \"14:42\""},{"visible":true,"include":false,"step":"230","x":134.0952380952381,"y":463.3333333333333,"z":-295.42857142857144,"a95":2,"info":"\"15-06-17\" at \"18:11\""},{"visible":true,"include":false,"step":"250","x":-50.38095238095238,"y":253.9047619047619,"z":94.38095238095238,"a95":4,"info":"\"15-06-17\" at \"21:07\""},{"visible":true,"include":false,"step":"280","x":66.0952380952381,"y":419.9047619047619,"z":86.66666666666667,"a95":2.3,"info":"\"15-06-18\" at \"06:49\""},{"visible":true,"include":false,"step":"300","x":141.42857142857142,"y":258.1904761904762,"z":11.142857142857142,"a95":2.6,"info":"\"15-06-18\" at \"09:35\""},{"visible":true,"include":false,"step":"320","x":110.66666666666667,"y":127.04761904761905,"z":70.0952380952381,"a95":3.4,"info":"\"15-06-18\" at \"13:42\""},{"visible":true,"include":false,"step":"340","x":148.85714285714286,"y":254.76190476190476,"z":8.666666666666666,"a95":1.8,"info":"\"15-06-19\" at \"09:13\""},{"visible":true,"include":false,"step":"360","x":180.76190476190476,"y":291.9047619047619,"z":20.666666666666668,"a95":2,"info":"\"15-06-19\" at \"12:36\""},{"visible":true,"include":false,"step":"390","x":133.23809523809524,"y":241.23809523809524,"z":-79.42857142857143,"a95":2.6,"info":"\"15-06-20\" at \"09:21\""},{"visible":true,"include":false,"step":"420","x":78.28571428571429,"y":311.04761904761904,"z":52.285714285714285,"a95":2.1,"info":"\"15-06-20\" at \"12:02\""},{"visible":true,"include":false,"step":"450","x":137.42857142857142,"y":283.9047619047619,"z":-274.6666666666667,"a95":2.3,"info":"\"15-06-21\" at \"15:55\""}]},{"version":"v1.1.0","exported":"2016-10-11T08:51:04.183Z","volume":10.5,"added":"2016-10-11T08:43:52.326Z","format":"Utrecht","demagType":"Unknown","strat":"4","patch":1.1,"GEO":[{"dec":282.018145372411,"inc":-4.609072812006054,"MAD":12.258856042251661,"cm":[-1.4210854715202004e-14,-3.907985046680551e-14,0],"intensity":2043.5666161505228,"type":"GC","origin":false,"forced":true,"remark":"","nSteps":5,"minStep":"10.0","maxStep":"25.0","steps":["10.0","15.0","20.0","23.0","25.0"],"group":"None","version":"v1.1.0"}],"TECT":[{"dec":259.6199205690275,"inc":-31.750038543966966,"MAD":12.258856042250939,"cm":[5.3290705182007514e-14,-7.105427357601002e-14,2.842170943040401e-14],"intensity":2043.5666161505228,"type":"GC","origin":false,"forced":true,"remark":"","nSteps":5,"minStep":"10.0","maxStep":"25.0","steps":["10.0","15.0","20.0","23.0","25.0"],"group":"None","version":"v1.1.0"}],"interpreted":true,"name":"SS30.15A","coreAzi":321,"coreDip":65,"bedStrike":249,"bedDip":65,"data":[{"visible":true,"include":false,"step":"0.0","x":462.2190476190476,"y":1232.3809523809523,"z":980.1904761904761,"a95":0.99,"info":"26/06/2015 at 10:49:56"},{"visible":true,"include":true,"step":"10.0","x":627.0761904761905,"y":929.7714285714286,"z":531.7238095238096,"a95":0.99,"info":"26/06/2015 at 10:49:56"},{"visible":true,"include":true,"step":"15.0","x":594.447619047619,"y":897.257142857143,"z":291.4666666666667,"a95":0.99,"info":"26/06/2015 at 10:49:56"},{"visible":true,"include":true,"step":"20.0","x":590.2857142857143,"y":782.9904761904761,"z":259.552380952381,"a95":0.99,"info":"26/06/2015 at 10:49:56"},{"visible":true,"include":true,"step":"23.0","x":598.2476190476191,"y":753.6,"z":218.39999999999998,"a95":0.99,"info":"26/06/2015 at 10:49:56"},{"visible":true,"include":true,"step":"25.0","x":531.5428571428571,"y":641.2380952380952,"z":73.00380952380952,"a95":0.99,"info":"26/06/2015 at 10:49:56"},{"visible":true,"include":false,"step":"30.0","x":426.14285714285717,"y":607.6285714285715,"z":138.83809523809524,"a95":0.99,"info":"26/06/2015 at 10:49:56"},{"visible":true,"include":false,"step":"33.0","x":414.35238095238094,"y":537.1142857142856,"z":85.3295238095238,"a95":0.99,"info":"26/06/2015 at 10:49:56"},{"visible":true,"include":false,"step":"35.0","x":439.53333333333336,"y":479.6,"z":153.33333333333334,"a95":0.99,"info":"26/06/2015 at 10:49:56"},{"visible":true,"include":false,"step":"40.0","x":295.65714285714284,"y":504.8857142857143,"z":128.62857142857143,"a95":0.99,"info":"26/06/2015 at 10:49:56"},{"visible":true,"include":false,"step":"45.0","x":350.3047619047619,"y":498.60952380952375,"z":9.865714285714287,"a95":0.99,"info":"26/06/2015 at 10:49:56"},{"visible":true,"include":false,"step":"50.0","x":254.47619047619048,"y":110.34285714285713,"z":105.25714285714287,"a95":0.99,"info":"26/06/2015 at 10:49:56"},{"visible":true,"include":false,"step":"55.0","x":99.29523809523809,"y":364.87619047619046,"z":60.52571428571429,"a95":0.99,"info":"26/06/2015 at 10:49:56"},{"visible":true,"include":false,"step":"60.0","x":273.96190476190475,"y":198.33333333333334,"z":-93.99619047619048,"a95":0.99,"info":"26/06/2015 at 10:49:56"},{"visible":true,"include":false,"step":"65.0","x":210.65714285714287,"y":128.92380952380952,"z":54.98476190476191,"a95":0.99,"info":"26/06/2015 at 10:49:56"},{"visible":true,"include":false,"step":"70.0","x":190.75238095238097,"y":271.1333333333333,"z":101.78095238095239,"a95":0.99,"info":"26/06/2015 at 10:49:56"},{"visible":true,"include":false,"step":"80.0","x":-639.495238095238,"y":170.63809523809525,"z":-74.94761904761906,"a95":0.99,"info":"26/06/2015 at 10:49:56"}]},{"version":"v1.1.0","exported":"2016-10-11T08:51:04.183Z","volume":10.5,"added":"2016-10-11T08:43:52.326Z","format":"Utrecht","demagType":"Unknown","strat":"0","patch":1.1,"GEO":[{"dec":282.2600265786194,"inc":-14.14048970329781,"MAD":8.842559209228527,"cm":[-1.4210854715202004e-14,6.972200594645983e-14,0],"intensity":1781.2459623059622,"type":"GC","origin":false,"forced":true,"remark":"","nSteps":11,"minStep":"10.0","maxStep":"50.0","steps":["10.0","15.0","20.0","23.0","25.0","30.0","33.0","35.0","40.0","45.0","50.0"],"group":"None","version":"v1.1.0"}],"TECT":[{"dec":249.23644742723047,"inc":-35.819938032043446,"MAD":8.84255920922834,"cm":[7.105427357601002e-15,1.2079226507921703e-13,3.197442310920451e-14],"intensity":1781.2459623059622,"type":"GC","origin":false,"forced":true,"remark":"","nSteps":11,"minStep":"10.0","maxStep":"50.0","steps":["10.0","15.0","20.0","23.0","25.0","30.0","33.0","35.0","40.0","45.0","50.0"],"group":"None","version":"v1.1.0"}],"interpreted":true,"name":"SS30.16A","coreAzi":332,"coreDip":68,"bedStrike":249,"bedDip":65,"data":[{"visible":true,"include":false,"step":"0.0","x":673.1428571428571,"y":876.6761904761905,"z":1779.904761904762,"a95":0.99,"info":"04/10/2015 at 21:22:24"},{"visible":true,"include":true,"step":"10.0","x":788.5809523809525,"y":743.0380952380953,"z":959.6190476190476,"a95":0.99,"info":"04/10/2015 at 21:22:24"},{"visible":true,"include":true,"step":"15.0","x":729.6952380952381,"y":656.447619047619,"z":610.2380952380952,"a95":0.99,"info":"04/10/2015 at 21:22:24"},{"visible":true,"include":true,"step":"20.0","x":689.3333333333334,"y":605.0285714285715,"z":448.4095238095238,"a95":0.99,"info":"04/10/2015 at 21:22:24"},{"visible":true,"include":true,"step":"23.0","x":645.0857142857143,"y":572.9333333333334,"z":373.0571428571428,"a95":0.99,"info":"04/10/2015 at 21:22:24"},{"visible":true,"include":true,"step":"25.0","x":582.2285714285714,"y":566.5904761904761,"z":313.67619047619047,"a95":0.99,"info":"04/10/2015 at 21:22:24"},{"visible":true,"include":true,"step":"30.0","x":518.2761904761904,"y":492.8952380952381,"z":225.47619047619048,"a95":0.99,"info":"04/10/2015 at 21:22:24"},{"visible":true,"include":true,"step":"33.0","x":465.9428571428571,"y":464.76190476190476,"z":171.53333333333333,"a95":0.99,"info":"04/10/2015 at 21:22:24"},{"visible":true,"include":true,"step":"35.0","x":416.3809523809524,"y":367.62857142857143,"z":119.94285714285715,"a95":0.99,"info":"04/10/2015 at 21:22:24"},{"visible":true,"include":true,"step":"40.0","x":446.60952380952375,"y":339.7809523809524,"z":178.2952380952381,"a95":0.99,"info":"04/10/2015 at 21:22:24"},{"visible":true,"include":true,"step":"45.0","x":334.96190476190475,"y":331.85714285714283,"z":118.28571428571429,"a95":0.99,"info":"04/10/2015 at 21:22:24"},{"visible":true,"include":true,"step":"50.0","x":243.7238095238095,"y":226,"z":121.19047619047619,"a95":0.99,"info":"04/10/2015 at 21:22:24"},{"visible":true,"include":false,"step":"60.0","x":162.86666666666665,"y":209.36190476190478,"z":77.88285714285715,"a95":0.99,"info":"04/10/2015 at 21:22:24"},{"visible":true,"include":false,"step":"70.0","x":196.54285714285712,"y":124.34285714285713,"z":48.71904761904762,"a95":0.99,"info":"04/10/2015 at 21:22:24"}]},{"version":"v1.1.0","exported":"2016-10-11T08:51:04.183Z","volume":10.5,"added":"2016-10-11T08:43:52.326Z","format":"Utrecht","demagType":"Unknown","strat":"0","patch":1.1,"GEO":[],"TECT":[],"interpreted":false,"name":"SS30.17A","coreAzi":311,"coreDip":53,"bedStrike":249,"bedDip":65,"data":[{"visible":true,"include":false,"step":"20","x":-235.23809523809524,"y":371.23809523809524,"z":786,"a95":2.6,"info":"\"15-06-15\" at \"09:48\""},{"visible":true,"include":false,"step":"100","x":-23.047619047619047,"y":97.04761904761905,"z":293.14285714285717,"a95":2.9,"info":"\"15-06-15\" at \"13:18\""},{"visible":true,"include":false,"step":"150","x":34.38095238095238,"y":28.761904761904763,"z":115.61904761904762,"a95":3.9,"info":"\"15-06-16\" at \"08:18\""},{"visible":true,"include":false,"step":"180","x":27.61904761904762,"y":45.523809523809526,"z":120.47619047619048,"a95":3.7,"info":"\"15-06-16\" at \"11:10\""},{"visible":true,"include":false,"step":"210","x":62.8,"y":-27.20952380952381,"z":-61.00952380952381,"a95":3.7,"info":"\"15-06-16\" at \"14:44\""},{"visible":true,"include":false,"step":"230","x":67.14285714285714,"y":-10.380952380952381,"z":-77.04761904761905,"a95":3.6,"info":"\"15-06-17\" at \"18:13\""},{"visible":true,"include":false,"step":"250","x":-0.09523809523809523,"y":28.857142857142858,"z":118.47619047619048,"a95":4.2,"info":"\"15-06-17\" at \"21:11\""}]},{"version":"v1.1.0","exported":"2016-10-11T08:51:04.183Z","volume":10.5,"added":"2016-10-11T08:43:52.326Z","format":"Utrecht","demagType":"Unknown","strat":"5","patch":1.1,"GEO":[],"TECT":[],"interpreted":false,"name":"SS30.18A","coreAzi":314,"coreDip":54,"bedStrike":249,"bedDip":65,"data":[{"visible":true,"include":false,"step":"0.0","x":-49.231428571428566,"y":265.2857142857143,"z":263.85714285714283,"a95":0.99,"info":"26/06/2015 at 10:49:56"},{"visible":true,"include":false,"step":"10.0","x":65.40666666666667,"y":181.47619047619048,"z":70.36285714285714,"a95":0.99,"info":"26/06/2015 at 10:49:56"},{"visible":true,"include":false,"step":"15.0","x":71.41714285714286,"y":102.42857142857143,"z":11.436190476190475,"a95":0.99,"info":"26/06/2015 at 10:49:56"},{"visible":false,"include":false,"step":"20.0","x":120.76190476190476,"y":108.93333333333332,"z":-9.61047619047619,"a95":0.99,"info":"26/06/2015 at 10:49:56"},{"visible":true,"include":true,"step":"23.0","x":100.67619047619047,"y":85.66666666666667,"z":-28.365714285714283,"a95":0.99,"info":"26/06/2015 at 10:49:56"},{"visible":true,"include":true,"step":"25.0","x":109.54285714285714,"y":56.18476190476191,"z":-23.23333333333333,"a95":0.99,"info":"26/06/2015 at 10:49:56"},{"visible":true,"include":false,"step":"30.0","x":70.9695238095238,"y":69,"z":-31.20380952380952,"a95":0.99,"info":"26/06/2015 at 10:49:56"},{"visible":true,"include":false,"step":"33.0","x":120.42857142857143,"y":54.567619047619054,"z":-21.245714285714286,"a95":0.99,"info":"26/06/2015 at 10:49:56"},{"visible":true,"include":false,"step":"35.0","x":49.387619047619054,"y":29.515238095238097,"z":-12.662857142857144,"a95":0.99,"info":"26/06/2015 at 10:49:56"},{"visible":true,"include":false,"step":"40.0","x":53.21333333333333,"y":19.704761904761906,"z":11.075238095238095,"a95":0.99,"info":"26/06/2015 at 10:49:56"},{"visible":true,"include":false,"step":"45.0","x":81.26666666666667,"y":67.82761904761905,"z":-19.272380952380953,"a95":0.99,"info":"26/06/2015 at 10:49:56"},{"visible":true,"include":false,"step":"50.0","x":65.01523809523809,"y":46.955238095238094,"z":-6.9126666666666665,"a95":0.99,"info":"26/06/2015 at 10:49:56"},{"visible":true,"include":false,"step":"55.0","x":62.6152380952381,"y":86.09238095238095,"z":28.38952380952381,"a95":0.99,"info":"26/06/2015 at 10:49:56"},{"visible":true,"include":false,"step":"60.0","x":100.66666666666667,"y":40.61333333333333,"z":2.451142857142857,"a95":0.99,"info":"26/06/2015 at 10:49:56"},{"visible":true,"include":false,"step":"65.0","x":87.66380952380953,"y":51.06666666666667,"z":52.81809523809524,"a95":0.99,"info":"26/06/2015 at 10:49:56"},{"visible":true,"include":false,"step":"70.0","x":61.10476190476191,"y":113.11428571428571,"z":87.31904761904762,"a95":0.99,"info":"26/06/2015 at 10:49:56"},{"visible":true,"include":false,"step":"80.0","x":14.540952380952382,"y":57.859047619047615,"z":113.76190476190476,"a95":0.99,"info":"26/06/2015 at 10:49:56"}]},{"version":"v1.1.0","exported":"2016-10-11T08:51:04.183Z","volume":10.5,"added":"2016-10-11T08:43:52.326Z","format":"Utrecht","demagType":"Unknown","strat":"0","patch":1.1,"GEO":[{"dec":291.0157834573857,"inc":-11.89299186833463,"MAD":14.419072294470753,"cm":[217.28717277461809,46.04161334776567,131.47190790166522],"intensity":823.3540627239789,"type":"GC","origin":false,"forced":false,"remark":"","nSteps":14,"minStep":"0.0","maxStep":"70.0","steps":["0.0","10.0","15.0","20.0","23.0","25.0","30.0","33.0","35.0","40.0","45.0","50.0","60.0","70.0"],"group":"None","version":"v1.1.0"}],"TECT":[{"dec":256.05894846505345,"inc":-42.8981486992559,"MAD":14.419072294470899,"cm":[228.07555085647232,41.900343005777486,-113.33275138666114],"intensity":823.3540627239789,"type":"GC","origin":false,"forced":false,"remark":"","nSteps":14,"minStep":"0.0","maxStep":"70.0","steps":["0.0","10.0","15.0","20.0","23.0","25.0","30.0","33.0","35.0","40.0","45.0","50.0","60.0","70.0"],"group":"None","version":"v1.1.0"}],"interpreted":true,"name":"SS30.19A","coreAzi":342,"coreDip":62,"bedStrike":249,"bedDip":65,"data":[{"visible":true,"include":true,"step":"0.0","x":144.61904761904762,"y":232.35238095238094,"z":823.0857142857143,"a95":0.99,"info":"05/10/2015 at 01:49:32"},{"visible":true,"include":true,"step":"10.0","x":152.61904761904762,"y":182.47619047619048,"z":477.1714285714286,"a95":0.99,"info":"05/10/2015 at 01:49:32"},{"visible":true,"include":true,"step":"15.0","x":144.31428571428572,"y":159.88571428571427,"z":333.4666666666667,"a95":0.99,"info":"05/10/2015 at 01:49:32"},{"visible":true,"include":true,"step":"20.0","x":133.2095238095238,"y":139.7904761904762,"z":242.12380952380954,"a95":0.99,"info":"05/10/2015 at 01:49:32"},{"visible":true,"include":true,"step":"23.0","x":122.64761904761905,"y":114.65714285714287,"z":198.16190476190474,"a95":0.99,"info":"05/10/2015 at 01:49:32"},{"visible":true,"include":true,"step":"25.0","x":121.38095238095238,"y":110.72380952380952,"z":168.96190476190475,"a95":0.99,"info":"05/10/2015 at 01:49:32"},{"visible":true,"include":true,"step":"30.0","x":108.79047619047618,"y":99.80000000000001,"z":141.2095238095238,"a95":0.99,"info":"05/10/2015 at 01:49:32"},{"visible":true,"include":true,"step":"33.0","x":99.19999999999999,"y":91.62095238095237,"z":121.80000000000001,"a95":0.99,"info":"05/10/2015 at 01:49:32"},{"visible":true,"include":true,"step":"35.0","x":99.45714285714286,"y":80.65904761904761,"z":107.9047619047619,"a95":0.99,"info":"05/10/2015 at 01:49:32"},{"visible":true,"include":true,"step":"40.0","x":93.19619047619047,"y":99.44761904761906,"z":89.50761904761904,"a95":0.99,"info":"05/10/2015 at 01:49:32"},{"visible":true,"include":true,"step":"45.0","x":93.19428571428571,"y":86.20571428571428,"z":66.79714285714286,"a95":0.99,"info":"05/10/2015 at 01:49:32"},{"visible":true,"include":true,"step":"50.0","x":74.28380952380952,"y":51.82285714285714,"z":59.54571428571429,"a95":0.99,"info":"05/10/2015 at 01:49:32"},{"visible":true,"include":true,"step":"60.0","x":65.79904761904761,"y":59.506666666666675,"z":34.32666666666667,"a95":0.99,"info":"05/10/2015 at 01:49:32"},{"visible":true,"include":true,"step":"70.0","x":61.78952380952381,"y":44.12190476190476,"z":25.82761904761905,"a95":0.99,"info":"05/10/2015 at 01:49:32"}]},{"version":"v1.1.0","exported":"2016-10-11T08:51:04.183Z","volume":10.5,"added":"2016-10-11T08:43:52.326Z","format":"Utrecht","demagType":"Unknown","strat":"0","patch":1.1,"GEO":[{"dec":300.9210558720929,"inc":-17.82191613055559,"MAD":21.160450402105162,"cm":[263.9591212473302,71.33850247848258,163.83903754404244],"intensity":845.9395505166694,"type":"GC","origin":false,"forced":false,"remark":"","nSteps":11,"minStep":"0.0","maxStep":"45.0","steps":["0.0","10.0","15.0","20.0","23.0","25.0","30.0","33.0","35.0","40.0","45.0"],"group":"None","version":"v1.1.0"}],"TECT":[{"dec":252.8313169857612,"inc":-53.95180145843842,"MAD":21.16045040210531,"cm":[283.5336142290011,63.82455861876596,-130.92725143473027],"intensity":845.9395505166696,"type":"GC","origin":false,"forced":false,"remark":"","nSteps":11,"minStep":"0.0","maxStep":"45.0","steps":["0.0","10.0","15.0","20.0","23.0","25.0","30.0","33.0","35.0","40.0","45.0"],"group":"None","version":"v1.1.0"}],"interpreted":true,"name":"SS30.20A","coreAzi":339,"coreDip":63,"bedStrike":249,"bedDip":65,"data":[{"visible":true,"include":true,"step":"0.0","x":186.9047619047619,"y":315.54285714285714,"z":855.9238095238096,"a95":0.99,"info":"05/10/2015 at 01:49:32"},{"visible":true,"include":true,"step":"10.0","x":149.7047619047619,"y":238.04761904761904,"z":482.9238095238095,"a95":0.99,"info":"05/10/2015 at 01:49:32"},{"visible":true,"include":true,"step":"15.0","x":146.78095238095239,"y":201.94285714285715,"z":341.3619047619048,"a95":0.99,"info":"05/10/2015 at 01:49:32"},{"visible":true,"include":true,"step":"20.0","x":129.04761904761904,"y":170.33333333333334,"z":235.05714285714285,"a95":0.99,"info":"05/10/2015 at 01:49:32"},{"visible":true,"include":true,"step":"23.0","x":125.51428571428572,"y":161.6,"z":201.39999999999998,"a95":0.99,"info":"05/10/2015 at 01:49:32"},{"visible":true,"include":true,"step":"25.0","x":118.13333333333334,"y":148.1809523809524,"z":165.7047619047619,"a95":0.99,"info":"05/10/2015 at 01:49:32"},{"visible":true,"include":true,"step":"30.0","x":117.32380952380953,"y":127.52380952380952,"z":117.45714285714286,"a95":0.99,"info":"05/10/2015 at 01:49:32"},{"visible":true,"include":true,"step":"33.0","x":101.81904761904761,"y":106.19047619047619,"z":108.91428571428571,"a95":0.99,"info":"05/10/2015 at 01:49:32"},{"visible":true,"include":true,"step":"35.0","x":99.98095238095237,"y":104.12380952380951,"z":86.11428571428571,"a95":0.99,"info":"05/10/2015 at 01:49:32"},{"visible":true,"include":true,"step":"40.0","x":83.01142857142857,"y":105.98095238095237,"z":68.32190476190476,"a95":0.99,"info":"05/10/2015 at 01:49:32"},{"visible":true,"include":true,"step":"45.0","x":88.2647619047619,"y":93.6752380952381,"z":45.579047619047614,"a95":0.99,"info":"05/10/2015 at 01:49:32"},{"visible":true,"include":false,"step":"50.0","x":92.14,"y":67.12190476190476,"z":42.02952380952381,"a95":0.99,"info":"05/10/2015 at 01:49:32"},{"visible":true,"include":false,"step":"60.0","x":83.36095238095238,"y":53.3247619047619,"z":31.28190476190476,"a95":0.99,"info":"05/10/2015 at 01:49:32"},{"visible":true,"include":false,"step":"70.0","x":89.49333333333333,"y":67.1047619047619,"z":26.21809523809524,"a95":0.99,"info":"05/10/2015 at 01:49:32"}]},{"version":"v1.1.0","exported":"2016-10-11T08:51:04.183Z","volume":10.5,"added":"2016-10-11T08:43:52.327Z","format":"Utrecht","demagType":"Unknown","strat":"6","patch":1.1,"GEO":[{"dec":13.983739428431534,"inc":58.942934728924214,"MAD":1.20196973971326,"cm":[-7.105427357601002e-14,1.7763568394002505e-13,0],"intensity":10132.673339785195,"type":"dir","forced":true,"remark":"","origin":false,"nSteps":16,"minStep":"10.0","maxStep":"80.0","steps":["10.0","15.0","20.0","23.0","25.0","30.0","33.0","35.0","40.0","45.0","50.0","55.0","60.0","65.0","70.0","80.0"],"group":"None","version":"v1.1.0"}],"TECT":[{"dec":356.20844009085613,"inc":-1.2054996411744403,"MAD":1.2019697397133444,"cm":[5.684341886080802e-14,7.389644451905042e-13,1.7674750552032492e-13],"intensity":10132.673339785195,"type":"dir","forced":true,"remark":"","origin":false,"nSteps":16,"minStep":"10.0","maxStep":"80.0","steps":["10.0","15.0","20.0","23.0","25.0","30.0","33.0","35.0","40.0","45.0","50.0","55.0","60.0","65.0","70.0","80.0"],"group":"None","version":"v1.1.0"}],"interpreted":true,"name":"SS30.21A","coreAzi":326,"coreDip":79,"bedStrike":249,"bedDip":65,"data":[{"visible":true,"include":false,"step":"0.0","x":1006.5714285714286,"y":2712.8571428571427,"z":5970.380952380952,"a95":0.99,"info":"26/06/2015 at 10:49:56"},{"visible":true,"include":true,"step":"10.0","x":993.3333333333334,"y":2357.0476190476193,"z":5334.571428571428,"a95":0.99,"info":"26/06/2015 at 10:49:56"},{"visible":true,"include":true,"step":"15.0","x":965.4285714285714,"y":2192.8571428571427,"z":4970.380952380952,"a95":0.99,"info":"26/06/2015 at 10:49:56"},{"visible":true,"include":true,"step":"20.0","x":916.5619047619048,"y":2166.3809523809523,"z":4779.714285714285,"a95":0.99,"info":"26/06/2015 at 10:49:56"},{"visible":true,"include":true,"step":"23.0","x":842.952380952381,"y":2049.904761904762,"z":4691.428571428572,"a95":0.99,"info":"26/06/2015 at 10:49:56"},{"visible":true,"include":true,"step":"25.0","x":846.4476190476191,"y":2058.095238095238,"z":4651.9047619047615,"a95":0.99,"info":"26/06/2015 at 10:49:56"},{"visible":true,"include":true,"step":"30.0","x":857.257142857143,"y":1934.7619047619048,"z":4546,"a95":0.99,"info":"26/06/2015 at 10:49:56"},{"visible":true,"include":true,"step":"33.0","x":818.7714285714286,"y":1931.8095238095239,"z":4376.476190476191,"a95":0.99,"info":"26/06/2015 at 10:49:56"},{"visible":true,"include":true,"step":"35.0","x":857.1428571428571,"y":1862.6666666666667,"z":4360.666666666667,"a95":0.99,"info":"26/06/2015 at 10:49:56"},{"visible":true,"include":true,"step":"40.0","x":863.6095238095238,"y":1838.4761904761904,"z":4384.571428571428,"a95":0.99,"info":"26/06/2015 at 10:49:56"},{"visible":true,"include":true,"step":"45.0","x":801.104761904762,"y":1800.2857142857142,"z":4326.857142857143,"a95":0.99,"info":"26/06/2015 at 10:49:56"},{"visible":true,"include":true,"step":"50.0","x":803.257142857143,"y":1689.904761904762,"z":4298.857142857143,"a95":0.99,"info":"26/06/2015 at 10:49:56"},{"visible":true,"include":true,"step":"55.0","x":828.5809523809525,"y":1650.2857142857142,"z":4200.571428571428,"a95":0.99,"info":"26/06/2015 at 10:49:56"},{"visible":true,"include":true,"step":"60.0","x":863.4000000000001,"y":1630.952380952381,"z":4056.095238095238,"a95":0.99,"info":"26/06/2015 at 10:49:56"},{"visible":true,"include":true,"step":"65.0","x":838.4666666666666,"y":1536.952380952381,"z":4036.285714285714,"a95":0.99,"info":"26/06/2015 at 10:49:56"},{"visible":true,"include":true,"step":"70.0","x":787,"y":1604.1904761904761,"z":4001.809523809524,"a95":0.99,"info":"26/06/2015 at 10:49:56"},{"visible":true,"include":true,"step":"80.0","x":877.0285714285714,"y":1527.4285714285713,"z":3835.1428571428573,"a95":0.99,"info":"26/06/2015 at 10:49:56"}]}]
