# Supplementary material for: Paleomagnetic constraints on the timing and distribution of Cenozoic rotations in Central and Eastern Anatolia
Source: Copernicus journal article supplement (doi:10.5194/se-9-295-2018), 2018-03-21
Supplement: Supplementary file 2 [file se-9-295-2018-supplement.zip › se-2017-66_DATA_dir files/dir files Sivas/SS32.dir]

[{"version":"v1.1.0","exported":"2017-05-19T12:11:31.791Z","info":"0","GEO":[{"dec":65.35251294869977,"inc":-19.405717782412136,"MAD":4.54317075651298,"cm":[-4.330927151299658e-14,6.496390726949487e-14,0],"intensity":6438.7768531825495,"type":"GC","origin":false,"forced":true,"remark":"","nSteps":6,"minStep":"100","maxStep":"250","steps":["100","150","180","210","230","250"],"group":"None"}],"TECT":[{"dec":45.00764075459688,"inc":-60.43265428995539,"MAD":4.543170756512835,"cm":[-9.311493375294265e-13,-1.7323708605198632e-13,-4.06024420434343e-14],"intensity":6438.776853182551,"type":"GC","origin":false,"forced":true,"remark":"","nSteps":6,"minStep":"100","maxStep":"250","steps":["100","150","180","210","230","250"],"group":"None"}],"interpreted":true,"name":"SS32.01A","coreAzi":269,"coreDip":35,"bedStrike":355,"bedDip":46,"data":[{"visible":true,"include":false,"step":"20","x":-6623.523809523809,"y":1092.5714285714287,"z":3901.1428571428573,"a95":"1.7","info":"\"15-06-15\" at \"10:36\""},{"visible":true,"include":true,"step":"100","x":-4952.476190476191,"y":732,"z":1594,"a95":"1.7","info":"\"15-06-15\" at \"13:46\""},{"visible":true,"include":true,"step":"150","x":-3625.1428571428573,"y":-359.6190476190476,"z":701.2380952380952,"a95":"1.6","info":"\"15-06-16\" at \"08:44\""},{"visible":true,"include":true,"step":"180","x":-2621.2380952380954,"y":-695.7142857142857,"z":340.85714285714283,"a95":"1.9","info":"\"15-06-16\" at \"11:45\""},{"visible":true,"include":true,"step":"210","x":-2024.095238095238,"y":-1065.5238095238096,"z":1.2380952380952381,"a95":"1.6","info":"\"15-06-17\" at \"15:26\""},{"visible":true,"include":true,"step":"230","x":-1830.6666666666667,"y":-1028.4761904761904,"z":-57.80952380952381,"a95":"1.9","info":"\"15-06-17\" at \"18:38\""},{"visible":true,"include":true,"step":"250","x":-1278,"y":-1403.047619047619,"z":-114.57142857142857,"a95":"1.9","info":"\"15-06-17\" at \"21:48\""},{"visible":true,"include":false,"step":"280","x":-890.8571428571429,"y":-1069.6190476190477,"z":0.6666666666666666,"a95":"2.3","info":"\"15-06-18\" at \"07:23\""},{"visible":true,"include":false,"step":"300","x":-459.23809523809524,"y":-985.4285714285714,"z":-272.0952380952381,"a95":"2.2","info":"\"15-06-18\" at \"10:28\""},{"visible":true,"include":false,"step":"320","x":-504.57142857142856,"y":-1125.047619047619,"z":488.3809523809524,"a95":"2.2","info":"\"15-06-18\" at \"14:26\""},{"visible":true,"include":false,"step":"340","x":-807.8095238095239,"y":-1443.3333333333333,"z":-321.9047619047619,"a95":"1.6","info":"\"15-06-19\" at \"09:52\""},{"visible":true,"include":false,"step":"360","x":-316.85714285714283,"y":-1092,"z":248.1904761904762,"a95":"2.1","info":"\"15-06-19\" at \"13:32\""},{"visible":true,"include":false,"step":"390","x":-477.3333333333333,"y":-1034,"z":-11.523809523809524,"a95":"2","info":"\"15-06-20\" at \"09:45\""},{"visible":true,"include":false,"step":"420","x":203.61904761904762,"y":-1088.857142857143,"z":750.1904761904761,"a95":"2.2","info":"\"15-06-20\" at \"13:03\""},{"visible":true,"include":false,"step":"450","x":31.238095238095237,"y":-1068.1904761904761,"z":578.1904761904761,"a95":"2.3","info":"\"15-06-21\" at \"16:25\""},{"visible":true,"include":false,"step":"470","x":-55.42857142857143,"y":-796.952380952381,"z":313.04761904761904,"a95":"3.4","info":"\"15-06-21\" at \"19:48\""},{"visible":true,"include":false,"step":"490","x":-2,"y":-849.4285714285714,"z":590.3809523809524,"a95":"3.3","info":"\"15-06-22\" at \"14:10\""},{"visible":true,"include":false,"step":"510","x":-95.61904761904762,"y":-1296.2857142857142,"z":315.3333333333333,"a95":"2.1","info":"\"15-06-29\" at \"09:39\""},{"visible":true,"include":false,"step":"540","x":-211.71428571428572,"y":-1143.6190476190477,"z":176.38095238095238,"a95":"2.4","info":"\"15-06-29\" at \"12:58\""},{"visible":true,"include":false,"step":"560","x":-170.66666666666666,"y":-1156,"z":623.5238095238095,"a95":"3","info":"\"15-06-30\" at \"06:17\""},{"visible":true,"include":false,"step":"580","x":429.9047619047619,"y":-1032.3809523809523,"z":517.8095238095239,"a95":"2.7","info":"\"15-06-30\" at \"09:57\""}],"demagType":"Unknown","patch":1.1,"format":"Unknown","strat":null},{"version":"v1.1.0","exported":"2017-05-19T12:11:31.791Z","info":"3","GEO":[{"dec":56.67973854478345,"inc":-21.296723630767506,"MAD":3.7442098319167574,"cm":[-1.948917218084846e-13,-1.2992781453898974e-13,0],"intensity":8640.103286472162,"type":"GC","origin":false,"forced":true,"remark":"","nSteps":5,"minStep":"0.0","maxStep":"23.0","steps":["0.0","10.0","15.0","20.0","23.0"],"group":"None"}],"TECT":[{"dec":29.912775192592505,"inc":-57.38352566721011,"MAD":3.7442098319165975,"cm":[-1.4508605956853856e-12,-2.598556290779795e-13,-2.842170943040401e-14],"intensity":8640.10328647216,"type":"GC","origin":false,"forced":true,"remark":"","nSteps":5,"minStep":"0.0","maxStep":"23.0","steps":["0.0","10.0","15.0","20.0","23.0"],"group":"None"}],"interpreted":true,"name":"SS32.02A","coreAzi":268,"coreDip":35,"bedStrike":355,"bedDip":46,"data":[{"visible":true,"include":true,"step":"0.0","x":-5483.428571428572,"y":-105.22857142857144,"z":920.0857142857143,"a95":"0.99","info":"26/06/2015 at 21:44:30"},{"visible":true,"include":true,"step":"10.0","x":-3902.095238095238,"y":-1421.8095238095239,"z":21.69047619047619,"a95":"0.99","info":"26/06/2015 at 21:44:30"},{"visible":true,"include":true,"step":"15.0","x":-3251.2380952380954,"y":-1631.8095238095239,"z":-273.8285714285714,"a95":"0.99","info":"26/06/2015 at 21:44:30"},{"visible":true,"include":true,"step":"20.0","x":-3017.4285714285716,"y":-1716.857142857143,"z":-535.5238095238095,"a95":"0.99","info":"26/06/2015 at 21:44:30"},{"visible":true,"include":true,"step":"23.0","x":-2928.285714285714,"y":-1816.4761904761904,"z":-471.20000000000005,"a95":"0.99","info":"26/06/2015 at 21:44:30"},{"visible":true,"include":false,"step":"25.0","x":-2829.2380952380954,"y":-1920,"z":-509.83809523809526,"a95":"0.99","info":"26/06/2015 at 21:44:30"},{"visible":true,"include":false,"step":"30.0","x":-2101.809523809524,"y":-2034.5714285714287,"z":-511.35238095238094,"a95":"0.99","info":"26/06/2015 at 21:44:30"},{"visible":true,"include":false,"step":"33.0","x":-2106.3809523809523,"y":-1844.952380952381,"z":-504.46666666666664,"a95":"0.99","info":"26/06/2015 at 21:44:30"},{"visible":true,"include":false,"step":"35.0","x":-2230.095238095238,"y":-2094.7619047619046,"z":-553.0095238095239,"a95":"0.99","info":"26/06/2015 at 21:44:30"},{"visible":true,"include":false,"step":"40.0","x":-1911.6190476190477,"y":-1700.7619047619048,"z":-436.2476190476191,"a95":"0.99","info":"26/06/2015 at 21:44:30"},{"visible":true,"include":false,"step":"45.0","x":-1968.952380952381,"y":-1975.6190476190477,"z":-588.447619047619,"a95":"0.99","info":"26/06/2015 at 21:44:30"},{"visible":true,"include":false,"step":"50.0","x":-1850.2857142857142,"y":-2211.2380952380954,"z":-389.0857142857143,"a95":"0.99","info":"26/06/2015 at 21:44:30"},{"visible":true,"include":false,"step":"55.0","x":-1697.4285714285713,"y":-1938.952380952381,"z":-303.3619047619048,"a95":"0.99","info":"26/06/2015 at 21:44:30"},{"visible":true,"include":false,"step":"60.0","x":-1434.6666666666667,"y":-2123.5238095238096,"z":-426.0571428571429,"a95":"0.99","info":"26/06/2015 at 21:44:30"},{"visible":true,"include":false,"step":"65.0","x":-1608.095238095238,"y":-2269.4285714285716,"z":-62.016190476190474,"a95":"0.99","info":"26/06/2015 at 21:44:30"},{"visible":true,"include":false,"step":"70.0","x":-1421.142857142857,"y":-1905.3333333333333,"z":-212.3904761904762,"a95":"0.99","info":"26/06/2015 at 21:44:30"},{"visible":true,"include":false,"step":"80.0","x":-1372.857142857143,"y":-2159.6190476190477,"z":-422.42857142857144,"a95":"0.99","info":"26/06/2015 at 21:44:30"}],"demagType":"Unknown","patch":1.1,"format":"Unknown","strat":null},{"version":"v1.1.0","exported":"2017-05-19T12:11:31.791Z","info":"0","GEO":[{"dec":64.65053888763231,"inc":-22.775232962759542,"MAD":3.103553003609298,"cm":[6.090366306515144e-14,-2.165463575649829e-13,0],"intensity":13358.126332910106,"type":"GC","origin":false,"forced":true,"remark":"","nSteps":4,"minStep":"0.0","maxStep":"20.0","steps":["0.0","10.0","15.0","20.0"],"group":"None"}],"TECT":[{"dec":40.12676489793364,"inc":-62.97056245852376,"MAD":3.103553003609558,"cm":[8.580649418512448e-13,-5.19711258155959e-13,0],"intensity":13358.126332910108,"type":"GC","origin":false,"forced":true,"remark":"","nSteps":4,"minStep":"0.0","maxStep":"20.0","steps":["0.0","10.0","15.0","20.0"],"group":"None"}],"interpreted":true,"name":"SS32.03A","coreAzi":269,"coreDip":36,"bedStrike":355,"bedDip":46,"data":[{"visible":true,"include":true,"step":"0.0","x":-8024.380952380952,"y":3628,"z":3103.904761904762,"a95":"0.99","info":"05/10/2015 at 06:15:42"},{"visible":true,"include":true,"step":"10.0","x":-5944.857142857143,"y":1089.8095238095239,"z":1717.904761904762,"a95":"0.99","info":"05/10/2015 at 06:15:42"},{"visible":true,"include":true,"step":"15.0","x":-5147.142857142857,"y":358.2761904761905,"z":1072.7619047619048,"a95":"0.99","info":"05/10/2015 at 06:15:42"},{"visible":true,"include":true,"step":"20.0","x":-4248,"y":-119.35238095238095,"z":835.3333333333334,"a95":"0.99","info":"05/10/2015 at 06:15:42"},{"visible":true,"include":false,"step":"23.0","x":-3673.714285714286,"y":-7.098,"z":739.9619047619047,"a95":"0.99","info":"05/10/2015 at 06:15:42"},{"visible":true,"include":false,"step":"25.0","x":-3550.7619047619046,"y":-180.07619047619048,"z":514.0666666666666,"a95":"0.99","info":"05/10/2015 at 06:15:42"},{"visible":true,"include":false,"step":"30.0","x":-3154.4761904761904,"y":-319.68571428571425,"z":540.3142857142857,"a95":"0.99","info":"05/10/2015 at 06:15:42"},{"visible":true,"include":false,"step":"33.0","x":-2881.3333333333335,"y":-163.82857142857142,"z":274.3047619047619,"a95":"0.99","info":"05/10/2015 at 06:15:42"},{"visible":true,"include":false,"step":"35.0","x":-2786,"y":-553.847619047619,"z":220.28571428571428,"a95":"0.99","info":"05/10/2015 at 06:15:42"},{"visible":true,"include":false,"step":"40.0","x":-2669.904761904762,"y":-471.95238095238096,"z":316.87619047619046,"a95":"0.99","info":"05/10/2015 at 06:15:42"},{"visible":true,"include":false,"step":"45.0","x":-2459.809523809524,"y":-151.8095238095238,"z":108.65714285714287,"a95":"0.99","info":"05/10/2015 at 06:15:42"},{"visible":true,"include":false,"step":"50.0","x":-2089.904761904762,"y":-136.40952380952382,"z":-104.33333333333333,"a95":"0.99","info":"05/10/2015 at 06:15:42"},{"visible":true,"include":false,"step":"60.0","x":-1984.6666666666667,"y":-807.6761904761905,"z":14.917142857142856,"a95":"0.99","info":"05/10/2015 at 06:15:42"},{"visible":true,"include":false,"step":"70.0","x":-1656.1904761904761,"y":-755.2857142857143,"z":303.68571428571425,"a95":"0.99","info":"05/10/2015 at 06:15:42"}],"demagType":"Unknown","patch":1.1,"format":"Unknown","strat":null},{"version":"v1.1.0","exported":"2017-05-19T12:11:31.791Z","info":"0","GEO":[{"dec":69.96110916119068,"inc":-27.578826850630858,"MAD":3.4651563414965185,"cm":[4.330927151299658e-13,-4.330927151299658e-14,0],"intensity":11003.265115987257,"type":"GC","origin":false,"forced":true,"remark":"","nSteps":4,"minStep":"0.0","maxStep":"20.0","steps":["0.0","10.0","15.0","20.0"],"group":"None"}],"TECT":[{"dec":43.679710533836555,"inc":-69.61472901091494,"MAD":3.465156341496315,"cm":[7.687395693556893e-13,8.661854302599316e-14,-6.496390726949487e-14],"intensity":11003.265115987257,"type":"GC","origin":false,"forced":true,"remark":"","nSteps":4,"minStep":"0.0","maxStep":"20.0","steps":["0.0","10.0","15.0","20.0"],"group":"None"}],"interpreted":true,"name":"SS32.05A","coreAzi":269,"coreDip":33,"bedStrike":355,"bedDip":46,"data":[{"visible":true,"include":true,"step":"0.0","x":-7275.238095238095,"y":1732.3809523809523,"z":1045.6190476190477,"a95":"0.99","info":"05/10/2015 at 06:15:42"},{"visible":true,"include":true,"step":"10.0","x":-5155.238095238095,"y":-15.753333333333334,"z":321.3904761904762,"a95":"0.99","info":"05/10/2015 at 06:15:42"},{"visible":true,"include":true,"step":"15.0","x":-4271.142857142857,"y":-582.2,"z":225.1142857142857,"a95":"0.99","info":"05/10/2015 at 06:15:42"},{"visible":true,"include":true,"step":"20.0","x":-3641.2380952380954,"y":-788.847619047619,"z":-39.56952380952381,"a95":"0.99","info":"05/10/2015 at 06:15:42"},{"visible":true,"include":false,"step":"23.0","x":-2933.3333333333335,"y":-849.9047619047619,"z":-76.19238095238094,"a95":"0.99","info":"05/10/2015 at 06:15:42"},{"visible":true,"include":false,"step":"25.0","x":-3039.6190476190477,"y":-1042.7619047619048,"z":-255.93333333333334,"a95":"0.99","info":"05/10/2015 at 06:15:42"},{"visible":true,"include":false,"step":"30.0","x":-2562.190476190476,"y":-1194.3809523809523,"z":-344.57142857142856,"a95":"0.99","info":"05/10/2015 at 06:15:42"},{"visible":true,"include":false,"step":"33.0","x":-2508.285714285714,"y":-1129.6190476190477,"z":-581.1142857142856,"a95":"0.99","info":"05/10/2015 at 06:15:42"},{"visible":true,"include":false,"step":"35.0","x":-2448.285714285714,"y":-1128.3809523809523,"z":-348.2761904761905,"a95":"0.99","info":"05/10/2015 at 06:15:42"},{"visible":true,"include":false,"step":"40.0","x":-2725.714285714286,"y":-1017.7142857142857,"z":-420.4,"a95":"0.99","info":"05/10/2015 at 06:15:42"},{"visible":true,"include":false,"step":"45.0","x":-2411.0476190476193,"y":-981.047619047619,"z":-537.8190476190476,"a95":"0.99","info":"05/10/2015 at 06:15:42"},{"visible":true,"include":false,"step":"50.0","x":-2298.3809523809523,"y":-1222.095238095238,"z":-594.104761904762,"a95":"0.99","info":"05/10/2015 at 06:15:42"},{"visible":true,"include":false,"step":"60.0","x":-2173.3333333333335,"y":-1332.7619047619048,"z":-637.6952380952381,"a95":"0.99","info":"05/10/2015 at 06:15:42"},{"visible":true,"include":false,"step":"70.0","x":-1733.8095238095239,"y":-1458.3809523809523,"z":-393.447619047619,"a95":"0.99","info":"05/10/2015 at 06:15:42"}],"demagType":"Unknown","patch":1.1,"format":"Unknown","strat":null},{"version":"v1.1.0","exported":"2017-05-19T12:11:31.791Z","info":"0","GEO":[{"dec":56.17849537714869,"inc":-28.134655591848894,"MAD":8.525122074735897,"cm":[6.496390726949487e-14,8.661854302599316e-14,0],"intensity":5665.912366363484,"type":"GC","origin":false,"forced":true,"remark":"","nSteps":5,"minStep":"10.0","maxStep":"25.0","steps":["10.0","15.0","20.0","23.0","25.0"],"group":"None"}],"TECT":[{"dec":19.91777917805166,"inc":-62.04646108377897,"MAD":8.525122074735691,"cm":[4.764019866429624e-13,0,-3.2481953634747435e-14],"intensity":5665.912366363484,"type":"GC","origin":false,"forced":true,"remark":"","nSteps":5,"minStep":"10.0","maxStep":"25.0","steps":["10.0","15.0","20.0","23.0","25.0"],"group":"None"}],"interpreted":true,"name":"SS32.07A","coreAzi":267,"coreDip":32,"bedStrike":355,"bedDip":46,"data":[{"visible":true,"include":false,"step":"0.0","x":-5754.761904761905,"y":2186.5714285714284,"z":1348.6666666666667,"a95":"0.99","info":"05/10/2015 at 06:15:42"},{"visible":true,"include":true,"step":"10.0","x":-3727.0476190476193,"y":676.6190476190476,"z":340.3333333333333,"a95":"0.99","info":"05/10/2015 at 06:15:42"},{"visible":true,"include":true,"step":"15.0","x":-2774.9523809523807,"y":-29.326666666666668,"z":63.493333333333325,"a95":"0.99","info":"05/10/2015 at 06:15:42"},{"visible":true,"include":true,"step":"20.0","x":-2363.0476190476193,"y":-165.82857142857142,"z":-177.45714285714286,"a95":"0.99","info":"05/10/2015 at 06:15:42"},{"visible":true,"include":true,"step":"23.0","x":-2095.904761904762,"y":-144.23809523809524,"z":-101.82857142857144,"a95":"0.99","info":"05/10/2015 at 06:15:42"},{"visible":true,"include":true,"step":"25.0","x":-1923.2380952380952,"y":-330.95238095238096,"z":-100.85714285714286,"a95":"0.99","info":"05/10/2015 at 06:15:42"},{"visible":true,"include":false,"step":"30.0","x":-1612.4761904761904,"y":-264.76190476190476,"z":-226.06666666666666,"a95":"0.99","info":"05/10/2015 at 06:15:42"},{"visible":true,"include":false,"step":"33.0","x":-1618.6666666666667,"y":-311.23809523809524,"z":-418.83809523809526,"a95":"0.99","info":"05/10/2015 at 06:15:42"},{"visible":true,"include":false,"step":"35.0","x":-1286.5714285714287,"y":-308.23809523809524,"z":-200.52380952380952,"a95":"0.99","info":"05/10/2015 at 06:15:42"},{"visible":true,"include":false,"step":"40.0","x":-1443.8095238095239,"y":-304.247619047619,"z":-184.35238095238097,"a95":"0.99","info":"05/10/2015 at 06:15:42"},{"visible":true,"include":false,"step":"45.0","x":-898.0761904761904,"y":82.11047619047619,"z":-338.32380952380953,"a95":"0.99","info":"05/10/2015 at 06:15:42"},{"visible":true,"include":false,"step":"50.0","x":-959.1428571428571,"y":-131.84761904761905,"z":-160.05714285714285,"a95":"0.99","info":"05/10/2015 at 06:15:42"},{"visible":true,"include":false,"step":"60.0","x":-760.6285714285715,"y":-191.52380952380952,"z":-106.87619047619049,"a95":"0.99","info":"05/10/2015 at 06:15:42"},{"visible":true,"include":false,"step":"70.0","x":-435.2190476190476,"y":-153.28571428571428,"z":-344.0095238095238,"a95":"0.99","info":"05/10/2015 at 06:15:42"}],"demagType":"Unknown","patch":1.1,"format":"Unknown","strat":null},{"version":"v1.1.0","exported":"2017-05-19T12:11:31.791Z","info":"4","GEO":[{"dec":42.00863316496839,"inc":-19.910532446525316,"MAD":0.9840891679984015,"cm":[-2.1113269862585835e-13,4.330927151299658e-14,0],"intensity":4469.209878506151,"type":"GC","origin":false,"forced":true,"remark":"","nSteps":3,"minStep":"10.0","maxStep":"20.0","steps":["10.0","15.0","20.0"],"group":"None"}],"TECT":[{"dec":14.953867248796598,"inc":-46.99397979773474,"MAD":0.9840891679881242,"cm":[4.601610098255887e-14,0,0],"intensity":4469.209878506151,"type":"GC","origin":false,"forced":true,"remark":"","nSteps":3,"minStep":"10.0","maxStep":"20.0","steps":["10.0","15.0","20.0"],"group":"None"}],"interpreted":true,"name":"SS32.09A","coreAzi":271,"coreDip":37,"bedStrike":355,"bedDip":46,"data":[{"visible":true,"include":false,"step":"0.0","x":-4150.285714285715,"y":506.99047619047616,"z":1282.2857142857142,"a95":"0.99","info":"26/06/2015 at 21:44:30"},{"visible":true,"include":true,"step":"10.0","x":-2681.4285714285716,"y":135.46666666666667,"z":521.8,"a95":"0.99","info":"26/06/2015 at 21:44:30"},{"visible":true,"include":true,"step":"15.0","x":-2081.5238095238096,"y":-57.494285714285716,"z":231.39999999999998,"a95":"0.99","info":"26/06/2015 at 21:44:30"},{"visible":true,"include":true,"step":"20.0","x":-1747.7142857142858,"y":-175.95238095238096,"z":73.92761904761905,"a95":"0.99","info":"26/06/2015 at 21:44:30"},{"visible":true,"include":false,"step":"23.0","x":-1693.3333333333333,"y":-151.14285714285714,"z":-160.84761904761905,"a95":"0.99","info":"26/06/2015 at 21:44:30"},{"visible":true,"include":false,"step":"25.0","x":-1374.857142857143,"y":-105.92380952380952,"z":-421,"a95":"0.99","info":"26/06/2015 at 21:44:30"},{"visible":true,"include":false,"step":"30.0","x":-1069.4285714285713,"y":4.744095238095238,"z":-407.45714285714286,"a95":"0.99","info":"26/06/2015 at 21:44:30"},{"visible":true,"include":false,"step":"33.0","x":-1061.3333333333333,"y":30.373333333333335,"z":-389.51428571428573,"a95":"0.99","info":"26/06/2015 at 21:44:30"},{"visible":true,"include":false,"step":"35.0","x":-1143.4285714285713,"y":184.05714285714285,"z":-370.6380952380952,"a95":"0.99","info":"26/06/2015 at 21:44:30"},{"visible":true,"include":false,"step":"40.0","x":-926.9904761904761,"y":87.10571428571428,"z":-347.6380952380952,"a95":"0.99","info":"26/06/2015 at 21:44:30"},{"visible":true,"include":false,"step":"45.0","x":-878.2190476190475,"y":133.83809523809524,"z":-423.27619047619044,"a95":"0.99","info":"26/06/2015 at 21:44:30"},{"visible":true,"include":false,"step":"50.0","x":-960.0952380952381,"y":-307.50476190476195,"z":-744.1714285714286,"a95":"0.99","info":"26/06/2015 at 21:44:30"},{"visible":true,"include":false,"step":"55.0","x":-956.7619047619048,"y":-352.5238095238095,"z":-656.9714285714285,"a95":"0.99","info":"26/06/2015 at 21:44:30"},{"visible":true,"include":false,"step":"60.0","x":-1011.5238095238095,"y":-169.64761904761903,"z":-808.104761904762,"a95":"0.99","info":"26/06/2015 at 21:44:30"},{"visible":true,"include":false,"step":"65.0","x":-718.0095238095239,"y":-52.241904761904756,"z":-634.9333333333334,"a95":"0.99","info":"26/06/2015 at 21:44:30"},{"visible":true,"include":false,"step":"70.0","x":-649.7809523809524,"y":-300.7809523809524,"z":-527.152380952381,"a95":"0.99","info":"26/06/2015 at 21:44:30"},{"visible":true,"include":false,"step":"80.0","x":-608.8761904761905,"y":-360.5904761904762,"z":-372.2761904761905,"a95":"0.99","info":"26/06/2015 at 21:44:30"}],"demagType":"Unknown","patch":1.1,"format":"Unknown","strat":null},{"version":"v1.1.0","exported":"2017-05-19T12:11:31.791Z","info":"0","GEO":[{"dec":56.15615718735893,"inc":-22.759749635388225,"MAD":10.24979341126834,"cm":[2.6797611748666636e-13,0,0],"intensity":10508.543612228694,"type":"GC","origin":false,"forced":true,"remark":"","nSteps":5,"minStep":"10.0","maxStep":"25.0","steps":["10.0","15.0","20.0","23.0","25.0"],"group":"None"}],"TECT":[{"dec":27.445166798068726,"inc":-58.187262546433196,"MAD":10.249793411267891,"cm":[3.4918100157353497e-13,0,-2.165463575649829e-14],"intensity":10508.543612228692,"type":"GC","origin":false,"forced":true,"remark":"","nSteps":5,"minStep":"10.0","maxStep":"25.0","steps":["10.0","15.0","20.0","23.0","25.0"],"group":"None"}],"interpreted":true,"name":"SS32.10A","coreAzi":272,"coreDip":36,"bedStrike":355,"bedDip":46,"data":[{"visible":true,"include":false,"step":"0.0","x":-9398.857142857143,"y":3828.190476190476,"z":3400.6666666666665,"a95":"0.99","info":"05/10/2015 at 06:15:42"},{"visible":true,"include":true,"step":"10.0","x":-6211.047619047619,"y":1496.6666666666667,"z":1990.4761904761904,"a95":"0.99","info":"05/10/2015 at 06:15:42"},{"visible":true,"include":true,"step":"15.0","x":-5371.428571428572,"y":852.847619047619,"z":1157.3333333333333,"a95":"0.99","info":"05/10/2015 at 06:15:42"},{"visible":true,"include":true,"step":"20.0","x":-4554.0952380952385,"y":377.51428571428573,"z":1025.4285714285713,"a95":"0.99","info":"05/10/2015 at 06:15:42"},{"visible":true,"include":true,"step":"23.0","x":-3915.809523809524,"y":111.48571428571428,"z":722.7619047619048,"a95":"0.99","info":"05/10/2015 at 06:15:42"},{"visible":true,"include":true,"step":"25.0","x":-3875.2380952380954,"y":-39.00666666666667,"z":573.0285714285715,"a95":"0.99","info":"05/10/2015 at 06:15:42"},{"visible":true,"include":false,"step":"30.0","x":-3330.3809523809523,"y":-199,"z":498.0571428571429,"a95":"0.99","info":"05/10/2015 at 06:15:42"},{"visible":true,"include":false,"step":"33.0","x":-3238,"y":-288.85714285714283,"z":570.4380952380952,"a95":"0.99","info":"05/10/2015 at 06:15:42"},{"visible":true,"include":false,"step":"35.0","x":-3281.904761904762,"y":-599.5142857142857,"z":469.23809523809524,"a95":"0.99","info":"05/10/2015 at 06:15:42"},{"visible":true,"include":false,"step":"40.0","x":-3040.5714285714284,"y":-246.0952380952381,"z":374.6380952380952,"a95":"0.99","info":"05/10/2015 at 06:15:42"},{"visible":true,"include":false,"step":"45.0","x":-2771.0476190476193,"y":-432.68571428571425,"z":183.16190476190476,"a95":"0.99","info":"05/10/2015 at 06:15:42"},{"visible":true,"include":false,"step":"50.0","x":-2490.190476190476,"y":-946.4857142857143,"z":-148.8761904761905,"a95":"0.99","info":"05/10/2015 at 06:15:42"},{"visible":true,"include":false,"step":"60.0","x":-2268.5714285714284,"y":-639.7333333333333,"z":-70.46095238095238,"a95":"0.99","info":"05/10/2015 at 06:15:42"},{"visible":true,"include":false,"step":"70.0","x":-1819.3333333333333,"y":-891.4190476190475,"z":-454.552380952381,"a95":"0.99","info":"05/10/2015 at 06:15:42"}],"demagType":"Unknown","patch":1.1,"format":"Unknown","strat":null},{"version":"v1.1.0","exported":"2017-05-19T12:11:31.791Z","info":"0","GEO":[{"dec":197.98876168713292,"inc":-14.878769656277518,"MAD":4.077484196210307,"cm":[-3.730349362740526e-14,1.7763568394002505e-14,0],"intensity":1655.9325930829632,"type":"GC","origin":false,"forced":true,"remark":"","nSteps":9,"minStep":"180","maxStep":"360","steps":["180","210","230","250","280","300","320","340","360"],"group":"None","version":"v1.1.0"}],"TECT":[{"dec":214.179130227204,"inc":-14.788601511539564,"MAD":4.077484196210283,"cm":[5.684341886080802e-14,4.973799150320701e-14,-3.552713678800501e-15],"intensity":1655.9325930829627,"type":"GC","origin":false,"forced":true,"remark":"","nSteps":9,"minStep":"180","maxStep":"360","steps":["180","210","230","250","280","300","320","340","360"],"group":"None","version":"v1.1.0"}],"interpreted":true,"name":"SS32.11A","coreAzi":42,"coreDip":5,"bedStrike":26,"bedDip":56,"data":[{"visible":true,"include":false,"step":"20","x":-3177.1428571428573,"y":516.1904761904761,"z":3655.5238095238096,"a95":"2.1","info":"\"15-06-15\" at \"10:39\""},{"visible":true,"include":false,"step":"100","x":-825.6190476190476,"y":1008.0952380952381,"z":1838.952380952381,"a95":"2.3","info":"\"15-06-15\" at \"13:49\""},{"visible":true,"include":false,"step":"150","x":-0.5714285714285714,"y":1141.904761904762,"z":1167.3333333333333,"a95":"2.2","info":"\"15-06-16\" at \"08:48\""},{"visible":true,"include":true,"step":"180","x":611.6190476190476,"y":1058.857142857143,"z":626.7619047619048,"a95":"1.8","info":"\"15-06-16\" at \"11:47\""},{"visible":true,"include":true,"step":"210","x":767.3333333333334,"y":947.8095238095239,"z":509.04761904761904,"a95":"1.7","info":"\"15-06-17\" at \"15:29\""},{"visible":true,"include":true,"step":"230","x":803.2380952380952,"y":803.6190476190476,"z":487.6190476190476,"a95":"1.9","info":"\"15-06-17\" at \"18:41\""},{"visible":true,"include":true,"step":"250","x":963.3333333333334,"y":402.1904761904762,"z":381.23809523809524,"a95":"1.7","info":"\"15-06-17\" at \"21:49\""},{"visible":true,"include":true,"step":"280","x":674.0952380952381,"y":46.476190476190474,"z":158.28571428571428,"a95":"2.7","info":"\"15-06-18\" at \"07:30\""},{"visible":true,"include":true,"step":"300","x":910.5714285714286,"y":41.61904761904762,"z":251.52380952380952,"a95":"1.7","info":"\"15-06-18\" at \"10:31\""},{"visible":true,"include":true,"step":"320","x":787.9047619047619,"y":-160,"z":79.61904761904762,"a95":"2.2","info":"\"15-06-18\" at \"14:28\""},{"visible":true,"include":true,"step":"340","x":834.952380952381,"y":-270,"z":53.714285714285715,"a95":"1.8","info":"\"15-06-19\" at \"09:54\""},{"visible":true,"include":true,"step":"360","x":737.2380952380952,"y":-305.6190476190476,"z":-30.666666666666668,"a95":"2.1","info":"\"15-06-19\" at \"13:34\""},{"visible":true,"include":false,"step":"390","x":591.2380952380952,"y":-61.523809523809526,"z":-158.38095238095238,"a95":"2.3","info":"\"15-06-20\" at \"09:47\""},{"visible":true,"include":false,"step":"420","x":411.14285714285717,"y":-291.42857142857144,"z":-514.8571428571429,"a95":"2.8","info":"\"15-06-20\" at \"13:05\""},{"visible":true,"include":false,"step":"450","x":467.7142857142857,"y":-145.14285714285714,"z":-162.28571428571428,"a95":"3.4","info":"\"15-06-21\" at \"16:28\""},{"visible":true,"include":false,"step":"470","x":398,"y":-394.85714285714283,"z":-206.95238095238096,"a95":"4.2","info":"\"15-06-21\" at \"19:51\""},{"visible":true,"include":false,"step":"490","x":486,"y":-253.61904761904762,"z":-492.85714285714283,"a95":"2.7","info":"\"15-06-22\" at \"14:11\""},{"visible":true,"include":false,"step":"510","x":340.2857142857143,"y":-383.8095238095238,"z":-194.66666666666666,"a95":"4.9","info":"\"15-06-29\" at \"09:41\""},{"visible":true,"include":false,"step":"540","x":220.1904761904762,"y":-375.6190476190476,"z":-95.33333333333333,"a95":"3.7","info":"\"15-06-29\" at \"13:01\""},{"visible":true,"include":false,"step":"560","x":130.38095238095238,"y":-253.61904761904762,"z":-430.76190476190476,"a95":"5.7","info":"\"15-06-30\" at \"06:18\""},{"visible":true,"include":false,"step":"580","x":4,"y":-117.80952380952381,"z":-178.47619047619048,"a95":"9.900001","info":"\"15-06-30\" at \"10:01\""}],"demagType":"Unknown","patch":1.1,"format":"Unknown","strat":null},{"version":"v1.1.0","exported":"2017-05-19T12:11:31.791Z","info":"5","GEO":[{"dec":143.10966189903888,"inc":-5.717504994856661,"MAD":5.42651445297916,"cm":[5.684341886080802e-14,-2.842170943040401e-14,0],"intensity":3541.7162489431757,"type":"GC","origin":false,"forced":true,"remark":"","nSteps":5,"minStep":"10.0","maxStep":"25.0","steps":["10.0","15.0","20.0","23.0","25.0"],"group":"None","version":"v1.1.0"}],"TECT":[{"dec":163.69295838434982,"inc":-52.18493796323486,"MAD":5.426514452979311,"cm":[1.7053025658242404e-13,-1.4210854715202004e-13,-1.4210854715202004e-14],"intensity":3541.716248943176,"type":"GC","origin":false,"forced":true,"remark":"","nSteps":5,"minStep":"10.0","maxStep":"25.0","steps":["10.0","15.0","20.0","23.0","25.0"],"group":"None","version":"v1.1.0"}],"interpreted":true,"name":"SS32.12B","coreAzi":39,"coreDip":7,"bedStrike":26,"bedDip":56,"data":[{"visible":true,"include":false,"step":"0.0","x":-506.08571428571423,"y":479.1333333333333,"z":2246.4761904761904,"a95":"0.99","info":"26/06/2015 at 21:44:30"},{"visible":true,"include":true,"step":"10.0","x":70.93238095238095,"y":438.3238095238095,"z":1792.6666666666667,"a95":"0.99","info":"26/06/2015 at 21:44:30"},{"visible":true,"include":true,"step":"15.0","x":385.6666666666667,"y":437.2857142857143,"z":1634.095238095238,"a95":"0.99","info":"26/06/2015 at 21:44:30"},{"visible":true,"include":true,"step":"20.0","x":624.447619047619,"y":400.60952380952375,"z":1597.8095238095239,"a95":"0.99","info":"26/06/2015 at 21:44:30"},{"visible":true,"include":true,"step":"23.0","x":739.2095238095238,"y":361.84761904761905,"z":1601.8095238095239,"a95":"0.99","info":"26/06/2015 at 21:44:30"},{"visible":true,"include":true,"step":"25.0","x":804.5904761904762,"y":318.3619047619048,"z":1554.6666666666667,"a95":"0.99","info":"26/06/2015 at 21:44:30"},{"visible":true,"include":false,"step":"30.0","x":835.695238095238,"y":146.63809523809525,"z":1540.095238095238,"a95":"0.99","info":"26/06/2015 at 21:44:30"},{"visible":true,"include":false,"step":"33.0","x":916.8380952380952,"y":104.63809523809525,"z":1548.7619047619048,"a95":"0.99","info":"26/06/2015 at 21:44:30"},{"visible":true,"include":false,"step":"35.0","x":905.7904761904762,"y":41.45333333333333,"z":1647.047619047619,"a95":"0.99","info":"26/06/2015 at 21:44:30"},{"visible":true,"include":false,"step":"40.0","x":981.9047619047619,"y":116.24761904761904,"z":1626,"a95":"0.99","info":"26/06/2015 at 21:44:30"},{"visible":true,"include":false,"step":"45.0","x":1039.047619047619,"y":119.44761904761906,"z":1604.7619047619048,"a95":"0.99","info":"26/06/2015 at 21:44:30"},{"visible":true,"include":false,"step":"50.0","x":1060.952380952381,"y":-157.35238095238097,"z":1540.3809523809523,"a95":"0.99","info":"26/06/2015 at 21:44:30"},{"visible":true,"include":false,"step":"55.0","x":1068,"y":-14.52857142857143,"z":1587.7142857142858,"a95":"0.99","info":"26/06/2015 at 21:44:30"},{"visible":true,"include":false,"step":"60.0","x":1259.7142857142858,"y":-65.16285714285715,"z":1540.4761904761904,"a95":"0.99","info":"26/06/2015 at 21:44:30"},{"visible":true,"include":false,"step":"65.0","x":1279.8095238095239,"y":-107.60952380952382,"z":1603.7142857142858,"a95":"0.99","info":"26/06/2015 at 21:44:30"},{"visible":true,"include":false,"step":"70.0","x":1237.3333333333333,"y":-111.34285714285713,"z":1653.3333333333333,"a95":"0.99","info":"26/06/2015 at 21:44:30"},{"visible":true,"include":false,"step":"80.0","x":1286.1904761904761,"y":-159.8190476190476,"z":1547.4285714285713,"a95":"0.99","info":"26/06/2015 at 21:44:30"}],"demagType":"Unknown","patch":1.1,"format":"Unknown","strat":null},{"version":"v1.1.0","exported":"2017-05-19T12:11:31.791Z","info":"0","GEO":[{"dec":163.16332675112983,"inc":-22.76936556597187,"MAD":5.579857017429682,"cm":[1.4210854715202004e-14,-5.3290705182007514e-14,0],"intensity":2211.133848947002,"type":"GC","origin":false,"forced":true,"remark":"","nSteps":4,"minStep":"180","maxStep":"250","steps":["180","210","230","250"],"group":"None","version":"v1.1.0"}],"TECT":[{"dec":203.483535920561,"inc":-47.40575792775078,"MAD":5.579857017429389,"cm":[-9.947598300641403e-14,-7.105427357601002e-14,-2.842170943040401e-14],"intensity":2211.1338489470018,"type":"GC","origin":false,"forced":true,"remark":"","nSteps":4,"minStep":"180","maxStep":"250","steps":["180","210","230","250"],"group":"None","version":"v1.1.0"}],"interpreted":true,"name":"SS32.13A","coreAzi":28,"coreDip":7,"bedStrike":26,"bedDip":56,"data":[{"visible":false,"include":false,"step":"20","x":-2010.7619047619048,"y":280.6666666666667,"z":3532.4761904761904,"a95":"2.3","info":"\"15-06-15\" at \"10:40\""},{"visible":true,"include":false,"step":"100","x":-387.9047619047619,"y":446.57142857142856,"z":1630.6666666666667,"a95":"2.6","info":"\"15-06-15\" at \"13:50\""},{"visible":true,"include":false,"step":"150","x":316.6666666666667,"y":529.047619047619,"z":1169.142857142857,"a95":"2.5","info":"\"15-06-16\" at \"08:50\""},{"visible":true,"include":true,"step":"180","x":757.8095238095239,"y":489.42857142857144,"z":839.1428571428571,"a95":"2.1","info":"\"15-06-16\" at \"11:49\""},{"visible":true,"include":true,"step":"210","x":993.8095238095239,"y":329.9047619047619,"z":709.5238095238095,"a95":"1.8","info":"\"15-06-17\" at \"15:31\""},{"visible":true,"include":true,"step":"230","x":1059.2380952380952,"y":230.66666666666666,"z":632.8571428571429,"a95":"2","info":"\"15-06-17\" at \"18:43\""},{"visible":true,"include":true,"step":"250","x":1077.7142857142858,"y":-169.61904761904762,"z":351.5238095238095,"a95":"1.5","info":"\"15-06-17\" at \"21:51\""},{"visible":true,"include":false,"step":"280","x":1073.142857142857,"y":-307.8095238095238,"z":488.57142857142856,"a95":"1.7","info":"\"15-06-18\" at \"07:32\""},{"visible":true,"include":false,"step":"300","x":1082.5714285714287,"y":-257.8095238095238,"z":595.9047619047619,"a95":"1.6","info":"\"15-06-18\" at \"10:32\""},{"visible":true,"include":false,"step":"320","x":1047.047619047619,"y":-439.3333333333333,"z":514.0952380952381,"a95":"1.8","info":"\"15-06-18\" at \"14:30\""},{"visible":true,"include":false,"step":"340","x":895.9047619047619,"y":-535.4285714285714,"z":513.1428571428571,"a95":"1.7","info":"\"15-06-19\" at \"09:56\""},{"visible":true,"include":false,"step":"360","x":811.7142857142857,"y":-529.047619047619,"z":323.23809523809524,"a95":"1.8","info":"\"15-06-19\" at \"13:36\""},{"visible":true,"include":false,"step":"390","x":498,"y":-395.23809523809524,"z":72.76190476190476,"a95":"2.4","info":"\"15-06-20\" at \"09:49\""},{"visible":true,"include":false,"step":"420","x":372.4761904761905,"y":-506.1904761904762,"z":20.571428571428573,"a95":"2.4","info":"\"15-06-20\" at \"13:10\""},{"visible":true,"include":false,"step":"450","x":341.7142857142857,"y":-541.5238095238095,"z":41.80952380952381,"a95":"2.5","info":"\"15-06-21\" at \"16:31\""},{"visible":true,"include":false,"step":"470","x":425.7142857142857,"y":-544.952380952381,"z":-54.19047619047619,"a95":"2.4","info":"\"15-06-21\" at \"19:53\""},{"visible":true,"include":false,"step":"490","x":408.0952380952381,"y":-306.57142857142856,"z":-27.333333333333332,"a95":"4.4","info":"\"15-06-22\" at \"14:13\""},{"visible":false,"include":false,"step":"510","x":155.33333333333334,"y":-492.95238095238096,"z":154.28571428571428,"a95":"5.7","info":"\"15-06-29\" at \"09:42\""},{"visible":false,"include":false,"step":"540","x":461.7142857142857,"y":-164.0952380952381,"z":163.52380952380952,"a95":"4.8","info":"\"15-06-29\" at \"13:03\""},{"visible":false,"include":false,"step":"560","x":142.85714285714286,"y":-386.95238095238096,"z":-484.6666666666667,"a95":"3.4","info":"\"15-06-30\" at \"06:20\""},{"visible":false,"include":false,"step":"580","x":254.66666666666666,"y":-704.7619047619048,"z":-235.33333333333334,"a95":"3.4","info":"\"15-06-30\" at \"10:02\""}],"demagType":"Unknown","patch":1.1,"format":"Unknown","strat":null},{"version":"v1.1.0","exported":"2017-05-19T12:11:31.791Z","info":"6","GEO":[{"dec":10.948319606514644,"inc":-15.53569535944896,"MAD":8.935194850891552,"cm":[-1.4346196188680118e-13,-1.0827317878249145e-14,0],"intensity":4794.215064504796,"type":"GC","origin":false,"forced":true,"remark":"","nSteps":10,"minStep":"15.0","maxStep":"50.0","steps":["15.0","20.0","23.0","25.0","30.0","33.0","35.0","40.0","45.0","50.0"],"group":"None"}],"TECT":[{"dec":184.74234086429044,"inc":-3.305132579415256,"MAD":8.93519485089157,"cm":[3.493501784153826e-14,-4.872293045212115e-14,-5.4136589391245725e-14],"intensity":4794.215064504795,"type":"GC","origin":false,"forced":true,"remark":"","nSteps":10,"minStep":"15.0","maxStep":"50.0","steps":["15.0","20.0","23.0","25.0","30.0","33.0","35.0","40.0","45.0","50.0"],"group":"None"}],"interpreted":true,"name":"SS32.15A","coreAzi":360,"coreDip":14,"bedStrike":26,"bedDip":56,"data":[{"visible":true,"include":false,"step":"0.0","x":-4474.666666666667,"y":3600.9523809523807,"z":2163.4285714285716,"a95":"0.99","info":"26/06/2015 at 21:44:30"},{"visible":true,"include":false,"step":"10.0","x":-2797.2380952380954,"y":3050.285714285714,"z":1093.4285714285713,"a95":"0.99","info":"26/06/2015 at 21:44:30"},{"visible":true,"include":true,"step":"15.0","x":-2148.4761904761904,"y":2838.3809523809523,"z":546.9428571428571,"a95":"0.99","info":"26/06/2015 at 21:44:30"},{"visible":true,"include":true,"step":"20.0","x":-1636.5714285714287,"y":2567.4285714285716,"z":457.83809523809526,"a95":"0.99","info":"26/06/2015 at 21:44:30"},{"visible":true,"include":true,"step":"23.0","x":-1387.4285714285713,"y":2439.6190476190477,"z":298.1904761904762,"a95":"0.99","info":"26/06/2015 at 21:44:30"},{"visible":true,"include":true,"step":"25.0","x":-1166.5714285714287,"y":2233.3333333333335,"z":128.67619047619047,"a95":"0.99","info":"26/06/2015 at 21:44:30"},{"visible":true,"include":true,"step":"30.0","x":-916.2666666666667,"y":2057.6190476190477,"z":234.45714285714288,"a95":"0.99","info":"26/06/2015 at 21:44:30"},{"visible":true,"include":true,"step":"33.0","x":-778.4761904761905,"y":1978.2857142857142,"z":-19.75809523809524,"a95":"0.99","info":"26/06/2015 at 21:44:30"},{"visible":true,"include":true,"step":"35.0","x":-644.2095238095238,"y":1839.6190476190477,"z":-148.92380952380952,"a95":"0.99","info":"26/06/2015 at 21:44:30"},{"visible":true,"include":true,"step":"40.0","x":-373.93333333333334,"y":1743.4285714285713,"z":-60.32,"a95":"0.99","info":"26/06/2015 at 21:44:30"},{"visible":true,"include":true,"step":"45.0","x":-269.3047619047619,"y":1686.2857142857142,"z":-255.0952380952381,"a95":"0.99","info":"26/06/2015 at 21:44:30"},{"visible":true,"include":true,"step":"50.0","x":-15.663809523809524,"y":1431.6190476190477,"z":-285.9904761904762,"a95":"0.99","info":"26/06/2015 at 21:44:30"},{"visible":true,"include":false,"step":"55.0","x":269.18095238095236,"y":1493.4285714285713,"z":-308.16190476190474,"a95":"0.99","info":"26/06/2015 at 21:44:30"},{"visible":true,"include":false,"step":"60.0","x":505.72380952380956,"y":1558.095238095238,"z":-271.6,"a95":"0.99","info":"26/06/2015 at 21:44:30"},{"visible":true,"include":false,"step":"65.0","x":488.53333333333336,"y":1322.3809523809523,"z":-563.0095238095239,"a95":"0.99","info":"26/06/2015 at 21:44:30"},{"visible":true,"include":false,"step":"70.0","x":782.0285714285714,"y":1226.4761904761904,"z":-510.53333333333336,"a95":"0.99","info":"26/06/2015 at 21:44:30"},{"visible":true,"include":false,"step":"80.0","x":692.8285714285714,"y":1001.8095238095239,"z":-606.1619047619048,"a95":"0.99","info":"26/06/2015 at 21:44:30"}],"demagType":"Unknown","patch":1.1,"format":"Unknown","strat":null},{"version":"v1.1.0","exported":"2017-05-19T12:11:31.791Z","info":"0","GEO":[{"dec":30.930560694872838,"inc":-20.049460710381652,"MAD":5.010237037872564,"cm":[-1.0827317878249145e-14,0,0],"intensity":9073.435727073473,"type":"GC","origin":false,"forced":true,"remark":"","nSteps":8,"minStep":"0.0","maxStep":"33.0","steps":["0.0","10.0","15.0","20.0","23.0","25.0","30.0","33.0"],"group":"None"}],"TECT":[{"dec":11.670819821890348,"inc":-14.98967389417046,"MAD":5.010237037872531,"cm":[-1.6240976817373718e-14,4.330927151299658e-14,-5.4136589391245725e-14],"intensity":9073.435727073473,"type":"GC","origin":false,"forced":true,"remark":"","nSteps":8,"minStep":"0.0","maxStep":"33.0","steps":["0.0","10.0","15.0","20.0","23.0","25.0","30.0","33.0"],"group":"None"}],"interpreted":true,"name":"SS32.16A","coreAzi":7,"coreDip":15,"bedStrike":26,"bedDip":56,"data":[{"visible":true,"include":true,"step":"0.0","x":-5821.9047619047615,"y":2396.7619047619046,"z":3198.4761904761904,"a95":"0.99","info":"05/10/2015 at 06:15:42"},{"visible":true,"include":true,"step":"10.0","x":-3778.6666666666665,"y":2226.095238095238,"z":1536.2857142857142,"a95":"0.99","info":"05/10/2015 at 06:15:42"},{"visible":true,"include":true,"step":"15.0","x":-2904.190476190476,"y":2165.4285714285716,"z":918.0952380952381,"a95":"0.99","info":"05/10/2015 at 06:15:42"},{"visible":true,"include":true,"step":"20.0","x":-2346.285714285714,"y":2035.6190476190477,"z":782.3333333333334,"a95":"0.99","info":"05/10/2015 at 06:15:42"},{"visible":true,"include":true,"step":"23.0","x":-2061.5238095238096,"y":1918.095238095238,"z":521.0666666666666,"a95":"0.99","info":"05/10/2015 at 06:15:42"},{"visible":true,"include":true,"step":"25.0","x":-1848.7619047619048,"y":1878.6666666666667,"z":520.0666666666666,"a95":"0.99","info":"05/10/2015 at 06:15:42"},{"visible":true,"include":true,"step":"30.0","x":-1589.4285714285713,"y":1890,"z":297.6,"a95":"0.99","info":"05/10/2015 at 06:15:42"},{"visible":true,"include":true,"step":"33.0","x":-1471.142857142857,"y":1838.7619047619048,"z":148.01904761904763,"a95":"0.99","info":"05/10/2015 at 06:15:42"},{"visible":true,"include":false,"step":"35.0","x":-1319.8095238095239,"y":1730.2857142857142,"z":4.6069523809523805,"a95":"0.99","info":"05/10/2015 at 06:15:42"},{"visible":true,"include":false,"step":"40.0","x":-1129.3333333333333,"y":1875.904761904762,"z":-43.90857142857143,"a95":"0.99","info":"05/10/2015 at 06:15:42"},{"visible":true,"include":false,"step":"45.0","x":-860.4761904761905,"y":1746.5714285714287,"z":123.4,"a95":"0.99","info":"05/10/2015 at 06:15:42"},{"visible":true,"include":false,"step":"50.0","x":-563.9428571428571,"y":1643.6190476190477,"z":20.082857142857144,"a95":"0.99","info":"05/10/2015 at 06:15:42"},{"visible":true,"include":false,"step":"60.0","x":-337.68571428571425,"y":1556.4761904761904,"z":-175.6952380952381,"a95":"0.99","info":"05/10/2015 at 06:15:42"},{"visible":true,"include":false,"step":"70.0","x":140.78095238095239,"y":1428.3809523809523,"z":35.19428571428572,"a95":"0.99","info":"05/10/2015 at 06:15:42"}],"demagType":"Unknown","patch":1.1,"format":"Unknown","strat":null},{"version":"v1.1.0","exported":"2017-05-19T12:11:31.791Z","info":"7","GEO":[{"dec":330.8597880121039,"inc":-6.693151297870293,"MAD":5.552208972846219,"cm":[1.0827317878249145e-14,-4.330927151299658e-14,0],"intensity":5838.492523862801,"type":"GC","origin":false,"forced":true,"remark":"","nSteps":10,"minStep":"0.0","maxStep":"40.0","steps":["0.0","10.0","15.0","20.0","23.0","25.0","30.0","33.0","35.0","40.0"],"group":"None"}],"TECT":[{"dec":161.78408691619597,"inc":-37.62263206984336,"MAD":5.552208972846414,"cm":[2.598556290779795e-13,-1.5158245029548803e-13,1.6240976817373718e-14],"intensity":5838.492523862801,"type":"GC","origin":false,"forced":true,"remark":"","nSteps":10,"minStep":"0.0","maxStep":"40.0","steps":["0.0","10.0","15.0","20.0","23.0","25.0","30.0","33.0","35.0","40.0"],"group":"None"}],"interpreted":true,"name":"SS32.17A","coreAzi":1,"coreDip":37,"bedStrike":26,"bedDip":56,"data":[{"visible":true,"include":true,"step":"0.0","x":-1513.047619047619,"y":2449.1428571428573,"z":3605.809523809524,"a95":"0.99","info":"26/06/2015 at 21:44:30"},{"visible":true,"include":true,"step":"10.0","x":-594.1238095238095,"y":2099.3333333333335,"z":2167.6190476190477,"a95":"0.99","info":"26/06/2015 at 21:44:30"},{"visible":true,"include":true,"step":"15.0","x":-263.552380952381,"y":1931.3333333333333,"z":1614.952380952381,"a95":"0.99","info":"26/06/2015 at 21:44:30"},{"visible":true,"include":true,"step":"20.0","x":122.33333333333333,"y":1763.2380952380952,"z":1342.952380952381,"a95":"0.99","info":"26/06/2015 at 21:44:30"},{"visible":true,"include":true,"step":"23.0","x":273.68571428571425,"y":1732.3809523809523,"z":1124.5714285714287,"a95":"0.99","info":"26/06/2015 at 21:44:30"},{"visible":true,"include":true,"step":"25.0","x":328.9904761904762,"y":1589.3333333333333,"z":941.695238095238,"a95":"0.99","info":"26/06/2015 at 21:44:30"},{"visible":true,"include":true,"step":"30.0","x":405.65714285714284,"y":1523.142857142857,"z":954.1904761904761,"a95":"0.99","info":"26/06/2015 at 21:44:30"},{"visible":true,"include":true,"step":"33.0","x":504.97142857142853,"y":1476.2857142857142,"z":629.895238095238,"a95":"0.99","info":"26/06/2015 at 21:44:30"},{"visible":true,"include":true,"step":"35.0","x":604.3523809523809,"y":1285.904761904762,"z":642.2476190476191,"a95":"0.99","info":"26/06/2015 at 21:44:30"},{"visible":true,"include":true,"step":"40.0","x":664.6571428571428,"y":1549.5238095238096,"z":562.9904761904761,"a95":"0.99","info":"26/06/2015 at 21:44:30"},{"visible":true,"include":false,"step":"45.0","x":936.8380952380952,"y":1394.7619047619048,"z":444.64761904761906,"a95":"0.99","info":"26/06/2015 at 21:44:30"},{"visible":true,"include":false,"step":"50.0","x":1056.6666666666667,"y":1240,"z":139.23809523809524,"a95":"0.99","info":"26/06/2015 at 21:44:30"},{"visible":true,"include":false,"step":"55.0","x":1266.6666666666667,"y":1261.8095238095239,"z":205.9142857142857,"a95":"0.99","info":"26/06/2015 at 21:44:30"},{"visible":true,"include":false,"step":"60.0","x":1263.8095238095239,"y":1240,"z":195.7904761904762,"a95":"0.99","info":"26/06/2015 at 21:44:30"},{"visible":true,"include":false,"step":"65.0","x":1285.904761904762,"y":1011.8095238095239,"z":128.58095238095237,"a95":"0.99","info":"26/06/2015 at 21:44:30"},{"visible":true,"include":false,"step":"70.0","x":1244.7619047619048,"y":1213.5238095238096,"z":55.0047619047619,"a95":"0.99","info":"26/06/2015 at 21:44:30"},{"visible":true,"include":false,"step":"80.0","x":1280.4761904761904,"y":1141.5238095238096,"z":174.9904761904762,"a95":"0.99","info":"26/06/2015 at 21:44:30"}],"demagType":"Unknown","patch":1.1,"format":"Unknown","strat":null},{"version":"v1.1.0","exported":"2017-05-19T12:11:31.791Z","info":"0","GEO":[{"dec":118.68455843431445,"inc":-6.4984081875898365,"MAD":9.490988425790396,"cm":[0,-2.842170943040401e-14,0],"intensity":3453.668695138882,"type":"GC","origin":false,"forced":true,"remark":"","nSteps":5,"minStep":"100","maxStep":"230","steps":["100","150","180","210","230"],"group":"None","version":"v1.1.0"}],"TECT":[{"dec":121.76224873652052,"inc":-62.38645260656829,"MAD":9.490988425790338,"cm":[2.2737367544323206e-13,-1.1457501614131615e-13,-3.552713678800501e-15],"intensity":3453.668695138883,"type":"GC","origin":false,"forced":true,"remark":"","nSteps":5,"minStep":"100","maxStep":"230","steps":["100","150","180","210","230"],"group":"None","version":"v1.1.0"}],"interpreted":true,"name":"SS32.18A","coreAzi":6,"coreDip":35,"bedStrike":26,"bedDip":56,"data":[{"visible":true,"include":false,"step":"20","x":-616.0952380952381,"y":1503.142857142857,"z":5299.142857142857,"a95":"2.4","info":"\"15-06-15\" at \"10:42\""},{"visible":true,"include":true,"step":"100","x":237.9047619047619,"y":921.9047619047619,"z":2370.9523809523807,"a95":"2.4","info":"\"15-06-15\" at \"13:52\""},{"visible":true,"include":true,"step":"150","x":624.952380952381,"y":766.0952380952381,"z":1368,"a95":"2.2","info":"\"15-06-16\" at \"08:51\""},{"visible":true,"include":true,"step":"180","x":867.5238095238095,"y":621.2380952380952,"z":849.6190476190476,"a95":"1.9","info":"\"15-06-16\" at \"11:51\""},{"visible":true,"include":true,"step":"210","x":1131.8095238095239,"y":299.7142857142857,"z":467.9047619047619,"a95":"1.6","info":"\"15-06-17\" at \"15:33\""},{"visible":true,"include":true,"step":"230","x":1125.142857142857,"y":275.42857142857144,"z":567.8095238095239,"a95":"1.7","info":"\"15-06-17\" at \"18:44\""},{"visible":true,"include":false,"step":"250","x":1261.6190476190477,"y":-42.285714285714285,"z":305.7142857142857,"a95":"1.5","info":"\"15-06-17\" at \"21:52\""},{"visible":true,"include":false,"step":"280","x":1230.952380952381,"y":-114.57142857142857,"z":288.6666666666667,"a95":"1.5","info":"\"15-06-18\" at \"07:34\""},{"visible":true,"include":false,"step":"300","x":1056.2857142857142,"y":-160.95238095238096,"z":324.95238095238096,"a95":"1.5","info":"\"15-06-18\" at \"10:35\""},{"visible":true,"include":false,"step":"320","x":1130.952380952381,"y":-339.5238095238095,"z":218.95238095238096,"a95":"1.4","info":"\"15-06-18\" at \"14:33\""},{"visible":true,"include":false,"step":"340","x":1059.6190476190477,"y":-264.76190476190476,"z":111.71428571428571,"a95":"1.5","info":"\"15-06-19\" at \"09:58\""},{"visible":true,"include":false,"step":"360","x":1054.952380952381,"y":-375.9047619047619,"z":161.8095238095238,"a95":"1.4","info":"\"15-06-19\" at \"13:38\""},{"visible":true,"include":false,"step":"390","x":793.3333333333334,"y":-246.57142857142858,"z":248.85714285714286,"a95":"1.6","info":"\"15-06-20\" at \"09:50\""},{"visible":true,"include":false,"step":"420","x":713.3333333333334,"y":-375.9047619047619,"z":219.71428571428572,"a95":"1.4","info":"\"15-06-20\" at \"13:12\""},{"visible":true,"include":false,"step":"450","x":639.8095238095239,"y":-309.5238095238095,"z":192.66666666666666,"a95":"1.8","info":"\"15-06-21\" at \"16:33\""},{"visible":true,"include":false,"step":"470","x":703.3333333333334,"y":-461.42857142857144,"z":59.714285714285715,"a95":"1.6","info":"\"15-06-21\" at \"19:55\""},{"visible":true,"include":false,"step":"490","x":552.1904761904761,"y":-479.7142857142857,"z":-98.85714285714286,"a95":"1.9","info":"\"15-06-22\" at \"14:16\""},{"visible":true,"include":false,"step":"510","x":300.3809523809524,"y":-386.3809523809524,"z":-175.04761904761904,"a95":"3.8","info":"\"15-06-29\" at \"09:47\""},{"visible":true,"include":false,"step":"540","x":250.85714285714286,"y":-430.76190476190476,"z":-228.0952380952381,"a95":"4.5","info":"\"15-06-29\" at \"13:05\""},{"visible":true,"include":false,"step":"560","x":363.3333333333333,"y":-394,"z":14,"a95":"6.1","info":"\"15-06-30\" at \"06:22\""},{"visible":true,"include":false,"step":"580","x":44.285714285714285,"y":-506.6666666666667,"z":48.19047619047619,"a95":"7.7","info":"\"15-06-30\" at \"10:05\""}],"demagType":"Unknown","patch":1.1,"format":"Unknown","strat":null},{"version":"v1.1.0","exported":"2017-05-19T12:11:31.791Z","info":"0","GEO":[{"dec":21.675330567169112,"inc":-32.96461767981514,"MAD":5.243318694211186,"cm":[1.7323708605198632e-13,-1.7323708605198632e-13,0],"intensity":28764.62873335584,"type":"GC","origin":false,"forced":true,"remark":"","nSteps":6,"minStep":"10.0","maxStep":"30.0","steps":["10.0","15.0","20.0","23.0","25.0","30.0"],"group":"None"}],"TECT":[{"dec":356.3285967355406,"inc":-39.19521837325752,"MAD":5.243318694208826,"cm":[6.496390726949488e-13,1.7323708605198632e-13,-2.815102648344778e-13],"intensity":28764.628733355847,"type":"GC","origin":false,"forced":true,"remark":"","nSteps":6,"minStep":"10.0","maxStep":"30.0","steps":["10.0","15.0","20.0","23.0","25.0","30.0"],"group":"None"}],"interpreted":true,"name":"SS32.20A","coreAzi":27,"coreDip":31,"bedStrike":359,"bedDip":34,"data":[{"visible":true,"include":false,"step":"0.0","x":-12028.57142857143,"y":5158.857142857143,"z":26586.666666666668,"a95":"0.99","info":"05/10/2015 at 06:15:42"},{"visible":true,"include":true,"step":"10.0","x":-8021.142857142857,"y":5121.047619047619,"z":17300,"a95":"0.99","info":"05/10/2015 at 06:15:42"},{"visible":true,"include":true,"step":"15.0","x":-6159.047619047619,"y":5015.428571428572,"z":13715.238095238095,"a95":"0.99","info":"05/10/2015 at 06:15:42"},{"visible":true,"include":true,"step":"20.0","x":-5022.666666666667,"y":4873.428571428572,"z":11097.142857142857,"a95":"0.99","info":"05/10/2015 at 06:15:42"},{"visible":true,"include":true,"step":"23.0","x":-4109.714285714285,"y":4909.142857142857,"z":9817.142857142857,"a95":"0.99","info":"05/10/2015 at 06:15:42"},{"visible":true,"include":true,"step":"25.0","x":-3997.904761904762,"y":4756.952380952381,"z":8807.047619047618,"a95":"0.99","info":"05/10/2015 at 06:15:42"},{"visible":true,"include":true,"step":"30.0","x":-3204.5714285714284,"y":4731.142857142857,"z":7282.952380952381,"a95":"0.99","info":"05/10/2015 at 06:15:42"},{"visible":true,"include":false,"step":"33.0","x":-2518,"y":4807.238095238095,"z":6550.666666666667,"a95":"0.99","info":"05/10/2015 at 06:15:42"},{"visible":true,"include":false,"step":"35.0","x":-2455.714285714286,"y":4089.6190476190477,"z":5980,"a95":"0.99","info":"05/10/2015 at 06:15:42"},{"visible":true,"include":false,"step":"40.0","x":-2143.3333333333335,"y":4087.5238095238096,"z":5758.761904761905,"a95":"0.99","info":"05/10/2015 at 06:15:42"},{"visible":true,"include":false,"step":"45.0","x":-1235.6190476190477,"y":4096.476190476191,"z":4534.761904761905,"a95":"0.99","info":"05/10/2015 at 06:15:42"},{"visible":true,"include":false,"step":"50.0","x":-1128.4761904761904,"y":4047.0476190476193,"z":3820.285714285714,"a95":"0.99","info":"05/10/2015 at 06:15:42"},{"visible":true,"include":false,"step":"60.0","x":-136.40952380952382,"y":3821.2380952380954,"z":3293.3333333333335,"a95":"0.99","info":"05/10/2015 at 06:15:42"},{"visible":true,"include":false,"step":"70.0","x":563.1238095238095,"y":3920.285714285714,"z":2263.6190476190477,"a95":"0.99","info":"05/10/2015 at 06:15:42"}],"demagType":"Unknown","patch":1.1,"format":"Unknown","strat":null},{"version":"v1.1.0","exported":"2017-05-19T12:11:31.791Z","info":"8","GEO":[{"dec":25.28316331473087,"inc":-24.514634676425118,"MAD":4.2490826781819955,"cm":[-4.06024420434343e-13,2.165463575649829e-13,0],"intensity":27187.644386939035,"type":"GC","origin":false,"forced":true,"remark":"","nSteps":9,"minStep":"0.0","maxStep":"35.0","steps":["0.0","10.0","15.0","20.0","23.0","25.0","30.0","33.0","35.0"],"group":"None"}],"TECT":[{"dec":6.1260087172370845,"inc":-34.70022345702687,"MAD":4.249082678179959,"cm":[-5.684341886080801e-13,1.7323708605198632e-13,-1.7323708605198632e-13],"intensity":27187.644386939035,"type":"GC","origin":false,"forced":true,"remark":"","nSteps":9,"minStep":"0.0","maxStep":"35.0","steps":["0.0","10.0","15.0","20.0","23.0","25.0","30.0","33.0","35.0"],"group":"None"}],"interpreted":true,"name":"SS32.20B","coreAzi":27,"coreDip":31,"bedStrike":359,"bedDip":34,"data":[{"visible":true,"include":true,"step":"0.0","x":-11943.809523809523,"y":2914.6666666666665,"z":17459.04761904762,"a95":"0.99","info":"26/06/2015 at 21:44:30"},{"visible":true,"include":true,"step":"10.0","x":-8559.714285714286,"y":3254.285714285714,"z":12669.52380952381,"a95":"0.99","info":"26/06/2015 at 21:44:30"},{"visible":true,"include":true,"step":"15.0","x":-6785.047619047619,"y":3269.904761904762,"z":10337.142857142857,"a95":"0.99","info":"26/06/2015 at 21:44:30"},{"visible":true,"include":true,"step":"20.0","x":-5656.571428571428,"y":3257.4285714285716,"z":8364.285714285714,"a95":"0.99","info":"26/06/2015 at 21:44:30"},{"visible":true,"include":true,"step":"23.0","x":-4934.666666666667,"y":3420.3809523809523,"z":7144,"a95":"0.99","info":"26/06/2015 at 21:44:30"},{"visible":true,"include":true,"step":"25.0","x":-4495.047619047619,"y":3462.190476190476,"z":6382.857142857143,"a95":"0.99","info":"26/06/2015 at 21:44:30"},{"visible":true,"include":true,"step":"30.0","x":-3586.5714285714284,"y":3399.3333333333335,"z":5517.523809523809,"a95":"0.99","info":"26/06/2015 at 21:44:30"},{"visible":true,"include":true,"step":"33.0","x":-3132.7619047619046,"y":3489.6190476190477,"z":4983.142857142857,"a95":"0.99","info":"26/06/2015 at 21:44:30"},{"visible":true,"include":true,"step":"35.0","x":-2979.1428571428573,"y":3272.4761904761904,"z":4408.571428571428,"a95":"0.99","info":"26/06/2015 at 21:44:30"},{"visible":true,"include":false,"step":"40.0","x":-2542.7619047619046,"y":3543.904761904762,"z":3833.904761904762,"a95":"0.99","info":"26/06/2015 at 21:44:30"},{"visible":true,"include":false,"step":"45.0","x":-2120.5714285714284,"y":3646.285714285714,"z":3326.095238095238,"a95":"0.99","info":"26/06/2015 at 21:44:30"},{"visible":true,"include":false,"step":"50.0","x":-1714.7619047619048,"y":3204.4761904761904,"z":2400.9523809523807,"a95":"0.99","info":"26/06/2015 at 21:44:30"},{"visible":true,"include":false,"step":"55.0","x":-1123.904761904762,"y":3709.809523809524,"z":2003.904761904762,"a95":"0.99","info":"26/06/2015 at 21:44:30"},{"visible":true,"include":false,"step":"60.0","x":-986.6666666666666,"y":3832.7619047619046,"z":1307.8095238095239,"a95":"0.99","info":"26/06/2015 at 21:44:30"},{"visible":true,"include":false,"step":"65.0","x":-1010.0952380952381,"y":3422.9523809523807,"z":743.3333333333334,"a95":"0.99","info":"26/06/2015 at 21:44:30"},{"visible":true,"include":false,"step":"70.0","x":-784.0857142857143,"y":3541.904761904762,"z":1268.857142857143,"a95":"0.99","info":"26/06/2015 at 21:44:30"},{"visible":true,"include":false,"step":"80.0","x":-70.05428571428573,"y":3763.6190476190477,"z":114.04761904761905,"a95":"0.99","info":"26/06/2015 at 21:44:30"}],"demagType":"Unknown","patch":1.1,"format":"Unknown","strat":null},{"version":"v1.1.0","exported":"2017-05-19T12:11:31.791Z","info":"0","GEO":[{"dec":15.55427384052615,"inc":-32.07779095014319,"MAD":4.95270203025926,"cm":[1.4921397450962104e-13,0,0],"intensity":11031.144204390126,"type":"GC","origin":false,"forced":true,"remark":"","nSteps":4,"minStep":"100","maxStep":"210","steps":["100","150","180","210"],"group":"None","version":"v1.1.0"}],"TECT":[{"dec":352.2019676554597,"inc":-35.11920712001959,"MAD":4.952702030259463,"cm":[3.055333763768431e-13,2.2737367544323206e-13,-1.1368683772161603e-13],"intensity":11031.144204390126,"type":"GC","origin":false,"forced":true,"remark":"","nSteps":4,"minStep":"100","maxStep":"210","steps":["100","150","180","210"],"group":"None","version":"v1.1.0"}],"interpreted":true,"name":"SS32.21A","coreAzi":27,"coreDip":30,"bedStrike":359,"bedDip":34,"data":[{"visible":true,"include":false,"step":"20","x":-5304.190476190476,"y":2402.9523809523807,"z":14119.238095238095,"a95":"2.4","info":"\"15-06-15\" at \"10:44\""},{"visible":true,"include":true,"step":"100","x":-2816.190476190476,"y":3580,"z":6904.190476190476,"a95":"2.2","info":"\"15-06-15\" at \"13:54\""},{"visible":true,"include":true,"step":"150","x":-1203.6190476190477,"y":3436.4761904761904,"z":3280,"a95":"2.5","info":"\"15-06-16\" at \"08:53\""},{"visible":true,"include":true,"step":"180","x":-836,"y":3605.714285714286,"z":2808,"a95":"1.9","info":"\"15-06-16\" at \"11:54\""},{"visible":true,"include":true,"step":"210","x":35.333333333333336,"y":3101.3333333333335,"z":1421.2380952380952,"a95":"1.8","info":"\"15-06-17\" at \"15:35\""},{"visible":true,"include":false,"step":"230","x":416.4761904761905,"y":3024.6666666666665,"z":1566.857142857143,"a95":"1.8","info":"\"15-06-17\" at \"18:46\""},{"visible":true,"include":false,"step":"250","x":651.3333333333334,"y":2172.7619047619046,"z":866.1904761904761,"a95":"1.5","info":"\"15-06-17\" at \"21:54\""},{"visible":true,"include":false,"step":"280","x":381.14285714285717,"y":2062.9523809523807,"z":204.47619047619048,"a95":"1.9","info":"\"15-06-18\" at \"07:35\""},{"visible":true,"include":false,"step":"300","x":87.42857142857143,"y":1984.7619047619048,"z":-655.3333333333334,"a95":"2.4","info":"\"15-06-18\" at \"10:37\""},{"visible":true,"include":false,"step":"320","x":515.2380952380952,"y":1609.904761904762,"z":-175.42857142857142,"a95":"1.7","info":"\"15-06-18\" at \"14:34\""},{"visible":true,"include":false,"step":"340","x":295.23809523809524,"y":1558.952380952381,"z":-377.04761904761904,"a95":"1.8","info":"\"15-06-19\" at \"10:02\""},{"visible":true,"include":false,"step":"360","x":462.4761904761905,"y":1445.4285714285713,"z":-305.9047619047619,"a95":"1.7","info":"\"15-06-19\" at \"13:40\""},{"visible":true,"include":false,"step":"390","x":162.85714285714286,"y":1491.6190476190477,"z":-536.0952380952381,"a95":"1.8","info":"\"15-06-20\" at \"09:52\""},{"visible":true,"include":false,"step":"420","x":235.61904761904762,"y":1243.142857142857,"z":-508.1904761904762,"a95":"1.8","info":"\"15-06-20\" at \"13:14\""},{"visible":true,"include":false,"step":"450","x":124.85714285714286,"y":1208.7619047619048,"z":-578.5714285714286,"a95":"1.9","info":"\"15-06-21\" at \"16:38\""},{"visible":true,"include":false,"step":"470","x":181.14285714285714,"y":830.3809523809524,"z":-1162,"a95":"2.5","info":"\"15-06-21\" at \"19:59\""},{"visible":true,"include":false,"step":"490","x":268.2857142857143,"y":1178,"z":-213.61904761904762,"a95":"2.3","info":"\"15-06-22\" at \"14:17\""},{"visible":true,"include":false,"step":"510","x":-78.76190476190476,"y":1291.3333333333333,"z":-712.4761904761905,"a95":"2.5","info":"\"15-06-29\" at \"09:49\""},{"visible":true,"include":false,"step":"540","x":403.8095238095238,"y":704.5714285714286,"z":127.14285714285714,"a95":"2.9","info":"\"15-06-29\" at \"13:06\""},{"visible":true,"include":false,"step":"560","x":26.857142857142858,"y":891.1428571428571,"z":-300.2857142857143,"a95":"3.4","info":"\"15-06-30\" at \"06:24\""},{"visible":true,"include":false,"step":"580","x":-104.38095238095238,"y":1052.6666666666667,"z":-319.9047619047619,"a95":"2.7","info":"\"15-06-30\" at \"10:07\""}],"demagType":"Unknown","patch":1.1,"format":"Unknown","strat":null},{"version":"v1.1.0","exported":"2017-05-19T12:11:31.792Z","info":"0","GEO":[{"dec":16.794553107009676,"inc":-31.42928605542615,"MAD":4.582963500273153,"cm":[7.146029799644436e-13,-1.2992781453898974e-13,0],"intensity":24460.693805413146,"type":"GC","origin":false,"forced":true,"remark":"","nSteps":5,"minStep":"20","maxStep":"210","steps":["20","100","150","180","210"],"group":"None"}],"TECT":[{"dec":353.6977132774095,"inc":-35.318260088162255,"MAD":4.582963500273082,"cm":[1.2234869202421536e-12,-3.0316490059097606e-13,4.547473508864641e-13],"intensity":24460.69380541315,"type":"GC","origin":false,"forced":true,"remark":"","nSteps":5,"minStep":"20","maxStep":"210","steps":["20","100","150","180","210"],"group":"None"}],"interpreted":true,"name":"SS32.22A","coreAzi":30,"coreDip":28,"bedStrike":359,"bedDip":34,"data":[{"visible":true,"include":true,"step":"20","x":-10790,"y":2766.4761904761904,"z":19634.285714285714,"a95":"2.3","info":"\"15-06-15\" at \"10:45\""},{"visible":true,"include":true,"step":"100","x":-3935.2380952380954,"y":3278.5714285714284,"z":8882.666666666666,"a95":"2.2","info":"\"15-06-15\" at \"13:55\""},{"visible":true,"include":true,"step":"150","x":-1772.952380952381,"y":3478.6666666666665,"z":4108,"a95":"2.2","info":"\"15-06-16\" at \"08:55\""},{"visible":true,"include":true,"step":"180","x":-1364.4761904761904,"y":3650.095238095238,"z":3928.5714285714284,"a95":"2.1","info":"\"15-06-16\" at \"11:55\""},{"visible":true,"include":true,"step":"210","x":-75.52380952380952,"y":3611.0476190476193,"z":1332.1904761904761,"a95":"1.7","info":"\"15-06-17\" at \"15:37\""},{"visible":true,"include":false,"step":"230","x":146.95238095238096,"y":3408.8571428571427,"z":1333.2380952380952,"a95":"1.7","info":"\"15-06-17\" at \"18:47\""},{"visible":true,"include":false,"step":"250","x":404.0952380952381,"y":1944,"z":29.523809523809526,"a95":"1.8","info":"\"15-06-17\" at \"21:55\""},{"visible":true,"include":false,"step":"280","x":507.6190476190476,"y":2394.095238095238,"z":341.42857142857144,"a95":"1.7","info":"\"15-06-18\" at \"07:37\""},{"visible":true,"include":false,"step":"300","x":345.04761904761904,"y":2453.904761904762,"z":121.14285714285714,"a95":"1.8","info":"\"15-06-18\" at \"10:40\""},{"visible":true,"include":false,"step":"320","x":574.6666666666666,"y":1805.7142857142858,"z":-718.0952380952381,"a95":"2","info":"\"15-06-18\" at \"14:36\""},{"visible":true,"include":false,"step":"340","x":420.2857142857143,"y":2225.5238095238096,"z":-191.33333333333334,"a95":"1.5","info":"\"15-06-19\" at \"10:04\""},{"visible":true,"include":false,"step":"360","x":568.8571428571429,"y":1846.857142857143,"z":-78.95238095238095,"a95":"1.5","info":"\"15-06-19\" at \"13:42\""},{"visible":true,"include":false,"step":"390","x":217.23809523809524,"y":1586,"z":-1041.7142857142858,"a95":"2.5","info":"\"15-06-20\" at \"09:54\""},{"visible":true,"include":false,"step":"420","x":237.52380952380952,"y":1410.4761904761904,"z":-589.5238095238095,"a95":"1.9","info":"\"15-06-20\" at \"13:16\""},{"visible":true,"include":false,"step":"450","x":80.19047619047619,"y":1526.1904761904761,"z":-307.5238095238095,"a95":"1.8","info":"\"15-06-21\" at \"16:40\""},{"visible":true,"include":false,"step":"470","x":152.76190476190476,"y":1168.7619047619048,"z":-229.23809523809524,"a95":"1.8","info":"\"15-06-21\" at \"20:05\""},{"visible":true,"include":false,"step":"490","x":-27.428571428571427,"y":1238.2857142857142,"z":-597.3333333333334,"a95":"2.1","info":"\"15-06-22\" at \"14:19\""},{"visible":true,"include":false,"step":"510","x":499.6190476190476,"y":1204.4761904761904,"z":-736.4761904761905,"a95":"2","info":"\"15-06-29\" at \"09:51\""},{"visible":true,"include":false,"step":"540","x":601.2380952380952,"y":1080.5714285714287,"z":-652.2857142857143,"a95":"2.4","info":"\"15-06-29\" at \"13:08\""},{"visible":true,"include":false,"step":"560","x":334.3809523809524,"y":1327.2380952380952,"z":-1220.1904761904761,"a95":"2.5","info":"\"15-06-30\" at \"06:27\""},{"visible":true,"include":false,"step":"580","x":128.28571428571428,"y":535.6190476190476,"z":-387.23809523809524,"a95":"4.9","info":"\"15-06-30\" at \"10:08\""}],"demagType":"Unknown","patch":1.1,"format":"Unknown","strat":null}]
