# Supplementary material for: Paleomagnetic constraints on the timing and distribution of Cenozoic rotations in Central and Eastern Anatolia
Source: Copernicus journal article supplement (doi:10.5194/se-9-295-2018), 2018-03-21
Supplement: Supplementary file 2 [file se-9-295-2018-supplement.zip › se-2017-66_DATA_dir files/dir files Sivas/SS33.dir]

[{"version":"v1.1.0","exported":"2016-10-17T09:14:05.068Z","volume":10.5,"added":"2016-10-17T08:55:10.786Z","format":"Utrecht","demagType":"Unknown","strat":null,"patch":1.1,"GEO":[],"TECT":[],"interpreted":false,"name":"SS33.01A","coreAzi":288,"coreDip":20,"bedStrike":212,"bedDip":29,"data":[{"visible":true,"include":false,"step":"20","x":-2096.7619047619046,"y":-1289.047619047619,"z":-983.3333333333334,"a95":1.7,"info":"\"15-06-22\" at \"10:07\""},{"visible":true,"include":false,"step":"100","x":-564.2857142857143,"y":-459.8095238095238,"z":-382,"a95":2,"info":"\"15-06-22\" at \"13:32\""},{"visible":true,"include":false,"step":"150","x":-219.14285714285714,"y":-231.8095238095238,"z":-277.14285714285717,"a95":2.6,"info":"\"15-06-23\" at \"10:20\""},{"visible":true,"include":false,"step":"180","x":-235.52380952380952,"y":-230.38095238095238,"z":-179.42857142857142,"a95":3.4,"info":"\"15-06-23\" at \"13:25\""},{"visible":true,"include":false,"step":"210","x":-212.28571428571428,"y":-211.52380952380952,"z":-145.61904761904762,"a95":2.5,"info":"\"15-06-23\" at \"16:16\""},{"visible":true,"include":false,"step":"230","x":-22.19047619047619,"y":-105.14285714285714,"z":-156.66666666666666,"a95":5.7,"info":"\"15-06-24\" at \"11:00\""},{"visible":true,"include":false,"step":"250","x":-34.285714285714285,"y":-197.8095238095238,"z":13.428571428571429,"a95":5.7,"info":"\"15-06-24\" at \"14:11\""},{"visible":true,"include":false,"step":"270","x":-2.2857142857142856,"y":-142.0952380952381,"z":-181.9047619047619,"a95":4.6,"info":"\"15-06-25\" at \"08:37\""},{"visible":true,"include":false,"step":"300","x":47.714285714285715,"y":-132.38095238095238,"z":-132.85714285714286,"a95":4.4,"info":"\"15-06-25\" at \"12:22\""},{"visible":true,"include":false,"step":"320","x":52.285714285714285,"y":-131.33333333333334,"z":-176.76190476190476,"a95":4.4,"info":"\"15-06-25\" at \"15:53\""},{"visible":true,"include":false,"step":"340","x":92.38095238095238,"y":-42.76190476190476,"z":-58.76190476190476,"a95":9.8,"info":"\"15-06-25\" at \"19:33\""},{"visible":true,"include":false,"step":"370","x":85.04761904761905,"y":-101.71428571428571,"z":-66.57142857142857,"a95":7.6,"info":"\"15-06-25\" at \"23:17\""},{"visible":true,"include":false,"step":"400","x":55.904761904761905,"y":185.14285714285714,"z":-112.0952380952381,"a95":5,"info":"\"15-06-26\" at \"10:20\""},{"visible":true,"include":false,"step":"420","x":-26,"y":-31.904761904761905,"z":-92.95238095238095,"a95":20.8,"info":"\"15-06-27\" at \"09:36\""}]},{"version":"v1.1.0","exported":"2016-10-17T09:14:05.068Z","volume":10.5,"added":"2016-10-17T08:55:10.787Z","format":"Utrecht","demagType":"Unknown","strat":null,"patch":1.1,"GEO":[{"dec":225.56336538030752,"inc":-32.998081197773956,"MAD":11.26105548722142,"cm":[-4.085620730620576e-14,2.4868995751603507e-14,0],"intensity":748.3566273664957,"type":"dir","forced":true,"remark":"","origin":false,"nSteps":7,"minStep":"230","maxStep":"370","steps":["230","250","270","300","320","340","370"],"group":"None","version":"v1.1.0"}],"TECT":[{"dec":205.56159240244088,"inc":-34.867780068771246,"MAD":11.261055487221448,"cm":[-4.263256414560601e-14,8.171241461241152e-14,3.552713678800501e-15],"intensity":748.3566273664957,"type":"dir","forced":true,"remark":"","origin":false,"nSteps":7,"minStep":"230","maxStep":"370","steps":["230","250","270","300","320","340","370"],"group":"None","version":"v1.1.0"}],"interpreted":true,"name":"SS33.02A","coreAzi":288,"coreDip":21,"bedStrike":212,"bedDip":29,"data":[{"visible":true,"include":false,"step":"20","x":-1580.7619047619048,"y":549.9047619047619,"z":644,"a95":1.7,"info":"\"15-06-22\" at \"10:09\""},{"visible":true,"include":false,"step":"100","x":-260.76190476190476,"y":-16,"z":483.9047619047619,"a95":3.2,"info":"\"15-06-22\" at \"13:35\""},{"visible":true,"include":false,"step":"150","x":114.66666666666667,"y":-171.52380952380952,"z":147.14285714285714,"a95":3.5,"info":"\"15-06-23\" at \"10:21\""},{"visible":true,"include":false,"step":"180","x":77.04761904761905,"y":-162.76190476190476,"z":140.0952380952381,"a95":3.4,"info":"\"15-06-23\" at \"13:47\""},{"visible":true,"include":false,"step":"210","x":152.28571428571428,"y":-213.42857142857142,"z":113.61904761904762,"a95":2.2,"info":"\"15-06-23\" at \"16:18\""},{"visible":true,"include":true,"step":"230","x":207.14285714285714,"y":-283.42857142857144,"z":159.52380952380952,"a95":3.3,"info":"\"15-06-24\" at \"11:01\""},{"visible":true,"include":true,"step":"250","x":209.8095238095238,"y":-258.1904761904762,"z":110,"a95":2.6,"info":"\"15-06-24\" at \"14:13\""},{"visible":true,"include":true,"step":"270","x":212.28571428571428,"y":-314.76190476190476,"z":11.142857142857142,"a95":1.8,"info":"\"15-06-25\" at \"08:39\""},{"visible":true,"include":true,"step":"300","x":256.4761904761905,"y":-233.9047619047619,"z":68.76190476190476,"a95":2.1,"info":"\"15-06-25\" at \"12:23\""},{"visible":true,"include":true,"step":"320","x":198.28571428571428,"y":-278.3809523809524,"z":-17.80952380952381,"a95":2.9,"info":"\"15-06-25\" at \"15:55\""},{"visible":true,"include":true,"step":"340","x":203.52380952380952,"y":-228.57142857142858,"z":55.42857142857143,"a95":2,"info":"\"15-06-25\" at \"19:35\""},{"visible":true,"include":true,"step":"370","x":303.8095238095238,"y":-232.57142857142858,"z":21.333333333333332,"a95":2,"info":"\"15-06-25\" at \"23:19\""},{"visible":false,"include":false,"step":"400","x":291.42857142857144,"y":-165.14285714285714,"z":39.61904761904762,"a95":3.5,"info":"\"15-06-26\" at \"10:22\""},{"visible":false,"include":false,"step":"420","x":210.47619047619048,"y":-103.71428571428571,"z":27.523809523809526,"a95":4.2,"info":"\"15-06-27\" at \"09:39\""},{"visible":false,"include":false,"step":"440","x":-164.57142857142858,"y":-20.952380952380953,"z":216.0952380952381,"a95":19.3,"info":"\"15-06-27\" at \"12:07\""}]},{"version":"v1.1.0","exported":"2016-10-17T09:14:05.068Z","volume":10.5,"added":"2016-10-17T08:55:10.787Z","format":"Utrecht","demagType":"Unknown","strat":null,"patch":1.1,"GEO":[{"dec":187.49213447998198,"inc":-40.34933195170975,"MAD":10.940013225783598,"cm":[1.7763568394002505e-15,1.7763568394002505e-15,0],"intensity":511.84202494851996,"type":"dir","forced":true,"remark":"","origin":false,"nSteps":7,"minStep":"230","maxStep":"370","steps":["230","250","270","300","320","340","370"],"group":"None","version":"v1.1.0"}],"TECT":[{"dec":171.5895767702517,"inc":-24.39359873867753,"MAD":10.940013225783598,"cm":[0,-1.7319479184152442e-14,0],"intensity":511.84202494851996,"type":"dir","forced":true,"remark":"","origin":false,"nSteps":7,"minStep":"230","maxStep":"370","steps":["230","250","270","300","320","340","370"],"group":"None","version":"v1.1.0"}],"interpreted":true,"name":"SS33.03A","coreAzi":269,"coreDip":13,"bedStrike":212,"bedDip":29,"data":[{"visible":false,"include":false,"step":"20","x":-1790.857142857143,"y":859.047619047619,"z":855.9047619047619,"a95":1.6,"info":"\"15-06-22\" at \"10:11\""},{"visible":true,"include":false,"step":"100","x":-283.23809523809524,"y":126,"z":335.6190476190476,"a95":2.8,"info":"\"15-06-22\" at \"13:36\""},{"visible":true,"include":false,"step":"150","x":-238.1904761904762,"y":146.76190476190476,"z":280.4761904761905,"a95":2.7,"info":"\"15-06-23\" at \"10:23\""},{"visible":true,"include":false,"step":"180","x":118.85714285714286,"y":-148.47619047619048,"z":83.52380952380952,"a95":2.7,"info":"\"15-06-23\" at \"13:29\""},{"visible":true,"include":false,"step":"210","x":114.0952380952381,"y":-140,"z":63.142857142857146,"a95":3.9,"info":"\"15-06-23\" at \"16:20\""},{"visible":true,"include":true,"step":"230","x":243.33333333333334,"y":-171.61904761904762,"z":18.761904761904763,"a95":2.4,"info":"\"15-06-24\" at \"11:03\""},{"visible":true,"include":true,"step":"250","x":167.42857142857142,"y":-285.9047619047619,"z":17.333333333333332,"a95":2.5,"info":"\"15-06-24\" at \"14:14\""},{"visible":true,"include":true,"step":"270","x":180.66666666666666,"y":-275.7142857142857,"z":-70.47619047619048,"a95":2.1,"info":"\"15-06-25\" at \"08:41\""},{"visible":true,"include":true,"step":"300","x":182.66666666666666,"y":-179.14285714285714,"z":13.047619047619047,"a95":2.1,"info":"\"15-06-25\" at \"12:25\""},{"visible":true,"include":true,"step":"320","x":189.71428571428572,"y":-176.95238095238096,"z":-34.38095238095238,"a95":3.2,"info":"\"15-06-25\" at \"15:56\""},{"visible":true,"include":true,"step":"340","x":118.0952380952381,"y":-161.04761904761904,"z":0.19047619047619047,"a95":3.8,"info":"\"15-06-25\" at \"19:37\""},{"visible":true,"include":true,"step":"370","x":159.33333333333334,"y":-144,"z":-3.7142857142857144,"a95":4.1,"info":"\"15-06-25\" at \"23:20\""},{"visible":false,"include":false,"step":"400","x":77.9047619047619,"y":-97.14285714285714,"z":36.285714285714285,"a95":9,"info":"\"15-06-26\" at \"10:26\""},{"visible":false,"include":false,"step":"420","x":171.8095238095238,"y":-222.1904761904762,"z":-61.904761904761905,"a95":6.4,"info":"\"15-06-27\" at \"09:40\""}]},{"version":"v1.1.0","exported":"2016-10-17T09:14:05.068Z","volume":10.5,"added":"2016-10-17T08:55:10.788Z","format":"Utrecht","demagType":"Unknown","strat":null,"patch":1.1,"GEO":[{"dec":201.2862598002786,"inc":-49.28064523483848,"MAD":5.528094119094734,"cm":[-3.552713678800501e-15,7.105427357601002e-15,0],"intensity":1108.3102539666495,"type":"dir","forced":true,"remark":"","origin":false,"nSteps":9,"minStep":"210","maxStep":"400","steps":["210","230","250","270","300","320","340","370","400"],"group":"None","version":"v1.1.0"}],"TECT":[{"dec":175.54563086232417,"inc":-37.16350590542029,"MAD":5.528094119094724,"cm":[-2.1316282072803006e-14,1.496580637194711e-13,3.552713678800501e-15],"intensity":1108.3102539666493,"type":"dir","forced":true,"remark":"","origin":false,"nSteps":9,"minStep":"210","maxStep":"400","steps":["210","230","250","270","300","320","340","370","400"],"group":"None","version":"v1.1.0"}],"interpreted":true,"name":"SS33.04A","coreAzi":267,"coreDip":13,"bedStrike":212,"bedDip":29,"data":[{"visible":true,"include":false,"step":"20","x":-546.8571428571429,"y":214.38095238095238,"z":661.1428571428571,"a95":2.1,"info":"\"15-06-22\" at \"10:13\""},{"visible":true,"include":false,"step":"100","x":267.6190476190476,"y":-100.19047619047619,"z":73.33333333333333,"a95":2.6,"info":"\"15-06-22\" at \"13:38\""},{"visible":true,"include":false,"step":"150","x":313.9047619047619,"y":-148.57142857142858,"z":134.1904761904762,"a95":1.7,"info":"\"15-06-23\" at \"10:25\""},{"visible":true,"include":false,"step":"180","x":502.0952380952381,"y":-328.3809523809524,"z":74.19047619047619,"a95":1.7,"info":"\"15-06-23\" at \"13:31\""},{"visible":true,"include":true,"step":"210","x":551.2380952380952,"y":-332.6666666666667,"z":68.19047619047619,"a95":1.5,"info":"\"15-06-23\" at \"16:22\""},{"visible":true,"include":true,"step":"230","x":613.1428571428571,"y":-380.95238095238096,"z":82.0952380952381,"a95":1.6,"info":"\"15-06-24\" at \"11:04\""},{"visible":true,"include":true,"step":"250","x":541.4285714285714,"y":-364.76190476190476,"z":94.95238095238095,"a95":1.6,"info":"\"15-06-24\" at \"14:16\""},{"visible":true,"include":true,"step":"270","x":495.42857142857144,"y":-464.2857142857143,"z":4.761904761904762,"a95":1.3,"info":"\"15-06-25\" at \"08:42\""},{"visible":true,"include":true,"step":"300","x":460,"y":-380.1904761904762,"z":24.095238095238095,"a95":1.4,"info":"\"15-06-25\" at \"12:27\""},{"visible":true,"include":true,"step":"320","x":472.2857142857143,"y":-401.5238095238095,"z":60.76190476190476,"a95":1.8,"info":"\"15-06-25\" at \"15:58\""},{"visible":true,"include":true,"step":"340","x":376.57142857142856,"y":-350.1904761904762,"z":48.38095238095238,"a95":1.5,"info":"\"15-06-25\" at \"19:39\""},{"visible":true,"include":true,"step":"370","x":490.95238095238096,"y":-343.7142857142857,"z":22.761904761904763,"a95":1.7,"info":"\"15-06-25\" at \"23:22\""},{"visible":true,"include":true,"step":"400","x":372.6666666666667,"y":-253.71428571428572,"z":107.61904761904762,"a95":3.5,"info":"\"15-06-26\" at \"10:28\""},{"visible":true,"include":false,"step":"420","x":260.3809523809524,"y":-370.6666666666667,"z":49.714285714285715,"a95":3.7,"info":"\"15-06-27\" at \"09:42\""},{"visible":false,"include":false,"step":"440","x":3.3333333333333335,"y":-145.42857142857142,"z":209.42857142857142,"a95":7.9,"info":"\"15-06-27\" at \"12:12\""},{"visible":false,"include":false,"step":"470","x":113.23809523809524,"y":-257.23809523809524,"z":-358,"a95":8.5,"info":"\"15-06-27\" at \"14:43\""}]},{"version":"v1.1.0","exported":"2016-10-17T09:14:05.069Z","volume":10.5,"added":"2016-10-17T08:55:10.789Z","format":"Utrecht","demagType":"Unknown","strat":"0","patch":1.1,"GEO":[{"dec":258.3335724288228,"inc":-25.468136301650258,"MAD":10.4140016122589,"cm":[-3.6193270602780103e-14,2.1316282072803006e-14,0],"intensity":743.5089387156777,"type":"dir","forced":true,"remark":"","origin":false,"nSteps":7,"minStep":"150","maxStep":"300","steps":["150","180","210","230","250","280","300"],"group":"None","version":"v1.1.0"}],"TECT":[{"dec":242.19425163769216,"inc":-43.8452398179948,"MAD":10.414001612258877,"cm":[-8.260059303211165e-14,3.552713678800501e-14,2.1316282072803006e-14],"intensity":743.5089387156777,"type":"dir","forced":true,"remark":"","origin":false,"nSteps":7,"minStep":"150","maxStep":"300","steps":["150","180","210","230","250","280","300"],"group":"None","version":"v1.1.0"}],"interpreted":true,"name":"SS33.05A","coreAzi":265,"coreDip":9,"bedStrike":212,"bedDip":29,"data":[{"visible":true,"include":false,"step":"20","x":-849.6190476190476,"y":476.95238095238096,"z":242.85714285714286,"a95":1.7,"info":"\"15-06-15\" at \"10:47\""},{"visible":true,"include":false,"step":"100","x":37.714285714285715,"y":27.333333333333332,"z":345.8095238095238,"a95":3.5,"info":"\"15-06-15\" at \"13:58\""},{"visible":true,"include":true,"step":"150","x":286.6666666666667,"y":-120.76190476190476,"z":242.76190476190476,"a95":2.8,"info":"\"15-06-16\" at \"08:57\""},{"visible":true,"include":true,"step":"180","x":219.71428571428572,"y":-61.714285714285715,"z":240.85714285714286,"a95":3.9,"info":"\"15-06-16\" at \"11:57\""},{"visible":true,"include":true,"step":"210","x":300.4761904761905,"y":-52.666666666666664,"z":439.42857142857144,"a95":2.7,"info":"\"15-06-17\" at \"15:39\""},{"visible":true,"include":true,"step":"230","x":279.23809523809524,"y":-24,"z":314.4761904761905,"a95":2.7,"info":"\"15-06-17\" at \"18:49\""},{"visible":true,"include":true,"step":"250","x":174.76190476190476,"y":-67.80952380952381,"z":323.04761904761904,"a95":3.6,"info":"\"15-06-17\" at \"21:58\""},{"visible":true,"include":true,"step":"280","x":235.71428571428572,"y":-38.285714285714285,"z":443.6190476190476,"a95":2.8,"info":"\"15-06-18\" at \"07:39\""},{"visible":true,"include":true,"step":"300","x":153.42857142857142,"y":50.57142857142857,"z":352.3809523809524,"a95":2.7,"info":"\"15-06-18\" at \"10:44\""},{"visible":true,"include":false,"step":"320","x":137.23809523809524,"y":-42.857142857142854,"z":154.1904761904762,"a95":4.1,"info":"\"15-06-18\" at \"14:40\""},{"visible":true,"include":false,"step":"340","x":201.33333333333334,"y":-229.33333333333334,"z":54.95238095238095,"a95":2.1,"info":"\"15-06-19\" at \"10:06\""},{"visible":true,"include":false,"step":"360","x":149.71428571428572,"y":-108.38095238095238,"z":97.42857142857143,"a95":5.4,"info":"\"15-06-19\" at \"13:46\""},{"visible":false,"include":false,"step":"390","x":-240.38095238095238,"y":-51.61904761904762,"z":224.66666666666666,"a95":7.4,"info":"\"15-06-20\" at \"09:56\""},{"visible":false,"include":false,"step":"420","x":-245.9047619047619,"y":-273.9047619047619,"z":-85.61904761904762,"a95":7.9,"info":"\"15-06-20\" at \"13:22\""},{"visible":false,"include":false,"step":"450","x":-142.47619047619048,"y":-242.85714285714286,"z":353.04761904761904,"a95":9.2,"info":"\"15-06-21\" at \"16:46\""}]},{"version":"v1.1.0","exported":"2016-10-17T09:14:05.069Z","volume":10.5,"added":"2016-10-17T08:55:10.789Z","format":"Utrecht","demagType":"Unknown","strat":null,"patch":1.1,"GEO":[],"TECT":[],"interpreted":false,"name":"SS33.06A","coreAzi":266,"coreDip":13,"bedStrike":212,"bedDip":29,"data":[{"visible":false,"include":false,"step":"20","x":-1489.904761904762,"y":764.2857142857143,"z":695.1428571428571,"a95":1.7,"info":"\"15-06-22\" at \"10:18\""},{"visible":true,"include":false,"step":"100","x":-344,"y":450.57142857142856,"z":395.6190476190476,"a95":1.9,"info":"\"15-06-22\" at \"13:42\""},{"visible":true,"include":false,"step":"150","x":-16.952380952380953,"y":303.8095238095238,"z":240.85714285714286,"a95":2.8,"info":"\"15-06-23\" at \"10:28\""},{"visible":true,"include":true,"step":"180","x":219.71428571428572,"y":239.14285714285714,"z":233.23809523809524,"a95":2.5,"info":"\"15-06-23\" at \"13:37\""},{"visible":true,"include":true,"step":"210","x":170.95238095238096,"y":215.33333333333334,"z":190.57142857142858,"a95":3.5,"info":"\"15-06-23\" at \"16:25\""},{"visible":true,"include":true,"step":"230","x":209.33333333333334,"y":160.28571428571428,"z":167.14285714285714,"a95":2.8,"info":"\"15-06-24\" at \"11:07\""},{"visible":true,"include":true,"step":"250","x":232.38095238095238,"y":148.85714285714286,"z":64.38095238095238,"a95":2.9,"info":"\"15-06-24\" at \"14:19\""},{"visible":true,"include":true,"step":"270","x":266.3809523809524,"y":154.47619047619048,"z":84.0952380952381,"a95":2.5,"info":"\"15-06-25\" at \"08:45\""},{"visible":true,"include":true,"step":"300","x":237.52380952380952,"y":145.42857142857142,"z":129.23809523809524,"a95":2.3,"info":"\"15-06-25\" at \"12:30\""},{"visible":true,"include":true,"step":"320","x":212.47619047619048,"y":139.42857142857142,"z":65.04761904761905,"a95":2.4,"info":"\"15-06-25\" at \"16:01\""},{"visible":true,"include":true,"step":"340","x":156.47619047619048,"y":205.61904761904762,"z":57.23809523809524,"a95":3.1,"info":"\"15-06-25\" at \"19:43\""},{"visible":true,"include":false,"step":"370","x":86.28571428571429,"y":179.14285714285714,"z":38.476190476190474,"a95":4.5,"info":"\"15-06-25\" at \"23:25\""},{"visible":false,"include":false,"step":"400","x":-48.76190476190476,"y":72.19047619047619,"z":520.5714285714286,"a95":4,"info":"\"15-06-26\" at \"10:34\""},{"visible":false,"include":false,"step":"420","x":31.333333333333332,"y":225.23809523809524,"z":168.0952380952381,"a95":5.2,"info":"\"15-06-27\" at \"09:45\""}]},{"version":"v1.1.0","exported":"2016-10-17T09:14:05.069Z","volume":10.5,"added":"2016-10-17T08:55:10.790Z","format":"Utrecht","demagType":"Unknown","strat":"5","patch":1.1,"GEO":[{"dec":223.59121709524217,"inc":-64.27040433117912,"MAD":12.164898431816328,"cm":[-1.404432126150823e-14,4.440892098500626e-15,0],"intensity":436.51836659852154,"type":"dir","forced":true,"remark":"","origin":false,"nSteps":9,"minStep":"23.0","maxStep":"55.0","steps":["23.0","25.0","30.0","33.0","35.0","40.0","45.0","50.0","55.0"],"group":"None","version":"v1.1.0"}],"TECT":[{"dec":171.71605952293908,"inc":-56.11851801719045,"MAD":12.164898431816319,"cm":[-1.7763568394002505e-14,1.915134717478395e-14,1.1546319456101628e-14],"intensity":436.51836659852154,"type":"dir","forced":true,"remark":"","origin":false,"nSteps":9,"minStep":"23.0","maxStep":"55.0","steps":["23.0","25.0","30.0","33.0","35.0","40.0","45.0","50.0","55.0"],"group":"None","version":"v1.1.0"}],"interpreted":true,"name":"SS33.07B","coreAzi":269,"coreDip":19,"bedStrike":212,"bedDip":29,"data":[{"visible":false,"include":false,"step":"0.0","x":-275.2857142857143,"y":331.67619047619047,"z":255.1047619047619,"a95":0.99,"info":"26/06/2015 at 16:16:20"},{"visible":true,"include":false,"step":"10.0","x":77.42571428571429,"y":19.228571428571428,"z":115.88571428571429,"a95":0.99,"info":"26/06/2015 at 16:16:20"},{"visible":true,"include":false,"step":"15.0","x":226.94285714285715,"y":-113.12380952380951,"z":63.49619047619048,"a95":0.99,"info":"26/06/2015 at 16:16:20"},{"visible":true,"include":false,"step":"20.0","x":294.0952380952381,"y":-173.03809523809525,"z":45.45333333333333,"a95":0.99,"info":"26/06/2015 at 16:16:20"},{"visible":true,"include":true,"step":"23.0","x":314.3904761904762,"y":-143.64761904761903,"z":-53.028571428571425,"a95":0.99,"info":"26/06/2015 at 16:16:20"},{"visible":true,"include":true,"step":"25.0","x":334.6952380952381,"y":-65.24476190476192,"z":-73.55904761904762,"a95":0.99,"info":"26/06/2015 at 16:16:20"},{"visible":true,"include":true,"step":"30.0","x":268.97142857142853,"y":-94.94952380952381,"z":67.17142857142856,"a95":0.99,"info":"26/06/2015 at 16:16:20"},{"visible":true,"include":true,"step":"33.0","x":241.96190476190475,"y":-77.4342857142857,"z":51.18,"a95":0.99,"info":"26/06/2015 at 16:16:20"},{"visible":true,"include":true,"step":"35.0","x":224.96190476190475,"y":-86.31809523809524,"z":-9.175619047619048,"a95":0.99,"info":"26/06/2015 at 16:16:20"},{"visible":true,"include":true,"step":"40.0","x":188.85714285714286,"y":-27.863809523809522,"z":-0.05918476190476191,"a95":0.99,"info":"26/06/2015 at 16:16:20"},{"visible":true,"include":true,"step":"45.0","x":187.4952380952381,"y":-61.71523809523809,"z":53.53809523809524,"a95":0.99,"info":"26/06/2015 at 16:16:20"},{"visible":true,"include":true,"step":"50.0","x":134.3904761904762,"y":-77.59333333333333,"z":-1.7390476190476192,"a95":0.99,"info":"26/06/2015 at 16:16:20"},{"visible":true,"include":true,"step":"55.0","x":97.03809523809524,"y":6.979428571428572,"z":2.0715238095238098,"a95":0.99,"info":"26/06/2015 at 16:16:20"},{"visible":false,"include":false,"step":"60.0","x":105.60952380952382,"y":-20.968571428571426,"z":-65.1047619047619,"a95":0.99,"info":"26/06/2015 at 16:16:20"},{"visible":false,"include":false,"step":"65.0","x":39.96476190476191,"y":-59.38666666666666,"z":80.53904761904762,"a95":0.99,"info":"26/06/2015 at 16:16:20"},{"visible":false,"include":false,"step":"70.0","x":91.40761904761905,"y":31.727619047619047,"z":-27.18952380952381,"a95":0.99,"info":"26/06/2015 at 16:16:20"},{"visible":false,"include":false,"step":"80.0","x":-401.49523809523805,"y":-48.381904761904764,"z":-28.291428571428572,"a95":0.99,"info":"26/06/2015 at 16:16:20"}]},{"version":"v1.1.0","exported":"2016-10-17T09:14:05.069Z","volume":10.5,"added":"2016-10-17T08:55:10.797Z","format":"Utrecht","demagType":"Unknown","strat":null,"patch":1.1,"GEO":[{"dec":235.640796174111,"inc":-31.912305867229286,"MAD":6.555139245153352,"cm":[-7.105427357601002e-15,3.552713678800501e-15,0],"intensity":1064.0748102525777,"type":"dir","forced":true,"remark":"","origin":false,"nSteps":7,"minStep":"210","maxStep":"340","steps":["210","230","250","270","300","320","340"],"group":"None","version":"v1.1.0"}],"TECT":[{"dec":215.05003668415017,"inc":-38.85620462700623,"MAD":6.55513924515341,"cm":[-5.684341886080802e-14,1.0125233984581428e-13,-7.105427357601002e-15],"intensity":1064.0748102525777,"type":"dir","forced":true,"remark":"","origin":false,"nSteps":7,"minStep":"210","maxStep":"340","steps":["210","230","250","270","300","320","340"],"group":"None","version":"v1.1.0"}],"interpreted":true,"name":"SS33.08A","coreAzi":262,"coreDip":5,"bedStrike":212,"bedDip":29,"data":[{"visible":true,"include":false,"step":"20","x":-1836.857142857143,"y":985.2380952380952,"z":149.42857142857142,"a95":1.7,"info":"\"15-06-22\" at \"10:20\""},{"visible":true,"include":false,"step":"100","x":-708.3809523809524,"y":468,"z":352.3809523809524,"a95":2.2,"info":"\"15-06-22\" at \"13:44\""},{"visible":true,"include":false,"step":"150","x":60.095238095238095,"y":-14.19047619047619,"z":485.23809523809524,"a95":3.1,"info":"\"15-06-23\" at \"10:30\""},{"visible":true,"include":false,"step":"180","x":248.57142857142858,"y":-148.47619047619048,"z":454.6666666666667,"a95":2.6,"info":"\"15-06-23\" at \"13:39\""},{"visible":true,"include":true,"step":"210","x":328.76190476190476,"y":-231.9047619047619,"z":518.2857142857143,"a95":2.6,"info":"\"15-06-23\" at \"16:28\""},{"visible":true,"include":true,"step":"230","x":371.6190476190476,"y":-212.28571428571428,"z":326.1904761904762,"a95":2.5,"info":"\"15-06-24\" at \"11:09\""},{"visible":true,"include":true,"step":"250","x":323.23809523809524,"y":-226.85714285714286,"z":442.4761904761905,"a95":2.6,"info":"\"15-06-24\" at \"14:21\""},{"visible":true,"include":true,"step":"270","x":323.9047619047619,"y":-259.23809523809524,"z":437.23809523809524,"a95":2.6,"info":"\"15-06-25\" at \"08:47\""},{"visible":true,"include":true,"step":"300","x":341.42857142857144,"y":-130.95238095238096,"z":291.23809523809524,"a95":2.1,"info":"\"15-06-25\" at \"12:32\""},{"visible":true,"include":true,"step":"320","x":359.9047619047619,"y":-201.8095238095238,"z":350.3809523809524,"a95":2.4,"info":"\"15-06-25\" at \"16:03\""},{"visible":true,"include":true,"step":"340","x":216.38095238095238,"y":-155.14285714285714,"z":309.5238095238095,"a95":2.9,"info":"\"15-06-25\" at \"19:45\""},{"visible":false,"include":false,"step":"370","x":359.9047619047619,"y":-146.1904761904762,"z":176.38095238095238,"a95":2.2,"info":"\"15-06-25\" at \"23:27\""},{"visible":false,"include":false,"step":"400","x":332.85714285714283,"y":-138.38095238095238,"z":116,"a95":3.4,"info":"\"15-06-26\" at \"10:36\""},{"visible":true,"include":false,"step":"420","x":220.85714285714286,"y":-183.8095238095238,"z":317.8095238095238,"a95":3.9,"info":"\"15-06-27\" at \"09:47\""},{"visible":true,"include":false,"step":"440","x":226.38095238095238,"y":-291.3333333333333,"z":282.85714285714283,"a95":4.8,"info":"\"15-06-27\" at \"12:14\""},{"visible":false,"include":false,"step":"470","x":374.57142857142856,"y":82,"z":141.23809523809524,"a95":5.7,"info":"\"15-06-27\" at \"14:46\""}]},{"version":"v1.1.0","exported":"2016-10-17T09:14:05.069Z","volume":10.5,"added":"2016-10-17T08:55:10.797Z","format":"Utrecht","demagType":"Unknown","strat":"0","patch":1.1,"GEO":[{"dec":242.0543393877453,"inc":-30.481432030866685,"MAD":6.418674803294709,"cm":[-6.217248937900877e-14,2.842170943040401e-14,0],"intensity":983.3891740169281,"type":"dir","forced":true,"remark":"","origin":false,"nSteps":9,"minStep":"150","maxStep":"340","steps":["150","180","210","230","250","280","300","320","340"],"group":"None","version":"v1.1.0"}],"TECT":[{"dec":222.00288583879657,"inc":-40.76097031165558,"MAD":6.418674803294744,"cm":[-5.861977570020827e-14,4.973799150320701e-14,2.1316282072803006e-14],"intensity":983.3891740169281,"type":"dir","forced":true,"remark":"","origin":false,"nSteps":9,"minStep":"150","maxStep":"340","steps":["150","180","210","230","250","280","300","320","340"],"group":"None","version":"v1.1.0"}],"interpreted":true,"name":"SS33.09A","coreAzi":269,"coreDip":12,"bedStrike":212,"bedDip":29,"data":[{"visible":true,"include":false,"step":"20","x":-1118,"y":507.7142857142857,"z":280.76190476190476,"a95":1.8,"info":"\"15-06-15\" at \"10:49\""},{"visible":true,"include":false,"step":"100","x":-5.619047619047619,"y":-62.285714285714285,"z":385.42857142857144,"a95":3.5,"info":"\"15-06-15\" at \"14:00\""},{"visible":true,"include":true,"step":"150","x":287.23809523809524,"y":-179.14285714285714,"z":329.7142857142857,"a95":2.5,"info":"\"15-06-16\" at \"08:58\""},{"visible":true,"include":true,"step":"180","x":286.57142857142856,"y":-186.57142857142858,"z":312.95238095238096,"a95":2.5,"info":"\"15-06-16\" at \"11:59\""},{"visible":true,"include":true,"step":"210","x":280.2857142857143,"y":-237.71428571428572,"z":335.5238095238095,"a95":2.2,"info":"\"15-06-17\" at \"15:41\""},{"visible":true,"include":true,"step":"230","x":305.7142857142857,"y":-249.61904761904762,"z":281.42857142857144,"a95":2.2,"info":"\"15-06-17\" at \"18:52\""},{"visible":true,"include":true,"step":"250","x":412.0952380952381,"y":-204.76190476190476,"z":300.76190476190476,"a95":1.7,"info":"\"15-06-17\" at \"22:02\""},{"visible":true,"include":true,"step":"280","x":434.1904761904762,"y":-205.33333333333334,"z":462.57142857142856,"a95":3.6,"info":"\"15-06-18\" at \"07:41\""},{"visible":true,"include":true,"step":"300","x":268.1904761904762,"y":-175.23809523809524,"z":338.2857142857143,"a95":2.3,"info":"\"15-06-18\" at \"10:47\""},{"visible":true,"include":true,"step":"320","x":407.14285714285717,"y":-269.42857142857144,"z":388.2857142857143,"a95":2.2,"info":"\"15-06-18\" at \"14:42\""},{"visible":true,"include":true,"step":"340","x":397.3333333333333,"y":-147.8095238095238,"z":296,"a95":2.8,"info":"\"15-06-19\" at \"10:08\""},{"visible":true,"include":false,"step":"360","x":292,"y":-268.57142857142856,"z":180.47619047619048,"a95":3,"info":"\"15-06-19\" at \"13:48\""},{"visible":true,"include":false,"step":"390","x":100.66666666666667,"y":-176.57142857142858,"z":134.76190476190476,"a95":2,"info":"\"15-06-20\" at \"10:02\""},{"visible":false,"include":false,"step":"420","x":107.52380952380952,"y":-277.04761904761904,"z":107.52380952380952,"a95":2,"info":"\"15-06-20\" at \"13:32\""},{"visible":false,"include":false,"step":"450","x":252.28571428571428,"y":-516,"z":-285.5238095238095,"a95":2.2,"info":"\"15-06-21\" at \"16:49\""}]},{"version":"v1.1.0","exported":"2016-10-17T09:14:05.069Z","volume":10.5,"added":"2016-10-17T08:55:10.797Z","format":"Utrecht","demagType":"Unknown","strat":null,"patch":1.1,"GEO":[{"dec":220.09584116742158,"inc":-18.81266370702662,"MAD":6.796163255524212,"cm":[-7.105427357601002e-15,2.1316282072803006e-14,0],"intensity":1223.1024379405615,"type":"dir","forced":true,"remark":"","origin":false,"nSteps":9,"minStep":"230","maxStep":"420","steps":["230","250","270","300","320","340","370","400","420"],"group":"None","version":"v1.1.0"}],"TECT":[{"dec":209.57138185540683,"inc":-20.283829765845176,"MAD":6.796163255524248,"cm":[-5.684341886080802e-14,1.0125233984581428e-13,2.842170943040401e-14],"intensity":1223.1024379405615,"type":"dir","forced":true,"remark":"","origin":false,"nSteps":9,"minStep":"230","maxStep":"420","steps":["230","250","270","300","320","340","370","400","420"],"group":"None","version":"v1.1.0"}],"interpreted":true,"name":"SS33.10A","coreAzi":270,"coreDip":15,"bedStrike":212,"bedDip":29,"data":[{"visible":true,"include":false,"step":"20","x":-1491.7142857142858,"y":234,"z":621.2380952380952,"a95":1.7,"info":"\"15-06-22\" at \"10:21\""},{"visible":true,"include":false,"step":"100","x":-757.4285714285714,"y":166.95238095238096,"z":628.3809523809524,"a95":2.2,"info":"\"15-06-22\" at \"13:45\""},{"visible":true,"include":false,"step":"150","x":152.47619047619048,"y":-316.57142857142856,"z":367.8095238095238,"a95":2.1,"info":"\"15-06-23\" at \"10:32\""},{"visible":true,"include":false,"step":"180","x":114.28571428571429,"y":-372.6666666666667,"z":429.9047619047619,"a95":2.5,"info":"\"15-06-23\" at \"13:41\""},{"visible":true,"include":false,"step":"210","x":212.28571428571428,"y":-463.5238095238095,"z":419.3333333333333,"a95":2.2,"info":"\"15-06-23\" at \"16:29\""},{"visible":true,"include":true,"step":"230","x":307.6190476190476,"y":-545.4285714285714,"z":393.23809523809524,"a95":1.8,"info":"\"15-06-24\" at \"11:11\""},{"visible":true,"include":true,"step":"250","x":183.61904761904762,"y":-449.9047619047619,"z":333.9047619047619,"a95":2.6,"info":"\"15-06-24\" at \"14:22\""},{"visible":true,"include":true,"step":"270","x":269.6190476190476,"y":-534,"z":290.1904761904762,"a95":1.9,"info":"\"15-06-25\" at \"08:49\""},{"visible":true,"include":true,"step":"300","x":320.2857142857143,"y":-451.14285714285717,"z":247.71428571428572,"a95":1.7,"info":"\"15-06-25\" at \"12:33\""},{"visible":true,"include":true,"step":"320","x":295.3333333333333,"y":-467.3333333333333,"z":322.1904761904762,"a95":1.9,"info":"\"15-06-25\" at \"16:05\""},{"visible":true,"include":true,"step":"340","x":345.23809523809524,"y":-418,"z":352.76190476190476,"a95":2.3,"info":"\"15-06-25\" at \"19:46\""},{"visible":true,"include":true,"step":"370","x":305.5238095238095,"y":-393.14285714285717,"z":209.61904761904762,"a95":1.8,"info":"\"15-06-25\" at \"23:30\""},{"visible":true,"include":true,"step":"400","x":307.04761904761904,"y":-318.95238095238096,"z":306.3809523809524,"a95":1.6,"info":"\"15-06-26\" at \"10:37\""},{"visible":true,"include":true,"step":"420","x":224.1904761904762,"y":-323.7142857142857,"z":283.3333333333333,"a95":2.8,"info":"\"15-06-27\" at \"09:57\""},{"visible":false,"include":false,"step":"440","x":117.61904761904762,"y":-328.85714285714283,"z":128.85714285714286,"a95":6.3,"info":"\"15-06-27\" at \"12:16\""},{"visible":false,"include":false,"step":"470","x":-273.5238095238095,"y":-471.9047619047619,"z":-467.14285714285717,"a95":5,"info":"\"15-06-27\" at \"14:48\""}]},{"version":"v1.1.0","exported":"2016-10-17T09:14:05.070Z","volume":10.5,"added":"2016-10-17T08:55:10.798Z","format":"Utrecht","demagType":"Unknown","strat":"6","patch":1.1,"GEO":[{"dec":177.71565812090887,"inc":-52.10291145435306,"MAD":7.403370435700516,"cm":[0,-2.6645352591003757e-14,0],"intensity":728.1027518289371,"type":"dir","forced":true,"remark":"","origin":false,"nSteps":7,"minStep":"23.0","maxStep":"60.0","steps":["23.0","25.0","30.0","33.0","35.0","40.0","60.0"],"group":"None","version":"v1.1.0"}],"TECT":[{"dec":158.5272923167064,"inc":-31.495360091620075,"MAD":7.40337043570048,"cm":[-2.842170943040401e-14,-7.904787935331115e-14,1.1546319456101628e-14],"intensity":728.1027518289371,"type":"dir","forced":true,"remark":"","origin":false,"nSteps":7,"minStep":"23.0","maxStep":"60.0","steps":["23.0","25.0","30.0","33.0","35.0","40.0","60.0"],"group":"None","version":"v1.1.0"}],"interpreted":true,"name":"SS33.11A","coreAzi":264,"coreDip":7,"bedStrike":212,"bedDip":29,"data":[{"visible":true,"include":false,"step":"0.0","x":-449.93333333333334,"y":117.35238095238095,"z":125.6,"a95":0.99,"info":"26/06/2015 at 16:16:20"},{"visible":true,"include":false,"step":"10.0","x":107.51428571428572,"y":-209.17142857142858,"z":19.695238095238096,"a95":0.99,"info":"26/06/2015 at 16:16:20"},{"visible":true,"include":false,"step":"15.0","x":300.87619047619046,"y":-364.2095238095238,"z":78.36285714285714,"a95":0.99,"info":"26/06/2015 at 16:16:20"},{"visible":true,"include":false,"step":"20.0","x":381.02857142857147,"y":-358.3333333333333,"z":-58.986666666666665,"a95":0.99,"info":"26/06/2015 at 16:16:20"},{"visible":true,"include":true,"step":"23.0","x":417.81904761904764,"y":-327.0571428571428,"z":-2.0286666666666666,"a95":0.99,"info":"26/06/2015 at 16:16:20"},{"visible":true,"include":true,"step":"25.0","x":395.1714285714286,"y":-365.8,"z":20.757142857142856,"a95":0.99,"info":"26/06/2015 at 16:16:20"},{"visible":true,"include":true,"step":"30.0","x":364.4,"y":-272.37142857142857,"z":23.116190476190475,"a95":0.99,"info":"26/06/2015 at 16:16:20"},{"visible":true,"include":true,"step":"33.0","x":328.56190476190477,"y":-198.85714285714286,"z":-113.20952380952382,"a95":0.99,"info":"26/06/2015 at 16:16:20"},{"visible":true,"include":true,"step":"35.0","x":326.8952380952381,"y":-262.8285714285714,"z":-71.85714285714286,"a95":0.99,"info":"26/06/2015 at 16:16:20"},{"visible":true,"include":true,"step":"40.0","x":323.48571428571427,"y":-232.8,"z":-29.03238095238095,"a95":0.99,"info":"26/06/2015 at 16:16:20"},{"visible":false,"include":false,"step":"45.0","x":301.8,"y":-74.16952380952381,"z":-71.75333333333333,"a95":0.99,"info":"26/06/2015 at 16:16:20"},{"visible":false,"include":false,"step":"50.0","x":124.85714285714286,"y":-234.1142857142857,"z":-3.1431428571428572,"a95":0.99,"info":"26/06/2015 at 16:16:20"},{"visible":false,"include":false,"step":"55.0","x":218.96190476190475,"y":-105.76190476190476,"z":23.843809523809526,"a95":0.99,"info":"26/06/2015 at 16:16:20"},{"visible":true,"include":true,"step":"60.0","x":158.53333333333333,"y":-115.70476190476191,"z":-41.714285714285715,"a95":0.99,"info":"26/06/2015 at 16:16:20"},{"visible":true,"include":false,"step":"65.0","x":160.47619047619048,"y":-168.1904761904762,"z":-163.55238095238096,"a95":0.99,"info":"26/06/2015 at 16:16:20"},{"visible":false,"include":false,"step":"70.0","x":218.38095238095238,"y":-100.5904761904762,"z":-179.57142857142858,"a95":0.99,"info":"26/06/2015 at 16:16:20"},{"visible":false,"include":false,"step":"80.0","x":111.6,"y":-65.59238095238095,"z":57.023809523809526,"a95":0.99,"info":"26/06/2015 at 16:16:20"}]},{"version":"v1.1.0","exported":"2016-10-17T09:14:05.070Z","volume":10.5,"added":"2016-10-17T08:55:10.798Z","format":"Utrecht","demagType":"Unknown","strat":"0","patch":1.1,"GEO":[{"dec":164.3530710818418,"inc":-64.79431937512751,"MAD":9.629121458575852,"cm":[-3.552713678800501e-15,6.217248937900877e-15,0],"intensity":725.5210028824685,"type":"dir","forced":true,"remark":"","origin":false,"nSteps":8,"minStep":"180","maxStep":"340","steps":["180","210","230","250","280","300","320","340"],"group":"None","version":"v1.1.0"}],"TECT":[{"dec":143.8942807288521,"inc":-39.69965608062814,"MAD":9.629121458575884,"cm":[0,5.329070518200751e-15,1.2434497875801753e-14],"intensity":725.5210028824685,"type":"dir","forced":true,"remark":"","origin":false,"nSteps":8,"minStep":"180","maxStep":"340","steps":["180","210","230","250","280","300","320","340"],"group":"None","version":"v1.1.0"}],"interpreted":true,"name":"SS33.12A","coreAzi":259,"coreDip":6,"bedStrike":212,"bedDip":29,"data":[{"visible":true,"include":false,"step":"20","x":-720.4761904761905,"y":557.3333333333334,"z":-404.6666666666667,"a95":2,"info":"\"15-06-15\" at \"10:50\""},{"visible":true,"include":false,"step":"100","x":112.28571428571429,"y":123.61904761904762,"z":-95.04761904761905,"a95":4,"info":"\"15-06-15\" at \"14:02\""},{"visible":true,"include":false,"step":"150","x":298.2857142857143,"y":-34.095238095238095,"z":-94.57142857142857,"a95":3.1,"info":"\"15-06-16\" at \"09:00\""},{"visible":true,"include":true,"step":"180","x":337.6190476190476,"y":-108.28571428571429,"z":-45.142857142857146,"a95":2,"info":"\"15-06-16\" at \"12:01\""},{"visible":true,"include":true,"step":"210","x":351.04761904761904,"y":-156.1904761904762,"z":6.190476190476191,"a95":2.5,"info":"\"15-06-17\" at \"15:43\""},{"visible":true,"include":true,"step":"230","x":409.7142857142857,"y":-183.42857142857142,"z":-160.38095238095238,"a95":1.9,"info":"\"15-06-17\" at \"18:53\""},{"visible":true,"include":true,"step":"250","x":412.85714285714283,"y":-196.95238095238096,"z":-40.857142857142854,"a95":2.4,"info":"\"15-06-17\" at \"22:03\""},{"visible":true,"include":true,"step":"280","x":410.3809523809524,"y":-165.52380952380952,"z":-155.42857142857142,"a95":1.6,"info":"\"15-06-18\" at \"07:43\""},{"visible":true,"include":true,"step":"300","x":409.42857142857144,"y":-160.57142857142858,"z":19.904761904761905,"a95":1.7,"info":"\"15-06-18\" at \"10:49\""},{"visible":true,"include":true,"step":"320","x":443.8095238095238,"y":-275.42857142857144,"z":-2.6666666666666665,"a95":2.3,"info":"\"15-06-18\" at \"14:44\""},{"visible":true,"include":true,"step":"340","x":309.9047619047619,"y":-201.9047619047619,"z":-59.142857142857146,"a95":2.7,"info":"\"15-06-19\" at \"10:11\""},{"visible":true,"include":false,"step":"360","x":351.04761904761904,"y":-287.3333333333333,"z":48.285714285714285,"a95":1.8,"info":"\"15-06-19\" at \"13:52\""},{"visible":true,"include":false,"step":"390","x":144.57142857142858,"y":-222,"z":-32.857142857142854,"a95":3.8,"info":"\"15-06-20\" at \"10:04\""},{"visible":true,"include":false,"step":"420","x":284.85714285714283,"y":-309.3333333333333,"z":87.61904761904762,"a95":1.9,"info":"\"15-06-20\" at \"13:37\""},{"visible":false,"include":false,"step":"450","x":173.14285714285714,"y":-250.95238095238096,"z":106.85714285714286,"a95":2.9,"info":"\"15-06-21\" at \"16:53\""},{"visible":false,"include":false,"step":"470","x":484,"y":-126.66666666666667,"z":-562.5714285714286,"a95":2.2,"info":"\"15-06-21\" at \"20:10\""},{"visible":false,"include":false,"step":"490","x":251.52380952380952,"y":-431.04761904761904,"z":-220.66666666666666,"a95":2.8,"info":"\"15-06-22\" at \"14:23\""}]},{"version":"v1.1.0","exported":"2016-10-17T09:14:05.070Z","volume":10.5,"added":"2016-10-17T08:55:10.798Z","format":"Utrecht","demagType":"Unknown","strat":"7","patch":1.1,"GEO":[{"dec":197.59402293395763,"inc":-32.00688291558649,"MAD":19.564688826169483,"cm":[-3.552713678800501e-15,-1.9761969838327786e-14,0],"intensity":412.4520630440549,"type":"dir","forced":true,"remark":"","origin":false,"nSteps":8,"minStep":"30.0","maxStep":"65.0","steps":["30.0","33.0","35.0","45.0","50.0","55.0","60.0","65.0"],"group":"None","version":"v1.1.0"}],"TECT":[{"dec":183.74097874397097,"inc":-21.179209521836004,"MAD":19.564688826169494,"cm":[-1.0658141036401503e-14,-5.329070518200751e-15,-3.552713678800501e-15],"intensity":412.4520630440549,"type":"dir","forced":true,"remark":"","origin":false,"nSteps":8,"minStep":"30.0","maxStep":"65.0","steps":["30.0","33.0","35.0","45.0","50.0","55.0","60.0","65.0"],"group":"None","version":"v1.1.0"}],"interpreted":true,"name":"S33.13B","coreAzi":261,"coreDip":4,"bedStrike":212,"bedDip":29,"data":[{"visible":true,"include":false,"step":"0.0","x":-625.4761904761905,"y":179.46666666666667,"z":37.52761904761905,"a95":0.99,"info":"26/06/2015 at 16:16:20"},{"visible":true,"include":false,"step":"10.0","x":-189.67619047619047,"y":-21.532380952380954,"z":20.804761904761904,"a95":0.99,"info":"26/06/2015 at 16:16:20"},{"visible":true,"include":false,"step":"15.0","x":-77.66666666666667,"y":-76.65142857142857,"z":-15.327619047619047,"a95":0.99,"info":"26/06/2015 at 16:16:20"},{"visible":true,"include":false,"step":"20.0","x":17.084761904761905,"y":-136.35238095238097,"z":76.58,"a95":0.99,"info":"26/06/2015 at 16:16:20"},{"visible":true,"include":false,"step":"23.0","x":45.11904761904762,"y":-94.94190476190477,"z":0.06233333333333333,"a95":0.99,"info":"26/06/2015 at 16:16:20"},{"visible":true,"include":false,"step":"25.0","x":-2.0305714285714287,"y":-150.82857142857142,"z":-32.860952380952384,"a95":0.99,"info":"26/06/2015 at 16:16:20"},{"visible":true,"include":true,"step":"30.0","x":115.8952380952381,"y":-146.3047619047619,"z":116.19047619047619,"a95":0.99,"info":"26/06/2015 at 16:16:20"},{"visible":true,"include":true,"step":"33.0","x":86.90571428571428,"y":-45.7047619047619,"z":41.79142857142857,"a95":0.99,"info":"26/06/2015 at 16:16:20"},{"visible":true,"include":true,"step":"35.0","x":39.2952380952381,"y":-149.0285714285714,"z":55.43047619047619,"a95":0.99,"info":"26/06/2015 at 16:16:20"},{"visible":false,"include":false,"step":"40.0","x":5.613428571428572,"y":2.4767619047619047,"z":113.68571428571428,"a95":0.99,"info":"26/06/2015 at 16:16:20"},{"visible":true,"include":true,"step":"45.0","x":43.647619047619045,"y":-96.38095238095238,"z":6.842190476190477,"a95":0.99,"info":"26/06/2015 at 16:16:20"},{"visible":true,"include":true,"step":"50.0","x":65.32571428571428,"y":-47.97238095238095,"z":19.75142857142857,"a95":0.99,"info":"26/06/2015 at 16:16:20"},{"visible":true,"include":true,"step":"55.0","x":102.20952380952382,"y":-77.84761904761905,"z":89.94,"a95":0.99,"info":"26/06/2015 at 16:16:20"},{"visible":true,"include":true,"step":"60.0","x":97.06666666666668,"y":-41.51428571428571,"z":9.09752380952381,"a95":0.99,"info":"26/06/2015 at 16:16:20"},{"visible":true,"include":true,"step":"65.0","x":92.6752380952381,"y":-186.28571428571428,"z":10.295238095238094,"a95":0.99,"info":"26/06/2015 at 16:16:20"},{"visible":false,"include":false,"step":"70.0","x":120.8952380952381,"y":5.1974285714285715,"z":12.418095238095237,"a95":0.99,"info":"26/06/2015 at 16:16:20"},{"visible":false,"include":false,"step":"80.0","x":63.061904761904756,"y":-38.90571428571428,"z":73.52285714285715,"a95":0.99,"info":"26/06/2015 at 16:16:20"}]},{"version":"v1.1.0","exported":"2016-10-17T09:14:05.070Z","volume":10.5,"added":"2016-10-17T08:55:10.799Z","format":"Utrecht","demagType":"Unknown","strat":"8","patch":1.1,"GEO":[{"dec":226.61212315764604,"inc":-54.55086995672769,"MAD":13.045258829708386,"cm":[-7.549516567451064e-15,6.217248937900877e-15,0],"intensity":310.90706124932876,"type":"dir","forced":true,"remark":"","origin":false,"nSteps":10,"minStep":"15.0","maxStep":"50.0","steps":["15.0","20.0","23.0","25.0","30.0","33.0","35.0","40.0","45.0","50.0"],"group":"None","version":"v1.1.0"}],"TECT":[{"dec":186.5596501841152,"inc":-51.57538416538078,"MAD":13.045258829708397,"cm":[-9.325873406851315e-15,-3.9968028886505635e-15,5.329070518200751e-15],"intensity":310.90706124932876,"type":"dir","forced":true,"remark":"","origin":false,"nSteps":10,"minStep":"15.0","maxStep":"50.0","steps":["15.0","20.0","23.0","25.0","30.0","33.0","35.0","40.0","45.0","50.0"],"group":"None","version":"v1.1.0"}],"interpreted":true,"name":"SS33.14A","coreAzi":260,"coreDip":7,"bedStrike":212,"bedDip":29,"data":[{"visible":true,"include":false,"step":"0.0","x":-964.2857142857143,"y":611.5619047619048,"z":172.16190476190476,"a95":0.99,"info":"26/06/2015 at 16:16:20"},{"visible":true,"include":false,"step":"10.0","x":-101.58095238095237,"y":56.607619047619046,"z":96.9047619047619,"a95":0.99,"info":"26/06/2015 at 16:16:20"},{"visible":true,"include":true,"step":"15.0","x":88.71333333333334,"y":-33.48285714285714,"z":61.24285714285714,"a95":0.99,"info":"26/06/2015 at 16:16:20"},{"visible":true,"include":true,"step":"20.0","x":257.56190476190477,"y":-86.92857142857143,"z":166.17142857142858,"a95":0.99,"info":"26/06/2015 at 16:16:20"},{"visible":true,"include":true,"step":"23.0","x":319.5238095238095,"y":-104.73333333333333,"z":106.06666666666668,"a95":0.99,"info":"26/06/2015 at 16:16:20"},{"visible":true,"include":true,"step":"25.0","x":359.68571428571425,"y":-143.66666666666666,"z":59.54,"a95":0.99,"info":"26/06/2015 at 16:16:20"},{"visible":true,"include":true,"step":"30.0","x":214.85714285714286,"y":-70.93809523809524,"z":182.84761904761905,"a95":0.99,"info":"26/06/2015 at 16:16:20"},{"visible":true,"include":true,"step":"33.0","x":183.57142857142858,"y":-48.160000000000004,"z":104.35238095238095,"a95":0.99,"info":"26/06/2015 at 16:16:20"},{"visible":true,"include":true,"step":"35.0","x":210.76190476190476,"y":-112.07619047619048,"z":28.007619047619045,"a95":0.99,"info":"26/06/2015 at 16:16:20"},{"visible":true,"include":true,"step":"40.0","x":245.65714285714287,"y":-117.48571428571428,"z":187.15238095238095,"a95":0.99,"info":"26/06/2015 at 16:16:20"},{"visible":true,"include":true,"step":"45.0","x":275.9142857142857,"y":-104.34285714285713,"z":47.69238095238095,"a95":0.99,"info":"26/06/2015 at 16:16:20"},{"visible":true,"include":true,"step":"50.0","x":153.05714285714285,"y":-10.376190476190477,"z":129.24761904761903,"a95":0.99,"info":"26/06/2015 at 16:16:20"},{"visible":false,"include":false,"step":"55.0","x":217.68571428571425,"y":-14.69047619047619,"z":-8.953999999999999,"a95":0.99,"info":"26/06/2015 at 16:16:20"},{"visible":false,"include":false,"step":"60.0","x":256.2857142857143,"y":-0.19897142857142858,"z":53.392380952380954,"a95":0.99,"info":"26/06/2015 at 16:16:20"},{"visible":false,"include":false,"step":"65.0","x":25.401904761904763,"y":-40.92666666666667,"z":-29.84952380952381,"a95":0.99,"info":"26/06/2015 at 16:16:20"},{"visible":false,"include":false,"step":"70.0","x":81.91142857142857,"y":-202.97142857142856,"z":3.185904761904762,"a95":0.99,"info":"26/06/2015 at 16:16:20"},{"visible":false,"include":false,"step":"80.0","x":-278.4761904761905,"y":-42.90380952380953,"z":-31.929523809523808,"a95":0.99,"info":"26/06/2015 at 16:16:20"}]},{"version":"v1.1.0","exported":"2016-10-17T09:14:05.070Z","volume":10.5,"added":"2016-10-17T08:55:10.799Z","format":"Utrecht","demagType":"Unknown","strat":"0","patch":1.1,"GEO":[],"TECT":[],"interpreted":false,"name":"SS33.16A","coreAzi":292,"coreDip":32,"bedStrike":212,"bedDip":29,"data":[{"visible":true,"include":false,"step":"20","x":-1307.8095238095239,"y":600.952380952381,"z":1348.2857142857142,"a95":2.1,"info":"\"15-06-15\" at \"10:52\""},{"visible":true,"include":false,"step":"100","x":-366.3809523809524,"y":229.23809523809524,"z":581.9047619047619,"a95":2.6,"info":"\"15-06-15\" at \"14:03\""},{"visible":true,"include":false,"step":"150","x":-218.0952380952381,"y":112.38095238095238,"z":284.1904761904762,"a95":5.2,"info":"\"15-06-16\" at \"09:03\""},{"visible":true,"include":false,"step":"180","x":-193.33333333333334,"y":33.333333333333336,"z":178.57142857142858,"a95":4.4,"info":"\"15-06-16\" at \"12:03\""},{"visible":true,"include":false,"step":"210","x":-144.95238095238096,"y":-34.76190476190476,"z":173.8095238095238,"a95":5.3,"info":"\"15-06-17\" at \"15:45\""},{"visible":true,"include":false,"step":"230","x":-158.66666666666666,"y":-49.42857142857143,"z":-5.333333333333333,"a95":7.1,"info":"\"15-06-17\" at \"18:55\""},{"visible":true,"include":false,"step":"250","x":-45.142857142857146,"y":-63.42857142857143,"z":77.42857142857143,"a95":9.400001,"info":"\"15-06-17\" at \"22:05\""},{"visible":true,"include":false,"step":"280","x":-71.14285714285714,"y":-97.80952380952381,"z":-6.476190476190476,"a95":6.3,"info":"\"15-06-18\" at \"07:44\""},{"visible":true,"include":false,"step":"300","x":-623.4285714285714,"y":-277.04761904761904,"z":143.04761904761904,"a95":2.9,"info":"\"15-06-18\" at \"11:44\""},{"visible":true,"include":false,"step":"320","x":-232.28571428571428,"y":-35.142857142857146,"z":181.33333333333334,"a95":4.2,"info":"\"15-06-18\" at \"14:46\""},{"visible":true,"include":false,"step":"340","x":-383.6190476190476,"y":-73.80952380952381,"z":-244,"a95":3.5,"info":"\"15-06-19\" at \"10:14\""},{"visible":true,"include":false,"step":"360","x":-45.42857142857143,"y":-166,"z":-101.61904761904762,"a95":5,"info":"\"15-06-19\" at \"13:55\""},{"visible":true,"include":false,"step":"390","x":-220.66666666666666,"y":78.38095238095238,"z":-267.3333333333333,"a95":3.4,"info":"\"15-06-20\" at \"10:08\""},{"visible":true,"include":false,"step":"420","x":33.80952380952381,"y":21.714285714285715,"z":316.0952380952381,"a95":8.8,"info":"\"15-06-20\" at \"13:39\""},{"visible":true,"include":false,"step":"450","x":-386.3809523809524,"y":-141.33333333333334,"z":273.7142857142857,"a95":5.8,"info":"\"15-06-21\" at \"16:56\""}]},{"version":"v1.1.0","exported":"2016-10-17T09:14:05.070Z","volume":10.5,"added":"2016-10-17T08:55:10.799Z","format":"Utrecht","demagType":"Unknown","strat":"1","patch":1.1,"GEO":[{"dec":101.000277612927,"inc":-10.197830446717816,"MAD":6.46820930443995e-7,"cm":[-3.552713678800501e-15,3.552713678800501e-15,0],"intensity":1426.7840903853926,"type":"GC","origin":false,"forced":true,"remark":"","nSteps":2,"minStep":"0.0","maxStep":"10.0","steps":["0.0","10.0"],"group":"None","version":"v1.1.0"}],"TECT":[{"dec":281.15635814488587,"inc":-9.100794004245664,"MAD":0,"cm":[-5.3290705182007514e-14,-1.5987211554602254e-14,2.842170943040401e-14],"intensity":1426.7840903853926,"type":"GC","origin":false,"forced":true,"remark":"","nSteps":2,"minStep":"0.0","maxStep":"10.0","steps":["0.0","10.0"],"group":"None","version":"v1.1.0"}],"interpreted":true,"name":"SS33.19A","coreAzi":280,"coreDip":37,"bedStrike":231,"bedDip":25,"data":[{"visible":true,"include":true,"step":"0.0","x":-926.4952380952382,"y":394.7904761904762,"z":460.4190476190476,"a95":0.99,"info":"26/06/2015 at 21:44:30"},{"visible":true,"include":true,"step":"10.0","x":-311.25714285714287,"y":-46.83238095238095,"z":158.13333333333335,"a95":0.99,"info":"26/06/2015 at 21:44:30"},{"visible":true,"include":false,"step":"15.0","x":-225.9904761904762,"y":-168.31428571428572,"z":48.03047619047619,"a95":0.99,"info":"26/06/2015 at 21:44:30"},{"visible":true,"include":false,"step":"20.0","x":-112,"y":-24.57333333333333,"z":6.679714285714286,"a95":0.99,"info":"26/06/2015 at 21:44:30"},{"visible":true,"include":false,"step":"23.0","x":-108.75238095238096,"y":-68.20380952380953,"z":9.15857142857143,"a95":0.99,"info":"26/06/2015 at 21:44:30"},{"visible":true,"include":false,"step":"25.0","x":-112.58095238095237,"y":-170.43809523809523,"z":47.56761904761905,"a95":0.99,"info":"26/06/2015 at 21:44:30"},{"visible":true,"include":false,"step":"30.0","x":-116.26666666666667,"y":-154.14285714285714,"z":-59.44666666666667,"a95":0.99,"info":"26/06/2015 at 21:44:30"},{"visible":true,"include":false,"step":"33.0","x":-112.84761904761906,"y":-136.26666666666665,"z":-132.86666666666665,"a95":0.99,"info":"26/06/2015 at 21:44:30"},{"visible":true,"include":false,"step":"35.0","x":-169.6095238095238,"y":-77.44095238095238,"z":-177.26666666666665,"a95":0.99,"info":"26/06/2015 at 21:44:30"},{"visible":true,"include":false,"step":"40.0","x":-167.65714285714287,"y":5.988952380952381,"z":-116.11428571428571,"a95":0.99,"info":"26/06/2015 at 21:44:30"},{"visible":true,"include":false,"step":"45.0","x":-6.9234285714285715,"y":107.97142857142858,"z":-123.29523809523809,"a95":0.99,"info":"26/06/2015 at 21:44:30"},{"visible":true,"include":false,"step":"50.0","x":-74.67999999999999,"y":-164.22857142857143,"z":-81.3295238095238,"a95":0.99,"info":"26/06/2015 at 21:44:30"},{"visible":true,"include":false,"step":"55.0","x":-4.771238095238095,"y":-16.412380952380953,"z":-27.7647619047619,"a95":0.99,"info":"26/06/2015 at 21:44:30"},{"visible":true,"include":false,"step":"60.0","x":215.36190476190478,"y":-78.56666666666668,"z":-65.58857142857143,"a95":0.99,"info":"26/06/2015 at 21:44:30"},{"visible":true,"include":false,"step":"65.0","x":32.51904761904762,"y":-110.62857142857142,"z":-13.92095238095238,"a95":0.99,"info":"26/06/2015 at 21:44:30"},{"visible":true,"include":false,"step":"70.0","x":58.280952380952385,"y":-28.36857142857143,"z":-38.563809523809525,"a95":0.99,"info":"26/06/2015 at 21:44:30"},{"visible":true,"include":false,"step":"80.0","x":834.1809523809524,"y":120.56190476190477,"z":-153.23809523809524,"a95":0.99,"info":"26/06/2015 at 21:44:30"}]},{"version":"v1.1.0","exported":"2016-10-17T09:14:05.070Z","volume":10.5,"added":"2016-10-17T08:55:10.799Z","format":"Utrecht","demagType":"Unknown","strat":"0","patch":1.1,"GEO":[{"dec":29.42467062451817,"inc":-23.08661626619952,"MAD":0,"cm":[1.0658141036401503e-14,4.618527782440651e-14,0],"intensity":998.4738785605764,"type":"GC","origin":false,"forced":true,"remark":"","nSteps":2,"minStep":"100","maxStep":"150","steps":["100","150"],"group":"None","version":"v1.1.0"}],"TECT":[{"dec":41.64940610966897,"inc":-29.890522476827606,"MAD":0,"cm":[2.1316282072803006e-14,1.0480505352461478e-13,2.842170943040401e-14],"intensity":998.4738785605764,"type":"GC","origin":false,"forced":true,"remark":"","nSteps":2,"minStep":"100","maxStep":"150","steps":["100","150"],"group":"None","version":"v1.1.0"}],"interpreted":true,"name":"SS33.21A","coreAzi":289,"coreDip":16,"bedStrike":231,"bedDip":25,"data":[{"visible":true,"include":false,"step":"20","x":-1410.095238095238,"y":569.9047619047619,"z":940.2857142857143,"a95":1.8,"info":"\"15-06-15\" at \"10:53\""},{"visible":true,"include":true,"step":"100","x":-577.3333333333334,"y":289.14285714285717,"z":262.85714285714283,"a95":2.1,"info":"\"15-06-15\" at \"14:05\""},{"visible":true,"include":true,"step":"150","x":-299.9047619047619,"y":109.42857142857143,"z":-1.0476190476190477,"a95":2.7,"info":"\"15-06-16\" at \"09:04\""},{"visible":true,"include":false,"step":"180","x":-295.8095238095238,"y":63.523809523809526,"z":90.0952380952381,"a95":2.3,"info":"\"15-06-16\" at \"12:05\""},{"visible":true,"include":false,"step":"210","x":-212.1904761904762,"y":70.66666666666667,"z":52.38095238095238,"a95":3,"info":"\"15-06-17\" at \"15:47\""},{"visible":true,"include":false,"step":"230","x":-162.47619047619048,"y":59.714285714285715,"z":134.95238095238096,"a95":4.5,"info":"\"15-06-17\" at \"18:57\""},{"visible":true,"include":false,"step":"250","x":-144.57142857142858,"y":-22.476190476190474,"z":-139.23809523809524,"a95":3.7,"info":"\"15-06-17\" at \"22:07\""},{"visible":true,"include":false,"step":"280","x":-185.42857142857142,"y":31.428571428571427,"z":-105.61904761904762,"a95":3.2,"info":"\"15-06-18\" at \"07:46\""},{"visible":true,"include":false,"step":"300","x":-274.2857142857143,"y":1.3333333333333333,"z":-82.47619047619048,"a95":3.8,"info":"\"15-06-18\" at \"11:46\""},{"visible":true,"include":false,"step":"320","x":-236,"y":40,"z":-59.04761904761905,"a95":3.5,"info":"\"15-06-18\" at \"14:47\""},{"visible":true,"include":false,"step":"340","x":-246.66666666666666,"y":31.142857142857142,"z":71.52380952380952,"a95":3.9,"info":"\"15-06-19\" at \"10:17\""},{"visible":true,"include":false,"step":"360","x":-212.38095238095238,"y":-24.857142857142858,"z":-98.76190476190476,"a95":4.3,"info":"\"15-06-19\" at \"13:57\""},{"visible":true,"include":false,"step":"390","x":-270.4761904761905,"y":-9.80952380952381,"z":-145.9047619047619,"a95":2.8,"info":"\"15-06-20\" at \"10:10\""},{"visible":true,"include":false,"step":"420","x":-340.85714285714283,"y":12.952380952380953,"z":-461.9047619047619,"a95":3,"info":"\"15-06-20\" at \"13:43\""},{"visible":true,"include":false,"step":"450","x":-310.57142857142856,"y":-25.047619047619047,"z":-290,"a95":3.7,"info":"\"15-06-21\" at \"17:00\""},{"visible":true,"include":false,"step":"470","x":-58.76190476190476,"y":-60.76190476190476,"z":157.42857142857142,"a95":9.3,"info":"\"15-06-21\" at \"20:14\""}]},{"version":"v1.1.0","exported":"2016-10-17T09:14:05.070Z","volume":10.5,"added":"2016-10-17T08:55:10.799Z","format":"Utrecht","demagType":"Unknown","strat":"2","patch":1.1,"GEO":[],"TECT":[],"interpreted":false,"name":"SS33.22B","coreAzi":213,"coreDip":23,"bedStrike":231,"bedDip":25,"data":[{"visible":true,"include":false,"step":"0.0","x":-708.552380952381,"y":484.57142857142856,"z":766.2952380952381,"a95":0.99,"info":"26/06/2015 at 21:44:30"},{"visible":true,"include":true,"step":"10.0","x":-432.06666666666666,"y":271.2,"z":490.16190476190474,"a95":0.99,"info":"26/06/2015 at 21:44:30"},{"visible":true,"include":true,"step":"15.0","x":-293.3904761904762,"y":126.34285714285713,"z":376.9428571428572,"a95":0.99,"info":"26/06/2015 at 21:44:30"},{"visible":true,"include":true,"step":"20.0","x":-236.54285714285712,"y":108.75238095238096,"z":338.6,"a95":0.99,"info":"26/06/2015 at 21:44:30"},{"visible":true,"include":false,"step":"23.0","x":-186.4952380952381,"y":73.94666666666667,"z":275.48571428571427,"a95":0.99,"info":"26/06/2015 at 21:44:30"},{"visible":true,"include":false,"step":"25.0","x":-164.78095238095239,"y":123.54285714285714,"z":275.2857142857143,"a95":0.99,"info":"26/06/2015 at 21:44:30"},{"visible":true,"include":false,"step":"30.0","x":-153.9904761904762,"y":110.31428571428572,"z":271.14285714285717,"a95":0.99,"info":"26/06/2015 at 21:44:30"},{"visible":true,"include":false,"step":"33.0","x":-144.56190476190477,"y":156.3047619047619,"z":183.5047619047619,"a95":0.99,"info":"26/06/2015 at 21:44:30"},{"visible":true,"include":false,"step":"35.0","x":-144.07619047619048,"y":115.62857142857142,"z":152.43809523809523,"a95":0.99,"info":"26/06/2015 at 21:44:30"},{"visible":true,"include":false,"step":"40.0","x":-114.11428571428571,"y":92.68476190476191,"z":174.76190476190476,"a95":0.99,"info":"26/06/2015 at 21:44:30"},{"visible":true,"include":false,"step":"45.0","x":-83.24571428571429,"y":113.68571428571428,"z":147.54285714285714,"a95":0.99,"info":"26/06/2015 at 21:44:30"},{"visible":true,"include":false,"step":"50.0","x":-72.84190476190477,"y":69.19238095238094,"z":113.74285714285713,"a95":0.99,"info":"26/06/2015 at 21:44:30"},{"visible":true,"include":false,"step":"55.0","x":-144.98095238095237,"y":106.02857142857142,"z":116.62857142857142,"a95":0.99,"info":"26/06/2015 at 21:44:30"},{"visible":true,"include":false,"step":"60.0","x":-66.53904761904762,"y":85.6647619047619,"z":140.21904761904761,"a95":0.99,"info":"26/06/2015 at 21:44:30"},{"visible":true,"include":false,"step":"65.0","x":-80.39619047619047,"y":-45.063809523809525,"z":61.71333333333333,"a95":0.99,"info":"26/06/2015 at 21:44:30"},{"visible":true,"include":false,"step":"70.0","x":-42.976190476190474,"y":118.48571428571428,"z":109.98095238095237,"a95":0.99,"info":"26/06/2015 at 21:44:30"},{"visible":true,"include":false,"step":"80.0","x":312.49523809523805,"y":-97.4952380952381,"z":-159.38095238095238,"a95":0.99,"info":"26/06/2015 at 21:44:30"}]}]
