# Supplementary material for: Paleomagnetic constraints on the timing and distribution of Cenozoic rotations in Central and Eastern Anatolia
Source: Copernicus journal article supplement (doi:10.5194/se-9-295-2018), 2018-03-21
Supplement: Supplementary file 2 [file se-9-295-2018-supplement.zip › se-2017-66_DATA_dir files/dir files Sivas/SS34.dir]

[{"version":"v1.1.0","exported":"2016-10-17T07:06:47.106Z","volume":10.5,"added":"2016-10-17T06:59:18.780Z","format":"Utrecht","demagType":"Unknown","strat":"0","patch":1.1,"GEO":[{"dec":289.68799855519455,"inc":41.621113645313265,"MAD":9.76559351231337,"cm":[-1.3500311979441904e-13,2.842170943040401e-14,0],"intensity":18553.697602883072,"type":"dir","forced":true,"remark":"","origin":false,"nSteps":11,"minStep":"210","maxStep":"450","steps":["210","230","250","280","300","320","340","360","390","420","450"],"group":"None","version":"v1.1.0"}],"TECT":[{"dec":275.789846412953,"inc":10.224850220991055,"MAD":9.765593512313384,"cm":[-3.659295089164516e-13,1.4210854715202004e-13,-4.263256414560601e-14],"intensity":18553.697602883072,"type":"dir","forced":true,"remark":"","origin":false,"nSteps":11,"minStep":"210","maxStep":"450","steps":["210","230","250","280","300","320","340","360","390","420","450"],"group":"None","version":"v1.1.0"}],"interpreted":true,"name":"SS34.01A","coreAzi":147,"coreDip":33,"bedStrike":151,"bedDip":41,"data":[{"visible":false,"include":false,"step":"20","x":-48921.80952380953,"y":342.76190476190476,"z":-1778.1904761904761,"a95":1.5,"info":"\"15-06-15\" at \"10:55\""},{"visible":true,"include":false,"step":"100","x":-42553.04761904762,"y":-229.33333333333334,"z":-353.42857142857144,"a95":1.5,"info":"\"15-06-15\" at \"14:07\""},{"visible":true,"include":false,"step":"150","x":-35990.666666666664,"y":1264.5714285714287,"z":-874,"a95":1.5,"info":"\"15-06-16\" at \"09:06\""},{"visible":true,"include":false,"step":"180","x":-16261.809523809523,"y":2858.285714285714,"z":-1452.1904761904761,"a95":1.5,"info":"\"15-06-16\" at \"12:10\""},{"visible":true,"include":true,"step":"210","x":-12543.714285714286,"y":4582.761904761905,"z":-1532.1904761904761,"a95":1.5,"info":"\"15-06-17\" at \"15:52\""},{"visible":true,"include":true,"step":"230","x":-9904.57142857143,"y":4673.809523809524,"z":546.6666666666666,"a95":1.5,"info":"\"15-06-17\" at \"18:58\""},{"visible":true,"include":true,"step":"250","x":-6398.285714285715,"y":2903.1428571428573,"z":-1594.857142857143,"a95":1.6,"info":"\"15-06-17\" at \"22:09\""},{"visible":true,"include":true,"step":"280","x":-4122.571428571428,"y":2577.1428571428573,"z":-1493.2380952380952,"a95":2,"info":"\"15-06-18\" at \"07:48\""},{"visible":true,"include":true,"step":"300","x":-4866.571428571428,"y":3341.2380952380954,"z":-2155.809523809524,"a95":1.8,"info":"\"15-06-18\" at \"11:49\""},{"visible":true,"include":true,"step":"320","x":-4077.5238095238096,"y":2158.6666666666665,"z":-282.95238095238096,"a95":1.9,"info":"\"15-06-18\" at \"14:49\""},{"visible":true,"include":true,"step":"340","x":-4930,"y":3006.4761904761904,"z":-968.6666666666666,"a95":1.6,"info":"\"15-06-19\" at \"10:22\""},{"visible":true,"include":true,"step":"360","x":-4032.095238095238,"y":2860,"z":-1447.3333333333333,"a95":1.7,"info":"\"15-06-19\" at \"14:00\""},{"visible":true,"include":true,"step":"390","x":-4255.428571428572,"y":2848,"z":-974.1904761904761,"a95":1.4,"info":"\"15-06-20\" at \"10:13\""},{"visible":true,"include":true,"step":"420","x":-3990.9523809523807,"y":3178.285714285714,"z":-626.1904761904761,"a95":1.8,"info":"\"15-06-20\" at \"13:44\""},{"visible":true,"include":true,"step":"450","x":-3782.4761904761904,"y":3634.5714285714284,"z":-1656.952380952381,"a95":1.6,"info":"\"15-06-21\" at \"17:02\""},{"visible":true,"include":false,"step":"470","x":-3598.6666666666665,"y":2696.8571428571427,"z":-2476.7619047619046,"a95":1.9,"info":"\"15-06-21\" at \"20:16\""},{"visible":true,"include":false,"step":"490","x":-2971.0476190476193,"y":3245.2380952380954,"z":-430.2857142857143,"a95":1.6,"info":"\"15-06-22\" at \"14:26\""},{"visible":true,"include":false,"step":"510","x":-3899.3333333333335,"y":3202.9523809523807,"z":-1714.857142857143,"a95":1.8,"info":"\"15-06-29\" at \"09:53\""},{"visible":true,"include":false,"step":"540","x":-3600.285714285714,"y":3028.190476190476,"z":-583.8095238095239,"a95":1.7,"info":"\"15-06-29\" at \"13:11\""},{"visible":true,"include":false,"step":"560","x":-2704.3809523809523,"y":1882.1904761904761,"z":-232.57142857142858,"a95":2,"info":"\"15-06-30\" at \"06:30\""},{"visible":true,"include":false,"step":"580","x":-1306,"y":2897.1428571428573,"z":470.6666666666667,"a95":1.7,"info":"\"15-06-30\" at \"10:10\""}]},{"version":"v1.1.0","exported":"2016-10-17T07:06:47.106Z","volume":10.5,"added":"2016-10-17T06:59:18.780Z","format":"Utrecht","demagType":"Unknown","strat":"0","patch":1.1,"GEO":[{"dec":302.13466374069066,"inc":55.089258452887385,"MAD":4.21409815088528,"cm":[-2.8421709430404007e-13,-5.684341886080802e-14,0],"intensity":15645.899292214925,"type":"dir","forced":true,"remark":"","origin":false,"nSteps":8,"minStep":"20.0","maxStep":"45.0","steps":["20.0","23.0","25.0","30.0","33.0","35.0","40.0","45.0"],"group":"None","version":"v1.1.0"}],"TECT":[{"dec":274.8768644234411,"inc":25.953405679246856,"MAD":4.214098150885293,"cm":[-4.547473508864641e-13,-1.4210854715202004e-13,-5.471179065352771e-13],"intensity":15645.899292214926,"type":"dir","forced":true,"remark":"","origin":false,"nSteps":8,"minStep":"20.0","maxStep":"45.0","steps":["20.0","23.0","25.0","30.0","33.0","35.0","40.0","45.0"],"group":"None","version":"v1.1.0"}],"interpreted":true,"name":"SS34.02A","coreAzi":157,"coreDip":22,"bedStrike":151,"bedDip":41,"data":[{"visible":false,"include":false,"step":"0.0","x":-39560,"y":4232.380952380952,"z":-2541.0476190476193,"a95":0.99,"info":"06/10/2015 at 04:28:54"},{"visible":true,"include":false,"step":"10.0","x":-21908.571428571428,"y":3900.8571428571427,"z":-2192.7619047619046,"a95":0.99,"info":"06/10/2015 at 04:28:54"},{"visible":true,"include":false,"step":"15.0","x":-15476.190476190477,"y":3611.809523809524,"z":-1707.7142857142858,"a95":0.99,"info":"06/10/2015 at 04:28:54"},{"visible":true,"include":true,"step":"20.0","x":-11501.904761904761,"y":3277.904761904762,"z":-1440.6666666666667,"a95":0.99,"info":"06/10/2015 at 04:28:54"},{"visible":true,"include":true,"step":"23.0","x":-9606.666666666666,"y":3282.9523809523807,"z":-732.0380952380953,"a95":0.99,"info":"06/10/2015 at 04:28:54"},{"visible":true,"include":true,"step":"25.0","x":-9064.380952380952,"y":3059.809523809524,"z":-1172.857142857143,"a95":0.99,"info":"06/10/2015 at 04:28:54"},{"visible":true,"include":true,"step":"30.0","x":-7273.809523809524,"y":2648.285714285714,"z":-1064.5714285714287,"a95":0.99,"info":"06/10/2015 at 04:28:54"},{"visible":true,"include":true,"step":"33.0","x":-5736.285714285715,"y":3035.0476190476193,"z":-1263.3333333333333,"a95":0.99,"info":"06/10/2015 at 04:28:54"},{"visible":true,"include":true,"step":"35.0","x":-4758.285714285715,"y":1633.904761904762,"z":-778.6,"a95":0.99,"info":"06/10/2015 at 04:28:54"},{"visible":true,"include":true,"step":"40.0","x":-5163.523809523809,"y":1994.5714285714287,"z":-1013.9047619047619,"a95":0.99,"info":"06/10/2015 at 04:28:54"},{"visible":true,"include":true,"step":"45.0","x":-3121.904761904762,"y":1706.3809523809523,"z":-1028.1904761904761,"a95":0.99,"info":"06/10/2015 at 04:28:54"},{"visible":true,"include":false,"step":"50.0","x":-3407.3333333333335,"y":812.9619047619047,"z":-1172.3809523809523,"a95":0.99,"info":"06/10/2015 at 04:28:54"},{"visible":true,"include":false,"step":"60.0","x":-2174.5714285714284,"y":1055.4285714285713,"z":-1031.4285714285713,"a95":0.99,"info":"06/10/2015 at 04:28:54"},{"visible":false,"include":false,"step":"70.0","x":-822.0571428571429,"y":645.2,"z":-617.4666666666666,"a95":0.99,"info":"06/10/2015 at 04:28:54"}]},{"version":"v1.1.0","exported":"2016-10-17T07:06:47.106Z","volume":10.5,"added":"2016-10-17T06:59:18.781Z","format":"Utrecht","demagType":"Unknown","strat":"5","patch":1.1,"GEO":[{"dec":307.1139602214001,"inc":36.79528802235785,"MAD":8.695281381096319,"cm":[-3.410605131648481e-13,-3.694822225952521e-13,0],"intensity":9477.292722570992,"type":"dir","forced":true,"remark":"","origin":false,"nSteps":6,"minStep":"30.0","maxStep":"50.0","steps":["30.0","33.0","35.0","40.0","45.0","50.0"],"group":"None","version":"v1.1.0"}],"TECT":[{"dec":289.9474964142752,"inc":13.84589377351804,"MAD":8.695281381096311,"cm":[-4.547473508864641e-13,8.526512829121202e-14,-1.0658141036401503e-13],"intensity":9477.292722570992,"type":"dir","forced":true,"remark":"","origin":false,"nSteps":6,"minStep":"30.0","maxStep":"50.0","steps":["30.0","33.0","35.0","40.0","45.0","50.0"],"group":"None","version":"v1.1.0"}],"interpreted":true,"name":"SS34.03B","coreAzi":97,"coreDip":49,"bedStrike":151,"bedDip":41,"data":[{"visible":false,"include":false,"step":"0.0","x":-31127.619047619046,"y":-10255.238095238095,"z":20917.14285714286,"a95":0.99,"info":"28/06/2015 at 08:26:23"},{"visible":true,"include":false,"step":"10.0","x":-18920,"y":-4003.3333333333335,"z":10644.761904761905,"a95":0.99,"info":"28/06/2015 at 08:26:23"},{"visible":true,"include":false,"step":"15.0","x":-13933.333333333334,"y":-4047.5238095238096,"z":5207.809523809524,"a95":0.99,"info":"28/06/2015 at 08:26:23"},{"visible":true,"include":false,"step":"20.0","x":-10258.095238095239,"y":-3210.4761904761904,"z":2906.190476190476,"a95":0.99,"info":"28/06/2015 at 08:26:23"},{"visible":true,"include":false,"step":"23.0","x":-8845.52380952381,"y":-3112.285714285714,"z":2474.8571428571427,"a95":0.99,"info":"28/06/2015 at 08:26:23"},{"visible":true,"include":false,"step":"25.0","x":-8274.952380952382,"y":-2022.952380952381,"z":1760.4761904761904,"a95":0.99,"info":"28/06/2015 at 08:26:23"},{"visible":true,"include":true,"step":"30.0","x":-6139.619047619048,"y":-1824.2857142857142,"z":467.8095238095238,"a95":0.99,"info":"28/06/2015 at 08:26:23"},{"visible":true,"include":true,"step":"33.0","x":-5944.190476190476,"y":-2819.4285714285716,"z":124.0952380952381,"a95":0.99,"info":"28/06/2015 at 08:26:23"},{"visible":true,"include":true,"step":"35.0","x":-5570.380952380952,"y":-1510.6666666666667,"z":211.64761904761906,"a95":0.99,"info":"28/06/2015 at 08:26:23"},{"visible":true,"include":true,"step":"40.0","x":-4034.7619047619046,"y":-2174.8571428571427,"z":-503.12380952380954,"a95":0.99,"info":"28/06/2015 at 08:26:23"},{"visible":true,"include":true,"step":"45.0","x":-3849.1428571428573,"y":-2955.809523809524,"z":-484.4,"a95":0.99,"info":"28/06/2015 at 08:26:23"},{"visible":true,"include":true,"step":"50.0","x":-2658.6666666666665,"y":-1692.4761904761904,"z":-263.77142857142854,"a95":0.99,"info":"28/06/2015 at 08:26:23"},{"visible":true,"include":false,"step":"55.0","x":-2527.714285714286,"y":-1802.3809523809523,"z":-1150.095238095238,"a95":0.99,"info":"28/06/2015 at 08:26:23"},{"visible":true,"include":false,"step":"60.0","x":-2200.5714285714284,"y":-2850.4761904761904,"z":-628.4380952380952,"a95":0.99,"info":"28/06/2015 at 08:26:23"},{"visible":true,"include":false,"step":"65.0","x":-1809.3333333333333,"y":-1019.9047619047619,"z":-412.3047619047619,"a95":0.99,"info":"28/06/2015 at 08:26:23"},{"visible":true,"include":false,"step":"70.0","x":-2153.4285714285716,"y":-1979.142857142857,"z":-1057.2380952380952,"a95":0.99,"info":"28/06/2015 at 08:26:23"},{"visible":true,"include":false,"step":"80.0","x":-982,"y":-3025.714285714286,"z":-1226.095238095238,"a95":0.99,"info":"28/06/2015 at 08:26:23"}]},{"version":"v1.1.0","exported":"2016-10-17T07:06:47.106Z","volume":10.5,"added":"2016-10-17T06:59:18.781Z","format":"Utrecht","demagType":"Unknown","strat":"0","patch":1.1,"GEO":[{"dec":304.9483023729612,"inc":52.67158888614335,"MAD":3.633608344647367,"cm":[1.9895196601282805e-13,3.268496584496461e-13,0],"intensity":28642.272756703554,"type":"dir","forced":true,"remark":"","origin":false,"nSteps":11,"minStep":"10.0","maxStep":"50.0","steps":["10.0","15.0","20.0","23.0","25.0","30.0","33.0","35.0","40.0","45.0","50.0"],"group":"None","version":"v1.1.0"}],"TECT":[{"dec":278.01027003828546,"inc":25.17648918111689,"MAD":3.6336083446474094,"cm":[-9.539036227579345e-13,8.526512829121202e-14,3.410605131648481e-13],"intensity":28642.27275670355,"type":"dir","forced":true,"remark":"","origin":false,"nSteps":11,"minStep":"10.0","maxStep":"50.0","steps":["10.0","15.0","20.0","23.0","25.0","30.0","33.0","35.0","40.0","45.0","50.0"],"group":"None","version":"v1.1.0"}],"interpreted":true,"name":"SS34.07A","coreAzi":165,"coreDip":26,"bedStrike":151,"bedDip":41,"data":[{"visible":true,"include":false,"step":"0.0","x":-39839.04761904762,"y":9698.095238095239,"z":-1726.1904761904761,"a95":0.99,"info":"06/10/2015 at 04:28:54"},{"visible":true,"include":true,"step":"10.0","x":-22630.47619047619,"y":8304.952380952382,"z":-1357.2380952380952,"a95":0.99,"info":"06/10/2015 at 04:28:54"},{"visible":true,"include":true,"step":"15.0","x":-16489.52380952381,"y":6400.857142857143,"z":-1535.6190476190477,"a95":0.99,"info":"06/10/2015 at 04:28:54"},{"visible":true,"include":true,"step":"20.0","x":-12697.142857142857,"y":5194.476190476191,"z":-1080.4761904761904,"a95":0.99,"info":"06/10/2015 at 04:28:54"},{"visible":true,"include":true,"step":"23.0","x":-10787.619047619048,"y":5225.142857142857,"z":-992.2857142857143,"a95":0.99,"info":"06/10/2015 at 04:28:54"},{"visible":true,"include":true,"step":"25.0","x":-10155.238095238095,"y":5032,"z":-567.8380952380952,"a95":0.99,"info":"06/10/2015 at 04:28:54"},{"visible":true,"include":true,"step":"30.0","x":-8313.333333333334,"y":4514.571428571428,"z":-481.00952380952384,"a95":0.99,"info":"06/10/2015 at 04:28:54"},{"visible":true,"include":true,"step":"33.0","x":-6835.428571428572,"y":4047.714285714286,"z":-805.6095238095238,"a95":0.99,"info":"06/10/2015 at 04:28:54"},{"visible":true,"include":true,"step":"35.0","x":-6064.0952380952385,"y":3226.190476190476,"z":-478.2952380952381,"a95":0.99,"info":"06/10/2015 at 04:28:54"},{"visible":true,"include":true,"step":"40.0","x":-5317.047619047619,"y":3232.190476190476,"z":-610.4666666666666,"a95":0.99,"info":"06/10/2015 at 04:28:54"},{"visible":true,"include":true,"step":"45.0","x":-4702,"y":2516.095238095238,"z":-330.76190476190476,"a95":0.99,"info":"06/10/2015 at 04:28:54"},{"visible":true,"include":true,"step":"50.0","x":-4304,"y":1347.904761904762,"z":39.61523809523809,"a95":0.99,"info":"06/10/2015 at 04:28:54"},{"visible":true,"include":false,"step":"60.0","x":-2536.6666666666665,"y":2016.857142857143,"z":166.86666666666665,"a95":0.99,"info":"06/10/2015 at 04:28:54"},{"visible":true,"include":false,"step":"70.0","x":-1883.8095238095239,"y":1115.142857142857,"z":-814,"a95":0.99,"info":"06/10/2015 at 04:28:54"}]},{"version":"v1.1.0","exported":"2016-10-17T07:06:47.106Z","volume":10.5,"added":"2016-10-17T06:59:18.781Z","format":"Utrecht","demagType":"Unknown","strat":"6","patch":1.1,"GEO":[{"dec":313.10902692930836,"inc":54.954572961819984,"MAD":5.103027602351271,"cm":[3.552713678800501e-14,4.263256414560601e-14,0],"intensity":24064.818092835645,"type":"dir","forced":true,"remark":"","origin":false,"nSteps":12,"minStep":"10.0","maxStep":"55.0","steps":["10.0","15.0","20.0","23.0","25.0","30.0","33.0","35.0","40.0","45.0","50.0","55.0"],"group":"None","version":"v1.1.0"}],"TECT":[{"dec":280.19056048467286,"inc":30.14206353703582,"MAD":5.103027602351245,"cm":[-3.055333763768431e-13,9.947598300641403e-14,-2.4868995751603507e-14],"intensity":24064.81809283565,"type":"dir","forced":true,"remark":"","origin":false,"nSteps":12,"minStep":"10.0","maxStep":"55.0","steps":["10.0","15.0","20.0","23.0","25.0","30.0","33.0","35.0","40.0","45.0","50.0","55.0"],"group":"None","version":"v1.1.0"}],"interpreted":true,"name":"SS34.07B","coreAzi":165,"coreDip":26,"bedStrike":151,"bedDip":41,"data":[{"visible":true,"include":false,"step":"0.0","x":-34285.71428571428,"y":5137.428571428572,"z":-457,"a95":0.99,"info":"28/06/2015 at 08:26:23"},{"visible":true,"include":true,"step":"10.0","x":-20393.333333333332,"y":5860.761904761905,"z":-379.32380952380953,"a95":0.99,"info":"28/06/2015 at 08:26:23"},{"visible":true,"include":true,"step":"15.0","x":-15073.333333333334,"y":3869.904761904762,"z":-1597.8095238095239,"a95":0.99,"info":"28/06/2015 at 08:26:23"},{"visible":true,"include":true,"step":"20.0","x":-11312.380952380952,"y":3473.3333333333335,"z":-1408.5714285714287,"a95":0.99,"info":"28/06/2015 at 08:26:23"},{"visible":true,"include":true,"step":"23.0","x":-9492.666666666666,"y":2877.5238095238096,"z":-1594.5714285714287,"a95":0.99,"info":"28/06/2015 at 08:26:23"},{"visible":true,"include":true,"step":"25.0","x":-8757.42857142857,"y":3286.9523809523807,"z":-1122.1904761904761,"a95":0.99,"info":"28/06/2015 at 08:26:23"},{"visible":true,"include":true,"step":"30.0","x":-6295.523809523809,"y":2721.4285714285716,"z":-1324.952380952381,"a95":0.99,"info":"28/06/2015 at 08:26:23"},{"visible":true,"include":true,"step":"33.0","x":-5373.809523809524,"y":2132.285714285714,"z":-748.8285714285714,"a95":0.99,"info":"28/06/2015 at 08:26:23"},{"visible":true,"include":true,"step":"35.0","x":-5415.523809523809,"y":2543.0476190476193,"z":-405.3047619047619,"a95":0.99,"info":"28/06/2015 at 08:26:23"},{"visible":true,"include":true,"step":"40.0","x":-4166,"y":2617.5238095238096,"z":-225.77142857142857,"a95":0.99,"info":"28/06/2015 at 08:26:23"},{"visible":true,"include":true,"step":"45.0","x":-3980.8571428571427,"y":1932.4761904761904,"z":-356.6380952380952,"a95":0.99,"info":"28/06/2015 at 08:26:23"},{"visible":true,"include":true,"step":"50.0","x":-3911.0476190476193,"y":2133.809523809524,"z":92.0247619047619,"a95":0.99,"info":"28/06/2015 at 08:26:23"},{"visible":true,"include":true,"step":"55.0","x":-2480.7619047619046,"y":1563.5238095238096,"z":-498.8666666666667,"a95":0.99,"info":"28/06/2015 at 08:26:23"},{"visible":true,"include":false,"step":"60.0","x":-1918.2857142857142,"y":1632.3809523809523,"z":-1363.7142857142858,"a95":0.99,"info":"28/06/2015 at 08:26:23"},{"visible":true,"include":false,"step":"65.0","x":-2341.4285714285716,"y":1811.4285714285713,"z":-628.5333333333334,"a95":0.99,"info":"28/06/2015 at 08:26:23"},{"visible":true,"include":false,"step":"70.0","x":-1238.095238095238,"y":1948.5714285714287,"z":-778.8666666666667,"a95":0.99,"info":"28/06/2015 at 08:26:23"},{"visible":true,"include":false,"step":"80.0","x":-1173.6190476190477,"y":1102.3809523809523,"z":15.513333333333332,"a95":0.99,"info":"28/06/2015 at 08:26:23"}]},{"version":"v1.1.0","exported":"2016-10-17T07:06:47.106Z","volume":10.5,"added":"2016-10-17T06:59:18.781Z","format":"Utrecht","demagType":"Unknown","strat":"0","patch":1.1,"GEO":[{"dec":278.41803587828474,"inc":37.49111007462847,"MAD":7.208916314165044,"cm":[-1.5631940186722204e-13,-1.1368683772161603e-13,0],"intensity":22196.44187456982,"type":"dir","forced":true,"remark":"","origin":false,"nSteps":8,"minStep":"210","maxStep":"360","steps":["210","230","250","280","300","320","340","360"],"group":"None","version":"v1.1.0"}],"TECT":[{"dec":269.85720650570454,"inc":2.6315643527930432,"MAD":7.208916314165045,"cm":[-2.255973186038318e-13,5.684341886080802e-14,-2.842170943040401e-14],"intensity":22196.441874569817,"type":"dir","forced":true,"remark":"","origin":false,"nSteps":8,"minStep":"210","maxStep":"360","steps":["210","230","250","280","300","320","340","360"],"group":"None","version":"v1.1.0"}],"interpreted":true,"name":"SS34.09A","coreAzi":178,"coreDip":34,"bedStrike":151,"bedDip":41,"data":[{"visible":false,"include":false,"step":"20","x":-46625.80952380953,"y":13230.57142857143,"z":6627.523809523809,"a95":1.5,"info":"\"15-06-15\" at \"10:57\""},{"visible":false,"include":false,"step":"100","x":-39337.90476190476,"y":15456.380952380952,"z":5004.285714285715,"a95":1.5,"info":"\"15-06-15\" at \"14:09\""},{"visible":true,"include":false,"step":"150","x":-32083.333333333332,"y":12605.52380952381,"z":4646.952380952381,"a95":1.5,"info":"\"15-06-16\" at \"09:08\""},{"visible":true,"include":false,"step":"180","x":-14852,"y":11193.238095238095,"z":3506,"a95":1.5,"info":"\"15-06-16\" at \"12:12\""},{"visible":true,"include":true,"step":"210","x":-10064.380952380952,"y":10779.333333333334,"z":2927.5238095238096,"a95":1.5,"info":"\"15-06-17\" at \"15:53\""},{"visible":true,"include":true,"step":"230","x":-8808.57142857143,"y":9684.761904761905,"z":2899.0476190476193,"a95":1.5,"info":"\"15-06-17\" at \"19:02\""},{"visible":true,"include":true,"step":"250","x":-5656,"y":8235.619047619048,"z":1690.2857142857142,"a95":1.6,"info":"\"15-06-17\" at \"22:11\""},{"visible":true,"include":true,"step":"280","x":-3884.095238095238,"y":6715.047619047619,"z":2792.3809523809523,"a95":1.8,"info":"\"15-06-18\" at \"07:51\""},{"visible":true,"include":true,"step":"300","x":-3119.3333333333335,"y":7056.285714285715,"z":2091.5238095238096,"a95":1.6,"info":"\"15-06-18\" at \"11:51\""},{"visible":true,"include":true,"step":"320","x":-2823.1428571428573,"y":5115.238095238095,"z":1057.4285714285713,"a95":1.8,"info":"\"15-06-18\" at \"14:52\""},{"visible":true,"include":true,"step":"340","x":-2727.0476190476193,"y":5614.476190476191,"z":1707.047619047619,"a95":1.5,"info":"\"15-06-19\" at \"10:24\""},{"visible":true,"include":true,"step":"360","x":-3890.285714285714,"y":5855.333333333333,"z":1680.857142857143,"a95":1.6,"info":"\"15-06-19\" at \"14:01\""},{"visible":true,"include":false,"step":"390","x":-2973.6190476190477,"y":6102,"z":-33.04761904761905,"a95":1.7,"info":"\"15-06-20\" at \"10:15\""},{"visible":true,"include":false,"step":"420","x":-4215.047619047619,"y":4746.0952380952385,"z":808.4761904761905,"a95":1.6,"info":"\"15-06-20\" at \"13:47\""},{"visible":true,"include":false,"step":"450","x":-3091.5238095238096,"y":5834.380952380952,"z":-166.76190476190476,"a95":1.8,"info":"\"15-06-21\" at \"17:04\""},{"visible":true,"include":false,"step":"470","x":-2532.7619047619046,"y":3473.3333333333335,"z":-139.04761904761904,"a95":1.7,"info":"\"15-06-21\" at \"20:19\""},{"visible":true,"include":false,"step":"490","x":-2478.095238095238,"y":3605.6190476190477,"z":454.76190476190476,"a95":1.7,"info":"\"15-06-22\" at \"14:28\""},{"visible":true,"include":false,"step":"510","x":-2916.5714285714284,"y":3621.5238095238096,"z":535.6190476190476,"a95":1.8,"info":"\"15-06-29\" at \"09:56\""},{"visible":true,"include":false,"step":"540","x":-1640.095238095238,"y":2983.2380952380954,"z":1595.7142857142858,"a95":1.8,"info":"\"15-06-29\" at \"13:12\""},{"visible":true,"include":false,"step":"560","x":-2440.6666666666665,"y":3932.3809523809523,"z":1176.5714285714287,"a95":1.7,"info":"\"15-06-30\" at \"06:31\""},{"visible":true,"include":false,"step":"580","x":-2286.4761904761904,"y":4586.761904761905,"z":-168.85714285714286,"a95":1.8,"info":"\"15-06-30\" at \"10:14\""}]},{"version":"v1.1.0","exported":"2016-10-17T07:06:47.106Z","volume":10.5,"added":"2016-10-17T06:59:18.781Z","format":"Utrecht","demagType":"Unknown","strat":"0","patch":1.1,"GEO":[{"dec":294.2432237665888,"inc":46.79610538928897,"MAD":4.453691999312736,"cm":[-7.105427357601002e-14,2.842170943040401e-14,0],"intensity":15739.327610059463,"type":"dir","forced":true,"remark":"","origin":false,"nSteps":8,"minStep":"25.0","maxStep":"60.0","steps":["25.0","30.0","33.0","35.0","40.0","45.0","50.0","60.0"],"group":"None","version":"v1.1.0"}],"TECT":[{"dec":275.8602280593899,"inc":16.34096782966192,"MAD":4.453691999312745,"cm":[-8.881784197001252e-14,-1.4210854715202004e-13,-2.1316282072803006e-13],"intensity":15739.32761005946,"type":"dir","forced":true,"remark":"","origin":false,"nSteps":8,"minStep":"25.0","maxStep":"60.0","steps":["25.0","30.0","33.0","35.0","40.0","45.0","50.0","60.0"],"group":"None","version":"v1.1.0"}],"interpreted":true,"name":"SS34.10A","coreAzi":171,"coreDip":42,"bedStrike":151,"bedDip":41,"data":[{"visible":false,"include":false,"step":"0.0","x":-45444.76190476191,"y":16492.380952380954,"z":11814.285714285714,"a95":0.99,"info":"06/10/2015 at 04:28:54"},{"visible":true,"include":false,"step":"10.0","x":-25032.380952380954,"y":11734.285714285714,"z":5300.380952380952,"a95":0.99,"info":"06/10/2015 at 04:28:54"},{"visible":true,"include":false,"step":"15.0","x":-18003.809523809523,"y":9587.619047619048,"z":3570.8571428571427,"a95":0.99,"info":"06/10/2015 at 04:28:54"},{"visible":true,"include":false,"step":"20.0","x":-13631.42857142857,"y":8332,"z":3200.285714285714,"a95":0.99,"info":"06/10/2015 at 04:28:54"},{"visible":true,"include":false,"step":"23.0","x":-11422.857142857143,"y":7456.0952380952385,"z":2575.904761904762,"a95":0.99,"info":"06/10/2015 at 04:28:54"},{"visible":true,"include":true,"step":"25.0","x":-10105.714285714286,"y":6579.238095238095,"z":2037.6190476190477,"a95":0.99,"info":"06/10/2015 at 04:28:54"},{"visible":true,"include":true,"step":"30.0","x":-7556.285714285715,"y":6019.714285714285,"z":2037.4285714285713,"a95":0.99,"info":"06/10/2015 at 04:28:54"},{"visible":true,"include":true,"step":"33.0","x":-6586.476190476191,"y":4867.333333333333,"z":1483.904761904762,"a95":0.99,"info":"06/10/2015 at 04:28:54"},{"visible":true,"include":true,"step":"35.0","x":-5556.190476190476,"y":3470.7619047619046,"z":1617.3333333333333,"a95":0.99,"info":"06/10/2015 at 04:28:54"},{"visible":true,"include":true,"step":"40.0","x":-4873.047619047619,"y":3853.3333333333335,"z":1831.4285714285713,"a95":0.99,"info":"06/10/2015 at 04:28:54"},{"visible":true,"include":true,"step":"45.0","x":-3526.095238095238,"y":3440,"z":1571.2380952380952,"a95":0.99,"info":"06/10/2015 at 04:28:54"},{"visible":true,"include":true,"step":"50.0","x":-3429.5238095238096,"y":1879.5238095238096,"z":1215.2380952380952,"a95":0.99,"info":"06/10/2015 at 04:28:54"},{"visible":true,"include":true,"step":"60.0","x":-2572.8571428571427,"y":2330.3809523809523,"z":719,"a95":0.99,"info":"06/10/2015 at 04:28:54"},{"visible":true,"include":false,"step":"70.0","x":-1351.3333333333333,"y":1252.5714285714287,"z":565.5142857142857,"a95":0.99,"info":"06/10/2015 at 04:28:54"}]},{"version":"v1.1.0","exported":"2016-10-17T07:06:47.106Z","volume":10.5,"added":"2016-10-17T06:59:18.781Z","format":"Utrecht","demagType":"Unknown","strat":"7","patch":1.1,"GEO":[{"dec":320.64728217119347,"inc":55.64253666732557,"MAD":4.245431596170412,"cm":[1.1368683772161603e-13,-5.3290705182007514e-14,0],"intensity":16201.67445667828,"type":"dir","forced":true,"remark":"","origin":false,"nSteps":10,"minStep":"15.0","maxStep":"55.0","steps":["15.0","20.0","23.0","25.0","30.0","33.0","35.0","40.0","50.0","55.0"],"group":"None","version":"v1.1.0"}],"TECT":[{"dec":282.9277953119606,"inc":33.81415003759062,"MAD":4.245431596170415,"cm":[-8.597567102697212e-13,-2.984279490192421e-13,-7.815970093361102e-14],"intensity":16201.67445667828,"type":"dir","forced":true,"remark":"","origin":false,"nSteps":10,"minStep":"15.0","maxStep":"55.0","steps":["15.0","20.0","23.0","25.0","30.0","33.0","35.0","40.0","50.0","55.0"],"group":"None","version":"v1.1.0"}],"interpreted":true,"name":"SS34.10B","coreAzi":171,"coreDip":42,"bedStrike":151,"bedDip":41,"data":[{"visible":false,"include":false,"step":"0.0","x":-34360,"y":9434.285714285714,"z":11668.57142857143,"a95":0.99,"info":"28/06/2015 at 08:26:23"},{"visible":true,"include":false,"step":"10.0","x":-19514.285714285714,"y":7446.952380952381,"z":7615.428571428572,"a95":0.99,"info":"28/06/2015 at 08:26:23"},{"visible":true,"include":true,"step":"15.0","x":-13822.857142857143,"y":4081.2380952380954,"z":3485.809523809524,"a95":0.99,"info":"28/06/2015 at 08:26:23"},{"visible":true,"include":true,"step":"20.0","x":-10517.142857142857,"y":3435.5238095238096,"z":2032.857142857143,"a95":0.99,"info":"28/06/2015 at 08:26:23"},{"visible":true,"include":true,"step":"23.0","x":-8507.42857142857,"y":2628.4761904761904,"z":1567.142857142857,"a95":0.99,"info":"28/06/2015 at 08:26:23"},{"visible":true,"include":true,"step":"25.0","x":-7814.761904761905,"y":2548.190476190476,"z":2204.4761904761904,"a95":0.99,"info":"28/06/2015 at 08:26:23"},{"visible":true,"include":true,"step":"30.0","x":-5746,"y":1703.6190476190477,"z":813.104761904762,"a95":0.99,"info":"28/06/2015 at 08:26:23"},{"visible":true,"include":true,"step":"33.0","x":-5186,"y":1115.8095238095239,"z":123.88571428571429,"a95":0.99,"info":"28/06/2015 at 08:26:23"},{"visible":true,"include":true,"step":"35.0","x":-4850.285714285715,"y":1673.2380952380952,"z":202.52380952380952,"a95":0.99,"info":"28/06/2015 at 08:26:23"},{"visible":true,"include":true,"step":"40.0","x":-3277.809523809524,"y":768.6095238095238,"z":234.1809523809524,"a95":0.99,"info":"28/06/2015 at 08:26:23"},{"visible":false,"include":false,"step":"45.0","x":-3513.0476190476193,"y":-233.0952380952381,"z":-53.90857142857143,"a95":0.99,"info":"28/06/2015 at 08:26:23"},{"visible":true,"include":true,"step":"50.0","x":-3008.095238095238,"y":889.5238095238095,"z":733.0666666666666,"a95":0.99,"info":"28/06/2015 at 08:26:23"},{"visible":true,"include":true,"step":"55.0","x":-1502,"y":114.29523809523809,"z":-317.1333333333333,"a95":0.99,"info":"28/06/2015 at 08:26:23"},{"visible":true,"include":false,"step":"60.0","x":-1568.857142857143,"y":-1494.857142857143,"z":-447.2952380952381,"a95":0.99,"info":"28/06/2015 at 08:26:23"},{"visible":true,"include":false,"step":"65.0","x":-1111.8095238095239,"y":-836.2190476190475,"z":88.37333333333333,"a95":0.99,"info":"28/06/2015 at 08:26:23"},{"visible":true,"include":false,"step":"70.0","x":-464.81904761904764,"y":-947.0095238095239,"z":-389.6666666666667,"a95":0.99,"info":"28/06/2015 at 08:26:23"},{"visible":true,"include":false,"step":"80.0","x":-155.06666666666666,"y":-2891.904761904762,"z":3.9162857142857144,"a95":0.99,"info":"28/06/2015 at 08:26:23"}]},{"version":"v1.1.0","exported":"2016-10-17T07:06:47.106Z","volume":10.5,"added":"2016-10-17T06:59:18.781Z","format":"Utrecht","demagType":"Unknown","strat":"0","patch":1.1,"GEO":[{"dec":318.95990369605806,"inc":32.87869647728282,"MAD":2.748274740007004,"cm":[-2.2737367544323206e-13,-1.1368683772161603e-12,0],"intensity":43979.145367093646,"type":"dir","forced":true,"remark":"","origin":false,"nSteps":11,"minStep":"280","maxStep":"510","steps":["280","300","320","340","360","390","420","450","470","490","510"],"group":"None","version":"v1.1.0"}],"TECT":[{"dec":300.26483351841665,"inc":17.143898643162732,"MAD":2.7482747400069885,"cm":[8.526512829121202e-13,0,-1.1368683772161603e-12],"intensity":43979.145367093646,"type":"dir","forced":true,"remark":"","origin":false,"nSteps":11,"minStep":"280","maxStep":"510","steps":["280","300","320","340","360","390","420","450","470","490","510"],"group":"None","version":"v1.1.0"}],"interpreted":true,"name":"SS34.12A","coreAzi":188,"coreDip":43,"bedStrike":151,"bedDip":41,"data":[{"visible":false,"include":false,"step":"20","x":-156322.85714285713,"y":82633.71428571429,"z":-1741.5238095238096,"a95":1.8,"info":"\"15-06-15\" at \"10:59\""},{"visible":true,"include":false,"step":"100","x":-133741.52380952382,"y":81187.61904761905,"z":509.7142857142857,"a95":1.9,"info":"\"15-06-15\" at \"14:11\""},{"visible":true,"include":false,"step":"150","x":-108400.47619047618,"y":69359.90476190476,"z":-101.42857142857143,"a95":2,"info":"\"15-06-16\" at \"09:10\""},{"visible":true,"include":false,"step":"180","x":-80700.19047619047,"y":43325.619047619046,"z":-1191.8095238095239,"a95":2,"info":"\"15-06-16\" at \"12:15\""},{"visible":true,"include":false,"step":"210","x":-53449.619047619046,"y":38746.857142857145,"z":-1656.7619047619048,"a95":2,"info":"\"15-06-17\" at \"15:55\""},{"visible":true,"include":false,"step":"230","x":-50490.95238095238,"y":29742.095238095237,"z":-1896.5714285714287,"a95":1.9,"info":"\"15-06-17\" at \"19:03\""},{"visible":true,"include":false,"step":"250","x":-28114.85714285714,"y":20490.095238095237,"z":-417.04761904761904,"a95":1.9,"info":"\"15-06-17\" at \"22:14\""},{"visible":true,"include":true,"step":"280","x":-24121.714285714286,"y":17705.333333333332,"z":259.5238095238095,"a95":1.9,"info":"\"15-06-18\" at \"07:53\""},{"visible":true,"include":true,"step":"300","x":-22227.04761904762,"y":17279.238095238095,"z":-2185.1428571428573,"a95":2,"info":"\"15-06-18\" at \"11:52\""},{"visible":true,"include":true,"step":"320","x":-21554.761904761905,"y":16366.190476190477,"z":-1167.8095238095239,"a95":1.9,"info":"\"15-06-18\" at \"14:54\""},{"visible":true,"include":true,"step":"340","x":-19992.095238095237,"y":17768.761904761905,"z":-820.0952380952381,"a95":1.9,"info":"\"15-06-19\" at \"10:26\""},{"visible":true,"include":true,"step":"360","x":-18008.85714285714,"y":16317.619047619048,"z":-561.8095238095239,"a95":1.9,"info":"\"15-06-19\" at \"14:04\""},{"visible":true,"include":true,"step":"390","x":-18640.95238095238,"y":15982.380952380952,"z":-1681.6190476190477,"a95":1.9,"info":"\"15-06-20\" at \"10:16\""},{"visible":true,"include":true,"step":"420","x":-14855.42857142857,"y":12950.380952380952,"z":-545.2380952380952,"a95":1.8,"info":"\"15-06-20\" at \"13:50\""},{"visible":true,"include":true,"step":"450","x":-14721.809523809523,"y":12077.42857142857,"z":315.3333333333333,"a95":1.9,"info":"\"15-06-21\" at \"17:06\""},{"visible":true,"include":true,"step":"470","x":-10765.809523809523,"y":9142.285714285714,"z":-291.6190476190476,"a95":1.9,"info":"\"15-06-21\" at \"20:21\""},{"visible":true,"include":true,"step":"490","x":-10827.047619047618,"y":9396.57142857143,"z":-76,"a95":1.8,"info":"\"15-06-22\" at \"14:30\""},{"visible":true,"include":true,"step":"510","x":-10550.761904761905,"y":9343.809523809523,"z":-832.6666666666666,"a95":1.9,"info":"\"15-06-29\" at \"09:58\""},{"visible":true,"include":false,"step":"540","x":-8785.142857142857,"y":8818.761904761905,"z":473.3333333333333,"a95":1.8,"info":"\"15-06-29\" at \"13:14\""},{"visible":true,"include":false,"step":"560","x":-6652.761904761905,"y":7717.142857142857,"z":-912.0952380952381,"a95":1.8,"info":"\"15-06-30\" at \"06:33\""},{"visible":true,"include":false,"step":"580","x":-4702.285714285715,"y":6527.714285714285,"z":699.2380952380952,"a95":1.7,"info":"\"15-06-30\" at \"10:16\""}]},{"version":"v1.1.0","exported":"2016-10-17T07:06:47.106Z","volume":10.5,"added":"2016-10-17T06:59:18.781Z","format":"Utrecht","demagType":"Unknown","strat":"8","patch":1.1,"GEO":[{"dec":290.6758020523247,"inc":32.664148552476206,"MAD":8.151174644262296,"cm":[-1.9895196601282805e-13,-8.526512829121202e-14,0],"intensity":4320.184306726002,"type":"dir","forced":true,"remark":"","origin":false,"nSteps":5,"minStep":"23.0","maxStep":"35.0","steps":["23.0","25.0","30.0","33.0","35.0"],"group":"None","version":"v1.1.0"}],"TECT":[{"dec":275.3180606265887,"inc":13.616531340126121,"MAD":8.151174644262289,"cm":[-5.684341886080801e-13,-8.526512829121202e-14,-1.4210854715202004e-14],"intensity":4320.184306726002,"type":"dir","forced":true,"remark":"","origin":false,"nSteps":5,"minStep":"23.0","maxStep":"35.0","steps":["23.0","25.0","30.0","33.0","35.0"],"group":"None","version":"v1.1.0"}],"interpreted":true,"name":"SS34.14B","coreAzi":197,"coreDip":36,"bedStrike":131,"bedDip":39,"data":[{"visible":false,"include":false,"step":"0.0","x":-9088.666666666666,"y":7087.333333333333,"z":6403.142857142857,"a95":0.99,"info":"28/06/2015 at 08:26:23"},{"visible":true,"include":false,"step":"10.0","x":-2986.3809523809523,"y":4039.4285714285716,"z":4292.761904761905,"a95":0.99,"info":"28/06/2015 at 08:26:23"},{"visible":true,"include":false,"step":"15.0","x":-1890.095238095238,"y":2948.7619047619046,"z":2075.714285714286,"a95":0.99,"info":"28/06/2015 at 08:26:23"},{"visible":true,"include":false,"step":"20.0","x":-1282.4761904761904,"y":2575.0476190476193,"z":928.5142857142857,"a95":0.99,"info":"28/06/2015 at 08:26:23"},{"visible":true,"include":true,"step":"23.0","x":-1429.4285714285713,"y":2012.095238095238,"z":855.3142857142857,"a95":0.99,"info":"28/06/2015 at 08:26:23"},{"visible":true,"include":true,"step":"25.0","x":-1107.3333333333333,"y":2104,"z":676.4761904761905,"a95":0.99,"info":"28/06/2015 at 08:26:23"},{"visible":true,"include":true,"step":"30.0","x":-380.6666666666667,"y":1457.142857142857,"z":141.11428571428573,"a95":0.99,"info":"28/06/2015 at 08:26:23"},{"visible":true,"include":true,"step":"33.0","x":-895.9142857142857,"y":1232.4761904761904,"z":266.0857142857143,"a95":0.99,"info":"28/06/2015 at 08:26:23"},{"visible":true,"include":true,"step":"35.0","x":-638.0571428571429,"y":1492.4761904761904,"z":596.4,"a95":0.99,"info":"28/06/2015 at 08:26:23"},{"visible":true,"include":false,"step":"40.0","x":-147.42857142857142,"y":1048.1904761904761,"z":-372.0857142857143,"a95":0.99,"info":"28/06/2015 at 08:26:23"},{"visible":true,"include":false,"step":"45.0","x":-779.6952380952381,"y":440.447619047619,"z":107.4952380952381,"a95":0.99,"info":"28/06/2015 at 08:26:23"},{"visible":true,"include":false,"step":"50.0","x":-1474.095238095238,"y":461.08571428571423,"z":631.2380952380952,"a95":0.99,"info":"28/06/2015 at 08:26:23"},{"visible":true,"include":false,"step":"55.0","x":-785.8,"y":1094.5714285714287,"z":247.35238095238094,"a95":0.99,"info":"28/06/2015 at 08:26:23"},{"visible":true,"include":false,"step":"60.0","x":-694.6285714285715,"y":293.552380952381,"z":-188.3904761904762,"a95":0.99,"info":"28/06/2015 at 08:26:23"},{"visible":true,"include":false,"step":"65.0","x":-612.9333333333334,"y":331.4666666666667,"z":303.3333333333333,"a95":0.99,"info":"28/06/2015 at 08:26:23"},{"visible":true,"include":false,"step":"70.0","x":-1602.5714285714287,"y":892.0857142857143,"z":591.895238095238,"a95":0.99,"info":"28/06/2015 at 08:26:23"},{"visible":true,"include":false,"step":"80.0","x":-1985.047619047619,"y":-4.802952380952381,"z":133.63809523809525,"a95":0.99,"info":"28/06/2015 at 08:26:23"}]},{"version":"v1.1.0","exported":"2016-10-17T07:06:47.106Z","volume":10.5,"added":"2016-10-17T06:59:18.781Z","format":"Utrecht","demagType":"Unknown","strat":"0","patch":1.1,"GEO":[{"dec":277.01938211409697,"inc":34.04047450761669,"MAD":4.902105192440907,"cm":[-6.572520305780927e-14,0,0],"intensity":9079.956129140723,"type":"dir","forced":true,"remark":"","origin":false,"nSteps":9,"minStep":"15.0","maxStep":"45.0","steps":["15.0","20.0","23.0","25.0","30.0","33.0","35.0","40.0","45.0"],"group":"None","version":"v1.1.0"}],"TECT":[{"dec":264.973464199253,"inc":8.254307641586882,"MAD":4.902105192440893,"cm":[6.750155989720952e-14,-5.684341886080802e-14,-1.4921397450962104e-13],"intensity":9079.956129140723,"type":"dir","forced":true,"remark":"","origin":false,"nSteps":9,"minStep":"15.0","maxStep":"45.0","steps":["15.0","20.0","23.0","25.0","30.0","33.0","35.0","40.0","45.0"],"group":"None","version":"v1.1.0"}],"interpreted":true,"name":"SS34.15A","coreAzi":201,"coreDip":37,"bedStrike":131,"bedDip":39,"data":[{"visible":false,"include":false,"step":"0.0","x":-15539.047619047618,"y":17632.380952380954,"z":10224.761904761905,"a95":0.99,"info":"06/10/2015 at 04:28:54"},{"visible":true,"include":false,"step":"10.0","x":-4370.571428571428,"y":7205.9047619047615,"z":4457.9047619047615,"a95":0.99,"info":"06/10/2015 at 04:28:54"},{"visible":true,"include":true,"step":"15.0","x":-2385.714285714286,"y":5440.285714285715,"z":3313.904761904762,"a95":0.99,"info":"06/10/2015 at 04:28:54"},{"visible":true,"include":true,"step":"20.0","x":-1916,"y":4241.714285714285,"z":2745.0476190476193,"a95":0.99,"info":"06/10/2015 at 04:28:54"},{"visible":true,"include":true,"step":"23.0","x":-1418.6666666666667,"y":3466.9523809523807,"z":2162,"a95":0.99,"info":"06/10/2015 at 04:28:54"},{"visible":true,"include":true,"step":"25.0","x":-934.2190476190475,"y":2889.1428571428573,"z":1804.2857142857142,"a95":0.99,"info":"06/10/2015 at 04:28:54"},{"visible":true,"include":true,"step":"30.0","x":-1206.2857142857142,"y":3043.2380952380954,"z":1870.3809523809523,"a95":0.99,"info":"06/10/2015 at 04:28:54"},{"visible":true,"include":true,"step":"33.0","x":-605.3809523809524,"y":3317.4285714285716,"z":1334.5714285714287,"a95":0.99,"info":"06/10/2015 at 04:28:54"},{"visible":true,"include":true,"step":"35.0","x":-754.6,"y":1612.095238095238,"z":1520.1904761904761,"a95":0.99,"info":"06/10/2015 at 04:28:54"},{"visible":true,"include":true,"step":"40.0","x":-1296.4761904761904,"y":2442.095238095238,"z":1650.3809523809523,"a95":0.99,"info":"06/10/2015 at 04:28:54"},{"visible":true,"include":true,"step":"45.0","x":-746.9619047619047,"y":1753.6190476190477,"z":1255.5238095238096,"a95":0.99,"info":"06/10/2015 at 04:28:54"},{"visible":true,"include":false,"step":"50.0","x":-363.64761904761906,"y":614.5238095238095,"z":788.4761904761905,"a95":0.99,"info":"06/10/2015 at 04:28:54"},{"visible":true,"include":false,"step":"60.0","x":-700.1333333333333,"y":1373.4285714285713,"z":731.1904761904761,"a95":0.99,"info":"06/10/2015 at 04:28:54"},{"visible":true,"include":false,"step":"70.0","x":-1101.142857142857,"y":703.2285714285714,"z":623.3333333333334,"a95":0.99,"info":"06/10/2015 at 04:28:54"}]},{"version":"v1.1.0","exported":"2016-10-17T07:06:47.106Z","volume":10.5,"added":"2016-10-17T06:59:18.781Z","format":"Utrecht","demagType":"Unknown","strat":"0","patch":1.1,"GEO":[{"dec":308.5717610954216,"inc":51.113831744675394,"MAD":4.593896636905988,"cm":[-2.2737367544323206e-13,-1.5631940186722204e-13,0],"intensity":12359.9964463666,"type":"dir","forced":true,"remark":"","origin":false,"nSteps":7,"minStep":"210","maxStep":"340","steps":["210","230","250","280","300","320","340"],"group":"None","version":"v1.1.0"}],"TECT":[{"dec":271.85552187505493,"inc":36.02852023918602,"MAD":4.593896636905967,"cm":[3.446132268436486e-13,0,-1.1368683772161603e-13],"intensity":12359.996446366598,"type":"dir","forced":true,"remark":"","origin":false,"nSteps":7,"minStep":"210","maxStep":"340","steps":["210","230","250","280","300","320","340"],"group":"None","version":"v1.1.0"}],"interpreted":true,"name":"SS34.16A","coreAzi":250,"coreDip":65,"bedStrike":131,"bedDip":39,"data":[{"visible":false,"include":false,"step":"20","x":-15135.047619047618,"y":26399.238095238095,"z":33520.09523809524,"a95":2,"info":"\"15-06-15\" at \"11:08\""},{"visible":true,"include":false,"step":"100","x":-13095.809523809523,"y":16560.761904761905,"z":27137.809523809523,"a95":2.1,"info":"\"15-06-15\" at \"14:13\""},{"visible":true,"include":false,"step":"150","x":-6961.714285714285,"y":11781.904761904761,"z":19554.95238095238,"a95":2.2,"info":"\"15-06-16\" at \"09:12\""},{"visible":true,"include":false,"step":"180","x":-3962,"y":8353.238095238095,"z":14048.47619047619,"a95":2.4,"info":"\"15-06-16\" at \"12:17\""},{"visible":true,"include":true,"step":"210","x":-291.23809523809524,"y":4946.190476190476,"z":7654.952380952381,"a95":2.2,"info":"\"15-06-17\" at \"16:00\""},{"visible":true,"include":true,"step":"230","x":-85.42857142857143,"y":4306.857142857143,"z":6956.571428571428,"a95":2.2,"info":"\"15-06-17\" at \"19:05\""},{"visible":true,"include":true,"step":"250","x":-151.04761904761904,"y":2328,"z":2508.285714285714,"a95":3,"info":"\"15-06-17\" at \"22:16\""},{"visible":true,"include":true,"step":"280","x":-791.2380952380952,"y":2235.904761904762,"z":3021.904761904762,"a95":2.6,"info":"\"15-06-18\" at \"07:56\""},{"visible":true,"include":true,"step":"300","x":-76.76190476190476,"y":2110.3809523809523,"z":4053.0476190476193,"a95":2.2,"info":"\"15-06-18\" at \"11:54\""},{"visible":true,"include":true,"step":"320","x":189.52380952380952,"y":1886.1904761904761,"z":2850.5714285714284,"a95":2.3,"info":"\"15-06-18\" at \"14:55\""},{"visible":true,"include":true,"step":"340","x":-155.33333333333334,"y":1352.5714285714287,"z":2970.285714285714,"a95":2.2,"info":"\"15-06-19\" at \"10:28\""},{"visible":true,"include":false,"step":"360","x":-175.8095238095238,"y":179.71428571428572,"z":1368.952380952381,"a95":3.3,"info":"\"15-06-19\" at \"14:09\""},{"visible":true,"include":false,"step":"390","x":-483.42857142857144,"y":631.4285714285714,"z":2858.285714285714,"a95":2.5,"info":"\"15-06-20\" at \"10:19\""},{"visible":true,"include":false,"step":"420","x":-661.5238095238095,"y":1259.5238095238096,"z":2328.3809523809523,"a95":2.5,"info":"\"15-06-20\" at \"13:53\""},{"visible":true,"include":false,"step":"450","x":50,"y":1150.095238095238,"z":2556.4761904761904,"a95":2.4,"info":"\"15-06-21\" at \"17:11\""},{"visible":true,"include":false,"step":"470","x":909.3333333333334,"y":-263.8095238095238,"z":1264.1904761904761,"a95":3.7,"info":"\"15-06-21\" at \"20:23\""},{"visible":true,"include":false,"step":"490","x":645.3333333333334,"y":-543.4285714285714,"z":1642,"a95":3.1,"info":"\"15-06-22\" at \"14:32\""},{"visible":true,"include":false,"step":"510","x":-1222.1904761904761,"y":419.04761904761904,"z":703.047619047619,"a95":3.8,"info":"\"15-06-29\" at \"10:00\""},{"visible":true,"include":false,"step":"540","x":-369.04761904761904,"y":127.23809523809524,"z":1491.4285714285713,"a95":3.4,"info":"\"15-06-29\" at \"13:16\""}]},{"version":"v1.1.0","exported":"2016-10-17T07:06:47.106Z","volume":10.5,"added":"2016-10-17T06:59:18.781Z","format":"Utrecht","demagType":"Unknown","strat":"0","patch":1.1,"GEO":[{"dec":307.50175003174076,"inc":60.25003087482097,"MAD":4.466339038365477,"cm":[-3.481659405224491e-13,-2.1316282072803006e-13,0],"intensity":18551.048275937,"type":"dir","forced":true,"remark":"","origin":false,"nSteps":10,"minStep":"15.0","maxStep":"50.0","steps":["15.0","20.0","23.0","25.0","30.0","33.0","35.0","40.0","45.0","50.0"],"group":"None","version":"v1.1.0"}],"TECT":[{"dec":261.99311403962776,"inc":40.969923179331516,"MAD":4.466339038365415,"cm":[-8.881784197001252e-14,-3.694822225952521e-13,-4.121147867408581e-13],"intensity":18551.048275937,"type":"dir","forced":true,"remark":"","origin":false,"nSteps":10,"minStep":"15.0","maxStep":"50.0","steps":["15.0","20.0","23.0","25.0","30.0","33.0","35.0","40.0","45.0","50.0"],"group":"None","version":"v1.1.0"}],"interpreted":true,"name":"SS34.17A","coreAzi":205,"coreDip":68,"bedStrike":131,"bedDip":39,"data":[{"visible":false,"include":false,"step":"0.0","x":-24176.190476190477,"y":12086.666666666666,"z":27653.333333333332,"a95":0.99,"info":"06/10/2015 at 04:28:54"},{"visible":true,"include":false,"step":"10.0","x":-10769.52380952381,"y":9486,"z":15517.142857142857,"a95":0.99,"info":"06/10/2015 at 04:28:54"},{"visible":true,"include":true,"step":"15.0","x":-7349.714285714285,"y":7178.380952380952,"z":11300,"a95":0.99,"info":"06/10/2015 at 04:28:54"},{"visible":true,"include":true,"step":"20.0","x":-4922.761904761905,"y":5733.809523809524,"z":8781.047619047618,"a95":0.99,"info":"06/10/2015 at 04:28:54"},{"visible":true,"include":true,"step":"23.0","x":-3943.904761904762,"y":4462,"z":7343.809523809524,"a95":0.99,"info":"06/10/2015 at 04:28:54"},{"visible":true,"include":true,"step":"25.0","x":-3327.904761904762,"y":3933.3333333333335,"z":6009.714285714285,"a95":0.99,"info":"06/10/2015 at 04:28:54"},{"visible":true,"include":true,"step":"30.0","x":-2870.3809523809523,"y":3114.4761904761904,"z":4908.666666666667,"a95":0.99,"info":"06/10/2015 at 04:28:54"},{"visible":true,"include":true,"step":"33.0","x":-2110.8571428571427,"y":2822.190476190476,"z":4876.952380952381,"a95":0.99,"info":"06/10/2015 at 04:28:54"},{"visible":true,"include":true,"step":"35.0","x":-1860.095238095238,"y":1779.7142857142858,"z":4074.6666666666665,"a95":0.99,"info":"06/10/2015 at 04:28:54"},{"visible":true,"include":true,"step":"40.0","x":-1515.904761904762,"y":3181.1428571428573,"z":4713.238095238095,"a95":0.99,"info":"06/10/2015 at 04:28:54"},{"visible":true,"include":true,"step":"45.0","x":-849.1333333333333,"y":2319.714285714286,"z":2734.095238095238,"a95":0.99,"info":"06/10/2015 at 04:28:54"},{"visible":true,"include":true,"step":"50.0","x":-832.1809523809524,"y":1889.6190476190477,"z":2663.1428571428573,"a95":0.99,"info":"06/10/2015 at 04:28:54"},{"visible":true,"include":false,"step":"60.0","x":-820.5428571428572,"y":323.25714285714287,"z":1516.5714285714287,"a95":0.99,"info":"06/10/2015 at 04:28:54"},{"visible":false,"include":false,"step":"70.0","x":513.2571428571429,"y":475.72380952380956,"z":1187.8095238095239,"a95":0.99,"info":"06/10/2015 at 04:28:54"}]},{"version":"v1.1.0","exported":"2016-10-17T07:06:47.106Z","volume":10.5,"added":"2016-10-17T06:59:18.782Z","format":"Utrecht","demagType":"Unknown","strat":"1","patch":1.1,"GEO":[{"dec":300.2626074338441,"inc":62.25566390120529,"MAD":4.694282359648048,"cm":[-4.334310688136611e-13,-2.5579538487363607e-13,0],"intensity":17953.08455385125,"type":"dir","forced":true,"remark":"","origin":false,"nSteps":11,"minStep":"15.0","maxStep":"60.0","steps":["15.0","20.0","23.0","25.0","30.0","33.0","35.0","40.0","45.0","50.0","60.0"],"group":"None","version":"v1.1.0"}],"TECT":[{"dec":257.22417115982125,"inc":39.28798130257734,"MAD":4.694282359647978,"cm":[9.947598300641403e-14,1.1368683772161603e-13,-8.526512829121202e-14],"intensity":17953.08455385125,"type":"dir","forced":true,"remark":"","origin":false,"nSteps":11,"minStep":"15.0","maxStep":"60.0","steps":["15.0","20.0","23.0","25.0","30.0","33.0","35.0","40.0","45.0","50.0","60.0"],"group":"None","version":"v1.1.0"}],"interpreted":true,"name":"SS34.17B","coreAzi":205,"coreDip":68,"bedStrike":131,"bedDip":39,"data":[{"visible":true,"include":false,"step":"0.0","x":-19431.428571428572,"y":17241.904761904763,"z":35036.19047619047,"a95":0.99,"info":"28/06/2015 at 13:39:07"},{"visible":true,"include":false,"step":"10.0","x":-9257.714285714286,"y":9681.904761904761,"z":17000.95238095238,"a95":0.99,"info":"28/06/2015 at 13:39:07"},{"visible":true,"include":true,"step":"15.0","x":-5856.190476190476,"y":7189.523809523809,"z":11187.619047619048,"a95":0.99,"info":"28/06/2015 at 13:39:07"},{"visible":true,"include":true,"step":"20.0","x":-4123.619047619048,"y":4274.0952380952385,"z":8197.619047619048,"a95":0.99,"info":"28/06/2015 at 13:39:07"},{"visible":true,"include":true,"step":"23.0","x":-3099.714285714286,"y":4047.1428571428573,"z":6928,"a95":0.99,"info":"28/06/2015 at 13:39:07"},{"visible":true,"include":true,"step":"25.0","x":-2335.0476190476193,"y":3725.4285714285716,"z":5817.142857142857,"a95":0.99,"info":"28/06/2015 at 13:39:07"},{"visible":true,"include":true,"step":"30.0","x":-1998,"y":2518.8571428571427,"z":5288.666666666667,"a95":0.99,"info":"28/06/2015 at 13:39:07"},{"visible":true,"include":true,"step":"33.0","x":-1590.7619047619048,"y":2202.9523809523807,"z":4658.476190476191,"a95":0.99,"info":"28/06/2015 at 13:39:07"},{"visible":true,"include":true,"step":"35.0","x":-1183.7142857142858,"y":1801.5238095238096,"z":3371.5238095238096,"a95":0.99,"info":"28/06/2015 at 13:39:07"},{"visible":true,"include":true,"step":"40.0","x":-1009.7142857142857,"y":682.1619047619048,"z":2675.904761904762,"a95":0.99,"info":"28/06/2015 at 13:39:07"},{"visible":true,"include":true,"step":"45.0","x":-1320.6666666666667,"y":2059.0476190476193,"z":3956.8571428571427,"a95":0.99,"info":"28/06/2015 at 13:39:07"},{"visible":true,"include":true,"step":"50.0","x":-442.5142857142857,"y":1865.047619047619,"z":1970.2857142857142,"a95":0.99,"info":"28/06/2015 at 13:39:07"},{"visible":true,"include":false,"step":"55.0","x":-1372.1904761904761,"y":147.46666666666667,"z":2412.6666666666665,"a95":0.99,"info":"28/06/2015 at 13:39:07"},{"visible":true,"include":true,"step":"60.0","x":-1644.3809523809523,"y":1182.095238095238,"z":2811.3333333333335,"a95":0.99,"info":"28/06/2015 at 13:39:07"},{"visible":true,"include":false,"step":"65.0","x":-250.0857142857143,"y":1024.6666666666667,"z":2441.6190476190477,"a95":0.99,"info":"28/06/2015 at 13:39:07"},{"visible":true,"include":false,"step":"70.0","x":-892.0952380952381,"y":-522.8,"z":1594.5714285714287,"a95":0.99,"info":"28/06/2015 at 13:39:07"},{"visible":true,"include":false,"step":"80.0","x":-495.8285714285714,"y":870.9428571428571,"z":2546,"a95":0.99,"info":"28/06/2015 at 13:39:07"}]},{"version":"v1.1.0","exported":"2016-10-17T07:06:47.106Z","volume":10.5,"added":"2016-10-17T06:59:18.783Z","format":"Utrecht","demagType":"Unknown","strat":"2","patch":1.1,"GEO":[{"dec":333.9346749418223,"inc":44.02984881675433,"MAD":4.0452962174321385,"cm":[4.263256414560601e-14,1.1013412404281553e-13,0],"intensity":9677.524302505171,"type":"dir","forced":true,"remark":"","origin":false,"nSteps":10,"minStep":"15.0","maxStep":"50.0","steps":["15.0","20.0","23.0","25.0","30.0","33.0","35.0","40.0","45.0","50.0"],"group":"None","version":"v1.1.0"}],"TECT":[{"dec":292.64689535550656,"inc":45.76299801000859,"MAD":4.045296217432114,"cm":[-2.0250467969162855e-13,2.2737367544323206e-13,1.9895196601282805e-13],"intensity":9677.524302505171,"type":"dir","forced":true,"remark":"","origin":false,"nSteps":10,"minStep":"15.0","maxStep":"50.0","steps":["15.0","20.0","23.0","25.0","30.0","33.0","35.0","40.0","45.0","50.0"],"group":"None","version":"v1.1.0"}],"interpreted":true,"name":"SS34.19B","coreAzi":177,"coreDip":41,"bedStrike":131,"bedDip":39,"data":[{"visible":true,"include":false,"step":"0.0","x":-16795.238095238095,"y":3804,"z":1894.5714285714287,"a95":0.99,"info":"28/06/2015 at 13:39:07"},{"visible":true,"include":false,"step":"10.0","x":-9880.952380952382,"y":2877.714285714286,"z":-208.73333333333332,"a95":0.99,"info":"28/06/2015 at 13:39:07"},{"visible":true,"include":true,"step":"15.0","x":-7196.571428571428,"y":2469.2380952380954,"z":-411.5142857142857,"a95":0.99,"info":"28/06/2015 at 13:39:07"},{"visible":true,"include":true,"step":"20.0","x":-5713.238095238095,"y":1691.5238095238096,"z":-263.16190476190474,"a95":0.99,"info":"28/06/2015 at 13:39:07"},{"visible":true,"include":true,"step":"23.0","x":-4912.190476190476,"y":1720,"z":-216.22857142857143,"a95":0.99,"info":"28/06/2015 at 13:39:07"},{"visible":true,"include":true,"step":"25.0","x":-4405.619047619048,"y":1420.952380952381,"z":-164.41904761904763,"a95":0.99,"info":"28/06/2015 at 13:39:07"},{"visible":true,"include":true,"step":"30.0","x":-3568.8571428571427,"y":785.4761904761905,"z":-196.47619047619048,"a95":0.99,"info":"28/06/2015 at 13:39:07"},{"visible":true,"include":true,"step":"33.0","x":-3211.714285714286,"y":699.8571428571429,"z":75.20380952380953,"a95":0.99,"info":"28/06/2015 at 13:39:07"},{"visible":true,"include":true,"step":"35.0","x":-2729.3333333333335,"y":673.7809523809524,"z":85.24857142857142,"a95":0.99,"info":"28/06/2015 at 13:39:07"},{"visible":true,"include":true,"step":"40.0","x":-2726.7619047619046,"y":191.71428571428572,"z":-374.9047619047619,"a95":0.99,"info":"28/06/2015 at 13:39:07"},{"visible":true,"include":true,"step":"45.0","x":-2433.809523809524,"y":395.06666666666666,"z":-61.39047619047619,"a95":0.99,"info":"28/06/2015 at 13:39:07"},{"visible":true,"include":true,"step":"50.0","x":-2008.3809523809523,"y":465.5142857142857,"z":-145.76190476190476,"a95":0.99,"info":"28/06/2015 at 13:39:07"},{"visible":true,"include":false,"step":"55.0","x":-1786.5714285714287,"y":-657.2380952380952,"z":-312.8,"a95":0.99,"info":"28/06/2015 at 13:39:07"},{"visible":true,"include":false,"step":"60.0","x":-2014.7619047619048,"y":72.9857142857143,"z":159.16190476190476,"a95":0.99,"info":"28/06/2015 at 13:39:07"},{"visible":true,"include":false,"step":"65.0","x":-1368.952380952381,"y":155.13333333333335,"z":-137.2761904761905,"a95":0.99,"info":"28/06/2015 at 13:39:07"},{"visible":true,"include":false,"step":"70.0","x":-1676.5714285714287,"y":-677.504761904762,"z":216.1809523809524,"a95":0.99,"info":"28/06/2015 at 13:39:07"},{"visible":true,"include":false,"step":"80.0","x":-1747.7142857142858,"y":-576.7333333333333,"z":384.67619047619047,"a95":0.99,"info":"28/06/2015 at 13:39:07"}]},{"version":"v1.1.0","exported":"2016-10-17T07:06:47.106Z","volume":10.5,"added":"2016-10-17T06:59:18.783Z","format":"Utrecht","demagType":"Unknown","strat":"0","patch":1.1,"GEO":[{"dec":332.73856097298426,"inc":46.21098061030129,"MAD":5.487123859054102,"cm":[-1.4210854715202004e-14,4.263256414560601e-14,0],"intensity":5065.4287549678675,"type":"dir","forced":true,"remark":"","origin":false,"nSteps":7,"minStep":"210","maxStep":"340","steps":["210","230","250","280","300","320","340"],"group":"None","version":"v1.1.0"}],"TECT":[{"dec":289.352187638026,"inc":46.24556581892322,"MAD":5.487123859054171,"cm":[-1.2523315717771766e-13,-4.973799150320701e-14,-5.684341886080802e-14],"intensity":5065.428754967868,"type":"dir","forced":true,"remark":"","origin":false,"nSteps":7,"minStep":"210","maxStep":"340","steps":["210","230","250","280","300","320","340"],"group":"None","version":"v1.1.0"}],"interpreted":true,"name":"SS34.20A","coreAzi":179,"coreDip":39,"bedStrike":131,"bedDip":39,"data":[{"visible":false,"include":false,"step":"20","x":-20526.571428571428,"y":2677.1428571428573,"z":231.33333333333334,"a95":1.4,"info":"\"15-06-15\" at \"11:11\""},{"visible":false,"include":false,"step":"100","x":-14764.285714285714,"y":1003.5238095238095,"z":-619.8095238095239,"a95":1.5,"info":"\"15-06-15\" at \"14:15\""},{"visible":true,"include":false,"step":"150","x":-7877.047619047619,"y":972.952380952381,"z":59.714285714285715,"a95":1.5,"info":"\"15-06-16\" at \"09:15\""},{"visible":true,"include":false,"step":"180","x":-7129.714285714285,"y":656.3809523809524,"z":-333.9047619047619,"a95":1.5,"info":"\"15-06-16\" at \"12:19\""},{"visible":true,"include":true,"step":"210","x":-3832,"y":1095.5238095238096,"z":-320.95238095238096,"a95":1.6,"info":"\"15-06-17\" at \"16:02\""},{"visible":true,"include":true,"step":"230","x":-3558.285714285714,"y":1151.7142857142858,"z":-140.76190476190476,"a95":1.5,"info":"\"15-06-17\" at \"19:07\""},{"visible":true,"include":true,"step":"250","x":-1799.2380952380952,"y":633.8095238095239,"z":118.47619047619048,"a95":2.2,"info":"\"15-06-17\" at \"22:20\""},{"visible":true,"include":true,"step":"280","x":-1435.047619047619,"y":362.6666666666667,"z":38.666666666666664,"a95":2.3,"info":"\"15-06-18\" at \"07:58\""},{"visible":true,"include":true,"step":"300","x":-1284.5714285714287,"y":703.5238095238095,"z":279.6190476190476,"a95":2.3,"info":"\"15-06-18\" at \"11:56\""},{"visible":true,"include":true,"step":"320","x":-1095.904761904762,"y":271.42857142857144,"z":-116.19047619047619,"a95":2.6,"info":"\"15-06-18\" at \"14:57\""},{"visible":true,"include":true,"step":"340","x":-959.9047619047619,"y":534.4761904761905,"z":122.66666666666667,"a95":2.2,"info":"\"15-06-19\" at \"10:31\""},{"visible":true,"include":false,"step":"360","x":-671.5238095238095,"y":496.76190476190476,"z":-448,"a95":2.6,"info":"\"15-06-19\" at \"14:11\""},{"visible":true,"include":false,"step":"390","x":-716.3809523809524,"y":261.8095238095238,"z":6.285714285714286,"a95":2.2,"info":"\"15-06-20\" at \"10:21\""},{"visible":true,"include":false,"step":"420","x":-328,"y":155.23809523809524,"z":104.47619047619048,"a95":4.2,"info":"\"15-06-20\" at \"13:57\""},{"visible":true,"include":false,"step":"450","x":-525.3333333333334,"y":762,"z":403.14285714285717,"a95":2,"info":"\"15-06-21\" at \"17:15\""},{"visible":true,"include":false,"step":"470","x":-431.6190476190476,"y":136.57142857142858,"z":-247.9047619047619,"a95":4.2,"info":"\"15-06-21\" at \"20:25\""},{"visible":true,"include":false,"step":"490","x":-347.23809523809524,"y":238,"z":-114.47619047619048,"a95":4.4,"info":"\"15-06-22\" at \"14:34\""},{"visible":true,"include":false,"step":"510","x":112.95238095238095,"y":-26.285714285714285,"z":276.0952380952381,"a95":9.5,"info":"\"15-06-29\" at \"10:01\""},{"visible":true,"include":false,"step":"540","x":-158.85714285714286,"y":410.95238095238096,"z":599.047619047619,"a95":4.1,"info":"\"15-06-29\" at \"13:18\""}]}]
