# Supplementary material for: Paleomagnetic constraints on the timing and distribution of Cenozoic rotations in Central and Eastern Anatolia
Source: Copernicus journal article supplement (doi:10.5194/se-9-295-2018), 2018-03-21
Supplement: Supplementary file 2 [file se-9-295-2018-supplement.zip › se-2017-66_DATA_dir files/dir files Sivas/SS35.dir]

[{"version":"v1.1.0","exported":"2017-05-22T12:48:34.072Z","info":"0","GEO":[{"dec":309.341844753322,"inc":-16.159997455423593,"MAD":5.801708489396837,"cm":[-7.815970093361102e-14,1.9539925233402755e-13,0],"intensity":6690.341073707654,"type":"GC","origin":false,"forced":true,"remark":"","nSteps":12,"minStep":"150","maxStep":"420","steps":["150","180","210","230","250","280","300","320","340","360","390","420"],"group":"None","version":"v1.1.0"}],"TECT":[{"dec":129.46637218468578,"inc":-15.142467954124532,"MAD":5.801708489397016,"cm":[7.105427357601002e-15,7.993605777301127e-14,-5.684341886080802e-14],"intensity":6690.341073707656,"type":"GC","origin":false,"forced":true,"remark":"","nSteps":12,"minStep":"150","maxStep":"420","steps":["150","180","210","230","250","280","300","320","340","360","390","420"],"group":"None","version":"v1.1.0"}],"interpreted":true,"name":"SS35.01A","coreAzi":272,"coreDip":3,"bedStrike":63,"bedDip":34,"data":[{"visible":true,"include":false,"step":"20","x":-15485.52380952381,"y":11735.238095238095,"z":-1443.3333333333333,"a95":"1.4","info":"\"15-06-15\" at \"11:13\""},{"visible":true,"include":false,"step":"100","x":-9095.809523809523,"y":9473.619047619048,"z":-3322.6666666666665,"a95":"1.6","info":"\"15-06-15\" at \"14:18\""},{"visible":true,"include":true,"step":"150","x":-5058.857142857143,"y":5525.523809523809,"z":-1816.3809523809523,"a95":"1.5","info":"\"15-06-16\" at \"09:16\""},{"visible":true,"include":true,"step":"180","x":-5049.714285714285,"y":5287.428571428572,"z":-2121.1428571428573,"a95":"1.5","info":"\"15-06-16\" at \"12:22\""},{"visible":true,"include":true,"step":"210","x":236.38095238095238,"y":1509.142857142857,"z":-1644.7619047619048,"a95":"2.1","info":"\"15-06-17\" at \"16:04\""},{"visible":true,"include":true,"step":"230","x":88.85714285714286,"y":1804.952380952381,"z":-1572.7619047619048,"a95":"2.2","info":"\"15-06-17\" at \"19:11\""},{"visible":true,"include":true,"step":"250","x":2890.095238095238,"y":414.85714285714283,"z":-1754.095238095238,"a95":"1.9","info":"\"15-06-17\" at \"22:22\""},{"visible":true,"include":true,"step":"280","x":2535.904761904762,"y":8.571428571428571,"z":-1118.6666666666667,"a95":"1.9","info":"\"15-06-18\" at \"08:00\""},{"visible":true,"include":true,"step":"300","x":2331.0476190476193,"y":-80.76190476190476,"z":-943.8095238095239,"a95":"1.6","info":"\"15-06-18\" at \"11:58\""},{"visible":true,"include":true,"step":"320","x":2230.8571428571427,"y":287.14285714285717,"z":-753.7142857142857,"a95":"1.7","info":"\"15-06-18\" at \"14:59\""},{"visible":true,"include":true,"step":"340","x":2465.5238095238096,"y":58.095238095238095,"z":-824.3809523809524,"a95":"1.6","info":"\"15-06-19\" at \"10:33\""},{"visible":true,"include":true,"step":"360","x":2365.0476190476193,"y":110.57142857142857,"z":-1186.4761904761904,"a95":"2.1","info":"\"15-06-19\" at \"14:14\""},{"visible":true,"include":true,"step":"390","x":2107.714285714286,"y":-281.6190476190476,"z":-494,"a95":"1.7","info":"\"15-06-20\" at \"10:26\""},{"visible":true,"include":true,"step":"420","x":2274,"y":-58.76190476190476,"z":-851.9047619047619,"a95":"1.5","info":"\"15-06-20\" at \"14:00\""},{"visible":true,"include":false,"step":"450","x":2169.3333333333335,"y":-296.3809523809524,"z":-274.95238095238096,"a95":"1.4","info":"\"15-06-21\" at \"17:19\""},{"visible":true,"include":false,"step":"470","x":1882.6666666666667,"y":-477.42857142857144,"z":-22.38095238095238,"a95":"2.1","info":"\"15-06-21\" at \"20:26\""},{"visible":true,"include":false,"step":"490","x":2134.5714285714284,"y":-489.8095238095238,"z":-95.61904761904762,"a95":"1.9","info":"\"15-06-22\" at \"14:36\""},{"visible":true,"include":false,"step":"510","x":1980.095238095238,"y":-459.3333333333333,"z":-400.4761904761905,"a95":"1.8","info":"\"15-06-29\" at \"10:03\""},{"visible":true,"include":false,"step":"540","x":1881.142857142857,"y":-289.9047619047619,"z":-458.4761904761905,"a95":"1.8","info":"\"15-06-29\" at \"13:20\""},{"visible":true,"include":false,"step":"560","x":1776.4761904761904,"y":-459.9047619047619,"z":-514.6666666666666,"a95":"2.1","info":"\"15-06-30\" at \"06:40\""},{"visible":true,"include":false,"step":"580","x":2025.5238095238096,"y":-476.0952380952381,"z":-415.7142857142857,"a95":"1.5","info":"\"15-06-30\" at \"10:18\""}],"demagType":"Unknown","patch":1.1,"format":"Unknown","strat":null},{"version":"v1.1.0","exported":"2017-05-22T12:48:34.072Z","info":"7","GEO":[{"dec":340.690747112969,"inc":-29.645504182293692,"MAD":7.1736792123481425,"cm":[-1.9539925233402755e-14,7.105427357601002e-15,0],"intensity":5534.632862210085,"type":"GC","origin":false,"forced":true,"remark":"","nSteps":16,"minStep":"10.0","maxStep":"80.0","steps":["10.0","15.0","20.0","23.0","25.0","30.0","33.0","35.0","40.0","45.0","50.0","55.0","60.0","65.0","70.0","80.0"],"group":"None","version":"v1.1.0"}],"TECT":[{"dec":159.6963536375381,"inc":-4.103336540103293,"MAD":7.1736792123481905,"cm":[-3.197442310920451e-14,5.684341886080802e-14,-5.684341886080802e-14],"intensity":5534.632862210085,"type":"GC","origin":false,"forced":true,"remark":"","nSteps":16,"minStep":"10.0","maxStep":"80.0","steps":["10.0","15.0","20.0","23.0","25.0","30.0","33.0","35.0","40.0","45.0","50.0","55.0","60.0","65.0","70.0","80.0"],"group":"None","version":"v1.1.0"}],"interpreted":true,"name":"SS35.02B","coreAzi":273,"coreDip":0,"bedStrike":63,"bedDip":34,"data":[{"visible":true,"include":false,"step":"0.0","x":-8037.809523809524,"y":4824.571428571428,"z":-451.2666666666667,"a95":"0.99","info":"27/06/2015 at 17:26:15"},{"visible":true,"include":true,"step":"10.0","x":-5104.190476190476,"y":3324.6666666666665,"z":-783.2666666666667,"a95":"0.99","info":"27/06/2015 at 17:26:15"},{"visible":true,"include":true,"step":"15.0","x":-3731.809523809524,"y":2613.4285714285716,"z":-933.6285714285715,"a95":"0.99","info":"27/06/2015 at 17:26:15"},{"visible":true,"include":true,"step":"20.0","x":-2896.3809523809523,"y":2248.6666666666665,"z":-815.1333333333333,"a95":"0.99","info":"27/06/2015 at 17:26:15"},{"visible":true,"include":true,"step":"23.0","x":-2452.8571428571427,"y":1938.7619047619048,"z":-968.3809523809524,"a95":"0.99","info":"27/06/2015 at 17:26:15"},{"visible":true,"include":true,"step":"25.0","x":-2033.8095238095239,"y":1884.3809523809523,"z":-1232.5714285714287,"a95":"0.99","info":"27/06/2015 at 17:26:15"},{"visible":true,"include":true,"step":"30.0","x":-1509.2380952380952,"y":1341.7142857142858,"z":-1045.8095238095239,"a95":"0.99","info":"27/06/2015 at 17:26:15"},{"visible":true,"include":true,"step":"33.0","x":-1064.952380952381,"y":1256.1904761904761,"z":-1131.6190476190477,"a95":"0.99","info":"27/06/2015 at 17:26:15"},{"visible":true,"include":true,"step":"35.0","x":-894.8761904761906,"y":1033.047619047619,"z":-1378.7619047619048,"a95":"0.99","info":"27/06/2015 at 17:26:15"},{"visible":true,"include":true,"step":"40.0","x":-749.847619047619,"y":892.1428571428571,"z":-1065.7142857142858,"a95":"0.99","info":"27/06/2015 at 17:26:15"},{"visible":true,"include":true,"step":"45.0","x":-336.31428571428575,"y":678.8857142857144,"z":-1218.2857142857142,"a95":"0.99","info":"27/06/2015 at 17:26:15"},{"visible":true,"include":true,"step":"50.0","x":-102.91428571428571,"y":708.895238095238,"z":-1359.4285714285713,"a95":"0.99","info":"27/06/2015 at 17:26:15"},{"visible":true,"include":true,"step":"55.0","x":-111.41904761904763,"y":460.18095238095236,"z":-1401.2380952380952,"a95":"0.99","info":"27/06/2015 at 17:26:15"},{"visible":true,"include":true,"step":"60.0","x":348.45714285714286,"y":400.02857142857147,"z":-1040.4761904761904,"a95":"0.99","info":"27/06/2015 at 17:26:15"},{"visible":true,"include":true,"step":"65.0","x":576.9333333333334,"y":-17.435238095238095,"z":-1324.1904761904761,"a95":"0.99","info":"27/06/2015 at 17:26:15"},{"visible":true,"include":true,"step":"70.0","x":1017.2380952380952,"y":234.69523809523812,"z":-1454.095238095238,"a95":"0.99","info":"27/06/2015 at 17:26:15"},{"visible":true,"include":true,"step":"80.0","x":935.352380952381,"y":-334.3047619047619,"z":-1292.952380952381,"a95":"0.99","info":"27/06/2015 at 17:26:15"}],"demagType":"Unknown","patch":1.1,"format":"Unknown","strat":null},{"version":"v1.1.0","exported":"2017-05-22T12:48:34.072Z","info":"8","GEO":[{"dec":336.358129109822,"inc":-32.65068203722725,"MAD":5.596707346269603,"cm":[-4.5297099404706387e-13,1.5631940186722204e-13,0],"intensity":6631.695537744932,"type":"GC","origin":false,"forced":true,"remark":"","nSteps":14,"minStep":"15.0","maxStep":"70.0","steps":["15.0","20.0","23.0","25.0","30.0","33.0","35.0","40.0","45.0","50.0","55.0","60.0","65.0","70.0"],"group":"None","version":"v1.1.0"}],"TECT":[{"dec":156.60914067290787,"inc":-6.336776917547155,"MAD":5.596707346270148,"cm":[1.4210854715202004e-14,-1.1368683772161603e-13,-1.9895196601282805e-13],"intensity":6631.695537744932,"type":"GC","origin":false,"forced":true,"remark":"","nSteps":14,"minStep":"15.0","maxStep":"70.0","steps":["15.0","20.0","23.0","25.0","30.0","33.0","35.0","40.0","45.0","50.0","55.0","60.0","65.0","70.0"],"group":"None","version":"v1.1.0"}],"interpreted":true,"name":"SS35.05A","coreAzi":227,"coreDip":32,"bedStrike":68,"bedDip":39,"data":[{"visible":true,"include":false,"step":"0.0","x":-6541.142857142857,"y":694.8285714285714,"z":-2163.714285714286,"a95":"0.99","info":"27/06/2015 at 17:26:15"},{"visible":true,"include":false,"step":"10.0","x":-4388.476190476191,"y":-145.2761904761905,"z":-2417.6190476190477,"a95":"0.99","info":"27/06/2015 at 17:26:15"},{"visible":true,"include":true,"step":"15.0","x":-3042.190476190476,"y":-535.6571428571428,"z":-2571.1428571428573,"a95":"0.99","info":"27/06/2015 at 17:26:15"},{"visible":true,"include":true,"step":"20.0","x":-2297.5238095238096,"y":-888.0380952380953,"z":-2654.5714285714284,"a95":"0.99","info":"27/06/2015 at 17:26:15"},{"visible":true,"include":true,"step":"23.0","x":-1928.4761904761904,"y":-1101.4285714285713,"z":-2761.809523809524,"a95":"0.99","info":"27/06/2015 at 17:26:15"},{"visible":true,"include":true,"step":"25.0","x":-1753.8095238095239,"y":-1190.7619047619048,"z":-2815.714285714286,"a95":"0.99","info":"27/06/2015 at 17:26:15"},{"visible":true,"include":true,"step":"30.0","x":-1205.5238095238096,"y":-1167.3333333333333,"z":-2691.3333333333335,"a95":"0.99","info":"27/06/2015 at 17:26:15"},{"visible":true,"include":true,"step":"33.0","x":-930.742857142857,"y":-1470.2857142857142,"z":-2832.095238095238,"a95":"0.99","info":"27/06/2015 at 17:26:15"},{"visible":true,"include":true,"step":"35.0","x":-697.2285714285714,"y":-1553.7142857142858,"z":-2837.714285714286,"a95":"0.99","info":"27/06/2015 at 17:26:15"},{"visible":true,"include":true,"step":"40.0","x":-653.6285714285715,"y":-1592.095238095238,"z":-2671.0476190476193,"a95":"0.99","info":"27/06/2015 at 17:26:15"},{"visible":true,"include":true,"step":"45.0","x":-309.7333333333333,"y":-1554.857142857143,"z":-2873.3333333333335,"a95":"0.99","info":"27/06/2015 at 17:26:15"},{"visible":true,"include":true,"step":"50.0","x":-168.6,"y":-1788.3809523809523,"z":-2795.3333333333335,"a95":"0.99","info":"27/06/2015 at 17:26:15"},{"visible":true,"include":true,"step":"55.0","x":83.74285714285713,"y":-1750.952380952381,"z":-2926.9523809523807,"a95":"0.99","info":"27/06/2015 at 17:26:15"},{"visible":true,"include":true,"step":"60.0","x":51.20666666666666,"y":-1934.1904761904761,"z":-2987.5238095238096,"a95":"0.99","info":"27/06/2015 at 17:26:15"},{"visible":true,"include":true,"step":"65.0","x":45.15238095238095,"y":-2149.1428571428573,"z":-2889.5238095238096,"a95":"0.99","info":"27/06/2015 at 17:26:15"},{"visible":true,"include":true,"step":"70.0","x":93.03619047619047,"y":-2061.0476190476193,"z":-2771.0476190476193,"a95":"0.99","info":"27/06/2015 at 17:26:15"},{"visible":true,"include":false,"step":"80.0","x":1257.6190476190477,"y":-2104.285714285714,"z":-3076.7619047619046,"a95":"0.99","info":"27/06/2015 at 17:26:15"}],"demagType":"Unknown","patch":1.1,"format":"Unknown","strat":null},{"version":"v1.1.0","exported":"2017-05-22T12:48:34.072Z","info":"0","GEO":[{"dec":330.2940770155142,"inc":-27.155134310096745,"MAD":5.120899984881819,"cm":[5.684341886080802e-14,-1.7053025658242404e-13,0],"intensity":15527.438789609809,"type":"GC","origin":false,"forced":true,"remark":"","nSteps":7,"minStep":"100","maxStep":"280","steps":["100","150","180","210","230","250","280"],"group":"None","version":"v1.1.0"}],"TECT":[{"dec":151.0055019396617,"inc":-11.548991129406605,"MAD":5.120899984880037,"cm":[5.684341886080801e-13,-3.979039320256561e-13,8.526512829121202e-14],"intensity":15527.43878960981,"type":"GC","origin":false,"forced":true,"remark":"","nSteps":7,"minStep":"100","maxStep":"280","steps":["100","150","180","210","230","250","280"],"group":"None","version":"v1.1.0"}],"interpreted":true,"name":"SS35.06A","coreAzi":218,"coreDip":34,"bedStrike":68,"bedDip":39,"data":[{"visible":true,"include":false,"step":"20","x":-15950.761904761905,"y":1698.1904761904761,"z":-3459.1428571428573,"a95":"1.5","info":"\"15-06-15\" at \"11:15\""},{"visible":true,"include":true,"step":"100","x":-10527.42857142857,"y":535.9047619047619,"z":-2912.285714285714,"a95":"1.6","info":"\"15-06-15\" at \"14:19\""},{"visible":true,"include":true,"step":"150","x":-7369.238095238095,"y":-490.4761904761905,"z":-3356.095238095238,"a95":"1.7","info":"\"15-06-16\" at \"09:18\""},{"visible":true,"include":true,"step":"180","x":-6148.952380952381,"y":-693.4285714285714,"z":-3433.4285714285716,"a95":"1.8","info":"\"15-06-16\" at \"12:24\""},{"visible":true,"include":true,"step":"210","x":-5028.380952380952,"y":-1051.3333333333333,"z":-3028.8571428571427,"a95":"1.8","info":"\"15-06-17\" at \"16:06\""},{"visible":true,"include":true,"step":"230","x":-4967.523809523809,"y":-916.2857142857143,"z":-3080.4761904761904,"a95":"1.8","info":"\"15-06-17\" at \"19:13\""},{"visible":true,"include":true,"step":"250","x":-4149.9047619047615,"y":-936.6666666666666,"z":-3142.190476190476,"a95":"1.9","info":"\"15-06-17\" at \"22:23\""},{"visible":true,"include":true,"step":"280","x":-4035.1428571428573,"y":-648.0952380952381,"z":-2474.7619047619046,"a95":"1.9","info":"\"15-06-18\" at \"08:02\""},{"visible":true,"include":false,"step":"300","x":-4033.5238095238096,"y":-629.4285714285714,"z":-2368.190476190476,"a95":"1.9","info":"\"15-06-18\" at \"12:01\""},{"visible":true,"include":false,"step":"320","x":-3688.3809523809523,"y":-709.3333333333334,"z":-2724.6666666666665,"a95":"1.9","info":"\"15-06-18\" at \"15:01\""},{"visible":true,"include":false,"step":"340","x":-3693.809523809524,"y":-635.3333333333334,"z":-2182.190476190476,"a95":"1.8","info":"\"15-06-19\" at \"10:35\""},{"visible":true,"include":false,"step":"360","x":-3566.190476190476,"y":-404.2857142857143,"z":-1610.6666666666667,"a95":"1.9","info":"\"15-06-19\" at \"14:16\""},{"visible":true,"include":false,"step":"390","x":-3608.095238095238,"y":-343.04761904761904,"z":-1658,"a95":"1.8","info":"\"15-06-20\" at \"10:28\""},{"visible":true,"include":false,"step":"420","x":-3769.5238095238096,"y":-646.952380952381,"z":-1370.952380952381,"a95":"1.7","info":"\"15-06-20\" at \"14:02\""},{"visible":true,"include":false,"step":"450","x":-3551.3333333333335,"y":-39.904761904761905,"z":-1888.3809523809523,"a95":"1.7","info":"\"15-06-21\" at \"17:21\""},{"visible":true,"include":false,"step":"470","x":-3543.809523809524,"y":32.666666666666664,"z":-1551.904761904762,"a95":"1.8","info":"\"15-06-21\" at \"20:31\""},{"visible":true,"include":false,"step":"490","x":-3821.809523809524,"y":-153.8095238095238,"z":-1015.7142857142857,"a95":"1.8","info":"\"15-06-22\" at \"14:40\""},{"visible":true,"include":false,"step":"510","x":-3620.8571428571427,"y":-294.76190476190476,"z":-1435.4285714285713,"a95":"1.8","info":"\"15-06-29\" at \"10:07\""},{"visible":true,"include":false,"step":"540","x":-3613.0476190476193,"y":302.4761904761905,"z":-1441.8095238095239,"a95":"1.7","info":"\"15-06-29\" at \"13:22\""},{"visible":true,"include":false,"step":"560","x":-3700,"y":-570.2857142857143,"z":-649.9047619047619,"a95":"1.7","info":"\"15-06-30\" at \"06:42\""},{"visible":true,"include":false,"step":"580","x":-3761.904761904762,"y":-458.76190476190476,"z":-147.04761904761904,"a95":"1.5","info":"\"15-06-30\" at \"10:20\""}],"demagType":"Unknown","patch":1.1,"format":"Unknown","strat":null},{"version":"v1.1.0","exported":"2017-05-22T12:48:34.072Z","info":"1","GEO":[{"dec":336.221743132101,"inc":-29.689762177809335,"MAD":4.5174582530964225,"cm":[-2.5579538487363607e-13,1.1368683772161603e-13,0],"intensity":9367.83621429562,"type":"GC","origin":false,"forced":true,"remark":"","nSteps":3,"minStep":"60.0","maxStep":"70.0","steps":["60.0","65.0","70.0"],"group":"None","version":"v1.1.0"}],"TECT":[{"dec":156.43469596686487,"inc":-9.29495151087044,"MAD":4.517458253093837,"cm":[2.8421709430404007e-13,-2.2737367544323206e-13,-1.7053025658242404e-13],"intensity":9367.83621429562,"type":"GC","origin":false,"forced":true,"remark":"","nSteps":3,"minStep":"60.0","maxStep":"70.0","steps":["60.0","65.0","70.0"],"group":"None","version":"v1.1.0"}],"interpreted":true,"name":"SS35.07B","coreAzi":219,"coreDip":33,"bedStrike":68,"bedDip":39,"data":[{"visible":true,"include":false,"step":"0.0","x":-10343.809523809523,"y":1397.2380952380952,"z":-1674.2857142857142,"a95":"0.99","info":"27/06/2015 at 22:25:17"},{"visible":true,"include":false,"step":"10.0","x":-7281.619047619048,"y":478.5142857142857,"z":-2077.904761904762,"a95":"0.99","info":"27/06/2015 at 22:25:17"},{"visible":true,"include":false,"step":"15.0","x":-6073.238095238095,"y":-738.8285714285714,"z":-3207.1428571428573,"a95":"0.99","info":"27/06/2015 at 22:25:17"},{"visible":true,"include":false,"step":"20.0","x":-4868.380952380952,"y":-1030.4761904761904,"z":-3326.5714285714284,"a95":"0.99","info":"27/06/2015 at 22:25:17"},{"visible":true,"include":false,"step":"23.0","x":-4303.9047619047615,"y":-1210.952380952381,"z":-3486.9523809523807,"a95":"0.99","info":"27/06/2015 at 22:25:17"},{"visible":true,"include":false,"step":"25.0","x":-3866.5714285714284,"y":-1238.1904761904761,"z":-3508.190476190476,"a95":"0.99","info":"27/06/2015 at 22:25:17"},{"visible":true,"include":false,"step":"30.0","x":-3279.6190476190477,"y":-1294.6666666666667,"z":-3575.714285714286,"a95":"0.99","info":"27/06/2015 at 22:25:17"},{"visible":true,"include":false,"step":"33.0","x":-3005.714285714286,"y":-1707.4285714285713,"z":-3556.5714285714284,"a95":"0.99","info":"27/06/2015 at 22:25:17"},{"visible":true,"include":false,"step":"35.0","x":-2960.5714285714284,"y":-1691.3333333333333,"z":-3341.4285714285716,"a95":"0.99","info":"27/06/2015 at 22:25:17"},{"visible":true,"include":false,"step":"40.0","x":-2430.095238095238,"y":-1747.5238095238096,"z":-3511.1428571428573,"a95":"0.99","info":"27/06/2015 at 22:25:17"},{"visible":true,"include":false,"step":"45.0","x":-2164.5714285714284,"y":-1855.4285714285713,"z":-3795.809523809524,"a95":"0.99","info":"27/06/2015 at 22:25:17"},{"visible":true,"include":false,"step":"50.0","x":-2158.9523809523807,"y":-1903.142857142857,"z":-3486.9523809523807,"a95":"0.99","info":"27/06/2015 at 22:25:17"},{"visible":true,"include":false,"step":"55.0","x":-1667.5238095238096,"y":-1734.095238095238,"z":-3557.1428571428573,"a95":"0.99","info":"27/06/2015 at 22:25:17"},{"visible":true,"include":true,"step":"60.0","x":-1962.1904761904761,"y":-2246.9523809523807,"z":-3482.190476190476,"a95":"0.99","info":"27/06/2015 at 22:25:17"},{"visible":true,"include":true,"step":"65.0","x":-1836.5714285714287,"y":-2224.6666666666665,"z":-3508.285714285714,"a95":"0.99","info":"27/06/2015 at 22:25:17"},{"visible":true,"include":true,"step":"70.0","x":-1410.7619047619048,"y":-2601.0476190476193,"z":-3789.4285714285716,"a95":"0.99","info":"27/06/2015 at 22:25:17"},{"visible":true,"include":false,"step":"80.0","x":-1714.4761904761904,"y":-3201.2380952380954,"z":-3166.190476190476,"a95":"0.99","info":"27/06/2015 at 22:25:17"}],"demagType":"Unknown","patch":1.1,"format":"Unknown","strat":null},{"version":"v1.1.0","exported":"2017-05-22T12:48:34.072Z","info":"0","GEO":[{"dec":286.6882039468536,"inc":-3.5800890155955276,"MAD":3.062506367363763,"cm":[-1.1368683772161603e-13,3.979039320256561e-13,0],"intensity":13868.655860070916,"type":"GC","origin":false,"forced":true,"remark":"","nSteps":5,"minStep":"100","maxStep":"230","steps":["100","150","180","210","230"],"group":"None","version":"v1.1.0"}],"TECT":[{"dec":289.97388346566095,"inc":-4.148215182996483,"MAD":3.062506367363926,"cm":[-5.684341886080802e-14,2.5579538487363607e-13,0],"intensity":13868.655860070916,"type":"GC","origin":false,"forced":true,"remark":"","nSteps":5,"minStep":"100","maxStep":"230","steps":["100","150","180","210","230"],"group":"None","version":"v1.1.0"}],"interpreted":true,"name":"SS35.12A","coreAzi":258,"coreDip":30,"bedStrike":109,"bedDip":46,"data":[{"visible":true,"include":false,"step":"20","x":-11677.333333333334,"y":11775.714285714286,"z":891.4285714285714,"a95":"1.4","info":"\"15-06-15\" at \"11:16\""},{"visible":true,"include":true,"step":"100","x":-4763.333333333333,"y":8105.428571428572,"z":-2129.809523809524,"a95":"1.6","info":"\"15-06-15\" at \"14:21\""},{"visible":true,"include":true,"step":"150","x":-2141.809523809524,"y":6181.9047619047615,"z":-2735.6190476190477,"a95":"1.6","info":"\"15-06-16\" at \"09:20\""},{"visible":true,"include":true,"step":"180","x":-1210.1904761904761,"y":5419.428571428572,"z":-2527.6190476190477,"a95":"1.6","info":"\"15-06-16\" at \"12:25\""},{"visible":true,"include":true,"step":"210","x":-78,"y":4306.476190476191,"z":-2887.2380952380954,"a95":"1.7","info":"\"15-06-17\" at \"16:08\""},{"visible":true,"include":true,"step":"230","x":518.7619047619048,"y":4052.9523809523807,"z":-3017.714285714286,"a95":"1.9","info":"\"15-06-17\" at \"19:14\""},{"visible":true,"include":false,"step":"250","x":-154.76190476190476,"y":3739.0476190476193,"z":-1623.904761904762,"a95":"1.8","info":"\"15-06-17\" at \"22:28\""},{"visible":true,"include":false,"step":"280","x":267.8095238095238,"y":3598.7619047619046,"z":-2400.095238095238,"a95":"1.8","info":"\"15-06-18\" at \"08:04\""},{"visible":true,"include":false,"step":"300","x":-191.8095238095238,"y":3356,"z":-2685.4285714285716,"a95":"2","info":"\"15-06-18\" at \"12:02\""},{"visible":true,"include":false,"step":"320","x":-857.5238095238095,"y":3566.8571428571427,"z":-2030.952380952381,"a95":"1.8","info":"\"15-06-18\" at \"15:03\""},{"visible":true,"include":false,"step":"340","x":-206.47619047619048,"y":3244.3809523809523,"z":-2014.095238095238,"a95":"1.9","info":"\"15-06-19\" at \"10:37\""},{"visible":true,"include":false,"step":"360","x":-162.85714285714286,"y":3379.809523809524,"z":-2134,"a95":"1.9","info":"\"15-06-19\" at \"14:20\""},{"visible":true,"include":false,"step":"390","x":-777.1428571428571,"y":3389.4285714285716,"z":-1880.3809523809523,"a95":"1.9","info":"\"15-06-20\" at \"10:30\""},{"visible":true,"include":false,"step":"420","x":-1065.5238095238096,"y":2712.7619047619046,"z":-1435.904761904762,"a95":"1.5","info":"\"15-06-20\" at \"14:05\""},{"visible":true,"include":false,"step":"450","x":-1215.4285714285713,"y":2957.2380952380954,"z":-1501.047619047619,"a95":"1.7","info":"\"15-06-21\" at \"17:23\""},{"visible":true,"include":false,"step":"470","x":-1478.952380952381,"y":2208.095238095238,"z":-994.7619047619048,"a95":"1.8","info":"\"15-06-21\" at \"20:33\""},{"visible":true,"include":false,"step":"490","x":-912.0952380952381,"y":2905.4285714285716,"z":-1502.3809523809523,"a95":"1.6","info":"\"15-06-22\" at \"14:42\""},{"visible":true,"include":false,"step":"510","x":-1432.6666666666667,"y":3110,"z":-898.5714285714286,"a95":"1.8","info":"\"15-06-29\" at \"10:09\""},{"visible":true,"include":false,"step":"540","x":-732.5714285714286,"y":2887.3333333333335,"z":-758.0952380952381,"a95":"1.6","info":"\"15-06-29\" at \"13:24\""},{"visible":true,"include":false,"step":"560","x":-946.7619047619048,"y":1784.1904761904761,"z":-1374,"a95":"2.2","info":"\"15-06-30\" at \"06:43\""},{"visible":true,"include":false,"step":"580","x":-1397.047619047619,"y":2398.095238095238,"z":-158.57142857142858,"a95":"1.5","info":"\"15-06-30\" at \"10:22\""}],"demagType":"Unknown","patch":1.1,"format":"Unknown","strat":null},{"version":"v1.1.0","exported":"2017-05-22T12:48:34.072Z","info":"2","GEO":[{"dec":99.6219422145328,"inc":-1.096888136783683,"MAD":5.7162835710322035,"cm":[-5.684341886080802e-14,2.1316282072803006e-14,0],"intensity":7404.98656502553,"type":"GC","origin":false,"forced":true,"remark":"","nSteps":10,"minStep":"15.0","maxStep":"50.0","steps":["15.0","20.0","23.0","25.0","30.0","33.0","35.0","40.0","45.0","50.0"],"group":"None","version":"v1.1.0"}],"TECT":[{"dec":281.6671264060981,"inc":-5.963544120960803,"MAD":5.716283571032093,"cm":[-8.526512829121202e-14,4.334310688136611e-13,-3.197442310920451e-14],"intensity":7404.98656502553,"type":"GC","origin":false,"forced":true,"remark":"","nSteps":10,"minStep":"15.0","maxStep":"50.0","steps":["15.0","20.0","23.0","25.0","30.0","33.0","35.0","40.0","45.0","50.0"],"group":"None","version":"v1.1.0"}],"interpreted":true,"name":"SS35.13B","coreAzi":261,"coreDip":27,"bedStrike":109,"bedDip":46,"data":[{"visible":true,"include":false,"step":"0.0","x":-4104.190476190476,"y":7895.142857142857,"z":798.8190476190476,"a95":"0.99","info":"27/06/2015 at 22:25:17"},{"visible":true,"include":false,"step":"10.0","x":-1707.142857142857,"y":5760.476190476191,"z":11.098095238095238,"a95":"0.99","info":"27/06/2015 at 22:25:17"},{"visible":true,"include":true,"step":"15.0","x":-675.8,"y":4319.9047619047615,"z":-1181.8095238095239,"a95":"0.99","info":"27/06/2015 at 22:25:17"},{"visible":true,"include":true,"step":"20.0","x":164.9904761904762,"y":3745.809523809524,"z":-1580.3809523809523,"a95":"0.99","info":"27/06/2015 at 22:25:17"},{"visible":true,"include":true,"step":"23.0","x":470.16190476190474,"y":3431.714285714286,"z":-1673.6190476190477,"a95":"0.99","info":"27/06/2015 at 22:25:17"},{"visible":true,"include":true,"step":"25.0","x":877.3238095238095,"y":3336.4761904761904,"z":-1653.047619047619,"a95":"0.99","info":"27/06/2015 at 22:25:17"},{"visible":true,"include":true,"step":"30.0","x":1344.5714285714287,"y":3197.2380952380954,"z":-1776.3809523809523,"a95":"0.99","info":"27/06/2015 at 22:25:17"},{"visible":true,"include":true,"step":"33.0","x":1545.2380952380952,"y":2804.4761904761904,"z":-1914.3809523809523,"a95":"0.99","info":"27/06/2015 at 22:25:17"},{"visible":true,"include":true,"step":"35.0","x":1769.7142857142858,"y":2847.809523809524,"z":-1759.7142857142858,"a95":"0.99","info":"27/06/2015 at 22:25:17"},{"visible":true,"include":true,"step":"40.0","x":2034.1904761904761,"y":2765.0476190476193,"z":-1877.2380952380952,"a95":"0.99","info":"27/06/2015 at 22:25:17"},{"visible":true,"include":true,"step":"45.0","x":2023.8095238095239,"y":2275.904761904762,"z":-2014.3809523809523,"a95":"0.99","info":"27/06/2015 at 22:25:17"},{"visible":true,"include":true,"step":"50.0","x":2103.2380952380954,"y":2287.4285714285716,"z":-1841.3333333333333,"a95":"0.99","info":"27/06/2015 at 22:25:17"},{"visible":true,"include":false,"step":"55.0","x":2614.9523809523807,"y":2294.5714285714284,"z":-1858.4761904761904,"a95":"0.99","info":"27/06/2015 at 22:25:17"},{"visible":true,"include":false,"step":"60.0","x":2408.8571428571427,"y":1864.857142857143,"z":-2047.8095238095239,"a95":"0.99","info":"27/06/2015 at 22:25:17"},{"visible":true,"include":false,"step":"65.0","x":2516.095238095238,"y":1853.047619047619,"z":-2182.190476190476,"a95":"0.99","info":"27/06/2015 at 22:25:17"},{"visible":true,"include":false,"step":"70.0","x":2712.4761904761904,"y":1735.047619047619,"z":-2343.3333333333335,"a95":"0.99","info":"27/06/2015 at 22:25:17"},{"visible":true,"include":false,"step":"80.0","x":2786.190476190476,"y":1266.095238095238,"z":-2200.6666666666665,"a95":"0.99","info":"27/06/2015 at 22:25:17"}],"demagType":"Unknown","patch":1.1,"format":"Unknown","strat":null},{"version":"v1.1.0","exported":"2017-05-22T12:48:34.072Z","info":"0","GEO":[{"dec":29.01297326454619,"inc":-28.659247242994102,"MAD":9.902332571616052,"cm":[-3.730349362740526e-13,-3.126388037344441e-13,0],"intensity":23407.491668548173,"type":"GC","origin":false,"forced":true,"remark":"","nSteps":7,"minStep":"100","maxStep":"300","steps":["100","150","180","210","250","280","300"],"group":"None","version":"v1.1.0"}],"TECT":[{"dec":204.9638169465129,"inc":-7.2489025591961145,"MAD":9.9023325716166,"cm":[-4.973799150320701e-13,-8.526512829121202e-14,-2.8421709430404007e-13],"intensity":23407.49166854817,"type":"GC","origin":false,"forced":true,"remark":"","nSteps":7,"minStep":"100","maxStep":"300","steps":["100","150","180","210","250","280","300"],"group":"None","version":"v1.1.0"}],"interpreted":true,"name":"SS35.16A","coreAzi":291,"coreDip":8,"bedStrike":87,"bedDip":41,"data":[{"visible":true,"include":false,"step":"20","x":-30563.619047619046,"y":18922.571428571428,"z":7204.285714285715,"a95":"1.5","info":"\"15-06-15\" at \"11:18\""},{"visible":true,"include":true,"step":"100","x":-18417.238095238095,"y":10568.095238095239,"z":1706.7619047619048,"a95":"1.5","info":"\"15-06-15\" at \"14:22\""},{"visible":true,"include":true,"step":"150","x":-11041.42857142857,"y":5345.047619047619,"z":610.6666666666666,"a95":"1.5","info":"\"15-06-16\" at \"09:21\""},{"visible":true,"include":true,"step":"180","x":-10095.333333333334,"y":4978.761904761905,"z":-1000.0952380952381,"a95":"1.5","info":"\"15-06-16\" at \"12:27\""},{"visible":true,"include":true,"step":"210","x":-5741.142857142857,"y":2370.095238095238,"z":-992.8571428571429,"a95":"1.6","info":"\"15-06-17\" at \"16:09\""},{"visible":false,"include":false,"step":"230","x":-3843.714285714286,"y":3626.7619047619046,"z":-2199.3333333333335,"a95":"1.9","info":"\"15-06-17\" at \"19:17\""},{"visible":true,"include":true,"step":"250","x":-2957.3333333333335,"y":1148.3809523809523,"z":-1849.8095238095239,"a95":"2.3","info":"\"15-06-17\" at \"22:31\""},{"visible":true,"include":true,"step":"280","x":-2742.285714285714,"y":933.2380952380952,"z":-3022.8571428571427,"a95":"2.2","info":"\"15-06-18\" at \"08:07\""},{"visible":true,"include":true,"step":"300","x":-1995.6190476190477,"y":868,"z":-2371.3333333333335,"a95":"2.3","info":"\"15-06-18\" at \"12:04\""},{"visible":true,"include":false,"step":"320","x":-2384.4761904761904,"y":811.7142857142857,"z":-2050.190476190476,"a95":"2.1","info":"\"15-06-18\" at \"15:05\""},{"visible":true,"include":false,"step":"340","x":-2251.4285714285716,"y":731.5238095238095,"z":-1701.5238095238096,"a95":"2.1","info":"\"15-06-19\" at \"10:39\""},{"visible":true,"include":false,"step":"360","x":-1944.1904761904761,"y":755.047619047619,"z":-2572.8571428571427,"a95":"2.5","info":"\"15-06-19\" at \"14:22\""},{"visible":true,"include":false,"step":"390","x":-2430.3809523809523,"y":658.7619047619048,"z":-1336.1904761904761,"a95":"1.9","info":"\"15-06-20\" at \"10:32\""},{"visible":true,"include":false,"step":"420","x":-2685.1428571428573,"y":134.85714285714286,"z":-1824.5714285714287,"a95":"2","info":"\"15-06-20\" at \"14:08\""},{"visible":true,"include":false,"step":"450","x":-2074.7619047619046,"y":487.6190476190476,"z":-774.5714285714286,"a95":"2.1","info":"\"15-06-21\" at \"17:25\""},{"visible":true,"include":false,"step":"470","x":-1930.1904761904761,"y":-362.1904761904762,"z":-1731.2380952380952,"a95":"2","info":"\"15-06-21\" at \"20:34\""},{"visible":true,"include":false,"step":"490","x":-2027.904761904762,"y":-33.142857142857146,"z":-888.0952380952381,"a95":"2.2","info":"\"15-06-22\" at \"14:44\""},{"visible":true,"include":false,"step":"510","x":-1879.904761904762,"y":-501.04761904761904,"z":-1054.3809523809523,"a95":"2.1","info":"\"15-06-29\" at \"10:11\""},{"visible":true,"include":false,"step":"540","x":-1806.2857142857142,"y":-154.76190476190476,"z":-143.71428571428572,"a95":"2.7","info":"\"15-06-29\" at \"13:26\""},{"visible":true,"include":false,"step":"560","x":-2125.5238095238096,"y":-81.14285714285714,"z":-933.6190476190476,"a95":"2","info":"\"15-06-30\" at \"06:45\""},{"visible":true,"include":false,"step":"580","x":-733.7142857142857,"y":-679.1428571428571,"z":-190.0952380952381,"a95":"3.7","info":"\"15-06-30\" at \"10:24\""}],"demagType":"Unknown","patch":1.1,"format":"Unknown","strat":null},{"version":"v1.1.0","exported":"2017-05-22T12:48:34.072Z","info":"3","GEO":[{"dec":44.21321798861561,"inc":-24.48689501842603,"MAD":5.232674177791198,"cm":[0,-7.105427357601002e-14,0],"intensity":25325.209234063903,"type":"GC","origin":false,"forced":true,"remark":"","nSteps":12,"minStep":"10.0","maxStep":"55.0","steps":["10.0","15.0","20.0","23.0","25.0","30.0","33.0","35.0","40.0","45.0","50.0","55.0"],"group":"None","version":"v1.1.0"}],"TECT":[{"dec":219.12644276016277,"inc":-5.3214776574520215,"MAD":5.232674177791438,"cm":[7.531752999057062e-13,9.947598300641403e-14,1.7053025658242404e-13],"intensity":25325.209234063906,"type":"GC","origin":false,"forced":true,"remark":"","nSteps":12,"minStep":"10.0","maxStep":"55.0","steps":["10.0","15.0","20.0","23.0","25.0","30.0","33.0","35.0","40.0","45.0","50.0","55.0"],"group":"None","version":"v1.1.0"}],"interpreted":true,"name":"SS35.17B","coreAzi":289,"coreDip":7,"bedStrike":87,"bedDip":41,"data":[{"visible":true,"include":false,"step":"0.0","x":-27867.619047619046,"y":17641.904761904763,"z":9225.142857142857,"a95":"0.99","info":"27/06/2015 at 22:25:17"},{"visible":true,"include":true,"step":"10.0","x":-18773.333333333332,"y":11574.285714285714,"z":5537.523809523809,"a95":"0.99","info":"27/06/2015 at 22:25:17"},{"visible":true,"include":true,"step":"15.0","x":-15066.666666666666,"y":6611.428571428572,"z":631,"a95":"0.99","info":"27/06/2015 at 22:25:17"},{"visible":true,"include":true,"step":"20.0","x":-12179.047619047618,"y":4681.047619047619,"z":-552.495238095238,"a95":"0.99","info":"27/06/2015 at 22:25:17"},{"visible":true,"include":true,"step":"23.0","x":-10154.285714285714,"y":3984.9523809523807,"z":-947.9333333333333,"a95":"0.99","info":"27/06/2015 at 22:25:17"},{"visible":true,"include":true,"step":"25.0","x":-9702.857142857143,"y":3798.4761904761904,"z":-892.1619047619048,"a95":"0.99","info":"27/06/2015 at 22:25:17"},{"visible":true,"include":true,"step":"30.0","x":-8224.57142857143,"y":2668,"z":-1969.2380952380952,"a95":"0.99","info":"27/06/2015 at 22:25:17"},{"visible":true,"include":true,"step":"33.0","x":-7544.190476190476,"y":2263.904761904762,"z":-2548.3809523809523,"a95":"0.99","info":"27/06/2015 at 22:25:17"},{"visible":true,"include":true,"step":"35.0","x":-7222.666666666667,"y":1991.5238095238096,"z":-1827.7142857142858,"a95":"0.99","info":"27/06/2015 at 22:25:17"},{"visible":true,"include":true,"step":"40.0","x":-5560.952380952381,"y":1666,"z":-1929.2380952380952,"a95":"0.99","info":"27/06/2015 at 22:25:17"},{"visible":true,"include":true,"step":"45.0","x":-5149.142857142857,"y":854.2857142857143,"z":-2466.285714285714,"a95":"0.99","info":"27/06/2015 at 22:25:17"},{"visible":true,"include":true,"step":"50.0","x":-3930.285714285714,"y":1093.904761904762,"z":-1887.2380952380952,"a95":"0.99","info":"27/06/2015 at 22:25:17"},{"visible":true,"include":true,"step":"55.0","x":-3225.0476190476193,"y":578.1238095238095,"z":-2414,"a95":"0.99","info":"27/06/2015 at 22:25:17"},{"visible":true,"include":false,"step":"60.0","x":-2817.2380952380954,"y":-1210,"z":-2738.190476190476,"a95":"0.99","info":"27/06/2015 at 22:25:17"},{"visible":true,"include":false,"step":"65.0","x":-1759.4285714285713,"y":73.1704761904762,"z":-2772.6666666666665,"a95":"0.99","info":"27/06/2015 at 22:25:17"},{"visible":true,"include":false,"step":"70.0","x":-1567.047619047619,"y":-614.7142857142857,"z":-3199.6190476190477,"a95":"0.99","info":"27/06/2015 at 22:25:17"},{"visible":true,"include":false,"step":"80.0","x":-3489.1428571428573,"y":-1390.7619047619048,"z":-3983.3333333333335,"a95":"0.99","info":"27/06/2015 at 22:25:17"}],"demagType":"Unknown","patch":1.1,"format":"Unknown","strat":null},{"version":"v1.1.0","exported":"2017-05-22T12:48:34.072Z","info":"0","GEO":[{"dec":87.70102544973741,"inc":-13.055385634861047,"MAD":14.310516563025375,"cm":[-2.8421709430404007e-13,5.258016244624741e-13,0],"intensity":43461.360077247606,"type":"GC","origin":false,"forced":true,"remark":"","nSteps":8,"minStep":"100","maxStep":"320","steps":["100","150","180","210","250","280","300","320"],"group":"None","version":"v1.1.0"}],"TECT":[{"dec":78.86703066923064,"inc":-10.270919785873716,"MAD":14.310516563025255,"cm":[-1.7053025658242404e-13,-1.4210854715202004e-13,8.526512829121202e-14],"intensity":43461.360077247606,"type":"GC","origin":false,"forced":true,"remark":"","nSteps":8,"minStep":"100","maxStep":"320","steps":["100","150","180","210","250","280","300","320"],"group":"None","version":"v1.1.0"}],"interpreted":true,"name":"SS35.20A","coreAzi":290,"coreDip":12,"bedStrike":87,"bedDip":41,"data":[{"visible":true,"include":false,"step":"20","x":-54536,"y":36217.619047619046,"z":18906.47619047619,"a95":"1.6","info":"\"15-06-15\" at \"11:21\""},{"visible":true,"include":true,"step":"100","x":-34094.95238095238,"y":16174.761904761905,"z":4717.809523809524,"a95":"1.5","info":"\"15-06-15\" at \"14:25\""},{"visible":true,"include":true,"step":"150","x":-23296.761904761905,"y":7340.476190476191,"z":2825.5238095238096,"a95":"1.5","info":"\"15-06-16\" at \"09:23\""},{"visible":true,"include":true,"step":"180","x":-21708.85714285714,"y":6960.380952380952,"z":1120.857142857143,"a95":"1.4","info":"\"15-06-16\" at \"12:29\""},{"visible":true,"include":true,"step":"210","x":-14327.333333333334,"y":1540.095238095238,"z":2000.5714285714287,"a95":"1.6","info":"\"15-06-17\" at \"16:12\""},{"visible":false,"include":false,"step":"230","x":-11247.333333333334,"y":5367.047619047619,"z":-2142.5714285714284,"a95":"1.6","info":"\"15-06-17\" at \"19:18\""},{"visible":true,"include":true,"step":"250","x":-10687.238095238095,"y":-1570.095238095238,"z":-191.42857142857142,"a95":"2","info":"\"15-06-17\" at \"22:34\""},{"visible":true,"include":true,"step":"280","x":-9302.47619047619,"y":-2765.904761904762,"z":-2126.190476190476,"a95":"2","info":"\"15-06-18\" at \"08:09\""},{"visible":true,"include":true,"step":"300","x":-5646.285714285715,"y":-716.952380952381,"z":-2046.1904761904761,"a95":"2.2","info":"\"15-06-18\" at \"12:06\""},{"visible":true,"include":true,"step":"320","x":-6849.142857142857,"y":-1979.904761904762,"z":-1404.6666666666667,"a95":"1.9","info":"\"15-06-18\" at \"15:07\""},{"visible":true,"include":false,"step":"340","x":-6454.761904761905,"y":-1232.1904761904761,"z":-1028.095238095238,"a95":"1.8","info":"\"15-06-19\" at \"10:43\""},{"visible":true,"include":false,"step":"360","x":-6249.714285714285,"y":-1762.5714285714287,"z":-1531.904761904762,"a95":"2","info":"\"15-06-19\" at \"14:23\""},{"visible":true,"include":false,"step":"390","x":-6177.714285714285,"y":-1472.095238095238,"z":-1991.142857142857,"a95":"1.9","info":"\"15-06-20\" at \"10:34\""},{"visible":true,"include":false,"step":"420","x":-6735.047619047619,"y":-1827.5238095238096,"z":-1194.095238095238,"a95":"1.9","info":"\"15-06-20\" at \"14:10\""},{"visible":true,"include":false,"step":"450","x":-6003.333333333333,"y":-1462.2857142857142,"z":-1743.142857142857,"a95":"1.7","info":"\"15-06-21\" at \"17:28\""},{"visible":true,"include":false,"step":"470","x":-5659.428571428572,"y":-3284.095238095238,"z":-2585.809523809524,"a95":"1.8","info":"\"15-06-21\" at \"20:36\""},{"visible":true,"include":false,"step":"490","x":-5445.333333333333,"y":-2737.5238095238096,"z":-1769.3333333333333,"a95":"1.8","info":"\"15-06-22\" at \"14:45\""},{"visible":true,"include":false,"step":"510","x":-6146.190476190476,"y":-2514.8571428571427,"z":-2052.4761904761904,"a95":"1.8","info":"\"15-06-29\" at \"10:12\""},{"visible":true,"include":false,"step":"540","x":-4601.238095238095,"y":-1175.7142857142858,"z":-1038.095238095238,"a95":"1.8","info":"\"15-06-29\" at \"13:28\""},{"visible":true,"include":false,"step":"560","x":-3827.714285714286,"y":-2574.4761904761904,"z":-2509.3333333333335,"a95":"1.9","info":"\"15-06-30\" at \"06:46\""},{"visible":true,"include":false,"step":"580","x":-4487.238095238095,"y":161.33333333333334,"z":1473.6190476190477,"a95":"2.2","info":"\"15-06-30\" at \"10:26\""}],"demagType":"Unknown","patch":1.1,"format":"Unknown","strat":null},{"version":"v1.1.0","exported":"2017-05-22T12:48:34.072Z","info":"4","GEO":[{"dec":64.48534045756332,"inc":-10.215253810253687,"MAD":9.067027265824182,"cm":[1.4210854715202004e-14,6.323830348264892e-13,0],"intensity":59616.27740924499,"type":"GC","origin":false,"forced":true,"remark":"","nSteps":12,"minStep":"10.0","maxStep":"55.0","steps":["10.0","15.0","20.0","23.0","25.0","30.0","33.0","35.0","40.0","45.0","50.0","55.0"],"group":"None","version":"v1.1.0"}],"TECT":[{"dec":243.21137253444817,"inc":-6.510800095072292,"MAD":9.067027265823885,"cm":[6.821210263296962e-13,1.2363443602225743e-12,1.1368683772161603e-13],"intensity":59616.27740924499,"type":"GC","origin":false,"forced":true,"remark":"","nSteps":12,"minStep":"10.0","maxStep":"55.0","steps":["10.0","15.0","20.0","23.0","25.0","30.0","33.0","35.0","40.0","45.0","50.0","55.0"],"group":"None","version":"v1.1.0"}],"interpreted":true,"name":"SS35.20B","coreAzi":290,"coreDip":12,"bedStrike":87,"bedDip":41,"data":[{"visible":true,"include":false,"step":"0.0","x":-59430.47619047619,"y":37134.28571428572,"z":31327.619047619046,"a95":"0.99","info":"27/06/2015 at 22:25:17"},{"visible":true,"include":true,"step":"10.0","x":-38063.80952380953,"y":23582.85714285714,"z":22200,"a95":"0.99","info":"27/06/2015 at 22:25:17"},{"visible":true,"include":true,"step":"15.0","x":-31228.571428571428,"y":14180,"z":12190.47619047619,"a95":"0.99","info":"27/06/2015 at 22:25:17"},{"visible":true,"include":true,"step":"20.0","x":-25251.428571428572,"y":11124.761904761905,"z":8837.619047619048,"a95":"0.99","info":"27/06/2015 at 22:25:17"},{"visible":true,"include":true,"step":"23.0","x":-22557.14285714286,"y":9073.714285714286,"z":7527.047619047619,"a95":"0.99","info":"27/06/2015 at 22:25:17"},{"visible":true,"include":true,"step":"25.0","x":-21132.380952380954,"y":7887.9047619047615,"z":7331.047619047619,"a95":"0.99","info":"27/06/2015 at 22:25:17"},{"visible":true,"include":true,"step":"30.0","x":-17533.333333333332,"y":6803.333333333333,"z":5830.571428571428,"a95":"0.99","info":"27/06/2015 at 22:25:17"},{"visible":true,"include":true,"step":"33.0","x":-16241.904761904761,"y":5445.714285714285,"z":4400.952380952381,"a95":"0.99","info":"27/06/2015 at 22:25:17"},{"visible":true,"include":true,"step":"35.0","x":-15611.42857142857,"y":4620.952380952381,"z":4862.476190476191,"a95":"0.99","info":"27/06/2015 at 22:25:17"},{"visible":true,"include":true,"step":"40.0","x":-13971.42857142857,"y":4681.238095238095,"z":3842.3809523809523,"a95":"0.99","info":"27/06/2015 at 22:25:17"},{"visible":true,"include":true,"step":"45.0","x":-12141.904761904761,"y":2816.3809523809523,"z":2640.190476190476,"a95":"0.99","info":"27/06/2015 at 22:25:17"},{"visible":true,"include":true,"step":"50.0","x":-11297.142857142857,"y":1875.5238095238096,"z":2887.0476190476193,"a95":"0.99","info":"27/06/2015 at 22:25:17"},{"visible":true,"include":true,"step":"55.0","x":-10180.952380952382,"y":2254.4761904761904,"z":1442.6666666666667,"a95":"0.99","info":"27/06/2015 at 22:25:17"},{"visible":true,"include":false,"step":"60.0","x":-9449.714285714286,"y":-532.0095238095239,"z":1130.857142857143,"a95":"0.99","info":"27/06/2015 at 22:25:17"},{"visible":true,"include":false,"step":"65.0","x":-8560.857142857143,"y":-514.6285714285715,"z":1112.7619047619048,"a95":"0.99","info":"27/06/2015 at 22:25:17"},{"visible":true,"include":false,"step":"70.0","x":-7133.714285714285,"y":21.247619047619047,"z":50.89809523809523,"a95":"0.99","info":"27/06/2015 at 22:25:17"},{"visible":true,"include":false,"step":"80.0","x":-6771.333333333333,"y":-1941.6190476190477,"z":147.63809523809525,"a95":"0.99","info":"27/06/2015 at 22:25:17"}],"demagType":"Unknown","patch":1.1,"format":"Unknown","strat":null}]
