# Supplementary material for: Paleomagnetic constraints on the timing and distribution of Cenozoic rotations in Central and Eastern Anatolia
Source: Copernicus journal article supplement (doi:10.5194/se-9-295-2018), 2018-03-21
Supplement: Supplementary file 2 [file se-9-295-2018-supplement.zip › se-2017-66_DATA_dir files/dir files Sivas/SS37.dir]

[{"version":"v1.1.0","exported":"2017-05-22T12:43:47.838Z","volume":10.5,"added":"2017-05-22T12:43:03.400Z","format":"Utrecht","demagType":"Unknown","strat":"0","patch":1.1,"GEO":[],"TECT":[],"interpreted":false,"name":"SS37.01A","coreAzi":33,"coreDip":44,"bedStrike":270,"bedDip":36,"data":[{"visible":true,"include":false,"step":"20","x":-223.8095238095238,"y":-70.19047619047619,"z":568.3809523809524,"a95":2.4,"info":"\"15-06-15\" at \"11:40\""},{"visible":true,"include":false,"step":"100","x":-39.714285714285715,"y":-71.52380952380952,"z":190,"a95":3,"info":"\"15-06-15\" at \"14:49\""},{"visible":true,"include":false,"step":"150","x":-12.666666666666666,"y":-48.95238095238095,"z":104.95238095238095,"a95":4,"info":"\"15-06-16\" at \"09:35\""},{"visible":true,"include":false,"step":"180","x":-2.0095238095238095,"y":-25.714285714285715,"z":50,"a95":6.2,"info":"\"15-06-16\" at \"12:46\""},{"visible":true,"include":false,"step":"210","x":12.866666666666665,"y":-18.123809523809523,"z":52.171428571428564,"a95":7.4,"info":"\"15-06-17\" at \"16:49\""},{"visible":true,"include":false,"step":"230","x":0.6095238095238096,"y":-22.047619047619047,"z":30.97142857142857,"a95":11.1,"info":"\"15-06-17\" at \"19:34\""}]},{"version":"v1.1.0","exported":"2017-05-22T12:43:47.838Z","volume":10.5,"added":"2017-05-22T12:43:03.401Z","format":"Utrecht","demagType":"Unknown","strat":"7","patch":1.1,"GEO":[],"TECT":[],"interpreted":false,"name":"SS37.02B","coreAzi":39,"coreDip":40,"bedStrike":270,"bedDip":36,"data":[{"visible":true,"include":false,"step":"0.0","x":-100.4952380952381,"y":-31.053333333333335,"z":167.9714285714286,"a95":0.99,"info":"26/06/2015 at 10:49:56"},{"visible":true,"include":false,"step":"10.0","x":-61.91238095238096,"y":-27.732380952380954,"z":121.4,"a95":0.99,"info":"26/06/2015 at 10:49:56"},{"visible":true,"include":false,"step":"15.0","x":-62.69333333333333,"y":-24.388571428571428,"z":97.43809523809524,"a95":0.99,"info":"26/06/2015 at 10:49:56"},{"visible":true,"include":false,"step":"20.0","x":-22.24857142857143,"y":14.598095238095238,"z":95.4095238095238,"a95":0.99,"info":"26/06/2015 at 10:49:56"},{"visible":true,"include":false,"step":"23.0","x":-59.81809523809524,"y":-10.848571428571429,"z":86.79428571428572,"a95":0.99,"info":"26/06/2015 at 10:49:56"},{"visible":true,"include":false,"step":"25.0","x":-36.53523809523809,"y":-20.622857142857143,"z":80.05904761904762,"a95":0.99,"info":"26/06/2015 at 10:49:56"},{"visible":true,"include":false,"step":"30.0","x":-25.43809523809524,"y":-0.36852380952380953,"z":72.35904761904762,"a95":0.99,"info":"26/06/2015 at 10:49:56"},{"visible":true,"include":false,"step":"33.0","x":-25.99904761904762,"y":-9.90857142857143,"z":62.89333333333333,"a95":0.99,"info":"26/06/2015 at 10:49:56"},{"visible":true,"include":false,"step":"35.0","x":-15.844761904761905,"y":-12.718095238095238,"z":59.18095238095238,"a95":0.99,"info":"26/06/2015 at 10:49:56"},{"visible":true,"include":false,"step":"40.0","x":-0.2951142857142857,"y":-9.603809523809524,"z":54.32761904761905,"a95":0.99,"info":"26/06/2015 at 10:49:56"},{"visible":true,"include":false,"step":"45.0","x":2.7943809523809526,"y":6.52352380952381,"z":40.352380952380955,"a95":0.99,"info":"26/06/2015 at 10:49:56"},{"visible":true,"include":false,"step":"50.0","x":26.414285714285718,"y":-15.36095238095238,"z":39.99809523809524,"a95":0.99,"info":"26/06/2015 at 10:49:56"},{"visible":true,"include":false,"step":"55.0","x":5.987809523809524,"y":4.771809523809524,"z":32.75333333333334,"a95":0.99,"info":"26/06/2015 at 10:49:56"},{"visible":true,"include":false,"step":"60.0","x":3.0137142857142853,"y":16.46095238095238,"z":33.87428571428571,"a95":0.99,"info":"26/06/2015 at 10:49:56"},{"visible":true,"include":false,"step":"65.0","x":31.098095238095237,"y":-2.117714285714286,"z":63.45238095238095,"a95":0.99,"info":"26/06/2015 at 10:49:56"},{"visible":true,"include":false,"step":"70.0","x":32.01904761904762,"y":-6.167142857142856,"z":18.378095238095238,"a95":0.99,"info":"26/06/2015 at 10:49:56"},{"visible":true,"include":false,"step":"80.0","x":-45.32,"y":-26.991428571428575,"z":32.54380952380952,"a95":0.99,"info":"26/06/2015 at 10:49:56"}]},{"version":"v1.1.0","exported":"2017-05-22T12:43:47.839Z","volume":10.5,"added":"2017-05-22T12:43:03.401Z","format":"Utrecht","demagType":"Unknown","strat":"8","patch":1.1,"GEO":[],"TECT":[],"interpreted":false,"name":"SS37.03B","coreAzi":46,"coreDip":39,"bedStrike":270,"bedDip":36,"data":[{"visible":true,"include":false,"step":"0.0","x":-52.331428571428575,"y":-59.488571428571426,"z":222.15238095238095,"a95":0.99,"info":"26/06/2015 at 10:49:56"},{"visible":true,"include":false,"step":"10.0","x":-9.901904761904762,"y":-66.64571428571428,"z":172.83809523809524,"a95":0.99,"info":"26/06/2015 at 10:49:56"},{"visible":true,"include":false,"step":"15.0","x":12.827619047619047,"y":-54.06571428571429,"z":134.46666666666667,"a95":0.99,"info":"26/06/2015 at 10:49:56"},{"visible":true,"include":false,"step":"20.0","x":58.91238095238096,"y":-32.40380952380953,"z":120.03809523809525,"a95":0.99,"info":"26/06/2015 at 10:49:56"},{"visible":true,"include":false,"step":"23.0","x":25.416190476190476,"y":-21.926666666666666,"z":110.4952380952381,"a95":0.99,"info":"26/06/2015 at 10:49:56"},{"visible":true,"include":false,"step":"25.0","x":18.362857142857145,"y":-15.406666666666668,"z":90.79142857142857,"a95":0.99,"info":"26/06/2015 at 10:49:56"},{"visible":true,"include":false,"step":"30.0","x":33.639047619047616,"y":-13.66952380952381,"z":100.29523809523809,"a95":0.99,"info":"26/06/2015 at 10:49:56"},{"visible":true,"include":false,"step":"33.0","x":31.955238095238094,"y":2.8625714285714285,"z":91.00380952380952,"a95":0.99,"info":"26/06/2015 at 10:49:56"},{"visible":true,"include":false,"step":"35.0","x":37.38952380952381,"y":-23.55047619047619,"z":91.04285714285714,"a95":0.99,"info":"26/06/2015 at 10:49:56"},{"visible":true,"include":false,"step":"40.0","x":19.17047619047619,"y":-1.2673333333333334,"z":108.72380952380952,"a95":0.99,"info":"26/06/2015 at 10:49:56"},{"visible":true,"include":false,"step":"45.0","x":41.46,"y":5.219904761904762,"z":83.78761904761905,"a95":0.99,"info":"26/06/2015 at 10:49:56"},{"visible":true,"include":false,"step":"50.0","x":57.59142857142857,"y":-24.05047619047619,"z":72.60571428571428,"a95":0.99,"info":"26/06/2015 at 10:49:56"},{"visible":true,"include":false,"step":"55.0","x":23.564761904761905,"y":10.66952380952381,"z":42.61904761904762,"a95":0.99,"info":"26/06/2015 at 10:49:56"},{"visible":true,"include":false,"step":"60.0","x":38.703809523809525,"y":16.98952380952381,"z":49.99047619047619,"a95":0.99,"info":"26/06/2015 at 10:49:56"},{"visible":true,"include":false,"step":"65.0","x":62.12571428571429,"y":8.416380952380953,"z":126.26666666666667,"a95":0.99,"info":"26/06/2015 at 10:49:56"},{"visible":true,"include":false,"step":"70.0","x":74.79238095238095,"y":27.183809523809526,"z":42.37809523809524,"a95":0.99,"info":"26/06/2015 at 10:49:56"},{"visible":true,"include":false,"step":"80.0","x":109.08571428571429,"y":28.901904761904763,"z":76.38666666666666,"a95":0.99,"info":"26/06/2015 at 10:49:56"}]},{"version":"v1.1.0","exported":"2017-05-22T12:43:47.839Z","volume":10.5,"added":"2017-05-22T12:43:03.401Z","format":"Utrecht","demagType":"Unknown","strat":"0","patch":1.1,"GEO":[],"TECT":[],"interpreted":false,"name":"SS37.04A","coreAzi":47,"coreDip":38,"bedStrike":270,"bedDip":36,"data":[{"visible":true,"include":false,"step":"20","x":-239.33333333333334,"y":-43.714285714285715,"z":600.6666666666666,"a95":2.6,"info":"\"15-06-15\" at \"11:41\""},{"visible":true,"include":false,"step":"100","x":-93.04761904761905,"y":-21.904761904761905,"z":240.38095238095238,"a95":2.6,"info":"\"15-06-15\" at \"14:51\""},{"visible":true,"include":false,"step":"150","x":-22,"y":32.476190476190474,"z":123.52380952380952,"a95":3.5,"info":"\"15-06-16\" at \"09:37\""},{"visible":true,"include":false,"step":"180","x":-8.380952380952381,"y":29.80952380952381,"z":107.04761904761905,"a95":4.1,"info":"\"15-06-16\" at \"12:47\""},{"visible":true,"include":false,"step":"210","x":10.666666666666666,"y":31.61904761904762,"z":97.9047619047619,"a95":4.7,"info":"\"15-06-17\" at \"16:51\""},{"visible":true,"include":false,"step":"230","x":-14.285714285714286,"y":22.285714285714285,"z":131.52380952380952,"a95":4.7,"info":"\"15-06-17\" at \"19:35\""}]},{"version":"v1.1.0","exported":"2017-05-22T12:43:47.839Z","volume":10.5,"added":"2017-05-22T12:43:03.402Z","format":"Utrecht","demagType":"Unknown","strat":"1","patch":1.1,"GEO":[],"TECT":[],"interpreted":false,"name":"SS37.06A","coreAzi":60,"coreDip":46,"bedStrike":270,"bedDip":36,"data":[{"visible":true,"include":false,"step":"0.0","x":-98.19999999999999,"y":-68.33904761904762,"z":57.18380952380952,"a95":0.99,"info":"26/06/2015 at 16:16:20"},{"visible":true,"include":false,"step":"10.0","x":-79.41333333333334,"y":-30.065714285714286,"z":-1.3102857142857143,"a95":0.99,"info":"26/06/2015 at 16:16:20"},{"visible":true,"include":false,"step":"15.0","x":-35.02095238095238,"y":-25.237142857142857,"z":-19.876190476190477,"a95":0.99,"info":"26/06/2015 at 16:16:20"},{"visible":true,"include":false,"step":"20.0","x":-45.7552380952381,"y":-18.046666666666667,"z":-0.5244857142857143,"a95":0.99,"info":"26/06/2015 at 16:16:20"},{"visible":true,"include":false,"step":"23.0","x":-38.31333333333333,"y":-22.316190476190474,"z":-25.335238095238093,"a95":0.99,"info":"26/06/2015 at 16:16:20"},{"visible":true,"include":false,"step":"25.0","x":3.627809523809524,"y":-15.666666666666666,"z":-45.29904761904762,"a95":0.99,"info":"26/06/2015 at 16:16:20"},{"visible":true,"include":false,"step":"30.0","x":-32.38476190476191,"y":-13.42,"z":-31.54285714285714,"a95":0.99,"info":"26/06/2015 at 16:16:20"},{"visible":true,"include":false,"step":"33.0","x":-45.561904761904756,"y":-24.184761904761906,"z":-43.73809523809524,"a95":0.99,"info":"26/06/2015 at 16:16:20"},{"visible":true,"include":false,"step":"35.0","x":-21.959047619047617,"y":-19.14952380952381,"z":-6.570190476190476,"a95":0.99,"info":"26/06/2015 at 16:16:20"},{"visible":true,"include":false,"step":"40.0","x":-36.320952380952384,"y":-35.66285714285714,"z":-19.135238095238094,"a95":0.99,"info":"26/06/2015 at 16:16:20"},{"visible":true,"include":false,"step":"45.0","x":-33.272380952380956,"y":-31.185714285714283,"z":-0.5679238095238095,"a95":0.99,"info":"26/06/2015 at 16:16:20"},{"visible":true,"include":false,"step":"50.0","x":-31.624761904761904,"y":-44.364761904761906,"z":9.147238095238096,"a95":0.99,"info":"26/06/2015 at 16:16:20"},{"visible":true,"include":false,"step":"55.0","x":-9.67142857142857,"y":-41.08571428571428,"z":-20.240952380952383,"a95":0.99,"info":"26/06/2015 at 16:16:20"},{"visible":true,"include":false,"step":"60.0","x":-41.48952380952381,"y":-3.911904761904762,"z":-24.31142857142857,"a95":0.99,"info":"26/06/2015 at 16:16:20"},{"visible":true,"include":false,"step":"65.0","x":-14.619047619047619,"y":-15.831428571428571,"z":-73.30095238095238,"a95":0.99,"info":"26/06/2015 at 16:16:20"},{"visible":true,"include":false,"step":"70.0","x":-34.8,"y":-25.231428571428573,"z":-23.591428571428573,"a95":0.99,"info":"26/06/2015 at 16:16:20"},{"visible":true,"include":false,"step":"80.0","x":48.93619047619048,"y":43.923809523809524,"z":-77.8047619047619,"a95":0.99,"info":"26/06/2015 at 16:16:20"}]},{"version":"v1.1.0","exported":"2017-05-22T12:43:47.839Z","volume":10.5,"added":"2017-05-22T12:43:03.402Z","format":"Utrecht","demagType":"Unknown","strat":"2","patch":1.1,"GEO":[],"TECT":[],"interpreted":false,"name":"SS37.08A","coreAzi":40,"coreDip":39,"bedStrike":270,"bedDip":36,"data":[{"visible":true,"include":false,"step":"0.0","x":-128.7238095238095,"y":-67.2752380952381,"z":263.6095238095238,"a95":0.99,"info":"26/06/2015 at 16:16:20"},{"visible":true,"include":false,"step":"10.0","x":-42.57047619047619,"y":-105.61904761904762,"z":160.34285714285713,"a95":0.99,"info":"26/06/2015 at 16:16:20"},{"visible":true,"include":false,"step":"15.0","x":-29.884761904761906,"y":-58.290476190476184,"z":136.15238095238095,"a95":0.99,"info":"26/06/2015 at 16:16:20"},{"visible":true,"include":false,"step":"20.0","x":6.154285714285715,"y":-25.62857142857143,"z":129.16190476190476,"a95":0.99,"info":"26/06/2015 at 16:16:20"},{"visible":true,"include":false,"step":"23.0","x":-1.5592380952380953,"y":-60.3447619047619,"z":129.13333333333335,"a95":0.99,"info":"26/06/2015 at 16:16:20"},{"visible":true,"include":false,"step":"25.0","x":0.1753142857142857,"y":-33.0152380952381,"z":113.53333333333333,"a95":0.99,"info":"26/06/2015 at 16:16:20"},{"visible":true,"include":false,"step":"30.0","x":-3.2595238095238095,"y":-43.275238095238095,"z":102.4095238095238,"a95":0.99,"info":"26/06/2015 at 16:16:20"},{"visible":true,"include":false,"step":"33.0","x":43.74095238095238,"y":-27.714285714285715,"z":106.5047619047619,"a95":0.99,"info":"26/06/2015 at 16:16:20"},{"visible":true,"include":false,"step":"35.0","x":13.27142857142857,"y":-41.163809523809526,"z":129.94285714285715,"a95":0.99,"info":"26/06/2015 at 16:16:20"},{"visible":true,"include":false,"step":"40.0","x":-3.361714285714286,"y":-22.540952380952383,"z":113.33333333333333,"a95":0.99,"info":"26/06/2015 at 16:16:20"},{"visible":true,"include":false,"step":"45.0","x":8.617428571428572,"y":-31.93809523809524,"z":53.26952380952381,"a95":0.99,"info":"26/06/2015 at 16:16:20"},{"visible":true,"include":false,"step":"50.0","x":19.28,"y":-61.06666666666667,"z":90.44285714285714,"a95":0.99,"info":"26/06/2015 at 16:16:20"},{"visible":true,"include":false,"step":"55.0","x":16.843809523809526,"y":-15.853333333333333,"z":82.60380952380953,"a95":0.99,"info":"26/06/2015 at 16:16:20"},{"visible":true,"include":false,"step":"60.0","x":6.217809523809525,"y":-0.7232095238095239,"z":62.81238095238095,"a95":0.99,"info":"26/06/2015 at 16:16:20"},{"visible":true,"include":false,"step":"65.0","x":11.054285714285713,"y":-24.07904761904762,"z":93.70476190476191,"a95":0.99,"info":"26/06/2015 at 16:16:20"},{"visible":true,"include":false,"step":"70.0","x":17.883809523809525,"y":-62.25142857142857,"z":94.92,"a95":0.99,"info":"26/06/2015 at 16:16:20"},{"visible":true,"include":false,"step":"80.0","x":30.16190476190476,"y":-47.84190476190476,"z":115.54285714285714,"a95":0.99,"info":"26/06/2015 at 16:16:20"}]},{"version":"v1.1.0","exported":"2017-05-22T12:43:47.839Z","volume":10.5,"added":"2017-05-22T12:43:03.403Z","format":"Utrecht","demagType":"Unknown","strat":"0","patch":1.1,"GEO":[],"TECT":[],"interpreted":false,"name":"SS37.09A","coreAzi":22,"coreDip":33,"bedStrike":270,"bedDip":36,"data":[{"visible":true,"include":false,"step":"20","x":-699.9047619047619,"y":-237.8095238095238,"z":1022.4761904761905,"a95":2.2,"info":"\"15-06-15\" at \"11:43\""},{"visible":true,"include":false,"step":"100","x":-280.4761904761905,"y":-217.04761904761904,"z":480.2857142857143,"a95":2.3,"info":"\"15-06-15\" at \"14:53\""},{"visible":true,"include":false,"step":"150","x":-166.66666666666666,"y":-87.33333333333333,"z":125.80952380952381,"a95":3,"info":"\"15-06-16\" at \"09:38\""},{"visible":true,"include":false,"step":"180","x":-172.95238095238096,"y":-131.23809523809524,"z":65.61904761904762,"a95":2.7,"info":"\"15-06-16\" at \"12:49\""},{"visible":true,"include":false,"step":"210","x":-106.19047619047619,"y":-116.28571428571429,"z":109.80952380952381,"a95":4.2,"info":"\"15-06-17\" at \"16:52\""},{"visible":true,"include":false,"step":"230","x":-165.14285714285714,"y":-111.23809523809524,"z":99.23809523809524,"a95":3.1,"info":"\"15-06-17\" at \"19:37\""},{"visible":true,"include":false,"step":"250","x":-93.04761904761905,"y":-141.71428571428572,"z":-14.095238095238095,"a95":3.1,"info":"\"15-06-17\" at \"22:41\""},{"visible":true,"include":false,"step":"280","x":-84.76190476190476,"y":-58.19047619047619,"z":-3.238095238095238,"a95":3.8,"info":"\"15-06-18\" at \"08:19\""},{"visible":true,"include":false,"step":"300","x":-240.38095238095238,"y":-96.47619047619048,"z":103.80952380952381,"a95":3.8,"info":"\"15-06-18\" at \"12:16\""},{"visible":true,"include":false,"step":"320","x":-130.95238095238096,"y":6.476190476190476,"z":-10.380952380952381,"a95":3.8,"info":"\"15-06-19\" at \"07:30\""},{"visible":true,"include":false,"step":"340","x":-256.1904761904762,"y":20.38095238095238,"z":116.38095238095238,"a95":7,"info":"\"15-06-19\" at \"11:03\""},{"visible":true,"include":false,"step":"360","x":-199.42857142857142,"y":-176.57142857142858,"z":176.47619047619048,"a95":3.6,"info":"\"15-06-19\" at \"14:39\""},{"visible":true,"include":false,"step":"390","x":-269.04761904761904,"y":39.80952380952381,"z":-460.1904761904762,"a95":3.7,"info":"\"15-06-20\" at \"10:49\""},{"visible":true,"include":false,"step":"420","x":-23.914285714285715,"y":-70.42857142857143,"z":54.095238095238095,"a95":9.3,"info":"\"15-06-20\" at \"14:28\""}]},{"version":"v1.1.0","exported":"2017-05-22T12:43:47.839Z","volume":10.5,"added":"2017-05-22T12:43:03.403Z","format":"Utrecht","demagType":"Unknown","strat":"3","patch":1.1,"GEO":[],"TECT":[],"interpreted":false,"name":"SS37.11A","coreAzi":42,"coreDip":44,"bedStrike":270,"bedDip":36,"data":[{"visible":true,"include":false,"step":"0.0","x":-20.355238095238093,"y":30.05047619047619,"z":250.30476190476188,"a95":0.99,"info":"26/06/2015 at 16:16:20"},{"visible":true,"include":false,"step":"10.0","x":-1.8659047619047617,"y":5.107428571428572,"z":101.5047619047619,"a95":0.99,"info":"26/06/2015 at 16:16:20"},{"visible":true,"include":false,"step":"15.0","x":48.298095238095236,"y":6.724285714285715,"z":55.73904761904762,"a95":0.99,"info":"26/06/2015 at 16:16:20"},{"visible":true,"include":false,"step":"20.0","x":36.94190476190476,"y":3.148,"z":65.46285714285715,"a95":0.99,"info":"26/06/2015 at 16:16:20"},{"visible":true,"include":false,"step":"23.0","x":87.15904761904761,"y":13.21238095238095,"z":6.953047619047619,"a95":0.99,"info":"26/06/2015 at 16:16:20"},{"visible":true,"include":false,"step":"25.0","x":51.58095238095238,"y":19.824761904761903,"z":36.09142857142857,"a95":0.99,"info":"26/06/2015 at 16:16:20"},{"visible":true,"include":false,"step":"30.0","x":62.4952380952381,"y":53.63619047619047,"z":32.98952380952381,"a95":0.99,"info":"26/06/2015 at 16:16:20"},{"visible":true,"include":false,"step":"33.0","x":22.98761904761905,"y":24.05047619047619,"z":43.13809523809524,"a95":0.99,"info":"26/06/2015 at 16:16:20"},{"visible":true,"include":false,"step":"35.0","x":27.895238095238092,"y":-13.964761904761904,"z":4.010095238095238,"a95":0.99,"info":"26/06/2015 at 16:16:20"},{"visible":true,"include":false,"step":"40.0","x":6.636190476190476,"y":1.0614285714285714,"z":19.421904761904763,"a95":0.99,"info":"26/06/2015 at 16:16:20"},{"visible":true,"include":false,"step":"45.0","x":29.401904761904763,"y":-8.390380952380953,"z":-46.77047619047619,"a95":0.99,"info":"26/06/2015 at 16:16:20"},{"visible":true,"include":false,"step":"50.0","x":30.493333333333332,"y":-44.17333333333333,"z":19.418095238095237,"a95":0.99,"info":"26/06/2015 at 16:16:20"},{"visible":true,"include":false,"step":"55.0","x":77.58666666666666,"y":16.176190476190477,"z":-5.540095238095238,"a95":0.99,"info":"26/06/2015 at 16:16:20"},{"visible":true,"include":false,"step":"60.0","x":46.62285714285714,"y":48.39333333333333,"z":-6.067142857142857,"a95":0.99,"info":"26/06/2015 at 16:16:20"},{"visible":true,"include":false,"step":"65.0","x":-17.527619047619048,"y":79.36,"z":4.758095238095239,"a95":0.99,"info":"26/06/2015 at 16:16:20"},{"visible":true,"include":false,"step":"70.0","x":-44.54761904761905,"y":41.93904761904762,"z":11.715238095238096,"a95":0.99,"info":"26/06/2015 at 16:16:20"},{"visible":true,"include":false,"step":"80.0","x":44.346666666666664,"y":-8.932857142857143,"z":-47.492380952380955,"a95":0.99,"info":"26/06/2015 at 16:16:20"}]},{"version":"v1.1.0","exported":"2017-05-22T12:43:47.839Z","volume":10.5,"added":"2017-05-22T12:43:03.412Z","format":"Utrecht","demagType":"Unknown","strat":"0","patch":1.1,"GEO":[],"TECT":[],"interpreted":false,"name":"SS37.13A","coreAzi":28,"coreDip":44,"bedStrike":270,"bedDip":36,"data":[{"visible":true,"include":false,"step":"20","x":-291.3333333333333,"y":-108.95238095238095,"z":756.952380952381,"a95":2.5,"info":"\"15-06-15\" at \"11:45\""},{"visible":true,"include":false,"step":"100","x":-119.14285714285714,"y":-66,"z":261.9047619047619,"a95":2.5,"info":"\"15-06-15\" at \"14:55\""},{"visible":true,"include":false,"step":"150","x":-153.23809523809524,"y":6.190476190476191,"z":140.76190476190476,"a95":3,"info":"\"15-06-16\" at \"09:40\""},{"visible":true,"include":false,"step":"180","x":-110,"y":-12.666666666666666,"z":87.14285714285714,"a95":2.8,"info":"\"15-06-16\" at \"12:52\""},{"visible":true,"include":false,"step":"210","x":-52.76190476190476,"y":2.857142857142857,"z":93.9047619047619,"a95":3.2,"info":"\"15-06-17\" at \"16:38\""},{"visible":true,"include":false,"step":"230","x":-86.28571428571429,"y":-14,"z":121.52380952380952,"a95":3.4,"info":"\"15-06-17\" at \"19:39\""},{"visible":true,"include":false,"step":"250","x":-113.42857142857143,"y":22,"z":64.76190476190476,"a95":3.7,"info":"\"15-06-17\" at \"22:43\""},{"visible":true,"include":false,"step":"280","x":-138.38095238095238,"y":-60.095238095238095,"z":0.6666666666666666,"a95":3,"info":"\"15-06-18\" at \"08:21\""},{"visible":true,"include":false,"step":"300","x":-78.4952380952381,"y":51.523809523809526,"z":-11.266666666666666,"a95":4.2,"info":"\"15-06-18\" at \"12:19\""},{"visible":true,"include":false,"step":"320","x":-154.1904761904762,"y":45.333333333333336,"z":88,"a95":4.2,"info":"\"15-06-19\" at \"07:32\""},{"visible":true,"include":false,"step":"340","x":-179.8095238095238,"y":8.952380952380953,"z":-30.952380952380953,"a95":5.2,"info":"\"15-06-19\" at \"11:07\""},{"visible":true,"include":false,"step":"360","x":-243.8095238095238,"y":60.285714285714285,"z":-47.61904761904762,"a95":2.8,"info":"\"15-06-19\" at \"14:43\""},{"visible":true,"include":false,"step":"390","x":-269.23809523809524,"y":148.1904761904762,"z":61.61904761904762,"a95":5.1,"info":"\"15-06-20\" at \"10:51\""},{"visible":true,"include":false,"step":"420","x":-53.333333333333336,"y":-101.52380952380952,"z":160.38095238095238,"a95":6,"info":"\"15-06-20\" at \"14:32\""}]},{"version":"v1.1.0","exported":"2017-05-22T12:43:47.839Z","volume":10.5,"added":"2017-05-22T12:43:03.412Z","format":"Utrecht","demagType":"Unknown","strat":"4","patch":1.1,"GEO":[],"TECT":[],"interpreted":false,"name":"SS37.16A","coreAzi":13,"coreDip":38,"bedStrike":270,"bedDip":36,"data":[{"visible":true,"include":false,"step":"0.0","x":-95.10190476190476,"y":-128.32380952380953,"z":242.58095238095237,"a95":0.99,"info":"26/06/2015 at 16:16:20"},{"visible":true,"include":false,"step":"10.0","x":-25.097142857142856,"y":-144.59047619047618,"z":139.64761904761903,"a95":0.99,"info":"26/06/2015 at 16:16:20"},{"visible":true,"include":false,"step":"15.0","x":2.676285714285714,"y":-115.22857142857144,"z":70.32761904761905,"a95":0.99,"info":"26/06/2015 at 16:16:20"},{"visible":true,"include":false,"step":"20.0","x":-17.201904761904764,"y":-106.22857142857144,"z":81.07714285714285,"a95":0.99,"info":"26/06/2015 at 16:16:20"},{"visible":true,"include":false,"step":"23.0","x":2.185619047619048,"y":-86.05809523809523,"z":82.75047619047619,"a95":0.99,"info":"26/06/2015 at 16:16:20"},{"visible":true,"include":false,"step":"25.0","x":-7.601714285714285,"y":-128.4,"z":78.61904761904762,"a95":0.99,"info":"26/06/2015 at 16:16:20"},{"visible":true,"include":false,"step":"30.0","x":-2.404095238095238,"y":-128.14285714285714,"z":70.06380952380952,"a95":0.99,"info":"26/06/2015 at 16:16:20"},{"visible":true,"include":false,"step":"33.0","x":19.534285714285716,"y":-96.08571428571429,"z":86.42380952380952,"a95":0.99,"info":"26/06/2015 at 16:16:20"},{"visible":true,"include":false,"step":"35.0","x":5.5799047619047615,"y":-124.46666666666667,"z":23.399047619047618,"a95":0.99,"info":"26/06/2015 at 16:16:20"},{"visible":true,"include":false,"step":"40.0","x":-25.046666666666667,"y":-112.98095238095237,"z":48.74190476190476,"a95":0.99,"info":"26/06/2015 at 16:16:20"},{"visible":true,"include":false,"step":"45.0","x":18.186666666666667,"y":-58.94,"z":80.05904761904762,"a95":0.99,"info":"26/06/2015 at 16:16:20"},{"visible":true,"include":false,"step":"50.0","x":-7.045809523809523,"y":-112.05714285714285,"z":74.04571428571428,"a95":0.99,"info":"26/06/2015 at 16:16:20"},{"visible":true,"include":false,"step":"55.0","x":2.8771428571428572,"y":-26.863809523809522,"z":23.51904761904762,"a95":0.99,"info":"26/06/2015 at 16:16:20"},{"visible":true,"include":false,"step":"60.0","x":-2.2243809523809523,"y":-77.9095238095238,"z":33.92666666666667,"a95":0.99,"info":"26/06/2015 at 16:16:20"},{"visible":true,"include":false,"step":"65.0","x":42.33428571428571,"y":-110.44761904761906,"z":83.09142857142858,"a95":0.99,"info":"26/06/2015 at 16:16:20"},{"visible":true,"include":false,"step":"70.0","x":11.306666666666667,"y":-42.05904761904762,"z":70.2895238095238,"a95":0.99,"info":"26/06/2015 at 16:16:20"},{"visible":true,"include":false,"step":"80.0","x":35.126666666666665,"y":-27.497142857142858,"z":-13.94190476190476,"a95":0.99,"info":"26/06/2015 at 16:16:20"}]},{"version":"v1.1.0","exported":"2017-05-22T12:43:47.839Z","volume":10.5,"added":"2017-05-22T12:43:03.412Z","format":"Utrecht","demagType":"Unknown","strat":"0","patch":1.1,"GEO":[],"TECT":[],"interpreted":false,"name":"SS37.18A","coreAzi":12,"coreDip":40,"bedStrike":270,"bedDip":36,"data":[{"visible":true,"include":false,"step":"20","x":-202.1904761904762,"y":-46.76190476190476,"z":-108.19047619047619,"a95":4.5,"info":"\"15-06-15\" at \"11:47\""},{"visible":true,"include":false,"step":"100","x":-78.0952380952381,"y":62,"z":-120.95238095238095,"a95":4.2,"info":"\"15-06-15\" at \"14:57\""},{"visible":true,"include":false,"step":"150","x":-57.904761904761905,"y":87.23809523809524,"z":-125.33333333333333,"a95":2.8,"info":"\"15-06-16\" at \"09:42\""},{"visible":true,"include":false,"step":"180","x":-63.80952380952381,"y":79.71428571428571,"z":-144.47619047619048,"a95":3.2,"info":"\"15-06-16\" at \"12:53\""},{"visible":true,"include":false,"step":"210","x":-10,"y":82.28571428571429,"z":-99.14285714285714,"a95":3.5,"info":"\"15-06-17\" at \"16:40\""},{"visible":true,"include":false,"step":"230","x":-45.714285714285715,"y":108,"z":-72.76190476190476,"a95":3.5,"info":"\"15-06-17\" at \"19:40\""},{"visible":true,"include":false,"step":"250","x":-40.95238095238095,"y":69.23809523809524,"z":-64.38095238095238,"a95":4.1,"info":"\"15-06-17\" at \"22:44\""},{"visible":true,"include":false,"step":"280","x":-28.095238095238095,"y":50.19047619047619,"z":-154.38095238095238,"a95":3.4,"info":"\"15-06-18\" at \"08:23\""},{"visible":true,"include":false,"step":"300","x":-63.42857142857143,"y":74.66666666666667,"z":-23.142857142857142,"a95":4.3,"info":"\"15-06-18\" at \"12:21\""},{"visible":true,"include":false,"step":"320","x":-53.23809523809524,"y":76.0952380952381,"z":-54.476190476190474,"a95":4.1,"info":"\"15-06-19\" at \"07:34\""},{"visible":true,"include":false,"step":"340","x":-86.66666666666667,"y":38.57142857142857,"z":18.285714285714285,"a95":7,"info":"\"15-06-19\" at \"11:12\""},{"visible":true,"include":false,"step":"360","x":-65.52380952380952,"y":100.76190476190476,"z":-1.9047619047619047,"a95":4.2,"info":"\"15-06-19\" at \"14:46\""},{"visible":true,"include":false,"step":"390","x":-237.52380952380952,"y":117.33333333333333,"z":112.95238095238095,"a95":6.3,"info":"\"15-06-20\" at \"10:54\""},{"visible":true,"include":false,"step":"420","x":-335.8095238095238,"y":363.04761904761904,"z":-1340,"a95":3.9,"info":"\"15-06-20\" at \"14:34\""}]}]
