# Supplementary material for: Paleomagnetic constraints on the timing and distribution of Cenozoic rotations in Central and Eastern Anatolia
Source: Copernicus journal article supplement (doi:10.5194/se-9-295-2018), 2018-03-21
Supplement: Supplementary file 2 [file se-9-295-2018-supplement.zip › se-2017-66_DATA_dir files/dir files Sivas/SS38.dir]

[{"version":"v1.1.0","exported":"2017-05-22T13:02:33.568Z","info":"","GEO":[{"dec":338.1420889191463,"inc":-41.455663383750505,"MAD":3.4047621395196,"cm":[-3.3564685422572354e-13,-4.330927151299658e-13,0],"intensity":13096.750301951068,"type":"GC","origin":false,"forced":true,"remark":"","nSteps":9,"minStep":"90","maxStep":"350","steps":["90","120","150","180","210","240","270","330","350"],"group":"None"}],"TECT":[{"dec":352.81015231089447,"inc":-39.80796331058753,"MAD":3.4047621395192142,"cm":[3.6812880786047096e-13,1.0827317878249145e-13,-5.4136589391245725e-14],"intensity":13096.750301951066,"type":"GC","origin":false,"forced":true,"remark":"","nSteps":9,"minStep":"90","maxStep":"350","steps":["90","120","150","180","210","240","270","330","350"],"group":"None"}],"interpreted":true,"name":"SS38.03A","coreAzi":244,"coreDip":39,"bedStrike":160,"bedDip":17,"data":[{"visible":false,"include":false,"step":"20","x":-10948.380952380952,"y":9767.52380952381,"z":12656.761904761905,"a95":"1.9","info":"\"15-06-23\" at \"18:39\""},{"visible":true,"include":true,"step":"90","x":-6533.809523809524,"y":8556,"z":6751.047619047619,"a95":"2.1","info":"\"15-06-23\" at \"22:17\""},{"visible":true,"include":true,"step":"120","x":-3272.3809523809523,"y":6007.047619047619,"z":6822.571428571428,"a95":"2","info":"\"15-06-24\" at \"21:41\""},{"visible":true,"include":true,"step":"150","x":54.19047619047619,"y":2653.5238095238096,"z":4609.428571428572,"a95":"2.6","info":"\"15-06-28\" at \"01:37\""},{"visible":true,"include":true,"step":"180","x":1107.3333333333333,"y":1760.1904761904761,"z":3771.2380952380954,"a95":"2.6","info":"\"15-06-28\" at \"17:02\""},{"visible":true,"include":true,"step":"210","x":1240.5714285714287,"y":1236.6666666666667,"z":3640.4761904761904,"a95":"3","info":"\"15-06-28\" at \"19:57\""},{"visible":true,"include":true,"step":"240","x":1312.952380952381,"y":1323.5238095238096,"z":3458,"a95":"2.9","info":"\"15-06-30\" at \"13:16\""},{"visible":true,"include":true,"step":"270","x":1603.2380952380952,"y":1154.095238095238,"z":3171.6190476190477,"a95":"2.9","info":"\"15-07-01\" at \"08:16\""},{"visible":true,"include":true,"step":"330","x":1388.1904761904761,"y":251.04761904761904,"z":1672.3809523809523,"a95":"3.2","info":"\"15-07-01\" at \"13:32\""},{"visible":true,"include":true,"step":"350","x":1386.095238095238,"y":125.14285714285714,"z":1595.4285714285713,"a95":"3.5","info":"\"15-07-02\" at \"08:31\""},{"visible":true,"include":false,"step":"380","x":1674.095238095238,"y":290.95238095238096,"z":1203.7142857142858,"a95":"3","info":"\"15-07-02\" at \"11:55\""},{"visible":true,"include":false,"step":"410","x":1015.047619047619,"y":-64.76190476190476,"z":944.0952380952381,"a95":"3.6","info":"\"15-07-02\" at \"15:06\""},{"visible":true,"include":false,"step":"440","x":1158.6666666666667,"y":-111.9047619047619,"z":1299.5238095238096,"a95":"2.9","info":"\"15-07-03\" at \"11:24\""},{"visible":true,"include":false,"step":"470","x":904.952380952381,"y":-114.28571428571429,"z":287.9047619047619,"a95":"3.5","info":"\"15-07-03\" at \"14:20\""}],"demagType":"Unknown","patch":1.1,"format":"Unknown","strat":null},{"version":"v1.1.0","exported":"2017-05-22T13:02:33.568Z","info":"","GEO":[{"dec":345.60317613441134,"inc":-42.29285333521963,"MAD":3.8398498931206193,"cm":[-4.06024420434343e-13,-2.490283111997304e-13,0],"intensity":10901.029783055626,"type":"GC","origin":false,"forced":true,"remark":"","nSteps":11,"minStep":"90","maxStep":"410","steps":["90","120","150","180","210","240","270","330","350","380","410"],"group":"None"}],"TECT":[{"dec":359.85303240280035,"inc":-38.49164304981231,"MAD":3.8398498931206877,"cm":[-9.094947017729282e-13,-2.165463575649829e-13,-5.684341886080802e-14],"intensity":10901.029783055625,"type":"GC","origin":false,"forced":true,"remark":"","nSteps":11,"minStep":"90","maxStep":"410","steps":["90","120","150","180","210","240","270","330","350","380","410"],"group":"None"}],"interpreted":true,"name":"SS38.04A","coreAzi":265,"coreDip":34,"bedStrike":160,"bedDip":17,"data":[{"visible":false,"include":false,"step":"20","x":-8293.238095238095,"y":8855.047619047618,"z":11500.380952380952,"a95":"1.9","info":"\"15-06-23\" at \"18:41\""},{"visible":true,"include":true,"step":"90","x":-3482.9523809523807,"y":6115.333333333333,"z":7886.190476190476,"a95":"2.4","info":"\"15-06-23\" at \"22:18\""},{"visible":true,"include":true,"step":"120","x":-1646,"y":3245.1428571428573,"z":5691.238095238095,"a95":"2.8","info":"\"15-06-24\" at \"21:42\""},{"visible":true,"include":true,"step":"150","x":-227.9047619047619,"y":1871.7142857142858,"z":4335.333333333333,"a95":"2.6","info":"\"15-06-28\" at \"01:38\""},{"visible":true,"include":true,"step":"180","x":794.7619047619048,"y":681.2380952380952,"z":3362.6666666666665,"a95":"3.3","info":"\"15-06-28\" at \"17:03\""},{"visible":true,"include":true,"step":"210","x":677.7142857142857,"y":718.5714285714286,"z":3093.6190476190477,"a95":"3.7","info":"\"15-06-28\" at \"19:58\""},{"visible":true,"include":true,"step":"240","x":859.4285714285714,"y":507.5238095238095,"z":3117.904761904762,"a95":"3.5","info":"\"15-06-30\" at \"13:17\""},{"visible":true,"include":true,"step":"270","x":943.2380952380952,"y":260.76190476190476,"z":3030.285714285714,"a95":"3.6","info":"\"15-07-01\" at \"08:18\""},{"visible":true,"include":true,"step":"330","x":736.6666666666666,"y":-68.95238095238095,"z":1644,"a95":"3.9","info":"\"15-07-01\" at \"13:33\""},{"visible":true,"include":true,"step":"350","x":724.5714285714286,"y":-64.28571428571429,"z":1701.904761904762,"a95":"4.7","info":"\"15-07-02\" at \"08:32\""},{"visible":true,"include":true,"step":"380","x":975.2380952380952,"y":-244.76190476190476,"z":1362.6666666666667,"a95":"3.7","info":"\"15-07-02\" at \"11:57\""},{"visible":true,"include":true,"step":"410","x":501.23809523809524,"y":-201.42857142857142,"z":772.1904761904761,"a95":"4.9","info":"\"15-07-02\" at \"15:07\""},{"visible":true,"include":false,"step":"440","x":1419.5238095238096,"y":61.333333333333336,"z":907.7142857142857,"a95":"2.5","info":"\"15-07-03\" at \"11:26\""},{"visible":true,"include":false,"step":"470","x":151.04761904761904,"y":-349.3333333333333,"z":581.8095238095239,"a95":"6.5","info":"\"15-07-03\" at \"14:22\""}],"demagType":"Unknown","patch":1.1,"format":"Unknown","strat":null},{"version":"v1.1.0","exported":"2017-05-22T13:02:33.568Z","info":"","GEO":[{"dec":354.2569080594345,"inc":-32.034660760244925,"MAD":4.322413822292768,"cm":[-1.1504025245639717e-13,-4.330927151299658e-14,0],"intensity":17631.27382903649,"type":"GC","origin":false,"forced":true,"remark":"","nSteps":8,"minStep":"90","maxStep":"330","steps":["90","120","150","180","210","240","270","330"],"group":"None"}],"TECT":[{"dec":3.3521140811657233,"inc":-26.50118999094545,"MAD":4.322413822293036,"cm":[-2.3549416385191894e-13,-2.598556290779795e-13,-4.330927151299658e-14],"intensity":17631.273829036494,"type":"GC","origin":false,"forced":true,"remark":"","nSteps":8,"minStep":"90","maxStep":"330","steps":["90","120","150","180","210","240","270","330"],"group":"None"}],"interpreted":true,"name":"SS38.06A","coreAzi":262,"coreDip":47,"bedStrike":160,"bedDip":17,"data":[{"visible":false,"include":false,"step":"20","x":-4397.619047619048,"y":9192.47619047619,"z":10990.095238095239,"a95":"2.2","info":"\"15-06-23\" at \"18:43\""},{"visible":true,"include":true,"step":"90","x":-3298.190476190476,"y":7062.476190476191,"z":12063.333333333334,"a95":"2.1","info":"\"15-06-23\" at \"22:20\""},{"visible":true,"include":true,"step":"120","x":-144,"y":3848.190476190476,"z":7563.333333333333,"a95":"2.5","info":"\"15-06-24\" at \"21:43\""},{"visible":true,"include":true,"step":"150","x":906.1904761904761,"y":2636.5714285714284,"z":6062.476190476191,"a95":"2.3","info":"\"15-06-28\" at \"01:39\""},{"visible":true,"include":true,"step":"180","x":1963.8095238095239,"y":1631.6190476190477,"z":4114.761904761905,"a95":"2.4","info":"\"15-06-28\" at \"17:04\""},{"visible":true,"include":true,"step":"210","x":2320.190476190476,"y":941.4285714285714,"z":3837.1428571428573,"a95":"2.4","info":"\"15-06-28\" at \"19:59\""},{"visible":true,"include":true,"step":"240","x":2119.904761904762,"y":816.4761904761905,"z":3885.1428571428573,"a95":"2.6","info":"\"15-06-30\" at \"13:18\""},{"visible":true,"include":true,"step":"270","x":2299.809523809524,"y":808.1904761904761,"z":3898,"a95":"2.6","info":"\"15-07-01\" at \"08:19\""},{"visible":true,"include":true,"step":"330","x":2327.809523809524,"y":759.2380952380952,"z":3708.190476190476,"a95":"2.7","info":"\"15-07-01\" at \"13:34\""},{"visible":true,"include":false,"step":"350","x":945.6190476190476,"y":-62.285714285714285,"z":1693.8095238095239,"a95":"3.9","info":"\"15-07-02\" at \"08:34\""},{"visible":true,"include":false,"step":"380","x":1145.904761904762,"y":126.19047619047619,"z":1221.3333333333333,"a95":"2.7","info":"\"15-07-02\" at \"11:58\""},{"visible":true,"include":false,"step":"410","x":1036.2857142857142,"y":207.23809523809524,"z":1055.3333333333333,"a95":"3.3","info":"\"15-07-02\" at \"15:08\""},{"visible":true,"include":false,"step":"470","x":580.952380952381,"y":-486.6666666666667,"z":1274.4761904761904,"a95":"4.1","info":"\"15-07-03\" at \"14:23\""}],"demagType":"Unknown","patch":1.1,"format":"Unknown","strat":null},{"version":"v1.1.0","exported":"2017-05-22T13:02:33.568Z","info":"3","GEO":[{"dec":215.7195495328759,"inc":-26.561977107164843,"MAD":25.03530190347815,"cm":[2.165463575649829e-14,1.0827317878249145e-13,0],"intensity":2424.5743945191334,"type":"dir","forced":true,"remark":"","origin":false,"nSteps":7,"minStep":"45.0","maxStep":"80.0","steps":["45.0","50.0","55.0","60.0","65.0","70.0","80.0"],"group":"None"}],"TECT":[{"dec":208.82782100473764,"inc":-40.06914899474084,"MAD":25.035301903478178,"cm":[-2.382009933214812e-13,3.0316490059097606e-13,3.2481953634747435e-14],"intensity":2424.574394519134,"type":"dir","forced":true,"remark":"","origin":false,"nSteps":7,"minStep":"45.0","maxStep":"80.0","steps":["45.0","50.0","55.0","60.0","65.0","70.0","80.0"],"group":"None"}],"interpreted":true,"name":"SS38.08B","coreAzi":213,"coreDip":38,"bedStrike":160,"bedDip":17,"data":[{"visible":false,"include":false,"step":"0.0","x":-15250.47619047619,"y":8876.57142857143,"z":5901.9047619047615,"a95":"0.99","info":"28/06/2015 at 13:39:07"},{"visible":false,"include":false,"step":"10.0","x":-8207.047619047618,"y":2164.9523809523807,"z":1627.904761904762,"a95":"0.99","info":"28/06/2015 at 13:39:07"},{"visible":true,"include":false,"step":"15.0","x":-4793.238095238095,"y":1439.904761904762,"z":1132.857142857143,"a95":"0.99","info":"28/06/2015 at 13:39:07"},{"visible":true,"include":false,"step":"20.0","x":-2928.5714285714284,"y":1081.4285714285713,"z":537.9904761904761,"a95":"0.99","info":"28/06/2015 at 13:39:07"},{"visible":true,"include":false,"step":"23.0","x":-1864.1904761904761,"y":793.0095238095239,"z":997.3333333333334,"a95":"0.99","info":"28/06/2015 at 13:39:07"},{"visible":true,"include":false,"step":"25.0","x":-1793.5238095238096,"y":738.0190476190476,"z":205.33333333333334,"a95":"0.99","info":"28/06/2015 at 13:39:07"},{"visible":true,"include":false,"step":"30.0","x":-743.8666666666667,"y":865.5809523809525,"z":82.76,"a95":"0.99","info":"28/06/2015 at 13:39:07"},{"visible":true,"include":false,"step":"33.0","x":-418.4857142857143,"y":480.1714285714286,"z":474.72380952380956,"a95":"0.99","info":"28/06/2015 at 13:39:07"},{"visible":true,"include":false,"step":"35.0","x":-193.94285714285715,"y":910.3428571428572,"z":-10.697142857142856,"a95":"0.99","info":"28/06/2015 at 13:39:07"},{"visible":true,"include":false,"step":"40.0","x":186.8952380952381,"y":254.73333333333332,"z":212.06666666666666,"a95":"0.99","info":"28/06/2015 at 13:39:07"},{"visible":true,"include":true,"step":"45.0","x":621.152380952381,"y":227.94285714285715,"z":744.7904761904762,"a95":"0.99","info":"28/06/2015 at 13:39:07"},{"visible":true,"include":true,"step":"50.0","x":1298.7619047619048,"y":791.2761904761904,"z":1.1012380952380953,"a95":"0.99","info":"28/06/2015 at 13:39:07"},{"visible":true,"include":true,"step":"55.0","x":1237.2380952380952,"y":-581.9142857142857,"z":-14.650476190476192,"a95":"0.99","info":"28/06/2015 at 13:39:07"},{"visible":true,"include":true,"step":"60.0","x":1302.7619047619048,"y":111.77142857142856,"z":751.7333333333333,"a95":"0.99","info":"28/06/2015 at 13:39:07"},{"visible":true,"include":true,"step":"65.0","x":1555.904761904762,"y":327.1142857142857,"z":694.5714285714286,"a95":"0.99","info":"28/06/2015 at 13:39:07"},{"visible":true,"include":true,"step":"70.0","x":1429.4285714285713,"y":-398.16190476190474,"z":553.4,"a95":"0.99","info":"28/06/2015 at 13:39:07"},{"visible":true,"include":true,"step":"80.0","x":769.952380952381,"y":-104.13333333333334,"z":1237.142857142857,"a95":"0.99","info":"28/06/2015 at 13:39:07"}],"demagType":"Unknown","patch":1.1,"format":"Unknown","strat":null},{"version":"v1.1.0","exported":"2017-05-22T13:02:33.568Z","info":"0","GEO":[],"TECT":[],"interpreted":false,"name":"SS38.08A","coreAzi":213,"coreDip":38,"bedStrike":160,"bedDip":17,"data":[{"visible":true,"include":false,"step":"20","x":-43260.95238095238,"y":28991.428571428572,"z":23924.095238095237,"a95":"1.7","info":"\"15-06-15\" at \"11:54\""},{"visible":true,"include":true,"step":"100","x":-19395.428571428572,"y":13700.190476190477,"z":11812.190476190477,"a95":"1.7","info":"\"15-06-15\" at \"15:00\""},{"visible":true,"include":true,"step":"150","x":-8730.190476190477,"y":6697.809523809524,"z":6862.761904761905,"a95":"1.8","info":"\"15-06-16\" at \"09:44\""},{"visible":true,"include":true,"step":"180","x":-9242.47619047619,"y":6216.761904761905,"z":6608.380952380952,"a95":"1.8","info":"\"15-06-16\" at \"12:55\""},{"visible":true,"include":false,"step":"210","x":-4487.142857142857,"y":4813.333333333333,"z":5896.190476190476,"a95":"2","info":"\"15-06-17\" at \"16:42\""},{"visible":true,"include":false,"step":"230","x":-3784.3809523809523,"y":3964,"z":1292.1904761904761,"a95":"2.1","info":"\"15-06-17\" at \"19:42\""},{"visible":true,"include":false,"step":"250","x":-3655.4285714285716,"y":3136.190476190476,"z":2901.2380952380954,"a95":"2","info":"\"15-06-17\" at \"22:47\""},{"visible":true,"include":false,"step":"280","x":594.8571428571429,"y":1163.2380952380952,"z":-3295.904761904762,"a95":"2.6","info":"\"15-06-18\" at \"08:25\""},{"visible":true,"include":false,"step":"300","x":614.4761904761905,"y":3454.9523809523807,"z":-1171.8095238095239,"a95":"2","info":"\"15-06-18\" at \"12:23\""},{"visible":true,"include":false,"step":"320","x":105.52380952380952,"y":1335.6190476190477,"z":2964.095238095238,"a95":"2.3","info":"\"15-06-19\" at \"07:36\""},{"visible":true,"include":false,"step":"340","x":-162.47619047619048,"y":2173.714285714286,"z":2552.4761904761904,"a95":"2.5","info":"\"15-06-19\" at \"11:14\""},{"visible":true,"include":false,"step":"360","x":373.7142857142857,"y":1437.8095238095239,"z":736.0952380952381,"a95":"2.2","info":"\"15-06-19\" at \"14:50\""},{"visible":true,"include":false,"step":"390","x":505.42857142857144,"y":1411.4285714285713,"z":1338.6666666666667,"a95":"2.5","info":"\"15-06-20\" at \"10:56\""},{"visible":true,"include":false,"step":"420","x":1412.4761904761904,"y":588.8571428571429,"z":3.7142857142857144,"a95":"2.4","info":"\"15-06-20\" at \"14:36\""}],"demagType":"Unknown","patch":1.1,"format":"Unknown","strat":null},{"version":"v1.1.0","exported":"2017-05-22T13:02:33.568Z","info":"4","GEO":[{"dec":335.26278072222203,"inc":-18.222589344131464,"MAD":10.694609910498055,"cm":[0,6.217248937900877e-15,0],"intensity":8063.021023797723,"type":"GC","origin":false,"forced":true,"remark":"","nSteps":11,"minStep":"10.0","maxStep":"50.0","steps":["10.0","15.0","20.0","23.0","25.0","30.0","33.0","35.0","40.0","45.0","50.0"],"group":"None","version":"v1.1.0"}],"TECT":[{"dec":340.9932145505171,"inc":-18.782730836946133,"MAD":10.694609910497828,"cm":[-6.750155989720952e-14,-4.085620730620576e-14,-2.842170943040401e-14],"intensity":8063.021023797723,"type":"GC","origin":false,"forced":true,"remark":"","nSteps":11,"minStep":"10.0","maxStep":"50.0","steps":["10.0","15.0","20.0","23.0","25.0","30.0","33.0","35.0","40.0","45.0","50.0"],"group":"None","version":"v1.1.0"}],"interpreted":true,"name":"SS38.09A","coreAzi":200,"coreDip":7,"bedStrike":160,"bedDip":17,"data":[{"visible":true,"include":false,"step":"0.0","x":-7049.714285714285,"y":2496.3809523809523,"z":426.45714285714286,"a95":"0.99","info":"28/06/2015 at 13:39:07"},{"visible":true,"include":true,"step":"10.0","x":-5929.238095238095,"y":1490.4761904761904,"z":-466.6190476190476,"a95":"0.99","info":"28/06/2015 at 13:39:07"},{"visible":true,"include":true,"step":"15.0","x":-5031.9047619047615,"y":1129.8095238095239,"z":-648.4,"a95":"0.99","info":"28/06/2015 at 13:39:07"},{"visible":true,"include":true,"step":"20.0","x":-4277.333333333333,"y":743.3714285714285,"z":-662.104761904762,"a95":"0.99","info":"28/06/2015 at 13:39:07"},{"visible":true,"include":true,"step":"23.0","x":-3821.4285714285716,"y":470.3333333333333,"z":-643.4190476190475,"a95":"0.99","info":"28/06/2015 at 13:39:07"},{"visible":true,"include":true,"step":"25.0","x":-3479.4285714285716,"y":516.8761904761905,"z":-732.4666666666666,"a95":"0.99","info":"28/06/2015 at 13:39:07"},{"visible":true,"include":true,"step":"30.0","x":-3202.190476190476,"y":253.34285714285713,"z":-690.104761904762,"a95":"0.99","info":"28/06/2015 at 13:39:07"},{"visible":true,"include":true,"step":"33.0","x":-2776,"y":218.42857142857142,"z":-673.4190476190475,"a95":"0.99","info":"28/06/2015 at 13:39:07"},{"visible":true,"include":true,"step":"35.0","x":-2537.809523809524,"y":253.37142857142857,"z":-777.8095238095239,"a95":"0.99","info":"28/06/2015 at 13:39:07"},{"visible":true,"include":true,"step":"40.0","x":-2545.2380952380954,"y":81.27238095238096,"z":-793.1333333333333,"a95":"0.99","info":"28/06/2015 at 13:39:07"},{"visible":true,"include":true,"step":"45.0","x":-2231.0476190476193,"y":-18.152380952380952,"z":-608.3523809523809,"a95":"0.99","info":"28/06/2015 at 13:39:07"},{"visible":true,"include":true,"step":"50.0","x":-1912.1904761904761,"y":95.55238095238094,"z":-537.7809523809524,"a95":"0.99","info":"28/06/2015 at 13:39:07"},{"visible":true,"include":false,"step":"55.0","x":-2100.4761904761904,"y":-194.46666666666667,"z":-644.504761904762,"a95":"0.99","info":"28/06/2015 at 13:39:07"},{"visible":true,"include":false,"step":"60.0","x":-2055.2380952380954,"y":-308.85714285714283,"z":-467.83809523809526,"a95":"0.99","info":"28/06/2015 at 13:39:07"},{"visible":true,"include":false,"step":"65.0","x":-1559.904761904762,"y":-12.89809523809524,"z":-480.45714285714286,"a95":"0.99","info":"28/06/2015 at 13:39:07"},{"visible":true,"include":false,"step":"70.0","x":-1680.857142857143,"y":-325.6666666666667,"z":-489.6952380952381,"a95":"0.99","info":"28/06/2015 at 13:39:07"},{"visible":true,"include":false,"step":"80.0","x":-1666.857142857143,"y":-77.95238095238095,"z":-166.06666666666666,"a95":"0.99","info":"28/06/2015 at 13:39:07"}],"demagType":"Unknown","patch":1.1,"format":"Unknown","strat":null},{"version":"v1.1.0","exported":"2017-05-22T13:02:33.568Z","info":"0","GEO":[{"dec":336.55033631081363,"inc":-37.3714764747569,"MAD":25.040147161127553,"cm":[-8.661854302599316e-14,-8.661854302599316e-14,0],"intensity":17343.604029052127,"type":"GC","origin":false,"forced":true,"remark":"","nSteps":3,"minStep":"100","maxStep":"180","steps":["100","150","180"],"group":"None"}],"TECT":[{"dec":349.42866580584,"inc":-36.472662147146295,"MAD":25.04014716112584,"cm":[2.165463575649829e-13,8.661854302599316e-14,1.7323708605198632e-13],"intensity":17343.604029052127,"type":"GC","origin":false,"forced":true,"remark":"","nSteps":3,"minStep":"100","maxStep":"180","steps":["100","150","180"],"group":"None"}],"interpreted":true,"name":"SS38.11A","coreAzi":282,"coreDip":32,"bedStrike":160,"bedDip":17,"data":[{"visible":true,"include":false,"step":"20","x":-9019.619047619048,"y":9950.666666666666,"z":18614.666666666668,"a95":"2.2","info":"\"15-06-15\" at \"11:58\""},{"visible":true,"include":true,"step":"100","x":-4455.047619047619,"y":4197.809523809524,"z":9556.190476190477,"a95":"2.2","info":"\"15-06-15\" at \"15:02\""},{"visible":true,"include":true,"step":"150","x":-2084.5714285714284,"y":1384.3809523809523,"z":5309.523809523809,"a95":"2.5","info":"\"15-06-16\" at \"09:47\""},{"visible":true,"include":true,"step":"180","x":-1664.952380952381,"y":1847.2380952380952,"z":5503.809523809524,"a95":"2.5","info":"\"15-06-16\" at \"12:59\""},{"visible":true,"include":false,"step":"210","x":-564.2857142857143,"y":931.5238095238095,"z":4308.857142857143,"a95":"2.4","info":"\"15-06-17\" at \"16:43\""},{"visible":true,"include":false,"step":"230","x":-59.23809523809524,"y":519.3333333333334,"z":3169.5238095238096,"a95":"2.4","info":"\"15-06-17\" at \"19:43\""},{"visible":true,"include":false,"step":"250","x":-438.0952380952381,"y":673.2380952380952,"z":3552.9523809523807,"a95":"2.7","info":"\"15-06-17\" at \"22:53\""},{"visible":true,"include":false,"step":"280","x":641.9047619047619,"y":-663.2380952380952,"z":3396.190476190476,"a95":"2.4","info":"\"15-06-18\" at \"08:27\""},{"visible":true,"include":false,"step":"300","x":-188.0952380952381,"y":229.33333333333334,"z":660.7619047619048,"a95":"3.9","info":"\"15-06-18\" at \"12:27\""},{"visible":true,"include":false,"step":"320","x":652.6666666666666,"y":-34.38095238095238,"z":1190.1904761904761,"a95":"2.4","info":"\"15-06-19\" at \"07:38\""},{"visible":true,"include":false,"step":"340","x":60.38095238095238,"y":-184.38095238095238,"z":2678.7619047619046,"a95":"2.7","info":"\"15-06-19\" at \"11:21\""},{"visible":true,"include":false,"step":"360","x":283.8095238095238,"y":-452.85714285714283,"z":-730.6666666666666,"a95":"3.7","info":"\"15-06-19\" at \"14:53\""},{"visible":true,"include":false,"step":"390","x":560.7619047619048,"y":606.5714285714286,"z":268.1904761904762,"a95":"2.5","info":"\"15-06-20\" at \"10:58\""},{"visible":true,"include":false,"step":"420","x":-407.5238095238095,"y":86.28571428571429,"z":-878.0952380952381,"a95":"5.2","info":"\"15-06-20\" at \"14:38\""}],"demagType":"Unknown","patch":1.1,"format":"Unknown","strat":null}]
