# Supplementary material for: Paleomagnetic constraints on the timing and distribution of Cenozoic rotations in Central and Eastern Anatolia
Source: Copernicus journal article supplement (doi:10.5194/se-9-295-2018), 2018-03-21
Supplement: Supplementary file 2 [file se-9-295-2018-supplement.zip › se-2017-66_DATA_dir files/dir files Sivas/SS39.dir]

[{"version":"v1.1.0","exported":"2017-05-22T13:37:43.675Z","volume":10.5,"added":"2017-05-22T13:36:38.177Z","format":"Utrecht","demagType":"Unknown","strat":null,"patch":1.1,"GEO":[{"dec":357.917000050599,"inc":-32.446868124713376,"MAD":19.671803561936688,"cm":[-2.2737367544323206e-13,1.1652900866465643e-12,0],"intensity":43599.19077605145,"type":"GC","origin":false,"forced":true,"remark":"","nSteps":10,"minStep":"120","maxStep":"410","steps":["120","150","180","210","240","270","330","350","380","410"],"group":"None","version":"v1.1.0"}],"TECT":[{"dec":6.578883686520612,"inc":-57.107220384684716,"MAD":19.67180356193681,"cm":[-5.684341886080801e-13,3.268496584496461e-12,2.5579538487363607e-13],"intensity":43599.19077605145,"type":"GC","origin":false,"forced":true,"remark":"","nSteps":10,"minStep":"120","maxStep":"410","steps":["120","150","180","210","240","270","330","350","380","410"],"group":"None","version":"v1.1.0"}],"interpreted":true,"name":"SS39.01A","coreAzi":276,"coreDip":28,"bedStrike":253,"bedDip":26,"data":[{"visible":true,"include":false,"step":"20","x":-27744.190476190477,"y":17447.52380952381,"z":18140.85714285714,"a95":1.7,"info":"\"15-06-23\" at \"18:15\""},{"visible":true,"include":false,"step":"90","x":-25254,"y":22971.04761904762,"z":15488.952380952382,"a95":1.7,"info":"\"15-06-23\" at \"22:08\""},{"visible":true,"include":true,"step":"120","x":-25857.714285714286,"y":19381.52380952381,"z":14228.47619047619,"a95":1.5,"info":"\"15-06-24\" at \"21:27\""},{"visible":true,"include":true,"step":"150","x":-19145.04761904762,"y":12669.238095238095,"z":8703.714285714286,"a95":1.6,"info":"\"15-06-28\" at \"01:27\""},{"visible":true,"include":true,"step":"180","x":-13735.333333333334,"y":10188.857142857143,"z":5621.714285714285,"a95":1.5,"info":"\"15-06-28\" at \"16:52\""},{"visible":true,"include":true,"step":"210","x":-12228.952380952382,"y":7499.238095238095,"z":4326.476190476191,"a95":1.6,"info":"\"15-06-28\" at \"19:44\""},{"visible":true,"include":true,"step":"240","x":-10439.42857142857,"y":7454.285714285715,"z":3373.3333333333335,"a95":1.7,"info":"\"15-06-30\" at \"13:00\""},{"visible":true,"include":true,"step":"270","x":-8446.761904761905,"y":6436.761904761905,"z":2255.904761904762,"a95":1.6,"info":"\"15-07-01\" at \"08:00\""},{"visible":true,"include":true,"step":"330","x":-7898.857142857143,"y":4768.761904761905,"z":1631.4285714285713,"a95":1.6,"info":"\"15-07-01\" at \"13:23\""},{"visible":true,"include":true,"step":"350","x":-6801.047619047619,"y":5203.809523809524,"z":1597.5238095238096,"a95":1.7,"info":"\"15-07-02\" at \"08:19\""},{"visible":true,"include":true,"step":"380","x":-7349.142857142857,"y":4849.523809523809,"z":1527.5238095238096,"a95":1.6,"info":"\"15-07-02\" at \"11:44\""},{"visible":true,"include":true,"step":"410","x":-6901.619047619048,"y":4923.142857142857,"z":1166.2857142857142,"a95":1.9,"info":"\"15-07-02\" at \"14:59\""},{"visible":true,"include":false,"step":"440","x":-6529.238095238095,"y":3529.2380952380954,"z":1022,"a95":1.7,"info":"\"15-07-03\" at \"11:12\""},{"visible":true,"include":false,"step":"470","x":-6158.761904761905,"y":2532.7619047619046,"z":1785.4285714285713,"a95":1.8,"info":"\"15-07-03\" at \"14:12\""}]},{"version":"v1.1.0","exported":"2017-05-22T13:37:43.675Z","volume":10.5,"added":"2017-05-22T13:36:38.178Z","format":"Utrecht","demagType":"Unknown","strat":null,"patch":1.1,"GEO":[{"dec":36.90263303035812,"inc":-32.29688686726523,"MAD":17.194023668583892,"cm":[2.2737367544323206e-13,6.252776074688882e-13,0],"intensity":55836.30548214748,"type":"GC","origin":false,"forced":true,"remark":"","nSteps":9,"minStep":"90","maxStep":"350","steps":["90","120","150","180","210","240","270","330","350"],"group":"None","version":"v1.1.0"}],"TECT":[{"dec":55.65023226954588,"inc":-44.31038902744467,"MAD":17.19402366858462,"cm":[1.1368683772161603e-13,6.480149750132114e-12,-1.7053025658242404e-13],"intensity":55836.305482147465,"type":"GC","origin":false,"forced":true,"remark":"","nSteps":9,"minStep":"90","maxStep":"350","steps":["90","120","150","180","210","240","270","330","350"],"group":"None","version":"v1.1.0"}],"interpreted":true,"name":"SS39.02A","coreAzi":294,"coreDip":26,"bedStrike":253,"bedDip":26,"data":[{"visible":true,"include":false,"step":"20","x":-33647.23809523809,"y":21279.04761904762,"z":22342,"a95":1.6,"info":"\"15-06-23\" at \"18:17\""},{"visible":true,"include":true,"step":"90","x":-29345.904761904763,"y":25316.095238095237,"z":20952.95238095238,"a95":1.7,"info":"\"15-06-23\" at \"22:09\""},{"visible":true,"include":true,"step":"120","x":-27258.47619047619,"y":21347.619047619046,"z":18404.380952380954,"a95":1.7,"info":"\"15-06-24\" at \"21:28\""},{"visible":true,"include":true,"step":"150","x":-17540.95238095238,"y":12378.952380952382,"z":8949.047619047618,"a95":1.6,"info":"\"15-06-28\" at \"01:29\""},{"visible":true,"include":true,"step":"180","x":-16253.904761904761,"y":9927.809523809523,"z":7451.619047619048,"a95":1.6,"info":"\"15-06-28\" at \"16:53\""},{"visible":true,"include":true,"step":"210","x":-13812,"y":9667.42857142857,"z":5927.428571428572,"a95":1.6,"info":"\"15-06-28\" at \"19:45\""},{"visible":true,"include":true,"step":"240","x":-13509.714285714286,"y":10062.47619047619,"z":5479.809523809524,"a95":1.6,"info":"\"15-06-30\" at \"13:01\""},{"visible":true,"include":true,"step":"270","x":-12213.619047619048,"y":8471.047619047618,"z":4400.761904761905,"a95":1.7,"info":"\"15-07-01\" at \"08:02\""},{"visible":true,"include":true,"step":"330","x":-10442.380952380952,"y":7807.428571428572,"z":3245.6190476190477,"a95":1.6,"info":"\"15-07-01\" at \"13:24\""},{"visible":true,"include":true,"step":"350","x":-10132.952380952382,"y":6097.142857142857,"z":2970.285714285714,"a95":1.7,"info":"\"15-07-02\" at \"08:21\""},{"visible":true,"include":false,"step":"380","x":-10622.47619047619,"y":5820.857142857143,"z":3084.6666666666665,"a95":1.6,"info":"\"15-07-02\" at \"11:46\""},{"visible":true,"include":false,"step":"410","x":-10916.285714285714,"y":5796.666666666667,"z":2578.3809523809523,"a95":1.7,"info":"\"15-07-02\" at \"15:00\""},{"visible":true,"include":false,"step":"440","x":-8927.42857142857,"y":6275.333333333333,"z":2396.9523809523807,"a95":1.6,"info":"\"15-07-03\" at \"11:13\""},{"visible":true,"include":false,"step":"470","x":-8609.047619047618,"y":5824.476190476191,"z":2738.6666666666665,"a95":1.7,"info":"\"15-07-03\" at \"14:13\""}]},{"version":"v1.1.0","exported":"2017-05-22T13:37:43.675Z","volume":10.5,"added":"2017-05-22T13:36:38.179Z","format":"Utrecht","demagType":"Unknown","strat":null,"patch":1.1,"GEO":[{"dec":332.0858132933539,"inc":-30.273708116569345,"MAD":15.008023386421035,"cm":[5.684341886080801e-13,-1.5347723092418164e-12,0],"intensity":58062.86849547568,"type":"GC","origin":false,"forced":true,"remark":"","nSteps":8,"minStep":"120","maxStep":"350","steps":["120","150","180","210","240","270","330","350"],"group":"None","version":"v1.1.0"}],"TECT":[{"dec":326.187940222296,"inc":-55.57343400478753,"MAD":15.008023386421643,"cm":[-1.1368683772161603e-13,2.5579538487363607e-12,-3.979039320256561e-13],"intensity":58062.868495475675,"type":"GC","origin":false,"forced":true,"remark":"","nSteps":8,"minStep":"120","maxStep":"350","steps":["120","150","180","210","240","270","330","350"],"group":"None","version":"v1.1.0"}],"interpreted":true,"name":"SS39.03A","coreAzi":290,"coreDip":20,"bedStrike":253,"bedDip":26,"data":[{"visible":true,"include":false,"step":"20","x":-37748.19047619047,"y":31903.809523809523,"z":19131.619047619046,"a95":1.5,"info":"\"15-06-23\" at \"18:19\""},{"visible":true,"include":false,"step":"90","x":-32353.238095238095,"y":34164.09523809524,"z":18654.95238095238,"a95":1.7,"info":"\"15-06-23\" at \"22:10\""},{"visible":true,"include":true,"step":"120","x":-30705.809523809523,"y":27484.761904761905,"z":11962.47619047619,"a95":1.5,"info":"\"15-06-24\" at \"21:29\""},{"visible":true,"include":true,"step":"150","x":-18328.85714285714,"y":18629.14285714286,"z":6212,"a95":1.3,"info":"\"15-06-28\" at \"01:30\""},{"visible":true,"include":true,"step":"180","x":-16612.190476190477,"y":15604.57142857143,"z":4054.190476190476,"a95":1.4,"info":"\"15-06-28\" at \"16:55\""},{"visible":true,"include":true,"step":"210","x":-14297.904761904761,"y":15197.714285714286,"z":3661.5238095238096,"a95":1.5,"info":"\"15-06-28\" at \"19:47\""},{"visible":true,"include":true,"step":"240","x":-14072.285714285714,"y":15527.238095238095,"z":2899.3333333333335,"a95":2.7,"info":"\"15-06-30\" at \"13:04\""},{"visible":true,"include":true,"step":"270","x":-13650.380952380952,"y":14041.142857142857,"z":2525.3333333333335,"a95":1.6,"info":"\"15-07-01\" at \"08:05\""},{"visible":true,"include":true,"step":"330","x":-11857.238095238095,"y":12167.238095238095,"z":1243.2380952380952,"a95":1.4,"info":"\"15-07-01\" at \"13:26\""},{"visible":true,"include":true,"step":"350","x":-10282,"y":11321.809523809523,"z":1651.7142857142858,"a95":1.5,"info":"\"15-07-02\" at \"08:22\""},{"visible":true,"include":false,"step":"380","x":-10789.142857142857,"y":10797.333333333334,"z":1928.095238095238,"a95":1.5,"info":"\"15-07-02\" at \"11:47\""},{"visible":true,"include":false,"step":"410","x":-10487.52380952381,"y":9935.904761904761,"z":605.2380952380952,"a95":1.6,"info":"\"15-07-02\" at \"15:01\""},{"visible":true,"include":false,"step":"440","x":-9923.619047619048,"y":9516.666666666666,"z":1031.3333333333333,"a95":5,"info":"\"15-07-03\" at \"11:14\""},{"visible":true,"include":false,"step":"470","x":-9399.142857142857,"y":9723.238095238095,"z":1388,"a95":1.6,"info":"\"15-07-03\" at \"14:14\""}]},{"version":"v1.1.0","exported":"2017-05-22T13:37:43.675Z","volume":10.5,"added":"2017-05-22T13:36:38.180Z","format":"Utrecht","demagType":"Unknown","strat":null,"patch":1.1,"GEO":[{"dec":34.003211629273494,"inc":-36.796068446462364,"MAD":11.909762961967873,"cm":[3.979039320256561e-13,-7.389644451905042e-13,0],"intensity":53158.24221580246,"type":"GC","origin":false,"forced":true,"remark":"","nSteps":8,"minStep":"90","maxStep":"330","steps":["90","120","150","180","210","240","270","330"],"group":"None","version":"v1.1.0"}],"TECT":[{"dec":55.994234804835,"inc":-49.39794750465578,"MAD":11.909762961970168,"cm":[1.1368683772161603e-13,5.3717030823463574e-12,-7.389644451905042e-13],"intensity":53158.24221580247,"type":"GC","origin":false,"forced":true,"remark":"","nSteps":8,"minStep":"90","maxStep":"330","steps":["90","120","150","180","210","240","270","330"],"group":"None","version":"v1.1.0"}],"interpreted":true,"name":"SS39.04A","coreAzi":274,"coreDip":20,"bedStrike":253,"bedDip":26,"data":[{"visible":true,"include":false,"step":"20","x":-33307.333333333336,"y":20748.095238095237,"z":10305.714285714286,"a95":1.4,"info":"\"15-06-23\" at \"18:21\""},{"visible":true,"include":true,"step":"90","x":-28707.333333333332,"y":26202.47619047619,"z":10155.904761904761,"a95":1.5,"info":"\"15-06-23\" at \"22:11\""},{"visible":true,"include":true,"step":"120","x":-20816.47619047619,"y":17511.904761904763,"z":5646.761904761905,"a95":1.5,"info":"\"15-06-24\" at \"21:31\""},{"visible":true,"include":true,"step":"150","x":-16452.761904761905,"y":12445.809523809523,"z":2961.714285714286,"a95":1.5,"info":"\"15-06-28\" at \"01:31\""},{"visible":true,"include":true,"step":"180","x":-14621.714285714286,"y":9616.190476190477,"z":1378.6666666666667,"a95":1.5,"info":"\"15-06-28\" at \"16:56\""},{"visible":true,"include":true,"step":"210","x":-14182,"y":8366.190476190477,"z":968.4761904761905,"a95":1.4,"info":"\"15-06-28\" at \"19:48\""},{"visible":true,"include":true,"step":"240","x":-13835.238095238095,"y":9464.761904761905,"z":931.1428571428571,"a95":1.6,"info":"\"15-06-30\" at \"13:09\""},{"visible":true,"include":true,"step":"270","x":-13425.142857142857,"y":9092.57142857143,"z":774,"a95":1.6,"info":"\"15-07-01\" at \"08:07\""},{"visible":true,"include":true,"step":"330","x":-10745.809523809523,"y":8031.714285714285,"z":-293.42857142857144,"a95":1.5,"info":"\"15-07-01\" at \"13:27\""},{"visible":true,"include":false,"step":"350","x":-9274,"y":6142.761904761905,"z":-312.3809523809524,"a95":1.6,"info":"\"15-07-02\" at \"08:24\""},{"visible":true,"include":false,"step":"380","x":-9267.142857142857,"y":6495.047619047619,"z":-372.57142857142856,"a95":1.6,"info":"\"15-07-02\" at \"11:48\""},{"visible":true,"include":false,"step":"410","x":-10153.619047619048,"y":4704.380952380952,"z":-321.42857142857144,"a95":1.6,"info":"\"15-07-02\" at \"15:01\""},{"visible":true,"include":false,"step":"440","x":-8891.142857142857,"y":4964.761904761905,"z":-510.2857142857143,"a95":1.6,"info":"\"15-07-03\" at \"11:15\""},{"visible":true,"include":false,"step":"470","x":-9004.857142857143,"y":5280.952380952381,"z":2.6666666666666665,"a95":1.6,"info":"\"15-07-03\" at \"14:15\""}]},{"version":"v1.1.0","exported":"2017-05-22T13:37:43.675Z","volume":10.5,"added":"2017-05-22T13:36:38.182Z","format":"Utrecht","demagType":"Unknown","strat":null,"patch":1.1,"GEO":[{"dec":344.8340176857174,"inc":-24.05206561143024,"MAD":13.94128089061683,"cm":[-7.105427357601002e-14,1.9895196601282805e-13,0],"intensity":26470.20385246267,"type":"GC","origin":false,"forced":true,"remark":"","nSteps":10,"minStep":"90","maxStep":"380","steps":["90","120","150","180","210","240","270","330","350","380"],"group":"None","version":"v1.1.0"}],"TECT":[{"dec":345.60778205076053,"inc":-50.033770543722135,"MAD":13.941280890619542,"cm":[-3.694822225952521e-13,1.0942358130705543e-12,0],"intensity":26470.203852462673,"type":"GC","origin":false,"forced":true,"remark":"","nSteps":10,"minStep":"90","maxStep":"380","steps":["90","120","150","180","210","240","270","330","350","380"],"group":"None","version":"v1.1.0"}],"interpreted":true,"name":"SS39.05A","coreAzi":301,"coreDip":9,"bedStrike":253,"bedDip":26,"data":[{"visible":true,"include":false,"step":"20","x":-21414.095238095237,"y":6403.047619047619,"z":5787.619047619048,"a95":1.4,"info":"\"15-06-23\" at \"18:23\""},{"visible":true,"include":true,"step":"90","x":-18309.333333333332,"y":10710.952380952382,"z":4352.857142857143,"a95":1.5,"info":"\"15-06-23\" at \"22:12\""},{"visible":true,"include":true,"step":"120","x":-11952.285714285714,"y":7682.380952380952,"z":2508.8571428571427,"a95":1.5,"info":"\"15-06-24\" at \"21:32\""},{"visible":true,"include":true,"step":"150","x":-9284.47619047619,"y":5668.952380952381,"z":1399.047619047619,"a95":1.6,"info":"\"15-06-28\" at \"01:32\""},{"visible":true,"include":true,"step":"180","x":-7462.666666666667,"y":4551.238095238095,"z":586.5714285714286,"a95":1.5,"info":"\"15-06-28\" at \"16:57\""},{"visible":true,"include":true,"step":"210","x":-6194.285714285715,"y":4770.666666666667,"z":393.8095238095238,"a95":1.5,"info":"\"15-06-28\" at \"19:49\""},{"visible":true,"include":true,"step":"240","x":-6389.333333333333,"y":4603.047619047619,"z":313.9047619047619,"a95":1.6,"info":"\"15-06-30\" at \"13:10\""},{"visible":true,"include":true,"step":"270","x":-6192,"y":4902.476190476191,"z":212.66666666666666,"a95":1.6,"info":"\"15-07-01\" at \"08:08\""},{"visible":true,"include":true,"step":"330","x":-4982.380952380952,"y":4080.5714285714284,"z":-75.52380952380952,"a95":1.6,"info":"\"15-07-01\" at \"13:28\""},{"visible":true,"include":true,"step":"350","x":-3705.5238095238096,"y":3278.9523809523807,"z":101.42857142857143,"a95":1.6,"info":"\"15-07-02\" at \"08:41\""},{"visible":true,"include":true,"step":"380","x":-3767.5238095238096,"y":3286.3809523809523,"z":-186.47619047619048,"a95":1.7,"info":"\"15-07-02\" at \"11:50\""},{"visible":true,"include":false,"step":"410","x":-3672.095238095238,"y":2782.5714285714284,"z":-484.4761904761905,"a95":1.7,"info":"\"15-07-02\" at \"15:02\""},{"visible":true,"include":false,"step":"440","x":-3273.2380952380954,"y":2690.190476190476,"z":-201.23809523809524,"a95":3.5,"info":"\"15-07-03\" at \"11:19\""},{"visible":true,"include":false,"step":"470","x":-2650.9523809523807,"y":3342.285714285714,"z":-264.76190476190476,"a95":1.7,"info":"\"15-07-03\" at \"14:16\""}]},{"version":"v1.1.0","exported":"2017-05-22T13:37:43.675Z","volume":10.5,"added":"2017-05-22T13:36:38.182Z","format":"Utrecht","demagType":"Unknown","strat":null,"patch":1.1,"GEO":[{"dec":0.07250260415912635,"inc":-38.21182931071428,"MAD":16.47013178551393,"cm":[-6.821210263296962e-13,9.947598300641403e-13,0],"intensity":27047.330521264583,"type":"GC","origin":false,"forced":true,"remark":"","nSteps":10,"minStep":"90","maxStep":"380","steps":["90","120","150","180","210","240","270","330","350","380"],"group":"None","version":"v1.1.0"}],"TECT":[{"dec":12.730025680990536,"inc":-62.27989756724884,"MAD":16.470131785513683,"cm":[0,-4.547473508864641e-13,3.694822225952521e-13],"intensity":27047.330521264583,"type":"GC","origin":false,"forced":true,"remark":"","nSteps":10,"minStep":"90","maxStep":"380","steps":["90","120","150","180","210","240","270","330","350","380"],"group":"None","version":"v1.1.0"}],"interpreted":true,"name":"SS39.06A","coreAzi":260,"coreDip":16,"bedStrike":253,"bedDip":26,"data":[{"visible":true,"include":false,"step":"20","x":-19964.85714285714,"y":11644.190476190477,"z":-664.0952380952381,"a95":1.4,"info":"\"15-06-23\" at \"18:26\""},{"visible":true,"include":true,"step":"90","x":-16984.761904761905,"y":11213.047619047618,"z":-1915.904761904762,"a95":1.5,"info":"\"15-06-23\" at \"22:14\""},{"visible":true,"include":true,"step":"120","x":-15736,"y":11875.714285714286,"z":-2080.5714285714284,"a95":1.6,"info":"\"15-06-24\" at \"21:36\""},{"visible":true,"include":true,"step":"150","x":-15593.904761904761,"y":8474.857142857143,"z":-2754.5714285714284,"a95":1.6,"info":"\"15-06-28\" at \"01:33\""},{"visible":true,"include":true,"step":"180","x":-8536.952380952382,"y":5050,"z":-4010.4761904761904,"a95":1.9,"info":"\"15-06-28\" at \"16:58\""},{"visible":true,"include":true,"step":"210","x":-8313.142857142857,"y":5070.952380952381,"z":-3959.3333333333335,"a95":1.9,"info":"\"15-06-28\" at \"19:52\""},{"visible":true,"include":true,"step":"240","x":-8417.142857142857,"y":4232.285714285715,"z":-4022.9523809523807,"a95":1.9,"info":"\"15-06-30\" at \"13:12\""},{"visible":true,"include":true,"step":"270","x":-6942.571428571428,"y":3429.904761904762,"z":-3406.7619047619046,"a95":1.8,"info":"\"15-07-01\" at \"08:28\""},{"visible":true,"include":true,"step":"330","x":-5996.380952380952,"y":3128.6666666666665,"z":-3825.4285714285716,"a95":2,"info":"\"15-07-01\" at \"13:29\""},{"visible":true,"include":true,"step":"350","x":-5584.476190476191,"y":2641.0476190476193,"z":-2551.3333333333335,"a95":1.8,"info":"\"15-07-02\" at \"08:42\""},{"visible":true,"include":true,"step":"380","x":-5504.952380952381,"y":2735.2380952380954,"z":-3671.2380952380954,"a95":2.1,"info":"\"15-07-02\" at \"11:52\""},{"visible":true,"include":false,"step":"410","x":-5158.571428571428,"y":2656.5714285714284,"z":-3719.3333333333335,"a95":2.1,"info":"\"15-07-02\" at \"15:03\""},{"visible":true,"include":false,"step":"440","x":-4816.952380952381,"y":2508.8571428571427,"z":-3344,"a95":2,"info":"\"15-07-03\" at \"11:20\""},{"visible":true,"include":false,"step":"470","x":-4590.0952380952385,"y":2920.6666666666665,"z":-3128.190476190476,"a95":2,"info":"\"15-07-03\" at \"14:17\""}]},{"version":"v1.1.0","exported":"2017-05-22T13:37:43.675Z","volume":10.5,"added":"2017-05-22T13:36:38.183Z","format":"Utrecht","demagType":"Unknown","strat":"5","patch":1.1,"GEO":[],"TECT":[],"interpreted":false,"name":"SS39.06B","coreAzi":260,"coreDip":16,"bedStrike":253,"bedDip":26,"data":[{"visible":true,"include":false,"step":"0.0","x":-20423.809523809523,"y":7179.047619047619,"z":8013.238095238095,"a95":0.99,"info":"28/06/2015 at 13:39:07"},{"visible":true,"include":false,"step":"10.0","x":-10488.57142857143,"y":2276.095238095238,"z":2334.5714285714284,"a95":0.99,"info":"28/06/2015 at 13:39:07"},{"visible":true,"include":false,"step":"15.0","x":-6510,"y":1570.6666666666667,"z":1393.4285714285713,"a95":0.99,"info":"28/06/2015 at 13:39:07"},{"visible":true,"include":false,"step":"20.0","x":-4355.523809523809,"y":1555.3333333333333,"z":705.0285714285715,"a95":0.99,"info":"28/06/2015 at 13:39:07"},{"visible":true,"include":false,"step":"23.0","x":-3144.9523809523807,"y":1036.3809523809523,"z":1298.6666666666667,"a95":0.99,"info":"28/06/2015 at 13:39:07"},{"visible":true,"include":false,"step":"25.0","x":-2573.1428571428573,"y":1249.7142857142858,"z":1057.2380952380952,"a95":0.99,"info":"28/06/2015 at 13:39:07"},{"visible":true,"include":false,"step":"30.0","x":-1975.142857142857,"y":435.8857142857143,"z":426.27619047619044,"a95":0.99,"info":"28/06/2015 at 13:39:07"},{"visible":true,"include":false,"step":"33.0","x":-1601.2380952380952,"y":1187.7142857142858,"z":824.2666666666667,"a95":0.99,"info":"28/06/2015 at 13:39:07"},{"visible":true,"include":false,"step":"35.0","x":-1335.047619047619,"y":766.8761904761905,"z":265.0095238095238,"a95":0.99,"info":"28/06/2015 at 13:39:07"},{"visible":true,"include":false,"step":"40.0","x":-368.9238095238095,"y":693.7047619047619,"z":84.5647619047619,"a95":0.99,"info":"28/06/2015 at 13:39:07"},{"visible":true,"include":false,"step":"45.0","x":-259.49523809523805,"y":925.2,"z":807.4190476190475,"a95":0.99,"info":"28/06/2015 at 13:39:07"},{"visible":true,"include":false,"step":"50.0","x":174.34285714285713,"y":859.152380952381,"z":407.1714285714286,"a95":0.99,"info":"28/06/2015 at 13:39:07"},{"visible":true,"include":false,"step":"55.0","x":357.1904761904762,"y":381.7142857142857,"z":130.85714285714286,"a95":0.99,"info":"28/06/2015 at 13:39:07"},{"visible":true,"include":false,"step":"60.0","x":352.1142857142857,"y":896,"z":125.38095238095238,"a95":0.99,"info":"28/06/2015 at 13:39:07"},{"visible":true,"include":false,"step":"65.0","x":1528.6666666666667,"y":1335.7142857142858,"z":-444,"a95":0.99,"info":"28/06/2015 at 13:39:07"},{"visible":true,"include":false,"step":"70.0","x":1344.6666666666667,"y":123.56190476190477,"z":-487.2666666666667,"a95":0.99,"info":"28/06/2015 at 13:39:07"},{"visible":true,"include":false,"step":"80.0","x":-585.3142857142857,"y":877.5428571428572,"z":859.0190476190477,"a95":0.99,"info":"28/06/2015 at 13:39:07"}]},{"version":"v1.1.0","exported":"2017-05-22T13:37:43.675Z","volume":10.5,"added":"2017-05-22T13:36:38.184Z","format":"Utrecht","demagType":"Unknown","strat":"6","patch":1.1,"GEO":[{"dec":349.89661335228607,"inc":-18.420861099871747,"MAD":16.81765733763919,"cm":[0,-2.842170943040401e-14,0],"intensity":17446.38106286553,"type":"GC","origin":false,"forced":true,"remark":"","nSteps":9,"minStep":"10.0","maxStep":"40.0","steps":["10.0","15.0","20.0","23.0","25.0","30.0","33.0","35.0","40.0"],"group":"None","version":"v1.1.0"}],"TECT":[{"dec":352.14059467636423,"inc":-44.17994258002006,"MAD":16.81765733763576,"cm":[-4.831690603168681e-13,1.4495071809506044e-12,1.7053025658242404e-13],"intensity":17446.38106286553,"type":"GC","origin":false,"forced":true,"remark":"","nSteps":9,"minStep":"10.0","maxStep":"40.0","steps":["10.0","15.0","20.0","23.0","25.0","30.0","33.0","35.0","40.0"],"group":"None","version":"v1.1.0"}],"interpreted":true,"name":"SS39.07A","coreAzi":236,"coreDip":38,"bedStrike":253,"bedDip":26,"data":[{"visible":true,"include":false,"step":"0.0","x":-15655.238095238095,"y":4639.714285714285,"z":6364.952380952381,"a95":0.99,"info":"28/06/2015 at 13:39:07"},{"visible":true,"include":true,"step":"10.0","x":-12763.809523809523,"y":2222,"z":3781.0476190476193,"a95":0.99,"info":"28/06/2015 at 13:39:07"},{"visible":true,"include":true,"step":"15.0","x":-10306.666666666666,"y":1719.8095238095239,"z":2835.904761904762,"a95":0.99,"info":"28/06/2015 at 13:39:07"},{"visible":true,"include":true,"step":"20.0","x":-8504.380952380952,"y":1320.857142857143,"z":1983.142857142857,"a95":0.99,"info":"28/06/2015 at 13:39:07"},{"visible":true,"include":true,"step":"23.0","x":-7582.285714285715,"y":1207.142857142857,"z":1770.5714285714287,"a95":0.99,"info":"28/06/2015 at 13:39:07"},{"visible":true,"include":true,"step":"25.0","x":-6941.142857142857,"y":945.4571428571428,"z":1436.2857142857142,"a95":0.99,"info":"28/06/2015 at 13:39:07"},{"visible":true,"include":true,"step":"30.0","x":-5811.428571428572,"y":372.23809523809524,"z":955.6190476190476,"a95":0.99,"info":"28/06/2015 at 13:39:07"},{"visible":true,"include":true,"step":"33.0","x":-4985.238095238095,"y":918.5809523809525,"z":824.6571428571428,"a95":0.99,"info":"28/06/2015 at 13:39:07"},{"visible":true,"include":true,"step":"35.0","x":-4612,"y":652.6,"z":614.4761904761905,"a95":0.99,"info":"28/06/2015 at 13:39:07"},{"visible":true,"include":true,"step":"40.0","x":-4118.0952380952385,"y":-52.91904761904762,"z":49.43428571428571,"a95":0.99,"info":"28/06/2015 at 13:39:07"},{"visible":true,"include":false,"step":"45.0","x":-3501.714285714286,"y":569.9333333333334,"z":414.7142857142857,"a95":0.99,"info":"28/06/2015 at 13:39:07"},{"visible":true,"include":false,"step":"50.0","x":-2909.809523809524,"y":271.2095238095238,"z":276.7904761904762,"a95":0.99,"info":"28/06/2015 at 13:39:07"},{"visible":true,"include":false,"step":"55.0","x":-2739.3333333333335,"y":-352.1714285714286,"z":-5.115142857142858,"a95":0.99,"info":"28/06/2015 at 13:39:07"},{"visible":true,"include":false,"step":"60.0","x":-2222.5714285714284,"y":904.104761904762,"z":222.61904761904762,"a95":0.99,"info":"28/06/2015 at 13:39:07"},{"visible":true,"include":false,"step":"65.0","x":-2187.809523809524,"y":70.05619047619048,"z":-72.22571428571429,"a95":0.99,"info":"28/06/2015 at 13:39:07"},{"visible":true,"include":false,"step":"70.0","x":-2512.095238095238,"y":-357.64761904761906,"z":-118.12380952380951,"a95":0.99,"info":"28/06/2015 at 13:39:07"},{"visible":true,"include":false,"step":"80.0","x":-2113.809523809524,"y":852.1238095238094,"z":-8.959047619047618,"a95":0.99,"info":"28/06/2015 at 13:39:07"}]},{"version":"v1.1.0","exported":"2017-05-22T13:37:43.675Z","volume":10.5,"added":"2017-05-22T13:36:38.198Z","format":"Utrecht","demagType":"Unknown","strat":null,"patch":1.1,"GEO":[],"TECT":[],"interpreted":false,"name":"SS39.08A","coreAzi":317,"coreDip":47,"bedStrike":253,"bedDip":26,"data":[{"visible":true,"include":false,"step":"20","x":-19761.904761904763,"y":21916.47619047619,"z":55708.09523809524,"a95":2.2,"info":"\"15-06-23\" at \"18:30\""},{"visible":true,"include":false,"step":"90","x":-7633.523809523809,"y":16456.761904761905,"z":35644.47619047619,"a95":2.3,"info":"\"15-06-23\" at \"22:15\""},{"visible":true,"include":false,"step":"120","x":-8856.857142857143,"y":15133.809523809523,"z":34333.71428571428,"a95":2.4,"info":"\"15-06-24\" at \"21:37\""},{"visible":true,"include":false,"step":"150","x":-6226.190476190476,"y":11064,"z":24924.095238095237,"a95":2.3,"info":"\"15-06-28\" at \"01:35\""},{"visible":true,"include":false,"step":"180","x":-3925.714285714286,"y":7317.619047619048,"z":14348.857142857143,"a95":2.3,"info":"\"15-06-28\" at \"16:59\""},{"visible":true,"include":false,"step":"210","x":-3743.714285714286,"y":6733.428571428572,"z":14162.47619047619,"a95":2.3,"info":"\"15-06-28\" at \"19:53\""},{"visible":true,"include":false,"step":"240","x":-3938.095238095238,"y":5866.952380952381,"z":13138.095238095239,"a95":2.4,"info":"\"15-06-30\" at \"13:13\""},{"visible":true,"include":false,"step":"270","x":-2729.2380952380954,"y":2826.5714285714284,"z":7861.809523809524,"a95":2.5,"info":"\"15-07-01\" at \"08:14\""},{"visible":true,"include":false,"step":"330","x":-1729.142857142857,"y":2478.5714285714284,"z":6552.571428571428,"a95":2.7,"info":"\"15-07-01\" at \"13:30\""},{"visible":true,"include":false,"step":"350","x":-1758.2857142857142,"y":2594.095238095238,"z":6702.0952380952385,"a95":2.8,"info":"\"15-07-02\" at \"08:28\""},{"visible":true,"include":false,"step":"380","x":-1398,"y":3312.190476190476,"z":5613.714285714285,"a95":2.9,"info":"\"15-07-02\" at \"11:53\""},{"visible":true,"include":false,"step":"410","x":-1804.5714285714287,"y":2627.904761904762,"z":4606,"a95":2.9,"info":"\"15-07-02\" at \"15:04\""},{"visible":true,"include":false,"step":"440","x":-1302.6666666666667,"y":2235.5238095238096,"z":5002.666666666667,"a95":2.7,"info":"\"15-07-03\" at \"11:21\""},{"visible":true,"include":false,"step":"470","x":-1438.2857142857142,"y":1729.4285714285713,"z":3880.8571428571427,"a95":2.6,"info":"\"15-07-03\" at \"14:18\""}]},{"version":"v1.1.0","exported":"2017-05-22T13:37:43.675Z","volume":10.5,"added":"2017-05-22T13:36:38.198Z","format":"Utrecht","demagType":"Unknown","strat":"7","patch":1.1,"GEO":[{"dec":29.14049881068263,"inc":-29.146907103282295,"MAD":16.77632053096243,"cm":[0,7.815970093361102e-14,0],"intensity":11523.86276414305,"type":"GC","origin":false,"forced":true,"remark":"","nSteps":11,"minStep":"10.0","maxStep":"50.0","steps":["10.0","15.0","20.0","23.0","25.0","30.0","33.0","35.0","40.0","45.0","50.0"],"group":"None","version":"v1.1.0"}],"TECT":[{"dec":45.31570231612062,"inc":-44.671431232772726,"MAD":16.77632053096289,"cm":[-3.552713678800501e-14,-7.815970093361102e-14,1.2789769243681803e-13],"intensity":11523.86276414305,"type":"GC","origin":false,"forced":true,"remark":"","nSteps":11,"minStep":"10.0","maxStep":"50.0","steps":["10.0","15.0","20.0","23.0","25.0","30.0","33.0","35.0","40.0","45.0","50.0"],"group":"None","version":"v1.1.0"}],"interpreted":true,"name":"SS39.08B","coreAzi":317,"coreDip":47,"bedStrike":253,"bedDip":26,"data":[{"visible":true,"include":false,"step":"0.0","x":-6169.047619047619,"y":8001.047619047619,"z":16962.85714285714,"a95":0.99,"info":"28/06/2015 at 13:39:07"},{"visible":true,"include":true,"step":"10.0","x":-3465.2380952380954,"y":3837.4285714285716,"z":8554.952380952382,"a95":0.99,"info":"28/06/2015 at 13:39:07"},{"visible":true,"include":true,"step":"15.0","x":-2519.3333333333335,"y":3006.095238095238,"z":5158.0952380952385,"a95":0.99,"info":"28/06/2015 at 13:39:07"},{"visible":true,"include":true,"step":"20.0","x":-1936,"y":2005.7142857142858,"z":3417.2380952380954,"a95":0.99,"info":"28/06/2015 at 13:39:07"},{"visible":true,"include":true,"step":"23.0","x":-1722.6666666666667,"y":1752.095238095238,"z":3600.9523809523807,"a95":0.99,"info":"28/06/2015 at 13:39:07"},{"visible":true,"include":true,"step":"25.0","x":-1649.142857142857,"y":1726.1904761904761,"z":2661.2380952380954,"a95":0.99,"info":"28/06/2015 at 13:39:07"},{"visible":true,"include":true,"step":"30.0","x":-1682.1904761904761,"y":1072.2857142857142,"z":2037.8095238095239,"a95":0.99,"info":"28/06/2015 at 13:39:07"},{"visible":true,"include":true,"step":"33.0","x":-1820.3809523809523,"y":1572.952380952381,"z":2128.7619047619046,"a95":0.99,"info":"28/06/2015 at 13:39:07"},{"visible":true,"include":true,"step":"35.0","x":-1385.7142857142858,"y":1622,"z":1390.1904761904761,"a95":0.99,"info":"28/06/2015 at 13:39:07"},{"visible":true,"include":true,"step":"40.0","x":-1382.1904761904761,"y":932.4761904761905,"z":1196.6666666666667,"a95":0.99,"info":"28/06/2015 at 13:39:07"},{"visible":true,"include":true,"step":"45.0","x":-1628.3809523809523,"y":1340.952380952381,"z":1701.8095238095239,"a95":0.99,"info":"28/06/2015 at 13:39:07"},{"visible":true,"include":true,"step":"50.0","x":-1584.2857142857142,"y":974.1904761904761,"z":618.3809523809524,"a95":0.99,"info":"28/06/2015 at 13:39:07"},{"visible":true,"include":false,"step":"55.0","x":-1466.6666666666667,"y":228.86666666666665,"z":697.8285714285714,"a95":0.99,"info":"28/06/2015 at 13:39:07"},{"visible":true,"include":false,"step":"60.0","x":-2045.3333333333333,"y":861.7238095238096,"z":1195.6190476190477,"a95":0.99,"info":"28/06/2015 at 13:39:07"},{"visible":true,"include":false,"step":"65.0","x":-1081.4285714285713,"y":860.104761904762,"z":403.91428571428577,"a95":0.99,"info":"28/06/2015 at 13:39:07"},{"visible":true,"include":false,"step":"70.0","x":-1701.142857142857,"y":-71.75714285714287,"z":239.62857142857143,"a95":0.99,"info":"28/06/2015 at 13:39:07"},{"visible":true,"include":false,"step":"80.0","x":-2802.9523809523807,"y":599.7619047619048,"z":1390.857142857143,"a95":0.99,"info":"28/06/2015 at 13:39:07"}]},{"version":"v1.1.0","exported":"2017-05-22T13:37:43.675Z","volume":10.5,"added":"2017-05-22T13:36:38.198Z","format":"Utrecht","demagType":"Unknown","strat":null,"patch":1.1,"GEO":[],"TECT":[],"interpreted":false,"name":"SS39.10A","coreAzi":285,"coreDip":24,"bedStrike":253,"bedDip":26,"data":[{"visible":true,"include":false,"step":"20","x":-36879.52380952381,"y":23541.904761904763,"z":30901.14285714286,"a95":1.8,"info":"\"15-06-23\" at \"18:36\""},{"visible":true,"include":false,"step":"90","x":-18180.666666666668,"y":19033.52380952381,"z":17333.809523809523,"a95":1.8,"info":"\"15-06-23\" at \"22:16\""},{"visible":true,"include":false,"step":"120","x":-16353.333333333334,"y":17729.714285714286,"z":16287.333333333334,"a95":1.8,"info":"\"15-06-24\" at \"21:39\""},{"visible":true,"include":false,"step":"150","x":-13624.57142857143,"y":9459.142857142857,"z":11337.809523809523,"a95":1.8,"info":"\"15-06-28\" at \"01:36\""},{"visible":true,"include":false,"step":"180","x":-7967.142857142857,"y":6482.666666666667,"z":7345.9047619047615,"a95":1.9,"info":"\"15-06-28\" at \"17:00\""},{"visible":true,"include":false,"step":"210","x":-8378.666666666666,"y":5739.238095238095,"z":7487.142857142857,"a95":2.1,"info":"\"15-06-28\" at \"19:55\""},{"visible":true,"include":false,"step":"240","x":-7365.809523809524,"y":5340.285714285715,"z":6672.666666666667,"a95":2,"info":"\"15-06-30\" at \"13:15\""},{"visible":true,"include":false,"step":"270","x":-4818.857142857143,"y":3247.2380952380954,"z":4254.952380952381,"a95":2.1,"info":"\"15-07-01\" at \"08:15\""},{"visible":true,"include":false,"step":"330","x":-4192.761904761905,"y":3019.4285714285716,"z":3997.3333333333335,"a95":2.1,"info":"\"15-07-01\" at \"13:31\""},{"visible":true,"include":false,"step":"350","x":-4223.428571428572,"y":2870.7619047619046,"z":3902.190476190476,"a95":2.3,"info":"\"15-07-02\" at \"08:30\""},{"visible":true,"include":false,"step":"380","x":-3442.7619047619046,"y":2228.5714285714284,"z":4332,"a95":2.4,"info":"\"15-07-02\" at \"11:54\""},{"visible":true,"include":false,"step":"410","x":-4307.809523809524,"y":2647.6190476190477,"z":3864,"a95":2.4,"info":"\"15-07-02\" at \"15:05\""},{"visible":true,"include":false,"step":"440","x":-3550.095238095238,"y":1989.6190476190477,"z":3802.285714285714,"a95":2.4,"info":"\"15-07-03\" at \"11:23\""},{"visible":true,"include":false,"step":"470","x":-3149.5238095238096,"y":3128.6666666666665,"z":3583.5238095238096,"a95":2.3,"info":"\"15-07-03\" at \"14:19\""}]},{"version":"v1.1.0","exported":"2017-05-22T13:37:43.675Z","volume":10.5,"added":"2017-05-22T13:36:38.198Z","format":"Utrecht","demagType":"Unknown","strat":"8","patch":1.1,"GEO":[{"dec":59.881850184061875,"inc":-8.021587587522221,"MAD":7.6790744118336,"cm":[-5.684341886080802e-14,-5.417888360170764e-13,0],"intensity":18179.129609791955,"type":"GC","origin":false,"forced":true,"remark":"","nSteps":6,"minStep":"10.0","maxStep":"30.0","steps":["10.0","15.0","20.0","23.0","25.0","30.0"],"group":"None","version":"v1.1.0"}],"TECT":[{"dec":64.69219988936186,"inc":-12.940698363235102,"MAD":7.679074411835371,"cm":[1.7053025658242404e-13,5.719869022868806e-13,0],"intensity":18179.129609791955,"type":"GC","origin":false,"forced":true,"remark":"","nSteps":6,"minStep":"10.0","maxStep":"30.0","steps":["10.0","15.0","20.0","23.0","25.0","30.0"],"group":"None","version":"v1.1.0"}],"interpreted":true,"name":"SS39.10B","coreAzi":285,"coreDip":24,"bedStrike":253,"bedDip":26,"data":[{"visible":true,"include":false,"step":"0.0","x":-17951.428571428572,"y":13466.666666666666,"z":18081.904761904763,"a95":0.99,"info":"28/06/2015 at 13:39:07"},{"visible":true,"include":true,"step":"10.0","x":-10030.47619047619,"y":5758.857142857143,"z":8030.0952380952385,"a95":0.99,"info":"28/06/2015 at 13:39:07"},{"visible":true,"include":true,"step":"15.0","x":-6766.285714285715,"y":3448.5714285714284,"z":5206.285714285715,"a95":0.99,"info":"28/06/2015 at 13:39:07"},{"visible":true,"include":true,"step":"20.0","x":-4941.809523809524,"y":2219.5238095238096,"z":3306.7619047619046,"a95":0.99,"info":"28/06/2015 at 13:39:07"},{"visible":true,"include":true,"step":"23.0","x":-4490.666666666667,"y":2100.6666666666665,"z":3017.3333333333335,"a95":0.99,"info":"28/06/2015 at 13:39:07"},{"visible":true,"include":true,"step":"25.0","x":-3544.285714285714,"y":1788.4761904761904,"z":2521.3333333333335,"a95":0.99,"info":"28/06/2015 at 13:39:07"},{"visible":true,"include":true,"step":"30.0","x":-3741.809523809524,"y":901.4285714285714,"z":1790.5714285714287,"a95":0.99,"info":"28/06/2015 at 13:39:07"},{"visible":true,"include":false,"step":"33.0","x":-3534.5714285714284,"y":1357.904761904762,"z":2074.3809523809523,"a95":0.99,"info":"28/06/2015 at 13:39:07"},{"visible":true,"include":false,"step":"35.0","x":-2628.4761904761904,"y":910.3428571428572,"z":1598.2857142857142,"a95":0.99,"info":"28/06/2015 at 13:39:07"},{"visible":true,"include":false,"step":"40.0","x":-3282.3809523809523,"y":-45.481904761904765,"z":1666.857142857143,"a95":0.99,"info":"28/06/2015 at 13:39:07"},{"visible":true,"include":false,"step":"45.0","x":-3210,"y":929.7047619047619,"z":1538.4761904761904,"a95":0.99,"info":"28/06/2015 at 13:39:07"},{"visible":true,"include":false,"step":"50.0","x":-1907.8095238095239,"y":497.57142857142856,"z":968.8571428571429,"a95":0.99,"info":"28/06/2015 at 13:39:07"},{"visible":true,"include":false,"step":"55.0","x":-2830.3809523809523,"y":-655.0666666666666,"z":1090.4761904761904,"a95":0.99,"info":"28/06/2015 at 13:39:07"},{"visible":true,"include":false,"step":"60.0","x":-2431.4285714285716,"y":884.2761904761904,"z":1585.5238095238096,"a95":0.99,"info":"28/06/2015 at 13:39:07"},{"visible":true,"include":false,"step":"65.0","x":-2301.4285714285716,"y":882.5619047619048,"z":1301.8095238095239,"a95":0.99,"info":"28/06/2015 at 13:39:07"},{"visible":true,"include":false,"step":"70.0","x":-3570,"y":-552.6571428571428,"z":951.4476190476191,"a95":0.99,"info":"28/06/2015 at 13:39:07"},{"visible":true,"include":false,"step":"80.0","x":2350.6666666666665,"y":581.2761904761904,"z":1253.6190476190477,"a95":0.99,"info":"28/06/2015 at 13:39:07"}]}]
