# Supplementary material for: Paleomagnetic constraints on the timing and distribution of Cenozoic rotations in Central and Eastern Anatolia
Source: Copernicus journal article supplement (doi:10.5194/se-9-295-2018), 2018-03-21
Supplement: Supplementary file 2 [file se-9-295-2018-supplement.zip › se-2017-66_DATA_dir files/dir files Sivas/SS40.dir]

[{"version":"v1.1.0","exported":"2017-05-22T13:34:37.136Z","info":"5","GEO":[{"dec":40.285114010546465,"inc":-20.864445694736293,"MAD":9.803758997723591,"cm":[-1.8474111129762605e-13,2.4158453015843406e-13,0],"intensity":16176.171825829975,"type":"GC","origin":false,"forced":true,"remark":"","nSteps":8,"minStep":"15.0","maxStep":"40.0","steps":["15.0","20.0","23.0","25.0","30.0","33.0","35.0","40.0"],"group":"None","version":"v1.1.0"}],"TECT":[{"dec":67.85297594103935,"inc":-33.407838424344625,"MAD":9.803758997721172,"cm":[-1.7053025658242404e-13,2.851052727237402e-13,1.4210854715202004e-13],"intensity":16176.171825829975,"type":"GC","origin":false,"forced":true,"remark":"","nSteps":8,"minStep":"15.0","maxStep":"40.0","steps":["15.0","20.0","23.0","25.0","30.0","33.0","35.0","40.0"],"group":"None","version":"v1.1.0"}],"interpreted":true,"name":"SS40.01A","coreAzi":295,"coreDip":61,"bedStrike":247,"bedDip":51,"data":[{"visible":true,"include":false,"step":"0.0","x":-8564.190476190477,"y":12154.285714285714,"z":22801.904761904763,"a95":"0.99","info":"27/06/2015 at 22:25:17"},{"visible":true,"include":false,"step":"10.0","x":-5471.238095238095,"y":7543.333333333333,"z":15077.142857142857,"a95":"0.99","info":"27/06/2015 at 22:25:17"},{"visible":true,"include":true,"step":"15.0","x":-5052.380952380952,"y":4446.761904761905,"z":9446.857142857143,"a95":"0.99","info":"27/06/2015 at 22:25:17"},{"visible":true,"include":true,"step":"20.0","x":-4050.6666666666665,"y":3229.4285714285716,"z":7355.047619047619,"a95":"0.99","info":"27/06/2015 at 22:25:17"},{"visible":true,"include":true,"step":"23.0","x":-3836,"y":2542.285714285714,"z":6172.952380952381,"a95":"0.99","info":"27/06/2015 at 22:25:17"},{"visible":true,"include":true,"step":"25.0","x":-3883.4285714285716,"y":2492.6666666666665,"z":5466.571428571428,"a95":"0.99","info":"27/06/2015 at 22:25:17"},{"visible":true,"include":true,"step":"30.0","x":-3672,"y":1941.2380952380952,"z":4527.809523809524,"a95":"0.99","info":"27/06/2015 at 22:25:17"},{"visible":true,"include":true,"step":"33.0","x":-3663.0476190476193,"y":1761.3333333333333,"z":3803.4285714285716,"a95":"0.99","info":"27/06/2015 at 22:25:17"},{"visible":true,"include":true,"step":"35.0","x":-2990.9523809523807,"y":1689.7142857142858,"z":3920.190476190476,"a95":"0.99","info":"27/06/2015 at 22:25:17"},{"visible":true,"include":true,"step":"40.0","x":-2532.8571428571427,"y":1570.7619047619048,"z":3511.6190476190477,"a95":"0.99","info":"27/06/2015 at 22:25:17"},{"visible":true,"include":false,"step":"45.0","x":-2723.5238095238096,"y":828.5238095238095,"z":3148.5714285714284,"a95":"0.99","info":"27/06/2015 at 22:25:17"},{"visible":true,"include":false,"step":"50.0","x":-2237.0476190476193,"y":913.6571428571428,"z":3152.3809523809523,"a95":"0.99","info":"27/06/2015 at 22:25:17"},{"visible":true,"include":false,"step":"55.0","x":-2352.4761904761904,"y":776.2095238095238,"z":2389.1428571428573,"a95":"0.99","info":"27/06/2015 at 22:25:17"},{"visible":true,"include":false,"step":"60.0","x":-2002.095238095238,"y":90.5952380952381,"z":2639.809523809524,"a95":"0.99","info":"27/06/2015 at 22:25:17"},{"visible":true,"include":false,"step":"65.0","x":-1803.6190476190477,"y":9.639047619047618,"z":2674.8571428571427,"a95":"0.99","info":"27/06/2015 at 22:25:17"},{"visible":true,"include":false,"step":"70.0","x":-1921.4285714285713,"y":474.57142857142856,"z":2711.6190476190477,"a95":"0.99","info":"27/06/2015 at 22:25:17"},{"visible":true,"include":false,"step":"80.0","x":-1717.5238095238096,"y":-111.96190476190475,"z":2055.714285714286,"a95":"0.99","info":"27/06/2015 at 22:25:17"}],"demagType":"Unknown","patch":1.1,"format":"Unknown","strat":null},{"version":"v1.1.0","exported":"2017-05-22T13:34:37.136Z","info":"","GEO":[{"dec":36.7496856332678,"inc":-25.4587889265641,"MAD":15.721668468968046,"cm":[1.1368683772161603e-13,7.673861546209082e-13,0],"intensity":36620.89193770306,"type":"GC","origin":false,"forced":true,"remark":"","nSteps":5,"minStep":"100","maxStep":"250","steps":["100","150","180","210","250"],"group":"None","version":"v1.1.0"}],"TECT":[{"dec":70.50800911631262,"inc":-38.60976080223519,"MAD":15.721668468968948,"cm":[2.2737367544323206e-13,-6.856737400084967e-13,3.410605131648481e-13],"intensity":36620.89193770306,"type":"GC","origin":false,"forced":true,"remark":"","nSteps":5,"minStep":"100","maxStep":"250","steps":["100","150","180","210","250"],"group":"None","version":"v1.1.0"}],"interpreted":true,"name":"SS40.02A","coreAzi":290,"coreDip":60,"bedStrike":247,"bedDip":51,"data":[{"visible":true,"include":false,"step":"20","x":-9172.952380952382,"y":19377.714285714286,"z":34616.76190476191,"a95":"2.2","info":"\"15-06-22\" at \"07:16\""},{"visible":true,"include":true,"step":"100","x":-9025.142857142857,"y":12630.285714285714,"z":20733.809523809523,"a95":"2.1","info":"\"15-06-22\" at \"10:37\""},{"visible":true,"include":true,"step":"150","x":-8250.666666666666,"y":11873.714285714286,"z":21533.714285714286,"a95":"2","info":"\"15-06-23\" at \"07:53\""},{"visible":true,"include":true,"step":"180","x":-6594.857142857143,"y":6597.428571428572,"z":11612.57142857143,"a95":"2.1","info":"\"15-06-23\" at \"10:54\""},{"visible":true,"include":true,"step":"210","x":-5947.238095238095,"y":6061.047619047619,"z":10818.47619047619,"a95":"2.1","info":"\"15-06-23\" at \"13:56\""},{"visible":true,"include":false,"step":"230","x":-5450.952380952381,"y":4571.333333333333,"z":7747.9047619047615,"a95":"2","info":"\"15-06-24\" at \"07:46\""},{"visible":true,"include":true,"step":"250","x":-5552.0952380952385,"y":4577.619047619048,"z":8118.952380952381,"a95":"2","info":"\"15-06-24\" at \"11:32\""},{"visible":true,"include":false,"step":"270","x":-6132.952380952381,"y":4276.761904761905,"z":5386,"a95":"2.4","info":"\"15-06-24\" at \"14:43\""},{"visible":true,"include":false,"step":"300","x":-3904.3809523809523,"y":4396.0952380952385,"z":6484.952380952381,"a95":"2","info":"\"15-06-25\" at \"09:30\""},{"visible":true,"include":false,"step":"320","x":-4752.190476190476,"y":23.714285714285715,"z":-149.14285714285714,"a95":"3.5","info":"\"15-06-25\" at \"13:18\""},{"visible":true,"include":false,"step":"340","x":-3624.285714285714,"y":3263.4285714285716,"z":4817.047619047619,"a95":"1.8","info":"\"15-06-25\" at \"16:22\""},{"visible":true,"include":false,"step":"370","x":-3950.8571428571427,"y":2093.904761904762,"z":4465.047619047619,"a95":"2","info":"\"15-06-25\" at \"20:14\""},{"visible":true,"include":false,"step":"400","x":-3600,"y":2185.1428571428573,"z":4200.761904761905,"a95":"2.1","info":"\"15-06-26\" at \"07:32\""},{"visible":true,"include":false,"step":"420","x":-2438.7619047619046,"y":1815.3333333333333,"z":4037.6190476190477,"a95":"2","info":"\"15-06-26\" at \"10:45\""},{"visible":true,"include":false,"step":"440","x":-4296.190476190476,"y":1543.047619047619,"z":4019.809523809524,"a95":"1.9","info":"\"15-06-27\" at \"11:00\""},{"visible":true,"include":false,"step":"470","x":-4029.904761904762,"y":2792.8571428571427,"z":2254.190476190476,"a95":"1.8","info":"\"15-06-29\" at \"06:59\""},{"visible":true,"include":false,"step":"490","x":-3211.4285714285716,"y":2567.1428571428573,"z":2987.1428571428573,"a95":"1.9","info":"\"15-06-29\" at \"10:23\""},{"visible":true,"include":false,"step":"520","x":-2852.5714285714284,"y":1739.5238095238096,"z":3753.5238095238096,"a95":"2.4","info":"\"15-06-29\" at \"14:11\""},{"visible":true,"include":false,"step":"550","x":-2190.8571428571427,"y":614.1904761904761,"z":2852.3809523809523,"a95":"2.3","info":"\"15-06-30\" at \"07:24\""},{"visible":true,"include":false,"step":"580","x":-2983.4285714285716,"y":676.8571428571429,"z":1098.095238095238,"a95":"1.9","info":"\"15-07-01\" at \"10:42\""}],"demagType":"Unknown","patch":1.1,"format":"Unknown","strat":null},{"version":"v1.1.0","exported":"2017-05-22T13:34:37.136Z","info":"","GEO":[{"dec":249.69798235510262,"inc":-25.69497892847488,"MAD":7.301002440396242,"cm":[-3.6812880786047096e-13,3.248195363474744e-13,0],"intensity":16651.740368413513,"type":"dir","forced":true,"remark":"","origin":false,"nSteps":14,"minStep":"180","maxStep":"520","steps":["180","210","230","250","270","300","320","340","370","400","420","440","470","520"],"group":"None"}],"TECT":[{"dec":227.98142004262775,"inc":-17.807788174762702,"MAD":7.301002440396244,"cm":[-2.9233758271272696e-13,4.980566223994607e-13,-7.342274936187702e-14],"intensity":16651.740368413513,"type":"dir","forced":true,"remark":"","origin":false,"nSteps":14,"minStep":"180","maxStep":"520","steps":["180","210","230","250","270","300","320","340","370","400","420","440","470","520"],"group":"None"}],"interpreted":true,"name":"SS40.04A","coreAzi":89,"coreDip":60,"bedStrike":247,"bedDip":51,"data":[{"visible":true,"include":false,"step":"20","x":-17106.47619047619,"y":22081.904761904763,"z":-4154.857142857143,"a95":"2.8","info":"\"15-06-22\" at \"07:19\""},{"visible":true,"include":false,"step":"100","x":-9906.666666666666,"y":8352.285714285714,"z":-11208.47619047619,"a95":"3.6","info":"\"15-06-22\" at \"10:40\""},{"visible":true,"include":false,"step":"150","x":-9834,"y":8188.0952380952385,"z":-11287.52380952381,"a95":"3.6","info":"\"15-06-23\" at \"07:55\""},{"visible":true,"include":true,"step":"180","x":-6850.952380952381,"y":4347.047619047619,"z":-11219.238095238095,"a95":"3","info":"\"15-06-23\" at \"10:56\""},{"visible":true,"include":true,"step":"210","x":-6839.9047619047615,"y":3810.7619047619046,"z":-10514.095238095239,"a95":"3.5","info":"\"15-06-23\" at \"13:58\""},{"visible":true,"include":true,"step":"230","x":-5090.0952380952385,"y":3155.904761904762,"z":-8460.666666666666,"a95":"3.4","info":"\"15-06-24\" at \"07:48\""},{"visible":true,"include":true,"step":"250","x":-5081.809523809524,"y":2194.4761904761904,"z":-8199.238095238095,"a95":"3.5","info":"\"15-06-24\" at \"11:33\""},{"visible":true,"include":true,"step":"270","x":-4091.4285714285716,"y":2483.904761904762,"z":-4736.571428571428,"a95":"4.6","info":"\"15-06-24\" at \"14:45\""},{"visible":true,"include":true,"step":"300","x":-3321.0476190476193,"y":1314.095238095238,"z":-6453.9047619047615,"a95":"3.5","info":"\"15-06-25\" at \"09:32\""},{"visible":true,"include":true,"step":"320","x":-3636.095238095238,"y":1610.2857142857142,"z":-4491.523809523809,"a95":"3.4","info":"\"15-06-25\" at \"13:20\""},{"visible":true,"include":true,"step":"340","x":-3049.2380952380954,"y":1483.142857142857,"z":-4436.0952380952385,"a95":"3","info":"\"15-06-25\" at \"16:24\""},{"visible":true,"include":true,"step":"370","x":-2603.4285714285716,"y":2021.4285714285713,"z":-5588.571428571428,"a95":"2.5","info":"\"15-06-25\" at \"20:17\""},{"visible":true,"include":true,"step":"400","x":-2694,"y":1402.6666666666667,"z":-3454.8571428571427,"a95":"3.4","info":"\"15-06-26\" at \"07:33\""},{"visible":true,"include":true,"step":"420","x":-2250.7619047619046,"y":1882.952380952381,"z":-4125.9047619047615,"a95":"2.7","info":"\"15-06-26\" at \"10:46\""},{"visible":true,"include":true,"step":"440","x":-3615.714285714286,"y":1331.3333333333333,"z":-941.9047619047619,"a95":"2.8","info":"\"15-06-27\" at \"11:02\""},{"visible":true,"include":true,"step":"470","x":-2073.5238095238096,"y":2001.5238095238096,"z":-2068.4761904761904,"a95":"2.5","info":"\"15-06-29\" at \"07:01\""},{"visible":true,"include":false,"step":"490","x":-1224.1904761904761,"y":828.8571428571429,"z":838.952380952381,"a95":"4.6","info":"\"15-06-29\" at \"10:25\""},{"visible":true,"include":true,"step":"520","x":-1749.047619047619,"y":1605.7142857142858,"z":-1737.8095238095239,"a95":"3.1","info":"\"15-06-29\" at \"14:13\""},{"visible":true,"include":false,"step":"550","x":-1247.6190476190477,"y":191.8095238095238,"z":-917.5238095238095,"a95":"5.3","info":"\"15-06-30\" at \"07:26\""},{"visible":true,"include":false,"step":"580","x":-967.2380952380952,"y":453.3333333333333,"z":-1059.6190476190477,"a95":"2.9","info":"\"15-07-01\" at \"10:44\""}],"demagType":"Unknown","patch":1.1,"format":"Unknown","strat":null},{"version":"v1.1.0","exported":"2017-05-22T13:34:37.136Z","info":"6","GEO":[{"dec":30.248772705143324,"inc":-22.161313608374453,"MAD":28.396132640270366,"cm":[-1.2789769243681803e-13,3.552713678800501e-13,0],"intensity":18847.76903571303,"type":"GC","origin":false,"forced":true,"remark":"","nSteps":8,"minStep":"15.0","maxStep":"40.0","steps":["15.0","20.0","23.0","25.0","30.0","33.0","35.0","40.0"],"group":"None","version":"v1.1.0"}],"TECT":[{"dec":62.716524141364175,"inc":-41.91572111850453,"MAD":28.396132640270366,"cm":[-3.410605131648481e-13,-2.029043599804936e-12,8.526512829121202e-14],"intensity":18847.76903571303,"type":"GC","origin":false,"forced":true,"remark":"","nSteps":8,"minStep":"15.0","maxStep":"40.0","steps":["15.0","20.0","23.0","25.0","30.0","33.0","35.0","40.0"],"group":"None","version":"v1.1.0"}],"interpreted":true,"name":"SS40.05A","coreAzi":310,"coreDip":53,"bedStrike":247,"bedDip":51,"data":[{"visible":true,"include":false,"step":"0.0","x":-13806.666666666666,"y":14104.761904761905,"z":32490.47619047619,"a95":"0.99","info":"27/06/2015 at 22:25:17"},{"visible":true,"include":false,"step":"10.0","x":-7565.9047619047615,"y":9069.238095238095,"z":19085.714285714286,"a95":"0.99","info":"27/06/2015 at 22:25:17"},{"visible":true,"include":true,"step":"15.0","x":-5970.761904761905,"y":5034.571428571428,"z":11133.333333333334,"a95":"0.99","info":"27/06/2015 at 22:25:17"},{"visible":true,"include":true,"step":"20.0","x":-5031.9047619047615,"y":4093.2380952380954,"z":8389.809523809523,"a95":"0.99","info":"27/06/2015 at 22:25:17"},{"visible":true,"include":true,"step":"23.0","x":-4324,"y":2911.3333333333335,"z":6978.571428571428,"a95":"0.99","info":"27/06/2015 at 22:25:17"},{"visible":true,"include":true,"step":"25.0","x":-4241.047619047619,"y":2760.190476190476,"z":6893.809523809524,"a95":"0.99","info":"27/06/2015 at 22:25:17"},{"visible":true,"include":true,"step":"30.0","x":-3582.190476190476,"y":2782.8571428571427,"z":5098.571428571428,"a95":"0.99","info":"27/06/2015 at 22:25:17"},{"visible":true,"include":true,"step":"33.0","x":-3535.2380952380954,"y":2470.4761904761904,"z":4526,"a95":"0.99","info":"27/06/2015 at 22:25:17"},{"visible":true,"include":true,"step":"35.0","x":-3226.095238095238,"y":2143.0476190476193,"z":4685.142857142857,"a95":"0.99","info":"27/06/2015 at 22:25:17"},{"visible":true,"include":true,"step":"40.0","x":-2925.904761904762,"y":2029.047619047619,"z":3906.3809523809523,"a95":"0.99","info":"27/06/2015 at 22:25:17"},{"visible":true,"include":false,"step":"45.0","x":-3015.5238095238096,"y":1343.7142857142858,"z":3152,"a95":"0.99","info":"27/06/2015 at 22:25:17"},{"visible":true,"include":false,"step":"50.0","x":-3024,"y":1818.4761904761904,"z":3385.5238095238096,"a95":"0.99","info":"27/06/2015 at 22:25:17"},{"visible":true,"include":false,"step":"55.0","x":-2957.3333333333335,"y":1505.5238095238096,"z":2739.6190476190477,"a95":"0.99","info":"27/06/2015 at 22:25:17"},{"visible":true,"include":false,"step":"60.0","x":-2834.9523809523807,"y":553.6952380952381,"z":2592.5714285714284,"a95":"0.99","info":"27/06/2015 at 22:25:17"},{"visible":true,"include":false,"step":"65.0","x":-2563.714285714286,"y":788.9333333333333,"z":2743.714285714286,"a95":"0.99","info":"27/06/2015 at 22:25:17"},{"visible":true,"include":false,"step":"70.0","x":-2024.857142857143,"y":499.81904761904764,"z":1710,"a95":"0.99","info":"27/06/2015 at 22:25:17"},{"visible":true,"include":false,"step":"80.0","x":-1456.857142857143,"y":854.2190476190475,"z":2400,"a95":"0.99","info":"27/06/2015 at 22:25:17"}],"demagType":"Unknown","patch":1.1,"format":"Unknown","strat":null},{"version":"v1.1.0","exported":"2017-05-22T13:34:37.136Z","info":"7","GEO":[],"TECT":[],"interpreted":false,"name":"SS40.06B","coreAzi":282,"coreDip":52,"bedStrike":247,"bedDip":51,"data":[{"visible":true,"include":false,"step":"0.0","x":-9192.47619047619,"y":6600.190476190476,"z":13164.761904761905,"a95":"0.99","info":"27/06/2015 at 22:25:17"},{"visible":true,"include":false,"step":"10.0","x":-5589.333333333333,"y":3950.4761904761904,"z":8562.761904761905,"a95":"0.99","info":"27/06/2015 at 22:25:17"},{"visible":true,"include":true,"step":"15.0","x":-4357.142857142857,"y":2165.6190476190477,"z":5354,"a95":"0.99","info":"27/06/2015 at 22:25:17"},{"visible":true,"include":true,"step":"20.0","x":-3495.4285714285716,"y":1701.4285714285713,"z":3931.6190476190477,"a95":"0.99","info":"27/06/2015 at 22:25:17"},{"visible":true,"include":true,"step":"23.0","x":-3062.6666666666665,"y":1323.3333333333333,"z":3312.285714285714,"a95":"0.99","info":"27/06/2015 at 22:25:17"},{"visible":true,"include":true,"step":"25.0","x":-2804.6666666666665,"y":1245.3333333333333,"z":3241.2380952380954,"a95":"0.99","info":"27/06/2015 at 22:25:17"},{"visible":true,"include":true,"step":"30.0","x":-2214.4761904761904,"y":996.2857142857143,"z":2551.4285714285716,"a95":"0.99","info":"27/06/2015 at 22:25:17"},{"visible":true,"include":true,"step":"33.0","x":-1900.2857142857142,"y":589.504761904762,"z":1856.7619047619048,"a95":"0.99","info":"27/06/2015 at 22:25:17"},{"visible":true,"include":true,"step":"35.0","x":-1799.5238095238096,"y":869.4285714285714,"z":2270,"a95":"0.99","info":"27/06/2015 at 22:25:17"},{"visible":true,"include":true,"step":"40.0","x":-1743.6190476190477,"y":677.5809523809525,"z":1446.2857142857142,"a95":"0.99","info":"27/06/2015 at 22:25:17"},{"visible":true,"include":true,"step":"45.0","x":-1468.4761904761904,"y":597.3809523809524,"z":1295.6190476190477,"a95":"0.99","info":"27/06/2015 at 22:25:17"},{"visible":true,"include":true,"step":"50.0","x":-1547.5238095238096,"y":593.6571428571428,"z":1493.4285714285713,"a95":"0.99","info":"27/06/2015 at 22:25:17"},{"visible":true,"include":true,"step":"55.0","x":-1452.1904761904761,"y":371.8285714285714,"z":807.8190476190476,"a95":"0.99","info":"27/06/2015 at 22:25:17"},{"visible":true,"include":false,"step":"60.0","x":-870.4190476190475,"y":61.64380952380952,"z":689.7619047619048,"a95":"0.99","info":"27/06/2015 at 22:25:17"},{"visible":true,"include":false,"step":"65.0","x":-824.952380952381,"y":475.95238095238096,"z":1370.095238095238,"a95":"0.99","info":"27/06/2015 at 22:25:17"},{"visible":true,"include":false,"step":"70.0","x":-1081.047619047619,"y":455.34285714285716,"z":969.8095238095239,"a95":"0.99","info":"27/06/2015 at 22:25:17"},{"visible":true,"include":false,"step":"80.0","x":-1637.5238095238096,"y":330.8952380952381,"z":434.2476190476191,"a95":"0.99","info":"27/06/2015 at 22:25:17"}],"demagType":"Unknown","patch":1.1,"format":"Unknown","strat":null},{"version":"v1.1.0","exported":"2017-05-22T13:34:37.136Z","info":"","GEO":[{"dec":51.24535390129353,"inc":-23.599021904439226,"MAD":25.94107977945652,"cm":[-2.8421709430404007e-13,3.694822225952521e-13,0],"intensity":29016.18673068573,"type":"GC","origin":false,"forced":true,"remark":"","nSteps":7,"minStep":"100","maxStep":"420","steps":["100","300","320","340","370","400","420"],"group":"None","version":"v1.1.0"}],"TECT":[{"dec":76.93854771322208,"inc":-26.44257584851576,"MAD":25.941079779456597,"cm":[0,1.2079226507921703e-12,4.547473508864641e-13],"intensity":29016.18673068573,"type":"GC","origin":false,"forced":true,"remark":"","nSteps":7,"minStep":"100","maxStep":"420","steps":["100","300","320","340","370","400","420"],"group":"None","version":"v1.1.0"}],"interpreted":true,"name":"SS40.07A","coreAzi":275,"coreDip":49,"bedStrike":247,"bedDip":51,"data":[{"visible":true,"include":false,"step":"20","x":-21348.666666666668,"y":24028.666666666668,"z":31810.47619047619,"a95":"2","info":"\"15-06-22\" at \"07:33\""},{"visible":true,"include":true,"step":"100","x":-15476.952380952382,"y":11544.380952380952,"z":14307.809523809523,"a95":"1.8","info":"\"15-06-22\" at \"10:42\""},{"visible":true,"include":false,"step":"150","x":-14136.761904761905,"y":9409.142857142857,"z":13087.904761904761,"a95":"1.8","info":"\"15-06-23\" at \"07:57\""},{"visible":true,"include":false,"step":"180","x":-10914.47619047619,"y":5064.380952380952,"z":7512.380952380952,"a95":"1.7","info":"\"15-06-23\" at \"10:57\""},{"visible":true,"include":false,"step":"210","x":-10464.285714285714,"y":5169.714285714285,"z":7853.523809523809,"a95":"1.8","info":"\"15-06-23\" at \"14:00\""},{"visible":true,"include":false,"step":"230","x":-8196.095238095239,"y":4300.952380952381,"z":4709.238095238095,"a95":"1.8","info":"\"15-06-24\" at \"07:49\""},{"visible":true,"include":false,"step":"250","x":-8964.57142857143,"y":3156.9523809523807,"z":4556.0952380952385,"a95":"1.8","info":"\"15-06-24\" at \"11:35\""},{"visible":true,"include":false,"step":"270","x":-8175.047619047619,"y":2048.5714285714284,"z":4740.761904761905,"a95":"2.2","info":"\"15-06-24\" at \"14:47\""},{"visible":true,"include":true,"step":"300","x":-6497.333333333333,"y":1741.6190476190477,"z":5779.142857142857,"a95":"2","info":"\"15-06-25\" at \"09:33\""},{"visible":true,"include":true,"step":"320","x":-5689.142857142857,"y":1598.7619047619048,"z":2085.904761904762,"a95":"1.8","info":"\"15-06-25\" at \"13:21\""},{"visible":true,"include":true,"step":"340","x":-6145.142857142857,"y":1238,"z":4823.142857142857,"a95":"2","info":"\"15-06-25\" at \"16:25\""},{"visible":true,"include":true,"step":"370","x":-5136.761904761905,"y":1430.7619047619048,"z":2243.714285714286,"a95":"1.7","info":"\"15-06-25\" at \"20:20\""},{"visible":true,"include":true,"step":"400","x":-5948.666666666667,"y":705.3333333333334,"z":2276.095238095238,"a95":"1.8","info":"\"15-06-26\" at \"07:54\""},{"visible":true,"include":true,"step":"420","x":-5237.9047619047615,"y":1248,"z":1477.904761904762,"a95":"2.2","info":"\"15-06-26\" at \"10:48\""},{"visible":true,"include":false,"step":"440","x":-5433.714285714285,"y":1946.7619047619048,"z":1190.7619047619048,"a95":"1.9","info":"\"15-06-27\" at \"10:08\""},{"visible":true,"include":false,"step":"470","x":-5399.238095238095,"y":390.1904761904762,"z":2007.3333333333333,"a95":"1.7","info":"\"15-06-29\" at \"07:09\""},{"visible":true,"include":false,"step":"490","x":-5362.476190476191,"y":2094.9523809523807,"z":3604.7619047619046,"a95":"1.9","info":"\"15-06-29\" at \"10:27\""},{"visible":true,"include":false,"step":"520","x":-4066.5714285714284,"y":295.42857142857144,"z":2845.4285714285716,"a95":"2.4","info":"\"15-06-29\" at \"14:15\""},{"visible":true,"include":false,"step":"550","x":-5314.666666666667,"y":108.38095238095238,"z":1674.952380952381,"a95":"1.6","info":"\"15-06-30\" at \"07:30\""},{"visible":true,"include":false,"step":"580","x":-3366.095238095238,"y":498.3809523809524,"z":519.8095238095239,"a95":"2","info":"\"15-07-01\" at \"10:45\""}],"demagType":"Unknown","patch":1.1,"format":"Unknown","strat":null},{"version":"v1.1.0","exported":"2017-05-22T13:34:37.136Z","info":"8","GEO":[{"dec":49.056271039010426,"inc":-17.340894312593104,"MAD":15.691153085979863,"cm":[-3.907985046680551e-14,9.947598300641403e-14,0],"intensity":11301.018461233209,"type":"GC","origin":false,"forced":true,"remark":"","nSteps":9,"minStep":"15.0","maxStep":"45.0","steps":["15.0","20.0","23.0","25.0","30.0","33.0","35.0","40.0","45.0"],"group":"None","version":"v1.1.0"}],"TECT":[{"dec":69.93520382477067,"inc":-24.58960927099493,"MAD":15.691153085979224,"cm":[-1.7053025658242404e-13,1.3290757383543905e-13,8.526512829121202e-14],"intensity":11301.018461233207,"type":"GC","origin":false,"forced":true,"remark":"","nSteps":9,"minStep":"15.0","maxStep":"45.0","steps":["15.0","20.0","23.0","25.0","30.0","33.0","35.0","40.0","45.0"],"group":"None","version":"v1.1.0"}],"interpreted":true,"name":"SS40.07B","coreAzi":275,"coreDip":49,"bedStrike":247,"bedDip":51,"data":[{"visible":true,"include":false,"step":"0.0","x":-10630.47619047619,"y":9138.761904761905,"z":13391.42857142857,"a95":"0.99","info":"27/06/2015 at 22:25:17"},{"visible":true,"include":false,"step":"10.0","x":-6857.809523809524,"y":5230.476190476191,"z":9003.809523809523,"a95":"0.99","info":"27/06/2015 at 22:25:17"},{"visible":true,"include":true,"step":"15.0","x":-5542.380952380952,"y":3051.714285714286,"z":5807.619047619048,"a95":"0.99","info":"27/06/2015 at 22:25:17"},{"visible":true,"include":true,"step":"20.0","x":-4639.333333333333,"y":2198.285714285714,"z":4127.142857142857,"a95":"0.99","info":"27/06/2015 at 22:25:17"},{"visible":true,"include":true,"step":"23.0","x":-3921.5238095238096,"y":1518.095238095238,"z":3449.0476190476193,"a95":"0.99","info":"27/06/2015 at 22:25:17"},{"visible":true,"include":true,"step":"25.0","x":-3601.4285714285716,"y":1455.7142857142858,"z":3262.3809523809523,"a95":"0.99","info":"27/06/2015 at 22:25:17"},{"visible":true,"include":true,"step":"30.0","x":-3427.5238095238096,"y":1075.047619047619,"z":2430.5714285714284,"a95":"0.99","info":"27/06/2015 at 22:25:17"},{"visible":true,"include":true,"step":"33.0","x":-3069.1428571428573,"y":762.3238095238095,"z":2503.2380952380954,"a95":"0.99","info":"27/06/2015 at 22:25:17"},{"visible":true,"include":true,"step":"35.0","x":-2911.4285714285716,"y":902.3714285714285,"z":2520.4761904761904,"a95":"0.99","info":"27/06/2015 at 22:25:17"},{"visible":true,"include":true,"step":"40.0","x":-2960.7619047619046,"y":796.8285714285715,"z":2113.2380952380954,"a95":"0.99","info":"27/06/2015 at 22:25:17"},{"visible":true,"include":true,"step":"45.0","x":-2342,"y":418.50476190476195,"z":1507.2380952380952,"a95":"0.99","info":"27/06/2015 at 22:25:17"},{"visible":true,"include":false,"step":"50.0","x":-2351.1428571428573,"y":337.8,"z":1786.2857142857142,"a95":"0.99","info":"27/06/2015 at 22:25:17"},{"visible":true,"include":false,"step":"55.0","x":-2044,"y":100.78095238095239,"z":1476.6666666666667,"a95":"0.99","info":"27/06/2015 at 22:25:17"},{"visible":true,"include":false,"step":"60.0","x":-1799.4285714285713,"y":-245.50476190476192,"z":1334.095238095238,"a95":"0.99","info":"27/06/2015 at 22:25:17"},{"visible":true,"include":false,"step":"65.0","x":-1450.1904761904761,"y":-110.96190476190475,"z":1294.1904761904761,"a95":"0.99","info":"27/06/2015 at 22:25:17"},{"visible":true,"include":false,"step":"70.0","x":-1038.7619047619048,"y":-253.30476190476188,"z":1049.7142857142858,"a95":"0.99","info":"27/06/2015 at 22:25:17"},{"visible":true,"include":false,"step":"80.0","x":-2294.095238095238,"y":-344.43809523809523,"z":837.3428571428572,"a95":"0.99","info":"27/06/2015 at 22:25:17"}],"demagType":"Unknown","patch":1.1,"format":"Unknown","strat":null}]
