# Supplementary material for: Paleomagnetic constraints on the timing and distribution of Cenozoic rotations in Central and Eastern Anatolia
Source: Copernicus journal article supplement (doi:10.5194/se-9-295-2018), 2018-03-21
Supplement: Supplementary file 2 [file se-9-295-2018-supplement.zip › se-2017-66_DATA_dir files/dir files Sivas/SS41.dir]

[{"version":"v1.1.0","exported":"2017-05-22T13:30:42.239Z","volume":10.5,"added":"2017-05-22T13:14:25.595Z","format":"Utrecht","demagType":"Unknown","strat":"0","patch":1.1,"GEO":[{"dec":31.433229902818084,"inc":-33.583304588678125,"MAD":3.9422514877659722,"cm":[-2.3092638912203256e-13,7.105427357601002e-14,0],"intensity":8623.182853305498,"type":"GC","origin":false,"forced":true,"remark":"","nSteps":9,"minStep":"100","maxStep":"320","steps":["100","150","180","210","230","250","280","300","320"],"group":"None","version":"v1.1.0"}],"TECT":[{"dec":30.873481219104576,"inc":-5.62371569777172,"MAD":3.942251487766144,"cm":[-5.613287612504791e-13,-2.842170943040401e-14,8.526512829121202e-14],"intensity":8623.182853305498,"type":"GC","origin":false,"forced":true,"remark":"","nSteps":9,"minStep":"100","maxStep":"320","steps":["100","150","180","210","230","250","280","300","320"],"group":"None","version":"v1.1.0"}],"interpreted":true,"name":"SS41.01A","coreAzi":283,"coreDip":44,"bedStrike":118,"bedDip":28,"data":[{"visible":true,"include":false,"step":"20","x":-9928.380952380952,"y":13992,"z":15960.095238095239,"a95":2.1,"info":"\"15-06-15\" at \"09:50\""},{"visible":true,"include":true,"step":"100","x":-1377.4285714285713,"y":5708.476190476191,"z":7383.142857142857,"a95":2.3,"info":"\"15-06-15\" at \"13:20\""},{"visible":true,"include":true,"step":"150","x":1037.8095238095239,"y":2466.7619047619046,"z":3698.4761904761904,"a95":2.3,"info":"\"15-06-16\" at \"08:19\""},{"visible":true,"include":true,"step":"180","x":966.952380952381,"y":2336,"z":3846.285714285714,"a95":2.3,"info":"\"15-06-16\" at \"11:12\""},{"visible":true,"include":true,"step":"210","x":2262.095238095238,"y":835.7142857142857,"z":1816.095238095238,"a95":2.1,"info":"\"15-06-16\" at \"14:46\""},{"visible":true,"include":true,"step":"230","x":2014.6666666666667,"y":728.1904761904761,"z":1508.1904761904761,"a95":2.2,"info":"\"15-06-17\" at \"18:15\""},{"visible":true,"include":true,"step":"250","x":1812.4761904761904,"y":-662.4761904761905,"z":-149.61904761904762,"a95":2.2,"info":"\"15-06-17\" at \"21:12\""},{"visible":true,"include":true,"step":"280","x":2249.4285714285716,"y":-587.8095238095239,"z":-59.904761904761905,"a95":1.8,"info":"\"15-06-18\" at \"06:52\""},{"visible":true,"include":true,"step":"300","x":2172.7619047619046,"y":-1135.7142857142858,"z":-300.76190476190476,"a95":1.7,"info":"\"15-06-18\" at \"09:37\""},{"visible":true,"include":true,"step":"320","x":2630.095238095238,"y":-907.7142857142857,"z":-330.2857142857143,"a95":1.6,"info":"\"15-06-18\" at \"13:44\""},{"visible":true,"include":false,"step":"340","x":2484.8571428571427,"y":-859.2380952380952,"z":184.76190476190476,"a95":1.9,"info":"\"15-06-19\" at \"09:15\""},{"visible":true,"include":false,"step":"360","x":2629.809523809524,"y":-1055.8095238095239,"z":-302.85714285714283,"a95":1.5,"info":"\"15-06-19\" at \"12:38\""}]},{"version":"v1.1.0","exported":"2017-05-22T13:30:42.239Z","volume":10.5,"added":"2017-05-22T13:14:25.595Z","format":"Utrecht","demagType":"Unknown","strat":"7","patch":1.1,"GEO":[{"dec":343.5335956720138,"inc":-30.79032690580348,"MAD":7.786939993630195,"cm":[-7.105427357601002e-14,4.263256414560601e-14,0],"intensity":2928.45684843387,"type":"GC","origin":false,"forced":true,"remark":"","nSteps":10,"minStep":"10.0","maxStep":"45.0","steps":["10.0","15.0","20.0","23.0","25.0","30.0","33.0","35.0","40.0","45.0"],"group":"None","version":"v1.1.0"}],"TECT":[{"dec":350.4083213956688,"inc":-9.44849376811556,"MAD":7.786939993630195,"cm":[1.0658141036401503e-14,2.842170943040401e-14,-1.4210854715202004e-14],"intensity":2928.4568484338693,"type":"GC","origin":false,"forced":true,"remark":"","nSteps":10,"minStep":"10.0","maxStep":"45.0","steps":["10.0","15.0","20.0","23.0","25.0","30.0","33.0","35.0","40.0","45.0"],"group":"None","version":"v1.1.0"}],"interpreted":true,"name":"SS41.02B","coreAzi":286,"coreDip":52,"bedStrike":118,"bedDip":28,"data":[{"visible":true,"include":false,"step":"0.0","x":-1968,"y":2763.4285714285716,"z":5683.523809523809,"a95":0.99,"info":"27/06/2015 at 10:00:49"},{"visible":true,"include":true,"step":"10.0","x":264.64761904761906,"y":70.10095238095238,"z":2190.7619047619046,"a95":0.99,"info":"27/06/2015 at 10:00:49"},{"visible":true,"include":true,"step":"15.0","x":908.5619047619048,"y":-701.3619047619047,"z":837.0190476190477,"a95":0.99,"info":"27/06/2015 at 10:00:49"},{"visible":true,"include":true,"step":"20.0","x":1157.3333333333333,"y":-972.4761904761905,"z":581.0190476190476,"a95":0.99,"info":"27/06/2015 at 10:00:49"},{"visible":true,"include":true,"step":"23.0","x":1329.142857142857,"y":-1002.1904761904761,"z":141.8761904761905,"a95":0.99,"info":"27/06/2015 at 10:00:49"},{"visible":true,"include":true,"step":"25.0","x":1380.3809523809523,"y":-1220.2857142857142,"z":-360.552380952381,"a95":0.99,"info":"27/06/2015 at 10:00:49"},{"visible":true,"include":true,"step":"30.0","x":1389.047619047619,"y":-1648.5714285714287,"z":-199.54285714285712,"a95":0.99,"info":"27/06/2015 at 10:00:49"},{"visible":true,"include":true,"step":"33.0","x":1528.4761904761904,"y":-1526.857142857143,"z":-908.0952380952381,"a95":0.99,"info":"27/06/2015 at 10:00:49"},{"visible":true,"include":true,"step":"35.0","x":1641.5238095238096,"y":-1679.4285714285713,"z":-582.4571428571429,"a95":0.99,"info":"27/06/2015 at 10:00:49"},{"visible":true,"include":true,"step":"40.0","x":1722.4761904761904,"y":-1505.3333333333333,"z":-231.85714285714286,"a95":0.99,"info":"27/06/2015 at 10:00:49"},{"visible":true,"include":true,"step":"45.0","x":1534.095238095238,"y":-1652.2857142857142,"z":-506.4,"a95":0.99,"info":"27/06/2015 at 10:00:49"},{"visible":true,"include":false,"step":"50.0","x":1525.7142857142858,"y":-1854.4761904761904,"z":-786.6571428571428,"a95":0.99,"info":"27/06/2015 at 10:00:49"},{"visible":true,"include":false,"step":"55.0","x":1366.2857142857142,"y":-1934,"z":-355.9904761904762,"a95":0.99,"info":"27/06/2015 at 10:00:49"},{"visible":true,"include":false,"step":"60.0","x":1593.6190476190477,"y":-2107.904761904762,"z":-635.047619047619,"a95":0.99,"info":"27/06/2015 at 10:00:49"},{"visible":true,"include":false,"step":"65.0","x":1772.6666666666667,"y":-2214.6666666666665,"z":-819.2190476190475,"a95":0.99,"info":"27/06/2015 at 10:00:49"},{"visible":true,"include":false,"step":"70.0","x":1229.142857142857,"y":-1841.047619047619,"z":-437.6380952380952,"a95":0.99,"info":"27/06/2015 at 10:00:49"},{"visible":true,"include":false,"step":"80.0","x":-213.05714285714285,"y":-2200.9523809523807,"z":-340.447619047619,"a95":0.99,"info":"27/06/2015 at 10:00:49"}]},{"version":"v1.1.0","exported":"2017-05-22T13:30:42.239Z","volume":10.5,"added":"2017-05-22T13:14:25.595Z","format":"Utrecht","demagType":"Unknown","strat":"0","patch":1.1,"GEO":[{"dec":8.69620643516862,"inc":-31.558101336517094,"MAD":9.225630186595456,"cm":[7.105427357601002e-15,8.526512829121202e-14,0],"intensity":7621.535293877978,"type":"GC","origin":false,"forced":true,"remark":"","nSteps":8,"minStep":"100","maxStep":"300","steps":["100","150","180","210","230","250","280","300"],"group":"None","version":"v1.1.0"}],"TECT":[{"dec":11.578576067936012,"inc":-4.850227676221343,"MAD":9.225630186595478,"cm":[1.580957587066223e-13,9.947598300641403e-14,-2.842170943040401e-14],"intensity":7621.535293877977,"type":"GC","origin":false,"forced":true,"remark":"","nSteps":8,"minStep":"100","maxStep":"300","steps":["100","150","180","210","230","250","280","300"],"group":"None","version":"v1.1.0"}],"interpreted":true,"name":"SS41.03A","coreAzi":294,"coreDip":37,"bedStrike":118,"bedDip":28,"data":[{"visible":true,"include":false,"step":"20","x":-14149.619047619048,"y":11735.142857142857,"z":19833.52380952381,"a95":2.1,"info":"\"15-06-15\" at \"09:53\""},{"visible":true,"include":true,"step":"100","x":-3148.6666666666665,"y":2936.190476190476,"z":6757.714285714285,"a95":2.3,"info":"\"15-06-15\" at \"13:21\""},{"visible":true,"include":true,"step":"150","x":-499.04761904761904,"y":1228.7619047619048,"z":3743.904761904762,"a95":2.5,"info":"\"15-06-16\" at \"08:21\""},{"visible":true,"include":true,"step":"180","x":-504.85714285714283,"y":1164.857142857143,"z":3511.0476190476193,"a95":2.6,"info":"\"15-06-16\" at \"11:14\""},{"visible":true,"include":true,"step":"210","x":693.8095238095239,"y":33.42857142857143,"z":1983.8095238095239,"a95":2.5,"info":"\"15-06-16\" at \"14:48\""},{"visible":true,"include":true,"step":"230","x":594.1904761904761,"y":-177.42857142857142,"z":1823.047619047619,"a95":2.8,"info":"\"15-06-17\" at \"18:16\""},{"visible":true,"include":true,"step":"250","x":1492,"y":-640.6666666666666,"z":472.85714285714283,"a95":1.5,"info":"\"15-06-17\" at \"21:15\""},{"visible":true,"include":true,"step":"280","x":1430.2857142857142,"y":-1160.857142857143,"z":421.04761904761904,"a95":1.9,"info":"\"15-06-18\" at \"06:53\""},{"visible":true,"include":true,"step":"300","x":1622.3809523809523,"y":-1342.2857142857142,"z":537.3333333333334,"a95":2,"info":"\"15-06-18\" at \"09:39\""},{"visible":true,"include":false,"step":"320","x":1548.7619047619048,"y":-1148,"z":104.76190476190476,"a95":1.6,"info":"\"15-06-18\" at \"13:46\""},{"visible":true,"include":false,"step":"340","x":1516.952380952381,"y":-998.5714285714286,"z":-135.9047619047619,"a95":1.7,"info":"\"15-06-19\" at \"09:18\""},{"visible":true,"include":false,"step":"360","x":1259.7142857142858,"y":-1112.952380952381,"z":-32.38095238095238,"a95":1.9,"info":"\"15-06-19\" at \"12:40\""}]},{"version":"v1.1.0","exported":"2017-05-22T13:30:42.239Z","volume":10.5,"added":"2017-05-22T13:14:25.595Z","format":"Utrecht","demagType":"Unknown","strat":"8","patch":1.1,"GEO":[{"dec":347.27413082258727,"inc":-39.01309374249721,"MAD":3.3472689172117187,"cm":[-3.446132268436486e-13,-5.684341886080802e-14,0],"intensity":4667.160874782562,"type":"GC","origin":false,"forced":true,"remark":"","nSteps":3,"minStep":"10.0","maxStep":"20.0","steps":["10.0","15.0","20.0"],"group":"None","version":"v1.1.0"}],"TECT":[{"dec":356.13164045059256,"inc":-16.222524569511695,"MAD":3.3472689172116215,"cm":[1.1013412404281553e-13,0,-8.526512829121202e-14],"intensity":4667.160874782562,"type":"GC","origin":false,"forced":true,"remark":"","nSteps":3,"minStep":"10.0","maxStep":"20.0","steps":["10.0","15.0","20.0"],"group":"None","version":"v1.1.0"}],"interpreted":true,"name":"SS41.05B","coreAzi":270,"coreDip":28,"bedStrike":118,"bedDip":28,"data":[{"visible":true,"include":false,"step":"0.0","x":-6188.666666666667,"y":5145.238095238095,"z":4554.380952380952,"a95":0.99,"info":"27/06/2015 at 10:00:49"},{"visible":true,"include":true,"step":"10.0","x":-1678.952380952381,"y":1852.7619047619048,"z":2508.4761904761904,"a95":0.99,"info":"27/06/2015 at 10:00:49"},{"visible":true,"include":true,"step":"15.0","x":-468.64761904761906,"y":805.2285714285714,"z":1720.3809523809523,"a95":0.99,"info":"27/06/2015 at 10:00:49"},{"visible":true,"include":true,"step":"20.0","x":368.2,"y":-43.60285714285714,"z":1589.2380952380952,"a95":0.99,"info":"27/06/2015 at 10:00:49"},{"visible":true,"include":false,"step":"23.0","x":1.835047619047619,"y":-205.2952380952381,"z":1213.8095238095239,"a95":0.99,"info":"27/06/2015 at 10:00:49"},{"visible":true,"include":false,"step":"25.0","x":525.8666666666667,"y":-791.352380952381,"z":780.0285714285715,"a95":0.99,"info":"27/06/2015 at 10:00:49"},{"visible":true,"include":false,"step":"30.0","x":584.4761904761905,"y":-419.0761904761905,"z":675.1333333333333,"a95":0.99,"info":"27/06/2015 at 10:00:49"},{"visible":true,"include":false,"step":"33.0","x":830.304761904762,"y":-697.5428571428571,"z":681.9428571428571,"a95":0.99,"info":"27/06/2015 at 10:00:49"},{"visible":true,"include":false,"step":"35.0","x":598.7619047619048,"y":-910.5333333333334,"z":475.1714285714286,"a95":0.99,"info":"27/06/2015 at 10:00:49"},{"visible":true,"include":false,"step":"40.0","x":790.4000000000001,"y":-357.43809523809523,"z":895.8095238095239,"a95":0.99,"info":"27/06/2015 at 10:00:49"},{"visible":true,"include":false,"step":"45.0","x":681.8190476190476,"y":-624.4,"z":388.3333333333333,"a95":0.99,"info":"27/06/2015 at 10:00:49"},{"visible":true,"include":false,"step":"50.0","x":661.3809523809524,"y":-1002.1904761904761,"z":-7.893714285714286,"a95":0.99,"info":"27/06/2015 at 10:00:49"},{"visible":true,"include":false,"step":"55.0","x":1204.857142857143,"y":-529.1809523809524,"z":347.7238095238095,"a95":0.99,"info":"27/06/2015 at 10:00:49"},{"visible":true,"include":false,"step":"60.0","x":921.5238095238095,"y":-688.495238095238,"z":391.14285714285717,"a95":0.99,"info":"27/06/2015 at 10:00:49"},{"visible":true,"include":false,"step":"65.0","x":855.7523809523809,"y":-1233.8095238095239,"z":173.6,"a95":0.99,"info":"27/06/2015 at 10:00:49"},{"visible":true,"include":false,"step":"70.0","x":1012.952380952381,"y":-488.7714285714286,"z":310.83809523809526,"a95":0.99,"info":"27/06/2015 at 10:00:49"},{"visible":true,"include":false,"step":"80.0","x":1682.6666666666667,"y":-1450.857142857143,"z":113.18095238095239,"a95":0.99,"info":"27/06/2015 at 10:00:49"}]},{"version":"v1.1.0","exported":"2017-05-22T13:30:42.239Z","volume":10.5,"added":"2017-05-22T13:14:25.597Z","format":"Utrecht","demagType":"Unknown","strat":"0","patch":1.1,"GEO":[{"dec":10.079720735662363,"inc":-34.24216738031734,"MAD":6.465468792383319,"cm":[-8.526512829121202e-14,-5.684341886080802e-14,0],"intensity":8050.907632386264,"type":"GC","origin":false,"forced":true,"remark":"","nSteps":5,"minStep":"100","maxStep":"230","steps":["100","150","180","210","230"],"group":"None","version":"v1.1.0"}],"TECT":[{"dec":13.140189331890781,"inc":-7.328574310583163,"MAD":6.4654687923831275,"cm":[1.1368683772161603e-13,0,-4.263256414560601e-14],"intensity":8050.907632386265,"type":"GC","origin":false,"forced":true,"remark":"","nSteps":5,"minStep":"100","maxStep":"230","steps":["100","150","180","210","230"],"group":"None","version":"v1.1.0"}],"interpreted":true,"name":"SS41.06A","coreAzi":241,"coreDip":25,"bedStrike":118,"bedDip":28,"data":[{"visible":true,"include":false,"step":"20","x":-24817.14285714286,"y":12421.809523809523,"z":5885.428571428572,"a95":2.5,"info":"\"15-06-15\" at \"09:54\""},{"visible":true,"include":true,"step":"100","x":-4760.190476190476,"y":4536.190476190476,"z":2361.809523809524,"a95":1.7,"info":"\"15-06-15\" at \"13:23\""},{"visible":true,"include":true,"step":"150","x":-1772.7619047619048,"y":3310.095238095238,"z":2178.095238095238,"a95":1.7,"info":"\"15-06-16\" at \"08:24\""},{"visible":true,"include":true,"step":"180","x":-1603.3333333333333,"y":3200.7619047619046,"z":1902.857142857143,"a95":1.7,"info":"\"15-06-16\" at \"11:18\""},{"visible":true,"include":true,"step":"210","x":844.0952380952381,"y":1272.2857142857142,"z":1545.8095238095239,"a95":2.1,"info":"\"15-06-16\" at \"14:51\""},{"visible":true,"include":true,"step":"230","x":829.6190476190476,"y":1219.3333333333333,"z":1668.2857142857142,"a95":2.4,"info":"\"15-06-17\" at \"18:18\""},{"visible":true,"include":false,"step":"250","x":2146.4761904761904,"y":1388.952380952381,"z":-229.14285714285714,"a95":1.8,"info":"\"15-06-17\" at \"21:18\""},{"visible":true,"include":false,"step":"280","x":1972.5714285714287,"y":252.0952380952381,"z":809.9047619047619,"a95":1.9,"info":"\"15-06-18\" at \"06:55\""},{"visible":true,"include":false,"step":"300","x":2254.7619047619046,"y":661.5238095238095,"z":-393.23809523809524,"a95":1.8,"info":"\"15-06-18\" at \"09:42\""},{"visible":true,"include":false,"step":"320","x":2320.6666666666665,"y":509.8095238095238,"z":506,"a95":1.5,"info":"\"15-06-18\" at \"13:48\""},{"visible":true,"include":false,"step":"340","x":2498.7619047619046,"y":607.7142857142857,"z":691.5238095238095,"a95":1.5,"info":"\"15-06-19\" at \"09:20\""}]}]
