# Supplementary material for: Paleomagnetic constraints on the timing and distribution of Cenozoic rotations in Central and Eastern Anatolia
Source: Copernicus journal article supplement (doi:10.5194/se-9-295-2018), 2018-03-21
Supplement: Supplementary file 2 [file se-9-295-2018-supplement.zip › se-2017-66_DATA_dir files/dir files Sivas/SS42.dir]

[{"version":"v1.1.0","exported":"2016-10-17T07:21:17.807Z","volume":10.5,"added":"2016-10-17T07:12:56.540Z","format":"Utrecht","demagType":"Unknown","strat":null,"patch":1.1,"GEO":[{"dec":27.435973427673787,"inc":-55.85626298195107,"MAD":13.411848602368497,"cm":[-5.115907697472721e-13,5.684341886080802e-14,0],"intensity":22135.97174607108,"type":"GC","origin":false,"forced":true,"remark":"","nSteps":15,"minStep":"210","maxStep":"580","steps":["210","230","270","300","320","340","370","400","420","440","470","490","520","550","580"],"group":"None","version":"v1.1.0"}],"TECT":[{"dec":90.31301287438447,"inc":-25.50769236054009,"MAD":13.41184860236964,"cm":[-2.5579538487363607e-13,-7.247535904753022e-13,3.410605131648481e-13],"intensity":22135.97174607108,"type":"GC","origin":false,"forced":true,"remark":"","nSteps":15,"minStep":"210","maxStep":"580","steps":["210","230","270","300","320","340","370","400","420","440","470","490","520","550","580"],"group":"None","version":"v1.1.0"}],"interpreted":true,"name":"SS42.01A","coreAzi":295,"coreDip":36,"bedStrike":218,"bedDip":66,"data":[{"visible":false,"include":false,"step":"20","x":-9837.047619047618,"y":3632.3809523809523,"z":-8782,"a95":1.9,"info":"\"15-06-22\" at \"07:35\""},{"visible":true,"include":false,"step":"100","x":-8952.380952380952,"y":2248.095238095238,"z":-11038.380952380952,"a95":2,"info":"\"15-06-22\" at \"10:44\""},{"visible":true,"include":false,"step":"150","x":-8799.047619047618,"y":1777.047619047619,"z":-11411.714285714286,"a95":2.1,"info":"\"15-06-23\" at \"07:59\""},{"visible":true,"include":false,"step":"180","x":-9268.285714285714,"y":954.952380952381,"z":-11228.47619047619,"a95":1.9,"info":"\"15-06-23\" at \"10:59\""},{"visible":true,"include":true,"step":"210","x":-9151.238095238095,"y":888.952380952381,"z":-11566.095238095239,"a95":2,"info":"\"15-06-23\" at \"14:02\""},{"visible":true,"include":true,"step":"230","x":-9034.380952380952,"y":536.6666666666666,"z":-11144.761904761905,"a95":1.9,"info":"\"15-06-24\" at \"07:51\""},{"visible":false,"include":false,"step":"250","x":5863.333333333333,"y":11639.42857142857,"z":4376.476190476191,"a95":1.5,"info":"\"15-06-24\" at \"11:36\""},{"visible":true,"include":true,"step":"270","x":-8816.666666666666,"y":299.14285714285717,"z":-10791.238095238095,"a95":2.1,"info":"\"15-06-24\" at \"14:51\""},{"visible":true,"include":true,"step":"300","x":-8576.857142857143,"y":-35.142857142857146,"z":-10929.42857142857,"a95":2,"info":"\"15-06-25\" at \"09:35\""},{"visible":true,"include":true,"step":"320","x":-8221.333333333334,"y":-152.47619047619048,"z":-9848.47619047619,"a95":1.9,"info":"\"15-06-25\" at \"13:23\""},{"visible":true,"include":true,"step":"340","x":-7881.714285714285,"y":-334.76190476190476,"z":-10369.42857142857,"a95":2,"info":"\"15-06-25\" at \"16:27\""},{"visible":true,"include":true,"step":"370","x":-6995.238095238095,"y":146.0952380952381,"z":-9822.47619047619,"a95":2,"info":"\"15-06-25\" at \"20:21\""},{"visible":true,"include":true,"step":"400","x":-6856.857142857143,"y":-470.57142857142856,"z":-9227.52380952381,"a95":2.1,"info":"\"15-06-26\" at \"07:56\""},{"visible":true,"include":true,"step":"420","x":-6243.333333333333,"y":-550.8571428571429,"z":-9000.857142857143,"a95":2,"info":"\"15-06-26\" at \"10:50\""},{"visible":true,"include":true,"step":"440","x":-6074.857142857143,"y":-514.8571428571429,"z":-8572,"a95":2,"info":"\"15-06-27\" at \"10:09\""},{"visible":true,"include":true,"step":"470","x":-5234.571428571428,"y":-1011.8095238095239,"z":-8218.857142857143,"a95":2.3,"info":"\"15-06-29\" at \"07:11\""},{"visible":true,"include":true,"step":"490","x":-5550.476190476191,"y":-1313.047619047619,"z":-8005.428571428572,"a95":2,"info":"\"15-06-29\" at \"10:28\""},{"visible":true,"include":true,"step":"520","x":-4437.047619047619,"y":-1453.904761904762,"z":-7444,"a95":2.3,"info":"\"15-06-29\" at \"14:17\""},{"visible":true,"include":true,"step":"550","x":-4464.857142857143,"y":-1353.3333333333333,"z":-7248.571428571428,"a95":2.3,"info":"\"15-06-30\" at \"07:34\""},{"visible":true,"include":true,"step":"580","x":-3496.9523809523807,"y":-1673.7142857142858,"z":-6583.523809523809,"a95":2.2,"info":"\"15-07-01\" at \"10:47\""}]},{"version":"v1.1.0","exported":"2016-10-17T07:21:17.807Z","volume":10.5,"added":"2016-10-17T07:12:56.540Z","format":"Utrecht","demagType":"Unknown","strat":null,"patch":1.1,"GEO":[{"dec":31.40843814564022,"inc":-63.80957430067014,"MAD":14.038458848577188,"cm":[-1.0516032489249483e-12,-5.968558980384842e-13,0],"intensity":24811.52384991905,"type":"GC","origin":false,"forced":true,"remark":"","nSteps":16,"minStep":"210","maxStep":"580","steps":["210","230","250","270","300","320","340","370","400","420","440","470","490","520","550","580"],"group":"None","version":"v1.1.0"}],"TECT":[{"dec":99.24937273118576,"inc":-24.284097437425736,"MAD":14.038458848577687,"cm":[-5.826450433232822e-13,-2.7000623958883807e-13,5.684341886080802e-14],"intensity":24811.523849919053,"type":"GC","origin":false,"forced":true,"remark":"","nSteps":16,"minStep":"210","maxStep":"580","steps":["210","230","250","270","300","320","340","370","400","420","440","470","490","520","550","580"],"group":"None","version":"v1.1.0"}],"interpreted":true,"name":"SS42.02A","coreAzi":311,"coreDip":34,"bedStrike":218,"bedDip":66,"data":[{"visible":false,"include":false,"step":"20","x":-9109.714285714286,"y":8004.190476190476,"z":-8007.619047619048,"a95":1.7,"info":"\"15-06-22\" at \"07:37\""},{"visible":true,"include":false,"step":"100","x":-8255.238095238095,"y":5585.238095238095,"z":-11758.380952380952,"a95":1.9,"info":"\"15-06-22\" at \"10:46\""},{"visible":true,"include":false,"step":"150","x":-7087.047619047619,"y":5165.333333333333,"z":-12487.047619047618,"a95":2,"info":"\"15-06-23\" at \"08:01\""},{"visible":true,"include":false,"step":"180","x":-9001.047619047618,"y":4913.238095238095,"z":-12165.047619047618,"a95":1.8,"info":"\"15-06-23\" at \"11:01\""},{"visible":true,"include":true,"step":"210","x":-9148.285714285714,"y":5070.380952380952,"z":-12355.333333333334,"a95":1.9,"info":"\"15-06-23\" at \"14:03\""},{"visible":true,"include":true,"step":"230","x":-9112.666666666666,"y":4097.619047619048,"z":-12160,"a95":1.9,"info":"\"15-06-24\" at \"07:53\""},{"visible":true,"include":true,"step":"250","x":-9264.666666666666,"y":3738,"z":-12089.619047619048,"a95":1.9,"info":"\"15-06-24\" at \"11:39\""},{"visible":true,"include":true,"step":"270","x":-8625.047619047618,"y":3006,"z":-12733.142857142857,"a95":2,"info":"\"15-06-24\" at \"14:52\""},{"visible":true,"include":true,"step":"300","x":-8910.761904761905,"y":3484.190476190476,"z":-11886.952380952382,"a95":2,"info":"\"15-06-25\" at \"09:37\""},{"visible":true,"include":true,"step":"320","x":-8162.857142857143,"y":2948.6666666666665,"z":-11920.380952380952,"a95":1.9,"info":"\"15-06-25\" at \"13:24\""},{"visible":true,"include":true,"step":"340","x":-7910.952380952381,"y":2576.095238095238,"z":-11767.333333333334,"a95":1.8,"info":"\"15-06-25\" at \"16:29\""},{"visible":true,"include":true,"step":"370","x":-7354.190476190476,"y":1790.5714285714287,"z":-10624.285714285714,"a95":1.8,"info":"\"15-06-25\" at \"20:24\""},{"visible":true,"include":true,"step":"400","x":-6961.619047619048,"y":2194,"z":-10144.666666666666,"a95":2,"info":"\"15-06-26\" at \"07:58\""},{"visible":true,"include":true,"step":"420","x":-6953.714285714285,"y":1860.095238095238,"z":-10393.142857142857,"a95":1.9,"info":"\"15-06-26\" at \"10:51\""},{"visible":true,"include":true,"step":"440","x":-6371.714285714285,"y":1373.904761904762,"z":-9677.42857142857,"a95":1.9,"info":"\"15-06-27\" at \"10:11\""},{"visible":true,"include":true,"step":"470","x":-5496.571428571428,"y":1046.1904761904761,"z":-9379.142857142857,"a95":2.2,"info":"\"15-06-29\" at \"07:12\""},{"visible":true,"include":true,"step":"490","x":-5545.619047619048,"y":876.0952380952381,"z":-8719.619047619048,"a95":2.1,"info":"\"15-06-29\" at \"10:30\""},{"visible":true,"include":true,"step":"520","x":-5496,"y":132.0952380952381,"z":-9113.047619047618,"a95":2.2,"info":"\"15-06-29\" at \"14:19\""},{"visible":true,"include":true,"step":"550","x":-5239.809523809524,"y":252.47619047619048,"z":-8292,"a95":2.2,"info":"\"15-06-30\" at \"07:35\""},{"visible":true,"include":true,"step":"580","x":-3705.714285714286,"y":138.47619047619048,"z":-8217.809523809523,"a95":2.1,"info":"\"15-07-01\" at \"10:48\""}]},{"version":"v1.1.0","exported":"2016-10-17T07:21:17.807Z","volume":10.5,"added":"2016-10-17T07:12:56.540Z","format":"Utrecht","demagType":"Unknown","strat":"1","patch":1.1,"GEO":[],"TECT":[],"interpreted":false,"name":"SS42.03","coreAzi":257,"coreDip":1,"bedStrike":218,"bedDip":66,"data":[{"visible":true,"include":true,"step":"0.0","x":-2746.6666666666665,"y":-4605.333333333333,"z":-6677.714285714285,"a95":0.99,"info":"08/07/2015 at 19:08:49"},{"visible":true,"include":true,"step":"10.0","x":-2451.714285714286,"y":-4662.571428571428,"z":-6691.142857142857,"a95":0.99,"info":"08/07/2015 at 19:08:49"},{"visible":true,"include":true,"step":"15.0","x":-2298.9523809523807,"y":-4641.714285714285,"z":-6562.0952380952385,"a95":0.99,"info":"08/07/2015 at 19:08:49"},{"visible":true,"include":true,"step":"20.0","x":-2281.0476190476193,"y":-4618.761904761905,"z":-6567.9047619047615,"a95":0.99,"info":"08/07/2015 at 19:08:49"},{"visible":true,"include":true,"step":"23.0","x":-2310.4761904761904,"y":-4615.619047619048,"z":-6646.285714285715,"a95":0.99,"info":"08/07/2015 at 19:08:49"},{"visible":true,"include":true,"step":"25.0","x":-2319.904761904762,"y":-4636.476190476191,"z":-6633.238095238095,"a95":0.99,"info":"08/07/2015 at 19:08:49"},{"visible":true,"include":true,"step":"30.0","x":-2392,"y":-4678.0952380952385,"z":-6578.952380952381,"a95":0.99,"info":"08/07/2015 at 19:08:49"},{"visible":true,"include":true,"step":"33.0","x":-2359.2380952380954,"y":-4617.809523809524,"z":-6604.285714285715,"a95":0.99,"info":"08/07/2015 at 19:08:49"},{"visible":true,"include":true,"step":"35.0","x":-2422.8571428571427,"y":-4655.428571428572,"z":-6542.857142857143,"a95":0.99,"info":"08/07/2015 at 19:08:49"},{"visible":true,"include":true,"step":"40.0","x":-2567.3333333333335,"y":-4570.380952380952,"z":-6461.523809523809,"a95":0.99,"info":"08/07/2015 at 19:08:49"},{"visible":true,"include":true,"step":"45.0","x":-2516.9523809523807,"y":-4424.285714285715,"z":-6501.047619047619,"a95":0.99,"info":"08/07/2015 at 19:08:49"},{"visible":true,"include":true,"step":"50.0","x":-2442.190476190476,"y":-4626.571428571428,"z":-6517.428571428572,"a95":0.99,"info":"08/07/2015 at 19:08:49"},{"visible":true,"include":true,"step":"55.0","x":-2456.7619047619046,"y":-4430.285714285715,"z":-6462.476190476191,"a95":0.99,"info":"08/07/2015 at 19:08:49"},{"visible":true,"include":true,"step":"60.0","x":-2408.8571428571427,"y":-4343.047619047619,"z":-6498.285714285715,"a95":0.99,"info":"08/07/2015 at 19:08:49"},{"visible":true,"include":true,"step":"65.0","x":-2518.9523809523807,"y":-4412.190476190476,"z":-6450.476190476191,"a95":0.99,"info":"08/07/2015 at 19:08:49"},{"visible":true,"include":true,"step":"70.0","x":-2532.8571428571427,"y":-4392.857142857143,"z":-6407.619047619048,"a95":0.99,"info":"08/07/2015 at 19:08:49"},{"visible":true,"include":true,"step":"80.0","x":-2394.7619047619046,"y":-4320.952380952381,"z":-6450.0952380952385,"a95":0.99,"info":"08/07/2015 at 19:08:49"}]},{"version":"v1.1.0","exported":"2016-10-17T07:21:17.807Z","volume":10.5,"added":"2016-10-17T07:12:56.540Z","format":"Utrecht","demagType":"Unknown","strat":"2","patch":1.1,"GEO":[],"TECT":[],"interpreted":false,"name":"SS42.04","coreAzi":257,"coreDip":23,"bedStrike":218,"bedDip":66,"data":[{"visible":true,"include":false,"step":"0.0","x":-4004.8571428571427,"y":-5744.857142857143,"z":-9397.238095238095,"a95":0.99,"info":"08/07/2015 at 19:08:49"},{"visible":true,"include":false,"step":"10.0","x":-3658.285714285714,"y":-5961.333333333333,"z":-9390.47619047619,"a95":0.99,"info":"08/07/2015 at 19:08:49"},{"visible":true,"include":false,"step":"15.0","x":-3618.5714285714284,"y":-5910,"z":-9297.714285714286,"a95":0.99,"info":"08/07/2015 at 19:08:49"},{"visible":true,"include":false,"step":"20.0","x":-3580.9523809523807,"y":-5932.380952380952,"z":-9137.142857142857,"a95":0.99,"info":"08/07/2015 at 19:08:49"},{"visible":true,"include":false,"step":"23.0","x":-3584.7619047619046,"y":-5929.9047619047615,"z":-9048.57142857143,"a95":0.99,"info":"08/07/2015 at 19:08:49"},{"visible":true,"include":false,"step":"25.0","x":-3644.9523809523807,"y":-5968,"z":-9051.714285714286,"a95":0.99,"info":"08/07/2015 at 19:08:49"},{"visible":true,"include":false,"step":"30.0","x":-3669.904761904762,"y":-5895.523809523809,"z":-9053.333333333334,"a95":0.99,"info":"08/07/2015 at 19:08:49"},{"visible":true,"include":false,"step":"33.0","x":-3682.8571428571427,"y":-5783.047619047619,"z":-8934.47619047619,"a95":0.99,"info":"08/07/2015 at 19:08:49"},{"visible":true,"include":false,"step":"35.0","x":-3601.3333333333335,"y":-5679.809523809524,"z":-9002.952380952382,"a95":0.99,"info":"08/07/2015 at 19:08:49"},{"visible":true,"include":false,"step":"40.0","x":-3687.1428571428573,"y":-5860.476190476191,"z":-8843.238095238095,"a95":0.99,"info":"08/07/2015 at 19:08:49"},{"visible":true,"include":true,"step":"45.0","x":-3707.6190476190477,"y":-5591.619047619048,"z":-8759.714285714286,"a95":0.99,"info":"08/07/2015 at 19:08:49"},{"visible":true,"include":true,"step":"50.0","x":-3711.0476190476193,"y":-5486.0952380952385,"z":-8721.904761904761,"a95":0.99,"info":"08/07/2015 at 19:08:49"},{"visible":true,"include":true,"step":"55.0","x":-3710.8571428571427,"y":-5557.238095238095,"z":-8601.333333333334,"a95":0.99,"info":"08/07/2015 at 19:08:49"},{"visible":true,"include":true,"step":"60.0","x":-3722.095238095238,"y":-5270.761904761905,"z":-8695.809523809523,"a95":0.99,"info":"08/07/2015 at 19:08:49"},{"visible":true,"include":true,"step":"65.0","x":-3804.8571428571427,"y":-5484.476190476191,"z":-8493.142857142857,"a95":0.99,"info":"08/07/2015 at 19:08:49"},{"visible":true,"include":true,"step":"70.0","x":-3870.8571428571427,"y":-5348.952380952381,"z":-8402.380952380952,"a95":0.99,"info":"08/07/2015 at 19:08:49"},{"visible":true,"include":true,"step":"80.0","x":-3784.4761904761904,"y":-5276.380952380952,"z":-8220.857142857143,"a95":0.99,"info":"08/07/2015 at 19:08:49"}]},{"version":"v1.1.0","exported":"2016-10-17T07:21:17.807Z","volume":10.5,"added":"2016-10-17T07:12:56.540Z","format":"Utrecht","demagType":"Unknown","strat":null,"patch":1.1,"GEO":[{"dec":22.658219389036447,"inc":-52.531879750043835,"MAD":16.41864890923412,"cm":[-5.542233338928781e-13,-2.4158453015843406e-13,0],"intensity":14932.03299033624,"type":"GC","origin":false,"forced":true,"remark":"","nSteps":16,"minStep":"210","maxStep":"580","steps":["210","230","250","270","300","320","340","370","400","420","440","470","490","520","550","580"],"group":"None","version":"v1.1.0"}],"TECT":[{"dec":86.35085246611084,"inc":-28.024952626989524,"MAD":16.418648909235035,"cm":[-1.4814816040598089e-12,-3.552713678800501e-13,3.126388037344441e-13],"intensity":14932.03299033624,"type":"GC","origin":false,"forced":true,"remark":"","nSteps":16,"minStep":"210","maxStep":"580","steps":["210","230","250","270","300","320","340","370","400","420","440","470","490","520","550","580"],"group":"None","version":"v1.1.0"}],"interpreted":true,"name":"SS42.05A","coreAzi":277,"coreDip":16,"bedStrike":218,"bedDip":66,"data":[{"visible":true,"include":false,"step":"20","x":-5888.380952380952,"y":2240.285714285714,"z":-10197.904761904761,"a95":2.2,"info":"\"15-06-22\" at \"07:39\""},{"visible":true,"include":false,"step":"100","x":-4612,"y":210,"z":-10294.47619047619,"a95":2.3,"info":"\"15-06-22\" at \"10:48\""},{"visible":true,"include":false,"step":"150","x":-3787.904761904762,"y":-451.5238095238095,"z":-10528.761904761905,"a95":2.2,"info":"\"15-06-23\" at \"08:03\""},{"visible":true,"include":false,"step":"180","x":-3569.0476190476193,"y":-596.1904761904761,"z":-10541.238095238095,"a95":2.4,"info":"\"15-06-23\" at \"11:04\""},{"visible":true,"include":true,"step":"210","x":-3686.3809523809523,"y":-1017.2380952380952,"z":-10170.285714285714,"a95":2.3,"info":"\"15-06-23\" at \"14:05\""},{"visible":true,"include":true,"step":"230","x":-3964.285714285714,"y":-1455.4285714285713,"z":-9511.238095238095,"a95":2.2,"info":"\"15-06-24\" at \"07:54\""},{"visible":true,"include":true,"step":"250","x":-4239.333333333333,"y":-1430.857142857143,"z":-9290,"a95":2.1,"info":"\"15-06-24\" at \"11:40\""},{"visible":true,"include":true,"step":"270","x":-3455.0476190476193,"y":-1863.142857142857,"z":-9120.47619047619,"a95":2.3,"info":"\"15-06-24\" at \"14:54\""},{"visible":true,"include":true,"step":"300","x":-3388.5714285714284,"y":-1826.3809523809523,"z":-9081.047619047618,"a95":2.3,"info":"\"15-06-25\" at \"09:38\""},{"visible":true,"include":true,"step":"320","x":-3380,"y":-1290.857142857143,"z":-8518.095238095239,"a95":2.1,"info":"\"15-06-25\" at \"13:26\""},{"visible":true,"include":true,"step":"340","x":-3214.6666666666665,"y":-1420.3809523809523,"z":-8388,"a95":2,"info":"\"15-06-25\" at \"16:30\""},{"visible":true,"include":true,"step":"370","x":-2491.1428571428573,"y":-1278.3809523809523,"z":-7115.142857142857,"a95":2.2,"info":"\"15-06-25\" at \"20:25\""},{"visible":true,"include":true,"step":"400","x":-2265.0476190476193,"y":-1754.095238095238,"z":-7175.142857142857,"a95":2.1,"info":"\"15-06-26\" at \"07:59\""},{"visible":true,"include":true,"step":"420","x":-2638.095238095238,"y":-1435.047619047619,"z":-6939.238095238095,"a95":2.2,"info":"\"15-06-26\" at \"10:53\""},{"visible":true,"include":true,"step":"440","x":-2062.3809523809523,"y":-1559.2380952380952,"z":-6304.190476190476,"a95":2.2,"info":"\"15-06-27\" at \"10:13\""},{"visible":true,"include":true,"step":"470","x":-1482.7619047619048,"y":-1693.3333333333333,"z":-5717.9047619047615,"a95":2.3,"info":"\"15-06-29\" at \"07:14\""},{"visible":true,"include":true,"step":"490","x":-1728.1904761904761,"y":-1811.2380952380952,"z":-5460.0952380952385,"a95":2.4,"info":"\"15-06-29\" at \"10:32\""},{"visible":true,"include":true,"step":"520","x":-1114.4761904761904,"y":-1690.4761904761904,"z":-5203.047619047619,"a95":2.6,"info":"\"15-06-29\" at \"14:20\""},{"visible":true,"include":true,"step":"550","x":-670.6666666666666,"y":-1967.8095238095239,"z":-4721.333333333333,"a95":2.6,"info":"\"15-06-30\" at \"07:37\""},{"visible":true,"include":true,"step":"580","x":-726.1904761904761,"y":-1850.1904761904761,"z":-3803.714285714286,"a95":2.4,"info":"\"15-07-01\" at \"10:50\""}]},{"version":"v1.1.0","exported":"2016-10-17T07:21:17.807Z","volume":10.5,"added":"2016-10-17T07:12:56.541Z","format":"Utrecht","demagType":"Unknown","strat":"3","patch":1.1,"GEO":[],"TECT":[],"interpreted":false,"name":"SS42.06","coreAzi":278,"coreDip":3,"bedStrike":218,"bedDip":66,"data":[{"visible":true,"include":false,"step":"0.0","x":-668.7238095238096,"y":-1466.4761904761904,"z":-8165.619047619048,"a95":0.99,"info":"08/07/2015 at 19:08:49"},{"visible":true,"include":true,"step":"10.0","x":-355.87619047619046,"y":-1694.952380952381,"z":-8317.42857142857,"a95":0.99,"info":"08/07/2015 at 19:08:49"},{"visible":true,"include":true,"step":"15.0","x":-343.37142857142857,"y":-1770.857142857143,"z":-8220.380952380952,"a95":0.99,"info":"08/07/2015 at 19:08:49"},{"visible":true,"include":true,"step":"20.0","x":-372.3333333333333,"y":-1664.6666666666667,"z":-8157.142857142857,"a95":0.99,"info":"08/07/2015 at 19:08:49"},{"visible":true,"include":true,"step":"23.0","x":-372.3904761904762,"y":-1595.6190476190477,"z":-8109.714285714285,"a95":0.99,"info":"08/07/2015 at 19:08:49"},{"visible":true,"include":true,"step":"25.0","x":-378.8666666666667,"y":-1697.4285714285713,"z":-8116.761904761905,"a95":0.99,"info":"08/07/2015 at 19:08:49"},{"visible":true,"include":true,"step":"30.0","x":-388.5809523809524,"y":-1677.142857142857,"z":-8060,"a95":0.99,"info":"08/07/2015 at 19:08:49"},{"visible":true,"include":true,"step":"33.0","x":-362.3333333333333,"y":-1640.857142857143,"z":-8031.9047619047615,"a95":0.99,"info":"08/07/2015 at 19:08:49"},{"visible":true,"include":true,"step":"35.0","x":-441.1047619047619,"y":-1590.4761904761904,"z":-8026.761904761905,"a95":0.99,"info":"08/07/2015 at 19:08:49"},{"visible":true,"include":true,"step":"40.0","x":-434.34285714285716,"y":-1539.7142857142858,"z":-7973.142857142857,"a95":0.99,"info":"08/07/2015 at 19:08:49"},{"visible":true,"include":true,"step":"45.0","x":-446.04761904761904,"y":-1386.4761904761904,"z":-7986.666666666667,"a95":0.99,"info":"08/07/2015 at 19:08:49"},{"visible":true,"include":true,"step":"50.0","x":-513.7904761904762,"y":-1453.7142857142858,"z":-7873.142857142857,"a95":0.99,"info":"08/07/2015 at 19:08:49"},{"visible":true,"include":true,"step":"55.0","x":-534.9904761904761,"y":-1390.5714285714287,"z":-7900.761904761905,"a95":0.99,"info":"08/07/2015 at 19:08:49"},{"visible":true,"include":true,"step":"60.0","x":-604.1809523809524,"y":-1251.2380952380952,"z":-7839.238095238095,"a95":0.99,"info":"08/07/2015 at 19:08:49"},{"visible":true,"include":true,"step":"65.0","x":-552.8285714285714,"y":-1413.2380952380952,"z":-7936.380952380952,"a95":0.99,"info":"08/07/2015 at 19:08:49"},{"visible":true,"include":true,"step":"70.0","x":-753.2761904761904,"y":-1348.952380952381,"z":-7900.666666666667,"a95":0.99,"info":"08/07/2015 at 19:08:49"},{"visible":true,"include":true,"step":"80.0","x":-519.552380952381,"y":-1085.142857142857,"z":-7735.142857142857,"a95":0.99,"info":"08/07/2015 at 19:08:49"}]},{"version":"v1.1.0","exported":"2016-10-17T07:21:17.807Z","volume":10.5,"added":"2016-10-17T07:12:56.541Z","format":"Utrecht","demagType":"Unknown","strat":"4","patch":1.1,"GEO":[{"dec":27.198120585924983,"inc":-16.91134301775947,"MAD":19.60105185065288,"cm":[-3.694822225952521e-13,-1.9895196601282805e-13,0],"intensity":11103.66040645015,"type":"GC","origin":false,"forced":true,"remark":"","nSteps":16,"minStep":"10.0","maxStep":"80.0","steps":["10.0","15.0","20.0","23.0","25.0","30.0","33.0","35.0","40.0","45.0","50.0","55.0","60.0","65.0","70.0","80.0"],"group":"None","version":"v1.1.0"}],"TECT":[{"dec":54.663515793650106,"inc":-21.25012002321587,"MAD":19.601051850644897,"cm":[-4.902744876744691e-13,9.947598300641403e-14,1.1368683772161603e-13],"intensity":11103.66040645015,"type":"GC","origin":false,"forced":true,"remark":"","nSteps":16,"minStep":"10.0","maxStep":"80.0","steps":["10.0","15.0","20.0","23.0","25.0","30.0","33.0","35.0","40.0","45.0","50.0","55.0","60.0","65.0","70.0","80.0"],"group":"None","version":"v1.1.0"}],"interpreted":true,"name":"SS42.07","coreAzi":244,"coreDip":25,"bedStrike":224,"bedDip":69,"data":[{"visible":true,"include":false,"step":"0.0","x":-4456.761904761905,"y":-3697.6190476190477,"z":-2540.095238095238,"a95":0.99,"info":"08/07/2015 at 19:08:49"},{"visible":true,"include":true,"step":"10.0","x":-3817.4285714285716,"y":-4031.809523809524,"z":-2592.8571428571427,"a95":0.99,"info":"08/07/2015 at 19:08:49"},{"visible":true,"include":true,"step":"15.0","x":-3462.190476190476,"y":-4085.3333333333335,"z":-2670.8571428571427,"a95":0.99,"info":"08/07/2015 at 19:08:49"},{"visible":true,"include":true,"step":"20.0","x":-3263.1428571428573,"y":-4107.238095238095,"z":-2615.809523809524,"a95":0.99,"info":"08/07/2015 at 19:08:49"},{"visible":true,"include":true,"step":"23.0","x":-3104.7619047619046,"y":-4064.4761904761904,"z":-2624.5714285714284,"a95":0.99,"info":"08/07/2015 at 19:08:49"},{"visible":true,"include":true,"step":"25.0","x":-3062.3809523809523,"y":-3964.4761904761904,"z":-2546.4761904761904,"a95":0.99,"info":"08/07/2015 at 19:08:49"},{"visible":true,"include":true,"step":"30.0","x":-3042,"y":-4088.3809523809523,"z":-2496,"a95":0.99,"info":"08/07/2015 at 19:08:49"},{"visible":true,"include":true,"step":"33.0","x":-2933.809523809524,"y":-4030.5714285714284,"z":-2625.6190476190477,"a95":0.99,"info":"08/07/2015 at 19:08:49"},{"visible":true,"include":true,"step":"35.0","x":-2889.6190476190477,"y":-4029.904761904762,"z":-2530.7619047619046,"a95":0.99,"info":"08/07/2015 at 19:08:49"},{"visible":true,"include":true,"step":"40.0","x":-2871.809523809524,"y":-3878.4761904761904,"z":-2415.904761904762,"a95":0.99,"info":"08/07/2015 at 19:08:49"},{"visible":true,"include":true,"step":"45.0","x":-2798.285714285714,"y":-3825.1428571428573,"z":-2492.9523809523807,"a95":0.99,"info":"08/07/2015 at 19:08:49"},{"visible":true,"include":true,"step":"50.0","x":-2976.6666666666665,"y":-3893.4285714285716,"z":-2501.2380952380954,"a95":0.99,"info":"08/07/2015 at 19:08:49"},{"visible":true,"include":true,"step":"55.0","x":-2928.4761904761904,"y":-3783.5238095238096,"z":-2313.2380952380954,"a95":0.99,"info":"08/07/2015 at 19:08:49"},{"visible":true,"include":true,"step":"60.0","x":-2844.6666666666665,"y":-3718,"z":-2555.2380952380954,"a95":0.99,"info":"08/07/2015 at 19:08:49"},{"visible":true,"include":true,"step":"65.0","x":-2886.095238095238,"y":-3788.4761904761904,"z":-2522.6666666666665,"a95":0.99,"info":"08/07/2015 at 19:08:49"},{"visible":true,"include":true,"step":"70.0","x":-2736.095238095238,"y":-3686.095238095238,"z":-2362.190476190476,"a95":0.99,"info":"08/07/2015 at 19:08:49"},{"visible":true,"include":true,"step":"80.0","x":-2495.5238095238096,"y":-3572,"z":-2468.7619047619046,"a95":0.99,"info":"08/07/2015 at 19:08:49"}]},{"version":"v1.1.0","exported":"2016-10-17T07:21:17.807Z","volume":10.5,"added":"2016-10-17T07:12:56.541Z","format":"Utrecht","demagType":"Unknown","strat":null,"patch":1.1,"GEO":[],"TECT":[],"interpreted":false,"name":"SS42.08A","coreAzi":231,"coreDip":24,"bedStrike":224,"bedDip":69,"data":[{"visible":false,"include":false,"step":"20","x":-12819.809523809523,"y":-3566.190476190476,"z":-3879.2380952380954,"a95":1.6,"info":"\"15-06-22\" at \"07:40\""},{"visible":false,"include":false,"step":"100","x":-8938.095238095239,"y":-4765.809523809524,"z":-4854.857142857143,"a95":1.7,"info":"\"15-06-22\" at \"10:51\""},{"visible":false,"include":false,"step":"150","x":-7439.619047619048,"y":-5613.523809523809,"z":-4995.142857142857,"a95":1.6,"info":"\"15-06-23\" at \"08:04\""},{"visible":true,"include":false,"step":"180","x":-6554,"y":-6655.523809523809,"z":-5031.523809523809,"a95":1.6,"info":"\"15-06-23\" at \"11:06\""},{"visible":true,"include":true,"step":"210","x":-6585.047619047619,"y":-6163.619047619048,"z":-4482.476190476191,"a95":1.6,"info":"\"15-06-23\" at \"14:06\""},{"visible":true,"include":true,"step":"230","x":-6136.476190476191,"y":-6362.285714285715,"z":-4128.476190476191,"a95":1.7,"info":"\"15-06-24\" at \"07:56\""},{"visible":true,"include":true,"step":"250","x":-6054.476190476191,"y":-6686.285714285715,"z":-3943.5238095238096,"a95":1.6,"info":"\"15-06-24\" at \"11:42\""},{"visible":true,"include":true,"step":"270","x":-5679.428571428572,"y":-6523.714285714285,"z":-4297.333333333333,"a95":1.6,"info":"\"15-06-24\" at \"14:55\""},{"visible":true,"include":true,"step":"300","x":-5342,"y":-5966,"z":-4174.666666666667,"a95":1.7,"info":"\"15-06-25\" at \"09:40\""},{"visible":true,"include":true,"step":"320","x":-5016,"y":-5390.952380952381,"z":-3921.809523809524,"a95":1.6,"info":"\"15-06-25\" at \"13:28\""},{"visible":true,"include":true,"step":"340","x":-5018.380952380952,"y":-5110.952380952381,"z":-3907.5238095238096,"a95":1.5,"info":"\"15-06-25\" at \"16:32\""},{"visible":true,"include":true,"step":"370","x":-3644.6666666666665,"y":-4529.428571428572,"z":-2551.809523809524,"a95":1.7,"info":"\"15-06-25\" at \"20:28\""},{"visible":true,"include":true,"step":"400","x":-3691.6190476190477,"y":-4283.428571428572,"z":-2933.0476190476193,"a95":1.7,"info":"\"15-06-26\" at \"08:01\""},{"visible":true,"include":true,"step":"420","x":-3714.190476190476,"y":-4241.9047619047615,"z":-3075.1428571428573,"a95":1.6,"info":"\"15-06-26\" at \"10:54\""},{"visible":true,"include":true,"step":"440","x":-2868.4761904761904,"y":-3614.285714285714,"z":-2276.8571428571427,"a95":1.7,"info":"\"15-06-27\" at \"10:15\""},{"visible":true,"include":true,"step":"470","x":-2336.7619047619046,"y":-3258.095238095238,"z":-2358.7619047619046,"a95":1.7,"info":"\"15-06-29\" at \"07:16\""},{"visible":true,"include":true,"step":"490","x":-2284.9523809523807,"y":-3434.095238095238,"z":-2064.7619047619046,"a95":1.7,"info":"\"15-06-29\" at \"10:33\""},{"visible":true,"include":true,"step":"520","x":-1904.7619047619048,"y":-3150.4761904761904,"z":-2230.3809523809523,"a95":1.8,"info":"\"15-06-29\" at \"14:22\""},{"visible":true,"include":true,"step":"550","x":-1493.4285714285713,"y":-2355.6190476190477,"z":-1662.3809523809523,"a95":2,"info":"\"15-06-30\" at \"07:38\""},{"visible":false,"include":false,"step":"580","x":-992.952380952381,"y":-2191.3333333333335,"z":-978.0952380952381,"a95":2,"info":"\"15-07-01\" at \"10:52\""}]},{"version":"v1.1.0","exported":"2016-10-17T07:21:17.807Z","volume":10.5,"added":"2016-10-17T07:12:56.541Z","format":"Utrecht","demagType":"Unknown","strat":"5","patch":1.1,"GEO":[{"dec":18.924976714058857,"inc":-47.72054560173024,"MAD":11.29794115156526,"cm":[-1.3358203432289883e-12,-3.410605131648481e-13,0],"intensity":25369.19149260894,"type":"GC","origin":false,"forced":true,"remark":"","nSteps":11,"minStep":"10.0","maxStep":"50.0","steps":["10.0","15.0","20.0","23.0","25.0","30.0","33.0","35.0","40.0","45.0","50.0"],"group":"None","version":"v1.1.0"}],"TECT":[{"dec":88.00578565653836,"inc":-32.09487682903185,"MAD":11.297941151545054,"cm":[-1.9895196601282805e-12,3.410605131648481e-13,9.094947017729282e-13],"intensity":25369.19149260895,"type":"GC","origin":false,"forced":true,"remark":"","nSteps":11,"minStep":"10.0","maxStep":"50.0","steps":["10.0","15.0","20.0","23.0","25.0","30.0","33.0","35.0","40.0","45.0","50.0"],"group":"None","version":"v1.1.0"}],"interpreted":true,"name":"SS42.09","coreAzi":269,"coreDip":43,"bedStrike":224,"bedDip":69,"data":[{"visible":true,"include":false,"step":"0.0","x":-11568.57142857143,"y":-810.1904761904761,"z":-6862.285714285715,"a95":0.99,"info":"08/07/2015 at 19:08:49"},{"visible":true,"include":true,"step":"10.0","x":-10704.761904761905,"y":-1500.095238095238,"z":-7440.0952380952385,"a95":0.99,"info":"08/07/2015 at 19:08:49"},{"visible":true,"include":true,"step":"15.0","x":-10217.142857142857,"y":-1746.4761904761904,"z":-7496.380952380952,"a95":0.99,"info":"08/07/2015 at 19:08:49"},{"visible":true,"include":true,"step":"20.0","x":-9933.333333333334,"y":-1880.7619047619048,"z":-7444.476190476191,"a95":0.99,"info":"08/07/2015 at 19:08:49"},{"visible":true,"include":true,"step":"23.0","x":-9810.47619047619,"y":-1904.5714285714287,"z":-7578.476190476191,"a95":0.99,"info":"08/07/2015 at 19:08:49"},{"visible":true,"include":true,"step":"25.0","x":-9698.095238095239,"y":-1956.1904761904761,"z":-7517.428571428572,"a95":0.99,"info":"08/07/2015 at 19:08:49"},{"visible":true,"include":true,"step":"30.0","x":-9634.285714285714,"y":-1988.5714285714287,"z":-7474.190476190476,"a95":0.99,"info":"08/07/2015 at 19:08:49"},{"visible":true,"include":true,"step":"33.0","x":-9538.095238095239,"y":-2118.4761904761904,"z":-7460.190476190476,"a95":0.99,"info":"08/07/2015 at 19:08:49"},{"visible":true,"include":true,"step":"35.0","x":-9515.809523809523,"y":-2100.4761904761904,"z":-7442.476190476191,"a95":0.99,"info":"08/07/2015 at 19:08:49"},{"visible":true,"include":true,"step":"40.0","x":-9492.190476190477,"y":-2177.2380952380954,"z":-7327.714285714285,"a95":0.99,"info":"08/07/2015 at 19:08:49"},{"visible":true,"include":true,"step":"45.0","x":-9411.904761904761,"y":-2083.6190476190477,"z":-7318.666666666667,"a95":0.99,"info":"08/07/2015 at 19:08:49"},{"visible":true,"include":true,"step":"50.0","x":-9467.52380952381,"y":-2316,"z":-7463.333333333333,"a95":0.99,"info":"08/07/2015 at 19:08:49"},{"visible":true,"include":false,"step":"55.0","x":-9290.952380952382,"y":-2302.9523809523807,"z":-7309.047619047619,"a95":0.99,"info":"08/07/2015 at 19:08:49"},{"visible":true,"include":false,"step":"60.0","x":-9206.190476190477,"y":-2266.095238095238,"z":-7282.285714285715,"a95":0.99,"info":"08/07/2015 at 19:08:49"},{"visible":true,"include":false,"step":"65.0","x":-9209.904761904761,"y":-2345.4285714285716,"z":-7192.666666666667,"a95":0.99,"info":"08/07/2015 at 19:08:49"},{"visible":true,"include":false,"step":"70.0","x":-9289.52380952381,"y":-2488.4761904761904,"z":-7183.142857142857,"a95":0.99,"info":"08/07/2015 at 19:08:49"},{"visible":true,"include":false,"step":"80.0","x":-8667.52380952381,"y":-2403.809523809524,"z":-6979.714285714285,"a95":0.99,"info":"08/07/2015 at 19:08:49"}]},{"version":"v1.1.0","exported":"2016-10-17T07:21:17.807Z","volume":10.5,"added":"2016-10-17T07:12:56.541Z","format":"Utrecht","demagType":"Unknown","strat":null,"patch":1.1,"GEO":[{"dec":123.03882646507543,"inc":-32.340231343210995,"MAD":17.954639933146673,"cm":[-1.7053025658242404e-13,2.4158453015843406e-13,0],"intensity":20765.585242367953,"type":"GC","origin":false,"forced":true,"remark":"","nSteps":18,"minStep":"100","maxStep":"550","steps":["100","150","180","210","230","250","270","300","320","340","370","400","420","440","470","490","520","550"],"group":"None","version":"v1.1.0"}],"TECT":[{"dec":302.59911714479665,"inc":-35.63869103109599,"MAD":17.954639933144644,"cm":[-3.126388037344441e-13,7.105427357601002e-13,4.671818487622659e-13],"intensity":20765.585242367957,"type":"GC","origin":false,"forced":true,"remark":"","nSteps":18,"minStep":"100","maxStep":"550","steps":["100","150","180","210","230","250","270","300","320","340","370","400","420","440","470","490","520","550"],"group":"None","version":"v1.1.0"}],"interpreted":true,"name":"SS42.11A","coreAzi":32,"coreDip":56,"bedStrike":224,"bedDip":69,"data":[{"visible":true,"include":false,"step":"20","x":-13348.857142857143,"y":1205.8095238095239,"z":-7445.523809523809,"a95":1.7,"info":"\"15-06-22\" at \"07:42\""},{"visible":true,"include":true,"step":"100","x":-13113.142857142857,"y":162.85714285714286,"z":-8534.57142857143,"a95":1.8,"info":"\"15-06-22\" at \"10:53\""},{"visible":true,"include":true,"step":"150","x":-12350.095238095239,"y":-963.2380952380952,"z":-9125.333333333334,"a95":1.9,"info":"\"15-06-23\" at \"08:06\""},{"visible":true,"include":true,"step":"180","x":-12359.809523809523,"y":-1084.857142857143,"z":-9399.333333333334,"a95":1.9,"info":"\"15-06-23\" at \"11:08\""},{"visible":true,"include":true,"step":"210","x":-12238.380952380952,"y":-861.3333333333334,"z":-9411.619047619048,"a95":1.9,"info":"\"15-06-23\" at \"14:08\""},{"visible":true,"include":true,"step":"230","x":-12129.52380952381,"y":-1623.4285714285713,"z":-9222.47619047619,"a95":1.8,"info":"\"15-06-24\" at \"07:58\""},{"visible":true,"include":true,"step":"250","x":-11994.761904761905,"y":-801.047619047619,"z":-9310.857142857143,"a95":1.9,"info":"\"15-06-24\" at \"11:44\""},{"visible":true,"include":true,"step":"270","x":-11624.952380952382,"y":-664.5714285714286,"z":-9352.095238095239,"a95":2,"info":"\"15-06-24\" at \"14:57\""},{"visible":true,"include":true,"step":"300","x":-11147.52380952381,"y":-674.5714285714286,"z":-8640,"a95":1.9,"info":"\"15-06-25\" at \"09:42\""},{"visible":true,"include":true,"step":"320","x":-10637.42857142857,"y":-544.952380952381,"z":-8244.095238095239,"a95":1.8,"info":"\"15-06-25\" at \"13:29\""},{"visible":true,"include":true,"step":"340","x":-9999.904761904761,"y":-519.9047619047619,"z":-7710.285714285715,"a95":1.8,"info":"\"15-06-25\" at \"16:33\""},{"visible":true,"include":true,"step":"370","x":-8614.761904761905,"y":-1501.7142857142858,"z":-7355.523809523809,"a95":2,"info":"\"15-06-25\" at \"20:29\""},{"visible":true,"include":true,"step":"400","x":-8846.47619047619,"y":-1213.5238095238096,"z":-7252.476190476191,"a95":1.9,"info":"\"15-06-26\" at \"08:02\""},{"visible":true,"include":true,"step":"420","x":-8607.142857142857,"y":-977.3333333333334,"z":-7455.523809523809,"a95":1.8,"info":"\"15-06-26\" at \"10:56\""},{"visible":true,"include":true,"step":"440","x":-6140.666666666667,"y":-1160.952380952381,"z":-6647.333333333333,"a95":2.1,"info":"\"15-06-27\" at \"10:16\""},{"visible":true,"include":true,"step":"470","x":-5102.285714285715,"y":-1047.3333333333333,"z":-5352.761904761905,"a95":2.1,"info":"\"15-06-29\" at \"07:18\""},{"visible":true,"include":true,"step":"490","x":-4739.238095238095,"y":-970.952380952381,"z":-5295.047619047619,"a95":2.1,"info":"\"15-06-29\" at \"10:35\""},{"visible":true,"include":true,"step":"520","x":-3881.6190476190477,"y":-1235.142857142857,"z":-4687.238095238095,"a95":2.4,"info":"\"15-06-29\" at \"14:23\""},{"visible":true,"include":true,"step":"550","x":-3614.095238095238,"y":-329.14285714285717,"z":-3769.1428571428573,"a95":2.4,"info":"\"15-06-30\" at \"07:40\""},{"visible":true,"include":false,"step":"580","x":-2719.5238095238096,"y":-909.5238095238095,"z":-4058.4761904761904,"a95":2.2,"info":"\"15-07-01\" at \"10:54\""}]},{"version":"v1.1.0","exported":"2016-10-17T07:21:17.807Z","volume":10.5,"added":"2016-10-17T07:12:56.541Z","format":"Utrecht","demagType":"Unknown","strat":"6","patch":1.1,"GEO":[{"dec":30.889347085547797,"inc":-40.053619122431485,"MAD":9.02587131294941,"cm":[-1.8189894035458565e-12,-7.958078640513122e-13,0],"intensity":35065.801320121325,"type":"GC","origin":false,"forced":true,"remark":"","nSteps":16,"minStep":"10.0","maxStep":"80.0","steps":["10.0","15.0","20.0","23.0","25.0","30.0","33.0","35.0","40.0","45.0","50.0","55.0","60.0","65.0","70.0","80.0"],"group":"None","version":"v1.1.0"}],"TECT":[{"dec":79.84425897876014,"inc":-23.122993043171903,"MAD":9.025871312949036,"cm":[-2.2168933355715126e-12,-8.526512829121202e-14,6.252776074688882e-13],"intensity":35065.801320121325,"type":"GC","origin":false,"forced":true,"remark":"","nSteps":16,"minStep":"10.0","maxStep":"80.0","steps":["10.0","15.0","20.0","23.0","25.0","30.0","33.0","35.0","40.0","45.0","50.0","55.0","60.0","65.0","70.0","80.0"],"group":"None","version":"v1.1.0"}],"interpreted":true,"name":"SS42.12","coreAzi":265,"coreDip":63,"bedStrike":224,"bedDip":69,"data":[{"visible":false,"include":false,"step":"0.0","x":-18670.47619047619,"y":-5054.857142857143,"z":-805.2666666666667,"a95":0.99,"info":"08/07/2015 at 19:08:49"},{"visible":true,"include":true,"step":"10.0","x":-17343.809523809523,"y":-6143.333333333333,"z":-2325.0476190476193,"a95":0.99,"info":"08/07/2015 at 19:08:49"},{"visible":true,"include":true,"step":"15.0","x":-16768.571428571428,"y":-6422,"z":-2917.714285714286,"a95":0.99,"info":"08/07/2015 at 19:08:49"},{"visible":true,"include":true,"step":"20.0","x":-16406.666666666668,"y":-6514.0952380952385,"z":-2949.5238095238096,"a95":0.99,"info":"08/07/2015 at 19:08:49"},{"visible":true,"include":true,"step":"23.0","x":-16290.47619047619,"y":-6590.666666666667,"z":-2947.714285714286,"a95":0.99,"info":"08/07/2015 at 19:08:49"},{"visible":true,"include":true,"step":"25.0","x":-16109.52380952381,"y":-6553.238095238095,"z":-3076.8571428571427,"a95":0.99,"info":"08/07/2015 at 19:08:49"},{"visible":true,"include":true,"step":"30.0","x":-16039.047619047618,"y":-6602.190476190476,"z":-3122.190476190476,"a95":0.99,"info":"08/07/2015 at 19:08:49"},{"visible":true,"include":true,"step":"33.0","x":-15714.285714285714,"y":-6671.714285714285,"z":-3108.4761904761904,"a95":0.99,"info":"08/07/2015 at 19:08:49"},{"visible":true,"include":true,"step":"35.0","x":-15720,"y":-6719.142857142857,"z":-3220.285714285714,"a95":0.99,"info":"08/07/2015 at 19:08:49"},{"visible":true,"include":true,"step":"40.0","x":-15808.57142857143,"y":-6689.523809523809,"z":-3340.4761904761904,"a95":0.99,"info":"08/07/2015 at 19:08:49"},{"visible":true,"include":true,"step":"45.0","x":-15507.619047619048,"y":-6755.714285714285,"z":-3243.809523809524,"a95":0.99,"info":"08/07/2015 at 19:08:49"},{"visible":true,"include":true,"step":"50.0","x":-15341.904761904761,"y":-6777.523809523809,"z":-3361.904761904762,"a95":0.99,"info":"08/07/2015 at 19:08:49"},{"visible":true,"include":true,"step":"55.0","x":-15400,"y":-6660.0952380952385,"z":-3198.285714285714,"a95":0.99,"info":"08/07/2015 at 19:08:49"},{"visible":true,"include":true,"step":"60.0","x":-14983.809523809523,"y":-6658.476190476191,"z":-3273.4285714285716,"a95":0.99,"info":"08/07/2015 at 19:08:49"},{"visible":true,"include":true,"step":"65.0","x":-14982.857142857143,"y":-6813.9047619047615,"z":-3298.095238095238,"a95":0.99,"info":"08/07/2015 at 19:08:49"},{"visible":true,"include":true,"step":"70.0","x":-15184.761904761905,"y":-6786.476190476191,"z":-3233.3333333333335,"a95":0.99,"info":"08/07/2015 at 19:08:49"},{"visible":true,"include":true,"step":"80.0","x":-14724.761904761905,"y":-6913.714285714285,"z":-3218.4761904761904,"a95":0.99,"info":"08/07/2015 at 19:08:49"}]},{"version":"v1.1.0","exported":"2016-10-17T07:21:17.807Z","volume":10.5,"added":"2016-10-17T07:12:56.541Z","format":"Utrecht","demagType":"Unknown","strat":null,"patch":1.1,"GEO":[{"dec":97.32494565709692,"inc":9.998607874309267,"MAD":3.284691046982601,"cm":[-6.821210263296962e-13,-1.5631940186722204e-13,0],"intensity":13436.59380529289,"type":"dir","forced":true,"remark":"","origin":false,"nSteps":16,"minStep":"210","maxStep":"580","steps":["210","230","250","270","300","320","340","370","400","420","440","470","490","520","550","580"],"group":"None","version":"v1.1.0"}],"TECT":[{"dec":55.62105258327824,"inc":53.09325740918762,"MAD":3.284691046982626,"cm":[-2.984279490192421e-13,-1.0658141036401503e-13,1.3500311979441904e-13],"intensity":13436.593805292894,"type":"dir","forced":true,"remark":"","origin":false,"nSteps":16,"minStep":"210","maxStep":"580","steps":["210","230","250","270","300","320","340","370","400","420","440","470","490","520","550","580"],"group":"None","version":"v1.1.0"}],"interpreted":true,"name":"SS42.13A","coreAzi":275,"coreDip":69,"bedStrike":224,"bedDip":69,"data":[{"visible":false,"include":false,"step":"20","x":-12658.666666666666,"y":2670.285714285714,"z":2150.190476190476,"a95":1.5,"info":"\"15-06-22\" at \"07:43\""},{"visible":true,"include":false,"step":"100","x":-11890,"y":666.2857142857143,"z":-206.57142857142858,"a95":1.4,"info":"\"15-06-22\" at \"10:55\""},{"visible":true,"include":false,"step":"150","x":-11479.047619047618,"y":441.5238095238095,"z":-1013.8095238095239,"a95":1.5,"info":"\"15-06-23\" at \"08:07\""},{"visible":true,"include":false,"step":"180","x":-11400.666666666666,"y":-132.85714285714286,"z":-1532.2857142857142,"a95":1.5,"info":"\"15-06-23\" at \"11:09\""},{"visible":true,"include":true,"step":"210","x":-10921.047619047618,"y":-186.66666666666666,"z":-1944.095238095238,"a95":1.5,"info":"\"15-06-23\" at \"14:09\""},{"visible":true,"include":true,"step":"230","x":-11004.47619047619,"y":-217.14285714285714,"z":-1981.047619047619,"a95":1.5,"info":"\"15-06-24\" at \"07:59\""},{"visible":true,"include":true,"step":"250","x":-10524.380952380952,"y":-255.33333333333334,"z":-1477.047619047619,"a95":1.5,"info":"\"15-06-24\" at \"11:45\""},{"visible":true,"include":true,"step":"270","x":-10392.952380952382,"y":-548.952380952381,"z":-2241.1428571428573,"a95":1.5,"info":"\"15-06-24\" at \"14:59\""},{"visible":true,"include":true,"step":"300","x":-10018.380952380952,"y":-898.1904761904761,"z":-1444.952380952381,"a95":1.4,"info":"\"15-06-25\" at \"09:43\""},{"visible":true,"include":true,"step":"320","x":-9660.666666666666,"y":-108.19047619047619,"z":-1993.047619047619,"a95":1.5,"info":"\"15-06-25\" at \"13:31\""},{"visible":true,"include":true,"step":"340","x":-8963.42857142857,"y":-54.857142857142854,"z":-1841.4285714285713,"a95":1.5,"info":"\"15-06-25\" at \"16:35\""},{"visible":true,"include":true,"step":"370","x":-8828,"y":-227.61904761904762,"z":-1583.047619047619,"a95":1.5,"info":"\"15-06-25\" at \"20:33\""},{"visible":true,"include":true,"step":"400","x":-7627.333333333333,"y":-688,"z":-1370.857142857143,"a95":1.5,"info":"\"15-06-26\" at \"08:04\""},{"visible":true,"include":true,"step":"420","x":-7306.857142857143,"y":-679.6190476190476,"z":-1566.095238095238,"a95":1.6,"info":"\"15-06-26\" at \"10:58\""},{"visible":true,"include":true,"step":"440","x":-5310.0952380952385,"y":-12.380952380952381,"z":-1656.952380952381,"a95":1.7,"info":"\"15-06-27\" at \"10:18\""},{"visible":true,"include":true,"step":"470","x":-4765.714285714285,"y":-161.23809523809524,"z":-1063.142857142857,"a95":1.6,"info":"\"15-06-29\" at \"07:19\""},{"visible":true,"include":true,"step":"490","x":-4381.809523809524,"y":-524.0952380952381,"z":-1426.952380952381,"a95":1.6,"info":"\"15-06-29\" at \"10:36\""},{"visible":true,"include":true,"step":"520","x":-3972.285714285714,"y":-508.57142857142856,"z":-1234.2857142857142,"a95":1.9,"info":"\"15-06-29\" at \"14:25\""},{"visible":true,"include":true,"step":"550","x":-3122.3809523809523,"y":-45.42857142857143,"z":-876.5714285714286,"a95":2.1,"info":"\"15-06-30\" at \"07:42\""},{"visible":true,"include":true,"step":"580","x":-2138.285714285714,"y":-320,"z":-1176.6666666666667,"a95":2,"info":"\"15-07-01\" at \"10:56\""}]},{"version":"v1.1.0","exported":"2016-10-17T09:37:18.499Z","volume":10.5,"added":"2016-10-17T09:36:26.240Z","format":"Utrecht","demagType":"Unknown","strat":null,"patch":1.1,"GEO":[{"dec":14.243921546888316,"inc":-31.220238550319447,"MAD":19.865893377883378,"cm":[-2.0605739337042905e-12,-6.536993168992922e-13,0],"intensity":21624.012038774425,"type":"GC","origin":false,"forced":true,"remark":"","nSteps":15,"minStep":"180","maxStep":"520","steps":["180","210","230","250","270","300","320","340","370","400","420","440","470","490","520"],"group":"None","version":"v1.1.0"}],"TECT":[{"dec":68.08050582662742,"inc":-35.59102759738887,"MAD":19.865893377884426,"cm":[-2.8634872251132037e-12,-1.2505552149377763e-12,9.947598300641403e-13],"intensity":21624.012038774425,"type":"GC","origin":false,"forced":true,"remark":"","nSteps":15,"minStep":"180","maxStep":"520","steps":["180","210","230","250","270","300","320","340","370","400","420","440","470","490","520"],"group":"None","version":"v1.1.0"}],"interpreted":true,"name":"SS42.11B","coreAzi":283,"coreDip":56,"bedStrike":224,"bedDip":69,"data":[{"visible":true,"include":false,"step":"20","x":-13348.857142857143,"y":1205.8095238095239,"z":-7445.523809523809,"a95":1.7,"info":"\"15-06-22\" at \"07:42\""},{"visible":true,"include":false,"step":"100","x":-13113.142857142857,"y":162.85714285714286,"z":-8534.57142857143,"a95":1.8,"info":"\"15-06-22\" at \"10:53\""},{"visible":true,"include":false,"step":"150","x":-12350.095238095239,"y":-963.2380952380952,"z":-9125.333333333334,"a95":1.9,"info":"\"15-06-23\" at \"08:06\""},{"visible":true,"include":true,"step":"180","x":-12359.809523809523,"y":-1084.857142857143,"z":-9399.333333333334,"a95":1.9,"info":"\"15-06-23\" at \"11:08\""},{"visible":true,"include":true,"step":"210","x":-12238.380952380952,"y":-861.3333333333334,"z":-9411.619047619048,"a95":1.9,"info":"\"15-06-23\" at \"14:08\""},{"visible":true,"include":true,"step":"230","x":-12129.52380952381,"y":-1623.4285714285713,"z":-9222.47619047619,"a95":1.8,"info":"\"15-06-24\" at \"07:58\""},{"visible":true,"include":true,"step":"250","x":-11994.761904761905,"y":-801.047619047619,"z":-9310.857142857143,"a95":1.9,"info":"\"15-06-24\" at \"11:44\""},{"visible":true,"include":true,"step":"270","x":-11624.952380952382,"y":-664.5714285714286,"z":-9352.095238095239,"a95":2,"info":"\"15-06-24\" at \"14:57\""},{"visible":true,"include":true,"step":"300","x":-11147.52380952381,"y":-674.5714285714286,"z":-8640,"a95":1.9,"info":"\"15-06-25\" at \"09:42\""},{"visible":true,"include":true,"step":"320","x":-10637.42857142857,"y":-544.952380952381,"z":-8244.095238095239,"a95":1.8,"info":"\"15-06-25\" at \"13:29\""},{"visible":true,"include":true,"step":"340","x":-9999.904761904761,"y":-519.9047619047619,"z":-7710.285714285715,"a95":1.8,"info":"\"15-06-25\" at \"16:33\""},{"visible":true,"include":true,"step":"370","x":-8614.761904761905,"y":-1501.7142857142858,"z":-7355.523809523809,"a95":2,"info":"\"15-06-25\" at \"20:29\""},{"visible":true,"include":true,"step":"400","x":-8846.47619047619,"y":-1213.5238095238096,"z":-7252.476190476191,"a95":1.9,"info":"\"15-06-26\" at \"08:02\""},{"visible":true,"include":true,"step":"420","x":-8607.142857142857,"y":-977.3333333333334,"z":-7455.523809523809,"a95":1.8,"info":"\"15-06-26\" at \"10:56\""},{"visible":true,"include":true,"step":"440","x":-6140.666666666667,"y":-1160.952380952381,"z":-6647.333333333333,"a95":2.1,"info":"\"15-06-27\" at \"10:16\""},{"visible":true,"include":true,"step":"470","x":-5102.285714285715,"y":-1047.3333333333333,"z":-5352.761904761905,"a95":2.1,"info":"\"15-06-29\" at \"07:18\""},{"visible":true,"include":true,"step":"490","x":-4739.238095238095,"y":-970.952380952381,"z":-5295.047619047619,"a95":2.1,"info":"\"15-06-29\" at \"10:35\""},{"visible":true,"include":true,"step":"520","x":-3881.6190476190477,"y":-1235.142857142857,"z":-4687.238095238095,"a95":2.4,"info":"\"15-06-29\" at \"14:23\""},{"visible":true,"include":false,"step":"550","x":-3614.095238095238,"y":-329.14285714285717,"z":-3769.1428571428573,"a95":2.4,"info":"\"15-06-30\" at \"07:40\""},{"visible":true,"include":false,"step":"580","x":-2719.5238095238096,"y":-909.5238095238095,"z":-4058.4761904761904,"a95":2.2,"info":"\"15-07-01\" at \"10:54\""}]}]
