# Supplementary material for: Paleomagnetic constraints on the timing and distribution of Cenozoic rotations in Central and Eastern Anatolia
Source: Copernicus journal article supplement (doi:10.5194/se-9-295-2018), 2018-03-21
Supplement: Supplementary file 2 [file se-9-295-2018-supplement.zip › se-2017-66_DATA_dir files/dir files Sivas/SS43.dir]

[{"info":"","GEO":[],"TECT":[],"interpreted":false,"name":"SS43.01A","coreAzi":323,"coreDip":58,"bedStrike":269,"bedDip":39,"data":[{"visible":true,"include":false,"step":"20","x":-774,"y":8202,"z":23255,"a95":"2.3","info":"\"15-06-22\" at \"07:46\""},{"visible":true,"include":false,"step":"100","x":-2253,"y":2559,"z":9823,"a95":"2.4","info":"\"15-06-22\" at \"11:00\""},{"visible":true,"include":false,"step":"150","x":-1052,"y":2793,"z":3475,"a95":"2.8","info":"\"15-06-23\" at \"08:09\""},{"visible":true,"include":true,"step":"180","x":-1734,"y":1600,"z":3033,"a95":"2.9","info":"\"15-06-23\" at \"11:14\""},{"visible":true,"include":true,"step":"210","x":-1891,"y":2599,"z":3591,"a95":"2.9","info":"\"15-06-23\" at \"14:11\""},{"visible":true,"include":true,"step":"230","x":-1581,"y":2710,"z":2298,"a95":"2.7","info":"\"15-06-24\" at \"08:01\""},{"visible":true,"include":true,"step":"250","x":-2402,"y":2261,"z":1672,"a95":"3.1","info":"\"15-06-24\" at \"11:47\""},{"visible":true,"include":true,"step":"270","x":-2397,"y":2058,"z":2124,"a95":"2.8","info":"\"15-06-24\" at \"15:02\""},{"visible":true,"include":true,"step":"300","x":-2286,"y":1585,"z":2398,"a95":"3.4","info":"\"15-06-25\" at \"09:45\""},{"visible":true,"include":true,"step":"320","x":-2906,"y":984,"z":2501,"a95":"3.2","info":"\"15-06-25\" at \"13:33\""},{"visible":true,"include":true,"step":"340","x":-2661,"y":957,"z":2879,"a95":"2.9","info":"\"15-06-25\" at \"16:38\""},{"visible":true,"include":true,"step":"370","x":-3673,"y":1703,"z":3075,"a95":"3","info":"\"15-06-25\" at \"20:43\""},{"visible":true,"include":true,"step":"400","x":-1962,"y":1332,"z":2006,"a95":"3","info":"\"15-06-26\" at \"08:06\""}]},{"info":"7","GEO":[],"TECT":[],"interpreted":false,"name":"SS43.02B","coreAzi":337,"coreDip":58,"bedStrike":269,"bedDip":39,"data":[{"visible":true,"include":false,"step":"0.0","x":-629.13,"y":4127.7,"z":12148,"a95":"0.99","info":"08/07/2015 at 19:08:49"},{"visible":true,"include":false,"step":"10.0","x":454.11,"y":2192.7,"z":5668.8,"a95":"0.99","info":"08/07/2015 at 19:08:49"},{"visible":true,"include":false,"step":"15.0","x":823.49,"y":2113.9,"z":4269.3,"a95":"0.99","info":"08/07/2015 at 19:08:49"},{"visible":true,"include":false,"step":"20.0","x":734.63,"y":989.29,"z":4318.6,"a95":"0.99","info":"08/07/2015 at 19:08:49"},{"visible":true,"include":false,"step":"23.0","x":468.93,"y":660.7,"z":3214.6,"a95":"0.99","info":"08/07/2015 at 19:08:49"},{"visible":true,"include":false,"step":"25.0","x":464.77,"y":767.8,"z":2723.4,"a95":"0.99","info":"08/07/2015 at 19:08:49"},{"visible":true,"include":false,"step":"30.0","x":79.883,"y":680.51,"z":2063.3,"a95":"0.99","info":"08/07/2015 at 19:08:49"},{"visible":true,"include":false,"step":"33.0","x":1035,"y":1401,"z":1491.7,"a95":"0.99","info":"08/07/2015 at 19:08:49"},{"visible":true,"include":false,"step":"35.0","x":173.51,"y":232.33,"z":1428.4,"a95":"0.99","info":"08/07/2015 at 19:08:49"},{"visible":true,"include":false,"step":"40.0","x":-544.67,"y":749.16,"z":1569.2,"a95":"0.99","info":"08/07/2015 at 19:08:49"},{"visible":true,"include":false,"step":"45.0","x":811,"y":996.31,"z":1540.5,"a95":"0.99","info":"08/07/2015 at 19:08:49"},{"visible":true,"include":false,"step":"50.0","x":-439.28,"y":-725.74,"z":7.0408,"a95":"0.99","info":"08/07/2015 at 19:08:49"},{"visible":true,"include":false,"step":"55.0","x":-455.61,"y":1001.5,"z":280.26,"a95":"0.99","info":"08/07/2015 at 19:08:49"},{"visible":true,"include":false,"step":"60.0","x":459.86,"y":1130.8,"z":317.39,"a95":"0.99","info":"08/07/2015 at 19:08:49"},{"visible":true,"include":false,"step":"65.0","x":195.76,"y":601.17,"z":599.3,"a95":"0.99","info":"08/07/2015 at 19:08:49"},{"visible":true,"include":false,"step":"70.0","x":780.61,"y":-488.67,"z":1006.4,"a95":"0.99","info":"08/07/2015 at 19:08:49"},{"visible":true,"include":false,"step":"80.0","x":-1767.2,"y":344.77,"z":451.3,"a95":"0.99","info":"08/07/2015 at 19:08:49"}]},{"info":"0","GEO":[{"dec":59.94808648089219,"inc":4.283955249479461,"MAD":32.8277403831392,"cm":[-4.260900200375261,-600.9882854842654,1008.6120004137462],"intensity":233.7461859461301,"type":"dir","forced":false,"remark":"","origin":false,"nSteps":8,"minStep":"23.0","maxStep":"50.0","steps":["23.0","25.0","30.0","33.0","35.0","40.0","45.0","50.0"]}],"TECT":[{"dec":2.777840156663842,"inc":49.136924898777245,"MAD":32.8277403831392,"cm":[70.09314121976355,-1002.1667929466624,-607.6610178441601],"intensity":233.74618594613003,"type":"dir","forced":false,"remark":"","origin":false,"nSteps":8,"minStep":"23.0","maxStep":"50.0","steps":["23.0","25.0","30.0","33.0","35.0","40.0","45.0","50.0"]}],"interpreted":true,"name":"SS43.02A","coreAzi":337,"coreDip":58,"bedStrike":10.5,"bedDip":269,"data":[{"visible":true,"include":false,"step":"0.0","x":-3615.2,"y":597.9,"z":17911,"a95":"0.99","info":"05/10/2015 at 10:43:21"},{"visible":true,"include":false,"step":"10.0","x":-980.39,"y":372.9,"z":7078.1,"a95":"0.99","info":"05/10/2015 at 10:43:21"},{"visible":true,"include":false,"step":"15.0","x":-235.29,"y":-328.27,"z":3869.5,"a95":"0.99","info":"05/10/2015 at 10:43:21"},{"visible":true,"include":false,"step":"20.0","x":382.96,"y":37.814,"z":2863,"a95":"0.99","info":"05/10/2015 at 10:43:21"},{"visible":true,"include":true,"step":"23.0","x":-364.12,"y":312.75,"z":1024,"a95":"0.99","info":"05/10/2015 at 10:43:21"},{"visible":true,"include":true,"step":"25.0","x":-654.3,"y":-304.49,"z":751.59,"a95":"0.99","info":"05/10/2015 at 10:43:21"},{"visible":true,"include":true,"step":"30.0","x":-104.58,"y":357.87,"z":1362.8,"a95":"0.99","info":"05/10/2015 at 10:43:21"},{"visible":true,"include":true,"step":"33.0","x":-273.75,"y":-810.02,"z":1607.6,"a95":"0.99","info":"05/10/2015 at 10:43:21"},{"visible":true,"include":true,"step":"35.0","x":-293.97,"y":-947.81,"z":1555.6,"a95":"0.99","info":"05/10/2015 at 10:43:21"},{"visible":true,"include":true,"step":"40.0","x":-914.9,"y":-1179,"z":404.06,"a95":"0.99","info":"05/10/2015 at 10:43:21"},{"visible":true,"include":true,"step":"45.0","x":-34.512,"y":223.48,"z":485.64,"a95":"0.99","info":"05/10/2015 at 10:43:21"},{"visible":true,"include":true,"step":"50.0","x":-69.199,"y":-2091.8,"z":630.4,"a95":"0.99","info":"05/10/2015 at 10:43:21"},{"visible":true,"include":false,"step":"60.0","x":-6.2438,"y":-820.19,"z":-566.46,"a95":"0.99","info":"05/10/2015 at 10:43:21"},{"visible":true,"include":false,"step":"70.0","x":53.483,"y":1845.1,"z":279.58,"a95":"0.99","info":"05/10/2015 at 10:43:21"}]},{"info":"","GEO":[],"TECT":[],"interpreted":false,"name":"SS43.05A","coreAzi":335,"coreDip":53,"bedStrike":271,"bedDip":37,"data":[{"visible":true,"include":false,"step":"20","x":-7109,"y":8822,"z":29190,"a95":"2.2","info":"\"15-06-22\" at \"07:47\""},{"visible":true,"include":false,"step":"100","x":-2222,"y":6182,"z":13934,"a95":"2.3","info":"\"15-06-22\" at \"11:02\""},{"visible":true,"include":false,"step":"150","x":-389,"y":4727,"z":5902,"a95":"2.5","info":"\"15-06-23\" at \"08:11\""},{"visible":true,"include":false,"step":"180","x":-1115,"y":4513,"z":3221,"a95":"3","info":"\"15-06-23\" at \"11:16\""},{"visible":true,"include":false,"step":"210","x":-1922,"y":4893,"z":3517,"a95":"2.8","info":"\"15-06-23\" at \"14:13\""},{"visible":true,"include":false,"step":"230","x":-1030,"y":4129,"z":3324,"a95":"3","info":"\"15-06-24\" at \"08:02\""},{"visible":true,"include":false,"step":"250","x":-769,"y":3482,"z":3715,"a95":"2.9","info":"\"15-06-24\" at \"11:49\""},{"visible":true,"include":false,"step":"270","x":-1086,"y":3035,"z":4243,"a95":"2.5","info":"\"15-06-24\" at \"15:03\""},{"visible":true,"include":false,"step":"300","x":-1855,"y":3012,"z":5399,"a95":"2.6","info":"\"15-06-25\" at \"09:46\""},{"visible":true,"include":false,"step":"320","x":-1639,"y":4548,"z":3319,"a95":"2.3","info":"\"15-06-25\" at \"13:34\""},{"visible":true,"include":false,"step":"340","x":-918,"y":2506,"z":6827,"a95":"2.9","info":"\"15-06-25\" at \"16:39\""},{"visible":true,"include":false,"step":"370","x":-1794,"y":3171,"z":3835,"a95":"3.1","info":"\"15-06-25\" at \"20:44\""},{"visible":true,"include":false,"step":"400","x":-2702,"y":1388,"z":3947,"a95":"3.9","info":"\"15-06-26\" at \"08:08\""}]},{"info":"0","GEO":[],"TECT":[],"interpreted":false,"name":"SS43.06A","coreAzi":345,"coreDip":50,"bedStrike":10.5,"bedDip":271,"data":[{"visible":true,"include":false,"step":"0.0","x":-1120,"y":7905.5,"z":16373,"a95":"0.99","info":"05/10/2015 at 10:43:21"},{"visible":true,"include":false,"step":"10.0","x":-1445,"y":2904.4,"z":9282.5,"a95":"0.99","info":"05/10/2015 at 10:43:21"},{"visible":true,"include":false,"step":"15.0","x":-1628.1,"y":1825,"z":6860.7,"a95":"0.99","info":"05/10/2015 at 10:43:21"},{"visible":true,"include":false,"step":"20.0","x":-1447.2,"y":888.19,"z":5075.2,"a95":"0.99","info":"05/10/2015 at 10:43:21"},{"visible":true,"include":false,"step":"23.0","x":-116.08,"y":1040.8,"z":3720.2,"a95":"0.99","info":"05/10/2015 at 10:43:21"},{"visible":true,"include":false,"step":"25.0","x":-79.032,"y":793.55,"z":4518.8,"a95":"0.99","info":"05/10/2015 at 10:43:21"},{"visible":true,"include":false,"step":"30.0","x":57.886,"y":368.34,"z":3286.4,"a95":"0.99","info":"05/10/2015 at 10:43:21"},{"visible":true,"include":false,"step":"33.0","x":16.4,"y":1050.4,"z":2292.2,"a95":"0.99","info":"05/10/2015 at 10:43:21"},{"visible":true,"include":false,"step":"35.0","x":-313.66,"y":730.03,"z":1961.6,"a95":"0.99","info":"05/10/2015 at 10:43:21"},{"visible":true,"include":false,"step":"40.0","x":-416.44,"y":932.99,"z":1295.7,"a95":"0.99","info":"05/10/2015 at 10:43:21"},{"visible":true,"include":false,"step":"45.0","x":-316.82,"y":939.63,"z":1245.3,"a95":"0.99","info":"05/10/2015 at 10:43:21"},{"visible":true,"include":false,"step":"50.0","x":-1063.1,"y":-304.9,"z":1957.5,"a95":"0.99","info":"05/10/2015 at 10:43:21"},{"visible":true,"include":false,"step":"60.0","x":-1212.3,"y":-98.481,"z":475.64,"a95":"0.99","info":"05/10/2015 at 10:43:21"},{"visible":true,"include":false,"step":"70.0","x":616.41,"y":1704.8,"z":392.44,"a95":"0.99","info":"05/10/2015 at 10:43:21"}]},{"info":"8","GEO":[],"TECT":[],"interpreted":false,"name":"SS43.06B","coreAzi":345,"coreDip":50,"bedStrike":271,"bedDip":37,"data":[{"visible":true,"include":false,"step":"0.0","x":-8356.7,"y":4036.4,"z":19417,"a95":"0.99","info":"08/07/2015 at 19:08:49"},{"visible":true,"include":false,"step":"10.0","x":-3706.9,"y":1589.7,"z":10044,"a95":"0.99","info":"08/07/2015 at 19:08:49"},{"visible":true,"include":false,"step":"15.0","x":-3003,"y":1506.5,"z":6435.4,"a95":"0.99","info":"08/07/2015 at 19:08:49"},{"visible":true,"include":false,"step":"20.0","x":-2310.8,"y":461.33,"z":4060.8,"a95":"0.99","info":"08/07/2015 at 19:08:49"},{"visible":true,"include":false,"step":"23.0","x":-1681.9,"y":742.54,"z":2639.9,"a95":"0.99","info":"08/07/2015 at 19:08:49"},{"visible":true,"include":false,"step":"25.0","x":-453.64,"y":257.92,"z":2659.4,"a95":"0.99","info":"08/07/2015 at 19:08:49"},{"visible":true,"include":false,"step":"30.0","x":-1031.7,"y":274.33,"z":2645.4,"a95":"0.99","info":"08/07/2015 at 19:08:49"},{"visible":true,"include":false,"step":"33.0","x":-625.46,"y":240.29,"z":949.13,"a95":"0.99","info":"08/07/2015 at 19:08:49"},{"visible":true,"include":false,"step":"35.0","x":-1230.9,"y":-794.04,"z":-90.645,"a95":"0.99","info":"08/07/2015 at 19:08:49"},{"visible":true,"include":false,"step":"40.0","x":-727,"y":310,"z":1449,"a95":"0.99","info":"08/07/2015 at 19:08:49"},{"visible":true,"include":false,"step":"45.0","x":-609.9,"y":340.87,"z":1000.1,"a95":"0.99","info":"08/07/2015 at 19:08:49"},{"visible":true,"include":false,"step":"50.0","x":-561.38,"y":-892.45,"z":1029.6,"a95":"0.99","info":"08/07/2015 at 19:08:49"},{"visible":true,"include":false,"step":"55.0","x":-1004.2,"y":588.53,"z":1136.9,"a95":"0.99","info":"08/07/2015 at 19:08:49"},{"visible":true,"include":false,"step":"60.0","x":1484.4,"y":225.5,"z":-85.376,"a95":"0.99","info":"08/07/2015 at 19:08:49"},{"visible":true,"include":false,"step":"65.0","x":-195.79,"y":-945.28,"z":-342.56,"a95":"0.99","info":"08/07/2015 at 19:08:49"},{"visible":true,"include":false,"step":"70.0","x":-1796.8,"y":1539.8,"z":-554.4,"a95":"0.99","info":"08/07/2015 at 19:08:49"},{"visible":true,"include":false,"step":"80.0","x":5749.9,"y":627,"z":-1375.7,"a95":"0.99","info":"08/07/2015 at 19:08:49"}]},{"info":"","GEO":[{"dec":22.531482356563856,"inc":84.50224730984755,"MAD":5.784385034714146,"cm":[-3.375077994860476e-14,-1.5987211554602254e-14,0],"intensity":1638.7180598927303,"type":"dir","forced":true,"remark":"","origin":false,"nSteps":10,"minStep":"180","maxStep":"400","steps":["180","210","230","250","270","300","320","340","370","400"]}],"TECT":[{"dec":4.003189801131555,"inc":47.844615532158606,"MAD":5.784385034714189,"cm":[2.842170943040401e-14,-7.567280135845067e-13,-5.684341886080802e-14],"intensity":1638.7180598927305,"type":"dir","forced":true,"remark":"","origin":false,"nSteps":10,"minStep":"180","maxStep":"400","steps":["180","210","230","250","270","300","320","340","370","400"]}],"interpreted":true,"name":"SS43.07A","coreAzi":347,"coreDip":40,"bedStrike":271,"bedDip":37,"data":[{"visible":true,"include":false,"step":"20","x":-16448,"y":8980,"z":29541,"a95":"2.2","info":"\"15-06-22\" at \"07:49\""},{"visible":true,"include":false,"step":"100","x":-10148,"y":2985,"z":18221,"a95":"2.3","info":"\"15-06-22\" at \"11:04\""},{"visible":true,"include":false,"step":"150","x":-6920,"y":1677,"z":8828,"a95":"2.2","info":"\"15-06-23\" at \"08:12\""},{"visible":true,"include":true,"step":"180","x":-6654,"y":1271,"z":7527,"a95":"2.3","info":"\"15-06-23\" at \"11:18\""},{"visible":true,"include":true,"step":"210","x":-6524,"y":669,"z":7480,"a95":"2.3","info":"\"15-06-23\" at \"14:14\""},{"visible":true,"include":true,"step":"230","x":-6134,"y":593,"z":6463,"a95":"2.4","info":"\"15-06-24\" at \"08:04\""},{"visible":true,"include":true,"step":"250","x":-5627,"y":439,"z":7056,"a95":"2.6","info":"\"15-06-24\" at \"11:50\""},{"visible":true,"include":true,"step":"270","x":-5577,"y":-3,"z":5525,"a95":"2.5","info":"\"15-06-24\" at \"15:05\""},{"visible":true,"include":true,"step":"300","x":-6802,"y":985,"z":4979,"a95":"2.4","info":"\"15-06-25\" at \"09:48\""},{"visible":true,"include":true,"step":"320","x":-6704,"y":-121,"z":5803,"a95":"2.6","info":"\"15-06-25\" at \"13:36\""},{"visible":true,"include":true,"step":"340","x":-6543,"y":743,"z":6628,"a95":"2.4","info":"\"15-06-25\" at \"16:41\""},{"visible":true,"include":true,"step":"370","x":-6901,"y":-164,"z":4889,"a95":"2.5","info":"\"15-06-25\" at \"20:46\""},{"visible":true,"include":true,"step":"400","x":-5337,"y":259,"z":4718,"a95":"2.7","info":"\"15-06-26\" at \"08:10\""}]},{"info":"1","GEO":[],"TECT":[],"interpreted":false,"name":"SS43.08B","coreAzi":351,"coreDip":43,"bedStrike":271,"bedDip":37,"data":[{"visible":true,"include":false,"step":"0.0","x":-2414.5,"y":1599.1,"z":8608.6,"a95":"0.99","info":"09/07/2015 at 00:33:06"},{"visible":true,"include":false,"step":"10.0","x":-827.11,"y":1393.6,"z":4278.9,"a95":"0.99","info":"09/07/2015 at 00:33:06"},{"visible":true,"include":false,"step":"15.0","x":-437.4,"y":1289.3,"z":2924.9,"a95":"0.99","info":"09/07/2015 at 00:33:06"},{"visible":true,"include":false,"step":"20.0","x":-389.55,"y":1641.6,"z":2493.6,"a95":"0.99","info":"09/07/2015 at 00:33:06"},{"visible":true,"include":false,"step":"23.0","x":-872.16,"y":1070.7,"z":1852.9,"a95":"0.99","info":"09/07/2015 at 00:33:06"},{"visible":true,"include":false,"step":"25.0","x":-570.62,"y":1693.9,"z":2067.4,"a95":"0.99","info":"09/07/2015 at 00:33:06"},{"visible":true,"include":false,"step":"30.0","x":-843.17,"y":1176,"z":1560.1,"a95":"0.99","info":"09/07/2015 at 00:33:06"},{"visible":true,"include":false,"step":"33.0","x":-602.27,"y":942.23,"z":838.98,"a95":"0.99","info":"09/07/2015 at 00:33:06"},{"visible":true,"include":false,"step":"35.0","x":-672.04,"y":829.99,"z":852.27,"a95":"0.99","info":"09/07/2015 at 00:33:06"},{"visible":true,"include":false,"step":"40.0","x":-461.82,"y":947.72,"z":808.84,"a95":"0.99","info":"09/07/2015 at 00:33:06"},{"visible":true,"include":false,"step":"45.0","x":-105.04,"y":1440.1,"z":584.63,"a95":"0.99","info":"09/07/2015 at 00:33:06"},{"visible":true,"include":false,"step":"50.0","x":-701.83,"y":328.47,"z":454.3,"a95":"0.99","info":"09/07/2015 at 00:33:06"},{"visible":true,"include":false,"step":"55.0","x":-1019.6,"y":328.12,"z":259.17,"a95":"0.99","info":"09/07/2015 at 00:33:06"},{"visible":true,"include":false,"step":"60.0","x":-337.76,"y":1425.6,"z":433.09,"a95":"0.99","info":"09/07/2015 at 00:33:06"},{"visible":true,"include":false,"step":"65.0","x":-18.667,"y":33.054,"z":507.6,"a95":"0.99","info":"09/07/2015 at 00:33:06"},{"visible":true,"include":false,"step":"70.0","x":98.503,"y":167.08,"z":829,"a95":"0.99","info":"09/07/2015 at 00:33:06"},{"visible":true,"include":false,"step":"80.0","x":255.21,"y":1201.6,"z":310.58,"a95":"0.99","info":"09/07/2015 at 00:33:06"}]},{"info":"0","GEO":[{"dec":15.010243243960304,"inc":52.62995710820219,"MAD":7.794283650560943,"cm":[-8.881784197001252e-14,6.750155989720952e-14,0],"intensity":824.8976654596166,"type":"dir","forced":true,"remark":"","origin":false,"nSteps":9,"minStep":"20.0","maxStep":"50.0","steps":["20.0","23.0","25.0","30.0","33.0","35.0","40.0","45.0","50.0"]}],"TECT":[{"dec":317.7596340488119,"inc":1.939975070129243,"MAD":7.794283650560911,"cm":[-2.1316282072803006e-13,-2.842170943040401e-14,1.3855583347321954e-13],"intensity":824.8976654596167,"type":"dir","forced":true,"remark":"","origin":false,"nSteps":9,"minStep":"20.0","maxStep":"50.0","steps":["20.0","23.0","25.0","30.0","33.0","35.0","40.0","45.0","50.0"]}],"interpreted":true,"name":"SS43.09A","coreAzi":8,"coreDip":56,"bedStrike":10.5,"bedDip":269,"data":[{"visible":true,"include":false,"step":"0.0","x":2288,"y":-1541.7,"z":34451,"a95":"0.99","info":"05/10/2015 at 10:43:21"},{"visible":true,"include":false,"step":"10.0","x":1707.1,"y":-170.59,"z":15010,"a95":"0.99","info":"05/10/2015 at 10:43:21"},{"visible":true,"include":false,"step":"15.0","x":98.512,"y":195.56,"z":9548,"a95":"0.99","info":"05/10/2015 at 10:43:21"},{"visible":true,"include":true,"step":"20.0","x":724.49,"y":197.24,"z":7248.8,"a95":"0.99","info":"05/10/2015 at 10:43:21"},{"visible":true,"include":true,"step":"23.0","x":732.11,"y":1193.7,"z":5295.9,"a95":"0.99","info":"05/10/2015 at 10:43:21"},{"visible":true,"include":true,"step":"25.0","x":-251.68,"y":156.03,"z":5093,"a95":"0.99","info":"05/10/2015 at 10:43:21"},{"visible":true,"include":true,"step":"30.0","x":-410.18,"y":442.25,"z":3768.7,"a95":"0.99","info":"05/10/2015 at 10:43:21"},{"visible":true,"include":true,"step":"33.0","x":640.55,"y":105.39,"z":2809.8,"a95":"0.99","info":"05/10/2015 at 10:43:21"},{"visible":true,"include":true,"step":"35.0","x":-127.71,"y":96.792,"z":3269.7,"a95":"0.99","info":"05/10/2015 at 10:43:21"},{"visible":true,"include":true,"step":"40.0","x":-159.66,"y":544.98,"z":3240,"a95":"0.99","info":"05/10/2015 at 10:43:21"},{"visible":true,"include":true,"step":"45.0","x":675.51,"y":-75.51,"z":3078.1,"a95":"0.99","info":"05/10/2015 at 10:43:21"},{"visible":true,"include":true,"step":"50.0","x":-318.77,"y":-329.95,"z":1402.1,"a95":"0.99","info":"05/10/2015 at 10:43:21"},{"visible":true,"include":false,"step":"60.0","x":-664.75,"y":-1005.2,"z":348.51,"a95":"0.99","info":"05/10/2015 at 10:43:21"},{"visible":true,"include":false,"step":"70.0","x":702.4,"y":1220.8,"z":-590.63,"a95":"0.99","info":"05/10/2015 at 10:43:21"}]},{"info":"2","GEO":[{"dec":359.9952899061704,"inc":49.617776882874864,"MAD":24.493182757617245,"cm":[-2.842170943040401e-14,-9.592326932761353e-14,0],"intensity":383.47882253329095,"type":"dir","forced":true,"remark":"","origin":false,"nSteps":10,"minStep":"20.0","maxStep":"55.0","steps":["20.0","23.0","25.0","30.0","33.0","35.0","40.0","45.0","50.0","55.0"]}],"TECT":[{"dec":359.6540131839462,"inc":9.621428204723289,"MAD":24.49318275761723,"cm":[-1.2678746941219288e-13,7.105427357601002e-14,-1.4210854715202004e-14],"intensity":383.478822533291,"type":"dir","forced":true,"remark":"","origin":false,"nSteps":10,"minStep":"20.0","maxStep":"55.0","steps":["20.0","23.0","25.0","30.0","33.0","35.0","40.0","45.0","50.0","55.0"]}],"interpreted":true,"name":"SS43.09B","coreAzi":8,"coreDip":56,"bedStrike":269,"bedDip":40,"data":[{"visible":false,"include":false,"step":"0.0","x":2582.2,"y":-2114.1,"z":20447,"a95":"0.99","info":"09/07/2015 at 00:33:06"},{"visible":true,"include":false,"step":"10.0","x":1056.9,"y":-1506,"z":8311,"a95":"0.99","info":"09/07/2015 at 00:33:06"},{"visible":true,"include":false,"step":"15.0","x":400.91,"y":407.73,"z":4949.2,"a95":"0.99","info":"09/07/2015 at 00:33:06"},{"visible":true,"include":true,"step":"20.0","x":260.93,"y":-203.82,"z":3641,"a95":"0.99","info":"09/07/2015 at 00:33:06"},{"visible":true,"include":true,"step":"23.0","x":286.81,"y":-139.44,"z":2947.6,"a95":"0.99","info":"09/07/2015 at 00:33:06"},{"visible":true,"include":true,"step":"25.0","x":623.74,"y":218.72,"z":2352.4,"a95":"0.99","info":"09/07/2015 at 00:33:06"},{"visible":true,"include":true,"step":"30.0","x":-110.32,"y":-659.93,"z":1441.5,"a95":"0.99","info":"09/07/2015 at 00:33:06"},{"visible":true,"include":true,"step":"33.0","x":953.47,"y":-558.72,"z":400.61,"a95":"0.99","info":"09/07/2015 at 00:33:06"},{"visible":true,"include":true,"step":"35.0","x":-439.65,"y":-1214.3,"z":-22.861,"a95":"0.99","info":"09/07/2015 at 00:33:06"},{"visible":true,"include":true,"step":"40.0","x":372.49,"y":-55.445,"z":1720.4,"a95":"0.99","info":"09/07/2015 at 00:33:06"},{"visible":true,"include":true,"step":"45.0","x":-81.631,"y":1061.3,"z":-156.47,"a95":"0.99","info":"09/07/2015 at 00:33:06"},{"visible":true,"include":true,"step":"50.0","x":-628.34,"y":-848.56,"z":800.61,"a95":"0.99","info":"09/07/2015 at 00:33:06"},{"visible":true,"include":true,"step":"55.0","x":-1103.3,"y":-291.33,"z":265.17,"a95":"0.99","info":"09/07/2015 at 00:33:06"},{"visible":true,"include":false,"step":"60.0","x":-162.96,"y":286.07,"z":159.92,"a95":"0.99","info":"09/07/2015 at 00:33:06"},{"visible":true,"include":false,"step":"65.0","x":-623.66,"y":-1856.2,"z":-75.314,"a95":"0.99","info":"09/07/2015 at 00:33:06"},{"visible":true,"include":false,"step":"70.0","x":-998.38,"y":-557.73,"z":-377.26,"a95":"0.99","info":"09/07/2015 at 00:33:06"},{"visible":true,"include":false,"step":"80.0","x":4689.9,"y":178.18,"z":-846.47,"a95":"0.99","info":"09/07/2015 at 00:33:06"}]},{"info":"","GEO":[{"dec":349.23453414920084,"inc":80.42086512606659,"MAD":14.242090491724603,"cm":[2.4868995751603507e-14,-9.592326932761353e-14,0],"intensity":720.0985445285942,"type":"dir","forced":true,"remark":"","origin":false,"nSteps":8,"minStep":"150","maxStep":"320","steps":["150","180","210","230","250","270","300","320"]}],"TECT":[{"dec":356.8715431932671,"inc":40.53761272829547,"MAD":14.2420904917246,"cm":[-2.842170943040401e-14,3.481659405224491e-13,2.842170943040401e-14],"intensity":720.0985445285941,"type":"dir","forced":true,"remark":"","origin":false,"nSteps":8,"minStep":"150","maxStep":"320","steps":["150","180","210","230","250","270","300","320"]}],"interpreted":true,"name":"SS43.10A","coreAzi":8,"coreDip":54,"bedStrike":269,"bedDip":40,"data":[{"visible":true,"include":false,"step":"20","x":-3521,"y":-3128,"z":18317,"a95":"2.4","info":"\"15-06-22\" at \"07:51\""},{"visible":true,"include":false,"step":"100","x":-2634,"y":-858,"z":11828,"a95":"2.5","info":"\"15-06-22\" at \"11:07\""},{"visible":true,"include":true,"step":"150","x":-1091,"y":196,"z":4806,"a95":"2.7","info":"\"15-06-23\" at \"08:14\""},{"visible":true,"include":true,"step":"180","x":-1243,"y":-374,"z":3309,"a95":"2.8","info":"\"15-06-23\" at \"11:19\""},{"visible":true,"include":true,"step":"210","x":-1866,"y":576,"z":2015,"a95":"3.6","info":"\"15-06-23\" at \"14:17\""},{"visible":true,"include":true,"step":"230","x":-1440,"y":25,"z":2062,"a95":"4.1","info":"\"15-06-24\" at \"08:05\""},{"visible":true,"include":true,"step":"250","x":-1246,"y":-1090,"z":1819,"a95":"3.8","info":"\"15-06-24\" at \"11:52\""},{"visible":true,"include":true,"step":"270","x":-1388,"y":-608,"z":2220,"a95":"3.6","info":"\"15-06-24\" at \"15:07\""},{"visible":true,"include":true,"step":"300","x":-1759,"y":-88,"z":2586,"a95":"3.9","info":"\"15-06-25\" at \"09:51\""},{"visible":true,"include":true,"step":"320","x":-1823,"y":-361,"z":2169,"a95":"3.6","info":"\"15-06-25\" at \"13:37\""},{"visible":true,"include":false,"step":"340","x":-6609,"y":690,"z":5892,"a95":"2","info":"\"15-06-25\" at \"16:43\""},{"visible":true,"include":false,"step":"370","x":-3108,"y":655,"z":2663,"a95":"3.1","info":"\"15-06-25\" at \"20:48\""}]},{"info":"0","GEO":[{"dec":356.45392188569963,"inc":79.61849191873068,"MAD":11.608264484640399,"cm":[-2.4424906541753444e-14,-3.197442310920451e-14,0],"intensity":358.7542670417105,"type":"dir","forced":true,"remark":"","origin":false,"nSteps":8,"minStep":"20.0","maxStep":"45.0","steps":["20.0","23.0","25.0","30.0","33.0","35.0","40.0","45.0"]}],"TECT":[{"dec":290.58673826786816,"inc":-3.4912083096059234,"MAD":11.60826448464039,"cm":[7.105427357601002e-15,-2.842170943040401e-14,-1.0658141036401503e-14],"intensity":358.75426704171053,"type":"dir","forced":true,"remark":"","origin":false,"nSteps":8,"minStep":"20.0","maxStep":"45.0","steps":["20.0","23.0","25.0","30.0","33.0","35.0","40.0","45.0"]}],"interpreted":true,"name":"SS43.10B","coreAzi":8,"coreDip":54,"bedStrike":10.5,"bedDip":269,"data":[{"visible":true,"include":false,"step":"0.0","x":-3508.2,"y":-4471.5,"z":14354,"a95":"0.99","info":"05/10/2015 at 10:43:21"},{"visible":true,"include":false,"step":"10.0","x":-2171.8,"y":-1473.4,"z":5780.7,"a95":"0.99","info":"05/10/2015 at 10:43:21"},{"visible":true,"include":false,"step":"15.0","x":-2141.1,"y":-818.96,"z":3501.6,"a95":"0.99","info":"05/10/2015 at 10:43:21"},{"visible":true,"include":true,"step":"20.0","x":-1025,"y":-252.94,"z":2530.6,"a95":"0.99","info":"05/10/2015 at 10:43:21"},{"visible":true,"include":true,"step":"23.0","x":-1553.2,"y":16.895,"z":1869.5,"a95":"0.99","info":"05/10/2015 at 10:43:21"},{"visible":true,"include":true,"step":"25.0","x":-1161.4,"y":-313.97,"z":1962.1,"a95":"0.99","info":"05/10/2015 at 10:43:21"},{"visible":true,"include":true,"step":"30.0","x":-454.51,"y":257.18,"z":2154.4,"a95":"0.99","info":"05/10/2015 at 10:43:21"},{"visible":true,"include":true,"step":"33.0","x":-729.55,"y":186.24,"z":1280,"a95":"0.99","info":"05/10/2015 at 10:43:21"},{"visible":true,"include":true,"step":"35.0","x":-508.62,"y":-272.96,"z":1304.2,"a95":"0.99","info":"05/10/2015 at 10:43:21"},{"visible":true,"include":true,"step":"40.0","x":-544.33,"y":-306.46,"z":1634.8,"a95":"0.99","info":"05/10/2015 at 10:43:21"},{"visible":true,"include":true,"step":"45.0","x":-626.36,"y":335.23,"z":854.06,"a95":"0.99","info":"05/10/2015 at 10:43:21"},{"visible":true,"include":false,"step":"50.0","x":-1625.3,"y":534.03,"z":1039.9,"a95":"0.99","info":"05/10/2015 at 10:43:21"},{"visible":true,"include":false,"step":"60.0","x":-1437.9,"y":130.13,"z":-242.54,"a95":"0.99","info":"05/10/2015 at 10:43:21"},{"visible":true,"include":false,"step":"70.0","x":554.2,"y":256.3,"z":815.28,"a95":"0.99","info":"05/10/2015 at 10:43:21"}]},{"info":"3","GEO":[{"dec":29.894377875470923,"inc":72.03547860363236,"MAD":24.677305152397626,"cm":[-2.1316282072803006e-14,-7.460698725481052e-14,0],"intensity":376.7312522920215,"type":"dir","forced":true,"remark":"","origin":false,"nSteps":9,"minStep":"20.0","maxStep":"50.0","steps":["20.0","23.0","25.0","30.0","33.0","35.0","40.0","45.0","50.0"]}],"TECT":[{"dec":10.006829966356804,"inc":33.9572002664066,"MAD":24.677305152397594,"cm":[-1.7053025658242404e-13,1.3500311979441904e-13,3.552713678800501e-15],"intensity":376.7312522920216,"type":"dir","forced":true,"remark":"","origin":false,"nSteps":9,"minStep":"20.0","maxStep":"50.0","steps":["20.0","23.0","25.0","30.0","33.0","35.0","40.0","45.0","50.0"]}],"interpreted":true,"name":"SS43.11","coreAzi":345,"coreDip":61,"bedStrike":269,"bedDip":40,"data":[{"visible":false,"include":false,"step":"0.0","x":-2976.2,"y":2267,"z":10913,"a95":"0.99","info":"09/07/2015 at 00:33:06"},{"visible":true,"include":false,"step":"10.0","x":-292.1,"y":1231.8,"z":5937.3,"a95":"0.99","info":"09/07/2015 at 00:33:06"},{"visible":true,"include":false,"step":"15.0","x":563.24,"y":751.88,"z":3828.9,"a95":"0.99","info":"09/07/2015 at 00:33:06"},{"visible":true,"include":true,"step":"20.0","x":-144.94,"y":-266.53,"z":2345,"a95":"0.99","info":"09/07/2015 at 00:33:06"},{"visible":true,"include":true,"step":"23.0","x":-298.15,"y":95.893,"z":2020.1,"a95":"0.99","info":"09/07/2015 at 00:33:06"},{"visible":true,"include":true,"step":"25.0","x":-44.372,"y":-353.6,"z":1639.8,"a95":"0.99","info":"09/07/2015 at 00:33:06"},{"visible":true,"include":true,"step":"30.0","x":-483.79,"y":968.06,"z":1192,"a95":"0.99","info":"09/07/2015 at 00:33:06"},{"visible":true,"include":true,"step":"33.0","x":-643.47,"y":424.23,"z":1391.4,"a95":"0.99","info":"09/07/2015 at 00:33:06"},{"visible":true,"include":true,"step":"35.0","x":-814.07,"y":443.77,"z":1048.5,"a95":"0.99","info":"09/07/2015 at 00:33:06"},{"visible":true,"include":true,"step":"40.0","x":-1136,"y":294.93,"z":1252.4,"a95":"0.99","info":"09/07/2015 at 00:33:06"},{"visible":true,"include":true,"step":"45.0","x":-889.97,"y":1362.7,"z":887.32,"a95":"0.99","info":"09/07/2015 at 00:33:06"},{"visible":true,"include":true,"step":"50.0","x":146.77,"y":726.02,"z":1583.9,"a95":"0.99","info":"09/07/2015 at 00:33:06"},{"visible":true,"include":false,"step":"55.0","x":-689.95,"y":-387.17,"z":1601.2,"a95":"0.99","info":"09/07/2015 at 00:33:06"},{"visible":true,"include":false,"step":"60.0","x":-154.48,"y":118.21,"z":811.02,"a95":"0.99","info":"09/07/2015 at 00:33:06"},{"visible":true,"include":false,"step":"65.0","x":619.57,"y":1067.2,"z":13.11,"a95":"0.99","info":"09/07/2015 at 00:33:06"},{"visible":true,"include":false,"step":"70.0","x":-1946.9,"y":-749.37,"z":985.7,"a95":"0.99","info":"09/07/2015 at 00:33:06"},{"visible":true,"include":false,"step":"80.0","x":-6847.7,"y":-2468.6,"z":-125.05,"a95":"0.99","info":"09/07/2015 at 00:33:06"}]},{"info":"4","GEO":[],"TECT":[],"interpreted":false,"name":"SS43.12","coreAzi":360,"coreDip":55,"bedStrike":267,"bedDip":39,"data":[{"visible":true,"include":false,"step":"0.0","x":1018.4,"y":2635.4,"z":8844.4,"a95":"0.99","info":"09/07/2015 at 00:33:06"},{"visible":true,"include":false,"step":"10.0","x":1935,"y":1261.5,"z":1702.3,"a95":"0.99","info":"09/07/2015 at 00:33:06"},{"visible":true,"include":false,"step":"15.0","x":2085.5,"y":930.9,"z":-974.93,"a95":"0.99","info":"09/07/2015 at 00:33:06"},{"visible":true,"include":false,"step":"20.0","x":1362.8,"y":1666.6,"z":-760.44,"a95":"0.99","info":"09/07/2015 at 00:33:06"},{"visible":true,"include":false,"step":"23.0","x":1015.3,"y":1334.2,"z":-748.78,"a95":"0.99","info":"09/07/2015 at 00:33:06"},{"visible":true,"include":false,"step":"25.0","x":633.01,"y":1244.1,"z":-936.34,"a95":"0.99","info":"09/07/2015 at 00:33:06"},{"visible":true,"include":false,"step":"30.0","x":530.93,"y":1679.4,"z":-48.235,"a95":"0.99","info":"09/07/2015 at 00:33:06"},{"visible":true,"include":false,"step":"33.0","x":602.17,"y":1014,"z":-1176.5,"a95":"0.99","info":"09/07/2015 at 00:33:06"},{"visible":true,"include":false,"step":"35.0","x":-472.21,"y":689.73,"z":-2096.8,"a95":"0.99","info":"09/07/2015 at 00:33:06"},{"visible":true,"include":false,"step":"40.0","x":515.12,"y":722.63,"z":-470.59,"a95":"0.99","info":"09/07/2015 at 00:33:06"},{"visible":true,"include":false,"step":"45.0","x":1570.3,"y":1445.2,"z":-1019.4,"a95":"0.99","info":"09/07/2015 at 00:33:06"},{"visible":true,"include":false,"step":"50.0","x":543.59,"y":-218.11,"z":-757.12,"a95":"0.99","info":"09/07/2015 at 00:33:06"},{"visible":true,"include":false,"step":"55.0","x":-514.53,"y":427.61,"z":-564.11,"a95":"0.99","info":"09/07/2015 at 00:33:06"},{"visible":true,"include":false,"step":"60.0","x":574.68,"y":1454.4,"z":-1134.1,"a95":"0.99","info":"09/07/2015 at 00:33:06"},{"visible":true,"include":false,"step":"65.0","x":-157.33,"y":-656.83,"z":-1021.9,"a95":"0.99","info":"09/07/2015 at 00:33:06"},{"visible":true,"include":false,"step":"70.0","x":-643.2,"y":596.13,"z":105.5,"a95":"0.99","info":"09/07/2015 at 00:33:06"},{"visible":true,"include":false,"step":"80.0","x":6390.7,"y":-290.37,"z":-441.25,"a95":"0.99","info":"09/07/2015 at 00:33:06"}]},{"info":"","GEO":[],"TECT":[],"interpreted":false,"name":"SS43.13A","coreAzi":355,"coreDip":57,"bedStrike":267,"bedDip":39,"data":[{"visible":true,"include":false,"step":"20","x":723,"y":-1010,"z":20280,"a95":"2.4","info":"\"15-06-22\" at \"07:52\""},{"visible":true,"include":false,"step":"100","x":2646,"y":-2594,"z":12579,"a95":"2.3","info":"\"15-06-22\" at \"11:09\""},{"visible":true,"include":false,"step":"150","x":3057,"y":-2139,"z":1283,"a95":"2.9","info":"\"15-06-23\" at \"08:18\""},{"visible":true,"include":false,"step":"180","x":2840,"y":-2145,"z":805,"a95":"2.5","info":"\"15-06-23\" at \"11:22\""},{"visible":true,"include":false,"step":"210","x":1126,"y":-2316,"z":1773,"a95":"2.2","info":"\"15-06-23\" at \"14:20\""},{"visible":true,"include":false,"step":"230","x":1089,"y":-2229,"z":-310,"a95":"3.7","info":"\"15-06-24\" at \"08:07\""},{"visible":true,"include":false,"step":"250","x":13,"y":-1697,"z":-1683,"a95":"4.4","info":"\"15-06-24\" at \"11:54\""},{"visible":true,"include":false,"step":"270","x":-363,"y":-1953,"z":-1082,"a95":"4.5","info":"\"15-06-24\" at \"15:11\""},{"visible":true,"include":false,"step":"300","x":-71,"y":-2302,"z":-247,"a95":"3.5","info":"\"15-06-25\" at \"09:52\""},{"visible":true,"include":false,"step":"320","x":-431,"y":-2141,"z":-1642,"a95":"3.3","info":"\"15-06-25\" at \"13:39\""},{"visible":true,"include":false,"step":"340","x":-50,"y":-2056,"z":268,"a95":"5.7","info":"\"15-06-25\" at \"16:44\""},{"visible":true,"include":false,"step":"370","x":1310,"y":-685,"z":-754,"a95":"5.3","info":"\"15-06-25\" at \"20:51\""}]},{"info":"0","GEO":[],"TECT":[],"interpreted":false,"name":"SS43.14A","coreAzi":5,"coreDip":65,"bedStrike":271,"bedDip":39,"data":[{"visible":true,"include":false,"step":"0.0","x":-1336.9,"y":-3277.3,"z":9233.4,"a95":"0.99","info":"05/10/2015 at 15:09:39"},{"visible":true,"include":false,"step":"10.0","x":-807.86,"y":-663.92,"z":4075.9,"a95":"0.99","info":"05/10/2015 at 15:09:39"},{"visible":true,"include":false,"step":"15.0","x":-162.3,"y":-33.045,"z":2998,"a95":"0.99","info":"05/10/2015 at 15:09:39"},{"visible":true,"include":false,"step":"20.0","x":265.61,"y":613.78,"z":2519,"a95":"0.99","info":"05/10/2015 at 15:09:39"},{"visible":true,"include":false,"step":"23.0","x":1124.4,"y":469.11,"z":1846.5,"a95":"0.99","info":"05/10/2015 at 15:09:39"},{"visible":true,"include":false,"step":"25.0","x":792.7,"y":1192.7,"z":1578.1,"a95":"0.99","info":"05/10/2015 at 15:09:39"},{"visible":true,"include":false,"step":"30.0","x":409.24,"y":741.42,"z":1313.1,"a95":"0.99","info":"05/10/2015 at 15:09:39"},{"visible":true,"include":false,"step":"33.0","x":1110.1,"y":679.07,"z":1467,"a95":"0.99","info":"05/10/2015 at 15:09:39"},{"visible":true,"include":false,"step":"35.0","x":467.2,"y":471.09,"z":1339.4,"a95":"0.99","info":"05/10/2015 at 15:09:39"},{"visible":true,"include":false,"step":"40.0","x":-125.99,"y":-165.05,"z":1615.2,"a95":"0.99","info":"05/10/2015 at 15:09:39"},{"visible":true,"include":false,"step":"45.0","x":458.27,"y":402.74,"z":931.33,"a95":"0.99","info":"05/10/2015 at 15:09:39"},{"visible":true,"include":false,"step":"50.0","x":-155.02,"y":-369,"z":576.28,"a95":"0.99","info":"05/10/2015 at 15:09:39"},{"visible":true,"include":false,"step":"60.0","x":-42.393,"y":-402.89,"z":533.97,"a95":"0.99","info":"05/10/2015 at 15:09:39"},{"visible":true,"include":false,"step":"70.0","x":-235.04,"y":533.55,"z":686.82,"a95":"0.99","info":"05/10/2015 at 15:09:39"}]},{"info":"","GEO":[{"dec":6.940403535119799,"inc":58.668381541351664,"MAD":32.55910832017785,"cm":[1341.590788319108,-2026.2774189707243,2053.914519791382],"intensity":232.5717600715238,"type":"dir","forced":false,"remark":"","origin":false,"nSteps":9,"minStep":"180","maxStep":"370","steps":["180","210","230","250","270","300","320","340","370"]}],"TECT":[{"dec":4.278447447151791,"inc":19.775338772639397,"MAD":32.55910832017784,"cm":[2342.95603208861,-2008.7985236238665,774.284443682927],"intensity":232.57176007152378,"type":"dir","forced":false,"remark":"","origin":false,"nSteps":9,"minStep":"180","maxStep":"370","steps":["180","210","230","250","270","300","320","340","370"]}],"interpreted":true,"name":"SS43.15A","coreAzi":358,"coreDip":65,"bedStrike":271,"bedDip":39,"data":[{"visible":true,"include":false,"step":"20","x":-394,"y":-140,"z":19769,"a95":"2.3","info":"\"15-06-22\" at \"07:54\""},{"visible":true,"include":false,"step":"100","x":1949,"y":-1658,"z":14368,"a95":"2.2","info":"\"15-06-22\" at \"11:10\""},{"visible":true,"include":false,"step":"150","x":1913,"y":-1848,"z":5248,"a95":"2.8","info":"\"15-06-23\" at \"08:20\""},{"visible":true,"include":true,"step":"180","x":1373,"y":-1851,"z":3858,"a95":"2.9","info":"\"15-06-23\" at \"11:24\""},{"visible":true,"include":true,"step":"210","x":644,"y":-1569,"z":4024,"a95":"3.4","info":"\"15-06-23\" at \"14:22\""},{"visible":true,"include":true,"step":"230","x":634,"y":-1799,"z":2392,"a95":"3.9","info":"\"15-06-24\" at \"08:09\""},{"visible":true,"include":true,"step":"250","x":1059,"y":-2235,"z":1206,"a95":"3","info":"\"15-06-24\" at \"11:56\""},{"visible":true,"include":true,"step":"270","x":-162,"y":-2524,"z":2078,"a95":"3.5","info":"\"15-06-24\" at \"15:14\""},{"visible":true,"include":true,"step":"300","x":-538,"y":-2494,"z":2814,"a95":"3.2","info":"\"15-06-25\" at \"09:55\""},{"visible":true,"include":true,"step":"320","x":520,"y":-1685,"z":992,"a95":"3.9","info":"\"15-06-25\" at \"13:41\""},{"visible":true,"include":true,"step":"340","x":44,"y":-1912,"z":2997,"a95":"2.6","info":"\"15-06-25\" at \"16:46\""},{"visible":true,"include":true,"step":"370","x":127,"y":-1735,"z":1761,"a95":"1.6","info":"\"15-06-25\" at \"20:55\""}]},{"info":"0","GEO":[{"dec":347.9402861126105,"inc":25.391062986448972,"MAD":19.07970949358335,"cm":[-7.460698725481052e-14,-3.019806626980426e-13,0],"intensity":350.0021484624696,"type":"dir","forced":true,"remark":"","origin":false,"nSteps":10,"minStep":"20.0","maxStep":"60.0","steps":["20.0","23.0","25.0","30.0","33.0","35.0","40.0","45.0","50.0","60.0"]}],"TECT":[{"dec":348.91901068425534,"inc":-12.743615765234205,"MAD":19.07970949358338,"cm":[-1.4210854715202004e-13,-4.583000645652646e-13,4.973799150320701e-14],"intensity":350.0021484624697,"type":"dir","forced":true,"remark":"","origin":false,"nSteps":10,"minStep":"20.0","maxStep":"60.0","steps":["20.0","23.0","25.0","30.0","33.0","35.0","40.0","45.0","50.0","60.0"]}],"interpreted":true,"name":"SS43.16A","coreAzi":315,"coreDip":50,"bedStrike":271,"bedDip":39,"data":[{"visible":true,"include":false,"step":"0.0","x":2864.5,"y":4858.8,"z":14575,"a95":"0.99","info":"05/10/2015 at 15:09:39"},{"visible":true,"include":false,"step":"10.0","x":1224.6,"y":2313.6,"z":5200.2,"a95":"0.99","info":"05/10/2015 at 15:09:39"},{"visible":true,"include":false,"step":"15.0","x":1370.1,"y":2092.4,"z":3174,"a95":"0.99","info":"05/10/2015 at 15:09:39"},{"visible":true,"include":true,"step":"20.0","x":1430.1,"y":1364.3,"z":2168.2,"a95":"0.99","info":"05/10/2015 at 15:09:39"},{"visible":true,"include":true,"step":"23.0","x":1244.3,"y":1656.6,"z":2009.6,"a95":"0.99","info":"05/10/2015 at 15:09:39"},{"visible":true,"include":true,"step":"25.0","x":715.02,"y":1422.5,"z":2586.5,"a95":"0.99","info":"05/10/2015 at 15:09:39"},{"visible":true,"include":true,"step":"30.0","x":-180.52,"y":1072.9,"z":1900.6,"a95":"0.99","info":"05/10/2015 at 15:09:39"},{"visible":true,"include":true,"step":"33.0","x":674.61,"y":1114.9,"z":1300.5,"a95":"0.99","info":"05/10/2015 at 15:09:39"},{"visible":true,"include":true,"step":"35.0","x":432.15,"y":351.53,"z":2037.9,"a95":"0.99","info":"05/10/2015 at 15:09:39"},{"visible":true,"include":true,"step":"40.0","x":958.05,"y":609.94,"z":1116.6,"a95":"0.99","info":"05/10/2015 at 15:09:39"},{"visible":true,"include":true,"step":"45.0","x":867.34,"y":903,"z":679.75,"a95":"0.99","info":"05/10/2015 at 15:09:39"},{"visible":true,"include":true,"step":"50.0","x":-214.22,"y":506.4,"z":1308.9,"a95":"0.99","info":"05/10/2015 at 15:09:39"},{"visible":true,"include":true,"step":"60.0","x":-1070.2,"y":628.36,"z":898.65,"a95":"0.99","info":"05/10/2015 at 15:09:39"},{"visible":true,"include":false,"step":"70.0","x":317.88,"y":1199.4,"z":776.26,"a95":"0.99","info":"05/10/2015 at 15:09:39"}]}]
