# Supplementary material for: Paleomagnetic constraints on the timing and distribution of Cenozoic rotations in Central and Eastern Anatolia
Source: Copernicus journal article supplement (doi:10.5194/se-9-295-2018), 2018-03-21
Supplement: Supplementary file 2 [file se-9-295-2018-supplement.zip › se-2017-66_DATA_dir files/dir files Sivas/SS44.dir]

[{"info":"5","GEO":[{"dec":203.9536099775299,"inc":-5.854489943249134,"MAD":3.6073410889944406,"cm":[3.907985046680551e-14,-4.796163466380676e-14,0],"intensity":190.64958757900672,"type":"dir","forced":true,"remark":"","origin":false,"nSteps":12,"minStep":"15.0","maxStep":"60.0","steps":["15.0","20.0","23.0","25.0","30.0","33.0","35.0","40.0","45.0","50.0","55.0","60.0"]}],"TECT":[{"dec":205.97411122144635,"inc":-53.759203052060684,"MAD":3.607341088994299,"cm":[4.973799150320701e-14,-4.529709940470639e-14,-5.329070518200751e-15],"intensity":190.64958757900672,"type":"dir","forced":true,"remark":"","origin":false,"nSteps":12,"minStep":"15.0","maxStep":"60.0","steps":["15.0","20.0","23.0","25.0","30.0","33.0","35.0","40.0","45.0","50.0","55.0","60.0"]}],"interpreted":true,"name":"SS44.01","coreAzi":197,"coreDip":42,"bedStrike":111,"bedDip":48,"data":[{"visible":true,"include":false,"step":"0.0","x":-374.16,"y":-71.268,"z":1184.2,"a95":"0.99","info":"09/07/2015 at 00:33:06"},{"visible":true,"include":false,"step":"10.0","x":867.71,"y":87.654,"z":1097.6,"a95":"0.99","info":"09/07/2015 at 00:33:06"},{"visible":true,"include":true,"step":"15.0","x":1064.5,"y":236.17,"z":1033.2,"a95":"0.99","info":"09/07/2015 at 00:33:06"},{"visible":true,"include":true,"step":"20.0","x":1050.2,"y":244.22,"z":1045.1,"a95":"0.99","info":"09/07/2015 at 00:33:06"},{"visible":true,"include":true,"step":"23.0","x":1043.7,"y":140.47,"z":866.35,"a95":"0.99","info":"09/07/2015 at 00:33:06"},{"visible":true,"include":true,"step":"25.0","x":1061.8,"y":120.02,"z":830.91,"a95":"0.99","info":"09/07/2015 at 00:33:06"},{"visible":true,"include":true,"step":"30.0","x":835.87,"y":176.51,"z":804.84,"a95":"0.99","info":"09/07/2015 at 00:33:06"},{"visible":true,"include":true,"step":"33.0","x":796.35,"y":91.142,"z":744.48,"a95":"0.99","info":"09/07/2015 at 00:33:06"},{"visible":true,"include":true,"step":"35.0","x":733.03,"y":157.85,"z":600.14,"a95":"0.99","info":"09/07/2015 at 00:33:06"},{"visible":true,"include":true,"step":"40.0","x":713.81,"y":57.507,"z":603.09,"a95":"0.99","info":"09/07/2015 at 00:33:06"},{"visible":true,"include":true,"step":"45.0","x":594.75,"y":42.828,"z":467.63,"a95":"0.99","info":"09/07/2015 at 00:33:06"},{"visible":true,"include":true,"step":"50.0","x":442,"y":58.288,"z":468.72,"a95":"0.99","info":"09/07/2015 at 00:33:06"},{"visible":true,"include":true,"step":"55.0","x":359.44,"y":10.655,"z":375.14,"a95":"0.99","info":"09/07/2015 at 00:33:06"},{"visible":true,"include":true,"step":"60.0","x":344.81,"y":59.214,"z":357.44,"a95":"0.99","info":"09/07/2015 at 00:33:06"},{"visible":true,"include":false,"step":"65.0","x":242.25,"y":-180.29,"z":139.98,"a95":"0.99","info":"09/07/2015 at 00:33:06"},{"visible":true,"include":false,"step":"70.0","x":167.18,"y":-75.056,"z":198.78,"a95":"0.99","info":"09/07/2015 at 00:33:06"},{"visible":false,"include":false,"step":"80.0","x":806.59,"y":12.172,"z":66.574,"a95":"0.99","info":"09/07/2015 at 00:33:06"}]},{"info":"","GEO":[{"dec":202.15640940349795,"inc":-3.150166600900184,"MAD":9.995271489207438,"cm":[-3.907985046680551e-14,5.861977570020827e-14,0],"intensity":265.4697801489571,"type":"dir","forced":true,"remark":"","origin":false,"nSteps":12,"minStep":"210","maxStep":"520","steps":["210","230","250","270","320","370","400","420","440","470","490","520"]}],"TECT":[{"dec":202.84038123779612,"inc":-51.136364499201434,"MAD":9.995271489207427,"cm":[-6.261657858885883e-14,3.2862601528904634e-14,1.4210854715202004e-14],"intensity":265.4697801489571,"type":"dir","forced":true,"remark":"","origin":false,"nSteps":12,"minStep":"210","maxStep":"520","steps":["210","230","250","270","320","370","400","420","440","470","490","520"]}],"interpreted":true,"name":"SS44.02A","coreAzi":190,"coreDip":38,"bedStrike":111,"bedDip":48,"data":[{"visible":false,"include":false,"step":"20","x":-71,"y":998,"z":1168,"a95":"2.1","info":"\"15-06-22\" at \"07:56\""},{"visible":true,"include":false,"step":"100","x":650,"y":929,"z":1538,"a95":"2.2","info":"\"15-06-22\" at \"11:12\""},{"visible":true,"include":false,"step":"150","x":601,"y":752,"z":1542,"a95":"1.7","info":"\"15-06-23\" at \"08:26\""},{"visible":true,"include":false,"step":"180","x":1113,"y":819,"z":1783,"a95":"2.2","info":"\"15-06-23\" at \"11:26\""},{"visible":true,"include":true,"step":"210","x":1229,"y":685,"z":1724,"a95":"2","info":"\"15-06-23\" at \"14:23\""},{"visible":true,"include":true,"step":"230","x":1298,"y":548,"z":1469,"a95":"2","info":"\"15-06-24\" at \"08:10\""},{"visible":true,"include":true,"step":"250","x":1305,"y":676,"z":1447,"a95":"1.9","info":"\"15-06-24\" at \"11:57\""},{"visible":true,"include":true,"step":"270","x":1350,"y":536,"z":1583,"a95":"2.2","info":"\"15-06-24\" at \"15:16\""},{"visible":false,"include":false,"step":"300","x":715,"y":553,"z":1839,"a95":"2.4","info":"\"15-06-25\" at \"10:14\""},{"visible":true,"include":true,"step":"320","x":1104,"y":307,"z":1304,"a95":"2.2","info":"\"15-06-25\" at \"13:48\""},{"visible":true,"include":false,"step":"340","x":1299,"y":366,"z":1576,"a95":"2.1","info":"\"15-06-25\" at \"16:48\""},{"visible":true,"include":true,"step":"370","x":1326,"y":77,"z":948,"a95":"2","info":"\"15-06-25\" at \"20:57\""},{"visible":true,"include":true,"step":"400","x":1052,"y":179,"z":1294,"a95":"2.5","info":"\"15-06-26\" at \"08:12\""},{"visible":true,"include":true,"step":"420","x":851,"y":-23,"z":720,"a95":"2.7","info":"\"15-06-26\" at \"11:00\""},{"visible":true,"include":true,"step":"440","x":756,"y":42,"z":1299,"a95":"3.5","info":"\"15-06-27\" at \"10:20\""},{"visible":true,"include":true,"step":"470","x":805,"y":159,"z":1015,"a95":"2.8","info":"\"15-06-29\" at \"07:21\""},{"visible":true,"include":true,"step":"490","x":519.3,"y":348,"z":463.6,"a95":"4.2","info":"\"15-06-29\" at \"10:40\""},{"visible":true,"include":true,"step":"520","x":730.2,"y":148.4,"z":75.1,"a95":"7.7","info":"\"15-06-29\" at \"14:27\""},{"visible":false,"include":false,"step":"550","x":-644.6,"y":207.5,"z":530,"a95":"9.3","info":"\"15-06-30\" at \"07:50\""},{"visible":false,"include":false,"step":"580","x":-214.5,"y":-827.6,"z":339.1,"a95":"13.5","info":"\"15-07-01\" at \"10:59\""}]},{"info":"0","GEO":[{"dec":199.32916238112347,"inc":3.8324254781809866,"MAD":3.183852677444501,"cm":[-1.4210854715202004e-14,2.1316282072803006e-14,0],"intensity":219.58026667931003,"type":"dir","forced":true,"remark":"","origin":false,"nSteps":7,"minStep":"20.0","maxStep":"40.0","steps":["20.0","23.0","25.0","30.0","33.0","35.0","40.0"]}],"TECT":[{"dec":198.67656621423407,"inc":-44.14239834704338,"MAD":3.1838526774444715,"cm":[-1.4210854715202004e-14,3.197442310920451e-14,0],"intensity":219.58026667931003,"type":"dir","forced":true,"remark":"","origin":false,"nSteps":7,"minStep":"20.0","maxStep":"40.0","steps":["20.0","23.0","25.0","30.0","33.0","35.0","40.0"]}],"interpreted":true,"name":"SS44.03A","coreAzi":198,"coreDip":42,"bedStrike":111,"bedDip":48,"data":[{"visible":true,"include":false,"step":"0.0","x":-1251,"y":-17.304,"z":2456,"a95":"0.99","info":"05/10/2015 at 15:09:39"},{"visible":true,"include":false,"step":"10.0","x":478.27,"y":192.11,"z":1632.4,"a95":"0.99","info":"05/10/2015 at 15:09:39"},{"visible":true,"include":false,"step":"15.0","x":847.43,"y":93.467,"z":1359,"a95":"0.99","info":"05/10/2015 at 15:09:39"},{"visible":true,"include":true,"step":"20.0","x":846.79,"y":74.72,"z":1148.3,"a95":"0.99","info":"05/10/2015 at 15:09:39"},{"visible":true,"include":true,"step":"23.0","x":871.16,"y":60.168,"z":1103.5,"a95":"0.99","info":"05/10/2015 at 15:09:39"},{"visible":true,"include":true,"step":"25.0","x":799.92,"y":108.26,"z":1019,"a95":"0.99","info":"05/10/2015 at 15:09:39"},{"visible":true,"include":true,"step":"30.0","x":695.17,"y":-10.627,"z":925.84,"a95":"0.99","info":"05/10/2015 at 15:09:39"},{"visible":true,"include":true,"step":"33.0","x":744.64,"y":17.086,"z":886.99,"a95":"0.99","info":"05/10/2015 at 15:09:39"},{"visible":true,"include":true,"step":"35.0","x":744.17,"y":-95.266,"z":955.11,"a95":"0.99","info":"05/10/2015 at 15:09:39"},{"visible":true,"include":true,"step":"40.0","x":588.63,"y":24.362,"z":653.23,"a95":"0.99","info":"05/10/2015 at 15:09:39"},{"visible":true,"include":false,"step":"45.0","x":593.77,"y":137.2,"z":627.31,"a95":"0.99","info":"05/10/2015 at 15:09:39"},{"visible":true,"include":false,"step":"50.0","x":335.39,"y":-197.7,"z":426.34,"a95":"0.99","info":"05/10/2015 at 15:09:39"},{"visible":true,"include":false,"step":"60.0","x":208.15,"y":9.483,"z":225.9,"a95":"0.99","info":"05/10/2015 at 15:09:39"},{"visible":true,"include":false,"step":"70.0","x":178.57,"y":88.998,"z":283.74,"a95":"0.99","info":"05/10/2015 at 15:09:39"}]},{"info":"6","GEO":[{"dec":209.158580596213,"inc":19.84182242107715,"MAD":9.011296315017539,"cm":[-2.842170943040401e-14,7.460698725481052e-14,0],"intensity":246.39419624242393,"type":"dir","forced":true,"remark":"","origin":false,"nSteps":6,"minStep":"30.0","maxStep":"50.0","steps":["30.0","33.0","35.0","40.0","45.0","50.0"]}],"TECT":[{"dec":209.67134879933963,"inc":-27.699385332143272,"MAD":9.011296315017567,"cm":[-7.815970093361102e-14,1.2789769243681803e-13,-3.552713678800501e-15],"intensity":246.39419624242393,"type":"dir","forced":true,"remark":"","origin":false,"nSteps":6,"minStep":"30.0","maxStep":"50.0","steps":["30.0","33.0","35.0","40.0","45.0","50.0"]}],"interpreted":true,"name":"SS44.04","coreAzi":196,"coreDip":53,"bedStrike":111,"bedDip":48,"data":[{"visible":true,"include":false,"step":"0.0","x":-287.57,"y":830.63,"z":3343.3,"a95":"0.99","info":"09/07/2015 at 00:33:06"},{"visible":true,"include":false,"step":"10.0","x":686.04,"y":586.37,"z":2442.3,"a95":"0.99","info":"09/07/2015 at 00:33:06"},{"visible":true,"include":false,"step":"15.0","x":869.24,"y":554.81,"z":1837.9,"a95":"0.99","info":"09/07/2015 at 00:33:06"},{"visible":true,"include":false,"step":"20.0","x":971.03,"y":725.72,"z":1591.2,"a95":"0.99","info":"09/07/2015 at 00:33:06"},{"visible":true,"include":false,"step":"23.0","x":1038.1,"y":834.59,"z":1543.8,"a95":"0.99","info":"09/07/2015 at 00:33:06"},{"visible":true,"include":false,"step":"25.0","x":806.94,"y":696.37,"z":1521.5,"a95":"0.99","info":"09/07/2015 at 00:33:06"},{"visible":true,"include":true,"step":"30.0","x":950.24,"y":474.59,"z":1396.4,"a95":"0.99","info":"09/07/2015 at 00:33:06"},{"visible":true,"include":true,"step":"33.0","x":711.48,"y":397.6,"z":1268.2,"a95":"0.99","info":"09/07/2015 at 00:33:06"},{"visible":true,"include":true,"step":"35.0","x":738.9,"y":191.27,"z":1048.1,"a95":"0.99","info":"09/07/2015 at 00:33:06"},{"visible":true,"include":true,"step":"40.0","x":625.54,"y":-91.042,"z":994.19,"a95":"0.99","info":"09/07/2015 at 00:33:06"},{"visible":true,"include":true,"step":"45.0","x":415.03,"y":434.72,"z":536.75,"a95":"0.99","info":"09/07/2015 at 00:33:06"},{"visible":true,"include":true,"step":"50.0","x":381.95,"y":168.16,"z":726.2,"a95":"0.99","info":"09/07/2015 at 00:33:06"},{"visible":true,"include":false,"step":"55.0","x":123.6,"y":-137.34,"z":383.76,"a95":"0.99","info":"09/07/2015 at 00:33:06"},{"visible":true,"include":false,"step":"60.0","x":428.63,"y":-4.3328,"z":446.09,"a95":"0.99","info":"09/07/2015 at 00:33:06"},{"visible":false,"include":false,"step":"65.0","x":154.23,"y":-231.11,"z":438.73,"a95":"0.99","info":"09/07/2015 at 00:33:06"},{"visible":false,"include":false,"step":"70.0","x":96.098,"y":-384.99,"z":288.79,"a95":"0.99","info":"09/07/2015 at 00:33:06"},{"visible":false,"include":false,"step":"80.0","x":-797.67,"y":-140.64,"z":203.59,"a95":"0.99","info":"09/07/2015 at 00:33:06"}]},{"info":"0","GEO":[{"dec":199.481941498007,"inc":23.018988514939462,"MAD":6.968365203222711,"cm":[-8.526512829121202e-14,2.3447910280083306e-13,0],"intensity":313.3328359017763,"type":"dir","forced":true,"remark":"","origin":false,"nSteps":7,"minStep":"20.0","maxStep":"40.0","steps":["20.0","23.0","25.0","30.0","33.0","35.0","40.0"]}],"TECT":[{"dec":199.45880118493108,"inc":-24.965838612268627,"MAD":6.968365203222705,"cm":[-1.2789769243681803e-13,2.4158453015843406e-13,1.0658141036401503e-14],"intensity":313.33283590177626,"type":"dir","forced":true,"remark":"","origin":false,"nSteps":7,"minStep":"20.0","maxStep":"40.0","steps":["20.0","23.0","25.0","30.0","33.0","35.0","40.0"]}],"interpreted":true,"name":"SS44.05A","coreAzi":220,"coreDip":40,"bedStrike":111,"bedDip":48,"data":[{"visible":true,"include":false,"step":"0.0","x":-1312.7,"y":-413.43,"z":2655.9,"a95":"0.99","info":"05/10/2015 at 15:09:39"},{"visible":true,"include":false,"step":"10.0","x":439.73,"y":-933.2,"z":2450.8,"a95":"0.99","info":"05/10/2015 at 15:09:39"},{"visible":true,"include":false,"step":"15.0","x":509.64,"y":-868.34,"z":1941.6,"a95":"0.99","info":"05/10/2015 at 15:09:39"},{"visible":true,"include":true,"step":"20.0","x":388.55,"y":-890.91,"z":1958.4,"a95":"0.99","info":"05/10/2015 at 15:09:39"},{"visible":true,"include":true,"step":"23.0","x":555.15,"y":-489.41,"z":1763.7,"a95":"0.99","info":"05/10/2015 at 15:09:39"},{"visible":true,"include":true,"step":"25.0","x":808.65,"y":-520.3,"z":1812,"a95":"0.99","info":"05/10/2015 at 15:09:39"},{"visible":true,"include":true,"step":"30.0","x":344.91,"y":-687.98,"z":1411.6,"a95":"0.99","info":"05/10/2015 at 15:09:39"},{"visible":true,"include":true,"step":"33.0","x":346.06,"y":-278.55,"z":1383.4,"a95":"0.99","info":"05/10/2015 at 15:09:39"},{"visible":true,"include":true,"step":"35.0","x":340.49,"y":-508.96,"z":1315.5,"a95":"0.99","info":"05/10/2015 at 15:09:39"},{"visible":true,"include":true,"step":"40.0","x":93.841,"y":-377.93,"z":1038.5,"a95":"0.99","info":"05/10/2015 at 15:09:39"},{"visible":true,"include":false,"step":"45.0","x":143.2,"y":-550.2,"z":728.02,"a95":"0.99","info":"05/10/2015 at 15:09:39"},{"visible":false,"include":false,"step":"50.0","x":-408.05,"y":-697.99,"z":639.61,"a95":"0.99","info":"05/10/2015 at 15:09:39"},{"visible":false,"include":false,"step":"60.0","x":-273.05,"y":-427.33,"z":534.12,"a95":"0.99","info":"05/10/2015 at 15:09:39"},{"visible":false,"include":false,"step":"70.0","x":-89.272,"y":-311.45,"z":386.33,"a95":"0.99","info":"05/10/2015 at 15:09:39"}]},{"info":"","GEO":[{"dec":208.60386332459092,"inc":13.662029932711116,"MAD":6.4056552873479955,"cm":[-5.684341886080802e-14,9.947598300641403e-14,0],"intensity":513.410728329394,"type":"dir","forced":true,"remark":"","origin":false,"nSteps":13,"minStep":"180","maxStep":"470","steps":["180","210","230","250","270","300","320","340","370","400","420","440","470"]}],"TECT":[{"dec":209.91156285844878,"inc":-33.89850995418817,"MAD":6.40565528734804,"cm":[5.684341886080802e-14,0,3.552713678800501e-14],"intensity":513.410728329394,"type":"dir","forced":true,"remark":"","origin":false,"nSteps":13,"minStep":"180","maxStep":"470","steps":["180","210","230","250","270","300","320","340","370","400","420","440","470"]}],"interpreted":true,"name":"SS44.06A","coreAzi":208,"coreDip":45,"bedStrike":111,"bedDip":48,"data":[{"visible":true,"include":false,"step":"20","x":-44,"y":1676,"z":4763,"a95":"2.2","info":"\"15-06-22\" at \"07:57\""},{"visible":true,"include":false,"step":"100","x":1052,"y":682,"z":3220,"a95":"2.3","info":"\"15-06-22\" at \"11:14\""},{"visible":true,"include":false,"step":"150","x":1433,"y":344,"z":3368,"a95":"2.3","info":"\"15-06-23\" at \"08:27\""},{"visible":true,"include":true,"step":"180","x":1778,"y":22,"z":2987,"a95":"2.1","info":"\"15-06-23\" at \"11:28\""},{"visible":true,"include":true,"step":"210","x":1853,"y":270,"z":3153,"a95":"2","info":"\"15-06-23\" at \"14:25\""},{"visible":true,"include":true,"step":"230","x":2206,"y":-55,"z":2851,"a95":"2","info":"\"15-06-24\" at \"08:12\""},{"visible":true,"include":true,"step":"250","x":2020,"y":57,"z":2634,"a95":"2","info":"\"15-06-24\" at \"11:59\""},{"visible":true,"include":true,"step":"270","x":1855,"y":-110,"z":2575,"a95":"1.9","info":"\"15-06-24\" at \"15:18\""},{"visible":true,"include":true,"step":"300","x":1755,"y":-111,"z":2796,"a95":"2.1","info":"\"15-06-25\" at \"10:15\""},{"visible":true,"include":true,"step":"320","x":1458,"y":-55,"z":2372,"a95":"2","info":"\"15-06-25\" at \"13:50\""},{"visible":true,"include":true,"step":"340","x":1658,"y":102,"z":2455,"a95":"1.8","info":"\"15-06-25\" at \"16:49\""},{"visible":true,"include":true,"step":"370","x":1200,"y":-117,"z":2255,"a95":"1.9","info":"\"15-06-25\" at \"20:58\""},{"visible":true,"include":true,"step":"400","x":1049,"y":48,"z":1955,"a95":"2.2","info":"\"15-06-26\" at \"08:14\""},{"visible":true,"include":true,"step":"420","x":664,"y":-34,"z":2045,"a95":"2.1","info":"\"15-06-26\" at \"11:02\""},{"visible":true,"include":true,"step":"440","x":639,"y":314,"z":2415,"a95":"2.9","info":"\"15-06-27\" at \"10:22\""},{"visible":true,"include":true,"step":"470","x":876,"y":86,"z":1704,"a95":"2.6","info":"\"15-06-29\" at \"07:23\""},{"visible":true,"include":false,"step":"490","x":-185,"y":550,"z":1517,"a95":"4.1","info":"\"15-06-29\" at \"10:42\""},{"visible":false,"include":false,"step":"520","x":977,"y":1166,"z":1101,"a95":"3.5","info":"\"15-06-29\" at \"14:28\""},{"visible":false,"include":false,"step":"550","x":-2264,"y":1035,"z":4260,"a95":"4.5","info":"\"15-06-30\" at \"07:52\""},{"visible":false,"include":false,"step":"580","x":330.1,"y":-555.2,"z":-754.2,"a95":"18.5","info":"\"15-07-01\" at \"11:03\""}]},{"info":"7","GEO":[{"dec":212.38419809595243,"inc":-3.8916464548297403,"MAD":7.782356579536205,"cm":[1.4210854715202004e-14,2.1316282072803006e-14,0],"intensity":195.79115943346196,"type":"dir","forced":true,"remark":"","origin":false,"nSteps":5,"minStep":"25.0","maxStep":"45.0","steps":["25.0","33.0","35.0","40.0","45.0"]}],"TECT":[{"dec":219.05790147943927,"inc":-50.55707914482633,"MAD":7.782356579536178,"cm":[7.105427357601002e-15,-3.552713678800501e-14,0],"intensity":195.79115943346196,"type":"dir","forced":true,"remark":"","origin":false,"nSteps":5,"minStep":"25.0","maxStep":"45.0","steps":["25.0","33.0","35.0","40.0","45.0"]}],"interpreted":true,"name":"SS44.06","coreAzi":208,"coreDip":45,"bedStrike":111,"bedDip":48,"data":[{"visible":true,"include":false,"step":"0.0","x":-1431.6,"y":3676.1,"z":2152.4,"a95":"0.99","info":"09/07/2015 at 00:33:06"},{"visible":true,"include":false,"step":"10.0","x":618.67,"y":742.95,"z":1602.5,"a95":"0.99","info":"09/07/2015 at 00:33:06"},{"visible":true,"include":false,"step":"15.0","x":933.42,"y":371.1,"z":1271.9,"a95":"0.99","info":"09/07/2015 at 00:33:06"},{"visible":true,"include":false,"step":"20.0","x":957.35,"y":377.7,"z":1147.8,"a95":"0.99","info":"09/07/2015 at 00:33:06"},{"visible":true,"include":false,"step":"23.0","x":939.47,"y":250.54,"z":990.3,"a95":"0.99","info":"09/07/2015 at 00:33:06"},{"visible":true,"include":true,"step":"25.0","x":1011.2,"y":194.94,"z":946.14,"a95":"0.99","info":"09/07/2015 at 00:33:06"},{"visible":false,"include":false,"step":"30.0","x":610.74,"y":-246.35,"z":847.78,"a95":"0.99","info":"09/07/2015 at 00:33:06"},{"visible":true,"include":true,"step":"33.0","x":1019.4,"y":43.282,"z":698.3,"a95":"0.99","info":"09/07/2015 at 00:33:06"},{"visible":true,"include":true,"step":"35.0","x":536.22,"y":-78.198,"z":400.75,"a95":"0.99","info":"09/07/2015 at 00:33:06"},{"visible":true,"include":true,"step":"40.0","x":475.33,"y":118.39,"z":664.38,"a95":"0.99","info":"09/07/2015 at 00:33:06"},{"visible":true,"include":true,"step":"45.0","x":506.37,"y":15.569,"z":424.63,"a95":"0.99","info":"09/07/2015 at 00:33:06"},{"visible":true,"include":false,"step":"50.0","x":353.7,"y":-272.47,"z":221.72,"a95":"0.99","info":"09/07/2015 at 00:33:06"},{"visible":true,"include":false,"step":"55.0","x":-24.078,"y":155.87,"z":480.31,"a95":"0.99","info":"09/07/2015 at 00:33:06"},{"visible":true,"include":false,"step":"60.0","x":-54.492,"y":-50.712,"z":86.526,"a95":"0.99","info":"09/07/2015 at 00:33:06"},{"visible":false,"include":false,"step":"65.0","x":-144.07,"y":-525.95,"z":166.41,"a95":"0.99","info":"09/07/2015 at 00:33:06"},{"visible":false,"include":false,"step":"70.0","x":16.613,"y":-175.48,"z":247.31,"a95":"0.99","info":"09/07/2015 at 00:33:06"},{"visible":false,"include":false,"step":"80.0","x":2967,"y":459.63,"z":97.249,"a95":"0.99","info":"09/07/2015 at 00:33:06"}]},{"info":"","GEO":[],"TECT":[],"interpreted":false,"name":"SS44.07A","coreAzi":220,"coreDip":33,"bedStrike":111,"bedDip":48,"data":[{"visible":true,"include":false,"step":"20","x":-18479,"y":13284,"z":1104,"a95":"1.5","info":"\"15-06-22\" at \"07:59\""},{"visible":true,"include":false,"step":"100","x":-10467,"y":6822,"z":-688,"a95":"2.1","info":"\"15-06-22\" at \"11:16\""},{"visible":true,"include":false,"step":"150","x":-9590,"y":5222,"z":1114,"a95":"1.7","info":"\"15-06-23\" at \"08:29\""},{"visible":true,"include":false,"step":"180","x":-7481,"y":2603,"z":497,"a95":"1.9","info":"\"15-06-23\" at \"11:30\""},{"visible":true,"include":false,"step":"210","x":-6588,"y":3635,"z":1379,"a95":"2","info":"\"15-06-23\" at \"14:26\""},{"visible":true,"include":false,"step":"230","x":-6160,"y":2343,"z":-329,"a95":"2.5","info":"\"15-06-24\" at \"08:13\""},{"visible":true,"include":false,"step":"250","x":-5948,"y":1749,"z":478,"a95":"1.9","info":"\"15-06-24\" at \"12:01\""},{"visible":true,"include":false,"step":"270","x":-6519,"y":3029,"z":1212,"a95":"2.2","info":"\"15-06-24\" at \"15:20\""},{"visible":true,"include":false,"step":"300","x":-6090,"y":1499,"z":604,"a95":"2.3","info":"\"15-06-25\" at \"10:17\""},{"visible":true,"include":false,"step":"320","x":-5594,"y":1996,"z":-1291,"a95":"2.5","info":"\"15-06-25\" at \"13:51\""},{"visible":true,"include":false,"step":"340","x":-5380,"y":692,"z":1602,"a95":"2.8","info":"\"15-06-25\" at \"16:51\""},{"visible":true,"include":false,"step":"370","x":-6207,"y":638,"z":1465,"a95":"3","info":"\"15-06-25\" at \"21:00\""},{"visible":true,"include":false,"step":"400","x":-5794,"y":1899,"z":773,"a95":"2.4","info":"\"15-06-26\" at \"08:15\""},{"visible":true,"include":false,"step":"420","x":-7785,"y":2098,"z":-20,"a95":"4.1","info":"\"15-06-26\" at \"11:04\""},{"visible":true,"include":false,"step":"440","x":-5671,"y":2734,"z":-5530,"a95":"5.6","info":"\"15-06-27\" at \"10:23\""},{"visible":true,"include":false,"step":"470","x":-8871,"y":-777,"z":-715,"a95":"3.9","info":"\"15-06-29\" at \"07:25\""},{"visible":false,"include":false,"step":"490","x":-12575,"y":-3900,"z":-5483,"a95":"4","info":"\"15-06-29\" at \"10:43\""},{"visible":false,"include":false,"step":"520","x":-4564,"y":4827,"z":-10695,"a95":"4.1","info":"\"15-06-29\" at \"14:30\""},{"visible":false,"include":false,"step":"550","x":-20624,"y":7681,"z":-6750,"a95":"7.9","info":"\"15-06-30\" at \"07:54\""},{"visible":false,"include":false,"step":"580","x":21903,"y":828,"z":-28014,"a95":"5","info":"\"15-07-01\" at \"11:05\""}]},{"info":"","GEO":[],"TECT":[],"interpreted":false,"name":"SS44.08A","coreAzi":228,"coreDip":29,"bedStrike":111,"bedDip":48,"data":[{"visible":true,"include":false,"step":"20","x":-21734,"y":10314,"z":-6265,"a95":"2.2","info":"\"15-06-22\" at \"08:00\""},{"visible":true,"include":false,"step":"100","x":-12238,"y":7449,"z":-9198,"a95":"3.3","info":"\"15-06-22\" at \"11:17\""},{"visible":true,"include":true,"step":"150","x":-11165,"y":4228,"z":-7735,"a95":"2.4","info":"\"15-06-23\" at \"08:31\""},{"visible":true,"include":true,"step":"180","x":-9747,"y":4345,"z":-6783,"a95":"2.8","info":"\"15-06-23\" at \"11:32\""},{"visible":true,"include":true,"step":"210","x":-9454,"y":4224,"z":-6755,"a95":"2.5","info":"\"15-06-23\" at \"14:28\""},{"visible":true,"include":true,"step":"230","x":-8087,"y":3710,"z":-5518,"a95":"2.6","info":"\"15-06-24\" at \"08:15\""},{"visible":true,"include":true,"step":"250","x":-8201,"y":3455,"z":-6113,"a95":"2.4","info":"\"15-06-24\" at \"12:04\""},{"visible":true,"include":true,"step":"270","x":-7378,"y":2620,"z":-6271,"a95":"2.7","info":"\"15-06-24\" at \"15:29\""},{"visible":true,"include":true,"step":"300","x":-8158,"y":2978,"z":-5598,"a95":"2.4","info":"\"15-06-25\" at \"10:19\""},{"visible":true,"include":true,"step":"320","x":-7258,"y":2977,"z":-6245,"a95":"2.3","info":"\"15-06-25\" at \"13:53\""},{"visible":true,"include":true,"step":"340","x":-7409,"y":2149,"z":-5127,"a95":"2.6","info":"\"15-06-25\" at \"16:52\""},{"visible":true,"include":true,"step":"370","x":-7283,"y":1907,"z":-4161,"a95":"2.4","info":"\"15-06-25\" at \"21:02\""},{"visible":true,"include":true,"step":"400","x":-6530,"y":1609,"z":-4110,"a95":"2.8","info":"\"15-06-26\" at \"08:17\""},{"visible":true,"include":false,"step":"420","x":-10046,"y":-721,"z":-6500,"a95":"3.3","info":"\"15-06-26\" at \"11:06\""},{"visible":true,"include":false,"step":"440","x":-10302,"y":1184,"z":-2642,"a95":"3.9","info":"\"15-06-27\" at \"10:27\""},{"visible":true,"include":false,"step":"470","x":-9796,"y":548,"z":-3969,"a95":"3.9","info":"\"15-06-29\" at \"07:27\""},{"visible":false,"include":false,"step":"490","x":-15038,"y":235,"z":-5638,"a95":"3.2","info":"\"15-06-29\" at \"10:45\""},{"visible":false,"include":false,"step":"520","x":-11175,"y":-6159,"z":-8915,"a95":"3.9","info":"\"15-06-29\" at \"14:32\""},{"visible":false,"include":false,"step":"550","x":-14552,"y":6222,"z":-1502,"a95":"11.4","info":"\"15-06-30\" at \"07:55\""},{"visible":false,"include":false,"step":"580","x":12578,"y":-16504,"z":-7393,"a95":"8.2","info":"\"15-07-01\" at \"11:07\""}]},{"info":"0","GEO":[],"TECT":[],"interpreted":false,"name":"SS44.09A","coreAzi":220,"coreDip":33,"bedStrike":111,"bedDip":48,"data":[{"visible":true,"include":false,"step":"0.0","x":-12464,"y":2252,"z":2810.8,"a95":"0.99","info":"05/10/2015 at 15:09:39"},{"visible":true,"include":false,"step":"10.0","x":-8059.8,"y":1809.6,"z":89.217,"a95":"0.99","info":"05/10/2015 at 15:09:39"},{"visible":true,"include":true,"step":"15.0","x":-6245.1,"y":1197.2,"z":-302.25,"a95":"0.99","info":"05/10/2015 at 15:09:39"},{"visible":true,"include":true,"step":"20.0","x":-5470.3,"y":1640.6,"z":-317.66,"a95":"0.99","info":"05/10/2015 at 15:09:39"},{"visible":true,"include":true,"step":"23.0","x":-5105.3,"y":1343.8,"z":201.59,"a95":"0.99","info":"05/10/2015 at 15:09:39"},{"visible":true,"include":true,"step":"25.0","x":-5279.7,"y":1304.4,"z":307.11,"a95":"0.99","info":"05/10/2015 at 15:09:39"},{"visible":true,"include":true,"step":"30.0","x":-5084.4,"y":867.75,"z":116,"a95":"0.99","info":"05/10/2015 at 15:09:39"},{"visible":true,"include":true,"step":"33.0","x":-4449.5,"y":1006,"z":368.22,"a95":"0.99","info":"05/10/2015 at 15:09:39"},{"visible":true,"include":true,"step":"35.0","x":-4111.6,"y":256.68,"z":17.586,"a95":"0.99","info":"05/10/2015 at 15:09:39"},{"visible":true,"include":true,"step":"40.0","x":-4099.9,"y":731.09,"z":-388.45,"a95":"0.99","info":"05/10/2015 at 15:09:39"},{"visible":true,"include":true,"step":"45.0","x":-2988.3,"y":274.78,"z":-336.87,"a95":"0.99","info":"05/10/2015 at 15:09:39"},{"visible":true,"include":false,"step":"50.0","x":-2638.7,"y":-33.835,"z":622.03,"a95":"0.99","info":"05/10/2015 at 15:09:39"},{"visible":true,"include":false,"step":"60.0","x":-2374.8,"y":809.68,"z":375.09,"a95":"0.99","info":"05/10/2015 at 15:09:39"},{"visible":true,"include":false,"step":"70.0","x":-1208.3,"y":747.83,"z":94.969,"a95":"0.99","info":"05/10/2015 at 15:09:39"}]},{"info":"","GEO":[],"TECT":[],"interpreted":false,"name":"SS44.10A","coreAzi":200,"coreDip":35,"bedStrike":111,"bedDip":48,"data":[{"visible":true,"include":false,"step":"20","x":-16669,"y":3655,"z":5038,"a95":"1.7","info":"\"15-06-22\" at \"08:03\""},{"visible":true,"include":false,"step":"100","x":-7364,"y":3629,"z":1432,"a95":"2.2","info":"\"15-06-22\" at \"11:19\""},{"visible":true,"include":false,"step":"150","x":-4716,"y":2802,"z":1939,"a95":"2.6","info":"\"15-06-23\" at \"08:33\""},{"visible":true,"include":false,"step":"180","x":-5048,"y":1153,"z":-302,"a95":"2.8","info":"\"15-06-23\" at \"11:34\""},{"visible":true,"include":true,"step":"210","x":-2839,"y":1772,"z":1240,"a95":"2.6","info":"\"15-06-23\" at \"14:30\""},{"visible":true,"include":true,"step":"230","x":-2861,"y":2087,"z":-153,"a95":"3","info":"\"15-06-24\" at \"08:16\""},{"visible":true,"include":true,"step":"250","x":-4571,"y":2460,"z":1927,"a95":"3.1","info":"\"15-06-24\" at \"12:07\""},{"visible":true,"include":true,"step":"270","x":-2750,"y":2143,"z":370,"a95":"3.1","info":"\"15-06-24\" at \"15:31\""},{"visible":true,"include":true,"step":"300","x":-3653,"y":1735,"z":383,"a95":"2.7","info":"\"15-06-25\" at \"10:20\""},{"visible":true,"include":true,"step":"320","x":-2086,"y":1359,"z":992,"a95":"3.8","info":"\"15-06-25\" at \"13:56\""},{"visible":true,"include":true,"step":"340","x":-4176,"y":523,"z":967,"a95":"3.5","info":"\"15-06-25\" at \"16:54\""},{"visible":true,"include":true,"step":"370","x":-3494,"y":1102,"z":879,"a95":"3.6","info":"\"15-06-25\" at \"21:03\""},{"visible":true,"include":true,"step":"400","x":-3777,"y":3127,"z":1859,"a95":"2.5","info":"\"15-06-26\" at \"08:19\""},{"visible":true,"include":false,"step":"420","x":-4718,"y":-151,"z":-346,"a95":"3.7","info":"\"15-06-26\" at \"11:09\""},{"visible":true,"include":false,"step":"440","x":-4763,"y":1746,"z":2455,"a95":"5.2","info":"\"15-06-27\" at \"10:30\""},{"visible":true,"include":false,"step":"470","x":-3575,"y":-917,"z":-847,"a95":"4.2","info":"\"15-06-29\" at \"07:34\""},{"visible":false,"include":false,"step":"490","x":2596,"y":-3095,"z":-3393,"a95":"3.6","info":"\"15-06-29\" at \"10:48\""},{"visible":false,"include":false,"step":"520","x":-6247,"y":-2324,"z":-4361,"a95":"4.8","info":"\"15-06-29\" at \"14:33\""},{"visible":false,"include":false,"step":"550","x":-2114,"y":5049,"z":10760,"a95":"8.1","info":"\"15-06-30\" at \"07:58\""},{"visible":false,"include":false,"step":"580","x":6653,"y":-2513,"z":-15378,"a95":"5.6","info":"\"15-07-01\" at \"11:08\""}]},{"info":"8","GEO":[],"TECT":[],"interpreted":false,"name":"SS44.10","coreAzi":200,"coreDip":35,"bedStrike":111,"bedDip":48,"data":[{"visible":true,"include":false,"step":"0.0","x":-8762.2,"y":3401.1,"z":2354.7,"a95":"0.99","info":"09/07/2015 at 00:33:06"},{"visible":true,"include":false,"step":"10.0","x":-3386.4,"y":1807,"z":1147.1,"a95":"0.99","info":"09/07/2015 at 00:33:06"},{"visible":true,"include":false,"step":"15.0","x":-1997.4,"y":1179.4,"z":986.46,"a95":"0.99","info":"09/07/2015 at 00:33:06"},{"visible":true,"include":false,"step":"20.0","x":-1574.6,"y":1222.8,"z":1004.8,"a95":"0.99","info":"09/07/2015 at 00:33:06"},{"visible":true,"include":false,"step":"23.0","x":-1205.5,"y":1160.1,"z":1748.3,"a95":"0.99","info":"09/07/2015 at 00:33:06"},{"visible":true,"include":false,"step":"25.0","x":-1287.6,"y":1222.7,"z":1505,"a95":"0.99","info":"09/07/2015 at 00:33:06"},{"visible":true,"include":false,"step":"30.0","x":-1360.5,"y":135.85,"z":819.83,"a95":"0.99","info":"09/07/2015 at 00:33:06"},{"visible":true,"include":false,"step":"33.0","x":-1297.6,"y":572.02,"z":1517.3,"a95":"0.99","info":"09/07/2015 at 00:33:06"},{"visible":true,"include":false,"step":"35.0","x":-943.59,"y":321.7,"z":502.42,"a95":"0.99","info":"09/07/2015 at 00:33:06"},{"visible":true,"include":false,"step":"40.0","x":-1340.2,"y":783.99,"z":443.04,"a95":"0.99","info":"09/07/2015 at 00:33:06"},{"visible":true,"include":false,"step":"45.0","x":-872.31,"y":-167.81,"z":1062.2,"a95":"0.99","info":"09/07/2015 at 00:33:06"},{"visible":true,"include":false,"step":"50.0","x":-835.39,"y":616.15,"z":-11.087,"a95":"0.99","info":"09/07/2015 at 00:33:06"},{"visible":true,"include":false,"step":"55.0","x":50.44,"y":-162.25,"z":785.29,"a95":"0.99","info":"09/07/2015 at 00:33:06"},{"visible":true,"include":false,"step":"60.0","x":-1450.2,"y":621.08,"z":92.113,"a95":"0.99","info":"09/07/2015 at 00:33:06"},{"visible":true,"include":false,"step":"65.0","x":-635.68,"y":782.32,"z":279.52,"a95":"0.99","info":"09/07/2015 at 00:33:06"},{"visible":true,"include":false,"step":"70.0","x":-1053,"y":1058.5,"z":134.48,"a95":"0.99","info":"09/07/2015 at 00:33:06"},{"visible":false,"include":false,"step":"80.0","x":3398.1,"y":1579.1,"z":-1744.7,"a95":"0.99","info":"09/07/2015 at 00:33:06"}]}]
