# Supplementary material for: Paleomagnetic constraints on the timing and distribution of Cenozoic rotations in Central and Eastern Anatolia
Source: Copernicus journal article supplement (doi:10.5194/se-9-295-2018), 2018-03-21
Supplement: Supplementary file 2 [file se-9-295-2018-supplement.zip › se-2017-66_DATA_dir files/dir files Sivas/SS45.dir]

[{"version":"v1.1.0","exported":"2016-10-17T07:28:00.233Z","volume":10.5,"added":"2016-10-17T07:23:13.766Z","format":"Utrecht","demagType":"Unknown","strat":null,"patch":1.1,"GEO":[{"dec":280.29226356034343,"inc":-47.56032301276423,"MAD":6.815560203566018,"cm":[-1.9895196601282805e-13,-2.842170943040401e-14,0],"intensity":3899.130695604585,"type":"dir","forced":true,"remark":"","origin":false,"nSteps":6,"minStep":"180","maxStep":"380","steps":["180","210","240","270","330","380"],"group":"None","version":"v1.1.0"}],"TECT":[{"dec":327.2749604590258,"inc":-24.64268703914098,"MAD":6.815560203566042,"cm":[-5.684341886080802e-14,-1.1368683772161603e-13,-4.263256414560601e-14],"intensity":3899.130695604585,"type":"dir","forced":true,"remark":"","origin":false,"nSteps":6,"minStep":"180","maxStep":"380","steps":["180","210","240","270","330","380"],"group":"None","version":"v1.1.0"}],"interpreted":true,"name":"SS45.00A","coreAzi":98,"coreDip":48,"bedStrike":105,"bedDip":60,"data":[{"visible":false,"include":false,"step":"20","x":-2809.5238095238096,"y":-984.8571428571429,"z":2140.7619047619046,"a95":2.2,"info":"\"15-06-23\" at \"17:43\""},{"visible":false,"include":false,"step":"90","x":-2047.904761904762,"y":-590.952380952381,"z":-361.6190476190476,"a95":2.4,"info":"\"15-06-23\" at \"21:53\""},{"visible":true,"include":false,"step":"120","x":-774.7619047619048,"y":-161.8095238095238,"z":-1702.7619047619048,"a95":3.1,"info":"\"15-06-24\" at \"21:11\""},{"visible":true,"include":false,"step":"150","x":-1035.047619047619,"y":-309.14285714285717,"z":-1967.142857142857,"a95":2.6,"info":"\"15-06-28\" at \"01:13\""},{"visible":true,"include":true,"step":"180","x":-428.4761904761905,"y":-231.9047619047619,"z":-1866,"a95":3,"info":"\"15-06-28\" at \"16:35\""},{"visible":true,"include":true,"step":"210","x":-112.28571428571429,"y":-161.04761904761904,"z":-2020.2857142857142,"a95":2.7,"info":"\"15-06-28\" at \"19:28\""},{"visible":true,"include":true,"step":"240","x":25.904761904761905,"y":40.19047619047619,"z":-2014.952380952381,"a95":3.1,"info":"\"15-06-30\" at \"12:45\""},{"visible":true,"include":true,"step":"270","x":1.1428571428571428,"y":-45.714285714285715,"z":-2111.2380952380954,"a95":2.7,"info":"\"15-07-01\" at \"07:44\""},{"visible":true,"include":true,"step":"330","x":247.42857142857142,"y":65.80952380952381,"z":-2050.7619047619046,"a95":2.8,"info":"\"15-07-01\" at \"13:08\""},{"visible":false,"include":false,"step":"350","x":-108.0952380952381,"y":-255.8095238095238,"z":-1720.1904761904761,"a95":4.3,"info":"\"15-07-02\" at \"07:59\""},{"visible":true,"include":true,"step":"380","x":145.23809523809524,"y":-7.904761904761905,"z":-2015.4285714285713,"a95":2.7,"info":"\"15-07-02\" at \"11:27\""},{"visible":false,"include":false,"step":"410","x":232.66666666666666,"y":-22.19047619047619,"z":-1566.6666666666667,"a95":3,"info":"\"15-07-02\" at \"14:46\""}]},{"version":"v1.1.0","exported":"2016-10-17T07:28:00.233Z","volume":10.5,"added":"2016-10-17T07:23:13.766Z","format":"Utrecht","demagType":"Unknown","strat":"2","patch":1.1,"GEO":[],"TECT":[],"interpreted":false,"name":"SS45.03A","coreAzi":101,"coreDip":41,"bedStrike":105,"bedDip":60,"data":[{"visible":false,"include":false,"step":"0.0","x":-9711.42857142857,"y":-1085.5238095238096,"z":13185.714285714286,"a95":0.99,"info":"10/07/2015 at 02:21:19"},{"visible":false,"include":false,"step":"10.0","x":-4039.809523809524,"y":-419.152380952381,"z":3300.9523809523807,"a95":0.99,"info":"10/07/2015 at 02:21:19"},{"visible":true,"include":false,"step":"15.0","x":-2459.3333333333335,"y":236.44761904761904,"z":1535.8095238095239,"a95":0.99,"info":"10/07/2015 at 02:21:19"},{"visible":true,"include":false,"step":"20.0","x":-1731.904761904762,"y":784.952380952381,"z":1767.6190476190477,"a95":0.99,"info":"10/07/2015 at 02:21:19"},{"visible":true,"include":false,"step":"23.0","x":-1426.095238095238,"y":755.2285714285714,"z":1445.2380952380952,"a95":0.99,"info":"10/07/2015 at 02:21:19"},{"visible":true,"include":false,"step":"25.0","x":-1463.142857142857,"y":237.15238095238095,"z":848.5999999999999,"a95":0.99,"info":"10/07/2015 at 02:21:19"},{"visible":true,"include":false,"step":"30.0","x":-1311.142857142857,"y":865.0857142857143,"z":1500.7619047619048,"a95":0.99,"info":"10/07/2015 at 02:21:19"},{"visible":true,"include":false,"step":"33.0","x":-994.3809523809524,"y":965.3333333333334,"z":1614.3809523809523,"a95":0.99,"info":"10/07/2015 at 02:21:19"},{"visible":true,"include":false,"step":"35.0","x":-1134,"y":713.4666666666666,"z":1320.857142857143,"a95":0.99,"info":"10/07/2015 at 02:21:19"},{"visible":true,"include":false,"step":"40.0","x":-491.5809523809524,"y":803.0857142857143,"z":1227.142857142857,"a95":0.99,"info":"10/07/2015 at 02:21:19"},{"visible":true,"include":false,"step":"45.0","x":-338.23809523809524,"y":827.3238095238095,"z":1217.6190476190477,"a95":0.99,"info":"10/07/2015 at 02:21:19"},{"visible":true,"include":false,"step":"50.0","x":-583.3333333333334,"y":679.2857142857143,"z":990,"a95":0.99,"info":"10/07/2015 at 02:21:19"},{"visible":true,"include":false,"step":"55.0","x":-960.952380952381,"y":685.7333333333333,"z":1760.3809523809523,"a95":0.99,"info":"10/07/2015 at 02:21:19"},{"visible":true,"include":false,"step":"60.0","x":-416.2952380952381,"y":577.2,"z":1036.857142857143,"a95":0.99,"info":"10/07/2015 at 02:21:19"},{"visible":true,"include":false,"step":"65.0","x":96.47619047619048,"y":172.75238095238097,"z":850.9142857142857,"a95":0.99,"info":"10/07/2015 at 02:21:19"},{"visible":true,"include":false,"step":"70.0","x":-649.3523809523809,"y":757.1428571428571,"z":1514.5714285714287,"a95":0.99,"info":"10/07/2015 at 02:21:19"},{"visible":true,"include":false,"step":"80.0","x":257.8857142857143,"y":822.4285714285714,"z":1402.5714285714287,"a95":0.99,"info":"10/07/2015 at 02:21:19"}]},{"version":"v1.1.0","exported":"2016-10-17T07:28:00.233Z","volume":10.5,"added":"2016-10-17T07:23:13.766Z","format":"Utrecht","demagType":"Unknown","strat":null,"patch":1.1,"GEO":[{"dec":213.90037512145747,"inc":49.37505418367728,"MAD":15.976966313347353,"cm":[0,1.7053025658242404e-13,0],"intensity":11847.715827961778,"type":"dir","forced":true,"remark":"","origin":false,"nSteps":7,"minStep":"120","maxStep":"330","steps":["120","150","180","210","240","270","330"],"group":"None","version":"v1.1.0"}],"TECT":[{"dec":207.32482839214657,"inc":-8.857474549219708,"MAD":15.976966313347368,"cm":[-1.7053025658242404e-13,1.9895196601282805e-13,0],"intensity":11847.715827961778,"type":"dir","forced":true,"remark":"","origin":false,"nSteps":7,"minStep":"120","maxStep":"330","steps":["120","150","180","210","240","270","330"],"group":"None","version":"v1.1.0"}],"interpreted":true,"name":"SS45.05A","coreAzi":122,"coreDip":36,"bedStrike":105,"bedDip":60,"data":[{"visible":true,"include":false,"step":"20","x":-19772.380952380954,"y":-7127.238095238095,"z":15233.52380952381,"a95":1.7,"info":"\"15-06-23\" at \"17:46\""},{"visible":true,"include":false,"step":"90","x":-16338.380952380952,"y":510.76190476190476,"z":7565.142857142857,"a95":1.8,"info":"\"15-06-23\" at \"21:54\""},{"visible":true,"include":true,"step":"120","x":-6039.428571428572,"y":2779.904761904762,"z":3719.4285714285716,"a95":2.5,"info":"\"15-06-24\" at \"21:12\""},{"visible":true,"include":true,"step":"150","x":-5585.619047619048,"y":4442.666666666667,"z":2825.4285714285716,"a95":3.1,"info":"\"15-06-28\" at \"01:15\""},{"visible":true,"include":true,"step":"180","x":-3723.904761904762,"y":3916.190476190476,"z":2900.190476190476,"a95":2.8,"info":"\"15-06-28\" at \"16:37\""},{"visible":true,"include":true,"step":"210","x":-3867.6190476190477,"y":3326.7619047619046,"z":2459.714285714286,"a95":3.7,"info":"\"15-06-28\" at \"19:29\""},{"visible":true,"include":true,"step":"240","x":-1338.5714285714287,"y":4137.238095238095,"z":2011.904761904762,"a95":2.6,"info":"\"15-06-30\" at \"12:46\""},{"visible":true,"include":true,"step":"270","x":-1794.952380952381,"y":4413.238095238095,"z":1789.6190476190477,"a95":2.3,"info":"\"15-07-01\" at \"07:45\""},{"visible":true,"include":true,"step":"330","x":-1513.904761904762,"y":4745.9047619047615,"z":1445.6190476190477,"a95":2.8,"info":"\"15-07-01\" at \"13:09\""},{"visible":true,"include":false,"step":"350","x":1249.047619047619,"y":3587.904761904762,"z":2225.2380952380954,"a95":3,"info":"\"15-07-02\" at \"08:01\""},{"visible":true,"include":false,"step":"380","x":516.952380952381,"y":3929.6190476190477,"z":3161.0476190476193,"a95":3.1,"info":"\"15-07-02\" at \"11:28\""},{"visible":true,"include":false,"step":"410","x":-2496.9523809523807,"y":4135.047619047619,"z":1874.7619047619048,"a95":3.6,"info":"\"15-07-02\" at \"14:48\""}]},{"version":"v1.1.0","exported":"2016-10-17T07:28:00.233Z","volume":10.5,"added":"2016-10-17T07:23:13.766Z","format":"Utrecht","demagType":"Unknown","strat":null,"patch":1.1,"GEO":[{"dec":199.2584692256817,"inc":-20.88030563858866,"MAD":11.436373051184157,"cm":[-1.7763568394002505e-14,6.394884621840902e-14,0],"intensity":1064.804841965852,"type":"dir","forced":true,"remark":"","origin":false,"nSteps":9,"minStep":"150","maxStep":"410","steps":["150","180","210","240","270","330","350","380","410"],"group":"None","version":"v1.1.0"}],"TECT":[{"dec":218.8129428642033,"inc":-80.10539028614822,"MAD":11.43637305118416,"cm":[-5.240252676230739e-14,6.838973831690964e-14,-7.105427357601002e-15],"intensity":1064.804841965852,"type":"dir","forced":true,"remark":"","origin":false,"nSteps":9,"minStep":"150","maxStep":"410","steps":["150","180","210","240","270","330","350","380","410"],"group":"None","version":"v1.1.0"}],"interpreted":true,"name":"SS45.07A","coreAzi":84,"coreDip":44,"bedStrike":105,"bedDip":60,"data":[{"visible":true,"include":false,"step":"20","x":-1052,"y":1.1428571428571428,"z":1125.3333333333333,"a95":2.2,"info":"\"15-06-23\" at \"17:48\""},{"visible":true,"include":false,"step":"90","x":-552.2857142857143,"y":178.1904761904762,"z":364.4761904761905,"a95":2.4,"info":"\"15-06-23\" at \"21:55\""},{"visible":true,"include":false,"step":"120","x":-194.76190476190476,"y":275.23809523809524,"z":7.238095238095238,"a95":2.9,"info":"\"15-06-24\" at \"21:14\""},{"visible":true,"include":true,"step":"150","x":-170.85714285714286,"y":420.0952380952381,"z":-282.6666666666667,"a95":2.5,"info":"\"15-06-28\" at \"01:16\""},{"visible":true,"include":true,"step":"180","x":0.9523809523809523,"y":385.8095238095238,"z":-148.85714285714286,"a95":2.5,"info":"\"15-06-28\" at \"16:38\""},{"visible":true,"include":true,"step":"210","x":-73.80952380952381,"y":266.0952380952381,"z":-209.14285714285714,"a95":2.8,"info":"\"15-06-28\" at \"19:31\""},{"visible":true,"include":true,"step":"240","x":15.523809523809524,"y":360.4761904761905,"z":-282.1904761904762,"a95":2.5,"info":"\"15-06-30\" at \"12:47\""},{"visible":true,"include":true,"step":"270","x":52.095238095238095,"y":371.5238095238095,"z":-353.7142857142857,"a95":2.1,"info":"\"15-07-01\" at \"07:47\""},{"visible":true,"include":true,"step":"330","x":34.38095238095238,"y":392,"z":-235.14285714285714,"a95":2.1,"info":"\"15-07-01\" at \"13:10\""},{"visible":true,"include":true,"step":"350","x":24.19047619047619,"y":318.0952380952381,"z":-283.3333333333333,"a95":2.8,"info":"\"15-07-02\" at \"08:03\""},{"visible":true,"include":true,"step":"380","x":35.714285714285715,"y":482,"z":-179.33333333333334,"a95":1.9,"info":"\"15-07-02\" at \"11:29\""},{"visible":true,"include":true,"step":"410","x":-9.238095238095237,"y":486.76190476190476,"z":-245.52380952380952,"a95":2.1,"info":"\"15-07-02\" at \"14:49\""}]},{"version":"v1.1.0","exported":"2016-10-17T07:28:00.233Z","volume":10.5,"added":"2016-10-17T07:23:13.766Z","format":"Utrecht","demagType":"Unknown","strat":null,"patch":1.1,"GEO":[{"dec":7.505580210205835,"inc":53.74133610769173,"MAD":7.641559566082098,"cm":[-2.842170943040401e-14,3.517186542012496e-13,0],"intensity":7611.319126673941,"type":"dir","forced":true,"remark":"","origin":false,"nSteps":7,"minStep":"120","maxStep":"330","steps":["120","150","180","210","240","270","330"],"group":"None","version":"v1.1.0"}],"TECT":[{"dec":205.78044179748807,"inc":65.64349251139924,"MAD":7.641559566082094,"cm":[-1.5631940186722204e-13,4.902744876744691e-13,0],"intensity":7611.31912667394,"type":"dir","forced":true,"remark":"","origin":false,"nSteps":7,"minStep":"120","maxStep":"330","steps":["120","150","180","210","240","270","330"],"group":"None","version":"v1.1.0"}],"interpreted":true,"name":"SS45.10A","coreAzi":105,"coreDip":49,"bedStrike":105,"bedDip":60,"data":[{"visible":false,"include":false,"step":"20","x":-3416.3809523809523,"y":-6417.619047619048,"z":9799.619047619048,"a95":2.1,"info":"\"15-06-23\" at \"17:50\""},{"visible":true,"include":false,"step":"90","x":-5549.238095238095,"y":-4454.285714285715,"z":5348.952380952381,"a95":1.8,"info":"\"15-06-23\" at \"21:56\""},{"visible":true,"include":true,"step":"120","x":-3489.1428571428573,"y":-3024.190476190476,"z":3586.3809523809523,"a95":2,"info":"\"15-06-24\" at \"21:16\""},{"visible":true,"include":true,"step":"150","x":-1576.7619047619048,"y":-2087.714285714286,"z":2426.285714285714,"a95":2.6,"info":"\"15-06-28\" at \"01:17\""},{"visible":true,"include":true,"step":"180","x":-2518.7619047619046,"y":-2568.6666666666665,"z":2632.6666666666665,"a95":2.2,"info":"\"15-06-28\" at \"16:39\""},{"visible":true,"include":true,"step":"210","x":-2572.9523809523807,"y":-3111.2380952380954,"z":2005.2380952380952,"a95":2.4,"info":"\"15-06-28\" at \"19:33\""},{"visible":true,"include":true,"step":"240","x":-2122.095238095238,"y":-2372,"z":1611.7142857142858,"a95":1.8,"info":"\"15-06-30\" at \"12:48\""},{"visible":true,"include":true,"step":"270","x":-2043.6190476190477,"y":-1330.5714285714287,"z":1471.5238095238096,"a95":2.3,"info":"\"15-07-01\" at \"07:48\""},{"visible":true,"include":true,"step":"330","x":-1390.1904761904761,"y":-1003.4285714285714,"z":644.7619047619048,"a95":2.6,"info":"\"15-07-01\" at \"13:11\""},{"visible":false,"include":false,"step":"350","x":-1071.3333333333333,"y":-371.9047619047619,"z":989.7142857142857,"a95":4,"info":"\"15-07-02\" at \"08:04\""},{"visible":false,"include":false,"step":"380","x":-1122.952380952381,"y":392.3809523809524,"z":594.3809523809524,"a95":4.2,"info":"\"15-07-02\" at \"11:30\""},{"visible":false,"include":false,"step":"410","x":-1697.047619047619,"y":-220.57142857142858,"z":-410.2857142857143,"a95":2.4,"info":"\"15-07-02\" at \"14:50\""}]},{"version":"v1.1.0","exported":"2016-10-17T07:28:00.233Z","volume":10.5,"added":"2016-10-17T07:23:13.766Z","format":"Utrecht","demagType":"Unknown","strat":null,"patch":1.1,"GEO":[],"TECT":[],"interpreted":false,"name":"SS45.14A","coreAzi":34,"coreDip":40,"bedStrike":105,"bedDip":60,"data":[{"visible":false,"include":false,"step":"20","x":-37027.333333333336,"y":-22475.619047619046,"z":65092.95238095238,"a95":2,"info":"\"15-06-23\" at \"17:55\""},{"visible":true,"include":false,"step":"90","x":-27612,"y":1135.5238095238096,"z":34341.80952380953,"a95":2.3,"info":"\"15-06-23\" at \"21:57\""},{"visible":true,"include":false,"step":"120","x":-16215.42857142857,"y":5465.714285714285,"z":23060.761904761905,"a95":2.4,"info":"\"15-06-24\" at \"21:17\""},{"visible":true,"include":false,"step":"150","x":-14419.333333333334,"y":8696.952380952382,"z":19519.04761904762,"a95":2.5,"info":"\"15-06-28\" at \"01:18\""},{"visible":true,"include":false,"step":"180","x":-18823.333333333332,"y":3228.190476190476,"z":1536.7619047619048,"a95":3.5,"info":"\"15-06-28\" at \"16:41\""},{"visible":true,"include":false,"step":"210","x":-21163.333333333332,"y":7631.714285714285,"z":17059.714285714286,"a95":2.6,"info":"\"15-06-28\" at \"19:34\""},{"visible":true,"include":false,"step":"240","x":-17246.666666666668,"y":2820.9523809523807,"z":15790.761904761905,"a95":3.3,"info":"\"15-06-30\" at \"12:51\""},{"visible":true,"include":false,"step":"270","x":-12807.619047619048,"y":4902,"z":14690.190476190477,"a95":3,"info":"\"15-07-01\" at \"07:51\""},{"visible":true,"include":false,"step":"330","x":-4848.666666666667,"y":761.047619047619,"z":4318.285714285715,"a95":77.2,"info":"\"15-07-01\" at \"13:13\""},{"visible":false,"include":false,"step":"330","x":-10264.952380952382,"y":3760.9523809523807,"z":15298.666666666666,"a95":3.4,"info":"\"15-07-01\" at \"13:39\""},{"visible":false,"include":false,"step":"350","x":-7042.285714285715,"y":-1605.3333333333333,"z":2196.285714285714,"a95":57.1,"info":"\"15-07-02\" at \"08:06\""},{"visible":false,"include":false,"step":"380","x":-7292.190476190476,"y":9865.619047619048,"z":9943.809523809523,"a95":2.5,"info":"\"15-07-02\" at \"11:33\""},{"visible":false,"include":false,"step":"410","x":-3738.095238095238,"y":-3224.8571428571427,"z":4146.476190476191,"a95":95.3,"info":"\"15-07-02\" at \"14:51\""}]},{"version":"v1.1.0","exported":"2016-10-17T07:28:00.233Z","volume":10.5,"added":"2016-10-17T07:23:13.767Z","format":"Utrecht","demagType":"Unknown","strat":"3","patch":1.1,"GEO":[],"TECT":[],"interpreted":false,"name":"SS45.17B","coreAzi":37,"coreDip":58,"bedStrike":105,"bedDip":60,"data":[{"visible":true,"include":false,"step":"0.0","x":-4705.619047619048,"y":-2594,"z":23763.809523809523,"a95":0.99,"info":"10/07/2015 at 02:21:19"},{"visible":true,"include":false,"step":"10.0","x":-1223.5238095238096,"y":-7.871333333333333,"z":4783.523809523809,"a95":0.99,"info":"10/07/2015 at 02:21:19"},{"visible":true,"include":false,"step":"15.0","x":-1335.2380952380952,"y":423.6761904761905,"z":2146.6666666666665,"a95":0.99,"info":"10/07/2015 at 02:21:19"},{"visible":true,"include":false,"step":"20.0","x":-425.2285714285714,"y":1227.047619047619,"z":1830.7619047619048,"a95":0.99,"info":"10/07/2015 at 02:21:19"},{"visible":true,"include":false,"step":"23.0","x":-420.3333333333333,"y":1155.904761904762,"z":1565.904761904762,"a95":0.99,"info":"10/07/2015 at 02:21:19"},{"visible":true,"include":false,"step":"25.0","x":-923.4666666666666,"y":-257.23809523809524,"z":214.58095238095237,"a95":0.99,"info":"10/07/2015 at 02:21:19"},{"visible":true,"include":false,"step":"30.0","x":-171.6,"y":226.74285714285716,"z":1510.857142857143,"a95":0.99,"info":"10/07/2015 at 02:21:19"},{"visible":true,"include":false,"step":"33.0","x":848.0761904761904,"y":-638.2380952380952,"z":111.27619047619048,"a95":0.99,"info":"10/07/2015 at 02:21:19"},{"visible":true,"include":false,"step":"35.0","x":-399.93333333333334,"y":-798.4476190476191,"z":-167.11428571428573,"a95":0.99,"info":"10/07/2015 at 02:21:19"},{"visible":true,"include":false,"step":"40.0","x":-615.6190476190476,"y":144.15238095238095,"z":1193.904761904762,"a95":0.99,"info":"10/07/2015 at 02:21:19"},{"visible":true,"include":false,"step":"45.0","x":-951.6857142857143,"y":-770.7238095238096,"z":-773.3333333333334,"a95":0.99,"info":"10/07/2015 at 02:21:19"},{"visible":true,"include":false,"step":"50.0","x":-320.9904761904762,"y":-1777.8095238095239,"z":-461.85714285714283,"a95":0.99,"info":"10/07/2015 at 02:21:19"},{"visible":true,"include":false,"step":"55.0","x":-778.4666666666666,"y":-1525.904761904762,"z":-327.9142857142857,"a95":0.99,"info":"10/07/2015 at 02:21:19"},{"visible":true,"include":false,"step":"60.0","x":-117.21904761904761,"y":-1773.6190476190477,"z":-1617.4285714285713,"a95":0.99,"info":"10/07/2015 at 02:21:19"},{"visible":true,"include":false,"step":"65.0","x":-367.5809523809524,"y":-1184.2857142857142,"z":-1274.7619047619048,"a95":0.99,"info":"10/07/2015 at 02:21:19"},{"visible":true,"include":false,"step":"70.0","x":1065.7142857142858,"y":-915.8761904761906,"z":-202.69523809523812,"a95":0.99,"info":"10/07/2015 at 02:21:19"},{"visible":true,"include":false,"step":"80.0","x":-1500.5714285714287,"y":-2141.4285714285716,"z":-1293.6190476190477,"a95":0.99,"info":"10/07/2015 at 02:21:19"}]},{"version":"v1.1.0","exported":"2016-10-17T07:28:00.233Z","volume":10.5,"added":"2016-10-17T07:23:13.767Z","format":"Utrecht","demagType":"Unknown","strat":null,"patch":1.1,"GEO":[{"dec":176.01296483867782,"inc":73.23247186493495,"MAD":9.098225844246084,"cm":[2.2737367544323206e-13,2.0055068716828828e-12,0],"intensity":51401.952298789045,"type":"dir","forced":true,"remark":"","origin":false,"nSteps":7,"minStep":"150","maxStep":"350","steps":["150","180","210","240","270","330","350"],"group":"None","version":"v1.1.0"}],"TECT":[{"dec":188.0194924220577,"inc":13.87490487040776,"MAD":9.09822584424607,"cm":[-6.821210263296962e-13,4.945377440890297e-12,9.094947017729282e-13],"intensity":51401.95229878904,"type":"dir","forced":true,"remark":"","origin":false,"nSteps":7,"minStep":"150","maxStep":"350","steps":["150","180","210","240","270","330","350"],"group":"None","version":"v1.1.0"}],"interpreted":true,"name":"SS45.20A","coreAzi":92,"coreDip":24,"bedStrike":103,"bedDip":60,"data":[{"visible":false,"include":false,"step":"20","x":-80352.38095238095,"y":-7601.333333333333,"z":44037.619047619046,"a95":1.8,"info":"\"15-06-23\" at \"17:57\""},{"visible":true,"include":false,"step":"90","x":-50238.47619047619,"y":3600.6666666666665,"z":16493.428571428572,"a95":1.6,"info":"\"15-06-23\" at \"21:59\""},{"visible":true,"include":false,"step":"120","x":-34723.04761904762,"y":4439.333333333333,"z":13893.52380952381,"a95":1.7,"info":"\"15-06-24\" at \"21:18\""},{"visible":true,"include":true,"step":"150","x":-28108.380952380954,"y":14327.42857142857,"z":13081.809523809523,"a95":1.9,"info":"\"15-06-28\" at \"01:19\""},{"visible":true,"include":true,"step":"180","x":-28282,"y":9464,"z":13557.047619047618,"a95":1.9,"info":"\"15-06-28\" at \"16:43\""},{"visible":true,"include":true,"step":"210","x":-34054.95238095238,"y":2442.9523809523807,"z":15891.714285714286,"a95":2.2,"info":"\"15-06-28\" at \"19:35\""},{"visible":true,"include":true,"step":"240","x":-22379.04761904762,"y":5561.333333333333,"z":10648.952380952382,"a95":3.4,"info":"\"15-06-30\" at \"12:52\""},{"visible":true,"include":true,"step":"270","x":-17832,"y":11550.666666666666,"z":9298.380952380952,"a95":2.2,"info":"\"15-07-01\" at \"07:52\""},{"visible":true,"include":true,"step":"330","x":-17098,"y":6831.047619047619,"z":10068.952380952382,"a95":2.3,"info":"\"15-07-01\" at \"13:14\""},{"visible":true,"include":true,"step":"350","x":-14018,"y":7787.428571428572,"z":6372.285714285715,"a95":2.9,"info":"\"15-07-02\" at \"08:08\""},{"visible":false,"include":false,"step":"380","x":-12638.190476190477,"y":7473.428571428572,"z":-31.047619047619047,"a95":2.4,"info":"\"15-07-02\" at \"11:34\""},{"visible":false,"include":false,"step":"410","x":-2895.1428571428573,"y":-3409.3333333333335,"z":6354.476190476191,"a95":78.7,"info":"\"15-07-02\" at \"14:52\""}]},{"version":"v1.1.0","exported":"2016-10-17T07:28:00.233Z","volume":10.5,"added":"2016-10-17T07:23:13.767Z","format":"Utrecht","demagType":"Unknown","strat":null,"patch":1.1,"GEO":[{"dec":72.33301970106527,"inc":76.88359589624088,"MAD":11.698302740206259,"cm":[2.2737367544323206e-13,-3.055333763768431e-13,0],"intensity":29889.725151810835,"type":"dir","forced":true,"remark":"","origin":false,"nSteps":6,"minStep":"150","maxStep":"350","steps":["150","180","240","270","330","350"],"group":"None","version":"v1.1.0"}],"TECT":[{"dec":177.5896131350588,"inc":42.73062957037019,"MAD":11.698302740206238,"cm":[-3.410605131648481e-13,1.0658141036401503e-12,-5.684341886080802e-14],"intensity":29889.72515181084,"type":"dir","forced":true,"remark":"","origin":false,"nSteps":6,"minStep":"150","maxStep":"350","steps":["150","180","240","270","330","350"],"group":"None","version":"v1.1.0"}],"interpreted":true,"name":"SS45.26A","coreAzi":61,"coreDip":50,"bedStrike":103,"bedDip":53,"data":[{"visible":false,"include":false,"step":"20","x":-30089.428571428572,"y":-43595.71428571428,"z":114845.23809523809,"a95":2.1,"info":"\"15-06-23\" at \"17:59\""},{"visible":true,"include":false,"step":"90","x":-23602.666666666668,"y":-12821.809523809523,"z":48341.333333333336,"a95":2.4,"info":"\"15-06-23\" at \"22:00\""},{"visible":true,"include":false,"step":"120","x":-17163.52380952381,"y":-6090.952380952381,"z":25744,"a95":2.7,"info":"\"15-06-24\" at \"21:19\""},{"visible":true,"include":true,"step":"150","x":-7847.523809523809,"y":3062.095238095238,"z":20214.095238095237,"a95":2.8,"info":"\"15-06-28\" at \"01:21\""},{"visible":true,"include":true,"step":"180","x":-9594.190476190477,"y":-3000.285714285714,"z":19410.85714285714,"a95":2.6,"info":"\"15-06-28\" at \"16:44\""},{"visible":false,"include":false,"step":"210","x":-3147.5238095238096,"y":-14631.904761904761,"z":17707.809523809523,"a95":3.2,"info":"\"15-06-28\" at \"19:36\""},{"visible":true,"include":true,"step":"240","x":-7363.142857142857,"y":-188.66666666666666,"z":12332.57142857143,"a95":3.6,"info":"\"15-06-30\" at \"12:53\""},{"visible":true,"include":true,"step":"270","x":-4482.666666666667,"y":1404.3809523809523,"z":7048.952380952381,"a95":4.2,"info":"\"15-07-01\" at \"07:53\""},{"visible":true,"include":true,"step":"330","x":-5337.142857142857,"y":4044.3809523809523,"z":5346.857142857143,"a95":4.2,"info":"\"15-07-01\" at \"13:15\""},{"visible":true,"include":true,"step":"350","x":-5634.0952380952385,"y":2307.714285714286,"z":5916.476190476191,"a95":4.1,"info":"\"15-07-02\" at \"08:10\""},{"visible":false,"include":false,"step":"380","x":-6269.619047619048,"y":3545.1428571428573,"z":6188,"a95":4,"info":"\"15-07-02\" at \"11:36\""},{"visible":false,"include":false,"step":"410","x":-5706,"y":346.85714285714283,"z":4788.761904761905,"a95":6,"info":"\"15-07-02\" at \"14:53\""}]},{"version":"v1.1.0","exported":"2016-10-17T07:28:00.233Z","volume":10.5,"added":"2016-10-17T07:23:13.767Z","format":"Utrecht","demagType":"Unknown","strat":null,"patch":1.1,"GEO":[{"dec":138.54245321138796,"inc":74.95497207481336,"MAD":18.14657019785919,"cm":[-2.8421709430404007e-13,-3.410605131648481e-13,0],"intensity":25221.939882523744,"type":"dir","forced":true,"remark":"","origin":false,"nSteps":5,"minStep":"240","maxStep":"380","steps":["240","270","330","350","380"],"group":"None","version":"v1.1.0"}],"TECT":[{"dec":175.2647077080578,"inc":26.515081872868787,"MAD":18.14657019785922,"cm":[-2.2737367544323206e-13,2.1600499167107046e-12,5.684341886080802e-14],"intensity":25221.939882523744,"type":"dir","forced":true,"remark":"","origin":false,"nSteps":5,"minStep":"240","maxStep":"380","steps":["240","270","330","350","380"],"group":"None","version":"v1.1.0"}],"interpreted":true,"name":"SS45.29A","coreAzi":76,"coreDip":34,"bedStrike":98,"bedDip":53,"data":[{"visible":false,"include":false,"step":"20","x":-63521.142857142855,"y":-29374.47619047619,"z":79228.47619047618,"a95":1.9,"info":"\"15-06-23\" at \"18:01\""},{"visible":true,"include":false,"step":"90","x":-33862.857142857145,"y":-7441.333333333333,"z":29769.428571428572,"a95":2.2,"info":"\"15-06-23\" at \"22:01\""},{"visible":true,"include":false,"step":"120","x":-25463.619047619046,"y":-6299.9047619047615,"z":19876.95238095238,"a95":2.3,"info":"\"15-06-24\" at \"21:21\""},{"visible":true,"include":false,"step":"150","x":-13823.714285714286,"y":3600.9523809523807,"z":16597.04761904762,"a95":3,"info":"\"15-06-28\" at \"01:22\""},{"visible":true,"include":false,"step":"180","x":-13491.142857142857,"y":-2847.904761904762,"z":16521.04761904762,"a95":2.6,"info":"\"15-06-28\" at \"16:45\""},{"visible":true,"include":false,"step":"210","x":-30565.619047619046,"y":-10945.714285714286,"z":15394,"a95":2.8,"info":"\"15-06-28\" at \"19:37\""},{"visible":true,"include":true,"step":"240","x":-12225.904761904761,"y":-949.6190476190476,"z":11008.095238095239,"a95":3.3,"info":"\"15-06-30\" at \"12:54\""},{"visible":true,"include":true,"step":"270","x":-9550.47619047619,"y":4152.285714285715,"z":7136.857142857143,"a95":3.7,"info":"\"15-07-01\" at \"07:54\""},{"visible":true,"include":true,"step":"330","x":-9475.238095238095,"y":4804.666666666667,"z":4139.714285714285,"a95":3.6,"info":"\"15-07-01\" at \"13:16\""},{"visible":true,"include":true,"step":"350","x":-8101.523809523809,"y":2174.095238095238,"z":6981.523809523809,"a95":4.9,"info":"\"15-07-02\" at \"08:11\""},{"visible":true,"include":true,"step":"380","x":-2880.3809523809523,"y":5991.428571428572,"z":8550.190476190477,"a95":4.6,"info":"\"15-07-02\" at \"11:37\""},{"visible":true,"include":false,"step":"410","x":-7220.285714285715,"y":940.4761904761905,"z":4124.380952380952,"a95":6.8,"info":"\"15-07-02\" at \"14:54\""}]}]
