# Supplementary material for: Paleomagnetic constraints on the timing and distribution of Cenozoic rotations in Central and Eastern Anatolia
Source: Copernicus journal article supplement (doi:10.5194/se-9-295-2018), 2018-03-21
Supplement: Supplementary file 2 [file se-9-295-2018-supplement.zip › se-2017-66_DATA_dir files/dir files Sivas/SS51.dir]

[{"version":"v1.1.0","exported":"2017-05-19T12:14:24.768Z","volume":10.5,"added":"2017-05-19T12:11:46.975Z","format":"Utrecht","demagType":"Unknown","strat":null,"patch":1.1,"GEO":[{"dec":86.70041821999729,"inc":-11.253599630271815,"MAD":4.330236345704087,"cm":[-5.684341886080801e-13,-1.7053025658242404e-12,0],"intensity":11405.90244699583,"type":"GC","origin":false,"forced":true,"remark":"","nSteps":3,"minStep":"100","maxStep":"180","steps":["100","150","180"],"group":"None","version":"v1.1.0"}],"TECT":[{"dec":264.8394497028014,"inc":-26.682845408171264,"MAD":4.330236345702532,"cm":[-1.5347723092418164e-12,5.684341886080802e-14,-9.094947017729282e-13],"intensity":11405.90244699583,"type":"GC","origin":false,"forced":true,"remark":"","nSteps":3,"minStep":"100","maxStep":"180","steps":["100","150","180"],"group":"None","version":"v1.1.0"}],"interpreted":true,"name":"SS51.01A","coreAzi":288,"coreDip":57,"bedStrike":195,"bedDip":40,"data":[{"visible":true,"include":false,"step":"20","x":2823.904761904762,"y":5037.714285714285,"z":90.0952380952381,"a95":1.3,"info":"\"15-06-22\" at \"08:04\""},{"visible":true,"include":true,"step":"100","x":3902.4761904761904,"y":3718.095238095238,"z":-1848.857142857143,"a95":1.4,"info":"\"15-06-22\" at \"11:23\""},{"visible":true,"include":true,"step":"150","x":4043.3333333333335,"y":3557.0476190476193,"z":-2186.095238095238,"a95":1.5,"info":"\"15-06-23\" at \"08:34\""},{"visible":true,"include":true,"step":"180","x":4191.523809523809,"y":3018.8571428571427,"z":-2532.3809523809523,"a95":1.5,"info":"\"15-06-23\" at \"11:37\""},{"visible":true,"include":false,"step":"210","x":3916.5714285714284,"y":3316.5714285714284,"z":-2671.904761904762,"a95":1.5,"info":"\"15-06-23\" at \"14:31\""},{"visible":true,"include":false,"step":"230","x":3854.9523809523807,"y":3077.0476190476193,"z":-2714.6666666666665,"a95":1.5,"info":"\"15-06-24\" at \"08:18\""},{"visible":true,"include":false,"step":"250","x":3698.4761904761904,"y":3238.190476190476,"z":-2577.4285714285716,"a95":1.5,"info":"\"15-06-24\" at \"12:08\""},{"visible":true,"include":false,"step":"270","x":3666.4761904761904,"y":3186.8571428571427,"z":-2694.6666666666665,"a95":1.6,"info":"\"15-06-24\" at \"15:34\""},{"visible":true,"include":false,"step":"300","x":3457.3333333333335,"y":3246.190476190476,"z":-2601.2380952380954,"a95":1.5,"info":"\"15-06-25\" at \"10:22\""},{"visible":true,"include":false,"step":"320","x":3179.5238095238096,"y":3028.7619047619046,"z":-2757.809523809524,"a95":1.5,"info":"\"15-06-25\" at \"13:58\""},{"visible":true,"include":false,"step":"340","x":3156.3809523809523,"y":2810.7619047619046,"z":-2767.1428571428573,"a95":1.5,"info":"\"15-06-25\" at \"16:56\""},{"visible":true,"include":false,"step":"370","x":2857.0476190476193,"y":2907.0476190476193,"z":-2755.809523809524,"a95":1.4,"info":"\"15-06-25\" at \"21:05\""},{"visible":true,"include":false,"step":"400","x":2552.9523809523807,"y":3061.6190476190477,"z":-2704.5714285714284,"a95":1.5,"info":"\"15-06-26\" at \"08:20\""},{"visible":true,"include":false,"step":"420","x":1983.142857142857,"y":3118.190476190476,"z":-2992.190476190476,"a95":1.6,"info":"\"15-06-26\" at \"11:11\""},{"visible":true,"include":false,"step":"440","x":2042.857142857143,"y":2923.809523809524,"z":-2918.7619047619046,"a95":1.7,"info":"\"15-06-27\" at \"10:32\""},{"visible":true,"include":false,"step":"470","x":1449.904761904762,"y":3360.8571428571427,"z":-2779.714285714286,"a95":1.7,"info":"\"15-06-29\" at \"07:36\""},{"visible":true,"include":false,"step":"490","x":815.6190476190476,"y":3272.5714285714284,"z":-3034.6666666666665,"a95":2,"info":"\"15-06-29\" at \"10:49\""},{"visible":true,"include":false,"step":"520","x":835.7142857142857,"y":3133.809523809524,"z":-2442.095238095238,"a95":1.8,"info":"\"15-06-29\" at \"14:35\""},{"visible":true,"include":false,"step":"550","x":470.85714285714283,"y":4147.523809523809,"z":-4161.238095238095,"a95":2.1,"info":"\"15-06-30\" at \"07:59\""},{"visible":true,"include":false,"step":"580","x":638.3809523809524,"y":3805.0476190476193,"z":-3616,"a95":1.9,"info":"\"15-07-01\" at \"11:11\""}]},{"version":"v1.1.0","exported":"2017-05-19T12:14:24.768Z","volume":10.5,"added":"2017-05-19T12:11:46.976Z","format":"Utrecht","demagType":"Unknown","strat":"1","patch":1.1,"GEO":[{"dec":203.11528331430065,"inc":-0.9469883624325709,"MAD":3.3274317378440155,"cm":[-4.334310688136611e-13,-8.526512829121202e-14,0],"intensity":10267.995578804523,"type":"GC","origin":false,"forced":true,"remark":"","nSteps":13,"minStep":"10.0","maxStep":"60.0","steps":["10.0","15.0","20.0","23.0","25.0","30.0","33.0","35.0","40.0","45.0","50.0","55.0","60.0"],"group":"None","version":"v1.1.0"}],"TECT":[{"dec":200.62550350477846,"inc":-5.934275759688451,"MAD":3.327431737843388,"cm":[-5.861977570020827e-13,-3.552713678800501e-13,-5.684341886080802e-14],"intensity":10267.995578804523,"type":"GC","origin":false,"forced":true,"remark":"","nSteps":13,"minStep":"10.0","maxStep":"60.0","steps":["10.0","15.0","20.0","23.0","25.0","30.0","33.0","35.0","40.0","45.0","50.0","55.0","60.0"],"group":"None","version":"v1.1.0"}],"interpreted":true,"name":"SS51.02","coreAzi":213,"coreDip":41,"bedStrike":195,"bedDip":40,"data":[{"visible":true,"include":false,"step":"0.0","x":3313.904761904762,"y":4219.9047619047615,"z":-1659.142857142857,"a95":0.99,"info":"09/07/2015 at 05:57:24"},{"visible":true,"include":true,"step":"10.0","x":3470.4761904761904,"y":3888.7619047619046,"z":-2212.9523809523807,"a95":0.99,"info":"09/07/2015 at 05:57:24"},{"visible":true,"include":true,"step":"15.0","x":3438.5714285714284,"y":3517.5238095238096,"z":-2286.190476190476,"a95":0.99,"info":"09/07/2015 at 05:57:24"},{"visible":true,"include":true,"step":"20.0","x":3405.6190476190477,"y":3272,"z":-2282.6666666666665,"a95":0.99,"info":"09/07/2015 at 05:57:24"},{"visible":true,"include":true,"step":"23.0","x":3395.5238095238096,"y":3098.190476190476,"z":-2318.3809523809523,"a95":0.99,"info":"09/07/2015 at 05:57:24"},{"visible":true,"include":true,"step":"25.0","x":3388.9523809523807,"y":2936.4761904761904,"z":-2375.2380952380954,"a95":0.99,"info":"09/07/2015 at 05:57:24"},{"visible":true,"include":true,"step":"30.0","x":3381.0476190476193,"y":2767.714285714286,"z":-2380.6666666666665,"a95":0.99,"info":"09/07/2015 at 05:57:24"},{"visible":true,"include":true,"step":"33.0","x":3396.8571428571427,"y":2770.3809523809523,"z":-2406.095238095238,"a95":0.99,"info":"09/07/2015 at 05:57:24"},{"visible":true,"include":true,"step":"35.0","x":3411.714285714286,"y":2632.095238095238,"z":-2453.3333333333335,"a95":0.99,"info":"09/07/2015 at 05:57:24"},{"visible":true,"include":true,"step":"40.0","x":3347.0476190476193,"y":2480.3809523809523,"z":-2401.0476190476193,"a95":0.99,"info":"09/07/2015 at 05:57:24"},{"visible":true,"include":true,"step":"45.0","x":3429.714285714286,"y":2484.5714285714284,"z":-2496.8571428571427,"a95":0.99,"info":"09/07/2015 at 05:57:24"},{"visible":true,"include":true,"step":"50.0","x":3309.6190476190477,"y":2216.4761904761904,"z":-2553.809523809524,"a95":0.99,"info":"09/07/2015 at 05:57:24"},{"visible":true,"include":true,"step":"55.0","x":3337.0476190476193,"y":2196.3809523809523,"z":-2475.6190476190477,"a95":0.99,"info":"09/07/2015 at 05:57:24"},{"visible":true,"include":true,"step":"60.0","x":3343.2380952380954,"y":2240.6666666666665,"z":-2416.8571428571427,"a95":0.99,"info":"09/07/2015 at 05:57:24"},{"visible":true,"include":false,"step":"65.0","x":3285.1428571428573,"y":2028.3809523809523,"z":-2435.1428571428573,"a95":0.99,"info":"09/07/2015 at 05:57:24"},{"visible":true,"include":false,"step":"70.0","x":3217.904761904762,"y":1909.142857142857,"z":-2378.4761904761904,"a95":0.99,"info":"09/07/2015 at 05:57:24"},{"visible":true,"include":false,"step":"80.0","x":3234.6666666666665,"y":1977.4285714285713,"z":-2367.2380952380954,"a95":0.99,"info":"09/07/2015 at 05:57:24"}]},{"version":"v1.1.0","exported":"2017-05-19T12:14:24.768Z","volume":10.5,"added":"2017-05-19T12:11:46.976Z","format":"Utrecht","demagType":"Unknown","strat":null,"patch":1.1,"GEO":[{"dec":246.47874097991308,"inc":-23.553314738767565,"MAD":9.53527294079145,"cm":[-4.405364961712621e-13,2.2737367544323206e-13,0],"intensity":20811.71421881493,"type":"GC","origin":false,"forced":true,"remark":"","nSteps":7,"minStep":"150","maxStep":"300","steps":["150","180","210","230","250","270","300"],"group":"None","version":"v1.1.0"}],"TECT":[{"dec":222.13110289052076,"inc":-50.09578096511266,"MAD":9.535272940781589,"cm":[1.8474111129762605e-13,3.410605131648481e-13,5.115907697472721e-13],"intensity":20811.71421881493,"type":"GC","origin":false,"forced":true,"remark":"","nSteps":7,"minStep":"150","maxStep":"300","steps":["150","180","210","230","250","270","300"],"group":"None","version":"v1.1.0"}],"interpreted":true,"name":"SS51.04A","coreAzi":275,"coreDip":49,"bedStrike":195,"bedDip":40,"data":[{"visible":true,"include":false,"step":"20","x":1173.047619047619,"y":5300.666666666667,"z":-5661.523809523809,"a95":2.1,"info":"\"15-06-22\" at \"08:07\""},{"visible":true,"include":false,"step":"100","x":3117.1428571428573,"y":3263.2380952380954,"z":-8592.952380952382,"a95":2.3,"info":"\"15-06-22\" at \"11:24\""},{"visible":true,"include":true,"step":"150","x":3730.7619047619046,"y":2474.4761904761904,"z":-9389.047619047618,"a95":2.4,"info":"\"15-06-23\" at \"08:36\""},{"visible":true,"include":true,"step":"180","x":3658.5714285714284,"y":2146.190476190476,"z":-9848.952380952382,"a95":2.3,"info":"\"15-06-23\" at \"11:38\""},{"visible":true,"include":true,"step":"210","x":3504.095238095238,"y":2000,"z":-9965.52380952381,"a95":2.4,"info":"\"15-06-23\" at \"14:33\""},{"visible":true,"include":true,"step":"230","x":3568.8571428571427,"y":1940.4761904761904,"z":-10248,"a95":2.4,"info":"\"15-06-24\" at \"08:20\""},{"visible":true,"include":true,"step":"250","x":3506.4761904761904,"y":1730.2857142857142,"z":-9844.952380952382,"a95":2.4,"info":"\"15-06-24\" at \"12:10\""},{"visible":true,"include":true,"step":"270","x":3505.2380952380954,"y":1626.6666666666667,"z":-10038.761904761905,"a95":2.4,"info":"\"15-06-24\" at \"15:37\""},{"visible":true,"include":true,"step":"300","x":3380.9523809523807,"y":1691.047619047619,"z":-9721.142857142857,"a95":2.5,"info":"\"15-06-25\" at \"10:23\""},{"visible":true,"include":false,"step":"320","x":3292.7619047619046,"y":1644.6666666666667,"z":-9499.619047619048,"a95":2.3,"info":"\"15-06-25\" at \"13:59\""},{"visible":true,"include":false,"step":"340","x":2858.4761904761904,"y":1434.3809523809523,"z":-9468.190476190477,"a95":2.2,"info":"\"15-06-25\" at \"16:57\""},{"visible":true,"include":false,"step":"370","x":3024.5714285714284,"y":1370.4761904761904,"z":-9383.809523809523,"a95":2,"info":"\"15-06-25\" at \"21:07\""},{"visible":true,"include":false,"step":"400","x":2120.3809523809523,"y":1715.5238095238096,"z":-9390.761904761905,"a95":2.2,"info":"\"15-06-26\" at \"08:22\""},{"visible":true,"include":false,"step":"420","x":1810.952380952381,"y":1602.2857142857142,"z":-9247.238095238095,"a95":2.4,"info":"\"15-06-26\" at \"11:14\""},{"visible":true,"include":false,"step":"440","x":1372.857142857143,"y":1808.7619047619048,"z":-9482.666666666666,"a95":2.2,"info":"\"15-06-27\" at \"10:34\""},{"visible":true,"include":false,"step":"470","x":461.9047619047619,"y":2038.5714285714287,"z":-9092.57142857143,"a95":2.3,"info":"\"15-06-29\" at \"07:38\""},{"visible":true,"include":false,"step":"490","x":443.7142857142857,"y":1929.047619047619,"z":-8957.619047619048,"a95":2.4,"info":"\"15-06-29\" at \"10:51\""},{"visible":true,"include":false,"step":"520","x":328.1904761904762,"y":1998.857142857143,"z":-8971.809523809523,"a95":2.5,"info":"\"15-06-29\" at \"14:37\""},{"visible":true,"include":false,"step":"550","x":-574.2857142857143,"y":2185.714285714286,"z":-8799.238095238095,"a95":2.4,"info":"\"15-06-30\" at \"08:01\""},{"visible":true,"include":false,"step":"580","x":-107.71428571428571,"y":2020,"z":-8971.047619047618,"a95":2.4,"info":"\"15-07-01\" at \"11:14\""}]},{"version":"v1.1.0","exported":"2017-05-19T12:14:24.768Z","volume":10.5,"added":"2017-05-19T12:11:46.978Z","format":"Utrecht","demagType":"Unknown","strat":null,"patch":1.1,"GEO":[{"dec":241.15946564492933,"inc":-9.490643648339377,"MAD":21.52283021980445,"cm":[4.263256414560601e-14,-8.526512829121202e-14,0],"intensity":15870.206737933879,"type":"GC","origin":false,"forced":true,"remark":"","nSteps":5,"minStep":"100","maxStep":"230","steps":["100","150","180","210","230"],"group":"None","version":"v1.1.0"}],"TECT":[{"dec":227.72293279175796,"inc":-35.70331937154802,"MAD":21.522830219803613,"cm":[-1.9753088054130785e-12,-2.2737367544323206e-13,-1.1368683772161603e-13],"intensity":15870.20673793388,"type":"GC","origin":false,"forced":true,"remark":"","nSteps":5,"minStep":"100","maxStep":"230","steps":["100","150","180","210","230"],"group":"None","version":"v1.1.0"}],"interpreted":true,"name":"SS51.05A","coreAzi":290,"coreDip":43,"bedStrike":195,"bedDip":40,"data":[{"visible":true,"include":false,"step":"20","x":3584.3809523809523,"y":3549.809523809524,"z":-2091.4285714285716,"a95":1.5,"info":"\"15-06-22\" at \"08:08\""},{"visible":true,"include":true,"step":"100","x":5336.0952380952385,"y":1960.6666666666667,"z":-4514.380952380952,"a95":1.8,"info":"\"15-06-22\" at \"11:26\""},{"visible":true,"include":true,"step":"150","x":5640.666666666667,"y":1425.4285714285713,"z":-5842.857142857143,"a95":2,"info":"\"15-06-23\" at \"08:37\""},{"visible":true,"include":true,"step":"180","x":5820,"y":1168.952380952381,"z":-5766.952380952381,"a95":1.9,"info":"\"15-06-23\" at \"11:40\""},{"visible":true,"include":true,"step":"210","x":5602.380952380952,"y":1101.142857142857,"z":-6223.428571428572,"a95":1.9,"info":"\"15-06-23\" at \"14:34\""},{"visible":true,"include":true,"step":"230","x":5549.142857142857,"y":1458.857142857143,"z":-6516.571428571428,"a95":2,"info":"\"15-06-24\" at \"08:22\""},{"visible":true,"include":false,"step":"250","x":5360.285714285715,"y":1361.904761904762,"z":-6329.047619047619,"a95":2.1,"info":"\"15-06-24\" at \"12:12\""},{"visible":true,"include":false,"step":"270","x":5321.238095238095,"y":1592.5714285714287,"z":-6285.238095238095,"a95":2,"info":"\"15-06-24\" at \"15:39\""},{"visible":true,"include":false,"step":"300","x":4953.809523809524,"y":1410.857142857143,"z":-6090.190476190476,"a95":2.1,"info":"\"15-06-25\" at \"10:25\""},{"visible":true,"include":false,"step":"320","x":4778.571428571428,"y":1250.3809523809523,"z":-6197.142857142857,"a95":2,"info":"\"15-06-25\" at \"14:01\""},{"visible":true,"include":false,"step":"340","x":4503.142857142857,"y":1090.4761904761904,"z":-5895.809523809524,"a95":1.9,"info":"\"15-06-25\" at \"16:59\""},{"visible":true,"include":false,"step":"370","x":4475.428571428572,"y":1404.4761904761904,"z":-5907.523809523809,"a95":1.9,"info":"\"15-06-25\" at \"21:08\""},{"visible":true,"include":false,"step":"400","x":3515.2380952380954,"y":1904.3809523809523,"z":-5927.809523809524,"a95":2.2,"info":"\"15-06-26\" at \"08:24\""},{"visible":true,"include":false,"step":"420","x":3230.190476190476,"y":2268.190476190476,"z":-5760.190476190476,"a95":2,"info":"\"15-06-26\" at \"11:15\""},{"visible":true,"include":false,"step":"440","x":2710.7619047619046,"y":2287.1428571428573,"z":-5912.476190476191,"a95":2.2,"info":"\"15-06-27\" at \"10:36\""},{"visible":true,"include":false,"step":"470","x":1510.952380952381,"y":2692.9523809523807,"z":-5829.9047619047615,"a95":2.3,"info":"\"15-06-29\" at \"07:40\""},{"visible":true,"include":false,"step":"490","x":1668,"y":2456.4761904761904,"z":-5775.714285714285,"a95":2.3,"info":"\"15-06-29\" at \"10:52\""},{"visible":true,"include":false,"step":"520","x":1924.1904761904761,"y":2656.190476190476,"z":-5593.333333333333,"a95":2.2,"info":"\"15-06-29\" at \"14:41\""},{"visible":true,"include":false,"step":"550","x":963.8095238095239,"y":2816.9523809523807,"z":-5284.0952380952385,"a95":2.4,"info":"\"15-06-30\" at \"08:03\""},{"visible":true,"include":false,"step":"580","x":1083.6190476190477,"y":2687.809523809524,"z":-6066.476190476191,"a95":2.2,"info":"\"15-07-01\" at \"11:16\""}]},{"version":"v1.1.0","exported":"2017-05-19T12:14:24.768Z","volume":10.5,"added":"2017-05-19T12:11:46.978Z","format":"Utrecht","demagType":"Unknown","strat":"2","patch":1.1,"GEO":[{"dec":128.79272565767525,"inc":-6.831794579784931,"MAD":7.914476314946237,"cm":[-7.105427357601002e-15,-7.815970093361102e-14,0],"intensity":17576.26559340943,"type":"GC","origin":false,"forced":true,"remark":"","nSteps":11,"minStep":"15.0","maxStep":"55.0","steps":["15.0","20.0","23.0","25.0","30.0","33.0","35.0","40.0","45.0","50.0","55.0"],"group":"None","version":"v1.1.0"}],"TECT":[{"dec":312.4103835876514,"inc":-29.52852103738441,"MAD":7.914476314943038,"cm":[-1.5631940186722204e-13,-3.410605131648481e-13,-1.7053025658242404e-13],"intensity":17576.265593409425,"type":"GC","origin":false,"forced":true,"remark":"","nSteps":11,"minStep":"15.0","maxStep":"55.0","steps":["15.0","20.0","23.0","25.0","30.0","33.0","35.0","40.0","45.0","50.0","55.0"],"group":"None","version":"v1.1.0"}],"interpreted":true,"name":"SS51.06","coreAzi":346,"coreDip":62,"bedStrike":195,"bedDip":40,"data":[{"visible":true,"include":false,"step":"0.0","x":5778,"y":702.504761904762,"z":-5505.333333333333,"a95":0.99,"info":"09/07/2015 at 05:57:24"},{"visible":true,"include":false,"step":"10.0","x":5739.142857142857,"y":690.7904761904762,"z":-6593.333333333333,"a95":0.99,"info":"09/07/2015 at 05:57:24"},{"visible":true,"include":true,"step":"15.0","x":5566.285714285715,"y":385.64761904761906,"z":-6968.952380952381,"a95":0.99,"info":"09/07/2015 at 05:57:24"},{"visible":true,"include":true,"step":"20.0","x":5365.047619047619,"y":100.51428571428572,"z":-7029.428571428572,"a95":0.99,"info":"09/07/2015 at 05:57:24"},{"visible":true,"include":true,"step":"23.0","x":5383.809523809524,"y":41.766666666666666,"z":-7112.666666666667,"a95":0.99,"info":"09/07/2015 at 05:57:24"},{"visible":true,"include":true,"step":"25.0","x":5173.714285714285,"y":-138.61904761904762,"z":-7277.523809523809,"a95":0.99,"info":"09/07/2015 at 05:57:24"},{"visible":true,"include":true,"step":"30.0","x":5091.047619047619,"y":-231.46666666666667,"z":-7216.476190476191,"a95":0.99,"info":"09/07/2015 at 05:57:24"},{"visible":true,"include":true,"step":"33.0","x":5130,"y":-289.5333333333333,"z":-7414.761904761905,"a95":0.99,"info":"09/07/2015 at 05:57:24"},{"visible":true,"include":true,"step":"35.0","x":5016,"y":-397.6761904761905,"z":-7322.0952380952385,"a95":0.99,"info":"09/07/2015 at 05:57:24"},{"visible":true,"include":true,"step":"40.0","x":5031.523809523809,"y":-299.6,"z":-7230.952380952381,"a95":0.99,"info":"09/07/2015 at 05:57:24"},{"visible":true,"include":true,"step":"45.0","x":4985.809523809524,"y":-351.9142857142857,"z":-7257.428571428572,"a95":0.99,"info":"09/07/2015 at 05:57:24"},{"visible":true,"include":true,"step":"50.0","x":4849.047619047619,"y":-720.2571428571429,"z":-7204.476190476191,"a95":0.99,"info":"09/07/2015 at 05:57:24"},{"visible":true,"include":true,"step":"55.0","x":4824.190476190476,"y":-603.2285714285714,"z":-7205.523809523809,"a95":0.99,"info":"09/07/2015 at 05:57:24"},{"visible":true,"include":false,"step":"60.0","x":4486.666666666667,"y":-712.1142857142856,"z":-7133.714285714285,"a95":0.99,"info":"09/07/2015 at 05:57:24"},{"visible":true,"include":false,"step":"65.0","x":4616.190476190476,"y":-814.695238095238,"z":-7269.9047619047615,"a95":0.99,"info":"09/07/2015 at 05:57:24"},{"visible":true,"include":false,"step":"70.0","x":4466.285714285715,"y":-933.8666666666667,"z":-7150.0952380952385,"a95":0.99,"info":"09/07/2015 at 05:57:24"},{"visible":true,"include":false,"step":"80.0","x":4131.142857142857,"y":-832.2380952380952,"z":-7082.476190476191,"a95":0.99,"info":"09/07/2015 at 05:57:24"}]},{"version":"v1.1.0","exported":"2017-05-19T12:14:24.768Z","volume":10.5,"added":"2017-05-19T12:11:46.979Z","format":"Utrecht","demagType":"Unknown","strat":null,"patch":1.1,"GEO":[{"dec":40.99240547464029,"inc":-7.414398407327889,"MAD":14.986532871155948,"cm":[-1.1013412404281553e-13,2.842170943040401e-14,0],"intensity":18649.755091921772,"type":"GC","origin":false,"forced":true,"remark":"","nSteps":4,"minStep":"100","maxStep":"210","steps":["100","150","180","210"],"group":"None","version":"v1.1.0"}],"TECT":[{"dec":220.01186712842082,"inc":-10.398507544366238,"MAD":14.98653287115713,"cm":[-3.126388037344441e-13,1.1368683772161603e-13,0],"intensity":18649.755091921776,"type":"GC","origin":false,"forced":true,"remark":"","nSteps":4,"minStep":"100","maxStep":"210","steps":["100","150","180","210"],"group":"None","version":"v1.1.0"}],"interpreted":true,"name":"SS51.08A","coreAzi":230,"coreDip":73,"bedStrike":195,"bedDip":40,"data":[{"visible":true,"include":false,"step":"20","x":3100.6666666666665,"y":2682.8571428571427,"z":-7842.952380952381,"a95":2.1,"info":"\"15-06-22\" at \"08:10\""},{"visible":true,"include":true,"step":"100","x":3919.809523809524,"y":1805.2380952380952,"z":-8194.380952380952,"a95":2.2,"info":"\"15-06-22\" at \"11:27\""},{"visible":true,"include":true,"step":"150","x":4254.571428571428,"y":1505.4285714285713,"z":-8616.761904761905,"a95":2.2,"info":"\"15-06-23\" at \"08:39\""},{"visible":true,"include":true,"step":"180","x":4288,"y":1445.4285714285713,"z":-8567.142857142857,"a95":2.1,"info":"\"15-06-23\" at \"11:42\""},{"visible":true,"include":true,"step":"210","x":3944.190476190476,"y":852.7619047619048,"z":-8506.095238095239,"a95":2.2,"info":"\"15-06-23\" at \"14:36\""},{"visible":true,"include":false,"step":"230","x":4043.3333333333335,"y":895.1428571428571,"z":-8701.52380952381,"a95":2.2,"info":"\"15-06-24\" at \"08:23\""},{"visible":true,"include":false,"step":"250","x":3773.6190476190477,"y":782.7619047619048,"z":-8175.142857142857,"a95":2.2,"info":"\"15-06-24\" at \"12:13\""},{"visible":true,"include":false,"step":"270","x":3779.5238095238096,"y":725.9047619047619,"z":-8200.952380952382,"a95":2.3,"info":"\"15-06-24\" at \"15:40\""},{"visible":true,"include":false,"step":"300","x":3282.285714285714,"y":766.4761904761905,"z":-7868.285714285715,"a95":2.1,"info":"\"15-06-25\" at \"10:27\""},{"visible":true,"include":false,"step":"320","x":3266,"y":624.7619047619048,"z":-7842.952380952381,"a95":2.1,"info":"\"15-06-25\" at \"14:02\""},{"visible":true,"include":false,"step":"340","x":2747.0476190476193,"y":591.9047619047619,"z":-7278.476190476191,"a95":2.1,"info":"\"15-06-25\" at \"17:00\""},{"visible":true,"include":false,"step":"370","x":2739.5238095238096,"y":457.3333333333333,"z":-7346.571428571428,"a95":1.9,"info":"\"15-06-25\" at \"21:10\""},{"visible":true,"include":false,"step":"400","x":1340.3809523809523,"y":25.238095238095237,"z":-6308.476190476191,"a95":2.2,"info":"\"15-06-26\" at \"08:25\""},{"visible":true,"include":false,"step":"420","x":1291.6190476190477,"y":-31.428571428571427,"z":-6396.571428571428,"a95":2.3,"info":"\"15-06-26\" at \"11:18\""},{"visible":true,"include":false,"step":"440","x":755.2380952380952,"y":-292.0952380952381,"z":-5979.428571428572,"a95":2.2,"info":"\"15-06-27\" at \"10:38\""},{"visible":true,"include":false,"step":"470","x":-599.8095238095239,"y":-678.5714285714286,"z":-5705.333333333333,"a95":2.4,"info":"\"15-06-29\" at \"07:42\""},{"visible":true,"include":false,"step":"490","x":-615.2380952380952,"y":-523.4285714285714,"z":-5286,"a95":2.5,"info":"\"15-06-29\" at \"10:54\""},{"visible":true,"include":false,"step":"520","x":-653.1428571428571,"y":-856.0952380952381,"z":-5344.0952380952385,"a95":2.4,"info":"\"15-06-29\" at \"14:43\""},{"visible":true,"include":false,"step":"550","x":-730.8571428571429,"y":-583.2380952380952,"z":-5108.666666666667,"a95":2.6,"info":"\"15-06-30\" at \"08:05\""},{"visible":true,"include":false,"step":"580","x":-1507.5238095238096,"y":-1007.4285714285714,"z":-4611.9047619047615,"a95":2.2,"info":"\"15-07-01\" at \"11:17\""}]},{"version":"v1.1.0","exported":"2017-05-19T12:14:24.768Z","volume":10.5,"added":"2017-05-19T12:11:46.986Z","format":"Utrecht","demagType":"Unknown","strat":"3","patch":1.1,"GEO":[{"dec":72.87856368115365,"inc":-18.283509260875714,"MAD":8.948359018567956,"cm":[7.460698725481052e-14,0,0],"intensity":10674.582366463463,"type":"GC","origin":false,"forced":true,"remark":"","nSteps":4,"minStep":"10.0","maxStep":"23.0","steps":["10.0","15.0","20.0","23.0"],"group":"None","version":"v1.1.0"}],"TECT":[{"dec":253.30703301056423,"inc":-16.056529972351484,"MAD":8.948359018566268,"cm":[1.5631940186722204e-13,0,0],"intensity":10674.582366463463,"type":"GC","origin":false,"forced":true,"remark":"","nSteps":4,"minStep":"10.0","maxStep":"23.0","steps":["10.0","15.0","20.0","23.0"],"group":"None","version":"v1.1.0"}],"interpreted":true,"name":"SS51.09","coreAzi":239,"coreDip":51,"bedStrike":195,"bedDip":40,"data":[{"visible":true,"include":false,"step":"0.0","x":3389.904761904762,"y":2314.3809523809523,"z":-2282.9523809523807,"a95":0.99,"info":"09/07/2015 at 05:57:24"},{"visible":true,"include":true,"step":"10.0","x":4018.190476190476,"y":1489.3333333333333,"z":-2918.285714285714,"a95":0.99,"info":"09/07/2015 at 05:57:24"},{"visible":true,"include":true,"step":"15.0","x":4163.9047619047615,"y":1192.3809523809523,"z":-2989.714285714286,"a95":0.99,"info":"09/07/2015 at 05:57:24"},{"visible":true,"include":true,"step":"20.0","x":4389.714285714285,"y":1053.7142857142858,"z":-3103.4285714285716,"a95":0.99,"info":"09/07/2015 at 05:57:24"},{"visible":true,"include":true,"step":"23.0","x":4483.619047619048,"y":995.6190476190476,"z":-3039.1428571428573,"a95":0.99,"info":"09/07/2015 at 05:57:24"},{"visible":true,"include":false,"step":"25.0","x":4425.238095238095,"y":1055.8095238095239,"z":-3095.4285714285716,"a95":0.99,"info":"09/07/2015 at 05:57:24"},{"visible":true,"include":false,"step":"30.0","x":4589.619047619048,"y":987.1428571428571,"z":-2980.9523809523807,"a95":0.99,"info":"09/07/2015 at 05:57:24"},{"visible":true,"include":false,"step":"33.0","x":4595.428571428572,"y":961.1428571428571,"z":-2964.4761904761904,"a95":0.99,"info":"09/07/2015 at 05:57:24"},{"visible":true,"include":false,"step":"35.0","x":4632.761904761905,"y":892.5428571428572,"z":-2967.2380952380954,"a95":0.99,"info":"09/07/2015 at 05:57:24"},{"visible":true,"include":false,"step":"40.0","x":4519.714285714285,"y":929.5619047619048,"z":-2811.809523809524,"a95":0.99,"info":"09/07/2015 at 05:57:24"},{"visible":true,"include":false,"step":"45.0","x":4613.333333333333,"y":910.3619047619047,"z":-2848.9523809523807,"a95":0.99,"info":"09/07/2015 at 05:57:24"},{"visible":true,"include":false,"step":"50.0","x":4617.523809523809,"y":775.4571428571429,"z":-2901.809523809524,"a95":0.99,"info":"09/07/2015 at 05:57:24"},{"visible":true,"include":false,"step":"55.0","x":4808.571428571428,"y":909.5333333333334,"z":-2654,"a95":0.99,"info":"09/07/2015 at 05:57:24"},{"visible":true,"include":false,"step":"60.0","x":4888.476190476191,"y":901.6095238095238,"z":-2648.285714285714,"a95":0.99,"info":"09/07/2015 at 05:57:24"},{"visible":true,"include":false,"step":"65.0","x":4916.666666666667,"y":741.6952380952381,"z":-2723.2380952380954,"a95":0.99,"info":"09/07/2015 at 05:57:24"},{"visible":true,"include":false,"step":"70.0","x":5013.809523809524,"y":724.3714285714285,"z":-2395.904761904762,"a95":0.99,"info":"09/07/2015 at 05:57:24"},{"visible":true,"include":false,"step":"80.0","x":4985.714285714285,"y":825.952380952381,"z":-2580.5714285714284,"a95":0.99,"info":"09/07/2015 at 05:57:24"}]},{"version":"v1.1.0","exported":"2017-05-19T12:14:24.768Z","volume":10.5,"added":"2017-05-19T12:11:46.986Z","format":"Utrecht","demagType":"Unknown","strat":null,"patch":1.1,"GEO":[{"dec":28.315653092171488,"inc":-26.223814249044647,"MAD":7.460064179340617,"cm":[-8.348877145181177e-14,5.684341886080802e-14,0],"intensity":13352.901036675068,"type":"GC","origin":false,"forced":true,"remark":"","nSteps":7,"minStep":"100","maxStep":"270","steps":["100","150","180","210","230","250","270"],"group":"None","version":"v1.1.0"}],"TECT":[{"dec":41.870243579124576,"inc":-11.870023248515626,"MAD":7.460064179340655,"cm":[-8.100187187665142e-13,2.8421709430404007e-13,-1.1368683772161603e-13],"intensity":13352.901036675068,"type":"GC","origin":false,"forced":true,"remark":"","nSteps":7,"minStep":"100","maxStep":"270","steps":["100","150","180","210","230","250","270"],"group":"None","version":"v1.1.0"}],"interpreted":true,"name":"SS51.11A","coreAzi":232,"coreDip":50,"bedStrike":195,"bedDip":40,"data":[{"visible":true,"include":false,"step":"20","x":3479.714285714286,"y":4820.761904761905,"z":277.8095238095238,"a95":1.4,"info":"\"15-06-22\" at \"08:12\""},{"visible":true,"include":true,"step":"100","x":5214,"y":4306.190476190476,"z":-289.14285714285717,"a95":1.6,"info":"\"15-06-22\" at \"11:29\""},{"visible":true,"include":true,"step":"150","x":5851.428571428572,"y":4134.190476190476,"z":-686.5714285714286,"a95":1.4,"info":"\"15-06-23\" at \"08:41\""},{"visible":true,"include":true,"step":"180","x":6161.714285714285,"y":3724,"z":-767.4285714285714,"a95":1.3,"info":"\"15-06-23\" at \"11:44\""},{"visible":true,"include":true,"step":"210","x":6183.714285714285,"y":3082,"z":-1040.4761904761904,"a95":1.4,"info":"\"15-06-23\" at \"14:37\""},{"visible":true,"include":true,"step":"230","x":6193.714285714285,"y":3308.8571428571427,"z":-1257.8095238095239,"a95":1.4,"info":"\"15-06-24\" at \"08:25\""},{"visible":true,"include":true,"step":"250","x":5976.0952380952385,"y":2790.095238095238,"z":-1210.952380952381,"a95":1.4,"info":"\"15-06-24\" at \"12:15\""},{"visible":true,"include":true,"step":"270","x":5969.523809523809,"y":2824.5714285714284,"z":-1253.904761904762,"a95":1.4,"info":"\"15-06-24\" at \"15:42\""},{"visible":true,"include":false,"step":"300","x":5488.857142857143,"y":2589.1428571428573,"z":-1295.8095238095239,"a95":1.4,"info":"\"15-06-25\" at \"10:29\""},{"visible":true,"include":false,"step":"320","x":5670.857142857143,"y":2193.6190476190477,"z":-1494.952380952381,"a95":1.4,"info":"\"15-06-25\" at \"14:04\""},{"visible":true,"include":false,"step":"340","x":5312.666666666667,"y":1982.3809523809523,"z":-1442.1904761904761,"a95":1.4,"info":"\"15-06-25\" at \"17:02\""},{"visible":true,"include":false,"step":"370","x":5173.714285714285,"y":1925.8095238095239,"z":-1432,"a95":1.5,"info":"\"15-06-25\" at \"21:11\""},{"visible":true,"include":false,"step":"400","x":3880.4761904761904,"y":1375.7142857142858,"z":-1528.095238095238,"a95":1.5,"info":"\"15-06-26\" at \"08:27\""},{"visible":true,"include":false,"step":"420","x":3738.285714285714,"y":1559.4285714285713,"z":-1638.4761904761904,"a95":1.6,"info":"\"15-06-26\" at \"11:38\""},{"visible":true,"include":false,"step":"440","x":3327.3333333333335,"y":1122.2857142857142,"z":-1758,"a95":1.7,"info":"\"15-06-27\" at \"10:39\""},{"visible":true,"include":false,"step":"470","x":2487.1428571428573,"y":655.3333333333334,"z":-1502.2857142857142,"a95":1.7,"info":"\"15-06-29\" at \"07:43\""},{"visible":true,"include":false,"step":"490","x":2517.6190476190477,"y":928.952380952381,"z":-1341.047619047619,"a95":1.7,"info":"\"15-06-29\" at \"10:56\""},{"visible":true,"include":false,"step":"520","x":2155.1428571428573,"y":682.1904761904761,"z":-1182.857142857143,"a95":1.8,"info":"\"15-06-29\" at \"14:45\""},{"visible":true,"include":false,"step":"550","x":2175.3333333333335,"y":456.4761904761905,"z":-932.6666666666666,"a95":1.8,"info":"\"15-06-30\" at \"08:06\""},{"visible":true,"include":false,"step":"580","x":1255.142857142857,"y":187.23809523809524,"z":-1771.7142857142858,"a95":2.4,"info":"\"15-07-01\" at \"11:19\""}]},{"version":"v1.1.0","exported":"2017-05-19T12:14:24.768Z","volume":10.5,"added":"2017-05-19T12:11:46.986Z","format":"Utrecht","demagType":"Unknown","strat":"4","patch":1.1,"GEO":[{"dec":44.597861233456456,"inc":-36.93991220485648,"MAD":9.345460497808508,"cm":[-3.0375701953744283e-13,0,0],"intensity":12720.231649172776,"type":"GC","origin":false,"forced":true,"remark":"","nSteps":10,"minStep":"10.0","maxStep":"45.0","steps":["10.0","15.0","20.0","23.0","25.0","30.0","33.0","35.0","40.0","45.0"],"group":"None","version":"v1.1.0"}],"TECT":[{"dec":59.74060475126373,"inc":-11.924646331061291,"MAD":9.345460497811992,"cm":[-2.2737367544323206e-13,2.7711166694643907e-13,0],"intensity":12720.231649172776,"type":"GC","origin":false,"forced":true,"remark":"","nSteps":10,"minStep":"10.0","maxStep":"45.0","steps":["10.0","15.0","20.0","23.0","25.0","30.0","33.0","35.0","40.0","45.0"],"group":"None","version":"v1.1.0"}],"interpreted":true,"name":"SS51.11","coreAzi":232,"coreDip":50,"bedStrike":195,"bedDip":40,"data":[{"visible":true,"include":false,"step":"0.0","x":3512,"y":5095.047619047619,"z":212.9904761904762,"a95":0.99,"info":"09/07/2015 at 05:57:24"},{"visible":true,"include":true,"step":"10.0","x":4647.333333333333,"y":3937.1428571428573,"z":-593.8380952380952,"a95":0.99,"info":"09/07/2015 at 05:57:24"},{"visible":true,"include":true,"step":"15.0","x":5116.190476190476,"y":3532.8571428571427,"z":-776.4761904761905,"a95":0.99,"info":"09/07/2015 at 05:57:24"},{"visible":true,"include":true,"step":"20.0","x":5370.285714285715,"y":3431.714285714286,"z":-911.1809523809524,"a95":0.99,"info":"09/07/2015 at 05:57:24"},{"visible":true,"include":true,"step":"23.0","x":5531.809523809524,"y":3329.714285714286,"z":-915.5142857142857,"a95":0.99,"info":"09/07/2015 at 05:57:24"},{"visible":true,"include":true,"step":"25.0","x":5513.142857142857,"y":3230.285714285714,"z":-950.9714285714286,"a95":0.99,"info":"09/07/2015 at 05:57:24"},{"visible":true,"include":true,"step":"30.0","x":5604.476190476191,"y":3151.0476190476193,"z":-870.9333333333333,"a95":0.99,"info":"09/07/2015 at 05:57:24"},{"visible":true,"include":true,"step":"33.0","x":5704.190476190476,"y":3149.714285714286,"z":-1133.3333333333333,"a95":0.99,"info":"09/07/2015 at 05:57:24"},{"visible":true,"include":true,"step":"35.0","x":5838.285714285715,"y":3021.1428571428573,"z":-1038.4761904761904,"a95":0.99,"info":"09/07/2015 at 05:57:24"},{"visible":true,"include":true,"step":"40.0","x":5858.857142857143,"y":3115.714285714286,"z":-953.8095238095239,"a95":0.99,"info":"09/07/2015 at 05:57:24"},{"visible":true,"include":true,"step":"45.0","x":6001.809523809524,"y":2847.6190476190477,"z":-944.6857142857143,"a95":0.99,"info":"09/07/2015 at 05:57:24"},{"visible":true,"include":false,"step":"50.0","x":6170.666666666667,"y":2685.1428571428573,"z":-1139.4285714285713,"a95":0.99,"info":"09/07/2015 at 05:57:24"},{"visible":true,"include":false,"step":"55.0","x":6155.428571428572,"y":3001.0476190476193,"z":-1022.1904761904761,"a95":0.99,"info":"09/07/2015 at 05:57:24"},{"visible":true,"include":false,"step":"60.0","x":6180,"y":2942.095238095238,"z":-709.9333333333334,"a95":0.99,"info":"09/07/2015 at 05:57:24"},{"visible":true,"include":false,"step":"65.0","x":6112.761904761905,"y":2708,"z":-1016.1904761904761,"a95":0.99,"info":"09/07/2015 at 05:57:24"},{"visible":true,"include":false,"step":"70.0","x":6220,"y":3001.6190476190477,"z":-1160.7619047619048,"a95":0.99,"info":"09/07/2015 at 05:57:24"},{"visible":true,"include":false,"step":"80.0","x":6561.142857142857,"y":2681.714285714286,"z":-1083.047619047619,"a95":0.99,"info":"09/07/2015 at 05:57:24"}]},{"version":"v1.1.0","exported":"2017-05-19T12:14:24.768Z","volume":10.5,"added":"2017-05-19T12:11:46.987Z","format":"Utrecht","demagType":"Unknown","strat":null,"patch":1.1,"GEO":[{"dec":26.838086102669706,"inc":-35.12001140653735,"MAD":10.405503302124952,"cm":[7.815970093361102e-14,0,0],"intensity":12366.519649638616,"type":"GC","origin":false,"forced":true,"remark":"","nSteps":7,"minStep":"100","maxStep":"270","steps":["100","150","180","210","230","250","270"],"group":"None","version":"v1.1.0"}],"TECT":[{"dec":46.901650335972136,"inc":-19.441182919963335,"MAD":10.405503302124982,"cm":[7.815970093361102e-13,8.526512829121202e-14,0],"intensity":12366.519649638612,"type":"GC","origin":false,"forced":true,"remark":"","nSteps":7,"minStep":"100","maxStep":"270","steps":["100","150","180","210","230","250","270"],"group":"None","version":"v1.1.0"}],"interpreted":true,"name":"SS51.12B","coreAzi":237,"coreDip":55,"bedStrike":195,"bedDip":40,"data":[{"visible":true,"include":false,"step":"20","x":3584.5714285714284,"y":5231.714285714285,"z":1735.8095238095239,"a95":1.5,"info":"\"15-06-22\" at \"08:13\""},{"visible":true,"include":true,"step":"100","x":4579.142857142857,"y":4443.809523809524,"z":801.2380952380952,"a95":1.5,"info":"\"15-06-22\" at \"11:32\""},{"visible":true,"include":true,"step":"150","x":5737.333333333333,"y":3382.9523809523807,"z":-90.76190476190476,"a95":1.4,"info":"\"15-06-23\" at \"08:42\""},{"visible":true,"include":true,"step":"180","x":6070.571428571428,"y":3011.5238095238096,"z":-27.904761904761905,"a95":1.3,"info":"\"15-06-23\" at \"11:46\""},{"visible":true,"include":true,"step":"210","x":5856.666666666667,"y":2970.5714285714284,"z":-523.047619047619,"a95":1.4,"info":"\"15-06-23\" at \"14:39\""},{"visible":true,"include":true,"step":"230","x":5946.190476190476,"y":2927.3333333333335,"z":-551.9047619047619,"a95":1.4,"info":"\"15-06-24\" at \"08:26\""},{"visible":true,"include":true,"step":"250","x":5734,"y":2400.3809523809523,"z":-393.42857142857144,"a95":1.4,"info":"\"15-06-24\" at \"12:17\""},{"visible":true,"include":true,"step":"270","x":5780.0952380952385,"y":2300.9523809523807,"z":-447.42857142857144,"a95":1.4,"info":"\"15-06-24\" at \"15:44\""},{"visible":true,"include":false,"step":"300","x":5333.047619047619,"y":2215.6190476190477,"z":-423.8095238095238,"a95":1.3,"info":"\"15-06-25\" at \"10:30\""},{"visible":true,"include":false,"step":"320","x":5419.047619047619,"y":2292.5714285714284,"z":-623.6190476190476,"a95":1.4,"info":"\"15-06-25\" at \"14:05\""},{"visible":true,"include":false,"step":"340","x":4998.857142857143,"y":1808.5714285714287,"z":-592.1904761904761,"a95":1.3,"info":"\"15-06-25\" at \"17:03\""},{"visible":true,"include":false,"step":"370","x":4786.0952380952385,"y":2166.285714285714,"z":-714.7619047619048,"a95":1.4,"info":"\"15-06-25\" at \"21:14\""},{"visible":true,"include":false,"step":"400","x":3435.1428571428573,"y":1262.857142857143,"z":-798.3809523809524,"a95":1.4,"info":"\"15-06-26\" at \"08:29\""},{"visible":true,"include":false,"step":"420","x":3388,"y":1311.7142857142858,"z":-832.5714285714286,"a95":1.5,"info":"\"15-06-26\" at \"11:40\""},{"visible":true,"include":false,"step":"440","x":2945.3333333333335,"y":1143.4285714285713,"z":-778.0952380952381,"a95":1.6,"info":"\"15-06-27\" at \"10:41\""},{"visible":true,"include":false,"step":"470","x":2394.5714285714284,"y":855.7142857142857,"z":-644.952380952381,"a95":1.4,"info":"\"15-06-29\" at \"07:45\""},{"visible":true,"include":false,"step":"490","x":2432.4761904761904,"y":1123.4285714285713,"z":-562,"a95":1.5,"info":"\"15-06-29\" at \"10:58\""},{"visible":true,"include":false,"step":"520","x":2010.6666666666667,"y":822.8571428571429,"z":-621.9047619047619,"a95":1.6,"info":"\"15-06-29\" at \"14:47\""},{"visible":true,"include":false,"step":"550","x":1909.5238095238096,"y":1081.142857142857,"z":-775.6190476190476,"a95":1.8,"info":"\"15-06-30\" at \"08:08\""},{"visible":true,"include":false,"step":"580","x":1108.3809523809523,"y":451.7142857142857,"z":-845.2380952380952,"a95":2,"info":"\"15-07-01\" at \"11:21\""}]},{"version":"v1.1.0","exported":"2017-05-19T12:14:24.769Z","volume":10.5,"added":"2017-05-19T12:11:46.987Z","format":"Utrecht","demagType":"Unknown","strat":"5","patch":1.1,"GEO":[{"dec":88.88784485545568,"inc":-30.7830890786971,"MAD":8.761789792103192,"cm":[5.3290705182007514e-14,0,0],"intensity":9558.525305380817,"type":"GC","origin":false,"forced":true,"remark":"","nSteps":11,"minStep":"10.0","maxStep":"50.0","steps":["10.0","15.0","20.0","23.0","25.0","30.0","33.0","35.0","40.0","45.0","50.0"],"group":"None","version":"v1.1.0"}],"TECT":[{"dec":271.0698583534511,"inc":-7.959973303248152,"MAD":8.761789792103992,"cm":[-3.730349362740526e-14,3.836930773104541e-13,2.842170943040401e-14],"intensity":9558.525305380817,"type":"GC","origin":false,"forced":true,"remark":"","nSteps":11,"minStep":"10.0","maxStep":"50.0","steps":["10.0","15.0","20.0","23.0","25.0","30.0","33.0","35.0","40.0","45.0","50.0"],"group":"None","version":"v1.1.0"}],"interpreted":true,"name":"SS51.13","coreAzi":268,"coreDip":67,"bedStrike":195,"bedDip":40,"data":[{"visible":true,"include":false,"step":"0.0","x":-263.25714285714287,"y":3885.809523809524,"z":-2603.3333333333335,"a95":0.99,"info":"09/07/2015 at 05:57:24"},{"visible":true,"include":true,"step":"10.0","x":2648.7619047619046,"y":2404.190476190476,"z":-2153.714285714286,"a95":0.99,"info":"09/07/2015 at 05:57:24"},{"visible":true,"include":true,"step":"15.0","x":3348.9523809523807,"y":2023.142857142857,"z":-2512.095238095238,"a95":0.99,"info":"09/07/2015 at 05:57:24"},{"visible":true,"include":true,"step":"20.0","x":3676.8571428571427,"y":1699.142857142857,"z":-2609.3333333333335,"a95":0.99,"info":"09/07/2015 at 05:57:24"},{"visible":true,"include":true,"step":"23.0","x":3890.4761904761904,"y":1639.7142857142858,"z":-2682.7619047619046,"a95":0.99,"info":"09/07/2015 at 05:57:24"},{"visible":true,"include":true,"step":"25.0","x":3994.8571428571427,"y":1633.3333333333333,"z":-2824.9523809523807,"a95":0.99,"info":"09/07/2015 at 05:57:24"},{"visible":true,"include":true,"step":"30.0","x":4101.714285714285,"y":1486.857142857143,"z":-3022.3809523809523,"a95":0.99,"info":"09/07/2015 at 05:57:24"},{"visible":true,"include":true,"step":"33.0","x":4119.238095238095,"y":1320.3809523809523,"z":-3059.2380952380954,"a95":0.99,"info":"09/07/2015 at 05:57:24"},{"visible":true,"include":true,"step":"35.0","x":4171.238095238095,"y":1145.8095238095239,"z":-3143.904761904762,"a95":0.99,"info":"09/07/2015 at 05:57:24"},{"visible":true,"include":true,"step":"40.0","x":4276.285714285715,"y":1192.5714285714287,"z":-3246.3809523809523,"a95":0.99,"info":"09/07/2015 at 05:57:24"},{"visible":true,"include":true,"step":"45.0","x":4486.952380952381,"y":1153.5238095238096,"z":-3230.4761904761904,"a95":0.99,"info":"09/07/2015 at 05:57:24"},{"visible":true,"include":true,"step":"50.0","x":4440.285714285715,"y":792.7619047619048,"z":-3404.190476190476,"a95":0.99,"info":"09/07/2015 at 05:57:24"},{"visible":true,"include":false,"step":"55.0","x":4524.190476190476,"y":826.695238095238,"z":-3294.095238095238,"a95":0.99,"info":"09/07/2015 at 05:57:24"},{"visible":true,"include":false,"step":"60.0","x":4860.190476190476,"y":648.8666666666667,"z":-3513.904761904762,"a95":0.99,"info":"09/07/2015 at 05:57:24"},{"visible":true,"include":false,"step":"65.0","x":5029.428571428572,"y":381.32380952380953,"z":-3381.6190476190477,"a95":0.99,"info":"09/07/2015 at 05:57:24"},{"visible":true,"include":false,"step":"70.0","x":4771.523809523809,"y":541.6952380952381,"z":-3241.4285714285716,"a95":0.99,"info":"09/07/2015 at 05:57:24"},{"visible":true,"include":false,"step":"80.0","x":4790.476190476191,"y":423.93333333333334,"z":-3549.904761904762,"a95":0.99,"info":"09/07/2015 at 05:57:24"}]},{"version":"v1.1.0","exported":"2017-05-19T12:14:24.769Z","volume":10.5,"added":"2017-05-19T12:11:46.987Z","format":"Utrecht","demagType":"Unknown","strat":"6","patch":1.1,"GEO":[{"dec":68.742185373513,"inc":-38.362531730903825,"MAD":4.384933418323638,"cm":[-7.105427357601002e-13,-2.8421709430404007e-13,0],"intensity":10246.238965752784,"type":"GC","origin":false,"forced":true,"remark":"","nSteps":7,"minStep":"15.0","maxStep":"35.0","steps":["15.0","20.0","23.0","25.0","30.0","33.0","35.0"],"group":"None","version":"v1.1.0"}],"TECT":[{"dec":77.30011183948471,"inc":-3.957648079365887,"MAD":4.384933418338423,"cm":[-9.183764859699295e-13,-1.4921397450962104e-13,-5.684341886080802e-14],"intensity":10246.238965752786,"type":"GC","origin":false,"forced":true,"remark":"","nSteps":7,"minStep":"15.0","maxStep":"35.0","steps":["15.0","20.0","23.0","25.0","30.0","33.0","35.0"],"group":"None","version":"v1.1.0"}],"interpreted":true,"name":"SS51.14","coreAzi":250,"coreDip":69,"bedStrike":195,"bedDip":40,"data":[{"visible":true,"include":false,"step":"0.0","x":1000.0952380952381,"y":3185.4285714285716,"z":-2253.0476190476193,"a95":0.99,"info":"09/07/2015 at 05:57:24"},{"visible":true,"include":false,"step":"10.0","x":3022.285714285714,"y":2713.6190476190477,"z":-1816.1904761904761,"a95":0.99,"info":"09/07/2015 at 05:57:24"},{"visible":true,"include":true,"step":"15.0","x":3476.285714285714,"y":2561.0476190476193,"z":-2056.5714285714284,"a95":0.99,"info":"09/07/2015 at 05:57:24"},{"visible":true,"include":true,"step":"20.0","x":3831.714285714286,"y":2463.809523809524,"z":-2151.3333333333335,"a95":0.99,"info":"09/07/2015 at 05:57:24"},{"visible":true,"include":true,"step":"23.0","x":3970.4761904761904,"y":2287.3333333333335,"z":-2310.3809523809523,"a95":0.99,"info":"09/07/2015 at 05:57:24"},{"visible":true,"include":true,"step":"25.0","x":4089.0476190476193,"y":2162.285714285714,"z":-2371.904761904762,"a95":0.99,"info":"09/07/2015 at 05:57:24"},{"visible":true,"include":true,"step":"30.0","x":4228.666666666667,"y":2059.3333333333335,"z":-2479.5238095238096,"a95":0.99,"info":"09/07/2015 at 05:57:24"},{"visible":true,"include":true,"step":"33.0","x":4352,"y":1906.2857142857142,"z":-2537.714285714286,"a95":0.99,"info":"09/07/2015 at 05:57:24"},{"visible":true,"include":true,"step":"35.0","x":4470,"y":1914.2857142857142,"z":-2613.904761904762,"a95":0.99,"info":"09/07/2015 at 05:57:24"},{"visible":true,"include":false,"step":"40.0","x":4548.761904761905,"y":1794.3809523809523,"z":-2584.7619047619046,"a95":0.99,"info":"09/07/2015 at 05:57:24"},{"visible":true,"include":false,"step":"45.0","x":4632.0952380952385,"y":1782.1904761904761,"z":-2775.714285714286,"a95":0.99,"info":"09/07/2015 at 05:57:24"},{"visible":true,"include":false,"step":"50.0","x":4690.952380952381,"y":1703.8095238095239,"z":-2559.3333333333335,"a95":0.99,"info":"09/07/2015 at 05:57:24"},{"visible":true,"include":false,"step":"55.0","x":4502.761904761905,"y":1560.952380952381,"z":-2742,"a95":0.99,"info":"09/07/2015 at 05:57:24"},{"visible":true,"include":false,"step":"60.0","x":4625.523809523809,"y":1607.3333333333333,"z":-2726,"a95":0.99,"info":"09/07/2015 at 05:57:24"},{"visible":true,"include":false,"step":"65.0","x":4554.285714285715,"y":1497.904761904762,"z":-2808.9523809523807,"a95":0.99,"info":"09/07/2015 at 05:57:24"},{"visible":true,"include":false,"step":"70.0","x":4813.523809523809,"y":1379.8095238095239,"z":-2716.7619047619046,"a95":0.99,"info":"09/07/2015 at 05:57:24"},{"visible":true,"include":false,"step":"80.0","x":4553.238095238095,"y":1334.095238095238,"z":-2720,"a95":0.99,"info":"09/07/2015 at 05:57:24"}]},{"version":"v1.1.0","exported":"2017-05-19T12:14:24.769Z","volume":10.5,"added":"2017-05-19T12:11:46.988Z","format":"Utrecht","demagType":"Unknown","strat":null,"patch":1.1,"GEO":[{"dec":88.92648636119839,"inc":-22.200217757098063,"MAD":4.834428437967918,"cm":[-1.4210854715202004e-14,-2.842170943040401e-14,0],"intensity":8493.366723735346,"type":"GC","origin":false,"forced":true,"remark":"","nSteps":8,"minStep":"100","maxStep":"300","steps":["100","150","180","210","230","250","270","300"],"group":"None","version":"v1.1.0"}],"TECT":[{"dec":269.50080648152505,"inc":-16.405057477517637,"MAD":4.834428437968188,"cm":[-1.1723955140041653e-13,2.842170943040401e-14,0],"intensity":8493.366723735344,"type":"GC","origin":false,"forced":true,"remark":"","nSteps":8,"minStep":"100","maxStep":"300","steps":["100","150","180","210","230","250","270","300"],"group":"None","version":"v1.1.0"}],"interpreted":true,"name":"SS51.15B","coreAzi":256,"coreDip":70,"bedStrike":195,"bedDip":40,"data":[{"visible":true,"include":false,"step":"20","x":-603.3333333333334,"y":4604.476190476191,"z":-825.5238095238095,"a95":1.7,"info":"\"15-06-22\" at \"08:16\""},{"visible":true,"include":true,"step":"100","x":1175.7142857142858,"y":3354.6666666666665,"z":-2346.285714285714,"a95":1.9,"info":"\"15-06-22\" at \"11:33\""},{"visible":true,"include":true,"step":"150","x":2736.9523809523807,"y":2292.8571428571427,"z":-3700.5714285714284,"a95":2,"info":"\"15-06-23\" at \"08:44\""},{"visible":true,"include":true,"step":"180","x":2877.1428571428573,"y":2032.857142857143,"z":-3572.8571428571427,"a95":2,"info":"\"15-06-23\" at \"11:47\""},{"visible":true,"include":true,"step":"210","x":3167.1428571428573,"y":1572.5714285714287,"z":-3952.9523809523807,"a95":2,"info":"\"15-06-23\" at \"14:40\""},{"visible":true,"include":true,"step":"230","x":3184.3809523809523,"y":1635.142857142857,"z":-4121.142857142857,"a95":2,"info":"\"15-06-24\" at \"08:28\""},{"visible":true,"include":true,"step":"250","x":3164.190476190476,"y":1531.3333333333333,"z":-3916.3809523809523,"a95":2,"info":"\"15-06-24\" at \"12:19\""},{"visible":true,"include":true,"step":"270","x":3368.3809523809523,"y":1272.7619047619048,"z":-3857.714285714286,"a95":2.1,"info":"\"15-06-24\" at \"15:45\""},{"visible":true,"include":true,"step":"300","x":2984.3809523809523,"y":984,"z":-3654.285714285714,"a95":2,"info":"\"15-06-25\" at \"10:32\""},{"visible":true,"include":false,"step":"320","x":2965.4285714285716,"y":1138.7619047619048,"z":-3635.4285714285716,"a95":2,"info":"\"15-06-25\" at \"14:07\""},{"visible":true,"include":false,"step":"340","x":2637.2380952380954,"y":1121.904761904762,"z":-3343.5238095238096,"a95":1.9,"info":"\"15-06-25\" at \"17:05\""},{"visible":true,"include":false,"step":"370","x":2766,"y":962.2857142857143,"z":-3415.3333333333335,"a95":1.8,"info":"\"15-06-25\" at \"21:16\""},{"visible":true,"include":false,"step":"400","x":1223.3333333333333,"y":976.0952380952381,"z":-2530.9523809523807,"a95":2.3,"info":"\"15-06-26\" at \"08:31\""},{"visible":true,"include":false,"step":"420","x":1136.2857142857142,"y":1082.5714285714287,"z":-2518.190476190476,"a95":2.2,"info":"\"15-06-26\" at \"11:42\""},{"visible":true,"include":false,"step":"440","x":736.1904761904761,"y":974.5714285714286,"z":-2329.3333333333335,"a95":2.2,"info":"\"15-06-27\" at \"10:42\""},{"visible":true,"include":false,"step":"470","x":170.66666666666666,"y":839.7142857142857,"z":-2103.1428571428573,"a95":2.5,"info":"\"15-06-29\" at \"07:47\""},{"visible":true,"include":false,"step":"490","x":72.57142857142857,"y":846,"z":-2023.4285714285713,"a95":2.6,"info":"\"15-06-29\" at \"10:59\""},{"visible":true,"include":false,"step":"520","x":18,"y":824.3809523809524,"z":-1966.1904761904761,"a95":2.5,"info":"\"15-06-29\" at \"14:49\""},{"visible":true,"include":false,"step":"550","x":-164.85714285714286,"y":1086.4761904761904,"z":-1790.857142857143,"a95":2.4,"info":"\"15-06-30\" at \"08:10\""},{"visible":true,"include":false,"step":"580","x":-612.0952380952381,"y":751.4285714285714,"z":-1675.5238095238096,"a95":2.3,"info":"\"15-07-01\" at \"11:22\""}]},{"version":"v1.1.0","exported":"2017-05-19T12:14:24.769Z","volume":10.5,"added":"2017-05-19T12:11:46.988Z","format":"Utrecht","demagType":"Unknown","strat":null,"patch":1.1,"GEO":[{"dec":311.54648617766225,"inc":-17.54785109221062,"MAD":5.465407468052906,"cm":[-6.252776074688882e-13,5.115907697472721e-13,0],"intensity":19027.975719261078,"type":"GC","origin":false,"forced":true,"remark":"","nSteps":6,"minStep":"100","maxStep":"250","steps":["100","150","180","210","230","250"],"group":"None","version":"v1.1.0"}],"TECT":[{"dec":327.8362632190846,"inc":-51.189730637117805,"MAD":5.4654074680525175,"cm":[-2.0463630789890885e-12,2.1600499167107046e-12,4.18332035678759e-13],"intensity":19027.975719261074,"type":"GC","origin":false,"forced":true,"remark":"","nSteps":6,"minStep":"100","maxStep":"250","steps":["100","150","180","210","230","250"],"group":"None","version":"v1.1.0"}],"interpreted":true,"name":"SS51.16B","coreAzi":297,"coreDip":52,"bedStrike":195,"bedDip":40,"data":[{"visible":true,"include":false,"step":"20","x":-6195.047619047619,"y":14187.238095238095,"z":2229.5238095238096,"a95":1.5,"info":"\"15-06-22\" at \"08:19\""},{"visible":true,"include":true,"step":"100","x":-3490.5714285714284,"y":12338.666666666666,"z":353.9047619047619,"a95":1.5,"info":"\"15-06-22\" at \"11:35\""},{"visible":true,"include":true,"step":"150","x":-1124.4761904761904,"y":8524.857142857143,"z":-2632,"a95":1.5,"info":"\"15-06-23\" at \"08:45\""},{"visible":true,"include":true,"step":"180","x":-901.047619047619,"y":8490,"z":-2676.8571428571427,"a95":1.4,"info":"\"15-06-23\" at \"11:49\""},{"visible":true,"include":true,"step":"210","x":-537.6190476190476,"y":6944.857142857143,"z":-3660.095238095238,"a95":1.5,"info":"\"15-06-23\" at \"14:42\""},{"visible":true,"include":true,"step":"230","x":-798.5714285714286,"y":6922.476190476191,"z":-3834.5714285714284,"a95":1.5,"info":"\"15-06-24\" at \"08:30\""},{"visible":true,"include":true,"step":"250","x":-35.523809523809526,"y":5964.285714285715,"z":-4179.142857142857,"a95":1.7,"info":"\"15-06-24\" at \"12:21\""},{"visible":true,"include":false,"step":"270","x":-8,"y":5766.761904761905,"z":-4248,"a95":1.6,"info":"\"15-06-24\" at \"15:47\""},{"visible":true,"include":false,"step":"300","x":-157.33333333333334,"y":5790.0952380952385,"z":-4344.476190476191,"a95":1.6,"info":"\"15-06-25\" at \"10:34\""},{"visible":true,"include":false,"step":"320","x":94.95238095238095,"y":5613.714285714285,"z":-4331.142857142857,"a95":1.7,"info":"\"15-06-25\" at \"14:08\""},{"visible":true,"include":false,"step":"340","x":-112.85714285714286,"y":5400.571428571428,"z":-3889.1428571428573,"a95":1.7,"info":"\"15-06-25\" at \"17:06\""},{"visible":true,"include":false,"step":"370","x":132.66666666666666,"y":5545.523809523809,"z":-4150.857142857143,"a95":1.5,"info":"\"15-06-25\" at \"21:19\""},{"visible":true,"include":false,"step":"400","x":-511.7142857142857,"y":6204.380952380952,"z":-3393.904761904762,"a95":1.6,"info":"\"15-06-26\" at \"08:33\""},{"visible":true,"include":false,"step":"420","x":-811.7142857142857,"y":6217.142857142857,"z":-3529.1428571428573,"a95":1.6,"info":"\"15-06-26\" at \"11:44\""},{"visible":true,"include":false,"step":"440","x":-1492.5714285714287,"y":6181.523809523809,"z":-3152.6666666666665,"a95":1.6,"info":"\"15-06-27\" at \"10:44\""},{"visible":true,"include":false,"step":"470","x":-1861.7142857142858,"y":6059.333333333333,"z":-2796.5714285714284,"a95":1.5,"info":"\"15-06-29\" at \"07:49\""},{"visible":true,"include":false,"step":"490","x":-1946.952380952381,"y":6180.952380952381,"z":-2667.0476190476193,"a95":1.5,"info":"\"15-06-29\" at \"11:01\""},{"visible":true,"include":false,"step":"520","x":-1784.6666666666667,"y":5975.047619047619,"z":-3015.0476190476193,"a95":1.6,"info":"\"15-06-29\" at \"14:52\""},{"visible":true,"include":false,"step":"550","x":-1438.2857142857142,"y":6172.285714285715,"z":-2347.904761904762,"a95":1.5,"info":"\"15-06-30\" at \"08:12\""},{"visible":true,"include":false,"step":"580","x":-2414.9523809523807,"y":5567.523809523809,"z":-3017.4285714285716,"a95":1.5,"info":"\"15-07-01\" at \"11:24\""}]}]
