# Supplementary material for: Paleomagnetic constraints on the timing and distribution of Cenozoic rotations in Central and Eastern Anatolia
Source: Copernicus journal article supplement (doi:10.5194/se-9-295-2018), 2018-03-21
Supplement: Supplementary file 2 [file se-9-295-2018-supplement.zip › se-2017-66_DATA_dir files/dir files Sivas/SS52.dir]

[{"version":"v1.1.0","exported":"2016-10-11T11:59:50.050Z","volume":10.5,"added":"2016-10-11T11:52:34.268Z","format":"Utrecht","demagType":"Unknown","strat":null,"patch":1.1,"GEO":[{"dec":252.5425156779665,"inc":-19.925141316627556,"MAD":4.6069539144565255,"cm":[2.8421709430404007e-13,5.684341886080802e-14,0],"intensity":21463.580376018894,"type":"dir","forced":true,"remark":"","origin":false,"nSteps":12,"minStep":"250","maxStep":"520","steps":["250","270","300","320","340","370","400","420","440","470","490","520"],"group":"None","version":"v1.1.0"}],"TECT":[{"dec":227.659729712383,"inc":-43.37053032996831,"MAD":4.606953914456496,"cm":[-1.0231815394945443e-12,7.105427357601002e-13,8.526512829121202e-14],"intensity":21463.58037601889,"type":"dir","forced":true,"remark":"","origin":false,"nSteps":12,"minStep":"250","maxStep":"520","steps":["250","270","300","320","340","370","400","420","440","470","490","520"],"group":"None","version":"v1.1.0"}],"interpreted":true,"name":"SS52.02A","coreAzi":197,"coreDip":42,"bedStrike":210,"bedDip":44,"data":[{"visible":false,"include":false,"step":"20","x":-24381.619047619046,"y":21242.095238095237,"z":6697.523809523809,"a95":1.4,"info":"\"15-06-22\" at \"08:23\""},{"visible":true,"include":false,"step":"100","x":-10089.142857142857,"y":14995.714285714286,"z":5304.476190476191,"a95":1.6,"info":"\"15-06-22\" at \"11:41\""},{"visible":true,"include":false,"step":"150","x":-10053.52380952381,"y":14869.619047619048,"z":5449.9047619047615,"a95":1.6,"info":"\"15-06-23\" at \"08:47\""},{"visible":true,"include":false,"step":"180","x":2558.7619047619046,"y":11684.285714285714,"z":3292.5714285714284,"a95":1.7,"info":"\"15-06-23\" at \"11:50\""},{"visible":true,"include":false,"step":"210","x":3798.190476190476,"y":12471.809523809523,"z":3817.2380952380954,"a95":1.6,"info":"\"15-06-23\" at \"14:44\""},{"visible":true,"include":false,"step":"230","x":6818.761904761905,"y":11320.57142857143,"z":2993.0476190476193,"a95":1.6,"info":"\"15-06-24\" at \"08:31\""},{"visible":true,"include":true,"step":"250","x":6766.285714285715,"y":10918.857142857143,"z":3620.7619047619046,"a95":1.5,"info":"\"15-06-24\" at \"12:23\""},{"visible":true,"include":true,"step":"270","x":7976,"y":8947.42857142857,"z":2419.904761904762,"a95":1.5,"info":"\"15-06-24\" at \"15:49\""},{"visible":true,"include":true,"step":"300","x":8207.238095238095,"y":9729.714285714286,"z":3038.6666666666665,"a95":1.4,"info":"\"15-06-25\" at \"10:37\""},{"visible":true,"include":true,"step":"320","x":7287.619047619048,"y":8974.857142857143,"z":2280.3809523809523,"a95":1.4,"info":"\"15-06-25\" at \"14:10\""},{"visible":true,"include":true,"step":"340","x":6989.142857142857,"y":8774.380952380952,"z":1484.7619047619048,"a95":1.4,"info":"\"15-06-25\" at \"17:08\""},{"visible":true,"include":true,"step":"370","x":6714.285714285715,"y":8235.42857142857,"z":1660.857142857143,"a95":1.4,"info":"\"15-06-25\" at \"21:20\""},{"visible":true,"include":true,"step":"400","x":6400.857142857143,"y":8522.380952380952,"z":1860.4761904761904,"a95":1.5,"info":"\"15-06-26\" at \"08:34\""},{"visible":true,"include":true,"step":"420","x":5760.476190476191,"y":7257.809523809524,"z":797.5238095238095,"a95":1.5,"info":"\"15-06-26\" at \"11:46\""},{"visible":true,"include":true,"step":"440","x":6150.666666666667,"y":8037.809523809524,"z":1145.6190476190477,"a95":1.5,"info":"\"15-06-27\" at \"10:46\""},{"visible":true,"include":true,"step":"470","x":5517.333333333333,"y":6824,"z":482.0952380952381,"a95":1.6,"info":"\"15-06-29\" at \"07:51\""},{"visible":true,"include":true,"step":"490","x":5498.476190476191,"y":6719.333333333333,"z":620.0952380952381,"a95":1.7,"info":"\"15-06-29\" at \"11:02\""},{"visible":true,"include":true,"step":"520","x":5035.523809523809,"y":6441.047619047619,"z":855.4285714285714,"a95":1.5,"info":"\"15-06-29\" at \"14:54\""},{"visible":true,"include":false,"step":"550","x":4683.809523809524,"y":6543.9047619047615,"z":1740.5714285714287,"a95":1.5,"info":"\"15-06-30\" at \"08:14\""},{"visible":true,"include":false,"step":"580","x":4238.285714285715,"y":5475.714285714285,"z":903.047619047619,"a95":1.5,"info":"\"15-07-01\" at \"11:26\""}]},{"version":"v1.1.0","exported":"2016-10-11T11:59:50.050Z","volume":10.5,"added":"2016-10-11T11:52:34.268Z","format":"Utrecht","demagType":"Unknown","strat":"7","patch":1.1,"GEO":[{"dec":345.01519287062933,"inc":-35.08381949115648,"MAD":4.600446707433002,"cm":[-1.7053025658242404e-13,1.1368683772161603e-13,0],"intensity":13995.658513428003,"type":"GC","origin":false,"forced":true,"remark":"","nSteps":16,"minStep":"10.0","maxStep":"80.0","steps":["10.0","15.0","20.0","23.0","25.0","30.0","33.0","35.0","40.0","45.0","50.0","55.0","60.0","65.0","70.0","80.0"],"group":"None","version":"v1.1.0"}],"TECT":[{"dec":28.332205847124158,"inc":-54.61746215489454,"MAD":4.600446707433087,"cm":[-1.7621459846850485e-12,6.963318810448982e-13,4.547473508864641e-13],"intensity":13995.658513428009,"type":"GC","origin":false,"forced":true,"remark":"","nSteps":16,"minStep":"10.0","maxStep":"80.0","steps":["10.0","15.0","20.0","23.0","25.0","30.0","33.0","35.0","40.0","45.0","50.0","55.0","60.0","65.0","70.0","80.0"],"group":"None","version":"v1.1.0"}],"interpreted":true,"name":"SS52.03","coreAzi":224,"coreDip":47,"bedStrike":210,"bedDip":44,"data":[{"visible":true,"include":false,"step":"0.0","x":-1846.2857142857142,"y":8047.714285714285,"z":7196.857142857143,"a95":0.99,"info":"09/07/2015 at 05:57:24"},{"visible":true,"include":true,"step":"10.0","x":1548,"y":5635.142857142857,"z":5785.619047619048,"a95":0.99,"info":"09/07/2015 at 05:57:24"},{"visible":true,"include":true,"step":"15.0","x":2871.809523809524,"y":4865.428571428572,"z":5074.666666666667,"a95":0.99,"info":"09/07/2015 at 05:57:24"},{"visible":true,"include":true,"step":"20.0","x":3610.190476190476,"y":4367.238095238095,"z":4911.9047619047615,"a95":0.99,"info":"09/07/2015 at 05:57:24"},{"visible":true,"include":true,"step":"23.0","x":4079.0476190476193,"y":4004.7619047619046,"z":4567.714285714285,"a95":0.99,"info":"09/07/2015 at 05:57:24"},{"visible":true,"include":true,"step":"25.0","x":4220.285714285715,"y":3932.9523809523807,"z":4191.619047619048,"a95":0.99,"info":"09/07/2015 at 05:57:24"},{"visible":true,"include":true,"step":"30.0","x":4726.0952380952385,"y":3418.4761904761904,"z":4252.666666666667,"a95":0.99,"info":"09/07/2015 at 05:57:24"},{"visible":true,"include":true,"step":"33.0","x":5044.761904761905,"y":3332.3809523809523,"z":3953.6190476190477,"a95":0.99,"info":"09/07/2015 at 05:57:24"},{"visible":true,"include":true,"step":"35.0","x":4972.857142857143,"y":3354.4761904761904,"z":3604.4761904761904,"a95":0.99,"info":"09/07/2015 at 05:57:24"},{"visible":true,"include":true,"step":"40.0","x":5128.666666666667,"y":3258.095238095238,"z":3816.4761904761904,"a95":0.99,"info":"09/07/2015 at 05:57:24"},{"visible":true,"include":true,"step":"45.0","x":5317.9047619047615,"y":3109.809523809524,"z":3665.0476190476193,"a95":0.99,"info":"09/07/2015 at 05:57:24"},{"visible":true,"include":true,"step":"50.0","x":5479.428571428572,"y":2833.2380952380954,"z":3445.904761904762,"a95":0.99,"info":"09/07/2015 at 05:57:24"},{"visible":true,"include":true,"step":"55.0","x":5581.9047619047615,"y":2754.3809523809523,"z":3448,"a95":0.99,"info":"09/07/2015 at 05:57:24"},{"visible":true,"include":true,"step":"60.0","x":5702.285714285715,"y":3103.904761904762,"z":3358.8571428571427,"a95":0.99,"info":"09/07/2015 at 05:57:24"},{"visible":true,"include":true,"step":"65.0","x":5811.9047619047615,"y":2350.8571428571427,"z":2956.285714285714,"a95":0.99,"info":"09/07/2015 at 05:57:24"},{"visible":true,"include":true,"step":"70.0","x":6136.0952380952385,"y":2157.6190476190477,"z":3227.3333333333335,"a95":0.99,"info":"09/07/2015 at 05:57:24"},{"visible":true,"include":true,"step":"80.0","x":6274.666666666667,"y":2113.809523809524,"z":2853.714285714286,"a95":0.99,"info":"09/07/2015 at 05:57:24"}]},{"version":"v1.1.0","exported":"2016-10-11T11:59:50.050Z","volume":10.5,"added":"2016-10-11T11:52:34.268Z","format":"Utrecht","demagType":"Unknown","strat":null,"patch":1.1,"GEO":[{"dec":319.84518178476355,"inc":-11.829528350420773,"MAD":9.16495097713391,"cm":[-1.9895196601282805e-12,7.958078640513122e-13,0],"intensity":34665.85312925586,"type":"GC","origin":false,"forced":true,"remark":"","nSteps":8,"minStep":"150","maxStep":"320","steps":["150","180","210","230","250","270","300","320"],"group":"None","version":"v1.1.0"}],"TECT":[{"dec":332.5855266198629,"inc":-51.905371060035215,"MAD":9.1649509771338,"cm":[-2.8421709430404007e-13,1.1368683772161603e-13,5.684341886080802e-14],"intensity":34665.85312925586,"type":"GC","origin":false,"forced":true,"remark":"","nSteps":8,"minStep":"150","maxStep":"320","steps":["150","180","210","230","250","270","300","320"],"group":"None","version":"v1.1.0"}],"interpreted":true,"name":"SS52.04A","coreAzi":199,"coreDip":57,"bedStrike":210,"bedDip":44,"data":[{"visible":true,"include":false,"step":"20","x":-26034.095238095237,"y":13338.57142857143,"z":36569.04761904762,"a95":2,"info":"\"15-06-22\" at \"08:25\""},{"visible":true,"include":false,"step":"100","x":-6019.238095238095,"y":11686.380952380952,"z":22743.619047619046,"a95":2.1,"info":"\"15-06-22\" at \"11:44\""},{"visible":true,"include":true,"step":"150","x":-5397.714285714285,"y":11422.095238095239,"z":23168.285714285714,"a95":2.1,"info":"\"15-06-23\" at \"08:49\""},{"visible":true,"include":true,"step":"180","x":5500.476190476191,"y":8214.285714285714,"z":14603.809523809523,"a95":2.1,"info":"\"15-06-23\" at \"11:52\""},{"visible":true,"include":true,"step":"210","x":5087.523809523809,"y":8895.904761904761,"z":14973.714285714286,"a95":2.1,"info":"\"15-06-23\" at \"14:45\""},{"visible":true,"include":true,"step":"230","x":8133.9047619047615,"y":8015.9047619047615,"z":11091.047619047618,"a95":2,"info":"\"15-06-24\" at \"08:33\""},{"visible":true,"include":true,"step":"250","x":7763.523809523809,"y":8205.333333333334,"z":11106.095238095239,"a95":1.8,"info":"\"15-06-24\" at \"12:25\""},{"visible":true,"include":true,"step":"270","x":9191.904761904761,"y":8612,"z":8776.285714285714,"a95":1.6,"info":"\"15-06-24\" at \"15:50\""},{"visible":true,"include":true,"step":"300","x":9286.761904761905,"y":8357.619047619048,"z":7665.142857142857,"a95":1.6,"info":"\"15-06-25\" at \"10:39\""},{"visible":true,"include":true,"step":"320","x":8093.142857142857,"y":7720.285714285715,"z":5607.142857142857,"a95":1.5,"info":"\"15-06-25\" at \"14:11\""},{"visible":true,"include":false,"step":"340","x":7385.523809523809,"y":8328.285714285714,"z":6007.333333333333,"a95":1.5,"info":"\"15-06-25\" at \"17:09\""},{"visible":true,"include":false,"step":"370","x":5441.142857142857,"y":7716.571428571428,"z":4606,"a95":1.5,"info":"\"15-06-25\" at \"21:22\""},{"visible":true,"include":false,"step":"400","x":6498.952380952381,"y":8138.761904761905,"z":4130.571428571428,"a95":1.5,"info":"\"15-06-26\" at \"08:36\""},{"visible":true,"include":false,"step":"420","x":4876.571428571428,"y":7034.952380952381,"z":2712.9523809523807,"a95":1.4,"info":"\"15-06-26\" at \"11:47\""},{"visible":true,"include":false,"step":"440","x":3957.904761904762,"y":7820.857142857143,"z":2889.6190476190477,"a95":1.5,"info":"\"15-06-27\" at \"10:48\""},{"visible":true,"include":false,"step":"470","x":3627.714285714286,"y":7485.428571428572,"z":1937.3333333333333,"a95":1.5,"info":"\"15-06-29\" at \"07:54\""},{"visible":true,"include":false,"step":"490","x":2150.7619047619046,"y":7597.238095238095,"z":2047.8095238095239,"a95":1.7,"info":"\"15-06-29\" at \"11:04\""},{"visible":true,"include":false,"step":"520","x":3492,"y":7003.809523809524,"z":1304.095238095238,"a95":1.5,"info":"\"15-06-29\" at \"14:57\""},{"visible":false,"include":false,"step":"550","x":3399.4285714285716,"y":7929.428571428572,"z":1749.142857142857,"a95":1.5,"info":"\"15-06-30\" at \"08:15\""},{"visible":false,"include":false,"step":"580","x":2890.8571428571427,"y":6031.047619047619,"z":751.4285714285714,"a95":1.5,"info":"\"15-07-01\" at \"11:27\""}]},{"version":"v1.1.0","exported":"2016-10-11T11:59:50.050Z","volume":10.5,"added":"2016-10-11T11:52:34.269Z","format":"Utrecht","demagType":"Unknown","strat":"8","patch":1.1,"GEO":[{"dec":322.24320791511377,"inc":-18.1649689484637,"MAD":4.98610723808891,"cm":[-4.263256414560601e-13,3.410605131648481e-13,0],"intensity":37274.943469542595,"type":"GC","origin":false,"forced":true,"remark":"","nSteps":15,"minStep":"10.0","maxStep":"70.0","steps":["10.0","15.0","20.0","23.0","25.0","30.0","33.0","35.0","40.0","45.0","50.0","55.0","60.0","65.0","70.0"],"group":"None","version":"v1.1.0"}],"TECT":[{"dec":340.8422127812603,"inc":-56.63449620962943,"MAD":4.986107238088981,"cm":[-7.105427357601002e-13,1.7053025658242404e-13,-8.704148513061227e-14],"intensity":37274.94346954258,"type":"GC","origin":false,"forced":true,"remark":"","nSteps":15,"minStep":"10.0","maxStep":"70.0","steps":["10.0","15.0","20.0","23.0","25.0","30.0","33.0","35.0","40.0","45.0","50.0","55.0","60.0","65.0","70.0"],"group":"None","version":"v1.1.0"}],"interpreted":true,"name":"SS52.05","coreAzi":162,"coreDip":58,"bedStrike":210,"bedDip":44,"data":[{"visible":false,"include":false,"step":"0.0","x":-28878.095238095237,"y":10309.52380952381,"z":24745.714285714286,"a95":0.99,"info":"09/07/2015 at 05:57:24"},{"visible":true,"include":true,"step":"10.0","x":-18303.809523809523,"y":9890.47619047619,"z":18207.619047619046,"a95":0.99,"info":"09/07/2015 at 05:57:24"},{"visible":true,"include":true,"step":"15.0","x":-13555.238095238095,"y":10220.952380952382,"z":15072.380952380952,"a95":0.99,"info":"09/07/2015 at 05:57:24"},{"visible":true,"include":true,"step":"20.0","x":-10266.666666666666,"y":10309.52380952381,"z":13198.095238095239,"a95":0.99,"info":"09/07/2015 at 05:57:24"},{"visible":true,"include":true,"step":"23.0","x":-8553.714285714286,"y":10548.57142857143,"z":12005.714285714286,"a95":0.99,"info":"09/07/2015 at 05:57:24"},{"visible":true,"include":true,"step":"25.0","x":-7795.523809523809,"y":10175.238095238095,"z":10918.095238095239,"a95":0.99,"info":"09/07/2015 at 05:57:24"},{"visible":true,"include":true,"step":"30.0","x":-6084,"y":9698.095238095239,"z":10130.47619047619,"a95":0.99,"info":"09/07/2015 at 05:57:24"},{"visible":true,"include":true,"step":"33.0","x":-5079.238095238095,"y":10383.809523809523,"z":9026.190476190477,"a95":0.99,"info":"09/07/2015 at 05:57:24"},{"visible":true,"include":true,"step":"35.0","x":-5013.714285714285,"y":10531.42857142857,"z":8434.666666666666,"a95":0.99,"info":"09/07/2015 at 05:57:24"},{"visible":true,"include":true,"step":"40.0","x":-3998.4761904761904,"y":10813.333333333334,"z":8271.809523809523,"a95":0.99,"info":"09/07/2015 at 05:57:24"},{"visible":true,"include":true,"step":"45.0","x":-3210.095238095238,"y":11010.47619047619,"z":7264,"a95":0.99,"info":"09/07/2015 at 05:57:24"},{"visible":true,"include":true,"step":"50.0","x":-2515.2380952380954,"y":10412.380952380952,"z":6007.523809523809,"a95":0.99,"info":"09/07/2015 at 05:57:24"},{"visible":true,"include":true,"step":"55.0","x":-2006.095238095238,"y":10942.857142857143,"z":6621.238095238095,"a95":0.99,"info":"09/07/2015 at 05:57:24"},{"visible":true,"include":true,"step":"60.0","x":-1735.6190476190477,"y":10991.42857142857,"z":5782.0952380952385,"a95":0.99,"info":"09/07/2015 at 05:57:24"},{"visible":true,"include":true,"step":"65.0","x":-1720,"y":10601.904761904761,"z":5382.857142857143,"a95":0.99,"info":"09/07/2015 at 05:57:24"},{"visible":true,"include":true,"step":"70.0","x":-1365.7142857142858,"y":11084.761904761905,"z":5510.952380952381,"a95":0.99,"info":"09/07/2015 at 05:57:24"},{"visible":true,"include":false,"step":"80.0","x":-767.8761904761905,"y":11520,"z":3812,"a95":0.99,"info":"09/07/2015 at 05:57:24"}]},{"version":"v1.1.0","exported":"2016-10-11T11:59:50.050Z","volume":10.5,"added":"2016-10-11T11:52:34.272Z","format":"Utrecht","demagType":"Unknown","strat":null,"patch":1.1,"GEO":[{"dec":310.6546706261165,"inc":-26.062042867855162,"MAD":6.069324278661973,"cm":[-1.7053025658242404e-13,2.2737367544323206e-13,0],"intensity":23307.88246140063,"type":"GC","origin":false,"forced":true,"remark":"","nSteps":8,"minStep":"100","maxStep":"300","steps":["100","150","180","210","230","250","270","300"],"group":"None","version":"v1.1.0"}],"TECT":[{"dec":326.72582568767297,"inc":-68.32655725197425,"MAD":6.069324278661144,"cm":[-5.115907697472721e-13,-5.684341886080801e-13,-2.7000623958883807e-13],"intensity":23307.882461400637,"type":"GC","origin":false,"forced":true,"remark":"","nSteps":8,"minStep":"100","maxStep":"300","steps":["100","150","180","210","230","250","270","300"],"group":"None","version":"v1.1.0"}],"interpreted":true,"name":"SS52.07A","coreAzi":306,"coreDip":67,"bedStrike":210,"bedDip":44,"data":[{"visible":true,"include":false,"step":"20","x":1558.952380952381,"y":-4444.380952380952,"z":18565.238095238095,"a95":2.2,"info":"\"15-06-22\" at \"08:27\""},{"visible":true,"include":true,"step":"100","x":1080,"y":-8012.761904761905,"z":10827.904761904761,"a95":1.9,"info":"\"15-06-22\" at \"11:46\""},{"visible":true,"include":true,"step":"150","x":1261.142857142857,"y":-8307.809523809523,"z":10159.238095238095,"a95":1.9,"info":"\"15-06-23\" at \"08:51\""},{"visible":true,"include":true,"step":"180","x":950.3809523809524,"y":-9620.761904761905,"z":7353.428571428572,"a95":1.6,"info":"\"15-06-23\" at \"11:54\""},{"visible":true,"include":true,"step":"210","x":1423.8095238095239,"y":-9504.761904761905,"z":6413.619047619048,"a95":1.5,"info":"\"15-06-23\" at \"14:47\""},{"visible":true,"include":true,"step":"230","x":881.1428571428571,"y":-9593.333333333334,"z":5073.9047619047615,"a95":1.6,"info":"\"15-06-24\" at \"08:35\""},{"visible":true,"include":true,"step":"250","x":616,"y":-9626.285714285714,"z":4883.333333333333,"a95":1.5,"info":"\"15-06-24\" at \"12:27\""},{"visible":true,"include":true,"step":"270","x":1262.7619047619048,"y":-9467.904761904761,"z":4472.571428571428,"a95":1.5,"info":"\"15-06-24\" at \"15:52\""},{"visible":true,"include":true,"step":"300","x":852,"y":-9354,"z":4596.761904761905,"a95":1.5,"info":"\"15-06-25\" at \"10:40\""},{"visible":true,"include":false,"step":"320","x":1313.8095238095239,"y":-8585.047619047618,"z":3993.809523809524,"a95":1.5,"info":"\"15-06-25\" at \"14:13\""},{"visible":true,"include":false,"step":"340","x":1046.5714285714287,"y":-8607.619047619048,"z":4024.6666666666665,"a95":1.5,"info":"\"15-06-25\" at \"17:11\""},{"visible":true,"include":false,"step":"370","x":796.6666666666666,"y":-7943.142857142857,"z":3669.3333333333335,"a95":1.5,"info":"\"15-06-25\" at \"21:25\""},{"visible":true,"include":false,"step":"400","x":1016,"y":-7537.238095238095,"z":3619.5238095238096,"a95":1.6,"info":"\"15-06-26\" at \"08:38\""},{"visible":true,"include":false,"step":"420","x":1460.5714285714287,"y":-6169.238095238095,"z":3084.5714285714284,"a95":1.5,"info":"\"15-06-26\" at \"11:49\""},{"visible":true,"include":false,"step":"440","x":1230.1904761904761,"y":-5768.761904761905,"z":3184.5714285714284,"a95":1.6,"info":"\"15-06-27\" at \"10:50\""},{"visible":true,"include":false,"step":"470","x":1053.6190476190477,"y":-5564.571428571428,"z":3046.190476190476,"a95":1.7,"info":"\"15-06-29\" at \"07:56\""},{"visible":true,"include":false,"step":"490","x":933.9047619047619,"y":-4696.666666666667,"z":3175.904761904762,"a95":1.8,"info":"\"15-06-29\" at \"11:05\""},{"visible":true,"include":false,"step":"520","x":910.8571428571429,"y":-4253.238095238095,"z":2612,"a95":1.7,"info":"\"15-06-29\" at \"14:59\""},{"visible":true,"include":false,"step":"550","x":714.1904761904761,"y":-3337.4285714285716,"z":2609.0476190476193,"a95":1.9,"info":"\"15-06-30\" at \"08:17\""},{"visible":true,"include":false,"step":"580","x":944.5714285714286,"y":-2941.2380952380954,"z":2466.095238095238,"a95":1.9,"info":"\"15-07-01\" at \"11:29\""}]},{"version":"v1.1.0","exported":"2016-10-11T11:59:50.050Z","volume":10.5,"added":"2016-10-11T11:52:34.273Z","format":"Utrecht","demagType":"Unknown","strat":"3","patch":1.1,"GEO":[{"dec":320.2655057251827,"inc":-23.199687053249086,"MAD":23.06437409586801,"cm":[-2368.42280133465,-8056.026785263455,8336.311154077486],"intensity":11689.555128092665,"type":"GC","origin":false,"forced":false,"remark":"","nSteps":16,"minStep":"10.0","maxStep":"80.0","steps":["10.0","15.0","20.0","23.0","25.0","30.0","33.0","35.0","40.0","45.0","50.0","55.0","60.0","65.0","70.0","80.0"],"group":"None","version":"v1.1.0"}],"TECT":[{"dec":342.5690265828856,"inc":-61.92559735149701,"MAD":23.06437409586837,"cm":[-285.8424905993307,-11663.161694299613,1972.8231424917476],"intensity":11689.55512809266,"type":"GC","origin":false,"forced":false,"remark":"","nSteps":16,"minStep":"10.0","maxStep":"80.0","steps":["10.0","15.0","20.0","23.0","25.0","30.0","33.0","35.0","40.0","45.0","50.0","55.0","60.0","65.0","70.0","80.0"],"group":"None","version":"v1.1.0"}],"interpreted":true,"name":"SS52.08","coreAzi":317,"coreDip":64,"bedStrike":210,"bedDip":44,"data":[{"visible":true,"include":false,"step":"0.0","x":-1509.5238095238096,"y":-4662.380952380952,"z":22383.809523809523,"a95":0.99,"info":"09/07/2015 at 11:23:07"},{"visible":true,"include":true,"step":"10.0","x":-730.1619047619048,"y":-5880.666666666667,"z":17102.85714285714,"a95":0.99,"info":"09/07/2015 at 11:23:07"},{"visible":true,"include":true,"step":"15.0","x":-548.4857142857143,"y":-6988.952380952381,"z":14524.761904761905,"a95":0.99,"info":"09/07/2015 at 11:23:07"},{"visible":true,"include":true,"step":"20.0","x":-455.6952380952381,"y":-7545.333333333333,"z":12700,"a95":0.99,"info":"09/07/2015 at 11:23:07"},{"visible":true,"include":true,"step":"23.0","x":-431.7523809523809,"y":-7698,"z":11780.952380952382,"a95":0.99,"info":"09/07/2015 at 11:23:07"},{"visible":true,"include":true,"step":"25.0","x":-289.65714285714284,"y":-7838.666666666667,"z":11028.57142857143,"a95":0.99,"info":"09/07/2015 at 11:23:07"},{"visible":true,"include":true,"step":"30.0","x":-433.64761904761906,"y":-7689.047619047619,"z":9692.380952380952,"a95":0.99,"info":"09/07/2015 at 11:23:07"},{"visible":true,"include":true,"step":"33.0","x":-12.434285714285714,"y":-7543.428571428572,"z":8734.285714285714,"a95":0.99,"info":"09/07/2015 at 11:23:07"},{"visible":true,"include":true,"step":"35.0","x":-260.2,"y":-7288.476190476191,"z":8261.42857142857,"a95":0.99,"info":"09/07/2015 at 11:23:07"},{"visible":true,"include":true,"step":"40.0","x":-346.8095238095238,"y":-7412.190476190476,"z":8279.142857142857,"a95":0.99,"info":"09/07/2015 at 11:23:07"},{"visible":true,"include":true,"step":"45.0","x":-306.83809523809526,"y":-7497.142857142857,"z":7375.714285714285,"a95":0.99,"info":"09/07/2015 at 11:23:07"},{"visible":true,"include":true,"step":"50.0","x":-50.772380952380956,"y":-7971.809523809524,"z":6843.238095238095,"a95":0.99,"info":"09/07/2015 at 11:23:07"},{"visible":true,"include":true,"step":"55.0","x":181.15238095238095,"y":-7646.380952380952,"z":6541.523809523809,"a95":0.99,"info":"09/07/2015 at 11:23:07"},{"visible":true,"include":true,"step":"60.0","x":-310.31428571428575,"y":-7680.571428571428,"z":6140.571428571428,"a95":0.99,"info":"09/07/2015 at 11:23:07"},{"visible":true,"include":true,"step":"65.0","x":13.69047619047619,"y":-8110.761904761905,"z":5651.523809523809,"a95":0.99,"info":"09/07/2015 at 11:23:07"},{"visible":true,"include":true,"step":"70.0","x":-359.1904761904762,"y":-7890.0952380952385,"z":6073.9047619047615,"a95":0.99,"info":"09/07/2015 at 11:23:07"},{"visible":true,"include":true,"step":"80.0","x":-28.437142857142856,"y":-7431.523809523809,"z":5537.9047619047615,"a95":0.99,"info":"09/07/2015 at 11:23:07"}]},{"version":"v1.1.0","exported":"2016-10-11T11:59:50.050Z","volume":10.5,"added":"2016-10-11T11:52:34.273Z","format":"Utrecht","demagType":"Unknown","strat":"2","patch":1.1,"GEO":[{"dec":289.010387613188,"inc":-51.46292558035253,"MAD":2.596548290897114,"cm":[-1.2647660696529783e-12,8.526512829121202e-14,0],"intensity":15275.915281145504,"type":"GC","origin":false,"forced":true,"remark":"","nSteps":14,"minStep":"20.0","maxStep":"80.0","steps":["20.0","23.0","25.0","30.0","33.0","35.0","40.0","45.0","50.0","55.0","60.0","65.0","70.0","80.0"],"group":"None","version":"v1.1.0"}],"TECT":[{"dec":168.95126331275742,"inc":-80.93908377285999,"MAD":2.5965482908960986,"cm":[2.7000623958883807e-13,-8.526512829121202e-14,4.2454928461665986e-13],"intensity":15275.915281145504,"type":"GC","origin":false,"forced":true,"remark":"","nSteps":14,"minStep":"20.0","maxStep":"80.0","steps":["20.0","23.0","25.0","30.0","33.0","35.0","40.0","45.0","50.0","55.0","60.0","65.0","70.0","80.0"],"group":"None","version":"v1.1.0"}],"interpreted":true,"name":"SS52.09","coreAzi":348,"coreDip":45,"bedStrike":210,"bedDip":44,"data":[{"visible":false,"include":false,"step":"0.0","x":40780.95238095238,"y":-13742.857142857143,"z":53260,"a95":0.99,"info":"09/07/2015 at 11:23:07"},{"visible":false,"include":false,"step":"10.0","x":7822.190476190476,"y":-8694.095238095239,"z":20557.14285714286,"a95":0.99,"info":"09/07/2015 at 11:23:07"},{"visible":false,"include":false,"step":"15.0","x":985.6190476190476,"y":-7502.952380952381,"z":11999.047619047618,"a95":0.99,"info":"09/07/2015 at 11:23:07"},{"visible":true,"include":true,"step":"20.0","x":-1262.2857142857142,"y":-6842.857142857143,"z":7940.285714285715,"a95":0.99,"info":"09/07/2015 at 11:23:07"},{"visible":true,"include":true,"step":"23.0","x":-1971.3333333333333,"y":-6515.523809523809,"z":6086.666666666667,"a95":0.99,"info":"09/07/2015 at 11:23:07"},{"visible":true,"include":true,"step":"25.0","x":-2281.5238095238096,"y":-6466,"z":5489.619047619048,"a95":0.99,"info":"09/07/2015 at 11:23:07"},{"visible":true,"include":true,"step":"30.0","x":-2400.9523809523807,"y":-5982.761904761905,"z":4090.3809523809523,"a95":0.99,"info":"09/07/2015 at 11:23:07"},{"visible":true,"include":true,"step":"33.0","x":-2464.9523809523807,"y":-5701.142857142857,"z":3223.1428571428573,"a95":0.99,"info":"09/07/2015 at 11:23:07"},{"visible":true,"include":true,"step":"35.0","x":-2540.7619047619046,"y":-5616.285714285715,"z":3037.714285714286,"a95":0.99,"info":"09/07/2015 at 11:23:07"},{"visible":true,"include":true,"step":"40.0","x":-2725.2380952380954,"y":-5618.761904761905,"z":2459.0476190476193,"a95":0.99,"info":"09/07/2015 at 11:23:07"},{"visible":true,"include":true,"step":"45.0","x":-3083.0476190476193,"y":-5244.571428571428,"z":1888.095238095238,"a95":0.99,"info":"09/07/2015 at 11:23:07"},{"visible":true,"include":true,"step":"50.0","x":-3011.2380952380954,"y":-5365.333333333333,"z":1283.4285714285713,"a95":0.99,"info":"09/07/2015 at 11:23:07"},{"visible":true,"include":true,"step":"55.0","x":-3095.0476190476193,"y":-5240.190476190476,"z":1267.904761904762,"a95":0.99,"info":"09/07/2015 at 11:23:07"},{"visible":true,"include":true,"step":"60.0","x":-3032,"y":-5378,"z":1347.2380952380952,"a95":0.99,"info":"09/07/2015 at 11:23:07"},{"visible":true,"include":true,"step":"65.0","x":-3254.190476190476,"y":-5374.285714285715,"z":826.5904761904762,"a95":0.99,"info":"09/07/2015 at 11:23:07"},{"visible":true,"include":true,"step":"70.0","x":-3255.904761904762,"y":-5472.476190476191,"z":1096.4761904761904,"a95":0.99,"info":"09/07/2015 at 11:23:07"},{"visible":true,"include":true,"step":"80.0","x":-3388.3809523809523,"y":-5069.238095238095,"z":415.9619047619048,"a95":0.99,"info":"09/07/2015 at 11:23:07"}]},{"version":"v1.1.0","exported":"2016-10-11T11:59:50.050Z","volume":10.5,"added":"2016-10-11T11:52:34.275Z","format":"Utrecht","demagType":"Unknown","strat":"4","patch":1.1,"GEO":[{"dec":308.2596824585221,"inc":-29.486758731033206,"MAD":2.1806234581500714,"cm":[-2.1600499167107046e-12,1.3642420526593924e-12,0],"intensity":27844.420051095683,"type":"GC","origin":false,"forced":true,"remark":"","nSteps":5,"minStep":"10.0","maxStep":"25.0","steps":["10.0","15.0","20.0","23.0","25.0"],"group":"None","version":"v1.1.0"}],"TECT":[{"dec":324.2393601017785,"inc":-72.26617232489444,"MAD":2.1806234581507344,"cm":[-6.821210263296962e-13,0,9.663381206337363e-13],"intensity":27844.420051095683,"type":"GC","origin":false,"forced":true,"remark":"","nSteps":5,"minStep":"10.0","maxStep":"25.0","steps":["10.0","15.0","20.0","23.0","25.0"],"group":"None","version":"v1.1.0"}],"interpreted":true,"name":"SS52.10","coreAzi":282,"coreDip":66,"bedStrike":210,"bedDip":44,"data":[{"visible":true,"include":false,"step":"0.0","x":-734.0380952380953,"y":7997.142857142857,"z":7080.285714285715,"a95":0.99,"info":"09/07/2015 at 11:23:07"},{"visible":true,"include":true,"step":"10.0","x":4299.142857142857,"y":-6574.380952380952,"z":10672.380952380952,"a95":0.99,"info":"09/07/2015 at 11:23:07"},{"visible":true,"include":true,"step":"15.0","x":5197.809523809524,"y":-8847.619047619048,"z":10262.857142857143,"a95":0.99,"info":"09/07/2015 at 11:23:07"},{"visible":true,"include":true,"step":"20.0","x":5652.285714285715,"y":-9808.57142857143,"z":9674.285714285714,"a95":0.99,"info":"09/07/2015 at 11:23:07"},{"visible":true,"include":true,"step":"23.0","x":5655.428571428572,"y":-10265.714285714286,"z":9319.619047619048,"a95":0.99,"info":"09/07/2015 at 11:23:07"},{"visible":true,"include":true,"step":"25.0","x":5654.380952380952,"y":-10484.761904761905,"z":8954.761904761905,"a95":0.99,"info":"09/07/2015 at 11:23:07"},{"visible":true,"include":false,"step":"30.0","x":5532.0952380952385,"y":-10375.238095238095,"z":7975.047619047619,"a95":0.99,"info":"09/07/2015 at 11:23:07"},{"visible":true,"include":false,"step":"33.0","x":5499.619047619048,"y":-10499.047619047618,"z":7761.428571428572,"a95":0.99,"info":"09/07/2015 at 11:23:07"},{"visible":true,"include":false,"step":"35.0","x":5530.857142857143,"y":-10640,"z":7536.666666666667,"a95":0.99,"info":"09/07/2015 at 11:23:07"},{"visible":true,"include":false,"step":"40.0","x":5667.047619047619,"y":-10704.761904761905,"z":7307.047619047619,"a95":0.99,"info":"09/07/2015 at 11:23:07"},{"visible":true,"include":false,"step":"45.0","x":5753.047619047619,"y":-10968.57142857143,"z":6906.952380952381,"a95":0.99,"info":"09/07/2015 at 11:23:07"},{"visible":true,"include":false,"step":"50.0","x":5702.761904761905,"y":-11069.52380952381,"z":6504.190476190476,"a95":0.99,"info":"09/07/2015 at 11:23:07"},{"visible":true,"include":false,"step":"55.0","x":5631.238095238095,"y":-11146.666666666666,"z":6099.238095238095,"a95":0.99,"info":"09/07/2015 at 11:23:07"},{"visible":true,"include":false,"step":"60.0","x":5771.238095238095,"y":-11147.619047619048,"z":5902.761904761905,"a95":0.99,"info":"09/07/2015 at 11:23:07"},{"visible":true,"include":false,"step":"65.0","x":5576.0952380952385,"y":-11360.952380952382,"z":5740.571428571428,"a95":0.99,"info":"09/07/2015 at 11:23:07"},{"visible":true,"include":false,"step":"70.0","x":5822,"y":-11218.095238095239,"z":5484.952380952381,"a95":0.99,"info":"09/07/2015 at 11:23:07"},{"visible":true,"include":false,"step":"80.0","x":5829.428571428572,"y":-11124.761904761905,"z":5138,"a95":0.99,"info":"09/07/2015 at 11:23:07"}]},{"version":"v1.1.0","exported":"2016-10-11T11:59:50.050Z","volume":10.5,"added":"2016-10-11T11:52:34.275Z","format":"Utrecht","demagType":"Unknown","strat":"5","patch":1.1,"GEO":[{"dec":294.36896181944326,"inc":-26.832379828964605,"MAD":12.741344048202475,"cm":[-2.9558577807620168e-12,6.59383658785373e-12,0],"intensity":275971.9326096394,"type":"GC","origin":false,"forced":true,"remark":"","nSteps":7,"minStep":"15.0","maxStep":"35.0","steps":["15.0","20.0","23.0","25.0","30.0","33.0","35.0"],"group":"None","version":"v1.1.0"}],"TECT":[{"dec":284.9325085630035,"inc":-70.31705536609353,"MAD":12.74134404823139,"cm":[-5.4569682106375694e-12,1.6711965145077556e-11,3.836930773104541e-12],"intensity":275971.9326096394,"type":"GC","origin":false,"forced":true,"remark":"","nSteps":7,"minStep":"15.0","maxStep":"35.0","steps":["15.0","20.0","23.0","25.0","30.0","33.0","35.0"],"group":"None","version":"v1.1.0"}],"interpreted":true,"name":"SS52.11","coreAzi":321,"coreDip":45,"bedStrike":210,"bedDip":44,"data":[{"visible":false,"include":false,"step":"0.0","x":362961.90476190473,"y":1102761.9047619049,"z":178219.04761904763,"a95":0.99,"info":"09/07/2015 at 11:23:07"},{"visible":false,"include":false,"step":"10.0","x":187295.2380952381,"y":512238.09523809527,"z":94123.80952380953,"a95":0.99,"info":"09/07/2015 at 11:23:07"},{"visible":true,"include":true,"step":"15.0","x":89928.57142857143,"y":230238.09523809524,"z":51814.28571428572,"a95":0.99,"info":"09/07/2015 at 11:23:07"},{"visible":true,"include":true,"step":"20.0","x":43066.666666666664,"y":111380.95238095238,"z":27900,"a95":0.99,"info":"09/07/2015 at 11:23:07"},{"visible":true,"include":true,"step":"23.0","x":28480,"y":75137.14285714286,"z":18377.14285714286,"a95":0.99,"info":"09/07/2015 at 11:23:07"},{"visible":true,"include":true,"step":"25.0","x":22377.14285714286,"y":58801.90476190476,"z":14755.238095238095,"a95":0.99,"info":"09/07/2015 at 11:23:07"},{"visible":true,"include":true,"step":"30.0","x":12686.666666666666,"y":35424.76190476191,"z":9847.619047619048,"a95":0.99,"info":"09/07/2015 at 11:23:07"},{"visible":true,"include":true,"step":"33.0","x":10120,"y":26101.904761904763,"z":7523.714285714285,"a95":0.99,"info":"09/07/2015 at 11:23:07"},{"visible":true,"include":true,"step":"35.0","x":8196.095238095239,"y":21040,"z":6421.238095238095,"a95":0.99,"info":"09/07/2015 at 11:23:07"},{"visible":true,"include":false,"step":"40.0","x":6009.428571428572,"y":15523.809523809523,"z":5730.666666666667,"a95":0.99,"info":"09/07/2015 at 11:23:07"},{"visible":true,"include":false,"step":"45.0","x":4394.952380952381,"y":10180,"z":4058.4761904761904,"a95":0.99,"info":"09/07/2015 at 11:23:07"},{"visible":true,"include":false,"step":"50.0","x":2903.6190476190477,"y":5592.761904761905,"z":3505.904761904762,"a95":0.99,"info":"09/07/2015 at 11:23:07"},{"visible":true,"include":false,"step":"55.0","x":2548.095238095238,"y":3497.4285714285716,"z":2859.4285714285716,"a95":0.99,"info":"09/07/2015 at 11:23:07"},{"visible":true,"include":false,"step":"60.0","x":1924.857142857143,"y":1360.1904761904761,"z":2201.1428571428573,"a95":0.99,"info":"09/07/2015 at 11:23:07"},{"visible":true,"include":false,"step":"65.0","x":1932.3809523809523,"y":50.69619047619047,"z":1954,"a95":0.99,"info":"09/07/2015 at 11:23:07"},{"visible":true,"include":false,"step":"70.0","x":1278.6666666666667,"y":-1020.3809523809524,"z":2591.4285714285716,"a95":0.99,"info":"09/07/2015 at 11:23:07"},{"visible":false,"include":false,"step":"80.0","x":687.8190476190476,"y":-1725.2380952380952,"z":1459.2380952380952,"a95":0.99,"info":"09/07/2015 at 11:23:07"}]},{"version":"v1.1.0","exported":"2016-10-11T11:59:50.050Z","volume":10.5,"added":"2016-10-11T11:52:34.275Z","format":"Utrecht","demagType":"Unknown","strat":null,"patch":1.1,"GEO":[{"dec":137.7246061271171,"inc":-62.997921132005864,"MAD":10.746982133540978,"cm":[5.002220859751105e-12,-6.821210263296962e-12,0],"intensity":183536.45754565537,"type":"GC","origin":false,"forced":true,"remark":"","nSteps":6,"minStep":"420","maxStep":"550","steps":["420","440","470","490","520","550"],"group":"None","version":"v1.1.0"}],"TECT":[{"dec":128.45360624064085,"inc":-19.90765579040218,"MAD":10.746982133514768,"cm":[-8.640199666842818e-12,1.000444171950221e-11,-4.376943252282217e-12],"intensity":183536.45754565534,"type":"GC","origin":false,"forced":true,"remark":"","nSteps":6,"minStep":"420","maxStep":"550","steps":["420","440","470","490","520","550"],"group":"None","version":"v1.1.0"}],"interpreted":true,"name":"SS52.11B","coreAzi":321,"coreDip":45,"bedStrike":210,"bedDip":44,"data":[{"visible":true,"include":false,"step":"20","x":363838.7619047619,"y":1589565.7142857143,"z":162740.7619047619,"a95":1.4,"info":"\"15-06-22\" at \"08:33\""},{"visible":true,"include":false,"step":"100","x":282488.5714285714,"y":1244520,"z":152859.90476190476,"a95":1.5,"info":"\"15-06-22\" at \"11:48\""},{"visible":true,"include":false,"step":"150","x":255187.04761904763,"y":1063609.5238095238,"z":103729.42857142857,"a95":1.4,"info":"\"15-06-23\" at \"08:53\""},{"visible":true,"include":false,"step":"180","x":212545.90476190476,"y":819898.380952381,"z":102741.52380952382,"a95":1.5,"info":"\"15-06-23\" at \"11:56\""},{"visible":true,"include":false,"step":"210","x":203897.42857142858,"y":692652.4761904762,"z":76904.28571428571,"a95":1.5,"info":"\"15-06-23\" at \"14:48\""},{"visible":true,"include":false,"step":"230","x":125226.85714285714,"y":496820,"z":55573.71428571428,"a95":1.5,"info":"\"15-06-24\" at \"08:36\""},{"visible":true,"include":false,"step":"250","x":128291.61904761905,"y":462542.95238095237,"z":53489.42857142857,"a95":1.5,"info":"\"15-06-24\" at \"12:29\""},{"visible":true,"include":false,"step":"270","x":104480.28571428571,"y":362384.09523809527,"z":33564.380952380954,"a95":1.4,"info":"\"15-06-24\" at \"15:54\""},{"visible":true,"include":false,"step":"300","x":101813.04761904762,"y":320541.5238095238,"z":39222.76190476191,"a95":1.4,"info":"\"15-06-25\" at \"11:10\""},{"visible":true,"include":false,"step":"320","x":72796.66666666667,"y":238906.7619047619,"z":29062.761904761905,"a95":1.4,"info":"\"15-06-25\" at \"14:15\""},{"visible":true,"include":false,"step":"340","x":50413.04761904762,"y":222911.14285714287,"z":27750.85714285714,"a95":1.4,"info":"\"15-06-25\" at \"17:12\""},{"visible":true,"include":false,"step":"370","x":54233.52380952381,"y":174584.66666666666,"z":19158.380952380954,"a95":1.4,"info":"\"15-06-25\" at \"21:26\""},{"visible":true,"include":false,"step":"400","x":41549.52380952381,"y":162888.19047619047,"z":18486.761904761905,"a95":1.4,"info":"\"15-06-26\" at \"08:39\""},{"visible":true,"include":true,"step":"420","x":39852.857142857145,"y":131630.95238095237,"z":15965.238095238095,"a95":1.4,"info":"\"15-06-26\" at \"11:50\""},{"visible":true,"include":true,"step":"440","x":36536.28571428572,"y":119885.33333333333,"z":15232.285714285714,"a95":1.4,"info":"\"15-06-27\" at \"10:52\""},{"visible":true,"include":true,"step":"470","x":30423.04761904762,"y":115509.52380952382,"z":13095.142857142857,"a95":1.4,"info":"\"15-06-29\" at \"07:59\""},{"visible":true,"include":true,"step":"490","x":20574.85714285714,"y":71167.33333333333,"z":9212.190476190477,"a95":4.1,"info":"\"15-06-29\" at \"11:07\""},{"visible":true,"include":true,"step":"520","x":20243.14285714286,"y":62233.04761904762,"z":8831.52380952381,"a95":1.4,"info":"\"15-06-29\" at \"15:03\""},{"visible":true,"include":true,"step":"550","x":14897.619047619048,"y":42186.57142857143,"z":5840.380952380952,"a95":1.5,"info":"\"15-06-30\" at \"08:19\""},{"visible":true,"include":false,"step":"580","x":6400.666666666667,"y":18232,"z":2756.3809523809523,"a95":1.5,"info":"\"15-07-01\" at \"11:31\""}]},{"version":"v1.1.0","exported":"2016-10-11T11:59:50.050Z","volume":10.5,"added":"2016-10-11T11:52:34.277Z","format":"Utrecht","demagType":"Unknown","strat":null,"patch":1.1,"GEO":[{"dec":331.3904329208869,"inc":-1.5125702974268693,"MAD":9.491261416100492,"cm":[-3.183231456205249e-12,3.467448550509289e-12,0],"intensity":635733.975264173,"type":"GC","origin":false,"forced":true,"remark":"","nSteps":15,"minStep":"100","maxStep":"470","steps":["100","150","180","210","230","250","270","300","320","340","370","400","420","440","470"],"group":"None","version":"v1.1.0"}],"TECT":[{"dec":341.1651289025647,"inc":-37.71744324077423,"MAD":9.491261415989268,"cm":[-1.8189894035458565e-12,-8.753886504564434e-12,-2.5011104298755527e-12],"intensity":635733.975264173,"type":"GC","origin":false,"forced":true,"remark":"","nSteps":15,"minStep":"100","maxStep":"470","steps":["100","150","180","210","230","250","270","300","320","340","370","400","420","440","470"],"group":"None","version":"v1.1.0"}],"interpreted":true,"name":"SS52.12B","coreAzi":353,"coreDip":51,"bedStrike":210,"bedDip":44,"data":[{"visible":true,"include":false,"step":"20","x":-318215.90476190473,"y":219378.85714285713,"z":564637.3333333334,"a95":2.1,"info":"\"15-06-22\" at \"08:38\""},{"visible":true,"include":true,"step":"100","x":-273022.28571428574,"y":166891.04761904763,"z":465715.71428571426,"a95":2,"info":"\"15-06-22\" at \"11:49\""},{"visible":true,"include":true,"step":"150","x":-226669.42857142858,"y":143724.19047619047,"z":390350.38095238095,"a95":2.1,"info":"\"15-06-23\" at \"08:54\""},{"visible":true,"include":true,"step":"180","x":-184782.66666666666,"y":127574.66666666667,"z":328216.85714285716,"a95":2.1,"info":"\"15-06-23\" at \"11:58\""},{"visible":true,"include":true,"step":"210","x":-161429.42857142858,"y":99850.28571428571,"z":273383.14285714284,"a95":2,"info":"\"15-06-23\" at \"14:50\""},{"visible":true,"include":true,"step":"230","x":-120035.04761904762,"y":78109.61904761905,"z":208414.2857142857,"a95":2.1,"info":"\"15-06-24\" at \"08:38\""},{"visible":true,"include":true,"step":"250","x":-110228.85714285714,"y":69311.80952380953,"z":188611.2380952381,"a95":2,"info":"\"15-06-24\" at \"12:31\""},{"visible":true,"include":true,"step":"270","x":-100412.38095238095,"y":51749.90476190476,"z":165161.04761904763,"a95":2.1,"info":"\"15-06-24\" at \"15:55\""},{"visible":true,"include":true,"step":"300","x":-82363.52380952382,"y":47080.380952380954,"z":136260.19047619047,"a95":2.1,"info":"\"15-06-25\" at \"11:11\""},{"visible":true,"include":true,"step":"320","x":-69825.04761904762,"y":35178.47619047619,"z":114805.71428571429,"a95":2,"info":"\"15-06-25\" at \"14:16\""},{"visible":true,"include":true,"step":"340","x":-62870.19047619047,"y":30182.285714285714,"z":102267.42857142857,"a95":2,"info":"\"15-06-25\" at \"17:14\""},{"visible":true,"include":true,"step":"370","x":-52724.47619047619,"y":25547.14285714286,"z":86644.76190476191,"a95":1.9,"info":"\"15-06-25\" at \"21:28\""},{"visible":true,"include":true,"step":"400","x":-47478.28571428572,"y":21396.761904761905,"z":76733.52380952382,"a95":2,"info":"\"15-06-26\" at \"08:41\""},{"visible":true,"include":true,"step":"420","x":-40233.80952380953,"y":19305.333333333332,"z":67200.09523809524,"a95":1.9,"info":"\"15-06-26\" at \"11:52\""},{"visible":true,"include":true,"step":"440","x":-35489.42857142857,"y":18684.761904761905,"z":61594.57142857143,"a95":1.9,"info":"\"15-06-27\" at \"10:53\""},{"visible":true,"include":true,"step":"470","x":-35876.95238095238,"y":15827.809523809523,"z":59024.95238095238,"a95":1.9,"info":"\"15-06-29\" at \"08:00\""},{"visible":true,"include":false,"step":"490","x":-25812.190476190477,"y":11571.238095238095,"z":43847.90476190476,"a95":2.1,"info":"\"15-06-29\" at \"11:09\""},{"visible":true,"include":false,"step":"520","x":-20332.190476190477,"y":8837.619047619048,"z":34574.666666666664,"a95":2.1,"info":"\"15-06-29\" at \"15:07\""},{"visible":true,"include":false,"step":"550","x":-13543.904761904761,"y":4182.285714285715,"z":21549.809523809523,"a95":2.1,"info":"\"15-06-30\" at \"08:21\""},{"visible":true,"include":false,"step":"580","x":-7439.047619047619,"y":-374.3809523809524,"z":9665.42857142857,"a95":1.9,"info":"\"15-07-01\" at \"11:33\""}]},{"version":"v1.1.0","exported":"2016-10-11T11:59:50.050Z","volume":10.5,"added":"2016-10-11T11:52:34.278Z","format":"Utrecht","demagType":"Unknown","strat":null,"patch":1.1,"GEO":[{"dec":120.39761061278807,"inc":-77.90252005788896,"MAD":16.04295770923413,"cm":[0,-4.3513637137948535e-11,0],"intensity":2634571.646750189,"type":"GC","origin":false,"forced":true,"remark":"","nSteps":4,"minStep":"100","maxStep":"520","steps":["100","470","490","520"],"group":"None","version":"v1.1.0"}],"TECT":[{"dec":120.10039795834632,"inc":-33.90276205071708,"MAD":16.042957709008135,"cm":[4.3655745685100555e-11,-3.4651748137548566e-10,-8.36735125631094e-11],"intensity":2634571.6467501884,"type":"GC","origin":false,"forced":true,"remark":"","nSteps":4,"minStep":"100","maxStep":"520","steps":["100","470","490","520"],"group":"None","version":"v1.1.0"}],"interpreted":true,"name":"SS52.13B","coreAzi":184,"coreDip":67,"bedStrike":210,"bedDip":44,"data":[{"visible":true,"include":false,"step":"20","x":2367297.1428571427,"y":-189864.2857142857,"z":1348148.5714285714,"a95":1.7,"info":"\"15-06-22\" at \"08:40\""},{"visible":true,"include":true,"step":"100","x":2097683.8095238097,"y":-221277.61904761905,"z":1184370.4761904762,"a95":1.7,"info":"\"15-06-22\" at \"11:51\""},{"visible":true,"include":false,"step":"150","x":1763871.4285714286,"y":-120776.76190476191,"z":986827.619047619,"a95":1.7,"info":"\"15-06-23\" at \"08:56\""},{"visible":true,"include":false,"step":"180","x":1581851.4285714286,"y":-116866.85714285714,"z":881541.3333333334,"a95":1.6,"info":"\"15-06-23\" at \"12:00\""},{"visible":true,"include":false,"step":"210","x":1303970.4761904762,"y":-97158.28571428571,"z":728062,"a95":1.6,"info":"\"15-06-23\" at \"14:51\""},{"visible":true,"include":false,"step":"230","x":1052038.0952380951,"y":-137149.7142857143,"z":589667.619047619,"a95":1.7,"info":"\"15-06-24\" at \"08:39\""},{"visible":true,"include":false,"step":"250","x":930017.3333333334,"y":-45209.619047619046,"z":517919.14285714284,"a95":1.7,"info":"\"15-06-24\" at \"12:34\""},{"visible":true,"include":false,"step":"270","x":857527.619047619,"y":-38019.23809523809,"z":479068.1904761905,"a95":1.7,"info":"\"15-06-24\" at \"15:57\""},{"visible":true,"include":false,"step":"300","x":658541.4285714285,"y":-32377.428571428572,"z":367286.6666666667,"a95":1.6,"info":"\"15-06-25\" at \"10:50\""},{"visible":true,"include":false,"step":"320","x":587573.3333333334,"y":-36875.619047619046,"z":324807.4285714286,"a95":1.7,"info":"\"15-06-25\" at \"14:18\""},{"visible":true,"include":false,"step":"340","x":500837.3333333333,"y":-21689.238095238095,"z":279586.85714285716,"a95":1.6,"info":"\"15-06-25\" at \"17:16\""},{"visible":true,"include":false,"step":"370","x":468311.3333333333,"y":2411.1428571428573,"z":258205.7142857143,"a95":1.7,"info":"\"15-06-25\" at \"21:34\""},{"visible":true,"include":false,"step":"400","x":369314.09523809527,"y":-33972.857142857145,"z":206079.90476190476,"a95":1.6,"info":"\"15-06-26\" at \"08:43\""},{"visible":true,"include":false,"step":"420","x":348397.4285714286,"y":-24774.095238095237,"z":191998.38095238095,"a95":1.6,"info":"\"15-06-26\" at \"11:53\""},{"visible":true,"include":false,"step":"440","x":306369.3333333333,"y":-25445.714285714286,"z":168613.90476190476,"a95":1.7,"info":"\"15-06-27\" at \"10:55\""},{"visible":true,"include":true,"step":"470","x":300760.09523809527,"y":-25759.619047619046,"z":166045.14285714287,"a95":1.6,"info":"\"15-06-29\" at \"08:02\""},{"visible":true,"include":true,"step":"490","x":218159.42857142858,"y":-11948.190476190477,"z":121097.14285714286,"a95":1.6,"info":"\"15-06-29\" at \"11:10\""},{"visible":true,"include":true,"step":"520","x":186004.57142857142,"y":-15840.57142857143,"z":107724.76190476191,"a95":1.8,"info":"\"15-06-30\" at \"04:34\""},{"visible":true,"include":false,"step":"550","x":115282.38095238095,"y":-5138.857142857143,"z":63508.76190476191,"a95":1.7,"info":"\"15-06-30\" at \"08:23\""},{"visible":true,"include":false,"step":"580","x":72580.47619047618,"y":-963.7142857142857,"z":39545.333333333336,"a95":1.6,"info":"\"15-07-01\" at \"11:35\""}]},{"version":"v1.1.0","exported":"2016-10-11T11:59:50.050Z","volume":10.5,"added":"2016-10-11T11:52:34.278Z","format":"Utrecht","demagType":"Unknown","strat":"6","patch":1.1,"GEO":[{"dec":311.93651672894885,"inc":-73.60402283310492,"MAD":3.0603585495986376,"cm":[6.821210263296962e-13,-2.3447910280083306e-11,0],"intensity":1030344.5778290896,"type":"GC","origin":false,"forced":true,"remark":"","nSteps":11,"minStep":"10.0","maxStep":"70.0","steps":["10.0","30.0","33.0","35.0","40.0","45.0","50.0","55.0","60.0","65.0","70.0"],"group":"None","version":"v1.1.0"}],"TECT":[{"dec":112.88541256990953,"inc":-61.87620692027869,"MAD":3.0603585495793686,"cm":[2.2737367544323206e-13,3.183231456205249e-12,1.8332002582610585e-12],"intensity":1030344.5778290895,"type":"GC","origin":false,"forced":true,"remark":"","nSteps":11,"minStep":"10.0","maxStep":"70.0","steps":["10.0","30.0","33.0","35.0","40.0","45.0","50.0","55.0","60.0","65.0","70.0"],"group":"None","version":"v1.1.0"}],"interpreted":true,"name":"SS52.14","coreAzi":45,"coreDip":51,"bedStrike":210,"bedDip":44,"data":[{"visible":true,"include":false,"step":"0.0","x":-481809.5238095238,"y":1245428.5714285714,"z":-818771.4285714285,"a95":0.99,"info":"09/07/2015 at 11:23:07"},{"visible":true,"include":true,"step":"10.0","x":-318228.5714285714,"y":792685.7142857143,"z":-545314.2857142857,"a95":0.99,"info":"09/07/2015 at 11:23:07"},{"visible":true,"include":false,"step":"15.0","x":-196257.14285714287,"y":461257.14285714284,"z":-329352.38095238095,"a95":0.99,"info":"09/07/2015 at 11:23:07"},{"visible":true,"include":false,"step":"20.0","x":-118390.47619047618,"y":259380.95238095237,"z":-192819.04761904763,"a95":0.99,"info":"09/07/2015 at 11:23:07"},{"visible":true,"include":false,"step":"23.0","x":-83859.04761904762,"y":178561.90476190476,"z":-135866.66666666666,"a95":0.99,"info":"09/07/2015 at 11:23:07"},{"visible":true,"include":false,"step":"25.0","x":-67848.57142857143,"y":139419.04761904763,"z":-108133.33333333333,"a95":0.99,"info":"09/07/2015 at 11:23:07"},{"visible":true,"include":true,"step":"30.0","x":-42687.619047619046,"y":81977.14285714286,"z":-65216.19047619047,"a95":0.99,"info":"09/07/2015 at 11:23:07"},{"visible":true,"include":true,"step":"33.0","x":-33436.19047619047,"y":61162.857142857145,"z":-49700,"a95":0.99,"info":"09/07/2015 at 11:23:07"},{"visible":true,"include":true,"step":"35.0","x":-28807.619047619046,"y":49903.80952380953,"z":-41492.380952380954,"a95":0.99,"info":"09/07/2015 at 11:23:07"},{"visible":true,"include":true,"step":"40.0","x":-23683.809523809523,"y":39059.04761904762,"z":-32857.142857142855,"a95":0.99,"info":"09/07/2015 at 11:23:07"},{"visible":true,"include":true,"step":"45.0","x":-19188.571428571428,"y":28917.14285714286,"z":-25717.14285714286,"a95":0.99,"info":"09/07/2015 at 11:23:07"},{"visible":true,"include":true,"step":"50.0","x":-15841.904761904761,"y":21394.285714285714,"z":-20193.333333333332,"a95":0.99,"info":"09/07/2015 at 11:23:07"},{"visible":true,"include":true,"step":"55.0","x":-13930.47619047619,"y":16889.52380952381,"z":-16865.714285714286,"a95":0.99,"info":"09/07/2015 at 11:23:07"},{"visible":true,"include":true,"step":"60.0","x":-12525.714285714286,"y":13924.761904761905,"z":-14409.52380952381,"a95":0.99,"info":"09/07/2015 at 11:23:07"},{"visible":true,"include":true,"step":"65.0","x":-11634.285714285714,"y":11187.619047619048,"z":-12732.380952380952,"a95":0.99,"info":"09/07/2015 at 11:23:07"},{"visible":true,"include":true,"step":"70.0","x":-10782.857142857143,"y":9515.047619047618,"z":-11314.285714285714,"a95":0.99,"info":"09/07/2015 at 11:23:07"},{"visible":true,"include":false,"step":"80.0","x":-9959.047619047618,"y":7586,"z":-10083.809523809523,"a95":0.99,"info":"09/07/2015 at 11:23:07"}]}]
