# Supplementary material for: Paleomagnetic constraints on the timing and distribution of Cenozoic rotations in Central and Eastern Anatolia
Source: Copernicus journal article supplement (doi:10.5194/se-9-295-2018), 2018-03-21
Supplement: Supplementary file 2 [file se-9-295-2018-supplement.zip › se-2017-66_DATA_dir files/dir files Sivas/SS53.dir]

[{"version":"v1.1.0","exported":"2016-10-11T15:37:42.533Z","volume":10.5,"added":"2016-10-11T15:17:09.618Z","format":"Utrecht","demagType":"Unknown","strat":null,"patch":1.1,"GEO":[{"dec":146.1516542176463,"inc":-40.27942977757065,"MAD":10.723089192332704,"cm":[-1097.9662680617919,3723.6644366443143,-3760.949422228623],"intensity":2608.638273452905,"type":"dir","forced":false,"remark":"","origin":false,"nSteps":10,"minStep":"230","maxStep":"440","steps":["230","250","270","300","320","340","370","400","420","440"],"group":"None","version":"v1.1.0"}],"TECT":[{"dec":95.14632186718683,"inc":-30.349714479215276,"MAD":10.723089192332692,"cm":[928.5665107224526,5306.965368353162,-435.695000382025],"intensity":2608.6382734529043,"type":"dir","forced":false,"remark":"","origin":false,"nSteps":10,"minStep":"230","maxStep":"440","steps":["230","250","270","300","320","340","370","400","420","440"],"group":"None","version":"v1.1.0"}],"interpreted":true,"name":"SS53.01A","coreAzi":216,"coreDip":67,"bedStrike":128,"bedDip":63,"data":[{"visible":true,"include":false,"step":"20","x":-2609.6190476190477,"y":-2564,"z":-1475.6190476190477,"a95":1.7,"info":"\"15-06-22\" at \"09:07\""},{"visible":true,"include":false,"step":"100","x":-643.5238095238095,"y":-4171.238095238095,"z":-2970.5714285714284,"a95":1.8,"info":"\"15-06-22\" at \"12:17\""},{"visible":true,"include":false,"step":"150","x":19.047619047619047,"y":-4478.380952380952,"z":-3590.7619047619046,"a95":1.8,"info":"\"15-06-23\" at \"09:22\""},{"visible":true,"include":false,"step":"180","x":200.1904761904762,"y":-4845.428571428572,"z":-4698.666666666667,"a95":1.9,"info":"\"15-06-23\" at \"12:29\""},{"visible":true,"include":false,"step":"210","x":394.3809523809524,"y":-4518.476190476191,"z":-3738.8571428571427,"a95":1.7,"info":"\"15-06-23\" at \"15:19\""},{"visible":true,"include":true,"step":"230","x":570,"y":-4298.285714285715,"z":-4259.523809523809,"a95":1.9,"info":"\"15-06-24\" at \"09:52\""},{"visible":true,"include":true,"step":"250","x":499.3333333333333,"y":-4447.333333333333,"z":-4292.571428571428,"a95":1.9,"info":"\"15-06-24\" at \"13:10\""},{"visible":true,"include":true,"step":"270","x":826.2857142857143,"y":-4088.5714285714284,"z":-4370.952380952381,"a95":1.8,"info":"\"15-06-25\" at \"07:33\""},{"visible":true,"include":true,"step":"300","x":717.2380952380952,"y":-3780.3809523809523,"z":-4280.761904761905,"a95":2,"info":"\"15-06-25\" at \"11:18\""},{"visible":true,"include":true,"step":"320","x":590.5714285714286,"y":-4108.476190476191,"z":-4430.0952380952385,"a95":1.9,"info":"\"15-06-25\" at \"14:56\""},{"visible":true,"include":true,"step":"340","x":629.6190476190476,"y":-4215.523809523809,"z":-4283.809523809524,"a95":2,"info":"\"15-06-25\" at \"18:20\""},{"visible":true,"include":true,"step":"370","x":-27.61904761904762,"y":-3474.7619047619046,"z":-3668.285714285714,"a95":2.2,"info":"\"15-06-25\" at \"22:05\""},{"visible":true,"include":true,"step":"400","x":-52.76190476190476,"y":-3158.7619047619046,"z":-3818.9523809523807,"a95":1.9,"info":"\"15-06-26\" at \"09:06\""},{"visible":true,"include":true,"step":"420","x":-405.5238095238095,"y":-2672.9523809523807,"z":-3270.6666666666665,"a95":2,"info":"\"15-06-27\" at \"08:27\""},{"visible":true,"include":true,"step":"440","x":-622.5714285714286,"y":-2333.714285714286,"z":-3025.3333333333335,"a95":1.8,"info":"\"15-06-27\" at \"11:36\""},{"visible":true,"include":false,"step":"470","x":-302.57142857142856,"y":-2074.6666666666665,"z":-3260.3809523809523,"a95":2.1,"info":"\"15-06-27\" at \"14:10\""},{"visible":false,"include":false,"step":"490","x":-41.80952380952381,"y":-2184.095238095238,"z":-2617.5238095238096,"a95":2.1,"info":"\"15-06-29\" at \"11:28\""},{"visible":false,"include":false,"step":"520","x":-462.3809523809524,"y":-1940.095238095238,"z":-2468.8571428571427,"a95":2.4,"info":"\"15-06-30\" at \"04:49\""},{"visible":false,"include":false,"step":"550","x":-553.9047619047619,"y":-2117.6190476190477,"z":-2416,"a95":2.2,"info":"\"15-06-30\" at \"08:37\""},{"visible":false,"include":false,"step":"580","x":-574.4761904761905,"y":-1482.4761904761904,"z":-1735.7142857142858,"a95":2.6,"info":"\"15-07-01\" at \"11:50\""}]},{"version":"v1.1.0","exported":"2016-10-11T15:37:42.533Z","volume":10.5,"added":"2016-10-11T15:17:09.619Z","format":"Utrecht","demagType":"Unknown","strat":"7","patch":1.1,"GEO":[{"dec":6.95211321218585,"inc":-22.445322166159993,"MAD":0.5514756593781063,"cm":[2.842170943040401e-14,1.7053025658242404e-13,0],"intensity":11902.699959051002,"type":"GC","origin":false,"forced":true,"remark":"","nSteps":5,"minStep":"0.0","maxStep":"23.0","steps":["0.0","10.0","15.0","20.0","23.0"],"group":"None","version":"v1.1.0"}],"TECT":[{"dec":183.7336236820047,"inc":-32.15387241525159,"MAD":0.5514756593745308,"cm":[1.5822898546957731e-12,3.410605131648481e-13,-2.4158453015843406e-13],"intensity":11902.699959051004,"type":"GC","origin":false,"forced":true,"remark":"","nSteps":5,"minStep":"0.0","maxStep":"23.0","steps":["0.0","10.0","15.0","20.0","23.0"],"group":"None","version":"v1.1.0"}],"interpreted":true,"name":"SS53.02","coreAzi":277,"coreDip":59,"bedStrike":128,"bedDip":63,"data":[{"visible":true,"include":true,"step":"0.0","x":-3828.7619047619046,"y":-571.6666666666666,"z":-3910.7619047619046,"a95":0.99,"info":"09/07/2015 at 11:23:07"},{"visible":true,"include":true,"step":"10.0","x":-3013.0476190476193,"y":-1173.8095238095239,"z":-5163.523809523809,"a95":0.99,"info":"09/07/2015 at 11:23:07"},{"visible":true,"include":true,"step":"15.0","x":-2599.5238095238096,"y":-1457.8095238095239,"z":-5712.380952380952,"a95":0.99,"info":"09/07/2015 at 11:23:07"},{"visible":true,"include":true,"step":"20.0","x":-2351.714285714286,"y":-1573.8095238095239,"z":-5883.047619047619,"a95":0.99,"info":"09/07/2015 at 11:23:07"},{"visible":true,"include":true,"step":"23.0","x":-2275.904761904762,"y":-1672.1904761904761,"z":-6057.809523809524,"a95":0.99,"info":"09/07/2015 at 11:23:07"},{"visible":true,"include":false,"step":"25.0","x":-2252.7619047619046,"y":-1599.4285714285713,"z":-6356.571428571428,"a95":0.99,"info":"09/07/2015 at 11:23:07"},{"visible":true,"include":false,"step":"30.0","x":-2142.095238095238,"y":-1630,"z":-5908.190476190476,"a95":0.99,"info":"09/07/2015 at 11:23:07"},{"visible":true,"include":false,"step":"33.0","x":-2114.8571428571427,"y":-1570.7619047619048,"z":-6062,"a95":0.99,"info":"09/07/2015 at 11:23:07"},{"visible":true,"include":false,"step":"35.0","x":-1855.8095238095239,"y":-1664.3809523809523,"z":-5979.9047619047615,"a95":0.99,"info":"09/07/2015 at 11:23:07"},{"visible":true,"include":false,"step":"40.0","x":-1912.1904761904761,"y":-1510.095238095238,"z":-5935.714285714285,"a95":0.99,"info":"09/07/2015 at 11:23:07"},{"visible":true,"include":false,"step":"45.0","x":-1840.4761904761904,"y":-1538.2857142857142,"z":-6195.523809523809,"a95":0.99,"info":"09/07/2015 at 11:23:07"},{"visible":true,"include":false,"step":"50.0","x":-1803.3333333333333,"y":-1546.095238095238,"z":-6461.428571428572,"a95":0.99,"info":"09/07/2015 at 11:23:07"},{"visible":true,"include":false,"step":"55.0","x":-1850.952380952381,"y":-1256.952380952381,"z":-6459.142857142857,"a95":0.99,"info":"09/07/2015 at 11:23:07"},{"visible":true,"include":false,"step":"60.0","x":-1747.2380952380952,"y":-1275.6190476190477,"z":-6505.142857142857,"a95":0.99,"info":"09/07/2015 at 11:23:07"},{"visible":true,"include":false,"step":"65.0","x":-1808.095238095238,"y":-1480.857142857143,"z":-6526.761904761905,"a95":0.99,"info":"09/07/2015 at 11:23:07"},{"visible":true,"include":false,"step":"70.0","x":-1768.095238095238,"y":-1354.7619047619048,"z":-6402.285714285715,"a95":0.99,"info":"09/07/2015 at 11:23:07"},{"visible":true,"include":false,"step":"80.0","x":-2002.2857142857142,"y":-1247.2380952380952,"z":-6363.809523809524,"a95":0.99,"info":"09/07/2015 at 11:23:07"}]},{"version":"v1.1.0","exported":"2016-10-11T15:37:42.533Z","volume":10.5,"added":"2016-10-11T15:17:09.620Z","format":"Utrecht","demagType":"Unknown","strat":"6","patch":1.1,"GEO":[{"dec":11.627020012483058,"inc":-24.2565090841762,"MAD":2.063303609020971,"cm":[-1.4210854715202004e-13,-1.7053025658242404e-13,0],"intensity":8951.450477424394,"type":"GC","origin":false,"forced":true,"remark":"","nSteps":5,"minStep":"0.0","maxStep":"23.0","steps":["0.0","10.0","15.0","20.0","23.0"],"group":"None","version":"v1.1.0"}],"TECT":[{"dec":189.20630842406985,"inc":-32.771304618643505,"MAD":2.0633036090213843,"cm":[2.2737367544323206e-13,0,7.105427357601002e-14],"intensity":8951.450477424394,"type":"GC","origin":false,"forced":true,"remark":"","nSteps":5,"minStep":"0.0","maxStep":"23.0","steps":["0.0","10.0","15.0","20.0","23.0"],"group":"None","version":"v1.1.0"}],"interpreted":true,"name":"SS53.03","coreAzi":199,"coreDip":71,"bedStrike":128,"bedDip":63,"data":[{"visible":true,"include":true,"step":"0.0","x":17.836190476190477,"y":-3972,"z":-709.8380952380952,"a95":0.99,"info":"09/07/2015 at 16:48:19"},{"visible":true,"include":true,"step":"10.0","x":918.6666666666666,"y":-4230.476190476191,"z":-1685.142857142857,"a95":0.99,"info":"09/07/2015 at 16:48:19"},{"visible":true,"include":true,"step":"15.0","x":1281.142857142857,"y":-4292.952380952381,"z":-2047.047619047619,"a95":0.99,"info":"09/07/2015 at 16:48:19"},{"visible":true,"include":true,"step":"20.0","x":1454.857142857143,"y":-4300.380952380952,"z":-2336.095238095238,"a95":0.99,"info":"09/07/2015 at 16:48:19"},{"visible":true,"include":true,"step":"23.0","x":1523.8095238095239,"y":-4306.476190476191,"z":-2326.3809523809523,"a95":0.99,"info":"09/07/2015 at 16:48:19"},{"visible":true,"include":false,"step":"25.0","x":1609.142857142857,"y":-4239.809523809524,"z":-2472.285714285714,"a95":0.99,"info":"09/07/2015 at 16:48:19"},{"visible":true,"include":false,"step":"30.0","x":1575.142857142857,"y":-4410,"z":-2737.4285714285716,"a95":0.99,"info":"09/07/2015 at 16:48:19"},{"visible":true,"include":false,"step":"33.0","x":1584,"y":-4234.380952380952,"z":-2728.190476190476,"a95":0.99,"info":"09/07/2015 at 16:48:19"},{"visible":true,"include":false,"step":"35.0","x":1598.6666666666667,"y":-4278.571428571428,"z":-2757.4285714285716,"a95":0.99,"info":"09/07/2015 at 16:48:19"},{"visible":true,"include":false,"step":"40.0","x":1684.6666666666667,"y":-4309.9047619047615,"z":-2796.285714285714,"a95":0.99,"info":"09/07/2015 at 16:48:19"},{"visible":true,"include":false,"step":"45.0","x":1758.095238095238,"y":-4240.857142857143,"z":-2958.3809523809523,"a95":0.99,"info":"09/07/2015 at 16:48:19"},{"visible":true,"include":false,"step":"50.0","x":1911.4285714285713,"y":-4323.9047619047615,"z":-3013.4285714285716,"a95":0.99,"info":"09/07/2015 at 16:48:19"},{"visible":true,"include":false,"step":"55.0","x":1966.3809523809523,"y":-4280.285714285715,"z":-3123.0476190476193,"a95":0.99,"info":"09/07/2015 at 16:48:19"},{"visible":true,"include":false,"step":"60.0","x":1996.095238095238,"y":-4307.142857142857,"z":-3155.6190476190477,"a95":0.99,"info":"09/07/2015 at 16:48:19"},{"visible":true,"include":false,"step":"65.0","x":2113.4285714285716,"y":-4514.666666666667,"z":-3219.904761904762,"a95":0.99,"info":"09/07/2015 at 16:48:19"},{"visible":true,"include":false,"step":"70.0","x":2148.4761904761904,"y":-4439.9047619047615,"z":-3229.0476190476193,"a95":0.99,"info":"09/07/2015 at 16:48:19"},{"visible":true,"include":false,"step":"80.0","x":2073.1428571428573,"y":-4443.142857142857,"z":-3460.190476190476,"a95":0.99,"info":"09/07/2015 at 16:48:19"}]},{"version":"v1.1.0","exported":"2016-10-11T15:37:42.534Z","volume":10.5,"added":"2016-10-11T15:17:09.621Z","format":"Utrecht","demagType":"Unknown","strat":null,"patch":1.1,"GEO":[{"dec":182.03029620759563,"inc":-17.563369084736475,"MAD":8.308476293213749,"cm":[-1621.3203394464167,594.0886737472265,-787.0184197366674],"intensity":1908.4115915391756,"type":"dir","forced":false,"remark":"","origin":false,"nSteps":9,"minStep":"300","maxStep":"520","steps":["300","320","340","370","400","420","470","490","520"],"group":"None","version":"v1.1.0"}],"TECT":[{"dec":136.27361943650772,"inc":-55.53751824370277,"MAD":8.308476293213745,"cm":[-676.3985501908129,1332.342485865639,-1169.7724095050794],"intensity":1908.411591539176,"type":"dir","forced":false,"remark":"","origin":false,"nSteps":9,"minStep":"300","maxStep":"520","steps":["300","320","340","370","400","420","470","490","520"],"group":"None","version":"v1.1.0"}],"interpreted":true,"name":"SS53.04A","coreAzi":170,"coreDip":55,"bedStrike":128,"bedDip":63,"data":[{"visible":false,"include":false,"step":"20","x":-2022.1904761904761,"y":-1707.6190476190477,"z":2392.3809523809523,"a95":1.9,"info":"\"15-06-22\" at \"09:09\""},{"visible":true,"include":false,"step":"100","x":1147.4285714285713,"y":-207.9047619047619,"z":2194.9523809523807,"a95":2.2,"info":"\"15-06-22\" at \"12:19\""},{"visible":true,"include":false,"step":"150","x":1923.047619047619,"y":-204.95238095238096,"z":1872.2857142857142,"a95":1.8,"info":"\"15-06-23\" at \"09:23\""},{"visible":true,"include":false,"step":"180","x":2091.1428571428573,"y":-390.76190476190476,"z":1772.7619047619048,"a95":1.8,"info":"\"15-06-23\" at \"12:31\""},{"visible":false,"include":false,"step":"210","x":1981.904761904762,"y":-411.42857142857144,"z":1728.1904761904761,"a95":1.9,"info":"\"15-06-23\" at \"15:23\""},{"visible":true,"include":false,"step":"230","x":2555.6190476190477,"y":-0.9523809523809523,"z":1368.2857142857142,"a95":1.6,"info":"\"15-06-24\" at \"09:55\""},{"visible":true,"include":false,"step":"250","x":2721.714285714286,"y":119.9047619047619,"z":1221.7142857142858,"a95":1.5,"info":"\"15-06-24\" at \"13:11\""},{"visible":true,"include":false,"step":"270","x":2818.6666666666665,"y":-122.95238095238095,"z":600.2857142857143,"a95":1.3,"info":"\"15-06-25\" at \"07:36\""},{"visible":true,"include":true,"step":"300","x":2652,"y":-170.57142857142858,"z":648.2857142857143,"a95":1.4,"info":"\"15-06-25\" at \"11:20\""},{"visible":true,"include":true,"step":"320","x":2672.285714285714,"y":28.761904761904763,"z":576.5714285714286,"a95":1.4,"info":"\"15-06-25\" at \"14:57\""},{"visible":true,"include":true,"step":"340","x":2688.8571428571427,"y":-179.9047619047619,"z":654.952380952381,"a95":1.5,"info":"\"15-06-25\" at \"18:23\""},{"visible":true,"include":true,"step":"370","x":2232.4761904761904,"y":-188.76190476190476,"z":350.85714285714283,"a95":1.4,"info":"\"15-06-25\" at \"22:06\""},{"visible":true,"include":true,"step":"400","x":1909.142857142857,"y":-403.9047619047619,"z":341.7142857142857,"a95":1.4,"info":"\"15-06-26\" at \"09:07\""},{"visible":true,"include":true,"step":"420","x":1650.5714285714287,"y":-384,"z":165.23809523809524,"a95":1.4,"info":"\"15-06-27\" at \"08:29\""},{"visible":true,"include":false,"step":"440","x":1521.4285714285713,"y":-459.6190476190476,"z":-99.71428571428571,"a95":1.4,"info":"\"15-06-27\" at \"11:37\""},{"visible":true,"include":true,"step":"470","x":1101.047619047619,"y":-536.8571428571429,"z":64.0952380952381,"a95":2.3,"info":"\"15-06-27\" at \"14:11\""},{"visible":true,"include":true,"step":"490","x":818.1904761904761,"y":-511.23809523809524,"z":171.42857142857142,"a95":3.5,"info":"\"15-06-29\" at \"11:29\""},{"visible":true,"include":true,"step":"520","x":870.0952380952381,"y":-385.23809523809524,"z":-0.38095238095238093,"a95":4.3,"info":"\"15-06-30\" at \"04:51\""},{"visible":true,"include":false,"step":"550","x":733.5238095238095,"y":-628.0952380952381,"z":117.23809523809524,"a95":3.3,"info":"\"15-06-30\" at \"08:39\""},{"visible":true,"include":false,"step":"580","x":567.2380952380952,"y":-621.3333333333334,"z":-225.42857142857142,"a95":4.6,"info":"\"15-07-01\" at \"11:51\""}]},{"version":"v1.1.0","exported":"2016-10-11T15:37:42.534Z","volume":10.5,"added":"2016-10-11T15:17:09.622Z","format":"Utrecht","demagType":"Unknown","strat":"8","patch":1.1,"GEO":[{"dec":184.128995062082,"inc":-23.76353945028265,"MAD":1.8451537493521701,"cm":[-1.1368683772161603e-13,1.5134560271690134e-12,0],"intensity":10118.268859012027,"type":"dir","forced":true,"remark":"","origin":false,"nSteps":5,"minStep":"55.0","maxStep":"80.0","steps":["55.0","60.0","65.0","70.0","80.0"],"group":"None","version":"v1.1.0"}],"TECT":[{"dec":126.42153996278029,"inc":-59.31841446621787,"MAD":1.8451537493521486,"cm":[-6.536993168992922e-13,1.2505552149377763e-12,9.663381206337363e-13],"intensity":10118.26885901203,"type":"dir","forced":true,"remark":"","origin":false,"nSteps":5,"minStep":"55.0","maxStep":"80.0","steps":["55.0","60.0","65.0","70.0","80.0"],"group":"None","version":"v1.1.0"}],"interpreted":true,"name":"SS53.05","coreAzi":196,"coreDip":65,"bedStrike":128,"bedDip":63,"data":[{"visible":true,"include":false,"step":"0.0","x":3272.8571428571427,"y":-539.4,"z":2604.6666666666665,"a95":0.99,"info":"09/07/2015 at 11:23:07"},{"visible":true,"include":false,"step":"10.0","x":4380.666666666667,"y":-863.4952380952382,"z":1787.047619047619,"a95":0.99,"info":"09/07/2015 at 11:23:07"},{"visible":true,"include":false,"step":"15.0","x":4845.714285714285,"y":-1091.7142857142858,"z":1275.2380952380952,"a95":0.99,"info":"09/07/2015 at 11:23:07"},{"visible":true,"include":false,"step":"20.0","x":5284.952380952381,"y":-971.8095238095239,"z":1081.2380952380952,"a95":0.99,"info":"09/07/2015 at 11:23:07"},{"visible":true,"include":false,"step":"23.0","x":5236.380952380952,"y":-851.3428571428572,"z":884.2285714285714,"a95":0.99,"info":"09/07/2015 at 11:23:07"},{"visible":true,"include":false,"step":"25.0","x":5329.142857142857,"y":-882.9428571428571,"z":765.5619047619048,"a95":0.99,"info":"09/07/2015 at 11:23:07"},{"visible":true,"include":false,"step":"30.0","x":5173.047619047619,"y":-1050.5714285714287,"z":787.952380952381,"a95":0.99,"info":"09/07/2015 at 11:23:07"},{"visible":true,"include":false,"step":"33.0","x":5226.0952380952385,"y":-902.952380952381,"z":588.8666666666667,"a95":0.99,"info":"09/07/2015 at 11:23:07"},{"visible":true,"include":false,"step":"35.0","x":5309.333333333333,"y":-1094.4761904761904,"z":568.2571428571429,"a95":0.99,"info":"09/07/2015 at 11:23:07"},{"visible":true,"include":false,"step":"40.0","x":5212.857142857143,"y":-893.0285714285714,"z":470.64761904761906,"a95":0.99,"info":"09/07/2015 at 11:23:07"},{"visible":true,"include":false,"step":"45.0","x":5434.952380952381,"y":-768.9809523809524,"z":201.76190476190476,"a95":0.99,"info":"09/07/2015 at 11:23:07"},{"visible":true,"include":false,"step":"50.0","x":5450.571428571428,"y":-980.952380952381,"z":255.86666666666665,"a95":0.99,"info":"09/07/2015 at 11:23:07"},{"visible":true,"include":true,"step":"55.0","x":5258.761904761905,"y":-862.7142857142857,"z":215.15238095238095,"a95":0.99,"info":"09/07/2015 at 11:23:07"},{"visible":true,"include":true,"step":"60.0","x":5548.0952380952385,"y":-1077.142857142857,"z":143.78095238095239,"a95":0.99,"info":"09/07/2015 at 11:23:07"},{"visible":true,"include":true,"step":"65.0","x":5477.047619047619,"y":-1277.047619047619,"z":-86.09904761904761,"a95":0.99,"info":"09/07/2015 at 11:23:07"},{"visible":true,"include":true,"step":"70.0","x":5192.571428571428,"y":-950.8380952380952,"z":134.9904761904762,"a95":0.99,"info":"09/07/2015 at 11:23:07"},{"visible":true,"include":true,"step":"80.0","x":4715.238095238095,"y":-832.8,"z":-60.49142857142857,"a95":0.99,"info":"09/07/2015 at 11:23:07"}]},{"version":"v1.1.0","exported":"2016-10-11T15:37:42.534Z","volume":10.5,"added":"2016-10-11T15:17:09.622Z","format":"Utrecht","demagType":"Unknown","strat":null,"patch":1.1,"GEO":[{"dec":182.84211546433386,"inc":-18.12793614470077,"MAD":5.372583922503879,"cm":[-2759.2572664991912,589.709133212808,-1418.0951256118412],"intensity":3594.682174616825,"type":"dir","forced":false,"remark":"","origin":false,"nSteps":8,"minStep":"320","maxStep":"490","steps":["320","340","370","400","420","440","470","490"],"group":"None","version":"v1.1.0"}],"TECT":[{"dec":135.85687709039087,"inc":-56.46573781289791,"MAD":5.3725839225038925,"cm":[-984.2638909924912,1976.485944640834,-2257.6490456518723],"intensity":3594.682174616824,"type":"dir","forced":false,"remark":"","origin":false,"nSteps":8,"minStep":"320","maxStep":"490","steps":["320","340","370","400","420","440","470","490"],"group":"None","version":"v1.1.0"}],"interpreted":true,"name":"SS53.06A","coreAzi":249,"coreDip":59,"bedStrike":128,"bedDip":63,"data":[{"visible":false,"include":false,"step":"20","x":-611.1428571428571,"y":-2394.095238095238,"z":1209.4285714285713,"a95":1.5,"info":"\"15-06-22\" at \"09:11\""},{"visible":true,"include":false,"step":"100","x":1470.3809523809523,"y":-4941.9047619047615,"z":-357.7142857142857,"a95":1.4,"info":"\"15-06-22\" at \"12:21\""},{"visible":true,"include":false,"step":"150","x":1569.3333333333333,"y":-5361.9047619047615,"z":-866.2857142857143,"a95":1.4,"info":"\"15-06-23\" at \"09:25\""},{"visible":true,"include":false,"step":"180","x":2012.952380952381,"y":-5316.666666666667,"z":-984.7619047619048,"a95":1.4,"info":"\"15-06-23\" at \"12:33\""},{"visible":true,"include":false,"step":"210","x":2018.5714285714287,"y":-5241.9047619047615,"z":-1361.4285714285713,"a95":1.3,"info":"\"15-06-23\" at \"15:24\""},{"visible":true,"include":false,"step":"230","x":1974.7619047619048,"y":-5488,"z":-1164,"a95":1.4,"info":"\"15-06-24\" at \"09:57\""},{"visible":true,"include":false,"step":"250","x":1838.7619047619048,"y":-5370.857142857143,"z":-1241.2380952380952,"a95":1.4,"info":"\"15-06-24\" at \"13:13\""},{"visible":true,"include":false,"step":"270","x":2170.5714285714284,"y":-4650.190476190476,"z":-1010.2857142857143,"a95":1.4,"info":"\"15-06-25\" at \"07:44\""},{"visible":true,"include":false,"step":"300","x":1978.6666666666667,"y":-4823.428571428572,"z":-1189.7142857142858,"a95":1.3,"info":"\"15-06-25\" at \"11:22\""},{"visible":true,"include":true,"step":"320","x":2052,"y":-4579.238095238095,"z":-992.7619047619048,"a95":1.4,"info":"\"15-06-25\" at \"15:00\""},{"visible":true,"include":true,"step":"340","x":1866.095238095238,"y":-4208.0952380952385,"z":-1062,"a95":1.5,"info":"\"15-06-25\" at \"18:24\""},{"visible":true,"include":true,"step":"370","x":1556.1904761904761,"y":-3542.8571428571427,"z":-1205.8095238095239,"a95":1.6,"info":"\"15-06-25\" at \"22:08\""},{"visible":true,"include":true,"step":"400","x":1298.5714285714287,"y":-2850.7619047619046,"z":-1117.8095238095239,"a95":1.4,"info":"\"15-06-26\" at \"09:09\""},{"visible":true,"include":true,"step":"420","x":786.0952380952381,"y":-2156.3809523809523,"z":-1000.7619047619048,"a95":1.6,"info":"\"15-06-27\" at \"08:31\""},{"visible":true,"include":true,"step":"440","x":552.4761904761905,"y":-1708.3809523809523,"z":-804.6666666666666,"a95":1.6,"info":"\"15-06-27\" at \"11:39\""},{"visible":true,"include":true,"step":"470","x":472.4761904761905,"y":-1786,"z":-941.7142857142857,"a95":1.7,"info":"\"15-06-27\" at \"14:13\""},{"visible":true,"include":true,"step":"490","x":264.57142857142856,"y":-1466.857142857143,"z":-792.952380952381,"a95":2.2,"info":"\"15-06-29\" at \"11:31\""},{"visible":true,"include":false,"step":"520","x":293.23809523809524,"y":-960.1904761904761,"z":-922.952380952381,"a95":3,"info":"\"15-06-30\" at \"04:52\""},{"visible":true,"include":false,"step":"550","x":241.61904761904762,"y":-724,"z":-1209.3333333333333,"a95":2.4,"info":"\"15-06-30\" at \"08:41\""},{"visible":true,"include":false,"step":"580","x":-161.8095238095238,"y":-525.8095238095239,"z":-862.952380952381,"a95":2.9,"info":"\"15-07-01\" at \"11:53\""}]},{"version":"v1.1.0","exported":"2016-10-11T15:37:42.534Z","volume":10.5,"added":"2016-10-11T15:17:09.626Z","format":"Utrecht","demagType":"Unknown","strat":"1","patch":1.1,"GEO":[{"dec":82.66751227862369,"inc":-0.728349257474778,"MAD":7.160764782548421,"cm":[0,-9.237055564881302e-14,0],"intensity":10419.55528727936,"type":"GC","origin":false,"forced":true,"remark":"","nSteps":5,"minStep":"0.0","maxStep":"23.0","steps":["0.0","10.0","15.0","20.0","23.0"],"group":"None","version":"v1.1.0"}],"TECT":[{"dec":279.83365003574136,"inc":-48.811569117285465,"MAD":7.1607647825363765,"cm":[5.115907697472721e-13,-2.2737367544323206e-13,-3.979039320256561e-13],"intensity":10419.55528727936,"type":"GC","origin":false,"forced":true,"remark":"","nSteps":5,"minStep":"0.0","maxStep":"23.0","steps":["0.0","10.0","15.0","20.0","23.0"],"group":"None","version":"v1.1.0"}],"interpreted":true,"name":"SS53.07","coreAzi":280,"coreDip":61,"bedStrike":145,"bedDip":59,"data":[{"visible":true,"include":true,"step":"0.0","x":-455.7333333333333,"y":-4596,"z":-2106.3809523809523,"a95":0.99,"info":"09/07/2015 at 16:48:19"},{"visible":true,"include":true,"step":"10.0","x":-242.53333333333333,"y":-4681.523809523809,"z":-2451.714285714286,"a95":0.99,"info":"09/07/2015 at 16:48:19"},{"visible":true,"include":true,"step":"15.0","x":-247.97142857142856,"y":-4700.666666666667,"z":-2602.190476190476,"a95":0.99,"info":"09/07/2015 at 16:48:19"},{"visible":true,"include":true,"step":"20.0","x":-177.25714285714287,"y":-4678.0952380952385,"z":-2590.6666666666665,"a95":0.99,"info":"09/07/2015 at 16:48:19"},{"visible":true,"include":true,"step":"23.0","x":-168.82857142857142,"y":-4656.666666666667,"z":-2643.904761904762,"a95":0.99,"info":"09/07/2015 at 16:48:19"},{"visible":true,"include":false,"step":"25.0","x":-171.38095238095238,"y":-4671.523809523809,"z":-2710.190476190476,"a95":0.99,"info":"09/07/2015 at 16:48:19"},{"visible":true,"include":false,"step":"30.0","x":-148.17142857142858,"y":-4529.142857142857,"z":-2790.6666666666665,"a95":0.99,"info":"09/07/2015 at 16:48:19"},{"visible":true,"include":false,"step":"33.0","x":-62.43333333333333,"y":-4580.666666666667,"z":-2788.8571428571427,"a95":0.99,"info":"09/07/2015 at 16:48:19"},{"visible":true,"include":false,"step":"35.0","x":-123.9047619047619,"y":-4582.666666666667,"z":-2910.095238095238,"a95":0.99,"info":"09/07/2015 at 16:48:19"},{"visible":true,"include":false,"step":"40.0","x":-94.23428571428572,"y":-4512.476190476191,"z":-2931.6190476190477,"a95":0.99,"info":"09/07/2015 at 16:48:19"},{"visible":true,"include":false,"step":"45.0","x":-78.4,"y":-4475.9047619047615,"z":-2941.904761904762,"a95":0.99,"info":"09/07/2015 at 16:48:19"},{"visible":true,"include":false,"step":"50.0","x":-77.28476190476191,"y":-4485.333333333333,"z":-2957.904761904762,"a95":0.99,"info":"09/07/2015 at 16:48:19"},{"visible":true,"include":false,"step":"55.0","x":3.8436190476190473,"y":-4505.809523809524,"z":-2998.6666666666665,"a95":0.99,"info":"09/07/2015 at 16:48:19"},{"visible":true,"include":false,"step":"60.0","x":-55.392380952380954,"y":-4443.714285714285,"z":-3001.3333333333335,"a95":0.99,"info":"09/07/2015 at 16:48:19"},{"visible":true,"include":false,"step":"65.0","x":-100,"y":-4451.142857142857,"z":-3109.0476190476193,"a95":0.99,"info":"09/07/2015 at 16:48:19"},{"visible":true,"include":false,"step":"70.0","x":-117.21904761904761,"y":-4378.952380952381,"z":-3004.095238095238,"a95":0.99,"info":"09/07/2015 at 16:48:19"},{"visible":true,"include":false,"step":"80.0","x":1.2879999999999998,"y":-4223.714285714285,"z":-3003.5238095238096,"a95":0.99,"info":"09/07/2015 at 16:48:19"}]},{"version":"v1.1.0","exported":"2016-10-11T15:37:42.534Z","volume":10.5,"added":"2016-10-11T15:17:09.626Z","format":"Utrecht","demagType":"Unknown","strat":"2","patch":1.1,"GEO":[{"dec":61.03709569227016,"inc":-6.94191445788322,"MAD":2.407018242237759,"cm":[-5.684341886080802e-14,-8.526512829121202e-14,0],"intensity":6312.920085031966,"type":"GC","origin":false,"forced":true,"remark":"","nSteps":6,"minStep":"0.0","maxStep":"25.0","steps":["0.0","10.0","15.0","20.0","23.0","25.0"],"group":"None","version":"v1.1.0"}],"TECT":[{"dec":244.68050422979604,"inc":-51.620486714085416,"MAD":2.4070182422370974,"cm":[1.7053025658242404e-13,2.8421709430404007e-13,-7.105427357601002e-14],"intensity":6312.920085031967,"type":"GC","origin":false,"forced":true,"remark":"","nSteps":6,"minStep":"0.0","maxStep":"25.0","steps":["0.0","10.0","15.0","20.0","23.0","25.0"],"group":"None","version":"v1.1.0"}],"interpreted":true,"name":"SS53.09","coreAzi":258,"coreDip":77,"bedStrike":145,"bedDip":59,"data":[{"visible":true,"include":true,"step":"0.0","x":-1152,"y":-2529.5238095238096,"z":876.3238095238095,"a95":0.99,"info":"09/07/2015 at 16:48:19"},{"visible":true,"include":true,"step":"10.0","x":-861.5809523809525,"y":-2961.3333333333335,"z":-226.96190476190475,"a95":0.99,"info":"09/07/2015 at 16:48:19"},{"visible":true,"include":true,"step":"15.0","x":-737.8095238095239,"y":-3314.9523809523807,"z":-742.2476190476191,"a95":0.99,"info":"09/07/2015 at 16:48:19"},{"visible":true,"include":true,"step":"20.0","x":-713.2380952380952,"y":-3209.2380952380954,"z":-1006.1904761904761,"a95":0.99,"info":"09/07/2015 at 16:48:19"},{"visible":true,"include":true,"step":"23.0","x":-648.2857142857143,"y":-3296.7619047619046,"z":-1186.6666666666667,"a95":0.99,"info":"09/07/2015 at 16:48:19"},{"visible":true,"include":true,"step":"25.0","x":-619.3142857142857,"y":-3511.0476190476193,"z":-1352.6666666666667,"a95":0.99,"info":"09/07/2015 at 16:48:19"},{"visible":true,"include":false,"step":"30.0","x":-533.152380952381,"y":-3171.2380952380954,"z":-1606.2857142857142,"a95":0.99,"info":"09/07/2015 at 16:48:19"},{"visible":true,"include":false,"step":"33.0","x":-530.1714285714286,"y":-3258.190476190476,"z":-1687.6190476190477,"a95":0.99,"info":"09/07/2015 at 16:48:19"},{"visible":true,"include":false,"step":"35.0","x":-808.2095238095238,"y":-3462.095238095238,"z":-1901.904761904762,"a95":0.99,"info":"09/07/2015 at 16:48:19"},{"visible":true,"include":false,"step":"40.0","x":-734.4190476190475,"y":-2981.5238095238096,"z":-1922.952380952381,"a95":0.99,"info":"09/07/2015 at 16:48:19"},{"visible":true,"include":false,"step":"45.0","x":-733.3142857142857,"y":-3142.7619047619046,"z":-2124.095238095238,"a95":0.99,"info":"09/07/2015 at 16:48:19"},{"visible":true,"include":false,"step":"50.0","x":-718.6476190476191,"y":-3155.5238095238096,"z":-2192.4761904761904,"a95":0.99,"info":"09/07/2015 at 16:48:19"},{"visible":true,"include":false,"step":"55.0","x":-630.047619047619,"y":-3221.2380952380954,"z":-2056.3809523809523,"a95":0.99,"info":"09/07/2015 at 16:48:19"},{"visible":true,"include":false,"step":"60.0","x":-747.9142857142857,"y":-3119.0476190476193,"z":-2180.4761904761904,"a95":0.99,"info":"09/07/2015 at 16:48:19"},{"visible":true,"include":false,"step":"65.0","x":-715.0095238095239,"y":-3344.095238095238,"z":-2369.2380952380954,"a95":0.99,"info":"09/07/2015 at 16:48:19"},{"visible":true,"include":false,"step":"70.0","x":-765.3809523809524,"y":-3269.714285714286,"z":-2714.5714285714284,"a95":0.99,"info":"09/07/2015 at 16:48:19"},{"visible":true,"include":false,"step":"80.0","x":-528,"y":-3248.4761904761904,"z":-2579.809523809524,"a95":0.99,"info":"09/07/2015 at 16:48:19"}]},{"version":"v1.1.0","exported":"2016-10-11T15:37:42.534Z","volume":10.5,"added":"2016-10-11T15:17:09.627Z","format":"Utrecht","demagType":"Unknown","strat":"3","patch":1.1,"GEO":[{"dec":276.8393480452133,"inc":-1.5200700487604941,"MAD":8.2031065946506,"cm":[1.7053025658242404e-13,-3.623767952376511e-13,0],"intensity":9679.32056357399,"type":"GC","origin":false,"forced":true,"remark":"","nSteps":6,"minStep":"10.0","maxStep":"30.0","steps":["10.0","15.0","20.0","23.0","25.0","30.0"],"group":"None","version":"v1.1.0"}],"TECT":[{"dec":300.58867987411907,"inc":-42.92268852458981,"MAD":8.20310659465045,"cm":[5.684341886080802e-14,-8.810729923425242e-13,-2.8421709430404007e-13],"intensity":9679.320563573989,"type":"GC","origin":false,"forced":true,"remark":"","nSteps":6,"minStep":"10.0","maxStep":"30.0","steps":["10.0","15.0","20.0","23.0","25.0","30.0"],"group":"None","version":"v1.1.0"}],"interpreted":true,"name":"SS53.10","coreAzi":177,"coreDip":78,"bedStrike":145,"bedDip":64,"data":[{"visible":true,"include":true,"step":"0.0","x":3320,"y":1052.6666666666667,"z":2789.1428571428573,"a95":0.99,"info":"09/07/2015 at 16:48:19"},{"visible":true,"include":true,"step":"10.0","x":4297.142857142857,"y":839.1428571428571,"z":1600.095238095238,"a95":0.99,"info":"09/07/2015 at 16:48:19"},{"visible":true,"include":true,"step":"15.0","x":4580.666666666667,"y":696.9904761904761,"z":1052.7619047619048,"a95":0.99,"info":"09/07/2015 at 16:48:19"},{"visible":true,"include":true,"step":"20.0","x":4726,"y":936.5333333333334,"z":811.5714285714286,"a95":0.99,"info":"09/07/2015 at 16:48:19"},{"visible":true,"include":true,"step":"23.0","x":4828.0952380952385,"y":766.4666666666666,"z":476.1333333333333,"a95":0.99,"info":"09/07/2015 at 16:48:19"},{"visible":true,"include":true,"step":"25.0","x":4877.809523809524,"y":819.0952380952381,"z":350.37142857142857,"a95":0.99,"info":"09/07/2015 at 16:48:19"},{"visible":true,"include":true,"step":"30.0","x":5051.428571428572,"y":874.1333333333333,"z":232.42857142857142,"a95":0.99,"info":"09/07/2015 at 16:48:19"},{"visible":true,"include":false,"step":"33.0","x":5068.380952380952,"y":706.2666666666667,"z":46.73142857142857,"a95":0.99,"info":"09/07/2015 at 16:48:19"},{"visible":true,"include":false,"step":"35.0","x":5030.761904761905,"y":768.0952380952381,"z":73.8047619047619,"a95":0.99,"info":"09/07/2015 at 16:48:19"},{"visible":true,"include":false,"step":"40.0","x":5173.714285714285,"y":808.895238095238,"z":12.247619047619047,"a95":0.99,"info":"09/07/2015 at 16:48:19"},{"visible":true,"include":false,"step":"45.0","x":5260.476190476191,"y":707.4095238095239,"z":107.94285714285715,"a95":0.99,"info":"09/07/2015 at 16:48:19"},{"visible":true,"include":false,"step":"50.0","x":5172.857142857143,"y":609.4571428571429,"z":-80.28761904761905,"a95":0.99,"info":"09/07/2015 at 16:48:19"},{"visible":true,"include":false,"step":"55.0","x":5501.523809523809,"y":654.4857142857143,"z":-218.16190476190474,"a95":0.99,"info":"09/07/2015 at 16:48:19"},{"visible":true,"include":false,"step":"60.0","x":5306.571428571428,"y":755.8190476190476,"z":-414.14285714285717,"a95":0.99,"info":"09/07/2015 at 16:48:19"},{"visible":true,"include":false,"step":"65.0","x":5130.380952380952,"y":571.6761904761905,"z":-450.4857142857143,"a95":0.99,"info":"09/07/2015 at 16:48:19"},{"visible":true,"include":false,"step":"70.0","x":5148.761904761905,"y":523.5904761904761,"z":-394.8095238095238,"a95":0.99,"info":"09/07/2015 at 16:48:19"},{"visible":true,"include":false,"step":"80.0","x":5366.476190476191,"y":673.2380952380952,"z":-109.13333333333334,"a95":0.99,"info":"09/07/2015 at 16:48:19"}]},{"version":"v1.1.0","exported":"2016-10-11T15:37:42.535Z","volume":10.5,"added":"2016-10-11T15:17:09.627Z","format":"Utrecht","demagType":"Unknown","strat":"4","patch":1.1,"GEO":[{"dec":72.19425924640541,"inc":-8.250891612378322,"MAD":1.754812779825638,"cm":[-5.684341886080802e-14,-3.694822225952521e-13,0],"intensity":6316.28277013389,"type":"GC","origin":false,"forced":true,"remark":"","nSteps":5,"minStep":"0.0","maxStep":"23.0","steps":["0.0","10.0","15.0","20.0","23.0"],"group":"None","version":"v1.1.0"}],"TECT":[{"dec":263.2956012410175,"inc":-51.8900501317984,"MAD":1.7548127798256437,"cm":[-3.410605131648481e-13,-9.094947017729282e-13,-1.5631940186722204e-13],"intensity":6316.282770133889,"type":"GC","origin":false,"forced":true,"remark":"","nSteps":5,"minStep":"0.0","maxStep":"23.0","steps":["0.0","10.0","15.0","20.0","23.0"],"group":"None","version":"v1.1.0"}],"interpreted":true,"name":"SS53.11","coreAzi":184,"coreDip":64,"bedStrike":145,"bedDip":64,"data":[{"visible":true,"include":true,"step":"0.0","x":704.4380952380952,"y":-1173.8095238095239,"z":3169.2380952380954,"a95":0.99,"info":"09/07/2015 at 16:48:19"},{"visible":true,"include":true,"step":"10.0","x":1898.7619047619048,"y":-1306,"z":2220.8571428571427,"a95":0.99,"info":"09/07/2015 at 16:48:19"},{"visible":true,"include":true,"step":"15.0","x":2523.1428571428573,"y":-1280.7619047619048,"z":1650.3809523809523,"a95":0.99,"info":"09/07/2015 at 16:48:19"},{"visible":true,"include":true,"step":"20.0","x":2884.190476190476,"y":-1291.4285714285713,"z":1448.857142857143,"a95":0.99,"info":"09/07/2015 at 16:48:19"},{"visible":true,"include":true,"step":"23.0","x":3128.5714285714284,"y":-1257.3333333333333,"z":1223.142857142857,"a95":0.99,"info":"09/07/2015 at 16:48:19"},{"visible":true,"include":false,"step":"25.0","x":3148.8571428571427,"y":-1240.952380952381,"z":950.9333333333333,"a95":0.99,"info":"09/07/2015 at 16:48:19"},{"visible":true,"include":false,"step":"30.0","x":3187.3333333333335,"y":-1243.5238095238096,"z":774.6857142857143,"a95":0.99,"info":"09/07/2015 at 16:48:19"},{"visible":true,"include":false,"step":"33.0","x":3269.904761904762,"y":-1349.8095238095239,"z":568.504761904762,"a95":0.99,"info":"09/07/2015 at 16:48:19"},{"visible":true,"include":false,"step":"35.0","x":3280.9523809523807,"y":-1423.5238095238096,"z":530.5714285714286,"a95":0.99,"info":"09/07/2015 at 16:48:19"},{"visible":true,"include":false,"step":"40.0","x":3358.190476190476,"y":-1335.047619047619,"z":449.83809523809526,"a95":0.99,"info":"09/07/2015 at 16:48:19"},{"visible":true,"include":false,"step":"45.0","x":3354.9523809523807,"y":-1266.7619047619048,"z":32.71714285714285,"a95":0.99,"info":"09/07/2015 at 16:48:19"},{"visible":true,"include":false,"step":"50.0","x":3223.5238095238096,"y":-1476.952380952381,"z":-77.0952380952381,"a95":0.99,"info":"09/07/2015 at 16:48:19"},{"visible":true,"include":false,"step":"55.0","x":3413.2380952380954,"y":-1193.5238095238096,"z":22.513333333333332,"a95":0.99,"info":"09/07/2015 at 16:48:19"},{"visible":true,"include":false,"step":"60.0","x":3528.6666666666665,"y":-1447.7142857142858,"z":-158.6095238095238,"a95":0.99,"info":"09/07/2015 at 16:48:19"},{"visible":false,"include":false,"step":"65.0","x":3536.5714285714284,"y":-1459.4285714285713,"z":-117.58095238095237,"a95":0.99,"info":"09/07/2015 at 16:48:19"},{"visible":false,"include":false,"step":"70.0","x":3815.2380952380954,"y":-1243.7142857142858,"z":-263.02857142857147,"a95":0.99,"info":"09/07/2015 at 16:48:19"},{"visible":false,"include":false,"step":"80.0","x":3887.1428571428573,"y":-1104.5714285714287,"z":-418,"a95":0.99,"info":"09/07/2015 at 16:48:19"}]},{"version":"v1.1.0","exported":"2016-10-11T15:37:42.535Z","volume":10.5,"added":"2016-10-11T15:17:09.628Z","format":"Utrecht","demagType":"Unknown","strat":"5","patch":1.1,"GEO":[{"dec":269.34763685142246,"inc":-0.834415376028881,"MAD":5.461562608056188,"cm":[0,-6.892264536872972e-13,0],"intensity":8738.911042654488,"type":"GC","origin":false,"forced":true,"remark":"","nSteps":7,"minStep":"10.0","maxStep":"80.0","steps":["10.0","15.0","20.0","23.0","25.0","30.0","80.0"],"group":"None","version":"v1.1.0"}],"TECT":[{"dec":293.2722983104342,"inc":-48.4499036032793,"MAD":5.461562608056145,"cm":[-1.9895196601282805e-13,-9.094947017729282e-13,-5.684341886080801e-13],"intensity":8738.91104265449,"type":"GC","origin":false,"forced":true,"remark":"","nSteps":7,"minStep":"10.0","maxStep":"80.0","steps":["10.0","15.0","20.0","23.0","25.0","30.0","80.0"],"group":"None","version":"v1.1.0"}],"interpreted":true,"name":"SS53.12","coreAzi":223,"coreDip":51,"bedStrike":145,"bedDip":64,"data":[{"visible":true,"include":false,"step":"0.0","x":848.0666666666667,"y":-2490.190476190476,"z":3452.8571428571427,"a95":0.99,"info":"09/07/2015 at 16:48:19"},{"visible":true,"include":true,"step":"10.0","x":1984.7619047619048,"y":-3047.809523809524,"z":2406.9523809523807,"a95":0.99,"info":"09/07/2015 at 16:48:19"},{"visible":true,"include":true,"step":"15.0","x":2580.285714285714,"y":-3098.3809523809523,"z":2099.5238095238096,"a95":0.99,"info":"09/07/2015 at 16:48:19"},{"visible":true,"include":true,"step":"20.0","x":2905.2380952380954,"y":-3292.190476190476,"z":1748.095238095238,"a95":0.99,"info":"09/07/2015 at 16:48:19"},{"visible":true,"include":true,"step":"23.0","x":3119.0476190476193,"y":-3194.3809523809523,"z":1556.952380952381,"a95":0.99,"info":"09/07/2015 at 16:48:19"},{"visible":true,"include":true,"step":"25.0","x":3181.4285714285716,"y":-3080.190476190476,"z":1429.047619047619,"a95":0.99,"info":"09/07/2015 at 16:48:19"},{"visible":true,"include":true,"step":"30.0","x":3209.2380952380954,"y":-3119.809523809524,"z":1260.6666666666667,"a95":0.99,"info":"09/07/2015 at 16:48:19"},{"visible":true,"include":false,"step":"33.0","x":3269.0476190476193,"y":-3152.190476190476,"z":1284.4761904761904,"a95":0.99,"info":"09/07/2015 at 16:48:19"},{"visible":true,"include":false,"step":"35.0","x":3230.285714285714,"y":-3362.4761904761904,"z":1169.3333333333333,"a95":0.99,"info":"09/07/2015 at 16:48:19"},{"visible":true,"include":false,"step":"40.0","x":3314.8571428571427,"y":-3147.4285714285716,"z":1125.7142857142858,"a95":0.99,"info":"09/07/2015 at 16:48:19"},{"visible":true,"include":false,"step":"45.0","x":3285.3333333333335,"y":-3367.714285714286,"z":966.3809523809524,"a95":0.99,"info":"09/07/2015 at 16:48:19"},{"visible":true,"include":false,"step":"50.0","x":3374.9523809523807,"y":-3368.7619047619046,"z":657.4571428571429,"a95":0.99,"info":"09/07/2015 at 16:48:19"},{"visible":true,"include":false,"step":"55.0","x":3446.095238095238,"y":-3214.5714285714284,"z":862.5047619047618,"a95":0.99,"info":"09/07/2015 at 16:48:19"},{"visible":true,"include":false,"step":"60.0","x":3657.714285714286,"y":-3136.5714285714284,"z":554.4761904761905,"a95":0.99,"info":"09/07/2015 at 16:48:19"},{"visible":true,"include":false,"step":"65.0","x":3690.7619047619046,"y":-3083.904761904762,"z":480.2285714285714,"a95":0.99,"info":"09/07/2015 at 16:48:19"},{"visible":true,"include":false,"step":"70.0","x":3620.095238095238,"y":-3081.1428571428573,"z":531.2476190476191,"a95":0.99,"info":"09/07/2015 at 16:48:19"},{"visible":true,"include":true,"step":"80.0","x":3722.3809523809523,"y":-3041.6190476190477,"z":184.56190476190477,"a95":0.99,"info":"09/07/2015 at 16:48:19"}]}]
