# Supplementary material for: Paleomagnetic constraints on the timing and distribution of Cenozoic rotations in Central and Eastern Anatolia
Source: Copernicus journal article supplement (doi:10.5194/se-9-295-2018), 2018-03-21
Supplement: Supplementary file 2 [file se-9-295-2018-supplement.zip › se-2017-66_DATA_dir files/dir files Sivas/SS54.dir]

[{"version":"v1.1.0","exported":"2016-10-11T11:28:54.844Z","volume":10.5,"added":"2016-10-11T11:23:37.929Z","format":"Utrecht","demagType":"Unknown","strat":null,"patch":1.1,"GEO":[{"dec":316.0622460410083,"inc":17.295706363808737,"MAD":8.061563735358954,"cm":[-1.5543122344752192e-15,-2.220446049250313e-15,0],"intensity":84.97015082140462,"type":"dir","forced":true,"remark":"","origin":false,"nSteps":7,"minStep":"300","maxStep":"440","steps":["300","320","340","370","400","420","440"],"group":"None","version":"v1.1.0"}],"TECT":[{"dec":307.0065727976609,"inc":61.30178444603488,"MAD":8.06156373535894,"cm":[-9.992007221626409e-16,-2.55351295663786e-15,-1.3322676295501878e-15],"intensity":84.97015082140462,"type":"dir","forced":true,"remark":"","origin":false,"nSteps":7,"minStep":"300","maxStep":"440","steps":["300","320","340","370","400","420","440"],"group":"None","version":"v1.1.0"}],"interpreted":true,"name":"SS54.01A","coreAzi":303,"coreDip":48,"bedStrike":55,"bedDip":45,"data":[{"visible":true,"include":false,"step":"20","x":-19.333333333333332,"y":87.9047619047619,"z":287.5238095238095,"a95":2.1,"info":"\"15-06-22\" at \"09:19\""},{"visible":true,"include":false,"step":"100","x":38.38095238095238,"y":32.476190476190474,"z":88.85714285714286,"a95":2.4,"info":"\"15-06-22\" at \"12:29\""},{"visible":false,"include":false,"step":"150","x":-127.33333333333333,"y":10.571428571428571,"z":72.19047619047619,"a95":2.6,"info":"\"15-06-23\" at \"09:34\""},{"visible":true,"include":false,"step":"180","x":61.63809523809524,"y":15.638095238095238,"z":53.599999999999994,"a95":2.2,"info":"\"15-06-23\" at \"12:42\""},{"visible":true,"include":false,"step":"210","x":66.20952380952382,"y":13.438095238095238,"z":37.17142857142857,"a95":2.8,"info":"\"15-06-23\" at \"15:30\""},{"visible":true,"include":false,"step":"230","x":52.542857142857144,"y":10.40952380952381,"z":44.457142857142856,"a95":2.5,"info":"\"15-06-24\" at \"10:05\""},{"visible":true,"include":false,"step":"250","x":39.18095238095238,"y":5.866666666666667,"z":26.80952380952381,"a95":2.8,"info":"\"15-06-24\" at \"13:20\""},{"visible":true,"include":false,"step":"270","x":37.27619047619047,"y":9.295238095238094,"z":30.361904761904764,"a95":2.9,"info":"\"15-06-25\" at \"07:50\""},{"visible":true,"include":true,"step":"300","x":15.171428571428573,"y":13.647619047619049,"z":43.76190476190476,"a95":3.4,"info":"\"15-06-25\" at \"11:28\""},{"visible":true,"include":true,"step":"320","x":23.638095238095236,"y":4.6761904761904765,"z":26.495238095238093,"a95":4.5,"info":"\"15-06-25\" at \"15:06\""},{"visible":true,"include":true,"step":"340","x":20.276190476190475,"y":7.3619047619047615,"z":32.19047619047619,"a95":2.6,"info":"\"15-06-25\" at \"18:32\""},{"visible":true,"include":true,"step":"370","x":22.904761904761905,"y":7.60952380952381,"z":28.20952380952381,"a95":4.5,"info":"\"15-06-25\" at \"22:15\""},{"visible":true,"include":true,"step":"400","x":18.17142857142857,"y":6.438095238095237,"z":32.57142857142857,"a95":3,"info":"\"15-06-26\" at \"09:17\""},{"visible":true,"include":true,"step":"420","x":15.638095238095238,"y":5.0476190476190474,"z":27.342857142857145,"a95":3.6,"info":"\"15-06-27\" at \"08:38\""},{"visible":true,"include":true,"step":"440","x":16.82857142857143,"y":10.952380952380953,"z":31.009523809523813,"a95":2.8,"info":"\"15-06-27\" at \"11:46\""},{"visible":true,"include":false,"step":"470","x":14.876190476190475,"y":3.8857142857142852,"z":37.87619047619047,"a95":4,"info":"\"15-06-27\" at \"14:20\""},{"visible":true,"include":false,"step":"490","x":3.5999999999999996,"y":2.0761904761904764,"z":23.638095238095236,"a95":4.3,"info":"\"15-06-29\" at \"11:39\""}]},{"version":"v1.1.0","exported":"2016-10-11T11:28:54.844Z","volume":10.5,"added":"2016-10-11T11:23:37.929Z","format":"Utrecht","demagType":"Unknown","strat":"0","patch":1.1,"GEO":[{"dec":341.3650383402167,"inc":15.030229074176502,"MAD":3.507292564888696,"cm":[8.881784197001252e-16,6.661338147750939e-16,0],"intensity":100.98445342282433,"type":"dir","forced":true,"remark":"","origin":false,"nSteps":5,"minStep":"33.0","maxStep":"50.0","steps":["33.0","35.0","40.0","45.0","50.0"],"group":"None","version":"v1.1.0"}],"TECT":[{"dec":354.9708067875916,"inc":56.99483582162083,"MAD":3.507292564888773,"cm":[3.552713678800501e-15,6.8833827526759706e-15,-2.6645352591003757e-15],"intensity":100.98445342282432,"type":"dir","forced":true,"remark":"","origin":false,"nSteps":5,"minStep":"33.0","maxStep":"50.0","steps":["33.0","35.0","40.0","45.0","50.0"],"group":"None","version":"v1.1.0"}],"interpreted":true,"name":"SS54.02A","coreAzi":293,"coreDip":41,"bedStrike":55,"bedDip":45,"data":[{"visible":true,"include":false,"step":"0.0","x":-123.74285714285713,"y":188.26666666666665,"z":214.71428571428572,"a95":0.99,"info":"05/10/2015 at 15:09:39"},{"visible":true,"include":false,"step":"10.0","x":-47.48380952380952,"y":118.98095238095237,"z":119.27619047619048,"a95":0.99,"info":"05/10/2015 at 15:09:39"},{"visible":true,"include":false,"step":"15.0","x":-20.48190476190476,"y":91.3552380952381,"z":89.25714285714287,"a95":0.99,"info":"05/10/2015 at 15:09:39"},{"visible":true,"include":false,"step":"20.0","x":-9.31342857142857,"y":81.4,"z":69.48285714285714,"a95":0.99,"info":"05/10/2015 at 15:09:39"},{"visible":true,"include":false,"step":"23.0","x":-0.1295047619047619,"y":67.81333333333333,"z":58.77619047619047,"a95":0.99,"info":"05/10/2015 at 15:09:39"},{"visible":true,"include":false,"step":"25.0","x":1.8341904761904761,"y":61.19333333333333,"z":54.1752380952381,"a95":0.99,"info":"05/10/2015 at 15:09:39"},{"visible":true,"include":false,"step":"30.0","x":10.764761904761905,"y":52.42095238095238,"z":48.70857142857143,"a95":0.99,"info":"05/10/2015 at 15:09:39"},{"visible":true,"include":true,"step":"33.0","x":11.737142857142857,"y":45.80380952380953,"z":41.614285714285714,"a95":0.99,"info":"05/10/2015 at 15:09:39"},{"visible":true,"include":true,"step":"35.0","x":14.461904761904762,"y":41.60952380952381,"z":42.02761904761905,"a95":0.99,"info":"05/10/2015 at 15:09:39"},{"visible":true,"include":true,"step":"40.0","x":13.90952380952381,"y":39.87047619047619,"z":33.46380952380952,"a95":0.99,"info":"05/10/2015 at 15:09:39"},{"visible":true,"include":true,"step":"45.0","x":7.1568571428571435,"y":33.873333333333335,"z":26.96761904761905,"a95":0.99,"info":"05/10/2015 at 15:09:39"},{"visible":true,"include":true,"step":"50.0","x":11.935238095238095,"y":26.34952380952381,"z":24.954285714285714,"a95":0.99,"info":"05/10/2015 at 15:09:39"},{"visible":false,"include":false,"step":"60.0","x":15.180952380952382,"y":15.353333333333333,"z":19.070476190476192,"a95":0.99,"info":"05/10/2015 at 15:09:39"},{"visible":false,"include":false,"step":"70.0","x":7.310190476190477,"y":14.258095238095239,"z":15.970476190476191,"a95":0.99,"info":"05/10/2015 at 15:09:39"}]},{"version":"v1.1.0","exported":"2016-10-11T11:28:54.844Z","volume":10.5,"added":"2016-10-11T11:23:37.929Z","format":"Utrecht","demagType":"Unknown","strat":"7","patch":1.1,"GEO":[{"dec":353.70115901959815,"inc":20.494757912022905,"MAD":4.780247991601649,"cm":[-3.3306690738754696e-16,7.216449660063518e-16,0],"intensity":77.36413063404713,"type":"dir","forced":true,"remark":"","origin":false,"nSteps":12,"minStep":"15.0","maxStep":"60.0","steps":["15.0","20.0","23.0","25.0","30.0","33.0","35.0","40.0","45.0","50.0","55.0","60.0"],"group":"None","version":"v1.1.0"}],"TECT":[{"dec":18.456339348907363,"inc":55.94952879222364,"MAD":4.7802479916017395,"cm":[-4.440892098500626e-16,1.6167622796103842e-15,-1.1102230246251565e-16],"intensity":77.36413063404711,"type":"dir","forced":true,"remark":"","origin":false,"nSteps":12,"minStep":"15.0","maxStep":"60.0","steps":["15.0","20.0","23.0","25.0","30.0","33.0","35.0","40.0","45.0","50.0","55.0","60.0"],"group":"None","version":"v1.1.0"}],"interpreted":true,"name":"SS54.02B","coreAzi":293,"coreDip":41,"bedStrike":55,"bedDip":45,"data":[{"visible":true,"include":false,"step":"0.0","x":-15.885714285714286,"y":68.68380952380951,"z":80.18190476190476,"a95":0.99,"info":"09/07/2015 at 16:48:19"},{"visible":true,"include":false,"step":"10.0","x":-6.975428571428572,"y":61.110476190476184,"z":43.294285714285714,"a95":0.99,"info":"09/07/2015 at 16:48:19"},{"visible":true,"include":true,"step":"15.0","x":-2.8181904761904764,"y":51.32761904761905,"z":37.22380952380953,"a95":0.99,"info":"09/07/2015 at 16:48:19"},{"visible":true,"include":true,"step":"20.0","x":0.4475238095238095,"y":48.21904761904762,"z":34.011428571428574,"a95":0.99,"info":"09/07/2015 at 16:48:19"},{"visible":true,"include":true,"step":"23.0","x":2.4367619047619047,"y":44.256190476190476,"z":30.01904761904762,"a95":0.99,"info":"09/07/2015 at 16:48:19"},{"visible":true,"include":true,"step":"25.0","x":3.5731428571428574,"y":39.27714285714286,"z":24.200952380952383,"a95":0.99,"info":"09/07/2015 at 16:48:19"},{"visible":true,"include":true,"step":"30.0","x":1.5240952380952382,"y":35.93333333333334,"z":25.42666666666667,"a95":0.99,"info":"09/07/2015 at 16:48:19"},{"visible":true,"include":true,"step":"33.0","x":1.2200952380952381,"y":27.85333333333333,"z":23.55047619047619,"a95":0.99,"info":"09/07/2015 at 16:48:19"},{"visible":true,"include":true,"step":"35.0","x":0.8915238095238096,"y":25.90095238095238,"z":21.29619047619048,"a95":0.99,"info":"09/07/2015 at 16:48:19"},{"visible":true,"include":true,"step":"40.0","x":4.5818095238095236,"y":21.632380952380952,"z":15.449523809523809,"a95":0.99,"info":"09/07/2015 at 16:48:19"},{"visible":true,"include":true,"step":"45.0","x":3.6127619047619044,"y":25.330476190476194,"z":14.986666666666668,"a95":0.99,"info":"09/07/2015 at 16:48:19"},{"visible":false,"include":false,"step":"50.0","x":5.164095238095238,"y":14.30857142857143,"z":14.498095238095237,"a95":0.99,"info":"09/07/2015 at 16:48:19"},{"visible":true,"include":true,"step":"55.0","x":2.548571428571429,"y":19.66190476190476,"z":9.948571428571428,"a95":0.99,"info":"09/07/2015 at 16:48:19"},{"visible":true,"include":true,"step":"60.0","x":2.7423809523809526,"y":12.067619047619047,"z":7.118571428571429,"a95":0.99,"info":"09/07/2015 at 16:48:19"},{"visible":false,"include":false,"step":"65.0","x":3.4057142857142857,"y":9.521904761904763,"z":14.52095238095238,"a95":0.99,"info":"09/07/2015 at 16:48:19"},{"visible":false,"include":false,"step":"70.0","x":-3.131809523809524,"y":9.646666666666667,"z":10.265714285714287,"a95":0.99,"info":"09/07/2015 at 16:48:19"},{"visible":false,"include":false,"step":"80.0","x":16.571428571428573,"y":0.31835238095238094,"z":5.599333333333333,"a95":0.99,"info":"09/07/2015 at 16:48:19"}]},{"version":"v1.1.0","exported":"2016-10-11T11:28:54.844Z","volume":10.5,"added":"2016-10-11T11:23:37.929Z","format":"Utrecht","demagType":"Unknown","strat":null,"patch":1.1,"GEO":[{"dec":314.94067414943436,"inc":-5.6911642943013865,"MAD":15.360446929691467,"cm":[-2.9976021664879227e-15,-2.886579864025407e-15,0],"intensity":107.12685510132472,"type":"dir","forced":true,"remark":"","origin":false,"nSteps":9,"minStep":"210","maxStep":"400","steps":["210","230","250","270","300","320","340","370","400"],"group":"None","version":"v1.1.0"}],"TECT":[{"dec":312.1661344373505,"inc":38.51238046878691,"MAD":15.360446929691463,"cm":[-2.831068712794149e-15,-3.1086244689504383e-15,-4.440892098500626e-16],"intensity":107.12685510132472,"type":"dir","forced":true,"remark":"","origin":false,"nSteps":9,"minStep":"210","maxStep":"400","steps":["210","230","250","270","300","320","340","370","400"],"group":"None","version":"v1.1.0"}],"interpreted":true,"name":"SS54.03A","coreAzi":311,"coreDip":51,"bedStrike":55,"bedDip":45,"data":[{"visible":false,"include":false,"step":"20","x":29.61904761904762,"y":147.33333333333334,"z":331.04761904761904,"a95":2.2,"info":"\"15-06-22\" at \"09:21\""},{"visible":false,"include":false,"step":"100","x":47.80952380952381,"y":33.61904761904762,"z":123.80952380952381,"a95":2.4,"info":"\"15-06-22\" at \"12:30\""},{"visible":false,"include":false,"step":"150","x":-128.28571428571428,"y":27.714285714285715,"z":66.85714285714286,"a95":2.7,"info":"\"15-06-23\" at \"09:36\""},{"visible":true,"include":false,"step":"180","x":68.79047619047618,"y":21.16190476190476,"z":59.76190476190476,"a95":3,"info":"\"15-06-23\" at \"12:44\""},{"visible":true,"include":true,"step":"210","x":73.74285714285713,"y":9.295238095238094,"z":31.323809523809523,"a95":3.1,"info":"\"15-06-23\" at \"15:32\""},{"visible":true,"include":true,"step":"230","x":57.4952380952381,"y":0.3523809523809524,"z":20.98095238095238,"a95":1.6,"info":"\"15-06-24\" at \"10:07\""},{"visible":true,"include":true,"step":"250","x":51.86666666666667,"y":7.066666666666667,"z":38.457142857142856,"a95":2.1,"info":"\"15-06-24\" at \"13:22\""},{"visible":true,"include":true,"step":"270","x":45.65714285714286,"y":1.980952380952381,"z":15.40952380952381,"a95":3.1,"info":"\"15-06-25\" at \"07:52\""},{"visible":true,"include":true,"step":"300","x":27.26666666666667,"y":0.20952380952380953,"z":31.571428571428573,"a95":2.5,"info":"\"15-06-25\" at \"11:30\""},{"visible":true,"include":true,"step":"320","x":25.323809523809523,"y":1.5619047619047617,"z":31.695238095238096,"a95":3.2,"info":"\"15-06-25\" at \"15:09\""},{"visible":true,"include":true,"step":"340","x":16.73333333333333,"y":3.0571428571428574,"z":34.87619047619047,"a95":3.6,"info":"\"15-06-25\" at \"18:34\""},{"visible":true,"include":true,"step":"370","x":13.952380952380953,"y":2.8666666666666667,"z":25.695238095238096,"a95":5.9,"info":"\"15-06-25\" at \"22:17\""},{"visible":true,"include":true,"step":"400","x":16.857142857142858,"y":-2.1333333333333333,"z":25.390476190476193,"a95":3.9,"info":"\"15-06-26\" at \"09:19\""},{"visible":true,"include":false,"step":"420","x":11.638095238095238,"y":0.942857238095238,"z":39.20952380952381,"a95":3.7,"info":"\"15-06-27\" at \"08:40\""},{"visible":true,"include":false,"step":"440","x":5.476190476190476,"y":-3.1333333333333333,"z":35.38095238095238,"a95":3.8,"info":"\"15-06-27\" at \"11:48\""},{"visible":true,"include":false,"step":"470","x":9.676190476190476,"y":-15.02857142857143,"z":21.276190476190475,"a95":4.9,"info":"\"15-06-27\" at \"14:21\""},{"visible":true,"include":false,"step":"490","x":4.961904761904762,"y":13.21904761904762,"z":20.104761904761904,"a95":4.3,"info":"\"15-06-29\" at \"11:43\""}]},{"version":"v1.1.0","exported":"2016-10-11T11:28:54.844Z","volume":10.5,"added":"2016-10-11T11:23:37.929Z","format":"Utrecht","demagType":"Unknown","strat":null,"patch":1.1,"GEO":[{"dec":318.80386126023177,"inc":-10.616583819352343,"MAD":18.94501586350806,"cm":[19.92579713283523,-14.576594274000817,-4.32849390275474],"intensity":21.256227578861544,"type":"dir","forced":false,"remark":"","origin":false,"nSteps":4,"minStep":"250","maxStep":"320","steps":["250","270","300","320"],"group":"None","version":"v1.1.0"}],"TECT":[{"dec":317.6392962805952,"inc":34.10201521077614,"MAD":18.945015863508022,"cm":[16.510924183298734,-12.185474492706932,14.392843550698123],"intensity":21.256227578861537,"type":"dir","forced":false,"remark":"","origin":false,"nSteps":4,"minStep":"250","maxStep":"320","steps":["250","270","300","320"],"group":"None","version":"v1.1.0"}],"interpreted":true,"name":"SS54.04A","coreAzi":309,"coreDip":53,"bedStrike":55,"bedDip":45,"data":[{"visible":false,"include":false,"step":"20","x":-15.714285714285714,"y":144.28571428571428,"z":400.6666666666667,"a95":2.1,"info":"\"15-06-22\" at \"09:23\""},{"visible":true,"include":false,"step":"100","x":12.819047619047618,"y":41.695238095238096,"z":70.32380952380952,"a95":2.3,"info":"\"15-06-22\" at \"12:32\""},{"visible":false,"include":false,"step":"150","x":-154.85714285714286,"y":31.61904761904762,"z":39.23809523809524,"a95":2.5,"info":"\"15-06-23\" at \"09:38\""},{"visible":true,"include":false,"step":"180","x":39,"y":31.695238095238096,"z":41.76190476190476,"a95":2.7,"info":"\"15-06-23\" at \"12:45\""},{"visible":true,"include":false,"step":"210","x":51.38095238095238,"y":17.38095238095238,"z":10.923809523809524,"a95":3.7,"info":"\"15-06-23\" at \"15:33\""},{"visible":true,"include":false,"step":"230","x":40.46666666666666,"y":16.514285714285716,"z":-2.5619047619047617,"a95":2.9,"info":"\"15-06-24\" at \"10:09\""},{"visible":true,"include":true,"step":"250","x":33.32380952380952,"y":9.466666666666667,"z":14.80952380952381,"a95":2.6,"info":"\"15-06-24\" at \"13:24\""},{"visible":true,"include":true,"step":"270","x":27.64761904761905,"y":7,"z":15.209523809523809,"a95":3.2,"info":"\"15-06-25\" at \"07:53\""},{"visible":true,"include":true,"step":"300","x":11.80952380952381,"y":7.095238095238095,"z":2.4666666666666663,"a95":7.6,"info":"\"15-06-25\" at \"11:32\""},{"visible":true,"include":true,"step":"320","x":13.885714285714286,"y":1.6857142857142857,"z":11.142857142857142,"a95":4.8,"info":"\"15-06-25\" at \"15:11\""},{"visible":true,"include":false,"step":"340","x":7.6,"y":1.8666666666666667,"z":14.914285714285715,"a95":6.6,"info":"\"15-06-25\" at \"18:37\""},{"visible":true,"include":false,"step":"370","x":15.019047619047617,"y":5.933333333333333,"z":7.114285714285715,"a95":6,"info":"\"15-06-25\" at \"22:18\""},{"visible":true,"include":false,"step":"400","x":5.076190476190476,"y":-4.828571428571429,"z":6.20952380952381,"a95":34.1,"info":"\"15-06-26\" at \"09:23\""},{"visible":true,"include":false,"step":"420","x":-1.8476190476190475,"y":-8.780952380952382,"z":14.019047619047617,"a95":6.2,"info":"\"15-06-27\" at \"08:42\""},{"visible":true,"include":false,"step":"440","x":7.542857142857143,"y":-0.9714285714285713,"z":23.285714285714285,"a95":6.9,"info":"\"15-06-27\" at \"11:49\""},{"visible":true,"include":false,"step":"470","x":18.26666666666667,"y":-0.3619047619047619,"z":12.942857142857143,"a95":4.6,"info":"\"15-06-27\" at \"14:23\""},{"visible":true,"include":false,"step":"490","x":-15.714285714285714,"y":9.77142857142857,"z":34.53333333333334,"a95":5,"info":"\"15-06-29\" at \"11:45\""}]},{"version":"v1.1.0","exported":"2016-10-11T11:28:54.844Z","volume":10.5,"added":"2016-10-11T11:23:37.929Z","format":"Utrecht","demagType":"Unknown","strat":"0","patch":1.1,"GEO":[],"TECT":[],"interpreted":false,"name":"SS54.05A","coreAzi":319,"coreDip":50,"bedStrike":55,"bedDip":45,"data":[{"visible":false,"include":false,"step":"0.0","x":-98.92380952380952,"y":58.277142857142856,"z":431.27619047619044,"a95":0.99,"info":"05/10/2015 at 15:09:39"},{"visible":true,"include":true,"step":"10.0","x":-41.41904761904762,"y":87.2752380952381,"z":261.49523809523805,"a95":0.99,"info":"05/10/2015 at 15:09:39"},{"visible":true,"include":true,"step":"15.0","x":-18.21142857142857,"y":67.44285714285714,"z":200.30476190476188,"a95":0.99,"info":"05/10/2015 at 15:09:39"},{"visible":true,"include":true,"step":"20.0","x":-8.325904761904761,"y":62.30095238095238,"z":159.76190476190476,"a95":0.99,"info":"05/10/2015 at 15:09:39"},{"visible":true,"include":true,"step":"23.0","x":2.3133333333333335,"y":53.59142857142857,"z":137.53333333333333,"a95":0.99,"info":"05/10/2015 at 15:09:39"},{"visible":true,"include":true,"step":"25.0","x":-1.1081904761904762,"y":44.37714285714286,"z":124.81904761904761,"a95":0.99,"info":"05/10/2015 at 15:09:39"},{"visible":true,"include":true,"step":"30.0","x":-2.1055238095238096,"y":41.624761904761904,"z":104.34285714285713,"a95":0.99,"info":"05/10/2015 at 15:09:39"},{"visible":true,"include":true,"step":"33.0","x":1.9865714285714287,"y":45.34095238095238,"z":88.62,"a95":0.99,"info":"05/10/2015 at 15:09:39"},{"visible":true,"include":true,"step":"35.0","x":2.5054285714285713,"y":32.34095238095238,"z":84.27333333333334,"a95":0.99,"info":"05/10/2015 at 15:09:39"},{"visible":true,"include":false,"step":"40.0","x":2.124,"y":30.745714285714286,"z":69.46285714285715,"a95":0.99,"info":"05/10/2015 at 15:09:39"},{"visible":true,"include":false,"step":"45.0","x":2.921238095238095,"y":28.644761904761904,"z":57.92285714285715,"a95":0.99,"info":"05/10/2015 at 15:09:39"},{"visible":true,"include":false,"step":"50.0","x":3.2365714285714287,"y":15.957142857142859,"z":54.831428571428575,"a95":0.99,"info":"05/10/2015 at 15:09:39"},{"visible":true,"include":false,"step":"60.0","x":5.490095238095238,"y":21.36952380952381,"z":35.49333333333333,"a95":0.99,"info":"05/10/2015 at 15:09:39"},{"visible":true,"include":false,"step":"70.0","x":5.1430476190476195,"y":15.399047619047618,"z":29.299999999999997,"a95":0.99,"info":"05/10/2015 at 15:09:39"}]},{"version":"v1.1.0","exported":"2016-10-11T11:28:54.844Z","volume":10.5,"added":"2016-10-11T11:23:37.930Z","format":"Utrecht","demagType":"Unknown","strat":"8","patch":1.1,"GEO":[],"TECT":[],"interpreted":false,"name":"SS54.05B","coreAzi":319,"coreDip":50,"bedStrike":55,"bedDip":45,"data":[{"visible":true,"include":false,"step":"0.0","x":-25.48095238095238,"y":36.864761904761906,"z":111.76190476190476,"a95":0.99,"info":"09/07/2015 at 16:48:19"},{"visible":true,"include":true,"step":"10.0","x":-7.991142857142857,"y":43.26190476190476,"z":65.5952380952381,"a95":0.99,"info":"09/07/2015 at 16:48:19"},{"visible":true,"include":true,"step":"15.0","x":-1.8253333333333335,"y":33.74190476190476,"z":45.68190476190476,"a95":0.99,"info":"09/07/2015 at 16:48:19"},{"visible":true,"include":true,"step":"20.0","x":0.691552380952381,"y":27.975238095238097,"z":37.30380952380953,"a95":0.99,"info":"09/07/2015 at 16:48:19"},{"visible":true,"include":true,"step":"23.0","x":-1.1443809523809523,"y":23.365714285714287,"z":33.07714285714286,"a95":0.99,"info":"09/07/2015 at 16:48:19"},{"visible":true,"include":true,"step":"25.0","x":5.35447619047619,"y":20.43619047619048,"z":30.92761904761905,"a95":0.99,"info":"09/07/2015 at 16:48:19"},{"visible":true,"include":true,"step":"30.0","x":5.566761904761905,"y":17.242857142857144,"z":20.17904761904762,"a95":0.99,"info":"09/07/2015 at 16:48:19"},{"visible":true,"include":true,"step":"33.0","x":6.275047619047619,"y":18.633333333333333,"z":17.84095238095238,"a95":0.99,"info":"09/07/2015 at 16:48:19"},{"visible":true,"include":false,"step":"35.0","x":7.9858095238095235,"y":16.06095238095238,"z":20.95809523809524,"a95":0.99,"info":"09/07/2015 at 16:48:19"},{"visible":true,"include":false,"step":"40.0","x":8.407809523809524,"y":11.360952380952382,"z":16.02095238095238,"a95":0.99,"info":"09/07/2015 at 16:48:19"},{"visible":true,"include":false,"step":"45.0","x":3.158190476190476,"y":10.652380952380952,"z":5.838571428571429,"a95":0.99,"info":"09/07/2015 at 16:48:19"},{"visible":true,"include":false,"step":"50.0","x":6.41952380952381,"y":9.536190476190475,"z":4.543428571428572,"a95":0.99,"info":"09/07/2015 at 16:48:19"},{"visible":true,"include":false,"step":"55.0","x":7.898666666666667,"y":8.608380952380953,"z":6.011047619047619,"a95":0.99,"info":"09/07/2015 at 16:48:19"},{"visible":true,"include":false,"step":"60.0","x":3.8013333333333335,"y":6.384285714285714,"z":6.919619047619048,"a95":0.99,"info":"09/07/2015 at 16:48:19"},{"visible":true,"include":false,"step":"65.0","x":7.403523809523809,"y":7.482095238095238,"z":5.724571428571428,"a95":0.99,"info":"09/07/2015 at 16:48:19"},{"visible":false,"include":false,"step":"70.0","x":8.697619047619048,"y":9.241619047619048,"z":2.089714285714286,"a95":0.99,"info":"09/07/2015 at 16:48:19"},{"visible":false,"include":false,"step":"80.0","x":8.527619047619048,"y":2.2768571428571427,"z":-1.1131428571428572,"a95":0.99,"info":"09/07/2015 at 16:48:19"}]},{"version":"v1.1.0","exported":"2016-10-11T11:28:54.844Z","volume":10.5,"added":"2016-10-11T11:23:37.933Z","format":"Utrecht","demagType":"Unknown","strat":null,"patch":1.1,"GEO":[{"dec":332.61307014924785,"inc":12.34746628537612,"MAD":2.5249993348327413,"cm":[0,-3.552713678800501e-15,0],"intensity":383.64460594861674,"type":"dir","forced":true,"remark":"","origin":false,"nSteps":9,"minStep":"230","maxStep":"440","steps":["230","250","270","300","320","340","370","420","440"],"group":"None","version":"v1.1.0"}],"TECT":[{"dec":338.63670962485855,"inc":56.70646690054949,"MAD":2.5249993348327138,"cm":[-7.105427357601002e-15,-1.1102230246251565e-14,1.7763568394002505e-15],"intensity":383.64460594861663,"type":"dir","forced":true,"remark":"","origin":false,"nSteps":9,"minStep":"230","maxStep":"440","steps":["230","250","270","300","320","340","370","420","440"],"group":"None","version":"v1.1.0"}],"interpreted":true,"name":"SS54.06A","coreAzi":133,"coreDip":36,"bedStrike":55,"bedDip":45,"data":[{"visible":true,"include":false,"step":"20","x":-558.1904761904761,"y":-219.23809523809524,"z":-89.52380952380952,"a95":1.5,"info":"\"15-06-22\" at \"09:24\""},{"visible":true,"include":false,"step":"100","x":-286,"y":-138.95238095238096,"z":-118.66666666666667,"a95":1.7,"info":"\"15-06-22\" at \"12:36\""},{"visible":false,"include":false,"step":"150","x":-428.76190476190476,"y":-123.52380952380952,"z":-129.61904761904762,"a95":1.7,"info":"\"15-06-23\" at \"09:39\""},{"visible":true,"include":false,"step":"180","x":-239.04761904761904,"y":-114.19047619047619,"z":-131.52380952380952,"a95":1.7,"info":"\"15-06-23\" at \"12:47\""},{"visible":true,"include":false,"step":"210","x":-183.04761904761904,"y":-81.42857142857143,"z":-146.76190476190476,"a95":2.2,"info":"\"15-06-23\" at \"15:35\""},{"visible":true,"include":true,"step":"230","x":-188.66666666666666,"y":-76.19047619047619,"z":-154.47619047619048,"a95":1.9,"info":"\"15-06-24\" at \"10:10\""},{"visible":true,"include":true,"step":"250","x":-186,"y":-73.04761904761905,"z":-152.47619047619048,"a95":1.8,"info":"\"15-06-24\" at \"13:25\""},{"visible":true,"include":true,"step":"270","x":-186.66666666666666,"y":-79.42857142857143,"z":-152.38095238095238,"a95":1.8,"info":"\"15-06-25\" at \"07:55\""},{"visible":true,"include":true,"step":"300","x":-157.23809523809524,"y":-86.19047619047619,"z":-143.9047619047619,"a95":2,"info":"\"15-06-25\" at \"11:34\""},{"visible":true,"include":true,"step":"320","x":-153.04761904761904,"y":-72.47619047619048,"z":-132.57142857142858,"a95":2,"info":"\"15-06-25\" at \"15:13\""},{"visible":true,"include":true,"step":"340","x":-138.85714285714286,"y":-74.19047619047619,"z":-130.95238095238096,"a95":1.9,"info":"\"15-06-25\" at \"18:39\""},{"visible":true,"include":true,"step":"370","x":-143.42857142857142,"y":-77.71428571428571,"z":-127.52380952380952,"a95":2,"info":"\"15-06-25\" at \"22:20\""},{"visible":false,"include":false,"step":"400","x":-128.47619047619048,"y":-0.19047619047619047,"z":3.9047619047619047,"a95":3,"info":"\"15-06-26\" at \"09:25\""},{"visible":true,"include":true,"step":"420","x":-138.38095238095238,"y":-57.714285714285715,"z":-126,"a95":2.5,"info":"\"15-06-27\" at \"08:48\""},{"visible":true,"include":true,"step":"440","x":-87.14285714285714,"y":-42.19047619047619,"z":-84.47619047619048,"a95":3.1,"info":"\"15-06-27\" at \"11:51\""},{"visible":false,"include":false,"step":"470","x":-90.95238095238095,"y":-54.38095238095238,"z":-120.85714285714286,"a95":2.4,"info":"\"15-06-27\" at \"14:25\""},{"visible":false,"include":false,"step":"490","x":-81.61904761904762,"y":-36.76190476190476,"z":-98.0952380952381,"a95":2.7,"info":"\"15-06-29\" at \"11:47\""}]},{"version":"v1.1.0","exported":"2016-10-11T11:28:54.844Z","volume":10.5,"added":"2016-10-11T11:23:37.933Z","format":"Utrecht","demagType":"Unknown","strat":"1","patch":1.1,"GEO":[{"dec":325.0023997161996,"inc":15.572353084459879,"MAD":2.9655361865274825,"cm":[-6.217248937900877e-15,4.440892098500626e-16,0],"intensity":235.40249590147505,"type":"dir","forced":true,"remark":"","origin":false,"nSteps":6,"minStep":"35.0","maxStep":"60.0","steps":["35.0","40.0","45.0","50.0","55.0","60.0"],"group":"None","version":"v1.1.0"}],"TECT":[{"dec":325.00470489441443,"inc":60.57235301479046,"MAD":2.965536186527474,"cm":[-3.9968028886505635e-15,-5.10702591327572e-15,0],"intensity":235.40249590147505,"type":"dir","forced":true,"remark":"","origin":false,"nSteps":6,"minStep":"35.0","maxStep":"60.0","steps":["35.0","40.0","45.0","50.0","55.0","60.0"],"group":"None","version":"v1.1.0"}],"interpreted":true,"name":"SS54.07A","coreAzi":141,"coreDip":44,"bedStrike":55,"bedDip":45,"data":[{"visible":true,"include":false,"step":"0.0","x":-348.1142857142857,"y":-62.50190476190476,"z":-91.85333333333334,"a95":0.99,"info":"09/07/2015 at 22:12:33"},{"visible":true,"include":false,"step":"10.0","x":-305.37142857142857,"y":-50.852380952380955,"z":-104.4952380952381,"a95":0.99,"info":"09/07/2015 at 22:12:33"},{"visible":true,"include":false,"step":"15.0","x":-267.65714285714284,"y":-44.145714285714284,"z":-107.43809523809523,"a95":0.99,"info":"09/07/2015 at 22:12:33"},{"visible":true,"include":false,"step":"20.0","x":-229.9047619047619,"y":-38.11904761904762,"z":-108.81904761904761,"a95":0.99,"info":"09/07/2015 at 22:12:33"},{"visible":true,"include":false,"step":"23.0","x":-209.0761904761905,"y":-32.58571428571428,"z":-98.25714285714287,"a95":0.99,"info":"09/07/2015 at 22:12:33"},{"visible":true,"include":false,"step":"25.0","x":-202,"y":-30.60571428571429,"z":-103,"a95":0.99,"info":"09/07/2015 at 22:12:33"},{"visible":true,"include":false,"step":"30.0","x":-171.3047619047619,"y":-22.002857142857142,"z":-89.86285714285714,"a95":0.99,"info":"09/07/2015 at 22:12:33"},{"visible":true,"include":false,"step":"33.0","x":-152.22857142857143,"y":-17.293333333333333,"z":-83.65809523809523,"a95":0.99,"info":"09/07/2015 at 22:12:33"},{"visible":true,"include":true,"step":"35.0","x":-138.9142857142857,"y":-18.613333333333333,"z":-84.17809523809524,"a95":0.99,"info":"09/07/2015 at 22:12:33"},{"visible":true,"include":true,"step":"40.0","x":-119.45714285714286,"y":-3.579714285714286,"z":-63.28476190476191,"a95":0.99,"info":"09/07/2015 at 22:12:33"},{"visible":true,"include":true,"step":"45.0","x":-101.84761904761906,"y":-6.674952380952381,"z":-59.75142857142857,"a95":0.99,"info":"09/07/2015 at 22:12:33"},{"visible":true,"include":true,"step":"50.0","x":-86.22,"y":-10.185714285714287,"z":-56.971428571428575,"a95":0.99,"info":"09/07/2015 at 22:12:33"},{"visible":true,"include":true,"step":"55.0","x":-70.89142857142858,"y":0.025087619047619046,"z":-41.82190476190476,"a95":0.99,"info":"09/07/2015 at 22:12:33"},{"visible":true,"include":true,"step":"60.0","x":-63.49809523809524,"y":-1.6323809523809525,"z":-34.285714285714285,"a95":0.99,"info":"09/07/2015 at 22:12:33"},{"visible":true,"include":false,"step":"65.0","x":-53.92476190476191,"y":-8.650761904761904,"z":-29.493333333333332,"a95":0.99,"info":"09/07/2015 at 22:12:33"},{"visible":false,"include":false,"step":"70.0","x":-36.537142857142854,"y":3.196476190476191,"z":-29.51809523809524,"a95":0.99,"info":"09/07/2015 at 22:12:33"},{"visible":false,"include":false,"step":"80.0","x":7.050285714285715,"y":11.067619047619047,"z":-14.61047619047619,"a95":0.99,"info":"09/07/2015 at 22:12:33"}]},{"version":"v1.1.0","exported":"2016-10-11T11:28:54.844Z","volume":10.5,"added":"2016-10-11T11:23:37.933Z","format":"Utrecht","demagType":"Unknown","strat":"0","patch":1.1,"GEO":[{"dec":317.0365823657849,"inc":20.763516867553065,"MAD":2.186459969652275,"cm":[-2.5757174171303632e-14,-2.398081733190338e-14,0],"intensity":492.73654196144923,"type":"dir","forced":true,"remark":"","origin":false,"nSteps":10,"minStep":"15.0","maxStep":"50.0","steps":["15.0","20.0","23.0","25.0","30.0","33.0","35.0","40.0","45.0","50.0"],"group":"None","version":"v1.1.0"}],"TECT":[{"dec":271.37795502854175,"inc":79.70727737621183,"MAD":2.186459969652341,"cm":[-8.770761894538737e-15,-9.992007221626409e-15,-2.6645352591003757e-15],"intensity":492.73654196144923,"type":"dir","forced":true,"remark":"","origin":false,"nSteps":10,"minStep":"15.0","maxStep":"50.0","steps":["15.0","20.0","23.0","25.0","30.0","33.0","35.0","40.0","45.0","50.0"],"group":"None","version":"v1.1.0"}],"interpreted":true,"name":"SS54.08A","coreAzi":182,"coreDip":50,"bedStrike":56,"bedDip":63,"data":[{"visible":false,"include":false,"step":"0.0","x":-460.83809523809526,"y":213.62857142857143,"z":51.19333333333333,"a95":0.99,"info":"05/10/2015 at 15:09:39"},{"visible":true,"include":false,"step":"10.0","x":-323.2761904761905,"y":217.86666666666665,"z":-36.94,"a95":0.99,"info":"05/10/2015 at 15:09:39"},{"visible":true,"include":true,"step":"15.0","x":-269.77142857142854,"y":220.28571428571428,"z":-51.87428571428571,"a95":0.99,"info":"05/10/2015 at 15:09:39"},{"visible":true,"include":true,"step":"20.0","x":-231.04761904761904,"y":209.38095238095238,"z":-48.38476190476191,"a95":0.99,"info":"05/10/2015 at 15:09:39"},{"visible":true,"include":true,"step":"23.0","x":-213.8857142857143,"y":193.56190476190477,"z":-53.551428571428566,"a95":0.99,"info":"05/10/2015 at 15:09:39"},{"visible":true,"include":true,"step":"25.0","x":-203.62857142857143,"y":181.58095238095237,"z":-50.09809523809523,"a95":0.99,"info":"05/10/2015 at 15:09:39"},{"visible":true,"include":true,"step":"30.0","x":-175.8190476190476,"y":159.13333333333335,"z":-30.509523809523813,"a95":0.99,"info":"05/10/2015 at 15:09:39"},{"visible":true,"include":true,"step":"33.0","x":-150.41904761904763,"y":154.51428571428573,"z":-35.96666666666666,"a95":0.99,"info":"05/10/2015 at 15:09:39"},{"visible":true,"include":true,"step":"35.0","x":-145.4,"y":137.8,"z":-25.399047619047618,"a95":0.99,"info":"05/10/2015 at 15:09:39"},{"visible":true,"include":true,"step":"40.0","x":-131.23809523809524,"y":124.23809523809524,"z":-30.134285714285717,"a95":0.99,"info":"05/10/2015 at 15:09:39"},{"visible":true,"include":true,"step":"45.0","x":-116.92380952380952,"y":108.91428571428571,"z":-21.656190476190474,"a95":0.99,"info":"05/10/2015 at 15:09:39"},{"visible":true,"include":true,"step":"50.0","x":-105.06666666666668,"y":93.34857142857143,"z":-10.729523809523808,"a95":0.99,"info":"05/10/2015 at 15:09:39"},{"visible":true,"include":false,"step":"60.0","x":-88.93333333333332,"y":64.68666666666667,"z":-18.84857142857143,"a95":0.99,"info":"05/10/2015 at 15:09:39"},{"visible":false,"include":false,"step":"70.0","x":-60.05619047619048,"y":51.645714285714284,"z":2.1123809523809522,"a95":0.99,"info":"05/10/2015 at 15:09:39"}]},{"version":"v1.1.0","exported":"2016-10-11T11:28:54.844Z","volume":10.5,"added":"2016-10-11T11:23:37.936Z","format":"Utrecht","demagType":"Unknown","strat":"0","patch":1.1,"GEO":[{"dec":330.7784050859752,"inc":-4.165694601070477,"MAD":1.8077569419914725,"cm":[7.993605777301127e-15,6.217248937900877e-15,0],"intensity":667.8342028145754,"type":"dir","forced":true,"remark":"","origin":false,"nSteps":10,"minStep":"15.0","maxStep":"50.0","steps":["15.0","20.0","23.0","25.0","30.0","33.0","35.0","40.0","45.0","50.0"],"group":"None","version":"v1.1.0"}],"TECT":[{"dec":335.14783114549846,"inc":58.4940177207182,"MAD":1.8077569419914683,"cm":[1.7763568394002505e-14,-4.440892098500626e-16,-5.329070518200751e-15],"intensity":667.8342028145754,"type":"dir","forced":true,"remark":"","origin":false,"nSteps":10,"minStep":"15.0","maxStep":"50.0","steps":["15.0","20.0","23.0","25.0","30.0","33.0","35.0","40.0","45.0","50.0"],"group":"None","version":"v1.1.0"}],"interpreted":true,"name":"SS54.09A","coreAzi":183,"coreDip":63,"bedStrike":56,"bedDip":63,"data":[{"visible":false,"include":false,"step":"0.0","x":-511.1333333333333,"y":234.50476190476192,"z":-123.62857142857142,"a95":0.99,"info":"05/10/2015 at 19:36:38"},{"visible":true,"include":false,"step":"10.0","x":-418.39047619047625,"y":259.97142857142853,"z":-202.87619047619046,"a95":0.99,"info":"05/10/2015 at 19:36:38"},{"visible":true,"include":true,"step":"15.0","x":-370.43809523809523,"y":249.7047619047619,"z":-208.68571428571425,"a95":0.99,"info":"05/10/2015 at 19:36:38"},{"visible":true,"include":true,"step":"20.0","x":-328.0095238095238,"y":233.45714285714288,"z":-198.56190476190477,"a95":0.99,"info":"05/10/2015 at 19:36:38"},{"visible":true,"include":true,"step":"23.0","x":-296.8095238095238,"y":223.13333333333335,"z":-187.1809523809524,"a95":0.99,"info":"05/10/2015 at 19:36:38"},{"visible":true,"include":true,"step":"25.0","x":-281.4666666666667,"y":214.13333333333335,"z":-178.7047619047619,"a95":0.99,"info":"05/10/2015 at 19:36:38"},{"visible":true,"include":true,"step":"30.0","x":-235.50476190476192,"y":181.21904761904761,"z":-155.96190476190475,"a95":0.99,"info":"05/10/2015 at 19:36:38"},{"visible":true,"include":true,"step":"33.0","x":-210.84761904761905,"y":165.59047619047618,"z":-143.77142857142857,"a95":0.99,"info":"05/10/2015 at 19:36:38"},{"visible":true,"include":true,"step":"35.0","x":-201.56190476190477,"y":155.26666666666665,"z":-128.46666666666667,"a95":0.99,"info":"05/10/2015 at 19:36:38"},{"visible":true,"include":true,"step":"40.0","x":-170.07619047619048,"y":140.82857142857142,"z":-113.12380952380951,"a95":0.99,"info":"05/10/2015 at 19:36:38"},{"visible":true,"include":true,"step":"45.0","x":-142.6,"y":118.42857142857143,"z":-97.36190476190475,"a95":0.99,"info":"05/10/2015 at 19:36:38"},{"visible":true,"include":true,"step":"50.0","x":-128.25714285714287,"y":88.42857142857143,"z":-79.36190476190475,"a95":0.99,"info":"05/10/2015 at 19:36:38"},{"visible":true,"include":false,"step":"60.0","x":-90.79619047619047,"y":63.887619047619054,"z":-57.79714285714286,"a95":0.99,"info":"05/10/2015 at 19:36:38"},{"visible":true,"include":false,"step":"70.0","x":-49.938095238095244,"y":44.11238095238095,"z":-32.210476190476186,"a95":0.99,"info":"05/10/2015 at 19:36:38"}]},{"version":"v1.1.0","exported":"2016-10-11T11:28:54.844Z","volume":10.5,"added":"2016-10-11T11:23:37.936Z","format":"Utrecht","demagType":"Unknown","strat":"1","patch":1.1,"GEO":[{"dec":336.4562984118448,"inc":3.3254517831186865,"MAD":9.350301432733605,"cm":[-5.329070518200751e-15,-9.769962616701378e-15,0],"intensity":471.0545884182016,"type":"dir","forced":true,"remark":"","origin":false,"nSteps":6,"minStep":"25.0","maxStep":"45.0","steps":["25.0","30.0","33.0","35.0","40.0","45.0"],"group":"None","version":"v1.1.0"}],"TECT":[{"dec":350.6944154251026,"inc":64.2990164008287,"MAD":9.350301432733605,"cm":[-1.2434497875801753e-14,-2.398081733190338e-14,3.552713678800501e-15],"intensity":471.0545884182016,"type":"dir","forced":true,"remark":"","origin":false,"nSteps":6,"minStep":"25.0","maxStep":"45.0","steps":["25.0","30.0","33.0","35.0","40.0","45.0"],"group":"None","version":"v1.1.0"}],"interpreted":true,"name":"SS54.10B","coreAzi":119,"coreDip":66,"bedStrike":56,"bedDip":63,"data":[{"visible":false,"include":false,"step":"0.0","x":-484.0952380952381,"y":-342.0571428571428,"z":198.43809523809523,"a95":0.99,"info":"10/07/2015 at 02:21:19"},{"visible":true,"include":false,"step":"10.0","x":-334.2,"y":-267.7904761904762,"z":-42.857142857142854,"a95":0.99,"info":"10/07/2015 at 02:21:19"},{"visible":true,"include":false,"step":"15.0","x":-289.7333333333333,"y":-281.15238095238095,"z":-42.33047619047619,"a95":0.99,"info":"10/07/2015 at 02:21:19"},{"visible":true,"include":false,"step":"20.0","x":-278.247619047619,"y":-263.0857142857143,"z":-34.900952380952376,"a95":0.99,"info":"10/07/2015 at 02:21:19"},{"visible":true,"include":false,"step":"23.0","x":-253.2,"y":-169.2952380952381,"z":-102.66666666666667,"a95":0.99,"info":"10/07/2015 at 02:21:19"},{"visible":true,"include":true,"step":"25.0","x":-242.9809523809524,"y":-196.84761904761905,"z":-95.6952380952381,"a95":0.99,"info":"10/07/2015 at 02:21:19"},{"visible":true,"include":true,"step":"30.0","x":-197.1047619047619,"y":-214.33333333333334,"z":-57.21999999999999,"a95":0.99,"info":"10/07/2015 at 02:21:19"},{"visible":true,"include":true,"step":"33.0","x":-168.85714285714286,"y":-136.44761904761904,"z":-27.55047619047619,"a95":0.99,"info":"10/07/2015 at 02:21:19"},{"visible":true,"include":true,"step":"35.0","x":-152.16190476190476,"y":-130.0952380952381,"z":-67.99142857142857,"a95":0.99,"info":"10/07/2015 at 02:21:19"},{"visible":true,"include":true,"step":"40.0","x":-153.2,"y":-57.89333333333333,"z":-63.53523809523809,"a95":0.99,"info":"10/07/2015 at 02:21:19"},{"visible":true,"include":true,"step":"45.0","x":-117.84761904761906,"y":-54.09142857142857,"z":-73.78857142857143,"a95":0.99,"info":"10/07/2015 at 02:21:19"},{"visible":true,"include":false,"step":"50.0","x":-123.91428571428571,"y":-110.84761904761906,"z":9.248,"a95":0.99,"info":"10/07/2015 at 02:21:19"},{"visible":true,"include":false,"step":"55.0","x":-155.0952380952381,"y":-65.85809523809523,"z":-17.677142857142858,"a95":0.99,"info":"10/07/2015 at 02:21:19"},{"visible":false,"include":false,"step":"60.0","x":-112.96190476190475,"y":26.91238095238095,"z":-40.24190476190476,"a95":0.99,"info":"10/07/2015 at 02:21:19"},{"visible":false,"include":false,"step":"65.0","x":-88.64666666666666,"y":-62.909523809523805,"z":-97.46666666666667,"a95":0.99,"info":"10/07/2015 at 02:21:19"},{"visible":false,"include":false,"step":"70.0","x":-106.79047619047618,"y":-81.70095238095239,"z":-11.527619047619048,"a95":0.99,"info":"10/07/2015 at 02:21:19"},{"visible":false,"include":false,"step":"80.0","x":-132.47619047619048,"y":0.4113428571428571,"z":-51.881904761904764,"a95":0.99,"info":"10/07/2015 at 02:21:19"}]},{"version":"v1.1.0","exported":"2016-10-11T11:28:54.844Z","volume":10.5,"added":"2016-10-11T11:23:37.937Z","format":"Utrecht","demagType":"Unknown","strat":null,"patch":1.1,"GEO":[],"TECT":[],"interpreted":false,"name":"SS54.11A","coreAzi":173,"coreDip":62,"bedStrike":56,"bedDip":63,"data":[{"visible":false,"include":false,"step":"20","x":-925.047619047619,"y":-1214,"z":-953.3333333333334,"a95":1.7,"info":"\"15-06-22\" at \"09:26\""},{"visible":true,"include":false,"step":"100","x":-536.2857142857143,"y":-72,"z":74.66666666666667,"a95":1.8,"info":"\"15-06-22\" at \"12:38\""},{"visible":true,"include":false,"step":"150","x":-695.047619047619,"y":-64.0952380952381,"z":17.047619047619047,"a95":1.7,"info":"\"15-06-23\" at \"09:42\""},{"visible":true,"include":false,"step":"180","x":49.61904761904762,"y":-0.5714285714285714,"z":-296,"a95":3.2,"info":"\"15-06-23\" at \"12:49\""},{"visible":true,"include":false,"step":"210","x":237.61904761904762,"y":-26.19047619047619,"z":-191.61904761904762,"a95":2.3,"info":"\"15-06-23\" at \"15:37\""},{"visible":true,"include":false,"step":"230","x":200.85714285714286,"y":3.7142857142857144,"z":-299.3333333333333,"a95":2.3,"info":"\"15-06-24\" at \"10:12\""},{"visible":true,"include":false,"step":"250","x":120.0952380952381,"y":18.476190476190474,"z":-147.71428571428572,"a95":3.4,"info":"\"15-06-24\" at \"13:27\""},{"visible":true,"include":false,"step":"270","x":172.28571428571428,"y":-1.7142857142857142,"z":-302.76190476190476,"a95":2.4,"info":"\"15-06-25\" at \"07:57\""},{"visible":true,"include":false,"step":"300","x":100.47619047619048,"y":-40.57142857142857,"z":-249.71428571428572,"a95":3.6,"info":"\"15-06-25\" at \"11:35\""},{"visible":true,"include":false,"step":"320","x":168.28571428571428,"y":-138.1904761904762,"z":-310.76190476190476,"a95":3.6,"info":"\"15-06-25\" at \"15:14\""},{"visible":true,"include":false,"step":"340","x":12.095238095238095,"y":-106.76190476190476,"z":-264.76190476190476,"a95":3.8,"info":"\"15-06-25\" at \"18:40\""},{"visible":true,"include":false,"step":"370","x":157.71428571428572,"y":-102.19047619047619,"z":-297.3333333333333,"a95":2.6,"info":"\"15-06-25\" at \"22:22\""},{"visible":true,"include":false,"step":"400","x":-145.52380952380952,"y":72.28571428571429,"z":-332.85714285714283,"a95":5.2,"info":"\"15-06-26\" at \"09:28\""},{"visible":true,"include":false,"step":"420","x":-111.33333333333333,"y":34.19047619047619,"z":-318.0952380952381,"a95":3.3,"info":"\"15-06-27\" at \"08:50\""},{"visible":true,"include":false,"step":"440","x":-189.42857142857142,"y":30.666666666666668,"z":-28.095238095238095,"a95":7.2,"info":"\"15-06-27\" at \"11:55\""},{"visible":true,"include":false,"step":"470","x":45.333333333333336,"y":-37.523809523809526,"z":-76.28571428571429,"a95":14,"info":"\"15-06-27\" at \"14:26\""},{"visible":true,"include":false,"step":"490","x":-261.7142857142857,"y":281.9047619047619,"z":503.8095238095238,"a95":3.6,"info":"\"15-06-29\" at \"11:50\""}]}]
