# Supplementary material for: Paleomagnetic constraints on the timing and distribution of Cenozoic rotations in Central and Eastern Anatolia
Source: Copernicus journal article supplement (doi:10.5194/se-9-295-2018), 2018-03-21
Supplement: Supplementary file 2 [file se-9-295-2018-supplement.zip › se-2017-66_DATA_dir files/dir files Sivas/SS55.dir]

[{"version":"v1.1.0","exported":"2016-10-11T14:17:38.803Z","info":"","GEO":[{"dec":354.0759210925127,"inc":48.702599578314874,"MAD":21.245711366249523,"cm":[44.91526775089477,-187.45365075745082,182.41246722240635],"intensity":459.24478081681343,"type":"dir","forced":false,"remark":"","origin":false,"nSteps":4,"minStep":"100","maxStep":"370","steps":["100","320","340","370"],"group":"None"}],"TECT":[{"dec":342.5620190757477,"inc":32.30163719055396,"MAD":21.245711366249566,"cm":[78.78367574548622,-229.27765148634097,107.96041692460466],"intensity":459.24478081681315,"type":"dir","forced":false,"remark":"","origin":false,"nSteps":4,"minStep":"100","maxStep":"370","steps":["100","320","340","370"],"group":"None"}],"interpreted":true,"name":"SS55.01A","coreAzi":48,"coreDip":73,"bedStrike":219,"bedDip":21,"data":[{"visible":true,"include":false,"step":"20","x":59.142857142857146,"y":-470.95238095238096,"z":301.3333333333333,"a95":"1.7","info":"\"15-06-22\" at \"09:28\""},{"visible":true,"include":true,"step":"100","x":-140.95238095238096,"y":-330.2857142857143,"z":367.7142857142857,"a95":"2","info":"\"15-06-22\" at \"12:41\""},{"visible":false,"include":false,"step":"150","x":-300.4761904761905,"y":-284.6666666666667,"z":322.2857142857143,"a95":"1.9","info":"\"15-06-23\" at \"09:43\""},{"visible":true,"include":false,"step":"180","x":-135.04761904761904,"y":-192.95238095238096,"z":198.95238095238096,"a95":"2.2","info":"\"15-06-23\" at \"12:50\""},{"visible":true,"include":false,"step":"210","x":-113.71428571428571,"y":-96.19047619047619,"z":113.80952380952381,"a95":"2.7","info":"\"15-06-23\" at \"15:38\""},{"visible":true,"include":false,"step":"230","x":-140.47619047619048,"y":-134.47619047619048,"z":121.80952380952381,"a95":"2.6","info":"\"15-06-24\" at \"10:15\""},{"visible":true,"include":false,"step":"250","x":-133.04761904761904,"y":-96.85714285714286,"z":76.85714285714286,"a95":"2.4","info":"\"15-06-24\" at \"13:30\""},{"visible":true,"include":false,"step":"270","x":-128.28571428571428,"y":-154,"z":92.47619047619048,"a95":"2.3","info":"\"15-06-25\" at \"07:58\""},{"visible":true,"include":false,"step":"300","x":-156.0952380952381,"y":-178.47619047619048,"z":80.66666666666667,"a95":"2.1","info":"\"15-06-25\" at \"11:37\""},{"visible":true,"include":true,"step":"320","x":-80.76190476190476,"y":-90.95238095238095,"z":137.9047619047619,"a95":"2.9","info":"\"15-06-25\" at \"15:16\""},{"visible":true,"include":true,"step":"340","x":-171.04761904761904,"y":-97.33333333333333,"z":91.33333333333333,"a95":"3","info":"\"15-06-25\" at \"18:42\""},{"visible":true,"include":true,"step":"370","x":-238.47619047619048,"y":-116.66666666666667,"z":-26.952380952380953,"a95":"7.9","info":"\"15-06-25\" at \"22:27\""},{"visible":false,"include":false,"step":"400","x":-324.4761904761905,"y":-97.14285714285714,"z":478.95238095238096,"a95":"5","info":"\"15-06-26\" at \"09:31\""}],"demagType":"Unknown","patch":1.1,"format":"Unknown","strat":null},{"version":"v1.1.0","exported":"2016-10-11T14:17:38.804Z","info":"2","GEO":[{"dec":303.9087706215943,"inc":47.61202785084574,"MAD":4.211942378692997,"cm":[-2.571487996084172e-14,-2.165463575649829e-14,0],"intensity":523.0566025136347,"type":"dir","forced":true,"remark":"","origin":false,"nSteps":5,"minStep":"15.0","maxStep":"30.0","steps":["15.0","20.0","23.0","25.0","30.0"],"group":"None"}],"TECT":[{"dec":305.16119217053483,"inc":26.673127717145164,"MAD":4.211942378693032,"cm":[-3.11285388999663e-14,-2.165463575649829e-14,2.7068294695622863e-15],"intensity":523.0566025136349,"type":"dir","forced":true,"remark":"","origin":false,"nSteps":5,"minStep":"15.0","maxStep":"30.0","steps":["15.0","20.0","23.0","25.0","30.0"],"group":"None"}],"interpreted":true,"name":"SS55.02","coreAzi":37,"coreDip":46,"bedStrike":219,"bedDip":21,"data":[{"visible":true,"include":false,"step":"0.0","x":-232.34285714285713,"y":-109.53333333333333,"z":227.36190476190478,"a95":"0.99","info":"09/07/2015 at 22:12:33"},{"visible":true,"include":false,"step":"10.0","x":-171.67619047619047,"y":-166.8,"z":189.6095238095238,"a95":"0.99","info":"09/07/2015 at 22:12:33"},{"visible":true,"include":true,"step":"15.0","x":-147.53333333333333,"y":-161.82857142857142,"z":144.9904761904762,"a95":"0.99","info":"09/07/2015 at 22:12:33"},{"visible":true,"include":true,"step":"20.0","x":-149.56190476190477,"y":-182.6095238095238,"z":125.3047619047619,"a95":"0.99","info":"09/07/2015 at 22:12:33"},{"visible":true,"include":true,"step":"23.0","x":-129.5047619047619,"y":-161.0285714285714,"z":129.1904761904762,"a95":"0.99","info":"09/07/2015 at 22:12:33"},{"visible":true,"include":true,"step":"25.0","x":-121.88571428571429,"y":-182.8761904761905,"z":146.44761904761904,"a95":"0.99","info":"09/07/2015 at 22:12:33"},{"visible":true,"include":true,"step":"30.0","x":-150.35238095238097,"y":-183.98095238095237,"z":110.48571428571428,"a95":"0.99","info":"09/07/2015 at 22:12:33"},{"visible":true,"include":false,"step":"33.0","x":-161.8761904761905,"y":-146.56190476190477,"z":54.45428571428571,"a95":"0.99","info":"09/07/2015 at 22:12:33"},{"visible":true,"include":false,"step":"35.0","x":-138.21904761904761,"y":-146.62857142857143,"z":51.25047619047619,"a95":"0.99","info":"09/07/2015 at 22:12:33"},{"visible":true,"include":false,"step":"40.0","x":-161.2095238095238,"y":-188.22857142857143,"z":87.56285714285714,"a95":"0.99","info":"09/07/2015 at 22:12:33"},{"visible":false,"include":false,"step":"45.0","x":-171.34285714285713,"y":-208.48571428571427,"z":52.90571428571428,"a95":"0.99","info":"09/07/2015 at 22:12:33"},{"visible":false,"include":false,"step":"50.0","x":-218.7238095238095,"y":-221.8952380952381,"z":36.275238095238095,"a95":"0.99","info":"09/07/2015 at 22:12:33"},{"visible":false,"include":false,"step":"55.0","x":-210.40952380952382,"y":-261.3904761904762,"z":53.08190476190477,"a95":"0.99","info":"09/07/2015 at 22:12:33"},{"visible":false,"include":false,"step":"60.0","x":-216.75238095238097,"y":-287.70476190476194,"z":44.37619047619047,"a95":"0.99","info":"09/07/2015 at 22:12:33"},{"visible":false,"include":false,"step":"65.0","x":-234.64761904761906,"y":-306.7238095238095,"z":26.677142857142858,"a95":"0.99","info":"09/07/2015 at 22:12:33"},{"visible":false,"include":false,"step":"70.0","x":-233,"y":-325.12380952380954,"z":21.163809523809523,"a95":"0.99","info":"09/07/2015 at 22:12:33"},{"visible":false,"include":false,"step":"80.0","x":-265.96190476190475,"y":-405.08571428571423,"z":62.65238095238095,"a95":"0.99","info":"09/07/2015 at 22:12:33"}],"demagType":"Unknown","patch":1.1,"format":"Unknown","strat":null},{"version":"v1.1.0","exported":"2016-10-11T14:17:38.804Z","info":"0","GEO":[{"dec":292.5899972798256,"inc":47.40947539113266,"MAD":5.572677173837873,"cm":[5.329070518200751e-15,1.7763568394002505e-15,0],"intensity":577.8936529781072,"type":"dir","forced":true,"remark":"","origin":false,"nSteps":7,"minStep":"15.0","maxStep":"35.0","steps":["15.0","20.0","23.0","25.0","30.0","33.0","35.0"],"group":"None","version":"v1.1.0"}],"TECT":[{"dec":296.60446872151834,"inc":27.043235253527232,"MAD":5.57267717383777,"cm":[3.552713678800501e-14,8.881784197001252e-15,3.552713678800501e-15],"intensity":577.8936529781071,"type":"dir","forced":true,"remark":"","origin":false,"nSteps":7,"minStep":"15.0","maxStep":"35.0","steps":["15.0","20.0","23.0","25.0","30.0","33.0","35.0"],"group":"None","version":"v1.1.0"}],"interpreted":true,"name":"SS55.03A","coreAzi":110,"coreDip":80,"bedStrike":219,"bedDip":21,"data":[{"visible":false,"include":false,"step":"0.0","x":-142.65714285714287,"y":344.65714285714284,"z":214.28571428571428,"a95":"0.99","info":"05/10/2015 at 19:36:38"},{"visible":true,"include":false,"step":"10.0","x":-330.0190476190476,"y":13.059999999999999,"z":283.5333333333333,"a95":"0.99","info":"05/10/2015 at 19:36:38"},{"visible":true,"include":true,"step":"15.0","x":-319.34285714285716,"y":-21.01238095238095,"z":264.49523809523805,"a95":"0.99","info":"05/10/2015 at 19:36:38"},{"visible":true,"include":true,"step":"20.0","x":-275.6095238095238,"y":-18.429523809523808,"z":213.56190476190477,"a95":"0.99","info":"05/10/2015 at 19:36:38"},{"visible":true,"include":true,"step":"23.0","x":-233.66666666666666,"y":-18.784761904761904,"z":174.04761904761904,"a95":"0.99","info":"05/10/2015 at 19:36:38"},{"visible":true,"include":true,"step":"25.0","x":-201.65714285714287,"y":-4.8072380952380955,"z":146.45714285714286,"a95":"0.99","info":"05/10/2015 at 19:36:38"},{"visible":true,"include":true,"step":"30.0","x":-182,"y":-8.553904761904763,"z":131.38095238095238,"a95":"0.99","info":"05/10/2015 at 19:36:38"},{"visible":true,"include":true,"step":"33.0","x":-132.43809523809523,"y":56.31238095238095,"z":109.27619047619048,"a95":"0.99","info":"05/10/2015 at 19:36:38"},{"visible":true,"include":true,"step":"35.0","x":-144.7047619047619,"y":-15.585714285714285,"z":77.96857142857142,"a95":"0.99","info":"05/10/2015 at 19:36:38"},{"visible":true,"include":false,"step":"40.0","x":-144.46666666666667,"y":41.94857142857143,"z":102.85714285714286,"a95":"0.99","info":"05/10/2015 at 19:36:38"},{"visible":true,"include":false,"step":"45.0","x":-165.92380952380952,"y":55.4752380952381,"z":87.41809523809523,"a95":"0.99","info":"05/10/2015 at 19:36:38"},{"visible":false,"include":false,"step":"50.0","x":-98.31428571428572,"y":53.96666666666666,"z":96.45714285714286,"a95":"0.99","info":"05/10/2015 at 19:36:38"},{"visible":false,"include":false,"step":"60.0","x":-113.27619047619048,"y":118,"z":40.51619047619048,"a95":"0.99","info":"05/10/2015 at 19:36:38"},{"visible":false,"include":false,"step":"70.0","x":-157.07619047619048,"y":157.85714285714286,"z":32.507619047619045,"a95":"0.99","info":"05/10/2015 at 19:36:38"}],"demagType":"Unknown","patch":1.1,"format":"Unknown","strat":null},{"version":"v1.1.0","exported":"2016-10-11T14:17:38.804Z","info":"","GEO":[{"dec":333.14230795541175,"inc":40.08532762630429,"MAD":4.771845778528448,"cm":[5.684341886080802e-14,9.237055564881302e-14,0],"intensity":947.8475245023408,"type":"dir","forced":true,"remark":"","origin":false,"nSteps":3,"minStep":"300","maxStep":"340","steps":["300","320","340"],"group":"None","version":"v1.1.0"}],"TECT":[{"dec":328.52271154363547,"inc":20.545920600894995,"MAD":4.771845778528436,"cm":[-4.263256414560601e-14,2.842170943040401e-14,2.4868995751603507e-14],"intensity":947.8475245023407,"type":"dir","forced":true,"remark":"","origin":false,"nSteps":3,"minStep":"300","maxStep":"340","steps":["300","320","340"],"group":"None","version":"v1.1.0"}],"interpreted":true,"name":"SS55.04A","coreAzi":52,"coreDip":60,"bedStrike":219,"bedDip":21,"data":[{"visible":true,"include":false,"step":"20","x":102.85714285714286,"y":-1069.6190476190477,"z":345.7142857142857,"a95":"1.7","info":"\"15-06-22\" at \"09:29\""},{"visible":true,"include":false,"step":"100","x":-174,"y":-861.1428571428571,"z":716.8571428571429,"a95":"1.8","info":"\"15-06-22\" at \"12:44\""},{"visible":true,"include":false,"step":"150","x":-311.6190476190476,"y":-710,"z":531.7142857142857,"a95":"1.9","info":"\"15-06-23\" at \"09:45\""},{"visible":true,"include":false,"step":"180","x":-163.33333333333334,"y":-735.4285714285714,"z":508,"a95":"1.7","info":"\"15-06-23\" at \"12:52\""},{"visible":true,"include":false,"step":"210","x":-59.23809523809524,"y":-556.1904761904761,"z":305.04761904761904,"a95":"1.9","info":"\"15-06-23\" at \"15:40\""},{"visible":true,"include":false,"step":"230","x":-172.66666666666666,"y":-656.7619047619048,"z":303.8095238095238,"a95":"2","info":"\"15-06-24\" at \"11:20\""},{"visible":true,"include":false,"step":"250","x":-82.57142857142857,"y":-394.4761904761905,"z":308.2857142857143,"a95":"1.7","info":"\"15-06-24\" at \"13:32\""},{"visible":true,"include":false,"step":"270","x":-78,"y":-333.7142857142857,"z":246.47619047619048,"a95":"2.6","info":"\"15-06-25\" at \"08:00\""},{"visible":true,"include":true,"step":"300","x":-128.47619047619048,"y":-355.5238095238095,"z":294.0952380952381,"a95":"2.3","info":"\"15-06-25\" at \"11:39\""},{"visible":true,"include":true,"step":"320","x":-25.80952380952381,"y":-271.5238095238095,"z":254.57142857142858,"a95":"3","info":"\"15-06-25\" at \"15:17\""},{"visible":true,"include":true,"step":"340","x":-90.66666666666667,"y":-360.0952380952381,"z":287.5238095238095,"a95":"2.7","info":"\"15-06-25\" at \"18:45\""},{"visible":false,"include":false,"step":"370","x":-718,"y":-541.6190476190476,"z":-840.6666666666666,"a95":"4.2","info":"\"15-06-25\" at \"22:31\""},{"visible":false,"include":false,"step":"400","x":-302.57142857142856,"y":-310.57142857142856,"z":115.9047619047619,"a95":"5.8","info":"\"15-06-26\" at \"09:35\""}],"demagType":"Unknown","patch":1.1,"format":"Unknown","strat":null},{"version":"v1.1.0","exported":"2016-10-11T14:17:38.804Z","info":"0","GEO":[{"dec":312.1377628909678,"inc":50.64975332254335,"MAD":11.523204069625962,"cm":[-6.767073673905716e-15,-8.120488408686859e-15,0],"intensity":611.791513107369,"type":"dir","forced":true,"remark":"","origin":false,"nSteps":6,"minStep":"20.0","maxStep":"35.0","steps":["20.0","23.0","25.0","30.0","33.0","35.0"],"group":"None"}],"TECT":[{"dec":311.28924767531214,"inc":29.672214574275973,"MAD":11.523204069625953,"cm":[-1.7594391552154862e-14,-1.3534147347811431e-14,0],"intensity":611.791513107369,"type":"dir","forced":true,"remark":"","origin":false,"nSteps":6,"minStep":"20.0","maxStep":"35.0","steps":["20.0","23.0","25.0","30.0","33.0","35.0"],"group":"None"}],"interpreted":true,"name":"SS55.04B","coreAzi":52,"coreDip":60,"bedStrike":219,"bedDip":21,"data":[{"visible":false,"include":false,"step":"0.0","x":-692.4380952380952,"y":55.51714285714285,"z":339.9142857142857,"a95":"0.99","info":"05/10/2015 at 19:36:38"},{"visible":true,"include":false,"step":"10.0","x":-262.42857142857144,"y":-195.9809523809524,"z":349.4761904761905,"a95":"0.99","info":"05/10/2015 at 19:36:38"},{"visible":true,"include":false,"step":"15.0","x":-263.2666666666667,"y":-238.96190476190475,"z":260.62857142857143,"a95":"0.99","info":"05/10/2015 at 19:36:38"},{"visible":true,"include":true,"step":"20.0","x":-106.81904761904761,"y":-166.34285714285713,"z":234.14285714285714,"a95":"0.99","info":"05/10/2015 at 19:36:38"},{"visible":true,"include":true,"step":"23.0","x":-100.38095238095238,"y":-159.7047619047619,"z":172.04761904761904,"a95":"0.99","info":"05/10/2015 at 19:36:38"},{"visible":true,"include":true,"step":"25.0","x":-96.88571428571429,"y":-172.2761904761905,"z":179.6,"a95":"0.99","info":"05/10/2015 at 19:36:38"},{"visible":true,"include":true,"step":"30.0","x":-128.05714285714285,"y":-172.6,"z":205.62857142857143,"a95":"0.99","info":"05/10/2015 at 19:36:38"},{"visible":true,"include":true,"step":"33.0","x":-161.15238095238095,"y":-154.83809523809524,"z":130.85714285714286,"a95":"0.99","info":"05/10/2015 at 19:36:38"},{"visible":true,"include":true,"step":"35.0","x":-210.6095238095238,"y":-222.74285714285716,"z":115.34285714285713,"a95":"0.99","info":"05/10/2015 at 19:36:38"},{"visible":true,"include":false,"step":"40.0","x":-208.6095238095238,"y":-191.13333333333335,"z":145.9714285714286,"a95":"0.99","info":"05/10/2015 at 19:36:38"},{"visible":false,"include":false,"step":"45.0","x":-203.1047619047619,"y":-135.92380952380952,"z":60.055238095238096,"a95":"0.99","info":"05/10/2015 at 19:36:38"},{"visible":false,"include":false,"step":"50.0","x":-242.73333333333332,"y":-265.0190476190476,"z":11.65047619047619,"a95":"0.99","info":"05/10/2015 at 19:36:38"},{"visible":false,"include":false,"step":"60.0","x":-289.25714285714287,"y":-399.50476190476195,"z":51.86857142857143,"a95":"0.99","info":"05/10/2015 at 19:36:38"},{"visible":false,"include":false,"step":"70.0","x":-291.8666666666667,"y":-382.8952380952381,"z":59.42857142857143,"a95":"0.99","info":"05/10/2015 at 19:36:38"}],"demagType":"Unknown","patch":1.1,"format":"Unknown","strat":null},{"version":"v1.1.0","exported":"2016-10-11T14:17:38.804Z","info":"","GEO":[{"dec":340.17540717353614,"inc":57.74284194626238,"MAD":18.671735957307195,"cm":[424.6263765349994,-83.61904761904786,286.11436986108595],"intensity":417.99912117864847,"type":"dir","forced":false,"remark":"","origin":false,"nSteps":5,"minStep":"150","maxStep":"300","steps":["150","180","250","270","300"],"group":"None","version":"v1.1.0"}],"TECT":[{"dec":329.74665604504327,"inc":38.7443231588539,"MAD":18.671735957307195,"cm":[475.26713230051143,-146.15517291866465,148.0572720231241],"intensity":417.9991211786485,"type":"dir","forced":false,"remark":"","origin":false,"nSteps":5,"minStep":"150","maxStep":"300","steps":["150","180","250","270","300"],"group":"None","version":"v1.1.0"}],"interpreted":true,"name":"SS55.05A","coreAzi":360,"coreDip":56,"bedStrike":219,"bedDip":21,"data":[{"visible":false,"include":false,"step":"20","x":308.2857142857143,"y":477.9047619047619,"z":320.95238095238096,"a95":"2.1","info":"\"15-06-22\" at \"09:31\""},{"visible":true,"include":false,"step":"100","x":280,"y":-29.047619047619047,"z":927.7142857142857,"a95":"2.2","info":"\"15-06-22\" at \"12:46\""},{"visible":true,"include":true,"step":"150","x":99.42857142857143,"y":-114.38095238095238,"z":686.952380952381,"a95":"2.5","info":"\"15-06-23\" at \"09:47\""},{"visible":true,"include":true,"step":"180","x":251.42857142857142,"y":-126.38095238095238,"z":667.4285714285714,"a95":"2.2","info":"\"15-06-23\" at \"12:53\""},{"visible":false,"include":false,"step":"210","x":320.85714285714283,"y":-83.23809523809524,"z":754.1904761904761,"a95":"2.2","info":"\"15-06-23\" at \"15:41\""},{"visible":false,"include":false,"step":"230","x":149.71428571428572,"y":-219.23809523809524,"z":349.6190476190476,"a95":"2.3","info":"\"15-06-24\" at \"11:22\""},{"visible":true,"include":true,"step":"250","x":237.61904761904762,"y":-79.23809523809524,"z":432,"a95":"2.2","info":"\"15-06-24\" at \"13:34\""},{"visible":true,"include":true,"step":"270","x":152.47619047619048,"y":-76.66666666666667,"z":289.42857142857144,"a95":"3","info":"\"15-06-25\" at \"08:02\""},{"visible":true,"include":true,"step":"300","x":219.23809523809524,"y":-21.428571428571427,"z":297.42857142857144,"a95":"2.7","info":"\"15-06-25\" at \"11:41\""},{"visible":true,"include":false,"step":"320","x":58.38095238095238,"y":-30.476190476190474,"z":282.1904761904762,"a95":"4.2","info":"\"15-06-25\" at \"15:19\""},{"visible":true,"include":false,"step":"340","x":46.666666666666664,"y":-90,"z":388.3809523809524,"a95":"4","info":"\"15-06-25\" at \"18:47\""},{"visible":false,"include":false,"step":"370","x":-269.14285714285717,"y":375.42857142857144,"z":-317.14285714285717,"a95":"7","info":"\"15-06-25\" at \"22:35\""},{"visible":false,"include":false,"step":"400","x":-157.8095238095238,"y":-224.28571428571428,"z":1206.3809523809523,"a95":"3.4","info":"\"15-06-26\" at \"09:37\""}],"demagType":"Unknown","patch":1.1,"format":"Unknown","strat":null},{"version":"v1.1.0","exported":"2016-10-11T14:17:38.804Z","info":"","GEO":[{"dec":349.50478273292765,"inc":34.85009322807548,"MAD":2.313017555890643,"cm":[1.4210854715202004e-14,2.6645352591003757e-14,0],"intensity":1034.0627445359341,"type":"dir","forced":true,"remark":"","origin":false,"nSteps":3,"minStep":"230","maxStep":"270","steps":["230","250","270"],"group":"None","version":"v1.1.0"}],"TECT":[{"dec":343.09827636694604,"inc":18.05089515512126,"MAD":2.3130175558906156,"cm":[1.4210854715202004e-14,1.0658141036401503e-14,-7.105427357601002e-15],"intensity":1034.0627445359341,"type":"dir","forced":true,"remark":"","origin":false,"nSteps":3,"minStep":"230","maxStep":"270","steps":["230","250","270"],"group":"None","version":"v1.1.0"}],"interpreted":true,"name":"SS55.08A","coreAzi":341,"coreDip":26,"bedStrike":219,"bedDip":21,"data":[{"visible":false,"include":false,"step":"20","x":-774.4761904761905,"y":515.3333333333334,"z":447.14285714285717,"a95":"1.4","info":"\"15-06-22\" at \"09:35\""},{"visible":true,"include":false,"step":"100","x":-454.57142857142856,"y":337.3333333333333,"z":942.8571428571429,"a95":"2.1","info":"\"15-06-22\" at \"12:48\""},{"visible":true,"include":false,"step":"150","x":-381.42857142857144,"y":171.42857142857142,"z":767.9047619047619,"a95":"2.3","info":"\"15-06-23\" at \"09:49\""},{"visible":true,"include":false,"step":"180","x":-174.38095238095238,"y":146,"z":652.952380952381,"a95":"2.6","info":"\"15-06-23\" at \"12:55\""},{"visible":true,"include":false,"step":"210","x":-224.38095238095238,"y":166.57142857142858,"z":668.4761904761905,"a95":"2.5","info":"\"15-06-23\" at \"15:43\""},{"visible":true,"include":true,"step":"230","x":-94.28571428571429,"y":73.42857142857143,"z":563.4285714285714,"a95":"2.6","info":"\"15-06-24\" at \"10:22\""},{"visible":true,"include":true,"step":"250","x":-82.38095238095238,"y":74.0952380952381,"z":661.5238095238095,"a95":"2.5","info":"\"15-06-24\" at \"13:36\""},{"visible":true,"include":true,"step":"270","x":-102.19047619047619,"y":61.714285714285715,"z":442.76190476190476,"a95":"3.1","info":"\"15-06-25\" at \"08:03\""},{"visible":true,"include":false,"step":"300","x":-133.52380952380952,"y":72.28571428571429,"z":683.9047619047619,"a95":"2.4","info":"\"15-06-25\" at \"11:43\""},{"visible":true,"include":false,"step":"320","x":-47.23809523809524,"y":81.23809523809524,"z":505.5238095238095,"a95":"2.8","info":"\"15-06-25\" at \"15:20\""},{"visible":true,"include":false,"step":"340","x":-159.23809523809524,"y":71.23809523809524,"z":542.5714285714286,"a95":"3.1","info":"\"15-06-25\" at \"18:49\""},{"visible":false,"include":false,"step":"370","x":788.1904761904761,"y":-118.0952380952381,"z":99.14285714285714,"a95":"3.3","info":"\"15-06-25\" at \"22:37\""},{"visible":false,"include":false,"step":"400","x":-578.2857142857143,"y":-22.38095238095238,"z":208.0952380952381,"a95":"6.5","info":"\"15-06-26\" at \"09:41\""}],"demagType":"Unknown","patch":1.1,"format":"Unknown","strat":null},{"version":"v1.1.0","exported":"2016-10-11T14:17:38.804Z","info":"3","GEO":[],"TECT":[],"interpreted":false,"name":"SS55.09","coreAzi":343,"coreDip":56,"bedStrike":219,"bedDip":21,"data":[{"visible":false,"include":false,"step":"0.0","x":-376.83809523809526,"y":41.12952380952381,"z":552.2857142857143,"a95":"0.99","info":"09/07/2015 at 22:12:33"},{"visible":true,"include":false,"step":"10.0","x":-265.3047619047619,"y":-2.442095238095238,"z":349.18095238095236,"a95":"0.99","info":"09/07/2015 at 22:12:33"},{"visible":true,"include":true,"step":"15.0","x":-289.87619047619046,"y":15.989523809523808,"z":217.0761904761905,"a95":"0.99","info":"09/07/2015 at 22:12:33"},{"visible":true,"include":true,"step":"20.0","x":-225.6095238095238,"y":12.97904761904762,"z":304.49523809523805,"a95":"0.99","info":"09/07/2015 at 22:12:33"},{"visible":true,"include":true,"step":"23.0","x":-151.93333333333334,"y":-2.834,"z":240.38095238095238,"a95":"0.99","info":"09/07/2015 at 22:12:33"},{"visible":true,"include":true,"step":"25.0","x":-238.86666666666665,"y":-79.19619047619047,"z":238.42857142857142,"a95":"0.99","info":"09/07/2015 at 22:12:33"},{"visible":true,"include":true,"step":"30.0","x":-250.77142857142857,"y":-100.37142857142858,"z":184.21904761904761,"a95":"0.99","info":"09/07/2015 at 22:12:33"},{"visible":true,"include":true,"step":"33.0","x":-309.3904761904762,"y":-71.35333333333334,"z":98.88571428571429,"a95":"0.99","info":"09/07/2015 at 22:12:33"},{"visible":true,"include":true,"step":"35.0","x":-277.29523809523806,"y":-194.06666666666666,"z":1.2259047619047618,"a95":"0.99","info":"09/07/2015 at 22:12:33"},{"visible":true,"include":true,"step":"40.0","x":-298.96190476190475,"y":-235.30476190476188,"z":141.45714285714286,"a95":"0.99","info":"09/07/2015 at 22:12:33"},{"visible":true,"include":true,"step":"45.0","x":-266.2190476190476,"y":-212.17142857142858,"z":101.32380952380953,"a95":"0.99","info":"09/07/2015 at 22:12:33"},{"visible":true,"include":true,"step":"50.0","x":-298.6,"y":-412.2952380952381,"z":-61.09428571428572,"a95":"0.99","info":"09/07/2015 at 22:12:33"},{"visible":true,"include":false,"step":"55.0","x":-287.2857142857143,"y":-491.8666666666667,"z":130.8190476190476,"a95":"0.99","info":"09/07/2015 at 22:12:33"},{"visible":true,"include":false,"step":"60.0","x":-360.3333333333333,"y":-475.3714285714285,"z":-26.40857142857143,"a95":"0.99","info":"09/07/2015 at 22:12:33"},{"visible":true,"include":false,"step":"65.0","x":-463.3047619047619,"y":-719.5809523809525,"z":-110.58095238095237,"a95":"0.99","info":"09/07/2015 at 22:12:33"},{"visible":true,"include":false,"step":"70.0","x":-352.4761904761905,"y":-656.504761904762,"z":50.8447619047619,"a95":"0.99","info":"09/07/2015 at 22:12:33"},{"visible":true,"include":false,"step":"80.0","x":-698.104761904762,"y":-767.3428571428572,"z":-13.452380952380953,"a95":"0.99","info":"09/07/2015 at 22:12:33"}],"demagType":"Unknown","patch":1.1,"format":"Unknown","strat":null},{"version":"v1.1.0","exported":"2016-10-11T14:17:38.804Z","info":"","GEO":[],"TECT":[],"interpreted":false,"name":"SS55.10A","coreAzi":330,"coreDip":72,"bedStrike":219,"bedDip":21,"data":[{"visible":false,"include":false,"step":"20","x":-1471.6190476190477,"y":1728.3809523809523,"z":-3699.809523809524,"a95":"2.7","info":"\"15-06-22\" at \"09:37\""},{"visible":true,"include":false,"step":"100","x":-711.3333333333334,"y":1448.2857142857142,"z":-1795.2380952380952,"a95":"3","info":"\"15-06-22\" at \"12:50\""},{"visible":true,"include":false,"step":"150","x":-514.952380952381,"y":626.1904761904761,"z":-425.3333333333333,"a95":"3.1","info":"\"15-06-23\" at \"09:51\""},{"visible":true,"include":false,"step":"180","x":-426.1904761904762,"y":518.3809523809524,"z":-417.9047619047619,"a95":"3.1","info":"\"15-06-23\" at \"12:57\""},{"visible":true,"include":false,"step":"210","x":-482.95238095238096,"y":581.1428571428571,"z":-461.7142857142857,"a95":"2.7","info":"\"15-06-23\" at \"15:45\""},{"visible":true,"include":false,"step":"230","x":-258.95238095238096,"y":396.2857142857143,"z":-225.9047619047619,"a95":"3.4","info":"\"15-06-24\" at \"10:24\""},{"visible":true,"include":false,"step":"250","x":-372.57142857142856,"y":247.9047619047619,"z":-169.04761904761904,"a95":"3.6","info":"\"15-06-24\" at \"13:38\""},{"visible":true,"include":false,"step":"270","x":-344.6666666666667,"y":183.71428571428572,"z":-133.9047619047619,"a95":"3.8","info":"\"15-06-25\" at \"08:05\""},{"visible":true,"include":false,"step":"300","x":-394.76190476190476,"y":186.38095238095238,"z":-21.904761904761905,"a95":"3.6","info":"\"15-06-25\" at \"11:45\""},{"visible":true,"include":false,"step":"320","x":-230.0952380952381,"y":271.42857142857144,"z":-261.14285714285717,"a95":"4.6","info":"\"15-06-25\" at \"15:22\""},{"visible":true,"include":false,"step":"340","x":-287.8095238095238,"y":116.85714285714286,"z":-87.42857142857143,"a95":"5.9","info":"\"15-06-25\" at \"18:52\""},{"visible":false,"include":false,"step":"370","x":-860.6666666666666,"y":418,"z":-35.61904761904762,"a95":"7.9","info":"\"15-06-25\" at \"22:40\""}],"demagType":"Unknown","patch":1.1,"format":"Unknown","strat":null},{"version":"v1.1.0","exported":"2016-10-11T14:17:38.804Z","info":"4","GEO":[],"TECT":[],"interpreted":false,"name":"SS55.11A","coreAzi":347,"coreDip":46,"bedStrike":219,"bedDip":21,"data":[{"visible":true,"include":false,"step":"0.0","x":169.2095238095238,"y":109.26666666666667,"z":1684.095238095238,"a95":"0.99","info":"09/07/2015 at 22:12:33"},{"visible":true,"include":false,"step":"10.0","x":188.73333333333335,"y":-16.00095238095238,"z":1019.5238095238095,"a95":"0.99","info":"09/07/2015 at 22:12:33"},{"visible":true,"include":false,"step":"15.0","x":202.39999999999998,"y":-49.099999999999994,"z":742,"a95":"0.99","info":"09/07/2015 at 22:12:33"},{"visible":true,"include":false,"step":"20.0","x":95.5047619047619,"y":-76.26857142857143,"z":607.9904761904761,"a95":"0.99","info":"09/07/2015 at 22:12:33"},{"visible":true,"include":false,"step":"23.0","x":111.71428571428571,"y":-114.63809523809525,"z":479.4,"a95":"0.99","info":"09/07/2015 at 22:12:33"},{"visible":true,"include":false,"step":"25.0","x":56.38095238095238,"y":-83.43142857142857,"z":353.67619047619047,"a95":"0.99","info":"09/07/2015 at 22:12:33"},{"visible":true,"include":false,"step":"30.0","x":8.230761904761906,"y":-128.3047619047619,"z":405.9238095238095,"a95":"0.99","info":"09/07/2015 at 22:12:33"},{"visible":true,"include":false,"step":"33.0","x":-28.22,"y":-226.78095238095236,"z":270.06666666666666,"a95":"0.99","info":"09/07/2015 at 22:12:33"},{"visible":true,"include":false,"step":"35.0","x":-5.3729523809523805,"y":-263.83809523809526,"z":282.7142857142857,"a95":"0.99","info":"09/07/2015 at 22:12:33"},{"visible":true,"include":false,"step":"40.0","x":-75.09142857142858,"y":-249.23809523809524,"z":282.74285714285713,"a95":"0.99","info":"09/07/2015 at 22:12:33"},{"visible":true,"include":false,"step":"45.0","x":-142.11428571428573,"y":-386.04761904761904,"z":230.42857142857142,"a95":"0.99","info":"09/07/2015 at 22:12:33"},{"visible":true,"include":false,"step":"50.0","x":-238.63809523809522,"y":-399.4095238095238,"z":262.06666666666666,"a95":"0.99","info":"09/07/2015 at 22:12:33"},{"visible":true,"include":false,"step":"55.0","x":-298.0571428571428,"y":-447.97142857142853,"z":238.58095238095237,"a95":"0.99","info":"09/07/2015 at 22:12:33"},{"visible":true,"include":false,"step":"60.0","x":-339.6095238095238,"y":-433.2476190476191,"z":115.63809523809525,"a95":"0.99","info":"09/07/2015 at 22:12:33"},{"visible":false,"include":false,"step":"65.0","x":-396.7523809523809,"y":-808.5333333333334,"z":138.53333333333333,"a95":"0.99","info":"09/07/2015 at 22:12:33"},{"visible":false,"include":false,"step":"70.0","x":-428.3333333333333,"y":-785.1714285714285,"z":271.25714285714287,"a95":"0.99","info":"09/07/2015 at 22:12:33"},{"visible":false,"include":false,"step":"80.0","x":-439.4,"y":-856.6761904761905,"z":149.22857142857143,"a95":"0.99","info":"09/07/2015 at 22:12:33"}],"demagType":"Unknown","patch":1.1,"format":"Unknown","strat":null},{"version":"v1.1.0","exported":"2016-10-11T14:17:38.804Z","info":"0","GEO":[{"dec":8.614512161522725,"inc":43.649074833098545,"MAD":3.718185032137745,"cm":[0,-8.120488408686859e-15,0],"intensity":915.7852736783011,"type":"dir","forced":true,"remark":"","origin":false,"nSteps":6,"minStep":"10.0","maxStep":"30.0","steps":["10.0","15.0","20.0","23.0","25.0","30.0"],"group":"None"}],"TECT":[{"dec":355.65916003186203,"inc":30.879357932765505,"MAD":3.7181850321377006,"cm":[2.7068294695622863e-15,-5.684341886080802e-14,-8.120488408686859e-15],"intensity":915.7852736783011,"type":"dir","forced":true,"remark":"","origin":false,"nSteps":6,"minStep":"10.0","maxStep":"30.0","steps":["10.0","15.0","20.0","23.0","25.0","30.0"],"group":"None"}],"interpreted":true,"name":"SS55.11B","coreAzi":347,"coreDip":46,"bedStrike":219,"bedDip":21,"data":[{"visible":false,"include":false,"step":"0.0","x":-246.28571428571428,"y":473.9809523809524,"z":633.2095238095238,"a95":"0.99","info":"05/10/2015 at 19:36:38"},{"visible":true,"include":true,"step":"10.0","x":2.2817142857142856,"y":181.55238095238096,"z":619.5142857142857,"a95":"0.99","info":"05/10/2015 at 19:36:38"},{"visible":true,"include":true,"step":"15.0","x":-24.540952380952383,"y":151.22857142857143,"z":472.152380952381,"a95":"0.99","info":"05/10/2015 at 19:36:38"},{"visible":true,"include":true,"step":"20.0","x":19.82095238095238,"y":110.76190476190476,"z":387.1047619047619,"a95":"0.99","info":"05/10/2015 at 19:36:38"},{"visible":true,"include":true,"step":"23.0","x":25.062857142857144,"y":96.08571428571429,"z":360.49523809523805,"a95":"0.99","info":"05/10/2015 at 19:36:38"},{"visible":true,"include":true,"step":"25.0","x":-16.81142857142857,"y":43.85809523809524,"z":241.1047619047619,"a95":"0.99","info":"05/10/2015 at 19:36:38"},{"visible":true,"include":true,"step":"30.0","x":8.495047619047618,"y":32.58095238095238,"z":270.81904761904764,"a95":"0.99","info":"05/10/2015 at 19:36:38"},{"visible":true,"include":false,"step":"33.0","x":51.03047619047619,"y":-8.240761904761905,"z":215.0190476190476,"a95":"0.99","info":"05/10/2015 at 19:36:38"},{"visible":true,"include":false,"step":"35.0","x":34.38,"y":-25.946666666666665,"z":178.9904761904762,"a95":"0.99","info":"05/10/2015 at 19:36:38"},{"visible":true,"include":false,"step":"40.0","x":-68.55619047619048,"y":-74.81428571428572,"z":124.11428571428571,"a95":"0.99","info":"05/10/2015 at 19:36:38"},{"visible":true,"include":false,"step":"45.0","x":-60.26285714285714,"y":-133.1904761904762,"z":68.92,"a95":"0.99","info":"05/10/2015 at 19:36:38"},{"visible":true,"include":false,"step":"50.0","x":-37.775238095238095,"y":-171.13333333333335,"z":36.243809523809524,"a95":"0.99","info":"05/10/2015 at 19:36:38"},{"visible":true,"include":false,"step":"60.0","x":-122,"y":-261.6190476190476,"z":43.06,"a95":"0.99","info":"05/10/2015 at 19:36:38"},{"visible":true,"include":false,"step":"70.0","x":-123.76190476190476,"y":-269.9238095238095,"z":21.522857142857145,"a95":"0.99","info":"05/10/2015 at 19:36:38"}],"demagType":"Unknown","patch":1.1,"format":"Unknown","strat":null}]
