# Supplementary material for: Paleomagnetic constraints on the timing and distribution of Cenozoic rotations in Central and Eastern Anatolia
Source: Copernicus journal article supplement (doi:10.5194/se-9-295-2018), 2018-03-21
Supplement: Supplementary file 2 [file se-9-295-2018-supplement.zip › se-2017-66_DATA_dir files/dir files Sivas/SS56.dir]

[{"version":"v1.1.0","exported":"2016-10-11T14:03:13.797Z","info":"5","GEO":[{"dec":7.386553830430671,"inc":36.73020320004037,"MAD":8.826603232808196,"cm":[-1.3534147347811431e-15,-2.5376526277146434e-16,0],"intensity":266.4098825909815,"type":"dir","forced":true,"remark":"","origin":false,"nSteps":9,"minStep":"15.0","maxStep":"45.0","steps":["15.0","20.0","23.0","25.0","30.0","33.0","35.0","40.0","45.0"],"group":"None"}],"TECT":[{"dec":355.0923606254034,"inc":19.659846708765603,"MAD":8.826603232808193,"cm":[-2.0301221021717147e-15,1.7086861026611932e-14,-2.7068294695622863e-15],"intensity":266.4098825909815,"type":"dir","forced":true,"remark":"","origin":false,"nSteps":9,"minStep":"15.0","maxStep":"45.0","steps":["15.0","20.0","23.0","25.0","30.0","33.0","35.0","40.0","45.0"],"group":"None"}],"interpreted":true,"name":"SS56.01","coreAzi":201,"coreDip":74,"bedStrike":218,"bedDip":28,"data":[{"visible":true,"include":false,"step":"0.0","x":-307.3904761904762,"y":62.69904761904762,"z":81.76666666666667,"a95":"0.99","info":"09/07/2015 at 22:12:33"},{"visible":true,"include":false,"step":"10.0","x":-241.28571428571428,"y":17.153333333333336,"z":68.26952380952382,"a95":"0.99","info":"09/07/2015 at 22:12:33"},{"visible":true,"include":true,"step":"15.0","x":-180.24761904761903,"y":4.020857142857143,"z":61.68476190476191,"a95":"0.99","info":"09/07/2015 at 22:12:33"},{"visible":true,"include":true,"step":"20.0","x":-135.67619047619047,"y":42.93047619047619,"z":58.0047619047619,"a95":"0.99","info":"09/07/2015 at 22:12:33"},{"visible":true,"include":true,"step":"23.0","x":-151.55238095238096,"y":19.66190476190476,"z":58.0647619047619,"a95":"0.99","info":"09/07/2015 at 22:12:33"},{"visible":true,"include":true,"step":"25.0","x":-118.36190476190475,"y":18.53047619047619,"z":37.91047619047619,"a95":"0.99","info":"09/07/2015 at 22:12:33"},{"visible":true,"include":true,"step":"30.0","x":-94.5647619047619,"y":28.768571428571427,"z":44.224761904761905,"a95":"0.99","info":"09/07/2015 at 22:12:33"},{"visible":true,"include":true,"step":"33.0","x":-115.92380952380952,"y":33.05714285714286,"z":53.691428571428574,"a95":"0.99","info":"09/07/2015 at 22:12:33"},{"visible":true,"include":true,"step":"35.0","x":-94.5904761904762,"y":15.747619047619047,"z":37.488571428571426,"a95":"0.99","info":"09/07/2015 at 22:12:33"},{"visible":true,"include":true,"step":"40.0","x":-68.84380952380953,"y":47.65714285714286,"z":43.71619047619048,"a95":"0.99","info":"09/07/2015 at 22:12:33"},{"visible":true,"include":true,"step":"45.0","x":-70.67809523809524,"y":38.29238095238095,"z":17.18285714285714,"a95":"0.99","info":"09/07/2015 at 22:12:33"},{"visible":true,"include":false,"step":"50.0","x":-28.461904761904766,"y":37.37047619047619,"z":16.955238095238094,"a95":"0.99","info":"09/07/2015 at 22:12:33"},{"visible":true,"include":false,"step":"55.0","x":-7.469619047619047,"y":47.93714285714285,"z":5.968857142857143,"a95":"0.99","info":"09/07/2015 at 22:12:33"},{"visible":true,"include":false,"step":"60.0","x":-26.464761904761904,"y":30.58,"z":24.13904761904762,"a95":"0.99","info":"09/07/2015 at 22:12:33"},{"visible":false,"include":false,"step":"65.0","x":33.01714285714286,"y":11.09047619047619,"z":0.24178095238095237,"a95":"0.99","info":"09/07/2015 at 22:12:33"},{"visible":false,"include":false,"step":"70.0","x":15.185714285714285,"y":8.71047619047619,"z":54.94095238095238,"a95":"0.99","info":"09/07/2015 at 22:12:33"},{"visible":false,"include":false,"step":"80.0","x":-88.20476190476191,"y":4.2881904761904766,"z":35.14666666666667,"a95":"0.99","info":"09/07/2015 at 22:12:33"}],"demagType":"Unknown","patch":1.1,"format":"Unknown","strat":null},{"version":"v1.1.0","exported":"2016-10-11T14:03:13.797Z","info":"","GEO":[],"TECT":[],"interpreted":false,"name":"SS56.02A","coreAzi":131,"coreDip":62,"bedStrike":218,"bedDip":28,"data":[{"visible":false,"include":false,"step":"20","x":-128.38095238095238,"y":-167.33333333333334,"z":-562.8571428571429,"a95":"3.9","info":"\"15-06-22\" at \"09:38\""},{"visible":true,"include":false,"step":"100","x":-219.42857142857142,"y":-109.33333333333333,"z":-268.3809523809524,"a95":"3.8","info":"\"15-06-22\" at \"12:52\""},{"visible":true,"include":false,"step":"150","x":-337.04761904761904,"y":-98.57142857142857,"z":-190.76190476190476,"a95":"3","info":"\"15-06-23\" at \"09:53\""},{"visible":true,"include":true,"step":"180","x":-151.14285714285714,"y":-67.52380952380952,"z":-154.66666666666666,"a95":"4.1","info":"\"15-06-23\" at \"12:58\""},{"visible":true,"include":true,"step":"210","x":-158,"y":-39.142857142857146,"z":-162.28571428571428,"a95":"3.8","info":"\"15-06-23\" at \"15:48\""},{"visible":true,"include":true,"step":"230","x":-155.04761904761904,"y":-68.47619047619048,"z":-139.52380952380952,"a95":"3.2","info":"\"15-06-24\" at \"10:26\""},{"visible":true,"include":true,"step":"250","x":-175.71428571428572,"y":-44.57142857142857,"z":-128,"a95":"3.3","info":"\"15-06-24\" at \"13:40\""},{"visible":true,"include":true,"step":"270","x":-124.76190476190476,"y":-57.714285714285715,"z":-80.66666666666667,"a95":"3.7","info":"\"15-06-25\" at \"08:06\""},{"visible":true,"include":true,"step":"300","x":-142.66666666666666,"y":-35.142857142857146,"z":-30.857142857142858,"a95":"3.1","info":"\"15-06-25\" at \"11:47\""},{"visible":true,"include":true,"step":"320","x":-134.1904761904762,"y":-12.380952380952381,"z":-5.333333333333333,"a95":"4.5","info":"\"15-06-25\" at \"15:24\""},{"visible":true,"include":false,"step":"340","x":-143.23809523809524,"y":15.523809523809524,"z":-45.61904761904762,"a95":"4.2","info":"\"15-06-25\" at \"18:55\""},{"visible":false,"include":false,"step":"370","x":417.5238095238095,"y":-358.76190476190476,"z":-280,"a95":"6","info":"\"15-06-25\" at \"22:41\""},{"visible":false,"include":false,"step":"400","x":-410.57142857142856,"y":-50.76190476190476,"z":131.9047619047619,"a95":"6.3","info":"\"15-06-26\" at \"09:44\""}],"demagType":"Unknown","patch":1.1,"format":"Unknown","strat":null},{"version":"v1.1.0","exported":"2016-10-11T14:03:13.797Z","info":"0","GEO":[{"dec":348.8777730671483,"inc":46.13623047331011,"MAD":4.108764729682084,"cm":[-5.4136589391245725e-15,-1.3195793664116147e-14,0],"intensity":591.6899074113285,"type":"dir","forced":true,"remark":"","origin":false,"nSteps":11,"minStep":"15.0","maxStep":"60.0","steps":["15.0","20.0","23.0","25.0","30.0","33.0","35.0","40.0","45.0","50.0","60.0"],"group":"None"}],"TECT":[{"dec":337.5139729892609,"inc":22.99309443272977,"MAD":4.108764729682161,"cm":[-1.7594391552154862e-14,-3.5188783104309725e-14,-1.691768418476429e-15],"intensity":591.6899074113284,"type":"dir","forced":true,"remark":"","origin":false,"nSteps":11,"minStep":"15.0","maxStep":"60.0","steps":["15.0","20.0","23.0","25.0","30.0","33.0","35.0","40.0","45.0","50.0","60.0"],"group":"None"}],"interpreted":true,"name":"SS56.03A","coreAzi":129,"coreDip":63,"bedStrike":218,"bedDip":28,"data":[{"visible":true,"include":false,"step":"0.0","x":-696.8571428571429,"y":-467.8857142857143,"z":186.73333333333335,"a95":"0.99","info":"05/10/2015 at 19:36:38"},{"visible":true,"include":false,"step":"10.0","x":-456.2857142857143,"y":-274.62857142857143,"z":194.9904761904762,"a95":"0.99","info":"05/10/2015 at 19:36:38"},{"visible":true,"include":true,"step":"15.0","x":-386.42857142857144,"y":-208.35238095238094,"z":170.01904761904763,"a95":"0.99","info":"05/10/2015 at 19:36:38"},{"visible":true,"include":true,"step":"20.0","x":-326.1142857142857,"y":-188.0952380952381,"z":160.75238095238097,"a95":"0.99","info":"05/10/2015 at 19:36:38"},{"visible":true,"include":true,"step":"23.0","x":-276.12380952380954,"y":-159.75238095238097,"z":142.7047619047619,"a95":"0.99","info":"05/10/2015 at 19:36:38"},{"visible":true,"include":true,"step":"25.0","x":-260.3047619047619,"y":-157.75238095238097,"z":140.73333333333335,"a95":"0.99","info":"05/10/2015 at 19:36:38"},{"visible":true,"include":true,"step":"30.0","x":-211.37142857142857,"y":-120.22857142857144,"z":127.64761904761905,"a95":"0.99","info":"05/10/2015 at 19:36:38"},{"visible":true,"include":true,"step":"33.0","x":-182.7047619047619,"y":-109.8952380952381,"z":95.8,"a95":"0.99","info":"05/10/2015 at 19:36:38"},{"visible":true,"include":true,"step":"35.0","x":-168.85714285714286,"y":-110.05714285714285,"z":75.23428571428572,"a95":"0.99","info":"05/10/2015 at 19:36:38"},{"visible":true,"include":true,"step":"40.0","x":-155.76190476190476,"y":-42.54761904761905,"z":76.43904761904761,"a95":"0.99","info":"05/10/2015 at 19:36:38"},{"visible":true,"include":true,"step":"45.0","x":-101.96190476190475,"y":-63.838095238095235,"z":68.91619047619048,"a95":"0.99","info":"05/10/2015 at 19:36:38"},{"visible":true,"include":true,"step":"50.0","x":-115.16190476190476,"y":-43.12571428571429,"z":65.72190476190477,"a95":"0.99","info":"05/10/2015 at 19:36:38"},{"visible":true,"include":true,"step":"60.0","x":-111.11428571428571,"y":-29.758095238095237,"z":44.11047619047619,"a95":"0.99","info":"05/10/2015 at 19:36:38"},{"visible":true,"include":false,"step":"70.0","x":-136.3904761904762,"y":-35.714285714285715,"z":15.08952380952381,"a95":"0.99","info":"05/10/2015 at 19:36:38"}],"demagType":"Unknown","patch":1.1,"format":"Unknown","strat":null},{"version":"v1.1.0","exported":"2016-10-11T14:03:13.797Z","info":"","GEO":[{"dec":336.22099079947975,"inc":33.900920423281626,"MAD":6.4843679827818965,"cm":[-1.6240976817373718e-14,-1.4210854715202004e-14,0],"intensity":760.2310724028005,"type":"dir","forced":true,"remark":"","origin":false,"nSteps":9,"minStep":"150","maxStep":"340","steps":["150","180","210","230","250","270","300","320","340"],"group":"None"}],"TECT":[{"dec":331.38609185519886,"inc":8.57637580690685,"MAD":6.484367982781864,"cm":[1.0827317878249145e-14,1.3534147347811431e-14,-5.24448209727693e-15],"intensity":760.2310724028005,"type":"dir","forced":true,"remark":"","origin":false,"nSteps":9,"minStep":"150","maxStep":"340","steps":["150","180","210","230","250","270","300","320","340"],"group":"None"}],"interpreted":true,"name":"SS56.04A","coreAzi":137,"coreDip":62,"bedStrike":218,"bedDip":28,"data":[{"visible":true,"include":false,"step":"20","x":-773.9047619047619,"y":-166.66666666666666,"z":472.2857142857143,"a95":"1.7","info":"\"15-06-22\" at \"09:40\""},{"visible":true,"include":false,"step":"100","x":-437.7142857142857,"y":-150.0952380952381,"z":126.57142857142857,"a95":"1.5","info":"\"15-06-22\" at \"12:55\""},{"visible":true,"include":true,"step":"150","x":-519.5238095238095,"y":-135.9047619047619,"z":90.76190476190476,"a95":"1.8","info":"\"15-06-23\" at \"09:55\""},{"visible":true,"include":true,"step":"180","x":-307.5238095238095,"y":-145.52380952380952,"z":34.857142857142854,"a95":"1.7","info":"\"15-06-23\" at \"13:00\""},{"visible":true,"include":true,"step":"210","x":-312.76190476190476,"y":-92.57142857142857,"z":59.42857142857143,"a95":"1.8","info":"\"15-06-23\" at \"15:50\""},{"visible":true,"include":true,"step":"230","x":-240.85714285714286,"y":-85.33333333333333,"z":25.523809523809526,"a95":"2","info":"\"15-06-24\" at \"10:28\""},{"visible":true,"include":true,"step":"250","x":-263.9047619047619,"y":-58.19047619047619,"z":16.476190476190474,"a95":"1.9","info":"\"15-06-24\" at \"13:41\""},{"visible":true,"include":true,"step":"270","x":-182.47619047619048,"y":-5.0476190476190474,"z":-5.904761904761905,"a95":"2.7","info":"\"15-06-25\" at \"08:08\""},{"visible":true,"include":true,"step":"300","x":-227.23809523809524,"y":-51.42857142857143,"z":56.476190476190474,"a95":"2.4","info":"\"15-06-25\" at \"11:49\""},{"visible":true,"include":true,"step":"320","x":-188.1904761904762,"y":-55.714285714285715,"z":-15.428571428571429,"a95":"3.2","info":"\"15-06-25\" at \"15:25\""},{"visible":true,"include":true,"step":"340","x":-210.1904761904762,"y":-52.476190476190474,"z":9.142857142857142,"a95":"3.5","info":"\"15-06-25\" at \"18:56\""},{"visible":false,"include":false,"step":"370","x":-380.76190476190476,"y":-488.4761904761905,"z":-28.571428571428573,"a95":"8.1","info":"\"15-06-25\" at \"22:44\""},{"visible":false,"include":false,"step":"400","x":-180.28571428571428,"y":204.57142857142858,"z":145.8095238095238,"a95":"10.3","info":"\"15-06-26\" at \"09:47\""}],"demagType":"Unknown","patch":1.1,"format":"Unknown","strat":null},{"version":"v1.1.0","exported":"2016-10-11T14:03:13.798Z","info":"0","GEO":[{"dec":356.6059959633352,"inc":44.51862253899179,"MAD":6.0619438769652785,"cm":[0,-2.740664837931815e-14,0],"intensity":553.2019368168907,"type":"dir","forced":true,"remark":"","origin":false,"nSteps":10,"minStep":"15.0","maxStep":"50.0","steps":["15.0","20.0","23.0","25.0","30.0","33.0","35.0","40.0","45.0","50.0"],"group":"None"}],"TECT":[{"dec":343.66111513820783,"inc":23.43615974348738,"MAD":6.061943876965259,"cm":[-1.2180732613030288e-14,-2.3177227333127077e-14,-9.473903143468002e-15],"intensity":553.2019368168907,"type":"dir","forced":true,"remark":"","origin":false,"nSteps":10,"minStep":"15.0","maxStep":"50.0","steps":["15.0","20.0","23.0","25.0","30.0","33.0","35.0","40.0","45.0","50.0"],"group":"None"}],"interpreted":true,"name":"SS56.05A","coreAzi":146,"coreDip":60,"bedStrike":218,"bedDip":28,"data":[{"visible":true,"include":false,"step":"0.0","x":-818.9619047619047,"y":-82.08190476190477,"z":104.25714285714287,"a95":"0.99","info":"05/10/2015 at 19:36:38"},{"visible":true,"include":false,"step":"10.0","x":-489.60952380952375,"y":-159.36190476190475,"z":139.17142857142858,"a95":"0.99","info":"05/10/2015 at 19:36:38"},{"visible":true,"include":true,"step":"15.0","x":-391.7904761904762,"y":-163.6952380952381,"z":133.0857142857143,"a95":"0.99","info":"05/10/2015 at 19:36:38"},{"visible":true,"include":true,"step":"20.0","x":-336.0095238095238,"y":-133.48571428571427,"z":104.01904761904763,"a95":"0.99","info":"05/10/2015 at 19:36:38"},{"visible":true,"include":true,"step":"23.0","x":-301.8666666666667,"y":-97.18095238095238,"z":86.98380952380953,"a95":"0.99","info":"05/10/2015 at 19:36:38"},{"visible":true,"include":true,"step":"25.0","x":-265.32380952380953,"y":-103.98095238095237,"z":93.54761904761905,"a95":"0.99","info":"05/10/2015 at 19:36:38"},{"visible":true,"include":true,"step":"30.0","x":-220.0761904761905,"y":-79.78,"z":52.68095238095238,"a95":"0.99","info":"05/10/2015 at 19:36:38"},{"visible":true,"include":true,"step":"33.0","x":-189.55238095238096,"y":-49.140952380952385,"z":70.41428571428571,"a95":"0.99","info":"05/10/2015 at 19:36:38"},{"visible":true,"include":true,"step":"35.0","x":-168.51428571428573,"y":-96.5142857142857,"z":82.03428571428572,"a95":"0.99","info":"05/10/2015 at 19:36:38"},{"visible":true,"include":true,"step":"40.0","x":-139.84761904761905,"y":-77.02666666666667,"z":49.55904761904762,"a95":"0.99","info":"05/10/2015 at 19:36:38"},{"visible":true,"include":true,"step":"45.0","x":-121.23809523809524,"y":-77.03428571428572,"z":71.13904761904762,"a95":"0.99","info":"05/10/2015 at 19:36:38"},{"visible":true,"include":true,"step":"50.0","x":-66.70857142857143,"y":-89.9352380952381,"z":44.34761904761905,"a95":"0.99","info":"05/10/2015 at 19:36:38"},{"visible":true,"include":false,"step":"60.0","x":-1.3372380952380953,"y":-58.239999999999995,"z":64.21809523809523,"a95":"0.99","info":"05/10/2015 at 19:36:38"},{"visible":true,"include":false,"step":"70.0","x":-36.04857142857143,"y":-25.983809523809523,"z":7.9200952380952385,"a95":"0.99","info":"05/10/2015 at 19:36:38"}],"demagType":"Unknown","patch":1.1,"format":"Unknown","strat":null},{"version":"v1.1.0","exported":"2016-10-11T14:03:13.798Z","info":"6","GEO":[{"dec":1.6751984944087894,"inc":42.03266873490147,"MAD":7.2420738894582835,"cm":[-3.383536836952858e-16,4.086678085882124e-15,0],"intensity":250.90806389650018,"type":"dir","forced":true,"remark":"","origin":false,"nSteps":11,"minStep":"15.0","maxStep":"55.0","steps":["15.0","20.0","23.0","25.0","30.0","33.0","35.0","40.0","45.0","50.0","55.0"],"group":"None"}],"TECT":[{"dec":348.41307884655225,"inc":22.620213297266996,"MAD":7.242073889458294,"cm":[-1.0573552615477682e-14,-1.9370748391555113e-14,6.767073673905716e-16],"intensity":250.90806389650018,"type":"dir","forced":true,"remark":"","origin":false,"nSteps":11,"minStep":"15.0","maxStep":"55.0","steps":["15.0","20.0","23.0","25.0","30.0","33.0","35.0","40.0","45.0","50.0","55.0"],"group":"None"}],"interpreted":true,"name":"SS56.05B","coreAzi":146,"coreDip":60,"bedStrike":218,"bedDip":28,"data":[{"visible":true,"include":false,"step":"0.0","x":-245.8952380952381,"y":-90.5142857142857,"z":106.42857142857143,"a95":"0.99","info":"09/07/2015 at 22:12:33"},{"visible":true,"include":false,"step":"10.0","x":-211.52380952380952,"y":-98.1047619047619,"z":84.93619047619048,"a95":"0.99","info":"09/07/2015 at 22:12:33"},{"visible":true,"include":true,"step":"15.0","x":-197.16190476190474,"y":-106.65714285714287,"z":61.82666666666666,"a95":"0.99","info":"09/07/2015 at 22:12:33"},{"visible":true,"include":true,"step":"20.0","x":-147.32380952380953,"y":-79.04857142857142,"z":40.62095238095238,"a95":"0.99","info":"09/07/2015 at 22:12:33"},{"visible":true,"include":true,"step":"23.0","x":-132.52380952380952,"y":-68.63142857142857,"z":50.6504761904762,"a95":"0.99","info":"09/07/2015 at 22:12:33"},{"visible":true,"include":true,"step":"25.0","x":-125.18095238095239,"y":-67.36952380952381,"z":39.64380952380952,"a95":"0.99","info":"09/07/2015 at 22:12:33"},{"visible":true,"include":true,"step":"30.0","x":-104.21904761904761,"y":-64.40380952380953,"z":35.6,"a95":"0.99","info":"09/07/2015 at 22:12:33"},{"visible":true,"include":true,"step":"33.0","x":-98.28571428571429,"y":-30.41333333333333,"z":37.438095238095244,"a95":"0.99","info":"09/07/2015 at 22:12:33"},{"visible":true,"include":true,"step":"35.0","x":-75.35333333333334,"y":-59.10952380952381,"z":38.01619047619048,"a95":"0.99","info":"09/07/2015 at 22:12:33"},{"visible":true,"include":true,"step":"40.0","x":-89.27619047619048,"y":-18.815238095238094,"z":23.197142857142858,"a95":"0.99","info":"09/07/2015 at 22:12:33"},{"visible":true,"include":true,"step":"45.0","x":-74.60761904761905,"y":-15.392380952380952,"z":21.952380952380953,"a95":"0.99","info":"09/07/2015 at 22:12:33"},{"visible":true,"include":true,"step":"50.0","x":-49.79428571428572,"y":-11.283809523809524,"z":-8.43009523809524,"a95":"0.99","info":"09/07/2015 at 22:12:33"},{"visible":true,"include":true,"step":"55.0","x":-13.814285714285715,"y":-1.398857142857143,"z":20.44,"a95":"0.99","info":"09/07/2015 at 22:12:33"},{"visible":false,"include":false,"step":"60.0","x":-38.28476190476191,"y":6.664571428571428,"z":14.644761904761905,"a95":"0.99","info":"09/07/2015 at 22:12:33"},{"visible":false,"include":false,"step":"65.0","x":-13.415238095238097,"y":-36.357142857142854,"z":18.513333333333332,"a95":"0.99","info":"09/07/2015 at 22:12:33"},{"visible":false,"include":false,"step":"70.0","x":23.84952380952381,"y":-21.36095238095238,"z":15.732380952380952,"a95":"0.99","info":"09/07/2015 at 22:12:33"},{"visible":false,"include":false,"step":"80.0","x":-1.3293333333333333,"y":-7.012380952380952,"z":7.9957142857142856,"a95":"0.99","info":"09/07/2015 at 22:12:33"}],"demagType":"Unknown","patch":1.1,"format":"Unknown","strat":null},{"version":"v1.1.0","exported":"2016-10-11T14:03:13.798Z","info":"","GEO":[],"TECT":[],"interpreted":false,"name":"SS56.06A","coreAzi":221,"coreDip":64,"bedStrike":218,"bedDip":28,"data":[{"visible":false,"include":false,"step":"20","x":-1671.5238095238096,"y":-72.0952380952381,"z":1889.5238095238096,"a95":"2.1","info":"\"15-06-22\" at \"09:42\""},{"visible":true,"include":false,"step":"100","x":-937.047619047619,"y":247.23809523809524,"z":477.7142857142857,"a95":"2.4","info":"\"15-06-22\" at \"12:57\""},{"visible":true,"include":false,"step":"150","x":-694.952380952381,"y":40.38095238095238,"z":236.38095238095238,"a95":"3","info":"\"15-06-23\" at \"09:56\""},{"visible":true,"include":false,"step":"180","x":-688.7619047619048,"y":-17.047619047619047,"z":119.52380952380952,"a95":"2.9","info":"\"15-06-23\" at \"13:02\""},{"visible":true,"include":false,"step":"210","x":-798.6666666666666,"y":2.2857142857142856,"z":69.61904761904762,"a95":"2.5","info":"\"15-06-23\" at \"15:51\""},{"visible":true,"include":false,"step":"230","x":-413.14285714285717,"y":-177.61904761904762,"z":-133.42857142857142,"a95":"2","info":"\"15-06-24\" at \"10:32\""},{"visible":true,"include":false,"step":"250","x":-556.0952380952381,"y":-336,"z":-233.71428571428572,"a95":"2.7","info":"\"15-06-24\" at \"13:43\""},{"visible":true,"include":false,"step":"270","x":-352.85714285714283,"y":-21.523809523809526,"z":-234.57142857142858,"a95":"3.7","info":"\"15-06-25\" at \"08:10\""},{"visible":true,"include":false,"step":"300","x":-497.23809523809524,"y":-172.66666666666666,"z":-205.61904761904762,"a95":"3","info":"\"15-06-25\" at \"11:50\""},{"visible":true,"include":false,"step":"320","x":-351.3333333333333,"y":-78.57142857142857,"z":106.19047619047619,"a95":"4.2","info":"\"15-06-25\" at \"15:29\""},{"visible":true,"include":false,"step":"340","x":-350.95238095238096,"y":-207.42857142857142,"z":130.66666666666666,"a95":"3.2","info":"\"15-06-25\" at \"18:58\""},{"visible":true,"include":false,"step":"370","x":-220.66666666666666,"y":-1.4285714285714286,"z":21.714285714285715,"a95":"4","info":"\"15-06-25\" at \"22:49\""},{"visible":false,"include":false,"step":"400","x":-1219.2380952380952,"y":864.0952380952381,"z":1147.8095238095239,"a95":"7.7","info":"\"15-06-26\" at \"10:03\""}],"demagType":"Unknown","patch":1.1,"format":"Unknown","strat":null},{"version":"v1.1.0","exported":"2016-10-11T14:03:13.798Z","info":"7","GEO":[],"TECT":[],"interpreted":false,"name":"SS56.07","coreAzi":224,"coreDip":65,"bedStrike":218,"bedDip":28,"data":[{"visible":false,"include":false,"step":"0.0","x":-1033.8095238095239,"y":702.5714285714286,"z":1517.5238095238096,"a95":"0.99","info":"09/07/2015 at 22:12:33"},{"visible":true,"include":false,"step":"10.0","x":-486.552380952381,"y":236.75238095238097,"z":293.8285714285714,"a95":"0.99","info":"09/07/2015 at 22:12:33"},{"visible":true,"include":false,"step":"15.0","x":-449.23809523809524,"y":61.73428571428572,"z":144.85714285714286,"a95":"0.99","info":"09/07/2015 at 22:12:33"},{"visible":true,"include":false,"step":"20.0","x":-260.12380952380954,"y":67.08190476190477,"z":115.4095238095238,"a95":"0.99","info":"09/07/2015 at 22:12:33"},{"visible":true,"include":false,"step":"23.0","x":-348.32380952380953,"y":167.7904761904762,"z":29.86857142857143,"a95":"0.99","info":"09/07/2015 at 22:12:33"},{"visible":true,"include":false,"step":"25.0","x":-286.4666666666667,"y":157.88571428571427,"z":-169.85714285714286,"a95":"0.99","info":"09/07/2015 at 22:12:33"},{"visible":true,"include":false,"step":"30.0","x":-210.36190476190478,"y":173.65714285714287,"z":91.7104761904762,"a95":"0.99","info":"09/07/2015 at 22:12:33"},{"visible":true,"include":false,"step":"33.0","x":-67.72857142857143,"y":276.9428571428572,"z":-0.30348571428571425,"a95":"0.99","info":"09/07/2015 at 22:12:33"},{"visible":true,"include":false,"step":"35.0","x":-128.75238095238097,"y":-0.8304761904761906,"z":-217.1809523809524,"a95":"0.99","info":"09/07/2015 at 22:12:33"},{"visible":true,"include":false,"step":"40.0","x":-63.38857142857143,"y":184.54285714285714,"z":90.4895238095238,"a95":"0.99","info":"09/07/2015 at 22:12:33"},{"visible":true,"include":false,"step":"45.0","x":19.11809523809524,"y":14.697142857142856,"z":-29.93904761904762,"a95":"0.99","info":"09/07/2015 at 22:12:33"},{"visible":true,"include":false,"step":"50.0","x":-58.34571428571429,"y":-138.2095238095238,"z":-194.98095238095237,"a95":"0.99","info":"09/07/2015 at 22:12:33"},{"visible":false,"include":false,"step":"55.0","x":-90.08857142857143,"y":-94.02380952380952,"z":17.445714285714285,"a95":"0.99","info":"09/07/2015 at 22:12:33"},{"visible":false,"include":false,"step":"60.0","x":26.375238095238096,"y":-116.60952380952382,"z":-69.58190476190477,"a95":"0.99","info":"09/07/2015 at 22:12:33"},{"visible":false,"include":false,"step":"65.0","x":18.589523809523808,"y":-126.73333333333333,"z":-160.3047619047619,"a95":"0.99","info":"09/07/2015 at 22:12:33"},{"visible":false,"include":false,"step":"70.0","x":142.8952380952381,"y":-97.39047619047619,"z":-8.192761904761905,"a95":"0.99","info":"09/07/2015 at 22:12:33"},{"visible":false,"include":false,"step":"80.0","x":418.3809523809524,"y":-316.247619047619,"z":-13.862857142857143,"a95":"0.99","info":"09/07/2015 at 22:12:33"}],"demagType":"Unknown","patch":1.1,"format":"Unknown","strat":null},{"version":"v1.1.0","exported":"2016-10-11T14:03:13.798Z","info":"","GEO":[],"TECT":[],"interpreted":false,"name":"SS56.08A","coreAzi":125,"coreDip":74,"bedStrike":218,"bedDip":28,"data":[{"visible":true,"include":false,"step":"20","x":-1251.7142857142858,"y":-408.6666666666667,"z":1004,"a95":"1.9","info":"\"15-06-22\" at \"09:44\""},{"visible":true,"include":false,"step":"100","x":-505.6190476190476,"y":-327.14285714285717,"z":337.42857142857144,"a95":"1.9","info":"\"15-06-22\" at \"12:58\""},{"visible":true,"include":false,"step":"150","x":-199.23809523809524,"y":-305.8095238095238,"z":220.76190476190476,"a95":"2.5","info":"\"15-06-23\" at \"09:58\""},{"visible":true,"include":false,"step":"180","x":-267.5238095238095,"y":-90,"z":93.9047619047619,"a95":"3.1","info":"\"15-06-23\" at \"13:03\""},{"visible":true,"include":false,"step":"210","x":-235.61904761904762,"y":-16.476190476190474,"z":134.28571428571428,"a95":"3.6","info":"\"15-06-23\" at \"15:53\""},{"visible":true,"include":false,"step":"230","x":-71.80952380952381,"y":-112.85714285714286,"z":208.28571428571428,"a95":"3.9","info":"\"15-06-24\" at \"10:34\""},{"visible":true,"include":false,"step":"250","x":-69.71428571428571,"y":2.1904761904761907,"z":145.04761904761904,"a95":"3.5","info":"\"15-06-24\" at \"13:45\""},{"visible":true,"include":false,"step":"270","x":-173.33333333333334,"y":-39.04761904761905,"z":47.61904761904762,"a95":"2.8","info":"\"15-06-25\" at \"08:12\""},{"visible":true,"include":false,"step":"300","x":-203.71428571428572,"y":-97.14285714285714,"z":61.42857142857143,"a95":"3.2","info":"\"15-06-25\" at \"11:52\""},{"visible":true,"include":false,"step":"320","x":-225.23809523809524,"y":-148.66666666666666,"z":71.52380952380952,"a95":"4.9","info":"\"15-06-25\" at \"15:30\""},{"visible":true,"include":false,"step":"340","x":-234.66666666666666,"y":-94.85714285714286,"z":34.095238095238095,"a95":"4.6","info":"\"15-06-25\" at \"19:02\""},{"visible":true,"include":false,"step":"370","x":-65.52380952380952,"y":-60.38095238095238,"z":69.80952380952381,"a95":"20.4","info":"\"15-06-25\" at \"22:51\""},{"visible":true,"include":false,"step":"400","x":-352.1904761904762,"y":190.47619047619048,"z":80.38095238095238,"a95":"22.8","info":"\"15-06-26\" at \"10:05\""}],"demagType":"Unknown","patch":1.1,"format":"Unknown","strat":null},{"version":"v1.1.0","exported":"2016-10-11T14:03:13.798Z","info":"0","GEO":[{"dec":347.2356171448358,"inc":45.982687710636256,"MAD":19.352929347578655,"cm":[67.72055189985447,-24.827272712552787,64.84720674830922],"intensity":73.08950555464322,"type":"dir","forced":false,"remark":"","origin":false,"nSteps":9,"minStep":"20.0","maxStep":"50.0","steps":["20.0","23.0","25.0","30.0","33.0","35.0","40.0","45.0","50.0"],"group":"None"}],"TECT":[{"dec":336.4011879467699,"inc":22.474761208872348,"MAD":19.352929347578666,"cm":[82.04922886990748,-43.167142900769875,28.498222026301296],"intensity":73.08950555464321,"type":"dir","forced":false,"remark":"","origin":false,"nSteps":9,"minStep":"20.0","maxStep":"50.0","steps":["20.0","23.0","25.0","30.0","33.0","35.0","40.0","45.0","50.0"],"group":"None"}],"interpreted":true,"name":"SS56.09A","coreAzi":129,"coreDip":65,"bedStrike":218,"bedDip":28,"data":[{"visible":true,"include":false,"step":"0.0","x":-290.9904761904762,"y":-149.64761904761903,"z":135.78095238095239,"a95":"0.99","info":"05/10/2015 at 19:36:38"},{"visible":true,"include":false,"step":"10.0","x":-164.2952380952381,"y":-96.39047619047619,"z":70.01333333333334,"a95":"0.99","info":"05/10/2015 at 19:36:38"},{"visible":true,"include":false,"step":"15.0","x":-137.66666666666666,"y":-80.06095238095239,"z":50.40857142857143,"a95":"0.99","info":"05/10/2015 at 19:36:38"},{"visible":true,"include":true,"step":"20.0","x":-112.53333333333333,"y":-61.078095238095244,"z":53.31619047619048,"a95":"0.99","info":"05/10/2015 at 19:36:38"},{"visible":true,"include":true,"step":"23.0","x":-103.61904761904762,"y":-47.597142857142856,"z":42.24095238095238,"a95":"0.99","info":"05/10/2015 at 19:36:38"},{"visible":true,"include":true,"step":"25.0","x":-96.13333333333333,"y":-38.28666666666667,"z":35.67142857142857,"a95":"0.99","info":"05/10/2015 at 19:36:38"},{"visible":true,"include":true,"step":"30.0","x":-93.2104761904762,"y":-32.45333333333333,"z":28.7647619047619,"a95":"0.99","info":"05/10/2015 at 19:36:38"},{"visible":true,"include":true,"step":"33.0","x":-73.18571428571428,"y":-31.38285714285714,"z":36.53904761904762,"a95":"0.99","info":"05/10/2015 at 19:36:38"},{"visible":true,"include":true,"step":"35.0","x":-73.68095238095238,"y":-38.346666666666664,"z":30.61619047619048,"a95":"0.99","info":"05/10/2015 at 19:36:38"},{"visible":true,"include":true,"step":"40.0","x":-80.66571428571429,"y":-25.816190476190474,"z":20.98952380952381,"a95":"0.99","info":"05/10/2015 at 19:36:38"},{"visible":true,"include":true,"step":"45.0","x":-63.12857142857143,"y":-26.581904761904763,"z":26.844761904761906,"a95":"0.99","info":"05/10/2015 at 19:36:38"},{"visible":true,"include":true,"step":"50.0","x":-55.49809523809524,"y":-31.497142857142858,"z":18.473333333333333,"a95":"0.99","info":"05/10/2015 at 19:36:38"},{"visible":true,"include":false,"step":"60.0","x":-43.007619047619045,"y":-11.651428571428571,"z":-5.790666666666667,"a95":"0.99","info":"05/10/2015 at 19:36:38"},{"visible":true,"include":false,"step":"70.0","x":-17.935238095238095,"y":-5.742380952380953,"z":14.423809523809522,"a95":"0.99","info":"05/10/2015 at 19:36:38"}],"demagType":"Unknown","patch":1.1,"format":"Unknown","strat":null},{"version":"v1.1.0","exported":"2016-10-11T14:03:13.799Z","info":"8","GEO":[{"dec":344.5253919670319,"inc":42.80392584864906,"MAD":36.10230336872623,"cm":[46.59039734365721,7.996155015713196,26.98777683293569],"intensity":33.103295701680906,"type":"dir","forced":false,"remark":"","origin":false,"nSteps":9,"minStep":"15.0","maxStep":"45.0","steps":["15.0","20.0","23.0","25.0","30.0","33.0","35.0","40.0","45.0"],"group":"None"}],"TECT":[{"dec":335.4795367286685,"inc":18.85432091524056,"MAD":36.102303368726254,"cm":[52.777811497565956,0.07662604450467046,13.320677912036397],"intensity":33.10329570168093,"type":"dir","forced":false,"remark":"","origin":false,"nSteps":9,"minStep":"15.0","maxStep":"45.0","steps":["15.0","20.0","23.0","25.0","30.0","33.0","35.0","40.0","45.0"],"group":"None"}],"interpreted":true,"name":"SS56.09B","coreAzi":129,"coreDip":65,"bedStrike":218,"bedDip":28,"data":[{"visible":true,"include":false,"step":"0.0","x":-81.70476190476191,"y":-57.950476190476195,"z":58.05714285714286,"a95":"0.99","info":"09/07/2015 at 22:12:33"},{"visible":true,"include":false,"step":"10.0","x":-59.75904761904762,"y":-65.06095238095239,"z":29.885714285714286,"a95":"0.99","info":"09/07/2015 at 22:12:33"},{"visible":true,"include":true,"step":"15.0","x":-52.82285714285714,"y":-52.739999999999995,"z":18.892380952380954,"a95":"0.99","info":"09/07/2015 at 22:12:33"},{"visible":true,"include":true,"step":"20.0","x":-33.96952380952381,"y":-49.703809523809525,"z":26.960952380952378,"a95":"0.99","info":"09/07/2015 at 22:12:33"},{"visible":true,"include":true,"step":"23.0","x":-38.60666666666667,"y":-37.62571428571429,"z":20.057142857142857,"a95":"0.99","info":"09/07/2015 at 22:12:33"},{"visible":true,"include":true,"step":"25.0","x":-42.56666666666666,"y":-43.140952380952385,"z":13.905714285714286,"a95":"0.99","info":"09/07/2015 at 22:12:33"},{"visible":true,"include":true,"step":"30.0","x":-28.27904761904762,"y":-26.385714285714286,"z":19.964761904761904,"a95":"0.99","info":"09/07/2015 at 22:12:33"},{"visible":true,"include":true,"step":"33.0","x":-23.450476190476188,"y":-44.63333333333333,"z":7.112952380952382,"a95":"0.99","info":"09/07/2015 at 22:12:33"},{"visible":true,"include":true,"step":"35.0","x":-26.285714285714285,"y":-38.12952380952381,"z":5.887047619047619,"a95":"0.99","info":"09/07/2015 at 22:12:33"},{"visible":true,"include":true,"step":"40.0","x":-21.367619047619048,"y":-34.679047619047616,"z":13.899999999999999,"a95":"0.99","info":"09/07/2015 at 22:12:33"},{"visible":true,"include":true,"step":"45.0","x":-23.772380952380953,"y":-44.11904761904762,"z":5.566571428571429,"a95":"0.99","info":"09/07/2015 at 22:12:33"},{"visible":false,"include":false,"step":"50.0","x":-37.124761904761904,"y":-28.213333333333335,"z":-19.64190476190476,"a95":"0.99","info":"09/07/2015 at 22:12:33"},{"visible":false,"include":false,"step":"55.0","x":-32.63238095238095,"y":-20.19047619047619,"z":-1.533809523809524,"a95":"0.99","info":"09/07/2015 at 22:12:33"},{"visible":false,"include":false,"step":"60.0","x":-8.112666666666668,"y":-43.61047619047619,"z":-13.427619047619048,"a95":"0.99","info":"09/07/2015 at 22:12:33"},{"visible":false,"include":false,"step":"65.0","x":-9.131047619047619,"y":-27.934285714285714,"z":-0.09821904761904762,"a95":"0.99","info":"09/07/2015 at 22:12:33"},{"visible":false,"include":false,"step":"70.0","x":-16.781904761904762,"y":-23.61047619047619,"z":3.593333333333333,"a95":"0.99","info":"09/07/2015 at 22:12:33"},{"visible":false,"include":false,"step":"80.0","x":-14.511428571428572,"y":-28.429523809523808,"z":-6.8434285714285705,"a95":"0.99","info":"09/07/2015 at 22:12:33"}],"demagType":"Unknown","patch":1.1,"format":"Unknown","strat":null},{"version":"v1.1.0","exported":"2016-10-11T14:03:13.799Z","info":"","GEO":[],"TECT":[],"interpreted":false,"name":"SS56.10A","coreAzi":131,"coreDip":65,"bedStrike":218,"bedDip":28,"data":[{"visible":false,"include":false,"step":"20","x":-131.04761904761904,"y":-179.14285714285714,"z":129.8095238095238,"a95":"1.8","info":"\"15-06-22\" at \"09:46\""},{"visible":true,"include":false,"step":"100","x":-75.42857142857143,"y":-44.77142857142857,"z":26.314285714285717,"a95":"1.7","info":"\"15-06-22\" at \"13:00\""},{"visible":true,"include":false,"step":"150","x":-48.38095238095238,"y":-32.2,"z":18.085714285714285,"a95":"3.8","info":"\"15-06-23\" at \"09:59\""},{"visible":true,"include":false,"step":"180","x":-52.75238095238095,"y":-22.685714285714283,"z":8.066666666666666,"a95":"3","info":"\"15-06-23\" at \"13:05\""},{"visible":true,"include":false,"step":"210","x":-30.695238095238096,"y":13.80952380952381,"z":17.104761904761904,"a95":"4.1","info":"\"15-06-23\" at \"15:55\""},{"visible":true,"include":false,"step":"230","x":-19,"y":-5.6952380952380945,"z":3.419047619047619,"a95":"6.2","info":"\"15-06-24\" at \"10:38\""},{"visible":true,"include":false,"step":"250","x":-39.86666666666667,"y":2.257142857142857,"z":11.695238095238095,"a95":"2.8","info":"\"15-06-24\" at \"13:47\""},{"visible":true,"include":false,"step":"270","x":-47.53333333333334,"y":-30.104761904761908,"z":-23.704761904761906,"a95":"3","info":"\"15-06-25\" at \"08:15\""},{"visible":true,"include":false,"step":"300","x":-28.228571428571428,"y":8.942857142857143,"z":14.752380952380953,"a95":"5.1","info":"\"15-06-25\" at \"11:55\""},{"visible":true,"include":false,"step":"320","x":-43.857142857142854,"y":-10.847619047619048,"z":-2.419047619047619,"a95":"3.8","info":"\"15-06-25\" at \"15:32\""},{"visible":true,"include":false,"step":"340","x":-31.133333333333333,"y":51.34285714285714,"z":2.4857142857142858,"a95":"6.2","info":"\"15-06-25\" at \"19:08\""},{"visible":true,"include":false,"step":"370","x":-1.8952380952380952,"y":30.257142857142856,"z":-1.6095238095238094,"a95":"11.3","info":"\"15-06-25\" at \"22:53\""},{"visible":false,"include":false,"step":"400","x":-252.66666666666666,"y":1.3333333333333333,"z":22.952380952380953,"a95":"5.4","info":"\"15-06-26\" at \"10:07\""}],"demagType":"Unknown","patch":1.1,"format":"Unknown","strat":null},{"version":"v1.1.0","exported":"2016-10-11T14:03:13.799Z","info":"","GEO":[],"TECT":[],"interpreted":false,"name":"SS56.11A","coreAzi":112,"coreDip":59,"bedStrike":218,"bedDip":28,"data":[{"visible":true,"include":false,"step":"20","x":-127.23809523809524,"y":-176.1904761904762,"z":152,"a95":"1.8","info":"\"15-06-22\" at \"09:48\""},{"visible":true,"include":false,"step":"100","x":-90.28571428571429,"y":-84.66666666666667,"z":32.666666666666664,"a95":"1.6","info":"\"15-06-22\" at \"13:03\""},{"visible":true,"include":false,"step":"150","x":-53.92380952380953,"y":-43.17142857142857,"z":9.342857142857142,"a95":"2.2","info":"\"15-06-23\" at \"10:01\""},{"visible":true,"include":false,"step":"180","x":-35.16190476190476,"y":-29.20952380952381,"z":12.485714285714286,"a95":"3.7","info":"\"15-06-23\" at \"13:07\""},{"visible":true,"include":false,"step":"210","x":-37.923809523809524,"y":-3.685714285714286,"z":3.8190476190476192,"a95":"3.3","info":"\"15-06-23\" at \"15:56\""},{"visible":true,"include":false,"step":"230","x":-22.723809523809525,"y":7.876190476190477,"z":2.6,"a95":"3.9","info":"\"15-06-24\" at \"10:40\""},{"visible":true,"include":false,"step":"250","x":-30.295238095238098,"y":-6.380952380952381,"z":10.82857142857143,"a95":"3.6","info":"\"15-06-24\" at \"13:48\""},{"visible":true,"include":false,"step":"270","x":-52.666666666666664,"y":3.8476190476190473,"z":0.38095238095238093,"a95":"3.2","info":"\"15-06-25\" at \"08:17\""},{"visible":true,"include":false,"step":"300","x":-50.904761904761905,"y":16.295238095238094,"z":16.81904761904762,"a95":"2.8","info":"\"15-06-25\" at \"11:58\""},{"visible":true,"include":false,"step":"320","x":-45.58095238095238,"y":1.5523809523809524,"z":-4.885714285714285,"a95":"4.3","info":"\"15-06-25\" at \"15:34\""},{"visible":true,"include":false,"step":"340","x":-31.257142857142856,"y":2.5238095238095237,"z":28.580952380952382,"a95":"3.5","info":"\"15-06-25\" at \"19:10\""},{"visible":true,"include":false,"step":"370","x":-27.066666666666666,"y":27.723809523809525,"z":4.352380952380953,"a95":"8.6","info":"\"15-06-25\" at \"22:55\""},{"visible":true,"include":false,"step":"400","x":-81.13333333333333,"y":-32.86666666666667,"z":1.380952380952381,"a95":"13.3","info":"\"15-06-26\" at \"10:08\""}],"demagType":"Unknown","patch":1.1,"format":"Unknown","strat":null},{"version":"v1.1.0","exported":"2016-10-11T14:03:13.799Z","info":"0","GEO":[{"dec":20.576449261571838,"inc":54.44683252887738,"MAD":15.616417658194704,"cm":[87.53074970342034,23.317937110415688,170.10945363669083],"intensity":192.86700220065768,"type":"dir","forced":false,"remark":"","origin":false,"nSteps":10,"minStep":"15.0","maxStep":"50.0","steps":["15.0","20.0","23.0","25.0","30.0","33.0","35.0","40.0","45.0","50.0"],"group":"None"}],"TECT":[{"dec":354.00348370655246,"inc":39.539245031929035,"MAD":15.616417658194695,"cm":[134.13908793227404,-36.338015396030386,133.5246729150725],"intensity":192.86700220065765,"type":"dir","forced":false,"remark":"","origin":false,"nSteps":10,"minStep":"15.0","maxStep":"50.0","steps":["15.0","20.0","23.0","25.0","30.0","33.0","35.0","40.0","45.0","50.0"],"group":"None"}],"interpreted":true,"name":"SS56.12A","coreAzi":113,"coreDip":63,"bedStrike":218,"bedDip":28,"data":[{"visible":true,"include":false,"step":"0.0","x":-304.4190476190476,"y":-270.8,"z":347.7142857142857,"a95":"0.99","info":"05/10/2015 at 19:36:38"},{"visible":true,"include":false,"step":"10.0","x":-169.17142857142858,"y":-197.48571428571427,"z":262.2761904761905,"a95":"0.99","info":"05/10/2015 at 19:36:38"},{"visible":true,"include":true,"step":"15.0","x":-134.28571428571428,"y":-168.32380952380953,"z":216.9809523809524,"a95":"0.99","info":"05/10/2015 at 19:36:38"},{"visible":true,"include":true,"step":"20.0","x":-116.15238095238094,"y":-136.07619047619048,"z":208.59047619047618,"a95":"0.99","info":"05/10/2015 at 19:36:38"},{"visible":true,"include":true,"step":"23.0","x":-108.26666666666667,"y":-117.15238095238094,"z":172.35238095238097,"a95":"0.99","info":"05/10/2015 at 19:36:38"},{"visible":true,"include":true,"step":"25.0","x":-106.27619047619048,"y":-112.81904761904761,"z":177.0095238095238,"a95":"0.99","info":"05/10/2015 at 19:36:38"},{"visible":true,"include":true,"step":"30.0","x":-84.48761904761905,"y":-73.97714285714285,"z":162.94285714285715,"a95":"0.99","info":"05/10/2015 at 19:36:38"},{"visible":true,"include":true,"step":"33.0","x":-88.4695238095238,"y":-56.53142857142858,"z":130.66666666666666,"a95":"0.99","info":"05/10/2015 at 19:36:38"},{"visible":true,"include":true,"step":"35.0","x":-59.651428571428575,"y":-58.86857142857143,"z":110.67619047619047,"a95":"0.99","info":"05/10/2015 at 19:36:38"},{"visible":true,"include":true,"step":"40.0","x":-61.49047619047619,"y":-43.097142857142856,"z":116.11428571428571,"a95":"0.99","info":"05/10/2015 at 19:36:38"},{"visible":true,"include":true,"step":"45.0","x":-75.18285714285715,"y":-56.50190476190476,"z":91.66761904761904,"a95":"0.99","info":"05/10/2015 at 19:36:38"},{"visible":true,"include":true,"step":"50.0","x":-51.50285714285714,"y":-73.48761904761905,"z":70.86190476190475,"a95":"0.99","info":"05/10/2015 at 19:36:38"},{"visible":true,"include":false,"step":"60.0","x":-56.904761904761905,"y":-46.16761904761905,"z":54.567619047619054,"a95":"0.99","info":"05/10/2015 at 19:36:38"},{"visible":true,"include":false,"step":"70.0","x":-50.350476190476186,"y":-31.32761904761905,"z":69.99047619047619,"a95":"0.99","info":"05/10/2015 at 19:36:38"}],"demagType":"Unknown","patch":1.1,"format":"Unknown","strat":null}]
