# Supplementary material for: Paleomagnetic constraints on the timing and distribution of Cenozoic rotations in Central and Eastern Anatolia
Source: Copernicus journal article supplement (doi:10.5194/se-9-295-2018), 2018-03-21
Supplement: Supplementary file 2 [file se-9-295-2018-supplement.zip › se-2017-66_DATA_dir files/dir files Sivas/SS57.dir]

[{"version":"v1.1.0","exported":"2016-10-11T13:46:22.902Z","info":"","GEO":[{"dec":329.7511798847961,"inc":35.48536730925662,"MAD":4.848596600354418,"cm":[-1.509903313490213e-14,-2.3092638912203256e-14,0],"intensity":471.32722335329083,"type":"dir","forced":true,"remark":"","origin":false,"nSteps":6,"minStep":"150","maxStep":"270","steps":["150","180","210","230","250","270"],"group":"None","version":"v1.1.0"}],"TECT":[{"dec":329.4709009839578,"inc":67.48475850231345,"MAD":4.848596600354405,"cm":[2.6645352591003757e-15,-7.549516567451064e-15,0],"intensity":471.32722335329083,"type":"dir","forced":true,"remark":"","origin":false,"nSteps":6,"minStep":"150","maxStep":"270","steps":["150","180","210","230","250","270"],"group":"None","version":"v1.1.0"}],"interpreted":true,"name":"SS57.01A","coreAzi":128,"coreDip":23,"bedStrike":60,"bedDip":32,"data":[{"visible":true,"include":false,"step":"20","x":-998.7619047619048,"y":-630.6666666666666,"z":-140.95238095238096,"a95":"1.4","info":"\"15-06-22\" at \"09:50\""},{"visible":true,"include":false,"step":"100","x":-648.0952380952381,"y":-266.1904761904762,"z":-209.33333333333334,"a95":"1.6","info":"\"15-06-22\" at \"13:04\""},{"visible":true,"include":true,"step":"150","x":-287.5238095238095,"y":-123.42857142857143,"z":-142.1904761904762,"a95":"1.9","info":"\"15-06-23\" at \"10:03\""},{"visible":true,"include":true,"step":"180","x":-274.2857142857143,"y":-103.23809523809524,"z":-163.61904761904762,"a95":"2","info":"\"15-06-23\" at \"13:08\""},{"visible":true,"include":true,"step":"210","x":-183.04761904761904,"y":-61.04761904761905,"z":-96,"a95":"2.4","info":"\"15-06-23\" at \"15:58\""},{"visible":true,"include":true,"step":"230","x":-152.0952380952381,"y":-51.142857142857146,"z":-98.95238095238095,"a95":"2.3","info":"\"15-06-24\" at \"10:41\""},{"visible":true,"include":true,"step":"250","x":-125.61904761904762,"y":-11.238095238095237,"z":-79.80952380952381,"a95":"2.2","info":"\"15-06-24\" at \"13:50\""},{"visible":true,"include":true,"step":"270","x":-101.71428571428571,"y":-31.714285714285715,"z":-73.61904761904762,"a95":"2.9","info":"\"15-06-25\" at \"08:18\""},{"visible":false,"include":false,"step":"300","x":-55.32380952380952,"y":-58.18095238095238,"z":-47.06666666666666,"a95":"3","info":"\"15-06-25\" at \"12:00\""},{"visible":false,"include":false,"step":"320","x":-99.33333333333333,"y":-16.857142857142858,"z":-15.333333333333334,"a95":"3.4","info":"\"15-06-25\" at \"15:37\""},{"visible":false,"include":false,"step":"340","x":-2.857142857142857,"y":-89.80952380952381,"z":-48.19047619047619,"a95":"3.2","info":"\"15-06-25\" at \"19:12\""},{"visible":false,"include":false,"step":"370","x":-23.228571428571428,"y":-73.87619047619049,"z":-53.77142857142857,"a95":"3.4","info":"\"15-06-25\" at \"22:57\""}],"demagType":"Unknown","patch":1.1,"format":"Unknown","strat":null},{"version":"v1.1.0","exported":"2016-10-11T13:46:22.902Z","info":"0","GEO":[{"dec":347.5040849166087,"inc":42.14353616964852,"MAD":3.337269676263225,"cm":[2.7068294695622863e-15,1.7256037868459575e-14,0],"intensity":626.1167383946537,"type":"dir","forced":true,"remark":"","origin":false,"nSteps":10,"minStep":"15.0","maxStep":"50.0","steps":["15.0","20.0","23.0","25.0","30.0","33.0","35.0","40.0","45.0","50.0"],"group":"None"}],"TECT":[{"dec":12.41389489672315,"inc":70.69209944054569,"MAD":3.3372696762632845,"cm":[-4.736951571734001e-15,4.610068940348269e-15,-2.7068294695622863e-15],"intensity":626.1167383946537,"type":"dir","forced":true,"remark":"","origin":false,"nSteps":10,"minStep":"15.0","maxStep":"50.0","steps":["15.0","20.0","23.0","25.0","30.0","33.0","35.0","40.0","45.0","50.0"],"group":"None"}],"interpreted":true,"name":"SS57.01B","coreAzi":128,"coreDip":23,"bedStrike":60,"bedDip":32,"data":[{"visible":true,"include":false,"step":"0.0","x":-683.7714285714286,"y":-381.16190476190474,"z":-54.653333333333336,"a95":"0.99","info":"06/10/2015 at 00:02:39"},{"visible":true,"include":false,"step":"10.0","x":-476.97142857142853,"y":-254.37142857142857,"z":-124.32380952380953,"a95":"0.99","info":"06/10/2015 at 00:02:39"},{"visible":true,"include":true,"step":"15.0","x":-390.3714285714285,"y":-224.69523809523812,"z":-119.1047619047619,"a95":"0.99","info":"06/10/2015 at 00:02:39"},{"visible":true,"include":true,"step":"20.0","x":-317.0952380952381,"y":-184.05714285714285,"z":-91.75904761904762,"a95":"0.99","info":"06/10/2015 at 00:02:39"},{"visible":true,"include":true,"step":"23.0","x":-298.16190476190474,"y":-181.13333333333335,"z":-75.47142857142858,"a95":"0.99","info":"06/10/2015 at 00:02:39"},{"visible":true,"include":true,"step":"25.0","x":-268.95238095238096,"y":-162.9047619047619,"z":-83.09714285714286,"a95":"0.99","info":"06/10/2015 at 00:02:39"},{"visible":true,"include":true,"step":"30.0","x":-242.8952380952381,"y":-142.83809523809524,"z":-101.78095238095239,"a95":"0.99","info":"06/10/2015 at 00:02:39"},{"visible":true,"include":true,"step":"33.0","x":-206.24761904761903,"y":-99.14285714285714,"z":-77.02095238095238,"a95":"0.99","info":"06/10/2015 at 00:02:39"},{"visible":true,"include":true,"step":"35.0","x":-205.14285714285714,"y":-112.51428571428572,"z":-72.26285714285714,"a95":"0.99","info":"06/10/2015 at 00:02:39"},{"visible":true,"include":true,"step":"40.0","x":-189.71428571428572,"y":-74.78476190476191,"z":-64.56,"a95":"0.99","info":"06/10/2015 at 00:02:39"},{"visible":true,"include":true,"step":"45.0","x":-168.84761904761905,"y":-81.34380952380953,"z":-40.79142857142857,"a95":"0.99","info":"06/10/2015 at 00:02:39"},{"visible":true,"include":true,"step":"50.0","x":-139.28571428571428,"y":-64.8647619047619,"z":-47.14952380952381,"a95":"0.99","info":"06/10/2015 at 00:02:39"},{"visible":true,"include":false,"step":"60.0","x":-126.74285714285713,"y":-58.38,"z":-28.404761904761905,"a95":"0.99","info":"06/10/2015 at 00:02:39"},{"visible":true,"include":false,"step":"70.0","x":-99.06666666666668,"y":-0.3468952380952381,"z":-30.318095238095236,"a95":"0.99","info":"06/10/2015 at 00:02:39"}],"demagType":"Unknown","patch":1.1,"format":"Unknown","strat":null},{"version":"v1.1.0","exported":"2016-10-11T13:46:22.902Z","info":"0","GEO":[{"dec":347.4854505275475,"inc":46.4211215946333,"MAD":7.802466423522953,"cm":[266.3061186558771,-72.73321143262824,308.17539209683247],"intensity":390.88592994333305,"type":"dir","forced":false,"remark":"","origin":false,"nSteps":10,"minStep":"15.0","maxStep":"50.0","steps":["15.0","20.0","23.0","25.0","30.0","33.0","35.0","40.0","45.0","50.0"],"group":"None"}],"TECT":[{"dec":20.015367464066344,"inc":74.31656466665906,"MAD":7.802466423522954,"cm":[89.74224929043733,29.205986074670243,402.8330674641757],"intensity":390.88592994333305,"type":"dir","forced":false,"remark":"","origin":false,"nSteps":10,"minStep":"15.0","maxStep":"50.0","steps":["15.0","20.0","23.0","25.0","30.0","33.0","35.0","40.0","45.0","50.0"],"group":"None"}],"interpreted":true,"name":"SS57.02A","coreAzi":126,"coreDip":14,"bedStrike":60,"bedDip":32,"data":[{"visible":true,"include":false,"step":"0.0","x":-901.2285714285714,"y":-292.02857142857147,"z":-140.26666666666665,"a95":"0.99","info":"06/10/2015 at 00:02:39"},{"visible":true,"include":false,"step":"10.0","x":-629.1619047619048,"y":-314.96190476190475,"z":-217.56190476190477,"a95":"0.99","info":"06/10/2015 at 00:02:39"},{"visible":true,"include":true,"step":"15.0","x":-528.9428571428571,"y":-275.77142857142854,"z":-200.13333333333335,"a95":"0.99","info":"06/10/2015 at 00:02:39"},{"visible":true,"include":true,"step":"20.0","x":-468.0571428571429,"y":-213.7904761904762,"z":-174.54285714285714,"a95":"0.99","info":"06/10/2015 at 00:02:39"},{"visible":true,"include":true,"step":"23.0","x":-414.23809523809524,"y":-209.15238095238095,"z":-153.40952380952382,"a95":"0.99","info":"06/10/2015 at 00:02:39"},{"visible":true,"include":true,"step":"25.0","x":-397.49523809523805,"y":-198.48571428571427,"z":-160.4,"a95":"0.99","info":"06/10/2015 at 00:02:39"},{"visible":true,"include":true,"step":"30.0","x":-343,"y":-175.31428571428572,"z":-139.31428571428572,"a95":"0.99","info":"06/10/2015 at 00:02:39"},{"visible":true,"include":true,"step":"33.0","x":-314.0190476190476,"y":-162.68571428571428,"z":-144.5047619047619,"a95":"0.99","info":"06/10/2015 at 00:02:39"},{"visible":true,"include":true,"step":"35.0","x":-308.68571428571425,"y":-164.14285714285714,"z":-110.82857142857144,"a95":"0.99","info":"06/10/2015 at 00:02:39"},{"visible":true,"include":true,"step":"40.0","x":-276.4761904761905,"y":-117.15238095238094,"z":-94.32571428571428,"a95":"0.99","info":"06/10/2015 at 00:02:39"},{"visible":true,"include":true,"step":"45.0","x":-243.57142857142858,"y":-134.8952380952381,"z":-90.10666666666667,"a95":"0.99","info":"06/10/2015 at 00:02:39"},{"visible":true,"include":true,"step":"50.0","x":-216.76190476190476,"y":-75.55619047619048,"z":-76.64761904761905,"a95":"0.99","info":"06/10/2015 at 00:02:39"},{"visible":true,"include":false,"step":"60.0","x":-222.8952380952381,"y":-66.39428571428572,"z":-43.24285714285715,"a95":"0.99","info":"06/10/2015 at 00:02:39"},{"visible":true,"include":false,"step":"70.0","x":-171.01904761904763,"y":-23.537142857142857,"z":-58.99904761904762,"a95":"0.99","info":"06/10/2015 at 00:02:39"}],"demagType":"Unknown","patch":1.1,"format":"Unknown","strat":null},{"version":"v1.1.0","exported":"2016-10-11T13:46:22.902Z","info":"","GEO":[{"dec":355.8983446611974,"inc":39.53450240759337,"MAD":11.751903519466525,"cm":[-1.691768418476429e-16,-6.090366306515144e-15,0],"intensity":337.1230263201899,"type":"dir","forced":true,"remark":"","origin":false,"nSteps":9,"minStep":"150","maxStep":"340","steps":["150","180","210","230","250","270","300","320","340"],"group":"None"}],"TECT":[{"dec":23.30435414912938,"inc":65.15795272178138,"MAD":11.751903519466545,"cm":[-2.3420419043283064e-15,6.767073673905716e-15,-4.0602442043434294e-15],"intensity":337.12302632018987,"type":"dir","forced":true,"remark":"","origin":false,"nSteps":9,"minStep":"150","maxStep":"340","steps":["150","180","210","230","250","270","300","320","340"],"group":"None"}],"interpreted":true,"name":"SS57.03A","coreAzi":174,"coreDip":46,"bedStrike":60,"bedDip":32,"data":[{"visible":true,"include":false,"step":"20","x":-819.6190476190476,"y":2.1904761904761907,"z":172.76190476190476,"a95":"1.5","info":"\"15-06-22\" at \"09:52\""},{"visible":true,"include":false,"step":"100","x":-746.3809523809524,"y":-48.38095238095238,"z":34.666666666666664,"a95":"1.5","info":"\"15-06-22\" at \"13:06\""},{"visible":true,"include":true,"step":"150","x":-292,"y":-38.666666666666664,"z":8.476190476190476,"a95":"1.8","info":"\"15-06-23\" at \"10:05\""},{"visible":true,"include":true,"step":"180","x":-266.1904761904762,"y":-10.476190476190476,"z":-31.523809523809526,"a95":"1.8","info":"\"15-06-23\" at \"13:10\""},{"visible":true,"include":true,"step":"210","x":-147.8095238095238,"y":9.904761904761905,"z":-11.904761904761905,"a95":"2.5","info":"\"15-06-23\" at \"15:59\""},{"visible":true,"include":true,"step":"230","x":-121.33333333333333,"y":-7.904761904761905,"z":-41.142857142857146,"a95":"2.4","info":"\"15-06-24\" at \"10:43\""},{"visible":true,"include":true,"step":"250","x":-97.80952380952381,"y":5.904761904761905,"z":-19.61904761904762,"a95":"1.8","info":"\"15-06-24\" at \"13:54\""},{"visible":true,"include":true,"step":"270","x":-95.9047619047619,"y":44.476190476190474,"z":-6.666666666666667,"a95":"3","info":"\"15-06-25\" at \"08:20\""},{"visible":true,"include":true,"step":"300","x":-61.019047619047626,"y":-10.752380952380953,"z":-16.923809523809524,"a95":"3.6","info":"\"15-06-25\" at \"12:01\""},{"visible":true,"include":true,"step":"320","x":-67.88571428571429,"y":21.285714285714285,"z":-15.323809523809524,"a95":"4.4","info":"\"15-06-25\" at \"15:39\""},{"visible":true,"include":true,"step":"340","x":-44.50476190476191,"y":53.93333333333333,"z":5.066666666666667,"a95":"3.2","info":"\"15-06-25\" at \"19:14\""},{"visible":true,"include":false,"step":"370","x":-43.61904761904762,"y":47.41904761904762,"z":-20.18095238095238,"a95":"4","info":"\"15-06-25\" at \"22:58\""}],"demagType":"Unknown","patch":1.1,"format":"Unknown","strat":null},{"version":"v1.1.0","exported":"2016-10-11T13:46:22.902Z","info":"0","GEO":[{"dec":342.59163659691757,"inc":52.36572381821456,"MAD":7.709819210642075,"cm":[250.58094590140814,9.073603806281112,206.49395325479128],"intensity":341.94861749376275,"type":"dir","forced":false,"remark":"","origin":false,"nSteps":11,"minStep":"15.0","maxStep":"60.0","steps":["15.0","20.0","23.0","25.0","30.0","33.0","35.0","40.0","45.0","50.0","60.0"],"group":"None"}],"TECT":[{"dec":27.21929211500253,"inc":80.89004772466373,"MAD":7.709819210642095,"cm":[127.85583690775218,79.92897852009452,287.7101611466342],"intensity":341.94861749376275,"type":"dir","forced":false,"remark":"","origin":false,"nSteps":11,"minStep":"15.0","maxStep":"60.0","steps":["15.0","20.0","23.0","25.0","30.0","33.0","35.0","40.0","45.0","50.0","60.0"],"group":"None"}],"interpreted":true,"name":"SS57.04A","coreAzi":116,"coreDip":47,"bedStrike":60,"bedDip":32,"data":[{"visible":true,"include":false,"step":"0.0","x":-547.9238095238095,"y":-485.60952380952375,"z":263.6,"a95":"0.99","info":"06/10/2015 at 00:02:39"},{"visible":true,"include":false,"step":"10.0","x":-428.0380952380952,"y":-364.96190476190475,"z":182.07619047619048,"a95":"0.99","info":"06/10/2015 at 00:02:39"},{"visible":true,"include":true,"step":"15.0","x":-376.4,"y":-321.42857142857144,"z":133.14285714285714,"a95":"0.99","info":"06/10/2015 at 00:02:39"},{"visible":true,"include":true,"step":"20.0","x":-306.22857142857146,"y":-289.3619047619048,"z":126.62857142857142,"a95":"0.99","info":"06/10/2015 at 00:02:39"},{"visible":true,"include":true,"step":"23.0","x":-281.6,"y":-254.0190476190476,"z":96.80952380952381,"a95":"0.99","info":"06/10/2015 at 00:02:39"},{"visible":true,"include":true,"step":"25.0","x":-260.6666666666667,"y":-248.7238095238095,"z":105.48571428571428,"a95":"0.99","info":"06/10/2015 at 00:02:39"},{"visible":true,"include":true,"step":"30.0","x":-237.2952380952381,"y":-235.23809523809524,"z":92.95619047619047,"a95":"0.99","info":"06/10/2015 at 00:02:39"},{"visible":true,"include":true,"step":"33.0","x":-202.2095238095238,"y":-206.21904761904764,"z":71.47904761904762,"a95":"0.99","info":"06/10/2015 at 00:02:39"},{"visible":true,"include":true,"step":"35.0","x":-187.78095238095239,"y":-215.2761904761905,"z":63.0247619047619,"a95":"0.99","info":"06/10/2015 at 00:02:39"},{"visible":true,"include":true,"step":"40.0","x":-168.2952380952381,"y":-197.06666666666666,"z":71.28857142857143,"a95":"0.99","info":"06/10/2015 at 00:02:39"},{"visible":true,"include":true,"step":"45.0","x":-149.17142857142858,"y":-198.59047619047618,"z":33.24857142857143,"a95":"0.99","info":"06/10/2015 at 00:02:39"},{"visible":true,"include":true,"step":"50.0","x":-114.97142857142858,"y":-188.56190476190477,"z":52.76952380952381,"a95":"0.99","info":"06/10/2015 at 00:02:39"},{"visible":true,"include":true,"step":"60.0","x":-82.59714285714286,"y":-166.6952380952381,"z":51.4952380952381,"a95":"0.99","info":"06/10/2015 at 00:02:39"},{"visible":true,"include":false,"step":"70.0","x":-53.364761904761906,"y":-149.53333333333333,"z":42.36952380952381,"a95":"0.99","info":"06/10/2015 at 00:02:39"}],"demagType":"Unknown","patch":1.1,"format":"Unknown","strat":null},{"version":"v1.1.0","exported":"2016-10-11T13:46:22.903Z","info":"","GEO":[{"dec":314.84108598095753,"inc":16.352501889233494,"MAD":15.61443990884425,"cm":[-1.4432899320127035e-14,-9.325873406851315e-15,0],"intensity":192.32153278504498,"type":"dir","forced":true,"remark":"","origin":false,"nSteps":5,"minStep":"180","maxStep":"300","steps":["180","210","250","270","300"],"group":"None","version":"v1.1.0"}],"TECT":[{"dec":308.47655024447295,"inc":46.84905110458988,"MAD":15.614439908844266,"cm":[7.466249840604178e-15,1.509903313490213e-14,4.440892098500626e-16],"intensity":192.32153278504495,"type":"dir","forced":true,"remark":"","origin":false,"nSteps":5,"minStep":"180","maxStep":"300","steps":["180","210","250","270","300"],"group":"None","version":"v1.1.0"}],"interpreted":true,"name":"SS57.05A","coreAzi":106,"coreDip":42,"bedStrike":60,"bedDip":32,"data":[{"visible":true,"include":false,"step":"20","x":-419.9047619047619,"y":-170.95238095238096,"z":-12.571428571428571,"a95":"1.6","info":"\"15-06-22\" at \"09:54\""},{"visible":true,"include":false,"step":"100","x":-358.57142857142856,"y":-203.8095238095238,"z":-98,"a95":"1.6","info":"\"15-06-22\" at \"13:08\""},{"visible":true,"include":false,"step":"150","x":-152.66666666666666,"y":-96.85714285714286,"z":-96.28571428571429,"a95":"2.2","info":"\"15-06-23\" at \"10:07\""},{"visible":true,"include":true,"step":"180","x":-127.14285714285714,"y":-58.476190476190474,"z":-70.76190476190476,"a95":"2.5","info":"\"15-06-23\" at \"13:12\""},{"visible":true,"include":true,"step":"210","x":-88.19047619047619,"y":-58.095238095238095,"z":-42.95238095238095,"a95":"2.8","info":"\"15-06-23\" at \"16:01\""},{"visible":false,"include":false,"step":"230","x":-81.42857142857143,"y":-78.0952380952381,"z":-74.0952380952381,"a95":"2.8","info":"\"15-06-24\" at \"10:45\""},{"visible":true,"include":true,"step":"250","x":-46.01904761904762,"y":-70.38095238095238,"z":11.019047619047619,"a95":"2.5","info":"\"15-06-24\" at \"13:56\""},{"visible":true,"include":true,"step":"270","x":-82.38095238095238,"y":-49.42857142857143,"z":-76.76190476190476,"a95":"2.4","info":"\"15-06-25\" at \"08:22\""},{"visible":true,"include":true,"step":"300","x":-34.96190476190476,"y":-5.657142857142857,"z":-10.457142857142857,"a95":"4.5","info":"\"15-06-25\" at \"12:06\""},{"visible":false,"include":false,"step":"320","x":-13.857142857142858,"y":-19.961904761904762,"z":-42.02857142857143,"a95":"4.7","info":"\"15-06-25\" at \"15:41\""},{"visible":false,"include":false,"step":"340","x":-36.80952380952381,"y":-45.542857142857144,"z":-21.714285714285715,"a95":"7.9","info":"\"15-06-25\" at \"19:18\""},{"visible":false,"include":false,"step":"370","x":-29.990476190476187,"y":-19.61904761904762,"z":7.504761904761905,"a95":"16.4","info":"\"15-06-25\" at \"23:00\""}],"demagType":"Unknown","patch":1.1,"format":"Unknown","strat":null},{"version":"v1.1.0","exported":"2016-10-11T13:46:22.903Z","info":"0","GEO":[{"dec":320.5380038501902,"inc":42.46081192673121,"MAD":12.170695618649114,"cm":[134.42138860134597,-109.58170960169907,65.84890123772968],"intensity":236.88933998906222,"type":"dir","forced":false,"remark":"","origin":false,"nSteps":12,"minStep":"15.0","maxStep":"70.0","steps":["15.0","20.0","23.0","25.0","30.0","33.0","35.0","40.0","45.0","50.0","60.0","70.0"],"group":"None"}],"TECT":[{"dec":304.94088015189203,"inc":73.3611465830038,"MAD":12.170695618649138,"cm":[81.67242879747502,-79.12708345946147,146.5669049426993],"intensity":236.88933998906222,"type":"dir","forced":false,"remark":"","origin":false,"nSteps":12,"minStep":"15.0","maxStep":"70.0","steps":["15.0","20.0","23.0","25.0","30.0","33.0","35.0","40.0","45.0","50.0","60.0","70.0"],"group":"None"}],"interpreted":true,"name":"SS57.06A","coreAzi":110,"coreDip":40,"bedStrike":60,"bedDip":32,"data":[{"visible":true,"include":false,"step":"0.0","x":-494.9428571428571,"y":-147.5047619047619,"z":-11.175238095238095,"a95":"0.99","info":"06/10/2015 at 00:02:39"},{"visible":true,"include":false,"step":"10.0","x":-337.68571428571425,"y":-153.34285714285713,"z":-62.81142857142857,"a95":"0.99","info":"06/10/2015 at 00:02:39"},{"visible":true,"include":true,"step":"15.0","x":-274.8,"y":-135.33333333333334,"z":-69.41333333333334,"a95":"0.99","info":"06/10/2015 at 00:02:39"},{"visible":true,"include":true,"step":"20.0","x":-223.75238095238097,"y":-132.61904761904762,"z":-71.86,"a95":"0.99","info":"06/10/2015 at 00:02:39"},{"visible":true,"include":true,"step":"23.0","x":-203.42857142857142,"y":-115.4095238095238,"z":-72.33047619047619,"a95":"0.99","info":"06/10/2015 at 00:02:39"},{"visible":true,"include":true,"step":"25.0","x":-192.16190476190476,"y":-96.79047619047618,"z":-75.7,"a95":"0.99","info":"06/10/2015 at 00:02:39"},{"visible":true,"include":true,"step":"30.0","x":-143.54285714285714,"y":-106.4095238095238,"z":-80.84095238095239,"a95":"0.99","info":"06/10/2015 at 00:02:39"},{"visible":true,"include":true,"step":"33.0","x":-144.85714285714286,"y":-76.36095238095238,"z":-72.92476190476191,"a95":"0.99","info":"06/10/2015 at 00:02:39"},{"visible":true,"include":true,"step":"35.0","x":-116.18095238095239,"y":-91.94571428571427,"z":-90.26666666666667,"a95":"0.99","info":"06/10/2015 at 00:02:39"},{"visible":true,"include":true,"step":"40.0","x":-133.13333333333335,"y":-73.43714285714286,"z":-79.63714285714286,"a95":"0.99","info":"06/10/2015 at 00:02:39"},{"visible":true,"include":true,"step":"45.0","x":-110.62857142857142,"y":-56.99619047619048,"z":-70.46095238095238,"a95":"0.99","info":"06/10/2015 at 00:02:39"},{"visible":true,"include":true,"step":"50.0","x":-92.54666666666667,"y":-58.37619047619048,"z":-72.33619047619047,"a95":"0.99","info":"06/10/2015 at 00:02:39"},{"visible":true,"include":true,"step":"60.0","x":-66.22952380952381,"y":-66.43047619047618,"z":-60.526666666666664,"a95":"0.99","info":"06/10/2015 at 00:02:39"},{"visible":true,"include":true,"step":"70.0","x":-52.959047619047624,"y":-55.91904761904762,"z":-44.98952380952381,"a95":"0.99","info":"06/10/2015 at 00:02:39"}],"demagType":"Unknown","patch":1.1,"format":"Unknown","strat":null},{"version":"v1.1.0","exported":"2016-10-11T13:46:22.903Z","info":"","GEO":[{"dec":313.1607753063028,"inc":20.026333345556974,"MAD":10.283623175123143,"cm":[6.090366306515144e-15,1.691768418476429e-15,0],"intensity":233.37009039928515,"type":"dir","forced":true,"remark":"","origin":false,"nSteps":8,"minStep":"180","maxStep":"340","steps":["180","210","230","250","270","300","320","340"],"group":"None"}],"TECT":[{"dec":304.904217538354,"inc":50.08036862871883,"MAD":10.28362317512315,"cm":[1.1504025245639717e-14,1.1504025245639717e-14,6.767073673905716e-16],"intensity":233.37009039928515,"type":"dir","forced":true,"remark":"","origin":false,"nSteps":8,"minStep":"180","maxStep":"340","steps":["180","210","230","250","270","300","320","340"],"group":"None"}],"interpreted":true,"name":"SS57.07A","coreAzi":121,"coreDip":47,"bedStrike":60,"bedDip":32,"data":[{"visible":true,"include":false,"step":"20","x":-483.8095238095238,"y":-253.14285714285714,"z":-138.28571428571428,"a95":"1.6","info":"\"15-06-22\" at \"09:55\""},{"visible":true,"include":false,"step":"100","x":-398.57142857142856,"y":-181.23809523809524,"z":-76.28571428571429,"a95":"1.6","info":"\"15-06-22\" at \"13:10\""},{"visible":true,"include":false,"step":"150","x":-145.33333333333334,"y":-56.19047619047619,"z":-76.57142857142857,"a95":"2.7","info":"\"15-06-23\" at \"10:08\""},{"visible":true,"include":true,"step":"180","x":-138.95238095238096,"y":-31.333333333333332,"z":-68.95238095238095,"a95":"2.7","info":"\"15-06-23\" at \"13:13\""},{"visible":true,"include":true,"step":"210","x":-76.67619047619048,"y":-14.19047619047619,"z":-16.323809523809523,"a95":"4","info":"\"15-06-23\" at \"16:03\""},{"visible":true,"include":true,"step":"230","x":-79.54285714285714,"y":-12.923809523809522,"z":-22.83809523809524,"a95":"2.9","info":"\"15-06-24\" at \"10:47\""},{"visible":true,"include":true,"step":"250","x":-72.55238095238094,"y":-16.257142857142856,"z":-18.81904761904762,"a95":"2.6","info":"\"15-06-24\" at \"13:58\""},{"visible":true,"include":true,"step":"270","x":-71.18095238095238,"y":-18.047619047619047,"z":-26.428571428571427,"a95":"2.7","info":"\"15-06-25\" at \"08:25\""},{"visible":true,"include":true,"step":"300","x":-55.409523809523805,"y":-7.0285714285714285,"z":-51.523809523809526,"a95":"3.6","info":"\"15-06-25\" at \"12:08\""},{"visible":true,"include":true,"step":"320","x":-29.038095238095234,"y":-5.914285714285715,"z":-32.523809523809526,"a95":"5.2","info":"\"15-06-25\" at \"15:42\""},{"visible":true,"include":true,"step":"340","x":-73.20952380952382,"y":-23.676190476190477,"z":-11.19047619047619,"a95":"6.1","info":"\"15-06-25\" at \"19:20\""},{"visible":true,"include":false,"step":"370","x":-35.733333333333334,"y":-24.333333333333332,"z":22.361904761904764,"a95":"8.7","info":"\"15-06-25\" at \"23:02\""}],"demagType":"Unknown","patch":1.1,"format":"Unknown","strat":null},{"version":"v1.1.0","exported":"2016-10-11T13:46:22.903Z","info":"","GEO":[{"dec":341.8480686352111,"inc":-7.397826432592886,"MAD":4.100997236142657,"cm":[1.0827317878249145e-14,2.334640417497472e-14,0],"intensity":289.0148698792812,"type":"dir","forced":true,"remark":"","origin":false,"nSteps":6,"minStep":"180","maxStep":"300","steps":["180","210","230","250","270","300"],"group":"None"}],"TECT":[{"dec":342.867771348879,"inc":23.89862113077877,"MAD":4.100997236142638,"cm":[-4.0602442043434294e-15,-2.1316282072803006e-14,-4.736951571734001e-15],"intensity":289.01486987928126,"type":"dir","forced":true,"remark":"","origin":false,"nSteps":6,"minStep":"180","maxStep":"300","steps":["180","210","230","250","270","300"],"group":"None"}],"interpreted":true,"name":"SS57.08A","coreAzi":243,"coreDip":54,"bedStrike":60,"bedDip":32,"data":[{"visible":true,"include":false,"step":"20","x":-159.52380952380952,"y":270.95238095238096,"z":37.333333333333336,"a95":"1.6","info":"\"15-06-22\" at \"09:57\""},{"visible":true,"include":false,"step":"100","x":-118.19047619047619,"y":263.3333333333333,"z":-8.19047619047619,"a95":"1.6","info":"\"15-06-22\" at \"13:12\""},{"visible":true,"include":false,"step":"150","x":-23.714285714285715,"y":184.76190476190476,"z":-43.80952380952381,"a95":"2.1","info":"\"15-06-23\" at \"10:10\""},{"visible":true,"include":true,"step":"180","x":-8.857142857142858,"y":194.66666666666666,"z":-39.23809523809524,"a95":"1.8","info":"\"15-06-23\" at \"13:15\""},{"visible":true,"include":true,"step":"210","x":-3.3333333333333335,"y":167.52380952380952,"z":-23.904761904761905,"a95":"1.9","info":"\"15-06-23\" at \"16:05\""},{"visible":true,"include":true,"step":"230","x":1.9047619047619047,"y":156,"z":-38.76190476190476,"a95":"2.1","info":"\"15-06-24\" at \"10:49\""},{"visible":true,"include":true,"step":"250","x":-19.333333333333332,"y":154.0952380952381,"z":-25.142857142857142,"a95":"1.7","info":"\"15-06-24\" at \"13:59\""},{"visible":true,"include":true,"step":"270","x":-8.380952380952381,"y":156.66666666666666,"z":-27.047619047619047,"a95":"1.6","info":"\"15-06-25\" at \"08:27\""},{"visible":true,"include":true,"step":"300","x":-9.542857142857143,"y":84.14285714285714,"z":-34.62857142857143,"a95":"2.1","info":"\"15-06-25\" at \"12:10\""},{"visible":false,"include":false,"step":"320","x":31.076190476190476,"y":61.19047619047619,"z":-52.7047619047619,"a95":"2.5","info":"\"15-06-25\" at \"15:44\""},{"visible":false,"include":false,"step":"340","x":29.466666666666665,"y":-26.047619047619047,"z":-24.34285714285714,"a95":"3.6","info":"\"15-06-25\" at \"19:21\""},{"visible":false,"include":false,"step":"370","x":-37.38095238095238,"y":13.914285714285715,"z":-4.723809523809524,"a95":"7","info":"\"15-06-25\" at \"23:04\""}],"demagType":"Unknown","patch":1.1,"format":"Unknown","strat":null},{"version":"v1.1.0","exported":"2016-10-11T13:46:22.903Z","info":"0","GEO":[{"dec":356.61083284439155,"inc":38.730089161710865,"MAD":4.230367412539753,"cm":[0,2.1147105230955362e-16,0],"intensity":519.4434509620775,"type":"dir","forced":true,"remark":"","origin":false,"nSteps":8,"minStep":"20.0","maxStep":"45.0","steps":["20.0","23.0","25.0","30.0","33.0","35.0","40.0","45.0"],"group":"None"}],"TECT":[{"dec":23.354624900552835,"inc":64.18222405850435,"MAD":4.230367412539802,"cm":[-5.4136589391245725e-15,2.9098416797794577e-14,0],"intensity":519.4434509620776,"type":"dir","forced":true,"remark":"","origin":false,"nSteps":8,"minStep":"20.0","maxStep":"45.0","steps":["20.0","23.0","25.0","30.0","33.0","35.0","40.0","45.0"],"group":"None"}],"interpreted":true,"name":"SS57.08C","coreAzi":243,"coreDip":54,"bedStrike":60,"bedDip":32,"data":[{"visible":true,"include":false,"step":"0.0","x":-421.31428571428575,"y":355.7904761904762,"z":239.53333333333333,"a95":"0.99","info":"06/10/2015 at 00:02:39"},{"visible":true,"include":false,"step":"10.0","x":-258.93333333333334,"y":265.12380952380954,"z":137.63809523809525,"a95":"0.99","info":"06/10/2015 at 00:02:39"},{"visible":true,"include":false,"step":"15.0","x":-229.30476190476188,"y":232.97142857142856,"z":125.76190476190476,"a95":"0.99","info":"06/10/2015 at 00:02:39"},{"visible":true,"include":true,"step":"20.0","x":-198.31428571428575,"y":220,"z":112.41904761904763,"a95":"0.99","info":"06/10/2015 at 00:02:39"},{"visible":true,"include":true,"step":"23.0","x":-166.73333333333335,"y":196.65714285714287,"z":116.68571428571428,"a95":"0.99","info":"06/10/2015 at 00:02:39"},{"visible":true,"include":true,"step":"25.0","x":-189.07619047619048,"y":199.8,"z":99.76190476190476,"a95":"0.99","info":"06/10/2015 at 00:02:39"},{"visible":true,"include":true,"step":"30.0","x":-161.76190476190476,"y":191.85714285714286,"z":84.42761904761905,"a95":"0.99","info":"06/10/2015 at 00:02:39"},{"visible":true,"include":true,"step":"33.0","x":-136.6095238095238,"y":183.04761904761904,"z":84.96000000000001,"a95":"0.99","info":"06/10/2015 at 00:02:39"},{"visible":true,"include":true,"step":"35.0","x":-151.1809523809524,"y":181.93333333333334,"z":55.32,"a95":"0.99","info":"06/10/2015 at 00:02:39"},{"visible":true,"include":true,"step":"40.0","x":-153.7047619047619,"y":158.16190476190476,"z":55.179047619047616,"a95":"0.99","info":"06/10/2015 at 00:02:39"},{"visible":true,"include":true,"step":"45.0","x":-126.9904761904762,"y":152.84761904761905,"z":45.640952380952385,"a95":"0.99","info":"06/10/2015 at 00:02:39"},{"visible":true,"include":false,"step":"50.0","x":-137.67619047619047,"y":145.04761904761904,"z":32.53904761904762,"a95":"0.99","info":"06/10/2015 at 00:02:39"},{"visible":true,"include":false,"step":"60.0","x":-164.47619047619048,"y":121.44761904761906,"z":52.735238095238095,"a95":"0.99","info":"06/10/2015 at 00:02:39"},{"visible":true,"include":false,"step":"70.0","x":-137.40952380952382,"y":81.9695238095238,"z":41.41428571428572,"a95":"0.99","info":"06/10/2015 at 00:02:39"}],"demagType":"Unknown","patch":1.1,"format":"Unknown","strat":null}]
