# Supplementary material for: Paleomagnetic constraints on the timing and distribution of Cenozoic rotations in Central and Eastern Anatolia
Source: Copernicus journal article supplement (doi:10.5194/se-9-295-2018), 2018-03-21
Supplement: Supplementary file 2 [file se-9-295-2018-supplement.zip › se-2017-66_DATA_dir files/dir files Sivas/SS58.dir]

[{"version":"v1.1.0","exported":"2016-10-11T11:14:27.310Z","volume":10.5,"added":"2016-10-11T11:07:26.196Z","format":"Utrecht","demagType":"Unknown","strat":null,"patch":1.1,"GEO":[{"dec":309.2010597396655,"inc":-24.70612240292085,"MAD":3.374119156494647,"cm":[8.526512829121202e-13,7.958078640513122e-13,0],"intensity":26850.176158903916,"type":"dir","forced":true,"remark":"","origin":false,"nSteps":11,"minStep":"230","maxStep":"470","steps":["230","250","270","300","320","340","370","400","420","440","470"],"group":"None","version":"v1.1.0"}],"TECT":[{"dec":309.94510891315554,"inc":19.16508984817624,"MAD":3.3741191564947215,"cm":[1.1368683772161603e-13,-1.7053025658242404e-13,1.9895196601282805e-13],"intensity":26850.176158903912,"type":"dir","forced":true,"remark":"","origin":false,"nSteps":11,"minStep":"230","maxStep":"470","steps":["230","250","270","300","320","340","370","400","420","440","470"],"group":"None","version":"v1.1.0"}],"interpreted":true,"name":"SS58.01B","coreAzi":138,"coreDip":55,"bedStrike":58,"bedDip":46,"data":[{"visible":false,"include":false,"step":"20","x":-21424.380952380954,"y":-9729.142857142857,"z":-4625.428571428572,"a95":2.1,"info":"\"15-06-22\" at \"09:59\""},{"visible":false,"include":false,"step":"100","x":-12691.047619047618,"y":-211.04761904761904,"z":-11599.047619047618,"a95":1.8,"info":"\"15-06-22\" at \"13:14\""},{"visible":false,"include":false,"step":"150","x":-12733.42857142857,"y":-166.57142857142858,"z":-11280.095238095239,"a95":1.8,"info":"\"15-06-23\" at \"10:12\""},{"visible":false,"include":false,"step":"180","x":-10135.42857142857,"y":1084.857142857143,"z":-12741.333333333334,"a95":1.9,"info":"\"15-06-23\" at \"13:17\""},{"visible":false,"include":false,"step":"210","x":-10293.619047619048,"y":802.7619047619048,"z":-12542.952380952382,"a95":2,"info":"\"15-06-23\" at \"16:07\""},{"visible":true,"include":true,"step":"230","x":-8906.190476190477,"y":2062.8571428571427,"z":-12873.714285714286,"a95":2,"info":"\"15-06-24\" at \"10:51\""},{"visible":true,"include":true,"step":"250","x":-9175.904761904761,"y":1705.7142857142858,"z":-13225.238095238095,"a95":2,"info":"\"15-06-24\" at \"14:01\""},{"visible":true,"include":true,"step":"270","x":-6606.761904761905,"y":2012,"z":-11637.42857142857,"a95":2.1,"info":"\"15-06-25\" at \"08:29\""},{"visible":true,"include":true,"step":"300","x":-6707.142857142857,"y":1822.7619047619048,"z":-12167.619047619048,"a95":2.1,"info":"\"15-06-25\" at \"12:12\""},{"visible":true,"include":true,"step":"320","x":-6120,"y":1458.3809523809523,"z":-11417.714285714286,"a95":2,"info":"\"15-06-25\" at \"15:46\""},{"visible":true,"include":true,"step":"340","x":-6122.190476190476,"y":2208.9523809523807,"z":-10716.095238095239,"a95":2,"info":"\"15-06-25\" at \"19:23\""},{"visible":true,"include":true,"step":"370","x":-5811.619047619048,"y":1558,"z":-10636.761904761905,"a95":2.4,"info":"\"15-06-25\" at \"23:07\""},{"visible":true,"include":true,"step":"400","x":-5539.333333333333,"y":1679.2380952380952,"z":-10175.904761904761,"a95":2.2,"info":"\"15-06-26\" at \"10:10\""},{"visible":true,"include":true,"step":"420","x":-4651.238095238095,"y":1740.952380952381,"z":-9541.238095238095,"a95":2.2,"info":"\"15-06-27\" at \"08:53\""},{"visible":true,"include":true,"step":"440","x":-4916.0952380952385,"y":2264.3809523809523,"z":-9983.714285714286,"a95":2.1,"info":"\"15-06-27\" at \"11:58\""},{"visible":true,"include":true,"step":"470","x":-5023.142857142857,"y":1526.857142857143,"z":-9798.285714285714,"a95":2.2,"info":"\"15-06-27\" at \"14:30\""},{"visible":true,"include":false,"step":"580","x":-2961.3333333333335,"y":1435.047619047619,"z":-4843.619047619048,"a95":2.3,"info":"\"15-07-01\" at \"12:05\""}]},{"version":"v1.1.0","exported":"2016-10-11T11:14:27.310Z","volume":10.5,"added":"2016-10-11T11:07:26.196Z","format":"Utrecht","demagType":"Unknown","strat":null,"patch":1.1,"GEO":[{"dec":321.3715580368079,"inc":-15.189501398160463,"MAD":3.6398510707895437,"cm":[-3.126388037344441e-13,-3.126388037344441e-13,0],"intensity":11960.850862733147,"type":"dir","forced":true,"remark":"","origin":false,"nSteps":11,"minStep":"270","maxStep":"520","steps":["270","300","320","340","370","400","420","440","470","490","520"],"group":"None","version":"v1.1.0"}],"TECT":[{"dec":320.57148457652744,"inc":30.5014299414408,"MAD":3.639851070789435,"cm":[5.968558980384842e-13,9.094947017729282e-13,0],"intensity":11960.850862733145,"type":"dir","forced":true,"remark":"","origin":false,"nSteps":11,"minStep":"270","maxStep":"520","steps":["270","300","320","340","370","400","420","440","470","490","520"],"group":"None","version":"v1.1.0"}],"interpreted":true,"name":"SS58.03A","coreAzi":80,"coreDip":47,"bedStrike":58,"bedDip":46,"data":[{"visible":false,"include":false,"step":"20","x":-4140.666666666667,"y":-11361.333333333334,"z":4591.619047619048,"a95":1.5,"info":"\"15-06-22\" at \"10:01\""},{"visible":false,"include":false,"step":"100","x":-3097.0476190476193,"y":-8018.571428571428,"z":-937.6190476190476,"a95":1.3,"info":"\"15-06-22\" at \"13:17\""},{"visible":false,"include":false,"step":"150","x":-2732.6666666666665,"y":-8142.0952380952385,"z":-702.952380952381,"a95":1.3,"info":"\"15-06-23\" at \"10:13\""},{"visible":false,"include":false,"step":"180","x":-1872.4761904761904,"y":-6802.666666666667,"z":-2014.1904761904761,"a95":1.6,"info":"\"15-06-23\" at \"13:18\""},{"visible":false,"include":false,"step":"210","x":-1887.904761904762,"y":-7063.809523809524,"z":-2060.4761904761904,"a95":1.4,"info":"\"15-06-23\" at \"16:09\""},{"visible":false,"include":false,"step":"230","x":-1675.904761904762,"y":-6417.238095238095,"z":-2301.4285714285716,"a95":1.5,"info":"\"15-06-24\" at \"10:52\""},{"visible":false,"include":false,"step":"250","x":-1503.4285714285713,"y":-6353.9047619047615,"z":-2393.809523809524,"a95":1.5,"info":"\"15-06-24\" at \"14:03\""},{"visible":true,"include":true,"step":"270","x":-1242.6666666666667,"y":-5371.333333333333,"z":-2948.285714285714,"a95":1.6,"info":"\"15-06-25\" at \"08:31\""},{"visible":true,"include":true,"step":"300","x":-1481.142857142857,"y":-5449.238095238095,"z":-3208.6666666666665,"a95":1.7,"info":"\"15-06-25\" at \"12:13\""},{"visible":true,"include":true,"step":"320","x":-954.8571428571429,"y":-5338.476190476191,"z":-3021.0476190476193,"a95":1.5,"info":"\"15-06-25\" at \"15:47\""},{"visible":true,"include":true,"step":"340","x":-1537.904761904762,"y":-5232.380952380952,"z":-2885.714285714286,"a95":1.6,"info":"\"15-06-25\" at \"19:25\""},{"visible":true,"include":true,"step":"370","x":-714.7619047619048,"y":-4947.809523809524,"z":-3130.6666666666665,"a95":1.8,"info":"\"15-06-25\" at \"23:09\""},{"visible":true,"include":true,"step":"400","x":-780.3809523809524,"y":-4899.619047619048,"z":-2986.095238095238,"a95":1.7,"info":"\"15-06-26\" at \"10:13\""},{"visible":true,"include":true,"step":"420","x":-869.7142857142857,"y":-4718.666666666667,"z":-3039.0476190476193,"a95":1.6,"info":"\"15-06-27\" at \"08:54\""},{"visible":true,"include":true,"step":"440","x":-537.4285714285714,"y":-5062.761904761905,"z":-3038.7619047619046,"a95":1.5,"info":"\"15-06-27\" at \"12:00\""},{"visible":true,"include":true,"step":"470","x":-646.0952380952381,"y":-4818.285714285715,"z":-3114.095238095238,"a95":1.7,"info":"\"15-06-27\" at \"14:32\""},{"visible":true,"include":true,"step":"490","x":-396.95238095238096,"y":-4399.619047619048,"z":-2252.285714285714,"a95":1.7,"info":"\"15-06-29\" at \"11:58\""},{"visible":true,"include":true,"step":"520","x":-1014.3809523809524,"y":-4626.190476190476,"z":-3217.5238095238096,"a95":1.8,"info":"\"15-06-30\" at \"04:59\""},{"visible":true,"include":false,"step":"550","x":-1020.6666666666666,"y":-3534.7619047619046,"z":-2305.1428571428573,"a95":1.8,"info":"\"15-06-30\" at \"08:48\""},{"visible":true,"include":false,"step":"580","x":-171.23809523809524,"y":-4037.809523809524,"z":-2657.904761904762,"a95":1.7,"info":"\"15-07-01\" at \"12:07\""}]},{"version":"v1.1.0","exported":"2016-10-11T11:14:27.310Z","volume":10.5,"added":"2016-10-11T11:07:26.196Z","format":"Utrecht","demagType":"Unknown","strat":null,"patch":1.1,"GEO":[{"dec":301.45950011803535,"inc":-14.466932732418657,"MAD":3.033260723912382,"cm":[-6.252776074688882e-13,-5.684341886080801e-13,0],"intensity":14387.245224885746,"type":"dir","forced":true,"remark":"","origin":false,"nSteps":8,"minStep":"370","maxStep":"550","steps":["370","400","420","440","470","490","520","550"],"group":"None","version":"v1.1.0"}],"TECT":[{"dec":299.02837352978634,"inc":26.71733397730304,"MAD":3.0332607239123672,"cm":[7.105427357601002e-13,2.8421709430404007e-13,-3.126388037344441e-13],"intensity":14387.245224885746,"type":"dir","forced":true,"remark":"","origin":false,"nSteps":8,"minStep":"370","maxStep":"550","steps":["370","400","420","440","470","490","520","550"],"group":"None","version":"v1.1.0"}],"interpreted":true,"name":"SS58.04A","coreAzi":87,"coreDip":51,"bedStrike":58,"bedDip":46,"data":[{"visible":false,"include":false,"step":"20","x":-11358.47619047619,"y":-15103.047619047618,"z":10861.42857142857,"a95":1.8,"info":"\"15-06-22\" at \"10:02\""},{"visible":false,"include":false,"step":"100","x":-8119.9047619047615,"y":-9212.380952380952,"z":477.3333333333333,"a95":1.5,"info":"\"15-06-22\" at \"13:19\""},{"visible":false,"include":false,"step":"150","x":-6787.619047619048,"y":-8161.142857142857,"z":-1891.142857142857,"a95":1.5,"info":"\"15-06-23\" at \"10:15\""},{"visible":false,"include":false,"step":"180","x":-6344.761904761905,"y":-7174.571428571428,"z":-3550,"a95":1.6,"info":"\"15-06-23\" at \"13:20\""},{"visible":false,"include":false,"step":"210","x":-6512.285714285715,"y":-7347.809523809524,"z":-3098.3809523809523,"a95":1.5,"info":"\"15-06-23\" at \"16:10\""},{"visible":false,"include":false,"step":"230","x":-5654.476190476191,"y":-6133.333333333333,"z":-4913.428571428572,"a95":1.7,"info":"\"15-06-24\" at \"10:55\""},{"visible":false,"include":false,"step":"250","x":-5824.380952380952,"y":-6281.809523809524,"z":-4687.619047619048,"a95":1.7,"info":"\"15-06-24\" at \"14:04\""},{"visible":true,"include":false,"step":"270","x":-4992.857142857143,"y":-5121.333333333333,"z":-5175.619047619048,"a95":1.8,"info":"\"15-06-25\" at \"08:32\""},{"visible":true,"include":false,"step":"300","x":-5047.428571428572,"y":-5086.190476190476,"z":-5156.761904761905,"a95":1.8,"info":"\"15-06-25\" at \"12:15\""},{"visible":true,"include":false,"step":"320","x":-4194,"y":-4732.571428571428,"z":-4638.190476190476,"a95":1.8,"info":"\"15-06-25\" at \"15:48\""},{"visible":true,"include":false,"step":"340","x":-4445.809523809524,"y":-4484.380952380952,"z":-4885.523809523809,"a95":1.7,"info":"\"15-06-25\" at \"19:27\""},{"visible":true,"include":true,"step":"370","x":-3863.2380952380954,"y":-4691.619047619048,"z":-5183.9047619047615,"a95":2,"info":"\"15-06-25\" at \"23:11\""},{"visible":true,"include":true,"step":"400","x":-3871.3333333333335,"y":-4157.333333333333,"z":-5103.428571428572,"a95":1.9,"info":"\"15-06-26\" at \"10:15\""},{"visible":true,"include":true,"step":"420","x":-3293.4285714285716,"y":-4229.523809523809,"z":-5414.476190476191,"a95":1.9,"info":"\"15-06-27\" at \"08:56\""},{"visible":true,"include":true,"step":"440","x":-3784.3809523809523,"y":-3840.6666666666665,"z":-5248.952380952381,"a95":1.8,"info":"\"15-06-27\" at \"12:01\""},{"visible":true,"include":true,"step":"470","x":-3346.7619047619046,"y":-4441.619047619048,"z":-5672.571428571428,"a95":1.9,"info":"\"15-06-27\" at \"14:33\""},{"visible":true,"include":true,"step":"490","x":-3041.3333333333335,"y":-3901.2380952380954,"z":-4781.238095238095,"a95":2,"info":"\"15-06-29\" at \"12:00\""},{"visible":true,"include":true,"step":"520","x":-3110.095238095238,"y":-3986.190476190476,"z":-5553.619047619048,"a95":2.2,"info":"\"15-06-30\" at \"05:00\""},{"visible":true,"include":true,"step":"550","x":-3258,"y":-3264.3809523809523,"z":-4458.857142857143,"a95":2,"info":"\"15-06-30\" at \"08:50\""},{"visible":false,"include":false,"step":"580","x":-3007.0476190476193,"y":-3747.2380952380954,"z":-4815.714285714285,"a95":2,"info":"\"15-07-01\" at \"12:08\""}]},{"version":"v1.1.0","exported":"2016-10-11T11:14:27.310Z","volume":10.5,"added":"2016-10-11T11:07:26.197Z","format":"Utrecht","demagType":"Unknown","strat":null,"patch":1.1,"GEO":[{"dec":318.28267777194355,"inc":14.05353237970406,"MAD":8.816874547139077,"cm":[-5.684341886080802e-14,-2.842170943040401e-14,0],"intensity":7072.485721845911,"type":"dir","forced":true,"remark":"","origin":false,"nSteps":8,"minStep":"320","maxStep":"520","steps":["320","340","370","400","420","440","470","520"],"group":"None","version":"v1.1.0"}],"TECT":[{"dec":309.505939935543,"inc":58.923664538136,"MAD":8.816874547139072,"cm":[1.5631940186722204e-13,2.842170943040401e-14,-2.842170943040401e-14],"intensity":7072.48572184591,"type":"dir","forced":true,"remark":"","origin":false,"nSteps":8,"minStep":"320","maxStep":"520","steps":["320","340","370","400","420","440","470","520"],"group":"None","version":"v1.1.0"}],"interpreted":true,"name":"SS58.06A","coreAzi":82,"coreDip":44,"bedStrike":58,"bedDip":46,"data":[{"visible":false,"include":false,"step":"20","x":-15895.52380952381,"y":-14229.52380952381,"z":16751.714285714286,"a95":1.8,"info":"\"15-06-22\" at \"10:04\""},{"visible":false,"include":false,"step":"100","x":-7434.571428571428,"y":-7143.047619047619,"z":5677.333333333333,"a95":1.7,"info":"\"15-06-22\" at \"13:22\""},{"visible":false,"include":false,"step":"150","x":-5240.0952380952385,"y":-5984.952380952381,"z":2859.809523809524,"a95":1.5,"info":"\"15-06-23\" at \"10:17\""},{"visible":true,"include":false,"step":"180","x":-4207.333333333333,"y":-5426.285714285715,"z":2067.3333333333335,"a95":1.4,"info":"\"15-06-23\" at \"13:21\""},{"visible":true,"include":false,"step":"210","x":-4342.857142857143,"y":-5169.714285714285,"z":1967.142857142857,"a95":1.6,"info":"\"15-06-23\" at \"16:12\""},{"visible":true,"include":false,"step":"230","x":-3402.3809523809523,"y":-4375.523809523809,"z":791.1428571428571,"a95":1.4,"info":"\"15-06-24\" at \"10:57\""},{"visible":true,"include":false,"step":"250","x":-3386.095238095238,"y":-4295.714285714285,"z":634.1904761904761,"a95":1.3,"info":"\"15-06-24\" at \"14:06\""},{"visible":true,"include":false,"step":"270","x":-2689.714285714286,"y":-3344,"z":-243.9047619047619,"a95":1.3,"info":"\"15-06-25\" at \"08:34\""},{"visible":true,"include":false,"step":"300","x":-2673.0476190476193,"y":-3553.1428571428573,"z":-320.57142857142856,"a95":1.4,"info":"\"15-06-25\" at \"12:19\""},{"visible":true,"include":true,"step":"320","x":-1943.2380952380952,"y":-3529.5238095238096,"z":-366.76190476190476,"a95":1.7,"info":"\"15-06-25\" at \"15:50\""},{"visible":true,"include":true,"step":"340","x":-2271.4285714285716,"y":-3343.0476190476193,"z":-399.3333333333333,"a95":1.5,"info":"\"15-06-25\" at \"19:29\""},{"visible":true,"include":true,"step":"370","x":-1941.2380952380952,"y":-2953.904761904762,"z":-667.8095238095239,"a95":1.6,"info":"\"15-06-25\" at \"23:13\""},{"visible":true,"include":true,"step":"400","x":-2077.809523809524,"y":-2539.809523809524,"z":-556.4761904761905,"a95":1.5,"info":"\"15-06-26\" at \"10:16\""},{"visible":true,"include":true,"step":"420","x":-1834,"y":-2660.190476190476,"z":-831.9047619047619,"a95":1.5,"info":"\"15-06-27\" at \"09:32\""},{"visible":true,"include":true,"step":"440","x":-2103.809523809524,"y":-2354.5714285714284,"z":-842.3809523809524,"a95":1.7,"info":"\"15-06-27\" at \"12:03\""},{"visible":true,"include":true,"step":"470","x":-1908.857142857143,"y":-2436.9523809523807,"z":-1115.5238095238096,"a95":1.7,"info":"\"15-06-27\" at \"14:38\""},{"visible":false,"include":false,"step":"490","x":-800.2857142857143,"y":-2492,"z":-630.6666666666666,"a95":1.7,"info":"\"15-06-29\" at \"12:02\""},{"visible":true,"include":true,"step":"520","x":-1169.5238095238096,"y":-2506.6666666666665,"z":-1606.857142857143,"a95":1.9,"info":"\"15-06-30\" at \"05:02\""},{"visible":true,"include":false,"step":"550","x":-1057.142857142857,"y":-1371.047619047619,"z":-1011.3333333333334,"a95":2.2,"info":"\"15-06-30\" at \"08:52\""},{"visible":false,"include":false,"step":"580","x":-114.57142857142857,"y":-1680,"z":-1978.095238095238,"a95":2,"info":"\"15-07-01\" at \"12:10\""}]},{"version":"v1.1.0","exported":"2016-10-11T11:14:27.310Z","volume":10.5,"added":"2016-10-11T11:07:26.199Z","format":"Utrecht","demagType":"Unknown","strat":null,"patch":1.1,"GEO":[{"dec":321.4532506548131,"inc":-6.427376732877498,"MAD":5.399638785775587,"cm":[-8.526512829121202e-14,-1.4210854715202004e-13,0],"intensity":11782.983974268507,"type":"dir","forced":true,"remark":"","origin":false,"nSteps":8,"minStep":"370","maxStep":"550","steps":["370","400","420","440","470","490","520","550"],"group":"None","version":"v1.1.0"}],"TECT":[{"dec":319.58994161744835,"inc":39.22700896385365,"MAD":5.399638785775604,"cm":[0,-1.9895196601282805e-13,-5.684341886080802e-14],"intensity":11782.983974268507,"type":"dir","forced":true,"remark":"","origin":false,"nSteps":8,"minStep":"370","maxStep":"550","steps":["370","400","420","440","470","490","520","550"],"group":"None","version":"v1.1.0"}],"interpreted":true,"name":"SS58.08A","coreAzi":67,"coreDip":39,"bedStrike":58,"bedDip":46,"data":[{"visible":false,"include":false,"step":"20","x":-20673.52380952381,"y":-17663.04761904762,"z":25364.95238095238,"a95":1.8,"info":"\"15-06-22\" at \"10:05\""},{"visible":false,"include":false,"step":"100","x":-6832.571428571428,"y":-13865.238095238095,"z":7422.380952380952,"a95":1.7,"info":"\"15-06-22\" at \"13:24\""},{"visible":false,"include":false,"step":"150","x":-4312.380952380952,"y":-11513.42857142857,"z":3548.5714285714284,"a95":1.4,"info":"\"15-06-23\" at \"10:18\""},{"visible":false,"include":false,"step":"180","x":-4468.666666666667,"y":-10682.285714285714,"z":3011.2380952380954,"a95":1.5,"info":"\"15-06-23\" at \"13:23\""},{"visible":false,"include":false,"step":"210","x":-3996.095238095238,"y":-10639.714285714286,"z":2842.5714285714284,"a95":1.4,"info":"\"15-06-23\" at \"16:14\""},{"visible":false,"include":false,"step":"230","x":-1920.5714285714287,"y":-9622.761904761905,"z":1169.047619047619,"a95":1.4,"info":"\"15-06-24\" at \"10:58\""},{"visible":false,"include":false,"step":"250","x":-2712.4761904761904,"y":-9324.57142857143,"z":1113.142857142857,"a95":1.5,"info":"\"15-06-24\" at \"14:07\""},{"visible":true,"include":false,"step":"270","x":-1894,"y":-8476,"z":-1017.2380952380952,"a95":1.3,"info":"\"15-06-25\" at \"08:35\""},{"visible":true,"include":false,"step":"300","x":-1307.142857142857,"y":-8213.42857142857,"z":-1784.095238095238,"a95":1.2,"info":"\"15-06-25\" at \"12:20\""},{"visible":true,"include":false,"step":"320","x":-1102,"y":-7796.0952380952385,"z":-1468.952380952381,"a95":1.3,"info":"\"15-06-25\" at \"15:51\""},{"visible":true,"include":false,"step":"340","x":-1595.8095238095239,"y":-7239.428571428572,"z":-1032.6666666666667,"a95":1.4,"info":"\"15-06-25\" at \"19:30\""},{"visible":true,"include":true,"step":"370","x":-692.8571428571429,"y":-7093.333333333333,"z":-1753.047619047619,"a95":1.4,"info":"\"15-06-25\" at \"23:15\""},{"visible":true,"include":true,"step":"400","x":-1302.7619047619048,"y":-6342.761904761905,"z":-1641.5238095238096,"a95":1.4,"info":"\"15-06-26\" at \"10:18\""},{"visible":true,"include":true,"step":"420","x":-328.0952380952381,"y":-6249.238095238095,"z":-1716.952380952381,"a95":1.5,"info":"\"15-06-27\" at \"09:34\""},{"visible":true,"include":true,"step":"440","x":-663.6190476190476,"y":-5741.523809523809,"z":-1567.3333333333333,"a95":1.5,"info":"\"15-06-27\" at \"12:05\""},{"visible":true,"include":true,"step":"470","x":-478.76190476190476,"y":-6672.380952380952,"z":-2696.285714285714,"a95":1.4,"info":"\"15-06-27\" at \"14:39\""},{"visible":true,"include":true,"step":"490","x":515.1428571428571,"y":-6388.952380952381,"z":-1348.857142857143,"a95":1.4,"info":"\"15-06-29\" at \"12:03\""},{"visible":true,"include":true,"step":"520","x":-514.7619047619048,"y":-5652.761904761905,"z":-1942.7619047619048,"a95":1.6,"info":"\"15-06-30\" at \"05:03\""},{"visible":true,"include":true,"step":"550","x":-704.5714285714286,"y":-4184.761904761905,"z":-1359.904761904762,"a95":1.6,"info":"\"15-06-30\" at \"08:56\""},{"visible":false,"include":false,"step":"580","x":1239.7142857142858,"y":-4669.714285714285,"z":-1372.095238095238,"a95":1.6,"info":"\"15-07-01\" at \"12:11\""}]}]
