# Supplementary material for: Paleomagnetic constraints on the timing and distribution of Cenozoic rotations in Central and Eastern Anatolia
Source: Copernicus journal article supplement (doi:10.5194/se-9-295-2018), 2018-03-21
Supplement: Supplementary file 2 [file se-9-295-2018-supplement.zip › se-2017-66_DATA_dir files/dir files Sivas/SS59.dir]

[{"version":"v1.1.0","exported":"2016-10-11T11:44:04.834Z","volume":10.5,"added":"2016-10-11T11:37:19.196Z","format":"Utrecht","demagType":"Unknown","strat":null,"patch":1.1,"GEO":[{"dec":357.3678068700018,"inc":59.316866887968054,"MAD":4.771756491683991,"cm":[-7.105427357601002e-15,7.993605777301127e-14,0],"intensity":10868.294611166099,"type":"dir","forced":true,"remark":"","origin":false,"nSteps":11,"minStep":"180","maxStep":"420","steps":["180","210","230","250","270","300","320","340","370","400","420"],"group":"None","version":"v1.1.0"}],"TECT":[{"dec":36.80787588320089,"inc":64.35513337051853,"MAD":4.771756491683964,"cm":[-1.2079226507921703e-13,1.4566126083082054e-13,2.842170943040401e-14],"intensity":10868.294611166097,"type":"dir","forced":true,"remark":"","origin":false,"nSteps":11,"minStep":"180","maxStep":"420","steps":["180","210","230","250","270","300","320","340","370","400","420"],"group":"None","version":"v1.1.0"}],"interpreted":true,"name":"SS59.02A","coreAzi":103,"coreDip":26,"bedStrike":30,"bedDip":21,"data":[{"visible":false,"include":false,"step":"20","x":-21481.238095238095,"y":-13092.952380952382,"z":6499.714285714285,"a95":1.5,"info":"\"15-06-22\" at \"08:42\""},{"visible":false,"include":false,"step":"100","x":-12858.380952380952,"y":-8476.285714285714,"z":4404.190476190476,"a95":1.5,"info":"\"15-06-22\" at \"11:54\""},{"visible":true,"include":false,"step":"150","x":-8095.523809523809,"y":-5190,"z":3157.2380952380954,"a95":1.6,"info":"\"15-06-23\" at \"08:58\""},{"visible":true,"include":true,"step":"180","x":-7008.285714285715,"y":-4587.523809523809,"z":2295.904761904762,"a95":1.5,"info":"\"15-06-23\" at \"12:03\""},{"visible":true,"include":true,"step":"210","x":-5072.952380952381,"y":-3175.1428571428573,"z":1930.4761904761904,"a95":1.5,"info":"\"15-06-23\" at \"14:53\""},{"visible":true,"include":true,"step":"230","x":-3930.8571428571427,"y":-2025.7142857142858,"z":1308.2857142857142,"a95":1.7,"info":"\"15-06-24\" at \"08:41\""},{"visible":true,"include":true,"step":"250","x":-3330.9523809523807,"y":-1997.3333333333333,"z":702.1904761904761,"a95":1.8,"info":"\"15-06-24\" at \"12:36\""},{"visible":true,"include":true,"step":"270","x":-3354.285714285714,"y":-1689.2380952380952,"z":445.5238095238095,"a95":1.8,"info":"\"15-06-24\" at \"16:00\""},{"visible":true,"include":true,"step":"300","x":-2804.7619047619046,"y":-1564,"z":899.047619047619,"a95":1.8,"info":"\"15-06-25\" at \"10:52\""},{"visible":true,"include":true,"step":"320","x":-2364.9523809523807,"y":-1328.4761904761904,"z":930.8571428571429,"a95":2.1,"info":"\"15-06-25\" at \"14:19\""},{"visible":true,"include":true,"step":"340","x":-2317.6190476190477,"y":-1095.4285714285713,"z":627.047619047619,"a95":1.9,"info":"\"15-06-25\" at \"17:17\""},{"visible":true,"include":true,"step":"370","x":-2551.904761904762,"y":-1254.1904761904761,"z":179.61904761904762,"a95":1.7,"info":"\"15-06-25\" at \"21:36\""},{"visible":true,"include":true,"step":"400","x":-1919.142857142857,"y":-1036.7619047619048,"z":845.2380952380952,"a95":2,"info":"\"15-06-26\" at \"08:45\""},{"visible":true,"include":true,"step":"420","x":-2000.1904761904761,"y":-873.4285714285714,"z":377.14285714285717,"a95":1.9,"info":"\"15-06-26\" at \"11:55\""},{"visible":false,"include":false,"step":"450","x":-1715.2380952380952,"y":-432.76190476190476,"z":430.76190476190476,"a95":2,"info":"\"15-06-28\" at \"20:06\""},{"visible":false,"include":false,"step":"470","x":-1501.047619047619,"y":-1183.047619047619,"z":458.57142857142856,"a95":2.2,"info":"\"15-06-29\" at \"08:04\""},{"visible":false,"include":false,"step":"490","x":-1081.142857142857,"y":-905.9047619047619,"z":972.4761904761905,"a95":3.2,"info":"\"15-06-29\" at \"11:12\""},{"visible":false,"include":false,"step":"520","x":-940.5714285714286,"y":-821.4285714285714,"z":487.04761904761904,"a95":2.8,"info":"\"15-06-30\" at \"04:36\""},{"visible":false,"include":false,"step":"550","x":-1215.3333333333333,"y":-1003.4285714285714,"z":103.04761904761905,"a95":2,"info":"\"15-06-30\" at \"08:25\""},{"visible":false,"include":false,"step":"580","x":-384,"y":-959.8095238095239,"z":-161.8095238095238,"a95":2.4,"info":"\"15-07-01\" at \"11:38\""}]},{"version":"v1.1.0","exported":"2016-10-11T11:44:04.834Z","volume":10.5,"added":"2016-10-11T11:37:19.196Z","format":"Utrecht","demagType":"Unknown","strat":null,"patch":1.1,"GEO":[{"dec":4.6258517011888785,"inc":61.31326514077071,"MAD":4.168587531293653,"cm":[-1.4210854715202004e-14,3.0819791163594346e-13,0],"intensity":23004.972652433844,"type":"dir","forced":true,"remark":"","origin":false,"nSteps":14,"minStep":"100","maxStep":"490","steps":["100","150","180","210","230","250","270","300","320","340","370","400","470","490"],"group":"None","version":"v1.1.0"}],"TECT":[{"dec":45.75270374030771,"inc":63.215435182750795,"MAD":4.168587531293512,"cm":[-3.446132268436486e-13,4.476419235288631e-13,-1.2789769243681803e-13],"intensity":23004.972652433844,"type":"dir","forced":true,"remark":"","origin":false,"nSteps":14,"minStep":"100","maxStep":"490","steps":["100","150","180","210","230","250","270","300","320","340","370","400","470","490"],"group":"None","version":"v1.1.0"}],"interpreted":true,"name":"SS59.03A","coreAzi":103,"coreDip":19,"bedStrike":30,"bedDip":21,"data":[{"visible":true,"include":false,"step":"20","x":-29066.190476190477,"y":-13206.095238095239,"z":8536.857142857143,"a95":1.4,"info":"\"15-06-22\" at \"08:44\""},{"visible":true,"include":true,"step":"100","x":-17291.52380952381,"y":-10692.380952380952,"z":4940.761904761905,"a95":1.5,"info":"\"15-06-22\" at \"11:56\""},{"visible":true,"include":true,"step":"150","x":-10656.285714285714,"y":-5799.428571428572,"z":2636.7619047619046,"a95":1.5,"info":"\"15-06-23\" at \"08:59\""},{"visible":true,"include":true,"step":"180","x":-9543.047619047618,"y":-5436.380952380952,"z":2566.285714285714,"a95":1.4,"info":"\"15-06-23\" at \"12:04\""},{"visible":true,"include":true,"step":"210","x":-7269.428571428572,"y":-2945.904761904762,"z":1463.2380952380952,"a95":1.5,"info":"\"15-06-23\" at \"14:54\""},{"visible":true,"include":true,"step":"230","x":-5582,"y":-2775.1428571428573,"z":1920,"a95":1.6,"info":"\"15-06-24\" at \"08:43\""},{"visible":true,"include":true,"step":"250","x":-4945.619047619048,"y":-2458.4761904761904,"z":1367.047619047619,"a95":1.6,"info":"\"15-06-24\" at \"12:42\""},{"visible":true,"include":true,"step":"270","x":-4518.857142857143,"y":-2520.5714285714284,"z":370.76190476190476,"a95":1.5,"info":"\"15-06-24\" at \"16:02\""},{"visible":true,"include":true,"step":"300","x":-3865.6190476190477,"y":-1463.047619047619,"z":978.952380952381,"a95":1.5,"info":"\"15-06-25\" at \"10:54\""},{"visible":true,"include":true,"step":"320","x":-3563.4285714285716,"y":-1641.5238095238096,"z":263.5238095238095,"a95":1.6,"info":"\"15-06-25\" at \"14:21\""},{"visible":true,"include":true,"step":"340","x":-3084.095238095238,"y":-1478.1904761904761,"z":429.3333333333333,"a95":1.6,"info":"\"15-06-25\" at \"17:19\""},{"visible":true,"include":true,"step":"370","x":-3077.6190476190477,"y":-1157.142857142857,"z":161.9047619047619,"a95":1.7,"info":"\"15-06-25\" at \"21:38\""},{"visible":true,"include":true,"step":"400","x":-2467.5238095238096,"y":-881.1428571428571,"z":688.1904761904761,"a95":1.8,"info":"\"15-06-26\" at \"08:46\""},{"visible":true,"include":false,"step":"420","x":-2176.8571428571427,"y":-413.42857142857144,"z":466.2857142857143,"a95":2.2,"info":"\"15-06-26\" at \"11:56\""},{"visible":true,"include":false,"step":"450","x":-2319.3333333333335,"y":-203.33333333333334,"z":671.8095238095239,"a95":1.8,"info":"\"15-06-28\" at \"20:08\""},{"visible":true,"include":true,"step":"470","x":-2067.2380952380954,"y":-801.8095238095239,"z":81.52380952380952,"a95":1.8,"info":"\"15-06-29\" at \"08:06\""},{"visible":true,"include":true,"step":"490","x":-1781.8095238095239,"y":-914.0952380952381,"z":602.3809523809524,"a95":2.3,"info":"\"15-06-29\" at \"11:15\""},{"visible":true,"include":false,"step":"520","x":-1608.7619047619048,"y":-665.2380952380952,"z":10,"a95":2,"info":"\"15-06-30\" at \"04:37\""},{"visible":false,"include":false,"step":"550","x":-763.3333333333334,"y":347.3333333333333,"z":443.42857142857144,"a95":3.7,"info":"\"15-06-30\" at \"08:27\""},{"visible":false,"include":false,"step":"580","x":-1182.857142857143,"y":-1057.4285714285713,"z":436.95238095238096,"a95":2.5,"info":"\"15-07-01\" at \"11:39\""}]},{"version":"v1.1.0","exported":"2016-10-11T11:44:04.834Z","volume":10.5,"added":"2016-10-11T11:37:19.196Z","format":"Utrecht","demagType":"Unknown","strat":null,"patch":1.1,"GEO":[{"dec":16.11658525342284,"inc":61.482649499883664,"MAD":7.471111748439341,"cm":[-8.171241461241152e-14,1.4921397450962104e-13,0],"intensity":19510.118438815247,"type":"dir","forced":true,"remark":"","origin":false,"nSteps":11,"minStep":"150","maxStep":"400","steps":["150","180","210","230","250","270","300","320","340","370","400"],"group":"None","version":"v1.1.0"}],"TECT":[{"dec":54.16350150350206,"inc":59.47018810605135,"MAD":7.471111748439297,"cm":[6.217248937900877e-13,-1.3233858453531866e-13,-1.1368683772161603e-13],"intensity":19510.118438815243,"type":"dir","forced":true,"remark":"","origin":false,"nSteps":11,"minStep":"150","maxStep":"400","steps":["150","180","210","230","250","270","300","320","340","370","400"],"group":"None","version":"v1.1.0"}],"interpreted":true,"name":"SS59.05A","coreAzi":101,"coreDip":18,"bedStrike":30,"bedDip":21,"data":[{"visible":false,"include":false,"step":"20","x":-39748.666666666664,"y":-21939.333333333332,"z":14079.809523809523,"a95":1.5,"info":"\"15-06-22\" at \"08:46\""},{"visible":true,"include":false,"step":"100","x":-25476.571428571428,"y":-16077.047619047618,"z":9765.047619047618,"a95":1.5,"info":"\"15-06-22\" at \"11:58\""},{"visible":true,"include":true,"step":"150","x":-13856.380952380952,"y":-8717.809523809523,"z":5616.571428571428,"a95":1.7,"info":"\"15-06-23\" at \"09:01\""},{"visible":true,"include":true,"step":"180","x":-13524.47619047619,"y":-8314.57142857143,"z":5309.9047619047615,"a95":1.5,"info":"\"15-06-23\" at \"12:08\""},{"visible":true,"include":true,"step":"210","x":-9065.904761904761,"y":-5830.761904761905,"z":5119.238095238095,"a95":1.8,"info":"\"15-06-23\" at \"14:56\""},{"visible":true,"include":true,"step":"230","x":-7563.714285714285,"y":-4715.809523809524,"z":2595.1428571428573,"a95":1.5,"info":"\"15-06-24\" at \"08:44\""},{"visible":true,"include":true,"step":"250","x":-6886.857142857143,"y":-3052.9523809523807,"z":3312.6666666666665,"a95":1.8,"info":"\"15-06-24\" at \"12:44\""},{"visible":true,"include":true,"step":"270","x":-5770.761904761905,"y":-1986.857142857143,"z":1210.6666666666667,"a95":1.9,"info":"\"15-06-24\" at \"16:04\""},{"visible":true,"include":true,"step":"300","x":-4913.523809523809,"y":-2921.6190476190477,"z":1476.3809523809523,"a95":1.8,"info":"\"15-06-25\" at \"10:56\""},{"visible":true,"include":true,"step":"320","x":-5144,"y":-2493.0476190476193,"z":701.6190476190476,"a95":2.2,"info":"\"15-06-25\" at \"14:22\""},{"visible":true,"include":true,"step":"340","x":-4431.238095238095,"y":-1335.6190476190477,"z":34.57142857142857,"a95":2.1,"info":"\"15-06-25\" at \"17:21\""},{"visible":true,"include":true,"step":"370","x":-4069.809523809524,"y":-1201.904761904762,"z":-594.8571428571429,"a95":2.3,"info":"\"15-06-25\" at \"21:40\""},{"visible":true,"include":true,"step":"400","x":-2592.9523809523807,"y":-80.85714285714286,"z":97.23809523809524,"a95":2.2,"info":"\"15-06-26\" at \"08:51\""},{"visible":true,"include":false,"step":"420","x":-2185.904761904762,"y":-823.9047619047619,"z":-554.5714285714286,"a95":3,"info":"\"15-06-26\" at \"11:58\""},{"visible":false,"include":false,"step":"450","x":-2345.809523809524,"y":119.52380952380952,"z":108.85714285714286,"a95":2.8,"info":"\"15-06-28\" at \"20:10\""},{"visible":false,"include":false,"step":"470","x":-1567.8095238095239,"y":102.95238095238095,"z":398.0952380952381,"a95":4.2,"info":"\"15-06-29\" at \"08:07\""},{"visible":false,"include":false,"step":"490","x":-1916.2857142857142,"y":742.7619047619048,"z":-42.38095238095238,"a95":3.9,"info":"\"15-06-29\" at \"11:17\""},{"visible":false,"include":false,"step":"520","x":-792,"y":-435.04761904761904,"z":-549.6190476190476,"a95":4.9,"info":"\"15-06-30\" at \"04:39\""},{"visible":false,"include":false,"step":"550","x":-2446,"y":662.8571428571429,"z":1890.952380952381,"a95":3.1,"info":"\"15-06-30\" at \"08:28\""}]},{"version":"v1.1.0","exported":"2016-10-11T11:44:04.834Z","volume":10.5,"added":"2016-10-11T11:37:19.197Z","format":"Utrecht","demagType":"Unknown","strat":null,"patch":1.1,"GEO":[{"dec":1.270506533564344,"inc":55.065756912790064,"MAD":2.326882722181992,"cm":[0,-4.1389114358025836e-13,0],"intensity":24681.490419426922,"type":"dir","forced":true,"remark":"","origin":false,"nSteps":11,"minStep":"100","maxStep":"370","steps":["100","150","180","210","230","250","270","300","320","340","370"],"group":"None","version":"v1.1.0"}],"TECT":[{"dec":34.19418557756785,"inc":59.76868799183459,"MAD":2.326882722181764,"cm":[-1.9895196601282805e-13,2.1316282072803006e-14,1.2789769243681803e-13],"intensity":24681.490419426926,"type":"dir","forced":true,"remark":"","origin":false,"nSteps":11,"minStep":"100","maxStep":"370","steps":["100","150","180","210","230","250","270","300","320","340","370"],"group":"None","version":"v1.1.0"}],"interpreted":true,"name":"SS59.06A","coreAzi":69,"coreDip":24,"bedStrike":30,"bedDip":21,"data":[{"visible":false,"include":false,"step":"20","x":-16882.095238095237,"y":-16628.47619047619,"z":18886,"a95":1.8,"info":"\"15-06-22\" at \"08:47\""},{"visible":true,"include":true,"step":"100","x":-13925.714285714286,"y":-11349.52380952381,"z":11922.666666666666,"a95":1.7,"info":"\"15-06-22\" at \"12:00\""},{"visible":true,"include":true,"step":"150","x":-7338.380952380952,"y":-5651.9047619047615,"z":5448.0952380952385,"a95":1.7,"info":"\"15-06-23\" at \"09:03\""},{"visible":true,"include":true,"step":"180","x":-7096.285714285715,"y":-5635.142857142857,"z":5478.285714285715,"a95":1.6,"info":"\"15-06-23\" at \"12:10\""},{"visible":true,"include":true,"step":"210","x":-5115.714285714285,"y":-3870.7619047619046,"z":3342.3809523809523,"a95":1.6,"info":"\"15-06-23\" at \"14:57\""},{"visible":true,"include":true,"step":"230","x":-4384,"y":-3863.1428571428573,"z":3867.1428571428573,"a95":1.8,"info":"\"15-06-24\" at \"08:46\""},{"visible":true,"include":true,"step":"250","x":-3472.285714285714,"y":-2720.4761904761904,"z":2497.1428571428573,"a95":1.7,"info":"\"15-06-24\" at \"12:47\""},{"visible":true,"include":true,"step":"270","x":-3247.4285714285716,"y":-2745.904761904762,"z":2455.5238095238096,"a95":1.7,"info":"\"15-06-24\" at \"16:06\""},{"visible":true,"include":true,"step":"300","x":-2668.285714285714,"y":-2318.5714285714284,"z":1791.6190476190477,"a95":1.6,"info":"\"15-06-25\" at \"10:57\""},{"visible":true,"include":true,"step":"320","x":-2587.2380952380954,"y":-2105.1428571428573,"z":2019.047619047619,"a95":2,"info":"\"15-06-25\" at \"14:24\""},{"visible":true,"include":true,"step":"340","x":-2277.4285714285716,"y":-1324,"z":1524.6666666666667,"a95":2,"info":"\"15-06-25\" at \"17:22\""},{"visible":true,"include":true,"step":"370","x":-2187.5238095238096,"y":-1377.7142857142858,"z":1772.4761904761904,"a95":1.9,"info":"\"15-06-25\" at \"21:44\""},{"visible":true,"include":false,"step":"400","x":-1922.4761904761904,"y":-1217.6190476190477,"z":686.8571428571429,"a95":1.9,"info":"\"15-06-26\" at \"08:53\""},{"visible":true,"include":false,"step":"420","x":-1957.7142857142858,"y":-928.3809523809524,"z":702.2857142857143,"a95":2,"info":"\"15-06-26\" at \"12:00\""},{"visible":true,"include":false,"step":"450","x":-1496.857142857143,"y":-747.2380952380952,"z":1047.8095238095239,"a95":1.9,"info":"\"15-06-28\" at \"20:12\""},{"visible":true,"include":false,"step":"470","x":-1272.6666666666667,"y":-661.9047619047619,"z":1105.7142857142858,"a95":2.5,"info":"\"15-06-29\" at \"08:09\""},{"visible":true,"include":false,"step":"490","x":-1328.4761904761904,"y":-725.8095238095239,"z":1410.952380952381,"a95":2.6,"info":"\"15-06-29\" at \"11:18\""},{"visible":true,"include":false,"step":"520","x":-1254.095238095238,"y":-406.76190476190476,"z":645.4285714285714,"a95":3.1,"info":"\"15-06-30\" at \"04:41\""},{"visible":true,"include":false,"step":"550","x":-1039.142857142857,"y":-241.23809523809524,"z":365.6190476190476,"a95":3.5,"info":"\"15-06-30\" at \"08:30\""},{"visible":false,"include":false,"step":"580","x":-976.4761904761905,"y":-1639.5238095238096,"z":-333.6190476190476,"a95":1.7,"info":"\"15-07-01\" at \"11:41\""}]},{"version":"v1.1.0","exported":"2016-10-11T11:44:04.834Z","volume":10.5,"added":"2016-10-11T11:37:19.197Z","format":"Utrecht","demagType":"Unknown","strat":null,"patch":1.1,"GEO":[{"dec":12.373935974121991,"inc":57.35902602692357,"MAD":3.29915598066571,"cm":[-1.6342482922482304e-13,8.952838470577262e-13,0],"intensity":30114.276716663815,"type":"dir","forced":true,"remark":"","origin":false,"nSteps":11,"minStep":"100","maxStep":"370","steps":["100","150","180","210","230","250","270","300","320","340","370"],"group":"None","version":"v1.1.0"}],"TECT":[{"dec":46.19465286440959,"inc":57.636304215601946,"MAD":3.299155980665767,"cm":[-1.7408297026122455e-13,5.613287612504791e-13,-8.526512829121202e-14],"intensity":30114.276716663815,"type":"dir","forced":true,"remark":"","origin":false,"nSteps":11,"minStep":"100","maxStep":"370","steps":["100","150","180","210","230","250","270","300","320","340","370"],"group":"None","version":"v1.1.0"}],"interpreted":true,"name":"SS59.07A","coreAzi":74,"coreDip":18,"bedStrike":30,"bedDip":21,"data":[{"visible":true,"include":false,"step":"20","x":-25517.619047619046,"y":-16523.904761904763,"z":20778.095238095237,"a95":1.7,"info":"\"15-06-22\" at \"08:49\""},{"visible":true,"include":true,"step":"100","x":-20234.571428571428,"y":-12642.285714285714,"z":13534.095238095239,"a95":1.7,"info":"\"15-06-22\" at \"12:02\""},{"visible":true,"include":true,"step":"150","x":-9053.52380952381,"y":-5614.571428571428,"z":6492.571428571428,"a95":1.8,"info":"\"15-06-23\" at \"09:04\""},{"visible":true,"include":true,"step":"180","x":-8069.142857142857,"y":-6720.952380952381,"z":5902.0952380952385,"a95":1.6,"info":"\"15-06-23\" at \"12:12\""},{"visible":true,"include":true,"step":"210","x":-5410.952380952381,"y":-3916.285714285714,"z":5051.238095238095,"a95":1.8,"info":"\"15-06-23\" at \"14:59\""},{"visible":true,"include":true,"step":"230","x":-5184.285714285715,"y":-3805.5238095238096,"z":3276.285714285714,"a95":1.6,"info":"\"15-06-24\" at \"08:47\""},{"visible":true,"include":true,"step":"250","x":-3933.904761904762,"y":-2344.4761904761904,"z":2934.095238095238,"a95":1.9,"info":"\"15-06-24\" at \"12:49\""},{"visible":true,"include":true,"step":"270","x":-3372.5714285714284,"y":-2560,"z":2858.8571428571427,"a95":1.9,"info":"\"15-06-24\" at \"16:08\""},{"visible":true,"include":true,"step":"300","x":-2717.904761904762,"y":-1585.5238095238096,"z":1576,"a95":2,"info":"\"15-06-25\" at \"10:59\""},{"visible":true,"include":true,"step":"320","x":-2307.3333333333335,"y":-2100.095238095238,"z":1682.6666666666667,"a95":2.3,"info":"\"15-06-25\" at \"14:27\""},{"visible":true,"include":true,"step":"340","x":-2205.2380952380954,"y":-1144.4761904761904,"z":1711.142857142857,"a95":2.4,"info":"\"15-06-25\" at \"17:24\""},{"visible":true,"include":true,"step":"370","x":-2111.6190476190477,"y":-951.5238095238095,"z":1389.904761904762,"a95":1.8,"info":"\"15-06-25\" at \"21:46\""},{"visible":true,"include":false,"step":"400","x":-1382.6666666666667,"y":-422.85714285714283,"z":397.04761904761904,"a95":3.2,"info":"\"15-06-26\" at \"08:54\""},{"visible":false,"include":false,"step":"420","x":-1036.952380952381,"y":-792.0952380952381,"z":-796.952380952381,"a95":2.6,"info":"\"15-06-26\" at \"12:01\""},{"visible":false,"include":false,"step":"450","x":-1618.3809523809523,"y":-509.9047619047619,"z":503.5238095238095,"a95":2.2,"info":"\"15-06-28\" at \"20:14\""},{"visible":false,"include":false,"step":"470","x":-1369.2380952380952,"y":-506.2857142857143,"z":194.66666666666666,"a95":1.9,"info":"\"15-06-29\" at \"08:14\""},{"visible":false,"include":false,"step":"490","x":-852.1904761904761,"y":-767.3333333333334,"z":1490.095238095238,"a95":2.9,"info":"\"15-06-29\" at \"11:20\""},{"visible":false,"include":false,"step":"520","x":-1740.095238095238,"y":-1573.6190476190477,"z":-502.1904761904762,"a95":2.1,"info":"\"15-06-30\" at \"04:42\""},{"visible":false,"include":false,"step":"550","x":-1277.4285714285713,"y":306,"z":1554.2857142857142,"a95":3.5,"info":"\"15-06-30\" at \"08:31\""},{"visible":false,"include":false,"step":"580","x":-1197.047619047619,"y":-824.5714285714286,"z":-248.1904761904762,"a95":2.9,"info":"\"15-07-01\" at \"11:43\""}]},{"version":"v1.1.0","exported":"2016-10-11T11:44:04.834Z","volume":10.5,"added":"2016-10-11T11:37:19.197Z","format":"Utrecht","demagType":"Unknown","strat":null,"patch":1.1,"GEO":[],"TECT":[],"interpreted":false,"name":"SS59.09A","coreAzi":77,"coreDip":36,"bedStrike":30,"bedDip":21,"data":[{"visible":true,"include":false,"step":"20","x":-7293.428571428572,"y":-11815.904761904761,"z":15021.904761904761,"a95":1.9,"info":"\"15-06-22\" at \"08:51\""},{"visible":true,"include":false,"step":"100","x":-6152.285714285715,"y":-8783.52380952381,"z":13818.47619047619,"a95":2,"info":"\"15-06-22\" at \"12:04\""},{"visible":true,"include":false,"step":"150","x":-1507.2380952380952,"y":-2095.4285714285716,"z":5899.619047619048,"a95":2.3,"info":"\"15-06-23\" at \"09:06\""},{"visible":true,"include":false,"step":"180","x":-1553.904761904762,"y":-2507.5238095238096,"z":5990.380952380952,"a95":2.3,"info":"\"15-06-23\" at \"12:13\""},{"visible":true,"include":false,"step":"210","x":-640.7619047619048,"y":-340,"z":3254.190476190476,"a95":3,"info":"\"15-06-23\" at \"15:00\""},{"visible":true,"include":false,"step":"230","x":-21.333333333333332,"y":-221.33333333333334,"z":3856.5714285714284,"a95":2.5,"info":"\"15-06-24\" at \"08:50\""},{"visible":true,"include":false,"step":"250","x":545.7142857142857,"y":519.2380952380952,"z":2718.3809523809523,"a95":2.9,"info":"\"15-06-24\" at \"12:51\""},{"visible":true,"include":false,"step":"270","x":168.57142857142858,"y":771.5238095238095,"z":2593.714285714286,"a95":3.1,"info":"\"15-06-24\" at \"16:10\""},{"visible":true,"include":false,"step":"300","x":551.4285714285714,"y":1640.1904761904761,"z":1413.142857142857,"a95":2.6,"info":"\"15-06-25\" at \"11:02\""},{"visible":true,"include":false,"step":"320","x":457.04761904761904,"y":1414.5714285714287,"z":2016.6666666666667,"a95":3.1,"info":"\"15-06-25\" at \"14:29\""},{"visible":true,"include":false,"step":"340","x":344.1904761904762,"y":1720.6666666666667,"z":883.7142857142857,"a95":3,"info":"\"15-06-25\" at \"17:26\""},{"visible":true,"include":false,"step":"370","x":562.5714285714286,"y":1228.3809523809523,"z":696.5714285714286,"a95":3.6,"info":"\"15-06-25\" at \"21:49\""},{"visible":true,"include":false,"step":"400","x":407.3333333333333,"y":1185.4285714285713,"z":-529.3333333333334,"a95":3.5,"info":"\"15-06-26\" at \"08:56\""},{"visible":true,"include":false,"step":"420","x":712.2857142857143,"y":822.4761904761905,"z":-1051.4285714285713,"a95":3.2,"info":"\"15-06-26\" at \"12:03\""},{"visible":true,"include":false,"step":"450","x":711.7142857142857,"y":1447.7142857142858,"z":190,"a95":2.5,"info":"\"15-06-28\" at \"20:17\""},{"visible":true,"include":false,"step":"470","x":730.6666666666666,"y":1085.4285714285713,"z":596.2857142857143,"a95":3.6,"info":"\"15-06-29\" at \"08:17\""},{"visible":true,"include":false,"step":"490","x":933.8095238095239,"y":1633.047619047619,"z":779.3333333333334,"a95":2.7,"info":"\"15-06-29\" at \"11:21\""},{"visible":true,"include":false,"step":"520","x":638.8571428571429,"y":539.5238095238095,"z":-205.52380952380952,"a95":6.6,"info":"\"15-06-30\" at \"04:44\""},{"visible":true,"include":false,"step":"550","x":-119.04761904761905,"y":965.047619047619,"z":-10.285714285714286,"a95":6.6,"info":"\"15-06-30\" at \"08:34\""},{"visible":true,"include":false,"step":"580","x":-215.33333333333334,"y":1210,"z":72.0952380952381,"a95":4.5,"info":"\"15-07-01\" at \"11:45\""}]}]
