# Supplementary material for: Paleomagnetic constraints on the timing and distribution of Cenozoic rotations in Central and Eastern Anatolia
Source: Copernicus journal article supplement (doi:10.5194/se-9-295-2018), 2018-03-21
Supplement: Supplementary file 2 [file se-9-295-2018-supplement.zip › se-2017-66_DATA_dir files/dir files Sivas/Yenikoy_rev.dir]

[{"version":"v1.1.0","exported":"2016-10-10T19:56:19.954Z","volume":10.5,"added":"2016-10-10T19:39:45.183Z","format":"Utrecht","demagType":"Unknown","strat":null,"patch":1.1,"GEO":[],"TECT":[],"interpreted":false,"name":"TY  1.1A","coreAzi":305,"coreDip":64,"bedStrike":10,"bedDip":25,"data":[{"visible":true,"include":false,"step":"20","x":-1234.7619047619048,"y":2290.9142857142856,"z":3570.152380952381,"a95":1.2,"info":"\"\" at \"\""},{"visible":true,"include":false,"step":"100","x":-1009.3142857142857,"y":1724.0190476190478,"z":3782.447619047619,"a95":0.4,"info":"\"\" at \"\""},{"visible":true,"include":false,"step":"150","x":-808.0857142857143,"y":1191.7619047619048,"z":2749.8666666666663,"a95":4.4,"info":"\"\" at \"\""},{"visible":true,"include":true,"step":"200","x":-530.047619047619,"y":676.6476190476191,"z":1877.8285714285714,"a95":0.4,"info":"\"\" at \"\""},{"visible":true,"include":true,"step":"250","x":-514.8285714285714,"y":550.2666666666667,"z":1562.485714285714,"a95":0.4,"info":"\"\" at \"\""},{"visible":true,"include":true,"step":"250","x":-292.76190476190476,"y":485.57142857142856,"z":1261.4,"a95":1.1,"info":"\"\" at \"\""},{"visible":true,"include":true,"step":"260","x":-382.45714285714286,"y":467.152380952381,"z":1233.647619047619,"a95":1,"info":"\"\" at \"\""},{"visible":true,"include":true,"step":"300","x":-212.8,"y":238.31428571428575,"z":815.2857142857143,"a95":1,"info":"\"\" at \"\""},{"visible":true,"include":true,"step":"330","x":-205.69523809523812,"y":240.15238095238095,"z":730.0666666666666,"a95":1.3,"info":"\"\" at \"\""},{"visible":true,"include":true,"step":"360","x":-139.40952380952382,"y":187.01904761904763,"z":594.0761904761905,"a95":1.1,"info":"\"\" at \"\""},{"visible":true,"include":true,"step":"390","x":-99.16190476190476,"y":106.53333333333333,"z":491.0952380952381,"a95":1.2,"info":"\"\" at \"\""},{"visible":true,"include":true,"step":"420","x":-112.31428571428572,"y":90.75238095238095,"z":418.76190476190476,"a95":1.7,"info":"\"\" at \"\""},{"visible":true,"include":false,"step":"450","x":-134.94285714285715,"y":53.65714285714286,"z":357.8666666666667,"a95":1.2,"info":"\"\" at \"\""},{"visible":true,"include":false,"step":"480","x":-148.61904761904762,"y":28.933333333333334,"z":300.9142857142857,"a95":1.5,"info":"\"\" at \"\""},{"visible":true,"include":false,"step":"510","x":-81.01904761904763,"y":28.933333333333334,"z":143.35238095238097,"a95":1.9,"info":"\"\" at \"\""},{"visible":true,"include":false,"step":"530","x":-89.96190476190476,"y":54.19047619047619,"z":129.15238095238095,"a95":2.2,"info":"\"\" at \"\""},{"visible":true,"include":false,"step":"550","x":-87.06666666666668,"y":122.83809523809524,"z":124.15238095238094,"a95":1.7,"info":"\"\" at \"\""},{"visible":true,"include":false,"step":"570","x":-173.07619047619048,"y":42.87619047619047,"z":174.3904761904762,"a95":1.5,"info":"\"\" at \"\""}]},{"version":"v1.1.0","exported":"2016-10-10T19:56:19.954Z","volume":10.5,"added":"2016-10-10T19:39:45.185Z","format":"Utrecht","demagType":"Unknown","strat":null,"patch":1.1,"GEO":[],"TECT":[],"interpreted":false,"name":"TY  2.1A","coreAzi":75,"coreDip":63,"bedStrike":10,"bedDip":25,"data":[{"visible":true,"include":false,"step":"20","x":-365.48571428571427,"y":-459.27619047619044,"z":89.27619047619048,"a95":1,"info":"\"\" at \"\""},{"visible":true,"include":false,"step":"100","x":-349.2190476190476,"y":-402.0952380952381,"z":162.9904761904762,"a95":0.7,"info":"\"\" at \"\""},{"visible":true,"include":false,"step":"150","x":-261.8857142857143,"y":-317.49523809523805,"z":75.71428571428571,"a95":0.8,"info":"\"\" at \"\""},{"visible":true,"include":false,"step":"200","x":-212.7904761904762,"y":-207.73333333333332,"z":-42.885714285714286,"a95":1.1,"info":"\"\" at \"\""},{"visible":true,"include":true,"step":"250","x":-219.05714285714285,"y":-194.65714285714287,"z":-56.36190476190476,"a95":1.3,"info":"\"\" at \"\""},{"visible":false,"include":false,"step":"250","x":-171.5047619047619,"y":-173.6095238095238,"z":-111.65714285714287,"a95":1,"info":"\"\" at \"\""},{"visible":true,"include":true,"step":"260","x":-190.1809523809524,"y":-172.0285714285714,"z":-53.65714285714286,"a95":1,"info":"\"\" at \"\""},{"visible":true,"include":true,"step":"300","x":-157.8190476190476,"y":-133.0952380952381,"z":-51.95238095238095,"a95":1.2,"info":"\"\" at \"\""},{"visible":true,"include":true,"step":"330","x":-161.77142857142857,"y":-136.51428571428573,"z":-42.08571428571428,"a95":1.2,"info":"\"\" at \"\""},{"visible":true,"include":true,"step":"360","x":-149.93333333333334,"y":-137.3047619047619,"z":-48.92380952380953,"a95":1.1,"info":"\"\" at \"\""},{"visible":true,"include":true,"step":"390","x":-142.82857142857142,"y":-146.24761904761903,"z":-46.561904761904756,"a95":1.2,"info":"\"\" at \"\""},{"visible":true,"include":true,"step":"420","x":-150.7238095238095,"y":-103.63809523809525,"z":-38.93333333333334,"a95":1.6,"info":"\"\" at \"\""},{"visible":true,"include":false,"step":"450","x":-162.56190476190477,"y":-117.04761904761905,"z":-37.08571428571428,"a95":1.2,"info":"\"\" at \"\""},{"visible":true,"include":false,"step":"480","x":-148.8761904761905,"y":-100.74285714285713,"z":-36.03809523809524,"a95":0.9,"info":"\"\" at \"\""},{"visible":true,"include":false,"step":"510","x":-102.58095238095237,"y":-67.6,"z":-29.200000000000003,"a95":1.3,"info":"\"\" at \"\""},{"visible":true,"include":false,"step":"530","x":-88.64761904761905,"y":-50.76190476190476,"z":-61.55238095238095,"a95":1.4,"info":"\"\" at \"\""},{"visible":true,"include":false,"step":"550","x":-98.38095238095238,"y":-68.65714285714286,"z":-54.44761904761905,"a95":1.1,"info":"\"\" at \"\""},{"visible":true,"include":false,"step":"570","x":-76.80952380952381,"y":-68.65714285714286,"z":-36.561904761904756,"a95":1.6,"info":"\"\" at \"\""}]},{"version":"v1.1.0","exported":"2016-10-10T19:56:19.954Z","volume":10.5,"added":"2016-10-10T19:39:45.185Z","format":"Utrecht","demagType":"Unknown","strat":null,"patch":1.1,"GEO":[],"TECT":[],"interpreted":false,"name":"TY  3.A1","coreAzi":235,"coreDip":76,"bedStrike":10,"bedDip":25,"data":[{"visible":false,"include":false,"step":"20","x":-2736.2380952380954,"y":2186.3142857142857,"z":819.6761904761905,"a95":0.4,"info":"\"\" at \"\""},{"visible":true,"include":false,"step":"100","x":-2359.704761904762,"y":1811.7619047619048,"z":1697,"a95":0.6,"info":"\"\" at \"\""},{"visible":true,"include":false,"step":"150","x":-1789.561904761905,"y":1485.0285714285715,"z":1187.0285714285715,"a95":0.6,"info":"\"\" at \"\""},{"visible":true,"include":false,"step":"200","x":-849.0571428571429,"y":927.0857142857143,"z":643.3523809523809,"a95":0.7,"info":"\"\" at \"\""},{"visible":true,"include":false,"step":"250","x":-636.847619047619,"y":786.1809523809524,"z":470.95238095238096,"a95":0.6,"info":"\"\" at \"\""},{"visible":false,"include":false,"step":"250","x":-504.2476190476191,"y":793.3238095238095,"z":121.65714285714287,"a95":0.9,"info":"\"\" at \"\""},{"visible":true,"include":false,"step":"260","x":-484.25714285714287,"y":619.7142857142857,"z":346.2857142857143,"a95":0.9,"info":"\"\" at \"\""},{"visible":true,"include":true,"step":"300","x":-192.54285714285714,"y":435.85714285714283,"z":161.63809523809525,"a95":1.1,"info":"\"\" at \"\""},{"visible":true,"include":true,"step":"330","x":-162.2952380952381,"y":414.8095238095238,"z":146.24761904761903,"a95":1,"info":"\"\" at \"\""},{"visible":true,"include":true,"step":"360","x":-150.45714285714286,"y":416.91428571428577,"z":125.46666666666667,"a95":1.3,"info":"\"\" at \"\""},{"visible":true,"include":true,"step":"390","x":-82.85714285714286,"y":394.5619047619047,"z":146.51428571428573,"a95":1.2,"info":"\"\" at \"\""},{"visible":true,"include":true,"step":"420","x":-81.80952380952381,"y":353.5238095238095,"z":94.82857142857144,"a95":1.5,"info":"\"\" at \"\""},{"visible":true,"include":true,"step":"450","x":-99.42857142857143,"y":258.03809523809525,"z":73.25714285714287,"a95":1.3,"info":"\"\" at \"\""},{"visible":true,"include":true,"step":"480","x":-106.26666666666667,"y":222,"z":57.476190476190474,"a95":1.3,"info":"\"\" at \"\""},{"visible":true,"include":false,"step":"510","x":-6.838095238095238,"y":190.96190476190475,"z":47.74285714285715,"a95":1.4,"info":"\"\" at \"\""},{"visible":true,"include":false,"step":"530","x":12.885714285714286,"y":235.68571428571425,"z":36.561904761904756,"a95":1.5,"info":"\"\" at \"\""},{"visible":true,"include":false,"step":"550","x":-52.08571428571428,"y":207.8,"z":26.304761904761904,"a95":1.5,"info":"\"\" at \"\""},{"visible":true,"include":false,"step":"570","x":-106.53333333333333,"y":142.03809523809525,"z":-21.961904761904762,"a95":1.5,"info":"\"\" at \"\""}]},{"version":"v1.1.0","exported":"2016-10-10T19:56:19.954Z","volume":10.5,"added":"2016-10-10T19:39:45.186Z","format":"Utrecht","demagType":"Unknown","strat":null,"patch":1.1,"GEO":[],"TECT":[],"interpreted":false,"name":"TY  3.B1","coreAzi":135,"coreDip":47,"bedStrike":10,"bedDip":25,"data":[{"visible":false,"include":false,"step":"20","x":-3518.352380952381,"y":-1691.1333333333334,"z":-377.02857142857147,"a95":1.1,"info":"\"\" at \"\""},{"visible":true,"include":false,"step":"100","x":-2786.790476190476,"y":-1509.0285714285715,"z":509.5904761904762,"a95":0.9,"info":"\"\" at \"\""},{"visible":true,"include":false,"step":"150","x":-2227.1714285714284,"y":-1099.7809523809524,"z":325.57142857142856,"a95":1.2,"info":"\"\" at \"\""},{"visible":true,"include":false,"step":"200","x":-1262.1904761904761,"y":-437.8285714285714,"z":1.2761904761904763,"a95":1,"info":"\"\" at \"\""},{"visible":true,"include":false,"step":"250","x":-1076.7142857142858,"y":-288.7904761904762,"z":-100.81904761904761,"a95":1,"info":"\"\" at \"\""},{"visible":false,"include":false,"step":"250","x":-1037.4285714285713,"y":-322.752380952381,"z":-264.2190476190476,"a95":1,"info":"\"\" at \"\""},{"visible":true,"include":false,"step":"260","x":-843.5619047619048,"y":-199.38095238095238,"z":-91.8,"a95":1,"info":"\"\" at \"\""},{"visible":true,"include":true,"step":"300","x":-531.6,"y":-62.07619047619047,"z":-211.35238095238094,"a95":0.7,"info":"\"\" at \"\""},{"visible":true,"include":true,"step":"330","x":-483.99047619047616,"y":-31.82857142857143,"z":-204.9047619047619,"a95":1,"info":"\"\" at \"\""},{"visible":true,"include":true,"step":"360","x":-455.5809523809524,"y":-99.95238095238095,"z":-245.94285714285715,"a95":0.9,"info":"\"\" at \"\""},{"visible":true,"include":true,"step":"390","x":-402.1904761904762,"y":-4.733333333333333,"z":-197.14285714285714,"a95":0.8,"info":"\"\" at \"\""},{"visible":true,"include":true,"step":"420","x":-374.57142857142856,"y":-13.41904761904762,"z":-210.56190476190477,"a95":0.9,"info":"\"\" at \"\""},{"visible":true,"include":true,"step":"450","x":-306.18095238095236,"y":0,"z":-196.48571428571427,"a95":0.9,"info":"\"\" at \"\""},{"visible":true,"include":true,"step":"480","x":-288.81904761904764,"y":16.571428571428573,"z":-171.23809523809524,"a95":1.2,"info":"\"\" at \"\""},{"visible":true,"include":false,"step":"510","x":-256.2,"y":59.18095238095238,"z":-153.0857142857143,"a95":1.1,"info":"\"\" at \"\""},{"visible":true,"include":false,"step":"530","x":-216.74285714285716,"y":39.714285714285715,"z":-207.2761904761905,"a95":1.3,"info":"\"\" at \"\""},{"visible":true,"include":false,"step":"550","x":-253.57142857142858,"y":13.41904761904762,"z":-220.8190476190476,"a95":1,"info":"\"\" at \"\""},{"visible":true,"include":false,"step":"570","x":-256.4666666666667,"y":4.733333333333333,"z":-279.34285714285716,"a95":1.5,"info":"\"\" at \"\""}]},{"version":"v1.1.0","exported":"2016-10-10T19:56:19.954Z","volume":10.5,"added":"2016-10-10T19:39:45.186Z","format":"Utrecht","demagType":"Unknown","strat":null,"patch":1.1,"GEO":[],"TECT":[],"interpreted":false,"name":"TY  4.1A","coreAzi":100,"coreDip":46,"bedStrike":20,"bedDip":22,"data":[{"visible":false,"include":false,"step":"20","x":-545.0380952380953,"y":-1791.657142857143,"z":2294.1333333333337,"a95":0.5,"info":"\"\" at \"\""},{"visible":true,"include":true,"step":"100","x":-103.42857142857143,"y":-1271.3714285714286,"z":3381.219047619048,"a95":0.3,"info":"\"\" at \"\""},{"visible":true,"include":true,"step":"150","x":187.9142857142857,"y":-668.9809523809524,"z":2919.9714285714285,"a95":5.8,"info":"\"\" at \"\""},{"visible":true,"include":true,"step":"200","x":614.6476190476191,"y":274.552380952381,"z":2796.2,"a95":0.4,"info":"\"\" at \"\""},{"visible":true,"include":true,"step":"250","x":709.4857142857143,"y":496.2285714285714,"z":2658.9523809523807,"a95":0.5,"info":"\"\" at \"\""},{"visible":false,"include":false,"step":"250","x":925.3714285714285,"y":442.1714285714286,"z":2230.304761904762,"a95":1.1,"info":"\"\" at \"\""},{"visible":true,"include":true,"step":"260","x":776.2285714285714,"y":551.0666666666666,"z":2359.847619047619,"a95":1,"info":"\"\" at \"\""},{"visible":true,"include":false,"step":"300","x":662.3333333333334,"y":535.5428571428571,"z":1714.6190476190477,"a95":1.1,"info":"\"\" at \"\""},{"visible":true,"include":false,"step":"330","x":543.1714285714286,"y":531.3333333333334,"z":1654.2476190476189,"a95":1,"info":"\"\" at \"\""},{"visible":true,"include":false,"step":"360","x":511.08571428571423,"y":528.447619047619,"z":1530.095238095238,"a95":1,"info":"\"\" at \"\""},{"visible":true,"include":false,"step":"390","x":503.45714285714286,"y":511.87619047619046,"z":1446.4476190476191,"a95":1,"info":"\"\" at \"\""},{"visible":true,"include":false,"step":"420","x":465.5809523809524,"y":514.504761904762,"z":1335.047619047619,"a95":0.9,"info":"\"\" at \"\""},{"visible":true,"include":false,"step":"450","x":342.74285714285713,"y":399.81904761904764,"z":1143.161904761905,"a95":1,"info":"\"\" at \"\""},{"visible":true,"include":false,"step":"480","x":420.85714285714283,"y":399.02857142857147,"z":1051.895238095238,"a95":1,"info":"\"\" at \"\""},{"visible":true,"include":false,"step":"510","x":354.57142857142856,"y":322.2190476190476,"z":951.0190476190477,"a95":1.3,"info":"\"\" at \"\""},{"visible":true,"include":false,"step":"530","x":282.23809523809524,"y":378.77142857142854,"z":903.2761904761904,"a95":1,"info":"\"\" at \"\""},{"visible":true,"include":false,"step":"550","x":270.4,"y":316.43809523809523,"z":839.6190476190476,"a95":1,"info":"\"\" at \"\""},{"visible":true,"include":false,"step":"570","x":126.25714285714287,"y":279.0857142857143,"z":550.8,"a95":1,"info":"\"\" at \"\""}]},{"version":"v1.1.0","exported":"2016-10-10T19:56:19.955Z","volume":10.5,"added":"2016-10-10T19:39:45.190Z","format":"Utrecht","demagType":"Unknown","strat":null,"patch":1.1,"GEO":[{"dec":154.4868501674182,"inc":-27.243666200467075,"MAD":18.659372841496296,"cm":[-219.9885062466622,307.5102261893774,-46.079497871218784],"intensity":192.8549495466109,"type":"dir","forced":false,"remark":"","origin":false,"nSteps":7,"minStep":"300","maxStep":"510","steps":["300","330","360","420","450","480","510"],"group":"None","version":"v1.1.0"}],"TECT":[{"dec":166.22979376263947,"inc":-41.45596724248487,"MAD":18.659372841496296,"cm":[-205.01427233795752,266.36885665157934,-179.1579821264227],"intensity":192.854949546611,"type":"dir","forced":false,"remark":"","origin":false,"nSteps":7,"minStep":"300","maxStep":"510","steps":["300","330","360","420","450","480","510"],"group":"None","version":"v1.1.0"}],"interpreted":true,"name":"TY  5.A3","coreAzi":282,"coreDip":68,"bedStrike":20,"bedDip":22,"data":[{"visible":true,"include":false,"step":"20","x":-556.0761904761905,"y":-99.5904761904762,"z":-279.1142857142857,"a95":0.8,"info":"\"\" at \"\""},{"visible":true,"include":false,"step":"100","x":-549.6857142857143,"y":-131.9047619047619,"z":-76.99047619047619,"a95":1,"info":"\"\" at \"\""},{"visible":true,"include":false,"step":"150","x":-523.4285714285714,"y":-199.30476190476188,"z":-137.57142857142858,"a95":1,"info":"\"\" at \"\""},{"visible":true,"include":false,"step":"200","x":-422.552380952381,"y":-339.04761904761904,"z":-342.4190476190476,"a95":0.9,"info":"\"\" at \"\""},{"visible":true,"include":false,"step":"250","x":-438.12380952380954,"y":-280.65714285714284,"z":-359.97142857142853,"a95":0.9,"info":"\"\" at \"\""},{"visible":false,"include":false,"step":"250","x":-371.67619047619047,"y":-236.73333333333332,"z":-439.4095238095238,"a95":0.9,"info":"\"\" at \"\""},{"visible":true,"include":false,"step":"260","x":-406.9238095238095,"y":-270.6666666666667,"z":-305.64761904761906,"a95":1.1,"info":"\"\" at \"\""},{"visible":true,"include":true,"step":"300","x":-325.9047619047619,"y":-205.69523809523812,"z":-238.83809523809526,"a95":1,"info":"\"\" at \"\""},{"visible":true,"include":true,"step":"330","x":-323.0095238095238,"y":-201.48571428571427,"z":-220.8190476190476,"a95":1,"info":"\"\" at \"\""},{"visible":true,"include":true,"step":"360","x":-306.96190476190475,"y":-163.34285714285713,"z":-195.7047619047619,"a95":1.1,"info":"\"\" at \"\""},{"visible":false,"include":false,"step":"390","x":-265.6666666666667,"y":-172.55238095238096,"z":-173.6095238095238,"a95":1.1,"info":"\"\" at \"\""},{"visible":true,"include":true,"step":"420","x":-304.3333333333333,"y":-149.14285714285714,"z":-167.42857142857142,"a95":1.1,"info":"\"\" at \"\""},{"visible":true,"include":true,"step":"450","x":-331.95238095238096,"y":-165.98095238095237,"z":-133.88571428571427,"a95":1,"info":"\"\" at \"\""},{"visible":true,"include":true,"step":"480","x":-273.03809523809525,"y":-107.05714285714285,"z":-129.41904761904763,"a95":1.1,"info":"\"\" at \"\""},{"visible":true,"include":true,"step":"510","x":-263.03809523809525,"y":-66.01904761904763,"z":-121.65714285714287,"a95":1.3,"info":"\"\" at \"\""},{"visible":true,"include":false,"step":"530","x":-221.74285714285716,"y":-38.142857142857146,"z":-112.97142857142858,"a95":1.5,"info":"\"\" at \"\""},{"visible":false,"include":false,"step":"550","x":-219.63809523809522,"y":-48.4,"z":-142.03809523809525,"a95":1.2,"info":"\"\" at \"\""},{"visible":false,"include":false,"step":"570","x":-404.552380952381,"y":-51.81904761904762,"z":-274.35238095238094,"a95":1.2,"info":"\"\" at \"\""}]},{"version":"v1.1.0","exported":"2016-10-10T19:56:19.955Z","volume":10.5,"added":"2016-10-10T19:39:45.191Z","format":"Utrecht","demagType":"Unknown","strat":null,"patch":1.1,"GEO":[],"TECT":[],"interpreted":false,"name":"TY  5.B1A","coreAzi":35,"coreDip":64,"bedStrike":20,"bedDip":22,"data":[{"visible":false,"include":false,"step":"20","x":2.3238095238095235,"y":-356.42857142857144,"z":1338.5714285714287,"a95":0.3,"info":"\"\" at \"\""},{"visible":true,"include":true,"step":"100","x":5.809523809523809,"y":-302.15238095238095,"z":1541.857142857143,"a95":0.3,"info":"\"\" at \"\""},{"visible":true,"include":true,"step":"150","x":-47.18095238095238,"y":-163.21904761904761,"z":1256.3809523809523,"a95":0.3,"info":"\"\" at \"\""},{"visible":true,"include":true,"step":"200","x":-170.37142857142857,"y":197.2761904761905,"z":189.83809523809524,"a95":0.7,"info":"\"\" at \"\""},{"visible":true,"include":true,"step":"250","x":-180.13333333333335,"y":281.23809523809524,"z":5.523809523809524,"a95":0.7,"info":"\"\" at \"\""},{"visible":true,"include":false,"step":"250","x":-90.75238095238095,"y":294.0761904761905,"z":-134.8095238095238,"a95":1.1,"info":"\"\" at \"\""},{"visible":true,"include":false,"step":"260","x":-124.94285714285715,"y":266.9809523809524,"z":-42.476190476190474,"a95":1.1,"info":"\"\" at \"\""},{"visible":true,"include":false,"step":"300","x":-125.73333333333333,"y":234.62857142857143,"z":-87.72380952380952,"a95":1.2,"info":"\"\" at \"\""},{"visible":true,"include":false,"step":"330","x":-135.7238095238095,"y":200.43809523809523,"z":-91.93333333333332,"a95":1.1,"info":"\"\" at \"\""},{"visible":true,"include":false,"step":"360","x":-123.36190476190475,"y":197.8095238095238,"z":-76.4095238095238,"a95":0.9,"info":"\"\" at \"\""},{"visible":true,"include":false,"step":"390","x":-114.68571428571428,"y":197.0190476190476,"z":-62.34285714285714,"a95":1,"info":"\"\" at \"\""},{"visible":true,"include":false,"step":"420","x":-95.21904761904761,"y":175.44761904761904,"z":-64.18095238095238,"a95":1.1,"info":"\"\" at \"\""},{"visible":true,"include":false,"step":"450","x":-112.05714285714285,"y":134.40952380952382,"z":-34.457142857142856,"a95":1.4,"info":"\"\" at \"\""},{"visible":true,"include":false,"step":"480","x":-122.31428571428572,"y":134.40952380952382,"z":-66.01904761904763,"a95":1.3,"info":"\"\" at \"\""},{"visible":true,"include":false,"step":"510","x":-62.34285714285714,"y":160.98095238095237,"z":-50.37142857142857,"a95":1.3,"info":"\"\" at \"\""},{"visible":true,"include":false,"step":"530","x":-39.457142857142856,"y":161.23809523809524,"z":-41.42857142857143,"a95":1.3,"info":"\"\" at \"\""},{"visible":true,"include":false,"step":"550","x":-57.34285714285714,"y":125.46666666666667,"z":-56.95238095238095,"a95":1.1,"info":"\"\" at \"\""},{"visible":false,"include":false,"step":"570","x":-358,"y":91.8,"z":-290.5238095238095,"a95":1.2,"info":"\"\" at \"\""}]},{"version":"v1.1.0","exported":"2016-10-10T19:56:19.955Z","volume":10.5,"added":"2016-10-10T19:39:45.191Z","format":"Utrecht","demagType":"Unknown","strat":null,"patch":1.1,"GEO":[{"dec":129.42605359576544,"inc":-19.821200757704386,"MAD":11.348489806332164,"cm":[-260.7067064956833,190.97251984433282,-84.15841312086104],"intensity":191.98881037877595,"type":"dir","forced":false,"remark":"","origin":false,"nSteps":8,"minStep":"300","maxStep":"550","steps":["300","330","360","390","480","510","530","550"],"group":"None","version":"v1.1.0"}],"TECT":[{"dec":134.2193778537615,"inc":-40.29670527961443,"MAD":11.348489806332159,"cm":[-243.2341474147323,142.96705830933317,-178.65804884288298],"intensity":191.98881037877595,"type":"dir","forced":false,"remark":"","origin":false,"nSteps":8,"minStep":"300","maxStep":"550","steps":["300","330","360","390","480","510","530","550"],"group":"None","version":"v1.1.0"}],"interpreted":true,"name":"TY  6.2","coreAzi":117,"coreDip":37,"bedStrike":20,"bedDip":22,"data":[{"visible":false,"include":false,"step":"20","x":-405.5809523809524,"y":-416.85714285714283,"z":380.97142857142853,"a95":0.5,"info":"\"\" at \"\""},{"visible":true,"include":false,"step":"100","x":-256.247619047619,"y":-409.64761904761906,"z":716.7428571428571,"a95":0.5,"info":"\"\" at \"\""},{"visible":true,"include":false,"step":"150","x":-96.22857142857143,"y":-260.7809523809524,"z":691,"a95":0.3,"info":"\"\" at \"\""},{"visible":true,"include":false,"step":"200","x":361.3047619047619,"y":151.37142857142857,"z":494.31428571428575,"a95":1,"info":"\"\" at \"\""},{"visible":true,"include":false,"step":"250","x":408.4857142857143,"y":235.9142857142857,"z":393.3809523809524,"a95":1,"info":"\"\" at \"\""},{"visible":false,"include":false,"step":"250","x":440.5904761904762,"y":282.76190476190476,"z":195.43809523809523,"a95":1.6,"info":"\"\" at \"\""},{"visible":true,"include":false,"step":"260","x":408.76190476190476,"y":182.28571428571428,"z":349.04761904761904,"a95":1.3,"info":"\"\" at \"\""},{"visible":true,"include":true,"step":"300","x":330.6380952380952,"y":163.8761904761905,"z":224.23809523809524,"a95":1.2,"info":"\"\" at \"\""},{"visible":true,"include":true,"step":"330","x":307.49523809523805,"y":161.77142857142857,"z":232.65714285714287,"a95":1.2,"info":"\"\" at \"\""},{"visible":true,"include":true,"step":"360","x":292.49523809523805,"y":169.13333333333335,"z":210.03809523809525,"a95":1.1,"info":"\"\" at \"\""},{"visible":true,"include":true,"step":"390","x":303.8095238095238,"y":149.40952380952382,"z":210.03809523809525,"a95":1.2,"info":"\"\" at \"\""},{"visible":true,"include":false,"step":"420","x":239.1047619047619,"y":182.28571428571428,"z":187.94285714285715,"a95":1.2,"info":"\"\" at \"\""},{"visible":true,"include":false,"step":"450","x":184.65714285714287,"y":158.35238095238097,"z":190.1809523809524,"a95":1.2,"info":"\"\" at \"\""},{"visible":true,"include":true,"step":"480","x":215.95238095238096,"y":148.8761904761905,"z":196.22857142857143,"a95":1.3,"info":"\"\" at \"\""},{"visible":true,"include":true,"step":"510","x":170.1904761904762,"y":107.58095238095237,"z":105.21904761904761,"a95":1.2,"info":"\"\" at \"\""},{"visible":true,"include":true,"step":"530","x":143.61904761904762,"y":126.78095238095239,"z":124.41904761904763,"a95":1,"info":"\"\" at \"\""},{"visible":true,"include":true,"step":"550","x":162.56190476190477,"y":137.3047619047619,"z":135.33333333333334,"a95":1,"info":"\"\" at \"\""},{"visible":false,"include":false,"step":"570","x":-462.4190476190476,"y":55.23809523809524,"z":-397.9809523809524,"a95":1.1,"info":"\"\" at \"\""}]},{"version":"v1.1.0","exported":"2016-10-10T19:56:19.955Z","volume":10.5,"added":"2016-10-10T19:39:45.192Z","format":"Utrecht","demagType":"Unknown","strat":null,"patch":1.1,"GEO":[],"TECT":[],"interpreted":false,"name":"TY  7.B1","coreAzi":272,"coreDip":64,"bedStrike":20,"bedDip":22,"data":[{"visible":true,"include":false,"step":"20","x":-105.17142857142856,"y":125.85714285714286,"z":163.07619047619048,"a95":0.4,"info":"\"\" at \"\""},{"visible":true,"include":true,"step":"100","x":-88.9047619047619,"y":86.58095238095238,"z":138.2952380952381,"a95":0.9,"info":"\"\" at \"\""},{"visible":true,"include":true,"step":"150","x":-64.55238095238094,"y":66.64761904761905,"z":98.95238095238095,"a95":0.7,"info":"\"\" at \"\""},{"visible":true,"include":true,"step":"200","x":-21.61904761904762,"y":14.238095238095237,"z":27.133333333333333,"a95":1.4,"info":"\"\" at \"\""},{"visible":true,"include":true,"step":"250","x":-5.809523809523809,"y":-0.5809523809523809,"z":11.038095238095238,"a95":3.5,"info":"\"\" at \"\""},{"visible":true,"include":false,"step":"250","x":0.5238095238095238,"y":2.895238095238095,"z":1.7142857142857142,"a95":20.1,"info":"\"\" at \"\""},{"visible":true,"include":false,"step":"260","x":-3.9428571428571426,"y":0.26666666666666666,"z":3.2857142857142856,"a95":20,"info":"\"\" at \"\""},{"visible":true,"include":false,"step":"300","x":0.7904761904761906,"y":-5,"z":1.9714285714285713,"a95":17.2,"info":"\"\" at \"\""},{"visible":true,"include":false,"step":"330","x":1.3142857142857143,"y":-3.685714285714286,"z":1.9714285714285713,"a95":20.9,"info":"\"\" at \"\""},{"visible":true,"include":false,"step":"360","x":-1.3142857142857143,"y":-1.0476190476190477,"z":0.6571428571428571,"a95":16.4,"info":"\"\" at \"\""}]},{"version":"v1.1.0","exported":"2016-10-10T19:56:19.955Z","volume":10.5,"added":"2016-10-10T19:39:45.192Z","format":"Utrecht","demagType":"Unknown","strat":null,"patch":1.1,"GEO":[],"TECT":[],"interpreted":false,"name":"TY  7.B4","coreAzi":272,"coreDip":64,"bedStrike":20,"bedDip":22,"data":[{"visible":true,"include":false,"step":"20","x":-148.75238095238097,"y":146.2,"z":169.76190476190476,"a95":0.7,"info":"\"\" at \"\""},{"visible":true,"include":true,"step":"100","x":-120.85714285714286,"y":108.07619047619048,"z":139.16190476190476,"a95":0.5,"info":"\"\" at \"\""},{"visible":true,"include":true,"step":"150","x":-88.32380952380952,"y":86,"z":98.92380952380952,"a95":0.8,"info":"\"\" at \"\""},{"visible":true,"include":true,"step":"200","x":-37.304761904761904,"y":30.504761904761907,"z":24.228571428571428,"a95":1,"info":"\"\" at \"\""},{"visible":true,"include":true,"step":"250","x":-23.238095238095237,"y":13.942857142857143,"z":-0.8761904761904761,"a95":2.4,"info":"\"\" at \"\""},{"visible":true,"include":false,"step":"250","x":-13.152380952380952,"y":16.047619047619047,"z":-6.838095238095238,"a95":10.4,"info":"\"\" at \"\""},{"visible":true,"include":false,"step":"260","x":-15.78095238095238,"y":6.571428571428571,"z":-3.419047619047619,"a95":11.1,"info":"\"\" at \"\""},{"visible":true,"include":false,"step":"300","x":-19.2,"y":10,"z":-3.552380952380952,"a95":10.9,"info":"\"\" at \"\""},{"visible":true,"include":false,"step":"330","x":-20.514285714285716,"y":5.257142857142857,"z":-3.419047619047619,"a95":9,"info":"\"\" at \"\""},{"visible":true,"include":false,"step":"360","x":-17.885714285714286,"y":9.466666666666667,"z":-4.733333333333333,"a95":9.6,"info":"\"\" at \"\""},{"visible":true,"include":false,"step":"390","x":-9.466666666666667,"y":8.676190476190476,"z":-4.733333333333333,"a95":11.2,"info":"\"\" at \"\""},{"visible":true,"include":false,"step":"420","x":-10.523809523809524,"y":5.79047619047619,"z":-4.866666666666667,"a95":12.4,"info":"\"\" at \"\""},{"visible":true,"include":false,"step":"450","x":-7.3619047619047615,"y":13.676190476190476,"z":-8.552380952380952,"a95":8,"info":"\"\" at \"\""},{"visible":true,"include":false,"step":"480","x":-16.83809523809524,"y":7.3619047619047615,"z":-1.9714285714285713,"a95":10.6,"info":"\"\" at \"\""},{"visible":true,"include":false,"step":"510","x":-3.419047619047619,"y":-9.20952380952381,"z":0.3904761904761904,"a95":7.7,"info":"\"\" at \"\""},{"visible":true,"include":false,"step":"530","x":-12.628571428571428,"y":-7.3619047619047615,"z":9.333333333333334,"a95":6.7,"info":"\"\" at \"\""},{"visible":true,"include":false,"step":"550","x":-15.257142857142856,"y":2.6285714285714286,"z":12.628571428571428,"a95":4.4,"info":"\"\" at \"\""}]},{"version":"v1.1.0","exported":"2016-10-10T19:56:19.956Z","volume":10.5,"added":"2016-10-10T19:39:45.192Z","format":"Utrecht","demagType":"Unknown","strat":null,"patch":1.1,"GEO":[],"TECT":[],"interpreted":false,"name":"TY  8.A1","coreAzi":128,"coreDip":79,"bedStrike":20,"bedDip":22,"data":[{"visible":false,"include":false,"step":"20","x":-469.50476190476195,"y":-976.4190476190475,"z":1166.8666666666668,"a95":0.5,"info":"\"\" at \"\""},{"visible":true,"include":true,"step":"100","x":-453.8095238095238,"y":-725.1714285714286,"z":1376.838095238095,"a95":0.6,"info":"\"\" at \"\""},{"visible":true,"include":true,"step":"150","x":-250.26666666666668,"y":-532.2571428571429,"z":1018.1428571428571,"a95":0.6,"info":"\"\" at \"\""},{"visible":true,"include":true,"step":"200","x":-48.34285714285714,"y":-321.6190476190476,"z":632.3142857142857,"a95":0.4,"info":"\"\" at \"\""},{"visible":true,"include":true,"step":"250","x":55.2,"y":-192.33333333333334,"z":420.4,"a95":0.4,"info":"\"\" at \"\""},{"visible":true,"include":true,"step":"250","x":94.95238095238095,"y":-141.24761904761903,"z":304.3333333333333,"a95":1,"info":"\"\" at \"\""},{"visible":true,"include":true,"step":"260","x":68.39047619047619,"y":-134.15238095238095,"z":312.48571428571427,"a95":1.1,"info":"\"\" at \"\""},{"visible":true,"include":false,"step":"300","x":74.70476190476191,"y":-74.96190476190476,"z":178.86666666666665,"a95":1,"info":"\"\" at \"\""},{"visible":true,"include":false,"step":"330","x":66.80952380952381,"y":-72.85714285714286,"z":148.35238095238097,"a95":1.1,"info":"\"\" at \"\""},{"visible":true,"include":false,"step":"360","x":56.81904761904762,"y":-60.23809523809524,"z":126.78095238095239,"a95":1.2,"info":"\"\" at \"\""},{"visible":true,"include":false,"step":"390","x":58.39047619047619,"y":-55.5047619047619,"z":119.41904761904763,"a95":1.2,"info":"\"\" at \"\""},{"visible":true,"include":false,"step":"420","x":52.34285714285714,"y":-44.457142857142856,"z":91.14285714285714,"a95":1.3,"info":"\"\" at \"\""},{"visible":true,"include":false,"step":"450","x":49.19047619047619,"y":-39.19047619047619,"z":61.028571428571425,"a95":1.6,"info":"\"\" at \"\""},{"visible":true,"include":false,"step":"480","x":91.00952380952381,"y":-19.723809523809525,"z":77.99047619047619,"a95":1.3,"info":"\"\" at \"\""},{"visible":true,"include":false,"step":"510","x":46.561904761904756,"y":-14.99047619047619,"z":33.666666666666664,"a95":3.7,"info":"\"\" at \"\""},{"visible":true,"include":false,"step":"530","x":23.40952380952381,"y":6.314285714285714,"z":25.64761904761905,"a95":6.2,"info":"\"\" at \"\""},{"visible":true,"include":false,"step":"550","x":29.990476190476187,"y":17.095238095238095,"z":44.84761904761905,"a95":4.5,"info":"\"\" at \"\""},{"visible":false,"include":false,"step":"570","x":636.552380952381,"y":914.0571428571429,"z":-488.46666666666664,"a95":1.2,"info":"\"\" at \"\""}]},{"version":"v1.1.0","exported":"2016-10-10T19:56:19.956Z","volume":10.5,"added":"2016-10-10T19:39:45.192Z","format":"Utrecht","demagType":"Unknown","strat":null,"patch":1.1,"GEO":[],"TECT":[],"interpreted":false,"name":"TY  8.B1A","coreAzi":287,"coreDip":60,"bedStrike":20,"bedDip":22,"data":[{"visible":false,"include":false,"step":"20","x":-199.30476190476188,"y":238.58095238095237,"z":268.247619047619,"a95":0.5,"info":"\"\" at \"\""},{"visible":true,"include":true,"step":"100","x":-152.8190476190476,"y":173.74285714285713,"z":262.0571428571428,"a95":0.6,"info":"\"\" at \"\""},{"visible":true,"include":true,"step":"150","x":-123.82857142857144,"y":119,"z":188.7904761904762,"a95":0.5,"info":"\"\" at \"\""},{"visible":true,"include":true,"step":"200","x":-48.92380952380953,"y":29.923809523809524,"z":37.885714285714286,"a95":0.9,"info":"\"\" at \"\""},{"visible":true,"include":true,"step":"250","x":-22.076190476190476,"y":8.714285714285714,"z":-15.980952380952383,"a95":1.5,"info":"\"\" at \"\""},{"visible":true,"include":false,"step":"250","x":-9.20952380952381,"y":16.047619047619047,"z":-28.009523809523813,"a95":5.3,"info":"\"\" at \"\""},{"visible":true,"include":false,"step":"260","x":-20.514285714285716,"y":11.047619047619047,"z":-3.9428571428571426,"a95":9.3,"info":"\"\" at \"\""},{"visible":true,"include":false,"step":"300","x":-21.82857142857143,"y":0.26666666666666666,"z":-2.3714285714285714,"a95":8.9,"info":"\"\" at \"\""},{"visible":true,"include":false,"step":"330","x":-16.571428571428573,"y":6.571428571428571,"z":-6.9714285714285715,"a95":11.7,"info":"\"\" at \"\""},{"visible":true,"include":false,"step":"360","x":-0.5238095238095238,"y":5.523809523809524,"z":-8.152380952380952,"a95":13.9,"info":"\"\" at \"\""},{"visible":true,"include":false,"step":"390","x":4.733333333333333,"y":6.838095238095238,"z":-1.4476190476190476,"a95":16,"info":"\"\" at \"\""},{"visible":true,"include":false,"step":"420","x":-16.571428571428573,"y":2.895238095238095,"z":-1.3142857142857143,"a95":9.1,"info":"\"\" at \"\""},{"visible":true,"include":false,"step":"450","x":-15.78095238095238,"y":14.733333333333333,"z":-2.4952380952380953,"a95":9.6,"info":"\"\" at \"\""},{"visible":true,"include":false,"step":"480","x":-16.83809523809524,"y":23.933333333333334,"z":-0.3904761904761904,"a95":9.2,"info":"\"\" at \"\""},{"visible":true,"include":false,"step":"510","x":-29.723809523809525,"y":3.419047619047619,"z":-13.285714285714286,"a95":4.7,"info":"\"\" at \"\""},{"visible":true,"include":false,"step":"530","x":-2.104761904761905,"y":5.257142857142857,"z":12.495238095238093,"a95":6.1,"info":"\"\" at \"\""},{"visible":true,"include":false,"step":"550","x":-2.6285714285714286,"y":-0.5238095238095238,"z":23.276190476190475,"a95":6.5,"info":"\"\" at \"\""},{"visible":false,"include":false,"step":"570","x":-885.647619047619,"y":-75.75238095238095,"z":-369.8285714285714,"a95":1.1,"info":"\"\" at \"\""}]},{"version":"v1.1.0","exported":"2016-10-10T19:56:19.956Z","volume":10.5,"added":"2016-10-10T19:39:45.193Z","format":"Utrecht","demagType":"Unknown","strat":"1.01","patch":1.1,"GEO":[],"TECT":[],"interpreted":false,"name":"TY 11.A1","coreAzi":340,"coreDip":42,"bedStrike":329,"bedDip":29,"data":[{"visible":true,"include":false,"step":"20","x":-281.5005714285714,"y":-156.39066666666668,"z":1414.4238095238095,"a95":1.081694,"info":"\"90-03-19\" at \"09:22\""},{"visible":true,"include":false,"step":"100","x":-268.96885714285713,"y":-276.65190476190475,"z":1495.7923809523809,"a95":1.248643,"info":"\"90-03-19\" at \"13:51\""},{"visible":true,"include":false,"step":"150","x":-85.80404761904762,"y":-361.61657142857143,"z":943.5861904761905,"a95":1.143562,"info":"\"90-03-20\" at \"10:59\""},{"visible":true,"include":false,"step":"200","x":-80.50989523809524,"y":-375.6267619047619,"z":868.1122857142857,"a95":1.163563,"info":"\"90-03-20\" at \"14:44\""},{"visible":true,"include":false,"step":"250","x":-93.68071428571429,"y":-329.9162857142857,"z":758.7427619047619,"a95":1.194335,"info":"\"90-03-21\" at \"10:48\""},{"visible":true,"include":true,"step":"300","x":-83.54434285714285,"y":-291.8241904761905,"z":563.1818095238095,"a95":2.422738,"info":"\"90-03-21\" at \"15:57\""},{"visible":true,"include":true,"step":"330","x":3.0344533333333334,"y":-273.81114285714284,"z":486.2229523809524,"a95":1.614926,"info":"\"90-03-22\" at \"12:02\""},{"visible":true,"include":true,"step":"360","x":-14.978580952380954,"y":-276.716380952381,"z":468.20990476190474,"a95":1.87317,"info":"\"90-03-23\" at \"09:12\""},{"visible":true,"include":true,"step":"390","x":-41.12654285714286,"y":-265.09514285714283,"z":433.0231428571429,"a95":1.868135,"info":"\"90-03-23\" at \"14:31\""},{"visible":true,"include":true,"step":"420","x":-22.751952380952382,"y":-266.0377142857143,"z":412.7310476190477,"a95":3.054732,"info":"\"90-03-27\" at \"10:48\""},{"visible":true,"include":true,"step":"450","x":-31.022457142857142,"y":-202.39161904761906,"z":373.6898095238095,"a95":1.856989,"info":"\"90-03-27\" at \"13:33\""},{"visible":true,"include":true,"step":"480","x":-15.662952380952381,"y":-202.46914285714286,"z":368.9251428571429,"a95":1.87619,"info":"\"90-03-28\" at \"09:19\""},{"visible":true,"include":true,"step":"510","x":-21.938457142857143,"y":-165.33904761904762,"z":354.36619047619047,"a95":2.026339,"info":"\"90-03-28\" at \"11:48\""},{"visible":true,"include":true,"step":"540","x":-42.49523809523809,"y":-176.5047619047619,"z":280.6,"a95":2.1,"info":"\"90-03-28\" at \"5:00\""},{"visible":true,"include":true,"step":"560","x":-16.954209523809524,"y":-100.01438095238096,"z":235.74485714285714,"a95":2.053787,"info":"\"90-03-29\" at \"10:23\""},{"visible":true,"include":true,"step":"580","x":-13.138542857142857,"y":-126.66590476190476,"z":242.8725714285714,"a95":2.2914,"info":"\"90-03-29\" at \"14:20\""},{"visible":true,"include":false,"step":"600","x":-52.99964761904762,"y":-31.487314285714287,"z":94.84930476190476,"a95":3.995043,"info":"\"90-03-30\" at \"09:03\""}]},{"version":"v1.1.0","exported":"2016-10-10T19:56:19.956Z","volume":10.5,"added":"2016-10-10T19:39:45.193Z","format":"Utrecht","demagType":"Unknown","strat":"1.02","patch":1.1,"GEO":[],"TECT":[],"interpreted":false,"name":"TY 11.B1","coreAzi":284,"coreDip":63,"bedStrike":329,"bedDip":29,"data":[{"visible":true,"include":false,"step":"20","x":280.9969523809524,"y":709.8945714285715,"z":1565.352380952381,"a95":0.7971972,"info":"\"90-03-19\" at \"09:23\""},{"visible":true,"include":false,"step":"100","x":359.938,"y":606.9554285714286,"z":1651.3885714285716,"a95":0.6836617,"info":"\"90-03-19\" at \"13:51\""},{"visible":true,"include":false,"step":"150","x":436.3803809523809,"y":306.8027619047619,"z":1208.0361904761903,"a95":1.25535,"info":"\"90-03-20\" at \"11:00\""},{"visible":true,"include":false,"step":"200","x":402.2266666666667,"y":300.8629523809524,"z":1136.6933333333334,"a95":2.872086,"info":"\"90-03-20\" at \"14:45\""},{"visible":true,"include":false,"step":"250","x":398.35285714285715,"y":232.1035238095238,"z":1017.187619047619,"a95":1.753871,"info":"\"90-03-21\" at \"10:49\""},{"visible":true,"include":true,"step":"300","x":328.30219047619045,"y":185.35999999999999,"z":815.8162857142858,"a95":2.318689,"info":"\"90-03-21\" at \"15:58\""},{"visible":true,"include":true,"step":"330","x":319.4570476190476,"y":186.07019047619048,"z":715.4210476190476,"a95":1.110564,"info":"\"90-03-22\" at \"12:03\""},{"visible":true,"include":true,"step":"360","x":276.716380952381,"y":124.80000000000001,"z":672.164,"a95":1.108936,"info":"\"90-03-23\" at \"09:13\""},{"visible":true,"include":true,"step":"390","x":267.41942857142857,"y":138.16457142857143,"z":631.7476190476191,"a95":1.51906,"info":"\"90-03-23\" at \"14:32\""},{"visible":true,"include":true,"step":"420","x":264.11380952380955,"y":133.27714285714288,"z":627.9513333333333,"a95":2.913976,"info":"\"90-03-27\" at \"10:49\""},{"visible":true,"include":true,"step":"450","x":252.46657142857143,"y":138.59066666666666,"z":561.1868571428572,"a95":1.558242,"info":"\"90-03-27\" at \"13:33\""},{"visible":true,"include":true,"step":"480","x":229.45638095238095,"y":96.46333333333334,"z":543.057619047619,"a95":1.419532,"info":"\"90-03-28\" at \"09:20\""},{"visible":true,"include":true,"step":"510","x":209.37733333333333,"y":118.05314285714286,"z":493.6347619047619,"a95":1.537646,"info":"\"90-03-28\" at \"11:48\""},{"visible":true,"include":true,"step":"540","x":163.88,"y":87.38095238095238,"z":432.7885714285714,"a95":1.687832,"info":"\"90-03-28\" at \"15:36\""},{"visible":true,"include":true,"step":"560","x":190.74457142857142,"y":85.66846666666667,"z":377.2924761904762,"a95":2.26337,"info":"\"90-03-29\" at \"10:24\""},{"visible":true,"include":true,"step":"580","x":151.21914285714286,"y":78.12752380952381,"z":365.47742857142856,"a95":3.463066,"info":"\"90-03-29\" at \"14:21\""},{"visible":true,"include":true,"step":"600","x":91.01426666666667,"y":52.04412380952381,"z":179.1555238095238,"a95":3.847496,"info":"\"90-03-30\" at \"09:04\""}]},{"version":"v1.1.0","exported":"2016-10-10T19:56:19.956Z","volume":10.5,"added":"2016-10-10T19:39:45.193Z","format":"Utrecht","demagType":"Unknown","strat":"1.03","patch":1.1,"GEO":[],"TECT":[],"interpreted":false,"name":"TY 12.1A","coreAzi":335,"coreDip":23,"bedStrike":329,"bedDip":29,"data":[{"visible":true,"include":false,"step":"20","x":-582.796,"y":-258.9939047619048,"z":947.0597142857143,"a95":0.9397743,"info":"\"90-03-19\" at \"09:24\""},{"visible":true,"include":false,"step":"100","x":-576.7400952380953,"y":-240.23838095238096,"z":1044.7561904761906,"a95":0.8230843,"info":"\"90-03-19\" at \"13:52\""},{"visible":true,"include":false,"step":"150","x":-328.30219047619045,"y":-319.00514285714286,"z":719.3594285714286,"a95":1.127973,"info":"\"90-03-20\" at \"11:01\""},{"visible":true,"include":false,"step":"200","x":-316.22895238095236,"y":-333.4026666666667,"z":674.8110476190476,"a95":1.656565,"info":"\"90-03-20\" at \"14:46\""},{"visible":true,"include":false,"step":"250","x":-269.1625714285714,"y":-347.3481904761905,"z":604.760380952381,"a95":1.220218,"info":"\"90-03-21\" at \"10:49\""},{"visible":true,"include":true,"step":"300","x":-264.8368571428571,"y":-327.26914285714287,"z":477.7652380952381,"a95":2.153219,"info":"\"90-03-21\" at \"15:59\""},{"visible":true,"include":true,"step":"330","x":-226.61561904761905,"y":-259.1553333333333,"z":442.19104761904765,"a95":1.719627,"info":"\"90-03-22\" at \"12:04\""},{"visible":true,"include":true,"step":"360","x":-251.02038095238095,"y":-227.19666666666666,"z":435.54114285714286,"a95":1.361837,"info":"\"90-03-23\" at \"09:14\""},{"visible":true,"include":true,"step":"390","x":-210.92685714285713,"y":-244.04761904761904,"z":419.5295238095238,"a95":1.517728,"info":"\"90-03-23\" at \"14:33\""},{"visible":true,"include":true,"step":"420","x":-144.42714285714285,"y":-193.63695238095238,"z":329.4061904761905,"a95":4.152477,"info":"\"90-03-27\" at \"10:50\""},{"visible":true,"include":true,"step":"450","x":-214.88457142857143,"y":-164.84190476190474,"z":267.8713333333333,"a95":1.698602,"info":"\"90-03-27\" at \"13:34\""},{"visible":true,"include":true,"step":"480","x":-154.46666666666667,"y":-176.79895238095236,"z":276.8326666666667,"a95":1.588194,"info":"\"90-03-28\" at \"09:21\""},{"visible":true,"include":true,"step":"510","x":-129.4872380952381,"y":-155.6998095238095,"z":206.698,"a95":1.845629,"info":"\"90-03-28\" at \"11:49\""},{"visible":true,"include":true,"step":"540","x":-134,"y":-122.94285714285715,"z":244.21904761904764,"a95":2,"info":"\"90-03-28\" at \"2:00\""},{"visible":true,"include":true,"step":"560","x":-125.65228571428571,"y":-72.31685714285715,"z":180.65333333333334,"a95":2.770528,"info":"\"90-03-29\" at \"10:25\""},{"visible":true,"include":true,"step":"580","x":-66.23504761904762,"y":-114.36019047619047,"z":173.03495238095238,"a95":2.091884,"info":"\"90-03-29\" at \"14:22\""},{"visible":true,"include":true,"step":"600","x":-64.14320952380952,"y":-72.58157142857142,"z":84.89370476190477,"a95":2.961976,"info":"\"90-03-30\" at \"09:05\""}]},{"version":"v1.1.0","exported":"2016-10-10T19:56:19.956Z","volume":10.5,"added":"2016-10-10T19:39:45.193Z","format":"Utrecht","demagType":"Unknown","strat":"1.04","patch":1.1,"GEO":[],"TECT":[],"interpreted":false,"name":"TY 13.1","coreAzi":281,"coreDip":64,"bedStrike":329,"bedDip":29,"data":[{"visible":true,"include":false,"step":"20","x":32.02963809523809,"y":1325.2238095238095,"z":1892.3895238095238,"a95":1.11804,"info":"\"90-03-19\" at \"09:25\""},{"visible":true,"include":false,"step":"100","x":-86.90160952380953,"y":1145.6038095238096,"z":2194.1047619047617,"a95":0.7787488,"info":"\"90-03-19\" at \"13:53\""},{"visible":true,"include":false,"step":"150","x":342.2477142857143,"y":504.3650476190476,"z":1266.1419047619047,"a95":1.269275,"info":"\"90-03-20\" at \"11:02\""},{"visible":true,"include":false,"step":"200","x":267.032,"y":479.0564761904762,"z":1140.3095238095239,"a95":1.452473,"info":"\"90-03-20\" at \"14:46\""},{"visible":true,"include":true,"step":"250","x":330.3681904761905,"y":410.4906666666667,"z":976.7714285714286,"a95":2.50682,"info":"\"90-03-21\" at \"10:50\""},{"visible":true,"include":true,"step":"300","x":279.62180952380953,"y":245.66171428571428,"z":688.1110476190477,"a95":1.813661,"info":"\"90-03-21\" at \"16:00\""},{"visible":true,"include":true,"step":"330","x":269.61447619047624,"y":284.1411428571429,"z":606.051619047619,"a95":1.685241,"info":"\"90-03-22\" at \"12:05\""},{"visible":true,"include":true,"step":"390","x":203.5021904761905,"y":139.9077142857143,"z":406.87514285714286,"a95":1.541502,"info":"\"90-03-23\" at \"14:35\""}]},{"version":"v1.1.0","exported":"2016-10-10T19:56:19.956Z","volume":10.5,"added":"2016-10-10T19:39:45.193Z","format":"Utrecht","demagType":"Unknown","strat":"1.05","patch":1.1,"GEO":[],"TECT":[],"interpreted":false,"name":"TY 14.A2","coreAzi":293,"coreDip":57,"bedStrike":329,"bedDip":29,"data":[{"visible":true,"include":false,"step":"20","x":224.95638095238095,"y":1890.355238095238,"z":2623.182857142857,"a95":0.9827351,"info":"\"90-03-19\" at \"09:26\""},{"visible":true,"include":false,"step":"100","x":241.98161904761903,"y":1722.0209523809524,"z":2928.5714285714284,"a95":0.9051573,"info":"\"90-03-19\" at \"13:54\""},{"visible":true,"include":false,"step":"150","x":370.268,"y":768.6209523809524,"z":1494.6304761904762,"a95":1.144409,"info":"\"90-03-20\" at \"11:03\""},{"visible":true,"include":false,"step":"200","x":347.4773333333334,"y":618.254,"z":1302.1685714285716,"a95":1.243757,"info":"\"90-03-20\" at \"14:47\""},{"visible":true,"include":false,"step":"250","x":265.41790476190477,"y":577.1274285714286,"z":1097.5038095238097,"a95":1.430827,"info":"\"90-03-21\" at \"10:51\""},{"visible":true,"include":false,"step":"300","x":311.58038095238095,"y":368.2665714285714,"z":751.4471428571428,"a95":2.560129,"info":"\"90-03-21\" at \"16:01\""},{"visible":true,"include":false,"step":"330","x":340.6337142857143,"y":323.5244761904762,"z":624.5165714285714,"a95":1.83922,"info":"\"90-03-22\" at \"12:05\""},{"visible":true,"include":true,"step":"360","x":309.2560952380952,"y":232.87828571428574,"z":587.3283809523809,"a95":2.102314,"info":"\"90-03-23\" at \"09:15\""},{"visible":true,"include":true,"step":"390","x":280.91304761904763,"y":223.4520952380952,"z":545.0397142857144,"a95":1.963566,"info":"\"90-03-23\" at \"14:37\""},{"visible":true,"include":true,"step":"420","x":246.57199999999997,"y":188.35571428571427,"z":556.6868571428572,"a95":3.68427,"info":"\"90-03-27\" at \"10:52\""},{"visible":true,"include":true,"step":"450","x":250.36828571428572,"y":193.50780952380953,"z":433.6429523809524,"a95":2.167384,"info":"\"90-03-27\" at \"13:35\""},{"visible":true,"include":true,"step":"480","x":216.65361904761903,"y":140.06266666666664,"z":447.0074285714286,"a95":2.032767,"info":"\"90-03-28\" at \"09:22\""},{"visible":true,"include":true,"step":"510","x":143.89771428571427,"y":182.02209523809523,"z":371.51409523809525,"a95":2.737315,"info":"\"90-03-28\" at \"11:50\""},{"visible":true,"include":true,"step":"540","x":41.320238095238096,"y":91.56951428571429,"z":320.1995238095238,"a95":2.556624,"info":"\"90-03-28\" at \"15:39\""},{"visible":true,"include":true,"step":"560","x":112.2812380952381,"y":82.89871428571429,"z":212.85733333333332,"a95":3.419571,"info":"\"90-03-29\" at \"10:26\""},{"visible":true,"include":true,"step":"580","x":34.49594285714286,"y":43.65740952380953,"z":222.60628571428572,"a95":3.822945,"info":"\"90-03-29\" at \"14:23\""},{"visible":true,"include":true,"step":"600","x":70.9610380952381,"y":80.58090476190476,"z":123.88971428571429,"a95":4.8386,"info":"\"90-03-30\" at \"09:06\""}]},{"version":"v1.1.0","exported":"2016-10-10T19:56:19.956Z","volume":10.5,"added":"2016-10-10T19:39:45.193Z","format":"Utrecht","demagType":"Unknown","strat":"1.06","patch":1.1,"GEO":[],"TECT":[],"interpreted":false,"name":"TY 14.B1A","coreAzi":51,"coreDip":35,"bedStrike":329,"bedDip":29,"data":[{"visible":true,"include":false,"step":"20","x":-2643.9590476190474,"y":-2814.34,"z":1153.5380952380951,"a95":0.695049,"info":"\"90-03-19\" at \"09:27\""},{"visible":true,"include":false,"step":"100","x":-2154.785714285714,"y":-2558.2390476190476,"z":1823.2552380952382,"a95":0.5909486,"info":"\"90-03-19\" at \"13:55\""},{"visible":true,"include":false,"step":"150","x":-1343.1657142857143,"y":-1497.0838095238094,"z":755.3855238095238,"a95":1.00672,"info":"\"90-03-20\" at \"11:03\""},{"visible":true,"include":false,"step":"200","x":-1091.6933333333334,"y":-1486.4952380952382,"z":625.0330476190476,"a95":0.7221705,"info":"\"90-03-20\" at \"14:48\""},{"visible":true,"include":true,"step":"250","x":-934.7411428571428,"y":-1330.8342857142857,"z":422.8867619047619,"a95":0.5787479,"info":"\"90-03-21\" at \"10:52\""},{"visible":true,"include":true,"step":"300","x":-636.2670476190476,"y":-1163.8742857142856,"z":248.69619047619048,"a95":0.8589117,"info":"\"90-03-21\" at \"16:02\""},{"visible":true,"include":true,"step":"330","x":-590.2337142857143,"y":-958.3066666666666,"z":157.33971428571428,"a95":1.176021,"info":"\"90-03-22\" at \"12:06\""},{"visible":true,"include":true,"step":"360","x":-485.7709523809524,"y":-913.4354285714286,"z":167.08866666666668,"a95":1.494172,"info":"\"90-03-23\" at \"09:16\""},{"visible":true,"include":true,"step":"390","x":-484.3505714285714,"y":-706.2531428571428,"z":72.63322857142857,"a95":3.343471,"info":"\"90-03-23\" at \"14:40\""}]},{"version":"v1.1.0","exported":"2016-10-10T19:56:19.956Z","volume":10.5,"added":"2016-10-10T19:39:45.194Z","format":"Utrecht","demagType":"Unknown","strat":"1.07","patch":1.1,"GEO":[],"TECT":[],"interpreted":false,"name":"TY 15.1","coreAzi":282,"coreDip":68,"bedStrike":329,"bedDip":29,"data":[{"visible":false,"include":false,"step":"20","x":-489.88361904761905,"y":2697.0038095238097,"z":3138.9752380952377,"a95":1.872947,"info":"\"90-03-19\" at \"09:28\""},{"visible":true,"include":false,"step":"100","x":-229.84380952380954,"y":2526.7971428571427,"z":3835.615238095238,"a95":1.040829,"info":"\"90-03-19\" at \"13:55\""},{"visible":true,"include":false,"step":"150","x":561.8906666666667,"y":1434.6514285714286,"z":2170.8619047619045,"a95":1.188662,"info":"\"90-03-20\" at \"11:04\""},{"visible":true,"include":false,"step":"200","x":616.7690476190476,"y":1211.2638095238096,"z":1898.858095238095,"a95":1.630139,"info":"\"90-03-20\" at \"14:48\""},{"visible":true,"include":false,"step":"250","x":720.3924761904761,"y":973.4142857142857,"z":1607.0990476190477,"a95":1.312588,"info":"\"90-03-21\" at \"10:52\""},{"visible":true,"include":false,"step":"300","x":663.2542857142857,"y":614.5093333333333,"z":1088.5295238095237,"a95":1.944687,"info":"\"90-03-21\" at \"16:03\""},{"visible":true,"include":false,"step":"330","x":688.5629523809524,"y":583.39,"z":953.5285714285714,"a95":1.67837,"info":"\"90-03-22\" at \"12:07\""},{"visible":true,"include":true,"step":"360","x":726.3321904761905,"y":403.25971428571427,"z":840.2210476190476,"a95":1.7731,"info":"\"90-03-23\" at \"09:17\""},{"visible":true,"include":true,"step":"390","x":600.3700952380952,"y":440.89980952380955,"z":732.2719999999999,"a95":1.815923,"info":"\"90-03-23\" at \"14:41\""},{"visible":true,"include":true,"step":"420","x":556.1897142857143,"y":411.9820952380952,"z":714.2782857142856,"a95":2.894978,"info":"\"90-03-27\" at \"10:53\""},{"visible":true,"include":true,"step":"450","x":531.4362857142858,"y":379.0357142857143,"z":594.8628571428571,"a95":1.969436,"info":"\"90-03-27\" at \"13:36\""},{"visible":true,"include":true,"step":"480","x":507.1541904761904,"y":296.28542857142855,"z":586.6246666666667,"a95":1.938509,"info":"\"90-03-28\" at \"09:23\""},{"visible":true,"include":true,"step":"510","x":464.96885714285713,"y":285.76809523809527,"z":448.1372380952381,"a95":2.035243,"info":"\"90-03-28\" at \"11:51\""},{"visible":true,"include":true,"step":"540","x":345.61790476190475,"y":222.89685714285713,"z":460.3525714285714,"a95":2.137503,"info":"\"90-03-28\" at \"15:40\""},{"visible":true,"include":true,"step":"560","x":391.08952380952377,"y":335.24266666666665,"z":313.79485714285715,"a95":2.215635,"info":"\"90-03-29\" at \"10:27\""},{"visible":true,"include":true,"step":"580","x":359.52476190476193,"y":158.72780952380953,"z":382.9029523809524,"a95":2.835311,"info":"\"90-03-29\" at \"14:24\""},{"visible":true,"include":true,"step":"600","x":320.6127619047619,"y":176.7214285714286,"z":197.91095238095238,"a95":2.46866,"info":"\"90-03-30\" at \"09:07\""}]},{"version":"v1.1.0","exported":"2016-10-10T19:56:19.957Z","volume":10.5,"added":"2016-10-10T19:39:45.194Z","format":"Utrecht","demagType":"Unknown","strat":"1.08","patch":1.1,"GEO":[],"TECT":[],"interpreted":false,"name":"TY 16.1B","coreAzi":78,"coreDip":44,"bedStrike":329,"bedDip":29,"data":[{"visible":false,"include":false,"step":"20","x":-427.70961904761907,"y":-791.1339047619049,"z":503.32561904761906,"a95":0.5069,"info":"\"90-03-19\" at \"09:28\""},{"visible":true,"include":false,"step":"100","x":-440.18961904761903,"y":-603.4045714285714,"z":640.9155238095238,"a95":0.769811,"info":"\"90-03-19\" at \"13:56\""},{"visible":true,"include":false,"step":"150","x":-152.82028571428572,"y":-138.29361904761905,"z":147.59066666666666,"a95":3.688888,"info":"\"90-03-20\" at \"11:05\""},{"visible":true,"include":false,"step":"200","x":-169.54209523809524,"y":-136.67961904761904,"z":109.36952380952383,"a95":3.814525,"info":"\"90-03-20\" at \"14:49\""},{"visible":true,"include":false,"step":"250","x":-163.40857142857143,"y":-116.66514285714285,"z":95.16565714285714,"a95":4.190037,"info":"\"90-03-21\" at \"10:53\""},{"visible":false,"include":false,"step":"300","x":-208.15066666666667,"y":-39.38334285714286,"z":54.16823809523809,"a95":4.097253,"info":"\"90-03-21\" at \"16:04\""},{"visible":true,"include":false,"step":"330","x":-110.40247619047621,"y":-85.41667619047618,"z":18.013038095238095,"a95":6.315374,"info":"\"90-03-22\" at \"12:07\""},{"visible":true,"include":true,"step":"360","x":-143.9752380952381,"y":-91.93751428571429,"z":33.314438095238096,"a95":4.921846,"info":"\"90-03-23\" at \"09:18\""},{"visible":true,"include":true,"step":"390","x":-141.06990476190475,"y":-58.23570476190476,"z":12.33150476190476,"a95":4.968119,"info":"\"90-03-23\" at \"14:42\""},{"visible":true,"include":true,"step":"420","x":-111.5904761904762,"y":-43.14736190476191,"z":17.464257142857143,"a95":14.77941,"info":"\"90-03-27\" at \"10:54\""},{"visible":false,"include":false,"step":"450","x":19.898276190476192,"y":-15.133533333333332,"z":76.02277142857143,"a95":130.5527,"info":"\"90-03-27\" at \"13:37\""},{"visible":true,"include":true,"step":"480","x":-136.33742857142857,"y":-51.11441904761905,"z":9.542390476190477,"a95":5.149632,"info":"\"90-03-28\" at \"09:23\""},{"visible":true,"include":false,"step":"510","x":-123.41838095238096,"y":-23.358838095238095,"z":-9.297053333333334,"a95":5.608634,"info":"\"90-03-28\" at \"11:52\""},{"visible":true,"include":false,"step":"540","x":-161.74285714285713,"y":-56.50541904761905,"z":33.85031428571428,"a95":4.268819,"info":"\"90-03-28\" at \"15:41\""},{"visible":true,"include":false,"step":"560","x":-128.85457142857143,"y":-45.34895238095238,"z":-16.56037142857143,"a95":4.85471,"info":"\"90-03-29\" at \"10:28\""},{"visible":true,"include":false,"step":"580","x":-116.8975238095238,"y":-51.611552380952375,"z":12.35087619047619,"a95":5.259273,"info":"\"90-03-29\" at \"14:24\""},{"visible":true,"include":false,"step":"600","x":-67.6489619047619,"y":-13.061066666666667,"z":-25.637914285714288,"a95":8.637671,"info":"\"90-03-30\" at \"09:07\""}]},{"version":"v1.1.0","exported":"2016-10-10T19:56:19.957Z","volume":10.5,"added":"2016-10-10T19:39:45.194Z","format":"Utrecht","demagType":"Unknown","strat":"1.09","patch":1.1,"GEO":[],"TECT":[],"interpreted":false,"name":"TY 17.B1","coreAzi":2,"coreDip":25,"bedStrike":329,"bedDip":29,"data":[{"visible":true,"include":false,"step":"20","x":-1389.3733333333334,"y":-846.9162857142857,"z":1849.0742857142857,"a95":0.617362,"info":"\"90-03-19\" at \"09:30\""},{"visible":true,"include":false,"step":"100","x":-1256.4580952380952,"y":-816.2037142857142,"z":1997.575238095238,"a95":0.6002595,"info":"\"90-03-19\" at \"13:57\""},{"visible":true,"include":false,"step":"150","x":-640.7863809523809,"y":-507.98057142857147,"z":924.9275238095238,"a95":3.830014,"info":"\"90-03-20\" at \"11:05\""},{"visible":true,"include":false,"step":"200","x":-630.327238095238,"y":-493.454,"z":810.4576190476191,"a95":0.9925921,"info":"\"90-03-20\" at \"14:50\""},{"visible":true,"include":false,"step":"250","x":-563.052761904762,"y":-492.1626666666666,"z":689.7250476190477,"a95":0.8718084,"info":"\"90-03-21\" at \"10:54\""},{"visible":true,"include":true,"step":"300","x":-482.28457142857144,"y":-402.09752380952386,"z":536.3237142857143,"a95":1.303123,"info":"\"90-03-21\" at \"16:05\""},{"visible":true,"include":true,"step":"330","x":-391.186380952381,"y":-380.4689523809524,"z":498.42533333333336,"a95":1.014377,"info":"\"90-03-22\" at \"12:08\""},{"visible":true,"include":true,"step":"360","x":-346.63800000000003,"y":-347.7356190476191,"z":446.2584761904762,"a95":1.640729,"info":"\"90-03-23\" at \"09:19\""},{"visible":true,"include":true,"step":"390","x":-333.7254285714286,"y":-337.4055238095238,"z":412.1047619047619,"a95":1.084651,"info":"\"90-03-23\" at \"14:43\""},{"visible":true,"include":true,"step":"420","x":-306.8608571428572,"y":-331.3237142857143,"z":398.5530476190476,"a95":2.981483,"info":"\"90-03-27\" at \"10:55\""},{"visible":true,"include":true,"step":"450","x":-339.24552380952383,"y":-220.61133333333333,"z":345.6954285714286,"a95":1.627537,"info":"\"90-03-27\" at \"13:38\""},{"visible":true,"include":true,"step":"480","x":-320.6901904761905,"y":-260.608,"z":328.8574285714286,"a95":1.492414,"info":"\"90-03-28\" at \"09:25\""},{"visible":true,"include":true,"step":"510","x":-297.6541904761905,"y":-217.92552380952378,"z":278.24009523809525,"a95":1.546545,"info":"\"90-03-28\" at \"11:53\""},{"visible":true,"include":true,"step":"540","x":-243.9314285714286,"y":-221.6184761904762,"z":221.36666666666665,"a95":1.634345,"info":"\"90-03-28\" at \"15:43\""},{"visible":true,"include":true,"step":"560","x":-227.50019047619048,"y":-143.27790476190475,"z":186.38657142857141,"a95":1.822901,"info":"\"90-03-29\" at \"10:29\""},{"visible":true,"include":true,"step":"580","x":-237.21685714285715,"y":-195.38657142857144,"z":206.63990476190477,"a95":1.608963,"info":"\"90-03-29\" at \"14:25\""},{"visible":true,"include":true,"step":"600","x":-140.68895238095237,"y":-116.25838095238095,"z":118.95704761904761,"a95":2.639791,"info":"\"90-03-30\" at \"09:08\""}]},{"version":"v1.1.0","exported":"2016-10-10T19:56:19.957Z","volume":10.5,"added":"2016-10-10T19:39:45.195Z","format":"Utrecht","demagType":"Unknown","strat":"1.10","patch":1.1,"GEO":[],"TECT":[],"interpreted":false,"name":"TY 18.B1A","coreAzi":84,"coreDip":10,"bedStrike":329,"bedDip":29,"data":[{"visible":false,"include":false,"step":"20","x":-2441.2314285714288,"y":-2167.5495238095236,"z":-1156.327619047619,"a95":0.5250474,"info":"\"90-03-19\" at \"09:30\""},{"visible":true,"include":false,"step":"100","x":-2393.0228571428574,"y":-1648.8714285714286,"z":-550.9795238095238,"a95":0.8771306,"info":"\"90-03-19\" at \"13:57\""},{"visible":true,"include":false,"step":"150","x":-1014.0885714285714,"y":-899.3606666666667,"z":-791.5407619047619,"a95":0.8824894,"info":"\"90-03-20\" at \"11:06\""},{"visible":true,"include":true,"step":"200","x":-945.846,"y":-765.3927619047619,"z":-788.6354285714286,"a95":0.8235822,"info":"\"90-03-20\" at \"14:51\""},{"visible":true,"include":true,"step":"250","x":-739.2447619047618,"y":-696.5687619047619,"z":-772.9465714285715,"a95":0.6104046,"info":"\"90-03-21\" at \"10:54\""},{"visible":true,"include":true,"step":"300","x":-538.0669523809524,"y":-595.5924761904762,"z":-718.1973333333333,"a95":0.8612174,"info":"\"90-03-21\" at \"16:06\""},{"visible":true,"include":true,"step":"330","x":-516.6965714285715,"y":-519.3437142857143,"z":-664.868380952381,"a95":0.8164811,"info":"\"90-03-22\" at \"12:09\""},{"visible":true,"include":true,"step":"360","x":-482.15542857142856,"y":-459.75209523809525,"z":-576.546380952381,"a95":0.7676695,"info":"\"90-03-23\" at \"09:20\""},{"visible":true,"include":true,"step":"390","x":-500.6204761904762,"y":-415.1392380952381,"z":-563.6338095238095,"a95":0.6346086,"info":"\"90-03-23\" at \"14:43\""},{"visible":true,"include":true,"step":"420","x":-422.2862857142857,"y":-464.24571428571426,"z":-509.29761904761904,"a95":2.234036,"info":"\"90-03-27\" at \"10:56\""},{"visible":true,"include":true,"step":"450","x":-467.86771428571427,"y":-360.2672380952381,"z":-530.3580952380953,"a95":1.020248,"info":"\"90-03-27\" at \"13:38\""},{"visible":true,"include":true,"step":"480","x":-403.82780952380955,"y":-416.056,"z":-496.12685714285715,"a95":0.8424394,"info":"\"90-03-28\" at \"09:25\""},{"visible":true,"include":true,"step":"510","x":-444.74123809523815,"y":-288.91238095238094,"z":-510.43399999999997,"a95":0.7315015,"info":"\"90-03-28\" at \"11:53\""},{"visible":true,"include":true,"step":"540","x":-375.94314285714285,"y":-319.53457142857144,"z":-412.89238095238096,"a95":1.068506,"info":"\"90-03-28\" at \"15:43\""},{"visible":true,"include":true,"step":"560","x":-288.35066666666665,"y":-253.84180952380953,"z":-415.7719047619047,"a95":1.005599,"info":"\"90-03-29\" at \"10:29\""},{"visible":true,"include":true,"step":"580","x":-273.43019047619043,"y":-300.25600000000003,"z":-347.2061904761905,"a95":0.7832144,"info":"\"90-03-29\" at \"14:26\""},{"visible":false,"include":false,"step":"600","x":-192.79761904761904,"y":-220.5144761904762,"z":-368.7249523809524,"a95":1.138506,"info":"\"90-03-30\" at \"09:09\""}]},{"version":"v1.1.0","exported":"2016-10-10T19:56:19.957Z","volume":10.5,"added":"2016-10-10T19:39:45.195Z","format":"Utrecht","demagType":"Unknown","strat":"2.01","patch":1.1,"GEO":[],"TECT":[],"interpreted":false,"name":"TY 19.A1","coreAzi":45,"coreDip":55,"bedStrike":329,"bedDip":29,"data":[{"visible":false,"include":false,"step":"20","x":-484.654,"y":-502.92533333333336,"z":1746.8066666666668,"a95":0.856541,"info":"\"90-03-19\" at \"09:31\""},{"visible":true,"include":false,"step":"100","x":-237.84961904761903,"y":-275.2315238095238,"z":2220.1228571428574,"a95":0.6479343,"info":"\"90-03-19\" at \"13:58\""},{"visible":true,"include":true,"step":"150","x":407.3271428571429,"y":332.9506666666667,"z":893.6791428571428,"a95":1.822758,"info":"\"90-03-20\" at \"11:07\""},{"visible":true,"include":true,"step":"200","x":474.7307619047619,"y":278.9115238095238,"z":754.8044761904762,"a95":1.940899,"info":"\"90-03-20\" at \"14:52\""},{"visible":true,"include":true,"step":"250","x":498.55438095238094,"y":317.26190476190476,"z":581.9697142857143,"a95":2.686029,"info":"\"90-03-21\" at \"10:55\""},{"visible":true,"include":true,"step":"300","x":505.5272380952381,"y":263.80380952380955,"z":368.3957142857143,"a95":2.486703,"info":"\"90-03-21\" at \"16:06\""},{"visible":true,"include":true,"step":"330","x":471.1152380952381,"y":335.9851428571429,"z":279.3635238095238,"a95":2.083555,"info":"\"90-03-22\" at \"12:09\""},{"visible":true,"include":false,"step":"360","x":416.17219047619045,"y":290.4038095238095,"z":265.41790476190477,"a95":2.421815,"info":"\"90-03-23\" at \"09:21\""},{"visible":true,"include":false,"step":"390","x":407.4561904761905,"y":294.4712380952381,"z":194.20504761904763,"a95":2.164474,"info":"\"90-03-23\" at \"14:44\""},{"visible":true,"include":false,"step":"420","x":394.8341904761905,"y":274.9602857142857,"z":205.142,"a95":3.826645,"info":"\"90-03-27\" at \"10:57\""},{"visible":true,"include":false,"step":"450","x":380.6949523809524,"y":250.80733333333333,"z":134.53609523809524,"a95":2.394319,"info":"\"90-03-27\" at \"13:39\""},{"visible":true,"include":false,"step":"480","x":321.01304761904765,"y":210.02295238095238,"z":121.41695238095238,"a95":2.569086,"info":"\"90-03-28\" at \"09:26\""},{"visible":true,"include":false,"step":"510","x":309.68228571428574,"y":242.38838095238094,"z":118.04676190476191,"a95":2.756314,"info":"\"90-03-28\" at \"11:54\""},{"visible":true,"include":false,"step":"540","x":237.9787619047619,"y":216.00790476190477,"z":96.10828571428571,"a95":2.841639,"info":"\"90-03-28\" at \"15:44\""},{"visible":true,"include":false,"step":"560","x":239.57990476190474,"y":213.6514285714286,"z":28.646542857142858,"a95":2.901862,"info":"\"90-03-29\" at \"10:30\""},{"visible":true,"include":false,"step":"580","x":177.67057142857144,"y":130.75914285714285,"z":78.18562857142858,"a95":3.528567,"info":"\"90-03-29\" at \"14:27\""},{"visible":true,"include":false,"step":"600","x":164.77085714285715,"y":128.26057142857144,"z":42.656685714285715,"a95":3.51148,"info":"\"90-03-30\" at \"09:10\""}]},{"version":"v1.1.0","exported":"2016-10-10T19:56:19.957Z","volume":10.5,"added":"2016-10-10T19:39:45.195Z","format":"Utrecht","demagType":"Unknown","strat":"2.02","patch":1.1,"GEO":[],"TECT":[],"interpreted":false,"name":"TY 19.B1","coreAzi":26,"coreDip":41,"bedStrike":329,"bedDip":29,"data":[{"visible":false,"include":false,"step":"20","x":-914.513619047619,"y":176.21142857142857,"z":2293.7180952380954,"a95":0.7708912,"info":"\"90-03-19\" at \"09:32\""},{"visible":true,"include":false,"step":"100","x":-923.507142857143,"y":317.45561904761905,"z":2708.2180952380954,"a95":0.8036278,"info":"\"90-03-19\" at \"13:59\""},{"visible":true,"include":false,"step":"150","x":-45.90419047619048,"y":906.4625714285714,"z":1171.4285714285713,"a95":1.42624,"info":"\"90-03-20\" at \"11:07\""},{"visible":true,"include":false,"step":"200","x":180.00123809523808,"y":908.916,"z":1029.7780952380951,"a95":1.345604,"info":"\"90-03-20\" at \"14:53\""},{"visible":true,"include":false,"step":"250","x":257.8640952380952,"y":858.3632380952381,"z":874.3748571428571,"a95":1.483042,"info":"\"90-03-21\" at \"10:57\""},{"visible":true,"include":false,"step":"300","x":142.49019047619046,"y":852.8753333333334,"z":623.6127619047619,"a95":1.765904,"info":"\"90-03-21\" at \"16:07\""},{"visible":true,"include":false,"step":"330","x":181.87361904761906,"y":808.8435238095238,"z":502.04085714285713,"a95":1.62964,"info":"\"90-03-22\" at \"12:10\""},{"visible":true,"include":false,"step":"360","x":258.12228571428574,"y":724.4599047619047,"z":431.02171428571427,"a95":1.982175,"info":"\"90-03-23\" at \"09:21\""},{"visible":true,"include":false,"step":"390","x":229.65009523809525,"y":742.4729523809524,"z":378.4029523809524,"a95":1.500064,"info":"\"90-03-23\" at \"14:45\""},{"visible":true,"include":false,"step":"420","x":273.6755238095238,"y":682.352,"z":383.9230476190476,"a95":2.617366,"info":"\"90-03-27\" at \"10:58\""},{"visible":true,"include":false,"step":"450","x":215.61409523809522,"y":671.5571428571429,"z":315.7899047619047,"a95":1.858818,"info":"\"90-03-27\" at \"13:40\""},{"visible":true,"include":false,"step":"480","x":207.04666666666665,"y":603.482,"z":315.73180952380955,"a95":1.859541,"info":"\"90-03-28\" at \"09:27\""},{"visible":true,"include":false,"step":"510","x":180.7824761904762,"y":625.7949523809524,"z":251.32380952380953,"a95":1.846629,"info":"\"90-03-28\" at \"11:55\""},{"visible":true,"include":false,"step":"540","x":143.11009523809523,"y":489.14761904761906,"z":212.1922857142857,"a95":1.815995,"info":"\"90-03-28\" at \"15:45\""},{"visible":true,"include":false,"step":"560","x":111.30638095238096,"y":406.7137142857143,"z":153.96952380952382,"a95":1.735429,"info":"\"90-03-29\" at \"10:31\""},{"visible":true,"include":false,"step":"580","x":77.86281904761906,"y":392.742380952381,"z":159.07,"a95":2.071951,"info":"\"90-03-29\" at \"14:28\""},{"visible":true,"include":false,"step":"600","x":23.397580952380952,"y":294.9102857142857,"z":14.914019047619046,"a95":2.280932,"info":"\"90-03-30\" at \"09:11\""}]},{"version":"v1.1.0","exported":"2016-10-10T19:56:19.957Z","volume":10.5,"added":"2016-10-10T19:39:45.195Z","format":"Utrecht","demagType":"Unknown","strat":"2.03","patch":1.1,"GEO":[],"TECT":[],"interpreted":false,"name":"TY 20.1A","coreAzi":10,"coreDip":27,"bedStrike":329,"bedDip":29,"data":[{"visible":false,"include":false,"step":"20","x":-1263.8628571428571,"y":-32.84312380952381,"z":1671.8485714285714,"a95":0.5881575,"info":"\"90-03-19\" at \"09:32\""},{"visible":true,"include":true,"step":"100","x":-1115.1295238095238,"y":183.10028571428572,"z":1922.1657142857143,"a95":0.8754334,"info":"\"90-03-19\" at \"14:00\""},{"visible":true,"include":true,"step":"150","x":-180.58238095238096,"y":442.0619047619047,"z":524.2504761904762,"a95":1.951638,"info":"\"90-03-20\" at \"11:08\""},{"visible":true,"include":true,"step":"200","x":-126.80142857142857,"y":459.17104761904767,"z":399.902380952381,"a95":2.084494,"info":"\"90-03-20\" at \"14:53\""},{"visible":true,"include":true,"step":"250","x":-22.338752380952382,"y":441.2872380952381,"z":298.9905714285714,"a95":2.179297,"info":"\"90-03-21\" at \"10:58\""},{"visible":true,"include":true,"step":"300","x":59.97889523809524,"y":375.2393333333333,"z":137.26066666666668,"a95":3.178289,"info":"\"90-03-21\" at \"16:08\""},{"visible":true,"include":true,"step":"330","x":117.37533333333333,"y":366.07142857142856,"z":87.15986666666666,"a95":2.62045,"info":"\"90-03-22\" at \"12:10\""},{"visible":true,"include":true,"step":"360","x":102.39666666666666,"y":285.1741904761905,"z":63.207047619047614,"a95":3.160337,"info":"\"90-03-23\" at \"09:22\""},{"visible":true,"include":true,"step":"390","x":66.49975238095237,"y":315.8415238095238,"z":24.985828571428573,"a95":2.738611,"info":"\"90-03-23\" at \"14:46\""},{"visible":true,"include":true,"step":"420","x":126.15580952380952,"y":298.1964761904762,"z":18.594104761904763,"a95":5.533781,"info":"\"90-03-27\" at \"10:58\""},{"visible":true,"include":true,"step":"450","x":105.45695238095239,"y":309.59828571428574,"z":-30.796485714285712,"a95":2.694382,"info":"\"90-03-27\" at \"13:41\""},{"visible":true,"include":true,"step":"480","x":73.42088571428572,"y":251.33676190476191,"z":-12.776990476190477,"a95":3.255705,"info":"\"90-03-28\" at \"09:28\""},{"visible":true,"include":true,"step":"510","x":119.86742857142856,"y":263.2873333333333,"z":-53.10940952380953,"a95":3.04033,"info":"\"90-03-28\" at \"11:56\""},{"visible":true,"include":true,"step":"540","x":70.64468571428571,"y":169.45171428571427,"z":-60.53414285714286,"a95":3.851409,"info":"\"90-03-28\" at \"15:46\""},{"visible":true,"include":true,"step":"560","x":85.08094285714286,"y":231.13504761904764,"z":-49.88772380952381,"a95":3.009916,"info":"\"90-03-29\" at \"10:32\""},{"visible":true,"include":true,"step":"580","x":88.12185714285714,"y":184.45609523809523,"z":-54.71056190476191,"a95":2.446939,"info":"\"90-03-29\" at \"14:28\""},{"visible":true,"include":true,"step":"600","x":79.86426666666667,"y":144.13657142857141,"z":-88.82559047619047,"a95":3.137786,"info":"\"90-03-30\" at \"09:12\""}]},{"version":"v1.1.0","exported":"2016-10-10T19:56:19.957Z","volume":10.5,"added":"2016-10-10T19:39:45.196Z","format":"Utrecht","demagType":"Unknown","strat":"2.04","patch":1.1,"GEO":[],"TECT":[],"interpreted":false,"name":"TY 21.A1","coreAzi":55,"coreDip":35,"bedStrike":329,"bedDip":29,"data":[{"visible":false,"include":false,"step":"20","x":-490.9166666666667,"y":-853.4371428571428,"z":824.2030476190475,"a95":0.4741155,"info":"\"90-03-19\" at \"09:33\""},{"visible":true,"include":true,"step":"100","x":-422.6284761904762,"y":-321.7167619047619,"z":1464.4152380952382,"a95":1.013637,"info":"\"90-03-19\" at \"14:01\""},{"visible":true,"include":true,"step":"150","x":230.10209523809525,"y":214.41323809523809,"z":674.0362857142858,"a95":2.246682,"info":"\"90-03-20\" at \"11:09\""},{"visible":true,"include":true,"step":"200","x":276.13533333333334,"y":276.4581904761905,"z":564.9250476190476,"a95":2.159228,"info":"\"90-03-20\" at \"14:54\""},{"visible":true,"include":true,"step":"250","x":280.20285714285717,"y":293.89019047619047,"z":503.65485714285717,"a95":2.735942,"info":"\"90-03-21\" at \"10:58\""},{"visible":true,"include":false,"step":"300","x":313.7755238095238,"y":229.52095238095237,"z":328.30219047619045,"a95":2.773791,"info":"\"90-03-21\" at \"16:09\""},{"visible":true,"include":false,"step":"330","x":260.6402857142857,"y":294.2775238095238,"z":274.26304761904765,"a95":2.227579,"info":"\"90-03-22\" at \"12:11\""},{"visible":true,"include":false,"step":"360","x":275.10238095238094,"y":239.14085714285713,"z":223.71028571428573,"a95":2.906122,"info":"\"90-03-23\" at \"09:23\""}]},{"version":"v1.1.0","exported":"2016-10-10T19:56:19.957Z","volume":10.5,"added":"2016-10-10T19:39:45.197Z","format":"Utrecht","demagType":"Unknown","strat":"2.05","patch":1.1,"GEO":[],"TECT":[],"interpreted":false,"name":"TY 22.1","coreAzi":5,"coreDip":25,"bedStrike":329,"bedDip":29,"data":[{"visible":false,"include":false,"step":"20","x":-3911.6514285714284,"y":-399.62476190476195,"z":2737.0714285714284,"a95":1.026113,"info":"\"90-03-19\" at \"09:34\""},{"visible":true,"include":true,"step":"100","x":-3184.3047619047616,"y":65.72499047619047,"z":3587.758095238095,"a95":1.108589,"info":"\"90-03-19\" at \"14:01\""},{"visible":true,"include":true,"step":"150","x":-1226.6295238095238,"y":265.54704761904765,"z":1313.7895238095239,"a95":2.14268,"info":"\"90-03-20\" at \"11:10\""},{"visible":true,"include":true,"step":"200","x":-1129.4628571428573,"y":270.6475238095238,"z":1001.3057142857142,"a95":2.205779,"info":"\"90-03-20\" at \"14:55\""},{"visible":true,"include":true,"step":"250","x":-991.427619047619,"y":308.094,"z":780.2421904761904,"a95":2.726542,"info":"\"90-03-21\" at \"10:59\""},{"visible":true,"include":true,"step":"300","x":-510.0465714285714,"y":316.5517142857143,"z":331.33657142857146,"a95":4.196767,"info":"\"90-03-21\" at \"16:10\""},{"visible":true,"include":true,"step":"330","x":-400.93533333333335,"y":382.92238095238093,"z":160.37419047619048,"a95":4.625803,"info":"\"90-03-22\" at \"12:12\""},{"visible":true,"include":false,"step":"360","x":-365.81314285714285,"y":207.18228571428574,"z":120.86171428571429,"a95":6.144124,"info":"\"90-03-23\" at \"09:24\""},{"visible":true,"include":false,"step":"390","x":-320.8774285714286,"y":269.74361904761906,"z":44.2255619047619,"a95":6.355415,"info":"\"90-03-23\" at \"14:47\""},{"visible":true,"include":false,"step":"420","x":-221.38609523809524,"y":237.36533333333333,"z":80.09022857142857,"a95":8.893167,"info":"\"90-03-27\" at \"11:00\""},{"visible":true,"include":false,"step":"450","x":-173.6547619047619,"y":411.65923809523804,"z":-126.79504761904761,"a95":4.698681,"info":"\"90-03-27\" at \"13:42\""},{"visible":true,"include":false,"step":"480","x":-165.69409523809523,"y":398.4109523809523,"z":-0.271164,"a95":5.134099,"info":"\"90-03-28\" at \"09:29\""},{"visible":true,"include":false,"step":"510","x":-117.70457142857143,"y":389.00419047619044,"z":-326.4169523809524,"a95":5.44551,"info":"\"90-03-28\" at \"11:57\""},{"visible":true,"include":false,"step":"540","x":-204.90961904761903,"y":328.8509523809524,"z":-160.18047619047618,"a95":4.342279,"info":"\"90-03-28\" at \"15:47\""},{"visible":true,"include":false,"step":"560","x":-116.99438095238095,"y":354.6502857142857,"z":-262.6869523809524,"a95":4.269044,"info":"\"90-03-29\" at \"10:33\""},{"visible":true,"include":false,"step":"580","x":-135.1881904761905,"y":241.46514285714287,"z":-180.6275238095238,"a95":5.201348,"info":"\"90-03-29\" at \"14:29\""},{"visible":true,"include":false,"step":"600","x":-104.59180952380952,"y":226.67371428571428,"z":-291.7273333333334,"a95":3.884289,"info":"\"90-03-30\" at \"09:14\""}]},{"version":"v1.1.0","exported":"2016-10-10T19:56:19.957Z","volume":10.5,"added":"2016-10-10T19:39:45.197Z","format":"Utrecht","demagType":"Unknown","strat":"2.06","patch":1.1,"GEO":[],"TECT":[],"interpreted":false,"name":"TY 23.1","coreAzi":75,"coreDip":57,"bedStrike":329,"bedDip":29,"data":[{"visible":false,"include":false,"step":"20","x":-2005.044761904762,"y":-2424.1866666666665,"z":1241.8600000000001,"a95":0.6159055,"info":"\"90-03-19\" at \"09:35\""},{"visible":true,"include":false,"step":"100","x":-1909.4466666666665,"y":-2230.6466666666665,"z":1812.6666666666667,"a95":0.5194815,"info":"\"90-03-19\" at \"14:02\""},{"visible":true,"include":false,"step":"150","x":-1368.9914285714285,"y":-1299.2628571428572,"z":816.9783809523809,"a95":0.751891,"info":"\"90-03-20\" at \"11:10\""},{"visible":true,"include":false,"step":"200","x":-1193.3799999999999,"y":-1158.1933333333334,"z":719.2302857142856,"a95":1.671007,"info":"\"90-03-20\" at \"15:37\""},{"visible":true,"include":false,"step":"250","x":-1169.8142857142857,"y":-1119.0038095238097,"z":554.5304761904762,"a95":1.015883,"info":"\"90-03-21\" at \"11:00\""},{"visible":true,"include":false,"step":"300","x":-964.6980952380952,"y":-915.0495238095239,"z":324.94485714285713,"a95":0.9158722,"info":"\"90-03-21\" at \"16:11\""},{"visible":true,"include":true,"step":"330","x":-893.0980952380953,"y":-692.630380952381,"z":247.534,"a95":1.261564,"info":"\"90-03-22\" at \"12:13\""},{"visible":true,"include":true,"step":"360","x":-721.1026666666667,"y":-672.2931428571429,"z":222.87104761904763,"a95":1.053593,"info":"\"90-03-23\" at \"09:25\""},{"visible":true,"include":true,"step":"390","x":-664.4810476190477,"y":-614.4447619047619,"z":181.29247619047618,"a95":0.844341,"info":"\"90-03-23\" at \"14:48\""},{"visible":true,"include":true,"step":"420","x":-653.763619047619,"y":-534.9807619047618,"z":164.04780952380952,"a95":2.531094,"info":"\"90-03-27\" at \"11:00\""},{"visible":true,"include":true,"step":"450","x":-617.6794285714286,"y":-475.5377142857143,"z":137.5382857142857,"a95":1.333054,"info":"\"90-03-27\" at \"13:42\""},{"visible":true,"include":true,"step":"480","x":-605.3478095238095,"y":-402.0458095238095,"z":114.41828571428572,"a95":1.404864,"info":"\"90-03-28\" at \"09:30\""},{"visible":true,"include":true,"step":"510","x":-616.6399047619047,"y":-286.162,"z":50.72704761904762,"a95":1.821774,"info":"\"90-03-28\" at \"11:58\""},{"visible":true,"include":true,"step":"540","x":-446.5102857142857,"y":-366.2844761904762,"z":55.34328571428572,"a95":1.520986,"info":"\"90-03-28\" at \"15:48\""},{"visible":true,"include":false,"step":"560","x":-425.67590476190475,"y":-364.80600000000004,"z":20.892542857142857,"a95":1.262558,"info":"\"90-03-29\" at \"10:33\""},{"visible":true,"include":false,"step":"580","x":-426.0632380952381,"y":-256.2241904761905,"z":97.2187619047619,"a95":1.356366,"info":"\"90-03-29\" at \"14:30\""},{"visible":true,"include":false,"step":"600","x":-328.1149523809524,"y":-252.48600000000002,"z":-44.057695238095235,"a95":1.663338,"info":"\"90-03-30\" at \"09:15\""}]},{"version":"v1.1.0","exported":"2016-10-10T19:56:19.957Z","volume":10.5,"added":"2016-10-10T19:39:45.198Z","format":"Utrecht","demagType":"Unknown","strat":"2.07","patch":1.1,"GEO":[],"TECT":[],"interpreted":false,"name":"TY 24.1","coreAzi":183,"coreDip":33,"bedStrike":8,"bedDip":25,"data":[{"visible":false,"include":false,"step":"20","x":-3669.6047619047617,"y":913.8421904761906,"z":-1241.162857142857,"a95":2.831764,"info":"\"90-03-19\" at \"09:35\""},{"visible":true,"include":false,"step":"100","x":-3071.255238095238,"y":669.1295238095238,"z":-327.14,"a95":0.9614074,"info":"\"90-03-19\" at \"14:03\""},{"visible":true,"include":false,"step":"150","x":-1635.8295238095238,"y":696.8270476190477,"z":-137.00238095238097,"a95":1.933438,"info":"\"90-03-20\" at \"11:11\""},{"visible":true,"include":false,"step":"200","x":-1431.7457142857143,"y":603.1462857142857,"z":-126.67238095238095,"a95":1.464584,"info":"\"90-03-20\" at \"15:37\""},{"visible":true,"include":false,"step":"250","x":-1189.7,"y":640.0117142857142,"z":-103.42971428571428,"a95":1.041036,"info":"\"90-03-21\" at \"11:01\""},{"visible":true,"include":false,"step":"300","x":-837.1866666666666,"y":464.1424761904762,"z":-128.8675238095238,"a95":1.217988,"info":"\"90-03-21\" at \"16:12\""},{"visible":true,"include":false,"step":"330","x":-692.7595238095239,"y":448.7119047619048,"z":-145.3955238095238,"a95":1.447804,"info":"\"90-03-22\" at \"12:14\""},{"visible":true,"include":true,"step":"360","x":-601.8550476190476,"y":388.60390476190474,"z":-105.302,"a95":1.581294,"info":"\"90-03-23\" at \"09:26\""},{"visible":true,"include":true,"step":"390","x":-552.464380952381,"y":376.4015238095238,"z":-125.38104761904762,"a95":2.469339,"info":"\"90-03-23\" at \"14:49\""},{"visible":true,"include":true,"step":"420","x":-499.78114285714287,"y":339.05838095238096,"z":-53.8196,"a95":3.432006,"info":"\"90-03-27\" at \"11:01\""},{"visible":true,"include":true,"step":"450","x":-487.20428571428573,"y":350.5957142857143,"z":-104.31419047619048,"a95":1.809239,"info":"\"90-03-27\" at \"13:43\""},{"visible":true,"include":true,"step":"480","x":-482.79466666666667,"y":235.78361904761906,"z":-68.84338095238095,"a95":1.78093,"info":"\"90-03-28\" at \"09:31\""},{"visible":true,"include":true,"step":"510","x":-432.75838095238095,"y":261.4020952380953,"z":-68.00406666666666,"a95":1.833802,"info":"\"90-03-28\" at \"11:59\""},{"visible":true,"include":true,"step":"540","x":-407.34,"y":200.132,"z":-31.73264761904762,"a95":1.931484,"info":"\"90-03-28\" at \"15:49\""},{"visible":true,"include":true,"step":"560","x":-364.76085714285716,"y":244.48019047619047,"z":-83.58308571428572,"a95":1.935613,"info":"\"90-03-29\" at \"10:34\""},{"visible":true,"include":true,"step":"580","x":-306.3442857142857,"y":179.55580952380953,"z":-30.37682857142857,"a95":1.98547,"info":"\"90-03-29\" at \"14:31\""},{"visible":true,"include":false,"step":"600","x":-232.89114285714285,"y":141.25704761904763,"z":-90.00709523809523,"a95":2.453982,"info":"\"90-03-30\" at \"09:16\""}]},{"version":"v1.1.0","exported":"2016-10-10T19:56:19.957Z","volume":10.5,"added":"2016-10-10T19:39:45.198Z","format":"Utrecht","demagType":"Unknown","strat":"2.08","patch":1.1,"GEO":[],"TECT":[],"interpreted":false,"name":"TY 25.C1","coreAzi":240,"coreDip":0,"bedStrike":8,"bedDip":25,"data":[{"visible":true,"include":false,"step":"20","x":-787.3893333333333,"y":827.1341904761905,"z":658.4701904761905,"a95":1.200429,"info":"\"90-03-19\" at \"09:36\""},{"visible":true,"include":false,"step":"100","x":-687.7236190476191,"y":677.264380952381,"z":400.93533333333335,"a95":1.06414,"info":"\"90-03-19\" at \"14:03\""},{"visible":true,"include":true,"step":"150","x":-353.8690476190476,"y":367.23352380952383,"z":351.5447619047619,"a95":1.73497,"info":"\"90-03-20\" at \"11:12\""},{"visible":true,"include":true,"step":"200","x":-322.03961904761906,"y":347.6064761904762,"z":316.5517142857143,"a95":1.769908,"info":"\"90-03-20\" at \"15:38\""},{"visible":true,"include":true,"step":"250","x":-319.0696190476191,"y":288.27314285714283,"z":295.0522857142857,"a95":1.522148,"info":"\"90-03-21\" at \"11:01\""},{"visible":true,"include":true,"step":"300","x":-275.29609523809523,"y":236.3646666666667,"z":255.79809523809524,"a95":1.420171,"info":"\"90-03-21\" at \"16:14\""},{"visible":true,"include":true,"step":"330","x":-242.3044761904762,"y":212.67009523809526,"z":253.92571428571426,"a95":1.00151,"info":"\"90-03-22\" at \"12:14\""}]},{"version":"v1.1.0","exported":"2016-10-10T19:56:19.957Z","volume":10.5,"added":"2016-10-10T19:39:45.199Z","format":"Utrecht","demagType":"Unknown","strat":"2.09","patch":1.1,"GEO":[],"TECT":[],"interpreted":false,"name":"TY 26.A1","coreAzi":37,"coreDip":48,"bedStrike":8,"bedDip":25,"data":[{"visible":true,"include":false,"step":"20","x":-533.9155238095238,"y":-1193.9419047619047,"z":815.8099047619048,"a95":0.5540355,"info":"\"90-03-19\" at \"09:37\""},{"visible":true,"include":false,"step":"100","x":-654.6028571428571,"y":-1090.9190476190477,"z":968.0552380952381,"a95":0.5757486,"info":"\"90-03-19\" at \"14:04\""},{"visible":true,"include":true,"step":"150","x":-605.9224761904761,"y":-971.0904761904762,"z":578.2896190476191,"a95":0.8088812,"info":"\"90-03-20\" at \"11:12\""},{"visible":true,"include":true,"step":"200","x":-632.9097142857142,"y":-926.6707619047619,"z":562.9236190476191,"a95":0.8970169,"info":"\"90-03-20\" at \"15:39\""},{"visible":true,"include":true,"step":"250","x":-556.2090476190476,"y":-902.266,"z":516.438380952381,"a95":0.9699495,"info":"\"90-03-21\" at \"11:02\""},{"visible":true,"include":true,"step":"300","x":-539.0999047619048,"y":-720.069619047619,"z":399.64409523809525,"a95":1.538442,"info":"\"90-03-21\" at \"16:15\""},{"visible":true,"include":true,"step":"330","x":-449.0346666666666,"y":-665.4494285714286,"z":352.83609523809525,"a95":0.6862195,"info":"\"90-03-22\" at \"12:15\""},{"visible":true,"include":true,"step":"360","x":-488.28895238095237,"y":-580.8720952380952,"z":346.1860952380953,"a95":1.176543,"info":"\"90-03-23\" at \"09:28\""},{"visible":true,"include":true,"step":"390","x":-440.31876190476186,"y":-571.316761904762,"z":310.4182857142857,"a95":0.9640146,"info":"\"90-03-23\" at \"14:50\""},{"visible":true,"include":true,"step":"420","x":-422.4283809523809,"y":-463.8131428571428,"z":264.06857142857143,"a95":2.610319,"info":"\"90-03-27\" at \"11:02\""},{"visible":false,"include":false,"step":"450","x":-267.3870476190476,"y":-574.4609523809524,"z":200.99704761904763,"a95":1.203679,"info":"\"90-03-27\" at \"13:44\""}]},{"version":"v1.1.0","exported":"2016-10-10T19:56:19.958Z","volume":10.5,"added":"2016-10-10T19:39:45.199Z","format":"Utrecht","demagType":"Unknown","strat":"2.10","patch":1.1,"GEO":[],"TECT":[],"interpreted":false,"name":"TY 26.B1","coreAzi":46,"coreDip":16,"bedStrike":8,"bedDip":25,"data":[{"visible":false,"include":false,"step":"20","x":-1038.4095238095238,"y":-916.6441904761904,"z":119.82219047619049,"a95":1.064382,"info":"\"90-03-19\" at \"09:37\""},{"visible":true,"include":false,"step":"100","x":-947.3309523809525,"y":-944.6192380952382,"z":-44.031866666666666,"a95":0.7006896,"info":"\"90-03-19\" at \"14:05\""},{"visible":true,"include":true,"step":"150","x":-678.6847619047619,"y":-768.1689523809524,"z":-184.77895238095238,"a95":1.010515,"info":"\"90-03-20\" at \"11:13\""},{"visible":true,"include":true,"step":"200","x":-764.4242857142857,"y":-674.8756190476191,"z":-171.6726666666667,"a95":1.12147,"info":"\"90-03-20\" at \"15:39\""},{"visible":true,"include":true,"step":"250","x":-548.6552380952381,"y":-737.8243809523809,"z":-193.04295238095239,"a95":0.6984155,"info":"\"90-03-21\" at \"11:03\""},{"visible":true,"include":true,"step":"300","x":-601.5967619047618,"y":-522.1844761904762,"z":-117.18161904761904,"a95":1.042735,"info":"\"90-03-21\" at \"16:16\""},{"visible":true,"include":true,"step":"330","x":-489.1282857142857,"y":-531.8042857142857,"z":-170.7041904761905,"a95":1.130902,"info":"\"90-03-22\" at \"12:16\""},{"visible":true,"include":true,"step":"360","x":-476.34485714285717,"y":-491.1297142857143,"z":-132.03104761904763,"a95":1.091791,"info":"\"90-03-23\" at \"09:28\""},{"visible":true,"include":true,"step":"390","x":-430.3115238095238,"y":-483.70495238095236,"z":-146.1702857142857,"a95":0.9783713,"info":"\"90-03-23\" at \"14:51\""},{"visible":false,"include":false,"step":"420","x":-248.91561904761906,"y":-585.2042857142858,"z":-115.43838095238095,"a95":2.781357,"info":"\"90-03-27\" at \"11:03\""},{"visible":false,"include":false,"step":"450","x":-476.6740952380953,"y":-339.60714285714283,"z":-150.24428571428572,"a95":1.27766,"info":"\"90-03-27\" at \"13:45\""},{"visible":true,"include":true,"step":"480","x":-378.25447619047617,"y":-422.3960952380952,"z":-127.32438095238095,"a95":1.202996,"info":"\"90-03-28\" at \"09:33\""},{"visible":true,"include":true,"step":"510","x":-311.41895238095236,"y":-402.18790476190475,"z":-121.9204761904762,"a95":1.108333,"info":"\"90-03-28\" at \"12:00\""},{"visible":true,"include":true,"step":"540","x":-344.4622857142857,"y":-269.1432380952381,"z":-111.13847619047618,"a95":1.416527,"info":"\"90-03-28\" at \"15:50\""},{"visible":true,"include":true,"step":"560","x":-317.19733333333335,"y":-247.71476190476193,"z":-134.16809523809525,"a95":1.522441,"info":"\"90-03-29\" at \"10:35\""},{"visible":true,"include":false,"step":"580","x":-351.64161904761903,"y":-135.11714285714285,"z":-67.7587238095238,"a95":1.576257,"info":"\"90-03-29\" at \"14:32\""},{"visible":true,"include":false,"step":"600","x":-195.9030476190476,"y":-192.42314285714286,"z":-119.02809523809525,"a95":1.543352,"info":"\"90-03-30\" at \"09:17\""}]},{"version":"v1.1.0","exported":"2016-10-10T19:56:19.958Z","volume":10.5,"added":"2016-10-10T19:39:45.199Z","format":"Utrecht","demagType":"Unknown","strat":"3.01","patch":1.1,"GEO":[],"TECT":[],"interpreted":false,"name":"TY 27.A1","coreAzi":52,"coreDip":7,"bedStrike":8,"bedDip":25,"data":[{"visible":true,"include":false,"step":"20","x":-300.3270476190476,"y":-1064.944761904762,"z":-217.64790476190475,"a95":0.5539314,"info":"\"90-03-19\" at \"09:38\""},{"visible":true,"include":false,"step":"100","x":-259.4781904761905,"y":-1018.8666666666667,"z":-55.20124761904762,"a95":1.026243,"info":"\"90-03-19\" at \"14:06\""},{"visible":true,"include":false,"step":"150","x":-261.6087619047619,"y":-842.4162857142857,"z":-138.4227619047619,"a95":0.5829945,"info":"\"90-03-20\" at \"11:14\""},{"visible":true,"include":false,"step":"200","x":-266.2572380952381,"y":-801.1605714285714,"z":-134.93638095238097,"a95":0.5067236,"info":"\"90-03-20\" at \"15:40\""},{"visible":true,"include":true,"step":"250","x":-152.23923809523808,"y":-754.8043809523809,"z":-179.22647619047618,"a95":0.8521115,"info":"\"90-03-21\" at \"11:03\""},{"visible":true,"include":true,"step":"300","x":-147.71980952380952,"y":-683.2041904761905,"z":-172.70561904761905,"a95":0.9578509,"info":"\"90-03-21\" at \"16:17\""},{"visible":true,"include":true,"step":"330","x":-109.69228571428572,"y":-632.3286666666667,"z":-157.59790476190477,"a95":0.6926497,"info":"\"90-03-22\" at \"12:16\""},{"visible":true,"include":true,"step":"360","x":-132.35390476190474,"y":-584.6812380952381,"z":-131.45,"a95":0.6807042,"info":"\"90-03-23\" at \"09:29\""},{"visible":true,"include":true,"step":"390","x":-45.193999999999996,"y":-568.4114285714286,"z":-113.75980952380954,"a95":1.315895,"info":"\"90-03-23\" at \"14:52\""},{"visible":true,"include":true,"step":"420","x":-94.55231428571429,"y":-554.4980952380952,"z":-110.90609523809523,"a95":3.24094,"info":"\"90-03-27\" at \"11:04\""},{"visible":true,"include":true,"step":"450","x":-45.49744761904762,"y":-512.0932380952381,"z":-114.77980952380953,"a95":2.142195,"info":"\"90-03-27\" at \"13:46\""},{"visible":true,"include":true,"step":"480","x":-116.40038095238094,"y":-486.3391428571428,"z":-122.20457142857143,"a95":1.02959,"info":"\"90-03-28\" at \"09:34\""},{"visible":true,"include":true,"step":"510","x":-84.91953333333333,"y":-472.8455238095238,"z":-112.16504761904761,"a95":0.8033912,"info":"\"90-03-28\" at \"12:01\""},{"visible":true,"include":true,"step":"540","x":-110.04095238095239,"y":-424.1909523809524,"z":-105.59257142857143,"a95":1.200599,"info":"\"90-03-28\" at \"15:50\""},{"visible":true,"include":false,"step":"560","x":-37.808009523809524,"y":-413.7381904761905,"z":-119.91904761904763,"a95":1.313442,"info":"\"90-03-29\" at \"10:36\""},{"visible":true,"include":false,"step":"580","x":-44.95512380952381,"y":-397.6426666666666,"z":-115.35447619047619,"a95":1.698723,"info":"\"90-03-29\" at \"14:33\""},{"visible":true,"include":false,"step":"600","x":-43.502457142857146,"y":-395.3765714285714,"z":-96.66352380952381,"a95":2.907772,"info":"\"90-03-30\" at \"09:18\""}]},{"version":"v1.1.0","exported":"2016-10-10T19:56:19.958Z","volume":10.5,"added":"2016-10-10T19:39:45.199Z","format":"Utrecht","demagType":"Unknown","strat":"3.02","patch":1.1,"GEO":[],"TECT":[],"interpreted":false,"name":"TY 27.B1A","coreAzi":48,"coreDip":8,"bedStrike":8,"bedDip":25,"data":[{"visible":true,"include":false,"step":"20","x":-473.0327619047619,"y":-623.2059047619048,"z":-241.01961904761907,"a95":0.615052,"info":"\"90-03-19\" at \"09:39\""},{"visible":true,"include":false,"step":"100","x":-449.61580952380956,"y":-557.3711428571429,"z":-112.85590476190477,"a95":0.4532828,"info":"\"90-03-19\" at \"14:06\""},{"visible":true,"include":false,"step":"150","x":-314.35657142857144,"y":-474.149619047619,"z":-152.23923809523808,"a95":0.9203572,"info":"\"90-03-20\" at \"11:15\""},{"visible":true,"include":true,"step":"200","x":-260.8985714285714,"y":-459.62304761904767,"z":-161.21342857142858,"a95":1.211504,"info":"\"90-03-20\" at \"15:41\""},{"visible":true,"include":true,"step":"250","x":-252.1825714285714,"y":-428.2454285714286,"z":-153.65961904761903,"a95":0.8167596,"info":"\"90-03-21\" at \"11:04\""},{"visible":true,"include":true,"step":"300","x":-223.00009523809527,"y":-394.67276190476196,"z":-125.96219047619049,"a95":1.145328,"info":"\"90-03-21\" at \"16:18\""},{"visible":true,"include":true,"step":"330","x":-211.056,"y":-351.4157142857143,"z":-125.05828571428572,"a95":0.5219398,"info":"\"90-03-22\" at \"12:17\""},{"visible":true,"include":true,"step":"360","x":-220.5467619047619,"y":-318.68228571428574,"z":-106.01219047619047,"a95":0.7431331,"info":"\"90-03-23\" at \"09:30\""},{"visible":true,"include":true,"step":"390","x":-232.29714285714286,"y":-306.3507619047619,"z":-99.23314285714287,"a95":1.05801,"info":"\"90-03-23\" at \"14:53\""},{"visible":true,"include":true,"step":"420","x":-172.82190476190476,"y":-309.23028571428574,"z":-84.4417619047619,"a95":4.104133,"info":"\"90-03-27\" at \"11:05\""},{"visible":true,"include":true,"step":"450","x":-117.57542857142856,"y":-261.3375238095238,"z":-80.98765714285715,"a95":1.271155,"info":"\"90-03-27\" at \"13:48\""}]},{"version":"v1.1.0","exported":"2016-10-10T19:56:19.958Z","volume":10.5,"added":"2016-10-10T19:39:45.199Z","format":"Utrecht","demagType":"Unknown","strat":"3.03","patch":1.1,"GEO":[],"TECT":[],"interpreted":false,"name":"TY 28.A1","coreAzi":61,"coreDip":52,"bedStrike":8,"bedDip":25,"data":[{"visible":false,"include":false,"step":"20","x":-1304.5380952380951,"y":-1212.4066666666668,"z":2033.8533333333332,"a95":0.8331511,"info":"\"90-03-19\" at \"09:40\""},{"visible":true,"include":false,"step":"100","x":-1037.5247619047618,"y":-1318.6961904761904,"z":1539.824761904762,"a95":1.037561,"info":"\"90-03-19\" at \"14:07\""},{"visible":true,"include":false,"step":"150","x":-604.308380952381,"y":-754.8044761904762,"z":637.4291428571429,"a95":0.8833815,"info":"\"90-03-20\" at \"11:15\""},{"visible":true,"include":false,"step":"200","x":-476.92590476190475,"y":-701.4755238095238,"z":510.6277142857143,"a95":1.004389,"info":"\"90-03-20\" at \"15:41\""},{"visible":true,"include":false,"step":"250","x":-352.83609523809525,"y":-662.8669523809524,"z":395.5766666666667,"a95":1.098833,"info":"\"90-03-21\" at \"11:05\""},{"visible":true,"include":true,"step":"300","x":-339.0841904761905,"y":-466.2729523809524,"z":249.53542857142855,"a95":1.419996,"info":"\"90-03-21\" at \"16:19\""},{"visible":true,"include":true,"step":"330","x":-168.38,"y":-408.618380952381,"z":177.67695238095237,"a95":1.398983,"info":"\"90-03-22\" at \"12:17\""},{"visible":true,"include":true,"step":"360","x":-228.10057142857144,"y":-364.58647619047616,"z":162.44019047619048,"a95":1.576211,"info":"\"90-03-23\" at \"09:30\""},{"visible":true,"include":true,"step":"390","x":-291.5659047619048,"y":-329.01238095238097,"z":173.2867619047619,"a95":2.458055,"info":"\"90-03-23\" at \"14:54\""},{"visible":true,"include":true,"step":"420","x":-213.97419047619047,"y":-330.07761904761907,"z":164.88066666666668,"a95":4.173893,"info":"\"90-03-27\" at \"11:07\""},{"visible":true,"include":true,"step":"450","x":-169.2709523809524,"y":-300.6950476190476,"z":149.0627619047619,"a95":2.233263,"info":"\"90-03-27\" at \"13:49\""},{"visible":true,"include":true,"step":"480","x":-108.44628571428571,"y":-162.9115238095238,"z":93.048,"a95":1.491216,"info":"\"90-03-28\" at \"09:36\""},{"visible":true,"include":true,"step":"510","x":-119.2992380952381,"y":-147.81666666666666,"z":59.12666666666667,"a95":2.047957,"info":"\"90-03-28\" at \"12:02\""},{"visible":true,"include":true,"step":"540","x":-89.54223809523809,"y":-104.18504761904762,"z":74.40224761904763,"a95":3.074384,"info":"\"90-03-28\" at \"15:51\""},{"visible":true,"include":true,"step":"560","x":-52.65746666666667,"y":-107.01942857142856,"z":31.94570476190476,"a95":3.008654,"info":"\"90-03-29\" at \"10:37\""},{"visible":true,"include":true,"step":"580","x":-58.629533333333335,"y":-103.13914285714286,"z":37.14947619047619,"a95":3.621497,"info":"\"90-03-29\" at \"14:33\""},{"visible":true,"include":true,"step":"600","x":-43.59284761904762,"y":-57.45449523809524,"z":-5.390999047619048,"a95":3.483073,"info":"\"90-03-30\" at \"09:19\""}]},{"version":"v1.1.0","exported":"2016-10-10T19:56:19.958Z","volume":10.5,"added":"2016-10-10T19:39:45.199Z","format":"Utrecht","demagType":"Unknown","strat":"3.04","patch":1.1,"GEO":[],"TECT":[],"interpreted":false,"name":"TY 28.B1","coreAzi":49,"coreDip":8,"bedStrike":8,"bedDip":25,"data":[{"visible":false,"include":false,"step":"20","x":-2441.1028571428574,"y":-1256.567619047619,"z":-51.59218095238095,"a95":0.8217581,"info":"\"90-03-19\" at \"09:40\""},{"visible":true,"include":false,"step":"100","x":-2062.3961904761904,"y":-1285.1238095238095,"z":356.7098095238095,"a95":1.361349,"info":"\"90-03-19\" at \"14:08\""},{"visible":true,"include":false,"step":"150","x":-1004.6628571428571,"y":-663.5771428571429,"z":130.1587619047619,"a95":0.9487029,"info":"\"90-03-20\" at \"11:16\""},{"visible":true,"include":false,"step":"200","x":-748.1544761904762,"y":-724.847238095238,"z":53.199799999999996,"a95":0.9460139,"info":"\"90-03-20\" at \"15:42\""},{"visible":true,"include":true,"step":"250","x":-683.4624761904762,"y":-562.9236190476191,"z":20.208180952380953,"a95":0.8085065,"info":"\"90-03-21\" at \"11:05\""},{"visible":true,"include":true,"step":"300","x":-423.2095238095238,"y":-473.3749523809524,"z":-29.76347619047619,"a95":1.305439,"info":"\"90-03-21\" at \"16:19\""},{"visible":true,"include":true,"step":"330","x":-390.3471428571429,"y":-384.21361904761903,"z":-38.80228571428571,"a95":1.158341,"info":"\"90-03-22\" at \"12:18\""},{"visible":true,"include":true,"step":"360","x":-326.4298095238095,"y":-310.9993333333333,"z":-58.816761904761904,"a95":1.206779,"info":"\"90-03-23\" at \"09:31\""},{"visible":true,"include":true,"step":"390","x":-304.9303809523809,"y":-305.76971428571426,"z":-51.004666666666665,"a95":1.324094,"info":"\"90-03-23\" at \"14:55\""},{"visible":true,"include":true,"step":"420","x":-243.72485714285713,"y":-330.31009523809524,"z":-36.63297142857143,"a95":3.84046,"info":"\"90-03-27\" at \"11:22\""},{"visible":true,"include":true,"step":"450","x":-284.41228571428576,"y":-214.4325714285714,"z":-61.515495238095234,"a95":1.20717,"info":"\"90-03-27\" at \"13:49\""},{"visible":true,"include":true,"step":"480","x":-252.6797142857143,"y":-204.61904761904762,"z":-59.64317142857143,"a95":1.469341,"info":"\"90-03-28\" at \"09:37\""},{"visible":true,"include":true,"step":"510","x":-236.04180952380952,"y":-192.61038095238095,"z":-57.42220952380953,"a95":1.664125,"info":"\"90-03-28\" at \"12:02\""},{"visible":true,"include":true,"step":"540","x":-168.78019047619048,"y":-169.57438095238095,"z":-15.501542857142857,"a95":1.741354,"info":"\"90-03-28\" at \"15:52\""},{"visible":true,"include":true,"step":"560","x":-147.6552380952381,"y":-137.3575238095238,"z":-62.21277142857143,"a95":2.129079,"info":"\"90-03-29\" at \"10:38\""},{"visible":true,"include":true,"step":"580","x":-118.54390476190477,"y":-111.38390476190476,"z":-17.070419047619048,"a95":3.034327,"info":"\"90-03-29\" at \"14:34\""},{"visible":true,"include":false,"step":"600","x":-107.10333333333334,"y":-104.11409523809525,"z":-36.329523809523806,"a95":2.226208,"info":"\"90-03-30\" at \"09:20\""}]},{"version":"v1.1.0","exported":"2016-10-10T19:56:19.958Z","volume":10.5,"added":"2016-10-10T19:39:45.199Z","format":"Utrecht","demagType":"Unknown","strat":"3.05","patch":1.1,"GEO":[],"TECT":[],"interpreted":false,"name":"TY 29.1","coreAzi":294,"coreDip":53,"bedStrike":8,"bedDip":25,"data":[{"visible":false,"include":false,"step":"20","x":-165.9072380952381,"y":735.5840952380952,"z":837.8258095238095,"a95":63.86067,"info":"\"90-03-19\" at \"09:41\""},{"visible":true,"include":false,"step":"100","x":-60.30171428571428,"y":682.6231428571429,"z":963.4066666666668,"a95":1.709204,"info":"\"90-03-19\" at \"14:09\""},{"visible":true,"include":false,"step":"150","x":2.4533885714285715,"y":397.9009523809524,"z":678.2328571428571,"a95":1.251605,"info":"\"90-03-20\" at \"11:17\""},{"visible":true,"include":false,"step":"200","x":60.30171428571428,"y":360.9709523809524,"z":606.1806666666666,"a95":1.415791,"info":"\"90-03-20\" at \"15:43\""},{"visible":true,"include":false,"step":"250","x":78.18562857142858,"y":298.92609523809523,"z":553.7557142857144,"a95":1.123848,"info":"\"90-03-21\" at \"11:06\""},{"visible":true,"include":false,"step":"300","x":68.11381904761905,"y":249.72914285714285,"z":419.0775238095238,"a95":1.952769,"info":"\"90-03-21\" at \"16:20\""},{"visible":true,"include":true,"step":"330","x":57.073571428571434,"y":207.31133333333332,"z":384.79466666666667,"a95":1.576708,"info":"\"90-03-22\" at \"12:19\""},{"visible":true,"include":true,"step":"360","x":63.33617142857143,"y":184.19780952380952,"z":337.5992380952381,"a95":1.795143,"info":"\"90-03-23\" at \"09:32\""},{"visible":true,"include":true,"step":"390","x":53.58717142857143,"y":173.0284761904762,"z":308.67504761904763,"a95":1.950996,"info":"\"90-03-23\" at \"14:56\""},{"visible":true,"include":true,"step":"420","x":85.33919047619048,"y":153.36257142857144,"z":294.96190476190475,"a95":4.55655,"info":"\"90-03-27\" at \"11:23\""},{"visible":true,"include":true,"step":"450","x":47.94438095238095,"y":152.5233333333333,"z":254.3970476190476,"a95":2.01047,"info":"\"90-03-27\" at \"13:50\""},{"visible":true,"include":true,"step":"480","x":72.37497142857143,"y":123.328,"z":237.714,"a95":2.286016,"info":"\"90-03-28\" at \"09:38\""},{"visible":true,"include":true,"step":"510","x":34.541133333333335,"y":121.47504761904763,"z":198.63409523809523,"a95":2.588907,"info":"\"90-03-28\" at \"12:03\""},{"visible":true,"include":true,"step":"540","x":38.47946666666667,"y":88.25098095238096,"z":158.08857142857144,"a95":2.887839,"info":"\"90-03-28\" at \"15:53\""},{"visible":true,"include":true,"step":"560","x":36.452190476190474,"y":91.78901904761905,"z":127.73114285714284,"a95":4.768459,"info":"\"90-03-29\" at \"10:39\""},{"visible":true,"include":true,"step":"580","x":28.717561904761904,"y":84.8808,"z":133.38685714285714,"a95":4.308912,"info":"\"90-03-29\" at \"14:35\""},{"visible":true,"include":true,"step":"600","x":34.48301904761905,"y":63.717085714285716,"z":83.57662857142857,"a95":3.923891,"info":"\"90-03-30\" at \"09:21\""}]},{"version":"v1.1.0","exported":"2016-10-10T19:56:19.958Z","volume":10.5,"added":"2016-10-10T19:39:45.200Z","format":"Utrecht","demagType":"Unknown","strat":"3.06","patch":1.1,"GEO":[],"TECT":[],"interpreted":false,"name":"TY 30.A1","coreAzi":3,"coreDip":72,"bedStrike":8,"bedDip":25,"data":[{"visible":false,"include":false,"step":"20","x":81.75595238095238,"y":-192.50704761904763,"z":163.27304761904762,"a95":2.420413,"info":"\"90-03-19\" at \"09:42\""},{"visible":true,"include":false,"step":"100","x":46.80807619047619,"y":-176.9667619047619,"z":219.90114285714284,"a95":3.154804,"info":"\"90-03-19\" at \"14:09\""},{"visible":true,"include":false,"step":"150","x":18.013038095238095,"y":-150.496,"z":100.52438095238097,"a95":2.412121,"info":"\"90-03-20\" at \"11:17\""},{"visible":true,"include":true,"step":"200","x":23.952828571428572,"y":-151.78733333333335,"z":84.7064761904762,"a95":2.883593,"info":"\"90-03-20\" at \"15:43\""},{"visible":true,"include":true,"step":"250","x":29.634352380952382,"y":-127.83447619047618,"z":83.6734761904762,"a95":3.056026,"info":"\"90-03-21\" at \"11:07\""},{"visible":true,"include":true,"step":"300","x":18.013038095238095,"y":-128.99657142857143,"z":56.944447619047615,"a95":2.680423,"info":"\"90-03-21\" at \"16:21\""},{"visible":true,"include":true,"step":"330","x":23.823695238095237,"y":-99.36228571428572,"z":73.79535238095238,"a95":3.2271,"info":"\"90-03-22\" at \"12:20\""},{"visible":true,"include":true,"step":"360","x":9.426176190476191,"y":-93.68071428571429,"z":67.01625714285714,"a95":2.897983,"info":"\"90-03-23\" at \"09:33\""},{"visible":true,"include":true,"step":"390","x":7.101913333333333,"y":-77.41086666666668,"z":56.49250476190476,"a95":5.028724,"info":"\"90-03-23\" at \"14:56\""},{"visible":true,"include":true,"step":"420","x":10.969228571428571,"y":-71.40006666666666,"z":37.31733333333333,"a95":15.50772,"info":"\"90-03-27\" at \"11:24\""},{"visible":true,"include":true,"step":"450","x":9.012976190476191,"y":-65.84120952380952,"z":24.010933333333334,"a95":2.957819,"info":"\"90-03-27\" at \"13:51\""},{"visible":true,"include":true,"step":"480","x":9.051713333333334,"y":-59.43011428571429,"z":28.375380952380954,"a95":2.462865,"info":"\"90-03-28\" at \"09:38\""},{"visible":true,"include":false,"step":"510","x":-1.5365952380952383,"y":-42.50819047619048,"z":24.146514285714286,"a95":3.707524,"info":"\"90-03-28\" at \"12:04\""},{"visible":true,"include":false,"step":"540","x":-18.226095238095237,"y":-35.40627619047619,"z":25.728304761904763,"a95":4.486189,"info":"\"90-03-28\" at \"15:54\""},{"visible":false,"include":false,"step":"560","x":-43.63158095238095,"y":-28.1300380952381,"z":-8.541667619047619,"a95":3.855901,"info":"\"90-03-29\" at \"10:39\""},{"visible":false,"include":false,"step":"580","x":-7.379537142857143,"y":-32.074828571428576,"z":4.87449619047619,"a95":5.585166,"info":"\"90-03-29\" at \"14:36\""},{"visible":false,"include":false,"step":"600","x":-9.916857142857143,"y":-11.001514285714286,"z":-1.0265495238095237,"a95":12.98491,"info":"\"90-03-30\" at \"09:22\""}]},{"version":"v1.1.0","exported":"2016-10-10T19:56:19.958Z","volume":10.5,"added":"2016-10-10T19:39:45.200Z","format":"Utrecht","demagType":"Unknown","strat":"3.07","patch":1.1,"GEO":[],"TECT":[],"interpreted":false,"name":"TY 30.B1","coreAzi":61,"coreDip":29,"bedStrike":8,"bedDip":25,"data":[{"visible":false,"include":false,"step":"20","x":-462.5735238095238,"y":-608.0982857142857,"z":7.676525714285715,"a95":0.757095,"info":"\"90-03-19\" at \"09:43\""},{"visible":true,"include":false,"step":"100","x":-486.99771428571427,"y":-501.3951428571429,"z":116.79419047619047,"a95":0.9939825,"info":"\"90-03-19\" at \"14:10\""},{"visible":true,"include":false,"step":"150","x":-264.966,"y":-329.4642857142857,"z":-25.56689523809524,"a95":1.471069,"info":"\"90-03-20\" at \"11:18\""},{"visible":true,"include":false,"step":"200","x":-244.62866666666667,"y":-321.32933333333335,"z":-27.8911619047619,"a95":2.019621,"info":"\"90-03-20\" at \"15:44\""},{"visible":true,"include":false,"step":"250","x":-221.51514285714288,"y":-296.21438095238096,"z":-37.8984,"a95":1.526125,"info":"\"90-03-21\" at \"11:07\""},{"visible":true,"include":true,"step":"300","x":-231.26419047619046,"y":-270.7766666666667,"z":-50.552723809523805,"a95":2.011325,"info":"\"90-03-21\" at \"16:22\""},{"visible":true,"include":true,"step":"330","x":-214.41323809523809,"y":-213.83219047619045,"z":-57.525514285714294,"a95":1.577236,"info":"\"90-03-22\" at \"12:21\""},{"visible":true,"include":true,"step":"360","x":-211.8307619047619,"y":-189.10466666666667,"z":-56.0405619047619,"a95":1.911346,"info":"\"90-03-23\" at \"09:34\""},{"visible":true,"include":true,"step":"390","x":-202.66285714285715,"y":-172.12457142857141,"z":-56.815323809523804,"a95":2.117426,"info":"\"90-03-23\" at \"14:57\""},{"visible":true,"include":true,"step":"420","x":-196.35504761904764,"y":-175.7595238095238,"z":-52.10868571428572,"a95":6.008461,"info":"\"90-03-27\" at \"11:25\""},{"visible":true,"include":true,"step":"450","x":-167.58580952380953,"y":-160.2515238095238,"z":-56.80240952380952,"a95":2.352841,"info":"\"90-03-27\" at \"13:52\""},{"visible":false,"include":false,"step":"480","x":-150.99314285714286,"y":-163.4215238095238,"z":-33.70180952380953,"a95":1.754135,"info":"\"90-03-28\" at \"09:39\""},{"visible":true,"include":true,"step":"510","x":-180.67914285714286,"y":-134.60714285714286,"z":-51.04985714285714,"a95":1.960909,"info":"\"90-03-28\" at \"12:05\""},{"visible":true,"include":true,"step":"540","x":-169.3290476190476,"y":-80.35494285714286,"z":-38.21475238095238,"a95":2.340912,"info":"\"90-03-28\" at \"15:55\""},{"visible":true,"include":false,"step":"560","x":-141.86399999999998,"y":-70.57366666666667,"z":-51.74713333333334,"a95":2.788051,"info":"\"90-03-29\" at \"10:40\""},{"visible":true,"include":false,"step":"580","x":-127.18238095238095,"y":-51.03048571428572,"z":-20.382495238095238,"a95":3.3095,"info":"\"90-03-29\" at \"14:36\""},{"visible":true,"include":false,"step":"600","x":-106.70952380952382,"y":-59.649638095238096,"z":-35.354619047619046,"a95":3.017302,"info":"\"90-03-30\" at \"09:23\""}]},{"version":"v1.1.0","exported":"2016-10-10T19:56:19.959Z","volume":10.5,"added":"2016-10-10T19:39:45.200Z","format":"Utrecht","demagType":"Unknown","strat":"3.08","patch":1.1,"GEO":[],"TECT":[],"interpreted":false,"name":"TY 31.A1","coreAzi":306,"coreDip":50,"bedStrike":8,"bedDip":25,"data":[{"visible":false,"include":false,"step":"20","x":-3896.930476190476,"y":1716.422857142857,"z":-1576.3085714285717,"a95":0.8241858,"info":"\"90-03-19\" at \"09:43\""},{"visible":true,"include":true,"step":"100","x":-3908.5714285714284,"y":2565.1466666666665,"z":-818.1406666666668,"a95":1.056179,"info":"\"90-03-19\" at \"14:11\""},{"visible":true,"include":true,"step":"150","x":-3356.9457142857145,"y":1456.8609523809525,"z":-2026.8866666666668,"a95":1.244797,"info":"\"90-03-20\" at \"11:19\""},{"visible":true,"include":true,"step":"200","x":-3269.2057142857147,"y":1193.6380952380953,"z":-2199.785714285714,"a95":1.593818,"info":"\"90-03-20\" at \"15:44\""},{"visible":true,"include":true,"step":"250","x":-3209.3552380952383,"y":917.0508571428571,"z":-2094.8714285714286,"a95":0.9979755,"info":"\"90-03-21\" at \"11:08\""},{"visible":true,"include":true,"step":"300","x":-2438.8619047619045,"y":936.2260952380952,"z":-1709.3666666666666,"a95":0.8329096,"info":"\"90-03-21\" at \"16:23\""},{"visible":true,"include":false,"step":"330","x":-2169.7,"y":767.0067619047619,"z":-1552.607619047619,"a95":0.771035,"info":"\"90-03-22\" at \"12:21\""},{"visible":true,"include":false,"step":"360","x":-1872.064761904762,"y":533.2892380952381,"z":-1419.672380952381,"a95":1.027055,"info":"\"90-03-23\" at \"09:34\""},{"visible":true,"include":false,"step":"390","x":-1778.5133333333333,"y":661.7047619047619,"z":-1288.0933333333332,"a95":1.467629,"info":"\"90-03-23\" at \"14:58\""},{"visible":true,"include":false,"step":"420","x":-1774.4457142857143,"y":419.74895238095235,"z":-1201.030476190476,"a95":2.642811,"info":"\"90-03-27\" at \"11:26\""},{"visible":true,"include":false,"step":"450","x":-1760.609523809524,"y":347.5741904761905,"z":-1147.8438095238096,"a95":2.751119,"info":"\"90-03-27\" at \"13:53\""},{"visible":true,"include":false,"step":"480","x":-1555.5133333333333,"y":428.12923809523807,"z":-1132.2,"a95":0.9021893,"info":"\"90-03-28\" at \"09:40\""},{"visible":true,"include":false,"step":"510","x":-1508.1371428571429,"y":424.5654285714286,"z":-1098.5695238095238,"a95":0.7986341,"info":"\"90-03-28\" at \"12:05\""},{"visible":true,"include":false,"step":"540","x":-1348.4409523809522,"y":349.53038095238094,"z":-858.2599047619047,"a95":2.300089,"info":"\"90-03-28\" at \"15:56\""},{"visible":true,"include":false,"step":"560","x":-1292.2447619047618,"y":318.6112380952381,"z":-871.8891428571428,"a95":1.742609,"info":"\"90-03-29\" at \"10:41\""},{"visible":true,"include":false,"step":"580","x":-1210.7857142857142,"y":221.4054285714286,"z":-806.6419047619047,"a95":0.9058618,"info":"\"90-03-29\" at \"14:37\""},{"visible":true,"include":false,"step":"600","x":-1084.6304761904762,"y":307.1061904761905,"z":-719.895238095238,"a95":2.261182,"info":"\"90-03-30\" at \"09:24\""}]},{"version":"v1.1.0","exported":"2016-10-10T19:56:19.959Z","volume":10.5,"added":"2016-10-10T19:39:45.200Z","format":"Utrecht","demagType":"Unknown","strat":"3.09","patch":1.1,"GEO":[],"TECT":[],"interpreted":false,"name":"TY 31.B1A","coreAzi":312,"coreDip":66,"bedStrike":8,"bedDip":25,"data":[{"visible":false,"include":false,"step":"20","x":-1642.5885714285714,"y":2831.6819047619047,"z":1049.075238095238,"a95":1.076844,"info":"\"90-03-19\" at \"09:44\""},{"visible":true,"include":true,"step":"100","x":-1546.0866666666666,"y":2729.137142857143,"z":1643.0600000000002,"a95":1.02469,"info":"\"90-03-19\" at \"14:12\""},{"visible":true,"include":true,"step":"150","x":-1542.2780952380951,"y":1537.6295238095238,"z":50.10078095238096,"a95":1.362561,"info":"\"90-03-20\" at \"11:19\""},{"visible":true,"include":true,"step":"200","x":-1454.2142857142858,"y":1452.4704761904763,"z":-147.78438095238096,"a95":0.9833006,"info":"\"90-03-20\" at \"15:45\""},{"visible":true,"include":true,"step":"250","x":-1460.4761904761904,"y":1208.2942857142857,"z":-274.84409523809524,"a95":1.265878,"info":"\"90-03-21\" at \"11:09\""},{"visible":true,"include":true,"step":"300","x":-1223.595238095238,"y":906.3335238095239,"z":-327.592,"a95":1.236098,"info":"\"90-03-21\" at \"16:24\""},{"visible":true,"include":false,"step":"330","x":-1040.107619047619,"y":812.9109523809524,"z":-346.3152380952381,"a95":1.312979,"info":"\"90-03-22\" at \"12:22\""},{"visible":true,"include":false,"step":"360","x":-945.846,"y":618.7059047619048,"z":-363.29523809523806,"a95":0.9893313,"info":"\"90-03-23\" at \"09:35\""},{"visible":true,"include":false,"step":"390","x":-899.9418095238094,"y":668.0965714285715,"z":-273.55285714285714,"a95":1.137816,"info":"\"90-03-23\" at \"14:58\""},{"visible":true,"include":false,"step":"420","x":-744.158,"y":651.7685714285714,"z":-255.17180952380954,"a95":2.2266,"info":"\"90-03-27\" at \"11:27\""},{"visible":true,"include":false,"step":"450","x":-714.975619047619,"y":581.7372380952381,"z":-297.9705714285714,"a95":1.453636,"info":"\"90-03-27\" at \"13:53\""},{"visible":true,"include":false,"step":"480","x":-679.3562857142857,"y":559.8891428571429,"z":-253.28657142857142,"a95":1.449672,"info":"\"90-03-28\" at \"09:41\""},{"visible":true,"include":false,"step":"510","x":-692.1978095238095,"y":596.2058095238095,"z":-268.6912380952381,"a95":1.282994,"info":"\"90-03-28\" at \"12:06\""},{"visible":true,"include":false,"step":"540","x":-568.2952380952381,"y":448.77,"z":-217.48,"a95":1.526258,"info":"\"90-03-28\" at \"15:56\""},{"visible":true,"include":false,"step":"560","x":-532.0560952380953,"y":402.71085714285715,"z":-303.684380952381,"a95":1.605488,"info":"\"90-03-29\" at \"10:42\""},{"visible":true,"include":false,"step":"580","x":-574.7450476190477,"y":358.4142857142857,"z":-183.06799999999998,"a95":1.588589,"info":"\"90-03-29\" at \"14:38\""},{"visible":true,"include":false,"step":"600","x":-476.9194285714286,"y":361.86838095238096,"z":-204.98714285714283,"a95":1.419951,"info":"\"90-03-30\" at \"09:24\""}]},{"version":"v1.1.0","exported":"2016-10-10T19:56:19.959Z","volume":10.5,"added":"2016-10-10T19:39:45.200Z","format":"Utrecht","demagType":"Unknown","strat":"3.10","patch":1.1,"GEO":[],"TECT":[],"interpreted":false,"name":"TY 32.1","coreAzi":325,"coreDip":66,"bedStrike":8,"bedDip":25,"data":[{"visible":true,"include":false,"step":"20","x":242.8402857142857,"y":-996.2504761904761,"z":2029.7857142857142,"a95":0.7654626,"info":"\"90-03-19\" at \"09:45\""},{"visible":true,"include":true,"step":"100","x":1.4203828571428572,"y":-782.9539047619047,"z":2572.3780952380953,"a95":0.9747881,"info":"\"90-03-19\" at \"14:12\""},{"visible":true,"include":true,"step":"150","x":233.5884761904762,"y":-467.75790476190474,"z":797.8033333333333,"a95":1.841659,"info":"\"90-03-20\" at \"11:20\""},{"visible":true,"include":true,"step":"200","x":283.23723809523807,"y":-410.4906666666667,"z":506.947619047619,"a95":2.88553,"info":"\"90-03-20\" at \"15:46\""},{"visible":true,"include":true,"step":"250","x":262.0606666666667,"y":-348.63942857142854,"z":264.7077142857143,"a95":3.55747,"info":"\"90-03-21\" at \"11:10\""},{"visible":true,"include":true,"step":"300","x":230.554,"y":-216.0273333333333,"z":28.278533333333332,"a95":4.596531,"info":"\"90-03-21\" at \"16:25\""},{"visible":true,"include":true,"step":"330","x":205.11619047619047,"y":-153.98238095238096,"z":-25.56689523809524,"a95":5.051022,"info":"\"90-03-22\" at \"12:23\""},{"visible":true,"include":true,"step":"360","x":220.93409523809524,"y":-129.12571428571428,"z":-121.57190476190478,"a95":4.424058,"info":"\"90-03-23\" at \"09:36\""},{"visible":true,"include":false,"step":"390","x":164.5707619047619,"y":-151.20619047619047,"z":-136.42133333333334,"a95":4.530214,"info":"\"90-03-23\" at \"14:59\""},{"visible":true,"include":false,"step":"420","x":160.83904761904762,"y":-150.32171428571428,"z":-114.23104761904762,"a95":8.253322,"info":"\"90-03-27\" at \"11:28\""},{"visible":true,"include":false,"step":"450","x":127.63428571428572,"y":-126.12352380952382,"z":-155.89990476190476,"a95":4.037316,"info":"\"90-03-27\" at \"13:54\""},{"visible":true,"include":false,"step":"480","x":101.26038095238094,"y":-180.69209523809525,"z":-163.84761904761905,"a95":3.562707,"info":"\"90-03-28\" at \"09:41\""},{"visible":true,"include":false,"step":"510","x":80.6971238095238,"y":-102.71952380952382,"z":-153.44009523809524,"a95":5.121152,"info":"\"90-03-28\" at \"12:07\""},{"visible":true,"include":false,"step":"540","x":108.04599999999999,"y":-6.243229523809524,"z":-119.35733333333333,"a95":5.851804,"info":"\"90-03-28\" at \"15:57\""},{"visible":true,"include":false,"step":"560","x":94.98488571428572,"y":-80.57444761904762,"z":-177.7997142857143,"a95":4.181713,"info":"\"90-03-29\" at \"10:42\""},{"visible":true,"include":false,"step":"580","x":73.25948571428572,"y":-60.417923809523806,"z":-90.11039047619047,"a95":6.171857,"info":"\"90-03-29\" at \"14:38\""},{"visible":true,"include":false,"step":"600","x":54.568533333333335,"y":-78.97329523809523,"z":-118.85380952380952,"a95":4.423064,"info":"\"90-03-30\" at \"09:25\""}]},{"version":"v1.1.0","exported":"2016-10-10T19:56:19.959Z","volume":10.5,"added":"2016-10-10T19:39:45.200Z","format":"Utrecht","demagType":"Unknown","strat":"1.01","patch":1.1,"GEO":[],"TECT":[],"interpreted":false,"name":"TY 33.2","coreAzi":289,"coreDip":64,"bedStrike":353,"bedDip":20,"data":[{"visible":true,"include":false,"step":"20","x":-5307.454285714285,"y":-1832.6819047619047,"z":-301.57314285714284,"a95":1.559244,"info":"\"90-03-19\" at \"10:56\""},{"visible":true,"include":true,"step":"100","x":-5144.175238095238,"y":-2338.2085714285713,"z":664.7392380952381,"a95":0.9044092,"info":"\"90-03-19\" at \"15:03\""},{"visible":true,"include":true,"step":"150","x":-4615.276190476191,"y":-3065.8323809523813,"z":-438.57552380952376,"a95":0.9301243,"info":"\"90-03-20\" at \"11:55\""},{"visible":true,"include":true,"step":"200","x":-4275.029523809523,"y":-3617.0047619047623,"z":-806.0673333333334,"a95":2.534391,"info":"\"90-03-21\" at \"08:35\""},{"visible":true,"include":true,"step":"250","x":-4167.145714285714,"y":-3108.96,"z":-719.2948571428572,"a95":0.5584833,"info":"\"90-03-21\" at \"14:01\""},{"visible":true,"include":true,"step":"300","x":-3261.844761904762,"y":-2558.109523809524,"z":-668.225619047619,"a95":0.860686,"info":"\"90-03-22\" at \"09:07\""},{"visible":true,"include":true,"step":"330","x":-2670.707619047619,"y":-2598.978095238095,"z":-548.332380952381,"a95":0.5436655,"info":"\"90-03-22\" at \"14:04\""},{"visible":true,"include":true,"step":"360","x":-2391.0857142857144,"y":-2069.7561904761906,"z":-396.8679047619048,"a95":2.336057,"info":"\"90-03-23\" at \"09:42\""},{"visible":true,"include":true,"step":"390","x":-2173.057142857143,"y":-1952.5104761904763,"z":-488.54723809523813,"a95":0.5609246,"info":"\"90-03-23\" at \"15:38\""}]},{"version":"v1.1.0","exported":"2016-10-10T19:56:19.959Z","volume":10.5,"added":"2016-10-10T19:39:45.200Z","format":"Utrecht","demagType":"Unknown","strat":"1.02","patch":1.1,"GEO":[],"TECT":[],"interpreted":false,"name":"TY 34.1","coreAzi":160,"coreDip":18,"bedStrike":353,"bedDip":20,"data":[{"visible":true,"include":false,"step":"20","x":-1907.9619047619046,"y":-559.8245714285715,"z":-2784.209523809524,"a95":0.5673546,"info":"\"90-03-19\" at \"10:57\""},{"visible":true,"include":false,"step":"100","x":-1764.6971428571428,"y":-501.4597142857143,"z":-1857.667619047619,"a95":0.7840531,"info":"\"90-03-19\" at \"15:04\""},{"visible":true,"include":false,"step":"150","x":-871.017619047619,"y":-252.1825714285714,"z":-831.5051428571429,"a95":0.4862733,"info":"\"90-03-20\" at \"11:56\""},{"visible":true,"include":false,"step":"200","x":-549.4944761904762,"y":-177.99980952380952,"z":-515.5344761904762,"a95":1.530266,"info":"\"90-03-21\" at \"08:36\""},{"visible":true,"include":false,"step":"250","x":-320.7482857142857,"y":-191.75171428571429,"z":-341.08561904761905,"a95":1.484051,"info":"\"90-03-21\" at \"14:01\""},{"visible":true,"include":false,"step":"300","x":-184.77895238095238,"y":-141.78,"z":-184.19780952380952,"a95":2.974114,"info":"\"90-03-22\" at \"09:08\""},{"visible":true,"include":false,"step":"330","x":-126.22038095238096,"y":-151.52904761904762,"z":-170.9624761904762,"a95":3.703367,"info":"\"90-03-22\" at \"14:05\""},{"visible":true,"include":false,"step":"360","x":-116.79419047619047,"y":-102.84866666666667,"z":-134.22619047619048,"a95":4.164975,"info":"\"90-03-23\" at \"09:43\""},{"visible":true,"include":false,"step":"390","x":-82.0594,"y":-67.27450476190477,"z":-143.39409523809522,"a95":4.458988,"info":"\"90-03-23\" at \"15:39\""},{"visible":true,"include":false,"step":"420","x":-60.04345714285715,"y":-58.95880952380952,"z":-93.4741142857143,"a95":5.231371,"info":"\"90-03-27\" at \"11:38\""},{"visible":true,"include":false,"step":"450","x":-35.845304761904764,"y":4.7582828571428575,"z":-85.46832380952381,"a95":6.498271,"info":"\"90-03-27\" at \"14:20\""},{"visible":true,"include":false,"step":"480","x":-40.125819047619046,"y":-32.79793333333333,"z":-59.79813333333333,"a95":7.347919,"info":"\"90-03-28\" at \"09:47\""},{"visible":true,"include":false,"step":"510","x":-45.77506666666667,"y":12.363790476190475,"z":-92.4927619047619,"a95":5.693622,"info":"\"90-03-28\" at \"12:31\""},{"visible":true,"include":false,"step":"540","x":-62.31607619047619,"y":-19.84662857142857,"z":-35.522485714285715,"a95":8.094644,"info":"\"90-03-29\" at \"08:50\""},{"visible":true,"include":false,"step":"540","x":-1.0523742857142857,"y":-25.269904761904762,"z":-77.55290476190477,"a95":7.089014,"info":"\"90-03-29\" at \"11:08\""},{"visible":true,"include":false,"step":"580","x":-35.257780952380955,"y":-13.493638095238095,"z":-44.445076190476186,"a95":7.727985,"info":"\"90-03-29\" at \"15:38\""},{"visible":true,"include":false,"step":"600","x":-2.233875238095238,"y":10.078266666666666,"z":-97.23171428571429,"a95":4.386226,"info":"\"90-03-30\" at \"10:37\""}]},{"version":"v1.1.0","exported":"2016-10-10T19:56:19.959Z","volume":10.5,"added":"2016-10-10T19:39:45.201Z","format":"Utrecht","demagType":"Unknown","strat":"1.03","patch":1.1,"GEO":[{"dec":122.22418239788595,"inc":-6.344046636732954,"MAD":10.216466395547535,"cm":[-9.769962616701378e-15,3.552713678800501e-15,0],"intensity":434.276466495689,"type":"dir","forced":true,"remark":"","origin":false,"nSteps":7,"minStep":"450","maxStep":"600","steps":["450","480","510","540","540","580","600"],"group":"None","version":"v1.1.0"}],"TECT":[{"dec":125.50672015766497,"inc":-21.541028316141027,"MAD":10.216466395547522,"cm":[8.881784197001252e-16,8.881784197001252e-16,1.7763568394002505e-15],"intensity":434.276466495689,"type":"dir","forced":true,"remark":"","origin":false,"nSteps":7,"minStep":"450","maxStep":"600","steps":["450","480","510","540","540","580","600"],"group":"None","version":"v1.1.0"}],"interpreted":true,"name":"TY 35.A1","coreAzi":12,"coreDip":26,"bedStrike":353,"bedDip":20,"data":[{"visible":false,"include":false,"step":"20","x":-989.4257142857142,"y":-108.20733333333332,"z":1094.857142857143,"a95":0.9009359,"info":"\"90-03-19\" at \"10:57\""},{"visible":false,"include":false,"step":"100","x":-912.2732380952382,"y":-0.5810662857142856,"z":1296.9390476190476,"a95":0.6031987,"info":"\"90-03-19\" at \"15:05\""},{"visible":true,"include":false,"step":"150","x":-475.7638095238096,"y":156.17761904761906,"z":871.1467619047619,"a95":1.322598,"info":"\"90-03-20\" at \"11:57\""},{"visible":true,"include":false,"step":"200","x":-47.32458095238095,"y":316.93904761904764,"z":231.8452380952381,"a95":3.245769,"info":"\"90-03-21\" at \"08:37\""},{"visible":true,"include":false,"step":"250","x":38.350342857142856,"y":356.77438095238097,"z":23.242628571428572,"a95":3.598845,"info":"\"90-03-21\" at \"14:02\""},{"visible":true,"include":false,"step":"300","x":69.01770476190475,"y":321.4584761904762,"z":-41.12654285714286,"a95":4.466189,"info":"\"90-03-22\" at \"09:09\""},{"visible":true,"include":false,"step":"330","x":5.100466666666667,"y":324.94485714285713,"z":-75.08660952380953,"a95":3.854275,"info":"\"90-03-22\" at \"14:06\""},{"visible":true,"include":false,"step":"360","x":38.350342857142856,"y":277.16838095238097,"z":-66.82257142857142,"a95":3.968322,"info":"\"90-03-23\" at \"09:44\""},{"visible":true,"include":false,"step":"390","x":67.98469523809524,"y":288.7897142857143,"z":-89.2258761904762,"a95":3.924139,"info":"\"90-03-23\" at \"15:40\""},{"visible":true,"include":false,"step":"420","x":38.80228571428571,"y":258.23857142857145,"z":-49.46806666666667,"a95":3.664081,"info":"\"90-03-27\" at \"11:38\""},{"visible":true,"include":true,"step":"450","x":6.520849523809524,"y":305.4533333333334,"z":-93.34498095238095,"a95":4.050714,"info":"\"90-03-27\" at \"14:21\""},{"visible":true,"include":true,"step":"480","x":-17.883914285714287,"y":208.64780952380954,"z":-64.3627238095238,"a95":4.488102,"info":"\"90-03-28\" at \"09:48\""},{"visible":true,"include":true,"step":"510","x":-22.835885714285716,"y":219.29419047619047,"z":-77.3979619047619,"a95":4.247386,"info":"\"90-03-28\" at \"12:32\""},{"visible":true,"include":true,"step":"540","x":9.167926666666666,"y":152.13590476190475,"z":-36.63297142857143,"a95":6.335575,"info":"\"90-03-29\" at \"08:51\""},{"visible":true,"include":true,"step":"540","x":-10.355885714285714,"y":139.81733333333335,"z":-116.14209523809524,"a95":4.744887,"info":"\"90-03-29\" at \"11:09\""},{"visible":true,"include":true,"step":"580","x":-43.38623809523809,"y":66.28023809523809,"z":-32.61070476190476,"a95":7.366459,"info":"\"90-03-29\" at \"15:39\""},{"visible":true,"include":true,"step":"600","x":-28.795038095238095,"y":94.3973619047619,"z":-74.6411238095238,"a95":5.670116,"info":"\"90-03-30\" at \"10:38\""}]},{"version":"v1.1.0","exported":"2016-10-10T19:56:19.959Z","volume":10.5,"added":"2016-10-10T19:39:45.201Z","format":"Utrecht","demagType":"Unknown","strat":"1.04","patch":1.1,"GEO":[{"dec":127.57318492323202,"inc":-30.673377171440823,"MAD":10.350530333388225,"cm":[-277.50375434584623,247.53074701858554,-85.60000113999631],"intensity":323.4552621060633,"type":"dir","forced":false,"remark":"","origin":false,"nSteps":8,"minStep":"300","maxStep":"580","steps":["300","330","360","390","420","480","540","580"],"group":"None","version":"v1.1.0"}],"TECT":[{"dec":139.38614782093458,"inc":-43.54545075397627,"MAD":10.350530333388226,"cm":[-282.62885227323,205.7901740206784,-152.90029669703648],"intensity":323.4552621060633,"type":"dir","forced":false,"remark":"","origin":false,"nSteps":8,"minStep":"300","maxStep":"580","steps":["300","330","360","390","420","480","540","580"],"group":"None","version":"v1.1.0"}],"interpreted":true,"name":"TY 35.B1","coreAzi":346,"coreDip":53,"bedStrike":353,"bedDip":20,"data":[{"visible":false,"include":false,"step":"20","x":-418.3673333333333,"y":714.7108571428571,"z":225.1307619047619,"a95":1.306767,"info":"\"90-03-19\" at \"10:58\""},{"visible":true,"include":false,"step":"100","x":-467.0477142857143,"y":703.5415238095238,"z":379.88790476190474,"a95":3.21747,"info":"\"90-03-19\" at \"15:05\""},{"visible":true,"include":false,"step":"150","x":-392.09028571428576,"y":577.4502857142858,"z":37.8984,"a95":1.450104,"info":"\"90-03-20\" at \"11:57\""},{"visible":true,"include":false,"step":"200","x":-330.56190476190477,"y":482.2200952380952,"z":-327.7857142857143,"a95":1.697909,"info":"\"90-03-21\" at \"08:37\""},{"visible":true,"include":false,"step":"250","x":-302.86438095238094,"y":388.86209523809526,"z":-400.80628571428576,"a95":1.736055,"info":"\"90-03-21\" at \"14:03\""},{"visible":true,"include":true,"step":"300","x":-233.5884761904762,"y":250.4393333333333,"z":-351.5447619047619,"a95":2.443601,"info":"\"90-03-22\" at \"09:10\""},{"visible":true,"include":true,"step":"330","x":-228.036,"y":229.1981904761905,"z":-375.045619047619,"a95":2.608978,"info":"\"90-03-22\" at \"14:07\""},{"visible":true,"include":true,"step":"360","x":-216.15647619047618,"y":216.15647619047618,"z":-290.5328571428571,"a95":2.614314,"info":"\"90-03-23\" at \"09:44\""},{"visible":true,"include":true,"step":"390","x":-224.7433333333333,"y":189.29828571428573,"z":-308.1585714285714,"a95":2.385433,"info":"\"90-03-23\" at \"15:40\""},{"visible":true,"include":true,"step":"420","x":-235.1057142857143,"y":186.238,"z":-306.99638095238095,"a95":2.140069,"info":"\"90-03-27\" at \"11:39\""},{"visible":true,"include":false,"step":"450","x":-205.50361904761905,"y":232.87180952380953,"z":-278.8921904761905,"a95":3.189249,"info":"\"90-03-27\" at \"14:22\""},{"visible":true,"include":true,"step":"480","x":-225.37599999999998,"y":122.876,"z":-216.69238095238094,"a95":2.512959,"info":"\"90-03-28\" at \"09:49\""},{"visible":true,"include":false,"step":"510","x":-238.3273333333333,"y":203.5215238095238,"z":-256.51476190476194,"a95":2.26211,"info":"\"90-03-28\" at \"12:32\""},{"visible":true,"include":false,"step":"540","x":-161.504,"y":135.5884761904762,"z":-152.0907619047619,"a95":2.909031,"info":"\"90-03-29\" at \"08:52\""},{"visible":true,"include":true,"step":"540","x":-172.81542857142855,"y":120.86809523809524,"z":-187.23228571428572,"a95":2.997831,"info":"\"90-03-29\" at \"11:09\""},{"visible":true,"include":true,"step":"580","x":-154.98314285714287,"y":69.27595238095239,"z":-95.37228571428571,"a95":3.473552,"info":"\"90-03-29\" at \"15:40\""},{"visible":true,"include":false,"step":"600","x":-133.44495238095237,"y":84.17060952380952,"z":-135.9435238095238,"a95":3.148832,"info":"\"90-03-30\" at \"10:40\""}]},{"version":"v1.1.0","exported":"2016-10-10T19:56:19.959Z","volume":10.5,"added":"2016-10-10T19:39:45.201Z","format":"Utrecht","demagType":"Unknown","strat":"1.05","patch":1.1,"GEO":[{"dec":120.593437078009,"inc":-20.209573265371066,"MAD":13.749724855807557,"cm":[9.769962616701378e-15,8.659739592076221e-15,0],"intensity":305.08468799633545,"type":"dir","forced":true,"remark":"","origin":false,"nSteps":10,"minStep":"360","maxStep":"600","steps":["360","390","420","450","480","510","540","540","580","600"],"group":"None","version":"v1.1.0"}],"TECT":[{"dec":127.59823102693139,"inc":-35.37603827198024,"MAD":13.749724855807555,"cm":[2.2648549702353193e-14,7.549516567451064e-15,-4.884981308350689e-15],"intensity":305.0846879963354,"type":"dir","forced":true,"remark":"","origin":false,"nSteps":10,"minStep":"360","maxStep":"600","steps":["360","390","420","450","480","510","540","540","580","600"],"group":"None","version":"v1.1.0"}],"interpreted":true,"name":"TY 36.1","coreAzi":92,"coreDip":72,"bedStrike":353,"bedDip":20,"data":[{"visible":false,"include":false,"step":"20","x":-26.01883809523809,"y":-492.87285714285713,"z":-141.6509523809524,"a95":2.619892,"info":"\"90-03-19\" at \"10:59\""},{"visible":true,"include":false,"step":"100","x":41.25566666666667,"y":-347.4773333333334,"z":386.9898095238095,"a95":2.279776,"info":"\"90-03-19\" at \"15:06\""},{"visible":true,"include":false,"step":"150","x":367.36266666666666,"y":-48.35758095238095,"z":257.5412380952381,"a95":2.874975,"info":"\"90-03-20\" at \"11:58\""},{"visible":true,"include":false,"step":"200","x":454.3934285714286,"y":67.98468571428572,"z":78.76669523809524,"a95":2.852501,"info":"\"90-03-21\" at \"08:38\""},{"visible":true,"include":false,"step":"250","x":465.88561904761906,"y":163.98971428571429,"z":-6.843662857142856,"a95":2.685091,"info":"\"90-03-21\" at \"14:04\""},{"visible":true,"include":false,"step":"300","x":413.0086666666667,"y":94.26178095238095,"z":-15.817904761904762,"a95":3.195056,"info":"\"90-03-22\" at \"09:10\""},{"visible":true,"include":false,"step":"330","x":394.41457142857143,"y":107.04523809523809,"z":-59.39782857142857,"a95":3.137625,"info":"\"90-03-22\" at \"14:08\""},{"visible":true,"include":true,"step":"360","x":284.72219047619046,"y":84.8356,"z":-10.459180952380953,"a95":3.967377,"info":"\"90-03-23\" at \"09:45\""},{"visible":true,"include":true,"step":"390","x":264.25580952380955,"y":127.96361904761905,"z":-37.64015238095239,"a95":4.207353,"info":"\"90-03-23\" at \"15:41\""},{"visible":true,"include":true,"step":"420","x":211.32066666666668,"y":89.09029523809524,"z":-22.661561904761907,"a95":4.117104,"info":"\"90-03-27\" at \"11:40\""},{"visible":true,"include":true,"step":"450","x":219.81714285714284,"y":112.14571428571428,"z":-26.328733333333336,"a95":4.2457,"info":"\"90-03-27\" at \"14:23\""},{"visible":true,"include":true,"step":"480","x":148.3912380952381,"y":123.60561904761904,"z":15.869552380952381,"a95":5.365377,"info":"\"90-03-28\" at \"09:50\""},{"visible":true,"include":true,"step":"510","x":133.86466666666666,"y":133.65800000000002,"z":-4.926146666666666,"a95":5.435564,"info":"\"90-03-28\" at \"12:34\""},{"visible":true,"include":true,"step":"540","x":116.78780952380951,"y":46.317390476190475,"z":18.49726666666667,"a95":8.348795,"info":"\"90-03-29\" at \"08:53\""},{"visible":true,"include":true,"step":"540","x":59.62380952380952,"y":64.60805714285713,"z":-66.73862857142856,"a95":7.541131,"info":"\"90-03-29\" at \"11:11\""},{"visible":true,"include":true,"step":"580","x":-18.755514285714284,"y":28.924161904761906,"z":12.738247619047618,"a95":17.46196,"info":"\"90-03-29\" at \"15:41\""},{"visible":true,"include":true,"step":"600","x":-13.513009523809522,"y":29.318,"z":-70.10881904761905,"a95":7.501249,"info":"\"90-03-30\" at \"10:40\""}]},{"version":"v1.1.0","exported":"2016-10-10T19:56:19.959Z","volume":10.5,"added":"2016-10-10T19:39:45.201Z","format":"Utrecht","demagType":"Unknown","strat":"1.06","patch":1.1,"GEO":[{"dec":120.13535349698634,"inc":-26.409433526430856,"MAD":26.54553598919485,"cm":[-78.47385940054544,204.8584513598924,-259.15090250150826],"intensity":249.0821372183671,"type":"dir","forced":false,"remark":"","origin":false,"nSteps":7,"minStep":"360","maxStep":"540","steps":["360","390","420","450","510","540","540"],"group":"None","version":"v1.1.0"}],"TECT":[{"dec":126.75017797002045,"inc":-45.442933056684474,"MAD":26.54553598919487,"cm":[-63.572460762275355,98.82949066796807,-318.55234417137035],"intensity":249.08213721836708,"type":"dir","forced":false,"remark":"","origin":false,"nSteps":7,"minStep":"360","maxStep":"540","steps":["360","390","420","450","510","540","540"],"group":"None","version":"v1.1.0"}],"interpreted":true,"name":"TY 37.B1","coreAzi":80,"coreDip":37,"bedStrike":8,"bedDip":21,"data":[{"visible":false,"include":false,"step":"20","x":165.28095238095239,"y":-523.2174285714286,"z":1069.4190476190477,"a95":0.9136699,"info":"\"90-03-19\" at \"10:59\""},{"visible":true,"include":false,"step":"100","x":191.88085714285714,"y":-600.9511428571428,"z":786.3111428571428,"a95":0.8059072,"info":"\"90-03-19\" at \"15:07\""},{"visible":true,"include":false,"step":"150","x":518.4398095238096,"y":-285.4324761904762,"z":541.6824761904762,"a95":1.209657,"info":"\"90-03-20\" at \"11:59\""},{"visible":true,"include":false,"step":"200","x":843.1263809523809,"y":142.36114285714285,"z":245.2097142857143,"a95":1.492639,"info":"\"90-03-21\" at \"08:39\""},{"visible":true,"include":false,"step":"250","x":758.2908571428571,"y":176.644,"z":130.73980952380953,"a95":1.328988,"info":"\"90-03-21\" at \"14:04\""},{"visible":true,"include":false,"step":"300","x":615.9297142857142,"y":85.99773333333333,"z":24.985828571428573,"a95":2.382157,"info":"\"90-03-22\" at \"09:11\""},{"visible":true,"include":false,"step":"330","x":552.916380952381,"y":140.29514285714285,"z":17.173723809523807,"a95":2.187093,"info":"\"90-03-22\" at \"14:09\""},{"visible":true,"include":true,"step":"360","x":403.711619047619,"y":187.81333333333333,"z":28.34309523809524,"a95":2.367125,"info":"\"90-03-23\" at \"09:45\""},{"visible":true,"include":true,"step":"390","x":411.6527619047619,"y":117.69809523809523,"z":14.784895238095238,"a95":2.784203,"info":"\"90-03-23\" at \"15:42\""},{"visible":true,"include":true,"step":"420","x":351.18971428571433,"y":205.0064761904762,"z":21.635019047619046,"a95":2.162581,"info":"\"90-03-27\" at \"11:40\""},{"visible":true,"include":true,"step":"450","x":333.4349523809524,"y":124.67733333333334,"z":-4.080373333333333,"a95":2.744884,"info":"\"90-03-27\" at \"14:24\""},{"visible":true,"include":false,"step":"480","x":300.67571428571426,"y":8.974237142857143,"z":-22.95855238095238,"a95":2.726585,"info":"\"90-03-28\" at \"09:51\""},{"visible":true,"include":true,"step":"510","x":303,"y":32.623619047619044,"z":-38.23413333333333,"a95":2.427289,"info":"\"90-03-28\" at \"12:35\""},{"visible":true,"include":true,"step":"540","x":253.59647619047618,"y":26.883971428571428,"z":-16.663676190476192,"a95":3.197149,"info":"\"90-03-29\" at \"08:53\""},{"visible":true,"include":true,"step":"540","x":184.67561904761905,"y":95.28190476190477,"z":-45.83962857142857,"a95":3.734131,"info":"\"90-03-29\" at \"11:11\""},{"visible":true,"include":false,"step":"580","x":72.65259047619048,"y":118.2275238095238,"z":66.8354761904762,"a95":3.705193,"info":"\"90-03-29\" at \"15:42\""},{"visible":true,"include":false,"step":"600","x":75.88073333333334,"y":97.62552380952381,"z":2.8213971428571427,"a95":7.094204,"info":"\"90-03-30\" at \"10:42\""}]},{"version":"v1.1.0","exported":"2016-10-10T19:56:19.959Z","volume":10.5,"added":"2016-10-10T19:39:45.201Z","format":"Utrecht","demagType":"Unknown","strat":"1.07","patch":1.1,"GEO":[{"dec":134.3056551976697,"inc":-26.355633206367227,"MAD":9.296784989446829,"cm":[-143.38625168511305,312.57341616747067,-197.0764271025447],"intensity":346.75264382031065,"type":"dir","forced":false,"remark":"","origin":false,"nSteps":8,"minStep":"300","maxStep":"540","steps":["300","330","390","420","450","480","510","540"],"group":"None","version":"v1.1.0"}],"TECT":[{"dec":143.8492961021119,"inc":-42.31716804549123,"MAD":9.296784989446842,"cm":[-130.51131193954373,220.9634597243259,-302.06426916947555],"intensity":346.75264382031054,"type":"dir","forced":false,"remark":"","origin":false,"nSteps":8,"minStep":"300","maxStep":"540","steps":["300","330","390","420","450","480","510","540"],"group":"None","version":"v1.1.0"}],"interpreted":true,"name":"TY 37.D1","coreAzi":228,"coreDip":55,"bedStrike":8,"bedDip":21,"data":[{"visible":false,"include":false,"step":"20","x":-710.8371428571429,"y":-522.7655238095238,"z":-290.4038095238095,"a95":0.543241,"info":"\"90-03-19\" at \"11:00\""},{"visible":false,"include":false,"step":"100","x":-760.6150476190476,"y":-392.80047619047616,"z":-86.32055238095238,"a95":0.8350232,"info":"\"90-03-19\" at \"15:07\""},{"visible":true,"include":false,"step":"150","x":-504.81704761904757,"y":-484.1568571428571,"z":-198.59533333333334,"a95":0.879591,"info":"\"90-03-20\" at \"11:59\""},{"visible":true,"include":false,"step":"200","x":-86.70792380952382,"y":-662.2858095238096,"z":-408.618380952381,"a95":0.9767287,"info":"\"90-03-21\" at \"08:39\""},{"visible":true,"include":false,"step":"250","x":-27.180961904761904,"y":-616.0588571428572,"z":-444.06333333333333,"a95":0.8216757,"info":"\"90-03-21\" at \"14:05\""},{"visible":true,"include":true,"step":"300","x":24.985828571428573,"y":-489.2574285714286,"z":-338.18028571428573,"a95":1.305746,"info":"\"90-03-22\" at \"09:12\""},{"visible":true,"include":true,"step":"330","x":57.267266666666664,"y":-462.8512380952381,"z":-280.91304761904763,"a95":1.229437,"info":"\"90-03-22\" at \"14:10\""},{"visible":true,"include":false,"step":"360","x":-26.147961904761907,"y":-379.436,"z":-266.1280952380952,"a95":1.593107,"info":"\"90-03-23\" at \"09:46\""},{"visible":true,"include":true,"step":"390","x":2.453387619047619,"y":-354.5792380952381,"z":-271.5514285714286,"a95":2.092457,"info":"\"90-03-23\" at \"15:43\""},{"visible":true,"include":true,"step":"420","x":13.435533333333334,"y":-372.7665714285714,"z":-243.01466666666667,"a95":1.302799,"info":"\"90-03-27\" at \"11:41\""},{"visible":true,"include":true,"step":"450","x":-3.5380438095238094,"y":-245.04190476190476,"z":-229.4370476190476,"a95":1.774346,"info":"\"90-03-27\" at \"14:25\""},{"visible":true,"include":true,"step":"480","x":-20.395409523809526,"y":-218.5969523809524,"z":-187.56799999999998,"a95":1.930892,"info":"\"90-03-28\" at \"09:52\""},{"visible":true,"include":true,"step":"510","x":-35.72262857142857,"y":-190.95114285714286,"z":-198.21447619047618,"a95":1.713554,"info":"\"90-03-28\" at \"12:35\""},{"visible":true,"include":true,"step":"540","x":-27.66518095238095,"y":-191.6290476190476,"z":-168.23142857142858,"a95":2.411595,"info":"\"90-03-29\" at \"08:55\""},{"visible":true,"include":false,"step":"540","x":-74.69278095238094,"y":-133.5612380952381,"z":-143.23266666666666,"a95":2.542311,"info":"\"90-03-29\" at \"11:12\""},{"visible":true,"include":false,"step":"580","x":-70.87064761904762,"y":-109.60838095238094,"z":-54.658923809523806,"a95":3.213984,"info":"\"90-03-29\" at \"15:43\""},{"visible":true,"include":false,"step":"600","x":-38.99597142857143,"y":-77.91445714285715,"z":-89.0063619047619,"a95":3.165055,"info":"\"90-03-30\" at \"10:43\""}]},{"version":"v1.1.0","exported":"2016-10-10T19:56:19.959Z","volume":10.5,"added":"2016-10-10T19:39:45.201Z","format":"Utrecht","demagType":"Unknown","strat":"1.08","patch":1.1,"GEO":[],"TECT":[],"interpreted":false,"name":"TY 38.A1","coreAzi":339,"coreDip":0,"bedStrike":8,"bedDip":21,"data":[{"visible":false,"include":false,"step":"20","x":-2661.2809523809524,"y":945.394,"z":-293.43819047619047,"a95":0.9419916,"info":"\"90-03-19\" at \"11:01\""},{"visible":false,"include":false,"step":"100","x":-2475.34,"y":1187.1171428571429,"z":421.85371428571426,"a95":0.9162534,"info":"\"90-03-19\" at \"15:08\""},{"visible":true,"include":true,"step":"150","x":-1296.4866666666667,"y":958.8876190476191,"z":125.63933333333333,"a95":1.462256,"info":"\"90-03-20\" at \"12:00\""},{"visible":true,"include":true,"step":"200","x":-700.7653333333334,"y":878.5714285714286,"z":-208.86085714285716,"a95":1.806016,"info":"\"90-03-21\" at \"08:40\""},{"visible":true,"include":true,"step":"250","x":-390.9281904761905,"y":830.7949523809524,"z":-349.34961904761906,"a95":1.70267,"info":"\"90-03-21\" at \"14:06\""},{"visible":true,"include":true,"step":"300","x":-172.512,"y":591.4603809523809,"z":-381.7601904761905,"a95":3.85175,"info":"\"90-03-22\" at \"09:13\""},{"visible":true,"include":true,"step":"330","x":-56.944447619047615,"y":516.5674285714285,"z":-402.67857142857144,"a95":2.049997,"info":"\"90-03-22\" at \"14:10\""},{"visible":true,"include":false,"step":"360","x":-76.70068571428571,"y":446.83952380952377,"z":-325.97790476190477,"a95":2.475712,"info":"\"90-03-23\" at \"09:47\""},{"visible":true,"include":false,"step":"390","x":-52.29592380952381,"y":445.6774285714286,"z":-337.922,"a95":2.265389,"info":"\"90-03-23\" at \"15:44\""},{"visible":true,"include":false,"step":"420","x":-31.390466666666665,"y":393.1039047619048,"z":-305.6535238095238,"a95":2.388406,"info":"\"90-03-27\" at \"11:42\""},{"visible":true,"include":false,"step":"450","x":-50.75286666666666,"y":403.63409523809526,"z":-310.7862857142857,"a95":2.113299,"info":"\"90-03-27\" at \"14:26\""},{"visible":true,"include":false,"step":"480","x":-50.339666666666666,"y":349.18180952380953,"z":-253.6998095238095,"a95":2.454394,"info":"\"90-03-28\" at \"09:52\""},{"visible":true,"include":false,"step":"510","x":-65.88640952380953,"y":367.28523809523807,"z":-292.66342857142854,"a95":2.131538,"info":"\"90-03-28\" at \"12:36\""},{"visible":true,"include":false,"step":"540","x":-68.68842857142857,"y":279.3828571428571,"z":-196.2904761904762,"a95":4.358864,"info":"\"90-03-29\" at \"08:55\""},{"visible":true,"include":false,"step":"540","x":-38.22767619047619,"y":296.9762857142857,"z":-265.02409523809524,"a95":2.783077,"info":"\"90-03-29\" at \"11:13\""},{"visible":true,"include":false,"step":"580","x":-60.15321904761905,"y":222.7354285714286,"z":-166.12666666666667,"a95":2.852195,"info":"\"90-03-29\" at \"15:44\""},{"visible":true,"include":false,"step":"600","x":-57.66755238095239,"y":199.50571428571428,"z":-187.13542857142858,"a95":2.260019,"info":"\"90-03-30\" at \"10:43\""}]},{"version":"v1.1.0","exported":"2016-10-10T19:56:19.959Z","volume":10.5,"added":"2016-10-10T19:39:45.202Z","format":"Utrecht","demagType":"Unknown","strat":"1.09","patch":1.1,"GEO":[],"TECT":[],"interpreted":false,"name":"TY 38.B2","coreAzi":345,"coreDip":58,"bedStrike":8,"bedDip":21,"data":[{"visible":true,"include":true,"step":"20","x":-478.7981904761905,"y":-591.5249523809523,"z":-3783.3190476190475,"a95":0.3969564,"info":"\"90-03-19\" at \"11:03\""},{"visible":true,"include":true,"step":"100","x":-732.1428571428571,"y":-522.9591428571429,"z":-2711.5114285714285,"a95":0.7043127,"info":"\"90-03-19\" at \"15:09\""},{"visible":true,"include":true,"step":"150","x":-766.5548571428571,"y":-478.6690476190476,"z":-1043.1419047619047,"a95":1.089652,"info":"\"90-03-20\" at \"12:01\""},{"visible":true,"include":true,"step":"200","x":-718.3263809523809,"y":-382.2121904761905,"z":-508.56161904761905,"a95":0.9963184,"info":"\"90-03-21\" at \"08:41\""},{"visible":true,"include":false,"step":"250","x":-677.070761904762,"y":-325.2677142857143,"z":-209.3127619047619,"a95":1.387129,"info":"\"90-03-21\" at \"14:07\""},{"visible":true,"include":false,"step":"300","x":-584.4230476190476,"y":-220.93409523809524,"z":-19.627114285714285,"a95":1.456174,"info":"\"90-03-22\" at \"09:14\""},{"visible":true,"include":false,"step":"330","x":-480.3477142857143,"y":-244.82238095238097,"z":1.0330057142857143,"a95":1.566074,"info":"\"90-03-22\" at \"14:11\""},{"visible":true,"include":false,"step":"360","x":-508.43257142857146,"y":-178.38714285714286,"z":42.998866666666665,"a95":1.497176,"info":"\"90-03-23\" at \"09:48\""},{"visible":true,"include":false,"step":"390","x":-462.5282857142857,"y":-173.15761904761905,"z":46.16244761904762,"a95":1.851831,"info":"\"90-03-23\" at \"15:45\""},{"visible":true,"include":false,"step":"420","x":-424.2102857142857,"y":-216.06609523809524,"z":78.4309619047619,"a95":1.86528,"info":"\"90-03-27\" at \"11:43\""},{"visible":true,"include":false,"step":"450","x":-406.2618095238095,"y":-113.96638095238094,"z":64.75009523809524,"a95":1.970658,"info":"\"90-03-27\" at \"14:27\""},{"visible":true,"include":false,"step":"480","x":-410.7877142857143,"y":-94.3328,"z":93.72590476190476,"a95":2.137717,"info":"\"90-03-28\" at \"09:53\""},{"visible":true,"include":false,"step":"510","x":-406.7589523809524,"y":-62.97461904761905,"z":74.66049523809524,"a95":2.276566,"info":"\"90-03-28\" at \"12:37\""},{"visible":true,"include":false,"step":"540","x":-364.5090476190476,"y":-76.57801904761905,"z":136.66019047619048,"a95":2.101927,"info":"\"90-03-29\" at \"08:56\""},{"visible":true,"include":false,"step":"540","x":-370.0226666666666,"y":-87.15986666666666,"z":66.32542857142857,"a95":1.728411,"info":"\"90-03-29\" at \"11:13\""},{"visible":true,"include":false,"step":"580","x":-291.5659047619048,"y":-74.44743809523808,"z":81.78178095238096,"a95":1.886654,"info":"\"90-03-29\" at \"15:44\""},{"visible":true,"include":false,"step":"600","x":-192.28114285714287,"y":-21.7254,"z":4.8486714285714285,"a95":2.681182,"info":"\"90-03-30\" at \"10:44\""}]},{"version":"v1.1.0","exported":"2016-10-10T19:56:19.960Z","volume":10.5,"added":"2016-10-10T19:39:45.202Z","format":"Utrecht","demagType":"Unknown","strat":"1.10","patch":1.1,"GEO":[],"TECT":[],"interpreted":false,"name":"TY 39.A1","coreAzi":5,"coreDip":63,"bedStrike":8,"bedDip":21,"data":[{"visible":false,"include":false,"step":"20","x":-93.87440952380952,"y":770.2349523809523,"z":1049.662857142857,"a95":1.153325,"info":"\"90-03-19\" at \"11:04\""},{"visible":true,"include":false,"step":"100","x":-313.19447619047617,"y":966.8933333333332,"z":1548.2819047619046,"a95":1.611337,"info":"\"90-03-19\" at \"15:09\""},{"visible":true,"include":true,"step":"150","x":-471.1152380952381,"y":842.9973333333334,"z":559.6954285714286,"a95":1.646678,"info":"\"90-03-20\" at \"12:01\""},{"visible":true,"include":true,"step":"200","x":-435.3473333333333,"y":765.3927619047619,"z":204.406,"a95":1.957012,"info":"\"90-03-21\" at \"08:41\""},{"visible":true,"include":true,"step":"250","x":-454.3934285714286,"y":662.996,"z":4.648525714285714,"a95":1.804558,"info":"\"90-03-21\" at \"14:07\""},{"visible":true,"include":false,"step":"300","x":-419.7877142857143,"y":534.2577142857143,"z":-98.78114285714285,"a95":1.845945,"info":"\"90-03-22\" at \"09:14\""},{"visible":true,"include":false,"step":"330","x":-374.33542857142857,"y":505.07533333333333,"z":-159.92219047619048,"a95":2.01421,"info":"\"90-03-22\" at \"14:12\""},{"visible":true,"include":false,"step":"360","x":-372.4631428571428,"y":489.8384761904762,"z":-106.91609523809522,"a95":1.573191,"info":"\"90-03-23\" at \"09:48\""},{"visible":true,"include":false,"step":"390","x":-364.90933333333334,"y":481.1224761904762,"z":-145.58923809523807,"a95":1.706932,"info":"\"90-03-23\" at \"15:45\""},{"visible":true,"include":false,"step":"420","x":-392.2517142857143,"y":397.19076190476187,"z":-177.7544761904762,"a95":3.010187,"info":"\"90-03-27\" at \"11:44\""},{"visible":true,"include":false,"step":"450","x":-374.6518095238095,"y":388.77171428571427,"z":-200.91961904761905,"a95":1.780353,"info":"\"90-03-27\" at \"14:27\""},{"visible":true,"include":false,"step":"480","x":-305.1886666666667,"y":383.0514285714286,"z":-124.74190476190476,"a95":2.09298,"info":"\"90-03-28\" at \"09:54\""},{"visible":true,"include":false,"step":"510","x":-343.1,"y":370.23571428571427,"z":-173.2867619047619,"a95":1.826632,"info":"\"90-03-28\" at \"12:38\""},{"visible":true,"include":false,"step":"540","x":-197.15561904761904,"y":354.8568571428571,"z":-96.76685714285715,"a95":1.961186,"info":"\"90-03-29\" at \"08:57\""},{"visible":true,"include":false,"step":"540","x":-228.05542857142856,"y":308.1262857142857,"z":-169.1418095238095,"a95":2.068859,"info":"\"90-03-29\" at \"11:14\""},{"visible":true,"include":false,"step":"580","x":-215.7432380952381,"y":220.91476190476192,"z":-119.49942857142857,"a95":3.880202,"info":"\"90-03-29\" at \"15:45\""},{"visible":true,"include":false,"step":"600","x":-176.70857142857145,"y":149.63085714285714,"z":-81.76240952380952,"a95":2.22049,"info":"\"90-03-30\" at \"10:45\""}]},{"version":"v1.1.0","exported":"2016-10-10T19:56:19.960Z","volume":10.5,"added":"2016-10-10T19:39:45.202Z","format":"Utrecht","demagType":"Unknown","strat":"2.01","patch":1.1,"GEO":[],"TECT":[],"interpreted":false,"name":"TY 39.B1","coreAzi":342,"coreDip":80,"bedStrike":8,"bedDip":21,"data":[{"visible":false,"include":false,"step":"20","x":498.68352380952376,"y":187.55514285714284,"z":805.4861904761905,"a95":1.475125,"info":"\"90-03-19\" at \"11:04\""},{"visible":true,"include":true,"step":"100","x":206.4075238095238,"y":453.6832380952381,"z":1416.1866666666665,"a95":2.478068,"info":"\"90-03-19\" at \"15:33\""},{"visible":true,"include":true,"step":"150","x":-75.40942857142856,"y":579.1934285714285,"z":639.3015238095238,"a95":2.358104,"info":"\"90-03-20\" at \"12:02\""},{"visible":true,"include":true,"step":"200","x":-133.90333333333334,"y":569.1216190476191,"z":294.0192380952381,"a95":2.774326,"info":"\"90-03-21\" at \"08:42\""},{"visible":true,"include":true,"step":"250","x":-250.89123809523812,"y":553.0455238095238,"z":44.290123809523806,"a95":3.049865,"info":"\"90-03-21\" at \"14:08\""},{"visible":true,"include":true,"step":"300","x":-225.45352380952383,"y":376.53066666666666,"z":-35.445009523809524,"a95":2.752459,"info":"\"90-03-22\" at \"09:15\""},{"visible":true,"include":false,"step":"330","x":-216.28561904761904,"y":373.17333333333335,"z":-71.60020952380953,"a95":3.466474,"info":"\"90-03-22\" at \"14:12\""},{"visible":true,"include":false,"step":"360","x":-184.19780952380952,"y":316.0998095238095,"z":-96.45695238095239,"a95":3.036841,"info":"\"90-03-23\" at \"09:49\""},{"visible":true,"include":false,"step":"390","x":-146.88047619047617,"y":311.9031428571429,"z":-85.6103619047619,"a95":2.898692,"info":"\"90-03-23\" at \"15:46\""},{"visible":true,"include":false,"step":"420","x":-139.99809523809523,"y":283.63761904761907,"z":-143.65885714285713,"a95":3.52886,"info":"\"90-03-27\" at \"11:44\""},{"visible":true,"include":false,"step":"450","x":-121.5912380952381,"y":282.08161904761903,"z":-144.18180952380953,"a95":3.219227,"info":"\"90-03-27\" at \"14:28\""},{"visible":true,"include":false,"step":"480","x":-172.0922857142857,"y":149.89561904761905,"z":-125.05828571428572,"a95":4.058246,"info":"\"90-03-28\" at \"09:55\""},{"visible":true,"include":false,"step":"510","x":-135.69180952380952,"y":148.7657142857143,"z":-114.28276190476191,"a95":4.356095,"info":"\"90-03-28\" at \"12:38\""},{"visible":true,"include":false,"step":"540","x":-135.93714285714285,"y":74.75088571428572,"z":-94.07454285714286,"a95":4.879241,"info":"\"90-03-29\" at \"08:57\""},{"visible":true,"include":false,"step":"540","x":-205.594,"y":144.87257142857143,"z":-152.45228571428572,"a95":2.953212,"info":"\"90-03-29\" at \"11:15\""},{"visible":true,"include":false,"step":"580","x":-106.79342857142856,"y":64.54995238095238,"z":-89.57451428571429,"a95":4.243714,"info":"\"90-03-29\" at \"15:46\""},{"visible":true,"include":false,"step":"600","x":-86.90161904761905,"y":61.218514285714285,"z":-169.76161904761906,"a95":2.800982,"info":"\"90-03-30\" at \"10:46\""}]},{"version":"v1.1.0","exported":"2016-10-10T19:56:19.960Z","volume":10.5,"added":"2016-10-10T19:39:45.202Z","format":"Utrecht","demagType":"Unknown","strat":"2.02","patch":1.1,"GEO":[],"TECT":[],"interpreted":false,"name":"TY 40.1","coreAzi":170,"coreDip":5,"bedStrike":7,"bedDip":17,"data":[{"visible":true,"include":true,"step":"20","x":-11.815009523809524,"y":-1.5495085714285712,"z":-9.167927619047619,"a95":16.46989,"info":"\"90-03-19\" at \"11:05\""},{"visible":true,"include":true,"step":"100","x":-9.297052380952382,"y":-0.5810646666666667,"z":-4.6485247619047625,"a95":18.51157,"info":"\"90-03-19\" at \"15:34\""},{"visible":true,"include":true,"step":"150","x":-4.519399047619048,"y":-0.7101901904761905,"z":-0.4519402857142857,"a95":31.0881,"info":"\"90-03-20\" at \"12:03\""},{"visible":true,"include":true,"step":"200","x":0.9038803809523809,"y":0.2582512380952381,"z":1.1621314285714286,"a95":186.8833,"info":"\"90-03-21\" at \"08:43\""},{"visible":true,"include":false,"step":"250","x":1.743197142857143,"y":1.1621314285714286,"z":-1.1621314285714286,"a95":105.7188,"info":"\"90-03-21\" at \"14:09\""},{"visible":true,"include":false,"step":"300","x":0.1291257142857143,"y":1.614070476190476,"z":-1.2912571428571429,"a95":93.26187,"info":"\"90-03-22\" at \"09:16\""},{"visible":true,"include":false,"step":"330","x":0.4519402857142857,"y":2.453389523809524,"z":-2.453387619047619,"a95":74.9759,"info":"\"90-03-22\" at \"14:13\""}]},{"version":"v1.1.0","exported":"2016-10-10T19:56:19.960Z","volume":10.5,"added":"2016-10-10T19:39:45.202Z","format":"Utrecht","demagType":"Unknown","strat":"2.03","patch":1.1,"GEO":[],"TECT":[],"interpreted":false,"name":"TY 41.A1","coreAzi":165,"coreDip":73,"bedStrike":7,"bedDip":17,"data":[{"visible":false,"include":false,"step":"20","x":-325.2677142857143,"y":-504.4941904761905,"z":-55.65319047619048,"a95":0.6491659,"info":"\"90-03-19\" at \"11:06\""},{"visible":true,"include":true,"step":"100","x":-409.0702857142857,"y":-502.04085714285713,"z":202.21085714285715,"a95":1.056062,"info":"\"90-03-19\" at \"15:35\""},{"visible":true,"include":true,"step":"150","x":-146.88047619047617,"y":-401.06447619047617,"z":48.93864761904762,"a95":2.562798,"info":"\"90-03-20\" at \"12:03\""},{"visible":true,"include":true,"step":"200","x":9.619866666666667,"y":-333.85457142857143,"z":-59.84977142857143,"a95":1.678646,"info":"\"90-03-21\" at \"08:44\""},{"visible":true,"include":true,"step":"250","x":81.80114285714286,"y":-267.16114285714286,"z":-123.89609523809524,"a95":2.049902,"info":"\"90-03-21\" at \"14:10\""},{"visible":true,"include":false,"step":"300","x":83.54434285714285,"y":-196.85219047619046,"z":-111.11266666666667,"a95":3.148363,"info":"\"90-03-22\" at \"09:16\""},{"visible":true,"include":false,"step":"330","x":96.19866666666667,"y":-178.70999999999998,"z":-123.18590476190477,"a95":2.574731,"info":"\"90-03-22\" at \"14:14\""},{"visible":true,"include":false,"step":"360","x":92.97052380952381,"y":-160.37419047619048,"z":-110.40247619047621,"a95":3.613234,"info":"\"90-03-23\" at \"09:50\""},{"visible":true,"include":false,"step":"390","x":93.55159047619047,"y":-141.78009523809524,"z":-120.60342857142857,"a95":2.36083,"info":"\"90-03-23\" at \"15:47\""}]},{"version":"v1.1.0","exported":"2016-10-10T19:56:19.960Z","volume":10.5,"added":"2016-10-10T19:39:45.203Z","format":"Utrecht","demagType":"Unknown","strat":"2.04","patch":1.1,"GEO":[],"TECT":[],"interpreted":false,"name":"TY 41.C1","coreAzi":163,"coreDip":75,"bedStrike":7,"bedDip":17,"data":[{"visible":false,"include":false,"step":"20","x":-758.8719047619047,"y":-468.3390476190477,"z":-115.37380952380951,"a95":0.6052518,"info":"\"90-03-19\" at \"11:07\""},{"visible":false,"include":false,"step":"100","x":-708.3192380952381,"y":-396.2868571428571,"z":214.41323809523809,"a95":1.287523,"info":"\"90-03-19\" at \"15:35\""},{"visible":true,"include":true,"step":"150","x":-348.9622857142857,"y":-261.73790476190476,"z":135.96942857142858,"a95":1.759415,"info":"\"90-03-20\" at \"12:04\""},{"visible":true,"include":true,"step":"200","x":-93.68071428571429,"y":-234.04038095238096,"z":-43.38623809523809,"a95":2.243637,"info":"\"90-03-21\" at \"08:44\""},{"visible":true,"include":true,"step":"250","x":-44.742066666666666,"y":-192.3327619047619,"z":-80.18707619047619,"a95":2.698961,"info":"\"90-03-21\" at \"14:11\""},{"visible":true,"include":true,"step":"300","x":29.634352380952382,"y":-153.40133333333333,"z":-90.64625714285714,"a95":5.014675,"info":"\"90-03-22\" at \"09:17\""},{"visible":true,"include":false,"step":"330","x":32.862495238095235,"y":-147.3324761904762,"z":-94.97197142857142,"a95":2.772625,"info":"\"90-03-22\" at \"14:15\""},{"visible":true,"include":false,"step":"360","x":33.249876190476186,"y":-132.61209523809524,"z":-92.8414,"a95":2.691637,"info":"\"90-03-23\" at \"09:51\""},{"visible":true,"include":false,"step":"390","x":42.4178,"y":-131.32085714285714,"z":-96.77971428571429,"a95":3.257788,"info":"\"90-03-23\" at \"15:48\""},{"visible":true,"include":false,"step":"420","x":33.80511428571429,"y":-132.76057142857144,"z":-92.34426666666666,"a95":2.278217,"info":"\"90-03-27\" at \"11:46\""},{"visible":true,"include":false,"step":"450","x":32.37827619047619,"y":-110.0667619047619,"z":-103.08752380952382,"a95":4.784505,"info":"\"90-03-27\" at \"14:30\""},{"visible":true,"include":false,"step":"480","x":31.926333333333332,"y":-89.6261619047619,"z":-83.90590476190475,"a95":3.783834,"info":"\"90-03-28\" at \"09:56\""},{"visible":true,"include":false,"step":"510","x":44.60648571428572,"y":-80.1096,"z":-110.97714285714285,"a95":2.857607,"info":"\"90-03-28\" at \"12:39\""},{"visible":true,"include":false,"step":"540","x":18.729685714285715,"y":-76.31330476190476,"z":-31.997361904761906,"a95":5.027516,"info":"\"90-03-29\" at \"08:58\""},{"visible":true,"include":false,"step":"540","x":16.411876190476193,"y":-42.908476190476186,"z":-74.78317142857142,"a95":4.389045,"info":"\"90-03-29\" at \"11:16\""},{"visible":true,"include":false,"step":"580","x":1.5947028571428572,"y":-29.31154285714286,"z":-25.366752380952384,"a95":10.26442,"info":"\"90-03-29\" at \"15:47\""},{"visible":true,"include":false,"step":"600","x":-14.578295238095238,"y":-39.17028571428572,"z":-51.43722857142858,"a95":4.938706,"info":"\"90-03-30\" at \"10:47\""}]},{"version":"v1.1.0","exported":"2016-10-10T19:56:19.960Z","volume":10.5,"added":"2016-10-10T19:39:45.203Z","format":"Utrecht","demagType":"Unknown","strat":"2.05","patch":1.1,"GEO":[{"dec":150.44223732856312,"inc":-23.09017776729776,"MAD":3.111087440500229,"cm":[-1.4210854715202004e-14,-4.263256414560601e-14,0],"intensity":1070.0466379810587,"type":"dir","forced":true,"remark":"","origin":false,"nSteps":7,"minStep":"390","maxStep":"540","steps":["390","420","450","480","510","540","540"],"group":"None","version":"v1.1.0"}],"TECT":[{"dec":158.0160335395086,"inc":-32.36006579471062,"MAD":3.111087440500211,"cm":[-5.684341886080802e-14,-1.2789769243681803e-13,1.4210854715202004e-14],"intensity":1070.046637981059,"type":"dir","forced":true,"remark":"","origin":false,"nSteps":7,"minStep":"390","maxStep":"540","steps":["390","420","450","480","510","540","540"],"group":"None","version":"v1.1.0"}],"interpreted":true,"name":"TY 42.A1","coreAzi":355,"coreDip":82,"bedStrike":7,"bedDip":17,"data":[{"visible":false,"include":false,"step":"20","x":-51.585723809523806,"y":1037.6542857142858,"z":711.6119047619047,"a95":1.403547,"info":"\"90-03-19\" at \"11:07\""},{"visible":false,"include":false,"step":"100","x":-309.1269523809524,"y":927.3809523809524,"z":314.35657142857144,"a95":4.301792,"info":"\"90-03-19\" at \"15:36\""},{"visible":true,"include":false,"step":"150","x":-606.5035238095238,"y":764.5534285714285,"z":-124.80000000000001,"a95":1.264974,"info":"\"90-03-20\" at \"12:05\""},{"visible":true,"include":false,"step":"200","x":-742.1500952380952,"y":621.288380952381,"z":-356.3224761904762,"a95":1.485136,"info":"\"90-03-21\" at \"08:45\""},{"visible":true,"include":false,"step":"250","x":-841.9642857142857,"y":539.8100952380953,"z":-395.70580952380953,"a95":1.175152,"info":"\"90-03-21\" at \"14:12\""},{"visible":true,"include":false,"step":"300","x":-700.3134285714286,"y":366.20057142857144,"z":-419.6586666666667,"a95":1.098378,"info":"\"90-03-22\" at \"09:18\""},{"visible":true,"include":false,"step":"330","x":-617.802,"y":339.47152380952383,"z":-385.3757142857143,"a95":1.375263,"info":"\"90-03-22\" at \"14:16\""},{"visible":true,"include":false,"step":"360","x":-467.62885714285716,"y":300.28190476190474,"z":-317.1327619047619,"a95":3.604411,"info":"\"90-03-23\" at \"09:52\""},{"visible":true,"include":true,"step":"390","x":-474.60161904761907,"y":261.9315238095238,"z":-322.94342857142857,"a95":1.877777,"info":"\"90-03-23\" at \"15:48\""},{"visible":true,"include":true,"step":"420","x":-456.36266666666666,"y":250.25857142857143,"z":-299.64914285714286,"a95":1.282506,"info":"\"90-03-27\" at \"11:47\""},{"visible":true,"include":true,"step":"450","x":-461.6309523809524,"y":220.08190476190478,"z":-270.4990476190476,"a95":1.660415,"info":"\"90-03-27\" at \"14:30\""},{"visible":true,"include":true,"step":"480","x":-407.93399999999997,"y":146.04761904761904,"z":-234.8344761904762,"a95":1.737722,"info":"\"90-03-28\" at \"09:56\""},{"visible":true,"include":true,"step":"510","x":-364.08933333333334,"y":178.26457142857143,"z":-273.7981904761905,"a95":1.358084,"info":"\"90-03-28\" at \"12:40\""},{"visible":true,"include":true,"step":"540","x":-329.70314285714284,"y":165.31961904761906,"z":-210.93333333333334,"a95":1.667674,"info":"\"90-03-29\" at \"08:59\""},{"visible":true,"include":true,"step":"540","x":-333.7835238095238,"y":163.2407619047619,"z":-234.49876190476192,"a95":1.405577,"info":"\"90-03-29\" at \"11:17\""},{"visible":true,"include":false,"step":"580","x":-218.64857142857142,"y":89.12902857142856,"z":-126.17523809523809,"a95":2.01116,"info":"\"90-03-29\" at \"15:48\""},{"visible":true,"include":false,"step":"600","x":-211.1270476190476,"y":100.55019047619048,"z":-159.14742857142858,"a95":1.686442,"info":"\"90-03-30\" at \"10:48\""}]},{"version":"v1.1.0","exported":"2016-10-10T19:56:19.960Z","volume":10.5,"added":"2016-10-10T19:39:45.203Z","format":"Utrecht","demagType":"Unknown","strat":"2.06","patch":1.1,"GEO":[{"dec":105.92912791968092,"inc":-20.641433350808594,"MAD":3.144886805370788,"cm":[-6.217248937900877e-14,-2.842170943040401e-14,0],"intensity":1253.2803505494787,"type":"dir","forced":true,"remark":"","origin":false,"nSteps":8,"minStep":"330","maxStep":"540","steps":["330","360","390","420","450","480","510","540"],"group":"None","version":"v1.1.0"}],"TECT":[{"dec":107.53534596270345,"inc":-37.40189962306271,"MAD":3.144886805370648,"cm":[-1.6342482922482304e-13,-4.263256414560601e-14,1.7763568394002505e-14],"intensity":1253.2803505494787,"type":"dir","forced":true,"remark":"","origin":false,"nSteps":8,"minStep":"330","maxStep":"540","steps":["330","360","390","420","450","480","510","540"],"group":"None","version":"v1.1.0"}],"interpreted":true,"name":"TY 42.B1","coreAzi":265,"coreDip":61,"bedStrike":7,"bedDip":17,"data":[{"visible":true,"include":false,"step":"20","x":-1077.747619047619,"y":209.63561904761906,"z":-1413.0228571428572,"a95":0.5311655,"info":"\"90-03-19\" at \"11:08\""},{"visible":true,"include":false,"step":"100","x":-970.38,"y":141.78,"z":-1051.7295238095237,"a95":0.8630022,"info":"\"90-03-19\" at \"15:37\""},{"visible":true,"include":false,"step":"150","x":-867.9830476190476,"y":-131.45,"z":-921.6994285714285,"a95":0.7505559,"info":"\"90-03-20\" at \"12:06\""},{"visible":true,"include":false,"step":"200","x":-794.7688571428572,"y":-326.1070476190476,"z":-887.9976190476191,"a95":1.762439,"info":"\"90-03-21\" at \"08:47\""},{"visible":true,"include":false,"step":"250","x":-729.3666666666667,"y":-315.97066666666666,"z":-888.5786666666665,"a95":1.692037,"info":"\"90-03-21\" at \"14:13\""},{"visible":true,"include":false,"step":"300","x":-615.4778095238095,"y":-278.20142857142855,"z":-700.3134285714286,"a95":0.5897953,"info":"\"90-03-22\" at \"09:19\""},{"visible":true,"include":true,"step":"330","x":-496.3592380952381,"y":-279.94457142857146,"z":-664.2873333333333,"a95":0.7194749,"info":"\"90-03-22\" at \"14:17\""},{"visible":true,"include":true,"step":"360","x":-396.7387619047619,"y":-212.21809523809523,"z":-495.7781904761905,"a95":1.906282,"info":"\"90-03-23\" at \"10:24\""},{"visible":true,"include":true,"step":"390","x":-374.78742857142856,"y":-227.7778095238095,"z":-473.31038095238097,"a95":0.587689,"info":"\"90-03-23\" at \"15:49\""},{"visible":true,"include":true,"step":"420","x":-352.1581904761905,"y":-227.39685714285713,"z":-432.4291428571429,"a95":0.9759802,"info":"\"90-03-27\" at \"11:48\""},{"visible":true,"include":true,"step":"450","x":-347.32885714285715,"y":-154.5377142857143,"z":-409.85152380952377,"a95":1.24383,"info":"\"90-03-27\" at \"14:31\""},{"visible":true,"include":true,"step":"480","x":-297.3959047619048,"y":-163.56352380952382,"z":-346.10219047619046,"a95":1.317755,"info":"\"90-03-28\" at \"09:57\""},{"visible":true,"include":true,"step":"510","x":-289.4418095238095,"y":-145.7764761904762,"z":-342.0346666666667,"a95":1.319065,"info":"\"90-03-28\" at \"12:41\""},{"visible":true,"include":true,"step":"540","x":-251.01390476190477,"y":-172.58295238095238,"z":-234.24695238095237,"a95":1.617483,"info":"\"90-03-29\" at \"09:00\""},{"visible":true,"include":false,"step":"540","x":-229.70171428571427,"y":-113.30133333333333,"z":-255.0684761904762,"a95":1.170291,"info":"\"90-03-29\" at \"11:17\""},{"visible":true,"include":false,"step":"580","x":-153.0398095238095,"y":-94.26178095238095,"z":-157.9142857142857,"a95":1.689115,"info":"\"90-03-29\" at \"15:49\""},{"visible":true,"include":false,"step":"600","x":-139.44933333333333,"y":-82.634,"z":-199.9382857142857,"a95":1.272115,"info":"\"90-03-30\" at \"10:49\""}]},{"version":"v1.1.0","exported":"2016-10-10T19:56:19.960Z","volume":10.5,"added":"2016-10-10T19:39:45.204Z","format":"Utrecht","demagType":"Unknown","strat":"2.07","patch":1.1,"GEO":[{"dec":117.18685971927033,"inc":-23.01099554852472,"MAD":2.41084380234732,"cm":[-1.0302869668521453e-13,-7.460698725481052e-14,0],"intensity":1438.0587206882533,"type":"dir","forced":true,"remark":"","origin":false,"nSteps":10,"minStep":"360","maxStep":"600","steps":["360","390","420","450","480","510","540","540","580","600"],"group":"None","version":"v1.1.0"}],"TECT":[{"dec":121.04619133115557,"inc":-38.785305414274376,"MAD":2.4108438023472702,"cm":[-1.0658141036401503e-13,-7.105427357601002e-14,0],"intensity":1438.0587206882533,"type":"dir","forced":true,"remark":"","origin":false,"nSteps":10,"minStep":"360","maxStep":"600","steps":["360","390","420","450","480","510","540","540","580","600"],"group":"None","version":"v1.1.0"}],"interpreted":true,"name":"TY 43.1A","coreAzi":303,"coreDip":69,"bedStrike":7,"bedDip":17,"data":[{"visible":true,"include":false,"step":"20","x":-694.6964761904762,"y":1070.6457142857143,"z":485.44819047619046,"a95":1.378796,"info":"\"90-03-19\" at \"11:09\""},{"visible":true,"include":false,"step":"100","x":-743.7641904761905,"y":1176.077142857143,"z":677.5226666666667,"a95":1.469493,"info":"\"90-03-19\" at \"15:38\""},{"visible":true,"include":false,"step":"150","x":-889.7408571428572,"y":622.4505714285714,"z":108.78838095238095,"a95":1.361529,"info":"\"90-03-20\" at \"12:06\""},{"visible":true,"include":false,"step":"200","x":-917.1800952380952,"y":284.9804761904762,"z":-508.1097142857143,"a95":1.042509,"info":"\"90-03-21\" at \"08:47\""},{"visible":true,"include":false,"step":"250","x":-895.4224761904761,"y":227.7778095238095,"z":-735.0481904761905,"a95":1.211334,"info":"\"90-03-21\" at \"14:14\""},{"visible":true,"include":false,"step":"300","x":-813.6211428571429,"y":132.03104761904763,"z":-764.2305714285715,"a95":0.983165,"info":"\"90-03-22\" at \"09:20\""},{"visible":true,"include":false,"step":"330","x":-746.217619047619,"y":147.71980952380952,"z":-760.7441904761905,"a95":0.9156313,"info":"\"90-03-22\" at \"14:18\""},{"visible":true,"include":true,"step":"360","x":-672.7450476190477,"y":49.84253333333333,"z":-651.5039047619048,"a95":1.02647,"info":"\"90-03-23\" at \"10:25\""},{"visible":true,"include":true,"step":"390","x":-635.686,"y":83.09240952380952,"z":-642.4004761904762,"a95":0.9837441,"info":"\"90-03-23\" at \"15:50\""},{"visible":true,"include":true,"step":"420","x":-646.1322857142857,"y":56.58289523809524,"z":-583.706380952381,"a95":0.9943846,"info":"\"90-03-27\" at \"11:49\""},{"visible":true,"include":true,"step":"450","x":-589.8527619047619,"y":90.3686380952381,"z":-576.2945714285714,"a95":1.13539,"info":"\"90-03-27\" at \"14:32\""},{"visible":true,"include":true,"step":"480","x":-522.7139047619048,"y":71.22575238095239,"z":-546.7829523809523,"a95":1.210326,"info":"\"90-03-28\" at \"09:58\""},{"visible":true,"include":true,"step":"510","x":-527.6980952380952,"y":84.11249523809524,"z":-532.785619047619,"a95":1.008396,"info":"\"90-03-28\" at \"12:42\""},{"visible":true,"include":true,"step":"540","x":-475.57647619047617,"y":71.27094285714286,"z":-464.31028571428567,"a95":1.903049,"info":"\"90-03-29\" at \"09:01\""},{"visible":true,"include":true,"step":"540","x":-460.0426666666667,"y":102.33857142857144,"z":-457.57638095238093,"a95":1.138491,"info":"\"90-03-29\" at \"11:18\""},{"visible":true,"include":true,"step":"580","x":-375.3749523809524,"y":36.32306666666667,"z":-348.7104761904762,"a95":1.124312,"info":"\"90-03-29\" at \"15:49\""},{"visible":true,"include":true,"step":"600","x":-393.1426666666666,"y":65.36344761904762,"z":-306.9447619047619,"a95":1.049497,"info":"\"90-03-30\" at \"10:49\""}]},{"version":"v1.1.0","exported":"2016-10-10T19:56:19.960Z","volume":10.5,"added":"2016-10-10T19:39:45.205Z","format":"Utrecht","demagType":"Unknown","strat":"2.08","patch":1.1,"GEO":[],"TECT":[],"interpreted":false,"name":"TY 44.A1","coreAzi":255,"coreDip":48,"bedStrike":330,"bedDip":24,"data":[{"visible":true,"include":false,"step":"20","x":1026.161904761905,"y":3431.7742857142853,"z":521.4741904761905,"a95":1.328175,"info":"\"90-03-19\" at \"11:10\""},{"visible":true,"include":false,"step":"100","x":740.6005714285714,"y":3557.542857142857,"z":706.576,"a95":1.724247,"info":"\"90-03-19\" at \"15:38\""},{"visible":true,"include":false,"step":"150","x":815.9455238095238,"y":3421.185714285714,"z":706.7050476190476,"a95":1.218939,"info":"\"90-03-20\" at \"12:07\""},{"visible":true,"include":false,"step":"200","x":832.9900952380953,"y":3261.780952380952,"z":681.5901904761905,"a95":1.396237,"info":"\"90-03-21\" at \"08:48\""},{"visible":true,"include":false,"step":"250","x":889.7407619047619,"y":3026.060952380952,"z":636.3961904761904,"a95":1.129191,"info":"\"90-03-21\" at \"14:15\""},{"visible":true,"include":false,"step":"300","x":742.4729523809524,"y":2538.224761904762,"z":546.0726666666667,"a95":1.152074,"info":"\"90-03-22\" at \"09:20\""},{"visible":true,"include":false,"step":"330","x":747.3151428571429,"y":2299.212380952381,"z":486.86857142857144,"a95":1.282175,"info":"\"90-03-22\" at \"14:18\""},{"visible":true,"include":false,"step":"360","x":484.02780952380954,"y":1894.855238095238,"z":373.04419047619047,"a95":1.544878,"info":"\"90-03-23\" at \"10:26\""},{"visible":true,"include":false,"step":"390","x":503.33209523809523,"y":1770.3780952380953,"z":378.66114285714286,"a95":1.260289,"info":"\"90-03-23\" at \"15:51\""},{"visible":true,"include":false,"step":"420","x":346.11504761904763,"y":1656.3533333333332,"z":394.1627619047619,"a95":1.200833,"info":"\"90-03-27\" at \"11:49\""},{"visible":true,"include":false,"step":"450","x":378.9452380952381,"y":1498.42,"z":268.1812380952381,"a95":1.962055,"info":"\"90-03-27\" at \"14:33\""},{"visible":true,"include":false,"step":"480","x":224.27200000000002,"y":1284.0580952380953,"z":269.82752380952377,"a95":1.156104,"info":"\"90-03-28\" at \"09:59\""},{"visible":true,"include":false,"step":"510","x":346.53476190476187,"y":1110.5457142857142,"z":231.74190476190475,"a95":1.339928,"info":"\"90-03-28\" at \"12:43\""},{"visible":true,"include":false,"step":"540","x":279.1181904761905,"y":964.6533333333334,"z":214.51657142857144,"a95":1.656619,"info":"\"90-03-29\" at \"09:01\""},{"visible":true,"include":false,"step":"540","x":187.77466666666666,"y":920.3178095238095,"z":157.26219047619048,"a95":2.054709,"info":"\"90-03-29\" at \"11:19\""},{"visible":true,"include":false,"step":"580","x":218.7454285714286,"y":698.5250476190477,"z":129.62285714285713,"a95":1.930867,"info":"\"90-03-29\" at \"15:50\""},{"visible":true,"include":false,"step":"600","x":125.8007619047619,"y":544.5748571428571,"z":58.287352380952385,"a95":2.14718,"info":"\"90-03-30\" at \"10:50\""}]},{"version":"v1.1.0","exported":"2016-10-10T19:56:19.960Z","volume":10.5,"added":"2016-10-10T19:39:45.205Z","format":"Utrecht","demagType":"Unknown","strat":"2.09","patch":1.1,"GEO":[],"TECT":[],"interpreted":false,"name":"TY 44.B1","coreAzi":63,"coreDip":37,"bedStrike":330,"bedDip":24,"data":[{"visible":true,"include":false,"step":"20","x":-1128.8819047619047,"y":-1492.8866666666665,"z":-296.21438095238096,"a95":0.8805522,"info":"\"90-03-19\" at \"11:10\""},{"visible":true,"include":false,"step":"100","x":-979.0961904761905,"y":-1533.432380952381,"z":-57.525514285714294,"a95":0.7615507,"info":"\"90-03-19\" at \"15:39\""},{"visible":true,"include":false,"step":"150","x":-1017.8980952380953,"y":-1295.324761904762,"z":-114.92190476190477,"a95":0.6842011,"info":"\"90-03-20\" at \"12:08\""},{"visible":true,"include":false,"step":"200","x":-781.8561904761905,"y":-1255.9409523809522,"z":-225.1307619047619,"a95":0.6312306,"info":"\"90-03-21\" at \"08:49\""},{"visible":true,"include":false,"step":"250","x":-625.2267619047619,"y":-1178.982857142857,"z":-243.46657142857143,"a95":0.5899826,"info":"\"90-03-21\" at \"14:15\""},{"visible":true,"include":false,"step":"300","x":-506.10828571428567,"y":-955.8533333333332,"z":-190.58952380952383,"a95":0.7741736,"info":"\"90-03-22\" at \"09:21\""},{"visible":true,"include":false,"step":"330","x":-390.73447619047624,"y":-906.7853333333333,"z":-191.42885714285714,"a95":0.7531407,"info":"\"90-03-22\" at \"14:19\""},{"visible":true,"include":true,"step":"360","x":-435.7993333333333,"y":-757.1287619047619,"z":-191.17066666666665,"a95":0.8471984,"info":"\"90-03-23\" at \"10:26\""},{"visible":true,"include":true,"step":"390","x":-388.0228571428571,"y":-708.4482857142857,"z":-181.16342857142857,"a95":0.8185322,"info":"\"90-03-23\" at \"15:51\""},{"visible":true,"include":true,"step":"420","x":-369.96457142857145,"y":-661.1366666666667,"z":-163.3504761904762,"a95":1.0615,"info":"\"90-03-27\" at \"11:50\""},{"visible":true,"include":true,"step":"450","x":-342.8287619047619,"y":-613.3149523809524,"z":-182.7387619047619,"a95":0.8997765,"info":"\"90-03-27\" at \"14:33\""},{"visible":true,"include":true,"step":"480","x":-282.5722857142857,"y":-561.4257142857143,"z":-119.29276190476192,"a95":1.007203,"info":"\"90-03-28\" at \"10:00\""},{"visible":true,"include":true,"step":"510","x":-280.51276190476193,"y":-481.32266666666663,"z":-126.58190476190475,"a95":1.05445,"info":"\"90-03-28\" at \"12:43\""},{"visible":true,"include":true,"step":"540","x":-246.9917142857143,"y":-445.46438095238096,"z":-103.52657142857143,"a95":1.197479,"info":"\"90-03-29\" at \"09:02\""},{"visible":true,"include":true,"step":"540","x":-220.23685714285716,"y":-399.8184761904762,"z":-118.66657142857143,"a95":1.197274,"info":"\"90-03-29\" at \"11:20\""},{"visible":true,"include":true,"step":"580","x":-175.55285714285714,"y":-290.1132380952381,"z":-74.08589523809523,"a95":1.242514,"info":"\"90-03-29\" at \"15:51\""},{"visible":true,"include":true,"step":"600","x":-99.06523809523809,"y":-168.1087619047619,"z":-85.05511428571428,"a95":2.033072,"info":"\"90-03-30\" at \"10:51\""}]},{"version":"v1.1.0","exported":"2016-10-10T19:56:19.960Z","volume":10.5,"added":"2016-10-10T19:39:45.205Z","format":"Utrecht","demagType":"Unknown","strat":"2.10","patch":1.1,"GEO":[],"TECT":[],"interpreted":false,"name":"TY 45.A1","coreAzi":5,"coreDip":67,"bedStrike":330,"bedDip":24,"data":[{"visible":false,"include":false,"step":"20","x":1107.0590476190478,"y":-819.4318095238095,"z":1876.390476190476,"a95":0.8302716,"info":"\"90-03-19\" at \"11:11\""},{"visible":true,"include":false,"step":"100","x":921.9577142857144,"y":-664.5456190476191,"z":2288.365714285714,"a95":0.9011576,"info":"\"90-03-19\" at \"15:40\""},{"visible":true,"include":false,"step":"150","x":505.0107619047619,"y":-503.2675238095238,"z":1338.0009523809524,"a95":2.28152,"info":"\"90-03-20\" at \"12:08\""},{"visible":true,"include":false,"step":"200","x":402.67857142857144,"y":-414.29990476190477,"z":807.6813333333333,"a95":2.184848,"info":"\"90-03-21\" at \"08:49\""},{"visible":true,"include":false,"step":"250","x":304.0265714285714,"y":-365.6195238095238,"z":522.8300952380953,"a95":5.703615,"info":"\"90-03-21\" at \"14:16\""},{"visible":true,"include":true,"step":"300","x":203.2439047619048,"y":-289.24161904761905,"z":332.82152380952385,"a95":2.089345,"info":"\"90-03-22\" at \"09:22\""},{"visible":true,"include":true,"step":"330","x":164.3124761904762,"y":-228.8107619047619,"z":267.16114285714286,"a95":2.937705,"info":"\"90-03-22\" at \"14:20\""},{"visible":true,"include":true,"step":"360","x":138.29361904761905,"y":-217.3185714285714,"z":203.3730476190476,"a95":3.147295,"info":"\"90-03-23\" at \"10:27\""},{"visible":true,"include":true,"step":"390","x":116.21314285714286,"y":-194.076,"z":170.51057142857144,"a95":5.035962,"info":"\"90-03-23\" at \"15:52\""},{"visible":true,"include":true,"step":"420","x":104.90819047619048,"y":-187.652,"z":161.35552380952382,"a95":2.892885,"info":"\"90-03-27\" at \"11:50\""},{"visible":true,"include":true,"step":"450","x":87.79258095238094,"y":-125.96857142857144,"z":131.54685714285714,"a95":4.81366,"info":"\"90-03-27\" at \"14:34\""},{"visible":true,"include":true,"step":"480","x":84.91307619047619,"y":-128.43495238095238,"z":160.16114285714286,"a95":3.897401,"info":"\"90-03-28\" at \"10:00\""},{"visible":true,"include":true,"step":"510","x":66.03490476190476,"y":-137.85466666666667,"z":114.72819047619048,"a95":4.397442,"info":"\"90-03-28\" at \"12:44\""},{"visible":true,"include":true,"step":"540","x":53.62591428571428,"y":-95.11400952380953,"z":119.6672380952381,"a95":6.021314,"info":"\"90-03-29\" at \"09:03\""},{"visible":true,"include":false,"step":"540","x":8.812830476190475,"y":-88.12830476190477,"z":53.613,"a95":8.48028,"info":"\"90-03-29\" at \"11:20\""},{"visible":true,"include":false,"step":"580","x":1.6592657142857143,"y":-88.81913333333334,"z":28.181685714285713,"a95":6.725608,"info":"\"90-03-29\" at \"15:52\""},{"visible":true,"include":false,"step":"600","x":25.43777142857143,"y":-46.704771428571426,"z":19.13642857142857,"a95":10.66207,"info":"\"90-03-30\" at \"10:52\""}]},{"version":"v1.1.0","exported":"2016-10-10T19:56:19.960Z","volume":10.5,"added":"2016-10-10T19:39:45.206Z","format":"Utrecht","demagType":"Unknown","strat":"3.01","patch":1.1,"GEO":[],"TECT":[],"interpreted":false,"name":"TY 45.C1","coreAzi":4,"coreDip":1,"bedStrike":330,"bedDip":24,"data":[{"visible":false,"include":false,"step":"20","x":-2400.9638095238092,"y":-479.37923809523807,"z":1328.8971428571429,"a95":1.623867,"info":"\"90-03-19\" at \"11:12\""},{"visible":true,"include":false,"step":"100","x":-2213.9895238095237,"y":-288.07952380952383,"z":1752.9466666666665,"a95":1.010112,"info":"\"90-03-19\" at \"15:41\""},{"visible":true,"include":false,"step":"150","x":-1253.8104761904763,"y":-556.2090476190476,"z":1087.3028571428572,"a95":1.088509,"info":"\"90-03-20\" at \"12:09\""},{"visible":true,"include":false,"step":"200","x":-794.898,"y":-593.8492380952381,"z":757.4515238095238,"a95":2.60286,"info":"\"90-03-21\" at \"08:50\""},{"visible":true,"include":false,"step":"250","x":-588.8133333333333,"y":-462.3346666666667,"z":525.1542857142857,"a95":1.524414,"info":"\"90-03-21\" at \"14:17\""},{"visible":true,"include":true,"step":"300","x":-407.3271428571429,"y":-342.2477142857143,"z":321.32933333333335,"a95":1.927319,"info":"\"90-03-22\" at \"09:22\""},{"visible":true,"include":true,"step":"330","x":-319.1342857142857,"y":-303.7682857142857,"z":241.5942857142857,"a95":2.390572,"info":"\"90-03-22\" at \"14:21\""},{"visible":true,"include":true,"step":"360","x":-234.16952380952384,"y":-270.19561904761906,"z":215.57542857142857,"a95":2.196158,"info":"\"90-03-23\" at \"10:28\""},{"visible":true,"include":true,"step":"390","x":-226.35742857142858,"y":-263.4810476190476,"z":177.4187619047619,"a95":2.259774,"info":"\"90-03-23\" at \"15:53\""},{"visible":true,"include":true,"step":"420","x":-212.06961904761906,"y":-234.59561904761904,"z":157.95304761904762,"a95":2.042259,"info":"\"90-03-27\" at \"11:51\""},{"visible":true,"include":true,"step":"450","x":-180.08523809523808,"y":-201.84933333333333,"z":120.76485714285714,"a95":2.943876,"info":"\"90-03-27\" at \"14:35\""},{"visible":true,"include":true,"step":"480","x":-150.61866666666668,"y":-198.77609523809522,"z":122.79857142857142,"a95":2.738038,"info":"\"90-03-28\" at \"10:41\""},{"visible":true,"include":true,"step":"510","x":-150.48961904761904,"y":-176.76666666666665,"z":65.41509523809525,"a95":3.339545,"info":"\"90-03-28\" at \"12:45\""},{"visible":true,"include":true,"step":"540","x":-119.73828571428571,"y":-148.19114285714286,"z":91.2725238095238,"a95":3.740228,"info":"\"90-03-29\" at \"09:03\""},{"visible":true,"include":true,"step":"540","x":-86.54006666666666,"y":-133.21904761904761,"z":20.99584761904762,"a95":5.117371,"info":"\"90-03-29\" at \"11:21\""},{"visible":true,"include":false,"step":"580","x":-62.858399999999996,"y":-96.52790476190476,"z":95.68866666666666,"a95":3.83646,"info":"\"90-03-29\" at \"15:53\""},{"visible":true,"include":false,"step":"600","x":-69.09518095238096,"y":-91.97625714285715,"z":30.90624761904762,"a95":3.711911,"info":"\"90-03-30\" at \"10:53\""}]},{"version":"v1.1.0","exported":"2016-10-10T19:56:19.961Z","volume":10.5,"added":"2016-10-10T19:39:45.206Z","format":"Utrecht","demagType":"Unknown","strat":"3.02","patch":1.1,"GEO":[{"dec":105.98858915075692,"inc":-21.8535179720512,"MAD":7.919117335392329,"cm":[-7.105427357601002e-15,0,0],"intensity":507.648680518132,"type":"dir","forced":true,"remark":"","origin":false,"nSteps":5,"minStep":"250","maxStep":"390","steps":["250","300","330","360","390"],"group":"None","version":"v1.1.0"}],"TECT":[{"dec":116.74555273247779,"inc":-37.03815142157493,"MAD":7.9191173353923165,"cm":[-1.0658141036401503e-14,7.105427357601002e-15,-1.7763568394002505e-15],"intensity":507.6486805181319,"type":"dir","forced":true,"remark":"","origin":false,"nSteps":5,"minStep":"250","maxStep":"390","steps":["250","300","330","360","390"],"group":"None","version":"v1.1.0"}],"interpreted":true,"name":"TY 46.A1","coreAzi":251,"coreDip":50,"bedStrike":330,"bedDip":24,"data":[{"visible":true,"include":false,"step":"20","x":-396.2868571428571,"y":-16.269838095238097,"z":-175.48190476190476,"a95":1.31303,"info":"\"90-03-19\" at \"11:12\""},{"visible":true,"include":false,"step":"100","x":-342.2477142857143,"y":-9.878123809523808,"z":-71.47109523809524,"a95":1.766143,"info":"\"90-03-19\" at \"15:41\""},{"visible":true,"include":false,"step":"150","x":-158.50180952380953,"y":-81.47833333333334,"z":-158.50180952380953,"a95":2.876223,"info":"\"90-03-20\" at \"12:10\""},{"visible":true,"include":false,"step":"200","x":-63.46529523809524,"y":-129.44857142857143,"z":-236.04180952380952,"a95":2.892779,"info":"\"90-03-21\" at \"08:51\""},{"visible":true,"include":true,"step":"250","x":-51.65029523809523,"y":-159.85761904761907,"z":-237.5267619047619,"a95":3.689552,"info":"\"90-03-21\" at \"14:18\""},{"visible":true,"include":true,"step":"300","x":-89.61324761904763,"y":-130.02961904761904,"z":-225.58266666666665,"a95":2.665848,"info":"\"90-03-22\" at \"09:23\""},{"visible":true,"include":true,"step":"330","x":-108.65933333333334,"y":-110.40247619047621,"z":-189.68571428571428,"a95":3.541135,"info":"\"90-03-22\" at \"14:21\""},{"visible":true,"include":true,"step":"360","x":-98.32923809523811,"y":-127.12428571428572,"z":-149.46304761904761,"a95":3.614426,"info":"\"90-03-23\" at \"10:28\""},{"visible":true,"include":true,"step":"390","x":-90.51713333333333,"y":-136.67961904761904,"z":-149.2047619047619,"a95":3.913965,"info":"\"90-03-23\" at \"15:53\""}]},{"version":"v1.1.0","exported":"2016-10-10T19:56:19.961Z","volume":10.5,"added":"2016-10-10T19:39:45.206Z","format":"Utrecht","demagType":"Unknown","strat":"3.03","patch":1.1,"GEO":[{"dec":113.24733724706186,"inc":-30.73600409357827,"MAD":5.848506258900534,"cm":[-2.2648549702353193e-14,-1.2434497875801753e-14,0],"intensity":359.3402070044455,"type":"dir","forced":true,"remark":"","origin":false,"nSteps":8,"minStep":"250","maxStep":"480","steps":["250","300","330","360","390","420","450","480"],"group":"None","version":"v1.1.0"}],"TECT":[{"dec":129.17343537202748,"inc":-42.538595282101284,"MAD":5.848506258900515,"cm":[-4.440892098500626e-14,-2.7533531010703882e-14,3.552713678800501e-15],"intensity":359.34020700444546,"type":"dir","forced":true,"remark":"","origin":false,"nSteps":8,"minStep":"250","maxStep":"480","steps":["250","300","330","360","390","420","450","480"],"group":"None","version":"v1.1.0"}],"interpreted":true,"name":"TY 46.C1","coreAzi":298,"coreDip":26,"bedStrike":330,"bedDip":24,"data":[{"visible":true,"include":false,"step":"20","x":-195.56095238095236,"y":160.11590476190477,"z":-88.90306666666667,"a95":2.364545,"info":"\"90-03-19\" at \"11:13\""},{"visible":true,"include":false,"step":"100","x":-178.1289523809524,"y":165.3455238095238,"z":-6.39172380952381,"a95":2.396651,"info":"\"90-03-19\" at \"15:42\""},{"visible":true,"include":false,"step":"150","x":-54.491057142857144,"y":64.36917142857143,"z":-82.9632761904762,"a95":7.088369,"info":"\"90-03-20\" at \"12:10\""},{"visible":true,"include":false,"step":"200","x":40.22266666666667,"y":24.275638095238097,"z":-163.98971428571429,"a95":4.794933,"info":"\"90-03-21\" at \"08:51\""},{"visible":true,"include":true,"step":"250","x":20.33730476190476,"y":19.175171428571428,"z":-187.10314285714287,"a95":4.535022,"info":"\"90-03-21\" at \"14:18\""},{"visible":true,"include":true,"step":"300","x":34.28287619047619,"y":15.107714285714286,"z":-183.03571428571428,"a95":4.149459,"info":"\"90-03-22\" at \"09:24\""},{"visible":true,"include":true,"step":"330","x":34.15375238095238,"y":12.912571428571429,"z":-194.78619047619048,"a95":4.830162,"info":"\"90-03-22\" at \"14:22\""},{"visible":true,"include":true,"step":"360","x":6.972789523809524,"y":8.134920952380952,"z":-187.10314285714287,"a95":3.507783,"info":"\"90-03-23\" at \"10:29\""},{"visible":true,"include":true,"step":"390","x":0.45193809523809525,"y":32.08774285714286,"z":-191.62257142857143,"a95":3.45683,"info":"\"90-03-23\" at \"15:54\""},{"visible":true,"include":true,"step":"420","x":14.358780952380952,"y":10.743257142857143,"z":-185.5278095238095,"a95":2.74741,"info":"\"90-03-27\" at \"11:52\""},{"visible":true,"include":true,"step":"450","x":-9.81355238095238,"y":-14.416885714285714,"z":-177.77380952380952,"a95":3.582688,"info":"\"90-03-27\" at \"14:36\""},{"visible":true,"include":true,"step":"480","x":22.37102857142857,"y":20.33730476190476,"z":-167.49542857142856,"a95":3.447466,"info":"\"90-03-28\" at \"10:42\""},{"visible":true,"include":false,"step":"510","x":-12.622038095238095,"y":44.406333333333336,"z":-175.84990476190475,"a95":3.086664,"info":"\"90-03-28\" at \"12:46\""},{"visible":true,"include":false,"step":"540","x":5.920414285714285,"y":8.257590476190476,"z":-151.0835238095238,"a95":3.933568,"info":"\"90-03-29\" at \"09:04\""},{"visible":true,"include":false,"step":"540","x":-45.02614285714286,"y":32.93997142857143,"z":-129.90047619047618,"a95":3.900481,"info":"\"90-03-29\" at \"11:22\""},{"visible":true,"include":false,"step":"580","x":-6.4046352380952385,"y":22.558266666666665,"z":-70.98686666666667,"a95":6.946453,"info":"\"90-03-29\" at \"15:53\""},{"visible":true,"include":false,"step":"600","x":-31.82302857142857,"y":14.739704761904761,"z":-107.51009523809523,"a95":3.582877,"info":"\"90-03-30\" at \"10:55\""}]},{"version":"v1.1.0","exported":"2016-10-10T19:56:19.961Z","volume":10.5,"added":"2016-10-10T19:39:45.206Z","format":"Utrecht","demagType":"Unknown","strat":"3.04","patch":1.1,"GEO":[{"dec":99.47991369723326,"inc":-29.199096207579498,"MAD":21.882810719397924,"cm":[-40.05912805338377,694.9148392073745,-463.8850084072389],"intensity":828.2454569629022,"type":"dir","forced":false,"remark":"","origin":false,"nSteps":10,"minStep":"360","maxStep":"600","steps":["360","390","420","450","480","510","540","540","580","600"],"group":"None","version":"v1.1.0"}],"TECT":[{"dec":113.07517651830938,"inc":-46.031022179445735,"MAD":21.88281071939789,"cm":[-159.54759304083146,487.95474693070037,-660.4130518233766],"intensity":828.245456962902,"type":"dir","forced":false,"remark":"","origin":false,"nSteps":10,"minStep":"360","maxStep":"600","steps":["360","390","420","450","480","510","540","540","580","600"],"group":"None","version":"v1.1.0"}],"interpreted":true,"name":"TY 47.1","coreAzi":94,"coreDip":65,"bedStrike":330,"bedDip":24,"data":[{"visible":true,"include":false,"step":"20","x":1635.2485714285715,"y":-575.3841904761905,"z":-166.0557142857143,"a95":1.269942,"info":"\"90-03-19\" at \"11:14\""},{"visible":true,"include":false,"step":"100","x":1434.6514285714286,"y":-694.9546666666668,"z":527.6077142857143,"a95":1.281249,"info":"\"90-03-19\" at \"15:43\""},{"visible":true,"include":false,"step":"150","x":1757.7238095238095,"y":-160.9552380952381,"z":261.7378095238095,"a95":1.888459,"info":"\"90-03-20\" at \"12:11\""},{"visible":true,"include":false,"step":"200","x":1889.3676190476192,"y":96.71514285714287,"z":73.53709523809523,"a95":1.390583,"info":"\"90-03-21\" at \"08:52\""},{"visible":true,"include":false,"step":"250","x":1926.2333333333333,"y":-13.94558095238095,"z":-110.66076190476191,"a95":1.285713,"info":"\"90-03-21\" at \"14:19\""},{"visible":true,"include":false,"step":"300","x":1517.7438095238094,"y":-254.5067619047619,"z":-151.65819047619047,"a95":1.283416,"info":"\"90-03-22\" at \"09:25\""},{"visible":true,"include":false,"step":"330","x":1418.8333333333333,"y":-170.7041904761905,"z":-186.07019047619048,"a95":1.51181,"info":"\"90-03-22\" at \"14:23\""},{"visible":true,"include":true,"step":"360","x":1212.1028571428571,"y":0.5810662857142856,"z":-108.65933333333334,"a95":1.430557,"info":"\"90-03-23\" at \"10:30\""},{"visible":true,"include":true,"step":"390","x":1137.7266666666667,"y":127.25342857142857,"z":-135.13009523809524,"a95":1.882928,"info":"\"90-03-23\" at \"15:55\""},{"visible":true,"include":true,"step":"420","x":1057.1333333333332,"y":107.38095238095238,"z":-138.016,"a95":1.23608,"info":"\"90-03-27\" at \"11:53\""},{"visible":true,"include":true,"step":"450","x":972.587619047619,"y":-169.61314285714286,"z":-179.80752380952381,"a95":1.202356,"info":"\"90-03-27\" at \"14:36\""},{"visible":true,"include":true,"step":"480","x":879.7529523809525,"y":25.431314285714286,"z":-141.412,"a95":1.535478,"info":"\"90-03-28\" at \"10:42\""},{"visible":true,"include":true,"step":"510","x":807.6942857142858,"y":-46.556285714285714,"z":-171.85990476190477,"a95":1.383729,"info":"\"90-03-28\" at \"12:47\""},{"visible":true,"include":true,"step":"540","x":707.996380952381,"y":-208.80276190476192,"z":-105.528,"a95":1.411974,"info":"\"90-03-29\" at \"09:05\""},{"visible":true,"include":true,"step":"540","x":631.2053333333333,"y":67.64250476190476,"z":-150.85114285714286,"a95":1.665462,"info":"\"90-03-29\" at \"11:22\""},{"visible":true,"include":true,"step":"580","x":477.3068571428571,"y":16.308580952380954,"z":-66.11882857142857,"a95":2.738308,"info":"\"90-03-29\" at \"15:54\""},{"visible":true,"include":true,"step":"600","x":385.0077142857143,"y":-4.758283809523809,"z":-65.35052380952382,"a95":2.738947,"info":"\"90-03-30\" at \"10:56\""}]},{"version":"v1.1.0","exported":"2016-10-10T19:56:19.961Z","volume":10.5,"added":"2016-10-10T19:39:45.206Z","format":"Utrecht","demagType":"Unknown","strat":"3.05","patch":1.1,"GEO":[],"TECT":[],"interpreted":false,"name":"TY 48.1","coreAzi":95,"coreDip":11,"bedStrike":330,"bedDip":24,"data":[{"visible":false,"include":false,"step":"20","x":-1270.532380952381,"y":-1313.4666666666667,"z":167.928,"a95":0.5111228,"info":"\"90-03-19\" at \"11:14\""},{"visible":false,"include":false,"step":"100","x":-1034.1676190476192,"y":-1079.749523809524,"z":976.6428571428571,"a95":1.390062,"info":"\"90-03-19\" at \"15:44\""},{"visible":true,"include":true,"step":"150","x":-461.108,"y":-60.10802857142858,"z":1437.2342857142855,"a95":1.24918,"info":"\"90-03-20\" at \"12:12\""},{"visible":true,"include":true,"step":"200","x":-149.91495238095237,"y":359.09866666666665,"z":1380.612380952381,"a95":1.412618,"info":"\"90-03-21\" at \"08:53\""},{"visible":true,"include":true,"step":"250","x":40.09353333333333,"y":567.7012380952381,"z":1292.290476190476,"a95":1.737108,"info":"\"90-03-21\" at \"14:20\""},{"visible":true,"include":true,"step":"300","x":151.65819047619047,"y":651.9558095238095,"z":1162.712380952381,"a95":1.496518,"info":"\"90-03-22\" at \"09:25\""},{"visible":true,"include":true,"step":"330","x":89.93606666666668,"y":666.6115238095239,"z":1066.7076190476191,"a95":1.368946,"info":"\"90-03-22\" at \"14:24\""},{"visible":true,"include":false,"step":"360","x":226.61561904761905,"y":600.822,"z":970.6380952380953,"a95":3.457826,"info":"\"90-03-23\" at \"10:31\""},{"visible":true,"include":false,"step":"390","x":131.32085714285714,"y":625.8078095238095,"z":891.0320952380952,"a95":1.494733,"info":"\"90-03-23\" at \"15:55\""},{"visible":true,"include":false,"step":"420","x":99.472,"y":635.5761904761905,"z":838.4714285714286,"a95":1.519876,"info":"\"90-03-27\" at \"11:53\""},{"visible":true,"include":false,"step":"450","x":66.49975238095237,"y":640.6572380952381,"z":787.1762857142858,"a95":2.686687,"info":"\"90-03-27\" at \"14:37\""},{"visible":true,"include":false,"step":"480","x":201.6169523809524,"y":565.2737142857143,"z":718.7913333333333,"a95":1.573668,"info":"\"90-03-28\" at \"10:43\""},{"visible":true,"include":false,"step":"510","x":130.0877142857143,"y":574.6288571428571,"z":690.9582857142857,"a95":1.831044,"info":"\"90-03-28\" at \"12:47\""},{"visible":true,"include":false,"step":"540","x":194.97980952380954,"y":503.51933333333335,"z":690.8290476190476,"a95":1.615391,"info":"\"90-03-29\" at \"09:06\""},{"visible":true,"include":false,"step":"540","x":116.05171428571427,"y":488.779619047619,"z":601.4611428571428,"a95":1.757579,"info":"\"90-03-29\" at \"11:23\""},{"visible":true,"include":false,"step":"580","x":74.95748571428571,"y":391.2897142857143,"z":544.2584761904761,"a95":1.690357,"info":"\"90-03-29\" at \"15:55\""},{"visible":true,"include":false,"step":"600","x":144.13657142857141,"y":411.8852380952381,"z":417.2052380952381,"a95":2.054828,"info":"\"90-03-30\" at \"10:57\""}]},{"version":"v1.1.0","exported":"2016-10-10T19:56:19.961Z","volume":10.5,"added":"2016-10-10T19:39:45.206Z","format":"Utrecht","demagType":"Unknown","strat":"3.06","patch":1.1,"GEO":[{"dec":179.94290471669228,"inc":-55.20920897525162,"MAD":3.1959829805716518,"cm":[0,8.049116928532385e-16,0],"intensity":149.08952397858025,"type":"dir","forced":true,"remark":"","origin":false,"nSteps":4,"minStep":"300","maxStep":"390","steps":["300","330","360","390"],"group":"None","version":"v1.1.0"}],"TECT":[{"dec":205.3133841163806,"inc":-38.68319264519218,"MAD":3.195982980571666,"cm":[1.7763568394002505e-15,-1.7763568394002505e-15,8.881784197001252e-16],"intensity":149.08952397858025,"type":"dir","forced":true,"remark":"","origin":false,"nSteps":4,"minStep":"300","maxStep":"390","steps":["300","330","360","390"],"group":"None","version":"v1.1.0"}],"interpreted":true,"name":"TY 49.1","coreAzi":281,"coreDip":0,"bedStrike":338,"bedDip":28,"data":[{"visible":false,"include":false,"step":"20","x":25.56689523809524,"y":-57.525514285714294,"z":-120.60342857142857,"a95":2.807258,"info":"\"90-03-19\" at \"11:15\""},{"visible":true,"include":false,"step":"100","x":15.107714285714286,"y":-47.64739047619047,"z":-44.742066666666666,"a95":3.775539,"info":"\"90-03-19\" at \"15:44\""},{"visible":true,"include":false,"step":"150","x":45.193999999999996,"y":-65.53130476190476,"z":-21.951371428571427,"a95":3.176947,"info":"\"90-03-20\" at \"12:12\""},{"visible":true,"include":false,"step":"200","x":98.07095238095238,"y":-82.38220952380952,"z":-23.37175238095238,"a95":3.820351,"info":"\"90-03-21\" at \"08:54\""},{"visible":true,"include":false,"step":"250","x":90.0652,"y":-72.63321904761905,"z":-18.852352380952382,"a95":3.82434,"info":"\"90-03-21\" at \"14:20\""},{"visible":true,"include":true,"step":"300","x":69.01770476190475,"y":-51.004666666666665,"z":-4.196583809523809,"a95":5.012612,"info":"\"90-03-22\" at \"09:26\""},{"visible":true,"include":true,"step":"330","x":67.8555619047619,"y":-42.86974285714285,"z":-13.170819047619048,"a95":4.827759,"info":"\"90-03-22\" at \"14:24\""},{"visible":true,"include":true,"step":"360","x":57.65463809523809,"y":-37.31733333333333,"z":-7.424729523809524,"a95":7.084771,"info":"\"90-03-23\" at \"10:31\""},{"visible":true,"include":true,"step":"390","x":51.26291428571428,"y":-36.1552,"z":-8.586861904761903,"a95":7.157572,"info":"\"90-03-23\" at \"15:56\""}]},{"version":"v1.1.0","exported":"2016-10-10T19:56:19.961Z","volume":10.5,"added":"2016-10-10T19:39:45.207Z","format":"Utrecht","demagType":"Unknown","strat":"3.07","patch":1.1,"GEO":[{"dec":105.29495460935107,"inc":-1.5999094462982937,"MAD":1.4725011547127498,"cm":[-1.7674750552032492e-13,-2.4868995751603507e-14,0],"intensity":2224.98082280922,"type":"dir","forced":true,"remark":"","origin":false,"nSteps":12,"minStep":"300","maxStep":"600","steps":["300","330","360","390","420","450","480","510","540","540","580","600"],"group":"None","version":"v1.1.0"}],"TECT":[{"dec":109.31675620098378,"inc":-23.452182770104393,"MAD":1.4725011547127747,"cm":[-9.059419880941277e-14,2.842170943040401e-14,4.085620730620576e-14],"intensity":2224.98082280922,"type":"dir","forced":true,"remark":"","origin":false,"nSteps":12,"minStep":"300","maxStep":"600","steps":["300","330","360","390","420","450","480","510","540","540","580","600"],"group":"None","version":"v1.1.0"}],"interpreted":true,"name":"TY 50.1","coreAzi":278,"coreDip":72,"bedStrike":338,"bedDip":28,"data":[{"visible":false,"include":false,"step":"20","x":-2240.3314285714287,"y":716.7768571428571,"z":-249.60000000000002,"a95":0.7660501,"info":"\"90-03-19\" at \"11:16\""},{"visible":false,"include":false,"step":"100","x":-2252.2114285714288,"y":642.658761904762,"z":-49.39059047619047,"a95":1.088636,"info":"\"90-03-19\" at \"15:45\""},{"visible":true,"include":false,"step":"150","x":-2103.587619047619,"y":191.88085714285714,"z":-247.98600000000002,"a95":1.548164,"info":"\"90-03-20\" at \"12:13\""},{"visible":true,"include":false,"step":"200","x":-1931.14,"y":40.35179047619048,"z":-531.9334285714286,"a95":1.58236,"info":"\"90-03-21\" at \"08:55\""},{"visible":true,"include":false,"step":"250","x":-1834.6180952380953,"y":-236.30009523809522,"z":-590.7501904761905,"a95":1.290615,"info":"\"90-03-21\" at \"14:21\""},{"visible":true,"include":true,"step":"300","x":-1577.0123809523811,"y":-218.4807619047619,"z":-539.8100952380953,"a95":1.740465,"info":"\"90-03-22\" at \"09:27\""},{"visible":true,"include":true,"step":"330","x":-1435.3619047619047,"y":-214.28409523809526,"z":-522.5072380952381,"a95":2.100043,"info":"\"90-03-22\" at \"14:25\""},{"visible":true,"include":true,"step":"360","x":-1159.807619047619,"y":-134.80723809523812,"z":-428.2454285714286,"a95":2.128224,"info":"\"90-03-23\" at \"10:32\""},{"visible":true,"include":true,"step":"390","x":-1104.6057142857144,"y":-131.90190476190477,"z":-403.0014285714286,"a95":0.6285266,"info":"\"90-03-23\" at \"15:57\""},{"visible":true,"include":true,"step":"420","x":-1052.7685714285715,"y":-96.63771428571428,"z":-371.84333333333336,"a95":2.800776,"info":"\"90-03-27\" at \"11:54\""},{"visible":true,"include":true,"step":"450","x":-971.5295238095238,"y":-163.11809523809524,"z":-345.80514285714287,"a95":1.708009,"info":"\"90-03-27\" at \"14:38\""},{"visible":true,"include":true,"step":"480","x":-853.7405714285715,"y":-156.03552380952382,"z":-311.3350476190476,"a95":1.960739,"info":"\"90-03-28\" at \"10:44\""},{"visible":true,"include":true,"step":"510","x":-792.1411428571429,"y":-111.82285714285715,"z":-299.7395238095238,"a95":0.9248744,"info":"\"90-03-28\" at \"12:48\""},{"visible":true,"include":true,"step":"540","x":-732.2784761904762,"y":-99.74961904761906,"z":-249.09,"a95":0.9828394,"info":"\"90-03-29\" at \"09:06\""},{"visible":true,"include":true,"step":"540","x":-704.1936190476191,"y":-74.37641904761905,"z":-264.4430476190476,"a95":1.173995,"info":"\"90-03-29\" at \"11:24\""},{"visible":true,"include":true,"step":"580","x":-590.0141904761905,"y":-77.3979619047619,"z":-177.8641904761905,"a95":0.8869429,"info":"\"90-03-29\" at \"15:56\""},{"visible":true,"include":true,"step":"600","x":-510.3564761904762,"y":-86.5142380952381,"z":-167.58580952380953,"a95":2.202921,"info":"\"90-03-30\" at \"10:58\""}]},{"version":"v1.1.0","exported":"2016-10-10T19:56:19.961Z","volume":10.5,"added":"2016-10-10T19:39:45.207Z","format":"Utrecht","demagType":"Unknown","strat":"3.08","patch":1.1,"GEO":[{"dec":115.60038580429898,"inc":-13.553709972687907,"MAD":4.878503604088867,"cm":[-9.814371537686384e-14,-4.440892098500626e-14,0],"intensity":871.1852309359701,"type":"dir","forced":true,"remark":"","origin":false,"nSteps":12,"minStep":"300","maxStep":"600","steps":["300","330","360","390","420","450","480","510","540","540","580","600"],"group":"None","version":"v1.1.0"}],"TECT":[{"dec":124.85659116616017,"inc":-30.97554211606278,"MAD":4.878503604088916,"cm":[-1.1723955140041653e-13,-6.039613253960852e-14,3.907985046680551e-14],"intensity":871.1852309359703,"type":"dir","forced":true,"remark":"","origin":false,"nSteps":12,"minStep":"300","maxStep":"600","steps":["300","330","360","390","420","450","480","510","540","540","580","600"],"group":"None","version":"v1.1.0"}],"interpreted":true,"name":"TY 51.1","coreAzi":263,"coreDip":58,"bedStrike":338,"bedDip":28,"data":[{"visible":true,"include":false,"step":"20","x":-718.649238095238,"y":-7.682981904761905,"z":-632.6515238095238,"a95":1.018039,"info":"\"90-03-19\" at \"11:17\""},{"visible":true,"include":false,"step":"100","x":-703.6706666666666,"y":-18.594104761904763,"z":-289.9518095238095,"a95":0.959225,"info":"\"90-03-19\" at \"15:46\""},{"visible":true,"include":false,"step":"150","x":-637.4291428571429,"y":-234.75057142857142,"z":-366.6524761904762,"a95":1.486732,"info":"\"90-03-20\" at \"12:13\""},{"visible":true,"include":false,"step":"200","x":-606.1806666666666,"y":-308.4167619047619,"z":-487.6433333333333,"a95":0.7706784,"info":"\"90-03-21\" at \"08:56\""},{"visible":true,"include":false,"step":"250","x":-602.6943809523809,"y":-370.0098095238095,"z":-491.71076190476185,"a95":0.7798485,"info":"\"90-03-21\" at \"14:22\""},{"visible":true,"include":true,"step":"300","x":-403.38876190476196,"y":-396.7387619047619,"z":-441.15799999999996,"a95":0.7496057,"info":"\"90-03-22\" at \"09:28\""},{"visible":true,"include":true,"step":"330","x":-357.74285714285713,"y":-368.0082857142857,"z":-392.3485714285714,"a95":0.8532221,"info":"\"90-03-22\" at \"14:26\""},{"visible":true,"include":true,"step":"360","x":-257.8640952380952,"y":-317.39104761904764,"z":-329.01238095238097,"a95":0.9043134,"info":"\"90-03-23\" at \"10:33\""},{"visible":true,"include":true,"step":"390","x":-274.58580952380953,"y":-270.4538095238095,"z":-316.0998095238095,"a95":1.716012,"info":"\"90-03-23\" at \"15:57\""},{"visible":true,"include":true,"step":"420","x":-258.8841904761905,"y":-261.92504761904763,"z":-296.7115238095238,"a95":0.9461316,"info":"\"90-03-27\" at \"11:55\""},{"visible":true,"include":true,"step":"450","x":-276.41942857142857,"y":-187.3872380952381,"z":-283.48266666666666,"a95":2.669128,"info":"\"90-03-27\" at \"14:39\""},{"visible":true,"include":true,"step":"480","x":-237.34599999999998,"y":-171.25942857142857,"z":-254.35180952380952,"a95":1.294206,"info":"\"90-03-28\" at \"10:45\""},{"visible":true,"include":true,"step":"510","x":-218.95847619047618,"y":-156.9910476190476,"z":-247.1982857142857,"a95":1.100851,"info":"\"90-03-28\" at \"12:49\""},{"visible":true,"include":true,"step":"540","x":-171.4789523809524,"y":-142.06409523809523,"z":-196.40666666666667,"a95":3.215969,"info":"\"90-03-29\" at \"09:07\""},{"visible":true,"include":true,"step":"540","x":-201.46200000000002,"y":-103.0164761904762,"z":-195.11542857142857,"a95":2.756853,"info":"\"90-03-29\" at \"11:24\""},{"visible":true,"include":true,"step":"580","x":-148.9464761904762,"y":-81.96900952380953,"z":-137.12504761904762,"a95":2.501065,"info":"\"90-03-29\" at \"15:57\""},{"visible":true,"include":true,"step":"600","x":-96.38590476190477,"y":-65.09227619047618,"z":-102.80990476190475,"a95":2.692747,"info":"\"90-03-30\" at \"10:58\""}]},{"version":"v1.1.0","exported":"2016-10-10T19:56:19.961Z","volume":10.5,"added":"2016-10-10T19:39:45.207Z","format":"Utrecht","demagType":"Unknown","strat":"3.09","patch":1.1,"GEO":[],"TECT":[],"interpreted":false,"name":"TY 52.1A","coreAzi":267,"coreDip":68,"bedStrike":338,"bedDip":28,"data":[{"visible":true,"include":false,"step":"20","x":-2.6470780952380952,"y":6.133472380952381,"z":3.16358,"a95":30.8695,"info":"\"90-03-19\" at \"11:17\""},{"visible":true,"include":true,"step":"100","x":-3.486394285714286,"y":4.067459047619048,"z":2.324262857142857,"a95":38.53763,"info":"\"90-03-19\" at \"15:46\""},{"visible":true,"include":true,"step":"150","x":-3.3572685714285715,"y":1.6140714285714286,"z":0.7101912380952381,"a95":60.09654,"info":"\"90-03-20\" at \"12:14\""},{"visible":true,"include":true,"step":"200","x":-3.16358,"y":-0.32281514285714286,"z":-0.2582500952380952,"a95":82.29916,"info":"\"90-03-21\" at \"08:56\""},{"visible":true,"include":false,"step":"250","x":-4.196586666666667,"y":1.2912571428571429,"z":-0.1291257142857143,"a95":43.97116,"info":"\"90-03-21\" at \"14:22\""},{"visible":true,"include":false,"step":"300","x":-1.8723219047619046,"y":-0.4519425714285714,"z":-1.2912580952380952,"a95":79.436,"info":"\"90-03-22\" at \"09:28\""},{"visible":true,"include":false,"step":"330","x":-0.7101923809523809,"y":-0.4519398095238095,"z":0.45194247619047623,"a95":356.6072,"info":"\"90-03-22\" at \"14:27\""},{"visible":true,"include":false,"step":"360","x":-4.5194,"y":1.0330066666666666,"z":-1.872322857142857,"a95":45.74618,"info":"\"90-03-23\" at \"10:34\""}]},{"version":"v1.1.0","exported":"2016-10-10T19:56:19.961Z","volume":10.5,"added":"2016-10-10T19:39:45.207Z","format":"Utrecht","demagType":"Unknown","strat":"3.10","patch":1.1,"GEO":[{"dec":140.48107065874763,"inc":-40.501324256560615,"MAD":4.3469066918136825,"cm":[-1.6653345369377348e-16,-4.85722573273506e-16,0],"intensity":30.520511038898857,"type":"dir","forced":true,"remark":"","origin":false,"nSteps":5,"minStep":"300","maxStep":"420","steps":["300","330","360","390","420"],"group":"None","version":"v1.1.0"}],"TECT":[{"dec":166.06936504541807,"inc":-42.91425641689765,"MAD":4.346906691813639,"cm":[-8.881784197001252e-16,-2.4841240175987878e-15,1.214306433183765e-16],"intensity":30.520511038898857,"type":"dir","forced":true,"remark":"","origin":false,"nSteps":5,"minStep":"300","maxStep":"420","steps":["300","330","360","390","420"],"group":"None","version":"v1.1.0"}],"interpreted":true,"name":"TY 53.1","coreAzi":290,"coreDip":73,"bedStrike":338,"bedDip":28,"data":[{"visible":false,"include":false,"step":"20","x":-21.951371428571427,"y":-11.169371428571429,"z":-43.450809523809525,"a95":5.295164,"info":"\"90-03-19\" at \"11:18\""},{"visible":true,"include":false,"step":"100","x":-23.11350476190476,"y":-8.845113333333334,"z":-32.99161904761905,"a95":5.280987,"info":"\"90-03-19\" at \"15:47\""},{"visible":true,"include":false,"step":"150","x":-21.951371428571427,"y":-13.493638095238095,"z":-36.47801904761905,"a95":4.124464,"info":"\"90-03-20\" at \"12:15\""},{"visible":true,"include":false,"step":"200","x":-20.59555238095238,"y":-15.430523809523809,"z":-36.28432380952381,"a95":8.119925,"info":"\"90-03-21\" at \"08:57\""},{"visible":true,"include":false,"step":"250","x":-18.013038095238095,"y":-17.431971428571426,"z":-31.958619047619045,"a95":7.294728,"info":"\"90-03-21\" at \"14:23\""},{"visible":true,"include":true,"step":"300","x":-12.78344761904762,"y":-11.621314285714286,"z":-24.404761904761905,"a95":7.773179,"info":"\"90-03-22\" at \"09:29\""},{"visible":true,"include":true,"step":"330","x":-9.297053333333334,"y":-8.134920952380952,"z":-18.271285714285714,"a95":17.92816,"info":"\"90-03-22\" at \"14:28\""},{"visible":true,"include":true,"step":"360","x":-4.196585714285714,"y":-3.938335238095238,"z":-6.843663809523809,"a95":32.30615,"info":"\"90-03-23\" at \"10:34\""},{"visible":true,"include":true,"step":"390","x":-4.648525714285714,"y":-2.324261904761905,"z":-3.228142857142857,"a95":38.74427,"info":"\"90-03-23\" at \"15:58\""},{"visible":true,"include":true,"step":"420","x":-1.155675238095238,"y":-0.2388829523809524,"z":-0.019368980952380953,"a95":72.81959,"info":"\"90-03-27\" at \"11:56\""}]},{"version":"v1.1.0","exported":"2016-10-10T19:56:19.961Z","volume":10.5,"added":"2016-10-10T19:39:45.207Z","format":"Utrecht","demagType":"Unknown","strat":"1.01","patch":1.1,"GEO":[],"TECT":[],"interpreted":false,"name":"TY 54.1","coreAzi":257,"coreDip":57,"bedStrike":338,"bedDip":28,"data":[{"visible":true,"include":false,"step":"20","x":-2.776202857142857,"y":-3.0344533333333334,"z":-1.2912571428571429,"a95":57.2669,"info":"\"90-03-19\" at \"11:48\""},{"visible":true,"include":false,"step":"100","x":-2.776201904761905,"y":-2.4533885714285715,"z":-0.7101918095238096,"a95":55.87878,"info":"\"90-03-20\" at \"09:04\""},{"visible":true,"include":false,"step":"150","x":-2.453387619047619,"y":-1.614072380952381,"z":-1.8723219047619046,"a95":60.52462,"info":"\"90-03-20\" at \"13:42\""},{"visible":true,"include":false,"step":"200","x":-2.9053314285714285,"y":-1.1621333333333335,"z":-0.5810658095238095,"a95":57.73503,"info":"\"90-03-21\" at \"09:03\""},{"visible":true,"include":false,"step":"250","x":-0.5810658095238095,"y":-1.743197142857143,"z":-1.1621314285714286,"a95":136.277,"info":"\"90-03-21\" at \"14:29\""},{"visible":true,"include":false,"step":"300","x":-1.0330085714285715,"y":-1.2912580952380952,"z":-0.45193790476190476,"a95":127.552,"info":"\"90-03-22\" at \"11:09\""},{"visible":true,"include":false,"step":"360","x":-1.6140714285714286,"y":-0.1291257142857143,"z":1.0330057142857143,"a95":128.9243,"info":"\"90-03-23\" at \"11:00\""}]},{"version":"v1.1.0","exported":"2016-10-10T19:56:19.961Z","volume":10.5,"added":"2016-10-10T19:39:45.207Z","format":"Utrecht","demagType":"Unknown","strat":"1.02","patch":1.1,"GEO":[{"dec":126.37882936649243,"inc":-25.665446521448033,"MAD":6.432678109595205,"cm":[-3.375077994860476e-14,-2.4868995751603507e-14,0],"intensity":805.5697429325994,"type":"dir","forced":true,"remark":"","origin":false,"nSteps":6,"minStep":"360","maxStep":"560","steps":["360","390","420","450","540","560"],"group":"None","version":"v1.1.0"}],"TECT":[{"dec":142.42592155939377,"inc":-37.176876164616736,"MAD":6.43267810959523,"cm":[-2.1316282072803006e-14,-1.9539925233402755e-14,7.105427357601002e-15],"intensity":805.5697429325994,"type":"dir","forced":true,"remark":"","origin":false,"nSteps":6,"minStep":"360","maxStep":"560","steps":["360","390","420","450","540","560"],"group":"None","version":"v1.1.0"}],"interpreted":true,"name":"TY 55.1","coreAzi":295,"coreDip":50,"bedStrike":338,"bedDip":28,"data":[{"visible":true,"include":false,"step":"20","x":-142.36114285714285,"y":295.18142857142857,"z":-491.25885714285715,"a95":2.459648,"info":"\"90-03-19\" at \"11:48\""},{"visible":true,"include":false,"step":"100","x":-264.8368571428571,"y":186.97409523809523,"z":-444.64447619047615,"a95":1.420061,"info":"\"90-03-20\" at \"09:05\""},{"visible":true,"include":false,"step":"150","x":-219.32000000000002,"y":50.22991428571428,"z":-587.7158095238095,"a95":0.8808295,"info":"\"90-03-20\" at \"13:43\""},{"visible":true,"include":false,"step":"200","x":-158.63095238095238,"y":-81.34920952380952,"z":-693.2114285714285,"a95":0.7872773,"info":"\"90-03-21\" at \"09:04\""},{"visible":true,"include":false,"step":"250","x":-183.03571428571428,"y":-89.48412380952381,"z":-628.1320952380952,"a95":1.174141,"info":"\"90-03-21\" at \"14:31\""},{"visible":true,"include":false,"step":"300","x":-183.61676190476192,"y":-105.75399999999999,"z":-513.6621904761905,"a95":1.37146,"info":"\"90-03-22\" at \"11:10\""},{"visible":false,"include":false,"step":"330","x":-143.65238095238095,"y":-62.044914285714285,"z":-475.6991428571429,"a95":1.584528,"info":"\"90-03-22\" at \"15:41\""},{"visible":true,"include":true,"step":"360","x":-202.9210476190476,"y":-123.63790476190476,"z":-454.52257142857144,"a95":1.014843,"info":"\"90-03-23\" at \"11:01\""},{"visible":true,"include":true,"step":"390","x":-183.16485714285713,"y":-105.62485714285714,"z":-355.74133333333333,"a95":1.812375,"info":"\"90-03-26\" at \"15:36\""},{"visible":true,"include":true,"step":"420","x":-193.95333333333332,"y":-55.84687619047619,"z":-340.38190476190476,"a95":1.746438,"info":"\"90-03-27\" at \"12:35\""},{"visible":true,"include":true,"step":"450","x":-135.6530476190476,"y":-23.15224761904762,"z":-357.30380952380955,"a95":1.609848,"info":"\"90-03-27\" at \"15:21\""},{"visible":true,"include":false,"step":"480","x":-194.8184761904762,"y":-31.622885714285715,"z":-291.5659047619048,"a95":1.767349,"info":"\"90-03-28\" at \"10:59\""},{"visible":true,"include":false,"step":"510","x":-123.89609523809524,"y":22.61637142857143,"z":-301.5601904761905,"a95":1.971212,"info":"\"90-03-28\" at \"14:46\""},{"visible":true,"include":true,"step":"540","x":-77.02995238095238,"y":-63.00689523809524,"z":-239.05695238095237,"a95":2.183015,"info":"\"90-03-29\" at \"09:12\""},{"visible":true,"include":true,"step":"560","x":-84.35138095238095,"y":-10.827190476190477,"z":-285.9747619047619,"a95":1.924973,"info":"\"90-03-29\" at \"11:42\""},{"visible":true,"include":false,"step":"580","x":-33.45647619047619,"y":-59.92079047619048,"z":-162.75009523809524,"a95":3.392715,"info":"\"90-03-30\" at \"08:39\""},{"visible":true,"include":false,"step":"600","x":-70.12172380952381,"y":-98.67790476190476,"z":-115.02523809523811,"a95":2.522605,"info":"\"90-03-30\" at \"11:31\""}]},{"version":"v1.1.0","exported":"2016-10-10T19:56:19.961Z","volume":10.5,"added":"2016-10-10T19:39:45.208Z","format":"Utrecht","demagType":"Unknown","strat":"1.03","patch":1.1,"GEO":[{"dec":125.88009226022268,"inc":-16.961212002095124,"MAD":2.4264027939224198,"cm":[-3.552713678800501e-15,-3.552713678800501e-15,0],"intensity":2523.5411541466615,"type":"dir","forced":true,"remark":"","origin":false,"nSteps":10,"minStep":"360","maxStep":"600","steps":["360","390","420","450","480","510","540","560","580","600"],"group":"None","version":"v1.1.0"}],"TECT":[{"dec":136.93141083375446,"inc":-29.757772931199092,"MAD":2.4264027939224806,"cm":[-2.2737367544323206e-13,-2.4513724383723456e-13,-1.4210854715202004e-14],"intensity":2523.5411541466615,"type":"dir","forced":true,"remark":"","origin":false,"nSteps":10,"minStep":"360","maxStep":"600","steps":["360","390","420","450","480","510","540","560","580","600"],"group":"None","version":"v1.1.0"}],"interpreted":true,"name":"TY 56.1","coreAzi":348,"coreDip":4,"bedStrike":338,"bedDip":28,"data":[{"visible":true,"include":false,"step":"20","x":-1746.5542857142857,"y":2040.5742857142857,"z":-1435.3619047619047,"a95":0.8675722,"info":"\"90-03-19\" at \"11:49\""},{"visible":true,"include":false,"step":"100","x":-1440.5914285714284,"y":1806.0819047619048,"z":-1001.3057142857142,"a95":2.76632,"info":"\"90-03-20\" at \"09:05\""},{"visible":true,"include":false,"step":"150","x":-746.4758095238095,"y":1653.52,"z":-1381.9038095238095,"a95":1.296571,"info":"\"90-03-20\" at \"13:44\""},{"visible":true,"include":false,"step":"200","x":140.35961904761905,"y":1566.8114285714287,"z":-1749.5885714285714,"a95":0.7180355,"info":"\"90-03-21\" at \"09:04\""},{"visible":true,"include":false,"step":"250","x":215.83361904761907,"y":1523.8771428571429,"z":-1739.7104761904761,"a95":0.8456089,"info":"\"90-03-21\" at \"14:32\""},{"visible":true,"include":false,"step":"300","x":271.9387619047619,"y":1348.072380952381,"z":-1579.9180952380952,"a95":1.824036,"info":"\"90-03-22\" at \"11:10\""},{"visible":true,"include":false,"step":"330","x":461.8181904761905,"y":1173.3009523809524,"z":-1474.8742857142856,"a95":0.964011,"info":"\"90-03-22\" at \"15:42\""},{"visible":true,"include":true,"step":"360","x":360.26076190476186,"y":1183.0495238095239,"z":-1329.4780952380952,"a95":0.9749312,"info":"\"90-03-23\" at \"11:01\""},{"visible":true,"include":true,"step":"390","x":353.73990476190477,"y":1003.6295238095239,"z":-1183.1790476190477,"a95":0.8027969,"info":"\"90-03-26\" at \"15:37\""},{"visible":true,"include":true,"step":"420","x":332.22761904761904,"y":974.8219047619046,"z":-1141.3809523809523,"a95":0.9738049,"info":"\"90-03-27\" at \"12:35\""},{"visible":true,"include":true,"step":"450","x":437.4521904761904,"y":953.6771428571429,"z":-1143.1438095238095,"a95":0.8463773,"info":"\"90-03-27\" at \"15:22\""},{"visible":true,"include":true,"step":"480","x":366.49752380952384,"y":905.6879047619047,"z":-1007.1161904761905,"a95":0.8894771,"info":"\"90-03-28\" at \"11:02\""},{"visible":true,"include":true,"step":"510","x":405.8228571428572,"y":858.8087619047619,"z":-991.6209523809524,"a95":0.9647985,"info":"\"90-03-28\" at \"14:46\""},{"visible":true,"include":true,"step":"540","x":310.9670476190476,"y":785.9689523809525,"z":-866.659619047619,"a95":0.9084138,"info":"\"90-03-29\" at \"09:13\""},{"visible":true,"include":true,"step":"560","x":321.9168571428571,"y":806.6290476190476,"z":-871.5986666666666,"a95":0.7576371,"info":"\"90-03-29\" at \"11:43\""},{"visible":true,"include":true,"step":"580","x":251.78866666666667,"y":684.773142857143,"z":-705.200761904762,"a95":1.109906,"info":"\"90-03-30\" at \"08:40\""},{"visible":true,"include":true,"step":"600","x":99.34285714285713,"y":484.9768571428571,"z":-507.5609523809524,"a95":1.489157,"info":"\"90-03-30\" at \"11:32\""}]},{"version":"v1.1.0","exported":"2016-10-10T19:56:19.962Z","volume":10.5,"added":"2016-10-10T19:39:45.208Z","format":"Utrecht","demagType":"Unknown","strat":"1.04","patch":1.1,"GEO":[{"dec":108.80678743624321,"inc":-26.89696155945666,"MAD":14.797653303895718,"cm":[-303.1838625474541,120.28757441266208,-146.80116596252537],"intensity":484.02070862156063,"type":"dir","forced":false,"remark":"","origin":false,"nSteps":11,"minStep":"250","maxStep":"600","steps":["250","300","360","390","450","480","510","540","560","580","600"],"group":"None","version":"v1.1.0"}],"TECT":[{"dec":124.64507287864751,"inc":-45.75348008796012,"MAD":14.797653303895702,"cm":[-328.91165093557737,56.609063605741795,-128.65720808313145],"intensity":484.0207086215604,"type":"dir","forced":false,"remark":"","origin":false,"nSteps":11,"minStep":"250","maxStep":"600","steps":["250","300","360","390","450","480","510","540","560","580","600"],"group":"None","version":"v1.1.0"}],"interpreted":true,"name":"TY 57.1","coreAzi":37,"coreDip":71,"bedStrike":338,"bedDip":28,"data":[{"visible":true,"include":false,"step":"20","x":352.2549523809524,"y":189.29828571428573,"z":137.26066666666668,"a95":3.126095,"info":"\"90-03-19\" at \"11:50\""},{"visible":true,"include":false,"step":"100","x":246.50104761904763,"y":314.22742857142856,"z":290.98485714285715,"a95":2.348628,"info":"\"90-03-20\" at \"09:06\""},{"visible":true,"include":false,"step":"150","x":113.75980952380954,"y":459.75209523809525,"z":-98.32923809523811,"a95":2.372621,"info":"\"90-03-20\" at \"13:45\""},{"visible":true,"include":false,"step":"200","x":35.896952380952385,"y":499.2646666666667,"z":-264.514,"a95":2.465674,"info":"\"90-03-21\" at \"09:05\""},{"visible":true,"include":true,"step":"250","x":12.33150476190476,"y":479.25009523809524,"z":-293.5673333333333,"a95":3.304314,"info":"\"90-03-21\" at \"14:33\""},{"visible":true,"include":true,"step":"300","x":-61.592971428571424,"y":402.09752380952386,"z":-235.91266666666667,"a95":3.086708,"info":"\"90-03-22\" at \"11:11\""},{"visible":false,"include":false,"step":"330","x":-5.358718095238095,"y":398.1591428571429,"z":-239.52819047619045,"a95":3.109786,"info":"\"90-03-22\" at \"15:43\""},{"visible":true,"include":true,"step":"360","x":-116.79419047619047,"y":345.15304761904764,"z":-208.0215238095238,"a95":3.239019,"info":"\"90-03-23\" at \"11:02\""},{"visible":true,"include":true,"step":"390","x":-109.24038095238095,"y":244.04761904761904,"z":-187.68428571428572,"a95":3.11656,"info":"\"90-03-26\" at \"15:38\""},{"visible":false,"include":false,"step":"420","x":-120.37742857142857,"y":306.37666666666667,"z":-198.20800000000003,"a95":3.088912,"info":"\"90-03-27\" at \"12:36\""},{"visible":true,"include":true,"step":"450","x":-118.86666666666666,"y":315.61552380952384,"z":-227.5324761904762,"a95":2.672698,"info":"\"90-03-27\" at \"15:23\""},{"visible":true,"include":true,"step":"480","x":-135.18171428571426,"y":246.45580952380953,"z":-169.54857142857142,"a95":3.409557,"info":"\"90-03-28\" at \"11:03\""},{"visible":true,"include":true,"step":"510","x":-103.88161904761905,"y":289.82266666666663,"z":-142.98095238095237,"a95":3.254336,"info":"\"90-03-28\" at \"14:47\""},{"visible":true,"include":true,"step":"540","x":-101.7252380952381,"y":239.14733333333334,"z":-183.51990476190477,"a95":3.184606,"info":"\"90-03-29\" at \"09:14\""},{"visible":true,"include":true,"step":"560","x":-148.32028571428572,"y":245.06771428571426,"z":-221.2827619047619,"a95":2.961154,"info":"\"90-03-29\" at \"11:44\""},{"visible":true,"include":true,"step":"580","x":-148.28799999999998,"y":182.5127619047619,"z":-119.22819047619048,"a95":4.064981,"info":"\"90-03-30\" at \"08:41\""},{"visible":true,"include":true,"step":"600","x":-208.15066666666667,"y":74.62175238095239,"z":-145.44723809523808,"a95":3.40382,"info":"\"90-03-30\" at \"11:33\""}]},{"version":"v1.1.0","exported":"2016-10-10T19:56:19.962Z","volume":10.5,"added":"2016-10-10T19:39:45.208Z","format":"Utrecht","demagType":"Unknown","strat":"1.05","patch":1.1,"GEO":[{"dec":120.92724846573321,"inc":-17.625403227257486,"MAD":7.53407644134443,"cm":[-4.796163466380676e-14,-4.796163466380676e-14,0],"intensity":845.6069641915245,"type":"dir","forced":true,"remark":"","origin":false,"nSteps":13,"minStep":"250","maxStep":"600","steps":["250","300","330","360","390","420","450","480","510","540","560","580","600"],"group":"None","version":"v1.1.0"}],"TECT":[{"dec":132.35118277866064,"inc":-32.484760153479165,"MAD":7.534076441344452,"cm":[-1.0125233984581428e-13,-6.128431095930864e-14,2.3314683517128287e-14],"intensity":845.6069641915246,"type":"dir","forced":true,"remark":"","origin":false,"nSteps":13,"minStep":"250","maxStep":"600","steps":["250","300","330","360","390","420","450","480","510","540","560","580","600"],"group":"None","version":"v1.1.0"}],"interpreted":true,"name":"TY 58.A1","coreAzi":6,"coreDip":61,"bedStrike":338,"bedDip":28,"data":[{"visible":false,"include":false,"step":"20","x":6.520848571428571,"y":501.9117142857143,"z":-237.20399999999998,"a95":2.055611,"info":"\"90-03-19\" at \"11:50\""},{"visible":false,"include":false,"step":"100","x":-88.77393333333333,"y":540.2620000000001,"z":-111.6937142857143,"a95":2.335318,"info":"\"90-03-20\" at \"09:07\""},{"visible":true,"include":false,"step":"150","x":-97.29619047619047,"y":595.269619047619,"z":-204.7934285714286,"a95":1.80948,"info":"\"90-03-20\" at \"13:46\""},{"visible":true,"include":false,"step":"200","x":-1.743197142857143,"y":626.97,"z":-332.36961904761904,"a95":2.648264,"info":"\"90-03-21\" at \"09:06\""},{"visible":true,"include":true,"step":"250","x":-81.22008571428572,"y":586.7473333333334,"z":-353.15885714285713,"a95":2.192253,"info":"\"90-03-21\" at \"14:35\""},{"visible":true,"include":true,"step":"300","x":-72.31040952380953,"y":532.5144761904762,"z":-272.51980952380956,"a95":1.803048,"info":"\"90-03-22\" at \"11:12\""},{"visible":true,"include":true,"step":"330","x":-73.47254285714286,"y":488.9345714285714,"z":-247.2112380952381,"a95":2.592786,"info":"\"90-03-22\" at \"15:43\""},{"visible":true,"include":true,"step":"360","x":-79.60600952380953,"y":473.5686666666666,"z":-258.57428571428574,"a95":2.024053,"info":"\"90-03-23\" at \"11:03\""},{"visible":true,"include":true,"step":"390","x":-89.48412380952381,"y":449.74485714285714,"z":-204.53514285714286,"a95":1.792986,"info":"\"90-03-26\" at \"15:38\""},{"visible":true,"include":true,"step":"420","x":-114.31504761904762,"y":416.9340952380952,"z":-185.43742857142857,"a95":1.967785,"info":"\"90-03-27\" at \"12:37\""},{"visible":true,"include":true,"step":"450","x":-114.0244761904762,"y":398.2237142857143,"z":-202.3658095238095,"a95":2.068475,"info":"\"90-03-27\" at \"15:24\""},{"visible":true,"include":true,"step":"480","x":-153.4142857142857,"y":323.4340952380952,"z":-187.72942857142857,"a95":2.071656,"info":"\"90-03-28\" at \"11:03\""},{"visible":true,"include":true,"step":"510","x":-79.65119999999999,"y":316.4355238095238,"z":-206.96266666666668,"a95":1.901025,"info":"\"90-03-28\" at \"14:49\""},{"visible":true,"include":true,"step":"540","x":-107.14209523809524,"y":278.7307619047619,"z":-143.43933333333334,"a95":2.349124,"info":"\"90-03-29\" at \"09:14\""},{"visible":true,"include":true,"step":"560","x":-139.1587619047619,"y":258.68399999999997,"z":-169.09657142857142,"a95":1.920753,"info":"\"90-03-29\" at \"11:45\""},{"visible":true,"include":true,"step":"580","x":-108.18799999999999,"y":200.51933333333332,"z":-87.37292380952381,"a95":3.381726,"info":"\"90-03-30\" at \"08:42\""},{"visible":true,"include":true,"step":"600","x":-149.99885714285716,"y":128.20895238095238,"z":-34.68962857142857,"a95":3.123802,"info":"\"90-03-30\" at \"11:34\""}]},{"version":"v1.1.0","exported":"2016-10-10T19:56:19.962Z","volume":10.5,"added":"2016-10-10T19:39:45.208Z","format":"Utrecht","demagType":"Unknown","strat":"1.06","patch":1.1,"GEO":[{"dec":114.3636015616737,"inc":2.4098918658829214,"MAD":10.93708550031996,"cm":[-630.1181536512776,1063.0513948907242,88.9142498610841],"intensity":1402.8769480531569,"type":"dir","forced":false,"remark":"","origin":false,"nSteps":12,"minStep":"300","maxStep":"600","steps":["300","330","360","390","420","450","480","510","540","560","580","600"],"group":"None","version":"v1.1.0"}],"TECT":[{"dec":117.00316396571486,"inc":-16.65211040909541,"MAD":10.937085500319919,"cm":[-647.349869795525,1020.401400800296,-273.4081690236763],"intensity":1402.8769480531569,"type":"dir","forced":false,"remark":"","origin":false,"nSteps":12,"minStep":"300","maxStep":"600","steps":["300","330","360","390","420","450","480","510","540","560","580","600"],"group":"None","version":"v1.1.0"}],"interpreted":true,"name":"TY 58.B1","coreAzi":8,"coreDip":59,"bedStrike":338,"bedDip":28,"data":[{"visible":true,"include":false,"step":"20","x":-791.2824761904762,"y":1754.689523809524,"z":-274.3921904761905,"a95":0.7951832,"info":"\"90-03-19\" at \"11:51\""},{"visible":true,"include":false,"step":"100","x":-898.779619047619,"y":1891.8209523809523,"z":-28.020285714285716,"a95":1.193099,"info":"\"90-03-20\" at \"09:08\""},{"visible":true,"include":false,"step":"150","x":-730.7870476190476,"y":2044.577142857143,"z":-140.166,"a95":0.793156,"info":"\"90-03-20\" at \"13:47\""},{"visible":true,"include":false,"step":"200","x":-850.8094285714285,"y":2060.0076190476193,"z":-188.7172380952381,"a95":0.8826753,"info":"\"90-03-21\" at \"09:07\""},{"visible":true,"include":false,"step":"250","x":-703.6706666666666,"y":2033.1495238095238,"z":-311.19295238095236,"a95":0.901445,"info":"\"90-03-21\" at \"14:36\""},{"visible":true,"include":true,"step":"300","x":-665.5785714285714,"y":1827.7104761904761,"z":-209.7647619047619,"a95":1.966944,"info":"\"90-03-22\" at \"11:13\""},{"visible":true,"include":true,"step":"330","x":-481.96180952380956,"y":1652.2285714285715,"z":-227.19666666666666,"a95":1.04881,"info":"\"90-03-22\" at \"15:44\""},{"visible":true,"include":true,"step":"360","x":-667.1925714285715,"y":1458.6038095238096,"z":-248.56704761904763,"a95":0.9324011,"info":"\"90-03-23\" at \"11:04\""},{"visible":true,"include":true,"step":"390","x":-532.8373333333334,"y":1263.2371428571428,"z":-147.00961904761905,"a95":1.106746,"info":"\"90-03-26\" at \"15:39\""},{"visible":true,"include":true,"step":"420","x":-413.764,"y":1256.1933333333334,"z":-167.786,"a95":1.12301,"info":"\"90-03-27\" at \"12:38\""},{"visible":true,"include":true,"step":"450","x":-434.3724761904762,"y":1231.595238095238,"z":-193.37866666666667,"a95":1.25771,"info":"\"90-03-27\" at \"15:25\""},{"visible":true,"include":true,"step":"480","x":-517.6004761904762,"y":1067.7533333333333,"z":-163.11161904761906,"a95":1.652638,"info":"\"90-03-28\" at \"11:04\""},{"visible":true,"include":true,"step":"510","x":-421.44057142857145,"y":996.0561904761905,"z":-154.20838095238096,"a95":1.329551,"info":"\"90-03-28\" at \"14:51\""},{"visible":true,"include":true,"step":"540","x":-287.124,"y":896.4295238095239,"z":-190.95761904761906,"a95":1.274865,"info":"\"90-03-29\" at \"09:15\""},{"visible":true,"include":true,"step":"560","x":-397.15199999999993,"y":826.792,"z":-151.74209523809523,"a95":1.406249,"info":"\"90-03-29\" at \"11:45\""},{"visible":true,"include":true,"step":"580","x":-318.5015238095238,"y":724.4340952380952,"z":-149.6502857142857,"a95":1.471808,"info":"\"90-03-30\" at \"08:43\""},{"visible":true,"include":true,"step":"600","x":-308.53304761904764,"y":483.78247619047625,"z":-24.18524761904762,"a95":1.46668,"info":"\"90-03-30\" at \"11:35\""}]},{"version":"v1.1.0","exported":"2016-10-10T19:56:19.962Z","volume":10.5,"added":"2016-10-10T19:39:45.209Z","format":"Utrecht","demagType":"Unknown","strat":"1.07","patch":1.1,"GEO":[{"dec":126.53117280514073,"inc":-34.5976210037,"MAD":5.2446114733371365,"cm":[-3.552713678800501e-15,0,0],"intensity":1090.2687517244142,"type":"dir","forced":true,"remark":"","origin":false,"nSteps":6,"minStep":"450","maxStep":"600","steps":["450","510","540","560","580","600"],"group":"None","version":"v1.1.0"}],"TECT":[{"dec":148.86890039695368,"inc":-44.67515830820436,"MAD":5.244611473337123,"cm":[-9.414691248821327e-14,-1.2789769243681803e-13,1.4210854715202004e-14],"intensity":1090.268751724414,"type":"dir","forced":true,"remark":"","origin":false,"nSteps":6,"minStep":"450","maxStep":"600","steps":["450","510","540","560","580","600"],"group":"None","version":"v1.1.0"}],"interpreted":true,"name":"TY 59.A1","coreAzi":259,"coreDip":59,"bedStrike":338,"bedDip":28,"data":[{"visible":true,"include":false,"step":"20","x":-175.22361904761905,"y":-1798.657142857143,"z":-265.2241904761905,"a95":0.4618273,"info":"\"90-03-19\" at \"11:52\""},{"visible":true,"include":false,"step":"100","x":-180.13038095238093,"y":-1664.172380952381,"z":-190.2667619047619,"a95":0.5456665,"info":"\"90-03-20\" at \"09:08\""},{"visible":true,"include":false,"step":"150","x":-88.58024761904761,"y":-1594.1866666666665,"z":-352.96514285714284,"a95":2.180793,"info":"\"90-03-20\" at \"13:47\""},{"visible":true,"include":false,"step":"200","x":31.829495238095237,"y":-1428.1304761904762,"z":-670.0979047619048,"a95":0.6200925,"info":"\"90-03-21\" at \"09:07\""},{"visible":true,"include":false,"step":"250","x":-138.03542857142858,"y":-1262.9142857142858,"z":-715.5501904761904,"a95":0.7831029,"info":"\"90-03-21\" at \"14:37\""},{"visible":true,"include":false,"step":"300","x":-117.50438095238096,"y":-1070.7752380952381,"z":-689.273142857143,"a95":0.839071,"info":"\"90-03-22\" at \"11:14\""},{"visible":true,"include":false,"step":"330","x":-4.906778095238095,"y":-873.6646666666666,"z":-664.1581904761905,"a95":0.6670073,"info":"\"90-03-22\" at \"15:45\""},{"visible":true,"include":false,"step":"360","x":-181.42161904761903,"y":-773.2694285714285,"z":-673.0033333333333,"a95":0.5794874,"info":"\"90-03-23\" at \"11:04\""},{"visible":true,"include":false,"step":"390","x":-154.43438095238093,"y":-626.518,"z":-603.8564761904762,"a95":0.5711326,"info":"\"90-03-26\" at \"15:40\""},{"visible":true,"include":false,"step":"420","x":-111.90038095238094,"y":-599.8471428571429,"z":-568.6825714285715,"a95":1.224506,"info":"\"90-03-27\" at \"12:39\""},{"visible":true,"include":true,"step":"450","x":-136.20180952380952,"y":-471.53485714285716,"z":-583.422380952381,"a95":0.8277872,"info":"\"90-03-27\" at \"15:26\""},{"visible":true,"include":true,"step":"510","x":-69.11455238095239,"y":-427.4061904761905,"z":-529.6349523809524,"a95":1.040121,"info":"\"90-03-28\" at \"14:52\""},{"visible":true,"include":true,"step":"540","x":-84.64837142857144,"y":-368.4086666666667,"z":-408.4699047619048,"a95":1.314654,"info":"\"90-03-29\" at \"09:16\""},{"visible":true,"include":true,"step":"560","x":-144.27219047619047,"y":-268.6912380952381,"z":-450.39695238095237,"a95":1.682956,"info":"\"90-03-29\" at \"11:46\""},{"visible":true,"include":true,"step":"580","x":-93.15129523809524,"y":-245.90057142857145,"z":-325.9326666666667,"a95":1.768263,"info":"\"90-03-30\" at \"08:44\""},{"visible":true,"include":true,"step":"600","x":-121.2232380952381,"y":-201.9655238095238,"z":-234.38904761904763,"a95":1.399894,"info":"\"90-03-30\" at \"11:36\""}]},{"version":"v1.1.0","exported":"2016-10-10T19:56:19.962Z","volume":10.5,"added":"2016-10-10T19:39:45.209Z","format":"Utrecht","demagType":"Unknown","strat":"1.08","patch":1.1,"GEO":[],"TECT":[],"interpreted":false,"name":"TY 59.B1","coreAzi":126,"coreDip":72,"bedStrike":338,"bedDip":28,"data":[{"visible":true,"include":false,"step":"20","x":1012.3457142857142,"y":1353.7542857142857,"z":400.2251428571428,"a95":1.237908,"info":"\"90-03-19\" at \"11:52\""},{"visible":true,"include":false,"step":"100","x":859.5254285714285,"y":1147.4761904761904,"z":744.2161904761905,"a95":1.440545,"info":"\"90-03-20\" at \"09:09\""},{"visible":true,"include":false,"step":"150","x":811.1678095238096,"y":963.4066666666668,"z":595.5924761904762,"a95":1.482535,"info":"\"90-03-20\" at \"13:48\""},{"visible":true,"include":false,"step":"200","x":804.5179047619048,"y":647.5655238095238,"z":404.42180952380954,"a95":1.725067,"info":"\"90-03-21\" at \"09:08\""},{"visible":true,"include":false,"step":"250","x":721.2318095238095,"y":550.7212380952382,"z":321.4584761904762,"a95":1.958691,"info":"\"90-03-21\" at \"14:37\""},{"visible":true,"include":false,"step":"300","x":597.9166666666666,"y":328.30219047619045,"z":221.96714285714287,"a95":2.224264,"info":"\"90-03-22\" at \"11:15\""},{"visible":true,"include":false,"step":"330","x":544.9105714285714,"y":227.90685714285715,"z":126.5432380952381,"a95":1.832264,"info":"\"90-03-22\" at \"15:46\""},{"visible":true,"include":false,"step":"360","x":428.6974285714286,"y":193.624,"z":106.78695238095237,"a95":2.683939,"info":"\"90-03-23\" at \"11:05\""}]},{"version":"v1.1.0","exported":"2016-10-10T19:56:19.962Z","volume":10.5,"added":"2016-10-10T19:39:45.209Z","format":"Utrecht","demagType":"Unknown","strat":"1.09","patch":1.1,"GEO":[{"dec":122.1222334843622,"inc":-24.335386191583652,"MAD":4.755911369716934,"cm":[-5.684341886080802e-14,-4.263256414560601e-14,0],"intensity":1854.371489710275,"type":"dir","forced":true,"remark":"","origin":false,"nSteps":7,"minStep":"100","maxStep":"360","steps":["100","150","200","250","300","330","360"],"group":"None","version":"v1.1.0"}],"TECT":[{"dec":137.36440416093717,"inc":-37.91805588679006,"MAD":4.755911369716913,"cm":[-2.4158453015843406e-13,-2.0605739337042905e-13,1.7763568394002505e-14],"intensity":1854.371489710275,"type":"dir","forced":true,"remark":"","origin":false,"nSteps":7,"minStep":"100","maxStep":"360","steps":["100","150","200","250","300","330","360"],"group":"None","version":"v1.1.0"}],"interpreted":true,"name":"TY 60.A1","coreAzi":42,"coreDip":51,"bedStrike":338,"bedDip":28,"data":[{"visible":true,"include":false,"step":"20","x":362.7141904761905,"y":928.4140952380952,"z":-350.5118095238095,"a95":1.554731,"info":"\"90-03-19\" at \"11:53\""},{"visible":true,"include":true,"step":"100","x":463.819619047619,"y":973.7371428571429,"z":-123.89609523809524,"a95":1.743375,"info":"\"90-03-20\" at \"09:10\""},{"visible":true,"include":true,"step":"150","x":452.65028571428576,"y":1047.0809523809523,"z":-192.3327619047619,"a95":1.511759,"info":"\"90-03-20\" at \"13:49\""},{"visible":true,"include":true,"step":"200","x":446.83952380952377,"y":1061.607619047619,"z":-272.51980952380956,"a95":1.553348,"info":"\"90-03-21\" at \"09:09\""},{"visible":true,"include":true,"step":"250","x":472.8584761904762,"y":975.7390476190476,"z":-263.6747619047619,"a95":1.474104,"info":"\"90-03-21\" at \"14:38\""},{"visible":true,"include":true,"step":"300","x":307.1255238095238,"y":835.8308571428572,"z":-262.6417142857143,"a95":1.763194,"info":"\"90-03-22\" at \"11:16\""},{"visible":true,"include":true,"step":"330","x":334.6939047619048,"y":769.3311428571428,"z":-258.8324761904762,"a95":1.970719,"info":"\"90-03-22\" at \"15:46\""},{"visible":true,"include":true,"step":"360","x":190.58952380952383,"y":721.1026666666667,"z":-247.534,"a95":1.710128,"info":"\"90-03-23\" at \"11:06\""}]},{"version":"v1.1.0","exported":"2016-10-10T19:56:19.962Z","volume":10.5,"added":"2016-10-10T19:39:45.209Z","format":"Utrecht","demagType":"Unknown","strat":"1.10","patch":1.1,"GEO":[{"dec":130.6132668611092,"inc":-26.87548314860351,"MAD":5.064239811829753,"cm":[1.7763568394002505e-15,1.7763568394002505e-15,0],"intensity":858.2886349093304,"type":"dir","forced":true,"remark":"","origin":false,"nSteps":8,"minStep":"330","maxStep":"540","steps":["330","360","390","420","450","480","510","540"],"group":"None","version":"v1.1.0"}],"TECT":[{"dec":147.27182891904778,"inc":-36.28259822587292,"MAD":5.064239811829784,"cm":[-2.1316282072803006e-14,-4.973799150320701e-14,1.7763568394002505e-15],"intensity":858.2886349093304,"type":"dir","forced":true,"remark":"","origin":false,"nSteps":8,"minStep":"330","maxStep":"540","steps":["330","360","390","420","450","480","510","540"],"group":"None","version":"v1.1.0"}],"interpreted":true,"name":"TY 61.1A","coreAzi":274,"coreDip":64,"bedStrike":338,"bedDip":28,"data":[{"visible":false,"include":false,"step":"20","x":-1020.6742857142857,"y":126.99514285714287,"z":-249.2772380952381,"a95":0.9374328,"info":"\"90-03-19\" at \"11:54\""},{"visible":false,"include":false,"step":"100","x":-866.8210476190476,"y":-107.04523809523809,"z":-129.70676190476192,"a95":1.458558,"info":"\"90-03-20\" at \"09:11\""},{"visible":true,"include":false,"step":"150","x":-631.7476190476191,"y":-257.8640952380952,"z":-389.4432380952381,"a95":0.3789703,"info":"\"90-03-20\" at \"13:50\""},{"visible":true,"include":false,"step":"200","x":-427.2124761904762,"y":-345.02390476190476,"z":-525.4125714285715,"a95":0.8600847,"info":"\"90-03-21\" at \"09:10\""},{"visible":true,"include":false,"step":"250","x":-340.3754285714286,"y":-324.36380952380955,"z":-528.0596190476191,"a95":1.368454,"info":"\"90-03-21\" at \"14:39\""},{"visible":true,"include":false,"step":"300","x":-314.937619047619,"y":-334.6939047619048,"z":-431.15076190476185,"a95":0.903906,"info":"\"90-03-22\" at \"11:16\""},{"visible":true,"include":true,"step":"330","x":-226.74476190476193,"y":-307.25466666666665,"z":-397.5780952380952,"a95":1.223008,"info":"\"90-03-22\" at \"15:47\""},{"visible":true,"include":true,"step":"360","x":-252.31161904761905,"y":-281.1067619047619,"z":-372.01123809523807,"a95":1.110922,"info":"\"90-03-23\" at \"11:07\""},{"visible":true,"include":true,"step":"390","x":-188.9755238095238,"y":-308.99790476190475,"z":-322.62066666666664,"a95":1.409759,"info":"\"90-03-26\" at \"15:41\""},{"visible":true,"include":true,"step":"420","x":-209.1772380952381,"y":-242.36904761904762,"z":-339.7233333333333,"a95":1.594989,"info":"\"90-03-27\" at \"12:40\""},{"visible":true,"include":true,"step":"450","x":-160.10942857142857,"y":-200.44190476190474,"z":-364.41219047619046,"a95":1.571447,"info":"\"90-03-27\" at \"15:27\""},{"visible":true,"include":true,"step":"480","x":-216.0015238095238,"y":-225.4341904761905,"z":-290.02933333333334,"a95":1.20849,"info":"\"90-03-28\" at \"11:06\""},{"visible":true,"include":true,"step":"510","x":-206.33,"y":-176.8247619047619,"z":-281.4037142857143,"a95":1.570913,"info":"\"90-03-28\" at \"14:53\""},{"visible":true,"include":true,"step":"540","x":-152.00038095238094,"y":-152.42000000000002,"z":-220.41114285714286,"a95":1.942728,"info":"\"90-03-29\" at \"09:17\""},{"visible":true,"include":false,"step":"560","x":-131.31438095238096,"y":-87.39874285714285,"z":-229.88895238095236,"a95":2.32864,"info":"\"90-03-29\" at \"11:47\""},{"visible":true,"include":false,"step":"580","x":-140.05619047619047,"y":-91.2079619047619,"z":-154.98961904761904,"a95":3.310823,"info":"\"90-03-30\" at \"08:45\""},{"visible":true,"include":false,"step":"600","x":-126.23333333333333,"y":-60.579342857142855,"z":-123.06323809523809,"a95":3.578281,"info":"\"90-03-30\" at \"11:36\""}]},{"version":"v1.1.0","exported":"2016-10-10T19:56:19.962Z","volume":10.5,"added":"2016-10-10T19:39:45.209Z","format":"Utrecht","demagType":"Unknown","strat":"2.01","patch":1.1,"GEO":[{"dec":119.57778811884617,"inc":-40.33282956757487,"MAD":2.0668942686968785,"cm":[1.1013412404281553e-13,8.526512829121202e-14,0],"intensity":1962.088495324757,"type":"dir","forced":true,"remark":"","origin":false,"nSteps":5,"minStep":"200","maxStep":"360","steps":["200","250","300","330","360"],"group":"None","version":"v1.1.0"}],"TECT":[{"dec":147.15385485963856,"inc":-52.54869904919689,"MAD":2.0668942686969016,"cm":[-4.263256414560601e-14,-1.4921397450962104e-13,-1.4210854715202004e-14],"intensity":1962.088495324757,"type":"dir","forced":true,"remark":"","origin":false,"nSteps":5,"minStep":"200","maxStep":"360","steps":["200","250","300","330","360"],"group":"None","version":"v1.1.0"}],"interpreted":true,"name":"TY 62.A1","coreAzi":307,"coreDip":70,"bedStrike":338,"bedDip":28,"data":[{"visible":true,"include":false,"step":"20","x":-797.0931428571428,"y":628.0029523809524,"z":396.1577142857143,"a95":1.084997,"info":"\"90-03-19\" at \"11:55\""},{"visible":true,"include":false,"step":"100","x":-669.3878095238096,"y":447.4206666666667,"z":-294.0192380952381,"a95":0.9961302,"info":"\"90-03-20\" at \"09:11\""},{"visible":true,"include":false,"step":"150","x":-609.0860952380953,"y":298.79695238095235,"z":-653.2470476190476,"a95":1.77917,"info":"\"90-03-20\" at \"13:50\""},{"visible":true,"include":true,"step":"200","x":-574.6740952380953,"y":120.86171428571429,"z":-932.6105714285715,"a95":0.6951359,"info":"\"90-03-21\" at \"09:11\""},{"visible":true,"include":true,"step":"250","x":-511.3379047619047,"y":81.93027619047619,"z":-947.7181904761904,"a95":0.6767823,"info":"\"90-03-21\" at \"14:40\""},{"visible":true,"include":true,"step":"300","x":-470.6632380952381,"y":57.525514285714294,"z":-849.7763809523809,"a95":0.7628146,"info":"\"90-03-22\" at \"11:17\""},{"visible":true,"include":true,"step":"330","x":-435.6701904761905,"y":120.73257142857143,"z":-782.8246666666666,"a95":0.9082381,"info":"\"90-03-22\" at \"15:48\""},{"visible":true,"include":true,"step":"360","x":-406.746,"y":109.24038095238095,"z":-750.7369523809524,"a95":1.860888,"info":"\"90-03-23\" at \"11:08\""}]},{"version":"v1.1.0","exported":"2016-10-10T19:56:19.962Z","volume":10.5,"added":"2016-10-10T19:39:45.209Z","format":"Utrecht","demagType":"Unknown","strat":"2.02","patch":1.1,"GEO":[],"TECT":[],"interpreted":false,"name":"TY 63.1","coreAzi":201,"coreDip":83,"bedStrike":338,"bedDip":28,"data":[{"visible":true,"include":false,"step":"20","x":-900.5228571428571,"y":424.6299047619047,"z":648.3402857142858,"a95":1.115504,"info":"\"90-03-19\" at \"11:55\""},{"visible":true,"include":false,"step":"100","x":-744.7971428571428,"y":382.2121904761905,"z":919.6979047619047,"a95":1.885116,"info":"\"90-03-20\" at \"09:12\""},{"visible":true,"include":false,"step":"150","x":-433.0231428571429,"y":222.67733333333334,"z":546.0727619047619,"a95":1.432103,"info":"\"90-03-20\" at \"13:51\""},{"visible":true,"include":false,"step":"200","x":-163.73142857142858,"y":47.51826666666667,"z":145.9766666666667,"a95":3.85878,"info":"\"90-03-21\" at \"09:11\""},{"visible":true,"include":false,"step":"250","x":-106.59323809523809,"y":-3.228142857142857,"z":67.98469523809524,"a95":7.455796,"info":"\"90-03-21\" at \"14:40\""},{"visible":true,"include":false,"step":"300","x":-76.70067619047619,"y":-5.810658095238095,"z":2.324262857142857,"a95":9.185803,"info":"\"90-03-22\" at \"11:18\""},{"visible":true,"include":false,"step":"330","x":-51.84398095238095,"y":-26.01883809523809,"z":-29.182419047619046,"a95":9.406414,"info":"\"90-03-22\" at \"15:49\""},{"visible":true,"include":false,"step":"360","x":-51.71485714285714,"y":-30.796485714285712,"z":-12.202380952380953,"a95":10.74604,"info":"\"90-03-23\" at \"11:08\""}]},{"version":"v1.1.0","exported":"2016-10-10T19:56:19.962Z","volume":10.5,"added":"2016-10-10T19:39:45.210Z","format":"Utrecht","demagType":"Unknown","strat":"2.03","patch":1.1,"GEO":[{"dec":108.40255778413791,"inc":3.4912326239280276,"MAD":3.273988856873966,"cm":[-9.769962616701378e-14,-4.263256414560601e-14,0],"intensity":1799.500052214337,"type":"dir","forced":true,"remark":"","origin":false,"nSteps":8,"minStep":"390","maxStep":"580","steps":["390","420","450","480","510","540","560","580"],"group":"None","version":"v1.1.0"}],"TECT":[{"dec":110.75627592134106,"inc":-17.64243107088465,"MAD":3.2739888568739626,"cm":[-3.7481129311345285e-13,-1.3500311979441904e-13,3.197442310920451e-14],"intensity":1799.5000522143373,"type":"dir","forced":true,"remark":"","origin":false,"nSteps":8,"minStep":"390","maxStep":"580","steps":["390","420","450","480","510","540","560","580"],"group":"None","version":"v1.1.0"}],"interpreted":true,"name":"TY 64.B1","coreAzi":297,"coreDip":70,"bedStrike":338,"bedDip":28,"data":[{"visible":true,"include":false,"step":"20","x":-2454.744761904762,"y":2357.1257142857144,"z":2049.419047619048,"a95":0.9592525,"info":"\"90-03-19\" at \"11:56\""},{"visible":true,"include":false,"step":"100","x":-2626.869523809524,"y":1538.5333333333333,"z":1026.872380952381,"a95":1.443234,"info":"\"90-03-20\" at \"09:13\""},{"visible":true,"include":false,"step":"150","x":-2431.1790476190477,"y":1147.604761904762,"z":349.80161904761906,"a95":0.8825781,"info":"\"90-03-20\" at \"13:52\""},{"visible":true,"include":false,"step":"200","x":-2405.612380952381,"y":694.9546666666668,"z":-152.23923809523808,"a95":0.8092628,"info":"\"90-03-21\" at \"09:12\""},{"visible":true,"include":false,"step":"250","x":-2278.0361904761908,"y":495.32628571428575,"z":-332.36961904761904,"a95":1.012398,"info":"\"90-03-21\" at \"14:41\""},{"visible":true,"include":false,"step":"300","x":-1822.2219047619049,"y":344.572,"z":-396.8679047619048,"a95":0.9830579,"info":"\"90-03-22\" at \"11:19\""},{"visible":true,"include":false,"step":"330","x":-1469.5152380952381,"y":313.19447619047617,"z":-343.4099047619048,"a95":1.549392,"info":"\"90-03-22\" at \"15:50\""},{"visible":true,"include":false,"step":"360","x":-1367.8285714285714,"y":319.5861904761905,"z":-296.9245714285714,"a95":0.9109465,"info":"\"90-03-23\" at \"11:09\""},{"visible":true,"include":true,"step":"390","x":-1132.0447619047618,"y":119.24761904761904,"z":-315.389619047619,"a95":0.9615068,"info":"\"90-03-26\" at \"15:42\""},{"visible":true,"include":true,"step":"420","x":-1066.2552380952382,"y":128.29933333333332,"z":-310.8701904761905,"a95":2.033371,"info":"\"90-03-27\" at \"12:41\""},{"visible":true,"include":true,"step":"450","x":-1001.3638095238096,"y":138.48085714285713,"z":-317.66219047619046,"a95":0.8807625,"info":"\"90-03-27\" at \"15:28\""},{"visible":true,"include":true,"step":"480","x":-968.0361904761904,"y":178.1935238095238,"z":-241.2649523809524,"a95":1.584905,"info":"\"90-03-28\" at \"11:09\""},{"visible":true,"include":true,"step":"510","x":-815.5645714285714,"y":177.2057142857143,"z":-267.6840952380952,"a95":1.104633,"info":"\"90-03-28\" at \"14:54\""},{"visible":true,"include":true,"step":"540","x":-684.9539047619047,"y":197.4978095238095,"z":-196.16780952380955,"a95":1.206837,"info":"\"90-03-29\" at \"09:18\""},{"visible":true,"include":true,"step":"560","x":-656.3848571428572,"y":131.33380952380952,"z":-235.51885714285714,"a95":1.091812,"info":"\"90-03-29\" at \"11:49\""},{"visible":true,"include":true,"step":"580","x":-589.3620952380952,"y":59.02337142857143,"z":-177.7415238095238,"a95":1.537675,"info":"\"90-03-30\" at \"08:46\""},{"visible":true,"include":false,"step":"600","x":-458.9515238095238,"y":76.3778761904762,"z":-84.01565714285714,"a95":1.171304,"info":"\"90-03-30\" at \"11:37\""}]},{"version":"v1.1.0","exported":"2016-10-10T19:56:19.962Z","volume":10.5,"added":"2016-10-10T19:39:45.210Z","format":"Utrecht","demagType":"Unknown","strat":"2.04","patch":1.1,"GEO":[],"TECT":[],"interpreted":false,"name":"TY 65.1","coreAzi":220,"coreDip":70,"bedStrike":338,"bedDip":28,"data":[{"visible":true,"include":false,"step":"20","x":-844.1594285714286,"y":1879.6190476190477,"z":1500.182857142857,"a95":1.328093,"info":"\"90-03-19\" at \"11:57\""},{"visible":true,"include":false,"step":"100","x":-637.3,"y":1337.4838095238094,"z":948.7513333333333,"a95":1.069334,"info":"\"90-03-20\" at \"09:13\""},{"visible":true,"include":false,"step":"150","x":-312.87161904761905,"y":1046.1761904761904,"z":640.0761904761905,"a95":1.137295,"info":"\"90-03-20\" at \"13:53\""},{"visible":true,"include":true,"step":"200","x":-62.75510476190476,"y":816.9783809523809,"z":322.4915238095238,"a95":1.538025,"info":"\"90-03-21\" at \"09:13\""},{"visible":true,"include":true,"step":"250","x":-15.495085714285713,"y":748.8000952380952,"z":241.01314285714284,"a95":1.82423,"info":"\"90-03-21\" at \"14:42\""},{"visible":true,"include":true,"step":"300","x":59.26871428571429,"y":647.3072380952381,"z":173.9969523809524,"a95":1.726367,"info":"\"90-03-22\" at \"11:19\""},{"visible":true,"include":true,"step":"330","x":83.54434285714285,"y":560.8576190476191,"z":132.93495238095238,"a95":2.12389,"info":"\"90-03-22\" at \"15:51\""},{"visible":true,"include":true,"step":"360","x":-10.007247619047618,"y":507.98057142857147,"z":133.77428571428572,"a95":1.978211,"info":"\"90-03-23\" at \"11:10\""}]},{"version":"v1.1.0","exported":"2016-10-10T19:56:19.962Z","volume":10.5,"added":"2016-10-10T19:39:45.210Z","format":"Utrecht","demagType":"Unknown","strat":"2.05","patch":1.1,"GEO":[],"TECT":[],"interpreted":false,"name":"TY 66.B1","coreAzi":75,"coreDip":66,"bedStrike":338,"bedDip":28,"data":[{"visible":true,"include":false,"step":"20","x":259.1553333333333,"y":-445.0963809523809,"z":-90.90451428571428,"a95":0.8262572,"info":"\"90-03-19\" at \"11:57\""},{"visible":true,"include":false,"step":"100","x":158.04990476190474,"y":-340.5045714285714,"z":68.56576190476191,"a95":1.292166,"info":"\"90-03-20\" at \"09:14\""},{"visible":true,"include":false,"step":"150","x":145.71838095238095,"y":-249.72914285714285,"z":-1.2912571428571429,"a95":1.672482,"info":"\"90-03-20\" at \"13:53\""},{"visible":true,"include":false,"step":"200","x":66.24149523809524,"y":-176.0629523809524,"z":-79.02494285714286,"a95":1.952399,"info":"\"90-03-21\" at \"09:14\""},{"visible":true,"include":false,"step":"250","x":19.04604761904762,"y":-174.7717142857143,"z":-75.66767619047619,"a95":3.624005,"info":"\"90-03-21\" at \"14:43\""},{"visible":true,"include":false,"step":"300","x":-12.589761904761904,"y":-167.54066666666665,"z":-64.95023809523809,"a95":3.531117,"info":"\"90-03-22\" at \"11:20\""},{"visible":true,"include":false,"step":"330","x":-10.459180952380953,"y":-131.32085714285714,"z":-62.75510476190476,"a95":3.561725,"info":"\"90-03-22\" at \"15:52\""},{"visible":true,"include":false,"step":"360","x":-23.242628571428572,"y":-138.29361904761905,"z":-55.782314285714286,"a95":3.528727,"info":"\"90-03-23\" at \"11:11\""}]},{"version":"v1.1.0","exported":"2016-10-10T19:56:19.963Z","volume":10.5,"added":"2016-10-10T19:39:45.210Z","format":"Utrecht","demagType":"Unknown","strat":"2.06","patch":1.1,"GEO":[{"dec":117.88549363471111,"inc":-5.192304216754394,"MAD":6.8588882825164,"cm":[-2.842170943040401e-14,-1.9539925233402755e-14,0],"intensity":514.4554784398433,"type":"dir","forced":true,"remark":"","origin":false,"nSteps":7,"minStep":"420","maxStep":"600","steps":["420","450","480","510","540","560","600"],"group":"None","version":"v1.1.0"}],"TECT":[{"dec":118.70851538692409,"inc":-29.052263374776295,"MAD":6.858888282516383,"cm":[-1.5987211554602254e-14,-1.865174681370263e-14,2.6645352591003757e-15],"intensity":514.4554784398433,"type":"dir","forced":true,"remark":"","origin":false,"nSteps":7,"minStep":"420","maxStep":"600","steps":["420","450","480","510","540","560","600"],"group":"None","version":"v1.1.0"}],"interpreted":true,"name":"TY 67.A1","coreAzi":1,"coreDip":35,"bedStrike":22,"bedDip":24,"data":[{"visible":true,"include":false,"step":"20","x":-704.8327619047619,"y":140.03685714285714,"z":959.6628571428571,"a95":1.288502,"info":"\"90-03-19\" at \"11:58\""},{"visible":true,"include":false,"step":"100","x":-538.5188571428572,"y":528.6407619047619,"z":1241.027619047619,"a95":3.665174,"info":"\"90-03-20\" at \"09:15\""},{"visible":true,"include":false,"step":"150","x":-301.12114285714284,"y":532.3853333333334,"z":630.9082857142857,"a95":1.471493,"info":"\"90-03-20\" at \"13:54\""},{"visible":true,"include":false,"step":"200","x":-60.4308380952381,"y":560.1474285714286,"z":121.4427619047619,"a95":2.21576,"info":"\"90-03-21\" at \"09:15\""},{"visible":true,"include":false,"step":"250","x":-61.205600000000004,"y":532.4499047619048,"z":2.517952380952381,"a95":2.452715,"info":"\"90-03-21\" at \"14:43\""},{"visible":true,"include":false,"step":"300","x":31.24842857142857,"y":449.2929523809524,"z":-54.74930476190476,"a95":2.22956,"info":"\"90-03-22\" at \"11:21\""},{"visible":true,"include":false,"step":"330","x":7.424729523809524,"y":413.84800000000007,"z":-130.86895238095238,"a95":2.714755,"info":"\"90-03-22\" at \"15:53\""},{"visible":true,"include":false,"step":"360","x":11.621314285714286,"y":381.7601904761905,"z":-109.24038095238095,"a95":2.000309,"info":"\"90-03-23\" at \"11:12\""},{"visible":true,"include":false,"step":"390","x":-42.998866666666665,"y":391.05723809523806,"z":-137.71257142857144,"a95":2.738956,"info":"\"90-03-26\" at \"15:44\""},{"visible":true,"include":true,"step":"420","x":-62.22569523809524,"y":337.9995238095238,"z":-165.57142857142858,"a95":2.310204,"info":"\"90-03-27\" at \"12:42\""},{"visible":true,"include":true,"step":"450","x":-81.81405714285714,"y":337.1924761904762,"z":-153.65314285714285,"a95":2.436279,"info":"\"90-03-27\" at \"15:29\""},{"visible":true,"include":true,"step":"480","x":-60.71492380952381,"y":323.5309523809524,"z":-109.96990476190476,"a95":2.90891,"info":"\"90-03-28\" at \"11:11\""},{"visible":true,"include":true,"step":"510","x":-31.739104761904763,"y":159.2249523809524,"z":-100.60180952380952,"a95":2.50573,"info":"\"90-03-28\" at \"14:57\""},{"visible":true,"include":true,"step":"540","x":-9.219577142857142,"y":175.0557142857143,"z":-65.73144761904761,"a95":2.686825,"info":"\"90-03-29\" at \"09:18\""},{"visible":true,"include":true,"step":"560","x":-38.62150476190476,"y":132.63790476190476,"z":-127.35028571428572,"a95":2.429968,"info":"\"90-03-29\" at \"11:50\""},{"visible":false,"include":false,"step":"580","x":53.367666666666665,"y":144.3109523809524,"z":-36.33598095238095,"a95":4.220538,"info":"\"90-03-30\" at \"08:47\""},{"visible":true,"include":true,"step":"600","x":-51.960190476190476,"y":106.87095238095237,"z":-66.19630476190476,"a95":3.004251,"info":"\"90-03-30\" at \"11:38\""}]},{"version":"v1.1.0","exported":"2016-10-10T19:56:19.963Z","volume":10.5,"added":"2016-10-10T19:39:45.210Z","format":"Utrecht","demagType":"Unknown","strat":"2.07","patch":1.1,"GEO":[{"dec":123.86517230276553,"inc":-20.735109814331114,"MAD":4.18792271739072,"cm":[4.085620730620576e-14,2.842170943040401e-14,0],"intensity":614.0635765881841,"type":"dir","forced":true,"remark":"","origin":false,"nSteps":8,"minStep":"420","maxStep":"600","steps":["420","450","480","510","540","560","580","600"],"group":"None","version":"v1.1.0"}],"TECT":[{"dec":127.52700105534655,"inc":-44.08324406451644,"MAD":4.187922717390753,"cm":[-3.907985046680551e-14,-3.907985046680551e-14,-1.7763568394002505e-15],"intensity":614.0635765881841,"type":"dir","forced":true,"remark":"","origin":false,"nSteps":8,"minStep":"420","maxStep":"600","steps":["420","450","480","510","540","560","580","600"],"group":"None","version":"v1.1.0"}],"interpreted":true,"name":"TY 68.A1","coreAzi":325,"coreDip":81,"bedStrike":22,"bedDip":24,"data":[{"visible":true,"include":false,"step":"20","x":177.22504761904761,"y":907.6247619047618,"z":595.0113333333333,"a95":1.327488,"info":"\"90-03-19\" at \"11:58\""},{"visible":true,"include":false,"step":"100","x":-32.410561904761906,"y":874.9559047619048,"z":937.13,"a95":1.418751,"info":"\"90-03-20\" at \"09:16\""},{"visible":true,"include":false,"step":"150","x":-131.57914285714284,"y":623.7418095238095,"z":418.94838095238094,"a95":1.3838,"info":"\"90-03-20\" at \"13:55\""},{"visible":true,"include":false,"step":"200","x":-305.76971428571426,"y":425.46923809523804,"z":-42.54692380952381,"a95":2.003185,"info":"\"90-03-21\" at \"09:16\""},{"visible":true,"include":false,"step":"250","x":-329.9162857142857,"y":375.2393333333333,"z":-115.18019047619048,"a95":2.434058,"info":"\"90-03-21\" at \"14:44\""},{"visible":true,"include":false,"step":"300","x":-373.17333333333335,"y":236.04180952380952,"z":-170.9624761904762,"a95":1.729801,"info":"\"90-03-22\" at \"11:22\""},{"visible":true,"include":false,"step":"330","x":-330.626380952381,"y":242.30438095238094,"z":-183.03571428571428,"a95":2.230762,"info":"\"90-03-22\" at \"15:54\""},{"visible":true,"include":false,"step":"360","x":-332.36961904761904,"y":225.45352380952383,"z":-166.1847619047619,"a95":1.871747,"info":"\"90-03-23\" at \"11:13\""},{"visible":true,"include":false,"step":"390","x":-311.1284761904762,"y":170.51057142857144,"z":-187.10314285714287,"a95":3.118307,"info":"\"90-03-26\" at \"15:45\""},{"visible":true,"include":true,"step":"420","x":-305.9827619047619,"y":143.45866666666666,"z":-185.9087619047619,"a95":2.159005,"info":"\"90-03-27\" at \"12:44\""},{"visible":true,"include":true,"step":"450","x":-298.63552380952376,"y":123.96714285714286,"z":-196.284,"a95":1.824862,"info":"\"90-03-27\" at \"15:30\""},{"visible":true,"include":true,"step":"480","x":-299.25533333333334,"y":136.55695238095237,"z":-168.54133333333334,"a95":1.968441,"info":"\"90-03-28\" at \"11:11\""},{"visible":true,"include":true,"step":"510","x":-272.771619047619,"y":100.19514285714286,"z":-203.5473333333333,"a95":2.069834,"info":"\"90-03-28\" at \"14:58\""},{"visible":true,"include":true,"step":"540","x":-251.13666666666666,"y":90.2395142857143,"z":-133.27066666666667,"a95":2.109619,"info":"\"90-03-29\" at \"09:19\""},{"visible":true,"include":true,"step":"560","x":-250.42,"y":111.89390476190476,"z":-167.5922857142857,"a95":3.222957,"info":"\"90-03-29\" at \"11:50\""},{"visible":true,"include":true,"step":"580","x":-211.63057142857144,"y":92.22159047619047,"z":-97.48342857142858,"a95":2.754379,"info":"\"90-03-30\" at \"08:48\""},{"visible":true,"include":true,"step":"600","x":-202.65638095238094,"y":68.43018095238095,"z":-85.13259047619047,"a95":2.152424,"info":"\"90-03-30\" at \"11:39\""}]},{"version":"v1.1.0","exported":"2016-10-10T19:56:19.963Z","volume":10.5,"added":"2016-10-10T19:39:45.210Z","format":"Utrecht","demagType":"Unknown","strat":"2.08","patch":1.1,"GEO":[{"dec":126.27648938690726,"inc":-27.080118835242168,"MAD":3.169882051398533,"cm":[-2.3092638912203256e-14,-1.0658141036401503e-14,0],"intensity":920.9744275011117,"type":"dir","forced":true,"remark":"","origin":false,"nSteps":8,"minStep":"330","maxStep":"540","steps":["330","360","390","420","450","480","510","540"],"group":"None","version":"v1.1.0"}],"TECT":[{"dec":132.00431826393435,"inc":-50.07105797723164,"MAD":3.1698820513984107,"cm":[-3.552713678800501e-14,-3.730349362740526e-14,0],"intensity":920.9744275011117,"type":"dir","forced":true,"remark":"","origin":false,"nSteps":8,"minStep":"330","maxStep":"540","steps":["330","360","390","420","450","480","510","540"],"group":"None","version":"v1.1.0"}],"interpreted":true,"name":"TY 68.C1","coreAzi":83,"coreDip":74,"bedStrike":22,"bedDip":24,"data":[{"visible":true,"include":false,"step":"20","x":694.5026666666666,"y":-555.628,"z":232.87828571428574,"a95":1.125712,"info":"\"90-03-19\" at \"11:59\""},{"visible":true,"include":false,"step":"100","x":574.8031428571428,"y":-269.74361904761906,"z":702.9604761904762,"a95":1.060746,"info":"\"90-03-20\" at \"09:16\""},{"visible":true,"include":false,"step":"150","x":631.4893333333333,"y":81.47833333333334,"z":288.6605714285714,"a95":1.779826,"info":"\"90-03-20\" at \"13:56\""},{"visible":true,"include":false,"step":"200","x":646.7261904761905,"y":323.07257142857145,"z":-27.310095238095236,"a95":1.856143,"info":"\"90-03-21\" at \"09:16\""},{"visible":true,"include":false,"step":"250","x":562.278,"y":411.0072380952381,"z":-65.78955238095239,"a95":1.707942,"info":"\"90-03-21\" at \"14:45\""},{"visible":true,"include":false,"step":"300","x":509.5946666666666,"y":329.4642857142857,"z":-107.49714285714286,"a95":1.888152,"info":"\"90-03-22\" at \"11:22\""},{"visible":true,"include":true,"step":"330","x":456.0075238095238,"y":355.74133333333333,"z":-126.80142857142857,"a95":1.92851,"info":"\"90-03-22\" at \"15:55\""},{"visible":true,"include":true,"step":"360","x":420.11057142857146,"y":314.35657142857144,"z":-129.57761904761907,"a95":2.491365,"info":"\"90-03-23\" at \"11:13\""},{"visible":true,"include":true,"step":"390","x":392.34847619047616,"y":277.0392380952381,"z":-141.32809523809524,"a95":2.409096,"info":"\"90-03-26\" at \"15:46\""},{"visible":true,"include":true,"step":"420","x":345.51466666666664,"y":304.5817142857143,"z":-120.64219047619046,"a95":1.934699,"info":"\"90-03-27\" at \"12:44\""},{"visible":true,"include":true,"step":"450","x":346.77361904761904,"y":289.08666666666664,"z":-134.91057142857142,"a95":1.789596,"info":"\"90-03-27\" at \"15:30\""},{"visible":true,"include":true,"step":"480","x":288.8671428571429,"y":272.268,"z":-104.24961904761906,"a95":2.069092,"info":"\"90-03-28\" at \"11:12\""},{"visible":true,"include":true,"step":"510","x":275.1088571428571,"y":259.47171428571426,"z":-124.11561904761905,"a95":1.966133,"info":"\"90-03-28\" at \"14:58\""},{"visible":true,"include":true,"step":"540","x":240.2578095238095,"y":205.76828571428572,"z":-92.55086666666666,"a95":2.491513,"info":"\"90-03-29\" at \"09:20\""},{"visible":true,"include":false,"step":"560","x":213.46419047619045,"y":210.01657142857144,"z":-105.27619047619048,"a95":3.127695,"info":"\"90-03-29\" at \"11:51\""},{"visible":true,"include":false,"step":"580","x":173.67409523809525,"y":177.46390476190476,"z":-45.67822857142857,"a95":3.563307,"info":"\"90-03-30\" at \"08:48\""},{"visible":true,"include":false,"step":"600","x":102.94552380952382,"y":135.81447619047617,"z":-35.87112380952381,"a95":3.593453,"info":"\"90-03-30\" at \"11:40\""}]},{"version":"v1.1.0","exported":"2016-10-10T19:56:19.963Z","volume":10.5,"added":"2016-10-10T19:39:45.210Z","format":"Utrecht","demagType":"Unknown","strat":"2.09","patch":1.1,"GEO":[{"dec":112.5771220346304,"inc":-30.76375449350895,"MAD":2.77408561399364,"cm":[-2.930988785010413e-14,-8.881784197001252e-15,0],"intensity":799.1630238602089,"type":"dir","forced":true,"remark":"","origin":false,"nSteps":9,"minStep":"390","maxStep":"600","steps":["390","420","450","480","510","540","560","580","600"],"group":"None","version":"v1.1.0"}],"TECT":[{"dec":112.85952147559408,"inc":-54.761993807597975,"MAD":2.7740856139937504,"cm":[-2.708944180085382e-14,-1.7763568394002505e-15,0],"intensity":799.1630238602088,"type":"dir","forced":true,"remark":"","origin":false,"nSteps":9,"minStep":"390","maxStep":"600","steps":["390","420","450","480","510","540","560","580","600"],"group":"None","version":"v1.1.0"}],"interpreted":true,"name":"TY 69.A1","coreAzi":276,"coreDip":61,"bedStrike":22,"bedDip":24,"data":[{"visible":true,"include":false,"step":"20","x":-1302.0390476190476,"y":446.12933333333336,"z":-409.45771428571425,"a95":0.9654611,"info":"\"90-03-19\" at \"12:00\""},{"visible":true,"include":false,"step":"100","x":-1231.730476190476,"y":484.4797142857143,"z":37.64015238095239,"a95":1.307945,"info":"\"90-03-20\" at \"09:17\""},{"visible":true,"include":false,"step":"150","x":-873.6000952380952,"y":49.06778095238095,"z":-521.4741904761905,"a95":1.136253,"info":"\"90-03-20\" at \"13:56\""},{"visible":true,"include":false,"step":"200","x":-661.5111428571429,"y":-50.87553333333333,"z":-729.4958095238095,"a95":0.9314735,"info":"\"90-03-21\" at \"09:17\""},{"visible":true,"include":false,"step":"250","x":-537.4858095238095,"y":-108.07819047619047,"z":-720.5216190476191,"a95":1.056495,"info":"\"90-03-21\" at \"14:45\""},{"visible":true,"include":false,"step":"300","x":-385.9567619047619,"y":-157.9207619047619,"z":-606.1806666666666,"a95":0.7443275,"info":"\"90-03-22\" at \"11:23\""},{"visible":true,"include":false,"step":"330","x":-356.9035238095238,"y":-121.31361904761904,"z":-553.8848571428572,"a95":1.24374,"info":"\"90-03-22\" at \"15:55\""},{"visible":true,"include":false,"step":"360","x":-349.93066666666664,"y":-127.12428571428572,"z":-532.3853333333334,"a95":0.8660926,"info":"\"90-03-23\" at \"11:14\""},{"visible":true,"include":true,"step":"390","x":-275.55428571428575,"y":-157.9207619047619,"z":-507.98057142857147,"a95":0.72029,"info":"\"90-03-26\" at \"15:47\""},{"visible":true,"include":true,"step":"420","x":-294.6907619047619,"y":-142.90990476190478,"z":-500.31057142857145,"a95":1.43838,"info":"\"90-03-27\" at \"12:45\""},{"visible":true,"include":true,"step":"450","x":-257.55419047619046,"y":-151.10933333333332,"z":-491.94971428571426,"a95":1.16878,"info":"\"90-03-27\" at \"15:31\""},{"visible":true,"include":true,"step":"480","x":-260.0915238095238,"y":-121.90114285714286,"z":-437.69104761904765,"a95":1.137307,"info":"\"90-03-28\" at \"11:13\""},{"visible":true,"include":true,"step":"510","x":-214.89104761904764,"y":-98.41961904761904,"z":-430.95714285714286,"a95":1.202533,"info":"\"90-03-28\" at \"14:59\""},{"visible":true,"include":true,"step":"540","x":-141.75419047619047,"y":-90.55587619047618,"z":-267.67114285714285,"a95":1.372732,"info":"\"90-03-29\" at \"09:21\""},{"visible":true,"include":true,"step":"560","x":-154.78942857142857,"y":-60.727828571428574,"z":-279.4797142857143,"a95":1.646351,"info":"\"90-03-29\" at \"11:52\""},{"visible":true,"include":true,"step":"580","x":-120.57761904761905,"y":-71.116,"z":-182.75161904761904,"a95":2.449086,"info":"\"90-03-30\" at \"08:49\""},{"visible":true,"include":true,"step":"600","x":-122.55971428571428,"y":-60.592247619047626,"z":-149.60504761904764,"a95":2.206355,"info":"\"90-03-30\" at \"11:41\""}]},{"version":"v1.1.0","exported":"2016-10-10T19:56:19.963Z","volume":10.5,"added":"2016-10-10T19:39:45.210Z","format":"Utrecht","demagType":"Unknown","strat":"2.10","patch":1.1,"GEO":[],"TECT":[],"interpreted":false,"name":"TY 70.A1","coreAzi":91,"coreDip":29,"bedStrike":22,"bedDip":24,"data":[{"visible":false,"include":false,"step":"20","x":-881.7996190476191,"y":-771.3325714285714,"z":99.10400000000001,"a95":0.739882,"info":"\"90-03-19\" at \"12:00\""},{"visible":true,"include":true,"step":"100","x":-676.2314285714286,"y":-563.1819047619048,"z":457.16961904761905,"a95":1.069566,"info":"\"90-03-20\" at \"09:18\""},{"visible":true,"include":true,"step":"150","x":-377.36990476190476,"y":-276.3290476190476,"z":350.70542857142857,"a95":1.054511,"info":"\"90-03-20\" at \"13:57\""},{"visible":true,"include":true,"step":"200","x":-156.88771428571428,"y":-116.79419047619047,"z":269.0334285714286,"a95":1.657441,"info":"\"90-03-21\" at \"09:18\""},{"visible":true,"include":true,"step":"250","x":-75.28029523809523,"y":-40.35179047619048,"z":207.4404761904762,"a95":3.624216,"info":"\"90-03-21\" at \"14:46\""},{"visible":true,"include":true,"step":"300","x":-33.12075238095238,"y":-6.391721904761904,"z":149.91495238095237,"a95":4.037464,"info":"\"90-03-22\" at \"11:24\""},{"visible":true,"include":true,"step":"330","x":-8.264045714285714,"y":16.980038095238097,"z":112.59761904761906,"a95":4.069676,"info":"\"90-03-22\" at \"15:56\""},{"visible":true,"include":false,"step":"360","x":5.939782857142857,"y":4.519400952380953,"z":82.9632761904762,"a95":4.334256,"info":"\"90-03-23\" at \"11:15\""},{"visible":true,"include":false,"step":"390","x":12.912571428571429,"y":30.086295238095236,"z":70.17982857142857,"a95":8.048122,"info":"\"90-03-26\" at \"15:48\""},{"visible":true,"include":false,"step":"420","x":17.26410476190476,"y":25.79286666666667,"z":71.94885714285714,"a95":5.891301,"info":"\"90-03-27\" at \"12:46\""},{"visible":true,"include":false,"step":"450","x":9.897485714285713,"y":38.04044761904762,"z":53.67756190476191,"a95":7.702228,"info":"\"90-03-27\" at \"15:32\""},{"visible":true,"include":false,"step":"480","x":14.100533333333333,"y":33.48876190476191,"z":63.955971428571424,"a95":6.454084,"info":"\"90-03-28\" at \"11:14\""},{"visible":true,"include":false,"step":"510","x":32.94642857142857,"y":41.37188571428572,"z":49.7908761904762,"a95":7.845253,"info":"\"90-03-28\" at \"15:00\""},{"visible":true,"include":false,"step":"540","x":-8.393171428571428,"y":16.121342857142857,"z":45.67822857142857,"a95":9.388156,"info":"\"90-03-29\" at \"09:21\""},{"visible":true,"include":false,"step":"560","x":-14.242571428571429,"y":39.577038095238095,"z":16.405428571428573,"a95":11.01966,"info":"\"90-03-29\" at \"11:53\""},{"visible":true,"include":false,"step":"580","x":3.712364761904762,"y":43.41206666666667,"z":55.51760952380952,"a95":9.309005,"info":"\"90-03-30\" at \"08:50\""},{"visible":true,"include":false,"step":"600","x":-0.23242638095238094,"y":32.24915238095238,"z":24.32082857142857,"a95":9.666677,"info":"\"90-03-30\" at \"11:42\""}]},{"version":"v1.1.0","exported":"2016-10-10T19:56:19.963Z","volume":10.5,"added":"2016-10-10T19:39:45.210Z","format":"Utrecht","demagType":"Unknown","strat":"3.01","patch":1.1,"GEO":[],"TECT":[],"interpreted":false,"name":"TY 70.C1","coreAzi":28,"coreDip":59,"bedStrike":22,"bedDip":24,"data":[{"visible":false,"include":false,"step":"20","x":31.506676190476192,"y":76.57155238095238,"z":539.0999047619048,"a95":1.883501,"info":"\"90-03-19\" at \"12:01\""},{"visible":true,"include":false,"step":"100","x":-89.35499999999999,"y":126.5432380952381,"z":798.8362857142859,"a95":1.143897,"info":"\"90-03-20\" at \"09:18\""},{"visible":true,"include":true,"step":"150","x":-79.73514285714286,"y":186.07019047619048,"z":459.49390476190473,"a95":1.84441,"info":"\"90-03-20\" at \"13:58\""},{"visible":true,"include":true,"step":"200","x":-29.182409523809525,"y":212.79923809523808,"z":198.01428571428573,"a95":2.818696,"info":"\"90-03-21\" at \"09:19\""},{"visible":true,"include":true,"step":"250","x":-21.49942857142857,"y":210.92685714285713,"z":88.06374285714286,"a95":3.935266,"info":"\"90-03-21\" at \"14:46\""},{"visible":true,"include":true,"step":"300","x":-31.958619047619045,"y":171.41438095238095,"z":11.04024761904762,"a95":3.658238,"info":"\"90-03-22\" at \"11:24\""},{"visible":true,"include":false,"step":"330","x":-16.980028571428573,"y":159.34114285714287,"z":5.100463809523809,"a95":5.901768,"info":"\"90-03-22\" at \"15:57\""},{"visible":true,"include":false,"step":"360","x":-16.39897142857143,"y":149.46304761904761,"z":14.074704761904762,"a95":2.831651,"info":"\"90-03-23\" at \"11:15\""}]},{"version":"v1.1.0","exported":"2016-10-10T19:56:19.963Z","volume":10.5,"added":"2016-10-10T19:39:45.210Z","format":"Utrecht","demagType":"Unknown","strat":"3.02","patch":1.1,"GEO":[{"dec":127.35446798568483,"inc":-2.8879310360949946,"MAD":6.882174454338544,"cm":[-7.105427357601002e-15,-3.552713678800501e-15,0],"intensity":788.0018729442012,"type":"dir","forced":true,"remark":"","origin":false,"nSteps":9,"minStep":"390","maxStep":"600","steps":["390","420","450","480","510","540","560","580","600"],"group":"None","version":"v1.1.0"}],"TECT":[{"dec":129.10550145960724,"inc":-25.960237003668993,"MAD":6.8821744543385535,"cm":[1.4210854715202004e-14,0,-8.881784197001252e-16],"intensity":788.0018729442012,"type":"dir","forced":true,"remark":"","origin":false,"nSteps":9,"minStep":"390","maxStep":"600","steps":["390","420","450","480","510","540","560","580","600"],"group":"None","version":"v1.1.0"}],"interpreted":true,"name":"TY 71.2","coreAzi":3,"coreDip":49,"bedStrike":22,"bedDip":24,"data":[{"visible":false,"include":false,"step":"20","x":-670.8727619047619,"y":517.4713333333333,"z":1162.1314285714284,"a95":0.982237,"info":"\"90-03-19\" at \"12:02\""},{"visible":true,"include":false,"step":"100","x":-442.0619047619047,"y":712.2575238095238,"z":1506.5742857142857,"a95":1.302846,"info":"\"90-03-20\" at \"09:19\""},{"visible":true,"include":false,"step":"150","x":-333.5317142857143,"y":718.778380952381,"z":678.6847619047619,"a95":1.636156,"info":"\"90-03-20\" at \"13:58\""},{"visible":true,"include":false,"step":"200","x":-220.93409523809524,"y":750.8660952380952,"z":36.1552,"a95":1.680471,"info":"\"90-03-21\" at \"09:19\""},{"visible":true,"include":false,"step":"250","x":-231.39333333333335,"y":669.5168571428571,"z":-92.51858095238096,"a95":1.922441,"info":"\"90-03-21\" at \"14:47\""},{"visible":true,"include":false,"step":"300","x":-188.84638095238094,"y":587.4575238095238,"z":-148.75285714285715,"a95":2.018026,"info":"\"90-03-22\" at \"11:25\""},{"visible":true,"include":false,"step":"330","x":-179.6784761904762,"y":503.9131428571428,"z":-204.6642857142857,"a95":3.845787,"info":"\"90-03-22\" at \"15:58\""},{"visible":true,"include":false,"step":"360","x":-165.02266666666668,"y":509.01361904761904,"z":-228.93990476190478,"a95":2.420885,"info":"\"90-03-23\" at \"11:16\""},{"visible":true,"include":true,"step":"390","x":-204.53514285714286,"y":420.69161904761904,"z":-225.45352380952383,"a95":2.532002,"info":"\"90-03-26\" at \"15:49\""},{"visible":true,"include":true,"step":"420","x":-213.10914285714287,"y":410.6714285714286,"z":-192.746,"a95":2.131222,"info":"\"90-03-27\" at \"12:47\""},{"visible":true,"include":true,"step":"450","x":-168.6575238095238,"y":427.2319047619048,"z":-224.22038095238094,"a95":2.082361,"info":"\"90-03-27\" at \"15:33\""},{"visible":true,"include":true,"step":"480","x":-201.26180952380952,"y":377.7315238095238,"z":-217.87380952380954,"a95":1.922649,"info":"\"90-03-28\" at \"11:15\""},{"visible":true,"include":true,"step":"510","x":-103.70733333333332,"y":343.51314285714284,"z":-211.64352380952383,"a95":1.967547,"info":"\"90-03-28\" at \"15:01\""},{"visible":true,"include":true,"step":"540","x":-108.97561904761903,"y":307.81638095238094,"z":-113.91466666666668,"a95":5.674119,"info":"\"90-03-29\" at \"09:22\""},{"visible":true,"include":true,"step":"560","x":-149.67609523809523,"y":295.29114285714286,"z":-100.85361904761905,"a95":2.525882,"info":"\"90-03-29\" at \"11:54\""},{"visible":true,"include":true,"step":"580","x":-115.1542857142857,"y":171.86638095238095,"z":-66.49329523809524,"a95":4.269039,"info":"\"90-03-30\" at \"08:51\""},{"visible":true,"include":true,"step":"600","x":-184.01057142857144,"y":201.50066666666666,"z":-62.39355238095238,"a95":2.710489,"info":"\"90-03-30\" at \"11:43\""}]},{"version":"v1.1.0","exported":"2016-10-10T19:56:19.963Z","volume":10.5,"added":"2016-10-10T19:39:45.210Z","format":"Utrecht","demagType":"Unknown","strat":"3.03","patch":1.1,"GEO":[],"TECT":[],"interpreted":false,"name":"TY 72.A1","coreAzi":16,"coreDip":80,"bedStrike":22,"bedDip":24,"data":[{"visible":false,"include":false,"step":"20","x":415.2682857142857,"y":-458.84828571428574,"z":793.6066666666668,"a95":0.7425024,"info":"\"90-03-19\" at \"12:02\""},{"visible":true,"include":true,"step":"100","x":297.6347619047619,"y":-369.6869523809524,"z":1001.047619047619,"a95":0.6969043,"info":"\"90-03-20\" at \"09:20\""},{"visible":true,"include":true,"step":"150","x":209.7647619047619,"y":-285.884380952381,"z":702.8313333333333,"a95":0.8323758,"info":"\"90-03-20\" at \"13:59\""},{"visible":true,"include":true,"step":"200","x":68.56576190476191,"y":-224.29142857142855,"z":305.0595238095238,"a95":1.674876,"info":"\"90-03-21\" at \"09:20\""},{"visible":true,"include":true,"step":"250","x":27.310095238095236,"y":-207.4404761904762,"z":239.39904761904762,"a95":2.410888,"info":"\"90-03-21\" at \"14:48\""},{"visible":true,"include":true,"step":"300","x":12.33150476190476,"y":-176.77314285714286,"z":175.3527619047619,"a95":1.92112,"info":"\"90-03-22\" at \"11:26\""},{"visible":true,"include":false,"step":"330","x":5.100463809523809,"y":-167.21780952380954,"z":130.61066666666667,"a95":2.996822,"info":"\"90-03-22\" at \"15:58\""},{"visible":true,"include":false,"step":"360","x":-16.269838095238097,"y":-162.69838095238097,"z":107.49714285714286,"a95":2.832736,"info":"\"90-03-23\" at \"11:17\""},{"visible":true,"include":false,"step":"390","x":-23.69457142857143,"y":-138.4227619047619,"z":80.05795238095239,"a95":4.051572,"info":"\"90-03-26\" at \"15:50\""},{"visible":true,"include":false,"step":"420","x":-43.57347619047619,"y":-113.95342857142857,"z":79.90945714285715,"a95":3.149742,"info":"\"90-03-27\" at \"12:47\""},{"visible":true,"include":false,"step":"450","x":-20.25337142857143,"y":-101.36371428571428,"z":58.758657142857146,"a95":4.095736,"info":"\"90-03-27\" at \"15:34\""},{"visible":true,"include":false,"step":"480","x":-53.851885714285714,"y":-112.5072380952381,"z":75.53209523809524,"a95":3.321944,"info":"\"90-03-28\" at \"11:15\""},{"visible":true,"include":false,"step":"510","x":-40.526114285714286,"y":-63.2522380952381,"z":47.06632380952381,"a95":5.127197,"info":"\"90-03-28\" at \"15:02\""},{"visible":true,"include":false,"step":"540","x":-31.455028571428574,"y":-56.05347619047619,"z":38.55694285714286,"a95":5.69618,"info":"\"90-03-29\" at \"09:23\""},{"visible":true,"include":false,"step":"560","x":-72.09089523809523,"y":-46.504628571428576,"z":6.992158095238095,"a95":5.558541,"info":"\"90-03-29\" at \"11:54\""},{"visible":true,"include":false,"step":"580","x":-28.162323809523812,"y":-71.25803809523809,"z":9.251859047619048,"a95":6.875401,"info":"\"90-03-30\" at \"08:52\""},{"visible":true,"include":false,"step":"600","x":-59.64962857142857,"y":-21.815790476190475,"z":21.738314285714285,"a95":5.947267,"info":"\"90-03-30\" at \"11:44\""}]},{"version":"v1.1.0","exported":"2016-10-10T19:56:19.963Z","volume":10.5,"added":"2016-10-10T19:39:45.210Z","format":"Utrecht","demagType":"Unknown","strat":"3.04","patch":1.1,"GEO":[],"TECT":[],"interpreted":false,"name":"TY 73.A1","coreAzi":297,"coreDip":67,"bedStrike":22,"bedDip":24,"data":[{"visible":false,"include":false,"step":"20","x":40.35179047619048,"y":338.5030476190476,"z":368.3957142857143,"a95":1.567501,"info":"\"90-03-19\" at \"12:03\""},{"visible":true,"include":true,"step":"100","x":-24.985828571428573,"y":334.11285714285714,"z":588.3614285714286,"a95":1.058937,"info":"\"90-03-20\" at \"09:20\""},{"visible":true,"include":true,"step":"150","x":-24.533885714285713,"y":232.55542857142856,"z":439.1566666666667,"a95":1.53955,"info":"\"90-03-20\" at \"14:00\""},{"visible":true,"include":true,"step":"200","x":6.972789523809524,"y":152.23923809523808,"z":267.8713333333333,"a95":2.316703,"info":"\"90-03-21\" at \"09:21\""},{"visible":true,"include":true,"step":"250","x":-19.756238095238093,"y":130.73980952380953,"z":199.88666666666666,"a95":2.817087,"info":"\"90-03-21\" at \"14:48\""},{"visible":true,"include":true,"step":"300","x":-23.37175238095238,"y":71.60021904761905,"z":172.12457142857141,"a95":2.929367,"info":"\"90-03-22\" at \"11:26\""},{"visible":true,"include":true,"step":"330","x":-12.202380952380953,"y":65.07937142857142,"z":161.85914285714284,"a95":4.023608,"info":"\"90-03-22\" at \"15:59\""},{"visible":true,"include":true,"step":"360","x":-27.180961904761904,"y":70.76089523809524,"z":155.59647619047618,"a95":4.144316,"info":"\"90-03-23\" at \"11:18\""},{"visible":true,"include":true,"step":"390","x":-49.71339999999999,"y":60.75364761904763,"z":89.48413333333333,"a95":4.72428,"info":"\"90-03-26\" at \"15:51\""},{"visible":true,"include":false,"step":"420","x":-54.96881904761905,"y":49.15817142857143,"z":94.02289523809524,"a95":4.340804,"info":"\"90-03-27\" at \"12:48\""},{"visible":true,"include":false,"step":"450","x":-36.29723809523809,"y":53.43867619047619,"z":71.3419619047619,"a95":4.631983,"info":"\"90-03-27\" at \"15:35\""},{"visible":true,"include":false,"step":"480","x":-43.70905714285715,"y":23.894714285714286,"z":93.07381904761904,"a95":4.477241,"info":"\"90-03-28\" at \"11:18\""},{"visible":true,"include":false,"step":"510","x":-37.57559047619048,"y":62.910047619047624,"z":28.80795238095238,"a95":5.686709,"info":"\"90-03-28\" at \"15:03\""},{"visible":true,"include":false,"step":"540","x":-13.487180952380951,"y":88.96761904761904,"z":62.658257142857146,"a95":3.600027,"info":"\"90-03-29\" at \"09:25\""},{"visible":true,"include":false,"step":"560","x":-78.4309619047619,"y":54.084314285714285,"z":-3.705908571428571,"a95":4.035518,"info":"\"90-03-29\" at \"11:55\""},{"visible":true,"include":false,"step":"580","x":-53.05130476190476,"y":26.496599999999997,"z":43.16673333333333,"a95":8.040786,"info":"\"90-03-30\" at \"08:53\""},{"visible":true,"include":false,"step":"600","x":-60.321085714285715,"y":-21.434866666666668,"z":18.942742857142857,"a95":5.215099,"info":"\"90-03-30\" at \"11:45\""}]},{"version":"v1.1.0","exported":"2016-10-10T19:56:19.963Z","volume":10.5,"added":"2016-10-10T19:39:45.211Z","format":"Utrecht","demagType":"Unknown","strat":"3.05","patch":1.1,"GEO":[],"TECT":[],"interpreted":false,"name":"TY 74.A1","coreAzi":350,"coreDip":16,"bedStrike":22,"bedDip":24,"data":[{"visible":false,"include":false,"step":"20","x":-919.3106666666667,"y":-867.4666666666666,"z":1409.6657142857143,"a95":0.6017177,"info":"\"90-03-19\" at \"12:04\""},{"visible":true,"include":false,"step":"100","x":-806.1319047619048,"y":-763.9078095238095,"z":1881.3619047619047,"a95":1.893369,"info":"\"90-03-20\" at \"09:21\""},{"visible":true,"include":false,"step":"150","x":-657.1854285714286,"y":-617.6728571428571,"z":1375.7057142857143,"a95":0.7896656,"info":"\"90-03-20\" at \"14:01\""},{"visible":true,"include":false,"step":"200","x":-332.36961904761904,"y":-678.6847619047619,"z":914.0164761904763,"a95":0.6842024,"info":"\"90-03-21\" at \"09:22\""},{"visible":true,"include":false,"step":"250","x":-334.11285714285714,"y":-600.822,"z":759.4529523809524,"a95":0.9525191,"info":"\"90-03-21\" at \"14:49\""},{"visible":true,"include":true,"step":"300","x":-213.25114285714287,"y":-506.10828571428567,"z":510.1757142857143,"a95":0.5908821,"info":"\"90-03-22\" at \"11:27\""},{"visible":true,"include":true,"step":"330","x":-149.46304761904761,"y":-430.44057142857145,"z":432.7648571428571,"a95":1.108376,"info":"\"90-03-22\" at \"16:00\""},{"visible":true,"include":true,"step":"360","x":-163.86057142857143,"y":-414.8809523809524,"z":371.88209523809525,"a95":1.650238,"info":"\"90-03-23\" at \"11:19\""},{"visible":true,"include":true,"step":"390","x":-171.28523809523807,"y":-320.29638095238096,"z":309.5789523809524,"a95":1.404285,"info":"\"90-03-26\" at \"15:52\""},{"visible":true,"include":true,"step":"420","x":-142.32885714285715,"y":-345.30161904761906,"z":283.05,"a95":1.544324,"info":"\"90-03-27\" at \"12:49\""},{"visible":true,"include":true,"step":"450","x":-138.37761904761905,"y":-337.86390476190473,"z":256.54704761904765,"a95":1.583777,"info":"\"90-03-27\" at \"15:36\""},{"visible":true,"include":true,"step":"480","x":-132.60561904761903,"y":-285.06438095238093,"z":243.61504761904763,"a95":1.737844,"info":"\"90-03-28\" at \"11:18\""},{"visible":true,"include":true,"step":"510","x":-115.44485714285715,"y":-271.02200000000005,"z":179.91733333333335,"a95":1.737693,"info":"\"90-03-28\" at \"15:03\""},{"visible":true,"include":true,"step":"540","x":-82.41449523809524,"y":-210.79133333333334,"z":220.83085714285716,"a95":3.94269,"info":"\"90-03-29\" at \"09:26\""},{"visible":true,"include":true,"step":"560","x":-128.81580952380952,"y":-185.3664761904762,"z":161.78161904761905,"a95":2.015967,"info":"\"90-03-29\" at \"11:56\""},{"visible":true,"include":false,"step":"580","x":-65.2666,"y":-177.85133333333334,"z":175.37857142857143,"a95":3.940999,"info":"\"90-03-30\" at \"08:54\""},{"visible":true,"include":false,"step":"600","x":-91.76319047619047,"y":-93.77110476190475,"z":138.978,"a95":2.546489,"info":"\"90-03-30\" at \"11:46\""}]},{"version":"v1.1.0","exported":"2016-10-10T19:56:19.963Z","volume":10.5,"added":"2016-10-10T19:39:45.211Z","format":"Utrecht","demagType":"Unknown","strat":"3.06","patch":1.1,"GEO":[{"dec":134.3445291981506,"inc":-40.212306467613146,"MAD":3.9366898406452506,"cm":[-3.907985046680551e-14,-7.460698725481052e-14,0],"intensity":2951.0203061135626,"type":"dir","forced":true,"remark":"","origin":false,"nSteps":8,"minStep":"250","maxStep":"510","steps":["250","300","360","390","420","450","480","510"],"group":"None","version":"v1.1.0"}],"TECT":[{"dec":149.18786253132737,"inc":-61.293315140959415,"MAD":3.9366898406452164,"cm":[-9.059419880941277e-14,-6.217248937900877e-14,2.842170943040401e-14],"intensity":2951.020306113563,"type":"dir","forced":true,"remark":"","origin":false,"nSteps":8,"minStep":"250","maxStep":"510","steps":["250","300","360","390","420","450","480","510"],"group":"None","version":"v1.1.0"}],"interpreted":true,"name":"TY 75.A1","coreAzi":48,"coreDip":71,"bedStrike":22,"bedDip":24,"data":[{"visible":true,"include":false,"step":"20","x":953.0771428571428,"y":959.2104761904761,"z":-793.8649523809524,"a95":0.9875714,"info":"\"90-03-19\" at \"12:04\""},{"visible":true,"include":false,"step":"100","x":914.1455238095239,"y":1188.7314285714285,"z":-391.186380952381,"a95":1.13762,"info":"\"90-03-20\" at \"09:22\""},{"visible":true,"include":false,"step":"150","x":676.5541904761906,"y":1536.7257142857143,"z":-782.2437142857142,"a95":0.8442335,"info":"\"90-03-20\" at \"14:01\""},{"visible":true,"include":false,"step":"200","x":714.1943809523809,"y":1717.5657142857142,"z":-1329.4780952380952,"a95":0.8381836,"info":"\"90-03-21\" at \"09:23\""},{"visible":true,"include":true,"step":"250","x":548.8489523809524,"y":1777.7380952380952,"z":-1274.2771428571427,"a95":0.6639179,"info":"\"90-03-21\" at \"14:50\""},{"visible":true,"include":true,"step":"300","x":427.53533333333337,"y":1507.4133333333334,"z":-1171.2990476190475,"a95":2.690966,"info":"\"90-03-22\" at \"11:28\""},{"visible":false,"include":false,"step":"330","x":728.5273333333333,"y":1169.2333333333333,"z":-989.6838095238096,"a95":0.9794066,"info":"\"90-03-22\" at \"16:01\""},{"visible":true,"include":true,"step":"360","x":466.5958095238096,"y":1158.644761904762,"z":-911.6921904761905,"a95":0.8655671,"info":"\"90-03-23\" at \"11:19\""},{"visible":true,"include":true,"step":"390","x":301.7022857142857,"y":583.2609523809524,"z":-564.0857142857143,"a95":1.215132,"info":"\"90-03-26\" at \"15:53\""},{"visible":true,"include":true,"step":"420","x":296.82771428571425,"y":603.533619047619,"z":-498.70942857142853,"a95":1.725728,"info":"\"90-03-27\" at \"12:50\""},{"visible":true,"include":true,"step":"450","x":166.12666666666667,"y":624.5295238095239,"z":-528.4405714285715,"a95":1.136758,"info":"\"90-03-27\" at \"15:37\""},{"visible":true,"include":true,"step":"480","x":106.49,"y":562.1423809523809,"z":-483.70495238095236,"a95":1.202963,"info":"\"90-03-28\" at \"11:19\""},{"visible":true,"include":true,"step":"510","x":264.75295238095237,"y":466.80885714285716,"z":-460.2492380952381,"a95":1.658724,"info":"\"90-03-28\" at \"15:04\""},{"visible":false,"include":false,"step":"540","x":229.12066666666664,"y":361.7650476190476,"z":384.25885714285715,"a95":3.880206,"info":"\"90-03-29\" at \"09:28\""},{"visible":false,"include":false,"step":"560","x":184.60457142857143,"y":358.2851428571429,"z":376.2336190476191,"a95":4.382977,"info":"\"90-03-29\" at \"11:57\""},{"visible":false,"include":false,"step":"580","x":181.3312380952381,"y":275.44457142857146,"z":303.6198095238095,"a95":3.817477,"info":"\"90-03-30\" at \"08:55\""},{"visible":false,"include":false,"step":"600","x":143.76209523809524,"y":192.79114285714286,"z":253.49961904761906,"a95":3.931008,"info":"\"90-03-30\" at \"11:47\""}]},{"version":"v1.1.0","exported":"2016-10-10T19:56:19.964Z","volume":10.5,"added":"2016-10-10T19:39:45.211Z","format":"Utrecht","demagType":"Unknown","strat":"3.07","patch":1.1,"GEO":[],"TECT":[],"interpreted":false,"name":"TY 75.B1","coreAzi":324,"coreDip":10,"bedStrike":22,"bedDip":24,"data":[{"visible":true,"include":false,"step":"20","x":694.7609523809524,"y":-1490.24,"z":393.2523809523809,"a95":0.6437754,"info":"\"90-03-19\" at \"12:05\""},{"visible":true,"include":false,"step":"100","x":1029.7780952380951,"y":-1258.7180952380954,"z":1030.1,"a95":0.6422628,"info":"\"90-03-20\" at \"09:22\""},{"visible":true,"include":false,"step":"150","x":1293,"y":-1335.9990476190476,"z":1166.6504761904762,"a95":0.894841,"info":"\"90-03-20\" at \"14:02\""},{"visible":true,"include":false,"step":"200","x":1734.1580952380953,"y":-1380.8704761904762,"z":1086.5933333333332,"a95":0.8694544,"info":"\"90-03-21\" at \"09:24\""},{"visible":true,"include":false,"step":"250","x":1730.8657142857144,"y":-1278.2152380952382,"z":1126.6219047619047,"a95":0.8999653,"info":"\"90-03-21\" at \"14:50\""},{"visible":true,"include":false,"step":"300","x":1536.5961904761905,"y":-1100.797142857143,"z":915.1785714285714,"a95":0.7512765,"info":"\"90-03-22\" at \"11:29\""},{"visible":true,"include":false,"step":"330","x":1352.269523809524,"y":-861.2685714285714,"z":906.3335238095239,"a95":0.8945073,"info":"\"90-03-22\" at \"16:02\""},{"visible":true,"include":false,"step":"360","x":1231.2780952380951,"y":-875.6660952380953,"z":749.5748571428571,"a95":1.145596,"info":"\"90-03-23\" at \"11:20\""},{"visible":true,"include":false,"step":"390","x":1059.412380952381,"y":-714.8399999999999,"z":536.7757142857143,"a95":0.9684392,"info":"\"90-03-26\" at \"15:53\""},{"visible":true,"include":false,"step":"420","x":851.6875238095238,"y":-871.7341904761905,"z":544.8007619047619,"a95":0.9132621,"info":"\"90-03-27\" at \"12:50\""},{"visible":true,"include":false,"step":"450","x":922.3127619047618,"y":-704.2387619047619,"z":510.2467619047619,"a95":0.9922304,"info":"\"90-03-27\" at \"15:38\""},{"visible":true,"include":false,"step":"480","x":824.0158095238095,"y":-597.2839047619048,"z":524.2633333333333,"a95":1.061993,"info":"\"90-03-28\" at \"11:20\""},{"visible":true,"include":false,"step":"510","x":717.6549523809524,"y":-603.0688571428572,"z":408.65704761904766,"a95":1.080629,"info":"\"90-03-28\" at \"15:05\""},{"visible":true,"include":false,"step":"540","x":765.8834285714286,"y":-262.21561904761904,"z":355.302380952381,"a95":1.327576,"info":"\"90-03-29\" at \"09:29\""},{"visible":true,"include":false,"step":"560","x":605.7029523809524,"y":-415.81066666666663,"z":311.19295238095236,"a95":1.398526,"info":"\"90-03-29\" at \"11:58\""},{"visible":true,"include":false,"step":"580","x":628.1966666666666,"y":-102.21590476190477,"z":327.96,"a95":1.38153,"info":"\"90-03-30\" at \"08:56\""},{"visible":true,"include":false,"step":"600","x":397.24885714285716,"y":60.398561904761905,"z":-244.364,"a95":1.248365,"info":"\"90-03-30\" at \"11:47\""}]},{"version":"v1.1.0","exported":"2016-10-10T19:56:19.964Z","volume":10.5,"added":"2016-10-10T19:39:45.211Z","format":"Utrecht","demagType":"Unknown","strat":"3.08","patch":1.1,"GEO":[],"TECT":[],"interpreted":false,"name":"TY 76.A1","coreAzi":60,"coreDip":55,"bedStrike":22,"bedDip":24,"data":[{"visible":false,"include":false,"step":"20","x":-490.8714285714285,"y":-1043.7228571428573,"z":1329.3495238095238,"a95":1.567234,"info":"\"90-03-19\" at \"12:06\""},{"visible":true,"include":true,"step":"100","x":-384.53638095238097,"y":-629.4233333333333,"z":1827.9038095238097,"a95":2.106661,"info":"\"90-03-20\" at \"09:23\""},{"visible":true,"include":true,"step":"150","x":-204.08323809523807,"y":-277.0392380952381,"z":1121.9085714285716,"a95":1.170848,"info":"\"90-03-20\" at \"14:03\""},{"visible":true,"include":true,"step":"200","x":24.985828571428573,"y":12.78344761904762,"z":441.60999999999996,"a95":4.897556,"info":"\"90-03-21\" at \"09:24\""},{"visible":true,"include":true,"step":"250","x":22.919819047619047,"y":82.25309523809524,"z":324.23466666666667,"a95":4.382304,"info":"\"90-03-21\" at \"14:51\""},{"visible":true,"include":true,"step":"300","x":29.76347619047619,"y":95.16565714285714,"z":198.85361904761908,"a95":5.928024,"info":"\"90-03-22\" at \"11:29\""},{"visible":true,"include":true,"step":"330","x":23.823695238095237,"y":80.18708571428571,"z":106.91609523809522,"a95":7.548421,"info":"\"90-03-22\" at \"16:02\""},{"visible":true,"include":true,"step":"360","x":24.856704761904762,"y":93.68071428571429,"z":94.00353333333334,"a95":8.484789,"info":"\"90-03-23\" at \"11:21\""},{"visible":true,"include":true,"step":"390","x":52.16679047619048,"y":153.53047619047618,"z":73.92447619047618,"a95":6.596416,"info":"\"90-03-26\" at \"15:54\""},{"visible":true,"include":true,"step":"420","x":42.77289523809524,"y":133.75485714285713,"z":50.50106666666667,"a95":6.251353,"info":"\"90-03-27\" at \"12:51\""},{"visible":true,"include":true,"step":"450","x":46.27220952380952,"y":103.00361904761905,"z":27.00664761904762,"a95":7.739601,"info":"\"90-03-27\" at \"15:38\""},{"visible":true,"include":true,"step":"480","x":41.26858095238096,"y":97.95476190476191,"z":39.38334285714286,"a95":8.026788,"info":"\"90-03-28\" at \"11:21\""},{"visible":true,"include":true,"step":"510","x":21.67375238095238,"y":74.95748571428571,"z":8.167201904761905,"a95":11.43276,"info":"\"90-03-28\" at \"15:06\""},{"visible":false,"include":false,"step":"540","x":2.776202857142857,"y":134.704,"z":27.08412380952381,"a95":5.575392,"info":"\"90-03-29\" at \"09:29\""},{"visible":false,"include":false,"step":"560","x":-34.870400000000004,"y":79.38003809523809,"z":-17.386780952380953,"a95":9.844208,"info":"\"90-03-29\" at \"11:58\""},{"visible":false,"include":false,"step":"580","x":8.496473333333332,"y":74.36350476190475,"z":44.664590476190476,"a95":10.87997,"info":"\"90-03-30\" at \"08:56\""},{"visible":false,"include":false,"step":"600","x":-34.20540952380952,"y":44.37405714285714,"z":13.971400000000001,"a95":12.19164,"info":"\"90-03-30\" at \"11:48\""}]},{"version":"v1.1.0","exported":"2016-10-10T19:56:19.964Z","volume":10.5,"added":"2016-10-10T19:39:45.211Z","format":"Utrecht","demagType":"Unknown","strat":"3.09","patch":1.1,"GEO":[],"TECT":[],"interpreted":false,"name":"TY 77.B1","coreAzi":318,"coreDip":51,"bedStrike":22,"bedDip":24,"data":[{"visible":true,"include":false,"step":"20","x":342.50600000000003,"y":1426.8390476190475,"z":2983.772380952381,"a95":0.8771447,"info":"\"90-03-19\" at \"12:06\""},{"visible":true,"include":false,"step":"100","x":411.33000000000004,"y":1478.8771428571429,"z":3384.3857142857146,"a95":1.045804,"info":"\"90-03-20\" at \"09:23\""},{"visible":true,"include":false,"step":"150","x":789.4101904761906,"y":923.5718095238096,"z":2456.1647619047617,"a95":1.164962,"info":"\"90-03-20\" at \"14:04\""},{"visible":true,"include":false,"step":"200","x":958.0485714285714,"y":456.8468571428571,"z":1648.612380952381,"a95":1.372946,"info":"\"90-03-21\" at \"09:25\""},{"visible":true,"include":false,"step":"250","x":922.8615238095239,"y":382.7932380952381,"z":1283.7038095238095,"a95":1.618272,"info":"\"90-03-21\" at \"14:52\""},{"visible":true,"include":false,"step":"300","x":728.333619047619,"y":206.02009523809522,"z":839.8982857142857,"a95":1.375267,"info":"\"90-03-22\" at \"11:30\""},{"visible":true,"include":false,"step":"330","x":650.0834285714286,"y":176.19209523809525,"z":582.0987619047619,"a95":1.900057,"info":"\"90-03-22\" at \"16:03\""},{"visible":true,"include":true,"step":"360","x":576.546380952381,"y":82.38220952380952,"z":506.8184761904762,"a95":2.411031,"info":"\"90-03-23\" at \"11:22\""},{"visible":true,"include":true,"step":"390","x":486.352,"y":63.91723809523809,"z":374.2063809523809,"a95":2.026592,"info":"\"90-03-26\" at \"15:55\""},{"visible":true,"include":true,"step":"420","x":441.2742857142857,"y":67.10018095238095,"z":342.55114285714285,"a95":2.169236,"info":"\"90-03-27\" at \"12:52\""},{"visible":true,"include":true,"step":"450","x":433.2297142857143,"y":79.90945714285715,"z":278.60809523809525,"a95":2.332321,"info":"\"90-03-27\" at \"15:39\""},{"visible":true,"include":true,"step":"480","x":378.49333333333334,"y":69.45026666666666,"z":246.81733333333332,"a95":2.730808,"info":"\"90-03-28\" at \"11:21\""},{"visible":true,"include":true,"step":"510","x":371.54638095238096,"y":37.930685714285715,"z":217.0345714285714,"a95":2.588292,"info":"\"90-03-28\" at \"15:06\""},{"visible":true,"include":true,"step":"540","x":309.1786666666667,"y":25.863885714285715,"z":181.7702857142857,"a95":2.935448,"info":"\"90-03-29\" at \"09:30\""},{"visible":true,"include":true,"step":"560","x":265.8957142857143,"y":37.13010476190476,"z":102.93904761904761,"a95":3.705876,"info":"\"90-03-29\" at \"11:59\""},{"visible":true,"include":true,"step":"580","x":233.89190476190475,"y":20.67302857142857,"z":137.55114285714285,"a95":3.81868,"info":"\"90-03-30\" at \"08:57\""},{"visible":true,"include":false,"step":"600","x":181.34419047619048,"y":46.78224761904762,"z":83.78968571428571,"a95":4.01765,"info":"\"90-03-30\" at \"11:49\""}]},{"version":"v1.1.0","exported":"2016-10-10T19:56:19.964Z","volume":10.5,"added":"2016-10-10T19:39:45.211Z","format":"Utrecht","demagType":"Unknown","strat":"3.10","patch":1.1,"GEO":[],"TECT":[],"interpreted":false,"name":"TY 78.1","coreAzi":44,"coreDip":48,"bedStrike":22,"bedDip":24,"data":[{"visible":true,"include":false,"step":"20","x":208.27980952380955,"y":-3062.475238095238,"z":2624.4161904761904,"a95":0.5604576,"info":"\"90-03-19\" at \"12:07\""},{"visible":true,"include":false,"step":"100","x":3.744645714285714,"y":-2644.6885714285713,"z":2950.3933333333334,"a95":0.6415296,"info":"\"90-03-20\" at \"09:24\""},{"visible":true,"include":false,"step":"150","x":326.4298095238095,"y":-2383.9838095238097,"z":2009.1961904761906,"a95":0.6485338,"info":"\"90-03-20\" at \"14:05\""},{"visible":true,"include":false,"step":"200","x":363.7471428571428,"y":-2146.4571428571426,"z":1261.235238095238,"a95":0.7328504,"info":"\"90-03-21\" at \"09:26\""},{"visible":true,"include":false,"step":"250","x":284.85133333333334,"y":-1900.2142857142858,"z":884.8340952380952,"a95":0.7272597,"info":"\"90-03-21\" at \"14:52\""},{"visible":true,"include":false,"step":"300","x":264.514,"y":-1422.578095238095,"z":625.097619047619,"a95":0.7910983,"info":"\"90-03-22\" at \"11:30\""},{"visible":true,"include":true,"step":"330","x":237.78504761904762,"y":-1220.3676190476192,"z":518.1815238095238,"a95":0.7317224,"info":"\"90-03-22\" at \"16:04\""},{"visible":true,"include":true,"step":"360","x":278.20142857142855,"y":-1125.9761904761904,"z":424.0488571428571,"a95":2.414253,"info":"\"90-03-23\" at \"11:22\""},{"visible":true,"include":true,"step":"390","x":215.57542857142857,"y":-988.3933333333332,"z":390.73447619047624,"a95":1.542282,"info":"\"90-03-26\" at \"15:56\""},{"visible":true,"include":true,"step":"420","x":205.31638095238097,"y":-981.6780952380954,"z":368.1245714285714,"a95":0.9242747,"info":"\"90-03-27\" at \"12:52\""},{"visible":true,"include":true,"step":"450","x":142.5677142857143,"y":-935.4319047619048,"z":312.77476190476193,"a95":0.9226406,"info":"\"90-03-27\" at \"15:40\""},{"visible":true,"include":true,"step":"480","x":137.15733333333333,"y":-907.9411428571428,"z":309.8823809523809,"a95":0.9753898,"info":"\"90-03-28\" at \"11:22\""},{"visible":true,"include":true,"step":"510","x":183.24876190476192,"y":-788.3125714285713,"z":282.6561904761905,"a95":1.04943,"info":"\"90-03-28\" at \"15:07\""},{"visible":true,"include":true,"step":"540","x":121.28133333333332,"y":-670.0980000000001,"z":219.32647619047617,"a95":1.307047,"info":"\"90-03-29\" at \"09:31\""},{"visible":true,"include":true,"step":"560","x":129.09990476190475,"y":-601.9131428571428,"z":206.42038095238098,"a95":1.766665,"info":"\"90-03-29\" at \"12:00\""},{"visible":true,"include":true,"step":"580","x":117.13,"y":-586.5730476190477,"z":184.48190476190476,"a95":1.2161,"info":"\"90-03-30\" at \"08:58\""},{"visible":true,"include":true,"step":"600","x":119.69952380952381,"y":-454.74209523809526,"z":119.04104761904762,"a95":1.166742,"info":"\"90-03-30\" at \"11:50\""}]}]
