# Supplementary material for: Paleomagnetic constraints on the timing and distribution of Cenozoic rotations in Central and Eastern Anatolia
Source: Copernicus journal article supplement (doi:10.5194/se-9-295-2018), 2018-03-21
Supplement: Supplementary file 2 [file se-9-295-2018-supplement.zip › se-2017-66_DATA_dir files/dir files Tauride basins/BR1.dir]

[{"version":"v1.1.0","exported":"2016-11-24T13:32:21.354Z","volume":10.5,"added":"2016-11-24T13:29:30.776Z","format":"Utrecht","demagType":"Unknown","strat":null,"patch":1.1,"GEO":[{"dec":149.1260362985725,"inc":-36.61911172474803,"MAD":5.427518765397816,"cm":[0,1.3322676295501878e-14,0],"intensity":395.0850994756249,"type":"dir","forced":true,"remark":"","origin":false,"nSteps":4,"minStep":"180","maxStep":"310","steps":["180","210","280","310"],"group":"None","version":"v1.1.0"}],"TECT":[{"dec":132.31201961811695,"inc":-23.467300940110274,"MAD":5.427518765397813,"cm":[1.7763568394002505e-15,8.881784197001252e-15,-1.7763568394002505e-15],"intensity":395.0850994756249,"type":"dir","forced":true,"remark":"","origin":false,"nSteps":4,"minStep":"180","maxStep":"310","steps":["180","210","280","310"],"group":"None","version":"v1.1.0"}],"interpreted":true,"name":"BR1.02A","coreAzi":335,"coreDip":6,"bedStrike":165,"bedDip":31,"data":[{"visible":true,"include":false,"step":"20","x":-526.1904761904761,"y":173.52380952380952,"z":767.7142857142857,"a95":2.7,"info":"\"16-03-14\" at \"12:04\""},{"visible":true,"include":false,"step":"100","x":-486.1904761904762,"y":170.95238095238096,"z":300.0952380952381,"a95":2.4,"info":"\"16-03-14\" at \"14:10\""},{"visible":true,"include":false,"step":"120","x":-161.04761904761904,"y":72.0952380952381,"z":83.61904761904762,"a95":3.7,"info":"\"16-03-15\" at \"10:10\""},{"visible":true,"include":false,"step":"150","x":-8.038095238095238,"y":-3.6761904761904765,"z":-44.714285714285715,"a95":12.4,"info":"\"16-03-15\" at \"12:32\""},{"visible":true,"include":true,"step":"180","x":119.71428571428571,"y":6.476190476190476,"z":-182.76190476190476,"a95":2.1,"info":"\"16-03-16\" at \"13:38\""},{"visible":true,"include":true,"step":"210","x":127.9047619047619,"y":46.285714285714285,"z":-204,"a95":3.2,"info":"\"16-03-17\" at \"16:48\""},{"visible":true,"include":false,"step":"250","x":105.23809523809524,"y":80,"z":-129.23809523809524,"a95":3.1,"info":"\"16-03-17\" at \"20:04\""},{"visible":true,"include":true,"step":"280","x":80.0952380952381,"y":3.619047619047619,"z":-173.14285714285714,"a95":2.7,"info":"\"16-03-18\" at \"15:29\""},{"visible":true,"include":true,"step":"310","x":91.9047619047619,"y":5.142857142857143,"z":-150.66666666666666,"a95":3,"info":"\"16-03-20\" at \"14:57\""},{"visible":true,"include":false,"step":"350","x":49.61904761904762,"y":57.523809523809526,"z":-167.14285714285714,"a95":3.9,"info":"\"16-04-18\" at \"10:29\""},{"visible":true,"include":false,"step":"380","x":84.38095238095238,"y":-62.19047619047619,"z":-173.14285714285714,"a95":3.3,"info":"\"16-04-18\" at \"13:27\""},{"visible":true,"include":false,"step":"410","x":85.23809523809524,"y":-70.47619047619048,"z":-202.38095238095238,"a95":3,"info":"\"16-04-19\" at \"08:58\""},{"visible":true,"include":false,"step":"430","x":80,"y":-48.95238095238095,"z":-172.85714285714286,"a95":2.8,"info":"\"16-04-19\" at \"12:33\""}]},{"version":"v1.1.0","exported":"2016-11-24T13:32:21.354Z","volume":10.5,"added":"2016-11-24T13:29:30.777Z","format":"Utrecht","demagType":"Unknown","strat":"1","patch":1.1,"GEO":[],"TECT":[],"interpreted":false,"name":"BR1.03B","coreAzi":0,"coreDip":0,"bedStrike":165,"bedDip":31,"data":[{"visible":true,"include":false,"step":"0.0","x":-869.4571428571428,"y":222,"z":446.64761904761906,"a95":0.99,"info":"18/03/2016 at 23:59:01"},{"visible":true,"include":false,"step":"10.0","x":-249.30476190476188,"y":112.85714285714286,"z":-72.42476190476191,"a95":0.99,"info":"18/03/2016 at 23:59:01"},{"visible":true,"include":false,"step":"15.0","x":-145.04761904761904,"y":143.31428571428572,"z":-151.28571428571428,"a95":0.99,"info":"18/03/2016 at 23:59:01"},{"visible":true,"include":false,"step":"20.0","x":-82.08285714285714,"y":-9.537142857142857,"z":-188.52380952380952,"a95":0.99,"info":"18/03/2016 at 23:59:01"},{"visible":true,"include":false,"step":"23.0","x":-125.0952380952381,"y":65.7247619047619,"z":-161.77142857142857,"a95":0.99,"info":"18/03/2016 at 23:59:01"},{"visible":true,"include":false,"step":"25.0","x":-111.39047619047618,"y":104.54285714285714,"z":-204.26666666666668,"a95":0.99,"info":"18/03/2016 at 23:59:01"},{"visible":true,"include":false,"step":"30.0","x":56.71047619047619,"y":79.42285714285715,"z":-186.55238095238096,"a95":0.99,"info":"18/03/2016 at 23:59:01"},{"visible":true,"include":false,"step":"33.0","x":-14.013333333333332,"y":142.1904761904762,"z":-93.46380952380953,"a95":0.99,"info":"18/03/2016 at 23:59:01"},{"visible":true,"include":false,"step":"35.0","x":-35.87047619047619,"y":10.16095238095238,"z":-77.22952380952381,"a95":0.99,"info":"18/03/2016 at 23:59:01"},{"visible":true,"include":false,"step":"40.0","x":-116.84761904761906,"y":168.44761904761904,"z":-129.4,"a95":0.99,"info":"18/03/2016 at 23:59:01"},{"visible":true,"include":false,"step":"45.0","x":-138.7904761904762,"y":90.03333333333333,"z":-17.49142857142857,"a95":0.99,"info":"18/03/2016 at 23:59:01"},{"visible":true,"include":false,"step":"50.0","x":11.219047619047618,"y":27.10571428571429,"z":-43.45428571428571,"a95":0.99,"info":"18/03/2016 at 23:59:01"},{"visible":true,"include":false,"step":"55.0","x":86.5904761904762,"y":58.37333333333333,"z":-131,"a95":0.99,"info":"18/03/2016 at 23:59:01"},{"visible":true,"include":false,"step":"60.0","x":-26.334285714285713,"y":-19.465714285714284,"z":-64.78095238095239,"a95":0.99,"info":"18/03/2016 at 23:59:01"},{"visible":true,"include":false,"step":"65.0","x":-99.33333333333333,"y":-33.789523809523814,"z":57.18857142857143,"a95":0.99,"info":"18/03/2016 at 23:59:01"},{"visible":true,"include":false,"step":"70.0","x":-32.10952380952381,"y":-70.73809523809524,"z":82.00857142857143,"a95":0.99,"info":"18/03/2016 at 23:59:01"},{"visible":true,"include":false,"step":"80.0","x":97.14285714285714,"y":12.350476190476192,"z":-54.54,"a95":0.99,"info":"18/03/2016 at 23:59:01"}]},{"version":"v1.1.0","exported":"2016-11-24T13:32:21.354Z","volume":10.5,"added":"2016-11-24T13:29:30.777Z","format":"Utrecht","demagType":"Unknown","strat":null,"patch":1.1,"GEO":[{"dec":149.0172542937279,"inc":-34.41045535642007,"MAD":8.25079021480589,"cm":[-1.0658141036401503e-14,-1.7763568394002505e-15,0],"intensity":357.14982850338873,"type":"dir","forced":true,"remark":"","origin":false,"nSteps":3,"minStep":"180","maxStep":"250","steps":["180","210","250"],"group":"None","version":"v1.1.0"}],"TECT":[{"dec":133.51306905063018,"inc":-21.555465314892192,"MAD":8.2507902148059,"cm":[2.1316282072803006e-14,2.1316282072803006e-14,-7.105427357601002e-15],"intensity":357.14982850338873,"type":"dir","forced":true,"remark":"","origin":false,"nSteps":3,"minStep":"180","maxStep":"250","steps":["180","210","250"],"group":"None","version":"v1.1.0"}],"interpreted":true,"name":"BR1.07A","coreAzi":330,"coreDip":18,"bedStrike":165,"bedDip":31,"data":[{"visible":true,"include":false,"step":"20","x":-1045.3333333333333,"y":-74.76190476190476,"z":628.7619047619048,"a95":2.2,"info":"\"16-03-14\" at \"12:05\""},{"visible":true,"include":false,"step":"100","x":-718.3809523809524,"y":235.9047619047619,"z":808.8571428571429,"a95":2.6,"info":"\"16-03-14\" at \"14:11\""},{"visible":true,"include":false,"step":"120","x":-326.3809523809524,"y":119.9047619047619,"z":314.4761904761905,"a95":3.2,"info":"\"16-03-15\" at \"10:11\""},{"visible":true,"include":false,"step":"150","x":-182,"y":43.04761904761905,"z":108.85714285714286,"a95":5.5,"info":"\"16-03-15\" at \"12:33\""},{"visible":true,"include":true,"step":"180","x":45.142857142857146,"y":4,"z":-175.33333333333334,"a95":2.8,"info":"\"16-03-16\" at \"13:40\""},{"visible":true,"include":true,"step":"210","x":82.57142857142857,"y":23.428571428571427,"z":-194.38095238095238,"a95":4.6,"info":"\"16-03-17\" at \"16:49\""},{"visible":true,"include":true,"step":"250","x":27.428571428571427,"y":-23.714285714285715,"z":-173.8095238095238,"a95":5.6,"info":"\"16-03-17\" at \"20:05\""},{"visible":true,"include":false,"step":"280","x":59.42857142857143,"y":-60.19047619047619,"z":-210.47619047619048,"a95":4.2,"info":"\"16-03-18\" at \"15:30\""},{"visible":true,"include":false,"step":"310","x":78.38095238095238,"y":-98.66666666666667,"z":-182.57142857142858,"a95":4.3,"info":"\"16-03-20\" at \"14:58\""},{"visible":true,"include":false,"step":"350","x":-49.904761904761905,"y":-138.0952380952381,"z":-191.71428571428572,"a95":3.7,"info":"\"16-04-18\" at \"10:33\""},{"visible":true,"include":false,"step":"380","x":-39.23809523809524,"y":-229.04761904761904,"z":-145.23809523809524,"a95":3.3,"info":"\"16-04-18\" at \"13:29\""},{"visible":true,"include":false,"step":"410","x":34.666666666666664,"y":-162,"z":-134.57142857142858,"a95":2.7,"info":"\"16-04-19\" at \"09:02\""},{"visible":true,"include":false,"step":"430","x":-55.142857142857146,"y":35.61904761904762,"z":-177.8095238095238,"a95":3.7,"info":"\"16-04-19\" at \"12:35\""}]},{"version":"v1.1.0","exported":"2016-11-24T13:32:21.354Z","volume":10.5,"added":"2016-11-24T13:29:30.777Z","format":"Utrecht","demagType":"Unknown","strat":null,"patch":1.1,"GEO":[{"dec":142.80589574844475,"inc":-39.497298130615356,"MAD":12.567485108691294,"cm":[-8.881784197001252e-15,-1.2434497875801753e-14,0],"intensity":243.83919090336602,"type":"dir","forced":true,"remark":"","origin":false,"nSteps":3,"minStep":"280","maxStep":"350","steps":["280","310","350"],"group":"None","version":"v1.1.0"}],"TECT":[{"dec":126.05504703356479,"inc":-23.270109050895137,"MAD":12.567485108691292,"cm":[1.4210854715202004e-14,3.552713678800501e-15,-1.3322676295501878e-15],"intensity":243.83919090336596,"type":"dir","forced":true,"remark":"","origin":false,"nSteps":3,"minStep":"280","maxStep":"350","steps":["280","310","350"],"group":"None","version":"v1.1.0"}],"interpreted":true,"name":"BR1.09A","coreAzi":327,"coreDip":18,"bedStrike":165,"bedDip":31,"data":[{"visible":true,"include":false,"step":"20","x":-282.57142857142856,"y":215.04761904761904,"z":814.5714285714286,"a95":2.5,"info":"\"16-03-14\" at \"12:06\""},{"visible":true,"include":false,"step":"100","x":-303.7142857142857,"y":197.71428571428572,"z":382.57142857142856,"a95":2.6,"info":"\"16-03-14\" at \"14:12\""},{"visible":true,"include":false,"step":"120","x":-101.33333333333333,"y":65.71428571428571,"z":139.04761904761904,"a95":3.6,"info":"\"16-03-15\" at \"10:12\""},{"visible":true,"include":false,"step":"150","x":-21.866666666666667,"y":19.628571428571426,"z":54.75238095238095,"a95":8.6,"info":"\"16-03-15\" at \"12:34\""},{"visible":true,"include":false,"step":"180","x":61.333333333333336,"y":-3.1142857142857148,"z":-56.285714285714285,"a95":6,"info":"\"16-03-16\" at \"13:41\""},{"visible":true,"include":false,"step":"210","x":100.47619047619048,"y":-10.952380952380953,"z":-56.38095238095238,"a95":3.5,"info":"\"16-03-17\" at \"16:50\""},{"visible":true,"include":false,"step":"250","x":51.523809523809526,"y":20.64761904761905,"z":-36.62857142857143,"a95":8.3,"info":"\"16-03-17\" at \"20:07\""},{"visible":true,"include":true,"step":"280","x":59.61904761904762,"y":22.952380952380953,"z":-109.61904761904762,"a95":2.9,"info":"\"16-03-18\" at \"15:31\""},{"visible":true,"include":true,"step":"310","x":61.61904761904762,"y":-11.238095238095237,"z":-110.76190476190476,"a95":2.9,"info":"\"16-03-20\" at \"14:59\""},{"visible":true,"include":true,"step":"350","x":11.714285714285714,"y":9.142857142857142,"z":-121.33333333333333,"a95":5.5,"info":"\"16-04-18\" at \"10:35\""},{"visible":true,"include":false,"step":"380","x":4.3047619047619055,"y":44.87619047619047,"z":-57.219047619047615,"a95":8.3,"info":"\"16-04-18\" at \"13:31\""},{"visible":true,"include":false,"step":"410","x":-14.380952380952381,"y":57.142857142857146,"z":-80.95238095238095,"a95":4.1,"info":"\"16-04-19\" at \"09:06\""},{"visible":true,"include":false,"step":"430","x":-32.19047619047619,"y":44.666666666666664,"z":-84.57142857142857,"a95":4.2,"info":"\"16-04-19\" at \"12:37\""}]},{"version":"v1.1.0","exported":"2016-11-24T13:32:21.354Z","volume":10.5,"added":"2016-11-24T13:29:30.778Z","format":"Utrecht","demagType":"Unknown","strat":"1","patch":1.1,"GEO":[],"TECT":[],"interpreted":false,"name":"BR1.10B","coreAzi":0,"coreDip":0,"bedStrike":165,"bedDip":31,"data":[{"visible":false,"include":false,"step":"0.0","x":-907.5714285714286,"y":167.51428571428573,"z":132.14285714285714,"a95":0.99,"info":"18/03/2016 at 23:59:01"},{"visible":true,"include":false,"step":"10.0","x":-200.39999999999998,"y":42.375238095238096,"z":-73.80095238095238,"a95":0.99,"info":"18/03/2016 at 23:59:01"},{"visible":true,"include":false,"step":"15.0","x":-120.11428571428571,"y":44.06761904761905,"z":-112.05714285714285,"a95":0.99,"info":"18/03/2016 at 23:59:01"},{"visible":true,"include":false,"step":"20.0","x":-72.32857142857144,"y":-5.426666666666667,"z":-113.26666666666667,"a95":0.99,"info":"18/03/2016 at 23:59:01"},{"visible":true,"include":false,"step":"23.0","x":-106.57142857142857,"y":-2.3408571428571427,"z":-100.42857142857143,"a95":0.99,"info":"18/03/2016 at 23:59:01"},{"visible":true,"include":false,"step":"25.0","x":-74.00952380952381,"y":-53.777142857142856,"z":-117.24761904761904,"a95":0.99,"info":"18/03/2016 at 23:59:01"},{"visible":true,"include":false,"step":"30.0","x":-0.1162857142857143,"y":-34.77714285714286,"z":-97.80000000000001,"a95":0.99,"info":"18/03/2016 at 23:59:01"},{"visible":true,"include":false,"step":"33.0","x":31.239047619047618,"y":-89.18666666666667,"z":-135.32380952380953,"a95":0.99,"info":"18/03/2016 at 23:59:01"},{"visible":true,"include":false,"step":"35.0","x":28.793333333333333,"y":-39.40952380952381,"z":-100.32380952380953,"a95":0.99,"info":"18/03/2016 at 23:59:01"},{"visible":true,"include":false,"step":"40.0","x":-24.388571428571428,"y":-12.69809523809524,"z":-54.582857142857144,"a95":0.99,"info":"18/03/2016 at 23:59:01"},{"visible":true,"include":false,"step":"45.0","x":-16.483809523809526,"y":23.97809523809524,"z":-19.094285714285714,"a95":0.99,"info":"18/03/2016 at 23:59:01"},{"visible":true,"include":false,"step":"50.0","x":-84.2247619047619,"y":-34.53809523809524,"z":-4.901047619047619,"a95":0.99,"info":"18/03/2016 at 23:59:01"},{"visible":true,"include":false,"step":"55.0","x":-11.57047619047619,"y":70.22666666666666,"z":-154.98095238095237,"a95":0.99,"info":"18/03/2016 at 23:59:01"},{"visible":true,"include":false,"step":"60.0","x":-66.9952380952381,"y":-1.9342857142857142,"z":110.03809523809525,"a95":0.99,"info":"18/03/2016 at 23:59:01"},{"visible":true,"include":false,"step":"65.0","x":-15.642857142857142,"y":-41.26285714285714,"z":37.021904761904764,"a95":0.99,"info":"18/03/2016 at 23:59:01"},{"visible":true,"include":false,"step":"70.0","x":37.38476190476191,"y":51.1647619047619,"z":-17.31047619047619,"a95":0.99,"info":"18/03/2016 at 23:59:01"},{"visible":true,"include":false,"step":"80.0","x":247.7904761904762,"y":-80.66285714285715,"z":-18.32952380952381,"a95":0.99,"info":"18/03/2016 at 23:59:01"}]},{"version":"v1.1.0","exported":"2016-11-24T13:32:21.355Z","volume":10.5,"added":"2016-11-24T13:29:30.779Z","format":"Utrecht","demagType":"Unknown","strat":"1","patch":1.1,"GEO":[],"TECT":[],"interpreted":false,"name":"BR1.11B","coreAzi":0,"coreDip":0,"bedStrike":165,"bedDip":31,"data":[{"visible":false,"include":false,"step":"0.0","x":-953.9047619047619,"y":266.54285714285714,"z":341.4095238095238,"a95":0.99,"info":"18/03/2016 at 23:59:01"},{"visible":true,"include":false,"step":"10.0","x":-130.64761904761903,"y":29.67142857142857,"z":-18.437142857142856,"a95":0.99,"info":"18/03/2016 at 23:59:01"},{"visible":true,"include":false,"step":"15.0","x":-31.024761904761903,"y":-4.30552380952381,"z":-67.9447619047619,"a95":0.99,"info":"18/03/2016 at 23:59:01"},{"visible":true,"include":false,"step":"20.0","x":37.23809523809524,"y":-27.903809523809525,"z":-55.25333333333333,"a95":0.99,"info":"18/03/2016 at 23:59:01"},{"visible":true,"include":false,"step":"23.0","x":40.65238095238095,"y":-52.98190476190476,"z":-46.549523809523805,"a95":0.99,"info":"18/03/2016 at 23:59:01"},{"visible":true,"include":false,"step":"25.0","x":107.04761904761905,"y":12.896190476190476,"z":-86.35809523809523,"a95":0.99,"info":"18/03/2016 at 23:59:01"},{"visible":true,"include":false,"step":"30.0","x":28.66190476190476,"y":20.938095238095237,"z":-6.618666666666666,"a95":0.99,"info":"18/03/2016 at 23:59:01"},{"visible":true,"include":false,"step":"33.0","x":-17.03333333333333,"y":-18.283809523809524,"z":-45.684761904761906,"a95":0.99,"info":"18/03/2016 at 23:59:01"},{"visible":true,"include":false,"step":"35.0","x":27.53047619047619,"y":-22.49047619047619,"z":-37.473333333333336,"a95":0.99,"info":"18/03/2016 at 23:59:01"},{"visible":true,"include":false,"step":"40.0","x":0.04757142857142857,"y":-88.0352380952381,"z":-63.944761904761904,"a95":0.99,"info":"18/03/2016 at 23:59:01"},{"visible":true,"include":false,"step":"45.0","x":-56.45142857142857,"y":9.542857142857143,"z":33.896190476190476,"a95":0.99,"info":"18/03/2016 at 23:59:01"},{"visible":true,"include":false,"step":"50.0","x":12.947619047619046,"y":-19.048571428571428,"z":-26.23333333333333,"a95":0.99,"info":"18/03/2016 at 23:59:01"},{"visible":true,"include":false,"step":"55.0","x":-28.44,"y":5.351428571428571,"z":-32.296190476190475,"a95":0.99,"info":"18/03/2016 at 23:59:01"},{"visible":true,"include":false,"step":"60.0","x":-7.407904761904762,"y":1.0614285714285714,"z":62.59619047619047,"a95":0.99,"info":"18/03/2016 at 23:59:01"},{"visible":true,"include":false,"step":"65.0","x":-9.292285714285715,"y":-98.25714285714287,"z":36.80095238095238,"a95":0.99,"info":"18/03/2016 at 23:59:01"},{"visible":true,"include":false,"step":"70.0","x":7.606190476190475,"y":21.52,"z":4.22352380952381,"a95":0.99,"info":"18/03/2016 at 23:59:01"},{"visible":true,"include":false,"step":"80.0","x":-18.09047619047619,"y":8.042666666666666,"z":48.68571428571428,"a95":0.99,"info":"18/03/2016 at 23:59:01"}]},{"version":"v1.1.0","exported":"2016-11-24T13:32:21.355Z","volume":10.5,"added":"2016-11-24T13:29:30.779Z","format":"Utrecht","demagType":"Unknown","strat":null,"patch":1.1,"GEO":[],"TECT":[],"interpreted":false,"name":"BR1.12A","coreAzi":333,"coreDip":0,"bedStrike":165,"bedDip":31,"data":[{"visible":false,"include":false,"step":"20","x":-443.42857142857144,"y":-634.1904761904761,"z":640.0952380952381,"a95":2.8,"info":"\"16-03-14\" at \"12:07\""},{"visible":true,"include":false,"step":"100","x":-367.8095238095238,"y":-328.57142857142856,"z":167.8095238095238,"a95":2.4,"info":"\"16-03-14\" at \"14:14\""},{"visible":true,"include":false,"step":"120","x":-198,"y":-18.857142857142858,"z":-4.476190476190476,"a95":2.9,"info":"\"16-03-15\" at \"10:14\""},{"visible":true,"include":false,"step":"150","x":-94.66666666666667,"y":111.33333333333333,"z":-84.85714285714286,"a95":3.6,"info":"\"16-03-15\" at \"12:35\""},{"visible":true,"include":false,"step":"180","x":-14.857142857142858,"y":221.8095238095238,"z":-150.28571428571428,"a95":2,"info":"\"16-03-16\" at \"13:42\""},{"visible":true,"include":false,"step":"210","x":36.095238095238095,"y":308.1904761904762,"z":-160,"a95":2.2,"info":"\"16-03-17\" at \"16:51\""},{"visible":true,"include":false,"step":"250","x":44.57142857142857,"y":326.1904761904762,"z":-135.9047619047619,"a95":1.7,"info":"\"16-03-17\" at \"20:08\""},{"visible":true,"include":false,"step":"280","x":54.095238095238095,"y":276.3809523809524,"z":-166,"a95":1.8,"info":"\"16-03-18\" at \"15:32\""},{"visible":true,"include":false,"step":"310","x":37.333333333333336,"y":282.85714285714283,"z":-92.57142857142857,"a95":2.1,"info":"\"16-03-20\" at \"15:00\""},{"visible":true,"include":false,"step":"350","x":15.047619047619047,"y":229.52380952380952,"z":-149.33333333333334,"a95":3.5,"info":"\"16-04-18\" at \"10:37\""},{"visible":true,"include":false,"step":"380","x":-24.476190476190474,"y":220.47619047619048,"z":-97.80952380952381,"a95":2.3,"info":"\"16-04-18\" at \"13:33\""},{"visible":true,"include":false,"step":"410","x":-4.190476190476191,"y":221.9047619047619,"z":-123.42857142857143,"a95":2.3,"info":"\"16-04-19\" at \"09:10\""},{"visible":true,"include":false,"step":"430","x":-35.04761904761905,"y":151.52380952380952,"z":-200.38095238095238,"a95":2.6,"info":"\"16-04-19\" at \"12:39\""}]},{"version":"v1.1.0","exported":"2016-11-24T13:32:21.355Z","volume":10.5,"added":"2016-11-24T13:29:30.782Z","format":"Utrecht","demagType":"Unknown","strat":"1","patch":1.1,"GEO":[],"TECT":[],"interpreted":false,"name":"BR1.13B","coreAzi":0,"coreDip":0,"bedStrike":165,"bedDip":31,"data":[{"visible":false,"include":false,"step":"0.0","x":-1373.8095238095239,"y":837.0761904761904,"z":633.447619047619,"a95":0.99,"info":"18/03/2016 at 23:59:01"},{"visible":true,"include":false,"step":"10.0","x":-449.02857142857147,"y":472.95238095238096,"z":266.0952380952381,"a95":0.99,"info":"18/03/2016 at 23:59:01"},{"visible":true,"include":false,"step":"15.0","x":-203.0857142857143,"y":409.1904761904762,"z":92.5647619047619,"a95":0.99,"info":"18/03/2016 at 23:59:01"},{"visible":true,"include":false,"step":"20.0","x":-176.75238095238097,"y":150.55238095238096,"z":1.8876190476190478,"a95":0.99,"info":"18/03/2016 at 23:59:01"},{"visible":true,"include":false,"step":"23.0","x":-115.19047619047619,"y":219.96190476190475,"z":21.885714285714286,"a95":0.99,"info":"18/03/2016 at 23:59:01"},{"visible":true,"include":false,"step":"25.0","x":-73.24476190476192,"y":11.263809523809524,"z":-94.9857142857143,"a95":0.99,"info":"18/03/2016 at 23:59:01"},{"visible":true,"include":false,"step":"30.0","x":12.374285714285715,"y":262.48571428571427,"z":103.08571428571429,"a95":0.99,"info":"18/03/2016 at 23:59:01"},{"visible":true,"include":false,"step":"33.0","x":64.53999999999999,"y":106.05714285714285,"z":59.400000000000006,"a95":0.99,"info":"18/03/2016 at 23:59:01"},{"visible":true,"include":false,"step":"35.0","x":-58.52,"y":-139.0857142857143,"z":-59.350476190476186,"a95":0.99,"info":"18/03/2016 at 23:59:01"},{"visible":true,"include":false,"step":"40.0","x":208.0095238095238,"y":187.7238095238095,"z":-92.65809523809523,"a95":0.99,"info":"18/03/2016 at 23:59:01"},{"visible":true,"include":false,"step":"45.0","x":0.5708571428571428,"y":-121.5047619047619,"z":-68.30095238095238,"a95":0.99,"info":"18/03/2016 at 23:59:01"},{"visible":true,"include":false,"step":"50.0","x":90.67904761904762,"y":-65.79904761904761,"z":277.31428571428575,"a95":0.99,"info":"18/03/2016 at 23:59:01"},{"visible":true,"include":false,"step":"55.0","x":-143.8190476190476,"y":-22.33904761904762,"z":140.9904761904762,"a95":0.99,"info":"18/03/2016 at 23:59:01"},{"visible":true,"include":false,"step":"60.0","x":-96.05714285714286,"y":-65.45333333333333,"z":83.55142857142857,"a95":0.99,"info":"18/03/2016 at 23:59:01"},{"visible":true,"include":false,"step":"65.0","x":-142.2,"y":130.71428571428572,"z":-32.39904761904762,"a95":0.99,"info":"18/03/2016 at 23:59:01"},{"visible":true,"include":false,"step":"70.0","x":-152.2761904761905,"y":93.82857142857144,"z":-35.946666666666665,"a95":0.99,"info":"18/03/2016 at 23:59:01"},{"visible":true,"include":false,"step":"80.0","x":-215.1047619047619,"y":-50.4952380952381,"z":26.61047619047619,"a95":0.99,"info":"18/03/2016 at 23:59:01"}]},{"version":"v1.1.0","exported":"2016-11-24T13:32:21.355Z","volume":10.5,"added":"2016-11-24T13:29:30.784Z","format":"Utrecht","demagType":"Unknown","strat":"1","patch":1.1,"GEO":[],"TECT":[],"interpreted":false,"name":"BR1.14B","coreAzi":0,"coreDip":0,"bedStrike":165,"bedDip":31,"data":[{"visible":false,"include":false,"step":"0.0","x":-1267.2380952380952,"y":523.7523809523809,"z":478.5142857142857,"a95":0.99,"info":"18/03/2016 at 23:59:01"},{"visible":true,"include":false,"step":"10.0","x":-350.77142857142854,"y":219.16190476190474,"z":29.22095238095238,"a95":0.99,"info":"18/03/2016 at 23:59:01"},{"visible":true,"include":false,"step":"15.0","x":-154.8761904761905,"y":121.83809523809524,"z":-53.42476190476191,"a95":0.99,"info":"18/03/2016 at 23:59:01"},{"visible":true,"include":false,"step":"20.0","x":-161.61904761904762,"y":21.66,"z":-129.98095238095237,"a95":0.99,"info":"18/03/2016 at 23:59:01"},{"visible":true,"include":false,"step":"23.0","x":-41.38761904761905,"y":118.18095238095239,"z":-49.09619047619047,"a95":0.99,"info":"18/03/2016 at 23:59:01"},{"visible":true,"include":false,"step":"25.0","x":27.418095238095237,"y":18.53904761904762,"z":-161.01904761904763,"a95":0.99,"info":"18/03/2016 at 23:59:01"},{"visible":true,"include":false,"step":"30.0","x":36.3552380952381,"y":17.280952380952378,"z":-225.54285714285712,"a95":0.99,"info":"18/03/2016 at 23:59:01"},{"visible":true,"include":false,"step":"33.0","x":-11.704761904761906,"y":33.233333333333334,"z":-108.41904761904763,"a95":0.99,"info":"18/03/2016 at 23:59:01"},{"visible":true,"include":false,"step":"35.0","x":14.785714285714286,"y":1.141047619047619,"z":-170.0952380952381,"a95":0.99,"info":"18/03/2016 at 23:59:01"},{"visible":true,"include":false,"step":"40.0","x":-26.576190476190476,"y":-27.75047619047619,"z":-67.13047619047619,"a95":0.99,"info":"18/03/2016 at 23:59:01"},{"visible":true,"include":false,"step":"45.0","x":-31.484761904761903,"y":-14.875238095238094,"z":-71.58666666666666,"a95":0.99,"info":"18/03/2016 at 23:59:01"},{"visible":true,"include":false,"step":"50.0","x":-29.637142857142855,"y":-87.80571428571429,"z":-86.83142857142857,"a95":0.99,"info":"18/03/2016 at 23:59:01"},{"visible":true,"include":false,"step":"55.0","x":-27.007619047619045,"y":-11.162857142857142,"z":-70.63809523809525,"a95":0.99,"info":"18/03/2016 at 23:59:01"},{"visible":true,"include":false,"step":"60.0","x":-40.96857142857143,"y":-112.43809523809523,"z":-38.64952380952381,"a95":0.99,"info":"18/03/2016 at 23:59:01"},{"visible":true,"include":false,"step":"65.0","x":74.97238095238096,"y":-74.71523809523809,"z":174.35238095238097,"a95":0.99,"info":"18/03/2016 at 23:59:01"},{"visible":true,"include":false,"step":"70.0","x":-105.0952380952381,"y":13.778095238095236,"z":-49.82380952380952,"a95":0.99,"info":"18/03/2016 at 23:59:01"},{"visible":true,"include":false,"step":"80.0","x":-305.1904761904762,"y":19.399047619047618,"z":185.1238095238095,"a95":0.99,"info":"18/03/2016 at 23:59:01"}]},{"version":"v1.1.0","exported":"2016-11-24T13:32:21.355Z","volume":10.5,"added":"2016-11-24T13:29:30.784Z","format":"Utrecht","demagType":"Unknown","strat":"1","patch":1.1,"GEO":[{"dec":190.82025642730827,"inc":-42.400334152817194,"MAD":5.722919138246989,"cm":[-2.220446049250313e-15,1.6653345369377348e-14,0],"intensity":305.2440780235457,"type":"dir","forced":true,"remark":"","origin":false,"nSteps":8,"minStep":"15.0","maxStep":"45.0","steps":["15.0","20.0","23.0","25.0","30.0","35.0","40.0","45.0"],"group":"None","version":"v1.1.0"}],"TECT":[{"dec":158.85209145759177,"inc":-48.042966262144034,"MAD":5.722919138247005,"cm":[6.217248937900877e-15,2.5424107263916085e-14,2.6645352591003757e-15],"intensity":305.2440780235457,"type":"dir","forced":true,"remark":"","origin":false,"nSteps":8,"minStep":"15.0","maxStep":"45.0","steps":["15.0","20.0","23.0","25.0","30.0","35.0","40.0","45.0"],"group":"None","version":"v1.1.0"}],"interpreted":true,"name":"BR1.16B","coreAzi":0,"coreDip":0,"bedStrike":165,"bedDip":31,"data":[{"visible":false,"include":false,"step":"0.0","x":-20.045714285714286,"y":49.480952380952374,"z":-95.62857142857143,"a95":0.99,"info":"18/03/2016 at 23:59:01"},{"visible":true,"include":false,"step":"10.0","x":183.1238095238095,"y":-49.034285714285716,"z":-193.92380952380952,"a95":0.99,"info":"18/03/2016 at 23:59:01"},{"visible":true,"include":true,"step":"15.0","x":186.9904761904762,"y":-36.04761904761905,"z":-186.4952380952381,"a95":0.99,"info":"18/03/2016 at 23:59:01"},{"visible":true,"include":true,"step":"20.0","x":159.26666666666665,"y":-32.48952380952381,"z":-160.66666666666666,"a95":0.99,"info":"18/03/2016 at 23:59:01"},{"visible":true,"include":true,"step":"23.0","x":133.06666666666666,"y":-39.72285714285714,"z":-136.92380952380952,"a95":0.99,"info":"18/03/2016 at 23:59:01"},{"visible":true,"include":true,"step":"25.0","x":106.1047619047619,"y":-25.43047619047619,"z":-121.75238095238096,"a95":0.99,"info":"18/03/2016 at 23:59:01"},{"visible":true,"include":true,"step":"30.0","x":97.68571428571428,"y":-4.105619047619048,"z":-106.52380952380952,"a95":0.99,"info":"18/03/2016 at 23:59:01"},{"visible":false,"include":false,"step":"33.0","x":55.494285714285716,"y":-15.234285714285715,"z":-125.29523809523809,"a95":0.99,"info":"18/03/2016 at 23:59:01"},{"visible":true,"include":true,"step":"35.0","x":62.99809523809524,"y":-13.853333333333333,"z":-78.52857142857142,"a95":0.99,"info":"18/03/2016 at 23:59:01"},{"visible":true,"include":true,"step":"40.0","x":29.026666666666664,"y":-9.729523809523808,"z":-83.11142857142856,"a95":0.99,"info":"18/03/2016 at 23:59:01"},{"visible":true,"include":true,"step":"45.0","x":17.054285714285715,"y":6.908476190476191,"z":-38.65047619047619,"a95":0.99,"info":"18/03/2016 at 23:59:01"},{"visible":true,"include":false,"step":"50.0","x":32.84761904761905,"y":-13.378095238095238,"z":-4.055428571428571,"a95":0.99,"info":"18/03/2016 at 23:59:01"},{"visible":false,"include":false,"step":"55.0","x":22.438095238095237,"y":-20.930476190476192,"z":-73.68761904761905,"a95":0.99,"info":"18/03/2016 at 23:59:01"},{"visible":false,"include":false,"step":"60.0","x":-5.824857142857143,"y":2.2085714285714286,"z":-26.42571428571429,"a95":0.99,"info":"18/03/2016 at 23:59:01"},{"visible":false,"include":false,"step":"65.0","x":-23.62666666666667,"y":5.143714285714286,"z":-48.43523809523809,"a95":0.99,"info":"18/03/2016 at 23:59:01"},{"visible":false,"include":false,"step":"70.0","x":-18.753333333333334,"y":-2.7094285714285715,"z":-24.975238095238097,"a95":0.99,"info":"18/03/2016 at 23:59:01"},{"visible":false,"include":false,"step":"80.0","x":19.073333333333334,"y":29.242857142857144,"z":0.2228857142857143,"a95":0.99,"info":"18/03/2016 at 23:59:01"}]},{"version":"v1.1.0","exported":"2016-11-24T13:32:21.356Z","volume":10.5,"added":"2016-11-24T13:29:30.785Z","format":"Utrecht","demagType":"Unknown","strat":null,"patch":1.1,"GEO":[{"dec":168.52737048807512,"inc":-48.163793636162396,"MAD":3.3795783398542545,"cm":[0,-4.440892098500626e-16,0],"intensity":538.0569307898329,"type":"dir","forced":true,"remark":"","origin":false,"nSteps":9,"minStep":"210","maxStep":"450","steps":["210","250","280","310","350","380","410","430","450"],"group":"None","version":"v1.1.0"}],"TECT":[{"dec":137.36519803696763,"inc":-41.2825187830167,"MAD":3.379578339854234,"cm":[1.7763568394002505e-15,5.329070518200751e-15,-4.440892098500626e-15],"intensity":538.056930789833,"type":"dir","forced":true,"remark":"","origin":false,"nSteps":9,"minStep":"210","maxStep":"450","steps":["210","250","280","310","350","380","410","430","450"],"group":"None","version":"v1.1.0"}],"interpreted":true,"name":"BR1.18A","coreAzi":341,"coreDip":-1,"bedStrike":165,"bedDip":31,"data":[{"visible":false,"include":false,"step":"20","x":11.323809523809524,"y":61.790476190476184,"z":7.819047619047619,"a95":2.4,"info":"\"16-03-14\" at \"12:08\""},{"visible":true,"include":false,"step":"100","x":139.71428571428572,"y":11.428571428571429,"z":-133.14285714285714,"a95":1.7,"info":"\"16-03-14\" at \"14:15\""},{"visible":true,"include":false,"step":"120","x":207.61904761904762,"y":-18.761904761904763,"z":-179.23809523809524,"a95":1.9,"info":"\"16-03-15\" at \"10:15\""},{"visible":true,"include":false,"step":"150","x":243.9047619047619,"y":-16.571428571428573,"z":-204.85714285714286,"a95":2.1,"info":"\"16-03-15\" at \"12:36\""},{"visible":true,"include":false,"step":"180","x":263.04761904761904,"y":-26,"z":-213.04761904761904,"a95":2,"info":"\"16-03-16\" at \"13:43\""},{"visible":true,"include":true,"step":"210","x":281.42857142857144,"y":-22.19047619047619,"z":-230.47619047619048,"a95":2.4,"info":"\"16-03-17\" at \"16:52\""},{"visible":true,"include":true,"step":"250","x":250.28571428571428,"y":-39.61904761904762,"z":-210.1904761904762,"a95":1.9,"info":"\"16-03-17\" at \"20:10\""},{"visible":true,"include":true,"step":"280","x":246.66666666666666,"y":-16.952380952380953,"z":-190,"a95":1.9,"info":"\"16-03-18\" at \"15:33\""},{"visible":true,"include":true,"step":"310","x":227.42857142857142,"y":-48.38095238095238,"z":-187.61904761904762,"a95":1.8,"info":"\"16-03-20\" at \"15:01\""},{"visible":true,"include":true,"step":"350","x":199.9047619047619,"y":-22.857142857142858,"z":-172.85714285714286,"a95":2.1,"info":"\"16-04-18\" at \"10:42\""},{"visible":true,"include":true,"step":"380","x":184.85714285714286,"y":-21.61904761904762,"z":-167.42857142857142,"a95":2.1,"info":"\"16-04-18\" at \"13:35\""},{"visible":true,"include":true,"step":"410","x":165.9047619047619,"y":-13.047619047619047,"z":-152.57142857142858,"a95":2.1,"info":"\"16-04-19\" at \"09:15\""},{"visible":true,"include":true,"step":"430","x":139.9047619047619,"y":-21.904761904761905,"z":-155.71428571428572,"a95":2.2,"info":"\"16-04-19\" at \"12:42\""},{"visible":true,"include":true,"step":"450","x":127.61904761904762,"y":0.19047619047619047,"z":-118.38095238095238,"a95":2.1,"info":"\"16-04-20\" at \"13:20\""},{"visible":true,"include":false,"step":"450","x":126.85714285714286,"y":-11.333333333333334,"z":-115.52380952380952,"a95":2,"info":"\"16-04-21\" at \"10:26\""}]},{"version":"v1.1.0","exported":"2016-11-24T13:32:21.356Z","volume":10.5,"added":"2016-11-24T13:29:30.786Z","format":"Utrecht","demagType":"Unknown","strat":"1","patch":1.1,"GEO":[{"dec":174.92898582310283,"inc":-50.86847099113008,"MAD":3.6250174233211845,"cm":[4.440892098500626e-16,-1.509903313490213e-14,0],"intensity":429.3790352677196,"type":"dir","forced":true,"remark":"","origin":false,"nSteps":9,"minStep":"15.0","maxStep":"45.0","steps":["15.0","20.0","23.0","25.0","30.0","33.0","35.0","40.0","45.0"],"group":"None","version":"v1.1.0"}],"TECT":[{"dec":138.77415845021733,"inc":-46.13298441626811,"MAD":3.62501742332112,"cm":[1.1546319456101628e-14,-1.199040866595169e-14,-1.509903313490213e-14],"intensity":429.37903526771964,"type":"dir","forced":true,"remark":"","origin":false,"nSteps":9,"minStep":"15.0","maxStep":"45.0","steps":["15.0","20.0","23.0","25.0","30.0","33.0","35.0","40.0","45.0"],"group":"None","version":"v1.1.0"}],"interpreted":true,"name":"BR1.19B","coreAzi":0,"coreDip":0,"bedStrike":165,"bedDip":31,"data":[{"visible":false,"include":false,"step":"0.0","x":8.045714285714286,"y":50.16761904761905,"z":-134.6,"a95":0.99,"info":"18/03/2016 at 23:59:01"},{"visible":true,"include":false,"step":"10.0","x":249.21904761904764,"y":39.24285714285715,"z":-229.8,"a95":0.99,"info":"18/03/2016 at 23:59:01"},{"visible":true,"include":true,"step":"15.0","x":263.37142857142857,"y":19.884761904761906,"z":-217.45714285714288,"a95":0.99,"info":"18/03/2016 at 23:59:01"},{"visible":true,"include":true,"step":"20.0","x":236.8952380952381,"y":-0.5917142857142857,"z":-194.8952380952381,"a95":0.99,"info":"18/03/2016 at 23:59:01"},{"visible":true,"include":true,"step":"23.0","x":210.56190476190477,"y":16.463809523809523,"z":-167.67619047619047,"a95":0.99,"info":"18/03/2016 at 23:59:01"},{"visible":true,"include":true,"step":"25.0","x":215.39999999999998,"y":12.216190476190476,"z":-168.0285714285714,"a95":0.99,"info":"18/03/2016 at 23:59:01"},{"visible":true,"include":true,"step":"30.0","x":139.03809523809525,"y":2.0770476190476193,"z":-122.13333333333334,"a95":0.99,"info":"18/03/2016 at 23:59:01"},{"visible":true,"include":true,"step":"33.0","x":129.06666666666666,"y":18.305714285714288,"z":-112.74285714285713,"a95":0.99,"info":"18/03/2016 at 23:59:01"},{"visible":true,"include":true,"step":"35.0","x":113.87619047619049,"y":24.772380952380953,"z":-92.01333333333334,"a95":0.99,"info":"18/03/2016 at 23:59:01"},{"visible":true,"include":true,"step":"40.0","x":99.63809523809525,"y":13.92,"z":-67.65904761904761,"a95":0.99,"info":"18/03/2016 at 23:59:01"},{"visible":true,"include":true,"step":"45.0","x":72.66571428571429,"y":31.448571428571427,"z":-44.86,"a95":0.99,"info":"18/03/2016 at 23:59:01"},{"visible":false,"include":false,"step":"50.0","x":28.051428571428573,"y":8.00457142857143,"z":-60.22571428571429,"a95":0.99,"info":"18/03/2016 at 23:59:01"},{"visible":false,"include":false,"step":"55.0","x":29.053333333333335,"y":17.51047619047619,"z":-61.425714285714285,"a95":0.99,"info":"18/03/2016 at 23:59:01"},{"visible":true,"include":false,"step":"60.0","x":29.604761904761908,"y":12.289523809523809,"z":-25.421904761904763,"a95":0.99,"info":"18/03/2016 at 23:59:01"},{"visible":false,"include":false,"step":"65.0","x":27.472380952380952,"y":21.385714285714286,"z":-7.005238095238096,"a95":0.99,"info":"18/03/2016 at 23:59:01"},{"visible":false,"include":false,"step":"70.0","x":12.018095238095238,"y":-3.5009523809523806,"z":16.375238095238096,"a95":0.99,"info":"18/03/2016 at 23:59:01"},{"visible":false,"include":false,"step":"80.0","x":-77.14952380952381,"y":1.5519047619047621,"z":30.064761904761905,"a95":0.99,"info":"18/03/2016 at 23:59:01"}]}]
