# Supplementary material for: Paleomagnetic constraints on the timing and distribution of Cenozoic rotations in Central and Eastern Anatolia
Source: Copernicus journal article supplement (doi:10.5194/se-9-295-2018), 2018-03-21
Supplement: Supplementary file 2 [file se-9-295-2018-supplement.zip › se-2017-66_DATA_dir files/dir files Tauride basins/BR2.dir]

[{"version":"v1.1.0","exported":"2016-11-24T13:37:09.835Z","volume":10.5,"added":"2016-11-24T13:33:13.908Z","format":"Utrecht","demagType":"Unknown","strat":null,"patch":1.1,"GEO":[{"dec":50.02067846533066,"inc":-21.839564346003876,"MAD":3.608743603422375,"cm":[-8.43769498715119e-15,-1.4210854715202004e-14,0],"intensity":299.21755862965375,"type":"GC","origin":false,"forced":true,"remark":"","nSteps":5,"minStep":"100","maxStep":"210","steps":["100","120","150","180","210"],"group":"None","version":"v1.1.0"}],"TECT":[{"dec":56.14371544807523,"inc":-22.345155501199873,"MAD":3.608743603422823,"cm":[-8.881784197001252e-15,-2.1094237467877974e-14,-3.552713678800501e-15],"intensity":299.2175586296538,"type":"GC","origin":false,"forced":true,"remark":"","nSteps":5,"minStep":"100","maxStep":"210","steps":["100","120","150","180","210"],"group":"None","version":"v1.1.0"}],"interpreted":true,"name":"BR2.02A","coreAzi":324,"coreDip":18,"bedStrike":235,"bedDip":15,"data":[{"visible":false,"include":false,"step":"20","x":-297.8095238095238,"y":112,"z":607.8095238095239,"a95":2.4,"info":"\"16-03-14\" at \"12:09\""},{"visible":true,"include":true,"step":"100","x":-187.8095238095238,"y":97.52380952380952,"z":321.8095238095238,"a95":2.6,"info":"\"16-03-14\" at \"14:16\""},{"visible":true,"include":true,"step":"120","x":-131.04761904761904,"y":68.28571428571429,"z":267.42857142857144,"a95":2.8,"info":"\"16-03-15\" at \"10:17\""},{"visible":true,"include":true,"step":"150","x":-42.76190476190476,"y":24.952380952380953,"z":173.42857142857142,"a95":3,"info":"\"16-03-15\" at \"12:37\""},{"visible":true,"include":true,"step":"180","x":9.047619047619047,"y":-1.8095238095238095,"z":96.19047619047619,"a95":4.3,"info":"\"16-03-16\" at \"13:44\""},{"visible":true,"include":true,"step":"210","x":106.0952380952381,"y":-40.285714285714285,"z":-39.714285714285715,"a95":2.7,"info":"\"16-03-17\" at \"16:55\""},{"visible":true,"include":false,"step":"250","x":76.31428571428572,"y":-25.485714285714288,"z":-14.266666666666667,"a95":2.8,"info":"\"16-03-17\" at \"20:11\""},{"visible":true,"include":false,"step":"280","x":70.91428571428571,"y":-27.342857142857145,"z":-24.095238095238095,"a95":2.2,"info":"\"16-03-18\" at \"15:34\""},{"visible":true,"include":false,"step":"310","x":53.22857142857143,"y":-32.02857142857143,"z":-30.75238095238095,"a95":3.3,"info":"\"16-03-20\" at \"15:02\""},{"visible":true,"include":false,"step":"350","x":58.5047619047619,"y":-1.5428571428571427,"z":-30.847619047619045,"a95":3.1,"info":"\"16-04-18\" at \"10:44\""},{"visible":true,"include":false,"step":"380","x":42.285714285714285,"y":-7.20952380952381,"z":-38.77142857142857,"a95":3.3,"info":"\"16-04-18\" at \"13:37\""},{"visible":true,"include":false,"step":"410","x":64.94285714285714,"y":-28.304761904761904,"z":-18.923809523809524,"a95":2.7,"info":"\"16-04-19\" at \"09:19\""},{"visible":true,"include":false,"step":"430","x":57.63809523809524,"y":-32.38095238095238,"z":-64.56190476190476,"a95":2.7,"info":"\"16-04-19\" at \"12:44\""},{"visible":true,"include":false,"step":"450","x":68.98095238095237,"y":-11.247619047619047,"z":-48.647619047619045,"a95":2.9,"info":"\"16-04-20\" at \"13:23\""}]},{"version":"v1.1.0","exported":"2016-11-24T13:37:09.836Z","volume":10.5,"added":"2016-11-24T13:33:13.909Z","format":"Utrecht","demagType":"Unknown","strat":"1","patch":1.1,"GEO":[],"TECT":[],"interpreted":false,"name":"BR2.04B","coreAzi":327,"coreDip":43,"bedStrike":235,"bedDip":15,"data":[{"visible":true,"include":false,"step":"0.0","x":-175.77142857142857,"y":151.2,"z":309.9142857142857,"a95":0.99,"info":"19/03/2016 at 05:25:47"},{"visible":true,"include":false,"step":"10.0","x":-86.35047619047619,"y":75.01238095238095,"z":155.23809523809524,"a95":0.99,"info":"19/03/2016 at 05:25:47"},{"visible":true,"include":false,"step":"15.0","x":-53.580000000000005,"y":50.49619047619048,"z":124.82857142857144,"a95":0.99,"info":"19/03/2016 at 05:25:47"},{"visible":true,"include":false,"step":"20.0","x":-47.084761904761905,"y":50.19428571428571,"z":100.53333333333333,"a95":0.99,"info":"19/03/2016 at 05:25:47"},{"visible":true,"include":false,"step":"23.0","x":-36.745714285714286,"y":49.87333333333333,"z":97.3047619047619,"a95":0.99,"info":"19/03/2016 at 05:25:47"},{"visible":true,"include":false,"step":"25.0","x":-44.77904761904762,"y":41.22095238095238,"z":98.28571428571429,"a95":0.99,"info":"19/03/2016 at 05:25:47"},{"visible":true,"include":false,"step":"30.0","x":-48.65428571428571,"y":43.245714285714286,"z":88.04761904761905,"a95":0.99,"info":"19/03/2016 at 05:25:47"},{"visible":true,"include":false,"step":"33.0","x":-55.016190476190474,"y":42.505714285714284,"z":79.27142857142857,"a95":0.99,"info":"19/03/2016 at 05:25:47"},{"visible":true,"include":false,"step":"35.0","x":-56.287619047619046,"y":15.973333333333333,"z":82.95523809523809,"a95":0.99,"info":"19/03/2016 at 05:25:47"},{"visible":true,"include":false,"step":"40.0","x":-41.5247619047619,"y":31.22190476190476,"z":81.75333333333333,"a95":0.99,"info":"19/03/2016 at 05:25:47"},{"visible":true,"include":false,"step":"45.0","x":-28.724761904761905,"y":45.864761904761906,"z":66.36190476190475,"a95":0.99,"info":"19/03/2016 at 05:25:47"},{"visible":true,"include":false,"step":"50.0","x":-73.37619047619049,"y":4.836666666666666,"z":104.88571428571429,"a95":0.99,"info":"19/03/2016 at 05:25:47"},{"visible":true,"include":false,"step":"55.0","x":-46.701904761904764,"y":4.620380952380953,"z":82.27714285714285,"a95":0.99,"info":"19/03/2016 at 05:25:47"},{"visible":true,"include":false,"step":"60.0","x":-40.54380952380952,"y":3.0070476190476194,"z":77.67238095238095,"a95":0.99,"info":"19/03/2016 at 05:25:47"},{"visible":true,"include":false,"step":"65.0","x":-65.24666666666667,"y":6.276190476190477,"z":75.55904761904762,"a95":0.99,"info":"19/03/2016 at 05:25:47"},{"visible":true,"include":false,"step":"70.0","x":-66.6647619047619,"y":26.19333333333333,"z":82.8647619047619,"a95":0.99,"info":"19/03/2016 at 05:25:47"},{"visible":true,"include":false,"step":"80.0","x":-123.70476190476191,"y":-14.264761904761905,"z":79.09619047619047,"a95":0.99,"info":"19/03/2016 at 05:25:47"}]},{"version":"v1.1.0","exported":"2016-11-24T13:37:09.836Z","volume":10.5,"added":"2016-11-24T13:33:13.909Z","format":"Utrecht","demagType":"Unknown","strat":null,"patch":1.1,"GEO":[{"dec":31.012658239391612,"inc":-15.314550586367773,"MAD":9.56647830107868,"cm":[-5.329070518200751e-15,-1.7763568394002505e-15,0],"intensity":213.52730594817967,"type":"GC","origin":false,"forced":true,"remark":"","nSteps":5,"minStep":"100","maxStep":"210","steps":["100","120","150","180","210"],"group":"None","version":"v1.1.0"}],"TECT":[{"dec":35.59636461160369,"inc":-20.891601503687586,"MAD":9.566478301078515,"cm":[-5.329070518200751e-15,7.993605777301127e-15,1.7763568394002505e-15],"intensity":213.52730594817965,"type":"GC","origin":false,"forced":true,"remark":"","nSteps":5,"minStep":"100","maxStep":"210","steps":["100","120","150","180","210"],"group":"None","version":"v1.1.0"}],"interpreted":true,"name":"BR2.06A","coreAzi":345,"coreDip":40,"bedStrike":235,"bedDip":15,"data":[{"visible":false,"include":false,"step":"20","x":-153.14285714285714,"y":97.71428571428571,"z":358.57142857142856,"a95":2.2,"info":"\"16-03-14\" at \"12:11\""},{"visible":true,"include":true,"step":"100","x":-134.57142857142858,"y":41.80952380952381,"z":187.14285714285714,"a95":1.7,"info":"\"16-03-14\" at \"14:17\""},{"visible":true,"include":true,"step":"120","x":-122.19047619047619,"y":30.095238095238095,"z":154.76190476190476,"a95":2.1,"info":"\"16-03-15\" at \"10:18\""},{"visible":true,"include":true,"step":"150","x":-89.52380952380952,"y":36.38095238095238,"z":80.19047619047619,"a95":2.3,"info":"\"16-03-15\" at \"12:38\""},{"visible":true,"include":true,"step":"180","x":-72.38095238095238,"y":28.666666666666668,"z":55.80952380952381,"a95":2.5,"info":"\"16-03-16\" at \"13:45\""},{"visible":true,"include":true,"step":"210","x":-11.076190476190476,"y":45.06666666666666,"z":-57.400000000000006,"a95":6.1,"info":"\"16-03-17\" at \"16:56\""},{"visible":true,"include":false,"step":"250","x":-42.6,"y":41.13333333333333,"z":-34.59047619047619,"a95":2.3,"info":"\"16-03-17\" at \"20:12\""},{"visible":true,"include":false,"step":"280","x":-38.80952380952381,"y":44.12380952380953,"z":-43.03809523809524,"a95":2.3,"info":"\"16-03-18\" at \"15:36\""},{"visible":true,"include":false,"step":"310","x":-41.46666666666666,"y":33.96190476190476,"z":-47.04761904761905,"a95":2.8,"info":"\"16-03-20\" at \"15:03\""},{"visible":true,"include":false,"step":"350","x":-32.49523809523809,"y":36.34285714285714,"z":-53.48571428571429,"a95":2.5,"info":"\"16-04-18\" at \"10:48\""},{"visible":true,"include":false,"step":"380","x":-35.98095238095238,"y":16.58095238095238,"z":-54.523809523809526,"a95":2.8,"info":"\"16-04-18\" at \"13:40\""},{"visible":true,"include":false,"step":"410","x":-14.40952380952381,"y":26.428571428571427,"z":-57.561904761904756,"a95":2.6,"info":"\"16-04-19\" at \"09:24\""},{"visible":true,"include":false,"step":"430","x":-32.076190476190476,"y":33.31428571428572,"z":-68.65714285714286,"a95":2.7,"info":"\"16-04-19\" at \"12:46\""},{"visible":true,"include":false,"step":"450","x":-39.16190476190476,"y":25.40952380952381,"z":-54.05714285714286,"a95":2.8,"info":"\"16-04-20\" at \"13:26\""},{"visible":true,"include":false,"step":"450","x":-37.79047619047619,"y":22.19047619047619,"z":-47.38095238095238,"a95":3.2,"info":"\"16-04-21\" at \"10:29\""}]},{"version":"v1.1.0","exported":"2016-11-24T13:37:09.836Z","volume":10.5,"added":"2016-11-24T13:33:13.910Z","format":"Utrecht","demagType":"Unknown","strat":"1","patch":1.1,"GEO":[{"dec":302.90309477851065,"inc":-16.606539419661207,"MAD":12.809025457878134,"cm":[-3.4416913763379853e-15,4.440892098500626e-16,0],"intensity":367.1784186804437,"type":"GC","origin":false,"forced":true,"remark":"","nSteps":9,"minStep":"10.0","maxStep":"40.0","steps":["10.0","15.0","20.0","23.0","25.0","30.0","33.0","35.0","40.0"],"group":"None","version":"v1.1.0"}],"TECT":[{"dec":300.29804987892277,"inc":-30.388823944892962,"MAD":12.809025457878311,"cm":[-8.881784197001252e-16,8.881784197001252e-16,1.7763568394002505e-15],"intensity":367.1784186804437,"type":"GC","origin":false,"forced":true,"remark":"","nSteps":9,"minStep":"10.0","maxStep":"40.0","steps":["10.0","15.0","20.0","23.0","25.0","30.0","33.0","35.0","40.0"],"group":"None","version":"v1.1.0"}],"interpreted":true,"name":"BR2.06B","coreAzi":345,"coreDip":40,"bedStrike":235,"bedDip":15,"data":[{"visible":true,"include":false,"step":"0.0","x":-185.0952380952381,"y":-0.2534666666666667,"z":306.74285714285713,"a95":0.99,"info":"19/03/2016 at 05:25:47"},{"visible":true,"include":true,"step":"10.0","x":-130.7238095238095,"y":-26.632380952380952,"z":202.25714285714284,"a95":0.99,"info":"19/03/2016 at 05:25:47"},{"visible":true,"include":true,"step":"15.0","x":-121.88571428571429,"y":-35.124761904761904,"z":153.42857142857142,"a95":0.99,"info":"19/03/2016 at 05:25:47"},{"visible":true,"include":true,"step":"20.0","x":-103.23809523809524,"y":-26.346666666666664,"z":143.73333333333335,"a95":0.99,"info":"19/03/2016 at 05:25:47"},{"visible":true,"include":true,"step":"23.0","x":-106.13333333333334,"y":-34.097142857142856,"z":124.0952380952381,"a95":0.99,"info":"19/03/2016 at 05:25:47"},{"visible":true,"include":true,"step":"25.0","x":-100.5904761904762,"y":-50.77904761904762,"z":101.4095238095238,"a95":0.99,"info":"19/03/2016 at 05:25:47"},{"visible":true,"include":true,"step":"30.0","x":-101,"y":-37.54190476190476,"z":116.28571428571429,"a95":0.99,"info":"19/03/2016 at 05:25:47"},{"visible":true,"include":true,"step":"33.0","x":-79.11904761904762,"y":-30.638095238095236,"z":110.80000000000001,"a95":0.99,"info":"19/03/2016 at 05:25:47"},{"visible":true,"include":true,"step":"35.0","x":-88.0047619047619,"y":-40.03142857142857,"z":101.96190476190475,"a95":0.99,"info":"19/03/2016 at 05:25:47"},{"visible":true,"include":true,"step":"40.0","x":-76.31809523809524,"y":-30.985714285714288,"z":95.45714285714286,"a95":0.99,"info":"19/03/2016 at 05:25:47"},{"visible":true,"include":false,"step":"45.0","x":-78.38952380952381,"y":-20.595238095238095,"z":91.1752380952381,"a95":0.99,"info":"19/03/2016 at 05:25:47"},{"visible":true,"include":false,"step":"50.0","x":-66.18285714285715,"y":-42.576190476190476,"z":74.63047619047619,"a95":0.99,"info":"19/03/2016 at 05:25:47"},{"visible":true,"include":false,"step":"55.0","x":-55.41809523809523,"y":-12.715238095238094,"z":54.20666666666666,"a95":0.99,"info":"19/03/2016 at 05:25:47"},{"visible":true,"include":false,"step":"60.0","x":-61.37809523809524,"y":-56.3495238095238,"z":36.917142857142856,"a95":0.99,"info":"19/03/2016 at 05:25:47"},{"visible":true,"include":false,"step":"65.0","x":-59.350476190476186,"y":-76.57047619047619,"z":54.647619047619045,"a95":0.99,"info":"19/03/2016 at 05:25:47"},{"visible":true,"include":false,"step":"70.0","x":-46.68666666666667,"y":-34.875238095238096,"z":76.13428571428571,"a95":0.99,"info":"19/03/2016 at 05:25:47"},{"visible":true,"include":false,"step":"80.0","x":-63.25238095238095,"y":-28.226666666666667,"z":53.81904761904762,"a95":0.99,"info":"19/03/2016 at 05:25:47"}]},{"version":"v1.1.0","exported":"2016-11-24T13:37:09.836Z","volume":10.5,"added":"2016-11-24T13:33:13.912Z","format":"Utrecht","demagType":"Unknown","strat":"1","patch":1.1,"GEO":[{"dec":86.27958257573084,"inc":-0.4515595435088391,"MAD":13.095314556925855,"cm":[-8.881784197001252e-16,-2.3764410578275275e-14,0],"intensity":744.2065951403144,"type":"GC","origin":false,"forced":true,"remark":"","nSteps":7,"minStep":"0.0","maxStep":"30.0","steps":["0.0","10.0","15.0","20.0","23.0","25.0","30.0"],"group":"None","version":"v1.1.0"}],"TECT":[{"dec":265.5069125301626,"inc":-7.282744271206949,"MAD":13.095314556925796,"cm":[-8.881784197001252e-16,-8.43769498715119e-15,-7.105427357601002e-15],"intensity":744.2065951403144,"type":"GC","origin":false,"forced":true,"remark":"","nSteps":7,"minStep":"0.0","maxStep":"30.0","steps":["0.0","10.0","15.0","20.0","23.0","25.0","30.0"],"group":"None","version":"v1.1.0"}],"interpreted":true,"name":"BR2.07B","coreAzi":324,"coreDip":44,"bedStrike":235,"bedDip":15,"data":[{"visible":true,"include":true,"step":"0.0","x":-222.54285714285712,"y":108.57142857142857,"z":446.1333333333333,"a95":0.99,"info":"19/03/2016 at 05:25:47"},{"visible":true,"include":true,"step":"10.0","x":-189.9142857142857,"y":68.5847619047619,"z":310.87619047619046,"a95":0.99,"info":"19/03/2016 at 05:25:47"},{"visible":true,"include":true,"step":"15.0","x":-168.35238095238097,"y":31.433333333333334,"z":252.82857142857142,"a95":0.99,"info":"19/03/2016 at 05:25:47"},{"visible":true,"include":true,"step":"20.0","x":-157.31428571428572,"y":26.93047619047619,"z":227.77142857142857,"a95":0.99,"info":"19/03/2016 at 05:25:47"},{"visible":true,"include":true,"step":"23.0","x":-163.88571428571427,"y":40.597142857142856,"z":208.1809523809524,"a95":0.99,"info":"19/03/2016 at 05:25:47"},{"visible":true,"include":true,"step":"25.0","x":-157.1904761904762,"y":16.88190476190476,"z":183.96190476190475,"a95":0.99,"info":"19/03/2016 at 05:25:47"},{"visible":true,"include":true,"step":"30.0","x":-150.07619047619048,"y":20.956190476190475,"z":184.9142857142857,"a95":0.99,"info":"19/03/2016 at 05:25:47"},{"visible":true,"include":false,"step":"33.0","x":-129.0952380952381,"y":18.89047619047619,"z":173.8095238095238,"a95":0.99,"info":"19/03/2016 at 05:25:47"},{"visible":true,"include":false,"step":"35.0","x":-138.43809523809523,"y":-18.32761904761905,"z":156.04761904761904,"a95":0.99,"info":"19/03/2016 at 05:25:47"},{"visible":true,"include":false,"step":"40.0","x":-142.1238095238095,"y":2.4083809523809525,"z":152.98095238095237,"a95":0.99,"info":"19/03/2016 at 05:25:47"},{"visible":true,"include":false,"step":"45.0","x":-121.19047619047619,"y":22.90285714285714,"z":166.1809523809524,"a95":0.99,"info":"19/03/2016 at 05:25:47"},{"visible":true,"include":false,"step":"50.0","x":-119.74285714285713,"y":-16.516190476190474,"z":153.9142857142857,"a95":0.99,"info":"19/03/2016 at 05:25:47"},{"visible":true,"include":false,"step":"55.0","x":-121.14285714285714,"y":13.557142857142857,"z":129.56190476190477,"a95":0.99,"info":"19/03/2016 at 05:25:47"},{"visible":true,"include":false,"step":"60.0","x":-95.76190476190476,"y":-8.193142857142858,"z":118.04761904761905,"a95":0.99,"info":"19/03/2016 at 05:25:47"},{"visible":true,"include":false,"step":"65.0","x":-93.50952380952381,"y":-12.625714285714285,"z":121.27619047619048,"a95":0.99,"info":"19/03/2016 at 05:25:47"},{"visible":true,"include":false,"step":"70.0","x":-100.4095238095238,"y":-1.058857142857143,"z":104.39047619047618,"a95":0.99,"info":"19/03/2016 at 05:25:47"},{"visible":true,"include":false,"step":"80.0","x":-18.724761904761905,"y":15.379047619047618,"z":119.47619047619048,"a95":0.99,"info":"19/03/2016 at 05:25:47"}]},{"version":"v1.1.0","exported":"2016-11-24T13:37:09.836Z","volume":10.5,"added":"2016-11-24T13:33:13.914Z","format":"Utrecht","demagType":"Unknown","strat":null,"patch":1.1,"GEO":[{"dec":68.4149242849262,"inc":-17.46079803209186,"MAD":22.42545324693617,"cm":[-7.327471962526033e-15,-6.661338147750939e-16,0],"intensity":1064.498638549586,"type":"GC","origin":false,"forced":true,"remark":"","nSteps":7,"minStep":"20","maxStep":"250","steps":["20","100","120","150","180","210","250"],"group":"None","version":"v1.1.0"}],"TECT":[{"dec":72.43625900640211,"inc":-13.44722192560226,"MAD":22.425453246936097,"cm":[-7.105427357601002e-15,9.281464485866309e-14,3.552713678800501e-15],"intensity":1064.4986385495863,"type":"GC","origin":false,"forced":true,"remark":"","nSteps":7,"minStep":"20","maxStep":"250","steps":["20","100","120","150","180","210","250"],"group":"None","version":"v1.1.0"}],"interpreted":true,"name":"BR2.11A","coreAzi":6,"coreDip":24,"bedStrike":235,"bedDip":15,"data":[{"visible":true,"include":true,"step":"20","x":-517.047619047619,"y":31.238095238095237,"z":685.5238095238095,"a95":2.5,"info":"\"16-03-14\" at \"12:12\""},{"visible":true,"include":true,"step":"100","x":-327.5238095238095,"y":66.38095238095238,"z":339.7142857142857,"a95":2.5,"info":"\"16-03-14\" at \"14:18\""},{"visible":true,"include":true,"step":"120","x":-291.42857142857144,"y":75.42857142857143,"z":291.7142857142857,"a95":2.3,"info":"\"16-03-15\" at \"10:19\""},{"visible":true,"include":true,"step":"150","x":-251.9047619047619,"y":80.66666666666667,"z":233.71428571428572,"a95":2.7,"info":"\"16-03-15\" at \"12:39\""},{"visible":true,"include":true,"step":"180","x":-183.14285714285714,"y":74.66666666666667,"z":185.52380952380952,"a95":2.8,"info":"\"16-03-16\" at \"13:46\""},{"visible":true,"include":true,"step":"210","x":-164.28571428571428,"y":59.904761904761905,"z":100.85714285714286,"a95":2.5,"info":"\"16-03-17\" at \"16:57\""},{"visible":true,"include":true,"step":"250","x":-212.95238095238096,"y":25.714285714285715,"z":87.14285714285714,"a95":2.5,"info":"\"16-03-17\" at \"20:13\""},{"visible":true,"include":false,"step":"280","x":-210.47619047619048,"y":5.142857142857143,"z":64.28571428571429,"a95":2.3,"info":"\"16-03-18\" at \"15:37\""},{"visible":true,"include":false,"step":"310","x":-206.66666666666666,"y":-9.142857142857142,"z":46.666666666666664,"a95":2.6,"info":"\"16-03-20\" at \"15:04\""},{"visible":true,"include":false,"step":"350","x":-192.0952380952381,"y":5.904761904761905,"z":50,"a95":2,"info":"\"16-04-18\" at \"10:50\""},{"visible":true,"include":false,"step":"380","x":-182.28571428571428,"y":2.9523809523809526,"z":27.333333333333332,"a95":2.2,"info":"\"16-04-18\" at \"13:42\""},{"visible":true,"include":false,"step":"410","x":-176.95238095238096,"y":0.9523809523809523,"z":44.857142857142854,"a95":2.2,"info":"\"16-04-19\" at \"09:28\""},{"visible":true,"include":false,"step":"430","x":-176.38095238095238,"y":-9.523809523809524,"z":29.428571428571427,"a95":1.9,"info":"\"16-04-19\" at \"12:49\""},{"visible":true,"include":false,"step":"450","x":-161.8095238095238,"y":16.666666666666668,"z":25.238095238095237,"a95":2.1,"info":"\"16-04-20\" at \"13:28\""},{"visible":true,"include":false,"step":"450","x":-174.85714285714286,"y":22.571428571428573,"z":38.95238095238095,"a95":2.3,"info":"\"16-04-21\" at \"10:33\""}]},{"version":"v1.1.0","exported":"2016-11-24T13:37:09.836Z","volume":10.5,"added":"2016-11-24T13:33:13.915Z","format":"Utrecht","demagType":"Unknown","strat":"1","patch":1.1,"GEO":[],"TECT":[],"interpreted":false,"name":"BR2.11B","coreAzi":6,"coreDip":24,"bedStrike":235,"bedDip":15,"data":[{"visible":true,"include":false,"step":"0.0","x":-1798.5714285714287,"y":1793.7142857142858,"z":-3561.904761904762,"a95":0.99,"info":"19/03/2016 at 05:25:47"},{"visible":true,"include":false,"step":"10.0","x":-1508.3809523809523,"y":1783.6190476190477,"z":-3779.6190476190477,"a95":0.99,"info":"19/03/2016 at 05:25:47"},{"visible":true,"include":false,"step":"15.0","x":-1372.857142857143,"y":1761.4285714285713,"z":-3869.904761904762,"a95":0.99,"info":"19/03/2016 at 05:25:47"},{"visible":true,"include":false,"step":"20.0","x":-1257.2380952380952,"y":1652.1904761904761,"z":-3637.1428571428573,"a95":0.99,"info":"19/03/2016 at 05:25:47"},{"visible":true,"include":false,"step":"23.0","x":-1200.095238095238,"y":1593.4285714285713,"z":-3452.190476190476,"a95":0.99,"info":"19/03/2016 at 05:25:47"},{"visible":true,"include":false,"step":"25.0","x":-1106.2857142857142,"y":1536.4761904761904,"z":-3266.285714285714,"a95":0.99,"info":"19/03/2016 at 05:25:47"},{"visible":true,"include":false,"step":"30.0","x":-959.2380952380952,"y":1156.6666666666667,"z":-2603.5238095238096,"a95":0.99,"info":"19/03/2016 at 05:25:47"},{"visible":true,"include":false,"step":"33.0","x":-912.3238095238095,"y":1152.857142857143,"z":-2307.809523809524,"a95":0.99,"info":"19/03/2016 at 05:25:47"},{"visible":true,"include":false,"step":"35.0","x":-857.6095238095238,"y":952.5714285714286,"z":-2106.7619047619046,"a95":0.99,"info":"19/03/2016 at 05:25:47"},{"visible":true,"include":false,"step":"40.0","x":-695.6571428571428,"y":765.2761904761904,"z":-1517.4285714285713,"a95":0.99,"info":"19/03/2016 at 05:25:47"},{"visible":true,"include":false,"step":"45.0","x":-590.0666666666666,"y":598.0190476190476,"z":-1083.904761904762,"a95":0.99,"info":"19/03/2016 at 05:25:47"},{"visible":true,"include":false,"step":"50.0","x":-488.68571428571425,"y":441.2666666666667,"z":-687.4380952380952,"a95":0.99,"info":"19/03/2016 at 05:25:47"},{"visible":true,"include":false,"step":"55.0","x":-416.49523809523805,"y":315.56190476190477,"z":-424.5238095238095,"a95":0.99,"info":"19/03/2016 at 05:25:47"},{"visible":true,"include":false,"step":"60.0","x":-150.0285714285714,"y":119.31428571428572,"z":-196.68571428571425,"a95":0.99,"info":"19/03/2016 at 05:25:47"},{"visible":true,"include":false,"step":"65.0","x":-237.58095238095237,"y":119.35238095238095,"z":-24.289523809523807,"a95":0.99,"info":"19/03/2016 at 05:25:47"},{"visible":true,"include":false,"step":"70.0","x":-344.62857142857143,"y":205.55238095238096,"z":-197.8857142857143,"a95":0.99,"info":"19/03/2016 at 05:25:47"},{"visible":true,"include":false,"step":"80.0","x":54.05238095238095,"y":100.11428571428571,"z":110.38095238095238,"a95":0.99,"info":"19/03/2016 at 05:25:47"}]},{"version":"v1.1.0","exported":"2016-11-24T13:37:09.836Z","volume":10.5,"added":"2016-11-24T13:33:13.919Z","format":"Utrecht","demagType":"Unknown","strat":null,"patch":1.1,"GEO":[],"TECT":[],"interpreted":false,"name":"BR2.13A","coreAzi":281,"coreDip":31,"bedStrike":235,"bedDip":15,"data":[{"visible":true,"include":false,"step":"20","x":-3066.4761904761904,"y":-17.714285714285715,"z":1424.1904761904761,"a95":1.7,"info":"\"16-03-14\" at \"12:13\""},{"visible":true,"include":true,"step":"100","x":-2729.809523809524,"y":-220.57142857142858,"z":1016.8571428571429,"a95":1.6,"info":"\"16-03-14\" at \"14:20\""},{"visible":true,"include":true,"step":"120","x":-2676.5714285714284,"y":-437.6190476190476,"z":1024.2857142857142,"a95":1.7,"info":"\"16-03-15\" at \"10:21\""},{"visible":true,"include":true,"step":"150","x":-2571.904761904762,"y":-476.85714285714283,"z":967.3333333333334,"a95":1.7,"info":"\"16-03-15\" at \"12:41\""},{"visible":true,"include":true,"step":"180","x":-2512.3809523809523,"y":-211.23809523809524,"z":923.3333333333334,"a95":1.7,"info":"\"16-03-16\" at \"13:47\""},{"visible":true,"include":true,"step":"210","x":-2345.1428571428573,"y":-434.2857142857143,"z":822.6666666666666,"a95":1.7,"info":"\"16-03-17\" at \"16:58\""},{"visible":true,"include":true,"step":"250","x":-2195.2380952380954,"y":-443.5238095238095,"z":771.6190476190476,"a95":1.7,"info":"\"16-03-17\" at \"20:15\""},{"visible":true,"include":true,"step":"280","x":-2140,"y":-498.95238095238096,"z":725.3333333333334,"a95":1.8,"info":"\"16-03-18\" at \"15:38\""},{"visible":true,"include":true,"step":"310","x":-2017.7142857142858,"y":-373.14285714285717,"z":667.8095238095239,"a95":1.8,"info":"\"16-03-20\" at \"15:05\""},{"visible":true,"include":true,"step":"350","x":-1897.904761904762,"y":-416.85714285714283,"z":598.3809523809524,"a95":2.6,"info":"\"16-04-18\" at \"10:54\""},{"visible":true,"include":true,"step":"380","x":-1807.904761904762,"y":-508.6666666666667,"z":573.7142857142857,"a95":1.9,"info":"\"16-04-18\" at \"13:44\""},{"visible":true,"include":false,"step":"410","x":-1770.7619047619048,"y":-448.6666666666667,"z":568.2857142857143,"a95":1.9,"info":"\"16-04-19\" at \"09:32\""},{"visible":true,"include":false,"step":"430","x":-1764.7619047619048,"y":-384.0952380952381,"z":497.7142857142857,"a95":2,"info":"\"16-04-19\" at \"12:51\""},{"visible":true,"include":false,"step":"450","x":-1696.857142857143,"y":-418.95238095238096,"z":471.6190476190476,"a95":2,"info":"\"16-04-20\" at \"13:30\""},{"visible":true,"include":false,"step":"450","x":-1710.857142857143,"y":-415.3333333333333,"z":503.23809523809524,"a95":1.9,"info":"\"16-04-21\" at \"10:35\""}]},{"version":"v1.1.0","exported":"2016-11-24T13:37:09.837Z","volume":10.5,"added":"2016-11-24T13:33:13.920Z","format":"Utrecht","demagType":"Unknown","strat":"1","patch":1.1,"GEO":[],"TECT":[],"interpreted":false,"name":"BR2.14B","coreAzi":295,"coreDip":20,"bedStrike":235,"bedDip":15,"data":[{"visible":true,"include":false,"step":"0.0","x":-667.0952380952381,"y":503.7714285714286,"z":391.7523809523809,"a95":0.99,"info":"19/03/2016 at 05:25:47"},{"visible":true,"include":false,"step":"10.0","x":-439.74285714285713,"y":282.02857142857147,"z":377.43809523809523,"a95":0.99,"info":"19/03/2016 at 05:25:47"},{"visible":true,"include":false,"step":"15.0","x":-352.6,"y":226.37142857142857,"z":322.50476190476195,"a95":0.99,"info":"19/03/2016 at 05:25:47"},{"visible":true,"include":false,"step":"20.0","x":-303.34285714285716,"y":206.04761904761904,"z":284.1333333333333,"a95":0.99,"info":"19/03/2016 at 05:25:47"},{"visible":true,"include":false,"step":"23.0","x":-272.752380952381,"y":206.21904761904764,"z":251.95238095238096,"a95":0.99,"info":"19/03/2016 at 05:25:47"},{"visible":true,"include":false,"step":"25.0","x":-265.9428571428572,"y":249.26666666666668,"z":191.16190476190476,"a95":0.99,"info":"19/03/2016 at 05:25:47"},{"visible":true,"include":false,"step":"30.0","x":-240.1904761904762,"y":170.83809523809524,"z":214.56190476190477,"a95":0.99,"info":"19/03/2016 at 05:25:47"},{"visible":true,"include":false,"step":"33.0","x":-231.59047619047618,"y":229.23809523809524,"z":170.8761904761905,"a95":0.99,"info":"19/03/2016 at 05:25:47"},{"visible":true,"include":false,"step":"35.0","x":-245.12380952380954,"y":220.74285714285716,"z":144.07619047619048,"a95":0.99,"info":"19/03/2016 at 05:25:47"},{"visible":true,"include":false,"step":"40.0","x":-207.53333333333333,"y":225.61904761904762,"z":143.31428571428572,"a95":0.99,"info":"19/03/2016 at 05:25:47"},{"visible":true,"include":false,"step":"45.0","x":-197.32380952380953,"y":225.45714285714288,"z":194.6952380952381,"a95":0.99,"info":"19/03/2016 at 05:25:47"},{"visible":true,"include":false,"step":"50.0","x":-182.2761904761905,"y":211.96190476190475,"z":170.7047619047619,"a95":0.99,"info":"19/03/2016 at 05:25:47"},{"visible":true,"include":false,"step":"55.0","x":-186.46666666666667,"y":230.8952380952381,"z":181.9904761904762,"a95":0.99,"info":"19/03/2016 at 05:25:47"},{"visible":true,"include":false,"step":"60.0","x":-165.74285714285713,"y":238.03809523809525,"z":122.75238095238096,"a95":0.99,"info":"19/03/2016 at 05:25:47"},{"visible":true,"include":false,"step":"65.0","x":-160.0952380952381,"y":222.14285714285714,"z":134.68571428571428,"a95":0.99,"info":"19/03/2016 at 05:25:47"},{"visible":true,"include":false,"step":"70.0","x":-173.0285714285714,"y":292.3809523809524,"z":141.26666666666665,"a95":0.99,"info":"19/03/2016 at 05:25:47"},{"visible":true,"include":false,"step":"80.0","x":-225.8,"y":338.43809523809523,"z":69.92190476190476,"a95":0.99,"info":"19/03/2016 at 05:25:47"}]},{"version":"v1.1.0","exported":"2016-11-24T13:37:09.837Z","volume":10.5,"added":"2016-11-24T13:33:13.920Z","format":"Utrecht","demagType":"Unknown","strat":null,"patch":1.1,"GEO":[{"dec":277.06596953460564,"inc":-7.53527146962502,"MAD":8.848075810543175,"cm":[-2.6645352591003757e-15,4.3298697960381105e-15,0],"intensity":322.51820838400585,"type":"GC","origin":false,"forced":true,"remark":"","nSteps":7,"minStep":"150","maxStep":"380","steps":["150","210","250","280","310","350","380"],"group":"None","version":"v1.1.0"}],"TECT":[{"dec":274.5438340720405,"inc":-17.372079605710994,"MAD":8.848075810543184,"cm":[-1.0436096431476471e-14,-2.2426505097428162e-14,-1.7763568394002505e-15],"intensity":322.5182083840058,"type":"GC","origin":false,"forced":true,"remark":"","nSteps":7,"minStep":"150","maxStep":"380","steps":["150","210","250","280","310","350","380"],"group":"None","version":"v1.1.0"}],"interpreted":true,"name":"BR2.15A","coreAzi":286,"coreDip":20,"bedStrike":235,"bedDip":15,"data":[{"visible":false,"include":false,"step":"20","x":-520.2857142857143,"y":453.3333333333333,"z":400.76190476190476,"a95":2.4,"info":"\"16-03-14\" at \"12:14\""},{"visible":true,"include":false,"step":"100","x":-340.0952380952381,"y":249.33333333333334,"z":178.76190476190476,"a95":3.1,"info":"\"16-03-14\" at \"14:21\""},{"visible":true,"include":false,"step":"120","x":-346.3809523809524,"y":215.14285714285714,"z":165.9047619047619,"a95":3,"info":"\"16-03-15\" at \"10:22\""},{"visible":true,"include":true,"step":"150","x":-234.47619047619048,"y":201.23809523809524,"z":161.42857142857142,"a95":3.4,"info":"\"16-03-15\" at \"12:42\""},{"visible":true,"include":false,"step":"180","x":-158.0952380952381,"y":170.1904761904762,"z":96.95238095238095,"a95":4.4,"info":"\"16-03-16\" at \"13:48\""},{"visible":true,"include":true,"step":"210","x":-51.142857142857146,"y":135.04761904761904,"z":44.857142857142854,"a95":5.7,"info":"\"16-03-17\" at \"16:59\""},{"visible":true,"include":true,"step":"250","x":-29.142857142857142,"y":112.95238095238095,"z":21.61904761904762,"a95":6.3,"info":"\"16-03-17\" at \"20:16\""},{"visible":true,"include":true,"step":"280","x":12.076190476190476,"y":81.60952380952381,"z":30.685714285714283,"a95":9.1,"info":"\"16-03-18\" at \"15:41\""},{"visible":true,"include":true,"step":"310","x":38.40952380952381,"y":76.53333333333333,"z":-15.866666666666665,"a95":8.5,"info":"\"16-03-20\" at \"15:07\""},{"visible":true,"include":true,"step":"350","x":60.58095238095238,"y":61.13333333333333,"z":-18.428571428571427,"a95":8.3,"info":"\"16-04-18\" at \"10:56\""},{"visible":true,"include":true,"step":"380","x":69.54285714285714,"y":39.542857142857144,"z":-24.17142857142857,"a95":8.1,"info":"\"16-04-18\" at \"13:46\""},{"visible":true,"include":false,"step":"410","x":95.33333333333333,"y":-5.523809523809524,"z":5.428571428571429,"a95":5.6,"info":"\"16-04-19\" at \"09:35\""},{"visible":true,"include":false,"step":"430","x":65.66666666666667,"y":-42.87619047619047,"z":-13.142857142857142,"a95":3.4,"info":"\"16-04-19\" at \"12:53\""},{"visible":true,"include":false,"step":"450","x":104.38095238095238,"y":-53.523809523809526,"z":-22.666666666666668,"a95":4.6,"info":"\"16-04-20\" at \"13:33\""},{"visible":true,"include":false,"step":"450","x":92.85714285714286,"y":-68.66666666666667,"z":2.5714285714285716,"a95":4.4,"info":"\"16-04-21\" at \"10:38\""}]}]
