# Supplementary material for: Paleomagnetic constraints on the timing and distribution of Cenozoic rotations in Central and Eastern Anatolia
Source: Copernicus journal article supplement (doi:10.5194/se-9-295-2018), 2018-03-21
Supplement: Supplementary file 2 [file se-9-295-2018-supplement.zip › se-2017-66_DATA_dir files/dir files Tauride basins/BR3.dir]

[{"version":"v1.1.0","exported":"2016-11-24T13:49:46.151Z","volume":10.5,"added":"2016-11-24T13:37:31.280Z","format":"Utrecht","demagType":"Unknown","strat":"1","patch":1.1,"GEO":[{"dec":159.83843084809075,"inc":-65.13880698166653,"MAD":7.363152701767327,"cm":[-4.440892098500626e-15,3.1086244689504383e-15,0],"intensity":430.87974667140014,"type":"dir","forced":true,"remark":"","origin":false,"nSteps":11,"minStep":"20.0","maxStep":"60.0","steps":["20.0","23.0","25.0","30.0","33.0","35.0","40.0","45.0","50.0","55.0","60.0"],"group":"None","version":"v1.1.0"}],"TECT":[{"dec":159.90014014747908,"inc":-47.13885049065555,"MAD":7.3631527017673015,"cm":[3.1086244689504383e-15,9.325873406851315e-15,-8.881784197001252e-16],"intensity":430.8797466714001,"type":"dir","forced":true,"remark":"","origin":false,"nSteps":11,"minStep":"20.0","maxStep":"60.0","steps":["20.0","23.0","25.0","30.0","33.0","35.0","40.0","45.0","50.0","55.0","60.0"],"group":"None","version":"v1.1.0"}],"interpreted":true,"name":"BR3.01B","coreAzi":360,"coreDip":17,"bedStrike":250,"bedDip":18,"data":[{"visible":true,"include":false,"step":"0.0","x":164.0095238095238,"y":72.11428571428571,"z":-214.9809523809524,"a95":0.99,"info":"19/03/2016 at 05:25:47"},{"visible":true,"include":false,"step":"10.0","x":236.39999999999998,"y":63.266666666666666,"z":-225.0095238095238,"a95":0.99,"info":"19/03/2016 at 05:25:47"},{"visible":true,"include":false,"step":"15.0","x":254.28571428571428,"y":46.96857142857143,"z":-180.5047619047619,"a95":0.99,"info":"19/03/2016 at 05:25:47"},{"visible":true,"include":true,"step":"20.0","x":234.71428571428572,"y":46.2552380952381,"z":-180.2761904761905,"a95":0.99,"info":"19/03/2016 at 05:25:47"},{"visible":true,"include":true,"step":"23.0","x":185.78095238095239,"y":6.288285714285714,"z":-158.41904761904763,"a95":0.99,"info":"19/03/2016 at 05:25:47"},{"visible":true,"include":true,"step":"25.0","x":175.2095238095238,"y":42.53047619047619,"z":-150.46666666666667,"a95":0.99,"info":"19/03/2016 at 05:25:47"},{"visible":true,"include":true,"step":"30.0","x":171.43809523809523,"y":23.632380952380952,"z":-150.1047619047619,"a95":0.99,"info":"19/03/2016 at 05:25:47"},{"visible":true,"include":true,"step":"33.0","x":180.51428571428573,"y":52.488571428571426,"z":-125.08571428571429,"a95":0.99,"info":"19/03/2016 at 05:25:47"},{"visible":true,"include":true,"step":"35.0","x":139.66666666666666,"y":29.313333333333336,"z":-121.45714285714286,"a95":0.99,"info":"19/03/2016 at 05:25:47"},{"visible":true,"include":true,"step":"40.0","x":143.48571428571427,"y":-6.1921904761904765,"z":-141.3047619047619,"a95":0.99,"info":"19/03/2016 at 05:25:47"},{"visible":true,"include":true,"step":"45.0","x":118.63809523809525,"y":40.34857142857143,"z":-118.94285714285715,"a95":0.99,"info":"19/03/2016 at 05:25:47"},{"visible":true,"include":true,"step":"50.0","x":78.92857142857143,"y":34.586666666666666,"z":-105.23809523809524,"a95":0.99,"info":"19/03/2016 at 05:25:47"},{"visible":true,"include":true,"step":"55.0","x":102.63809523809525,"y":1.064,"z":-68.8742857142857,"a95":0.99,"info":"19/03/2016 at 05:25:47"},{"visible":true,"include":true,"step":"60.0","x":85.41428571428571,"y":62.28857142857142,"z":-86.91904761904762,"a95":0.99,"info":"19/03/2016 at 05:25:47"},{"visible":true,"include":false,"step":"65.0","x":58.99619047619048,"y":30.315238095238094,"z":-40.565714285714286,"a95":0.99,"info":"19/03/2016 at 05:25:47"},{"visible":true,"include":false,"step":"70.0","x":92.99142857142857,"y":34.24190476190476,"z":-32.91619047619048,"a95":0.99,"info":"19/03/2016 at 05:25:47"},{"visible":true,"include":false,"step":"80.0","x":63.86190476190476,"y":18.792380952380952,"z":-18.907619047619047,"a95":0.99,"info":"19/03/2016 at 05:25:47"}]},{"version":"v1.1.0","exported":"2016-11-24T13:49:46.151Z","volume":10.5,"added":"2016-11-24T13:37:31.281Z","format":"Utrecht","demagType":"Unknown","strat":"1","patch":1.1,"GEO":[{"dec":168.6326166123962,"inc":-55.23701492557565,"MAD":4.634874754287408,"cm":[-1.7763568394002505e-15,1.1754486273218845e-14,0],"intensity":489.3910544502871,"type":"dir","forced":true,"remark":"","origin":false,"nSteps":6,"minStep":"10.0","maxStep":"30.0","steps":["10.0","15.0","20.0","23.0","25.0","30.0"],"group":"None","version":"v1.1.0"}],"TECT":[{"dec":166.1829698247965,"inc":-37.38080636279616,"MAD":4.634874754287408,"cm":[-7.105427357601002e-15,-2.6867397195928788e-14,1.7763568394002505e-15],"intensity":489.3910544502871,"type":"dir","forced":true,"remark":"","origin":false,"nSteps":6,"minStep":"10.0","maxStep":"30.0","steps":["10.0","15.0","20.0","23.0","25.0","30.0"],"group":"None","version":"v1.1.0"}],"interpreted":true,"name":"BR3.03B","coreAzi":350,"coreDip":9,"bedStrike":250,"bedDip":18,"data":[{"visible":true,"include":false,"step":"0.0","x":152.86666666666665,"y":21.633333333333333,"z":-177.15238095238095,"a95":0.99,"info":"19/03/2016 at 05:25:47"},{"visible":true,"include":true,"step":"10.0","x":201.0761904761905,"y":17.81142857142857,"z":-206.9904761904762,"a95":0.99,"info":"19/03/2016 at 05:25:47"},{"visible":true,"include":true,"step":"15.0","x":185.48571428571427,"y":-3.0018095238095235,"z":-172.04761904761904,"a95":0.99,"info":"19/03/2016 at 05:25:47"},{"visible":true,"include":true,"step":"20.0","x":159.88571428571427,"y":-15.283809523809524,"z":-138.14285714285714,"a95":0.99,"info":"19/03/2016 at 05:25:47"},{"visible":true,"include":true,"step":"23.0","x":169.0095238095238,"y":21.53904761904762,"z":-143.46666666666667,"a95":0.99,"info":"19/03/2016 at 05:25:47"},{"visible":true,"include":true,"step":"25.0","x":135.40952380952382,"y":12.754285714285713,"z":-139.1238095238095,"a95":0.99,"info":"19/03/2016 at 05:25:47"},{"visible":true,"include":true,"step":"30.0","x":138.3904761904762,"y":-20.337142857142858,"z":-145.51428571428573,"a95":0.99,"info":"19/03/2016 at 05:25:47"},{"visible":true,"include":false,"step":"33.0","x":104.88571428571429,"y":-29.76380952380952,"z":-99.96190476190475,"a95":0.99,"info":"19/03/2016 at 05:25:47"},{"visible":true,"include":false,"step":"35.0","x":115.37142857142858,"y":-79.88380952380952,"z":-81.60666666666667,"a95":0.99,"info":"19/03/2016 at 05:25:47"},{"visible":true,"include":false,"step":"40.0","x":118.55238095238094,"y":-84.69428571428571,"z":-54.53619047619048,"a95":0.99,"info":"19/03/2016 at 05:25:47"},{"visible":true,"include":false,"step":"45.0","x":107.92380952380952,"y":-99.45714285714286,"z":-71.46666666666667,"a95":0.99,"info":"19/03/2016 at 05:25:47"},{"visible":true,"include":false,"step":"50.0","x":125.23809523809524,"y":-126.88571428571429,"z":-61.06952380952381,"a95":0.99,"info":"19/03/2016 at 05:25:47"},{"visible":true,"include":false,"step":"55.0","x":124.21904761904761,"y":-118.61904761904762,"z":-53.605714285714285,"a95":0.99,"info":"19/03/2016 at 05:25:47"},{"visible":true,"include":false,"step":"60.0","x":122.19999999999999,"y":-74.86285714285714,"z":-60.87619047619048,"a95":0.99,"info":"19/03/2016 at 05:25:47"},{"visible":true,"include":false,"step":"65.0","x":110.98095238095237,"y":-109.17142857142856,"z":-20.234285714285715,"a95":0.99,"info":"19/03/2016 at 05:25:47"},{"visible":true,"include":false,"step":"70.0","x":141.66666666666666,"y":-127.11428571428571,"z":-27.514285714285712,"a95":0.99,"info":"19/03/2016 at 05:25:47"},{"visible":true,"include":false,"step":"80.0","x":111.24761904761904,"y":-132.9714285714286,"z":-25.80857142857143,"a95":0.99,"info":"19/03/2016 at 05:25:47"}]},{"version":"v1.1.0","exported":"2016-11-24T13:49:46.151Z","volume":10.5,"added":"2016-11-24T13:37:31.282Z","format":"Utrecht","demagType":"Unknown","strat":null,"patch":1.1,"GEO":[{"dec":144.3479085186471,"inc":-65.23669504198793,"MAD":4.879560924783225,"cm":[5.10702591327572e-15,6.217248937900877e-15,0],"intensity":448.25544426215026,"type":"dir","forced":true,"remark":"","origin":false,"nSteps":4,"minStep":"100","maxStep":"180","steps":["100","120","150","180"],"group":"None","version":"v1.1.0"}],"TECT":[{"dec":150.34394261081377,"inc":-47.64330085941058,"MAD":4.879560924783238,"cm":[-3.552713678800501e-14,-4.263256414560601e-14,0],"intensity":448.2554442621502,"type":"dir","forced":true,"remark":"","origin":false,"nSteps":4,"minStep":"100","maxStep":"180","steps":["100","120","150","180"],"group":"None","version":"v1.1.0"}],"interpreted":true,"name":"BR3.05A","coreAzi":360,"coreDip":8,"bedStrike":250,"bedDip":18,"data":[{"visible":true,"include":false,"step":"20","x":387.3333333333333,"y":72.76190476190476,"z":-182.57142857142858,"a95":1.7,"info":"\"16-03-14\" at \"12:15\""},{"visible":true,"include":true,"step":"100","x":262.6666666666667,"y":74.57142857142857,"z":-163.33333333333334,"a95":1.5,"info":"\"16-03-14\" at \"14:22\""},{"visible":true,"include":true,"step":"120","x":285.14285714285717,"y":69.80952380952381,"z":-143.9047619047619,"a95":1.8,"info":"\"16-03-15\" at \"10:24\""},{"visible":true,"include":true,"step":"150","x":154.85714285714286,"y":54.476190476190474,"z":-91.80952380952381,"a95":2.4,"info":"\"16-03-15\" at \"12:43\""},{"visible":true,"include":true,"step":"180","x":120.19047619047619,"y":51.523809523809526,"z":-32.76190476190476,"a95":1.5,"info":"\"16-03-16\" at \"13:49\""},{"visible":true,"include":false,"step":"210","x":39.38095238095238,"y":58.11428571428572,"z":-4.180952380952381,"a95":1.9,"info":"\"16-03-17\" at \"17:01\""},{"visible":true,"include":false,"step":"250","x":24.333333333333332,"y":17.523809523809526,"z":10.647619047619047,"a95":3.8,"info":"\"16-03-17\" at \"20:17\""},{"visible":true,"include":false,"step":"280","x":15.2,"y":2.1904761904761907,"z":28.123809523809523,"a95":3.6,"info":"\"16-03-18\" at \"15:42\""},{"visible":true,"include":false,"step":"310","x":-9.095238095238095,"y":6.828571428571429,"z":10.22857142857143,"a95":6.2,"info":"\"16-03-20\" at \"15:08\""},{"visible":true,"include":false,"step":"350","x":-13.504761904761907,"y":-0.8857142857142858,"z":-1.019047619047619,"a95":7.7,"info":"\"16-04-18\" at \"10:58\""},{"visible":true,"include":false,"step":"380","x":22.142857142857142,"y":20.876190476190477,"z":-2.276190476190476,"a95":3.6,"info":"\"16-04-18\" at \"13:48\""},{"visible":true,"include":false,"step":"410","x":13.428571428571429,"y":-9.17142857142857,"z":24.54285714285714,"a95":4.6,"info":"\"16-04-19\" at \"09:38\""},{"visible":true,"include":false,"step":"430","x":18.2,"y":2.4857142857142858,"z":-12.923809523809522,"a95":18,"info":"\"16-04-19\" at \"12:55\""},{"visible":true,"include":false,"step":"450","x":4.247619047619048,"y":-24.142857142857142,"z":-49.38095238095238,"a95":3.2,"info":"\"16-04-20\" at \"13:37\""}]},{"version":"v1.1.0","exported":"2016-11-24T13:49:46.151Z","volume":10.5,"added":"2016-11-24T13:37:31.282Z","format":"Utrecht","demagType":"Unknown","strat":"1","patch":1.1,"GEO":[{"dec":158.91167381657954,"inc":-55.926512969311496,"MAD":6.769289377046144,"cm":[0,-3.552713678800501e-15,0],"intensity":289.22599879373104,"type":"dir","forced":true,"remark":"","origin":false,"nSteps":10,"minStep":"10.0","maxStep":"50.0","steps":["10.0","15.0","20.0","23.0","30.0","33.0","35.0","40.0","45.0","50.0"],"group":"None","version":"v1.1.0"}],"TECT":[{"dec":159.22700069536654,"inc":-37.92878158588358,"MAD":6.7692893770462375,"cm":[-3.9968028886505635e-15,-9.769962616701378e-15,8.881784197001252e-16],"intensity":289.2259987937311,"type":"dir","forced":true,"remark":"","origin":false,"nSteps":10,"minStep":"10.0","maxStep":"50.0","steps":["10.0","15.0","20.0","23.0","30.0","33.0","35.0","40.0","45.0","50.0"],"group":"None","version":"v1.1.0"}],"interpreted":true,"name":"BR3.07B","coreAzi":15,"coreDip":24,"bedStrike":250,"bedDip":18,"data":[{"visible":true,"include":false,"step":"0.0","x":60.42952380952381,"y":41.13047619047619,"z":-104.03809523809525,"a95":0.99,"info":"19/03/2016 at 05:25:47"},{"visible":true,"include":true,"step":"10.0","x":111.26666666666667,"y":77.32285714285715,"z":-152.42857142857142,"a95":0.99,"info":"19/03/2016 at 05:25:47"},{"visible":true,"include":true,"step":"15.0","x":97.61904761904762,"y":65.13714285714286,"z":-143.58095238095237,"a95":0.99,"info":"19/03/2016 at 05:25:47"},{"visible":true,"include":true,"step":"20.0","x":81.7247619047619,"y":57.40380952380953,"z":-135.07619047619048,"a95":0.99,"info":"19/03/2016 at 05:25:47"},{"visible":true,"include":true,"step":"23.0","x":74.89809523809524,"y":49.75238095238095,"z":-120.35238095238095,"a95":0.99,"info":"19/03/2016 at 05:25:47"},{"visible":false,"include":false,"step":"25.0","x":69.83333333333333,"y":31.855238095238096,"z":-132.5047619047619,"a95":0.99,"info":"19/03/2016 at 05:25:47"},{"visible":true,"include":true,"step":"30.0","x":81.9857142857143,"y":31.893333333333334,"z":-80.26190476190476,"a95":0.99,"info":"19/03/2016 at 05:25:47"},{"visible":true,"include":true,"step":"33.0","x":82.6,"y":32.33047619047619,"z":-69.51333333333334,"a95":0.99,"info":"19/03/2016 at 05:25:47"},{"visible":true,"include":true,"step":"35.0","x":70.51904761904763,"y":19.31904761904762,"z":-68.10857142857142,"a95":0.99,"info":"19/03/2016 at 05:25:47"},{"visible":true,"include":true,"step":"40.0","x":62.94,"y":21.698095238095238,"z":-68.41904761904762,"a95":0.99,"info":"19/03/2016 at 05:25:47"},{"visible":true,"include":true,"step":"45.0","x":53.034285714285716,"y":44.52761904761905,"z":-78.87333333333333,"a95":0.99,"info":"19/03/2016 at 05:25:47"},{"visible":true,"include":true,"step":"50.0","x":62.42666666666667,"y":18.02190476190476,"z":-58.264761904761905,"a95":0.99,"info":"19/03/2016 at 05:25:47"},{"visible":true,"include":false,"step":"55.0","x":58.64190476190476,"y":55.03333333333334,"z":-66.56285714285714,"a95":0.99,"info":"19/03/2016 at 05:25:47"},{"visible":false,"include":false,"step":"60.0","x":43.31142857142857,"y":40.99047619047619,"z":-47.639047619047616,"a95":0.99,"info":"19/03/2016 at 05:25:47"},{"visible":false,"include":false,"step":"65.0","x":41.31809523809524,"y":22.00190476190476,"z":-44.44285714285714,"a95":0.99,"info":"19/03/2016 at 05:25:47"},{"visible":false,"include":false,"step":"70.0","x":37.77333333333333,"y":61.0295238095238,"z":-56.58857142857143,"a95":0.99,"info":"19/03/2016 at 05:25:47"},{"visible":false,"include":false,"step":"80.0","x":34.51238095238095,"y":76.63619047619048,"z":-60.9352380952381,"a95":0.99,"info":"19/03/2016 at 05:25:47"}]},{"version":"v1.1.0","exported":"2016-11-24T13:49:46.151Z","volume":10.5,"added":"2016-11-24T13:37:31.283Z","format":"Utrecht","demagType":"Unknown","strat":null,"patch":1.1,"GEO":[{"dec":160.7821504607649,"inc":-59.752224175264985,"MAD":5.172788202577298,"cm":[-21.06848115384842,53.406444303204296,-172.90912595257026],"intensity":284.7077913228039,"type":"dir","forced":false,"remark":"","origin":false,"nSteps":7,"minStep":"100","maxStep":"280","steps":["100","120","150","180","210","250","280"],"group":"None","version":"v1.1.0"}],"TECT":[{"dec":164.17549811823574,"inc":-45.97934166758153,"MAD":5.172788202577303,"cm":[-61.77876492825865,58.40503862067786,-161.1394759100923],"intensity":284.707791322804,"type":"dir","forced":false,"remark":"","origin":false,"nSteps":7,"minStep":"100","maxStep":"280","steps":["100","120","150","180","210","250","280"],"group":"None","version":"v1.1.0"}],"interpreted":true,"name":"BR3.08A","coreAzi":5,"coreDip":12,"bedStrike":263,"bedDip":14,"data":[{"visible":true,"include":false,"step":"20","x":297.7142857142857,"y":67.52380952380952,"z":-208.57142857142858,"a95":1.9,"info":"\"16-03-14\" at \"12:17\""},{"visible":true,"include":true,"step":"100","x":286.2857142857143,"y":87.14285714285714,"z":-150.85714285714286,"a95":1.5,"info":"\"16-03-14\" at \"14:23\""},{"visible":true,"include":true,"step":"120","x":294.3809523809524,"y":99.04761904761905,"z":-156.57142857142858,"a95":1.7,"info":"\"16-03-15\" at \"10:26\""},{"visible":true,"include":true,"step":"150","x":210.95238095238096,"y":58.76190476190476,"z":-87.33333333333333,"a95":1.6,"info":"\"16-03-15\" at \"12:44\""},{"visible":true,"include":true,"step":"180","x":130.76190476190476,"y":44.476190476190474,"z":-46.476190476190474,"a95":1.5,"info":"\"16-03-16\" at \"13:50\""},{"visible":true,"include":true,"step":"210","x":104.28571428571429,"y":31.428571428571427,"z":2.761904761904762,"a95":1.9,"info":"\"16-03-17\" at \"17:02\""},{"visible":true,"include":true,"step":"250","x":54.409523809523805,"y":37.78095238095238,"z":40.21904761904762,"a95":3.6,"info":"\"16-03-17\" at \"20:20\""},{"visible":true,"include":true,"step":"280","x":79.06666666666668,"y":26.638095238095236,"z":34.77142857142857,"a95":2.5,"info":"\"16-03-18\" at \"15:43\""},{"visible":true,"include":false,"step":"310","x":64.28571428571429,"y":31.24761904761905,"z":4.257142857142857,"a95":2.5,"info":"\"16-03-20\" at \"15:09\""},{"visible":true,"include":false,"step":"350","x":42.076190476190476,"y":31.723809523809525,"z":-18.095238095238095,"a95":2.8,"info":"\"16-04-18\" at \"11:01\""},{"visible":true,"include":false,"step":"380","x":34.25714285714285,"y":50.06666666666667,"z":-33.86666666666667,"a95":2,"info":"\"16-04-18\" at \"13:51\""},{"visible":true,"include":false,"step":"410","x":25.19047619047619,"y":15.438095238095238,"z":1.0666666666666667,"a95":5.9,"info":"\"16-04-19\" at \"09:40\""},{"visible":true,"include":false,"step":"430","x":50.400000000000006,"y":26.047619047619047,"z":7.495238095238095,"a95":7.7,"info":"\"16-04-19\" at \"12:58\""},{"visible":true,"include":false,"step":"450","x":56.92380952380953,"y":-24.257142857142856,"z":-2.3904761904761904,"a95":2.3,"info":"\"16-04-20\" at \"13:39\""}]},{"version":"v1.1.0","exported":"2016-11-24T13:49:46.151Z","volume":10.5,"added":"2016-11-24T13:37:31.284Z","format":"Utrecht","demagType":"Unknown","strat":null,"patch":1.1,"GEO":[{"dec":158.1433073150058,"inc":-54.34105534070789,"MAD":5.085136093334274,"cm":[-233.5065124783606,191.66400726764,-444.15891589822445],"intensity":763.1381980329986,"type":"dir","forced":false,"remark":"","origin":false,"nSteps":5,"minStep":"100","maxStep":"210","steps":["100","120","150","180","210"],"group":"None","version":"v1.1.0"}],"TECT":[{"dec":161.62982225820576,"inc":-40.69639747987319,"MAD":5.0851360933342535,"cm":[-332.635565618796,203.83552453020917,-369.2454265776908],"intensity":763.1381980329985,"type":"dir","forced":false,"remark":"","origin":false,"nSteps":5,"minStep":"100","maxStep":"210","steps":["100","120","150","180","210"],"group":"None","version":"v1.1.0"}],"interpreted":true,"name":"BR3.10A","coreAzi":4,"coreDip":19,"bedStrike":263,"bedDip":14,"data":[{"visible":true,"include":false,"step":"20","x":593.9047619047619,"y":257.5238095238095,"z":-699.3333333333334,"a95":2.3,"info":"\"16-03-14\" at \"12:19\""},{"visible":true,"include":true,"step":"100","x":547.1428571428571,"y":275.23809523809524,"z":-631.3333333333334,"a95":2.1,"info":"\"16-03-14\" at \"14:25\""},{"visible":true,"include":true,"step":"120","x":481.42857142857144,"y":293.14285714285717,"z":-507.04761904761904,"a95":2.2,"info":"\"16-03-15\" at \"10:27\""},{"visible":true,"include":true,"step":"150","x":396.0952380952381,"y":229.04761904761904,"z":-394,"a95":2.1,"info":"\"16-03-15\" at \"12:45\""},{"visible":true,"include":true,"step":"180","x":226.85714285714286,"y":123.80952380952381,"z":-188,"a95":2.1,"info":"\"16-03-16\" at \"13:52\""},{"visible":true,"include":true,"step":"210","x":90.85714285714286,"y":116.19047619047619,"z":-40.666666666666664,"a95":1.9,"info":"\"16-03-17\" at \"17:03\""},{"visible":true,"include":false,"step":"250","x":-34.476190476190474,"y":84.28571428571429,"z":41.42857142857143,"a95":2.4,"info":"\"16-03-17\" at \"20:21\""},{"visible":true,"include":false,"step":"280","x":-44.476190476190474,"y":73.42857142857143,"z":55.142857142857146,"a95":3.6,"info":"\"16-03-18\" at \"15:44\""},{"visible":true,"include":false,"step":"310","x":-49.75238095238095,"y":60.76190476190476,"z":39.27619047619047,"a95":2.6,"info":"\"16-03-20\" at \"15:10\""},{"visible":true,"include":false,"step":"350","x":-54.92380952380953,"y":14.695238095238096,"z":67.24761904761905,"a95":3.1,"info":"\"16-04-18\" at \"11:03\""},{"visible":true,"include":false,"step":"380","x":-84.85714285714286,"y":61.04761904761905,"z":46.476190476190474,"a95":2.3,"info":"\"16-04-18\" at \"13:53\""},{"visible":true,"include":false,"step":"410","x":-54.95238095238095,"y":22.285714285714285,"z":108.19047619047619,"a95":2.8,"info":"\"16-04-19\" at \"09:43\""},{"visible":true,"include":false,"step":"430","x":-22.40952380952381,"y":-10.8,"z":-15.390476190476189,"a95":7.2,"info":"\"16-04-19\" at \"13:00\""},{"visible":true,"include":false,"step":"450","x":-20.58095238095238,"y":-9.361904761904762,"z":31.390476190476193,"a95":4.2,"info":"\"16-04-20\" at \"13:42\""}]},{"version":"v1.1.0","exported":"2016-11-24T13:49:46.151Z","volume":10.5,"added":"2016-11-24T13:37:31.285Z","format":"Utrecht","demagType":"Unknown","strat":null,"patch":1.1,"GEO":[{"dec":156.98967899991453,"inc":-51.76601666893004,"MAD":3.5604860582853948,"cm":[3.8191672047105385e-14,1.0302869668521453e-13,0],"intensity":1157.5740820241915,"type":"dir","forced":true,"remark":"","origin":false,"nSteps":5,"minStep":"100","maxStep":"250","steps":["100","120","150","180","250"],"group":"None","version":"v1.1.0"}],"TECT":[{"dec":160.4571544472816,"inc":-38.18813141069437,"MAD":3.5604860582854703,"cm":[2.3092638912203256e-14,8.08242361927114e-14,2.220446049250313e-15],"intensity":1157.5740820241915,"type":"dir","forced":true,"remark":"","origin":false,"nSteps":5,"minStep":"100","maxStep":"250","steps":["100","120","150","180","250"],"group":"None","version":"v1.1.0"}],"interpreted":true,"name":"BR3.11A","coreAzi":7,"coreDip":10,"bedStrike":263,"bedDip":14,"data":[{"visible":true,"include":false,"step":"20","x":859.2380952380952,"y":440.2857142857143,"z":-987.047619047619,"a95":2.2,"info":"\"16-03-14\" at \"12:20\""},{"visible":true,"include":true,"step":"100","x":751.5238095238095,"y":318.4761904761905,"z":-757.9047619047619,"a95":1.7,"info":"\"16-03-14\" at \"14:26\""},{"visible":true,"include":true,"step":"120","x":611.8095238095239,"y":298,"z":-541.8095238095239,"a95":1.9,"info":"\"16-03-15\" at \"10:28\""},{"visible":true,"include":true,"step":"150","x":464.76190476190476,"y":210.76190476190476,"z":-462.4761904761905,"a95":1.9,"info":"\"16-03-15\" at \"12:46\""},{"visible":true,"include":true,"step":"180","x":218.28571428571428,"y":116,"z":-249.9047619047619,"a95":1.7,"info":"\"16-03-16\" at \"13:53\""},{"visible":false,"include":false,"step":"210","x":-81.42857142857143,"y":-120.76190476190476,"z":148.76190476190476,"a95":2.6,"info":"\"16-03-17\" at \"17:04\""},{"visible":true,"include":true,"step":"250","x":-7.742857142857143,"y":78.47619047619048,"z":-35.31428571428572,"a95":2.5,"info":"\"16-03-17\" at \"20:23\""},{"visible":true,"include":false,"step":"280","x":-35.04761904761905,"y":63.333333333333336,"z":63.333333333333336,"a95":3.9,"info":"\"16-03-18\" at \"15:45\""},{"visible":true,"include":false,"step":"310","x":-31.514285714285712,"y":-11.895238095238096,"z":47.666666666666664,"a95":5.4,"info":"\"16-03-20\" at \"15:11\""},{"visible":true,"include":false,"step":"350","x":-66.41904761904762,"y":44.61904761904762,"z":49.95238095238095,"a95":3.2,"info":"\"16-04-18\" at \"11:05\""},{"visible":true,"include":false,"step":"380","x":-20.73333333333333,"y":18.02857142857143,"z":45.80952380952381,"a95":4.5,"info":"\"16-04-18\" at \"13:56\""},{"visible":true,"include":false,"step":"410","x":-68.92380952380952,"y":-27.495238095238093,"z":36.733333333333334,"a95":4.8,"info":"\"16-04-19\" at \"09:45\""},{"visible":true,"include":false,"step":"430","x":-92.0952380952381,"y":34.19047619047619,"z":-63.04761904761905,"a95":3.8,"info":"\"16-04-19\" at \"13:02\""},{"visible":true,"include":false,"step":"450","x":-76.85714285714286,"y":-19.904761904761905,"z":84.85714285714286,"a95":3.1,"info":"\"16-04-20\" at \"13:44\""}]},{"version":"v1.1.0","exported":"2016-11-24T13:49:46.151Z","volume":10.5,"added":"2016-11-24T13:37:31.290Z","format":"Utrecht","demagType":"Unknown","strat":"1","patch":1.1,"GEO":[{"dec":171.01663624751063,"inc":-56.11660561220421,"MAD":5.719985736343758,"cm":[5.329070518200751e-15,1.815214645262131e-14,0],"intensity":412.81586974452085,"type":"dir","forced":true,"remark":"","origin":false,"nSteps":10,"minStep":"15.0","maxStep":"55.0","steps":["15.0","20.0","23.0","25.0","30.0","33.0","35.0","45.0","50.0","55.0"],"group":"None","version":"v1.1.0"}],"TECT":[{"dec":171.50933585751636,"inc":-42.12284695032815,"MAD":5.719985736343712,"cm":[3.552713678800501e-15,1.3711254354120683e-14,8.881784197001252e-16],"intensity":412.8158697445208,"type":"dir","forced":true,"remark":"","origin":false,"nSteps":10,"minStep":"15.0","maxStep":"55.0","steps":["15.0","20.0","23.0","25.0","30.0","33.0","35.0","45.0","50.0","55.0"],"group":"None","version":"v1.1.0"}],"interpreted":true,"name":"BR3.12B","coreAzi":6,"coreDip":5,"bedStrike":263,"bedDip":14,"data":[{"visible":true,"include":false,"step":"0.0","x":166.54285714285714,"y":77.76761904761904,"z":-130.35238095238097,"a95":0.99,"info":"19/03/2016 at 10:54:15"},{"visible":true,"include":false,"step":"10.0","x":196.60000000000002,"y":70.41142857142857,"z":-186.56190476190477,"a95":0.99,"info":"19/03/2016 at 10:54:15"},{"visible":true,"include":true,"step":"15.0","x":222.12380952380954,"y":40.88666666666667,"z":-166.96190476190475,"a95":0.99,"info":"19/03/2016 at 10:54:15"},{"visible":true,"include":true,"step":"20.0","x":203.12380952380954,"y":58.488571428571426,"z":-164.51428571428573,"a95":0.99,"info":"19/03/2016 at 10:54:15"},{"visible":true,"include":true,"step":"23.0","x":171.63809523809525,"y":53.892380952380954,"z":-135.71428571428572,"a95":0.99,"info":"19/03/2016 at 10:54:15"},{"visible":true,"include":true,"step":"25.0","x":179.06666666666666,"y":21.915238095238095,"z":-141.93333333333334,"a95":0.99,"info":"19/03/2016 at 10:54:15"},{"visible":true,"include":true,"step":"30.0","x":166.0857142857143,"y":8.243333333333334,"z":-132.6095238095238,"a95":0.99,"info":"19/03/2016 at 10:54:15"},{"visible":true,"include":true,"step":"33.0","x":121.97142857142858,"y":10.083809523809524,"z":-105.18095238095239,"a95":0.99,"info":"19/03/2016 at 10:54:15"},{"visible":true,"include":true,"step":"35.0","x":135.51428571428573,"y":16.557142857142857,"z":-74.89238095238095,"a95":0.99,"info":"19/03/2016 at 10:54:15"},{"visible":false,"include":false,"step":"40.0","x":142.37142857142857,"y":44.894285714285715,"z":-124.32380952380953,"a95":0.99,"info":"19/03/2016 at 10:54:15"},{"visible":true,"include":true,"step":"45.0","x":121.31428571428572,"y":6.886,"z":-74.53238095238096,"a95":0.99,"info":"19/03/2016 at 10:54:15"},{"visible":true,"include":true,"step":"50.0","x":75.76857142857143,"y":36.107619047619046,"z":-64.44571428571427,"a95":0.99,"info":"19/03/2016 at 10:54:15"},{"visible":true,"include":true,"step":"55.0","x":87.7352380952381,"y":16.1,"z":-99.79047619047618,"a95":0.99,"info":"19/03/2016 at 10:54:15"},{"visible":false,"include":false,"step":"60.0","x":82.74952380952381,"y":18.087619047619047,"z":-18.00190476190476,"a95":0.99,"info":"19/03/2016 at 10:54:15"},{"visible":false,"include":false,"step":"65.0","x":11.443809523809524,"y":32.026666666666664,"z":-69.51904761904763,"a95":0.99,"info":"19/03/2016 at 10:54:15"},{"visible":false,"include":false,"step":"70.0","x":41.74285714285715,"y":84.68761904761905,"z":-47.09047619047619,"a95":0.99,"info":"19/03/2016 at 10:54:15"},{"visible":false,"include":false,"step":"80.0","x":-54.04761904761905,"y":48.50380952380952,"z":-5.48847619047619,"a95":0.99,"info":"19/03/2016 at 10:54:15"}]},{"version":"v1.1.0","exported":"2016-11-24T13:49:46.152Z","volume":10.5,"added":"2016-11-24T13:37:31.291Z","format":"Utrecht","demagType":"Unknown","strat":"1","patch":1.1,"GEO":[{"dec":108.8911145121458,"inc":-33.25964419238353,"MAD":11.259499078630613,"cm":[-6.217248937900877e-15,-1.7763568394002505e-15,0],"intensity":239.9538560496717,"type":"dir","forced":true,"remark":"","origin":false,"nSteps":8,"minStep":"23.0","maxStep":"50.0","steps":["23.0","25.0","30.0","33.0","35.0","40.0","45.0","50.0"],"group":"None","version":"v1.1.0"},{"dec":342.2388259861949,"inc":-33.54831102483527,"MAD":2.101520339862512,"cm":[-1.687538997430238e-14,8.881784197001252e-16,0],"intensity":265.89909872704504,"type":"GC","origin":false,"forced":true,"remark":"","nSteps":6,"minStep":"0.0","maxStep":"25.0","steps":["0.0","10.0","15.0","20.0","23.0","25.0"],"group":"None","version":"v1.1.0"}],"TECT":[{"dec":112.83069316119236,"inc":-47.55271345947938,"MAD":11.25949907863058,"cm":[-2.6700863742235015e-14,-6.217248937900877e-15,1.3322676295501878e-15],"intensity":239.9538560496717,"type":"dir","forced":true,"remark":"","origin":false,"nSteps":8,"minStep":"23.0","maxStep":"50.0","steps":["23.0","25.0","30.0","33.0","35.0","40.0","45.0","50.0"],"group":"None","version":"v1.1.0"},{"dec":334.20185007195744,"inc":-27.21607688997038,"MAD":2.101520339862275,"cm":[-7.993605777301127e-15,-2.6645352591003757e-15,3.552713678800501e-15],"intensity":265.8990987270451,"type":"GC","origin":false,"forced":true,"remark":"","nSteps":6,"minStep":"0.0","maxStep":"25.0","steps":["0.0","10.0","15.0","20.0","23.0","25.0"],"group":"None","version":"v1.1.0"}],"interpreted":true,"name":"BR3.14B","coreAzi":363,"coreDip":15,"bedStrike":363,"bedDip":15,"data":[{"visible":true,"include":true,"step":"0.0","x":20.271428571428572,"y":168.83809523809524,"z":55.74761904761905,"a95":0.99,"info":"19/03/2016 at 10:54:15"},{"visible":true,"include":true,"step":"10.0","x":86.85619047619048,"y":132.55238095238096,"z":-35.04857142857143,"a95":0.99,"info":"19/03/2016 at 10:54:15"},{"visible":true,"include":true,"step":"15.0","x":85.69904761904762,"y":116.23809523809524,"z":-47.518095238095235,"a95":0.99,"info":"19/03/2016 at 10:54:15"},{"visible":true,"include":true,"step":"20.0","x":85.69333333333333,"y":114.20952380952382,"z":-48.31619047619048,"a95":0.99,"info":"19/03/2016 at 10:54:15"},{"visible":true,"include":true,"step":"23.0","x":90.53809523809524,"y":94.82190476190476,"z":-63.47238095238096,"a95":0.99,"info":"19/03/2016 at 10:54:15"},{"visible":true,"include":true,"step":"25.0","x":74.40095238095239,"y":79.63619047619048,"z":-55.729523809523805,"a95":0.99,"info":"19/03/2016 at 10:54:15"},{"visible":true,"include":false,"step":"30.0","x":58.56380952380952,"y":97.58095238095237,"z":-52.24857142857143,"a95":0.99,"info":"19/03/2016 at 10:54:15"},{"visible":true,"include":false,"step":"33.0","x":40.859047619047615,"y":96.93333333333332,"z":-54.168571428571425,"a95":0.99,"info":"19/03/2016 at 10:54:15"},{"visible":true,"include":false,"step":"35.0","x":35.74666666666666,"y":103.42857142857143,"z":-33.08,"a95":0.99,"info":"19/03/2016 at 10:54:15"},{"visible":true,"include":false,"step":"40.0","x":66.5495238095238,"y":98.41904761904763,"z":-37.44571428571429,"a95":0.99,"info":"19/03/2016 at 10:54:15"},{"visible":true,"include":false,"step":"45.0","x":44.48095238095238,"y":106.53333333333333,"z":-32.444761904761904,"a95":0.99,"info":"19/03/2016 at 10:54:15"},{"visible":true,"include":false,"step":"50.0","x":28.922857142857143,"y":99.4095238095238,"z":-11.234285714285713,"a95":0.99,"info":"19/03/2016 at 10:54:15"},{"visible":true,"include":false,"step":"55.0","x":42.54761904761905,"y":112.55238095238094,"z":9.556190476190476,"a95":0.99,"info":"19/03/2016 at 10:54:15"},{"visible":false,"include":false,"step":"60.0","x":40.854285714285716,"y":101.77142857142856,"z":-18.13047619047619,"a95":0.99,"info":"19/03/2016 at 10:54:15"},{"visible":false,"include":false,"step":"65.0","x":-7.732952380952381,"y":33.56476190476191,"z":-0.7832571428571429,"a95":0.99,"info":"19/03/2016 at 10:54:15"},{"visible":false,"include":false,"step":"70.0","x":30.546666666666667,"y":67.79523809523809,"z":11.214285714285714,"a95":0.99,"info":"19/03/2016 at 10:54:15"},{"visible":false,"include":false,"step":"80.0","x":72.01904761904763,"y":125.26666666666667,"z":-21.432380952380953,"a95":0.99,"info":"19/03/2016 at 10:54:15"}]},{"version":"v1.1.0","exported":"2016-11-24T13:49:46.152Z","volume":10.5,"added":"2016-11-24T13:37:31.291Z","format":"Utrecht","demagType":"Unknown","strat":null,"patch":1.1,"GEO":[{"dec":156.76235193748403,"inc":-48.00584700199844,"MAD":10.486811986082193,"cm":[80.15606396679307,51.72874830583312,59.94169208479239],"intensity":191.54198843421597,"type":"dir","forced":false,"remark":"","origin":false,"nSteps":6,"minStep":"20","maxStep":"210","steps":["20","100","120","150","180","210"],"group":"None","version":"v1.1.0"}],"TECT":[{"dec":172.84606918235943,"inc":-50.031332746293955,"MAD":10.486811986082241,"cm":[81.7020896841759,64.32011733475662,43.37690041032138],"intensity":191.54198843421594,"type":"dir","forced":false,"remark":"","origin":false,"nSteps":6,"minStep":"20","maxStep":"210","steps":["20","100","120","150","180","210"],"group":"None","version":"v1.1.0"}],"interpreted":true,"name":"BR3.15A","coreAzi":7,"coreDip":13,"bedStrike":353,"bedDip":14,"data":[{"visible":true,"include":true,"step":"20","x":8.504761904761905,"y":83.03809523809524,"z":22.428571428571427,"a95":2.4,"info":"\"16-03-14\" at \"12:22\""},{"visible":true,"include":true,"step":"100","x":1.3333333333333333,"y":46.31428571428572,"z":67.97142857142858,"a95":2.3,"info":"\"16-03-14\" at \"14:27\""},{"visible":true,"include":true,"step":"120","x":-28.476190476190474,"y":35.61904761904762,"z":98.57142857142857,"a95":2.5,"info":"\"16-03-15\" at \"10:30\""},{"visible":true,"include":true,"step":"150","x":-52.19047619047619,"y":40.666666666666664,"z":100.47619047619048,"a95":1.7,"info":"\"16-03-15\" at \"12:47\""},{"visible":true,"include":true,"step":"180","x":-66.95238095238095,"y":33.904761904761905,"z":128.66666666666666,"a95":2.3,"info":"\"16-03-16\" at \"13:55\""},{"visible":true,"include":true,"step":"210","x":-96.76190476190476,"y":9.904761904761905,"z":164.76190476190476,"a95":2,"info":"\"16-03-17\" at \"17:05\""},{"visible":true,"include":false,"step":"250","x":-134.38095238095238,"y":23.80952380952381,"z":151.14285714285714,"a95":2.1,"info":"\"16-03-17\" at \"20:24\""},{"visible":true,"include":false,"step":"280","x":-126.47619047619048,"y":0.2857142857142857,"z":157.71428571428572,"a95":1.9,"info":"\"16-03-18\" at \"15:46\""},{"visible":true,"include":false,"step":"310","x":-97.71428571428571,"y":0.8571428571428571,"z":120.0952380952381,"a95":2.6,"info":"\"16-03-20\" at \"15:12\""},{"visible":true,"include":false,"step":"350","x":-100.57142857142857,"y":-4.190476190476191,"z":108.76190476190476,"a95":2,"info":"\"16-04-18\" at \"11:09\""},{"visible":true,"include":false,"step":"380","x":-98,"y":3.3333333333333335,"z":106.19047619047619,"a95":2.2,"info":"\"16-04-18\" at \"13:58\""},{"visible":true,"include":false,"step":"410","x":-109.9047619047619,"y":10.095238095238095,"z":90.76190476190476,"a95":2,"info":"\"16-04-19\" at \"09:47\""},{"visible":true,"include":false,"step":"430","x":-117.14285714285714,"y":-4,"z":92.85714285714286,"a95":2.3,"info":"\"16-04-19\" at \"13:04\""},{"visible":true,"include":false,"step":"450","x":-103.71428571428571,"y":-7.619047619047619,"z":76.0952380952381,"a95":2.1,"info":"\"16-04-20\" at \"13:46\""}]},{"version":"v1.1.0","exported":"2016-11-24T13:49:46.152Z","volume":10.5,"added":"2016-11-24T13:37:31.292Z","format":"Utrecht","demagType":"Unknown","strat":"1","patch":1.1,"GEO":[{"dec":131.87576554890688,"inc":-26.637440280723727,"MAD":7.014805051192775,"cm":[-1.7763568394002505e-15,-5.329070518200751e-15,0],"intensity":407.3977426413861,"type":"dir","forced":true,"remark":"","origin":false,"nSteps":8,"minStep":"10.0","maxStep":"40.0","steps":["10.0","15.0","20.0","23.0","25.0","30.0","33.0","40.0"],"group":"None","version":"v1.1.0"}],"TECT":[{"dec":138.54674069290206,"inc":-35.25723933420282,"MAD":7.0148050511927655,"cm":[-2.6645352591003757e-14,-4.1744385725905886e-14,3.552713678800501e-15],"intensity":407.3977426413861,"type":"dir","forced":true,"remark":"","origin":false,"nSteps":8,"minStep":"10.0","maxStep":"40.0","steps":["10.0","15.0","20.0","23.0","25.0","30.0","33.0","40.0"],"group":"None","version":"v1.1.0"}],"interpreted":true,"name":"BR3.17B","coreAzi":36,"coreDip":1,"bedStrike":353,"bedDip":14,"data":[{"visible":true,"include":false,"step":"0.0","x":-24.390476190476193,"y":134.0952380952381,"z":11.17047619047619,"a95":0.99,"info":"19/03/2016 at 10:54:15"},{"visible":true,"include":true,"step":"10.0","x":98.05714285714285,"y":166.31428571428572,"z":-9.994285714285715,"a95":0.99,"info":"19/03/2016 at 10:54:15"},{"visible":true,"include":true,"step":"15.0","x":95.95238095238095,"y":179.6095238095238,"z":-3.379238095238095,"a95":0.99,"info":"19/03/2016 at 10:54:15"},{"visible":true,"include":true,"step":"20.0","x":102.18095238095239,"y":155.93333333333334,"z":-18.777142857142856,"a95":0.99,"info":"19/03/2016 at 10:54:15"},{"visible":true,"include":true,"step":"23.0","x":77.43333333333332,"y":165.85714285714286,"z":-14.875238095238094,"a95":0.99,"info":"19/03/2016 at 10:54:15"},{"visible":true,"include":true,"step":"25.0","x":88.66761904761904,"y":155.40952380952382,"z":-1.105047619047619,"a95":0.99,"info":"19/03/2016 at 10:54:15"},{"visible":true,"include":true,"step":"30.0","x":47.544761904761906,"y":177.41904761904763,"z":-47.44095238095238,"a95":0.99,"info":"19/03/2016 at 10:54:15"},{"visible":true,"include":true,"step":"33.0","x":83.96380952380953,"y":172.93333333333334,"z":-46.10190476190476,"a95":0.99,"info":"19/03/2016 at 10:54:15"},{"visible":true,"include":false,"step":"35.0","x":85.90095238095239,"y":104.22857142857144,"z":-18.292380952380952,"a95":0.99,"info":"19/03/2016 at 10:54:15"},{"visible":true,"include":true,"step":"40.0","x":92.39142857142858,"y":193.13333333333335,"z":-12.35904761904762,"a95":0.99,"info":"19/03/2016 at 10:54:15"},{"visible":true,"include":false,"step":"45.0","x":83.50666666666667,"y":114.80952380952381,"z":-68.85714285714286,"a95":0.99,"info":"19/03/2016 at 10:54:15"},{"visible":false,"include":false,"step":"50.0","x":29.68761904761905,"y":75.63047619047619,"z":-49.47714285714286,"a95":0.99,"info":"19/03/2016 at 10:54:15"},{"visible":false,"include":false,"step":"55.0","x":49.18095238095238,"y":169.31428571428572,"z":-71.42857142857143,"a95":0.99,"info":"19/03/2016 at 10:54:15"},{"visible":false,"include":false,"step":"60.0","x":33.614285714285714,"y":123.11428571428571,"z":-38.920952380952386,"a95":0.99,"info":"19/03/2016 at 10:54:15"},{"visible":false,"include":false,"step":"65.0","x":-27.20285714285714,"y":68.28571428571429,"z":-46.13428571428572,"a95":0.99,"info":"19/03/2016 at 10:54:15"},{"visible":false,"include":false,"step":"70.0","x":-21.616190476190475,"y":117.01904761904763,"z":-79.97904761904762,"a95":0.99,"info":"19/03/2016 at 10:54:15"},{"visible":false,"include":false,"step":"80.0","x":112.5904761904762,"y":98.55238095238094,"z":-32.76285714285714,"a95":0.99,"info":"19/03/2016 at 10:54:15"}]},{"version":"v1.1.0","exported":"2016-11-24T13:49:46.152Z","volume":10.5,"added":"2016-11-24T13:37:31.294Z","format":"Utrecht","demagType":"Unknown","strat":"1","patch":1.1,"GEO":[{"dec":120.47694645475013,"inc":-56.15252267245973,"MAD":8.9591125801134,"cm":[-6.661338147750939e-16,1.7763568394002505e-15,0],"intensity":270.7083538588708,"type":"dir","forced":true,"remark":"","origin":false,"nSteps":11,"minStep":"10.0","maxStep":"50.0","steps":["10.0","15.0","20.0","23.0","25.0","30.0","33.0","35.0","40.0","45.0","50.0"],"group":"None","version":"v1.1.0"}],"TECT":[{"dec":139.07164918676267,"inc":-65.89349493559257,"MAD":8.959112580113391,"cm":[-2.6645352591003757e-15,-1.2212453270876722e-15,0],"intensity":270.7083538588708,"type":"dir","forced":true,"remark":"","origin":false,"nSteps":11,"minStep":"10.0","maxStep":"50.0","steps":["10.0","15.0","20.0","23.0","25.0","30.0","33.0","35.0","40.0","45.0","50.0"],"group":"None","version":"v1.1.0"}],"interpreted":true,"name":"BR3.19B","coreAzi":36,"coreDip":13,"bedStrike":353,"bedDip":14,"data":[{"visible":false,"include":false,"step":"0.0","x":-107.0952380952381,"y":51.72190476190477,"z":60.54666666666667,"a95":0.99,"info":"19/03/2016 at 10:54:15"},{"visible":true,"include":true,"step":"10.0","x":128.17142857142858,"y":119.12380952380951,"z":-18.468571428571426,"a95":0.99,"info":"19/03/2016 at 10:54:15"},{"visible":true,"include":true,"step":"15.0","x":130.75238095238097,"y":101.38095238095238,"z":-32.74857142857143,"a95":0.99,"info":"19/03/2016 at 10:54:15"},{"visible":true,"include":true,"step":"20.0","x":152.22857142857143,"y":86.89142857142858,"z":-31.585714285714282,"a95":0.99,"info":"19/03/2016 at 10:54:15"},{"visible":true,"include":true,"step":"23.0","x":121.82857142857144,"y":91.67714285714285,"z":-30.803809523809523,"a95":0.99,"info":"19/03/2016 at 10:54:15"},{"visible":true,"include":true,"step":"25.0","x":130.7047619047619,"y":66.99714285714286,"z":-15.619047619047619,"a95":0.99,"info":"19/03/2016 at 10:54:15"},{"visible":true,"include":true,"step":"30.0","x":72.56952380952382,"y":78.31714285714285,"z":-11.688571428571429,"a95":0.99,"info":"19/03/2016 at 10:54:15"},{"visible":true,"include":true,"step":"33.0","x":139.93333333333334,"y":78.97428571428571,"z":9.037047619047618,"a95":0.99,"info":"19/03/2016 at 10:54:15"},{"visible":true,"include":true,"step":"35.0","x":82.55333333333333,"y":60.31809523809524,"z":-41.668571428571425,"a95":0.99,"info":"19/03/2016 at 10:54:15"},{"visible":true,"include":true,"step":"40.0","x":127.93333333333332,"y":86.52190476190476,"z":-8.562380952380952,"a95":0.99,"info":"19/03/2016 at 10:54:15"},{"visible":true,"include":true,"step":"45.0","x":99.19047619047619,"y":59.07619047619047,"z":-8.24,"a95":0.99,"info":"19/03/2016 at 10:54:15"},{"visible":true,"include":true,"step":"50.0","x":94.87904761904763,"y":26.343809523809526,"z":-30.22095238095238,"a95":0.99,"info":"19/03/2016 at 10:54:15"},{"visible":true,"include":false,"step":"55.0","x":31.39428571428571,"y":73.67238095238095,"z":-15.234285714285715,"a95":0.99,"info":"19/03/2016 at 10:54:15"},{"visible":false,"include":false,"step":"60.0","x":72.40857142857142,"y":133.9047619047619,"z":-5.191333333333334,"a95":0.99,"info":"19/03/2016 at 10:54:15"},{"visible":false,"include":false,"step":"65.0","x":108.85714285714286,"y":45.875238095238096,"z":-2.8244761904761906,"a95":0.99,"info":"19/03/2016 at 10:54:15"},{"visible":false,"include":false,"step":"70.0","x":96.75238095238095,"y":124.74285714285713,"z":-77.03809523809524,"a95":0.99,"info":"19/03/2016 at 10:54:15"},{"visible":false,"include":false,"step":"80.0","x":33.68761904761905,"y":-4.815047619047619,"z":-19.97047619047619,"a95":0.99,"info":"19/03/2016 at 10:54:15"}]},{"version":"v1.1.0","exported":"2016-11-24T13:49:46.153Z","volume":10.5,"added":"2016-11-24T13:37:31.295Z","format":"Utrecht","demagType":"Unknown","strat":null,"patch":1.1,"GEO":[],"TECT":[],"interpreted":false,"name":"BR3.20A","coreAzi":23,"coreDip":-1,"bedStrike":353,"bedDip":14,"data":[{"visible":false,"include":false,"step":"20","x":-125.23809523809524,"y":172.66666666666666,"z":-77.52380952380952,"a95":2.3,"info":"\"16-03-14\" at \"12:23\""},{"visible":true,"include":false,"step":"100","x":-41.80952380952381,"y":167.9047619047619,"z":-39.142857142857146,"a95":1.9,"info":"\"16-03-14\" at \"14:28\""},{"visible":true,"include":false,"step":"120","x":-1.5238095238095237,"y":173.8095238095238,"z":-51.904761904761905,"a95":1.7,"info":"\"16-03-15\" at \"10:32\""},{"visible":true,"include":false,"step":"150","x":-7.142857142857143,"y":174,"z":-79.80952380952381,"a95":2.8,"info":"\"16-03-15\" at \"12:48\""},{"visible":true,"include":false,"step":"180","x":3.8095238095238093,"y":156.0952380952381,"z":-59.523809523809526,"a95":1.4,"info":"\"16-03-16\" at \"13:56\""},{"visible":true,"include":false,"step":"210","x":22.857142857142858,"y":131.14285714285714,"z":-51.80952380952381,"a95":1.9,"info":"\"16-03-17\" at \"17:07\""},{"visible":true,"include":false,"step":"250","x":-16.761904761904763,"y":116.76190476190476,"z":-58.38095238095238,"a95":1.8,"info":"\"16-03-17\" at \"20:25\""},{"visible":true,"include":false,"step":"280","x":-11.523809523809524,"y":107.04761904761905,"z":-51.04761904761905,"a95":1.9,"info":"\"16-03-18\" at \"15:47\""},{"visible":true,"include":false,"step":"310","x":-26.857142857142858,"y":87.23809523809524,"z":-62.57142857142857,"a95":1.9,"info":"\"16-03-20\" at \"15:13\""},{"visible":true,"include":false,"step":"350","x":-52,"y":83.23809523809524,"z":-70.85714285714286,"a95":1.9,"info":"\"16-04-18\" at \"11:11\""},{"visible":true,"include":false,"step":"380","x":-57.04761904761905,"y":78.19047619047619,"z":-55.523809523809526,"a95":2,"info":"\"16-04-18\" at \"14:00\""},{"visible":true,"include":false,"step":"410","x":-33.61904761904762,"y":84,"z":-51.23809523809524,"a95":2.1,"info":"\"16-04-19\" at \"09:50\""},{"visible":true,"include":false,"step":"430","x":-43.04761904761905,"y":86.57142857142857,"z":-71.33333333333333,"a95":2.2,"info":"\"16-04-19\" at \"13:07\""},{"visible":true,"include":false,"step":"450","x":-56.095238095238095,"y":80.76190476190476,"z":-81.04761904761905,"a95":2.2,"info":"\"16-04-20\" at \"13:49\""},{"visible":true,"include":false,"step":"450","x":-62.57142857142857,"y":84.28571428571429,"z":-45.04761904761905,"a95":2.2,"info":"\"16-04-21\" at \"10:41\""}]},{"version":"v1.1.0","exported":"2016-11-24T13:49:46.153Z","volume":10.5,"added":"2016-11-24T13:37:31.295Z","format":"Utrecht","demagType":"Unknown","strat":"1","patch":1.1,"GEO":[],"TECT":[],"interpreted":false,"name":"BR3.20B","coreAzi":23,"coreDip":-1,"bedStrike":353,"bedDip":14,"data":[{"visible":true,"include":false,"step":"0.0","x":-225.7047619047619,"y":-13.322857142857142,"z":60.16952380952381,"a95":0.99,"info":"19/03/2016 at 10:54:15"},{"visible":true,"include":false,"step":"10.0","x":-46.766666666666666,"y":30.91142857142857,"z":-23.03904761904762,"a95":0.99,"info":"19/03/2016 at 10:54:15"},{"visible":true,"include":false,"step":"15.0","x":-14.016190476190475,"y":55.47904761904762,"z":-26.151428571428568,"a95":0.99,"info":"19/03/2016 at 10:54:15"},{"visible":true,"include":false,"step":"20.0","x":1.0606666666666666,"y":74.10190476190476,"z":-29.592380952380957,"a95":0.99,"info":"19/03/2016 at 10:54:15"},{"visible":true,"include":false,"step":"23.0","x":13.125714285714285,"y":75.32666666666667,"z":-39.20761904761905,"a95":0.99,"info":"19/03/2016 at 10:54:15"},{"visible":true,"include":false,"step":"25.0","x":-21.468571428571426,"y":84.09238095238095,"z":-41.438095238095244,"a95":0.99,"info":"19/03/2016 at 10:54:15"},{"visible":true,"include":false,"step":"30.0","x":16.93619047619048,"y":78.9695238095238,"z":-26.72,"a95":0.99,"info":"19/03/2016 at 10:54:15"},{"visible":true,"include":false,"step":"33.0","x":8.850952380952382,"y":48.976190476190474,"z":-74.40761904761905,"a95":0.99,"info":"19/03/2016 at 10:54:15"},{"visible":true,"include":false,"step":"35.0","x":10.083809523809524,"y":44.18952380952381,"z":-53.59904761904762,"a95":0.99,"info":"19/03/2016 at 10:54:15"},{"visible":true,"include":false,"step":"40.0","x":-5.251333333333333,"y":45.60952380952381,"z":-64.82095238095238,"a95":0.99,"info":"19/03/2016 at 10:54:15"},{"visible":true,"include":false,"step":"45.0","x":-16.82,"y":37.46666666666666,"z":-55.787619047619046,"a95":0.99,"info":"19/03/2016 at 10:54:15"},{"visible":true,"include":false,"step":"50.0","x":17.27047619047619,"y":24.208571428571428,"z":-52.86380952380953,"a95":0.99,"info":"19/03/2016 at 10:54:15"},{"visible":true,"include":false,"step":"55.0","x":-5.690095238095238,"y":34.32285714285714,"z":-60.8752380952381,"a95":0.99,"info":"19/03/2016 at 10:54:15"},{"visible":true,"include":false,"step":"60.0","x":17.54190476190476,"y":32.87238095238096,"z":-54.56380952380952,"a95":0.99,"info":"19/03/2016 at 10:54:15"},{"visible":true,"include":false,"step":"65.0","x":-62.051428571428566,"y":24.00190476190476,"z":-89.02666666666667,"a95":0.99,"info":"19/03/2016 at 10:54:15"},{"visible":true,"include":false,"step":"70.0","x":-11.944761904761904,"y":38.36571428571428,"z":-93.5,"a95":0.99,"info":"19/03/2016 at 10:54:15"},{"visible":true,"include":false,"step":"80.0","x":-7.531238095238096,"y":42.49047619047619,"z":-107.06666666666668,"a95":0.99,"info":"19/03/2016 at 10:54:15"}]}]
