# Supplementary material for: Paleomagnetic constraints on the timing and distribution of Cenozoic rotations in Central and Eastern Anatolia
Source: Copernicus journal article supplement (doi:10.5194/se-9-295-2018), 2018-03-21
Supplement: Supplementary file 2 [file se-9-295-2018-supplement.zip › se-2017-66_DATA_dir files/dir files Tauride basins/BR4.dir]

[{"version":"v1.1.0","exported":"2016-11-24T13:56:30.892Z","volume":10.5,"added":"2016-11-24T13:50:12.592Z","format":"Utrecht","demagType":"Unknown","strat":"””","patch":1.1,"GEO":[],"TECT":[],"interpreted":false,"name":"BR4.01A”","coreAzi":40,"coreDip":29,"bedStrike":327,"bedDip":22,"data":[{"visible":true,"include":false,"step":"20","x":-214.0952380952381,"y":-256.3809523809524,"z":247.52380952380952,"a95":2.3,"info":"\"16-04-18\" at \"09:22\""},{"visible":true,"include":false,"step":"100","x":-71.9047619047619,"y":-76.38095238095238,"z":105.9047619047619,"a95":2.6,"info":"\"16-04-18\" at \"11:46\""},{"visible":true,"include":false,"step":"150","x":17.638095238095236,"y":-35.78095238095238,"z":20.238095238095237,"a95":3.8,"info":"\"16-04-18\" at \"14:54\""},{"visible":true,"include":false,"step":"180","x":1.7142857142857142,"y":13.980952380952383,"z":2.657142857142857,"a95":5.7,"info":"\"16-04-19\" at \"10:38\""},{"visible":true,"include":false,"step":"210","x":-0.7523809523809524,"y":-23.857142857142858,"z":5.3238095238095235,"a95":5.1,"info":"\"16-04-19\" at \"13:49\""},{"visible":true,"include":false,"step":"240","x":-11.076190476190476,"y":14.723809523809523,"z":-25.723809523809525,"a95":4.6,"info":"\"16-04-20\" at \"09:17\""}]},{"version":"v1.1.0","exported":"2016-11-24T13:56:30.892Z","volume":10.5,"added":"2016-11-24T13:50:12.593Z","format":"Utrecht","demagType":"Unknown","strat":"1","patch":1.1,"GEO":[],"TECT":[],"interpreted":false,"name":"BR4.01B","coreAzi":40,"coreDip":29,"bedStrike":327,"bedDip":22,"data":[{"visible":true,"include":false,"step":"0.0","x":-60.8495238095238,"y":15.153333333333334,"z":19.86952380952381,"a95":0.99,"info":"19/03/2016 at 21:49:00"},{"visible":true,"include":false,"step":"10.0","x":-20.94190476190476,"y":32.38095238095238,"z":-9.091238095238095,"a95":0.99,"info":"19/03/2016 at 21:49:00"},{"visible":true,"include":false,"step":"15.0","x":-11.53047619047619,"y":34.478095238095236,"z":-17.906666666666666,"a95":0.99,"info":"19/03/2016 at 21:49:00"},{"visible":true,"include":false,"step":"20.0","x":-7.421142857142857,"y":27.54285714285714,"z":-17.15142857142857,"a95":0.99,"info":"19/03/2016 at 21:49:00"},{"visible":true,"include":false,"step":"23.0","x":-5.655714285714286,"y":20.883809523809525,"z":-14.784761904761906,"a95":0.99,"info":"19/03/2016 at 21:49:00"},{"visible":true,"include":false,"step":"25.0","x":-9.815238095238096,"y":6.861809523809525,"z":-16.454285714285714,"a95":0.99,"info":"19/03/2016 at 21:49:00"},{"visible":true,"include":false,"step":"30.0","x":-7.703904761904762,"y":8.631714285714285,"z":-0.8405523809523808,"a95":0.99,"info":"19/03/2016 at 21:49:00"},{"visible":true,"include":false,"step":"33.0","x":-4.175714285714285,"y":-1.969809523809524,"z":-0.6422190476190476,"a95":0.99,"info":"19/03/2016 at 21:49:00"},{"visible":true,"include":false,"step":"35.0","x":-11.734285714285713,"y":-20.33142857142857,"z":1.0785714285714285,"a95":0.99,"info":"19/03/2016 at 21:49:00"},{"visible":true,"include":false,"step":"40.0","x":-11.031428571428572,"y":-6.646380952380953,"z":8.955238095238096,"a95":0.99,"info":"19/03/2016 at 21:49:00"},{"visible":true,"include":false,"step":"45.0","x":-3.3220952380952378,"y":-18.124761904761904,"z":15.092380952380953,"a95":0.99,"info":"19/03/2016 at 21:49:00"},{"visible":true,"include":false,"step":"50.0","x":-19.982857142857142,"y":-51.14666666666666,"z":17.00761904761905,"a95":0.99,"info":"19/03/2016 at 21:49:00"},{"visible":true,"include":false,"step":"55.0","x":-20.740952380952383,"y":-24.00095238095238,"z":22.15809523809524,"a95":0.99,"info":"19/03/2016 at 21:49:00"},{"visible":true,"include":false,"step":"60.0","x":-14.337142857142856,"y":-38.96,"z":26.937142857142856,"a95":0.99,"info":"19/03/2016 at 21:49:00"},{"visible":true,"include":false,"step":"65.0","x":-23.397142857142857,"y":-71.19238095238094,"z":22.778095238095236,"a95":0.99,"info":"19/03/2016 at 21:49:00"},{"visible":true,"include":false,"step":"70.0","x":-30.567619047619047,"y":-36.626666666666665,"z":34.179047619047616,"a95":0.99,"info":"19/03/2016 at 21:49:00"},{"visible":true,"include":false,"step":"80.0","x":-16.613333333333333,"y":-56.6152380952381,"z":28.915238095238095,"a95":0.99,"info":"19/03/2016 at 21:49:00"}]},{"version":"v1.1.0","exported":"2016-11-24T13:56:30.892Z","volume":10.5,"added":"2016-11-24T13:50:12.593Z","format":"Utrecht","demagType":"Unknown","strat":"””","patch":1.1,"GEO":[],"TECT":[],"interpreted":false,"name":"BR4.02A”","coreAzi":40,"coreDip":22,"bedStrike":327,"bedDip":22,"data":[{"visible":true,"include":false,"step":"20","x":-9.428571428571429,"y":48.476190476190474,"z":131.14285714285714,"a95":1.9,"info":"\"16-04-18\" at \"09:24\""},{"visible":true,"include":false,"step":"100","x":154.95238095238096,"y":36.476190476190474,"z":-131.9047619047619,"a95":2.9,"info":"\"16-04-18\" at \"11:49\""},{"visible":true,"include":false,"step":"150","x":66.66666666666667,"y":86.0952380952381,"z":-122.0952380952381,"a95":2.3,"info":"\"16-04-18\" at \"14:55\""},{"visible":true,"include":false,"step":"180","x":23.238095238095237,"y":68,"z":-79.9047619047619,"a95":2.7,"info":"\"16-04-19\" at \"10:41\""},{"visible":true,"include":false,"step":"210","x":-7.542857142857143,"y":16.323809523809523,"z":-35.142857142857146,"a95":4,"info":"\"16-04-19\" at \"13:52\""},{"visible":true,"include":false,"step":"240","x":-14.323809523809524,"y":11.342857142857142,"z":-14.466666666666667,"a95":4.8,"info":"\"16-04-20\" at \"09:20\""}]},{"version":"v1.1.0","exported":"2016-11-24T13:56:30.893Z","volume":10.5,"added":"2016-11-24T13:50:12.593Z","format":"Utrecht","demagType":"Unknown","strat":"1","patch":1.1,"GEO":[{"dec":167.4517430334654,"inc":-52.23087111806144,"MAD":2.5642894266402894,"cm":[-1.7763568394002505e-15,-7.327471962526033e-15,0],"intensity":283.7897683648434,"type":"dir","forced":true,"remark":"","origin":false,"nSteps":9,"minStep":"20.0","maxStep":"50.0","steps":["20.0","23.0","25.0","30.0","33.0","35.0","40.0","45.0","50.0"],"group":"None","version":"v1.1.0"}],"TECT":[{"dec":187.75387334634206,"inc":-40.74961630117432,"MAD":2.5642894266401313,"cm":[0,-9.880984919163893e-15,2.220446049250313e-15],"intensity":283.7897683648433,"type":"dir","forced":true,"remark":"","origin":false,"nSteps":9,"minStep":"20.0","maxStep":"50.0","steps":["20.0","23.0","25.0","30.0","33.0","35.0","40.0","45.0","50.0"],"group":"None","version":"v1.1.0"}],"interpreted":true,"name":"BR4.06B","coreAzi":7,"coreDip":2,"bedStrike":327,"bedDip":22,"data":[{"visible":true,"include":false,"step":"0.0","x":138.9142857142857,"y":35.50190476190476,"z":-115.04761904761905,"a95":0.99,"info":"19/03/2016 at 21:49:00"},{"visible":true,"include":false,"step":"10.0","x":163.15238095238095,"y":43.02857142857143,"z":-125.85714285714286,"a95":0.99,"info":"19/03/2016 at 21:49:00"},{"visible":true,"include":false,"step":"15.0","x":155.40952380952382,"y":41.73047619047619,"z":-119.44761904761906,"a95":0.99,"info":"19/03/2016 at 21:49:00"},{"visible":true,"include":true,"step":"20.0","x":145.13333333333335,"y":40.74095238095238,"z":-109.8952380952381,"a95":0.99,"info":"19/03/2016 at 21:49:00"},{"visible":true,"include":true,"step":"23.0","x":139.93333333333334,"y":39.210476190476186,"z":-102.33333333333333,"a95":0.99,"info":"19/03/2016 at 21:49:00"},{"visible":true,"include":true,"step":"25.0","x":132.2952380952381,"y":32.896190476190476,"z":-102.12380952380951,"a95":0.99,"info":"19/03/2016 at 21:49:00"},{"visible":true,"include":true,"step":"30.0","x":114.27619047619048,"y":33.15809523809524,"z":-93.37047619047618,"a95":0.99,"info":"19/03/2016 at 21:49:00"},{"visible":true,"include":true,"step":"33.0","x":113.9047619047619,"y":34.88,"z":-83.79809523809524,"a95":0.99,"info":"19/03/2016 at 21:49:00"},{"visible":true,"include":true,"step":"35.0","x":98.56190476190477,"y":21.80857142857143,"z":-81.1,"a95":0.99,"info":"19/03/2016 at 21:49:00"},{"visible":true,"include":true,"step":"40.0","x":95.5142857142857,"y":17.374285714285715,"z":-75.95809523809524,"a95":0.99,"info":"19/03/2016 at 21:49:00"},{"visible":true,"include":true,"step":"45.0","x":88.47714285714285,"y":29.16761904761905,"z":-79.10190476190476,"a95":0.99,"info":"19/03/2016 at 21:49:00"},{"visible":true,"include":true,"step":"50.0","x":71.52761904761904,"y":13.443809523809524,"z":-65.20095238095239,"a95":0.99,"info":"19/03/2016 at 21:49:00"},{"visible":true,"include":false,"step":"55.0","x":68.58761904761904,"y":31.73619047619048,"z":-55.39809523809523,"a95":0.99,"info":"19/03/2016 at 21:49:00"},{"visible":true,"include":false,"step":"60.0","x":63.54857142857143,"y":30.753333333333337,"z":-58.6552380952381,"a95":0.99,"info":"19/03/2016 at 21:49:00"},{"visible":true,"include":false,"step":"65.0","x":40.74190476190476,"y":10.341904761904763,"z":-48.00190476190476,"a95":0.99,"info":"19/03/2016 at 21:49:00"},{"visible":true,"include":false,"step":"70.0","x":22.31142857142857,"y":25.50190476190476,"z":-37.21619047619048,"a95":0.99,"info":"19/03/2016 at 21:49:00"},{"visible":false,"include":false,"step":"80.0","x":45.71142857142858,"y":35.61904761904762,"z":-32.019999999999996,"a95":0.99,"info":"19/03/2016 at 21:49:00"}]},{"version":"v1.1.0","exported":"2016-11-24T13:56:30.893Z","volume":10.5,"added":"2016-11-24T13:50:12.594Z","format":"Utrecht","demagType":"Unknown","strat":"1","patch":1.1,"GEO":[{"dec":170.65218921139672,"inc":-50.40805314176679,"MAD":5.433389399002673,"cm":[2.220446049250313e-16,5.6066262743570405e-15,0],"intensity":156.53990214693613,"type":"dir","forced":true,"remark":"","origin":false,"nSteps":10,"minStep":"15.0","maxStep":"55.0","steps":["15.0","20.0","25.0","30.0","33.0","35.0","40.0","45.0","50.0","55.0"],"group":"None","version":"v1.1.0"}],"TECT":[{"dec":189.00532256440306,"inc":-38.22205646712185,"MAD":5.433389399002698,"cm":[0,3.885780586188048e-16,-2.220446049250313e-16],"intensity":156.53990214693613,"type":"dir","forced":true,"remark":"","origin":false,"nSteps":10,"minStep":"15.0","maxStep":"55.0","steps":["15.0","20.0","25.0","30.0","33.0","35.0","40.0","45.0","50.0","55.0"],"group":"None","version":"v1.1.0"}],"interpreted":true,"name":"BR4.08B","coreAzi":24,"coreDip":-6,"bedStrike":327,"bedDip":22,"data":[{"visible":true,"include":false,"step":"0.0","x":84.94,"y":43.727619047619044,"z":-53.12666666666667,"a95":0.99,"info":"19/03/2016 at 21:49:00"},{"visible":true,"include":false,"step":"10.0","x":100.9047619047619,"y":38.03619047619048,"z":-53.61142857142857,"a95":0.99,"info":"19/03/2016 at 21:49:00"},{"visible":true,"include":true,"step":"15.0","x":84.70571428571428,"y":33.061904761904756,"z":-56.18476190476191,"a95":0.99,"info":"19/03/2016 at 21:49:00"},{"visible":true,"include":true,"step":"20.0","x":76.2647619047619,"y":30.744761904761905,"z":-47.73142857142857,"a95":0.99,"info":"19/03/2016 at 21:49:00"},{"visible":true,"include":false,"step":"23.0","x":78.38857142857144,"y":27.00190476190476,"z":-39.772380952380956,"a95":0.99,"info":"19/03/2016 at 21:49:00"},{"visible":true,"include":true,"step":"25.0","x":71.95714285714286,"y":34.304761904761904,"z":-42.8352380952381,"a95":0.99,"info":"19/03/2016 at 21:49:00"},{"visible":true,"include":true,"step":"30.0","x":66.70380952380953,"y":27.140000000000004,"z":-36.392380952380954,"a95":0.99,"info":"19/03/2016 at 21:49:00"},{"visible":true,"include":true,"step":"33.0","x":66.03238095238096,"y":24.12761904761905,"z":-35.3,"a95":0.99,"info":"19/03/2016 at 21:49:00"},{"visible":true,"include":true,"step":"35.0","x":62.4952380952381,"y":20.994285714285713,"z":-31.267619047619046,"a95":0.99,"info":"19/03/2016 at 21:49:00"},{"visible":true,"include":true,"step":"40.0","x":55.67333333333334,"y":26.601904761904763,"z":-23.228571428571428,"a95":0.99,"info":"19/03/2016 at 21:49:00"},{"visible":true,"include":true,"step":"45.0","x":56.179047619047616,"y":27.333333333333332,"z":-24.63047619047619,"a95":0.99,"info":"19/03/2016 at 21:49:00"},{"visible":true,"include":true,"step":"50.0","x":45.519999999999996,"y":26.119999999999997,"z":-10.758095238095237,"a95":0.99,"info":"19/03/2016 at 21:49:00"},{"visible":true,"include":true,"step":"55.0","x":40.3352380952381,"y":21.823809523809523,"z":-20.346666666666664,"a95":0.99,"info":"19/03/2016 at 21:49:00"},{"visible":true,"include":false,"step":"60.0","x":37.94285714285714,"y":28.55809523809524,"z":-23.207619047619048,"a95":0.99,"info":"19/03/2016 at 21:49:00"},{"visible":true,"include":false,"step":"65.0","x":37.18,"y":25.448571428571427,"z":-18.69142857142857,"a95":0.99,"info":"19/03/2016 at 21:49:00"},{"visible":true,"include":false,"step":"70.0","x":35.23142857142857,"y":20.423809523809524,"z":-24.801904761904762,"a95":0.99,"info":"19/03/2016 at 21:49:00"},{"visible":true,"include":false,"step":"80.0","x":33.42857142857143,"y":22.66,"z":-15.145714285714286,"a95":0.99,"info":"19/03/2016 at 21:49:00"}]},{"version":"v1.1.0","exported":"2016-11-24T13:56:30.893Z","volume":10.5,"added":"2016-11-24T13:50:12.595Z","format":"Utrecht","demagType":"Unknown","strat":"1","patch":1.1,"GEO":[],"TECT":[],"interpreted":false,"name":"BR4.09B","coreAzi":29,"coreDip":-7,"bedStrike":327,"bedDip":22,"data":[{"visible":true,"include":false,"step":"0.0","x":-62.96190476190476,"y":-27.640000000000004,"z":28.76666666666667,"a95":0.99,"info":"20/03/2016 at 03:16:03"},{"visible":true,"include":false,"step":"10.0","x":-30.816190476190474,"y":-15.732380952380952,"z":21.700952380952383,"a95":0.99,"info":"20/03/2016 at 03:16:03"},{"visible":true,"include":false,"step":"15.0","x":-33.239999999999995,"y":-20.02857142857143,"z":23.863809523809522,"a95":0.99,"info":"20/03/2016 at 03:16:03"},{"visible":true,"include":false,"step":"20.0","x":-32.21714285714285,"y":-20.405714285714286,"z":24.507619047619045,"a95":0.99,"info":"20/03/2016 at 03:16:03"},{"visible":true,"include":false,"step":"23.0","x":-33.4752380952381,"y":-21.162857142857142,"z":22.79619047619048,"a95":0.99,"info":"20/03/2016 at 03:16:03"},{"visible":true,"include":false,"step":"25.0","x":-37.48285714285714,"y":-21.12761904761905,"z":30.447619047619046,"a95":0.99,"info":"20/03/2016 at 03:16:03"},{"visible":true,"include":false,"step":"30.0","x":-33.521904761904764,"y":-16.89047619047619,"z":28.873333333333335,"a95":0.99,"info":"20/03/2016 at 03:16:03"},{"visible":true,"include":false,"step":"33.0","x":-35.5752380952381,"y":-14.145714285714286,"z":18.046666666666667,"a95":0.99,"info":"20/03/2016 at 03:16:03"},{"visible":true,"include":false,"step":"35.0","x":-37.099047619047624,"y":-12.726666666666667,"z":25.107619047619046,"a95":0.99,"info":"20/03/2016 at 03:16:03"},{"visible":true,"include":false,"step":"40.0","x":-41.98380952380952,"y":-4.4871428571428575,"z":24.399047619047618,"a95":0.99,"info":"20/03/2016 at 03:16:03"},{"visible":true,"include":false,"step":"45.0","x":-36.17714285714286,"y":-2.6246666666666667,"z":27.701904761904764,"a95":0.99,"info":"20/03/2016 at 03:16:03"},{"visible":true,"include":false,"step":"50.0","x":-37.81809523809524,"y":-20.94190476190476,"z":21.440952380952382,"a95":0.99,"info":"20/03/2016 at 03:16:03"},{"visible":true,"include":false,"step":"55.0","x":-49.3752380952381,"y":-4.090095238095238,"z":31.455238095238094,"a95":0.99,"info":"20/03/2016 at 03:16:03"},{"visible":true,"include":false,"step":"60.0","x":-34.22666666666667,"y":2.8193333333333337,"z":30.294285714285714,"a95":0.99,"info":"20/03/2016 at 03:16:03"},{"visible":true,"include":false,"step":"65.0","x":-36.95619047619048,"y":-27.58,"z":17.53904761904762,"a95":0.99,"info":"20/03/2016 at 03:16:03"},{"visible":true,"include":false,"step":"70.0","x":-42.666666666666664,"y":1.198952380952381,"z":26.739047619047618,"a95":0.99,"info":"20/03/2016 at 03:16:03"},{"visible":true,"include":false,"step":"80.0","x":-16.362857142857145,"y":3.5831428571428567,"z":25.592380952380957,"a95":0.99,"info":"20/03/2016 at 03:16:03"}]},{"version":"v1.1.0","exported":"2016-11-24T13:56:30.893Z","volume":10.5,"added":"2016-11-24T13:50:12.595Z","format":"Utrecht","demagType":"Unknown","strat":"””","patch":1.1,"GEO":[{"dec":166.70005945159585,"inc":-57.450368172351084,"MAD":2.4880405080050885,"cm":[5.329070518200751e-15,1.3766765505351941e-14,0],"intensity":316.31959497919263,"type":"dir","forced":true,"remark":"","origin":false,"nSteps":3,"minStep":"100","maxStep":"180","steps":["100","150","180"],"group":"None","version":"v1.1.0"}],"TECT":[{"dec":190.69216703339524,"inc":-45.52903066184324,"MAD":2.48804050800511,"cm":[0,-2.3092638912203256e-14,1.7763568394002505e-15],"intensity":316.31959497919263,"type":"dir","forced":true,"remark":"","origin":false,"nSteps":3,"minStep":"100","maxStep":"180","steps":["100","150","180"],"group":"None","version":"v1.1.0"}],"interpreted":true,"name":"BR4.10A”","coreAzi":358,"coreDip":7,"bedStrike":327,"bedDip":22,"data":[{"visible":true,"include":false,"step":"20","x":-138.47619047619048,"y":-31.714285714285715,"z":147.52380952380952,"a95":2,"info":"\"16-04-18\" at \"09:25\""},{"visible":true,"include":true,"step":"100","x":152,"y":28.761904761904763,"z":-128,"a95":2.9,"info":"\"16-04-18\" at \"11:51\""},{"visible":true,"include":true,"step":"150","x":145.52380952380952,"y":10.666666666666666,"z":-113.04761904761905,"a95":2.5,"info":"\"16-04-18\" at \"14:57\""},{"visible":true,"include":true,"step":"180","x":89.33333333333333,"y":12.952380952380953,"z":-72.19047619047619,"a95":2.1,"info":"\"16-04-19\" at \"10:44\""},{"visible":true,"include":false,"step":"210","x":1.5904761904761904,"y":1.7714285714285716,"z":-23.41904761904762,"a95":4.9,"info":"\"16-04-19\" at \"13:54\""},{"visible":true,"include":false,"step":"240","x":-1.6285714285714288,"y":2.8476190476190473,"z":1.9333333333333333,"a95":27.8,"info":"\"16-04-20\" at \"09:23\""}]},{"version":"v1.1.0","exported":"2016-11-24T13:56:30.893Z","volume":10.5,"added":"2016-11-24T13:50:12.595Z","format":"Utrecht","demagType":"Unknown","strat":"1","patch":1.1,"GEO":[{"dec":171.29764235949528,"inc":-57.60232081669332,"MAD":5.322708528926747,"cm":[-117.42537257528859,74.49632469401865,-240.8700770607192],"intensity":362.9682732173134,"type":"dir","forced":false,"remark":"","origin":false,"nSteps":14,"minStep":"15.0","maxStep":"70.0","steps":["15.0","20.0","23.0","25.0","30.0","33.0","35.0","40.0","45.0","50.0","55.0","60.0","65.0","70.0"],"group":"None","version":"v1.1.0"}],"TECT":[{"dec":193.83794946665157,"inc":-44.449411120519116,"MAD":5.322708528926727,"cm":[-166.510421582722,-1.0880225196497557,-222.77771489073976],"intensity":362.96827321731337,"type":"dir","forced":false,"remark":"","origin":false,"nSteps":14,"minStep":"15.0","maxStep":"70.0","steps":["15.0","20.0","23.0","25.0","30.0","33.0","35.0","40.0","45.0","50.0","55.0","60.0","65.0","70.0"],"group":"None","version":"v1.1.0"}],"interpreted":true,"name":"BR4.10B","coreAzi":358,"coreDip":7,"bedStrike":327,"bedDip":22,"data":[{"visible":true,"include":false,"step":"0.0","x":392.447619047619,"y":79.68476190476191,"z":-277.447619047619,"a95":0.99,"info":"20/03/2016 at 03:16:03"},{"visible":true,"include":false,"step":"10.0","x":393.65714285714284,"y":85.92095238095237,"z":-286.65714285714284,"a95":0.99,"info":"20/03/2016 at 03:16:03"},{"visible":true,"include":true,"step":"15.0","x":370.03809523809525,"y":80.37238095238095,"z":-269.4,"a95":0.99,"info":"20/03/2016 at 03:16:03"},{"visible":true,"include":true,"step":"20.0","x":338.247619047619,"y":76.76857142857143,"z":-238.74285714285716,"a95":0.99,"info":"20/03/2016 at 03:16:03"},{"visible":true,"include":true,"step":"23.0","x":322.85714285714283,"y":76.50857142857143,"z":-224.9142857142857,"a95":0.99,"info":"20/03/2016 at 03:16:03"},{"visible":true,"include":true,"step":"25.0","x":301.7238095238095,"y":71.36952380952381,"z":-212,"a95":0.99,"info":"20/03/2016 at 03:16:03"},{"visible":true,"include":true,"step":"30.0","x":270.0571428571428,"y":78.06857142857143,"z":-188.67619047619047,"a95":0.99,"info":"20/03/2016 at 03:16:03"},{"visible":true,"include":true,"step":"33.0","x":251.0857142857143,"y":84.27428571428571,"z":-172.57142857142858,"a95":0.99,"info":"20/03/2016 at 03:16:03"},{"visible":true,"include":true,"step":"35.0","x":233.53333333333333,"y":66.39428571428572,"z":-160.42857142857142,"a95":0.99,"info":"20/03/2016 at 03:16:03"},{"visible":true,"include":true,"step":"40.0","x":217.23809523809524,"y":79.16,"z":-144.28571428571428,"a95":0.99,"info":"20/03/2016 at 03:16:03"},{"visible":true,"include":true,"step":"45.0","x":198.3904761904762,"y":75.85428571428572,"z":-119.22857142857144,"a95":0.99,"info":"20/03/2016 at 03:16:03"},{"visible":true,"include":true,"step":"50.0","x":168.63809523809525,"y":46.35142857142857,"z":-103.6952380952381,"a95":0.99,"info":"20/03/2016 at 03:16:03"},{"visible":true,"include":true,"step":"55.0","x":152.64761904761903,"y":69.04666666666667,"z":-86.15142857142857,"a95":0.99,"info":"20/03/2016 at 03:16:03"},{"visible":true,"include":true,"step":"60.0","x":128.26666666666665,"y":68.17333333333333,"z":-67.18380952380951,"a95":0.99,"info":"20/03/2016 at 03:16:03"},{"visible":true,"include":true,"step":"65.0","x":100.9047619047619,"y":39.513333333333335,"z":-50.409523809523805,"a95":0.99,"info":"20/03/2016 at 03:16:03"},{"visible":true,"include":true,"step":"70.0","x":88.75523809523808,"y":73.0847619047619,"z":-40.11238095238095,"a95":0.99,"info":"20/03/2016 at 03:16:03"},{"visible":true,"include":false,"step":"80.0","x":47.77333333333333,"y":82.89047619047619,"z":-8.899809523809523,"a95":0.99,"info":"20/03/2016 at 03:16:03"}]},{"version":"v1.1.0","exported":"2016-11-24T13:56:30.893Z","volume":10.5,"added":"2016-11-24T13:50:12.598Z","format":"Utrecht","demagType":"Unknown","strat":"1","patch":1.1,"GEO":[{"dec":174.02188772432908,"inc":-55.78015109083939,"MAD":4.972856180866938,"cm":[-117.36927190819135,18.746571428571507,-185.63340083945766],"intensity":192.73167321045963,"type":"dir","forced":false,"remark":"","origin":false,"nSteps":11,"minStep":"15.0","maxStep":"55.0","steps":["15.0","20.0","23.0","25.0","30.0","33.0","35.0","40.0","45.0","50.0","55.0"],"group":"None","version":"v1.1.0"}],"TECT":[{"dec":194.49650282259302,"inc":-42.14138997940057,"MAD":4.972856180866864,"cm":[-153.33158843116655,-36.63053980276831,-154.05962150654986],"intensity":192.73167321045966,"type":"dir","forced":false,"remark":"","origin":false,"nSteps":11,"minStep":"15.0","maxStep":"55.0","steps":["15.0","20.0","23.0","25.0","30.0","33.0","35.0","40.0","45.0","50.0","55.0"],"group":"None","version":"v1.1.0"}],"interpreted":true,"name":"BR4.11B","coreAzi":360,"coreDip":3,"bedStrike":327,"bedDip":22,"data":[{"visible":true,"include":false,"step":"0.0","x":248.2761904761905,"y":23.814285714285717,"z":-199.76190476190476,"a95":0.99,"info":"20/03/2016 at 03:16:03"},{"visible":true,"include":false,"step":"10.0","x":273.42857142857144,"y":24.571428571428573,"z":-198.96190476190475,"a95":0.99,"info":"20/03/2016 at 03:16:03"},{"visible":true,"include":true,"step":"15.0","x":256.18095238095236,"y":23.432380952380953,"z":-181.8095238095238,"a95":0.99,"info":"20/03/2016 at 03:16:03"},{"visible":true,"include":true,"step":"20.0","x":239.65714285714287,"y":24.706666666666667,"z":-172.33333333333334,"a95":0.99,"info":"20/03/2016 at 03:16:03"},{"visible":true,"include":true,"step":"23.0","x":224.13333333333335,"y":25.705714285714286,"z":-160.31428571428572,"a95":0.99,"info":"20/03/2016 at 03:16:03"},{"visible":true,"include":true,"step":"25.0","x":212.57142857142858,"y":20.795238095238094,"z":-157.55238095238096,"a95":0.99,"info":"20/03/2016 at 03:16:03"},{"visible":true,"include":true,"step":"30.0","x":193.75238095238097,"y":21.416190476190476,"z":-136.86666666666665,"a95":0.99,"info":"20/03/2016 at 03:16:03"},{"visible":true,"include":true,"step":"33.0","x":178.6952380952381,"y":17.683809523809526,"z":-129.7904761904762,"a95":0.99,"info":"20/03/2016 at 03:16:03"},{"visible":true,"include":true,"step":"35.0","x":163.01904761904763,"y":9.553333333333333,"z":-113.86666666666666,"a95":0.99,"info":"20/03/2016 at 03:16:03"},{"visible":true,"include":true,"step":"40.0","x":147.05714285714285,"y":15.602857142857143,"z":-104.84761904761906,"a95":0.99,"info":"20/03/2016 at 03:16:03"},{"visible":true,"include":true,"step":"45.0","x":139.4,"y":18.574285714285715,"z":-86.6,"a95":0.99,"info":"20/03/2016 at 03:16:03"},{"visible":true,"include":true,"step":"50.0","x":115.94285714285715,"y":8.390380952380953,"z":-84.88666666666666,"a95":0.99,"info":"20/03/2016 at 03:16:03"},{"visible":true,"include":true,"step":"55.0","x":101.19047619047619,"y":20.35142857142857,"z":-67.29333333333334,"a95":0.99,"info":"20/03/2016 at 03:16:03"},{"visible":true,"include":false,"step":"60.0","x":93.34571428571428,"y":21.14857142857143,"z":-45.49809523809524,"a95":0.99,"info":"20/03/2016 at 03:16:03"},{"visible":true,"include":false,"step":"65.0","x":72.77333333333334,"y":10.928571428571429,"z":-52.78857142857142,"a95":0.99,"info":"20/03/2016 at 03:16:03"},{"visible":true,"include":false,"step":"70.0","x":68.06666666666668,"y":17.385714285714286,"z":-24.423809523809524,"a95":0.99,"info":"20/03/2016 at 03:16:03"},{"visible":true,"include":false,"step":"80.0","x":1.7495238095238097,"y":31.062857142857144,"z":-18.775238095238095,"a95":0.99,"info":"20/03/2016 at 03:16:03"}]},{"version":"v1.1.0","exported":"2016-11-24T13:56:30.893Z","volume":10.5,"added":"2016-11-24T13:50:12.598Z","format":"Utrecht","demagType":"Unknown","strat":"””","patch":1.1,"GEO":[],"TECT":[],"interpreted":false,"name":"BR4.12A”","coreAzi":4,"coreDip":1,"bedStrike":327,"bedDip":22,"data":[{"visible":true,"include":false,"step":"20","x":-142.28571428571428,"y":-24.19047619047619,"z":145.52380952380952,"a95":2.2,"info":"\"16-04-18\" at \"09:26\""},{"visible":true,"include":false,"step":"100","x":-19.552380952380954,"y":3.314285714285714,"z":6.561904761904763,"a95":6.1,"info":"\"16-04-18\" at \"11:52\""},{"visible":true,"include":false,"step":"150","x":7.009523809523809,"y":10.752380952380953,"z":-20.152380952380952,"a95":4.9,"info":"\"16-04-18\" at \"14:58\""},{"visible":true,"include":false,"step":"180","x":5.923809523809524,"y":6.295238095238095,"z":-11.361904761904762,"a95":7,"info":"\"16-04-19\" at \"10:46\""},{"visible":true,"include":false,"step":"210","x":-21.504761904761907,"y":7.914285714285714,"z":-16.685714285714283,"a95":3.6,"info":"\"16-04-19\" at \"13:57\""},{"visible":true,"include":false,"step":"240","x":-3.2952380952380955,"y":13.609523809523811,"z":-8.933333333333334,"a95":4.5,"info":"\"16-04-20\" at \"09:25\""}]},{"version":"v1.1.0","exported":"2016-11-24T13:56:30.894Z","volume":10.5,"added":"2016-11-24T13:50:12.598Z","format":"Utrecht","demagType":"Unknown","strat":"1","patch":1.1,"GEO":[{"dec":161.27075169651073,"inc":-50.41499132219735,"MAD":2.8278165094994603,"cm":[-3.552713678800501e-15,-1.304512053934559e-14,0],"intensity":338.3763837709091,"type":"dir","forced":true,"remark":"","origin":false,"nSteps":13,"minStep":"15.0","maxStep":"65.0","steps":["15.0","20.0","23.0","25.0","30.0","33.0","35.0","40.0","45.0","50.0","55.0","60.0","65.0"],"group":"None","version":"v1.1.0"}],"TECT":[{"dec":182.119525772087,"inc":-40.974234231341676,"MAD":2.8278165094994456,"cm":[-5.329070518200751e-15,1.2462253451417382e-14,1.7763568394002505e-15],"intensity":338.3763837709091,"type":"dir","forced":true,"remark":"","origin":false,"nSteps":13,"minStep":"15.0","maxStep":"65.0","steps":["15.0","20.0","23.0","25.0","30.0","33.0","35.0","40.0","45.0","50.0","55.0","60.0","65.0"],"group":"None","version":"v1.1.0"}],"interpreted":true,"name":"BR4.13B","coreAzi":358,"coreDip":0,"bedStrike":327,"bedDip":22,"data":[{"visible":true,"include":false,"step":"0.0","x":193.4,"y":56.26380952380952,"z":-169.68571428571428,"a95":0.99,"info":"20/03/2016 at 03:16:03"},{"visible":true,"include":false,"step":"10.0","x":210.06666666666666,"y":51.05333333333333,"z":-171.9047619047619,"a95":0.99,"info":"20/03/2016 at 03:16:03"},{"visible":true,"include":true,"step":"15.0","x":200,"y":48.88857142857143,"z":-160.2,"a95":0.99,"info":"20/03/2016 at 03:16:03"},{"visible":true,"include":true,"step":"20.0","x":189.24761904761903,"y":46.36,"z":-146.0857142857143,"a95":0.99,"info":"20/03/2016 at 03:16:03"},{"visible":true,"include":true,"step":"23.0","x":174.96190476190475,"y":42.03142857142857,"z":-134.05714285714285,"a95":0.99,"info":"20/03/2016 at 03:16:03"},{"visible":true,"include":true,"step":"25.0","x":159.7047619047619,"y":36.15904761904762,"z":-125.98095238095237,"a95":0.99,"info":"20/03/2016 at 03:16:03"},{"visible":true,"include":true,"step":"30.0","x":157.40952380952382,"y":34.33714285714286,"z":-118.97142857142858,"a95":0.99,"info":"20/03/2016 at 03:16:03"},{"visible":true,"include":true,"step":"33.0","x":151.73333333333335,"y":34.80571428571428,"z":-110.47619047619048,"a95":0.99,"info":"20/03/2016 at 03:16:03"},{"visible":true,"include":true,"step":"35.0","x":135.8761904761905,"y":22.955238095238094,"z":-108.84761904761906,"a95":0.99,"info":"20/03/2016 at 03:16:03"},{"visible":true,"include":true,"step":"40.0","x":119.45714285714286,"y":30.78190476190476,"z":-89.60285714285715,"a95":0.99,"info":"20/03/2016 at 03:16:03"},{"visible":true,"include":true,"step":"45.0","x":111.19047619047619,"y":32.462857142857146,"z":-88.97142857142858,"a95":0.99,"info":"20/03/2016 at 03:16:03"},{"visible":true,"include":true,"step":"50.0","x":87.12285714285714,"y":13.273333333333333,"z":-84.65619047619047,"a95":0.99,"info":"20/03/2016 at 03:16:03"},{"visible":true,"include":true,"step":"55.0","x":75.84285714285714,"y":22.645714285714284,"z":-67.8495238095238,"a95":0.99,"info":"20/03/2016 at 03:16:03"},{"visible":true,"include":true,"step":"60.0","x":63.067619047619054,"y":32.166666666666664,"z":-63.74476190476191,"a95":0.99,"info":"20/03/2016 at 03:16:03"},{"visible":true,"include":true,"step":"65.0","x":54.394285714285715,"y":9.702857142857143,"z":-55.08857142857143,"a95":0.99,"info":"20/03/2016 at 03:16:03"},{"visible":true,"include":false,"step":"70.0","x":43.27142857142857,"y":24.026666666666667,"z":-40.22952380952381,"a95":0.99,"info":"20/03/2016 at 03:16:03"},{"visible":true,"include":false,"step":"80.0","x":43.17809523809524,"y":35.26095238095238,"z":-40.73809523809524,"a95":0.99,"info":"20/03/2016 at 03:16:03"}]},{"version":"v1.1.0","exported":"2016-11-24T13:56:30.894Z","volume":10.5,"added":"2016-11-24T13:50:12.598Z","format":"Utrecht","demagType":"Unknown","strat":"””","patch":1.1,"GEO":[{"dec":176.42292824200047,"inc":-55.758758787237745,"MAD":4.79184894016558,"cm":[-3.552713678800501e-15,-1.0880185641326534e-14,0],"intensity":308.0664171402241,"type":"dir","forced":true,"remark":"","origin":false,"nSteps":4,"minStep":"100","maxStep":"210","steps":["100","150","180","210"],"group":"None","version":"v1.1.0"}],"TECT":[{"dec":196.10890048569033,"inc":-41.52392554434808,"MAD":4.791848940165567,"cm":[1.7763568394002505e-15,-1.7763568394002505e-14,3.552713678800501e-15],"intensity":308.066417140224,"type":"dir","forced":true,"remark":"","origin":false,"nSteps":4,"minStep":"100","maxStep":"210","steps":["100","150","180","210"],"group":"None","version":"v1.1.0"}],"interpreted":true,"name":"BR4.15A”","coreAzi":26,"coreDip":-2,"bedStrike":327,"bedDip":22,"data":[{"visible":true,"include":false,"step":"20","x":201.14285714285714,"y":72.19047619047619,"z":-34.095238095238095,"a95":1.8,"info":"\"16-04-18\" at \"09:27\""},{"visible":true,"include":true,"step":"100","x":222.95238095238096,"y":73.52380952380952,"z":-116.66666666666667,"a95":1.9,"info":"\"16-04-18\" at \"11:53\""},{"visible":true,"include":true,"step":"150","x":109.52380952380952,"y":45.714285714285715,"z":-66.57142857142857,"a95":1.8,"info":"\"16-04-18\" at \"14:59\""},{"visible":true,"include":true,"step":"180","x":71.86666666666667,"y":13.609523809523811,"z":-52.60952380952381,"a95":2.1,"info":"\"16-04-19\" at \"10:49\""},{"visible":true,"include":true,"step":"210","x":47.25714285714285,"y":5.819047619047619,"z":-8.219047619047618,"a95":9,"info":"\"16-04-19\" at \"14:01\""},{"visible":true,"include":false,"step":"240","x":6.857142857142857,"y":-8.79047619047619,"z":-1.8571428571428572,"a95":7.6,"info":"\"16-04-20\" at \"09:27\""}]},{"version":"v1.1.0","exported":"2016-11-24T13:56:30.894Z","volume":10.5,"added":"2016-11-24T13:50:12.599Z","format":"Utrecht","demagType":"Unknown","strat":"1","patch":1.1,"GEO":[{"dec":154.14568424950232,"inc":-57.0799917026915,"MAD":4.603059231855811,"cm":[-2.220446049250313e-15,-5.995204332975845e-15,0],"intensity":269.51292552649556,"type":"dir","forced":true,"remark":"","origin":false,"nSteps":10,"minStep":"15.0","maxStep":"50.0","steps":["15.0","20.0","23.0","25.0","30.0","33.0","35.0","40.0","45.0","50.0"],"group":"None","version":"v1.1.0"}],"TECT":[{"dec":181.9680707095243,"inc":-48.84929937782668,"MAD":4.6030592318557755,"cm":[-8.881784197001252e-16,7.771561172376096e-16,-1.3322676295501878e-15],"intensity":269.51292552649556,"type":"dir","forced":true,"remark":"","origin":false,"nSteps":10,"minStep":"15.0","maxStep":"50.0","steps":["15.0","20.0","23.0","25.0","30.0","33.0","35.0","40.0","45.0","50.0"],"group":"None","version":"v1.1.0"}],"interpreted":true,"name":"BR4.15B","coreAzi":26,"coreDip":-2,"bedStrike":327,"bedDip":22,"data":[{"visible":true,"include":false,"step":"0.0","x":141.8952380952381,"y":97.73333333333333,"z":-55.724761904761905,"a95":0.99,"info":"20/03/2016 at 03:16:03"},{"visible":true,"include":false,"step":"10.0","x":175.13333333333335,"y":79.78571428571429,"z":-67.93904761904761,"a95":0.99,"info":"20/03/2016 at 03:16:03"},{"visible":true,"include":true,"step":"15.0","x":163.85714285714286,"y":70.22571428571429,"z":-62.07238095238095,"a95":0.99,"info":"20/03/2016 at 03:16:03"},{"visible":true,"include":true,"step":"20.0","x":145.36190476190475,"y":72.25619047619048,"z":-51.42857142857143,"a95":0.99,"info":"20/03/2016 at 03:16:03"},{"visible":true,"include":true,"step":"23.0","x":136.26666666666665,"y":69.63142857142857,"z":-44.44095238095238,"a95":0.99,"info":"20/03/2016 at 03:16:03"},{"visible":true,"include":true,"step":"25.0","x":141.46666666666667,"y":57.96190476190476,"z":-47.58,"a95":0.99,"info":"20/03/2016 at 03:16:03"},{"visible":true,"include":true,"step":"30.0","x":110.58095238095237,"y":61.38857142857143,"z":-41.640952380952385,"a95":0.99,"info":"20/03/2016 at 03:16:03"},{"visible":true,"include":true,"step":"33.0","x":111.31428571428572,"y":61.80761904761905,"z":-25.32857142857143,"a95":0.99,"info":"20/03/2016 at 03:16:03"},{"visible":true,"include":true,"step":"35.0","x":106.78095238095239,"y":49.56095238095238,"z":-38.51714285714286,"a95":0.99,"info":"20/03/2016 at 03:16:03"},{"visible":true,"include":true,"step":"40.0","x":93.22285714285715,"y":64.5304761904762,"z":-47.75714285714285,"a95":0.99,"info":"20/03/2016 at 03:16:03"},{"visible":true,"include":true,"step":"45.0","x":86.98095238095237,"y":59.54857142857143,"z":-32.21619047619048,"a95":0.99,"info":"20/03/2016 at 03:16:03"},{"visible":true,"include":true,"step":"50.0","x":68.75333333333333,"y":27.26666666666667,"z":-32.92666666666667,"a95":0.99,"info":"20/03/2016 at 03:16:03"},{"visible":true,"include":false,"step":"55.0","x":52.338095238095235,"y":45.642857142857146,"z":-19.67809523809524,"a95":0.99,"info":"20/03/2016 at 03:16:03"},{"visible":true,"include":false,"step":"60.0","x":51.54,"y":60.74095238095238,"z":-22.417142857142856,"a95":0.99,"info":"20/03/2016 at 03:16:03"},{"visible":true,"include":false,"step":"65.0","x":32.62190476190476,"y":30.54952380952381,"z":-9.278857142857143,"a95":0.99,"info":"20/03/2016 at 03:16:03"},{"visible":true,"include":false,"step":"70.0","x":14.694285714285714,"y":47.96,"z":-26.965714285714284,"a95":0.99,"info":"20/03/2016 at 03:16:03"},{"visible":true,"include":false,"step":"80.0","x":49.29238095238096,"y":49.50285714285714,"z":-10.471428571428572,"a95":0.99,"info":"20/03/2016 at 03:16:03"}]},{"version":"v1.1.0","exported":"2016-11-24T13:56:30.894Z","volume":10.5,"added":"2016-11-24T13:50:12.599Z","format":"Utrecht","demagType":"Unknown","strat":"1","patch":1.1,"GEO":[{"dec":152.79456205139684,"inc":-54.226174760270986,"MAD":7.195733656895798,"cm":[-4.6629367034256575e-15,-9.992007221626409e-15,0],"intensity":198.53231442335724,"type":"dir","forced":true,"remark":"","origin":false,"nSteps":10,"minStep":"15.0","maxStep":"50.0","steps":["15.0","20.0","23.0","25.0","30.0","33.0","35.0","40.0","45.0","50.0"],"group":"None","version":"v1.1.0"}],"TECT":[{"dec":178.6607443600401,"inc":-46.898409745771275,"MAD":7.195733656895764,"cm":[-6.439293542825908e-15,-9.769962616701378e-15,5.773159728050814e-15],"intensity":198.53231442335724,"type":"dir","forced":true,"remark":"","origin":false,"nSteps":10,"minStep":"15.0","maxStep":"50.0","steps":["15.0","20.0","23.0","25.0","30.0","33.0","35.0","40.0","45.0","50.0"],"group":"None","version":"v1.1.0"}],"interpreted":true,"name":"BR4.16B","coreAzi":23,"coreDip":5,"bedStrike":327,"bedDip":22,"data":[{"visible":true,"include":false,"step":"0.0","x":85.4095238095238,"y":67.69714285714286,"z":-55.69428571428571,"a95":0.99,"info":"20/03/2016 at 14:11:13"},{"visible":true,"include":false,"step":"10.0","x":116.88571428571429,"y":59.62857142857143,"z":-74.66952380952381,"a95":0.99,"info":"20/03/2016 at 14:11:13"},{"visible":true,"include":true,"step":"15.0","x":113.78095238095239,"y":50.965714285714284,"z":-71.16761904761904,"a95":0.99,"info":"20/03/2016 at 14:11:13"},{"visible":true,"include":true,"step":"20.0","x":105.18095238095239,"y":50.780952380952385,"z":-63.298095238095236,"a95":0.99,"info":"20/03/2016 at 14:11:13"},{"visible":true,"include":true,"step":"23.0","x":108.14285714285714,"y":51.03047619047619,"z":-62.540952380952376,"a95":0.99,"info":"20/03/2016 at 14:11:13"},{"visible":true,"include":true,"step":"25.0","x":92.48380952380953,"y":43.906666666666666,"z":-49.69333333333333,"a95":0.99,"info":"20/03/2016 at 14:11:13"},{"visible":true,"include":true,"step":"30.0","x":82.90095238095239,"y":49.94761904761905,"z":-49.161904761904765,"a95":0.99,"info":"20/03/2016 at 14:11:13"},{"visible":true,"include":true,"step":"33.0","x":71.6447619047619,"y":67.2895238095238,"z":-37.21333333333333,"a95":0.99,"info":"20/03/2016 at 14:11:13"},{"visible":true,"include":true,"step":"35.0","x":61.802857142857135,"y":43.07333333333333,"z":-31.583809523809524,"a95":0.99,"info":"20/03/2016 at 14:11:13"},{"visible":true,"include":true,"step":"40.0","x":58.671428571428564,"y":38.147619047619045,"z":-30.29619047619048,"a95":0.99,"info":"20/03/2016 at 14:11:13"},{"visible":true,"include":true,"step":"45.0","x":50.8247619047619,"y":53.078095238095244,"z":-25.707619047619048,"a95":0.99,"info":"20/03/2016 at 14:11:13"},{"visible":true,"include":true,"step":"50.0","x":39.653333333333336,"y":33.76190476190476,"z":-22.075238095238095,"a95":0.99,"info":"20/03/2016 at 14:11:13"},{"visible":true,"include":false,"step":"55.0","x":33.53809523809524,"y":48.88666666666666,"z":-22.74190476190476,"a95":0.99,"info":"20/03/2016 at 14:11:13"},{"visible":true,"include":false,"step":"60.0","x":32.57333333333333,"y":45.13142857142857,"z":-14.234285714285715,"a95":0.99,"info":"20/03/2016 at 14:11:13"},{"visible":true,"include":false,"step":"65.0","x":12.093333333333334,"y":15.944761904761904,"z":-22.00190476190476,"a95":0.99,"info":"20/03/2016 at 14:11:13"},{"visible":true,"include":false,"step":"70.0","x":8.660666666666666,"y":62.44952380952381,"z":-21.047619047619047,"a95":0.99,"info":"20/03/2016 at 14:11:13"},{"visible":true,"include":false,"step":"80.0","x":14.683809523809524,"y":54.37047619047619,"z":-11.120000000000001,"a95":0.99,"info":"20/03/2016 at 14:11:13"}]},{"version":"v1.1.0","exported":"2016-11-24T13:56:30.894Z","volume":10.5,"added":"2016-11-24T13:50:12.599Z","format":"Utrecht","demagType":"Unknown","strat":"1","patch":1.1,"GEO":[{"dec":140.87349197355172,"inc":-48.50603415366813,"MAD":5.538686265087758,"cm":[-4.218847493575595e-15,-6.328271240363392e-15,0],"intensity":152.08062825438824,"type":"dir","forced":true,"remark":"","origin":false,"nSteps":9,"minStep":"20.0","maxStep":"50.0","steps":["20.0","23.0","25.0","30.0","33.0","35.0","40.0","45.0","50.0"],"group":"None","version":"v1.1.0"}],"TECT":[{"dec":165.0775635448781,"inc":-46.13482602598285,"MAD":5.5386862650878,"cm":[-5.551115123125783e-15,-8.590350653037149e-15,1.5543122344752192e-15],"intensity":152.08062825438827,"type":"dir","forced":true,"remark":"","origin":false,"nSteps":9,"minStep":"20.0","maxStep":"50.0","steps":["20.0","23.0","25.0","30.0","33.0","35.0","40.0","45.0","50.0"],"group":"None","version":"v1.1.0"}],"interpreted":true,"name":"BR4.17B","coreAzi":16,"coreDip":1,"bedStrike":327,"bedDip":22,"data":[{"visible":true,"include":false,"step":"0.0","x":83.21714285714286,"y":82.47904761904762,"z":-48.14380952380952,"a95":0.99,"info":"20/03/2016 at 14:11:13"},{"visible":true,"include":false,"step":"10.0","x":104.27619047619048,"y":74.74857142857142,"z":-61.359047619047615,"a95":0.99,"info":"20/03/2016 at 14:11:13"},{"visible":true,"include":false,"step":"15.0","x":89.28666666666666,"y":74.84380952380953,"z":-69.56761904761905,"a95":0.99,"info":"20/03/2016 at 14:11:13"},{"visible":true,"include":true,"step":"20.0","x":79.65333333333334,"y":63.83904761904761,"z":-47.896190476190476,"a95":0.99,"info":"20/03/2016 at 14:11:13"},{"visible":true,"include":true,"step":"23.0","x":77.65238095238095,"y":54.09428571428572,"z":-45.28476190476191,"a95":0.99,"info":"20/03/2016 at 14:11:13"},{"visible":true,"include":true,"step":"25.0","x":70.22952380952381,"y":52.84095238095239,"z":-38.950476190476195,"a95":0.99,"info":"20/03/2016 at 14:11:13"},{"visible":true,"include":true,"step":"30.0","x":64.33238095238096,"y":48.19238095238095,"z":-29.940952380952382,"a95":0.99,"info":"20/03/2016 at 14:11:13"},{"visible":true,"include":true,"step":"33.0","x":56.03523809523809,"y":46.96190476190476,"z":-31.593333333333334,"a95":0.99,"info":"20/03/2016 at 14:11:13"},{"visible":true,"include":true,"step":"35.0","x":56.01238095238095,"y":23.12761904761905,"z":-27.835238095238093,"a95":0.99,"info":"20/03/2016 at 14:11:13"},{"visible":true,"include":true,"step":"40.0","x":45.30095238095238,"y":37.304761904761904,"z":-17.13142857142857,"a95":0.99,"info":"20/03/2016 at 14:11:13"},{"visible":true,"include":true,"step":"45.0","x":39.89809523809524,"y":31.274285714285714,"z":-8.742380952380952,"a95":0.99,"info":"20/03/2016 at 14:11:13"},{"visible":true,"include":true,"step":"50.0","x":31.219047619047622,"y":17.257142857142856,"z":-17.366666666666667,"a95":0.99,"info":"20/03/2016 at 14:11:13"},{"visible":true,"include":false,"step":"55.0","x":14.493333333333334,"y":33.41619047619048,"z":-13.444761904761904,"a95":0.99,"info":"20/03/2016 at 14:11:13"},{"visible":false,"include":false,"step":"60.0","x":22.61904761904762,"y":53.691428571428574,"z":5.504190476190476,"a95":0.99,"info":"20/03/2016 at 14:11:13"},{"visible":false,"include":false,"step":"65.0","x":7.296095238095238,"y":8.948380952380953,"z":-2.3674285714285714,"a95":0.99,"info":"20/03/2016 at 14:11:13"},{"visible":false,"include":false,"step":"70.0","x":-0.7884476190476191,"y":47.40761904761904,"z":-5.089904761904762,"a95":0.99,"info":"20/03/2016 at 14:11:13"},{"visible":false,"include":false,"step":"80.0","x":9.05704761904762,"y":53.94380952380952,"z":-6.793714285714286,"a95":0.99,"info":"20/03/2016 at 14:11:13"}]},{"version":"v1.1.0","exported":"2016-11-24T13:56:30.894Z","volume":10.5,"added":"2016-11-24T13:50:12.600Z","format":"Utrecht","demagType":"Unknown","strat":"1","patch":1.1,"GEO":[{"dec":161.26455242435054,"inc":-49.895459214878414,"MAD":16.920126253789,"cm":[-4.364265633594622,27.293084329661873,6.410985474726605],"intensity":58.98065260363791,"type":"dir","forced":false,"remark":"","origin":false,"nSteps":9,"minStep":"15.0","maxStep":"45.0","steps":["15.0","20.0","23.0","25.0","30.0","33.0","35.0","40.0","45.0"],"group":"None","version":"v1.1.0"}],"TECT":[{"dec":181.78628988462688,"inc":-40.52014696845116,"MAD":16.920126253788993,"cm":[-3.8697753483802257,28.054532594810198,-1.7401267607752464],"intensity":58.980652603637914,"type":"dir","forced":false,"remark":"","origin":false,"nSteps":9,"minStep":"15.0","maxStep":"45.0","steps":["15.0","20.0","23.0","25.0","30.0","33.0","35.0","40.0","45.0"],"group":"None","version":"v1.1.0"}],"interpreted":true,"name":"BR4.18B","coreAzi":19,"coreDip":2,"bedStrike":327,"bedDip":22,"data":[{"visible":true,"include":false,"step":"0.0","x":-26.01047619047619,"y":32.87428571428571,"z":6.298857142857143,"a95":0.99,"info":"20/03/2016 at 14:11:13"},{"visible":true,"include":false,"step":"10.0","x":13.567619047619049,"y":37.58095238095238,"z":-16.86952380952381,"a95":0.99,"info":"20/03/2016 at 14:11:13"},{"visible":true,"include":true,"step":"15.0","x":18.684761904761906,"y":42.33047619047619,"z":-7.544190476190476,"a95":0.99,"info":"20/03/2016 at 14:11:13"},{"visible":true,"include":true,"step":"20.0","x":13.340952380952382,"y":36.60666666666667,"z":-4.720952380952381,"a95":0.99,"info":"20/03/2016 at 14:11:13"},{"visible":true,"include":true,"step":"23.0","x":4.780952380952381,"y":35.37428571428571,"z":-9.062285714285714,"a95":0.99,"info":"20/03/2016 at 14:11:13"},{"visible":true,"include":true,"step":"25.0","x":4.772095238095238,"y":26.996190476190474,"z":-6.203714285714286,"a95":0.99,"info":"20/03/2016 at 14:11:13"},{"visible":true,"include":true,"step":"30.0","x":-15.024761904761904,"y":23.11142857142857,"z":5.746666666666667,"a95":0.99,"info":"20/03/2016 at 14:11:13"},{"visible":true,"include":true,"step":"33.0","x":-10.777142857142858,"y":30.114285714285714,"z":13.755238095238095,"a95":0.99,"info":"20/03/2016 at 14:11:13"},{"visible":true,"include":true,"step":"35.0","x":-20.69904761904762,"y":16.395238095238096,"z":5.096857142857143,"a95":0.99,"info":"20/03/2016 at 14:11:13"},{"visible":true,"include":true,"step":"40.0","x":-28.936190476190475,"y":15.456190476190475,"z":20.116190476190475,"a95":0.99,"info":"20/03/2016 at 14:11:13"},{"visible":true,"include":true,"step":"45.0","x":-22.31047619047619,"y":18.65809523809524,"z":27.637142857142855,"a95":0.99,"info":"20/03/2016 at 14:11:13"},{"visible":false,"include":false,"step":"50.0","x":-46.978095238095236,"y":-9.523619047619048,"z":31.195238095238096,"a95":0.99,"info":"20/03/2016 at 14:11:13"},{"visible":false,"include":false,"step":"55.0","x":-54.16761904761905,"y":-1.6038095238095238,"z":26.380000000000003,"a95":0.99,"info":"20/03/2016 at 14:11:13"},{"visible":false,"include":false,"step":"60.0","x":-50.24761904761905,"y":8.887809523809524,"z":35.94761904761905,"a95":0.99,"info":"20/03/2016 at 14:11:13"},{"visible":false,"include":false,"step":"65.0","x":-61.770476190476195,"y":-33.49714285714286,"z":40.534285714285716,"a95":0.99,"info":"20/03/2016 at 14:11:13"},{"visible":false,"include":false,"step":"70.0","x":-74.57809523809524,"y":-2.5459047619047617,"z":24.06,"a95":0.99,"info":"20/03/2016 at 14:11:13"},{"visible":false,"include":false,"step":"80.0","x":-71.20952380952382,"y":-5.661904761904762,"z":45.90857142857143,"a95":0.99,"info":"20/03/2016 at 14:11:13"}]}]
