# Supplementary material for: Paleomagnetic constraints on the timing and distribution of Cenozoic rotations in Central and Eastern Anatolia
Source: Copernicus journal article supplement (doi:10.5194/se-9-295-2018), 2018-03-21
Supplement: Supplementary file 2 [file se-9-295-2018-supplement.zip › se-2017-66_DATA_dir files/dir files Tauride basins/BR5.dir]

[{"version":"v1.1.0","exported":"2016-11-24T14:03:36.344Z","volume":10.5,"added":"2016-11-24T13:57:00.818Z","format":"Utrecht","demagType":"Unknown","strat":"1","patch":1.1,"GEO":[],"TECT":[],"interpreted":false,"name":"BR5.01A","coreAzi":22,"coreDip":29,"bedStrike":237,"bedDip":9,"data":[{"visible":true,"include":false,"step":"0.0","x":-45.82476190476191,"y":-43.69904761904762,"z":19.656190476190474,"a95":0.99,"info":"19/03/2016 at 10:54:15"},{"visible":true,"include":false,"step":"10.0","x":-41.139047619047616,"y":-37.986666666666665,"z":7.217428571428572,"a95":0.99,"info":"19/03/2016 at 10:54:15"},{"visible":true,"include":false,"step":"15.0","x":-30.527619047619048,"y":-27.083809523809524,"z":8.666190476190476,"a95":0.99,"info":"19/03/2016 at 10:54:15"},{"visible":true,"include":false,"step":"20.0","x":-24.472380952380952,"y":-22.780952380952378,"z":-11.318095238095239,"a95":0.99,"info":"19/03/2016 at 10:54:15"},{"visible":true,"include":false,"step":"23.0","x":-27.92666666666667,"y":-20.102857142857143,"z":-14.104761904761904,"a95":0.99,"info":"19/03/2016 at 10:54:15"},{"visible":true,"include":false,"step":"25.0","x":-20.965714285714284,"y":-21.42095238095238,"z":1.768,"a95":0.99,"info":"19/03/2016 at 10:54:15"},{"visible":true,"include":false,"step":"30.0","x":-31.90952380952381,"y":-24.831428571428575,"z":11.060952380952381,"a95":0.99,"info":"19/03/2016 at 10:54:15"},{"visible":true,"include":false,"step":"33.0","x":-14.96952380952381,"y":-6.963047619047619,"z":-14.355238095238095,"a95":0.99,"info":"19/03/2016 at 10:54:15"},{"visible":true,"include":false,"step":"35.0","x":-26.182857142857145,"y":-14.47904761904762,"z":-4.289619047619047,"a95":0.99,"info":"19/03/2016 at 10:54:15"},{"visible":true,"include":false,"step":"40.0","x":-9.561904761904762,"y":-13.731428571428571,"z":1.3429523809523811,"a95":0.99,"info":"19/03/2016 at 10:54:15"},{"visible":true,"include":false,"step":"45.0","x":13.095238095238095,"y":-6.713904761904762,"z":30.142857142857142,"a95":0.99,"info":"19/03/2016 at 10:54:15"},{"visible":true,"include":false,"step":"50.0","x":-25.207619047619048,"y":-10.767619047619048,"z":-6.401428571428572,"a95":0.99,"info":"19/03/2016 at 10:54:15"},{"visible":true,"include":false,"step":"55.0","x":-15.571428571428571,"y":-13.80190476190476,"z":-17.538095238095238,"a95":0.99,"info":"19/03/2016 at 10:54:15"},{"visible":true,"include":false,"step":"60.0","x":3.023428571428571,"y":-7.471714285714286,"z":-14.323809523809524,"a95":0.99,"info":"19/03/2016 at 10:54:15"},{"visible":true,"include":false,"step":"65.0","x":2.632285714285714,"y":-8.53057142857143,"z":-8.685142857142857,"a95":0.99,"info":"19/03/2016 at 10:54:15"},{"visible":true,"include":false,"step":"70.0","x":-14.015238095238095,"y":1.3313333333333333,"z":-24.45714285714286,"a95":0.99,"info":"19/03/2016 at 10:54:15"},{"visible":true,"include":false,"step":"80.0","x":0.4228571428571429,"y":-2.9014285714285712,"z":8.804095238095238,"a95":0.99,"info":"19/03/2016 at 10:54:15"}]},{"version":"v1.1.0","exported":"2016-11-24T14:03:36.344Z","volume":10.5,"added":"2016-11-24T13:57:00.818Z","format":"Utrecht","demagType":"Unknown","strat":"1","patch":1.1,"GEO":[{"dec":359.52173768071947,"inc":45.34192200971073,"MAD":3.516541531470075,"cm":[4.440892098500626e-16,1.0547118733938987e-14,0],"intensity":252.09803073632642,"type":"dir","forced":true,"remark":"","origin":false,"nSteps":9,"minStep":"15.0","maxStep":"45.0","steps":["15.0","20.0","23.0","25.0","30.0","33.0","35.0","40.0","45.0"],"group":"None","version":"v1.1.0"}],"TECT":[{"dec":355.47703201572267,"inc":37.57828355368134,"MAD":3.5165415314698967,"cm":[1.7763568394002505e-15,8.770761894538737e-15,-4.440892098500626e-16],"intensity":252.09803073632642,"type":"dir","forced":true,"remark":"","origin":false,"nSteps":9,"minStep":"15.0","maxStep":"45.0","steps":["15.0","20.0","23.0","25.0","30.0","33.0","35.0","40.0","45.0"],"group":"None","version":"v1.1.0"}],"interpreted":true,"name":"BR5.02B","coreAzi":327,"coreDip":27,"bedStrike":237,"bedDip":9,"data":[{"visible":true,"include":false,"step":"0.0","x":-78.30095238095238,"y":89.09142857142858,"z":148.64761904761903,"a95":0.99,"info":"19/03/2016 at 10:54:15"},{"visible":true,"include":false,"step":"10.0","x":-53.0247619047619,"y":75.47999999999999,"z":133.94285714285715,"a95":0.99,"info":"19/03/2016 at 10:54:15"},{"visible":true,"include":true,"step":"15.0","x":-56.82285714285714,"y":70.68571428571428,"z":130.4,"a95":0.99,"info":"19/03/2016 at 10:54:15"},{"visible":true,"include":true,"step":"20.0","x":-58.81523809523809,"y":59.54761904761905,"z":119.13333333333334,"a95":0.99,"info":"19/03/2016 at 10:54:15"},{"visible":true,"include":true,"step":"23.0","x":-52.44095238095238,"y":56.43047619047619,"z":115.67619047619047,"a95":0.99,"info":"19/03/2016 at 10:54:15"},{"visible":true,"include":true,"step":"25.0","x":-50.8847619047619,"y":48.99142857142857,"z":123.04761904761905,"a95":0.99,"info":"19/03/2016 at 10:54:15"},{"visible":true,"include":true,"step":"30.0","x":-35.00857142857143,"y":47.27809523809524,"z":102.33333333333333,"a95":0.99,"info":"19/03/2016 at 10:54:15"},{"visible":true,"include":true,"step":"33.0","x":-42.08,"y":36.17809523809524,"z":99.19999999999999,"a95":0.99,"info":"19/03/2016 at 10:54:15"},{"visible":true,"include":true,"step":"35.0","x":-43.67523809523809,"y":35.54857142857143,"z":97.64761904761905,"a95":0.99,"info":"19/03/2016 at 10:54:15"},{"visible":true,"include":true,"step":"40.0","x":-36.904761904761905,"y":32.61904761904762,"z":88.05428571428573,"a95":0.99,"info":"19/03/2016 at 10:54:15"},{"visible":true,"include":true,"step":"45.0","x":-31.07428571428571,"y":29.741904761904763,"z":83.47333333333333,"a95":0.99,"info":"19/03/2016 at 10:54:15"},{"visible":true,"include":false,"step":"50.0","x":-42.21904761904762,"y":14.906666666666668,"z":82.99142857142857,"a95":0.99,"info":"19/03/2016 at 10:54:15"},{"visible":true,"include":false,"step":"55.0","x":-35.89523809523809,"y":11.687619047619048,"z":68.91047619047619,"a95":0.99,"info":"19/03/2016 at 10:54:15"},{"visible":true,"include":false,"step":"60.0","x":-58.843809523809526,"y":-2.1445714285714286,"z":91.68380952380951,"a95":0.99,"info":"19/03/2016 at 10:54:15"},{"visible":true,"include":false,"step":"65.0","x":-47.084761904761905,"y":1.750952380952381,"z":95.91428571428571,"a95":0.99,"info":"19/03/2016 at 10:54:15"},{"visible":true,"include":false,"step":"70.0","x":-87.61714285714285,"y":7.811714285714285,"z":84.33142857142857,"a95":0.99,"info":"19/03/2016 at 10:54:15"},{"visible":true,"include":false,"step":"80.0","x":-95.4095238095238,"y":6.471619047619048,"z":84.78,"a95":0.99,"info":"19/03/2016 at 10:54:15"}]},{"version":"v1.1.0","exported":"2016-11-24T14:03:36.344Z","volume":10.5,"added":"2016-11-24T13:57:00.819Z","format":"Utrecht","demagType":"Unknown","strat":null,"patch":1.1,"GEO":[],"TECT":[],"interpreted":false,"name":"BR5.04A","coreAzi":2,"coreDip":49,"bedStrike":237,"bedDip":9,"data":[{"visible":true,"include":false,"step":"20","x":-10.504761904761905,"y":-8.723809523809523,"z":27.19047619047619,"a95":3.6,"info":"\"16-03-14\" at \"12:24\""},{"visible":true,"include":false,"step":"100","x":-2.4857142857142858,"y":-2.9904761904761905,"z":-17.133333333333333,"a95":4.2,"info":"\"16-03-14\" at \"14:29\""},{"visible":true,"include":false,"step":"120","x":12.952380952380953,"y":-16.142857142857142,"z":-6.714285714285714,"a95":3.7,"info":"\"16-03-15\" at \"10:33\""},{"visible":true,"include":false,"step":"150","x":4.276190476190476,"y":-4.276190476190476,"z":-50.94285714285714,"a95":2.8,"info":"\"16-03-15\" at \"13:25\""},{"visible":true,"include":false,"step":"180","x":-1.4571428571428573,"y":7.9523809523809526,"z":-5.876190476190477,"a95":4.4,"info":"\"16-03-16\" at \"13:57\""},{"visible":true,"include":false,"step":"210","x":-13.295238095238094,"y":-8.295238095238094,"z":-0.6761904761904761,"a95":4.3,"info":"\"16-03-17\" at \"17:08\""},{"visible":true,"include":false,"step":"250","x":-31.952380952380953,"y":-17.40952380952381,"z":-17.45714285714286,"a95":2.7,"info":"\"16-03-17\" at \"20:26\""},{"visible":true,"include":false,"step":"350","x":37.08571428571428,"y":-3.8095238095238093,"z":-10.866666666666665,"a95":2.5,"info":"\"16-04-18\" at \"11:13\""},{"visible":true,"include":false,"step":"380","x":50.76190476190476,"y":80,"z":-90.47619047619048,"a95":2.1,"info":"\"16-04-18\" at \"14:03\""},{"visible":true,"include":false,"step":"410","x":-49.39047619047619,"y":36.16190476190476,"z":17.38095238095238,"a95":7.6,"info":"\"16-04-19\" at \"09:52\""},{"visible":true,"include":false,"step":"430","x":67.42857142857143,"y":61.80952380952381,"z":-45.904761904761905,"a95":3.6,"info":"\"16-04-19\" at \"13:09\""}]},{"version":"v1.1.0","exported":"2016-11-24T14:03:36.344Z","volume":10.5,"added":"2016-11-24T13:57:00.819Z","format":"Utrecht","demagType":"Unknown","strat":null,"patch":1.1,"GEO":[{"dec":350.9414751975064,"inc":57.7971795541408,"MAD":3.591108940583856,"cm":[1193.064595324344,-245.85102747215103,1737.9511186175305],"intensity":1600.028330248053,"type":"dir","forced":false,"remark":"","origin":false,"nSteps":5,"minStep":"100","maxStep":"210","steps":["100","120","150","180","210"],"group":"None","version":"v1.1.0"}],"TECT":[{"dec":346.41943213414567,"inc":49.42501154924013,"MAD":3.5911089405837964,"cm":[1409.364461642937,-386.31780306705133,1539.0809973230257],"intensity":1600.0283302480527,"type":"dir","forced":false,"remark":"","origin":false,"nSteps":5,"minStep":"100","maxStep":"210","steps":["100","120","150","180","210"],"group":"None","version":"v1.1.0"}],"interpreted":true,"name":"BR5.05A","coreAzi":70,"coreDip":8,"bedStrike":237,"bedDip":9,"data":[{"visible":true,"include":false,"step":"20","x":-2932.8571428571427,"y":-2482.095238095238,"z":1162.3809523809523,"a95":1.9,"info":"\"16-03-14\" at \"12:25\""},{"visible":true,"include":true,"step":"100","x":-2485.904761904762,"y":-1725.4285714285713,"z":596,"a95":1.7,"info":"\"16-03-14\" at \"14:31\""},{"visible":true,"include":true,"step":"120","x":-1938.095238095238,"y":-1327.6190476190477,"z":539.7142857142857,"a95":1.8,"info":"\"16-03-15\" at \"10:35\""},{"visible":true,"include":true,"step":"150","x":-1586.095238095238,"y":-1123.8095238095239,"z":376.0952380952381,"a95":1.8,"info":"\"16-03-15\" at \"13:26\""},{"visible":true,"include":true,"step":"180","x":-1297.7142857142858,"y":-978.0952380952381,"z":309.04761904761904,"a95":1.8,"info":"\"16-03-16\" at \"13:58\""},{"visible":true,"include":true,"step":"210","x":-1174.1904761904761,"y":-871.047619047619,"z":265.04761904761904,"a95":1.8,"info":"\"16-03-17\" at \"17:09\""},{"visible":true,"include":false,"step":"250","x":-1054.7619047619048,"y":-671.047619047619,"z":199.14285714285714,"a95":3.2,"info":"\"16-03-17\" at \"20:27\""},{"visible":true,"include":false,"step":"280","x":-945.8095238095239,"y":-568.4761904761905,"z":298.2857142857143,"a95":1.8,"info":"\"16-03-18\" at \"15:49\""},{"visible":true,"include":false,"step":"310","x":-831.9047619047619,"y":-486.3809523809524,"z":-5.0476190476190474,"a95":1.8,"info":"\"16-03-20\" at \"15:15\""},{"visible":true,"include":false,"step":"350","x":-624.6666666666666,"y":-253.04761904761904,"z":139.14285714285714,"a95":1.8,"info":"\"16-04-18\" at \"11:16\""},{"visible":true,"include":false,"step":"380","x":-672.4761904761905,"y":-85.71428571428571,"z":263.14285714285717,"a95":1.9,"info":"\"16-04-18\" at \"14:05\""},{"visible":true,"include":false,"step":"410","x":-843.9047619047619,"y":7.904761904761905,"z":244.85714285714286,"a95":1.7,"info":"\"16-04-19\" at \"09:55\""},{"visible":true,"include":false,"step":"430","x":-740,"y":-174.85714285714286,"z":197.8095238095238,"a95":1.9,"info":"\"16-04-19\" at \"13:12\""},{"visible":true,"include":false,"step":"450","x":-455.14285714285717,"y":-240.95238095238096,"z":109.04761904761905,"a95":2.2,"info":"\"16-04-20\" at \"13:52\""},{"visible":true,"include":false,"step":"450","x":-386.4761904761905,"y":-193.04761904761904,"z":126.0952380952381,"a95":2.3,"info":"\"16-04-21\" at \"10:43\""}]},{"version":"v1.1.0","exported":"2016-11-24T14:03:36.344Z","volume":10.5,"added":"2016-11-24T13:57:00.820Z","format":"Utrecht","demagType":"Unknown","strat":"1","patch":1.1,"GEO":[{"dec":357.8961888538492,"inc":52.08126379677551,"MAD":6.408066282492183,"cm":[777.5417431601079,54.64660127567042,1248.9273825818186],"intensity":3259.747935624706,"type":"dir","forced":false,"remark":"","origin":false,"nSteps":5,"minStep":"0.0","maxStep":"23.0","steps":["0.0","10.0","15.0","20.0","23.0"],"group":"None","version":"v1.1.0"}],"TECT":[{"dec":353.0957625712862,"inc":44.160981097473545,"MAD":6.408066282492202,"cm":[934.9713335781029,-47.58937013574961,1136.1957919246931],"intensity":3259.747935624706,"type":"dir","forced":false,"remark":"","origin":false,"nSteps":5,"minStep":"0.0","maxStep":"23.0","steps":["0.0","10.0","15.0","20.0","23.0"],"group":"None","version":"v1.1.0"}],"interpreted":true,"name":"BR5.05B","coreAzi":70,"coreDip":8,"bedStrike":237,"bedDip":9,"data":[{"visible":true,"include":true,"step":"0.0","x":-2775.2380952380954,"y":-1975.5238095238096,"z":1174.857142857143,"a95":0.99,"info":"20/03/2016 at 14:11:13"},{"visible":true,"include":true,"step":"10.0","x":-1405.8095238095239,"y":-871.3238095238095,"z":425.3333333333333,"a95":0.99,"info":"20/03/2016 at 14:11:13"},{"visible":true,"include":true,"step":"15.0","x":-918.1809523809524,"y":-391.8095238095238,"z":396.0952380952381,"a95":0.99,"info":"20/03/2016 at 14:11:13"},{"visible":true,"include":true,"step":"20.0","x":-643.1904761904761,"y":-148.34285714285713,"z":191.0285714285714,"a95":0.99,"info":"20/03/2016 at 14:11:13"},{"visible":true,"include":true,"step":"23.0","x":-220.65714285714287,"y":-172.8,"z":252.76190476190476,"a95":0.99,"info":"20/03/2016 at 14:11:13"},{"visible":true,"include":false,"step":"25.0","x":-179.63809523809525,"y":-24.084761904761905,"z":267.50476190476195,"a95":0.99,"info":"20/03/2016 at 14:11:13"},{"visible":true,"include":false,"step":"30.0","x":-136.8952380952381,"y":-90.57428571428571,"z":186.94285714285715,"a95":0.99,"info":"20/03/2016 at 14:11:13"},{"visible":true,"include":false,"step":"33.0","x":-214.15238095238095,"y":-28.72095238095238,"z":9.608571428571429,"a95":0.99,"info":"20/03/2016 at 14:11:13"},{"visible":true,"include":false,"step":"35.0","x":-297.4190476190476,"y":-161.66666666666666,"z":113.93333333333332,"a95":0.99,"info":"20/03/2016 at 14:11:13"},{"visible":true,"include":false,"step":"40.0","x":-87.74857142857142,"y":27.995238095238093,"z":69.40571428571428,"a95":0.99,"info":"20/03/2016 at 14:11:13"},{"visible":true,"include":false,"step":"45.0","x":11.003809523809524,"y":8.82552380952381,"z":70.67999999999999,"a95":0.99,"info":"20/03/2016 at 14:11:13"},{"visible":true,"include":false,"step":"50.0","x":-154.55238095238096,"y":-12.587619047619047,"z":2.6286666666666667,"a95":0.99,"info":"20/03/2016 at 14:11:13"},{"visible":true,"include":false,"step":"55.0","x":-97.14285714285714,"y":236.06666666666666,"z":165.8,"a95":0.99,"info":"20/03/2016 at 14:11:13"},{"visible":true,"include":false,"step":"60.0","x":96.34285714285714,"y":94.1952380952381,"z":30.5,"a95":0.99,"info":"20/03/2016 at 14:11:13"},{"visible":true,"include":false,"step":"65.0","x":10.424761904761905,"y":9.882857142857143,"z":-77.11238095238095,"a95":0.99,"info":"20/03/2016 at 14:11:13"},{"visible":true,"include":false,"step":"70.0","x":-30.229523809523812,"y":1.6427619047619046,"z":125.9904761904762,"a95":0.99,"info":"20/03/2016 at 14:11:13"},{"visible":true,"include":false,"step":"80.0","x":-39.86190476190476,"y":30.100952380952382,"z":-74.50285714285714,"a95":0.99,"info":"20/03/2016 at 14:11:13"}]},{"version":"v1.1.0","exported":"2016-11-24T14:03:36.345Z","volume":10.5,"added":"2016-11-24T13:57:00.821Z","format":"Utrecht","demagType":"Unknown","strat":"1","patch":1.1,"GEO":[{"dec":358.70532527769086,"inc":55.61423810965269,"MAD":4.542073224541776,"cm":[375.10893754811144,50.8902955304025,299.9118643264783],"intensity":610.7600925177127,"type":"dir","forced":false,"remark":"","origin":false,"nSteps":4,"minStep":"0.0","maxStep":"20.0","steps":["0.0","10.0","15.0","20.0"],"group":"None","version":"v1.1.0"}],"TECT":[{"dec":353.1826597019023,"inc":47.725476926017976,"MAD":4.542073224541769,"cm":[411.49435204915477,27.26133107178616,251.34216047306776],"intensity":610.7600925177127,"type":"dir","forced":false,"remark":"","origin":false,"nSteps":4,"minStep":"0.0","maxStep":"20.0","steps":["0.0","10.0","15.0","20.0"],"group":"None","version":"v1.1.0"}],"interpreted":true,"name":"BR5.07B","coreAzi":51,"coreDip":6,"bedStrike":237,"bedDip":9,"data":[{"visible":true,"include":true,"step":"0.0","x":-580.104761904762,"y":-431.74285714285713,"z":472.23809523809524,"a95":0.99,"info":"20/03/2016 at 14:11:13"},{"visible":true,"include":true,"step":"10.0","x":-215.14285714285714,"y":-224.04761904761904,"z":270.1904761904762,"a95":0.99,"info":"20/03/2016 at 14:11:13"},{"visible":true,"include":true,"step":"15.0","x":-171.92380952380952,"y":-233.62857142857143,"z":276.3047619047619,"a95":0.99,"info":"20/03/2016 at 14:11:13"},{"visible":true,"include":true,"step":"20.0","x":-110.66666666666667,"y":-148.53333333333333,"z":203.0761904761905,"a95":0.99,"info":"20/03/2016 at 14:11:13"},{"visible":true,"include":false,"step":"23.0","x":-91.24190476190476,"y":-141.7238095238095,"z":124.16190476190476,"a95":0.99,"info":"20/03/2016 at 14:11:13"},{"visible":true,"include":false,"step":"25.0","x":-10.836190476190476,"y":-53.790476190476184,"z":171.93333333333334,"a95":0.99,"info":"20/03/2016 at 14:11:13"},{"visible":true,"include":false,"step":"30.0","x":-36.38380952380952,"y":-117.56190476190477,"z":213.0952380952381,"a95":0.99,"info":"20/03/2016 at 14:11:13"},{"visible":true,"include":false,"step":"33.0","x":-73.10571428571428,"y":-158.37142857142857,"z":202.8857142857143,"a95":0.99,"info":"20/03/2016 at 14:11:13"},{"visible":true,"include":false,"step":"35.0","x":1.1284761904761904,"y":-148.6952380952381,"z":122.5904761904762,"a95":0.99,"info":"20/03/2016 at 14:11:13"},{"visible":true,"include":false,"step":"40.0","x":-82.01809523809524,"y":-94.52952380952381,"z":207.62857142857143,"a95":0.99,"info":"20/03/2016 at 14:11:13"},{"visible":true,"include":false,"step":"45.0","x":0.24402857142857143,"y":-10.253333333333334,"z":160.01904761904763,"a95":0.99,"info":"20/03/2016 at 14:11:13"},{"visible":true,"include":false,"step":"50.0","x":-54.68761904761905,"y":-185.7904761904762,"z":94.42761904761905,"a95":0.99,"info":"20/03/2016 at 14:11:13"},{"visible":true,"include":false,"step":"55.0","x":-150.8761904761905,"y":-191.36190476190475,"z":179.21904761904761,"a95":0.99,"info":"20/03/2016 at 14:11:13"},{"visible":true,"include":false,"step":"60.0","x":-73.06857142857143,"y":-76.25428571428571,"z":62.88666666666666,"a95":0.99,"info":"20/03/2016 at 14:11:13"},{"visible":true,"include":false,"step":"65.0","x":-29.551428571428573,"y":-9.298761904761905,"z":183.55238095238096,"a95":0.99,"info":"20/03/2016 at 14:11:13"},{"visible":true,"include":false,"step":"70.0","x":-62.973333333333336,"y":-124.19999999999999,"z":15.227619047619047,"a95":0.99,"info":"20/03/2016 at 14:11:13"},{"visible":true,"include":false,"step":"80.0","x":98.23809523809524,"y":-10.421904761904763,"z":40.787619047619046,"a95":0.99,"info":"20/03/2016 at 14:11:13"}]},{"version":"v1.1.0","exported":"2016-11-24T14:03:36.345Z","volume":10.5,"added":"2016-11-24T13:57:00.821Z","format":"Utrecht","demagType":"Unknown","strat":"1","patch":1.1,"GEO":[{"dec":8.528614770440015,"inc":54.526112668141145,"MAD":14.073246914299231,"cm":[137.95518100039456,10.104141591075535,155.79197977547716],"intensity":228.66024542064073,"type":"dir","forced":false,"remark":"","origin":false,"nSteps":8,"minStep":"0.0","maxStep":"33.0","steps":["0.0","10.0","15.0","20.0","23.0","25.0","30.0","33.0"],"group":"None","version":"v1.1.0"}],"TECT":[{"dec":1.6595006480217762,"inc":47.42485493913128,"MAD":14.073246914299268,"cm":[157.2567994762228,-2.4304760081286716,136.63549469071273],"intensity":228.66024542064076,"type":"dir","forced":false,"remark":"","origin":false,"nSteps":8,"minStep":"0.0","maxStep":"33.0","steps":["0.0","10.0","15.0","20.0","23.0","25.0","30.0","33.0"],"group":"None","version":"v1.1.0"}],"interpreted":true,"name":"BR5.09A","coreAzi":74,"coreDip":40,"bedStrike":237,"bedDip":9,"data":[{"visible":true,"include":true,"step":"0.0","x":-169.14285714285714,"y":-193.38095238095238,"z":250.8857142857143,"a95":0.99,"info":"19/03/2016 at 10:54:15"},{"visible":true,"include":true,"step":"10.0","x":-94.23809523809524,"y":-174.28571428571428,"z":170.77142857142857,"a95":0.99,"info":"19/03/2016 at 10:54:15"},{"visible":true,"include":true,"step":"15.0","x":-93.71904761904761,"y":-139.88571428571427,"z":134.73333333333335,"a95":0.99,"info":"19/03/2016 at 10:54:15"},{"visible":true,"include":true,"step":"20.0","x":-83.65904761904761,"y":-146.61904761904762,"z":130.98095238095237,"a95":0.99,"info":"19/03/2016 at 10:54:15"},{"visible":true,"include":true,"step":"23.0","x":-78.0495238095238,"y":-94.26190476190476,"z":103.84761904761906,"a95":0.99,"info":"19/03/2016 at 10:54:15"},{"visible":true,"include":true,"step":"25.0","x":-77.11714285714285,"y":-123.08571428571429,"z":108.08571428571429,"a95":0.99,"info":"19/03/2016 at 10:54:15"},{"visible":true,"include":true,"step":"30.0","x":-64.53999999999999,"y":-80.55714285714286,"z":105.93333333333332,"a95":0.99,"info":"19/03/2016 at 10:54:15"},{"visible":true,"include":true,"step":"33.0","x":-48.798095238095236,"y":-86.53142857142858,"z":88.44857142857143,"a95":0.99,"info":"19/03/2016 at 10:54:15"},{"visible":true,"include":false,"step":"35.0","x":-27.55047619047619,"y":-92.24190476190476,"z":96.62857142857143,"a95":0.99,"info":"19/03/2016 at 10:54:15"},{"visible":true,"include":false,"step":"40.0","x":-78.74095238095238,"y":-88.93047619047618,"z":74.5904761904762,"a95":0.99,"info":"19/03/2016 at 10:54:15"},{"visible":true,"include":false,"step":"45.0","x":-27.82190476190476,"y":-73.02571428571429,"z":60.04857142857143,"a95":0.99,"info":"19/03/2016 at 10:54:15"},{"visible":true,"include":false,"step":"50.0","x":-37.48952380952381,"y":-56.81714285714286,"z":67.73809523809524,"a95":0.99,"info":"19/03/2016 at 10:54:15"},{"visible":true,"include":false,"step":"55.0","x":-55.75904761904762,"y":-53.42476190476191,"z":30.669523809523806,"a95":0.99,"info":"19/03/2016 at 10:54:15"},{"visible":true,"include":false,"step":"60.0","x":10.776190476190477,"y":-52.43047619047619,"z":69.10952380952381,"a95":0.99,"info":"19/03/2016 at 10:54:15"},{"visible":true,"include":false,"step":"65.0","x":-25.46952380952381,"y":-91.94571428571427,"z":73.12285714285714,"a95":0.99,"info":"19/03/2016 at 10:54:15"},{"visible":true,"include":false,"step":"70.0","x":-25.64761904761905,"y":-56.47238095238096,"z":46.59142857142857,"a95":0.99,"info":"19/03/2016 at 10:54:15"},{"visible":true,"include":false,"step":"80.0","x":6.222190476190476,"y":-64.24666666666667,"z":33.521904761904764,"a95":0.99,"info":"19/03/2016 at 10:54:15"}]},{"version":"v1.1.0","exported":"2016-11-24T14:03:36.345Z","volume":10.5,"added":"2016-11-24T13:57:00.822Z","format":"Utrecht","demagType":"Unknown","strat":null,"patch":1.1,"GEO":[],"TECT":[],"interpreted":false,"name":"BR5.10A","coreAzi":73,"coreDip":42,"bedStrike":237,"bedDip":9,"data":[{"visible":true,"include":false,"step":"20","x":-81.71428571428571,"y":-161.14285714285714,"z":267.8095238095238,"a95":2.5,"info":"\"16-03-14\" at \"12:26\""},{"visible":true,"include":false,"step":"100","x":-73.14285714285714,"y":-159.42857142857142,"z":139.71428571428572,"a95":2.2,"info":"\"16-03-14\" at \"14:33\""},{"visible":true,"include":false,"step":"120","x":-62.476190476190474,"y":-133.71428571428572,"z":127.61904761904762,"a95":2.3,"info":"\"16-03-15\" at \"10:37\""},{"visible":true,"include":false,"step":"150","x":-58.095238095238095,"y":-119.04761904761905,"z":123.42857142857143,"a95":2.5,"info":"\"16-03-15\" at \"13:27\""},{"visible":true,"include":false,"step":"180","x":-26.361904761904764,"y":-44.77142857142857,"z":61.92380952380953,"a95":4,"info":"\"16-03-16\" at \"14:00\""},{"visible":true,"include":false,"step":"210","x":-30.571428571428573,"y":-102.47619047619048,"z":51.142857142857146,"a95":1.7,"info":"\"16-03-17\" at \"17:10\""},{"visible":true,"include":false,"step":"250","x":0.26666666666666666,"y":-62.333333333333336,"z":71.91428571428571,"a95":3.1,"info":"\"16-03-17\" at \"20:28\""},{"visible":true,"include":false,"step":"280","x":17.80952380952381,"y":-12.095238095238095,"z":104.38095238095238,"a95":3.5,"info":"\"16-03-18\" at \"15:50\""},{"visible":true,"include":false,"step":"350","x":-41.714285714285715,"y":-85.42857142857143,"z":50.57142857142857,"a95":2,"info":"\"16-04-18\" at \"11:20\""},{"visible":true,"include":false,"step":"380","x":17.504761904761907,"y":-30.81904761904762,"z":84.88571428571429,"a95":2.4,"info":"\"16-04-18\" at \"14:08\""},{"visible":true,"include":false,"step":"410","x":3.142857142857143,"y":-128.76190476190476,"z":27.80952380952381,"a95":2.2,"info":"\"16-04-19\" at \"09:57\""},{"visible":true,"include":false,"step":"430","x":-50.5047619047619,"y":26.61904761904762,"z":-15.819047619047618,"a95":3.2,"info":"\"16-04-19\" at \"13:14\""}]},{"version":"v1.1.0","exported":"2016-11-24T14:03:36.345Z","volume":10.5,"added":"2016-11-24T13:57:00.822Z","format":"Utrecht","demagType":"Unknown","strat":null,"patch":1.1,"GEO":[],"TECT":[],"interpreted":false,"name":"BR5.14A","coreAzi":65,"coreDip":48,"bedStrike":237,"bedDip":9,"data":[{"visible":true,"include":false,"step":"20","x":-30.857142857142858,"y":-77.61904761904762,"z":175.42857142857142,"a95":2.7,"info":"\"16-03-14\" at \"12:28\""},{"visible":true,"include":false,"step":"100","x":14.761904761904763,"y":-47.714285714285715,"z":102.76190476190476,"a95":3.7,"info":"\"16-03-14\" at \"14:34\""},{"visible":true,"include":false,"step":"120","x":59.42857142857143,"y":-26.666666666666668,"z":114.28571428571429,"a95":2.7,"info":"\"16-03-15\" at \"10:38\""},{"visible":true,"include":false,"step":"150","x":65.42857142857143,"y":-22.476190476190474,"z":84.28571428571429,"a95":1.5,"info":"\"16-03-15\" at \"13:28\""},{"visible":true,"include":false,"step":"180","x":77.54285714285714,"y":-25.314285714285717,"z":30.085714285714282,"a95":2.6,"info":"\"16-03-16\" at \"14:01\""},{"visible":true,"include":false,"step":"210","x":31.80952380952381,"y":-86,"z":103.80952380952381,"a95":2.7,"info":"\"16-03-17\" at \"17:11\""},{"visible":true,"include":false,"step":"250","x":47.142857142857146,"y":-54.95238095238095,"z":77.23809523809524,"a95":2.1,"info":"\"16-03-17\" at \"20:30\""},{"visible":true,"include":false,"step":"350","x":-97.23809523809524,"y":-28.285714285714285,"z":46.19047619047619,"a95":2.1,"info":"\"16-04-18\" at \"11:23\""},{"visible":true,"include":false,"step":"380","x":-112.28571428571429,"y":-36,"z":32.285714285714285,"a95":2.1,"info":"\"16-04-18\" at \"14:10\""},{"visible":true,"include":false,"step":"410","x":2.0857142857142854,"y":12.819047619047618,"z":54.666666666666664,"a95":3.6,"info":"\"16-04-19\" at \"09:59\""}]},{"version":"v1.1.0","exported":"2016-11-24T14:03:36.345Z","volume":10.5,"added":"2016-11-24T13:57:00.823Z","format":"Utrecht","demagType":"Unknown","strat":"1","patch":1.1,"GEO":[],"TECT":[],"interpreted":false,"name":"BR5.15A","coreAzi":76,"coreDip":46,"bedStrike":237,"bedDip":9,"data":[{"visible":true,"include":false,"step":"0.0","x":-200.0952380952381,"y":-57.51809523809524,"z":144.59047619047618,"a95":0.99,"info":"19/03/2016 at 16:21:29"},{"visible":true,"include":false,"step":"10.0","x":-129.3904761904762,"y":-41.359047619047615,"z":107.93333333333332,"a95":0.99,"info":"19/03/2016 at 16:21:29"},{"visible":true,"include":false,"step":"15.0","x":-112.94285714285715,"y":-57.32380952380952,"z":104.19047619047619,"a95":0.99,"info":"19/03/2016 at 16:21:29"},{"visible":true,"include":false,"step":"20.0","x":-117.57142857142857,"y":-58.10476190476191,"z":74.80761904761906,"a95":0.99,"info":"19/03/2016 at 16:21:29"},{"visible":true,"include":false,"step":"23.0","x":-119.78095238095239,"y":-37.00857142857143,"z":82.66,"a95":0.99,"info":"19/03/2016 at 16:21:29"},{"visible":true,"include":false,"step":"25.0","x":-78.57047619047619,"y":-43.28380952380952,"z":44.81238095238095,"a95":0.99,"info":"19/03/2016 at 16:21:29"},{"visible":true,"include":false,"step":"30.0","x":-55.346666666666664,"y":-80.86952380952381,"z":77.42761904761905,"a95":0.99,"info":"19/03/2016 at 16:21:29"},{"visible":true,"include":false,"step":"33.0","x":-121.68571428571428,"y":-46.913333333333334,"z":40.710476190476186,"a95":0.99,"info":"19/03/2016 at 16:21:29"},{"visible":true,"include":false,"step":"35.0","x":-72.48285714285714,"y":-61.343809523809526,"z":58.078095238095244,"a95":0.99,"info":"19/03/2016 at 16:21:29"},{"visible":true,"include":false,"step":"40.0","x":-11.411428571428571,"y":-57.13333333333333,"z":33.94,"a95":0.99,"info":"19/03/2016 at 16:21:29"},{"visible":true,"include":false,"step":"45.0","x":-36.829523809523806,"y":-46.70666666666667,"z":70.8495238095238,"a95":0.99,"info":"19/03/2016 at 16:21:29"},{"visible":true,"include":false,"step":"50.0","x":-44.50190476190476,"y":-44.446666666666665,"z":50.05809523809524,"a95":0.99,"info":"19/03/2016 at 16:21:29"},{"visible":true,"include":false,"step":"55.0","x":-75.11238095238095,"y":-12.397142857142857,"z":75.53999999999999,"a95":0.99,"info":"19/03/2016 at 16:21:29"},{"visible":true,"include":false,"step":"60.0","x":-95.94285714285714,"y":-24.676190476190477,"z":22.19047619047619,"a95":0.99,"info":"19/03/2016 at 16:21:29"},{"visible":true,"include":false,"step":"65.0","x":-71.61142857142856,"y":-49.01238095238095,"z":20.89428571428571,"a95":0.99,"info":"19/03/2016 at 16:21:29"},{"visible":true,"include":false,"step":"70.0","x":-13.78,"y":-14.871428571428572,"z":34.36,"a95":0.99,"info":"19/03/2016 at 16:21:29"},{"visible":true,"include":false,"step":"80.0","x":-20.385714285714286,"y":23.612380952380953,"z":-34.315238095238094,"a95":0.99,"info":"19/03/2016 at 16:21:29"}]},{"version":"v1.1.0","exported":"2016-11-24T14:03:36.345Z","volume":10.5,"added":"2016-11-24T13:57:00.823Z","format":"Utrecht","demagType":"Unknown","strat":"1","patch":1.1,"GEO":[{"dec":3.470432218975475,"inc":46.25767514613662,"MAD":10.034090807642208,"cm":[0,-9.992007221626409e-16,0],"intensity":189.06298653384673,"type":"dir","forced":true,"remark":"","origin":false,"nSteps":8,"minStep":"23.0","maxStep":"50.0","steps":["23.0","25.0","30.0","33.0","35.0","40.0","45.0","50.0"],"group":"None","version":"v1.1.0"}],"TECT":[{"dec":358.8257470905752,"inc":38.79843519610416,"MAD":10.034090807642217,"cm":[0,4.786102070220011e-15,0],"intensity":189.0629865338467,"type":"dir","forced":true,"remark":"","origin":false,"nSteps":8,"minStep":"23.0","maxStep":"50.0","steps":["23.0","25.0","30.0","33.0","35.0","40.0","45.0","50.0"],"group":"None","version":"v1.1.0"}],"interpreted":true,"name":"BR5.15B","coreAzi":76,"coreDip":46,"bedStrike":237,"bedDip":9,"data":[{"visible":true,"include":false,"step":"0.0","x":-96.06666666666668,"y":-155.31428571428572,"z":165.05714285714285,"a95":0.99,"info":"20/03/2016 at 14:11:13"},{"visible":true,"include":false,"step":"10.0","x":-48.1,"y":-144.96190476190475,"z":116.24761904761904,"a95":0.99,"info":"20/03/2016 at 14:11:13"},{"visible":true,"include":false,"step":"15.0","x":-38.097142857142856,"y":-112.84761904761906,"z":76.55619047619048,"a95":0.99,"info":"20/03/2016 at 14:11:13"},{"visible":true,"include":false,"step":"20.0","x":-35.01238095238095,"y":-95.14380952380952,"z":78.62666666666667,"a95":0.99,"info":"20/03/2016 at 14:11:13"},{"visible":true,"include":true,"step":"23.0","x":-42.84571428571429,"y":-84.76571428571428,"z":84.57333333333334,"a95":0.99,"info":"20/03/2016 at 14:11:13"},{"visible":true,"include":true,"step":"25.0","x":-33.289523809523814,"y":-74.84666666666666,"z":73.03999999999999,"a95":0.99,"info":"20/03/2016 at 14:11:13"},{"visible":true,"include":true,"step":"30.0","x":-20.843809523809526,"y":-91.43809523809524,"z":58.2,"a95":0.99,"info":"20/03/2016 at 14:11:13"},{"visible":true,"include":true,"step":"33.0","x":-35.71333333333333,"y":-75.64380952380952,"z":69.85904761904762,"a95":0.99,"info":"20/03/2016 at 14:11:13"},{"visible":true,"include":true,"step":"35.0","x":-55.714285714285715,"y":-85.33428571428571,"z":87.11142857142856,"a95":0.99,"info":"20/03/2016 at 14:11:13"},{"visible":true,"include":true,"step":"40.0","x":-39.523809523809526,"y":-19.236190476190476,"z":57.18952380952381,"a95":0.99,"info":"20/03/2016 at 14:11:13"},{"visible":true,"include":true,"step":"45.0","x":-30.884761904761906,"y":-58.70666666666666,"z":62.24666666666667,"a95":0.99,"info":"20/03/2016 at 14:11:13"},{"visible":true,"include":true,"step":"50.0","x":-34.142857142857146,"y":-22.16095238095238,"z":51.01523809523809,"a95":0.99,"info":"20/03/2016 at 14:11:13"},{"visible":true,"include":false,"step":"55.0","x":0.9910476190476191,"y":-83.86761904761904,"z":35.679047619047616,"a95":0.99,"info":"20/03/2016 at 14:11:13"},{"visible":false,"include":false,"step":"60.0","x":7.680095238095238,"y":-72.75523809523808,"z":15.578095238095237,"a95":0.99,"info":"20/03/2016 at 14:11:13"},{"visible":false,"include":false,"step":"65.0","x":15.822857142857142,"y":-20.561904761904763,"z":21.93904761904762,"a95":0.99,"info":"20/03/2016 at 14:11:13"},{"visible":false,"include":false,"step":"70.0","x":-1.9213333333333333,"y":-42.10476190476191,"z":34.82380952380952,"a95":0.99,"info":"20/03/2016 at 14:11:13"},{"visible":false,"include":false,"step":"80.0","x":52.14666666666666,"y":-10.459047619047618,"z":36.34190476190476,"a95":0.99,"info":"20/03/2016 at 14:11:13"}]},{"version":"v1.1.0","exported":"2016-11-24T14:03:36.345Z","volume":10.5,"added":"2016-11-24T13:57:00.823Z","format":"Utrecht","demagType":"Unknown","strat":"1","patch":1.1,"GEO":[{"dec":3.043279004658359,"inc":56.24796268512944,"MAD":4.667974178130851,"cm":[389.81277524642917,10.1761997667664,592.3465341092626],"intensity":810.4130668160608,"type":"dir","forced":false,"remark":"","origin":false,"nSteps":7,"minStep":"0.0","maxStep":"30.0","steps":["0.0","10.0","15.0","20.0","23.0","25.0","30.0"],"group":"None","version":"v1.1.0"}],"TECT":[{"dec":356.6724793553435,"inc":48.67154495632029,"MAD":4.667974178130911,"cm":[464.2084449174041,-38.136913018578404,534.7785212506678],"intensity":810.4130668160608,"type":"dir","forced":false,"remark":"","origin":false,"nSteps":7,"minStep":"0.0","maxStep":"30.0","steps":["0.0","10.0","15.0","20.0","23.0","25.0","30.0"],"group":"None","version":"v1.1.0"}],"interpreted":true,"name":"BR5.18B","coreAzi":52,"coreDip":8,"bedStrike":237,"bedDip":9,"data":[{"visible":true,"include":true,"step":"0.0","x":-978.7619047619048,"y":-524.0666666666666,"z":593.3047619047619,"a95":0.99,"info":"20/03/2016 at 14:11:13"},{"visible":true,"include":true,"step":"10.0","x":-683.6285714285715,"y":-380.4190476190476,"z":425.8095238095238,"a95":0.99,"info":"20/03/2016 at 14:11:13"},{"visible":true,"include":true,"step":"15.0","x":-569.2571428571429,"y":-322.81904761904764,"z":328.64761904761906,"a95":0.99,"info":"20/03/2016 at 14:11:13"},{"visible":true,"include":true,"step":"20.0","x":-476.6761904761905,"y":-267.51428571428573,"z":257.8666666666667,"a95":0.99,"info":"20/03/2016 at 14:11:13"},{"visible":true,"include":true,"step":"23.0","x":-428.0380952380952,"y":-217.73333333333332,"z":226.21904761904764,"a95":0.99,"info":"20/03/2016 at 14:11:13"},{"visible":true,"include":true,"step":"25.0","x":-394.5142857142857,"y":-209.0761904761905,"z":225.1904761904762,"a95":0.99,"info":"20/03/2016 at 14:11:13"},{"visible":true,"include":true,"step":"30.0","x":-333.5809523809524,"y":-184.75238095238097,"z":239.21904761904764,"a95":0.99,"info":"20/03/2016 at 14:11:13"},{"visible":true,"include":false,"step":"33.0","x":-304.43809523809523,"y":-158.42857142857142,"z":230.43809523809523,"a95":0.99,"info":"20/03/2016 at 14:11:13"},{"visible":true,"include":false,"step":"35.0","x":-271.7904761904762,"y":-183.8190476190476,"z":228.6095238095238,"a95":0.99,"info":"20/03/2016 at 14:11:13"},{"visible":true,"include":false,"step":"40.0","x":-283.34285714285716,"y":-132.38095238095238,"z":162.34285714285713,"a95":0.99,"info":"20/03/2016 at 14:11:13"},{"visible":true,"include":false,"step":"45.0","x":-223.37142857142857,"y":-131.9142857142857,"z":161.28571428571428,"a95":0.99,"info":"20/03/2016 at 14:11:13"},{"visible":true,"include":false,"step":"50.0","x":-209.53333333333333,"y":-153.13333333333335,"z":108.33333333333333,"a95":0.99,"info":"20/03/2016 at 14:11:13"},{"visible":true,"include":false,"step":"55.0","x":-157.42857142857142,"y":-136.83809523809524,"z":89.84,"a95":0.99,"info":"20/03/2016 at 14:11:13"},{"visible":true,"include":false,"step":"60.0","x":-114.46666666666667,"y":-99.94285714285715,"z":120.19999999999999,"a95":0.99,"info":"20/03/2016 at 14:11:13"},{"visible":true,"include":false,"step":"65.0","x":-105.72380952380952,"y":-138.61904761904762,"z":73.31809523809524,"a95":0.99,"info":"20/03/2016 at 14:11:13"},{"visible":true,"include":false,"step":"70.0","x":-105.63809523809525,"y":-73.13142857142857,"z":63.537142857142854,"a95":0.99,"info":"20/03/2016 at 14:11:13"},{"visible":true,"include":false,"step":"80.0","x":-12.024761904761906,"y":-123.4,"z":1.4097142857142857,"a95":0.99,"info":"20/03/2016 at 14:11:13"}]},{"version":"v1.1.0","exported":"2016-11-24T14:03:36.345Z","volume":10.5,"added":"2016-11-24T13:57:00.823Z","format":"Utrecht","demagType":"Unknown","strat":null,"patch":1.1,"GEO":[{"dec":356.8115006022775,"inc":54.52218835345987,"MAD":4.800750474169772,"cm":[140.48469717375968,13.651063123282025,176.95747702693228],"intensity":282.18451370201484,"type":"dir","forced":false,"remark":"","origin":false,"nSteps":5,"minStep":"100","maxStep":"250","steps":["100","150","180","210","250"],"group":"None","version":"v1.1.0"}],"TECT":[{"dec":351.7888742705267,"inc":46.51352246448142,"MAD":4.800750474169772,"cm":[162.56120690198523,-0.6855899255263624,157.51074349757863],"intensity":282.1845137020148,"type":"dir","forced":false,"remark":"","origin":false,"nSteps":5,"minStep":"100","maxStep":"250","steps":["100","150","180","210","250"],"group":"None","version":"v1.1.0"}],"interpreted":true,"name":"BR5.19A","coreAzi":72,"coreDip":10,"bedStrike":237,"bedDip":9,"data":[{"visible":true,"include":false,"step":"20","x":-508.1904761904762,"y":-362.1904761904762,"z":295.3333333333333,"a95":2,"info":"\"16-03-14\" at \"12:29\""},{"visible":true,"include":true,"step":"100","x":-309.04761904761904,"y":-237.9047619047619,"z":143.8095238095238,"a95":1.8,"info":"\"16-03-14\" at \"14:35\""},{"visible":false,"include":false,"step":"120","x":37.714285714285715,"y":-39.714285714285715,"z":-222.95238095238096,"a95":2.3,"info":"\"16-03-15\" at \"10:39\""},{"visible":true,"include":true,"step":"150","x":-190.66666666666666,"y":-135.52380952380952,"z":88.85714285714286,"a95":2,"info":"\"16-03-15\" at \"13:29\""},{"visible":true,"include":true,"step":"180","x":-129.42857142857142,"y":-110,"z":68.19047619047619,"a95":2.4,"info":"\"16-03-16\" at \"14:02\""},{"visible":true,"include":true,"step":"210","x":-101.9047619047619,"y":-89.52380952380952,"z":59.904761904761905,"a95":2.2,"info":"\"16-03-17\" at \"17:12\""},{"visible":true,"include":true,"step":"250","x":-91.33333333333333,"y":-74,"z":70.57142857142857,"a95":2.9,"info":"\"16-03-17\" at \"20:31\""},{"visible":true,"include":false,"step":"280","x":-85.23809523809524,"y":-64.76190476190476,"z":92.0952380952381,"a95":3.4,"info":"\"16-03-18\" at \"15:51\""},{"visible":true,"include":false,"step":"310","x":-83.9047619047619,"y":-81.04761904761905,"z":75.61904761904762,"a95":3.2,"info":"\"16-03-20\" at \"15:16\""},{"visible":true,"include":false,"step":"350","x":-107.33333333333333,"y":-71.61904761904762,"z":38.57142857142857,"a95":2.1,"info":"\"16-04-18\" at \"11:28\""},{"visible":true,"include":false,"step":"380","x":-85.33333333333333,"y":-60.38095238095238,"z":36,"a95":2,"info":"\"16-04-18\" at \"14:12\""},{"visible":true,"include":false,"step":"410","x":-71.42857142857143,"y":-68.0952380952381,"z":25.238095238095237,"a95":2.2,"info":"\"16-04-19\" at \"10:02\""},{"visible":true,"include":false,"step":"430","x":-99.71428571428571,"y":-68.76190476190476,"z":-10.857142857142858,"a95":2.3,"info":"\"16-04-19\" at \"13:16\""},{"visible":true,"include":false,"step":"450","x":-71.87619047619049,"y":-58.523809523809526,"z":14.123809523809525,"a95":2.2,"info":"\"16-04-20\" at \"13:54\""}]},{"version":"v1.1.0","exported":"2016-11-24T14:03:36.345Z","volume":10.5,"added":"2016-11-24T13:57:00.824Z","format":"Utrecht","demagType":"Unknown","strat":"1","patch":1.1,"GEO":[],"TECT":[],"interpreted":false,"name":"BR5.20A","coreAzi":64,"coreDip":17,"bedStrike":237,"bedDip":9,"data":[{"visible":true,"include":false,"step":"0.0","x":-63.07523809523809,"y":-42.23238095238095,"z":24.50095238095238,"a95":0.99,"info":"19/03/2016 at 16:21:29"},{"visible":true,"include":true,"step":"10.0","x":-43.301904761904765,"y":-24.674285714285713,"z":21.51047619047619,"a95":0.99,"info":"19/03/2016 at 16:21:29"},{"visible":true,"include":true,"step":"15.0","x":-30.65904761904762,"y":-24.589523809523808,"z":10.938095238095238,"a95":0.99,"info":"19/03/2016 at 16:21:29"},{"visible":true,"include":true,"step":"20.0","x":-35.26761904761905,"y":-27.522857142857145,"z":7.829428571428572,"a95":0.99,"info":"19/03/2016 at 16:21:29"},{"visible":true,"include":true,"step":"23.0","x":-23.18095238095238,"y":-10.298095238095238,"z":9.821904761904761,"a95":0.99,"info":"19/03/2016 at 16:21:29"},{"visible":true,"include":true,"step":"25.0","x":-21.68095238095238,"y":-4.801238095238095,"z":10.12095238095238,"a95":0.99,"info":"19/03/2016 at 16:21:29"},{"visible":true,"include":true,"step":"30.0","x":-19.935238095238095,"y":-9.878095238095238,"z":13.607619047619048,"a95":0.99,"info":"19/03/2016 at 16:21:29"},{"visible":true,"include":false,"step":"33.0","x":-17.081904761904763,"y":-4.890285714285715,"z":14.225714285714286,"a95":0.99,"info":"19/03/2016 at 16:21:29"},{"visible":true,"include":false,"step":"35.0","x":-8.37257142857143,"y":-1.6895238095238094,"z":13.204761904761906,"a95":0.99,"info":"19/03/2016 at 16:21:29"},{"visible":true,"include":false,"step":"40.0","x":-9.963809523809525,"y":-0.7353142857142857,"z":18.82952380952381,"a95":0.99,"info":"19/03/2016 at 16:21:29"},{"visible":true,"include":false,"step":"45.0","x":-19.125714285714285,"y":-3.6981904761904767,"z":12.46,"a95":0.99,"info":"19/03/2016 at 16:21:29"},{"visible":true,"include":false,"step":"50.0","x":-11.352380952380953,"y":-4.286476190476191,"z":5.0578095238095235,"a95":0.99,"info":"19/03/2016 at 16:21:29"},{"visible":true,"include":false,"step":"55.0","x":-17.049523809523812,"y":-13.28,"z":6.63752380952381,"a95":0.99,"info":"19/03/2016 at 16:21:29"},{"visible":true,"include":false,"step":"60.0","x":-7.580571428571429,"y":-1.9066666666666667,"z":6.611714285714286,"a95":0.99,"info":"19/03/2016 at 16:21:29"},{"visible":true,"include":false,"step":"65.0","x":4.9932380952380955,"y":2.449047619047619,"z":6.281142857142857,"a95":0.99,"info":"19/03/2016 at 16:21:29"},{"visible":true,"include":false,"step":"70.0","x":1.220952380952381,"y":-2.4153333333333333,"z":18.547619047619047,"a95":0.99,"info":"19/03/2016 at 16:21:29"},{"visible":true,"include":false,"step":"80.0","x":-6.140190476190476,"y":5.695714285714286,"z":7.564380952380953,"a95":0.99,"info":"19/03/2016 at 16:21:29"}]},{"version":"v1.1.0","exported":"2016-11-24T14:03:36.345Z","volume":10.5,"added":"2016-11-24T13:57:00.824Z","format":"Utrecht","demagType":"Unknown","strat":null,"patch":1.1,"GEO":[],"TECT":[],"interpreted":false,"name":"BR5.21A","coreAzi":70,"coreDip":14,"bedStrike":237,"bedDip":9,"data":[{"visible":true,"include":false,"step":"20","x":-50.266666666666666,"y":-25.257142857142856,"z":31.18095238095238,"a95":2.3,"info":"\"16-03-14\" at \"12:30\""},{"visible":true,"include":false,"step":"100","x":-38.89523809523809,"y":-15.266666666666667,"z":24.123809523809523,"a95":2.6,"info":"\"16-03-14\" at \"14:36\""},{"visible":false,"include":false,"step":"120","x":-110.19047619047619,"y":57.904761904761905,"z":69.23809523809524,"a95":2.1,"info":"\"16-03-15\" at \"10:40\""},{"visible":true,"include":true,"step":"150","x":-28.323809523809523,"y":-12.142857142857142,"z":4.847619047619047,"a95":5.9,"info":"\"16-03-15\" at \"13:31\""},{"visible":true,"include":true,"step":"180","x":-20.304761904761904,"y":-7.3047619047619055,"z":12.180952380952382,"a95":4.8,"info":"\"16-03-16\" at \"14:03\""},{"visible":true,"include":false,"step":"210","x":-16.085714285714285,"y":-6.723809523809523,"z":8.219047619047618,"a95":3.5,"info":"\"16-03-17\" at \"17:14\""},{"visible":true,"include":false,"step":"250","x":-13.447619047619046,"y":-0.34285714285714286,"z":7.323809523809524,"a95":3.5,"info":"\"16-03-17\" at \"20:32\""},{"visible":true,"include":false,"step":"280","x":-3.7809523809523813,"y":-18.057142857142857,"z":26.666666666666668,"a95":5.2,"info":"\"16-03-18\" at \"15:52\""},{"visible":true,"include":false,"step":"310","x":-6.285714285714286,"y":-18.152380952380952,"z":9.628571428571428,"a95":6.2,"info":"\"16-03-20\" at \"15:17\""},{"visible":true,"include":false,"step":"350","x":-9.704761904761906,"y":-10.428571428571429,"z":2.8190476190476192,"a95":3.8,"info":"\"16-04-18\" at \"11:31\""},{"visible":true,"include":false,"step":"380","x":-6.504761904761905,"y":-20.085714285714285,"z":15.066666666666666,"a95":3.2,"info":"\"16-04-18\" at \"14:15\""},{"visible":true,"include":false,"step":"410","x":-9.80952380952381,"y":-3.5619047619047617,"z":5.333333333333333,"a95":5.3,"info":"\"16-04-19\" at \"10:04\""},{"visible":true,"include":false,"step":"430","x":-23.066666666666666,"y":0.7714285714285714,"z":0.7714285714285714,"a95":5.5,"info":"\"16-04-19\" at \"13:26\""},{"visible":true,"include":false,"step":"450","x":-12.314285714285715,"y":-6.561904761904763,"z":-3.3714285714285714,"a95":5.2,"info":"\"16-04-20\" at \"13:56\""}]},{"version":"v1.1.0","exported":"2016-11-24T14:03:36.345Z","volume":10.5,"added":"2016-11-24T13:57:00.824Z","format":"Utrecht","demagType":"Unknown","strat":"1","patch":1.1,"GEO":[],"TECT":[],"interpreted":false,"name":"BR5.21B","coreAzi":70,"coreDip":14,"bedStrike":237,"bedDip":9,"data":[{"visible":true,"include":false,"step":"0.0","x":-71.84285714285714,"y":-45.52095238095238,"z":34.936190476190475,"a95":0.99,"info":"20/03/2016 at 14:11:13"},{"visible":true,"include":false,"step":"10.0","x":-43.31428571428572,"y":-31.24,"z":21.65809523809524,"a95":0.99,"info":"20/03/2016 at 14:11:13"},{"visible":true,"include":false,"step":"15.0","x":-38.139047619047616,"y":-28.54285714285714,"z":18.177142857142858,"a95":0.99,"info":"20/03/2016 at 14:11:13"},{"visible":true,"include":false,"step":"20.0","x":-29.623809523809523,"y":-31.134285714285717,"z":12.651428571428571,"a95":0.99,"info":"20/03/2016 at 14:11:13"},{"visible":true,"include":false,"step":"23.0","x":-39.91238095238095,"y":-28.48952380952381,"z":10.568571428571428,"a95":0.99,"info":"20/03/2016 at 14:11:13"},{"visible":true,"include":false,"step":"25.0","x":-31.14666666666667,"y":-29.836190476190474,"z":14.574285714285715,"a95":0.99,"info":"20/03/2016 at 14:11:13"},{"visible":true,"include":false,"step":"30.0","x":-26.330476190476194,"y":-23.53047619047619,"z":1.5721904761904761,"a95":0.99,"info":"20/03/2016 at 14:11:13"},{"visible":true,"include":false,"step":"33.0","x":-25.822857142857142,"y":-28.133333333333333,"z":17.10952380952381,"a95":0.99,"info":"20/03/2016 at 14:11:13"},{"visible":true,"include":false,"step":"35.0","x":-33.35333333333333,"y":-24.562857142857144,"z":8.52704761904762,"a95":0.99,"info":"20/03/2016 at 14:11:13"},{"visible":true,"include":false,"step":"40.0","x":-37.30952380952381,"y":-10.177142857142858,"z":5.511142857142857,"a95":0.99,"info":"20/03/2016 at 14:11:13"},{"visible":true,"include":false,"step":"45.0","x":-19.68285714285714,"y":-7.927619047619047,"z":7.8508571428571425,"a95":0.99,"info":"20/03/2016 at 14:11:13"},{"visible":true,"include":false,"step":"50.0","x":-20.66857142857143,"y":-5.620380952380953,"z":5.380190476190476,"a95":0.99,"info":"20/03/2016 at 14:11:13"},{"visible":true,"include":false,"step":"55.0","x":-7.508380952380952,"y":-5.5122857142857145,"z":2.3453333333333335,"a95":0.99,"info":"20/03/2016 at 14:11:13"},{"visible":true,"include":false,"step":"60.0","x":-16.99238095238095,"y":5.2570476190476185,"z":-3.1299047619047617,"a95":0.99,"info":"20/03/2016 at 14:11:13"},{"visible":true,"include":false,"step":"65.0","x":0.09866666666666667,"y":6.210380952380953,"z":0.2405142857142857,"a95":0.99,"info":"20/03/2016 at 14:11:13"},{"visible":true,"include":false,"step":"70.0","x":-15.729523809523808,"y":-6.796952380952381,"z":12.004761904761905,"a95":0.99,"info":"20/03/2016 at 14:11:13"},{"visible":true,"include":false,"step":"80.0","x":1.2183809523809523,"y":-2.654095238095238,"z":8.869619047619048,"a95":0.99,"info":"20/03/2016 at 14:11:13"}]},{"version":"v1.1.0","exported":"2016-11-24T14:03:36.346Z","volume":10.5,"added":"2016-11-24T13:57:00.825Z","format":"Utrecht","demagType":"Unknown","strat":"1","patch":1.1,"GEO":[{"dec":0.26684286008696745,"inc":53.279204587144456,"MAD":1.397827843722177,"cm":[-1.7763568394002505e-15,-9.658940314238862e-15,0],"intensity":891.6800673726311,"type":"dir","forced":true,"remark":"","origin":false,"nSteps":7,"minStep":"30.0","maxStep":"55.0","steps":["30.0","33.0","35.0","40.0","45.0","50.0","55.0"],"group":"None","version":"v1.1.0"}],"TECT":[{"dec":354.9106402138442,"inc":45.519052491679794,"MAD":1.397827843722606,"cm":[0,-4.4853010194856324e-14,-3.552713678800501e-15],"intensity":891.6800673726311,"type":"dir","forced":true,"remark":"","origin":false,"nSteps":7,"minStep":"30.0","maxStep":"55.0","steps":["30.0","33.0","35.0","40.0","45.0","50.0","55.0"],"group":"None","version":"v1.1.0"}],"interpreted":true,"name":"BR5.23A","coreAzi":74,"coreDip":8,"bedStrike":237,"bedDip":9,"data":[{"visible":true,"include":false,"step":"0.0","x":-813.7904761904762,"y":-643.1428571428571,"z":281.2190476190476,"a95":0.99,"info":"19/03/2016 at 16:21:29"},{"visible":true,"include":false,"step":"10.0","x":-608.4761904761905,"y":-502.2285714285714,"z":228.51428571428573,"a95":0.99,"info":"19/03/2016 at 16:21:29"},{"visible":true,"include":false,"step":"15.0","x":-545.9142857142857,"y":-431.85714285714283,"z":222.2,"a95":0.99,"info":"19/03/2016 at 16:21:29"},{"visible":true,"include":false,"step":"20.0","x":-502.6380952380952,"y":-385.2857142857143,"z":200.7047619047619,"a95":0.99,"info":"19/03/2016 at 16:21:29"},{"visible":true,"include":false,"step":"23.0","x":-467.5904761904762,"y":-366.1714285714286,"z":187.0095238095238,"a95":0.99,"info":"19/03/2016 at 16:21:29"},{"visible":true,"include":false,"step":"25.0","x":-446.9047619047619,"y":-351.8952380952381,"z":176.03809523809525,"a95":0.99,"info":"19/03/2016 at 16:21:29"},{"visible":true,"include":true,"step":"30.0","x":-409.35238095238094,"y":-301.1904761904762,"z":157.1238095238095,"a95":0.99,"info":"19/03/2016 at 16:21:29"},{"visible":true,"include":true,"step":"33.0","x":-383.9809523809524,"y":-285.96190476190475,"z":144.54285714285714,"a95":0.99,"info":"19/03/2016 at 16:21:29"},{"visible":true,"include":true,"step":"35.0","x":-378.25714285714287,"y":-273.64761904761906,"z":123.96190476190475,"a95":0.99,"info":"19/03/2016 at 16:21:29"},{"visible":true,"include":true,"step":"40.0","x":-342.4666666666667,"y":-256.4761904761905,"z":137.67619047619047,"a95":0.99,"info":"19/03/2016 at 16:21:29"},{"visible":true,"include":true,"step":"45.0","x":-328.6095238095238,"y":-247.87619047619046,"z":119.01904761904763,"a95":0.99,"info":"19/03/2016 at 16:21:29"},{"visible":true,"include":true,"step":"50.0","x":-308.247619047619,"y":-231.82857142857142,"z":98.80000000000001,"a95":0.99,"info":"19/03/2016 at 16:21:29"},{"visible":true,"include":true,"step":"55.0","x":-275.83809523809526,"y":-214.41904761904763,"z":87.32285714285715,"a95":0.99,"info":"19/03/2016 at 16:21:29"},{"visible":true,"include":false,"step":"60.0","x":-248.51428571428573,"y":-183.71428571428572,"z":84.0352380952381,"a95":0.99,"info":"19/03/2016 at 16:21:29"},{"visible":true,"include":false,"step":"65.0","x":-240.68571428571425,"y":-198.12380952380954,"z":77.4047619047619,"a95":0.99,"info":"19/03/2016 at 16:21:29"},{"visible":true,"include":false,"step":"70.0","x":-195.63809523809522,"y":-147.03809523809525,"z":76.88952380952381,"a95":0.99,"info":"19/03/2016 at 16:21:29"},{"visible":true,"include":false,"step":"80.0","x":-94.60095238095238,"y":-105.3047619047619,"z":32.43238095238095,"a95":0.99,"info":"19/03/2016 at 16:21:29"}]}]
