# Supplementary material for: Paleomagnetic constraints on the timing and distribution of Cenozoic rotations in Central and Eastern Anatolia
Source: Copernicus journal article supplement (doi:10.5194/se-9-295-2018), 2018-03-21
Supplement: Supplementary file 2 [file se-9-295-2018-supplement.zip › se-2017-66_DATA_dir files/dir files Tauride basins/BR6.dir]

[{"version":"v1.1.0","exported":"2016-11-24T14:11:48.210Z","volume":10.5,"added":"2016-11-24T14:04:42.702Z","format":"Utrecht","demagType":"Unknown","strat":null,"patch":1.1,"GEO":[{"dec":342.62060612604233,"inc":36.28645658964777,"MAD":2.778589850063887,"cm":[-2.842170943040401e-14,-1.2079226507921703e-13,0],"intensity":4908.347688786279,"type":"dir","forced":true,"remark":"","origin":false,"nSteps":7,"minStep":"100","maxStep":"270","steps":["100","150","180","210","240","270","270"],"group":"None","version":"v1.1.0"}],"TECT":[{"dec":345.2817569723851,"inc":38.22980217698035,"MAD":2.7785898500638555,"cm":[-5.684341886080802e-14,-2.7355895326763857e-13,-1.4210854715202004e-14],"intensity":4908.347688786278,"type":"dir","forced":true,"remark":"","origin":false,"nSteps":7,"minStep":"100","maxStep":"270","steps":["100","150","180","210","240","270","270"],"group":"None","version":"v1.1.0"}],"interpreted":true,"name":"BR6.01A","coreAzi":298,"coreDip":4,"bedStrike":13,"bedDip":4,"data":[{"visible":true,"include":false,"step":"20","x":-2104.7619047619046,"y":1933.7142857142858,"z":1704.857142857143,"a95":1.9,"info":"\"16-04-18\" at \"09:28\""},{"visible":true,"include":true,"step":"100","x":-1807.7142857142858,"y":1620.2857142857142,"z":1865.142857142857,"a95":1.9,"info":"\"16-04-18\" at \"11:55\""},{"visible":true,"include":true,"step":"150","x":-1561.142857142857,"y":1445.142857142857,"z":1678.857142857143,"a95":1.9,"info":"\"16-04-18\" at \"15:00\""},{"visible":true,"include":true,"step":"180","x":-1381.904761904762,"y":1533.8095238095239,"z":1635.6190476190477,"a95":1.8,"info":"\"16-04-19\" at \"10:52\""},{"visible":true,"include":true,"step":"210","x":-1336.1904761904761,"y":1421.7142857142858,"z":1554,"a95":2,"info":"\"16-04-19\" at \"14:04\""},{"visible":true,"include":true,"step":"240","x":-1060.2857142857142,"y":1332.6666666666667,"z":1342.7619047619048,"a95":1.9,"info":"\"16-04-20\" at \"09:29\""},{"visible":true,"include":true,"step":"270","x":-1083.5238095238096,"y":1270.4761904761904,"z":1267.047619047619,"a95":1.9,"info":"\"16-04-21\" at \"10:50\""},{"visible":true,"include":true,"step":"270","x":-1078.4761904761904,"y":1058.4761904761904,"z":1065.047619047619,"a95":2,"info":"\"16-04-21\" at \"14:18\""}]},{"version":"v1.1.0","exported":"2016-11-24T14:11:48.211Z","volume":10.5,"added":"2016-11-24T14:04:42.703Z","format":"Utrecht","demagType":"Unknown","strat":null,"patch":1.1,"GEO":[],"TECT":[],"interpreted":false,"name":"BR6.02A","coreAzi":304,"coreDip":3,"bedStrike":13,"bedDip":4,"data":[{"visible":true,"include":false,"step":"20","x":-751.4285714285714,"y":3800.7619047619046,"z":1426.3809523809523,"a95":1.6,"info":"\"16-04-18\" at \"09:30\""},{"visible":true,"include":false,"step":"100","x":216.66666666666666,"y":2866.7619047619046,"z":227.23809523809524,"a95":1.5,"info":"\"16-04-18\" at \"11:56\""},{"visible":true,"include":false,"step":"150","x":738.6666666666666,"y":2554.6666666666665,"z":126.66666666666667,"a95":1.5,"info":"\"16-04-18\" at \"15:01\""},{"visible":true,"include":false,"step":"180","x":440.57142857142856,"y":2324.6666666666665,"z":123.80952380952381,"a95":1.6,"info":"\"16-04-19\" at \"10:54\""},{"visible":true,"include":false,"step":"210","x":384,"y":2718.5714285714284,"z":-4.285714285714286,"a95":1.6,"info":"\"16-04-19\" at \"14:06\""},{"visible":true,"include":false,"step":"240","x":-285.14285714285717,"y":2749.809523809524,"z":910.2857142857143,"a95":1.6,"info":"\"16-04-20\" at \"09:31\""},{"visible":true,"include":false,"step":"270","x":-353.42857142857144,"y":2850.8571428571427,"z":761.2380952380952,"a95":1.7,"info":"\"16-04-21\" at \"10:52\""},{"visible":true,"include":false,"step":"300","x":-617.047619047619,"y":2487.904761904762,"z":1146.857142857143,"a95":1.8,"info":"\"16-04-21\" at \"14:22\""}]},{"version":"v1.1.0","exported":"2016-11-24T14:11:48.211Z","volume":10.5,"added":"2016-11-24T14:04:42.704Z","format":"Utrecht","demagType":"Unknown","strat":"1","patch":1.1,"GEO":[],"TECT":[],"interpreted":false,"name":"BR6.02B","coreAzi":304,"coreDip":3,"bedStrike":13,"bedDip":4,"data":[{"visible":true,"include":false,"step":"0.0","x":-21.993333333333332,"y":3813.0476190476193,"z":349.9047619047619,"a95":0.99,"info":"19/03/2016 at 16:21:29"},{"visible":true,"include":false,"step":"10.0","x":635.2476190476191,"y":2301.1428571428573,"z":435.9619047619048,"a95":0.99,"info":"19/03/2016 at 16:21:29"},{"visible":true,"include":false,"step":"15.0","x":258.3904761904762,"y":2192.4761904761904,"z":648.8,"a95":0.99,"info":"19/03/2016 at 16:21:29"},{"visible":true,"include":false,"step":"20.0","x":383.8857142857143,"y":1823.142857142857,"z":466.49523809523805,"a95":0.99,"info":"19/03/2016 at 16:21:29"},{"visible":true,"include":false,"step":"23.0","x":364.49523809523805,"y":1782.2857142857142,"z":411.54285714285714,"a95":0.99,"info":"19/03/2016 at 16:21:29"},{"visible":true,"include":false,"step":"25.0","x":174.01904761904763,"y":1485.7142857142858,"z":246.7047619047619,"a95":0.99,"info":"19/03/2016 at 16:21:29"},{"visible":true,"include":false,"step":"30.0","x":-105.48571428571428,"y":1051.904761904762,"z":540.5333333333334,"a95":0.99,"info":"19/03/2016 at 16:21:29"},{"visible":true,"include":false,"step":"33.0","x":67.56,"y":1185.3333333333333,"z":153.57142857142858,"a95":0.99,"info":"19/03/2016 at 16:21:29"},{"visible":true,"include":false,"step":"35.0","x":6.763047619047619,"y":664.2571428571429,"z":-3.539142857142857,"a95":0.99,"info":"19/03/2016 at 16:21:29"},{"visible":true,"include":false,"step":"40.0","x":-38.94,"y":148.14285714285714,"z":-142.35238095238097,"a95":0.99,"info":"19/03/2016 at 16:21:29"},{"visible":true,"include":false,"step":"45.0","x":369.49523809523805,"y":578.1333333333333,"z":29.06190476190476,"a95":0.99,"info":"19/03/2016 at 16:21:29"},{"visible":true,"include":false,"step":"50.0","x":129.93333333333334,"y":-346.3904761904762,"z":-223.43809523809523,"a95":0.99,"info":"19/03/2016 at 16:21:29"},{"visible":true,"include":false,"step":"55.0","x":-235.06666666666666,"y":-361.35238095238094,"z":-41.02857142857143,"a95":0.99,"info":"19/03/2016 at 16:21:29"},{"visible":true,"include":false,"step":"60.0","x":213.49523809523808,"y":-86.06952380952382,"z":-43.22190476190476,"a95":0.99,"info":"19/03/2016 at 16:21:29"},{"visible":true,"include":false,"step":"65.0","x":-139.58095238095237,"y":-808.1809523809524,"z":-47.77047619047619,"a95":0.99,"info":"19/03/2016 at 16:21:29"},{"visible":true,"include":false,"step":"70.0","x":81.10952380952381,"y":-295.9809523809524,"z":-156.0857142857143,"a95":0.99,"info":"19/03/2016 at 16:21:29"},{"visible":true,"include":false,"step":"80.0","x":308.4190476190476,"y":353.7142857142857,"z":-78.03142857142858,"a95":0.99,"info":"19/03/2016 at 16:21:29"}]},{"version":"v1.1.0","exported":"2016-11-24T14:11:48.211Z","volume":10.5,"added":"2016-11-24T14:04:42.704Z","format":"Utrecht","demagType":"Unknown","strat":"1","patch":1.1,"GEO":[],"TECT":[],"interpreted":false,"name":"BR6.03B","coreAzi":304,"coreDip":6,"bedStrike":13,"bedDip":4,"data":[{"visible":false,"include":false,"step":"0.0","x":-2853.809523809524,"y":7668,"z":2820.3809523809523,"a95":0.99,"info":"19/03/2016 at 16:21:29"},{"visible":true,"include":false,"step":"10.0","x":-1165.3333333333333,"y":4858.380952380952,"z":2340.190476190476,"a95":0.99,"info":"19/03/2016 at 16:21:29"},{"visible":true,"include":false,"step":"15.0","x":-1036.4761904761904,"y":4232,"z":2278.190476190476,"a95":0.99,"info":"19/03/2016 at 16:21:29"},{"visible":true,"include":false,"step":"20.0","x":-1120.1904761904761,"y":3569.809523809524,"z":1883.904761904762,"a95":0.99,"info":"19/03/2016 at 16:21:29"},{"visible":true,"include":false,"step":"23.0","x":-1070.6666666666667,"y":3145.4285714285716,"z":1963.2380952380952,"a95":0.99,"info":"19/03/2016 at 16:21:29"},{"visible":true,"include":false,"step":"25.0","x":-1073.047619047619,"y":2464.095238095238,"z":1730.6666666666667,"a95":0.99,"info":"19/03/2016 at 16:21:29"},{"visible":true,"include":false,"step":"30.0","x":-571.1904761904761,"y":1707.142857142857,"z":1389.047619047619,"a95":0.99,"info":"19/03/2016 at 16:21:29"},{"visible":true,"include":false,"step":"33.0","x":-176.92380952380952,"y":1662.952380952381,"z":885.3333333333334,"a95":0.99,"info":"19/03/2016 at 16:21:29"},{"visible":true,"include":false,"step":"35.0","x":-567.047619047619,"y":860.4571428571428,"z":546.8285714285714,"a95":0.99,"info":"19/03/2016 at 16:21:29"},{"visible":true,"include":false,"step":"40.0","x":-506.7523809523809,"y":901.2380952380952,"z":598.447619047619,"a95":0.99,"info":"19/03/2016 at 16:21:29"},{"visible":true,"include":false,"step":"45.0","x":53.80666666666667,"y":757.2666666666667,"z":742.6666666666666,"a95":0.99,"info":"19/03/2016 at 16:21:29"},{"visible":true,"include":false,"step":"50.0","x":-418.16190476190474,"y":-722.9428571428571,"z":236.0761904761905,"a95":0.99,"info":"19/03/2016 at 16:21:29"},{"visible":true,"include":false,"step":"55.0","x":-572.3714285714285,"y":-27.473333333333336,"z":380.6666666666667,"a95":0.99,"info":"19/03/2016 at 16:21:29"},{"visible":true,"include":false,"step":"60.0","x":185.34285714285713,"y":-87.66857142857143,"z":158.8095238095238,"a95":0.99,"info":"19/03/2016 at 16:21:29"},{"visible":true,"include":false,"step":"65.0","x":-239.1142857142857,"y":-1152.5714285714287,"z":161.57142857142858,"a95":0.99,"info":"19/03/2016 at 16:21:29"},{"visible":true,"include":false,"step":"70.0","x":-178.56190476190477,"y":-752.6095238095238,"z":144.03809523809525,"a95":0.99,"info":"19/03/2016 at 16:21:29"},{"visible":true,"include":false,"step":"80.0","x":-810.4761904761905,"y":-509.5904761904762,"z":-127.11428571428571,"a95":0.99,"info":"19/03/2016 at 16:21:29"}]},{"version":"v1.1.0","exported":"2016-11-24T14:11:48.211Z","volume":10.5,"added":"2016-11-24T14:04:42.704Z","format":"Utrecht","demagType":"Unknown","strat":null,"patch":1.1,"GEO":[],"TECT":[],"interpreted":false,"name":"BR6.05A","coreAzi":303,"coreDip":8,"bedStrike":13,"bedDip":4,"data":[{"visible":true,"include":false,"step":"20","x":-3721.5238095238096,"y":4155.714285714285,"z":3782.095238095238,"a95":1.9,"info":"\"16-04-18\" at \"09:30\""},{"visible":true,"include":false,"step":"100","x":-521.2380952380952,"y":2489.2380952380954,"z":-396.6666666666667,"a95":1.6,"info":"\"16-04-18\" at \"11:58\""},{"visible":true,"include":false,"step":"150","x":1276.2857142857142,"y":2052.6666666666665,"z":-750.3809523809524,"a95":1.6,"info":"\"16-04-18\" at \"15:02\""},{"visible":true,"include":false,"step":"180","x":709.8095238095239,"y":-503.42857142857144,"z":-82.19047619047619,"a95":5.4,"info":"\"16-04-19\" at \"10:56\""},{"visible":true,"include":false,"step":"210","x":186.95238095238096,"y":1046.1904761904761,"z":-1074.5714285714287,"a95":3.1,"info":"\"16-04-19\" at \"14:08\""},{"visible":true,"include":false,"step":"240","x":-297.9047619047619,"y":1199.7142857142858,"z":245.04761904761904,"a95":2.6,"info":"\"16-04-20\" at \"09:34\""},{"visible":true,"include":false,"step":"270","x":-502.2857142857143,"y":1720.4761904761904,"z":18.38095238095238,"a95":2.2,"info":"\"16-04-21\" at \"10:54\""}]},{"version":"v1.1.0","exported":"2016-11-24T14:11:48.211Z","volume":10.5,"added":"2016-11-24T14:04:42.705Z","format":"Utrecht","demagType":"Unknown","strat":"1","patch":1.1,"GEO":[],"TECT":[],"interpreted":false,"name":"BR6.06A","coreAzi":296,"coreDip":2,"bedStrike":13,"bedDip":4,"data":[{"visible":true,"include":false,"step":"0.0","x":-366.7904761904762,"y":808.6666666666666,"z":-510.8952380952381,"a95":0.99,"info":"19/03/2016 at 16:21:29"},{"visible":true,"include":false,"step":"10.0","x":84.17238095238095,"y":376.4095238095238,"z":-85.53999999999999,"a95":0.99,"info":"19/03/2016 at 16:21:29"},{"visible":true,"include":false,"step":"15.0","x":-40.99619047619048,"y":320.4095238095238,"z":-2.6236190476190475,"a95":0.99,"info":"19/03/2016 at 16:21:29"},{"visible":true,"include":false,"step":"20.0","x":-180.24761904761903,"y":421.1142857142857,"z":-37.25238095238095,"a95":0.99,"info":"19/03/2016 at 16:21:29"},{"visible":true,"include":false,"step":"23.0","x":-83.00380952380952,"y":265.62857142857143,"z":178.83809523809524,"a95":0.99,"info":"19/03/2016 at 16:21:29"},{"visible":true,"include":false,"step":"25.0","x":-165.59047619047618,"y":309.57142857142856,"z":63.438095238095244,"a95":0.99,"info":"19/03/2016 at 16:21:29"},{"visible":true,"include":false,"step":"30.0","x":-214.51428571428573,"y":329.8285714285714,"z":15.453333333333333,"a95":0.99,"info":"19/03/2016 at 16:21:29"},{"visible":true,"include":false,"step":"33.0","x":-102.43809523809523,"y":424.06666666666666,"z":10.72857142857143,"a95":0.99,"info":"19/03/2016 at 16:21:29"},{"visible":true,"include":false,"step":"35.0","x":-69.3352380952381,"y":172.1809523809524,"z":-22.084761904761905,"a95":0.99,"info":"19/03/2016 at 16:21:29"},{"visible":true,"include":false,"step":"40.0","x":-198.75238095238097,"y":521.3333333333334,"z":24.959999999999997,"a95":0.99,"info":"19/03/2016 at 16:21:29"},{"visible":true,"include":false,"step":"45.0","x":-89.44761904761906,"y":199.8,"z":-29.88380952380952,"a95":0.99,"info":"19/03/2016 at 16:21:29"},{"visible":true,"include":false,"step":"50.0","x":12.968571428571428,"y":-29.318095238095236,"z":-64.8,"a95":0.99,"info":"19/03/2016 at 16:21:29"},{"visible":true,"include":false,"step":"55.0","x":-214,"y":130.95238095238096,"z":155.62857142857143,"a95":0.99,"info":"19/03/2016 at 16:21:29"},{"visible":true,"include":false,"step":"60.0","x":-102.75238095238096,"y":-97.47619047619048,"z":70.64285714285714,"a95":0.99,"info":"19/03/2016 at 16:21:29"},{"visible":true,"include":false,"step":"65.0","x":101.31428571428572,"y":-103.55238095238094,"z":-129.07619047619048,"a95":0.99,"info":"19/03/2016 at 16:21:29"},{"visible":true,"include":false,"step":"70.0","x":-120.79047619047618,"y":98.29523809523809,"z":-71.06380952380952,"a95":0.99,"info":"19/03/2016 at 16:21:29"},{"visible":true,"include":false,"step":"80.0","x":-53.56,"y":-214.36190476190478,"z":-85.72190476190477,"a95":0.99,"info":"19/03/2016 at 16:21:29"}]},{"version":"v1.1.0","exported":"2016-11-24T14:11:48.211Z","volume":10.5,"added":"2016-11-24T14:04:42.706Z","format":"Utrecht","demagType":"Unknown","strat":"1","patch":1.1,"GEO":[],"TECT":[],"interpreted":false,"name":"BR6.07B","coreAzi":298,"coreDip":-4,"bedStrike":13,"bedDip":4,"data":[{"visible":true,"include":false,"step":"0.0","x":-175.14285714285714,"y":941.0571428571429,"z":-407.5142857142857,"a95":0.99,"info":"19/03/2016 at 16:21:29"},{"visible":true,"include":false,"step":"10.0","x":-1.636857142857143,"y":921.9809523809523,"z":103.93333333333332,"a95":0.99,"info":"19/03/2016 at 16:21:29"},{"visible":true,"include":false,"step":"15.0","x":-37.37619047619047,"y":940.1333333333333,"z":213.8,"a95":0.99,"info":"19/03/2016 at 16:21:29"},{"visible":true,"include":false,"step":"20.0","x":-70.42761904761905,"y":799.7047619047619,"z":306.5238095238095,"a95":0.99,"info":"19/03/2016 at 16:21:29"},{"visible":true,"include":false,"step":"23.0","x":-19.625714285714285,"y":789.6857142857143,"z":204.41904761904763,"a95":0.99,"info":"19/03/2016 at 16:21:29"},{"visible":true,"include":false,"step":"25.0","x":-38.86952380952381,"y":641.6761904761905,"z":317.42857142857144,"a95":0.99,"info":"19/03/2016 at 16:21:29"},{"visible":true,"include":false,"step":"30.0","x":-84.23047619047618,"y":543.3238095238095,"z":222.6095238095238,"a95":0.99,"info":"19/03/2016 at 16:21:29"},{"visible":true,"include":false,"step":"33.0","x":-65.4152380952381,"y":614.6190476190476,"z":16.578095238095237,"a95":0.99,"info":"19/03/2016 at 16:21:29"},{"visible":true,"include":false,"step":"35.0","x":-184.1047619047619,"y":554.104761904762,"z":373.9238095238095,"a95":0.99,"info":"19/03/2016 at 16:21:29"},{"visible":true,"include":false,"step":"40.0","x":-74.6895238095238,"y":424.2666666666667,"z":134.76190476190476,"a95":0.99,"info":"19/03/2016 at 16:21:29"},{"visible":true,"include":false,"step":"45.0","x":-95.18857142857144,"y":420.8666666666667,"z":-83.11142857142856,"a95":0.99,"info":"19/03/2016 at 16:21:29"},{"visible":true,"include":false,"step":"50.0","x":-84.25904761904762,"y":365.70476190476194,"z":67.79809523809524,"a95":0.99,"info":"19/03/2016 at 16:21:29"},{"visible":true,"include":false,"step":"55.0","x":-43.54857142857143,"y":166.38095238095238,"z":43.73904761904762,"a95":0.99,"info":"19/03/2016 at 16:21:29"},{"visible":true,"include":false,"step":"60.0","x":91.59142857142858,"y":447.1333333333333,"z":-160,"a95":0.99,"info":"19/03/2016 at 16:21:29"},{"visible":true,"include":false,"step":"65.0","x":-25.75047619047619,"y":0.3226761904761905,"z":29.934285714285714,"a95":0.99,"info":"19/03/2016 at 16:21:29"},{"visible":true,"include":false,"step":"70.0","x":-71.37333333333333,"y":305.97142857142853,"z":51.140952380952385,"a95":0.99,"info":"19/03/2016 at 16:21:29"},{"visible":true,"include":false,"step":"80.0","x":-1.7169523809523808,"y":206.3904761904762,"z":60.8552380952381,"a95":0.99,"info":"19/03/2016 at 16:21:29"}]},{"version":"v1.1.0","exported":"2016-11-24T14:11:48.211Z","volume":10.5,"added":"2016-11-24T14:04:42.706Z","format":"Utrecht","demagType":"Unknown","strat":"1","patch":1.1,"GEO":[],"TECT":[],"interpreted":false,"name":"BR6.08B","coreAzi":297,"coreDip":-8,"bedStrike":13,"bedDip":4,"data":[{"visible":true,"include":false,"step":"0.0","x":-586.9142857142857,"y":1515.7142857142858,"z":-44.07714285714286,"a95":0.99,"info":"19/03/2016 at 16:21:29"},{"visible":true,"include":false,"step":"10.0","x":-108.52380952380952,"y":1029.904761904762,"z":262.2857142857143,"a95":0.99,"info":"19/03/2016 at 16:21:29"},{"visible":true,"include":false,"step":"15.0","x":-265.8095238095238,"y":1076.3809523809523,"z":543.0190476190476,"a95":0.99,"info":"19/03/2016 at 16:21:29"},{"visible":true,"include":false,"step":"20.0","x":-250.78095238095236,"y":940.5142857142857,"z":549.6095238095238,"a95":0.99,"info":"19/03/2016 at 16:21:29"},{"visible":true,"include":false,"step":"23.0","x":-332.5809523809524,"y":888.7238095238096,"z":573.4571428571429,"a95":0.99,"info":"19/03/2016 at 16:21:29"},{"visible":true,"include":false,"step":"25.0","x":-421.27619047619044,"y":763.5809523809525,"z":456.4095238095238,"a95":0.99,"info":"19/03/2016 at 16:21:29"},{"visible":true,"include":false,"step":"30.0","x":-228.49523809523808,"y":691.5809523809525,"z":481.5142857142857,"a95":0.99,"info":"19/03/2016 at 16:21:29"},{"visible":true,"include":false,"step":"33.0","x":-292.45714285714286,"y":606.0380952380953,"z":189.61904761904762,"a95":0.99,"info":"19/03/2016 at 16:21:29"},{"visible":true,"include":false,"step":"35.0","x":-427.76190476190476,"y":589.1333333333333,"z":354.32380952380953,"a95":0.99,"info":"19/03/2016 at 16:21:29"},{"visible":true,"include":false,"step":"40.0","x":-195.12380952380954,"y":441.91428571428577,"z":404.23809523809524,"a95":0.99,"info":"19/03/2016 at 16:21:29"},{"visible":true,"include":false,"step":"45.0","x":-137.48571428571427,"y":531.6476190476191,"z":281.4095238095238,"a95":0.99,"info":"19/03/2016 at 16:21:29"},{"visible":true,"include":false,"step":"50.0","x":-283.70476190476194,"y":173.17142857142858,"z":115.36190476190475,"a95":0.99,"info":"19/03/2016 at 16:21:29"},{"visible":true,"include":false,"step":"55.0","x":96.94285714285714,"y":257.43809523809523,"z":121.31428571428572,"a95":0.99,"info":"19/03/2016 at 16:21:29"},{"visible":true,"include":false,"step":"60.0","x":-82.49238095238096,"y":299.87619047619046,"z":49.034285714285716,"a95":0.99,"info":"19/03/2016 at 16:21:29"},{"visible":true,"include":false,"step":"65.0","x":-93.62761904761905,"y":62.17047619047619,"z":238.03809523809525,"a95":0.99,"info":"19/03/2016 at 16:21:29"},{"visible":true,"include":false,"step":"70.0","x":82.1952380952381,"y":466.3238095238095,"z":117.97142857142858,"a95":0.99,"info":"19/03/2016 at 16:21:29"},{"visible":true,"include":false,"step":"80.0","x":82.45142857142858,"y":420.8095238095238,"z":154,"a95":0.99,"info":"19/03/2016 at 16:21:29"}]},{"version":"v1.1.0","exported":"2016-11-24T14:11:48.211Z","volume":10.5,"added":"2016-11-24T14:04:42.707Z","format":"Utrecht","demagType":"Unknown","strat":null,"patch":1.1,"GEO":[],"TECT":[],"interpreted":false,"name":"BR6.09A","coreAzi":293,"coreDip":-6,"bedStrike":13,"bedDip":4,"data":[{"visible":true,"include":false,"step":"20","x":-862.0952380952381,"y":2644.095238095238,"z":1638.1904761904761,"a95":1.6,"info":"\"16-04-18\" at \"09:31\""},{"visible":true,"include":false,"step":"100","x":-206.85714285714286,"y":2131.5238095238096,"z":1167.7142857142858,"a95":1.8,"info":"\"16-04-18\" at \"11:59\""},{"visible":true,"include":false,"step":"150","x":210.28571428571428,"y":1796.6666666666667,"z":1126.4761904761904,"a95":1.9,"info":"\"16-04-18\" at \"15:03\""},{"visible":true,"include":false,"step":"180","x":-104.28571428571429,"y":1704,"z":1217.3333333333333,"a95":1.8,"info":"\"16-04-19\" at \"10:58\""},{"visible":true,"include":false,"step":"210","x":-427.6190476190476,"y":1961.142857142857,"z":1309.7142857142858,"a95":1.9,"info":"\"16-04-19\" at \"14:11\""},{"visible":true,"include":false,"step":"240","x":-555.6190476190476,"y":2034.5714285714287,"z":1391.142857142857,"a95":1.8,"info":"\"16-04-20\" at \"09:36\""},{"visible":true,"include":false,"step":"270","x":-765.9047619047619,"y":1997.5238095238096,"z":1270.6666666666667,"a95":1.9,"info":"\"16-04-21\" at \"10:57\""},{"visible":true,"include":false,"step":"300","x":-958.6666666666666,"y":1858.7619047619048,"z":1332.952380952381,"a95":1.9,"info":"\"16-04-21\" at \"14:24\""}]},{"version":"v1.1.0","exported":"2016-11-24T14:11:48.212Z","volume":10.5,"added":"2016-11-24T14:04:42.708Z","format":"Utrecht","demagType":"Unknown","strat":"1","patch":1.1,"GEO":[],"TECT":[],"interpreted":false,"name":"BR6.09B","coreAzi":293,"coreDip":-6,"bedStrike":13,"bedDip":4,"data":[{"visible":true,"include":false,"step":"0.0","x":-695.4380952380952,"y":2169.1428571428573,"z":240.82857142857142,"a95":0.99,"info":"19/03/2016 at 21:48:59"},{"visible":true,"include":false,"step":"10.0","x":-165.9047619047619,"y":1441.5238095238096,"z":513.3047619047619,"a95":0.99,"info":"19/03/2016 at 21:48:59"},{"visible":true,"include":false,"step":"15.0","x":-328.1047619047619,"y":1324.5714285714287,"z":549.6095238095238,"a95":0.99,"info":"19/03/2016 at 21:48:59"},{"visible":true,"include":false,"step":"20.0","x":-341.3333333333333,"y":1257.6190476190477,"z":448.6952380952381,"a95":0.99,"info":"19/03/2016 at 21:48:59"},{"visible":true,"include":false,"step":"23.0","x":-242.03809523809525,"y":1325.5238095238096,"z":539.0571428571429,"a95":0.99,"info":"19/03/2016 at 21:48:59"},{"visible":true,"include":false,"step":"25.0","x":-161.6952380952381,"y":1286.7619047619048,"z":511.447619047619,"a95":0.99,"info":"19/03/2016 at 21:48:59"},{"visible":true,"include":false,"step":"30.0","x":-297.03809523809525,"y":1013.2380952380952,"z":458.7333333333333,"a95":0.99,"info":"19/03/2016 at 21:48:59"},{"visible":true,"include":false,"step":"33.0","x":-318.2666666666667,"y":1179.4285714285713,"z":348.8,"a95":0.99,"info":"19/03/2016 at 21:48:59"},{"visible":true,"include":false,"step":"35.0","x":-375.12380952380954,"y":870.1333333333333,"z":98.73333333333333,"a95":0.99,"info":"19/03/2016 at 21:48:59"},{"visible":true,"include":false,"step":"40.0","x":-450.9428571428571,"y":805.3714285714285,"z":167.0952380952381,"a95":0.99,"info":"19/03/2016 at 21:48:59"},{"visible":true,"include":false,"step":"45.0","x":-209.8095238095238,"y":1000.6666666666666,"z":260.22857142857146,"a95":0.99,"info":"19/03/2016 at 21:48:59"},{"visible":true,"include":false,"step":"50.0","x":-324.447619047619,"y":933.047619047619,"z":217.24761904761903,"a95":0.99,"info":"19/03/2016 at 21:48:59"},{"visible":true,"include":false,"step":"55.0","x":-275.2,"y":628.9142857142857,"z":192.68571428571428,"a95":0.99,"info":"19/03/2016 at 21:48:59"},{"visible":true,"include":false,"step":"60.0","x":-290.12380952380954,"y":938.8761904761906,"z":380.83809523809526,"a95":0.99,"info":"19/03/2016 at 21:48:59"},{"visible":true,"include":false,"step":"65.0","x":-275.43809523809523,"y":678.9809523809524,"z":6.343523809523809,"a95":0.99,"info":"19/03/2016 at 21:48:59"},{"visible":true,"include":false,"step":"70.0","x":-490.46666666666664,"y":542.6761904761905,"z":59.11904761904762,"a95":0.99,"info":"19/03/2016 at 21:48:59"},{"visible":true,"include":false,"step":"80.0","x":-593.2666666666667,"y":823.4952380952382,"z":302.57142857142856,"a95":0.99,"info":"19/03/2016 at 21:48:59"}]},{"version":"v1.1.0","exported":"2016-11-24T14:11:48.212Z","volume":10.5,"added":"2016-11-24T14:04:42.709Z","format":"Utrecht","demagType":"Unknown","strat":"1","patch":1.1,"GEO":[],"TECT":[],"interpreted":false,"name":"BR6.11B","coreAzi":307,"coreDip":8,"bedStrike":13,"bedDip":4,"data":[{"visible":true,"include":false,"step":"0.0","x":-711.7904761904762,"y":763.9809523809524,"z":277.4095238095238,"a95":0.99,"info":"19/03/2016 at 21:48:59"},{"visible":true,"include":false,"step":"10.0","x":-328.1333333333333,"y":506.68571428571425,"z":190.82857142857142,"a95":0.99,"info":"19/03/2016 at 21:48:59"},{"visible":true,"include":false,"step":"15.0","x":-199.25714285714284,"y":455.5809523809524,"z":197.35238095238094,"a95":0.99,"info":"19/03/2016 at 21:48:59"},{"visible":true,"include":false,"step":"20.0","x":-172.55238095238096,"y":401.25714285714287,"z":67.83238095238096,"a95":0.99,"info":"19/03/2016 at 21:48:59"},{"visible":true,"include":false,"step":"23.0","x":-170.71428571428572,"y":365.6666666666667,"z":235.2095238095238,"a95":0.99,"info":"19/03/2016 at 21:48:59"},{"visible":true,"include":false,"step":"25.0","x":-137.5047619047619,"y":368.67619047619047,"z":214.54285714285712,"a95":0.99,"info":"19/03/2016 at 21:48:59"},{"visible":true,"include":false,"step":"30.0","x":-166.1047619047619,"y":217.38095238095238,"z":212.84761904761905,"a95":0.99,"info":"19/03/2016 at 21:48:59"},{"visible":true,"include":false,"step":"33.0","x":-39.7447619047619,"y":303.97142857142853,"z":126.05714285714285,"a95":0.99,"info":"19/03/2016 at 21:48:59"},{"visible":true,"include":false,"step":"35.0","x":-106.5047619047619,"y":158.34285714285713,"z":120.93333333333332,"a95":0.99,"info":"19/03/2016 at 21:48:59"},{"visible":true,"include":false,"step":"40.0","x":-152.68571428571428,"y":217.38095238095238,"z":157.17142857142858,"a95":0.99,"info":"19/03/2016 at 21:48:59"},{"visible":true,"include":false,"step":"45.0","x":2.907142857142857,"y":149.9047619047619,"z":-36.724761904761905,"a95":0.99,"info":"19/03/2016 at 21:48:59"},{"visible":true,"include":false,"step":"50.0","x":-59.99142857142857,"y":109.35238095238095,"z":133.65714285714287,"a95":0.99,"info":"19/03/2016 at 21:48:59"},{"visible":true,"include":false,"step":"55.0","x":9.144285714285715,"y":162.85714285714286,"z":-29.664761904761907,"a95":0.99,"info":"19/03/2016 at 21:48:59"},{"visible":true,"include":false,"step":"60.0","x":-77.54190476190476,"y":59.57619047619047,"z":59.18761904761905,"a95":0.99,"info":"19/03/2016 at 21:48:59"},{"visible":true,"include":false,"step":"65.0","x":28.89428571428571,"y":-176.24761904761903,"z":-8.22295238095238,"a95":0.99,"info":"19/03/2016 at 21:48:59"},{"visible":true,"include":false,"step":"70.0","x":68.34380952380953,"y":-9.844761904761905,"z":23.944761904761904,"a95":0.99,"info":"19/03/2016 at 21:48:59"},{"visible":true,"include":false,"step":"80.0","x":180.06666666666666,"y":89.67714285714285,"z":-154.55238095238096,"a95":0.99,"info":"19/03/2016 at 21:48:59"}]},{"version":"v1.1.0","exported":"2016-11-24T14:11:48.212Z","volume":10.5,"added":"2016-11-24T14:04:42.709Z","format":"Utrecht","demagType":"Unknown","strat":null,"patch":1.1,"GEO":[],"TECT":[],"interpreted":false,"name":"BR6.12A","coreAzi":191,"coreDip":8,"bedStrike":34,"bedDip":5,"data":[{"visible":true,"include":false,"step":"20","x":190,"y":153.71428571428572,"z":-50.476190476190474,"a95":1.6,"info":"\"16-04-18\" at \"09:33\""},{"visible":true,"include":false,"step":"100","x":121.61904761904762,"y":290.6666666666667,"z":129.61904761904762,"a95":1.8,"info":"\"16-04-18\" at \"12:01\""},{"visible":true,"include":false,"step":"150","x":89.14285714285714,"y":277.9047619047619,"z":101.52380952380952,"a95":1.8,"info":"\"16-04-18\" at \"15:05\""},{"visible":true,"include":false,"step":"180","x":50.666666666666664,"y":224.85714285714286,"z":114.57142857142857,"a95":1.9,"info":"\"16-04-19\" at \"11:01\""},{"visible":true,"include":false,"step":"210","x":15.047619047619047,"y":259.3333333333333,"z":30.857142857142858,"a95":1.8,"info":"\"16-04-19\" at \"14:13\""},{"visible":true,"include":false,"step":"240","x":-139.9047619047619,"y":168,"z":0.47619047619047616,"a95":2.1,"info":"\"16-04-20\" at \"09:38\""},{"visible":true,"include":false,"step":"270","x":-108.0952380952381,"y":169.33333333333334,"z":69.52380952380952,"a95":2.5,"info":"\"16-04-21\" at \"10:59\""}]}]
