# Supplementary material for: Paleomagnetic constraints on the timing and distribution of Cenozoic rotations in Central and Eastern Anatolia
Source: Copernicus journal article supplement (doi:10.5194/se-9-295-2018), 2018-03-21
Supplement: Supplementary file 2 [file se-9-295-2018-supplement.zip › se-2017-66_DATA_dir files/dir files Tauride basins/SS07.dir]

[{"version":"v1.1.0","exported":"2017-05-22T14:43:25.966Z","volume":10.5,"added":"2017-05-22T14:42:20.019Z","format":"Utrecht","demagType":"Unknown","strat":"5","patch":1.1,"GEO":[],"TECT":[],"interpreted":false,"name":"SS7.1A","coreAzi":237,"coreDip":56,"bedStrike":175,"bedDip":56,"data":[{"visible":true,"include":false,"step":"0.0","x":-37.703809523809525,"y":15.065714285714286,"z":33.20095238095238,"a95":0.99,"info":"21/09/2014 at 08:43:29"},{"visible":true,"include":false,"step":"5.0","x":-24.674285714285713,"y":21.146666666666665,"z":30.7647619047619,"a95":0.99,"info":"21/09/2014 at 08:43:29"},{"visible":true,"include":false,"step":"10.0","x":-22.06095238095238,"y":15.557142857142857,"z":27.31238095238095,"a95":0.99,"info":"21/09/2014 at 08:43:29"},{"visible":true,"include":false,"step":"15.0","x":-17.554285714285715,"y":22.740000000000002,"z":31.466666666666665,"a95":0.99,"info":"21/09/2014 at 08:43:29"},{"visible":true,"include":false,"step":"20.0","x":-26.152380952380955,"y":13.03047619047619,"z":25.9247619047619,"a95":0.99,"info":"21/09/2014 at 08:43:29"},{"visible":true,"include":false,"step":"25.0","x":-19.32095238095238,"y":14.093333333333332,"z":24.493333333333332,"a95":0.99,"info":"21/09/2014 at 08:43:29"},{"visible":true,"include":false,"step":"30.0","x":-23.761904761904763,"y":12.373333333333331,"z":21.08857142857143,"a95":0.99,"info":"21/09/2014 at 08:43:29"},{"visible":true,"include":false,"step":"35.0","x":-23.440952380952382,"y":23.48952380952381,"z":18.924761904761905,"a95":0.99,"info":"21/09/2014 at 08:43:29"},{"visible":true,"include":false,"step":"40.0","x":-24.51809523809524,"y":11.994285714285715,"z":21.214285714285715,"a95":0.99,"info":"21/09/2014 at 08:43:29"},{"visible":true,"include":false,"step":"45.0","x":-23.674285714285716,"y":17.272380952380953,"z":18.803809523809523,"a95":0.99,"info":"21/09/2014 at 08:43:29"},{"visible":true,"include":false,"step":"50.0","x":-29.09047619047619,"y":19.437142857142856,"z":16.214285714285715,"a95":0.99,"info":"21/09/2014 at 08:43:29"},{"visible":true,"include":false,"step":"60.0","x":-25.460952380952378,"y":-4.410190476190476,"z":24.737142857142857,"a95":0.99,"info":"21/09/2014 at 08:43:29"},{"visible":true,"include":false,"step":"70.0","x":-23.552380952380954,"y":15.506666666666666,"z":13.3,"a95":0.99,"info":"21/09/2014 at 08:43:29"},{"visible":true,"include":false,"step":"80.0","x":-110.38095238095238,"y":8.16552380952381,"z":11.83047619047619,"a95":0.99,"info":"21/09/2014 at 08:43:29"},{"visible":true,"include":false,"step":"90.0","x":-19.282857142857143,"y":4.488857142857143,"z":7.767714285714287,"a95":0.99,"info":"21/09/2014 at 08:43:29"},{"visible":true,"include":false,"step":"100.0","x":61.81333333333333,"y":16.599047619047617,"z":-1.508,"a95":0.99,"info":"21/09/2014 at 08:43:29"}]},{"version":"v1.1.0","exported":"2017-05-22T14:43:25.966Z","volume":10.5,"added":"2017-05-22T14:42:20.020Z","format":"Utrecht","demagType":"Unknown","strat":"6","patch":1.1,"GEO":[],"TECT":[],"interpreted":false,"name":"SS7.4A","coreAzi":247,"coreDip":39,"bedStrike":175,"bedDip":56,"data":[{"visible":true,"include":false,"step":"0.0","x":-118.9047619047619,"y":96.73333333333333,"z":140.1047619047619,"a95":0.99,"info":"21/09/2014 at 08:43:29"},{"visible":true,"include":false,"step":"5.0","x":-92.33904761904762,"y":100.87619047619049,"z":119.87619047619049,"a95":0.99,"info":"21/09/2014 at 08:43:29"},{"visible":true,"include":false,"step":"10.0","x":-97.34285714285714,"y":91.86095238095238,"z":129.15238095238095,"a95":0.99,"info":"21/09/2014 at 08:43:29"},{"visible":true,"include":false,"step":"15.0","x":-83.5352380952381,"y":96,"z":114.47619047619048,"a95":0.99,"info":"21/09/2014 at 08:43:29"},{"visible":true,"include":false,"step":"20.0","x":-88.06761904761905,"y":79.57809523809524,"z":112.68571428571428,"a95":0.99,"info":"21/09/2014 at 08:43:29"},{"visible":true,"include":false,"step":"25.0","x":-75.50095238095238,"y":92.09238095238095,"z":115.96190476190475,"a95":0.99,"info":"21/09/2014 at 08:43:29"},{"visible":true,"include":false,"step":"30.0","x":-72.3247619047619,"y":72.76285714285714,"z":104.95238095238095,"a95":0.99,"info":"21/09/2014 at 08:43:29"},{"visible":true,"include":false,"step":"35.0","x":-73.85238095238095,"y":76.51809523809524,"z":106.60952380952382,"a95":0.99,"info":"21/09/2014 at 08:43:29"},{"visible":true,"include":false,"step":"40.0","x":-61.787619047619046,"y":63.224761904761905,"z":106.01904761904763,"a95":0.99,"info":"21/09/2014 at 08:43:29"},{"visible":true,"include":false,"step":"45.0","x":-49.320952380952384,"y":70.61142857142856,"z":104.29523809523809,"a95":0.99,"info":"21/09/2014 at 08:43:29"},{"visible":true,"include":false,"step":"50.0","x":-65.12761904761905,"y":67.10285714285715,"z":99.51428571428572,"a95":0.99,"info":"21/09/2014 at 08:43:29"},{"visible":true,"include":false,"step":"60.0","x":-37.58190476190477,"y":65.09333333333333,"z":117.04761904761905,"a95":0.99,"info":"21/09/2014 at 08:43:29"},{"visible":true,"include":false,"step":"70.0","x":-49.44,"y":68.25714285714287,"z":102,"a95":0.99,"info":"21/09/2014 at 08:43:29"},{"visible":true,"include":false,"step":"80.0","x":-159.66666666666666,"y":46.28857142857142,"z":104.75238095238096,"a95":0.99,"info":"21/09/2014 at 08:43:29"},{"visible":true,"include":false,"step":"90.0","x":-38.41619047619048,"y":42.53809523809524,"z":91.35428571428572,"a95":0.99,"info":"21/09/2014 at 08:43:29"},{"visible":true,"include":false,"step":"100.0","x":36.80952380952381,"y":65.40761904761905,"z":84.85047619047619,"a95":0.99,"info":"21/09/2014 at 08:43:29"}]},{"version":"v1.1.0","exported":"2017-05-22T14:43:25.966Z","volume":10.5,"added":"2017-05-22T14:42:20.020Z","format":"Utrecht","demagType":"Unknown","strat":null,"patch":1.1,"GEO":[],"TECT":[],"interpreted":false,"name":"SS7.5A","coreAzi":244,"coreDip":31,"bedStrike":175,"bedDip":56,"data":[{"visible":true,"include":false,"step":"20","x":-191.04761904761904,"y":108.57142857142857,"z":85.33333333333333,"a95":2,"info":"\"14-10-13\" at \"17:14\""},{"visible":true,"include":false,"step":"100","x":49.44761904761905,"y":-16.26666666666667,"z":-31.504761904761907,"a95":5.6,"info":"\"14-10-13\" at \"20:05\""},{"visible":true,"include":false,"step":"150","x":5.0095238095238095,"y":-14.266666666666667,"z":-38.38095238095238,"a95":8,"info":"\"14-10-13\" at \"22:14\""},{"visible":true,"include":false,"step":"180","x":34.10476190476191,"y":-5.657142857142857,"z":-28.97142857142857,"a95":6.1,"info":"\"14-10-14\" at \"15:23\""},{"visible":true,"include":false,"step":"210","x":34.39047619047619,"y":-2.5238095238095237,"z":-23.123809523809523,"a95":7.3,"info":"\"14-10-14\" at \"18:29\""},{"visible":true,"include":false,"step":"240","x":25.714285714285715,"y":-4.3047619047619055,"z":-22.285714285714285,"a95":9.7,"info":"\"14-10-14\" at \"21:37\""},{"visible":true,"include":false,"step":"270","x":31.81904761904762,"y":-4.123809523809523,"z":-17.904761904761905,"a95":2.1,"info":"\"14-10-15\" at \"15:31\""},{"visible":true,"include":false,"step":"290","x":38.68571428571428,"y":-5.0285714285714285,"z":-16.8,"a95":6.3,"info":"\"14-10-15\" at \"18:36\""},{"visible":true,"include":false,"step":"310","x":30.866666666666667,"y":3.580952380952381,"z":-26.657142857142855,"a95":2.2,"info":"\"14-10-15\" at \"21:51\""},{"visible":true,"include":false,"step":"330","x":27.54285714285714,"y":5.847619047619047,"z":-19.361904761904764,"a95":3.2,"info":"\"14-10-16\" at \"15:14\""},{"visible":true,"include":false,"step":"350","x":26.20952380952381,"y":-5.79047619047619,"z":-19.81904761904762,"a95":9.3,"info":"\"14-10-16\" at \"19:08\""},{"visible":true,"include":false,"step":"370","x":23.83809523809524,"y":-16.46666666666667,"z":-27.799999999999997,"a95":3.2,"info":"\"14-10-16\" at \"22:17\""},{"visible":true,"include":false,"step":"400","x":35.44761904761905,"y":0.21904761904761902,"z":-20.61904761904762,"a95":2.4,"info":"\"14-10-17\" at \"13:52\""}]},{"version":"v1.1.0","exported":"2017-05-22T14:43:25.966Z","volume":10.5,"added":"2017-05-22T14:42:20.021Z","format":"Utrecht","demagType":"Unknown","strat":"4","patch":1.1,"GEO":[],"TECT":[],"interpreted":false,"name":"SS7.6A","coreAzi":238,"coreDip":35,"bedStrike":175,"bedDip":56,"data":[{"visible":true,"include":false,"step":"0.0","x":-13.100952380952382,"y":18.15809523809524,"z":-37.00857142857143,"a95":0.99,"info":"29/01/2015 at 18:51:30"},{"visible":true,"include":false,"step":"10.0","x":-8.910857142857143,"y":12.130476190476191,"z":-32.404761904761905,"a95":0.99,"info":"29/01/2015 at 18:51:30"},{"visible":true,"include":false,"step":"15.0","x":-3.270095238095238,"y":25.88380952380952,"z":-59.921904761904756,"a95":0.99,"info":"29/01/2015 at 18:51:30"},{"visible":true,"include":false,"step":"20.0","x":-16.201904761904764,"y":11.31047619047619,"z":-28.743809523809524,"a95":0.99,"info":"29/01/2015 at 18:51:30"},{"visible":true,"include":false,"step":"23.0","x":-19.415238095238095,"y":-0.06228571428571429,"z":-31.05809523809524,"a95":0.99,"info":"29/01/2015 at 18:51:30"},{"visible":true,"include":false,"step":"25.0","x":-9.64857142857143,"y":9.844761904761905,"z":-26.516190476190477,"a95":0.99,"info":"29/01/2015 at 18:51:30"},{"visible":true,"include":false,"step":"30.0","x":-49.3552380952381,"y":37.885714285714286,"z":-41.743809523809524,"a95":0.99,"info":"29/01/2015 at 18:51:30"},{"visible":true,"include":false,"step":"33.0","x":-85.11428571428571,"y":3.2873333333333337,"z":-20.47904761904762,"a95":0.99,"info":"29/01/2015 at 18:51:30"},{"visible":true,"include":false,"step":"35.0","x":0.19644761904761904,"y":7.238952380952381,"z":-36.304761904761904,"a95":0.99,"info":"29/01/2015 at 18:51:30"},{"visible":true,"include":false,"step":"40.0","x":-20.027619047619048,"y":3.174,"z":-23.226666666666667,"a95":0.99,"info":"29/01/2015 at 18:51:30"},{"visible":true,"include":false,"step":"45.0","x":-3.4630476190476194,"y":8.713904761904761,"z":-28.668571428571425,"a95":0.99,"info":"29/01/2015 at 18:51:30"},{"visible":true,"include":false,"step":"50.0","x":-24.815238095238094,"y":-3.078857142857143,"z":-24.90952380952381,"a95":0.99,"info":"29/01/2015 at 18:51:30"},{"visible":true,"include":false,"step":"60.0","x":-15.085714285714285,"y":-1.9957142857142856,"z":-6.660857142857142,"a95":0.99,"info":"29/01/2015 at 18:51:30"},{"visible":true,"include":false,"step":"70.0","x":8.735523809523809,"y":6.373904761904762,"z":-23.431428571428572,"a95":0.99,"info":"29/01/2015 at 18:51:30"}]},{"version":"v1.1.0","exported":"2017-05-22T14:43:25.966Z","volume":10.5,"added":"2017-05-22T14:42:20.022Z","format":"Utrecht","demagType":"Unknown","strat":"5","patch":1.1,"GEO":[],"TECT":[],"interpreted":false,"name":"SS7.7A","coreAzi":262,"coreDip":59,"bedStrike":175,"bedDip":56,"data":[{"visible":true,"include":false,"step":"0.0","x":2.634952380952381,"y":4.786476190476191,"z":10.177142857142858,"a95":0.99,"info":"29/01/2015 at 18:51:30"},{"visible":true,"include":false,"step":"10.0","x":3.8285714285714287,"y":6.080666666666667,"z":14.492380952380952,"a95":0.99,"info":"29/01/2015 at 18:51:30"},{"visible":true,"include":false,"step":"15.0","x":13.204761904761906,"y":11.791428571428572,"z":-14.997142857142856,"a95":0.99,"info":"29/01/2015 at 18:51:30"},{"visible":true,"include":false,"step":"20.0","x":8.851809523809525,"y":4.471619047619048,"z":-7.15447619047619,"a95":0.99,"info":"29/01/2015 at 18:51:30"},{"visible":true,"include":false,"step":"23.0","x":1.4174285714285713,"y":22.228571428571428,"z":-31.546666666666667,"a95":0.99,"info":"29/01/2015 at 18:51:30"},{"visible":true,"include":false,"step":"25.0","x":7.562952380952381,"y":30.314285714285717,"z":6.348571428571428,"a95":0.99,"info":"29/01/2015 at 18:51:30"},{"visible":true,"include":false,"step":"30.0","x":0.30128571428571427,"y":14.503809523809522,"z":6.4744761904761905,"a95":0.99,"info":"29/01/2015 at 18:51:30"},{"visible":true,"include":false,"step":"33.0","x":2.022666666666667,"y":1.1817142857142857,"z":0.911704761904762,"a95":0.99,"info":"29/01/2015 at 18:51:30"},{"visible":true,"include":false,"step":"35.0","x":1.1197142857142857,"y":5.4283809523809525,"z":-6.6199047619047615,"a95":0.99,"info":"29/01/2015 at 18:51:30"},{"visible":true,"include":false,"step":"40.0","x":4.733333333333333,"y":19.856190476190477,"z":3.642380952380952,"a95":0.99,"info":"29/01/2015 at 18:51:30"},{"visible":true,"include":false,"step":"45.0","x":9.583809523809524,"y":12.564761904761905,"z":0.5679238095238095,"a95":0.99,"info":"29/01/2015 at 18:51:30"},{"visible":true,"include":false,"step":"50.0","x":1.4659047619047618,"y":-1.257809523809524,"z":4.413047619047619,"a95":0.99,"info":"29/01/2015 at 18:51:30"},{"visible":true,"include":false,"step":"60.0","x":1.591047619047619,"y":7.3757142857142854,"z":11.57904761904762,"a95":0.99,"info":"29/01/2015 at 18:51:30"},{"visible":true,"include":false,"step":"70.0","x":4.750952380952381,"y":9.174190476190475,"z":8.573619047619047,"a95":0.99,"info":"29/01/2015 at 18:51:30"}]},{"version":"v1.1.0","exported":"2017-05-22T14:43:25.967Z","volume":10.5,"added":"2017-05-22T14:42:20.023Z","format":"Utrecht","demagType":"Unknown","strat":"7","patch":1.1,"GEO":[],"TECT":[],"interpreted":false,"name":"SS7.7B","coreAzi":262,"coreDip":59,"bedStrike":175,"bedDip":56,"data":[{"visible":true,"include":false,"step":"0.0","x":-145.57142857142858,"y":173.05714285714285,"z":154.14285714285714,"a95":0.99,"info":"21/09/2014 at 08:43:29"},{"visible":true,"include":false,"step":"5.0","x":-138,"y":170.1809523809524,"z":146.61904761904762,"a95":0.99,"info":"21/09/2014 at 08:43:29"},{"visible":true,"include":false,"step":"10.0","x":-130.0285714285714,"y":155.7047619047619,"z":137.71428571428572,"a95":0.99,"info":"21/09/2014 at 08:43:29"},{"visible":true,"include":false,"step":"15.0","x":-115.04761904761905,"y":147.5047619047619,"z":127.34285714285713,"a95":0.99,"info":"21/09/2014 at 08:43:29"},{"visible":true,"include":false,"step":"20.0","x":-107.65714285714287,"y":125.94285714285715,"z":112.44761904761906,"a95":0.99,"info":"21/09/2014 at 08:43:29"},{"visible":true,"include":false,"step":"25.0","x":-92.46666666666667,"y":108.65714285714287,"z":103.48571428571428,"a95":0.99,"info":"21/09/2014 at 08:43:29"},{"visible":true,"include":false,"step":"30.0","x":-78.65904761904761,"y":99.72380952380952,"z":88.6257142857143,"a95":0.99,"info":"21/09/2014 at 08:43:29"},{"visible":true,"include":false,"step":"35.0","x":-69.95238095238095,"y":75.17142857142856,"z":77.83904761904762,"a95":0.99,"info":"21/09/2014 at 08:43:29"},{"visible":true,"include":false,"step":"40.0","x":-67.96857142857142,"y":74.42952380952381,"z":70.87809523809524,"a95":0.99,"info":"21/09/2014 at 08:43:29"},{"visible":true,"include":false,"step":"45.0","x":-56.55047619047619,"y":69.46571428571428,"z":60.75619047619048,"a95":0.99,"info":"21/09/2014 at 08:43:29"},{"visible":true,"include":false,"step":"50.0","x":-61.84761904761905,"y":58.06380952380952,"z":56.21714285714285,"a95":0.99,"info":"21/09/2014 at 08:43:29"},{"visible":true,"include":false,"step":"60.0","x":-36.833333333333336,"y":41.86952380952381,"z":77.00285714285714,"a95":0.99,"info":"21/09/2014 at 08:43:29"},{"visible":true,"include":false,"step":"70.0","x":-39.862857142857145,"y":42.76952380952381,"z":45.11238095238095,"a95":0.99,"info":"21/09/2014 at 08:43:29"},{"visible":true,"include":false,"step":"80.0","x":-148.8761904761905,"y":28.674285714285713,"z":34.679047619047616,"a95":0.99,"info":"21/09/2014 at 08:43:29"},{"visible":true,"include":false,"step":"90.0","x":-27.119999999999997,"y":36.87142857142857,"z":37.59809523809523,"a95":0.99,"info":"21/09/2014 at 08:43:29"},{"visible":true,"include":false,"step":"100.0","x":72.84095238095239,"y":36.01714285714286,"z":18.662857142857142,"a95":0.99,"info":"21/09/2014 at 08:43:29"}]},{"version":"v1.1.0","exported":"2017-05-22T14:43:25.967Z","volume":10.5,"added":"2017-05-22T14:42:20.024Z","format":"Utrecht","demagType":"Unknown","strat":null,"patch":1.1,"GEO":[],"TECT":[],"interpreted":false,"name":"SS7.8A","coreAzi":191,"coreDip":14,"bedStrike":175,"bedDip":56,"data":[{"visible":true,"include":false,"step":"20","x":3.304761904761905,"y":-6.828571428571429,"z":-10.390476190476189,"a95":23.2,"info":"\"14-10-13\" at \"17:18\""},{"visible":true,"include":false,"step":"100","x":8.714285714285714,"y":-5.485714285714286,"z":-6.4,"a95":33.4,"info":"\"14-10-13\" at \"20:07\""},{"visible":true,"include":false,"step":"150","x":-42.96190476190476,"y":-3.857142857142857,"z":-5.3047619047619055,"a95":4.1,"info":"\"14-10-13\" at \"22:16\""},{"visible":true,"include":false,"step":"180","x":1.6,"y":-2.9142857142857146,"z":-3.0952380952380953,"a95":18.8,"info":"\"14-10-14\" at \"15:25\""},{"visible":true,"include":false,"step":"210","x":-0.009523809523809525,"y":-0.8857142857142858,"z":-2.038095238095238,"a95":121.4,"info":"\"14-10-14\" at \"18:31\""},{"visible":true,"include":false,"step":"240","x":-3.657142857142857,"y":-1.8571428571428572,"z":-1.3047619047619048,"a95":66.7,"info":"\"14-10-14\" at \"21:39\""},{"visible":true,"include":false,"step":"270","x":0.49523809523809526,"y":-1.7333333333333332,"z":-0.19047619047619047,"a95":15.8,"info":"\"14-10-15\" at \"15:33\""},{"visible":true,"include":false,"step":"290","x":3.8666666666666667,"y":-0.4666666666666667,"z":-0.8000000952380952,"a95":45.8,"info":"\"14-10-15\" at \"18:38\""},{"visible":true,"include":false,"step":"310","x":-2.5047619047619047,"y":-2.857142857142857,"z":-0.4095238095238095,"a95":20.1,"info":"\"14-10-15\" at \"21:53\""},{"visible":true,"include":false,"step":"330","x":-1.7714285714285716,"y":-0.17142857142857143,"z":-3.7047619047619045,"a95":8.400001,"info":"\"14-10-16\" at \"15:16\""},{"visible":true,"include":false,"step":"350","x":3.142857142857143,"y":0.3333333333333333,"z":0.5619047619047619,"a95":91.9,"info":"\"14-10-16\" at \"19:10\""},{"visible":true,"include":false,"step":"370","x":-0.09523809523809523,"y":0.38095238095238093,"z":-2.8,"a95":18.5,"info":"\"14-10-16\" at \"22:19\""},{"visible":true,"include":false,"step":"400","x":3.0476190476190474,"y":-2.6952380952380954,"z":3.695238095238095,"a95":11.4,"info":"\"14-10-17\" at \"13:54\""}]},{"version":"v1.1.0","exported":"2017-05-22T14:43:25.967Z","volume":10.5,"added":"2017-05-22T14:42:20.024Z","format":"Utrecht","demagType":"Unknown","strat":"6","patch":1.1,"GEO":[],"TECT":[],"interpreted":false,"name":"SS7.9A","coreAzi":270,"coreDip":37,"bedStrike":175,"bedDip":56,"data":[{"visible":true,"include":false,"step":"0.0","x":-3.734380952380952,"y":-35.936190476190475,"z":43.23142857142857,"a95":0.99,"info":"29/01/2015 at 18:51:30"},{"visible":true,"include":false,"step":"10.0","x":-74.48380952380953,"y":-9.560952380952381,"z":10.15047619047619,"a95":0.99,"info":"29/01/2015 at 18:51:30"},{"visible":true,"include":false,"step":"15.0","x":16.01047619047619,"y":4.362571428571429,"z":-7.568761904761904,"a95":0.99,"info":"29/01/2015 at 18:51:30"},{"visible":true,"include":false,"step":"20.0","x":1.6518095238095238,"y":-0.8953619047619048,"z":5.7592380952380955,"a95":0.99,"info":"29/01/2015 at 18:51:30"},{"visible":true,"include":false,"step":"23.0","x":-0.10042857142857142,"y":-3.4801904761904763,"z":10.158095238095237,"a95":0.99,"info":"29/01/2015 at 18:51:30"},{"visible":true,"include":false,"step":"25.0","x":1.5593333333333335,"y":-3.046857142857143,"z":9.253619047619047,"a95":0.99,"info":"29/01/2015 at 18:51:30"},{"visible":true,"include":false,"step":"30.0","x":-4.487619047619047,"y":7.923238095238095,"z":5.064095238095239,"a95":0.99,"info":"29/01/2015 at 18:51:30"},{"visible":true,"include":false,"step":"33.0","x":-7.791142857142857,"y":-3.7500952380952377,"z":1.5734285714285714,"a95":0.99,"info":"29/01/2015 at 18:51:30"},{"visible":true,"include":false,"step":"35.0","x":-4.228571428571429,"y":2.2319047619047616,"z":0.13221904761904762,"a95":0.99,"info":"29/01/2015 at 18:51:30"},{"visible":true,"include":false,"step":"40.0","x":-0.2537142857142857,"y":20.53904761904762,"z":7.430857142857143,"a95":0.99,"info":"29/01/2015 at 18:51:30"},{"visible":true,"include":false,"step":"45.0","x":0.6369238095238096,"y":12.17904761904762,"z":0.8651142857142857,"a95":0.99,"info":"29/01/2015 at 18:51:30"},{"visible":true,"include":false,"step":"50.0","x":-0.8272190476190476,"y":4.0200000000000005,"z":5.88952380952381,"a95":0.99,"info":"29/01/2015 at 18:51:30"},{"visible":true,"include":false,"step":"60.0","x":2.116952380952381,"y":4.056380952380953,"z":14.19142857142857,"a95":0.99,"info":"29/01/2015 at 18:51:30"},{"visible":true,"include":false,"step":"70.0","x":8.758476190476191,"y":3.8773333333333335,"z":14.16095238095238,"a95":0.99,"info":"29/01/2015 at 18:51:30"}]},{"version":"v1.1.0","exported":"2017-05-22T14:43:25.967Z","volume":10.5,"added":"2017-05-22T14:42:20.037Z","format":"Utrecht","demagType":"Unknown","strat":null,"patch":1.1,"GEO":[],"TECT":[],"interpreted":false,"name":"SS7.10A","coreAzi":190,"coreDip":23,"bedStrike":175,"bedDip":56,"data":[{"visible":true,"include":false,"step":"20","x":-11.133333333333335,"y":11.295238095238094,"z":9.095238095238095,"a95":11.9,"info":"\"14-10-13\" at \"17:20\""},{"visible":true,"include":false,"step":"100","x":-1.4095238095238096,"y":6.800000000000001,"z":0.8666666666666666,"a95":31.4,"info":"\"14-10-13\" at \"20:09\""},{"visible":true,"include":false,"step":"150","x":-49.11428571428572,"y":2.638095238095238,"z":-1.1142857142857143,"a95":6.7,"info":"\"14-10-13\" at \"22:18\""},{"visible":true,"include":false,"step":"180","x":-2.1619047619047618,"y":3.6476190476190475,"z":0.5714285714285714,"a95":62.7,"info":"\"14-10-14\" at \"15:27\""},{"visible":true,"include":false,"step":"210","x":-3.2952380952380955,"y":4,"z":-1.0571428571428572,"a95":36.6,"info":"\"14-10-14\" at \"18:33\""},{"visible":true,"include":false,"step":"240","x":-2.0095238095238095,"y":3.304761904761905,"z":-3.5904761904761906,"a95":74.7,"info":"\"14-10-14\" at \"21:41\""},{"visible":true,"include":false,"step":"270","x":0.7809523809523808,"y":2.5047619047619047,"z":-0.6,"a95":15,"info":"\"14-10-15\" at \"15:34\""},{"visible":true,"include":false,"step":"290","x":2.9142857142857146,"y":3.5142857142857142,"z":-0.22857142857142856,"a95":24,"info":"\"14-10-15\" at \"18:39\""},{"visible":true,"include":false,"step":"310","x":-3.3714285714285714,"y":4.761904761904762,"z":-2.1904761904761907,"a95":11.3,"info":"\"14-10-15\" at \"21:55\""},{"visible":true,"include":false,"step":"330","x":-3.0095238095238095,"y":2.6952380952380954,"z":-1.5047619047619047,"a95":7.2,"info":"\"14-10-16\" at \"15:17\""},{"visible":true,"include":false,"step":"350","x":-1.361904761904762,"y":3.3904761904761904,"z":-0.3238095238095238,"a95":66,"info":"\"14-10-16\" at \"19:12\""},{"visible":true,"include":false,"step":"370","x":-1.9714285714285713,"y":4.104761904761905,"z":1.7809523809523808,"a95":29.1,"info":"\"14-10-16\" at \"22:21\""},{"visible":true,"include":false,"step":"400","x":-2.895238095238095,"y":3.6095238095238096,"z":2.9523809523809526,"a95":11.9,"info":"\"14-10-17\" at \"13:56\""}]},{"version":"v1.1.0","exported":"2017-05-22T14:43:25.967Z","volume":10.5,"added":"2017-05-22T14:42:20.037Z","format":"Utrecht","demagType":"Unknown","strat":"8","patch":1.1,"GEO":[],"TECT":[],"interpreted":false,"name":"SS7.10B","coreAzi":190,"coreDip":23,"bedStrike":175,"bedDip":56,"data":[{"visible":true,"include":false,"step":"0.0","x":-33.56285714285715,"y":-0.18685714285714286,"z":-17.35142857142857,"a95":0.99,"info":"21/09/2014 at 08:43:29"},{"visible":true,"include":false,"step":"5.0","x":-30.65047619047619,"y":-15.681904761904761,"z":-5.309619047619047,"a95":0.99,"info":"21/09/2014 at 08:43:29"},{"visible":true,"include":false,"step":"10.0","x":-43.56857142857143,"y":-20.54190476190476,"z":-12.651428571428571,"a95":0.99,"info":"21/09/2014 at 08:43:29"},{"visible":true,"include":false,"step":"15.0","x":-43.56,"y":-11.153333333333332,"z":-23.31809523809524,"a95":0.99,"info":"21/09/2014 at 08:43:29"},{"visible":true,"include":false,"step":"20.0","x":-36.549523809523805,"y":-16.585714285714285,"z":-21.356190476190477,"a95":0.99,"info":"21/09/2014 at 08:43:29"},{"visible":true,"include":false,"step":"25.0","x":-38.56666666666666,"y":-0.3910190476190476,"z":-22.495238095238093,"a95":0.99,"info":"21/09/2014 at 08:43:29"},{"visible":true,"include":false,"step":"30.0","x":-35.44857142857143,"y":13.489523809523808,"z":-32.52761904761905,"a95":0.99,"info":"21/09/2014 at 08:43:29"},{"visible":true,"include":false,"step":"35.0","x":-26.305714285714284,"y":-10.72857142857143,"z":-14.564761904761905,"a95":0.99,"info":"21/09/2014 at 08:43:29"},{"visible":true,"include":false,"step":"40.0","x":-30.757142857142856,"y":-2.764761904761905,"z":-21.564761904761905,"a95":0.99,"info":"21/09/2014 at 08:43:29"},{"visible":true,"include":false,"step":"45.0","x":-8.501142857142858,"y":-16.69142857142857,"z":-13.382857142857144,"a95":0.99,"info":"21/09/2014 at 08:43:29"},{"visible":true,"include":false,"step":"50.0","x":-34.49523809523809,"y":-9.429333333333332,"z":-22.245714285714286,"a95":0.99,"info":"21/09/2014 at 08:43:29"},{"visible":true,"include":false,"step":"60.0","x":-9.136380952380952,"y":-28.598095238095237,"z":19.03047619047619,"a95":0.99,"info":"21/09/2014 at 08:43:29"},{"visible":true,"include":false,"step":"70.0","x":-3.84447619047619,"y":-27.19047619047619,"z":-11.696190476190477,"a95":0.99,"info":"21/09/2014 at 08:43:29"},{"visible":true,"include":false,"step":"80.0","x":-141.71428571428572,"y":-23.64190476190476,"z":-13.80190476190476,"a95":0.99,"info":"21/09/2014 at 08:43:29"},{"visible":true,"include":false,"step":"90.0","x":4.838190476190476,"y":-12.87047619047619,"z":-6.616190476190476,"a95":0.99,"info":"21/09/2014 at 08:43:29"},{"visible":true,"include":false,"step":"100.0","x":115.65714285714287,"y":-3.65152380952381,"z":-28.50190476190476,"a95":0.99,"info":"21/09/2014 at 08:43:29"}]},{"version":"v1.1.0","exported":"2017-05-22T14:43:25.967Z","volume":10.5,"added":"2017-05-22T14:42:20.037Z","format":"Utrecht","demagType":"Unknown","strat":"7","patch":1.1,"GEO":[],"TECT":[],"interpreted":false,"name":"SS7.11A","coreAzi":182,"coreDip":11,"bedStrike":175,"bedDip":56,"data":[{"visible":true,"include":false,"step":"0.0","x":38.086666666666666,"y":-65.84476190476191,"z":2.8786666666666667,"a95":0.99,"info":"29/01/2015 at 18:51:30"},{"visible":true,"include":false,"step":"10.0","x":30.917142857142856,"y":-27.69333333333333,"z":-14.108571428571427,"a95":0.99,"info":"29/01/2015 at 18:51:30"},{"visible":true,"include":false,"step":"15.0","x":28.67904761904762,"y":-19.198095238095238,"z":-44.32380952380952,"a95":0.99,"info":"29/01/2015 at 18:51:30"},{"visible":true,"include":false,"step":"20.0","x":25.420952380952382,"y":-9.244285714285715,"z":-29.91333333333333,"a95":0.99,"info":"29/01/2015 at 18:51:30"},{"visible":true,"include":false,"step":"23.0","x":20.16190476190476,"y":-13.78095238095238,"z":-23.752380952380953,"a95":0.99,"info":"29/01/2015 at 18:51:30"},{"visible":true,"include":false,"step":"25.0","x":20.561904761904763,"y":-14.031428571428572,"z":-26.74857142857143,"a95":0.99,"info":"29/01/2015 at 18:51:30"},{"visible":true,"include":false,"step":"30.0","x":17.006666666666668,"y":0.1513904761904762,"z":-25.835238095238093,"a95":0.99,"info":"29/01/2015 at 18:51:30"},{"visible":true,"include":false,"step":"33.0","x":11.952380952380953,"y":-16.210476190476193,"z":-31.509523809523813,"a95":0.99,"info":"29/01/2015 at 18:51:30"},{"visible":true,"include":false,"step":"35.0","x":16.080000000000002,"y":-16.73047619047619,"z":-40.534285714285716,"a95":0.99,"info":"29/01/2015 at 18:51:30"},{"visible":true,"include":false,"step":"40.0","x":20.44,"y":10.687619047619048,"z":-25.716190476190473,"a95":0.99,"info":"29/01/2015 at 18:51:30"},{"visible":true,"include":false,"step":"45.0","x":22.69047619047619,"y":-0.608152380952381,"z":-34.53238095238095,"a95":0.99,"info":"29/01/2015 at 18:51:30"},{"visible":true,"include":false,"step":"50.0","x":19.31714285714286,"y":-8.414666666666667,"z":-14.932380952380951,"a95":0.99,"info":"29/01/2015 at 18:51:30"},{"visible":true,"include":false,"step":"60.0","x":9.398,"y":-6.83847619047619,"z":-18.693333333333335,"a95":0.99,"info":"29/01/2015 at 18:51:30"},{"visible":true,"include":false,"step":"70.0","x":9.942857142857143,"y":-5.343619047619048,"z":-13.974285714285713,"a95":0.99,"info":"29/01/2015 at 18:51:30"}]},{"version":"v1.1.0","exported":"2017-05-22T14:43:25.967Z","volume":10.5,"added":"2017-05-22T14:42:20.037Z","format":"Utrecht","demagType":"Unknown","strat":null,"patch":1.1,"GEO":[],"TECT":[],"interpreted":false,"name":"SS7.12A","coreAzi":176,"coreDip":19,"bedStrike":175,"bedDip":56,"data":[{"visible":true,"include":false,"step":"20","x":8.476190476190476,"y":-12.17142857142857,"z":-14.40952380952381,"a95":9.8,"info":"\"14-10-13\" at \"17:22\""},{"visible":true,"include":false,"step":"100","x":27.323809523809523,"y":-11.095238095238095,"z":-15.2,"a95":9.1,"info":"\"14-10-13\" at \"20:10\""},{"visible":true,"include":false,"step":"150","x":-21.59047619047619,"y":-12.066666666666666,"z":-17.628571428571426,"a95":6.5,"info":"\"14-10-13\" at \"22:20\""},{"visible":true,"include":false,"step":"180","x":19.495238095238093,"y":-2.6476190476190475,"z":-11.390476190476189,"a95":11.7,"info":"\"14-10-14\" at \"15:29\""},{"visible":true,"include":false,"step":"210","x":15.571428571428571,"y":4.514285714285714,"z":-9.8,"a95":13.1,"info":"\"14-10-14\" at \"18:35\""},{"visible":true,"include":false,"step":"240","x":8.266666666666666,"y":13.704761904761906,"z":-7.819047619047619,"a95":21.2,"info":"\"14-10-14\" at \"21:42\""},{"visible":true,"include":false,"step":"270","x":15.761904761904763,"y":16.219047619047622,"z":-1.619047619047619,"a95":2.5,"info":"\"14-10-15\" at \"15:36\""},{"visible":true,"include":false,"step":"290","x":13.361904761904762,"y":12.476190476190476,"z":1.9142857142857144,"a95":7.4,"info":"\"14-10-15\" at \"18:41\""},{"visible":true,"include":false,"step":"310","x":4.704761904761905,"y":20.742857142857144,"z":1.4952380952380953,"a95":3.4,"info":"\"14-10-15\" at \"21:57\""},{"visible":true,"include":false,"step":"330","x":0.3523809523809524,"y":12.952380952380953,"z":0.8285714285714285,"a95":5.4,"info":"\"14-10-16\" at \"15:19\""},{"visible":true,"include":false,"step":"350","x":5.20952380952381,"y":11.028571428571428,"z":1.1333333333333333,"a95":13.8,"info":"\"14-10-16\" at \"19:14\""},{"visible":true,"include":false,"step":"370","x":8.266666666666666,"y":21.666666666666668,"z":0.6857142857142857,"a95":10.2,"info":"\"14-10-16\" at \"22:23\""},{"visible":true,"include":false,"step":"400","x":-0.8476191428571428,"y":5.380952380952381,"z":2.9904761904761905,"a95":9.8,"info":"\"14-10-17\" at \"13:57\""}]},{"version":"v1.1.0","exported":"2017-05-22T14:43:25.967Z","volume":10.5,"added":"2017-05-22T14:42:20.037Z","format":"Utrecht","demagType":"Unknown","strat":"1","patch":1.1,"GEO":[],"TECT":[],"interpreted":false,"name":"SS7.12B","coreAzi":176,"coreDip":19,"bedStrike":175,"bedDip":56,"data":[{"visible":true,"include":false,"step":"0.0","x":-133.3904761904762,"y":-22.450476190476188,"z":-77.22,"a95":0.99,"info":"21/09/2014 at 13:51:28"},{"visible":true,"include":false,"step":"5.0","x":-139.3904761904762,"y":-21.413333333333334,"z":-76.12380952380951,"a95":0.99,"info":"21/09/2014 at 13:51:28"},{"visible":true,"include":false,"step":"10.0","x":-123.46666666666667,"y":-24.447619047619046,"z":-75.00190476190475,"a95":0.99,"info":"21/09/2014 at 13:51:28"},{"visible":true,"include":false,"step":"15.0","x":-111.95238095238095,"y":-26.155238095238094,"z":-62.56095238095238,"a95":0.99,"info":"21/09/2014 at 13:51:28"},{"visible":true,"include":false,"step":"20.0","x":-103.21904761904761,"y":-13.206666666666665,"z":-56.831428571428575,"a95":0.99,"info":"21/09/2014 at 13:51:28"},{"visible":true,"include":false,"step":"25.0","x":-92.70285714285714,"y":-15.335238095238097,"z":-48.22285714285714,"a95":0.99,"info":"21/09/2014 at 13:51:28"},{"visible":true,"include":false,"step":"30.0","x":-86.49142857142857,"y":-6.510571428571429,"z":-42.063809523809525,"a95":0.99,"info":"21/09/2014 at 13:51:28"},{"visible":true,"include":false,"step":"35.0","x":-73.79714285714286,"y":-4.42752380952381,"z":-36.906666666666666,"a95":0.99,"info":"21/09/2014 at 13:51:28"},{"visible":true,"include":false,"step":"40.0","x":-67.22666666666666,"y":-6.921523809523809,"z":-34.64857142857143,"a95":0.99,"info":"21/09/2014 at 13:51:28"},{"visible":true,"include":false,"step":"45.0","x":-75.16857142857143,"y":-1.4836190476190476,"z":-22.865714285714287,"a95":0.99,"info":"21/09/2014 at 13:51:28"},{"visible":true,"include":false,"step":"50.0","x":-63.13619047619047,"y":3.400666666666667,"z":-20.354285714285716,"a95":0.99,"info":"21/09/2014 at 13:51:28"},{"visible":true,"include":false,"step":"60.0","x":-59.75047619047619,"y":-7.657714285714286,"z":-22.794285714285714,"a95":0.99,"info":"21/09/2014 at 13:51:28"},{"visible":true,"include":false,"step":"70.0","x":-56.21619047619048,"y":1.7344761904761905,"z":-14.35904761904762,"a95":0.99,"info":"21/09/2014 at 13:51:28"},{"visible":true,"include":false,"step":"80.0","x":-49.037142857142854,"y":1.4395238095238096,"z":-15.343809523809526,"a95":0.99,"info":"21/09/2014 at 13:51:28"},{"visible":true,"include":false,"step":"90.0","x":-41.44190476190476,"y":-3.390285714285714,"z":-10.390476190476189,"a95":0.99,"info":"21/09/2014 at 13:51:28"},{"visible":true,"include":false,"step":"100.0","x":-49.392380952380954,"y":-3.0225714285714282,"z":-12.472380952380954,"a95":0.99,"info":"21/09/2014 at 13:51:28"}]},{"version":"v1.1.0","exported":"2017-05-22T14:43:25.967Z","volume":10.5,"added":"2017-05-22T14:42:20.037Z","format":"Utrecht","demagType":"Unknown","strat":"8","patch":1.1,"GEO":[],"TECT":[],"interpreted":false,"name":"SS7.13A","coreAzi":145,"coreDip":25,"bedStrike":134,"bedDip":38,"data":[{"visible":true,"include":false,"step":"0.0","x":1.6041904761904764,"y":3.3280000000000003,"z":-6.097333333333334,"a95":0.99,"info":"29/01/2015 at 18:51:30"},{"visible":true,"include":false,"step":"10.0","x":1.08,"y":-4.196476190476191,"z":-9.950476190476191,"a95":0.99,"info":"29/01/2015 at 18:51:30"},{"visible":true,"include":false,"step":"15.0","x":-0.6968380952380953,"y":-12.612380952380953,"z":-16.51238095238095,"a95":0.99,"info":"29/01/2015 at 18:51:30"},{"visible":true,"include":false,"step":"20.0","x":-0.014976190476190476,"y":-4.598761904761905,"z":-7.524666666666667,"a95":0.99,"info":"29/01/2015 at 18:51:30"},{"visible":true,"include":false,"step":"23.0","x":2.3820952380952383,"y":-7.077238095238096,"z":-6.7023809523809526,"a95":0.99,"info":"29/01/2015 at 18:51:30"},{"visible":true,"include":false,"step":"25.0","x":0.8897619047619048,"y":-5.264,"z":-8.855142857142857,"a95":0.99,"info":"29/01/2015 at 18:51:30"},{"visible":true,"include":false,"step":"30.0","x":-2.798761904761905,"y":9.461333333333332,"z":-19.19904761904762,"a95":0.99,"info":"29/01/2015 at 18:51:30"},{"visible":true,"include":false,"step":"33.0","x":-5.543809523809524,"y":-7.260571428571429,"z":-14.66952380952381,"a95":0.99,"info":"29/01/2015 at 18:51:30"},{"visible":true,"include":false,"step":"35.0","x":-2.3899999999999997,"y":-10.366666666666665,"z":-15.512380952380951,"a95":0.99,"info":"29/01/2015 at 18:51:30"},{"visible":true,"include":false,"step":"40.0","x":2.2199999999999998,"y":15.425714285714285,"z":-9.766666666666666,"a95":0.99,"info":"29/01/2015 at 18:51:30"},{"visible":true,"include":false,"step":"45.0","x":9.747619047619047,"y":12.507619047619048,"z":-11.845714285714285,"a95":0.99,"info":"29/01/2015 at 18:51:30"},{"visible":true,"include":false,"step":"50.0","x":-0.24402857142857143,"y":3.0996190476190475,"z":-5.120190476190476,"a95":0.99,"info":"29/01/2015 at 18:51:30"},{"visible":true,"include":false,"step":"60.0","x":2.2728571428571427,"y":10.357142857142858,"z":-2.3963809523809525,"a95":0.99,"info":"29/01/2015 at 18:51:30"},{"visible":true,"include":false,"step":"70.0","x":-3.6585714285714284,"y":0.4853142857142857,"z":-1.2013333333333334,"a95":0.99,"info":"29/01/2015 at 18:51:30"}]},{"version":"v1.1.0","exported":"2017-05-22T14:43:25.967Z","volume":10.5,"added":"2017-05-22T14:42:20.038Z","format":"Utrecht","demagType":"Unknown","strat":"1","patch":1.1,"GEO":[],"TECT":[],"interpreted":false,"name":"SS7.14A","coreAzi":222,"coreDip":50,"bedStrike":134,"bedDip":38,"data":[{"visible":true,"include":false,"step":"0.0","x":-27.564761904761905,"y":24.788571428571426,"z":-22.98761904761905,"a95":0.99,"info":"29/01/2015 at 23:20:58"},{"visible":true,"include":false,"step":"10.0","x":-24.15809523809524,"y":13.628571428571428,"z":-4.945714285714286,"a95":0.99,"info":"29/01/2015 at 23:20:58"},{"visible":true,"include":false,"step":"15.0","x":-26.18761904761905,"y":12.424761904761905,"z":9.147904761904762,"a95":0.99,"info":"29/01/2015 at 23:20:58"},{"visible":true,"include":false,"step":"20.0","x":-23.743809523809524,"y":17.524761904761903,"z":7.338952380952381,"a95":0.99,"info":"29/01/2015 at 23:20:58"},{"visible":true,"include":false,"step":"23.0","x":-17.81809523809524,"y":5.456952380952381,"z":-3.0864761904761906,"a95":0.99,"info":"29/01/2015 at 23:20:58"},{"visible":true,"include":false,"step":"25.0","x":-20.14190476190476,"y":21.98857142857143,"z":-10.77904761904762,"a95":0.99,"info":"29/01/2015 at 23:20:58"},{"visible":true,"include":false,"step":"30.0","x":-15.318095238095239,"y":10.262857142857143,"z":-1.7913333333333334,"a95":0.99,"info":"29/01/2015 at 23:20:58"},{"visible":true,"include":false,"step":"33.0","x":5.333333333333333,"y":-22.663809523809523,"z":-3.790380952380952,"a95":0.99,"info":"29/01/2015 at 23:20:58"},{"visible":true,"include":false,"step":"35.0","x":-15.911428571428571,"y":7.429333333333333,"z":5.218380952380953,"a95":0.99,"info":"29/01/2015 at 23:20:58"},{"visible":true,"include":false,"step":"40.0","x":-18.97809523809524,"y":8.723428571428572,"z":3.4875238095238097,"a95":0.99,"info":"29/01/2015 at 23:20:58"},{"visible":true,"include":false,"step":"45.0","x":-5.2275238095238095,"y":12.344761904761905,"z":-3.854,"a95":0.99,"info":"29/01/2015 at 23:20:58"},{"visible":true,"include":false,"step":"50.0","x":-7.664285714285714,"y":2.711142857142857,"z":-2.2314285714285713,"a95":0.99,"info":"29/01/2015 at 23:20:58"},{"visible":true,"include":false,"step":"60.0","x":-5.490952380952381,"y":2.504380952380952,"z":-0.29466666666666663,"a95":0.99,"info":"29/01/2015 at 23:20:58"},{"visible":true,"include":false,"step":"70.0","x":6.417714285714285,"y":-3.3738095238095234,"z":28.644761904761904,"a95":0.99,"info":"29/01/2015 at 23:20:58"}]},{"version":"v1.1.0","exported":"2017-05-22T14:43:25.967Z","volume":10.5,"added":"2017-05-22T14:42:20.038Z","format":"Utrecht","demagType":"Unknown","strat":null,"patch":1.1,"GEO":[],"TECT":[],"interpreted":false,"name":"SS7.15A","coreAzi":182,"coreDip":26,"bedStrike":134,"bedDip":38,"data":[{"visible":true,"include":false,"step":"20","x":-65.9047619047619,"y":64,"z":-84.57142857142857,"a95":3.1,"info":"\"14-10-13\" at \"17:23\""},{"visible":true,"include":false,"step":"100","x":-32.57142857142857,"y":32.76190476190476,"z":-88.57142857142857,"a95":4,"info":"\"14-10-13\" at \"20:12\""},{"visible":true,"include":false,"step":"150","x":-75.80952380952381,"y":24.857142857142858,"z":-91.42857142857143,"a95":2.8,"info":"\"14-10-13\" at \"22:22\""},{"visible":true,"include":false,"step":"180","x":-28.095238095238095,"y":26.095238095238095,"z":-92.19047619047619,"a95":3.9,"info":"\"14-10-14\" at \"15:31\""},{"visible":true,"include":false,"step":"210","x":-29.19047619047619,"y":25.523809523809526,"z":-83.8,"a95":3.8,"info":"\"14-10-14\" at \"18:37\""},{"visible":true,"include":false,"step":"240","x":-30.38095238095238,"y":25.523809523809526,"z":-86.95238095238095,"a95":3.8,"info":"\"14-10-14\" at \"21:45\""},{"visible":true,"include":false,"step":"270","x":-23.885714285714286,"y":26.142857142857142,"z":-80,"a95":2.8,"info":"\"14-10-15\" at \"15:38\""},{"visible":true,"include":false,"step":"290","x":-24.990476190476187,"y":25.895238095238092,"z":-81.64761904761905,"a95":3.6,"info":"\"14-10-15\" at \"18:43\""},{"visible":true,"include":false,"step":"310","x":-29.333333333333332,"y":25.54285714285714,"z":-81.33333333333333,"a95":2.7,"info":"\"14-10-15\" at \"21:59\""},{"visible":true,"include":false,"step":"330","x":-25.02857142857143,"y":27.01904761904762,"z":-83.35238095238095,"a95":2.9,"info":"\"14-10-16\" at \"15:21\""},{"visible":true,"include":false,"step":"350","x":-26.552380952380954,"y":22.247619047619047,"z":-79.42857142857143,"a95":3.1,"info":"\"14-10-16\" at \"19:16\""},{"visible":true,"include":false,"step":"370","x":-37.23809523809524,"y":28.552380952380954,"z":-82.64761904761905,"a95":3.7,"info":"\"14-10-16\" at \"22:24\""},{"visible":true,"include":false,"step":"400","x":-38.142857142857146,"y":21.58095238095238,"z":-82.25714285714287,"a95":2.6,"info":"\"14-10-17\" at \"14:00\""},{"visible":true,"include":false,"step":"420","x":-52.38095238095238,"y":19.428571428571427,"z":-80.19047619047619,"a95":3.4,"info":"\"14-10-17\" at \"16:59\""},{"visible":true,"include":false,"step":"440","x":-43.24761904761905,"y":31.714285714285715,"z":-77.73333333333333,"a95":3.5,"info":"\"14-10-17\" at \"20:14\""},{"visible":true,"include":false,"step":"470","x":-47.523809523809526,"y":42.095238095238095,"z":-76.38095238095238,"a95":4.1,"info":"\"14-10-17\" at \"23:27\""},{"visible":true,"include":false,"step":"490","x":-34.60952380952381,"y":17.83809523809524,"z":-74.8952380952381,"a95":6.3,"info":"\"14-10-18\" at \"11:48\""},{"visible":true,"include":false,"step":"520","x":-49.80952380952381,"y":50.095238095238095,"z":-67.14285714285714,"a95":6.4,"info":"\"14-10-18\" at \"14:51\""},{"visible":true,"include":false,"step":"550","x":-55.23809523809524,"y":-33.65714285714286,"z":-50.04761904761905,"a95":12.7,"info":"\"14-10-19\" at \"09:43\""},{"visible":true,"include":false,"step":"580","x":-77.42857142857143,"y":97.61904761904762,"z":-25.047619047619047,"a95":6.4,"info":"\"14-10-19\" at \"11:47\""},{"visible":true,"include":false,"step":"610","x":60.38095238095238,"y":40.438095238095244,"z":30.276190476190475,"a95":17.1,"info":"\"14-10-19\" at \"15:10\""}]},{"version":"v1.1.0","exported":"2017-05-22T14:43:25.967Z","volume":10.5,"added":"2017-05-22T14:42:20.038Z","format":"Utrecht","demagType":"Unknown","strat":"2","patch":1.1,"GEO":[],"TECT":[],"interpreted":false,"name":"SS7.16A","coreAzi":221,"coreDip":63,"bedStrike":134,"bedDip":38,"data":[{"visible":true,"include":false,"step":"0.0","x":-42.526666666666664,"y":20.935238095238095,"z":8.08504761904762,"a95":0.99,"info":"21/09/2014 at 13:51:28"},{"visible":true,"include":false,"step":"5.0","x":4.209142857142857,"y":11.027619047619048,"z":-2.9756190476190474,"a95":0.99,"info":"21/09/2014 at 13:51:28"},{"visible":true,"include":false,"step":"10.0","x":-45.53238095238095,"y":22.795238095238094,"z":8.352,"a95":0.99,"info":"21/09/2014 at 13:51:28"},{"visible":true,"include":false,"step":"15.0","x":-42.10095238095238,"y":10.8,"z":4.825523809523809,"a95":0.99,"info":"21/09/2014 at 13:51:28"},{"visible":true,"include":false,"step":"20.0","x":-48.892380952380954,"y":21.391428571428573,"z":-0.867,"a95":0.99,"info":"21/09/2014 at 13:51:28"},{"visible":true,"include":false,"step":"25.0","x":-37.06952380952381,"y":12.556190476190476,"z":-1.3077142857142856,"a95":0.99,"info":"21/09/2014 at 13:51:28"},{"visible":true,"include":false,"step":"30.0","x":-33.670476190476194,"y":14.742857142857144,"z":-3.836380952380952,"a95":0.99,"info":"21/09/2014 at 13:51:28"},{"visible":true,"include":false,"step":"35.0","x":-29.062857142857144,"y":12.088571428571429,"z":-2.4183809523809523,"a95":0.99,"info":"21/09/2014 at 13:51:28"},{"visible":true,"include":false,"step":"40.0","x":-36.03523809523809,"y":13.103809523809524,"z":-2.3226666666666667,"a95":0.99,"info":"21/09/2014 at 13:51:28"},{"visible":true,"include":false,"step":"45.0","x":-21.100952380952382,"y":39.63619047619048,"z":14.171428571428573,"a95":0.99,"info":"21/09/2014 at 13:51:28"},{"visible":true,"include":false,"step":"50.0","x":-22.621904761904762,"y":6.271809523809524,"z":-0.865742857142857,"a95":0.99,"info":"21/09/2014 at 13:51:28"},{"visible":true,"include":false,"step":"60.0","x":-15.85904761904762,"y":3.2769523809523813,"z":-1.236,"a95":0.99,"info":"21/09/2014 at 13:51:28"},{"visible":true,"include":false,"step":"70.0","x":-16.607619047619046,"y":3.032952380952381,"z":-0.7876666666666667,"a95":0.99,"info":"21/09/2014 at 13:51:28"},{"visible":true,"include":false,"step":"80.0","x":-27.145714285714284,"y":1.3218095238095238,"z":-9.544761904761904,"a95":0.99,"info":"21/09/2014 at 13:51:28"},{"visible":true,"include":false,"step":"90.0","x":-16.513333333333332,"y":-7.940571428571429,"z":-36.83428571428571,"a95":0.99,"info":"21/09/2014 at 13:51:28"},{"visible":true,"include":false,"step":"100.0","x":-27.229523809523812,"y":-26.684761904761906,"z":10.76095238095238,"a95":0.99,"info":"21/09/2014 at 13:51:28"}]}]
