# Supplementary material for: Paleomagnetic constraints on the timing and distribution of Cenozoic rotations in Central and Eastern Anatolia
Source: Copernicus journal article supplement (doi:10.5194/se-9-295-2018), 2018-03-21
Supplement: Supplementary file 2 [file se-9-295-2018-supplement.zip › se-2017-66_DATA_dir files/dir files Tauride basins/SS08.dir]

[{"version":"v1.1.0","exported":"2017-05-22T14:45:14.676Z","volume":10.5,"added":"2017-05-22T14:43:46.134Z","format":"Utrecht","demagType":"Unknown","strat":null,"patch":1.1,"GEO":[],"TECT":[],"interpreted":false,"name":"SS8.1A","coreAzi":288,"coreDip":40,"bedStrike":208,"bedDip":35,"data":[{"visible":true,"include":false,"step":"20","x":-5.857142857142857,"y":9.390476190476189,"z":15.038095238095238,"a95":5.4,"info":"\"14-10-13\" at \"16:05\""},{"visible":true,"include":false,"step":"100","x":-0.8666666666666666,"y":1.7904761904761906,"z":5.857142857142857,"a95":51.3,"info":"\"14-10-13\" at \"19:04\""},{"visible":true,"include":false,"step":"150","x":-0.5523809523809524,"y":3.2,"z":3.2476190476190476,"a95":42.4,"info":"\"14-10-13\" at \"22:24\""},{"visible":true,"include":false,"step":"180","x":1.019047619047619,"y":3.3523809523809525,"z":3.657142857142857,"a95":5.2,"info":"\"14-10-14\" at \"15:33\""},{"visible":true,"include":false,"step":"210","x":-0.37142857142857144,"y":2.6761904761904765,"z":2.019047619047619,"a95":65.8,"info":"\"14-10-14\" at \"18:39\""},{"visible":true,"include":false,"step":"240","x":0.8952381904761905,"y":1.6857142857142857,"z":2.5428571428571427,"a95":94.2,"info":"\"14-10-14\" at \"21:47\""},{"visible":true,"include":false,"step":"270","x":-2.3714285714285714,"y":0.3333333333333333,"z":2.123809523809524,"a95":12.6,"info":"\"14-10-15\" at \"15:40\""},{"visible":true,"include":false,"step":"290","x":3.2095238095238097,"y":-1.6,"z":2.3333333333333335,"a95":41.9,"info":"\"14-10-15\" at \"18:45\""},{"visible":true,"include":false,"step":"310","x":3.657142857142857,"y":-1.5619047619047617,"z":0.7047619047619048,"a95":19.9,"info":"\"14-10-15\" at \"22:02\""},{"visible":true,"include":false,"step":"330","x":0.8095238095238095,"y":-2.1619047619047618,"z":2.257142857142857,"a95":11.3,"info":"\"14-10-16\" at \"15:23\""},{"visible":true,"include":false,"step":"350","x":1.2761904761904763,"y":-0.3047619047619048,"z":0.5904761904761905,"a95":230.6,"info":"\"14-10-16\" at \"19:18\""},{"visible":true,"include":false,"step":"370","x":-0.9904761904761905,"y":-1.0095238095238095,"z":1.7999999999999998,"a95":64.5,"info":"\"14-10-16\" at \"22:27\""},{"visible":true,"include":false,"step":"400","x":-1.657142857142857,"y":-0.34285714285714286,"z":0.14285714285714285,"a95":26.5,"info":"\"14-10-17\" at \"14:02\""}]},{"version":"v1.1.0","exported":"2017-05-22T14:45:14.676Z","volume":10.5,"added":"2017-05-22T14:43:46.134Z","format":"Utrecht","demagType":"Unknown","strat":null,"patch":1.1,"GEO":[],"TECT":[],"interpreted":false,"name":"SS8.2A","coreAzi":339,"coreDip":42,"bedStrike":208,"bedDip":35,"data":[{"visible":true,"include":false,"step":"20","x":-2.361904761904762,"y":-16.99047619047619,"z":29.200000000000003,"a95":2.1,"info":"\"14-10-20\" at \"15:32\""},{"visible":true,"include":false,"step":"100","x":0.3904761904761904,"y":-10.22857142857143,"z":1.619047619047619,"a95":3.6,"info":"\"14-10-20\" at \"18:23\""},{"visible":true,"include":false,"step":"150","x":2.8476190476190473,"y":-7.266666666666667,"z":2.380952380952381,"a95":7.3,"info":"\"14-10-20\" at \"21:45\""},{"visible":true,"include":false,"step":"180","x":1.0952380952380953,"y":-6.685714285714286,"z":1.7142857142857142,"a95":5.1,"info":"\"14-10-21\" at \"00:38\""},{"visible":true,"include":false,"step":"210","x":0.13333333333333333,"y":-5.942857142857143,"z":1.5047619047619047,"a95":10.3,"info":"\"14-10-21\" at \"16:43\""},{"visible":true,"include":false,"step":"240","x":1.8380952380952382,"y":-4.714285714285714,"z":0.819047619047619,"a95":16.3,"info":"\"14-10-21\" at \"19:44\""},{"visible":true,"include":false,"step":"270","x":10.485714285714286,"y":-4.761904761904762,"z":0.02857142857142857,"a95":8.7,"info":"\"14-10-21\" at \"22:47\""},{"visible":true,"include":false,"step":"290","x":1.6285714285714288,"y":-6.095238095238095,"z":-0.47619047619047616,"a95":5.5,"info":"\"14-10-22\" at \"15:17\""},{"visible":true,"include":false,"step":"310","x":-0.05714285714285714,"y":-7.60952380952381,"z":-0.819047619047619,"a95":6.8,"info":"\"14-10-22\" at \"18:03\""},{"visible":true,"include":false,"step":"330","x":-10.238095238095237,"y":-7.0285714285714285,"z":-2.4761904761904763,"a95":5.5,"info":"\"14-10-22\" at \"21:15\""},{"visible":true,"include":false,"step":"350","x":2.2285714285714286,"y":-7.219047619047619,"z":-1.7809523809523808,"a95":17,"info":"\"14-10-23\" at \"15:29\""},{"visible":true,"include":false,"step":"370","x":-3.1904761904761907,"y":-10.114285714285714,"z":-2.5523809523809526,"a95":5.8,"info":"\"14-10-23\" at \"18:28\""},{"visible":true,"include":false,"step":"400","x":4.390476190476191,"y":-5.923809523809524,"z":0.5523809523809524,"a95":14.7,"info":"\"14-10-23\" at \"21:28\""}]},{"version":"v1.1.0","exported":"2017-05-22T14:45:14.676Z","volume":10.5,"added":"2017-05-22T14:43:46.134Z","format":"Utrecht","demagType":"Unknown","strat":"3","patch":1.1,"GEO":[],"TECT":[],"interpreted":false,"name":"SS8.3A","coreAzi":312,"coreDip":35,"bedStrike":208,"bedDip":35,"data":[{"visible":true,"include":false,"step":"0.0","x":-5.034666666666666,"y":2.167047619047619,"z":-15.092380952380953,"a95":0.99,"info":"21/09/2014 at 13:51:28"},{"visible":true,"include":false,"step":"5.0","x":34.68190476190476,"y":-5.917142857142857,"z":-15.689523809523811,"a95":0.99,"info":"21/09/2014 at 13:51:28"},{"visible":true,"include":false,"step":"10.0","x":-5.428476190476191,"y":-3.685238095238095,"z":-1.358095238095238,"a95":0.99,"info":"21/09/2014 at 13:51:28"},{"visible":true,"include":false,"step":"15.0","x":-5.779904761904762,"y":-8.465619047619047,"z":1.5432380952380953,"a95":0.99,"info":"21/09/2014 at 13:51:28"},{"visible":true,"include":false,"step":"20.0","x":-21.383809523809525,"y":6.667142857142856,"z":-6.476952380952381,"a95":0.99,"info":"21/09/2014 at 13:51:28"},{"visible":true,"include":false,"step":"25.0","x":-2.494857142857143,"y":-3.612571428571429,"z":-2.6160952380952383,"a95":0.99,"info":"21/09/2014 at 13:51:28"},{"visible":true,"include":false,"step":"30.0","x":0.2642857142857143,"y":4.222476190476191,"z":-2.754,"a95":0.99,"info":"21/09/2014 at 13:51:28"},{"visible":true,"include":false,"step":"35.0","x":-1.3742857142857143,"y":1.3391428571428572,"z":-1.8794285714285717,"a95":0.99,"info":"21/09/2014 at 13:51:28"},{"visible":true,"include":false,"step":"40.0","x":-8.206095238095239,"y":-6.306476190476191,"z":-5.169904761904762,"a95":0.99,"info":"21/09/2014 at 13:51:28"},{"visible":true,"include":false,"step":"45.0","x":30.548571428571428,"y":17.02952380952381,"z":-18.089523809523808,"a95":0.99,"info":"21/09/2014 at 13:51:28"},{"visible":true,"include":false,"step":"50.0","x":-1.8024761904761903,"y":1.8867619047619049,"z":-0.740447619047619,"a95":0.99,"info":"21/09/2014 at 13:51:28"},{"visible":true,"include":false,"step":"60.0","x":-0.6369238095238096,"y":2.0658095238095235,"z":-0.1397809523809524,"a95":0.99,"info":"21/09/2014 at 13:51:28"},{"visible":true,"include":false,"step":"70.0","x":-0.3885047619047619,"y":-0.09861904761904763,"z":-1.5753333333333335,"a95":0.99,"info":"21/09/2014 at 13:51:28"},{"visible":true,"include":false,"step":"80.0","x":-8.124095238095238,"y":2.9326666666666665,"z":-8.528285714285714,"a95":0.99,"info":"21/09/2014 at 13:51:28"},{"visible":true,"include":false,"step":"90.0","x":0.3514952380952381,"y":-9.446666666666667,"z":-34.82,"a95":0.99,"info":"21/09/2014 at 13:51:28"},{"visible":true,"include":false,"step":"100.0","x":1.4192380952380952,"y":7.0175238095238095,"z":-5.145333333333333,"a95":0.99,"info":"21/09/2014 at 13:51:28"}]},{"version":"v1.1.0","exported":"2017-05-22T14:45:14.676Z","volume":10.5,"added":"2017-05-22T14:43:46.134Z","format":"Utrecht","demagType":"Unknown","strat":"4","patch":1.1,"GEO":[],"TECT":[],"interpreted":false,"name":"SS8.4A","coreAzi":334,"coreDip":45,"bedStrike":208,"bedDip":35,"data":[{"visible":true,"include":false,"step":"0.0","x":69.38,"y":-61.01809523809524,"z":101.85714285714286,"a95":0.99,"info":"21/09/2014 at 13:51:28"},{"visible":true,"include":false,"step":"5.0","x":87.32380952380952,"y":-46.39809523809524,"z":67.99333333333333,"a95":0.99,"info":"21/09/2014 at 13:51:28"},{"visible":true,"include":false,"step":"10.0","x":21.093333333333334,"y":-22.410476190476192,"z":19.01047619047619,"a95":0.99,"info":"21/09/2014 at 13:51:28"},{"visible":true,"include":false,"step":"15.0","x":10.140952380952381,"y":-25.963809523809523,"z":-5.309047619047619,"a95":0.99,"info":"21/09/2014 at 13:51:28"},{"visible":true,"include":false,"step":"20.0","x":-11.546666666666667,"y":1.8382857142857143,"z":-24.791428571428572,"a95":0.99,"info":"21/09/2014 at 13:51:28"},{"visible":true,"include":false,"step":"25.0","x":4.3536190476190475,"y":-13.988571428571428,"z":-21.428571428571427,"a95":0.99,"info":"21/09/2014 at 13:51:28"},{"visible":true,"include":false,"step":"30.0","x":2.5327619047619048,"y":-3.5416190476190472,"z":-21.64095238095238,"a95":0.99,"info":"21/09/2014 at 13:51:28"},{"visible":true,"include":false,"step":"35.0","x":-0.2783809523809524,"y":-2.4032380952380956,"z":-20.278095238095236,"a95":0.99,"info":"21/09/2014 at 13:51:28"},{"visible":true,"include":false,"step":"40.0","x":-8.586666666666666,"y":6.0572380952380955,"z":-17.905714285714286,"a95":0.99,"info":"21/09/2014 at 13:51:28"},{"visible":true,"include":false,"step":"45.0","x":30.59904761904762,"y":13.38190476190476,"z":-35.01714285714286,"a95":0.99,"info":"21/09/2014 at 13:51:28"},{"visible":true,"include":false,"step":"50.0","x":4.714,"y":-3.02,"z":-21.864761904761906,"a95":0.99,"info":"21/09/2014 at 13:51:28"},{"visible":true,"include":false,"step":"60.0","x":7.520666666666666,"y":-1.1384761904761906,"z":-19.353333333333335,"a95":0.99,"info":"21/09/2014 at 13:51:28"},{"visible":true,"include":false,"step":"70.0","x":5.182666666666667,"y":-2.1323809523809523,"z":-18.275238095238095,"a95":0.99,"info":"21/09/2014 at 13:51:28"},{"visible":true,"include":false,"step":"80.0","x":-4.801238095238095,"y":-4.885142857142857,"z":-22.602857142857143,"a95":0.99,"info":"21/09/2014 at 13:51:28"},{"visible":true,"include":false,"step":"90.0","x":12.665714285714287,"y":-8.951809523809525,"z":-41.27142857142857,"a95":0.99,"info":"21/09/2014 at 13:51:28"},{"visible":true,"include":false,"step":"100.0","x":4.077904761904762,"y":4.952571428571429,"z":-17.974285714285713,"a95":0.99,"info":"21/09/2014 at 13:51:28"}]},{"version":"v1.1.0","exported":"2017-05-22T14:45:14.676Z","volume":10.5,"added":"2017-05-22T14:43:46.135Z","format":"Utrecht","demagType":"Unknown","strat":null,"patch":1.1,"GEO":[],"TECT":[],"interpreted":false,"name":"SS8.5A","coreAzi":312,"coreDip":39,"bedStrike":208,"bedDip":35,"data":[{"visible":true,"include":false,"step":"20","x":12.285714285714286,"y":70.38095238095238,"z":191.52380952380952,"a95":2.7,"info":"\"14-10-20\" at \"15:34\""},{"visible":true,"include":false,"step":"100","x":34.13333333333333,"y":25.009523809523813,"z":70.96190476190476,"a95":2.3,"info":"\"14-10-20\" at \"18:25\""},{"visible":true,"include":false,"step":"150","x":34.99047619047619,"y":18.73333333333333,"z":35.285714285714285,"a95":2.2,"info":"\"14-10-20\" at \"21:46\""},{"visible":true,"include":false,"step":"180","x":22.780952380952378,"y":3.0095238095238095,"z":30.314285714285717,"a95":2.3,"info":"\"14-10-21\" at \"00:40\""},{"visible":true,"include":false,"step":"210","x":30.35238095238095,"y":12.17142857142857,"z":29.076190476190476,"a95":2.5,"info":"\"14-10-21\" at \"16:45\""},{"visible":true,"include":false,"step":"240","x":29.580952380952382,"y":11.047619047619047,"z":24.533333333333335,"a95":2.8,"info":"\"14-10-21\" at \"19:46\""},{"visible":true,"include":false,"step":"270","x":38.80952380952381,"y":9.40952380952381,"z":21.26666666666667,"a95":2.5,"info":"\"14-10-21\" at \"22:49\""},{"visible":true,"include":false,"step":"290","x":26.904761904761905,"y":10.723809523809523,"z":21.047619047619047,"a95":2.2,"info":"\"14-10-22\" at \"15:19\""},{"visible":true,"include":false,"step":"310","x":27.82857142857143,"y":6.066666666666667,"z":20.34285714285714,"a95":9.1,"info":"\"14-10-22\" at \"18:05\""},{"visible":true,"include":false,"step":"330","x":16.59047619047619,"y":8.942857142857143,"z":15.628571428571428,"a95":2.8,"info":"\"14-10-22\" at \"21:16\""},{"visible":true,"include":false,"step":"350","x":27.419047619047618,"y":5.857142857142857,"z":19.45714285714286,"a95":7.9,"info":"\"14-10-23\" at \"15:31\""},{"visible":true,"include":false,"step":"370","x":20.057142857142857,"y":7.847619047619048,"z":13.266666666666667,"a95":4.1,"info":"\"14-10-23\" at \"18:30\""},{"visible":true,"include":false,"step":"400","x":30.01904761904762,"y":6.933333333333333,"z":23.6,"a95":3.1,"info":"\"14-10-23\" at \"21:30\""},{"visible":true,"include":false,"step":"420","x":27.961904761904766,"y":5.390476190476191,"z":9.304761904761905,"a95":8.7,"info":"\"14-10-24\" at \"16:05\""},{"visible":true,"include":false,"step":"440","x":21.904761904761905,"y":5.752380952380952,"z":22.685714285714283,"a95":4.2,"info":"\"14-10-24\" at \"19:18\""},{"visible":true,"include":false,"step":"470","x":16.228571428571428,"y":9.41904761904762,"z":13.247619047619047,"a95":8,"info":"\"14-10-24\" at \"21:55\""},{"visible":true,"include":false,"step":"490","x":20.39047619047619,"y":3.7809523809523813,"z":28.35238095238095,"a95":8.7,"info":"\"14-10-25\" at \"00:50\""},{"visible":true,"include":false,"step":"520","x":-8.142857142857142,"y":36.50476190476191,"z":-18.219047619047622,"a95":16.2,"info":"\"14-10-25\" at \"03:29\""},{"visible":true,"include":false,"step":"550","x":3.6095238095238096,"y":1.4857142857142858,"z":11.933333333333334,"a95":55.4,"info":"\"14-10-25\" at \"06:10\""}]},{"version":"v1.1.0","exported":"2017-05-22T14:45:14.676Z","volume":10.5,"added":"2017-05-22T14:43:46.136Z","format":"Utrecht","demagType":"Unknown","strat":"5","patch":1.1,"GEO":[{"dec":286.95873808405975,"inc":31.61191391814063,"MAD":2.701526430886846,"cm":[-3.9745984281580604e-14,-1.3322676295501878e-14,0],"intensity":503.3938165206285,"type":"dir","forced":true,"remark":"","origin":false,"nSteps":8,"minStep":"30.0","maxStep":"80.0","steps":["30.0","35.0","40.0","45.0","50.0","60.0","70.0","80.0"],"group":"None","version":"v1.1.0"}],"TECT":[{"dec":288.60132900310657,"inc":-2.869255227846971,"MAD":2.7015264308868,"cm":[-5.551115123125783e-14,-1.9984014443252818e-14,1.3322676295501878e-15],"intensity":503.39381652062843,"type":"dir","forced":true,"remark":"","origin":false,"nSteps":8,"minStep":"30.0","maxStep":"80.0","steps":["30.0","35.0","40.0","45.0","50.0","60.0","70.0","80.0"],"group":"None","version":"v1.1.0"}],"interpreted":true,"name":"SS8.6A","coreAzi":330,"coreDip":50,"bedStrike":208,"bedDip":35,"data":[{"visible":true,"include":false,"step":"0.0","x":118.4,"y":-683.7523809523809,"z":726.0190476190476,"a95":0.99,"info":"21/09/2014 at 13:51:28"},{"visible":true,"include":false,"step":"5.0","x":145.40952380952382,"y":-679.2380952380952,"z":718.3714285714285,"a95":0.99,"info":"21/09/2014 at 13:51:28"},{"visible":true,"include":false,"step":"10.0","x":103.18095238095239,"y":-622.8571428571429,"z":689.3238095238095,"a95":0.99,"info":"21/09/2014 at 13:51:28"},{"visible":true,"include":false,"step":"15.0","x":97.85714285714286,"y":-549.7238095238096,"z":628.847619047619,"a95":0.99,"info":"21/09/2014 at 13:51:28"},{"visible":true,"include":false,"step":"20.0","x":64.65238095238095,"y":-433.97142857142853,"z":535.7523809523809,"a95":0.99,"info":"21/09/2014 at 13:51:28"},{"visible":true,"include":false,"step":"25.0","x":74.43238095238095,"y":-366.65714285714284,"z":450.14285714285717,"a95":0.99,"info":"21/09/2014 at 13:51:28"},{"visible":true,"include":true,"step":"30.0","x":62.790476190476184,"y":-275.70476190476194,"z":357.9142857142857,"a95":0.99,"info":"21/09/2014 at 13:51:28"},{"visible":true,"include":true,"step":"35.0","x":48.34095238095238,"y":-217.0095238095238,"z":295.74285714285713,"a95":0.99,"info":"21/09/2014 at 13:51:28"},{"visible":true,"include":true,"step":"40.0","x":31.096190476190475,"y":-162.76190476190476,"z":235.3904761904762,"a95":0.99,"info":"21/09/2014 at 13:51:28"},{"visible":true,"include":true,"step":"45.0","x":50.85142857142858,"y":-112.08571428571429,"z":173.3047619047619,"a95":0.99,"info":"21/09/2014 at 13:51:28"},{"visible":true,"include":true,"step":"50.0","x":23.67047619047619,"y":-97.29523809523809,"z":143.0285714285714,"a95":0.99,"info":"21/09/2014 at 13:51:28"},{"visible":true,"include":true,"step":"60.0","x":19.37333333333333,"y":-59.14666666666666,"z":92.96857142857142,"a95":0.99,"info":"21/09/2014 at 13:51:28"},{"visible":true,"include":true,"step":"70.0","x":7.9708571428571435,"y":-35.153333333333336,"z":61.06380952380952,"a95":0.99,"info":"21/09/2014 at 13:51:28"},{"visible":true,"include":true,"step":"80.0","x":-0.14623809523809525,"y":-21.228571428571428,"z":43.72190476190476,"a95":0.99,"info":"21/09/2014 at 13:51:28"},{"visible":true,"include":false,"step":"90.0","x":7.988476190476191,"y":-31.10571428571429,"z":7.005238095238096,"a95":0.99,"info":"21/09/2014 at 13:51:28"},{"visible":true,"include":false,"step":"100.0","x":-2.516,"y":-7.109238095238096,"z":24.502857142857142,"a95":0.99,"info":"21/09/2014 at 13:51:28"}]},{"version":"v1.1.0","exported":"2017-05-22T14:45:14.676Z","volume":10.5,"added":"2017-05-22T14:43:46.136Z","format":"Utrecht","demagType":"Unknown","strat":null,"patch":1.1,"GEO":[{"dec":284.5572051376785,"inc":26.62538947916666,"MAD":5.0945113146086225,"cm":[-1.3322676295501878e-14,-8.881784197001252e-16,0],"intensity":176.0721100472984,"type":"dir","forced":true,"remark":"","origin":false,"nSteps":10,"minStep":"310","maxStep":"520","steps":["310","330","350","370","400","420","440","470","490","520"],"group":"None","version":"v1.1.0"}],"TECT":[{"dec":285.8984482539528,"inc":-7.561858997876123,"MAD":5.094511314608563,"cm":[-1.354472090042691e-14,-1.7763568394002505e-15,2.1094237467877974e-15],"intensity":176.07211004729837,"type":"dir","forced":true,"remark":"","origin":false,"nSteps":10,"minStep":"310","maxStep":"520","steps":["310","330","350","370","400","420","440","470","490","520"],"group":"None","version":"v1.1.0"}],"interpreted":true,"name":"SS8.7A","coreAzi":331,"coreDip":41,"bedStrike":208,"bedDip":35,"data":[{"visible":true,"include":false,"step":"20","x":-31.238095238095237,"y":-378,"z":360.6666666666667,"a95":2.4,"info":"\"14-10-13\" at \"16:07\""},{"visible":true,"include":false,"step":"100","x":-10,"y":-225.61904761904762,"z":238.47619047619048,"a95":2.6,"info":"\"14-10-13\" at \"19:06\""},{"visible":true,"include":false,"step":"150","x":0.2857142857142857,"y":-155.23809523809524,"z":161.52380952380952,"a95":2.7,"info":"\"14-10-13\" at \"22:26\""},{"visible":true,"include":false,"step":"180","x":0.9523809523809523,"y":-128.38095238095238,"z":128.66666666666666,"a95":2.2,"info":"\"14-10-14\" at \"15:35\""},{"visible":true,"include":false,"step":"210","x":3.0476190476190474,"y":-116.47619047619048,"z":120.95238095238095,"a95":2.7,"info":"\"14-10-14\" at \"18:41\""},{"visible":true,"include":false,"step":"240","x":3.7142857142857144,"y":-105.52380952380952,"z":103.52380952380952,"a95":3.1,"info":"\"14-10-14\" at \"21:49\""},{"visible":true,"include":false,"step":"270","x":-4.476190476190476,"y":-100.95238095238095,"z":109.14285714285714,"a95":2.3,"info":"\"14-10-15\" at \"15:42\""},{"visible":true,"include":false,"step":"290","x":8.476190476190476,"y":-90.28571428571429,"z":94.0952380952381,"a95":2.9,"info":"\"14-10-15\" at \"18:47\""},{"visible":true,"include":true,"step":"310","x":3.0476190476190474,"y":-84,"z":96.57142857142857,"a95":2.3,"info":"\"14-10-15\" at \"22:04\""},{"visible":true,"include":true,"step":"330","x":7.142857142857143,"y":-80.47619047619048,"z":85.71428571428571,"a95":2.4,"info":"\"14-10-16\" at \"15:26\""},{"visible":true,"include":true,"step":"350","x":12.380952380952381,"y":-72.66666666666667,"z":94.85714285714286,"a95":3.4,"info":"\"14-10-16\" at \"19:20\""},{"visible":true,"include":true,"step":"370","x":13.428571428571429,"y":-70.85714285714286,"z":73.23809523809524,"a95":2.5,"info":"\"14-10-16\" at \"22:29\""},{"visible":true,"include":true,"step":"400","x":5.390476190476191,"y":-65.16190476190476,"z":62.86666666666667,"a95":2.2,"info":"\"14-10-17\" at \"14:04\""},{"visible":true,"include":true,"step":"420","x":10.857142857142858,"y":-59.904761904761905,"z":75.04761904761905,"a95":2.3,"info":"\"14-10-17\" at \"17:01\""},{"visible":true,"include":true,"step":"440","x":11.333333333333334,"y":-57.599999999999994,"z":71.29523809523809,"a95":2.3,"info":"\"14-10-17\" at \"20:16\""},{"visible":true,"include":true,"step":"470","x":-0.42857142857142855,"y":-47.114285714285714,"z":59.69523809523809,"a95":3,"info":"\"14-10-17\" at \"23:31\""},{"visible":true,"include":true,"step":"490","x":1.3333333333333333,"y":-41.08571428571428,"z":53.96190476190476,"a95":3.4,"info":"\"14-10-18\" at \"11:50\""},{"visible":true,"include":true,"step":"520","x":-12.028571428571428,"y":-23.17142857142857,"z":42.83809523809524,"a95":9.2,"info":"\"14-10-18\" at \"14:53\""},{"visible":true,"include":false,"step":"550","x":-14.485714285714286,"y":-18.314285714285717,"z":34.19047619047619,"a95":16.1,"info":"\"14-10-19\" at \"09:45\""},{"visible":true,"include":false,"step":"580","x":0.980952380952381,"y":6.295238095238095,"z":-3.857142857142857,"a95":58.8,"info":"\"14-10-19\" at \"11:49\""}]},{"version":"v1.1.0","exported":"2017-05-22T14:45:14.676Z","volume":10.5,"added":"2017-05-22T14:43:46.141Z","format":"Utrecht","demagType":"Unknown","strat":null,"patch":1.1,"GEO":[],"TECT":[],"interpreted":false,"name":"SS8.8A","coreAzi":309,"coreDip":41,"bedStrike":208,"bedDip":35,"data":[{"visible":true,"include":false,"step":"20","x":-26.504761904761907,"y":-23.761904761904763,"z":-43.93333333333334,"a95":3.8,"info":"\"14-10-13\" at \"16:09\""},{"visible":true,"include":false,"step":"100","x":-4.8,"y":-7.3619047619047615,"z":-30.914285714285718,"a95":7.8,"info":"\"14-10-13\" at \"19:08\""},{"visible":true,"include":false,"step":"150","x":-6.847619047619048,"y":-4.933333333333333,"z":-12.97142857142857,"a95":12.2,"info":"\"14-10-13\" at \"22:28\""},{"visible":true,"include":false,"step":"180","x":-9.504761904761905,"y":1.7904761904761906,"z":-7.857142857142857,"a95":12.2,"info":"\"14-10-14\" at \"15:37\""},{"visible":true,"include":false,"step":"210","x":-3.3714285714285714,"y":3.9904761904761905,"z":-0.14285714285714285,"a95":50.1,"info":"\"14-10-14\" at \"18:43\""},{"visible":true,"include":false,"step":"240","x":-1.8571428571428572,"y":0.5142857142857143,"z":-3.4952380952380957,"a95":83,"info":"\"14-10-14\" at \"21:51\""},{"visible":true,"include":false,"step":"270","x":-6.133333333333334,"y":3.4285714285714284,"z":1.1428571428571428,"a95":8,"info":"\"14-10-15\" at \"15:44\""},{"visible":true,"include":false,"step":"290","x":-3.3523809523809525,"y":5.038095238095238,"z":-1.3428571428571427,"a95":35.2,"info":"\"14-10-15\" at \"18:49\""},{"visible":true,"include":false,"step":"310","x":-7.3428571428571425,"y":2.9428571428571426,"z":5.6380952380952385,"a95":6.6,"info":"\"14-10-15\" at \"22:06\""},{"visible":true,"include":false,"step":"330","x":-0.7714285714285714,"y":7.133333333333334,"z":-3.161904761904762,"a95":6,"info":"\"14-10-16\" at \"15:28\""},{"visible":true,"include":false,"step":"350","x":-1.8571428571428572,"y":2.7523809523809524,"z":7.666666666666667,"a95":37.4,"info":"\"14-10-16\" at \"19:21\""},{"visible":true,"include":false,"step":"370","x":-4.190476190476191,"y":0.6190476190476191,"z":-5.904761904761905,"a95":28.4,"info":"\"14-10-16\" at \"22:31\""},{"visible":true,"include":false,"step":"400","x":-5.619047619047619,"y":2.0476190476190474,"z":11.428571428571429,"a95":4.4,"info":"\"14-10-17\" at \"14:06\""}]},{"version":"v1.1.0","exported":"2017-05-22T14:45:14.676Z","volume":10.5,"added":"2017-05-22T14:43:46.142Z","format":"Utrecht","demagType":"Unknown","strat":"6","patch":1.1,"GEO":[],"TECT":[],"interpreted":false,"name":"SS8.8B","coreAzi":309,"coreDip":41,"bedStrike":208,"bedDip":35,"data":[{"visible":true,"include":false,"step":"0.0","x":-48.56285714285715,"y":-10.155238095238095,"z":-29.640000000000004,"a95":0.99,"info":"21/09/2014 at 13:51:28"},{"visible":true,"include":false,"step":"5.0","x":-23.581904761904763,"y":6.119523809523809,"z":-23.00857142857143,"a95":0.99,"info":"21/09/2014 at 13:51:28"},{"visible":true,"include":false,"step":"10.0","x":-35.94285714285714,"y":17.17047619047619,"z":-18.31047619047619,"a95":0.99,"info":"21/09/2014 at 13:51:28"},{"visible":true,"include":false,"step":"15.0","x":-27.567619047619047,"y":-0.02854761904761905,"z":-14.78095238095238,"a95":0.99,"info":"21/09/2014 at 13:51:28"},{"visible":true,"include":false,"step":"20.0","x":-45.00285714285714,"y":21.781904761904762,"z":-25.97047619047619,"a95":0.99,"info":"21/09/2014 at 13:51:28"},{"visible":true,"include":false,"step":"25.0","x":-28.664761904761907,"y":3.0286666666666666,"z":-16.12952380952381,"a95":0.99,"info":"21/09/2014 at 13:51:28"},{"visible":true,"include":false,"step":"30.0","x":-27.174285714285713,"y":18.16952380952381,"z":-11.67904761904762,"a95":0.99,"info":"21/09/2014 at 13:51:28"},{"visible":true,"include":false,"step":"35.0","x":-30.87142857142857,"y":5.839238095238095,"z":-20.49809523809524,"a95":0.99,"info":"21/09/2014 at 13:51:28"},{"visible":true,"include":false,"step":"40.0","x":-34.362857142857145,"y":9.272761904761905,"z":-5.579809523809524,"a95":0.99,"info":"21/09/2014 at 13:51:28"},{"visible":true,"include":false,"step":"45.0","x":-7.865142857142858,"y":20.474285714285713,"z":-15.824761904761905,"a95":0.99,"info":"21/09/2014 at 13:51:28"},{"visible":true,"include":false,"step":"50.0","x":-24.59142857142857,"y":3.5399047619047614,"z":-7.300571428571429,"a95":0.99,"info":"21/09/2014 at 13:51:28"},{"visible":true,"include":false,"step":"60.0","x":-12.38190476190476,"y":12.267619047619048,"z":-7.232571428571428,"a95":0.99,"info":"21/09/2014 at 13:51:28"},{"visible":true,"include":false,"step":"70.0","x":-20.502857142857142,"y":2.706857142857143,"z":-18.156190476190474,"a95":0.99,"info":"21/09/2014 at 13:51:28"},{"visible":true,"include":false,"step":"80.0","x":-25.453333333333333,"y":3.1013333333333333,"z":-12.296190476190478,"a95":0.99,"info":"21/09/2014 at 13:51:28"},{"visible":true,"include":false,"step":"90.0","x":-22.876190476190477,"y":-1.4844761904761905,"z":-24.20952380952381,"a95":0.99,"info":"21/09/2014 at 13:51:28"},{"visible":true,"include":false,"step":"100.0","x":-19.314285714285717,"y":8.865333333333334,"z":-9.395333333333333,"a95":0.99,"info":"21/09/2014 at 13:51:28"}]},{"version":"v1.1.0","exported":"2017-05-22T14:45:14.676Z","volume":10.5,"added":"2017-05-22T14:43:46.142Z","format":"Utrecht","demagType":"Unknown","strat":"2","patch":1.1,"GEO":[],"TECT":[],"interpreted":false,"name":"SS8.9A","coreAzi":309,"coreDip":44,"bedStrike":208,"bedDip":35,"data":[{"visible":true,"include":false,"step":"0.0","x":10.280952380952382,"y":-21.31904761904762,"z":-27.52952380952381,"a95":0.99,"info":"29/01/2015 at 23:20:58"},{"visible":true,"include":false,"step":"10.0","x":5.851238095238095,"y":-12.769523809523811,"z":-28.03047619047619,"a95":0.99,"info":"29/01/2015 at 23:20:58"},{"visible":true,"include":false,"step":"15.0","x":3.464761904761905,"y":-10.956190476190477,"z":-16.66190476190476,"a95":0.99,"info":"29/01/2015 at 23:20:58"},{"visible":true,"include":false,"step":"20.0","x":6.776285714285714,"y":-8.418095238095239,"z":-14.726666666666667,"a95":0.99,"info":"29/01/2015 at 23:20:58"},{"visible":true,"include":false,"step":"23.0","x":6.3296190476190475,"y":-16.25047619047619,"z":-16.429523809523808,"a95":0.99,"info":"29/01/2015 at 23:20:58"},{"visible":true,"include":false,"step":"25.0","x":4.567714285714286,"y":-2.519142857142857,"z":-32.21619047619048,"a95":0.99,"info":"29/01/2015 at 23:20:58"},{"visible":true,"include":false,"step":"30.0","x":4.772952380952381,"y":-6.997619047619047,"z":-18.752380952380953,"a95":0.99,"info":"29/01/2015 at 23:20:58"},{"visible":true,"include":false,"step":"33.0","x":17.262857142857143,"y":-29.725714285714286,"z":-24.86952380952381,"a95":0.99,"info":"29/01/2015 at 23:20:58"},{"visible":true,"include":false,"step":"35.0","x":7.161238095238095,"y":-3.9282857142857144,"z":-20.214285714285715,"a95":0.99,"info":"29/01/2015 at 23:20:58"},{"visible":true,"include":false,"step":"40.0","x":7.101333333333333,"y":-3.6835238095238094,"z":-19.125714285714285,"a95":0.99,"info":"29/01/2015 at 23:20:58"},{"visible":true,"include":false,"step":"45.0","x":10.523809523809524,"y":-4.203428571428572,"z":-21.393333333333334,"a95":0.99,"info":"29/01/2015 at 23:20:58"},{"visible":true,"include":false,"step":"50.0","x":7.283714285714286,"y":-3.2587619047619047,"z":-22.857142857142858,"a95":0.99,"info":"29/01/2015 at 23:20:58"},{"visible":true,"include":false,"step":"60.0","x":2.5045714285714284,"y":-2.706857142857143,"z":-17.747619047619047,"a95":0.99,"info":"29/01/2015 at 23:20:58"},{"visible":true,"include":false,"step":"70.0","x":16.64952380952381,"y":-11.784761904761904,"z":1.3542857142857143,"a95":0.99,"info":"29/01/2015 at 23:20:58"}]},{"version":"v1.1.0","exported":"2017-05-22T14:45:14.676Z","volume":10.5,"added":"2017-05-22T14:43:46.142Z","format":"Utrecht","demagType":"Unknown","strat":"7","patch":1.1,"GEO":[],"TECT":[],"interpreted":false,"name":"SS8.10A","coreAzi":315,"coreDip":63,"bedStrike":208,"bedDip":35,"data":[{"visible":true,"include":false,"step":"0.0","x":-73.39714285714285,"y":-181.15238095238095,"z":-90.04190476190476,"a95":0.99,"info":"21/09/2014 at 13:51:28"},{"visible":true,"include":false,"step":"5.0","x":-41.465714285714284,"y":-123.73333333333333,"z":-70.37904761904763,"a95":0.99,"info":"21/09/2014 at 13:51:28"},{"visible":true,"include":false,"step":"10.0","x":-52.473333333333336,"y":-52.87904761904762,"z":-46.69238095238095,"a95":0.99,"info":"21/09/2014 at 13:51:28"},{"visible":true,"include":false,"step":"15.0","x":-46.15238095238095,"y":-59.6552380952381,"z":-28.076190476190476,"a95":0.99,"info":"21/09/2014 at 13:51:28"},{"visible":true,"include":false,"step":"20.0","x":-71.05047619047619,"y":-19.99047619047619,"z":-45.78095238095238,"a95":0.99,"info":"21/09/2014 at 13:51:28"},{"visible":true,"include":false,"step":"25.0","x":-42.406666666666666,"y":-45.87047619047619,"z":-44.90952380952381,"a95":0.99,"info":"21/09/2014 at 13:51:28"},{"visible":true,"include":false,"step":"30.0","x":-42.09428571428572,"y":-26.795238095238098,"z":-40.59619047619047,"a95":0.99,"info":"21/09/2014 at 13:51:28"},{"visible":true,"include":false,"step":"35.0","x":-37.172380952380955,"y":-27.380000000000003,"z":-41.12952380952381,"a95":0.99,"info":"21/09/2014 at 13:51:28"},{"visible":true,"include":false,"step":"40.0","x":-42.544761904761906,"y":-17.18285714285714,"z":-47.88952380952381,"a95":0.99,"info":"21/09/2014 at 13:51:28"},{"visible":true,"include":false,"step":"45.0","x":-9.479904761904763,"y":1.8071428571428574,"z":-48.12,"a95":0.99,"info":"21/09/2014 at 13:51:28"},{"visible":true,"include":false,"step":"50.0","x":-34.304761904761904,"y":-19.11809523809524,"z":-49.590476190476195,"a95":0.99,"info":"21/09/2014 at 13:51:28"},{"visible":true,"include":false,"step":"60.0","x":-20.461904761904762,"y":-16.1,"z":-44.22190476190476,"a95":0.99,"info":"21/09/2014 at 13:51:28"},{"visible":true,"include":false,"step":"70.0","x":-25.770476190476188,"y":-9.425047619047618,"z":-47.684761904761906,"a95":0.99,"info":"21/09/2014 at 13:51:28"},{"visible":true,"include":false,"step":"80.0","x":-36.25904761904762,"y":-12.276190476190477,"z":-49.94952380952381,"a95":0.99,"info":"21/09/2014 at 13:51:28"},{"visible":true,"include":false,"step":"90.0","x":-22.986666666666668,"y":-7.700952380952381,"z":-58.42857142857143,"a95":0.99,"info":"21/09/2014 at 13:51:28"},{"visible":true,"include":false,"step":"100.0","x":-31.997142857142858,"y":-7.112666666666668,"z":-50.50095238095238,"a95":0.99,"info":"21/09/2014 at 13:51:28"}]},{"version":"v1.1.0","exported":"2017-05-22T14:45:14.676Z","volume":10.5,"added":"2017-05-22T14:43:46.142Z","format":"Utrecht","demagType":"Unknown","strat":"3","patch":1.1,"GEO":[],"TECT":[],"interpreted":false,"name":"SS8.10B","coreAzi":315,"coreDip":63,"bedStrike":208,"bedDip":35,"data":[{"visible":true,"include":false,"step":"0.0","x":-29.961904761904766,"y":-21.24952380952381,"z":50.35619047619048,"a95":0.99,"info":"29/01/2015 at 23:20:58"},{"visible":true,"include":false,"step":"10.0","x":-39.476190476190474,"y":11.494285714285715,"z":58.60285714285715,"a95":0.99,"info":"29/01/2015 at 23:20:58"},{"visible":true,"include":false,"step":"15.0","x":-34.18,"y":20.504761904761907,"z":66.83809523809524,"a95":0.99,"info":"29/01/2015 at 23:20:58"},{"visible":true,"include":false,"step":"20.0","x":-25.72,"y":24.14095238095238,"z":64.73238095238096,"a95":0.99,"info":"29/01/2015 at 23:20:58"},{"visible":true,"include":false,"step":"23.0","x":-26.124761904761904,"y":29.754285714285714,"z":59.88571428571428,"a95":0.99,"info":"29/01/2015 at 23:20:58"},{"visible":true,"include":false,"step":"25.0","x":-24.533333333333335,"y":38.72380952380953,"z":36.21333333333333,"a95":0.99,"info":"29/01/2015 at 23:20:58"},{"visible":true,"include":false,"step":"30.0","x":-17.65714285714286,"y":25.594285714285714,"z":45.42190476190476,"a95":0.99,"info":"29/01/2015 at 23:20:58"},{"visible":true,"include":false,"step":"33.0","x":-6.620380952380952,"y":2.5615238095238095,"z":42.46761904761905,"a95":0.99,"info":"29/01/2015 at 23:20:58"},{"visible":true,"include":false,"step":"35.0","x":-19.762857142857143,"y":20.644761904761907,"z":33.46,"a95":0.99,"info":"29/01/2015 at 23:20:58"},{"visible":true,"include":false,"step":"40.0","x":-19.726666666666667,"y":22.347619047619048,"z":34.743809523809524,"a95":0.99,"info":"29/01/2015 at 23:20:58"},{"visible":true,"include":false,"step":"45.0","x":-14.667619047619047,"y":13.684761904761904,"z":26.64857142857143,"a95":0.99,"info":"29/01/2015 at 23:20:58"},{"visible":true,"include":false,"step":"50.0","x":-14.065714285714286,"y":23.003809523809522,"z":21.304761904761904,"a95":0.99,"info":"29/01/2015 at 23:20:58"},{"visible":true,"include":false,"step":"60.0","x":-13.99904761904762,"y":11.78,"z":11.684761904761904,"a95":0.99,"info":"29/01/2015 at 23:20:58"},{"visible":true,"include":false,"step":"70.0","x":-5.325333333333333,"y":23.092380952380953,"z":36.92952380952381,"a95":0.99,"info":"29/01/2015 at 23:20:58"}]},{"version":"v1.1.0","exported":"2017-05-22T14:45:14.676Z","volume":10.5,"added":"2017-05-22T14:43:46.142Z","format":"Utrecht","demagType":"Unknown","strat":null,"patch":1.1,"GEO":[],"TECT":[],"interpreted":false,"name":"SS8.11A","coreAzi":345,"coreDip":28,"bedStrike":208,"bedDip":35,"data":[{"visible":true,"include":false,"step":"20","x":-2.8857142857142857,"y":-24.047619047619047,"z":1.5333333333333334,"a95":5.3,"info":"\"14-10-13\" at \"16:13\""},{"visible":true,"include":false,"step":"100","x":-0.5333333333333333,"y":-15.638095238095238,"z":4.447619047619048,"a95":20.3,"info":"\"14-10-13\" at \"19:09\""},{"visible":true,"include":false,"step":"150","x":-1.961904761904762,"y":-7.123809523809523,"z":5.114285714285715,"a95":33.6,"info":"\"14-10-13\" at \"22:30\""},{"visible":true,"include":false,"step":"180","x":-5.761904761904762,"y":-5.285714285714286,"z":3.4095238095238094,"a95":15.7,"info":"\"14-10-14\" at \"15:39\""},{"visible":true,"include":false,"step":"210","x":-1.8952380952380952,"y":-4.276190476190476,"z":4.761904761904762,"a95":28.2,"info":"\"14-10-14\" at \"18:45\""},{"visible":true,"include":false,"step":"240","x":-1.1523809523809523,"y":-2.8190476190476192,"z":-0.22857142857142856,"a95":62.1,"info":"\"14-10-14\" at \"21:53\""},{"visible":true,"include":false,"step":"270","x":-3.5047619047619043,"y":-2.6285714285714286,"z":3.6285714285714286,"a95":6.2,"info":"\"14-10-15\" at \"15:46\""},{"visible":true,"include":false,"step":"290","x":-1.1238095238095238,"y":-1.7809523809523808,"z":5.180952380952381,"a95":33,"info":"\"14-10-15\" at \"18:51\""},{"visible":true,"include":false,"step":"310","x":0.5523809523809524,"y":-1.6761904761904762,"z":5.219047619047619,"a95":14.1,"info":"\"14-10-15\" at \"22:08\""},{"visible":true,"include":false,"step":"330","x":-0.4095238095238095,"y":-1.1619047619047618,"z":2.5047619047619047,"a95":24,"info":"\"14-10-16\" at \"15:30\""},{"visible":true,"include":false,"step":"350","x":1.2857142857142858,"y":0.3904761904761904,"z":1.961904761904762,"a95":98.5,"info":"\"14-10-16\" at \"19:23\""},{"visible":true,"include":false,"step":"370","x":-0.11428571428571428,"y":0.9523809523809523,"z":-3.6476190476190475,"a95":65.6,"info":"\"14-10-16\" at \"22:33\""},{"visible":true,"include":false,"step":"400","x":-4.095238095238095,"y":0.3904761904761904,"z":5.0285714285714285,"a95":7.9,"info":"\"14-10-17\" at \"14:08\""}]},{"version":"v1.1.0","exported":"2017-05-22T14:45:14.676Z","volume":10.5,"added":"2017-05-22T14:43:46.142Z","format":"Utrecht","demagType":"Unknown","strat":null,"patch":1.1,"GEO":[],"TECT":[],"interpreted":false,"name":"SS8.12A","coreAzi":315,"coreDip":48,"bedStrike":208,"bedDip":35,"data":[{"visible":true,"include":false,"step":"20","x":24.361904761904764,"y":-35.2952380952381,"z":30.514285714285712,"a95":3.6,"info":"\"14-10-13\" at \"16:15\""},{"visible":true,"include":false,"step":"100","x":17.295238095238094,"y":-24.476190476190474,"z":14.923809523809522,"a95":8.900001,"info":"\"14-10-13\" at \"19:12\""},{"visible":true,"include":false,"step":"150","x":9.495238095238095,"y":-11.342857142857142,"z":4.085714285714285,"a95":14.6,"info":"\"14-10-13\" at \"22:32\""},{"visible":true,"include":false,"step":"180","x":4.3238095238095235,"y":-7.4,"z":0.9142857142857143,"a95":11.9,"info":"\"14-10-14\" at \"15:41\""},{"visible":true,"include":false,"step":"210","x":7.295238095238095,"y":-4.752380952380952,"z":1.6285714285714288,"a95":21.9,"info":"\"14-10-14\" at \"18:47\""},{"visible":true,"include":false,"step":"240","x":6.0285714285714285,"y":-4.266666666666667,"z":4.019047619047619,"a95":42.1,"info":"\"14-10-14\" at \"21:55\""},{"visible":true,"include":false,"step":"270","x":5.190476190476191,"y":-1.980952380952381,"z":1.180952380952381,"a95":6.1,"info":"\"14-10-15\" at \"15:48\""},{"visible":true,"include":false,"step":"290","x":6.819047619047619,"y":-2.6095238095238096,"z":3.857142857142857,"a95":52,"info":"\"14-10-15\" at \"18:53\""},{"visible":true,"include":false,"step":"310","x":6.20952380952381,"y":0.20952380952380953,"z":2.5238095238095237,"a95":11.9,"info":"\"14-10-15\" at \"22:10\""},{"visible":true,"include":false,"step":"330","x":5.628571428571429,"y":-1.1333333333333333,"z":1.0666666666666667,"a95":4.4,"info":"\"14-10-16\" at \"15:32\""},{"visible":true,"include":false,"step":"350","x":7.438095238095237,"y":-1.3523809523809522,"z":-0.43809523809523804,"a95":30.3,"info":"\"14-10-16\" at \"19:25\""},{"visible":true,"include":false,"step":"370","x":4.6,"y":0.2,"z":-0.6476190476190476,"a95":9.5,"info":"\"14-10-16\" at \"22:34\""},{"visible":true,"include":false,"step":"400","x":0.3523809523809524,"y":1.0380952380952382,"z":3.2952380952380955,"a95":12.1,"info":"\"14-10-17\" at \"14:10\""},{"visible":true,"include":false,"step":"420","x":1.8857142857142857,"y":1.3428571428571427,"z":2.104761904761905,"a95":19.8,"info":"\"14-10-17\" at \"17:03\""}]},{"version":"v1.1.0","exported":"2017-05-22T14:45:14.676Z","volume":10.5,"added":"2017-05-22T14:43:46.142Z","format":"Utrecht","demagType":"Unknown","strat":"4","patch":1.1,"GEO":[],"TECT":[],"interpreted":false,"name":"SS8.12B","coreAzi":315,"coreDip":48,"bedStrike":208,"bedDip":35,"data":[{"visible":true,"include":false,"step":"0.0","x":4.640857142857143,"y":10.554285714285713,"z":57.16952380952381,"a95":0.99,"info":"29/01/2015 at 23:20:58"},{"visible":true,"include":false,"step":"10.0","x":-10.75904761904762,"y":17.236190476190476,"z":48.993333333333325,"a95":0.99,"info":"29/01/2015 at 23:20:58"},{"visible":true,"include":false,"step":"15.0","x":-14.319047619047618,"y":22.123809523809523,"z":52.67333333333334,"a95":0.99,"info":"29/01/2015 at 23:20:58"},{"visible":true,"include":false,"step":"20.0","x":-15.45047619047619,"y":21.18190476190476,"z":46.36190476190476,"a95":0.99,"info":"29/01/2015 at 23:20:58"},{"visible":true,"include":false,"step":"23.0","x":-9.310761904761906,"y":21.656190476190474,"z":46.111428571428576,"a95":0.99,"info":"29/01/2015 at 23:20:58"},{"visible":true,"include":false,"step":"25.0","x":-17.385714285714286,"y":22.78761904761905,"z":28.053333333333335,"a95":0.99,"info":"29/01/2015 at 23:20:58"},{"visible":true,"include":false,"step":"30.0","x":-12.178095238095239,"y":28.522857142857145,"z":35.521904761904764,"a95":0.99,"info":"29/01/2015 at 23:20:58"},{"visible":true,"include":false,"step":"33.0","x":-1.2791428571428571,"y":2.5070476190476194,"z":30.478095238095236,"a95":0.99,"info":"29/01/2015 at 23:20:58"},{"visible":true,"include":false,"step":"35.0","x":-9.26495238095238,"y":21.059047619047618,"z":33.99142857142857,"a95":0.99,"info":"29/01/2015 at 23:20:58"},{"visible":true,"include":false,"step":"40.0","x":-9.487809523809524,"y":19.135238095238094,"z":33.09809523809523,"a95":0.99,"info":"29/01/2015 at 23:20:58"},{"visible":true,"include":false,"step":"45.0","x":-4.815333333333333,"y":17.86952380952381,"z":25.780952380952378,"a95":0.99,"info":"29/01/2015 at 23:20:58"},{"visible":true,"include":false,"step":"50.0","x":0.8827142857142857,"y":2.700761904761905,"z":26.054285714285715,"a95":0.99,"info":"29/01/2015 at 23:20:58"},{"visible":true,"include":false,"step":"60.0","x":-11.34,"y":0.19204761904761908,"z":18.371428571428574,"a95":0.99,"info":"29/01/2015 at 23:20:58"},{"visible":true,"include":false,"step":"70.0","x":-0.5488285714285714,"y":13.007619047619048,"z":30.826666666666668,"a95":0.99,"info":"29/01/2015 at 23:20:58"}]},{"version":"v1.1.0","exported":"2017-05-22T14:45:14.676Z","volume":10.5,"added":"2017-05-22T14:43:46.142Z","format":"Utrecht","demagType":"Unknown","strat":"5","patch":1.1,"GEO":[],"TECT":[],"interpreted":false,"name":"SS8.13A","coreAzi":338,"coreDip":29,"bedStrike":208,"bedDip":35,"data":[{"visible":true,"include":false,"step":"0.0","x":2.7564761904761905,"y":-24.552380952380954,"z":-22.506666666666668,"a95":0.99,"info":"29/01/2015 at 23:20:58"},{"visible":true,"include":false,"step":"10.0","x":-6.2001904761904765,"y":-8.570380952380953,"z":-13.015238095238095,"a95":0.99,"info":"29/01/2015 at 23:20:58"},{"visible":true,"include":false,"step":"15.0","x":1.3478095238095238,"y":9.945714285714287,"z":-3.520857142857143,"a95":0.99,"info":"29/01/2015 at 23:20:58"},{"visible":true,"include":false,"step":"20.0","x":-0.367352380952381,"y":11.245714285714286,"z":-5.663523809523809,"a95":0.99,"info":"29/01/2015 at 23:20:58"},{"visible":true,"include":false,"step":"23.0","x":5.092761904761905,"y":7.3376190476190475,"z":-1.5375238095238093,"a95":0.99,"info":"29/01/2015 at 23:20:58"},{"visible":true,"include":false,"step":"25.0","x":-4.441809523809524,"y":8.331619047619048,"z":-17.025714285714287,"a95":0.99,"info":"29/01/2015 at 23:20:58"},{"visible":true,"include":false,"step":"30.0","x":1.7680952380952382,"y":17.374285714285715,"z":-4.38352380952381,"a95":0.99,"info":"29/01/2015 at 23:20:58"},{"visible":true,"include":false,"step":"33.0","x":7.772666666666667,"y":-2.7172380952380952,"z":-5.4311428571428575,"a95":0.99,"info":"29/01/2015 at 23:20:58"},{"visible":true,"include":false,"step":"35.0","x":-0.3682380952380952,"y":14.817142857142859,"z":-0.6264857142857143,"a95":0.99,"info":"29/01/2015 at 23:20:58"},{"visible":true,"include":false,"step":"40.0","x":-2.2781904761904763,"y":9.040952380952382,"z":-1.7894285714285716,"a95":0.99,"info":"29/01/2015 at 23:20:58"},{"visible":true,"include":false,"step":"45.0","x":6.448571428571428,"y":1.033809523809524,"z":-3.7658095238095237,"a95":0.99,"info":"29/01/2015 at 23:20:58"},{"visible":true,"include":false,"step":"50.0","x":0.4017142857142857,"y":-5.6593333333333335,"z":-0.911704761904762,"a95":0.99,"info":"29/01/2015 at 23:20:58"},{"visible":true,"include":false,"step":"60.0","x":-5.635428571428571,"y":-7.4016190476190475,"z":-1.9493333333333334,"a95":0.99,"info":"29/01/2015 at 23:20:58"},{"visible":true,"include":false,"step":"70.0","x":3.712285714285714,"y":8.060857142857142,"z":9.083714285714287,"a95":0.99,"info":"29/01/2015 at 23:20:58"}]}]
