# Supplementary material for: Paleomagnetic constraints on the timing and distribution of Cenozoic rotations in Central and Eastern Anatolia
Source: Copernicus journal article supplement (doi:10.5194/se-9-295-2018), 2018-03-21
Supplement: Supplementary file 2 [file se-9-295-2018-supplement.zip › se-2017-66_DATA_dir files/dir files Tauride basins/SS09.dir]

[{"version":"v1.1.0","exported":"2016-11-16T09:51:15.546Z","volume":10.5,"added":"2016-11-16T09:47:03.394Z","format":"Utrecht","demagType":"Unknown","strat":null,"patch":1.1,"GEO":[],"TECT":[],"interpreted":false,"name":"SS9.1A","coreAzi":50,"coreDip":3,"bedStrike":60,"bedDip":50,"data":[{"visible":true,"include":false,"step":"20","x":-110.0952380952381,"y":-18.38095238095238,"z":54.19047619047619,"a95":2,"info":"\"14-10-13\" at \"17:25\""},{"visible":true,"include":false,"step":"100","x":-61.25714285714286,"y":-2.8190476190476192,"z":23.104761904761904,"a95":4,"info":"\"14-10-13\" at \"20:14\""},{"visible":true,"include":false,"step":"150","x":-24.00952380952381,"y":10.380952380952381,"z":6.4,"a95":7.7,"info":"\"14-10-13\" at \"22:34\""},{"visible":true,"include":false,"step":"180","x":-21.64761904761905,"y":9.247619047619047,"z":5.057142857142857,"a95":4.7,"info":"\"14-10-14\" at \"15:43\""},{"visible":true,"include":false,"step":"210","x":-16.571428571428573,"y":9.047619047619047,"z":3.1333333333333333,"a95":16.1,"info":"\"14-10-14\" at \"18:50\""},{"visible":true,"include":false,"step":"240","x":-21.495238095238093,"y":15.352380952380951,"z":3.161904761904762,"a95":13.5,"info":"\"14-10-14\" at \"21:57\""},{"visible":true,"include":false,"step":"270","x":-12.123809523809523,"y":7.419047619047619,"z":2.3047619047619046,"a95":5.6,"info":"\"14-10-15\" at \"15:50\""},{"visible":true,"include":false,"step":"290","x":-16.295238095238094,"y":3.4000000000000004,"z":5.409523809523809,"a95":16.4,"info":"\"14-10-15\" at \"18:55\""},{"visible":true,"include":false,"step":"310","x":-13.295238095238094,"y":9.142857142857142,"z":7.352380952380953,"a95":5.9,"info":"\"14-10-15\" at \"22:13\""},{"visible":true,"include":false,"step":"330","x":-4.390476190476191,"y":2.4571428571428573,"z":-4.390476190476191,"a95":8.7,"info":"\"14-10-16\" at \"15:35\""},{"visible":true,"include":false,"step":"350","x":-13.876190476190475,"y":-2.961904761904762,"z":8.971428571428572,"a95":10.6,"info":"\"14-10-16\" at \"19:27\""},{"visible":true,"include":false,"step":"370","x":-14.361904761904762,"y":14.057142857142857,"z":13.742857142857144,"a95":7.3,"info":"\"14-10-16\" at \"22:37\""},{"visible":true,"include":false,"step":"400","x":2.4380952380952383,"y":6.809523809523809,"z":19.17142857142857,"a95":3.1,"info":"\"14-10-17\" at \"14:12\""},{"visible":true,"include":false,"step":"420","x":-16.219047619047622,"y":4.809523809523809,"z":6.923809523809524,"a95":5.3,"info":"\"14-10-17\" at \"17:05\""}]},{"version":"v1.1.0","exported":"2016-11-16T09:51:15.546Z","volume":10.5,"added":"2016-11-16T09:47:03.395Z","format":"Utrecht","demagType":"Unknown","strat":"8","patch":1.1,"GEO":[{"dec":332.938996756657,"inc":46.466964278864,"MAD":8.086323153624063,"cm":[32.05099751616734,-5.382302090802433,37.505076021344905],"intensity":86.45363657057206,"type":"dir","forced":false,"remark":"","origin":false,"nSteps":7,"minStep":"15.0","maxStep":"60.0","steps":["15.0","25.0","30.0","35.0","40.0","45.0","60.0"],"group":"None","version":"v1.1.0"}],"TECT":[{"dec":132.67536487244456,"inc":83.18909979050264,"MAD":8.086323153624118,"cm":[-2.249674163456365,14.421199936813283,47.43241827574908],"intensity":86.45363657057207,"type":"dir","forced":false,"remark":"","origin":false,"nSteps":7,"minStep":"15.0","maxStep":"60.0","steps":["15.0","25.0","30.0","35.0","40.0","45.0","60.0"],"group":"None","version":"v1.1.0"}],"interpreted":true,"name":"SS9.2B","coreAzi":37,"coreDip":38,"bedStrike":60,"bedDip":50,"data":[{"visible":true,"include":false,"step":"0.0","x":-55.60857142857143,"y":-43.44,"z":101.37142857142858,"a95":0.99,"info":"21/09/2014 at 13:51:28"},{"visible":true,"include":false,"step":"5.0","x":-44.94285714285714,"y":-43.27047619047619,"z":90.36380952380952,"a95":0.99,"info":"21/09/2014 at 13:51:28"},{"visible":false,"include":false,"step":"10.0","x":-42.06952380952381,"y":-34.19428571428572,"z":71.64666666666666,"a95":0.99,"info":"21/09/2014 at 13:51:28"},{"visible":true,"include":true,"step":"15.0","x":-36.81238095238095,"y":-54.270476190476195,"z":76.04761904761905,"a95":0.99,"info":"21/09/2014 at 13:51:28"},{"visible":false,"include":false,"step":"20.0","x":-61.67333333333334,"y":0.22751428571428572,"z":38.584761904761905,"a95":0.99,"info":"21/09/2014 at 13:51:28"},{"visible":true,"include":true,"step":"25.0","x":-19.415238095238095,"y":-40.099047619047624,"z":51.54380952380953,"a95":0.99,"info":"21/09/2014 at 13:51:28"},{"visible":true,"include":true,"step":"30.0","x":-19.623809523809523,"y":-25.06857142857143,"z":49.68,"a95":0.99,"info":"21/09/2014 at 13:51:28"},{"visible":true,"include":true,"step":"35.0","x":-14.86761904761905,"y":-22.97809523809524,"z":39.61523809523809,"a95":0.99,"info":"21/09/2014 at 13:51:28"},{"visible":true,"include":true,"step":"40.0","x":-15.294285714285715,"y":-14.582857142857144,"z":29.656190476190474,"a95":0.99,"info":"21/09/2014 at 13:51:28"},{"visible":true,"include":true,"step":"45.0","x":-1.635904761904762,"y":-7.205238095238095,"z":21.31904761904762,"a95":0.99,"info":"21/09/2014 at 13:51:28"},{"visible":false,"include":false,"step":"50.0","x":-15.475238095238096,"y":-20.66952380952381,"z":36.56095238095238,"a95":0.99,"info":"21/09/2014 at 13:51:28"},{"visible":true,"include":true,"step":"60.0","x":-2.877238095238095,"y":-0.9066,"z":17.099047619047617,"a95":0.99,"info":"21/09/2014 at 13:51:28"},{"visible":false,"include":false,"step":"70.0","x":-9.654285714285715,"y":-5.572857142857143,"z":24.122857142857143,"a95":0.99,"info":"21/09/2014 at 13:51:28"},{"visible":false,"include":false,"step":"80.0","x":-11.449523809523809,"y":-6.406761904761905,"z":23.865714285714287,"a95":0.99,"info":"21/09/2014 at 13:51:28"},{"visible":false,"include":false,"step":"90.0","x":3.781047619047619,"y":4.978571428571429,"z":7.160190476190476,"a95":0.99,"info":"21/09/2014 at 13:51:28"},{"visible":false,"include":false,"step":"100.0","x":-19.174285714285716,"y":-6.1334285714285715,"z":18.240952380952383,"a95":0.99,"info":"21/09/2014 at 13:51:28"}]},{"version":"v1.1.0","exported":"2016-11-16T09:51:15.546Z","volume":10.5,"added":"2016-11-16T09:47:03.395Z","format":"Utrecht","demagType":"Unknown","strat":"1","patch":1.1,"GEO":[{"dec":354.4824084046242,"inc":46.325971142525155,"MAD":10.26943486447602,"cm":[47.27781047314539,-2.008489695806465,49.893953952098215],"intensity":71.44078116598,"type":"dir","forced":false,"remark":"","origin":false,"nSteps":7,"minStep":"5.0","maxStep":"35.0","steps":["5.0","10.0","15.0","20.0","25.0","30.0","35.0"],"group":"None","version":"v1.1.0"}],"TECT":[{"dec":87.6763413870591,"inc":71.14657557968518,"MAD":10.269434864476027,"cm":[1.2006325565999725,24.594181377809313,64.20527049071876],"intensity":71.44078116598,"type":"dir","forced":false,"remark":"","origin":false,"nSteps":7,"minStep":"5.0","maxStep":"35.0","steps":["5.0","10.0","15.0","20.0","25.0","30.0","35.0"],"group":"None","version":"v1.1.0"}],"interpreted":true,"name":"SS9.3A","coreAzi":52,"coreDip":-8,"bedStrike":60,"bedDip":50,"data":[{"visible":true,"include":false,"step":"0.0","x":-92.75238095238095,"y":-78.31238095238095,"z":31.85047619047619,"a95":0.99,"info":"21/09/2014 at 19:03:10"},{"visible":true,"include":true,"step":"5.0","x":-85.83428571428571,"y":-60.32761904761905,"z":32.114285714285714,"a95":0.99,"info":"21/09/2014 at 19:03:10"},{"visible":true,"include":true,"step":"10.0","x":-71.00952380952381,"y":-55.50952380952381,"z":26.70380952380952,"a95":0.99,"info":"21/09/2014 at 19:03:10"},{"visible":true,"include":true,"step":"15.0","x":-58.768571428571434,"y":-37.46190476190476,"z":18.355238095238093,"a95":0.99,"info":"21/09/2014 at 19:03:10"},{"visible":true,"include":true,"step":"20.0","x":-47.65047619047619,"y":-39.75238095238095,"z":23.22095238095238,"a95":0.99,"info":"21/09/2014 at 19:03:10"},{"visible":true,"include":true,"step":"25.0","x":-42.16571428571429,"y":-27.80952380952381,"z":13.581904761904763,"a95":0.99,"info":"21/09/2014 at 19:03:10"},{"visible":true,"include":true,"step":"30.0","x":-35.87714285714286,"y":-31.157142857142855,"z":13.320000000000002,"a95":0.99,"info":"21/09/2014 at 19:03:10"},{"visible":true,"include":true,"step":"35.0","x":-31.367619047619048,"y":-17.425714285714285,"z":14.892380952380952,"a95":0.99,"info":"21/09/2014 at 19:03:10"},{"visible":true,"include":false,"step":"40.0","x":-29.021904761904764,"y":-28.762857142857143,"z":36.359047619047615,"a95":0.99,"info":"21/09/2014 at 19:03:10"},{"visible":true,"include":false,"step":"45.0","x":-23.75809523809524,"y":-26.760952380952382,"z":38.745714285714286,"a95":0.99,"info":"21/09/2014 at 19:03:10"},{"visible":true,"include":false,"step":"50.0","x":-22.13904761904762,"y":-18.94190476190476,"z":39.05809523809524,"a95":0.99,"info":"21/09/2014 at 19:03:10"},{"visible":true,"include":false,"step":"60.0","x":-20.785714285714285,"y":-15.384761904761904,"z":32.2447619047619,"a95":0.99,"info":"21/09/2014 at 19:03:10"},{"visible":true,"include":false,"step":"70.0","x":-20.41142857142857,"y":-16.227619047619047,"z":23.11047619047619,"a95":0.99,"info":"21/09/2014 at 19:03:10"},{"visible":true,"include":false,"step":"80.0","x":-13.149523809523808,"y":-12.231428571428571,"z":17.707619047619048,"a95":0.99,"info":"21/09/2014 at 19:03:10"},{"visible":false,"include":false,"step":"90.0","x":-8.998952380952382,"y":-19.768571428571427,"z":13.489523809523808,"a95":0.99,"info":"21/09/2014 at 19:03:10"},{"visible":false,"include":false,"step":"100.0","x":-13.05809523809524,"y":-3.174857142857143,"z":3.3666666666666667,"a95":0.99,"info":"21/09/2014 at 19:03:10"}]},{"version":"v1.1.0","exported":"2016-11-16T09:51:15.546Z","volume":10.5,"added":"2016-11-16T09:47:03.395Z","format":"Utrecht","demagType":"Unknown","strat":null,"patch":1.1,"GEO":[],"TECT":[],"interpreted":false,"name":"SS9.5A","coreAzi":339,"coreDip":52,"bedStrike":60,"bedDip":50,"data":[{"visible":true,"include":false,"step":"20","x":-31.61904761904762,"y":34.95238095238095,"z":116.85714285714286,"a95":4,"info":"\"14-10-13\" at \"17:27\""},{"visible":true,"include":false,"step":"100","x":-21.676190476190477,"y":20.81904761904762,"z":70.25714285714287,"a95":5.5,"info":"\"14-10-13\" at \"20:16\""},{"visible":true,"include":false,"step":"150","x":-14.847619047619048,"y":8.276190476190477,"z":31.428571428571427,"a95":5.8,"info":"\"14-10-13\" at \"22:36\""},{"visible":true,"include":false,"step":"180","x":-14.304761904761904,"y":8.076190476190476,"z":30.19047619047619,"a95":4.2,"info":"\"14-10-14\" at \"15:45\""},{"visible":true,"include":false,"step":"210","x":-11.523809523809524,"y":5.542857142857143,"z":10.114285714285714,"a95":16,"info":"\"14-10-14\" at \"18:52\""},{"visible":true,"include":false,"step":"240","x":-9.8,"y":3.8761904761904766,"z":17.01904761904762,"a95":21.2,"info":"\"14-10-14\" at \"21:59\""},{"visible":true,"include":false,"step":"270","x":-9.085714285714285,"y":6.457142857142857,"z":16.34285714285714,"a95":3.6,"info":"\"14-10-15\" at \"15:52\""},{"visible":true,"include":false,"step":"290","x":-12.723809523809523,"y":1.4095238095238096,"z":12.704761904761906,"a95":17.4,"info":"\"14-10-15\" at \"18:57\""},{"visible":true,"include":false,"step":"310","x":-11.59047619047619,"y":9.647619047619047,"z":11.761904761904763,"a95":4.8,"info":"\"14-10-15\" at \"22:15\""},{"visible":true,"include":false,"step":"330","x":-16.485714285714284,"y":6.247619047619047,"z":9.219047619047618,"a95":7.5,"info":"\"14-10-16\" at \"15:37\""},{"visible":true,"include":false,"step":"350","x":-9.657142857142858,"y":5.428571428571429,"z":12.361904761904762,"a95":9.8,"info":"\"14-10-16\" at \"19:29\""},{"visible":true,"include":false,"step":"370","x":-14.40952380952381,"y":8.847619047619048,"z":12.314285714285715,"a95":4.6,"info":"\"14-10-16\" at \"22:38\""},{"visible":true,"include":false,"step":"400","x":-8.380952380952381,"y":0.5714285714285714,"z":10.019047619047619,"a95":4.6,"info":"\"14-10-17\" at \"14:14\""},{"visible":true,"include":false,"step":"420","x":-10.247619047619047,"y":7.866666666666666,"z":6.314285714285714,"a95":6.1,"info":"\"14-10-17\" at \"17:07\""}]},{"version":"v1.1.0","exported":"2016-11-16T09:51:15.546Z","volume":10.5,"added":"2016-11-16T09:47:03.397Z","format":"Utrecht","demagType":"Unknown","strat":"2","patch":1.1,"GEO":[],"TECT":[],"interpreted":false,"name":"SS9.6A","coreAzi":310,"coreDip":54,"bedStrike":60,"bedDip":50,"data":[{"visible":true,"include":false,"step":"0.0","x":-0.547952380952381,"y":39.817142857142855,"z":56.23238095238096,"a95":0.99,"info":"21/09/2014 at 19:03:10"},{"visible":true,"include":false,"step":"5.0","x":7.359428571428571,"y":32.18666666666667,"z":28.85142857142857,"a95":0.99,"info":"21/09/2014 at 19:03:10"},{"visible":true,"include":false,"step":"10.0","x":-9.619047619047619,"y":78.16571428571429,"z":36.01714285714286,"a95":0.99,"info":"21/09/2014 at 19:03:10"},{"visible":true,"include":false,"step":"15.0","x":40.45619047619048,"y":-20.276190476190475,"z":20.01142857142857,"a95":0.99,"info":"21/09/2014 at 19:03:10"},{"visible":true,"include":false,"step":"20.0","x":3.425142857142857,"y":18.05047619047619,"z":25.293333333333333,"a95":0.99,"info":"21/09/2014 at 19:03:10"},{"visible":true,"include":false,"step":"25.0","x":-3.063904761904762,"y":15.355238095238095,"z":23.543809523809525,"a95":0.99,"info":"21/09/2014 at 19:03:10"},{"visible":true,"include":false,"step":"30.0","x":10.26,"y":-0.40312380952380955,"z":46.91047619047619,"a95":0.99,"info":"21/09/2014 at 19:03:10"},{"visible":true,"include":false,"step":"35.0","x":-7.854571428571428,"y":17.935238095238095,"z":12.722857142857142,"a95":0.99,"info":"21/09/2014 at 19:03:10"},{"visible":true,"include":false,"step":"40.0","x":-9.616190476190477,"y":5.507142857142857,"z":5.02447619047619,"a95":0.99,"info":"21/09/2014 at 19:03:10"},{"visible":true,"include":false,"step":"45.0","x":-4.012761904761905,"y":12.126666666666667,"z":9.09,"a95":0.99,"info":"21/09/2014 at 19:03:10"},{"visible":true,"include":false,"step":"50.0","x":-3.089523809523809,"y":17.410476190476192,"z":4.83552380952381,"a95":0.99,"info":"21/09/2014 at 19:03:10"},{"visible":true,"include":false,"step":"60.0","x":-2.079904761904762,"y":-13.624761904761906,"z":13.681904761904761,"a95":0.99,"info":"21/09/2014 at 19:03:10"},{"visible":true,"include":false,"step":"70.0","x":3.1405714285714286,"y":-1.0095238095238095,"z":13.682857142857141,"a95":0.99,"info":"21/09/2014 at 19:03:10"},{"visible":true,"include":false,"step":"80.0","x":-8.807714285714285,"y":17.51809523809524,"z":-28.521904761904764,"a95":0.99,"info":"21/09/2014 at 19:03:10"},{"visible":true,"include":false,"step":"90.0","x":-45.51047619047619,"y":26.07238095238095,"z":-0.8732952380952381,"a95":0.99,"info":"21/09/2014 at 19:03:10"},{"visible":true,"include":false,"step":"100.0","x":0.18236190476190478,"y":7.929333333333333,"z":9.045238095238094,"a95":0.99,"info":"21/09/2014 at 19:03:10"}]},{"version":"v1.1.0","exported":"2016-11-16T09:51:15.546Z","volume":10.5,"added":"2016-11-16T09:47:03.397Z","format":"Utrecht","demagType":"Unknown","strat":"3","patch":1.1,"GEO":[],"TECT":[],"interpreted":false,"name":"SS9.7A","coreAzi":326,"coreDip":38,"bedStrike":60,"bedDip":50,"data":[{"visible":true,"include":false,"step":"0.0","x":24.10571428571429,"y":30.992380952380955,"z":18.30857142857143,"a95":0.99,"info":"21/09/2014 at 19:03:10"},{"visible":true,"include":false,"step":"5.0","x":17.2,"y":22.591428571428573,"z":6.169142857142857,"a95":0.99,"info":"21/09/2014 at 19:03:10"},{"visible":true,"include":false,"step":"10.0","x":-1.8023809523809524,"y":59.11714285714286,"z":19.863809523809522,"a95":0.99,"info":"21/09/2014 at 19:03:10"},{"visible":true,"include":false,"step":"15.0","x":39.25714285714285,"y":-23.972380952380952,"z":22.036190476190477,"a95":0.99,"info":"21/09/2014 at 19:03:10"},{"visible":true,"include":false,"step":"20.0","x":11.457142857142857,"y":24.133333333333333,"z":19.580000000000002,"a95":0.99,"info":"21/09/2014 at 19:03:10"},{"visible":true,"include":false,"step":"25.0","x":5.806380952380953,"y":20.96952380952381,"z":15.876190476190475,"a95":0.99,"info":"21/09/2014 at 19:03:10"},{"visible":true,"include":false,"step":"30.0","x":16.419999999999998,"y":6.3323809523809516,"z":47.20857142857143,"a95":0.99,"info":"21/09/2014 at 19:03:10"},{"visible":true,"include":false,"step":"35.0","x":0.6105047619047619,"y":10.606666666666667,"z":19.739047619047618,"a95":0.99,"info":"21/09/2014 at 19:03:10"},{"visible":true,"include":false,"step":"40.0","x":-1.184,"y":10.65047619047619,"z":22.173333333333332,"a95":0.99,"info":"21/09/2014 at 19:03:10"},{"visible":true,"include":false,"step":"45.0","x":2.1592380952380954,"y":3.6307619047619046,"z":19.095238095238095,"a95":0.99,"info":"21/09/2014 at 19:03:10"},{"visible":true,"include":false,"step":"50.0","x":-7.397333333333333,"y":13.012380952380951,"z":20.39428571428571,"a95":0.99,"info":"21/09/2014 at 19:03:10"},{"visible":true,"include":false,"step":"60.0","x":6.802666666666666,"y":-2.359047619047619,"z":6.004761904761905,"a95":0.99,"info":"21/09/2014 at 19:03:10"},{"visible":true,"include":false,"step":"70.0","x":4.389809523809524,"y":-3.005238095238095,"z":14.268571428571429,"a95":0.99,"info":"21/09/2014 at 19:03:10"},{"visible":true,"include":false,"step":"80.0","x":6.792190476190476,"y":16.544761904761906,"z":-6.43352380952381,"a95":0.99,"info":"21/09/2014 at 19:03:10"},{"visible":true,"include":false,"step":"90.0","x":-35.18666666666667,"y":25.300952380952385,"z":5.34552380952381,"a95":0.99,"info":"21/09/2014 at 19:03:10"},{"visible":true,"include":false,"step":"100.0","x":-1.117904761904762,"y":9.76095238095238,"z":6.189904761904762,"a95":0.99,"info":"21/09/2014 at 19:03:10"}]},{"version":"v1.1.0","exported":"2016-11-16T09:51:15.547Z","volume":10.5,"added":"2016-11-16T09:47:03.398Z","format":"Utrecht","demagType":"Unknown","strat":"4","patch":1.1,"GEO":[],"TECT":[],"interpreted":false,"name":"SS9.8A","coreAzi":312,"coreDip":31,"bedStrike":60,"bedDip":50,"data":[{"visible":true,"include":false,"step":"0.0","x":-1.4685714285714286,"y":13.71238095238095,"z":30.127619047619046,"a95":0.99,"info":"21/09/2014 at 19:03:10"},{"visible":true,"include":false,"step":"5.0","x":-3.786380952380952,"y":17.924761904761905,"z":6.929714285714286,"a95":0.99,"info":"21/09/2014 at 19:03:10"},{"visible":true,"include":false,"step":"10.0","x":-21.045714285714286,"y":47.23047619047619,"z":9.983809523809523,"a95":0.99,"info":"21/09/2014 at 19:03:10"},{"visible":true,"include":false,"step":"15.0","x":10.521904761904763,"y":-18.395238095238096,"z":1.6143809523809525,"a95":0.99,"info":"21/09/2014 at 19:03:10"},{"visible":true,"include":false,"step":"20.0","x":-8.48352380952381,"y":5.885142857142857,"z":6.2509523809523815,"a95":0.99,"info":"21/09/2014 at 19:03:10"},{"visible":true,"include":false,"step":"25.0","x":-2.7423809523809526,"y":4.885142857142857,"z":1.8448571428571428,"a95":0.99,"info":"21/09/2014 at 19:03:10"},{"visible":true,"include":false,"step":"30.0","x":1.657047619047619,"y":-5.477714285714286,"z":15.638095238095238,"a95":0.99,"info":"21/09/2014 at 19:03:10"},{"visible":true,"include":false,"step":"35.0","x":-7.12247619047619,"y":-0.6764952380952381,"z":-7.930857142857143,"a95":0.99,"info":"21/09/2014 at 19:03:10"},{"visible":true,"include":false,"step":"40.0","x":-7.903047619047619,"y":5.735428571428572,"z":-2.4744761904761905,"a95":0.99,"info":"21/09/2014 at 19:03:10"},{"visible":true,"include":false,"step":"45.0","x":-8.390190476190476,"y":4.516571428571429,"z":-2.520380952380952,"a95":0.99,"info":"21/09/2014 at 19:03:10"},{"visible":true,"include":false,"step":"50.0","x":-4.474380952380953,"y":18.276190476190475,"z":-4.115904761904762,"a95":0.99,"info":"21/09/2014 at 19:03:10"},{"visible":true,"include":false,"step":"60.0","x":-6.0547619047619055,"y":-4.9283809523809525,"z":-11.696190476190477,"a95":0.99,"info":"21/09/2014 at 19:03:10"},{"visible":true,"include":false,"step":"70.0","x":3.545809523809524,"y":9.636190476190476,"z":-4.418095238095238,"a95":0.99,"info":"21/09/2014 at 19:03:10"},{"visible":true,"include":false,"step":"80.0","x":-6.214190476190476,"y":12.916190476190476,"z":-25.474285714285717,"a95":0.99,"info":"21/09/2014 at 19:03:10"},{"visible":true,"include":false,"step":"90.0","x":-44.66952380952381,"y":18.526666666666667,"z":-11.662857142857142,"a95":0.99,"info":"21/09/2014 at 19:03:10"},{"visible":true,"include":false,"step":"100.0","x":-11.147619047619047,"y":12.456190476190475,"z":-1.793809523809524,"a95":0.99,"info":"21/09/2014 at 19:03:10"}]},{"version":"v1.1.0","exported":"2016-11-16T09:51:15.547Z","volume":10.5,"added":"2016-11-16T09:47:03.407Z","format":"Utrecht","demagType":"Unknown","strat":null,"patch":1.1,"GEO":[{"dec":162.8108428342622,"inc":-57.23023509277794,"MAD":3.4012236393959907,"cm":[-14.458083198771389,-1.6110295492026094,-16.374873712211805],"intensity":55.69867506169349,"type":"dir","forced":false,"remark":"","origin":false,"nSteps":6,"minStep":"100","maxStep":"310","steps":["100","150","180","210","240","310"],"group":"None","version":"v1.1.0"}],"TECT":[{"dec":308.51241652696064,"inc":-70.8741002561319,"MAD":3.4012236393960062,"cm":[0.029501238734478186,-9.975440324104056,-19.500199873309928],"intensity":55.69867506169349,"type":"dir","forced":false,"remark":"","origin":false,"nSteps":6,"minStep":"100","maxStep":"310","steps":["100","150","180","210","240","310"],"group":"None","version":"v1.1.0"}],"interpreted":true,"name":"SS9.9A","coreAzi":336,"coreDip":50,"bedStrike":60,"bedDip":50,"data":[{"visible":true,"include":false,"step":"20","x":1.4095238095238096,"y":-13.476190476190476,"z":-40.6,"a95":7.2,"info":"\"14-10-13\" at \"17:29\""},{"visible":true,"include":true,"step":"100","x":3.895238095238095,"y":-7.380952380952381,"z":-45.36190476190476,"a95":8,"info":"\"14-10-13\" at \"20:18\""},{"visible":true,"include":true,"step":"150","x":4.809523809523809,"y":-10.047619047619047,"z":-42.93333333333334,"a95":5.4,"info":"\"14-10-13\" at \"22:38\""},{"visible":true,"include":true,"step":"180","x":2.1714285714285717,"y":-8.00952380952381,"z":-33.37142857142857,"a95":5.5,"info":"\"14-10-14\" at \"15:47\""},{"visible":true,"include":true,"step":"210","x":-1.0285714285714287,"y":-8.438095238095238,"z":-13.980952380952383,"a95":13.7,"info":"\"14-10-14\" at \"18:54\""},{"visible":true,"include":true,"step":"240","x":-1.657142857142857,"y":-4.857142857142857,"z":2.0666666666666664,"a95":90.7,"info":"\"14-10-14\" at \"22:01\""},{"visible":false,"include":false,"step":"270","x":1.4952380952380953,"y":2.257142857142857,"z":5.219047619047619,"a95":10.7,"info":"\"14-10-15\" at \"15:54\""},{"visible":false,"include":false,"step":"290","x":-2.4571428571428573,"y":-0.47619047619047616,"z":0.41904761904761906,"a95":37.3,"info":"\"14-10-15\" at \"18:59\""},{"visible":true,"include":true,"step":"310","x":-2.7333333333333334,"y":-5.380952380952381,"z":9.904761904761905,"a95":7,"info":"\"14-10-15\" at \"22:17\""},{"visible":true,"include":false,"step":"330","x":-1.2,"y":2.8857142857142857,"z":7.057142857142857,"a95":10,"info":"\"14-10-16\" at \"15:39\""},{"visible":false,"include":false,"step":"350","x":-2.4666666666666663,"y":-8.2,"z":11.276190476190477,"a95":9.5,"info":"\"14-10-16\" at \"19:31\""},{"visible":false,"include":false,"step":"370","x":2.8285714285714283,"y":3.7142857142857144,"z":6.504761904761905,"a95":17.1,"info":"\"14-10-16\" at \"22:40\""},{"visible":false,"include":false,"step":"400","x":2.4952380952380953,"y":-0.02857142857142857,"z":5.876190476190477,"a95":15.5,"info":"\"14-10-17\" at \"14:16\""},{"visible":false,"include":false,"step":"420","x":-2.7047619047619045,"y":-3.5904761904761906,"z":2.580952380952381,"a95":16.8,"info":"\"14-10-17\" at \"17:09\""}]}]
