# Supplementary material for: Paleomagnetic constraints on the timing and distribution of Cenozoic rotations in Central and Eastern Anatolia
Source: Copernicus journal article supplement (doi:10.5194/se-9-295-2018), 2018-03-21
Supplement: Supplementary file 2 [file se-9-295-2018-supplement.zip › se-2017-66_DATA_dir files/dir files Tauride basins/SS10.dir]

[{"version":"v1.1.0","exported":"2016-11-16T09:43:19.950Z","info":"2","GEO":[],"TECT":[],"interpreted":false,"name":"SS10.1A","coreAzi":196,"coreDip":3,"bedStrike":321,"bedDip":6,"data":[{"visible":true,"include":false,"step":"0.0","x":-62.74952380952381,"y":4.148952380952381,"z":-48.60190476190476,"a95":"0.99","info":"09/10/2014 at 05:24:56"},{"visible":true,"include":false,"step":"4.0","x":-52.62952380952381,"y":1.3218095238095238,"z":-24.366666666666667,"a95":"0.99","info":"09/10/2014 at 05:24:56"},{"visible":true,"include":false,"step":"8.0","x":-46.817142857142855,"y":1.8893333333333335,"z":-21.522857142857145,"a95":"0.99","info":"09/10/2014 at 05:24:56"},{"visible":true,"include":false,"step":"12.0","x":-38.88380952380952,"y":5.761428571428572,"z":-15.539047619047619,"a95":"0.99","info":"09/10/2014 at 05:24:56"},{"visible":true,"include":false,"step":"16.0","x":-33.66571428571429,"y":5.329714285714286,"z":-10.04857142857143,"a95":"0.99","info":"09/10/2014 at 05:24:56"},{"visible":true,"include":false,"step":"20.0","x":-26.19047619047619,"y":0.3823619047619048,"z":-10.708571428571428,"a95":"0.99","info":"09/10/2014 at 05:24:56"},{"visible":true,"include":false,"step":"25.0","x":-21.485714285714284,"y":4.753619047619047,"z":-12.962857142857144,"a95":"0.99","info":"09/10/2014 at 05:24:56"},{"visible":true,"include":false,"step":"30.0","x":-14.122857142857143,"y":-12.062857142857142,"z":-11.307619047619047,"a95":"0.99","info":"09/10/2014 at 05:24:56"},{"visible":true,"include":false,"step":"35.0","x":-13.312380952380952,"y":14.917142857142856,"z":-6.222,"a95":"0.99","info":"09/10/2014 at 05:24:56"},{"visible":true,"include":false,"step":"40.0","x":-11.225714285714286,"y":0.16003809523809523,"z":0.08814857142857144,"a95":"0.99","info":"09/10/2014 at 05:24:56"},{"visible":true,"include":false,"step":"45.0","x":-19.910476190476192,"y":4.723333333333334,"z":0.17944761904761905,"a95":"0.99","info":"09/10/2014 at 05:24:56"},{"visible":true,"include":false,"step":"50.0","x":-10.393333333333333,"y":2.402285714285714,"z":-3.0650476190476192,"a95":"0.99","info":"09/10/2014 at 05:24:56"},{"visible":true,"include":false,"step":"60.0","x":-7.1436190476190475,"y":-0.02768285714285714,"z":-5.322857142857143,"a95":"0.99","info":"09/10/2014 at 05:24:56"},{"visible":true,"include":false,"step":"70.0","x":-8.028095238095238,"y":3.186952380952381,"z":-2.728190476190476,"a95":"0.99","info":"09/10/2014 at 05:24:56"},{"visible":true,"include":false,"step":"80.0","x":-6.921619047619048,"y":-2.2137142857142855,"z":-3.5227619047619045,"a95":"0.99","info":"09/10/2014 at 05:24:56"},{"visible":true,"include":false,"step":"90.0","x":-9.922857142857143,"y":5.1654285714285715,"z":-0.4098857142857143,"a95":"0.99","info":"09/10/2014 at 05:24:56"},{"visible":true,"include":false,"step":"100.0","x":-2.2525714285714287,"y":6.5442857142857145,"z":1.6647619047619049,"a95":"0.99","info":"09/10/2014 at 05:24:56"}],"demagType":"Unknown","patch":1.1,"format":"Unknown","strat":null},{"version":"v1.1.0","exported":"2016-11-16T09:43:19.951Z","info":"","GEO":[],"TECT":[],"interpreted":false,"name":"SS10.3A","coreAzi":357,"coreDip":7,"bedStrike":299,"bedDip":19,"data":[{"visible":true,"include":false,"step":"20","x":-99.61904761904762,"y":23.428571428571427,"z":49.23809523809524,"a95":"2.4","info":"\"14-10-20\" at \"15:36\""},{"visible":true,"include":false,"step":"100","x":-57.37142857142857,"y":15.97142857142857,"z":44.25714285714285,"a95":"2.4","info":"\"14-10-20\" at \"18:28\""},{"visible":true,"include":false,"step":"150","x":-14.628571428571428,"y":11.285714285714286,"z":4.580952380952381,"a95":"5.1","info":"\"14-10-20\" at \"21:49\""},{"visible":true,"include":false,"step":"180","x":-6.314285714285714,"y":14.095238095238095,"z":-5.447619047619048,"a95":"6.3","info":"\"14-10-21\" at \"00:42\""},{"visible":true,"include":false,"step":"210","x":-23.571428571428573,"y":4.457142857142857,"z":25.43809523809524,"a95":"5.6","info":"\"14-10-21\" at \"16:47\""},{"visible":true,"include":false,"step":"240","x":-8.723809523809523,"y":12.22857142857143,"z":-14.438095238095238,"a95":"6.2","info":"\"14-10-21\" at \"19:49\""},{"visible":true,"include":false,"step":"270","x":-10.41904761904762,"y":9.819047619047618,"z":-1.1333333333333333,"a95":"12.3","info":"\"14-10-21\" at \"22:52\""},{"visible":true,"include":false,"step":"290","x":5.190476190476191,"y":11.895238095238096,"z":-17.076190476190476,"a95":"9.2","info":"\"14-10-22\" at \"15:21\""},{"visible":true,"include":false,"step":"310","x":-2.0476190476190474,"y":3.6761904761904765,"z":-1.0857142857142859,"a95":"65","info":"\"14-10-22\" at \"18:08\""},{"visible":true,"include":false,"step":"330","x":-8.123809523809523,"y":-1.180952380952381,"z":-11.495238095238095,"a95":"9.400001","info":"\"14-10-22\" at \"21:19\""},{"visible":true,"include":false,"step":"350","x":-8.495238095238095,"y":6.60952380952381,"z":17.01904761904762,"a95":"12.7","info":"\"14-10-23\" at \"15:33\""},{"visible":true,"include":false,"step":"370","x":-1.8476190476190475,"y":2.0952380952380953,"z":-31.228571428571428,"a95":"4.1","info":"\"14-10-23\" at \"18:33\""},{"visible":true,"include":false,"step":"400","x":-5.476190476190476,"y":2.9238095238095236,"z":-2.1714285714285717,"a95":"15.5","info":"\"14-10-23\" at \"21:32\""}],"demagType":"Unknown","patch":1.1,"format":"Unknown","strat":null},{"version":"v1.1.0","exported":"2016-11-16T09:43:19.951Z","info":"3","GEO":[],"TECT":[],"interpreted":false,"name":"SS10.5A","coreAzi":340,"coreDip":31,"bedStrike":299,"bedDip":19,"data":[{"visible":true,"include":false,"step":"0.0","x":-64.16571428571429,"y":20.930476190476192,"z":69.13714285714286,"a95":"0.99","info":"09/10/2014 at 05:24:56"},{"visible":true,"include":false,"step":"4.0","x":-56.79238095238096,"y":15.311428571428573,"z":79.17999999999999,"a95":"0.99","info":"09/10/2014 at 05:24:56"},{"visible":true,"include":false,"step":"8.0","x":-49.74666666666667,"y":17.284761904761904,"z":66.6895238095238,"a95":"0.99","info":"09/10/2014 at 05:24:56"},{"visible":true,"include":false,"step":"12.0","x":-37.24285714285715,"y":16.397142857142857,"z":60.73714285714286,"a95":"0.99","info":"09/10/2014 at 05:24:56"},{"visible":true,"include":false,"step":"16.0","x":-35.58857142857143,"y":7.881714285714286,"z":48.1647619047619,"a95":"0.99","info":"09/10/2014 at 05:24:56"},{"visible":true,"include":false,"step":"20.0","x":-30.905714285714286,"y":0.12197142857142856,"z":40.275238095238095,"a95":"0.99","info":"09/10/2014 at 05:24:56"},{"visible":true,"include":false,"step":"25.0","x":-26.53142857142857,"y":3.3893333333333335,"z":28.959999999999997,"a95":"0.99","info":"09/10/2014 at 05:24:56"},{"visible":true,"include":false,"step":"30.0","x":-20.307619047619045,"y":-27.125714285714285,"z":26.476190476190474,"a95":"0.99","info":"09/10/2014 at 05:24:56"},{"visible":true,"include":false,"step":"35.0","x":-21.43904761904762,"y":17.540952380952383,"z":28.15809523809524,"a95":"0.99","info":"09/10/2014 at 05:24:56"},{"visible":true,"include":false,"step":"40.0","x":-16.485714285714284,"y":4.814190476190476,"z":32.81142857142857,"a95":"0.99","info":"09/10/2014 at 05:24:56"},{"visible":true,"include":false,"step":"45.0","x":-27.33238095238095,"y":0.7552190476190477,"z":27.738095238095237,"a95":"0.99","info":"09/10/2014 at 05:24:56"},{"visible":true,"include":false,"step":"50.0","x":-18.238095238095237,"y":-6.630857142857143,"z":21.871428571428574,"a95":"0.99","info":"09/10/2014 at 05:24:56"},{"visible":true,"include":false,"step":"60.0","x":-15.556190476190476,"y":0.15312380952380952,"z":11.865714285714287,"a95":"0.99","info":"09/10/2014 at 05:24:56"},{"visible":true,"include":false,"step":"70.0","x":-13.22,"y":-7.162857142857142,"z":14.151428571428571,"a95":"0.99","info":"09/10/2014 at 05:24:56"},{"visible":true,"include":false,"step":"80.0","x":-16.68952380952381,"y":-8.400761904761904,"z":10.40952380952381,"a95":"0.99","info":"09/10/2014 at 05:24:56"},{"visible":true,"include":false,"step":"90.0","x":-11.26952380952381,"y":-2.3149523809523807,"z":5.179333333333334,"a95":"0.99","info":"09/10/2014 at 05:24:56"},{"visible":true,"include":false,"step":"100.0","x":-14.125714285714285,"y":-7.168095238095238,"z":16.527619047619048,"a95":"0.99","info":"09/10/2014 at 05:24:56"}],"demagType":"Unknown","patch":1.1,"format":"Unknown","strat":null},{"version":"v1.1.0","exported":"2016-11-16T09:43:19.951Z","info":"","GEO":[],"TECT":[],"interpreted":false,"name":"SS10.6A","coreAzi":353,"coreDip":27,"bedStrike":299,"bedDip":19,"data":[{"visible":true,"include":false,"step":"20","x":-65.9047619047619,"y":15.238095238095237,"z":166.0952380952381,"a95":"3.3","info":"\"14-10-13\" at \"16:17\""},{"visible":true,"include":false,"step":"100","x":-38.76190476190476,"y":12.761904761904763,"z":103.9047619047619,"a95":"3.6","info":"\"14-10-13\" at \"19:14\""},{"visible":true,"include":false,"step":"150","x":-17.104761904761904,"y":11.257142857142858,"z":65.01904761904763,"a95":"7.5","info":"\"14-10-13\" at \"22:40\""},{"visible":true,"include":false,"step":"180","x":-14.352380952380951,"y":8.076190476190476,"z":45.60952380952381,"a95":"5.6","info":"\"14-10-14\" at \"15:50\""},{"visible":true,"include":false,"step":"210","x":7.409523809523809,"y":7.428571428571429,"z":44.22857142857143,"a95":"10.1","info":"\"14-10-14\" at \"18:57\""},{"visible":true,"include":false,"step":"240","x":-5.885714285714285,"y":11.857142857142858,"z":29.238095238095237,"a95":"14.4","info":"\"14-10-14\" at \"22:04\""},{"visible":true,"include":false,"step":"270","x":-6.752380952380953,"y":8.77142857142857,"z":29.228571428571428,"a95":"5","info":"\"14-10-15\" at \"15:56\""},{"visible":true,"include":false,"step":"290","x":-6.590476190476191,"y":2.580952380952381,"z":24.333333333333332,"a95":"11.6","info":"\"14-10-15\" at \"19:01\""},{"visible":true,"include":false,"step":"310","x":-6.447619047619048,"y":2.0285714285714285,"z":19.371428571428574,"a95":"6.7","info":"\"14-10-15\" at \"22:19\""},{"visible":true,"include":false,"step":"330","x":-8.142857142857142,"y":0.5238095238095238,"z":20.561904761904763,"a95":"6","info":"\"14-10-16\" at \"15:42\""},{"visible":true,"include":false,"step":"350","x":-2.619047619047619,"y":3.457142857142857,"z":20.476190476190474,"a95":"11.4","info":"\"14-10-16\" at \"19:33\""},{"visible":true,"include":false,"step":"370","x":-2.104761904761905,"y":0.9523809523809523,"z":21.247619047619047,"a95":"6","info":"\"14-10-16\" at \"22:42\""},{"visible":true,"include":false,"step":"400","x":-3.4857142857142858,"y":0.5714285714285714,"z":21.085714285714285,"a95":"8.6","info":"\"14-10-17\" at \"14:19\""},{"visible":true,"include":false,"step":"420","x":-5.704761904761905,"y":-3.1714285714285713,"z":8.561904761904762,"a95":"11.1","info":"\"14-10-17\" at \"17:12\""},{"visible":true,"include":false,"step":"440","x":-5.257142857142857,"y":4.6761904761904765,"z":13.761904761904763,"a95":"18.4","info":"\"14-10-17\" at \"20:19\""},{"visible":true,"include":false,"step":"470","x":-4.961904761904762,"y":4.4,"z":11.2,"a95":"9.8","info":"\"14-10-17\" at \"23:33\""},{"visible":true,"include":false,"step":"490","x":-9.038095238095238,"y":2.8285714285714283,"z":14.171428571428573,"a95":"6","info":"\"14-10-18\" at \"11:52\""},{"visible":true,"include":false,"step":"520","x":-13.514285714285714,"y":7.038095238095239,"z":10.876190476190477,"a95":"10.8","info":"\"14-10-18\" at \"14:56\""},{"visible":true,"include":false,"step":"550","x":-1.9047619047619047,"y":-2.580952380952381,"z":17.59047619047619,"a95":"7.1","info":"\"14-10-19\" at \"09:47\""},{"visible":true,"include":false,"step":"580","x":-8.17142857142857,"y":16.41904761904762,"z":1.1142857142857143,"a95":"18","info":"\"14-10-19\" at \"11:52\""}],"demagType":"Unknown","patch":1.1,"format":"Unknown","strat":null},{"version":"v1.1.0","exported":"2016-11-16T09:43:19.951Z","info":"","GEO":[],"TECT":[],"interpreted":false,"name":"SS10.7A","coreAzi":2,"coreDip":33,"bedStrike":299,"bedDip":19,"data":[{"visible":true,"include":false,"step":"20","x":-58.857142857142854,"y":8.571428571428571,"z":163.8095238095238,"a95":"2.6","info":"\"14-10-20\" at \"15:38\""},{"visible":true,"include":false,"step":"100","x":-30.16190476190476,"y":16.428571428571427,"z":81.32380952380952,"a95":"2.5","info":"\"14-10-20\" at \"18:29\""},{"visible":true,"include":false,"step":"150","x":-37.142857142857146,"y":13.523809523809524,"z":90.76190476190476,"a95":"2.9","info":"\"14-10-20\" at \"21:50\""},{"visible":true,"include":false,"step":"180","x":-15.133333333333335,"y":3.8476190476190473,"z":33.32380952380952,"a95":"3.9","info":"\"14-10-21\" at \"00:44\""},{"visible":true,"include":false,"step":"210","x":-10.476190476190476,"y":4.619047619047619,"z":38.63809523809524,"a95":"3.8","info":"\"14-10-21\" at \"16:49\""},{"visible":true,"include":false,"step":"240","x":-11.723809523809523,"y":8.619047619047619,"z":21.98095238095238,"a95":"3.4","info":"\"14-10-21\" at \"19:50\""},{"visible":true,"include":false,"step":"270","x":-20.714285714285715,"y":8.161904761904761,"z":45.98095238095238,"a95":"4","info":"\"14-10-21\" at \"22:54\""},{"visible":true,"include":false,"step":"290","x":-11.780952380952382,"y":12.638095238095238,"z":21.46666666666667,"a95":"6.8","info":"\"14-10-22\" at \"15:23\""},{"visible":true,"include":false,"step":"310","x":-15.704761904761906,"y":11.676190476190476,"z":38.17142857142857,"a95":"3.8","info":"\"14-10-22\" at \"18:10\""},{"visible":true,"include":false,"step":"330","x":-23.142857142857142,"y":5.923809523809524,"z":11.038095238095238,"a95":"6.9","info":"\"14-10-22\" at \"21:20\""},{"visible":true,"include":false,"step":"350","x":-18.2,"y":5.238095238095238,"z":25.98095238095238,"a95":"5.7","info":"\"14-10-23\" at \"15:35\""},{"visible":true,"include":false,"step":"370","x":-8.219047619047618,"y":2.9333333333333336,"z":-8.59047619047619,"a95":"9.1","info":"\"14-10-23\" at \"18:35\""},{"visible":true,"include":false,"step":"400","x":-24.799999999999997,"y":13.342857142857142,"z":35.10476190476191,"a95":"3.7","info":"\"14-10-23\" at \"21:34\""}],"demagType":"Unknown","patch":1.1,"format":"Unknown","strat":null},{"version":"v1.1.0","exported":"2016-11-16T09:43:19.951Z","info":"","GEO":[{"dec":134.61355515770998,"inc":-49.25943145912008,"MAD":4.458038167593423,"cm":[-5.4136589391245725e-15,-5.075305255429287e-15,0],"intensity":212.3445695934503,"type":"dir","forced":true,"remark":"","origin":false,"nSteps":8,"minStep":"180","maxStep":"350","steps":["180","210","240","270","290","310","330","350"],"group":"None"}],"TECT":[{"dec":152.29221240202514,"inc":-41.23931622894212,"MAD":4.458038167593413,"cm":[-3.383536836952858e-15,-2.0301221021717147e-15,3.383536836952858e-15],"intensity":212.3445695934503,"type":"dir","forced":true,"remark":"","origin":false,"nSteps":8,"minStep":"180","maxStep":"350","steps":["180","210","240","270","290","310","330","350"],"group":"None"}],"interpreted":true,"name":"SS10.8A","coreAzi":13,"coreDip":7,"bedStrike":299,"bedDip":19,"data":[{"visible":true,"include":false,"step":"20","x":67.12380952380951,"y":57.161904761904765,"z":0.01904761904761905,"a95":"1.8","info":"\"14-10-20\" at \"15:40\""},{"visible":true,"include":false,"step":"100","x":85.14285714285714,"y":69.71428571428571,"z":-43.23809523809524,"a95":"1.9","info":"\"14-10-20\" at \"18:31\""},{"visible":true,"include":false,"step":"150","x":93.04761904761905,"y":71.04761904761905,"z":-44.476190476190474,"a95":"1.9","info":"\"14-10-20\" at \"21:52\""},{"visible":true,"include":true,"step":"180","x":92.57142857142857,"y":77.61904761904762,"z":-63.714285714285715,"a95":"1.8","info":"\"14-10-21\" at \"00:45\""},{"visible":true,"include":true,"step":"210","x":85.9047619047619,"y":63.23809523809524,"z":-53.61904761904762,"a95":"1.7","info":"\"14-10-21\" at \"16:51\""},{"visible":true,"include":true,"step":"240","x":85.9047619047619,"y":64.38095238095238,"z":-55.142857142857146,"a95":"1.8","info":"\"14-10-21\" at \"19:52\""},{"visible":true,"include":true,"step":"270","x":77.42857142857143,"y":57.714285714285715,"z":-31.047619047619047,"a95":"2.1","info":"\"14-10-21\" at \"22:56\""},{"visible":true,"include":true,"step":"290","x":71.61904761904762,"y":57.80952380952381,"z":-47.904761904761905,"a95":"2","info":"\"14-10-22\" at \"15:25\""},{"visible":true,"include":true,"step":"310","x":76.76190476190476,"y":50.095238095238095,"z":-33.142857142857146,"a95":"2.9","info":"\"14-10-22\" at \"18:11\""},{"visible":true,"include":true,"step":"330","x":55.971428571428575,"y":54.666666666666664,"z":-44.333333333333336,"a95":"2.7","info":"\"14-10-22\" at \"21:22\""},{"visible":true,"include":true,"step":"350","x":52.69523809523809,"y":43.94285714285714,"z":-32.25714285714285,"a95":"4.3","info":"\"14-10-23\" at \"15:37\""},{"visible":false,"include":false,"step":"370","x":42.095238095238095,"y":56.476190476190474,"z":-64.19047619047619,"a95":"3.2","info":"\"14-10-23\" at \"18:37\""},{"visible":true,"include":false,"step":"400","x":11.057142857142857,"y":16.73333333333333,"z":1.8095238095238095,"a95":"21.4","info":"\"14-10-23\" at \"21:36\""},{"visible":true,"include":false,"step":"420","x":16.952380952380953,"y":61.00952380952381,"z":-23.64761904761905,"a95":"17","info":"\"14-10-24\" at \"16:07\""},{"visible":false,"include":false,"step":"440","x":-79.61904761904762,"y":-28.285714285714285,"z":192.66666666666666,"a95":"10.6","info":"\"14-10-24\" at \"19:20\""},{"visible":false,"include":false,"step":"470","x":-38.19047619047619,"y":90.76190476190476,"z":24.857142857142858,"a95":"19.6","info":"\"14-10-24\" at \"21:57\""}],"demagType":"Unknown","patch":1.1,"format":"Unknown","strat":null},{"version":"v1.1.0","exported":"2016-11-16T09:43:19.951Z","info":"4","GEO":[],"TECT":[],"interpreted":false,"name":"SS10.9A","coreAzi":353,"coreDip":0,"bedStrike":299,"bedDip":19,"data":[{"visible":true,"include":false,"step":"0.0","x":-65.70952380952382,"y":24.803809523809523,"z":56.582857142857144,"a95":"0.99","info":"09/10/2014 at 05:24:56"},{"visible":true,"include":false,"step":"4.0","x":-57.45809523809523,"y":16.930476190476192,"z":59.10857142857143,"a95":"0.99","info":"09/10/2014 at 05:24:56"},{"visible":true,"include":false,"step":"8.0","x":-49.22666666666667,"y":17.45809523809524,"z":52.52761904761904,"a95":"0.99","info":"09/10/2014 at 05:24:56"},{"visible":true,"include":false,"step":"12.0","x":-39.4247619047619,"y":21.239047619047618,"z":45.64380952380952,"a95":"0.99","info":"09/10/2014 at 05:24:56"},{"visible":true,"include":false,"step":"16.0","x":-30.581904761904763,"y":15.689523809523811,"z":41.17142857142857,"a95":"0.99","info":"09/10/2014 at 05:24:56"},{"visible":true,"include":false,"step":"20.0","x":-27.85809523809524,"y":9.251142857142858,"z":33.798095238095236,"a95":"0.99","info":"09/10/2014 at 05:24:56"},{"visible":true,"include":false,"step":"25.0","x":-21.017142857142858,"y":10.457142857142857,"z":25.861904761904764,"a95":"0.99","info":"09/10/2014 at 05:24:56"},{"visible":true,"include":false,"step":"30.0","x":-11.69047619047619,"y":-23.346666666666664,"z":24.12952380952381,"a95":"0.99","info":"09/10/2014 at 05:24:56"},{"visible":true,"include":false,"step":"35.0","x":-19.655238095238094,"y":44.59619047619047,"z":27.211428571428574,"a95":"0.99","info":"09/10/2014 at 05:24:56"},{"visible":true,"include":false,"step":"40.0","x":-8.315333333333333,"y":12.90952380952381,"z":30.72,"a95":"0.99","info":"09/10/2014 at 05:24:56"},{"visible":true,"include":false,"step":"45.0","x":-15.440000000000001,"y":18.314285714285717,"z":25.444761904761908,"a95":"0.99","info":"09/10/2014 at 05:24:56"},{"visible":true,"include":false,"step":"50.0","x":-9.734285714285713,"y":4.960380952380953,"z":22.31047619047619,"a95":"0.99","info":"09/10/2014 at 05:24:56"},{"visible":true,"include":false,"step":"60.0","x":-8.642095238095239,"y":12.76,"z":8.592571428571429,"a95":"0.99","info":"09/10/2014 at 05:24:56"},{"visible":true,"include":false,"step":"70.0","x":-4.599428571428571,"y":-0.36074285714285714,"z":24.82095238095238,"a95":"0.99","info":"09/10/2014 at 05:24:56"},{"visible":true,"include":false,"step":"80.0","x":34.52857142857143,"y":-8.335904761904763,"z":24.155238095238094,"a95":"0.99","info":"09/10/2014 at 05:24:56"},{"visible":true,"include":false,"step":"90.0","x":-10.680952380952382,"y":-0.8572952380952381,"z":8.91552380952381,"a95":"0.99","info":"09/10/2014 at 05:24:56"},{"visible":true,"include":false,"step":"100.0","x":0.5928857142857142,"y":-10.151428571428571,"z":8.661809523809524,"a95":"0.99","info":"09/10/2014 at 05:24:56"}],"demagType":"Unknown","patch":1.1,"format":"Unknown","strat":null},{"version":"v1.1.0","exported":"2016-11-16T09:43:19.951Z","info":"","GEO":[{"dec":136.5599415119517,"inc":-44.70695249514644,"MAD":7.810787286109373,"cm":[-3.552713678800501e-15,-3.383536836952858e-15,0],"intensity":59.126793309588756,"type":"dir","forced":true,"remark":"","origin":false,"nSteps":5,"minStep":"210","maxStep":"310","steps":["210","240","270","290","310"],"group":"None"}],"TECT":[{"dec":151.5058536279236,"inc":-36.53718742410222,"MAD":7.810787286109373,"cm":[-4.3985978880387156e-15,-7.274604199448644e-15,2.0301221021717147e-15],"intensity":59.12679330958876,"type":"dir","forced":true,"remark":"","origin":false,"nSteps":5,"minStep":"210","maxStep":"310","steps":["210","240","270","290","310"],"group":"None"}],"interpreted":true,"name":"SS10.10A","coreAzi":23,"coreDip":23,"bedStrike":299,"bedDip":19,"data":[{"visible":true,"include":false,"step":"20","x":-28.285714285714285,"y":-22.571428571428573,"z":125.52380952380952,"a95":"2.5","info":"\"14-10-20\" at \"15:42\""},{"visible":true,"include":false,"step":"100","x":0.4666666666666667,"y":-2.9428571428571426,"z":77.21904761904761,"a95":"2.8","info":"\"14-10-20\" at \"18:33\""},{"visible":true,"include":false,"step":"150","x":12.80952380952381,"y":6.7714285714285705,"z":49.37142857142857,"a95":"2.8","info":"\"14-10-20\" at \"21:54\""},{"visible":true,"include":false,"step":"180","x":16.81904761904762,"y":18.933333333333334,"z":-6,"a95":"2.1","info":"\"14-10-21\" at \"00:47\""},{"visible":true,"include":true,"step":"210","x":16.057142857142857,"y":21.085714285714285,"z":-12.885714285714286,"a95":"3.8","info":"\"14-10-21\" at \"16:53\""},{"visible":true,"include":true,"step":"240","x":19.247619047619047,"y":19.561904761904763,"z":-17.8,"a95":"2.8","info":"\"14-10-21\" at \"19:54\""},{"visible":true,"include":true,"step":"270","x":10.942857142857143,"y":11.352380952380953,"z":-6.742857142857143,"a95":"13.8","info":"\"14-10-21\" at \"22:57\""},{"visible":true,"include":true,"step":"290","x":13.333333333333334,"y":20.97142857142857,"z":-22.79047619047619,"a95":"3.4","info":"\"14-10-22\" at \"15:27\""},{"visible":true,"include":true,"step":"310","x":17.438095238095237,"y":19.561904761904763,"z":-13.980952380952383,"a95":"8.7","info":"\"14-10-22\" at \"18:13\""},{"visible":true,"include":false,"step":"330","x":-1.7809523809523808,"y":17.923809523809524,"z":-22.41904761904762,"a95":"6.5","info":"\"14-10-22\" at \"21:24\""},{"visible":true,"include":false,"step":"350","x":3.0857142857142854,"y":14.066666666666666,"z":-16.771428571428572,"a95":"11","info":"\"14-10-23\" at \"15:39\""},{"visible":true,"include":false,"step":"370","x":0.11428571428571428,"y":12.647619047619049,"z":-24.285714285714285,"a95":"7.1","info":"\"14-10-23\" at \"18:39\""},{"visible":false,"include":false,"step":"400","x":1.0571428571428572,"y":-2.0095238095238095,"z":-3.2666666666666666,"a95":"61","info":"\"14-10-23\" at \"21:38\""},{"visible":false,"include":false,"step":"420","x":1.2095238095238094,"y":14.22857142857143,"z":-11.647619047619047,"a95":"17.4","info":"\"14-10-24\" at \"16:08\""},{"visible":false,"include":false,"step":"440","x":4.704761904761905,"y":11.542857142857143,"z":2.419047619047619,"a95":"23.2","info":"\"14-10-24\" at \"19:22\""}],"demagType":"Unknown","patch":1.1,"format":"Unknown","strat":null},{"version":"v1.1.0","exported":"2016-11-16T09:43:19.951Z","info":"","GEO":[{"dec":145.29039140715292,"inc":-44.2218715143481,"MAD":6.166135799453036,"cm":[-2.5376526277146436e-15,-3.2989484160290367e-15,0],"intensity":88.98586552390525,"type":"dir","forced":true,"remark":"","origin":false,"nSteps":9,"minStep":"210","maxStep":"400","steps":["210","240","270","290","310","330","350","370","400"],"group":"None"}],"TECT":[{"dec":158.36906555483608,"inc":-33.786546396711636,"MAD":6.166135799453002,"cm":[-3.214359995105215e-15,-1.1842378929335002e-15,1.522591576628786e-15],"intensity":88.98586552390525,"type":"dir","forced":true,"remark":"","origin":false,"nSteps":9,"minStep":"210","maxStep":"400","steps":["210","240","270","290","310","330","350","370","400"],"group":"None"}],"interpreted":true,"name":"SS10.11A","coreAzi":305,"coreDip":18,"bedStrike":299,"bedDip":19,"data":[{"visible":false,"include":false,"step":"20","x":-76.12380952380951,"y":48.65714285714286,"z":-19.361904761904764,"a95":"4","info":"\"14-10-13\" at \"16:19\""},{"visible":true,"include":false,"step":"100","x":-26.990476190476187,"y":21.704761904761906,"z":-20.82857142857143,"a95":"7","info":"\"14-10-13\" at \"19:15\""},{"visible":true,"include":false,"step":"150","x":6.428571428571429,"y":-1.8476190476190475,"z":-45.50476190476191,"a95":"5","info":"\"14-10-13\" at \"22:42\""},{"visible":true,"include":false,"step":"180","x":19.26666666666667,"y":-11.114285714285714,"z":-51.790476190476184,"a95":"2.5","info":"\"14-10-14\" at \"15:52\""},{"visible":true,"include":true,"step":"210","x":35.352380952380955,"y":-11.361904761904762,"z":-48.542857142857144,"a95":"6.2","info":"\"14-10-14\" at \"18:59\""},{"visible":true,"include":true,"step":"240","x":24.580952380952382,"y":-15.504761904761907,"z":-46.24761904761905,"a95":"6.7","info":"\"14-10-14\" at \"22:06\""},{"visible":true,"include":true,"step":"270","x":18.933333333333334,"y":-13.619047619047619,"z":-44.63809523809524,"a95":"3","info":"\"14-10-15\" at \"15:58\""},{"visible":true,"include":true,"step":"290","x":23.523809523809526,"y":-10.17142857142857,"z":-45.8,"a95":"3.6","info":"\"14-10-15\" at \"19:03\""},{"visible":true,"include":true,"step":"310","x":19.02857142857143,"y":-13.209523809523809,"z":-37.304761904761904,"a95":"3.6","info":"\"14-10-15\" at \"22:21\""},{"visible":true,"include":true,"step":"330","x":15.647619047619049,"y":-11.58095238095238,"z":-36.08571428571428,"a95":"6.8","info":"\"14-10-16\" at \"15:43\""},{"visible":true,"include":true,"step":"350","x":18.18095238095238,"y":-9.838095238095239,"z":-30.37142857142857,"a95":"6.2","info":"\"14-10-16\" at \"19:35\""},{"visible":true,"include":true,"step":"370","x":13.22857142857143,"y":-4.8,"z":-34.2952380952381,"a95":"5.9","info":"\"14-10-16\" at \"22:44\""},{"visible":true,"include":true,"step":"400","x":12.485714285714286,"y":-13.266666666666667,"z":-22.333333333333332,"a95":"7.2","info":"\"14-10-17\" at \"14:21\""},{"visible":true,"include":false,"step":"420","x":-0.34285714285714286,"y":-4.066666666666667,"z":-15.866666666666665,"a95":"9","info":"\"14-10-17\" at \"17:13\""},{"visible":true,"include":false,"step":"440","x":10.514285714285714,"y":-6.571428571428571,"z":-8.666666666666666,"a95":"15.5","info":"\"14-10-17\" at \"20:21\""},{"visible":false,"include":false,"step":"470","x":2.8095238095238093,"y":3.066666666666667,"z":-12.314285714285715,"a95":"15.9","info":"\"14-10-17\" at \"23:35\""},{"visible":false,"include":false,"step":"490","x":-13.21904761904762,"y":-9.2,"z":-1.3523809523809522,"a95":"9.400001","info":"\"14-10-18\" at \"11:55\""},{"visible":false,"include":false,"step":"520","x":-3.8761904761904766,"y":6.0476190476190474,"z":-4.314285714285714,"a95":"30.2","info":"\"14-10-18\" at \"14:58\""},{"visible":false,"include":false,"step":"550","x":3.1714285714285713,"y":3.142857142857143,"z":5.190476190476191,"a95":"21.8","info":"\"14-10-19\" at \"09:49\""}],"demagType":"Unknown","patch":1.1,"format":"Unknown","strat":null},{"version":"v1.1.0","exported":"2016-11-16T09:43:19.952Z","info":"5","GEO":[],"TECT":[],"interpreted":false,"name":"SS10.12A","coreAzi":301,"coreDip":11,"bedStrike":299,"bedDip":19,"data":[{"visible":true,"include":false,"step":"0.0","x":20.556190476190476,"y":-58.36761904761905,"z":0.5314095238095238,"a95":"0.99","info":"09/10/2014 at 05:24:56"},{"visible":true,"include":false,"step":"4.0","x":28.416190476190476,"y":-57.75904761904762,"z":7.253333333333333,"a95":"0.99","info":"09/10/2014 at 05:24:56"},{"visible":true,"include":false,"step":"8.0","x":29.72285714285714,"y":-46.888571428571424,"z":9.06352380952381,"a95":"0.99","info":"09/10/2014 at 05:24:56"},{"visible":true,"include":false,"step":"12.0","x":34.01714285714286,"y":-39.357142857142854,"z":10.665714285714285,"a95":"0.99","info":"09/10/2014 at 05:24:56"},{"visible":true,"include":false,"step":"16.0","x":32.15238095238095,"y":-37.9247619047619,"z":8.38352380952381,"a95":"0.99","info":"09/10/2014 at 05:24:56"},{"visible":true,"include":false,"step":"20.0","x":34.38380952380952,"y":-37.16285714285714,"z":2.286857142857143,"a95":"0.99","info":"09/10/2014 at 05:24:56"},{"visible":true,"include":false,"step":"25.0","x":35.61333333333333,"y":-35.47238095238095,"z":-0.5943714285714286,"a95":"0.99","info":"09/10/2014 at 05:24:56"},{"visible":true,"include":false,"step":"30.0","x":38.67142857142857,"y":-67.45809523809524,"z":-1.2926666666666666,"a95":"0.99","info":"09/10/2014 at 05:24:56"},{"visible":true,"include":false,"step":"35.0","x":28.93142857142857,"y":17.82190476190476,"z":6.8737142857142866,"a95":"0.99","info":"09/10/2014 at 05:24:56"},{"visible":true,"include":false,"step":"40.0","x":30.744761904761905,"y":-17.02857142857143,"z":16.69904761904762,"a95":"0.99","info":"09/10/2014 at 05:24:56"},{"visible":true,"include":false,"step":"45.0","x":23.86857142857143,"y":-12.615238095238096,"z":4.85447619047619,"a95":"0.99","info":"09/10/2014 at 05:24:56"},{"visible":true,"include":false,"step":"50.0","x":22.84,"y":-14.817142857142859,"z":2.395714285714286,"a95":"0.99","info":"09/10/2014 at 05:24:56"},{"visible":true,"include":false,"step":"60.0","x":22.50095238095238,"y":-5.231142857142857,"z":-0.8235523809523809,"a95":"0.99","info":"09/10/2014 at 05:24:56"},{"visible":true,"include":false,"step":"70.0","x":12.996190476190478,"y":-11.536190476190475,"z":3.1443809523809523,"a95":"0.99","info":"09/10/2014 at 05:24:56"},{"visible":true,"include":false,"step":"80.0","x":8.015809523809523,"y":-4.946571428571429,"z":-6.656476190476191,"a95":"0.99","info":"09/10/2014 at 05:24:56"},{"visible":true,"include":false,"step":"90.0","x":9.071142857142856,"y":-9.264095238095237,"z":2.7804761904761905,"a95":"0.99","info":"09/10/2014 at 05:24:56"},{"visible":true,"include":false,"step":"100.0","x":6.225714285714286,"y":-10.900952380952381,"z":-1.0968571428571428,"a95":"0.99","info":"09/10/2014 at 05:24:56"}],"demagType":"Unknown","patch":1.1,"format":"Unknown","strat":null},{"version":"v1.1.0","exported":"2016-11-16T09:43:19.952Z","info":"","GEO":[{"dec":150.90183834819481,"inc":-42.764608421406294,"MAD":3.814193915700704,"cm":[-2.3684757858670005e-15,-3.975655783419608e-15,0],"intensity":102.80446402335481,"type":"dir","forced":true,"remark":"","origin":false,"nSteps":9,"minStep":"180","maxStep":"400","steps":["180","240","270","290","310","330","350","370","400"],"group":"None"}],"TECT":[{"dec":162.3273560232119,"inc":-31.043196569132324,"MAD":3.814193915700798,"cm":[-2.1992989440193578e-15,-4.0602442043434294e-15,8.458842092382145e-16],"intensity":102.80446402335481,"type":"dir","forced":true,"remark":"","origin":false,"nSteps":9,"minStep":"180","maxStep":"400","steps":["180","240","270","290","310","330","350","370","400"],"group":"None"}],"interpreted":true,"name":"SS10.13A","coreAzi":17,"coreDip":10,"bedStrike":299,"bedDip":19,"data":[{"visible":false,"include":false,"step":"20","x":-9.257142857142858,"y":43.04761904761905,"z":-6.742857142857143,"a95":"2.7","info":"\"14-10-13\" at \"16:21\""},{"visible":true,"include":false,"step":"100","x":20.371428571428574,"y":39.99047619047619,"z":-6.628571428571428,"a95":"6.2","info":"\"14-10-13\" at \"19:17\""},{"visible":true,"include":false,"step":"150","x":45.60952380952381,"y":44.78095238095238,"z":-39.76190476190476,"a95":"3.8","info":"\"14-10-13\" at \"22:44\""},{"visible":true,"include":true,"step":"180","x":51.62857142857143,"y":43.17142857142857,"z":-49.05714285714286,"a95":"2.4","info":"\"14-10-14\" at \"15:54\""},{"visible":false,"include":false,"step":"210","x":63.65714285714286,"y":39.36190476190476,"z":-49.209523809523816,"a95":"5.6","info":"\"14-10-14\" at \"19:01\""},{"visible":true,"include":true,"step":"240","x":44.38095238095238,"y":33.98095238095238,"z":-42.647619047619045,"a95":"6.5","info":"\"14-10-14\" at \"22:08\""},{"visible":true,"include":true,"step":"270","x":39.62857142857143,"y":31.685714285714283,"z":-41.50476190476191,"a95":"2.6","info":"\"14-10-15\" at \"16:00\""},{"visible":true,"include":true,"step":"290","x":31.104761904761908,"y":33.05714285714286,"z":-37.476190476190474,"a95":"5.5","info":"\"14-10-15\" at \"19:05\""},{"visible":true,"include":true,"step":"310","x":31.83809523809524,"y":30.43809523809524,"z":-33,"a95":"3.4","info":"\"14-10-15\" at \"22:23\""},{"visible":true,"include":true,"step":"330","x":29.114285714285714,"y":29.94285714285714,"z":-36.095238095238095,"a95":"4.2","info":"\"14-10-16\" at \"15:45\""},{"visible":true,"include":true,"step":"350","x":25.742857142857144,"y":26.885714285714286,"z":-29.79047619047619,"a95":"7","info":"\"14-10-16\" at \"19:37\""},{"visible":true,"include":true,"step":"370","x":18.41904761904762,"y":25.104761904761908,"z":-26.24761904761905,"a95":"7.2","info":"\"14-10-16\" at \"22:46\""},{"visible":true,"include":true,"step":"400","x":10.266666666666666,"y":10.895238095238096,"z":-12.704761904761906,"a95":"19.6","info":"\"14-10-17\" at \"14:23\""},{"visible":false,"include":false,"step":"420","x":-35.352380952380955,"y":9.438095238095238,"z":-5.161904761904762,"a95":"19.6","info":"\"14-10-17\" at \"17:15\""},{"visible":false,"include":false,"step":"440","x":-7.800000000000001,"y":14.80952380952381,"z":29.571428571428573,"a95":"30.2","info":"\"14-10-17\" at \"20:24\""}],"demagType":"Unknown","patch":1.1,"format":"Unknown","strat":null}]
