# Supplementary material for: Paleomagnetic constraints on the timing and distribution of Cenozoic rotations in Central and Eastern Anatolia
Source: Copernicus journal article supplement (doi:10.5194/se-9-295-2018), 2018-03-21
Supplement: Supplementary file 2 [file se-9-295-2018-supplement.zip › se-2017-66_DATA_dir files/dir files Ulukisla/AD3.dir]

[{"version":"v1.1.0","exported":"2016-11-24T13:32:50.003Z","volume":10.5,"added":"2016-11-24T13:25:40.961Z","format":"Utrecht","demagType":"Unknown","strat":null,"patch":1.1,"GEO":[],"TECT":[],"interpreted":false,"name":"AD3.03A","coreAzi":186,"coreDip":26,"bedStrike":132,"bedDip":18,"data":[{"visible":true,"include":false,"step":"20","x":-147.23809523809524,"y":64.95238095238095,"z":267.23809523809524,"a95":1.9,"info":"\"16-04-18\" at \"09:34\""},{"visible":true,"include":false,"step":"100","x":-7.285714285714286,"y":-20.65714285714286,"z":72.84761904761905,"a95":2.8,"info":"\"16-04-18\" at \"12:03\""},{"visible":true,"include":false,"step":"150","x":-29.323809523809523,"y":-10.923809523809524,"z":30.62857142857143,"a95":3.3,"info":"\"16-04-18\" at \"15:07\""},{"visible":true,"include":false,"step":"180","x":-34.904761904761905,"y":-10.82857142857143,"z":9.495238095238095,"a95":4.9,"info":"\"16-04-19\" at \"11:03\""},{"visible":true,"include":false,"step":"240","x":-12.714285714285714,"y":-22.638095238095236,"z":-5.685714285714286,"a95":4.5,"info":"\"16-04-20\" at \"09:40\""},{"visible":true,"include":false,"step":"270","x":-29.771428571428572,"y":-20.942857142857143,"z":-7.876190476190477,"a95":3.6,"info":"\"16-04-21\" at \"11:01\""},{"visible":true,"include":false,"step":"300","x":-27.695238095238096,"y":-22.228571428571428,"z":-7.171428571428571,"a95":8,"info":"\"16-04-21\" at \"14:26\""}]},{"version":"v1.1.0","exported":"2016-11-24T13:32:50.003Z","volume":10.5,"added":"2016-11-24T13:25:40.962Z","format":"Utrecht","demagType":"Unknown","strat":null,"patch":1.1,"GEO":[],"TECT":[],"interpreted":false,"name":"AD3.04A","coreAzi":177,"coreDip":31,"bedStrike":132,"bedDip":18,"data":[{"visible":true,"include":false,"step":"20","x":-406,"y":-43.80952380952381,"z":90.57142857142857,"a95":1.9,"info":"\"16-04-18\" at \"09:35\""},{"visible":true,"include":false,"step":"100","x":-124.19047619047619,"y":-33.333333333333336,"z":-23.61904761904762,"a95":2.3,"info":"\"16-04-18\" at \"12:04\""},{"visible":true,"include":false,"step":"150","x":-153.42857142857142,"y":8.476190476190476,"z":-12.761904761904763,"a95":1.6,"info":"\"16-04-18\" at \"15:08\""},{"visible":true,"include":false,"step":"180","x":-131.23809523809524,"y":16.761904761904763,"z":-26.476190476190474,"a95":2.2,"info":"\"16-04-19\" at \"11:05\""},{"visible":true,"include":false,"step":"240","x":-76.28571428571429,"y":-17.428571428571427,"z":-95.61904761904762,"a95":2.6,"info":"\"16-04-20\" at \"09:43\""},{"visible":true,"include":false,"step":"270","x":-92.28571428571429,"y":-0.47619047619047616,"z":-37.42857142857143,"a95":2.1,"info":"\"16-04-21\" at \"11:03\""},{"visible":true,"include":false,"step":"300","x":-72.27619047619048,"y":-0.11428571428571428,"z":-21.076190476190476,"a95":4.4,"info":"\"16-04-21\" at \"14:28\""}]},{"version":"v1.1.0","exported":"2016-11-24T13:32:50.003Z","volume":10.5,"added":"2016-11-24T13:25:40.962Z","format":"Utrecht","demagType":"Unknown","strat":null,"patch":1.1,"GEO":[],"TECT":[],"interpreted":false,"name":"AD3.05A","coreAzi":148,"coreDip":22,"bedStrike":132,"bedDip":18,"data":[{"visible":true,"include":false,"step":"20","x":-112,"y":-182.28571428571428,"z":82.66666666666667,"a95":2.7,"info":"\"16-04-18\" at \"09:36\""},{"visible":true,"include":false,"step":"100","x":40.647619047619045,"y":-42.438095238095244,"z":-56.733333333333334,"a95":2.2,"info":"\"16-04-18\" at \"12:05\""},{"visible":true,"include":false,"step":"150","x":-84.76190476190476,"y":-24.952380952380953,"z":-90.0952380952381,"a95":1.9,"info":"\"16-04-18\" at \"15:09\""},{"visible":true,"include":false,"step":"180","x":-87.71428571428571,"y":-12.095238095238095,"z":-93.14285714285714,"a95":2.8,"info":"\"16-04-19\" at \"11:08\""},{"visible":true,"include":false,"step":"240","x":-85.23809523809524,"y":-14.19047619047619,"z":-106.38095238095238,"a95":3,"info":"\"16-04-20\" at \"09:45\""},{"visible":true,"include":false,"step":"270","x":-69.04761904761905,"y":-11.80952380952381,"z":-84.28571428571429,"a95":2.9,"info":"\"16-04-21\" at \"11:05\""}]},{"version":"v1.1.0","exported":"2016-11-24T13:32:50.003Z","volume":10.5,"added":"2016-11-24T13:25:40.963Z","format":"Utrecht","demagType":"Unknown","strat":null,"patch":1.1,"GEO":[],"TECT":[],"interpreted":false,"name":"AD3.09A","coreAzi":151,"coreDip":11,"bedStrike":132,"bedDip":18,"data":[{"visible":true,"include":false,"step":"20","x":26.19047619047619,"y":-81.80952380952381,"z":340.4761904761905,"a95":2.9,"info":"\"16-04-18\" at \"09:37\""},{"visible":true,"include":false,"step":"100","x":67.71428571428571,"y":-24.285714285714285,"z":75.52380952380952,"a95":3.5,"info":"\"16-04-18\" at \"12:07\""},{"visible":true,"include":false,"step":"150","x":-62.46666666666666,"y":-52.42857142857143,"z":-6.314285714285714,"a95":3.6,"info":"\"16-04-18\" at \"15:10\""},{"visible":true,"include":false,"step":"180","x":-75.14285714285714,"y":-55.333333333333336,"z":-25.047619047619047,"a95":3.5,"info":"\"16-04-19\" at \"11:10\""},{"visible":true,"include":false,"step":"210","x":-90.57142857142857,"y":-66.28571428571429,"z":-28.666666666666668,"a95":2.5,"info":"\"16-04-19\" at \"14:21\""},{"visible":true,"include":false,"step":"240","x":-55.2952380952381,"y":-33.95238095238095,"z":-58.542857142857144,"a95":4.4,"info":"\"16-04-20\" at \"09:49\""},{"visible":true,"include":false,"step":"270","x":-76.95238095238095,"y":-56.095238095238095,"z":2.2857142857142856,"a95":2.6,"info":"\"16-04-21\" at \"11:07\""},{"visible":true,"include":false,"step":"300","x":-58.171428571428564,"y":-52.94285714285714,"z":-38.48571428571429,"a95":3.6,"info":"\"16-04-21\" at \"14:34\""}]},{"version":"v1.1.0","exported":"2016-11-24T13:32:50.003Z","volume":10.5,"added":"2016-11-24T13:25:40.963Z","format":"Utrecht","demagType":"Unknown","strat":"1","patch":1.1,"GEO":[{"dec":29.779737155924806,"inc":42.65454485567803,"MAD":3.3640367368549433,"cm":[-2.6645352591003757e-15,8.881784197001252e-15,0],"intensity":890.078906255251,"type":"dir","forced":true,"remark":"","origin":false,"nSteps":10,"minStep":"10.0","maxStep":"45.0","steps":["10.0","15.0","20.0","23.0","25.0","30.0","33.0","35.0","40.0","45.0"],"group":"None","version":"v1.1.0"}],"TECT":[{"dec":23.826584781572535,"inc":60.05800203673035,"MAD":3.364036736855001,"cm":[2.0872192862952943e-14,-1.6209256159527285e-14,-5.329070518200751e-15],"intensity":890.0789062552511,"type":"dir","forced":true,"remark":"","origin":false,"nSteps":10,"minStep":"10.0","maxStep":"45.0","steps":["10.0","15.0","20.0","23.0","25.0","30.0","33.0","35.0","40.0","45.0"],"group":"None","version":"v1.1.0"}],"interpreted":true,"name":"AD3.10B","coreAzi":155,"coreDip":19,"bedStrike":132,"bedDip":18,"data":[{"visible":false,"include":false,"step":"0.0","x":-892.3142857142857,"y":-539.6476190476191,"z":-95.38095238095238,"a95":0.99,"info":"20/03/2016 at 19:39:05"},{"visible":true,"include":true,"step":"10.0","x":-634.6571428571428,"y":-442.6952380952381,"z":-130.59047619047618,"a95":0.99,"info":"20/03/2016 at 19:39:05"},{"visible":true,"include":true,"step":"15.0","x":-486.2095238095238,"y":-364.0761904761905,"z":-119.9904761904762,"a95":0.99,"info":"20/03/2016 at 19:39:05"},{"visible":true,"include":true,"step":"20.0","x":-374.7333333333333,"y":-293.5904761904762,"z":-105.63809523809525,"a95":0.99,"info":"20/03/2016 at 19:39:05"},{"visible":true,"include":true,"step":"23.0","x":-331.65714285714284,"y":-257.5809523809524,"z":-65.20857142857143,"a95":0.99,"info":"20/03/2016 at 19:39:05"},{"visible":true,"include":true,"step":"25.0","x":-297.2095238095238,"y":-254.0952380952381,"z":-65.5142857142857,"a95":0.99,"info":"20/03/2016 at 19:39:05"},{"visible":true,"include":true,"step":"30.0","x":-221.05714285714285,"y":-197.13333333333335,"z":-51.580000000000005,"a95":0.99,"info":"20/03/2016 at 19:39:05"},{"visible":true,"include":true,"step":"33.0","x":-163.9047619047619,"y":-157.03809523809525,"z":-48.900000000000006,"a95":0.99,"info":"20/03/2016 at 19:39:05"},{"visible":true,"include":true,"step":"35.0","x":-153.07619047619048,"y":-144.62857142857143,"z":-46.881904761904764,"a95":0.99,"info":"20/03/2016 at 19:39:05"},{"visible":true,"include":true,"step":"40.0","x":-99.88571428571429,"y":-133.52380952380952,"z":-26.274285714285714,"a95":0.99,"info":"20/03/2016 at 19:39:05"},{"visible":true,"include":true,"step":"45.0","x":-78.00952380952381,"y":-69.70571428571428,"z":-17.03047619047619,"a95":0.99,"info":"20/03/2016 at 19:39:05"},{"visible":false,"include":false,"step":"50.0","x":-45.86666666666667,"y":-102.16190476190476,"z":-19.635238095238094,"a95":0.99,"info":"20/03/2016 at 19:39:05"},{"visible":false,"include":false,"step":"55.0","x":-23.534285714285716,"y":-70.86285714285714,"z":-40.90380952380953,"a95":0.99,"info":"20/03/2016 at 19:39:05"},{"visible":false,"include":false,"step":"60.0","x":29.684761904761906,"y":-44.87142857142857,"z":-12.336190476190476,"a95":0.99,"info":"20/03/2016 at 19:39:05"},{"visible":false,"include":false,"step":"65.0","x":24.11904761904762,"y":-85.50761904761904,"z":-33.23142857142857,"a95":0.99,"info":"20/03/2016 at 19:39:05"},{"visible":false,"include":false,"step":"70.0","x":61.599999999999994,"y":-24.262857142857143,"z":-1.4034285714285715,"a95":0.99,"info":"20/03/2016 at 19:39:05"},{"visible":false,"include":false,"step":"80.0","x":202.9238095238095,"y":-29.70285714285714,"z":-35.586666666666666,"a95":0.99,"info":"20/03/2016 at 19:39:05"}]},{"version":"v1.1.0","exported":"2016-11-24T13:32:50.004Z","volume":10.5,"added":"2016-11-24T13:25:40.963Z","format":"Utrecht","demagType":"Unknown","strat":null,"patch":1.1,"GEO":[],"TECT":[],"interpreted":false,"name":"AD3.11A","coreAzi":122,"coreDip":-2,"bedStrike":132,"bedDip":18,"data":[{"visible":true,"include":false,"step":"20","x":-149.71428571428572,"y":-284.57142857142856,"z":513.7142857142857,"a95":2.5,"info":"\"16-04-18\" at \"09:39\""},{"visible":true,"include":false,"step":"100","x":-7.809523809523809,"y":-151.71428571428572,"z":190.28571428571428,"a95":2.7,"info":"\"16-04-18\" at \"12:08\""},{"visible":true,"include":false,"step":"150","x":-143.33333333333334,"y":-130.47619047619048,"z":91.23809523809524,"a95":2.4,"info":"\"16-04-18\" at \"15:12\""},{"visible":true,"include":false,"step":"180","x":-149.33333333333334,"y":-158.85714285714286,"z":68.95238095238095,"a95":2.1,"info":"\"16-04-19\" at \"11:12\""},{"visible":true,"include":false,"step":"210","x":-106.66666666666667,"y":-149.61904761904762,"z":54.666666666666664,"a95":1.9,"info":"\"16-04-19\" at \"14:24\""},{"visible":true,"include":false,"step":"240","x":-93.42857142857143,"y":-125.42857142857143,"z":111.23809523809524,"a95":2.9,"info":"\"16-04-20\" at \"09:52\""},{"visible":true,"include":false,"step":"270","x":-71.52380952380952,"y":-128.47619047619048,"z":93.80952380952381,"a95":2.1,"info":"\"16-04-21\" at \"11:10\""},{"visible":true,"include":false,"step":"300","x":-79.23809523809524,"y":-138.1904761904762,"z":31.523809523809526,"a95":2.5,"info":"\"16-04-21\" at \"14:36\""}]},{"version":"v1.1.0","exported":"2016-11-24T13:32:50.004Z","volume":10.5,"added":"2016-11-24T13:25:40.964Z","format":"Utrecht","demagType":"Unknown","strat":"1","patch":1.1,"GEO":[{"dec":44.03363741634337,"inc":38.87733525943391,"MAD":14.301405320803333,"cm":[29.996522410855036,56.63279747385489,17.722478863042298],"intensity":119.76483001634303,"type":"dir","forced":false,"remark":"","origin":false,"nSteps":7,"minStep":"10.0","maxStep":"35.0","steps":["10.0","15.0","20.0","23.0","25.0","33.0","35.0"],"group":"None","version":"v1.1.0"}],"TECT":[{"dec":44.89667383287434,"inc":56.861451413898635,"MAD":14.301405320803351,"cm":[23.73754559225065,50.99718943321707,35.453729883877784],"intensity":119.76483001634304,"type":"dir","forced":false,"remark":"","origin":false,"nSteps":7,"minStep":"10.0","maxStep":"35.0","steps":["10.0","15.0","20.0","23.0","25.0","33.0","35.0"],"group":"None","version":"v1.1.0"}],"interpreted":true,"name":"AD3.12B","coreAzi":123,"coreDip":-2,"bedStrike":132,"bedDip":18,"data":[{"visible":false,"include":false,"step":"0.0","x":-113.17142857142856,"y":-182.04761904761904,"z":105.8952380952381,"a95":0.99,"info":"20/03/2016 at 19:39:05"},{"visible":true,"include":true,"step":"10.0","x":-64.77333333333334,"y":-111.85714285714286,"z":41.9847619047619,"a95":0.99,"info":"20/03/2016 at 19:39:05"},{"visible":true,"include":true,"step":"15.0","x":-40.772380952380956,"y":-73.7752380952381,"z":35.77809523809524,"a95":0.99,"info":"20/03/2016 at 19:39:05"},{"visible":true,"include":true,"step":"20.0","x":-3.7642857142857142,"y":-64.22761904761904,"z":20.847619047619048,"a95":0.99,"info":"20/03/2016 at 19:39:05"},{"visible":true,"include":true,"step":"23.0","x":-11.52095238095238,"y":-35.15714285714286,"z":26.83809523809524,"a95":0.99,"info":"20/03/2016 at 19:39:05"},{"visible":true,"include":true,"step":"25.0","x":-11.458095238095238,"y":-48.01428571428571,"z":34.15904761904762,"a95":0.99,"info":"20/03/2016 at 19:39:05"},{"visible":false,"include":false,"step":"30.0","x":-4.6276190476190475,"y":-18.86952380952381,"z":42.105714285714285,"a95":0.99,"info":"20/03/2016 at 19:39:05"},{"visible":true,"include":true,"step":"33.0","x":-11.036190476190475,"y":-38.684761904761906,"z":22.404761904761905,"a95":0.99,"info":"20/03/2016 at 19:39:05"},{"visible":true,"include":true,"step":"35.0","x":11.731428571428571,"y":-20.295238095238094,"z":31.638095238095236,"a95":0.99,"info":"20/03/2016 at 19:39:05"},{"visible":true,"include":false,"step":"40.0","x":6.897809523809524,"y":-28.953333333333333,"z":12.386666666666667,"a95":0.99,"info":"20/03/2016 at 19:39:05"},{"visible":true,"include":false,"step":"45.0","x":14.662857142857144,"y":-28.38190476190476,"z":12.911428571428571,"a95":0.99,"info":"20/03/2016 at 19:39:05"},{"visible":false,"include":false,"step":"50.0","x":11.805714285714284,"y":-28.25142857142857,"z":19.502857142857142,"a95":0.99,"info":"20/03/2016 at 19:39:05"},{"visible":false,"include":false,"step":"55.0","x":13.526666666666667,"y":-6.53047619047619,"z":33.58095238095238,"a95":0.99,"info":"20/03/2016 at 19:39:05"},{"visible":false,"include":false,"step":"60.0","x":19.53047619047619,"y":-9.617142857142857,"z":-0.9821904761904763,"a95":0.99,"info":"20/03/2016 at 19:39:05"},{"visible":false,"include":false,"step":"65.0","x":37.52095238095238,"y":-17.923809523809524,"z":17.714285714285715,"a95":0.99,"info":"20/03/2016 at 19:39:05"},{"visible":false,"include":false,"step":"70.0","x":12.299047619047618,"y":22.24190476190476,"z":21.403809523809525,"a95":0.99,"info":"20/03/2016 at 19:39:05"},{"visible":false,"include":false,"step":"80.0","x":79.63809523809525,"y":-0.24395238095238098,"z":-0.6006666666666667,"a95":0.99,"info":"20/03/2016 at 19:39:05"}]},{"version":"v1.1.0","exported":"2016-11-24T13:32:50.004Z","volume":10.5,"added":"2016-11-24T13:25:40.965Z","format":"Utrecht","demagType":"Unknown","strat":"1","patch":1.1,"GEO":[{"dec":40.67915361603167,"inc":41.74385414183873,"MAD":13.169958952590644,"cm":[43.345658842945646,77.67663291162602,22.25732014490476],"intensity":148.39687053805255,"type":"dir","forced":false,"remark":"","origin":false,"nSteps":8,"minStep":"10.0","maxStep":"40.0","steps":["10.0","15.0","20.0","23.0","25.0","30.0","35.0","40.0"],"group":"None","version":"v1.1.0"}],"TECT":[{"dec":40.04428358911957,"inc":59.73688838879688,"MAD":13.169958952590617,"cm":[35.17229938441133,70.31730699966171,47.18346567790438],"intensity":148.39687053805255,"type":"dir","forced":false,"remark":"","origin":false,"nSteps":8,"minStep":"10.0","maxStep":"40.0","steps":["10.0","15.0","20.0","23.0","25.0","30.0","35.0","40.0"],"group":"None","version":"v1.1.0"}],"interpreted":true,"name":"AD3.13A","coreAzi":122,"coreDip":3,"bedStrike":132,"bedDip":18,"data":[{"visible":false,"include":false,"step":"0.0","x":-141.0857142857143,"y":-191.42857142857142,"z":61.894285714285715,"a95":0.99,"info":"20/03/2016 at 19:39:05"},{"visible":true,"include":true,"step":"10.0","x":-82.69714285714286,"y":-140.67619047619047,"z":51.578095238095244,"a95":0.99,"info":"20/03/2016 at 19:39:05"},{"visible":true,"include":true,"step":"15.0","x":-60.71523809523809,"y":-119.76190476190476,"z":56.848571428571425,"a95":0.99,"info":"20/03/2016 at 19:39:05"},{"visible":true,"include":true,"step":"20.0","x":-25.990476190476187,"y":-88.65428571428572,"z":41.457142857142856,"a95":0.99,"info":"20/03/2016 at 19:39:05"},{"visible":true,"include":true,"step":"23.0","x":-13.283809523809524,"y":-74.58857142857143,"z":48.97904761904762,"a95":0.99,"info":"20/03/2016 at 19:39:05"},{"visible":true,"include":true,"step":"25.0","x":2.411142857142857,"y":-72.59428571428572,"z":50.917142857142856,"a95":0.99,"info":"20/03/2016 at 19:39:05"},{"visible":true,"include":true,"step":"30.0","x":2.190952380952381,"y":-58.11428571428572,"z":42.272380952380956,"a95":0.99,"info":"20/03/2016 at 19:39:05"},{"visible":false,"include":false,"step":"33.0","x":16.64190476190476,"y":-36.21619047619048,"z":55.40380952380953,"a95":0.99,"info":"20/03/2016 at 19:39:05"},{"visible":true,"include":true,"step":"35.0","x":13.817142857142859,"y":-47.478095238095236,"z":23.64952380952381,"a95":0.99,"info":"20/03/2016 at 19:39:05"},{"visible":true,"include":true,"step":"40.0","x":4.416190476190476,"y":-21.504761904761907,"z":36.37714285714286,"a95":0.99,"info":"20/03/2016 at 19:39:05"},{"visible":false,"include":false,"step":"45.0","x":33.45333333333333,"y":-34.586666666666666,"z":25.940952380952382,"a95":0.99,"info":"20/03/2016 at 19:39:05"},{"visible":false,"include":false,"step":"50.0","x":22.85809523809524,"y":-24.28857142857143,"z":38.333333333333336,"a95":0.99,"info":"20/03/2016 at 19:39:05"},{"visible":false,"include":false,"step":"55.0","x":16.074285714285715,"y":-29.609523809523807,"z":35.4247619047619,"a95":0.99,"info":"20/03/2016 at 19:39:05"},{"visible":false,"include":false,"step":"60.0","x":50.642857142857146,"y":-20.452380952380953,"z":4.508761904761904,"a95":0.99,"info":"20/03/2016 at 19:39:05"},{"visible":false,"include":false,"step":"65.0","x":30.97142857142857,"y":-8.629999999999999,"z":2.546857142857143,"a95":0.99,"info":"20/03/2016 at 19:39:05"},{"visible":false,"include":false,"step":"70.0","x":50.54380952380953,"y":-11.117142857142857,"z":11.485714285714286,"a95":0.99,"info":"20/03/2016 at 19:39:05"},{"visible":false,"include":false,"step":"80.0","x":87.49047619047619,"y":24.156190476190474,"z":19,"a95":0.99,"info":"20/03/2016 at 19:39:05"}]},{"version":"v1.1.0","exported":"2016-11-24T13:32:50.004Z","volume":10.5,"added":"2016-11-24T13:25:40.965Z","format":"Utrecht","demagType":"Unknown","strat":"1","patch":1.1,"GEO":[],"TECT":[],"interpreted":false,"name":"AD3.15A","coreAzi":212,"coreDip":3,"bedStrike":132,"bedDip":18,"data":[{"visible":false,"include":false,"step":"0.0","x":-1090.4761904761904,"y":612.1333333333333,"z":29.863809523809522,"a95":0.99,"info":"20/03/2016 at 19:39:05"},{"visible":true,"include":true,"step":"10.0","x":-851.5142857142857,"y":488.97142857142853,"z":-22.536190476190477,"a95":0.99,"info":"20/03/2016 at 19:39:05"},{"visible":true,"include":true,"step":"15.0","x":-715.047619047619,"y":414.7333333333333,"z":-37.166666666666664,"a95":0.99,"info":"20/03/2016 at 19:39:05"},{"visible":true,"include":true,"step":"20.0","x":-605.0190476190476,"y":359.6666666666667,"z":-24.19142857142857,"a95":0.99,"info":"20/03/2016 at 19:39:05"},{"visible":true,"include":true,"step":"23.0","x":-534.5714285714286,"y":328.49523809523805,"z":-29.200952380952383,"a95":0.99,"info":"20/03/2016 at 19:39:05"},{"visible":true,"include":true,"step":"25.0","x":-510.91428571428577,"y":297.3904761904762,"z":-25.90857142857143,"a95":0.99,"info":"20/03/2016 at 19:39:05"},{"visible":true,"include":true,"step":"30.0","x":-440.8666666666667,"y":278.83809523809526,"z":-11.115238095238094,"a95":0.99,"info":"20/03/2016 at 19:39:05"},{"visible":true,"include":true,"step":"33.0","x":-413.5238095238095,"y":230.50476190476192,"z":-10.833333333333334,"a95":0.99,"info":"20/03/2016 at 19:39:05"},{"visible":true,"include":true,"step":"35.0","x":-397.0952380952381,"y":219.55238095238096,"z":-12.840952380952382,"a95":0.99,"info":"20/03/2016 at 19:39:05"},{"visible":true,"include":true,"step":"40.0","x":-384.8095238095238,"y":196.8952380952381,"z":-30.237142857142857,"a95":0.99,"info":"20/03/2016 at 19:39:05"},{"visible":true,"include":true,"step":"45.0","x":-324.29523809523806,"y":186.2952380952381,"z":-3.2664761904761908,"a95":0.99,"info":"20/03/2016 at 19:39:05"},{"visible":true,"include":true,"step":"50.0","x":-324.9809523809524,"y":148.54285714285714,"z":-32.275238095238095,"a95":0.99,"info":"20/03/2016 at 19:39:05"},{"visible":true,"include":true,"step":"55.0","x":-317.3619047619048,"y":189.9714285714286,"z":-37.29904761904762,"a95":0.99,"info":"20/03/2016 at 19:39:05"},{"visible":true,"include":true,"step":"60.0","x":-263.2095238095238,"y":168.0952380952381,"z":-11.144761904761904,"a95":0.99,"info":"20/03/2016 at 19:39:05"},{"visible":true,"include":false,"step":"65.0","x":-265.3047619047619,"y":109.32380952380953,"z":-47.804761904761904,"a95":0.99,"info":"20/03/2016 at 19:39:05"},{"visible":false,"include":false,"step":"70.0","x":-277.6190476190476,"y":139.94285714285715,"z":-27.4,"a95":0.99,"info":"20/03/2016 at 19:39:05"},{"visible":false,"include":false,"step":"80.0","x":-264.37142857142857,"y":96.44761904761906,"z":17.380000000000003,"a95":0.99,"info":"20/03/2016 at 19:39:05"}]},{"version":"v1.1.0","exported":"2016-11-24T13:32:50.004Z","volume":10.5,"added":"2016-11-24T13:25:40.970Z","format":"Utrecht","demagType":"Unknown","strat":"1","patch":1.1,"GEO":[{"dec":75.86339230716754,"inc":53.069937831012034,"MAD":3.031840417175102,"cm":[-2.4868995751603507e-14,9.769962616701378e-15,0],"intensity":886.4795683715085,"type":"dir","forced":true,"remark":"","origin":false,"nSteps":14,"minStep":"10.0","maxStep":"65.0","steps":["10.0","15.0","20.0","23.0","25.0","30.0","33.0","35.0","40.0","45.0","50.0","55.0","60.0","65.0"],"group":"None","version":"v1.1.0"}],"TECT":[{"dec":97.80548106456803,"inc":66.12347083031237,"MAD":3.0318404171750757,"cm":[-3.236300116782331e-14,7.993605777301127e-15,-1.3322676295501878e-14],"intensity":886.4795683715085,"type":"dir","forced":true,"remark":"","origin":false,"nSteps":14,"minStep":"10.0","maxStep":"65.0","steps":["10.0","15.0","20.0","23.0","25.0","30.0","33.0","35.0","40.0","45.0","50.0","55.0","60.0","65.0"],"group":"None","version":"v1.1.0"}],"interpreted":true,"name":"AD3.15B","coreAzi":212,"coreDip":31,"bedStrike":132,"bedDip":18,"data":[{"visible":false,"include":false,"step":"0.0","x":-997.5238095238095,"y":-167.36190476190475,"z":-546.9333333333334,"a95":0.99,"info":"20/03/2016 at 19:39:05"},{"visible":true,"include":true,"step":"10.0","x":-615.0857142857143,"y":-294.6380952380952,"z":32.674285714285716,"a95":0.99,"info":"20/03/2016 at 19:39:05"},{"visible":true,"include":true,"step":"15.0","x":-508.95238095238096,"y":-250.8190476190476,"z":22.071428571428573,"a95":0.99,"info":"20/03/2016 at 19:39:05"},{"visible":true,"include":true,"step":"20.0","x":-425.4095238095238,"y":-202.2,"z":21.074285714285715,"a95":0.99,"info":"20/03/2016 at 19:39:05"},{"visible":true,"include":true,"step":"23.0","x":-384.6,"y":-187,"z":9.506190476190476,"a95":0.99,"info":"20/03/2016 at 19:39:05"},{"visible":true,"include":true,"step":"25.0","x":-359.54285714285714,"y":-183.16190476190476,"z":5.805809523809524,"a95":0.99,"info":"20/03/2016 at 19:39:05"},{"visible":true,"include":true,"step":"30.0","x":-321.62857142857143,"y":-143.17142857142858,"z":6.2912380952380955,"a95":0.99,"info":"20/03/2016 at 19:39:05"},{"visible":true,"include":true,"step":"33.0","x":-294.3809523809524,"y":-124.61904761904762,"z":-5.327333333333333,"a95":0.99,"info":"20/03/2016 at 19:39:05"},{"visible":true,"include":true,"step":"35.0","x":-287.70476190476194,"y":-141.4952380952381,"z":6.893809523809525,"a95":0.99,"info":"20/03/2016 at 19:39:05"},{"visible":true,"include":true,"step":"40.0","x":-282.7904761904762,"y":-109.48571428571428,"z":35.48761904761905,"a95":0.99,"info":"20/03/2016 at 19:39:05"},{"visible":true,"include":true,"step":"45.0","x":-265.752380952381,"y":-83.94285714285714,"z":28.40857142857143,"a95":0.99,"info":"20/03/2016 at 19:39:05"},{"visible":true,"include":true,"step":"50.0","x":-248.13333333333335,"y":-102.83809523809524,"z":13.680952380952382,"a95":0.99,"info":"20/03/2016 at 19:39:05"},{"visible":true,"include":true,"step":"55.0","x":-209.77142857142857,"y":-64.55809523809523,"z":26.364761904761902,"a95":0.99,"info":"20/03/2016 at 19:39:05"},{"visible":true,"include":true,"step":"60.0","x":-193.26666666666665,"y":-75.9895238095238,"z":-6.2087619047619045,"a95":0.99,"info":"20/03/2016 at 19:39:05"},{"visible":true,"include":true,"step":"65.0","x":-190.92380952380952,"y":-71.73428571428572,"z":11.664761904761905,"a95":0.99,"info":"20/03/2016 at 19:39:05"},{"visible":true,"include":false,"step":"70.0","x":-181.11428571428573,"y":-38.018095238095235,"z":1.218952380952381,"a95":0.99,"info":"20/03/2016 at 19:39:05"},{"visible":true,"include":false,"step":"80.0","x":-142.51428571428573,"y":-21.735238095238095,"z":0.16433333333333333,"a95":0.99,"info":"20/03/2016 at 19:39:05"}]},{"version":"v1.1.0","exported":"2016-11-24T13:32:50.004Z","volume":10.5,"added":"2016-11-24T13:25:40.970Z","format":"Utrecht","demagType":"Unknown","strat":"1","patch":1.1,"GEO":[{"dec":354.22613305032195,"inc":65.01860880899623,"MAD":3.516692484828622,"cm":[0,-3.9968028886505635e-15,0],"intensity":723.1413920087006,"type":"dir","forced":true,"remark":"","origin":false,"nSteps":10,"minStep":"10.0","maxStep":"45.0","steps":["10.0","15.0","20.0","23.0","25.0","30.0","33.0","35.0","40.0","45.0"],"group":"None","version":"v1.1.0"}],"TECT":[{"dec":310.13702062846534,"inc":71.76618998320139,"MAD":3.5166924848286056,"cm":[-1.0658141036401503e-14,-3.1086244689504383e-15,0],"intensity":723.1413920087006,"type":"dir","forced":true,"remark":"","origin":false,"nSteps":10,"minStep":"10.0","maxStep":"45.0","steps":["10.0","15.0","20.0","23.0","25.0","30.0","33.0","35.0","40.0","45.0"],"group":"None","version":"v1.1.0"}],"interpreted":true,"name":"AD3.18A","coreAzi":195,"coreDip":15,"bedStrike":132,"bedDip":18,"data":[{"visible":false,"include":false,"step":"0.0","x":-699.3333333333334,"y":87.74476190476192,"z":-96.39047619047619,"a95":0.99,"info":"20/03/2016 at 19:39:05"},{"visible":true,"include":true,"step":"10.0","x":-524.9238095238095,"y":58.465714285714284,"z":-94.0952380952381,"a95":0.99,"info":"20/03/2016 at 19:39:05"},{"visible":true,"include":true,"step":"15.0","x":-422.847619047619,"y":42.56476190476191,"z":-61.328571428571436,"a95":0.99,"info":"20/03/2016 at 19:39:05"},{"visible":true,"include":true,"step":"20.0","x":-365.83809523809526,"y":38.12380952380953,"z":-48.25714285714285,"a95":0.99,"info":"20/03/2016 at 19:39:05"},{"visible":true,"include":true,"step":"23.0","x":-325.5238095238095,"y":69.98857142857143,"z":-46.60666666666667,"a95":0.99,"info":"20/03/2016 at 19:39:05"},{"visible":true,"include":true,"step":"25.0","x":-302.70476190476194,"y":56.67238095238095,"z":-41.97142857142857,"a95":0.99,"info":"20/03/2016 at 19:39:05"},{"visible":true,"include":true,"step":"30.0","x":-267.8952380952381,"y":60.85619047619048,"z":-40.565714285714286,"a95":0.99,"info":"20/03/2016 at 19:39:05"},{"visible":true,"include":true,"step":"33.0","x":-226.0857142857143,"y":51.15238095238095,"z":-27.929523809523808,"a95":0.99,"info":"20/03/2016 at 19:39:05"},{"visible":true,"include":true,"step":"35.0","x":-226.28571428571428,"y":47.988571428571426,"z":-33.43714285714285,"a95":0.99,"info":"20/03/2016 at 19:39:05"},{"visible":true,"include":true,"step":"40.0","x":-223.71428571428572,"y":31.20285714285714,"z":-34.11523809523809,"a95":0.99,"info":"20/03/2016 at 19:39:05"},{"visible":true,"include":true,"step":"45.0","x":-179.41904761904763,"y":60.790476190476184,"z":-18.210476190476193,"a95":0.99,"info":"20/03/2016 at 19:39:05"},{"visible":true,"include":false,"step":"50.0","x":-193.03809523809525,"y":48.396190476190476,"z":-2.668952380952381,"a95":0.99,"info":"20/03/2016 at 19:39:05"},{"visible":true,"include":false,"step":"55.0","x":-181.01904761904763,"y":58.857142857142854,"z":-9.82952380952381,"a95":0.99,"info":"20/03/2016 at 19:39:05"},{"visible":true,"include":false,"step":"60.0","x":-153.8190476190476,"y":105.74285714285713,"z":-25.363809523809522,"a95":0.99,"info":"20/03/2016 at 19:39:05"},{"visible":true,"include":false,"step":"65.0","x":-149.0285714285714,"y":46.50952380952381,"z":-34.88761904761905,"a95":0.99,"info":"20/03/2016 at 19:39:05"},{"visible":true,"include":false,"step":"70.0","x":-155.07619047619048,"y":75.88190476190476,"z":-30.72095238095238,"a95":0.99,"info":"20/03/2016 at 19:39:05"},{"visible":true,"include":false,"step":"80.0","x":-208.8952380952381,"y":131.54285714285714,"z":22.44,"a95":0.99,"info":"20/03/2016 at 19:39:05"}]},{"version":"v1.1.0","exported":"2016-11-24T13:32:50.004Z","volume":10.5,"added":"2016-11-24T13:25:40.970Z","format":"Utrecht","demagType":"Unknown","strat":"1","patch":1.1,"GEO":[{"dec":2.423686365968649,"inc":49.23827893870762,"MAD":1.874736632217834,"cm":[0,1.582067810090848e-14,0],"intensity":1217.5815385372957,"type":"dir","forced":true,"remark":"","origin":false,"nSteps":11,"minStep":"10.0","maxStep":"50.0","steps":["10.0","15.0","20.0","23.0","25.0","30.0","33.0","35.0","40.0","45.0","50.0"],"group":"None","version":"v1.1.0"}],"TECT":[{"dec":342.45223143594734,"inc":61.148505200369236,"MAD":1.874736632217814,"cm":[-5.329070518200751e-15,2.7755575615628914e-14,3.552713678800501e-15],"intensity":1217.5815385372957,"type":"dir","forced":true,"remark":"","origin":false,"nSteps":11,"minStep":"10.0","maxStep":"50.0","steps":["10.0","15.0","20.0","23.0","25.0","30.0","33.0","35.0","40.0","45.0","50.0"],"group":"None","version":"v1.1.0"}],"interpreted":true,"name":"AD3.19A","coreAzi":166,"coreDip":16,"bedStrike":132,"bedDip":18,"data":[{"visible":false,"include":false,"step":"0.0","x":-1307.7142857142858,"y":-342.34285714285716,"z":-417.1142857142857,"a95":0.99,"info":"20/03/2016 at 19:39:05"},{"visible":true,"include":true,"step":"10.0","x":-946.5714285714286,"y":-210.0952380952381,"z":-395.5809523809524,"a95":0.99,"info":"20/03/2016 at 19:39:05"},{"visible":true,"include":true,"step":"15.0","x":-728.0190476190476,"y":-155.34285714285713,"z":-315.752380952381,"a95":0.99,"info":"20/03/2016 at 19:39:05"},{"visible":true,"include":true,"step":"20.0","x":-571.952380952381,"y":-122.11428571428571,"z":-269.54285714285714,"a95":0.99,"info":"20/03/2016 at 19:39:05"},{"visible":true,"include":true,"step":"23.0","x":-488.8095238095238,"y":-84.76952380952382,"z":-219.0095238095238,"a95":0.99,"info":"20/03/2016 at 19:39:05"},{"visible":true,"include":true,"step":"25.0","x":-436.0952380952381,"y":-82.62952380952382,"z":-195.73333333333332,"a95":0.99,"info":"20/03/2016 at 19:39:05"},{"visible":true,"include":true,"step":"30.0","x":-351.4190476190476,"y":-47.873333333333335,"z":-133.75238095238097,"a95":0.99,"info":"20/03/2016 at 19:39:05"},{"visible":true,"include":true,"step":"33.0","x":-286.97142857142853,"y":-50.44095238095238,"z":-136.43809523809523,"a95":0.99,"info":"20/03/2016 at 19:39:05"},{"visible":true,"include":true,"step":"35.0","x":-283.48571428571427,"y":-73.74190476190476,"z":-127.6,"a95":0.99,"info":"20/03/2016 at 19:39:05"},{"visible":true,"include":true,"step":"40.0","x":-224.95238095238096,"y":-32.32190476190476,"z":-103.34285714285713,"a95":0.99,"info":"20/03/2016 at 19:39:05"},{"visible":true,"include":true,"step":"45.0","x":-159.95238095238096,"y":-13.424761904761905,"z":-86.35904761904762,"a95":0.99,"info":"20/03/2016 at 19:39:05"},{"visible":true,"include":true,"step":"50.0","x":-152.7238095238095,"y":-33.82666666666667,"z":-67.62190476190476,"a95":0.99,"info":"20/03/2016 at 19:39:05"},{"visible":true,"include":false,"step":"55.0","x":-119.57142857142857,"y":-4.020857142857143,"z":-73.06761904761905,"a95":0.99,"info":"20/03/2016 at 19:39:05"},{"visible":true,"include":false,"step":"60.0","x":-75.9447619047619,"y":-7.058190476190477,"z":-80.45142857142858,"a95":0.99,"info":"20/03/2016 at 19:39:05"},{"visible":true,"include":false,"step":"65.0","x":-55.86952380952381,"y":-21.385714285714286,"z":-15.074285714285715,"a95":0.99,"info":"20/03/2016 at 19:39:05"},{"visible":true,"include":false,"step":"70.0","x":-18.85809523809524,"y":20.573333333333334,"z":-55.37714285714286,"a95":0.99,"info":"20/03/2016 at 19:39:05"},{"visible":false,"include":false,"step":"80.0","x":-57.72666666666667,"y":8.686285714285715,"z":-61.73238095238096,"a95":0.99,"info":"20/03/2016 at 19:39:05"}]},{"version":"v1.1.0","exported":"2016-11-24T13:32:50.004Z","volume":10.5,"added":"2016-11-24T13:25:40.971Z","format":"Utrecht","demagType":"Unknown","strat":"1","patch":1.1,"GEO":[{"dec":186.1736669181255,"inc":-14.704341127199676,"MAD":3.0066237364956216,"cm":[-5.329070518200751e-15,3.6415315207705135e-14,0],"intensity":716.0493751968,"type":"dir","forced":true,"remark":"","origin":false,"nSteps":11,"minStep":"10.0","maxStep":"50.0","steps":["10.0","15.0","20.0","23.0","25.0","30.0","33.0","35.0","40.0","45.0","50.0"],"group":"None","version":"v1.1.0"}],"TECT":[{"dec":185.37530757425466,"inc":-28.56205805866952,"MAD":3.0066237364957344,"cm":[4.440892098500626e-15,9.470202400052585e-14,-5.329070518200751e-15],"intensity":716.0493751968002,"type":"dir","forced":true,"remark":"","origin":false,"nSteps":11,"minStep":"10.0","maxStep":"50.0","steps":["10.0","15.0","20.0","23.0","25.0","30.0","33.0","35.0","40.0","45.0","50.0"],"group":"None","version":"v1.1.0"}],"interpreted":true,"name":"AD3.20A","coreAzi":155,"coreDip":6,"bedStrike":104,"bedDip":14,"data":[{"visible":false,"include":false,"step":"0.0","x":-15.25904761904762,"y":362.74285714285713,"z":442.9238095238095,"a95":0.99,"info":"20/03/2016 at 19:39:05"},{"visible":true,"include":true,"step":"10.0","x":151.0095238095238,"y":295.32380952380953,"z":467.02857142857147,"a95":0.99,"info":"20/03/2016 at 19:39:05"},{"visible":true,"include":true,"step":"15.0","x":184.59047619047618,"y":275.752380952381,"z":442.7523809523809,"a95":0.99,"info":"20/03/2016 at 19:39:05"},{"visible":true,"include":true,"step":"20.0","x":169.47619047619048,"y":244.02857142857144,"z":399.8857142857143,"a95":0.99,"info":"20/03/2016 at 19:39:05"},{"visible":true,"include":true,"step":"23.0","x":169.3047619047619,"y":220.8952380952381,"z":373.3333333333333,"a95":0.99,"info":"20/03/2016 at 19:39:05"},{"visible":true,"include":true,"step":"25.0","x":138.7904761904762,"y":208.1142857142857,"z":325.9904761904762,"a95":0.99,"info":"20/03/2016 at 19:39:05"},{"visible":true,"include":true,"step":"30.0","x":130.3904761904762,"y":175.65714285714287,"z":281.4666666666667,"a95":0.99,"info":"20/03/2016 at 19:39:05"},{"visible":true,"include":true,"step":"33.0","x":119.60952380952382,"y":162.14285714285714,"z":229.53333333333333,"a95":0.99,"info":"20/03/2016 at 19:39:05"},{"visible":true,"include":true,"step":"35.0","x":100.4095238095238,"y":140.38095238095238,"z":202.84761904761905,"a95":0.99,"info":"20/03/2016 at 19:39:05"},{"visible":true,"include":true,"step":"40.0","x":87.29333333333334,"y":110.77142857142856,"z":188.92380952380952,"a95":0.99,"info":"20/03/2016 at 19:39:05"},{"visible":true,"include":true,"step":"45.0","x":86.78380952380952,"y":101.35238095238095,"z":149.62857142857143,"a95":0.99,"info":"20/03/2016 at 19:39:05"},{"visible":true,"include":true,"step":"50.0","x":74.48095238095237,"y":73.43238095238095,"z":103.84761904761906,"a95":0.99,"info":"20/03/2016 at 19:39:05"},{"visible":true,"include":false,"step":"55.0","x":58.277142857142856,"y":83.92571428571429,"z":71.84285714285714,"a95":0.99,"info":"20/03/2016 at 19:39:05"},{"visible":true,"include":false,"step":"60.0","x":60.42095238095238,"y":57.80571428571429,"z":76.39428571428572,"a95":0.99,"info":"20/03/2016 at 19:39:05"},{"visible":true,"include":false,"step":"65.0","x":58.3752380952381,"y":52.87142857142857,"z":66.9752380952381,"a95":0.99,"info":"20/03/2016 at 19:39:05"},{"visible":true,"include":false,"step":"70.0","x":54.31428571428571,"y":44.71809523809524,"z":48.12380952380953,"a95":0.99,"info":"20/03/2016 at 19:39:05"},{"visible":true,"include":false,"step":"80.0","x":55.89523809523809,"y":74.17714285714285,"z":71.08285714285714,"a95":0.99,"info":"20/03/2016 at 19:39:05"}]},{"version":"v1.1.0","exported":"2016-11-24T13:32:50.004Z","volume":10.5,"added":"2016-11-24T13:25:40.971Z","format":"Utrecht","demagType":"Unknown","strat":"1","patch":1.1,"GEO":[{"dec":275.9602791485284,"inc":-0.2982456625889249,"MAD":2.5181069066779824,"cm":[1.7763568394002505e-15,6.217248937900877e-15,0],"intensity":514.1801959617604,"type":"GC","origin":false,"forced":true,"remark":"","nSteps":7,"minStep":"0.0","maxStep":"33.0","steps":["0.0","10.0","15.0","20.0","23.0","30.0","33.0"],"group":"None","version":"v1.1.0"}],"TECT":[{"dec":276.2676441930712,"inc":-2.2285289085914872,"MAD":2.5181069066779447,"cm":[-7.105427357601002e-15,3.1308289294429414e-14,0],"intensity":514.1801959617604,"type":"GC","origin":false,"forced":true,"remark":"","nSteps":7,"minStep":"0.0","maxStep":"33.0","steps":["0.0","10.0","15.0","20.0","23.0","30.0","33.0"],"group":"None","version":"v1.1.0"}],"interpreted":true,"name":"AD3.20B","coreAzi":155,"coreDip":6,"bedStrike":104,"bedDip":14,"data":[{"visible":true,"include":true,"step":"0.0","x":-401.87619047619046,"y":86.14380952380952,"z":177.3047619047619,"a95":0.99,"info":"21/03/2016 at 01:05:41"},{"visible":true,"include":true,"step":"10.0","x":-142.1904761904762,"y":99.06666666666668,"z":187.83809523809524,"a95":0.99,"info":"21/03/2016 at 01:05:41"},{"visible":true,"include":true,"step":"15.0","x":-63.36952380952381,"y":106.07619047619048,"z":194.86666666666665,"a95":0.99,"info":"21/03/2016 at 01:05:41"},{"visible":true,"include":true,"step":"20.0","x":-18.462857142857143,"y":101.94285714285715,"z":173.65714285714287,"a95":0.99,"info":"21/03/2016 at 01:05:41"},{"visible":true,"include":true,"step":"23.0","x":-6.8511428571428565,"y":102.58095238095237,"z":168.2952380952381,"a95":0.99,"info":"21/03/2016 at 01:05:41"},{"visible":false,"include":false,"step":"25.0","x":-5.477714285714286,"y":83.48666666666666,"z":180.59047619047618,"a95":0.99,"info":"21/03/2016 at 01:05:41"},{"visible":true,"include":true,"step":"30.0","x":5.341238095238095,"y":85.53904761904762,"z":125.76190476190476,"a95":0.99,"info":"21/03/2016 at 01:05:41"},{"visible":true,"include":true,"step":"33.0","x":13.495238095238093,"y":72.9647619047619,"z":119.72380952380952,"a95":0.99,"info":"21/03/2016 at 01:05:41"},{"visible":true,"include":false,"step":"35.0","x":15.334285714285713,"y":61.87238095238095,"z":95.52380952380952,"a95":0.99,"info":"21/03/2016 at 01:05:41"},{"visible":true,"include":false,"step":"40.0","x":15.862857142857143,"y":60.89523809523809,"z":83.40571428571428,"a95":0.99,"info":"21/03/2016 at 01:05:41"},{"visible":true,"include":false,"step":"45.0","x":33.57333333333333,"y":44.19714285714286,"z":44.2952380952381,"a95":0.99,"info":"21/03/2016 at 01:05:41"},{"visible":false,"include":false,"step":"50.0","x":15.512380952380951,"y":40.31904761904762,"z":52.11142857142857,"a95":0.99,"info":"21/03/2016 at 01:05:41"},{"visible":false,"include":false,"step":"55.0","x":15.369523809523809,"y":49.01238095238095,"z":36.05904761904762,"a95":0.99,"info":"21/03/2016 at 01:05:41"},{"visible":false,"include":false,"step":"60.0","x":45.205714285714286,"y":43.23714285714286,"z":27.415238095238095,"a95":0.99,"info":"21/03/2016 at 01:05:41"},{"visible":false,"include":false,"step":"65.0","x":44.6647619047619,"y":10.357142857142858,"z":15.523809523809524,"a95":0.99,"info":"21/03/2016 at 01:05:41"},{"visible":false,"include":false,"step":"70.0","x":65.87142857142857,"y":28.212380952380954,"z":-12.029523809523809,"a95":0.99,"info":"21/03/2016 at 01:05:41"},{"visible":false,"include":false,"step":"80.0","x":38.34190476190476,"y":51.86095238095238,"z":14.646666666666667,"a95":0.99,"info":"21/03/2016 at 01:05:41"}]},{"version":"v1.1.0","exported":"2016-11-24T13:32:50.004Z","volume":10.5,"added":"2016-11-24T13:25:40.971Z","format":"Utrecht","demagType":"Unknown","strat":"1","patch":1.1,"GEO":[],"TECT":[],"interpreted":false,"name":"AD3.21B","coreAzi":149,"coreDip":6,"bedStrike":104,"bedDip":14,"data":[{"visible":false,"include":false,"step":"0.0","x":-554.0285714285715,"y":-40.36380952380952,"z":-27.76380952380952,"a95":0.99,"info":"21/03/2016 at 01:05:41"},{"visible":true,"include":false,"step":"10.0","x":-303,"y":28.639047619047616,"z":18.68952380952381,"a95":0.99,"info":"21/03/2016 at 01:05:41"},{"visible":true,"include":false,"step":"15.0","x":-206.9809523809524,"y":43.420952380952386,"z":34.4247619047619,"a95":0.99,"info":"21/03/2016 at 01:05:41"},{"visible":true,"include":false,"step":"20.0","x":-155.23809523809524,"y":43.17142857142857,"z":30.504761904761907,"a95":0.99,"info":"21/03/2016 at 01:05:41"},{"visible":true,"include":false,"step":"23.0","x":-125.4095238095238,"y":41.25047619047619,"z":38.640952380952385,"a95":0.99,"info":"21/03/2016 at 01:05:41"},{"visible":true,"include":true,"step":"25.0","x":-113.39047619047618,"y":31.76571428571429,"z":38.94190476190476,"a95":0.99,"info":"21/03/2016 at 01:05:41"},{"visible":true,"include":true,"step":"30.0","x":-71.81428571428572,"y":31.036190476190477,"z":36.455238095238094,"a95":0.99,"info":"21/03/2016 at 01:05:41"},{"visible":true,"include":true,"step":"33.0","x":-64.78285714285714,"y":15.714285714285714,"z":32.52571428571429,"a95":0.99,"info":"21/03/2016 at 01:05:41"},{"visible":true,"include":true,"step":"35.0","x":-71.32571428571428,"y":12.58,"z":19.854285714285716,"a95":0.99,"info":"21/03/2016 at 01:05:41"},{"visible":true,"include":true,"step":"40.0","x":-46.26857142857143,"y":8.859238095238096,"z":7.736857142857143,"a95":0.99,"info":"21/03/2016 at 01:05:41"},{"visible":false,"include":false,"step":"45.0","x":-25.30857142857143,"y":26.95714285714286,"z":1.7043809523809526,"a95":0.99,"info":"21/03/2016 at 01:05:41"},{"visible":false,"include":false,"step":"50.0","x":-7.903904761904762,"y":-7.091904761904762,"z":-2.050095238095238,"a95":0.99,"info":"21/03/2016 at 01:05:41"},{"visible":false,"include":false,"step":"55.0","x":-1.9671428571428573,"y":6.658476190476191,"z":-19.48857142857143,"a95":0.99,"info":"21/03/2016 at 01:05:41"},{"visible":false,"include":false,"step":"60.0","x":34.88,"y":16.543809523809525,"z":-38.66952380952381,"a95":0.99,"info":"21/03/2016 at 01:05:41"},{"visible":false,"include":false,"step":"65.0","x":56.32380952380952,"y":-17.43619047619048,"z":-33.09428571428572,"a95":0.99,"info":"21/03/2016 at 01:05:41"},{"visible":false,"include":false,"step":"70.0","x":50.158095238095235,"y":6.682761904761905,"z":-37.13809523809524,"a95":0.99,"info":"21/03/2016 at 01:05:41"},{"visible":false,"include":false,"step":"80.0","x":67.99333333333333,"y":5.286476190476191,"z":-7.1778095238095245,"a95":0.99,"info":"21/03/2016 at 01:05:41"}]},{"version":"v1.1.0","exported":"2016-11-24T13:32:50.004Z","volume":10.5,"added":"2016-11-24T13:25:40.971Z","format":"Utrecht","demagType":"Unknown","strat":"1","patch":1.1,"GEO":[{"dec":185.563330023509,"inc":-7.104285676297883,"MAD":4.671647497235911,"cm":[-1.7763568394002505e-15,3.552713678800501e-15,0],"intensity":521.2197981753737,"type":"dir","forced":true,"remark":"","origin":false,"nSteps":10,"minStep":"10.0","maxStep":"45.0","steps":["10.0","15.0","20.0","23.0","25.0","30.0","33.0","35.0","40.0","45.0"],"group":"None","version":"v1.1.0"}],"TECT":[{"dec":185.03157208093336,"inc":-20.94482534834411,"MAD":4.6716474972359086,"cm":[-5.329070518200751e-15,1.6764367671839864e-14,1.7763568394002505e-15],"intensity":521.2197981753737,"type":"dir","forced":true,"remark":"","origin":false,"nSteps":10,"minStep":"10.0","maxStep":"45.0","steps":["10.0","15.0","20.0","23.0","25.0","30.0","33.0","35.0","40.0","45.0"],"group":"None","version":"v1.1.0"}],"interpreted":true,"name":"AD3.23A","coreAzi":153,"coreDip":2,"bedStrike":104,"bedDip":14,"data":[{"visible":false,"include":false,"step":"0.0","x":-151.45714285714286,"y":168.3904761904762,"z":315.2,"a95":0.99,"info":"20/03/2016 at 03:16:03"},{"visible":true,"include":false,"step":"10.0","x":13.208571428571428,"y":203.04761904761904,"z":330.1333333333333,"a95":0.99,"info":"20/03/2016 at 03:16:03"},{"visible":true,"include":true,"step":"15.0","x":46.019999999999996,"y":199.0952380952381,"z":318.74285714285713,"a95":0.99,"info":"20/03/2016 at 03:16:03"},{"visible":true,"include":true,"step":"20.0","x":59.149523809523814,"y":179.8,"z":279.48571428571427,"a95":0.99,"info":"20/03/2016 at 03:16:03"},{"visible":true,"include":true,"step":"23.0","x":58.85619047619048,"y":163,"z":231.26666666666668,"a95":0.99,"info":"20/03/2016 at 03:16:03"},{"visible":true,"include":true,"step":"25.0","x":49.67809523809524,"y":144.05714285714285,"z":228.24761904761903,"a95":0.99,"info":"20/03/2016 at 03:16:03"},{"visible":true,"include":true,"step":"30.0","x":52.526666666666664,"y":106.8952380952381,"z":193.62857142857143,"a95":0.99,"info":"20/03/2016 at 03:16:03"},{"visible":true,"include":true,"step":"33.0","x":37.05047619047619,"y":127.61904761904762,"z":184.45714285714286,"a95":0.99,"info":"20/03/2016 at 03:16:03"},{"visible":true,"include":true,"step":"35.0","x":37.72666666666667,"y":95.32380952380952,"z":147.5047619047619,"a95":0.99,"info":"20/03/2016 at 03:16:03"},{"visible":true,"include":true,"step":"40.0","x":49.75714285714286,"y":96.24761904761905,"z":117,"a95":0.99,"info":"20/03/2016 at 03:16:03"},{"visible":true,"include":true,"step":"45.0","x":39.672380952380955,"y":73.51523809523809,"z":108.48571428571428,"a95":0.99,"info":"20/03/2016 at 03:16:03"},{"visible":true,"include":false,"step":"50.0","x":20.112380952380953,"y":47.22285714285714,"z":47.260000000000005,"a95":0.99,"info":"20/03/2016 at 03:16:03"},{"visible":true,"include":false,"step":"55.0","x":20.556190476190476,"y":50.94190476190476,"z":39.147619047619045,"a95":0.99,"info":"20/03/2016 at 03:16:03"},{"visible":false,"include":false,"step":"60.0","x":46.981904761904765,"y":45.06857142857143,"z":29.885714285714286,"a95":0.99,"info":"20/03/2016 at 03:16:03"},{"visible":false,"include":false,"step":"65.0","x":51.01523809523809,"y":15.153333333333334,"z":-4.761904761904762,"a95":0.99,"info":"20/03/2016 at 03:16:03"},{"visible":false,"include":false,"step":"70.0","x":41.481904761904765,"y":37.698095238095235,"z":-10.71047619047619,"a95":0.99,"info":"20/03/2016 at 03:16:03"},{"visible":false,"include":false,"step":"80.0","x":22.115238095238094,"y":32.13428571428572,"z":-22.17142857142857,"a95":0.99,"info":"20/03/2016 at 03:16:03"}]},{"version":"v1.1.0","exported":"2016-11-24T13:32:50.004Z","volume":10.5,"added":"2016-11-24T13:25:40.971Z","format":"Utrecht","demagType":"Unknown","strat":"1","patch":1.1,"GEO":[{"dec":193.65374137250947,"inc":-20.582025953629685,"MAD":1.7284758316218942,"cm":[-1.2434497875801753e-14,3.952393967665557e-14,0],"intensity":799.1269569948935,"type":"dir","forced":true,"remark":"","origin":false,"nSteps":10,"minStep":"10.0","maxStep":"45.0","steps":["10.0","15.0","20.0","23.0","25.0","30.0","33.0","35.0","40.0","45.0"],"group":"None","version":"v1.1.0"}],"TECT":[{"dec":193.60627881329114,"inc":-34.58173814050585,"MAD":1.7284758316220685,"cm":[0,2.886579864025407e-15,0],"intensity":799.1269569948934,"type":"dir","forced":true,"remark":"","origin":false,"nSteps":10,"minStep":"10.0","maxStep":"45.0","steps":["10.0","15.0","20.0","23.0","25.0","30.0","33.0","35.0","40.0","45.0"],"group":"None","version":"v1.1.0"}],"interpreted":true,"name":"AD3.24A","coreAzi":153,"coreDip":2,"bedStrike":104,"bedDip":14,"data":[{"visible":false,"include":false,"step":"0.0","x":108.32380952380953,"y":410.18095238095236,"z":393.5904761904762,"a95":0.99,"info":"20/03/2016 at 03:16:03"},{"visible":true,"include":true,"step":"10.0","x":200.17142857142858,"y":374.14285714285717,"z":408.3809523809524,"a95":0.99,"info":"20/03/2016 at 03:16:03"},{"visible":true,"include":true,"step":"15.0","x":214.84761904761905,"y":336.22857142857146,"z":387.77142857142854,"a95":0.99,"info":"20/03/2016 at 03:16:03"},{"visible":true,"include":true,"step":"20.0","x":185.25714285714287,"y":311.4,"z":350.76190476190476,"a95":0.99,"info":"20/03/2016 at 03:16:03"},{"visible":true,"include":true,"step":"23.0","x":170.9047619047619,"y":279.76190476190476,"z":317.5333333333333,"a95":0.99,"info":"20/03/2016 at 03:16:03"},{"visible":true,"include":true,"step":"25.0","x":173.7047619047619,"y":252.44761904761904,"z":296.2190476190476,"a95":0.99,"info":"20/03/2016 at 03:16:03"},{"visible":true,"include":true,"step":"30.0","x":129.71428571428572,"y":209.2952380952381,"z":250.93333333333334,"a95":0.99,"info":"20/03/2016 at 03:16:03"},{"visible":true,"include":true,"step":"33.0","x":122.11428571428571,"y":186.43809523809523,"z":225.06666666666666,"a95":0.99,"info":"20/03/2016 at 03:16:03"},{"visible":true,"include":true,"step":"35.0","x":121.19047619047619,"y":174.47619047619048,"z":201.47619047619048,"a95":0.99,"info":"20/03/2016 at 03:16:03"},{"visible":true,"include":true,"step":"40.0","x":93.05333333333333,"y":152.16190476190476,"z":177.0095238095238,"a95":0.99,"info":"20/03/2016 at 03:16:03"},{"visible":true,"include":true,"step":"45.0","x":94.17428571428572,"y":121.74285714285713,"z":144.84761904761905,"a95":0.99,"info":"20/03/2016 at 03:16:03"},{"visible":true,"include":false,"step":"50.0","x":86.40380952380953,"y":78.56952380952382,"z":108.19999999999999,"a95":0.99,"info":"20/03/2016 at 03:16:03"},{"visible":true,"include":false,"step":"55.0","x":75.64761904761905,"y":73.44,"z":87.43238095238095,"a95":0.99,"info":"20/03/2016 at 03:16:03"},{"visible":true,"include":false,"step":"60.0","x":71.30761904761906,"y":81.8495238095238,"z":56.87047619047619,"a95":0.99,"info":"20/03/2016 at 03:16:03"},{"visible":true,"include":false,"step":"65.0","x":78.27238095238096,"y":75.05333333333333,"z":47.0152380952381,"a95":0.99,"info":"20/03/2016 at 03:16:03"},{"visible":true,"include":false,"step":"70.0","x":63.156190476190474,"y":51.409523809523805,"z":24.829523809523806,"a95":0.99,"info":"20/03/2016 at 03:16:03"},{"visible":false,"include":false,"step":"80.0","x":-42.27904761904762,"y":69.96666666666667,"z":72.63238095238096,"a95":0.99,"info":"20/03/2016 at 03:16:03"}]},{"version":"v1.1.0","exported":"2016-11-24T13:32:50.005Z","volume":10.5,"added":"2016-11-24T13:25:40.972Z","format":"Utrecht","demagType":"Unknown","strat":"1","patch":1.1,"GEO":[{"dec":188.71490442263712,"inc":49.668578640971766,"MAD":4.41249989449577,"cm":[0,3.552713678800501e-15,0],"intensity":358.2326559204233,"type":"dir","forced":true,"remark":"","origin":false,"nSteps":7,"minStep":"20.0","maxStep":"40.0","steps":["20.0","23.0","25.0","30.0","33.0","35.0","40.0"],"group":"None","version":"v1.1.0"}],"TECT":[{"dec":189.78928758853098,"inc":35.715537785202535,"MAD":4.412499894495724,"cm":[-2.6645352591003757e-15,1.8207657603852567e-14,0],"intensity":358.2326559204233,"type":"dir","forced":true,"remark":"","origin":false,"nSteps":7,"minStep":"20.0","maxStep":"40.0","steps":["20.0","23.0","25.0","30.0","33.0","35.0","40.0"],"group":"None","version":"v1.1.0"}],"interpreted":true,"name":"AD3.25A","coreAzi":149,"coreDip":5,"bedStrike":104,"bedDip":14,"data":[{"visible":false,"include":false,"step":"0.0","x":-708.3428571428572,"y":-5.939619047619048,"z":72.5142857142857,"a95":0.99,"info":"20/03/2016 at 03:16:03"},{"visible":true,"include":false,"step":"10.0","x":-373.2761904761905,"y":73.18285714285715,"z":123.19047619047619,"a95":0.99,"info":"20/03/2016 at 03:16:03"},{"visible":true,"include":false,"step":"15.0","x":-255.1904761904762,"y":94.00857142857143,"z":146.17142857142858,"a95":0.99,"info":"20/03/2016 at 03:16:03"},{"visible":true,"include":true,"step":"20.0","x":-193.2952380952381,"y":94.90666666666667,"z":151.88571428571427,"a95":0.99,"info":"20/03/2016 at 03:16:03"},{"visible":true,"include":true,"step":"23.0","x":-154.03809523809525,"y":81.54857142857142,"z":123.41904761904763,"a95":0.99,"info":"20/03/2016 at 03:16:03"},{"visible":true,"include":true,"step":"25.0","x":-147.25714285714287,"y":85.54666666666667,"z":108.63809523809525,"a95":0.99,"info":"20/03/2016 at 03:16:03"},{"visible":true,"include":true,"step":"30.0","x":-94.92857142857143,"y":74.72285714285715,"z":83.8647619047619,"a95":0.99,"info":"20/03/2016 at 03:16:03"},{"visible":true,"include":true,"step":"33.0","x":-102.88571428571429,"y":64.6752380952381,"z":84.96190476190476,"a95":0.99,"info":"20/03/2016 at 03:16:03"},{"visible":true,"include":true,"step":"35.0","x":-99.60952380952382,"y":54.201904761904764,"z":65.28666666666666,"a95":0.99,"info":"20/03/2016 at 03:16:03"},{"visible":true,"include":true,"step":"40.0","x":-57.290476190476184,"y":60.81714285714286,"z":51.30761904761905,"a95":0.99,"info":"20/03/2016 at 03:16:03"},{"visible":false,"include":false,"step":"45.0","x":-46.94571428571429,"y":53.62095238095238,"z":30.024761904761903,"a95":0.99,"info":"20/03/2016 at 03:16:03"},{"visible":false,"include":false,"step":"50.0","x":-40.333333333333336,"y":15.125714285714285,"z":18.736190476190476,"a95":0.99,"info":"20/03/2016 at 03:16:03"},{"visible":false,"include":false,"step":"55.0","x":-12.174285714285714,"y":38.50285714285714,"z":-17.99142857142857,"a95":0.99,"info":"20/03/2016 at 03:16:03"},{"visible":false,"include":false,"step":"60.0","x":9.28352380952381,"y":39.30095238095238,"z":4.057333333333333,"a95":0.99,"info":"20/03/2016 at 03:16:03"},{"visible":false,"include":false,"step":"65.0","x":19.18,"y":48.82,"z":-39.78666666666667,"a95":0.99,"info":"20/03/2016 at 03:16:03"},{"visible":false,"include":false,"step":"70.0","x":50.26952380952381,"y":41.42,"z":-45.10476190476191,"a95":0.99,"info":"20/03/2016 at 03:16:03"},{"visible":false,"include":false,"step":"80.0","x":162.43809523809523,"y":70.31142857142856,"z":-52.36666666666667,"a95":0.99,"info":"20/03/2016 at 03:16:03"}]}]
