# Supplementary material for: Paleomagnetic constraints on the timing and distribution of Cenozoic rotations in Central and Eastern Anatolia
Source: Copernicus journal article supplement (doi:10.5194/se-9-295-2018), 2018-03-21
Supplement: Supplementary file 2 [file se-9-295-2018-supplement.zip › se-2017-66_DATA_dir files/dir files Ulukisla/AD4.dir]

[{"version":"v1.1.0","exported":"2016-11-24T13:37:17.022Z","volume":10.5,"added":"2016-11-24T13:33:54.691Z","format":"Utrecht","demagType":"Unknown","strat":null,"patch":1.1,"GEO":[{"dec":332.2925038385364,"inc":39.47489676455068,"MAD":1.338712198192059,"cm":[-7.105427357601002e-14,-1.2079226507921703e-13,0],"intensity":2673.1634499094835,"type":"dir","forced":true,"remark":"","origin":false,"nSteps":6,"minStep":"150","maxStep":"300","steps":["150","180","210","240","270","300"],"group":"None","version":"v1.1.0"}],"TECT":[{"dec":340.129019731416,"inc":13.490727982171405,"MAD":1.3387121981920953,"cm":[8.526512829121202e-14,1.4210854715202004e-13,2.842170943040401e-14],"intensity":2673.1634499094835,"type":"dir","forced":true,"remark":"","origin":false,"nSteps":6,"minStep":"150","maxStep":"300","steps":["150","180","210","240","270","300"],"group":"None","version":"v1.1.0"}],"interpreted":true,"name":"AD4.02A","coreAzi":260,"coreDip":29,"bedStrike":277,"bedDip":30,"data":[{"visible":false,"include":false,"step":"20","x":-1435.4285714285713,"y":609.3333333333334,"z":934.7619047619048,"a95":1.9,"info":"\"16-04-18\" at \"09:42\""},{"visible":true,"include":false,"step":"100","x":-1241.047619047619,"y":576,"z":606.7619047619048,"a95":1.8,"info":"\"16-04-18\" at \"12:11\""},{"visible":true,"include":true,"step":"150","x":-644.0952380952381,"y":1082.1904761904761,"z":722.4761904761905,"a95":1.9,"info":"\"16-04-18\" at \"15:13\""},{"visible":true,"include":true,"step":"180","x":-583.6190476190476,"y":1010.7619047619048,"z":716.5714285714286,"a95":1.8,"info":"\"16-04-19\" at \"11:14\""},{"visible":true,"include":true,"step":"210","x":-580.7619047619048,"y":998.0952380952381,"z":659.3333333333334,"a95":1.8,"info":"\"16-04-19\" at \"14:26\""},{"visible":true,"include":true,"step":"240","x":-608.3809523809524,"y":911.3333333333334,"z":670.8571428571429,"a95":1.8,"info":"\"16-04-20\" at \"09:54\""},{"visible":true,"include":true,"step":"270","x":-560.0952380952381,"y":934.8571428571429,"z":669.1428571428571,"a95":1.8,"info":"\"16-04-21\" at \"11:13\""},{"visible":true,"include":true,"step":"300","x":-532.6666666666666,"y":893.9047619047619,"z":639.9047619047619,"a95":1.8,"info":"\"16-04-21\" at \"14:38\""}]},{"version":"v1.1.0","exported":"2016-11-24T13:37:17.023Z","volume":10.5,"added":"2016-11-24T13:33:54.692Z","format":"Utrecht","demagType":"Unknown","strat":null,"patch":1.1,"GEO":[{"dec":337.5322395630011,"inc":62.8276985856828,"MAD":3.0474852854423484,"cm":[2.1316282072803006e-14,3.730349362740526e-14,0],"intensity":2715.480433808087,"type":"dir","forced":true,"remark":"","origin":false,"nSteps":7,"minStep":"100","maxStep":"300","steps":["100","150","180","210","240","270","300"],"group":"None","version":"v1.1.0"}],"TECT":[{"dec":351.1095742029871,"inc":34.86560750593867,"MAD":3.047485285442357,"cm":[2.842170943040401e-14,2.824407374646398e-13,2.1316282072803006e-14],"intensity":2715.480433808087,"type":"dir","forced":true,"remark":"","origin":false,"nSteps":7,"minStep":"100","maxStep":"300","steps":["100","150","180","210","240","270","300"],"group":"None","version":"v1.1.0"}],"interpreted":true,"name":"AD4.03A","coreAzi":280,"coreDip":9,"bedStrike":277,"bedDip":30,"data":[{"visible":false,"include":false,"step":"20","x":-1215.7142857142858,"y":717.2380952380952,"z":922.7619047619048,"a95":1.9,"info":"\"16-04-18\" at \"09:44\""},{"visible":true,"include":true,"step":"100","x":-1314.3809523809523,"y":431.04761904761904,"z":587.1428571428571,"a95":1.8,"info":"\"16-04-18\" at \"12:12\""},{"visible":true,"include":true,"step":"150","x":-1193.5238095238096,"y":530.5714285714286,"z":539.7142857142857,"a95":1.8,"info":"\"16-04-18\" at \"15:14\""},{"visible":true,"include":true,"step":"180","x":-1088.2857142857142,"y":569.4285714285714,"z":534.0952380952381,"a95":1.7,"info":"\"16-04-19\" at \"11:17\""},{"visible":true,"include":true,"step":"210","x":-1101.142857142857,"y":544.6666666666666,"z":498.95238095238096,"a95":1.7,"info":"\"16-04-19\" at \"14:28\""},{"visible":true,"include":true,"step":"240","x":-1060.952380952381,"y":534.0952380952381,"z":469.23809523809524,"a95":1.7,"info":"\"16-04-20\" at \"09:57\""},{"visible":true,"include":true,"step":"270","x":-1063.3333333333333,"y":515.8095238095239,"z":458.0952380952381,"a95":1.8,"info":"\"16-04-21\" at \"11:15\""},{"visible":true,"include":true,"step":"300","x":-1011.1428571428571,"y":493.42857142857144,"z":466.95238095238096,"a95":1.8,"info":"\"16-04-21\" at \"14:40\""}]},{"version":"v1.1.0","exported":"2016-11-24T13:37:17.023Z","volume":10.5,"added":"2016-11-24T13:33:54.692Z","format":"Utrecht","demagType":"Unknown","strat":"1","patch":1.1,"GEO":[{"dec":328.9723809071369,"inc":67.76433775510255,"MAD":3.449271636161354,"cm":[-1.2434497875801753e-14,-2.531308496145357e-14,0],"intensity":1260.2520951858833,"type":"dir","forced":true,"remark":"","origin":false,"nSteps":9,"minStep":"10.0","maxStep":"40.0","steps":["10.0","15.0","20.0","23.0","25.0","30.0","33.0","35.0","40.0"],"group":"None","version":"v1.1.0"}],"TECT":[{"dec":349.08166976089854,"inc":40.736516895473144,"MAD":3.4492716361614004,"cm":[-1.7763568394002505e-15,-1.0658141036401503e-14,3.552713678800501e-15],"intensity":1260.2520951858833,"type":"dir","forced":true,"remark":"","origin":false,"nSteps":9,"minStep":"10.0","maxStep":"40.0","steps":["10.0","15.0","20.0","23.0","25.0","30.0","33.0","35.0","40.0"],"group":"None","version":"v1.1.0"}],"interpreted":true,"name":"AD4.03B","coreAzi":280,"coreDip":9,"bedStrike":277,"bedDip":30,"data":[{"visible":false,"include":false,"step":"0.0","x":-1024.5714285714287,"y":449.31428571428575,"z":437.6190476190476,"a95":0.99,"info":"20/03/2016 at 08:43:49"},{"visible":true,"include":true,"step":"10.0","x":-827.5619047619048,"y":334.76190476190476,"z":392.3809523809524,"a95":0.99,"info":"20/03/2016 at 08:43:49"},{"visible":true,"include":true,"step":"15.0","x":-707.1619047619048,"y":241.02857142857144,"z":333.1047619047619,"a95":0.99,"info":"20/03/2016 at 08:43:49"},{"visible":true,"include":true,"step":"20.0","x":-587.3714285714285,"y":187.03809523809525,"z":253.02857142857144,"a95":0.99,"info":"20/03/2016 at 08:43:49"},{"visible":true,"include":true,"step":"23.0","x":-492.65714285714284,"y":121.32380952380953,"z":183.76190476190476,"a95":0.99,"info":"20/03/2016 at 08:43:49"},{"visible":true,"include":true,"step":"25.0","x":-489.04761904761904,"y":147.1904761904762,"z":213.02857142857144,"a95":0.99,"info":"20/03/2016 at 08:43:49"},{"visible":true,"include":true,"step":"30.0","x":-386.7333333333333,"y":106.35238095238095,"z":186.40952380952382,"a95":0.99,"info":"20/03/2016 at 08:43:49"},{"visible":true,"include":true,"step":"33.0","x":-320.57142857142856,"y":59.02761904761904,"z":121.43809523809523,"a95":0.99,"info":"20/03/2016 at 08:43:49"},{"visible":true,"include":true,"step":"35.0","x":-293.9047619047619,"y":58.86952380952381,"z":129.9714285714286,"a95":0.99,"info":"20/03/2016 at 08:43:49"},{"visible":true,"include":true,"step":"40.0","x":-264.1142857142857,"y":71.26190476190476,"z":88.89142857142858,"a95":0.99,"info":"20/03/2016 at 08:43:49"},{"visible":false,"include":false,"step":"45.0","x":-212.57142857142858,"y":53.68380952380952,"z":29.454285714285714,"a95":0.99,"info":"20/03/2016 at 08:43:49"},{"visible":false,"include":false,"step":"50.0","x":-166.54285714285714,"y":24.566666666666666,"z":70.09809523809524,"a95":0.99,"info":"20/03/2016 at 08:43:49"},{"visible":false,"include":false,"step":"55.0","x":-110.80000000000001,"y":27.316190476190474,"z":20.62761904761905,"a95":0.99,"info":"20/03/2016 at 08:43:49"},{"visible":false,"include":false,"step":"60.0","x":-88.27333333333334,"y":34.02952380952381,"z":14.710476190476191,"a95":0.99,"info":"20/03/2016 at 08:43:49"},{"visible":false,"include":false,"step":"65.0","x":-81.02952380952381,"y":0.02422190476190476,"z":43.43142857142857,"a95":0.99,"info":"20/03/2016 at 08:43:49"},{"visible":false,"include":false,"step":"70.0","x":-91.97238095238096,"y":-2.681714285714286,"z":29.60285714285714,"a95":0.99,"info":"20/03/2016 at 08:43:49"},{"visible":false,"include":false,"step":"80.0","x":-100.86666666666666,"y":-26.893333333333334,"z":67.27904761904762,"a95":0.99,"info":"20/03/2016 at 08:43:49"}]},{"version":"v1.1.0","exported":"2016-11-24T13:37:17.023Z","volume":10.5,"added":"2016-11-24T13:33:54.692Z","format":"Utrecht","demagType":"Unknown","strat":null,"patch":1.1,"GEO":[{"dec":333.1016489633138,"inc":56.86981228448885,"MAD":1.0645432104178003,"cm":[0,2.4868995751603507e-14,0],"intensity":2590.40848300872,"type":"dir","forced":true,"remark":"","origin":false,"nSteps":7,"minStep":"100","maxStep":"300","steps":["100","150","180","210","240","270","300"],"group":"None","version":"v1.1.0"}],"TECT":[{"dec":346.4145920617075,"inc":29.895074497395914,"MAD":1.0645432104179502,"cm":[-4.263256414560601e-14,-2.3803181647963356e-13,7.105427357601002e-15],"intensity":2590.4084830087204,"type":"dir","forced":true,"remark":"","origin":false,"nSteps":7,"minStep":"100","maxStep":"300","steps":["100","150","180","210","240","270","300"],"group":"None","version":"v1.1.0"}],"interpreted":true,"name":"AD4.04A","coreAzi":287,"coreDip":1,"bedStrike":277,"bedDip":30,"data":[{"visible":false,"include":false,"step":"20","x":-2123.1428571428573,"y":2293.1428571428573,"z":17.142857142857142,"a95":1.7,"info":"\"16-04-18\" at \"09:45\""},{"visible":true,"include":true,"step":"100","x":-1175.6190476190477,"y":538.5714285714286,"z":585.047619047619,"a95":1.8,"info":"\"16-04-18\" at \"12:13\""},{"visible":true,"include":true,"step":"150","x":-1121.5238095238096,"y":554.8571428571429,"z":526.8571428571429,"a95":1.8,"info":"\"16-04-18\" at \"15:15\""},{"visible":true,"include":true,"step":"180","x":-1048,"y":528.4761904761905,"z":494.76190476190476,"a95":1.7,"info":"\"16-04-19\" at \"11:19\""},{"visible":true,"include":true,"step":"210","x":-1029.047619047619,"y":481.23809523809524,"z":469.5238095238095,"a95":1.7,"info":"\"16-04-19\" at \"14:30\""},{"visible":true,"include":true,"step":"240","x":-1005.7142857142857,"y":457.9047619047619,"z":474.1904761904762,"a95":1.7,"info":"\"16-04-20\" at \"10:00\""},{"visible":true,"include":true,"step":"270","x":-1011.4285714285714,"y":455.9047619047619,"z":461.14285714285717,"a95":1.7,"info":"\"16-04-21\" at \"11:17\""},{"visible":true,"include":true,"step":"300","x":-964.8571428571429,"y":469.5238095238095,"z":469.6190476190476,"a95":1.7,"info":"\"16-04-21\" at \"14:42\""}]},{"version":"v1.1.0","exported":"2016-11-24T13:37:17.023Z","volume":10.5,"added":"2016-11-24T13:33:54.693Z","format":"Utrecht","demagType":"Unknown","strat":"1","patch":1.1,"GEO":[{"dec":328.94106323123003,"inc":60.62491601482999,"MAD":1.842935275104625,"cm":[-9.769962616701378e-15,-1.3322676295501878e-14,0],"intensity":1268.1884220402053,"type":"dir","forced":true,"remark":"","origin":false,"nSteps":8,"minStep":"10.0","maxStep":"40.0","steps":["10.0","15.0","20.0","23.0","25.0","30.0","33.0","40.0"],"group":"None","version":"v1.1.0"}],"TECT":[{"dec":345.5640348251001,"inc":34.16403464389388,"MAD":1.8429352751046482,"cm":[-2.6645352591003757e-14,-2.930988785010413e-14,1.7763568394002505e-15],"intensity":1268.1884220402053,"type":"dir","forced":true,"remark":"","origin":false,"nSteps":8,"minStep":"10.0","maxStep":"40.0","steps":["10.0","15.0","20.0","23.0","25.0","30.0","33.0","40.0"],"group":"None","version":"v1.1.0"}],"interpreted":true,"name":"AD4.04B","coreAzi":287,"coreDip":1,"bedStrike":277,"bedDip":30,"data":[{"visible":false,"include":false,"step":"0.0","x":-1112,"y":433.68571428571425,"z":412.9238095238095,"a95":0.99,"info":"20/03/2016 at 08:43:49"},{"visible":true,"include":true,"step":"10.0","x":-841.257142857143,"y":326.3047619047619,"z":346.6666666666667,"a95":0.99,"info":"20/03/2016 at 08:43:49"},{"visible":true,"include":true,"step":"15.0","x":-709.5428571428571,"y":255.28571428571428,"z":283.0952380952381,"a95":0.99,"info":"20/03/2016 at 08:43:49"},{"visible":true,"include":true,"step":"20.0","x":-572.2,"y":212.6095238095238,"z":268.4666666666667,"a95":0.99,"info":"20/03/2016 at 08:43:49"},{"visible":true,"include":true,"step":"23.0","x":-490.64761904761906,"y":192.42857142857142,"z":240.38095238095238,"a95":0.99,"info":"20/03/2016 at 08:43:49"},{"visible":true,"include":true,"step":"25.0","x":-451.3238095238095,"y":175.41904761904763,"z":223.61904761904762,"a95":0.99,"info":"20/03/2016 at 08:43:49"},{"visible":true,"include":true,"step":"30.0","x":-369.29523809523806,"y":142.96190476190475,"z":157.1238095238095,"a95":0.99,"info":"20/03/2016 at 08:43:49"},{"visible":true,"include":true,"step":"33.0","x":-310.67619047619047,"y":126.4095238095238,"z":150.77142857142857,"a95":0.99,"info":"20/03/2016 at 08:43:49"},{"visible":false,"include":false,"step":"35.0","x":-256.247619047619,"y":34.77428571428571,"z":166.21904761904761,"a95":0.99,"info":"20/03/2016 at 08:43:49"},{"visible":true,"include":true,"step":"40.0","x":-261.37142857142857,"y":86.42761904761905,"z":124.67619047619047,"a95":0.99,"info":"20/03/2016 at 08:43:49"},{"visible":false,"include":false,"step":"45.0","x":-189.93333333333334,"y":22.753333333333334,"z":100.03809523809525,"a95":0.99,"info":"20/03/2016 at 08:43:49"},{"visible":false,"include":false,"step":"50.0","x":-156.65714285714287,"y":-12.903809523809525,"z":33.26190476190476,"a95":0.99,"info":"20/03/2016 at 08:43:49"},{"visible":false,"include":false,"step":"55.0","x":-122.08571428571429,"y":-4.719047619047619,"z":40.36571428571428,"a95":0.99,"info":"20/03/2016 at 08:43:49"},{"visible":false,"include":false,"step":"60.0","x":-68.13142857142857,"y":-38.51904761904762,"z":23.035238095238096,"a95":0.99,"info":"20/03/2016 at 08:43:49"},{"visible":false,"include":false,"step":"65.0","x":-52.4952380952381,"y":-63.537142857142854,"z":57.18761904761905,"a95":0.99,"info":"20/03/2016 at 08:43:49"},{"visible":false,"include":false,"step":"70.0","x":-8.897619047619047,"y":-89.05238095238094,"z":88.02571428571429,"a95":0.99,"info":"20/03/2016 at 08:43:49"},{"visible":false,"include":false,"step":"80.0","x":26.910476190476192,"y":-70.28476190476191,"z":27.707619047619048,"a95":0.99,"info":"20/03/2016 at 08:43:49"}]},{"version":"v1.1.0","exported":"2016-11-24T13:37:17.023Z","volume":10.5,"added":"2016-11-24T13:33:54.695Z","format":"Utrecht","demagType":"Unknown","strat":"1","patch":1.1,"GEO":[{"dec":293.4335734944072,"inc":73.45778080150517,"MAD":2.4050906234341793,"cm":[-2.220446049250313e-14,-9.769962616701378e-15,0],"intensity":1442.4412115284442,"type":"dir","forced":true,"remark":"","origin":false,"nSteps":8,"minStep":"10.0","maxStep":"35.0","steps":["10.0","15.0","20.0","23.0","25.0","30.0","33.0","35.0"],"group":"None","version":"v1.1.0"}],"TECT":[{"dec":340.5553524193955,"inc":52.17676342929928,"MAD":2.405090623434243,"cm":[-3.730349362740526e-14,-5.5067062021407764e-14,1.4210854715202004e-14],"intensity":1442.4412115284442,"type":"dir","forced":true,"remark":"","origin":false,"nSteps":8,"minStep":"10.0","maxStep":"35.0","steps":["10.0","15.0","20.0","23.0","25.0","30.0","33.0","35.0"],"group":"None","version":"v1.1.0"}],"interpreted":true,"name":"AD4.05B","coreAzi":267,"coreDip":0,"bedStrike":277,"bedDip":30,"data":[{"visible":false,"include":false,"step":"0.0","x":-1281.3333333333333,"y":205.83809523809526,"z":278.2,"a95":0.99,"info":"20/03/2016 at 08:43:49"},{"visible":true,"include":true,"step":"10.0","x":-1006.3809523809524,"y":148.23809523809524,"z":274.1047619047619,"a95":0.99,"info":"20/03/2016 at 08:43:49"},{"visible":true,"include":true,"step":"15.0","x":-852.1714285714285,"y":125.55238095238094,"z":216.06666666666666,"a95":0.99,"info":"20/03/2016 at 08:43:49"},{"visible":true,"include":true,"step":"20.0","x":-669.3428571428572,"y":81.96000000000001,"z":196.03809523809525,"a95":0.99,"info":"20/03/2016 at 08:43:49"},{"visible":true,"include":true,"step":"23.0","x":-591.5619047619048,"y":59.404761904761905,"z":114.6,"a95":0.99,"info":"20/03/2016 at 08:43:49"},{"visible":true,"include":true,"step":"25.0","x":-578.4571428571429,"y":81.02095238095238,"z":146.57142857142858,"a95":0.99,"info":"20/03/2016 at 08:43:49"},{"visible":true,"include":true,"step":"30.0","x":-434.18095238095236,"y":33.12,"z":115.39047619047618,"a95":0.99,"info":"20/03/2016 at 08:43:49"},{"visible":true,"include":true,"step":"33.0","x":-385.2857142857143,"y":24.20285714285714,"z":144.78095238095239,"a95":0.99,"info":"20/03/2016 at 08:43:49"},{"visible":true,"include":true,"step":"35.0","x":-368.29523809523806,"y":68.42571428571429,"z":105.31428571428572,"a95":0.99,"info":"20/03/2016 at 08:43:49"},{"visible":false,"include":false,"step":"40.0","x":-286.4666666666667,"y":67.72571428571429,"z":122.26666666666667,"a95":0.99,"info":"20/03/2016 at 08:43:49"},{"visible":false,"include":false,"step":"45.0","x":-235.0857142857143,"y":-7.788285714285714,"z":87.15523809523809,"a95":0.99,"info":"20/03/2016 at 08:43:49"},{"visible":false,"include":false,"step":"50.0","x":-249.0190476190476,"y":-63.41428571428572,"z":108.68571428571428,"a95":0.99,"info":"20/03/2016 at 08:43:49"},{"visible":false,"include":false,"step":"55.0","x":-164.94285714285715,"y":-7.744190476190475,"z":77.20095238095239,"a95":0.99,"info":"20/03/2016 at 08:43:49"},{"visible":false,"include":false,"step":"60.0","x":-159.25714285714287,"y":-43.16095238095238,"z":19.243809523809524,"a95":0.99,"info":"20/03/2016 at 08:43:49"},{"visible":false,"include":false,"step":"65.0","x":-117.39047619047618,"y":-41.3552380952381,"z":31.038095238095234,"a95":0.99,"info":"20/03/2016 at 08:43:49"},{"visible":false,"include":false,"step":"70.0","x":-174.32380952380953,"y":-63.62,"z":87.69142857142857,"a95":0.99,"info":"20/03/2016 at 08:43:49"},{"visible":false,"include":false,"step":"80.0","x":8.005238095238095,"y":-134.3047619047619,"z":6.082190476190476,"a95":0.99,"info":"20/03/2016 at 08:43:49"}]},{"version":"v1.1.0","exported":"2016-11-24T13:37:17.023Z","volume":10.5,"added":"2016-11-24T13:33:54.695Z","format":"Utrecht","demagType":"Unknown","strat":null,"patch":1.1,"GEO":[{"dec":348.39594636949676,"inc":47.95866377879292,"MAD":3.1636914296137584,"cm":[-2.4868995751603507e-14,-1.3322676295501878e-14,0],"intensity":1955.8170599220382,"type":"dir","forced":true,"remark":"","origin":false,"nSteps":7,"minStep":"100","maxStep":"300","steps":["100","150","180","210","240","270","300"],"group":"None","version":"v1.1.0"}],"TECT":[{"dec":353.93991254035353,"inc":19.01569835670973,"MAD":3.1636914296137264,"cm":[-1.0658141036401503e-14,-1.971756091734278e-13,1.7763568394002505e-14],"intensity":1955.8170599220384,"type":"dir","forced":true,"remark":"","origin":false,"nSteps":7,"minStep":"100","maxStep":"300","steps":["100","150","180","210","240","270","300"],"group":"None","version":"v1.1.0"}],"interpreted":true,"name":"AD4.09A","coreAzi":266,"coreDip":-7,"bedStrike":277,"bedDip":30,"data":[{"visible":false,"include":false,"step":"20","x":-2935.0476190476193,"y":2794.7619047619046,"z":1236.6666666666667,"a95":1.6,"info":"\"16-04-18\" at \"09:46\""},{"visible":true,"include":true,"step":"100","x":-1158.952380952381,"y":1003.5238095238095,"z":-60.476190476190474,"a95":1.7,"info":"\"16-04-18\" at \"12:15\""},{"visible":true,"include":true,"step":"150","x":-681.2380952380952,"y":682.952380952381,"z":20,"a95":1.7,"info":"\"16-04-18\" at \"15:17\""},{"visible":true,"include":true,"step":"180","x":-466.3809523809524,"y":421.3333333333333,"z":32.095238095238095,"a95":1.7,"info":"\"16-04-19\" at \"11:22\""},{"visible":true,"include":true,"step":"210","x":-429.14285714285717,"y":338.85714285714283,"z":24.571428571428573,"a95":1.7,"info":"\"16-04-19\" at \"14:33\""},{"visible":true,"include":true,"step":"240","x":-348.95238095238096,"y":292.57142857142856,"z":29.80952380952381,"a95":1.7,"info":"\"16-04-20\" at \"10:03\""},{"visible":true,"include":true,"step":"270","x":-330.85714285714283,"y":317.04761904761904,"z":23.333333333333332,"a95":1.6,"info":"\"16-04-21\" at \"11:20\""},{"visible":true,"include":true,"step":"300","x":-340.76190476190476,"y":250.85714285714286,"z":9.428571428571429,"a95":1.8,"info":"\"16-04-21\" at \"14:45\""}]},{"version":"v1.1.0","exported":"2016-11-24T13:37:17.023Z","volume":10.5,"added":"2016-11-24T13:33:54.696Z","format":"Utrecht","demagType":"Unknown","strat":"1","patch":1.1,"GEO":[{"dec":351.80796468613244,"inc":52.99862854759289,"MAD":2.185312847772038,"cm":[-1.5987211554602254e-14,3.952393967665557e-14,0],"intensity":2753.128121703106,"type":"dir","forced":true,"remark":"","origin":false,"nSteps":13,"minStep":"10.0","maxStep":"60.0","steps":["10.0","15.0","20.0","23.0","25.0","30.0","33.0","35.0","40.0","45.0","50.0","55.0","60.0"],"group":"None","version":"v1.1.0"}],"TECT":[{"dec":357.08538609402655,"inc":23.654798026394182,"MAD":2.1853128477721264,"cm":[3.552713678800501e-15,-2.858824288409778e-14,-1.2434497875801753e-14],"intensity":2753.128121703106,"type":"dir","forced":true,"remark":"","origin":false,"nSteps":13,"minStep":"10.0","maxStep":"60.0","steps":["10.0","15.0","20.0","23.0","25.0","30.0","33.0","35.0","40.0","45.0","50.0","55.0","60.0"],"group":"None","version":"v1.1.0"}],"interpreted":true,"name":"AD4.10B","coreAzi":228,"coreDip":-12,"bedStrike":277,"bedDip":30,"data":[{"visible":true,"include":false,"step":"0.0","x":-2007.904761904762,"y":1369.142857142857,"z":-1484.6666666666667,"a95":0.99,"info":"20/03/2016 at 08:43:49"},{"visible":true,"include":true,"step":"10.0","x":-1606.6666666666667,"y":1158.4761904761904,"z":-1159.142857142857,"a95":0.99,"info":"20/03/2016 at 08:43:49"},{"visible":true,"include":true,"step":"15.0","x":-1360.857142857143,"y":989.9047619047619,"z":-942.4666666666666,"a95":0.99,"info":"20/03/2016 at 08:43:49"},{"visible":true,"include":true,"step":"20.0","x":-1130.6666666666667,"y":853.0380952380953,"z":-761.7619047619048,"a95":0.99,"info":"20/03/2016 at 08:43:49"},{"visible":true,"include":true,"step":"23.0","x":-1016.4761904761905,"y":727.2190476190476,"z":-707.7238095238096,"a95":0.99,"info":"20/03/2016 at 08:43:49"},{"visible":true,"include":true,"step":"25.0","x":-951.7714285714286,"y":665.1904761904761,"z":-659.9142857142857,"a95":0.99,"info":"20/03/2016 at 08:43:49"},{"visible":true,"include":true,"step":"30.0","x":-801.0761904761904,"y":550.495238095238,"z":-546.3333333333334,"a95":0.99,"info":"20/03/2016 at 08:43:49"},{"visible":true,"include":true,"step":"33.0","x":-702.9428571428571,"y":511.60952380952375,"z":-499.4380952380953,"a95":0.99,"info":"20/03/2016 at 08:43:49"},{"visible":true,"include":true,"step":"35.0","x":-646.4857142857143,"y":410.45714285714286,"z":-422.91428571428577,"a95":0.99,"info":"20/03/2016 at 08:43:49"},{"visible":true,"include":true,"step":"40.0","x":-593.3619047619047,"y":324.85714285714283,"z":-384.0761904761905,"a95":0.99,"info":"20/03/2016 at 08:43:49"},{"visible":true,"include":true,"step":"45.0","x":-470.97142857142853,"y":316.81904761904764,"z":-358.97142857142853,"a95":0.99,"info":"20/03/2016 at 08:43:49"},{"visible":true,"include":true,"step":"50.0","x":-438.39047619047625,"y":202.62857142857143,"z":-277.8952380952381,"a95":0.99,"info":"20/03/2016 at 08:43:49"},{"visible":true,"include":true,"step":"55.0","x":-375.74285714285713,"y":182.21904761904761,"z":-214.24761904761903,"a95":0.99,"info":"20/03/2016 at 08:43:49"},{"visible":true,"include":true,"step":"60.0","x":-355.12380952380954,"y":189.03809523809525,"z":-224.8,"a95":0.99,"info":"20/03/2016 at 08:43:49"},{"visible":false,"include":false,"step":"65.0","x":-313.0761904761905,"y":49.396190476190476,"z":-195.65714285714287,"a95":0.99,"info":"20/03/2016 at 08:43:49"},{"visible":false,"include":false,"step":"70.0","x":-312.0761904761905,"y":42.285714285714285,"z":-167.28571428571428,"a95":0.99,"info":"20/03/2016 at 08:43:49"},{"visible":false,"include":false,"step":"80.0","x":-266.5333333333333,"y":-13.390476190476189,"z":-123.19999999999999,"a95":0.99,"info":"20/03/2016 at 08:43:49"}]},{"version":"v1.1.0","exported":"2016-11-24T13:37:17.023Z","volume":10.5,"added":"2016-11-24T13:33:54.697Z","format":"Utrecht","demagType":"Unknown","strat":null,"patch":1.1,"GEO":[{"dec":352.9728707387755,"inc":49.700963665698026,"MAD":3.8719286587679353,"cm":[6.394884621840902e-14,2.3447910280083306e-13,0],"intensity":3580.7342613408405,"type":"dir","forced":true,"remark":"","origin":false,"nSteps":7,"minStep":"100","maxStep":"300","steps":["100","150","180","210","240","270","300"],"group":"None","version":"v1.1.0"}],"TECT":[{"dec":357.37863256823306,"inc":20.2889149936626,"MAD":3.8719286587679376,"cm":[4.263256414560601e-14,3.375077994860476e-14,-4.263256414560601e-14],"intensity":3580.7342613408405,"type":"dir","forced":true,"remark":"","origin":false,"nSteps":7,"minStep":"100","maxStep":"300","steps":["100","150","180","210","240","270","300"],"group":"None","version":"v1.1.0"}],"interpreted":true,"name":"AD4.11A","coreAzi":276,"coreDip":12,"bedStrike":277,"bedDip":30,"data":[{"visible":false,"include":false,"step":"20","x":-2794.3809523809523,"y":2942.5714285714284,"z":1185.142857142857,"a95":1.7,"info":"\"16-04-18\" at \"09:48\""},{"visible":true,"include":true,"step":"100","x":-1988.1904761904761,"y":1629.047619047619,"z":666.6666666666666,"a95":1.7,"info":"\"16-04-18\" at \"12:16\""},{"visible":true,"include":true,"step":"150","x":-1405.6190476190477,"y":1196,"z":522.6666666666666,"a95":1.7,"info":"\"16-04-18\" at \"15:18\""},{"visible":true,"include":true,"step":"180","x":-1127.142857142857,"y":1070.857142857143,"z":519.047619047619,"a95":1.7,"info":"\"16-04-19\" at \"11:25\""},{"visible":true,"include":true,"step":"210","x":-958.3809523809524,"y":846.3809523809524,"z":453.5238095238095,"a95":1.7,"info":"\"16-04-19\" at \"14:36\""},{"visible":true,"include":true,"step":"240","x":-816.4761904761905,"y":821.1428571428571,"z":462.2857142857143,"a95":1.7,"info":"\"16-04-20\" at \"10:05\""},{"visible":true,"include":true,"step":"270","x":-853.9047619047619,"y":772.6666666666666,"z":508.1904761904762,"a95":1.7,"info":"\"16-04-21\" at \"11:22\""},{"visible":true,"include":true,"step":"300","x":-584.2857142857143,"y":639.6190476190476,"z":361.5238095238095,"a95":1.8,"info":"\"16-04-21\" at \"14:48\""}]},{"version":"v1.1.0","exported":"2016-11-24T13:37:17.023Z","volume":10.5,"added":"2016-11-24T13:33:54.701Z","format":"Utrecht","demagType":"Unknown","strat":"1","patch":1.1,"GEO":[{"dec":2.2918487821288522,"inc":48.58322075474513,"MAD":1.4622654070063514,"cm":[-3.552713678800501e-14,2.270406085358445e-14,0],"intensity":3397.4089714078095,"type":"dir","forced":true,"remark":"","origin":false,"nSteps":10,"minStep":"10.0","maxStep":"45.0","steps":["10.0","15.0","20.0","23.0","25.0","30.0","33.0","35.0","40.0","45.0"],"group":"None","version":"v1.1.0"}],"TECT":[{"dec":3.714682308334204,"inc":18.65069925292087,"MAD":1.4622654070062298,"cm":[0,-7.616129948928574e-14,1.7763568394002505e-15],"intensity":3397.4089714078095,"type":"dir","forced":true,"remark":"","origin":false,"nSteps":10,"minStep":"10.0","maxStep":"45.0","steps":["10.0","15.0","20.0","23.0","25.0","30.0","33.0","35.0","40.0","45.0"],"group":"None","version":"v1.1.0"}],"interpreted":true,"name":"AD4.11B","coreAzi":276,"coreDip":12,"bedStrike":277,"bedDip":30,"data":[{"visible":false,"include":false,"step":"0.0","x":-2460.095238095238,"y":2384.285714285714,"z":606.4095238095239,"a95":0.99,"info":"20/03/2016 at 08:43:49"},{"visible":true,"include":true,"step":"10.0","x":-1923.047619047619,"y":1832.095238095238,"z":525.0285714285715,"a95":0.99,"info":"20/03/2016 at 08:43:49"},{"visible":true,"include":true,"step":"15.0","x":-1577.4285714285713,"y":1483.3333333333333,"z":450.0190476190476,"a95":0.99,"info":"20/03/2016 at 08:43:49"},{"visible":true,"include":true,"step":"20.0","x":-1359.5238095238096,"y":1214.1904761904761,"z":352,"a95":0.99,"info":"20/03/2016 at 08:43:49"},{"visible":true,"include":true,"step":"23.0","x":-1148.3809523809523,"y":1026.1904761904761,"z":308.29523809523806,"a95":0.99,"info":"20/03/2016 at 08:43:49"},{"visible":true,"include":true,"step":"25.0","x":-1074.5714285714287,"y":940.647619047619,"z":279.552380952381,"a95":0.99,"info":"20/03/2016 at 08:43:49"},{"visible":true,"include":true,"step":"30.0","x":-893.4285714285714,"y":789.5809523809525,"z":232.75238095238097,"a95":0.99,"info":"20/03/2016 at 08:43:49"},{"visible":true,"include":true,"step":"33.0","x":-777.7809523809524,"y":714.9904761904761,"z":227.85714285714286,"a95":0.99,"info":"20/03/2016 at 08:43:49"},{"visible":true,"include":true,"step":"35.0","x":-740.6285714285715,"y":594.504761904762,"z":180.13333333333335,"a95":0.99,"info":"20/03/2016 at 08:43:49"},{"visible":true,"include":true,"step":"40.0","x":-652.9714285714285,"y":524.3714285714285,"z":205.0095238095238,"a95":0.99,"info":"20/03/2016 at 08:43:49"},{"visible":true,"include":true,"step":"45.0","x":-515.6666666666666,"y":431.4190476190476,"z":161.67619047619047,"a95":0.99,"info":"20/03/2016 at 08:43:49"},{"visible":false,"include":false,"step":"50.0","x":-470.5904761904762,"y":340.2,"z":203.1809523809524,"a95":0.99,"info":"20/03/2016 at 08:43:49"},{"visible":false,"include":false,"step":"55.0","x":-378.447619047619,"y":250.66666666666666,"z":143.45714285714286,"a95":0.99,"info":"20/03/2016 at 08:43:49"},{"visible":false,"include":false,"step":"60.0","x":-336.74285714285713,"y":298.83809523809526,"z":140.15238095238095,"a95":0.99,"info":"20/03/2016 at 08:43:49"},{"visible":false,"include":false,"step":"65.0","x":-299.4190476190476,"y":101.47619047619048,"z":117.46666666666667,"a95":0.99,"info":"20/03/2016 at 08:43:49"},{"visible":false,"include":false,"step":"70.0","x":-250.87619047619046,"y":88.8647619047619,"z":75.74666666666667,"a95":0.99,"info":"20/03/2016 at 08:43:49"},{"visible":false,"include":false,"step":"80.0","x":-352.4761904761905,"y":81.91238095238096,"z":79.46857142857142,"a95":0.99,"info":"20/03/2016 at 08:43:49"}]},{"version":"v1.1.0","exported":"2016-11-24T13:37:17.023Z","volume":10.5,"added":"2016-11-24T13:33:54.702Z","format":"Utrecht","demagType":"Unknown","strat":"1","patch":1.1,"GEO":[{"dec":356.2802626304901,"inc":51.6522166599419,"MAD":2.351899190613376,"cm":[-1.2434497875801753e-14,-1.0785816684233396e-13,0],"intensity":3396.892129103133,"type":"dir","forced":true,"remark":"","origin":false,"nSteps":13,"minStep":"10.0","maxStep":"60.0","steps":["10.0","15.0","20.0","23.0","25.0","30.0","33.0","35.0","40.0","45.0","50.0","55.0","60.0"],"group":"None","version":"v1.1.0"}],"TECT":[{"dec":359.8507179330974,"inc":21.986332715550883,"MAD":2.351899190613364,"cm":[0,-1.6409096303959814e-13,2.1316282072803006e-14],"intensity":3396.8921291031324,"type":"dir","forced":true,"remark":"","origin":false,"nSteps":13,"minStep":"10.0","maxStep":"60.0","steps":["10.0","15.0","20.0","23.0","25.0","30.0","33.0","35.0","40.0","45.0","50.0","55.0","60.0"],"group":"None","version":"v1.1.0"}],"interpreted":true,"name":"AD4.12B","coreAzi":272,"coreDip":8,"bedStrike":277,"bedDip":30,"data":[{"visible":false,"include":false,"step":"0.0","x":-2751.0476190476193,"y":2325.4285714285716,"z":542.8190476190476,"a95":0.99,"info":"20/03/2016 at 08:43:49"},{"visible":true,"include":true,"step":"10.0","x":-2169.4285714285716,"y":1816.6666666666667,"z":471.6285714285715,"a95":0.99,"info":"20/03/2016 at 08:43:49"},{"visible":true,"include":true,"step":"15.0","x":-1784,"y":1498.857142857143,"z":410.9047619047619,"a95":0.99,"info":"20/03/2016 at 08:43:49"},{"visible":true,"include":true,"step":"20.0","x":-1472,"y":1253.142857142857,"z":351.14285714285717,"a95":0.99,"info":"20/03/2016 at 08:43:49"},{"visible":true,"include":true,"step":"23.0","x":-1329.6190476190477,"y":1116.3809523809523,"z":308.67619047619047,"a95":0.99,"info":"20/03/2016 at 08:43:49"},{"visible":true,"include":true,"step":"25.0","x":-1241.904761904762,"y":985.047619047619,"z":259.62857142857143,"a95":0.99,"info":"20/03/2016 at 08:43:49"},{"visible":true,"include":true,"step":"30.0","x":-1083.2380952380952,"y":810.4000000000001,"z":219.32380952380953,"a95":0.99,"info":"20/03/2016 at 08:43:49"},{"visible":true,"include":true,"step":"33.0","x":-943.0095238095239,"y":702.552380952381,"z":237.31428571428575,"a95":0.99,"info":"20/03/2016 at 08:43:49"},{"visible":true,"include":true,"step":"35.0","x":-889.1619047619048,"y":613.6380952380953,"z":185.65714285714287,"a95":0.99,"info":"20/03/2016 at 08:43:49"},{"visible":true,"include":true,"step":"40.0","x":-783.6380952380953,"y":536.2666666666667,"z":130.38095238095238,"a95":0.99,"info":"20/03/2016 at 08:43:49"},{"visible":true,"include":true,"step":"45.0","x":-617.4571428571429,"y":469.2285714285714,"z":143.9904761904762,"a95":0.99,"info":"20/03/2016 at 08:43:49"},{"visible":true,"include":true,"step":"50.0","x":-633.4285714285714,"y":386.6666666666667,"z":131.53333333333333,"a95":0.99,"info":"20/03/2016 at 08:43:49"},{"visible":true,"include":true,"step":"55.0","x":-467.6285714285715,"y":285,"z":132.63809523809525,"a95":0.99,"info":"20/03/2016 at 08:43:49"},{"visible":true,"include":true,"step":"60.0","x":-455.74285714285713,"y":272.0761904761905,"z":61.76095238095238,"a95":0.99,"info":"20/03/2016 at 08:43:49"},{"visible":false,"include":false,"step":"65.0","x":-366.87619047619046,"y":146.62857142857143,"z":125.81904761904761,"a95":0.99,"info":"20/03/2016 at 08:43:49"},{"visible":false,"include":false,"step":"70.0","x":-288.7809523809524,"y":173.46666666666667,"z":112.34285714285713,"a95":0.99,"info":"20/03/2016 at 08:43:49"},{"visible":false,"include":false,"step":"80.0","x":-252.9238095238095,"y":81.03904761904762,"z":107.83809523809524,"a95":0.99,"info":"20/03/2016 at 08:43:49"}]},{"version":"v1.1.0","exported":"2016-11-24T13:37:17.024Z","volume":10.5,"added":"2016-11-24T13:33:54.702Z","format":"Utrecht","demagType":"Unknown","strat":"1","patch":1.1,"GEO":[{"dec":338.657450176811,"inc":53.95383855641266,"MAD":2.764741009930533,"cm":[1.4210854715202004e-14,1.0658141036401503e-14,0],"intensity":1706.2555725487068,"type":"dir","forced":true,"remark":"","origin":false,"nSteps":13,"minStep":"10.0","maxStep":"60.0","steps":["10.0","15.0","20.0","23.0","25.0","30.0","33.0","35.0","40.0","45.0","50.0","55.0","60.0"],"group":"None","version":"v1.1.0"}],"TECT":[{"dec":348.8622060862302,"inc":26.184935092581014,"MAD":2.764741009930587,"cm":[8.881784197001252e-15,8.393286066166183e-14,5.329070518200751e-15],"intensity":1706.2555725487068,"type":"dir","forced":true,"remark":"","origin":false,"nSteps":13,"minStep":"10.0","maxStep":"60.0","steps":["10.0","15.0","20.0","23.0","25.0","30.0","33.0","35.0","40.0","45.0","50.0","55.0","60.0"],"group":"None","version":"v1.1.0"}],"interpreted":true,"name":"AD4.13B","coreAzi":268,"coreDip":-7,"bedStrike":277,"bedDip":30,"data":[{"visible":false,"include":false,"step":"0.0","x":-1564.857142857143,"y":1158.095238095238,"z":108.77142857142856,"a95":0.99,"info":"20/03/2016 at 08:43:49"},{"visible":true,"include":true,"step":"10.0","x":-1167.6190476190477,"y":815.8571428571429,"z":90.63809523809525,"a95":0.99,"info":"20/03/2016 at 08:43:49"},{"visible":true,"include":true,"step":"15.0","x":-944.4857142857143,"y":654.2476190476191,"z":60.36285714285714,"a95":0.99,"info":"20/03/2016 at 08:43:49"},{"visible":true,"include":true,"step":"20.0","x":-762.9714285714285,"y":521.504761904762,"z":122.37142857142858,"a95":0.99,"info":"20/03/2016 at 08:43:49"},{"visible":true,"include":true,"step":"23.0","x":-678.4285714285714,"y":482.552380952381,"z":103.60952380952382,"a95":0.99,"info":"20/03/2016 at 08:43:49"},{"visible":true,"include":true,"step":"25.0","x":-678.9333333333334,"y":428.3238095238095,"z":68.54761904761905,"a95":0.99,"info":"20/03/2016 at 08:43:49"},{"visible":true,"include":true,"step":"30.0","x":-551.3238095238095,"y":340.15238095238095,"z":89.19619047619047,"a95":0.99,"info":"20/03/2016 at 08:43:49"},{"visible":true,"include":true,"step":"33.0","x":-487.39047619047625,"y":333.95238095238096,"z":80.56666666666668,"a95":0.99,"info":"20/03/2016 at 08:43:49"},{"visible":true,"include":true,"step":"35.0","x":-453.5619047619047,"y":273.7333333333333,"z":51.02095238095238,"a95":0.99,"info":"20/03/2016 at 08:43:49"},{"visible":true,"include":true,"step":"40.0","x":-426.552380952381,"y":255.94285714285715,"z":98.5904761904762,"a95":0.99,"info":"20/03/2016 at 08:43:49"},{"visible":true,"include":true,"step":"45.0","x":-333.54285714285714,"y":209,"z":46.63333333333333,"a95":0.99,"info":"20/03/2016 at 08:43:49"},{"visible":true,"include":true,"step":"50.0","x":-332.93333333333334,"y":170.24761904761903,"z":51.460952380952385,"a95":0.99,"info":"20/03/2016 at 08:43:49"},{"visible":true,"include":true,"step":"55.0","x":-325.62857142857143,"y":203.67619047619047,"z":41.63047619047619,"a95":0.99,"info":"20/03/2016 at 08:43:49"},{"visible":true,"include":true,"step":"60.0","x":-221.74285714285716,"y":165.37142857142857,"z":44.16571428571429,"a95":0.99,"info":"20/03/2016 at 08:43:49"},{"visible":false,"include":false,"step":"65.0","x":-226.1809523809524,"y":77.76952380952382,"z":-21.764761904761905,"a95":0.99,"info":"20/03/2016 at 08:43:49"},{"visible":false,"include":false,"step":"70.0","x":-213.30476190476188,"y":108.87619047619049,"z":29.364761904761902,"a95":0.99,"info":"20/03/2016 at 08:43:49"},{"visible":false,"include":false,"step":"80.0","x":-157.07619047619048,"y":136.15238095238095,"z":2.4051428571428572,"a95":0.99,"info":"20/03/2016 at 08:43:49"}]},{"version":"v1.1.0","exported":"2016-11-24T13:37:17.024Z","volume":10.5,"added":"2016-11-24T13:33:54.702Z","format":"Utrecht","demagType":"Unknown","strat":"1","patch":1.1,"GEO":[{"dec":337.54710208913747,"inc":63.94959595801683,"MAD":1.5374883923411748,"cm":[3.019806626980426e-14,9.769962616701378e-15,0],"intensity":5776.921728167847,"type":"dir","forced":true,"remark":"","origin":false,"nSteps":13,"minStep":"10.0","maxStep":"60.0","steps":["10.0","15.0","20.0","23.0","25.0","30.0","33.0","35.0","40.0","45.0","50.0","55.0","60.0"],"group":"None","version":"v1.1.0"}],"TECT":[{"dec":351.53260603137727,"inc":35.933222063584154,"MAD":1.537488392340919,"cm":[-3.552713678800501e-15,-6.8833827526759706e-15,-7.105427357601002e-15],"intensity":5776.921728167847,"type":"dir","forced":true,"remark":"","origin":false,"nSteps":13,"minStep":"10.0","maxStep":"60.0","steps":["10.0","15.0","20.0","23.0","25.0","30.0","33.0","35.0","40.0","45.0","50.0","55.0","60.0"],"group":"None","version":"v1.1.0"}],"interpreted":true,"name":"AD4.18B","coreAzi":265,"coreDip":-8,"bedStrike":277,"bedDip":30,"data":[{"visible":false,"include":false,"step":"0.0","x":-5859.142857142857,"y":2688.9523809523807,"z":-129.9714285714286,"a95":0.99,"info":"20/03/2016 at 08:43:49"},{"visible":true,"include":true,"step":"10.0","x":-4502.666666666667,"y":2104,"z":-37.08857142857143,"a95":0.99,"info":"20/03/2016 at 08:43:49"},{"visible":true,"include":true,"step":"15.0","x":-3647.4285714285716,"y":1725.047619047619,"z":38.43523809523809,"a95":0.99,"info":"20/03/2016 at 08:43:49"},{"visible":true,"include":true,"step":"20.0","x":-2970.8571428571427,"y":1393.2380952380952,"z":73.09619047619047,"a95":0.99,"info":"20/03/2016 at 08:43:49"},{"visible":true,"include":true,"step":"23.0","x":-2609.0476190476193,"y":1202.857142857143,"z":87.85428571428572,"a95":0.99,"info":"20/03/2016 at 08:43:49"},{"visible":true,"include":true,"step":"25.0","x":-2426.095238095238,"y":1109.904761904762,"z":27.83904761904762,"a95":0.99,"info":"20/03/2016 at 08:43:49"},{"visible":true,"include":true,"step":"30.0","x":-1978.857142857143,"y":890.3619047619047,"z":42.034285714285716,"a95":0.99,"info":"20/03/2016 at 08:43:49"},{"visible":true,"include":true,"step":"33.0","x":-1759.4285714285713,"y":812.6571428571428,"z":-3.9080952380952376,"a95":0.99,"info":"20/03/2016 at 08:43:49"},{"visible":true,"include":true,"step":"35.0","x":-1650,"y":740.152380952381,"z":-36.18190476190476,"a95":0.99,"info":"20/03/2016 at 08:43:49"},{"visible":true,"include":true,"step":"40.0","x":-1395.904761904762,"y":575.1142857142856,"z":44.64952380952381,"a95":0.99,"info":"20/03/2016 at 08:43:49"},{"visible":true,"include":true,"step":"45.0","x":-1245.3333333333333,"y":638.4285714285714,"z":-67.82285714285715,"a95":0.99,"info":"20/03/2016 at 08:43:49"},{"visible":true,"include":true,"step":"50.0","x":-1059.8095238095239,"y":374.54285714285714,"z":-48.22,"a95":0.99,"info":"20/03/2016 at 08:43:49"},{"visible":true,"include":true,"step":"55.0","x":-828.3809523809524,"y":351.77142857142854,"z":27.890476190476193,"a95":0.99,"info":"20/03/2016 at 08:43:49"},{"visible":true,"include":true,"step":"60.0","x":-774.9619047619047,"y":243.9238095238095,"z":-44.857142857142854,"a95":0.99,"info":"20/03/2016 at 08:43:49"},{"visible":false,"include":false,"step":"65.0","x":-700.8666666666667,"y":148.51428571428573,"z":-120.80000000000001,"a95":0.99,"info":"20/03/2016 at 08:43:49"},{"visible":false,"include":false,"step":"70.0","x":-577.7904761904762,"y":244,"z":-1.3429523809523811,"a95":0.99,"info":"20/03/2016 at 08:43:49"},{"visible":false,"include":false,"step":"80.0","x":-400.14285714285717,"y":183.1809523809524,"z":-38.88952380952381,"a95":0.99,"info":"20/03/2016 at 08:43:49"}]}]
