# Supplementary material for: Paleomagnetic constraints on the timing and distribution of Cenozoic rotations in Central and Eastern Anatolia
Source: Copernicus journal article supplement (doi:10.5194/se-9-295-2018), 2018-03-21
Supplement: Supplementary file 2 [file se-9-295-2018-supplement.zip › se-2017-66_DATA_dir files/dir files Ulukisla/AD5.dir]

[{"version":"v1.1.0","exported":"2016-11-24T13:42:30.426Z","volume":10.5,"added":"2016-11-24T13:38:03.823Z","format":"Utrecht","demagType":"Unknown","strat":null,"patch":1.1,"GEO":[{"dec":334.26787983362914,"inc":45.11176198228562,"MAD":7.31795795404855,"cm":[8162.292835281692,-4418.829703255067,14627.106561689847],"intensity":14641.21005742279,"type":"dir","forced":false,"remark":"","origin":false,"nSteps":4,"minStep":"150","maxStep":"270","steps":["150","180","240","270"],"group":"None","version":"v1.1.0"}],"TECT":[{"dec":303.615405521154,"inc":28.108922434092246,"MAD":7.31795795404859,"cm":[5102.979591609165,-13303.72050374652,9852.509664451238],"intensity":14641.210057422784,"type":"dir","forced":false,"remark":"","origin":false,"nSteps":4,"minStep":"150","maxStep":"270","steps":["150","180","240","270"],"group":"None","version":"v1.1.0"}],"interpreted":true,"name":"AD5.01A","coreAzi":295,"coreDip":9,"bedStrike":161,"bedDip":42,"data":[{"visible":false,"include":false,"step":"20","x":-45118.666666666664,"y":9995.52380952381,"z":70261.42857142857,"a95":2.2,"info":"\"16-04-18\" at \"10:00\""},{"visible":true,"include":false,"step":"100","x":-34296.76190476191,"y":10588.666666666666,"z":28570.85714285714,"a95":1.9,"info":"\"16-04-18\" at \"12:25\""},{"visible":true,"include":true,"step":"150","x":-18139.14285714286,"y":9091.42857142857,"z":15421.238095238095,"a95":2.1,"info":"\"16-04-18\" at \"15:23\""},{"visible":true,"include":true,"step":"180","x":-14866.666666666666,"y":6647.523809523809,"z":9840.285714285714,"a95":2.3,"info":"\"16-04-19\" at \"11:37\""},{"visible":false,"include":false,"step":"210","x":-11839.809523809523,"y":6345.428571428572,"z":7333.714285714285,"a95":2.3,"info":"\"16-04-19\" at \"14:49\""},{"visible":true,"include":true,"step":"240","x":-10680,"y":3587.4285714285716,"z":7869.809523809524,"a95":2,"info":"\"16-04-20\" at \"10:20\""},{"visible":true,"include":true,"step":"270","x":-9437.809523809523,"y":2793.904761904762,"z":5471.714285714285,"a95":2.2,"info":"\"16-04-21\" at \"11:39\""},{"visible":false,"include":false,"step":"300","x":-5186.190476190476,"y":-975.1428571428571,"z":1424.3809523809523,"a95":3.2,"info":"\"16-04-21\" at \"14:50\""}]},{"version":"v1.1.0","exported":"2016-11-24T13:42:30.426Z","volume":10.5,"added":"2016-11-24T13:38:03.824Z","format":"Utrecht","demagType":"Unknown","strat":"1","patch":1.1,"GEO":[{"dec":340.43299464284473,"inc":51.530380874307696,"MAD":2.934472427656166,"cm":[3.979039320256561e-13,1.3855583347321954e-12,0],"intensity":37304.03637367822,"type":"dir","forced":true,"remark":"","origin":false,"nSteps":10,"minStep":"10.0","maxStep":"45.0","steps":["10.0","15.0","20.0","23.0","25.0","30.0","33.0","35.0","40.0","45.0"],"group":"None","version":"v1.1.0"}],"TECT":[{"dec":300.65128842624074,"inc":35.29013363169862,"MAD":2.9344724276561878,"cm":[2.4726887204451486e-12,1.7905676941154525e-12,2.2737367544323206e-13],"intensity":37304.03637367822,"type":"dir","forced":true,"remark":"","origin":false,"nSteps":10,"minStep":"10.0","maxStep":"45.0","steps":["10.0","15.0","20.0","23.0","25.0","30.0","33.0","35.0","40.0","45.0"],"group":"None","version":"v1.1.0"}],"interpreted":true,"name":"AD5.02B","coreAzi":293,"coreDip":7,"bedStrike":161,"bedDip":42,"data":[{"visible":false,"include":false,"step":"0.0","x":-36290.47619047619,"y":14387.619047619048,"z":25093.333333333332,"a95":0.99,"info":"21/03/2016 at 12:00:26"},{"visible":true,"include":true,"step":"10.0","x":-23312.380952380954,"y":12777.142857142857,"z":15481.904761904761,"a95":0.99,"info":"21/03/2016 at 12:00:26"},{"visible":true,"include":true,"step":"15.0","x":-17109.52380952381,"y":11266.666666666666,"z":11907.619047619048,"a95":0.99,"info":"21/03/2016 at 12:00:26"},{"visible":true,"include":true,"step":"20.0","x":-13421.904761904761,"y":9186.380952380952,"z":9906.666666666666,"a95":0.99,"info":"21/03/2016 at 12:00:26"},{"visible":true,"include":true,"step":"23.0","x":-11633.333333333334,"y":7614,"z":8204.761904761905,"a95":0.99,"info":"21/03/2016 at 12:00:26"},{"visible":true,"include":true,"step":"25.0","x":-10113.333333333334,"y":6448.666666666667,"z":7142.761904761905,"a95":0.99,"info":"21/03/2016 at 12:00:26"},{"visible":true,"include":true,"step":"30.0","x":-7350,"y":5622.761904761905,"z":6842.285714285715,"a95":0.99,"info":"21/03/2016 at 12:00:26"},{"visible":true,"include":true,"step":"33.0","x":-6727.714285714285,"y":4768.571428571428,"z":5383.047619047619,"a95":0.99,"info":"21/03/2016 at 12:00:26"},{"visible":true,"include":true,"step":"35.0","x":-5799.428571428572,"y":4356.190476190476,"z":4529.809523809524,"a95":0.99,"info":"21/03/2016 at 12:00:26"},{"visible":true,"include":true,"step":"40.0","x":-4716.0952380952385,"y":3629.5238095238096,"z":3776.7619047619046,"a95":0.99,"info":"21/03/2016 at 12:00:26"},{"visible":true,"include":true,"step":"45.0","x":-4852.285714285715,"y":3486.6666666666665,"z":2789.1428571428573,"a95":0.99,"info":"21/03/2016 at 12:00:26"},{"visible":false,"include":false,"step":"50.0","x":-3326.285714285714,"y":3761.904761904762,"z":1782.1904761904761,"a95":0.99,"info":"21/03/2016 at 12:00:26"},{"visible":false,"include":false,"step":"55.0","x":-1818.857142857143,"y":2706.6666666666665,"z":1981.047619047619,"a95":0.99,"info":"21/03/2016 at 12:00:26"},{"visible":false,"include":false,"step":"60.0","x":-2312.6666666666665,"y":1851.047619047619,"z":1532.7619047619048,"a95":0.99,"info":"21/03/2016 at 12:00:26"},{"visible":false,"include":false,"step":"65.0","x":-1264.857142857143,"y":2080.7619047619046,"z":1837.142857142857,"a95":0.99,"info":"21/03/2016 at 12:00:26"},{"visible":false,"include":false,"step":"70.0","x":-1346.5714285714287,"y":1587.8095238095239,"z":600.9238095238095,"a95":0.99,"info":"21/03/2016 at 12:00:26"},{"visible":false,"include":false,"step":"80.0","x":-1418,"y":1950.095238095238,"z":997.6190476190476,"a95":0.99,"info":"21/03/2016 at 12:00:26"}]},{"version":"v1.1.0","exported":"2016-11-24T13:42:30.426Z","volume":10.5,"added":"2016-11-24T13:38:03.824Z","format":"Utrecht","demagType":"Unknown","strat":null,"patch":1.1,"GEO":[{"dec":335.47170013211985,"inc":40.60509960715317,"MAD":4.447850253755417,"cm":[-2.5579538487363607e-13,-7.815970093361102e-13,0],"intensity":9479.370372902764,"type":"dir","forced":true,"remark":"","origin":false,"nSteps":5,"minStep":"100","maxStep":"270","steps":["100","150","180","240","270"],"group":"None","version":"v1.1.0"}],"TECT":[{"dec":308.0476718122188,"inc":25.768055551181217,"MAD":4.44785025375541,"cm":[-3.694822225952521e-13,-6.252776074688882e-13,-6.821210263296962e-13],"intensity":9479.370372902764,"type":"dir","forced":true,"remark":"","origin":false,"nSteps":5,"minStep":"100","maxStep":"270","steps":["100","150","180","240","270"],"group":"None","version":"v1.1.0"}],"interpreted":true,"name":"AD5.05A","coreAzi":272,"coreDip":47,"bedStrike":161,"bedDip":42,"data":[{"visible":false,"include":false,"step":"20","x":-2372.4761904761904,"y":4443.428571428572,"z":-4869.809523809524,"a95":2.5,"info":"\"16-04-18\" at \"10:05\""},{"visible":true,"include":true,"step":"100","x":-1262.3809523809523,"y":4643.047619047619,"z":4630,"a95":2.1,"info":"\"16-04-18\" at \"12:26\""},{"visible":true,"include":true,"step":"150","x":-809.3333333333334,"y":4182.952380952381,"z":4216.952380952381,"a95":2.1,"info":"\"16-04-18\" at \"15:24\""},{"visible":true,"include":true,"step":"180","x":-984.952380952381,"y":3306.4761904761904,"z":3938.4761904761904,"a95":2,"info":"\"16-04-19\" at \"11:39\""},{"visible":false,"include":false,"step":"210","x":-876.3809523809524,"y":1183.2380952380952,"z":-857.8095238095239,"a95":3.3,"info":"\"16-04-19\" at \"14:52\""},{"visible":true,"include":true,"step":"240","x":-1020.5714285714286,"y":1968.095238095238,"z":2111.6190476190477,"a95":1.9,"info":"\"16-04-20\" at \"10:22\""},{"visible":true,"include":true,"step":"270","x":-1040,"y":1931.047619047619,"z":1799.5238095238096,"a95":1.9,"info":"\"16-04-21\" at \"11:41\""}]},{"version":"v1.1.0","exported":"2016-11-24T13:42:30.426Z","volume":10.5,"added":"2016-11-24T13:38:03.824Z","format":"Utrecht","demagType":"Unknown","strat":null,"patch":1.1,"GEO":[],"TECT":[],"interpreted":false,"name":"AD5.09A","coreAzi":265,"coreDip":23,"bedStrike":161,"bedDip":42,"data":[{"visible":true,"include":false,"step":"20","x":-73.52380952380952,"y":102.0952380952381,"z":151.42857142857142,"a95":2.2,"info":"\"16-04-18\" at \"10:07\""},{"visible":true,"include":false,"step":"100","x":-59.61904761904762,"y":50.095238095238095,"z":60.666666666666664,"a95":1.8,"info":"\"16-04-18\" at \"12:28\""},{"visible":true,"include":false,"step":"150","x":-26.704761904761902,"y":36.44761904761905,"z":26.742857142857144,"a95":3.1,"info":"\"16-04-18\" at \"15:25\""},{"visible":true,"include":false,"step":"180","x":-9.438095238095238,"y":8.6,"z":35.34285714285714,"a95":5.1,"info":"\"16-04-19\" at \"11:43\""},{"visible":true,"include":false,"step":"210","x":1.8571428571428572,"y":15.761904761904763,"z":1.5523809523809524,"a95":5.3,"info":"\"16-04-19\" at \"14:54\""},{"visible":true,"include":false,"step":"240","x":-16.857142857142858,"y":18.99047619047619,"z":1.0476190476190477,"a95":3.9,"info":"\"16-04-20\" at \"10:24\""}]},{"version":"v1.1.0","exported":"2016-11-24T13:42:30.426Z","volume":10.5,"added":"2016-11-24T13:38:03.824Z","format":"Utrecht","demagType":"Unknown","strat":null,"patch":1.1,"GEO":[],"TECT":[],"interpreted":false,"name":"AD5.11A","coreAzi":290,"coreDip":23,"bedStrike":161,"bedDip":42,"data":[{"visible":true,"include":false,"step":"20","x":-53.904761904761905,"y":7.619047619047619,"z":138.57142857142858,"a95":7.3,"info":"\"16-04-18\" at \"10:11\""},{"visible":true,"include":false,"step":"100","x":-20.2,"y":12.019047619047619,"z":60.838095238095235,"a95":4.1,"info":"\"16-04-18\" at \"12:30\""},{"visible":true,"include":false,"step":"150","x":4.161904761904762,"y":14.523809523809524,"z":23.58095238095238,"a95":4.6,"info":"\"16-04-18\" at \"15:27\""},{"visible":true,"include":false,"step":"180","x":-44.57142857142857,"y":16.571428571428573,"z":-106,"a95":2.7,"info":"\"16-04-19\" at \"11:45\""},{"visible":true,"include":false,"step":"210","x":26,"y":13.695238095238096,"z":-22.02857142857143,"a95":5,"info":"\"16-04-19\" at \"14:57\""},{"visible":true,"include":false,"step":"240","x":-38.99047619047619,"y":-31.152380952380955,"z":-60.30476190476191,"a95":6.4,"info":"\"16-04-20\" at \"10:27\""}]},{"version":"v1.1.0","exported":"2016-11-24T13:42:30.426Z","volume":10.5,"added":"2016-11-24T13:38:03.824Z","format":"Utrecht","demagType":"Unknown","strat":"1","patch":1.1,"GEO":[{"dec":353.2675717958308,"inc":37.67509775174477,"MAD":3.446827465696272,"cm":[5.684341886080802e-14,-3.552713678800501e-14,0],"intensity":15479.612858219765,"type":"dir","forced":true,"remark":"","origin":false,"nSteps":7,"minStep":"10.0","maxStep":"33.0","steps":["10.0","15.0","20.0","23.0","25.0","30.0","33.0"],"group":"None","version":"v1.1.0"}],"TECT":[{"dec":320.8377100253233,"inc":34.52234680720873,"MAD":3.4468274656963005,"cm":[-5.400124791776761e-13,2.5579538487363607e-13,5.400124791776761e-13],"intensity":15479.612858219765,"type":"dir","forced":true,"remark":"","origin":false,"nSteps":7,"minStep":"10.0","maxStep":"33.0","steps":["10.0","15.0","20.0","23.0","25.0","30.0","33.0"],"group":"None","version":"v1.1.0"}],"interpreted":true,"name":"AD5.12B","coreAzi":260,"coreDip":40,"bedStrike":161,"bedDip":42,"data":[{"visible":false,"include":false,"step":"0.0","x":-11830.47619047619,"y":13557.142857142857,"z":9003.142857142857,"a95":0.99,"info":"21/03/2016 at 12:00:26"},{"visible":true,"include":true,"step":"10.0","x":-6197.9047619047615,"y":9223.52380952381,"z":4771.714285714285,"a95":0.99,"info":"21/03/2016 at 12:00:26"},{"visible":true,"include":true,"step":"15.0","x":-4034.6666666666665,"y":7193.809523809524,"z":3202,"a95":0.99,"info":"21/03/2016 at 12:00:26"},{"visible":true,"include":true,"step":"20.0","x":-3309.4285714285716,"y":5245.619047619048,"z":2311.3333333333335,"a95":0.99,"info":"21/03/2016 at 12:00:26"},{"visible":true,"include":true,"step":"23.0","x":-3103.714285714286,"y":4429.714285714285,"z":1606.7619047619048,"a95":0.99,"info":"21/03/2016 at 12:00:26"},{"visible":true,"include":true,"step":"25.0","x":-2632.285714285714,"y":4352.761904761905,"z":1284.5714285714287,"a95":0.99,"info":"21/03/2016 at 12:00:26"},{"visible":true,"include":true,"step":"30.0","x":-1927.7142857142858,"y":3351.3333333333335,"z":1367.5238095238096,"a95":0.99,"info":"21/03/2016 at 12:00:26"},{"visible":true,"include":true,"step":"33.0","x":-1453.2380952380952,"y":2761.2380952380954,"z":1347.4285714285713,"a95":0.99,"info":"21/03/2016 at 12:00:26"},{"visible":false,"include":false,"step":"35.0","x":-1252.6666666666667,"y":2875.809523809524,"z":361.64761904761906,"a95":0.99,"info":"21/03/2016 at 12:00:26"},{"visible":false,"include":false,"step":"40.0","x":-1267.3333333333333,"y":1761.7142857142858,"z":-188.53333333333333,"a95":0.99,"info":"21/03/2016 at 12:00:26"},{"visible":false,"include":false,"step":"45.0","x":-1044.3809523809523,"y":1798.3809523809523,"z":109.04761904761905,"a95":0.99,"info":"21/03/2016 at 12:00:26"},{"visible":false,"include":false,"step":"50.0","x":-762.1238095238095,"y":1136.857142857143,"z":194.9047619047619,"a95":0.99,"info":"21/03/2016 at 12:00:26"},{"visible":false,"include":false,"step":"55.0","x":-812.5333333333334,"y":1321.8095238095239,"z":487.4761904761905,"a95":0.99,"info":"21/03/2016 at 12:00:26"},{"visible":false,"include":false,"step":"60.0","x":-712.6761904761905,"y":350.0857142857143,"z":-113.4095238095238,"a95":0.99,"info":"21/03/2016 at 12:00:26"},{"visible":false,"include":false,"step":"65.0","x":51.68761904761905,"y":-3.0424761904761906,"z":176.1047619047619,"a95":0.99,"info":"21/03/2016 at 12:00:26"},{"visible":false,"include":false,"step":"70.0","x":-743.0857142857143,"y":578.3904761904762,"z":306.06666666666666,"a95":0.99,"info":"21/03/2016 at 12:00:26"},{"visible":false,"include":false,"step":"80.0","x":-917.8190476190476,"y":431.95238095238096,"z":668.0666666666666,"a95":0.99,"info":"21/03/2016 at 12:00:26"}]},{"version":"v1.1.0","exported":"2016-11-24T13:42:30.426Z","volume":10.5,"added":"2016-11-24T13:38:03.826Z","format":"Utrecht","demagType":"Unknown","strat":"1","patch":1.1,"GEO":[{"dec":353.0323807224218,"inc":47.68246739974188,"MAD":7.808404097291618,"cm":[3387.5768418081493,-750.5791162663822,2747.339329273803],"intensity":7745.505864210355,"type":"dir","forced":false,"remark":"","origin":false,"nSteps":9,"minStep":"10.0","maxStep":"40.0","steps":["10.0","15.0","20.0","23.0","25.0","30.0","33.0","35.0","40.0"],"group":"None","version":"v1.1.0"}],"TECT":[{"dec":310.33110584001133,"inc":40.04656694429955,"MAD":7.80840409729162,"cm":[2756.194559337228,-2584.2464089902196,2304.7735914414125],"intensity":7745.505864210355,"type":"dir","forced":false,"remark":"","origin":false,"nSteps":9,"minStep":"10.0","maxStep":"40.0","steps":["10.0","15.0","20.0","23.0","25.0","30.0","33.0","35.0","40.0"],"group":"None","version":"v1.1.0"}],"interpreted":true,"name":"AD5.13B","coreAzi":263,"coreDip":38,"bedStrike":161,"bedDip":42,"data":[{"visible":false,"include":false,"step":"0.0","x":-9466.190476190477,"y":10683.809523809523,"z":7438.285714285715,"a95":0.99,"info":"21/03/2016 at 12:00:26"},{"visible":true,"include":true,"step":"10.0","x":-5082.190476190476,"y":7218.571428571428,"z":4170.0952380952385,"a95":0.99,"info":"21/03/2016 at 12:00:26"},{"visible":true,"include":true,"step":"15.0","x":-3506.5714285714284,"y":4921.619047619048,"z":3148.7619047619046,"a95":0.99,"info":"21/03/2016 at 12:00:26"},{"visible":true,"include":true,"step":"20.0","x":-1990.1904761904761,"y":3682.6666666666665,"z":2222.3809523809523,"a95":0.99,"info":"21/03/2016 at 12:00:26"},{"visible":true,"include":true,"step":"23.0","x":-1784.952380952381,"y":3029.0476190476193,"z":2172.5714285714284,"a95":0.99,"info":"21/03/2016 at 12:00:26"},{"visible":true,"include":true,"step":"25.0","x":-1728.3809523809523,"y":2930.4761904761904,"z":1855.904761904762,"a95":0.99,"info":"21/03/2016 at 12:00:26"},{"visible":true,"include":true,"step":"30.0","x":-1114.3809523809523,"y":2590.4761904761904,"z":1568.952380952381,"a95":0.99,"info":"21/03/2016 at 12:00:26"},{"visible":true,"include":true,"step":"33.0","x":-806.742857142857,"y":2793.6190476190477,"z":1018,"a95":0.99,"info":"21/03/2016 at 12:00:26"},{"visible":true,"include":true,"step":"35.0","x":-781.1904761904761,"y":2180.7619047619046,"z":719.8857142857144,"a95":0.99,"info":"21/03/2016 at 12:00:26"},{"visible":true,"include":true,"step":"40.0","x":-849.4095238095238,"y":1736.952380952381,"z":701.9142857142857,"a95":0.99,"info":"21/03/2016 at 12:00:26"},{"visible":false,"include":false,"step":"45.0","x":-275.6952380952381,"y":1303.2380952380952,"z":591.5428571428571,"a95":0.99,"info":"21/03/2016 at 12:00:26"},{"visible":false,"include":false,"step":"50.0","x":-411.72380952380956,"y":565.7047619047619,"z":87.09142857142858,"a95":0.99,"info":"21/03/2016 at 12:00:26"},{"visible":false,"include":false,"step":"55.0","x":-151.41904761904763,"y":858.5999999999999,"z":646.7714285714286,"a95":0.99,"info":"21/03/2016 at 12:00:26"},{"visible":false,"include":false,"step":"60.0","x":-228.93333333333334,"y":908.0666666666667,"z":14.43904761904762,"a95":0.99,"info":"21/03/2016 at 12:00:26"},{"visible":false,"include":false,"step":"65.0","x":-81.3047619047619,"y":683.1428571428571,"z":587.6476190476191,"a95":0.99,"info":"21/03/2016 at 12:00:26"},{"visible":false,"include":false,"step":"70.0","x":518.7904761904762,"y":122.15238095238094,"z":474.83809523809526,"a95":0.99,"info":"21/03/2016 at 12:00:26"},{"visible":false,"include":false,"step":"80.0","x":100.62857142857142,"y":476.27619047619044,"z":465.447619047619,"a95":0.99,"info":"21/03/2016 at 12:00:26"}]},{"version":"v1.1.0","exported":"2016-11-24T13:42:30.426Z","volume":10.5,"added":"2016-11-24T13:38:03.826Z","format":"Utrecht","demagType":"Unknown","strat":"1","patch":1.1,"GEO":[{"dec":350.7636418333117,"inc":49.393281926633,"MAD":4.8582266165463395,"cm":[4262.227840351498,-209.86044675970606,4666.0394118291715],"intensity":8918.849932957799,"type":"dir","forced":false,"remark":"","origin":false,"nSteps":7,"minStep":"10.0","maxStep":"33.0","steps":["10.0","15.0","20.0","23.0","25.0","30.0","33.0"],"group":"None","version":"v1.1.0"}],"TECT":[{"dec":307.41201366708066,"inc":39.64640653367452,"MAD":4.858226616546299,"cm":[3146.2952112298804,-3450.7641270080876,4263.285674977779],"intensity":8918.849932957799,"type":"dir","forced":false,"remark":"","origin":false,"nSteps":7,"minStep":"10.0","maxStep":"33.0","steps":["10.0","15.0","20.0","23.0","25.0","30.0","33.0"],"group":"None","version":"v1.1.0"}],"interpreted":true,"name":"AD5.14B","coreAzi":265,"coreDip":33,"bedStrike":161,"bedDip":42,"data":[{"visible":false,"include":false,"step":"0.0","x":-13162.857142857143,"y":11341.904761904761,"z":9833.333333333334,"a95":0.99,"info":"21/03/2016 at 12:00:26"},{"visible":true,"include":true,"step":"10.0","x":-7560,"y":7918.0952380952385,"z":4928.285714285715,"a95":0.99,"info":"21/03/2016 at 12:00:26"},{"visible":true,"include":true,"step":"15.0","x":-5300.0952380952385,"y":5559.619047619048,"z":3289.2380952380954,"a95":0.99,"info":"21/03/2016 at 12:00:26"},{"visible":true,"include":true,"step":"20.0","x":-3976.190476190476,"y":4487.714285714285,"z":2856.8571428571427,"a95":0.99,"info":"21/03/2016 at 12:00:26"},{"visible":true,"include":true,"step":"23.0","x":-3213.6190476190477,"y":3864.190476190476,"z":1995.8095238095239,"a95":0.99,"info":"21/03/2016 at 12:00:26"},{"visible":true,"include":true,"step":"25.0","x":-3212.7619047619046,"y":3283.4285714285716,"z":1421.047619047619,"a95":0.99,"info":"21/03/2016 at 12:00:26"},{"visible":true,"include":true,"step":"30.0","x":-2575.714285714286,"y":2675.714285714286,"z":1445.047619047619,"a95":0.99,"info":"21/03/2016 at 12:00:26"},{"visible":true,"include":true,"step":"33.0","x":-2173.714285714286,"y":2061.3333333333335,"z":899.3714285714285,"a95":0.99,"info":"21/03/2016 at 12:00:26"},{"visible":false,"include":false,"step":"35.0","x":-1897.5238095238096,"y":2113.6190476190477,"z":416.2190476190476,"a95":0.99,"info":"21/03/2016 at 12:00:26"},{"visible":false,"include":false,"step":"40.0","x":-1782,"y":754.2571428571429,"z":1443.3333333333333,"a95":0.99,"info":"21/03/2016 at 12:00:26"},{"visible":false,"include":false,"step":"45.0","x":-1372.952380952381,"y":892.9904761904761,"z":352.8095238095238,"a95":0.99,"info":"21/03/2016 at 12:00:26"},{"visible":false,"include":false,"step":"50.0","x":-1132.095238095238,"y":553.9428571428571,"z":-149.83809523809524,"a95":0.99,"info":"21/03/2016 at 12:00:26"},{"visible":false,"include":false,"step":"55.0","x":-780.4476190476191,"y":1235.6190476190477,"z":1208.857142857143,"a95":0.99,"info":"21/03/2016 at 12:00:26"},{"visible":false,"include":false,"step":"60.0","x":-564.895238095238,"y":94.52095238095238,"z":343.8666666666667,"a95":0.99,"info":"21/03/2016 at 12:00:26"},{"visible":false,"include":false,"step":"65.0","x":-1020.2857142857143,"y":616.7619047619048,"z":157.3904761904762,"a95":0.99,"info":"21/03/2016 at 12:00:26"},{"visible":false,"include":false,"step":"70.0","x":-813.304761904762,"y":244.9809523809524,"z":327.6952380952381,"a95":0.99,"info":"21/03/2016 at 12:00:26"},{"visible":false,"include":false,"step":"80.0","x":-1123.6190476190477,"y":71.0352380952381,"z":-66.55142857142857,"a95":0.99,"info":"21/03/2016 at 12:00:26"}]},{"version":"v1.1.0","exported":"2016-11-24T13:42:30.426Z","volume":10.5,"added":"2016-11-24T13:38:03.827Z","format":"Utrecht","demagType":"Unknown","strat":"1","patch":1.1,"GEO":[{"dec":353.701035973946,"inc":44.161089751151714,"MAD":6.9846410028754295,"cm":[5005.380603529759,-1132.8175301186725,3492.2453743124565],"intensity":8421.692887788999,"type":"dir","forced":false,"remark":"","origin":false,"nSteps":6,"minStep":"10.0","maxStep":"30.0","steps":["10.0","15.0","20.0","23.0","25.0","30.0"],"group":"None","version":"v1.1.0"}],"TECT":[{"dec":314.4978716928743,"inc":38.55550747626454,"MAD":6.984641002875429,"cm":[4197.899969980237,-3477.911569585761,2968.9485097125366],"intensity":8421.692887789,"type":"dir","forced":false,"remark":"","origin":false,"nSteps":6,"minStep":"10.0","maxStep":"30.0","steps":["10.0","15.0","20.0","23.0","25.0","30.0"],"group":"None","version":"v1.1.0"}],"interpreted":true,"name":"AD5.15B","coreAzi":263,"coreDip":36,"bedStrike":161,"bedDip":42,"data":[{"visible":false,"include":false,"step":"0.0","x":-10796.190476190477,"y":10837.142857142857,"z":8639.809523809523,"a95":0.99,"info":"21/03/2016 at 12:00:26"},{"visible":true,"include":true,"step":"10.0","x":-5510.571428571428,"y":8597.809523809523,"z":4630,"a95":0.99,"info":"21/03/2016 at 12:00:26"},{"visible":true,"include":true,"step":"15.0","x":-3469.6190476190477,"y":6497.809523809524,"z":2941.809523809524,"a95":0.99,"info":"21/03/2016 at 12:00:26"},{"visible":true,"include":true,"step":"20.0","x":-2326.7619047619046,"y":5066.380952380952,"z":2697.904761904762,"a95":0.99,"info":"21/03/2016 at 12:00:26"},{"visible":true,"include":true,"step":"23.0","x":-1545.047619047619,"y":4296.380952380952,"z":1820.2857142857142,"a95":0.99,"info":"21/03/2016 at 12:00:26"},{"visible":true,"include":true,"step":"25.0","x":-1556.4761904761904,"y":3747.2380952380954,"z":1260.857142857143,"a95":0.99,"info":"21/03/2016 at 12:00:26"},{"visible":true,"include":true,"step":"30.0","x":-729.2,"y":2431.1428571428573,"z":1462.095238095238,"a95":0.99,"info":"21/03/2016 at 12:00:26"},{"visible":false,"include":false,"step":"33.0","x":-433.8952380952381,"y":2257.2380952380954,"z":-17.20952380952381,"a95":0.99,"info":"21/03/2016 at 12:00:26"},{"visible":false,"include":false,"step":"35.0","x":-576.6380952380953,"y":1698.5714285714287,"z":-105.34285714285713,"a95":0.99,"info":"21/03/2016 at 12:00:26"},{"visible":false,"include":false,"step":"40.0","x":-408.152380952381,"y":1874.095238095238,"z":685.2095238095238,"a95":0.99,"info":"21/03/2016 at 12:00:26"},{"visible":false,"include":false,"step":"45.0","x":251.44761904761904,"y":1880.3809523809523,"z":-176.59047619047618,"a95":0.99,"info":"21/03/2016 at 12:00:26"},{"visible":false,"include":false,"step":"50.0","x":-287.6,"y":1571.142857142857,"z":-736.6476190476191,"a95":0.99,"info":"21/03/2016 at 12:00:26"},{"visible":false,"include":false,"step":"55.0","x":-52.01238095238095,"y":625.6571428571428,"z":1016.0952380952381,"a95":0.99,"info":"21/03/2016 at 12:00:26"},{"visible":false,"include":false,"step":"60.0","x":84.60380952380953,"y":1340.857142857143,"z":-191.67619047619047,"a95":0.99,"info":"21/03/2016 at 12:00:26"},{"visible":false,"include":false,"step":"65.0","x":-204.32380952380953,"y":1472.7619047619048,"z":-403.8095238095238,"a95":0.99,"info":"21/03/2016 at 12:00:26"},{"visible":false,"include":false,"step":"70.0","x":62.13904761904762,"y":723.8857142857144,"z":224.44761904761904,"a95":0.99,"info":"21/03/2016 at 12:00:26"},{"visible":false,"include":false,"step":"80.0","x":200.52380952380952,"y":412.2095238095238,"z":-305.03809523809525,"a95":0.99,"info":"21/03/2016 at 12:00:26"}]}]
