# Supplementary material for: Paleomagnetic constraints on the timing and distribution of Cenozoic rotations in Central and Eastern Anatolia
Source: Copernicus journal article supplement (doi:10.5194/se-9-295-2018), 2018-03-21
Supplement: Supplementary file 2 [file se-9-295-2018-supplement.zip › se-2017-66_DATA_dir files/dir files Ulukisla/AL1.dir]

[{"version":"v1.1.0","exported":"2016-11-16T14:42:51.673Z","volume":10.5,"added":"2016-11-16T14:26:51.970Z","format":"Utrecht","demagType":"Unknown","strat":null,"patch":1.1,"GEO":[{"dec":356.9844328198068,"inc":-13.631897886755324,"MAD":2.2540460798184223,"cm":[-1.4210854715202004e-14,-1.4166445794216997e-13,0],"intensity":1462.7491558604715,"type":"dir","forced":true,"remark":"","origin":false,"nSteps":9,"minStep":"200","maxStep":"420","steps":["200","225","250","275","300","320","340","380","420"],"group":"None","version":"v1.1.0"}],"TECT":[{"dec":79.47938892800835,"inc":-70.11250583309462,"MAD":2.254046079818429,"cm":[-8.881784197001252e-14,-1.829647544582258e-13,-7.460698725481052e-14],"intensity":1462.7491558604718,"type":"dir","forced":true,"remark":"","origin":false,"nSteps":9,"minStep":"200","maxStep":"420","steps":["200","225","250","275","300","320","340","380","420"],"group":"None","version":"v1.1.0"}],"interpreted":true,"name":"AL 1.1A","coreAzi":331,"coreDip":42,"bedStrike":247,"bedDip":80,"data":[{"visible":true,"include":false,"step":"20","x":463.8095238095238,"y":709.2380952380952,"z":883.6190476190476,"a95":2.3,"info":"\"13-11-02\" at \"16:13\""},{"visible":true,"include":false,"step":"80","x":559.3333333333334,"y":565.047619047619,"z":748.6666666666666,"a95":2.2,"info":"\"13-11-03\" at \"13:35\""},{"visible":true,"include":false,"step":"150","x":647.9047619047619,"y":425.23809523809524,"z":505.6190476190476,"a95":2.2,"info":"\"13-11-04\" at \"10:44\""},{"visible":true,"include":false,"step":"180","x":653.4285714285714,"y":416.4761904761905,"z":520.1904761904761,"a95":2.8,"info":"\"13-11-04\" at \"16:38\""},{"visible":true,"include":true,"step":"200","x":664.7619047619048,"y":377.6190476190476,"z":412.6666666666667,"a95":2.4,"info":"\"13-11-05\" at \"10:43\""},{"visible":true,"include":true,"step":"225","x":631.4285714285714,"y":378.0952380952381,"z":406.2857142857143,"a95":2.6,"info":"\"13-11-05\" at \"15:15\""},{"visible":true,"include":true,"step":"250","x":615.1428571428571,"y":370.76190476190476,"z":379.04761904761904,"a95":2.5,"info":"\"13-11-06\" at \"09:25\""},{"visible":true,"include":true,"step":"275","x":608.2857142857143,"y":363.23809523809524,"z":372.4761904761905,"a95":2.6,"info":"\"13-11-06\" at \"14:08\""},{"visible":true,"include":true,"step":"300","x":560.0952380952381,"y":296,"z":371.9047619047619,"a95":3.7,"info":"\"13-11-07\" at \"02:56\""},{"visible":true,"include":true,"step":"320","x":589.6190476190476,"y":285.3333333333333,"z":374,"a95":2.1,"info":"\"13-11-07\" at \"06:21\""},{"visible":true,"include":true,"step":"340","x":554.0952380952381,"y":296.0952380952381,"z":353.14285714285717,"a95":2.1,"info":"\"13-11-07\" at \"10:00\""},{"visible":true,"include":true,"step":"380","x":497.3333333333333,"y":260,"z":356.0952380952381,"a95":3.6,"info":"\"13-11-08\" at \"09:14\""},{"visible":true,"include":true,"step":"420","x":429.5238095238095,"y":251.42857142857142,"z":326.57142857142856,"a95":3.9,"info":"\"13-11-08\" at \"13:00\""},{"visible":true,"include":false,"step":"450","x":418.6666666666667,"y":260.57142857142856,"z":298.0952380952381,"a95":3.7,"info":"\"13-11-08\" at \"18:08\""},{"visible":true,"include":false,"step":"500","x":333.14285714285717,"y":244.76190476190476,"z":265.14285714285717,"a95":4.4,"info":"\"13-11-10\" at \"10:25\""},{"visible":true,"include":false,"step":"530","x":246.38095238095238,"y":219.04761904761904,"z":234.66666666666666,"a95":5,"info":"\"13-11-10\" at \"13:09\""},{"visible":false,"include":false,"step":"560","x":284.4761904761905,"y":234.85714285714286,"z":134.95238095238096,"a95":4.1,"info":"\"13-11-10\" at \"22:23\""},{"visible":true,"include":false,"step":"580","x":227.52380952380952,"y":268.3809523809524,"z":201.61904761904762,"a95":4.9,"info":"\"13-11-11\" at \"00:55\""},{"visible":false,"include":false,"step":"600","x":-211.14285714285714,"y":85.80952380952381,"z":-433.7142857142857,"a95":5.9,"info":"\"14-01-29\" at \"21:15\""}]},{"version":"v1.1.0","exported":"2016-11-16T14:42:51.673Z","volume":10.5,"added":"2016-11-16T14:26:51.970Z","format":"Utrecht","demagType":"Unknown","strat":"1","patch":1.1,"GEO":[{"dec":18.45486473493463,"inc":-12.855563606304326,"MAD":1.034237574456563,"cm":[0,5.684341886080802e-14,0],"intensity":3825.5189519344913,"type":"dir","forced":true,"remark":"","origin":false,"nSteps":4,"minStep":"70.0","maxStep":"100.0","steps":["70.0","80.0","90.0","100.0"],"group":"None","version":"v1.1.0"}],"TECT":[{"dec":75.13233255582156,"inc":-49.30805048439244,"MAD":1.0342375744566328,"cm":[-3.979039320256561e-13,0,2.842170943040401e-14],"intensity":3825.5189519344917,"type":"dir","forced":true,"remark":"","origin":false,"nSteps":4,"minStep":"70.0","maxStep":"100.0","steps":["70.0","80.0","90.0","100.0"],"group":"None","version":"v1.1.0"}],"interpreted":true,"name":"AL 1.2","coreAzi":353,"coreDip":50,"bedStrike":247,"bedDip":80,"data":[{"visible":true,"include":false,"step":"0.0","x":1489.047619047619,"y":705.2761904761904,"z":1440.3809523809523,"a95":0.99,"info":"08/11/2013 at 20:57:53"},{"visible":true,"include":false,"step":"4.0","x":1497.5238095238096,"y":685.152380952381,"z":1338.6666666666667,"a95":0.99,"info":"08/11/2013 at 20:57:53"},{"visible":true,"include":false,"step":"8.0","x":1507.5238095238096,"y":667.7619047619048,"z":1142.952380952381,"a95":0.99,"info":"08/11/2013 at 20:57:53"},{"visible":true,"include":false,"step":"12.0","x":1500.7619047619048,"y":654.4571428571429,"z":1054.3809523809523,"a95":0.99,"info":"08/11/2013 at 20:57:53"},{"visible":true,"include":false,"step":"16.0","x":1498.095238095238,"y":645.6952380952381,"z":992.952380952381,"a95":0.99,"info":"08/11/2013 at 20:57:53"},{"visible":true,"include":false,"step":"20.0","x":1488.5714285714287,"y":669.3904761904762,"z":953.6190476190476,"a95":0.99,"info":"08/11/2013 at 20:57:53"},{"visible":true,"include":false,"step":"25.0","x":1505.8095238095239,"y":674.5714285714286,"z":916.2857142857143,"a95":0.99,"info":"08/11/2013 at 20:57:53"},{"visible":true,"include":false,"step":"30.0","x":1508.952380952381,"y":676.0666666666666,"z":892.1333333333333,"a95":0.99,"info":"08/11/2013 at 20:57:53"},{"visible":true,"include":false,"step":"35.0","x":1508.095238095238,"y":696.4857142857143,"z":906.1619047619048,"a95":0.99,"info":"08/11/2013 at 20:57:53"},{"visible":true,"include":false,"step":"40.0","x":1516.1904761904761,"y":724.7714285714286,"z":886.4380952380952,"a95":0.99,"info":"08/11/2013 at 20:57:53"},{"visible":true,"include":false,"step":"45.0","x":1505.6190476190477,"y":736.9904761904761,"z":877.9238095238096,"a95":0.99,"info":"08/11/2013 at 20:57:53"},{"visible":true,"include":false,"step":"50.0","x":1517.7142857142858,"y":784.695238095238,"z":861.2380952380952,"a95":0.99,"info":"08/11/2013 at 20:57:53"},{"visible":true,"include":false,"step":"60.0","x":1528.7619047619048,"y":798.847619047619,"z":832.0761904761904,"a95":0.99,"info":"08/11/2013 at 20:57:53"},{"visible":true,"include":true,"step":"70.0","x":1540.1904761904761,"y":822.8,"z":795.5714285714286,"a95":0.99,"info":"08/11/2013 at 20:57:53"},{"visible":true,"include":true,"step":"80.0","x":1686.3809523809523,"y":821.847619047619,"z":783.847619047619,"a95":0.99,"info":"08/11/2013 at 20:57:53"},{"visible":true,"include":true,"step":"90.0","x":1532.2857142857142,"y":791.6571428571428,"z":745.1428571428571,"a95":0.99,"info":"08/11/2013 at 20:57:53"},{"visible":true,"include":true,"step":"100.0","x":1563.3333333333333,"y":807.5333333333334,"z":735.6857142857143,"a95":0.99,"info":"08/11/2013 at 20:57:53"}]},{"version":"v1.1.0","exported":"2016-11-16T14:42:51.674Z","volume":10.5,"added":"2016-11-16T14:26:51.971Z","format":"Utrecht","demagType":"Unknown","strat":"2","patch":1.1,"GEO":[{"dec":7.4054482991913915,"inc":-20.718326992525494,"MAD":1.6159747256772212,"cm":[-2.842170943040401e-14,6.394884621840902e-14,0],"intensity":2892.114957005539,"type":"dir","forced":true,"remark":"","origin":false,"nSteps":5,"minStep":"50.0","maxStep":"90.0","steps":["50.0","60.0","70.0","80.0","90.0"],"group":"None","version":"v1.1.0"}],"TECT":[{"dec":90.75246832785916,"inc":-58.85570109302204,"MAD":1.6159747256772896,"cm":[-8.615330671091215e-14,-1.8474111129762605e-13,-8.526512829121202e-14],"intensity":2892.114957005538,"type":"dir","forced":true,"remark":"","origin":false,"nSteps":5,"minStep":"50.0","maxStep":"90.0","steps":["50.0","60.0","70.0","80.0","90.0"],"group":"None","version":"v1.1.0"}],"interpreted":true,"name":"AL 1.3","coreAzi":297,"coreDip":40,"bedStrike":247,"bedDip":80,"data":[{"visible":true,"include":false,"step":"0.0","x":631.5714285714286,"y":1393.3333333333333,"z":620.5714285714286,"a95":0.99,"info":"08/11/2013 at 20:57:53"},{"visible":true,"include":false,"step":"4.0","x":644.6761904761905,"y":1384.2857142857142,"z":548.7523809523809,"a95":0.99,"info":"08/11/2013 at 20:57:53"},{"visible":true,"include":false,"step":"8.0","x":673.2476190476191,"y":1325.6190476190477,"z":409.7333333333333,"a95":0.99,"info":"08/11/2013 at 20:57:53"},{"visible":true,"include":false,"step":"12.0","x":691.9428571428571,"y":1277.904761904762,"z":324.5904761904762,"a95":0.99,"info":"08/11/2013 at 20:57:53"},{"visible":true,"include":false,"step":"16.0","x":701.495238095238,"y":1256.1904761904761,"z":287.4,"a95":0.99,"info":"08/11/2013 at 20:57:53"},{"visible":true,"include":false,"step":"20.0","x":707.9904761904761,"y":1233.5238095238096,"z":252.49523809523808,"a95":0.99,"info":"08/11/2013 at 20:57:53"},{"visible":true,"include":false,"step":"25.0","x":683.9238095238095,"y":1229.5238095238096,"z":173.14285714285714,"a95":0.99,"info":"08/11/2013 at 20:57:53"},{"visible":true,"include":false,"step":"30.0","x":668.8190476190476,"y":1254.3809523809523,"z":152.8095238095238,"a95":0.99,"info":"08/11/2013 at 20:57:53"},{"visible":true,"include":false,"step":"35.0","x":663.5809523809525,"y":1266.6666666666667,"z":124.98095238095237,"a95":0.99,"info":"08/11/2013 at 20:57:53"},{"visible":true,"include":false,"step":"40.0","x":676.8571428571429,"y":1260.5714285714287,"z":104.4,"a95":0.99,"info":"08/11/2013 at 20:57:53"},{"visible":true,"include":false,"step":"45.0","x":659.1142857142856,"y":1289.5238095238096,"z":84.4152380952381,"a95":0.99,"info":"08/11/2013 at 20:57:53"},{"visible":true,"include":true,"step":"50.0","x":669.3714285714285,"y":1272.2857142857142,"z":67.33714285714285,"a95":0.99,"info":"08/11/2013 at 20:57:53"},{"visible":true,"include":true,"step":"60.0","x":661.7523809523809,"y":1309.2380952380952,"z":16.176190476190477,"a95":0.99,"info":"08/11/2013 at 20:57:53"},{"visible":true,"include":true,"step":"70.0","x":678.6666666666666,"y":1299.2380952380952,"z":25.674285714285713,"a95":0.99,"info":"08/11/2013 at 20:57:53"},{"visible":true,"include":true,"step":"80.0","x":738.4380952380952,"y":1271.7142857142858,"z":6.327809523809523,"a95":0.99,"info":"08/11/2013 at 20:57:53"},{"visible":true,"include":true,"step":"90.0","x":699.1238095238095,"y":1275.142857142857,"z":-20.88952380952381,"a95":0.99,"info":"08/11/2013 at 20:57:53"},{"visible":true,"include":false,"step":"100.0","x":688.6952380952381,"y":1265.6190476190477,"z":-55.203809523809525,"a95":0.99,"info":"08/11/2013 at 20:57:53"}]},{"version":"v1.1.0","exported":"2016-11-16T14:42:51.674Z","volume":10.5,"added":"2016-11-16T14:26:51.973Z","format":"Utrecht","demagType":"Unknown","strat":"3","patch":1.1,"GEO":[],"TECT":[],"interpreted":false,"name":"AL 1.4","coreAzi":312,"coreDip":45,"bedStrike":247,"bedDip":80,"data":[{"visible":true,"include":true,"step":"0.0","x":-39.36571428571428,"y":770.6952380952381,"z":845.0380952380953,"a95":0.99,"info":"08/11/2013 at 20:57:53"},{"visible":true,"include":true,"step":"4.0","x":-7.838666666666667,"y":744.847619047619,"z":772.6095238095238,"a95":0.99,"info":"08/11/2013 at 20:57:53"},{"visible":true,"include":true,"step":"8.0","x":13.885714285714286,"y":688.2952380952381,"z":622.2952380952381,"a95":0.99,"info":"08/11/2013 at 20:57:53"},{"visible":true,"include":true,"step":"12.0","x":28.455238095238094,"y":643.2285714285714,"z":523.152380952381,"a95":0.99,"info":"08/11/2013 at 20:57:53"},{"visible":true,"include":true,"step":"16.0","x":34.68,"y":640.3428571428572,"z":470.57142857142856,"a95":0.99,"info":"08/11/2013 at 20:57:53"},{"visible":true,"include":true,"step":"20.0","x":47.22285714285714,"y":618.9904761904761,"z":425.04761904761904,"a95":0.99,"info":"08/11/2013 at 20:57:53"},{"visible":true,"include":true,"step":"25.0","x":60.400000000000006,"y":602,"z":382.2095238095238,"a95":0.99,"info":"08/11/2013 at 20:57:53"},{"visible":true,"include":false,"step":"30.0","x":77.30857142857143,"y":607.0571428571429,"z":337.0761904761905,"a95":0.99,"info":"08/11/2013 at 20:57:53"},{"visible":true,"include":false,"step":"35.0","x":74.76952380952382,"y":611.5809523809525,"z":328.1047619047619,"a95":0.99,"info":"08/11/2013 at 20:57:53"},{"visible":true,"include":false,"step":"40.0","x":94.24952380952381,"y":601.3047619047619,"z":298.76190476190476,"a95":0.99,"info":"08/11/2013 at 20:57:53"},{"visible":true,"include":false,"step":"45.0","x":103.80952380952381,"y":639.9619047619047,"z":279.2190476190476,"a95":0.99,"info":"08/11/2013 at 20:57:53"},{"visible":true,"include":false,"step":"50.0","x":108.60952380952382,"y":630.5714285714286,"z":274.5333333333333,"a95":0.99,"info":"08/11/2013 at 20:57:53"},{"visible":true,"include":false,"step":"60.0","x":119.56190476190477,"y":651.8190476190476,"z":258.247619047619,"a95":0.99,"info":"08/11/2013 at 20:57:53"},{"visible":true,"include":false,"step":"70.0","x":118.55238095238094,"y":647.9809523809524,"z":247.32380952380953,"a95":0.99,"info":"08/11/2013 at 20:57:53"},{"visible":true,"include":false,"step":"80.0","x":128.35238095238097,"y":626.552380952381,"z":211.47619047619048,"a95":0.99,"info":"08/11/2013 at 20:57:53"},{"visible":true,"include":false,"step":"90.0","x":104.75238095238096,"y":647.2095238095238,"z":180.95238095238096,"a95":0.99,"info":"08/11/2013 at 20:57:53"},{"visible":true,"include":false,"step":"100.0","x":135.98095238095237,"y":622.504761904762,"z":211.7047619047619,"a95":0.99,"info":"08/11/2013 at 20:57:53"},{"visible":true,"include":false,"step":"400","x":61.42857142857143,"y":409.6190476190476,"z":37.333333333333336,"a95":1.7,"info":"\"02-01-01\" at \"01:53\""},{"visible":true,"include":false,"step":"425","x":34.95238095238095,"y":395.3333333333333,"z":24,"a95":1.6,"info":"\"02-01-01\" at \"04:55\""},{"visible":true,"include":false,"step":"450","x":33.23809523809524,"y":372.57142857142856,"z":34.95238095238095,"a95":1.7,"info":"\"02-01-01\" at \"08:18\""},{"visible":true,"include":false,"step":"480","x":-3.7142857142857144,"y":339.8095238095238,"z":38.476190476190474,"a95":2.3,"info":"\"02-01-01\" at \"21:09\""},{"visible":false,"include":false,"step":"510","x":-170.28571428571428,"y":342.0952380952381,"z":23.238095238095237,"a95":5.4,"info":"\"02-01-02\" at \"01:17\""},{"visible":false,"include":false,"step":"530","x":-167.14285714285714,"y":-374.6666666666667,"z":1296.3809523809523,"a95":2.1,"info":"\"14-01-28\" at \"21:13\""},{"visible":false,"include":false,"step":"580","x":-7753.9047619047615,"y":12439.619047619048,"z":-4214.285714285715,"a95":1.9,"info":"\"14-01-29\" at \"15:16\""},{"visible":false,"include":false,"step":"600","x":-2195.0476190476193,"y":1087.8095238095239,"z":1224.3809523809523,"a95":5.8,"info":"\"14-01-29\" at \"18:08\""}]},{"version":"v1.1.0","exported":"2016-11-16T14:42:51.674Z","volume":10.5,"added":"2016-11-16T14:26:51.973Z","format":"Utrecht","demagType":"Unknown","strat":null,"patch":1.1,"GEO":[{"dec":26.154254618345306,"inc":-22.71885654433661,"MAD":1.0858263433728208,"cm":[-8.526512829121202e-14,9.947598300641403e-14,0],"intensity":3287.191295353056,"type":"dir","forced":true,"remark":"","origin":false,"nSteps":5,"minStep":"340","maxStep":"500","steps":["340","380","420","450","500"],"group":"None","version":"v1.1.0"}],"TECT":[{"dec":88.55125417851866,"inc":-41.38986017610191,"MAD":1.0858263433729738,"cm":[-2.2648549702353193e-13,1.1368683772161603e-13,1.5631940186722204e-13],"intensity":3287.191295353056,"type":"dir","forced":true,"remark":"","origin":false,"nSteps":5,"minStep":"340","maxStep":"500","steps":["340","380","420","450","500"],"group":"None","version":"v1.1.0"}],"interpreted":true,"name":"AL 1.5A","coreAzi":295,"coreDip":31,"bedStrike":247,"bedDip":80,"data":[{"visible":true,"include":false,"step":"20","x":219.14285714285714,"y":2598.4761904761904,"z":-358.6666666666667,"a95":1.8,"info":"\"13-11-02\" at \"16:20\""},{"visible":true,"include":false,"step":"80","x":683.1428571428571,"y":2353.904761904762,"z":-435.3333333333333,"a95":1.7,"info":"\"13-11-03\" at \"13:37\""},{"visible":true,"include":false,"step":"150","x":649.5238095238095,"y":2263.0476190476193,"z":-458.76190476190476,"a95":1.7,"info":"\"13-11-04\" at \"10:48\""},{"visible":true,"include":false,"step":"180","x":740.5714285714286,"y":2229.3333333333335,"z":-448.2857142857143,"a95":1.9,"info":"\"13-11-04\" at \"16:41\""},{"visible":true,"include":false,"step":"200","x":754.4761904761905,"y":2124.4761904761904,"z":-565.9047619047619,"a95":1.8,"info":"\"13-11-05\" at \"10:46\""},{"visible":true,"include":false,"step":"225","x":686.6666666666666,"y":2135.6190476190477,"z":-556.6666666666666,"a95":1.7,"info":"\"13-11-05\" at \"15:19\""},{"visible":true,"include":false,"step":"250","x":725.6190476190476,"y":2054.095238095238,"z":-581.5238095238095,"a95":1.5,"info":"\"13-11-06\" at \"09:27\""},{"visible":true,"include":false,"step":"275","x":698.0952380952381,"y":2016.1904761904761,"z":-571.4285714285714,"a95":1.8,"info":"\"13-11-06\" at \"14:12\""},{"visible":true,"include":false,"step":"300","x":611.1428571428571,"y":1900,"z":-405.8095238095238,"a95":2.4,"info":"\"13-11-07\" at \"02:58\""},{"visible":false,"include":false,"step":"320","x":720.952380952381,"y":1971.3333333333333,"z":-397.3333333333333,"a95":1.6,"info":"\"13-11-07\" at \"06:23\""},{"visible":true,"include":true,"step":"340","x":675.5238095238095,"y":1862.952380952381,"z":-481.8095238095238,"a95":1.7,"info":"\"13-11-07\" at \"10:02\""},{"visible":true,"include":true,"step":"380","x":572.5714285714286,"y":1692.5714285714287,"z":-373.14285714285717,"a95":2.5,"info":"\"13-11-08\" at \"09:16\""},{"visible":true,"include":true,"step":"420","x":499.7142857142857,"y":1475.142857142857,"z":-321.6190476190476,"a95":2.5,"info":"\"13-11-08\" at \"13:02\""},{"visible":true,"include":true,"step":"450","x":497.9047619047619,"y":1400.5714285714287,"z":-299.3333333333333,"a95":2.6,"info":"\"13-11-08\" at \"18:11\""},{"visible":true,"include":true,"step":"500","x":390.85714285714283,"y":1151.2380952380952,"z":-281.8095238095238,"a95":3.1,"info":"\"13-11-10\" at \"10:28\""},{"visible":true,"include":false,"step":"530","x":253.42857142857142,"y":963.7142857142857,"z":-199.71428571428572,"a95":3.3,"info":"\"13-11-10\" at \"13:14\""},{"visible":true,"include":false,"step":"560","x":230.85714285714286,"y":1026.1904761904761,"z":-245.04761904761904,"a95":3.5,"info":"\"13-11-10\" at \"22:26\""},{"visible":true,"include":false,"step":"580","x":189.8095238095238,"y":935.1428571428571,"z":-116.66666666666667,"a95":3.1,"info":"\"13-11-11\" at \"00:58\""},{"visible":false,"include":false,"step":"600","x":-595.047619047619,"y":1244.1904761904761,"z":-429.3333333333333,"a95":3.9,"info":"\"14-01-29\" at \"21:25\""}]},{"version":"v1.1.0","exported":"2016-11-16T14:42:51.674Z","volume":10.5,"added":"2016-11-16T14:26:51.974Z","format":"Utrecht","demagType":"Unknown","strat":"4","patch":1.1,"GEO":[{"dec":18.177773939922076,"inc":-21.58068984905061,"MAD":3.826004167705543,"cm":[-1.4210854715202004e-14,-4.618527782440651e-14,0],"intensity":3747.5505484754553,"type":"dir","forced":true,"remark":"","origin":false,"nSteps":8,"minStep":"90.0","maxStep":"530","steps":["90.0","100.0","400","425","450","480","510","530"],"group":"None","version":"v1.1.0"}],"TECT":[{"dec":88.46078304289426,"inc":-48.86355645340099,"MAD":3.8260041677055177,"cm":[-2.2293278334473143e-13,-4.263256414560601e-14,-5.684341886080802e-14],"intensity":3747.5505484754553,"type":"dir","forced":true,"remark":"","origin":false,"nSteps":8,"minStep":"90.0","maxStep":"530","steps":["90.0","100.0","400","425","450","480","510","530"],"group":"None","version":"v1.1.0"}],"interpreted":true,"name":"AL 1.5B","coreAzi":295,"coreDip":31,"bedStrike":247,"bedDip":80,"data":[{"visible":true,"include":false,"step":"0.0","x":445.4,"y":2724.6666666666665,"z":-4.682571428571428,"a95":0.99,"info":"08/11/2013 at 20:57:53"},{"visible":true,"include":false,"step":"4.0","x":524.1904761904761,"y":2687.5238095238096,"z":-19.33809523809524,"a95":0.99,"info":"08/11/2013 at 20:57:53"},{"visible":true,"include":false,"step":"8.0","x":639.9333333333334,"y":2619.1428571428573,"z":-32.38285714285714,"a95":0.99,"info":"08/11/2013 at 20:57:53"},{"visible":true,"include":false,"step":"12.0","x":706.952380952381,"y":2572.9523809523807,"z":-59.03809523809524,"a95":0.99,"info":"08/11/2013 at 20:57:53"},{"visible":true,"include":false,"step":"16.0","x":729.8285714285714,"y":2547.0476190476193,"z":-70.26761904761904,"a95":0.99,"info":"08/11/2013 at 20:57:53"},{"visible":true,"include":false,"step":"20.0","x":750.2571428571429,"y":2526.5714285714284,"z":-106.72380952380952,"a95":0.99,"info":"08/11/2013 at 20:57:53"},{"visible":true,"include":false,"step":"25.0","x":770.7809523809524,"y":2514.285714285714,"z":-118.07619047619048,"a95":0.99,"info":"08/11/2013 at 20:57:53"},{"visible":true,"include":false,"step":"30.0","x":789.4666666666666,"y":2521.6190476190477,"z":-102.05714285714285,"a95":0.99,"info":"08/11/2013 at 20:57:53"},{"visible":true,"include":false,"step":"35.0","x":816.0761904761904,"y":2525.904761904762,"z":-127.13333333333334,"a95":0.99,"info":"08/11/2013 at 20:57:53"},{"visible":true,"include":false,"step":"40.0","x":828.6666666666666,"y":2509.6190476190477,"z":-133.95238095238096,"a95":0.99,"info":"08/11/2013 at 20:57:53"},{"visible":true,"include":false,"step":"45.0","x":839.6285714285715,"y":2543.0476190476193,"z":-138,"a95":0.99,"info":"08/11/2013 at 20:57:53"},{"visible":true,"include":false,"step":"50.0","x":859.9714285714286,"y":2563.809523809524,"z":-155.2761904761905,"a95":0.99,"info":"08/11/2013 at 20:57:53"},{"visible":true,"include":false,"step":"60.0","x":884.3904761904762,"y":2506.5714285714284,"z":-143.84761904761905,"a95":0.99,"info":"08/11/2013 at 20:57:53"},{"visible":true,"include":false,"step":"70.0","x":895.4000000000001,"y":2541.5238095238096,"z":-163.82857142857142,"a95":0.99,"info":"08/11/2013 at 20:57:53"},{"visible":true,"include":false,"step":"80.0","x":917.847619047619,"y":2502.8571428571427,"z":-168.8095238095238,"a95":0.99,"info":"08/11/2013 at 20:57:53"},{"visible":true,"include":true,"step":"90.0","x":940.8571428571429,"y":2502.5714285714284,"z":-198.52380952380952,"a95":0.99,"info":"08/11/2013 at 20:57:53"},{"visible":true,"include":true,"step":"100.0","x":966.8571428571429,"y":2507.3333333333335,"z":-189.57142857142858,"a95":0.99,"info":"08/11/2013 at 20:57:53"},{"visible":true,"include":true,"step":"400","x":699.4285714285714,"y":1586.5714285714287,"z":-241.71428571428572,"a95":1.5,"info":"\"02-01-01\" at \"01:56\""},{"visible":true,"include":true,"step":"425","x":652.7619047619048,"y":1497.047619047619,"z":-191.14285714285714,"a95":1.5,"info":"\"02-01-01\" at \"05:24\""},{"visible":true,"include":true,"step":"450","x":659.6190476190476,"y":1357.7142857142858,"z":-234.95238095238096,"a95":2.2,"info":"\"02-01-01\" at \"08:23\""},{"visible":true,"include":true,"step":"480","x":399.8095238095238,"y":1389.8095238095239,"z":-197.04761904761904,"a95":1.5,"info":"\"02-01-01\" at \"21:12\""},{"visible":true,"include":true,"step":"510","x":476.85714285714283,"y":1156.857142857143,"z":-185.9047619047619,"a95":2.1,"info":"\"02-01-02\" at \"01:21\""},{"visible":true,"include":true,"step":"530","x":532.2857142857143,"y":940.6666666666666,"z":64,"a95":2.4,"info":"\"14-01-28\" at \"21:16\""},{"visible":false,"include":false,"step":"580","x":-1291.5238095238096,"y":2181.3333333333335,"z":-938.0952380952381,"a95":1.8,"info":"\"14-01-29\" at \"15:19\""},{"visible":true,"include":false,"step":"600","x":235.04761904761904,"y":883.1428571428571,"z":29.142857142857142,"a95":2,"info":"\"14-01-29\" at \"18:11\""},{"visible":false,"include":false,"step":"600","x":154.1904761904762,"y":837.6190476190476,"z":-225.04761904761904,"a95":3.1,"info":"\"14-01-29\" at \"21:29\""}]},{"version":"v1.1.0","exported":"2016-11-16T14:42:51.674Z","volume":10.5,"added":"2016-11-16T14:26:51.980Z","format":"Utrecht","demagType":"Unknown","strat":"5","patch":1.1,"GEO":[{"dec":19.380588780710923,"inc":-26.26669467163803,"MAD":3.853458512014806,"cm":[1.4210854715202004e-14,-3.197442310920451e-14,0],"intensity":2778.264080606324,"type":"dir","forced":true,"remark":"","origin":false,"nSteps":6,"minStep":"400","maxStep":"530","steps":["400","425","450","480","510","530"],"group":"None","version":"v1.1.0"}],"TECT":[{"dec":94.95619568334922,"inc":-46.818916489500964,"MAD":3.8534585120147624,"cm":[-1.687538997430238e-13,-9.947598300641403e-14,-8.526512829121202e-14],"intensity":2778.264080606324,"type":"dir","forced":true,"remark":"","origin":false,"nSteps":6,"minStep":"400","maxStep":"530","steps":["400","425","450","480","510","530"],"group":"None","version":"v1.1.0"}],"interpreted":true,"name":"AL 1.5C","coreAzi":295,"coreDip":31,"bedStrike":247,"bedDip":80,"data":[{"visible":true,"include":false,"step":"0.0","x":450.0380952380952,"y":2595.809523809524,"z":104,"a95":0.99,"info":"08/11/2013 at 20:57:53"},{"visible":true,"include":false,"step":"4.0","x":505.72380952380956,"y":2564.6666666666665,"z":116.06666666666668,"a95":0.99,"info":"08/11/2013 at 20:57:53"},{"visible":true,"include":false,"step":"8.0","x":604,"y":2497.809523809524,"z":57.24857142857143,"a95":0.99,"info":"08/11/2013 at 20:57:53"},{"visible":true,"include":false,"step":"12.0","x":657.0571428571429,"y":2452.285714285714,"z":33.54380952380952,"a95":0.99,"info":"08/11/2013 at 20:57:53"},{"visible":true,"include":false,"step":"16.0","x":672.1619047619048,"y":2436.4761904761904,"z":3.0216190476190476,"a95":0.99,"info":"08/11/2013 at 20:57:53"},{"visible":true,"include":false,"step":"20.0","x":688.1238095238095,"y":2419.4285714285716,"z":1.071047619047619,"a95":0.99,"info":"08/11/2013 at 20:57:53"},{"visible":true,"include":false,"step":"25.0","x":709.3619047619047,"y":2409.0476190476193,"z":-4.612666666666667,"a95":0.99,"info":"08/11/2013 at 20:57:53"},{"visible":true,"include":false,"step":"30.0","x":728.7238095238096,"y":2422.285714285714,"z":-24.985714285714288,"a95":0.99,"info":"08/11/2013 at 20:57:53"},{"visible":true,"include":false,"step":"35.0","x":729.3904761904762,"y":2430.190476190476,"z":-23.286666666666665,"a95":0.99,"info":"08/11/2013 at 20:57:53"},{"visible":true,"include":false,"step":"40.0","x":750.6190476190476,"y":2429.6190476190477,"z":-42.787619047619046,"a95":0.99,"info":"08/11/2013 at 20:57:53"},{"visible":true,"include":false,"step":"45.0","x":773.6571428571428,"y":2440.9523809523807,"z":-42.599047619047624,"a95":0.99,"info":"08/11/2013 at 20:57:53"},{"visible":true,"include":false,"step":"50.0","x":788.9428571428571,"y":2442.285714285714,"z":-58.174285714285716,"a95":0.99,"info":"08/11/2013 at 20:57:53"},{"visible":true,"include":false,"step":"60.0","x":826.6857142857143,"y":2423.3333333333335,"z":-52.62666666666667,"a95":0.99,"info":"08/11/2013 at 20:57:53"},{"visible":true,"include":false,"step":"70.0","x":815.9238095238096,"y":2432.3809523809523,"z":-68.04857142857142,"a95":0.99,"info":"08/11/2013 at 20:57:53"},{"visible":true,"include":false,"step":"80.0","x":830.4857142857143,"y":2411.2380952380954,"z":-83.00761904761904,"a95":0.99,"info":"08/11/2013 at 20:57:53"},{"visible":true,"include":false,"step":"90.0","x":878.9142857142857,"y":2408.5714285714284,"z":-94.36285714285714,"a95":0.99,"info":"08/11/2013 at 20:57:53"},{"visible":true,"include":false,"step":"100.0","x":889.1714285714285,"y":2398.4761904761904,"z":-85.35904761904762,"a95":0.99,"info":"08/11/2013 at 20:57:53"},{"visible":true,"include":true,"step":"400","x":755.4285714285714,"y":1446.5714285714287,"z":-284.57142857142856,"a95":1.9,"info":"\"02-01-01\" at \"01:59\""},{"visible":true,"include":true,"step":"425","x":698.952380952381,"y":1339.2380952380952,"z":-245.23809523809524,"a95":1.8,"info":"\"02-01-01\" at \"05:27\""},{"visible":true,"include":true,"step":"450","x":620.952380952381,"y":1275.5238095238096,"z":-197.9047619047619,"a95":1.8,"info":"\"02-01-01\" at \"08:27\""},{"visible":true,"include":true,"step":"480","x":527.9047619047619,"y":1235.5238095238096,"z":-271.42857142857144,"a95":1.5,"info":"\"02-01-01\" at \"21:15\""},{"visible":true,"include":true,"step":"510","x":496.3809523809524,"y":1071.2380952380952,"z":-223.71428571428572,"a95":2.9,"info":"\"02-01-02\" at \"01:24\""},{"visible":true,"include":true,"step":"530","x":392.4761904761905,"y":1065.7142857142858,"z":-14.571428571428571,"a95":1.7,"info":"\"14-01-28\" at \"21:19\""},{"visible":false,"include":false,"step":"580","x":-1253.142857142857,"y":1381.047619047619,"z":-839.4285714285714,"a95":2.2,"info":"\"14-01-29\" at \"15:24\""},{"visible":true,"include":false,"step":"600","x":98.28571428571429,"y":768.5714285714286,"z":-105.80952380952381,"a95":3.6,"info":"\"14-01-29\" at \"18:16\""},{"visible":true,"include":false,"step":"600","x":48.57142857142857,"y":799.5238095238095,"z":-117.52380952380952,"a95":3.7,"info":"\"14-01-29\" at \"21:34\""}]},{"version":"v1.1.0","exported":"2016-11-16T14:42:51.674Z","volume":10.5,"added":"2016-11-16T14:26:51.980Z","format":"Utrecht","demagType":"Unknown","strat":"6","patch":1.1,"GEO":[{"dec":11.787153128033708,"inc":-17.069920275616255,"MAD":0.4962918129804315,"cm":[-1.7053025658242404e-13,4.831690603168681e-13,0],"intensity":5818.942359744745,"type":"dir","forced":true,"remark":"","origin":false,"nSteps":4,"minStep":"70.0","maxStep":"100.0","steps":["70.0","80.0","90.0","100.0"],"group":"None","version":"v1.1.0"}],"TECT":[{"dec":82.64588259443087,"inc":-55.5016669174041,"MAD":0.4962918129803136,"cm":[-5.755396159656812e-13,1.9895196601282805e-13,1.1368683772161603e-13],"intensity":5818.942359744745,"type":"dir","forced":true,"remark":"","origin":false,"nSteps":4,"minStep":"70.0","maxStep":"100.0","steps":["70.0","80.0","90.0","100.0"],"group":"None","version":"v1.1.0"}],"interpreted":true,"name":"AL 1.6","coreAzi":318,"coreDip":37,"bedStrike":247,"bedDip":80,"data":[{"visible":true,"include":false,"step":"0.0","x":1476.1904761904761,"y":2305.3333333333335,"z":1150.1904761904761,"a95":0.99,"info":"09/11/2013 at 02:46:36"},{"visible":true,"include":false,"step":"4.0","x":1498.2857142857142,"y":2302.6666666666665,"z":1109.3333333333333,"a95":0.99,"info":"09/11/2013 at 02:46:36"},{"visible":true,"include":false,"step":"8.0","x":1534.7619047619048,"y":2246.7619047619046,"z":1009.1428571428571,"a95":0.99,"info":"09/11/2013 at 02:46:36"},{"visible":true,"include":false,"step":"12.0","x":1547.7142857142858,"y":2216.5714285714284,"z":934.5619047619048,"a95":0.99,"info":"09/11/2013 at 02:46:36"},{"visible":true,"include":false,"step":"16.0","x":1573.904761904762,"y":2185.0476190476193,"z":901.2190476190475,"a95":0.99,"info":"09/11/2013 at 02:46:36"},{"visible":true,"include":false,"step":"20.0","x":1583.2380952380952,"y":2181.904761904762,"z":881.2,"a95":0.99,"info":"09/11/2013 at 02:46:36"},{"visible":true,"include":false,"step":"25.0","x":1598.2857142857142,"y":2178.8571428571427,"z":864.5523809523809,"a95":0.99,"info":"09/11/2013 at 02:46:36"},{"visible":true,"include":false,"step":"30.0","x":1614.857142857143,"y":2194.4761904761904,"z":843.9904761904761,"a95":0.99,"info":"09/11/2013 at 02:46:36"},{"visible":true,"include":false,"step":"35.0","x":1632.6666666666667,"y":2202.9523809523807,"z":834.4666666666666,"a95":0.99,"info":"09/11/2013 at 02:46:36"},{"visible":true,"include":false,"step":"40.0","x":1633.8095238095239,"y":2223.4285714285716,"z":833.647619047619,"a95":0.99,"info":"09/11/2013 at 02:46:36"},{"visible":true,"include":false,"step":"45.0","x":1647.904761904762,"y":2239.4285714285716,"z":832.257142857143,"a95":0.99,"info":"09/11/2013 at 02:46:36"},{"visible":true,"include":false,"step":"50.0","x":1672.095238095238,"y":2228.6666666666665,"z":822.352380952381,"a95":0.99,"info":"09/11/2013 at 02:46:36"},{"visible":true,"include":false,"step":"60.0","x":1656.1904761904761,"y":2254.190476190476,"z":815.952380952381,"a95":0.99,"info":"09/11/2013 at 02:46:36"},{"visible":true,"include":true,"step":"70.0","x":1673.2380952380952,"y":2248,"z":808.0095238095239,"a95":0.99,"info":"09/11/2013 at 02:46:36"},{"visible":true,"include":true,"step":"80.0","x":1639.904761904762,"y":2262,"z":808.152380952381,"a95":0.99,"info":"09/11/2013 at 02:46:36"},{"visible":true,"include":true,"step":"90.0","x":1670.095238095238,"y":2226.4761904761904,"z":792.257142857143,"a95":0.99,"info":"09/11/2013 at 02:46:36"},{"visible":true,"include":true,"step":"100.0","x":1690.857142857143,"y":2226.4761904761904,"z":780.0761904761905,"a95":0.99,"info":"09/11/2013 at 02:46:36"}]},{"version":"v1.1.0","exported":"2016-11-16T14:42:51.674Z","volume":10.5,"added":"2016-11-16T14:26:51.981Z","format":"Utrecht","demagType":"Unknown","strat":"4","patch":1.1,"GEO":[{"dec":13.18608460383831,"inc":-23.540630403752278,"MAD":0.9708688584693141,"cm":[5.684341886080802e-14,-1.9895196601282805e-13,0],"intensity":4819.293907841555,"type":"dir","forced":true,"remark":"","origin":false,"nSteps":4,"minStep":"70.0","maxStep":"100.0","steps":["70.0","80.0","90.0","100.0"],"group":"None","version":"v1.1.0"}],"TECT":[{"dec":93.07232384317177,"inc":-52.944092076613416,"MAD":0.970868858469248,"cm":[-2.362554596402333e-13,-1.4210854715202004e-13,0],"intensity":4819.293907841555,"type":"dir","forced":true,"remark":"","origin":false,"nSteps":4,"minStep":"70.0","maxStep":"100.0","steps":["70.0","80.0","90.0","100.0"],"group":"None","version":"v1.1.0"}],"interpreted":true,"name":"AL 1.7A","coreAzi":300,"coreDip":49,"bedStrike":247,"bedDip":80,"data":[{"visible":true,"include":false,"step":"0.0","x":735.5428571428571,"y":2589.714285714286,"z":191.85714285714286,"a95":0.99,"info":"09/11/2013 at 02:46:36"},{"visible":true,"include":false,"step":"4.0","x":811.9809523809523,"y":2517.6190476190477,"z":120.80952380952381,"a95":0.99,"info":"09/11/2013 at 02:46:36"},{"visible":true,"include":false,"step":"8.0","x":923.9619047619047,"y":2351.809523809524,"z":10.338095238095239,"a95":0.99,"info":"09/11/2013 at 02:46:36"},{"visible":true,"include":false,"step":"12.0","x":974.3809523809524,"y":2253.0476190476193,"z":-31.74952380952381,"a95":0.99,"info":"09/11/2013 at 02:46:36"},{"visible":true,"include":false,"step":"16.0","x":993.6190476190476,"y":2196,"z":-60.3495238095238,"a95":0.99,"info":"09/11/2013 at 02:46:36"},{"visible":true,"include":false,"step":"20.0","x":999.047619047619,"y":2168.190476190476,"z":-115.6952380952381,"a95":0.99,"info":"09/11/2013 at 02:46:36"},{"visible":true,"include":false,"step":"25.0","x":1006,"y":2148.5714285714284,"z":-115.12380952380951,"a95":0.99,"info":"09/11/2013 at 02:46:36"},{"visible":true,"include":false,"step":"30.0","x":1022.4761904761905,"y":2140.5714285714284,"z":-149.6095238095238,"a95":0.99,"info":"09/11/2013 at 02:46:36"},{"visible":true,"include":false,"step":"35.0","x":1042.4761904761904,"y":2141.5238095238096,"z":-173.8095238095238,"a95":0.99,"info":"09/11/2013 at 02:46:36"},{"visible":true,"include":false,"step":"40.0","x":1030.4761904761904,"y":2144.9523809523807,"z":-190.35238095238097,"a95":0.99,"info":"09/11/2013 at 02:46:36"},{"visible":true,"include":false,"step":"45.0","x":1052.3809523809523,"y":2138.4761904761904,"z":-234.76190476190476,"a95":0.99,"info":"09/11/2013 at 02:46:36"},{"visible":true,"include":false,"step":"50.0","x":1067.8095238095239,"y":2120,"z":-254.95238095238096,"a95":0.99,"info":"09/11/2013 at 02:46:36"},{"visible":true,"include":false,"step":"60.0","x":1099.7142857142858,"y":2130.7619047619046,"z":-300.3333333333333,"a95":0.99,"info":"09/11/2013 at 02:46:36"},{"visible":true,"include":true,"step":"70.0","x":1098.2857142857142,"y":2126.6666666666665,"z":-281.2190476190476,"a95":0.99,"info":"09/11/2013 at 02:46:36"},{"visible":true,"include":true,"step":"80.0","x":1157.047619047619,"y":2117.6190476190477,"z":-269.64761904761906,"a95":0.99,"info":"09/11/2013 at 02:46:36"},{"visible":true,"include":true,"step":"90.0","x":1081.7142857142858,"y":2096.4761904761904,"z":-335.43809523809523,"a95":0.99,"info":"09/11/2013 at 02:46:36"},{"visible":true,"include":true,"step":"100.0","x":1112.857142857143,"y":2109.904761904762,"z":-341.6,"a95":0.99,"info":"09/11/2013 at 02:46:36"}]},{"version":"v1.1.0","exported":"2016-11-16T14:42:51.674Z","volume":10.5,"added":"2016-11-16T14:26:51.981Z","format":"Utrecht","demagType":"Unknown","strat":"5","patch":1.1,"GEO":[{"dec":17.967796881916286,"inc":-12.544367229336988,"MAD":0.6116059062831543,"cm":[-5.684341886080802e-14,4.831690603168681e-13,0],"intensity":5646.876259461495,"type":"dir","forced":true,"remark":"","origin":false,"nSteps":4,"minStep":"70.0","maxStep":"100.0","steps":["70.0","80.0","90.0","100.0"],"group":"None","version":"v1.1.0"}],"TECT":[{"dec":74.64537500341322,"inc":-49.780044570658546,"MAD":0.6116059062834504,"cm":[1.4210854715202004e-14,4.263256414560601e-13,2.2737367544323206e-13],"intensity":5646.876259461494,"type":"dir","forced":true,"remark":"","origin":false,"nSteps":4,"minStep":"70.0","maxStep":"100.0","steps":["70.0","80.0","90.0","100.0"],"group":"None","version":"v1.1.0"}],"interpreted":true,"name":"AL 1.7B","coreAzi":300,"coreDip":49,"bedStrike":247,"bedDip":80,"data":[{"visible":true,"include":false,"step":"0.0","x":403.6190476190476,"y":3181.809523809524,"z":563.9904761904761,"a95":0.99,"info":"09/11/2013 at 02:46:36"},{"visible":true,"include":false,"step":"4.0","x":479.6380952380952,"y":3112.190476190476,"z":482.6666666666667,"a95":0.99,"info":"09/11/2013 at 02:46:36"},{"visible":true,"include":false,"step":"8.0","x":621.2761904761904,"y":2952.190476190476,"z":309.447619047619,"a95":0.99,"info":"09/11/2013 at 02:46:36"},{"visible":true,"include":false,"step":"12.0","x":678.8571428571429,"y":2848.6666666666665,"z":216.41904761904763,"a95":0.99,"info":"09/11/2013 at 02:46:36"},{"visible":true,"include":false,"step":"16.0","x":701.8,"y":2796.3809523809523,"z":162.8095238095238,"a95":0.99,"info":"09/11/2013 at 02:46:36"},{"visible":true,"include":false,"step":"20.0","x":713.9238095238095,"y":2764.3809523809523,"z":134.28571428571428,"a95":0.99,"info":"09/11/2013 at 02:46:36"},{"visible":true,"include":false,"step":"25.0","x":734.8857142857144,"y":2743.5238095238096,"z":110.45714285714286,"a95":0.99,"info":"09/11/2013 at 02:46:36"},{"visible":true,"include":false,"step":"30.0","x":746.2190476190476,"y":2734.8571428571427,"z":69.41904761904762,"a95":0.99,"info":"09/11/2013 at 02:46:36"},{"visible":true,"include":false,"step":"35.0","x":767.4285714285714,"y":2738.5714285714284,"z":55.32285714285714,"a95":0.99,"info":"09/11/2013 at 02:46:36"},{"visible":true,"include":false,"step":"40.0","x":765.1428571428571,"y":2748.6666666666665,"z":32.79238095238095,"a95":0.99,"info":"09/11/2013 at 02:46:36"},{"visible":true,"include":false,"step":"45.0","x":784.9142857142857,"y":2743.3333333333335,"z":7.362285714285714,"a95":0.99,"info":"09/11/2013 at 02:46:36"},{"visible":true,"include":false,"step":"50.0","x":800.2095238095238,"y":2732,"z":-11.48,"a95":0.99,"info":"09/11/2013 at 02:46:36"},{"visible":true,"include":false,"step":"60.0","x":827.9333333333333,"y":2732.190476190476,"z":-40.843809523809526,"a95":0.99,"info":"09/11/2013 at 02:46:36"},{"visible":true,"include":true,"step":"70.0","x":839.5999999999999,"y":2714.5714285714284,"z":-65.92285714285715,"a95":0.99,"info":"09/11/2013 at 02:46:36"},{"visible":true,"include":true,"step":"80.0","x":806.047619047619,"y":2738.5714285714284,"z":-79.23904761904762,"a95":0.99,"info":"09/11/2013 at 02:46:36"},{"visible":true,"include":true,"step":"90.0","x":854.6857142857143,"y":2705.5238095238096,"z":-101.46666666666667,"a95":0.99,"info":"09/11/2013 at 02:46:36"},{"visible":true,"include":true,"step":"100.0","x":858.0190476190477,"y":2668.5714285714284,"z":-98.61904761904762,"a95":0.99,"info":"09/11/2013 at 02:46:36"}]},{"version":"v1.1.0","exported":"2016-11-16T14:42:51.674Z","volume":10.5,"added":"2016-11-16T14:26:51.982Z","format":"Utrecht","demagType":"Unknown","strat":null,"patch":1.1,"GEO":[{"dec":10.303138980907022,"inc":-25.628555722919586,"MAD":2.542039178636034,"cm":[-2.842170943040401e-14,5.861977570020827e-14,0],"intensity":1731.959819489624,"type":"dir","forced":true,"remark":"","origin":false,"nSteps":9,"minStep":"250","maxStep":"500","steps":["250","275","300","320","340","380","420","450","500"],"group":"None","version":"v1.1.0"}],"TECT":[{"dec":97.80020540993974,"inc":-54.80665730217886,"MAD":2.5420391786361227,"cm":[4.951594689828198e-14,1.0658141036401503e-13,6.750155989720952e-14],"intensity":1731.959819489624,"type":"dir","forced":true,"remark":"","origin":false,"nSteps":9,"minStep":"250","maxStep":"500","steps":["250","275","300","320","340","380","420","450","500"],"group":"None","version":"v1.1.0"}],"interpreted":true,"name":"AL 1.8A","coreAzi":321,"coreDip":44,"bedStrike":247,"bedDip":80,"data":[{"visible":true,"include":false,"step":"20","x":789.1428571428571,"y":1022.6666666666666,"z":527.7142857142857,"a95":1.6,"info":"\"13-11-02\" at \"16:24\""},{"visible":true,"include":false,"step":"80","x":802.1904761904761,"y":1037.4285714285713,"z":400.6666666666667,"a95":1.7,"info":"\"13-11-03\" at \"13:40\""},{"visible":true,"include":false,"step":"150","x":736.2857142857143,"y":1045.8095238095239,"z":2.761904761904762,"a95":1.9,"info":"\"13-11-04\" at \"10:53\""},{"visible":true,"include":false,"step":"180","x":838.7619047619048,"y":921.047619047619,"z":247.8095238095238,"a95":1.7,"info":"\"13-11-04\" at \"16:44\""},{"visible":true,"include":false,"step":"200","x":854.952380952381,"y":880.6666666666666,"z":171.8095238095238,"a95":2.3,"info":"\"13-11-05\" at \"10:48\""},{"visible":true,"include":false,"step":"225","x":851.8095238095239,"y":840.5714285714286,"z":162.1904761904762,"a95":2,"info":"\"13-11-05\" at \"15:22\""},{"visible":true,"include":true,"step":"250","x":807.047619047619,"y":846,"z":128.28571428571428,"a95":1.8,"info":"\"13-11-06\" at \"09:30\""},{"visible":true,"include":true,"step":"275","x":851.047619047619,"y":756.3809523809524,"z":128.38095238095238,"a95":2,"info":"\"13-11-06\" at \"14:16\""},{"visible":true,"include":true,"step":"300","x":743.047619047619,"y":714.5714285714286,"z":149.52380952380952,"a95":2.1,"info":"\"13-11-07\" at \"03:01\""},{"visible":true,"include":true,"step":"320","x":749.8095238095239,"y":717.4285714285714,"z":154.95238095238096,"a95":1.6,"info":"\"13-11-07\" at \"06:26\""},{"visible":true,"include":true,"step":"340","x":756.3809523809524,"y":662.7619047619048,"z":128.85714285714286,"a95":1.6,"info":"\"13-11-07\" at \"10:05\""},{"visible":true,"include":true,"step":"380","x":645.6190476190476,"y":594.952380952381,"z":110.76190476190476,"a95":2.3,"info":"\"13-11-08\" at \"09:19\""},{"visible":true,"include":true,"step":"420","x":549.3333333333334,"y":499.42857142857144,"z":85.33333333333333,"a95":2.5,"info":"\"13-11-08\" at \"13:05\""},{"visible":true,"include":true,"step":"450","x":512.952380952381,"y":475.04761904761904,"z":96.66666666666667,"a95":2.4,"info":"\"13-11-08\" at \"18:13\""},{"visible":true,"include":true,"step":"500","x":355.7142857142857,"y":429.5238095238095,"z":15.619047619047619,"a95":2.8,"info":"\"13-11-10\" at \"10:31\""},{"visible":true,"include":false,"step":"530","x":178.85714285714286,"y":298.4761904761905,"z":121.71428571428571,"a95":6.2,"info":"\"13-11-10\" at \"13:18\""},{"visible":true,"include":false,"step":"560","x":159.9047619047619,"y":265.14285714285717,"z":47.523809523809526,"a95":9.1,"info":"\"13-11-10\" at \"22:29\""},{"visible":false,"include":false,"step":"580","x":35.61904761904762,"y":274.4761904761905,"z":48.476190476190474,"a95":11.6,"info":"\"13-11-11\" at \"01:02\""},{"visible":false,"include":false,"step":"600","x":-1763.4285714285713,"y":554.8571428571429,"z":168.95238095238096,"a95":12.8,"info":"\"14-01-29\" at \"21:38\""}]},{"version":"v1.1.0","exported":"2016-11-16T14:42:51.675Z","volume":10.5,"added":"2016-11-16T14:26:51.982Z","format":"Utrecht","demagType":"Unknown","strat":"6","patch":1.1,"GEO":[{"dec":13.318620451090737,"inc":-22.420832177385,"MAD":3.5337258344322895,"cm":[-3.552713678800501e-14,1.474376176702208e-13,0],"intensity":2120.3696534142773,"type":"dir","forced":true,"remark":"","origin":false,"nSteps":6,"minStep":"100.0","maxStep":"510","steps":["100.0","400","425","450","480","510"],"group":"None","version":"v1.1.0"}],"TECT":[{"dec":91.21882173747815,"inc":-53.10557926990787,"MAD":3.533725834432306,"cm":[-7.593925488436071e-14,9.592326932761353e-14,6.394884621840902e-14],"intensity":2120.369653414277,"type":"dir","forced":true,"remark":"","origin":false,"nSteps":6,"minStep":"100.0","maxStep":"510","steps":["100.0","400","425","450","480","510"],"group":"None","version":"v1.1.0"}],"interpreted":true,"name":"AL 1.8B","coreAzi":321,"coreDip":44,"bedStrike":247,"bedDip":80,"data":[{"visible":true,"include":false,"step":"0.0","x":800.7142857142857,"y":1198,"z":536.0857142857143,"a95":0.99,"info":"08/11/2013 at 20:57:53"},{"visible":true,"include":false,"step":"4.0","x":837.0190476190477,"y":1162.1904761904761,"z":515.5809523809525,"a95":0.99,"info":"08/11/2013 at 20:57:53"},{"visible":true,"include":false,"step":"8.0","x":879.9619047619047,"y":1115.2380952380952,"z":437.4857142857143,"a95":0.99,"info":"08/11/2013 at 20:57:53"},{"visible":true,"include":false,"step":"12.0","x":896.9714285714286,"y":1080.2857142857142,"z":391.1904761904762,"a95":0.99,"info":"08/11/2013 at 20:57:53"},{"visible":true,"include":false,"step":"16.0","x":897.9714285714286,"y":1078.857142857143,"z":359.2666666666667,"a95":0.99,"info":"08/11/2013 at 20:57:53"},{"visible":true,"include":false,"step":"20.0","x":894.8761904761906,"y":1074.6666666666667,"z":353.6666666666667,"a95":0.99,"info":"08/11/2013 at 20:57:53"},{"visible":true,"include":false,"step":"25.0","x":905.647619047619,"y":1078.5714285714287,"z":350.87619047619046,"a95":0.99,"info":"08/11/2013 at 20:57:53"},{"visible":true,"include":false,"step":"30.0","x":916.3809523809524,"y":1095.7142857142858,"z":338.32380952380953,"a95":0.99,"info":"08/11/2013 at 20:57:53"},{"visible":true,"include":false,"step":"35.0","x":925.5714285714286,"y":1100.857142857143,"z":337.16190476190474,"a95":0.99,"info":"08/11/2013 at 20:57:53"},{"visible":true,"include":false,"step":"40.0","x":931.3619047619047,"y":1114.4761904761904,"z":328.7904761904762,"a95":0.99,"info":"08/11/2013 at 20:57:53"},{"visible":true,"include":false,"step":"45.0","x":942.847619047619,"y":1133.142857142857,"z":320.81904761904764,"a95":0.99,"info":"08/11/2013 at 20:57:53"},{"visible":true,"include":false,"step":"50.0","x":960.1904761904761,"y":1138.3809523809523,"z":312.48571428571427,"a95":0.99,"info":"08/11/2013 at 20:57:53"},{"visible":true,"include":false,"step":"60.0","x":965.5238095238095,"y":1144.3809523809523,"z":316.9142857142857,"a95":0.99,"info":"08/11/2013 at 20:57:53"},{"visible":true,"include":false,"step":"70.0","x":974.3809523809524,"y":1161.6190476190477,"z":304.8095238095238,"a95":0.99,"info":"08/11/2013 at 20:57:53"},{"visible":true,"include":false,"step":"80.0","x":989.2380952380952,"y":1139.904761904762,"z":295.6666666666667,"a95":0.99,"info":"08/11/2013 at 20:57:53"},{"visible":true,"include":false,"step":"90.0","x":981.5238095238095,"y":1173.047619047619,"z":274.0761904761905,"a95":0.99,"info":"08/11/2013 at 20:57:53"},{"visible":true,"include":true,"step":"100.0","x":1001.6190476190476,"y":1161.4285714285713,"z":273.1904761904762,"a95":0.99,"info":"08/11/2013 at 20:57:53"},{"visible":true,"include":true,"step":"400","x":585.4285714285714,"y":595.5238095238095,"z":97.14285714285714,"a95":1.7,"info":"\"02-01-01\" at \"02:02\""},{"visible":true,"include":true,"step":"425","x":538.4761904761905,"y":547.9047619047619,"z":79.80952380952381,"a95":1.7,"info":"\"02-01-01\" at \"05:31\""},{"visible":true,"include":true,"step":"450","x":545.9047619047619,"y":475.04761904761904,"z":84.76190476190476,"a95":1.7,"info":"\"02-01-01\" at \"08:30\""},{"visible":true,"include":true,"step":"480","x":423.42857142857144,"y":533.9047619047619,"z":58.95238095238095,"a95":3,"info":"\"02-01-01\" at \"21:21\""},{"visible":true,"include":true,"step":"510","x":360.57142857142856,"y":426,"z":73.9047619047619,"a95":3.1,"info":"\"02-01-02\" at \"01:30\""},{"visible":false,"include":false,"step":"530","x":195.71428571428572,"y":604.952380952381,"z":212.95238095238096,"a95":2.9,"info":"\"14-01-28\" at \"21:22\""},{"visible":false,"include":false,"step":"580","x":-3269.714285714286,"y":1970.4761904761904,"z":-1151.904761904762,"a95":1.8,"info":"\"14-01-29\" at \"15:27\""},{"visible":false,"include":false,"step":"600","x":201.71428571428572,"y":350.1904761904762,"z":147.9047619047619,"a95":5.1,"info":"\"14-01-29\" at \"18:19\""},{"visible":true,"include":false,"step":"600","x":14.285714285714286,"y":380.3809523809524,"z":112.28571428571429,"a95":10.7,"info":"\"14-01-29\" at \"21:43\""}]},{"version":"v1.1.0","exported":"2016-11-16T14:42:51.675Z","volume":10.5,"added":"2016-11-16T14:26:51.983Z","format":"Utrecht","demagType":"Unknown","strat":null,"patch":1.1,"GEO":[{"dec":8.862088061145982,"inc":-29.645238395393186,"MAD":2.8913717921844144,"cm":[-3.552713678800501e-15,6.483702463810914e-14,0],"intensity":1166.101604655852,"type":"dir","forced":true,"remark":"","origin":false,"nSteps":9,"minStep":"225","maxStep":"450","steps":["225","250","275","300","320","340","380","420","450"],"group":"None","version":"v1.1.0"}],"TECT":[{"dec":105.03854937707854,"inc":-54.37297836059153,"MAD":2.891371792184463,"cm":[4.39648317751562e-14,5.3290705182007514e-14,3.907985046680551e-14],"intensity":1166.101604655852,"type":"dir","forced":true,"remark":"","origin":false,"nSteps":9,"minStep":"225","maxStep":"450","steps":["225","250","275","300","320","340","380","420","450"],"group":"None","version":"v1.1.0"}],"interpreted":true,"name":"AL 1.9A","coreAzi":295,"coreDip":12,"bedStrike":247,"bedDip":80,"data":[{"visible":true,"include":false,"step":"20","x":179.04761904761904,"y":760.2857142857143,"z":264.0952380952381,"a95":1.6,"info":"\"13-11-02\" at \"16:28\""},{"visible":true,"include":false,"step":"80","x":276.4761904761905,"y":715.047619047619,"z":208,"a95":1.6,"info":"\"13-11-03\" at \"13:42\""},{"visible":true,"include":false,"step":"150","x":373.23809523809524,"y":640.2857142857143,"z":157.42857142857142,"a95":1.7,"info":"\"13-11-04\" at \"10:56\""},{"visible":true,"include":false,"step":"180","x":379.14285714285717,"y":635.3333333333334,"z":153.42857142857142,"a95":1.6,"info":"\"13-11-04\" at \"16:46\""},{"visible":true,"include":false,"step":"200","x":369.6190476190476,"y":607.047619047619,"z":110.57142857142857,"a95":2,"info":"\"13-11-05\" at \"10:51\""},{"visible":true,"include":true,"step":"225","x":406.57142857142856,"y":588.952380952381,"z":106.28571428571429,"a95":2,"info":"\"13-11-05\" at \"15:25\""},{"visible":true,"include":true,"step":"250","x":324.95238095238096,"y":606.6666666666666,"z":98.47619047619048,"a95":1.9,"info":"\"13-11-06\" at \"09:32\""},{"visible":true,"include":true,"step":"275","x":346.95238095238096,"y":589.1428571428571,"z":102.28571428571429,"a95":2,"info":"\"13-11-06\" at \"14:18\""},{"visible":true,"include":true,"step":"300","x":358.3809523809524,"y":521.2380952380952,"z":91.42857142857143,"a95":1.9,"info":"\"13-11-07\" at \"03:03\""},{"visible":true,"include":true,"step":"320","x":369.5238095238095,"y":517.7142857142857,"z":87.61904761904762,"a95":1.7,"info":"\"13-11-07\" at \"06:28\""},{"visible":true,"include":true,"step":"340","x":333.6190476190476,"y":514.6666666666666,"z":78.38095238095238,"a95":1.6,"info":"\"13-11-07\" at \"10:08\""},{"visible":true,"include":true,"step":"380","x":299.8095238095238,"y":426.2857142857143,"z":77.61904761904762,"a95":2.3,"info":"\"13-11-08\" at \"09:21\""},{"visible":true,"include":true,"step":"420","x":228.95238095238096,"y":391.04761904761904,"z":24.571428571428573,"a95":1.9,"info":"\"13-11-08\" at \"13:08\""},{"visible":true,"include":true,"step":"450","x":229.8095238095238,"y":377.23809523809524,"z":39.61904761904762,"a95":2.7,"info":"\"13-11-08\" at \"18:16\""},{"visible":true,"include":false,"step":"500","x":154.57142857142858,"y":368.0952380952381,"z":-33.61904761904762,"a95":3.5,"info":"\"13-11-10\" at \"10:34\""},{"visible":false,"include":false,"step":"530","x":-121.80952380952381,"y":80.66666666666667,"z":50.76190476190476,"a95":13.8,"info":"\"13-11-10\" at \"13:24\""},{"visible":false,"include":false,"step":"560","x":-96.85714285714286,"y":691.8095238095239,"z":33.23809523809524,"a95":5.8,"info":"\"13-11-10\" at \"22:32\""}]},{"version":"v1.1.0","exported":"2016-11-16T14:42:51.675Z","volume":10.5,"added":"2016-11-16T14:26:51.983Z","format":"Utrecht","demagType":"Unknown","strat":"7","patch":1.1,"GEO":[{"dec":22.59832680141659,"inc":-21.189285679364247,"MAD":1.4656261120154874,"cm":[1.0658141036401503e-14,-7.105427357601002e-15,0],"intensity":1149.2000281706369,"type":"dir","forced":true,"remark":"","origin":false,"nSteps":9,"minStep":"50.0","maxStep":"450","steps":["50.0","60.0","70.0","80.0","90.0","100.0","400","425","450"],"group":"None","version":"v1.1.0"}],"TECT":[{"dec":87.01640345284795,"inc":-44.848419505494995,"MAD":1.4656261120155876,"cm":[-9.392486788328824e-14,-2.4868995751603507e-14,-1.7763568394002505e-14],"intensity":1149.2000281706366,"type":"dir","forced":true,"remark":"","origin":false,"nSteps":9,"minStep":"50.0","maxStep":"450","steps":["50.0","60.0","70.0","80.0","90.0","100.0","400","425","450"],"group":"None","version":"v1.1.0"}],"interpreted":true,"name":"AL 1.9B","coreAzi":295,"coreDip":12,"bedStrike":247,"bedDip":80,"data":[{"visible":true,"include":false,"step":"0.0","x":124.56190476190477,"y":752.3238095238095,"z":11.852380952380953,"a95":0.99,"info":"08/11/2013 at 20:57:53"},{"visible":true,"include":false,"step":"4.0","x":163.2095238095238,"y":731.9047619047619,"z":23.486666666666668,"a95":0.99,"info":"08/11/2013 at 20:57:53"},{"visible":true,"include":false,"step":"8.0","x":214.77142857142857,"y":711.047619047619,"z":25.104761904761908,"a95":0.99,"info":"08/11/2013 at 20:57:53"},{"visible":true,"include":false,"step":"12.0","x":247.40952380952382,"y":686.4666666666666,"z":24.416190476190476,"a95":0.99,"info":"08/11/2013 at 20:57:53"},{"visible":true,"include":false,"step":"16.0","x":244.54285714285712,"y":679.4857142857143,"z":20.134285714285713,"a95":0.99,"info":"08/11/2013 at 20:57:53"},{"visible":true,"include":false,"step":"20.0","x":247.2952380952381,"y":666.5238095238095,"z":14.693333333333333,"a95":0.99,"info":"08/11/2013 at 20:57:53"},{"visible":true,"include":false,"step":"25.0","x":249.16190476190474,"y":663.7238095238096,"z":11.327619047619047,"a95":0.99,"info":"08/11/2013 at 20:57:53"},{"visible":true,"include":false,"step":"30.0","x":256.6952380952381,"y":669.4285714285714,"z":-10.268571428571429,"a95":0.99,"info":"08/11/2013 at 20:57:53"},{"visible":true,"include":false,"step":"35.0","x":252.62857142857143,"y":673.6095238095238,"z":-11.10190476190476,"a95":0.99,"info":"08/11/2013 at 20:57:53"},{"visible":true,"include":false,"step":"40.0","x":235.48571428571427,"y":667.0666666666666,"z":-17.66190476190476,"a95":0.99,"info":"08/11/2013 at 20:57:53"},{"visible":true,"include":false,"step":"45.0","x":240.3904761904762,"y":666.9904761904761,"z":-11.00952380952381,"a95":0.99,"info":"08/11/2013 at 20:57:53"},{"visible":true,"include":true,"step":"50.0","x":244.67619047619047,"y":679.3714285714285,"z":-20.116190476190475,"a95":0.99,"info":"08/11/2013 at 20:57:53"},{"visible":true,"include":true,"step":"60.0","x":251.13333333333335,"y":651.4285714285714,"z":-17.677142857142858,"a95":0.99,"info":"08/11/2013 at 20:57:53"},{"visible":true,"include":true,"step":"70.0","x":227.73333333333332,"y":670.2476190476191,"z":-20.608571428571427,"a95":0.99,"info":"08/11/2013 at 20:57:53"},{"visible":true,"include":true,"step":"80.0","x":262.49523809523805,"y":650.2952380952381,"z":-25.282857142857146,"a95":0.99,"info":"08/11/2013 at 20:57:53"},{"visible":true,"include":true,"step":"90.0","x":268.552380952381,"y":670.0095238095239,"z":-30.473333333333336,"a95":0.99,"info":"08/11/2013 at 20:57:53"},{"visible":true,"include":true,"step":"100.0","x":290.14285714285717,"y":694.8285714285714,"z":-36.511428571428574,"a95":0.99,"info":"08/11/2013 at 20:57:53"},{"visible":true,"include":true,"step":"400","x":179.42857142857142,"y":441.5238095238095,"z":-21.428571428571427,"a95":1.8,"info":"\"02-01-01\" at \"02:05\""},{"visible":true,"include":true,"step":"425","x":178.95238095238096,"y":416.6666666666667,"z":-15.333333333333334,"a95":1.7,"info":"\"02-01-01\" at \"05:34\""},{"visible":true,"include":true,"step":"450","x":150,"y":398.95238095238096,"z":-25.80952380952381,"a95":1.6,"info":"\"02-01-01\" at \"08:33\""},{"visible":true,"include":false,"step":"480","x":23.238095238095237,"y":385.6190476190476,"z":-55.333333333333336,"a95":4.2,"info":"\"02-01-01\" at \"21:24\""},{"visible":true,"include":false,"step":"510","x":52.57142857142857,"y":339.9047619047619,"z":51.142857142857146,"a95":8.400001,"info":"\"02-01-02\" at \"01:34\""},{"visible":false,"include":false,"step":"530","x":-1014.1904761904761,"y":170,"z":483.14285714285717,"a95":3.1,"info":"\"14-01-28\" at \"21:25\""},{"visible":false,"include":false,"step":"580","x":46.38095238095238,"y":8706.285714285714,"z":-2800.285714285714,"a95":1.8,"info":"\"14-01-29\" at \"15:30\""},{"visible":false,"include":false,"step":"600","x":-829.047619047619,"y":78.19047619047619,"z":221.61904761904762,"a95":13.9,"info":"\"14-01-29\" at \"18:23\""},{"visible":false,"include":false,"step":"600","x":-1746.095238095238,"y":1208.952380952381,"z":1260.7619047619048,"a95":199,"info":"\"14-01-29\" at \"21:48\""}]},{"version":"v1.1.0","exported":"2016-11-16T14:42:51.675Z","volume":10.5,"added":"2016-11-16T14:26:51.984Z","format":"Utrecht","demagType":"Unknown","strat":"8","patch":1.1,"GEO":[{"dec":25.079638223740176,"inc":-27.067982502012253,"MAD":3.9610576064893186,"cm":[-1.0658141036401503e-14,-3.197442310920451e-14,0],"intensity":3103.3342458769494,"type":"dir","forced":true,"remark":"","origin":false,"nSteps":10,"minStep":"70.0","maxStep":"530","steps":["70.0","80.0","90.0","100.0","400","425","450","480","510","530"],"group":"None","version":"v1.1.0"}],"TECT":[{"dec":94.49412487209486,"inc":-41.67453957903902,"MAD":3.9610576064893177,"cm":[1.9539925233402755e-14,-3.552713678800501e-15,4.263256414560601e-14],"intensity":3103.3342458769494,"type":"dir","forced":true,"remark":"","origin":false,"nSteps":10,"minStep":"70.0","maxStep":"530","steps":["70.0","80.0","90.0","100.0","400","425","450","480","510","530"],"group":"None","version":"v1.1.0"}],"interpreted":true,"name":"AL 1.10A","coreAzi":280,"coreDip":34,"bedStrike":247,"bedDip":80,"data":[{"visible":true,"include":false,"step":"0.0","x":283.3904761904762,"y":2493.6190476190477,"z":-599.6285714285715,"a95":0.99,"info":"08/11/2013 at 20:57:53"},{"visible":true,"include":false,"step":"4.0","x":342.50476190476195,"y":2427.3333333333335,"z":-662.6952380952381,"a95":0.99,"info":"08/11/2013 at 20:57:53"},{"visible":true,"include":false,"step":"8.0","x":448.91428571428577,"y":2323.1428571428573,"z":-732.5238095238095,"a95":0.99,"info":"08/11/2013 at 20:57:53"},{"visible":true,"include":false,"step":"12.0","x":512.8380952380952,"y":2253.3333333333335,"z":-781.2666666666667,"a95":0.99,"info":"08/11/2013 at 20:57:53"},{"visible":true,"include":false,"step":"16.0","x":516.2,"y":2229.3333333333335,"z":-793.2285714285714,"a95":0.99,"info":"08/11/2013 at 20:57:53"},{"visible":true,"include":false,"step":"20.0","x":528.5904761904761,"y":2205.809523809524,"z":-816.7714285714286,"a95":0.99,"info":"08/11/2013 at 20:57:53"},{"visible":true,"include":false,"step":"25.0","x":549.9333333333334,"y":2196.285714285714,"z":-845.1333333333333,"a95":0.99,"info":"08/11/2013 at 20:57:53"},{"visible":true,"include":false,"step":"30.0","x":549.952380952381,"y":2184.095238095238,"z":-878.7238095238096,"a95":0.99,"info":"08/11/2013 at 20:57:53"},{"visible":true,"include":false,"step":"35.0","x":555.6190476190476,"y":2187.5238095238096,"z":-910.5238095238095,"a95":0.99,"info":"08/11/2013 at 20:57:53"},{"visible":true,"include":false,"step":"40.0","x":546.6095238095238,"y":2181.5238095238096,"z":-927.6095238095238,"a95":0.99,"info":"08/11/2013 at 20:57:53"},{"visible":true,"include":false,"step":"45.0","x":543.0380952380953,"y":2182.5714285714284,"z":-944.0571428571429,"a95":0.99,"info":"08/11/2013 at 20:57:53"},{"visible":true,"include":false,"step":"50.0","x":555.3714285714285,"y":2183.714285714286,"z":-973.3333333333334,"a95":0.99,"info":"08/11/2013 at 20:57:53"},{"visible":true,"include":false,"step":"60.0","x":567.3714285714285,"y":2184,"z":-993.6190476190476,"a95":0.99,"info":"08/11/2013 at 20:57:53"},{"visible":true,"include":true,"step":"70.0","x":575.7333333333333,"y":2195.4285714285716,"z":-1008.4761904761905,"a95":0.99,"info":"08/11/2013 at 20:57:53"},{"visible":true,"include":true,"step":"80.0","x":601.1142857142856,"y":2145.3333333333335,"z":-1014.2857142857143,"a95":0.99,"info":"08/11/2013 at 20:57:53"},{"visible":true,"include":true,"step":"90.0","x":607.9904761904761,"y":2162.8571428571427,"z":-1041.047619047619,"a95":0.99,"info":"08/11/2013 at 20:57:53"},{"visible":true,"include":true,"step":"100.0","x":619.4380952380952,"y":2155.5238095238096,"z":-1055.142857142857,"a95":0.99,"info":"08/11/2013 at 20:57:53"},{"visible":true,"include":true,"step":"400","x":515.3333333333334,"y":1360.4761904761904,"z":-850,"a95":1.9,"info":"\"02-01-01\" at \"02:08\""},{"visible":true,"include":true,"step":"425","x":471.7142857142857,"y":1292.5714285714287,"z":-799.9047619047619,"a95":2.1,"info":"\"02-01-01\" at \"05:45\""},{"visible":true,"include":true,"step":"450","x":488.57142857142856,"y":1200.095238095238,"z":-777.4285714285714,"a95":2.5,"info":"\"02-01-01\" at \"08:37\""},{"visible":true,"include":true,"step":"480","x":275.14285714285717,"y":1205.904761904762,"z":-723.6190476190476,"a95":2.2,"info":"\"02-01-01\" at \"21:27\""},{"visible":true,"include":true,"step":"510","x":181.9047619047619,"y":1092.952380952381,"z":-683.047619047619,"a95":3.9,"info":"\"02-01-02\" at \"01:36\""},{"visible":true,"include":true,"step":"530","x":34.857142857142854,"y":575.047619047619,"z":-249.42857142857142,"a95":4.1,"info":"\"14-01-28\" at \"21:28\""},{"visible":false,"include":false,"step":"580","x":-6552.666666666667,"y":683.5238095238095,"z":-2310.285714285714,"a95":2.1,"info":"\"14-01-29\" at \"15:32\""},{"visible":false,"include":false,"step":"600","x":-1037.904761904762,"y":661.047619047619,"z":33.42857142857143,"a95":13.2,"info":"\"14-01-29\" at \"18:25\""},{"visible":false,"include":false,"step":"600","x":-1474.3809523809523,"y":1048.3809523809523,"z":759.7142857142857,"a95":15.8,"info":"\"14-01-29\" at \"21:51\""}]},{"version":"v1.1.0","exported":"2016-11-16T14:42:51.675Z","volume":10.5,"added":"2016-11-16T14:26:51.984Z","format":"Utrecht","demagType":"Unknown","strat":"1","patch":1.1,"GEO":[{"dec":24.19645983412886,"inc":-25.135353155764257,"MAD":6.059121186445649,"cm":[1119.701171407384,715.1026499454695,-757.1465102702307],"intensity":1014.485604984658,"type":"dir","forced":false,"remark":"","origin":false,"nSteps":10,"minStep":"60.0","maxStep":"510","steps":["60.0","70.0","80.0","90.0","100.0","400","425","450","480","510"],"group":"None","version":"v1.1.0"}],"TECT":[{"dec":92.12450554304348,"inc":-42.8090338257036,"MAD":6.059121186445602,"cm":[-138.1349121526738,1249.0223903364345,-871.3410157379963],"intensity":1014.4856049846582,"type":"dir","forced":false,"remark":"","origin":false,"nSteps":10,"minStep":"60.0","maxStep":"510","steps":["60.0","70.0","80.0","90.0","100.0","400","425","450","480","510"],"group":"None","version":"v1.1.0"}],"interpreted":true,"name":"AL 1.10B","coreAzi":280,"coreDip":34,"bedStrike":247,"bedDip":80,"data":[{"visible":true,"include":false,"step":"0.0","x":240.02857142857144,"y":1830.857142857143,"z":-658.0095238095239,"a95":0.99,"info":"09/11/2013 at 02:46:36"},{"visible":true,"include":false,"step":"4.0","x":277.7142857142857,"y":1797.142857142857,"z":-717.2476190476191,"a95":0.99,"info":"09/11/2013 at 02:46:36"},{"visible":true,"include":false,"step":"8.0","x":365.62857142857143,"y":1709.2380952380952,"z":-772.8761904761905,"a95":0.99,"info":"09/11/2013 at 02:46:36"},{"visible":true,"include":false,"step":"12.0","x":398.76190476190476,"y":1661.6190476190477,"z":-812.6380952380953,"a95":0.99,"info":"09/11/2013 at 02:46:36"},{"visible":true,"include":false,"step":"16.0","x":418.9047619047619,"y":1636.5714285714287,"z":-822.8095238095239,"a95":0.99,"info":"09/11/2013 at 02:46:36"},{"visible":true,"include":false,"step":"20.0","x":426.1333333333333,"y":1622.3809523809523,"z":-844.8,"a95":0.99,"info":"09/11/2013 at 02:46:36"},{"visible":true,"include":false,"step":"25.0","x":435.57142857142856,"y":1607.142857142857,"z":-874.2380952380952,"a95":0.99,"info":"09/11/2013 at 02:46:36"},{"visible":true,"include":false,"step":"30.0","x":439.2857142857143,"y":1607.7142857142858,"z":-894.8285714285715,"a95":0.99,"info":"09/11/2013 at 02:46:36"},{"visible":true,"include":false,"step":"35.0","x":432.2095238095238,"y":1605.8095238095239,"z":-916.8761904761906,"a95":0.99,"info":"09/11/2013 at 02:46:36"},{"visible":true,"include":false,"step":"40.0","x":438.6285714285715,"y":1602.6666666666667,"z":-934.5523809523809,"a95":0.99,"info":"09/11/2013 at 02:46:36"},{"visible":true,"include":false,"step":"45.0","x":444.6285714285715,"y":1600.095238095238,"z":-957.3333333333334,"a95":0.99,"info":"09/11/2013 at 02:46:36"},{"visible":true,"include":false,"step":"50.0","x":438.2857142857143,"y":1605.904761904762,"z":-987.2380952380952,"a95":0.99,"info":"09/11/2013 at 02:46:36"},{"visible":true,"include":true,"step":"60.0","x":448.53333333333336,"y":1608.952380952381,"z":-999.2380952380952,"a95":0.99,"info":"09/11/2013 at 02:46:36"},{"visible":true,"include":true,"step":"70.0","x":448.5619047619047,"y":1599.7142857142858,"z":-1008.1904761904761,"a95":0.99,"info":"09/11/2013 at 02:46:36"},{"visible":true,"include":true,"step":"80.0","x":356.68571428571425,"y":1603.8095238095239,"z":-1016.2857142857143,"a95":0.99,"info":"09/11/2013 at 02:46:36"},{"visible":true,"include":true,"step":"90.0","x":468.4761904761905,"y":1598.952380952381,"z":-1037.7142857142858,"a95":0.99,"info":"09/11/2013 at 02:46:36"},{"visible":true,"include":true,"step":"100.0","x":465.50476190476195,"y":1589.6190476190477,"z":-1043.8095238095239,"a95":0.99,"info":"09/11/2013 at 02:46:36"},{"visible":true,"include":true,"step":"400","x":292.1904761904762,"y":976.1904761904761,"z":-776.2857142857143,"a95":2.3,"info":"\"02-01-01\" at \"02:11\""},{"visible":true,"include":true,"step":"425","x":274.2857142857143,"y":896.2857142857143,"z":-714.1904761904761,"a95":2.8,"info":"\"02-01-01\" at \"05:48\""},{"visible":true,"include":true,"step":"450","x":264.1904761904762,"y":852.4761904761905,"z":-702,"a95":3.4,"info":"\"02-01-01\" at \"08:40\""},{"visible":true,"include":true,"step":"480","x":198.66666666666666,"y":831.3333333333334,"z":-571.047619047619,"a95":2.9,"info":"\"02-01-01\" at \"21:31\""},{"visible":true,"include":true,"step":"510","x":209.14285714285714,"y":711.3333333333334,"z":-591.6190476190476,"a95":4.9,"info":"\"02-01-02\" at \"01:40\""},{"visible":true,"include":false,"step":"530","x":-24.476190476190474,"y":466,"z":-370.57142857142856,"a95":2.2,"info":"\"14-01-28\" at \"21:32\""},{"visible":false,"include":false,"step":"580","x":-1524.2857142857142,"y":-2999.809523809524,"z":-1467.4285714285713,"a95":2.6,"info":"\"14-01-29\" at \"15:35\""},{"visible":false,"include":false,"step":"600","x":-673.6190476190476,"y":209.8095238095238,"z":-651.4285714285714,"a95":16.3,"info":"\"14-01-29\" at \"18:28\""},{"visible":false,"include":false,"step":"600","x":-2258.7619047619046,"y":312.1904761904762,"z":1602.3809523809523,"a95":9.900001,"info":"\"14-01-29\" at \"21:57\""}]},{"version":"v1.1.0","exported":"2016-11-16T14:42:51.675Z","volume":10.5,"added":"2016-11-16T14:26:51.985Z","format":"Utrecht","demagType":"Unknown","strat":"7","patch":1.1,"GEO":[{"dec":30.403794630199513,"inc":-27.239009501460913,"MAD":2.5556142694704587,"cm":[-4.263256414560601e-14,6.394884621840902e-14,0],"intensity":2076.4447397823074,"type":"dir","forced":true,"remark":"","origin":false,"nSteps":5,"minStep":"400","maxStep":"510","steps":["400","425","450","480","510"],"group":"None","version":"v1.1.0"}],"TECT":[{"dec":93.68013077715017,"inc":-36.97638324505451,"MAD":2.555614269470563,"cm":[-2.0250467969162855e-13,4.263256414560601e-14,1.4210854715202004e-13],"intensity":2076.4447397823074,"type":"dir","forced":true,"remark":"","origin":false,"nSteps":5,"minStep":"400","maxStep":"510","steps":["400","425","450","480","510"],"group":"None","version":"v1.1.0"}],"interpreted":true,"name":"AL 1.10C","coreAzi":280,"coreDip":34,"bedStrike":247,"bedDip":80,"data":[{"visible":true,"include":false,"step":"0.0","x":-115.20952380952382,"y":2000.952380952381,"z":-529.3904761904762,"a95":0.99,"info":"09/11/2013 at 02:46:36"},{"visible":true,"include":false,"step":"4.0","x":-59.2047619047619,"y":1969.2380952380952,"z":-559.4761904761905,"a95":0.99,"info":"09/11/2013 at 02:46:36"},{"visible":true,"include":false,"step":"8.0","x":60.74476190476191,"y":1876.952380952381,"z":-589.5333333333334,"a95":0.99,"info":"09/11/2013 at 02:46:36"},{"visible":true,"include":false,"step":"12.0","x":96.16190476190476,"y":1817.2380952380952,"z":-598.5619047619048,"a95":0.99,"info":"09/11/2013 at 02:46:36"},{"visible":true,"include":false,"step":"16.0","x":111.4952380952381,"y":1793.047619047619,"z":-608.6095238095238,"a95":0.99,"info":"09/11/2013 at 02:46:36"},{"visible":true,"include":false,"step":"20.0","x":131.64761904761903,"y":1776.3809523809523,"z":-621.9809523809524,"a95":0.99,"info":"09/11/2013 at 02:46:36"},{"visible":true,"include":false,"step":"25.0","x":151.2761904761905,"y":1761.3333333333333,"z":-644.2857142857143,"a95":0.99,"info":"09/11/2013 at 02:46:36"},{"visible":true,"include":false,"step":"30.0","x":158.94285714285715,"y":1764.095238095238,"z":-640.152380952381,"a95":0.99,"info":"09/11/2013 at 02:46:36"},{"visible":true,"include":false,"step":"35.0","x":157.98095238095237,"y":1747.6190476190477,"z":-680.6285714285715,"a95":0.99,"info":"09/11/2013 at 02:46:36"},{"visible":true,"include":false,"step":"40.0","x":156.76190476190476,"y":1749.142857142857,"z":-685.447619047619,"a95":0.99,"info":"09/11/2013 at 02:46:36"},{"visible":true,"include":false,"step":"45.0","x":173.1047619047619,"y":1747.2380952380952,"z":-708.7904761904762,"a95":0.99,"info":"09/11/2013 at 02:46:36"},{"visible":true,"include":false,"step":"50.0","x":174.95238095238096,"y":1738.1904761904761,"z":-740.7619047619048,"a95":0.99,"info":"09/11/2013 at 02:46:36"},{"visible":true,"include":false,"step":"60.0","x":173.9714285714286,"y":1736,"z":-732.7523809523809,"a95":0.99,"info":"09/11/2013 at 02:46:36"},{"visible":true,"include":false,"step":"70.0","x":199.87619047619046,"y":1742.3809523809523,"z":-755.2476190476191,"a95":0.99,"info":"09/11/2013 at 02:46:36"},{"visible":true,"include":false,"step":"80.0","x":139.2095238095238,"y":1737.2380952380952,"z":-742.6190476190476,"a95":0.99,"info":"09/11/2013 at 02:46:36"},{"visible":true,"include":false,"step":"90.0","x":192.56190476190477,"y":1726.6666666666667,"z":-764.5904761904761,"a95":0.99,"info":"09/11/2013 at 02:46:36"},{"visible":true,"include":false,"step":"100.0","x":208.60000000000002,"y":1706.3809523809523,"z":-779.0285714285715,"a95":0.99,"info":"09/11/2013 at 02:46:36"},{"visible":true,"include":true,"step":"400","x":267.14285714285717,"y":993.2380952380952,"z":-607.5238095238095,"a95":2.2,"info":"\"02-01-01\" at \"02:14\""},{"visible":true,"include":true,"step":"425","x":244.57142857142858,"y":937.6190476190476,"z":-578.0952380952381,"a95":2.5,"info":"\"02-01-01\" at \"05:51\""},{"visible":true,"include":true,"step":"450","x":253.61904761904762,"y":871.4285714285714,"z":-524.1904761904761,"a95":3,"info":"\"02-01-01\" at \"08:43\""},{"visible":true,"include":true,"step":"480","x":198.57142857142858,"y":798.952380952381,"z":-490.3809523809524,"a95":3,"info":"\"02-01-01\" at \"21:36\""},{"visible":true,"include":true,"step":"510","x":91.71428571428571,"y":741.2380952380952,"z":-476.1904761904762,"a95":4.1,"info":"\"02-01-02\" at \"01:42\""},{"visible":true,"include":false,"step":"530","x":-126,"y":647.5238095238095,"z":-211.04761904761904,"a95":4.3,"info":"\"14-01-28\" at \"21:34\""},{"visible":false,"include":false,"step":"580","x":-2343.1428571428573,"y":-121.52380952380952,"z":-1038.7619047619048,"a95":2.3,"info":"\"14-01-29\" at \"15:38\""},{"visible":false,"include":false,"step":"600","x":-317.14285714285717,"y":512.2857142857143,"z":-161.33333333333334,"a95":14.9,"info":"\"14-01-29\" at \"18:31\""},{"visible":false,"include":false,"step":"600","x":-3986.6666666666665,"y":3419.714285714286,"z":3784.285714285714,"a95":6.5,"info":"\"14-01-29\" at \"22:18\""}]},{"version":"v1.1.0","exported":"2016-11-16T14:42:51.675Z","volume":10.5,"added":"2016-11-16T14:26:51.985Z","format":"Utrecht","demagType":"Unknown","strat":null,"patch":1.1,"GEO":[{"dec":13.008074610007384,"inc":-8.38344689413816,"MAD":1.5580546955545864,"cm":[-1.4210854715202004e-14,7.194245199571014e-14,0],"intensity":1816.6926990583167,"type":"dir","forced":true,"remark":"","origin":false,"nSteps":11,"minStep":"200","maxStep":"500","steps":["200","225","250","275","300","320","340","380","420","450","500"],"group":"None","version":"v1.1.0"}],"TECT":[{"dec":67.45444987064332,"inc":-54.43433867766314,"MAD":1.5580546955546604,"cm":[-1.5276668818842154e-13,1.2079226507921703e-13,5.684341886080802e-14],"intensity":1816.6926990583167,"type":"dir","forced":true,"remark":"","origin":false,"nSteps":11,"minStep":"200","maxStep":"500","steps":["200","225","250","275","300","320","340","380","420","450","500"],"group":"None","version":"v1.1.0"}],"interpreted":true,"name":"AL 1.11A","coreAzi":286,"coreDip":17,"bedStrike":247,"bedDip":80,"data":[{"visible":true,"include":false,"step":"20","x":182.38095238095238,"y":1279.904761904762,"z":-28.666666666666668,"a95":1.5,"info":"\"13-11-02\" at \"16:34\""},{"visible":true,"include":false,"step":"80","x":97.33333333333333,"y":1227.047619047619,"z":31.428571428571427,"a95":1.5,"info":"\"13-11-03\" at \"13:45\""},{"visible":true,"include":false,"step":"150","x":307.6190476190476,"y":1131.047619047619,"z":19.61904761904762,"a95":1.7,"info":"\"13-11-04\" at \"10:59\""},{"visible":true,"include":false,"step":"180","x":153.23809523809524,"y":1139.5238095238096,"z":27.61904761904762,"a95":1.7,"info":"\"13-11-04\" at \"16:48\""},{"visible":true,"include":true,"step":"200","x":168,"y":1090.2857142857142,"z":-7.333333333333333,"a95":1.9,"info":"\"13-11-05\" at \"10:53\""},{"visible":true,"include":true,"step":"225","x":142.76190476190476,"y":1079.2380952380952,"z":-18.095238095238095,"a95":1.8,"info":"\"13-11-05\" at \"15:28\""},{"visible":true,"include":true,"step":"250","x":161.33333333333334,"y":1044.1904761904761,"z":-33.61904761904762,"a95":1.7,"info":"\"13-11-06\" at \"09:34\""},{"visible":true,"include":true,"step":"275","x":191.04761904761904,"y":1006.5714285714286,"z":12.571428571428571,"a95":1.9,"info":"\"13-11-06\" at \"14:21\""},{"visible":true,"include":true,"step":"300","x":143.14285714285714,"y":973.3333333333334,"z":-0.09523809523809523,"a95":1.7,"info":"\"13-11-07\" at \"03:06\""},{"visible":true,"include":true,"step":"320","x":160.1904761904762,"y":950.952380952381,"z":30.095238095238095,"a95":1.6,"info":"\"13-11-07\" at \"06:30\""},{"visible":true,"include":true,"step":"340","x":140.1904761904762,"y":929.1428571428571,"z":28.761904761904763,"a95":1.6,"info":"\"13-11-07\" at \"10:21\""},{"visible":true,"include":true,"step":"380","x":146.85714285714286,"y":841.8095238095239,"z":31.904761904761905,"a95":2.2,"info":"\"13-11-08\" at \"09:24\""},{"visible":true,"include":true,"step":"420","x":106,"y":765.5238095238095,"z":13.238095238095237,"a95":2.2,"info":"\"13-11-08\" at \"13:10\""},{"visible":true,"include":true,"step":"450","x":114.57142857142857,"y":732.8571428571429,"z":24.19047619047619,"a95":2.5,"info":"\"13-11-08\" at \"18:19\""},{"visible":true,"include":true,"step":"500","x":109.14285714285714,"y":705.1428571428571,"z":6.666666666666667,"a95":2.9,"info":"\"13-11-10\" at \"10:37\""},{"visible":true,"include":false,"step":"530","x":94.57142857142857,"y":504.1904761904762,"z":127.04761904761905,"a95":4.3,"info":"\"13-11-10\" at \"13:26\""},{"visible":false,"include":false,"step":"560","x":-90.95238095238095,"y":775.2380952380952,"z":42.57142857142857,"a95":3.1,"info":"\"13-11-10\" at \"22:35\""},{"visible":false,"include":false,"step":"580","x":-3126.4761904761904,"y":3952.095238095238,"z":-1654.1904761904761,"a95":2.1,"info":"\"14-01-29\" at \"15:40\""},{"visible":false,"include":false,"step":"600","x":-469.5238095238095,"y":150.85714285714286,"z":203.14285714285714,"a95":10.7,"info":"\"14-01-29\" at \"18:34\""},{"visible":false,"include":false,"step":"600","x":-3056.190476190476,"y":1434.095238095238,"z":573.9047619047619,"a95":9.2,"info":"\"14-01-29\" at \"22:27\""}]},{"version":"v1.1.0","exported":"2016-11-16T14:42:51.675Z","volume":10.5,"added":"2016-11-16T14:26:51.985Z","format":"Utrecht","demagType":"Unknown","strat":"2","patch":1.1,"GEO":[{"dec":15.467832099901386,"inc":-8.610988313948766,"MAD":3.015152566312027,"cm":[-1.4210854715202004e-14,5.684341886080802e-14,0],"intensity":2407.5351742835396,"type":"dir","forced":true,"remark":"","origin":false,"nSteps":8,"minStep":"70.0","maxStep":"480","steps":["70.0","80.0","90.0","100.0","400","425","450","480"],"group":"None","version":"v1.1.0"}],"TECT":[{"dec":68.21303595944664,"inc":-52.03348792485958,"MAD":3.0151525663120657,"cm":[1.7763568394002505e-14,5.684341886080802e-14,6.394884621840902e-14],"intensity":2407.535174283539,"type":"dir","forced":true,"remark":"","origin":false,"nSteps":8,"minStep":"70.0","maxStep":"480","steps":["70.0","80.0","90.0","100.0","400","425","450","480"],"group":"None","version":"v1.1.0"}],"interpreted":true,"name":"AL 1.11B","coreAzi":286,"coreDip":17,"bedStrike":247,"bedDip":80,"data":[{"visible":true,"include":false,"step":"0.0","x":171.77142857142857,"y":1702.7619047619048,"z":291.1047619047619,"a95":0.99,"info":"09/11/2013 at 02:46:36"},{"visible":true,"include":false,"step":"4.0","x":145.6,"y":1690.952380952381,"z":235.93333333333334,"a95":0.99,"info":"09/11/2013 at 02:46:36"},{"visible":true,"include":false,"step":"8.0","x":157.86666666666665,"y":1639.3333333333333,"z":163.6,"a95":0.99,"info":"09/11/2013 at 02:46:36"},{"visible":true,"include":false,"step":"12.0","x":169.15238095238095,"y":1598.3809523809523,"z":148.93333333333334,"a95":0.99,"info":"09/11/2013 at 02:46:36"},{"visible":true,"include":false,"step":"16.0","x":176.2952380952381,"y":1567.4285714285713,"z":120.80952380952381,"a95":0.99,"info":"09/11/2013 at 02:46:36"},{"visible":true,"include":false,"step":"20.0","x":180.9904761904762,"y":1549.4285714285713,"z":107.83809523809524,"a95":0.99,"info":"09/11/2013 at 02:46:36"},{"visible":true,"include":false,"step":"25.0","x":193.7047619047619,"y":1536.7619047619048,"z":96.99047619047619,"a95":0.99,"info":"09/11/2013 at 02:46:36"},{"visible":true,"include":false,"step":"30.0","x":191.1904761904762,"y":1534.095238095238,"z":76.47619047619048,"a95":0.99,"info":"09/11/2013 at 02:46:36"},{"visible":true,"include":false,"step":"35.0","x":181.9714285714286,"y":1528.6666666666667,"z":57.222857142857144,"a95":0.99,"info":"09/11/2013 at 02:46:36"},{"visible":true,"include":false,"step":"40.0","x":189,"y":1529.7142857142858,"z":51.45619047619047,"a95":0.99,"info":"09/11/2013 at 02:46:36"},{"visible":true,"include":false,"step":"45.0","x":200.16190476190474,"y":1536.1904761904761,"z":40.38,"a95":0.99,"info":"09/11/2013 at 02:46:36"},{"visible":true,"include":false,"step":"50.0","x":195.0857142857143,"y":1548.7619047619048,"z":17.710476190476193,"a95":0.99,"info":"09/11/2013 at 02:46:36"},{"visible":true,"include":false,"step":"60.0","x":208.71428571428572,"y":1556.857142857143,"z":20.58857142857143,"a95":0.99,"info":"09/11/2013 at 02:46:36"},{"visible":true,"include":true,"step":"70.0","x":223.55238095238096,"y":1573.047619047619,"z":4.625238095238095,"a95":0.99,"info":"09/11/2013 at 02:46:36"},{"visible":true,"include":true,"step":"80.0","x":213.9238095238095,"y":1585.047619047619,"z":8.855142857142857,"a95":0.99,"info":"09/11/2013 at 02:46:36"},{"visible":true,"include":true,"step":"90.0","x":228.63809523809522,"y":1558.095238095238,"z":-31.46857142857143,"a95":0.99,"info":"09/11/2013 at 02:46:36"},{"visible":true,"include":true,"step":"100.0","x":238.83809523809526,"y":1548.857142857143,"z":-40.38285714285714,"a95":0.99,"info":"09/11/2013 at 02:46:36"},{"visible":true,"include":true,"step":"400","x":202.38095238095238,"y":989.2380952380952,"z":-74.0952380952381,"a95":1.4,"info":"\"02-01-01\" at \"02:48\""},{"visible":true,"include":true,"step":"425","x":179.8095238095238,"y":962.6666666666666,"z":-117.61904761904762,"a95":1.6,"info":"\"02-01-01\" at \"05:54\""},{"visible":true,"include":true,"step":"450","x":114.85714285714286,"y":925.9047619047619,"z":-114.0952380952381,"a95":1.7,"info":"\"02-01-01\" at \"08:49\""},{"visible":true,"include":true,"step":"480","x":68.19047619047619,"y":814.6666666666666,"z":-104.28571428571429,"a95":2.7,"info":"\"02-01-01\" at \"21:42\""},{"visible":false,"include":false,"step":"510","x":-207.42857142857142,"y":848.4761904761905,"z":-74.57142857142857,"a95":2.8,"info":"\"02-01-02\" at \"02:01\""},{"visible":false,"include":false,"step":"530","x":-641.5238095238095,"y":930.3809523809524,"z":230.38095238095238,"a95":4.5,"info":"\"14-01-28\" at \"21:38\""},{"visible":false,"include":false,"step":"580","x":-4200.285714285715,"y":1825.7142857142858,"z":-1586.4761904761904,"a95":2.2,"info":"\"14-01-29\" at \"15:43\""},{"visible":false,"include":false,"step":"600","x":-695.3333333333334,"y":151.33333333333334,"z":347.04761904761904,"a95":17.6,"info":"\"14-01-29\" at \"18:37\""},{"visible":false,"include":false,"step":"600","x":-1674.5714285714287,"y":1257.142857142857,"z":335.8095238095238,"a95":25.8,"info":"\"14-01-29\" at \"22:30\""}]},{"version":"v1.1.0","exported":"2016-11-16T14:42:51.675Z","volume":10.5,"added":"2016-11-16T14:26:51.986Z","format":"Utrecht","demagType":"Unknown","strat":"3","patch":1.1,"GEO":[{"dec":21.39139376291405,"inc":-26.850822382920292,"MAD":1.4965797453925638,"cm":[-7.105427357601002e-15,4.263256414560601e-14,0],"intensity":1428.3135068754698,"type":"dir","forced":true,"remark":"","origin":false,"nSteps":6,"minStep":"400","maxStep":"530","steps":["400","425","450","480","510","530"],"group":"None","version":"v1.1.0"}],"TECT":[{"dec":95.16024894474458,"inc":-44.93319655741323,"MAD":1.496579745392627,"cm":[6.106226635438361e-15,5.684341886080802e-14,4.618527782440651e-14],"intensity":1428.3135068754698,"type":"dir","forced":true,"remark":"","origin":false,"nSteps":6,"minStep":"400","maxStep":"530","steps":["400","425","450","480","510","530"],"group":"None","version":"v1.1.0"}],"interpreted":true,"name":"AL 1.12A","coreAzi":269,"coreDip":28,"bedStrike":247,"bedDip":80,"data":[{"visible":true,"include":false,"step":"0.0","x":-37.827619047619045,"y":1627.4285714285713,"z":-561.2,"a95":0.99,"info":"09/11/2013 at 02:46:36"},{"visible":true,"include":false,"step":"4.0","x":-21.142857142857142,"y":1599.142857142857,"z":-557.5714285714286,"a95":0.99,"info":"09/11/2013 at 02:46:36"},{"visible":true,"include":false,"step":"8.0","x":38.33714285714286,"y":1543.8095238095239,"z":-551.6,"a95":0.99,"info":"09/11/2013 at 02:46:36"},{"visible":true,"include":false,"step":"12.0","x":61.65238095238095,"y":1513.8095238095239,"z":-549.3809523809524,"a95":0.99,"info":"09/11/2013 at 02:46:36"},{"visible":true,"include":false,"step":"16.0","x":87.81428571428572,"y":1491.6190476190477,"z":-550.7619047619048,"a95":0.99,"info":"09/11/2013 at 02:46:36"},{"visible":true,"include":false,"step":"20.0","x":102.65714285714287,"y":1489.6190476190477,"z":-558.7142857142857,"a95":0.99,"info":"09/11/2013 at 02:46:36"},{"visible":true,"include":false,"step":"25.0","x":110.4952380952381,"y":1475.3333333333333,"z":-546.6095238095238,"a95":0.99,"info":"09/11/2013 at 02:46:36"},{"visible":true,"include":false,"step":"30.0","x":138.59047619047618,"y":1464,"z":-556.5809523809525,"a95":0.99,"info":"09/11/2013 at 02:46:36"},{"visible":true,"include":false,"step":"35.0","x":139.1238095238095,"y":1450,"z":-545.1142857142856,"a95":0.99,"info":"09/11/2013 at 02:46:36"},{"visible":true,"include":false,"step":"40.0","x":157.40952380952382,"y":1452.952380952381,"z":-551.1714285714286,"a95":0.99,"info":"09/11/2013 at 02:46:36"},{"visible":true,"include":false,"step":"45.0","x":172.1904761904762,"y":1428.095238095238,"z":-562.7904761904762,"a95":0.99,"info":"09/11/2013 at 02:46:36"},{"visible":true,"include":false,"step":"50.0","x":175.58095238095237,"y":1440.6666666666667,"z":-556.9714285714285,"a95":0.99,"info":"09/11/2013 at 02:46:36"},{"visible":true,"include":false,"step":"60.0","x":171.53333333333333,"y":1437.7142857142858,"z":-563.3142857142857,"a95":0.99,"info":"09/11/2013 at 02:46:36"},{"visible":true,"include":false,"step":"70.0","x":181.03809523809525,"y":1414.095238095238,"z":-586.9333333333334,"a95":0.99,"info":"09/11/2013 at 02:46:36"},{"visible":true,"include":false,"step":"80.0","x":140.63809523809525,"y":1416.952380952381,"z":-575.7333333333333,"a95":0.99,"info":"09/11/2013 at 02:46:36"},{"visible":true,"include":false,"step":"90.0","x":191.8952380952381,"y":1368.857142857143,"z":-579.9428571428571,"a95":0.99,"info":"09/11/2013 at 02:46:36"},{"visible":true,"include":false,"step":"100.0","x":249.7047619047619,"y":1395.6190476190477,"z":-606.4095238095239,"a95":0.99,"info":"09/11/2013 at 02:46:36"},{"visible":true,"include":true,"step":"400","x":241.8095238095238,"y":801.8095238095239,"z":-486.85714285714283,"a95":1.9,"info":"\"02-01-01\" at \"02:26\""},{"visible":true,"include":true,"step":"425","x":224.1904761904762,"y":725.047619047619,"z":-459.04761904761904,"a95":2.2,"info":"\"02-01-01\" at \"05:57\""},{"visible":true,"include":true,"step":"450","x":201.33333333333334,"y":676,"z":-422.4761904761905,"a95":2.6,"info":"\"02-01-01\" at \"08:51\""},{"visible":true,"include":true,"step":"480","x":184.95238095238096,"y":621.7142857142857,"z":-400.1904761904762,"a95":3.6,"info":"\"02-01-01\" at \"21:44\""},{"visible":true,"include":true,"step":"510","x":137.42857142857142,"y":549.3333333333334,"z":-346.0952380952381,"a95":5.2,"info":"\"02-01-02\" at \"01:45\""},{"visible":true,"include":true,"step":"530","x":83.42857142857143,"y":397.8095238095238,"z":-216.85714285714286,"a95":3.6,"info":"\"14-01-28\" at \"21:40\""},{"visible":false,"include":false,"step":"580","x":209.52380952380952,"y":3423.0476190476193,"z":-1444.095238095238,"a95":2.2,"info":"\"14-01-29\" at \"15:46\""},{"visible":false,"include":false,"step":"600","x":-875.4285714285714,"y":-527.9047619047619,"z":1.7142857142857142,"a95":15,"info":"\"14-01-29\" at \"18:40\""},{"visible":false,"include":false,"step":"600","x":-3461.809523809524,"y":2952.8571428571427,"z":527.2380952380952,"a95":11.7,"info":"\"14-01-29\" at \"22:34\""}]},{"version":"v1.1.0","exported":"2016-11-16T14:42:51.675Z","volume":10.5,"added":"2016-11-16T14:26:51.986Z","format":"Utrecht","demagType":"Unknown","strat":"8","patch":1.1,"GEO":[{"dec":15.550462732511505,"inc":-22.911944471946484,"MAD":6.990173925800314,"cm":[0,3.375077994860476e-14,0],"intensity":1732.0319395022086,"type":"dir","forced":true,"remark":"","origin":false,"nSteps":6,"minStep":"400","maxStep":"530","steps":["400","425","450","480","510","530"],"group":"None","version":"v1.1.0"}],"TECT":[{"dec":91.22745230792259,"inc":-50.98840246901835,"MAD":6.990173925800355,"cm":[4.440892098500626e-14,7.105427357601002e-15,2.1316282072803006e-14],"intensity":1732.0319395022086,"type":"dir","forced":true,"remark":"","origin":false,"nSteps":6,"minStep":"400","maxStep":"530","steps":["400","425","450","480","510","530"],"group":"None","version":"v1.1.0"}],"interpreted":true,"name":"AL 1.12B","coreAzi":269,"coreDip":28,"bedStrike":247,"bedDip":80,"data":[{"visible":true,"include":false,"step":"0.0","x":59.768571428571434,"y":1968.952380952381,"z":-489.2285714285714,"a95":0.99,"info":"09/11/2013 at 02:46:36"},{"visible":true,"include":false,"step":"4.0","x":98.28571428571429,"y":1947.142857142857,"z":-495.25714285714287,"a95":0.99,"info":"09/11/2013 at 02:46:36"},{"visible":true,"include":false,"step":"8.0","x":162.24761904761903,"y":1884.3809523809523,"z":-502.5809523809524,"a95":0.99,"info":"09/11/2013 at 02:46:36"},{"visible":true,"include":false,"step":"12.0","x":205.60000000000002,"y":1835.6190476190477,"z":-511.8095238095238,"a95":0.99,"info":"09/11/2013 at 02:46:36"},{"visible":true,"include":false,"step":"16.0","x":232.83809523809526,"y":1809.142857142857,"z":-513.1428571428571,"a95":0.99,"info":"09/11/2013 at 02:46:36"},{"visible":true,"include":false,"step":"20.0","x":235.0761904761905,"y":1790.7619047619048,"z":-519.1428571428571,"a95":0.99,"info":"09/11/2013 at 02:46:36"},{"visible":true,"include":false,"step":"25.0","x":256.2190476190476,"y":1793.142857142857,"z":-512.2285714285714,"a95":0.99,"info":"09/11/2013 at 02:46:36"},{"visible":true,"include":false,"step":"30.0","x":270.8095238095238,"y":1782.952380952381,"z":-518.0761904761905,"a95":0.99,"info":"09/11/2013 at 02:46:36"},{"visible":true,"include":false,"step":"35.0","x":275.62857142857143,"y":1782.5714285714287,"z":-533.2666666666667,"a95":0.99,"info":"09/11/2013 at 02:46:36"},{"visible":true,"include":false,"step":"40.0","x":286.1047619047619,"y":1791.047619047619,"z":-533.6666666666666,"a95":0.99,"info":"09/11/2013 at 02:46:36"},{"visible":true,"include":false,"step":"45.0","x":303.8095238095238,"y":1784.5714285714287,"z":-526.0380952380953,"a95":0.99,"info":"09/11/2013 at 02:46:36"},{"visible":true,"include":false,"step":"50.0","x":313.18095238095236,"y":1769.904761904762,"z":-553.2285714285714,"a95":0.99,"info":"09/11/2013 at 02:46:36"},{"visible":true,"include":false,"step":"60.0","x":322.9142857142857,"y":1764.2857142857142,"z":-557.847619047619,"a95":0.99,"info":"09/11/2013 at 02:46:36"},{"visible":true,"include":false,"step":"70.0","x":325.8952380952381,"y":1763.047619047619,"z":-554.7523809523809,"a95":0.99,"info":"09/11/2013 at 02:46:36"},{"visible":true,"include":false,"step":"80.0","x":284.62857142857143,"y":1734.952380952381,"z":-577.6761904761905,"a95":0.99,"info":"09/11/2013 at 02:46:36"},{"visible":true,"include":false,"step":"90.0","x":359.45714285714286,"y":1729.2380952380952,"z":-563.3238095238095,"a95":0.99,"info":"09/11/2013 at 02:46:36"},{"visible":true,"include":false,"step":"100.0","x":360.6380952380952,"y":1735.4285714285713,"z":-560.4571428571429,"a95":0.99,"info":"09/11/2013 at 02:46:36"},{"visible":true,"include":true,"step":"400","x":335.9047619047619,"y":1041.6190476190477,"z":-480.76190476190476,"a95":1.9,"info":"\"02-01-01\" at \"02:29\""},{"visible":true,"include":true,"step":"425","x":270.57142857142856,"y":968.4761904761905,"z":-369.04761904761904,"a95":1.9,"info":"\"02-01-01\" at \"06:03\""},{"visible":true,"include":true,"step":"450","x":252.0952380952381,"y":898.7619047619048,"z":-417.3333333333333,"a95":2.2,"info":"\"02-01-01\" at \"08:55\""},{"visible":true,"include":true,"step":"480","x":251.52380952380952,"y":791.8095238095239,"z":-430.85714285714283,"a95":2.3,"info":"\"02-01-01\" at \"21:50\""},{"visible":true,"include":true,"step":"510","x":23.333333333333332,"y":668.952380952381,"z":-430.4761904761905,"a95":3.6,"info":"\"02-01-02\" at \"01:51\""},{"visible":true,"include":true,"step":"530","x":-31.238095238095237,"y":532,"z":-175.61904761904762,"a95":3,"info":"\"14-01-28\" at \"21:43\""},{"visible":false,"include":false,"step":"580","x":-2174.8571428571427,"y":1287.904761904762,"z":-944.952380952381,"a95":2.8,"info":"\"14-01-29\" at \"15:49\""},{"visible":false,"include":false,"step":"600","x":-734.1904761904761,"y":285.9047619047619,"z":-79.80952380952381,"a95":18.8,"info":"\"14-01-29\" at \"18:45\""},{"visible":false,"include":false,"step":"600","x":-1585.142857142857,"y":2330.5714285714284,"z":166.57142857142858,"a95":13.6,"info":"\"14-01-29\" at \"22:36\""}]},{"version":"v1.1.0","exported":"2016-11-16T14:42:51.675Z","volume":10.5,"added":"2016-11-16T14:26:51.990Z","format":"Utrecht","demagType":"Unknown","strat":"1","patch":1.1,"GEO":[{"dec":16.261862969702406,"inc":-28.173849170111275,"MAD":3.3658778786700525,"cm":[7.105427357601002e-15,3.552713678800501e-14,0],"intensity":1640.7541058390393,"type":"dir","forced":true,"remark":"","origin":false,"nSteps":8,"minStep":"80.0","maxStep":"510","steps":["80.0","90.0","100.0","400","425","450","480","510"],"group":"None","version":"v1.1.0"}],"TECT":[{"dec":98.8410665164975,"inc":-48.95071597821581,"MAD":3.3658778786699433,"cm":[6.661338147750939e-16,-3.907985046680551e-14,-2.1316282072803006e-14],"intensity":1640.754105839039,"type":"dir","forced":true,"remark":"","origin":false,"nSteps":8,"minStep":"80.0","maxStep":"510","steps":["80.0","90.0","100.0","400","425","450","480","510"],"group":"None","version":"v1.1.0"}],"interpreted":true,"name":"AL 1.13A","coreAzi":256,"coreDip":33,"bedStrike":247,"bedDip":80,"data":[{"visible":true,"include":false,"step":"0.0","x":-210.68571428571425,"y":1253.8095238095239,"z":-495.4857142857143,"a95":0.99,"info":"09/11/2013 at 08:31:36"},{"visible":true,"include":false,"step":"4.0","x":-188.78095238095239,"y":1184.3809523809523,"z":-514.0380952380953,"a95":0.99,"info":"09/11/2013 at 08:31:36"},{"visible":true,"include":false,"step":"8.0","x":-102.8952380952381,"y":1063.4285714285713,"z":-541.1619047619048,"a95":0.99,"info":"09/11/2013 at 08:31:36"},{"visible":true,"include":false,"step":"12.0","x":-45.542857142857144,"y":1010.0952380952381,"z":-550.9809523809524,"a95":0.99,"info":"09/11/2013 at 08:31:36"},{"visible":true,"include":false,"step":"16.0","x":-15.230476190476189,"y":974.3809523809524,"z":-571.2,"a95":0.99,"info":"09/11/2013 at 08:31:36"},{"visible":true,"include":false,"step":"20.0","x":19.433333333333334,"y":955.7142857142857,"z":-580.7904761904762,"a95":0.99,"info":"09/11/2013 at 08:31:36"},{"visible":true,"include":false,"step":"25.0","x":46.97142857142857,"y":938.2952380952381,"z":-598.047619047619,"a95":0.99,"info":"09/11/2013 at 08:31:36"},{"visible":true,"include":false,"step":"30.0","x":51.41142857142857,"y":948.1142857142858,"z":-604.5714285714286,"a95":0.99,"info":"09/11/2013 at 08:31:36"},{"visible":true,"include":false,"step":"35.0","x":74.00952380952381,"y":948.7142857142857,"z":-630.9714285714285,"a95":0.99,"info":"09/11/2013 at 08:31:36"},{"visible":true,"include":false,"step":"40.0","x":95.00761904761904,"y":942.3904761904762,"z":-649.7047619047619,"a95":0.99,"info":"09/11/2013 at 08:31:36"},{"visible":true,"include":false,"step":"45.0","x":92.87047619047618,"y":946.9714285714286,"z":-663.0095238095239,"a95":0.99,"info":"09/11/2013 at 08:31:36"},{"visible":true,"include":false,"step":"50.0","x":103.86666666666666,"y":939.3619047619047,"z":-677.8761904761905,"a95":0.99,"info":"09/11/2013 at 08:31:36"},{"visible":true,"include":false,"step":"60.0","x":116.5904761904762,"y":962.7619047619048,"z":-712.3428571428572,"a95":0.99,"info":"09/11/2013 at 08:31:36"},{"visible":true,"include":false,"step":"70.0","x":154.3047619047619,"y":951.952380952381,"z":-729.5619047619048,"a95":0.99,"info":"09/11/2013 at 08:31:36"},{"visible":true,"include":true,"step":"80.0","x":189.94285714285715,"y":940.304761904762,"z":-729.952380952381,"a95":0.99,"info":"09/11/2013 at 08:31:36"},{"visible":true,"include":true,"step":"90.0","x":161.8952380952381,"y":956.1904761904761,"z":-743.7428571428571,"a95":0.99,"info":"09/11/2013 at 08:31:36"},{"visible":true,"include":true,"step":"100.0","x":166.8952380952381,"y":937.6285714285715,"z":-741.6285714285715,"a95":0.99,"info":"09/11/2013 at 08:31:36"},{"visible":true,"include":true,"step":"400","x":142.95238095238096,"y":553.7142857142857,"z":-520.7619047619048,"a95":2.3,"info":"\"02-01-01\" at \"02:32\""},{"visible":true,"include":true,"step":"425","x":172.66666666666666,"y":516.7619047619048,"z":-458.57142857142856,"a95":2.4,"info":"\"02-01-01\" at \"06:08\""},{"visible":true,"include":true,"step":"450","x":72,"y":464.1904761904762,"z":-440,"a95":3.4,"info":"\"02-01-01\" at \"09:00\""},{"visible":true,"include":true,"step":"480","x":133.04761904761904,"y":428.6666666666667,"z":-389.3333333333333,"a95":4.5,"info":"\"02-01-01\" at \"21:54\""},{"visible":true,"include":true,"step":"510","x":17.523809523809526,"y":304.85714285714283,"z":-318.1904761904762,"a95":8.900001,"info":"\"02-01-02\" at \"01:54\""},{"visible":false,"include":false,"step":"530","x":-150.1904761904762,"y":285.3333333333333,"z":-230.95238095238096,"a95":6.4,"info":"\"14-01-28\" at \"21:48\""},{"visible":false,"include":false,"step":"580","x":-1745.7142857142858,"y":1315.142857142857,"z":-931.047619047619,"a95":2.7,"info":"\"14-01-29\" at \"15:52\""},{"visible":false,"include":false,"step":"600","x":-827.5238095238095,"y":70.66666666666667,"z":335.23809523809524,"a95":22,"info":"\"14-01-29\" at \"18:48\""},{"visible":false,"include":false,"step":"600","x":-2538.8571428571427,"y":1095.4285714285713,"z":1459.047619047619,"a95":21.9,"info":"\"14-01-29\" at \"22:39\""}]},{"version":"v1.1.0","exported":"2016-11-16T14:42:51.675Z","volume":10.5,"added":"2016-11-16T14:26:51.990Z","format":"Utrecht","demagType":"Unknown","strat":"2","patch":1.1,"GEO":[{"dec":13.449798042960992,"inc":-39.116561591879496,"MAD":0.5962534866988878,"cm":[-1.7053025658242404e-13,5.542233338928781e-13,0],"intensity":8867.619690995267,"type":"dir","forced":true,"remark":"","origin":false,"nSteps":4,"minStep":"70.0","maxStep":"100.0","steps":["70.0","80.0","90.0","100.0"],"group":"None","version":"v1.1.0"}],"TECT":[{"dec":115.05566066826316,"inc":-46.39910924387357,"MAD":0.5962534866987811,"cm":[1.1368683772161603e-13,7.389644451905042e-13,3.979039320256561e-13],"intensity":8867.619690995267,"type":"dir","forced":true,"remark":"","origin":false,"nSteps":4,"minStep":"70.0","maxStep":"100.0","steps":["70.0","80.0","90.0","100.0"],"group":"None","version":"v1.1.0"}],"interpreted":true,"name":"AL 1.14","coreAzi":271,"coreDip":30,"bedStrike":247,"bedDip":80,"data":[{"visible":true,"include":false,"step":"0.0","x":1462.4761904761904,"y":3796.8571428571427,"z":-1965.047619047619,"a95":0.99,"info":"09/11/2013 at 08:31:36"},{"visible":true,"include":false,"step":"4.0","x":1534.857142857143,"y":3739.4285714285716,"z":-1958.095238095238,"a95":0.99,"info":"09/11/2013 at 08:31:36"},{"visible":true,"include":false,"step":"8.0","x":1664.952380952381,"y":3625.0476190476193,"z":-1970.095238095238,"a95":0.99,"info":"09/11/2013 at 08:31:36"},{"visible":true,"include":false,"step":"12.0","x":1740.952380952381,"y":3565.4285714285716,"z":-1971.3333333333333,"a95":0.99,"info":"09/11/2013 at 08:31:36"},{"visible":true,"include":false,"step":"16.0","x":1787.4285714285713,"y":3533.6190476190477,"z":-1979.2380952380952,"a95":0.99,"info":"09/11/2013 at 08:31:36"},{"visible":true,"include":false,"step":"20.0","x":1820.7619047619048,"y":3518.7619047619046,"z":-1969.4285714285713,"a95":0.99,"info":"09/11/2013 at 08:31:36"},{"visible":true,"include":false,"step":"25.0","x":1850.5714285714287,"y":3493.809523809524,"z":-2000.5714285714287,"a95":0.99,"info":"09/11/2013 at 08:31:36"},{"visible":true,"include":false,"step":"30.0","x":1860.095238095238,"y":3482.9523809523807,"z":-2001.2380952380952,"a95":0.99,"info":"09/11/2013 at 08:31:36"},{"visible":true,"include":false,"step":"35.0","x":1892.857142857143,"y":3467.904761904762,"z":-1976.952380952381,"a95":0.99,"info":"09/11/2013 at 08:31:36"},{"visible":true,"include":false,"step":"40.0","x":1922.6666666666667,"y":3449.904761904762,"z":-2000.1904761904761,"a95":0.99,"info":"09/11/2013 at 08:31:36"},{"visible":true,"include":false,"step":"45.0","x":1933.142857142857,"y":3443.714285714286,"z":-2002.5714285714287,"a95":0.99,"info":"09/11/2013 at 08:31:36"},{"visible":true,"include":false,"step":"50.0","x":1952.3809523809523,"y":3404.190476190476,"z":-2017.7142857142858,"a95":0.99,"info":"09/11/2013 at 08:31:36"},{"visible":true,"include":false,"step":"60.0","x":1984.7619047619048,"y":3414.6666666666665,"z":-2007.904761904762,"a95":0.99,"info":"09/11/2013 at 08:31:36"},{"visible":true,"include":true,"step":"70.0","x":2021.7142857142858,"y":3397.5238095238096,"z":-2015.142857142857,"a95":0.99,"info":"09/11/2013 at 08:31:36"},{"visible":true,"include":true,"step":"80.0","x":2020.857142857143,"y":3372.6666666666665,"z":-2042.6666666666667,"a95":0.99,"info":"09/11/2013 at 08:31:36"},{"visible":true,"include":true,"step":"90.0","x":2064.7619047619046,"y":3331.3333333333335,"z":-2064.7619047619046,"a95":0.99,"info":"09/11/2013 at 08:31:36"},{"visible":true,"include":true,"step":"100.0","x":2096.190476190476,"y":3329.4285714285716,"z":-2037.7142857142858,"a95":0.99,"info":"09/11/2013 at 08:31:36"}]},{"version":"v1.1.0","exported":"2016-11-16T14:42:51.675Z","volume":10.5,"added":"2016-11-16T14:26:51.991Z","format":"Utrecht","demagType":"Unknown","strat":"3","patch":1.1,"GEO":[{"dec":25.57322033518517,"inc":-28.122932246471315,"MAD":9.143807341152973,"cm":[1063.5013404299182,772.9828494637419,-984.5518242780852],"intensity":836.4060750909094,"type":"dir","forced":false,"remark":"","origin":false,"nSteps":8,"minStep":"70.0","maxStep":"480","steps":["70.0","80.0","90.0","100.0","400","425","450","480"],"group":"None","version":"v1.1.0"}],"TECT":[{"dec":95.75547054262398,"inc":-41.035892278648724,"MAD":9.143807341152945,"cm":[-343.92880883214167,1370.4015033996116,-837.6112315901767],"intensity":836.4060750909094,"type":"dir","forced":false,"remark":"","origin":false,"nSteps":8,"minStep":"70.0","maxStep":"480","steps":["70.0","80.0","90.0","100.0","400","425","450","480"],"group":"None","version":"v1.1.0"}],"interpreted":true,"name":"AL 1.15","coreAzi":280,"coreDip":13,"bedStrike":247,"bedDip":80,"data":[{"visible":true,"include":false,"step":"0.0","x":727.3333333333334,"y":1765.2380952380952,"z":-876.3714285714285,"a95":0.99,"info":"09/11/2013 at 08:31:36"},{"visible":true,"include":false,"step":"4.0","x":755.9714285714285,"y":1726.095238095238,"z":-868.9428571428571,"a95":0.99,"info":"09/11/2013 at 08:31:36"},{"visible":true,"include":false,"step":"8.0","x":802.7904761904762,"y":1668.6666666666667,"z":-869.0095238095239,"a95":0.99,"info":"09/11/2013 at 08:31:36"},{"visible":true,"include":false,"step":"12.0","x":837.1904761904761,"y":1626.6666666666667,"z":-863.742857142857,"a95":0.99,"info":"09/11/2013 at 08:31:36"},{"visible":true,"include":false,"step":"16.0","x":872.9619047619047,"y":1610.5714285714287,"z":-864.3428571428572,"a95":0.99,"info":"09/11/2013 at 08:31:36"},{"visible":true,"include":false,"step":"20.0","x":876.9904761904761,"y":1594.2857142857142,"z":-864.2952380952381,"a95":0.99,"info":"09/11/2013 at 08:31:36"},{"visible":true,"include":false,"step":"25.0","x":902.3714285714285,"y":1573.3333333333333,"z":-883.5523809523809,"a95":0.99,"info":"09/11/2013 at 08:31:36"},{"visible":true,"include":false,"step":"30.0","x":893.3714285714285,"y":1570.3809523809523,"z":-886.3714285714285,"a95":0.99,"info":"09/11/2013 at 08:31:36"},{"visible":true,"include":false,"step":"35.0","x":928.7142857142857,"y":1550.2857142857142,"z":-882,"a95":0.99,"info":"09/11/2013 at 08:31:36"},{"visible":true,"include":false,"step":"40.0","x":936.152380952381,"y":1530.7619047619048,"z":-884.9238095238096,"a95":0.99,"info":"09/11/2013 at 08:31:36"},{"visible":true,"include":false,"step":"45.0","x":931.9047619047619,"y":1526.952380952381,"z":-890.6571428571428,"a95":0.99,"info":"09/11/2013 at 08:31:36"},{"visible":true,"include":false,"step":"50.0","x":937.9142857142857,"y":1508.3809523809523,"z":-885.6761904761905,"a95":0.99,"info":"09/11/2013 at 08:31:36"},{"visible":true,"include":false,"step":"60.0","x":942.1333333333333,"y":1499.142857142857,"z":-904.0857142857143,"a95":0.99,"info":"09/11/2013 at 08:31:36"},{"visible":true,"include":true,"step":"70.0","x":959.5238095238095,"y":1495.047619047619,"z":-909.4761904761905,"a95":0.99,"info":"09/11/2013 at 08:31:36"},{"visible":true,"include":true,"step":"80.0","x":969.5238095238095,"y":1488.1904761904761,"z":-907.2476190476191,"a95":0.99,"info":"09/11/2013 at 08:31:36"},{"visible":true,"include":true,"step":"90.0","x":958,"y":1488.095238095238,"z":-890.0285714285714,"a95":0.99,"info":"09/11/2013 at 08:31:36"},{"visible":true,"include":true,"step":"100.0","x":973.047619047619,"y":1465.047619047619,"z":-892.9714285714286,"a95":0.99,"info":"09/11/2013 at 08:31:36"},{"visible":true,"include":true,"step":"400","x":807.6190476190476,"y":945.9047619047619,"z":-723.047619047619,"a95":2.3,"info":"\"02-01-01\" at \"02:36\""},{"visible":true,"include":true,"step":"425","x":750.5714285714286,"y":870.3809523809524,"z":-649.1428571428571,"a95":2.4,"info":"\"02-01-01\" at \"06:11\""},{"visible":true,"include":true,"step":"450","x":674.952380952381,"y":861.3333333333334,"z":-694.0952380952381,"a95":2.7,"info":"\"02-01-01\" at \"09:02\""},{"visible":true,"include":true,"step":"480","x":543.7142857142857,"y":838.5714285714286,"z":-600.0952380952381,"a95":5.3,"info":"\"02-01-01\" at \"21:58\""},{"visible":true,"include":false,"step":"510","x":442.85714285714283,"y":781.4285714285714,"z":-583.5238095238095,"a95":5,"info":"\"02-01-02\" at \"01:56\""},{"visible":true,"include":false,"step":"530","x":344.57142857142856,"y":809.2380952380952,"z":-558,"a95":3.3,"info":"\"14-01-28\" at \"21:50\""},{"visible":false,"include":false,"step":"580","x":18.476190476190474,"y":-314.3809523809524,"z":-1207.047619047619,"a95":6.6,"info":"\"14-01-29\" at \"15:55\""},{"visible":false,"include":false,"step":"600","x":-1460.4761904761904,"y":69.61904761904762,"z":-712.8571428571429,"a95":19.3,"info":"\"14-01-29\" at \"18:55\""},{"visible":false,"include":false,"step":"600","x":-2357.714285714286,"y":2866.8571428571427,"z":-124.28571428571429,"a95":20.8,"info":"\"14-01-29\" at \"22:42\""}]}]
