# Supplementary material for: Paleomagnetic constraints on the timing and distribution of Cenozoic rotations in Central and Eastern Anatolia
Source: Copernicus journal article supplement (doi:10.5194/se-9-295-2018), 2018-03-21
Supplement: Supplementary file 2 [file se-9-295-2018-supplement.zip › se-2017-66_DATA_dir files/dir files Ulukisla/AL2.dir]

[{"version":"v1.1.0","exported":"2016-11-23T20:32:43.204Z","volume":10.5,"added":"2016-11-23T20:21:00.336Z","format":"Utrecht","demagType":"Unknown","strat":null,"patch":1.1,"GEO":[{"dec":350.64248850777636,"inc":-46.88194762832211,"MAD":7.606842703415981,"cm":[4.263256414560601e-14,1.305622276959184e-13,0],"intensity":9735.601410332165,"type":"dir","forced":true,"remark":"","origin":false,"nSteps":10,"minStep":"200","maxStep":"450","steps":["200","225","250","275","300","320","340","380","420","450"],"group":"None","version":"v1.1.0"}],"TECT":[{"dec":142.04418518633406,"inc":-51.341459786938465,"MAD":7.606842703415965,"cm":[2.1316282072803006e-13,4.121147867408581e-13,5.684341886080802e-14],"intensity":9735.601410332167,"type":"dir","forced":true,"remark":"","origin":false,"nSteps":10,"minStep":"200","maxStep":"450","steps":["200","225","250","275","300","320","340","380","420","450"],"group":"None","version":"v1.1.0"}],"interpreted":true,"name":"AL 2.2","coreAzi":306,"coreDip":7,"bedStrike":247,"bedDip":80,"data":[{"visible":false,"include":false,"step":"20","x":3944.095238095238,"y":11698.952380952382,"z":9273.238095238095,"a95":2.2,"info":"\"13-11-02\" at \"17:03\""},{"visible":true,"include":false,"step":"80","x":4678.761904761905,"y":5809.047619047619,"z":6400.0952380952385,"a95":2.1,"info":"\"13-11-03\" at \"13:56\""},{"visible":true,"include":false,"step":"150","x":4911.523809523809,"y":4107.333333333333,"z":4577.428571428572,"a95":2.5,"info":"\"13-11-04\" at \"11:05\""},{"visible":true,"include":false,"step":"180","x":4994.761904761905,"y":4085.714285714286,"z":4646,"a95":2.4,"info":"\"13-11-04\" at \"16:56\""},{"visible":true,"include":true,"step":"200","x":5528.190476190476,"y":2735.3333333333335,"z":3110.3809523809523,"a95":2.3,"info":"\"13-11-05\" at \"10:57\""},{"visible":true,"include":true,"step":"225","x":4660.0952380952385,"y":3601.4285714285716,"z":3309.3333333333335,"a95":2.5,"info":"\"13-11-05\" at \"15:33\""},{"visible":true,"include":true,"step":"250","x":5389.047619047619,"y":2857.904761904762,"z":2838.285714285714,"a95":2.4,"info":"\"13-11-06\" at \"09:36\""},{"visible":true,"include":true,"step":"275","x":4298.190476190476,"y":3295.5238095238096,"z":2846.5714285714284,"a95":2.6,"info":"\"13-11-06\" at \"14:24\""},{"visible":true,"include":true,"step":"300","x":4783.9047619047615,"y":2400.190476190476,"z":1912,"a95":2,"info":"\"13-11-07\" at \"03:08\""},{"visible":true,"include":true,"step":"320","x":3644.8571428571427,"y":2717.714285714286,"z":1805.2380952380952,"a95":2,"info":"\"13-11-07\" at \"06:33\""},{"visible":true,"include":true,"step":"340","x":3643.6190476190477,"y":2561.2380952380954,"z":1197.2380952380952,"a95":2.4,"info":"\"13-11-07\" at \"13:19\""},{"visible":true,"include":true,"step":"380","x":3519.809523809524,"y":1922.3809523809523,"z":1028.857142857143,"a95":2,"info":"\"13-11-08\" at \"09:27\""},{"visible":true,"include":true,"step":"420","x":2769.3333333333335,"y":1225.6190476190477,"z":224.85714285714286,"a95":2.2,"info":"\"13-11-08\" at \"13:14\""},{"visible":true,"include":true,"step":"450","x":2425.3333333333335,"y":1455.047619047619,"z":626.4761904761905,"a95":2.7,"info":"\"13-11-08\" at \"18:22\""},{"visible":true,"include":false,"step":"500","x":2533.6190476190477,"y":1875.904761904762,"z":221.9047619047619,"a95":2.6,"info":"\"13-11-10\" at \"10:40\""},{"visible":true,"include":false,"step":"530","x":2004,"y":932.952380952381,"z":275.8095238095238,"a95":3.1,"info":"\"13-11-10\" at \"13:29\""},{"visible":false,"include":false,"step":"560","x":2173.5238095238096,"y":2542,"z":-72.95238095238095,"a95":2.7,"info":"\"13-11-10\" at \"22:39\""},{"visible":false,"include":false,"step":"580","x":404.95238095238096,"y":974.2857142857143,"z":287.14285714285717,"a95":11.5,"info":"\"13-11-11\" at \"01:09\""}]},{"version":"v1.1.0","exported":"2016-11-23T20:32:43.204Z","volume":10.5,"added":"2016-11-23T20:21:00.337Z","format":"Utrecht","demagType":"Unknown","strat":null,"patch":1.1,"GEO":[],"TECT":[],"interpreted":false,"name":"AL 2.3A","coreAzi":311,"coreDip":25,"bedStrike":247,"bedDip":80,"data":[{"visible":false,"include":false,"step":"100","x":-6312.0952380952385,"y":-1049.5238095238096,"z":-147.14285714285714,"a95":1.8,"info":"\"02-01-01\" at \"03:12\""},{"visible":true,"include":false,"step":"150","x":-6211.428571428572,"y":-346.76190476190476,"z":205.8095238095238,"a95":1.8,"info":"\"02-01-01\" at \"06:33\""},{"visible":true,"include":false,"step":"200","x":-7028.190476190476,"y":-828.952380952381,"z":563.4285714285714,"a95":2.2,"info":"\"02-01-01\" at \"09:33\""},{"visible":true,"include":false,"step":"250","x":-5708.571428571428,"y":-8.476190476190476,"z":179.8095238095238,"a95":2.5,"info":"\"02-01-01\" at \"22:18\""},{"visible":true,"include":false,"step":"300","x":-4906.380952380952,"y":569.047619047619,"z":602.7619047619048,"a95":2.7,"info":"\"02-01-02\" at \"02:07\""},{"visible":true,"include":false,"step":"400","x":-4808.952380952381,"y":95.80952380952381,"z":124.19047619047619,"a95":1.8,"info":"\"14-01-28\" at \"17:21\""},{"visible":false,"include":false,"step":"500","x":-3857.1428571428573,"y":-5155.809523809524,"z":-284.0952380952381,"a95":2.6,"info":"\"14-01-28\" at \"20:27\""},{"visible":false,"include":false,"step":"580","x":-3427.3333333333335,"y":-624.5714285714286,"z":1820.2857142857142,"a95":6.3,"info":"\"14-01-28\" at \"22:24\""},{"visible":false,"include":false,"step":"600","x":-7555.428571428572,"y":774.952380952381,"z":410.2857142857143,"a95":6,"info":"\"14-01-29\" at \"17:43\""},{"visible":false,"include":false,"step":"620","x":-18696.85714285714,"y":-452.6666666666667,"z":2378,"a95":4.2,"info":"\"14-01-29\" at \"20:36\""}]},{"version":"v1.1.0","exported":"2016-11-23T20:32:43.204Z","volume":10.5,"added":"2016-11-23T20:21:00.337Z","format":"Utrecht","demagType":"Unknown","strat":null,"patch":1.1,"GEO":[{"dec":18.79206551402774,"inc":-23.713881366381603,"MAD":5.459117213109108,"cm":[-5.684341886080802e-14,-8.526512829121202e-14,0],"intensity":18207.753172282584,"type":"dir","forced":true,"remark":"","origin":false,"nSteps":8,"minStep":"200","maxStep":"380","steps":["200","225","250","275","300","320","340","380"],"group":"None","version":"v1.1.0"}],"TECT":[{"dec":91.45792076735722,"inc":-47.90906624282324,"MAD":5.459117213109118,"cm":[-6.323830348264892e-13,-2.2737367544323206e-13,-1.7053025658242404e-13],"intensity":18207.753172282584,"type":"dir","forced":true,"remark":"","origin":false,"nSteps":8,"minStep":"200","maxStep":"380","steps":["200","225","250","275","300","320","340","380"],"group":"None","version":"v1.1.0"}],"interpreted":true,"name":"AL 2.4A","coreAzi":332,"coreDip":37,"bedStrike":247,"bedDip":80,"data":[{"visible":false,"include":false,"step":"20","x":14163.42857142857,"y":8664.095238095239,"z":13899.52380952381,"a95":2.3,"info":"\"13-11-02\" at \"17:07\""},{"visible":true,"include":false,"step":"80","x":8327.809523809523,"y":8278.57142857143,"z":8857.238095238095,"a95":2.1,"info":"\"13-11-03\" at \"13:59\""},{"visible":true,"include":false,"step":"150","x":8260.666666666666,"y":7156.571428571428,"z":5966.571428571428,"a95":2.2,"info":"\"13-11-04\" at \"11:08\""},{"visible":true,"include":false,"step":"180","x":8151.047619047619,"y":6787.333333333333,"z":5861.523809523809,"a95":2.2,"info":"\"13-11-04\" at \"17:00\""},{"visible":true,"include":true,"step":"200","x":7381.619047619048,"y":8032.761904761905,"z":3601.0476190476193,"a95":2.1,"info":"\"13-11-05\" at \"11:03\""},{"visible":true,"include":true,"step":"225","x":8145.333333333333,"y":7379.238095238095,"z":3757.6190476190477,"a95":2.2,"info":"\"13-11-05\" at \"15:36\""},{"visible":true,"include":true,"step":"250","x":7547.619047619048,"y":6712.857142857143,"z":2934.6666666666665,"a95":2.1,"info":"\"13-11-06\" at \"09:39\""},{"visible":true,"include":true,"step":"275","x":7098,"y":5671.333333333333,"z":2927.0476190476193,"a95":2.2,"info":"\"13-11-06\" at \"14:27\""},{"visible":true,"include":true,"step":"300","x":6739.714285714285,"y":6000.0952380952385,"z":1902.2857142857142,"a95":1.8,"info":"\"13-11-07\" at \"03:10\""},{"visible":true,"include":true,"step":"320","x":5480.857142857143,"y":6522.952380952381,"z":1884.5714285714287,"a95":1.6,"info":"\"13-11-07\" at \"06:35\""},{"visible":true,"include":true,"step":"340","x":5297.238095238095,"y":5238.476190476191,"z":788.7619047619048,"a95":1.6,"info":"\"13-11-07\" at \"10:32\""},{"visible":true,"include":true,"step":"380","x":4848.190476190476,"y":4756.285714285715,"z":687.8095238095239,"a95":1.8,"info":"\"13-11-08\" at \"09:33\""},{"visible":true,"include":false,"step":"420","x":3397.809523809524,"y":5076.0952380952385,"z":82.95238095238095,"a95":2,"info":"\"13-11-08\" at \"13:19\""},{"visible":true,"include":false,"step":"450","x":3568.190476190476,"y":4233.428571428572,"z":585.047619047619,"a95":2.5,"info":"\"13-11-08\" at \"18:28\""},{"visible":true,"include":false,"step":"500","x":4418.666666666667,"y":3738.285714285714,"z":-366.57142857142856,"a95":2.7,"info":"\"13-11-10\" at \"10:43\""},{"visible":true,"include":false,"step":"530","x":2358,"y":3638.7619047619046,"z":140.1904761904762,"a95":3,"info":"\"13-11-10\" at \"13:34\""},{"visible":false,"include":false,"step":"560","x":1002.8571428571429,"y":4550.0952380952385,"z":-687.8095238095239,"a95":3.6,"info":"\"13-11-10\" at \"22:45\""},{"visible":false,"include":false,"step":"580","x":509.7142857142857,"y":-153.8095238095238,"z":924,"a95":26,"info":"\"13-11-11\" at \"01:11\""}]},{"version":"v1.1.0","exported":"2016-11-23T20:32:43.205Z","volume":10.5,"added":"2016-11-23T20:21:00.337Z","format":"Utrecht","demagType":"Unknown","strat":null,"patch":1.1,"GEO":[{"dec":9.725500735721937,"inc":-8.966289936135542,"MAD":9.508395713819251,"cm":[-5.684341886080802e-14,5.684341886080802e-14,0],"intensity":14843.405042059261,"type":"dir","forced":true,"remark":"","origin":false,"nSteps":9,"minStep":"150","maxStep":"340","steps":["150","180","200","225","250","275","300","320","340"],"group":"None","version":"v1.1.0"}],"TECT":[{"dec":67.98546557420838,"inc":-57.71794443218603,"MAD":9.508395713819263,"cm":[-2.6645352591003757e-13,-4.263256414560601e-13,-1.7053025658242404e-13],"intensity":14843.405042059263,"type":"dir","forced":true,"remark":"","origin":false,"nSteps":9,"minStep":"150","maxStep":"340","steps":["150","180","200","225","250","275","300","320","340"],"group":"None","version":"v1.1.0"}],"interpreted":true,"name":"AL 2.5A","coreAzi":309,"coreDip":25,"bedStrike":247,"bedDip":80,"data":[{"visible":false,"include":false,"step":"20","x":-4508.285714285715,"y":17777.04761904762,"z":11758.380952380952,"a95":2.1,"info":"\"13-11-02\" at \"17:12\""},{"visible":true,"include":false,"step":"80","x":-576.952380952381,"y":10695.52380952381,"z":8068.190476190476,"a95":2.1,"info":"\"13-11-03\" at \"14:02\""},{"visible":true,"include":true,"step":"150","x":2444.7619047619046,"y":8045.714285714285,"z":4975.714285714285,"a95":2.3,"info":"\"13-11-04\" at \"11:11\""},{"visible":true,"include":true,"step":"180","x":2217.904761904762,"y":7381.9047619047615,"z":5066.0952380952385,"a95":2.2,"info":"\"13-11-04\" at \"17:02\""},{"visible":true,"include":true,"step":"200","x":2669.2380952380954,"y":8069.809523809524,"z":2824.4761904761904,"a95":2.3,"info":"\"13-11-05\" at \"11:06\""},{"visible":true,"include":true,"step":"225","x":3096.095238095238,"y":7265.523809523809,"z":3034.190476190476,"a95":2.4,"info":"\"13-11-05\" at \"15:39\""},{"visible":true,"include":true,"step":"250","x":2493.1428571428573,"y":6653.809523809524,"z":2127.714285714286,"a95":2.3,"info":"\"13-11-06\" at \"09:41\""},{"visible":true,"include":true,"step":"275","x":3058.3809523809523,"y":5241.142857142857,"z":2386.3809523809523,"a95":2.6,"info":"\"13-11-06\" at \"14:29\""},{"visible":true,"include":true,"step":"300","x":2752.6666666666665,"y":5513.809523809524,"z":1762.1904761904761,"a95":1.8,"info":"\"13-11-07\" at \"03:13\""},{"visible":true,"include":true,"step":"320","x":2802.285714285714,"y":5798.285714285715,"z":1399.2380952380952,"a95":1.7,"info":"\"13-11-07\" at \"06:37\""},{"visible":true,"include":true,"step":"340","x":3072.9523809523807,"y":4679.047619047619,"z":312.1904761904762,"a95":1.6,"info":"\"13-11-07\" at \"10:36\""},{"visible":true,"include":false,"step":"380","x":2475.714285714286,"y":4214.190476190476,"z":112,"a95":1.8,"info":"\"13-11-08\" at \"09:36\""},{"visible":false,"include":false,"step":"420","x":2395.4285714285716,"y":3040.095238095238,"z":-878.4761904761905,"a95":2.4,"info":"\"13-11-08\" at \"13:21\""},{"visible":false,"include":false,"step":"450","x":1983.4285714285713,"y":2842.3809523809523,"z":30.476190476190474,"a95":2.5,"info":"\"13-11-08\" at \"18:31\""},{"visible":false,"include":false,"step":"500","x":2116.4761904761904,"y":2901.0476190476193,"z":-507.14285714285717,"a95":2.8,"info":"\"13-11-10\" at \"10:46\""},{"visible":false,"include":false,"step":"530","x":1838.6666666666667,"y":2259.904761904762,"z":16.095238095238095,"a95":2.9,"info":"\"13-11-10\" at \"13:38\""},{"visible":false,"include":false,"step":"560","x":1669.7142857142858,"y":2474.4761904761904,"z":-424.95238095238096,"a95":4.5,"info":"\"13-11-10\" at \"22:48\""}]},{"version":"v1.1.0","exported":"2016-11-23T20:32:43.205Z","volume":10.5,"added":"2016-11-23T20:21:00.338Z","format":"Utrecht","demagType":"Unknown","strat":null,"patch":1.1,"GEO":[],"TECT":[],"interpreted":false,"name":"AL 2.5B","coreAzi":309,"coreDip":25,"bedStrike":247,"bedDip":80,"data":[{"visible":true,"include":false,"step":"100","x":-5023.047619047619,"y":-913.4285714285714,"z":-271.23809523809524,"a95":1.8,"info":"\"02-01-01\" at \"03:15\""},{"visible":true,"include":false,"step":"150","x":-4913.428571428572,"y":-430.85714285714283,"z":165.8095238095238,"a95":1.8,"info":"\"02-01-01\" at \"06:36\""},{"visible":true,"include":false,"step":"200","x":-4340.857142857143,"y":-692.1904761904761,"z":-210.38095238095238,"a95":2.1,"info":"\"02-01-01\" at \"09:35\""},{"visible":true,"include":false,"step":"250","x":-5132.666666666667,"y":342.6666666666667,"z":-154,"a95":2.9,"info":"\"02-01-01\" at \"22:23\""},{"visible":true,"include":false,"step":"300","x":-3757.714285714286,"y":479.7142857142857,"z":-207.9047619047619,"a95":2.8,"info":"\"02-01-02\" at \"02:10\""},{"visible":true,"include":false,"step":"400","x":-3677.3333333333335,"y":-1034.6666666666667,"z":-68.95238095238095,"a95":2.4,"info":"\"14-01-28\" at \"17:24\""},{"visible":true,"include":false,"step":"500","x":-4875.333333333333,"y":-3850.4761904761904,"z":-727.047619047619,"a95":2.6,"info":"\"14-01-28\" at \"20:31\""},{"visible":true,"include":false,"step":"580","x":-2936.9523809523807,"y":-294.1904761904762,"z":-53.523809523809526,"a95":4.7,"info":"\"14-01-28\" at \"22:30\""},{"visible":true,"include":false,"step":"600","x":-3915.2380952380954,"y":138.38095238095238,"z":-354.4761904761905,"a95":8,"info":"\"14-01-29\" at \"17:46\""},{"visible":true,"include":false,"step":"620","x":-5656,"y":-2328.5714285714284,"z":962.5714285714286,"a95":8.7,"info":"\"14-01-29\" at \"20:39\""}]},{"version":"v1.1.0","exported":"2016-11-23T20:32:43.205Z","volume":10.5,"added":"2016-11-23T20:21:00.338Z","format":"Utrecht","demagType":"Unknown","strat":null,"patch":1.1,"GEO":[],"TECT":[],"interpreted":false,"name":"AL 2.6A","coreAzi":309,"coreDip":23,"bedStrike":247,"bedDip":80,"data":[{"visible":true,"include":false,"step":"100","x":-7481.428571428572,"y":176.1904761904762,"z":-110.76190476190476,"a95":2.1,"info":"\"02-01-01\" at \"03:18\""},{"visible":true,"include":false,"step":"150","x":-7121.428571428572,"y":172.28571428571428,"z":593.2380952380952,"a95":1.9,"info":"\"02-01-01\" at \"06:43\""},{"visible":true,"include":false,"step":"200","x":-5365.714285714285,"y":395.6190476190476,"z":-155.33333333333334,"a95":2,"info":"\"02-01-01\" at \"09:37\""},{"visible":true,"include":false,"step":"250","x":-4837.9047619047615,"y":5.809523809523809,"z":0,"a95":3.4,"info":"\"02-01-01\" at \"22:27\""},{"visible":true,"include":false,"step":"300","x":-4938,"y":667.6190476190476,"z":26.38095238095238,"a95":2.8,"info":"\"02-01-02\" at \"02:12\""},{"visible":true,"include":false,"step":"400","x":-4128.857142857143,"y":169.61904761904762,"z":136.95238095238096,"a95":2.2,"info":"\"14-01-28\" at \"17:26\""},{"visible":true,"include":false,"step":"500","x":-5133.9047619047615,"y":4820.571428571428,"z":-1461.8095238095239,"a95":1.7,"info":"\"14-01-28\" at \"20:35\""},{"visible":true,"include":false,"step":"580","x":-2813.3333333333335,"y":1357.904761904762,"z":932,"a95":5.8,"info":"\"14-01-28\" at \"22:34\""},{"visible":true,"include":false,"step":"600","x":-2240.285714285714,"y":-401.14285714285717,"z":386.57142857142856,"a95":8.3,"info":"\"14-01-29\" at \"17:49\""},{"visible":true,"include":false,"step":"620","x":-5273.047619047619,"y":1912.952380952381,"z":1381.3333333333333,"a95":9.7,"info":"\"14-01-29\" at \"20:42\""}]},{"version":"v1.1.0","exported":"2016-11-23T20:32:43.205Z","volume":10.5,"added":"2016-11-23T20:21:00.339Z","format":"Utrecht","demagType":"Unknown","strat":"1","patch":1.1,"GEO":[{"dec":272.96167322667924,"inc":-43.633856091705226,"MAD":15.020775087268078,"cm":[-1.7053025658242404e-13,-1.4210854715202004e-13,0],"intensity":16170.012858172666,"type":"GC","origin":false,"forced":true,"remark":"","nSteps":9,"minStep":"4.0","maxStep":"40.0","steps":["4.0","8.0","12.0","16.0","20.0","25.0","30.0","35.0","40.0"],"group":"None","version":"v1.1.0"}],"TECT":[{"dec":203.17615477958034,"inc":-25.585281038451313,"MAD":15.020775087268127,"cm":[-1.3216094885137863e-12,-2.984279490192421e-13,-1.2789769243681803e-13],"intensity":16170.012858172668,"type":"GC","origin":false,"forced":true,"remark":"","nSteps":9,"minStep":"4.0","maxStep":"40.0","steps":["4.0","8.0","12.0","16.0","20.0","25.0","30.0","35.0","40.0"],"group":"None","version":"v1.1.0"}],"interpreted":true,"name":"AL 2.6B","coreAzi":309,"coreDip":23,"bedStrike":247,"bedDip":80,"data":[{"visible":true,"include":false,"step":"0.0","x":646.6571428571428,"y":13824.761904761905,"z":18577.14285714286,"a95":0.99,"info":"09/11/2013 at 13:59:54"},{"visible":true,"include":true,"step":"4.0","x":1413.047619047619,"y":10228.57142857143,"z":10632.380952380952,"a95":0.99,"info":"09/11/2013 at 13:59:54"},{"visible":true,"include":true,"step":"8.0","x":2858.4761904761904,"y":8808,"z":6180.476190476191,"a95":0.99,"info":"09/11/2013 at 13:59:54"},{"visible":true,"include":true,"step":"12.0","x":3450.190476190476,"y":7668.571428571428,"z":2794.3809523809523,"a95":0.99,"info":"09/11/2013 at 13:59:54"},{"visible":true,"include":true,"step":"16.0","x":3266.7619047619046,"y":6670.571428571428,"z":1589.047619047619,"a95":0.99,"info":"09/11/2013 at 13:59:54"},{"visible":true,"include":true,"step":"20.0","x":3054.7619047619046,"y":6341.523809523809,"z":536.7714285714286,"a95":0.99,"info":"09/11/2013 at 13:59:54"},{"visible":true,"include":true,"step":"25.0","x":1873.5238095238096,"y":4979.047619047619,"z":72.34380952380953,"a95":0.99,"info":"09/11/2013 at 13:59:54"},{"visible":true,"include":true,"step":"30.0","x":1250.095238095238,"y":3715.809523809524,"z":239.24761904761903,"a95":0.99,"info":"09/11/2013 at 13:59:54"},{"visible":true,"include":true,"step":"35.0","x":526.9904761904761,"y":3105.904761904762,"z":234.0857142857143,"a95":0.99,"info":"09/11/2013 at 13:59:54"},{"visible":true,"include":true,"step":"40.0","x":-676.9333333333334,"y":1783.142857142857,"z":167.9047619047619,"a95":0.99,"info":"09/11/2013 at 13:59:54"},{"visible":true,"include":false,"step":"45.0","x":-1175.5238095238096,"y":1471.5238095238096,"z":88.02952380952381,"a95":0.99,"info":"09/11/2013 at 13:59:54"},{"visible":true,"include":false,"step":"50.0","x":-1677.2380952380952,"y":1192.7619047619048,"z":44.766666666666666,"a95":0.99,"info":"09/11/2013 at 13:59:54"},{"visible":true,"include":false,"step":"60.0","x":-3704.4761904761904,"y":-231.73333333333332,"z":-191.92380952380952,"a95":0.99,"info":"09/11/2013 at 13:59:54"},{"visible":true,"include":false,"step":"70.0","x":-4834.380952380952,"y":-412.6952380952381,"z":-87.92761904761905,"a95":0.99,"info":"09/11/2013 at 13:59:54"},{"visible":true,"include":false,"step":"80.0","x":-5913.333333333333,"y":-865.0095238095239,"z":495.7047619047619,"a95":0.99,"info":"09/11/2013 at 13:59:54"},{"visible":true,"include":false,"step":"90.0","x":-6187.142857142857,"y":-2672.6666666666665,"z":-363.77142857142854,"a95":0.99,"info":"09/11/2013 at 13:59:54"},{"visible":true,"include":false,"step":"100.0","x":-7680.380952380952,"y":-1230.7619047619048,"z":313.3809523809524,"a95":0.99,"info":"09/11/2013 at 13:59:54"}]},{"version":"v1.1.0","exported":"2016-11-23T20:32:43.205Z","volume":10.5,"added":"2016-11-23T20:21:00.339Z","format":"Utrecht","demagType":"Unknown","strat":"2","patch":1.1,"GEO":[{"dec":22.440197368995086,"inc":45.42779699667353,"MAD":2.9188709144767238,"cm":[-6.536993168992922e-13,9.237055564881302e-13,0],"intensity":25615.931695801944,"type":"dir","forced":true,"remark":"","origin":false,"nSteps":10,"minStep":"4.0","maxStep":"45.0","steps":["4.0","8.0","12.0","16.0","20.0","25.0","30.0","35.0","40.0","45.0"],"group":"None","version":"v1.1.0"}],"TECT":[{"dec":9.42966675359338,"inc":-21.17657608247146,"MAD":2.9188709144766234,"cm":[2.5579538487363607e-13,9.521272659185342e-13,1.3642420526593924e-12],"intensity":25615.931695801944,"type":"dir","forced":true,"remark":"","origin":false,"nSteps":10,"minStep":"4.0","maxStep":"45.0","steps":["4.0","8.0","12.0","16.0","20.0","25.0","30.0","35.0","40.0","45.0"],"group":"None","version":"v1.1.0"}],"interpreted":true,"name":"AL 2.7","coreAzi":336,"coreDip":33,"bedStrike":247,"bedDip":80,"data":[{"visible":false,"include":false,"step":"0.0","x":-8866.57142857143,"y":14780,"z":16984.761904761905,"a95":0.99,"info":"09/11/2013 at 13:59:54"},{"visible":true,"include":true,"step":"4.0","x":-7636.0952380952385,"y":11400,"z":15577.142857142857,"a95":0.99,"info":"09/11/2013 at 13:59:54"},{"visible":true,"include":true,"step":"8.0","x":-6112.285714285715,"y":8860.57142857143,"z":14234.285714285714,"a95":0.99,"info":"09/11/2013 at 13:59:54"},{"visible":true,"include":true,"step":"12.0","x":-4949.428571428572,"y":7175.714285714285,"z":12271.42857142857,"a95":0.99,"info":"09/11/2013 at 13:59:54"},{"visible":true,"include":true,"step":"16.0","x":-4165.238095238095,"y":6202.0952380952385,"z":10793.333333333334,"a95":0.99,"info":"09/11/2013 at 13:59:54"},{"visible":true,"include":true,"step":"20.0","x":-3512.3809523809523,"y":5368.476190476191,"z":9150.57142857143,"a95":0.99,"info":"09/11/2013 at 13:59:54"},{"visible":true,"include":true,"step":"25.0","x":-2688.9523809523807,"y":4715.238095238095,"z":7497.333333333333,"a95":0.99,"info":"09/11/2013 at 13:59:54"},{"visible":true,"include":true,"step":"30.0","x":-2072.190476190476,"y":3879.1428571428573,"z":6392.285714285715,"a95":0.99,"info":"09/11/2013 at 13:59:54"},{"visible":true,"include":true,"step":"35.0","x":-1644.7619047619048,"y":3506.285714285714,"z":5177.333333333333,"a95":0.99,"info":"09/11/2013 at 13:59:54"},{"visible":true,"include":true,"step":"40.0","x":-1901.142857142857,"y":3111.3333333333335,"z":4528.0952380952385,"a95":0.99,"info":"09/11/2013 at 13:59:54"},{"visible":true,"include":true,"step":"45.0","x":-1612.2857142857142,"y":2569.5238095238096,"z":3800.5714285714284,"a95":0.99,"info":"09/11/2013 at 13:59:54"},{"visible":false,"include":false,"step":"50.0","x":-709.7809523809524,"y":2641.1428571428573,"z":2937.4285714285716,"a95":0.99,"info":"09/11/2013 at 13:59:54"},{"visible":false,"include":false,"step":"60.0","x":-724.8666666666667,"y":1636.1904761904761,"z":1907.8095238095239,"a95":0.99,"info":"09/11/2013 at 13:59:54"},{"visible":false,"include":false,"step":"70.0","x":-441.53333333333336,"y":1804.3809523809523,"z":1319.3333333333333,"a95":0.99,"info":"09/11/2013 at 13:59:54"},{"visible":false,"include":false,"step":"80.0","x":18.502857142857142,"y":2506.190476190476,"z":1152.952380952381,"a95":0.99,"info":"09/11/2013 at 13:59:54"},{"visible":false,"include":false,"step":"90.0","x":-524.447619047619,"y":569.7904761904762,"z":439.7809523809524,"a95":0.99,"info":"09/11/2013 at 13:59:54"},{"visible":false,"include":false,"step":"100.0","x":72.1152380952381,"y":1954.5714285714287,"z":285.54285714285714,"a95":0.99,"info":"09/11/2013 at 13:59:54"}]},{"version":"v1.1.0","exported":"2016-11-23T20:32:43.205Z","volume":10.5,"added":"2016-11-23T20:21:00.343Z","format":"Utrecht","demagType":"Unknown","strat":null,"patch":1.1,"GEO":[],"TECT":[],"interpreted":false,"name":"AL 2.8AB","coreAzi":280,"coreDip":9,"bedStrike":247,"bedDip":80,"data":[{"visible":true,"include":false,"step":"100","x":-3920.190476190476,"y":-1274.857142857143,"z":-375.23809523809524,"a95":1.8,"info":"\"02-01-01\" at \"03:21\""},{"visible":true,"include":false,"step":"150","x":-3314.095238095238,"y":-1058.4761904761904,"z":-362.0952380952381,"a95":1.8,"info":"\"02-01-01\" at \"06:46\""},{"visible":true,"include":false,"step":"200","x":-2787.0476190476193,"y":-812.0952380952381,"z":-488.76190476190476,"a95":2.1,"info":"\"02-01-01\" at \"09:39\""},{"visible":true,"include":false,"step":"250","x":-2195.714285714286,"y":-495.42857142857144,"z":-433.3333333333333,"a95":2.8,"info":"\"02-01-01\" at \"22:29\""},{"visible":true,"include":false,"step":"300","x":-1863.6190476190477,"y":-311.8095238095238,"z":-193.9047619047619,"a95":2.5,"info":"\"02-01-02\" at \"02:15\""},{"visible":true,"include":false,"step":"400","x":-1150.3809523809523,"y":79.9047619047619,"z":-339.9047619047619,"a95":2.1,"info":"\"14-01-28\" at \"17:29\""},{"visible":true,"include":false,"step":"500","x":-2226.5714285714284,"y":793.3333333333334,"z":-939.6190476190476,"a95":2.1,"info":"\"14-01-28\" at \"20:38\""},{"visible":true,"include":false,"step":"580","x":-2627.0476190476193,"y":-38.57142857142857,"z":620.952380952381,"a95":5.8,"info":"\"14-01-28\" at \"22:40\""},{"visible":true,"include":false,"step":"600","x":-4896.761904761905,"y":-588.952380952381,"z":-128.1904761904762,"a95":9.400001,"info":"\"14-01-29\" at \"17:55\""},{"visible":true,"include":false,"step":"620","x":-5910.571428571428,"y":-175.42857142857142,"z":3364.7619047619046,"a95":12.9,"info":"\"14-01-29\" at \"20:44\""}]},{"version":"v1.1.0","exported":"2016-11-23T20:32:43.205Z","volume":10.5,"added":"2016-11-23T20:21:00.344Z","format":"Utrecht","demagType":"Unknown","strat":"3","patch":1.1,"GEO":[{"dec":108.0771524446522,"inc":-2.5929137209475646,"MAD":8.300504869166035,"cm":[5.684341886080802e-14,4.121147867408581e-13,0],"intensity":14354.758141948343,"type":"GC","origin":false,"forced":true,"remark":"","nSteps":8,"minStep":"4.0","maxStep":"35.0","steps":["4.0","8.0","12.0","16.0","20.0","25.0","30.0","35.0"],"group":"None","version":"v1.1.0"}],"TECT":[{"dec":258.88847848285815,"inc":-39.68556836360253,"MAD":8.300504869164321,"cm":[-7.389644451905042e-13,1.6200374375330284e-12,4.263256414560601e-13],"intensity":14354.758141948343,"type":"GC","origin":false,"forced":true,"remark":"","nSteps":8,"minStep":"4.0","maxStep":"35.0","steps":["4.0","8.0","12.0","16.0","20.0","25.0","30.0","35.0"],"group":"None","version":"v1.1.0"}],"interpreted":true,"name":"AL 2.8BA","coreAzi":280,"coreDip":9,"bedStrike":247,"bedDip":80,"data":[{"visible":true,"include":false,"step":"0.0","x":-4166,"y":11066.666666666666,"z":-884.695238095238,"a95":0.99,"info":"09/11/2013 at 13:59:54"},{"visible":true,"include":true,"step":"4.0","x":-3628,"y":10154.285714285714,"z":-1188.7619047619048,"a95":0.99,"info":"09/11/2013 at 13:59:54"},{"visible":true,"include":true,"step":"8.0","x":-2493.3333333333335,"y":8802.380952380952,"z":-841.9047619047619,"a95":0.99,"info":"09/11/2013 at 13:59:54"},{"visible":true,"include":true,"step":"12.0","x":-1567.2380952380952,"y":7379.142857142857,"z":-800.1619047619048,"a95":0.99,"info":"09/11/2013 at 13:59:54"},{"visible":true,"include":true,"step":"16.0","x":-959.8095238095239,"y":6386.666666666667,"z":-678.2380952380952,"a95":0.99,"info":"09/11/2013 at 13:59:54"},{"visible":true,"include":true,"step":"20.0","x":-523.6095238095238,"y":5583.523809523809,"z":-710.1142857142856,"a95":0.99,"info":"09/11/2013 at 13:59:54"},{"visible":true,"include":true,"step":"25.0","x":-374.77142857142854,"y":4738.857142857143,"z":-779.8285714285714,"a95":0.99,"info":"09/11/2013 at 13:59:54"},{"visible":true,"include":true,"step":"30.0","x":-165.38095238095238,"y":4117.428571428572,"z":-639.1142857142856,"a95":0.99,"info":"09/11/2013 at 13:59:54"},{"visible":true,"include":true,"step":"35.0","x":-97.91428571428571,"y":3596.6666666666665,"z":-568.495238095238,"a95":0.99,"info":"09/11/2013 at 13:59:54"},{"visible":true,"include":false,"step":"40.0","x":-169.9904761904762,"y":3007.3333333333335,"z":-601.3809523809524,"a95":0.99,"info":"09/11/2013 at 13:59:54"},{"visible":true,"include":false,"step":"45.0","x":-286.0857142857143,"y":2851.5238095238096,"z":-555.504761904762,"a95":0.99,"info":"09/11/2013 at 13:59:54"},{"visible":true,"include":false,"step":"50.0","x":-391.08571428571423,"y":2514.7619047619046,"z":-510.57142857142856,"a95":0.99,"info":"09/11/2013 at 13:59:54"},{"visible":true,"include":false,"step":"60.0","x":-746.104761904762,"y":1537.3333333333333,"z":-590.2,"a95":0.99,"info":"09/11/2013 at 13:59:54"},{"visible":false,"include":false,"step":"70.0","x":-1502.952380952381,"y":1503.5238095238096,"z":-276.42857142857144,"a95":0.99,"info":"09/11/2013 at 13:59:54"},{"visible":false,"include":false,"step":"80.0","x":-1914.2857142857142,"y":1031.6190476190477,"z":-568.4857142857143,"a95":0.99,"info":"09/11/2013 at 13:59:54"},{"visible":false,"include":false,"step":"90.0","x":-3171.3333333333335,"y":-148.54285714285714,"z":-551.9428571428571,"a95":0.99,"info":"09/11/2013 at 13:59:54"},{"visible":false,"include":false,"step":"100.0","x":-4351.619047619048,"y":13.230476190476189,"z":-319.9047619047619,"a95":0.99,"info":"09/11/2013 at 13:59:54"}]},{"version":"v1.1.0","exported":"2016-11-23T20:32:43.205Z","volume":10.5,"added":"2016-11-23T20:21:00.344Z","format":"Utrecht","demagType":"Unknown","strat":"4","patch":1.1,"GEO":[{"dec":121.09937355149634,"inc":-45.734688481908925,"MAD":2.27609613659088,"cm":[-2.842170943040401e-14,9.237055564881302e-14,0],"intensity":12810.139522394751,"type":"GC","origin":false,"forced":true,"remark":"","nSteps":9,"minStep":"4.0","maxStep":"40.0","steps":["4.0","8.0","12.0","16.0","20.0","25.0","30.0","35.0","40.0"],"group":"None","version":"v1.1.0"}],"TECT":[{"dec":310.0043552910519,"inc":-25.623030255860975,"MAD":2.2760961365898877,"cm":[3.3573144264664734e-13,6.679101716144942e-13,4.831690603168681e-13],"intensity":12810.13952239475,"type":"GC","origin":false,"forced":true,"remark":"","nSteps":9,"minStep":"4.0","maxStep":"40.0","steps":["4.0","8.0","12.0","16.0","20.0","25.0","30.0","35.0","40.0"],"group":"None","version":"v1.1.0"}],"interpreted":true,"name":"AL 2.8BC","coreAzi":280,"coreDip":9,"bedStrike":247,"bedDip":80,"data":[{"visible":true,"include":false,"step":"0.0","x":-6161.333333333333,"y":-8353.333333333334,"z":-1859.5238095238096,"a95":0.99,"info":"09/11/2013 at 13:59:54"},{"visible":true,"include":true,"step":"4.0","x":-5264.952380952381,"y":-8208.57142857143,"z":-1487.7142857142858,"a95":0.99,"info":"09/11/2013 at 13:59:54"},{"visible":true,"include":true,"step":"8.0","x":-4135.142857142857,"y":-7433.714285714285,"z":-794.2857142857143,"a95":0.99,"info":"09/11/2013 at 13:59:54"},{"visible":true,"include":true,"step":"12.0","x":-2969.4285714285716,"y":-6451.333333333333,"z":-279.3809523809524,"a95":0.99,"info":"09/11/2013 at 13:59:54"},{"visible":true,"include":true,"step":"16.0","x":-2222.9523809523807,"y":-5675.142857142857,"z":48.69428571428572,"a95":0.99,"info":"09/11/2013 at 13:59:54"},{"visible":true,"include":true,"step":"20.0","x":-1757.3333333333333,"y":-4997.9047619047615,"z":212.38095238095238,"a95":0.99,"info":"09/11/2013 at 13:59:54"},{"visible":true,"include":true,"step":"25.0","x":-1380.1904761904761,"y":-4310.952380952381,"z":376.83809523809526,"a95":0.99,"info":"09/11/2013 at 13:59:54"},{"visible":true,"include":true,"step":"30.0","x":-949.7523809523809,"y":-3611.904761904762,"z":432.2476190476191,"a95":0.99,"info":"09/11/2013 at 13:59:54"},{"visible":true,"include":true,"step":"35.0","x":-894.047619047619,"y":-3212.6666666666665,"z":426.87619047619046,"a95":0.99,"info":"09/11/2013 at 13:59:54"},{"visible":true,"include":true,"step":"40.0","x":-898.647619047619,"y":-2955.4285714285716,"z":273.29523809523806,"a95":0.99,"info":"09/11/2013 at 13:59:54"},{"visible":true,"include":false,"step":"45.0","x":-855.0952380952381,"y":-2389.809523809524,"z":332.6095238095238,"a95":0.99,"info":"09/11/2013 at 13:59:54"},{"visible":true,"include":false,"step":"50.0","x":-711.6380952380953,"y":-2159.3333333333335,"z":325.15238095238095,"a95":0.99,"info":"09/11/2013 at 13:59:54"},{"visible":false,"include":false,"step":"60.0","x":-1194.095238095238,"y":-1849.142857142857,"z":184.94285714285715,"a95":0.99,"info":"09/11/2013 at 13:59:54"},{"visible":false,"include":false,"step":"70.0","x":-1160.7619047619048,"y":-567.0285714285715,"z":103.87619047619049,"a95":0.99,"info":"09/11/2013 at 13:59:54"},{"visible":false,"include":false,"step":"80.0","x":-1722.952380952381,"y":-124.36190476190475,"z":278.6666666666667,"a95":0.99,"info":"09/11/2013 at 13:59:54"},{"visible":false,"include":false,"step":"90.0","x":-2822.6666666666665,"y":26.76380952380952,"z":40.25714285714285,"a95":0.99,"info":"09/11/2013 at 13:59:54"},{"visible":false,"include":false,"step":"100.0","x":-3863.714285714286,"y":1652.857142857143,"z":19.128571428571426,"a95":0.99,"info":"09/11/2013 at 13:59:54"}]},{"version":"v1.1.0","exported":"2016-11-23T20:32:43.205Z","volume":10.5,"added":"2016-11-23T20:21:00.345Z","format":"Utrecht","demagType":"Unknown","strat":"5","patch":1.1,"GEO":[{"dec":106.11070964156158,"inc":-3.1424015363192694,"MAD":11.779227310619365,"cm":[2.842170943040401e-14,3.552713678800501e-13,0],"intensity":13143.827054207983,"type":"GC","origin":false,"forced":true,"remark":"","nSteps":10,"minStep":"4.0","maxStep":"45.0","steps":["4.0","8.0","12.0","16.0","20.0","25.0","30.0","35.0","40.0","45.0"],"group":"None","version":"v1.1.0"}],"TECT":[{"dec":258.90660059349796,"inc":-37.646224170130445,"MAD":11.779227310619659,"cm":[2.8421709430404007e-13,2.2026824808563106e-13,2.5579538487363607e-13],"intensity":13143.827054207983,"type":"GC","origin":false,"forced":true,"remark":"","nSteps":10,"minStep":"4.0","maxStep":"45.0","steps":["4.0","8.0","12.0","16.0","20.0","25.0","30.0","35.0","40.0","45.0"],"group":"None","version":"v1.1.0"}],"interpreted":true,"name":"AL 2.9","coreAzi":300,"coreDip":30,"bedStrike":247,"bedDip":80,"data":[{"visible":true,"include":false,"step":"0.0","x":-5317.142857142857,"y":8180.285714285715,"z":4492.285714285715,"a95":0.99,"info":"09/11/2013 at 13:59:54"},{"visible":true,"include":true,"step":"4.0","x":-4752.190476190476,"y":7831.142857142857,"z":4338.190476190476,"a95":0.99,"info":"09/11/2013 at 13:59:54"},{"visible":true,"include":true,"step":"8.0","x":-3527.0476190476193,"y":7221.714285714285,"z":3949.809523809524,"a95":0.99,"info":"09/11/2013 at 13:59:54"},{"visible":true,"include":true,"step":"12.0","x":-2593.714285714286,"y":6430.190476190476,"z":3231.904761904762,"a95":0.99,"info":"09/11/2013 at 13:59:54"},{"visible":true,"include":true,"step":"16.0","x":-1951.7142857142858,"y":5819.333333333333,"z":2809.1428571428573,"a95":0.99,"info":"09/11/2013 at 13:59:54"},{"visible":true,"include":true,"step":"20.0","x":-1580.095238095238,"y":5236.0952380952385,"z":2295.1428571428573,"a95":0.99,"info":"09/11/2013 at 13:59:54"},{"visible":true,"include":true,"step":"25.0","x":-1166,"y":4605.9047619047615,"z":1892.3809523809523,"a95":0.99,"info":"09/11/2013 at 13:59:54"},{"visible":true,"include":true,"step":"30.0","x":-1027.2380952380952,"y":4007.5238095238096,"z":1508.952380952381,"a95":0.99,"info":"09/11/2013 at 13:59:54"},{"visible":true,"include":true,"step":"35.0","x":-875.6666666666666,"y":3615.2380952380954,"z":1254.857142857143,"a95":0.99,"info":"09/11/2013 at 13:59:54"},{"visible":true,"include":true,"step":"40.0","x":-800.1142857142858,"y":3158.8571428571427,"z":1124.4761904761904,"a95":0.99,"info":"09/11/2013 at 13:59:54"},{"visible":true,"include":true,"step":"45.0","x":-832.9619047619047,"y":2800.3809523809523,"z":1003.8095238095239,"a95":0.99,"info":"09/11/2013 at 13:59:54"},{"visible":true,"include":false,"step":"50.0","x":-739.047619047619,"y":2492,"z":646.9333333333334,"a95":0.99,"info":"09/11/2013 at 13:59:54"},{"visible":true,"include":false,"step":"60.0","x":-970.8571428571429,"y":1787.047619047619,"z":385.5904761904762,"a95":0.99,"info":"09/11/2013 at 13:59:54"},{"visible":true,"include":false,"step":"70.0","x":-1216.6666666666667,"y":1330.095238095238,"z":285.2,"a95":0.99,"info":"09/11/2013 at 13:59:54"},{"visible":false,"include":false,"step":"80.0","x":-1779.7142857142858,"y":1129.8095238095239,"z":405.5809523809524,"a95":0.99,"info":"09/11/2013 at 13:59:54"},{"visible":false,"include":false,"step":"90.0","x":-2902.285714285714,"y":-646.4095238095239,"z":527.4,"a95":0.99,"info":"09/11/2013 at 13:59:54"},{"visible":false,"include":false,"step":"100.0","x":-3455.4285714285716,"y":-1078.4761904761904,"z":275.64761904761906,"a95":0.99,"info":"09/11/2013 at 13:59:54"}]},{"version":"v1.1.0","exported":"2016-11-23T20:32:43.205Z","volume":10.5,"added":"2016-11-23T20:21:00.346Z","format":"Utrecht","demagType":"Unknown","strat":null,"patch":1.1,"GEO":[{"dec":1.9710299979681167,"inc":-20.634510818079825,"MAD":5.450083682443523,"cm":[-8.526512829121202e-14,-1.9895196601282805e-13,0],"intensity":9092.907637112134,"type":"dir","forced":true,"remark":"","origin":false,"nSteps":8,"minStep":"200","maxStep":"380","steps":["200","225","250","275","300","320","340","380"],"group":"None","version":"v1.1.0"}],"TECT":[{"dec":93.81923441020439,"inc":-63.72396397427761,"MAD":5.450083682443517,"cm":[4.263256414560601e-14,0,8.526512829121202e-14],"intensity":9092.907637112134,"type":"dir","forced":true,"remark":"","origin":false,"nSteps":8,"minStep":"200","maxStep":"380","steps":["200","225","250","275","300","320","340","380"],"group":"None","version":"v1.1.0"}],"interpreted":true,"name":"AL 2.10A","coreAzi":307,"coreDip":10,"bedStrike":247,"bedDip":80,"data":[{"visible":true,"include":false,"step":"20","x":98.57142857142857,"y":4205.428571428572,"z":8104.761904761905,"a95":2.6,"info":"\"13-11-02\" at \"17:16\""},{"visible":true,"include":false,"step":"80","x":1150.3809523809523,"y":4087.1428571428573,"z":5548.857142857143,"a95":2.3,"info":"\"13-11-03\" at \"14:05\""},{"visible":true,"include":false,"step":"150","x":1609.3333333333333,"y":3903.3333333333335,"z":3904.6666666666665,"a95":2.4,"info":"\"13-11-04\" at \"11:14\""},{"visible":true,"include":false,"step":"180","x":1882.7619047619048,"y":3764.9523809523807,"z":3570.5714285714284,"a95":2.2,"info":"\"13-11-04\" at \"17:05\""},{"visible":true,"include":true,"step":"200","x":1964.5714285714287,"y":3741.0476190476193,"z":2858.9523809523807,"a95":2.4,"info":"\"13-11-05\" at \"11:09\""},{"visible":true,"include":true,"step":"225","x":1925.142857142857,"y":3898,"z":2822.8571428571427,"a95":2.5,"info":"\"13-11-05\" at \"15:43\""},{"visible":true,"include":true,"step":"250","x":2047.8095238095239,"y":3690.095238095238,"z":2417.4285714285716,"a95":2.5,"info":"\"13-11-06\" at \"09:43\""},{"visible":true,"include":true,"step":"275","x":2021.2380952380952,"y":3829.2380952380954,"z":2185.0476190476193,"a95":2.7,"info":"\"13-11-06\" at \"14:32\""},{"visible":true,"include":true,"step":"300","x":2092.190476190476,"y":3564.8571428571427,"z":2125.0476190476193,"a95":2.1,"info":"\"13-11-07\" at \"03:15\""},{"visible":true,"include":true,"step":"320","x":2174.6666666666665,"y":3294.3809523809523,"z":1941.3333333333333,"a95":1.9,"info":"\"13-11-07\" at \"06:40\""},{"visible":true,"include":true,"step":"340","x":2090.190476190476,"y":3447.714285714286,"z":1556.3809523809523,"a95":1.9,"info":"\"13-11-07\" at \"10:38\""},{"visible":true,"include":true,"step":"380","x":2266.5714285714284,"y":3134.5714285714284,"z":1324.857142857143,"a95":2.1,"info":"\"13-11-08\" at \"09:38\""},{"visible":true,"include":false,"step":"420","x":2059.5238095238096,"y":2831.2380952380954,"z":882.952380952381,"a95":2.6,"info":"\"13-11-08\" at \"13:24\""},{"visible":true,"include":false,"step":"450","x":1941.6190476190477,"y":2717.6190476190477,"z":801.7142857142857,"a95":2.6,"info":"\"13-11-08\" at \"18:33\""},{"visible":true,"include":false,"step":"500","x":1748.952380952381,"y":2689.1428571428573,"z":467.23809523809524,"a95":2.6,"info":"\"13-11-10\" at \"10:49\""},{"visible":true,"include":false,"step":"530","x":1269.6190476190477,"y":1700.3809523809523,"z":509.8095238095238,"a95":3,"info":"\"13-11-10\" at \"13:40\""},{"visible":true,"include":false,"step":"560","x":637.7142857142857,"y":2082.5714285714284,"z":-13.333333333333334,"a95":2.9,"info":"\"13-11-10\" at \"22:52\""}]},{"version":"v1.1.0","exported":"2016-11-23T20:32:43.205Z","volume":10.5,"added":"2016-11-23T20:21:00.347Z","format":"Utrecht","demagType":"Unknown","strat":null,"patch":1.1,"GEO":[{"dec":130.36988699620343,"inc":-4.119031740058743,"MAD":2.8530646415531247,"cm":[2.842170943040401e-14,0,0],"intensity":2889.7126174306445,"type":"GC","origin":false,"forced":true,"remark":"","nSteps":5,"minStep":"150","maxStep":"400","steps":["150","200","250","300","400"],"group":"None","version":"v1.1.0"}],"TECT":[{"dec":273.7726318133001,"inc":-59.9502909249954,"MAD":2.853064641552955,"cm":[1.5631940186722204e-13,-2.1316282072803006e-13,-5.684341886080802e-14],"intensity":2889.712617430644,"type":"GC","origin":false,"forced":true,"remark":"","nSteps":5,"minStep":"150","maxStep":"400","steps":["150","200","250","300","400"],"group":"None","version":"v1.1.0"}],"interpreted":true,"name":"AL 2.10B","coreAzi":307,"coreDip":10,"bedStrike":247,"bedDip":80,"data":[{"visible":true,"include":false,"step":"100","x":-2104.7619047619046,"y":787.5238095238095,"z":200.1904761904762,"a95":1.8,"info":"\"02-01-01\" at \"03:23\""},{"visible":true,"include":true,"step":"150","x":-1652.7619047619048,"y":920.952380952381,"z":130.1904761904762,"a95":1.8,"info":"\"02-01-01\" at \"06:48\""},{"visible":true,"include":true,"step":"200","x":-1396.2857142857142,"y":997.5238095238095,"z":87.42857142857143,"a95":1.9,"info":"\"02-01-01\" at \"09:42\""},{"visible":true,"include":true,"step":"250","x":-947.1428571428571,"y":1191.3333333333333,"z":-15.428571428571429,"a95":2.7,"info":"\"02-01-01\" at \"22:32\""},{"visible":true,"include":true,"step":"300","x":-727.3333333333334,"y":1309.5238095238096,"z":8.666666666666666,"a95":2.5,"info":"\"02-01-02\" at \"02:17\""},{"visible":true,"include":true,"step":"400","x":-257.9047619047619,"y":1244.6666666666667,"z":-30.761904761904763,"a95":1.7,"info":"\"14-01-28\" at \"17:31\""},{"visible":false,"include":false,"step":"500","x":-930,"y":1343.6190476190477,"z":-431.42857142857144,"a95":2.2,"info":"\"14-01-28\" at \"20:40\""},{"visible":false,"include":false,"step":"580","x":-489.3333333333333,"y":349.04761904761904,"z":336.57142857142856,"a95":12.4,"info":"\"14-01-28\" at \"22:45\""},{"visible":false,"include":false,"step":"600","x":-5874.285714285715,"y":-1036.2857142857142,"z":1834,"a95":8.2,"info":"\"14-01-29\" at \"17:58\""},{"visible":false,"include":false,"step":"620","x":-8440.190476190477,"y":-1441.5238095238096,"z":2516.4761904761904,"a95":11.7,"info":"\"14-01-29\" at \"20:47\""}]},{"version":"v1.1.0","exported":"2016-11-23T20:32:43.205Z","volume":10.5,"added":"2016-11-23T20:21:00.347Z","format":"Utrecht","demagType":"Unknown","strat":"6","patch":1.1,"GEO":[{"dec":290.8927658117055,"inc":-1.1191109278344091,"MAD":35.805197559536595,"cm":[-2.842170943040401e-14,7.105427357601002e-14,0],"intensity":7885.692849666058,"type":"GC","origin":false,"forced":true,"remark":"","nSteps":7,"minStep":"20.0","maxStep":"50.0","steps":["20.0","25.0","30.0","35.0","40.0","45.0","50.0"],"group":"None","version":"v1.1.0"}],"TECT":[{"dec":254.99026383401753,"inc":-43.317386761094056,"MAD":35.8051975595372,"cm":[-4.263256414560601e-14,-3.410605131648481e-13,-2.2737367544323206e-13],"intensity":7885.692849666058,"type":"GC","origin":false,"forced":true,"remark":"","nSteps":7,"minStep":"20.0","maxStep":"50.0","steps":["20.0","25.0","30.0","35.0","40.0","45.0","50.0"],"group":"None","version":"v1.1.0"}],"interpreted":true,"name":"AL 2.10C","coreAzi":307,"coreDip":10,"bedStrike":247,"bedDip":80,"data":[{"visible":false,"include":false,"step":"0.0","x":-1244.5714285714287,"y":5578.190476190476,"z":5318.380952380952,"a95":0.99,"info":"09/11/2013 at 13:59:54"},{"visible":true,"include":false,"step":"4.0","x":-951.7523809523809,"y":5778.380952380952,"z":4008.5714285714284,"a95":0.99,"info":"09/11/2013 at 13:59:54"},{"visible":true,"include":false,"step":"8.0","x":-375.25714285714287,"y":5619.238095238095,"z":3103.2380952380954,"a95":0.99,"info":"09/11/2013 at 13:59:54"},{"visible":true,"include":false,"step":"12.0","x":-16.116190476190475,"y":5327.619047619048,"z":2367.2380952380954,"a95":0.99,"info":"09/11/2013 at 13:59:54"},{"visible":true,"include":false,"step":"16.0","x":241.68571428571425,"y":5044.952380952381,"z":1937.8095238095239,"a95":0.99,"info":"09/11/2013 at 13:59:54"},{"visible":true,"include":true,"step":"20.0","x":444.8952380952381,"y":4729.333333333333,"z":1490.6666666666667,"a95":0.99,"info":"09/11/2013 at 13:59:54"},{"visible":true,"include":true,"step":"25.0","x":510.34285714285716,"y":4385.428571428572,"z":1190.095238095238,"a95":0.99,"info":"09/11/2013 at 13:59:54"},{"visible":true,"include":true,"step":"30.0","x":563.2,"y":3841.3333333333335,"z":1104.857142857143,"a95":0.99,"info":"09/11/2013 at 13:59:54"},{"visible":true,"include":true,"step":"35.0","x":720.4571428571429,"y":3576.190476190476,"z":911.647619047619,"a95":0.99,"info":"09/11/2013 at 13:59:54"},{"visible":true,"include":true,"step":"40.0","x":566.552380952381,"y":3100.5714285714284,"z":749.847619047619,"a95":0.99,"info":"09/11/2013 at 13:59:54"},{"visible":true,"include":true,"step":"45.0","x":290.3904761904762,"y":3061.3333333333335,"z":619.6190476190476,"a95":0.99,"info":"09/11/2013 at 13:59:54"},{"visible":true,"include":true,"step":"50.0","x":128.73333333333335,"y":2834.095238095238,"z":665.6380952380953,"a95":0.99,"info":"09/11/2013 at 13:59:54"},{"visible":true,"include":false,"step":"60.0","x":-181.66666666666666,"y":2059.1428571428573,"z":305.3333333333333,"a95":0.99,"info":"09/11/2013 at 13:59:54"},{"visible":true,"include":false,"step":"70.0","x":-664.4,"y":2409.6190476190477,"z":464.2666666666667,"a95":0.99,"info":"09/11/2013 at 13:59:54"},{"visible":true,"include":false,"step":"80.0","x":-912.1904761904761,"y":1744.952380952381,"z":369.447619047619,"a95":0.99,"info":"09/11/2013 at 13:59:54"},{"visible":false,"include":false,"step":"90.0","x":-1747.904761904762,"y":532.8380952380952,"z":20.044761904761906,"a95":0.99,"info":"09/11/2013 at 13:59:54"},{"visible":false,"include":false,"step":"100.0","x":-2410,"y":596.0571428571429,"z":222.55238095238096,"a95":0.99,"info":"09/11/2013 at 13:59:54"}]},{"version":"v1.1.0","exported":"2016-11-23T20:32:43.205Z","volume":10.5,"added":"2016-11-23T20:21:00.347Z","format":"Utrecht","demagType":"Unknown","strat":null,"patch":1.1,"GEO":[{"dec":24.305920194915302,"inc":-32.821036339113945,"MAD":3.427449087097966,"cm":[-1.8474111129762605e-13,2.4158453015843406e-13,0],"intensity":6756.2677415802855,"type":"dir","forced":true,"remark":"","origin":false,"nSteps":8,"minStep":"250","maxStep":"450","steps":["250","275","300","320","340","380","420","450"],"group":"None","version":"v1.1.0"}],"TECT":[{"dec":102.14554280534077,"inc":-40.942607671334734,"MAD":3.4274490870980068,"cm":[-5.471179065352771e-13,-5.684341886080802e-14,1.4210854715202004e-13],"intensity":6756.267741580285,"type":"dir","forced":true,"remark":"","origin":false,"nSteps":8,"minStep":"250","maxStep":"450","steps":["250","275","300","320","340","380","420","450"],"group":"None","version":"v1.1.0"}],"interpreted":true,"name":"AL 2.11A","coreAzi":317,"coreDip":13,"bedStrike":247,"bedDip":80,"data":[{"visible":false,"include":false,"step":"20","x":449.42857142857144,"y":4539.809523809524,"z":3326,"a95":2.1,"info":"\"13-11-02\" at \"17:20\""},{"visible":true,"include":false,"step":"80","x":1592.2857142857142,"y":3973.5238095238096,"z":2517.714285714286,"a95":1.9,"info":"\"13-11-03\" at \"14:08\""},{"visible":true,"include":false,"step":"150","x":1869.4285714285713,"y":3527.5238095238096,"z":1680.952380952381,"a95":1.9,"info":"\"13-11-04\" at \"11:18\""},{"visible":true,"include":false,"step":"180","x":2172.4761904761904,"y":3282.9523809523807,"z":1519.7142857142858,"a95":1.9,"info":"\"13-11-04\" at \"17:08\""},{"visible":true,"include":false,"step":"200","x":2246.190476190476,"y":3168.7619047619046,"z":1182.952380952381,"a95":2.1,"info":"\"13-11-05\" at \"11:11\""},{"visible":true,"include":false,"step":"225","x":2091.3333333333335,"y":3443.5238095238096,"z":1083.7142857142858,"a95":2.1,"info":"\"13-11-05\" at \"15:45\""},{"visible":true,"include":true,"step":"250","x":2338.3809523809523,"y":3002.6666666666665,"z":977.8095238095239,"a95":2,"info":"\"13-11-06\" at \"09:45\""},{"visible":true,"include":true,"step":"275","x":2289.1428571428573,"y":3063.6190476190477,"z":853.4285714285714,"a95":2.2,"info":"\"13-11-06\" at \"14:35\""},{"visible":true,"include":true,"step":"300","x":2263.1428571428573,"y":2912.095238095238,"z":860.0952380952381,"a95":1.7,"info":"\"13-11-07\" at \"03:17\""},{"visible":true,"include":true,"step":"320","x":2157.809523809524,"y":2742.190476190476,"z":878.8571428571429,"a95":1.7,"info":"\"13-11-07\" at \"06:42\""},{"visible":true,"include":true,"step":"340","x":2185.3333333333335,"y":2730.285714285714,"z":680.1904761904761,"a95":1.7,"info":"\"13-11-07\" at \"10:41\""},{"visible":true,"include":true,"step":"380","x":1987.047619047619,"y":2642.3809523809523,"z":470.6666666666667,"a95":1.7,"info":"\"13-11-08\" at \"09:44\""},{"visible":true,"include":true,"step":"420","x":1822.2857142857142,"y":2481.6190476190477,"z":238.38095238095238,"a95":2.1,"info":"\"13-11-08\" at \"13:27\""},{"visible":true,"include":true,"step":"450","x":1824.1904761904761,"y":2156.4761904761904,"z":327.3333333333333,"a95":2.3,"info":"\"13-11-08\" at \"18:35\""},{"visible":true,"include":false,"step":"500","x":1702.095238095238,"y":2066.095238095238,"z":157.8095238095238,"a95":2.5,"info":"\"13-11-10\" at \"10:52\""},{"visible":false,"include":false,"step":"530","x":1347.2380952380952,"y":1270.2857142857142,"z":218,"a95":2.8,"info":"\"13-11-10\" at \"13:43\""},{"visible":false,"include":false,"step":"560","x":706.5714285714286,"y":1876.952380952381,"z":3.238095238095238,"a95":2.9,"info":"\"13-11-10\" at \"22:54\""}]},{"version":"v1.1.0","exported":"2016-11-23T20:32:43.205Z","volume":10.5,"added":"2016-11-23T20:21:00.348Z","format":"Utrecht","demagType":"Unknown","strat":"7","patch":1.1,"GEO":[{"dec":283.63074566752186,"inc":-26.27706183215199,"MAD":2.909888580438798,"cm":[2.842170943040401e-14,-2.1316282072803006e-13,0],"intensity":11062.176240589753,"type":"GC","origin":false,"forced":true,"remark":"","nSteps":8,"minStep":"4.0","maxStep":"35.0","steps":["4.0","8.0","12.0","16.0","20.0","25.0","30.0","35.0"],"group":"None","version":"v1.1.0"}],"TECT":[{"dec":221.50860624078007,"inc":-37.138785837284956,"MAD":2.909888580437255,"cm":[4.689582056016661e-13,-8.242295734817162e-13,-1.1368683772161603e-13],"intensity":11062.176240589753,"type":"GC","origin":false,"forced":true,"remark":"","nSteps":8,"minStep":"4.0","maxStep":"35.0","steps":["4.0","8.0","12.0","16.0","20.0","25.0","30.0","35.0"],"group":"None","version":"v1.1.0"}],"interpreted":true,"name":"AL 2.11B","coreAzi":317,"coreDip":13,"bedStrike":247,"bedDip":80,"data":[{"visible":true,"include":false,"step":"0.0","x":-1211.5238095238096,"y":5528.380952380952,"z":6657.9047619047615,"a95":0.99,"info":"09/11/2013 at 13:59:54"},{"visible":true,"include":true,"step":"4.0","x":-883.0380952380953,"y":5577.047619047619,"z":5251.619047619048,"a95":0.99,"info":"09/11/2013 at 13:59:54"},{"visible":true,"include":true,"step":"8.0","x":-167.67619047619047,"y":5390.476190476191,"z":4294.571428571428,"a95":0.99,"info":"09/11/2013 at 13:59:54"},{"visible":true,"include":true,"step":"12.0","x":354.1047619047619,"y":4942.0952380952385,"z":3460.3809523809523,"a95":0.99,"info":"09/11/2013 at 13:59:54"},{"visible":true,"include":true,"step":"16.0","x":640.047619047619,"y":4552.952380952381,"z":3099.3333333333335,"a95":0.99,"info":"09/11/2013 at 13:59:54"},{"visible":true,"include":true,"step":"20.0","x":846.2476190476191,"y":4319.9047619047615,"z":2548.9523809523807,"a95":0.99,"info":"09/11/2013 at 13:59:54"},{"visible":true,"include":true,"step":"25.0","x":934.0761904761904,"y":3798.6666666666665,"z":2101.809523809524,"a95":0.99,"info":"09/11/2013 at 13:59:54"},{"visible":true,"include":true,"step":"30.0","x":908.5142857142857,"y":3549.4285714285716,"z":1931.2380952380952,"a95":0.99,"info":"09/11/2013 at 13:59:54"},{"visible":true,"include":true,"step":"35.0","x":883.9333333333333,"y":3132.3809523809523,"z":1568.7619047619048,"a95":0.99,"info":"09/11/2013 at 13:59:54"},{"visible":true,"include":false,"step":"40.0","x":714.6380952380953,"y":2795.5238095238096,"z":1444.952380952381,"a95":0.99,"info":"09/11/2013 at 13:59:54"},{"visible":true,"include":false,"step":"45.0","x":634.1619047619048,"y":2728.095238095238,"z":1255.142857142857,"a95":0.99,"info":"09/11/2013 at 13:59:54"},{"visible":true,"include":false,"step":"50.0","x":519.1333333333333,"y":2523.6190476190477,"z":1223.3333333333333,"a95":0.99,"info":"09/11/2013 at 13:59:54"},{"visible":true,"include":false,"step":"60.0","x":111.53333333333333,"y":1765.3333333333333,"z":874.0095238095239,"a95":0.99,"info":"09/11/2013 at 13:59:54"},{"visible":true,"include":false,"step":"70.0","x":-111.72380952380952,"y":1751.904761904762,"z":628.9428571428571,"a95":0.99,"info":"09/11/2013 at 13:59:54"},{"visible":true,"include":false,"step":"80.0","x":-75.00952380952381,"y":1623.3333333333333,"z":549.6761904761905,"a95":0.99,"info":"09/11/2013 at 13:59:54"},{"visible":true,"include":false,"step":"90.0","x":-733.0571428571429,"y":529.1238095238095,"z":520.4666666666666,"a95":0.99,"info":"09/11/2013 at 13:59:54"},{"visible":true,"include":false,"step":"100.0","x":-1588.952380952381,"y":844.8857142857142,"z":438.5904761904762,"a95":0.99,"info":"09/11/2013 at 13:59:54"}]},{"version":"v1.1.0","exported":"2016-11-23T20:32:43.205Z","volume":10.5,"added":"2016-11-23T20:21:00.348Z","format":"Utrecht","demagType":"Unknown","strat":null,"patch":1.1,"GEO":[{"dec":284.09653516806037,"inc":-17.678612424748707,"MAD":9.090589715269537,"cm":[7.105427357601002e-14,1.9184653865522705e-13,0],"intensity":6726.620537452316,"type":"GC","origin":false,"forced":true,"remark":"","nSteps":10,"minStep":"150","maxStep":"380","steps":["150","180","200","225","250","275","300","320","340","380"],"group":"None","version":"v1.1.0"}],"TECT":[{"dec":232.30686545207408,"inc":-38.21965173770525,"MAD":9.090589715269662,"cm":[-3.907985046680551e-13,-2.842170943040401e-14,-9.947598300641403e-14],"intensity":6726.620537452315,"type":"GC","origin":false,"forced":true,"remark":"","nSteps":10,"minStep":"150","maxStep":"380","steps":["150","180","200","225","250","275","300","320","340","380"],"group":"None","version":"v1.1.0"}],"interpreted":true,"name":"AL 2.12A","coreAzi":317,"coreDip":7,"bedStrike":247,"bedDip":80,"data":[{"visible":false,"include":false,"step":"20","x":-1904.857142857143,"y":4615.9047619047615,"z":3575.2380952380954,"a95":2.1,"info":"\"13-11-02\" at \"17:23\""},{"visible":false,"include":false,"step":"80","x":-442.4761904761905,"y":4200.190476190476,"z":2851.904761904762,"a95":2,"info":"\"13-11-03\" at \"14:10\""},{"visible":true,"include":true,"step":"150","x":995.1428571428571,"y":3320.7619047619046,"z":1797.4285714285713,"a95":2,"info":"\"13-11-04\" at \"11:21\""},{"visible":true,"include":true,"step":"180","x":1297.3333333333333,"y":3168.4761904761904,"z":1600.952380952381,"a95":1.9,"info":"\"13-11-04\" at \"17:10\""},{"visible":true,"include":true,"step":"200","x":1433.3333333333333,"y":2991.3333333333335,"z":1279.3333333333333,"a95":2.3,"info":"\"13-11-05\" at \"11:14\""},{"visible":true,"include":true,"step":"225","x":1528.7619047619048,"y":3000.190476190476,"z":1159.4285714285713,"a95":2.2,"info":"\"13-11-05\" at \"15:48\""},{"visible":true,"include":true,"step":"250","x":1679.6190476190477,"y":2829.714285714286,"z":1006.8571428571429,"a95":2.2,"info":"\"13-11-06\" at \"09:47\""},{"visible":true,"include":true,"step":"275","x":1559.142857142857,"y":2831.714285714286,"z":877.7142857142857,"a95":2.2,"info":"\"13-11-06\" at \"14:37\""},{"visible":true,"include":true,"step":"300","x":1789.6190476190477,"y":2692.4761904761904,"z":874.6666666666666,"a95":1.8,"info":"\"13-11-07\" at \"03:20\""},{"visible":true,"include":true,"step":"320","x":1768,"y":2546.190476190476,"z":865.8095238095239,"a95":1.8,"info":"\"13-11-07\" at \"06:44\""},{"visible":true,"include":true,"step":"340","x":1938.952380952381,"y":2417.2380952380954,"z":667.047619047619,"a95":1.8,"info":"\"13-11-07\" at \"10:44\""},{"visible":true,"include":true,"step":"380","x":1956.857142857143,"y":2214.4761904761904,"z":630.3809523809524,"a95":1.8,"info":"\"13-11-08\" at \"09:46\""},{"visible":true,"include":false,"step":"420","x":1798.3809523809523,"y":1948.3809523809523,"z":354.1904761904762,"a95":2.4,"info":"\"13-11-08\" at \"13:29\""},{"visible":true,"include":false,"step":"450","x":1633.047619047619,"y":1743.4285714285713,"z":342.95238095238096,"a95":2.6,"info":"\"13-11-08\" at \"18:37\""},{"visible":true,"include":false,"step":"500","x":1736.7619047619048,"y":1827.8095238095239,"z":182.38095238095238,"a95":2.7,"info":"\"13-11-10\" at \"10:55\""},{"visible":false,"include":false,"step":"530","x":1514,"y":971.7142857142857,"z":91.9047619047619,"a95":2.7,"info":"\"13-11-10\" at \"13:46\""},{"visible":false,"include":false,"step":"560","x":57.61904761904762,"y":1910.4761904761904,"z":-275.42857142857144,"a95":3.6,"info":"\"13-11-10\" at \"22:57\""}]},{"version":"v1.1.0","exported":"2016-11-23T20:32:43.206Z","volume":10.5,"added":"2016-11-23T20:21:00.351Z","format":"Utrecht","demagType":"Unknown","strat":"8","patch":1.1,"GEO":[{"dec":285.3994255734657,"inc":-22.525485629431493,"MAD":4.813924495427752,"cm":[-1.4210854715202004e-13,4.050093593832571e-13,0],"intensity":9554.157459190807,"type":"GC","origin":false,"forced":true,"remark":"","nSteps":11,"minStep":"4.0","maxStep":"50.0","steps":["4.0","8.0","12.0","16.0","20.0","25.0","30.0","35.0","40.0","45.0","50.0"],"group":"None","version":"v1.1.0"}],"TECT":[{"dec":226.01656324089308,"inc":-39.16528956720541,"MAD":4.813924495427298,"cm":[2.2382096176443156e-13,7.815970093361102e-13,4.973799150320701e-13],"intensity":9554.157459190808,"type":"GC","origin":false,"forced":true,"remark":"","nSteps":11,"minStep":"4.0","maxStep":"50.0","steps":["4.0","8.0","12.0","16.0","20.0","25.0","30.0","35.0","40.0","45.0","50.0"],"group":"None","version":"v1.1.0"}],"interpreted":true,"name":"AL 2.12B","coreAzi":317,"coreDip":7,"bedStrike":247,"bedDip":80,"data":[{"visible":true,"include":false,"step":"0.0","x":-1812.095238095238,"y":5500.666666666667,"z":5335.619047619048,"a95":0.99,"info":"09/11/2013 at 13:59:54"},{"visible":true,"include":true,"step":"4.0","x":-1250.7619047619048,"y":5396.0952380952385,"z":4367.619047619048,"a95":0.99,"info":"09/11/2013 at 13:59:54"},{"visible":true,"include":true,"step":"8.0","x":-427.99047619047616,"y":5113.9047619047615,"z":3645.6190476190477,"a95":0.99,"info":"09/11/2013 at 13:59:54"},{"visible":true,"include":true,"step":"12.0","x":80.85142857142857,"y":4727.523809523809,"z":2980.285714285714,"a95":0.99,"info":"09/11/2013 at 13:59:54"},{"visible":true,"include":true,"step":"16.0","x":476.2666666666667,"y":4399.619047619048,"z":2667.2380952380954,"a95":0.99,"info":"09/11/2013 at 13:59:54"},{"visible":true,"include":true,"step":"20.0","x":662.552380952381,"y":4042.8571428571427,"z":2213.0476190476193,"a95":0.99,"info":"09/11/2013 at 13:59:54"},{"visible":true,"include":true,"step":"25.0","x":859.3238095238095,"y":3697.2380952380954,"z":2000.095238095238,"a95":0.99,"info":"09/11/2013 at 13:59:54"},{"visible":true,"include":true,"step":"30.0","x":897.4761904761905,"y":3434.9523809523807,"z":1736.952380952381,"a95":0.99,"info":"09/11/2013 at 13:59:54"},{"visible":true,"include":true,"step":"35.0","x":886.1904761904761,"y":3033.2380952380954,"z":1425.6190476190477,"a95":0.99,"info":"09/11/2013 at 13:59:54"},{"visible":true,"include":true,"step":"40.0","x":771.4571428571429,"y":2711.3333333333335,"z":1286.7619047619048,"a95":0.99,"info":"09/11/2013 at 13:59:54"},{"visible":true,"include":true,"step":"45.0","x":790.7238095238096,"y":2694.3809523809523,"z":1011.7142857142857,"a95":0.99,"info":"09/11/2013 at 13:59:54"},{"visible":true,"include":true,"step":"50.0","x":832.8380952380952,"y":2409.2380952380954,"z":1126.3809523809523,"a95":0.99,"info":"09/11/2013 at 13:59:54"},{"visible":true,"include":false,"step":"60.0","x":463.16190476190474,"y":1898,"z":869.1428571428571,"a95":0.99,"info":"09/11/2013 at 13:59:54"},{"visible":true,"include":false,"step":"70.0","x":82.33142857142857,"y":1822.095238095238,"z":665.9809523809524,"a95":0.99,"info":"09/11/2013 at 13:59:54"},{"visible":true,"include":false,"step":"80.0","x":124.34285714285713,"y":1905.904761904762,"z":693.5714285714286,"a95":0.99,"info":"09/11/2013 at 13:59:54"},{"visible":false,"include":false,"step":"90.0","x":-409.3809523809524,"y":865.1142857142858,"z":707.8666666666667,"a95":0.99,"info":"09/11/2013 at 13:59:54"},{"visible":false,"include":false,"step":"100.0","x":-663.6761904761905,"y":1002.3809523809524,"z":337.37142857142857,"a95":0.99,"info":"09/11/2013 at 13:59:54"}]}]
