# Supplementary material for: Paleomagnetic constraints on the timing and distribution of Cenozoic rotations in Central and Eastern Anatolia
Source: Copernicus journal article supplement (doi:10.5194/se-9-295-2018), 2018-03-21
Supplement: Supplementary file 2 [file se-9-295-2018-supplement.zip › se-2017-66_DATA_dir files/dir files Ulukisla/AL4.dir]

[{"version":"v1.1.0","exported":"2016-11-24T14:12:01.397Z","volume":10.5,"added":"2016-11-24T14:01:36.778Z","format":"Utrecht","demagType":"Unknown","strat":null,"patch":1.1,"GEO":[{"dec":330.93908899777125,"inc":65.52065638484807,"MAD":3.8338854219249674,"cm":[-1.5543122344752192e-15,-2.55351295663786e-15,0],"intensity":124.70469826236493,"type":"dir","forced":true,"remark":"","origin":false,"nSteps":3,"minStep":"80","maxStep":"180","steps":["80","150","180"],"group":"None","version":"v1.1.0"}],"TECT":[{"dec":331.7371346986804,"inc":-47.458431990784845,"MAD":3.8338854219249523,"cm":[-1.3766765505351941e-14,-2.6645352591003757e-14,0],"intensity":124.70469826236494,"type":"dir","forced":true,"remark":"","origin":false,"nSteps":3,"minStep":"80","maxStep":"180","steps":["80","150","180"],"group":"None","version":"v1.1.0"}],"interpreted":true,"name":"AL 4.1","coreAzi":133,"coreDip":40,"bedStrike":243,"bedDip":113,"data":[{"visible":true,"include":false,"step":"20","x":-153.52380952380952,"y":-34.095238095238095,"z":16.095238095238095,"a95":1.8,"info":"\"13-11-02\" at \"17:56\""},{"visible":true,"include":true,"step":"80","x":-93.61904761904762,"y":-13.714285714285714,"z":24.857142857142858,"a95":2.5,"info":"\"13-11-03\" at \"14:39\""},{"visible":true,"include":true,"step":"150","x":-43.03809523809524,"y":-3.5904761904761906,"z":19.40952380952381,"a95":3.1,"info":"\"13-11-04\" at \"11:52\""},{"visible":true,"include":true,"step":"180","x":-25.73333333333333,"y":-3.104761904761905,"z":7.133333333333334,"a95":4.8,"info":"\"13-11-05\" at \"07:14\""},{"visible":true,"include":false,"step":"200","x":-41.53333333333334,"y":-0.4095238095238095,"z":3.2285714285714286,"a95":7.2,"info":"\"13-11-05\" at \"11:38\""},{"visible":false,"include":false,"step":"225","x":-22.97142857142857,"y":0.18095238095238095,"z":9.6,"a95":14.8,"info":"\"13-11-05\" at \"16:18\""},{"visible":false,"include":false,"step":"250","x":-33.44761904761905,"y":0.7238095238095238,"z":5.3047619047619055,"a95":5.1,"info":"\"13-11-06\" at \"10:06\""},{"visible":false,"include":false,"step":"275","x":-30.16190476190476,"y":8.295238095238094,"z":7.980952380952381,"a95":7.6,"info":"\"13-11-06\" at \"14:59\""},{"visible":false,"include":false,"step":"300","x":-24.885714285714286,"y":3.7809523809523813,"z":1.4761904761904763,"a95":11.4,"info":"\"13-11-07\" at \"03:38\""},{"visible":false,"include":false,"step":"320","x":-27.94285714285714,"y":2.2476190476190476,"z":9.780952380952382,"a95":10.5,"info":"\"13-11-07\" at \"07:03\""},{"visible":false,"include":false,"step":"340","x":-25.64761904761905,"y":-2.761904761904762,"z":-0.22857142857142856,"a95":9.5,"info":"\"13-11-07\" at \"11:07\""}]},{"version":"v1.1.0","exported":"2016-11-24T14:12:01.397Z","volume":10.5,"added":"2016-11-24T14:01:36.779Z","format":"Utrecht","demagType":"Unknown","strat":"1","patch":1.1,"GEO":[{"dec":12.492324642749509,"inc":57.84469801357959,"MAD":5.655776283324251,"cm":[4.440892098500626e-16,1.1102230246251565e-16,0],"intensity":130.15566737434014,"type":"dir","forced":true,"remark":"","origin":false,"nSteps":6,"minStep":"4.0","maxStep":"25.0","steps":["4.0","8.0","12.0","16.0","20.0","25.0"],"group":"None","version":"v1.1.0"}],"TECT":[{"dec":1.6770356745882964,"inc":-45.14245399508256,"MAD":5.655776283324252,"cm":[2.220446049250313e-15,1.021405182655144e-14,4.440892098500626e-15],"intensity":130.1556673743401,"type":"dir","forced":true,"remark":"","origin":false,"nSteps":6,"minStep":"4.0","maxStep":"25.0","steps":["4.0","8.0","12.0","16.0","20.0","25.0"],"group":"None","version":"v1.1.0"}],"interpreted":true,"name":"AL 4.2B","coreAzi":82,"coreDip":42,"bedStrike":243,"bedDip":113,"data":[{"visible":false,"include":false,"step":"0.0","x":-45.36857142857143,"y":-31.54952380952381,"z":70.52380952380952,"a95":0.99,"info":"11/11/2013 at 00:44:52"},{"visible":true,"include":true,"step":"4.0","x":-48.285714285714285,"y":-40.96761904761905,"z":66.89047619047619,"a95":0.99,"info":"11/11/2013 at 00:44:52"},{"visible":true,"include":true,"step":"8.0","x":-37.52285714285714,"y":-32.99714285714286,"z":48.87428571428571,"a95":0.99,"info":"11/11/2013 at 00:44:52"},{"visible":true,"include":true,"step":"12.0","x":-23.206666666666667,"y":-34.44095238095238,"z":41.82857142857143,"a95":0.99,"info":"11/11/2013 at 00:44:52"},{"visible":true,"include":true,"step":"16.0","x":-23.437142857142856,"y":-28.538095238095234,"z":31.92761904761905,"a95":0.99,"info":"11/11/2013 at 00:44:52"},{"visible":true,"include":true,"step":"20.0","x":-28.859999999999996,"y":-20.03333333333333,"z":30.98952380952381,"a95":0.99,"info":"11/11/2013 at 00:44:52"},{"visible":true,"include":true,"step":"25.0","x":-14.733333333333333,"y":-24.162857142857142,"z":26.52857142857143,"a95":0.99,"info":"11/11/2013 at 00:44:52"},{"visible":true,"include":false,"step":"30.0","x":-14.290476190476191,"y":-2.994,"z":13.642857142857142,"a95":0.99,"info":"11/11/2013 at 00:44:52"},{"visible":false,"include":false,"step":"35.0","x":-8.065999999999999,"y":-10.837142857142858,"z":10.31047619047619,"a95":0.99,"info":"11/11/2013 at 00:44:52"},{"visible":false,"include":false,"step":"40.0","x":1.3804761904761904,"y":-8.741619047619048,"z":7.619809523809524,"a95":0.99,"info":"11/11/2013 at 00:44:52"},{"visible":false,"include":false,"step":"45.0","x":-9.419142857142857,"y":-13.037142857142856,"z":11.953333333333333,"a95":0.99,"info":"11/11/2013 at 00:44:52"},{"visible":false,"include":false,"step":"50.0","x":-0.5312190476190476,"y":-9.397333333333332,"z":7.175238095238096,"a95":0.99,"info":"11/11/2013 at 00:44:52"},{"visible":false,"include":false,"step":"60.0","x":-10.645714285714286,"y":-0.44119047619047624,"z":-0.9608571428571429,"a95":0.99,"info":"11/11/2013 at 00:44:52"},{"visible":false,"include":false,"step":"70.0","x":4.371333333333333,"y":-21.686666666666667,"z":21.48,"a95":0.99,"info":"11/11/2013 at 00:44:52"},{"visible":false,"include":false,"step":"80.0","x":-10.540000000000001,"y":-0.32094285714285714,"z":6.38952380952381,"a95":0.99,"info":"11/11/2013 at 00:44:52"},{"visible":false,"include":false,"step":"90.0","x":-8.368190476190476,"y":-0.717152380952381,"z":1.9291428571428573,"a95":0.99,"info":"11/11/2013 at 00:44:52"},{"visible":false,"include":false,"step":"100.0","x":-7.108380952380953,"y":-5.8773333333333335,"z":8.528952380952381,"a95":0.99,"info":"11/11/2013 at 00:44:52"}]},{"version":"v1.1.0","exported":"2016-11-24T14:12:01.397Z","volume":10.5,"added":"2016-11-24T14:01:36.779Z","format":"Utrecht","demagType":"Unknown","strat":"2","patch":1.1,"GEO":[{"dec":1.0342994467010271,"inc":40.22176342142646,"MAD":19.08239190194509,"cm":[33.01898967299164,4.327826259838249,42.264104613706735],"intensity":49.85719363257522,"type":"dir","forced":false,"remark":"","origin":false,"nSteps":5,"minStep":"8.0","maxStep":"25.0","steps":["8.0","12.0","16.0","20.0","25.0"],"group":"None","version":"v1.1.0"}],"TECT":[{"dec":20.306739296635158,"inc":-60.77366901634177,"MAD":19.08239190194508,"cm":[33.66168423730952,4.0003570230665595,-41.78667797222568],"intensity":49.85719363257522,"type":"dir","forced":false,"remark":"","origin":false,"nSteps":5,"minStep":"8.0","maxStep":"25.0","steps":["8.0","12.0","16.0","20.0","25.0"],"group":"None","version":"v1.1.0"}],"interpreted":true,"name":"AL 4.3","coreAzi":136,"coreDip":39,"bedStrike":243,"bedDip":113,"data":[{"visible":false,"include":false,"step":"0.0","x":-105.06666666666668,"y":-68.09714285714286,"z":13.286666666666665,"a95":0.99,"info":"11/11/2013 at 00:44:52"},{"visible":true,"include":false,"step":"4.0","x":-78.29619047619047,"y":-41.06,"z":-4.45152380952381,"a95":0.99,"info":"11/11/2013 at 00:44:52"},{"visible":true,"include":true,"step":"8.0","x":-72.23809523809524,"y":-38.26857142857143,"z":10.323809523809524,"a95":0.99,"info":"11/11/2013 at 00:44:52"},{"visible":true,"include":true,"step":"12.0","x":-48.73714285714286,"y":-37.660000000000004,"z":11.288571428571428,"a95":0.99,"info":"11/11/2013 at 00:44:52"},{"visible":true,"include":true,"step":"16.0","x":-37.58095238095238,"y":-24.944761904761908,"z":6.945428571428572,"a95":0.99,"info":"11/11/2013 at 00:44:52"},{"visible":true,"include":true,"step":"20.0","x":-42.67142857142857,"y":-14.538095238095238,"z":11.438095238095238,"a95":0.99,"info":"11/11/2013 at 00:44:52"},{"visible":true,"include":true,"step":"25.0","x":-28.27714285714286,"y":-14.83904761904762,"z":12.380952380952381,"a95":0.99,"info":"11/11/2013 at 00:44:52"},{"visible":false,"include":false,"step":"30.0","x":-22.34952380952381,"y":0.777704761904762,"z":3.2760000000000002,"a95":0.99,"info":"11/11/2013 at 00:44:52"},{"visible":false,"include":false,"step":"35.0","x":-12.064761904761905,"y":-2.5753333333333335,"z":7.893047619047619,"a95":0.99,"info":"11/11/2013 at 00:44:52"},{"visible":false,"include":false,"step":"40.0","x":-5.659238095238095,"y":-0.09775238095238095,"z":1.3901904761904762,"a95":0.99,"info":"11/11/2013 at 00:44:52"},{"visible":false,"include":false,"step":"45.0","x":-9.522190476190477,"y":-6.556476190476191,"z":9.678095238095239,"a95":0.99,"info":"11/11/2013 at 00:44:52"},{"visible":false,"include":false,"step":"50.0","x":-4.075333333333333,"y":1.5571428571428574,"z":2.3144761904761904,"a95":0.99,"info":"11/11/2013 at 00:44:52"},{"visible":false,"include":false,"step":"60.0","x":-10.30952380952381,"y":1.756952380952381,"z":6.720000000000001,"a95":0.99,"info":"11/11/2013 at 00:44:52"},{"visible":false,"include":false,"step":"70.0","x":-6.361333333333333,"y":-23.753333333333334,"z":12.168571428571429,"a95":0.99,"info":"11/11/2013 at 00:44:52"},{"visible":false,"include":false,"step":"80.0","x":-11.46952380952381,"y":-0.7820285714285714,"z":4.720952380952381,"a95":0.99,"info":"11/11/2013 at 00:44:52"},{"visible":false,"include":false,"step":"90.0","x":-3.0675238095238098,"y":-10.076190476190476,"z":1.3537142857142856,"a95":0.99,"info":"11/11/2013 at 00:44:52"},{"visible":false,"include":false,"step":"100.0","x":-13.225714285714286,"y":-16.994285714285713,"z":1.604952380952381,"a95":0.99,"info":"11/11/2013 at 00:44:52"}]},{"version":"v1.1.0","exported":"2016-11-24T14:12:01.397Z","volume":10.5,"added":"2016-11-24T14:01:36.780Z","format":"Utrecht","demagType":"Unknown","strat":null,"patch":1.1,"GEO":[{"dec":356.45424655241925,"inc":52.68212641501771,"MAD":15.339990488590507,"cm":[8.227882274029904,0.4240327246135909,16.054912552127682],"intensity":16.81694966152802,"type":"dir","forced":false,"remark":"","origin":false,"nSteps":6,"minStep":"80","maxStep":"250","steps":["80","150","180","200","225","250"],"group":"None","version":"v1.1.0"}],"TECT":[{"dec":358.1147481910879,"inc":-55.35392466125295,"MAD":15.33999048859053,"cm":[12.549946122678708,-1.7781688006128085,-12.844260802307563],"intensity":16.816949661528014,"type":"dir","forced":false,"remark":"","origin":false,"nSteps":6,"minStep":"80","maxStep":"250","steps":["80","150","180","200","225","250"],"group":"None","version":"v1.1.0"}],"interpreted":true,"name":"AL4.4A","coreAzi":145,"coreDip":44,"bedStrike":243,"bedDip":113,"data":[{"visible":false,"include":false,"step":"20","x":-50.96190476190476,"y":-30.895238095238092,"z":14.628571428571428,"a95":1.9,"info":"\"13-11-02\" at \"18:00\""},{"visible":true,"include":true,"step":"80","x":-31.4,"y":-11.609523809523811,"z":11.857142857142858,"a95":2.9,"info":"\"13-11-03\" at \"14:42\""},{"visible":true,"include":true,"step":"150","x":-21.095238095238095,"y":-5.333333333333333,"z":4.352380952380953,"a95":4.6,"info":"\"13-11-04\" at \"12:01\""},{"visible":true,"include":true,"step":"180","x":-5.961904761904762,"y":-3.9428571428571426,"z":7.485714285714285,"a95":13.5,"info":"\"13-11-05\" at \"07:17\""},{"visible":true,"include":true,"step":"200","x":-11.980952380952381,"y":-1.5523809523809524,"z":5.066666666666667,"a95":13.8,"info":"\"13-11-05\" at \"11:43\""},{"visible":true,"include":true,"step":"225","x":-8.352380952380953,"y":-3.0571428571428574,"z":5.104761904761905,"a95":32.4,"info":"\"13-11-05\" at \"16:24\""},{"visible":true,"include":true,"step":"250","x":-17.58095238095238,"y":-4.904761904761905,"z":5.0095238095238095,"a95":10.8,"info":"\"13-11-06\" at \"10:09\""},{"visible":false,"include":false,"step":"275","x":-6.123809523809523,"y":-1.7428571428571429,"z":6.238095238095238,"a95":14.5,"info":"\"13-11-06\" at \"15:02\""},{"visible":false,"include":false,"step":"300","x":-4.3238095238095235,"y":1.2095238095238094,"z":2.5523809523809526,"a95":25.2,"info":"\"13-11-07\" at \"03:40\""},{"visible":false,"include":false,"step":"320","x":-6.0285714285714285,"y":-3.6666666666666665,"z":4.295238095238095,"a95":23.8,"info":"\"13-11-07\" at \"07:05\""},{"visible":false,"include":false,"step":"340","x":-11.095238095238095,"y":1.8095238095238095,"z":-3.1809523809523808,"a95":8,"info":"\"13-11-07\" at \"11:10\""}]},{"version":"v1.1.0","exported":"2016-11-24T14:12:01.397Z","volume":10.5,"added":"2016-11-24T14:01:36.781Z","format":"Utrecht","demagType":"Unknown","strat":"3","patch":1.1,"GEO":[{"dec":18.599042827548033,"inc":53.159583201002036,"MAD":4.8521385193046545,"cm":[1.1102230246251565e-16,-2.0816681711721685e-15,0],"intensity":127.05765532119196,"type":"dir","forced":true,"remark":"","origin":false,"nSteps":8,"minStep":"8.0","maxStep":"40.0","steps":["8.0","12.0","16.0","20.0","25.0","30.0","35.0","40.0"],"group":"None","version":"v1.1.0"}],"TECT":[{"dec":9.793332727459017,"inc":-44.33665587150756,"MAD":4.852138519304509,"cm":[-1.4432899320127035e-15,-2.7200464103316335e-15,-2.220446049250313e-15],"intensity":127.05765532119196,"type":"dir","forced":true,"remark":"","origin":false,"nSteps":8,"minStep":"8.0","maxStep":"40.0","steps":["8.0","12.0","16.0","20.0","25.0","30.0","35.0","40.0"],"group":"None","version":"v1.1.0"}],"interpreted":true,"name":"AL 4.4B","coreAzi":145,"coreDip":44,"bedStrike":243,"bedDip":113,"data":[{"visible":false,"include":false,"step":"0.0","x":-128.7047619047619,"y":-80.21333333333334,"z":38.91904761904762,"a95":0.99,"info":"11/11/2013 at 00:44:52"},{"visible":true,"include":false,"step":"4.0","x":-102.18095238095239,"y":-57.222857142857144,"z":18.16,"a95":0.99,"info":"11/11/2013 at 00:44:52"},{"visible":true,"include":true,"step":"8.0","x":-92.71428571428571,"y":-52.95333333333333,"z":29.447619047619046,"a95":0.99,"info":"11/11/2013 at 00:44:52"},{"visible":true,"include":true,"step":"12.0","x":-66.32285714285715,"y":-46.53238095238095,"z":26.892380952380954,"a95":0.99,"info":"11/11/2013 at 00:44:52"},{"visible":true,"include":true,"step":"16.0","x":-47.745714285714286,"y":-30.959047619047617,"z":12.987619047619049,"a95":0.99,"info":"11/11/2013 at 00:44:52"},{"visible":true,"include":true,"step":"20.0","x":-58.56,"y":-26.34952380952381,"z":24.20952380952381,"a95":0.99,"info":"11/11/2013 at 00:44:52"},{"visible":true,"include":true,"step":"25.0","x":-41.423809523809524,"y":-22.705714285714286,"z":20.32857142857143,"a95":0.99,"info":"11/11/2013 at 00:44:52"},{"visible":true,"include":true,"step":"30.0","x":-30.837142857142858,"y":-13.046666666666667,"z":10.096190476190477,"a95":0.99,"info":"11/11/2013 at 00:44:52"},{"visible":true,"include":true,"step":"35.0","x":-18.6,"y":-16.215238095238096,"z":10.711428571428572,"a95":0.99,"info":"11/11/2013 at 00:44:52"},{"visible":true,"include":true,"step":"40.0","x":-13.737142857142858,"y":-7.881714285714286,"z":3.8816190476190475,"a95":0.99,"info":"11/11/2013 at 00:44:52"},{"visible":true,"include":false,"step":"45.0","x":-15.286666666666665,"y":-9.62095238095238,"z":8.909904761904762,"a95":0.99,"info":"11/11/2013 at 00:44:52"},{"visible":true,"include":false,"step":"50.0","x":-9.133714285714285,"y":7.116095238095237,"z":2.7124761904761905,"a95":0.99,"info":"11/11/2013 at 00:44:52"},{"visible":true,"include":false,"step":"60.0","x":-1.8156190476190477,"y":20.18857142857143,"z":-5.09247619047619,"a95":0.99,"info":"11/11/2013 at 00:44:52"},{"visible":true,"include":false,"step":"70.0","x":-9.712380952380952,"y":5.486380952380952,"z":17.634285714285713,"a95":0.99,"info":"11/11/2013 at 00:44:52"},{"visible":true,"include":false,"step":"80.0","x":2.0614285714285714,"y":24.13047619047619,"z":4.106476190476191,"a95":0.99,"info":"11/11/2013 at 00:44:52"},{"visible":true,"include":false,"step":"90.0","x":9.210380952380953,"y":21.034285714285716,"z":-7.262761904761905,"a95":0.99,"info":"11/11/2013 at 00:44:52"},{"visible":true,"include":false,"step":"100.0","x":-2.146,"y":18.485714285714284,"z":12.043809523809523,"a95":0.99,"info":"11/11/2013 at 00:44:52"}]},{"version":"v1.1.0","exported":"2016-11-24T14:12:01.397Z","volume":10.5,"added":"2016-11-24T14:01:36.782Z","format":"Utrecht","demagType":"Unknown","strat":"4","patch":1.1,"GEO":[],"TECT":[],"interpreted":false,"name":"AL 4.5A","coreAzi":27,"coreDip":15,"bedStrike":243,"bedDip":113,"data":[{"visible":true,"include":false,"step":"0.0","x":-48.09428571428572,"y":-31.91238095238095,"z":45.09142857142857,"a95":0.99,"info":"11/11/2013 at 00:44:52"},{"visible":true,"include":true,"step":"4.0","x":-29.80666666666667,"y":-15.949523809523809,"z":22.62666666666667,"a95":0.99,"info":"11/11/2013 at 00:44:52"},{"visible":true,"include":true,"step":"8.0","x":-31.120952380952378,"y":-20.293333333333333,"z":29.096190476190475,"a95":0.99,"info":"11/11/2013 at 00:44:52"},{"visible":true,"include":true,"step":"12.0","x":-15.040952380952382,"y":-16.086666666666666,"z":22.548571428571428,"a95":0.99,"info":"11/11/2013 at 00:44:52"},{"visible":true,"include":true,"step":"16.0","x":-4.574761904761904,"y":-13.46,"z":9.675238095238095,"a95":0.99,"info":"11/11/2013 at 00:44:52"},{"visible":true,"include":false,"step":"20.0","x":-26.845714285714287,"y":-8.443142857142858,"z":20.06095238095238,"a95":0.99,"info":"11/11/2013 at 00:44:52"},{"visible":true,"include":false,"step":"25.0","x":-17.18,"y":-5.066761904761905,"z":16.06380952380952,"a95":0.99,"info":"11/11/2013 at 00:44:52"},{"visible":true,"include":false,"step":"30.0","x":-15.506666666666666,"y":0.8235523809523809,"z":8.903619047619047,"a95":0.99,"info":"11/11/2013 at 00:44:52"},{"visible":true,"include":false,"step":"35.0","x":-4.157238095238095,"y":-7.821142857142857,"z":7.342761904761905,"a95":0.99,"info":"11/11/2013 at 00:44:52"},{"visible":true,"include":false,"step":"40.0","x":-4.531619047619047,"y":2.537238095238095,"z":9.161142857142856,"a95":0.99,"info":"11/11/2013 at 00:44:52"},{"visible":true,"include":false,"step":"45.0","x":-2.997047619047619,"y":0.7379142857142857,"z":16.346666666666664,"a95":0.99,"info":"11/11/2013 at 00:44:52"},{"visible":true,"include":false,"step":"50.0","x":-5.6927619047619045,"y":1.5493333333333335,"z":5.564,"a95":0.99,"info":"11/11/2013 at 00:44:52"},{"visible":true,"include":false,"step":"60.0","x":-13.19047619047619,"y":2.750952380952381,"z":4.832380952380952,"a95":0.99,"info":"11/11/2013 at 00:44:52"},{"visible":true,"include":false,"step":"70.0","x":-7.204380952380952,"y":-13.506666666666666,"z":13.841904761904763,"a95":0.99,"info":"11/11/2013 at 00:44:52"},{"visible":true,"include":false,"step":"80.0","x":-11.665714285714285,"y":7.872190476190476,"z":8.625904761904762,"a95":0.99,"info":"11/11/2013 at 00:44:52"},{"visible":true,"include":false,"step":"90.0","x":-9.472857142857142,"y":0.5181809523809524,"z":-1.230952380952381,"a95":0.99,"info":"11/11/2013 at 00:44:52"},{"visible":true,"include":false,"step":"100.0","x":-7.454666666666666,"y":0.5951714285714286,"z":6.910190476190476,"a95":0.99,"info":"11/11/2013 at 00:44:52"}]},{"version":"v1.1.0","exported":"2016-11-24T14:12:01.397Z","volume":10.5,"added":"2016-11-24T14:01:36.782Z","format":"Utrecht","demagType":"Unknown","strat":"5","patch":1.1,"GEO":[],"TECT":[],"interpreted":false,"name":"AL 4.5B","coreAzi":27,"coreDip":15,"bedStrike":243,"bedDip":113,"data":[{"visible":true,"include":false,"step":"0.0","x":-39.5247619047619,"y":-27.873333333333335,"z":24.800952380952385,"a95":0.99,"info":"11/11/2013 at 00:44:52"},{"visible":true,"include":false,"step":"4.0","x":-22.02190476190476,"y":-10,"z":5.117619047619048,"a95":0.99,"info":"11/11/2013 at 00:44:52"},{"visible":true,"include":false,"step":"8.0","x":-23.64952380952381,"y":-12.78095238095238,"z":11.505714285714285,"a95":0.99,"info":"11/11/2013 at 00:44:52"},{"visible":true,"include":false,"step":"12.0","x":-7.016761904761905,"y":-11.201904761904762,"z":3.0247619047619048,"a95":0.99,"info":"11/11/2013 at 00:44:52"},{"visible":true,"include":false,"step":"16.0","x":3.401333333333333,"y":-11.314285714285713,"z":-2.687904761904762,"a95":0.99,"info":"11/11/2013 at 00:44:52"},{"visible":true,"include":false,"step":"20.0","x":-19.02095238095238,"y":-7.984666666666667,"z":8.057333333333334,"a95":0.99,"info":"11/11/2013 at 00:44:52"},{"visible":true,"include":false,"step":"25.0","x":-12.67904761904762,"y":1.0181904761904763,"z":1.4122857142857144,"a95":0.99,"info":"11/11/2013 at 00:44:52"},{"visible":true,"include":false,"step":"30.0","x":-7.47047619047619,"y":4.509619047619047,"z":-0.6189238095238095,"a95":0.99,"info":"11/11/2013 at 00:44:52"},{"visible":true,"include":false,"step":"35.0","x":4.1334285714285715,"y":-5.3834285714285715,"z":0.7379238095238095,"a95":0.99,"info":"11/11/2013 at 00:44:52"},{"visible":true,"include":false,"step":"40.0","x":-2.1124761904761904,"y":0.016436190476190476,"z":0.517552380952381,"a95":0.99,"info":"11/11/2013 at 00:44:52"},{"visible":true,"include":false,"step":"45.0","x":-3.1476190476190475,"y":-4.31152380952381,"z":3.9565714285714284,"a95":0.99,"info":"11/11/2013 at 00:44:52"},{"visible":true,"include":false,"step":"50.0","x":-2.743238095238095,"y":2.616,"z":3.5309523809523813,"a95":0.99,"info":"11/11/2013 at 00:44:52"},{"visible":true,"include":false,"step":"60.0","x":-8.961904761904762,"y":2.8392380952380956,"z":3.134952380952381,"a95":0.99,"info":"11/11/2013 at 00:44:52"},{"visible":true,"include":false,"step":"70.0","x":-6.17104761904762,"y":-5.965619047619048,"z":9.329238095238095,"a95":0.99,"info":"11/11/2013 at 00:44:52"},{"visible":true,"include":false,"step":"80.0","x":-8.623619047619048,"y":1.571809523809524,"z":6.152761904761904,"a95":0.99,"info":"11/11/2013 at 00:44:52"},{"visible":true,"include":false,"step":"90.0","x":-2.7767619047619045,"y":2.853047619047619,"z":0.4432571428571429,"a95":0.99,"info":"11/11/2013 at 00:44:52"},{"visible":true,"include":false,"step":"100.0","x":-2.567047619047619,"y":-2.5805714285714285,"z":3.986857142857143,"a95":0.99,"info":"11/11/2013 at 00:44:52"}]},{"version":"v1.1.0","exported":"2016-11-24T14:12:01.397Z","volume":10.5,"added":"2016-11-24T14:01:36.783Z","format":"Utrecht","demagType":"Unknown","strat":null,"patch":1.1,"GEO":[],"TECT":[],"interpreted":false,"name":"AL 4.6A","coreAzi":322,"coreDip":30,"bedStrike":243,"bedDip":113,"data":[{"visible":true,"include":false,"step":"20","x":-16.095238095238095,"y":37.523809523809526,"z":94.57142857142857,"a95":2.7,"info":"\"13-11-02\" at \"18:22\""},{"visible":true,"include":false,"step":"80","x":-23.38095238095238,"y":17.933333333333334,"z":56.714285714285715,"a95":3.5,"info":"\"13-11-03\" at \"14:45\""},{"visible":true,"include":false,"step":"150","x":-4.428571428571429,"y":-3.7142857142857144,"z":6.676190476190476,"a95":11.5,"info":"\"13-11-04\" at \"12:07\""},{"visible":true,"include":false,"step":"180","x":12.361904761904762,"y":1.0571428571428572,"z":6.60952380952381,"a95":11.5,"info":"\"13-11-05\" at \"07:20\""},{"visible":true,"include":false,"step":"200","x":12.457142857142859,"y":-2.276190476190476,"z":-5.390476190476191,"a95":14.6,"info":"\"13-11-05\" at \"11:46\""},{"visible":true,"include":false,"step":"225","x":9.80952380952381,"y":-3.1333333333333333,"z":-2.9238095238095236,"a95":33.9,"info":"\"13-11-05\" at \"16:27\""},{"visible":true,"include":false,"step":"250","x":-2.0571428571428574,"y":-3.5714285714285716,"z":-6.6,"a95":24.2,"info":"\"13-11-06\" at \"10:14\""},{"visible":true,"include":false,"step":"275","x":2.0285714285714285,"y":-4.2,"z":-1.9714285714285713,"a95":31.2,"info":"\"13-11-06\" at \"15:05\""},{"visible":true,"include":false,"step":"300","x":5.666666666666667,"y":-4.0095238095238095,"z":-5.352380952380953,"a95":17.2,"info":"\"13-11-07\" at \"03:43\""},{"visible":true,"include":false,"step":"320","x":9.685714285714287,"y":-4.057142857142857,"z":-3.2476190476190476,"a95":22.3,"info":"\"13-11-07\" at \"07:07\""},{"visible":true,"include":false,"step":"340","x":2.1142857142857143,"y":-0.6095238095238096,"z":-4.6380952380952385,"a95":26.1,"info":"\"13-11-07\" at \"11:12\""}]},{"version":"v1.1.0","exported":"2016-11-24T14:12:01.397Z","volume":10.5,"added":"2016-11-24T14:01:36.787Z","format":"Utrecht","demagType":"Unknown","strat":"6","patch":1.1,"GEO":[{"dec":11.95474224467057,"inc":65.10032702804956,"MAD":9.410500499693855,"cm":[-7.771561172376096e-16,3.9968028886505635e-15,0],"intensity":83.76664503893757,"type":"dir","forced":true,"remark":"","origin":false,"nSteps":7,"minStep":"4.0","maxStep":"30.0","steps":["4.0","8.0","12.0","16.0","20.0","25.0","30.0"],"group":"None","version":"v1.1.0"}],"TECT":[{"dec":353.52588508344644,"inc":-40.97996610818722,"MAD":9.410500499693843,"cm":[3.552713678800501e-15,4.163336342344337e-15,2.9976021664879227e-15],"intensity":83.76664503893758,"type":"dir","forced":true,"remark":"","origin":false,"nSteps":7,"minStep":"4.0","maxStep":"30.0","steps":["4.0","8.0","12.0","16.0","20.0","25.0","30.0"],"group":"None","version":"v1.1.0"}],"interpreted":true,"name":"AL 4.6B","coreAzi":322,"coreDip":30,"bedStrike":243,"bedDip":113,"data":[{"visible":true,"include":false,"step":"0.0","x":-67.41904761904762,"y":15.849523809523808,"z":59.59619047619047,"a95":0.99,"info":"11/11/2013 at 00:44:52"},{"visible":true,"include":true,"step":"4.0","x":-42.50285714285714,"y":23.984761904761903,"z":41.20952380952381,"a95":0.99,"info":"11/11/2013 at 00:44:52"},{"visible":true,"include":true,"step":"8.0","x":-34.90380952380953,"y":13.347619047619048,"z":39.73047619047619,"a95":0.99,"info":"11/11/2013 at 00:44:52"},{"visible":true,"include":true,"step":"12.0","x":-18.275238095238095,"y":9.612380952380953,"z":26.476190476190474,"a95":0.99,"info":"11/11/2013 at 00:44:52"},{"visible":true,"include":true,"step":"16.0","x":-5.082190476190476,"y":3.545047619047619,"z":19.045714285714286,"a95":0.99,"info":"11/11/2013 at 00:44:52"},{"visible":true,"include":true,"step":"20.0","x":-26.156190476190474,"y":7.072,"z":24.523809523809526,"a95":0.99,"info":"11/11/2013 at 00:44:52"},{"visible":true,"include":true,"step":"25.0","x":-18.06380952380952,"y":13.510476190476192,"z":13.926666666666666,"a95":0.99,"info":"11/11/2013 at 00:44:52"},{"visible":true,"include":true,"step":"30.0","x":-14.71238095238095,"y":11.971428571428572,"z":8.292190476190475,"a95":0.99,"info":"11/11/2013 at 00:44:52"},{"visible":true,"include":false,"step":"35.0","x":0.9276380952380953,"y":-3.8487619047619046,"z":9.77904761904762,"a95":0.99,"info":"11/11/2013 at 00:44:52"},{"visible":true,"include":false,"step":"40.0","x":-9.778095238095238,"y":1.0302857142857142,"z":10.251428571428571,"a95":0.99,"info":"11/11/2013 at 00:44:52"},{"visible":true,"include":false,"step":"45.0","x":-7.698666666666666,"y":1.4533333333333334,"z":6.531809523809524,"a95":0.99,"info":"11/11/2013 at 00:44:52"},{"visible":true,"include":false,"step":"50.0","x":-5.034666666666666,"y":2.9819047619047616,"z":3.3055238095238093,"a95":0.99,"info":"11/11/2013 at 00:44:52"},{"visible":true,"include":false,"step":"60.0","x":-4.527238095238095,"y":3.301142857142857,"z":4.85447619047619,"a95":0.99,"info":"11/11/2013 at 00:44:52"},{"visible":true,"include":false,"step":"70.0","x":-6.350761904761906,"y":-3.8201904761904766,"z":8.67,"a95":0.99,"info":"11/11/2013 at 00:44:52"},{"visible":true,"include":false,"step":"80.0","x":-4.788857142857143,"y":2.7613333333333334,"z":3.3225714285714285,"a95":0.99,"info":"11/11/2013 at 00:44:52"},{"visible":true,"include":false,"step":"90.0","x":-1.6226666666666667,"y":-1.0484761904761906,"z":-1.276857142857143,"a95":0.99,"info":"11/11/2013 at 00:44:52"},{"visible":true,"include":false,"step":"100.0","x":-3.055142857142857,"y":2.2397142857142858,"z":8.832476190476191,"a95":0.99,"info":"11/11/2013 at 00:44:52"}]},{"version":"v1.1.0","exported":"2016-11-24T14:12:01.397Z","volume":10.5,"added":"2016-11-24T14:01:36.787Z","format":"Utrecht","demagType":"Unknown","strat":"7","patch":1.1,"GEO":[],"TECT":[],"interpreted":false,"name":"AL 4.7A","coreAzi":285,"coreDip":14,"bedStrike":243,"bedDip":113,"data":[{"visible":true,"include":false,"step":"0.0","x":-94.43333333333332,"y":-3.5545714285714287,"z":47.60190476190476,"a95":0.99,"info":"11/11/2013 at 00:44:52"},{"visible":true,"include":false,"step":"4.0","x":-61.016190476190474,"y":-1.083904761904762,"z":30.5752380952381,"a95":0.99,"info":"11/11/2013 at 00:44:52"},{"visible":true,"include":false,"step":"8.0","x":-47.03904761904762,"y":-4.685238095238096,"z":27.903809523809525,"a95":0.99,"info":"11/11/2013 at 00:44:52"},{"visible":true,"include":false,"step":"12.0","x":-23.976190476190474,"y":-8.602380952380953,"z":15.69047619047619,"a95":0.99,"info":"11/11/2013 at 00:44:52"},{"visible":true,"include":false,"step":"16.0","x":-7.71447619047619,"y":-11.087619047619048,"z":10.184761904761904,"a95":0.99,"info":"11/11/2013 at 00:44:52"},{"visible":true,"include":false,"step":"20.0","x":-18.282857142857143,"y":0.17301904761904763,"z":5.844857142857143,"a95":0.99,"info":"11/11/2013 at 00:44:52"},{"visible":true,"include":false,"step":"25.0","x":-18.771428571428572,"y":1.283809523809524,"z":8.206,"a95":0.99,"info":"11/11/2013 at 00:44:52"},{"visible":false,"include":false,"step":"30.0","x":-9.713333333333333,"y":1.7215238095238097,"z":5.6546666666666665,"a95":0.99,"info":"11/11/2013 at 00:44:52"},{"visible":false,"include":false,"step":"35.0","x":4.405619047619048,"y":-9.788571428571428,"z":4.364,"a95":0.99,"info":"11/11/2013 at 00:44:52"},{"visible":false,"include":false,"step":"40.0","x":-8.651809523809524,"y":-1.5217142857142858,"z":6.89447619047619,"a95":0.99,"info":"11/11/2013 at 00:44:52"},{"visible":false,"include":false,"step":"45.0","x":-5.621333333333333,"y":-6.001904761904762,"z":4.556666666666667,"a95":0.99,"info":"11/11/2013 at 00:44:52"},{"visible":false,"include":false,"step":"50.0","x":-1.871142857142857,"y":-3.246666666666667,"z":2.8704761904761904,"a95":0.99,"info":"11/11/2013 at 00:44:52"},{"visible":false,"include":false,"step":"60.0","x":0.2325714285714286,"y":-0.7681904761904763,"z":3.582,"a95":0.99,"info":"11/11/2013 at 00:44:52"},{"visible":false,"include":false,"step":"70.0","x":-1.6226666666666667,"y":-3.1540952380952385,"z":2.6898095238095237,"a95":0.99,"info":"11/11/2013 at 00:44:52"},{"visible":false,"include":false,"step":"80.0","x":-5.5922857142857145,"y":2.930857142857143,"z":-0.8676285714285713,"a95":0.99,"info":"11/11/2013 at 00:44:52"},{"visible":false,"include":false,"step":"90.0","x":-0.7065238095238096,"y":2.5164761904761903,"z":-2.283047619047619,"a95":0.99,"info":"11/11/2013 at 00:44:52"},{"visible":false,"include":false,"step":"100.0","x":-4.042666666666666,"y":-0.6012285714285714,"z":6.096095238095238,"a95":0.99,"info":"11/11/2013 at 00:44:52"}]},{"version":"v1.1.0","exported":"2016-11-24T14:12:01.398Z","volume":10.5,"added":"2016-11-24T14:01:36.787Z","format":"Utrecht","demagType":"Unknown","strat":"8","patch":1.1,"GEO":[],"TECT":[],"interpreted":false,"name":"AL 4.7B","coreAzi":285,"coreDip":14,"bedStrike":243,"bedDip":113,"data":[{"visible":true,"include":false,"step":"0.0","x":-146.6095238095238,"y":-62.37714285714286,"z":-72.59142857142858,"a95":0.99,"info":"11/11/2013 at 00:44:52"},{"visible":true,"include":false,"step":"4.0","x":-113.71428571428571,"y":-42.75238095238095,"z":-82.57047619047619,"a95":0.99,"info":"11/11/2013 at 00:44:52"},{"visible":true,"include":false,"step":"8.0","x":-96.57142857142857,"y":-30.822857142857142,"z":-66.44666666666667,"a95":0.99,"info":"11/11/2013 at 00:44:52"},{"visible":true,"include":false,"step":"12.0","x":-64.66571428571429,"y":-17.90285714285714,"z":-62.523809523809526,"a95":0.99,"info":"11/11/2013 at 00:44:52"},{"visible":true,"include":false,"step":"16.0","x":-36.82857142857143,"y":-10.187619047619048,"z":-58.02285714285714,"a95":0.99,"info":"11/11/2013 at 00:44:52"},{"visible":true,"include":false,"step":"20.0","x":-43.73428571428571,"y":4.750190476190476,"z":-48.81142857142857,"a95":0.99,"info":"11/11/2013 at 00:44:52"},{"visible":true,"include":false,"step":"25.0","x":-33.11619047619048,"y":21.102857142857143,"z":-41.74857142857143,"a95":0.99,"info":"11/11/2013 at 00:44:52"},{"visible":true,"include":false,"step":"30.0","x":-25.986666666666668,"y":14.446666666666667,"z":-28.608571428571427,"a95":0.99,"info":"11/11/2013 at 00:44:52"},{"visible":true,"include":false,"step":"35.0","x":-18.224761904761905,"y":10.08952380952381,"z":-20.14190476190476,"a95":0.99,"info":"11/11/2013 at 00:44:52"},{"visible":true,"include":false,"step":"40.0","x":-20.615238095238094,"y":9.418952380952382,"z":-14.658095238095237,"a95":0.99,"info":"11/11/2013 at 00:44:52"},{"visible":true,"include":false,"step":"45.0","x":-13.620952380952382,"y":7.252857142857143,"z":-15.376190476190475,"a95":0.99,"info":"11/11/2013 at 00:44:52"},{"visible":true,"include":false,"step":"50.0","x":-10.90952380952381,"y":9.444095238095239,"z":-14.292380952380952,"a95":0.99,"info":"11/11/2013 at 00:44:52"},{"visible":true,"include":false,"step":"60.0","x":-0.6131428571428571,"y":3.5165714285714285,"z":-6.502190476190476,"a95":0.99,"info":"11/11/2013 at 00:44:52"},{"visible":true,"include":false,"step":"70.0","x":-5.766666666666667,"y":-2.184285714285714,"z":-1.1144761904761904,"a95":0.99,"info":"11/11/2013 at 00:44:52"},{"visible":true,"include":false,"step":"80.0","x":-20.738095238095237,"y":4.4239999999999995,"z":-4.36647619047619,"a95":0.99,"info":"11/11/2013 at 00:44:52"},{"visible":true,"include":false,"step":"90.0","x":-11.104761904761904,"y":5.4741904761904765,"z":-6.949809523809524,"a95":0.99,"info":"11/11/2013 at 00:44:52"},{"visible":true,"include":false,"step":"100.0","x":-4.657619047619048,"y":-0.9273619047619047,"z":-1.2416190476190476,"a95":0.99,"info":"11/11/2013 at 00:44:52"}]},{"version":"v1.1.0","exported":"2016-11-24T14:12:01.398Z","volume":10.5,"added":"2016-11-24T14:01:36.787Z","format":"Utrecht","demagType":"Unknown","strat":"1","patch":1.1,"GEO":[],"TECT":[],"interpreted":false,"name":"AL 4.8B","coreAzi":326,"coreDip":31,"bedStrike":243,"bedDip":113,"data":[{"visible":true,"include":false,"step":"0.0","x":-36.20761904761905,"y":-17.071428571428573,"z":9.904761904761905,"a95":0.99,"info":"11/11/2013 at 06:29:40"},{"visible":true,"include":false,"step":"4.0","x":-26.29619047619048,"y":-9.212190476190475,"z":12.508571428571429,"a95":0.99,"info":"11/11/2013 at 06:29:40"},{"visible":true,"include":false,"step":"8.0","x":-3.678857142857143,"y":-8.091904761904763,"z":4.4079999999999995,"a95":0.99,"info":"11/11/2013 at 06:29:40"},{"visible":true,"include":false,"step":"12.0","x":-8.491523809523809,"y":-6.1593333333333335,"z":4.217238095238095,"a95":0.99,"info":"11/11/2013 at 06:29:40"},{"visible":true,"include":false,"step":"16.0","x":-14.864761904761906,"y":-3.1610476190476193,"z":7.46047619047619,"a95":0.99,"info":"11/11/2013 at 06:29:40"},{"visible":true,"include":false,"step":"20.0","x":-15.293333333333335,"y":7.148190476190476,"z":3.605238095238095,"a95":0.99,"info":"11/11/2013 at 06:29:40"},{"visible":true,"include":false,"step":"25.0","x":-7.914476190476191,"y":-0.9715238095238096,"z":5.635809523809524,"a95":0.99,"info":"11/11/2013 at 06:29:40"},{"visible":true,"include":false,"step":"30.0","x":-7.592,"y":0.30191428571428575,"z":4.5799047619047615,"a95":0.99,"info":"11/11/2013 at 06:29:40"},{"visible":true,"include":false,"step":"35.0","x":-8.070380952380953,"y":1.2353333333333334,"z":4.355142857142857,"a95":0.99,"info":"11/11/2013 at 06:29:40"},{"visible":true,"include":false,"step":"40.0","x":-6.926952380952382,"y":4.003619047619047,"z":-0.006296285714285714,"a95":0.99,"info":"11/11/2013 at 06:29:40"},{"visible":true,"include":false,"step":"45.0","x":-4.209238095238096,"y":0.605552380952381,"z":1.8473333333333333,"a95":0.99,"info":"11/11/2013 at 06:29:40"},{"visible":true,"include":false,"step":"50.0","x":-0.3453333333333333,"y":-3.004380952380952,"z":5.809619047619047,"a95":0.99,"info":"11/11/2013 at 06:29:40"},{"visible":true,"include":false,"step":"60.0","x":-6.733999999999999,"y":14.08095238095238,"z":-2.0305714285714287,"a95":0.99,"info":"11/11/2013 at 06:29:40"},{"visible":true,"include":false,"step":"70.0","x":10.488571428571428,"y":-6.334095238095237,"z":5.239809523809524,"a95":0.99,"info":"11/11/2013 at 06:29:40"},{"visible":true,"include":false,"step":"80.0","x":-12.732380952380952,"y":0.31142857142857144,"z":14.705714285714285,"a95":0.99,"info":"11/11/2013 at 06:29:40"},{"visible":true,"include":false,"step":"90.0","x":19.716190476190476,"y":14.755238095238095,"z":-14.149523809523808,"a95":0.99,"info":"11/11/2013 at 06:29:40"},{"visible":true,"include":false,"step":"100.0","x":-11.981904761904762,"y":1.9637142857142857,"z":3.993142857142857,"a95":0.99,"info":"11/11/2013 at 06:29:40"}]},{"version":"v1.1.0","exported":"2016-11-24T14:12:01.398Z","volume":10.5,"added":"2016-11-24T14:01:36.787Z","format":"Utrecht","demagType":"Unknown","strat":"2","patch":1.1,"GEO":[],"TECT":[],"interpreted":false,"name":"AL 4.9","coreAzi":291,"coreDip":34,"bedStrike":243,"bedDip":113,"data":[{"visible":true,"include":false,"step":"0.0","x":-52.88666666666666,"y":-11.984761904761905,"z":37.37047619047619,"a95":0.99,"info":"11/11/2013 at 06:29:40"},{"visible":true,"include":false,"step":"4.0","x":-41.54,"y":-7.57895238095238,"z":32.07809523809524,"a95":0.99,"info":"11/11/2013 at 06:29:40"},{"visible":true,"include":false,"step":"8.0","x":-18.100952380952382,"y":-8.001142857142858,"z":22.314285714285717,"a95":0.99,"info":"11/11/2013 at 06:29:40"},{"visible":true,"include":false,"step":"12.0","x":-15.80190476190476,"y":-3.552,"z":19.42761904761905,"a95":0.99,"info":"11/11/2013 at 06:29:40"},{"visible":true,"include":false,"step":"16.0","x":-17.154285714285713,"y":1.5104761904761905,"z":13.918095238095237,"a95":0.99,"info":"11/11/2013 at 06:29:40"},{"visible":true,"include":false,"step":"20.0","x":-12.025714285714285,"y":8.69057142857143,"z":8.882190476190477,"a95":0.99,"info":"11/11/2013 at 06:29:40"},{"visible":true,"include":false,"step":"25.0","x":-5.054,"y":-0.5104000000000001,"z":10.835238095238095,"a95":0.99,"info":"11/11/2013 at 06:29:40"},{"visible":true,"include":false,"step":"30.0","x":-3.4815238095238095,"y":-3.3280000000000003,"z":11.517142857142858,"a95":0.99,"info":"11/11/2013 at 06:29:40"},{"visible":true,"include":false,"step":"35.0","x":-2.3688571428571428,"y":-0.06747619047619048,"z":8.659333333333333,"a95":0.99,"info":"11/11/2013 at 06:29:40"},{"visible":true,"include":false,"step":"40.0","x":-2.975904761904762,"y":2.533809523809524,"z":4.651047619047619,"a95":0.99,"info":"11/11/2013 at 06:29:40"},{"visible":true,"include":false,"step":"45.0","x":0.5012666666666666,"y":0.5026095238095238,"z":6.63,"a95":0.99,"info":"11/11/2013 at 06:29:40"},{"visible":true,"include":false,"step":"50.0","x":3.0358095238095237,"y":-0.7379142857142857,"z":4.110857142857143,"a95":0.99,"info":"11/11/2013 at 06:29:40"},{"visible":true,"include":false,"step":"60.0","x":-0.22728571428571426,"y":14.466666666666667,"z":-6.905809523809523,"a95":0.99,"info":"11/11/2013 at 06:29:40"},{"visible":true,"include":false,"step":"70.0","x":5.7940000000000005,"y":-5.3963809523809525,"z":0.013221904761904763,"a95":0.99,"info":"11/11/2013 at 06:29:40"},{"visible":true,"include":false,"step":"80.0","x":-14.769523809523811,"y":-4.3210476190476195,"z":13.816190476190476,"a95":0.99,"info":"11/11/2013 at 06:29:40"},{"visible":true,"include":false,"step":"90.0","x":13.316190476190476,"y":9.243333333333334,"z":-19.35142857142857,"a95":0.99,"info":"11/11/2013 at 06:29:40"},{"visible":true,"include":false,"step":"100.0","x":-8.970761904761904,"y":4.075428571428572,"z":5.362571428571429,"a95":0.99,"info":"11/11/2013 at 06:29:40"}]},{"version":"v1.1.0","exported":"2016-11-24T14:12:01.398Z","volume":10.5,"added":"2016-11-24T14:01:36.787Z","format":"Utrecht","demagType":"Unknown","strat":null,"patch":1.1,"GEO":[],"TECT":[],"interpreted":false,"name":"AL 4.11","coreAzi":267,"coreDip":30,"bedStrike":243,"bedDip":113,"data":[{"visible":true,"include":false,"step":"20","x":-105.33333333333333,"y":173.42857142857142,"z":84.57142857142857,"a95":1.7,"info":"\"13-11-02\" at \"18:24\""},{"visible":true,"include":false,"step":"80","x":-79.61904761904762,"y":90.57142857142857,"z":58.095238095238095,"a95":2.3,"info":"\"13-11-03\" at \"14:48\""},{"visible":true,"include":false,"step":"150","x":-42.60952380952381,"y":34.01904761904762,"z":19.095238095238095,"a95":3,"info":"\"13-11-04\" at \"12:09\""},{"visible":true,"include":false,"step":"180","x":-23.333333333333332,"y":27.257142857142856,"z":18.2,"a95":4.6,"info":"\"13-11-05\" at \"07:22\""},{"visible":true,"include":false,"step":"200","x":-22.6,"y":17.714285714285715,"z":11.20952380952381,"a95":6.8,"info":"\"13-11-05\" at \"11:48\""},{"visible":true,"include":false,"step":"225","x":-21.723809523809525,"y":16.60952380952381,"z":14.295238095238094,"a95":12.2,"info":"\"13-11-05\" at \"16:30\""},{"visible":true,"include":false,"step":"250","x":-36.542857142857144,"y":16.780952380952378,"z":8.895238095238096,"a95":5.6,"info":"\"13-11-06\" at \"10:16\""},{"visible":true,"include":false,"step":"275","x":-30.02857142857143,"y":17.047619047619047,"z":16.60952380952381,"a95":6.7,"info":"\"13-11-06\" at \"15:07\""},{"visible":true,"include":false,"step":"300","x":-30.038095238095234,"y":7.590476190476191,"z":4.6761904761904765,"a95":10,"info":"\"13-11-07\" at \"03:45\""},{"visible":true,"include":false,"step":"320","x":-29.40952380952381,"y":10.676190476190476,"z":17.64761904761905,"a95":13,"info":"\"13-11-07\" at \"07:09\""},{"visible":true,"include":false,"step":"340","x":-24.152380952380952,"y":11.733333333333334,"z":3.0095238095238095,"a95":6.8,"info":"\"13-11-07\" at \"11:15\""}]},{"version":"v1.1.0","exported":"2016-11-24T14:12:01.398Z","volume":10.5,"added":"2016-11-24T14:01:36.787Z","format":"Utrecht","demagType":"Unknown","strat":"3","patch":1.1,"GEO":[{"dec":355.08101131523574,"inc":57.9336452694617,"MAD":3.3338321800764246,"cm":[-1.1102230246251565e-16,-2.0816681711721685e-15,0],"intensity":175.31333579821703,"type":"dir","forced":true,"remark":"","origin":false,"nSteps":9,"minStep":"4.0","maxStep":"40.0","steps":["4.0","8.0","12.0","16.0","20.0","25.0","30.0","35.0","40.0"],"group":"None","version":"v1.1.0"}],"TECT":[{"dec":351.75255321384145,"inc":-51.62564803458086,"MAD":3.3338321800762145,"cm":[-4.107825191113079e-15,-8.042178034628478e-15,-1.9984014443252818e-15],"intensity":175.31333579821705,"type":"dir","forced":true,"remark":"","origin":false,"nSteps":9,"minStep":"4.0","maxStep":"40.0","steps":["4.0","8.0","12.0","16.0","20.0","25.0","30.0","35.0","40.0"],"group":"None","version":"v1.1.0"}],"interpreted":true,"name":"AL 4.12","coreAzi":255,"coreDip":37,"bedStrike":243,"bedDip":113,"data":[{"visible":true,"include":false,"step":"0.0","x":-123.38095238095238,"y":90.57904761904763,"z":73.80666666666667,"a95":0.99,"info":"11/11/2013 at 06:29:40"},{"visible":true,"include":true,"step":"4.0","x":-112.01904761904763,"y":77.25238095238095,"z":63.70095238095238,"a95":0.99,"info":"11/11/2013 at 06:29:40"},{"visible":true,"include":true,"step":"8.0","x":-78.55619047619048,"y":55.691428571428574,"z":48.62952380952381,"a95":0.99,"info":"11/11/2013 at 06:29:40"},{"visible":true,"include":true,"step":"12.0","x":-61.45428571428571,"y":40.34285714285714,"z":40.12380952380953,"a95":0.99,"info":"11/11/2013 at 06:29:40"},{"visible":true,"include":true,"step":"16.0","x":-53.203809523809525,"y":36.12571428571429,"z":32.53619047619048,"a95":0.99,"info":"11/11/2013 at 06:29:40"},{"visible":true,"include":true,"step":"20.0","x":-45.579047619047614,"y":38.04380952380952,"z":21.162857142857142,"a95":0.99,"info":"11/11/2013 at 06:29:40"},{"visible":true,"include":true,"step":"25.0","x":-32.37809523809524,"y":25.137142857142855,"z":20.653333333333336,"a95":0.99,"info":"11/11/2013 at 06:29:40"},{"visible":true,"include":true,"step":"30.0","x":-20.35809523809524,"y":19.069523809523808,"z":18.715238095238096,"a95":0.99,"info":"11/11/2013 at 06:29:40"},{"visible":true,"include":true,"step":"35.0","x":-22.99047619047619,"y":19.923809523809524,"z":12.52190476190476,"a95":0.99,"info":"11/11/2013 at 06:29:40"},{"visible":true,"include":true,"step":"40.0","x":-15.983809523809525,"y":17.662857142857142,"z":9.382095238095237,"a95":0.99,"info":"11/11/2013 at 06:29:40"},{"visible":true,"include":false,"step":"45.0","x":-6.538380952380953,"y":12.576190476190478,"z":10.653333333333332,"a95":0.99,"info":"11/11/2013 at 06:29:40"},{"visible":true,"include":false,"step":"50.0","x":-7.577047619047619,"y":10.972380952380952,"z":8.651142857142858,"a95":0.99,"info":"11/11/2013 at 06:29:40"},{"visible":true,"include":false,"step":"60.0","x":-5.335904761904762,"y":16.744761904761905,"z":-2.901333333333333,"a95":0.99,"info":"11/11/2013 at 06:29:40"},{"visible":true,"include":false,"step":"70.0","x":0.8695047619047619,"y":6.628285714285714,"z":6.924666666666667,"a95":0.99,"info":"11/11/2013 at 06:29:40"},{"visible":true,"include":false,"step":"80.0","x":-19.454285714285714,"y":9.031428571428572,"z":16.97904761904762,"a95":0.99,"info":"11/11/2013 at 06:29:40"},{"visible":true,"include":false,"step":"90.0","x":13.425714285714285,"y":16.383809523809525,"z":-9.700952380952382,"a95":0.99,"info":"11/11/2013 at 06:29:40"},{"visible":true,"include":false,"step":"100.0","x":-12.302857142857144,"y":10.788571428571428,"z":7.1626666666666665,"a95":0.99,"info":"11/11/2013 at 06:29:40"}]},{"version":"v1.1.0","exported":"2016-11-24T14:12:01.398Z","volume":10.5,"added":"2016-11-24T14:01:36.788Z","format":"Utrecht","demagType":"Unknown","strat":"4","patch":1.1,"GEO":[{"dec":348.3485999845462,"inc":71.8563547995331,"MAD":3.2670471571595785,"cm":[-7.771561172376096e-16,-1.020884765612351e-15,0],"intensity":104.6368364327668,"type":"dir","forced":true,"remark":"","origin":false,"nSteps":7,"minStep":"4.0","maxStep":"40.0","steps":["4.0","8.0","12.0","16.0","25.0","35.0","40.0"],"group":"None","version":"v1.1.0"}],"TECT":[{"dec":339.210819730964,"inc":-40.37032299421599,"MAD":3.2670471571595354,"cm":[-4.440892098500626e-16,-5.023759186428833e-15,9.43689570931383e-16],"intensity":104.63683643276681,"type":"dir","forced":true,"remark":"","origin":false,"nSteps":7,"minStep":"4.0","maxStep":"40.0","steps":["4.0","8.0","12.0","16.0","25.0","35.0","40.0"],"group":"None","version":"v1.1.0"}],"interpreted":true,"name":"AL 4.13","coreAzi":300,"coreDip":34,"bedStrike":243,"bedDip":113,"data":[{"visible":true,"include":false,"step":"0.0","x":-69.98285714285714,"y":22.526666666666667,"z":74.25904761904762,"a95":0.99,"info":"11/11/2013 at 06:29:40"},{"visible":true,"include":true,"step":"4.0","x":-66.09809523809524,"y":22.56380952380952,"z":65.63047619047619,"a95":0.99,"info":"11/11/2013 at 06:29:40"},{"visible":true,"include":true,"step":"8.0","x":-42.695238095238096,"y":20.038095238095238,"z":45.67619047619048,"a95":0.99,"info":"11/11/2013 at 06:29:40"},{"visible":true,"include":true,"step":"12.0","x":-33.91809523809523,"y":8.179333333333332,"z":38.96380952380952,"a95":0.99,"info":"11/11/2013 at 06:29:40"},{"visible":true,"include":true,"step":"16.0","x":-30.145714285714284,"y":8.478666666666665,"z":32.85047619047619,"a95":0.99,"info":"11/11/2013 at 06:29:40"},{"visible":false,"include":false,"step":"20.0","x":-22.600952380952382,"y":15.13904761904762,"z":21.034285714285716,"a95":0.99,"info":"11/11/2013 at 06:29:40"},{"visible":true,"include":true,"step":"25.0","x":-19.344761904761906,"y":5.1143809523809525,"z":20.475238095238097,"a95":0.99,"info":"11/11/2013 at 06:29:40"},{"visible":false,"include":false,"step":"30.0","x":-15.311428571428573,"y":-3.557238095238095,"z":20.86952380952381,"a95":0.99,"info":"11/11/2013 at 06:29:40"},{"visible":true,"include":true,"step":"35.0","x":-10.763809523809524,"y":3.446476190476191,"z":12.445714285714287,"a95":0.99,"info":"11/11/2013 at 06:29:40"},{"visible":true,"include":true,"step":"40.0","x":-5.682095238095238,"y":3.1912380952380954,"z":6.015523809523809,"a95":0.99,"info":"11/11/2013 at 06:29:40"},{"visible":false,"include":false,"step":"45.0","x":-1.9468571428571428,"y":-3.385904761904762,"z":6.8850476190476195,"a95":0.99,"info":"11/11/2013 at 06:29:40"},{"visible":false,"include":false,"step":"50.0","x":-2.308952380952381,"y":-1.9585714285714286,"z":2.9177142857142857,"a95":0.99,"info":"11/11/2013 at 06:29:40"},{"visible":false,"include":false,"step":"60.0","x":3.351142857142857,"y":3.886761904761905,"z":-2.6935238095238097,"a95":0.99,"info":"11/11/2013 at 06:29:40"},{"visible":false,"include":false,"step":"70.0","x":3.604,"y":-6.284761904761904,"z":3.9534285714285717,"a95":0.99,"info":"11/11/2013 at 06:29:40"},{"visible":false,"include":false,"step":"80.0","x":-11.937142857142858,"y":-1.814095238095238,"z":8.904857142857143,"a95":0.99,"info":"11/11/2013 at 06:29:40"},{"visible":false,"include":false,"step":"90.0","x":16.571428571428573,"y":6.738095238095238,"z":-16.450476190476188,"a95":0.99,"info":"11/11/2013 at 06:29:40"},{"visible":false,"include":false,"step":"100.0","x":-10.472380952380952,"y":2.545047619047619,"z":2.8994285714285715,"a95":0.99,"info":"11/11/2013 at 06:29:40"}]},{"version":"v1.1.0","exported":"2016-11-24T14:12:01.398Z","volume":10.5,"added":"2016-11-24T14:01:36.788Z","format":"Utrecht","demagType":"Unknown","strat":"5","patch":1.1,"GEO":[{"dec":328.80668154076085,"inc":53.380126093052716,"MAD":2.685899287108792,"cm":[3.3306690738754696e-16,-2.886579864025407e-15,0],"intensity":381.73429880270726,"type":"dir","forced":true,"remark":"","origin":false,"nSteps":9,"minStep":"4.0","maxStep":"40.0","steps":["4.0","8.0","12.0","16.0","20.0","25.0","30.0","35.0","40.0"],"group":"None","version":"v1.1.0"}],"TECT":[{"dec":328.07672480171476,"inc":-59.45375712418042,"MAD":2.685899287108781,"cm":[-6.994405055138486e-15,-7.549516567451064e-15,-8.881784197001252e-16],"intensity":381.73429880270726,"type":"dir","forced":true,"remark":"","origin":false,"nSteps":9,"minStep":"4.0","maxStep":"40.0","steps":["4.0","8.0","12.0","16.0","20.0","25.0","30.0","35.0","40.0"],"group":"None","version":"v1.1.0"}],"interpreted":true,"name":"AL 4.14A","coreAzi":300,"coreDip":31,"bedStrike":243,"bedDip":113,"data":[{"visible":true,"include":false,"step":"0.0","x":-151.6095238095238,"y":112.96190476190475,"z":334.96190476190475,"a95":0.99,"info":"11/11/2013 at 06:29:40"},{"visible":true,"include":true,"step":"4.0","x":-144.40952380952382,"y":104.53333333333333,"z":296.84761904761905,"a95":0.99,"info":"11/11/2013 at 06:29:40"},{"visible":true,"include":true,"step":"8.0","x":-109.45714285714286,"y":82.31333333333333,"z":225.53333333333333,"a95":0.99,"info":"11/11/2013 at 06:29:40"},{"visible":true,"include":true,"step":"12.0","x":-81.57714285714285,"y":52.268571428571434,"z":172.06666666666666,"a95":0.99,"info":"11/11/2013 at 06:29:40"},{"visible":true,"include":true,"step":"16.0","x":-67.36857142857143,"y":41.52857142857143,"z":134.35238095238097,"a95":0.99,"info":"11/11/2013 at 06:29:40"},{"visible":true,"include":true,"step":"20.0","x":-52.63333333333333,"y":34.99333333333333,"z":98.33333333333333,"a95":0.99,"info":"11/11/2013 at 06:29:40"},{"visible":true,"include":true,"step":"25.0","x":-39.2952380952381,"y":17.619999999999997,"z":77.36,"a95":0.99,"info":"11/11/2013 at 06:29:40"},{"visible":true,"include":true,"step":"30.0","x":-23.87904761904762,"y":2.218095238095238,"z":61.919999999999995,"a95":0.99,"info":"11/11/2013 at 06:29:40"},{"visible":true,"include":true,"step":"35.0","x":-16.756190476190476,"y":6.674952380952381,"z":41.24095238095238,"a95":0.99,"info":"11/11/2013 at 06:29:40"},{"visible":true,"include":true,"step":"40.0","x":-14.274285714285714,"y":3.5121904761904763,"z":33.10190476190476,"a95":0.99,"info":"11/11/2013 at 06:29:40"},{"visible":false,"include":false,"step":"45.0","x":-5.069904761904762,"y":-4.781333333333333,"z":21.935238095238095,"a95":0.99,"info":"11/11/2013 at 06:29:40"},{"visible":false,"include":false,"step":"50.0","x":-3.1696190476190473,"y":-0.49396190476190477,"z":19.53333333333333,"a95":0.99,"info":"11/11/2013 at 06:29:40"},{"visible":false,"include":false,"step":"60.0","x":4.315809523809524,"y":1.4463809523809523,"z":6.801904761904762,"a95":0.99,"info":"11/11/2013 at 06:29:40"},{"visible":false,"include":false,"step":"70.0","x":2.0094285714285713,"y":-1.9135238095238094,"z":7.38552380952381,"a95":0.99,"info":"11/11/2013 at 06:29:40"},{"visible":false,"include":false,"step":"80.0","x":0.28983809523809523,"y":-10.129523809523809,"z":17.121904761904762,"a95":0.99,"info":"11/11/2013 at 06:29:40"},{"visible":false,"include":false,"step":"90.0","x":15.777142857142858,"y":7.899047619047619,"z":-8.046666666666667,"a95":0.99,"info":"11/11/2013 at 06:29:40"},{"visible":false,"include":false,"step":"100.0","x":-6.4785714285714295,"y":6.875619047619048,"z":0.7498857142857143,"a95":0.99,"info":"11/11/2013 at 06:29:40"}]},{"version":"v1.1.0","exported":"2016-11-24T14:12:01.398Z","volume":10.5,"added":"2016-11-24T14:01:36.788Z","format":"Utrecht","demagType":"Unknown","strat":"6","patch":1.1,"GEO":[{"dec":351.6959345014682,"inc":57.52656353438054,"MAD":2.2525880685575816,"cm":[2.6645352591003757e-15,-1.6653345369377348e-15,0],"intensity":346.38783484265747,"type":"dir","forced":true,"remark":"","origin":false,"nSteps":6,"minStep":"4.0","maxStep":"25.0","steps":["4.0","8.0","12.0","16.0","20.0","25.0"],"group":"None","version":"v1.1.0"}],"TECT":[{"dec":349.58513708682864,"inc":-52.91906904541824,"MAD":2.252588068557454,"cm":[6.661338147750939e-15,3.730349362740526e-14,0],"intensity":346.3878348426574,"type":"dir","forced":true,"remark":"","origin":false,"nSteps":6,"minStep":"4.0","maxStep":"25.0","steps":["4.0","8.0","12.0","16.0","20.0","25.0"],"group":"None","version":"v1.1.0"}],"interpreted":true,"name":"AL 4.14B","coreAzi":300,"coreDip":31,"bedStrike":243,"bedDip":113,"data":[{"visible":true,"include":false,"step":"0.0","x":-168.9142857142857,"y":122.19999999999999,"z":216.2095238095238,"a95":0.99,"info":"11/11/2013 at 06:29:40"},{"visible":true,"include":true,"step":"4.0","x":-155.07619047619048,"y":115.61904761904762,"z":193.2761904761905,"a95":0.99,"info":"11/11/2013 at 06:29:40"},{"visible":true,"include":true,"step":"8.0","x":-116.78095238095239,"y":95.00095238095238,"z":146.92380952380952,"a95":0.99,"info":"11/11/2013 at 06:29:40"},{"visible":true,"include":true,"step":"12.0","x":-82.78190476190477,"y":60.87904761904762,"z":119.58095238095237,"a95":0.99,"info":"11/11/2013 at 06:29:40"},{"visible":true,"include":true,"step":"16.0","x":-66.42285714285715,"y":48.82380952380952,"z":95.39047619047619,"a95":0.99,"info":"11/11/2013 at 06:29:40"},{"visible":true,"include":true,"step":"20.0","x":-51.25333333333333,"y":43.50380952380952,"z":70.7104761904762,"a95":0.99,"info":"11/11/2013 at 06:29:40"},{"visible":true,"include":true,"step":"25.0","x":-39.455238095238094,"y":26.34190476190476,"z":55.7,"a95":0.99,"info":"11/11/2013 at 06:29:40"},{"visible":false,"include":false,"step":"30.0","x":-22.408571428571427,"y":5.361809523809524,"z":51.76095238095238,"a95":0.99,"info":"11/11/2013 at 06:29:40"},{"visible":false,"include":false,"step":"35.0","x":-17.57238095238095,"y":9.000285714285715,"z":34.26857142857143,"a95":0.99,"info":"11/11/2013 at 06:29:40"},{"visible":false,"include":false,"step":"40.0","x":-12.463809523809525,"y":8.901714285714286,"z":25.104761904761908,"a95":0.99,"info":"11/11/2013 at 06:29:40"},{"visible":false,"include":false,"step":"45.0","x":-1.3187619047619048,"y":0.12197142857142856,"z":21.380000000000003,"a95":0.99,"info":"11/11/2013 at 06:29:40"},{"visible":false,"include":false,"step":"50.0","x":-6.202761904761905,"y":8.499428571428572,"z":15.772380952380953,"a95":0.99,"info":"11/11/2013 at 06:29:40"},{"visible":false,"include":false,"step":"60.0","x":10.822857142857142,"y":-1.8581904761904762,"z":2.759714285714286,"a95":0.99,"info":"11/11/2013 at 06:29:40"},{"visible":false,"include":false,"step":"70.0","x":1.8738095238095238,"y":-2.789904761904762,"z":9.82,"a95":0.99,"info":"11/11/2013 at 06:29:40"},{"visible":false,"include":false,"step":"80.0","x":-9.794285714285715,"y":9.857142857142858,"z":7.857809523809524,"a95":0.99,"info":"11/11/2013 at 06:29:40"},{"visible":false,"include":false,"step":"90.0","x":20.69904761904762,"y":6.856666666666667,"z":-8.845619047619047,"a95":0.99,"info":"11/11/2013 at 06:29:40"},{"visible":false,"include":false,"step":"100.0","x":-9.786666666666667,"y":13.814285714285715,"z":3.037333333333333,"a95":0.99,"info":"11/11/2013 at 06:29:40"}]},{"version":"v1.1.0","exported":"2016-11-24T14:12:01.398Z","volume":10.5,"added":"2016-11-24T14:01:36.788Z","format":"Utrecht","demagType":"Unknown","strat":null,"patch":1.1,"GEO":[],"TECT":[],"interpreted":false,"name":"AL 4.15A","coreAzi":316,"coreDip":43,"bedStrike":243,"bedDip":113,"data":[{"visible":true,"include":false,"step":"20","x":-3.961904761904762,"y":5.590476190476191,"z":88.53333333333333,"a95":2.6,"info":"\"13-11-02\" at \"18:27\""},{"visible":true,"include":false,"step":"80","x":-14.828571428571427,"y":13.609523809523811,"z":58.561904761904756,"a95":3.2,"info":"\"13-11-03\" at \"14:52\""},{"visible":true,"include":false,"step":"150","x":-15.085714285714285,"y":-0.9142857142857143,"z":14.504761904761907,"a95":6.5,"info":"\"13-11-04\" at \"12:14\""},{"visible":true,"include":false,"step":"180","x":-2,"y":-2.1619047619047618,"z":15.923809523809522,"a95":10.2,"info":"\"13-11-05\" at \"07:25\""},{"visible":true,"include":false,"step":"200","x":-9.58095238095238,"y":-4.904761904761905,"z":7.152380952380952,"a95":18.3,"info":"\"13-11-05\" at \"11:54\""},{"visible":true,"include":false,"step":"225","x":-3.9523809523809526,"y":-4.923809523809524,"z":7.333333333333333,"a95":34.3,"info":"\"13-11-05\" at \"16:32\""},{"visible":true,"include":false,"step":"250","x":-18.238095238095237,"y":-6.371428571428572,"z":6.2285714285714295,"a95":9.2,"info":"\"13-11-06\" at \"10:18\""},{"visible":true,"include":false,"step":"275","x":-5.819047619047619,"y":-3.542857142857143,"z":7.019047619047619,"a95":13.4,"info":"\"13-11-06\" at \"15:09\""},{"visible":true,"include":false,"step":"300","x":-7.133333333333334,"y":-5.0095238095238095,"z":3.5333333333333337,"a95":17.1,"info":"\"13-11-07\" at \"03:47\""},{"visible":true,"include":false,"step":"320","x":-8.761904761904763,"y":-3.9047619047619047,"z":4.4,"a95":27.9,"info":"\"13-11-07\" at \"07:11\""},{"visible":true,"include":false,"step":"340","x":-9.82857142857143,"y":-6.085714285714285,"z":1.3333333333333333,"a95":15.1,"info":"\"13-11-07\" at \"11:19\""}]},{"version":"v1.1.0","exported":"2016-11-24T14:12:01.398Z","volume":10.5,"added":"2016-11-24T14:01:36.788Z","format":"Utrecht","demagType":"Unknown","strat":"7","patch":1.1,"GEO":[{"dec":2.5370554007944293,"inc":61.246925632964235,"MAD":4.514521337598537,"cm":[-4.440892098500626e-16,-2.9351521213527576e-15,0],"intensity":118.53370963910334,"type":"dir","forced":true,"remark":"","origin":false,"nSteps":6,"minStep":"4.0","maxStep":"25.0","steps":["4.0","8.0","12.0","16.0","20.0","25.0"],"group":"None","version":"v1.1.0"}],"TECT":[{"dec":353.23057040147893,"inc":-46.70253482505888,"MAD":4.514521337598511,"cm":[-1.9984014443252818e-15,-5.218048215738236e-15,1.1102230246251565e-15],"intensity":118.53370963910334,"type":"dir","forced":true,"remark":"","origin":false,"nSteps":6,"minStep":"4.0","maxStep":"25.0","steps":["4.0","8.0","12.0","16.0","20.0","25.0"],"group":"None","version":"v1.1.0"}],"interpreted":true,"name":"AL 4.15B","coreAzi":316,"coreDip":43,"bedStrike":243,"bedDip":113,"data":[{"visible":true,"include":false,"step":"0.0","x":-32.00476190476191,"y":27.85238095238095,"z":88.22,"a95":0.99,"info":"11/11/2013 at 06:29:40"},{"visible":true,"include":true,"step":"4.0","x":-38.09428571428572,"y":28.864761904761902,"z":77.86666666666667,"a95":0.99,"info":"11/11/2013 at 06:29:40"},{"visible":true,"include":true,"step":"8.0","x":-26.584761904761905,"y":29.39619047619048,"z":53.61333333333334,"a95":0.99,"info":"11/11/2013 at 06:29:40"},{"visible":true,"include":true,"step":"12.0","x":-21.81142857142857,"y":17.86952380952381,"z":42.168571428571425,"a95":0.99,"info":"11/11/2013 at 06:29:40"},{"visible":true,"include":true,"step":"16.0","x":-14.702857142857143,"y":9.818095238095239,"z":35.79047619047619,"a95":0.99,"info":"11/11/2013 at 06:29:40"},{"visible":true,"include":true,"step":"20.0","x":-11.125714285714285,"y":13.008571428571429,"z":22.273333333333333,"a95":0.99,"info":"11/11/2013 at 06:29:40"},{"visible":true,"include":true,"step":"25.0","x":-14.75904761904762,"y":6.505428571428571,"z":22.16190476190476,"a95":0.99,"info":"11/11/2013 at 06:29:40"},{"visible":false,"include":false,"step":"30.0","x":-7.420285714285714,"y":-8.623142857142858,"z":28.387619047619047,"a95":0.99,"info":"11/11/2013 at 06:29:40"},{"visible":false,"include":false,"step":"35.0","x":-7.24847619047619,"y":3.2674285714285713,"z":17.24857142857143,"a95":0.99,"info":"11/11/2013 at 06:29:40"},{"visible":false,"include":false,"step":"40.0","x":-5.063714285714285,"y":5.734571428571429,"z":9.08495238095238,"a95":0.99,"info":"11/11/2013 at 06:29:40"},{"visible":false,"include":false,"step":"45.0","x":1.8614285714285717,"y":-3.3600000000000003,"z":8.942,"a95":0.99,"info":"11/11/2013 at 06:29:40"},{"visible":false,"include":false,"step":"50.0","x":1.5786666666666667,"y":-0.2353047619047619,"z":5.5338095238095235,"a95":0.99,"info":"11/11/2013 at 06:29:40"},{"visible":false,"include":false,"step":"60.0","x":18.97809523809524,"y":-6.914571428571428,"z":0.5647809523809524,"a95":0.99,"info":"11/11/2013 at 06:29:40"},{"visible":false,"include":false,"step":"70.0","x":-0.20438095238095239,"y":2.2431428571428573,"z":2.8144761904761904,"a95":0.99,"info":"11/11/2013 at 06:29:40"},{"visible":false,"include":false,"step":"80.0","x":-0.9690476190476192,"y":-0.9498571428571428,"z":4.1977142857142855,"a95":0.99,"info":"11/11/2013 at 06:29:40"},{"visible":false,"include":false,"step":"90.0","x":14.425714285714285,"y":4.24152380952381,"z":-2.4423809523809523,"a95":0.99,"info":"11/11/2013 at 06:29:40"},{"visible":false,"include":false,"step":"100.0","x":-2.787333333333333,"y":12.04857142857143,"z":-5.492857142857143,"a95":0.99,"info":"11/11/2013 at 06:29:40"}]},{"version":"v1.1.0","exported":"2016-11-24T14:12:01.398Z","volume":10.5,"added":"2016-11-24T14:01:36.788Z","format":"Utrecht","demagType":"Unknown","strat":"8","patch":1.1,"GEO":[{"dec":346.97452163945434,"inc":63.26465726263467,"MAD":3.8181723555310922,"cm":[-1.5543122344752192e-15,-6.9111383282915995e-15,0],"intensity":137.40743882149536,"type":"dir","forced":true,"remark":"","origin":false,"nSteps":6,"minStep":"4.0","maxStep":"25.0","steps":["4.0","8.0","12.0","16.0","20.0","25.0"],"group":"None","version":"v1.1.0"}],"TECT":[{"dec":342.4668003020979,"inc":-48.66066957888634,"MAD":3.8181723555311105,"cm":[-6.217248937900877e-15,-7.882583474838611e-15,-2.886579864025407e-15],"intensity":137.4074388214954,"type":"dir","forced":true,"remark":"","origin":false,"nSteps":6,"minStep":"4.0","maxStep":"25.0","steps":["4.0","8.0","12.0","16.0","20.0","25.0"],"group":"None","version":"v1.1.0"}],"interpreted":true,"name":"AL 4.16A","coreAzi":291,"coreDip":40,"bedStrike":243,"bedDip":113,"data":[{"visible":true,"include":false,"step":"0.0","x":-53.6552380952381,"y":45.73809523809524,"z":100.75238095238096,"a95":0.99,"info":"11/11/2013 at 06:29:40"},{"visible":true,"include":true,"step":"4.0","x":-57.25523809523809,"y":40.85333333333333,"z":86.42571428571429,"a95":0.99,"info":"11/11/2013 at 06:29:40"},{"visible":true,"include":true,"step":"8.0","x":-35.519999999999996,"y":26.03047619047619,"z":60.350476190476186,"a95":0.99,"info":"11/11/2013 at 06:29:40"},{"visible":true,"include":true,"step":"12.0","x":-30.84190476190476,"y":21.31047619047619,"z":40.05047619047619,"a95":0.99,"info":"11/11/2013 at 06:29:40"},{"visible":true,"include":true,"step":"16.0","x":-22.48761904761905,"y":16.552380952380954,"z":27.293333333333333,"a95":0.99,"info":"11/11/2013 at 06:29:40"},{"visible":true,"include":true,"step":"20.0","x":-19.346666666666664,"y":15.033333333333333,"z":18.301904761904762,"a95":0.99,"info":"11/11/2013 at 06:29:40"},{"visible":true,"include":true,"step":"25.0","x":-15.062857142857142,"y":8.212190476190475,"z":19.60952380952381,"a95":0.99,"info":"11/11/2013 at 06:29:40"},{"visible":false,"include":false,"step":"30.0","x":-12.253333333333334,"y":-0.3953428571428571,"z":19.03904761904762,"a95":0.99,"info":"11/11/2013 at 06:29:40"},{"visible":false,"include":false,"step":"35.0","x":-12.496190476190478,"y":1.5207619047619048,"z":16.242857142857144,"a95":0.99,"info":"11/11/2013 at 06:29:40"},{"visible":false,"include":false,"step":"40.0","x":-10.459999999999999,"y":1.5086666666666666,"z":11.962857142857143,"a95":0.99,"info":"11/11/2013 at 06:29:40"},{"visible":false,"include":false,"step":"45.0","x":2.7186666666666666,"y":-7.052095238095238,"z":6.8340000000000005,"a95":0.99,"info":"11/11/2013 at 06:29:40"},{"visible":false,"include":false,"step":"50.0","x":-5.165047619047619,"y":-1.0363809523809524,"z":4.679428571428572,"a95":0.99,"info":"11/11/2013 at 06:29:40"},{"visible":false,"include":false,"step":"60.0","x":12.862857142857143,"y":-10.538095238095238,"z":0.0018888571428571429,"a95":0.99,"info":"11/11/2013 at 06:29:40"},{"visible":false,"include":false,"step":"70.0","x":-8.799809523809524,"y":-5.601428571428571,"z":9.295238095238094,"a95":0.99,"info":"11/11/2013 at 06:29:40"},{"visible":false,"include":false,"step":"80.0","x":-11.060952380952381,"y":-3.379047619047619,"z":3.3313333333333333,"a95":0.99,"info":"11/11/2013 at 06:29:40"},{"visible":false,"include":false,"step":"90.0","x":4.148380952380952,"y":-3.294190476190476,"z":5.400380952380952,"a95":0.99,"info":"11/11/2013 at 06:29:40"},{"visible":false,"include":false,"step":"100.0","x":-10.836190476190476,"y":5.604,"z":2.755904761904762,"a95":0.99,"info":"11/11/2013 at 06:29:40"}]},{"version":"v1.1.0","exported":"2016-11-24T14:12:01.398Z","volume":10.5,"added":"2016-11-24T14:01:36.788Z","format":"Utrecht","demagType":"Unknown","strat":"1","patch":1.1,"GEO":[{"dec":354.5551518228013,"inc":60.11311103404128,"MAD":14.846253836165483,"cm":[5.551115123125783e-16,-1.4988010832439613e-15,0],"intensity":90.26103811439091,"type":"dir","forced":true,"remark":"","origin":false,"nSteps":8,"minStep":"4.0","maxStep":"35.0","steps":["4.0","8.0","12.0","16.0","20.0","25.0","30.0","35.0"],"group":"None","version":"v1.1.0"}],"TECT":[{"dec":349.52595899717187,"inc":-49.93973736553209,"MAD":14.846253836165506,"cm":[4.440892098500626e-16,1.3877787807814457e-15,-8.881784197001252e-16],"intensity":90.26103811439091,"type":"dir","forced":true,"remark":"","origin":false,"nSteps":8,"minStep":"4.0","maxStep":"35.0","steps":["4.0","8.0","12.0","16.0","20.0","25.0","30.0","35.0"],"group":"None","version":"v1.1.0"}],"interpreted":true,"name":"AL 4.16B","coreAzi":291,"coreDip":40,"bedStrike":243,"bedDip":113,"data":[{"visible":true,"include":false,"step":"0.0","x":-42.93238095238095,"y":35.09142857142857,"z":69.73238095238096,"a95":0.99,"info":"11/11/2013 at 12:15:13"},{"visible":true,"include":true,"step":"4.0","x":-40.96952380952381,"y":30.486666666666668,"z":56.18285714285714,"a95":0.99,"info":"11/11/2013 at 12:15:13"},{"visible":true,"include":true,"step":"8.0","x":-25.38095238095238,"y":11.206666666666667,"z":45.82285714285714,"a95":0.99,"info":"11/11/2013 at 12:15:13"},{"visible":true,"include":true,"step":"12.0","x":-13.443809523809524,"y":27.06,"z":15.914285714285715,"a95":0.99,"info":"11/11/2013 at 12:15:13"},{"visible":true,"include":true,"step":"16.0","x":-20.717142857142857,"y":27.69238095238095,"z":12.442857142857143,"a95":0.99,"info":"11/11/2013 at 12:15:13"},{"visible":true,"include":true,"step":"20.0","x":-12.89809523809524,"y":11.880952380952381,"z":21.031428571428574,"a95":0.99,"info":"11/11/2013 at 12:15:13"},{"visible":true,"include":true,"step":"25.0","x":-6.301428571428572,"y":3.330571428571428,"z":15.512380952380951,"a95":0.99,"info":"11/11/2013 at 12:15:13"},{"visible":true,"include":true,"step":"30.0","x":-6.587809523809524,"y":10.157142857142858,"z":10.413333333333334,"a95":0.99,"info":"11/11/2013 at 12:15:13"},{"visible":true,"include":true,"step":"35.0","x":-8.590190476190477,"y":9.373142857142858,"z":7.8646666666666665,"a95":0.99,"info":"11/11/2013 at 12:15:13"},{"visible":true,"include":false,"step":"40.0","x":-8.140857142857143,"y":6.981142857142858,"z":3.986857142857143,"a95":0.99,"info":"11/11/2013 at 12:15:13"},{"visible":true,"include":false,"step":"45.0","x":-4.332571428571429,"y":4.147238095238095,"z":7.655047619047619,"a95":0.99,"info":"11/11/2013 at 12:15:13"},{"visible":true,"include":false,"step":"50.0","x":-5.491809523809524,"y":7.410285714285715,"z":8.508857142857144,"a95":0.99,"info":"11/11/2013 at 12:15:13"},{"visible":true,"include":false,"step":"60.0","x":-10.512380952380951,"y":14.270476190476192,"z":4.897238095238095,"a95":0.99,"info":"11/11/2013 at 12:15:13"},{"visible":true,"include":false,"step":"70.0","x":-3.3053333333333335,"y":1.757809523809524,"z":6.243428571428571,"a95":0.99,"info":"11/11/2013 at 12:15:13"},{"visible":true,"include":false,"step":"80.0","x":-5.247809523809524,"y":3.361714285714286,"z":8.416857142857143,"a95":0.99,"info":"11/11/2013 at 12:15:13"},{"visible":true,"include":false,"step":"90.0","x":-13.783809523809524,"y":20.44952380952381,"z":-3.65752380952381,"a95":0.99,"info":"11/11/2013 at 12:15:13"},{"visible":true,"include":false,"step":"100.0","x":1.2633333333333334,"y":-1.0086666666666666,"z":6.300666666666666,"a95":0.99,"info":"11/11/2013 at 12:15:13"}]},{"version":"v1.1.0","exported":"2016-11-24T14:12:01.398Z","volume":10.5,"added":"2016-11-24T14:01:36.788Z","format":"Utrecht","demagType":"Unknown","strat":"2","patch":1.1,"GEO":[],"TECT":[],"interpreted":false,"name":"AL 4.17A","coreAzi":276,"coreDip":21,"bedStrike":243,"bedDip":113,"data":[{"visible":true,"include":false,"step":"0.0","x":-81.01238095238095,"y":0.7803047619047618,"z":31.401904761904763,"a95":0.99,"info":"11/11/2013 at 12:15:13"},{"visible":true,"include":true,"step":"4.0","x":-74.32761904761905,"y":3.0701904761904766,"z":24.316190476190474,"a95":0.99,"info":"11/11/2013 at 12:15:13"},{"visible":true,"include":true,"step":"8.0","x":-54.719047619047615,"y":-9.149047619047618,"z":25.606666666666666,"a95":0.99,"info":"11/11/2013 at 12:15:13"},{"visible":true,"include":true,"step":"12.0","x":-35.203809523809525,"y":11.67142857142857,"z":6.973809523809523,"a95":0.99,"info":"11/11/2013 at 12:15:13"},{"visible":true,"include":true,"step":"16.0","x":-37.978095238095236,"y":16.65047619047619,"z":4.8028571428571425,"a95":0.99,"info":"11/11/2013 at 12:15:13"},{"visible":true,"include":true,"step":"20.0","x":-27.57238095238095,"y":3.5502857142857143,"z":13.112380952380953,"a95":0.99,"info":"11/11/2013 at 12:15:13"},{"visible":true,"include":true,"step":"25.0","x":-15.695238095238096,"y":-0.39274285714285717,"z":9.723809523809523,"a95":0.99,"info":"11/11/2013 at 12:15:13"},{"visible":true,"include":true,"step":"30.0","x":-14.412380952380953,"y":4.392,"z":5.334190476190476,"a95":0.99,"info":"11/11/2013 at 12:15:13"},{"visible":true,"include":true,"step":"35.0","x":-11.693333333333333,"y":5.4093333333333335,"z":2.985047619047619,"a95":0.99,"info":"11/11/2013 at 12:15:13"},{"visible":true,"include":true,"step":"40.0","x":-12.238095238095237,"y":1.3573333333333335,"z":6.2396190476190485,"a95":0.99,"info":"11/11/2013 at 12:15:13"},{"visible":true,"include":false,"step":"45.0","x":-6.968285714285715,"y":1.3261904761904764,"z":4.2374285714285715,"a95":0.99,"info":"11/11/2013 at 12:15:13"},{"visible":true,"include":false,"step":"50.0","x":-6.583333333333333,"y":2.4957142857142856,"z":4.942,"a95":0.99,"info":"11/11/2013 at 12:15:13"},{"visible":true,"include":false,"step":"60.0","x":-11.422857142857143,"y":10.485714285714286,"z":1.4815238095238095,"a95":0.99,"info":"11/11/2013 at 12:15:13"},{"visible":true,"include":false,"step":"70.0","x":-3.2727619047619045,"y":-0.26817142857142856,"z":2.5644761904761904,"a95":0.99,"info":"11/11/2013 at 12:15:13"},{"visible":true,"include":false,"step":"80.0","x":7.890666666666667,"y":0.48703809523809527,"z":4.741142857142857,"a95":0.99,"info":"11/11/2013 at 12:15:13"},{"visible":true,"include":false,"step":"90.0","x":-12.996190476190478,"y":13.088571428571429,"z":-5.303333333333334,"a95":0.99,"info":"11/11/2013 at 12:15:13"},{"visible":true,"include":false,"step":"100.0","x":3.1291428571428574,"y":-5.832380952380952,"z":2.8887619047619046,"a95":0.99,"info":"11/11/2013 at 12:15:13"}]},{"version":"v1.1.0","exported":"2016-11-24T14:12:01.399Z","volume":10.5,"added":"2016-11-24T14:01:36.789Z","format":"Utrecht","demagType":"Unknown","strat":"3","patch":1.1,"GEO":[{"dec":19.979532612579987,"inc":69.83990156802741,"MAD":12.15317398672706,"cm":[3.191891195797325e-16,-4.163336342344337e-16,0],"intensity":90.4598762613817,"type":"dir","forced":true,"remark":"","origin":false,"nSteps":6,"minStep":"4.0","maxStep":"25.0","steps":["4.0","8.0","12.0","16.0","20.0","25.0"],"group":"None","version":"v1.1.0"}],"TECT":[{"dec":351.0710615565002,"inc":-35.678545834474264,"MAD":12.153173986727076,"cm":[-2.886579864025407e-15,-2.220446049250313e-15,-2.4424906541753444e-15],"intensity":90.4598762613817,"type":"dir","forced":true,"remark":"","origin":false,"nSteps":6,"minStep":"4.0","maxStep":"25.0","steps":["4.0","8.0","12.0","16.0","20.0","25.0"],"group":"None","version":"v1.1.0"}],"interpreted":true,"name":"AL 4.17B","coreAzi":276,"coreDip":21,"bedStrike":243,"bedDip":113,"data":[{"visible":true,"include":false,"step":"0.0","x":-74.85142857142857,"y":36.61904761904762,"z":23.450476190476188,"a95":0.99,"info":"11/11/2013 at 12:15:13"},{"visible":true,"include":true,"step":"4.0","x":-67.12285714285714,"y":29.173333333333332,"z":19.474285714285713,"a95":0.99,"info":"11/11/2013 at 12:15:13"},{"visible":true,"include":true,"step":"8.0","x":-47.481904761904765,"y":5.047714285714285,"z":21.835238095238097,"a95":0.99,"info":"11/11/2013 at 12:15:13"},{"visible":true,"include":true,"step":"12.0","x":-33.5752380952381,"y":18.994285714285713,"z":2.606666666666667,"a95":0.99,"info":"11/11/2013 at 12:15:13"},{"visible":true,"include":true,"step":"16.0","x":-34.77428571428571,"y":19.755238095238095,"z":0.5515523809523809,"a95":0.99,"info":"11/11/2013 at 12:15:13"},{"visible":true,"include":true,"step":"20.0","x":-24.945714285714285,"y":4.866095238095238,"z":11.850476190476192,"a95":0.99,"info":"11/11/2013 at 12:15:13"},{"visible":true,"include":true,"step":"25.0","x":-14.575238095238095,"y":-1.2898095238095237,"z":7.561238095238095,"a95":0.99,"info":"11/11/2013 at 12:15:13"},{"visible":false,"include":false,"step":"30.0","x":-11.359047619047619,"y":6.623047619047619,"z":5.445619047619048,"a95":0.99,"info":"11/11/2013 at 12:15:13"},{"visible":false,"include":false,"step":"35.0","x":-15.416190476190476,"y":10.734285714285713,"z":-1.3108571428571427,"a95":0.99,"info":"11/11/2013 at 12:15:13"},{"visible":false,"include":false,"step":"40.0","x":-14.036190476190475,"y":4.609142857142857,"z":6.021809523809524,"a95":0.99,"info":"11/11/2013 at 12:15:13"},{"visible":false,"include":false,"step":"45.0","x":-7.106666666666667,"y":2.9819047619047616,"z":6.225809523809524,"a95":0.99,"info":"11/11/2013 at 12:15:13"},{"visible":false,"include":false,"step":"50.0","x":-7.032666666666667,"y":4.8453333333333335,"z":6.2598095238095235,"a95":0.99,"info":"11/11/2013 at 12:15:13"},{"visible":false,"include":false,"step":"60.0","x":-13.824761904761905,"y":17.367619047619048,"z":-0.12088571428571429,"a95":0.99,"info":"11/11/2013 at 12:15:13"},{"visible":false,"include":false,"step":"70.0","x":-2.566190476190476,"y":2.0813333333333333,"z":-0.6724476190476191,"a95":0.99,"info":"11/11/2013 at 12:15:13"},{"visible":false,"include":false,"step":"80.0","x":-0.4017142857142857,"y":0.2828761904761905,"z":4.782666666666667,"a95":0.99,"info":"11/11/2013 at 12:15:13"},{"visible":false,"include":false,"step":"90.0","x":-5.8486666666666665,"y":12.236190476190476,"z":-0.12088571428571429,"a95":0.99,"info":"11/11/2013 at 12:15:13"},{"visible":false,"include":false,"step":"100.0","x":6.509333333333333,"y":-2.1774285714285715,"z":0.6951142857142857,"a95":0.99,"info":"11/11/2013 at 12:15:13"}]},{"version":"v1.1.0","exported":"2016-11-24T14:12:01.399Z","volume":10.5,"added":"2016-11-24T14:01:36.789Z","format":"Utrecht","demagType":"Unknown","strat":"4","patch":1.1,"GEO":[{"dec":348.39614818267705,"inc":62.206047084035056,"MAD":8.775759245394084,"cm":[1.5543122344752192e-15,1.6653345369377348e-15,0],"intensity":140.6302092807882,"type":"dir","forced":true,"remark":"","origin":false,"nSteps":6,"minStep":"8.0","maxStep":"30.0","steps":["8.0","12.0","16.0","20.0","25.0","30.0"],"group":"None","version":"v1.1.0"}],"TECT":[{"dec":343.97025261424636,"inc":-49.41787370497478,"MAD":8.7757592453941,"cm":[9.992007221626409e-15,2.4868995751603507e-14,-4.440892098500626e-16],"intensity":140.6302092807882,"type":"dir","forced":true,"remark":"","origin":false,"nSteps":6,"minStep":"8.0","maxStep":"30.0","steps":["8.0","12.0","16.0","20.0","25.0","30.0"],"group":"None","version":"v1.1.0"}],"interpreted":true,"name":"AL 4.18A","coreAzi":308,"coreDip":36,"bedStrike":243,"bedDip":113,"data":[{"visible":true,"include":false,"step":"0.0","x":-73.05809523809523,"y":50.68857142857143,"z":156.63809523809525,"a95":0.99,"info":"11/11/2013 at 12:15:13"},{"visible":true,"include":false,"step":"4.0","x":-68.45809523809524,"y":46.31428571428572,"z":126.1047619047619,"a95":0.99,"info":"11/11/2013 at 12:15:13"},{"visible":true,"include":true,"step":"8.0","x":-52.12952380952381,"y":22.42095238095238,"z":99.03809523809525,"a95":0.99,"info":"11/11/2013 at 12:15:13"},{"visible":true,"include":true,"step":"12.0","x":-37.69428571428572,"y":31.60380952380952,"z":57.444761904761904,"a95":0.99,"info":"11/11/2013 at 12:15:13"},{"visible":true,"include":true,"step":"16.0","x":-37.446666666666665,"y":31.244761904761905,"z":40.94761904761905,"a95":0.99,"info":"11/11/2013 at 12:15:13"},{"visible":true,"include":true,"step":"20.0","x":-30.153333333333336,"y":14.263809523809524,"z":40.906666666666666,"a95":0.99,"info":"11/11/2013 at 12:15:13"},{"visible":true,"include":true,"step":"25.0","x":-15.311428571428573,"y":6.649904761904762,"z":27.005714285714287,"a95":0.99,"info":"11/11/2013 at 12:15:13"},{"visible":true,"include":true,"step":"30.0","x":-16.32095238095238,"y":10.41904761904762,"z":19.33809523809524,"a95":0.99,"info":"11/11/2013 at 12:15:13"},{"visible":false,"include":false,"step":"35.0","x":-12.28,"y":10.772380952380953,"z":11.098095238095238,"a95":0.99,"info":"11/11/2013 at 12:15:13"},{"visible":false,"include":false,"step":"40.0","x":-11.235238095238095,"y":0.04411904761904762,"z":17.415238095238095,"a95":0.99,"info":"11/11/2013 at 12:15:13"},{"visible":false,"include":false,"step":"45.0","x":-7.340095238095238,"y":0.2154095238095238,"z":9.704761904761906,"a95":0.99,"info":"11/11/2013 at 12:15:13"},{"visible":false,"include":false,"step":"50.0","x":-4.619714285714285,"y":1.1298095238095238,"z":6.733238095238095,"a95":0.99,"info":"11/11/2013 at 12:15:13"},{"visible":false,"include":false,"step":"60.0","x":-13.91904761904762,"y":12.095238095238095,"z":2.5663809523809524,"a95":0.99,"info":"11/11/2013 at 12:15:13"},{"visible":false,"include":false,"step":"70.0","x":-4.135142857142857,"y":3.551142857142857,"z":3.6160000000000005,"a95":0.99,"info":"11/11/2013 at 12:15:13"},{"visible":false,"include":false,"step":"80.0","x":-1.7962857142857143,"y":-2.3115238095238095,"z":5.7195238095238095,"a95":0.99,"info":"11/11/2013 at 12:15:13"},{"visible":false,"include":false,"step":"90.0","x":-11.791428571428572,"y":8.371333333333334,"z":1.6842857142857142,"a95":0.99,"info":"11/11/2013 at 12:15:13"},{"visible":false,"include":false,"step":"100.0","x":0.5972857142857142,"y":-5.381619047619047,"z":7.409523809523809,"a95":0.99,"info":"11/11/2013 at 12:15:13"}]},{"version":"v1.1.0","exported":"2016-11-24T14:12:01.399Z","volume":10.5,"added":"2016-11-24T14:01:36.789Z","format":"Utrecht","demagType":"Unknown","strat":"5","patch":1.1,"GEO":[{"dec":333.0118053253279,"inc":69.21276128159514,"MAD":5.433768770350596,"cm":[7.771561172376096e-16,3.4416913763379853e-15,0],"intensity":174.4139137751294,"type":"dir","forced":true,"remark":"","origin":false,"nSteps":7,"minStep":"4.0","maxStep":"30.0","steps":["4.0","8.0","12.0","16.0","20.0","25.0","30.0"],"group":"None","version":"v1.1.0"}],"TECT":[{"dec":333.0058035900698,"inc":-43.78723816804326,"MAD":5.433768770350603,"cm":[2.220446049250313e-16,1.1102230246251565e-16,4.440892098500626e-16],"intensity":174.4139137751294,"type":"dir","forced":true,"remark":"","origin":false,"nSteps":7,"minStep":"4.0","maxStep":"30.0","steps":["4.0","8.0","12.0","16.0","20.0","25.0","30.0"],"group":"None","version":"v1.1.0"}],"interpreted":true,"name":"AL 4.18B","coreAzi":308,"coreDip":36,"bedStrike":243,"bedDip":113,"data":[{"visible":true,"include":false,"step":"0.0","x":-93.30666666666667,"y":29.255238095238095,"z":144.54285714285714,"a95":0.99,"info":"11/11/2013 at 12:15:13"},{"visible":true,"include":true,"step":"4.0","x":-82.86666666666667,"y":26.972380952380952,"z":118.4,"a95":0.99,"info":"11/11/2013 at 12:15:13"},{"visible":true,"include":true,"step":"8.0","x":-60.41619047619048,"y":5.366095238095238,"z":96.53333333333333,"a95":0.99,"info":"11/11/2013 at 12:15:13"},{"visible":true,"include":true,"step":"12.0","x":-43.653333333333336,"y":16.395238095238096,"z":58.902857142857144,"a95":0.99,"info":"11/11/2013 at 12:15:13"},{"visible":true,"include":true,"step":"16.0","x":-40.23714285714286,"y":17.843809523809526,"z":42.52761904761905,"a95":0.99,"info":"11/11/2013 at 12:15:13"},{"visible":true,"include":true,"step":"20.0","x":-31.11904761904762,"y":6.454380952380952,"z":41.53238095238095,"a95":0.99,"info":"11/11/2013 at 12:15:13"},{"visible":true,"include":true,"step":"25.0","x":-16.697142857142858,"y":-0.3745809523809524,"z":29.428571428571427,"a95":0.99,"info":"11/11/2013 at 12:15:13"},{"visible":true,"include":true,"step":"30.0","x":-17.049523809523812,"y":1.469809523809524,"z":21.7,"a95":0.99,"info":"11/11/2013 at 12:15:13"},{"visible":false,"include":false,"step":"35.0","x":-19.553333333333335,"y":12.140952380952381,"z":7.75447619047619,"a95":0.99,"info":"11/11/2013 at 12:15:13"},{"visible":false,"include":false,"step":"40.0","x":-13.184761904761904,"y":-4.388571428571429,"z":17.69047619047619,"a95":0.99,"info":"11/11/2013 at 12:15:13"},{"visible":false,"include":false,"step":"45.0","x":-5.155333333333333,"y":-1.1262857142857143,"z":11.534285714285714,"a95":0.99,"info":"11/11/2013 at 12:15:13"},{"visible":false,"include":false,"step":"50.0","x":-3.292952380952381,"y":1.1436190476190475,"z":5.671047619047619,"a95":0.99,"info":"11/11/2013 at 12:15:13"},{"visible":false,"include":false,"step":"60.0","x":-15.146666666666667,"y":11.534285714285714,"z":-0.056037142857142855,"a95":0.99,"info":"11/11/2013 at 12:15:13"},{"visible":false,"include":false,"step":"70.0","x":-3.9678095238095237,"y":3.2301904761904763,"z":4.7026666666666666,"a95":0.99,"info":"11/11/2013 at 12:15:13"},{"visible":false,"include":false,"step":"80.0","x":17.106666666666666,"y":1.2915238095238095,"z":7.993809523809524,"a95":0.99,"info":"11/11/2013 at 12:15:13"},{"visible":false,"include":false,"step":"90.0","x":-7.379714285714285,"y":3.8366666666666664,"z":2.4977142857142858,"a95":0.99,"info":"11/11/2013 at 12:15:13"},{"visible":false,"include":false,"step":"100.0","x":3.3987619047619044,"y":-6.514952380952381,"z":1.3058095238095238,"a95":0.99,"info":"11/11/2013 at 12:15:13"}]}]
