# Supplementary material for: Paleomagnetic constraints on the timing and distribution of Cenozoic rotations in Central and Eastern Anatolia
Source: Copernicus journal article supplement (doi:10.5194/se-9-295-2018), 2018-03-21
Supplement: Supplementary file 2 [file se-9-295-2018-supplement.zip › se-2017-66_DATA_dir files/dir files Ulukisla/AR1.dir]

[{"version":"v1.1.0","exported":"2016-11-28T13:39:06.384Z","volume":10.5,"added":"2016-11-28T13:35:49.139Z","format":"Utrecht","demagType":"Unknown","strat":"5","patch":1.1,"GEO":[{"dec":13.112040055302202,"inc":-22.19880149060154,"MAD":3.328729829770043,"cm":[-2.6290081223123707e-13,1.4210854715202004e-14,0],"intensity":3095.2435926340922,"type":"GC","origin":false,"forced":true,"remark":"","nSteps":10,"minStep":"8.0","maxStep":"50.0","steps":["8.0","12.0","16.0","20.0","25.0","30.0","35.0","40.0","45.0","50.0"],"group":"None","version":"v1.1.0"}],"TECT":[{"dec":37.861302264142125,"inc":-59.85209792841335,"MAD":3.3287298297708885,"cm":[-8.526512829121202e-14,2.1316282072803006e-14,1.6342482922482304e-13],"intensity":3095.243592634093,"type":"GC","origin":false,"forced":true,"remark":"","nSteps":10,"minStep":"8.0","maxStep":"50.0","steps":["8.0","12.0","16.0","20.0","25.0","30.0","35.0","40.0","45.0","50.0"],"group":"None","version":"v1.1.0"}],"interpreted":true,"name":"AR 1.1","coreAzi":37,"coreDip":54,"bedStrike":259,"bedDip":45,"data":[{"visible":true,"include":false,"step":"0.0","x":-991.047619047619,"y":-1559.8095238095239,"z":-417.23809523809524,"a95":0.99,"info":"18/01/2014 at 16:35:41"},{"visible":true,"include":false,"step":"4.0","x":-570.5714285714286,"y":-1491.047619047619,"z":-624.9809523809524,"a95":0.99,"info":"18/01/2014 at 16:35:41"},{"visible":true,"include":true,"step":"8.0","x":-322.48571428571427,"y":-1231.4285714285713,"z":-1003.4285714285714,"a95":0.99,"info":"18/01/2014 at 16:35:41"},{"visible":true,"include":true,"step":"12.0","x":-182.67619047619047,"y":-1100.6666666666667,"z":-1183.7142857142858,"a95":0.99,"info":"18/01/2014 at 16:35:41"},{"visible":true,"include":true,"step":"16.0","x":-123.79047619047618,"y":-1005.1428571428571,"z":-1284.3809523809523,"a95":0.99,"info":"18/01/2014 at 16:35:41"},{"visible":true,"include":true,"step":"20.0","x":-86.30095238095238,"y":-909.4000000000001,"z":-1378.5714285714287,"a95":0.99,"info":"18/01/2014 at 16:35:41"},{"visible":true,"include":true,"step":"25.0","x":-43.43714285714285,"y":-860.0952380952381,"z":-1406,"a95":0.99,"info":"18/01/2014 at 16:35:41"},{"visible":true,"include":true,"step":"30.0","x":-30.97047619047619,"y":-804.0380952380953,"z":-1432.952380952381,"a95":0.99,"info":"18/01/2014 at 16:35:41"},{"visible":true,"include":true,"step":"35.0","x":-19.35238095238095,"y":-735.6476190476191,"z":-1449.2380952380952,"a95":0.99,"info":"18/01/2014 at 16:35:41"},{"visible":true,"include":true,"step":"40.0","x":-11.645714285714286,"y":-764.5142857142857,"z":-1443.904761904762,"a95":0.99,"info":"18/01/2014 at 16:35:41"},{"visible":true,"include":true,"step":"45.0","x":-0.8122380952380952,"y":-720.4,"z":-1410.7619047619048,"a95":0.99,"info":"18/01/2014 at 16:35:41"},{"visible":true,"include":true,"step":"50.0","x":11.658095238095237,"y":-683.6571428571428,"z":-1408.2857142857142,"a95":0.99,"info":"18/01/2014 at 16:35:41"},{"visible":true,"include":false,"step":"60.0","x":3.8198095238095235,"y":-664.5714285714286,"z":-1352.5714285714287,"a95":0.99,"info":"18/01/2014 at 16:35:41"},{"visible":true,"include":false,"step":"70.0","x":2.628761904761905,"y":-598.4,"z":-1316.3809523809523,"a95":0.99,"info":"18/01/2014 at 16:35:41"},{"visible":true,"include":false,"step":"80.0","x":103.18095238095239,"y":-577.552380952381,"z":-1229.7142857142858,"a95":0.99,"info":"18/01/2014 at 16:35:41"},{"visible":true,"include":false,"step":"90.0","x":24.361904761904764,"y":-608.4190476190475,"z":-1206.1904761904761,"a95":0.99,"info":"18/01/2014 at 16:35:41"},{"visible":true,"include":false,"step":"100.0","x":25.891428571428573,"y":-556.2095238095238,"z":-1162.7619047619048,"a95":0.99,"info":"18/01/2014 at 16:35:41"}]},{"version":"v1.1.0","exported":"2016-11-28T13:39:06.385Z","volume":10.5,"added":"2016-11-28T13:35:49.139Z","format":"Utrecht","demagType":"Unknown","strat":null,"patch":1.1,"GEO":[{"dec":258.7384214826664,"inc":-46.534093969671815,"MAD":1.6601667201750678,"cm":[-4.440892098500626e-13,2.842170943040401e-14,0],"intensity":4981.963817002579,"type":"dir","forced":true,"remark":"","origin":false,"nSteps":5,"minStep":"200","maxStep":"300","steps":["200","225","250","275","300"],"group":"None","version":"v1.1.0"}],"TECT":[{"dec":222.15725967952685,"inc":-30.72952347084214,"MAD":1.6601667201751233,"cm":[-2.7000623958883807e-13,9.947598300641403e-14,1.9895196601282805e-13],"intensity":4981.963817002579,"type":"dir","forced":true,"remark":"","origin":false,"nSteps":5,"minStep":"200","maxStep":"300","steps":["200","225","250","275","300"],"group":"None","version":"v1.1.0"}],"interpreted":true,"name":"AR 1.2","coreAzi":346,"coreDip":29,"bedStrike":259,"bedDip":45,"data":[{"visible":true,"include":false,"step":"20","x":1360.095238095238,"y":-2475.809523809524,"z":242,"a95":1.7,"info":"\"13-11-03\" at \"12:18\""},{"visible":true,"include":false,"step":"80","x":1871.047619047619,"y":-2329.5238095238096,"z":-462,"a95":1.8,"info":"\"13-11-04\" at \"08:57\""},{"visible":true,"include":false,"step":"150","x":2641.5238095238096,"y":-2551.2380952380954,"z":-1246.3809523809523,"a95":2,"info":"\"13-11-04\" at \"14:41\""},{"visible":true,"include":false,"step":"180","x":2542.285714285714,"y":-2551.2380952380954,"z":-1205.4285714285713,"a95":2.3,"info":"\"13-11-05\" at \"09:15\""},{"visible":true,"include":true,"step":"200","x":2457.3333333333335,"y":-2543.714285714286,"z":-1298.6666666666667,"a95":2.2,"info":"\"13-11-05\" at \"13:54\""},{"visible":true,"include":true,"step":"225","x":2448.4761904761904,"y":-2602.095238095238,"z":-1173.6190476190477,"a95":2.2,"info":"\"13-11-06\" at \"08:12\""},{"visible":true,"include":true,"step":"250","x":2168.9523809523807,"y":-2174.3809523809523,"z":-1072,"a95":2.2,"info":"\"13-11-06\" at \"12:45\""},{"visible":true,"include":true,"step":"275","x":1753.8095238095239,"y":-1996,"z":-807.6190476190476,"a95":2.1,"info":"\"13-11-06\" at \"16:49\""},{"visible":true,"include":true,"step":"300","x":740.8571428571429,"y":-871.1428571428571,"z":-413.14285714285717,"a95":2.3,"info":"\"13-11-07\" at \"05:26\""},{"visible":true,"include":false,"step":"320","x":-260.57142857142856,"y":182.0952380952381,"z":202.0952380952381,"a95":3.1,"info":"\"13-11-07\" at \"08:54\""},{"visible":true,"include":false,"step":"340","x":-361.14285714285717,"y":172.57142857142858,"z":175.8095238095238,"a95":3.2,"info":"\"13-11-07\" at \"14:27\""},{"visible":true,"include":false,"step":"380","x":-395.6190476190476,"y":168.28571428571428,"z":276.4761904761905,"a95":4.3,"info":"\"13-11-08\" at \"11:39\""},{"visible":true,"include":false,"step":"420","x":-395.42857142857144,"y":218.28571428571428,"z":147.8095238095238,"a95":3.7,"info":"\"13-11-08\" at \"16:44\""}]},{"version":"v1.1.0","exported":"2016-11-28T13:39:06.385Z","volume":10.5,"added":"2016-11-28T13:35:49.139Z","format":"Utrecht","demagType":"Unknown","strat":"6","patch":1.1,"GEO":[{"dec":29.545499596125694,"inc":-31.85331153401742,"MAD":14.60395286394697,"cm":[-1.4210854715202004e-14,2.842170943040401e-14,0],"intensity":5486.012009620942,"type":"GC","origin":false,"forced":true,"remark":"","nSteps":10,"minStep":"4.0","maxStep":"45.0","steps":["4.0","8.0","12.0","16.0","20.0","25.0","30.0","35.0","40.0","45.0"],"group":"None","version":"v1.1.0"}],"TECT":[{"dec":70.42791111424157,"inc":-56.05526668114764,"MAD":14.60395286394368,"cm":[-2.2737367544323206e-13,2.4158453015843406e-13,1.4210854715202004e-14],"intensity":5486.012009620943,"type":"GC","origin":false,"forced":true,"remark":"","nSteps":10,"minStep":"4.0","maxStep":"45.0","steps":["4.0","8.0","12.0","16.0","20.0","25.0","30.0","35.0","40.0","45.0"],"group":"None","version":"v1.1.0"}],"interpreted":true,"name":"AR 1.3","coreAzi":347,"coreDip":20,"bedStrike":259,"bedDip":45,"data":[{"visible":true,"include":false,"step":"0.0","x":1271.047619047619,"y":-1604.6666666666667,"z":-177.62857142857143,"a95":0.99,"info":"18/01/2014 at 16:35:41"},{"visible":true,"include":true,"step":"4.0","x":1627.6190476190477,"y":-1856.952380952381,"z":-265.31428571428575,"a95":0.99,"info":"18/01/2014 at 16:35:41"},{"visible":true,"include":true,"step":"8.0","x":1803.7142857142858,"y":-1944.952380952381,"z":-386.12380952380954,"a95":0.99,"info":"18/01/2014 at 16:35:41"},{"visible":true,"include":true,"step":"12.0","x":1928.857142857143,"y":-2016.7619047619048,"z":-458.20000000000005,"a95":0.99,"info":"18/01/2014 at 16:35:41"},{"visible":true,"include":true,"step":"16.0","x":2002.6666666666667,"y":-2063.2380952380954,"z":-543.6857142857143,"a95":0.99,"info":"18/01/2014 at 16:35:41"},{"visible":true,"include":true,"step":"20.0","x":1991.8095238095239,"y":-2087.714285714286,"z":-564.8285714285714,"a95":0.99,"info":"18/01/2014 at 16:35:41"},{"visible":true,"include":true,"step":"25.0","x":2070.9523809523807,"y":-2100.9523809523807,"z":-557.4380952380952,"a95":0.99,"info":"18/01/2014 at 16:35:41"},{"visible":true,"include":true,"step":"30.0","x":2049.1428571428573,"y":-2135.6190476190477,"z":-616.0857142857143,"a95":0.99,"info":"18/01/2014 at 16:35:41"},{"visible":true,"include":true,"step":"35.0","x":2094.9523809523807,"y":-2113.1428571428573,"z":-621.4095238095239,"a95":0.99,"info":"18/01/2014 at 16:35:41"},{"visible":true,"include":true,"step":"40.0","x":2059.1428571428573,"y":-2169.2380952380954,"z":-642.2761904761904,"a95":0.99,"info":"18/01/2014 at 16:35:41"},{"visible":true,"include":true,"step":"45.0","x":2059.5238095238096,"y":-2108.3809523809523,"z":-616.4095238095239,"a95":0.99,"info":"18/01/2014 at 16:35:41"},{"visible":true,"include":false,"step":"50.0","x":2057.2380952380954,"y":-2113.904761904762,"z":-629.4285714285714,"a95":0.99,"info":"18/01/2014 at 16:35:41"},{"visible":true,"include":false,"step":"60.0","x":2028.6666666666667,"y":-2068.285714285714,"z":-648.2857142857143,"a95":0.99,"info":"18/01/2014 at 16:35:41"},{"visible":true,"include":false,"step":"70.0","x":1974.3809523809523,"y":-2012.1904761904761,"z":-709.7619047619048,"a95":0.99,"info":"18/01/2014 at 16:35:41"},{"visible":true,"include":false,"step":"80.0","x":2087.2380952380954,"y":-2003.7142857142858,"z":-621.7428571428571,"a95":0.99,"info":"18/01/2014 at 16:35:41"},{"visible":true,"include":false,"step":"90.0","x":1897.2380952380952,"y":-1954.6666666666667,"z":-612.9809523809524,"a95":0.99,"info":"18/01/2014 at 16:35:41"},{"visible":true,"include":false,"step":"100.0","x":1891.5238095238096,"y":-1885.3333333333333,"z":-542.047619047619,"a95":0.99,"info":"18/01/2014 at 16:35:41"}]},{"version":"v1.1.0","exported":"2016-11-28T13:39:06.385Z","volume":10.5,"added":"2016-11-28T13:35:49.140Z","format":"Utrecht","demagType":"Unknown","strat":"7","patch":1.1,"GEO":[{"dec":12.497261359488562,"inc":-7.419486929383977,"MAD":5.831557356034558,"cm":[-6.838973831690964e-13,-2.842170943040401e-14,0],"intensity":7069.819627645223,"type":"GC","origin":false,"forced":true,"remark":"","nSteps":8,"minStep":"8.0","maxStep":"40.0","steps":["8.0","12.0","16.0","20.0","25.0","30.0","35.0","40.0"],"group":"None","version":"v1.1.0"}],"TECT":[{"dec":21.79375564807674,"inc":-43.11563689664573,"MAD":5.831557356023103,"cm":[-3.552713678800501e-13,2.842170943040401e-14,8.526512829121202e-14],"intensity":7069.819627645223,"type":"GC","origin":false,"forced":true,"remark":"","nSteps":8,"minStep":"8.0","maxStep":"40.0","steps":["8.0","12.0","16.0","20.0","25.0","30.0","35.0","40.0"],"group":"None","version":"v1.1.0"}],"interpreted":true,"name":"AR 1.4","coreAzi":349,"coreDip":40,"bedStrike":259,"bedDip":40,"data":[{"visible":true,"include":false,"step":"0.0","x":1495.8095238095239,"y":-2557.714285714286,"z":-318.31428571428575,"a95":0.99,"info":"18/01/2014 at 16:35:41"},{"visible":true,"include":false,"step":"4.0","x":1892,"y":-2530,"z":-566.6952380952381,"a95":0.99,"info":"18/01/2014 at 16:35:41"},{"visible":true,"include":true,"step":"8.0","x":2140.285714285714,"y":-2493.3333333333335,"z":-815.6095238095238,"a95":0.99,"info":"18/01/2014 at 16:35:41"},{"visible":true,"include":true,"step":"12.0","x":2279.1428571428573,"y":-2491.1428571428573,"z":-904.1333333333333,"a95":0.99,"info":"18/01/2014 at 16:35:41"},{"visible":true,"include":true,"step":"16.0","x":2358.5714285714284,"y":-2485.1428571428573,"z":-992.8571428571429,"a95":0.99,"info":"18/01/2014 at 16:35:41"},{"visible":true,"include":true,"step":"20.0","x":2408,"y":-2461.3333333333335,"z":-1117.047619047619,"a95":0.99,"info":"18/01/2014 at 16:35:41"},{"visible":true,"include":true,"step":"25.0","x":2452.8571428571427,"y":-2460,"z":-1123.6190476190477,"a95":0.99,"info":"18/01/2014 at 16:35:41"},{"visible":true,"include":true,"step":"30.0","x":2464.9523809523807,"y":-2431.2380952380954,"z":-1197.904761904762,"a95":0.99,"info":"18/01/2014 at 16:35:41"},{"visible":true,"include":true,"step":"35.0","x":2487.4285714285716,"y":-2417.6190476190477,"z":-1206.6666666666667,"a95":0.99,"info":"18/01/2014 at 16:35:41"},{"visible":true,"include":true,"step":"40.0","x":2488.5714285714284,"y":-2453.3333333333335,"z":-1205.904761904762,"a95":0.99,"info":"18/01/2014 at 16:35:41"},{"visible":true,"include":false,"step":"45.0","x":2497.5238095238096,"y":-2427.6190476190477,"z":-1228.857142857143,"a95":0.99,"info":"18/01/2014 at 16:35:41"},{"visible":true,"include":false,"step":"50.0","x":2489.714285714286,"y":-2372.3809523809523,"z":-1271.2380952380952,"a95":0.99,"info":"18/01/2014 at 16:35:41"},{"visible":true,"include":false,"step":"60.0","x":2463.714285714286,"y":-2361.5238095238096,"z":-1212.952380952381,"a95":0.99,"info":"18/01/2014 at 16:35:41"},{"visible":true,"include":false,"step":"70.0","x":2391.3333333333335,"y":-2311.0476190476193,"z":-1254.952380952381,"a95":0.99,"info":"18/01/2014 at 16:35:41"},{"visible":true,"include":false,"step":"80.0","x":2549.2380952380954,"y":-2244,"z":-1202.952380952381,"a95":0.99,"info":"18/01/2014 at 16:35:41"},{"visible":true,"include":false,"step":"90.0","x":2291.3333333333335,"y":-2217.6190476190477,"z":-1159.3333333333333,"a95":0.99,"info":"18/01/2014 at 16:35:41"},{"visible":true,"include":false,"step":"100.0","x":2292.190476190476,"y":-2153.5238095238096,"z":-1078,"a95":0.99,"info":"18/01/2014 at 16:35:41"}]},{"version":"v1.1.0","exported":"2016-11-28T13:39:06.385Z","volume":10.5,"added":"2016-11-28T13:35:49.141Z","format":"Utrecht","demagType":"Unknown","strat":null,"patch":1.1,"GEO":[{"dec":259.4893502953214,"inc":-46.838018181257475,"MAD":1.2600433281094932,"cm":[-1.616484723854228e-13,3.197442310920451e-14,0],"intensity":5475.12914187249,"type":"dir","forced":true,"remark":"","origin":false,"nSteps":4,"minStep":"250","maxStep":"320","steps":["250","275","300","320"],"group":"None","version":"v1.1.0"}],"TECT":[{"dec":222.84595265133697,"inc":-29.58585241735573,"MAD":1.2600433281096568,"cm":[3.694822225952521e-13,-3.9612757518625585e-13,0],"intensity":5475.129141872491,"type":"dir","forced":true,"remark":"","origin":false,"nSteps":4,"minStep":"250","maxStep":"320","steps":["250","275","300","320"],"group":"None","version":"v1.1.0"}],"interpreted":true,"name":"AR 1.5","coreAzi":346,"coreDip":15,"bedStrike":261,"bedDip":46,"data":[{"visible":true,"include":false,"step":"20","x":3875.904761904762,"y":-4091.5238095238096,"z":-139.14285714285714,"a95":1.5,"info":"\"13-11-03\" at \"12:22\""},{"visible":true,"include":false,"step":"80","x":4236.952380952381,"y":-4362.190476190476,"z":-634,"a95":1.6,"info":"\"13-11-04\" at \"09:05\""},{"visible":true,"include":false,"step":"150","x":4635.142857142857,"y":-4604.761904761905,"z":-1083.6190476190477,"a95":1.8,"info":"\"13-11-04\" at \"14:46\""},{"visible":true,"include":false,"step":"180","x":4658,"y":-4491.9047619047615,"z":-1083.7142857142858,"a95":1.9,"info":"\"13-11-05\" at \"09:21\""},{"visible":true,"include":false,"step":"200","x":4404.666666666667,"y":-4705.619047619048,"z":-1222.4761904761904,"a95":2,"info":"\"13-11-05\" at \"13:56\""},{"visible":true,"include":false,"step":"225","x":4584.190476190476,"y":-4539.428571428572,"z":-1114.952380952381,"a95":1.9,"info":"\"13-11-06\" at \"08:17\""},{"visible":true,"include":true,"step":"250","x":4190,"y":-3951.714285714286,"z":-814.6666666666666,"a95":2,"info":"\"13-11-06\" at \"12:48\""},{"visible":true,"include":true,"step":"275","x":3693.714285714286,"y":-3553.4285714285716,"z":-851.1428571428571,"a95":1.8,"info":"\"13-11-06\" at \"16:52\""},{"visible":true,"include":true,"step":"300","x":1830.095238095238,"y":-1818.7619047619048,"z":-331.14285714285717,"a95":2.2,"info":"\"13-11-07\" at \"05:29\""},{"visible":true,"include":true,"step":"320","x":-318.2857142857143,"y":145.52380952380952,"z":107.71428571428571,"a95":2.4,"info":"\"13-11-07\" at \"09:00\""},{"visible":true,"include":false,"step":"340","x":-319.5238095238095,"y":221.9047619047619,"z":74.19047619047619,"a95":2.8,"info":"\"13-11-07\" at \"14:30\""},{"visible":true,"include":false,"step":"380","x":-416.76190476190476,"y":182,"z":177.8095238095238,"a95":4.2,"info":"\"13-11-08\" at \"11:41\""},{"visible":true,"include":false,"step":"420","x":-336.76190476190476,"y":178.0952380952381,"z":67.14285714285714,"a95":3.3,"info":"\"13-11-08\" at \"16:47\""}]},{"version":"v1.1.0","exported":"2016-11-28T13:39:06.385Z","volume":10.5,"added":"2016-11-28T13:35:49.141Z","format":"Utrecht","demagType":"Unknown","strat":"8","patch":1.1,"GEO":[{"dec":37.80891531845077,"inc":-34.216685230468876,"MAD":3.2094120959955914,"cm":[-3.3928415632544784e-13,-1.4210854715202004e-14,0],"intensity":5859.093819744777,"type":"GC","origin":false,"forced":true,"remark":"","nSteps":11,"minStep":"8.0","maxStep":"60.0","steps":["8.0","12.0","16.0","20.0","25.0","30.0","35.0","40.0","45.0","50.0","60.0"],"group":"None","version":"v1.1.0"}],"TECT":[{"dec":82.07820624546588,"inc":-52.91556586628379,"MAD":3.20941209599356,"cm":[-6.536993168992922e-13,1.2789769243681803e-13,3.836930773104541e-13],"intensity":5859.093819744777,"type":"GC","origin":false,"forced":true,"remark":"","nSteps":11,"minStep":"8.0","maxStep":"60.0","steps":["8.0","12.0","16.0","20.0","25.0","30.0","35.0","40.0","45.0","50.0","60.0"],"group":"None","version":"v1.1.0"}],"interpreted":true,"name":"AR 1.6","coreAzi":345,"coreDip":14,"bedStrike":261,"bedDip":46,"data":[{"visible":true,"include":false,"step":"0.0","x":145.85714285714286,"y":-1582.6666666666667,"z":2378.5714285714284,"a95":0.99,"info":"18/01/2014 at 16:35:41"},{"visible":true,"include":false,"step":"4.0","x":1094.4761904761904,"y":-1939.6190476190477,"z":1478.4761904761904,"a95":0.99,"info":"18/01/2014 at 16:35:41"},{"visible":true,"include":true,"step":"8.0","x":1616.6666666666667,"y":-2106.3809523809523,"z":842.5904761904762,"a95":0.99,"info":"18/01/2014 at 16:35:41"},{"visible":true,"include":true,"step":"12.0","x":1909.8095238095239,"y":-2218.5714285714284,"z":537.0761904761905,"a95":0.99,"info":"18/01/2014 at 16:35:41"},{"visible":true,"include":true,"step":"16.0","x":2101.4285714285716,"y":-2272.190476190476,"z":303.74285714285713,"a95":0.99,"info":"18/01/2014 at 16:35:41"},{"visible":true,"include":true,"step":"20.0","x":2206.9523809523807,"y":-2275.809523809524,"z":146.22857142857143,"a95":0.99,"info":"18/01/2014 at 16:35:41"},{"visible":true,"include":true,"step":"25.0","x":2302.5714285714284,"y":-2317.0476190476193,"z":43.53047619047619,"a95":0.99,"info":"18/01/2014 at 16:35:41"},{"visible":true,"include":true,"step":"30.0","x":2328.4761904761904,"y":-2302.9523809523807,"z":-105.22857142857144,"a95":0.99,"info":"18/01/2014 at 16:35:41"},{"visible":true,"include":true,"step":"35.0","x":2347.1428571428573,"y":-2280.285714285714,"z":-116.70476190476191,"a95":0.99,"info":"18/01/2014 at 16:35:41"},{"visible":true,"include":true,"step":"40.0","x":2315.0476190476193,"y":-2294.7619047619046,"z":-177.26666666666665,"a95":0.99,"info":"18/01/2014 at 16:35:41"},{"visible":true,"include":true,"step":"45.0","x":2327.809523809524,"y":-2291.2380952380954,"z":-228.0095238095238,"a95":0.99,"info":"18/01/2014 at 16:35:41"},{"visible":true,"include":true,"step":"50.0","x":2300,"y":-2221.714285714286,"z":-238.04761904761904,"a95":0.99,"info":"18/01/2014 at 16:35:41"},{"visible":true,"include":true,"step":"60.0","x":2349.2380952380954,"y":-2175.1428571428573,"z":-323.8095238095238,"a95":0.99,"info":"18/01/2014 at 16:35:41"},{"visible":true,"include":false,"step":"70.0","x":2224.7619047619046,"y":-2158.095238095238,"z":-383.6952380952381,"a95":0.99,"info":"18/01/2014 at 16:35:41"},{"visible":true,"include":false,"step":"80.0","x":2347.809523809524,"y":-2046.5714285714287,"z":-324.18095238095236,"a95":0.99,"info":"18/01/2014 at 16:35:41"},{"visible":true,"include":false,"step":"90.0","x":2127.809523809524,"y":-1908.1904761904761,"z":-245.9047619047619,"a95":0.99,"info":"18/01/2014 at 16:35:41"},{"visible":true,"include":false,"step":"100.0","x":2083.6190476190477,"y":-1904.5714285714287,"z":-306.6380952380952,"a95":0.99,"info":"18/01/2014 at 16:35:41"}]},{"version":"v1.1.0","exported":"2016-11-28T13:39:06.385Z","volume":10.5,"added":"2016-11-28T13:35:49.142Z","format":"Utrecht","demagType":"Unknown","strat":"1","patch":1.1,"GEO":[{"dec":93.28557329312304,"inc":-40.458094153537914,"MAD":15.713231881582853,"cm":[-1.9184653865522705e-13,-2.842170943040401e-14,0],"intensity":4541.990606394011,"type":"GC","origin":false,"forced":true,"remark":"","nSteps":6,"minStep":"8.0","maxStep":"30.0","steps":["8.0","12.0","16.0","20.0","25.0","30.0"],"group":"None","version":"v1.1.0"}],"TECT":[{"dec":118.46223424341673,"inc":-18.96428118108986,"MAD":15.7132318815836,"cm":[-1.4210854715202004e-13,-7.105427357601002e-14,2.7000623958883807e-13],"intensity":4541.99060639401,"type":"GC","origin":false,"forced":true,"remark":"","nSteps":6,"minStep":"8.0","maxStep":"30.0","steps":["8.0","12.0","16.0","20.0","25.0","30.0"],"group":"None","version":"v1.1.0"}],"interpreted":true,"name":"AR 1.7","coreAzi":347,"coreDip":38,"bedStrike":260,"bedDip":46,"data":[{"visible":true,"include":false,"step":"0.0","x":1432.857142857143,"y":-1180,"z":-426.3619047619048,"a95":0.99,"info":"18/01/2014 at 22:11:10"},{"visible":true,"include":false,"step":"4.0","x":1504.7619047619048,"y":-1356,"z":-627.5619047619048,"a95":0.99,"info":"18/01/2014 at 22:11:10"},{"visible":true,"include":true,"step":"8.0","x":1485.5238095238096,"y":-1429.904761904762,"z":-862.7714285714286,"a95":0.99,"info":"18/01/2014 at 22:11:10"},{"visible":true,"include":true,"step":"12.0","x":1404.1904761904761,"y":-1509.047619047619,"z":-924.0380952380953,"a95":0.99,"info":"18/01/2014 at 22:11:10"},{"visible":true,"include":true,"step":"16.0","x":1503.2380952380952,"y":-1598.3809523809523,"z":-1092,"a95":0.99,"info":"18/01/2014 at 22:11:10"},{"visible":true,"include":true,"step":"20.0","x":1458.857142857143,"y":-1605.3333333333333,"z":-1105.6190476190477,"a95":0.99,"info":"18/01/2014 at 22:11:10"},{"visible":true,"include":true,"step":"25.0","x":1468.095238095238,"y":-1656.952380952381,"z":-1211.3333333333333,"a95":0.99,"info":"18/01/2014 at 22:11:10"},{"visible":true,"include":true,"step":"30.0","x":1297.5238095238096,"y":-1579.6190476190477,"z":-1093.5238095238096,"a95":0.99,"info":"18/01/2014 at 22:11:10"},{"visible":true,"include":false,"step":"35.0","x":1500.1904761904761,"y":-1489.5238095238096,"z":-999.3333333333334,"a95":0.99,"info":"18/01/2014 at 22:11:10"},{"visible":true,"include":false,"step":"40.0","x":1527.142857142857,"y":-1541.7142857142858,"z":-1051.8095238095239,"a95":0.99,"info":"18/01/2014 at 22:11:10"},{"visible":true,"include":false,"step":"45.0","x":1605.6190476190477,"y":-1521.047619047619,"z":-1050.4761904761904,"a95":0.99,"info":"18/01/2014 at 22:11:10"},{"visible":true,"include":false,"step":"50.0","x":1522.1904761904761,"y":-1597.142857142857,"z":-1097.5238095238096,"a95":0.99,"info":"18/01/2014 at 22:11:10"},{"visible":true,"include":false,"step":"60.0","x":1662.5714285714287,"y":-1435.8095238095239,"z":-988.8571428571429,"a95":0.99,"info":"18/01/2014 at 22:11:10"},{"visible":true,"include":false,"step":"70.0","x":1529.142857142857,"y":-1402.3809523809523,"z":-1141.5238095238096,"a95":0.99,"info":"18/01/2014 at 22:11:10"},{"visible":true,"include":false,"step":"80.0","x":1468.7619047619048,"y":-1400.7619047619048,"z":-1093.047619047619,"a95":0.99,"info":"18/01/2014 at 22:11:10"},{"visible":true,"include":false,"step":"90.0","x":1429.4285714285713,"y":-1421.3333333333333,"z":-780.1428571428571,"a95":0.99,"info":"18/01/2014 at 22:11:10"},{"visible":true,"include":false,"step":"100.0","x":1425.5238095238096,"y":-1295.2380952380952,"z":-910.847619047619,"a95":0.99,"info":"18/01/2014 at 22:11:10"}]},{"version":"v1.1.0","exported":"2016-11-28T13:39:06.385Z","volume":10.5,"added":"2016-11-28T13:35:49.144Z","format":"Utrecht","demagType":"Unknown","strat":"2","patch":1.1,"GEO":[{"dec":261.8204481040787,"inc":-45.97986695070734,"MAD":2.9201275900739807,"cm":[-8.881784197001252e-14,8.526512829121202e-14,0],"intensity":6462.537461393109,"type":"dir","forced":true,"remark":"","origin":false,"nSteps":8,"minStep":"40.0","maxStep":"100.0","steps":["40.0","45.0","50.0","60.0","70.0","80.0","90.0","100.0"],"group":"None","version":"v1.1.0"}],"TECT":[{"dec":224.14542381002727,"inc":-31.024573276440226,"MAD":2.9201275900740584,"cm":[-1.5631940186722204e-13,-1.7053025658242404e-13,3.126388037344441e-13],"intensity":6462.537461393109,"type":"dir","forced":true,"remark":"","origin":false,"nSteps":8,"minStep":"40.0","maxStep":"100.0","steps":["40.0","45.0","50.0","60.0","70.0","80.0","90.0","100.0"],"group":"None","version":"v1.1.0"}],"interpreted":true,"name":"AR 1.8","coreAzi":342,"coreDip":42,"bedStrike":260,"bedDip":46,"data":[{"visible":true,"include":false,"step":"0.0","x":1828,"y":-1635.904761904762,"z":-724.2476190476191,"a95":0.99,"info":"18/01/2014 at 22:11:10"},{"visible":true,"include":false,"step":"4.0","x":2049.809523809524,"y":-2076.5714285714284,"z":-1033.6190476190477,"a95":0.99,"info":"18/01/2014 at 22:11:10"},{"visible":true,"include":false,"step":"8.0","x":2166.3809523809523,"y":-2054.4761904761904,"z":-1210.2857142857142,"a95":0.99,"info":"18/01/2014 at 22:11:10"},{"visible":true,"include":false,"step":"12.0","x":2163.3333333333335,"y":-2144.190476190476,"z":-1219.8095238095239,"a95":0.99,"info":"18/01/2014 at 22:11:10"},{"visible":true,"include":false,"step":"16.0","x":2241.6190476190477,"y":-2269.5238095238096,"z":-1282.2857142857142,"a95":0.99,"info":"18/01/2014 at 22:11:10"},{"visible":true,"include":false,"step":"20.0","x":2144.7619047619046,"y":-2337.3333333333335,"z":-1309.3333333333333,"a95":0.99,"info":"18/01/2014 at 22:11:10"},{"visible":true,"include":false,"step":"25.0","x":1943.047619047619,"y":-2464.190476190476,"z":-1192,"a95":0.99,"info":"18/01/2014 at 22:11:10"},{"visible":true,"include":false,"step":"30.0","x":2095.904761904762,"y":-2459.714285714286,"z":-1388,"a95":0.99,"info":"18/01/2014 at 22:11:10"},{"visible":true,"include":false,"step":"35.0","x":2243.1428571428573,"y":-2382,"z":-1248.2857142857142,"a95":0.99,"info":"18/01/2014 at 22:11:10"},{"visible":true,"include":true,"step":"40.0","x":1984.952380952381,"y":-2348.7619047619046,"z":-1212.095238095238,"a95":0.99,"info":"18/01/2014 at 22:11:10"},{"visible":true,"include":true,"step":"45.0","x":2053.1428571428573,"y":-2394.6666666666665,"z":-1223.8095238095239,"a95":0.99,"info":"18/01/2014 at 22:11:10"},{"visible":true,"include":true,"step":"50.0","x":2024.952380952381,"y":-2383.6190476190477,"z":-1354,"a95":0.99,"info":"18/01/2014 at 22:11:10"},{"visible":true,"include":true,"step":"60.0","x":2270.8571428571427,"y":-2500.095238095238,"z":-1449.4285714285713,"a95":0.99,"info":"18/01/2014 at 22:11:10"},{"visible":true,"include":true,"step":"70.0","x":2127.5238095238096,"y":-2301.714285714286,"z":-1345.8095238095239,"a95":0.99,"info":"18/01/2014 at 22:11:10"},{"visible":true,"include":true,"step":"80.0","x":1888,"y":-2145.0476190476193,"z":-1471.3333333333333,"a95":0.99,"info":"18/01/2014 at 22:11:10"},{"visible":true,"include":true,"step":"90.0","x":2090.190476190476,"y":-2124.285714285714,"z":-1501.6190476190477,"a95":0.99,"info":"18/01/2014 at 22:11:10"},{"visible":true,"include":true,"step":"100.0","x":2046.5714285714287,"y":-2194.3809523809523,"z":-994.952380952381,"a95":0.99,"info":"18/01/2014 at 22:11:10"}]},{"version":"v1.1.0","exported":"2016-11-28T13:39:06.385Z","volume":10.5,"added":"2016-11-28T13:35:49.144Z","format":"Utrecht","demagType":"Unknown","strat":"3","patch":1.1,"GEO":[{"dec":33.49768590360088,"inc":-27.59718550955936,"MAD":4.058893468493419,"cm":[-6.661338147750939e-13,2.842170943040401e-14,0],"intensity":6491.530709213516,"type":"GC","origin":false,"forced":true,"remark":"","nSteps":9,"minStep":"4.0","maxStep":"40.0","steps":["4.0","8.0","12.0","16.0","20.0","25.0","30.0","35.0","40.0"],"group":"None","version":"v1.1.0"}],"TECT":[{"dec":69.47454195047379,"inc":-51.65086431083003,"MAD":4.058893468487122,"cm":[-3.410605131648481e-13,-2.2737367544323206e-13,4.973799150320701e-13],"intensity":6491.530709213516,"type":"GC","origin":false,"forced":true,"remark":"","nSteps":9,"minStep":"4.0","maxStep":"40.0","steps":["4.0","8.0","12.0","16.0","20.0","25.0","30.0","35.0","40.0"],"group":"None","version":"v1.1.0"}],"interpreted":true,"name":"AR 1.9","coreAzi":321,"coreDip":17,"bedStrike":260,"bedDip":46,"data":[{"visible":true,"include":false,"step":"0.0","x":1762.095238095238,"y":-1232.7619047619048,"z":1020.1904761904761,"a95":0.99,"info":"18/01/2014 at 22:11:10"},{"visible":true,"include":true,"step":"4.0","x":2333.5238095238096,"y":-1551.4285714285713,"z":790.5999999999999,"a95":0.99,"info":"18/01/2014 at 22:11:10"},{"visible":true,"include":true,"step":"8.0","x":2655.1428571428573,"y":-1727.3333333333333,"z":605.1238095238095,"a95":0.99,"info":"18/01/2014 at 22:11:10"},{"visible":true,"include":true,"step":"12.0","x":2858.3809523809523,"y":-1843.3333333333333,"z":511.6761904761905,"a95":0.99,"info":"18/01/2014 at 22:11:10"},{"visible":true,"include":true,"step":"16.0","x":3014.4761904761904,"y":-1914.1904761904761,"z":466.3809523809524,"a95":0.99,"info":"18/01/2014 at 22:11:10"},{"visible":true,"include":true,"step":"20.0","x":3064.7619047619046,"y":-1929.047619047619,"z":402.02857142857147,"a95":0.99,"info":"18/01/2014 at 22:11:10"},{"visible":true,"include":true,"step":"25.0","x":3051.809523809524,"y":-1909.3333333333333,"z":406.6285714285715,"a95":0.99,"info":"18/01/2014 at 22:11:10"},{"visible":true,"include":true,"step":"30.0","x":3080.8571428571427,"y":-1956.857142857143,"z":367.5238095238095,"a95":0.99,"info":"18/01/2014 at 22:11:10"},{"visible":true,"include":true,"step":"35.0","x":3095.5238095238096,"y":-1961.8095238095239,"z":295.7142857142857,"a95":0.99,"info":"18/01/2014 at 22:11:10"},{"visible":true,"include":true,"step":"40.0","x":3021.809523809524,"y":-1934.857142857143,"z":352.2857142857143,"a95":0.99,"info":"18/01/2014 at 22:11:10"},{"visible":true,"include":false,"step":"45.0","x":3125.4285714285716,"y":-1949.6190476190477,"z":271.74285714285713,"a95":0.99,"info":"18/01/2014 at 22:11:10"},{"visible":true,"include":false,"step":"50.0","x":3073.3333333333335,"y":-1887.142857142857,"z":204.77142857142857,"a95":0.99,"info":"18/01/2014 at 22:11:10"},{"visible":true,"include":false,"step":"60.0","x":2985.3333333333335,"y":-1896.095238095238,"z":304.5333333333333,"a95":0.99,"info":"18/01/2014 at 22:11:10"},{"visible":true,"include":false,"step":"70.0","x":2993.2380952380954,"y":-1918.4761904761904,"z":197.45714285714288,"a95":0.99,"info":"18/01/2014 at 22:11:10"},{"visible":true,"include":false,"step":"80.0","x":2716.5714285714284,"y":-1855.6190476190477,"z":242.71428571428572,"a95":0.99,"info":"18/01/2014 at 22:11:10"},{"visible":true,"include":false,"step":"90.0","x":2844.9523809523807,"y":-1830.095238095238,"z":237.13333333333335,"a95":0.99,"info":"18/01/2014 at 22:11:10"},{"visible":true,"include":false,"step":"100.0","x":2749.0476190476193,"y":-1690.952380952381,"z":189.77142857142857,"a95":0.99,"info":"18/01/2014 at 22:11:10"}]},{"version":"v1.1.0","exported":"2016-11-28T13:39:06.385Z","volume":10.5,"added":"2016-11-28T13:35:49.144Z","format":"Utrecht","demagType":"Unknown","strat":"4","patch":1.1,"GEO":[{"dec":264.7831952089109,"inc":-52.48288685347786,"MAD":1.9189385811475368,"cm":[-1.7763568394002505e-13,2.842170943040401e-14,0],"intensity":5518.945779445797,"type":"dir","forced":true,"remark":"","origin":false,"nSteps":8,"minStep":"8.0","maxStep":"40.0","steps":["8.0","12.0","16.0","20.0","25.0","30.0","35.0","40.0"],"group":"None","version":"v1.1.0"}],"TECT":[{"dec":218.58675067565144,"inc":-35.98068476343983,"MAD":1.9189385811476374,"cm":[-3.979039320256561e-13,5.258016244624741e-13,1.4210854715202004e-14],"intensity":5518.945779445798,"type":"dir","forced":true,"remark":"","origin":false,"nSteps":8,"minStep":"8.0","maxStep":"40.0","steps":["8.0","12.0","16.0","20.0","25.0","30.0","35.0","40.0"],"group":"None","version":"v1.1.0"}],"interpreted":true,"name":"AR 1.10","coreAzi":310,"coreDip":20,"bedStrike":260,"bedDip":46,"data":[{"visible":true,"include":false,"step":"0.0","x":1911.142857142857,"y":-827.9047619047619,"z":585.0761904761905,"a95":0.99,"info":"18/01/2014 at 22:11:10"},{"visible":true,"include":false,"step":"4.0","x":2200.5714285714284,"y":-1016.8571428571429,"z":549.9333333333334,"a95":0.99,"info":"18/01/2014 at 22:11:10"},{"visible":true,"include":true,"step":"8.0","x":2356.285714285714,"y":-1082,"z":457.3238095238095,"a95":0.99,"info":"18/01/2014 at 22:11:10"},{"visible":true,"include":true,"step":"12.0","x":2397.714285714286,"y":-1121.3333333333333,"z":397.79999999999995,"a95":0.99,"info":"18/01/2014 at 22:11:10"},{"visible":true,"include":true,"step":"16.0","x":2432.9523809523807,"y":-1182.5714285714287,"z":427.8095238095238,"a95":0.99,"info":"18/01/2014 at 22:11:10"},{"visible":true,"include":true,"step":"20.0","x":2480.9523809523807,"y":-1183.5238095238096,"z":389.81904761904764,"a95":0.99,"info":"18/01/2014 at 22:11:10"},{"visible":true,"include":true,"step":"25.0","x":2453.5238095238096,"y":-1278.5714285714287,"z":393.72380952380956,"a95":0.99,"info":"18/01/2014 at 22:11:10"},{"visible":true,"include":true,"step":"30.0","x":2544.190476190476,"y":-1345.2380952380952,"z":331.15238095238095,"a95":0.99,"info":"18/01/2014 at 22:11:10"},{"visible":true,"include":true,"step":"35.0","x":2657.5238095238096,"y":-1208.857142857143,"z":277.3047619047619,"a95":0.99,"info":"18/01/2014 at 22:11:10"},{"visible":true,"include":true,"step":"40.0","x":2592.9523809523807,"y":-1243.3333333333333,"z":288.752380952381,"a95":0.99,"info":"18/01/2014 at 22:11:10"},{"visible":true,"include":false,"step":"45.0","x":2762.095238095238,"y":-1263.3333333333333,"z":275.23809523809524,"a95":0.99,"info":"18/01/2014 at 22:11:10"},{"visible":true,"include":false,"step":"50.0","x":2637.0476190476193,"y":-1205.5238095238096,"z":200.9809523809524,"a95":0.99,"info":"18/01/2014 at 22:11:10"},{"visible":true,"include":false,"step":"60.0","x":2596.7619047619046,"y":-1320.2857142857142,"z":230.14285714285714,"a95":0.99,"info":"18/01/2014 at 22:11:10"},{"visible":true,"include":false,"step":"70.0","x":2635.809523809524,"y":-1092,"z":280.81904761904764,"a95":0.99,"info":"18/01/2014 at 22:11:10"},{"visible":true,"include":false,"step":"80.0","x":2601.4285714285716,"y":-1168.1904761904761,"z":163.59047619047618,"a95":0.99,"info":"18/01/2014 at 22:11:10"},{"visible":true,"include":false,"step":"90.0","x":2638.4761904761904,"y":-1158.3809523809523,"z":264.83809523809526,"a95":0.99,"info":"18/01/2014 at 22:11:10"},{"visible":true,"include":false,"step":"100.0","x":2435.4285714285716,"y":-1092.5714285714287,"z":214.1904761904762,"a95":0.99,"info":"18/01/2014 at 22:11:10"}]},{"version":"v1.1.0","exported":"2016-11-28T13:39:06.385Z","volume":10.5,"added":"2016-11-28T13:35:49.145Z","format":"Utrecht","demagType":"Unknown","strat":"5","patch":1.1,"GEO":[{"dec":41.568564060155154,"inc":-35.64490627117289,"MAD":18.48893202173166,"cm":[-5.169198402654729e-13,0,0],"intensity":4726.413529926578,"type":"GC","origin":false,"forced":true,"remark":"","nSteps":9,"minStep":"4.0","maxStep":"40.0","steps":["4.0","8.0","12.0","16.0","20.0","25.0","30.0","35.0","40.0"],"group":"None","version":"v1.1.0"}],"TECT":[{"dec":86.12527994248325,"inc":-50.19012413939837,"MAD":18.488932021732523,"cm":[-4.263256414560601e-13,2.7000623958883807e-13,8.526512829121202e-14],"intensity":4726.413529926577,"type":"GC","origin":false,"forced":true,"remark":"","nSteps":9,"minStep":"4.0","maxStep":"40.0","steps":["4.0","8.0","12.0","16.0","20.0","25.0","30.0","35.0","40.0"],"group":"None","version":"v1.1.0"}],"interpreted":true,"name":"AR 1.11","coreAzi":347,"coreDip":38,"bedStrike":260,"bedDip":46,"data":[{"visible":true,"include":false,"step":"0.0","x":1195.7142857142858,"y":-1476.2857142857142,"z":222.0095238095238,"a95":0.99,"info":"18/01/2014 at 22:11:10"},{"visible":true,"include":true,"step":"4.0","x":1372.7619047619048,"y":-1632.2857142857142,"z":-152.54285714285714,"a95":0.99,"info":"18/01/2014 at 22:11:10"},{"visible":true,"include":true,"step":"8.0","x":1478.6666666666667,"y":-1661.5238095238096,"z":-455.7904761904762,"a95":0.99,"info":"18/01/2014 at 22:11:10"},{"visible":true,"include":true,"step":"12.0","x":1604.7619047619048,"y":-1752.095238095238,"z":-572.1428571428571,"a95":0.99,"info":"18/01/2014 at 22:11:10"},{"visible":true,"include":true,"step":"16.0","x":1665.4285714285713,"y":-1784.7619047619048,"z":-657.2666666666667,"a95":0.99,"info":"18/01/2014 at 22:11:10"},{"visible":true,"include":true,"step":"20.0","x":1607.7142857142858,"y":-1786,"z":-738.9714285714285,"a95":0.99,"info":"18/01/2014 at 22:11:10"},{"visible":true,"include":true,"step":"25.0","x":1642.5714285714287,"y":-1844.5714285714287,"z":-772.2095238095238,"a95":0.99,"info":"18/01/2014 at 22:11:10"},{"visible":true,"include":true,"step":"30.0","x":1703.6190476190477,"y":-1848.857142857143,"z":-814.2476190476191,"a95":0.99,"info":"18/01/2014 at 22:11:10"},{"visible":true,"include":true,"step":"35.0","x":1758.095238095238,"y":-1905.904761904762,"z":-867.4761904761905,"a95":0.99,"info":"18/01/2014 at 22:11:10"},{"visible":true,"include":true,"step":"40.0","x":1534.095238095238,"y":-1942,"z":-902.7523809523809,"a95":0.99,"info":"18/01/2014 at 22:11:10"},{"visible":true,"include":false,"step":"45.0","x":1654.4761904761904,"y":-1748.7619047619048,"z":-881.8190476190476,"a95":0.99,"info":"18/01/2014 at 22:11:10"},{"visible":true,"include":false,"step":"50.0","x":1683.5238095238096,"y":-1846,"z":-1011.8095238095239,"a95":0.99,"info":"18/01/2014 at 22:11:10"},{"visible":true,"include":false,"step":"60.0","x":1625.047619047619,"y":-1815.142857142857,"z":-937.3238095238095,"a95":0.99,"info":"18/01/2014 at 22:11:10"},{"visible":true,"include":false,"step":"70.0","x":1584.7619047619048,"y":-1808,"z":-979.2380952380952,"a95":0.99,"info":"18/01/2014 at 22:11:10"},{"visible":true,"include":false,"step":"80.0","x":1514.857142857143,"y":-1858.857142857143,"z":-1010.2857142857143,"a95":0.99,"info":"18/01/2014 at 22:11:10"},{"visible":true,"include":false,"step":"90.0","x":1364,"y":-1501.7142857142858,"z":-934.8380952380952,"a95":0.99,"info":"18/01/2014 at 22:11:10"},{"visible":true,"include":false,"step":"100.0","x":1487.2380952380952,"y":-1524.095238095238,"z":-827.4571428571428,"a95":0.99,"info":"18/01/2014 at 22:11:10"}]},{"version":"v1.1.0","exported":"2016-11-28T13:39:06.385Z","volume":10.5,"added":"2016-11-28T13:35:49.145Z","format":"Utrecht","demagType":"Unknown","strat":"6","patch":1.1,"GEO":[{"dec":35.550681527686436,"inc":-28.03462504129188,"MAD":13.363394190750281,"cm":[-2.859934511434403e-13,-3.552713678800501e-14,0],"intensity":3577.314788403279,"type":"GC","origin":false,"forced":true,"remark":"","nSteps":12,"minStep":"4.0","maxStep":"60.0","steps":["4.0","8.0","12.0","16.0","20.0","25.0","30.0","35.0","40.0","45.0","50.0","60.0"],"group":"None","version":"v1.1.0"}],"TECT":[{"dec":71.75705655880074,"inc":-50.45494070376905,"MAD":13.363394190750098,"cm":[-1.1368683772161603e-13,2.842170943040401e-14,9.237055564881302e-14],"intensity":3577.314788403279,"type":"GC","origin":false,"forced":true,"remark":"","nSteps":12,"minStep":"4.0","maxStep":"60.0","steps":["4.0","8.0","12.0","16.0","20.0","25.0","30.0","35.0","40.0","45.0","50.0","60.0"],"group":"None","version":"v1.1.0"}],"interpreted":true,"name":"AR 1.12","coreAzi":340,"coreDip":20,"bedStrike":260,"bedDip":46,"data":[{"visible":true,"include":false,"step":"0.0","x":953.5238095238095,"y":-1009.8095238095239,"z":838.742857142857,"a95":0.99,"info":"18/01/2014 at 22:11:10"},{"visible":true,"include":true,"step":"4.0","x":1168.6666666666667,"y":-1167.047619047619,"z":536.4857142857143,"a95":0.99,"info":"18/01/2014 at 22:11:10"},{"visible":true,"include":true,"step":"8.0","x":1278.095238095238,"y":-1238.4761904761904,"z":354.49523809523805,"a95":0.99,"info":"18/01/2014 at 22:11:10"},{"visible":true,"include":true,"step":"12.0","x":1354.7619047619048,"y":-1244.952380952381,"z":186.23809523809524,"a95":0.99,"info":"18/01/2014 at 22:11:10"},{"visible":true,"include":true,"step":"16.0","x":1386,"y":-1267.047619047619,"z":89.39333333333333,"a95":0.99,"info":"18/01/2014 at 22:11:10"},{"visible":true,"include":true,"step":"20.0","x":1505.047619047619,"y":-1276.952380952381,"z":10.292380952380952,"a95":0.99,"info":"18/01/2014 at 22:11:10"},{"visible":true,"include":true,"step":"25.0","x":1490.4761904761904,"y":-1280.3809523809523,"z":-30.626666666666665,"a95":0.99,"info":"18/01/2014 at 22:11:10"},{"visible":true,"include":true,"step":"30.0","x":1655.5238095238096,"y":-1256.952380952381,"z":-80.13238095238096,"a95":0.99,"info":"18/01/2014 at 22:11:10"},{"visible":true,"include":true,"step":"35.0","x":1682.095238095238,"y":-1162.4761904761904,"z":-95.91428571428571,"a95":0.99,"info":"18/01/2014 at 22:11:10"},{"visible":true,"include":true,"step":"40.0","x":1597.4285714285713,"y":-1304.7619047619048,"z":-140.25714285714287,"a95":0.99,"info":"18/01/2014 at 22:11:10"},{"visible":true,"include":true,"step":"45.0","x":1470.5714285714287,"y":-1306.5714285714287,"z":-53.825714285714284,"a95":0.99,"info":"18/01/2014 at 22:11:10"},{"visible":true,"include":true,"step":"50.0","x":1416.2857142857142,"y":-1191.4285714285713,"z":-232.12380952380954,"a95":0.99,"info":"18/01/2014 at 22:11:10"},{"visible":true,"include":true,"step":"60.0","x":1553.6190476190477,"y":-1150.3809523809523,"z":-410.5238095238095,"a95":0.99,"info":"18/01/2014 at 22:11:10"},{"visible":true,"include":false,"step":"70.0","x":1508,"y":-1232.095238095238,"z":-111.36190476190475,"a95":0.99,"info":"18/01/2014 at 22:11:10"},{"visible":true,"include":false,"step":"80.0","x":1475.904761904762,"y":-1315.904761904762,"z":-477.31428571428575,"a95":0.99,"info":"18/01/2014 at 22:11:10"},{"visible":true,"include":false,"step":"90.0","x":1387.142857142857,"y":-1180.6666666666667,"z":-252.42857142857142,"a95":0.99,"info":"18/01/2014 at 22:11:10"},{"visible":true,"include":false,"step":"100.0","x":1536.6666666666667,"y":-1067.142857142857,"z":-265.1714285714286,"a95":0.99,"info":"18/01/2014 at 22:11:10"}]},{"version":"v1.1.0","exported":"2016-11-28T13:39:06.385Z","volume":10.5,"added":"2016-11-28T13:35:49.145Z","format":"Utrecht","demagType":"Unknown","strat":"7","patch":1.1,"GEO":[{"dec":254.34606355513355,"inc":-48.08707871643821,"MAD":2.8287513225757723,"cm":[-1.2434497875801753e-13,2.1316282072803006e-14,0],"intensity":3896.8192225742314,"type":"dir","forced":true,"remark":"","origin":false,"nSteps":10,"minStep":"16.0","maxStep":"70.0","steps":["16.0","20.0","25.0","30.0","35.0","40.0","45.0","50.0","60.0","70.0"],"group":"None","version":"v1.1.0"}],"TECT":[{"dec":218.84513319847542,"inc":-28.008138888152164,"MAD":2.8287513225757253,"cm":[0,-4.973799150320701e-14,5.684341886080802e-14],"intensity":3896.8192225742314,"type":"dir","forced":true,"remark":"","origin":false,"nSteps":10,"minStep":"16.0","maxStep":"70.0","steps":["16.0","20.0","25.0","30.0","35.0","40.0","45.0","50.0","60.0","70.0"],"group":"None","version":"v1.1.0"}],"interpreted":true,"name":"AR 1.13","coreAzi":346,"coreDip":10,"bedStrike":260,"bedDip":46,"data":[{"visible":true,"include":false,"step":"0.0","x":795.0857142857143,"y":-1260.7619047619048,"z":4.220380952380952,"a95":0.99,"info":"18/01/2014 at 22:11:10"},{"visible":true,"include":false,"step":"4.0","x":1034.952380952381,"y":-1316,"z":-40.48095238095238,"a95":0.99,"info":"18/01/2014 at 22:11:10"},{"visible":true,"include":false,"step":"8.0","x":1214.6666666666667,"y":-1289.6190476190477,"z":-131.63809523809525,"a95":0.99,"info":"18/01/2014 at 22:11:10"},{"visible":true,"include":false,"step":"12.0","x":1333.3333333333333,"y":-1279.4285714285713,"z":-255.51428571428573,"a95":0.99,"info":"18/01/2014 at 22:11:10"},{"visible":true,"include":true,"step":"16.0","x":1369.7142857142858,"y":-1321.8095238095239,"z":-220.0761904761905,"a95":0.99,"info":"18/01/2014 at 22:11:10"},{"visible":true,"include":true,"step":"20.0","x":1406.2857142857142,"y":-1330,"z":-351.68571428571425,"a95":0.99,"info":"18/01/2014 at 22:11:10"},{"visible":true,"include":true,"step":"25.0","x":1502,"y":-1233.904761904762,"z":-246.97142857142856,"a95":0.99,"info":"18/01/2014 at 22:11:10"},{"visible":true,"include":true,"step":"30.0","x":1526.095238095238,"y":-1374,"z":-369.65714285714284,"a95":0.99,"info":"18/01/2014 at 22:11:10"},{"visible":true,"include":true,"step":"35.0","x":1501.047619047619,"y":-1425.6190476190477,"z":-282.0095238095238,"a95":0.99,"info":"18/01/2014 at 22:11:10"},{"visible":true,"include":true,"step":"40.0","x":1449.904761904762,"y":-1375.2380952380952,"z":-296.1714285714286,"a95":0.99,"info":"18/01/2014 at 22:11:10"},{"visible":true,"include":true,"step":"45.0","x":1500.2857142857142,"y":-1407.7142857142858,"z":-326.9238095238095,"a95":0.99,"info":"18/01/2014 at 22:11:10"},{"visible":true,"include":true,"step":"50.0","x":1451.2380952380952,"y":-1287.047619047619,"z":-101.94285714285715,"a95":0.99,"info":"18/01/2014 at 22:11:10"},{"visible":true,"include":true,"step":"60.0","x":1500.857142857143,"y":-1250.7619047619048,"z":-345.49523809523805,"a95":0.99,"info":"18/01/2014 at 22:11:10"},{"visible":true,"include":true,"step":"70.0","x":1392.2857142857142,"y":-1352.6666666666667,"z":-415.3238095238095,"a95":0.99,"info":"18/01/2014 at 22:11:10"},{"visible":true,"include":false,"step":"80.0","x":1377.904761904762,"y":-1306.952380952381,"z":-393.6761904761905,"a95":0.99,"info":"18/01/2014 at 22:11:10"},{"visible":true,"include":false,"step":"90.0","x":1422.5714285714287,"y":-1301.904761904762,"z":-506.0380952380952,"a95":0.99,"info":"18/01/2014 at 22:11:10"},{"visible":true,"include":false,"step":"100.0","x":1332,"y":-1217.3333333333333,"z":-114.22857142857144,"a95":0.99,"info":"18/01/2014 at 22:11:10"}]},{"version":"v1.1.0","exported":"2016-11-28T13:39:06.385Z","volume":10.5,"added":"2016-11-28T13:35:49.146Z","format":"Utrecht","demagType":"Unknown","strat":null,"patch":1.1,"GEO":[{"dec":267.2480092120592,"inc":-37.82640621102518,"MAD":2.4952786310297763,"cm":[-8.193445921733655e-14,3.552713678800501e-15,0],"intensity":447.4769075231033,"type":"dir","forced":true,"remark":"","origin":false,"nSteps":5,"minStep":"200","maxStep":"300","steps":["200","225","250","275","300"],"group":"None","version":"v1.1.0"}],"TECT":[{"dec":227.4524264701019,"inc":-17.260820418537406,"MAD":2.4952786310296813,"cm":[-1.9539925233402755e-14,-1.5987211554602254e-14,6.794564910705958e-14],"intensity":447.47690752310325,"type":"dir","forced":true,"remark":"","origin":false,"nSteps":5,"minStep":"200","maxStep":"300","steps":["200","225","250","275","300"],"group":"None","version":"v1.1.0"}],"interpreted":true,"name":"AR 1.14","coreAzi":335,"coreDip":41,"bedStrike":262,"bedDip":68,"data":[{"visible":true,"include":false,"step":"20","x":-38,"y":-186.0952380952381,"z":734.8571428571429,"a95":2.9,"info":"\"13-11-03\" at \"12:27\""},{"visible":true,"include":false,"step":"80","x":135.71428571428572,"y":-205.9047619047619,"z":274.4761904761905,"a95":2.3,"info":"\"13-11-04\" at \"09:10\""},{"visible":true,"include":false,"step":"150","x":232.0952380952381,"y":-245.23809523809524,"z":4.857142857142857,"a95":2,"info":"\"13-11-04\" at \"14:49\""},{"visible":true,"include":false,"step":"180","x":222,"y":-250.85714285714286,"z":-42.857142857142854,"a95":2.1,"info":"\"13-11-05\" at \"09:25\""},{"visible":true,"include":true,"step":"200","x":206.85714285714286,"y":-228.95238095238096,"z":-60.95238095238095,"a95":2.8,"info":"\"13-11-05\" at \"13:58\""},{"visible":true,"include":true,"step":"225","x":199.71428571428572,"y":-239.33333333333334,"z":-53.80952380952381,"a95":2.8,"info":"\"13-11-06\" at \"08:19\""},{"visible":true,"include":true,"step":"250","x":186.66666666666666,"y":-200,"z":-50.19047619047619,"a95":2.5,"info":"\"13-11-06\" at \"12:51\""},{"visible":true,"include":true,"step":"275","x":171.8095238095238,"y":-176.76190476190476,"z":-30.666666666666668,"a95":2.2,"info":"\"13-11-06\" at \"16:55\""},{"visible":true,"include":true,"step":"300","x":85.9047619047619,"y":-94.76190476190476,"z":-37.714285714285715,"a95":4.3,"info":"\"13-11-07\" at \"05:31\""},{"visible":true,"include":false,"step":"320","x":-24.780952380952378,"y":-42.61904761904762,"z":-8.038095238095238,"a95":7.2,"info":"\"13-11-07\" at \"09:02\""},{"visible":true,"include":false,"step":"340","x":-64.95238095238095,"y":-1.380952380952381,"z":-19.238095238095237,"a95":5.2,"info":"\"13-11-07\" at \"14:32\""},{"visible":true,"include":false,"step":"380","x":-84.4095238095238,"y":31.009523809523813,"z":15.390476190476189,"a95":8.1,"info":"\"13-11-08\" at \"11:45\""},{"visible":true,"include":false,"step":"420","x":-110.38095238095238,"y":61.42857142857143,"z":-7.333333333333333,"a95":7,"info":"\"13-11-08\" at \"16:49\""}]},{"version":"v1.1.0","exported":"2016-11-28T13:39:06.385Z","volume":10.5,"added":"2016-11-28T13:35:49.146Z","format":"Utrecht","demagType":"Unknown","strat":"8","patch":1.1,"GEO":[{"dec":20.11303453337291,"inc":-33.29795535570267,"MAD":11.260370916251238,"cm":[1.3322676295501878e-15,0,0],"intensity":943.6249199929738,"type":"GC","origin":false,"forced":true,"remark":"","nSteps":6,"minStep":"8.0","maxStep":"30.0","steps":["8.0","12.0","16.0","20.0","25.0","30.0"],"group":"None","version":"v1.1.0"}],"TECT":[{"dec":112.59224091851104,"inc":-62.77176487556303,"MAD":11.260370916250798,"cm":[-3.907985046680551e-14,7.460698725481052e-14,-1.2434497875801753e-14],"intensity":943.6249199929739,"type":"GC","origin":false,"forced":true,"remark":"","nSteps":6,"minStep":"8.0","maxStep":"30.0","steps":["8.0","12.0","16.0","20.0","25.0","30.0"],"group":"None","version":"v1.1.0"}],"interpreted":true,"name":"AR 1.15","coreAzi":333,"coreDip":33,"bedStrike":262,"bedDip":68,"data":[{"visible":true,"include":false,"step":"0.0","x":-617.6952380952381,"y":417.3619047619048,"z":852.695238095238,"a95":0.99,"info":"18/01/2014 at 22:11:10"},{"visible":true,"include":false,"step":"4.0","x":-462.14285714285717,"y":377.49523809523805,"z":576.5619047619048,"a95":0.99,"info":"18/01/2014 at 22:11:10"},{"visible":true,"include":true,"step":"8.0","x":-352.95238095238096,"y":336.5809523809524,"z":326.552380952381,"a95":0.99,"info":"18/01/2014 at 22:11:10"},{"visible":true,"include":true,"step":"12.0","x":-299.1142857142857,"y":330.247619047619,"z":204.2761904761905,"a95":0.99,"info":"18/01/2014 at 22:11:10"},{"visible":true,"include":true,"step":"16.0","x":-270.87619047619046,"y":297.9809523809524,"z":118.22857142857144,"a95":0.99,"info":"18/01/2014 at 22:11:10"},{"visible":true,"include":true,"step":"20.0","x":-268.3619047619048,"y":301.3333333333333,"z":95.05142857142857,"a95":0.99,"info":"18/01/2014 at 22:11:10"},{"visible":true,"include":true,"step":"25.0","x":-240.42857142857142,"y":323.3904761904762,"z":94.55809523809523,"a95":0.99,"info":"18/01/2014 at 22:11:10"},{"visible":true,"include":true,"step":"30.0","x":-260.0952380952381,"y":284.6952380952381,"z":32.079047619047614,"a95":0.99,"info":"18/01/2014 at 22:11:10"},{"visible":true,"include":false,"step":"35.0","x":-228.87619047619046,"y":305.8666666666667,"z":26.255238095238095,"a95":0.99,"info":"18/01/2014 at 22:11:10"},{"visible":true,"include":false,"step":"40.0","x":-285.3619047619048,"y":299.6095238095238,"z":0.07429619047619047,"a95":0.99,"info":"18/01/2014 at 22:11:10"},{"visible":true,"include":false,"step":"45.0","x":-262.35238095238094,"y":265.8,"z":61.2952380952381,"a95":0.99,"info":"18/01/2014 at 22:11:10"},{"visible":true,"include":false,"step":"50.0","x":-196.13333333333335,"y":240.53333333333333,"z":45.77428571428571,"a95":0.99,"info":"18/01/2014 at 22:11:10"},{"visible":true,"include":false,"step":"60.0","x":-210.56190476190477,"y":214.54285714285712,"z":65.34666666666666,"a95":0.99,"info":"18/01/2014 at 22:11:10"},{"visible":true,"include":false,"step":"70.0","x":-185,"y":223.2,"z":171.13333333333335,"a95":0.99,"info":"18/01/2014 at 22:11:10"},{"visible":true,"include":false,"step":"80.0","x":-196.71428571428572,"y":257.54285714285714,"z":70.18571428571428,"a95":0.99,"info":"18/01/2014 at 22:11:10"},{"visible":true,"include":false,"step":"90.0","x":-194.65714285714287,"y":150.41904761904763,"z":31.74761904761905,"a95":0.99,"info":"18/01/2014 at 22:11:10"},{"visible":true,"include":false,"step":"100.0","x":-172.23809523809524,"y":262.2190476190476,"z":7.610952380952382,"a95":0.99,"info":"18/01/2014 at 22:11:10"}]},{"version":"v1.1.0","exported":"2016-11-28T13:39:06.385Z","volume":10.5,"added":"2016-11-28T13:35:49.146Z","format":"Utrecht","demagType":"Unknown","strat":"1","patch":1.1,"GEO":[{"dec":22.392053528065503,"inc":-30.457164122308303,"MAD":4.431791757529429,"cm":[1.887379141862766e-15,-2.1316282072803006e-14,0],"intensity":898.0764846802309,"type":"GC","origin":false,"forced":true,"remark":"","nSteps":6,"minStep":"4.0","maxStep":"25.0","steps":["4.0","8.0","12.0","16.0","20.0","25.0"],"group":"None","version":"v1.1.0"}],"TECT":[{"dec":63.371877791052896,"inc":-69.98940651210069,"MAD":4.43179175752934,"cm":[-4.973799150320701e-14,-4.263256414560601e-14,-5.329070518200751e-15],"intensity":898.0764846802311,"type":"GC","origin":false,"forced":true,"remark":"","nSteps":6,"minStep":"4.0","maxStep":"25.0","steps":["4.0","8.0","12.0","16.0","20.0","25.0"],"group":"None","version":"v1.1.0"}],"interpreted":true,"name":"AR 1.16B","coreAzi":1,"coreDip":24,"bedStrike":272,"bedDip":48,"data":[{"visible":true,"include":false,"step":"0.0","x":-767.7142857142857,"y":-79.14952380952381,"z":989.6190476190476,"a95":0.99,"info":"19/01/2014 at 03:44:49"},{"visible":true,"include":true,"step":"4.0","x":-352.22857142857146,"y":-278.4095238095238,"z":664.7333333333333,"a95":0.99,"info":"19/01/2014 at 03:44:49"},{"visible":true,"include":true,"step":"8.0","x":-11.277142857142858,"y":-334.03809523809525,"z":287.70476190476194,"a95":0.99,"info":"19/01/2014 at 03:44:49"},{"visible":true,"include":true,"step":"12.0","x":135.8095238095238,"y":-422.9047619047619,"z":7.706666666666667,"a95":0.99,"info":"19/01/2014 at 03:44:49"},{"visible":true,"include":true,"step":"16.0","x":242.2952380952381,"y":-475,"z":-53.32380952380952,"a95":0.99,"info":"19/01/2014 at 03:44:49"},{"visible":true,"include":true,"step":"20.0","x":218.33333333333334,"y":-365.56190476190477,"z":-116.0095238095238,"a95":0.99,"info":"19/01/2014 at 03:44:49"},{"visible":true,"include":true,"step":"25.0","x":191.67619047619047,"y":-386.0761904761905,"z":-82.3047619047619,"a95":0.99,"info":"19/01/2014 at 03:44:49"},{"visible":true,"include":false,"step":"30.0","x":255.2,"y":-269.06666666666666,"z":-324.5904761904762,"a95":0.99,"info":"19/01/2014 at 03:44:49"},{"visible":true,"include":false,"step":"35.0","x":219.45714285714288,"y":-138.1047619047619,"z":-145.9047619047619,"a95":0.99,"info":"19/01/2014 at 03:44:49"},{"visible":true,"include":false,"step":"40.0","x":120.45714285714286,"y":-220.22857142857143,"z":-189.03809523809525,"a95":0.99,"info":"19/01/2014 at 03:44:49"},{"visible":true,"include":false,"step":"45.0","x":267.22857142857146,"y":-210.71428571428572,"z":-202.41904761904763,"a95":0.99,"info":"19/01/2014 at 03:44:49"},{"visible":true,"include":false,"step":"50.0","x":358.65714285714284,"y":-129.1047619047619,"z":-35.170476190476194,"a95":0.99,"info":"19/01/2014 at 03:44:49"},{"visible":true,"include":false,"step":"60.0","x":276.6190476190476,"y":25.919047619047618,"z":-32.96190476190476,"a95":0.99,"info":"19/01/2014 at 03:44:49"},{"visible":true,"include":false,"step":"70.0","x":352.56190476190477,"y":-36.91904761904762,"z":12.043809523809523,"a95":0.99,"info":"19/01/2014 at 03:44:49"},{"visible":true,"include":false,"step":"80.0","x":39.13619047619048,"y":-53.938095238095244,"z":-174.86666666666665,"a95":0.99,"info":"19/01/2014 at 03:44:49"},{"visible":true,"include":false,"step":"90.0","x":125.66666666666667,"y":-56.43714285714286,"z":14.494285714285715,"a95":0.99,"info":"19/01/2014 at 03:44:49"},{"visible":true,"include":false,"step":"100.0","x":247.04761904761904,"y":164.8190476190476,"z":-95.83809523809524,"a95":0.99,"info":"19/01/2014 at 03:44:49"}]},{"version":"v1.1.0","exported":"2016-11-28T13:39:06.385Z","volume":10.5,"added":"2016-11-28T13:35:49.146Z","format":"Utrecht","demagType":"Unknown","strat":null,"patch":1.1,"GEO":[],"TECT":[],"interpreted":false,"name":"AR 1.17","coreAzi":359,"coreDip":15,"bedStrike":272,"bedDip":48,"data":[{"visible":true,"include":false,"step":"20","x":-1361.4285714285713,"y":73.23809523809524,"z":1187.4285714285713,"a95":2.5,"info":"\"13-11-03\" at \"12:30\""},{"visible":true,"include":false,"step":"80","x":-781.047619047619,"y":160.0952380952381,"z":778.6666666666666,"a95":2.6,"info":"\"13-11-04\" at \"09:13\""},{"visible":true,"include":false,"step":"150","x":-302.3809523809524,"y":170.57142857142858,"z":197.04761904761904,"a95":4,"info":"\"13-11-04\" at \"14:53\""},{"visible":true,"include":false,"step":"180","x":-198.1904761904762,"y":125.9047619047619,"z":148.28571428571428,"a95":2.9,"info":"\"13-11-05\" at \"09:28\""},{"visible":true,"include":false,"step":"200","x":-269.3333333333333,"y":147.61904761904762,"z":106.57142857142857,"a95":4.9,"info":"\"13-11-05\" at \"14:01\""},{"visible":true,"include":false,"step":"225","x":-238,"y":137.14285714285714,"z":134.38095238095238,"a95":6,"info":"\"13-11-06\" at \"08:21\""},{"visible":true,"include":false,"step":"250","x":-254.66666666666666,"y":148.28571428571428,"z":61.904761904761905,"a95":2.8,"info":"\"13-11-06\" at \"12:54\""},{"visible":true,"include":false,"step":"275","x":-291.6190476190476,"y":187.33333333333334,"z":122,"a95":2.3,"info":"\"13-11-06\" at \"16:59\""},{"visible":true,"include":false,"step":"300","x":-582.2857142857143,"y":421.5238095238095,"z":265.7142857142857,"a95":2.4,"info":"\"13-11-07\" at \"05:34\""},{"visible":true,"include":false,"step":"320","x":-368.3809523809524,"y":124.66666666666667,"z":223.9047619047619,"a95":3.2,"info":"\"13-11-07\" at \"09:05\""},{"visible":true,"include":false,"step":"340","x":-215.71428571428572,"y":129.71428571428572,"z":18.19047619047619,"a95":3.6,"info":"\"13-11-07\" at \"14:35\""},{"visible":true,"include":false,"step":"380","x":-168.57142857142858,"y":41.142857142857146,"z":-1.2380952380952381,"a95":3.8,"info":"\"13-11-08\" at \"11:49\""},{"visible":true,"include":false,"step":"420","x":-50.95238095238095,"y":104,"z":-34.38095238095238,"a95":7.5,"info":"\"13-11-08\" at \"16:52\""}]},{"version":"v1.1.0","exported":"2016-11-28T13:39:06.385Z","volume":10.5,"added":"2016-11-28T13:35:49.147Z","format":"Utrecht","demagType":"Unknown","strat":"2","patch":1.1,"GEO":[{"dec":38.88623784102106,"inc":-43.133167233532234,"MAD":8.614111333363216,"cm":[-1.5987211554602254e-13,5.684341886080802e-14,0],"intensity":3547.1646622014846,"type":"GC","origin":false,"forced":true,"remark":"","nSteps":10,"minStep":"4.0","maxStep":"45.0","steps":["4.0","8.0","12.0","16.0","20.0","25.0","30.0","35.0","40.0","45.0"],"group":"None","version":"v1.1.0"}],"TECT":[{"dec":107.01864451243915,"inc":-63.030384844709474,"MAD":8.61411133336413,"cm":[-4.973799150320701e-14,-3.552713678800501e-14,3.019806626980426e-14],"intensity":3547.164662201486,"type":"GC","origin":false,"forced":true,"remark":"","nSteps":10,"minStep":"4.0","maxStep":"45.0","steps":["4.0","8.0","12.0","16.0","20.0","25.0","30.0","35.0","40.0","45.0"],"group":"None","version":"v1.1.0"}],"interpreted":true,"name":"AR 1.18","coreAzi":352,"coreDip":8,"bedStrike":272,"bedDip":48,"data":[{"visible":true,"include":false,"step":"0.0","x":-2067.5238095238096,"y":1868.5714285714287,"z":1671.142857142857,"a95":0.99,"info":"19/01/2014 at 03:44:49"},{"visible":true,"include":true,"step":"4.0","x":-1648.095238095238,"y":1459.6190476190477,"z":1153.047619047619,"a95":0.99,"info":"19/01/2014 at 03:44:49"},{"visible":true,"include":true,"step":"8.0","x":-1267.6190476190477,"y":1239.5238095238096,"z":748.0190476190476,"a95":0.99,"info":"19/01/2014 at 03:44:49"},{"visible":true,"include":true,"step":"12.0","x":-1058.2857142857142,"y":1086.952380952381,"z":522.3047619047619,"a95":0.99,"info":"19/01/2014 at 03:44:49"},{"visible":true,"include":true,"step":"16.0","x":-936.7619047619048,"y":1017.1428571428571,"z":375.0571428571428,"a95":0.99,"info":"19/01/2014 at 03:44:49"},{"visible":true,"include":true,"step":"20.0","x":-860.1238095238094,"y":982.6666666666666,"z":262.7904761904762,"a95":0.99,"info":"19/01/2014 at 03:44:49"},{"visible":true,"include":true,"step":"25.0","x":-858.7238095238096,"y":927.5047619047618,"z":236.39999999999998,"a95":0.99,"info":"19/01/2014 at 03:44:49"},{"visible":true,"include":true,"step":"30.0","x":-778.4,"y":910.7333333333333,"z":163.2952380952381,"a95":0.99,"info":"19/01/2014 at 03:44:49"},{"visible":true,"include":true,"step":"35.0","x":-739.1904761904761,"y":883.0285714285714,"z":133.38095238095238,"a95":0.99,"info":"19/01/2014 at 03:44:49"},{"visible":true,"include":true,"step":"40.0","x":-637.3904761904762,"y":898.4857142857143,"z":124.07619047619048,"a95":0.99,"info":"19/01/2014 at 03:44:49"},{"visible":true,"include":true,"step":"45.0","x":-644.3333333333334,"y":911.7523809523809,"z":152.22857142857143,"a95":0.99,"info":"19/01/2014 at 03:44:49"},{"visible":true,"include":false,"step":"50.0","x":-670.0571428571429,"y":913.3904761904762,"z":65.65904761904761,"a95":0.99,"info":"19/01/2014 at 03:44:49"},{"visible":true,"include":false,"step":"60.0","x":-596.6190476190476,"y":923.0380952380953,"z":99.29523809523809,"a95":0.99,"info":"19/01/2014 at 03:44:49"},{"visible":true,"include":false,"step":"70.0","x":-611,"y":861.6666666666666,"z":53.86,"a95":0.99,"info":"19/01/2014 at 03:44:49"},{"visible":true,"include":false,"step":"80.0","x":-600.8857142857144,"y":802.4666666666666,"z":94.18095238095238,"a95":0.99,"info":"19/01/2014 at 03:44:49"},{"visible":true,"include":false,"step":"90.0","x":-576.5809523809525,"y":809.5333333333334,"z":45.08761904761905,"a95":0.99,"info":"19/01/2014 at 03:44:49"},{"visible":true,"include":false,"step":"100.0","x":-560.5428571428571,"y":748.2571428571429,"z":-26.157142857142855,"a95":0.99,"info":"19/01/2014 at 03:44:49"}]},{"version":"v1.1.0","exported":"2016-11-28T13:39:06.386Z","volume":10.5,"added":"2016-11-28T13:35:49.147Z","format":"Utrecht","demagType":"Unknown","strat":null,"patch":1.1,"GEO":[{"dec":347.07304421310505,"inc":-33.098301683515466,"MAD":10.35026069644025,"cm":[-2.042810365310288e-14,2.6645352591003757e-15,0],"intensity":509.61609311154683,"type":"GC","origin":false,"forced":true,"remark":"","nSteps":6,"minStep":"80","maxStep":"250","steps":["80","150","180","200","225","250"],"group":"None","version":"v1.1.0"}],"TECT":[{"dec":325.1187059014719,"inc":-61.75309861218492,"MAD":10.350260696440376,"cm":[-2.1316282072803006e-14,-1.2434497875801753e-14,9.658940314238862e-15],"intensity":509.61609311154666,"type":"GC","origin":false,"forced":true,"remark":"","nSteps":6,"minStep":"80","maxStep":"250","steps":["80","150","180","200","225","250"],"group":"None","version":"v1.1.0"}],"interpreted":true,"name":"AR 1.19","coreAzi":351,"coreDip":38,"bedStrike":281,"bedDip":34,"data":[{"visible":true,"include":false,"step":"20","x":-332.6666666666667,"y":10.952380952380953,"z":909.3333333333334,"a95":2.6,"info":"\"13-11-03\" at \"12:32\""},{"visible":true,"include":true,"step":"80","x":-183.71428571428572,"y":-59.714285714285715,"z":511.42857142857144,"a95":3.1,"info":"\"13-11-04\" at \"09:16\""},{"visible":true,"include":true,"step":"150","x":-10.666666666666666,"y":-90.0952380952381,"z":74.38095238095238,"a95":4.2,"info":"\"13-11-04\" at \"14:55\""},{"visible":true,"include":true,"step":"180","x":16.19047619047619,"y":-99.42857142857143,"z":-4.9523809523809526,"a95":4.5,"info":"\"13-11-05\" at \"09:31\""},{"visible":true,"include":true,"step":"200","x":-3.4285714285714284,"y":-87.52380952380952,"z":-44.285714285714285,"a95":7.7,"info":"\"13-11-05\" at \"14:04\""},{"visible":true,"include":true,"step":"225","x":-4.9523809523809526,"y":-93.52380952380952,"z":-42.76190476190476,"a95":7.4,"info":"\"13-11-06\" at \"08:25\""},{"visible":true,"include":true,"step":"250","x":2,"y":-80.66666666666667,"z":-56.476190476190474,"a95":6.7,"info":"\"13-11-06\" at \"12:57\""},{"visible":true,"include":false,"step":"275","x":-9.104761904761904,"y":-79.00952380952381,"z":2.8190476190476192,"a95":6.5,"info":"\"13-11-06\" at \"17:04\""},{"visible":true,"include":false,"step":"300","x":-78.88571428571429,"y":11,"z":13.914285714285715,"a95":7.3,"info":"\"13-11-07\" at \"05:36\""},{"visible":true,"include":false,"step":"320","x":-100.28571428571429,"y":13.523809523809524,"z":61.23809523809524,"a95":5.1,"info":"\"13-11-07\" at \"09:07\""},{"visible":true,"include":false,"step":"340","x":-78.42857142857143,"y":9.819047619047618,"z":36.542857142857144,"a95":5.3,"info":"\"13-11-07\" at \"14:38\""},{"visible":true,"include":false,"step":"380","x":-128.57142857142858,"y":-29.333333333333332,"z":56.95238095238095,"a95":6.9,"info":"\"13-11-08\" at \"11:52\""},{"visible":true,"include":false,"step":"420","x":-103.9047619047619,"y":87.23809523809524,"z":27.523809523809526,"a95":5.8,"info":"\"13-11-08\" at \"16:54\""}]}]
