# Supplementary material for: Paleomagnetic constraints on the timing and distribution of Cenozoic rotations in Central and Eastern Anatolia
Source: Copernicus journal article supplement (doi:10.5194/se-9-295-2018), 2018-03-21
Supplement: Supplementary file 2 [file se-9-295-2018-supplement.zip › se-2017-66_DATA_dir files/dir files Ulukisla/AR2.dir]

[{"version":"v1.1.0","exported":"2016-11-28T13:43:02.644Z","volume":10.5,"added":"2016-11-28T13:39:24.454Z","format":"Utrecht","demagType":"Unknown","strat":null,"patch":1.1,"GEO":[{"dec":200.40957580061328,"inc":36.879686382274606,"MAD":3.5062516720784727,"cm":[-7.105427357601002e-15,5.861977570020827e-14,0],"intensity":982.6849886143946,"type":"dir","forced":true,"remark":"","origin":false,"nSteps":4,"minStep":"420","maxStep":"530","steps":["420","450","500","530"],"group":"None","version":"v1.1.0"}],"TECT":[{"dec":285.44746592919455,"inc":50.46793870530163,"MAD":3.5062516720785317,"cm":[1.2434497875801753e-14,2.4868995751603507e-14,7.105427357601002e-15],"intensity":982.6849886143947,"type":"dir","forced":true,"remark":"","origin":false,"nSteps":4,"minStep":"420","maxStep":"530","steps":["420","450","500","530"],"group":"None","version":"v1.1.0"}],"interpreted":true,"name":"AR 2.1","coreAzi":95,"coreDip":60,"bedStrike":250,"bedDip":71,"data":[{"visible":true,"include":false,"step":"20","x":-715.6190476190476,"y":208.0952380952381,"z":1031.2380952380952,"a95":2.6,"info":"\"13-11-03\" at \"12:35\""},{"visible":true,"include":false,"step":"80","x":-623.2380952380952,"y":327.14285714285717,"z":644.0952380952381,"a95":2.4,"info":"\"13-11-04\" at \"09:19\""},{"visible":true,"include":false,"step":"150","x":-533.4285714285714,"y":422.1904761904762,"z":384.95238095238096,"a95":2.2,"info":"\"13-11-04\" at \"14:58\""},{"visible":true,"include":false,"step":"180","x":-503.5238095238095,"y":473.6190476190476,"z":346.0952380952381,"a95":2.5,"info":"\"13-11-05\" at \"09:34\""},{"visible":true,"include":false,"step":"200","x":-519.9047619047619,"y":480.4761904761905,"z":323.7142857142857,"a95":2.5,"info":"\"13-11-05\" at \"14:06\""},{"visible":true,"include":false,"step":"225","x":-487.5238095238095,"y":491.8095238095238,"z":328.1904761904762,"a95":2.3,"info":"\"13-11-06\" at \"08:28\""},{"visible":true,"include":false,"step":"250","x":-490.1904761904762,"y":545.2380952380952,"z":278.76190476190476,"a95":2.6,"info":"\"13-11-06\" at \"12:59\""},{"visible":true,"include":false,"step":"275","x":-434.76190476190476,"y":577.9047619047619,"z":257.42857142857144,"a95":3,"info":"\"13-11-06\" at \"17:07\""},{"visible":true,"include":false,"step":"300","x":-474.2857142857143,"y":557.1428571428571,"z":244.76190476190476,"a95":2.7,"info":"\"13-11-07\" at \"05:39\""},{"visible":true,"include":false,"step":"320","x":-447.9047619047619,"y":535.6190476190476,"z":263.9047619047619,"a95":2.2,"info":"\"13-11-07\" at \"09:10\""},{"visible":true,"include":false,"step":"340","x":-412,"y":535.047619047619,"z":242.57142857142858,"a95":3.1,"info":"\"13-11-07\" at \"14:44\""},{"visible":true,"include":false,"step":"380","x":-348.85714285714283,"y":537.047619047619,"z":337.8095238095238,"a95":3.2,"info":"\"13-11-08\" at \"11:54\""},{"visible":true,"include":true,"step":"420","x":-331.7142857142857,"y":508,"z":260.85714285714283,"a95":3.4,"info":"\"13-11-08\" at \"16:57\""},{"visible":true,"include":true,"step":"450","x":-313.9047619047619,"y":459.9047619047619,"z":237.52380952380952,"a95":3.3,"info":"\"13-11-08\" at \"20:35\""},{"visible":true,"include":true,"step":"500","x":-221.61904761904762,"y":393.7142857142857,"z":210.38095238095238,"a95":3.7,"info":"\"13-11-10\" at \"12:01\""},{"visible":true,"include":true,"step":"530","x":-121.42857142857143,"y":247.52380952380952,"z":174.47619047619048,"a95":4.4,"info":"\"13-11-10\" at \"15:20\""},{"visible":true,"include":false,"step":"560","x":-61.523809523809526,"y":171.14285714285714,"z":60.38095238095238,"a95":3.5,"info":"\"13-11-10\" at \"23:59\""}]},{"version":"v1.1.0","exported":"2016-11-28T13:43:02.644Z","volume":10.5,"added":"2016-11-28T13:39:24.454Z","format":"Utrecht","demagType":"Unknown","strat":"3","patch":1.1,"GEO":[{"dec":234.83936508665403,"inc":40.16864267059994,"MAD":5.018818791919181,"cm":[-6.039613253960852e-14,2.842170943040401e-14,0],"intensity":1164.6441826971234,"type":"dir","forced":true,"remark":"","origin":false,"nSteps":7,"minStep":"25.0","maxStep":"60.0","steps":["25.0","30.0","35.0","40.0","45.0","50.0","60.0"],"group":"None","version":"v1.1.0"}],"TECT":[{"dec":286.4534121822271,"inc":23.513270283815835,"MAD":5.018818791919184,"cm":[4.263256414560601e-14,3.907985046680551e-14,2.842170943040401e-14],"intensity":1164.6441826971234,"type":"dir","forced":true,"remark":"","origin":false,"nSteps":7,"minStep":"25.0","maxStep":"60.0","steps":["25.0","30.0","35.0","40.0","45.0","50.0","60.0"],"group":"None","version":"v1.1.0"}],"interpreted":true,"name":"AR 2.2B","coreAzi":89,"coreDip":57,"bedStrike":250,"bedDip":71,"data":[{"visible":true,"include":false,"step":"0.0","x":-1098,"y":82.53619047619047,"z":9.440666666666667,"a95":0.99,"info":"19/01/2014 at 03:44:49"},{"visible":true,"include":false,"step":"4.0","x":-1020.5714285714286,"y":89.06380952380952,"z":66.83047619047619,"a95":0.99,"info":"19/01/2014 at 03:44:49"},{"visible":true,"include":false,"step":"8.0","x":-863.8571428571429,"y":206.97142857142856,"z":22.816190476190474,"a95":0.99,"info":"19/01/2014 at 03:44:49"},{"visible":true,"include":false,"step":"12.0","x":-780.352380952381,"y":284.7809523809524,"z":30.74761904761905,"a95":0.99,"info":"19/01/2014 at 03:44:49"},{"visible":true,"include":false,"step":"16.0","x":-708.9714285714285,"y":321.7904761904762,"z":33.10285714285714,"a95":0.99,"info":"19/01/2014 at 03:44:49"},{"visible":true,"include":false,"step":"20.0","x":-651.4571428571429,"y":332.0190476190476,"z":31.062857142857144,"a95":0.99,"info":"19/01/2014 at 03:44:49"},{"visible":true,"include":true,"step":"25.0","x":-628.9809523809524,"y":326.8285714285714,"z":89.32380952380952,"a95":0.99,"info":"19/01/2014 at 03:44:49"},{"visible":true,"include":true,"step":"30.0","x":-555.4666666666666,"y":300.5238095238095,"z":81.49238095238096,"a95":0.99,"info":"19/01/2014 at 03:44:49"},{"visible":true,"include":true,"step":"35.0","x":-513.5428571428571,"y":276.1714285714286,"z":122.13333333333334,"a95":0.99,"info":"19/01/2014 at 03:44:49"},{"visible":true,"include":true,"step":"40.0","x":-481.23809523809524,"y":244.78095238095236,"z":119.21904761904761,"a95":0.99,"info":"19/01/2014 at 03:44:49"},{"visible":true,"include":true,"step":"45.0","x":-436.4380952380953,"y":218.6095238095238,"z":132.2761904761905,"a95":0.99,"info":"19/01/2014 at 03:44:49"},{"visible":true,"include":true,"step":"50.0","x":-451.95238095238096,"y":164,"z":129.54285714285714,"a95":0.99,"info":"19/01/2014 at 03:44:49"},{"visible":true,"include":true,"step":"60.0","x":-416.14285714285717,"y":134.2952380952381,"z":137.56190476190477,"a95":0.99,"info":"19/01/2014 at 03:44:49"},{"visible":true,"include":false,"step":"70.0","x":-328.85714285714283,"y":138.21904761904761,"z":157.32380952380953,"a95":0.99,"info":"19/01/2014 at 03:44:49"},{"visible":true,"include":false,"step":"80.0","x":-344.32380952380953,"y":82.05904761904762,"z":113.0952380952381,"a95":0.99,"info":"19/01/2014 at 03:44:49"},{"visible":true,"include":false,"step":"90.0","x":-299.67619047619047,"y":118.43809523809523,"z":82.56,"a95":0.99,"info":"19/01/2014 at 03:44:49"},{"visible":true,"include":false,"step":"100.0","x":-220.54285714285712,"y":109.1047619047619,"z":116.19047619047619,"a95":0.99,"info":"19/01/2014 at 03:44:49"}]},{"version":"v1.1.0","exported":"2016-11-28T13:43:02.644Z","volume":10.5,"added":"2016-11-28T13:39:24.455Z","format":"Utrecht","demagType":"Unknown","strat":"4","patch":1.1,"GEO":[{"dec":251.12882362058747,"inc":62.957536663416896,"MAD":1.6802122924106893,"cm":[-1.509903313490213e-14,-1.7763568394002505e-15,0],"intensity":1285.9607927441969,"type":"dir","forced":true,"remark":"","origin":false,"nSteps":8,"minStep":"25.0","maxStep":"70.0","steps":["25.0","30.0","35.0","40.0","45.0","50.0","60.0","70.0"],"group":"None","version":"v1.1.0"}],"TECT":[{"dec":312.962577848352,"inc":0.3775182166839362,"MAD":1.6802122924105933,"cm":[3.907985046680551e-14,4.618527782440651e-14,2.917110997202599e-14],"intensity":1285.9607927441969,"type":"dir","forced":true,"remark":"","origin":false,"nSteps":8,"minStep":"25.0","maxStep":"70.0","steps":["25.0","30.0","35.0","40.0","45.0","50.0","60.0","70.0"],"group":"None","version":"v1.1.0"}],"interpreted":true,"name":"AR 2.3B","coreAzi":68,"coreDip":33,"bedStrike":250,"bedDip":89,"data":[{"visible":true,"include":false,"step":"0.0","x":-1330.5714285714287,"y":-380.45714285714286,"z":130.13333333333335,"a95":0.99,"info":"19/01/2014 at 03:44:49"},{"visible":true,"include":false,"step":"4.0","x":-1249.8095238095239,"y":-352.9142857142857,"z":160.73333333333335,"a95":0.99,"info":"19/01/2014 at 03:44:49"},{"visible":true,"include":false,"step":"8.0","x":-1084.3809523809523,"y":-208.1904761904762,"z":112.45714285714286,"a95":0.99,"info":"19/01/2014 at 03:44:49"},{"visible":true,"include":false,"step":"12.0","x":-1006.0952380952381,"y":-123.11428571428571,"z":88.70571428571428,"a95":0.99,"info":"19/01/2014 at 03:44:49"},{"visible":true,"include":false,"step":"16.0","x":-925.3428571428572,"y":-64.76095238095238,"z":64.9152380952381,"a95":0.99,"info":"19/01/2014 at 03:44:49"},{"visible":true,"include":false,"step":"20.0","x":-877.0952380952381,"y":-31.743809523809524,"z":36.976190476190474,"a95":0.99,"info":"19/01/2014 at 03:44:49"},{"visible":true,"include":true,"step":"25.0","x":-832.847619047619,"y":-9.06952380952381,"z":64.67714285714285,"a95":0.99,"info":"19/01/2014 at 03:44:49"},{"visible":true,"include":true,"step":"30.0","x":-752.3142857142857,"y":-7.745904761904761,"z":57.35619047619048,"a95":0.99,"info":"19/01/2014 at 03:44:49"},{"visible":true,"include":true,"step":"35.0","x":-689.1238095238095,"y":-13.641904761904764,"z":69.73619047619047,"a95":0.99,"info":"19/01/2014 at 03:44:49"},{"visible":true,"include":true,"step":"40.0","x":-645.7809523809524,"y":-24.985714285714288,"z":77.69142857142857,"a95":0.99,"info":"19/01/2014 at 03:44:49"},{"visible":true,"include":true,"step":"45.0","x":-603.1809523809524,"y":-13.001904761904763,"z":72.89619047619047,"a95":0.99,"info":"19/01/2014 at 03:44:49"},{"visible":true,"include":true,"step":"50.0","x":-584.0285714285715,"y":-23.89047619047619,"z":68.90571428571428,"a95":0.99,"info":"19/01/2014 at 03:44:49"},{"visible":true,"include":true,"step":"60.0","x":-524.1428571428571,"y":-32.8447619047619,"z":78.40666666666667,"a95":0.99,"info":"19/01/2014 at 03:44:49"},{"visible":true,"include":true,"step":"70.0","x":-446.447619047619,"y":-11.34,"z":64.48285714285714,"a95":0.99,"info":"19/01/2014 at 03:44:49"},{"visible":true,"include":false,"step":"80.0","x":-326.7904761904762,"y":-21.13904761904762,"z":91.52380952380952,"a95":0.99,"info":"19/01/2014 at 03:44:49"},{"visible":true,"include":false,"step":"90.0","x":-415.9428571428571,"y":-1.8071428571428574,"z":23.64761904761905,"a95":0.99,"info":"19/01/2014 at 03:44:49"},{"visible":true,"include":false,"step":"100.0","x":-372,"y":7.851428571428571,"z":86.81333333333333,"a95":0.99,"info":"19/01/2014 at 03:44:49"}]},{"version":"v1.1.0","exported":"2016-11-28T13:43:02.644Z","volume":10.5,"added":"2016-11-28T13:39:24.456Z","format":"Utrecht","demagType":"Unknown","strat":"5","patch":1.1,"GEO":[{"dec":216.44817860502508,"inc":41.07065153215401,"MAD":0.8444678360300463,"cm":[-2.842170943040401e-14,-2.842170943040401e-14,0],"intensity":1878.0381425205148,"type":"dir","forced":true,"remark":"","origin":false,"nSteps":3,"minStep":"35.0","maxStep":"45.0","steps":["35.0","40.0","45.0"],"group":"None","version":"v1.1.0"}],"TECT":[{"dec":295.95613030531405,"inc":25.345540000928047,"MAD":0.8444678360302281,"cm":[-3.339550858072471e-13,-1.7053025658242404e-13,1.4210854715202004e-14],"intensity":1878.0381425205148,"type":"dir","forced":true,"remark":"","origin":false,"nSteps":3,"minStep":"35.0","maxStep":"45.0","steps":["35.0","40.0","45.0"],"group":"None","version":"v1.1.0"}],"interpreted":true,"name":"AR 2.4B","coreAzi":120,"coreDip":39,"bedStrike":250,"bedDip":89,"data":[{"visible":true,"include":false,"step":"0.0","x":-1334,"y":841.5238095238095,"z":925.9714285714286,"a95":0.99,"info":"19/01/2014 at 03:44:49"},{"visible":true,"include":false,"step":"4.0","x":-1159.7142857142858,"y":786.2857142857143,"z":722.5333333333334,"a95":0.99,"info":"19/01/2014 at 03:44:49"},{"visible":true,"include":false,"step":"8.0","x":-870.104761904762,"y":909.1619047619048,"z":452.9238095238095,"a95":0.99,"info":"19/01/2014 at 03:44:49"},{"visible":true,"include":false,"step":"12.0","x":-704.3238095238095,"y":965.7142857142857,"z":347.70476190476194,"a95":0.99,"info":"19/01/2014 at 03:44:49"},{"visible":true,"include":false,"step":"16.0","x":-618.1333333333333,"y":993.7142857142857,"z":295.3333333333333,"a95":0.99,"info":"19/01/2014 at 03:44:49"},{"visible":true,"include":false,"step":"20.0","x":-582.7714285714286,"y":1001.9047619047619,"z":283.8285714285714,"a95":0.99,"info":"19/01/2014 at 03:44:49"},{"visible":true,"include":false,"step":"25.0","x":-574.4666666666666,"y":907.6285714285715,"z":340.34285714285716,"a95":0.99,"info":"19/01/2014 at 03:44:49"},{"visible":true,"include":false,"step":"30.0","x":-586.152380952381,"y":854.6857142857143,"z":337.57142857142856,"a95":0.99,"info":"19/01/2014 at 03:44:49"},{"visible":true,"include":true,"step":"35.0","x":-549.1619047619048,"y":759.2761904761904,"z":341.7904761904762,"a95":0.99,"info":"19/01/2014 at 03:44:49"},{"visible":true,"include":true,"step":"40.0","x":-536.1142857142856,"y":700.6571428571428,"z":331.8,"a95":0.99,"info":"19/01/2014 at 03:44:49"},{"visible":true,"include":true,"step":"45.0","x":-506.53333333333336,"y":651.8,"z":307.3619047619048,"a95":0.99,"info":"19/01/2014 at 03:44:49"},{"visible":true,"include":false,"step":"50.0","x":-537.7238095238096,"y":586.0952380952381,"z":328.93333333333334,"a95":0.99,"info":"19/01/2014 at 03:44:49"},{"visible":true,"include":false,"step":"60.0","x":-499.79999999999995,"y":514.4285714285714,"z":344.1714285714286,"a95":0.99,"info":"19/01/2014 at 03:44:49"},{"visible":true,"include":false,"step":"70.0","x":-481.23809523809524,"y":489.7714285714286,"z":342.56190476190477,"a95":0.99,"info":"19/01/2014 at 03:44:49"},{"visible":true,"include":false,"step":"80.0","x":-678.1904761904761,"y":419.4380952380953,"z":369.95238095238096,"a95":0.99,"info":"19/01/2014 at 03:44:49"},{"visible":true,"include":false,"step":"90.0","x":-470.7523809523809,"y":481.27619047619044,"z":158.6,"a95":0.99,"info":"19/01/2014 at 03:44:49"},{"visible":true,"include":false,"step":"100.0","x":-357.6666666666667,"y":495.42857142857144,"z":315.93333333333334,"a95":0.99,"info":"19/01/2014 at 03:44:49"}]},{"version":"v1.1.0","exported":"2016-11-28T13:43:02.644Z","volume":10.5,"added":"2016-11-28T13:39:24.456Z","format":"Utrecht","demagType":"Unknown","strat":"6","patch":1.1,"GEO":[{"dec":300.9219877752859,"inc":-2.484085174428217,"MAD":3.903276102729735,"cm":[-2.842170943040401e-14,5.684341886080802e-14,0],"intensity":1921.353351929447,"type":"GC","origin":false,"forced":true,"remark":"","nSteps":6,"minStep":"0.0","maxStep":"20.0","steps":["0.0","4.0","8.0","12.0","16.0","20.0"],"group":"None","version":"v1.1.0"}],"TECT":[{"dec":247.29092443693597,"inc":-50.91370104458814,"MAD":3.9032761027301506,"cm":[6.927791673660977e-14,2.0605739337042905e-13,7.105427357601002e-14],"intensity":1921.3533519294467,"type":"GC","origin":false,"forced":true,"remark":"","nSteps":6,"minStep":"0.0","maxStep":"20.0","steps":["0.0","4.0","8.0","12.0","16.0","20.0"],"group":"None","version":"v1.1.0"}],"interpreted":true,"name":"AR 2.5B","coreAzi":102,"coreDip":43,"bedStrike":250,"bedDip":89,"data":[{"visible":true,"include":true,"step":"0.0","x":-860.9142857142857,"y":472.5809523809524,"z":541.2952380952381,"a95":0.99,"info":"19/01/2014 at 03:44:49"},{"visible":true,"include":true,"step":"4.0","x":-755.0761904761905,"y":495.25714285714287,"z":407.76190476190476,"a95":0.99,"info":"19/01/2014 at 03:44:49"},{"visible":true,"include":true,"step":"8.0","x":-595.447619047619,"y":642.9142857142857,"z":175.2095238095238,"a95":0.99,"info":"19/01/2014 at 03:44:49"},{"visible":true,"include":true,"step":"12.0","x":-515.8761904761905,"y":723.5142857142857,"z":105.23809523809524,"a95":0.99,"info":"19/01/2014 at 03:44:49"},{"visible":true,"include":true,"step":"16.0","x":-479.4095238095238,"y":762.6857142857143,"z":79.18190476190476,"a95":0.99,"info":"19/01/2014 at 03:44:49"},{"visible":true,"include":true,"step":"20.0","x":-467.7904761904762,"y":770.9619047619047,"z":74.93809523809524,"a95":0.99,"info":"19/01/2014 at 03:44:49"},{"visible":true,"include":false,"step":"25.0","x":-466.4761904761905,"y":744.0857142857143,"z":110.26666666666667,"a95":0.99,"info":"19/01/2014 at 03:44:49"},{"visible":true,"include":false,"step":"30.0","x":-483.79999999999995,"y":699.2,"z":136.13333333333335,"a95":0.99,"info":"19/01/2014 at 03:44:49"},{"visible":true,"include":false,"step":"35.0","x":-452.3809523809524,"y":633.0190476190476,"z":163.5047619047619,"a95":0.99,"info":"19/01/2014 at 03:44:49"},{"visible":true,"include":false,"step":"40.0","x":-461.1904761904762,"y":579.7142857142857,"z":189.76190476190476,"a95":0.99,"info":"19/01/2014 at 03:44:49"},{"visible":true,"include":false,"step":"45.0","x":-443.23809523809524,"y":570.9333333333334,"z":189.65714285714287,"a95":0.99,"info":"19/01/2014 at 03:44:49"},{"visible":true,"include":false,"step":"50.0","x":-460.3809523809524,"y":526.1809523809524,"z":213.0095238095238,"a95":0.99,"info":"19/01/2014 at 03:44:49"},{"visible":true,"include":false,"step":"60.0","x":-429.4095238095238,"y":445.27619047619044,"z":213.63809523809522,"a95":0.99,"info":"19/01/2014 at 03:44:49"},{"visible":true,"include":false,"step":"70.0","x":-389.6380952380952,"y":421.2095238095238,"z":244.7904761904762,"a95":0.99,"info":"19/01/2014 at 03:44:49"},{"visible":true,"include":false,"step":"80.0","x":-344.51428571428573,"y":397.1047619047619,"z":239.0952380952381,"a95":0.99,"info":"19/01/2014 at 03:44:49"},{"visible":true,"include":false,"step":"90.0","x":-349.87619047619046,"y":358.4761904761905,"z":133.88571428571427,"a95":0.99,"info":"19/01/2014 at 03:44:49"},{"visible":true,"include":false,"step":"100.0","x":-300.83809523809526,"y":391.0571428571429,"z":231.9047619047619,"a95":0.99,"info":"19/01/2014 at 03:44:49"}]},{"version":"v1.1.0","exported":"2016-11-28T13:43:02.644Z","volume":10.5,"added":"2016-11-28T13:39:24.457Z","format":"Utrecht","demagType":"Unknown","strat":null,"patch":1.1,"GEO":[{"dec":288.2503895621259,"inc":-22.602073955837344,"MAD":5.6731914740638025,"cm":[4.263256414560601e-14,-2.4868995751603507e-14,0],"intensity":1950.9328148535924,"type":"GC","origin":false,"forced":true,"remark":"","nSteps":9,"minStep":"150","maxStep":"340","steps":["150","180","200","225","250","275","300","320","340"],"group":"None","version":"v1.1.0"}],"TECT":[{"dec":222.6940089226796,"inc":-35.32197414888069,"MAD":5.673191474062781,"cm":[-2.2382096176443156e-13,-1.9184653865522705e-13,-4.796163466380676e-14],"intensity":1950.9328148535926,"type":"GC","origin":false,"forced":true,"remark":"","nSteps":9,"minStep":"150","maxStep":"340","steps":["150","180","200","225","250","275","300","320","340"],"group":"None","version":"v1.1.0"}],"interpreted":true,"name":"AR 2.6A","coreAzi":45,"coreDip":44,"bedStrike":250,"bedDip":89,"data":[{"visible":true,"include":false,"step":"20","x":-1163.8095238095239,"y":-502,"z":1261.8095238095239,"a95":2.5,"info":"\"13-11-03\" at \"12:38\""},{"visible":true,"include":false,"step":"80","x":-1020.2857142857143,"y":-435.42857142857144,"z":829.5238095238095,"a95":2.2,"info":"\"13-11-04\" at \"09:22\""},{"visible":true,"include":true,"step":"150","x":-957.1428571428571,"y":-300.6666666666667,"z":459.8095238095238,"a95":2.1,"info":"\"13-11-04\" at \"15:00\""},{"visible":true,"include":true,"step":"180","x":-934.1904761904761,"y":-281.14285714285717,"z":388.2857142857143,"a95":2,"info":"\"13-11-05\" at \"09:36\""},{"visible":true,"include":true,"step":"200","x":-970.3809523809524,"y":-218,"z":365.23809523809524,"a95":1.9,"info":"\"13-11-05\" at \"14:09\""},{"visible":true,"include":true,"step":"225","x":-962.2857142857143,"y":-224.28571428571428,"z":368.2857142857143,"a95":2.1,"info":"\"13-11-06\" at \"08:30\""},{"visible":true,"include":true,"step":"250","x":-974.5714285714286,"y":-168.57142857142858,"z":249.33333333333334,"a95":2.3,"info":"\"13-11-06\" at \"13:02\""},{"visible":true,"include":true,"step":"275","x":-920.7619047619048,"y":-102.38095238095238,"z":208.1904761904762,"a95":2.4,"info":"\"13-11-06\" at \"17:10\""},{"visible":true,"include":true,"step":"300","x":-943.2380952380952,"y":-103.33333333333333,"z":152.76190476190476,"a95":1.6,"info":"\"13-11-07\" at \"05:41\""},{"visible":true,"include":true,"step":"320","x":-929.5238095238095,"y":-82.76190476190476,"z":132.85714285714286,"a95":1.8,"info":"\"13-11-07\" at \"09:12\""},{"visible":true,"include":true,"step":"340","x":-883.047619047619,"y":-48.666666666666664,"z":85.9047619047619,"a95":2.1,"info":"\"13-11-07\" at \"14:46\""},{"visible":true,"include":false,"step":"380","x":-800.7619047619048,"y":-6,"z":12.19047619047619,"a95":2.5,"info":"\"13-11-08\" at \"11:56\""},{"visible":true,"include":false,"step":"420","x":-765.5238095238095,"y":2.1904761904761907,"z":40.38095238095238,"a95":2.3,"info":"\"13-11-08\" at \"16:59\""},{"visible":true,"include":false,"step":"450","x":-711.7142857142857,"y":8.476190476190476,"z":24.285714285714285,"a95":2,"info":"\"13-11-08\" at \"20:38\""},{"visible":true,"include":false,"step":"500","x":-601.8095238095239,"y":28.952380952380953,"z":32,"a95":2.5,"info":"\"13-11-10\" at \"12:04\""},{"visible":true,"include":false,"step":"530","x":-461.14285714285717,"y":-25.904761904761905,"z":39.333333333333336,"a95":2.6,"info":"\"13-11-10\" at \"15:23\""},{"visible":true,"include":false,"step":"560","x":-340.76190476190476,"y":27.80952380952381,"z":66.19047619047619,"a95":3.4,"info":"\"13-11-11\" at \"00:11\""}]},{"version":"v1.1.0","exported":"2016-11-28T13:43:02.644Z","volume":10.5,"added":"2016-11-28T13:39:24.457Z","format":"Utrecht","demagType":"Unknown","strat":"7","patch":1.1,"GEO":[{"dec":305.9059798737507,"inc":-12.334149372579391,"MAD":5.090827199398745,"cm":[-3.552713678800501e-15,4.263256414560601e-14,0],"intensity":2758.5575088302603,"type":"GC","origin":false,"forced":true,"remark":"","nSteps":5,"minStep":"4.0","maxStep":"20.0","steps":["4.0","8.0","12.0","16.0","20.0"],"group":"None","version":"v1.1.0"}],"TECT":[{"dec":229.98652804894516,"inc":-54.35166606584065,"MAD":5.0908271993986745,"cm":[-1.4210854715202004e-14,-7.105427357601002e-14,4.440892098500626e-14],"intensity":2758.5575088302608,"type":"GC","origin":false,"forced":true,"remark":"","nSteps":5,"minStep":"4.0","maxStep":"20.0","steps":["4.0","8.0","12.0","16.0","20.0"],"group":"None","version":"v1.1.0"}],"interpreted":true,"name":"AR 2.6B","coreAzi":45,"coreDip":44,"bedStrike":250,"bedDip":89,"data":[{"visible":true,"include":false,"step":"0.0","x":-1189.5238095238096,"y":-318.1047619047619,"z":1536.6666666666667,"a95":0.99,"info":"19/01/2014 at 03:44:49"},{"visible":true,"include":true,"step":"4.0","x":-1115.6190476190477,"y":-376.6,"z":1261.5238095238096,"a95":0.99,"info":"19/01/2014 at 03:44:49"},{"visible":true,"include":true,"step":"8.0","x":-1053.4285714285713,"y":-301.93333333333334,"z":837.0666666666667,"a95":0.99,"info":"19/01/2014 at 03:44:49"},{"visible":true,"include":true,"step":"12.0","x":-1028.952380952381,"y":-226.97142857142856,"z":623.1428571428571,"a95":0.99,"info":"19/01/2014 at 03:44:49"},{"visible":true,"include":true,"step":"16.0","x":-1010.6666666666666,"y":-197.05714285714285,"z":517.4380952380952,"a95":0.99,"info":"19/01/2014 at 03:44:49"},{"visible":true,"include":true,"step":"20.0","x":-996.7619047619048,"y":-136.47619047619048,"z":436.7809523809524,"a95":0.99,"info":"19/01/2014 at 03:44:49"},{"visible":true,"include":false,"step":"25.0","x":-968.3809523809524,"y":-100.66666666666667,"z":417.5619047619047,"a95":0.99,"info":"19/01/2014 at 03:44:49"},{"visible":true,"include":false,"step":"30.0","x":-913.352380952381,"y":-86.22285714285715,"z":368.45714285714286,"a95":0.99,"info":"19/01/2014 at 03:44:49"},{"visible":true,"include":false,"step":"35.0","x":-830.3142857142857,"y":-91.93238095238095,"z":362.6095238095238,"a95":0.99,"info":"19/01/2014 at 03:44:49"},{"visible":true,"include":false,"step":"40.0","x":-785.9047619047619,"y":-87.42476190476191,"z":392.0571428571429,"a95":0.99,"info":"19/01/2014 at 03:44:49"},{"visible":true,"include":false,"step":"45.0","x":-767.3142857142857,"y":-82.3104761904762,"z":376.552380952381,"a95":0.99,"info":"19/01/2014 at 03:44:49"},{"visible":true,"include":false,"step":"50.0","x":-736.7333333333333,"y":-91.75333333333333,"z":361.51428571428573,"a95":0.99,"info":"19/01/2014 at 03:44:49"},{"visible":true,"include":false,"step":"60.0","x":-656.3714285714285,"y":-44.93333333333334,"z":367.93333333333334,"a95":0.99,"info":"19/01/2014 at 03:44:49"},{"visible":true,"include":false,"step":"70.0","x":-553.8666666666667,"y":-24.627619047619046,"z":328.7333333333333,"a95":0.99,"info":"19/01/2014 at 03:44:49"},{"visible":true,"include":false,"step":"80.0","x":-643.047619047619,"y":-69.62285714285714,"z":304.9047619047619,"a95":0.99,"info":"19/01/2014 at 03:44:49"},{"visible":true,"include":false,"step":"90.0","x":-502.50476190476195,"y":-4.098761904761905,"z":228.73333333333332,"a95":0.99,"info":"19/01/2014 at 03:44:49"},{"visible":true,"include":false,"step":"100.0","x":-483.97142857142853,"y":47.87238095238096,"z":293.2857142857143,"a95":0.99,"info":"19/01/2014 at 03:44:49"}]},{"version":"v1.1.0","exported":"2016-11-28T13:43:02.644Z","volume":10.5,"added":"2016-11-28T13:39:24.459Z","format":"Utrecht","demagType":"Unknown","strat":"8","patch":1.1,"GEO":[{"dec":223.29020521612628,"inc":23.906004915497594,"MAD":2.345119026469463,"cm":[-7.460698725481052e-14,7.105427357601002e-14,0],"intensity":1338.318884309969,"type":"dir","forced":true,"remark":"","origin":false,"nSteps":6,"minStep":"30.0","maxStep":"60.0","steps":["30.0","35.0","40.0","45.0","50.0","60.0"],"group":"None","version":"v1.1.0"}],"TECT":[{"dec":275.9825698130539,"inc":24.70346337031455,"MAD":2.3451190264693764,"cm":[6.52811138479592e-14,4.263256414560601e-14,1.1723955140041653e-13],"intensity":1338.318884309969,"type":"dir","forced":true,"remark":"","origin":false,"nSteps":6,"minStep":"30.0","maxStep":"60.0","steps":["30.0","35.0","40.0","45.0","50.0","60.0"],"group":"None","version":"v1.1.0"}],"interpreted":true,"name":"AR 2.7B","coreAzi":45,"coreDip":46,"bedStrike":250,"bedDip":89,"data":[{"visible":true,"include":false,"step":"0.0","x":-894.9428571428571,"y":329.29523809523806,"z":-473.4857142857143,"a95":0.99,"info":"19/01/2014 at 03:44:49"},{"visible":true,"include":false,"step":"4.0","x":-856.4666666666666,"y":305.77142857142854,"z":-519.2761904761904,"a95":0.99,"info":"19/01/2014 at 03:44:49"},{"visible":true,"include":false,"step":"8.0","x":-825.8095238095239,"y":222.71428571428572,"z":-407.2476190476191,"a95":0.99,"info":"19/01/2014 at 03:44:49"},{"visible":true,"include":false,"step":"12.0","x":-808.6666666666666,"y":148.56190476190477,"z":-317.5904761904762,"a95":0.99,"info":"19/01/2014 at 03:44:49"},{"visible":true,"include":false,"step":"16.0","x":-812.104761904762,"y":128.9142857142857,"z":-292.8,"a95":0.99,"info":"19/01/2014 at 03:44:49"},{"visible":true,"include":false,"step":"20.0","x":-793.952380952381,"y":94.54666666666667,"z":-272.7238095238095,"a95":0.99,"info":"19/01/2014 at 03:44:49"},{"visible":true,"include":false,"step":"25.0","x":-778.152380952381,"y":82.02380952380952,"z":-244.0952380952381,"a95":0.99,"info":"19/01/2014 at 03:44:49"},{"visible":true,"include":true,"step":"30.0","x":-736.7904761904762,"y":54.71999999999999,"z":-243.2095238095238,"a95":0.99,"info":"19/01/2014 at 03:44:49"},{"visible":true,"include":true,"step":"35.0","x":-651.2095238095238,"y":22.637142857142855,"z":-240.45714285714288,"a95":0.99,"info":"19/01/2014 at 03:44:49"},{"visible":true,"include":true,"step":"40.0","x":-644.495238095238,"y":32.81333333333333,"z":-237.50476190476192,"a95":0.99,"info":"19/01/2014 at 03:44:49"},{"visible":true,"include":true,"step":"45.0","x":-594.6285714285715,"y":15.602857142857143,"z":-221.6095238095238,"a95":0.99,"info":"19/01/2014 at 03:44:49"},{"visible":true,"include":true,"step":"50.0","x":-585.5904761904761,"y":-19.86857142857143,"z":-216.44761904761904,"a95":0.99,"info":"19/01/2014 at 03:44:49"},{"visible":true,"include":true,"step":"60.0","x":-520.2285714285714,"y":-9.959047619047618,"z":-213.95238095238096,"a95":0.99,"info":"19/01/2014 at 03:44:49"},{"visible":true,"include":false,"step":"70.0","x":-454.0571428571429,"y":-4.267428571428572,"z":-184.03809523809525,"a95":0.99,"info":"19/01/2014 at 03:44:49"},{"visible":true,"include":false,"step":"80.0","x":-613.5428571428571,"y":-93.58571428571429,"z":-233.49523809523808,"a95":0.99,"info":"19/01/2014 at 03:44:49"},{"visible":true,"include":false,"step":"90.0","x":-447.3333333333333,"y":-10.301904761904762,"z":-235.15238095238095,"a95":0.99,"info":"19/01/2014 at 03:44:49"},{"visible":true,"include":false,"step":"100.0","x":-365.8857142857143,"y":-44.30952380952381,"z":-157.84761904761905,"a95":0.99,"info":"19/01/2014 at 03:44:49"}]},{"version":"v1.1.0","exported":"2016-11-28T13:43:02.644Z","volume":10.5,"added":"2016-11-28T13:39:24.460Z","format":"Utrecht","demagType":"Unknown","strat":"1","patch":1.1,"GEO":[{"dec":264.4921863608183,"inc":-10.779495388470433,"MAD":2.681111270265563,"cm":[-8.881784197001252e-14,-2.1316282072803006e-14,0],"intensity":3608.0967057188896,"type":"GC","origin":false,"forced":true,"remark":"","nSteps":7,"minStep":"8.0","maxStep":"35.0","steps":["8.0","12.0","16.0","20.0","25.0","30.0","35.0"],"group":"None","version":"v1.1.0"}],"TECT":[{"dec":238.58905340390072,"inc":-18.717026943556572,"MAD":2.681111270264189,"cm":[0,-3.552713678800501e-14,3.197442310920451e-14],"intensity":3608.0967057188896,"type":"GC","origin":false,"forced":true,"remark":"","nSteps":7,"minStep":"8.0","maxStep":"35.0","steps":["8.0","12.0","16.0","20.0","25.0","30.0","35.0"],"group":"None","version":"v1.1.0"}],"interpreted":true,"name":"AR 2.8","coreAzi":120,"coreDip":49,"bedStrike":247,"bedDip":81,"data":[{"visible":true,"include":false,"step":"0.0","x":-2455.2380952380954,"y":-192.0952380952381,"z":1109.4285714285713,"a95":0.99,"info":"19/01/2014 at 09:14:50"},{"visible":true,"include":false,"step":"4.0","x":-2272.095238095238,"y":-214.44761904761904,"z":1289.142857142857,"a95":0.99,"info":"19/01/2014 at 09:14:50"},{"visible":true,"include":true,"step":"8.0","x":-1830,"y":-53.10095238095238,"z":1261.2380952380952,"a95":0.99,"info":"19/01/2014 at 09:14:50"},{"visible":true,"include":true,"step":"12.0","x":-1508.1904761904761,"y":94.6047619047619,"z":1183.3333333333333,"a95":0.99,"info":"19/01/2014 at 09:14:50"},{"visible":true,"include":true,"step":"16.0","x":-1334.5714285714287,"y":186.06666666666666,"z":1146.952380952381,"a95":0.99,"info":"19/01/2014 at 09:14:50"},{"visible":true,"include":true,"step":"20.0","x":-1202.4761904761904,"y":262.81904761904764,"z":1092.6666666666667,"a95":0.99,"info":"19/01/2014 at 09:14:50"},{"visible":true,"include":true,"step":"25.0","x":-1111.3333333333333,"y":319.8095238095238,"z":1055.904761904762,"a95":0.99,"info":"19/01/2014 at 09:14:50"},{"visible":true,"include":true,"step":"30.0","x":-1015.047619047619,"y":328.7238095238095,"z":1012,"a95":0.99,"info":"19/01/2014 at 09:14:50"},{"visible":true,"include":true,"step":"35.0","x":-972.952380952381,"y":335.97142857142853,"z":993.047619047619,"a95":0.99,"info":"19/01/2014 at 09:14:50"},{"visible":true,"include":false,"step":"40.0","x":-940.0380952380953,"y":341.3333333333333,"z":967.7142857142857,"a95":0.99,"info":"19/01/2014 at 09:14:50"},{"visible":true,"include":false,"step":"45.0","x":-860.3904761904762,"y":317.74285714285713,"z":942.5904761904762,"a95":0.99,"info":"19/01/2014 at 09:14:50"},{"visible":true,"include":false,"step":"50.0","x":-850.1142857142858,"y":340.7238095238095,"z":930.847619047619,"a95":0.99,"info":"19/01/2014 at 09:14:50"},{"visible":true,"include":false,"step":"60.0","x":-786.7333333333333,"y":351.1047619047619,"z":730.7333333333333,"a95":0.99,"info":"19/01/2014 at 09:14:50"},{"visible":true,"include":false,"step":"70.0","x":-699.5428571428571,"y":409.1904761904762,"z":828.3142857142857,"a95":0.99,"info":"19/01/2014 at 09:14:50"},{"visible":true,"include":false,"step":"80.0","x":-1018.4761904761905,"y":307.9238095238095,"z":636.504761904762,"a95":0.99,"info":"19/01/2014 at 09:14:50"},{"visible":true,"include":false,"step":"90.0","x":-576.1333333333333,"y":432.25714285714287,"z":712.2095238095238,"a95":0.99,"info":"19/01/2014 at 09:14:50"},{"visible":true,"include":false,"step":"100.0","x":-361.8,"y":525.2952380952381,"z":738.447619047619,"a95":0.99,"info":"19/01/2014 at 09:14:50"}]},{"version":"v1.1.0","exported":"2016-11-28T13:43:02.644Z","volume":10.5,"added":"2016-11-28T13:39:24.460Z","format":"Utrecht","demagType":"Unknown","strat":"2","patch":1.1,"GEO":[{"dec":252.93225970674035,"inc":-28.76197385923241,"MAD":5.64815329401765,"cm":[-2.842170943040401e-14,-1.7763568394002505e-15,0],"intensity":1380.7905829353354,"type":"GC","origin":false,"forced":true,"remark":"","nSteps":8,"minStep":"4.0","maxStep":"35.0","steps":["4.0","8.0","12.0","16.0","20.0","25.0","30.0","35.0"],"group":"None","version":"v1.1.0"}],"TECT":[{"dec":219.13025445279007,"inc":-9.483176682122206,"MAD":5.648153294018158,"cm":[-1.4210854715202004e-13,-1.2434497875801753e-13,2.842170943040401e-14],"intensity":1380.7905829353351,"type":"GC","origin":false,"forced":true,"remark":"","nSteps":8,"minStep":"4.0","maxStep":"35.0","steps":["4.0","8.0","12.0","16.0","20.0","25.0","30.0","35.0"],"group":"None","version":"v1.1.0"}],"interpreted":true,"name":"AR 2.9B","coreAzi":105,"coreDip":62,"bedStrike":247,"bedDip":81,"data":[{"visible":true,"include":false,"step":"0.0","x":-939.0857142857143,"y":-103.02857142857142,"z":328.3809523809524,"a95":0.99,"info":"19/01/2014 at 09:14:50"},{"visible":true,"include":true,"step":"4.0","x":-862.304761904762,"y":-154.7238095238095,"z":388.9904761904762,"a95":0.99,"info":"19/01/2014 at 09:14:50"},{"visible":true,"include":true,"step":"8.0","x":-699.8095238095239,"y":-55.78952380952381,"z":369.62857142857143,"a95":0.99,"info":"19/01/2014 at 09:14:50"},{"visible":true,"include":true,"step":"12.0","x":-587.8095238095239,"y":40.4247619047619,"z":345.7333333333333,"a95":0.99,"info":"19/01/2014 at 09:14:50"},{"visible":true,"include":true,"step":"16.0","x":-518.1809523809524,"y":109.88571428571429,"z":343.0095238095238,"a95":0.99,"info":"19/01/2014 at 09:14:50"},{"visible":true,"include":true,"step":"20.0","x":-447.6380952380952,"y":164.88571428571427,"z":317.9047619047619,"a95":0.99,"info":"19/01/2014 at 09:14:50"},{"visible":true,"include":true,"step":"25.0","x":-413.4,"y":184.7238095238095,"z":324.0761904761905,"a95":0.99,"info":"19/01/2014 at 09:14:50"},{"visible":true,"include":true,"step":"30.0","x":-352.552380952381,"y":204.7047619047619,"z":330.96190476190475,"a95":0.99,"info":"19/01/2014 at 09:14:50"},{"visible":true,"include":true,"step":"35.0","x":-316.48571428571427,"y":192.35238095238097,"z":329.0761904761905,"a95":0.99,"info":"19/01/2014 at 09:14:50"},{"visible":true,"include":false,"step":"40.0","x":-316.45714285714286,"y":181.04761904761904,"z":351.8095238095238,"a95":0.99,"info":"19/01/2014 at 09:14:50"},{"visible":true,"include":false,"step":"45.0","x":-298.57142857142856,"y":182.1238095238095,"z":342.76190476190476,"a95":0.99,"info":"19/01/2014 at 09:14:50"},{"visible":true,"include":false,"step":"50.0","x":-295.2857142857143,"y":179.51428571428573,"z":358.3619047619048,"a95":0.99,"info":"19/01/2014 at 09:14:50"},{"visible":true,"include":false,"step":"60.0","x":-267.85714285714283,"y":161.62857142857143,"z":283.2666666666667,"a95":0.99,"info":"19/01/2014 at 09:14:50"},{"visible":true,"include":false,"step":"70.0","x":-224.85714285714286,"y":162.41904761904763,"z":344.34285714285716,"a95":0.99,"info":"19/01/2014 at 09:14:50"},{"visible":true,"include":false,"step":"80.0","x":-256.93333333333334,"y":222.53333333333333,"z":324.23809523809524,"a95":0.99,"info":"19/01/2014 at 09:14:50"},{"visible":true,"include":false,"step":"90.0","x":-246,"y":179.74285714285713,"z":325.447619047619,"a95":0.99,"info":"19/01/2014 at 09:14:50"},{"visible":true,"include":false,"step":"100.0","x":-150.8095238095238,"y":201.2,"z":308.06666666666666,"a95":0.99,"info":"19/01/2014 at 09:14:50"}]},{"version":"v1.1.0","exported":"2016-11-28T13:43:02.645Z","volume":10.5,"added":"2016-11-28T13:39:24.460Z","format":"Utrecht","demagType":"Unknown","strat":null,"patch":1.1,"GEO":[{"dec":280.50111468153887,"inc":-27.619510370856833,"MAD":4.308799630376848,"cm":[-1.4210854715202004e-14,-1.4210854715202004e-14,0],"intensity":3446.8722408725794,"type":"GC","origin":false,"forced":true,"remark":"","nSteps":9,"minStep":"150","maxStep":"340","steps":["150","180","200","225","250","275","300","320","340"],"group":"None","version":"v1.1.0"}],"TECT":[{"dec":219.6978416464005,"inc":-33.74911468573598,"MAD":4.308799630376794,"cm":[-1.1723955140041653e-13,-7.105427357601002e-14,3.552713678800501e-14],"intensity":3446.8722408725794,"type":"GC","origin":false,"forced":true,"remark":"","nSteps":9,"minStep":"150","maxStep":"340","steps":["150","180","200","225","250","275","300","320","340"],"group":"None","version":"v1.1.0"}],"interpreted":true,"name":"AR 2.10A","coreAzi":160,"coreDip":13,"bedStrike":247,"bedDip":81,"data":[{"visible":true,"include":false,"step":"20","x":-3940.4761904761904,"y":505.14285714285717,"z":-1347.3333333333333,"a95":1.9,"info":"\"13-11-03\" at \"12:40\""},{"visible":true,"include":false,"step":"80","x":-3058.9523809523807,"y":770.7619047619048,"z":-604.1904761904761,"a95":1.8,"info":"\"13-11-04\" at \"09:24\""},{"visible":true,"include":true,"step":"150","x":-1917.7142857142858,"y":859.3333333333334,"z":18.38095238095238,"a95":1.8,"info":"\"13-11-04\" at \"15:05\""},{"visible":true,"include":true,"step":"180","x":-1698.2857142857142,"y":921.4285714285714,"z":234.47619047619048,"a95":1.9,"info":"\"13-11-05\" at \"09:39\""},{"visible":true,"include":true,"step":"200","x":-1586.095238095238,"y":933.6190476190476,"z":290.4761904761905,"a95":1.9,"info":"\"13-11-05\" at \"14:11\""},{"visible":true,"include":true,"step":"225","x":-1545.047619047619,"y":958.2857142857143,"z":288.2857142857143,"a95":1.9,"info":"\"13-11-06\" at \"08:33\""},{"visible":true,"include":true,"step":"250","x":-1379.3333333333333,"y":978.5714285714286,"z":463.04761904761904,"a95":2.1,"info":"\"13-11-06\" at \"13:04\""},{"visible":true,"include":true,"step":"275","x":-1123.5238095238096,"y":1058.2857142857142,"z":640.5714285714286,"a95":2.2,"info":"\"13-11-06\" at \"17:13\""},{"visible":true,"include":true,"step":"300","x":-1114.2857142857142,"y":1035.5238095238096,"z":753.2380952380952,"a95":2,"info":"\"13-11-07\" at \"05:44\""},{"visible":true,"include":true,"step":"320","x":-972.7619047619048,"y":1037.904761904762,"z":885.3333333333334,"a95":2.1,"info":"\"13-11-07\" at \"09:15\""},{"visible":true,"include":true,"step":"340","x":-860.0952380952381,"y":976.7619047619048,"z":872.3809523809524,"a95":4,"info":"\"13-11-07\" at \"14:49\""},{"visible":true,"include":false,"step":"380","x":-742.3809523809524,"y":765.2380952380952,"z":987.9047619047619,"a95":3.8,"info":"\"13-11-08\" at \"12:03\""},{"visible":true,"include":false,"step":"420","x":-767.047619047619,"y":758.2857142857143,"z":938.5714285714286,"a95":4.5,"info":"\"13-11-08\" at \"17:02\""},{"visible":true,"include":false,"step":"450","x":-741.1428571428571,"y":682.1904761904761,"z":920.8571428571429,"a95":4.6,"info":"\"13-11-08\" at \"20:40\""},{"visible":true,"include":false,"step":"500","x":-560.2857142857143,"y":694.1904761904761,"z":838.7619047619048,"a95":4.9,"info":"\"13-11-10\" at \"12:07\""},{"visible":true,"include":false,"step":"530","x":-344.1904761904762,"y":293.04761904761904,"z":839.5238095238095,"a95":6,"info":"\"13-11-10\" at \"15:26\""},{"visible":true,"include":false,"step":"560","x":-235.04761904761904,"y":577.3333333333334,"z":457.14285714285717,"a95":4.9,"info":"\"13-11-11\" at \"00:16\""}]},{"version":"v1.1.0","exported":"2016-11-28T13:43:02.645Z","volume":10.5,"added":"2016-11-28T13:39:24.460Z","format":"Utrecht","demagType":"Unknown","strat":"3","patch":1.1,"GEO":[{"dec":284.72553972468194,"inc":-30.919874327931353,"MAD":6.877097896796404,"cm":[-1.0658141036401503e-14,0,0],"intensity":3945.82339885682,"type":"GC","origin":false,"forced":true,"remark":"","nSteps":7,"minStep":"8.0","maxStep":"35.0","steps":["8.0","12.0","16.0","20.0","25.0","30.0","35.0"],"group":"None","version":"v1.1.0"}],"TECT":[{"dec":214.91543748727184,"inc":-36.78706929013669,"MAD":6.877097896799148,"cm":[2.3447910280083306e-13,2.7711166694643907e-13,2.1316282072803006e-14],"intensity":3945.82339885682,"type":"GC","origin":false,"forced":true,"remark":"","nSteps":7,"minStep":"8.0","maxStep":"35.0","steps":["8.0","12.0","16.0","20.0","25.0","30.0","35.0"],"group":"None","version":"v1.1.0"}],"interpreted":true,"name":"AR 2.10B","coreAzi":160,"coreDip":13,"bedStrike":247,"bedDip":81,"data":[{"visible":true,"include":false,"step":"0.0","x":-3542.190476190476,"y":398.2190476190476,"z":-1748.095238095238,"a95":0.99,"info":"19/01/2014 at 09:14:50"},{"visible":true,"include":false,"step":"4.0","x":-3153.0476190476193,"y":388.49523809523805,"z":-1470,"a95":0.99,"info":"19/01/2014 at 09:14:50"},{"visible":true,"include":true,"step":"8.0","x":-2508.190476190476,"y":468.152380952381,"z":-1064.2857142857142,"a95":0.99,"info":"19/01/2014 at 09:14:50"},{"visible":true,"include":true,"step":"12.0","x":-2022.5714285714287,"y":529.0761904761905,"z":-738.5904761904761,"a95":0.99,"info":"19/01/2014 at 09:14:50"},{"visible":true,"include":true,"step":"16.0","x":-1760.3809523809523,"y":543.5428571428571,"z":-529.3904761904762,"a95":0.99,"info":"19/01/2014 at 09:14:50"},{"visible":true,"include":true,"step":"20.0","x":-1534.095238095238,"y":524.8285714285714,"z":-434.5619047619047,"a95":0.99,"info":"19/01/2014 at 09:14:50"},{"visible":true,"include":true,"step":"25.0","x":-1373.047619047619,"y":486.25714285714287,"z":-315.6380952380952,"a95":0.99,"info":"19/01/2014 at 09:14:50"},{"visible":true,"include":true,"step":"30.0","x":-1254.3809523809523,"y":492.2666666666667,"z":-255.57142857142858,"a95":0.99,"info":"19/01/2014 at 09:14:50"},{"visible":true,"include":true,"step":"35.0","x":-1131.904761904762,"y":419.95238095238096,"z":-172.84761904761905,"a95":0.99,"info":"19/01/2014 at 09:14:50"},{"visible":true,"include":false,"step":"40.0","x":-1060.857142857143,"y":414.1904761904762,"z":-111.15238095238094,"a95":0.99,"info":"19/01/2014 at 09:14:50"},{"visible":true,"include":false,"step":"45.0","x":-1024.6666666666667,"y":453.2857142857143,"z":-149.3904761904762,"a95":0.99,"info":"19/01/2014 at 09:14:50"},{"visible":true,"include":false,"step":"50.0","x":-974.6666666666666,"y":353.3047619047619,"z":-103.03809523809525,"a95":0.99,"info":"19/01/2014 at 09:14:50"},{"visible":true,"include":false,"step":"60.0","x":-911.304761904762,"y":400.1714285714286,"z":-168.22857142857143,"a95":0.99,"info":"19/01/2014 at 09:14:50"},{"visible":true,"include":false,"step":"70.0","x":-813.4380952380952,"y":429.8666666666667,"z":-54.955238095238094,"a95":0.99,"info":"19/01/2014 at 09:14:50"},{"visible":true,"include":false,"step":"80.0","x":-809.4857142857143,"y":382.45714285714286,"z":34.11904761904762,"a95":0.99,"info":"19/01/2014 at 09:14:50"},{"visible":true,"include":false,"step":"90.0","x":-782.9142857142857,"y":544.2285714285714,"z":-18.943809523809524,"a95":0.99,"info":"19/01/2014 at 09:14:50"},{"visible":true,"include":false,"step":"100.0","x":-859.6571428571428,"y":540.9809523809524,"z":61.857142857142854,"a95":0.99,"info":"19/01/2014 at 09:14:50"}]},{"version":"v1.1.0","exported":"2016-11-28T13:43:02.645Z","volume":10.5,"added":"2016-11-28T13:39:24.460Z","format":"Utrecht","demagType":"Unknown","strat":"4","patch":1.1,"GEO":[{"dec":281.6206287357764,"inc":-24.13287160654046,"MAD":2.7010723247304065,"cm":[3.197442310920451e-14,2.842170943040401e-14,0],"intensity":5022.079152237434,"type":"GC","origin":false,"forced":true,"remark":"","nSteps":8,"minStep":"8.0","maxStep":"40.0","steps":["8.0","12.0","16.0","20.0","25.0","30.0","35.0","40.0"],"group":"None","version":"v1.1.0"}],"TECT":[{"dec":223.74656532241215,"inc":-35.173895677093704,"MAD":2.701072324726195,"cm":[-3.268496584496461e-13,-5.542233338928781e-13,-7.105427357601002e-15],"intensity":5022.079152237436,"type":"GC","origin":false,"forced":true,"remark":"","nSteps":8,"minStep":"8.0","maxStep":"40.0","steps":["8.0","12.0","16.0","20.0","25.0","30.0","35.0","40.0"],"group":"None","version":"v1.1.0"}],"interpreted":true,"name":"AR 2.11B","coreAzi":165,"coreDip":20,"bedStrike":247,"bedDip":81,"data":[{"visible":true,"include":false,"step":"0.0","x":-4813.523809523809,"y":494.65714285714284,"z":-1440.3809523809523,"a95":0.99,"info":"19/01/2014 at 09:14:50"},{"visible":true,"include":false,"step":"4.0","x":-4268,"y":477.76190476190476,"z":-1165.3333333333333,"a95":0.99,"info":"19/01/2014 at 09:14:50"},{"visible":true,"include":true,"step":"8.0","x":-3387.6190476190477,"y":567.8285714285714,"z":-694.1238095238095,"a95":0.99,"info":"19/01/2014 at 09:14:50"},{"visible":true,"include":true,"step":"12.0","x":-2827.2380952380954,"y":632.7047619047619,"z":-327.1904761904762,"a95":0.99,"info":"19/01/2014 at 09:14:50"},{"visible":true,"include":true,"step":"16.0","x":-2452.8571428571427,"y":636.6952380952381,"z":-129.36190476190475,"a95":0.99,"info":"19/01/2014 at 09:14:50"},{"visible":true,"include":true,"step":"20.0","x":-2173.6190476190477,"y":640.8190476190476,"z":-48.3352380952381,"a95":0.99,"info":"19/01/2014 at 09:14:50"},{"visible":true,"include":true,"step":"25.0","x":-1964.095238095238,"y":651.7142857142857,"z":56.76952380952381,"a95":0.99,"info":"19/01/2014 at 09:14:50"},{"visible":true,"include":true,"step":"30.0","x":-1763.047619047619,"y":601.6666666666666,"z":109.74285714285713,"a95":0.99,"info":"19/01/2014 at 09:14:50"},{"visible":true,"include":true,"step":"35.0","x":-1616.5714285714287,"y":543.447619047619,"z":110.65714285714287,"a95":0.99,"info":"19/01/2014 at 09:14:50"},{"visible":true,"include":true,"step":"40.0","x":-1484.6666666666667,"y":533.9809523809524,"z":176.31428571428572,"a95":0.99,"info":"19/01/2014 at 09:14:50"},{"visible":true,"include":false,"step":"45.0","x":-1349.5238095238096,"y":535.7238095238096,"z":112.55238095238094,"a95":0.99,"info":"19/01/2014 at 09:14:50"},{"visible":true,"include":false,"step":"50.0","x":-1275.904761904762,"y":453.93333333333334,"z":134.2095238095238,"a95":0.99,"info":"19/01/2014 at 09:14:50"},{"visible":true,"include":false,"step":"60.0","x":-1247.7142857142858,"y":431.0571428571429,"z":79.10857142857142,"a95":0.99,"info":"19/01/2014 at 09:14:50"},{"visible":true,"include":false,"step":"70.0","x":-1102.857142857143,"y":482.2095238095238,"z":165.44761904761904,"a95":0.99,"info":"19/01/2014 at 09:14:50"},{"visible":true,"include":false,"step":"80.0","x":-1062.2857142857142,"y":318.2666666666667,"z":189.61904761904762,"a95":0.99,"info":"19/01/2014 at 09:14:50"},{"visible":true,"include":false,"step":"90.0","x":-1015.4285714285714,"y":429.2476190476191,"z":204.26666666666668,"a95":0.99,"info":"19/01/2014 at 09:14:50"},{"visible":true,"include":false,"step":"100.0","x":-1014.6666666666666,"y":556.9904761904761,"z":257.29523809523806,"a95":0.99,"info":"19/01/2014 at 09:14:50"}]},{"version":"v1.1.0","exported":"2016-11-28T13:43:02.645Z","volume":10.5,"added":"2016-11-28T13:39:24.460Z","format":"Utrecht","demagType":"Unknown","strat":"5","patch":1.1,"GEO":[{"dec":268.7825809730694,"inc":-36.838060538944276,"MAD":4.251743964127316,"cm":[-4.973799150320701e-14,4.973799150320701e-14,0],"intensity":1885.1980158599436,"type":"GC","origin":false,"forced":true,"remark":"","nSteps":5,"minStep":"8.0","maxStep":"25.0","steps":["8.0","12.0","16.0","20.0","25.0"],"group":"None","version":"v1.1.0"}],"TECT":[{"dec":216.55822738864612,"inc":-26.827943397425887,"MAD":4.25174396412839,"cm":[1.7763568394002505e-14,0,9.237055564881302e-14],"intensity":1885.1980158599436,"type":"GC","origin":false,"forced":true,"remark":"","nSteps":5,"minStep":"8.0","maxStep":"25.0","steps":["8.0","12.0","16.0","20.0","25.0"],"group":"None","version":"v1.1.0"}],"interpreted":true,"name":"AR 2.12B","coreAzi":146,"coreDip":28,"bedStrike":249,"bedDip":71,"data":[{"visible":true,"include":false,"step":"0.0","x":-1472.857142857143,"y":480.0761904761905,"z":-278.77142857142854,"a95":0.99,"info":"19/01/2014 at 09:14:50"},{"visible":true,"include":false,"step":"4.0","x":-1314.7619047619048,"y":488.99047619047616,"z":-125.37142857142858,"a95":0.99,"info":"19/01/2014 at 09:14:50"},{"visible":true,"include":true,"step":"8.0","x":-919.0666666666667,"y":564.952380952381,"z":130.57142857142858,"a95":0.99,"info":"19/01/2014 at 09:14:50"},{"visible":true,"include":true,"step":"12.0","x":-672.2952380952381,"y":622.2761904761904,"z":284.447619047619,"a95":0.99,"info":"19/01/2014 at 09:14:50"},{"visible":true,"include":true,"step":"16.0","x":-561.6380952380953,"y":635.5142857142857,"z":360.15238095238095,"a95":0.99,"info":"19/01/2014 at 09:14:50"},{"visible":true,"include":true,"step":"20.0","x":-496.85714285714283,"y":629.6,"z":375.93333333333334,"a95":0.99,"info":"19/01/2014 at 09:14:50"},{"visible":true,"include":true,"step":"25.0","x":-470.8285714285714,"y":591.5619047619048,"z":402.9428571428571,"a95":0.99,"info":"19/01/2014 at 09:14:50"},{"visible":true,"include":false,"step":"30.0","x":-483.57142857142856,"y":533.3238095238095,"z":408.2285714285714,"a95":0.99,"info":"19/01/2014 at 09:14:50"},{"visible":true,"include":false,"step":"35.0","x":-490.8285714285714,"y":464.31428571428575,"z":414.3714285714285,"a95":0.99,"info":"19/01/2014 at 09:14:50"},{"visible":true,"include":false,"step":"40.0","x":-469.1333333333333,"y":452.12380952380954,"z":389.5904761904762,"a95":0.99,"info":"19/01/2014 at 09:14:50"},{"visible":true,"include":false,"step":"45.0","x":-474.0190476190476,"y":443.46666666666664,"z":405.06666666666666,"a95":0.99,"info":"19/01/2014 at 09:14:50"},{"visible":true,"include":false,"step":"50.0","x":-504.6190476190476,"y":403.7333333333333,"z":386.51428571428573,"a95":0.99,"info":"19/01/2014 at 09:14:50"},{"visible":true,"include":false,"step":"60.0","x":-474.4190476190476,"y":395.8285714285714,"z":273.6666666666667,"a95":0.99,"info":"19/01/2014 at 09:14:50"},{"visible":true,"include":false,"step":"70.0","x":-446.7333333333333,"y":362.85714285714283,"z":384.0095238095238,"a95":0.99,"info":"19/01/2014 at 09:14:50"},{"visible":true,"include":false,"step":"80.0","x":-258.7809523809524,"y":399.8095238095238,"z":369.03809523809525,"a95":0.99,"info":"19/01/2014 at 09:14:50"},{"visible":true,"include":false,"step":"90.0","x":-419.34285714285716,"y":352.65714285714284,"z":328.54285714285714,"a95":0.99,"info":"19/01/2014 at 09:14:50"},{"visible":true,"include":false,"step":"100.0","x":-379.3904761904762,"y":346.8095238095238,"z":362.70476190476194,"a95":0.99,"info":"19/01/2014 at 09:14:50"}]},{"version":"v1.1.0","exported":"2016-11-28T13:43:02.645Z","volume":10.5,"added":"2016-11-28T13:39:24.461Z","format":"Utrecht","demagType":"Unknown","strat":"6","patch":1.1,"GEO":[{"dec":305.7020734301754,"inc":-18.5078288258087,"MAD":4.169466267738584,"cm":[-7.105427357601002e-14,0,0],"intensity":3351.9011102326904,"type":"GC","origin":false,"forced":true,"remark":"","nSteps":6,"minStep":"4.0","maxStep":"25.0","steps":["4.0","8.0","12.0","16.0","20.0","25.0"],"group":"None","version":"v1.1.0"}],"TECT":[{"dec":244.37717425694237,"inc":-58.513480036059214,"MAD":4.169466267738369,"cm":[-3.339550858072471e-13,-4.263256414560601e-13,2.1316282072803006e-14],"intensity":3351.9011102326904,"type":"GC","origin":false,"forced":true,"remark":"","nSteps":6,"minStep":"4.0","maxStep":"25.0","steps":["4.0","8.0","12.0","16.0","20.0","25.0"],"group":"None","version":"v1.1.0"}],"interpreted":true,"name":"AR 2.13B","coreAzi":65,"coreDip":45,"bedStrike":249,"bedDip":71,"data":[{"visible":true,"include":false,"step":"0.0","x":-1812.5714285714287,"y":-807.2857142857143,"z":1748.095238095238,"a95":0.99,"info":"19/01/2014 at 09:14:50"},{"visible":true,"include":true,"step":"4.0","x":-1665.4285714285713,"y":-721.2571428571429,"z":1428.5714285714287,"a95":0.99,"info":"19/01/2014 at 09:14:50"},{"visible":true,"include":true,"step":"8.0","x":-1423.904761904762,"y":-428.25714285714287,"z":858.2380952380952,"a95":0.99,"info":"19/01/2014 at 09:14:50"},{"visible":true,"include":true,"step":"12.0","x":-1280.7619047619048,"y":-215.51428571428573,"z":525.0190476190476,"a95":0.99,"info":"19/01/2014 at 09:14:50"},{"visible":true,"include":true,"step":"16.0","x":-1200.4761904761904,"y":-122.13333333333334,"z":380.0952380952381,"a95":0.99,"info":"19/01/2014 at 09:14:50"},{"visible":true,"include":true,"step":"20.0","x":-1155.2380952380952,"y":-45.60095238095238,"z":300.50476190476195,"a95":0.99,"info":"19/01/2014 at 09:14:50"},{"visible":true,"include":true,"step":"25.0","x":-1114.5714285714287,"y":-12.997142857142856,"z":294.1333333333333,"a95":0.99,"info":"19/01/2014 at 09:14:50"},{"visible":true,"include":false,"step":"30.0","x":-1049.5238095238096,"y":-32.27142857142857,"z":328.4761904761905,"a95":0.99,"info":"19/01/2014 at 09:14:50"},{"visible":true,"include":false,"step":"35.0","x":-967.5238095238095,"y":-26.375238095238096,"z":352.51428571428573,"a95":0.99,"info":"19/01/2014 at 09:14:50"},{"visible":true,"include":false,"step":"40.0","x":-913.5523809523809,"y":-43.885714285714286,"z":371.5809523809524,"a95":0.99,"info":"19/01/2014 at 09:14:50"},{"visible":true,"include":false,"step":"45.0","x":-875.9809523809523,"y":-32.17619047619048,"z":387.56190476190477,"a95":0.99,"info":"19/01/2014 at 09:14:50"},{"visible":true,"include":false,"step":"50.0","x":-884.5809523809525,"y":-85.49714285714286,"z":435.5142857142857,"a95":0.99,"info":"19/01/2014 at 09:14:50"},{"visible":true,"include":false,"step":"60.0","x":-748.9619047619047,"y":-76.44761904761906,"z":295.77142857142854,"a95":0.99,"info":"19/01/2014 at 09:14:50"},{"visible":true,"include":false,"step":"70.0","x":-743.4190476190475,"y":-82.47714285714285,"z":325.2761904761905,"a95":0.99,"info":"19/01/2014 at 09:14:50"},{"visible":true,"include":false,"step":"80.0","x":-968.2857142857143,"y":77.94761904761906,"z":251.66666666666666,"a95":0.99,"info":"19/01/2014 at 09:14:50"},{"visible":true,"include":false,"step":"90.0","x":-681.7523809523809,"y":19.95714285714286,"z":317.03809523809525,"a95":0.99,"info":"19/01/2014 at 09:14:50"},{"visible":true,"include":false,"step":"100.0","x":-640.2190476190476,"y":37.420952380952386,"z":288.2666666666667,"a95":0.99,"info":"19/01/2014 at 09:14:50"}]},{"version":"v1.1.0","exported":"2016-11-28T13:43:02.645Z","volume":10.5,"added":"2016-11-28T13:39:24.461Z","format":"Utrecht","demagType":"Unknown","strat":null,"patch":1.1,"GEO":[{"dec":270.0965070885022,"inc":-27.410148880920786,"MAD":5.201201348311096,"cm":[-7.105427357601002e-14,2.1316282072803006e-14,0],"intensity":2263.6451509930866,"type":"GC","origin":false,"forced":true,"remark":"","nSteps":7,"minStep":"150","maxStep":"300","steps":["150","180","200","225","250","275","300"],"group":"None","version":"v1.1.0"}],"TECT":[{"dec":227.6763916316429,"inc":-27.239576557568867,"MAD":5.201201348307398,"cm":[-3.552713678800501e-14,0,8.526512829121202e-14],"intensity":2263.6451509930866,"type":"GC","origin":false,"forced":true,"remark":"","nSteps":7,"minStep":"150","maxStep":"300","steps":["150","180","200","225","250","275","300"],"group":"None","version":"v1.1.0"}],"interpreted":true,"name":"AR 2.14","coreAzi":90,"coreDip":48,"bedStrike":249,"bedDip":70,"data":[{"visible":true,"include":false,"step":"20","x":-1828.3809523809523,"y":-491.04761904761904,"z":747.1428571428571,"a95":1.9,"info":"\"13-11-03\" at \"12:46\""},{"visible":true,"include":false,"step":"80","x":-1526.1904761904761,"y":-220.76190476190476,"z":715.8095238095239,"a95":2,"info":"\"13-11-04\" at \"09:27\""},{"visible":true,"include":true,"step":"150","x":-1213.5238095238096,"y":56.19047619047619,"z":467.7142857142857,"a95":2.5,"info":"\"13-11-04\" at \"15:08\""},{"visible":true,"include":true,"step":"180","x":-1124.7619047619048,"y":172.76190476190476,"z":418,"a95":2,"info":"\"13-11-05\" at \"09:41\""},{"visible":true,"include":true,"step":"200","x":-1093.8095238095239,"y":176.1904761904762,"z":393.23809523809524,"a95":2,"info":"\"13-11-05\" at \"14:14\""},{"visible":true,"include":true,"step":"225","x":-1056.2857142857142,"y":220.0952380952381,"z":402.76190476190476,"a95":2,"info":"\"13-11-06\" at \"08:35\""},{"visible":true,"include":true,"step":"250","x":-987.1428571428571,"y":323.3333333333333,"z":354.0952380952381,"a95":2.4,"info":"\"13-11-06\" at \"13:07\""},{"visible":true,"include":true,"step":"275","x":-895.6190476190476,"y":317.6190476190476,"z":349.14285714285717,"a95":2.1,"info":"\"13-11-06\" at \"17:17\""},{"visible":true,"include":true,"step":"300","x":-861.9047619047619,"y":366.85714285714283,"z":330.85714285714283,"a95":2.2,"info":"\"13-11-07\" at \"05:46\""},{"visible":true,"include":false,"step":"320","x":-830.6666666666666,"y":381.3333333333333,"z":362.4761904761905,"a95":2.3,"info":"\"13-11-07\" at \"09:17\""},{"visible":true,"include":false,"step":"340","x":-751.7142857142857,"y":363.14285714285717,"z":324.95238095238096,"a95":3,"info":"\"13-11-07\" at \"14:51\""},{"visible":true,"include":false,"step":"380","x":-664.4761904761905,"y":359.7142857142857,"z":361.23809523809524,"a95":3.1,"info":"\"13-11-08\" at \"12:05\""},{"visible":true,"include":false,"step":"420","x":-612.0952380952381,"y":374.0952380952381,"z":339.04761904761904,"a95":3.3,"info":"\"13-11-08\" at \"17:05\""},{"visible":true,"include":false,"step":"450","x":-562.0952380952381,"y":352.76190476190476,"z":304.0952380952381,"a95":3.3,"info":"\"13-11-08\" at \"20:43\""},{"visible":true,"include":false,"step":"500","x":-383.3333333333333,"y":225.52380952380952,"z":199.71428571428572,"a95":3.6,"info":"\"13-11-10\" at \"12:09\""},{"visible":true,"include":false,"step":"530","x":-337.42857142857144,"y":126.0952380952381,"z":163.9047619047619,"a95":3.7,"info":"\"13-11-10\" at \"15:28\""},{"visible":true,"include":false,"step":"560","x":-306.85714285714283,"y":180.66666666666666,"z":25.047619047619047,"a95":3.8,"info":"\"13-11-11\" at \"00:18\""}]},{"version":"v1.1.0","exported":"2016-11-28T13:43:02.645Z","volume":10.5,"added":"2016-11-28T13:39:24.461Z","format":"Utrecht","demagType":"Unknown","strat":"7","patch":1.1,"GEO":[{"dec":222.68380347672132,"inc":70.21486498865607,"MAD":1.553651047888803,"cm":[-1.0658141036401503e-14,3.197442310920451e-14,0],"intensity":2967.050799452313,"type":"dir","forced":true,"remark":"","origin":false,"nSteps":7,"minStep":"25.0","maxStep":"60.0","steps":["25.0","30.0","35.0","40.0","45.0","50.0","60.0"],"group":"None","version":"v1.1.0"}],"TECT":[{"dec":317.2963272052673,"inc":30.059808842907522,"MAD":1.5536510478888559,"cm":[-3.552713678800501e-14,-5.684341886080802e-14,2.1316282072803006e-14],"intensity":2967.050799452313,"type":"dir","forced":true,"remark":"","origin":false,"nSteps":7,"minStep":"25.0","maxStep":"60.0","steps":["25.0","30.0","35.0","40.0","45.0","50.0","60.0"],"group":"None","version":"v1.1.0"}],"interpreted":true,"name":"AR 2.15B","coreAzi":164,"coreDip":35,"bedStrike":248,"bedDip":67,"data":[{"visible":true,"include":false,"step":"0.0","x":-2398.3809523809523,"y":842.9333333333333,"z":2050.285714285714,"a95":0.99,"info":"19/01/2014 at 09:14:50"},{"visible":true,"include":false,"step":"4.0","x":-2218.095238095238,"y":737.1809523809524,"z":1815.8095238095239,"a95":0.99,"info":"19/01/2014 at 09:14:50"},{"visible":true,"include":false,"step":"8.0","x":-1864.5714285714287,"y":694.0761904761905,"z":1580.952380952381,"a95":0.99,"info":"19/01/2014 at 09:14:50"},{"visible":true,"include":false,"step":"12.0","x":-1583.904761904762,"y":669.4571428571429,"z":1441.8095238095239,"a95":0.99,"info":"19/01/2014 at 09:14:50"},{"visible":true,"include":false,"step":"16.0","x":-1416,"y":631.8380952380952,"z":1360.857142857143,"a95":0.99,"info":"19/01/2014 at 09:14:50"},{"visible":true,"include":false,"step":"20.0","x":-1281.7142857142858,"y":607.1333333333333,"z":1269.142857142857,"a95":0.99,"info":"19/01/2014 at 09:14:50"},{"visible":true,"include":true,"step":"25.0","x":-1196.2857142857142,"y":563.5238095238095,"z":1214,"a95":0.99,"info":"19/01/2014 at 09:14:50"},{"visible":true,"include":true,"step":"30.0","x":-1107.2380952380952,"y":504.8857142857143,"z":1146.2857142857142,"a95":0.99,"info":"19/01/2014 at 09:14:50"},{"visible":true,"include":true,"step":"35.0","x":-1050,"y":430.9428571428571,"z":1056.1904761904761,"a95":0.99,"info":"19/01/2014 at 09:14:50"},{"visible":true,"include":true,"step":"40.0","x":-978.3809523809524,"y":426.76190476190476,"z":1011.1428571428571,"a95":0.99,"info":"19/01/2014 at 09:14:50"},{"visible":true,"include":true,"step":"45.0","x":-918.2666666666667,"y":379.447619047619,"z":966.6666666666666,"a95":0.99,"info":"19/01/2014 at 09:14:50"},{"visible":true,"include":true,"step":"50.0","x":-919.8761904761906,"y":319.85714285714283,"z":939.8095238095239,"a95":0.99,"info":"19/01/2014 at 09:14:50"},{"visible":true,"include":true,"step":"60.0","x":-799.5714285714286,"y":367.7904761904762,"z":774.1142857142856,"a95":0.99,"info":"19/01/2014 at 09:14:50"},{"visible":true,"include":false,"step":"70.0","x":-711.104761904762,"y":367.18095238095236,"z":768.952380952381,"a95":0.99,"info":"19/01/2014 at 09:14:50"},{"visible":true,"include":false,"step":"80.0","x":-228.97142857142856,"y":347.64761904761906,"z":755.1714285714286,"a95":0.99,"info":"19/01/2014 at 09:14:50"},{"visible":true,"include":false,"step":"90.0","x":-651.7714285714286,"y":414.9619047619048,"z":657.6,"a95":0.99,"info":"19/01/2014 at 09:14:50"},{"visible":true,"include":false,"step":"100.0","x":-603.8380952380952,"y":404.9047619047619,"z":685.2666666666667,"a95":0.99,"info":"19/01/2014 at 09:14:50"}]},{"version":"v1.1.0","exported":"2016-11-28T13:43:02.645Z","volume":10.5,"added":"2016-11-28T13:39:24.461Z","format":"Utrecht","demagType":"Unknown","strat":null,"patch":1.1,"GEO":[{"dec":219.16578312708475,"inc":61.24382327114895,"MAD":2.6021171115888677,"cm":[0,1.0658141036401503e-14,0],"intensity":1968.859437083612,"type":"dir","forced":true,"remark":"","origin":false,"nSteps":5,"minStep":"380","maxStep":"530","steps":["380","420","450","500","530"],"group":"None","version":"v1.1.0"}],"TECT":[{"dec":307.5303745702845,"inc":33.787577803553766,"MAD":2.6021171115888966,"cm":[-2.1316282072803006e-14,-2.842170943040401e-14,-2.1316282072803006e-14],"intensity":1968.859437083612,"type":"dir","forced":true,"remark":"","origin":false,"nSteps":5,"minStep":"380","maxStep":"530","steps":["380","420","450","500","530"],"group":"None","version":"v1.1.0"}],"interpreted":true,"name":"AR 2.16A","coreAzi":172,"coreDip":32,"bedStrike":248,"bedDip":67,"data":[{"visible":true,"include":false,"step":"20","x":-2734.9523809523807,"y":435.3333333333333,"z":228.1904761904762,"a95":1.7,"info":"\"13-11-03\" at \"12:49\""},{"visible":true,"include":false,"step":"80","x":-2339.6190476190477,"y":555.2380952380952,"z":503.5238095238095,"a95":1.7,"info":"\"13-11-04\" at \"09:29\""},{"visible":true,"include":false,"step":"150","x":-1550.7619047619048,"y":553.1428571428571,"z":593.3333333333334,"a95":1.8,"info":"\"13-11-04\" at \"15:13\""},{"visible":true,"include":false,"step":"180","x":-1349.7142857142858,"y":564.1904761904761,"z":681.1428571428571,"a95":2.1,"info":"\"13-11-05\" at \"09:45\""},{"visible":true,"include":false,"step":"200","x":-1212.7619047619048,"y":580.8571428571429,"z":679.9047619047619,"a95":2.2,"info":"\"13-11-05\" at \"14:17\""},{"visible":true,"include":false,"step":"225","x":-1227.7142857142858,"y":565.5238095238095,"z":692.3809523809524,"a95":2.3,"info":"\"13-11-06\" at \"08:38\""},{"visible":true,"include":false,"step":"250","x":-1022.0952380952381,"y":603.9047619047619,"z":704,"a95":2.7,"info":"\"13-11-06\" at \"13:10\""},{"visible":true,"include":false,"step":"275","x":-973.2380952380952,"y":544,"z":800.6666666666666,"a95":2.5,"info":"\"13-11-06\" at \"17:19\""},{"visible":true,"include":false,"step":"300","x":-854.952380952381,"y":480.0952380952381,"z":816.4761904761905,"a95":2.6,"info":"\"13-11-07\" at \"05:49\""},{"visible":true,"include":false,"step":"320","x":-795.5238095238095,"y":524.3809523809524,"z":829.047619047619,"a95":2.4,"info":"\"13-11-07\" at \"09:20\""},{"visible":true,"include":false,"step":"340","x":-795.9047619047619,"y":496.85714285714283,"z":827.2380952380952,"a95":3.9,"info":"\"13-11-07\" at \"14:54\""},{"visible":true,"include":true,"step":"380","x":-641.3333333333334,"y":474.0952380952381,"z":870.8571428571429,"a95":4.1,"info":"\"13-11-08\" at \"12:08\""},{"visible":true,"include":true,"step":"420","x":-673.5238095238095,"y":399.5238095238095,"z":854.6666666666666,"a95":5,"info":"\"13-11-08\" at \"17:07\""},{"visible":true,"include":true,"step":"450","x":-611.6190476190476,"y":386.2857142857143,"z":778.2857142857143,"a95":4.7,"info":"\"13-11-08\" at \"20:45\""},{"visible":true,"include":true,"step":"500","x":-473.5238095238095,"y":273.8095238095238,"z":650.1904761904761,"a95":5.5,"info":"\"13-11-10\" at \"12:12\""},{"visible":true,"include":true,"step":"530","x":-481.14285714285717,"y":217.8095238095238,"z":591.2380952380952,"a95":5.5,"info":"\"13-11-10\" at \"15:30\""},{"visible":true,"include":false,"step":"560","x":-464.3809523809524,"y":282.4761904761905,"z":352.1904761904762,"a95":4.6,"info":"\"13-11-11\" at \"00:21\""}]},{"version":"v1.1.0","exported":"2016-11-28T13:43:02.645Z","volume":10.5,"added":"2016-11-28T13:39:24.461Z","format":"Utrecht","demagType":"Unknown","strat":"8","patch":1.1,"GEO":[{"dec":308.82874339341106,"inc":-0.4853013000479358,"MAD":5.581094947533593,"cm":[2.842170943040401e-14,-3.197442310920451e-14,0],"intensity":4085.883589354895,"type":"GC","origin":false,"forced":true,"remark":"","nSteps":7,"minStep":"4.0","maxStep":"30.0","steps":["4.0","8.0","12.0","16.0","20.0","25.0","30.0"],"group":"None","version":"v1.1.0"}],"TECT":[{"dec":282.37052818234525,"inc":-53.80723241887409,"MAD":5.581094947537695,"cm":[-1.4210854715202004e-14,-4.973799150320701e-14,-2.842170943040401e-14],"intensity":4085.883589354895,"type":"GC","origin":false,"forced":true,"remark":"","nSteps":7,"minStep":"4.0","maxStep":"30.0","steps":["4.0","8.0","12.0","16.0","20.0","25.0","30.0"],"group":"None","version":"v1.1.0"}],"interpreted":true,"name":"AR 2.16B","coreAzi":172,"coreDip":32,"bedStrike":248,"bedDip":67,"data":[{"visible":true,"include":false,"step":"0.0","x":-2356.3809523809523,"y":196.15238095238095,"z":1866.5714285714287,"a95":0.99,"info":"19/01/2014 at 09:14:50"},{"visible":true,"include":true,"step":"4.0","x":-2128,"y":267.29523809523806,"z":1614.095238095238,"a95":0.99,"info":"19/01/2014 at 09:14:50"},{"visible":true,"include":true,"step":"8.0","x":-1746.2857142857142,"y":334.14285714285717,"z":1388.952380952381,"a95":0.99,"info":"19/01/2014 at 09:14:50"},{"visible":true,"include":true,"step":"12.0","x":-1466.095238095238,"y":352.1333333333333,"z":1274.095238095238,"a95":0.99,"info":"19/01/2014 at 09:14:50"},{"visible":true,"include":true,"step":"16.0","x":-1296.5714285714287,"y":354.9809523809524,"z":1186.857142857143,"a95":0.99,"info":"19/01/2014 at 09:14:50"},{"visible":true,"include":true,"step":"20.0","x":-1172.1904761904761,"y":357.76190476190476,"z":1114.7619047619048,"a95":0.99,"info":"19/01/2014 at 09:14:50"},{"visible":true,"include":true,"step":"25.0","x":-1103.047619047619,"y":356.6666666666667,"z":1053.047619047619,"a95":0.99,"info":"19/01/2014 at 09:14:50"},{"visible":true,"include":true,"step":"30.0","x":-984.6666666666666,"y":318.3333333333333,"z":967.1428571428571,"a95":0.99,"info":"19/01/2014 at 09:14:50"},{"visible":true,"include":false,"step":"35.0","x":-940.2476190476191,"y":293.4,"z":868.3904761904762,"a95":0.99,"info":"19/01/2014 at 09:14:50"},{"visible":true,"include":false,"step":"40.0","x":-893.4952380952382,"y":301.22857142857146,"z":890.8571428571429,"a95":0.99,"info":"19/01/2014 at 09:14:50"},{"visible":true,"include":false,"step":"45.0","x":-802.2666666666667,"y":323.54285714285714,"z":774.2857142857143,"a95":0.99,"info":"19/01/2014 at 09:14:50"},{"visible":true,"include":false,"step":"50.0","x":-828.5047619047618,"y":247.86666666666665,"z":799.0190476190477,"a95":0.99,"info":"19/01/2014 at 09:14:50"},{"visible":true,"include":false,"step":"60.0","x":-752.4666666666666,"y":287.37142857142857,"z":674.3333333333334,"a95":0.99,"info":"19/01/2014 at 09:14:50"},{"visible":true,"include":false,"step":"70.0","x":-580,"y":327.34285714285716,"z":621.3047619047619,"a95":0.99,"info":"19/01/2014 at 09:14:50"},{"visible":true,"include":false,"step":"80.0","x":-864.5333333333334,"y":301.49523809523805,"z":672.895238095238,"a95":0.99,"info":"19/01/2014 at 09:14:50"},{"visible":true,"include":false,"step":"90.0","x":-554.1238095238095,"y":265.65714285714284,"z":585.8666666666667,"a95":0.99,"info":"19/01/2014 at 09:14:50"},{"visible":true,"include":false,"step":"100.0","x":-490.91428571428577,"y":281.48571428571427,"z":630.0190476190476,"a95":0.99,"info":"19/01/2014 at 09:14:50"}]},{"version":"v1.1.0","exported":"2016-11-28T13:43:02.645Z","volume":10.5,"added":"2016-11-28T13:39:24.461Z","format":"Utrecht","demagType":"Unknown","strat":"1","patch":1.1,"GEO":[{"dec":228.01710249737638,"inc":77.2176922448911,"MAD":0.45810818920075713,"cm":[-4.618527782440651e-14,3.197442310920451e-14,0],"intensity":3003.363695166168,"type":"dir","forced":true,"remark":"","origin":false,"nSteps":4,"minStep":"30.0","maxStep":"45.0","steps":["30.0","35.0","40.0","45.0"],"group":"None","version":"v1.1.0"}],"TECT":[{"dec":327.27317697165967,"inc":21.366154880200675,"MAD":0.45810818920072266,"cm":[-5.684341886080802e-14,1.4210854715202004e-14,9.237055564881302e-14],"intensity":3003.363695166168,"type":"dir","forced":true,"remark":"","origin":false,"nSteps":4,"minStep":"30.0","maxStep":"45.0","steps":["30.0","35.0","40.0","45.0"],"group":"None","version":"v1.1.0"}],"interpreted":true,"name":"AR 2.17","coreAzi":114,"coreDip":22,"bedStrike":250,"bedDip":73,"data":[{"visible":true,"include":false,"step":"0.0","x":-3500,"y":-208.7904761904762,"z":893.7047619047619,"a95":0.99,"info":"19/01/2014 at 14:50:44"},{"visible":true,"include":false,"step":"4.0","x":-3266.9523809523807,"y":-200.15238095238095,"z":746.2,"a95":0.99,"info":"19/01/2014 at 14:50:44"},{"visible":true,"include":false,"step":"8.0","x":-2624.095238095238,"y":29.173333333333332,"z":512.9142857142857,"a95":0.99,"info":"19/01/2014 at 14:50:44"},{"visible":true,"include":false,"step":"12.0","x":-2204.8571428571427,"y":237.55238095238096,"z":478.7142857142857,"a95":0.99,"info":"19/01/2014 at 14:50:44"},{"visible":true,"include":false,"step":"16.0","x":-1935.2380952380952,"y":296.56190476190477,"z":438.20000000000005,"a95":0.99,"info":"19/01/2014 at 14:50:44"},{"visible":true,"include":false,"step":"20.0","x":-1773.7142857142858,"y":337.57142857142856,"z":455.4190476190476,"a95":0.99,"info":"19/01/2014 at 14:50:44"},{"visible":true,"include":false,"step":"25.0","x":-1657.904761904762,"y":370.02857142857147,"z":452.8666666666667,"a95":0.99,"info":"19/01/2014 at 14:50:44"},{"visible":true,"include":true,"step":"30.0","x":-1518.857142857143,"y":338.74285714285713,"z":447.7809523809524,"a95":0.99,"info":"19/01/2014 at 14:50:44"},{"visible":true,"include":true,"step":"35.0","x":-1454.4761904761904,"y":319.9047619047619,"z":433.3809523809524,"a95":0.99,"info":"19/01/2014 at 14:50:44"},{"visible":true,"include":true,"step":"40.0","x":-1366.6666666666667,"y":286.74285714285713,"z":419.552380952381,"a95":0.99,"info":"19/01/2014 at 14:50:44"},{"visible":true,"include":true,"step":"45.0","x":-1299.3333333333333,"y":267.3619047619048,"z":395.2095238095238,"a95":0.99,"info":"19/01/2014 at 14:50:44"},{"visible":true,"include":false,"step":"50.0","x":-1215.904761904762,"y":252.2761904761905,"z":428.3238095238095,"a95":0.99,"info":"19/01/2014 at 14:50:44"},{"visible":true,"include":false,"step":"60.0","x":-1184.7619047619048,"y":235.34285714285713,"z":368.8952380952381,"a95":0.99,"info":"19/01/2014 at 14:50:44"},{"visible":true,"include":false,"step":"70.0","x":-1006.8571428571429,"y":215.42857142857142,"z":444.18095238095236,"a95":0.99,"info":"19/01/2014 at 14:50:44"},{"visible":true,"include":false,"step":"80.0","x":-808.5619047619048,"y":205.8095238095238,"z":506.1142857142857,"a95":0.99,"info":"19/01/2014 at 14:50:44"},{"visible":true,"include":false,"step":"90.0","x":-1144.1904761904761,"y":199.33333333333334,"z":380.5238095238095,"a95":0.99,"info":"19/01/2014 at 14:50:44"},{"visible":true,"include":false,"step":"100.0","x":-931.4952380952382,"y":222.22857142857143,"z":394.2190476190476,"a95":0.99,"info":"19/01/2014 at 14:50:44"}]},{"version":"v1.1.0","exported":"2016-11-28T13:43:02.645Z","volume":10.5,"added":"2016-11-28T13:39:24.461Z","format":"Utrecht","demagType":"Unknown","strat":null,"patch":1.1,"GEO":[{"dec":210.58450797785343,"inc":68.08250292540488,"MAD":4.334738942584181,"cm":[-1.4210854715202004e-14,1.3322676295501878e-14,0],"intensity":3127.8886998774205,"type":"dir","forced":true,"remark":"","origin":false,"nSteps":4,"minStep":"420","maxStep":"530","steps":["420","450","500","530"],"group":"None","version":"v1.1.0"}],"TECT":[{"dec":325.9579991138005,"inc":35.19429538451893,"MAD":4.334738942584165,"cm":[1.2789769243681803e-13,1.6342482922482304e-13,-7.105427357601002e-14],"intensity":3127.888699877421,"type":"dir","forced":true,"remark":"","origin":false,"nSteps":4,"minStep":"420","maxStep":"530","steps":["420","450","500","530"],"group":"None","version":"v1.1.0"}],"interpreted":true,"name":"AR 2.18","coreAzi":164,"coreDip":30,"bedStrike":255,"bedDip":69,"data":[{"visible":true,"include":false,"step":"20","x":-6722.476190476191,"y":672.952380952381,"z":-621.6190476190476,"a95":1.8,"info":"\"13-11-03\" at \"12:51\""},{"visible":true,"include":false,"step":"80","x":-6017.714285714285,"y":786.8571428571429,"z":-22.285714285714285,"a95":1.6,"info":"\"13-11-04\" at \"09:34\""},{"visible":true,"include":false,"step":"150","x":-4013.2380952380954,"y":778.952380952381,"z":399.3333333333333,"a95":2.2,"info":"\"13-11-04\" at \"15:18\""},{"visible":true,"include":false,"step":"180","x":-3503.809523809524,"y":874.6666666666666,"z":613.2380952380952,"a95":1.9,"info":"\"13-11-05\" at \"09:51\""},{"visible":true,"include":false,"step":"200","x":-3044.3809523809523,"y":901.047619047619,"z":696.952380952381,"a95":1.9,"info":"\"13-11-05\" at \"14:20\""},{"visible":true,"include":false,"step":"225","x":-3018.5714285714284,"y":865.6190476190476,"z":710.5714285714286,"a95":1.9,"info":"\"13-11-06\" at \"08:40\""},{"visible":true,"include":false,"step":"250","x":-2444.285714285714,"y":980.5714285714286,"z":883.4285714285714,"a95":2.2,"info":"\"13-11-06\" at \"13:13\""},{"visible":true,"include":false,"step":"275","x":-2307.5238095238096,"y":864.2857142857143,"z":1003.3333333333334,"a95":2.1,"info":"\"13-11-06\" at \"17:22\""},{"visible":true,"include":false,"step":"300","x":-2049.1428571428573,"y":826.8571428571429,"z":1123.142857142857,"a95":2,"info":"\"13-11-07\" at \"05:51\""},{"visible":true,"include":false,"step":"320","x":-1943.904761904762,"y":799.9047619047619,"z":1157.2380952380952,"a95":2.1,"info":"\"13-11-07\" at \"09:22\""},{"visible":true,"include":false,"step":"340","x":-1675.904761904762,"y":842.7619047619048,"z":1179.6190476190477,"a95":2.9,"info":"\"13-11-07\" at \"14:57\""},{"visible":true,"include":false,"step":"380","x":-1426.095238095238,"y":711.2380952380952,"z":1271.3333333333333,"a95":3.9,"info":"\"13-11-08\" at \"12:10\""},{"visible":true,"include":true,"step":"420","x":-1245.4285714285713,"y":624.4761904761905,"z":1304,"a95":4.5,"info":"\"13-11-08\" at \"17:09\""},{"visible":true,"include":true,"step":"450","x":-1144.7619047619048,"y":486.6666666666667,"z":1165.2380952380952,"a95":4.6,"info":"\"13-11-08\" at \"20:48\""},{"visible":true,"include":true,"step":"500","x":-1001.9047619047619,"y":392,"z":977.047619047619,"a95":4.9,"info":"\"13-11-10\" at \"12:14\""},{"visible":true,"include":true,"step":"530","x":-871.4285714285714,"y":130.85714285714286,"z":871.3333333333334,"a95":5.4,"info":"\"13-11-10\" at \"15:33\""},{"visible":true,"include":false,"step":"560","x":-579.047619047619,"y":652.5714285714286,"z":461.5238095238095,"a95":4.1,"info":"\"13-11-11\" at \"00:24\""}]},{"version":"v1.1.0","exported":"2016-11-28T13:43:02.645Z","volume":10.5,"added":"2016-11-28T13:39:24.461Z","format":"Utrecht","demagType":"Unknown","strat":"2","patch":1.1,"GEO":[{"dec":253.54730277397385,"inc":64.91763198976392,"MAD":1.2424090984523113,"cm":[-1.1013412404281553e-13,2.842170943040401e-14,0],"intensity":3341.5651323032657,"type":"dir","forced":true,"remark":"","origin":false,"nSteps":4,"minStep":"40.0","maxStep":"60.0","steps":["40.0","45.0","50.0","60.0"],"group":"None","version":"v1.1.0"}],"TECT":[{"dec":314.162785678998,"inc":13.86988937037176,"MAD":1.2424090984522973,"cm":[-2.842170943040401e-14,0,6.394884621840902e-14],"intensity":3341.565132303266,"type":"dir","forced":true,"remark":"","origin":false,"nSteps":4,"minStep":"40.0","maxStep":"60.0","steps":["40.0","45.0","50.0","60.0"],"group":"None","version":"v1.1.0"}],"interpreted":true,"name":"AR 2.19","coreAzi":76,"coreDip":61,"bedStrike":250,"bedDip":73,"data":[{"visible":true,"include":false,"step":"0.0","x":-2742.285714285714,"y":-1121.6190476190477,"z":1540.952380952381,"a95":0.99,"info":"19/01/2014 at 14:50:44"},{"visible":true,"include":false,"step":"4.0","x":-2581.0476190476193,"y":-1070.7619047619048,"z":1664.7619047619048,"a95":0.99,"info":"19/01/2014 at 14:50:44"},{"visible":true,"include":false,"step":"8.0","x":-2280.3809523809523,"y":-664.895238095238,"z":1458,"a95":0.99,"info":"19/01/2014 at 14:50:44"},{"visible":true,"include":false,"step":"12.0","x":-2076.5714285714284,"y":-343.8952380952381,"z":1303.8095238095239,"a95":0.99,"info":"19/01/2014 at 14:50:44"},{"visible":true,"include":false,"step":"16.0","x":-1946.4761904761904,"y":-150.23809523809524,"z":1221.4285714285713,"a95":0.99,"info":"19/01/2014 at 14:50:44"},{"visible":true,"include":false,"step":"20.0","x":-1838,"y":-50.64857142857142,"z":1158.857142857143,"a95":0.99,"info":"19/01/2014 at 14:50:44"},{"visible":true,"include":false,"step":"25.0","x":-1735.3333333333333,"y":28.63142857142857,"z":1155.047619047619,"a95":0.99,"info":"19/01/2014 at 14:50:44"},{"visible":true,"include":false,"step":"30.0","x":-1571.6190476190477,"y":52.27333333333333,"z":1091.4285714285713,"a95":0.99,"info":"19/01/2014 at 14:50:44"},{"visible":true,"include":false,"step":"35.0","x":-1503.6190476190477,"y":35.27142857142857,"z":1075.6190476190477,"a95":0.99,"info":"19/01/2014 at 14:50:44"},{"visible":true,"include":true,"step":"40.0","x":-1489.904761904762,"y":45.308571428571426,"z":1033.7142857142858,"a95":0.99,"info":"19/01/2014 at 14:50:44"},{"visible":true,"include":true,"step":"45.0","x":-1322.095238095238,"y":53.75904761904762,"z":998,"a95":0.99,"info":"19/01/2014 at 14:50:44"},{"visible":true,"include":true,"step":"50.0","x":-1278.6666666666667,"y":-12.811428571428573,"z":944.5142857142857,"a95":0.99,"info":"19/01/2014 at 14:50:44"},{"visible":true,"include":true,"step":"60.0","x":-1239.7142857142858,"y":30.595238095238095,"z":892.2857142857143,"a95":0.99,"info":"19/01/2014 at 14:50:44"},{"visible":true,"include":false,"step":"70.0","x":-972.8571428571429,"y":34.88380952380952,"z":871.4857142857143,"a95":0.99,"info":"19/01/2014 at 14:50:44"},{"visible":true,"include":false,"step":"80.0","x":-1228.4761904761904,"y":124.19047619047619,"z":716.0380952380953,"a95":0.99,"info":"19/01/2014 at 14:50:44"},{"visible":true,"include":false,"step":"90.0","x":-965.5238095238095,"y":-2.7033333333333336,"z":609.847619047619,"a95":0.99,"info":"19/01/2014 at 14:50:44"},{"visible":true,"include":false,"step":"100.0","x":-928.9714285714286,"y":181.53333333333333,"z":1005.6190476190476,"a95":0.99,"info":"19/01/2014 at 14:50:44"}]},{"version":"v1.1.0","exported":"2016-11-28T13:43:02.645Z","volume":10.5,"added":"2016-11-28T13:39:24.462Z","format":"Utrecht","demagType":"Unknown","strat":"3","patch":1.1,"GEO":[{"dec":264.03580100485823,"inc":-24.706152827325056,"MAD":5.309967114654679,"cm":[-1.1812772982011666e-13,-7.815970093361102e-14,0],"intensity":3115.1246554188147,"type":"GC","origin":false,"forced":true,"remark":"","nSteps":7,"minStep":"4.0","maxStep":"30.0","steps":["4.0","8.0","12.0","16.0","20.0","25.0","30.0"],"group":"None","version":"v1.1.0"}],"TECT":[{"dec":233.49964578819686,"inc":-15.358083729645891,"MAD":5.309967114654261,"cm":[-3.836930773104541e-13,-5.684341886080801e-13,1.1013412404281553e-13],"intensity":3115.1246554188147,"type":"GC","origin":false,"forced":true,"remark":"","nSteps":7,"minStep":"4.0","maxStep":"30.0","steps":["4.0","8.0","12.0","16.0","20.0","25.0","30.0"],"group":"None","version":"v1.1.0"}],"interpreted":true,"name":"AR 2.20B","coreAzi":161,"coreDip":29,"bedStrike":255,"bedDip":72,"data":[{"visible":true,"include":false,"step":"0.0","x":-2157.2380952380954,"y":624.2571428571429,"z":-138.42857142857142,"a95":0.99,"info":"19/01/2014 at 14:50:44"},{"visible":true,"include":true,"step":"4.0","x":-1995.8095238095239,"y":574.1809523809524,"z":-17.138095238095236,"a95":0.99,"info":"19/01/2014 at 14:50:44"},{"visible":true,"include":true,"step":"8.0","x":-1654.857142857143,"y":569.2952380952381,"z":134.8095238095238,"a95":0.99,"info":"19/01/2014 at 14:50:44"},{"visible":true,"include":true,"step":"12.0","x":-1404.7619047619048,"y":557.4571428571429,"z":257.7809523809524,"a95":0.99,"info":"19/01/2014 at 14:50:44"},{"visible":true,"include":true,"step":"16.0","x":-1254.857142857143,"y":519.9047619047619,"z":305.12380952380954,"a95":0.99,"info":"19/01/2014 at 14:50:44"},{"visible":true,"include":true,"step":"20.0","x":-1136.7619047619048,"y":496.9428571428571,"z":321.74285714285713,"a95":0.99,"info":"19/01/2014 at 14:50:44"},{"visible":true,"include":true,"step":"25.0","x":-1055.047619047619,"y":444.02857142857147,"z":350.70476190476194,"a95":0.99,"info":"19/01/2014 at 14:50:44"},{"visible":true,"include":true,"step":"30.0","x":-942.5619047619048,"y":406.6,"z":345.83809523809526,"a95":0.99,"info":"19/01/2014 at 14:50:44"},{"visible":true,"include":false,"step":"35.0","x":-883.6190476190476,"y":378.8285714285714,"z":336.31428571428575,"a95":0.99,"info":"19/01/2014 at 14:50:44"},{"visible":true,"include":false,"step":"40.0","x":-851.2761904761904,"y":373.8952380952381,"z":320.54285714285714,"a95":0.99,"info":"19/01/2014 at 14:50:44"},{"visible":true,"include":false,"step":"45.0","x":-754.0761904761905,"y":358.8285714285714,"z":304.87619047619046,"a95":0.99,"info":"19/01/2014 at 14:50:44"},{"visible":true,"include":false,"step":"50.0","x":-720.8857142857144,"y":309.03809523809525,"z":291.9904761904762,"a95":0.99,"info":"19/01/2014 at 14:50:44"},{"visible":true,"include":false,"step":"60.0","x":-640.2666666666667,"y":320.2761904761905,"z":249.71428571428572,"a95":0.99,"info":"19/01/2014 at 14:50:44"},{"visible":true,"include":false,"step":"70.0","x":-511.6761904761905,"y":280.8666666666667,"z":240.7238095238095,"a95":0.99,"info":"19/01/2014 at 14:50:44"},{"visible":true,"include":false,"step":"80.0","x":-740.0571428571429,"y":262.1714285714286,"z":219.68571428571425,"a95":0.99,"info":"19/01/2014 at 14:50:44"},{"visible":true,"include":false,"step":"90.0","x":-508.9619047619048,"y":307,"z":224.0857142857143,"a95":0.99,"info":"19/01/2014 at 14:50:44"},{"visible":true,"include":false,"step":"100.0","x":-371.77142857142854,"y":429.0571428571429,"z":252,"a95":0.99,"info":"19/01/2014 at 14:50:44"}]},{"version":"v1.1.0","exported":"2016-11-28T13:43:02.645Z","volume":10.5,"added":"2016-11-28T13:39:24.462Z","format":"Utrecht","demagType":"Unknown","strat":"4","patch":1.1,"GEO":[{"dec":229.0699696297833,"inc":65.35112416766161,"MAD":1.5991610164355825,"cm":[-5.684341886080802e-14,7.460698725481052e-14,0],"intensity":3346.810742298092,"type":"dir","forced":true,"remark":"","origin":false,"nSteps":7,"minStep":"25.0","maxStep":"60.0","steps":["25.0","30.0","35.0","40.0","45.0","50.0","60.0"],"group":"None","version":"v1.1.0"}],"TECT":[{"dec":319.4092844290569,"inc":29.733631956896154,"MAD":1.5991610164356,"cm":[-1.9895196601282805e-13,-2.2737367544323206e-13,6.394884621840902e-14],"intensity":3346.810742298092,"type":"dir","forced":true,"remark":"","origin":false,"nSteps":7,"minStep":"25.0","maxStep":"60.0","steps":["25.0","30.0","35.0","40.0","45.0","50.0","60.0"],"group":"None","version":"v1.1.0"}],"interpreted":true,"name":"AR 2.21B","coreAzi":171,"coreDip":29,"bedStrike":255,"bedDip":69,"data":[{"visible":true,"include":false,"step":"0.0","x":-3713.6190476190477,"y":482.9809523809524,"z":2592.285714285714,"a95":0.99,"info":"19/01/2014 at 14:50:44"},{"visible":true,"include":false,"step":"4.0","x":-3171.6190476190477,"y":651.2857142857143,"z":2108.7619047619046,"a95":0.99,"info":"19/01/2014 at 14:50:44"},{"visible":true,"include":false,"step":"8.0","x":-2437.904761904762,"y":823.2952380952381,"z":1606.952380952381,"a95":0.99,"info":"19/01/2014 at 14:50:44"},{"visible":true,"include":false,"step":"12.0","x":-1962.5714285714287,"y":850.6571428571428,"z":1438.6666666666667,"a95":0.99,"info":"19/01/2014 at 14:50:44"},{"visible":true,"include":false,"step":"16.0","x":-1688.7619047619048,"y":824.8571428571429,"z":1350.3809523809523,"a95":0.99,"info":"19/01/2014 at 14:50:44"},{"visible":true,"include":false,"step":"20.0","x":-1498.2857142857142,"y":783.5809523809525,"z":1271.904761904762,"a95":0.99,"info":"19/01/2014 at 14:50:44"},{"visible":true,"include":true,"step":"25.0","x":-1357.8095238095239,"y":733.2952380952381,"z":1232.7619047619048,"a95":0.99,"info":"19/01/2014 at 14:50:44"},{"visible":true,"include":true,"step":"30.0","x":-1223.8095238095239,"y":646,"z":1136.095238095238,"a95":0.99,"info":"19/01/2014 at 14:50:44"},{"visible":true,"include":true,"step":"35.0","x":-1158.7619047619048,"y":576.7904761904762,"z":1088.1904761904761,"a95":0.99,"info":"19/01/2014 at 14:50:44"},{"visible":true,"include":true,"step":"40.0","x":-1120.1904761904761,"y":591.9904761904761,"z":1038.5714285714287,"a95":0.99,"info":"19/01/2014 at 14:50:44"},{"visible":true,"include":true,"step":"45.0","x":-985.6190476190476,"y":548.6952380952381,"z":978.6666666666666,"a95":0.99,"info":"19/01/2014 at 14:50:44"},{"visible":true,"include":true,"step":"50.0","x":-1027.7142857142858,"y":440.87619047619046,"z":853.0095238095239,"a95":0.99,"info":"19/01/2014 at 14:50:44"},{"visible":true,"include":true,"step":"60.0","x":-950.352380952381,"y":467.31428571428575,"z":872.4857142857143,"a95":0.99,"info":"19/01/2014 at 14:50:44"},{"visible":true,"include":false,"step":"70.0","x":-790.4190476190475,"y":407.4095238095238,"z":883.0095238095239,"a95":0.99,"info":"19/01/2014 at 14:50:44"},{"visible":true,"include":false,"step":"80.0","x":-665.3047619047619,"y":392.152380952381,"z":814.2,"a95":0.99,"info":"19/01/2014 at 14:50:44"},{"visible":true,"include":false,"step":"90.0","x":-780.7904761904762,"y":366.8857142857143,"z":692.6285714285715,"a95":0.99,"info":"19/01/2014 at 14:50:44"},{"visible":true,"include":false,"step":"100.0","x":-684.8095238095239,"y":425.1333333333333,"z":762.4190476190475,"a95":0.99,"info":"19/01/2014 at 14:50:44"}]},{"version":"v1.1.0","exported":"2016-11-28T13:43:02.645Z","volume":10.5,"added":"2016-11-28T13:39:24.462Z","format":"Utrecht","demagType":"Unknown","strat":null,"patch":1.1,"GEO":[{"dec":117.34014358734498,"inc":-11.977140329683051,"MAD":9.75552493478559,"cm":[1.4210854715202004e-14,1.4210854715202004e-14,0],"intensity":4837.105981539374,"type":"GC","origin":false,"forced":true,"remark":"","nSteps":5,"minStep":"150","maxStep":"250","steps":["150","180","200","225","250"],"group":"None","version":"v1.1.0"}],"TECT":[{"dec":136.83850799976403,"inc":-33.524084082057634,"MAD":9.75552493478568,"cm":[1.8474111129762605e-13,-1.4210854715202004e-13,0],"intensity":4837.105981539375,"type":"GC","origin":false,"forced":true,"remark":"","nSteps":5,"minStep":"150","maxStep":"250","steps":["150","180","200","225","250"],"group":"None","version":"v1.1.0"}],"interpreted":true,"name":"AR 2.22","coreAzi":335,"coreDip":31,"bedStrike":332,"bedDip":48,"data":[{"visible":true,"include":false,"step":"20","x":-3681.3333333333335,"y":642.952380952381,"z":1823.904761904762,"a95":1.8,"info":"\"13-11-03\" at \"12:54\""},{"visible":true,"include":false,"step":"80","x":-3406.9523809523807,"y":591.2380952380952,"z":1504.1904761904761,"a95":1.8,"info":"\"13-11-04\" at \"09:37\""},{"visible":true,"include":true,"step":"150","x":-2446.190476190476,"y":752.4761904761905,"z":1306.7619047619048,"a95":2.5,"info":"\"13-11-04\" at \"15:25\""},{"visible":true,"include":true,"step":"180","x":-2007.2380952380952,"y":858,"z":1244.3809523809523,"a95":2.4,"info":"\"13-11-05\" at \"09:54\""},{"visible":true,"include":true,"step":"200","x":-1684.095238095238,"y":954.6666666666666,"z":1116.095238095238,"a95":2.5,"info":"\"13-11-05\" at \"14:22\""},{"visible":true,"include":true,"step":"225","x":-1637.3333333333333,"y":921.7142857142857,"z":1212.857142857143,"a95":2.6,"info":"\"13-11-06\" at \"08:42\""},{"visible":true,"include":true,"step":"250","x":-1347.5238095238096,"y":942.4761904761905,"z":1169.6190476190477,"a95":3,"info":"\"13-11-06\" at \"13:16\""},{"visible":true,"include":false,"step":"275","x":-1233.904761904762,"y":877.5238095238095,"z":1180.7619047619048,"a95":2.8,"info":"\"13-11-06\" at \"17:24\""},{"visible":true,"include":false,"step":"300","x":-1152.857142857143,"y":872,"z":1169.2380952380952,"a95":2.5,"info":"\"13-11-07\" at \"05:54\""},{"visible":true,"include":false,"step":"320","x":-1066.952380952381,"y":823.7142857142857,"z":1210,"a95":2.8,"info":"\"13-11-07\" at \"09:25\""},{"visible":true,"include":false,"step":"340","x":-929.047619047619,"y":823.7142857142857,"z":1166.952380952381,"a95":4.4,"info":"\"13-11-07\" at \"15:03\""},{"visible":true,"include":false,"step":"380","x":-753.047619047619,"y":733.6190476190476,"z":1100.952380952381,"a95":4.2,"info":"\"13-11-08\" at \"12:12\""},{"visible":true,"include":false,"step":"420","x":-790.7619047619048,"y":664.1904761904761,"z":1091.142857142857,"a95":4.9,"info":"\"13-11-08\" at \"17:12\""},{"visible":true,"include":false,"step":"450","x":-696,"y":650.6666666666666,"z":926.1904761904761,"a95":4.6,"info":"\"13-11-08\" at \"20:50\""},{"visible":true,"include":false,"step":"500","x":-638.1904761904761,"y":568.2857142857143,"z":724.2857142857143,"a95":4.8,"info":"\"13-11-10\" at \"12:17\""},{"visible":true,"include":false,"step":"530","x":-464.85714285714283,"y":313.23809523809524,"z":630.7619047619048,"a95":5.6,"info":"\"13-11-10\" at \"15:38\""},{"visible":true,"include":false,"step":"560","x":-494.2857142857143,"y":387.7142857142857,"z":355.9047619047619,"a95":4.4,"info":"\"13-11-11\" at \"00:26\""}]}]
