# Supplementary material for: Paleomagnetic constraints on the timing and distribution of Cenozoic rotations in Central and Eastern Anatolia
Source: Copernicus journal article supplement (doi:10.5194/se-9-295-2018), 2018-03-21
Supplement: Supplementary file 2 [file se-9-295-2018-supplement.zip › se-2017-66_DATA_dir files/dir files Ulukisla/AR3.dir]

[{"version":"v1.1.0","exported":"2016-11-28T13:45:29.906Z","volume":10.5,"added":"2016-11-28T13:43:19.767Z","format":"Utrecht","demagType":"Unknown","strat":null,"patch":1.1,"GEO":[{"dec":248.34557810974366,"inc":-9.940624663353846,"MAD":6.0091311119768145,"cm":[-4.831690603168681e-13,5.684341886080801e-13,0],"intensity":73038.84356979924,"type":"GC","origin":false,"forced":true,"remark":"","nSteps":5,"minStep":"100","maxStep":"240","steps":["100","150","180","210","240"],"group":"None","version":"v1.1.0"}],"TECT":[{"dec":67.62804121595241,"inc":-8.011291753087452,"MAD":6.009131111976497,"cm":[-4.547473508864641e-13,-1.5916157281026244e-12,0],"intensity":73038.84356979925,"type":"GC","origin":false,"forced":true,"remark":"","nSteps":5,"minStep":"100","maxStep":"240","steps":["100","150","180","210","240"],"group":"None","version":"v1.1.0"}],"interpreted":true,"name":"AR3.1A","coreAzi":73,"coreDip":44,"bedStrike":271,"bedDip":44,"data":[{"visible":true,"include":false,"step":"20","x":32185.619047619046,"y":-12045.714285714286,"z":-11025.714285714286,"a95":1.9,"info":"\"14-11-03\" at \"17:12\""},{"visible":true,"include":true,"step":"100","x":33499.42857142857,"y":-7646.285714285715,"z":-22777.619047619046,"a95":2.3,"info":"\"14-11-03\" at \"22:13\""},{"visible":true,"include":true,"step":"150","x":34044.47619047619,"y":-8372.857142857143,"z":-24268.380952380954,"a95":2.3,"info":"\"14-11-04\" at \"19:14\""},{"visible":true,"include":true,"step":"180","x":39692.57142857143,"y":-3515.4285714285716,"z":-27573.714285714286,"a95":2.2,"info":"\"14-11-04\" at \"22:25\""},{"visible":true,"include":true,"step":"210","x":39231.52380952381,"y":-1181.3333333333333,"z":-26060.571428571428,"a95":2.3,"info":"\"14-11-05\" at \"17:51\""},{"visible":true,"include":true,"step":"240","x":26720.380952380954,"y":1763.8095238095239,"z":-18132.571428571428,"a95":2.3,"info":"\"14-11-06\" at \"15:29\""},{"visible":true,"include":false,"step":"270","x":14665.904761904761,"y":3910.6666666666665,"z":-18000.285714285714,"a95":2.7,"info":"\"14-11-06\" at \"21:46\""},{"visible":true,"include":false,"step":"300","x":-4614,"y":-159.71428571428572,"z":-20610.761904761905,"a95":2.9,"info":"\"14-11-07\" at \"16:00\""},{"visible":true,"include":false,"step":"320","x":-5266.666666666667,"y":-9057.619047619048,"z":-14384.57142857143,"a95":2.6,"info":"\"14-11-15\" at \"00:29\""},{"visible":true,"include":false,"step":"340","x":-905.7142857142857,"y":-8402.857142857143,"z":-9361.52380952381,"a95":2.6,"info":"\"14-11-15\" at \"21:23\""},{"visible":true,"include":false,"step":"360","x":-719.047619047619,"y":-7125.047619047619,"z":-9502.47619047619,"a95":2.7,"info":"\"14-11-16\" at \"00:36\""},{"visible":true,"include":false,"step":"380","x":12715.333333333334,"y":6793.9047619047615,"z":641.1428571428571,"a95":1.8,"info":"\"14-11-16\" at \"18:32\""},{"visible":true,"include":false,"step":"400","x":-8404.857142857143,"y":1514,"z":-1526.5714285714287,"a95":2.4,"info":"\"14-11-16\" at \"22:37\""}]},{"version":"v1.1.0","exported":"2016-11-28T13:45:29.907Z","volume":10.5,"added":"2016-11-28T13:43:19.768Z","format":"Utrecht","demagType":"Unknown","strat":"5","patch":1.1,"GEO":[],"TECT":[],"interpreted":false,"name":"AR3.2B","coreAzi":69,"coreDip":44,"bedStrike":271,"bedDip":44,"data":[{"visible":true,"include":false,"step":"0.0","x":-2760,"y":-21788.571428571428,"z":18821.904761904763,"a95":0.99,"info":"23/09/2014 at 01:58:34"},{"visible":true,"include":false,"step":"5.0","x":17830.47619047619,"y":-14464.761904761905,"z":-1677.047619047619,"a95":0.99,"info":"23/09/2014 at 01:58:34"},{"visible":true,"include":false,"step":"10.0","x":9039.809523809523,"y":-13242.857142857143,"z":6543.619047619048,"a95":0.99,"info":"23/09/2014 at 01:58:34"},{"visible":true,"include":false,"step":"15.0","x":8678.57142857143,"y":792.5238095238095,"z":-3209.4285714285716,"a95":0.99,"info":"23/09/2014 at 01:58:34"},{"visible":true,"include":false,"step":"20.0","x":11060.952380952382,"y":9745.714285714286,"z":3994.4761904761904,"a95":0.99,"info":"23/09/2014 at 01:58:34"},{"visible":true,"include":false,"step":"25.0","x":13375.238095238095,"y":-7856.952380952381,"z":-8656.285714285714,"a95":0.99,"info":"23/09/2014 at 01:58:34"},{"visible":true,"include":false,"step":"30.0","x":22826.666666666668,"y":14120.952380952382,"z":3223.904761904762,"a95":0.99,"info":"23/09/2014 at 01:58:34"},{"visible":true,"include":false,"step":"35.0","x":11005.714285714286,"y":14388.57142857143,"z":-4179.047619047619,"a95":0.99,"info":"23/09/2014 at 01:58:34"},{"visible":true,"include":false,"step":"40.0","x":1662.2857142857142,"y":12260.952380952382,"z":-9548.57142857143,"a95":0.99,"info":"23/09/2014 at 01:58:34"},{"visible":true,"include":false,"step":"45.0","x":8048.761904761905,"y":-2817.0476190476193,"z":14620,"a95":0.99,"info":"23/09/2014 at 01:58:34"},{"visible":true,"include":false,"step":"50.0","x":-5660.571428571428,"y":1432.6666666666667,"z":4029.5238095238096,"a95":0.99,"info":"23/09/2014 at 01:58:34"},{"visible":true,"include":false,"step":"60.0","x":-4245.238095238095,"y":891.9428571428571,"z":-8683.238095238095,"a95":0.99,"info":"23/09/2014 at 01:58:34"},{"visible":true,"include":false,"step":"70.0","x":4728.857142857143,"y":-4500.857142857143,"z":-7398.952380952381,"a95":0.99,"info":"23/09/2014 at 01:58:34"},{"visible":true,"include":false,"step":"80.0","x":2784.285714285714,"y":-11362.857142857143,"z":4505.523809523809,"a95":0.99,"info":"23/09/2014 at 01:58:34"},{"visible":true,"include":false,"step":"90.0","x":6842.285714285715,"y":-3016.4761904761904,"z":-13149.52380952381,"a95":0.99,"info":"23/09/2014 at 01:58:34"},{"visible":true,"include":false,"step":"100.0","x":-3778.190476190476,"y":-8723.142857142857,"z":5383.523809523809,"a95":0.99,"info":"23/09/2014 at 01:58:34"}]},{"version":"v1.1.0","exported":"2016-11-28T13:45:29.907Z","volume":10.5,"added":"2016-11-28T13:43:19.769Z","format":"Utrecht","demagType":"Unknown","strat":null,"patch":1.1,"GEO":[],"TECT":[],"interpreted":false,"name":"AR3.3A","coreAzi":75,"coreDip":30,"bedStrike":271,"bedDip":44,"data":[{"visible":true,"include":false,"step":"20","x":-4683.714285714285,"y":4419.714285714285,"z":4767.9047619047615,"a95":2.7,"info":"\"14-11-03\" at \"17:14\""},{"visible":true,"include":false,"step":"100","x":-3177.904761904762,"y":8401.238095238095,"z":2212.8571428571427,"a95":1.8,"info":"\"14-11-03\" at \"22:15\""},{"visible":true,"include":false,"step":"150","x":-2913.5238095238096,"y":8230.57142857143,"z":2008.952380952381,"a95":2.2,"info":"\"14-11-04\" at \"19:16\""},{"visible":true,"include":false,"step":"180","x":-4329.809523809524,"y":8748.57142857143,"z":2190.8571428571427,"a95":2.1,"info":"\"14-11-04\" at \"22:27\""},{"visible":true,"include":false,"step":"210","x":-2482.3809523809523,"y":8415.619047619048,"z":2164.7619047619046,"a95":1.8,"info":"\"14-11-05\" at \"17:55\""},{"visible":true,"include":false,"step":"240","x":-0.19047619047619047,"y":9789.619047619048,"z":4678.190476190476,"a95":1.8,"info":"\"14-11-06\" at \"15:31\""},{"visible":true,"include":false,"step":"270","x":-1585.142857142857,"y":9535.904761904761,"z":6342.571428571428,"a95":2,"info":"\"14-11-06\" at \"21:49\""},{"visible":true,"include":false,"step":"300","x":-146.1904761904762,"y":3692.6666666666665,"z":5104.666666666667,"a95":2.6,"info":"\"14-11-07\" at \"16:02\""},{"visible":true,"include":false,"step":"320","x":-3796.095238095238,"y":3704.9523809523807,"z":3579.809523809524,"a95":2.2,"info":"\"14-11-15\" at \"00:32\""},{"visible":true,"include":false,"step":"340","x":-4506.761904761905,"y":1146.2857142857142,"z":2442.9523809523807,"a95":1.9,"info":"\"14-11-15\" at \"21:25\""},{"visible":true,"include":false,"step":"360","x":-4129.333333333333,"y":1673.5238095238096,"z":2386.190476190476,"a95":1.8,"info":"\"14-11-16\" at \"00:38\""},{"visible":true,"include":false,"step":"380","x":-495.6190476190476,"y":-2757.4285714285716,"z":-2131.2380952380954,"a95":2.6,"info":"\"14-11-16\" at \"18:34\""},{"visible":true,"include":false,"step":"400","x":1940.857142857143,"y":-2913.904761904762,"z":774.952380952381,"a95":1.5,"info":"\"14-11-16\" at \"22:39\""}]},{"version":"v1.1.0","exported":"2016-11-28T13:45:29.907Z","volume":10.5,"added":"2016-11-28T13:43:19.769Z","format":"Utrecht","demagType":"Unknown","strat":null,"patch":1.1,"GEO":[{"dec":314.25152965089626,"inc":-7.914873058378126,"MAD":19.678104208386234,"cm":[0,-9.947598300641403e-14,0],"intensity":24379.908071384536,"type":"GC","origin":false,"forced":true,"remark":"","nSteps":5,"minStep":"100","maxStep":"240","steps":["100","150","180","210","240"],"group":"None","version":"v1.1.0"}],"TECT":[{"dec":299.55189098380674,"inc":-34.785209453894865,"MAD":19.67810420838595,"cm":[0,-9.379164112033322e-13,0],"intensity":24379.90807138454,"type":"GC","origin":false,"forced":true,"remark":"","nSteps":5,"minStep":"100","maxStep":"240","steps":["100","150","180","210","240"],"group":"None","version":"v1.1.0"}],"interpreted":true,"name":"AR3.7A","coreAzi":47,"coreDip":46,"bedStrike":271,"bedDip":44,"data":[{"visible":true,"include":false,"step":"20","x":7415.428571428572,"y":-5258.285714285715,"z":-3313.4285714285716,"a95":2.9,"info":"\"14-11-03\" at \"17:17\""},{"visible":true,"include":true,"step":"100","x":10607.809523809523,"y":1050.1904761904761,"z":-7988.476190476191,"a95":3.4,"info":"\"14-11-03\" at \"22:18\""},{"visible":true,"include":true,"step":"150","x":10557.619047619048,"y":2950.285714285714,"z":-8959.333333333334,"a95":3,"info":"\"14-11-04\" at \"19:18\""},{"visible":true,"include":true,"step":"180","x":9769.142857142857,"y":1481.047619047619,"z":-9952.952380952382,"a95":2.7,"info":"\"14-11-04\" at \"22:30\""},{"visible":true,"include":true,"step":"210","x":9582.190476190477,"y":2084.3809523809523,"z":-11175.714285714286,"a95":2.9,"info":"\"14-11-05\" at \"17:57\""},{"visible":true,"include":true,"step":"240","x":5737.714285714285,"y":1663.904761904762,"z":-9895.52380952381,"a95":2.6,"info":"\"14-11-06\" at \"15:37\""},{"visible":true,"include":false,"step":"270","x":3605.3333333333335,"y":-1727.6190476190477,"z":-7835.333333333333,"a95":2.6,"info":"\"14-11-06\" at \"21:51\""},{"visible":true,"include":false,"step":"300","x":8378,"y":4177.238095238095,"z":-3592.6666666666665,"a95":3,"info":"\"14-11-07\" at \"17:15\""},{"visible":true,"include":false,"step":"320","x":6566.857142857143,"y":2673.6190476190477,"z":-298.0952380952381,"a95":3.1,"info":"\"14-11-15\" at \"00:35\""},{"visible":true,"include":false,"step":"340","x":-2258.5714285714284,"y":91.42857142857143,"z":-2831.809523809524,"a95":2.5,"info":"\"14-11-15\" at \"21:28\""},{"visible":true,"include":false,"step":"360","x":-2249.6190476190477,"y":-537.1428571428571,"z":-2667.904761904762,"a95":2.2,"info":"\"14-11-16\" at \"00:40\""},{"visible":true,"include":false,"step":"380","x":-3012.6666666666665,"y":3192.7619047619046,"z":2686.3809523809523,"a95":2.4,"info":"\"14-11-16\" at \"18:38\""},{"visible":true,"include":false,"step":"400","x":-1820.4761904761904,"y":-715.9047619047619,"z":-923.047619047619,"a95":4,"info":"\"14-11-16\" at \"22:41\""}]},{"version":"v1.1.0","exported":"2016-11-28T13:45:29.907Z","volume":10.5,"added":"2016-11-28T13:43:19.770Z","format":"Utrecht","demagType":"Unknown","strat":"6","patch":1.1,"GEO":[],"TECT":[],"interpreted":false,"name":"AR3.9A","coreAzi":57,"coreDip":68,"bedStrike":271,"bedDip":44,"data":[{"visible":true,"include":false,"step":"0.0","x":-5003.142857142857,"y":-7409.428571428572,"z":-15567.619047619048,"a95":0.99,"info":"23/09/2014 at 01:58:34"},{"visible":true,"include":false,"step":"5.0","x":-5401.809523809524,"y":-5027.809523809524,"z":-17799.04761904762,"a95":0.99,"info":"23/09/2014 at 01:58:34"},{"visible":true,"include":false,"step":"10.0","x":-2960.190476190476,"y":-4876.285714285715,"z":-17525.714285714286,"a95":0.99,"info":"23/09/2014 at 01:58:34"},{"visible":true,"include":false,"step":"15.0","x":-3111.1428571428573,"y":-3730.5714285714284,"z":-16199.047619047618,"a95":0.99,"info":"23/09/2014 at 01:58:34"},{"visible":true,"include":false,"step":"20.0","x":-1627.142857142857,"y":-5936.0952380952385,"z":-17760.95238095238,"a95":0.99,"info":"23/09/2014 at 01:58:34"},{"visible":true,"include":false,"step":"25.0","x":-4846.666666666667,"y":-10383.809523809523,"z":-13156.190476190477,"a95":0.99,"info":"23/09/2014 at 01:58:34"},{"visible":true,"include":false,"step":"30.0","x":-4134.666666666667,"y":-5809.142857142857,"z":-16935.238095238095,"a95":0.99,"info":"23/09/2014 at 01:58:34"},{"visible":true,"include":false,"step":"35.0","x":-7267.142857142857,"y":-9793.333333333334,"z":-14325.714285714286,"a95":0.99,"info":"23/09/2014 at 01:58:34"},{"visible":true,"include":false,"step":"40.0","x":-9150.095238095239,"y":-7652,"z":-16428.571428571428,"a95":0.99,"info":"23/09/2014 at 01:58:34"},{"visible":true,"include":false,"step":"45.0","x":-4255.809523809524,"y":-6361.809523809524,"z":-14894.285714285714,"a95":0.99,"info":"23/09/2014 at 01:58:34"},{"visible":true,"include":false,"step":"50.0","x":-6376.666666666667,"y":-5834.571428571428,"z":-15805.714285714286,"a95":0.99,"info":"23/09/2014 at 01:58:34"},{"visible":true,"include":false,"step":"60.0","x":-3232,"y":-5345.619047619048,"z":-19748.571428571428,"a95":0.99,"info":"23/09/2014 at 01:58:34"},{"visible":true,"include":false,"step":"70.0","x":3433.3333333333335,"y":-4489.714285714285,"z":-21753.333333333332,"a95":0.99,"info":"23/09/2014 at 01:58:34"},{"visible":true,"include":false,"step":"80.0","x":-3884.8571428571427,"y":-3458.285714285714,"z":-19147.619047619046,"a95":0.99,"info":"23/09/2014 at 01:58:34"},{"visible":true,"include":false,"step":"90.0","x":-838.7809523809525,"y":-3706.285714285714,"z":-20837.14285714286,"a95":0.99,"info":"23/09/2014 at 01:58:34"},{"visible":true,"include":false,"step":"100.0","x":-2465.809523809524,"y":-6478.0952380952385,"z":-15036.190476190477,"a95":0.99,"info":"23/09/2014 at 01:58:34"}]},{"version":"v1.1.0","exported":"2016-11-28T13:45:29.907Z","volume":10.5,"added":"2016-11-28T13:43:19.771Z","format":"Utrecht","demagType":"Unknown","strat":null,"patch":1.1,"GEO":[{"dec":259.4179578825114,"inc":-47.80871934902937,"MAD":0.4656173287068188,"cm":[-2.2382096176443156e-13,5.684341886080802e-14,0],"intensity":11108.121397818,"type":"dir","forced":true,"remark":"","origin":false,"nSteps":4,"minStep":"240","maxStep":"320","steps":["240","270","300","320"],"group":"None","version":"v1.1.0"}],"TECT":[{"dec":228.0867504831248,"inc":-26.059004095063695,"MAD":0.4656173287075501,"cm":[-2.2737367544323206e-13,-2.4158453015843406e-13,5.542233338928781e-13],"intensity":11108.121397818,"type":"dir","forced":true,"remark":"","origin":false,"nSteps":4,"minStep":"240","maxStep":"320","steps":["240","270","300","320"],"group":"None","version":"v1.1.0"}],"interpreted":true,"name":"AR3.10A","coreAzi":61,"coreDip":59,"bedStrike":271,"bedDip":44,"data":[{"visible":true,"include":false,"step":"20","x":-1819.2380952380952,"y":-2198.8571428571427,"z":-9415.619047619048,"a95":2.9,"info":"\"14-11-03\" at \"17:19\""},{"visible":true,"include":false,"step":"100","x":-1721.8095238095239,"y":-2185.5238095238096,"z":-9750.761904761905,"a95":2.8,"info":"\"14-11-03\" at \"22:20\""},{"visible":true,"include":false,"step":"150","x":-1640,"y":-2138.7619047619046,"z":-9782.761904761905,"a95":3,"info":"\"14-11-04\" at \"19:21\""},{"visible":true,"include":false,"step":"180","x":-1723.2380952380952,"y":-1990,"z":-9720.952380952382,"a95":2.8,"info":"\"14-11-04\" at \"22:32\""},{"visible":true,"include":false,"step":"210","x":-1624.2857142857142,"y":-2154.8571428571427,"z":-9589.904761904761,"a95":2.9,"info":"\"14-11-05\" at \"17:59\""},{"visible":true,"include":true,"step":"240","x":-1568.1904761904761,"y":-2080.7619047619046,"z":-9472.857142857143,"a95":2.5,"info":"\"14-11-06\" at \"15:40\""},{"visible":true,"include":true,"step":"270","x":-1626.3809523809523,"y":-1998.7619047619048,"z":-9103.238095238095,"a95":2.7,"info":"\"14-11-06\" at \"21:53\""},{"visible":true,"include":true,"step":"300","x":-569.9047619047619,"y":-817.8095238095239,"z":-3515.714285714286,"a95":2.8,"info":"\"14-11-07\" at \"17:21\""},{"visible":true,"include":true,"step":"320","x":-165.23809523809524,"y":-245.61904761904762,"z":-1249.7142857142858,"a95":2.8,"info":"\"14-11-15\" at \"00:39\""},{"visible":true,"include":false,"step":"340","x":-86.85714285714286,"y":35.22857142857143,"z":-9.533333333333333,"a95":5.9,"info":"\"14-11-15\" at \"21:32\""},{"visible":true,"include":false,"step":"360","x":-68.74285714285713,"y":29.02857142857143,"z":-24.82857142857143,"a95":5,"info":"\"14-11-16\" at \"00:42\""},{"visible":true,"include":false,"step":"380","x":21.904761904761905,"y":-38.57142857142857,"z":120.66666666666667,"a95":3.5,"info":"\"14-11-16\" at \"18:42\""},{"visible":true,"include":false,"step":"400","x":-25.276190476190475,"y":64.17142857142856,"z":38.266666666666666,"a95":4.4,"info":"\"14-11-16\" at \"22:44\""}]},{"version":"v1.1.0","exported":"2016-11-28T13:45:29.907Z","volume":10.5,"added":"2016-11-28T13:43:19.771Z","format":"Utrecht","demagType":"Unknown","strat":null,"patch":1.1,"GEO":[{"dec":261.55922765959167,"inc":-48.005231013894104,"MAD":1.0223218109317307,"cm":[-3.907985046680551e-13,-2.2737367544323206e-13,0],"intensity":16016.797077909197,"type":"dir","forced":true,"remark":"","origin":false,"nSteps":4,"minStep":"240","maxStep":"320","steps":["240","270","300","320"],"group":"None","version":"v1.1.0"}],"TECT":[{"dec":228.95444804756696,"inc":-27.282769641451225,"MAD":1.0223218109316439,"cm":[5.684341886080801e-13,-6.536993168992922e-13,2.8421709430404007e-13],"intensity":16016.797077909196,"type":"dir","forced":true,"remark":"","origin":false,"nSteps":4,"minStep":"240","maxStep":"320","steps":["240","270","300","320"],"group":"None","version":"v1.1.0"}],"interpreted":true,"name":"AR3.12A","coreAzi":48,"coreDip":43,"bedStrike":271,"bedDip":44,"data":[{"visible":true,"include":false,"step":"20","x":2727.809523809524,"y":-5667.9047619047615,"z":-13033.142857142857,"a95":2.6,"info":"\"14-11-03\" at \"17:21\""},{"visible":true,"include":false,"step":"100","x":2676.095238095238,"y":-5568,"z":-13596.190476190477,"a95":2.6,"info":"\"14-11-03\" at \"22:22\""},{"visible":true,"include":false,"step":"150","x":2792.285714285714,"y":-5373.333333333333,"z":-13581.619047619048,"a95":2.8,"info":"\"14-11-04\" at \"19:23\""},{"visible":true,"include":false,"step":"180","x":2670.285714285714,"y":-5356.666666666667,"z":-13538.190476190477,"a95":2.6,"info":"\"14-11-04\" at \"22:34\""},{"visible":true,"include":false,"step":"210","x":2664,"y":-5288.285714285715,"z":-13322.095238095239,"a95":2.7,"info":"\"14-11-05\" at \"18:01\""},{"visible":true,"include":true,"step":"240","x":2537.1428571428573,"y":-5145.9047619047615,"z":-12990.761904761905,"a95":2.5,"info":"\"14-11-06\" at \"15:42\""},{"visible":true,"include":true,"step":"270","x":2003.6190476190477,"y":-5103.428571428572,"z":-12327.42857142857,"a95":2.5,"info":"\"14-11-06\" at \"21:55\""},{"visible":true,"include":true,"step":"300","x":456.2857142857143,"y":-1211.6190476190477,"z":-3005.5238095238096,"a95":2.3,"info":"\"14-11-07\" at \"17:23\""},{"visible":true,"include":true,"step":"320","x":210.57142857142858,"y":-648,"z":-1686.3809523809523,"a95":2.5,"info":"\"14-11-15\" at \"00:42\""},{"visible":true,"include":false,"step":"340","x":-63.61904761904762,"y":62.57142857142857,"z":86.28571428571429,"a95":5.1,"info":"\"14-11-15\" at \"21:34\""},{"visible":true,"include":false,"step":"360","x":-60.38095238095238,"y":59.333333333333336,"z":82.57142857142857,"a95":4,"info":"\"14-11-16\" at \"00:44\""},{"visible":true,"include":false,"step":"380","x":-90.38095238095238,"y":68.38095238095238,"z":138.47619047619048,"a95":3.3,"info":"\"14-11-16\" at \"18:44\""},{"visible":true,"include":false,"step":"400","x":-92.95238095238095,"y":43.714285714285715,"z":197.04761904761904,"a95":3,"info":"\"14-11-16\" at \"22:46\""}]},{"version":"v1.1.0","exported":"2016-11-28T13:45:29.907Z","volume":10.5,"added":"2016-11-28T13:43:19.771Z","format":"Utrecht","demagType":"Unknown","strat":null,"patch":1.1,"GEO":[],"TECT":[],"interpreted":false,"name":"AR3.14A","coreAzi":69,"coreDip":51,"bedStrike":271,"bedDip":44,"data":[{"visible":true,"include":false,"step":"20","x":-7941.238095238095,"y":-5904.285714285715,"z":1859.5238095238096,"a95":1.7,"info":"\"14-11-03\" at \"17:23\""},{"visible":true,"include":true,"step":"100","x":-7544.476190476191,"y":-1788.4761904761904,"z":-3554.6666666666665,"a95":2.2,"info":"\"14-11-03\" at \"22:24\""},{"visible":true,"include":true,"step":"150","x":-6264.476190476191,"y":-206.57142857142858,"z":-5484.761904761905,"a95":2.9,"info":"\"14-11-04\" at \"19:25\""},{"visible":true,"include":true,"step":"180","x":-7188.761904761905,"y":386.1904761904762,"z":-5480.571428571428,"a95":2.7,"info":"\"14-11-04\" at \"22:36\""},{"visible":true,"include":true,"step":"210","x":-4911.9047619047615,"y":2372.285714285714,"z":-2838.6666666666665,"a95":3,"info":"\"14-11-05\" at \"18:02\""},{"visible":true,"include":false,"step":"240","x":-1419.3333333333333,"y":3368.6666666666665,"z":-7020.952380952381,"a95":3.6,"info":"\"14-11-06\" at \"15:45\""},{"visible":true,"include":false,"step":"270","x":-979.3333333333334,"y":3872.3809523809523,"z":-7247.9047619047615,"a95":3.2,"info":"\"14-11-06\" at \"21:57\""},{"visible":true,"include":false,"step":"300","x":-4064.8571428571427,"y":3187.904761904762,"z":-4759.142857142857,"a95":3.4,"info":"\"14-11-07\" at \"17:26\""},{"visible":true,"include":false,"step":"320","x":-4008.5714285714284,"y":2340.7619047619046,"z":-5145.9047619047615,"a95":2.9,"info":"\"14-11-15\" at \"00:45\""},{"visible":true,"include":false,"step":"340","x":1168.952380952381,"y":-2321.5238095238096,"z":-1165.2380952380952,"a95":3.4,"info":"\"14-11-15\" at \"21:37\""},{"visible":true,"include":false,"step":"360","x":1050.952380952381,"y":-2607.5238095238096,"z":-1372.7619047619048,"a95":3.1,"info":"\"14-11-16\" at \"00:46\""},{"visible":true,"include":false,"step":"380","x":-7409.809523809524,"y":1650.3809523809523,"z":-3921.3333333333335,"a95":2.4,"info":"\"14-11-16\" at \"18:46\""},{"visible":true,"include":false,"step":"400","x":-1942.6666666666667,"y":1567.8095238095239,"z":-1587.7142857142858,"a95":3.5,"info":"\"14-11-16\" at \"22:49\""}]},{"version":"v1.1.0","exported":"2016-11-28T13:45:29.907Z","volume":10.5,"added":"2016-11-28T13:43:19.774Z","format":"Utrecht","demagType":"Unknown","strat":"7","patch":1.1,"GEO":[],"TECT":[],"interpreted":false,"name":"AR3.14B","coreAzi":69,"coreDip":51,"bedStrike":271,"bedDip":44,"data":[{"visible":true,"include":false,"step":"0.0","x":4094.095238095238,"y":-13112.380952380952,"z":5485.714285714285,"a95":0.99,"info":"23/09/2014 at 01:58:34"},{"visible":true,"include":false,"step":"5.0","x":11252.380952380952,"y":-3411.904761904762,"z":-4039.0476190476193,"a95":0.99,"info":"23/09/2014 at 01:58:34"},{"visible":true,"include":false,"step":"10.0","x":5251.142857142857,"y":4011.4285714285716,"z":-9354.190476190477,"a95":0.99,"info":"23/09/2014 at 01:58:34"},{"visible":true,"include":false,"step":"15.0","x":4682.190476190476,"y":0.5666285714285715,"z":916.695238095238,"a95":0.99,"info":"23/09/2014 at 01:58:34"},{"visible":true,"include":false,"step":"20.0","x":-1166.1904761904761,"y":5696.0952380952385,"z":1842.952380952381,"a95":0.99,"info":"23/09/2014 at 01:58:34"},{"visible":true,"include":false,"step":"25.0","x":-1863.904761904762,"y":-1402.2857142857142,"z":-5501.619047619048,"a95":0.99,"info":"23/09/2014 at 01:58:34"},{"visible":true,"include":false,"step":"30.0","x":5245.9047619047615,"y":-4253.428571428572,"z":-8082.476190476191,"a95":0.99,"info":"23/09/2014 at 01:58:34"},{"visible":true,"include":false,"step":"35.0","x":1830.6666666666667,"y":-9436.952380952382,"z":-8094.0952380952385,"a95":0.99,"info":"23/09/2014 at 01:58:34"},{"visible":true,"include":false,"step":"40.0","x":7319.047619047619,"y":-4018.3809523809523,"z":-19900.95238095238,"a95":0.99,"info":"23/09/2014 at 01:58:34"},{"visible":true,"include":false,"step":"45.0","x":10332.380952380952,"y":-5307.333333333333,"z":-3821.3333333333335,"a95":0.99,"info":"23/09/2014 at 01:58:34"},{"visible":true,"include":false,"step":"50.0","x":-35.88952380952381,"y":-11731.42857142857,"z":-2707.809523809524,"a95":0.99,"info":"23/09/2014 at 01:58:34"},{"visible":true,"include":false,"step":"60.0","x":5761.619047619048,"y":-1862.4761904761904,"z":-734.8666666666667,"a95":0.99,"info":"23/09/2014 at 01:58:34"},{"visible":true,"include":false,"step":"70.0","x":964.4761904761905,"y":-1880.7619047619048,"z":-21634.285714285714,"a95":0.99,"info":"23/09/2014 at 01:58:34"},{"visible":true,"include":false,"step":"80.0","x":-10108.57142857143,"y":-2969.5238095238096,"z":471.6761904761905,"a95":0.99,"info":"23/09/2014 at 01:58:34"},{"visible":true,"include":false,"step":"90.0","x":4981.9047619047615,"y":-9718.095238095239,"z":-14118.095238095239,"a95":0.99,"info":"23/09/2014 at 01:58:34"},{"visible":true,"include":false,"step":"100.0","x":-6655.619047619048,"y":-2739.4285714285716,"z":3945.714285714286,"a95":0.99,"info":"23/09/2014 at 01:58:34"}]},{"version":"v1.1.0","exported":"2016-11-28T13:45:29.907Z","volume":10.5,"added":"2016-11-28T13:43:19.774Z","format":"Utrecht","demagType":"Unknown","strat":"7","patch":1.1,"GEO":[],"TECT":[],"interpreted":false,"name":"AR3.15A","coreAzi":65,"coreDip":52,"bedStrike":271,"bedDip":44,"data":[{"visible":true,"include":false,"step":"0.0","x":-10430.47619047619,"y":-15587.619047619048,"z":29066.666666666668,"a95":0.99,"info":"29/09/2014 at 01:04:14"},{"visible":true,"include":false,"step":"10.0","x":-7386.666666666667,"y":-9940.952380952382,"z":-1382.857142857143,"a95":0.99,"info":"29/09/2014 at 01:04:14"},{"visible":true,"include":false,"step":"15.0","x":-2905.0476190476193,"y":-13929.52380952381,"z":3905.1428571428573,"a95":0.99,"info":"29/09/2014 at 01:04:14"},{"visible":true,"include":false,"step":"20.0","x":-2920.285714285714,"y":-8866.095238095239,"z":5038.571428571428,"a95":0.99,"info":"29/09/2014 at 01:04:14"},{"visible":true,"include":false,"step":"25.0","x":-2936.5714285714284,"y":-3902.4761904761904,"z":3901.809523809524,"a95":0.99,"info":"29/09/2014 at 01:04:14"},{"visible":true,"include":false,"step":"30.0","x":-408.72380952380956,"y":-12419.047619047618,"z":-9405.238095238095,"a95":0.99,"info":"29/09/2014 at 01:04:14"},{"visible":true,"include":false,"step":"35.0","x":3687.6190476190477,"y":-4193.428571428572,"z":5224.761904761905,"a95":0.99,"info":"29/09/2014 at 01:04:14"},{"visible":true,"include":false,"step":"40.0","x":1306.2857142857142,"y":-6302.0952380952385,"z":-13409.52380952381,"a95":0.99,"info":"29/09/2014 at 01:04:14"},{"visible":true,"include":false,"step":"45.0","x":6604.761904761905,"y":-635.5428571428571,"z":-9504.285714285714,"a95":0.99,"info":"29/09/2014 at 01:04:14"},{"visible":true,"include":false,"step":"50.0","x":-16693.333333333332,"y":-3048.8571428571427,"z":-5962.571428571428,"a95":0.99,"info":"29/09/2014 at 01:04:14"},{"visible":true,"include":false,"step":"60.0","x":-1180.3809523809523,"y":7511.9047619047615,"z":-9634.285714285714,"a95":0.99,"info":"29/09/2014 at 01:04:14"},{"visible":true,"include":false,"step":"70.0","x":-6687.619047619048,"y":-2510.095238095238,"z":-3364.8571428571427,"a95":0.99,"info":"29/09/2014 at 01:04:14"},{"visible":true,"include":false,"step":"80.0","x":2110.190476190476,"y":6057.714285714285,"z":-12181.904761904761,"a95":0.99,"info":"29/09/2014 at 01:04:14"},{"visible":true,"include":false,"step":"90.0","x":3747.4285714285716,"y":-2651.809523809524,"z":4643.714285714285,"a95":0.99,"info":"29/09/2014 at 01:04:14"}]},{"version":"v1.1.0","exported":"2016-11-28T13:45:29.907Z","volume":10.5,"added":"2016-11-28T13:43:19.774Z","format":"Utrecht","demagType":"Unknown","strat":null,"patch":1.1,"GEO":[{"dec":265.05758132476853,"inc":-37.08726912114698,"MAD":5.701659646825147,"cm":[-9.485745522397337e-13,1.1368683772161603e-13,0],"intensity":5377.527261363909,"type":"dir","forced":true,"remark":"","origin":false,"nSteps":3,"minStep":"270","maxStep":"320","steps":["270","300","320"],"group":"None","version":"v1.1.0"}],"TECT":[{"dec":239.9169456530929,"inc":-22.111755274681226,"MAD":5.701659646825143,"cm":[8.348877145181177e-14,-1.9895196601282805e-13,4.760636329592671e-13],"intensity":5377.527261363909,"type":"dir","forced":true,"remark":"","origin":false,"nSteps":3,"minStep":"270","maxStep":"320","steps":["270","300","320"],"group":"None","version":"v1.1.0"}],"interpreted":true,"name":"AR3.17A","coreAzi":53,"coreDip":26,"bedStrike":271,"bedDip":44,"data":[{"visible":true,"include":false,"step":"20","x":962.2857142857143,"y":-2543.714285714286,"z":-4755.142857142857,"a95":2.4,"info":"\"14-11-03\" at \"17:26\""},{"visible":true,"include":false,"step":"100","x":1510.857142857143,"y":-2241.714285714286,"z":-5203.047619047619,"a95":2.5,"info":"\"14-11-03\" at \"22:27\""},{"visible":true,"include":false,"step":"150","x":1424,"y":-2398.9523809523807,"z":-5092.476190476191,"a95":2.4,"info":"\"14-11-04\" at \"19:28\""},{"visible":true,"include":false,"step":"180","x":1315.5238095238096,"y":-2476,"z":-5043.809523809524,"a95":2.4,"info":"\"14-11-04\" at \"22:39\""},{"visible":true,"include":false,"step":"210","x":1432.952380952381,"y":-2356.5714285714284,"z":-5061.619047619048,"a95":2.2,"info":"\"14-11-05\" at \"18:04\""},{"visible":true,"include":false,"step":"240","x":1320,"y":-2362.3809523809523,"z":-4865.809523809524,"a95":2.2,"info":"\"14-11-06\" at \"15:47\""},{"visible":true,"include":true,"step":"270","x":1308.6666666666667,"y":-2141.3333333333335,"z":-4396.285714285715,"a95":2.3,"info":"\"14-11-06\" at \"22:00\""},{"visible":true,"include":true,"step":"300","x":-186,"y":-290,"z":-657.4285714285714,"a95":2.5,"info":"\"14-11-07\" at \"17:28\""},{"visible":true,"include":true,"step":"320","x":-268.6666666666667,"y":-129.33333333333334,"z":-366.0952380952381,"a95":2.6,"info":"\"14-11-15\" at \"00:48\""},{"visible":true,"include":false,"step":"340","x":-190.47619047619048,"y":182.95238095238096,"z":276.0952380952381,"a95":2.6,"info":"\"14-11-15\" at \"21:39\""},{"visible":true,"include":false,"step":"360","x":-198.47619047619048,"y":174.95238095238096,"z":272,"a95":2.6,"info":"\"14-11-16\" at \"00:48\""},{"visible":true,"include":false,"step":"380","x":-174.0952380952381,"y":2.380952380952381,"z":262.95238095238096,"a95":2.6,"info":"\"14-11-16\" at \"18:49\""},{"visible":true,"include":false,"step":"400","x":-138.0952380952381,"y":44.285714285714285,"z":213.8095238095238,"a95":2.9,"info":"\"14-11-16\" at \"22:51\""}]},{"version":"v1.1.0","exported":"2016-11-28T13:45:29.908Z","volume":10.5,"added":"2016-11-28T13:43:19.774Z","format":"Utrecht","demagType":"Unknown","strat":"8","patch":1.1,"GEO":[{"dec":49.964110163784426,"inc":-39.91932253247541,"MAD":9.488734631709516,"cm":[-3.4994229736184934e-13,-5.684341886080802e-14,0],"intensity":5495.56774351684,"type":"GC","origin":false,"forced":true,"remark":"","nSteps":6,"minStep":"10.0","maxStep":"35.0","steps":["10.0","15.0","20.0","25.0","30.0","35.0"],"group":"None","version":"v1.1.0"}],"TECT":[{"dec":99.21914550175507,"inc":-54.231469780959415,"MAD":9.48873463171023,"cm":[-1.7053025658242404e-13,-1.9895196601282805e-13,3.126388037344441e-13],"intensity":5495.567743516839,"type":"GC","origin":false,"forced":true,"remark":"","nSteps":6,"minStep":"10.0","maxStep":"35.0","steps":["10.0","15.0","20.0","25.0","30.0","35.0"],"group":"None","version":"v1.1.0"}],"interpreted":true,"name":"AR3.19A","coreAzi":92,"coreDip":51,"bedStrike":271,"bedDip":44,"data":[{"visible":true,"include":false,"step":"0.0","x":-986.3809523809524,"y":-612.6095238095238,"z":-2005.904761904762,"a95":0.99,"info":"23/09/2014 at 01:58:34"},{"visible":true,"include":false,"step":"5.0","x":-810.6761904761905,"y":-582.0666666666666,"z":-2260.095238095238,"a95":0.99,"info":"23/09/2014 at 01:58:34"},{"visible":true,"include":true,"step":"10.0","x":-684.552380952381,"y":-520.1142857142856,"z":-2468.285714285714,"a95":0.99,"info":"23/09/2014 at 01:58:34"},{"visible":true,"include":true,"step":"15.0","x":-576.8095238095239,"y":-288.2,"z":-2531.1428571428573,"a95":0.99,"info":"23/09/2014 at 01:58:34"},{"visible":true,"include":true,"step":"20.0","x":-520.1809523809524,"y":50.60095238095238,"z":-2535.6190476190477,"a95":0.99,"info":"23/09/2014 at 01:58:34"},{"visible":true,"include":true,"step":"25.0","x":-343.45714285714286,"y":233.9238095238095,"z":-2596.285714285714,"a95":0.99,"info":"23/09/2014 at 01:58:34"},{"visible":true,"include":true,"step":"30.0","x":-222.22857142857143,"y":344.9142857142857,"z":-3054,"a95":0.99,"info":"23/09/2014 at 01:58:34"},{"visible":true,"include":true,"step":"35.0","x":-333.56190476190477,"y":186.07619047619048,"z":-2921.809523809524,"a95":0.99,"info":"23/09/2014 at 01:58:34"},{"visible":true,"include":false,"step":"40.0","x":-306.2761904761905,"y":300.15238095238095,"z":-2851.809523809524,"a95":0.99,"info":"23/09/2014 at 01:58:34"},{"visible":true,"include":false,"step":"45.0","x":-647.1428571428571,"y":102.96190476190475,"z":-2807.904761904762,"a95":0.99,"info":"23/09/2014 at 01:58:34"},{"visible":true,"include":false,"step":"50.0","x":-334.0571428571428,"y":131.34285714285713,"z":-2776.8571428571427,"a95":0.99,"info":"23/09/2014 at 01:58:34"},{"visible":true,"include":false,"step":"60.0","x":-452.23809523809524,"y":466.23809523809524,"z":-2665.3333333333335,"a95":0.99,"info":"23/09/2014 at 01:58:34"},{"visible":true,"include":false,"step":"70.0","x":-201.83809523809526,"y":483.97142857142853,"z":-2766.7619047619046,"a95":0.99,"info":"23/09/2014 at 01:58:34"},{"visible":true,"include":false,"step":"80.0","x":-91.53333333333333,"y":115.12380952380951,"z":-3053.904761904762,"a95":0.99,"info":"23/09/2014 at 01:58:34"},{"visible":true,"include":false,"step":"90.0","x":-141.04761904761904,"y":142.8761904761905,"z":-2755.2380952380954,"a95":0.99,"info":"23/09/2014 at 01:58:34"},{"visible":true,"include":false,"step":"100.0","x":-331.7904761904762,"y":30.793333333333333,"z":-2481.4285714285716,"a95":0.99,"info":"23/09/2014 at 01:58:34"}]},{"version":"v1.1.0","exported":"2016-11-28T13:45:29.908Z","volume":10.5,"added":"2016-11-28T13:43:19.774Z","format":"Utrecht","demagType":"Unknown","strat":"8","patch":1.1,"GEO":[],"TECT":[],"interpreted":false,"name":"AR3.20B","coreAzi":46,"coreDip":66,"bedStrike":271,"bedDip":44,"data":[{"visible":true,"include":false,"step":"0.0","x":-893.647619047619,"y":-1556.5714285714287,"z":-1717.4285714285713,"a95":0.99,"info":"29/09/2014 at 01:04:14"},{"visible":true,"include":false,"step":"10.0","x":-593.7904761904762,"y":-1444.1904761904761,"z":-2063.2380952380954,"a95":0.99,"info":"29/09/2014 at 01:04:14"},{"visible":true,"include":false,"step":"15.0","x":-623.6095238095238,"y":-1453.047619047619,"z":-2193.904761904762,"a95":0.99,"info":"29/09/2014 at 01:04:14"},{"visible":true,"include":false,"step":"20.0","x":-695.495238095238,"y":-1392,"z":-2216.9523809523807,"a95":0.99,"info":"29/09/2014 at 01:04:14"},{"visible":true,"include":false,"step":"25.0","x":-551.0857142857143,"y":-1352.5714285714287,"z":-2411.809523809524,"a95":0.99,"info":"29/09/2014 at 01:04:14"},{"visible":true,"include":false,"step":"30.0","x":-672.1809523809524,"y":-1418,"z":-2169.0476190476193,"a95":0.99,"info":"29/09/2014 at 01:04:14"},{"visible":true,"include":false,"step":"35.0","x":-506.6666666666667,"y":-1348.6666666666667,"z":-2313.4285714285716,"a95":0.99,"info":"29/09/2014 at 01:04:14"},{"visible":true,"include":false,"step":"40.0","x":-402.6380952380952,"y":-1182.095238095238,"z":-2257.0476190476193,"a95":0.99,"info":"29/09/2014 at 01:04:14"},{"visible":true,"include":false,"step":"45.0","x":-451.152380952381,"y":-1057.3333333333333,"z":-2165.5238095238096,"a95":0.99,"info":"29/09/2014 at 01:04:14"},{"visible":true,"include":false,"step":"50.0","x":-637.6666666666666,"y":-1462.095238095238,"z":-2172.095238095238,"a95":0.99,"info":"29/09/2014 at 01:04:14"},{"visible":true,"include":false,"step":"60.0","x":-98.4095238095238,"y":-1141.5238095238096,"z":-1967.7142857142858,"a95":0.99,"info":"29/09/2014 at 01:04:14"},{"visible":true,"include":false,"step":"70.0","x":-432.9428571428571,"y":-1533.3333333333333,"z":-1995.904761904762,"a95":0.99,"info":"29/09/2014 at 01:04:14"},{"visible":true,"include":false,"step":"80.0","x":-487.53333333333336,"y":-1416.952380952381,"z":-2073.904761904762,"a95":0.99,"info":"29/09/2014 at 01:04:14"},{"visible":true,"include":false,"step":"90.0","x":-338.4190476190476,"y":-1239.6190476190477,"z":-2229.5238095238096,"a95":0.99,"info":"29/09/2014 at 01:04:14"}]},{"version":"v1.1.0","exported":"2016-11-28T13:45:29.908Z","volume":10.5,"added":"2016-11-28T13:43:19.774Z","format":"Utrecht","demagType":"Unknown","strat":null,"patch":1.1,"GEO":[{"dec":255.4061135896696,"inc":-53.132491031045625,"MAD":3.1401228761666085,"cm":[-1.4210854715202004e-14,2.1316282072803006e-14,0],"intensity":2718.8379553891036,"type":"dir","forced":true,"remark":"","origin":false,"nSteps":3,"minStep":"270","maxStep":"320","steps":["270","300","320"],"group":"None","version":"v1.1.0"}],"TECT":[{"dec":221.70381305073607,"inc":-27.610242766696906,"MAD":3.140122876166557,"cm":[6.394884621840902e-14,-1.4210854715202004e-14,-5.3290705182007514e-14],"intensity":2718.8379553891036,"type":"dir","forced":true,"remark":"","origin":false,"nSteps":3,"minStep":"270","maxStep":"320","steps":["270","300","320"],"group":"None","version":"v1.1.0"}],"interpreted":true,"name":"AR3.21A","coreAzi":23,"coreDip":62,"bedStrike":271,"bedDip":44,"data":[{"visible":true,"include":false,"step":"20","x":858.952380952381,"y":-1880,"z":-1557.2380952380952,"a95":2.1,"info":"\"14-11-03\" at \"17:28\""},{"visible":true,"include":false,"step":"100","x":133.61904761904762,"y":-1752,"z":-2586.285714285714,"a95":2.5,"info":"\"14-11-03\" at \"22:30\""},{"visible":true,"include":false,"step":"150","x":63.80952380952381,"y":-1773.3333333333333,"z":-2652.285714285714,"a95":2.6,"info":"\"14-11-04\" at \"19:30\""},{"visible":true,"include":false,"step":"180","x":58.857142857142854,"y":-1710.952380952381,"z":-2620.8571428571427,"a95":2.5,"info":"\"14-11-04\" at \"22:41\""},{"visible":true,"include":false,"step":"210","x":143.23809523809524,"y":-1772.3809523809523,"z":-2616.7619047619046,"a95":2.7,"info":"\"14-11-05\" at \"18:07\""},{"visible":true,"include":false,"step":"240","x":-37.04761904761905,"y":-1570.2857142857142,"z":-2439.714285714286,"a95":2.4,"info":"\"14-11-06\" at \"15:50\""},{"visible":true,"include":true,"step":"270","x":159.71428571428572,"y":-1126.6666666666667,"z":-2021.8095238095239,"a95":2.6,"info":"\"14-11-06\" at \"22:02\""},{"visible":true,"include":true,"step":"300","x":-26.857142857142858,"y":-347.14285714285717,"z":-755.1428571428571,"a95":2.7,"info":"\"14-11-07\" at \"17:31\""},{"visible":true,"include":true,"step":"320","x":-55.333333333333336,"y":-145.33333333333334,"z":-378.85714285714283,"a95":4,"info":"\"14-11-15\" at \"00:50\""},{"visible":true,"include":false,"step":"340","x":-145.9047619047619,"y":343.04761904761904,"z":26.571428571428573,"a95":3.4,"info":"\"14-11-15\" at \"21:42\""},{"visible":true,"include":false,"step":"360","x":-149.9047619047619,"y":309.8095238095238,"z":-9.142857142857142,"a95":2.6,"info":"\"14-11-16\" at \"00:52\""},{"visible":true,"include":false,"step":"380","x":-136.1904761904762,"y":306.6666666666667,"z":244.0952380952381,"a95":4.1,"info":"\"14-11-16\" at \"18:51\""},{"visible":true,"include":false,"step":"400","x":-146.76190476190476,"y":172.47619047619048,"z":13.904761904761905,"a95":3.7,"info":"\"14-11-16\" at \"22:53\""}]},{"version":"v1.1.0","exported":"2016-11-28T13:45:29.908Z","volume":10.5,"added":"2016-11-28T13:43:19.774Z","format":"Utrecht","demagType":"Unknown","strat":"1","patch":1.1,"GEO":[{"dec":4.058878025815545,"inc":-13.358030648976824,"MAD":9.849657818918214,"cm":[-7.815970093361102e-14,0,0],"intensity":7415.730633893543,"type":"GC","origin":false,"forced":true,"remark":"","nSteps":5,"minStep":"10.0","maxStep":"30.0","steps":["10.0","15.0","20.0","25.0","30.0"],"group":"None","version":"v1.1.0"}],"TECT":[{"dec":6.508153488351127,"inc":-57.2558841501641,"MAD":9.849657818917867,"cm":[0,-2.842170943040401e-14,8.526512829121202e-14],"intensity":7415.730633893542,"type":"GC","origin":false,"forced":true,"remark":"","nSteps":5,"minStep":"10.0","maxStep":"30.0","steps":["10.0","15.0","20.0","25.0","30.0"],"group":"None","version":"v1.1.0"}],"interpreted":true,"name":"AR3.22A","coreAzi":117,"coreDip":11,"bedStrike":271,"bedDip":44,"data":[{"visible":true,"include":false,"step":"0.0","x":1156.1904761904761,"y":1565.2380952380952,"z":-2874.4761904761904,"a95":0.99,"info":"29/09/2014 at 05:34:57"},{"visible":true,"include":true,"step":"10.0","x":2215.1428571428573,"y":1558,"z":-2613.4285714285716,"a95":0.99,"info":"29/09/2014 at 05:34:57"},{"visible":true,"include":true,"step":"15.0","x":2181.809523809524,"y":1618.7619047619048,"z":-2732.9523809523807,"a95":0.99,"info":"29/09/2014 at 05:34:57"},{"visible":true,"include":true,"step":"20.0","x":2068.4761904761904,"y":1511.2380952380952,"z":-2436.3809523809523,"a95":0.99,"info":"29/09/2014 at 05:34:57"},{"visible":true,"include":true,"step":"25.0","x":2387.809523809524,"y":1540.7619047619048,"z":-2192.095238095238,"a95":0.99,"info":"29/09/2014 at 05:34:57"},{"visible":true,"include":true,"step":"30.0","x":2714.5714285714284,"y":1375.047619047619,"z":-2086.3809523809523,"a95":0.99,"info":"29/09/2014 at 05:34:57"},{"visible":true,"include":false,"step":"35.0","x":2597.3333333333335,"y":1334.1904761904761,"z":-2051.4285714285716,"a95":0.99,"info":"29/09/2014 at 05:34:57"},{"visible":true,"include":false,"step":"40.0","x":2854.4761904761904,"y":1186,"z":-2518.6666666666665,"a95":0.99,"info":"29/09/2014 at 05:34:57"},{"visible":true,"include":false,"step":"45.0","x":2760,"y":1155.5238095238096,"z":-2780,"a95":0.99,"info":"29/09/2014 at 05:34:57"},{"visible":true,"include":false,"step":"50.0","x":2871.0476190476193,"y":657.7428571428571,"z":-2414.095238095238,"a95":0.99,"info":"29/09/2014 at 05:34:57"},{"visible":true,"include":false,"step":"60.0","x":1935.142857142857,"y":897.1428571428571,"z":-2627.904761904762,"a95":0.99,"info":"29/09/2014 at 05:34:57"},{"visible":true,"include":false,"step":"70.0","x":2406.9523809523807,"y":832.3333333333334,"z":-2569.0476190476193,"a95":0.99,"info":"29/09/2014 at 05:34:57"},{"visible":true,"include":false,"step":"80.0","x":2398.3809523809523,"y":542.6952380952381,"z":-2454.095238095238,"a95":0.99,"info":"29/09/2014 at 05:34:57"},{"visible":true,"include":false,"step":"90.0","x":2234.190476190476,"y":1025.142857142857,"z":-1779.904761904762,"a95":0.99,"info":"29/09/2014 at 05:34:57"}]}]
