# Supplementary material for: Paleomagnetic constraints on the timing and distribution of Cenozoic rotations in Central and Eastern Anatolia
Source: Copernicus journal article supplement (doi:10.5194/se-9-295-2018), 2018-03-21
Supplement: Supplementary file 2 [file se-9-295-2018-supplement.zip › se-2017-66_DATA_dir files/dir files Ulukisla/AT1.dir]

[{"version":"v1.1.0","exported":"2017-05-18T12:24:48.767Z","volume":10.5,"added":"2017-05-18T12:21:50.431Z","format":"Utrecht","demagType":"Unknown","strat":null,"patch":1.1,"GEO":[{"dec":245.4365865840066,"inc":-22.765257617396408,"MAD":15.771352206277651,"cm":[-6.661338147750939e-16,6.938893903907228e-16,0],"intensity":20.912698352459262,"type":"GC","origin":false,"forced":true,"remark":"","nSteps":3,"minStep":"210","maxStep":"270","steps":["210","240","270"],"group":"None","version":"v1.1.0"}],"TECT":[{"dec":239.88318203170974,"inc":-6.803942229736035,"MAD":15.771352206277674,"cm":[-3.885780586188048e-16,-1.27675647831893e-15,-4.440892098500626e-16],"intensity":20.912698352459262,"type":"GC","origin":false,"forced":true,"remark":"","nSteps":3,"minStep":"210","maxStep":"270","steps":["210","240","270"],"group":"None","version":"v1.1.0"}],"interpreted":true,"name":"AT1.1A","coreAzi":11,"coreDip":6,"bedStrike":280,"bedDip":26,"data":[{"visible":true,"include":false,"step":"20","x":-43.523809523809526,"y":1.9714285714285713,"z":36.44761904761905,"a95":2.2,"info":"\"14-11-30\" at \"14:54\""},{"visible":true,"include":false,"step":"100","x":-22.742857142857144,"y":-1.8190476190476192,"z":19.58095238095238,"a95":3.4,"info":"\"15-01-31\" at \"11:41\""},{"visible":true,"include":false,"step":"150","x":-17.65714285714286,"y":0.41904761904761906,"z":7.257142857142857,"a95":3.7,"info":"\"15-01-31\" at \"15:01\""},{"visible":true,"include":false,"step":"180","x":-4.019047619047619,"y":4.6761904761904765,"z":7.038095238095239,"a95":5.3,"info":"\"15-02-01\" at \"08:30\""},{"visible":true,"include":true,"step":"210","x":-11.00952380952381,"y":-2.7714285714285714,"z":-1.8761904761904762,"a95":5.6,"info":"\"15-02-01\" at \"11:43\""},{"visible":true,"include":true,"step":"240","x":-10.161904761904761,"y":-1.5047619047619047,"z":-5.533333333333333,"a95":4.8,"info":"\"15-02-02\" at \"16:33\""},{"visible":true,"include":true,"step":"270","x":-8.4,"y":1.5904761904761904,"z":-5.819047619047619,"a95":3.6,"info":"\"15-02-02\" at \"20:23\""},{"visible":true,"include":false,"step":"300","x":-1.0571428571428572,"y":0.23809523809523808,"z":4.809523809523809,"a95":5.1,"info":"\"15-02-03\" at \"00:06\""},{"visible":true,"include":false,"step":"320","x":8.161904761904761,"y":1.3523809523809522,"z":7.590476190476191,"a95":4.4,"info":"\"15-02-03\" at \"18:40\""},{"visible":true,"include":false,"step":"340","x":2.7714285714285714,"y":1.2095238095238094,"z":6.780952380952381,"a95":5.4,"info":"\"15-02-04\" at \"16:34\""},{"visible":true,"include":false,"step":"370","x":3.9142857142857146,"y":1.8190476190476192,"z":7.20952380952381,"a95":6,"info":"\"15-02-04\" at \"21:49\""}]},{"version":"v1.1.0","exported":"2017-05-18T12:24:48.768Z","volume":10.5,"added":"2017-05-18T12:21:50.431Z","format":"Utrecht","demagType":"Unknown","strat":null,"patch":1.1,"GEO":[],"TECT":[],"interpreted":false,"name":"AT1.3A","coreAzi":350,"coreDip":64,"bedStrike":280,"bedDip":26,"data":[{"visible":true,"include":false,"step":"20","x":-3.7142857142857144,"y":1.6952380952380952,"z":53.75238095238095,"a95":3.4,"info":"\"14-11-30\" at \"14:56\""},{"visible":true,"include":true,"step":"100","x":-3.3619047619047615,"y":1.380952380952381,"z":28.485714285714288,"a95":3,"info":"\"15-01-31\" at \"11:44\""},{"visible":true,"include":true,"step":"150","x":0.3619047619047619,"y":-0.9333333333333333,"z":19.247619047619047,"a95":3.5,"info":"\"15-01-31\" at \"15:03\""},{"visible":true,"include":true,"step":"180","x":-6.171428571428571,"y":-0.8666666666666666,"z":6.742857142857143,"a95":4.7,"info":"\"15-02-01\" at \"08:32\""},{"visible":true,"include":false,"step":"210","x":-6.838095238095238,"y":8.390476190476189,"z":4.333333333333333,"a95":5.3,"info":"\"15-02-01\" at \"11:45\""},{"visible":true,"include":true,"step":"240","x":-8.266666666666666,"y":0.7809523809523808,"z":1.6285714285714288,"a95":4.8,"info":"\"15-02-02\" at \"16:35\""},{"visible":true,"include":false,"step":"270","x":-6.857142857142857,"y":5.923809523809524,"z":2.1619047619047618,"a95":5.4,"info":"\"15-02-02\" at \"20:26\""},{"visible":true,"include":false,"step":"300","x":-0.9714285714285713,"y":0.8000000952380952,"z":7.542857142857143,"a95":4.5,"info":"\"15-02-03\" at \"00:08\""},{"visible":true,"include":false,"step":"320","x":-4.285714285714286,"y":3.5714285714285716,"z":2.8666666666666667,"a95":6.4,"info":"\"15-02-03\" at \"18:43\""},{"visible":true,"include":false,"step":"340","x":-7.876190476190477,"y":3.5904761904761906,"z":3.5047619047619043,"a95":4.2,"info":"\"15-02-04\" at \"16:36\""},{"visible":true,"include":false,"step":"370","x":-6.066666666666667,"y":3.380952380952381,"z":4.142857142857143,"a95":3.2,"info":"\"15-02-04\" at \"21:51\""}]},{"version":"v1.1.0","exported":"2017-05-18T12:24:48.768Z","volume":10.5,"added":"2017-05-18T12:21:50.432Z","format":"Utrecht","demagType":"Unknown","strat":"3","patch":1.1,"GEO":[],"TECT":[],"interpreted":false,"name":"AT1.3B","coreAzi":350,"coreDip":64,"bedStrike":280,"bedDip":26,"data":[{"visible":true,"include":false,"step":"0.0","x":27.996190476190474,"y":18.005714285714287,"z":39.56857142857143,"a95":0.99,"info":"26/10/2014 at 18:57:51"},{"visible":true,"include":false,"step":"4.0","x":26.579047619047618,"y":9.166380952380953,"z":36.68571428571428,"a95":0.99,"info":"26/10/2014 at 18:57:51"},{"visible":true,"include":false,"step":"8.0","x":22.11047619047619,"y":7.201809523809524,"z":7.791714285714286,"a95":0.99,"info":"26/10/2014 at 18:57:51"},{"visible":true,"include":false,"step":"12.0","x":18.30952380952381,"y":11.855238095238096,"z":26.915238095238095,"a95":0.99,"info":"26/10/2014 at 18:57:51"},{"visible":true,"include":false,"step":"16.0","x":15.542857142857141,"y":9.083333333333334,"z":27.82857142857143,"a95":0.99,"info":"26/10/2014 at 18:57:51"},{"visible":true,"include":false,"step":"20.0","x":11.74,"y":5.403238095238096,"z":27.914285714285718,"a95":0.99,"info":"26/10/2014 at 18:57:51"},{"visible":true,"include":false,"step":"25.0","x":10.598095238095238,"y":8.232095238095237,"z":29.64190476190476,"a95":0.99,"info":"26/10/2014 at 18:57:51"},{"visible":true,"include":false,"step":"30.0","x":9.06504761904762,"y":1.6012380952380951,"z":11.882857142857143,"a95":0.99,"info":"26/10/2014 at 18:57:51"},{"visible":true,"include":false,"step":"35.0","x":8.644761904761904,"y":4.7570476190476185,"z":18.069523809523808,"a95":0.99,"info":"26/10/2014 at 18:57:51"},{"visible":true,"include":false,"step":"40.0","x":6.377238095238095,"y":1.0692380952380953,"z":20.87238095238095,"a95":0.99,"info":"26/10/2014 at 18:57:51"},{"visible":true,"include":false,"step":"45.0","x":1.9240000000000002,"y":5.574571428571429,"z":23.108571428571427,"a95":0.99,"info":"26/10/2014 at 18:57:51"},{"visible":true,"include":false,"step":"50.0","x":-0.3462190476190476,"y":3.5839999999999996,"z":11.694285714285716,"a95":0.99,"info":"26/10/2014 at 18:57:51"},{"visible":true,"include":false,"step":"60.0","x":0.24314285714285713,"y":-9.44152380952381,"z":19.619999999999997,"a95":0.99,"info":"26/10/2014 at 18:57:51"},{"visible":true,"include":false,"step":"70.0","x":4.019809523809523,"y":1.3001904761904761,"z":15.475238095238096,"a95":0.99,"info":"26/10/2014 at 18:57:51"},{"visible":true,"include":false,"step":"80.0","x":6.128761904761905,"y":-5.662761904761905,"z":15.326666666666668,"a95":0.99,"info":"26/10/2014 at 18:57:51"},{"visible":true,"include":false,"step":"90.0","x":2.486952380952381,"y":4.349619047619048,"z":17.413333333333334,"a95":0.99,"info":"26/10/2014 at 18:57:51"},{"visible":true,"include":false,"step":"100.0","x":0.8272095238095238,"y":3.1013333333333333,"z":10.576190476190476,"a95":0.99,"info":"26/10/2014 at 18:57:51"}]},{"version":"v1.1.0","exported":"2017-05-18T12:24:48.768Z","volume":10.5,"added":"2017-05-18T12:21:50.432Z","format":"Utrecht","demagType":"Unknown","strat":null,"patch":1.1,"GEO":[],"TECT":[],"interpreted":false,"name":"AT1.5A","coreAzi":9,"coreDip":9,"bedStrike":280,"bedDip":26,"data":[{"visible":true,"include":false,"step":"20","x":-0.3047619047619048,"y":-1.6285714285714288,"z":78.76190476190476,"a95":3.8,"info":"\"14-11-30\" at \"14:58\""},{"visible":true,"include":false,"step":"100","x":-14.885714285714286,"y":-0.6952380952380952,"z":25.485714285714288,"a95":3.2,"info":"\"15-01-31\" at \"11:46\""},{"visible":true,"include":false,"step":"150","x":-9.723809523809523,"y":-1.380952380952381,"z":18.8,"a95":2.9,"info":"\"15-01-31\" at \"15:05\""},{"visible":true,"include":false,"step":"180","x":-6.371428571428572,"y":0.2761904761904762,"z":13.00952380952381,"a95":5.3,"info":"\"15-02-01\" at \"08:33\""},{"visible":true,"include":false,"step":"210","x":-7.7714285714285705,"y":-0.9238095238095237,"z":11.447619047619048,"a95":4.8,"info":"\"15-02-01\" at \"11:47\""},{"visible":true,"include":false,"step":"240","x":-0.43809523809523804,"y":-1.0761904761904764,"z":7.780952380952381,"a95":7,"info":"\"15-02-02\" at \"16:38\""},{"visible":true,"include":false,"step":"270","x":-2.876190476190476,"y":-0.34285714285714286,"z":6.6952380952380945,"a95":7.3,"info":"\"15-02-02\" at \"20:28\""},{"visible":true,"include":false,"step":"300","x":-1.5142857142857142,"y":-0.5619047619047619,"z":6.466666666666667,"a95":4.7,"info":"\"15-02-03\" at \"00:10\""},{"visible":true,"include":false,"step":"320","x":2.9714285714285715,"y":0.6,"z":5.876190476190477,"a95":6.4,"info":"\"15-02-03\" at \"18:45\""},{"visible":true,"include":false,"step":"340","x":-1.9333333333333333,"y":0.18095238095238095,"z":5.504761904761905,"a95":6.1,"info":"\"15-02-04\" at \"16:38\""},{"visible":true,"include":false,"step":"370","x":-0.0380952380952381,"y":0.13333333333333333,"z":5.476190476190476,"a95":6.8,"info":"\"15-02-04\" at \"21:53\""}]},{"version":"v1.1.0","exported":"2017-05-18T12:24:48.768Z","volume":10.5,"added":"2017-05-18T12:21:50.432Z","format":"Utrecht","demagType":"Unknown","strat":null,"patch":1.1,"GEO":[],"TECT":[],"interpreted":false,"name":"AT1.7A","coreAzi":354,"coreDip":11,"bedStrike":280,"bedDip":26,"data":[{"visible":true,"include":false,"step":"20","x":-42.57142857142857,"y":4.285714285714286,"z":60.34285714285714,"a95":2.4,"info":"\"14-11-30\" at \"15:00\""},{"visible":true,"include":false,"step":"100","x":-29.476190476190474,"y":1.3523809523809522,"z":36.22857142857143,"a95":2.6,"info":"\"15-01-31\" at \"11:48\""},{"visible":true,"include":false,"step":"150","x":-18.314285714285717,"y":1.580952380952381,"z":25.62857142857143,"a95":2.5,"info":"\"15-01-31\" at \"15:07\""},{"visible":true,"include":false,"step":"180","x":-11.609523809523811,"y":-0.17142857142857143,"z":14.304761904761904,"a95":5,"info":"\"15-02-01\" at \"08:35\""},{"visible":true,"include":false,"step":"210","x":-8.123809523809523,"y":0.23809523809523808,"z":8.342857142857142,"a95":7,"info":"\"15-02-01\" at \"11:49\""},{"visible":true,"include":false,"step":"240","x":-1.5619047619047617,"y":-1.6285714285714288,"z":4.8,"a95":10.1,"info":"\"15-02-02\" at \"17:06\""},{"visible":true,"include":false,"step":"270","x":-2.0095238095238095,"y":-0.0761904761904762,"z":4.390476190476191,"a95":13,"info":"\"15-02-02\" at \"20:30\""},{"visible":true,"include":false,"step":"300","x":-1.980952380952381,"y":-0.5142857142857143,"z":1.5904761904761904,"a95":10.6,"info":"\"15-02-03\" at \"00:12\""},{"visible":true,"include":false,"step":"320","x":2.5904761904761906,"y":1.619047619047619,"z":3.304761904761905,"a95":10.3,"info":"\"15-02-03\" at \"18:47\""},{"visible":true,"include":false,"step":"340","x":-1.7904761904761906,"y":1.3238095238095238,"z":2.3333333333333335,"a95":10.7,"info":"\"15-02-04\" at \"16:40\""},{"visible":true,"include":false,"step":"370","x":-0.10476190476190476,"y":1.7999999999999998,"z":2.5904761904761906,"a95":9.2,"info":"\"15-02-04\" at \"21:56\""}]},{"version":"v1.1.0","exported":"2017-05-18T12:24:48.768Z","volume":10.5,"added":"2017-05-18T12:21:50.434Z","format":"Utrecht","demagType":"Unknown","strat":null,"patch":1.1,"GEO":[],"TECT":[],"interpreted":false,"name":"AT1.8A","coreAzi":358,"coreDip":34,"bedStrike":280,"bedDip":26,"data":[{"visible":false,"include":false,"step":"20","x":-0.4095238095238095,"y":7.723809523809523,"z":37.333333333333336,"a95":4.5,"info":"\"14-11-30\" at \"15:04\""},{"visible":false,"include":false,"step":"100","x":0.5904761904761905,"y":-0.5714285714285714,"z":1.8666666666666667,"a95":20.1,"info":"\"15-01-31\" at \"11:50\""},{"visible":false,"include":false,"step":"150","x":-0.43809523809523804,"y":-0.4666666666666667,"z":-4.542857142857143,"a95":16.3,"info":"\"15-01-31\" at \"15:09\""},{"visible":true,"include":false,"step":"180","x":-0.3142857142857143,"y":-0.1523809523809524,"z":-1.5428571428571427,"a95":37.4,"info":"\"15-02-01\" at \"08:39\""},{"visible":true,"include":false,"step":"210","x":-2.6666666666666665,"y":-2.4,"z":0.18095238095238095,"a95":16.4,"info":"\"15-02-01\" at \"11:51\""},{"visible":true,"include":false,"step":"240","x":-2.6,"y":-1.580952380952381,"z":-6.6952380952380945,"a95":6.3,"info":"\"15-02-02\" at \"16:44\""},{"visible":true,"include":false,"step":"270","x":0.49523809523809526,"y":-1.9238095238095236,"z":-1.8380952380952382,"a95":23.1,"info":"\"15-02-02\" at \"20:32\""},{"visible":true,"include":false,"step":"300","x":-2.0285714285714285,"y":-1.0571428571428572,"z":-3.038095238095238,"a95":16.9,"info":"\"15-02-03\" at \"00:15\""},{"visible":true,"include":false,"step":"320","x":0.7809523809523808,"y":0.20952380952380953,"z":-0.2,"a95":51.8,"info":"\"15-02-03\" at \"18:49\""},{"visible":true,"include":false,"step":"340","x":-3.4952380952380957,"y":-1.6,"z":0.18095238095238095,"a95":12.8,"info":"\"15-02-04\" at \"16:42\""},{"visible":true,"include":false,"step":"370","x":-3.142857142857143,"y":0.01904761904761905,"z":1.5047619047619047,"a95":16,"info":"\"15-02-04\" at \"21:59\""}]},{"version":"v1.1.0","exported":"2017-05-18T12:24:48.768Z","volume":10.5,"added":"2017-05-18T12:21:50.435Z","format":"Utrecht","demagType":"Unknown","strat":null,"patch":1.1,"GEO":[],"TECT":[],"interpreted":false,"name":"AT1.11A","coreAzi":313,"coreDip":16,"bedStrike":280,"bedDip":26,"data":[{"visible":true,"include":false,"step":"20","x":-10.657142857142858,"y":4.733333333333333,"z":15.371428571428572,"a95":3.8,"info":"\"14-11-30\" at \"15:06\""},{"visible":true,"include":false,"step":"100","x":-6.647619047619047,"y":3.9714285714285715,"z":8.276190476190477,"a95":3.2,"info":"\"15-01-31\" at \"11:52\""},{"visible":true,"include":false,"step":"150","x":-2.619047619047619,"y":2.7142857142857144,"z":4.6761904761904765,"a95":6.1,"info":"\"15-01-31\" at \"15:11\""},{"visible":true,"include":false,"step":"180","x":-5.4,"y":2.4952380952380953,"z":3.6095238095238096,"a95":13.6,"info":"\"15-02-01\" at \"08:41\""},{"visible":true,"include":false,"step":"210","x":-7.809523809523809,"y":2.7333333333333334,"z":2.038095238095238,"a95":7.6,"info":"\"15-02-01\" at \"11:53\""},{"visible":true,"include":false,"step":"240","x":-3.933333333333333,"y":2.3238095238095235,"z":2.361904761904762,"a95":7.2,"info":"\"15-02-02\" at \"16:47\""},{"visible":true,"include":false,"step":"270","x":-3.6380952380952385,"y":2.219047619047619,"z":2.0476190476190474,"a95":8.400001,"info":"\"15-02-02\" at \"20:35\""},{"visible":true,"include":false,"step":"300","x":-5.0476190476190474,"y":0.8380952380952381,"z":2.4952380952380953,"a95":5.8,"info":"\"15-02-03\" at \"00:17\""},{"visible":true,"include":false,"step":"320","x":-2.5333333333333337,"y":-1.6285714285714288,"z":-0.11428571428571428,"a95":11.6,"info":"\"15-02-03\" at \"18:51\""},{"visible":true,"include":false,"step":"340","x":-6.038095238095238,"y":-1.9238095238095236,"z":-0.3523809523809524,"a95":5.6,"info":"\"15-02-04\" at \"16:45\""},{"visible":true,"include":false,"step":"370","x":-5.161904761904762,"y":-1.4761904761904763,"z":1.2380952380952381,"a95":5.5,"info":"\"15-02-04\" at \"22:02\""}]},{"version":"v1.1.0","exported":"2017-05-18T12:24:48.768Z","volume":10.5,"added":"2017-05-18T12:21:50.435Z","format":"Utrecht","demagType":"Unknown","strat":"4","patch":1.1,"GEO":[],"TECT":[],"interpreted":false,"name":"AT1.11B","coreAzi":313,"coreDip":16,"bedStrike":280,"bedDip":26,"data":[{"visible":true,"include":false,"step":"0.0","x":-44.68,"y":24.254285714285714,"z":30.535238095238096,"a95":0.99,"info":"26/10/2014 at 18:57:51"},{"visible":true,"include":false,"step":"4.0","x":-41.40761904761904,"y":23.259047619047617,"z":30.242857142857144,"a95":0.99,"info":"26/10/2014 at 18:57:51"},{"visible":true,"include":false,"step":"8.0","x":-40.32,"y":22.36095238095238,"z":-4.839333333333333,"a95":0.99,"info":"26/10/2014 at 18:57:51"},{"visible":true,"include":false,"step":"12.0","x":-36.54190476190476,"y":18.822857142857142,"z":14.849523809523808,"a95":0.99,"info":"26/10/2014 at 18:57:51"},{"visible":true,"include":false,"step":"16.0","x":-31.829523809523806,"y":18.93619047619048,"z":25.269523809523808,"a95":0.99,"info":"26/10/2014 at 18:57:51"},{"visible":true,"include":false,"step":"20.0","x":-31.094285714285714,"y":14.336190476190476,"z":21.633333333333333,"a95":0.99,"info":"26/10/2014 at 18:57:51"},{"visible":true,"include":false,"step":"25.0","x":-24.846666666666664,"y":17.51904761904762,"z":19.975238095238097,"a95":0.99,"info":"26/10/2014 at 18:57:51"},{"visible":true,"include":false,"step":"30.0","x":-22.86,"y":8.778857142857143,"z":11.277142857142858,"a95":0.99,"info":"26/10/2014 at 18:57:51"},{"visible":true,"include":false,"step":"35.0","x":-17.78,"y":13.707619047619048,"z":11.421904761904763,"a95":0.99,"info":"26/10/2014 at 18:57:51"},{"visible":true,"include":false,"step":"40.0","x":-18.219047619047622,"y":11.666666666666666,"z":12.293333333333335,"a95":0.99,"info":"26/10/2014 at 18:57:51"},{"visible":true,"include":false,"step":"45.0","x":-15.762857142857142,"y":9.547619047619047,"z":11.582857142857144,"a95":0.99,"info":"26/10/2014 at 18:57:51"},{"visible":true,"include":false,"step":"50.0","x":-17.37333333333333,"y":6.797809523809524,"z":63.79428571428572,"a95":0.99,"info":"26/10/2014 at 18:57:51"},{"visible":true,"include":false,"step":"60.0","x":-13.236190476190476,"y":3.3591428571428574,"z":7.369142857142857,"a95":0.99,"info":"26/10/2014 at 18:57:51"},{"visible":true,"include":false,"step":"70.0","x":-10.799047619047618,"y":4.671428571428571,"z":7.104095238095239,"a95":0.99,"info":"26/10/2014 at 18:57:51"},{"visible":true,"include":false,"step":"80.0","x":-4.61447619047619,"y":-7.802190476190477,"z":11.324761904761905,"a95":0.99,"info":"26/10/2014 at 18:57:51"},{"visible":true,"include":false,"step":"90.0","x":-8.865047619047619,"y":5.080571428571428,"z":8.73047619047619,"a95":0.99,"info":"26/10/2014 at 18:57:51"},{"visible":true,"include":false,"step":"100.0","x":-9.560952380952381,"y":6.725142857142858,"z":8.345714285714285,"a95":0.99,"info":"26/10/2014 at 18:57:51"}]},{"version":"v1.1.0","exported":"2017-05-18T12:24:48.768Z","volume":10.5,"added":"2017-05-18T12:21:50.436Z","format":"Utrecht","demagType":"Unknown","strat":"5","patch":1.1,"GEO":[],"TECT":[],"interpreted":false,"name":"AT1.12B","coreAzi":326,"coreDip":47,"bedStrike":280,"bedDip":26,"data":[{"visible":false,"include":false,"step":"0.0","x":-12.262857142857142,"y":-4.828857142857143,"z":-13.206666666666665,"a95":0.99,"info":"26/10/2014 at 18:57:51"},{"visible":true,"include":false,"step":"4.0","x":-9.343333333333334,"y":-13.005714285714285,"z":-12.443809523809524,"a95":0.99,"info":"26/10/2014 at 18:57:51"},{"visible":true,"include":false,"step":"8.0","x":-9.883809523809523,"y":-8.455333333333334,"z":10.74952380952381,"a95":0.99,"info":"26/10/2014 at 18:57:51"},{"visible":false,"include":false,"step":"12.0","x":-8.444761904761904,"y":-6.271809523809524,"z":-39.210476190476186,"a95":0.99,"info":"26/10/2014 at 18:57:51"},{"visible":true,"include":false,"step":"16.0","x":-1.946,"y":-9.336761904761905,"z":-18.565714285714286,"a95":0.99,"info":"26/10/2014 at 18:57:51"},{"visible":true,"include":false,"step":"20.0","x":-4.893714285714286,"y":-7.585904761904762,"z":-22.51142857142857,"a95":0.99,"info":"26/10/2014 at 18:57:51"},{"visible":true,"include":false,"step":"25.0","x":-5.528,"y":-7.7087619047619045,"z":-16.404761904761905,"a95":0.99,"info":"26/10/2014 at 18:57:51"},{"visible":true,"include":false,"step":"30.0","x":-2.7732380952380953,"y":-7.081523809523809,"z":-18.513333333333332,"a95":0.99,"info":"26/10/2014 at 18:57:51"},{"visible":true,"include":false,"step":"35.0","x":-0.7726,"y":-3.578857142857143,"z":-10.231428571428571,"a95":0.99,"info":"26/10/2014 at 18:57:51"},{"visible":true,"include":false,"step":"40.0","x":-6.1455238095238105,"y":-12.912380952380953,"z":-14.175238095238095,"a95":0.99,"info":"26/10/2014 at 18:57:51"},{"visible":true,"include":false,"step":"45.0","x":-10.623809523809523,"y":-8.512380952380951,"z":-11.775238095238095,"a95":0.99,"info":"26/10/2014 at 18:57:51"},{"visible":false,"include":false,"step":"50.0","x":-5.18352380952381,"y":-11.562857142857142,"z":37.96761904761905,"a95":0.99,"info":"26/10/2014 at 18:57:51"},{"visible":true,"include":false,"step":"60.0","x":-7.496857142857142,"y":-8.980380952380951,"z":-17.756190476190476,"a95":0.99,"info":"26/10/2014 at 18:57:51"},{"visible":true,"include":false,"step":"70.0","x":-3.5758095238095238,"y":0.5527809523809524,"z":-9.796190476190477,"a95":0.99,"info":"26/10/2014 at 18:57:51"},{"visible":true,"include":false,"step":"80.0","x":-0.07928571428571429,"y":-7.753714285714286,"z":-4.151142857142857,"a95":0.99,"info":"26/10/2014 at 18:57:51"},{"visible":true,"include":false,"step":"90.0","x":-3.7334285714285715,"y":-0.5026095238095238,"z":1.548857142857143,"a95":0.99,"info":"26/10/2014 at 18:57:51"},{"visible":true,"include":false,"step":"100.0","x":-7.747047619047619,"y":7.203523809523809,"z":-4.231714285714285,"a95":0.99,"info":"26/10/2014 at 18:57:51"}]},{"version":"v1.1.0","exported":"2017-05-18T12:24:48.768Z","volume":10.5,"added":"2017-05-18T12:21:50.443Z","format":"Utrecht","demagType":"Unknown","strat":null,"patch":1.1,"GEO":[],"TECT":[],"interpreted":false,"name":"AT1.14A","coreAzi":338,"coreDip":2,"bedStrike":280,"bedDip":26,"data":[{"visible":true,"include":false,"step":"20","x":37.72380952380953,"y":-19.057142857142857,"z":-10.961904761904762,"a95":1.9,"info":"\"14-11-30\" at \"15:08\""},{"visible":true,"include":false,"step":"100","x":34.4,"y":-13.266666666666667,"z":-13.2,"a95":1.8,"info":"\"15-01-31\" at \"11:54\""},{"visible":true,"include":false,"step":"150","x":18.46666666666667,"y":-1.8380952380952382,"z":-8,"a95":3,"info":"\"15-01-31\" at \"15:13\""},{"visible":true,"include":false,"step":"180","x":1.0571428571428572,"y":-1.4476190476190476,"z":0.7619047619047619,"a95":40.2,"info":"\"15-02-01\" at \"08:42\""},{"visible":true,"include":false,"step":"210","x":-6.419047619047619,"y":0.17142857142857143,"z":-1.1714285714285715,"a95":10,"info":"\"15-02-01\" at \"11:55\""},{"visible":true,"include":false,"step":"240","x":-5.714285714285714,"y":1.3904761904761904,"z":1.8952380952380952,"a95":8,"info":"\"15-02-02\" at \"16:50\""},{"visible":true,"include":false,"step":"270","x":-3.9809523809523806,"y":-4.580952380952381,"z":-0.11428571428571428,"a95":5.9,"info":"\"15-02-02\" at \"20:37\""},{"visible":true,"include":false,"step":"300","x":-3.8761904761904766,"y":3.2,"z":4.238095238095238,"a95":5.1,"info":"\"15-02-03\" at \"00:19\""},{"visible":true,"include":false,"step":"320","x":-2.1714285714285717,"y":-0.26666666666666666,"z":0.6952380952380952,"a95":16.2,"info":"\"15-02-03\" at \"18:53\""},{"visible":true,"include":false,"step":"340","x":-6.371428571428572,"y":-0.49523809523809526,"z":1.3142857142857143,"a95":6,"info":"\"15-02-04\" at \"16:47\""},{"visible":true,"include":false,"step":"370","x":-3.8285714285714287,"y":-0.8000000952380952,"z":0.8761904761904761,"a95":7.7,"info":"\"15-02-04\" at \"22:04\""}]},{"version":"v1.1.0","exported":"2017-05-18T12:24:48.768Z","volume":10.5,"added":"2017-05-18T12:21:50.443Z","format":"Utrecht","demagType":"Unknown","strat":"6","patch":1.1,"GEO":[{"dec":205.25600271648923,"inc":-45.89789094973733,"MAD":19.684398488807066,"cm":[1.1102230246251565e-16,2.220446049250313e-16,0],"intensity":48.08887970831621,"type":"dir","forced":true,"remark":"","origin":false,"nSteps":7,"minStep":"16.0","maxStep":"60.0","steps":["16.0","20.0","25.0","30.0","35.0","40.0","60.0"],"group":"None","version":"v1.1.0"}],"TECT":[{"dec":201.27828387389556,"inc":-20.55436717136866,"MAD":19.684398488807087,"cm":[2.220446049250313e-16,-4.218847493575595e-15,2.5500435096859064e-16],"intensity":48.088879708316206,"type":"dir","forced":true,"remark":"","origin":false,"nSteps":7,"minStep":"16.0","maxStep":"60.0","steps":["16.0","20.0","25.0","30.0","35.0","40.0","60.0"],"group":"None","version":"v1.1.0"}],"interpreted":true,"name":"AT1.14B","coreAzi":338,"coreDip":2,"bedStrike":280,"bedDip":26,"data":[{"visible":true,"include":false,"step":"0.0","x":33.77619047619047,"y":-7.510666666666666,"z":-15.841904761904763,"a95":0.99,"info":"26/10/2014 at 18:57:51"},{"visible":true,"include":false,"step":"4.0","x":28.952380952380953,"y":-16.243809523809524,"z":-14.506666666666666,"a95":0.99,"info":"26/10/2014 at 18:57:51"},{"visible":true,"include":false,"step":"8.0","x":36.68857142857143,"y":-7.287428571428571,"z":4.686285714285715,"a95":0.99,"info":"26/10/2014 at 18:57:51"},{"visible":true,"include":false,"step":"12.0","x":34.36761904761905,"y":-13.147619047619049,"z":-32.836190476190474,"a95":0.99,"info":"26/10/2014 at 18:57:51"},{"visible":true,"include":true,"step":"16.0","x":26.69238095238095,"y":-15.661904761904761,"z":-11.644761904761904,"a95":0.99,"info":"26/10/2014 at 18:57:51"},{"visible":true,"include":true,"step":"20.0","x":16.938095238095237,"y":-17.782857142857143,"z":-10.455238095238096,"a95":0.99,"info":"26/10/2014 at 18:57:51"},{"visible":true,"include":true,"step":"25.0","x":23.04285714285714,"y":-11.08952380952381,"z":-8.760666666666665,"a95":0.99,"info":"26/10/2014 at 18:57:51"},{"visible":true,"include":true,"step":"30.0","x":12.374285714285715,"y":-8.343714285714285,"z":-20.67809523809524,"a95":0.99,"info":"26/10/2014 at 18:57:51"},{"visible":true,"include":true,"step":"35.0","x":17.353333333333335,"y":-7.03047619047619,"z":-3.1827619047619047,"a95":0.99,"info":"26/10/2014 at 18:57:51"},{"visible":true,"include":true,"step":"40.0","x":7.315428571428571,"y":-10.100952380952382,"z":-20.594285714285714,"a95":0.99,"info":"26/10/2014 at 18:57:51"},{"visible":true,"include":false,"step":"45.0","x":8.295904761904762,"y":-2.359047619047619,"z":-13.764761904761905,"a95":0.99,"info":"26/10/2014 at 18:57:51"},{"visible":true,"include":false,"step":"50.0","x":9.701904761904762,"y":-10.357142857142858,"z":27.50190476190476,"a95":0.99,"info":"26/10/2014 at 18:57:51"},{"visible":true,"include":true,"step":"60.0","x":6.083809523809524,"y":-14.149523809523808,"z":-7.051238095238095,"a95":0.99,"info":"26/10/2014 at 18:57:51"},{"visible":true,"include":false,"step":"70.0","x":15.135238095238094,"y":-4.282190476190476,"z":-6.29,"a95":0.99,"info":"26/10/2014 at 18:57:51"},{"visible":true,"include":false,"step":"80.0","x":10.592380952380953,"y":-18.223809523809525,"z":1.8492380952380953,"a95":0.99,"info":"26/10/2014 at 18:57:51"},{"visible":true,"include":false,"step":"90.0","x":10.00095238095238,"y":2.0814285714285714,"z":-3.4000000000000004,"a95":0.99,"info":"26/10/2014 at 18:57:51"},{"visible":true,"include":false,"step":"100.0","x":9.08352380952381,"y":-2.922190476190476,"z":-4.206571428571428,"a95":0.99,"info":"26/10/2014 at 18:57:51"}]},{"version":"v1.1.0","exported":"2017-05-18T12:24:48.768Z","volume":10.5,"added":"2017-05-18T12:21:50.443Z","format":"Utrecht","demagType":"Unknown","strat":"7","patch":1.1,"GEO":[],"TECT":[],"interpreted":false,"name":"AT1.15B","coreAzi":344,"coreDip":2,"bedStrike":280,"bedDip":26,"data":[{"visible":true,"include":false,"step":"0.0","x":13.983809523809525,"y":-10.067619047619047,"z":-20.557142857142857,"a95":0.99,"info":"26/10/2014 at 18:57:51"},{"visible":true,"include":false,"step":"4.0","x":15.094285714285714,"y":-13.697142857142856,"z":-17.804761904761904,"a95":0.99,"info":"26/10/2014 at 18:57:51"},{"visible":true,"include":false,"step":"8.0","x":18.776190476190475,"y":-11.841904761904763,"z":-0.13033333333333333,"a95":0.99,"info":"26/10/2014 at 18:57:51"},{"visible":true,"include":false,"step":"12.0","x":14.623809523809525,"y":-12.292380952380952,"z":-31.42571428571429,"a95":0.99,"info":"26/10/2014 at 18:57:51"},{"visible":true,"include":false,"step":"16.0","x":16.156190476190474,"y":-7.327238095238096,"z":-15.47904761904762,"a95":0.99,"info":"26/10/2014 at 18:57:51"},{"visible":true,"include":false,"step":"20.0","x":14.262857142857142,"y":-13.52095238095238,"z":-12.842857142857142,"a95":0.99,"info":"26/10/2014 at 18:57:51"},{"visible":true,"include":false,"step":"25.0","x":19.02,"y":-4.060666666666667,"z":-6.437333333333333,"a95":0.99,"info":"26/10/2014 at 18:57:51"},{"visible":true,"include":false,"step":"30.0","x":20.219047619047622,"y":-9.068666666666667,"z":-18.90952380952381,"a95":0.99,"info":"26/10/2014 at 18:57:51"},{"visible":true,"include":false,"step":"35.0","x":16.577142857142857,"y":-8.800476190476191,"z":-9.20142857142857,"a95":0.99,"info":"26/10/2014 at 18:57:51"},{"visible":true,"include":false,"step":"40.0","x":17.446666666666665,"y":-11.618095238095238,"z":-8.722285714285714,"a95":0.99,"info":"26/10/2014 at 18:57:51"},{"visible":true,"include":false,"step":"45.0","x":18.835238095238097,"y":-4.676571428571428,"z":-11.316190476190476,"a95":0.99,"info":"26/10/2014 at 18:57:51"},{"visible":true,"include":false,"step":"50.0","x":15.88952380952381,"y":-11.005714285714285,"z":11.523809523809524,"a95":0.99,"info":"26/10/2014 at 18:57:51"},{"visible":true,"include":false,"step":"60.0","x":12.616190476190477,"y":-5.981142857142857,"z":-5.157904761904762,"a95":0.99,"info":"26/10/2014 at 18:57:51"},{"visible":true,"include":false,"step":"70.0","x":20.48761904761905,"y":1.4948571428571429,"z":-4.863904761904761,"a95":0.99,"info":"26/10/2014 at 18:57:51"},{"visible":true,"include":false,"step":"80.0","x":9.197142857142856,"y":-17.755238095238095,"z":-11.144761904761904,"a95":0.99,"info":"26/10/2014 at 18:57:51"},{"visible":true,"include":false,"step":"90.0","x":12.57904761904762,"y":1.737904761904762,"z":3.551142857142857,"a95":0.99,"info":"26/10/2014 at 18:57:51"},{"visible":true,"include":false,"step":"100.0","x":3.9916190476190474,"y":4.0572380952380955,"z":-5.683047619047619,"a95":0.99,"info":"26/10/2014 at 18:57:51"}]},{"version":"v1.1.0","exported":"2017-05-18T12:24:48.768Z","volume":10.5,"added":"2017-05-18T12:21:50.443Z","format":"Utrecht","demagType":"Unknown","strat":null,"patch":1.1,"GEO":[{"dec":73.31298831364961,"inc":-7.839401620514689,"MAD":10.230862474460915,"cm":[4.440892098500626e-16,1.3877787807814457e-15,0],"intensity":47.225873995122356,"type":"GC","origin":false,"forced":true,"remark":"","nSteps":3,"minStep":"100","maxStep":"180","steps":["100","150","180"],"group":"None","version":"v1.1.0"}],"TECT":[{"dec":78.98130962296693,"inc":-18.51980331259407,"MAD":10.230862474460965,"cm":[0,2.7755575615628914e-17,-8.326672684688674e-17],"intensity":47.225873995122356,"type":"GC","origin":false,"forced":true,"remark":"","nSteps":3,"minStep":"100","maxStep":"180","steps":["100","150","180"],"group":"None","version":"v1.1.0"}],"interpreted":true,"name":"AT1.16A","coreAzi":352,"coreDip":4,"bedStrike":280,"bedDip":26,"data":[{"visible":true,"include":false,"step":"20","x":44.67619047619048,"y":0.45714285714285713,"z":-15.247619047619047,"a95":1.7,"info":"\"14-11-30\" at \"15:10\""},{"visible":true,"include":true,"step":"100","x":32.46666666666666,"y":-2.276190476190476,"z":-20.2,"a95":2.7,"info":"\"15-01-31\" at \"11:56\""},{"visible":true,"include":true,"step":"150","x":14.914285714285715,"y":0.6095238095238096,"z":-13.847619047619048,"a95":4.3,"info":"\"15-01-31\" at \"15:15\""},{"visible":true,"include":true,"step":"180","x":4.428571428571429,"y":-0.009523809523809525,"z":-9.19047619047619,"a95":4.6,"info":"\"15-02-01\" at \"08:45\""},{"visible":true,"include":false,"step":"210","x":-1.2476190476190476,"y":0.12380952380952381,"z":-7.542857142857143,"a95":7.1,"info":"\"15-02-01\" at \"11:57\""},{"visible":true,"include":false,"step":"240","x":-4.533333333333333,"y":3.2857142857142856,"z":-0.7619047619047619,"a95":7.9,"info":"\"15-02-02\" at \"16:52\""},{"visible":true,"include":false,"step":"270","x":-2.6476190476190475,"y":2.742857142857143,"z":-2.0285714285714285,"a95":10.4,"info":"\"15-02-02\" at \"20:39\""},{"visible":true,"include":false,"step":"300","x":-2.3238095238095235,"y":1.7142857142857142,"z":-0.10476190476190476,"a95":11.4,"info":"\"15-02-03\" at \"00:22\""},{"visible":true,"include":false,"step":"320","x":3.3238095238095235,"y":1.723809523809524,"z":-7.800000000000001,"a95":5.1,"info":"\"15-02-03\" at \"18:55\""},{"visible":true,"include":false,"step":"340","x":0.5238095238095238,"y":1.2571428571428571,"z":-7.942857142857143,"a95":3.4,"info":"\"15-02-04\" at \"16:48\""},{"visible":true,"include":false,"step":"370","x":1.7904761904761906,"y":0.6952380952380952,"z":-8.238095238095237,"a95":5.6,"info":"\"15-02-04\" at \"22:07\""}]},{"version":"v1.1.0","exported":"2017-05-18T12:24:48.768Z","volume":10.5,"added":"2017-05-18T12:21:50.443Z","format":"Utrecht","demagType":"Unknown","strat":null,"patch":1.1,"GEO":[],"TECT":[],"interpreted":false,"name":"AT1.19A","coreAzi":321,"coreDip":15,"bedStrike":280,"bedDip":26,"data":[{"visible":true,"include":false,"step":"20","x":-3.304761904761905,"y":1.1523809523809523,"z":15.02857142857143,"a95":8.7,"info":"\"14-11-30\" at \"15:12\""},{"visible":true,"include":false,"step":"100","x":1.7428571428571429,"y":-4.457142857142857,"z":-14.952380952380953,"a95":6.7,"info":"\"15-01-31\" at \"11:58\""},{"visible":true,"include":false,"step":"150","x":0.19047619047619047,"y":-1.0857142857142859,"z":-3.695238095238095,"a95":13,"info":"\"15-01-31\" at \"15:16\""},{"visible":true,"include":false,"step":"180","x":-3.895238095238095,"y":3.1809523809523808,"z":3.142857142857143,"a95":12.8,"info":"\"15-02-01\" at \"08:46\""},{"visible":true,"include":false,"step":"210","x":-6.0095238095238095,"y":-3.4761904761904763,"z":-0.2761904761904762,"a95":7.2,"info":"\"15-02-01\" at \"11:59\""},{"visible":true,"include":false,"step":"240","x":-3.9904761904761905,"y":-1.3142857142857143,"z":-0.48571428571428565,"a95":9.1,"info":"\"15-02-02\" at \"16:55\""},{"visible":true,"include":false,"step":"270","x":-1.6857142857142857,"y":-2.895238095238095,"z":-0.3904761904761904,"a95":10.2,"info":"\"15-02-02\" at \"20:42\""},{"visible":true,"include":false,"step":"300","x":-3.6285714285714286,"y":-1.4761904761904763,"z":0.4,"a95":7.7,"info":"\"15-02-03\" at \"00:25\""},{"visible":true,"include":false,"step":"320","x":1.9238095238095236,"y":-0.8285714285714285,"z":1.5904761904761904,"a95":8.8,"info":"\"15-02-03\" at \"18:57\""},{"visible":true,"include":false,"step":"340","x":-2.1619047619047618,"y":-0.3523809523809524,"z":1.1714285714285715,"a95":13.9,"info":"\"15-02-04\" at \"16:51\""},{"visible":true,"include":false,"step":"370","x":-0.5142857142857143,"y":-0.7428571428571429,"z":1.1523809523809523,"a95":14.5,"info":"\"15-02-04\" at \"22:09\""}]},{"version":"v1.1.0","exported":"2017-05-18T12:24:48.768Z","volume":10.5,"added":"2017-05-18T12:21:50.444Z","format":"Utrecht","demagType":"Unknown","strat":null,"patch":1.1,"GEO":[],"TECT":[],"interpreted":false,"name":"AT1.20A","coreAzi":99,"coreDip":26,"bedStrike":280,"bedDip":26,"data":[{"visible":true,"include":false,"step":"20","x":-6.60952380952381,"y":-1.6095238095238094,"z":10.371428571428572,"a95":5.4,"info":"\"14-11-30\" at \"15:14\""},{"visible":true,"include":false,"step":"100","x":0.9714285714285713,"y":0.942857238095238,"z":6.752380952380953,"a95":4.4,"info":"\"15-01-31\" at \"12:04\""},{"visible":true,"include":false,"step":"150","x":1.8380952380952382,"y":0.9238095238095237,"z":6.380952380952381,"a95":8.1,"info":"\"15-01-31\" at \"15:18\""},{"visible":true,"include":false,"step":"180","x":-1.0380952380952382,"y":2.619047619047619,"z":4.504761904761905,"a95":18.1,"info":"\"15-02-01\" at \"08:48\""},{"visible":true,"include":false,"step":"210","x":-6.3428571428571425,"y":0.06666666666666667,"z":5.0285714285714285,"a95":13.7,"info":"\"15-02-01\" at \"12:01\""},{"visible":true,"include":false,"step":"240","x":0.3619047619047619,"y":0.44761904761904764,"z":6.904761904761905,"a95":4.4,"info":"\"15-02-02\" at \"16:58\""},{"visible":true,"include":false,"step":"270","x":-1.7333333333333332,"y":-0.8857142857142858,"z":2.2,"a95":21.1,"info":"\"15-02-02\" at \"20:44\""},{"visible":true,"include":false,"step":"300","x":-31.133333333333333,"y":19.552380952380954,"z":-4.933333333333333,"a95":7.2,"info":"\"15-02-03\" at \"00:29\""},{"visible":true,"include":false,"step":"320","x":-26.61904761904762,"y":-3.019047619047619,"z":-2.5238095238095237,"a95":11.2,"info":"\"15-02-03\" at \"18:59\""},{"visible":true,"include":false,"step":"340","x":-16.428571428571427,"y":-7.866666666666666,"z":-7.199999999999999,"a95":9.2,"info":"\"15-02-04\" at \"16:53\""},{"visible":true,"include":false,"step":"370","x":-15.542857142857141,"y":-7.809523809523809,"z":-8.58095238095238,"a95":8.2,"info":"\"15-02-04\" at \"22:12\""}]}]
