# Supplementary material for: Paleomagnetic constraints on the timing and distribution of Cenozoic rotations in Central and Eastern Anatolia
Source: Copernicus journal article supplement (doi:10.5194/se-9-295-2018), 2018-03-21
Supplement: Supplementary file 2 [file se-9-295-2018-supplement.zip › se-2017-66_DATA_dir files/dir files Ulukisla/AT2.dir]

[{"version":"v1.1.0","exported":"2016-11-22T23:34:40.147Z","volume":10.5,"added":"2016-11-22T23:17:41.680Z","format":"Utrecht","demagType":"Unknown","strat":null,"patch":1.1,"GEO":[],"TECT":[],"interpreted":false,"name":"AT2.1A","coreAzi":278,"coreDip":15,"bedStrike":55,"bedDip":51,"data":[{"visible":true,"include":false,"step":"20","x":-6579.809523809524,"y":14853.52380952381,"z":-15598.47619047619,"a95":2.5,"info":"\"14-11-30\" at \"16:56\""},{"visible":true,"include":false,"step":"100","x":-3639.6190476190477,"y":7203.809523809524,"z":-13209.42857142857,"a95":2.5,"info":"\"15-02-10\" at \"15:48\""},{"visible":true,"include":false,"step":"150","x":-404.85714285714283,"y":3068.4761904761904,"z":-9938.57142857143,"a95":2.8,"info":"\"15-02-10\" at \"19:43\""},{"visible":true,"include":false,"step":"180","x":231.14285714285714,"y":2412.6666666666665,"z":-8516.47619047619,"a95":2.8,"info":"\"15-02-11\" at \"15:14\""},{"visible":true,"include":false,"step":"210","x":-435.6190476190476,"y":2217.0476190476193,"z":-7874.476190476191,"a95":2.8,"info":"\"15-02-11\" at \"18:38\""},{"visible":true,"include":false,"step":"240","x":168.76190476190476,"y":1283.7142857142858,"z":-5894.190476190476,"a95":2.8,"info":"\"15-02-11\" at \"22:38\""},{"visible":true,"include":false,"step":"270","x":-101.9047619047619,"y":1609.2380952380952,"z":-5700.571428571428,"a95":2.8,"info":"\"15-02-12\" at \"16:46\""},{"visible":true,"include":false,"step":"300","x":198.38095238095238,"y":1322.857142857143,"z":-4612.476190476191,"a95":3,"info":"\"15-02-13\" at \"15:11\""},{"visible":true,"include":false,"step":"320","x":-1176.7619047619048,"y":1369.047619047619,"z":-1736.6666666666667,"a95":2.8,"info":"\"15-02-13\" at \"20:02\""},{"visible":true,"include":false,"step":"340","x":-2360.8571428571427,"y":267.3333333333333,"z":-2752,"a95":4.1,"info":"\"15-02-14\" at \"00:02\""},{"visible":true,"include":false,"step":"370","x":-1096,"y":1521.904761904762,"z":-4232.571428571428,"a95":3.2,"info":"\"15-02-16\" at \"17:27\""},{"visible":true,"include":false,"step":"390","x":-441.3333333333333,"y":1838.4761904761904,"z":-3186.9523809523807,"a95":2.5,"info":"\"15-02-16\" at \"21:16\""},{"visible":true,"include":false,"step":"420","x":-666.2857142857143,"y":935.1428571428571,"z":-2979.1428571428573,"a95":2.9,"info":"\"15-02-17\" at \"16:55\""},{"visible":true,"include":false,"step":"450","x":19.714285714285715,"y":764.0952380952381,"z":-1499.142857142857,"a95":3,"info":"\"15-03-08\" at \"19:16\""},{"visible":true,"include":false,"step":"470","x":62,"y":-194.85714285714286,"z":-1845.904761904762,"a95":3.3,"info":"\"15-03-09\" at \"10:07\""},{"visible":true,"include":false,"step":"490","x":710.1904761904761,"y":963.8095238095239,"z":-2165.6190476190477,"a95":2.8,"info":"\"15-03-09\" at \"13:39\""},{"visible":true,"include":false,"step":"510","x":183.9047619047619,"y":991.8095238095239,"z":-1714.095238095238,"a95":3.7,"info":"\"15-04-21\" at \"09:32\""}]},{"version":"v1.1.0","exported":"2016-11-22T23:34:40.147Z","volume":10.5,"added":"2016-11-22T23:17:41.680Z","format":"Utrecht","demagType":"Unknown","strat":"1","patch":1.1,"GEO":[{"dec":232.0284228996228,"inc":-9.685126530566807,"MAD":1.4420473004673944,"cm":[-1.4210854715202004e-14,7.105427357601002e-15,0],"intensity":2233.527130549906,"type":"GC","origin":false,"forced":true,"remark":"","nSteps":5,"minStep":"15.0","maxStep":"40.0","steps":["15.0","20.0","25.0","30.0","40.0"],"group":"None","version":"v1.1.0"}],"TECT":[{"dec":240.71868827687817,"inc":-8.371228176991867,"MAD":1.4420473004685899,"cm":[-2.842170943040401e-14,0,0],"intensity":2233.527130549906,"type":"GC","origin":false,"forced":true,"remark":"","nSteps":5,"minStep":"15.0","maxStep":"40.0","steps":["15.0","20.0","25.0","30.0","40.0"],"group":"None","version":"v1.1.0"}],"interpreted":true,"name":"AT2.1B","coreAzi":278,"coreDip":15,"bedStrike":55,"bedDip":51,"data":[{"visible":true,"include":false,"step":"0.0","x":-3348.5714285714284,"y":4578.952380952381,"z":-7936.857142857143,"a95":0.99,"info":"05/11/2014 at 13:44:22"},{"visible":true,"include":false,"step":"10.0","x":111.3047619047619,"y":-339.43809523809523,"z":-1645.5238095238096,"a95":0.99,"info":"05/11/2014 at 13:44:22"},{"visible":true,"include":true,"step":"15.0","x":165.8,"y":-729.1142857142856,"z":-934.3428571428572,"a95":0.99,"info":"05/11/2014 at 13:44:22"},{"visible":true,"include":true,"step":"20.0","x":-223.12380952380954,"y":-547.5809523809525,"z":-490.7809523809524,"a95":0.99,"info":"05/11/2014 at 13:44:22"},{"visible":true,"include":true,"step":"25.0","x":-18.04,"y":-540.4666666666666,"z":-610.3333333333334,"a95":0.99,"info":"05/11/2014 at 13:44:22"},{"visible":true,"include":true,"step":"30.0","x":-479.6190476190476,"y":-710.9333333333334,"z":-533.5238095238095,"a95":0.99,"info":"05/11/2014 at 13:44:22"},{"visible":true,"include":false,"step":"35.0","x":-813.7523809523809,"y":-731.9047619047619,"z":-611.9142857142857,"a95":0.99,"info":"05/11/2014 at 13:44:22"},{"visible":true,"include":true,"step":"40.0","x":-753.8095238095239,"y":-829.2285714285714,"z":-553.7619047619048,"a95":0.99,"info":"05/11/2014 at 13:44:22"},{"visible":true,"include":false,"step":"45.0","x":-589.5714285714286,"y":-1087.3333333333333,"z":-538.5619047619048,"a95":0.99,"info":"05/11/2014 at 13:44:22"},{"visible":true,"include":false,"step":"50.0","x":-804.5714285714286,"y":-1106.857142857143,"z":-728.8380952380952,"a95":0.99,"info":"05/11/2014 at 13:44:22"},{"visible":true,"include":false,"step":"60.0","x":-866.8666666666667,"y":-1389.3333333333333,"z":-669.447619047619,"a95":0.99,"info":"05/11/2014 at 13:44:22"},{"visible":false,"include":false,"step":"70.0","x":-1306.5714285714287,"y":-1473.5238095238096,"z":-504.8952380952381,"a95":0.99,"info":"05/11/2014 at 13:44:22"},{"visible":false,"include":false,"step":"80.0","x":-938.647619047619,"y":-1748.952380952381,"z":-299.0190476190476,"a95":0.99,"info":"05/11/2014 at 13:44:22"},{"visible":false,"include":false,"step":"90.0","x":-1457.8095238095239,"y":-880.5428571428572,"z":-510.3809523809524,"a95":0.99,"info":"05/11/2014 at 13:44:22"}]},{"version":"v1.1.0","exported":"2016-11-22T23:34:40.147Z","volume":10.5,"added":"2016-11-22T23:17:41.680Z","format":"Utrecht","demagType":"Unknown","strat":"2","patch":1.1,"GEO":[],"TECT":[],"interpreted":false,"name":"AT2.3B","coreAzi":270,"coreDip":20,"bedStrike":55,"bedDip":51,"data":[{"visible":false,"include":false,"step":"0.0","x":-1125.2380952380952,"y":2524.8571428571427,"z":-3558.8571428571427,"a95":0.99,"info":"05/11/2014 at 13:44:22"},{"visible":true,"include":false,"step":"10.0","x":500.0571428571429,"y":468.8666666666667,"z":-741.1619047619048,"a95":0.99,"info":"05/11/2014 at 13:44:22"},{"visible":true,"include":false,"step":"15.0","x":531,"y":132.33333333333334,"z":-664.047619047619,"a95":0.99,"info":"05/11/2014 at 13:44:22"},{"visible":true,"include":false,"step":"20.0","x":662.3809523809524,"y":175.0952380952381,"z":-409.06666666666666,"a95":0.99,"info":"05/11/2014 at 13:44:22"},{"visible":true,"include":false,"step":"25.0","x":723.5714285714286,"y":194.8952380952381,"z":-448.552380952381,"a95":0.99,"info":"05/11/2014 at 13:44:22"},{"visible":true,"include":false,"step":"30.0","x":610.0952380952381,"y":453.57142857142856,"z":-461,"a95":0.99,"info":"05/11/2014 at 13:44:22"},{"visible":true,"include":false,"step":"35.0","x":209.0095238095238,"y":291.1904761904762,"z":-385.7142857142857,"a95":0.99,"info":"05/11/2014 at 13:44:22"},{"visible":true,"include":false,"step":"40.0","x":231.95238095238096,"y":479.06666666666666,"z":-252.1809523809524,"a95":0.99,"info":"05/11/2014 at 13:44:22"},{"visible":true,"include":false,"step":"45.0","x":167.16190476190476,"y":440.0190476190476,"z":-720.1333333333333,"a95":0.99,"info":"05/11/2014 at 13:44:22"},{"visible":true,"include":false,"step":"50.0","x":-211.55238095238096,"y":186.45714285714286,"z":-273.37142857142857,"a95":0.99,"info":"05/11/2014 at 13:44:22"},{"visible":true,"include":false,"step":"60.0","x":66.25619047619048,"y":393.5809523809524,"z":-182.6,"a95":0.99,"info":"05/11/2014 at 13:44:22"},{"visible":true,"include":false,"step":"70.0","x":89.16190476190476,"y":-219.62857142857143,"z":-343.70476190476194,"a95":0.99,"info":"05/11/2014 at 13:44:22"},{"visible":true,"include":false,"step":"80.0","x":-855.9238095238096,"y":142.42857142857142,"z":-528.6095238095238,"a95":0.99,"info":"05/11/2014 at 13:44:22"},{"visible":true,"include":false,"step":"90.0","x":-500.04761904761904,"y":85.58,"z":-93.35619047619048,"a95":0.99,"info":"05/11/2014 at 13:44:22"}]},{"version":"v1.1.0","exported":"2016-11-22T23:34:40.147Z","volume":10.5,"added":"2016-11-22T23:17:41.681Z","format":"Utrecht","demagType":"Unknown","strat":null,"patch":1.1,"GEO":[],"TECT":[],"interpreted":false,"name":"AT2.6A","coreAzi":256,"coreDip":28,"bedStrike":55,"bedDip":51,"data":[{"visible":true,"include":false,"step":"20","x":-12222.952380952382,"y":-261.23809523809524,"z":-19248.95238095238,"a95":2.8,"info":"\"14-11-30\" at \"16:58\""},{"visible":true,"include":true,"step":"100","x":-9599.142857142857,"y":-878.7619047619048,"z":-14383.714285714286,"a95":2.5,"info":"\"15-02-10\" at \"15:50\""},{"visible":true,"include":true,"step":"150","x":-4052.285714285714,"y":-2594.5714285714284,"z":-11161.333333333334,"a95":2.7,"info":"\"15-02-10\" at \"19:45\""},{"visible":true,"include":true,"step":"180","x":-3335.904761904762,"y":-2684.3809523809523,"z":-9525.904761904761,"a95":2.6,"info":"\"15-02-11\" at \"15:16\""},{"visible":true,"include":false,"step":"210","x":-3225.3333333333335,"y":-2362.8571428571427,"z":-9164.857142857143,"a95":2.6,"info":"\"15-02-11\" at \"18:40\""},{"visible":true,"include":false,"step":"240","x":-2779.4285714285716,"y":-2591.1428571428573,"z":-7540.952380952381,"a95":2.6,"info":"\"15-02-11\" at \"22:40\""},{"visible":true,"include":false,"step":"270","x":-2009.904761904762,"y":-2892.285714285714,"z":-7213.047619047619,"a95":2.5,"info":"\"15-02-12\" at \"16:48\""},{"visible":true,"include":false,"step":"300","x":-2961.3333333333335,"y":-2243.0476190476193,"z":-6171.333333333333,"a95":2.5,"info":"\"15-02-13\" at \"15:13\""},{"visible":true,"include":false,"step":"320","x":-1658.2857142857142,"y":-1668.095238095238,"z":-5200.380952380952,"a95":2.6,"info":"\"15-02-13\" at \"20:05\""},{"visible":true,"include":false,"step":"340","x":-1680.2857142857142,"y":-1630.2857142857142,"z":-5519.809523809524,"a95":2.7,"info":"\"15-02-14\" at \"00:05\""},{"visible":true,"include":false,"step":"370","x":-2407.714285714286,"y":-58.38095238095238,"z":-4183.333333333333,"a95":2.6,"info":"\"15-02-16\" at \"17:29\""},{"visible":true,"include":false,"step":"390","x":-2173.4285714285716,"y":-1619.2380952380952,"z":-2884.095238095238,"a95":2.3,"info":"\"15-02-16\" at \"21:19\""},{"visible":true,"include":false,"step":"420","x":-1412.7619047619048,"y":-1565.2380952380952,"z":-2614.5714285714284,"a95":2.6,"info":"\"15-02-17\" at \"16:57\""},{"visible":true,"include":false,"step":"450","x":-1202.6666666666667,"y":-987.8095238095239,"z":-2291.6190476190477,"a95":2.4,"info":"\"15-03-08\" at \"19:18\""},{"visible":true,"include":false,"step":"470","x":-2044.095238095238,"y":-1161.7142857142858,"z":-2861.5238095238096,"a95":2.4,"info":"\"15-03-09\" at \"10:09\""},{"visible":true,"include":false,"step":"490","x":495.04761904761904,"y":-598.952380952381,"z":-1550.7619047619048,"a95":2.7,"info":"\"15-03-09\" at \"13:41\""},{"visible":true,"include":false,"step":"510","x":-812.0952380952381,"y":385.8095238095238,"z":-2280.7619047619046,"a95":2.9,"info":"\"15-04-21\" at \"09:35\""}]},{"version":"v1.1.0","exported":"2016-11-22T23:34:40.148Z","volume":10.5,"added":"2016-11-22T23:17:41.683Z","format":"Utrecht","demagType":"Unknown","strat":"3","patch":1.1,"GEO":[],"TECT":[],"interpreted":false,"name":"AT2.6B","coreAzi":256,"coreDip":28,"bedStrike":55,"bedDip":51,"data":[{"visible":false,"include":false,"step":"0.0","x":-9944.761904761905,"y":1486.1904761904761,"z":-11521.904761904761,"a95":0.99,"info":"05/11/2014 at 13:44:22"},{"visible":true,"include":false,"step":"10.0","x":-1295.7142857142858,"y":-783.7809523809525,"z":-1938.095238095238,"a95":0.99,"info":"05/11/2014 at 13:44:22"},{"visible":true,"include":false,"step":"15.0","x":-1275.047619047619,"y":-759.3523809523809,"z":-1190.6666666666667,"a95":0.99,"info":"05/11/2014 at 13:44:22"},{"visible":true,"include":false,"step":"20.0","x":-633.8095238095239,"y":-649.2952380952381,"z":-607.5619047619048,"a95":0.99,"info":"05/11/2014 at 13:44:22"},{"visible":true,"include":false,"step":"25.0","x":-120.97142857142858,"y":-579.3809523809524,"z":-596.4666666666666,"a95":0.99,"info":"05/11/2014 at 13:44:22"},{"visible":true,"include":true,"step":"30.0","x":-159.9047619047619,"y":-876.8761904761906,"z":-605.8190476190476,"a95":0.99,"info":"05/11/2014 at 13:44:22"},{"visible":true,"include":true,"step":"35.0","x":-119.55238095238094,"y":-920.9428571428571,"z":-133.9904761904762,"a95":0.99,"info":"05/11/2014 at 13:44:22"},{"visible":true,"include":true,"step":"40.0","x":370.8,"y":-478.4380952380953,"z":-797.0857142857143,"a95":0.99,"info":"05/11/2014 at 13:44:22"},{"visible":true,"include":true,"step":"45.0","x":-113.38095238095238,"y":-890.5333333333334,"z":-883.742857142857,"a95":0.99,"info":"05/11/2014 at 13:44:22"},{"visible":true,"include":true,"step":"50.0","x":351.74285714285713,"y":-1972.6666666666667,"z":-1002.952380952381,"a95":0.99,"info":"05/11/2014 at 13:44:22"},{"visible":true,"include":true,"step":"60.0","x":907.0095238095239,"y":-973.1428571428571,"z":-630.7523809523809,"a95":0.99,"info":"05/11/2014 at 13:44:22"},{"visible":true,"include":false,"step":"70.0","x":-384.85714285714283,"y":-1345.6190476190477,"z":-1141.4285714285713,"a95":0.99,"info":"05/11/2014 at 13:44:22"},{"visible":true,"include":false,"step":"80.0","x":-684.2761904761904,"y":-674.7523809523809,"z":111.94285714285715,"a95":0.99,"info":"05/11/2014 at 13:44:22"},{"visible":true,"include":false,"step":"90.0","x":481.6,"y":-607.4,"z":-1239.142857142857,"a95":0.99,"info":"05/11/2014 at 13:44:22"}]},{"version":"v1.1.0","exported":"2016-11-22T23:34:40.148Z","volume":10.5,"added":"2016-11-22T23:17:41.683Z","format":"Utrecht","demagType":"Unknown","strat":"4","patch":1.1,"GEO":[{"dec":176.1743008351956,"inc":-18.545486746759455,"MAD":13.816996845880189,"cm":[-1.1368683772161603e-13,-2.842170943040401e-14,0],"intensity":6639.23670628319,"type":"GC","origin":false,"forced":true,"remark":"","nSteps":4,"minStep":"8.0","maxStep":"20.0","steps":["8.0","12.0","16.0","20.0"],"group":"None","version":"v1.1.0"}],"TECT":[{"dec":206.78531729891668,"inc":-56.155782056295315,"MAD":13.816996845880048,"cm":[0,1.1368683772161603e-13,-2.842170943040401e-14],"intensity":6639.236706283189,"type":"GC","origin":false,"forced":true,"remark":"","nSteps":4,"minStep":"8.0","maxStep":"20.0","steps":["8.0","12.0","16.0","20.0"],"group":"None","version":"v1.1.0"}],"interpreted":true,"name":"AT2.6C","coreAzi":256,"coreDip":28,"bedStrike":55,"bedDip":51,"data":[{"visible":false,"include":false,"step":"0.0","x":-9963.809523809523,"y":684.2761904761904,"z":-8255.047619047618,"a95":0.99,"info":"27/10/2014 at 11:28:52"},{"visible":true,"include":false,"step":"4.0","x":-5590.571428571428,"y":-915.3428571428572,"z":-3553.5238095238096,"a95":0.99,"info":"27/10/2014 at 11:28:52"},{"visible":true,"include":true,"step":"8.0","x":-3501.714285714286,"y":-1258.4761904761904,"z":-1471.2380952380952,"a95":0.99,"info":"27/10/2014 at 11:28:52"},{"visible":true,"include":true,"step":"12.0","x":-2764.3809523809523,"y":-1305.6190476190477,"z":-491.65714285714284,"a95":0.99,"info":"27/10/2014 at 11:28:52"},{"visible":true,"include":true,"step":"16.0","x":-2580.6666666666665,"y":-991.5238095238095,"z":107.9047619047619,"a95":0.99,"info":"27/10/2014 at 11:28:52"},{"visible":true,"include":true,"step":"20.0","x":-2630.3809523809523,"y":-868.2666666666667,"z":73.44095238095238,"a95":0.99,"info":"27/10/2014 at 11:28:52"},{"visible":true,"include":false,"step":"25.0","x":-2255.2380952380954,"y":-387.1333333333333,"z":174.9904761904762,"a95":0.99,"info":"27/10/2014 at 11:28:52"},{"visible":true,"include":false,"step":"30.0","x":-2378.285714285714,"y":-217.64761904761906,"z":-66.89714285714285,"a95":0.99,"info":"27/10/2014 at 11:28:52"},{"visible":true,"include":false,"step":"35.0","x":-2197.0476190476193,"y":-787.2666666666667,"z":12.508571428571429,"a95":0.99,"info":"27/10/2014 at 11:28:52"},{"visible":true,"include":false,"step":"40.0","x":-1678.2857142857142,"y":-471.93333333333334,"z":147.21904761904761,"a95":0.99,"info":"27/10/2014 at 11:28:52"},{"visible":true,"include":false,"step":"45.0","x":-1609.4285714285713,"y":-502.93333333333334,"z":-192.48571428571427,"a95":0.99,"info":"27/10/2014 at 11:28:52"},{"visible":true,"include":false,"step":"50.0","x":-1749.2380952380952,"y":-1258.857142857143,"z":-289.8,"a95":0.99,"info":"27/10/2014 at 11:28:52"},{"visible":true,"include":false,"step":"60.0","x":-1572.1904761904761,"y":-866.1238095238094,"z":448.83809523809526,"a95":0.99,"info":"27/10/2014 at 11:28:52"},{"visible":true,"include":false,"step":"70.0","x":-1598.5714285714287,"y":-703.3619047619047,"z":-337.4190476190476,"a95":0.99,"info":"27/10/2014 at 11:28:52"},{"visible":true,"include":false,"step":"80.0","x":-2891.1428571428573,"y":-1152.952380952381,"z":-916.5238095238095,"a95":0.99,"info":"27/10/2014 at 11:28:52"},{"visible":true,"include":false,"step":"90.0","x":-1919.8095238095239,"y":-825.5714285714286,"z":-43.019999999999996,"a95":0.99,"info":"27/10/2014 at 11:28:52"},{"visible":true,"include":false,"step":"100.0","x":-1040.1904761904761,"y":-628.6666666666666,"z":-367.3047619047619,"a95":0.99,"info":"27/10/2014 at 11:28:52"}]},{"version":"v1.1.0","exported":"2016-11-22T23:34:40.148Z","volume":10.5,"added":"2016-11-22T23:17:41.684Z","format":"Utrecht","demagType":"Unknown","strat":"4","patch":1.1,"GEO":[],"TECT":[],"interpreted":false,"name":"AT2.9B","coreAzi":211,"coreDip":35,"bedStrike":55,"bedDip":51,"data":[{"visible":false,"include":false,"step":"0.0","x":-3293.714285714286,"y":-7990.190476190476,"z":-5210.285714285715,"a95":0.99,"info":"05/11/2014 at 13:44:22"},{"visible":true,"include":false,"step":"10.0","x":721.152380952381,"y":-1384.6666666666667,"z":-1505.142857142857,"a95":0.99,"info":"05/11/2014 at 13:44:22"},{"visible":true,"include":false,"step":"15.0","x":368.2666666666667,"y":-613.2,"z":-1134.7619047619048,"a95":0.99,"info":"05/11/2014 at 13:44:22"},{"visible":true,"include":false,"step":"20.0","x":-30.741904761904763,"y":-114.0952380952381,"z":-822.4666666666666,"a95":0.99,"info":"05/11/2014 at 13:44:22"},{"visible":true,"include":false,"step":"25.0","x":-282.42857142857144,"y":366.15238095238095,"z":-793.6095238095238,"a95":0.99,"info":"05/11/2014 at 13:44:22"},{"visible":true,"include":false,"step":"30.0","x":-397.00952380952384,"y":517.7809523809524,"z":-577.2761904761904,"a95":0.99,"info":"05/11/2014 at 13:44:22"},{"visible":true,"include":false,"step":"35.0","x":-693.2190476190476,"y":746.2190476190476,"z":54.21333333333333,"a95":0.99,"info":"05/11/2014 at 13:44:22"},{"visible":true,"include":false,"step":"40.0","x":-231.49523809523808,"y":1109.6190476190477,"z":-498.3333333333333,"a95":0.99,"info":"05/11/2014 at 13:44:22"},{"visible":true,"include":false,"step":"45.0","x":-327.8952380952381,"y":727.0571428571429,"z":-544.0285714285715,"a95":0.99,"info":"05/11/2014 at 13:44:22"},{"visible":true,"include":false,"step":"50.0","x":106.81904761904761,"y":623.104761904762,"z":-895.5428571428572,"a95":0.99,"info":"05/11/2014 at 13:44:22"},{"visible":true,"include":false,"step":"60.0","x":535.9619047619047,"y":1379.2380952380952,"z":-659.4666666666666,"a95":0.99,"info":"05/11/2014 at 13:44:22"},{"visible":true,"include":false,"step":"70.0","x":77.17142857142856,"y":261.83809523809526,"z":-693.0190476190476,"a95":0.99,"info":"05/11/2014 at 13:44:22"},{"visible":true,"include":false,"step":"80.0","x":-744.104761904762,"y":518.3428571428572,"z":561.4666666666666,"a95":0.99,"info":"05/11/2014 at 13:44:22"},{"visible":true,"include":false,"step":"90.0","x":26.668571428571425,"y":694.3619047619047,"z":-569.4095238095239,"a95":0.99,"info":"05/11/2014 at 13:44:22"}]},{"version":"v1.1.0","exported":"2016-11-22T23:34:40.148Z","volume":10.5,"added":"2016-11-22T23:17:41.689Z","format":"Utrecht","demagType":"Unknown","strat":"5","patch":1.1,"GEO":[{"dec":351.31676140952595,"inc":-66.01311048998535,"MAD":4.944901761663724,"cm":[-2.842170943040401e-14,5.293543381412746e-13,0],"intensity":6847.572288442245,"type":"GC","origin":false,"forced":true,"remark":"","nSteps":8,"minStep":"4.0","maxStep":"35.0","steps":["4.0","8.0","12.0","16.0","20.0","25.0","30.0","35.0"],"group":"None","version":"v1.1.0"}],"TECT":[{"dec":335.8609895136178,"inc":-16.96480365268792,"MAD":4.9449017616636635,"cm":[1.2079226507921703e-13,3.126388037344441e-13,-1.4210854715202004e-13],"intensity":6847.572288442245,"type":"GC","origin":false,"forced":true,"remark":"","nSteps":8,"minStep":"4.0","maxStep":"35.0","steps":["4.0","8.0","12.0","16.0","20.0","25.0","30.0","35.0"],"group":"None","version":"v1.1.0"}],"interpreted":true,"name":"AT2.9C","coreAzi":211,"coreDip":35,"bedStrike":55,"bedDip":51,"data":[{"visible":true,"include":false,"step":"0.0","x":-8774.095238095239,"y":-6938.380952380952,"z":-7078.857142857143,"a95":0.99,"info":"27/10/2014 at 11:28:52"},{"visible":true,"include":true,"step":"4.0","x":-3675.3333333333335,"y":-1885.6190476190477,"z":-3240.5714285714284,"a95":0.99,"info":"27/10/2014 at 11:28:52"},{"visible":true,"include":true,"step":"8.0","x":-2104.285714285714,"y":-511.0761904761905,"z":-1906.5714285714287,"a95":0.99,"info":"27/10/2014 at 11:28:52"},{"visible":true,"include":true,"step":"12.0","x":-2041.2380952380952,"y":665.847619047619,"z":-1100.5714285714287,"a95":0.99,"info":"27/10/2014 at 11:28:52"},{"visible":true,"include":true,"step":"16.0","x":-1976.3809523809523,"y":1066.1904761904761,"z":-1185.5238095238096,"a95":0.99,"info":"27/10/2014 at 11:28:52"},{"visible":true,"include":true,"step":"20.0","x":-2498.095238095238,"y":1227.8095238095239,"z":-1339.142857142857,"a95":0.99,"info":"27/10/2014 at 11:28:52"},{"visible":true,"include":true,"step":"25.0","x":-2351.3333333333335,"y":1739.142857142857,"z":-1090.7619047619048,"a95":0.99,"info":"27/10/2014 at 11:28:52"},{"visible":true,"include":true,"step":"30.0","x":-2411.714285714286,"y":2089.0476190476193,"z":-1266.4761904761904,"a95":0.99,"info":"27/10/2014 at 11:28:52"},{"visible":true,"include":true,"step":"35.0","x":-1892.4761904761904,"y":1481.8095238095239,"z":-724.9904761904761,"a95":0.99,"info":"27/10/2014 at 11:28:52"},{"visible":true,"include":false,"step":"40.0","x":-2109.714285714286,"y":1583.142857142857,"z":-457.72380952380956,"a95":0.99,"info":"27/10/2014 at 11:28:52"},{"visible":true,"include":false,"step":"45.0","x":-918.4952380952382,"y":2251.904761904762,"z":-840.7333333333333,"a95":0.99,"info":"27/10/2014 at 11:28:52"},{"visible":true,"include":false,"step":"50.0","x":-1284.2857142857142,"y":1471.5238095238096,"z":-775.5238095238095,"a95":0.99,"info":"27/10/2014 at 11:28:52"},{"visible":true,"include":false,"step":"60.0","x":-1185.5238095238096,"y":2207.2380952380954,"z":-191.53333333333333,"a95":0.99,"info":"27/10/2014 at 11:28:52"},{"visible":true,"include":false,"step":"70.0","x":-1078.1904761904761,"y":2287.5238095238096,"z":-167.15238095238095,"a95":0.99,"info":"27/10/2014 at 11:28:52"},{"visible":true,"include":false,"step":"80.0","x":-645.9809523809524,"y":1225.5238095238096,"z":-481.1714285714286,"a95":0.99,"info":"27/10/2014 at 11:28:52"},{"visible":true,"include":false,"step":"90.0","x":-1030.6666666666667,"y":626.152380952381,"z":160.86666666666665,"a95":0.99,"info":"27/10/2014 at 11:28:52"},{"visible":true,"include":false,"step":"100.0","x":-677.3238095238095,"y":1612.5714285714287,"z":679.6285714285715,"a95":0.99,"info":"27/10/2014 at 11:28:52"}]},{"version":"v1.1.0","exported":"2016-11-22T23:34:40.148Z","volume":10.5,"added":"2016-11-22T23:17:41.689Z","format":"Utrecht","demagType":"Unknown","strat":null,"patch":1.1,"GEO":[],"TECT":[],"interpreted":false,"name":"AT2.11A","coreAzi":266,"coreDip":41,"bedStrike":55,"bedDip":51,"data":[{"visible":false,"include":false,"step":"20","x":-13534.952380952382,"y":786.7619047619048,"z":-5891.333333333333,"a95":1.8,"info":"\"14-11-30\" at \"17:01\""},{"visible":true,"include":false,"step":"100","x":-7142,"y":1571.5238095238096,"z":-7026.380952380952,"a95":2.3,"info":"\"15-02-10\" at \"15:52\""},{"visible":true,"include":false,"step":"150","x":-2639.0476190476193,"y":-560.952380952381,"z":-6559.809523809524,"a95":2.9,"info":"\"15-02-10\" at \"19:48\""},{"visible":true,"include":false,"step":"180","x":-2086.7619047619046,"y":3.8095238095238093,"z":-5708.285714285715,"a95":2.8,"info":"\"15-02-11\" at \"15:18\""},{"visible":true,"include":false,"step":"210","x":-2383.904761904762,"y":246.28571428571428,"z":-5033.428571428572,"a95":2.9,"info":"\"15-02-11\" at \"18:43\""},{"visible":true,"include":false,"step":"240","x":-1401.7142857142858,"y":766,"z":-3833.5238095238096,"a95":3,"info":"\"15-02-11\" at \"22:43\""},{"visible":true,"include":false,"step":"270","x":-2281.714285714286,"y":571.8095238095239,"z":-4221.714285714285,"a95":2.9,"info":"\"15-02-12\" at \"16:50\""},{"visible":true,"include":false,"step":"300","x":-1346.1904761904761,"y":893.9047619047619,"z":-2994,"a95":2.7,"info":"\"15-02-13\" at \"15:15\""},{"visible":true,"include":false,"step":"320","x":-410.4761904761905,"y":793.5238095238095,"z":-4668.666666666667,"a95":2.8,"info":"\"15-02-13\" at \"20:07\""},{"visible":true,"include":false,"step":"340","x":-2238.190476190476,"y":205.71428571428572,"z":-2613.809523809524,"a95":2.5,"info":"\"15-02-14\" at \"00:09\""},{"visible":true,"include":false,"step":"370","x":-2220.3809523809523,"y":866.8571428571429,"z":-2144.4761904761904,"a95":2.8,"info":"\"15-02-16\" at \"17:33\""},{"visible":true,"include":false,"step":"390","x":-1270.3809523809523,"y":1326,"z":-1536.4761904761904,"a95":2.6,"info":"\"15-02-16\" at \"21:21\""},{"visible":true,"include":false,"step":"420","x":-1655.142857142857,"y":473.23809523809524,"z":-866.5714285714286,"a95":2.7,"info":"\"15-02-17\" at \"16:59\""},{"visible":true,"include":false,"step":"450","x":-936.3809523809524,"y":510.0952380952381,"z":-385.5238095238095,"a95":3,"info":"\"15-03-08\" at \"19:20\""},{"visible":true,"include":false,"step":"470","x":-1328.857142857143,"y":1018.1904761904761,"z":-1120,"a95":2.7,"info":"\"15-03-09\" at \"10:12\""},{"visible":true,"include":false,"step":"490","x":-789.5238095238095,"y":580.7619047619048,"z":-537.047619047619,"a95":3.2,"info":"\"15-03-09\" at \"13:43\""},{"visible":true,"include":false,"step":"510","x":-1946.4761904761904,"y":-17.523809523809526,"z":-280.85714285714283,"a95":2.8,"info":"\"15-04-21\" at \"09:38\""}]},{"version":"v1.1.0","exported":"2016-11-22T23:34:40.148Z","volume":10.5,"added":"2016-11-22T23:17:41.689Z","format":"Utrecht","demagType":"Unknown","strat":"5","patch":1.1,"GEO":[{"dec":201.43919748145032,"inc":-3.7623162663582543,"MAD":11.364365047376513,"cm":[-3.197442310920451e-13,-1.2789769243681803e-13,0],"intensity":3698.2123527314775,"type":"GC","origin":false,"forced":true,"remark":"","nSteps":6,"minStep":"10.0","maxStep":"35.0","steps":["10.0","15.0","20.0","25.0","30.0","35.0"],"group":"None","version":"v1.1.0"}],"TECT":[{"dec":210.89272186683593,"inc":-19.42047122049158,"MAD":11.364365047376506,"cm":[-9.947598300641403e-14,-2.842170943040401e-14,-5.684341886080802e-14],"intensity":3698.2123527314775,"type":"GC","origin":false,"forced":true,"remark":"","nSteps":6,"minStep":"10.0","maxStep":"35.0","steps":["10.0","15.0","20.0","25.0","30.0","35.0"],"group":"None","version":"v1.1.0"}],"interpreted":true,"name":"AT2.12B","coreAzi":194,"coreDip":32,"bedStrike":45,"bedDip":46,"data":[{"visible":true,"include":false,"step":"0.0","x":-4282.380952380952,"y":-12927.619047619048,"z":982.8571428571429,"a95":0.99,"info":"05/11/2014 at 13:44:22"},{"visible":true,"include":true,"step":"10.0","x":850.647619047619,"y":-2883.1428571428573,"z":-154.1047619047619,"a95":0.99,"info":"05/11/2014 at 13:44:22"},{"visible":true,"include":true,"step":"15.0","x":833.4666666666666,"y":-1644.6666666666667,"z":-476.45714285714286,"a95":0.99,"info":"05/11/2014 at 13:44:22"},{"visible":true,"include":true,"step":"20.0","x":1451.7142857142858,"y":-1264.1904761904761,"z":-399.1142857142857,"a95":0.99,"info":"05/11/2014 at 13:44:22"},{"visible":true,"include":true,"step":"25.0","x":1191.142857142857,"y":-1487.6190476190477,"z":-924.5333333333334,"a95":0.99,"info":"05/11/2014 at 13:44:22"},{"visible":true,"include":true,"step":"30.0","x":2146.5714285714284,"y":-443.1333333333333,"z":-1374.2857142857142,"a95":0.99,"info":"05/11/2014 at 13:44:22"},{"visible":true,"include":true,"step":"35.0","x":1429.3333333333333,"y":325.85714285714283,"z":-1238.2857142857142,"a95":0.99,"info":"05/11/2014 at 13:44:22"},{"visible":true,"include":false,"step":"40.0","x":1590.5714285714287,"y":-422.97142857142853,"z":-125.36190476190475,"a95":0.99,"info":"05/11/2014 at 13:44:22"},{"visible":true,"include":false,"step":"45.0","x":1100.095238095238,"y":-102.5047619047619,"z":-1064.3809523809523,"a95":0.99,"info":"05/11/2014 at 13:44:22"},{"visible":true,"include":false,"step":"50.0","x":2147.1428571428573,"y":-274.85714285714283,"z":-312.1142857142857,"a95":0.99,"info":"05/11/2014 at 13:44:22"},{"visible":true,"include":false,"step":"60.0","x":2440.4761904761904,"y":331.83809523809526,"z":-2138.9523809523807,"a95":0.99,"info":"05/11/2014 at 13:44:22"},{"visible":false,"include":false,"step":"70.0","x":2204.4761904761904,"y":-776.5333333333334,"z":-1322.857142857143,"a95":0.99,"info":"05/11/2014 at 13:44:22"},{"visible":false,"include":false,"step":"80.0","x":1386,"y":816.2285714285714,"z":789.6285714285715,"a95":0.99,"info":"05/11/2014 at 13:44:22"},{"visible":false,"include":false,"step":"90.0","x":1498.1904761904761,"y":403.76190476190476,"z":-1205.8095238095239,"a95":0.99,"info":"05/11/2014 at 13:44:22"}]},{"version":"v1.1.0","exported":"2016-11-22T23:34:40.149Z","volume":10.5,"added":"2016-11-22T23:17:41.689Z","format":"Utrecht","demagType":"Unknown","strat":"6","patch":1.1,"GEO":[{"dec":110.36228356572178,"inc":-38.21856985468165,"MAD":15.701549244030327,"cm":[1.4210854715202004e-14,-2.842170943040401e-14,0],"intensity":8420.043640613821,"type":"GC","origin":false,"forced":true,"remark":"","nSteps":8,"minStep":"4.0","maxStep":"40.0","steps":["4.0","8.0","12.0","16.0","20.0","30.0","35.0","40.0"],"group":"None","version":"v1.1.0"}],"TECT":[{"dec":53.85897513336255,"inc":-70.64147607487111,"MAD":15.701549244029726,"cm":[0,0,-1.8474111129762605e-13],"intensity":8420.043640613821,"type":"GC","origin":false,"forced":true,"remark":"","nSteps":8,"minStep":"4.0","maxStep":"40.0","steps":["4.0","8.0","12.0","16.0","20.0","30.0","35.0","40.0"],"group":"None","version":"v1.1.0"}],"interpreted":true,"name":"AT2.13C","coreAzi":191,"coreDip":38,"bedStrike":45,"bedDip":46,"data":[{"visible":true,"include":false,"step":"0.0","x":-7038.571428571428,"y":-6661.714285714285,"z":841.9809523809523,"a95":0.99,"info":"27/10/2014 at 11:28:52"},{"visible":true,"include":true,"step":"4.0","x":-4953.333333333333,"y":-3687.809523809524,"z":658.2476190476191,"a95":0.99,"info":"27/10/2014 at 11:28:52"},{"visible":true,"include":true,"step":"8.0","x":-3637.714285714286,"y":-2774.3809523809523,"z":420.35238095238094,"a95":0.99,"info":"27/10/2014 at 11:28:52"},{"visible":true,"include":true,"step":"12.0","x":-2761.2380952380954,"y":-2320.6666666666665,"z":334.81904761904764,"a95":0.99,"info":"27/10/2014 at 11:28:52"},{"visible":true,"include":true,"step":"16.0","x":-2415.904761904762,"y":-1981.4285714285713,"z":115.4,"a95":0.99,"info":"27/10/2014 at 11:28:52"},{"visible":true,"include":true,"step":"20.0","x":-2682.3809523809523,"y":-1946,"z":-254.67619047619047,"a95":0.99,"info":"27/10/2014 at 11:28:52"},{"visible":true,"include":false,"step":"25.0","x":-3225.1428571428573,"y":-1349.7142857142858,"z":-168.47619047619048,"a95":0.99,"info":"27/10/2014 at 11:28:52"},{"visible":true,"include":true,"step":"30.0","x":-1836.7619047619048,"y":-1059.8095238095239,"z":-283.9047619047619,"a95":0.99,"info":"27/10/2014 at 11:28:52"},{"visible":true,"include":true,"step":"35.0","x":-2198,"y":-1496.3809523809523,"z":-341.57142857142856,"a95":0.99,"info":"27/10/2014 at 11:28:52"},{"visible":true,"include":true,"step":"40.0","x":-1855.4285714285713,"y":-1256.6666666666667,"z":-358.16190476190474,"a95":0.99,"info":"27/10/2014 at 11:28:52"},{"visible":true,"include":false,"step":"45.0","x":-1267.5238095238096,"y":-1048.4761904761904,"z":-416.9047619047619,"a95":0.99,"info":"27/10/2014 at 11:28:52"},{"visible":true,"include":false,"step":"50.0","x":-1844.952380952381,"y":-1431.8095238095239,"z":15.603809523809524,"a95":0.99,"info":"27/10/2014 at 11:28:52"},{"visible":true,"include":false,"step":"60.0","x":-1264.3809523809523,"y":-1279.7142857142858,"z":-399.4,"a95":0.99,"info":"27/10/2014 at 11:28:52"},{"visible":true,"include":false,"step":"70.0","x":-496.23809523809524,"y":-1020.1904761904761,"z":-881.3619047619047,"a95":0.99,"info":"27/10/2014 at 11:28:52"},{"visible":true,"include":false,"step":"80.0","x":-1375.142857142857,"y":-1128.2857142857142,"z":-481.7809523809524,"a95":0.99,"info":"27/10/2014 at 11:28:52"},{"visible":true,"include":false,"step":"90.0","x":-531.2,"y":-1281.047619047619,"z":134.63809523809525,"a95":0.99,"info":"27/10/2014 at 11:28:52"},{"visible":true,"include":false,"step":"100.0","x":-961.7142857142857,"y":-458.1333333333333,"z":-625.1809523809524,"a95":0.99,"info":"27/10/2014 at 11:28:52"}]},{"version":"v1.1.0","exported":"2016-11-22T23:34:40.149Z","volume":10.5,"added":"2016-11-22T23:17:41.690Z","format":"Utrecht","demagType":"Unknown","strat":null,"patch":1.1,"GEO":[{"dec":21.315132859893367,"inc":-35.20773051848978,"MAD":8.591433355351908,"cm":[8.526512829121202e-14,8.79296635503124e-14,0],"intensity":3704.055241699304,"type":"GC","origin":false,"forced":true,"remark":"","nSteps":7,"minStep":"100","maxStep":"300","steps":["100","150","180","210","240","270","300"],"group":"None","version":"v1.1.0"}],"TECT":[{"dec":4.3378958731941,"inc":-9.462259401187383,"MAD":8.59143335535189,"cm":[-1.2434497875801753e-13,-1.4566126083082054e-13,-5.684341886080802e-14],"intensity":3704.055241699303,"type":"GC","origin":false,"forced":true,"remark":"","nSteps":7,"minStep":"100","maxStep":"300","steps":["100","150","180","210","240","270","300"],"group":"None","version":"v1.1.0"}],"interpreted":true,"name":"AT2.14A","coreAzi":161,"coreDip":48,"bedStrike":45,"bedDip":46,"data":[{"visible":true,"include":false,"step":"20","x":-175.71428571428572,"y":-3680.5714285714284,"z":3086.095238095238,"a95":2.2,"info":"\"14-11-30\" at \"17:03\""},{"visible":true,"include":true,"step":"100","x":2418.9523809523807,"y":-1800.095238095238,"z":974.7619047619048,"a95":1.6,"info":"\"15-02-10\" at \"15:55\""},{"visible":true,"include":true,"step":"150","x":3030.7619047619046,"y":-1059.3333333333333,"z":261.7142857142857,"a95":1.5,"info":"\"15-02-10\" at \"19:50\""},{"visible":true,"include":true,"step":"180","x":3147.809523809524,"y":-505.14285714285717,"z":-107.04761904761905,"a95":1.5,"info":"\"15-02-11\" at \"15:20\""},{"visible":true,"include":true,"step":"210","x":2673.1428571428573,"y":-307.6190476190476,"z":80.85714285714286,"a95":1.6,"info":"\"15-02-11\" at \"18:45\""},{"visible":true,"include":true,"step":"240","x":1509.5238095238096,"y":-61.904761904761905,"z":22.285714285714285,"a95":1.6,"info":"\"15-02-11\" at \"22:45\""},{"visible":true,"include":true,"step":"270","x":1084.5714285714287,"y":69.71428571428571,"z":-83.33333333333333,"a95":2.3,"info":"\"15-02-12\" at \"16:52\""},{"visible":true,"include":true,"step":"300","x":748.4761904761905,"y":99.42857142857143,"z":-83.04761904761905,"a95":2.2,"info":"\"15-02-13\" at \"15:17\""},{"visible":true,"include":false,"step":"320","x":177.14285714285714,"y":134.28571428571428,"z":-396.0952380952381,"a95":5.6,"info":"\"15-02-13\" at \"20:10\""},{"visible":true,"include":false,"step":"340","x":-84.57142857142857,"y":101.14285714285714,"z":-585.6190476190476,"a95":4.3,"info":"\"15-02-14\" at \"00:11\""},{"visible":true,"include":false,"step":"370","x":-109.33333333333333,"y":10.19047619047619,"z":-436.85714285714283,"a95":9.2,"info":"\"15-02-16\" at \"17:38\""},{"visible":false,"include":false,"step":"390","x":-173.8095238095238,"y":582.6666666666666,"z":-1100.1904761904761,"a95":3,"info":"\"15-02-16\" at \"21:22\""},{"visible":false,"include":false,"step":"420","x":-563.7142857142857,"y":318.0952380952381,"z":-874,"a95":3.1,"info":"\"15-02-17\" at \"17:01\""},{"visible":false,"include":false,"step":"450","x":-563.9047619047619,"y":467.3333333333333,"z":-1660,"a95":2.8,"info":"\"15-03-08\" at \"19:22\""},{"visible":false,"include":false,"step":"470","x":-541.1428571428571,"y":511.7142857142857,"z":-1277.8095238095239,"a95":3,"info":"\"15-03-09\" at \"10:13\""},{"visible":false,"include":false,"step":"490","x":-94.95238095238095,"y":990,"z":-1474.6666666666667,"a95":2.5,"info":"\"15-03-09\" at \"13:44\""},{"visible":false,"include":false,"step":"510","x":-604.1904761904761,"y":804,"z":-1325.4285714285713,"a95":2.9,"info":"\"15-04-21\" at \"09:40\""}]},{"version":"v1.1.0","exported":"2016-11-22T23:34:40.149Z","volume":10.5,"added":"2016-11-22T23:17:41.690Z","format":"Utrecht","demagType":"Unknown","strat":"7","patch":1.1,"GEO":[{"dec":296.98165960732086,"inc":-72.66564231659292,"MAD":5.8275666026760895,"cm":[-2.1316282072803006e-14,-2.3092638912203256e-14,0],"intensity":2201.476378551181,"type":"GC","origin":false,"forced":true,"remark":"","nSteps":6,"minStep":"8.0","maxStep":"35.0","steps":["8.0","12.0","16.0","20.0","30.0","35.0"],"group":"None","version":"v1.1.0"}],"TECT":[{"dec":309.0447161639091,"inc":-27.341575811174263,"MAD":5.8275666026764,"cm":[-6.394884621840902e-14,2.1316282072803006e-14,0],"intensity":2201.47637855118,"type":"GC","origin":false,"forced":true,"remark":"","nSteps":6,"minStep":"8.0","maxStep":"35.0","steps":["8.0","12.0","16.0","20.0","30.0","35.0"],"group":"None","version":"v1.1.0"}],"interpreted":true,"name":"AT2.14B","coreAzi":161,"coreDip":48,"bedStrike":45,"bedDip":46,"data":[{"visible":true,"include":false,"step":"0.0","x":-234.12380952380954,"y":-2327.2380952380954,"z":2138.8571428571427,"a95":0.99,"info":"27/10/2014 at 11:28:52"},{"visible":true,"include":false,"step":"4.0","x":836.0380952380953,"y":-1125.7142857142858,"z":1115.5238095238096,"a95":0.99,"info":"27/10/2014 at 11:28:52"},{"visible":true,"include":true,"step":"8.0","x":1247.904761904762,"y":-712.8285714285714,"z":572.3047619047619,"a95":0.99,"info":"27/10/2014 at 11:28:52"},{"visible":true,"include":true,"step":"12.0","x":1360.6666666666667,"y":-617.3428571428572,"z":608.3047619047619,"a95":0.99,"info":"27/10/2014 at 11:28:52"},{"visible":true,"include":true,"step":"16.0","x":1229.2380952380952,"y":-280.1047619047619,"z":581.104761904762,"a95":0.99,"info":"27/10/2014 at 11:28:52"},{"visible":true,"include":true,"step":"20.0","x":1184.1904761904761,"y":-278.1047619047619,"z":572.0952380952381,"a95":0.99,"info":"27/10/2014 at 11:28:52"},{"visible":true,"include":false,"step":"25.0","x":688.8571428571429,"y":-90.56285714285714,"z":753.4095238095239,"a95":0.99,"info":"27/10/2014 at 11:28:52"},{"visible":true,"include":true,"step":"30.0","x":769.6666666666666,"y":163.59047619047618,"z":504.16190476190474,"a95":0.99,"info":"27/10/2014 at 11:28:52"},{"visible":true,"include":true,"step":"35.0","x":629.552380952381,"y":88.67809523809524,"z":393.14285714285717,"a95":0.99,"info":"27/10/2014 at 11:28:52"},{"visible":true,"include":false,"step":"40.0","x":791.9333333333333,"y":72.88285714285715,"z":792.4285714285714,"a95":0.99,"info":"27/10/2014 at 11:28:52"},{"visible":true,"include":false,"step":"45.0","x":622.1333333333333,"y":438.93333333333334,"z":695.5333333333334,"a95":0.99,"info":"27/10/2014 at 11:28:52"},{"visible":true,"include":false,"step":"50.0","x":606.2380952380952,"y":-102.28571428571429,"z":371.31428571428575,"a95":0.99,"info":"27/10/2014 at 11:28:52"},{"visible":true,"include":false,"step":"60.0","x":511.08571428571423,"y":607.0571428571429,"z":860.2476190476191,"a95":0.99,"info":"27/10/2014 at 11:28:52"},{"visible":false,"include":false,"step":"70.0","x":1055.5238095238096,"y":943.9714285714286,"z":1386.5714285714287,"a95":0.99,"info":"27/10/2014 at 11:28:52"},{"visible":false,"include":false,"step":"80.0","x":270.6666666666667,"y":-115.15238095238094,"z":590.1238095238095,"a95":0.99,"info":"27/10/2014 at 11:28:52"},{"visible":false,"include":false,"step":"90.0","x":742.6476190476191,"y":190.52380952380952,"z":1330.4761904761904,"a95":0.99,"info":"27/10/2014 at 11:28:52"},{"visible":false,"include":false,"step":"100.0","x":1074.857142857143,"y":997.2380952380952,"z":967.5238095238095,"a95":0.99,"info":"27/10/2014 at 11:28:52"}]},{"version":"v1.1.0","exported":"2016-11-22T23:34:40.149Z","volume":10.5,"added":"2016-11-22T23:17:41.690Z","format":"Utrecht","demagType":"Unknown","strat":null,"patch":1.1,"GEO":[{"dec":29.338831589508686,"inc":-27.2638144143712,"MAD":4.719183473172625,"cm":[-1.4210854715202004e-14,-2.4868995751603507e-14,0],"intensity":3238.5918400712317,"type":"GC","origin":false,"forced":true,"remark":"","nSteps":7,"minStep":"90","maxStep":"250","steps":["90","120","150","180","210","230","250"],"group":"None","version":"v1.1.0"}],"TECT":[{"dec":14.897045707261327,"inc":-8.372205917880589,"MAD":4.719183473172738,"cm":[1.5987211554602254e-14,2.1316282072803006e-14,0],"intensity":3238.591840071231,"type":"GC","origin":false,"forced":true,"remark":"","nSteps":7,"minStep":"90","maxStep":"250","steps":["90","120","150","180","210","230","250"],"group":"None","version":"v1.1.0"}],"interpreted":true,"name":"AT2.15A","coreAzi":161,"coreDip":48,"bedStrike":45,"bedDip":46,"data":[{"visible":true,"include":false,"step":"20","x":1930.6666666666667,"y":-3439.4285714285716,"z":2798.095238095238,"a95":1.7,"info":"\"15-06-22\" at \"16:58\""},{"visible":true,"include":true,"step":"90","x":2288.190476190476,"y":-1694.3809523809523,"z":1058.857142857143,"a95":1.5,"info":"\"15-06-22\" at \"20:22\""},{"visible":true,"include":true,"step":"120","x":2442.285714285714,"y":-1315.2380952380952,"z":746.0952380952381,"a95":1.4,"info":"\"15-06-22\" at \"22:46\""},{"visible":true,"include":true,"step":"150","x":2236.3809523809523,"y":-175.8095238095238,"z":-100.28571428571429,"a95":1.5,"info":"\"15-06-23\" at \"21:17\""},{"visible":true,"include":true,"step":"180","x":2455.6190476190477,"y":-179.9047619047619,"z":-176.47619047619048,"a95":1.5,"info":"\"15-06-24\" at \"17:42\""},{"visible":true,"include":true,"step":"210","x":2023.3333333333333,"y":-88.0952380952381,"z":-428.57142857142856,"a95":1.5,"info":"\"15-06-24\" at \"20:23\""},{"visible":true,"include":true,"step":"230","x":1818.5714285714287,"y":335.8095238095238,"z":-698.6666666666666,"a95":1.6,"info":"\"15-06-28\" at \"00:35\""},{"visible":true,"include":true,"step":"250","x":680.7619047619048,"y":486.95238095238096,"z":-594.1904761904761,"a95":2.4,"info":"\"15-06-28\" at \"03:03\""},{"visible":true,"include":false,"step":"270","x":873.5238095238095,"y":335.3333333333333,"z":-904.6666666666666,"a95":2.4,"info":"\"15-06-28\" at \"18:55\""},{"visible":true,"include":false,"step":"300","x":386.76190476190476,"y":78.47619047619048,"z":-1284.4761904761904,"a95":2.8,"info":"\"15-06-30\" at \"11:45\""},{"visible":true,"include":false,"step":"330","x":172.1904761904762,"y":230.0952380952381,"z":-1078.857142857143,"a95":3.1,"info":"\"15-06-30\" at \"14:28\""},{"visible":true,"include":false,"step":"360","x":-39.04761904761905,"y":21.61904761904762,"z":-1122.952380952381,"a95":3.1,"info":"\"15-07-01\" at \"09:48\""},{"visible":false,"include":false,"step":"380","x":-15.714285714285714,"y":408.76190476190476,"z":-1169.6190476190477,"a95":2.6,"info":"\"15-07-01\" at \"14:42\""},{"visible":false,"include":false,"step":"410","x":-746.2857142857143,"y":63.523809523809526,"z":-1346.095238095238,"a95":2.8,"info":"\"15-07-02\" at \"10:06\""},{"visible":false,"include":false,"step":"430","x":-11.714285714285714,"y":955.2380952380952,"z":-1200.4761904761904,"a95":2.8,"info":"\"15-07-02\" at \"13:48\""}]},{"version":"v1.1.0","exported":"2016-11-22T23:34:40.149Z","volume":10.5,"added":"2016-11-22T23:17:41.690Z","format":"Utrecht","demagType":"Unknown","strat":null,"patch":1.1,"GEO":[],"TECT":[],"interpreted":false,"name":"AT2.16A","coreAzi":238,"coreDip":43,"bedStrike":65,"bedDip":60,"data":[{"visible":false,"include":false,"step":"20","x":-1678.6666666666667,"y":-2710.4761904761904,"z":6579.714285714285,"a95":4.8,"info":"\"14-11-30\" at \"17:08\""},{"visible":true,"include":false,"step":"100","x":430.1904761904762,"y":-2874.8571428571427,"z":873.8095238095239,"a95":1.7,"info":"\"15-02-10\" at \"15:57\""},{"visible":true,"include":true,"step":"150","x":1706.2857142857142,"y":-2659.5238095238096,"z":-140.1904761904762,"a95":1.6,"info":"\"15-02-10\" at \"19:52\""},{"visible":true,"include":true,"step":"180","x":1591.8095238095239,"y":-2205.2380952380954,"z":-444.4761904761905,"a95":1.6,"info":"\"15-02-11\" at \"15:23\""},{"visible":true,"include":true,"step":"210","x":1124.4761904761904,"y":-1806.5714285714287,"z":-410.76190476190476,"a95":1.7,"info":"\"15-02-11\" at \"18:48\""},{"visible":true,"include":true,"step":"240","x":290.6666666666667,"y":-1458,"z":179.9047619047619,"a95":2.2,"info":"\"15-02-11\" at \"22:47\""},{"visible":true,"include":true,"step":"270","x":475.7142857142857,"y":-1301.4285714285713,"z":-307.23809523809524,"a95":2.1,"info":"\"15-02-12\" at \"16:57\""},{"visible":true,"include":true,"step":"300","x":512.7619047619048,"y":-1124.1904761904761,"z":-182.85714285714286,"a95":2,"info":"\"15-02-13\" at \"15:20\""},{"visible":true,"include":true,"step":"320","x":290.2857142857143,"y":-576,"z":-75.71428571428571,"a95":2.6,"info":"\"15-02-13\" at \"20:13\""},{"visible":true,"include":true,"step":"340","x":124.28571428571429,"y":-543.6190476190476,"z":-627.8095238095239,"a95":3.1,"info":"\"15-02-14\" at \"00:13\""},{"visible":true,"include":false,"step":"370","x":-91.23809523809524,"y":-366.4761904761905,"z":-252.38095238095238,"a95":5.5,"info":"\"15-02-16\" at \"17:40\""},{"visible":true,"include":false,"step":"390","x":237.42857142857142,"y":-257.3333333333333,"z":-72.19047619047619,"a95":5.7,"info":"\"15-02-16\" at \"21:25\""},{"visible":false,"include":false,"step":"420","x":-105.61904761904762,"y":-240.66666666666666,"z":-232.66666666666666,"a95":5.2,"info":"\"15-02-17\" at \"17:03\""},{"visible":false,"include":false,"step":"450","x":302.95238095238096,"y":-387.14285714285717,"z":-9.333333333333334,"a95":3.1,"info":"\"15-03-08\" at \"19:24\""},{"visible":false,"include":false,"step":"470","x":163.52380952380952,"y":-536.2857142857143,"z":-45.42857142857143,"a95":4.6,"info":"\"15-03-09\" at \"10:17\""},{"visible":false,"include":false,"step":"510","x":203.04761904761904,"y":-167.9047619047619,"z":-72.38095238095238,"a95":6,"info":"\"15-04-21\" at \"09:42\""}]},{"version":"v1.1.0","exported":"2016-11-22T23:34:40.149Z","volume":10.5,"added":"2016-11-22T23:17:41.690Z","format":"Utrecht","demagType":"Unknown","strat":null,"patch":1.1,"GEO":[{"dec":325.9211991860931,"inc":-69.61606507046181,"MAD":10.701532450171424,"cm":[-3.6415315207705135e-14,1.4210854715202004e-14,0],"intensity":1346.0016745667544,"type":"GC","origin":false,"forced":true,"remark":"","nSteps":5,"minStep":"240","maxStep":"340","steps":["240","270","300","320","340"],"group":"None","version":"v1.1.0"}],"TECT":[{"dec":331.8023502977514,"inc":-9.835739077487858,"MAD":10.701532450171468,"cm":[-2.1316282072803006e-14,-8.526512829121202e-14,-1.0302869668521453e-13],"intensity":1346.0016745667544,"type":"GC","origin":false,"forced":true,"remark":"","nSteps":5,"minStep":"240","maxStep":"340","steps":["240","270","300","320","340"],"group":"None","version":"v1.1.0"}],"interpreted":true,"name":"AT2.17A","coreAzi":235,"coreDip":40,"bedStrike":65,"bedDip":60,"data":[{"visible":false,"include":false,"step":"20","x":-5027.714285714285,"y":-2575.4285714285716,"z":6558.476190476191,"a95":2.6,"info":"\"14-11-30\" at \"17:10\""},{"visible":true,"include":false,"step":"100","x":-1171.904761904762,"y":-2368.3809523809523,"z":738.952380952381,"a95":1.8,"info":"\"15-02-10\" at \"15:59\""},{"visible":true,"include":false,"step":"150","x":-45.80952380952381,"y":-2549.4285714285716,"z":-349.14285714285717,"a95":1.6,"info":"\"15-02-10\" at \"19:54\""},{"visible":true,"include":false,"step":"180","x":257.7142857142857,"y":-1947.7142857142858,"z":-462.57142857142856,"a95":1.9,"info":"\"15-02-11\" at \"15:25\""},{"visible":true,"include":false,"step":"210","x":-65.80952380952381,"y":-1387.8095238095239,"z":-514.3809523809524,"a95":2.3,"info":"\"15-02-11\" at \"18:50\""},{"visible":true,"include":true,"step":"240","x":135.9047619047619,"y":-792.1904761904761,"z":-215.9047619047619,"a95":3.3,"info":"\"15-02-11\" at \"22:49\""},{"visible":true,"include":true,"step":"270","x":-129.52380952380952,"y":-661.5238095238095,"z":-596.8571428571429,"a95":3,"info":"\"15-02-12\" at \"16:59\""},{"visible":true,"include":true,"step":"300","x":-86.47619047619048,"y":-742.1904761904761,"z":-604.2857142857143,"a95":2.5,"info":"\"15-02-13\" at \"15:23\""},{"visible":true,"include":true,"step":"320","x":-222.38095238095238,"y":-417.14285714285717,"z":-470.76190476190476,"a95":3,"info":"\"15-02-13\" at \"20:16\""},{"visible":true,"include":true,"step":"340","x":-333.6190476190476,"y":-333.6190476190476,"z":-494.85714285714283,"a95":3.9,"info":"\"15-02-14\" at \"00:16\""},{"visible":true,"include":false,"step":"370","x":-637.3333333333334,"y":-367.9047619047619,"z":-195.8095238095238,"a95":4,"info":"\"15-02-16\" at \"17:43\""},{"visible":true,"include":false,"step":"390","x":-336.85714285714283,"y":-181.42857142857142,"z":200.38095238095238,"a95":5.9,"info":"\"15-02-16\" at \"21:28\""},{"visible":false,"include":false,"step":"420","x":-173.04761904761904,"y":-181.14285714285714,"z":-7.714285714285714,"a95":8,"info":"\"15-02-17\" at \"17:05\""},{"visible":false,"include":false,"step":"450","x":-641.047619047619,"y":-170.0952380952381,"z":-180.76190476190476,"a95":3.8,"info":"\"15-03-08\" at \"19:26\""},{"visible":false,"include":false,"step":"470","x":-403.5238095238095,"y":-50.38095238095238,"z":43.714285714285715,"a95":5.2,"info":"\"15-03-09\" at \"10:20\""},{"visible":false,"include":false,"step":"510","x":-264,"y":-280.95238095238096,"z":-333.42857142857144,"a95":4.1,"info":"\"15-04-21\" at \"09:44\""}]},{"version":"v1.1.0","exported":"2016-11-22T23:34:40.149Z","volume":10.5,"added":"2016-11-22T23:17:41.691Z","format":"Utrecht","demagType":"Unknown","strat":null,"patch":1.1,"GEO":[{"dec":356.34335789253566,"inc":-76.04052126989966,"MAD":15.377745564830132,"cm":[-6.394884621840902e-14,-2.2026824808563106e-13,0],"intensity":3377.5025967988863,"type":"GC","origin":false,"forced":true,"remark":"","nSteps":5,"minStep":"180","maxStep":"320","steps":["180","210","270","300","320"],"group":"None","version":"v1.1.0"}],"TECT":[{"dec":340.2648903456351,"inc":-16.896599750470433,"MAD":15.377745564829775,"cm":[-1.936228954946273e-13,-1.6342482922482304e-13,4.263256414560601e-14],"intensity":3377.5025967988863,"type":"GC","origin":false,"forced":true,"remark":"","nSteps":5,"minStep":"180","maxStep":"320","steps":["180","210","270","300","320"],"group":"None","version":"v1.1.0"}],"interpreted":true,"name":"AT2.18A","coreAzi":243,"coreDip":38,"bedStrike":65,"bedDip":60,"data":[{"visible":false,"include":false,"step":"20","x":-3031.904761904762,"y":-573.047619047619,"z":6524.857142857143,"a95":2.5,"info":"\"14-11-30\" at \"17:13\""},{"visible":true,"include":false,"step":"100","x":-846.5714285714286,"y":-3050.095238095238,"z":873.9047619047619,"a95":1.7,"info":"\"15-02-10\" at \"16:01\""},{"visible":true,"include":false,"step":"150","x":407.42857142857144,"y":-3135.6190476190477,"z":14.19047619047619,"a95":1.6,"info":"\"15-02-10\" at \"19:56\""},{"visible":true,"include":true,"step":"180","x":401.7142857142857,"y":-2515.5238095238096,"z":-317.04761904761904,"a95":1.7,"info":"\"15-02-11\" at \"15:27\""},{"visible":true,"include":true,"step":"210","x":409.3333333333333,"y":-2087.5238095238096,"z":-346,"a95":2,"info":"\"15-02-11\" at \"18:52\""},{"visible":false,"include":false,"step":"240","x":998.6666666666666,"y":-1452,"z":-311.5238095238095,"a95":1.7,"info":"\"15-02-11\" at \"22:51\""},{"visible":true,"include":true,"step":"270","x":89.80952380952381,"y":-1363.904761904762,"z":-451.3333333333333,"a95":2.4,"info":"\"15-02-12\" at \"17:01\""},{"visible":true,"include":true,"step":"300","x":-23.142857142857142,"y":-1142.7619047619048,"z":-357.5238095238095,"a95":2.5,"info":"\"15-02-13\" at \"15:26\""},{"visible":true,"include":true,"step":"320","x":-79.71428571428571,"y":-792,"z":-286.3809523809524,"a95":3,"info":"\"15-02-13\" at \"20:18\""},{"visible":true,"include":false,"step":"340","x":-320.95238095238096,"y":-900.5714285714286,"z":-83.9047619047619,"a95":2.8,"info":"\"15-02-14\" at \"00:18\""},{"visible":true,"include":false,"step":"370","x":-515.4285714285714,"y":-657.6190476190476,"z":-237.33333333333334,"a95":3.8,"info":"\"15-02-16\" at \"17:45\""},{"visible":true,"include":false,"step":"390","x":-311.5238095238095,"y":-680.8571428571429,"z":-411.42857142857144,"a95":2.6,"info":"\"15-02-16\" at \"21:30\""},{"visible":false,"include":false,"step":"420","x":-358.57142857142856,"y":-548.0952380952381,"z":-450.1904761904762,"a95":3.4,"info":"\"15-02-17\" at \"17:07\""},{"visible":false,"include":false,"step":"450","x":-450.1904761904762,"y":-724.6666666666666,"z":-149.42857142857142,"a95":2.5,"info":"\"15-03-08\" at \"19:29\""},{"visible":false,"include":false,"step":"470","x":-373.14285714285717,"y":-235.8095238095238,"z":-4.190476190476191,"a95":4,"info":"\"15-03-09\" at \"10:22\""},{"visible":false,"include":false,"step":"510","x":-425.23809523809524,"y":-397.7142857142857,"z":-220.47619047619048,"a95":3.9,"info":"\"15-04-21\" at \"09:46\""}]},{"version":"v1.1.0","exported":"2016-11-22T23:34:40.150Z","volume":10.5,"added":"2016-11-22T23:17:41.691Z","format":"Utrecht","demagType":"Unknown","strat":null,"patch":1.1,"GEO":[{"dec":286.6295114361094,"inc":-68.9577968024127,"MAD":7.350219545490022,"cm":[-2.2737367544323206e-13,-1.2505552149377763e-12,0],"intensity":10673.808385541082,"type":"GC","origin":false,"forced":true,"remark":"","nSteps":4,"minStep":"150","maxStep":"230","steps":["150","180","210","230"],"group":"None","version":"v1.1.0"}],"TECT":[{"dec":318.8624779320054,"inc":-15.075385344547144,"MAD":7.350219545490097,"cm":[-1.7053025658242404e-13,-1.2754242106893798e-12,1.1368683772161603e-13],"intensity":10673.808385541084,"type":"GC","origin":false,"forced":true,"remark":"","nSteps":4,"minStep":"150","maxStep":"230","steps":["150","180","210","230"],"group":"None","version":"v1.1.0"}],"interpreted":true,"name":"AT2.19A","coreAzi":205,"coreDip":24,"bedStrike":65,"bedDip":60,"data":[{"visible":false,"include":false,"step":"20","x":-5068.0952380952385,"y":-3617.1428571428573,"z":490.4761904761905,"a95":2.8,"info":"\"15-06-22\" at \"17:00\""},{"visible":true,"include":false,"step":"90","x":602.6666666666666,"y":-5274.190476190476,"z":4608.952380952381,"a95":1.5,"info":"\"15-06-22\" at \"20:24\""},{"visible":true,"include":false,"step":"120","x":1955.4285714285713,"y":-5379.142857142857,"z":4599.333333333333,"a95":1.7,"info":"\"15-06-22\" at \"22:48\""},{"visible":true,"include":true,"step":"150","x":2760.6666666666665,"y":-3374.4761904761904,"z":3747.714285714286,"a95":1.7,"info":"\"15-06-23\" at \"21:19\""},{"visible":true,"include":true,"step":"180","x":2866.285714285714,"y":-3405.809523809524,"z":3767.1428571428573,"a95":1.8,"info":"\"15-06-24\" at \"17:44\""},{"visible":true,"include":true,"step":"210","x":2791.3333333333335,"y":-3666.8571428571427,"z":3521.809523809524,"a95":1.8,"info":"\"15-06-24\" at \"20:26\""},{"visible":true,"include":true,"step":"230","x":2417.904761904762,"y":-3281.6190476190477,"z":2795.1428571428573,"a95":1.8,"info":"\"15-06-28\" at \"00:40\""},{"visible":true,"include":false,"step":"250","x":-242.57142857142858,"y":-1334.3809523809523,"z":1281.6190476190477,"a95":2.3,"info":"\"15-06-28\" at \"03:05\""},{"visible":true,"include":false,"step":"270","x":-632.0952380952381,"y":-2175.714285714286,"z":2141.904761904762,"a95":2,"info":"\"15-06-28\" at \"18:57\""},{"visible":true,"include":false,"step":"300","x":822.7619047619048,"y":-1121.047619047619,"z":1588,"a95":2.2,"info":"\"15-06-30\" at \"11:47\""},{"visible":true,"include":false,"step":"330","x":389.7142857142857,"y":-1344.7619047619048,"z":1019.9047619047619,"a95":2.3,"info":"\"15-06-30\" at \"14:30\""},{"visible":true,"include":false,"step":"360","x":161.71428571428572,"y":-1136.7619047619048,"z":2114.8571428571427,"a95":2.6,"info":"\"15-07-01\" at \"09:50\""},{"visible":false,"include":false,"step":"380","x":387.5238095238095,"y":-1308.952380952381,"z":1575.4285714285713,"a95":2.2,"info":"\"15-07-01\" at \"14:44\""},{"visible":false,"include":false,"step":"410","x":-572.1904761904761,"y":-1874.4761904761904,"z":1371.2380952380952,"a95":2.1,"info":"\"15-07-02\" at \"10:09\""},{"visible":false,"include":false,"step":"430","x":-281.5238095238095,"y":-1492.4761904761904,"z":1039.5238095238096,"a95":2.9,"info":"\"15-07-02\" at \"13:51\""}]},{"version":"v1.1.0","exported":"2016-11-22T23:34:40.150Z","volume":10.5,"added":"2016-11-22T23:17:41.691Z","format":"Utrecht","demagType":"Unknown","strat":null,"patch":1.1,"GEO":[{"dec":67.61055760198025,"inc":-48.32126790147393,"MAD":8.470641367836013,"cm":[-5.115907697472721e-13,-1.4424017535930034e-12,0],"intensity":9180.269898067298,"type":"GC","origin":false,"forced":true,"remark":"","nSteps":4,"minStep":"100","maxStep":"240","steps":["100","150","210","240"],"group":"None","version":"v1.1.0"}],"TECT":[{"dec":21.440333570992493,"inc":-23.557647104439344,"MAD":8.470641367835851,"cm":[-6.252776074688882e-13,-7.531752999057062e-13,2.2737367544323206e-13],"intensity":9180.269898067298,"type":"GC","origin":false,"forced":true,"remark":"","nSteps":4,"minStep":"100","maxStep":"240","steps":["100","150","210","240"],"group":"None","version":"v1.1.0"}],"interpreted":true,"name":"AT2.20A","coreAzi":204,"coreDip":19,"bedStrike":65,"bedDip":60,"data":[{"visible":true,"include":false,"step":"20","x":-1959.6190476190477,"y":-5250.571428571428,"z":1833.142857142857,"a95":1.7,"info":"\"14-11-30\" at \"17:15\""},{"visible":true,"include":true,"step":"100","x":937.4285714285714,"y":-4401.333333333333,"z":3753.2380952380954,"a95":2.1,"info":"\"15-02-10\" at \"16:03\""},{"visible":true,"include":true,"step":"150","x":2095.4285714285716,"y":-3755.5238095238096,"z":3898.190476190476,"a95":2.2,"info":"\"15-02-10\" at \"19:58\""},{"visible":true,"include":false,"step":"180","x":2572.8571428571427,"y":-3093.4285714285716,"z":2876.285714285714,"a95":1.9,"info":"\"15-02-11\" at \"15:29\""},{"visible":true,"include":true,"step":"210","x":1780.857142857143,"y":-2549.904761904762,"z":3032.8571428571427,"a95":2.2,"info":"\"15-02-11\" at \"18:54\""},{"visible":true,"include":true,"step":"240","x":1762.1904761904761,"y":-1600,"z":2647.809523809524,"a95":2.3,"info":"\"15-02-11\" at \"22:54\""},{"visible":true,"include":false,"step":"270","x":931.3333333333334,"y":-1764.6666666666667,"z":1341.2380952380952,"a95":2.2,"info":"\"15-02-12\" at \"17:03\""},{"visible":true,"include":false,"step":"300","x":-95.71428571428571,"y":-932.2857142857143,"z":2233.714285714286,"a95":2.7,"info":"\"15-02-13\" at \"15:28\""},{"visible":true,"include":false,"step":"320","x":76.85714285714286,"y":-873.6190476190476,"z":2442.285714285714,"a95":2.7,"info":"\"15-02-13\" at \"20:20\""},{"visible":true,"include":false,"step":"340","x":65.52380952380952,"y":-1091.3333333333333,"z":2331.904761904762,"a95":2.6,"info":"\"15-02-14\" at \"00:20\""},{"visible":true,"include":false,"step":"370","x":238.76190476190476,"y":-1351.5238095238096,"z":1044.7619047619048,"a95":3.3,"info":"\"15-02-16\" at \"17:48\""},{"visible":true,"include":false,"step":"390","x":314.0952380952381,"y":18.285714285714285,"z":2253.2380952380954,"a95":3,"info":"\"15-02-16\" at \"21:32\""},{"visible":false,"include":false,"step":"420","x":-34.57142857142857,"y":57.04761904761905,"z":1682,"a95":3.1,"info":"\"15-02-17\" at \"17:09\""},{"visible":false,"include":false,"step":"450","x":-156.66666666666666,"y":-890,"z":1472.857142857143,"a95":2.5,"info":"\"15-03-08\" at \"19:31\""},{"visible":false,"include":false,"step":"470","x":-262.76190476190476,"y":368.57142857142856,"z":2050.095238095238,"a95":2.8,"info":"\"15-03-09\" at \"10:24\""},{"visible":false,"include":false,"step":"490","x":-186.95238095238096,"y":-1440,"z":2153.6190476190477,"a95":2.5,"info":"\"15-03-09\" at \"13:46\""},{"visible":false,"include":false,"step":"510","x":-1003.7142857142857,"y":-387.04761904761904,"z":1606.857142857143,"a95":2.9,"info":"\"15-04-21\" at \"09:48\""}]},{"version":"v1.1.0","exported":"2016-11-22T23:34:40.150Z","volume":10.5,"added":"2016-11-22T23:17:41.691Z","format":"Utrecht","demagType":"Unknown","strat":"8","patch":1.1,"GEO":[{"dec":68.88649647648953,"inc":-15.596962830128952,"MAD":5.0060638727671956,"cm":[5.684341886080802e-14,-5.329070518200751e-13,0],"intensity":8134.108855080797,"type":"GC","origin":false,"forced":true,"remark":"","nSteps":7,"minStep":"4.0","maxStep":"35.0","steps":["4.0","8.0","12.0","16.0","20.0","30.0","35.0"],"group":"None","version":"v1.1.0"}],"TECT":[{"dec":53.23144409550525,"inc":-11.00952732929599,"MAD":5.006063872767109,"cm":[2.753353101070388e-13,-4.973799150320701e-14,-2.842170943040401e-14],"intensity":8134.108855080798,"type":"GC","origin":false,"forced":true,"remark":"","nSteps":7,"minStep":"4.0","maxStep":"35.0","steps":["4.0","8.0","12.0","16.0","20.0","30.0","35.0"],"group":"None","version":"v1.1.0"}],"interpreted":true,"name":"AT2.20B","coreAzi":204,"coreDip":19,"bedStrike":65,"bedDip":60,"data":[{"visible":true,"include":false,"step":"0.0","x":-2358.8571428571427,"y":-5032.285714285715,"z":5468.0952380952385,"a95":0.99,"info":"27/10/2014 at 11:28:52"},{"visible":true,"include":true,"step":"4.0","x":375.8952380952381,"y":-3923.2380952380954,"z":3728.7619047619046,"a95":0.99,"info":"27/10/2014 at 11:28:52"},{"visible":true,"include":true,"step":"8.0","x":2029.2380952380952,"y":-3542.190476190476,"z":3188.5714285714284,"a95":0.99,"info":"27/10/2014 at 11:28:52"},{"visible":true,"include":true,"step":"12.0","x":2331.904761904762,"y":-2857.0476190476193,"z":2928.6666666666665,"a95":0.99,"info":"27/10/2014 at 11:28:52"},{"visible":true,"include":true,"step":"16.0","x":2437.809523809524,"y":-2455.714285714286,"z":2326.3809523809523,"a95":0.99,"info":"27/10/2014 at 11:28:52"},{"visible":true,"include":true,"step":"20.0","x":2303.0476190476193,"y":-2310.095238095238,"z":2142.6666666666665,"a95":0.99,"info":"27/10/2014 at 11:28:52"},{"visible":true,"include":false,"step":"25.0","x":2190.190476190476,"y":-1118.2857142857142,"z":2398.9523809523807,"a95":0.99,"info":"27/10/2014 at 11:28:52"},{"visible":true,"include":true,"step":"30.0","x":2572.7619047619046,"y":-1573.3333333333333,"z":1532.4761904761904,"a95":0.99,"info":"27/10/2014 at 11:28:52"},{"visible":true,"include":true,"step":"35.0","x":2454.095238095238,"y":-1482.5714285714287,"z":1650.095238095238,"a95":0.99,"info":"27/10/2014 at 11:28:52"},{"visible":true,"include":false,"step":"40.0","x":1986.1904761904761,"y":-669.9904761904761,"z":2338,"a95":0.99,"info":"27/10/2014 at 11:28:52"},{"visible":true,"include":false,"step":"45.0","x":2787.3333333333335,"y":-711.495238095238,"z":1706.952380952381,"a95":0.99,"info":"27/10/2014 at 11:28:52"},{"visible":true,"include":false,"step":"50.0","x":1982.6666666666667,"y":-811.0952380952381,"z":1551.047619047619,"a95":0.99,"info":"27/10/2014 at 11:28:52"},{"visible":true,"include":false,"step":"60.0","x":1559.4285714285713,"y":-910.2476190476191,"z":2272.190476190476,"a95":0.99,"info":"27/10/2014 at 11:28:52"},{"visible":true,"include":false,"step":"70.0","x":2141.4285714285716,"y":352.4666666666667,"z":1205.3333333333333,"a95":0.99,"info":"27/10/2014 at 11:28:52"},{"visible":true,"include":false,"step":"80.0","x":2381.1428571428573,"y":-750.0666666666666,"z":1831.047619047619,"a95":0.99,"info":"27/10/2014 at 11:28:52"},{"visible":true,"include":false,"step":"90.0","x":1329.4285714285713,"y":392.6952380952381,"z":1478.3809523809523,"a95":0.99,"info":"27/10/2014 at 11:28:52"},{"visible":true,"include":false,"step":"100.0","x":1340.7619047619048,"y":442.34285714285716,"z":1441.904761904762,"a95":0.99,"info":"27/10/2014 at 11:28:52"}]},{"version":"v1.1.0","exported":"2016-11-22T23:34:40.150Z","volume":10.5,"added":"2016-11-22T23:17:41.692Z","format":"Utrecht","demagType":"Unknown","strat":null,"patch":1.1,"GEO":[{"dec":65.09451003332657,"inc":-20.297657141773563,"MAD":5.440454479040803,"cm":[3.410605131648481e-13,9.094947017729282e-13,0],"intensity":12823.79060985644,"type":"GC","origin":false,"forced":true,"remark":"","nSteps":5,"minStep":"90","maxStep":"210","steps":["90","120","150","180","210"],"group":"None","version":"v1.1.0"}],"TECT":[{"dec":47.28194563578563,"inc":-10.066348126167325,"MAD":5.440454479040782,"cm":[4.547473508864641e-13,1.1084466677857563e-12,-2.2737367544323206e-13],"intensity":12823.790609856438,"type":"GC","origin":false,"forced":true,"remark":"","nSteps":5,"minStep":"90","maxStep":"210","steps":["90","120","150","180","210"],"group":"None","version":"v1.1.0"}],"interpreted":true,"name":"AT2.21A","coreAzi":205,"coreDip":18,"bedStrike":65,"bedDip":60,"data":[{"visible":true,"include":false,"step":"20","x":1853.142857142857,"y":-2056.5714285714284,"z":4706,"a95":1.9,"info":"\"15-06-22\" at \"17:02\""},{"visible":true,"include":true,"step":"90","x":3273.4285714285716,"y":-4029.809523809524,"z":3672.7619047619046,"a95":1.6,"info":"\"15-06-22\" at \"20:26\""},{"visible":true,"include":true,"step":"120","x":4364.857142857143,"y":-3972.285714285714,"z":3444.4761904761904,"a95":1.4,"info":"\"15-06-22\" at \"22:50\""},{"visible":true,"include":true,"step":"150","x":5522.285714285715,"y":-2790,"z":2873.5238095238096,"a95":1.4,"info":"\"15-06-23\" at \"21:21\""},{"visible":true,"include":true,"step":"180","x":5064.380952380952,"y":-2871.0476190476193,"z":2836,"a95":1.5,"info":"\"15-06-24\" at \"17:48\""},{"visible":true,"include":true,"step":"210","x":5450.666666666667,"y":-2665.714285714286,"z":2923.4285714285716,"a95":1.5,"info":"\"15-06-24\" at \"20:28\""},{"visible":true,"include":false,"step":"230","x":5397.047619047619,"y":-2945.5238095238096,"z":2569.904761904762,"a95":1.6,"info":"\"15-06-28\" at \"00:42\""},{"visible":true,"include":false,"step":"250","x":864.1904761904761,"y":-1534.1904761904761,"z":1117.3333333333333,"a95":2.2,"info":"\"15-06-28\" at \"03:06\""},{"visible":true,"include":false,"step":"270","x":1333.7142857142858,"y":-984.3809523809524,"z":1421.3333333333333,"a95":1.8,"info":"\"15-06-28\" at \"18:59\""},{"visible":true,"include":false,"step":"300","x":89.33333333333333,"y":-1138.4761904761904,"z":792.4761904761905,"a95":2.3,"info":"\"15-06-30\" at \"11:49\""},{"visible":true,"include":false,"step":"330","x":-91.9047619047619,"y":-1392.095238095238,"z":417.23809523809524,"a95":2.5,"info":"\"15-06-30\" at \"14:32\""},{"visible":true,"include":false,"step":"360","x":317.5238095238095,"y":-1036.6666666666667,"z":1068.1904761904761,"a95":2.4,"info":"\"15-07-01\" at \"09:52\""},{"visible":false,"include":false,"step":"380","x":13.142857142857142,"y":-881.047619047619,"z":508,"a95":2.5,"info":"\"15-07-01\" at \"14:47\""},{"visible":false,"include":false,"step":"410","x":-38.95238095238095,"y":-1033.904761904762,"z":176.38095238095238,"a95":2.8,"info":"\"15-07-02\" at \"10:11\""},{"visible":false,"include":false,"step":"430","x":436.57142857142856,"y":-1309.8095238095239,"z":919.4285714285714,"a95":2.4,"info":"\"15-07-02\" at \"13:53\""}]},{"version":"v1.1.0","exported":"2016-11-22T23:34:40.150Z","volume":10.5,"added":"2016-11-22T23:17:41.692Z","format":"Utrecht","demagType":"Unknown","strat":null,"patch":1.1,"GEO":[{"dec":16.949490262757195,"inc":-33.158747322535014,"MAD":3.5190111885997153,"cm":[-8.526512829121202e-14,-1.8474111129762605e-13,0],"intensity":7139.217637859603,"type":"GC","origin":false,"forced":true,"remark":"","nSteps":6,"minStep":"90","maxStep":"230","steps":["90","120","150","180","210","230"],"group":"None","version":"v1.1.0"}],"TECT":[{"dec":190.48496033879792,"inc":-15.410181471996186,"MAD":3.5190111885997237,"cm":[5.684341886080802e-14,-1.2789769243681803e-13,5.684341886080802e-14],"intensity":7139.217637859602,"type":"GC","origin":false,"forced":true,"remark":"","nSteps":6,"minStep":"90","maxStep":"230","steps":["90","120","150","180","210","230"],"group":"None","version":"v1.1.0"}],"interpreted":true,"name":"AT2.22A","coreAzi":202,"coreDip":29,"bedStrike":65,"bedDip":60,"data":[{"visible":true,"include":false,"step":"20","x":-3280.9523809523807,"y":-4988.285714285715,"z":-2392.9523809523807,"a95":1.7,"info":"\"15-06-22\" at \"17:04\""},{"visible":true,"include":true,"step":"90","x":-507.14285714285717,"y":-3920.190476190476,"z":-398.6666666666667,"a95":1.6,"info":"\"15-06-22\" at \"20:30\""},{"visible":true,"include":true,"step":"120","x":1126.6666666666667,"y":-3565.4285714285716,"z":-70.85714285714286,"a95":1.2,"info":"\"15-06-22\" at \"22:52\""},{"visible":true,"include":true,"step":"150","x":3713.5238095238096,"y":-1927.5238095238096,"z":207.61904761904762,"a95":1.3,"info":"\"15-06-23\" at \"21:23\""},{"visible":true,"include":true,"step":"180","x":3865.5238095238096,"y":-2015.6190476190477,"z":217.14285714285714,"a95":1.3,"info":"\"15-06-24\" at \"17:50\""},{"visible":true,"include":true,"step":"210","x":3727.3333333333335,"y":-2065.0476190476193,"z":-45.714285714285715,"a95":1.2,"info":"\"15-06-24\" at \"20:37\""},{"visible":true,"include":true,"step":"230","x":4073.809523809524,"y":-2257.5238095238096,"z":110.28571428571429,"a95":1.2,"info":"\"15-06-28\" at \"00:44\""},{"visible":true,"include":false,"step":"250","x":361.3333333333333,"y":-587.4285714285714,"z":-334.6666666666667,"a95":3.2,"info":"\"15-06-28\" at \"03:09\""},{"visible":true,"include":false,"step":"270","x":-101.33333333333333,"y":-608.2857142857143,"z":450.1904761904762,"a95":3.6,"info":"\"15-06-28\" at \"19:01\""},{"visible":true,"include":false,"step":"300","x":111.33333333333333,"y":-291.9047619047619,"z":269.42857142857144,"a95":4.6,"info":"\"15-06-30\" at \"11:52\""},{"visible":true,"include":false,"step":"330","x":-42.95238095238095,"y":-564.1904761904761,"z":253.71428571428572,"a95":4.8,"info":"\"15-06-30\" at \"14:34\""},{"visible":false,"include":false,"step":"360","x":-334.76190476190476,"y":-530.5714285714286,"z":339.23809523809524,"a95":3.7,"info":"\"15-07-01\" at \"09:54\""},{"visible":false,"include":false,"step":"380","x":-658.1904761904761,"y":-871.7142857142857,"z":185.52380952380952,"a95":2.2,"info":"\"15-07-01\" at \"14:49\""},{"visible":false,"include":false,"step":"410","x":-584.7619047619048,"y":-823.9047619047619,"z":579.3333333333334,"a95":3.3,"info":"\"15-07-02\" at \"10:15\""},{"visible":false,"include":false,"step":"430","x":-438.1904761904762,"y":-1103.2380952380952,"z":902.2857142857143,"a95":2.4,"info":"\"15-07-02\" at \"13:56\""}]}]
