# Supplementary material for: Paleomagnetic constraints on the timing and distribution of Cenozoic rotations in Central and Eastern Anatolia
Source: Copernicus journal article supplement (doi:10.5194/se-9-295-2018), 2018-03-21
Supplement: Supplementary file 2 [file se-9-295-2018-supplement.zip › se-2017-66_DATA_dir files/dir files Ulukisla/AT3.dir]

[{"version":"v1.1.0","exported":"2016-11-17T13:22:22.933Z","volume":10.5,"added":"2016-11-17T12:37:06.407Z","format":"Utrecht","demagType":"Unknown","strat":"1","patch":1.1,"GEO":[{"dec":32.80307266718074,"inc":-43.73918431975448,"MAD":5.988987843732293,"cm":[-1.4210854715202004e-13,1.4210854715202004e-13,0],"intensity":13271.243346481968,"type":"dir","forced":true,"remark":"","origin":false,"nSteps":6,"minStep":"20.0","maxStep":"45.0","steps":["20.0","25.0","30.0","35.0","40.0","45.0"],"group":"None","version":"v1.1.0"}],"TECT":[{"dec":124.96655812905749,"inc":-54.70263472076773,"MAD":5.988987843732317,"cm":[-5.115907697472721e-13,-4.547473508864641e-13,-1.1368683772161603e-13],"intensity":13271.243346481968,"type":"dir","forced":true,"remark":"","origin":false,"nSteps":6,"minStep":"20.0","maxStep":"45.0","steps":["20.0","25.0","30.0","35.0","40.0","45.0"],"group":"None","version":"v1.1.0"}],"interpreted":true,"name":"AT3.1A","coreAzi":63,"coreDip":50,"bedStrike":265,"bedDip":64,"data":[{"visible":false,"include":false,"step":"0.0","x":-9034.666666666666,"y":-26029.52380952381,"z":49700,"a95":0.99,"info":"27/08/2014 at 02:05:14"},{"visible":false,"include":false,"step":"4.0","x":1873.5238095238096,"y":-15804.761904761905,"z":23605.714285714286,"a95":0.99,"info":"27/08/2014 at 02:05:14"},{"visible":true,"include":false,"step":"8.0","x":8917.142857142857,"y":-8616.095238095239,"z":3477.0476190476193,"a95":0.99,"info":"27/08/2014 at 02:05:14"},{"visible":true,"include":false,"step":"12.0","x":8975.42857142857,"y":-5921.619047619048,"z":-679.895238095238,"a95":0.99,"info":"27/08/2014 at 02:05:14"},{"visible":true,"include":false,"step":"16.0","x":8427.904761904761,"y":-4549.619047619048,"z":-868.8190476190476,"a95":0.99,"info":"27/08/2014 at 02:05:14"},{"visible":true,"include":true,"step":"20.0","x":7441.523809523809,"y":-3333.4285714285716,"z":-866.8190476190476,"a95":0.99,"info":"27/08/2014 at 02:05:14"},{"visible":true,"include":true,"step":"25.0","x":5464.476190476191,"y":-2555.2380952380954,"z":-1061.6190476190477,"a95":0.99,"info":"27/08/2014 at 02:05:14"},{"visible":true,"include":true,"step":"30.0","x":5784.571428571428,"y":-1818.3809523809523,"z":-490.54285714285714,"a95":0.99,"info":"27/08/2014 at 02:05:14"},{"visible":true,"include":true,"step":"35.0","x":5004.476190476191,"y":-2587.6190476190477,"z":-847.9333333333333,"a95":0.99,"info":"27/08/2014 at 02:05:14"},{"visible":true,"include":true,"step":"40.0","x":4585.333333333333,"y":-1025.8095238095239,"z":-107.5047619047619,"a95":0.99,"info":"27/08/2014 at 02:05:14"},{"visible":true,"include":true,"step":"45.0","x":4801.809523809524,"y":-1325.4285714285713,"z":-1259.6190476190477,"a95":0.99,"info":"27/08/2014 at 02:05:14"},{"visible":true,"include":false,"step":"50.0","x":4154.571428571428,"y":-2160.190476190476,"z":-1192.2857142857142,"a95":0.99,"info":"27/08/2014 at 02:05:14"},{"visible":true,"include":false,"step":"60.0","x":3263.5238095238096,"y":-1178,"z":-934.4000000000001,"a95":0.99,"info":"27/08/2014 at 02:05:14"},{"visible":true,"include":false,"step":"70.0","x":3106.095238095238,"y":-2302.7619047619046,"z":-838.8095238095239,"a95":0.99,"info":"27/08/2014 at 02:05:14"},{"visible":true,"include":false,"step":"80.0","x":3892.3809523809523,"y":-2159.1428571428573,"z":-219.7047619047619,"a95":0.99,"info":"27/08/2014 at 02:05:14"},{"visible":true,"include":false,"step":"90.0","x":2638.3809523809523,"y":-748.1142857142856,"z":24.133333333333333,"a95":0.99,"info":"27/08/2014 at 02:05:14"},{"visible":true,"include":false,"step":"100.0","x":3301.5238095238096,"y":-300.74285714285713,"z":-682.7904761904762,"a95":0.99,"info":"27/08/2014 at 02:05:14"}]},{"version":"v1.1.0","exported":"2016-11-17T13:22:22.933Z","volume":10.5,"added":"2016-11-17T12:37:06.408Z","format":"Utrecht","demagType":"Unknown","strat":"2","patch":1.1,"GEO":[{"dec":257.22966962343764,"inc":-30.69625415570755,"MAD":3.2116518044104683,"cm":[-7.531752999057062e-13,-1.3642420526593924e-12,0],"intensity":16161.530785301964,"type":"GC","origin":false,"forced":true,"remark":"","nSteps":4,"minStep":"4.0","maxStep":"16.0","steps":["4.0","8.0","12.0","16.0"],"group":"None","version":"v1.1.0"}],"TECT":[{"dec":234.10587899917448,"inc":-6.851129018162166,"MAD":3.2116518044104283,"cm":[-2.2737367544323206e-13,-2.2737367544323206e-13,5.542233338928781e-13],"intensity":16161.530785301962,"type":"GC","origin":false,"forced":true,"remark":"","nSteps":4,"minStep":"4.0","maxStep":"16.0","steps":["4.0","8.0","12.0","16.0"],"group":"None","version":"v1.1.0"}],"interpreted":true,"name":"AT3.2A","coreAzi":70,"coreDip":49,"bedStrike":265,"bedDip":64,"data":[{"visible":true,"include":false,"step":"0.0","x":15349.52380952381,"y":-25151.428571428572,"z":928.6380952380953,"a95":0.99,"info":"27/08/2014 at 02:05:14"},{"visible":true,"include":true,"step":"4.0","x":2588.095238095238,"y":-14036.190476190477,"z":844,"a95":0.99,"info":"27/08/2014 at 02:05:14"},{"visible":true,"include":true,"step":"8.0","x":-4445.047619047619,"y":-5678.952380952381,"z":1754.2857142857142,"a95":0.99,"info":"27/08/2014 at 02:05:14"},{"visible":true,"include":true,"step":"12.0","x":-4639.047619047619,"y":-3064.4761904761904,"z":1989.142857142857,"a95":0.99,"info":"27/08/2014 at 02:05:14"},{"visible":true,"include":true,"step":"16.0","x":-4640.761904761905,"y":-1746.7619047619048,"z":1963.142857142857,"a95":0.99,"info":"27/08/2014 at 02:05:14"},{"visible":true,"include":false,"step":"20.0","x":-3886.190476190476,"y":-1194.952380952381,"z":2227.5238095238096,"a95":0.99,"info":"27/08/2014 at 02:05:14"},{"visible":true,"include":false,"step":"25.0","x":-3250.5714285714284,"y":-949.2476190476191,"z":2234.190476190476,"a95":0.99,"info":"27/08/2014 at 02:05:14"},{"visible":true,"include":false,"step":"30.0","x":-2873.0476190476193,"y":-1163.2380952380952,"z":1681.4285714285713,"a95":0.99,"info":"27/08/2014 at 02:05:14"},{"visible":true,"include":false,"step":"35.0","x":-2849.0476190476193,"y":-1295.6190476190477,"z":1466,"a95":0.99,"info":"27/08/2014 at 02:05:14"},{"visible":true,"include":false,"step":"40.0","x":-2387.714285714286,"y":-45.79047619047619,"z":1443.7142857142858,"a95":0.99,"info":"27/08/2014 at 02:05:14"},{"visible":true,"include":false,"step":"45.0","x":-1974.1904761904761,"y":-377.31428571428575,"z":932.8095238095239,"a95":0.99,"info":"27/08/2014 at 02:05:14"},{"visible":true,"include":false,"step":"50.0","x":-2878,"y":-786.7523809523809,"z":423.6285714285715,"a95":0.99,"info":"27/08/2014 at 02:05:14"},{"visible":true,"include":false,"step":"60.0","x":-1899.8095238095239,"y":-528.847619047619,"z":959.047619047619,"a95":0.99,"info":"27/08/2014 at 02:05:14"},{"visible":true,"include":false,"step":"70.0","x":-1214.2857142857142,"y":-1036.4761904761904,"z":1719.7142857142858,"a95":0.99,"info":"27/08/2014 at 02:05:14"},{"visible":true,"include":false,"step":"80.0","x":-2806.3809523809523,"y":-1792.1904761904761,"z":803.5333333333334,"a95":0.99,"info":"27/08/2014 at 02:05:14"},{"visible":true,"include":false,"step":"90.0","x":-1322.6666666666667,"y":-509.18095238095236,"z":2063.6190476190477,"a95":0.99,"info":"27/08/2014 at 02:05:14"},{"visible":true,"include":false,"step":"100.0","x":459.8095238095238,"y":-1084.857142857143,"z":284.6666666666667,"a95":0.99,"info":"27/08/2014 at 02:05:14"}]},{"version":"v1.1.0","exported":"2016-11-17T13:22:22.933Z","volume":10.5,"added":"2016-11-17T12:37:06.408Z","format":"Utrecht","demagType":"Unknown","strat":null,"patch":1.1,"GEO":[{"dec":176.0037501556019,"inc":-45.80316236257144,"MAD":3.718856952694413,"cm":[4.263256414560601e-14,3.4638958368304884e-14,0],"intensity":12397.898563064844,"type":"dir","forced":true,"remark":"","origin":false,"nSteps":11,"minStep":"210","maxStep":"480","steps":["210","240","270","300","320","340","370","390","420","450","480"],"group":"None","version":"v1.1.0"}],"TECT":[{"dec":175.73653469044996,"inc":18.191038909131713,"MAD":3.71885695269443,"cm":[-2.842170943040401e-14,-4.0234482412415673e-13,0],"intensity":12397.898563064842,"type":"dir","forced":true,"remark":"","origin":false,"nSteps":11,"minStep":"210","maxStep":"480","steps":["210","240","270","300","320","340","370","390","420","450","480"],"group":"None","version":"v1.1.0"}],"interpreted":true,"name":"AT3.5A","coreAzi":68,"coreDip":57,"bedStrike":265,"bedDip":64,"data":[{"visible":false,"include":false,"step":"20","x":2735.1428571428573,"y":13880.285714285714,"z":-14004.380952380952,"a95":2.4,"info":"\"14-09-15\" at \"16:39\""},{"visible":true,"include":false,"step":"100","x":2790.8571428571427,"y":11728,"z":-11120,"a95":2.9,"info":"\"14-09-15\" at \"20:45\""},{"visible":true,"include":false,"step":"150","x":3582.4761904761904,"y":8716.952380952382,"z":-9822,"a95":3,"info":"\"14-09-15\" at \"23:12\""},{"visible":true,"include":false,"step":"180","x":3183.0476190476193,"y":7504.476190476191,"z":-8803.333333333334,"a95":3.1,"info":"\"14-09-16\" at \"12:11\""},{"visible":true,"include":false,"step":"210","x":2626.9523809523807,"y":6429.428571428572,"z":-7606.761904761905,"a95":3.3,"info":"\"14-09-16\" at \"14:55\""},{"visible":true,"include":false,"step":"240","x":2201.0476190476193,"y":5722,"z":-6209.238095238095,"a95":2.7,"info":"\"14-09-16\" at \"17:40\""},{"visible":true,"include":true,"step":"270","x":1248.3809523809523,"y":4539.9047619047615,"z":-5011.333333333333,"a95":2.6,"info":"\"14-09-16\" at \"21:02\""},{"visible":true,"include":true,"step":"300","x":948.2857142857143,"y":3760.285714285714,"z":-3929.714285714286,"a95":3.3,"info":"\"14-09-17\" at \"11:56\""},{"visible":true,"include":true,"step":"320","x":620.2857142857143,"y":3518.8571428571427,"z":-3352,"a95":2.5,"info":"\"14-09-17\" at \"15:30\""},{"visible":true,"include":true,"step":"340","x":638.6666666666666,"y":3065.904761904762,"z":-3115.904761904762,"a95":2.6,"info":"\"14-09-17\" at \"21:15\""},{"visible":true,"include":true,"step":"370","x":732.1904761904761,"y":2765.0476190476193,"z":-2643.2380952380954,"a95":2.8,"info":"\"14-09-18\" at \"10:00\""},{"visible":true,"include":true,"step":"390","x":384,"y":2447.4285714285716,"z":-2117.4285714285716,"a95":2.4,"info":"\"14-09-18\" at \"13:00\""},{"visible":true,"include":true,"step":"420","x":508.0952380952381,"y":1895.904761904762,"z":-1885.3333333333333,"a95":3.1,"info":"\"14-09-18\" at \"16:31\""},{"visible":true,"include":true,"step":"450","x":239.61904761904762,"y":1427.3333333333333,"z":-1545.904761904762,"a95":2.9,"info":"\"14-09-19\" at \"11:20\""},{"visible":true,"include":true,"step":"480","x":192.38095238095238,"y":1360.5714285714287,"z":-1616.857142857143,"a95":2.7,"info":"\"14-09-19\" at \"14:08\""},{"visible":true,"include":true,"step":"510","x":405.8095238095238,"y":891.1428571428571,"z":-977.3333333333334,"a95":2.7,"info":"\"14-09-19\" at \"16:46\""},{"visible":false,"include":false,"step":"540","x":171.23809523809524,"y":407.7142857142857,"z":-1365.7142857142858,"a95":3.2,"info":"\"14-10-04\" at \"12:23\""},{"visible":false,"include":false,"step":"570","x":182.1904761904762,"y":-441.04761904761904,"z":-356.57142857142856,"a95":4.3,"info":"\"14-10-04\" at \"15:42\""},{"visible":false,"include":false,"step":"600","x":-614.8571428571429,"y":731.2380952380952,"z":-124.85714285714286,"a95":3.4,"info":"\"14-10-05\" at \"09:48\""},{"visible":false,"include":false,"step":"630","x":-491.04761904761904,"y":-846.5714285714286,"z":-64.47619047619048,"a95":2.4,"info":"\"14-10-05\" at \"12:37\""},{"visible":false,"include":false,"step":"660","x":-790.8571428571429,"y":-597.6190476190476,"z":129.33333333333334,"a95":2.8,"info":"\"14-10-05\" at \"16:08\""}]},{"version":"v1.1.0","exported":"2016-11-17T13:22:22.933Z","volume":10.5,"added":"2016-11-17T12:37:06.409Z","format":"Utrecht","demagType":"Unknown","strat":"3","patch":1.1,"GEO":[{"dec":52.74368197816159,"inc":-51.36637652877389,"MAD":11.141510874449848,"cm":[-2.2026824808563106e-13,1.3145040611561853e-13,0],"intensity":4138.938890612757,"type":"dir","forced":true,"remark":"","origin":false,"nSteps":8,"minStep":"20.0","maxStep":"60.0","steps":["20.0","25.0","30.0","35.0","40.0","45.0","50.0","60.0"],"group":"None","version":"v1.1.0"}],"TECT":[{"dec":131.48183907800285,"inc":-39.93561113501606,"MAD":11.141510874449887,"cm":[-1.0658141036401503e-14,1.7763568394002505e-13,1.2789769243681803e-13],"intensity":4138.938890612757,"type":"dir","forced":true,"remark":"","origin":false,"nSteps":8,"minStep":"20.0","maxStep":"60.0","steps":["20.0","25.0","30.0","35.0","40.0","45.0","50.0","60.0"],"group":"None","version":"v1.1.0"}],"interpreted":true,"name":"AT3.6A","coreAzi":66,"coreDip":55,"bedStrike":265,"bedDip":64,"data":[{"visible":false,"include":false,"step":"0.0","x":4703.714285714285,"y":-564.3904761904762,"z":-406.447619047619,"a95":0.99,"info":"27/08/2014 at 02:05:14"},{"visible":false,"include":false,"step":"4.0","x":4856.380952380952,"y":-746.4285714285714,"z":-1611.904761904762,"a95":0.99,"info":"27/08/2014 at 02:05:14"},{"visible":true,"include":false,"step":"8.0","x":4553.809523809524,"y":-531.2285714285714,"z":-2122,"a95":0.99,"info":"27/08/2014 at 02:05:14"},{"visible":true,"include":false,"step":"12.0","x":3744,"y":-454.54285714285714,"z":-1548.3809523809523,"a95":0.99,"info":"27/08/2014 at 02:05:14"},{"visible":true,"include":false,"step":"16.0","x":3435.714285714286,"y":-226.51428571428573,"z":-1520.952380952381,"a95":0.99,"info":"27/08/2014 at 02:05:14"},{"visible":true,"include":true,"step":"20.0","x":2955.2380952380954,"y":-163.76190476190476,"z":-1235.904761904762,"a95":0.99,"info":"27/08/2014 at 02:05:14"},{"visible":true,"include":true,"step":"25.0","x":2475.1428571428573,"y":-387.16190476190474,"z":-746.3523809523809,"a95":0.99,"info":"27/08/2014 at 02:05:14"},{"visible":true,"include":true,"step":"30.0","x":2516.285714285714,"y":28.67238095238095,"z":-670.4285714285714,"a95":0.99,"info":"27/08/2014 at 02:05:14"},{"visible":true,"include":true,"step":"35.0","x":1587.2380952380952,"y":-727.8380952380952,"z":-911.1714285714285,"a95":0.99,"info":"27/08/2014 at 02:05:14"},{"visible":true,"include":true,"step":"40.0","x":1626.4761904761904,"y":-196.8,"z":-259.16190476190474,"a95":0.99,"info":"27/08/2014 at 02:05:14"},{"visible":true,"include":true,"step":"45.0","x":1809.2380952380952,"y":-355.9904761904762,"z":-25.753333333333337,"a95":0.99,"info":"27/08/2014 at 02:05:14"},{"visible":true,"include":true,"step":"50.0","x":1350,"y":-640.7809523809524,"z":-244.96190476190475,"a95":0.99,"info":"27/08/2014 at 02:05:14"},{"visible":true,"include":true,"step":"60.0","x":825.8190476190476,"y":-460.9238095238095,"z":-327.48571428571427,"a95":0.99,"info":"27/08/2014 at 02:05:14"},{"visible":true,"include":false,"step":"70.0","x":1282.6666666666667,"y":-49.691428571428574,"z":-368.35238095238094,"a95":0.99,"info":"27/08/2014 at 02:05:14"},{"visible":false,"include":false,"step":"80.0","x":992.6666666666666,"y":-768.3428571428572,"z":44.4247619047619,"a95":0.99,"info":"27/08/2014 at 02:05:14"},{"visible":false,"include":false,"step":"90.0","x":19.628571428571426,"y":-697.495238095238,"z":242.63809523809522,"a95":0.99,"info":"27/08/2014 at 02:05:14"},{"visible":false,"include":false,"step":"100.0","x":501.72380952380956,"y":-105.28571428571429,"z":303.752380952381,"a95":0.99,"info":"27/08/2014 at 02:05:14"}]},{"version":"v1.1.0","exported":"2016-11-17T13:22:22.933Z","volume":10.5,"added":"2016-11-17T12:37:06.410Z","format":"Utrecht","demagType":"Unknown","strat":null,"patch":1.1,"GEO":[{"dec":51.73550247414539,"inc":-69.23294288455168,"MAD":21.84044882940226,"cm":[96.3154969625208,1291.8184356614536,-4143.214981958819],"intensity":4476.785620010004,"type":"dir","forced":false,"remark":"","origin":false,"nSteps":8,"minStep":"320","maxStep":"510","steps":["320","340","370","390","420","450","480","510"],"group":"None","version":"v1.1.0"}],"TECT":[{"dec":153.5648306468628,"inc":-35.78110925348899,"MAD":21.84044882940226,"cm":[-3604.1007393237105,1615.5629066637657,-1801.3096035430372],"intensity":4476.785620010001,"type":"dir","forced":false,"remark":"","origin":false,"nSteps":8,"minStep":"320","maxStep":"510","steps":["320","340","370","390","420","450","480","510"],"group":"None","version":"v1.1.0"}],"interpreted":true,"name":"AT3.7A","coreAzi":358,"coreDip":51,"bedStrike":265,"bedDip":64,"data":[{"visible":false,"include":false,"step":"20","x":6703.333333333333,"y":2936.190476190476,"z":4519.333333333333,"a95":2.1,"info":"\"14-09-15\" at \"16:42\""},{"visible":false,"include":false,"step":"100","x":5164.476190476191,"y":3022.095238095238,"z":-4208.666666666667,"a95":2.3,"info":"\"14-09-15\" at \"20:47\""},{"visible":true,"include":false,"step":"150","x":4981.142857142857,"y":2962.9523809523807,"z":-10065.142857142857,"a95":2.7,"info":"\"14-09-15\" at \"23:14\""},{"visible":true,"include":false,"step":"180","x":4765.333333333333,"y":2675.1428571428573,"z":-9867.42857142857,"a95":2.7,"info":"\"14-09-16\" at \"12:13\""},{"visible":true,"include":false,"step":"210","x":4195.523809523809,"y":2398.095238095238,"z":-8473.904761904761,"a95":2.7,"info":"\"14-09-16\" at \"14:57\""},{"visible":true,"include":false,"step":"240","x":3896,"y":2568.095238095238,"z":-6828.380952380952,"a95":2.7,"info":"\"14-09-16\" at \"17:42\""},{"visible":true,"include":false,"step":"270","x":4481.9047619047615,"y":1638,"z":-5467.333333333333,"a95":2.5,"info":"\"14-09-16\" at \"21:05\""},{"visible":true,"include":false,"step":"300","x":4151.809523809524,"y":1885.7142857142858,"z":-5246.571428571428,"a95":2.7,"info":"\"14-09-17\" at \"11:59\""},{"visible":true,"include":true,"step":"320","x":4071.0476190476193,"y":2359.714285714286,"z":-4478.380952380952,"a95":2.3,"info":"\"14-09-17\" at \"15:36\""},{"visible":true,"include":true,"step":"340","x":3874.7619047619046,"y":1133.2380952380952,"z":-4240.285714285715,"a95":2.4,"info":"\"14-09-17\" at \"21:17\""},{"visible":true,"include":true,"step":"370","x":2994.7619047619046,"y":1380,"z":-4018,"a95":2.5,"info":"\"14-09-18\" at \"10:02\""},{"visible":true,"include":true,"step":"390","x":2911.809523809524,"y":1488,"z":-3071.904761904762,"a95":2.3,"info":"\"14-09-18\" at \"13:17\""},{"visible":true,"include":true,"step":"420","x":3032.095238095238,"y":1189.047619047619,"z":-2873.3333333333335,"a95":2.3,"info":"\"14-09-18\" at \"16:34\""},{"visible":true,"include":true,"step":"450","x":1722.7619047619048,"y":1827.3333333333333,"z":-2118.4761904761904,"a95":2.4,"info":"\"14-09-19\" at \"11:24\""},{"visible":true,"include":true,"step":"480","x":1844.4761904761904,"y":598.3809523809524,"z":-2442.7619047619046,"a95":2.4,"info":"\"14-09-19\" at \"14:10\""},{"visible":true,"include":true,"step":"510","x":725.7142857142857,"y":379.42857142857144,"z":-2258.285714285714,"a95":2.9,"info":"\"14-09-19\" at \"16:48\""},{"visible":true,"include":false,"step":"540","x":1653.904761904762,"y":513.9047619047619,"z":-818.7619047619048,"a95":270.1,"info":"\"14-10-04\" at \"12:25\""},{"visible":true,"include":false,"step":"570","x":1075.142857142857,"y":1174.857142857143,"z":-4026.4761904761904,"a95":3.1,"info":"\"14-10-04\" at \"15:44\""},{"visible":true,"include":false,"step":"600","x":-280.76190476190476,"y":1057.142857142857,"z":-1586.1904761904761,"a95":3,"info":"\"14-10-05\" at \"09:50\""},{"visible":true,"include":false,"step":"630","x":-840.2857142857143,"y":1122.5714285714287,"z":74.95238095238095,"a95":3,"info":"\"14-10-05\" at \"12:39\""},{"visible":true,"include":false,"step":"660","x":325.3333333333333,"y":1458.5714285714287,"z":739.5238095238095,"a95":2.3,"info":"\"14-10-05\" at \"16:11\""}]},{"version":"v1.1.0","exported":"2016-11-17T13:22:22.933Z","volume":10.5,"added":"2016-11-17T12:37:06.410Z","format":"Utrecht","demagType":"Unknown","strat":"4","patch":1.1,"GEO":[{"dec":61.83419050134455,"inc":-63.41950267958108,"MAD":20.654648730041202,"cm":[77.13112181665738,1562.744271238728,-762.510263142272],"intensity":2877.9291507023913,"type":"dir","forced":false,"remark":"","origin":false,"nSteps":6,"minStep":"12.0","maxStep":"35.0","steps":["12.0","16.0","20.0","25.0","30.0","35.0"],"group":"None","version":"v1.1.0"},{"dec":184.32661776815874,"inc":-14.630771217158282,"MAD":14.163868532137503,"cm":[-4.405364961712621e-13,0,0],"intensity":3222.163182998105,"type":"GC","origin":false,"forced":true,"remark":"","nSteps":6,"minStep":"12.0","maxStep":"35.0","steps":["12.0","16.0","20.0","25.0","30.0","35.0"],"group":"None","version":"v1.1.0"}],"TECT":[{"dec":145.48402692577292,"inc":-33.3841016727721,"MAD":20.654648730041227,"cm":[-572.386681432892,1619.5697157813256,-280.9060185928639],"intensity":2877.929150702391,"type":"dir","forced":false,"remark":"","origin":false,"nSteps":6,"minStep":"12.0","maxStep":"35.0","steps":["12.0","16.0","20.0","25.0","30.0","35.0"],"group":"None","version":"v1.1.0"},{"dec":8.65249189905171,"inc":-48.367846910031076,"MAD":14.163868532137489,"cm":[-1.1368683772161603e-13,1.7053025658242404e-13,2.6290081223123707e-13],"intensity":3222.163182998105,"type":"GC","origin":false,"forced":true,"remark":"","nSteps":6,"minStep":"12.0","maxStep":"35.0","steps":["12.0","16.0","20.0","25.0","30.0","35.0"],"group":"None","version":"v1.1.0"}],"interpreted":true,"name":"AT3.7B","coreAzi":358,"coreDip":51,"bedStrike":265,"bedDip":64,"data":[{"visible":true,"include":false,"step":"0.0","x":1884.952380952381,"y":3829.904761904762,"z":973.2380952380952,"a95":0.99,"info":"27/08/2014 at 02:05:14"},{"visible":true,"include":false,"step":"4.0","x":2326,"y":2482.4761904761904,"z":-1125.142857142857,"a95":0.99,"info":"27/08/2014 at 02:05:14"},{"visible":true,"include":false,"step":"8.0","x":2511.5238095238096,"y":2018.1904761904761,"z":-2693.4285714285716,"a95":0.99,"info":"27/08/2014 at 02:05:14"},{"visible":true,"include":true,"step":"12.0","x":1754.5714285714287,"y":1848.4761904761904,"z":-1425.8095238095239,"a95":0.99,"info":"27/08/2014 at 02:05:14"},{"visible":true,"include":true,"step":"16.0","x":788.0666666666667,"y":2078.190476190476,"z":-1166.952380952381,"a95":0.99,"info":"27/08/2014 at 02:05:14"},{"visible":true,"include":true,"step":"20.0","x":246.74285714285716,"y":1574.4761904761904,"z":-391.83809523809526,"a95":0.99,"info":"27/08/2014 at 02:05:14"},{"visible":true,"include":true,"step":"25.0","x":324.56190476190477,"y":1957.047619047619,"z":-225.14285714285714,"a95":0.99,"info":"27/08/2014 at 02:05:14"},{"visible":true,"include":true,"step":"30.0","x":310.03809523809525,"y":1153.142857142857,"z":-356.85714285714283,"a95":0.99,"info":"27/08/2014 at 02:05:14"},{"visible":true,"include":true,"step":"35.0","x":-439.6761904761905,"y":775.5714285714286,"z":96.23809523809524,"a95":0.99,"info":"27/08/2014 at 02:05:14"},{"visible":false,"include":false,"step":"40.0","x":-559.4761904761905,"y":1914.095238095238,"z":-145.52380952380952,"a95":0.99,"info":"27/08/2014 at 02:05:14"},{"visible":false,"include":false,"step":"45.0","x":330.49523809523805,"y":1919.4285714285713,"z":-423.2095238095238,"a95":0.99,"info":"27/08/2014 at 02:05:14"},{"visible":false,"include":false,"step":"50.0","x":164.76190476190476,"y":136.83809523809524,"z":-803.0380952380953,"a95":0.99,"info":"27/08/2014 at 02:05:14"},{"visible":false,"include":false,"step":"60.0","x":-356.9238095238095,"y":1883.142857142857,"z":-1192.857142857143,"a95":0.99,"info":"27/08/2014 at 02:05:14"},{"visible":false,"include":false,"step":"70.0","x":-226.42857142857142,"y":1937.8095238095239,"z":-2192.190476190476,"a95":0.99,"info":"27/08/2014 at 02:05:14"},{"visible":false,"include":false,"step":"80.0","x":2866,"y":474.50476190476195,"z":-1078.7619047619048,"a95":0.99,"info":"27/08/2014 at 02:05:14"},{"visible":false,"include":false,"step":"90.0","x":114.31428571428572,"y":2198.7619047619046,"z":-1475.7142857142858,"a95":0.99,"info":"27/08/2014 at 02:05:14"},{"visible":false,"include":false,"step":"100.0","x":-473.7142857142857,"y":1193.6190476190477,"z":-1466.2857142857142,"a95":0.99,"info":"27/08/2014 at 02:05:14"}]},{"version":"v1.1.0","exported":"2016-11-17T13:22:22.933Z","volume":10.5,"added":"2016-11-17T12:37:06.416Z","format":"Utrecht","demagType":"Unknown","strat":"5","patch":1.1,"GEO":[{"dec":72.79754375263144,"inc":-44.07589533809473,"MAD":20.666546433223335,"cm":[1759.0348554497764,1161.9580848725768,-999.6942109298901],"intensity":2055.0844097773092,"type":"dir","forced":false,"remark":"","origin":false,"nSteps":6,"minStep":"8.0","maxStep":"30.0","steps":["8.0","12.0","16.0","20.0","25.0","30.0"],"group":"None","version":"v1.1.0"}],"TECT":[{"dec":123.50493770325266,"inc":-26.194349762354086,"MAD":20.666546433223363,"cm":[-59.825081475127945,1321.0877098949836,-1922.20887300148],"intensity":2055.084409777309,"type":"dir","forced":false,"remark":"","origin":false,"nSteps":6,"minStep":"8.0","maxStep":"30.0","steps":["8.0","12.0","16.0","20.0","25.0","30.0"],"group":"None","version":"v1.1.0"}],"interpreted":true,"name":"AT3.8A","coreAzi":358,"coreDip":55,"bedStrike":265,"bedDip":64,"data":[{"visible":true,"include":false,"step":"0.0","x":2679.4285714285716,"y":3313.1428571428573,"z":2247.809523809524,"a95":0.99,"info":"27/08/2014 at 02:05:14"},{"visible":true,"include":false,"step":"4.0","x":2971.6190476190477,"y":2417.809523809524,"z":343.2666666666667,"a95":0.99,"info":"27/08/2014 at 02:05:14"},{"visible":true,"include":true,"step":"8.0","x":2782.8571428571427,"y":2111.6190476190477,"z":-593.3428571428572,"a95":0.99,"info":"27/08/2014 at 02:05:14"},{"visible":true,"include":true,"step":"12.0","x":2322.6666666666665,"y":1791.5238095238096,"z":-73.48761904761905,"a95":0.99,"info":"27/08/2014 at 02:05:14"},{"visible":true,"include":true,"step":"16.0","x":1812.6666666666667,"y":1296.952380952381,"z":343.4,"a95":0.99,"info":"27/08/2014 at 02:05:14"},{"visible":true,"include":true,"step":"20.0","x":2051.904761904762,"y":821.4190476190475,"z":763.2666666666667,"a95":0.99,"info":"27/08/2014 at 02:05:14"},{"visible":true,"include":true,"step":"25.0","x":1411.3333333333333,"y":666.6190476190476,"z":491.4380952380953,"a95":0.99,"info":"27/08/2014 at 02:05:14"},{"visible":true,"include":true,"step":"30.0","x":1499.904761904762,"y":647.7047619047619,"z":65.71714285714286,"a95":0.99,"info":"27/08/2014 at 02:05:14"},{"visible":true,"include":false,"step":"35.0","x":1484,"y":267.6666666666667,"z":24.56,"a95":0.99,"info":"27/08/2014 at 02:05:14"},{"visible":true,"include":false,"step":"40.0","x":823.2857142857143,"y":1365.142857142857,"z":-143.56190476190477,"a95":0.99,"info":"27/08/2014 at 02:05:14"},{"visible":true,"include":false,"step":"45.0","x":1105.2380952380952,"y":922.6095238095238,"z":73.08380952380952,"a95":0.99,"info":"27/08/2014 at 02:05:14"},{"visible":false,"include":false,"step":"50.0","x":906.895238095238,"y":-72.40571428571428,"z":-356.12380952380954,"a95":0.99,"info":"27/08/2014 at 02:05:14"},{"visible":false,"include":false,"step":"60.0","x":1208.7619047619048,"y":1639.8095238095239,"z":-9.111333333333333,"a95":0.99,"info":"27/08/2014 at 02:05:14"},{"visible":false,"include":false,"step":"70.0","x":204.95238095238096,"y":687.6476190476191,"z":-956.7619047619048,"a95":0.99,"info":"27/08/2014 at 02:05:14"},{"visible":false,"include":false,"step":"80.0","x":1655.3333333333333,"y":-385.247619047619,"z":-1008.952380952381,"a95":0.99,"info":"27/08/2014 at 02:05:14"},{"visible":false,"include":false,"step":"90.0","x":1489.5238095238096,"y":-222.25714285714284,"z":-996.0952380952381,"a95":0.99,"info":"27/08/2014 at 02:05:14"},{"visible":false,"include":false,"step":"100.0","x":943.2095238095238,"y":1137.7142857142858,"z":-1170.7619047619048,"a95":0.99,"info":"27/08/2014 at 02:05:14"}]},{"version":"v1.1.0","exported":"2016-11-17T13:22:22.933Z","volume":10.5,"added":"2016-11-17T12:37:06.417Z","format":"Utrecht","demagType":"Unknown","strat":null,"patch":1.1,"GEO":[{"dec":177.195956808735,"inc":-71.77130679887871,"MAD":3.3910412117094966,"cm":[1.2434497875801753e-14,-1.9184653865522705e-13,0],"intensity":7065.644929344646,"type":"dir","forced":true,"remark":"","origin":false,"nSteps":7,"minStep":"180","maxStep":"340","steps":["180","210","240","270","300","320","340"],"group":"None","version":"v1.1.0"}],"TECT":[{"dec":175.69315287840084,"inc":-7.783246591266358,"MAD":3.3910412117095134,"cm":[-5.684341886080802e-14,-7.462919171530302e-13,0],"intensity":7065.644929344645,"type":"dir","forced":true,"remark":"","origin":false,"nSteps":7,"minStep":"180","maxStep":"340","steps":["180","210","240","270","300","320","340"],"group":"None","version":"v1.1.0"}],"interpreted":true,"name":"AT3.8B","coreAzi":358,"coreDip":55,"bedStrike":265,"bedDip":64,"data":[{"visible":false,"include":false,"step":"20","x":2488.5714285714284,"y":2509.5238095238096,"z":2133.3333333333335,"a95":2.3,"info":"\"14-11-03\" at \"21:31\""},{"visible":true,"include":false,"step":"150","x":1640.4761904761904,"y":348.2857142857143,"z":-5707.047619047619,"a95":3.4,"info":"\"14-11-04\" at \"16:32\""},{"visible":true,"include":true,"step":"180","x":1345.5238095238096,"y":76.95238095238095,"z":-5549.333333333333,"a95":4,"info":"\"14-11-04\" at \"21:45\""},{"visible":true,"include":true,"step":"210","x":1499.904761904762,"y":-2.380952380952381,"z":-5513.523809523809,"a95":3.6,"info":"\"14-11-05\" at \"17:07\""},{"visible":true,"include":true,"step":"240","x":1335.4285714285713,"y":52.19047619047619,"z":-3806.7619047619046,"a95":3.6,"info":"\"14-11-05\" at \"22:46\""},{"visible":true,"include":true,"step":"270","x":1283.047619047619,"y":-98.38095238095238,"z":-3364.8571428571427,"a95":3.3,"info":"\"14-11-06\" at \"21:08\""},{"visible":true,"include":true,"step":"300","x":1039.047619047619,"y":40.095238095238095,"z":-2787.3333333333335,"a95":3.5,"info":"\"14-11-07\" at \"15:15\""},{"visible":true,"include":true,"step":"320","x":547.2380952380952,"y":144.66666666666666,"z":-1575.904761904762,"a95":4.4,"info":"\"14-11-07\" at \"19:57\""},{"visible":true,"include":true,"step":"340","x":632.1904761904761,"y":-124.38095238095238,"z":-1233.7142857142858,"a95":4.1,"info":"\"14-11-15\" at \"19:53\""},{"visible":true,"include":false,"step":"360","x":253.9047619047619,"y":-335.7142857142857,"z":-1086.095238095238,"a95":3.8,"info":"\"14-11-15\" at \"23:45\""},{"visible":true,"include":false,"step":"380","x":429.7142857142857,"y":-225.9047619047619,"z":-499.42857142857144,"a95":5,"info":"\"14-11-16\" at \"02:52\""},{"visible":true,"include":false,"step":"400","x":-15.142857142857142,"y":-291.42857142857144,"z":-700.0952380952381,"a95":5.4,"info":"\"14-11-16\" at \"22:01\""},{"visible":true,"include":false,"step":"420","x":358.1904761904762,"y":57.523809523809526,"z":-466,"a95":5.2,"info":"\"14-11-17\" at \"01:16\""},{"visible":true,"include":false,"step":"450","x":-13.80952380952381,"y":-720,"z":-511.9047619047619,"a95":3.8,"info":"\"14-11-17\" at \"04:04\""},{"visible":true,"include":false,"step":"610","x":217.9047619047619,"y":220.95238095238096,"z":298.76190476190476,"a95":6.2,"info":"\"14-11-28\" at \"23:06\""}]},{"version":"v1.1.0","exported":"2016-11-17T13:22:22.933Z","volume":10.5,"added":"2016-11-17T12:37:06.417Z","format":"Utrecht","demagType":"Unknown","strat":null,"patch":1.1,"GEO":[{"dec":97.74110250393096,"inc":-69.92689918208306,"MAD":4.9086357793689475,"cm":[-4.654054919228656e-13,-5.684341886080802e-14,0],"intensity":9430.518704639142,"type":"dir","forced":true,"remark":"","origin":false,"nSteps":7,"minStep":"240","maxStep":"380","steps":["240","270","300","320","340","360","380"],"group":"None","version":"v1.1.0"}],"TECT":[{"dec":154.11546258100248,"inc":-20.10293660872545,"MAD":4.908635779368955,"cm":[4.263256414560601e-14,-1.4210854715202004e-14,2.4158453015843406e-13],"intensity":9430.518704639142,"type":"dir","forced":true,"remark":"","origin":false,"nSteps":7,"minStep":"240","maxStep":"380","steps":["240","270","300","320","340","360","380"],"group":"None","version":"v1.1.0"}],"interpreted":true,"name":"AT3.9A","coreAzi":351,"coreDip":55,"bedStrike":265,"bedDip":64,"data":[{"visible":false,"include":false,"step":"20","x":5020.857142857143,"y":4062,"z":6800.476190476191,"a95":2.2,"info":"\"14-11-03\" at \"21:34\""},{"visible":true,"include":false,"step":"150","x":3855.5238095238096,"y":1909.047619047619,"z":-8426.285714285714,"a95":2.7,"info":"\"14-11-04\" at \"16:34\""},{"visible":true,"include":false,"step":"180","x":3802,"y":1783.047619047619,"z":-8182.857142857143,"a95":2.6,"info":"\"14-11-04\" at \"21:48\""},{"visible":true,"include":false,"step":"210","x":3820.285714285714,"y":1677.6190476190477,"z":-7818,"a95":2.7,"info":"\"14-11-05\" at \"17:09\""},{"visible":true,"include":true,"step":"240","x":3047.3333333333335,"y":2636.8571428571427,"z":-6176.952380952381,"a95":2.6,"info":"\"14-11-05\" at \"22:49\""},{"visible":true,"include":true,"step":"270","x":2764.190476190476,"y":2074.6666666666665,"z":-5269.142857142857,"a95":2.5,"info":"\"14-11-06\" at \"21:13\""},{"visible":true,"include":true,"step":"300","x":2995.0476190476193,"y":2102.190476190476,"z":-5250,"a95":2.6,"info":"\"14-11-07\" at \"15:17\""},{"visible":true,"include":true,"step":"320","x":1905.904761904762,"y":759.7142857142857,"z":-3396.5714285714284,"a95":2.6,"info":"\"14-11-07\" at \"19:59\""},{"visible":true,"include":true,"step":"340","x":1791.6190476190477,"y":1270,"z":-2473.0476190476193,"a95":2.3,"info":"\"14-11-15\" at \"19:55\""},{"visible":true,"include":true,"step":"360","x":1280.2857142857142,"y":328.6666666666667,"z":-1794,"a95":2.9,"info":"\"14-11-15\" at \"23:47\""},{"visible":true,"include":true,"step":"380","x":1290,"y":1008,"z":-1362.095238095238,"a95":3.1,"info":"\"14-11-16\" at \"02:55\""},{"visible":false,"include":false,"step":"400","x":1043.7142857142858,"y":248.57142857142858,"z":-1322.095238095238,"a95":2.9,"info":"\"14-11-16\" at \"22:04\""},{"visible":false,"include":false,"step":"420","x":477.9047619047619,"y":1210.3809523809523,"z":-974.2857142857143,"a95":2.4,"info":"\"14-11-17\" at \"01:19\""},{"visible":false,"include":false,"step":"450","x":704.7619047619048,"y":1355.2380952380952,"z":-1173.3333333333333,"a95":3,"info":"\"14-11-17\" at \"04:06\""},{"visible":false,"include":false,"step":"610","x":379.3333333333333,"y":496.4761904761905,"z":-183.42857142857142,"a95":6.3,"info":"\"14-11-28\" at \"23:08\""}]},{"version":"v1.1.0","exported":"2016-11-17T13:22:22.933Z","volume":10.5,"added":"2016-11-17T12:37:06.418Z","format":"Utrecht","demagType":"Unknown","strat":"6","patch":1.1,"GEO":[{"dec":26.033300141804318,"inc":-53.322280352269814,"MAD":13.71515845196301,"cm":[-2.842170943040401e-14,9.592326932761353e-14,0],"intensity":5012.220236477734,"type":"dir","forced":true,"remark":"","origin":false,"nSteps":6,"minStep":"8.0","maxStep":"45.0","steps":["8.0","12.0","16.0","20.0","40.0","45.0"],"group":"None","version":"v1.1.0"}],"TECT":[{"dec":143.19083099429952,"inc":-54.25222128956848,"MAD":13.715158451963,"cm":[1.4210854715202004e-14,5.3290705182007514e-14,-2.842170943040401e-14],"intensity":5012.220236477735,"type":"dir","forced":true,"remark":"","origin":false,"nSteps":6,"minStep":"8.0","maxStep":"45.0","steps":["8.0","12.0","16.0","20.0","40.0","45.0"],"group":"None","version":"v1.1.0"}],"interpreted":true,"name":"AT3.9B","coreAzi":351,"coreDip":55,"bedStrike":265,"bedDip":64,"data":[{"visible":false,"include":false,"step":"0.0","x":2322.6666666666665,"y":3077.1428571428573,"z":520.2952380952381,"a95":0.99,"info":"27/08/2014 at 02:05:14"},{"visible":true,"include":false,"step":"4.0","x":2839.6190476190477,"y":1912.1904761904761,"z":-1031.142857142857,"a95":0.99,"info":"27/08/2014 at 02:05:14"},{"visible":true,"include":true,"step":"8.0","x":2858.6666666666665,"y":1114.095238095238,"z":-1992.2857142857142,"a95":0.99,"info":"27/08/2014 at 02:05:14"},{"visible":true,"include":true,"step":"12.0","x":2401.4285714285716,"y":956.6666666666666,"z":-1136.3809523809523,"a95":0.99,"info":"27/08/2014 at 02:05:14"},{"visible":true,"include":true,"step":"16.0","x":1889.904761904762,"y":794.5333333333334,"z":-636.0095238095239,"a95":0.99,"info":"27/08/2014 at 02:05:14"},{"visible":true,"include":true,"step":"20.0","x":1768.6666666666667,"y":326.752380952381,"z":223.21904761904764,"a95":0.99,"info":"27/08/2014 at 02:05:14"},{"visible":false,"include":false,"step":"25.0","x":983.8095238095239,"y":576.5619047619048,"z":327.0571428571428,"a95":0.99,"info":"27/08/2014 at 02:05:14"},{"visible":false,"include":false,"step":"30.0","x":1268,"y":672.4095238095239,"z":1031.7142857142858,"a95":0.99,"info":"27/08/2014 at 02:05:14"},{"visible":false,"include":false,"step":"35.0","x":793.2857142857143,"y":662.9809523809524,"z":749.4285714285714,"a95":0.99,"info":"27/08/2014 at 02:05:14"},{"visible":true,"include":true,"step":"40.0","x":1233.2380952380952,"y":1011.8095238095239,"z":-128.25714285714287,"a95":0.99,"info":"27/08/2014 at 02:05:14"},{"visible":true,"include":true,"step":"45.0","x":1320.3809523809523,"y":402.9047619047619,"z":-322.15238095238095,"a95":0.99,"info":"27/08/2014 at 02:05:14"},{"visible":false,"include":false,"step":"50.0","x":357.447619047619,"y":471.50476190476195,"z":-9.558095238095238,"a95":0.99,"info":"27/08/2014 at 02:05:14"},{"visible":false,"include":false,"step":"60.0","x":844.3333333333334,"y":1078.4761904761904,"z":332.68571428571425,"a95":0.99,"info":"27/08/2014 at 02:05:14"},{"visible":false,"include":false,"step":"70.0","x":665.0571428571429,"y":1706.5714285714287,"z":-426.7809523809524,"a95":0.99,"info":"27/08/2014 at 02:05:14"},{"visible":false,"include":false,"step":"80.0","x":626.7904761904762,"y":-419.0380952380952,"z":-94.13238095238096,"a95":0.99,"info":"27/08/2014 at 02:05:14"},{"visible":false,"include":false,"step":"90.0","x":379.8857142857143,"y":1777.142857142857,"z":-294,"a95":0.99,"info":"27/08/2014 at 02:05:14"},{"visible":false,"include":false,"step":"100.0","x":683.2190476190476,"y":1330.3809523809523,"z":64.31714285714285,"a95":0.99,"info":"27/08/2014 at 02:05:14"}]},{"version":"v1.1.0","exported":"2016-11-17T13:22:22.933Z","volume":10.5,"added":"2016-11-17T12:37:06.419Z","format":"Utrecht","demagType":"Unknown","strat":null,"patch":1.1,"GEO":[{"dec":15.067498041929298,"inc":-84.68361476643409,"MAD":3.3723006319238715,"cm":[-2.842170943040401e-14,3.552713678800501e-14,0],"intensity":8507.335082391055,"type":"dir","forced":true,"remark":"","origin":false,"nSteps":5,"minStep":"320","maxStep":"420","steps":["320","340","370","390","420"],"group":"None","version":"v1.1.0"}],"TECT":[{"dec":172.87489062082727,"inc":-30.977909553408725,"MAD":3.372300631923853,"cm":[-1.1368683772161603e-13,4.405364961712621e-13,5.684341886080802e-14],"intensity":8507.335082391055,"type":"dir","forced":true,"remark":"","origin":false,"nSteps":5,"minStep":"320","maxStep":"420","steps":["320","340","370","390","420"],"group":"None","version":"v1.1.0"}],"interpreted":true,"name":"AT3.10A","coreAzi":355,"coreDip":56,"bedStrike":265,"bedDip":64,"data":[{"visible":false,"include":false,"step":"20","x":4475.333333333333,"y":229.52380952380952,"z":6498.857142857143,"a95":2.5,"info":"\"14-09-15\" at \"16:45\""},{"visible":true,"include":false,"step":"100","x":3967.4285714285716,"y":1591.8095238095239,"z":-3179.0476190476193,"a95":2.3,"info":"\"14-09-15\" at \"20:50\""},{"visible":true,"include":false,"step":"150","x":4105.238095238095,"y":1216.952380952381,"z":-8290.57142857143,"a95":2.7,"info":"\"14-09-15\" at \"23:17\""},{"visible":true,"include":false,"step":"180","x":4016.4761904761904,"y":1183.142857142857,"z":-9931.333333333334,"a95":2.8,"info":"\"14-09-16\" at \"12:16\""},{"visible":true,"include":false,"step":"210","x":3933.5238095238096,"y":411.14285714285717,"z":-8999.52380952381,"a95":2.7,"info":"\"14-09-16\" at \"15:00\""},{"visible":true,"include":false,"step":"240","x":3395.809523809524,"y":472.0952380952381,"z":-7288.952380952381,"a95":2.6,"info":"\"14-09-16\" at \"17:45\""},{"visible":true,"include":false,"step":"270","x":3025.809523809524,"y":-8.571428571428571,"z":-5855.428571428572,"a95":2.6,"info":"\"14-09-16\" at \"21:07\""},{"visible":true,"include":false,"step":"300","x":2513.0476190476193,"y":83.14285714285714,"z":-5719.428571428572,"a95":2.9,"info":"\"14-09-17\" at \"12:01\""},{"visible":true,"include":true,"step":"320","x":3057.2380952380954,"y":444.85714285714283,"z":-3923.714285714286,"a95":2.6,"info":"\"14-09-17\" at \"15:38\""},{"visible":true,"include":true,"step":"340","x":2649.904761904762,"y":-70.47619047619048,"z":-3609.904761904762,"a95":2.4,"info":"\"14-09-17\" at \"21:20\""},{"visible":true,"include":true,"step":"370","x":2314.8571428571427,"y":111.42857142857143,"z":-2778.285714285714,"a95":2.6,"info":"\"14-09-18\" at \"10:04\""},{"visible":true,"include":true,"step":"390","x":2108.3809523809523,"y":-31.142857142857142,"z":-2460.285714285714,"a95":2.4,"info":"\"14-09-18\" at \"13:05\""},{"visible":true,"include":true,"step":"420","x":2418.095238095238,"y":102.95238095238095,"z":-2564.3809523809523,"a95":2.4,"info":"\"14-09-18\" at \"16:36\""},{"visible":false,"include":false,"step":"450","x":1829.142857142857,"y":-5.904761904761905,"z":-1031.904761904762,"a95":2.2,"info":"\"14-09-19\" at \"11:27\""},{"visible":false,"include":false,"step":"480","x":1665.8095238095239,"y":-826.6666666666666,"z":-1779.8095238095239,"a95":2.3,"info":"\"14-09-19\" at \"14:13\""},{"visible":false,"include":false,"step":"510","x":1438,"y":-27.047619047619047,"z":-766.2857142857143,"a95":2.8,"info":"\"14-09-19\" at \"16:51\""},{"visible":false,"include":false,"step":"540","x":-8239.904761904761,"y":-21929.428571428572,"z":-28890.666666666668,"a95":2.8,"info":"\"14-10-04\" at \"12:30\""},{"visible":false,"include":false,"step":"570","x":1664.4761904761904,"y":-1776.5714285714287,"z":-2012.7619047619048,"a95":2.4,"info":"\"14-10-04\" at \"15:46\""},{"visible":false,"include":false,"step":"600","x":-415.7142857142857,"y":1446.952380952381,"z":-368.4761904761905,"a95":2.3,"info":"\"14-10-05\" at \"09:52\""},{"visible":false,"include":false,"step":"630","x":-1410.6666666666667,"y":1542.857142857143,"z":578.8571428571429,"a95":2.2,"info":"\"14-10-05\" at \"12:41\""},{"visible":false,"include":false,"step":"660","x":338.57142857142856,"y":358.4761904761905,"z":-1607.8095238095239,"a95":3.2,"info":"\"14-10-05\" at \"16:14\""}]},{"version":"v1.1.0","exported":"2016-11-17T13:22:22.933Z","volume":10.5,"added":"2016-11-17T12:37:06.419Z","format":"Utrecht","demagType":"Unknown","strat":"7","patch":1.1,"GEO":[{"dec":55.94559736579242,"inc":-27.967219713332234,"MAD":6.654436381870281,"cm":[-5.684341886080802e-14,-3.552713678800501e-13,0],"intensity":9204.137847522194,"type":"GC","origin":false,"forced":true,"remark":"","nSteps":4,"minStep":"4.0","maxStep":"16.0","steps":["4.0","8.0","12.0","16.0"],"group":"None","version":"v1.1.0"}],"TECT":[{"dec":101.82541835323804,"inc":-36.23485548723382,"MAD":6.654436381870139,"cm":[-1.1368683772161603e-13,-9.521272659185342e-13,1.4210854715202004e-13],"intensity":9204.137847522194,"type":"GC","origin":false,"forced":true,"remark":"","nSteps":4,"minStep":"4.0","maxStep":"16.0","steps":["4.0","8.0","12.0","16.0"],"group":"None","version":"v1.1.0"}],"interpreted":true,"name":"AT3.10B","coreAzi":355,"coreDip":56,"bedStrike":265,"bedDip":64,"data":[{"visible":false,"include":false,"step":"0.0","x":-152.2,"y":2155.5238095238096,"z":8756.285714285714,"a95":0.99,"info":"27/08/2014 at 02:05:14"},{"visible":true,"include":true,"step":"4.0","x":565.7142857142857,"y":885.9619047619047,"z":6500.476190476191,"a95":0.99,"info":"27/08/2014 at 02:05:14"},{"visible":true,"include":true,"step":"8.0","x":943.2857142857143,"y":-34.019999999999996,"z":4675.333333333333,"a95":0.99,"info":"27/08/2014 at 02:05:14"},{"visible":true,"include":true,"step":"12.0","x":1375.142857142857,"y":-382.02857142857147,"z":3737.714285714286,"a95":0.99,"info":"27/08/2014 at 02:05:14"},{"visible":true,"include":true,"step":"16.0","x":1273.904761904762,"y":-416.4,"z":2505.714285714286,"a95":0.99,"info":"27/08/2014 at 02:05:14"},{"visible":true,"include":false,"step":"20.0","x":1474.4761904761904,"y":-1114.952380952381,"z":1642.4761904761904,"a95":0.99,"info":"27/08/2014 at 02:05:14"},{"visible":true,"include":false,"step":"25.0","x":1505.7142857142858,"y":-686.4857142857143,"z":1433.142857142857,"a95":0.99,"info":"27/08/2014 at 02:05:14"},{"visible":true,"include":false,"step":"30.0","x":1764,"y":-743.952380952381,"z":679.0380952380953,"a95":0.99,"info":"27/08/2014 at 02:05:14"},{"visible":true,"include":false,"step":"35.0","x":1239.6190476190477,"y":-1063.6190476190477,"z":721.9714285714285,"a95":0.99,"info":"27/08/2014 at 02:05:14"},{"visible":false,"include":false,"step":"40.0","x":1814.3809523809523,"y":793.7809523809525,"z":530.552380952381,"a95":0.99,"info":"27/08/2014 at 02:05:14"},{"visible":false,"include":false,"step":"45.0","x":1932.952380952381,"y":1045.6190476190477,"z":815.895238095238,"a95":0.99,"info":"27/08/2014 at 02:05:14"},{"visible":false,"include":false,"step":"50.0","x":1241.904761904762,"y":-436.8285714285714,"z":-157.8095238095238,"a95":0.99,"info":"27/08/2014 at 02:05:14"},{"visible":false,"include":false,"step":"60.0","x":1522.2857142857142,"y":829.3333333333334,"z":429.93333333333334,"a95":0.99,"info":"27/08/2014 at 02:05:14"},{"visible":false,"include":false,"step":"70.0","x":1883.7142857142858,"y":1262.5714285714287,"z":-11.948571428571428,"a95":0.99,"info":"27/08/2014 at 02:05:14"},{"visible":false,"include":false,"step":"80.0","x":1868,"y":286.5238095238095,"z":-407.87619047619046,"a95":0.99,"info":"27/08/2014 at 02:05:14"},{"visible":false,"include":false,"step":"90.0","x":654.3142857142857,"y":1329.7142857142858,"z":-483.53333333333336,"a95":0.99,"info":"27/08/2014 at 02:05:14"},{"visible":false,"include":false,"step":"100.0","x":1016.4761904761905,"y":1119.2380952380952,"z":-76.94380952380952,"a95":0.99,"info":"27/08/2014 at 02:05:14"}]},{"version":"v1.1.0","exported":"2016-11-17T13:22:22.934Z","volume":10.5,"added":"2016-11-17T12:37:06.420Z","format":"Utrecht","demagType":"Unknown","strat":"8","patch":1.1,"GEO":[{"dec":2.646632939871779,"inc":-57.50430121944387,"MAD":13.988637001486186,"cm":[-1.4210854715202004e-14,-2.842170943040401e-14,0],"intensity":4913.168640065863,"type":"dir","forced":true,"remark":"","origin":false,"nSteps":6,"minStep":"12.0","maxStep":"40.0","steps":["12.0","16.0","20.0","30.0","35.0","40.0"],"group":"None","version":"v1.1.0"}],"TECT":[{"dec":167.24102963186942,"inc":-58.02801445307452,"MAD":13.988637001486156,"cm":[1.3500311979441904e-13,-2.8421709430404007e-13,-2.842170943040401e-14],"intensity":4913.168640065862,"type":"dir","forced":true,"remark":"","origin":false,"nSteps":6,"minStep":"12.0","maxStep":"40.0","steps":["12.0","16.0","20.0","30.0","35.0","40.0"],"group":"None","version":"v1.1.0"}],"interpreted":true,"name":"AT3.11A","coreAzi":355,"coreDip":57,"bedStrike":265,"bedDip":64,"data":[{"visible":false,"include":false,"step":"0.0","x":1834.095238095238,"y":2153.6190476190477,"z":-1677.904761904762,"a95":0.99,"info":"27/08/2014 at 02:05:14"},{"visible":true,"include":false,"step":"4.0","x":2394.190476190476,"y":1220.095238095238,"z":-3086,"a95":0.99,"info":"27/08/2014 at 02:05:14"},{"visible":true,"include":false,"step":"8.0","x":2655.1428571428573,"y":682.9714285714285,"z":-3255.2380952380954,"a95":0.99,"info":"27/08/2014 at 02:05:14"},{"visible":true,"include":false,"step":"12.0","x":2290.7619047619046,"y":-1.6410476190476193,"z":-1805.7142857142858,"a95":0.99,"info":"27/08/2014 at 02:05:14"},{"visible":true,"include":false,"step":"16.0","x":2503.904761904762,"y":248.9047619047619,"z":-1447.142857142857,"a95":0.99,"info":"27/08/2014 at 02:05:14"},{"visible":true,"include":true,"step":"20.0","x":2011.4285714285713,"y":67.79619047619047,"z":-918.2285714285714,"a95":0.99,"info":"27/08/2014 at 02:05:14"},{"visible":true,"include":false,"step":"25.0","x":1469.047619047619,"y":912.4000000000001,"z":311.85714285714283,"a95":0.99,"info":"27/08/2014 at 02:05:14"},{"visible":true,"include":true,"step":"30.0","x":2121.714285714286,"y":116.03809523809525,"z":-384.4190476190476,"a95":0.99,"info":"27/08/2014 at 02:05:14"},{"visible":true,"include":true,"step":"35.0","x":1705.3333333333333,"y":-364.6095238095238,"z":-364.15238095238095,"a95":0.99,"info":"27/08/2014 at 02:05:14"},{"visible":true,"include":true,"step":"40.0","x":1994,"y":894.5714285714286,"z":-426.4857142857143,"a95":0.99,"info":"27/08/2014 at 02:05:14"},{"visible":true,"include":false,"step":"45.0","x":2175.904761904762,"y":292.2190476190476,"z":-538.8190476190476,"a95":0.99,"info":"27/08/2014 at 02:05:14"},{"visible":true,"include":false,"step":"50.0","x":1922.857142857143,"y":-545.6,"z":-1116.5714285714287,"a95":0.99,"info":"27/08/2014 at 02:05:14"},{"visible":true,"include":false,"step":"60.0","x":1290.952380952381,"y":113.07619047619048,"z":-283.31428571428575,"a95":0.99,"info":"27/08/2014 at 02:05:14"},{"visible":true,"include":false,"step":"70.0","x":2039.904761904762,"y":761.3047619047619,"z":-725.9428571428571,"a95":0.99,"info":"27/08/2014 at 02:05:14"},{"visible":true,"include":false,"step":"80.0","x":951.2190476190475,"y":729.6095238095238,"z":-458.60952380952375,"a95":0.99,"info":"27/08/2014 at 02:05:14"},{"visible":false,"include":false,"step":"90.0","x":1351.6190476190477,"y":1753.6190476190477,"z":-165.25714285714287,"a95":0.99,"info":"27/08/2014 at 02:05:14"},{"visible":false,"include":false,"step":"100.0","x":1332.3809523809523,"y":831.0285714285714,"z":-677.7238095238096,"a95":0.99,"info":"27/08/2014 at 02:05:14"}]},{"version":"v1.1.0","exported":"2016-11-17T13:22:22.934Z","volume":10.5,"added":"2016-11-17T12:37:06.420Z","format":"Utrecht","demagType":"Unknown","strat":null,"patch":1.1,"GEO":[{"dec":153.65177399341405,"inc":-70.84545504169344,"MAD":7.5269398229196955,"cm":[-853.6849662495451,1655.4735337945135,-3136.9553030885313],"intensity":5962.016632146832,"type":"dir","forced":false,"remark":"","origin":false,"nSteps":8,"minStep":"210","maxStep":"400","steps":["210","240","270","300","320","360","380","400"],"group":"None","version":"v1.1.0"}],"TECT":[{"dec":168.07185381962609,"inc":-8.01468419479038,"MAD":7.526939822919702,"cm":[-3105.894927300814,1852.5163732666601,-481.10186407439],"intensity":5962.016632146833,"type":"dir","forced":false,"remark":"","origin":false,"nSteps":8,"minStep":"210","maxStep":"400","steps":["210","240","270","300","320","360","380","400"],"group":"None","version":"v1.1.0"}],"interpreted":true,"name":"AT3.12A","coreAzi":346,"coreDip":59,"bedStrike":265,"bedDip":64,"data":[{"visible":false,"include":false,"step":"20","x":1902.5714285714287,"y":5492.666666666667,"z":10815.42857142857,"a95":2.6,"info":"\"14-11-03\" at \"21:36\""},{"visible":true,"include":false,"step":"150","x":1586,"y":2081.809523809524,"z":-6867.142857142857,"a95":2.8,"info":"\"14-11-04\" at \"16:37\""},{"visible":true,"include":false,"step":"180","x":1429.047619047619,"y":1675.047619047619,"z":-7282.0952380952385,"a95":2.9,"info":"\"14-11-04\" at \"21:50\""},{"visible":true,"include":true,"step":"210","x":1249.047619047619,"y":1627.3333333333333,"z":-6738.666666666667,"a95":2.9,"info":"\"14-11-05\" at \"17:12\""},{"visible":true,"include":true,"step":"240","x":1060.5714285714287,"y":1494.5714285714287,"z":-5083.619047619048,"a95":3,"info":"\"14-11-05\" at \"22:51\""},{"visible":true,"include":true,"step":"270","x":574.7619047619048,"y":1367.904761904762,"z":-4080.8571428571427,"a95":3,"info":"\"14-11-06\" at \"21:15\""},{"visible":true,"include":true,"step":"300","x":1077.2380952380952,"y":1630.6666666666667,"z":-3899.904761904762,"a95":2.7,"info":"\"14-11-07\" at \"15:19\""},{"visible":true,"include":true,"step":"320","x":255.61904761904762,"y":1315.3333333333333,"z":-2794.285714285714,"a95":2.7,"info":"\"14-11-07\" at \"20:02\""},{"visible":false,"include":false,"step":"340","x":204.66666666666666,"y":2350.285714285714,"z":-2134.4761904761904,"a95":2.1,"info":"\"14-11-15\" at \"19:57\""},{"visible":true,"include":true,"step":"360","x":-72.28571428571429,"y":1328.095238095238,"z":-2264.4761904761904,"a95":3.8,"info":"\"14-11-15\" at \"23:49\""},{"visible":true,"include":true,"step":"380","x":298.1904761904762,"y":1069.904761904762,"z":-809.2380952380952,"a95":3,"info":"\"14-11-16\" at \"02:57\""},{"visible":true,"include":true,"step":"400","x":55.61904761904762,"y":1364.3809523809523,"z":-903.2380952380952,"a95":2.6,"info":"\"14-11-16\" at \"22:05\""},{"visible":false,"include":false,"step":"420","x":418.0952380952381,"y":1297.4285714285713,"z":-672.0952380952381,"a95":2.5,"info":"\"14-11-17\" at \"01:21\""},{"visible":false,"include":false,"step":"450","x":-7.333333333333333,"y":1245.142857142857,"z":-1106,"a95":3.1,"info":"\"14-11-17\" at \"04:08\""},{"visible":false,"include":false,"step":"610","x":45.23809523809524,"y":1030.2857142857142,"z":228,"a95":2.8,"info":"\"14-11-28\" at \"23:10\""}]},{"version":"v1.1.0","exported":"2016-11-17T13:22:22.934Z","volume":10.5,"added":"2016-11-17T12:37:06.421Z","format":"Utrecht","demagType":"Unknown","strat":"1","patch":1.1,"GEO":[{"dec":60.6830642737865,"inc":-42.52913927410966,"MAD":5.571605396570801,"cm":[-1.1368683772161603e-13,1.1368683772161603e-13,0],"intensity":5322.625898963543,"type":"dir","forced":true,"remark":"","origin":false,"nSteps":5,"minStep":"16.0","maxStep":"40.0","steps":["16.0","20.0","30.0","35.0","40.0"],"group":"None","version":"v1.1.0"}],"TECT":[{"dec":120.24538926830348,"inc":-34.68534348408817,"MAD":5.571605396570837,"cm":[2.3447910280083306e-13,1.9895196601282805e-13,-8.526512829121202e-14],"intensity":5322.625898963543,"type":"dir","forced":true,"remark":"","origin":false,"nSteps":5,"minStep":"16.0","maxStep":"40.0","steps":["16.0","20.0","30.0","35.0","40.0"],"group":"None","version":"v1.1.0"}],"interpreted":true,"name":"AT3.12B","coreAzi":346,"coreDip":59,"bedStrike":265,"bedDip":64,"data":[{"visible":false,"include":false,"step":"0.0","x":2715.1428571428573,"y":5140.285714285715,"z":-90.04761904761905,"a95":0.99,"info":"27/08/2014 at 07:32:28"},{"visible":true,"include":false,"step":"4.0","x":2679.904761904762,"y":3826.6666666666665,"z":-2159.5238095238096,"a95":0.99,"info":"27/08/2014 at 07:32:28"},{"visible":true,"include":false,"step":"8.0","x":2419.6190476190477,"y":2730.4761904761904,"z":-3428.7619047619046,"a95":0.99,"info":"27/08/2014 at 07:32:28"},{"visible":true,"include":false,"step":"12.0","x":1942.2857142857142,"y":2661.4285714285716,"z":-2262.8571428571427,"a95":0.99,"info":"27/08/2014 at 07:32:28"},{"visible":true,"include":true,"step":"16.0","x":1766.857142857143,"y":2395.6190476190477,"z":-1706.3809523809523,"a95":0.99,"info":"27/08/2014 at 07:32:28"},{"visible":true,"include":true,"step":"20.0","x":1436.5714285714287,"y":1867.6190476190477,"z":-1408.7619047619048,"a95":0.99,"info":"27/08/2014 at 07:32:28"},{"visible":false,"include":false,"step":"25.0","x":1019.8095238095239,"y":2176.4761904761904,"z":-397.00952380952384,"a95":0.99,"info":"27/08/2014 at 07:32:28"},{"visible":true,"include":true,"step":"30.0","x":1244.857142857143,"y":1500.952380952381,"z":-1062.7619047619048,"a95":0.99,"info":"27/08/2014 at 07:32:28"},{"visible":true,"include":true,"step":"35.0","x":794.2857142857143,"y":940.2190476190475,"z":-715.6761904761905,"a95":0.99,"info":"27/08/2014 at 07:32:28"},{"visible":true,"include":true,"step":"40.0","x":760.7904761904762,"y":1670.952380952381,"z":-618.3428571428572,"a95":0.99,"info":"27/08/2014 at 07:32:28"},{"visible":false,"include":false,"step":"45.0","x":1114.7619047619048,"y":1658.857142857143,"z":-348.77142857142854,"a95":0.99,"info":"27/08/2014 at 07:32:28"},{"visible":false,"include":false,"step":"50.0","x":571.1238095238095,"y":675.9142857142857,"z":-811.6095238095238,"a95":0.99,"info":"27/08/2014 at 07:32:28"},{"visible":false,"include":false,"step":"60.0","x":516.6,"y":1442.095238095238,"z":-805.742857142857,"a95":0.99,"info":"27/08/2014 at 07:32:28"},{"visible":false,"include":false,"step":"70.0","x":812.8095238095239,"y":1372,"z":-975.047619047619,"a95":0.99,"info":"27/08/2014 at 07:32:28"},{"visible":false,"include":false,"step":"80.0","x":188.6952380952381,"y":-354.447619047619,"z":-1056.3809523809523,"a95":0.99,"info":"27/08/2014 at 07:32:28"},{"visible":false,"include":false,"step":"90.0","x":1518.7619047619048,"y":634.4761904761905,"z":490.50476190476195,"a95":0.99,"info":"27/08/2014 at 07:32:28"},{"visible":false,"include":false,"step":"100.0","x":674.9333333333334,"y":1079.5238095238096,"z":-1064.1904761904761,"a95":0.99,"info":"27/08/2014 at 07:32:28"}]},{"version":"v1.1.0","exported":"2016-11-17T13:22:22.934Z","volume":10.5,"added":"2016-11-17T12:37:06.421Z","format":"Utrecht","demagType":"Unknown","strat":null,"patch":1.1,"GEO":[{"dec":134.86028510220933,"inc":-80.23002863468989,"MAD":3.424917508278563,"cm":[-1.2612133559741778e-13,-1.8118839761882555e-13,0],"intensity":7974.355282834516,"type":"dir","forced":true,"remark":"","origin":false,"nSteps":4,"minStep":"240","maxStep":"320","steps":["240","270","300","320"],"group":"None","version":"v1.1.0"}],"TECT":[{"dec":168.38035288037122,"inc":-18.38595647143576,"MAD":3.4249175082785603,"cm":[-1.7053025658242404e-13,-5.471179065352771e-13,1.2789769243681803e-13],"intensity":7974.3552828345155,"type":"dir","forced":true,"remark":"","origin":false,"nSteps":4,"minStep":"240","maxStep":"320","steps":["240","270","300","320"],"group":"None","version":"v1.1.0"}],"interpreted":true,"name":"AT3.13A","coreAzi":47,"coreDip":59,"bedStrike":265,"bedDip":64,"data":[{"visible":false,"include":false,"step":"20","x":-3354.285714285714,"y":-984.952380952381,"z":10979.52380952381,"a95":3.1,"info":"\"14-11-03\" at \"21:38\""},{"visible":true,"include":false,"step":"150","x":2782.8571428571427,"y":2308.5714285714284,"z":-6270.476190476191,"a95":2.7,"info":"\"14-11-04\" at \"16:39\""},{"visible":true,"include":false,"step":"180","x":2771.4285714285716,"y":2073.904761904762,"z":-6806.761904761905,"a95":2.8,"info":"\"14-11-04\" at \"21:52\""},{"visible":true,"include":false,"step":"210","x":2937.0476190476193,"y":1853.5238095238096,"z":-6399.9047619047615,"a95":2.8,"info":"\"14-11-05\" at \"17:14\""},{"visible":true,"include":true,"step":"240","x":2783.809523809524,"y":1115.7142857142858,"z":-4968.571428571428,"a95":2.8,"info":"\"14-11-05\" at \"22:54\""},{"visible":true,"include":true,"step":"270","x":2294.9523809523807,"y":907.2380952380952,"z":-3888.4761904761904,"a95":2.7,"info":"\"14-11-06\" at \"21:17\""},{"visible":true,"include":true,"step":"300","x":2459.2380952380954,"y":489.23809523809524,"z":-3419.5238095238096,"a95":2.7,"info":"\"14-11-07\" at \"15:21\""},{"visible":true,"include":true,"step":"320","x":1195.2380952380952,"y":187.61904761904762,"z":-1818.095238095238,"a95":3.4,"info":"\"14-11-07\" at \"20:04\""},{"visible":false,"include":false,"step":"340","x":2572.7619047619046,"y":-684.3809523809524,"z":-707.6190476190476,"a95":2.2,"info":"\"14-11-15\" at \"20:00\""},{"visible":true,"include":false,"step":"360","x":1258.1904761904761,"y":-230.85714285714286,"z":-415.8095238095238,"a95":4.1,"info":"\"14-11-15\" at \"23:51\""},{"visible":true,"include":false,"step":"380","x":1222.4761904761904,"y":-76,"z":365.9047619047619,"a95":4.1,"info":"\"14-11-16\" at \"02:59\""},{"visible":true,"include":false,"step":"400","x":1078.6666666666667,"y":-425.04761904761904,"z":-40.857142857142854,"a95":3.5,"info":"\"14-11-16\" at \"22:08\""},{"visible":true,"include":false,"step":"420","x":1132.3809523809523,"y":208.28571428571428,"z":816.5714285714286,"a95":3.3,"info":"\"14-11-17\" at \"01:23\""},{"visible":true,"include":false,"step":"450","x":632.8571428571429,"y":-93.33333333333333,"z":-118.66666666666667,"a95":5.4,"info":"\"14-11-17\" at \"04:10\""},{"visible":true,"include":false,"step":"610","x":892.5714285714286,"y":-568.8571428571429,"z":739.2380952380952,"a95":2.8,"info":"\"14-11-28\" at \"23:12\""}]},{"version":"v1.1.0","exported":"2016-11-17T13:22:22.934Z","volume":10.5,"added":"2016-11-17T12:37:06.423Z","format":"Utrecht","demagType":"Unknown","strat":"2","patch":1.1,"GEO":[{"dec":14.474546755588449,"inc":-39.4261594411145,"MAD":11.545493927433089,"cm":[4.263256414560601e-14,-1.092459456231154e-13,0],"intensity":4844.217697724561,"type":"dir","forced":true,"remark":"","origin":false,"nSteps":7,"minStep":"12.0","maxStep":"40.0","steps":["12.0","16.0","20.0","25.0","30.0","35.0","40.0"],"group":"None","version":"v1.1.0"}],"TECT":[{"dec":129.32935752779855,"inc":-68.89954753722816,"MAD":11.545493927433062,"cm":[2.842170943040401e-14,1.1679546219056647e-13,-5.684341886080802e-14],"intensity":4844.217697724561,"type":"dir","forced":true,"remark":"","origin":false,"nSteps":7,"minStep":"12.0","maxStep":"40.0","steps":["12.0","16.0","20.0","25.0","30.0","35.0","40.0"],"group":"None","version":"v1.1.0"}],"interpreted":true,"name":"AT3.13B","coreAzi":47,"coreDip":59,"bedStrike":265,"bedDip":64,"data":[{"visible":false,"include":false,"step":"0.0","x":3835.4285714285716,"y":-946.952380952381,"z":2164.9523809523807,"a95":0.99,"info":"27/08/2014 at 07:32:28"},{"visible":true,"include":false,"step":"4.0","x":3835.809523809524,"y":-727.847619047619,"z":1.2233333333333334,"a95":0.99,"info":"27/08/2014 at 07:32:28"},{"visible":false,"include":false,"step":"8.0","x":3759.3333333333335,"y":-809.6095238095238,"z":-1535.4285714285713,"a95":0.99,"info":"27/08/2014 at 07:32:28"},{"visible":true,"include":true,"step":"12.0","x":3302.095238095238,"y":-804.3619047619047,"z":-773.4,"a95":0.99,"info":"27/08/2014 at 07:32:28"},{"visible":true,"include":true,"step":"16.0","x":2498,"y":-1184.3809523809523,"z":-631.6285714285715,"a95":0.99,"info":"27/08/2014 at 07:32:28"},{"visible":true,"include":true,"step":"20.0","x":2214.3809523809523,"y":-1198.095238095238,"z":-105.20952380952382,"a95":0.99,"info":"27/08/2014 at 07:32:28"},{"visible":true,"include":true,"step":"25.0","x":2000.5714285714287,"y":-1055.7142857142858,"z":-499.8095238095238,"a95":0.99,"info":"27/08/2014 at 07:32:28"},{"visible":true,"include":true,"step":"30.0","x":1877.7142857142858,"y":-1003.9047619047619,"z":-308.8952380952381,"a95":0.99,"info":"27/08/2014 at 07:32:28"},{"visible":true,"include":true,"step":"35.0","x":793.7714285714286,"y":-1199.7142857142858,"z":-785.9142857142857,"a95":0.99,"info":"27/08/2014 at 07:32:28"},{"visible":true,"include":true,"step":"40.0","x":1078.1904761904761,"y":-827.2,"z":-498.42857142857144,"a95":0.99,"info":"27/08/2014 at 07:32:28"},{"visible":false,"include":false,"step":"45.0","x":1693.8095238095239,"y":-895.6095238095238,"z":-295.06666666666666,"a95":0.99,"info":"27/08/2014 at 07:32:28"},{"visible":false,"include":false,"step":"50.0","x":904.8380952380952,"y":-1938.095238095238,"z":-559.3904761904762,"a95":0.99,"info":"27/08/2014 at 07:32:28"},{"visible":false,"include":false,"step":"60.0","x":1011.1428571428571,"y":-208.06666666666666,"z":-1227.7142857142858,"a95":0.99,"info":"27/08/2014 at 07:32:28"},{"visible":false,"include":false,"step":"70.0","x":2068.285714285714,"y":-753.7809523809524,"z":-1330.5714285714287,"a95":0.99,"info":"27/08/2014 at 07:32:28"},{"visible":false,"include":false,"step":"80.0","x":2206,"y":-1852.7619047619048,"z":-1669.904761904762,"a95":0.99,"info":"27/08/2014 at 07:32:28"},{"visible":false,"include":false,"step":"90.0","x":842.2,"y":-132.4952380952381,"z":-361.3333333333333,"a95":0.99,"info":"27/08/2014 at 07:32:28"},{"visible":false,"include":false,"step":"100.0","x":1230.6666666666667,"y":986.0952380952381,"z":-1615.2380952380952,"a95":0.99,"info":"27/08/2014 at 07:32:28"}]},{"version":"v1.1.0","exported":"2016-11-17T13:22:22.934Z","volume":10.5,"added":"2016-11-17T12:37:06.423Z","format":"Utrecht","demagType":"Unknown","strat":null,"patch":1.1,"GEO":[{"dec":177.9477245207687,"inc":-78.22230933129799,"MAD":11.381130191412637,"cm":[-1547.713520183337,153.43202101740195,-5183.84772847816],"intensity":7776.374046181321,"type":"dir","forced":false,"remark":"","origin":false,"nSteps":11,"minStep":"180","maxStep":"480","steps":["180","210","240","270","300","320","340","370","390","420","480"],"group":"None","version":"v1.1.0"}],"TECT":[{"dec":175.62047679960142,"inc":-14.236657402622425,"MAD":11.381130191412604,"cm":[-5319.075786054694,483.38346533058734,-874.6479322170624],"intensity":7776.374046181322,"type":"dir","forced":false,"remark":"","origin":false,"nSteps":11,"minStep":"180","maxStep":"480","steps":["180","210","240","270","300","320","340","370","390","420","480"],"group":"None","version":"v1.1.0"}],"interpreted":true,"name":"AT3.14A","coreAzi":39,"coreDip":53,"bedStrike":265,"bedDip":64,"data":[{"visible":false,"include":false,"step":"20","x":3655.714285714286,"y":-1184.952380952381,"z":2684.6666666666665,"a95":2.5,"info":"\"14-09-15\" at \"16:48\""},{"visible":true,"include":false,"step":"100","x":4049.5238095238096,"y":-538.0952380952381,"z":-402.0952380952381,"a95":1.7,"info":"\"14-09-15\" at \"20:52\""},{"visible":true,"include":false,"step":"150","x":4840.476190476191,"y":2083.1428571428573,"z":-7970.666666666667,"a95":2.5,"info":"\"14-09-15\" at \"23:20\""},{"visible":true,"include":true,"step":"180","x":4567.238095238095,"y":1899.4285714285713,"z":-9164.095238095239,"a95":2.6,"info":"\"14-09-16\" at \"12:18\""},{"visible":true,"include":true,"step":"210","x":3873.6190476190477,"y":1848.4761904761904,"z":-7725.9047619047615,"a95":2.6,"info":"\"14-09-16\" at \"15:02\""},{"visible":true,"include":true,"step":"240","x":3432,"y":1228.857142857143,"z":-6826.190476190476,"a95":2.5,"info":"\"14-09-16\" at \"17:47\""},{"visible":true,"include":true,"step":"270","x":2800.9523809523807,"y":964,"z":-5132.285714285715,"a95":2.5,"info":"\"14-09-16\" at \"21:10\""},{"visible":true,"include":true,"step":"300","x":1957.2380952380952,"y":754.5714285714286,"z":-4890.952380952381,"a95":2.7,"info":"\"14-09-17\" at \"12:03\""},{"visible":true,"include":true,"step":"320","x":1646.5714285714287,"y":788.2857142857143,"z":-3737.0476190476193,"a95":2.7,"info":"\"14-09-17\" at \"15:41\""},{"visible":true,"include":true,"step":"340","x":1432.3809523809523,"y":329.23809523809524,"z":-3932.4761904761904,"a95":2.5,"info":"\"14-09-17\" at \"21:22\""},{"visible":true,"include":true,"step":"370","x":1456.857142857143,"y":1477.904761904762,"z":-3739.5238095238096,"a95":2.8,"info":"\"14-09-18\" at \"10:06\""},{"visible":true,"include":true,"step":"390","x":771.047619047619,"y":705.6190476190476,"z":-3503.809523809524,"a95":2.7,"info":"\"14-09-18\" at \"13:07\""},{"visible":true,"include":true,"step":"420","x":1281.4285714285713,"y":1366.1904761904761,"z":-2031.2380952380952,"a95":2.7,"info":"\"14-09-18\" at \"16:38\""},{"visible":false,"include":false,"step":"450","x":1497.2380952380952,"y":1740.952380952381,"z":-1541.8095238095239,"a95":2.5,"info":"\"14-09-19\" at \"11:30\""},{"visible":true,"include":true,"step":"480","x":1379.2380952380952,"y":663.1428571428571,"z":-2179.809523809524,"a95":2.7,"info":"\"14-09-19\" at \"14:15\""},{"visible":true,"include":false,"step":"510","x":284.76190476190476,"y":190.38095238095238,"z":-1716.4761904761904,"a95":2.8,"info":"\"14-09-19\" at \"16:53\""},{"visible":true,"include":false,"step":"540","x":890,"y":1368.3809523809523,"z":-2347.3333333333335,"a95":2.6,"info":"\"14-10-04\" at \"12:34\""},{"visible":true,"include":false,"step":"570","x":19.523809523809526,"y":396.6666666666667,"z":8.857142857142858,"a95":6.5,"info":"\"14-10-04\" at \"15:48\""},{"visible":true,"include":false,"step":"600","x":-1425.5238095238096,"y":637.3333333333334,"z":-668.2857142857143,"a95":2.5,"info":"\"14-10-05\" at \"09:54\""},{"visible":true,"include":false,"step":"630","x":-1671.3333333333333,"y":-207.8095238095238,"z":221.33333333333334,"a95":2.6,"info":"\"14-10-05\" at \"12:43\""},{"visible":true,"include":false,"step":"660","x":-381.42857142857144,"y":117.71428571428571,"z":-363.23809523809524,"a95":6.2,"info":"\"14-10-05\" at \"16:17\""}]},{"version":"v1.1.0","exported":"2016-11-17T13:22:22.934Z","volume":10.5,"added":"2016-11-17T12:37:06.424Z","format":"Utrecht","demagType":"Unknown","strat":"3","patch":1.1,"GEO":[{"dec":243.08688747467548,"inc":-33.76169863055356,"MAD":9.711316346332522,"cm":[0,-1.5276668818842154e-13,0],"intensity":5904.012845167356,"type":"GC","origin":false,"forced":true,"remark":"","nSteps":5,"minStep":"8.0","maxStep":"25.0","steps":["8.0","12.0","16.0","20.0","25.0"],"group":"None","version":"v1.1.0"}],"TECT":[{"dec":45.51317270065476,"inc":-2.019604733723541,"MAD":9.711316346332719,"cm":[-1.6964207816272392e-13,-9.263700917472306e-13,-2.842170943040401e-14],"intensity":5904.012845167358,"type":"GC","origin":false,"forced":true,"remark":"","nSteps":5,"minStep":"8.0","maxStep":"25.0","steps":["8.0","12.0","16.0","20.0","25.0"],"group":"None","version":"v1.1.0"}],"interpreted":true,"name":"AT3.14B","coreAzi":39,"coreDip":53,"bedStrike":265,"bedDip":64,"data":[{"visible":false,"include":false,"step":"0.0","x":3837.714285714286,"y":-1629.8095238095239,"z":2824.9523809523807,"a95":0.99,"info":"27/08/2014 at 07:32:28"},{"visible":true,"include":false,"step":"4.0","x":4171.047619047619,"y":-1307.3333333333333,"z":752.1428571428571,"a95":0.99,"info":"27/08/2014 at 07:32:28"},{"visible":true,"include":true,"step":"8.0","x":3932.4761904761904,"y":-1085.2380952380952,"z":-697.3714285714285,"a95":0.99,"info":"27/08/2014 at 07:32:28"},{"visible":true,"include":true,"step":"12.0","x":3381.4285714285716,"y":-1535.7142857142858,"z":-524.3333333333334,"a95":0.99,"info":"27/08/2014 at 07:32:28"},{"visible":true,"include":true,"step":"16.0","x":2842.5714285714284,"y":-1066.6666666666667,"z":-482.3238095238095,"a95":0.99,"info":"27/08/2014 at 07:32:28"},{"visible":true,"include":true,"step":"20.0","x":2539.1428571428573,"y":-1440.1904761904761,"z":-268.7333333333333,"a95":0.99,"info":"27/08/2014 at 07:32:28"},{"visible":true,"include":true,"step":"25.0","x":1496.7619047619048,"y":-1154,"z":91.9342857142857,"a95":0.99,"info":"27/08/2014 at 07:32:28"},{"visible":true,"include":false,"step":"30.0","x":1539.047619047619,"y":-1459.6190476190477,"z":-217.67619047619047,"a95":0.99,"info":"27/08/2014 at 07:32:28"},{"visible":true,"include":false,"step":"35.0","x":940.4095238095238,"y":-2162.4761904761904,"z":609.3047619047619,"a95":0.99,"info":"27/08/2014 at 07:32:28"},{"visible":true,"include":false,"step":"40.0","x":925.9333333333333,"y":-1702.1904761904761,"z":451.7809523809524,"a95":0.99,"info":"27/08/2014 at 07:32:28"},{"visible":true,"include":false,"step":"45.0","x":1133.047619047619,"y":-879.5999999999999,"z":-298.4190476190476,"a95":0.99,"info":"27/08/2014 at 07:32:28"},{"visible":true,"include":false,"step":"50.0","x":499.3714285714285,"y":-1607.8095238095239,"z":-89.87142857142857,"a95":0.99,"info":"27/08/2014 at 07:32:28"},{"visible":true,"include":false,"step":"60.0","x":710.4571428571429,"y":-545.0666666666666,"z":197.12380952380954,"a95":0.99,"info":"27/08/2014 at 07:32:28"},{"visible":true,"include":false,"step":"70.0","x":275.9047619047619,"y":-723.8571428571429,"z":154.2,"a95":0.99,"info":"27/08/2014 at 07:32:28"},{"visible":true,"include":false,"step":"80.0","x":-419.18095238095236,"y":-2135.6190476190477,"z":-374.6,"a95":0.99,"info":"27/08/2014 at 07:32:28"},{"visible":true,"include":false,"step":"90.0","x":1239.047619047619,"y":-889.047619047619,"z":541.6857142857143,"a95":0.99,"info":"27/08/2014 at 07:32:28"},{"visible":true,"include":false,"step":"100.0","x":554.4571428571429,"y":-70.39047619047619,"z":-79.29904761904761,"a95":0.99,"info":"27/08/2014 at 07:32:28"}]},{"version":"v1.1.0","exported":"2016-11-17T13:22:22.934Z","volume":10.5,"added":"2016-11-17T12:37:06.424Z","format":"Utrecht","demagType":"Unknown","strat":"4","patch":1.1,"GEO":[{"dec":38.23701683548683,"inc":-51.37796237820744,"MAD":30.218740225175456,"cm":[1384.6339515397938,408.6025240258926,-1730.016483858205],"intensity":1856.9468494854823,"type":"dir","forced":false,"remark":"","origin":false,"nSteps":5,"minStep":"12.0","maxStep":"30.0","steps":["12.0","16.0","20.0","25.0","30.0"],"group":"None","version":"v1.1.0"}],"TECT":[{"dec":134.62647314769572,"inc":-48.69450749818438,"MAD":30.218740225175456,"cm":[-916.1961922033169,609.8990783021364,-1966.1464565226281],"intensity":1856.9468494854823,"type":"dir","forced":false,"remark":"","origin":false,"nSteps":5,"minStep":"12.0","maxStep":"30.0","steps":["12.0","16.0","20.0","25.0","30.0"],"group":"None","version":"v1.1.0"}],"interpreted":true,"name":"AT3.15A","coreAzi":55,"coreDip":56,"bedStrike":265,"bedDip":64,"data":[{"visible":false,"include":false,"step":"0.0","x":3434.8571428571427,"y":-2146.095238095238,"z":1644.2857142857142,"a95":0.99,"info":"27/08/2014 at 07:32:28"},{"visible":true,"include":false,"step":"4.0","x":3849.1428571428573,"y":-1610.5714285714287,"z":-332.04761904761904,"a95":0.99,"info":"27/08/2014 at 07:32:28"},{"visible":true,"include":false,"step":"8.0","x":3983.2380952380954,"y":-1067.5238095238096,"z":-1816.7619047619048,"a95":0.99,"info":"27/08/2014 at 07:32:28"},{"visible":true,"include":true,"step":"12.0","x":2976.5714285714284,"y":-956.1904761904761,"z":-1141.142857142857,"a95":0.99,"info":"27/08/2014 at 07:32:28"},{"visible":true,"include":true,"step":"16.0","x":2111.714285714286,"y":-1037.7142857142858,"z":-965.047619047619,"a95":0.99,"info":"27/08/2014 at 07:32:28"},{"visible":true,"include":true,"step":"20.0","x":1383.2380952380952,"y":-1295.2380952380952,"z":-949.5714285714286,"a95":0.99,"info":"27/08/2014 at 07:32:28"},{"visible":true,"include":true,"step":"25.0","x":1730.095238095238,"y":-887.1428571428571,"z":-353.1047619047619,"a95":0.99,"info":"27/08/2014 at 07:32:28"},{"visible":true,"include":true,"step":"30.0","x":1314.952380952381,"y":-323.0190476190476,"z":-606.0095238095239,"a95":0.99,"info":"27/08/2014 at 07:32:28"},{"visible":false,"include":false,"step":"35.0","x":815,"y":-999.2380952380952,"z":-310.83809523809526,"a95":0.99,"info":"27/08/2014 at 07:32:28"},{"visible":true,"include":false,"step":"40.0","x":519.8,"y":29.75047619047619,"z":67.82190476190476,"a95":0.99,"info":"27/08/2014 at 07:32:28"},{"visible":true,"include":false,"step":"45.0","x":425.447619047619,"y":-366.1904761904762,"z":-459.7047619047619,"a95":0.99,"info":"27/08/2014 at 07:32:28"},{"visible":false,"include":false,"step":"50.0","x":-682.2857142857143,"y":-1567.2380952380952,"z":-93.83142857142857,"a95":0.99,"info":"27/08/2014 at 07:32:28"},{"visible":false,"include":false,"step":"60.0","x":-680.6571428571428,"y":-420.64761904761906,"z":-896.4571428571428,"a95":0.99,"info":"27/08/2014 at 07:32:28"},{"visible":false,"include":false,"step":"70.0","x":96.3047619047619,"y":-704.152380952381,"z":-797.952380952381,"a95":0.99,"info":"27/08/2014 at 07:32:28"},{"visible":false,"include":false,"step":"80.0","x":-824.3428571428572,"y":-1986.095238095238,"z":-1257.142857142857,"a95":0.99,"info":"27/08/2014 at 07:32:28"},{"visible":false,"include":false,"step":"90.0","x":230.50476190476192,"y":76.09238095238095,"z":422.95238095238096,"a95":0.99,"info":"27/08/2014 at 07:32:28"},{"visible":false,"include":false,"step":"100.0","x":-1102.4761904761904,"y":1085.142857142857,"z":-997.5238095238095,"a95":0.99,"info":"27/08/2014 at 07:32:28"}]},{"version":"v1.1.0","exported":"2016-11-17T13:22:22.934Z","volume":10.5,"added":"2016-11-17T12:37:06.425Z","format":"Utrecht","demagType":"Unknown","strat":null,"patch":1.1,"GEO":[{"dec":52.30086333139559,"inc":-64.11528244724978,"MAD":10.69655278203307,"cm":[-1.2079226507921703e-13,1.1368683772161603e-13,0],"intensity":5817.708777474268,"type":"dir","forced":true,"remark":"","origin":false,"nSteps":6,"minStep":"320","maxStep":"420","steps":["320","340","360","380","400","420"],"group":"None","version":"v1.1.0"}],"TECT":[{"dec":147.48384063814706,"inc":-37.327152838403876,"MAD":10.696552782033066,"cm":[2.8421709430404007e-13,1.9895196601282805e-13,7.105427357601002e-14],"intensity":5817.708777474268,"type":"dir","forced":true,"remark":"","origin":false,"nSteps":6,"minStep":"320","maxStep":"420","steps":["320","340","360","380","400","420"],"group":"None","version":"v1.1.0"}],"interpreted":true,"name":"AT3.15B","coreAzi":55,"coreDip":56,"bedStrike":265,"bedDip":64,"data":[{"visible":false,"include":false,"step":"20","x":3138.7619047619046,"y":-2384.285714285714,"z":5603.9047619047615,"a95":3.4,"info":"\"14-11-03\" at \"21:40\""},{"visible":true,"include":false,"step":"150","x":4783.523809523809,"y":1592,"z":-5152.190476190476,"a95":2.5,"info":"\"14-11-04\" at \"16:40\""},{"visible":true,"include":false,"step":"180","x":4797.238095238095,"y":1935.7142857142858,"z":-5578.952380952381,"a95":2.6,"info":"\"14-11-04\" at \"21:54\""},{"visible":true,"include":false,"step":"210","x":4326.666666666667,"y":1529.5238095238096,"z":-5017.333333333333,"a95":2.6,"info":"\"14-11-05\" at \"17:17\""},{"visible":true,"include":false,"step":"240","x":3364.285714285714,"y":684.5714285714286,"z":-4000.8571428571427,"a95":2.8,"info":"\"14-11-05\" at \"22:56\""},{"visible":true,"include":false,"step":"270","x":3369.4285714285716,"y":347.5238095238095,"z":-2695.3333333333335,"a95":2.4,"info":"\"14-11-06\" at \"21:19\""},{"visible":true,"include":false,"step":"300","x":3631.5238095238096,"y":470.2857142857143,"z":-2756.5714285714284,"a95":2.9,"info":"\"14-11-07\" at \"15:23\""},{"visible":true,"include":true,"step":"320","x":2607.5238095238096,"y":-281.23809523809524,"z":-2418.7619047619046,"a95":2.5,"info":"\"14-11-07\" at \"20:06\""},{"visible":true,"include":true,"step":"340","x":3010.4761904761904,"y":-61.80952380952381,"z":-1980.952380952381,"a95":2.3,"info":"\"14-11-15\" at \"20:02\""},{"visible":true,"include":true,"step":"360","x":2915.0476190476193,"y":-139.14285714285714,"z":-1904.095238095238,"a95":2,"info":"\"14-11-15\" at \"23:55\""},{"visible":true,"include":true,"step":"380","x":2142.190476190476,"y":-8.095238095238095,"z":-1054.3809523809523,"a95":2.3,"info":"\"14-11-16\" at \"03:03\""},{"visible":true,"include":true,"step":"400","x":2811.714285714286,"y":-35.142857142857146,"z":-560.8571428571429,"a95":1.7,"info":"\"14-11-16\" at \"22:10\""},{"visible":true,"include":true,"step":"420","x":2277.714285714286,"y":280.4761904761905,"z":-740.3809523809524,"a95":1.9,"info":"\"14-11-17\" at \"01:25\""},{"visible":true,"include":false,"step":"450","x":1703.047619047619,"y":-292.57142857142856,"z":-1162.6666666666667,"a95":2.5,"info":"\"14-11-17\" at \"04:13\""},{"visible":true,"include":false,"step":"610","x":1400.952380952381,"y":-437.5238095238095,"z":7.714285714285714,"a95":2.6,"info":"\"14-11-28\" at \"23:15\""}]},{"version":"v1.1.0","exported":"2016-11-17T13:22:22.934Z","volume":10.5,"added":"2016-11-17T12:37:06.425Z","format":"Utrecht","demagType":"Unknown","strat":null,"patch":1.1,"GEO":[{"dec":32.833182840548716,"inc":-66.87806142180972,"MAD":5.267899050817007,"cm":[0,-7.105427357601002e-15,0],"intensity":8743.002288451777,"type":"dir","forced":true,"remark":"","origin":false,"nSteps":8,"minStep":"210","maxStep":"390","steps":["210","240","270","300","320","340","370","390"],"group":"None","version":"v1.1.0"}],"TECT":[{"dec":155.77360452174673,"inc":-42.99344374976487,"MAD":5.267899050817037,"cm":[-1.7053025658242404e-13,-1.7053025658242404e-13,2.842170943040401e-14],"intensity":8743.002288451775,"type":"dir","forced":true,"remark":"","origin":false,"nSteps":8,"minStep":"210","maxStep":"390","steps":["210","240","270","300","320","340","370","390"],"group":"None","version":"v1.1.0"}],"interpreted":true,"name":"AT3.16A","coreAzi":55,"coreDip":54,"bedStrike":265,"bedDip":64,"data":[{"visible":false,"include":false,"step":"20","x":4757.333333333333,"y":1047.047619047619,"z":352.95238095238096,"a95":1.7,"info":"\"14-09-15\" at \"16:51\""},{"visible":true,"include":false,"step":"100","x":5309.714285714285,"y":-846.0952380952381,"z":269.6190476190476,"a95":1.6,"info":"\"14-09-15\" at \"20:54\""},{"visible":true,"include":false,"step":"150","x":6048.380952380952,"y":-166,"z":-3262.285714285714,"a95":2,"info":"\"14-09-15\" at \"23:23\""},{"visible":true,"include":false,"step":"180","x":5805.619047619048,"y":248.66666666666666,"z":-3832.190476190476,"a95":2.2,"info":"\"14-09-16\" at \"12:20\""},{"visible":true,"include":true,"step":"210","x":4851.142857142857,"y":-802.1904761904761,"z":-3382.5714285714284,"a95":2.3,"info":"\"14-09-16\" at \"15:04\""},{"visible":true,"include":true,"step":"240","x":3977.5238095238096,"y":-708.2857142857143,"z":-2239.714285714286,"a95":2.1,"info":"\"14-09-16\" at \"17:49\""},{"visible":true,"include":true,"step":"270","x":3805.5238095238096,"y":-967.7142857142857,"z":-1937.5238095238096,"a95":2.3,"info":"\"14-09-16\" at \"21:12\""},{"visible":true,"include":true,"step":"300","x":3639.809523809524,"y":-837.6190476190476,"z":-2540.9523809523807,"a95":2.2,"info":"\"14-09-17\" at \"12:05\""},{"visible":true,"include":true,"step":"320","x":3243.809523809524,"y":-533.4285714285714,"z":-1600.1904761904761,"a95":2.2,"info":"\"14-09-17\" at \"15:44\""},{"visible":true,"include":true,"step":"340","x":2815.3333333333335,"y":-382.6666666666667,"z":-1706.095238095238,"a95":2.2,"info":"\"14-09-17\" at \"21:25\""},{"visible":true,"include":true,"step":"370","x":1987.2380952380952,"y":-198.0952380952381,"z":-1936,"a95":2.5,"info":"\"14-09-18\" at \"10:09\""},{"visible":true,"include":true,"step":"390","x":2228.285714285714,"y":-93.33333333333333,"z":-1669.142857142857,"a95":2.4,"info":"\"14-09-18\" at \"13:09\""},{"visible":true,"include":false,"step":"420","x":1724.2857142857142,"y":-202.66666666666666,"z":-2067.904761904762,"a95":2.7,"info":"\"14-09-18\" at \"16:41\""},{"visible":true,"include":false,"step":"450","x":1372.3809523809523,"y":136.85714285714286,"z":-1690.6666666666667,"a95":2.8,"info":"\"14-09-19\" at \"11:32\""},{"visible":true,"include":false,"step":"480","x":1513.2380952380952,"y":-78.57142857142857,"z":-1707.3333333333333,"a95":2.7,"info":"\"14-09-19\" at \"14:18\""},{"visible":true,"include":false,"step":"510","x":1467.7142857142858,"y":-565.2380952380952,"z":-1441.047619047619,"a95":2.6,"info":"\"14-09-19\" at \"16:56\""},{"visible":true,"include":false,"step":"540","x":1314.095238095238,"y":16.476190476190474,"z":-2268.5714285714284,"a95":2.7,"info":"\"14-10-04\" at \"12:36\""},{"visible":true,"include":false,"step":"570","x":572.952380952381,"y":69.9047619047619,"z":-890.7619047619048,"a95":3.8,"info":"\"14-10-04\" at \"15:50\""},{"visible":true,"include":false,"step":"600","x":820.4761904761905,"y":392.4761904761905,"z":20.38095238095238,"a95":2.9,"info":"\"14-10-05\" at \"09:56\""},{"visible":true,"include":false,"step":"630","x":-1180.095238095238,"y":359.04761904761904,"z":-481.14285714285717,"a95":3.7,"info":"\"14-10-05\" at \"12:45\""},{"visible":true,"include":false,"step":"660","x":-497.23809523809524,"y":680.5714285714286,"z":78,"a95":3.7,"info":"\"14-10-05\" at \"16:19\""}]},{"version":"v1.1.0","exported":"2016-11-17T13:22:22.934Z","volume":10.5,"added":"2016-11-17T12:37:06.427Z","format":"Utrecht","demagType":"Unknown","strat":"5","patch":1.1,"GEO":[{"dec":288.2989649760345,"inc":-2.923151351962308,"MAD":3.969292128110422,"cm":[-2.2737367544323206e-13,1.2789769243681803e-13,0],"intensity":11563.887025506812,"type":"GC","origin":false,"forced":true,"remark":"","nSteps":6,"minStep":"4.0","maxStep":"25.0","steps":["4.0","8.0","12.0","16.0","20.0","25.0"],"group":"None","version":"v1.1.0"}],"TECT":[{"dec":272.9029040583316,"inc":-22.17222141931732,"MAD":3.9692921281128264,"cm":[-2.842170943040401e-14,5.115907697472721e-13,1.7053025658242404e-13],"intensity":11563.887025506812,"type":"GC","origin":false,"forced":true,"remark":"","nSteps":6,"minStep":"4.0","maxStep":"25.0","steps":["4.0","8.0","12.0","16.0","20.0","25.0"],"group":"None","version":"v1.1.0"}],"interpreted":true,"name":"AT3.16B","coreAzi":55,"coreDip":54,"bedStrike":265,"bedDip":64,"data":[{"visible":true,"include":false,"step":"0.0","x":4555.523809523809,"y":-4307.238095238095,"z":3826.095238095238,"a95":0.99,"info":"27/08/2014 at 07:32:28"},{"visible":true,"include":true,"step":"4.0","x":5046.190476190476,"y":-4349.238095238095,"z":2980.7619047619046,"a95":0.99,"info":"27/08/2014 at 07:32:28"},{"visible":true,"include":true,"step":"8.0","x":5176.666666666667,"y":-3985.809523809524,"z":2238.190476190476,"a95":0.99,"info":"27/08/2014 at 07:32:28"},{"visible":true,"include":true,"step":"12.0","x":5034.952380952381,"y":-3635.6190476190477,"z":1551.904761904762,"a95":0.99,"info":"27/08/2014 at 07:32:28"},{"visible":true,"include":true,"step":"16.0","x":4432.571428571428,"y":-3067.6190476190477,"z":1148.4761904761904,"a95":0.99,"info":"27/08/2014 at 07:32:28"},{"visible":true,"include":true,"step":"20.0","x":3733.3333333333335,"y":-2657.714285714286,"z":1285.6190476190477,"a95":0.99,"info":"27/08/2014 at 07:32:28"},{"visible":true,"include":true,"step":"25.0","x":3541.714285714286,"y":-2430.5714285714284,"z":761.6380952380953,"a95":0.99,"info":"27/08/2014 at 07:32:28"},{"visible":true,"include":false,"step":"30.0","x":3182.6666666666665,"y":-2282.8571428571427,"z":990.1904761904761,"a95":0.99,"info":"27/08/2014 at 07:32:28"},{"visible":true,"include":false,"step":"35.0","x":2174.8571428571427,"y":-2717.4285714285716,"z":797.8571428571429,"a95":0.99,"info":"27/08/2014 at 07:32:28"},{"visible":true,"include":false,"step":"40.0","x":1941.8095238095239,"y":-1336.6666666666667,"z":1008.4761904761905,"a95":0.99,"info":"27/08/2014 at 07:32:28"},{"visible":true,"include":false,"step":"45.0","x":2403.904761904762,"y":-1585.047619047619,"z":781.8666666666667,"a95":0.99,"info":"27/08/2014 at 07:32:28"},{"visible":true,"include":false,"step":"50.0","x":1643.3333333333333,"y":-2336.4761904761904,"z":1149.904761904762,"a95":0.99,"info":"27/08/2014 at 07:32:28"},{"visible":true,"include":false,"step":"60.0","x":2190.190476190476,"y":-1348.4761904761904,"z":-146.0285714285714,"a95":0.99,"info":"27/08/2014 at 07:32:28"},{"visible":true,"include":false,"step":"70.0","x":2189.904761904762,"y":-2139.0476190476193,"z":470.3333333333333,"a95":0.99,"info":"27/08/2014 at 07:32:28"},{"visible":true,"include":false,"step":"80.0","x":-1778.952380952381,"y":-2602.285714285714,"z":-402.2095238095238,"a95":0.99,"info":"27/08/2014 at 07:32:28"},{"visible":true,"include":false,"step":"90.0","x":634.5904761904761,"y":-1727.4285714285713,"z":411.1714285714286,"a95":0.99,"info":"27/08/2014 at 07:32:28"},{"visible":true,"include":false,"step":"100.0","x":1949.047619047619,"y":-612.1714285714286,"z":164.96190476190475,"a95":0.99,"info":"27/08/2014 at 07:32:28"}]},{"version":"v1.1.0","exported":"2016-11-17T13:22:22.934Z","volume":10.5,"added":"2016-11-17T12:37:06.427Z","format":"Utrecht","demagType":"Unknown","strat":null,"patch":1.1,"GEO":[{"dec":35.36879296025927,"inc":-64.37421989299393,"MAD":5.482799718807911,"cm":[-1.0302869668521453e-13,2.2737367544323206e-13,0],"intensity":7693.669780072916,"type":"dir","forced":true,"remark":"","origin":false,"nSteps":8,"minStep":"210","maxStep":"390","steps":["210","240","270","300","320","340","370","390"],"group":"None","version":"v1.1.0"}],"TECT":[{"dec":152.18595505791245,"inc":-43.74222517305363,"MAD":5.482799718807893,"cm":[-2.984279490192421e-13,-1.4210854715202004e-14,3.126388037344441e-13],"intensity":7693.669780072916,"type":"dir","forced":true,"remark":"","origin":false,"nSteps":8,"minStep":"210","maxStep":"390","steps":["210","240","270","300","320","340","370","390"],"group":"None","version":"v1.1.0"}],"interpreted":true,"name":"AT3.17A","coreAzi":55,"coreDip":52,"bedStrike":265,"bedDip":64,"data":[{"visible":false,"include":false,"step":"20","x":2073.714285714286,"y":-2071.6190476190477,"z":5630.571428571428,"a95":3,"info":"\"14-09-15\" at \"16:54\""},{"visible":true,"include":false,"step":"100","x":3732,"y":-1913.7142857142858,"z":2491.3333333333335,"a95":2.4,"info":"\"14-09-15\" at \"20:56\""},{"visible":true,"include":false,"step":"150","x":5343.428571428572,"y":-719.5238095238095,"z":-1934.1904761904761,"a95":2,"info":"\"14-09-15\" at \"23:25\""},{"visible":true,"include":false,"step":"180","x":4941.428571428572,"y":-476.6666666666667,"z":-2588.4761904761904,"a95":2.1,"info":"\"14-09-16\" at \"12:23\""},{"visible":true,"include":true,"step":"210","x":4609.238095238095,"y":-803.3333333333334,"z":-1996.6666666666667,"a95":2.1,"info":"\"14-09-16\" at \"15:07\""},{"visible":true,"include":true,"step":"240","x":4040.7619047619046,"y":-867.1428571428571,"z":-2087.904761904762,"a95":2.3,"info":"\"14-09-16\" at \"17:51\""},{"visible":true,"include":true,"step":"270","x":3603.6190476190477,"y":-837.7142857142857,"z":-1970.1904761904761,"a95":2.4,"info":"\"14-09-16\" at \"21:16\""},{"visible":true,"include":true,"step":"300","x":3597.1428571428573,"y":-1024.5714285714287,"z":-2154.285714285714,"a95":2.3,"info":"\"14-09-17\" at \"12:07\""},{"visible":true,"include":true,"step":"320","x":3054.5714285714284,"y":-492.4761904761905,"z":-1864.5714285714287,"a95":2.5,"info":"\"14-09-17\" at \"15:47\""},{"visible":true,"include":true,"step":"340","x":3092.5714285714284,"y":-126.76190476190476,"z":-1816,"a95":2.3,"info":"\"14-09-17\" at \"21:27\""},{"visible":true,"include":true,"step":"370","x":2953.1428571428573,"y":-104.28571428571429,"z":-1243.5238095238096,"a95":2.3,"info":"\"14-09-18\" at \"10:11\""},{"visible":true,"include":true,"step":"390","x":2319.6190476190477,"y":114.57142857142857,"z":-1275.8095238095239,"a95":2.8,"info":"\"14-09-18\" at \"13:11\""},{"visible":true,"include":false,"step":"420","x":2055.5238095238096,"y":-174.0952380952381,"z":-1555.2380952380952,"a95":2.5,"info":"\"14-09-18\" at \"16:43\""},{"visible":false,"include":false,"step":"450","x":1505.7142857142858,"y":-398.57142857142856,"z":-1731.904761904762,"a95":2.8,"info":"\"14-09-19\" at \"11:35\""},{"visible":true,"include":false,"step":"480","x":1635.047619047619,"y":-344.76190476190476,"z":-758.2857142857143,"a95":3,"info":"\"14-09-19\" at \"14:20\""},{"visible":true,"include":false,"step":"510","x":957.047619047619,"y":-113.52380952380952,"z":-12.476190476190476,"a95":4,"info":"\"14-09-19\" at \"16:59\""},{"visible":true,"include":false,"step":"540","x":843.4285714285714,"y":416.95238095238096,"z":1000.6666666666666,"a95":3.2,"info":"\"14-10-04\" at \"12:38\""},{"visible":true,"include":false,"step":"570","x":158.66666666666666,"y":-480.3809523809524,"z":333.6190476190476,"a95":6.3,"info":"\"14-10-04\" at \"15:52\""},{"visible":true,"include":false,"step":"600","x":-36.666666666666664,"y":-7.714285714285714,"z":-456.3809523809524,"a95":5,"info":"\"14-10-05\" at \"09:58\""},{"visible":true,"include":false,"step":"630","x":551.4285714285714,"y":1285.8095238095239,"z":-286,"a95":4.2,"info":"\"14-10-05\" at \"12:48\""},{"visible":true,"include":false,"step":"660","x":-586.5714285714286,"y":96.95238095238095,"z":-1820.952380952381,"a95":3,"info":"\"14-10-05\" at \"16:21\""}]},{"version":"v1.1.0","exported":"2016-11-17T13:22:22.934Z","volume":10.5,"added":"2016-11-17T12:37:06.428Z","format":"Utrecht","demagType":"Unknown","strat":"6","patch":1.1,"GEO":[{"dec":281.26655248710273,"inc":-60.60556764663733,"MAD":2.637479491169451,"cm":[-1.1368683772161603e-13,1.1368683772161603e-13,0],"intensity":16578.340304907066,"type":"GC","origin":false,"forced":true,"remark":"","nSteps":4,"minStep":"4.0","maxStep":"16.0","steps":["4.0","8.0","12.0","16.0"],"group":"None","version":"v1.1.0"}],"TECT":[{"dec":208.0984875584827,"inc":-30.36478176358013,"MAD":2.637479491169719,"cm":[-2.8421709430404007e-13,-7.958078640513122e-13,0],"intensity":16578.340304907066,"type":"GC","origin":false,"forced":true,"remark":"","nSteps":4,"minStep":"4.0","maxStep":"16.0","steps":["4.0","8.0","12.0","16.0"],"group":"None","version":"v1.1.0"}],"interpreted":true,"name":"AT3.17B","coreAzi":55,"coreDip":52,"bedStrike":265,"bedDip":64,"data":[{"visible":false,"include":false,"step":"0.0","x":6056.857142857143,"y":-9073.904761904761,"z":5152.857142857143,"a95":0.99,"info":"27/08/2014 at 07:32:28"},{"visible":true,"include":true,"step":"4.0","x":6903.238095238095,"y":-5657.809523809524,"z":4348.380952380952,"a95":0.99,"info":"27/08/2014 at 07:32:28"},{"visible":true,"include":true,"step":"8.0","x":7046.761904761905,"y":-3212.4761904761904,"z":3297.1428571428573,"a95":0.99,"info":"27/08/2014 at 07:32:28"},{"visible":true,"include":true,"step":"12.0","x":6528.380952380952,"y":-2378.4761904761904,"z":2887.2380952380954,"a95":0.99,"info":"27/08/2014 at 07:32:28"},{"visible":true,"include":true,"step":"16.0","x":6235.238095238095,"y":-1669.8095238095239,"z":2617.809523809524,"a95":0.99,"info":"27/08/2014 at 07:32:28"},{"visible":true,"include":false,"step":"20.0","x":5874.285714285715,"y":-1492.952380952381,"z":2106.6666666666665,"a95":0.99,"info":"27/08/2014 at 07:32:28"},{"visible":true,"include":false,"step":"25.0","x":4597.619047619048,"y":-660.1619047619048,"z":2153.809523809524,"a95":0.99,"info":"27/08/2014 at 07:32:28"},{"visible":true,"include":false,"step":"30.0","x":4598,"y":-600.4857142857143,"z":1406.1904761904761,"a95":0.99,"info":"27/08/2014 at 07:32:28"},{"visible":true,"include":false,"step":"35.0","x":3228.095238095238,"y":-1937.2380952380952,"z":1922.5714285714287,"a95":0.99,"info":"27/08/2014 at 07:32:28"},{"visible":true,"include":false,"step":"40.0","x":2817.0476190476193,"y":-542.6095238095238,"z":1733.047619047619,"a95":0.99,"info":"27/08/2014 at 07:32:28"},{"visible":true,"include":false,"step":"45.0","x":3179.714285714286,"y":-556.3238095238095,"z":830.2095238095238,"a95":0.99,"info":"27/08/2014 at 07:32:28"},{"visible":true,"include":false,"step":"50.0","x":1998.3809523809523,"y":-2054.095238095238,"z":962.4761904761905,"a95":0.99,"info":"27/08/2014 at 07:32:28"},{"visible":true,"include":false,"step":"60.0","x":2319.5238095238096,"y":376,"z":1107.6190476190477,"a95":0.99,"info":"27/08/2014 at 07:32:28"},{"visible":true,"include":false,"step":"70.0","x":2860.190476190476,"y":-49.89047619047619,"z":-294.93333333333334,"a95":0.99,"info":"27/08/2014 at 07:32:28"},{"visible":true,"include":false,"step":"80.0","x":1144.2857142857142,"y":-1832.4761904761904,"z":-169.3047619047619,"a95":0.99,"info":"27/08/2014 at 07:32:28"},{"visible":true,"include":false,"step":"90.0","x":1843.7142857142858,"y":-52.841904761904765,"z":221.57142857142858,"a95":0.99,"info":"27/08/2014 at 07:32:28"},{"visible":true,"include":false,"step":"100.0","x":2321.4285714285716,"y":-120.77142857142856,"z":-418.8952380952381,"a95":0.99,"info":"27/08/2014 at 07:32:28"}]},{"version":"v1.1.0","exported":"2016-11-17T13:22:22.934Z","volume":0.99,"added":"2016-11-17T12:37:06.429Z","format":"Utrecht","demagType":"Unknown","strat":"-5.5691E+4","patch":1.1,"GEO":[],"TECT":[],"interpreted":false,"name":"0.0","coreAzi":-58605,"coreDip":-46411,"bedStrike":null,"bedDip":null,"data":[{"visible":true,"include":false,"step":"10.0","x":59616.16161616162,"y":-37470.707070707074,"z":28945.454545454544,"a95":0.99,"info":"07/07/2015 at 21:32:23"},{"visible":true,"include":false,"step":"15.0","x":50597.979797979795,"y":-34126.26262626263,"z":26793.939393939396,"a95":0.99,"info":"07/07/2015 at 21:32:23"},{"visible":true,"include":false,"step":"20.0","x":45929.29292929293,"y":-31618.18181818182,"z":24191.91919191919,"a95":0.99,"info":"07/07/2015 at 21:32:23"},{"visible":true,"include":false,"step":"23.0","x":46958.58585858586,"y":-27968.68686868687,"z":25108.08080808081,"a95":0.99,"info":"07/07/2015 at 21:32:23"},{"visible":true,"include":false,"step":"25.0","x":44434.343434343435,"y":-28112.121212121212,"z":19520.20202020202,"a95":0.99,"info":"07/07/2015 at 21:32:23"},{"visible":true,"include":false,"step":"30.0","x":43984.84848484849,"y":-22779.79797979798,"z":30667.676767676767,"a95":0.99,"info":"07/07/2015 at 21:32:23"},{"visible":true,"include":false,"step":"33.0","x":36260.606060606064,"y":-26496.969696969696,"z":22272.727272727272,"a95":0.99,"info":"07/07/2015 at 21:32:23"},{"visible":true,"include":false,"step":"35.0","x":30168.68686868687,"y":-31241.41414141414,"z":27845.454545454544,"a95":0.99,"info":"07/07/2015 at 21:32:23"},{"visible":true,"include":false,"step":"40.0","x":25720.20202020202,"y":-19081.818181818184,"z":30512.121212121212,"a95":0.99,"info":"07/07/2015 at 21:32:23"},{"visible":true,"include":false,"step":"45.0","x":32510.10101010101,"y":-16162.626262626263,"z":24385.858585858587,"a95":0.99,"info":"07/07/2015 at 21:32:23"},{"visible":true,"include":false,"step":"50.0","x":23353.535353535353,"y":-26942.424242424244,"z":20682.828282828283,"a95":0.99,"info":"07/07/2015 at 21:32:23"},{"visible":true,"include":false,"step":"55.0","x":17873.737373737375,"y":-10654.545454545454,"z":17406.060606060608,"a95":0.99,"info":"07/07/2015 at 21:32:23"},{"visible":true,"include":false,"step":"60.0","x":16801.010101010103,"y":-9651.111111111111,"z":8069.292929292929,"a95":0.99,"info":"07/07/2015 at 21:32:23"},{"visible":true,"include":false,"step":"65.0","x":18013.131313131315,"y":-25841.41414141414,"z":9406.666666666668,"a95":0.99,"info":"07/07/2015 at 21:32:23"},{"visible":true,"include":false,"step":"70.0","x":10162.626262626263,"y":-6992.929292929293,"z":16719.19191919192,"a95":0.99,"info":"07/07/2015 at 21:32:23"},{"visible":true,"include":false,"step":"80.0","x":52180.80808080808,"y":-11679.79797979798,"z":-9147.676767676769,"a95":0.99,"info":"07/07/2015 at 21:32:23"}]},{"version":"v1.1.0","exported":"2016-11-17T13:22:22.934Z","volume":10.5,"added":"2016-11-17T12:37:06.430Z","format":"Utrecht","demagType":"Unknown","strat":"7","patch":1.1,"GEO":[{"dec":283.22676157301214,"inc":-12.238601722043121,"MAD":7.167528219884528,"cm":[2.2737367544323206e-13,3.410605131648481e-13,0],"intensity":15368.248215866695,"type":"GC","origin":false,"forced":true,"remark":"","nSteps":3,"minStep":"4.0","maxStep":"12.0","steps":["4.0","8.0","12.0"],"group":"None","version":"v1.1.0"}],"TECT":[{"dec":261.5148365223463,"inc":-21.57149099987178,"MAD":7.167528219884673,"cm":[-2.2737367544323206e-13,-2.2737367544323206e-13,-2.2737367544323206e-13],"intensity":15368.248215866692,"type":"GC","origin":false,"forced":true,"remark":"","nSteps":3,"minStep":"4.0","maxStep":"12.0","steps":["4.0","8.0","12.0"],"group":"None","version":"v1.1.0"}],"interpreted":true,"name":"AT3.18B","coreAzi":48,"coreDip":54,"bedStrike":265,"bedDip":64,"data":[{"visible":false,"include":false,"step":"0.0","x":4322.666666666667,"y":-5234.952380952381,"z":6456.666666666667,"a95":0.99,"info":"27/08/2014 at 07:32:28"},{"visible":true,"include":true,"step":"4.0","x":4737.9047619047615,"y":-5012.571428571428,"z":5060.0952380952385,"a95":0.99,"info":"27/08/2014 at 07:32:28"},{"visible":true,"include":true,"step":"8.0","x":4870.857142857143,"y":-4370.952380952381,"z":3571.5238095238096,"a95":0.99,"info":"27/08/2014 at 07:32:28"},{"visible":true,"include":true,"step":"12.0","x":5035.523809523809,"y":-3755.4285714285716,"z":2926.4761904761904,"a95":0.99,"info":"27/08/2014 at 07:32:28"},{"visible":true,"include":false,"step":"16.0","x":4706.761904761905,"y":-3133.2380952380954,"z":2140,"a95":0.99,"info":"27/08/2014 at 07:32:28"},{"visible":true,"include":false,"step":"20.0","x":4526.666666666667,"y":-2942.285714285714,"z":1950.5714285714287,"a95":0.99,"info":"27/08/2014 at 07:32:28"},{"visible":true,"include":false,"step":"25.0","x":3852.9523809523807,"y":-3006.3809523809523,"z":2085.1428571428573,"a95":0.99,"info":"27/08/2014 at 07:32:28"},{"visible":true,"include":false,"step":"30.0","x":3229.3333333333335,"y":-2496.5714285714284,"z":1622.5714285714287,"a95":0.99,"info":"27/08/2014 at 07:32:28"},{"visible":true,"include":false,"step":"35.0","x":2916.190476190476,"y":-2770.285714285714,"z":1764.6666666666667,"a95":0.99,"info":"27/08/2014 at 07:32:28"},{"visible":true,"include":false,"step":"40.0","x":2614,"y":-2331.904761904762,"z":1722.4761904761904,"a95":0.99,"info":"27/08/2014 at 07:32:28"},{"visible":false,"include":false,"step":"45.0","x":2775.6190476190477,"y":-838.4857142857143,"z":1853.904761904762,"a95":0.99,"info":"27/08/2014 at 07:32:28"},{"visible":false,"include":false,"step":"50.0","x":1809.7142857142858,"y":-2634.3809523809523,"z":897.352380952381,"a95":0.99,"info":"27/08/2014 at 07:32:28"},{"visible":true,"include":false,"step":"60.0","x":1754.4761904761904,"y":-1500.095238095238,"z":1310.952380952381,"a95":0.99,"info":"27/08/2014 at 07:32:28"},{"visible":true,"include":false,"step":"70.0","x":2831.5238095238096,"y":-981.047619047619,"z":-55.82285714285714,"a95":0.99,"info":"27/08/2014 at 07:32:28"},{"visible":true,"include":false,"step":"80.0","x":1828.857142857143,"y":-2304.095238095238,"z":-822.352380952381,"a95":0.99,"info":"27/08/2014 at 07:32:28"},{"visible":true,"include":false,"step":"90.0","x":1532.4761904761904,"y":-395.5238095238095,"z":202.50476190476192,"a95":0.99,"info":"27/08/2014 at 07:32:28"},{"visible":true,"include":false,"step":"100.0","x":943.5523809523809,"y":-1095.8095238095239,"z":-1330.5714285714287,"a95":0.99,"info":"27/08/2014 at 07:32:28"}]}]
