# Supplementary material for: Paleomagnetic constraints on the timing and distribution of Cenozoic rotations in Central and Eastern Anatolia
Source: Copernicus journal article supplement (doi:10.5194/se-9-295-2018), 2018-03-21
Supplement: Supplementary file 2 [file se-9-295-2018-supplement.zip › se-2017-66_DATA_dir files/dir files Ulukisla/AT4.dir]

[{"version":"v1.1.0","exported":"2016-11-17T14:24:53.044Z","volume":10.5,"added":"2016-11-17T14:05:00.229Z","format":"Utrecht","demagType":"Unknown","strat":null,"patch":1.1,"GEO":[],"TECT":[],"interpreted":false,"name":"AT4.1A","coreAzi":24,"coreDip":53,"bedStrike":286,"bedDip":55,"data":[{"visible":true,"include":false,"step":"20","x":4037.809523809524,"y":-1353.3333333333333,"z":40080.380952380954,"a95":3.1,"info":"\"14-08-11\" at \"16:48\""},{"visible":true,"include":false,"step":"100","x":-826.6666666666666,"y":-758.6666666666666,"z":14014.190476190477,"a95":2.7,"info":"\"14-08-11\" at \"20:30\""},{"visible":true,"include":false,"step":"150","x":-75.52380952380952,"y":-149.42857142857142,"z":5578.761904761905,"a95":3.2,"info":"\"14-08-11\" at \"23:04\""},{"visible":true,"include":false,"step":"180","x":100.66666666666667,"y":491.9047619047619,"z":3544.4761904761904,"a95":3.1,"info":"\"14-08-12\" at \"15:28\""},{"visible":true,"include":false,"step":"210","x":-735.5238095238095,"y":826.1904761904761,"z":2590.190476190476,"a95":3.5,"info":"\"14-08-12\" at \"18:09\""},{"visible":true,"include":false,"step":"240","x":-839.4285714285714,"y":-904.0952380952381,"z":-328.0952380952381,"a95":5.3,"info":"\"14-08-12\" at \"21:12\""},{"visible":true,"include":false,"step":"270","x":-1028.857142857143,"y":768.0952380952381,"z":-874.6666666666666,"a95":3.9,"info":"\"14-08-13\" at \"15:10\""},{"visible":true,"include":false,"step":"300","x":-744.7619047619048,"y":1051.8095238095239,"z":-473.04761904761904,"a95":6.4,"info":"\"14-08-13\" at \"17:52\""},{"visible":true,"include":false,"step":"320","x":473.9047619047619,"y":1368.095238095238,"z":-748.1904761904761,"a95":4.2,"info":"\"14-08-13\" at \"20:58\""},{"visible":true,"include":false,"step":"340","x":-443.6190476190476,"y":2367.3333333333335,"z":-1009.4285714285714,"a95":2.5,"info":"\"14-08-14\" at \"13:54\""},{"visible":true,"include":false,"step":"370","x":-2320.095238095238,"y":377.3333333333333,"z":-273.6190476190476,"a95":4.2,"info":"\"14-08-14\" at \"16:59\""},{"visible":true,"include":false,"step":"400","x":-435.04761904761904,"y":1352.857142857143,"z":135.9047619047619,"a95":4.9,"info":"\"14-08-14\" at \"20:12\""},{"visible":true,"include":false,"step":"430","x":-1225.3333333333333,"y":1698.952380952381,"z":-818.0952380952381,"a95":3.1,"info":"\"14-08-14\" at \"23:28\""},{"visible":true,"include":false,"step":"460","x":-629.1428571428571,"y":191.04761904761904,"z":-36.38095238095238,"a95":10.4,"info":"\"14-08-15\" at \"16:07\""},{"visible":true,"include":false,"step":"490","x":118.19047619047619,"y":-282.2857142857143,"z":369.23809523809524,"a95":11.1,"info":"\"14-08-15\" at \"19:11\""},{"visible":true,"include":false,"step":"510","x":-545.1428571428571,"y":273.7142857142857,"z":-1675.6190476190477,"a95":3.9,"info":"\"14-08-15\" at \"22:24\""},{"visible":true,"include":false,"step":"540","x":810.0952380952381,"y":1822,"z":-1626.3809523809523,"a95":2.7,"info":"\"14-08-16\" at \"12:42\""},{"visible":true,"include":false,"step":"570","x":-674.1904761904761,"y":1038.3809523809523,"z":-488.2857142857143,"a95":3.6,"info":"\"14-08-16\" at \"15:29\""},{"visible":true,"include":false,"step":"600","x":-582.6666666666666,"y":-582.7619047619048,"z":-610.952380952381,"a95":7,"info":"\"14-08-16\" at \"18:10\""}]},{"version":"v1.1.0","exported":"2016-11-17T14:24:53.045Z","volume":10.5,"added":"2016-11-17T14:05:00.230Z","format":"Utrecht","demagType":"Unknown","strat":"3","patch":1.1,"GEO":[{"dec":10.769605794126562,"inc":55.808752598063855,"MAD":2.073720526640858,"cm":[13581.18656178539,7614.040714149289,20227.424458693014],"intensity":33507.08048503161,"type":"dir","forced":false,"remark":"","origin":false,"nSteps":5,"minStep":"4.0","maxStep":"20.0","steps":["4.0","8.0","12.0","16.0","20.0"],"group":"None","version":"v1.1.0"}],"TECT":[{"dec":13.06316077453954,"inc":0.9185852908912617,"MAD":2.0737205266407925,"cm":[23297.046498422405,10400.018719658825,-811.2827718900272],"intensity":33507.080485031605,"type":"dir","forced":false,"remark":"","origin":false,"nSteps":5,"minStep":"4.0","maxStep":"20.0","steps":["4.0","8.0","12.0","16.0","20.0"],"group":"None","version":"v1.1.0"}],"interpreted":true,"name":"AT4.2A","coreAzi":349,"coreDip":49,"bedStrike":286,"bedDip":55,"data":[{"visible":true,"include":false,"step":"0.0","x":-9149.142857142857,"y":16091.42857142857,"z":51510.47619047619,"a95":0.99,"info":"16/08/2014 at 04:56:40"},{"visible":true,"include":true,"step":"4.0","x":-7452.952380952381,"y":14226.666666666666,"z":42812.380952380954,"a95":0.99,"info":"16/08/2014 at 04:56:40"},{"visible":true,"include":true,"step":"8.0","x":-5248.761904761905,"y":11129.52380952381,"z":28192.380952380954,"a95":0.99,"info":"16/08/2014 at 04:56:40"},{"visible":true,"include":true,"step":"12.0","x":-3291.904761904762,"y":9839.047619047618,"z":20077.14285714286,"a95":0.99,"info":"16/08/2014 at 04:56:40"},{"visible":true,"include":true,"step":"16.0","x":-2635.2380952380954,"y":8045.9047619047615,"z":13820,"a95":0.99,"info":"16/08/2014 at 04:56:40"},{"visible":true,"include":true,"step":"20.0","x":-2897.714285714286,"y":7086.666666666667,"z":10393.333333333334,"a95":0.99,"info":"16/08/2014 at 04:56:40"},{"visible":true,"include":false,"step":"25.0","x":-1007.3333333333334,"y":4959.333333333333,"z":7354.0952380952385,"a95":0.99,"info":"16/08/2014 at 04:56:40"},{"visible":true,"include":false,"step":"30.0","x":-2242.4761904761904,"y":4766.761904761905,"z":4504.285714285715,"a95":0.99,"info":"16/08/2014 at 04:56:40"},{"visible":true,"include":false,"step":"35.0","x":-1482.4761904761904,"y":3839.5238095238096,"z":2475.1428571428573,"a95":0.99,"info":"16/08/2014 at 04:56:40"},{"visible":true,"include":false,"step":"40.0","x":-309.5333333333333,"y":3976.285714285714,"z":2439.809523809524,"a95":0.99,"info":"16/08/2014 at 04:56:40"},{"visible":true,"include":false,"step":"45.0","x":-760.9142857142857,"y":3857.5238095238096,"z":568.0285714285715,"a95":0.99,"info":"16/08/2014 at 04:56:40"},{"visible":false,"include":false,"step":"50.0","x":-104.94285714285715,"y":2852.9523809523807,"z":833.5333333333334,"a95":0.99,"info":"16/08/2014 at 04:56:40"},{"visible":false,"include":false,"step":"60.0","x":337.8285714285714,"y":3522.3809523809523,"z":-542.8380952380952,"a95":0.99,"info":"16/08/2014 at 04:56:40"},{"visible":false,"include":false,"step":"70.0","x":-44.976190476190474,"y":5080.285714285715,"z":-1261.6190476190477,"a95":0.99,"info":"16/08/2014 at 04:56:40"},{"visible":false,"include":false,"step":"80.0","x":2494.6666666666665,"y":1521.6190476190477,"z":-2674.6666666666665,"a95":0.99,"info":"16/08/2014 at 04:56:40"},{"visible":false,"include":false,"step":"90.0","x":584.2476190476191,"y":2549.714285714286,"z":-1596.5714285714287,"a95":0.99,"info":"16/08/2014 at 04:56:40"},{"visible":false,"include":false,"step":"100.0","x":2054.4761904761904,"y":2145.904761904762,"z":-2828.190476190476,"a95":0.99,"info":"16/08/2014 at 04:56:40"}]},{"version":"v1.1.0","exported":"2016-11-17T14:24:53.045Z","volume":10.5,"added":"2016-11-17T14:05:00.230Z","format":"Utrecht","demagType":"Unknown","strat":"4","patch":1.1,"GEO":[{"dec":19.151720464955588,"inc":50.04795376041369,"MAD":6.4104099797223375,"cm":[0,-3.126388037344441e-13,0],"intensity":19352.60898206488,"type":"dir","forced":true,"remark":"","origin":false,"nSteps":6,"minStep":"4.0","maxStep":"25.0","steps":["4.0","8.0","12.0","16.0","20.0","25.0"],"group":"None","version":"v1.1.0"}],"TECT":[{"dec":18.030709219492564,"inc":-4.906290997657564,"MAD":6.410409979722321,"cm":[-6.252776074688882e-13,1.7053025658242404e-12,-1.5631940186722204e-13],"intensity":19352.60898206488,"type":"dir","forced":true,"remark":"","origin":false,"nSteps":6,"minStep":"4.0","maxStep":"25.0","steps":["4.0","8.0","12.0","16.0","20.0","25.0"],"group":"None","version":"v1.1.0"}],"interpreted":true,"name":"AT4.3A","coreAzi":19,"coreDip":55,"bedStrike":286,"bedDip":55,"data":[{"visible":true,"include":false,"step":"0.0","x":136.82857142857142,"y":-1521.4285714285713,"z":18511.428571428572,"a95":0.99,"info":"16/08/2014 at 04:56:40"},{"visible":true,"include":true,"step":"4.0","x":601.9047619047619,"y":-1021.2380952380952,"z":15869.52380952381,"a95":0.99,"info":"16/08/2014 at 04:56:40"},{"visible":true,"include":true,"step":"8.0","x":933.6380952380953,"y":34.27142857142857,"z":11078.095238095239,"a95":0.99,"info":"16/08/2014 at 04:56:40"},{"visible":true,"include":true,"step":"12.0","x":1447.904761904762,"y":556.3428571428572,"z":7666,"a95":0.99,"info":"16/08/2014 at 04:56:40"},{"visible":true,"include":true,"step":"16.0","x":857.4666666666666,"y":662.6095238095238,"z":5710,"a95":0.99,"info":"16/08/2014 at 04:56:40"},{"visible":true,"include":true,"step":"20.0","x":831.1428571428571,"y":1038.7619047619048,"z":4165.809523809524,"a95":0.99,"info":"16/08/2014 at 04:56:40"},{"visible":true,"include":true,"step":"25.0","x":981.2380952380952,"y":1185.3333333333333,"z":3417.5238095238096,"a95":0.99,"info":"16/08/2014 at 04:56:40"},{"visible":true,"include":false,"step":"30.0","x":655.0380952380953,"y":1532.1904761904761,"z":1826.095238095238,"a95":0.99,"info":"16/08/2014 at 04:56:40"},{"visible":true,"include":false,"step":"35.0","x":1139.3333333333333,"y":885.5142857142857,"z":1456.6666666666667,"a95":0.99,"info":"16/08/2014 at 04:56:40"},{"visible":true,"include":false,"step":"40.0","x":921.8,"y":1161.904761904762,"z":1196.857142857143,"a95":0.99,"info":"16/08/2014 at 04:56:40"},{"visible":true,"include":false,"step":"45.0","x":744.0190476190476,"y":1743.142857142857,"z":981.7142857142857,"a95":0.99,"info":"16/08/2014 at 04:56:40"},{"visible":true,"include":false,"step":"50.0","x":554.104761904762,"y":704.8857142857144,"z":169.0952380952381,"a95":0.99,"info":"16/08/2014 at 04:56:40"},{"visible":true,"include":false,"step":"60.0","x":782.2761904761904,"y":1082.095238095238,"z":-116.41904761904763,"a95":0.99,"info":"16/08/2014 at 04:56:40"},{"visible":false,"include":false,"step":"70.0","x":-372.22857142857146,"y":611.5904761904761,"z":-672.495238095238,"a95":0.99,"info":"16/08/2014 at 04:56:40"},{"visible":false,"include":false,"step":"80.0","x":-545.3523809523809,"y":554.7428571428571,"z":-1053.8095238095239,"a95":0.99,"info":"16/08/2014 at 04:56:40"},{"visible":false,"include":false,"step":"90.0","x":830.9142857142857,"y":1062.1904761904761,"z":547.6857142857143,"a95":0.99,"info":"16/08/2014 at 04:56:40"},{"visible":false,"include":false,"step":"100.0","x":594.0190476190476,"y":1377.2380952380952,"z":-428.72380952380956,"a95":0.99,"info":"16/08/2014 at 04:56:40"}]},{"version":"v1.1.0","exported":"2016-11-17T14:24:53.045Z","volume":10.5,"added":"2016-11-17T14:05:00.232Z","format":"Utrecht","demagType":"Unknown","strat":"5","patch":1.1,"GEO":[{"dec":306.95734992636176,"inc":-15.95983217694312,"MAD":11.239635720609144,"cm":[0,-2.4158453015843406e-13,0],"intensity":21455.326692872062,"type":"GC","origin":false,"forced":true,"remark":"","nSteps":6,"minStep":"4.0","maxStep":"25.0","steps":["4.0","8.0","12.0","16.0","20.0","25.0"],"group":"None","version":"v1.1.0"}],"TECT":[{"dec":284.21430455578985,"inc":-26.066095051300195,"MAD":11.239635720609348,"cm":[-3.410605131648481e-13,4.831690603168681e-13,0],"intensity":21455.326692872062,"type":"GC","origin":false,"forced":true,"remark":"","nSteps":6,"minStep":"4.0","maxStep":"25.0","steps":["4.0","8.0","12.0","16.0","20.0","25.0"],"group":"None","version":"v1.1.0"}],"interpreted":true,"name":"AT4.4A","coreAzi":363,"coreDip":52,"bedStrike":286,"bedDip":55,"data":[{"visible":true,"include":false,"step":"0.0","x":-1087.7142857142858,"y":1958.7619047619048,"z":19650.47619047619,"a95":0.99,"info":"16/08/2014 at 04:56:40"},{"visible":true,"include":true,"step":"4.0","x":-628.2,"y":1833.142857142857,"z":16726.666666666668,"a95":0.99,"info":"16/08/2014 at 04:56:40"},{"visible":true,"include":true,"step":"8.0","x":-404.1904761904762,"y":1616.2857142857142,"z":11892.380952380952,"a95":0.99,"info":"16/08/2014 at 04:56:40"},{"visible":true,"include":true,"step":"12.0","x":71.24571428571429,"y":1245.4285714285713,"z":8518.285714285714,"a95":0.99,"info":"16/08/2014 at 04:56:40"},{"visible":true,"include":true,"step":"16.0","x":381.6380952380952,"y":1000.1904761904761,"z":6238.380952380952,"a95":0.99,"info":"16/08/2014 at 04:56:40"},{"visible":true,"include":true,"step":"20.0","x":400.53333333333336,"y":996.7619047619048,"z":5336.285714285715,"a95":0.99,"info":"16/08/2014 at 04:56:40"},{"visible":true,"include":true,"step":"25.0","x":599.7047619047619,"y":1214.7619047619048,"z":4511.047619047619,"a95":0.99,"info":"16/08/2014 at 04:56:40"},{"visible":true,"include":false,"step":"30.0","x":577.4,"y":1537.5238095238096,"z":2786.285714285714,"a95":0.99,"info":"16/08/2014 at 04:56:40"},{"visible":true,"include":false,"step":"35.0","x":1028.4761904761904,"y":1023.8095238095239,"z":2768.9523809523807,"a95":0.99,"info":"16/08/2014 at 04:56:40"},{"visible":true,"include":false,"step":"40.0","x":530.7714285714286,"y":697.6380952380953,"z":2437.5238095238096,"a95":0.99,"info":"16/08/2014 at 04:56:40"},{"visible":true,"include":false,"step":"45.0","x":845.847619047619,"y":921.6761904761905,"z":1950.1904761904761,"a95":0.99,"info":"16/08/2014 at 04:56:40"},{"visible":true,"include":false,"step":"50.0","x":617.5333333333334,"y":1034.952380952381,"z":924.4285714285714,"a95":0.99,"info":"16/08/2014 at 04:56:40"},{"visible":true,"include":false,"step":"60.0","x":458.4095238095238,"y":842.8,"z":600.1142857142856,"a95":0.99,"info":"16/08/2014 at 04:56:40"},{"visible":false,"include":false,"step":"70.0","x":730.2952380952381,"y":475.99047619047616,"z":-207.36190476190478,"a95":0.99,"info":"16/08/2014 at 04:56:40"},{"visible":false,"include":false,"step":"80.0","x":1180.5714285714287,"y":453.85714285714283,"z":-4.166285714285714,"a95":0.99,"info":"16/08/2014 at 04:56:40"},{"visible":false,"include":false,"step":"90.0","x":838.3904761904762,"y":1113.7142857142858,"z":368.6952380952381,"a95":0.99,"info":"16/08/2014 at 04:56:40"},{"visible":false,"include":false,"step":"100.0","x":471.847619047619,"y":756.5142857142857,"z":2.419047619047619,"a95":0.99,"info":"16/08/2014 at 04:56:40"}]},{"version":"v1.1.0","exported":"2016-11-17T14:24:53.045Z","volume":10.5,"added":"2016-11-17T14:05:00.233Z","format":"Utrecht","demagType":"Unknown","strat":"8","patch":1.1,"GEO":[{"dec":328.38327803255464,"inc":-26.59870825215124,"MAD":11.991059226310199,"cm":[-1.1368683772161603e-13,9.947598300641403e-14,0],"intensity":3628.6949260228826,"type":"GC","origin":false,"forced":true,"remark":"","nSteps":5,"minStep":"10.0","maxStep":"35.0","steps":["10.0","15.0","20.0","25.0","35.0"],"group":"None","version":"v1.1.0"}],"TECT":[{"dec":284.17487104541016,"inc":-48.638200211057615,"MAD":11.991059226310213,"cm":[-2.877698079828406e-13,1.7053025658242404e-13,1.5631940186722204e-13],"intensity":3628.694926022883,"type":"GC","origin":false,"forced":true,"remark":"","nSteps":5,"minStep":"10.0","maxStep":"35.0","steps":["10.0","15.0","20.0","25.0","35.0"],"group":"None","version":"v1.1.0"}],"interpreted":true,"name":"AT4.4B","coreAzi":3,"coreDip":52,"bedStrike":286,"bedDip":55,"data":[{"visible":false,"include":false,"step":"0.0","x":-973.5238095238095,"y":1558.095238095238,"z":6366.476190476191,"a95":0.99,"info":"05/11/2014 at 18:18:16"},{"visible":true,"include":true,"step":"10.0","x":332.42857142857144,"y":1254.7619047619048,"z":2885.0476190476193,"a95":0.99,"info":"05/11/2014 at 18:18:16"},{"visible":true,"include":true,"step":"15.0","x":624.3428571428572,"y":954.0952380952381,"z":1449.904761904762,"a95":0.99,"info":"05/11/2014 at 18:18:16"},{"visible":true,"include":true,"step":"20.0","x":711.6857142857143,"y":1418.5714285714287,"z":987.9047619047619,"a95":0.99,"info":"05/11/2014 at 18:18:16"},{"visible":true,"include":true,"step":"25.0","x":503.9809523809524,"y":1301.7142857142858,"z":323.6095238095238,"a95":0.99,"info":"05/11/2014 at 18:18:16"},{"visible":false,"include":false,"step":"30.0","x":813.4476190476191,"y":483.06666666666666,"z":-260.70476190476194,"a95":0.99,"info":"05/11/2014 at 18:18:16"},{"visible":true,"include":true,"step":"35.0","x":664.9619047619047,"y":821.8190476190476,"z":-81.39809523809524,"a95":0.99,"info":"05/11/2014 at 18:18:16"},{"visible":true,"include":false,"step":"40.0","x":640.2476190476191,"y":983.3333333333334,"z":-339.8285714285714,"a95":0.99,"info":"05/11/2014 at 18:18:16"},{"visible":true,"include":false,"step":"45.0","x":985.047619047619,"y":177.9714285714286,"z":-473.7047619047619,"a95":0.99,"info":"05/11/2014 at 18:18:16"},{"visible":true,"include":false,"step":"50.0","x":385.5333333333333,"y":666.3904761904762,"z":7.095904761904762,"a95":0.99,"info":"05/11/2014 at 18:18:16"},{"visible":true,"include":false,"step":"60.0","x":802.3619047619047,"y":695.5619047619048,"z":-625.4095238095239,"a95":0.99,"info":"05/11/2014 at 18:18:16"},{"visible":true,"include":false,"step":"70.0","x":439.72380952380956,"y":-99.4095238095238,"z":-480.8952380952381,"a95":0.99,"info":"05/11/2014 at 18:18:16"},{"visible":true,"include":false,"step":"80.0","x":750.6095238095238,"y":416.8285714285714,"z":259.3047619047619,"a95":0.99,"info":"05/11/2014 at 18:18:16"},{"visible":true,"include":false,"step":"90.0","x":393.2285714285714,"y":687.2952380952381,"z":-235.14285714285714,"a95":0.99,"info":"05/11/2014 at 18:18:16"}]},{"version":"v1.1.0","exported":"2016-11-17T14:24:53.045Z","volume":10.5,"added":"2016-11-17T14:05:00.234Z","format":"Utrecht","demagType":"Unknown","strat":null,"patch":1.1,"GEO":[],"TECT":[],"interpreted":false,"name":"AT4.5A","coreAzi":42,"coreDip":50,"bedStrike":286,"bedDip":55,"data":[{"visible":true,"include":false,"step":"20","x":-5235.142857142857,"y":-8708.380952380952,"z":39824.95238095238,"a95":3.6,"info":"\"14-08-11\" at \"16:51\""},{"visible":true,"include":false,"step":"100","x":-1832.3809523809523,"y":-4954.190476190476,"z":14438.761904761905,"a95":2.6,"info":"\"14-08-11\" at \"20:33\""},{"visible":true,"include":false,"step":"150","x":350.0952380952381,"y":-2065.1428571428573,"z":4124.190476190476,"a95":2.7,"info":"\"14-08-11\" at \"23:06\""},{"visible":true,"include":false,"step":"180","x":739.4285714285714,"y":-1004,"z":1893.3333333333333,"a95":3.7,"info":"\"14-08-12\" at \"15:30\""},{"visible":true,"include":false,"step":"210","x":227.71428571428572,"y":-1119.047619047619,"z":1414.5714285714287,"a95":4.8,"info":"\"14-08-12\" at \"18:12\""},{"visible":true,"include":false,"step":"240","x":632.7619047619048,"y":-775.5238095238095,"z":550.0952380952381,"a95":5.2,"info":"\"14-08-12\" at \"21:16\""},{"visible":true,"include":false,"step":"270","x":-121.42857142857143,"y":-773.3333333333334,"z":-549.4285714285714,"a95":4.7,"info":"\"14-08-13\" at \"15:17\""},{"visible":true,"include":false,"step":"300","x":1284,"y":-381.3333333333333,"z":188.66666666666666,"a95":5.6,"info":"\"14-08-13\" at \"17:55\""},{"visible":true,"include":false,"step":"320","x":449.04761904761904,"y":606.8571428571429,"z":-921.6190476190476,"a95":6.2,"info":"\"14-08-13\" at \"21:01\""},{"visible":true,"include":false,"step":"340","x":110.95238095238095,"y":-1232,"z":-2292.190476190476,"a95":3.4,"info":"\"14-08-14\" at \"13:56\""},{"visible":true,"include":false,"step":"370","x":164.1904761904762,"y":-994.1904761904761,"z":-1620.7619047619048,"a95":4.6,"info":"\"14-08-14\" at \"17:02\""},{"visible":true,"include":false,"step":"400","x":716.4761904761905,"y":173.8095238095238,"z":-1549.4285714285713,"a95":5,"info":"\"14-08-14\" at \"20:15\""},{"visible":true,"include":false,"step":"430","x":-111.33333333333333,"y":999.9047619047619,"z":-1516.952380952381,"a95":3.7,"info":"\"14-08-14\" at \"23:31\""},{"visible":true,"include":false,"step":"460","x":-35.523809523809526,"y":-410.76190476190476,"z":-1055.6190476190477,"a95":4.9,"info":"\"14-08-15\" at \"16:12\""},{"visible":true,"include":false,"step":"490","x":-76,"y":1541.047619047619,"z":-811.047619047619,"a95":6.5,"info":"\"14-08-15\" at \"19:14\""},{"visible":true,"include":false,"step":"510","x":1177.904761904762,"y":293.3333333333333,"z":-198.95238095238096,"a95":5.2,"info":"\"14-08-15\" at \"22:27\""},{"visible":true,"include":false,"step":"540","x":591.4285714285714,"y":1224.7619047619048,"z":-376.3809523809524,"a95":4,"info":"\"14-08-16\" at \"12:45\""},{"visible":true,"include":false,"step":"570","x":-590.5714285714286,"y":-417.5238095238095,"z":-453.14285714285717,"a95":6.7,"info":"\"14-08-16\" at \"15:31\""},{"visible":true,"include":false,"step":"600","x":-1226.2857142857142,"y":-473.42857142857144,"z":-1779.5238095238096,"a95":3.5,"info":"\"14-08-16\" at \"18:12\""}]},{"version":"v1.1.0","exported":"2016-11-17T14:24:53.045Z","volume":10.5,"added":"2016-11-17T14:05:00.234Z","format":"Utrecht","demagType":"Unknown","strat":"1","patch":1.1,"GEO":[{"dec":103.14615419607702,"inc":-48.70919513810474,"MAD":16.39688434788712,"cm":[-1.3145040611561853e-13,0,0],"intensity":4032.852267932212,"type":"dir","forced":true,"remark":"","origin":false,"nSteps":10,"minStep":"25.0","maxStep":"90.0","steps":["25.0","30.0","35.0","40.0","45.0","50.0","60.0","70.0","80.0","90.0"],"group":"None","version":"v1.1.0"}],"TECT":[{"dec":148.15417615937713,"inc":-27.25045195466906,"MAD":16.396884347887134,"cm":[8.526512829121202e-14,-8.526512829121202e-14,-5.684341886080802e-14],"intensity":4032.852267932212,"type":"dir","forced":true,"remark":"","origin":false,"nSteps":10,"minStep":"25.0","maxStep":"90.0","steps":["25.0","30.0","35.0","40.0","45.0","50.0","60.0","70.0","80.0","90.0"],"group":"None","version":"v1.1.0"}],"interpreted":true,"name":"AT4.5B","coreAzi":42,"coreDip":50,"bedStrike":286,"bedDip":55,"data":[{"visible":false,"include":false,"step":"0.0","x":-2791.3333333333335,"y":-2005.3333333333333,"z":12130.47619047619,"a95":0.99,"info":"05/11/2014 at 22:47:31"},{"visible":true,"include":false,"step":"10.0","x":675.8857142857144,"y":84.47619047619048,"z":4172,"a95":0.99,"info":"05/11/2014 at 22:47:31"},{"visible":true,"include":false,"step":"15.0","x":1441.904761904762,"y":685.8571428571429,"z":2019.8095238095239,"a95":0.99,"info":"05/11/2014 at 22:47:31"},{"visible":true,"include":false,"step":"20.0","x":1208.095238095238,"y":924.3333333333334,"z":1070.4761904761904,"a95":0.99,"info":"05/11/2014 at 22:47:31"},{"visible":true,"include":true,"step":"25.0","x":1565.4285714285713,"y":1156.4761904761904,"z":-400.76190476190476,"a95":0.99,"info":"05/11/2014 at 22:47:31"},{"visible":true,"include":true,"step":"30.0","x":1732.952380952381,"y":993.2380952380952,"z":-859.1142857142858,"a95":0.99,"info":"05/11/2014 at 22:47:31"},{"visible":true,"include":true,"step":"35.0","x":1977.2380952380952,"y":1125.8095238095239,"z":-630.1333333333333,"a95":0.99,"info":"05/11/2014 at 22:47:31"},{"visible":true,"include":true,"step":"40.0","x":1707.047619047619,"y":1951.8095238095239,"z":-1980.1904761904761,"a95":0.99,"info":"05/11/2014 at 22:47:31"},{"visible":true,"include":true,"step":"45.0","x":2084.8571428571427,"y":1913.4285714285713,"z":-2114.285714285714,"a95":0.99,"info":"05/11/2014 at 22:47:31"},{"visible":true,"include":true,"step":"50.0","x":1859.7142857142858,"y":1831.8095238095239,"z":-1231.3333333333333,"a95":0.99,"info":"05/11/2014 at 22:47:31"},{"visible":true,"include":true,"step":"60.0","x":1184.952380952381,"y":2277.714285714286,"z":-970.2857142857143,"a95":0.99,"info":"05/11/2014 at 22:47:31"},{"visible":true,"include":true,"step":"70.0","x":2572.095238095238,"y":1109.8095238095239,"z":-484.16190476190474,"a95":0.99,"info":"05/11/2014 at 22:47:31"},{"visible":true,"include":true,"step":"80.0","x":2632.285714285714,"y":1501.8095238095239,"z":-165.66666666666666,"a95":0.99,"info":"05/11/2014 at 22:47:31"},{"visible":true,"include":true,"step":"90.0","x":1807.2380952380952,"y":981.1428571428571,"z":-164.57142857142858,"a95":0.99,"info":"05/11/2014 at 22:47:31"}]},{"version":"v1.1.0","exported":"2016-11-17T14:24:53.045Z","volume":10.5,"added":"2016-11-17T14:05:00.237Z","format":"Utrecht","demagType":"Unknown","strat":"6","patch":1.1,"GEO":[{"dec":351.27262132048423,"inc":55.46018707035665,"MAD":4.591000991507668,"cm":[4685.857440263615,557.8065426445078,6560.241014610755],"intensity":14440.586353849802,"type":"dir","forced":false,"remark":"","origin":false,"nSteps":7,"minStep":"4.0","maxStep":"30.0","steps":["4.0","8.0","12.0","16.0","20.0","25.0","30.0"],"group":"None","version":"v1.1.0"}],"TECT":[{"dec":2.2626000013047474,"inc":2.9013864516495693,"MAD":4.591000991507674,"cm":[7942.147323035,1491.5326412222923,-52.88230940937025],"intensity":14440.586353849803,"type":"dir","forced":false,"remark":"","origin":false,"nSteps":7,"minStep":"4.0","maxStep":"30.0","steps":["4.0","8.0","12.0","16.0","20.0","25.0","30.0"],"group":"None","version":"v1.1.0"}],"interpreted":true,"name":"AT4.6A","coreAzi":49,"coreDip":53,"bedStrike":286,"bedDip":55,"data":[{"visible":true,"include":false,"step":"0.0","x":-4559.047619047619,"y":-9043.333333333334,"z":17739.04761904762,"a95":0.99,"info":"16/08/2014 at 04:56:40"},{"visible":true,"include":true,"step":"4.0","x":-3448.9523809523807,"y":-7890.571428571428,"z":15164.761904761905,"a95":0.99,"info":"16/08/2014 at 04:56:40"},{"visible":true,"include":true,"step":"8.0","x":-2344.4761904761904,"y":-5192.285714285715,"z":10775.238095238095,"a95":0.99,"info":"16/08/2014 at 04:56:40"},{"visible":true,"include":true,"step":"12.0","x":-1218.952380952381,"y":-2970.9523809523807,"z":7977.619047619048,"a95":0.99,"info":"16/08/2014 at 04:56:40"},{"visible":true,"include":true,"step":"16.0","x":-852.8666666666667,"y":-2052.6666666666665,"z":6069.238095238095,"a95":0.99,"info":"16/08/2014 at 04:56:40"},{"visible":true,"include":true,"step":"20.0","x":-439.93333333333334,"y":-1848.952380952381,"z":4754.380952380952,"a95":0.99,"info":"16/08/2014 at 04:56:40"},{"visible":true,"include":true,"step":"25.0","x":-58.53142857142858,"y":-857.0761904761904,"z":3835.809523809524,"a95":0.99,"info":"16/08/2014 at 04:56:40"},{"visible":true,"include":true,"step":"30.0","x":266.9809523809524,"y":-1381.047619047619,"z":2821.809523809524,"a95":0.99,"info":"16/08/2014 at 04:56:40"},{"visible":false,"include":false,"step":"35.0","x":-299.3047619047619,"y":-873.0095238095239,"z":1942.857142857143,"a95":0.99,"info":"16/08/2014 at 04:56:40"},{"visible":false,"include":false,"step":"40.0","x":-55.89333333333333,"y":-582.2666666666667,"z":1466.1904761904761,"a95":0.99,"info":"16/08/2014 at 04:56:40"},{"visible":false,"include":false,"step":"45.0","x":674.8761904761905,"y":-755.0095238095239,"z":768.2190476190476,"a95":0.99,"info":"16/08/2014 at 04:56:40"},{"visible":false,"include":false,"step":"50.0","x":-456.50476190476195,"y":-1008,"z":-76.13333333333333,"a95":0.99,"info":"16/08/2014 at 04:56:40"},{"visible":false,"include":false,"step":"60.0","x":-237.22857142857143,"y":-328.9142857142857,"z":1059.904761904762,"a95":0.99,"info":"16/08/2014 at 04:56:40"},{"visible":false,"include":false,"step":"70.0","x":212.30476190476188,"y":267.48571428571427,"z":293.0190476190476,"a95":0.99,"info":"16/08/2014 at 04:56:40"},{"visible":false,"include":false,"step":"80.0","x":-836.2666666666667,"y":-787.304761904762,"z":-824.5904761904762,"a95":0.99,"info":"16/08/2014 at 04:56:40"},{"visible":false,"include":false,"step":"90.0","x":327.15238095238095,"y":-196.77142857142857,"z":321.1714285714286,"a95":0.99,"info":"16/08/2014 at 04:56:40"},{"visible":false,"include":false,"step":"100.0","x":1481.904761904762,"y":22.516190476190474,"z":-1160.6666666666667,"a95":0.99,"info":"16/08/2014 at 04:56:40"}]},{"version":"v1.1.0","exported":"2016-11-17T14:24:53.045Z","volume":10.5,"added":"2016-11-17T14:05:00.238Z","format":"Utrecht","demagType":"Unknown","strat":"7","patch":1.1,"GEO":[{"dec":359.73280728732044,"inc":60.90773049141568,"MAD":2.0042566517403553,"cm":[4736.8665826743345,426.0711882518357,7594.328994940062],"intensity":11262.132833691794,"type":"dir","forced":false,"remark":"","origin":false,"nSteps":5,"minStep":"4.0","maxStep":"20.0","steps":["4.0","8.0","12.0","16.0","20.0"],"group":"None","version":"v1.1.0"}],"TECT":[{"dec":8.115856742771598,"inc":6.826994844338626,"MAD":2.0042566517403886,"cm":[8802.202702323844,1591.787562119948,529.8249778799795],"intensity":11262.132833691792,"type":"dir","forced":false,"remark":"","origin":false,"nSteps":5,"minStep":"4.0","maxStep":"20.0","steps":["4.0","8.0","12.0","16.0","20.0"],"group":"None","version":"v1.1.0"}],"interpreted":true,"name":"AT4.7A","coreAzi":328,"coreDip":36,"bedStrike":286,"bedDip":55,"data":[{"visible":true,"include":false,"step":"0.0","x":-8612.285714285714,"y":5308.285714285715,"z":15535.238095238095,"a95":0.99,"info":"16/08/2014 at 04:56:40"},{"visible":true,"include":true,"step":"4.0","x":-7067.9047619047615,"y":4478.952380952381,"z":13157.142857142857,"a95":0.99,"info":"16/08/2014 at 04:56:40"},{"visible":true,"include":true,"step":"8.0","x":-4847.619047619048,"y":3609.6190476190477,"z":9300.761904761905,"a95":0.99,"info":"16/08/2014 at 04:56:40"},{"visible":true,"include":true,"step":"12.0","x":-3303.6190476190477,"y":2553.714285714286,"z":6726,"a95":0.99,"info":"16/08/2014 at 04:56:40"},{"visible":true,"include":true,"step":"16.0","x":-2485.904761904762,"y":2009.3333333333333,"z":4913.809523809524,"a95":0.99,"info":"16/08/2014 at 04:56:40"},{"visible":true,"include":true,"step":"20.0","x":-1872.2857142857142,"y":1705.8095238095239,"z":3557.6190476190477,"a95":0.99,"info":"16/08/2014 at 04:56:40"},{"visible":true,"include":false,"step":"25.0","x":-899.0571428571429,"y":1271.904761904762,"z":3083.2380952380954,"a95":0.99,"info":"16/08/2014 at 04:56:40"},{"visible":true,"include":false,"step":"30.0","x":-391.552380952381,"y":1516.7619047619048,"z":1906,"a95":0.99,"info":"16/08/2014 at 04:56:40"},{"visible":true,"include":false,"step":"35.0","x":-137.42857142857142,"y":1019.1428571428571,"z":1043.4285714285713,"a95":0.99,"info":"16/08/2014 at 04:56:40"},{"visible":false,"include":false,"step":"40.0","x":63.359047619047615,"y":561.895238095238,"z":1239.142857142857,"a95":0.99,"info":"16/08/2014 at 04:56:40"},{"visible":false,"include":false,"step":"45.0","x":-116.16190476190476,"y":233.8952380952381,"z":1010.1904761904761,"a95":0.99,"info":"16/08/2014 at 04:56:40"},{"visible":false,"include":false,"step":"50.0","x":400.7523809523809,"y":708.504761904762,"z":-98.85714285714286,"a95":0.99,"info":"16/08/2014 at 04:56:40"},{"visible":false,"include":false,"step":"60.0","x":74.54761904761905,"y":864.9238095238096,"z":33.896190476190476,"a95":0.99,"info":"16/08/2014 at 04:56:40"},{"visible":false,"include":false,"step":"70.0","x":310.51428571428573,"y":693.5333333333334,"z":-469.3333333333333,"a95":0.99,"info":"16/08/2014 at 04:56:40"},{"visible":false,"include":false,"step":"80.0","x":253.78095238095236,"y":-189.26666666666665,"z":-904.9809523809523,"a95":0.99,"info":"16/08/2014 at 04:56:40"},{"visible":false,"include":false,"step":"90.0","x":888.3238095238095,"y":100.4095238095238,"z":818.4857142857143,"a95":0.99,"info":"16/08/2014 at 04:56:40"},{"visible":false,"include":false,"step":"100.0","x":588.4761904761905,"y":346.97142857142853,"z":-319.14285714285717,"a95":0.99,"info":"16/08/2014 at 04:56:40"}]},{"version":"v1.1.0","exported":"2016-11-17T14:24:53.045Z","volume":10.5,"added":"2016-11-17T14:05:00.238Z","format":"Utrecht","demagType":"Unknown","strat":"8","patch":1.1,"GEO":[{"dec":1.7714768183688534,"inc":51.26729573501384,"MAD":4.264162897349328,"cm":[4954.355300548243,1206.8555495486028,7054.284890783608],"intensity":12000.760405612855,"type":"dir","forced":false,"remark":"","origin":false,"nSteps":6,"minStep":"8.0","maxStep":"30.0","steps":["8.0","12.0","16.0","20.0","25.0","30.0"],"group":"None","version":"v1.1.0"}],"TECT":[{"dec":7.142606595004281,"inc":-2.8303574323296052,"MAD":4.264162897349298,"cm":[8420.537097286264,2200.767185964404,-127.47889351874429],"intensity":12000.760405612855,"type":"dir","forced":false,"remark":"","origin":false,"nSteps":6,"minStep":"8.0","maxStep":"30.0","steps":["8.0","12.0","16.0","20.0","25.0","30.0"],"group":"None","version":"v1.1.0"}],"interpreted":true,"name":"AT4.8A","coreAzi":329,"coreDip":42,"bedStrike":286,"bedDip":55,"data":[{"visible":true,"include":false,"step":"0.0","x":-2417.5238095238096,"y":7808.571428571428,"z":21760.95238095238,"a95":0.99,"info":"16/08/2014 at 04:56:40"},{"visible":true,"include":false,"step":"4.0","x":-4827.9047619047615,"y":7068.190476190476,"z":19367.619047619046,"a95":0.99,"info":"16/08/2014 at 04:56:40"},{"visible":true,"include":true,"step":"8.0","x":-4267.523809523809,"y":5730.666666666667,"z":14070.47619047619,"a95":0.99,"info":"16/08/2014 at 04:56:40"},{"visible":true,"include":true,"step":"12.0","x":-3617.6190476190477,"y":4769.238095238095,"z":9600.952380952382,"a95":0.99,"info":"16/08/2014 at 04:56:40"},{"visible":true,"include":true,"step":"16.0","x":-2840.3809523809523,"y":3636.8571428571427,"z":7084,"a95":0.99,"info":"16/08/2014 at 04:56:40"},{"visible":true,"include":true,"step":"20.0","x":-2531.4285714285716,"y":2974.4761904761904,"z":5656,"a95":0.99,"info":"16/08/2014 at 04:56:40"},{"visible":true,"include":true,"step":"25.0","x":-2049.4285714285716,"y":2773.714285714286,"z":4961.142857142857,"a95":0.99,"info":"16/08/2014 at 04:56:40"},{"visible":true,"include":true,"step":"30.0","x":-1593.6190476190477,"y":1632,"z":3112.8571428571427,"a95":0.99,"info":"16/08/2014 at 04:56:40"},{"visible":true,"include":false,"step":"35.0","x":-1397.8095238095239,"y":1876.2857142857142,"z":1794.1904761904761,"a95":0.99,"info":"16/08/2014 at 04:56:40"},{"visible":true,"include":false,"step":"40.0","x":-560.9809523809524,"y":1707.3333333333333,"z":2163.1428571428573,"a95":0.99,"info":"16/08/2014 at 04:56:40"},{"visible":true,"include":false,"step":"45.0","x":-107.24761904761904,"y":2204,"z":1450.1904761904761,"a95":0.99,"info":"16/08/2014 at 04:56:40"},{"visible":false,"include":false,"step":"50.0","x":-26.387619047619047,"y":1678.3809523809523,"z":1172.7619047619048,"a95":0.99,"info":"16/08/2014 at 04:56:40"},{"visible":false,"include":false,"step":"60.0","x":37.417142857142856,"y":404.9619047619048,"z":1229.5238095238096,"a95":0.99,"info":"16/08/2014 at 04:56:40"},{"visible":false,"include":false,"step":"70.0","x":-873.3714285714285,"y":625.5714285714286,"z":577.6666666666666,"a95":0.99,"info":"16/08/2014 at 04:56:40"},{"visible":false,"include":false,"step":"80.0","x":-228.21904761904764,"y":627.7333333333333,"z":176.95238095238096,"a95":0.99,"info":"16/08/2014 at 04:56:40"},{"visible":false,"include":false,"step":"90.0","x":-110.04761904761905,"y":265.4666666666667,"z":546.9714285714285,"a95":0.99,"info":"16/08/2014 at 04:56:40"},{"visible":false,"include":false,"step":"100.0","x":282.12380952380954,"y":704.9714285714285,"z":669.8380952380952,"a95":0.99,"info":"16/08/2014 at 04:56:40"}]},{"version":"v1.1.0","exported":"2016-11-17T14:24:53.045Z","volume":10.5,"added":"2016-11-17T14:05:00.240Z","format":"Utrecht","demagType":"Unknown","strat":null,"patch":1.1,"GEO":[{"dec":11.533132467693918,"inc":57.61366167884304,"MAD":1.2976843405179646,"cm":[2.842170943040401e-14,-1.7053025658242404e-13,0],"intensity":23528.31324170945,"type":"dir","forced":true,"remark":"","origin":false,"nSteps":6,"minStep":"100","maxStep":"270","steps":["100","150","180","210","240","270"],"group":"None","version":"v1.1.0"}],"TECT":[{"dec":13.60652204892358,"inc":2.6901023763411027,"MAD":1.29768434051792,"cm":[-5.684341886080802e-14,4.405364961712621e-13,-4.263256414560601e-14],"intensity":23528.313241709442,"type":"dir","forced":true,"remark":"","origin":false,"nSteps":6,"minStep":"100","maxStep":"270","steps":["100","150","180","210","240","270"],"group":"None","version":"v1.1.0"}],"interpreted":true,"name":"AT4.9A","coreAzi":40,"coreDip":34,"bedStrike":286,"bedDip":55,"data":[{"visible":true,"include":false,"step":"20","x":-11038.952380952382,"y":-8836.761904761905,"z":24011.714285714286,"a95":4,"info":"\"14-08-11\" at \"16:55\""},{"visible":true,"include":true,"step":"100","x":-7908,"y":-4700.571428571428,"z":15404.761904761905,"a95":3.2,"info":"\"14-08-11\" at \"20:36\""},{"visible":true,"include":true,"step":"150","x":-3174.7619047619046,"y":-1898.3809523809523,"z":7012.761904761905,"a95":2.6,"info":"\"14-08-11\" at \"23:09\""},{"visible":true,"include":true,"step":"180","x":-2881.4285714285716,"y":-1806.952380952381,"z":5560.0952380952385,"a95":2.7,"info":"\"14-08-12\" at \"15:33\""},{"visible":true,"include":true,"step":"210","x":-2648.8571428571427,"y":-1377.904761904762,"z":5385.238095238095,"a95":2.6,"info":"\"14-08-12\" at \"18:14\""},{"visible":true,"include":true,"step":"240","x":-2821.6190476190477,"y":-1414.6666666666667,"z":5191.619047619048,"a95":2.9,"info":"\"14-08-12\" at \"21:18\""},{"visible":true,"include":true,"step":"270","x":-2432,"y":-1409.4285714285713,"z":4827.238095238095,"a95":3.2,"info":"\"14-08-13\" at \"15:19\""},{"visible":true,"include":false,"step":"300","x":-1816.3809523809523,"y":-950.3809523809524,"z":2606.9523809523807,"a95":2.7,"info":"\"14-08-13\" at \"17:57\""},{"visible":true,"include":false,"step":"320","x":-1904,"y":-837.1428571428571,"z":2301.714285714286,"a95":2.7,"info":"\"14-08-13\" at \"21:03\""},{"visible":true,"include":false,"step":"340","x":-2361.1428571428573,"y":-1440.3809523809523,"z":1812.095238095238,"a95":2.4,"info":"\"14-08-14\" at \"13:59\""},{"visible":true,"include":false,"step":"370","x":-1597.7142857142858,"y":-556.7619047619048,"z":1783.047619047619,"a95":2.9,"info":"\"14-08-14\" at \"17:04\""},{"visible":true,"include":false,"step":"400","x":-1215.3333333333333,"y":236.38095238095238,"z":1107.047619047619,"a95":3.1,"info":"\"14-08-14\" at \"20:17\""},{"visible":true,"include":false,"step":"430","x":-1151.4285714285713,"y":757.5238095238095,"z":2081.904761904762,"a95":2.8,"info":"\"14-08-14\" at \"23:33\""},{"visible":true,"include":false,"step":"460","x":-1206.5714285714287,"y":367.5238095238095,"z":1786.5714285714287,"a95":2.6,"info":"\"14-08-15\" at \"16:14\""},{"visible":true,"include":false,"step":"490","x":-859.2380952380952,"y":350.95238095238096,"z":1561.4285714285713,"a95":3.6,"info":"\"14-08-15\" at \"19:16\""},{"visible":false,"include":false,"step":"510","x":-446.95238095238096,"y":-371.6190476190476,"z":421.04761904761904,"a95":4.8,"info":"\"14-08-15\" at \"22:30\""},{"visible":false,"include":false,"step":"540","x":104.28571428571429,"y":-167.42857142857142,"z":1208,"a95":3.9,"info":"\"14-08-16\" at \"12:47\""},{"visible":false,"include":false,"step":"570","x":-248.85714285714286,"y":-391.23809523809524,"z":469.3333333333333,"a95":6,"info":"\"14-08-16\" at \"15:33\""},{"visible":false,"include":false,"step":"600","x":-666.4761904761905,"y":-63.523809523809526,"z":-672.4761904761905,"a95":5.6,"info":"\"14-08-16\" at \"18:14\""}]},{"version":"v1.1.0","exported":"2016-11-17T14:24:53.045Z","volume":10.5,"added":"2016-11-17T14:05:00.240Z","format":"Utrecht","demagType":"Unknown","strat":"1","patch":1.1,"GEO":[{"dec":4.294247379487217,"inc":56.92614726210817,"MAD":2.3389242562561847,"cm":[8106.474656140561,-851.8271364291804,10513.28884049338],"intensity":18042.096239029783,"type":"dir","forced":false,"remark":"","origin":false,"nSteps":7,"minStep":"4.0","maxStep":"30.0","steps":["4.0","8.0","12.0","16.0","20.0","25.0","30.0"],"group":"None","version":"v1.1.0"}],"TECT":[{"dec":9.637371371159588,"inc":2.4592226742748906,"MAD":2.3389242562561834,"cm":[13286.928074969775,633.6439775585364,-160.68822275675362],"intensity":18042.096239029783,"type":"dir","forced":false,"remark":"","origin":false,"nSteps":7,"minStep":"4.0","maxStep":"30.0","steps":["4.0","8.0","12.0","16.0","20.0","25.0","30.0"],"group":"None","version":"v1.1.0"}],"interpreted":true,"name":"AT4.9B","coreAzi":40,"coreDip":34,"bedStrike":286,"bedDip":55,"data":[{"visible":true,"include":false,"step":"0.0","x":-12028.57142857143,"y":-9991.42857142857,"z":22734.285714285714,"a95":0.99,"info":"16/08/2014 at 10:23:18"},{"visible":true,"include":true,"step":"4.0","x":-10460,"y":-9312.190476190477,"z":19718.095238095237,"a95":0.99,"info":"16/08/2014 at 10:23:18"},{"visible":true,"include":true,"step":"8.0","x":-7976.571428571428,"y":-7522,"z":15211.42857142857,"a95":0.99,"info":"16/08/2014 at 10:23:18"},{"visible":true,"include":true,"step":"12.0","x":-5764.857142857143,"y":-6384.571428571428,"z":11551.42857142857,"a95":0.99,"info":"16/08/2014 at 10:23:18"},{"visible":true,"include":true,"step":"16.0","x":-5179.238095238095,"y":-5296.190476190476,"z":9204.57142857143,"a95":0.99,"info":"16/08/2014 at 10:23:18"},{"visible":true,"include":true,"step":"20.0","x":-4118.761904761905,"y":-4992.666666666667,"z":7489.333333333333,"a95":0.99,"info":"16/08/2014 at 10:23:18"},{"visible":true,"include":true,"step":"25.0","x":-3119.904761904762,"y":-4107.714285714285,"z":6057.047619047619,"a95":0.99,"info":"16/08/2014 at 10:23:18"},{"visible":true,"include":true,"step":"30.0","x":-2227.5238095238096,"y":-3427.6190476190477,"z":4781.047619047619,"a95":0.99,"info":"16/08/2014 at 10:23:18"},{"visible":true,"include":false,"step":"35.0","x":-2165.714285714286,"y":-3188.095238095238,"z":3922.285714285714,"a95":0.99,"info":"16/08/2014 at 10:23:18"},{"visible":true,"include":false,"step":"40.0","x":-1888.095238095238,"y":-2596.8571428571427,"z":2898.8571428571427,"a95":0.99,"info":"16/08/2014 at 10:23:18"},{"visible":true,"include":false,"step":"45.0","x":-1555.4285714285713,"y":-2391.6190476190477,"z":1906.095238095238,"a95":0.99,"info":"16/08/2014 at 10:23:18"},{"visible":true,"include":false,"step":"50.0","x":-1304.952380952381,"y":-2143.5238095238096,"z":1263.142857142857,"a95":0.99,"info":"16/08/2014 at 10:23:18"},{"visible":true,"include":false,"step":"60.0","x":-837.7238095238096,"y":-1660.6666666666667,"z":718.895238095238,"a95":0.99,"info":"16/08/2014 at 10:23:18"},{"visible":false,"include":false,"step":"70.0","x":-517.6190476190476,"y":-2225.0476190476193,"z":443.91428571428577,"a95":0.99,"info":"16/08/2014 at 10:23:18"},{"visible":false,"include":false,"step":"80.0","x":-565.5809523809525,"y":-1291.904761904762,"z":1120.2857142857142,"a95":0.99,"info":"16/08/2014 at 10:23:18"},{"visible":false,"include":false,"step":"90.0","x":-309.95238095238096,"y":-896.5428571428572,"z":788.4761904761905,"a95":0.99,"info":"16/08/2014 at 10:23:18"},{"visible":false,"include":false,"step":"100.0","x":-130.85714285714286,"y":-826.0190476190477,"z":308.2761904761905,"a95":0.99,"info":"16/08/2014 at 10:23:18"}]},{"version":"v1.1.0","exported":"2016-11-17T14:24:53.046Z","volume":10.5,"added":"2016-11-17T14:05:00.241Z","format":"Utrecht","demagType":"Unknown","strat":"2","patch":1.1,"GEO":[{"dec":8.515404307938638,"inc":56.13507569565183,"MAD":2.7172635962369283,"cm":[-1.1368683772161603e-13,1.2789769243681803e-13,0],"intensity":30332.74919246325,"type":"dir","forced":true,"remark":"","origin":false,"nSteps":7,"minStep":"4.0","maxStep":"30.0","steps":["4.0","8.0","12.0","16.0","20.0","25.0","30.0"],"group":"None","version":"v1.1.0"}],"TECT":[{"dec":11.836326819933845,"inc":1.3579570956735263,"MAD":2.7172635962369847,"cm":[-5.684341886080802e-14,-1.9895196601282805e-13,0],"intensity":30332.749192463245,"type":"dir","forced":true,"remark":"","origin":false,"nSteps":7,"minStep":"4.0","maxStep":"30.0","steps":["4.0","8.0","12.0","16.0","20.0","25.0","30.0"],"group":"None","version":"v1.1.0"}],"interpreted":true,"name":"AT4.10A","coreAzi":40,"coreDip":31,"bedStrike":286,"bedDip":55,"data":[{"visible":true,"include":false,"step":"0.0","x":-13221.904761904761,"y":-8506.285714285714,"z":22825.714285714286,"a95":0.99,"info":"16/08/2014 at 10:23:18"},{"visible":true,"include":true,"step":"4.0","x":-11359.047619047618,"y":-7509.428571428572,"z":19827.619047619046,"a95":0.99,"info":"16/08/2014 at 10:23:18"},{"visible":true,"include":true,"step":"8.0","x":-8282.285714285714,"y":-5334.190476190476,"z":15281.904761904761,"a95":0.99,"info":"16/08/2014 at 10:23:18"},{"visible":true,"include":true,"step":"12.0","x":-6353.428571428572,"y":-4214.380952380952,"z":11377.142857142857,"a95":0.99,"info":"16/08/2014 at 10:23:18"},{"visible":true,"include":true,"step":"16.0","x":-4854.0952380952385,"y":-2908.7619047619046,"z":9409.714285714286,"a95":0.99,"info":"16/08/2014 at 10:23:18"},{"visible":true,"include":true,"step":"20.0","x":-4140.476190476191,"y":-2734.6666666666665,"z":7238.0952380952385,"a95":0.99,"info":"16/08/2014 at 10:23:18"},{"visible":true,"include":true,"step":"25.0","x":-3998.8571428571427,"y":-1263.047619047619,"z":6709.9047619047615,"a95":0.99,"info":"16/08/2014 at 10:23:18"},{"visible":true,"include":true,"step":"30.0","x":-3117.2380952380954,"y":-757.9142857142857,"z":5513.333333333333,"a95":0.99,"info":"16/08/2014 at 10:23:18"},{"visible":true,"include":false,"step":"35.0","x":-2526.6666666666665,"y":-373.81904761904764,"z":4544.857142857143,"a95":0.99,"info":"16/08/2014 at 10:23:18"},{"visible":true,"include":false,"step":"40.0","x":-1444.3809523809523,"y":334.56190476190477,"z":3892.095238095238,"a95":0.99,"info":"16/08/2014 at 10:23:18"},{"visible":true,"include":false,"step":"45.0","x":-1564.952380952381,"y":603,"z":3344.7619047619046,"a95":0.99,"info":"16/08/2014 at 10:23:18"},{"visible":true,"include":false,"step":"50.0","x":-1370,"y":-523.3904761904762,"z":2775.2380952380954,"a95":0.99,"info":"16/08/2014 at 10:23:18"},{"visible":true,"include":false,"step":"60.0","x":-909.1714285714285,"y":-387.5333333333333,"z":2986.8571428571427,"a95":0.99,"info":"16/08/2014 at 10:23:18"},{"visible":false,"include":false,"step":"70.0","x":-473.8095238095238,"y":1114.7619047619048,"z":1039.6190476190477,"a95":0.99,"info":"16/08/2014 at 10:23:18"},{"visible":false,"include":false,"step":"80.0","x":-249.1809523809524,"y":877.5619047619048,"z":922.7904761904762,"a95":0.99,"info":"16/08/2014 at 10:23:18"},{"visible":false,"include":false,"step":"90.0","x":-37.00952380952381,"y":889.4857142857143,"z":1641.4285714285713,"a95":0.99,"info":"16/08/2014 at 10:23:18"},{"visible":false,"include":false,"step":"100.0","x":-819.6761904761905,"y":1472.4761904761904,"z":1138.1904761904761,"a95":0.99,"info":"16/08/2014 at 10:23:18"}]},{"version":"v1.1.0","exported":"2016-11-17T14:24:53.046Z","volume":10.5,"added":"2016-11-17T14:05:00.241Z","format":"Utrecht","demagType":"Unknown","strat":null,"patch":1.1,"GEO":[{"dec":3.476905340541066,"inc":50.04772678827199,"MAD":2.4222079688113682,"cm":[9626.076483812623,144.15448289975186,6376.5267505795455],"intensity":21409.967298617976,"type":"dir","forced":false,"remark":"","origin":false,"nSteps":6,"minStep":"100","maxStep":"270","steps":["100","150","180","210","240","270"],"group":"None","version":"v1.1.0"}],"TECT":[{"dec":7.9741373076979585,"inc":-4.2329218022323625,"MAD":2.4222079688113314,"cm":[10837.869757811313,491.6306127124384,-3954.8831640605968],"intensity":21409.967298617976,"type":"dir","forced":false,"remark":"","origin":false,"nSteps":6,"minStep":"100","maxStep":"270","steps":["100","150","180","210","240","270"],"group":"None","version":"v1.1.0"}],"interpreted":true,"name":"AT4.11A","coreAzi":39,"coreDip":31,"bedStrike":286,"bedDip":55,"data":[{"visible":true,"include":false,"step":"20","x":-9954.952380952382,"y":-15224.857142857143,"z":23763.428571428572,"a95":2.9,"info":"\"14-08-11\" at \"16:58\""},{"visible":true,"include":true,"step":"100","x":-7720.380952380952,"y":-11779.619047619048,"z":22973.904761904763,"a95":2.7,"info":"\"14-08-11\" at \"20:39\""},{"visible":true,"include":true,"step":"150","x":-798.952380952381,"y":-5515.523809523809,"z":8516.666666666666,"a95":2.6,"info":"\"14-08-11\" at \"23:11\""},{"visible":true,"include":true,"step":"180","x":-899.2380952380952,"y":-5334.285714285715,"z":8628.380952380952,"a95":2.6,"info":"\"14-08-12\" at \"15:35\""},{"visible":true,"include":true,"step":"210","x":-383.5238095238095,"y":-5103.619047619048,"z":7879.428571428572,"a95":2.6,"info":"\"14-08-12\" at \"18:16\""},{"visible":true,"include":true,"step":"240","x":-325.3333333333333,"y":-4226.857142857143,"z":5615.714285714285,"a95":3,"info":"\"14-08-12\" at \"21:20\""},{"visible":true,"include":true,"step":"270","x":730.8571428571429,"y":-3715.2380952380954,"z":5031.523809523809,"a95":2.7,"info":"\"14-08-13\" at \"15:22\""},{"visible":true,"include":false,"step":"300","x":34.76190476190476,"y":-4013.2380952380954,"z":4308.761904761905,"a95":2.7,"info":"\"14-08-13\" at \"18:00\""},{"visible":true,"include":false,"step":"320","x":-280.3809523809524,"y":-2738.8571428571427,"z":2318.6666666666665,"a95":2.3,"info":"\"14-08-13\" at \"21:05\""},{"visible":true,"include":false,"step":"340","x":429.14285714285717,"y":-2442.4761904761904,"z":1938.857142857143,"a95":2.4,"info":"\"14-08-14\" at \"14:04\""},{"visible":true,"include":false,"step":"370","x":129.71428571428572,"y":-2503.2380952380954,"z":985.5238095238095,"a95":2.4,"info":"\"14-08-14\" at \"17:06\""},{"visible":false,"include":false,"step":"400","x":953.4285714285714,"y":-277.5238095238095,"z":908.7619047619048,"a95":3.1,"info":"\"14-08-14\" at \"20:19\""},{"visible":false,"include":false,"step":"430","x":-255.33333333333334,"y":-1242.1904761904761,"z":820.1904761904761,"a95":2.9,"info":"\"14-08-14\" at \"23:37\""},{"visible":false,"include":false,"step":"460","x":-579.6190476190476,"y":245.23809523809524,"z":1131.2380952380952,"a95":3.8,"info":"\"14-08-15\" at \"16:17\""},{"visible":false,"include":false,"step":"490","x":-140,"y":-651.8095238095239,"z":371.9047619047619,"a95":5.2,"info":"\"14-08-15\" at \"19:19\""},{"visible":false,"include":false,"step":"510","x":-752.0952380952381,"y":-846.0952380952381,"z":-652.952380952381,"a95":4,"info":"\"14-08-15\" at \"22:32\""},{"visible":false,"include":false,"step":"540","x":-182.95238095238096,"y":204.76190476190476,"z":-616.6666666666666,"a95":7.5,"info":"\"14-08-16\" at \"12:49\""},{"visible":false,"include":false,"step":"570","x":305.3333333333333,"y":1547.4285714285713,"z":-560.5714285714286,"a95":3.4,"info":"\"14-08-16\" at \"15:35\""},{"visible":false,"include":false,"step":"600","x":623.047619047619,"y":-1536.3809523809523,"z":519.6190476190476,"a95":4,"info":"\"14-08-16\" at \"18:16\""}]},{"version":"v1.1.0","exported":"2016-11-17T14:24:53.046Z","volume":10.5,"added":"2016-11-17T14:05:00.242Z","format":"Utrecht","demagType":"Unknown","strat":"3","patch":1.1,"GEO":[],"TECT":[],"interpreted":false,"name":"AT4.11B","coreAzi":39,"coreDip":31,"bedStrike":286,"bedDip":55,"data":[{"visible":true,"include":false,"step":"0.0","x":-19709.52380952381,"y":-12632.380952380952,"z":28129.52380952381,"a95":0.99,"info":"16/08/2014 at 10:23:18"},{"visible":true,"include":false,"step":"4.0","x":-17174.285714285714,"y":-11057.142857142857,"z":24395.238095238095,"a95":0.99,"info":"16/08/2014 at 10:23:18"},{"visible":true,"include":false,"step":"8.0","x":-12872.380952380952,"y":-8629.238095238095,"z":18067.619047619046,"a95":0.99,"info":"16/08/2014 at 10:23:18"},{"visible":true,"include":false,"step":"12.0","x":-9555.238095238095,"y":-6194,"z":13611.42857142857,"a95":0.99,"info":"16/08/2014 at 10:23:18"},{"visible":true,"include":false,"step":"16.0","x":-7712.666666666667,"y":-4827.238095238095,"z":10529.52380952381,"a95":0.99,"info":"16/08/2014 at 10:23:18"},{"visible":true,"include":false,"step":"20.0","x":-6383.619047619048,"y":-4339.238095238095,"z":8153.142857142857,"a95":0.99,"info":"16/08/2014 at 10:23:18"},{"visible":true,"include":false,"step":"25.0","x":-5462.476190476191,"y":-3441.5238095238096,"z":7319.333333333333,"a95":0.99,"info":"16/08/2014 at 10:23:18"},{"visible":true,"include":false,"step":"30.0","x":-3401.4285714285716,"y":-2788.095238095238,"z":5012.380952380952,"a95":0.99,"info":"16/08/2014 at 10:23:18"},{"visible":true,"include":false,"step":"35.0","x":-3186.285714285714,"y":-2267.714285714286,"z":4149.428571428572,"a95":0.99,"info":"16/08/2014 at 10:23:18"},{"visible":true,"include":false,"step":"40.0","x":-1965.047619047619,"y":-1959.5238095238096,"z":4382.285714285715,"a95":0.99,"info":"16/08/2014 at 10:23:18"},{"visible":true,"include":false,"step":"45.0","x":-1635.5238095238096,"y":-2090.095238095238,"z":2370.285714285714,"a95":0.99,"info":"16/08/2014 at 10:23:18"},{"visible":true,"include":false,"step":"50.0","x":-1951.7142857142858,"y":-1267.4285714285713,"z":1537.5238095238096,"a95":0.99,"info":"16/08/2014 at 10:23:18"},{"visible":true,"include":false,"step":"60.0","x":-1207.2380952380952,"y":-183.73333333333335,"z":2288.190476190476,"a95":0.99,"info":"16/08/2014 at 10:23:18"},{"visible":true,"include":false,"step":"70.0","x":-958.3809523809524,"y":657.8761904761905,"z":473.60952380952375,"a95":0.99,"info":"16/08/2014 at 10:23:18"},{"visible":true,"include":false,"step":"80.0","x":-2561.4285714285716,"y":-41.90571428571428,"z":1178.2857142857142,"a95":0.99,"info":"16/08/2014 at 10:23:18"},{"visible":true,"include":false,"step":"90.0","x":-2218,"y":1230,"z":1374.1904761904761,"a95":0.99,"info":"16/08/2014 at 10:23:18"},{"visible":true,"include":false,"step":"100.0","x":-1506.857142857143,"y":280.16190476190474,"z":501.5619047619047,"a95":0.99,"info":"16/08/2014 at 10:23:18"}]},{"version":"v1.1.0","exported":"2016-11-17T14:24:53.046Z","volume":10.5,"added":"2016-11-17T14:05:00.243Z","format":"Utrecht","demagType":"Unknown","strat":null,"patch":1.1,"GEO":[],"TECT":[],"interpreted":false,"name":"AT4.12A","coreAzi":29,"coreDip":36,"bedStrike":286,"bedDip":55,"data":[{"visible":true,"include":false,"step":"20","x":-11229.52380952381,"y":-5942.285714285715,"z":28623.238095238095,"a95":2.9,"info":"\"14-08-11\" at \"17:01\""},{"visible":true,"include":false,"step":"100","x":-10243.047619047618,"y":-5548.571428571428,"z":22956.95238095238,"a95":2.6,"info":"\"14-08-11\" at \"20:41\""},{"visible":true,"include":false,"step":"150","x":-3552.5714285714284,"y":-1999.4285714285713,"z":8786.095238095239,"a95":2.5,"info":"\"14-08-11\" at \"23:13\""},{"visible":true,"include":false,"step":"180","x":-3548.8571428571427,"y":-1544.6666666666667,"z":8417.142857142857,"a95":2.6,"info":"\"14-08-12\" at \"15:38\""},{"visible":true,"include":false,"step":"210","x":-2553.904761904762,"y":-935.3333333333334,"z":4815.9047619047615,"a95":2.9,"info":"\"14-08-12\" at \"18:19\""},{"visible":true,"include":false,"step":"240","x":-2219.714285714286,"y":-938,"z":4872.476190476191,"a95":3.1,"info":"\"14-08-12\" at \"21:23\""},{"visible":true,"include":false,"step":"270","x":-1996.4761904761904,"y":-437.8095238095238,"z":4135.619047619048,"a95":2.7,"info":"\"14-08-13\" at \"15:24\""},{"visible":true,"include":false,"step":"300","x":-1470.952380952381,"y":-314.3809523809524,"z":3255.5238095238096,"a95":2.8,"info":"\"14-08-13\" at \"18:02\""},{"visible":true,"include":false,"step":"320","x":-1474.6666666666667,"y":305.23809523809524,"z":2516.5714285714284,"a95":3,"info":"\"14-08-13\" at \"21:08\""},{"visible":true,"include":false,"step":"340","x":-1055.047619047619,"y":146.38095238095238,"z":2436.095238095238,"a95":2.6,"info":"\"14-08-14\" at \"14:06\""},{"visible":true,"include":false,"step":"370","x":-1566.857142857143,"y":406.3809523809524,"z":1877.8095238095239,"a95":2.6,"info":"\"14-08-14\" at \"17:09\""},{"visible":true,"include":false,"step":"400","x":-634.0952380952381,"y":-62.38095238095238,"z":2445.5238095238096,"a95":2.6,"info":"\"14-08-14\" at \"20:21\""},{"visible":true,"include":false,"step":"430","x":-134.38095238095238,"y":580.5714285714286,"z":1536.5714285714287,"a95":2.6,"info":"\"14-08-14\" at \"23:39\""},{"visible":true,"include":false,"step":"460","x":181.61904761904762,"y":199.8095238095238,"z":1736.2857142857142,"a95":2.8,"info":"\"14-08-15\" at \"16:19\""},{"visible":true,"include":false,"step":"490","x":-739.7142857142857,"y":-692.2857142857143,"z":1668.7619047619048,"a95":3.7,"info":"\"14-08-15\" at \"19:21\""},{"visible":true,"include":false,"step":"510","x":-1240.6666666666667,"y":359.23809523809524,"z":524.2857142857143,"a95":2.7,"info":"\"14-08-15\" at \"22:35\""},{"visible":true,"include":false,"step":"540","x":-655.047619047619,"y":-440.2857142857143,"z":758,"a95":3.2,"info":"\"14-08-16\" at \"12:51\""},{"visible":true,"include":false,"step":"570","x":274.57142857142856,"y":116.76190476190476,"z":947.8095238095239,"a95":4.5,"info":"\"14-08-16\" at \"15:37\""},{"visible":true,"include":false,"step":"600","x":-458.6666666666667,"y":-379.8095238095238,"z":1335.7142857142858,"a95":3.6,"info":"\"14-08-16\" at \"18:19\""}]},{"version":"v1.1.0","exported":"2016-11-17T14:24:53.046Z","volume":10.5,"added":"2016-11-17T14:05:00.243Z","format":"Utrecht","demagType":"Unknown","strat":"4","patch":1.1,"GEO":[],"TECT":[],"interpreted":false,"name":"AT4.12B","coreAzi":29,"coreDip":36,"bedStrike":286,"bedDip":55,"data":[{"visible":true,"include":false,"step":"0.0","x":-14027.619047619048,"y":-10115.238095238095,"z":36313.333333333336,"a95":0.99,"info":"16/08/2014 at 10:23:18"},{"visible":true,"include":false,"step":"4.0","x":-11810.47619047619,"y":-9446.285714285714,"z":31708.571428571428,"a95":0.99,"info":"16/08/2014 at 10:23:18"},{"visible":true,"include":false,"step":"8.0","x":-8835.142857142857,"y":-7210.285714285715,"z":24690.47619047619,"a95":0.99,"info":"16/08/2014 at 10:23:18"},{"visible":true,"include":false,"step":"12.0","x":-6581.428571428572,"y":-5613.619047619048,"z":18561.904761904763,"a95":0.99,"info":"16/08/2014 at 10:23:18"},{"visible":true,"include":false,"step":"16.0","x":-5224.476190476191,"y":-3887.3333333333335,"z":14499.047619047618,"a95":0.99,"info":"16/08/2014 at 10:23:18"},{"visible":true,"include":false,"step":"20.0","x":-3652.5714285714284,"y":-3137.3333333333335,"z":11236.190476190477,"a95":0.99,"info":"16/08/2014 at 10:23:18"},{"visible":true,"include":false,"step":"25.0","x":-2805.3333333333335,"y":-2662.4761904761904,"z":9040.380952380952,"a95":0.99,"info":"16/08/2014 at 10:23:18"},{"visible":true,"include":false,"step":"30.0","x":-2104.4761904761904,"y":-1237.7142857142858,"z":8255.809523809523,"a95":0.99,"info":"16/08/2014 at 10:23:18"},{"visible":true,"include":false,"step":"35.0","x":-1014.7619047619048,"y":-1935.047619047619,"z":5703.619047619048,"a95":0.99,"info":"16/08/2014 at 10:23:18"},{"visible":true,"include":false,"step":"40.0","x":83.1352380952381,"y":-1633.6190476190477,"z":6118.285714285715,"a95":0.99,"info":"16/08/2014 at 10:23:18"},{"visible":true,"include":false,"step":"45.0","x":-587.7142857142857,"y":-490.0761904761905,"z":5064.380952380952,"a95":0.99,"info":"16/08/2014 at 10:23:18"},{"visible":true,"include":false,"step":"50.0","x":339.8285714285714,"y":-798.304761904762,"z":3309.4285714285716,"a95":0.99,"info":"16/08/2014 at 10:23:18"},{"visible":true,"include":false,"step":"60.0","x":404.4761904761905,"y":-1224.2857142857142,"z":3486.5714285714284,"a95":0.99,"info":"16/08/2014 at 10:23:18"},{"visible":true,"include":false,"step":"70.0","x":347.4761904761905,"y":-675.9142857142857,"z":1330.3809523809523,"a95":0.99,"info":"16/08/2014 at 10:23:18"},{"visible":true,"include":false,"step":"80.0","x":3442.6666666666665,"y":-1031.904761904762,"z":378.447619047619,"a95":0.99,"info":"16/08/2014 at 10:23:18"},{"visible":true,"include":false,"step":"90.0","x":535.2,"y":-228.13333333333335,"z":1165.7142857142858,"a95":0.99,"info":"16/08/2014 at 10:23:18"},{"visible":true,"include":false,"step":"100.0","x":1355.904761904762,"y":-417.93333333333334,"z":443.42857142857144,"a95":0.99,"info":"16/08/2014 at 10:23:18"}]},{"version":"v1.1.0","exported":"2016-11-17T14:24:53.046Z","volume":10.5,"added":"2016-11-17T14:05:00.245Z","format":"Utrecht","demagType":"Unknown","strat":null,"patch":1.1,"GEO":[],"TECT":[],"interpreted":false,"name":"AT4.13A","coreAzi":19,"coreDip":50,"bedStrike":286,"bedDip":55,"data":[{"visible":true,"include":false,"step":"20","x":-5225.428571428572,"y":-4248.0952380952385,"z":30956.190476190477,"a95":2.9,"info":"\"14-08-11\" at \"17:04\""},{"visible":true,"include":false,"step":"100","x":-1700.3809523809523,"y":-1312.6666666666667,"z":9843.142857142857,"a95":3.6,"info":"\"14-08-11\" at \"20:44\""},{"visible":true,"include":false,"step":"150","x":-1847.4285714285713,"y":-1518.952380952381,"z":9637.52380952381,"a95":2.8,"info":"\"14-08-11\" at \"23:15\""},{"visible":true,"include":false,"step":"180","x":-352.76190476190476,"y":-751.047619047619,"z":4971.9047619047615,"a95":2.8,"info":"\"14-08-12\" at \"15:40\""},{"visible":true,"include":false,"step":"210","x":489.6190476190476,"y":-6,"z":2099.904761904762,"a95":3.8,"info":"\"14-08-12\" at \"18:21\""},{"visible":true,"include":false,"step":"240","x":426,"y":-148.85714285714286,"z":1720.2857142857142,"a95":3.7,"info":"\"14-08-12\" at \"21:25\""},{"visible":true,"include":false,"step":"270","x":687.3333333333334,"y":-197.42857142857142,"z":1423.6190476190477,"a95":3.8,"info":"\"14-08-13\" at \"15:27\""},{"visible":true,"include":false,"step":"300","x":656.5714285714286,"y":110.0952380952381,"z":1371.5238095238096,"a95":3.3,"info":"\"14-08-13\" at \"18:04\""},{"visible":true,"include":false,"step":"320","x":987.2380952380952,"y":205.33333333333334,"z":1088.7619047619048,"a95":3.3,"info":"\"14-08-13\" at \"21:10\""},{"visible":true,"include":false,"step":"340","x":1169.047619047619,"y":-137.04761904761904,"z":-110.38095238095238,"a95":2.2,"info":"\"14-08-14\" at \"14:08\""},{"visible":true,"include":false,"step":"370","x":-535.6190476190476,"y":7.809523809523809,"z":-323.23809523809524,"a95":5,"info":"\"14-08-14\" at \"17:14\""},{"visible":true,"include":false,"step":"400","x":-334.57142857142856,"y":-1352.3809523809523,"z":50.76190476190476,"a95":3,"info":"\"14-08-14\" at \"20:24\""},{"visible":true,"include":false,"step":"430","x":388.4761904761905,"y":362.6666666666667,"z":-421.6190476190476,"a95":6.6,"info":"\"14-08-14\" at \"23:41\""},{"visible":true,"include":false,"step":"460","x":403.9047619047619,"y":-950.7619047619048,"z":-699.5238095238095,"a95":3.3,"info":"\"14-08-15\" at \"16:22\""},{"visible":true,"include":false,"step":"490","x":-535.7142857142857,"y":-334.57142857142856,"z":-680.2857142857143,"a95":4.8,"info":"\"14-08-15\" at \"19:25\""},{"visible":true,"include":false,"step":"510","x":-458.4761904761905,"y":26.857142857142858,"z":-748.2857142857143,"a95":4.4,"info":"\"14-08-15\" at \"22:38\""},{"visible":true,"include":false,"step":"540","x":-250.1904761904762,"y":491.42857142857144,"z":-207.14285714285714,"a95":6,"info":"\"14-08-16\" at \"12:53\""},{"visible":true,"include":false,"step":"570","x":-637.3333333333334,"y":-800.952380952381,"z":-1048.095238095238,"a95":4.5,"info":"\"14-08-16\" at \"15:39\""},{"visible":true,"include":false,"step":"600","x":185.8095238095238,"y":-485.8095238095238,"z":55.714285714285715,"a95":5.5,"info":"\"14-08-16\" at \"18:21\""}]},{"version":"v1.1.0","exported":"2016-11-17T14:24:53.046Z","volume":10.5,"added":"2016-11-17T14:05:00.245Z","format":"Utrecht","demagType":"Unknown","strat":"5","patch":1.1,"GEO":[],"TECT":[],"interpreted":false,"name":"AT4.13B","coreAzi":19,"coreDip":50,"bedStrike":286,"bedDip":55,"data":[{"visible":true,"include":false,"step":"0.0","x":-2540.8571428571427,"y":-4138,"z":23144.761904761905,"a95":0.99,"info":"16/08/2014 at 10:23:18"},{"visible":true,"include":false,"step":"4.0","x":-1717.047619047619,"y":-3304.7619047619046,"z":19538.095238095237,"a95":0.99,"info":"16/08/2014 at 10:23:18"},{"visible":true,"include":false,"step":"8.0","x":-389.25714285714287,"y":-2294.3809523809523,"z":13348.57142857143,"a95":0.99,"info":"16/08/2014 at 10:23:18"},{"visible":true,"include":false,"step":"12.0","x":254.53333333333333,"y":-1248.4761904761904,"z":9635.238095238095,"a95":0.99,"info":"16/08/2014 at 10:23:18"},{"visible":true,"include":false,"step":"16.0","x":705.2285714285714,"y":-301.15238095238095,"z":7074.857142857143,"a95":0.99,"info":"16/08/2014 at 10:23:18"},{"visible":true,"include":false,"step":"20.0","x":810.1714285714285,"y":-52.0647619047619,"z":5554.857142857143,"a95":0.99,"info":"16/08/2014 at 10:23:18"},{"visible":true,"include":false,"step":"25.0","x":1377.7142857142858,"y":342.65714285714284,"z":4271.809523809524,"a95":0.99,"info":"16/08/2014 at 10:23:18"},{"visible":true,"include":false,"step":"30.0","x":1117.047619047619,"y":555.5809523809525,"z":2491.0476190476193,"a95":0.99,"info":"16/08/2014 at 10:23:18"},{"visible":true,"include":false,"step":"35.0","x":423.1142857142857,"y":111.53333333333333,"z":682.2666666666667,"a95":0.99,"info":"16/08/2014 at 10:23:18"},{"visible":true,"include":false,"step":"40.0","x":931.6571428571428,"y":-187.26666666666665,"z":1295.4285714285713,"a95":0.99,"info":"16/08/2014 at 10:23:18"},{"visible":true,"include":false,"step":"45.0","x":899.8761904761906,"y":370.74285714285713,"z":516.0571428571429,"a95":0.99,"info":"16/08/2014 at 10:23:18"},{"visible":true,"include":false,"step":"50.0","x":1090,"y":1103.8095238095239,"z":-23.734285714285715,"a95":0.99,"info":"16/08/2014 at 10:23:18"},{"visible":true,"include":false,"step":"60.0","x":1024.6666666666667,"y":1219.7142857142858,"z":720.3619047619047,"a95":0.99,"info":"16/08/2014 at 10:23:18"},{"visible":true,"include":false,"step":"70.0","x":1241.5238095238096,"y":1596.095238095238,"z":-224.8095238095238,"a95":0.99,"info":"16/08/2014 at 10:23:18"},{"visible":true,"include":false,"step":"80.0","x":660.2190476190476,"y":117.88571428571429,"z":-463.68571428571425,"a95":0.99,"info":"16/08/2014 at 10:23:18"},{"visible":true,"include":false,"step":"90.0","x":1052.095238095238,"y":1300.095238095238,"z":-278.23809523809524,"a95":0.99,"info":"16/08/2014 at 10:23:18"},{"visible":true,"include":false,"step":"100.0","x":718,"y":1912.952380952381,"z":-882.8666666666667,"a95":0.99,"info":"16/08/2014 at 10:23:18"}]},{"version":"v1.1.0","exported":"2016-11-17T14:24:53.046Z","volume":10.5,"added":"2016-11-17T14:05:00.245Z","format":"Utrecht","demagType":"Unknown","strat":"6","patch":1.1,"GEO":[],"TECT":[],"interpreted":false,"name":"AT4.14A","coreAzi":350,"coreDip":23,"bedStrike":286,"bedDip":55,"data":[{"visible":true,"include":false,"step":"0.0","x":1903.904761904762,"y":11584.761904761905,"z":19079.04761904762,"a95":0.99,"info":"16/08/2014 at 10:23:18"},{"visible":true,"include":false,"step":"4.0","x":1391.6190476190477,"y":9863.809523809523,"z":16531.428571428572,"a95":0.99,"info":"16/08/2014 at 10:23:18"},{"visible":true,"include":false,"step":"8.0","x":1124.1904761904761,"y":6777.047619047619,"z":12341.904761904761,"a95":0.99,"info":"16/08/2014 at 10:23:18"},{"visible":true,"include":false,"step":"12.0","x":831.9619047619047,"y":4565.523809523809,"z":9437.333333333334,"a95":0.99,"info":"16/08/2014 at 10:23:18"},{"visible":true,"include":false,"step":"16.0","x":872.0857142857143,"y":3433.809523809524,"z":7522.285714285715,"a95":0.99,"info":"16/08/2014 at 10:23:18"},{"visible":true,"include":false,"step":"20.0","x":489.7333333333333,"y":2156.7619047619046,"z":6215.428571428572,"a95":0.99,"info":"16/08/2014 at 10:23:18"},{"visible":true,"include":false,"step":"25.0","x":724.0285714285715,"y":1881.2380952380952,"z":5606.857142857143,"a95":0.99,"info":"16/08/2014 at 10:23:18"},{"visible":true,"include":false,"step":"30.0","x":660.1809523809524,"y":1229.7142857142858,"z":4108.761904761905,"a95":0.99,"info":"16/08/2014 at 10:23:18"},{"visible":true,"include":false,"step":"35.0","x":653.104761904762,"y":604.6190476190476,"z":2527.714285714286,"a95":0.99,"info":"16/08/2014 at 10:23:18"},{"visible":true,"include":false,"step":"40.0","x":-160.8761904761905,"y":1214.095238095238,"z":2550.6666666666665,"a95":0.99,"info":"16/08/2014 at 10:23:18"},{"visible":true,"include":false,"step":"45.0","x":261.5809523809524,"y":205.54285714285712,"z":1464.3809523809523,"a95":0.99,"info":"16/08/2014 at 10:23:18"},{"visible":true,"include":false,"step":"50.0","x":741.4190476190475,"y":-273.1047619047619,"z":642.0857142857143,"a95":0.99,"info":"16/08/2014 at 10:23:18"},{"visible":true,"include":false,"step":"60.0","x":984.1904761904761,"y":-222.26666666666668,"z":194.01904761904763,"a95":0.99,"info":"16/08/2014 at 10:23:18"},{"visible":true,"include":false,"step":"70.0","x":777.5619047619048,"y":247.52380952380952,"z":-362.65714285714284,"a95":0.99,"info":"16/08/2014 at 10:23:18"},{"visible":true,"include":false,"step":"80.0","x":-169.88571428571427,"y":-1167.4285714285713,"z":-357.76190476190476,"a95":0.99,"info":"16/08/2014 at 10:23:18"},{"visible":true,"include":false,"step":"90.0","x":416.1047619047619,"y":124.64761904761905,"z":-63.30952380952381,"a95":0.99,"info":"16/08/2014 at 10:23:18"},{"visible":true,"include":false,"step":"100.0","x":1220.952380952381,"y":-297.8095238095238,"z":-444.9238095238095,"a95":0.99,"info":"16/08/2014 at 10:23:18"}]},{"version":"v1.1.0","exported":"2016-11-17T14:24:53.046Z","volume":10.5,"added":"2016-11-17T14:05:00.246Z","format":"Utrecht","demagType":"Unknown","strat":null,"patch":1.1,"GEO":[],"TECT":[],"interpreted":false,"name":"AT4.15A","coreAzi":68,"coreDip":47,"bedStrike":286,"bedDip":55,"data":[{"visible":true,"include":false,"step":"20","x":-10807.619047619048,"y":-11423.238095238095,"z":21478.666666666668,"a95":4.8,"info":"\"14-08-11\" at \"17:06\""},{"visible":true,"include":false,"step":"100","x":-2011.142857142857,"y":-4087.0476190476193,"z":5406.380952380952,"a95":2.9,"info":"\"14-08-11\" at \"20:47\""},{"visible":true,"include":false,"step":"150","x":-1935.7142857142858,"y":-4123.523809523809,"z":5088.571428571428,"a95":2.8,"info":"\"14-08-11\" at \"23:18\""},{"visible":true,"include":false,"step":"180","x":-345.3333333333333,"y":-2307.714285714286,"z":2642.7619047619046,"a95":2.7,"info":"\"14-08-12\" at \"15:42\""},{"visible":true,"include":false,"step":"210","x":188.85714285714286,"y":-1371.6190476190477,"z":1637.5238095238096,"a95":2.9,"info":"\"14-08-12\" at \"18:23\""},{"visible":true,"include":false,"step":"240","x":296.6666666666667,"y":-1285.047619047619,"z":331.3333333333333,"a95":3.6,"info":"\"14-08-12\" at \"21:28\""},{"visible":true,"include":false,"step":"270","x":171.61904761904762,"y":-1739.2380952380952,"z":517.5238095238095,"a95":2.3,"info":"\"14-08-13\" at \"15:30\""},{"visible":true,"include":false,"step":"300","x":12.666666666666666,"y":-1564.4761904761904,"z":506.57142857142856,"a95":3.4,"info":"\"14-08-13\" at \"18:06\""},{"visible":true,"include":false,"step":"320","x":54.95238095238095,"y":-1072.857142857143,"z":187.61904761904762,"a95":3.2,"info":"\"14-08-13\" at \"21:12\""},{"visible":true,"include":false,"step":"340","x":495.3333333333333,"y":-648.8571428571429,"z":-82.0952380952381,"a95":3.7,"info":"\"14-08-14\" at \"14:11\""},{"visible":true,"include":false,"step":"370","x":411.04761904761904,"y":-228.66666666666666,"z":-508.1904761904762,"a95":2.6,"info":"\"14-08-14\" at \"17:17\""},{"visible":true,"include":false,"step":"400","x":437.04761904761904,"y":-660.0952380952381,"z":-701.8095238095239,"a95":2.8,"info":"\"14-08-14\" at \"20:26\""},{"visible":true,"include":false,"step":"430","x":92,"y":-28.38095238095238,"z":-706.3809523809524,"a95":5.7,"info":"\"14-08-14\" at \"23:46\""},{"visible":true,"include":false,"step":"460","x":656.8571428571429,"y":-349.3333333333333,"z":-415.5238095238095,"a95":4,"info":"\"14-08-15\" at \"16:25\""},{"visible":true,"include":false,"step":"490","x":-532.2857142857143,"y":-731.3333333333334,"z":-566.3809523809524,"a95":3.6,"info":"\"14-08-15\" at \"19:27\""},{"visible":true,"include":false,"step":"510","x":-506,"y":-674.1904761904761,"z":870.6666666666666,"a95":2.8,"info":"\"14-08-15\" at \"22:41\""},{"visible":true,"include":false,"step":"540","x":-950,"y":-645.4285714285714,"z":822.952380952381,"a95":3.2,"info":"\"14-08-16\" at \"12:55\""},{"visible":true,"include":false,"step":"570","x":1482.2857142857142,"y":-337.23809523809524,"z":349.8095238095238,"a95":3.3,"info":"\"14-08-16\" at \"15:41\""},{"visible":true,"include":false,"step":"600","x":330.3809523809524,"y":315.7142857142857,"z":-398.57142857142856,"a95":5.4,"info":"\"14-08-16\" at \"18:23\""}]}]
