# Supplementary material for: Paleomagnetic constraints on the timing and distribution of Cenozoic rotations in Central and Eastern Anatolia
Source: Copernicus journal article supplement (doi:10.5194/se-9-295-2018), 2018-03-21
Supplement: Supplementary file 2 [file se-9-295-2018-supplement.zip › se-2017-66_DATA_dir files/dir files Ulukisla/BU1.dir]

[{"version":"v1.1.0","exported":"2016-11-28T13:51:07.960Z","volume":10.5,"added":"2016-11-28T13:45:45.890Z","format":"Utrecht","demagType":"Unknown","strat":"4","patch":1.1,"GEO":[{"dec":342.6357486536513,"inc":26.246755527660802,"MAD":1.8570474516926079,"cm":[-3.979039320256561e-13,-9.379164112033322e-13,0],"intensity":8012.680407647746,"type":"dir","forced":true,"remark":"","origin":false,"nSteps":3,"minStep":"25.0","maxStep":"35.0","steps":["25.0","30.0","35.0"],"group":"None","version":"v1.1.0"}],"TECT":[{"dec":353.74078731818224,"inc":12.879309952287139,"MAD":1.857047451692596,"cm":[-1.1368683772161603e-13,-2.3021584638627246e-12,5.115907697472721e-13],"intensity":8012.6804076477465,"type":"dir","forced":true,"remark":"","origin":false,"nSteps":3,"minStep":"25.0","maxStep":"35.0","steps":["25.0","30.0","35.0"],"group":"None","version":"v1.1.0"}],"interpreted":true,"name":"BU1.1B","coreAzi":66,"coreDip":33,"bedStrike":325,"bedDip":33,"data":[{"visible":true,"include":false,"step":"0.0","x":-7086.761904761905,"y":-7745.047619047619,"z":13865.714285714286,"a95":0.99,"info":"02/12/2013 at 00:36:48"},{"visible":true,"include":false,"step":"4.0","x":-5139.619047619048,"y":-8226.857142857143,"z":9240.857142857143,"a95":0.99,"info":"02/12/2013 at 00:36:48"},{"visible":true,"include":false,"step":"8.0","x":-3839.4285714285716,"y":-7358.571428571428,"z":5872.380952380952,"a95":0.99,"info":"02/12/2013 at 00:36:48"},{"visible":true,"include":false,"step":"12.0","x":-2958.3809523809523,"y":-6378.285714285715,"z":3881.714285714286,"a95":0.99,"info":"02/12/2013 at 00:36:48"},{"visible":true,"include":false,"step":"16.0","x":-2428.190476190476,"y":-5692.285714285715,"z":2673.0476190476193,"a95":0.99,"info":"02/12/2013 at 00:36:48"},{"visible":true,"include":false,"step":"20.0","x":-1871.142857142857,"y":-5045.619047619048,"z":1926.095238095238,"a95":0.99,"info":"02/12/2013 at 00:36:48"},{"visible":true,"include":true,"step":"25.0","x":-1483.6190476190477,"y":-4287.619047619048,"z":1726.7619047619048,"a95":0.99,"info":"02/12/2013 at 00:36:48"},{"visible":true,"include":true,"step":"30.0","x":-1127.2380952380952,"y":-3276.8571428571427,"z":1085.6190476190477,"a95":0.99,"info":"02/12/2013 at 00:36:48"},{"visible":true,"include":true,"step":"35.0","x":-1074.5714285714287,"y":-2819.714285714286,"z":946.1619047619048,"a95":0.99,"info":"02/12/2013 at 00:36:48"},{"visible":true,"include":false,"step":"40.0","x":-788.7238095238096,"y":-2434.095238095238,"z":908.0190476190477,"a95":0.99,"info":"02/12/2013 at 00:36:48"},{"visible":true,"include":false,"step":"45.0","x":-454.85714285714283,"y":-1634.4761904761904,"z":700.0571428571429,"a95":0.99,"info":"02/12/2013 at 00:36:48"},{"visible":true,"include":false,"step":"50.0","x":-412.35238095238094,"y":-1420.3809523809523,"z":579.4571428571429,"a95":0.99,"info":"02/12/2013 at 00:36:48"},{"visible":true,"include":false,"step":"60.0","x":125.37142857142858,"y":-720.6761904761905,"z":448.20000000000005,"a95":0.99,"info":"02/12/2013 at 00:36:48"},{"visible":true,"include":false,"step":"70.0","x":858.0285714285714,"y":746.552380952381,"z":448.0952380952381,"a95":0.99,"info":"02/12/2013 at 00:36:48"},{"visible":true,"include":false,"step":"80.0","x":343.8,"y":455.8666666666667,"z":-185.82857142857142,"a95":0.99,"info":"02/12/2013 at 00:36:48"},{"visible":true,"include":false,"step":"90.0","x":871.8095238095239,"y":1266,"z":258.1333333333333,"a95":0.99,"info":"02/12/2013 at 00:36:48"},{"visible":true,"include":false,"step":"100.0","x":1875.7142857142858,"y":2855.3333333333335,"z":291.14285714285717,"a95":0.99,"info":"02/12/2013 at 00:36:48"}]},{"version":"v1.1.0","exported":"2016-11-28T13:51:07.960Z","volume":10.5,"added":"2016-11-28T13:45:45.890Z","format":"Utrecht","demagType":"Unknown","strat":"5","patch":1.1,"GEO":[{"dec":4.3256150358737955,"inc":41.68797230031625,"MAD":1.1906483740411693,"cm":[5.684341886080802e-14,-2.0250467969162855e-13,0],"intensity":9374.191500864237,"type":"dir","forced":true,"remark":"","origin":false,"nSteps":6,"minStep":"16.0","maxStep":"40.0","steps":["16.0","20.0","25.0","30.0","35.0","40.0"],"group":"None","version":"v1.1.0"}],"TECT":[{"dec":17.729897318479402,"inc":17.45913777056002,"MAD":1.1906483740410259,"cm":[-5.684341886080802e-14,1.9895196601282805e-13,-1.2789769243681803e-13],"intensity":9374.191500864235,"type":"dir","forced":true,"remark":"","origin":false,"nSteps":6,"minStep":"16.0","maxStep":"40.0","steps":["16.0","20.0","25.0","30.0","35.0","40.0"],"group":"None","version":"v1.1.0"}],"interpreted":true,"name":"BU1.2B","coreAzi":11,"coreDip":55,"bedStrike":325,"bedDip":33,"data":[{"visible":true,"include":false,"step":"0.0","x":1521.7142857142858,"y":1039.047619047619,"z":6789.809523809524,"a95":0.99,"info":"02/12/2013 at 00:36:48"},{"visible":true,"include":false,"step":"4.0","x":1821.3333333333333,"y":73.11333333333334,"z":7602.0952380952385,"a95":0.99,"info":"02/12/2013 at 00:36:48"},{"visible":true,"include":false,"step":"8.0","x":1646.5714285714287,"y":-220.71428571428572,"z":7524.285714285715,"a95":0.99,"info":"02/12/2013 at 00:36:48"},{"visible":true,"include":false,"step":"12.0","x":1442.6666666666667,"y":-317.56190476190477,"z":6866.571428571428,"a95":0.99,"info":"02/12/2013 at 00:36:48"},{"visible":true,"include":true,"step":"16.0","x":1299.904761904762,"y":-451.23809523809524,"z":5938.190476190476,"a95":0.99,"info":"02/12/2013 at 00:36:48"},{"visible":true,"include":true,"step":"20.0","x":1188.2857142857142,"y":-413.8666666666667,"z":5096.285714285715,"a95":0.99,"info":"02/12/2013 at 00:36:48"},{"visible":true,"include":true,"step":"25.0","x":1047.3333333333333,"y":-384.37142857142857,"z":4606,"a95":0.99,"info":"02/12/2013 at 00:36:48"},{"visible":true,"include":true,"step":"30.0","x":1013.2380952380952,"y":-388.0190476190476,"z":3845.714285714286,"a95":0.99,"info":"02/12/2013 at 00:36:48"},{"visible":true,"include":true,"step":"35.0","x":833.0761904761904,"y":-375.3904761904762,"z":3322.7619047619046,"a95":0.99,"info":"02/12/2013 at 00:36:48"},{"visible":true,"include":true,"step":"40.0","x":728.2380952380952,"y":-404.2285714285714,"z":3173.904761904762,"a95":0.99,"info":"02/12/2013 at 00:36:48"},{"visible":true,"include":false,"step":"45.0","x":839.8285714285715,"y":-374.6190476190476,"z":2672.190476190476,"a95":0.99,"info":"02/12/2013 at 00:36:48"},{"visible":true,"include":false,"step":"50.0","x":567.152380952381,"y":-528.8380952380952,"z":2142.9523809523807,"a95":0.99,"info":"02/12/2013 at 00:36:48"},{"visible":true,"include":false,"step":"60.0","x":533.6285714285715,"y":-418.8857142857143,"z":1700.095238095238,"a95":0.99,"info":"02/12/2013 at 00:36:48"},{"visible":true,"include":false,"step":"70.0","x":1033.6190476190477,"y":-426.2666666666667,"z":1272.2857142857142,"a95":0.99,"info":"02/12/2013 at 00:36:48"},{"visible":true,"include":false,"step":"80.0","x":497.97142857142853,"y":-1091.4285714285713,"z":1153.8095238095239,"a95":0.99,"info":"02/12/2013 at 00:36:48"},{"visible":true,"include":false,"step":"90.0","x":1401.7142857142858,"y":-482.99047619047616,"z":730.8857142857144,"a95":0.99,"info":"02/12/2013 at 00:36:48"},{"visible":true,"include":false,"step":"100.0","x":2297.0476190476193,"y":-1526.1904761904761,"z":540.6761904761905,"a95":0.99,"info":"02/12/2013 at 00:36:48"}]},{"version":"v1.1.0","exported":"2016-11-28T13:51:07.960Z","volume":10.5,"added":"2016-11-28T13:45:45.890Z","format":"Utrecht","demagType":"Unknown","strat":"6","patch":1.1,"GEO":[{"dec":9.600113231110129,"inc":40.15462468848079,"MAD":4.996852695165936,"cm":[-5.684341886080802e-14,6.572520305780927e-14,0],"intensity":2230.1391591775277,"type":"dir","forced":true,"remark":"","origin":false,"nSteps":5,"minStep":"12.0","maxStep":"30.0","steps":["12.0","16.0","20.0","25.0","30.0"],"group":"None","version":"v1.1.0"}],"TECT":[{"dec":17.229244701011567,"inc":2.184105625626625,"MAD":4.996852695165989,"cm":[5.684341886080802e-14,-4.440892098500626e-14,-3.6415315207705135e-14],"intensity":2230.139159177528,"type":"dir","forced":true,"remark":"","origin":false,"nSteps":5,"minStep":"12.0","maxStep":"30.0","steps":["12.0","16.0","20.0","25.0","30.0"],"group":"None","version":"v1.1.0"}],"interpreted":true,"name":"BU1.3A","coreAzi":81,"coreDip":46,"bedStrike":310,"bedDip":42,"data":[{"visible":true,"include":false,"step":"0.0","x":-1782.2857142857142,"y":-2428.7619047619046,"z":4979.523809523809,"a95":0.99,"info":"02/12/2013 at 00:36:48"},{"visible":true,"include":false,"step":"4.0","x":-1002.1904761904761,"y":-2205.4285714285716,"z":2980.095238095238,"a95":0.99,"info":"02/12/2013 at 00:36:48"},{"visible":true,"include":false,"step":"8.0","x":-620.4761904761905,"y":-1606.952380952381,"z":1735.3333333333333,"a95":0.99,"info":"02/12/2013 at 00:36:48"},{"visible":true,"include":true,"step":"12.0","x":-509.6,"y":-1134.2857142857142,"z":1126.7619047619048,"a95":0.99,"info":"02/12/2013 at 00:36:48"},{"visible":true,"include":true,"step":"16.0","x":-237.66666666666666,"y":-946.9714285714286,"z":780.895238095238,"a95":0.99,"info":"02/12/2013 at 00:36:48"},{"visible":true,"include":true,"step":"20.0","x":-316.4761904761905,"y":-758.8761904761905,"z":509.60952380952375,"a95":0.99,"info":"02/12/2013 at 00:36:48"},{"visible":true,"include":true,"step":"25.0","x":-159.03809523809525,"y":-573.3523809523809,"z":477.49523809523805,"a95":0.99,"info":"02/12/2013 at 00:36:48"},{"visible":true,"include":true,"step":"30.0","x":-189.41904761904763,"y":-393.74285714285713,"z":339.5333333333333,"a95":0.99,"info":"02/12/2013 at 00:36:48"},{"visible":true,"include":false,"step":"35.0","x":-231.35238095238094,"y":-549.1428571428571,"z":410,"a95":0.99,"info":"02/12/2013 at 00:36:48"},{"visible":true,"include":false,"step":"40.0","x":-282.18095238095236,"y":-320.8,"z":432.3714285714285,"a95":0.99,"info":"02/12/2013 at 00:36:48"},{"visible":true,"include":false,"step":"45.0","x":-85.48857142857143,"y":-82.99047619047619,"z":192.1904761904762,"a95":0.99,"info":"02/12/2013 at 00:36:48"},{"visible":true,"include":false,"step":"50.0","x":-75.72857142857143,"y":-34.934285714285714,"z":162.3047619047619,"a95":0.99,"info":"02/12/2013 at 00:36:48"},{"visible":true,"include":false,"step":"60.0","x":141.59047619047618,"y":-159.58095238095237,"z":161.78095238095239,"a95":0.99,"info":"02/12/2013 at 00:36:48"},{"visible":true,"include":false,"step":"70.0","x":387.97142857142853,"y":-109.01904761904763,"z":87.14952380952381,"a95":0.99,"info":"02/12/2013 at 00:36:48"},{"visible":true,"include":false,"step":"80.0","x":174.0095238095238,"y":-11.96952380952381,"z":-61.219047619047615,"a95":0.99,"info":"02/12/2013 at 00:36:48"},{"visible":true,"include":false,"step":"90.0","x":365.2,"y":61.42380952380953,"z":164.04761904761904,"a95":0.99,"info":"02/12/2013 at 00:36:48"},{"visible":true,"include":false,"step":"100.0","x":610.3142857142857,"y":-0.8901714285714286,"z":-52.06,"a95":0.99,"info":"02/12/2013 at 00:36:48"}]},{"version":"v1.1.0","exported":"2016-11-28T13:51:07.960Z","volume":10.5,"added":"2016-11-28T13:45:45.892Z","format":"Utrecht","demagType":"Unknown","strat":"8","patch":1.1,"GEO":[{"dec":2.288403005310954,"inc":64.24129723598641,"MAD":2.6600525104326125,"cm":[0,8.526512829121202e-14,0],"intensity":9249.690907606508,"type":"dir","forced":true,"remark":"","origin":false,"nSteps":6,"minStep":"30.0","maxStep":"60.0","steps":["30.0","35.0","40.0","45.0","50.0","60.0"],"group":"None","version":"v1.1.0"}],"TECT":[{"dec":22.788301713955832,"inc":26.056330608334154,"MAD":2.6600525104326334,"cm":[1.1368683772161603e-13,4.263256414560601e-14,-5.684341886080802e-14],"intensity":9249.69090760651,"type":"dir","forced":true,"remark":"","origin":false,"nSteps":6,"minStep":"30.0","maxStep":"60.0","steps":["30.0","35.0","40.0","45.0","50.0","60.0"],"group":"None","version":"v1.1.0"}],"interpreted":true,"name":"BU1.3BA","coreAzi":22,"coreDip":34,"bedStrike":310,"bedDip":42,"data":[{"visible":true,"include":false,"step":"0.0","x":-9487.619047619048,"y":-927.8761904761906,"z":15292.380952380952,"a95":0.99,"info":"30/09/2014 at 17:45:33"},{"visible":true,"include":false,"step":"10.0","x":-6276.0952380952385,"y":-968.7619047619048,"z":10553.333333333334,"a95":0.99,"info":"30/09/2014 at 17:45:33"},{"visible":true,"include":false,"step":"15.0","x":-5324,"y":-1083.2380952380952,"z":8571.047619047618,"a95":0.99,"info":"30/09/2014 at 17:45:33"},{"visible":true,"include":false,"step":"20.0","x":-4376,"y":-831.895238095238,"z":7330.285714285715,"a95":0.99,"info":"30/09/2014 at 17:45:33"},{"visible":true,"include":false,"step":"25.0","x":-3915.714285714286,"y":-876.6285714285715,"z":6206.476190476191,"a95":0.99,"info":"30/09/2014 at 17:45:33"},{"visible":true,"include":true,"step":"30.0","x":-3326.095238095238,"y":-872.4857142857143,"z":5204.0952380952385,"a95":0.99,"info":"30/09/2014 at 17:45:33"},{"visible":true,"include":true,"step":"35.0","x":-2716.7619047619046,"y":-786.2285714285714,"z":4827.523809523809,"a95":0.99,"info":"30/09/2014 at 17:45:33"},{"visible":true,"include":true,"step":"40.0","x":-2619.1428571428573,"y":-775.1904761904761,"z":3899.4285714285716,"a95":0.99,"info":"30/09/2014 at 17:45:33"},{"visible":true,"include":true,"step":"45.0","x":-2411.5238095238096,"y":-697.5714285714286,"z":3517.809523809524,"a95":0.99,"info":"30/09/2014 at 17:45:33"},{"visible":true,"include":true,"step":"50.0","x":-1998.6666666666667,"y":-661.504761904762,"z":3422.3809523809523,"a95":0.99,"info":"30/09/2014 at 17:45:33"},{"visible":true,"include":true,"step":"60.0","x":-1299.5238095238096,"y":-275.4761904761905,"z":2723.2380952380954,"a95":0.99,"info":"30/09/2014 at 17:45:33"},{"visible":true,"include":false,"step":"70.0","x":-730.2190476190476,"y":-313.97142857142853,"z":1921.7142857142858,"a95":0.99,"info":"30/09/2014 at 17:45:33"},{"visible":true,"include":false,"step":"80.0","x":-1448.4761904761904,"y":182.1047619047619,"z":1964.2857142857142,"a95":0.99,"info":"30/09/2014 at 17:45:33"},{"visible":true,"include":false,"step":"90.0","x":-814,"y":834.847619047619,"z":1626.857142857143,"a95":0.99,"info":"30/09/2014 at 17:45:33"}]},{"version":"v1.1.0","exported":"2016-11-28T13:51:07.960Z","volume":10.5,"added":"2016-11-28T13:45:45.892Z","format":"Utrecht","demagType":"Unknown","strat":"1","patch":1.1,"GEO":[{"dec":355.3858305870954,"inc":60.76053563308334,"MAD":3.303879964811733,"cm":[0,-3.304023721284466e-13,0],"intensity":14039.875083102259,"type":"dir","forced":true,"remark":"","origin":false,"nSteps":6,"minStep":"35.0","maxStep":"70.0","steps":["35.0","40.0","45.0","50.0","60.0","70.0"],"group":"None","version":"v1.1.0"}],"TECT":[{"dec":17.83881925889682,"inc":24.56926058879959,"MAD":3.3038799648116672,"cm":[5.684341886080802e-14,-1.1368683772161603e-13,0],"intensity":14039.875083102257,"type":"dir","forced":true,"remark":"","origin":false,"nSteps":6,"minStep":"35.0","maxStep":"70.0","steps":["35.0","40.0","45.0","50.0","60.0","70.0"],"group":"None","version":"v1.1.0"}],"interpreted":true,"name":"BU1.3BB","coreAzi":22,"coreDip":34,"bedStrike":310,"bedDip":42,"data":[{"visible":true,"include":false,"step":"0.0","x":-15866.666666666666,"y":-2803.5238095238096,"z":30392.380952380954,"a95":0.99,"info":"02/12/2013 at 00:36:48"},{"visible":true,"include":false,"step":"4.0","x":-13310.47619047619,"y":-4018.9523809523807,"z":25389.52380952381,"a95":0.99,"info":"02/12/2013 at 00:36:48"},{"visible":true,"include":false,"step":"8.0","x":-11148.57142857143,"y":-4101.619047619048,"z":20557.14285714286,"a95":0.99,"info":"02/12/2013 at 00:36:48"},{"visible":true,"include":false,"step":"12.0","x":-9340.857142857143,"y":-3871.6190476190477,"z":17799.04761904762,"a95":0.99,"info":"02/12/2013 at 00:36:48"},{"visible":true,"include":false,"step":"16.0","x":-8211.904761904761,"y":-3564.7619047619046,"z":14989.52380952381,"a95":0.99,"info":"02/12/2013 at 00:36:48"},{"visible":true,"include":false,"step":"20.0","x":-7159.619047619048,"y":-3174.9523809523807,"z":12961.904761904761,"a95":0.99,"info":"02/12/2013 at 00:36:48"},{"visible":true,"include":false,"step":"25.0","x":-6433.333333333333,"y":-2779.714285714286,"z":11597.142857142857,"a95":0.99,"info":"02/12/2013 at 00:36:48"},{"visible":true,"include":false,"step":"30.0","x":-5379.238095238095,"y":-2587.904761904762,"z":9434.095238095239,"a95":0.99,"info":"02/12/2013 at 00:36:48"},{"visible":true,"include":true,"step":"35.0","x":-4688.0952380952385,"y":-2658.095238095238,"z":8307.142857142857,"a95":0.99,"info":"02/12/2013 at 00:36:48"},{"visible":true,"include":true,"step":"40.0","x":-4513.714285714285,"y":-1625.4285714285713,"z":7962.476190476191,"a95":0.99,"info":"02/12/2013 at 00:36:48"},{"visible":true,"include":true,"step":"45.0","x":-3755.0476190476193,"y":-1721.142857142857,"z":6542,"a95":0.99,"info":"02/12/2013 at 00:36:48"},{"visible":true,"include":true,"step":"50.0","x":-3700.190476190476,"y":-2009.2380952380952,"z":6125.142857142857,"a95":0.99,"info":"02/12/2013 at 00:36:48"},{"visible":true,"include":true,"step":"60.0","x":-2659.5238095238096,"y":-824.7619047619048,"z":5010,"a95":0.99,"info":"02/12/2013 at 00:36:48"},{"visible":true,"include":true,"step":"70.0","x":-1725.7142857142858,"y":-482.9238095238095,"z":3780.6666666666665,"a95":0.99,"info":"02/12/2013 at 00:36:48"},{"visible":true,"include":false,"step":"80.0","x":-1287.8095238095239,"y":-969.1428571428571,"z":2750.285714285714,"a95":0.99,"info":"02/12/2013 at 00:36:48"},{"visible":true,"include":false,"step":"90.0","x":-1110.3809523809523,"y":903.2095238095238,"z":3126.7619047619046,"a95":0.99,"info":"02/12/2013 at 00:36:48"},{"visible":true,"include":false,"step":"100.0","x":161.11428571428573,"y":545.4666666666666,"z":1803.142857142857,"a95":0.99,"info":"02/12/2013 at 00:36:48"}]},{"version":"v1.1.0","exported":"2016-11-28T13:51:07.961Z","volume":10.5,"added":"2016-11-28T13:45:45.893Z","format":"Utrecht","demagType":"Unknown","strat":"8","patch":1.1,"GEO":[{"dec":335.28576815670425,"inc":37.81361089980365,"MAD":2.5844072603131676,"cm":[1.4210854715202004e-13,5.542233338928781e-13,0],"intensity":10850.73123180845,"type":"dir","forced":true,"remark":"","origin":false,"nSteps":6,"minStep":"25.0","maxStep":"50.0","steps":["25.0","30.0","35.0","40.0","45.0","50.0"],"group":"None","version":"v1.1.0"}],"TECT":[{"dec":355.1896986310565,"inc":25.935333540282734,"MAD":2.5844072603131036,"cm":[1.4210854715202004e-13,8.242295734817162e-13,-3.552713678800501e-13],"intensity":10850.731231808451,"type":"dir","forced":true,"remark":"","origin":false,"nSteps":6,"minStep":"25.0","maxStep":"50.0","steps":["25.0","30.0","35.0","40.0","45.0","50.0"],"group":"None","version":"v1.1.0"}],"interpreted":true,"name":"BU1.4A","coreAzi":20,"coreDip":26,"bedStrike":325,"bedDip":33,"data":[{"visible":true,"include":false,"step":"0.0","x":-6097.619047619048,"y":-5681.238095238095,"z":4379.523809523809,"a95":0.99,"info":"02/12/2013 at 00:36:48"},{"visible":true,"include":false,"step":"4.0","x":-5196.0952380952385,"y":-6432.952380952381,"z":6661.428571428572,"a95":0.99,"info":"02/12/2013 at 00:36:48"},{"visible":true,"include":false,"step":"8.0","x":-4806.857142857143,"y":-6171.619047619048,"z":8006.476190476191,"a95":0.99,"info":"02/12/2013 at 00:36:48"},{"visible":true,"include":false,"step":"12.0","x":-4021.3333333333335,"y":-5815.428571428572,"z":8272.666666666666,"a95":0.99,"info":"02/12/2013 at 00:36:48"},{"visible":true,"include":false,"step":"16.0","x":-3301.714285714286,"y":-5362.380952380952,"z":7444.857142857143,"a95":0.99,"info":"02/12/2013 at 00:36:48"},{"visible":true,"include":false,"step":"20.0","x":-2770.5714285714284,"y":-4824.285714285715,"z":6516.380952380952,"a95":0.99,"info":"02/12/2013 at 00:36:48"},{"visible":true,"include":true,"step":"25.0","x":-2203.4285714285716,"y":-4124.476190476191,"z":5859.9047619047615,"a95":0.99,"info":"02/12/2013 at 00:36:48"},{"visible":true,"include":true,"step":"30.0","x":-1946.5714285714287,"y":-3332.9523809523807,"z":4762.285714285715,"a95":0.99,"info":"02/12/2013 at 00:36:48"},{"visible":true,"include":true,"step":"35.0","x":-1836.5714285714287,"y":-2968.7619047619046,"z":4069.2380952380954,"a95":0.99,"info":"02/12/2013 at 00:36:48"},{"visible":true,"include":true,"step":"40.0","x":-1449.4285714285713,"y":-2450.9523809523807,"z":3720.9523809523807,"a95":0.99,"info":"02/12/2013 at 00:36:48"},{"visible":true,"include":true,"step":"45.0","x":-1039.142857142857,"y":-2085.0476190476193,"z":2763.3333333333335,"a95":0.99,"info":"02/12/2013 at 00:36:48"},{"visible":true,"include":true,"step":"50.0","x":-774.5619047619048,"y":-2231.2380952380954,"z":2415.0476190476193,"a95":0.99,"info":"02/12/2013 at 00:36:48"},{"visible":true,"include":false,"step":"60.0","x":-378.5904761904762,"y":-1010.6666666666666,"z":2176.285714285714,"a95":0.99,"info":"02/12/2013 at 00:36:48"},{"visible":true,"include":false,"step":"70.0","x":912.4952380952382,"y":-680.6,"z":1514,"a95":0.99,"info":"02/12/2013 at 00:36:48"},{"visible":true,"include":false,"step":"80.0","x":-1317.4285714285713,"y":-1264.857142857143,"z":1377.904761904762,"a95":0.99,"info":"02/12/2013 at 00:36:48"},{"visible":true,"include":false,"step":"90.0","x":735.3238095238095,"y":-15.215238095238094,"z":1521.3333333333333,"a95":0.99,"info":"02/12/2013 at 00:36:48"},{"visible":true,"include":false,"step":"100.0","x":2093.809523809524,"y":85.69142857142857,"z":671.047619047619,"a95":0.99,"info":"02/12/2013 at 00:36:48"}]},{"version":"v1.1.0","exported":"2016-11-28T13:51:07.961Z","volume":10.5,"added":"2016-11-28T13:45:45.893Z","format":"Utrecht","demagType":"Unknown","strat":"1","patch":1.1,"GEO":[{"dec":359.47763228890847,"inc":58.00455055865292,"MAD":0.5763251097777589,"cm":[-1.1368683772161603e-13,-7.247535904753022e-13,0],"intensity":21895.88449862952,"type":"dir","forced":true,"remark":"","origin":false,"nSteps":5,"minStep":"20.0","maxStep":"40.0","steps":["20.0","25.0","30.0","35.0","40.0"],"group":"None","version":"v1.1.0"}],"TECT":[{"dec":23.524738292540178,"inc":33.22366129291816,"MAD":0.5763251097773405,"cm":[-1.1368683772161603e-12,2.0463630789890885e-12,-1.7053025658242404e-13],"intensity":21895.884498629515,"type":"dir","forced":true,"remark":"","origin":false,"nSteps":5,"minStep":"20.0","maxStep":"40.0","steps":["20.0","25.0","30.0","35.0","40.0"],"group":"None","version":"v1.1.0"}],"interpreted":true,"name":"BU1.5A","coreAzi":27,"coreDip":8,"bedStrike":325,"bedDip":33,"data":[{"visible":true,"include":false,"step":"0.0","x":-17411.428571428572,"y":-1086.1904761904761,"z":11026.666666666666,"a95":0.99,"info":"02/12/2013 at 05:54:16"},{"visible":true,"include":false,"step":"4.0","x":-16848.571428571428,"y":-2340.3809523809523,"z":11302.857142857143,"a95":0.99,"info":"02/12/2013 at 05:54:16"},{"visible":true,"include":false,"step":"8.0","x":-15207.619047619048,"y":-3981.1428571428573,"z":10858.095238095239,"a95":0.99,"info":"02/12/2013 at 05:54:16"},{"visible":true,"include":false,"step":"12.0","x":-13380.952380952382,"y":-3880.7619047619046,"z":9900.952380952382,"a95":0.99,"info":"02/12/2013 at 05:54:16"},{"visible":true,"include":false,"step":"16.0","x":-11852.380952380952,"y":-3592.3809523809523,"z":8829.142857142857,"a95":0.99,"info":"02/12/2013 at 05:54:16"},{"visible":true,"include":true,"step":"20.0","x":-10601.904761904761,"y":-3236,"z":8097.142857142857,"a95":0.99,"info":"02/12/2013 at 05:54:16"},{"visible":true,"include":true,"step":"25.0","x":-9190.952380952382,"y":-2895.714285714286,"z":6822.476190476191,"a95":0.99,"info":"02/12/2013 at 05:54:16"},{"visible":true,"include":true,"step":"30.0","x":-8080.380952380952,"y":-2612.8571428571427,"z":6033.333333333333,"a95":0.99,"info":"02/12/2013 at 05:54:16"},{"visible":true,"include":true,"step":"35.0","x":-7031.523809523809,"y":-2342.095238095238,"z":5401.238095238095,"a95":0.99,"info":"02/12/2013 at 05:54:16"},{"visible":true,"include":true,"step":"40.0","x":-6367.619047619048,"y":-2014.3809523809523,"z":4705.142857142857,"a95":0.99,"info":"02/12/2013 at 05:54:16"},{"visible":true,"include":false,"step":"45.0","x":-5768.666666666667,"y":-1857.142857142857,"z":4093.904761904762,"a95":0.99,"info":"02/12/2013 at 05:54:16"},{"visible":true,"include":false,"step":"50.0","x":-5327.9047619047615,"y":-1307.4285714285713,"z":3693.2380952380954,"a95":0.99,"info":"02/12/2013 at 05:54:16"},{"visible":true,"include":false,"step":"60.0","x":-4117.428571428572,"y":-757.495238095238,"z":2625.714285714286,"a95":0.99,"info":"02/12/2013 at 05:54:16"},{"visible":true,"include":false,"step":"70.0","x":-3539.0476190476193,"y":-313.247619047619,"z":2136.190476190476,"a95":0.99,"info":"02/12/2013 at 05:54:16"},{"visible":true,"include":false,"step":"80.0","x":-3357.1428571428573,"y":602.8,"z":2086.7619047619046,"a95":0.99,"info":"02/12/2013 at 05:54:16"},{"visible":true,"include":false,"step":"90.0","x":-2019.142857142857,"y":1282.095238095238,"z":1557.7142857142858,"a95":0.99,"info":"02/12/2013 at 05:54:16"},{"visible":true,"include":false,"step":"100.0","x":-2115.904761904762,"y":1449.5238095238096,"z":1044.857142857143,"a95":0.99,"info":"02/12/2013 at 05:54:16"}]},{"version":"v1.1.0","exported":"2016-11-28T13:51:07.961Z","volume":10.5,"added":"2016-11-28T13:45:45.898Z","format":"Utrecht","demagType":"Unknown","strat":null,"patch":1.1,"GEO":[{"dec":305.3543927583771,"inc":30.38143469333268,"MAD":4.37990494170866,"cm":[-1.0800249583553523e-12,-7.389644451905042e-13,0],"intensity":17427.086170645194,"type":"dir","forced":true,"remark":"","origin":false,"nSteps":10,"minStep":"225","maxStep":"500","steps":["225","250","275","300","320","340","380","420","450","500"],"group":"None","version":"v1.1.0"}],"TECT":[{"dec":330.032857525195,"inc":33.41360405166777,"MAD":4.379904941708669,"cm":[-1.2505552149377763e-12,-9.094947017729282e-13,1.1368683772161603e-12],"intensity":17427.086170645194,"type":"dir","forced":true,"remark":"","origin":false,"nSteps":10,"minStep":"225","maxStep":"500","steps":["225","250","275","300","320","340","380","420","450","500"],"group":"None","version":"v1.1.0"}],"interpreted":true,"name":"BU1.6A","coreAzi":11,"coreDip":22,"bedStrike":322,"bedDip":38,"data":[{"visible":true,"include":false,"step":"20","x":-8718.47619047619,"y":-10336.47619047619,"z":6027.714285714285,"a95":2.4,"info":"\"13-11-03\" at \"11:39\""},{"visible":true,"include":false,"step":"80","x":-5955.333333333333,"y":-8119.523809523809,"z":6308.190476190476,"a95":2.1,"info":"\"13-11-04\" at \"08:21\""},{"visible":true,"include":false,"step":"150","x":-4739.428571428572,"y":-8430.952380952382,"z":5234,"a95":2.2,"info":"\"13-11-04\" at \"13:51\""},{"visible":true,"include":false,"step":"180","x":-3740.3809523809523,"y":-7756.285714285715,"z":5492.0952380952385,"a95":2.1,"info":"\"13-11-05\" at \"08:38\""},{"visible":true,"include":false,"step":"200","x":-3474.7619047619046,"y":-8065.142857142857,"z":4908.952380952381,"a95":2,"info":"\"13-11-05\" at \"13:19\""},{"visible":true,"include":true,"step":"225","x":-3468.3809523809523,"y":-7865.714285714285,"z":5497.142857142857,"a95":2.1,"info":"\"13-11-06\" at \"07:43\""},{"visible":true,"include":true,"step":"250","x":-3049.0476190476193,"y":-7892.380952380952,"z":5104.952380952381,"a95":1.9,"info":"\"13-11-06\" at \"11:34\""},{"visible":true,"include":true,"step":"275","x":-3577.904761904762,"y":-7591.9047619047615,"z":5514.952380952381,"a95":2.4,"info":"\"13-11-06\" at \"16:14\""},{"visible":true,"include":true,"step":"300","x":-4408.857142857143,"y":-7891.619047619048,"z":4852.285714285715,"a95":2,"info":"\"13-11-07\" at \"04:53\""},{"visible":true,"include":true,"step":"320","x":-3734.7619047619046,"y":-7271.047619047619,"z":5258.380952380952,"a95":2.5,"info":"\"13-11-07\" at \"08:18\""},{"visible":true,"include":true,"step":"340","x":-3173.714285714286,"y":-7201.619047619048,"z":4304.0952380952385,"a95":3.5,"info":"\"13-11-07\" at \"13:51\""},{"visible":true,"include":true,"step":"380","x":-2094.5714285714284,"y":-6939.9047619047615,"z":5259.523809523809,"a95":3.8,"info":"\"13-11-08\" at \"11:10\""},{"visible":true,"include":true,"step":"420","x":-2262.095238095238,"y":-7128.952380952381,"z":3598.285714285714,"a95":3.4,"info":"\"13-11-08\" at \"16:14\""},{"visible":true,"include":true,"step":"450","x":-3036.190476190476,"y":-6848.952380952381,"z":4579.238095238095,"a95":3.6,"info":"\"13-11-08\" at \"20:15\""},{"visible":true,"include":true,"step":"500","x":-1744.7619047619048,"y":-5927.809523809524,"z":3790.7619047619046,"a95":3.9,"info":"\"13-11-10\" at \"11:48\""},{"visible":true,"include":false,"step":"530","x":-1904.857142857143,"y":-4883.333333333333,"z":3915.0476190476193,"a95":4.8,"info":"\"13-11-10\" at \"15:06\""},{"visible":true,"include":false,"step":"560","x":-1461.2380952380952,"y":-1515.6190476190477,"z":1720.5714285714287,"a95":4.8,"info":"\"13-11-10\" at \"23:44\""}]},{"version":"v1.1.0","exported":"2016-11-28T13:51:07.961Z","volume":10.5,"added":"2016-11-28T13:45:45.899Z","format":"Utrecht","demagType":"Unknown","strat":"2","patch":1.1,"GEO":[{"dec":326.6974377987549,"inc":46.17675386810478,"MAD":8.081767697690104,"cm":[-1.7053025658242404e-13,-4.547473508864641e-13,0],"intensity":4800.583420269456,"type":"dir","forced":true,"remark":"","origin":false,"nSteps":4,"minStep":"25.0","maxStep":"40.0","steps":["25.0","30.0","35.0","40.0"],"group":"None","version":"v1.1.0"}],"TECT":[{"dec":357.3136591984435,"inc":32.250479789605855,"MAD":8.081767697690095,"cm":[-1.7053025658242404e-13,-2.6290081223123707e-13,3.126388037344441e-13],"intensity":4800.583420269455,"type":"dir","forced":true,"remark":"","origin":false,"nSteps":4,"minStep":"25.0","maxStep":"40.0","steps":["25.0","30.0","35.0","40.0"],"group":"None","version":"v1.1.0"}],"interpreted":true,"name":"BU1.6B","coreAzi":11,"coreDip":22,"bedStrike":322,"bedDip":38,"data":[{"visible":true,"include":false,"step":"0.0","x":-12284.761904761905,"y":-631.104761904762,"z":5659.047619047619,"a95":0.99,"info":"02/12/2013 at 05:54:16"},{"visible":true,"include":false,"step":"4.0","x":-8275.809523809523,"y":-1912.4761904761904,"z":4932.952380952381,"a95":0.99,"info":"02/12/2013 at 05:54:16"},{"visible":true,"include":false,"step":"8.0","x":-5512.666666666667,"y":-2723.4285714285716,"z":4488,"a95":0.99,"info":"02/12/2013 at 05:54:16"},{"visible":true,"include":false,"step":"12.0","x":-3813.3333333333335,"y":-2780.9523809523807,"z":4050.3809523809523,"a95":0.99,"info":"02/12/2013 at 05:54:16"},{"visible":true,"include":false,"step":"16.0","x":-2772.5714285714284,"y":-2569.5238095238096,"z":3495.4285714285716,"a95":0.99,"info":"02/12/2013 at 05:54:16"},{"visible":true,"include":false,"step":"20.0","x":-2192.3809523809523,"y":-2305.5238095238096,"z":3207.904761904762,"a95":0.99,"info":"02/12/2013 at 05:54:16"},{"visible":true,"include":true,"step":"25.0","x":-1538.5714285714287,"y":-1787.904761904762,"z":2207.904761904762,"a95":0.99,"info":"02/12/2013 at 05:54:16"},{"visible":true,"include":true,"step":"30.0","x":-1431.2380952380952,"y":-1248.6666666666667,"z":1868.2857142857142,"a95":0.99,"info":"02/12/2013 at 05:54:16"},{"visible":true,"include":true,"step":"35.0","x":-1146.952380952381,"y":-633.5904761904761,"z":1792.2857142857142,"a95":0.99,"info":"02/12/2013 at 05:54:16"},{"visible":true,"include":true,"step":"40.0","x":-396.6190476190476,"y":-915.1714285714285,"z":1255.3333333333333,"a95":0.99,"info":"02/12/2013 at 05:54:16"},{"visible":true,"include":false,"step":"45.0","x":-903.104761904762,"y":-788.9047619047619,"z":1149.904761904762,"a95":0.99,"info":"02/12/2013 at 05:54:16"},{"visible":true,"include":false,"step":"50.0","x":-1001.5238095238095,"y":744.4190476190475,"z":993.4285714285714,"a95":0.99,"info":"02/12/2013 at 05:54:16"},{"visible":true,"include":false,"step":"60.0","x":-312.70476190476194,"y":243.51428571428573,"z":583.047619047619,"a95":0.99,"info":"02/12/2013 at 05:54:16"},{"visible":true,"include":false,"step":"70.0","x":-65.64285714285714,"y":-566.7142857142857,"z":718.9333333333334,"a95":0.99,"info":"02/12/2013 at 05:54:16"},{"visible":true,"include":false,"step":"80.0","x":-685.4666666666666,"y":1246.5714285714287,"z":347.56190476190477,"a95":0.99,"info":"02/12/2013 at 05:54:16"},{"visible":true,"include":false,"step":"90.0","x":-127.36190476190475,"y":181.2761904761905,"z":107.80952380952381,"a95":0.99,"info":"02/12/2013 at 05:54:16"},{"visible":true,"include":false,"step":"100.0","x":-208.35238095238094,"y":-149.15238095238095,"z":580.2761904761904,"a95":0.99,"info":"02/12/2013 at 05:54:16"}]},{"version":"v1.1.0","exported":"2016-11-28T13:51:07.961Z","volume":10.5,"added":"2016-11-28T13:45:45.899Z","format":"Utrecht","demagType":"Unknown","strat":null,"patch":1.1,"GEO":[{"dec":359.2654169632211,"inc":-37.4087878122513,"MAD":20.40396737647749,"cm":[-1.1368683772161603e-13,-1.4210854715202004e-13,0],"intensity":10682.71496061302,"type":"GC","origin":false,"forced":true,"remark":"","nSteps":5,"minStep":"150","maxStep":"250","steps":["150","180","200","225","250"],"group":"None","version":"v1.1.0"}],"TECT":[{"dec":322.45272964006415,"inc":-50.78946298359314,"MAD":20.403967376477674,"cm":[-6.252776074688882e-13,1.2079226507921703e-12,1.7053025658242404e-13],"intensity":10682.714960613017,"type":"GC","origin":false,"forced":true,"remark":"","nSteps":5,"minStep":"150","maxStep":"250","steps":["150","180","200","225","250"],"group":"None","version":"v1.1.0"}],"interpreted":true,"name":"BU1.7A","coreAzi":13,"coreDip":24,"bedStrike":322,"bedDip":38,"data":[{"visible":true,"include":false,"step":"20","x":-7115.428571428572,"y":948.8571428571429,"z":10314.095238095239,"a95":2.6,"info":"\"13-11-03\" at \"11:42\""},{"visible":true,"include":false,"step":"80","x":-3969.6190476190477,"y":-209.9047619047619,"z":7493.619047619048,"a95":2.6,"info":"\"13-11-04\" at \"08:23\""},{"visible":true,"include":true,"step":"150","x":-3171.4285714285716,"y":-765.3333333333334,"z":5193.047619047619,"a95":2.8,"info":"\"13-11-04\" at \"13:54\""},{"visible":true,"include":true,"step":"180","x":-2524.4761904761904,"y":-946.6666666666666,"z":4736.380952380952,"a95":2.9,"info":"\"13-11-05\" at \"08:40\""},{"visible":true,"include":true,"step":"200","x":-2514.5714285714284,"y":-1368.3809523809523,"z":4060.7619047619046,"a95":2.9,"info":"\"13-11-05\" at \"13:22\""},{"visible":true,"include":true,"step":"225","x":-2213.3333333333335,"y":-1124,"z":4298.666666666667,"a95":3.1,"info":"\"13-11-06\" at \"07:45\""},{"visible":true,"include":true,"step":"250","x":-2360.9523809523807,"y":-1756.4761904761904,"z":3590.6666666666665,"a95":3.2,"info":"\"13-11-06\" at \"11:37\""},{"visible":true,"include":false,"step":"275","x":-901.3333333333334,"y":-2876.8571428571427,"z":1016.8571428571429,"a95":2,"info":"\"13-11-06\" at \"16:17\""},{"visible":true,"include":false,"step":"300","x":-1582.3809523809523,"y":-3256.9523809523807,"z":439.8095238095238,"a95":1.7,"info":"\"13-11-07\" at \"04:55\""},{"visible":true,"include":false,"step":"320","x":-1050.952380952381,"y":-2122,"z":938.7619047619048,"a95":2.5,"info":"\"13-11-07\" at \"08:21\""},{"visible":true,"include":false,"step":"340","x":-672.6666666666666,"y":-3098.4761904761904,"z":87.52380952380952,"a95":2.5,"info":"\"13-11-07\" at \"13:54\""},{"visible":true,"include":false,"step":"380","x":-677.6190476190476,"y":-2668.285714285714,"z":2538.9523809523807,"a95":4.2,"info":"\"13-11-08\" at \"11:12\""},{"visible":true,"include":false,"step":"420","x":-1361.8095238095239,"y":-2309.3333333333335,"z":1332,"a95":3.4,"info":"\"13-11-08\" at \"16:16\""},{"visible":true,"include":false,"step":"450","x":-1848.1904761904761,"y":-1704.7619047619048,"z":1219.8095238095239,"a95":3.7,"info":"\"13-11-08\" at \"20:19\""},{"visible":true,"include":false,"step":"500","x":-1577.7142857142858,"y":-2146.095238095238,"z":1005.4285714285714,"a95":3.6,"info":"\"13-11-10\" at \"11:51\""},{"visible":true,"include":false,"step":"530","x":-2054.7619047619046,"y":-1424.5714285714287,"z":1948.952380952381,"a95":5.1,"info":"\"13-11-10\" at \"15:09\""},{"visible":true,"include":false,"step":"560","x":-916.2857142857143,"y":-95.42857142857143,"z":885.7142857142857,"a95":6.4,"info":"\"13-11-10\" at \"23:48\""}]},{"version":"v1.1.0","exported":"2016-11-28T13:51:07.961Z","volume":10.5,"added":"2016-11-28T13:45:45.899Z","format":"Utrecht","demagType":"Unknown","strat":null,"patch":1.1,"GEO":[],"TECT":[],"interpreted":false,"name":"BU1.7B","coreAzi":13,"coreDip":24,"bedStrike":317,"bedDip":38,"data":[{"visible":true,"include":false,"step":"20","x":-563.2380952380952,"y":-6452.476190476191,"z":2830.190476190476,"a95":1.9,"info":"\"13-11-03\" at \"11:45\""},{"visible":true,"include":false,"step":"80","x":-1086.857142857143,"y":-3575.6190476190477,"z":2548.5714285714284,"a95":2.2,"info":"\"13-11-04\" at \"08:26\""},{"visible":true,"include":false,"step":"150","x":-1207.3333333333333,"y":-3332.190476190476,"z":1025.047619047619,"a95":3.3,"info":"\"13-11-04\" at \"14:00\""},{"visible":true,"include":false,"step":"180","x":-755.047619047619,"y":-3032.5714285714284,"z":1121.142857142857,"a95":2.1,"info":"\"13-11-05\" at \"08:43\""},{"visible":true,"include":false,"step":"200","x":-854.2857142857143,"y":-3173.4285714285716,"z":730.1904761904761,"a95":2.3,"info":"\"13-11-05\" at \"13:25\""},{"visible":true,"include":false,"step":"225","x":-550.0952380952381,"y":-2828,"z":852.1904761904761,"a95":1.8,"info":"\"13-11-06\" at \"07:47\""},{"visible":true,"include":false,"step":"250","x":-462.95238095238096,"y":-3180.4761904761904,"z":662.0952380952381,"a95":1.8,"info":"\"13-11-06\" at \"11:40\""},{"visible":true,"include":false,"step":"275","x":-1716.3809523809523,"y":-1759.904761904762,"z":3400,"a95":3.1,"info":"\"13-11-06\" at \"16:20\""},{"visible":true,"include":false,"step":"300","x":-2563.904761904762,"y":-2647.4285714285716,"z":2710.190476190476,"a95":2.7,"info":"\"13-11-07\" at \"04:58\""},{"visible":true,"include":false,"step":"320","x":-1527.5238095238096,"y":-1116.3809523809523,"z":3009.6190476190477,"a95":3.6,"info":"\"13-11-07\" at \"08:23\""},{"visible":true,"include":false,"step":"340","x":-1141.5238095238096,"y":-3463.904761904762,"z":592,"a95":2.5,"info":"\"13-11-07\" at \"14:00\""},{"visible":true,"include":true,"step":"380","x":-1185.904761904762,"y":-2560.7619047619046,"z":1154.7619047619048,"a95":3,"info":"\"13-11-08\" at \"11:15\""},{"visible":true,"include":true,"step":"420","x":-736.3809523809524,"y":-2534.285714285714,"z":267.04761904761904,"a95":2.4,"info":"\"13-11-08\" at \"16:20\""},{"visible":true,"include":true,"step":"450","x":-625.7142857142857,"y":-2077.0476190476193,"z":146.85714285714286,"a95":2.6,"info":"\"13-11-08\" at \"20:22\""},{"visible":true,"include":true,"step":"500","x":-554.7619047619048,"y":-1753.904761904762,"z":272.95238095238096,"a95":2.8,"info":"\"13-11-10\" at \"11:53\""},{"visible":true,"include":false,"step":"530","x":-1274.095238095238,"y":-1412.2857142857142,"z":1385.047619047619,"a95":5.1,"info":"\"13-11-10\" at \"15:11\""},{"visible":true,"include":false,"step":"560","x":-2241.1428571428573,"y":-561.5238095238095,"z":249.8095238095238,"a95":2.9,"info":"\"13-11-10\" at \"23:51\""}]},{"version":"v1.1.0","exported":"2016-11-28T13:51:07.961Z","volume":10.5,"added":"2016-11-28T13:45:45.899Z","format":"Utrecht","demagType":"Unknown","strat":null,"patch":1.1,"GEO":[],"TECT":[],"interpreted":false,"name":"BU1.8A","coreAzi":10,"coreDip":34,"bedStrike":322,"bedDip":38,"data":[{"visible":true,"include":false,"step":"20","x":1685.6190476190477,"y":-756.3809523809524,"z":4379.428571428572,"a95":2.7,"info":"\"13-11-03\" at \"11:48\""},{"visible":true,"include":false,"step":"80","x":157.71428571428572,"y":-1155.7142857142858,"z":3914.190476190476,"a95":2.7,"info":"\"13-11-04\" at \"08:29\""},{"visible":true,"include":false,"step":"150","x":356.4761904761905,"y":-1102.952380952381,"z":2768.285714285714,"a95":2.9,"info":"\"13-11-04\" at \"14:05\""},{"visible":true,"include":false,"step":"180","x":707.2380952380952,"y":-1063.904761904762,"z":2612.8571428571427,"a95":2.8,"info":"\"13-11-05\" at \"08:46\""},{"visible":true,"include":false,"step":"200","x":741.5238095238095,"y":-1476.3809523809523,"z":2172.6666666666665,"a95":2.8,"info":"\"13-11-05\" at \"13:27\""},{"visible":true,"include":false,"step":"225","x":885.5238095238095,"y":-1279.047619047619,"z":2375.1428571428573,"a95":3.1,"info":"\"13-11-06\" at \"07:49\""},{"visible":true,"include":false,"step":"250","x":474.3809523809524,"y":-1612.3809523809523,"z":2165.809523809524,"a95":3,"info":"\"13-11-06\" at \"11:43\""},{"visible":true,"include":false,"step":"275","x":926.5714285714286,"y":-1820,"z":2252.9523809523807,"a95":2.6,"info":"\"13-11-06\" at \"16:23\""},{"visible":true,"include":false,"step":"300","x":810.8571428571429,"y":-2690.285714285714,"z":1675.2380952380952,"a95":2.1,"info":"\"13-11-07\" at \"05:00\""},{"visible":true,"include":false,"step":"320","x":1341.2380952380952,"y":-1176.3809523809523,"z":2231.0476190476193,"a95":3,"info":"\"13-11-07\" at \"08:26\""},{"visible":true,"include":false,"step":"340","x":1285.5238095238096,"y":-1846.2857142857142,"z":1865.5238095238096,"a95":3.7,"info":"\"13-11-07\" at \"14:03\""},{"visible":true,"include":false,"step":"380","x":791.4285714285714,"y":-1317.4285714285713,"z":2364.095238095238,"a95":5,"info":"\"13-11-08\" at \"11:17\""},{"visible":true,"include":false,"step":"420","x":446.95238095238096,"y":-1690.095238095238,"z":1472.857142857143,"a95":4.3,"info":"\"13-11-08\" at \"16:22\""},{"visible":true,"include":false,"step":"450","x":485.23809523809524,"y":-2171.0476190476193,"z":1778.4761904761904,"a95":4,"info":"\"13-11-08\" at \"20:24\""},{"visible":true,"include":false,"step":"500","x":654,"y":-2126.095238095238,"z":1328.2857142857142,"a95":4.2,"info":"\"13-11-10\" at \"11:56\""},{"visible":true,"include":false,"step":"530","x":-581.5238095238095,"y":-2094.3809523809523,"z":2169.904761904762,"a95":5.2,"info":"\"13-11-10\" at \"15:14\""},{"visible":true,"include":false,"step":"560","x":-975.6190476190476,"y":188.1904761904762,"z":1149.5238095238096,"a95":5.8,"info":"\"13-11-10\" at \"23:54\""}]},{"version":"v1.1.0","exported":"2016-11-28T13:51:07.961Z","volume":10.5,"added":"2016-11-28T13:45:45.900Z","format":"Utrecht","demagType":"Unknown","strat":"3","patch":1.1,"GEO":[{"dec":341.01347151106677,"inc":34.586018386136836,"MAD":4.167963998316073,"cm":[-8.526512829121202e-14,-3.836930773104541e-13,0],"intensity":7003.718630123388,"type":"dir","forced":true,"remark":"","origin":false,"nSteps":5,"minStep":"12.0","maxStep":"30.0","steps":["12.0","16.0","20.0","25.0","30.0"],"group":"None","version":"v1.1.0"}],"TECT":[{"dec":357.77395183581245,"inc":16.390295519894938,"MAD":4.167963998316064,"cm":[0,-4.2454928461665986e-13,1.6342482922482304e-13],"intensity":7003.718630123387,"type":"dir","forced":true,"remark":"","origin":false,"nSteps":5,"minStep":"12.0","maxStep":"30.0","steps":["12.0","16.0","20.0","25.0","30.0"],"group":"None","version":"v1.1.0"}],"interpreted":true,"name":"BU1.8B","coreAzi":10,"coreDip":34,"bedStrike":322,"bedDip":38,"data":[{"visible":true,"include":false,"step":"0.0","x":-6330.666666666667,"y":-3647.714285714286,"z":18777.14285714286,"a95":0.99,"info":"02/12/2013 at 05:54:16"},{"visible":true,"include":false,"step":"4.0","x":-3436.8571428571427,"y":-3821.1428571428573,"z":11577.142857142857,"a95":0.99,"info":"02/12/2013 at 05:54:16"},{"visible":true,"include":false,"step":"8.0","x":-1838.2857142857142,"y":-2967.714285714286,"z":7201.523809523809,"a95":0.99,"info":"02/12/2013 at 05:54:16"},{"visible":true,"include":true,"step":"12.0","x":-653.0095238095239,"y":-2173.0476190476193,"z":4753.714285714285,"a95":0.99,"info":"02/12/2013 at 05:54:16"},{"visible":true,"include":true,"step":"16.0","x":-173.40952380952382,"y":-1620.952380952381,"z":3505.3333333333335,"a95":0.99,"info":"02/12/2013 at 05:54:16"},{"visible":true,"include":true,"step":"20.0","x":-75.58,"y":-1177.2380952380952,"z":2978.5714285714284,"a95":0.99,"info":"02/12/2013 at 05:54:16"},{"visible":true,"include":true,"step":"25.0","x":215.28571428571428,"y":-753.8761904761905,"z":1807.904761904762,"a95":0.99,"info":"02/12/2013 at 05:54:16"},{"visible":true,"include":true,"step":"30.0","x":-68.14857142857143,"y":-494.54285714285714,"z":1681.8095238095239,"a95":0.99,"info":"02/12/2013 at 05:54:16"},{"visible":true,"include":false,"step":"35.0","x":-456.7047619047619,"y":100.81904761904761,"z":1296.2857142857142,"a95":0.99,"info":"02/12/2013 at 05:54:16"},{"visible":true,"include":false,"step":"40.0","x":-192.77142857142857,"y":230.8095238095238,"z":1213.047619047619,"a95":0.99,"info":"02/12/2013 at 05:54:16"},{"visible":true,"include":false,"step":"45.0","x":-138.32380952380953,"y":-227.43809523809523,"z":1142.3809523809523,"a95":0.99,"info":"02/12/2013 at 05:54:16"},{"visible":true,"include":false,"step":"50.0","x":-184.3047619047619,"y":768.8380952380952,"z":1144.7619047619048,"a95":0.99,"info":"02/12/2013 at 05:54:16"},{"visible":true,"include":false,"step":"60.0","x":375.3809523809524,"y":1329.3333333333333,"z":228.7904761904762,"a95":0.99,"info":"02/12/2013 at 05:54:16"},{"visible":true,"include":false,"step":"70.0","x":-294.9809523809524,"y":457.3047619047619,"z":378.06666666666666,"a95":0.99,"info":"02/12/2013 at 05:54:16"},{"visible":true,"include":false,"step":"80.0","x":831.4952380952382,"y":1753.142857142857,"z":19.706666666666667,"a95":0.99,"info":"02/12/2013 at 05:54:16"},{"visible":true,"include":false,"step":"90.0","x":-245.69523809523812,"y":2078,"z":48.08190476190477,"a95":0.99,"info":"02/12/2013 at 05:54:16"},{"visible":true,"include":false,"step":"100.0","x":-1510.4761904761904,"y":1296,"z":165.88571428571427,"a95":0.99,"info":"02/12/2013 at 05:54:16"}]},{"version":"v1.1.0","exported":"2016-11-28T13:51:07.961Z","volume":10.5,"added":"2016-11-28T13:45:45.900Z","format":"Utrecht","demagType":"Unknown","strat":null,"patch":1.1,"GEO":[{"dec":5.807174134075865,"inc":-21.622288537701,"MAD":10.240933357371896,"cm":[-6.394884621840902e-14,1.4210854715202004e-13,0],"intensity":9312.358372022609,"type":"GC","origin":false,"forced":true,"remark":"","nSteps":11,"minStep":"80","maxStep":"380","steps":["80","150","180","200","225","250","275","300","320","340","380"],"group":"None","version":"v1.1.0"}],"TECT":[{"dec":344.6709511880355,"inc":-43.35869976628925,"MAD":10.24093335737193,"cm":[-2.4158453015843406e-13,-3.339550858072471e-13,2.842170943040401e-14],"intensity":9312.358372022612,"type":"GC","origin":false,"forced":true,"remark":"","nSteps":11,"minStep":"80","maxStep":"380","steps":["80","150","180","200","225","250","275","300","320","340","380"],"group":"None","version":"v1.1.0"}],"interpreted":true,"name":"BU1.9A","coreAzi":17,"coreDip":34,"bedStrike":322,"bedDip":38,"data":[{"visible":true,"include":false,"step":"20","x":-4171.333333333333,"y":862.3809523809524,"z":6739.9047619047615,"a95":2.9,"info":"\"13-11-03\" at \"11:51\""},{"visible":true,"include":true,"step":"80","x":-3430.6666666666665,"y":-942.8571428571429,"z":4975.523809523809,"a95":2.8,"info":"\"13-11-04\" at \"08:32\""},{"visible":true,"include":true,"step":"150","x":-2661.6190476190477,"y":-1676.095238095238,"z":3431.904761904762,"a95":3.8,"info":"\"13-11-04\" at \"14:12\""},{"visible":true,"include":true,"step":"180","x":-2499.6190476190477,"y":-1700.1904761904761,"z":3304.7619047619046,"a95":2.8,"info":"\"13-11-05\" at \"08:49\""},{"visible":true,"include":true,"step":"200","x":-2560.4761904761904,"y":-1755.904761904762,"z":2691.2380952380954,"a95":2.7,"info":"\"13-11-05\" at \"13:31\""},{"visible":true,"include":true,"step":"225","x":-2331.2380952380954,"y":-1837.6190476190477,"z":2961.714285714286,"a95":3,"info":"\"13-11-06\" at \"07:51\""},{"visible":true,"include":true,"step":"250","x":-2282.095238095238,"y":-2105.714285714286,"z":2331.3333333333335,"a95":2.8,"info":"\"13-11-06\" at \"11:46\""},{"visible":true,"include":true,"step":"275","x":-2341.904761904762,"y":-2402.6666666666665,"z":2254.190476190476,"a95":2,"info":"\"13-11-06\" at \"16:26\""},{"visible":true,"include":true,"step":"300","x":-1400.2857142857142,"y":-2382,"z":1725.4285714285713,"a95":2.9,"info":"\"13-11-07\" at \"05:02\""},{"visible":true,"include":true,"step":"320","x":-1676.095238095238,"y":-1818.2857142857142,"z":2065.5238095238096,"a95":3,"info":"\"13-11-07\" at \"08:28\""},{"visible":true,"include":true,"step":"340","x":-1716.3809523809523,"y":-2206.6666666666665,"z":1831.2380952380952,"a95":3.3,"info":"\"13-11-07\" at \"14:05\""},{"visible":true,"include":true,"step":"380","x":-1679.4285714285713,"y":-2921.2380952380954,"z":1782.857142857143,"a95":4.2,"info":"\"13-11-08\" at \"11:19\""},{"visible":true,"include":false,"step":"420","x":-1891.7142857142858,"y":-2298.4761904761904,"z":1179.4285714285713,"a95":3.5,"info":"\"13-11-08\" at \"16:24\""},{"visible":true,"include":false,"step":"450","x":-1843.5238095238096,"y":-2644.190476190476,"z":1273.047619047619,"a95":3.1,"info":"\"13-11-08\" at \"20:27\""},{"visible":true,"include":false,"step":"500","x":-1586.5714285714287,"y":-2459.714285714286,"z":848,"a95":2.9,"info":"\"13-11-10\" at \"11:58\""},{"visible":true,"include":false,"step":"530","x":-2269.5238095238096,"y":-2533.0476190476193,"z":1452.4761904761904,"a95":3.9,"info":"\"13-11-10\" at \"15:16\""},{"visible":true,"include":false,"step":"560","x":-1005.5238095238095,"y":5.0476190476190474,"z":1208.095238095238,"a95":6,"info":"\"13-11-10\" at \"23:56\""}]},{"version":"v1.1.0","exported":"2016-11-28T13:51:07.961Z","volume":10.5,"added":"2016-11-28T13:45:45.900Z","format":"Utrecht","demagType":"Unknown","strat":"4","patch":1.1,"GEO":[{"dec":221.6170925704701,"inc":-3.9721186696873807,"MAD":5.60842652712248,"cm":[-3.410605131648481e-13,-2.4158453015843406e-13,0],"intensity":6290.210998223897,"type":"GC","origin":false,"forced":true,"remark":"","nSteps":5,"minStep":"8.0","maxStep":"25.0","steps":["8.0","12.0","16.0","20.0","25.0"],"group":"None","version":"v1.1.0"}],"TECT":[{"dec":39.572732378734486,"inc":-33.33540566268493,"MAD":5.608426527122807,"cm":[-4.263256414560601e-13,-1.0302869668521453e-13,1.9895196601282805e-13],"intensity":6290.210998223898,"type":"GC","origin":false,"forced":true,"remark":"","nSteps":5,"minStep":"8.0","maxStep":"25.0","steps":["8.0","12.0","16.0","20.0","25.0"],"group":"None","version":"v1.1.0"}],"interpreted":true,"name":"BU1.9B","coreAzi":17,"coreDip":34,"bedStrike":322,"bedDip":38,"data":[{"visible":true,"include":false,"step":"0.0","x":-6985.523809523809,"y":4850.666666666667,"z":2057.5238095238096,"a95":0.99,"info":"02/12/2013 at 05:54:16"},{"visible":true,"include":false,"step":"4.0","x":-5012.857142857143,"y":1006.0952380952381,"z":2560.190476190476,"a95":0.99,"info":"02/12/2013 at 05:54:16"},{"visible":true,"include":true,"step":"8.0","x":-3801.4285714285716,"y":-677.8285714285714,"z":2545.2380952380954,"a95":0.99,"info":"02/12/2013 at 05:54:16"},{"visible":true,"include":true,"step":"12.0","x":-2725.6190476190477,"y":-1360.6666666666667,"z":2253.5238095238096,"a95":0.99,"info":"02/12/2013 at 05:54:16"},{"visible":true,"include":true,"step":"16.0","x":-2030.1904761904761,"y":-1446.7619047619048,"z":1802.952380952381,"a95":0.99,"info":"02/12/2013 at 05:54:16"},{"visible":true,"include":true,"step":"20.0","x":-1404,"y":-1466.5714285714287,"z":1702,"a95":0.99,"info":"02/12/2013 at 05:54:16"},{"visible":true,"include":true,"step":"25.0","x":-979.2380952380952,"y":-1139.047619047619,"z":1116.857142857143,"a95":0.99,"info":"02/12/2013 at 05:54:16"},{"visible":true,"include":false,"step":"30.0","x":-1114.095238095238,"y":-1074.952380952381,"z":700.4571428571429,"a95":0.99,"info":"02/12/2013 at 05:54:16"},{"visible":true,"include":false,"step":"35.0","x":-734.1238095238095,"y":-458.6380952380952,"z":553.6380952380953,"a95":0.99,"info":"02/12/2013 at 05:54:16"},{"visible":true,"include":false,"step":"40.0","x":-77.67904761904762,"y":-344.2761904761905,"z":289.6952380952381,"a95":0.99,"info":"02/12/2013 at 05:54:16"},{"visible":true,"include":false,"step":"45.0","x":-101.98095238095237,"y":-685.7047619047619,"z":490.3619047619048,"a95":0.99,"info":"02/12/2013 at 05:54:16"},{"visible":true,"include":false,"step":"50.0","x":-218.16190476190474,"y":469.7047619047619,"z":393.39047619047625,"a95":0.99,"info":"02/12/2013 at 05:54:16"},{"visible":true,"include":false,"step":"60.0","x":982.4761904761905,"y":1322.5714285714287,"z":-70.69142857142857,"a95":0.99,"info":"02/12/2013 at 05:54:16"},{"visible":true,"include":false,"step":"70.0","x":834.7047619047619,"y":-695.952380952381,"z":-214.54285714285712,"a95":0.99,"info":"02/12/2013 at 05:54:16"},{"visible":true,"include":false,"step":"80.0","x":-594.2476190476191,"y":2679.1428571428573,"z":768.7047619047619,"a95":0.99,"info":"02/12/2013 at 05:54:16"},{"visible":true,"include":false,"step":"90.0","x":1368.952380952381,"y":2138.9523809523807,"z":702.5904761904761,"a95":0.99,"info":"02/12/2013 at 05:54:16"},{"visible":true,"include":false,"step":"100.0","x":-289.9809523809524,"y":492.2285714285714,"z":41.6647619047619,"a95":0.99,"info":"02/12/2013 at 05:54:16"}]},{"version":"v1.1.0","exported":"2016-11-28T13:51:07.961Z","volume":10.5,"added":"2016-11-28T13:45:45.900Z","format":"Utrecht","demagType":"Unknown","strat":"5","patch":1.1,"GEO":[{"dec":338.673812081647,"inc":23.457909382216986,"MAD":5.010174420287329,"cm":[3.126388037344441e-13,8.810729923425242e-13,0],"intensity":9230.30228764312,"type":"dir","forced":true,"remark":"","origin":false,"nSteps":6,"minStep":"16.0","maxStep":"40.0","steps":["16.0","20.0","25.0","30.0","35.0","40.0"],"group":"None","version":"v1.1.0"}],"TECT":[{"dec":349.24428905214546,"inc":8.721964362276594,"MAD":5.010174420287312,"cm":[6.252776074688882e-13,1.1972645097557688e-12,-4.334310688136611e-13],"intensity":9230.302287643122,"type":"dir","forced":true,"remark":"","origin":false,"nSteps":6,"minStep":"16.0","maxStep":"40.0","steps":["16.0","20.0","25.0","30.0","35.0","40.0"],"group":"None","version":"v1.1.0"}],"interpreted":true,"name":"BU1.10A","coreAzi":338,"coreDip":41,"bedStrike":322,"bedDip":38,"data":[{"visible":true,"include":false,"step":"0.0","x":-9498.285714285714,"y":6869.809523809524,"z":1626.6666666666667,"a95":0.99,"info":"02/12/2013 at 05:54:16"},{"visible":true,"include":false,"step":"4.0","x":-1920.095238095238,"y":1910.2857142857142,"z":4727.238095238095,"a95":0.99,"info":"02/12/2013 at 05:54:16"},{"visible":true,"include":false,"step":"8.0","x":516.4190476190475,"y":255.35238095238094,"z":6259.333333333333,"a95":0.99,"info":"02/12/2013 at 05:54:16"},{"visible":true,"include":false,"step":"12.0","x":1877.6190476190477,"y":-156.1047619047619,"z":6757.809523809524,"a95":0.99,"info":"02/12/2013 at 05:54:16"},{"visible":true,"include":true,"step":"16.0","x":2166.285714285714,"y":-305.2095238095238,"z":6147.714285714285,"a95":0.99,"info":"02/12/2013 at 05:54:16"},{"visible":true,"include":true,"step":"20.0","x":1882,"y":-57.703809523809525,"z":5915.142857142857,"a95":0.99,"info":"02/12/2013 at 05:54:16"},{"visible":true,"include":true,"step":"25.0","x":1801.6190476190477,"y":182.38095238095238,"z":4516.761904761905,"a95":0.99,"info":"02/12/2013 at 05:54:16"},{"visible":true,"include":true,"step":"30.0","x":740.8857142857144,"y":128.34285714285713,"z":3950.285714285714,"a95":0.99,"info":"02/12/2013 at 05:54:16"},{"visible":true,"include":true,"step":"35.0","x":541.3428571428572,"y":486.3047619047619,"z":3056.3809523809523,"a95":0.99,"info":"02/12/2013 at 05:54:16"},{"visible":true,"include":true,"step":"40.0","x":814.9428571428571,"y":342.3619047619048,"z":2587.809523809524,"a95":0.99,"info":"02/12/2013 at 05:54:16"},{"visible":true,"include":false,"step":"45.0","x":-273.247619047619,"y":-305.552380952381,"z":2492.285714285714,"a95":0.99,"info":"02/12/2013 at 05:54:16"},{"visible":true,"include":false,"step":"50.0","x":-671.5809523809525,"y":683.3904761904762,"z":1938.3809523809523,"a95":0.99,"info":"02/12/2013 at 05:54:16"},{"visible":true,"include":false,"step":"60.0","x":-95.76190476190476,"y":-408.6380952380952,"z":722.0571428571429,"a95":0.99,"info":"02/12/2013 at 05:54:16"},{"visible":true,"include":false,"step":"70.0","x":-1384.952380952381,"y":-3312.8571428571427,"z":696.3904761904762,"a95":0.99,"info":"02/12/2013 at 05:54:16"},{"visible":true,"include":false,"step":"80.0","x":2292.4761904761904,"y":-1866.2857142857142,"z":367.9142857142857,"a95":0.99,"info":"02/12/2013 at 05:54:16"},{"visible":true,"include":false,"step":"90.0","x":-461.00952380952384,"y":-2282.190476190476,"z":1123.3333333333333,"a95":0.99,"info":"02/12/2013 at 05:54:16"},{"visible":true,"include":false,"step":"100.0","x":-42.54380952380952,"y":-4285.333333333333,"z":1256.3809523809523,"a95":0.99,"info":"02/12/2013 at 05:54:16"}]},{"version":"v1.1.0","exported":"2016-11-28T13:51:07.961Z","volume":10.5,"added":"2016-11-28T13:45:45.900Z","format":"Utrecht","demagType":"Unknown","strat":"7","patch":1.1,"GEO":[{"dec":343.041756917834,"inc":44.85414844923287,"MAD":1.2829046749494832,"cm":[-4.547473508864641e-13,-3.240074875066057e-12,0],"intensity":28517.096975036362,"type":"dir","forced":true,"remark":"","origin":false,"nSteps":7,"minStep":"25.0","maxStep":"60.0","steps":["25.0","30.0","35.0","40.0","45.0","50.0","60.0"],"group":"None","version":"v1.1.0"}],"TECT":[{"dec":5.814327370136766,"inc":23.520842646295684,"MAD":1.2829046749493604,"cm":[-4.547473508864641e-13,-2.1813661987835076e-12,1.3642420526593924e-12],"intensity":28517.096975036362,"type":"dir","forced":true,"remark":"","origin":false,"nSteps":7,"minStep":"25.0","maxStep":"60.0","steps":["25.0","30.0","35.0","40.0","45.0","50.0","60.0"],"group":"None","version":"v1.1.0"}],"interpreted":true,"name":"BU1.10B","coreAzi":338,"coreDip":41,"bedStrike":322,"bedDip":38,"data":[{"visible":true,"include":false,"step":"0.0","x":-8290.285714285714,"y":4161.238095238095,"z":34942.857142857145,"a95":0.99,"info":"30/09/2014 at 17:45:33"},{"visible":true,"include":false,"step":"10.0","x":-4907.523809523809,"y":2656.5714285714284,"z":27584.761904761905,"a95":0.99,"info":"30/09/2014 at 17:45:33"},{"visible":true,"include":false,"step":"15.0","x":-3620.9523809523807,"y":1790.1904761904761,"z":23941.904761904763,"a95":0.99,"info":"30/09/2014 at 17:45:33"},{"visible":true,"include":false,"step":"20.0","x":-2533.904761904762,"y":1585.047619047619,"z":21642.85714285714,"a95":0.99,"info":"30/09/2014 at 17:45:33"},{"visible":true,"include":true,"step":"25.0","x":-1764.095238095238,"y":1392,"z":18875.238095238095,"a95":0.99,"info":"30/09/2014 at 17:45:33"},{"visible":true,"include":true,"step":"30.0","x":-1245.7142857142858,"y":936.5428571428572,"z":16584.761904761905,"a95":0.99,"info":"30/09/2014 at 17:45:33"},{"visible":true,"include":true,"step":"35.0","x":-971.6190476190476,"y":878.4761904761905,"z":15421.904761904761,"a95":0.99,"info":"30/09/2014 at 17:45:33"},{"visible":true,"include":true,"step":"40.0","x":-712.895238095238,"y":880.695238095238,"z":14033.333333333334,"a95":0.99,"info":"30/09/2014 at 17:45:33"},{"visible":true,"include":true,"step":"45.0","x":-1080,"y":565.3142857142857,"z":12563.809523809523,"a95":0.99,"info":"30/09/2014 at 17:45:33"},{"visible":true,"include":true,"step":"50.0","x":-431.31428571428575,"y":756.9333333333334,"z":11672.380952380952,"a95":0.99,"info":"30/09/2014 at 17:45:33"},{"visible":true,"include":true,"step":"60.0","x":-309.0095238095238,"y":746.3714285714285,"z":9485.904761904761,"a95":0.99,"info":"30/09/2014 at 17:45:33"},{"visible":true,"include":false,"step":"70.0","x":-171.13333333333335,"y":181.96190476190475,"z":7962.380952380952,"a95":0.99,"info":"30/09/2014 at 17:45:33"},{"visible":true,"include":false,"step":"80.0","x":16.802857142857142,"y":1109.5238095238096,"z":6981.333333333333,"a95":0.99,"info":"30/09/2014 at 17:45:33"},{"visible":true,"include":false,"step":"90.0","x":821.047619047619,"y":606.7333333333333,"z":6030.476190476191,"a95":0.99,"info":"30/09/2014 at 17:45:33"}]},{"version":"v1.1.0","exported":"2016-11-28T13:51:07.961Z","volume":10.5,"added":"2016-11-28T13:45:45.901Z","format":"Utrecht","demagType":"Unknown","strat":"6","patch":1.1,"GEO":[{"dec":351.4908057329009,"inc":47.95694839706711,"MAD":1.7843381967289318,"cm":[-2.8421709430404007e-13,-1.2647660696529783e-12,0],"intensity":34816.95648104777,"type":"dir","forced":true,"remark":"","origin":false,"nSteps":8,"minStep":"16.0","maxStep":"50.0","steps":["16.0","20.0","25.0","30.0","35.0","40.0","45.0","50.0"],"group":"None","version":"v1.1.0"}],"TECT":[{"dec":12.88911445390238,"inc":22.47252231936004,"MAD":1.7843381967289453,"cm":[0,1.7053025658242404e-13,-2.842170943040401e-14],"intensity":34816.956481047775,"type":"dir","forced":true,"remark":"","origin":false,"nSteps":8,"minStep":"16.0","maxStep":"50.0","steps":["16.0","20.0","25.0","30.0","35.0","40.0","45.0","50.0"],"group":"None","version":"v1.1.0"}],"interpreted":true,"name":"BU1.11B","coreAzi":14,"coreDip":38,"bedStrike":322,"bedDip":38,"data":[{"visible":true,"include":false,"step":"0.0","x":-14237.142857142857,"y":-3093.5238095238096,"z":30919.04761904762,"a95":0.99,"info":"02/12/2013 at 05:54:16"},{"visible":true,"include":false,"step":"4.0","x":-9727.619047619048,"y":-5612.857142857143,"z":30079.04761904762,"a95":0.99,"info":"02/12/2013 at 05:54:16"},{"visible":true,"include":false,"step":"8.0","x":-7331.142857142857,"y":-6477.047619047619,"z":27732.380952380954,"a95":0.99,"info":"02/12/2013 at 05:54:16"},{"visible":true,"include":false,"step":"12.0","x":-5861.238095238095,"y":-6033.523809523809,"z":24875.238095238095,"a95":0.99,"info":"02/12/2013 at 05:54:16"},{"visible":true,"include":true,"step":"16.0","x":-5084.476190476191,"y":-5589.714285714285,"z":22392.380952380954,"a95":0.99,"info":"02/12/2013 at 05:54:16"},{"visible":true,"include":true,"step":"20.0","x":-4448.666666666667,"y":-5123.142857142857,"z":20598.095238095237,"a95":0.99,"info":"02/12/2013 at 05:54:16"},{"visible":true,"include":true,"step":"25.0","x":-3944.285714285714,"y":-4644.666666666667,"z":17904.761904761905,"a95":0.99,"info":"02/12/2013 at 05:54:16"},{"visible":true,"include":true,"step":"30.0","x":-3810,"y":-4569.714285714285,"z":15820.952380952382,"a95":0.99,"info":"02/12/2013 at 05:54:16"},{"visible":true,"include":true,"step":"35.0","x":-2958.285714285714,"y":-4264.190476190476,"z":14233.333333333334,"a95":0.99,"info":"02/12/2013 at 05:54:16"},{"visible":true,"include":true,"step":"40.0","x":-2491.3333333333335,"y":-3546.4761904761904,"z":12685.714285714286,"a95":0.99,"info":"02/12/2013 at 05:54:16"},{"visible":true,"include":true,"step":"45.0","x":-2073.3333333333335,"y":-4078.095238095238,"z":11221.904761904761,"a95":0.99,"info":"02/12/2013 at 05:54:16"},{"visible":true,"include":true,"step":"50.0","x":-1935.142857142857,"y":-2976.4761904761904,"z":10616.190476190477,"a95":0.99,"info":"02/12/2013 at 05:54:16"},{"visible":true,"include":false,"step":"60.0","x":-964,"y":-1657.142857142857,"z":8329.714285714286,"a95":0.99,"info":"02/12/2013 at 05:54:16"},{"visible":true,"include":false,"step":"70.0","x":-943.4380952380952,"y":-2684.6666666666665,"z":6966.0952380952385,"a95":0.99,"info":"02/12/2013 at 05:54:16"},{"visible":true,"include":false,"step":"80.0","x":3043.5238095238096,"y":-1450,"z":6042.0952380952385,"a95":0.99,"info":"02/12/2013 at 05:54:16"},{"visible":true,"include":false,"step":"90.0","x":776.7047619047619,"y":207.9809523809524,"z":4317.714285714285,"a95":0.99,"info":"02/12/2013 at 05:54:16"},{"visible":true,"include":false,"step":"100.0","x":678.2095238095238,"y":108.14285714285714,"z":3753.3333333333335,"a95":0.99,"info":"02/12/2013 at 05:54:16"}]},{"version":"v1.1.0","exported":"2016-11-28T13:51:07.961Z","volume":10.5,"added":"2016-11-28T13:45:45.901Z","format":"Utrecht","demagType":"Unknown","strat":"7","patch":1.1,"GEO":[{"dec":352.2927284402166,"inc":41.70821295540507,"MAD":2.1923262135244554,"cm":[-1.1368683772161603e-13,-9.769962616701378e-13,0],"intensity":23757.450332000284,"type":"dir","forced":true,"remark":"","origin":false,"nSteps":6,"minStep":"30.0","maxStep":"60.0","steps":["30.0","35.0","40.0","45.0","50.0","60.0"],"group":"None","version":"v1.1.0"}],"TECT":[{"dec":9.617211188492377,"inc":17.00490476406685,"MAD":2.1923262135243253,"cm":[-2.2737367544323206e-13,8.384404281969182e-13,2.2737367544323206e-13],"intensity":23757.45033200028,"type":"dir","forced":true,"remark":"","origin":false,"nSteps":6,"minStep":"30.0","maxStep":"60.0","steps":["30.0","35.0","40.0","45.0","50.0","60.0"],"group":"None","version":"v1.1.0"}],"interpreted":true,"name":"BU1.12B","coreAzi":4,"coreDip":34,"bedStrike":322,"bedDip":38,"data":[{"visible":true,"include":false,"step":"0.0","x":-11829.52380952381,"y":-2978.4761904761904,"z":46960,"a95":0.99,"info":"02/12/2013 at 05:54:16"},{"visible":true,"include":false,"step":"4.0","x":-8258,"y":-3305.5238095238096,"z":39006.666666666664,"a95":0.99,"info":"02/12/2013 at 05:54:16"},{"visible":true,"include":false,"step":"8.0","x":-6370.761904761905,"y":-3505.714285714286,"z":31664.761904761905,"a95":0.99,"info":"02/12/2013 at 05:54:16"},{"visible":true,"include":false,"step":"12.0","x":-5000.0952380952385,"y":-3381.6190476190477,"z":26080.95238095238,"a95":0.99,"info":"02/12/2013 at 05:54:16"},{"visible":true,"include":false,"step":"16.0","x":-4101.714285714285,"y":-3322.285714285714,"z":22387.619047619046,"a95":0.99,"info":"02/12/2013 at 05:54:16"},{"visible":true,"include":false,"step":"20.0","x":-3257.904761904762,"y":-3361.714285714286,"z":20919.04761904762,"a95":0.99,"info":"02/12/2013 at 05:54:16"},{"visible":true,"include":false,"step":"25.0","x":-2718.190476190476,"y":-2940.190476190476,"z":17681.904761904763,"a95":0.99,"info":"02/12/2013 at 05:54:16"},{"visible":true,"include":true,"step":"30.0","x":-2691.6190476190477,"y":-2682.095238095238,"z":15404.761904761905,"a95":0.99,"info":"02/12/2013 at 05:54:16"},{"visible":true,"include":true,"step":"35.0","x":-2306.095238095238,"y":-2234,"z":14386.666666666666,"a95":0.99,"info":"02/12/2013 at 05:54:16"},{"visible":true,"include":true,"step":"40.0","x":-1879.5238095238096,"y":-1684.6666666666667,"z":12563.809523809523,"a95":0.99,"info":"02/12/2013 at 05:54:16"},{"visible":true,"include":true,"step":"45.0","x":-1546.6666666666667,"y":-1965.4285714285713,"z":11214.285714285714,"a95":0.99,"info":"02/12/2013 at 05:54:16"},{"visible":true,"include":true,"step":"50.0","x":-1174,"y":-1607.4285714285713,"z":10343.809523809523,"a95":0.99,"info":"02/12/2013 at 05:54:16"},{"visible":true,"include":true,"step":"60.0","x":-390.0761904761905,"y":-702.7142857142857,"z":7907.523809523809,"a95":0.99,"info":"02/12/2013 at 05:54:16"},{"visible":true,"include":false,"step":"70.0","x":-532.3238095238095,"y":-1450.1904761904761,"z":6222.666666666667,"a95":0.99,"info":"02/12/2013 at 05:54:16"},{"visible":true,"include":false,"step":"80.0","x":-1147.8095238095239,"y":440.1333333333333,"z":6569.142857142857,"a95":0.99,"info":"02/12/2013 at 05:54:16"},{"visible":true,"include":false,"step":"90.0","x":1213.142857142857,"y":1993.4285714285713,"z":5624.952380952381,"a95":0.99,"info":"02/12/2013 at 05:54:16"},{"visible":true,"include":false,"step":"100.0","x":1098.2857142857142,"y":-652.952380952381,"z":3839.2380952380954,"a95":0.99,"info":"02/12/2013 at 05:54:16"}]},{"version":"v1.1.0","exported":"2016-11-28T13:51:07.961Z","volume":10.5,"added":"2016-11-28T13:45:45.901Z","format":"Utrecht","demagType":"Unknown","strat":"8","patch":1.1,"GEO":[{"dec":335.5466715303389,"inc":39.11463058382097,"MAD":2.9871153411265494,"cm":[-9.094947017729282e-13,-1.7053025658242404e-12,0],"intensity":37661.41567275826,"type":"dir","forced":true,"remark":"","origin":false,"nSteps":6,"minStep":"35.0","maxStep":"70.0","steps":["35.0","40.0","45.0","50.0","60.0","70.0"],"group":"None","version":"v1.1.0"}],"TECT":[{"dec":357.1755939897478,"inc":22.658909088860348,"MAD":2.9871153411265046,"cm":[-1.8189894035458565e-12,-7.44648787076585e-12,2.7853275241795927e-12],"intensity":37661.41567275825,"type":"dir","forced":true,"remark":"","origin":false,"nSteps":6,"minStep":"35.0","maxStep":"70.0","steps":["35.0","40.0","45.0","50.0","60.0","70.0"],"group":"None","version":"v1.1.0"}],"interpreted":true,"name":"BU1.13A","coreAzi":358,"coreDip":38,"bedStrike":322,"bedDip":38,"data":[{"visible":true,"include":false,"step":"0.0","x":-12228.57142857143,"y":-10927.619047619048,"z":63664.76190476191,"a95":0.99,"info":"02/12/2013 at 05:54:16"},{"visible":true,"include":false,"step":"4.0","x":-8888.095238095239,"y":-10860.952380952382,"z":57590.47619047619,"a95":0.99,"info":"02/12/2013 at 05:54:16"},{"visible":true,"include":false,"step":"8.0","x":-7164.666666666667,"y":-10523.809523809523,"z":49425.71428571428,"a95":0.99,"info":"02/12/2013 at 05:54:16"},{"visible":true,"include":false,"step":"12.0","x":-5784.761904761905,"y":-9686.666666666666,"z":42132.380952380954,"a95":0.99,"info":"02/12/2013 at 05:54:16"},{"visible":true,"include":false,"step":"16.0","x":-4847.142857142857,"y":-9009.904761904761,"z":36981.90476190476,"a95":0.99,"info":"02/12/2013 at 05:54:16"},{"visible":true,"include":false,"step":"20.0","x":-4022.5714285714284,"y":-8323.333333333334,"z":33780.95238095238,"a95":0.99,"info":"02/12/2013 at 05:54:16"},{"visible":true,"include":false,"step":"25.0","x":-3376.9523809523807,"y":-7665.809523809524,"z":29321.904761904763,"a95":0.99,"info":"02/12/2013 at 05:54:16"},{"visible":true,"include":false,"step":"30.0","x":-2795.0476190476193,"y":-7653.047619047619,"z":25885.714285714286,"a95":0.99,"info":"02/12/2013 at 05:54:16"},{"visible":true,"include":true,"step":"35.0","x":-2210.4761904761904,"y":-6919.047619047619,"z":23750.47619047619,"a95":0.99,"info":"02/12/2013 at 05:54:16"},{"visible":true,"include":true,"step":"40.0","x":-1862.952380952381,"y":-6509.238095238095,"z":21491.428571428572,"a95":0.99,"info":"02/12/2013 at 05:54:16"},{"visible":true,"include":true,"step":"45.0","x":-1436,"y":-6228.857142857143,"z":19506.666666666668,"a95":0.99,"info":"02/12/2013 at 05:54:16"},{"visible":true,"include":true,"step":"50.0","x":-1026.095238095238,"y":-5537.142857142857,"z":17873.333333333332,"a95":0.99,"info":"02/12/2013 at 05:54:16"},{"visible":true,"include":true,"step":"60.0","x":376.3047619047619,"y":-4671.428571428572,"z":14600.952380952382,"a95":0.99,"info":"02/12/2013 at 05:54:16"},{"visible":true,"include":true,"step":"70.0","x":940.9619047619047,"y":-4554.857142857143,"z":12098.095238095239,"a95":0.99,"info":"02/12/2013 at 05:54:16"},{"visible":true,"include":false,"step":"80.0","x":-416.72380952380956,"y":-2315.3333333333335,"z":12368.57142857143,"a95":0.99,"info":"02/12/2013 at 05:54:16"},{"visible":true,"include":false,"step":"90.0","x":3880.095238095238,"y":-2337.6190476190477,"z":9166.857142857143,"a95":0.99,"info":"02/12/2013 at 05:54:16"},{"visible":true,"include":false,"step":"100.0","x":3048.190476190476,"y":-3636.4761904761904,"z":7414.666666666667,"a95":0.99,"info":"02/12/2013 at 05:54:16"}]},{"version":"v1.1.0","exported":"2016-11-28T13:51:07.961Z","volume":10.5,"added":"2016-11-28T13:45:45.901Z","format":"Utrecht","demagType":"Unknown","strat":"1","patch":1.1,"GEO":[{"dec":356.51647856689476,"inc":48.36913239770781,"MAD":2.7928092720892566,"cm":[0,-5.755396159656812e-13,0],"intensity":23548.857599184434,"type":"dir","forced":true,"remark":"","origin":false,"nSteps":7,"minStep":"35.0","maxStep":"80.0","steps":["35.0","40.0","45.0","50.0","60.0","70.0","80.0"],"group":"None","version":"v1.1.0"}],"TECT":[{"dec":16.12257166937684,"inc":20.93035642625698,"MAD":2.792809272089376,"cm":[-4.547473508864641e-13,8.100187187665142e-13,2.842170943040401e-14],"intensity":23548.857599184434,"type":"dir","forced":true,"remark":"","origin":false,"nSteps":7,"minStep":"35.0","maxStep":"80.0","steps":["35.0","40.0","45.0","50.0","60.0","70.0","80.0"],"group":"None","version":"v1.1.0"}],"interpreted":true,"name":"BU1.14B","coreAzi":4,"coreDip":34,"bedStrike":322,"bedDip":38,"data":[{"visible":true,"include":false,"step":"0.0","x":-12366.666666666666,"y":6512.0952380952385,"z":25690.47619047619,"a95":0.99,"info":"02/12/2013 at 11:25:50"},{"visible":true,"include":false,"step":"4.0","x":-11287.619047619048,"y":2740.095238095238,"z":26815.238095238095,"a95":0.99,"info":"02/12/2013 at 11:25:50"},{"visible":true,"include":false,"step":"8.0","x":-10001.904761904761,"y":656.8380952380952,"z":26772.380952380954,"a95":0.99,"info":"02/12/2013 at 11:25:50"},{"visible":true,"include":false,"step":"12.0","x":-8605.52380952381,"y":-448.65714285714284,"z":25557.14285714286,"a95":0.99,"info":"02/12/2013 at 11:25:50"},{"visible":true,"include":false,"step":"16.0","x":-7522.761904761905,"y":-797.8571428571429,"z":23470.47619047619,"a95":0.99,"info":"02/12/2013 at 11:25:50"},{"visible":true,"include":false,"step":"20.0","x":-6766.857142857143,"y":-1218.1904761904761,"z":21471.428571428572,"a95":0.99,"info":"02/12/2013 at 11:25:50"},{"visible":true,"include":false,"step":"25.0","x":-5801.714285714285,"y":-1570.952380952381,"z":19530.47619047619,"a95":0.99,"info":"02/12/2013 at 11:25:50"},{"visible":true,"include":false,"step":"30.0","x":-5269.428571428572,"y":-1433.904761904762,"z":17506.666666666668,"a95":0.99,"info":"02/12/2013 at 11:25:50"},{"visible":true,"include":true,"step":"35.0","x":-4805.047619047619,"y":-1763.904761904762,"z":15918.095238095239,"a95":0.99,"info":"02/12/2013 at 11:25:50"},{"visible":true,"include":true,"step":"40.0","x":-4129.428571428572,"y":-1405.142857142857,"z":14980,"a95":0.99,"info":"02/12/2013 at 11:25:50"},{"visible":true,"include":true,"step":"45.0","x":-3367.714285714286,"y":-1119.904761904762,"z":13441.904761904761,"a95":0.99,"info":"02/12/2013 at 11:25:50"},{"visible":true,"include":true,"step":"50.0","x":-2979.6190476190477,"y":-1447.4285714285713,"z":11784.761904761905,"a95":0.99,"info":"02/12/2013 at 11:25:50"},{"visible":true,"include":true,"step":"60.0","x":-2672.6666666666665,"y":-496.3238095238095,"z":10464.761904761905,"a95":0.99,"info":"02/12/2013 at 11:25:50"},{"visible":true,"include":true,"step":"70.0","x":-1121.6190476190477,"y":-22.90952380952381,"z":8471.904761904761,"a95":0.99,"info":"02/12/2013 at 11:25:50"},{"visible":true,"include":true,"step":"80.0","x":-1494,"y":-727.9333333333334,"z":6635.428571428572,"a95":0.99,"info":"02/12/2013 at 11:25:50"},{"visible":true,"include":false,"step":"90.0","x":-794.9142857142857,"y":1036.1904761904761,"z":5462.857142857143,"a95":0.99,"info":"02/12/2013 at 11:25:50"},{"visible":true,"include":false,"step":"100.0","x":994.1904761904761,"y":872.3333333333334,"z":4637.619047619048,"a95":0.99,"info":"02/12/2013 at 11:25:50"}]},{"version":"v1.1.0","exported":"2016-11-28T13:51:07.962Z","volume":10.5,"added":"2016-11-28T13:45:45.901Z","format":"Utrecht","demagType":"Unknown","strat":"2","patch":1.1,"GEO":[{"dec":354.3038896349265,"inc":49.9631869708859,"MAD":1.940805466710888,"cm":[5.684341886080801e-13,1.1652900866465643e-12,0],"intensity":30485.56272332566,"type":"dir","forced":true,"remark":"","origin":false,"nSteps":7,"minStep":"35.0","maxStep":"80.0","steps":["35.0","40.0","45.0","50.0","60.0","70.0","80.0"],"group":"None","version":"v1.1.0"}],"TECT":[{"dec":15.77696784329919,"inc":23.058870007475893,"MAD":1.9408054667108203,"cm":[-1.1368683772161603e-13,-1.6768808563938364e-12,-1.0231815394945443e-12],"intensity":30485.56272332566,"type":"dir","forced":true,"remark":"","origin":false,"nSteps":7,"minStep":"35.0","maxStep":"80.0","steps":["35.0","40.0","45.0","50.0","60.0","70.0","80.0"],"group":"None","version":"v1.1.0"}],"interpreted":true,"name":"BU1.15A","coreAzi":3,"coreDip":34,"bedStrike":322,"bedDip":38,"data":[{"visible":true,"include":false,"step":"0.0","x":-18151.428571428572,"y":2581.3333333333335,"z":36764.76190476191,"a95":0.99,"info":"02/12/2013 at 11:25:50"},{"visible":true,"include":false,"step":"4.0","x":-16164.761904761905,"y":150.2,"z":36895.23809523809,"a95":0.99,"info":"02/12/2013 at 11:25:50"},{"visible":true,"include":false,"step":"8.0","x":-14187.619047619048,"y":-794.4952380952382,"z":35494.28571428572,"a95":0.99,"info":"02/12/2013 at 11:25:50"},{"visible":true,"include":false,"step":"12.0","x":-12334.285714285714,"y":-1298.2857142857142,"z":32918.09523809524,"a95":0.99,"info":"02/12/2013 at 11:25:50"},{"visible":true,"include":false,"step":"16.0","x":-10812.380952380952,"y":-1543.5238095238096,"z":29920,"a95":0.99,"info":"02/12/2013 at 11:25:50"},{"visible":true,"include":false,"step":"20.0","x":-9565.714285714286,"y":-1664.095238095238,"z":27267.619047619046,"a95":0.99,"info":"02/12/2013 at 11:25:50"},{"visible":true,"include":false,"step":"25.0","x":-8366.761904761905,"y":-1842.095238095238,"z":24858.095238095237,"a95":0.99,"info":"02/12/2013 at 11:25:50"},{"visible":true,"include":false,"step":"30.0","x":-7132.761904761905,"y":-1788.952380952381,"z":21993.333333333332,"a95":0.99,"info":"02/12/2013 at 11:25:50"},{"visible":true,"include":true,"step":"35.0","x":-6389.047619047619,"y":-1886.1904761904761,"z":20030.47619047619,"a95":0.99,"info":"02/12/2013 at 11:25:50"},{"visible":true,"include":true,"step":"40.0","x":-5768.0952380952385,"y":-1763.047619047619,"z":18422.85714285714,"a95":0.99,"info":"02/12/2013 at 11:25:50"},{"visible":true,"include":true,"step":"45.0","x":-4770.666666666667,"y":-1628.7619047619048,"z":16881.904761904763,"a95":0.99,"info":"02/12/2013 at 11:25:50"},{"visible":true,"include":true,"step":"50.0","x":-4276.380952380952,"y":-1793.3333333333333,"z":14873.333333333334,"a95":0.99,"info":"02/12/2013 at 11:25:50"},{"visible":true,"include":true,"step":"60.0","x":-3550.095238095238,"y":-1009.8095238095239,"z":13048.57142857143,"a95":0.99,"info":"02/12/2013 at 11:25:50"},{"visible":true,"include":true,"step":"70.0","x":-2367.6190476190477,"y":-1014.952380952381,"z":10670.47619047619,"a95":0.99,"info":"02/12/2013 at 11:25:50"},{"visible":true,"include":true,"step":"80.0","x":-2296.7619047619046,"y":-1739.7142857142858,"z":8965.714285714286,"a95":0.99,"info":"02/12/2013 at 11:25:50"},{"visible":true,"include":false,"step":"90.0","x":-1845.8095238095239,"y":577.6095238095238,"z":8290.380952380952,"a95":0.99,"info":"02/12/2013 at 11:25:50"},{"visible":true,"include":false,"step":"100.0","x":444.60952380952375,"y":-132.05714285714285,"z":6418.285714285715,"a95":0.99,"info":"02/12/2013 at 11:25:50"}]},{"version":"v1.1.0","exported":"2016-11-28T13:51:07.962Z","volume":10.5,"added":"2016-11-28T13:45:45.901Z","format":"Utrecht","demagType":"Unknown","strat":"3","patch":1.1,"GEO":[{"dec":357.73062037360705,"inc":53.51093730600567,"MAD":3.7787485167593537,"cm":[5.684341886080802e-14,3.552713678800501e-14,0],"intensity":9768.447966503469,"type":"dir","forced":true,"remark":"","origin":false,"nSteps":6,"minStep":"35.0","maxStep":"70.0","steps":["35.0","40.0","45.0","50.0","60.0","70.0"],"group":"None","version":"v1.1.0"}],"TECT":[{"dec":19.869178722600964,"inc":24.81787477812026,"MAD":3.7787485167593458,"cm":[0,8.526512829121202e-14,-3.552713678800501e-15],"intensity":9768.447966503467,"type":"dir","forced":true,"remark":"","origin":false,"nSteps":6,"minStep":"35.0","maxStep":"70.0","steps":["35.0","40.0","45.0","50.0","60.0","70.0"],"group":"None","version":"v1.1.0"}],"interpreted":true,"name":"BU1.16B","coreAzi":56,"coreDip":37,"bedStrike":322,"bedDip":38,"data":[{"visible":true,"include":false,"step":"0.0","x":-10980,"y":-9792.380952380952,"z":22142.85714285714,"a95":0.99,"info":"02/12/2013 at 11:25:50"},{"visible":true,"include":false,"step":"4.0","x":-10364.761904761905,"y":-9980.952380952382,"z":20346.666666666668,"a95":0.99,"info":"02/12/2013 at 11:25:50"},{"visible":true,"include":false,"step":"8.0","x":-9042.761904761905,"y":-8971.809523809523,"z":17074.285714285714,"a95":0.99,"info":"02/12/2013 at 11:25:50"},{"visible":true,"include":false,"step":"12.0","x":-7614.0952380952385,"y":-7639.428571428572,"z":13869.52380952381,"a95":0.99,"info":"02/12/2013 at 11:25:50"},{"visible":true,"include":false,"step":"16.0","x":-6468.952380952381,"y":-6574.190476190476,"z":11292.380952380952,"a95":0.99,"info":"02/12/2013 at 11:25:50"},{"visible":true,"include":false,"step":"20.0","x":-5667.428571428572,"y":-5848.761904761905,"z":9286.761904761905,"a95":0.99,"info":"02/12/2013 at 11:25:50"},{"visible":true,"include":false,"step":"25.0","x":-4827.428571428572,"y":-4909.333333333333,"z":7838.380952380952,"a95":0.99,"info":"02/12/2013 at 11:25:50"},{"visible":true,"include":false,"step":"30.0","x":-3942.8571428571427,"y":-4073.3333333333335,"z":6369.238095238095,"a95":0.99,"info":"02/12/2013 at 11:25:50"},{"visible":true,"include":true,"step":"35.0","x":-3593.5238095238096,"y":-3687.2380952380954,"z":5316.857142857143,"a95":0.99,"info":"02/12/2013 at 11:25:50"},{"visible":true,"include":true,"step":"40.0","x":-3026.5714285714284,"y":-3257.4285714285716,"z":4743.333333333333,"a95":0.99,"info":"02/12/2013 at 11:25:50"},{"visible":true,"include":true,"step":"45.0","x":-2534.8571428571427,"y":-2804.7619047619046,"z":4111.047619047619,"a95":0.99,"info":"02/12/2013 at 11:25:50"},{"visible":true,"include":true,"step":"50.0","x":-2150.7619047619046,"y":-2664.5714285714284,"z":3398.5714285714284,"a95":0.99,"info":"02/12/2013 at 11:25:50"},{"visible":true,"include":true,"step":"60.0","x":-1486.952380952381,"y":-1760.1904761904761,"z":2855.5238095238096,"a95":0.99,"info":"02/12/2013 at 11:25:50"},{"visible":true,"include":true,"step":"70.0","x":-463.1142857142857,"y":-1169.7142857142858,"z":2124.6666666666665,"a95":0.99,"info":"02/12/2013 at 11:25:50"},{"visible":true,"include":false,"step":"80.0","x":-561.1142857142856,"y":-1253.3333333333333,"z":1506.3809523809523,"a95":0.99,"info":"02/12/2013 at 11:25:50"},{"visible":true,"include":false,"step":"90.0","x":923.9809523809523,"y":-558.8,"z":1310.3809523809523,"a95":0.99,"info":"02/12/2013 at 11:25:50"},{"visible":true,"include":false,"step":"100.0","x":2342.6666666666665,"y":-171.9714285714286,"z":1084.5714285714287,"a95":0.99,"info":"02/12/2013 at 11:25:50"}]}]
