# Supplementary material for: Paleomagnetic constraints on the timing and distribution of Cenozoic rotations in Central and Eastern Anatolia
Source: Copernicus journal article supplement (doi:10.5194/se-9-295-2018), 2018-03-21
Supplement: Supplementary file 2 [file se-9-295-2018-supplement.zip › se-2017-66_DATA_dir files/dir files Ulukisla/BU2.dir]

[{"version":"v1.1.0","exported":"2016-11-28T13:56:39.400Z","volume":10.5,"added":"2016-11-28T13:51:20.526Z","format":"Utrecht","demagType":"Unknown","strat":null,"patch":1.1,"GEO":[{"dec":100.10260998412616,"inc":-8.119955813899082,"MAD":4.065203260135579,"cm":[-3.552713678800501e-15,7.327471962526033e-15,0],"intensity":245.2620544930456,"type":"GC","origin":false,"forced":true,"remark":"","nSteps":3,"minStep":"80","maxStep":"180","steps":["80","150","180"],"group":"None","version":"v1.1.0"}],"TECT":[{"dec":100.72138663124161,"inc":-40.09349666120373,"MAD":4.06520326013591,"cm":[1.0658141036401503e-14,-3.1086244689504383e-15,-3.3306690738754696e-16],"intensity":245.26205449304553,"type":"GC","origin":false,"forced":true,"remark":"","nSteps":3,"minStep":"80","maxStep":"180","steps":["80","150","180"],"group":"None","version":"v1.1.0"}],"interpreted":true,"name":"BU2.1A","coreAzi":38,"coreDip":30,"bedStrike":8,"bedDip":32,"data":[{"visible":true,"include":false,"step":"20","x":-36.76190476190476,"y":-96.85714285714286,"z":311.3333333333333,"a95":3,"info":"\"13-11-03\" at \"11:58\""},{"visible":true,"include":true,"step":"80","x":-15.714285714285714,"y":-62.476190476190474,"z":180.76190476190476,"a95":3,"info":"\"13-11-04\" at \"08:37\""},{"visible":true,"include":true,"step":"150","x":21.60952380952381,"y":-33.17142857142857,"z":71.88571428571429,"a95":3.7,"info":"\"13-11-04\" at \"14:15\""},{"visible":true,"include":true,"step":"180","x":30.80952380952381,"y":-31.61904761904762,"z":45.22857142857143,"a95":5.2,"info":"\"13-11-05\" at \"08:52\""},{"visible":true,"include":false,"step":"200","x":9.952380952380953,"y":-41.076190476190476,"z":28,"a95":7.1,"info":"\"13-11-05\" at \"13:36\""},{"visible":true,"include":false,"step":"225","x":-7.085714285714286,"y":-35.476190476190474,"z":17.314285714285717,"a95":5.8,"info":"\"13-11-06\" at \"07:54\""},{"visible":true,"include":false,"step":"250","x":17.085714285714285,"y":-37.457142857142856,"z":14.00952380952381,"a95":9.400001,"info":"\"13-11-06\" at \"11:48\""},{"visible":true,"include":false,"step":"275","x":24.876190476190477,"y":-27.82857142857143,"z":12.047619047619047,"a95":6.7,"info":"\"13-11-06\" at \"16:29\""},{"visible":true,"include":false,"step":"300","x":26.6,"y":-41.50476190476191,"z":-11.857142857142858,"a95":4.7,"info":"\"13-11-07\" at \"05:05\""},{"visible":true,"include":false,"step":"320","x":13.561904761904762,"y":-29.066666666666666,"z":16.495238095238093,"a95":7.3,"info":"\"13-11-07\" at \"08:33\""},{"visible":true,"include":false,"step":"340","x":30.19047619047619,"y":-31.666666666666668,"z":-6.590476190476191,"a95":3.5,"info":"\"13-11-07\" at \"14:08\""},{"visible":true,"include":false,"step":"380","x":11.666666666666666,"y":-24.714285714285715,"z":-4.876190476190477,"a95":6.9,"info":"\"13-11-08\" at \"11:23\""},{"visible":true,"include":false,"step":"420","x":8.80952380952381,"y":2.0571428571428574,"z":-20.942857142857143,"a95":8.8,"info":"\"13-11-08\" at \"16:28\""}]},{"version":"v1.1.0","exported":"2016-11-28T13:56:39.400Z","volume":10.5,"added":"2016-11-28T13:51:20.526Z","format":"Utrecht","demagType":"Unknown","strat":null,"patch":1.1,"GEO":[],"TECT":[],"interpreted":false,"name":"BU2.2A","coreAzi":28,"coreDip":33,"bedStrike":8,"bedDip":32,"data":[{"visible":true,"include":false,"step":"20","x":-28.476190476190474,"y":13.333333333333334,"z":229.71428571428572,"a95":3.2,"info":"\"13-11-03\" at \"12:03\""},{"visible":true,"include":false,"step":"80","x":-16,"y":12,"z":146.66666666666666,"a95":3,"info":"\"13-11-04\" at \"08:40\""},{"visible":true,"include":false,"step":"150","x":0.3142857142857143,"y":23.295238095238094,"z":69.87619047619049,"a95":3,"info":"\"13-11-04\" at \"14:18\""},{"visible":true,"include":false,"step":"180","x":12.399999999999999,"y":18.8,"z":51.980952380952374,"a95":5.6,"info":"\"13-11-05\" at \"08:55\""},{"visible":true,"include":false,"step":"200","x":-5.057142857142857,"y":21.371428571428574,"z":38.647619047619045,"a95":7,"info":"\"13-11-05\" at \"13:38\""},{"visible":true,"include":false,"step":"225","x":-30.704761904761902,"y":21.46666666666667,"z":30.428571428571427,"a95":3.6,"info":"\"13-11-06\" at \"07:56\""},{"visible":true,"include":false,"step":"250","x":5.885714285714285,"y":26,"z":15.19047619047619,"a95":7.9,"info":"\"13-11-06\" at \"12:01\""},{"visible":true,"include":false,"step":"275","x":25.238095238095237,"y":10.761904761904763,"z":8.247619047619047,"a95":4.6,"info":"\"13-11-06\" at \"16:31\""},{"visible":true,"include":false,"step":"300","x":0.5047619047619047,"y":-4,"z":5.819047619047619,"a95":33.6,"info":"\"13-11-07\" at \"05:11\""},{"visible":true,"include":false,"step":"320","x":12.78095238095238,"y":6.704761904761905,"z":12.161904761904761,"a95":10.5,"info":"\"13-11-07\" at \"08:36\""},{"visible":true,"include":false,"step":"340","x":14.647619047619049,"y":6.171428571428571,"z":7.847619047619048,"a95":10.5,"info":"\"13-11-07\" at \"14:10\""},{"visible":true,"include":false,"step":"380","x":6.761904761904762,"y":-12.399999999999999,"z":1.0095238095238095,"a95":11.4,"info":"\"13-11-08\" at \"11:25\""},{"visible":true,"include":false,"step":"420","x":7.6,"y":-6.0285714285714285,"z":-3.161904761904762,"a95":18.6,"info":"\"13-11-08\" at \"16:30\""}]},{"version":"v1.1.0","exported":"2016-11-28T13:56:39.400Z","volume":10.5,"added":"2016-11-28T13:51:20.527Z","format":"Utrecht","demagType":"Unknown","strat":null,"patch":1.1,"GEO":[],"TECT":[],"interpreted":false,"name":"BU2.2B","coreAzi":28,"coreDip":33,"bedStrike":8,"bedDip":32,"data":[{"visible":true,"include":false,"step":"20","x":-67.23809523809524,"y":2.9523809523809526,"z":222.0952380952381,"a95":2.9,"info":"\"13-11-03\" at \"12:06\""},{"visible":true,"include":false,"step":"80","x":-29.904761904761905,"y":0.8571428571428571,"z":147.33333333333334,"a95":2.9,"info":"\"13-11-04\" at \"08:42\""},{"visible":true,"include":false,"step":"150","x":-27.40952380952381,"y":4.0095238095238095,"z":53.10476190476191,"a95":4.5,"info":"\"13-11-04\" at \"14:23\""},{"visible":true,"include":false,"step":"180","x":-8.8,"y":0.2857142857142857,"z":28.552380952380954,"a95":10.2,"info":"\"13-11-05\" at \"08:57\""},{"visible":true,"include":false,"step":"200","x":-21.857142857142858,"y":-14.323809523809524,"z":21.19047619047619,"a95":8.5,"info":"\"13-11-05\" at \"13:41\""},{"visible":true,"include":false,"step":"225","x":-48.476190476190474,"y":-0.5428571428571429,"z":-12.447619047619046,"a95":4.3,"info":"\"13-11-06\" at \"08:01\""},{"visible":true,"include":false,"step":"250","x":-25.761904761904763,"y":14.619047619047619,"z":-17.142857142857142,"a95":14.6,"info":"\"13-11-06\" at \"12:07\""},{"visible":true,"include":false,"step":"275","x":-3.076190476190476,"y":8.58095238095238,"z":-4.142857142857143,"a95":14.3,"info":"\"13-11-06\" at \"16:35\""},{"visible":true,"include":false,"step":"300","x":-4.828571428571429,"y":-4.266666666666667,"z":-25.26666666666667,"a95":19.4,"info":"\"13-11-07\" at \"05:13\""},{"visible":true,"include":false,"step":"320","x":-2.4,"y":-7.923809523809524,"z":-24.038095238095238,"a95":7.9,"info":"\"13-11-07\" at \"08:38\""},{"visible":true,"include":false,"step":"340","x":-18.752380952380953,"y":-7.961904761904761,"z":-23.857142857142858,"a95":7.5,"info":"\"13-11-07\" at \"14:14\""},{"visible":true,"include":false,"step":"380","x":-22.73333333333333,"y":-13.152380952380952,"z":-42.57142857142857,"a95":8.7,"info":"\"13-11-08\" at \"11:27\""},{"visible":true,"include":false,"step":"420","x":-9.028571428571428,"y":-11.704761904761906,"z":-15.676190476190476,"a95":13.6,"info":"\"13-11-08\" at \"16:33\""}]},{"version":"v1.1.0","exported":"2016-11-28T13:56:39.400Z","volume":10.5,"added":"2016-11-28T13:51:20.528Z","format":"Utrecht","demagType":"Unknown","strat":null,"patch":1.1,"GEO":[{"dec":36.208041340290436,"inc":-73.7507545859812,"MAD":13.935152608132992,"cm":[2.6645352591003757e-15,7.105427357601002e-15,0],"intensity":160.2096644982426,"type":"GC","origin":false,"forced":true,"remark":"","nSteps":5,"minStep":"80","maxStep":"225","steps":["80","150","180","200","225"],"group":"None","version":"v1.1.0"}],"TECT":[{"dec":309.8720172748668,"inc":-62.16056727075823,"MAD":13.935152608132974,"cm":[4.440892098500626e-16,-1.1102230246251565e-14,-1.3322676295501878e-15],"intensity":160.20966449824257,"type":"GC","origin":false,"forced":true,"remark":"","nSteps":5,"minStep":"80","maxStep":"225","steps":["80","150","180","200","225"],"group":"None","version":"v1.1.0"}],"interpreted":true,"name":"BU2.3A","coreAzi":24,"coreDip":24,"bedStrike":8,"bedDip":32,"data":[{"visible":true,"include":false,"step":"20","x":-58.76190476190476,"y":72.28571428571429,"z":-156.0952380952381,"a95":2.8,"info":"\"13-11-03\" at \"12:08\""},{"visible":true,"include":true,"step":"80","x":-23.333333333333332,"y":60.095238095238095,"z":-110,"a95":2.8,"info":"\"13-11-04\" at \"08:45\""},{"visible":true,"include":true,"step":"150","x":-6.428571428571429,"y":48.75238095238095,"z":-58.266666666666666,"a95":3.3,"info":"\"13-11-04\" at \"14:25\""},{"visible":true,"include":true,"step":"180","x":0.8380952380952381,"y":47.304761904761904,"z":-32.542857142857144,"a95":5.2,"info":"\"13-11-05\" at \"09:00\""},{"visible":true,"include":true,"step":"200","x":-8.095238095238095,"y":47.65714285714286,"z":-12.295238095238094,"a95":8.6,"info":"\"13-11-05\" at \"13:43\""},{"visible":true,"include":true,"step":"225","x":-8.447619047619048,"y":43.65714285714286,"z":-7.866666666666666,"a95":5,"info":"\"13-11-06\" at \"08:03\""},{"visible":true,"include":false,"step":"250","x":-0.047619047619047616,"y":40.61904761904762,"z":3.342857142857143,"a95":4.8,"info":"\"13-11-06\" at \"12:09\""},{"visible":true,"include":false,"step":"275","x":27.37142857142857,"y":41.438095238095244,"z":-10.628571428571428,"a95":3.5,"info":"\"13-11-06\" at \"16:37\""},{"visible":true,"include":false,"step":"300","x":14.457142857142859,"y":53.10476190476191,"z":8.58095238095238,"a95":4.1,"info":"\"13-11-07\" at \"05:15\""},{"visible":true,"include":false,"step":"320","x":16.60952380952381,"y":58.590476190476195,"z":15.542857142857141,"a95":3.2,"info":"\"13-11-07\" at \"08:40\""},{"visible":true,"include":false,"step":"340","x":0.3904761904761904,"y":42.10476190476191,"z":23.41904761904762,"a95":3.9,"info":"\"13-11-07\" at \"14:17\""},{"visible":true,"include":false,"step":"380","x":-17.8,"y":45.22857142857143,"z":25.104761904761908,"a95":6.3,"info":"\"13-11-08\" at \"11:30\""},{"visible":true,"include":false,"step":"420","x":9.8,"y":46.04761904761905,"z":14.542857142857141,"a95":3.7,"info":"\"13-11-08\" at \"16:35\""}]},{"version":"v1.1.0","exported":"2016-11-28T13:56:39.400Z","volume":10.5,"added":"2016-11-28T13:51:20.528Z","format":"Utrecht","demagType":"Unknown","strat":"4","patch":1.1,"GEO":[{"dec":226.49449838008974,"inc":-57.687726988998136,"MAD":15.6324891554564,"cm":[-6.217248937900877e-15,-1.4210854715202004e-14,0],"intensity":171.71774083323695,"type":"GC","origin":false,"forced":true,"remark":"","nSteps":5,"minStep":"4.0","maxStep":"20.0","steps":["4.0","8.0","12.0","16.0","20.0"],"group":"None","version":"v1.1.0"}],"TECT":[{"dec":248.18363542365927,"inc":-32.71180419061849,"MAD":15.632489155456433,"cm":[-7.993605777301127e-15,-2.042810365310288e-14,8.43769498715119e-15],"intensity":171.717740833237,"type":"GC","origin":false,"forced":true,"remark":"","nSteps":5,"minStep":"4.0","maxStep":"20.0","steps":["4.0","8.0","12.0","16.0","20.0"],"group":"None","version":"v1.1.0"}],"interpreted":true,"name":"BU2.3B","coreAzi":24,"coreDip":24,"bedStrike":8,"bedDip":32,"data":[{"visible":true,"include":false,"step":"0.0","x":-80.30285714285714,"y":108.58095238095237,"z":-51.450476190476195,"a95":0.99,"info":"02/12/2013 at 11:25:50"},{"visible":true,"include":true,"step":"4.0","x":-55.346666666666664,"y":88.62857142857143,"z":-55.679047619047616,"a95":0.99,"info":"02/12/2013 at 11:25:50"},{"visible":true,"include":true,"step":"8.0","x":-23.33238095238095,"y":78.5142857142857,"z":-45.27142857142857,"a95":0.99,"info":"02/12/2013 at 11:25:50"},{"visible":true,"include":true,"step":"12.0","x":-7.341904761904762,"y":65.77238095238096,"z":-28.343809523809526,"a95":0.99,"info":"02/12/2013 at 11:25:50"},{"visible":true,"include":true,"step":"16.0","x":0.3056952380952381,"y":62.46666666666666,"z":-17.85047619047619,"a95":0.99,"info":"02/12/2013 at 11:25:50"},{"visible":true,"include":true,"step":"20.0","x":3.0296190476190477,"y":63.44666666666667,"z":-4.5125714285714285,"a95":0.99,"info":"02/12/2013 at 11:25:50"},{"visible":true,"include":false,"step":"25.0","x":10.361904761904762,"y":49.82666666666666,"z":-0.13033333333333333,"a95":0.99,"info":"02/12/2013 at 11:25:50"},{"visible":true,"include":false,"step":"30.0","x":0.13566666666666669,"y":50.89714285714285,"z":3.207333333333333,"a95":0.99,"info":"02/12/2013 at 11:25:50"},{"visible":true,"include":false,"step":"35.0","x":2.664857142857143,"y":41.05904761904762,"z":-0.9935238095238096,"a95":0.99,"info":"02/12/2013 at 11:25:50"},{"visible":true,"include":false,"step":"40.0","x":3.032285714285714,"y":48.47428571428571,"z":-3.870952380952381,"a95":0.99,"info":"02/12/2013 at 11:25:50"},{"visible":true,"include":false,"step":"45.0","x":4.383619047619048,"y":41.212380952380954,"z":-4.895333333333333,"a95":0.99,"info":"02/12/2013 at 11:25:50"},{"visible":true,"include":false,"step":"50.0","x":-6.838857142857144,"y":10.414285714285715,"z":3.9654285714285713,"a95":0.99,"info":"02/12/2013 at 11:25:50"},{"visible":true,"include":false,"step":"60.0","x":16.51238095238095,"y":27.70285714285714,"z":-3.075714285714286,"a95":0.99,"info":"02/12/2013 at 11:25:50"},{"visible":true,"include":false,"step":"70.0","x":4.016285714285714,"y":4.482857142857143,"z":0.9520000000000001,"a95":0.99,"info":"02/12/2013 at 11:25:50"},{"visible":true,"include":false,"step":"80.0","x":7.559428571428571,"y":16.40952380952381,"z":-22.654285714285713,"a95":0.99,"info":"02/12/2013 at 11:25:50"},{"visible":true,"include":false,"step":"90.0","x":-23.006666666666668,"y":-0.13754285714285713,"z":4.2241904761904765,"a95":0.99,"info":"02/12/2013 at 11:25:50"},{"visible":true,"include":false,"step":"100.0","x":24.52952380952381,"y":0.5328857142857143,"z":-7.3880952380952385,"a95":0.99,"info":"02/12/2013 at 11:25:50"}]},{"version":"v1.1.0","exported":"2016-11-28T13:56:39.400Z","volume":10.5,"added":"2016-11-28T13:51:20.529Z","format":"Utrecht","demagType":"Unknown","strat":null,"patch":1.1,"GEO":[],"TECT":[],"interpreted":false,"name":"BU2.4A","coreAzi":32,"coreDip":36,"bedStrike":8,"bedDip":32,"data":[{"visible":true,"include":false,"step":"20","x":-40,"y":-60.476190476190474,"z":72.85714285714286,"a95":2.6,"info":"\"13-11-03\" at \"12:11\""},{"visible":true,"include":false,"step":"80","x":8.123809523809523,"y":-46.19047619047619,"z":41.2952380952381,"a95":3.1,"info":"\"13-11-04\" at \"08:48\""},{"visible":true,"include":true,"step":"150","x":24.133333333333333,"y":-35.91428571428572,"z":-12.523809523809524,"a95":3.9,"info":"\"13-11-04\" at \"14:28\""},{"visible":true,"include":true,"step":"180","x":18.59047619047619,"y":-33.27619047619047,"z":-6.161904761904762,"a95":5.3,"info":"\"13-11-05\" at \"09:03\""},{"visible":true,"include":true,"step":"200","x":4.3619047619047615,"y":-36.923809523809524,"z":-9.361904761904762,"a95":8.900001,"info":"\"13-11-05\" at \"13:46\""},{"visible":true,"include":true,"step":"225","x":-19.561904761904763,"y":-22.933333333333334,"z":-12,"a95":7,"info":"\"13-11-06\" at \"08:05\""},{"visible":true,"include":false,"step":"250","x":7.114285714285715,"y":-38.542857142857144,"z":-25.847619047619045,"a95":4.8,"info":"\"13-11-06\" at \"12:12\""},{"visible":true,"include":false,"step":"275","x":31.866666666666667,"y":-38.44761904761905,"z":-28.428571428571427,"a95":3.4,"info":"\"13-11-06\" at \"16:40\""},{"visible":true,"include":false,"step":"300","x":17.228571428571428,"y":-43.80952380952381,"z":-21.276190476190475,"a95":4.6,"info":"\"13-11-07\" at \"05:19\""},{"visible":true,"include":false,"step":"320","x":13.171428571428573,"y":-32.19047619047619,"z":-18.53333333333333,"a95":5.4,"info":"\"13-11-07\" at \"08:44\""},{"visible":true,"include":false,"step":"340","x":20.447619047619046,"y":-42.49523809523809,"z":-16.361904761904764,"a95":3.7,"info":"\"13-11-07\" at \"14:19\""},{"visible":true,"include":false,"step":"380","x":27.780952380952378,"y":2.8666666666666667,"z":-21.123809523809523,"a95":5.7,"info":"\"13-11-08\" at \"11:32\""},{"visible":true,"include":false,"step":"420","x":19.285714285714285,"y":-28.666666666666668,"z":-7.523809523809524,"a95":4.3,"info":"\"13-11-08\" at \"16:37\""}]},{"version":"v1.1.0","exported":"2016-11-28T13:56:39.400Z","volume":10.5,"added":"2016-11-28T13:51:20.529Z","format":"Utrecht","demagType":"Unknown","strat":null,"patch":1.1,"GEO":[{"dec":284.9192389988981,"inc":-9.361830904971148,"MAD":2.2065341256781044,"cm":[0,4.440892098500626e-15,0],"intensity":121.11098300353125,"type":"GC","origin":false,"forced":true,"remark":"","nSteps":4,"minStep":"80","maxStep":"200","steps":["80","150","180","200"],"group":"None","version":"v1.1.0"}],"TECT":[{"dec":106.31931998782534,"inc":-30.008866038999177,"MAD":2.2065341256788504,"cm":[4.440892098500626e-16,2.6645352591003757e-15,-4.440892098500626e-15],"intensity":121.11098300353125,"type":"GC","origin":false,"forced":true,"remark":"","nSteps":4,"minStep":"80","maxStep":"200","steps":["80","150","180","200"],"group":"None","version":"v1.1.0"}],"interpreted":true,"name":"BU2.5A","coreAzi":11,"coreDip":10,"bedStrike":5,"bedDip":40,"data":[{"visible":true,"include":false,"step":"20","x":-178.57142857142858,"y":-45.61904761904762,"z":109.04761904761905,"a95":2.4,"info":"\"13-11-03\" at \"12:13\""},{"visible":true,"include":true,"step":"80","x":-88,"y":-13.428571428571429,"z":53.23809523809524,"a95":3.1,"info":"\"13-11-04\" at \"08:51\""},{"visible":true,"include":true,"step":"150","x":-39.8,"y":-6.866666666666666,"z":5.933333333333333,"a95":5.2,"info":"\"13-11-04\" at \"14:33\""},{"visible":true,"include":true,"step":"180","x":-30.94285714285714,"y":-4.4,"z":0.6761904761904761,"a95":9.1,"info":"\"13-11-05\" at \"09:06\""},{"visible":true,"include":true,"step":"200","x":-24.54285714285714,"y":-5.314285714285714,"z":-12.609523809523811,"a95":16.4,"info":"\"13-11-05\" at \"13:48\""},{"visible":true,"include":false,"step":"225","x":-69.5142857142857,"y":-1.2285714285714286,"z":3.5904761904761906,"a95":3.9,"info":"\"13-11-06\" at \"08:07\""},{"visible":true,"include":false,"step":"250","x":-26.19047619047619,"y":-17.123809523809523,"z":-18.514285714285716,"a95":8.6,"info":"\"13-11-06\" at \"12:15\""},{"visible":true,"include":false,"step":"275","x":-30.82857142857143,"y":-13.21904761904762,"z":-16.942857142857143,"a95":7,"info":"\"13-11-06\" at \"16:42\""},{"visible":true,"include":false,"step":"300","x":-19.504761904761907,"y":-9.619047619047619,"z":-24.285714285714285,"a95":7.5,"info":"\"13-11-07\" at \"05:21\""},{"visible":true,"include":false,"step":"320","x":-22.476190476190474,"y":2.5047619047619047,"z":-14.133333333333335,"a95":10.1,"info":"\"13-11-07\" at \"08:47\""},{"visible":true,"include":false,"step":"340","x":-15.257142857142856,"y":-0.3238095238095238,"z":-25.714285714285715,"a95":6.7,"info":"\"13-11-07\" at \"14:21\""},{"visible":true,"include":false,"step":"380","x":-49.019047619047626,"y":-7.085714285714286,"z":30.047619047619047,"a95":7.7,"info":"\"13-11-08\" at \"11:34\""},{"visible":true,"include":false,"step":"420","x":-25.904761904761905,"y":-12.276190476190477,"z":-22,"a95":7.7,"info":"\"13-11-08\" at \"16:40\""}]},{"version":"v1.1.0","exported":"2016-11-28T13:56:39.400Z","volume":10.5,"added":"2016-11-28T13:51:20.530Z","format":"Utrecht","demagType":"Unknown","strat":"5","patch":1.1,"GEO":[{"dec":28.787631547131184,"inc":40.873058687155606,"MAD":3.8296700893329234,"cm":[-1.4210854715202004e-14,2.5091040356528538e-14,0],"intensity":339.1545180768977,"type":"dir","forced":true,"remark":"","origin":false,"nSteps":7,"minStep":"4.0","maxStep":"30.0","steps":["4.0","8.0","12.0","16.0","20.0","25.0","30.0"],"group":"None","version":"v1.1.0"}],"TECT":[{"dec":48.397913654204444,"inc":17.77264080643004,"MAD":3.8296700893328377,"cm":[-2.4424906541753444e-14,2.6201263381153694e-14,-1.021405182655144e-14],"intensity":339.1545180768977,"type":"dir","forced":true,"remark":"","origin":false,"nSteps":7,"minStep":"4.0","maxStep":"30.0","steps":["4.0","8.0","12.0","16.0","20.0","25.0","30.0"],"group":"None","version":"v1.1.0"}],"interpreted":true,"name":"BU2.6B","coreAzi":14,"coreDip":4,"bedStrike":5,"bedDip":40,"data":[{"visible":true,"include":false,"step":"0.0","x":-227.87619047619046,"y":80.51333333333334,"z":303.9047619047619,"a95":0.99,"info":"02/12/2013 at 11:25:50"},{"visible":true,"include":true,"step":"4.0","x":-180.41904761904763,"y":54.69904761904762,"z":233.87619047619046,"a95":0.99,"info":"02/12/2013 at 11:25:50"},{"visible":true,"include":true,"step":"8.0","x":-126.80952380952381,"y":51.00095238095238,"z":165.54285714285714,"a95":0.99,"info":"02/12/2013 at 11:25:50"},{"visible":true,"include":true,"step":"12.0","x":-85.27142857142857,"y":27.990476190476187,"z":106.11428571428571,"a95":0.99,"info":"02/12/2013 at 11:25:50"},{"visible":true,"include":true,"step":"16.0","x":-64.36857142857143,"y":14.284761904761906,"z":83.53238095238096,"a95":0.99,"info":"02/12/2013 at 11:25:50"},{"visible":true,"include":true,"step":"20.0","x":-49.26095238095238,"y":18.412380952380953,"z":69.11238095238095,"a95":0.99,"info":"02/12/2013 at 11:25:50"},{"visible":true,"include":true,"step":"25.0","x":-41.37047619047619,"y":11.726666666666667,"z":33.093333333333334,"a95":0.99,"info":"02/12/2013 at 11:25:50"},{"visible":true,"include":true,"step":"30.0","x":-24.333333333333332,"y":-13.992380952380952,"z":33.41619047619048,"a95":0.99,"info":"02/12/2013 at 11:25:50"},{"visible":true,"include":false,"step":"35.0","x":-13.185714285714285,"y":-0.23097142857142855,"z":18.64,"a95":0.99,"info":"02/12/2013 at 11:25:50"},{"visible":true,"include":false,"step":"40.0","x":-19.23047619047619,"y":16,"z":4.67,"a95":0.99,"info":"02/12/2013 at 11:25:50"},{"visible":true,"include":false,"step":"45.0","x":0.5558857142857143,"y":-0.40744761904761906,"z":21.35142857142857,"a95":0.99,"info":"02/12/2013 at 11:25:50"},{"visible":true,"include":false,"step":"50.0","x":-21.70380952380952,"y":5.702571428571429,"z":20.58857142857143,"a95":0.99,"info":"02/12/2013 at 11:25:50"},{"visible":true,"include":false,"step":"60.0","x":-10.288571428571428,"y":10.338095238095239,"z":1.3417142857142856,"a95":0.99,"info":"02/12/2013 at 11:25:50"},{"visible":true,"include":false,"step":"70.0","x":-2.4146666666666667,"y":1.9793333333333334,"z":22.49142857142857,"a95":0.99,"info":"02/12/2013 at 11:25:50"},{"visible":true,"include":false,"step":"80.0","x":-14.964761904761904,"y":-6.841047619047619,"z":4.8210476190476195,"a95":0.99,"info":"02/12/2013 at 11:25:50"},{"visible":true,"include":false,"step":"90.0","x":10.32095238095238,"y":7.845428571428571,"z":26.772380952380953,"a95":0.99,"info":"02/12/2013 at 11:25:50"},{"visible":true,"include":false,"step":"100.0","x":18.752380952380953,"y":-4.379047619047618,"z":17.83142857142857,"a95":0.99,"info":"02/12/2013 at 11:25:50"}]},{"version":"v1.1.0","exported":"2016-11-28T13:56:39.400Z","volume":10.5,"added":"2016-11-28T13:51:20.532Z","format":"Utrecht","demagType":"Unknown","strat":"6","patch":1.1,"GEO":[{"dec":117.34099810057717,"inc":-2.106362196345336,"MAD":2.7607039494543493,"cm":[-4.884981308350689e-15,6.217248937900877e-15,0],"intensity":263.71473271387254,"type":"GC","origin":false,"forced":true,"remark":"","nSteps":4,"minStep":"4.0","maxStep":"16.0","steps":["4.0","8.0","12.0","16.0"],"group":"None","version":"v1.1.0"}],"TECT":[{"dec":120.16030134936972,"inc":-32.972001961410754,"MAD":2.7607039494558894,"cm":[-4.440892098500626e-15,4.440892098500626e-15,-4.440892098500626e-15],"intensity":263.71473271387254,"type":"GC","origin":false,"forced":true,"remark":"","nSteps":4,"minStep":"4.0","maxStep":"16.0","steps":["4.0","8.0","12.0","16.0"],"group":"None","version":"v1.1.0"}],"interpreted":true,"name":"BU2.7A","coreAzi":360,"coreDip":59,"bedStrike":13,"bedDip":32,"data":[{"visible":true,"include":false,"step":"0.0","x":-81.07714285714285,"y":66.80666666666667,"z":263.1142857142857,"a95":0.99,"info":"02/12/2013 at 11:25:50"},{"visible":true,"include":true,"step":"4.0","x":-37.91428571428572,"y":43.660000000000004,"z":197.1047619047619,"a95":0.99,"info":"02/12/2013 at 11:25:50"},{"visible":true,"include":true,"step":"8.0","x":-3.795142857142857,"y":36.15428571428571,"z":127.5904761904762,"a95":0.99,"info":"02/12/2013 at 11:25:50"},{"visible":true,"include":true,"step":"12.0","x":4.4399999999999995,"y":25.920952380952382,"z":80.03809523809524,"a95":0.99,"info":"02/12/2013 at 11:25:50"},{"visible":true,"include":true,"step":"16.0","x":2.738,"y":19.451428571428572,"z":56.519047619047626,"a95":0.99,"info":"02/12/2013 at 11:25:50"},{"visible":true,"include":false,"step":"20.0","x":1.9636190476190474,"y":-4.074571428571429,"z":18.473333333333333,"a95":0.99,"info":"02/12/2013 at 11:25:50"},{"visible":true,"include":false,"step":"25.0","x":8.438666666666666,"y":-4.751904761904762,"z":12.47809523809524,"a95":0.99,"info":"02/12/2013 at 11:25:50"},{"visible":true,"include":false,"step":"30.0","x":28.72285714285714,"y":14.935238095238095,"z":-5.082952380952381,"a95":0.99,"info":"02/12/2013 at 11:25:50"},{"visible":true,"include":false,"step":"35.0","x":30.33238095238095,"y":16.80952380952381,"z":-15.826666666666668,"a95":0.99,"info":"02/12/2013 at 11:25:50"},{"visible":true,"include":false,"step":"40.0","x":21.674285714285716,"y":-4.1030476190476195,"z":-28.399047619047618,"a95":0.99,"info":"02/12/2013 at 11:25:50"},{"visible":true,"include":false,"step":"45.0","x":38.27428571428571,"y":-1.5415238095238095,"z":12.022857142857143,"a95":0.99,"info":"02/12/2013 at 11:25:50"},{"visible":true,"include":false,"step":"50.0","x":-15.082857142857144,"y":44.62285714285714,"z":-5.390857142857143,"a95":0.99,"info":"02/12/2013 at 11:25:50"},{"visible":true,"include":false,"step":"60.0","x":35.35333333333333,"y":-5.198285714285714,"z":18.413333333333334,"a95":0.99,"info":"02/12/2013 at 11:25:50"},{"visible":true,"include":false,"step":"70.0","x":-6.958666666666667,"y":28.64857142857143,"z":-14.222857142857142,"a95":0.99,"info":"02/12/2013 at 11:25:50"},{"visible":true,"include":false,"step":"80.0","x":27.795238095238098,"y":37.93238095238095,"z":13.369523809523809,"a95":0.99,"info":"02/12/2013 at 11:25:50"},{"visible":true,"include":false,"step":"90.0","x":30.90857142857143,"y":13.803809523809523,"z":49.78000000000001,"a95":0.99,"info":"02/12/2013 at 11:25:50"},{"visible":true,"include":false,"step":"100.0","x":7.854571428571428,"y":-35.256190476190476,"z":42.81333333333333,"a95":0.99,"info":"02/12/2013 at 11:25:50"}]},{"version":"v1.1.0","exported":"2016-11-28T13:56:39.400Z","volume":10.5,"added":"2016-11-28T13:51:20.533Z","format":"Utrecht","demagType":"Unknown","strat":"7","patch":1.1,"GEO":[{"dec":7.008156621976013,"inc":45.75221505073188,"MAD":4.091670085534981,"cm":[0,5.440092820663267e-15,0],"intensity":180.0860154686229,"type":"dir","forced":true,"remark":"","origin":false,"nSteps":4,"minStep":"15.0","maxStep":"40.0","steps":["15.0","25.0","30.0","40.0"],"group":"None","version":"v1.1.0"}],"TECT":[{"dec":37.60761219284569,"inc":40.24664253622214,"MAD":4.091670085534988,"cm":[4.884981308350689e-15,4.440892098500626e-16,-4.440892098500626e-15],"intensity":180.0860154686229,"type":"dir","forced":true,"remark":"","origin":false,"nSteps":4,"minStep":"15.0","maxStep":"40.0","steps":["15.0","25.0","30.0","40.0"],"group":"None","version":"v1.1.0"}],"interpreted":true,"name":"BU2.7B","coreAzi":360,"coreDip":59,"bedStrike":13,"bedDip":32,"data":[{"visible":true,"include":false,"step":"0.0","x":-5.914666666666666,"y":42.53047619047619,"z":251.34285714285713,"a95":0.99,"info":"30/09/2014 at 08:46:09"},{"visible":true,"include":false,"step":"10.0","x":21.70380952380952,"y":6.1082857142857145,"z":159.0285714285714,"a95":0.99,"info":"30/09/2014 at 08:46:09"},{"visible":true,"include":true,"step":"15.0","x":26.317142857142855,"y":4.730285714285714,"z":125.13333333333334,"a95":0.99,"info":"30/09/2014 at 08:46:09"},{"visible":true,"include":false,"step":"20.0","x":-16.964761904761904,"y":23.85238095238095,"z":91.25904761904762,"a95":0.99,"info":"30/09/2014 at 08:46:09"},{"visible":true,"include":true,"step":"25.0","x":26.920952380952382,"y":10.059999999999999,"z":84.9895238095238,"a95":0.99,"info":"30/09/2014 at 08:46:09"},{"visible":true,"include":true,"step":"30.0","x":15.968571428571428,"y":13.084761904761903,"z":73.00571428571428,"a95":0.99,"info":"30/09/2014 at 08:46:09"},{"visible":true,"include":false,"step":"35.0","x":2.628761904761905,"y":-27.771428571428572,"z":90.64190476190477,"a95":0.99,"info":"30/09/2014 at 08:46:09"},{"visible":true,"include":true,"step":"40.0","x":7.32247619047619,"y":5.666285714285714,"z":51.47714285714286,"a95":0.99,"info":"30/09/2014 at 08:46:09"},{"visible":true,"include":false,"step":"45.0","x":12.838095238095239,"y":-19.51142857142857,"z":66.25238095238095,"a95":0.99,"info":"30/09/2014 at 08:46:09"},{"visible":true,"include":false,"step":"50.0","x":13.100000000000001,"y":26.17142857142857,"z":56.90190476190477,"a95":0.99,"info":"30/09/2014 at 08:46:09"},{"visible":true,"include":false,"step":"60.0","x":19.194285714285712,"y":14.770476190476192,"z":28.144761904761904,"a95":0.99,"info":"30/09/2014 at 08:46:09"},{"visible":true,"include":false,"step":"70.0","x":28.06,"y":-17.049523809523812,"z":25.657142857142855,"a95":0.99,"info":"30/09/2014 at 08:46:09"},{"visible":true,"include":false,"step":"80.0","x":29.69047619047619,"y":15.506666666666666,"z":26.022857142857145,"a95":0.99,"info":"30/09/2014 at 08:46:09"},{"visible":true,"include":false,"step":"90.0","x":11.068571428571428,"y":37.52095238095238,"z":74.46190476190476,"a95":0.99,"info":"30/09/2014 at 08:46:09"}]},{"version":"v1.1.0","exported":"2016-11-28T13:56:39.400Z","volume":10.5,"added":"2016-11-28T13:51:20.533Z","format":"Utrecht","demagType":"Unknown","strat":"8","patch":1.1,"GEO":[],"TECT":[],"interpreted":false,"name":"BU2.8A","coreAzi":354,"coreDip":26,"bedStrike":13,"bedDip":32,"data":[{"visible":true,"include":false,"step":"0.0","x":-77.50190476190475,"y":98.32380952380953,"z":69.99238095238096,"a95":0.99,"info":"30/09/2014 at 08:46:09"},{"visible":true,"include":false,"step":"10.0","x":-7.926857142857143,"y":61.48952380952381,"z":-18.63142857142857,"a95":0.99,"info":"30/09/2014 at 08:46:09"},{"visible":true,"include":false,"step":"15.0","x":13.337142857142856,"y":37.798095238095236,"z":-20.283809523809524,"a95":0.99,"info":"30/09/2014 at 08:46:09"},{"visible":true,"include":false,"step":"20.0","x":-14.582857142857144,"y":30.545714285714286,"z":-29.655238095238094,"a95":0.99,"info":"30/09/2014 at 08:46:09"},{"visible":true,"include":false,"step":"25.0","x":14.440000000000001,"y":6.092761904761905,"z":-32.957142857142856,"a95":0.99,"info":"30/09/2014 at 08:46:09"},{"visible":true,"include":false,"step":"30.0","x":5.847714285714286,"y":20.116190476190475,"z":-39.034285714285716,"a95":0.99,"info":"30/09/2014 at 08:46:09"},{"visible":true,"include":false,"step":"35.0","x":38.95904761904762,"y":48.37238095238096,"z":9.89809523809524,"a95":0.99,"info":"30/09/2014 at 08:46:09"},{"visible":true,"include":false,"step":"40.0","x":53.46857142857142,"y":69.26857142857143,"z":-6.249714285714286,"a95":0.99,"info":"30/09/2014 at 08:46:09"},{"visible":true,"include":false,"step":"45.0","x":35.13238095238095,"y":-5.800380952380952,"z":-36.71809523809524,"a95":0.99,"info":"30/09/2014 at 08:46:09"},{"visible":true,"include":false,"step":"50.0","x":26.18857142857143,"y":25.414285714285718,"z":-11.464761904761904,"a95":0.99,"info":"30/09/2014 at 08:46:09"},{"visible":true,"include":false,"step":"60.0","x":40.43904761904762,"y":4.465523809523809,"z":-6.79495238095238,"a95":0.99,"info":"30/09/2014 at 08:46:09"},{"visible":true,"include":false,"step":"70.0","x":25.106666666666666,"y":-57.96,"z":-48.385714285714286,"a95":0.99,"info":"30/09/2014 at 08:46:09"},{"visible":true,"include":false,"step":"80.0","x":173.32380952380953,"y":16.415238095238095,"z":-60.44285714285714,"a95":0.99,"info":"30/09/2014 at 08:46:09"},{"visible":true,"include":false,"step":"90.0","x":3.6154285714285717,"y":6.937904761904762,"z":-30.845714285714287,"a95":0.99,"info":"30/09/2014 at 08:46:09"}]},{"version":"v1.1.0","exported":"2016-11-28T13:56:39.400Z","volume":10.5,"added":"2016-11-28T13:51:20.533Z","format":"Utrecht","demagType":"Unknown","strat":"7","patch":1.1,"GEO":[],"TECT":[],"interpreted":false,"name":"BU2.8B","coreAzi":354,"coreDip":26,"bedStrike":13,"bedDip":32,"data":[{"visible":true,"include":false,"step":"0.0","x":-147.38095238095238,"y":79.64095238095238,"z":221.2761904761905,"a95":0.99,"info":"02/12/2013 at 11:25:50"},{"visible":true,"include":true,"step":"4.0","x":-104.68571428571428,"y":54.05428571428572,"z":143.51428571428573,"a95":0.99,"info":"02/12/2013 at 11:25:50"},{"visible":true,"include":true,"step":"8.0","x":-52.92380952380953,"y":52.60666666666667,"z":82.54095238095238,"a95":0.99,"info":"02/12/2013 at 11:25:50"},{"visible":true,"include":true,"step":"12.0","x":-23.54,"y":40.46666666666666,"z":56.56952380952381,"a95":0.99,"info":"02/12/2013 at 11:25:50"},{"visible":true,"include":true,"step":"16.0","x":-21.56380952380952,"y":23.34095238095238,"z":37.94952380952381,"a95":0.99,"info":"02/12/2013 at 11:25:50"},{"visible":true,"include":false,"step":"20.0","x":-13.094285714285714,"y":23.523809523809526,"z":5.851809523809524,"a95":0.99,"info":"02/12/2013 at 11:25:50"},{"visible":true,"include":false,"step":"25.0","x":-14.290476190476191,"y":16.724761904761905,"z":26.418095238095237,"a95":0.99,"info":"02/12/2013 at 11:25:50"},{"visible":true,"include":false,"step":"30.0","x":-14.180952380952382,"y":18.34190476190476,"z":10.336190476190476,"a95":0.99,"info":"02/12/2013 at 11:25:50"},{"visible":true,"include":false,"step":"35.0","x":1.5654285714285716,"y":9.316857142857142,"z":19.33238095238095,"a95":0.99,"info":"02/12/2013 at 11:25:50"},{"visible":true,"include":false,"step":"40.0","x":-5.060190476190476,"y":3.86952380952381,"z":2.5588571428571427,"a95":0.99,"info":"02/12/2013 at 11:25:50"},{"visible":true,"include":false,"step":"45.0","x":-1.0818095238095238,"y":4.432666666666667,"z":10.316190476190476,"a95":0.99,"info":"02/12/2013 at 11:25:50"},{"visible":true,"include":false,"step":"50.0","x":-8.199904761904762,"y":-26.664761904761907,"z":4.618952380952381,"a95":0.99,"info":"02/12/2013 at 11:25:50"},{"visible":true,"include":false,"step":"60.0","x":-11.792380952380952,"y":12.323809523809524,"z":-6.483333333333333,"a95":0.99,"info":"02/12/2013 at 11:25:50"},{"visible":true,"include":false,"step":"70.0","x":37.76571428571429,"y":30.98761904761905,"z":0.833,"a95":0.99,"info":"02/12/2013 at 11:25:50"},{"visible":true,"include":false,"step":"80.0","x":127.65714285714287,"y":17.125714285714285,"z":45.92190476190476,"a95":0.99,"info":"02/12/2013 at 11:25:50"},{"visible":true,"include":false,"step":"90.0","x":17.053333333333335,"y":-8.63952380952381,"z":26.886666666666667,"a95":0.99,"info":"02/12/2013 at 11:25:50"},{"visible":true,"include":false,"step":"100.0","x":3.394285714285714,"y":-16.959047619047617,"z":40.56095238095238,"a95":0.99,"info":"02/12/2013 at 11:25:50"}]},{"version":"v1.1.0","exported":"2016-11-28T13:56:39.401Z","volume":10.5,"added":"2016-11-28T13:51:20.533Z","format":"Utrecht","demagType":"Unknown","strat":"1","patch":1.1,"GEO":[],"TECT":[],"interpreted":false,"name":"BU2.9A","coreAzi":356,"coreDip":24,"bedStrike":13,"bedDip":32,"data":[{"visible":true,"include":false,"step":"0.0","x":-48.88095238095238,"y":-29.082857142857144,"z":86.13142857142857,"a95":0.99,"info":"30/09/2014 at 13:17:05"},{"visible":true,"include":false,"step":"10.0","x":-23.408571428571427,"y":-13.975238095238096,"z":32.764761904761905,"a95":0.99,"info":"30/09/2014 at 13:17:05"},{"visible":true,"include":false,"step":"15.0","x":-7.276666666666666,"y":7.414571428571428,"z":18.933333333333334,"a95":0.99,"info":"30/09/2014 at 13:17:05"},{"visible":true,"include":false,"step":"20.0","x":-13.02095238095238,"y":-2.4438095238095237,"z":7.711714285714286,"a95":0.99,"info":"30/09/2014 at 13:17:05"},{"visible":true,"include":false,"step":"25.0","x":3.108,"y":-12.69047619047619,"z":10.586666666666666,"a95":0.99,"info":"30/09/2014 at 13:17:05"},{"visible":true,"include":false,"step":"30.0","x":-13.904761904761905,"y":-5.020952380952381,"z":-11.298095238095238,"a95":0.99,"info":"30/09/2014 at 13:17:05"},{"visible":true,"include":false,"step":"35.0","x":-1.2527619047619047,"y":-6.0365714285714285,"z":6.014857142857143,"a95":0.99,"info":"30/09/2014 at 13:17:05"},{"visible":true,"include":false,"step":"40.0","x":-9.519619047619049,"y":-9.425047619047618,"z":-2.068380952380952,"a95":0.99,"info":"30/09/2014 at 13:17:05"},{"visible":true,"include":false,"step":"45.0","x":-18.666666666666668,"y":-1.7405714285714287,"z":-3.615333333333333,"a95":0.99,"info":"30/09/2014 at 13:17:05"},{"visible":true,"include":false,"step":"50.0","x":-8.582285714285714,"y":11.008571428571429,"z":14.180952380952382,"a95":0.99,"info":"30/09/2014 at 13:17:05"},{"visible":true,"include":false,"step":"60.0","x":0.7646666666666666,"y":-29.067619047619047,"z":-7.502666666666667,"a95":0.99,"info":"30/09/2014 at 13:17:05"},{"visible":true,"include":false,"step":"70.0","x":39.915238095238095,"y":-8.89390476190476,"z":0.5679238095238095,"a95":0.99,"info":"30/09/2014 at 13:17:05"},{"visible":true,"include":false,"step":"80.0","x":-20.83142857142857,"y":-14.32095238095238,"z":-19.986666666666668,"a95":0.99,"info":"30/09/2014 at 13:17:05"},{"visible":true,"include":false,"step":"90.0","x":25.04952380952381,"y":-16.031428571428574,"z":-2.9895238095238095,"a95":0.99,"info":"30/09/2014 at 13:17:05"}]},{"version":"v1.1.0","exported":"2016-11-28T13:56:39.401Z","volume":10.5,"added":"2016-11-28T13:51:20.533Z","format":"Utrecht","demagType":"Unknown","strat":"8","patch":1.1,"GEO":[{"dec":39.8182668725168,"inc":-16.187423730145472,"MAD":8.29330295267305,"cm":[-2.220446049250313e-16,6.439293542825908e-15,0],"intensity":191.2421530617916,"type":"GC","origin":false,"forced":true,"remark":"","nSteps":7,"minStep":"4.0","maxStep":"30.0","steps":["4.0","8.0","12.0","16.0","20.0","25.0","30.0"],"group":"None","version":"v1.1.0"}],"TECT":[{"dec":27.378154188564622,"inc":-27.77627217303656,"MAD":8.293302952673123,"cm":[3.9968028886505635e-15,8.881784197001252e-16,-1.7763568394002505e-15],"intensity":191.24215306179164,"type":"GC","origin":false,"forced":true,"remark":"","nSteps":7,"minStep":"4.0","maxStep":"30.0","steps":["4.0","8.0","12.0","16.0","20.0","25.0","30.0"],"group":"None","version":"v1.1.0"}],"interpreted":true,"name":"BU2.9B","coreAzi":356,"coreDip":24,"bedStrike":13,"bedDip":32,"data":[{"visible":true,"include":false,"step":"0.0","x":-182.73333333333335,"y":26.335238095238093,"z":133.2761904761905,"a95":0.99,"info":"02/12/2013 at 11:25:50"},{"visible":true,"include":true,"step":"4.0","x":-126.58095238095237,"y":10.081904761904761,"z":118.11428571428571,"a95":0.99,"info":"02/12/2013 at 11:25:50"},{"visible":true,"include":true,"step":"8.0","x":-89.9695238095238,"y":9.248571428571429,"z":83.63428571428571,"a95":0.99,"info":"02/12/2013 at 11:25:50"},{"visible":true,"include":true,"step":"12.0","x":-55.39714285714285,"y":-3.746666666666667,"z":61.99047619047619,"a95":0.99,"info":"02/12/2013 at 11:25:50"},{"visible":true,"include":true,"step":"16.0","x":-43.36,"y":-9.168095238095239,"z":50.506666666666675,"a95":0.99,"info":"02/12/2013 at 11:25:50"},{"visible":true,"include":true,"step":"20.0","x":-27.85904761904762,"y":-6.8652380952380945,"z":32.32476190476191,"a95":0.99,"info":"02/12/2013 at 11:25:50"},{"visible":true,"include":true,"step":"25.0","x":-13.710476190476191,"y":-6.598,"z":30.027619047619048,"a95":0.99,"info":"02/12/2013 at 11:25:50"},{"visible":true,"include":true,"step":"30.0","x":3.8233333333333337,"y":-24.03904761904762,"z":27.862857142857145,"a95":0.99,"info":"02/12/2013 at 11:25:50"},{"visible":true,"include":false,"step":"35.0","x":-3.8515238095238096,"y":3.1324761904761904,"z":17.14952380952381,"a95":0.99,"info":"02/12/2013 at 11:25:50"},{"visible":true,"include":false,"step":"40.0","x":2.5997142857142856,"y":-18.592380952380953,"z":19.877142857142857,"a95":0.99,"info":"02/12/2013 at 11:25:50"},{"visible":true,"include":false,"step":"45.0","x":-0.4061142857142857,"y":-16.913333333333334,"z":19.908571428571427,"a95":0.99,"info":"02/12/2013 at 11:25:50"},{"visible":true,"include":false,"step":"50.0","x":-17.856190476190477,"y":-22.281904761904762,"z":-4.5415238095238095,"a95":0.99,"info":"02/12/2013 at 11:25:50"},{"visible":true,"include":false,"step":"60.0","x":-12.270476190476192,"y":-0.6194000000000001,"z":-8.746857142857143,"a95":0.99,"info":"02/12/2013 at 11:25:50"},{"visible":true,"include":false,"step":"70.0","x":17.324761904761903,"y":-8.326380952380953,"z":-6.471333333333333,"a95":0.99,"info":"02/12/2013 at 11:25:50"},{"visible":true,"include":false,"step":"80.0","x":-17.483809523809526,"y":-0.8538285714285714,"z":13.171428571428573,"a95":0.99,"info":"02/12/2013 at 11:25:50"},{"visible":true,"include":false,"step":"90.0","x":-16.48761904761905,"y":-8.348857142857142,"z":12.596190476190475,"a95":0.99,"info":"02/12/2013 at 11:25:50"},{"visible":true,"include":false,"step":"100.0","x":-27.784761904761904,"y":-10.449523809523809,"z":-7.301809523809523,"a95":0.99,"info":"02/12/2013 at 11:25:50"}]},{"version":"v1.1.0","exported":"2016-11-28T13:56:39.401Z","volume":10.5,"added":"2016-11-28T13:51:20.534Z","format":"Utrecht","demagType":"Unknown","strat":null,"patch":1.1,"GEO":[],"TECT":[],"interpreted":false,"name":"BU2.10A","coreAzi":65,"coreDip":39,"bedStrike":22,"bedDip":36,"data":[{"visible":true,"include":false,"step":"20","x":-150.57142857142858,"y":-83.71428571428571,"z":174.38095238095238,"a95":3.1,"info":"\"13-11-03\" at \"12:16\""},{"visible":true,"include":false,"step":"80","x":-70.76190476190476,"y":-25.714285714285715,"z":72.76190476190476,"a95":3.3,"info":"\"13-11-04\" at \"08:53\""},{"visible":true,"include":false,"step":"150","x":-18.933333333333334,"y":2.1333333333333333,"z":-9.58095238095238,"a95":7.1,"info":"\"13-11-04\" at \"14:38\""},{"visible":true,"include":false,"step":"180","x":-12.78095238095238,"y":1.8190476190476192,"z":-13.447619047619046,"a95":11.7,"info":"\"13-11-05\" at \"09:12\""},{"visible":true,"include":false,"step":"200","x":-28.333333333333332,"y":-7.0285714285714285,"z":-26.83809523809524,"a95":11.3,"info":"\"13-11-05\" at \"13:51\""},{"visible":true,"include":false,"step":"225","x":-51.142857142857146,"y":-5.419047619047619,"z":-13.104761904761904,"a95":5.7,"info":"\"13-11-06\" at \"08:10\""},{"visible":true,"include":false,"step":"250","x":-30.504761904761907,"y":-7.247619047619047,"z":-29.638095238095236,"a95":7,"info":"\"13-11-06\" at \"12:17\""},{"visible":true,"include":false,"step":"275","x":-26.285714285714285,"y":-27.114285714285714,"z":-31.79047619047619,"a95":6,"info":"\"13-11-06\" at \"16:45\""},{"visible":true,"include":false,"step":"300","x":-27.857142857142858,"y":-18.00952380952381,"z":-28.45714285714286,"a95":6.4,"info":"\"13-11-07\" at \"05:24\""},{"visible":true,"include":false,"step":"320","x":-39.82857142857143,"y":-30.45714285714286,"z":-12.266666666666667,"a95":4.3,"info":"\"13-11-07\" at \"08:49\""},{"visible":true,"include":false,"step":"340","x":-30.323809523809523,"y":-12.914285714285715,"z":-27.219047619047622,"a95":4.8,"info":"\"13-11-07\" at \"14:24\""},{"visible":true,"include":false,"step":"380","x":-62.2,"y":-40.695238095238096,"z":-28.82857142857143,"a95":6.5,"info":"\"13-11-08\" at \"11:36\""},{"visible":true,"include":false,"step":"420","x":-45.16190476190476,"y":3.9142857142857146,"z":-36.13333333333333,"a95":7,"info":"\"13-11-08\" at \"16:42\""}]},{"version":"v1.1.0","exported":"2016-11-28T13:56:39.401Z","volume":10.5,"added":"2016-11-28T13:51:20.534Z","format":"Utrecht","demagType":"Unknown","strat":"1","patch":1.1,"GEO":[{"dec":44.015939940326064,"inc":-23.8405737517078,"MAD":5.1890770545277345,"cm":[-1.176836406102666e-14,-1.7763568394002505e-15,0],"intensity":311.2877040722553,"type":"GC","origin":false,"forced":true,"remark":"","nSteps":6,"minStep":"4.0","maxStep":"25.0","steps":["4.0","8.0","12.0","16.0","20.0","25.0"],"group":"None","version":"v1.1.0"}],"TECT":[{"dec":18.78772378373708,"inc":-31.11377732753818,"MAD":5.189077054526694,"cm":[4.884981308350689e-15,-8.881784197001252e-16,-1.1102230246251565e-15],"intensity":311.2877040722552,"type":"GC","origin":false,"forced":true,"remark":"","nSteps":6,"minStep":"4.0","maxStep":"25.0","steps":["4.0","8.0","12.0","16.0","20.0","25.0"],"group":"None","version":"v1.1.0"}],"interpreted":true,"name":"BU2.11B","coreAzi":359,"coreDip":66,"bedStrike":23,"bedDip":46,"data":[{"visible":true,"include":false,"step":"0.0","x":-38.26285714285714,"y":109.85714285714286,"z":284.7904761904762,"a95":0.99,"info":"02/12/2013 at 16:57:24"},{"visible":true,"include":true,"step":"4.0","x":-47.862857142857145,"y":97.28571428571429,"z":236.76190476190476,"a95":0.99,"info":"02/12/2013 at 16:57:24"},{"visible":true,"include":true,"step":"8.0","x":-52.53142857142858,"y":87.1752380952381,"z":166.8,"a95":0.99,"info":"02/12/2013 at 16:57:24"},{"visible":true,"include":true,"step":"12.0","x":-51.58380952380952,"y":75.36095238095238,"z":109.28571428571429,"a95":0.99,"info":"02/12/2013 at 16:57:24"},{"visible":true,"include":true,"step":"16.0","x":-54.156190476190474,"y":70.53238095238096,"z":75.6,"a95":0.99,"info":"02/12/2013 at 16:57:24"},{"visible":true,"include":true,"step":"20.0","x":-41.87714285714286,"y":63.28000000000001,"z":42.400952380952376,"a95":0.99,"info":"02/12/2013 at 16:57:24"},{"visible":true,"include":true,"step":"25.0","x":-27.62857142857143,"y":38.37904761904762,"z":33.04571428571429,"a95":0.99,"info":"02/12/2013 at 16:57:24"},{"visible":true,"include":false,"step":"30.0","x":-23.945714285714285,"y":44.49809523809524,"z":21.696190476190477,"a95":0.99,"info":"02/12/2013 at 16:57:24"},{"visible":true,"include":false,"step":"35.0","x":1.6227619047619048,"y":37.58095238095238,"z":9.397238095238096,"a95":0.99,"info":"02/12/2013 at 16:57:24"},{"visible":true,"include":false,"step":"40.0","x":3.3635238095238096,"y":30.052380952380954,"z":-4.967142857142857,"a95":0.99,"info":"02/12/2013 at 16:57:24"},{"visible":true,"include":false,"step":"45.0","x":6.093523809523809,"y":29.06190476190476,"z":-2.3963809523809525,"a95":0.99,"info":"02/12/2013 at 16:57:24"},{"visible":true,"include":false,"step":"50.0","x":10.692380952380953,"y":27.614285714285714,"z":13.751428571428571,"a95":0.99,"info":"02/12/2013 at 16:57:24"},{"visible":true,"include":false,"step":"60.0","x":21.57904761904762,"y":23.302857142857142,"z":-0.3381142857142857,"a95":0.99,"info":"02/12/2013 at 16:57:24"},{"visible":true,"include":false,"step":"70.0","x":62.23238095238096,"y":12.626666666666669,"z":1.1484761904761904,"a95":0.99,"info":"02/12/2013 at 16:57:24"},{"visible":true,"include":false,"step":"80.0","x":138.7238095238095,"y":3.9205714285714284,"z":6.351714285714285,"a95":0.99,"info":"02/12/2013 at 16:57:24"},{"visible":true,"include":false,"step":"90.0","x":46.955238095238094,"y":7.260571428571429,"z":-6.143333333333333,"a95":0.99,"info":"02/12/2013 at 16:57:24"},{"visible":true,"include":false,"step":"100.0","x":77.97238095238096,"y":16.19047619047619,"z":2.9057142857142857,"a95":0.99,"info":"02/12/2013 at 16:57:24"}]},{"version":"v1.1.0","exported":"2016-11-28T13:56:39.401Z","volume":10.5,"added":"2016-11-28T13:51:20.534Z","format":"Utrecht","demagType":"Unknown","strat":"2","patch":1.1,"GEO":[{"dec":54.02470902158916,"inc":-15.29804059803057,"MAD":4.496709756381135,"cm":[-3.552713678800501e-15,-1.7763568394002505e-15,0],"intensity":199.58790854227914,"type":"GC","origin":false,"forced":true,"remark":"","nSteps":4,"minStep":"8.0","maxStep":"20.0","steps":["8.0","12.0","16.0","20.0"],"group":"None","version":"v1.1.0"}],"TECT":[{"dec":33.6579130517876,"inc":-32.74457676737397,"MAD":4.496709756381336,"cm":[-1.199040866595169e-14,0,0],"intensity":199.58790854227914,"type":"GC","origin":false,"forced":true,"remark":"","nSteps":4,"minStep":"8.0","maxStep":"20.0","steps":["8.0","12.0","16.0","20.0"],"group":"None","version":"v1.1.0"}],"interpreted":true,"name":"BU2.12A","coreAzi":336,"coreDip":67,"bedStrike":23,"bedDip":46,"data":[{"visible":true,"include":false,"step":"0.0","x":-42.203809523809525,"y":62.81428571428571,"z":265.48571428571427,"a95":0.99,"info":"02/12/2013 at 16:57:24"},{"visible":true,"include":false,"step":"4.0","x":-41.05809523809524,"y":50.72666666666667,"z":210.1142857142857,"a95":0.99,"info":"02/12/2013 at 16:57:24"},{"visible":true,"include":true,"step":"8.0","x":-45.724761904761905,"y":37.45333333333333,"z":137.88571428571427,"a95":0.99,"info":"02/12/2013 at 16:57:24"},{"visible":true,"include":true,"step":"12.0","x":-45.32190476190476,"y":30.244761904761905,"z":84.16095238095238,"a95":0.99,"info":"02/12/2013 at 16:57:24"},{"visible":true,"include":true,"step":"16.0","x":-52.06,"y":21.343809523809526,"z":46.798095238095236,"a95":0.99,"info":"02/12/2013 at 16:57:24"},{"visible":true,"include":true,"step":"20.0","x":-47.33809523809524,"y":21.117142857142856,"z":28.68,"a95":0.99,"info":"02/12/2013 at 16:57:24"},{"visible":true,"include":false,"step":"25.0","x":-16.89047619047619,"y":16.614285714285714,"z":6.211333333333333,"a95":0.99,"info":"02/12/2013 at 16:57:24"},{"visible":true,"include":false,"step":"30.0","x":-14.64,"y":25.85333333333333,"z":7.88552380952381,"a95":0.99,"info":"02/12/2013 at 16:57:24"},{"visible":true,"include":false,"step":"35.0","x":-7.045904761904762,"y":19.12761904761905,"z":-0.619552380952381,"a95":0.99,"info":"02/12/2013 at 16:57:24"},{"visible":true,"include":false,"step":"40.0","x":-15.266666666666667,"y":13.358095238095236,"z":5.1899999999999995,"a95":0.99,"info":"02/12/2013 at 16:57:24"},{"visible":true,"include":false,"step":"45.0","x":-1.458,"y":20.216190476190476,"z":1.842952380952381,"a95":0.99,"info":"02/12/2013 at 16:57:24"},{"visible":true,"include":false,"step":"50.0","x":0.40523809523809523,"y":18.853333333333335,"z":-3.483142857142857,"a95":0.99,"info":"02/12/2013 at 16:57:24"},{"visible":true,"include":false,"step":"60.0","x":0.589352380952381,"y":26.206666666666667,"z":-0.2908857142857143,"a95":0.99,"info":"02/12/2013 at 16:57:24"},{"visible":true,"include":false,"step":"70.0","x":46.71714285714285,"y":0.8218285714285715,"z":5.509904761904762,"a95":0.99,"info":"02/12/2013 at 16:57:24"},{"visible":true,"include":false,"step":"80.0","x":39.56285714285715,"y":22.073333333333334,"z":-7.322571428571429,"a95":0.99,"info":"02/12/2013 at 16:57:24"},{"visible":true,"include":false,"step":"90.0","x":45.64,"y":7.537428571428571,"z":-5.979619047619048,"a95":0.99,"info":"02/12/2013 at 16:57:24"},{"visible":true,"include":false,"step":"100.0","x":32.54380952380952,"y":36.764761904761905,"z":15.841904761904763,"a95":0.99,"info":"02/12/2013 at 16:57:24"}]},{"version":"v1.1.0","exported":"2016-11-28T13:56:39.401Z","volume":10.5,"added":"2016-11-28T13:51:20.534Z","format":"Utrecht","demagType":"Unknown","strat":"2","patch":1.1,"GEO":[],"TECT":[],"interpreted":false,"name":"BU2.12B","coreAzi":336,"coreDip":67,"bedStrike":23,"bedDip":46,"data":[{"visible":true,"include":false,"step":"0.0","x":-11.95142857142857,"y":52.320952380952384,"z":83.6247619047619,"a95":0.99,"info":"30/09/2014 at 13:17:05"},{"visible":true,"include":false,"step":"10.0","x":-27.162857142857142,"y":35.96190476190476,"z":41.92761904761905,"a95":0.99,"info":"30/09/2014 at 13:17:05"},{"visible":true,"include":false,"step":"15.0","x":-17.336190476190477,"y":21.882857142857144,"z":30.155238095238094,"a95":0.99,"info":"30/09/2014 at 13:17:05"},{"visible":true,"include":false,"step":"20.0","x":-19.88857142857143,"y":18.710476190476193,"z":22.104761904761904,"a95":0.99,"info":"30/09/2014 at 13:17:05"},{"visible":true,"include":false,"step":"25.0","x":-15.730476190476189,"y":11.662857142857142,"z":22.357142857142858,"a95":0.99,"info":"30/09/2014 at 13:17:05"},{"visible":true,"include":false,"step":"30.0","x":-12.872380952380952,"y":16.655238095238094,"z":1.7818095238095237,"a95":0.99,"info":"30/09/2014 at 13:17:05"},{"visible":true,"include":false,"step":"35.0","x":-13.09047619047619,"y":13.557142857142857,"z":9.020666666666667,"a95":0.99,"info":"30/09/2014 at 13:17:05"},{"visible":true,"include":false,"step":"40.0","x":-6.583333333333333,"y":5.643809523809524,"z":3.269619047619048,"a95":0.99,"info":"30/09/2014 at 13:17:05"},{"visible":true,"include":false,"step":"45.0","x":-2.241142857142857,"y":12.424761904761905,"z":-6.613047619047618,"a95":0.99,"info":"30/09/2014 at 13:17:05"},{"visible":true,"include":false,"step":"50.0","x":-5.335047619047619,"y":4.975047619047619,"z":9.27,"a95":0.99,"info":"30/09/2014 at 13:17:05"},{"visible":true,"include":false,"step":"60.0","x":14.096190476190475,"y":21.886666666666667,"z":8.715333333333334,"a95":0.99,"info":"30/09/2014 at 13:17:05"},{"visible":true,"include":false,"step":"70.0","x":9.923809523809524,"y":10.162857142857142,"z":5.90152380952381,"a95":0.99,"info":"30/09/2014 at 13:17:05"},{"visible":true,"include":false,"step":"80.0","x":-4.970380952380952,"y":5.2112380952380954,"z":4.849428571428571,"a95":0.99,"info":"30/09/2014 at 13:17:05"},{"visible":true,"include":false,"step":"90.0","x":23.364761904761906,"y":13.747619047619047,"z":-0.5049619047619048,"a95":0.99,"info":"30/09/2014 at 13:17:05"}]},{"version":"v1.1.0","exported":"2016-11-28T13:56:39.401Z","volume":10.5,"added":"2016-11-28T13:51:20.534Z","format":"Utrecht","demagType":"Unknown","strat":"3","patch":1.1,"GEO":[],"TECT":[],"interpreted":false,"name":"BU2.13B","coreAzi":347,"coreDip":62,"bedStrike":23,"bedDip":46,"data":[{"visible":true,"include":false,"step":"0.0","x":-123.25714285714287,"y":123.15238095238094,"z":121.57142857142857,"a95":0.99,"info":"02/12/2013 at 16:57:24"},{"visible":true,"include":false,"step":"4.0","x":-80.73142857142857,"y":100.01904761904763,"z":106.34285714285713,"a95":0.99,"info":"02/12/2013 at 16:57:24"},{"visible":true,"include":false,"step":"8.0","x":-46.80761904761905,"y":79.49428571428572,"z":77.54285714285714,"a95":0.99,"info":"02/12/2013 at 16:57:24"},{"visible":true,"include":false,"step":"12.0","x":-40.406666666666666,"y":65.34571428571428,"z":48.27428571428571,"a95":0.99,"info":"02/12/2013 at 16:57:24"},{"visible":true,"include":false,"step":"16.0","x":-35.27904761904762,"y":52.986666666666665,"z":34.62190476190476,"a95":0.99,"info":"02/12/2013 at 16:57:24"},{"visible":true,"include":false,"step":"20.0","x":-33.72285714285714,"y":39.09238095238096,"z":11.461904761904762,"a95":0.99,"info":"02/12/2013 at 16:57:24"},{"visible":true,"include":false,"step":"25.0","x":-19.163809523809523,"y":22.845714285714287,"z":14.777142857142858,"a95":0.99,"info":"02/12/2013 at 16:57:24"},{"visible":true,"include":false,"step":"30.0","x":-28.31047619047619,"y":31.08857142857143,"z":2.3421904761904764,"a95":0.99,"info":"02/12/2013 at 16:57:24"},{"visible":true,"include":false,"step":"35.0","x":-8.491523809523809,"y":33.23428571428571,"z":5.796952380952381,"a95":0.99,"info":"02/12/2013 at 16:57:24"},{"visible":true,"include":false,"step":"40.0","x":-21.719047619047622,"y":22.37333333333333,"z":0.4098857142857143,"a95":0.99,"info":"02/12/2013 at 16:57:24"},{"visible":true,"include":false,"step":"45.0","x":1.8843809523809525,"y":17.862857142857145,"z":7.538571428571428,"a95":0.99,"info":"02/12/2013 at 16:57:24"},{"visible":true,"include":false,"step":"50.0","x":6.371904761904762,"y":9.742857142857142,"z":6.703714285714286,"a95":0.99,"info":"02/12/2013 at 16:57:24"},{"visible":true,"include":false,"step":"60.0","x":7.175333333333333,"y":26.47142857142857,"z":0.23800000000000002,"a95":0.99,"info":"02/12/2013 at 16:57:24"},{"visible":true,"include":false,"step":"70.0","x":37.417142857142856,"y":8.014095238095237,"z":8.284666666666666,"a95":0.99,"info":"02/12/2013 at 16:57:24"},{"visible":true,"include":false,"step":"80.0","x":10.166666666666666,"y":1.2275238095238095,"z":-2.194857142857143,"a95":0.99,"info":"02/12/2013 at 16:57:24"},{"visible":true,"include":false,"step":"90.0","x":43.76285714285714,"y":3.5087619047619047,"z":-11.737142857142857,"a95":0.99,"info":"02/12/2013 at 16:57:24"},{"visible":true,"include":false,"step":"100.0","x":48.808571428571426,"y":18.30952380952381,"z":2.359238095238095,"a95":0.99,"info":"02/12/2013 at 16:57:24"}]},{"version":"v1.1.0","exported":"2016-11-28T13:56:39.401Z","volume":10.5,"added":"2016-11-28T13:51:20.535Z","format":"Utrecht","demagType":"Unknown","strat":"4","patch":1.1,"GEO":[{"dec":62.49806617001025,"inc":-36.00152780680921,"MAD":8.70539627073333,"cm":[3.6637359812630166e-15,-5.329070518200751e-15,0],"intensity":433.2953725350842,"type":"GC","origin":false,"forced":true,"remark":"","nSteps":7,"minStep":"4.0","maxStep":"30.0","steps":["4.0","8.0","12.0","16.0","20.0","25.0","30.0"],"group":"None","version":"v1.1.0"}],"TECT":[{"dec":17.83048170293165,"inc":-49.69183434834804,"MAD":8.705396270732969,"cm":[2.3314683517128287e-14,-4.440892098500626e-15,-8.881784197001252e-16],"intensity":433.2953725350842,"type":"GC","origin":false,"forced":true,"remark":"","nSteps":7,"minStep":"4.0","maxStep":"30.0","steps":["4.0","8.0","12.0","16.0","20.0","25.0","30.0"],"group":"None","version":"v1.1.0"}],"interpreted":true,"name":"BU2.14B","coreAzi":17,"coreDip":38,"bedStrike":25,"bedDip":46,"data":[{"visible":true,"include":false,"step":"0.0","x":-122.98095238095237,"y":109.9047619047619,"z":449.4,"a95":0.99,"info":"02/12/2013 at 16:57:24"},{"visible":true,"include":true,"step":"4.0","x":-98.81904761904761,"y":80.28380952380952,"z":347.84761904761905,"a95":0.99,"info":"02/12/2013 at 16:57:24"},{"visible":true,"include":true,"step":"8.0","x":-70.39142857142858,"y":74.65809523809523,"z":239.25714285714284,"a95":0.99,"info":"02/12/2013 at 16:57:24"},{"visible":true,"include":true,"step":"12.0","x":-60.45142857142857,"y":60.925714285714285,"z":161.6095238095238,"a95":0.99,"info":"02/12/2013 at 16:57:24"},{"visible":true,"include":true,"step":"16.0","x":-56.421904761904756,"y":67.95238095238095,"z":113.22857142857144,"a95":0.99,"info":"02/12/2013 at 16:57:24"},{"visible":true,"include":true,"step":"20.0","x":-51.51238095238095,"y":52.28666666666667,"z":79.19904761904762,"a95":0.99,"info":"02/12/2013 at 16:57:24"},{"visible":true,"include":true,"step":"25.0","x":-37.579047619047614,"y":53.8752380952381,"z":60.741904761904756,"a95":0.99,"info":"02/12/2013 at 16:57:24"},{"visible":true,"include":true,"step":"30.0","x":-46.12,"y":50.03333333333334,"z":39.13428571428572,"a95":0.99,"info":"02/12/2013 at 16:57:24"},{"visible":true,"include":false,"step":"35.0","x":-25.365714285714283,"y":68.5657142857143,"z":10.332380952380952,"a95":0.99,"info":"02/12/2013 at 16:57:24"},{"visible":true,"include":false,"step":"40.0","x":-36.62285714285714,"y":61.20761904761904,"z":20.86952380952381,"a95":0.99,"info":"02/12/2013 at 16:57:24"},{"visible":true,"include":false,"step":"45.0","x":-9.369809523809524,"y":41.670476190476194,"z":2.886857142857143,"a95":0.99,"info":"02/12/2013 at 16:57:24"},{"visible":true,"include":false,"step":"50.0","x":-24.90952380952381,"y":24.277142857142856,"z":11.05904761904762,"a95":0.99,"info":"02/12/2013 at 16:57:24"},{"visible":true,"include":false,"step":"60.0","x":-18.896190476190476,"y":27.016190476190477,"z":7.92952380952381,"a95":0.99,"info":"02/12/2013 at 16:57:24"},{"visible":true,"include":false,"step":"70.0","x":-10.921904761904763,"y":30.972380952380952,"z":-13.794285714285715,"a95":0.99,"info":"02/12/2013 at 16:57:24"},{"visible":true,"include":false,"step":"80.0","x":-0.08104761904761905,"y":1.0917142857142856,"z":-35.16952380952381,"a95":0.99,"info":"02/12/2013 at 16:57:24"},{"visible":true,"include":false,"step":"90.0","x":48.25238095238095,"y":19.925714285714285,"z":-15.631428571428572,"a95":0.99,"info":"02/12/2013 at 16:57:24"},{"visible":true,"include":false,"step":"100.0","x":44.88666666666667,"y":19.45809523809524,"z":-21.555238095238096,"a95":0.99,"info":"02/12/2013 at 16:57:24"}]},{"version":"v1.1.0","exported":"2016-11-28T13:56:39.401Z","volume":10.5,"added":"2016-11-28T13:51:20.535Z","format":"Utrecht","demagType":"Unknown","strat":"5","patch":1.1,"GEO":[],"TECT":[],"interpreted":false,"name":"BU2.15B","coreAzi":20,"coreDip":13,"bedStrike":30,"bedDip":41,"data":[{"visible":true,"include":false,"step":"0.0","x":-153.6,"y":41.42952380952381,"z":145.13333333333335,"a95":0.99,"info":"02/12/2013 at 16:57:24"},{"visible":true,"include":false,"step":"4.0","x":-127.37142857142858,"y":22.783809523809524,"z":120.5904761904762,"a95":0.99,"info":"02/12/2013 at 16:57:24"},{"visible":true,"include":false,"step":"8.0","x":-87.89428571428572,"y":11.560952380952381,"z":85.00190476190475,"a95":0.99,"info":"02/12/2013 at 16:57:24"},{"visible":true,"include":false,"step":"12.0","x":-63.75047619047619,"y":5.244952380952381,"z":53.52761904761904,"a95":0.99,"info":"02/12/2013 at 16:57:24"},{"visible":true,"include":false,"step":"16.0","x":-46.72952380952381,"y":1.2465714285714287,"z":37.92190476190476,"a95":0.99,"info":"02/12/2013 at 16:57:24"},{"visible":true,"include":false,"step":"20.0","x":-38.294285714285714,"y":12.747619047619047,"z":25.402857142857144,"a95":0.99,"info":"02/12/2013 at 16:57:24"},{"visible":true,"include":false,"step":"25.0","x":-21.623809523809523,"y":-1.384095238095238,"z":13.74,"a95":0.99,"info":"02/12/2013 at 16:57:24"},{"visible":true,"include":false,"step":"30.0","x":-14.970476190476191,"y":5.673238095238095,"z":2.5153333333333334,"a95":0.99,"info":"02/12/2013 at 16:57:24"},{"visible":true,"include":false,"step":"35.0","x":-13.340952380952382,"y":10.77142857142857,"z":8.62847619047619,"a95":0.99,"info":"02/12/2013 at 16:57:24"},{"visible":true,"include":false,"step":"40.0","x":-18.187619047619048,"y":8.388666666666667,"z":-0.11207619047619048,"a95":0.99,"info":"02/12/2013 at 16:57:24"},{"visible":true,"include":false,"step":"45.0","x":-11.371428571428572,"y":0.9879047619047618,"z":1.7484761904761907,"a95":0.99,"info":"02/12/2013 at 16:57:24"},{"visible":true,"include":false,"step":"50.0","x":-11.140952380952381,"y":4.8729523809523805,"z":5.668571428571429,"a95":0.99,"info":"02/12/2013 at 16:57:24"},{"visible":true,"include":false,"step":"60.0","x":-15.22857142857143,"y":-0.8252857142857143,"z":-1.3845714285714286,"a95":0.99,"info":"02/12/2013 at 16:57:24"},{"visible":true,"include":false,"step":"70.0","x":-10.421904761904763,"y":-9.64,"z":-10.441904761904762,"a95":0.99,"info":"02/12/2013 at 16:57:24"},{"visible":true,"include":false,"step":"80.0","x":-22.5,"y":-16.64761904761905,"z":-8.93952380952381,"a95":0.99,"info":"02/12/2013 at 16:57:24"},{"visible":true,"include":false,"step":"90.0","x":-11.812380952380952,"y":-33.83047619047619,"z":-12.480952380952383,"a95":0.99,"info":"02/12/2013 at 16:57:24"},{"visible":true,"include":false,"step":"100.0","x":13.278095238095236,"y":-26.753333333333337,"z":0.6623714285714286,"a95":0.99,"info":"02/12/2013 at 16:57:24"}]},{"version":"v1.1.0","exported":"2016-11-28T13:56:39.401Z","volume":10.5,"added":"2016-11-28T13:51:20.535Z","format":"Utrecht","demagType":"Unknown","strat":"3","patch":1.1,"GEO":[],"TECT":[],"interpreted":false,"name":"BU2.16A","coreAzi":27,"coreDip":46,"bedStrike":13,"bedDip":40,"data":[{"visible":true,"include":false,"step":"0.0","x":-57.44761904761905,"y":97.95238095238095,"z":14.21238095238095,"a95":0.99,"info":"30/09/2014 at 13:17:05"},{"visible":true,"include":true,"step":"10.0","x":-54.1552380952381,"y":89.1152380952381,"z":-38.28380952380952,"a95":0.99,"info":"30/09/2014 at 13:17:05"},{"visible":true,"include":true,"step":"15.0","x":-42.444761904761904,"y":79.11047619047619,"z":-52.03333333333334,"a95":0.99,"info":"30/09/2014 at 13:17:05"},{"visible":true,"include":true,"step":"20.0","x":-43.54857142857143,"y":77.01904761904763,"z":-48.08952380952381,"a95":0.99,"info":"30/09/2014 at 13:17:05"},{"visible":true,"include":true,"step":"25.0","x":-41.97428571428571,"y":64.73809523809524,"z":-46.61619047619048,"a95":0.99,"info":"30/09/2014 at 13:17:05"},{"visible":true,"include":true,"step":"30.0","x":-42.245714285714286,"y":59.859047619047615,"z":-40.275238095238095,"a95":0.99,"info":"30/09/2014 at 13:17:05"},{"visible":true,"include":true,"step":"35.0","x":-33.82285714285714,"y":48.925714285714285,"z":-26.229523809523812,"a95":0.99,"info":"30/09/2014 at 13:17:05"},{"visible":true,"include":true,"step":"40.0","x":-28.241904761904763,"y":48.39047619047619,"z":-32.23238095238095,"a95":0.99,"info":"30/09/2014 at 13:17:05"},{"visible":true,"include":false,"step":"45.0","x":-19.155238095238094,"y":32.320952380952384,"z":28.356190476190477,"a95":0.99,"info":"30/09/2014 at 13:17:05"},{"visible":true,"include":false,"step":"50.0","x":-17.722857142857144,"y":32.201904761904764,"z":-12.176190476190476,"a95":0.99,"info":"30/09/2014 at 13:17:05"},{"visible":true,"include":false,"step":"60.0","x":-3.1053333333333333,"y":31.28,"z":-25.046666666666667,"a95":0.99,"info":"30/09/2014 at 13:17:05"},{"visible":true,"include":false,"step":"70.0","x":-3.932571428571429,"y":13.298095238095238,"z":-16.644761904761907,"a95":0.99,"info":"30/09/2014 at 13:17:05"},{"visible":true,"include":false,"step":"80.0","x":-13.187619047619048,"y":5.356571428571429,"z":-13.630476190476191,"a95":0.99,"info":"30/09/2014 at 13:17:05"},{"visible":true,"include":false,"step":"90.0","x":-20.27904761904762,"y":43.044761904761906,"z":1.8945714285714286,"a95":0.99,"info":"30/09/2014 at 13:17:05"}]},{"version":"v1.1.0","exported":"2016-11-28T13:56:39.401Z","volume":10.5,"added":"2016-11-28T13:51:20.535Z","format":"Utrecht","demagType":"Unknown","strat":"6","patch":1.1,"GEO":[{"dec":72.15653166565454,"inc":-15.76618509470957,"MAD":12.460063997706634,"cm":[-8.881784197001252e-15,-1.0880185641326534e-14,0],"intensity":208.29264582495918,"type":"GC","origin":false,"forced":true,"remark":"","nSteps":7,"minStep":"8.0","maxStep":"35.0","steps":["8.0","12.0","16.0","20.0","25.0","30.0","35.0"],"group":"None","version":"v1.1.0"}],"TECT":[{"dec":55.887870169571954,"inc":-47.6684277217265,"MAD":12.460063997706584,"cm":[-1.1546319456101628e-14,-1.0658141036401503e-14,7.549516567451064e-15],"intensity":208.29264582495918,"type":"GC","origin":false,"forced":true,"remark":"","nSteps":7,"minStep":"8.0","maxStep":"35.0","steps":["8.0","12.0","16.0","20.0","25.0","30.0","35.0"],"group":"None","version":"v1.1.0"}],"interpreted":true,"name":"BU2.16B","coreAzi":27,"coreDip":46,"bedStrike":13,"bedDip":40,"data":[{"visible":true,"include":false,"step":"0.0","x":-132.86666666666665,"y":99.97142857142858,"z":79.77333333333334,"a95":0.99,"info":"02/12/2013 at 16:57:24"},{"visible":true,"include":false,"step":"4.0","x":-117.86666666666666,"y":89.10761904761905,"z":54.78000000000001,"a95":0.99,"info":"02/12/2013 at 16:57:24"},{"visible":true,"include":true,"step":"8.0","x":-99.02857142857142,"y":91.58857142857143,"z":14.727619047619047,"a95":0.99,"info":"02/12/2013 at 16:57:24"},{"visible":true,"include":true,"step":"12.0","x":-88.6152380952381,"y":98.54285714285714,"z":-13.940000000000001,"a95":0.99,"info":"02/12/2013 at 16:57:24"},{"visible":true,"include":true,"step":"16.0","x":-80.24761904761905,"y":91.52380952380952,"z":-30.93809523809524,"a95":0.99,"info":"02/12/2013 at 16:57:24"},{"visible":true,"include":true,"step":"20.0","x":-82.09809523809524,"y":86.49904761904762,"z":-40.41238095238095,"a95":0.99,"info":"02/12/2013 at 16:57:24"},{"visible":true,"include":true,"step":"25.0","x":-52.915238095238095,"y":77.16952380952381,"z":-38.07238095238095,"a95":0.99,"info":"02/12/2013 at 16:57:24"},{"visible":true,"include":true,"step":"30.0","x":-53.417142857142856,"y":72.67142857142856,"z":-34.103809523809524,"a95":0.99,"info":"02/12/2013 at 16:57:24"},{"visible":true,"include":true,"step":"35.0","x":-49.18095238095238,"y":53.91047619047619,"z":-30.53238095238095,"a95":0.99,"info":"02/12/2013 at 16:57:24"},{"visible":true,"include":false,"step":"40.0","x":-43.02571428571429,"y":57.203809523809525,"z":-30.74952380952381,"a95":0.99,"info":"02/12/2013 at 16:57:24"},{"visible":true,"include":false,"step":"45.0","x":-51.421904761904756,"y":58.60857142857143,"z":-36.359047619047615,"a95":0.99,"info":"02/12/2013 at 16:57:24"},{"visible":true,"include":false,"step":"50.0","x":-32.54380952380952,"y":40.77142857142857,"z":-19.714285714285715,"a95":0.99,"info":"02/12/2013 at 16:57:24"},{"visible":true,"include":false,"step":"60.0","x":-24.824761904761907,"y":31.758095238095237,"z":-9.083619047619047,"a95":0.99,"info":"02/12/2013 at 16:57:24"},{"visible":true,"include":false,"step":"70.0","x":0.1955714285714286,"y":24.273333333333333,"z":-9.593333333333334,"a95":0.99,"info":"02/12/2013 at 16:57:24"},{"visible":true,"include":false,"step":"80.0","x":-15.154285714285715,"y":8.909428571428572,"z":9.147904761904762,"a95":0.99,"info":"02/12/2013 at 16:57:24"},{"visible":true,"include":false,"step":"90.0","x":-4.572190476190476,"y":2.634190476190476,"z":4.960190476190476,"a95":0.99,"info":"02/12/2013 at 16:57:24"},{"visible":true,"include":false,"step":"100.0","x":25.046666666666667,"y":7.414571428571428,"z":-3.9515238095238097,"a95":0.99,"info":"02/12/2013 at 16:57:24"}]},{"version":"v1.1.0","exported":"2016-11-28T13:56:39.401Z","volume":10.5,"added":"2016-11-28T13:51:20.535Z","format":"Utrecht","demagType":"Unknown","strat":"7","patch":1.1,"GEO":[{"dec":72.76425691546746,"inc":-16.370710366463,"MAD":6.790525930541468,"cm":[5.329070518200751e-15,7.993605777301127e-15,0],"intensity":314.9093105194378,"type":"GC","origin":false,"forced":true,"remark":"","nSteps":4,"minStep":"8.0","maxStep":"20.0","steps":["8.0","12.0","16.0","20.0"],"group":"None","version":"v1.1.0"}],"TECT":[{"dec":56.2080603308292,"inc":-48.48127232842965,"MAD":6.790525930541074,"cm":[-1.9539925233402755e-14,-2.6645352591003757e-14,-2.220446049250313e-15],"intensity":314.9093105194378,"type":"GC","origin":false,"forced":true,"remark":"","nSteps":4,"minStep":"8.0","maxStep":"20.0","steps":["8.0","12.0","16.0","20.0"],"group":"None","version":"v1.1.0"}],"interpreted":true,"name":"BU2.17B","coreAzi":24,"coreDip":67,"bedStrike":13,"bedDip":40,"data":[{"visible":true,"include":false,"step":"0.0","x":-117.1047619047619,"y":120.21904761904761,"z":234.44761904761904,"a95":0.99,"info":"02/12/2013 at 16:57:24"},{"visible":true,"include":false,"step":"4.0","x":-109.24761904761904,"y":110.97142857142858,"z":180.78095238095239,"a95":0.99,"info":"02/12/2013 at 16:57:24"},{"visible":true,"include":true,"step":"8.0","x":-114.05714285714285,"y":108.42857142857143,"z":91.79809523809524,"a95":0.99,"info":"02/12/2013 at 16:57:24"},{"visible":true,"include":true,"step":"12.0","x":-107.22857142857144,"y":111.29523809523809,"z":45.10666666666667,"a95":0.99,"info":"02/12/2013 at 16:57:24"},{"visible":true,"include":true,"step":"16.0","x":-108.75238095238096,"y":98.9047619047619,"z":19.224761904761905,"a95":0.99,"info":"02/12/2013 at 16:57:24"},{"visible":true,"include":true,"step":"20.0","x":-102.61904761904762,"y":99.04761904761905,"z":3.977333333333333,"a95":0.99,"info":"02/12/2013 at 16:57:24"},{"visible":false,"include":false,"step":"25.0","x":-87.02095238095238,"y":79.12666666666667,"z":0.16937142857142856,"a95":0.99,"info":"02/12/2013 at 16:57:24"},{"visible":true,"include":false,"step":"30.0","x":-78.32285714285715,"y":72.64285714285714,"z":0.7221809523809524,"a95":0.99,"info":"02/12/2013 at 16:57:24"},{"visible":true,"include":false,"step":"35.0","x":-62.98761904761905,"y":71.06952380952382,"z":4.325523809523809,"a95":0.99,"info":"02/12/2013 at 16:57:24"},{"visible":true,"include":false,"step":"40.0","x":-77.64,"y":55.34285714285714,"z":1.7176190476190476,"a95":0.99,"info":"02/12/2013 at 16:57:24"},{"visible":true,"include":false,"step":"45.0","x":-45.51047619047619,"y":53.724761904761905,"z":-1.6956190476190476,"a95":0.99,"info":"02/12/2013 at 16:57:24"},{"visible":true,"include":false,"step":"50.0","x":-46.287619047619046,"y":38.33238095238095,"z":0.9727619047619048,"a95":0.99,"info":"02/12/2013 at 16:57:24"},{"visible":true,"include":false,"step":"60.0","x":-33.06476190476191,"y":35.23809523809524,"z":1.9625714285714284,"a95":0.99,"info":"02/12/2013 at 16:57:24"},{"visible":true,"include":false,"step":"70.0","x":17.75809523809524,"y":46.32857142857143,"z":-1.4865714285714287,"a95":0.99,"info":"02/12/2013 at 16:57:24"},{"visible":true,"include":false,"step":"80.0","x":76.3295238095238,"y":2.770857142857143,"z":52.54857142857143,"a95":0.99,"info":"02/12/2013 at 16:57:24"},{"visible":true,"include":false,"step":"90.0","x":-9.303714285714285,"y":-0.5692190476190476,"z":3.265238095238095,"a95":0.99,"info":"02/12/2013 at 16:57:24"},{"visible":true,"include":false,"step":"100.0","x":26.46857142857143,"y":25.364761904761902,"z":16.48095238095238,"a95":0.99,"info":"02/12/2013 at 16:57:24"}]},{"version":"v1.1.0","exported":"2016-11-28T13:56:39.401Z","volume":10.5,"added":"2016-11-28T13:51:20.535Z","format":"Utrecht","demagType":"Unknown","strat":"8","patch":1.1,"GEO":[{"dec":53.41162599153188,"inc":-13.34117562617275,"MAD":4.507339802351431,"cm":[-8.881784197001252e-15,-1.0658141036401503e-14,0],"intensity":230.06105477713967,"type":"GC","origin":false,"forced":true,"remark":"","nSteps":4,"minStep":"8.0","maxStep":"20.0","steps":["8.0","12.0","16.0","20.0"],"group":"None","version":"v1.1.0"}],"TECT":[{"dec":37.32389058643946,"inc":-35.60693314006211,"MAD":4.507339802351503,"cm":[-1.5987211554602254e-14,-1.5987211554602254e-14,7.105427357601002e-15],"intensity":230.0610547771396,"type":"GC","origin":false,"forced":true,"remark":"","nSteps":4,"minStep":"8.0","maxStep":"20.0","steps":["8.0","12.0","16.0","20.0"],"group":"None","version":"v1.1.0"}],"interpreted":true,"name":"BU2.18B","coreAzi":324,"coreDip":63,"bedStrike":13,"bedDip":40,"data":[{"visible":true,"include":false,"step":"0.0","x":-193.98095238095237,"y":45.145714285714284,"z":154.9904761904762,"a95":0.99,"info":"02/12/2013 at 16:57:24"},{"visible":true,"include":false,"step":"4.0","x":-156.57142857142858,"y":46.00857142857143,"z":133.0285714285714,"a95":0.99,"info":"02/12/2013 at 16:57:24"},{"visible":true,"include":true,"step":"8.0","x":-114.15238095238094,"y":31.60380952380952,"z":78.49619047619048,"a95":0.99,"info":"02/12/2013 at 16:57:24"},{"visible":true,"include":true,"step":"12.0","x":-128.6,"y":16.698095238095238,"z":18.15047619047619,"a95":0.99,"info":"02/12/2013 at 16:57:24"},{"visible":true,"include":true,"step":"16.0","x":-104.93333333333332,"y":9.847619047619048,"z":5.4557142857142855,"a95":0.99,"info":"02/12/2013 at 16:57:24"},{"visible":true,"include":true,"step":"20.0","x":-106.71428571428571,"y":10.131428571428572,"z":-29.463809523809523,"a95":0.99,"info":"02/12/2013 at 16:57:24"},{"visible":true,"include":false,"step":"25.0","x":-86.10666666666667,"y":23.198095238095238,"z":-49.26952380952381,"a95":0.99,"info":"02/12/2013 at 16:57:24"},{"visible":true,"include":false,"step":"30.0","x":-68.8495238095238,"y":-20.260952380952382,"z":-36.45809523809524,"a95":0.99,"info":"02/12/2013 at 16:57:24"},{"visible":true,"include":false,"step":"35.0","x":-62.13333333333333,"y":-30.830476190476194,"z":-45.5,"a95":0.99,"info":"02/12/2013 at 16:57:24"},{"visible":true,"include":false,"step":"40.0","x":-77.1152380952381,"y":18.235238095238095,"z":-50.96857142857142,"a95":0.99,"info":"02/12/2013 at 16:57:24"},{"visible":true,"include":false,"step":"45.0","x":-6.307619047619048,"y":15.557142857142857,"z":-38.70952380952381,"a95":0.99,"info":"02/12/2013 at 16:57:24"},{"visible":true,"include":false,"step":"50.0","x":-35.563809523809525,"y":-0.7456952380952381,"z":-34.49142857142857,"a95":0.99,"info":"02/12/2013 at 16:57:24"},{"visible":true,"include":false,"step":"60.0","x":-40.11619047619048,"y":52.32761904761905,"z":-33.97904761904762,"a95":0.99,"info":"02/12/2013 at 16:57:24"},{"visible":true,"include":false,"step":"70.0","x":30.571428571428573,"y":56.82952380952381,"z":-12.096190476190477,"a95":0.99,"info":"02/12/2013 at 16:57:24"},{"visible":true,"include":false,"step":"80.0","x":-93.32285714285715,"y":16.789523809523807,"z":-21.397142857142857,"a95":0.99,"info":"02/12/2013 at 16:57:24"},{"visible":true,"include":false,"step":"90.0","x":23.213333333333335,"y":76.68476190476191,"z":45.19238095238095,"a95":0.99,"info":"02/12/2013 at 16:57:24"},{"visible":true,"include":false,"step":"100.0","x":38.87904761904762,"y":62.444761904761904,"z":29.943809523809527,"a95":0.99,"info":"02/12/2013 at 16:57:24"}]},{"version":"v1.1.0","exported":"2016-11-28T13:56:39.401Z","volume":10.5,"added":"2016-11-28T13:51:20.536Z","format":"Utrecht","demagType":"Unknown","strat":"4","patch":1.1,"GEO":[],"TECT":[],"interpreted":false,"name":"BU2.19A","coreAzi":325,"coreDip":58,"bedStrike":13,"bedDip":40,"data":[{"visible":true,"include":false,"step":"0.0","x":-180.04761904761904,"y":27.523809523809526,"z":124.57142857142857,"a95":0.99,"info":"30/09/2014 at 13:17:05"},{"visible":true,"include":false,"step":"10.0","x":-122.3047619047619,"y":-16.404761904761905,"z":-47.80952380952381,"a95":0.99,"info":"30/09/2014 at 13:17:05"},{"visible":true,"include":false,"step":"15.0","x":-75.20380952380953,"y":-95.45714285714286,"z":-49.51047619047619,"a95":0.99,"info":"30/09/2014 at 13:17:05"},{"visible":true,"include":false,"step":"20.0","x":-79.64952380952381,"y":-57.42380952380953,"z":-92.74285714285713,"a95":0.99,"info":"30/09/2014 at 13:17:05"},{"visible":true,"include":false,"step":"25.0","x":-49.17333333333334,"y":-74.68857142857144,"z":-62.3,"a95":0.99,"info":"30/09/2014 at 13:17:05"},{"visible":true,"include":false,"step":"30.0","x":-52.32190476190476,"y":-59.308571428571426,"z":-71.66666666666667,"a95":0.99,"info":"30/09/2014 at 13:17:05"},{"visible":true,"include":false,"step":"35.0","x":-86.62,"y":-27.36952380952381,"z":-66.14857142857143,"a95":0.99,"info":"30/09/2014 at 13:17:05"},{"visible":true,"include":false,"step":"40.0","x":-57.48761904761905,"y":-1.0372380952380953,"z":-75.3047619047619,"a95":0.99,"info":"30/09/2014 at 13:17:05"},{"visible":true,"include":false,"step":"45.0","x":-25.34190476190476,"y":-95.23619047619047,"z":7.548,"a95":0.99,"info":"30/09/2014 at 13:17:05"},{"visible":true,"include":false,"step":"50.0","x":-15.966666666666667,"y":-3.005238095238095,"z":-35.944761904761904,"a95":0.99,"info":"30/09/2014 at 13:17:05"},{"visible":true,"include":false,"step":"60.0","x":2.6384761904761906,"y":-11.147619047619047,"z":-37.59809523809523,"a95":0.99,"info":"30/09/2014 at 13:17:05"},{"visible":true,"include":false,"step":"70.0","x":8.525809523809524,"y":-32.710476190476186,"z":14.947619047619046,"a95":0.99,"info":"30/09/2014 at 13:17:05"},{"visible":true,"include":false,"step":"80.0","x":37.019999999999996,"y":39.96952380952381,"z":-19.444761904761904,"a95":0.99,"info":"30/09/2014 at 13:17:05"},{"visible":true,"include":false,"step":"90.0","x":40.71142857142858,"y":37.02571428571429,"z":19.503809523809522,"a95":0.99,"info":"30/09/2014 at 13:17:05"}]},{"version":"v1.1.0","exported":"2016-11-28T13:56:39.401Z","volume":10.5,"added":"2016-11-28T13:51:20.536Z","format":"Utrecht","demagType":"Unknown","strat":"1","patch":1.1,"GEO":[{"dec":100.5363408296617,"inc":-35.78536336678422,"MAD":12.198752830397728,"cm":[-3.4416913763379853e-15,1.7763568394002505e-15,0],"intensity":218.32071287614536,"type":"GC","origin":false,"forced":true,"remark":"","nSteps":5,"minStep":"8.0","maxStep":"30.0","steps":["8.0","12.0","16.0","25.0","30.0"],"group":"None","version":"v1.1.0"}],"TECT":[{"dec":94.89892886692814,"inc":-75.67333634476728,"MAD":12.198752830397485,"cm":[-2.7200464103316335e-14,1.0658141036401503e-14,1.3322676295501878e-15],"intensity":218.32071287614534,"type":"GC","origin":false,"forced":true,"remark":"","nSteps":5,"minStep":"8.0","maxStep":"30.0","steps":["8.0","12.0","16.0","25.0","30.0"],"group":"None","version":"v1.1.0"}],"interpreted":true,"name":"BU2.19B","coreAzi":325,"coreDip":58,"bedStrike":13,"bedDip":40,"data":[{"visible":true,"include":false,"step":"0.0","x":-67.63809523809525,"y":207.03809523809525,"z":174.48571428571427,"a95":0.99,"info":"18/01/2014 at 16:35:41"},{"visible":true,"include":false,"step":"4.0","x":-55.07238095238095,"y":159.64761904761903,"z":146.75238095238097,"a95":0.99,"info":"18/01/2014 at 16:35:41"},{"visible":true,"include":true,"step":"8.0","x":-68.02380952380952,"y":128.1809523809524,"z":105.6952380952381,"a95":0.99,"info":"18/01/2014 at 16:35:41"},{"visible":true,"include":true,"step":"12.0","x":-68.73238095238096,"y":91.2647619047619,"z":76.55238095238094,"a95":0.99,"info":"18/01/2014 at 16:35:41"},{"visible":true,"include":true,"step":"16.0","x":-63.7952380952381,"y":54.421904761904756,"z":62.219047619047615,"a95":0.99,"info":"18/01/2014 at 16:35:41"},{"visible":true,"include":false,"step":"20.0","x":-68.22952380952381,"y":53.86,"z":27.44190476190476,"a95":0.99,"info":"18/01/2014 at 16:35:41"},{"visible":true,"include":true,"step":"25.0","x":-54.287619047619046,"y":30.533333333333335,"z":28.816190476190474,"a95":0.99,"info":"18/01/2014 at 16:35:41"},{"visible":true,"include":true,"step":"30.0","x":-34.785714285714285,"y":18.548571428571428,"z":19.062857142857144,"a95":0.99,"info":"18/01/2014 at 16:35:41"},{"visible":true,"include":false,"step":"35.0","x":-51.28000000000001,"y":9.545714285714286,"z":26.139047619047616,"a95":0.99,"info":"18/01/2014 at 16:35:41"},{"visible":true,"include":false,"step":"40.0","x":-59.29428571428572,"y":15.896190476190476,"z":14.355238095238095,"a95":0.99,"info":"18/01/2014 at 16:35:41"},{"visible":true,"include":false,"step":"45.0","x":-33.44190476190476,"y":16.63047619047619,"z":11.521904761904763,"a95":0.99,"info":"18/01/2014 at 16:35:41"},{"visible":true,"include":false,"step":"50.0","x":-31.772380952380953,"y":-7.9778095238095235,"z":14.299047619047618,"a95":0.99,"info":"18/01/2014 at 16:35:41"},{"visible":true,"include":false,"step":"60.0","x":-42.72285714285714,"y":33.404761904761905,"z":-1.8196190476190477,"a95":0.99,"info":"18/01/2014 at 16:35:41"},{"visible":true,"include":false,"step":"70.0","x":13.099047619047619,"y":45.78476190476191,"z":34.23619047619048,"a95":0.99,"info":"18/01/2014 at 16:35:41"},{"visible":true,"include":false,"step":"80.0","x":14.33904761904762,"y":-29.32761904761905,"z":2.5569523809523806,"a95":0.99,"info":"18/01/2014 at 16:35:41"},{"visible":true,"include":false,"step":"90.0","x":-8.346190476190477,"y":5.457809523809524,"z":37.98285714285714,"a95":0.99,"info":"18/01/2014 at 16:35:41"},{"visible":true,"include":false,"step":"100.0","x":37.605714285714285,"y":32.00285714285714,"z":59.30761904761905,"a95":0.99,"info":"18/01/2014 at 16:35:41"}]},{"version":"v1.1.0","exported":"2016-11-28T13:56:39.401Z","volume":10.5,"added":"2016-11-28T13:51:20.536Z","format":"Utrecht","demagType":"Unknown","strat":"5","patch":1.1,"GEO":[],"TECT":[],"interpreted":false,"name":"BU2.20A","coreAzi":333,"coreDip":60,"bedStrike":13,"bedDip":40,"data":[{"visible":true,"include":false,"step":"0.0","x":-155.05714285714285,"y":1.1817142857142857,"z":75.0847619047619,"a95":0.99,"info":"30/09/2014 at 13:17:05"},{"visible":true,"include":false,"step":"10.0","x":-73.30952380952381,"y":-22.454285714285714,"z":-35.45619047619048,"a95":0.99,"info":"30/09/2014 at 13:17:05"},{"visible":true,"include":false,"step":"15.0","x":-85.26285714285714,"y":-25.711428571428574,"z":-60.67809523809524,"a95":0.99,"info":"30/09/2014 at 13:17:05"},{"visible":true,"include":false,"step":"20.0","x":-50.95809523809523,"y":-28.211428571428574,"z":-77.42666666666666,"a95":0.99,"info":"30/09/2014 at 13:17:05"},{"visible":true,"include":false,"step":"25.0","x":-49.561904761904756,"y":-29.11809523809524,"z":-81.37809523809524,"a95":0.99,"info":"30/09/2014 at 13:17:05"},{"visible":true,"include":false,"step":"30.0","x":-30.31047619047619,"y":-29.34,"z":-42.635238095238094,"a95":0.99,"info":"30/09/2014 at 13:17:05"},{"visible":true,"include":false,"step":"35.0","x":-31.84952380952381,"y":-10.881904761904762,"z":-32.735238095238095,"a95":0.99,"info":"30/09/2014 at 13:17:05"},{"visible":true,"include":false,"step":"40.0","x":2.130190476190476,"y":25.460952380952378,"z":-38.703809523809525,"a95":0.99,"info":"30/09/2014 at 13:17:05"},{"visible":true,"include":false,"step":"45.0","x":-18.32,"y":-66.16095238095238,"z":17.628571428571426,"a95":0.99,"info":"30/09/2014 at 13:17:05"},{"visible":true,"include":false,"step":"50.0","x":-20.48952380952381,"y":-26.502857142857142,"z":-0.2707428571428571,"a95":0.99,"info":"30/09/2014 at 13:17:05"},{"visible":true,"include":false,"step":"60.0","x":20.005714285714287,"y":-0.07958761904761905,"z":-5.751714285714286,"a95":0.99,"info":"30/09/2014 at 13:17:05"},{"visible":true,"include":false,"step":"70.0","x":-5.90152380952381,"y":8.582476190476191,"z":12.444761904761904,"a95":0.99,"info":"30/09/2014 at 13:17:05"},{"visible":true,"include":false,"step":"80.0","x":5.1359047619047615,"y":39.94285714285714,"z":-2.978190476190476,"a95":0.99,"info":"30/09/2014 at 13:17:05"},{"visible":true,"include":false,"step":"90.0","x":124.06666666666668,"y":78.53809523809524,"z":-49.32666666666666,"a95":0.99,"info":"30/09/2014 at 13:17:05"}]},{"version":"v1.1.0","exported":"2016-11-28T13:56:39.401Z","volume":10.5,"added":"2016-11-28T13:51:20.538Z","format":"Utrecht","demagType":"Unknown","strat":"2","patch":1.1,"GEO":[{"dec":76.64435984711872,"inc":-34.75617303824548,"MAD":11.488800079955462,"cm":[3.1086244689504383e-15,4.6629367034256575e-15,0],"intensity":152.91641897686293,"type":"GC","origin":false,"forced":true,"remark":"","nSteps":7,"minStep":"4.0","maxStep":"30.0","steps":["4.0","8.0","12.0","16.0","20.0","25.0","30.0"],"group":"None","version":"v1.1.0"}],"TECT":[{"dec":41.43593841302186,"inc":-65.49459879319683,"MAD":11.488800079955533,"cm":[-7.993605777301127e-15,-4.6629367034256575e-15,-3.4416913763379853e-15],"intensity":152.9164189768629,"type":"GC","origin":false,"forced":true,"remark":"","nSteps":7,"minStep":"4.0","maxStep":"30.0","steps":["4.0","8.0","12.0","16.0","20.0","25.0","30.0"],"group":"None","version":"v1.1.0"}],"interpreted":true,"name":"BU2.20B","coreAzi":333,"coreDip":60,"bedStrike":13,"bedDip":40,"data":[{"visible":true,"include":false,"step":"0.0","x":-94.75238095238095,"y":92.36666666666667,"z":48.26190476190476,"a95":0.99,"info":"18/01/2014 at 16:35:41"},{"visible":true,"include":true,"step":"4.0","x":-80.46857142857142,"y":59.76571428571428,"z":57.76761904761904,"a95":0.99,"info":"18/01/2014 at 16:35:41"},{"visible":true,"include":true,"step":"8.0","x":-94.32666666666667,"y":48.13142857142857,"z":38.80285714285714,"a95":0.99,"info":"18/01/2014 at 16:35:41"},{"visible":true,"include":true,"step":"12.0","x":-96.75238095238095,"y":23.623809523809523,"z":27.683809523809526,"a95":0.99,"info":"18/01/2014 at 16:35:41"},{"visible":true,"include":true,"step":"16.0","x":-96.42857142857143,"y":17.82952380952381,"z":18.59714285714286,"a95":0.99,"info":"18/01/2014 at 16:35:41"},{"visible":true,"include":true,"step":"20.0","x":-97.8952380952381,"y":9.183714285714286,"z":-13.229523809523808,"a95":0.99,"info":"18/01/2014 at 16:35:41"},{"visible":true,"include":true,"step":"25.0","x":-66.06285714285714,"y":6.207809523809524,"z":-11.92,"a95":0.99,"info":"18/01/2014 at 16:35:41"},{"visible":true,"include":true,"step":"30.0","x":-52.05047619047619,"y":2.513904761904762,"z":-13.683809523809524,"a95":0.99,"info":"18/01/2014 at 16:35:41"},{"visible":true,"include":false,"step":"35.0","x":-47.55238095238095,"y":15.563809523809523,"z":-17.79047619047619,"a95":0.99,"info":"18/01/2014 at 16:35:41"},{"visible":true,"include":false,"step":"40.0","x":-42.19714285714286,"y":1.3962857142857144,"z":-12.146666666666667,"a95":0.99,"info":"18/01/2014 at 16:35:41"},{"visible":true,"include":false,"step":"45.0","x":-11.002857142857144,"y":0.9654285714285715,"z":9.477142857142857,"a95":0.99,"info":"18/01/2014 at 16:35:41"},{"visible":true,"include":false,"step":"50.0","x":-18.613333333333333,"y":7.713047619047619,"z":2.3158095238095235,"a95":0.99,"info":"18/01/2014 at 16:35:41"},{"visible":true,"include":false,"step":"60.0","x":6.098,"y":24.3,"z":-8.688285714285715,"a95":0.99,"info":"18/01/2014 at 16:35:41"},{"visible":true,"include":false,"step":"70.0","x":-0.1805904761904762,"y":33.88476190476191,"z":-2.004095238095238,"a95":0.99,"info":"18/01/2014 at 16:35:41"},{"visible":true,"include":false,"step":"80.0","x":27.18761904761905,"y":13.977142857142857,"z":0.11018095238095238,"a95":0.99,"info":"18/01/2014 at 16:35:41"},{"visible":true,"include":false,"step":"90.0","x":-9.382190476190477,"y":1.1678095238095239,"z":10.01047619047619,"a95":0.99,"info":"18/01/2014 at 16:35:41"},{"visible":true,"include":false,"step":"100.0","x":35.22095238095238,"y":39.153333333333336,"z":31.077142857142857,"a95":0.99,"info":"18/01/2014 at 16:35:41"}]},{"version":"v1.1.0","exported":"2016-11-28T13:56:39.401Z","volume":10.5,"added":"2016-11-28T13:51:20.538Z","format":"Utrecht","demagType":"Unknown","strat":"6","patch":1.1,"GEO":[],"TECT":[],"interpreted":false,"name":"BU2.20C","coreAzi":333,"coreDip":60,"bedStrike":13,"bedDip":40,"data":[{"visible":true,"include":false,"step":"0.0","x":-81.45238095238095,"y":29.54952380952381,"z":64.95142857142858,"a95":0.99,"info":"30/09/2014 at 13:17:05"},{"visible":true,"include":false,"step":"10.0","x":-57.55047619047619,"y":17.634285714285713,"z":20.615238095238094,"a95":0.99,"info":"30/09/2014 at 13:17:05"},{"visible":true,"include":false,"step":"15.0","x":-40.798095238095236,"y":-3.7293333333333334,"z":13.619047619047619,"a95":0.99,"info":"30/09/2014 at 13:17:05"},{"visible":true,"include":false,"step":"20.0","x":-45.82190476190476,"y":2.0761904761904764,"z":0.37588571428571427,"a95":0.99,"info":"30/09/2014 at 13:17:05"},{"visible":true,"include":false,"step":"25.0","x":-34.37047619047619,"y":-3.924,"z":-6.242761904761905,"a95":0.99,"info":"30/09/2014 at 13:17:05"},{"visible":true,"include":false,"step":"30.0","x":-36.27047619047619,"y":7.15247619047619,"z":-4.735428571428572,"a95":0.99,"info":"30/09/2014 at 13:17:05"},{"visible":true,"include":false,"step":"35.0","x":-36.20952380952381,"y":8.556476190476191,"z":-1.5715238095238095,"a95":0.99,"info":"30/09/2014 at 13:17:05"},{"visible":true,"include":false,"step":"40.0","x":-21.55809523809524,"y":-4.043428571428572,"z":-4.216,"a95":0.99,"info":"30/09/2014 at 13:17:05"},{"visible":true,"include":false,"step":"45.0","x":-18.806666666666665,"y":-6.636,"z":27.77809523809524,"a95":0.99,"info":"30/09/2014 at 13:17:05"},{"visible":true,"include":false,"step":"50.0","x":-10.558095238095238,"y":5.200857142857143,"z":0.8651142857142857,"a95":0.99,"info":"30/09/2014 at 13:17:05"},{"visible":true,"include":false,"step":"60.0","x":-5.045238095238095,"y":10.528571428571428,"z":0.9520000000000001,"a95":0.99,"info":"30/09/2014 at 13:17:05"},{"visible":true,"include":false,"step":"70.0","x":6.057428571428572,"y":9.553333333333333,"z":-2.264761904761905,"a95":0.99,"info":"30/09/2014 at 13:17:05"},{"visible":true,"include":false,"step":"80.0","x":10.563809523809525,"y":17.727619047619047,"z":8.071238095238096,"a95":0.99,"info":"30/09/2014 at 13:17:05"},{"visible":true,"include":false,"step":"90.0","x":5.991333333333333,"y":12.958095238095238,"z":-9.731428571428571,"a95":0.99,"info":"30/09/2014 at 13:17:05"}]},{"version":"v1.1.0","exported":"2016-11-28T13:56:39.401Z","volume":10.5,"added":"2016-11-28T13:51:20.538Z","format":"Utrecht","demagType":"Unknown","strat":"3","patch":1.1,"GEO":[{"dec":66.40901961172267,"inc":-34.19463172233646,"MAD":3.82129927324546,"cm":[1.7763568394002505e-15,4.440892098500626e-16,0],"intensity":281.81138328133375,"type":"GC","origin":false,"forced":true,"remark":"","nSteps":8,"minStep":"4.0","maxStep":"35.0","steps":["4.0","8.0","12.0","16.0","20.0","25.0","30.0","35.0"],"group":"None","version":"v1.1.0"}],"TECT":[{"dec":29.653929211214347,"inc":-59.0265807660038,"MAD":3.8212992732451285,"cm":[-1.7763568394002505e-15,-1.9984014443252818e-14,0],"intensity":281.81138328133375,"type":"GC","origin":false,"forced":true,"remark":"","nSteps":8,"minStep":"4.0","maxStep":"35.0","steps":["4.0","8.0","12.0","16.0","20.0","25.0","30.0","35.0"],"group":"None","version":"v1.1.0"}],"interpreted":true,"name":"BU2.21A","coreAzi":41,"coreDip":31,"bedStrike":13,"bedDip":40,"data":[{"visible":true,"include":false,"step":"0.0","x":-133.4952380952381,"y":101.84761904761906,"z":214.94285714285715,"a95":0.99,"info":"18/01/2014 at 16:35:41"},{"visible":true,"include":true,"step":"4.0","x":-99.85714285714286,"y":96.39047619047619,"z":156.52380952380952,"a95":0.99,"info":"18/01/2014 at 16:35:41"},{"visible":true,"include":true,"step":"8.0","x":-90.8742857142857,"y":131.6,"z":81.59619047619047,"a95":0.99,"info":"18/01/2014 at 16:35:41"},{"visible":true,"include":true,"step":"12.0","x":-70.11238095238095,"y":128.41904761904763,"z":30.972380952380952,"a95":0.99,"info":"18/01/2014 at 16:35:41"},{"visible":true,"include":true,"step":"16.0","x":-54.30761904761905,"y":137.04761904761904,"z":11.501904761904761,"a95":0.99,"info":"18/01/2014 at 16:35:41"},{"visible":true,"include":true,"step":"20.0","x":-56.22666666666667,"y":135.14285714285714,"z":-6.0633333333333335,"a95":0.99,"info":"18/01/2014 at 16:35:41"},{"visible":true,"include":true,"step":"25.0","x":-39.13809523809524,"y":120.44761904761906,"z":-14.19142857142857,"a95":0.99,"info":"18/01/2014 at 16:35:41"},{"visible":true,"include":true,"step":"30.0","x":-33.07238095238095,"y":99.24761904761904,"z":-13.020000000000001,"a95":0.99,"info":"18/01/2014 at 16:35:41"},{"visible":true,"include":true,"step":"35.0","x":-39.28095238095238,"y":103.47619047619048,"z":-14.708571428571428,"a95":0.99,"info":"18/01/2014 at 16:35:41"},{"visible":true,"include":false,"step":"40.0","x":-27.652380952380955,"y":79.84285714285714,"z":-23.121904761904762,"a95":0.99,"info":"18/01/2014 at 16:35:41"},{"visible":true,"include":false,"step":"45.0","x":-26.04285714285714,"y":75.84095238095239,"z":-7.8105714285714285,"a95":0.99,"info":"18/01/2014 at 16:35:41"},{"visible":true,"include":false,"step":"50.0","x":-27.02857142857143,"y":67.54095238095238,"z":-12.047619047619047,"a95":0.99,"info":"18/01/2014 at 16:35:41"},{"visible":true,"include":false,"step":"60.0","x":-27.570476190476192,"y":61.19333333333333,"z":-1.6225714285714286,"a95":0.99,"info":"18/01/2014 at 16:35:41"},{"visible":true,"include":false,"step":"70.0","x":-16.084761904761905,"y":68.94761904761906,"z":-16.81904761904762,"a95":0.99,"info":"18/01/2014 at 16:35:41"},{"visible":true,"include":false,"step":"80.0","x":78.84666666666666,"y":21.023809523809526,"z":7.155142857142858,"a95":0.99,"info":"18/01/2014 at 16:35:41"},{"visible":true,"include":false,"step":"90.0","x":-17.815238095238094,"y":11.405714285714286,"z":12.14,"a95":0.99,"info":"18/01/2014 at 16:35:41"},{"visible":true,"include":false,"step":"100.0","x":7.614095238095238,"y":3.5606666666666666,"z":23.49047619047619,"a95":0.99,"info":"18/01/2014 at 16:35:41"}]},{"version":"v1.1.0","exported":"2016-11-28T13:56:39.401Z","volume":10.5,"added":"2016-11-28T13:51:20.538Z","format":"Utrecht","demagType":"Unknown","strat":"7","patch":1.1,"GEO":[],"TECT":[],"interpreted":false,"name":"BU2.21B","coreAzi":41,"coreDip":31,"bedStrike":13,"bedDip":40,"data":[{"visible":true,"include":false,"step":"0.0","x":-107.82857142857144,"y":61.3352380952381,"z":65.66952380952381,"a95":0.99,"info":"30/09/2014 at 13:17:05"},{"visible":true,"include":false,"step":"10.0","x":-57.66571428571429,"y":87.69047619047619,"z":0.7706666666666667,"a95":0.99,"info":"30/09/2014 at 13:17:05"},{"visible":true,"include":false,"step":"15.0","x":-42.84190476190476,"y":63.62761904761905,"z":-0.16684761904761905,"a95":0.99,"info":"30/09/2014 at 13:17:05"},{"visible":true,"include":false,"step":"20.0","x":-43.857142857142854,"y":72.24952380952381,"z":-8.770761904761905,"a95":0.99,"info":"30/09/2014 at 13:17:05"},{"visible":true,"include":false,"step":"25.0","x":-35.8447619047619,"y":68.66190476190476,"z":-17.302857142857142,"a95":0.99,"info":"30/09/2014 at 13:17:05"},{"visible":true,"include":false,"step":"30.0","x":-31.186666666666664,"y":66.86952380952381,"z":-17.30857142857143,"a95":0.99,"info":"30/09/2014 at 13:17:05"},{"visible":true,"include":false,"step":"35.0","x":-32.079047619047614,"y":64.70476190476191,"z":-8.057333333333334,"a95":0.99,"info":"30/09/2014 at 13:17:05"},{"visible":true,"include":false,"step":"40.0","x":-38.60190476190476,"y":49.66571428571429,"z":-14.977142857142857,"a95":0.99,"info":"30/09/2014 at 13:17:05"},{"visible":true,"include":false,"step":"45.0","x":-22.091428571428573,"y":26.495238095238093,"z":6.006666666666667,"a95":0.99,"info":"30/09/2014 at 13:17:05"},{"visible":true,"include":false,"step":"50.0","x":-26.410476190476192,"y":46.301904761904765,"z":-3.7619999999999996,"a95":0.99,"info":"30/09/2014 at 13:17:05"},{"visible":true,"include":false,"step":"60.0","x":-6.992095238095239,"y":31.943809523809527,"z":-6.46,"a95":0.99,"info":"30/09/2014 at 13:17:05"},{"visible":true,"include":false,"step":"70.0","x":-5.428476190476191,"y":6.11695238095238,"z":0.5584857142857143,"a95":0.99,"info":"30/09/2014 at 13:17:05"},{"visible":true,"include":false,"step":"80.0","x":-72.65809523809523,"y":29.084761904761905,"z":-2.089714285714286,"a95":0.99,"info":"30/09/2014 at 13:17:05"},{"visible":true,"include":false,"step":"90.0","x":-8.998095238095239,"y":19.302857142857142,"z":8.092666666666666,"a95":0.99,"info":"30/09/2014 at 13:17:05"}]},{"version":"v1.1.0","exported":"2016-11-28T13:56:39.401Z","volume":10.5,"added":"2016-11-28T13:51:20.538Z","format":"Utrecht","demagType":"Unknown","strat":"4","patch":1.1,"GEO":[{"dec":246.8480220531714,"inc":-3.403787122505611,"MAD":4.67842045539895,"cm":[-1.0658141036401503e-14,-2.220446049250313e-14,0],"intensity":299.02950178665566,"type":"GC","origin":false,"forced":true,"remark":"","nSteps":5,"minStep":"4.0","maxStep":"20.0","steps":["4.0","8.0","12.0","16.0","20.0"],"group":"None","version":"v1.1.0"}],"TECT":[{"dec":61.75911411899739,"inc":-26.708783159925794,"MAD":4.678420455398921,"cm":[-2.3092638912203256e-14,-4.973799150320701e-14,1.687538997430238e-14],"intensity":299.02950178665566,"type":"GC","origin":false,"forced":true,"remark":"","nSteps":5,"minStep":"4.0","maxStep":"20.0","steps":["4.0","8.0","12.0","16.0","20.0"],"group":"None","version":"v1.1.0"}],"interpreted":true,"name":"BU2.22B","coreAzi":23,"coreDip":13,"bedStrike":13,"bedDip":38,"data":[{"visible":true,"include":false,"step":"0.0","x":-144.1809523809524,"y":147.76190476190476,"z":-70.60190476190476,"a95":0.99,"info":"18/01/2014 at 16:35:41"},{"visible":true,"include":true,"step":"4.0","x":-93.95714285714286,"y":102.60952380952382,"z":-87.08190476190477,"a95":0.99,"info":"18/01/2014 at 16:35:41"},{"visible":true,"include":true,"step":"8.0","x":-75.24380952380952,"y":114.33333333333333,"z":-96.08571428571429,"a95":0.99,"info":"18/01/2014 at 16:35:41"},{"visible":true,"include":true,"step":"12.0","x":-49.67238095238095,"y":103.96190476190475,"z":-94.79238095238095,"a95":0.99,"info":"18/01/2014 at 16:35:41"},{"visible":true,"include":true,"step":"16.0","x":-24.934285714285714,"y":91.87904761904763,"z":-89.72285714285715,"a95":0.99,"info":"18/01/2014 at 16:35:41"},{"visible":true,"include":true,"step":"20.0","x":-16.755238095238095,"y":105.6952380952381,"z":-96.68571428571428,"a95":0.99,"info":"18/01/2014 at 16:35:41"},{"visible":true,"include":false,"step":"25.0","x":-2.826095238095238,"y":68.30190476190475,"z":-90.06666666666668,"a95":0.99,"info":"18/01/2014 at 16:35:41"},{"visible":true,"include":false,"step":"30.0","x":-0.6325238095238095,"y":77.94857142857143,"z":-84.01714285714286,"a95":0.99,"info":"18/01/2014 at 16:35:41"},{"visible":true,"include":false,"step":"35.0","x":-9.174285714285714,"y":80.02190476190476,"z":-53.8552380952381,"a95":0.99,"info":"18/01/2014 at 16:35:41"},{"visible":true,"include":false,"step":"40.0","x":7.871333333333333,"y":47.98095238095238,"z":-71.57619047619048,"a95":0.99,"info":"18/01/2014 at 16:35:41"},{"visible":true,"include":false,"step":"45.0","x":3.1907619047619047,"y":56.049523809523805,"z":-33.98952380952381,"a95":0.99,"info":"18/01/2014 at 16:35:41"},{"visible":true,"include":false,"step":"50.0","x":-8.24047619047619,"y":35.06952380952381,"z":-38.53142857142857,"a95":0.99,"info":"18/01/2014 at 16:35:41"},{"visible":true,"include":false,"step":"60.0","x":-8.894095238095238,"y":37.02285714285714,"z":-35.79904761904762,"a95":0.99,"info":"18/01/2014 at 16:35:41"},{"visible":true,"include":false,"step":"70.0","x":-15.552380952380954,"y":51.6447619047619,"z":-18.361904761904764,"a95":0.99,"info":"18/01/2014 at 16:35:41"},{"visible":true,"include":false,"step":"80.0","x":-39.15714285714286,"y":6.792571428571429,"z":-27.37047619047619,"a95":0.99,"info":"18/01/2014 at 16:35:41"},{"visible":true,"include":false,"step":"90.0","x":-1.3373333333333333,"y":10.300952380952381,"z":-16.885714285714286,"a95":0.99,"info":"18/01/2014 at 16:35:41"},{"visible":true,"include":false,"step":"100.0","x":23.789523809523807,"y":10.127619047619048,"z":20.844761904761906,"a95":0.99,"info":"18/01/2014 at 16:35:41"}]}]
