# Supplementary material for: Paleomagnetic constraints on the timing and distribution of Cenozoic rotations in Central and Eastern Anatolia
Source: Copernicus journal article supplement (doi:10.5194/se-9-295-2018), 2018-03-21
Supplement: Supplementary file 2 [file se-9-295-2018-supplement.zip › se-2017-66_DATA_dir files/dir files Ulukisla/CP1.dir]

[{"version":"v1.1.0","exported":"2016-11-28T14:00:02.665Z","volume":10.5,"added":"2016-11-28T13:57:04.781Z","format":"Utrecht","demagType":"Unknown","strat":"1","patch":1.1,"GEO":[{"dec":151.2897521749349,"inc":-52.36960570888937,"MAD":6.234987215857205,"cm":[2.220446049250313e-15,-3.3306690738754696e-16,0],"intensity":142.7023067124112,"type":"dir","forced":true,"remark":"","origin":false,"nSteps":7,"minStep":"20.0","maxStep":"40.0","steps":["20.0","23.0","25.0","30.0","33.0","35.0","40.0"],"group":"None","version":"v1.1.0"}],"TECT":[{"dec":211.77390188098585,"inc":-54.5050712812607,"MAD":6.234987215857177,"cm":[4.440892098500626e-16,4.440892098500626e-16,4.440892098500626e-16],"intensity":142.7023067124112,"type":"dir","forced":true,"remark":"","origin":false,"nSteps":7,"minStep":"20.0","maxStep":"40.0","steps":["20.0","23.0","25.0","30.0","33.0","35.0","40.0"],"group":"None","version":"v1.1.0"}],"interpreted":true,"name":"CP1.0A","coreAzi":65,"coreDip":30,"bedStrike":4,"bedDip":41,"data":[{"visible":true,"include":false,"step":"0.0","x":44.97238095238095,"y":90.19333333333333,"z":-14.200952380952382,"a95":0.99,"info":"21/11/2014 at 03:01:58"},{"visible":true,"include":false,"step":"10.0","x":79.04285714285714,"y":77.55904761904762,"z":-28.54380952380952,"a95":0.99,"info":"21/11/2014 at 03:01:58"},{"visible":true,"include":false,"step":"15.0","x":81.40571428571428,"y":67.43809523809524,"z":-34.86571428571428,"a95":0.99,"info":"21/11/2014 at 03:01:58"},{"visible":true,"include":true,"step":"20.0","x":69.63619047619048,"y":59.859047619047615,"z":-32.9847619047619,"a95":0.99,"info":"21/11/2014 at 03:01:58"},{"visible":true,"include":true,"step":"23.0","x":55.96952380952381,"y":55.49809523809524,"z":-21.67904761904762,"a95":0.99,"info":"21/11/2014 at 03:01:58"},{"visible":true,"include":true,"step":"25.0","x":43.913333333333334,"y":43.607619047619046,"z":-26.472380952380952,"a95":0.99,"info":"21/11/2014 at 03:01:58"},{"visible":true,"include":true,"step":"30.0","x":49.53047619047619,"y":43.39047619047619,"z":-32.465714285714284,"a95":0.99,"info":"21/11/2014 at 03:01:58"},{"visible":true,"include":true,"step":"33.0","x":48.423809523809524,"y":24.36,"z":-18.73047619047619,"a95":0.99,"info":"21/11/2014 at 03:01:58"},{"visible":true,"include":true,"step":"35.0","x":38.14952380952381,"y":29.76380952380952,"z":-26.119999999999997,"a95":0.99,"info":"21/11/2014 at 03:01:58"},{"visible":true,"include":true,"step":"40.0","x":30.079047619047618,"y":29.606666666666666,"z":-16.175238095238097,"a95":0.99,"info":"21/11/2014 at 03:01:58"},{"visible":true,"include":false,"step":"45.0","x":30.51238095238095,"y":14.680952380952382,"z":-10.845714285714285,"a95":0.99,"info":"21/11/2014 at 03:01:58"},{"visible":true,"include":false,"step":"50.0","x":27.547619047619047,"y":32.17714285714286,"z":5.129619047619047,"a95":0.99,"info":"21/11/2014 at 03:01:58"},{"visible":true,"include":false,"step":"60.0","x":1.6914285714285715,"y":14.086666666666666,"z":-16.115238095238094,"a95":0.99,"info":"21/11/2014 at 03:01:58"},{"visible":true,"include":false,"step":"70.0","x":21.232380952380954,"y":11.15047619047619,"z":-15.040952380952382,"a95":0.99,"info":"21/11/2014 at 03:01:58"},{"visible":true,"include":false,"step":"80.0","x":10.038095238095238,"y":16.66190476190476,"z":-17.28761904761905,"a95":0.99,"info":"21/11/2014 at 03:01:58"},{"visible":true,"include":false,"step":"90.0","x":17.954285714285714,"y":11.668571428571429,"z":8.940761904761905,"a95":0.99,"info":"21/11/2014 at 03:01:58"}]},{"version":"v1.1.0","exported":"2016-11-28T14:00:02.665Z","volume":10.5,"added":"2016-11-28T13:57:04.782Z","format":"Utrecht","demagType":"Unknown","strat":null,"patch":1.1,"GEO":[{"dec":150.35475715825578,"inc":-40.684112585266135,"MAD":3.8517402555322873,"cm":[-2.220446049250313e-15,-4.884981308350689e-15,0],"intensity":190.99444804410797,"type":"dir","forced":true,"remark":"","origin":false,"nSteps":6,"minStep":"320","maxStep":"450","steps":["320","340","370","400","420","450"],"group":"None","version":"v1.1.0"}],"TECT":[{"dec":193.9364296794993,"inc":-50.14112546925053,"MAD":3.851740255532268,"cm":[-6.217248937900877e-15,-1.554312234475219e-14,7.105427357601002e-15],"intensity":190.994448044108,"type":"dir","forced":true,"remark":"","origin":false,"nSteps":6,"minStep":"320","maxStep":"450","steps":["320","340","370","400","420","450"],"group":"None","version":"v1.1.0"}],"interpreted":true,"name":"CP1.1A","coreAzi":78,"coreDip":36,"bedStrike":4,"bedDip":41,"data":[{"visible":true,"include":false,"step":"20","x":-42.95238095238095,"y":-25.333333333333332,"z":86,"a95":2.7,"info":"\"14-11-29\" at \"18:04\""},{"visible":true,"include":false,"step":"100","x":37.24761904761905,"y":16.6,"z":74.2,"a95":2.7,"info":"\"15-01-31\" at \"07:40\""},{"visible":true,"include":false,"step":"150","x":91.61904761904762,"y":65.23809523809524,"z":22.38095238095238,"a95":1.8,"info":"\"15-01-31\" at \"12:11\""},{"visible":true,"include":false,"step":"180","x":98.47619047619048,"y":79.42857142857143,"z":9.619047619047619,"a95":1.9,"info":"\"15-01-31\" at \"15:33\""},{"visible":true,"include":false,"step":"210","x":124.38095238095238,"y":94.28571428571429,"z":-24.761904761904763,"a95":1.6,"info":"\"15-02-01\" at \"08:55\""},{"visible":true,"include":false,"step":"240","x":127.9047619047619,"y":101.71428571428571,"z":-35.23809523809524,"a95":1.5,"info":"\"15-02-01\" at \"13:51\""},{"visible":true,"include":false,"step":"270","x":109.42857142857143,"y":83.42857142857143,"z":-35.714285714285715,"a95":1.6,"info":"\"15-02-02\" at \"17:28\""},{"visible":true,"include":false,"step":"300","x":103.9047619047619,"y":88.19047619047619,"z":-25.333333333333332,"a95":1.6,"info":"\"15-02-02\" at \"21:05\""},{"visible":true,"include":true,"step":"320","x":84,"y":85.9047619047619,"z":-17.523809523809526,"a95":2,"info":"\"15-02-03\" at \"15:04\""},{"visible":true,"include":true,"step":"340","x":67.04761904761905,"y":72,"z":-23.61904761904762,"a95":1.9,"info":"\"15-02-03\" at \"22:59\""},{"visible":true,"include":true,"step":"370","x":67.04761904761905,"y":71.9047619047619,"z":-23.142857142857142,"a95":1.8,"info":"\"15-02-04\" at \"17:09\""},{"visible":true,"include":true,"step":"400","x":48.21904761904762,"y":59.74285714285714,"z":-17.638095238095236,"a95":1.7,"info":"\"15-02-04\" at \"22:47\""},{"visible":true,"include":true,"step":"420","x":45.55238095238095,"y":61.38095238095238,"z":-18.504761904761907,"a95":1.9,"info":"\"15-02-09\" at \"16:46\""},{"visible":true,"include":true,"step":"450","x":50.44761904761905,"y":47.17142857142857,"z":-8.80952380952381,"a95":2,"info":"\"15-02-09\" at \"20:49\""},{"visible":true,"include":false,"step":"480","x":27.885714285714286,"y":46.647619047619045,"z":-6.590476190476191,"a95":2.2,"info":"\"15-02-10\" at \"14:27\""},{"visible":true,"include":false,"step":"500","x":-4.8,"y":28.24761904761905,"z":-15.876190476190475,"a95":11.2,"info":"\"15-02-10\" at \"18:20\""},{"visible":true,"include":false,"step":"530","x":7.857142857142857,"y":17.6,"z":-0.7428571428571429,"a95":21.3,"info":"\"15-02-10\" at \"22:16\""},{"visible":true,"include":false,"step":"550","x":-21.933333333333334,"y":40.17142857142857,"z":8.314285714285713,"a95":25.5,"info":"\"15-02-11\" at \"17:01\""},{"visible":true,"include":false,"step":"580","x":-99.61904761904762,"y":6.571428571428571,"z":7.523809523809524,"a95":14.8,"info":"\"15-02-11\" at \"20:39\""}]},{"version":"v1.1.0","exported":"2016-11-28T14:00:02.665Z","volume":10.5,"added":"2016-11-28T13:57:04.783Z","format":"Utrecht","demagType":"Unknown","strat":"2","patch":1.1,"GEO":[{"dec":118.56652239842305,"inc":-37.08737985706089,"MAD":4.313913137849977,"cm":[-4.440892098500626e-15,-2.6645352591003757e-15,0],"intensity":78.7585809990801,"type":"dir","forced":true,"remark":"","origin":false,"nSteps":3,"minStep":"25.0","maxStep":"33.0","steps":["25.0","30.0","33.0"],"group":"None","version":"v1.1.0"}],"TECT":[{"dec":159.38846379012114,"inc":-68.60529584373634,"MAD":4.313913137849998,"cm":[-6.661338147750939e-16,-1.1102230246251565e-15,0],"intensity":78.7585809990801,"type":"dir","forced":true,"remark":"","origin":false,"nSteps":3,"minStep":"25.0","maxStep":"33.0","steps":["25.0","30.0","33.0"],"group":"None","version":"v1.1.0"}],"interpreted":true,"name":"CP1.3A","coreAzi":56,"coreDip":27,"bedStrike":4,"bedDip":41,"data":[{"visible":true,"include":false,"step":"0.0","x":-1.502857142857143,"y":39.20761904761905,"z":43.58190476190477,"a95":0.99,"info":"21/11/2014 at 03:01:58"},{"visible":true,"include":false,"step":"10.0","x":31.45809523809524,"y":56.153333333333336,"z":14,"a95":0.99,"info":"21/11/2014 at 03:01:58"},{"visible":true,"include":false,"step":"15.0","x":32.03809523809524,"y":44.84190476190476,"z":2.320190476190476,"a95":0.99,"info":"21/11/2014 at 03:01:58"},{"visible":true,"include":false,"step":"20.0","x":41.97238095238095,"y":44.50857142857143,"z":-1.6874285714285715,"a95":0.99,"info":"21/11/2014 at 03:01:58"},{"visible":true,"include":false,"step":"23.0","x":43.182857142857145,"y":58.396190476190476,"z":28.200952380952383,"a95":0.99,"info":"21/11/2014 at 03:01:58"},{"visible":true,"include":true,"step":"25.0","x":32.81142857142857,"y":36.6552380952381,"z":2.7363809523809524,"a95":0.99,"info":"21/11/2014 at 03:01:58"},{"visible":true,"include":true,"step":"30.0","x":30.169523809523806,"y":29.244761904761905,"z":0.2638190476190476,"a95":0.99,"info":"21/11/2014 at 03:01:58"},{"visible":true,"include":true,"step":"33.0","x":22.954285714285714,"y":18.51904761904762,"z":4.256285714285714,"a95":0.99,"info":"21/11/2014 at 03:01:58"},{"visible":true,"include":false,"step":"35.0","x":21.63142857142857,"y":1.1116190476190477,"z":2.193619047619048,"a95":0.99,"info":"21/11/2014 at 03:01:58"},{"visible":true,"include":false,"step":"40.0","x":25.946666666666665,"y":23.600952380952382,"z":-2.6117142857142857,"a95":0.99,"info":"21/11/2014 at 03:01:58"},{"visible":true,"include":false,"step":"45.0","x":24.67238095238095,"y":1.8321904761904761,"z":7.961714285714286,"a95":0.99,"info":"21/11/2014 at 03:01:58"},{"visible":true,"include":false,"step":"50.0","x":5.850380952380952,"y":0.8313428571428572,"z":41.59619047619047,"a95":0.99,"info":"21/11/2014 at 03:01:58"},{"visible":true,"include":false,"step":"60.0","x":25.162857142857142,"y":14.05809523809524,"z":24.640000000000004,"a95":0.99,"info":"21/11/2014 at 03:01:58"},{"visible":true,"include":false,"step":"70.0","x":17.244761904761905,"y":9.751428571428571,"z":22.227619047619047,"a95":0.99,"info":"21/11/2014 at 03:01:58"},{"visible":true,"include":false,"step":"80.0","x":-14.483809523809525,"y":5.599619047619048,"z":5.187523809523809,"a95":0.99,"info":"21/11/2014 at 03:01:58"},{"visible":true,"include":false,"step":"90.0","x":-9.07904761904762,"y":20.61904761904762,"z":0.5018190476190476,"a95":0.99,"info":"21/11/2014 at 03:01:58"}]},{"version":"v1.1.0","exported":"2016-11-28T14:00:02.665Z","volume":10.5,"added":"2016-11-28T13:57:04.783Z","format":"Utrecht","demagType":"Unknown","strat":null,"patch":1.1,"GEO":[{"dec":20.908209490430067,"inc":-35.59666688076014,"MAD":5.5475047711700824,"cm":[-1.2434497875801753e-14,-1.7763568394002505e-15,0],"intensity":592.6400443964466,"type":"GC","origin":false,"forced":true,"remark":"","nSteps":9,"minStep":"100","maxStep":"340","steps":["100","150","180","210","240","270","300","320","340"],"group":"None","version":"v1.1.0"}],"TECT":[{"dec":349.3487107910555,"inc":-36.47346670766783,"MAD":5.547504771170132,"cm":[-2.842170943040401e-14,2.531308496145357e-14,-1.4210854715202004e-14],"intensity":592.6400443964468,"type":"GC","origin":false,"forced":true,"remark":"","nSteps":9,"minStep":"100","maxStep":"340","steps":["100","150","180","210","240","270","300","320","340"],"group":"None","version":"v1.1.0"}],"interpreted":true,"name":"CP1.5A","coreAzi":70,"coreDip":34,"bedStrike":4,"bedDip":41,"data":[{"visible":true,"include":false,"step":"20","x":-302.1904761904762,"y":-36.476190476190474,"z":1129.5238095238096,"a95":3.1,"info":"\"14-11-29\" at \"18:06\""},{"visible":true,"include":true,"step":"100","x":-143.23809523809524,"y":-46.095238095238095,"z":573.3333333333334,"a95":2.9,"info":"\"15-01-31\" at \"07:46\""},{"visible":true,"include":true,"step":"150","x":100.66666666666667,"y":156.1904761904762,"z":283.7142857142857,"a95":2.9,"info":"\"15-01-31\" at \"12:13\""},{"visible":true,"include":true,"step":"180","x":152.76190476190476,"y":207.33333333333334,"z":210.0952380952381,"a95":2.6,"info":"\"15-01-31\" at \"15:36\""},{"visible":true,"include":true,"step":"210","x":257.23809523809524,"y":295.5238095238095,"z":69.71428571428571,"a95":1.9,"info":"\"15-02-01\" at \"08:57\""},{"visible":true,"include":true,"step":"240","x":248.57142857142858,"y":329.23809523809524,"z":16.19047619047619,"a95":1.8,"info":"\"15-02-01\" at \"13:53\""},{"visible":true,"include":true,"step":"270","x":246.76190476190476,"y":321.04761904761904,"z":15.714285714285714,"a95":1.7,"info":"\"15-02-02\" at \"17:30\""},{"visible":true,"include":true,"step":"300","x":243.71428571428572,"y":308.95238095238096,"z":9.238095238095237,"a95":1.7,"info":"\"15-02-02\" at \"21:07\""},{"visible":true,"include":true,"step":"320","x":195.33333333333334,"y":289.42857142857144,"z":-6.761904761904762,"a95":2.2,"info":"\"15-02-03\" at \"15:07\""},{"visible":true,"include":true,"step":"340","x":158.47619047619048,"y":240.28571428571428,"z":-13.619047619047619,"a95":2.1,"info":"\"15-02-03\" at \"23:01\""},{"visible":true,"include":false,"step":"370","x":171.14285714285714,"y":216.28571428571428,"z":-8.19047619047619,"a95":2,"info":"\"15-02-04\" at \"17:11\""},{"visible":true,"include":false,"step":"400","x":64.38095238095238,"y":207.42857142857142,"z":33.42857142857143,"a95":2.5,"info":"\"15-02-04\" at \"22:49\""},{"visible":true,"include":false,"step":"420","x":58.095238095238095,"y":199.04761904761904,"z":11.714285714285714,"a95":3.4,"info":"\"15-02-09\" at \"16:48\""},{"visible":true,"include":false,"step":"450","x":24.571428571428573,"y":160.47619047619048,"z":15.523809523809524,"a95":3.4,"info":"\"15-02-09\" at \"21:10\""},{"visible":true,"include":false,"step":"480","x":-11.619047619047619,"y":157.8095238095238,"z":-2.380952380952381,"a95":3.7,"info":"\"15-02-10\" at \"14:29\""},{"visible":true,"include":false,"step":"500","x":-22.571428571428573,"y":147.04761904761904,"z":-30.571428571428573,"a95":4.8,"info":"\"15-02-10\" at \"18:22\""},{"visible":true,"include":false,"step":"530","x":-25.714285714285715,"y":103.80952380952381,"z":37.142857142857146,"a95":5.6,"info":"\"15-02-10\" at \"22:18\""},{"visible":true,"include":false,"step":"550","x":41.904761904761905,"y":132.47619047619048,"z":23.61904761904762,"a95":6.3,"info":"\"15-02-11\" at \"17:03\""},{"visible":true,"include":false,"step":"580","x":-110.76190476190476,"y":43.333333333333336,"z":18.095238095238095,"a95":9.3,"info":"\"15-02-11\" at \"20:41\""}]},{"version":"v1.1.0","exported":"2016-11-28T14:00:02.665Z","volume":10.5,"added":"2016-11-28T13:57:04.783Z","format":"Utrecht","demagType":"Unknown","strat":null,"patch":1.1,"GEO":[{"dec":345.46469719886136,"inc":-23.91950433590172,"MAD":3.8284441180117033,"cm":[5.773159728050814e-15,1.7763568394002505e-15,0],"intensity":414.66260907523275,"type":"GC","origin":false,"forced":true,"remark":"","nSteps":6,"minStep":"100","maxStep":"270","steps":["100","150","180","210","240","270"],"group":"None","version":"v1.1.0"}],"TECT":[{"dec":334.753257032071,"inc":-6.624197197255197,"MAD":3.828444118011785,"cm":[1.6431300764452317e-14,-7.549516567451064e-15,0],"intensity":414.6626090752328,"type":"GC","origin":false,"forced":true,"remark":"","nSteps":6,"minStep":"100","maxStep":"270","steps":["100","150","180","210","240","270"],"group":"None","version":"v1.1.0"}],"interpreted":true,"name":"CP1.6A","coreAzi":69,"coreDip":32,"bedStrike":4,"bedDip":41,"data":[{"visible":true,"include":false,"step":"20","x":-168,"y":-186.47619047619048,"z":1032.2857142857142,"a95":3.2,"info":"\"14-11-29\" at \"18:09\""},{"visible":true,"include":true,"step":"100","x":-91.80952380952381,"y":-102.38095238095238,"z":422.85714285714283,"a95":2.8,"info":"\"15-01-31\" at \"07:51\""},{"visible":true,"include":true,"step":"150","x":95.52380952380952,"y":23.333333333333332,"z":189.42857142857142,"a95":3.1,"info":"\"15-01-31\" at \"12:15\""},{"visible":true,"include":true,"step":"180","x":163.04761904761904,"y":43.61904761904762,"z":135.33333333333334,"a95":2.3,"info":"\"15-01-31\" at \"15:40\""},{"visible":true,"include":true,"step":"210","x":176.1904761904762,"y":86.28571428571429,"z":54.095238095238095,"a95":2.9,"info":"\"15-02-01\" at \"08:59\""},{"visible":true,"include":true,"step":"240","x":201.61904761904762,"y":77.9047619047619,"z":9.428571428571429,"a95":2.5,"info":"\"15-02-01\" at \"13:55\""},{"visible":true,"include":true,"step":"270","x":162,"y":68.0952380952381,"z":-15.619047619047619,"a95":2.4,"info":"\"15-02-02\" at \"17:32\""},{"visible":true,"include":false,"step":"300","x":182.1904761904762,"y":49.61904761904762,"z":-13.80952380952381,"a95":2.2,"info":"\"15-02-02\" at \"21:09\""},{"visible":true,"include":false,"step":"320","x":116.95238095238095,"y":86.85714285714286,"z":-26.952380952380953,"a95":2.9,"info":"\"15-02-03\" at \"15:18\""},{"visible":true,"include":false,"step":"340","x":90.57142857142857,"y":80.28571428571429,"z":-28.19047619047619,"a95":3.3,"info":"\"15-02-03\" at \"23:03\""},{"visible":true,"include":false,"step":"370","x":92.95238095238095,"y":68.28571428571429,"z":-31.80952380952381,"a95":2.9,"info":"\"15-02-04\" at \"17:13\""},{"visible":true,"include":false,"step":"400","x":61.61904761904762,"y":110,"z":0.9523809523809523,"a95":4.6,"info":"\"15-02-04\" at \"22:51\""},{"visible":true,"include":false,"step":"420","x":27.885714285714286,"y":66.77142857142857,"z":5.390476190476191,"a95":9.1,"info":"\"15-02-09\" at \"16:50\""},{"visible":true,"include":false,"step":"450","x":36.93333333333334,"y":-6.619047619047619,"z":-45.24761904761905,"a95":7.7,"info":"\"15-02-09\" at \"21:12\""},{"visible":true,"include":false,"step":"480","x":-23.752380952380953,"y":41.72380952380953,"z":-55.58095238095238,"a95":6.9,"info":"\"15-02-10\" at \"14:31\""},{"visible":true,"include":false,"step":"500","x":21.933333333333334,"y":56.39047619047619,"z":-6.238095238095238,"a95":10.4,"info":"\"15-02-10\" at \"18:24\""},{"visible":true,"include":false,"step":"530","x":-68.4,"y":-9.380952380952381,"z":-46.00952380952381,"a95":8.5,"info":"\"15-02-10\" at \"22:19\""},{"visible":true,"include":false,"step":"550","x":34.23809523809524,"y":-7.666666666666667,"z":41.8,"a95":10.1,"info":"\"15-02-11\" at \"17:05\""},{"visible":true,"include":false,"step":"580","x":-30.26666666666667,"y":20.695238095238096,"z":58.476190476190474,"a95":11.8,"info":"\"15-02-11\" at \"20:43\""}]},{"version":"v1.1.0","exported":"2016-11-28T14:00:02.665Z","volume":10.5,"added":"2016-11-28T13:57:04.783Z","format":"Utrecht","demagType":"Unknown","strat":"3","patch":1.1,"GEO":[],"TECT":[],"interpreted":false,"name":"CP1.7A","coreAzi":75,"coreDip":46,"bedStrike":4,"bedDip":41,"data":[{"visible":true,"include":false,"step":"0.0","x":-43.67333333333333,"y":-13.380952380952381,"z":260.6,"a95":0.99,"info":"21/11/2014 at 03:01:58"},{"visible":true,"include":false,"step":"10.0","x":71.14285714285714,"y":58.25238095238095,"z":120.35238095238095,"a95":0.99,"info":"21/11/2014 at 03:01:58"},{"visible":true,"include":false,"step":"15.0","x":92.6952380952381,"y":55.61619047619048,"z":53.16285714285715,"a95":0.99,"info":"21/11/2014 at 03:01:58"},{"visible":true,"include":false,"step":"20.0","x":57.161904761904765,"y":12.348571428571429,"z":69.26571428571428,"a95":0.99,"info":"21/11/2014 at 03:01:58"},{"visible":true,"include":false,"step":"23.0","x":68.39714285714285,"y":4.3262857142857145,"z":63.993333333333325,"a95":0.99,"info":"21/11/2014 at 03:01:58"},{"visible":true,"include":false,"step":"25.0","x":58.528571428571425,"y":1.5960952380952382,"z":51.21714285714285,"a95":0.99,"info":"21/11/2014 at 03:01:58"},{"visible":true,"include":false,"step":"30.0","x":94.28095238095239,"y":-1.1497142857142857,"z":39.63428571428572,"a95":0.99,"info":"21/11/2014 at 03:01:58"},{"visible":true,"include":false,"step":"33.0","x":34.55809523809524,"y":2.7276190476190476,"z":82.20476190476191,"a95":0.99,"info":"21/11/2014 at 03:01:58"},{"visible":true,"include":false,"step":"35.0","x":60.81238095238095,"y":-13.199047619047619,"z":27.486666666666668,"a95":0.99,"info":"21/11/2014 at 03:01:58"},{"visible":true,"include":false,"step":"40.0","x":92.56095238095239,"y":-23.48952380952381,"z":56.54,"a95":0.99,"info":"21/11/2014 at 03:01:58"},{"visible":true,"include":false,"step":"45.0","x":1.2553333333333332,"y":-32.46666666666666,"z":32.294285714285714,"a95":0.99,"info":"21/11/2014 at 03:01:58"},{"visible":true,"include":false,"step":"50.0","x":-5.460095238095239,"y":3.5399047619047614,"z":116.23809523809524,"a95":0.99,"info":"21/11/2014 at 03:01:58"},{"visible":true,"include":false,"step":"60.0","x":7.302190476190477,"y":9.42847619047619,"z":30.698095238095238,"a95":0.99,"info":"21/11/2014 at 03:01:58"},{"visible":true,"include":false,"step":"70.0","x":22.295238095238094,"y":22.022857142857145,"z":20.277142857142856,"a95":0.99,"info":"21/11/2014 at 03:01:58"},{"visible":true,"include":false,"step":"80.0","x":-83.20761904761905,"y":-21.174285714285716,"z":80.70285714285714,"a95":0.99,"info":"21/11/2014 at 03:01:58"},{"visible":true,"include":false,"step":"90.0","x":22.923809523809524,"y":23.333333333333332,"z":-60.41619047619048,"a95":0.99,"info":"21/11/2014 at 03:01:58"}]},{"version":"v1.1.0","exported":"2016-11-28T14:00:02.665Z","volume":10.5,"added":"2016-11-28T13:57:04.784Z","format":"Utrecht","demagType":"Unknown","strat":"4","patch":1.1,"GEO":[],"TECT":[],"interpreted":false,"name":"CP1.9A","coreAzi":74,"coreDip":45,"bedStrike":4,"bedDip":41,"data":[{"visible":true,"include":false,"step":"0.0","x":27.54285714285714,"y":-3.3729523809523805,"z":137.52380952380952,"a95":0.99,"info":"21/11/2014 at 03:01:58"},{"visible":true,"include":false,"step":"10.0","x":61.32190476190476,"y":59.84571428571429,"z":70.72666666666666,"a95":0.99,"info":"21/11/2014 at 03:01:58"},{"visible":true,"include":false,"step":"15.0","x":55.3552380952381,"y":42.65904761904762,"z":47.08380952380952,"a95":0.99,"info":"21/11/2014 at 03:01:58"},{"visible":true,"include":false,"step":"20.0","x":55.58380952380952,"y":41.28285714285715,"z":68.61428571428571,"a95":0.99,"info":"21/11/2014 at 03:01:58"},{"visible":true,"include":false,"step":"23.0","x":61.21523809523809,"y":48.473333333333336,"z":68.25142857142858,"a95":0.99,"info":"21/11/2014 at 03:01:58"},{"visible":true,"include":false,"step":"25.0","x":50.95428571428571,"y":30.504761904761907,"z":43.68857142857143,"a95":0.99,"info":"21/11/2014 at 03:01:58"},{"visible":true,"include":false,"step":"30.0","x":41.31904761904762,"y":32.21333333333333,"z":35.00952380952381,"a95":0.99,"info":"21/11/2014 at 03:01:58"},{"visible":true,"include":false,"step":"33.0","x":41.38095238095238,"y":26.183809523809526,"z":32.53904761904762,"a95":0.99,"info":"21/11/2014 at 03:01:58"},{"visible":true,"include":false,"step":"35.0","x":40.84571428571429,"y":11.348571428571429,"z":32.74857142857143,"a95":0.99,"info":"21/11/2014 at 03:01:58"},{"visible":true,"include":false,"step":"40.0","x":29.66190476190476,"y":34.698095238095235,"z":35.48571428571429,"a95":0.99,"info":"21/11/2014 at 03:01:58"},{"visible":true,"include":false,"step":"45.0","x":44.77904761904762,"y":-4.510571428571429,"z":40.77142857142857,"a95":0.99,"info":"21/11/2014 at 03:01:58"},{"visible":true,"include":false,"step":"50.0","x":31.910476190476192,"y":11.565714285714286,"z":100.38095238095238,"a95":0.99,"info":"21/11/2014 at 03:01:58"},{"visible":true,"include":false,"step":"60.0","x":19.633333333333333,"y":25.18952380952381,"z":22.47047619047619,"a95":0.99,"info":"21/11/2014 at 03:01:58"},{"visible":true,"include":false,"step":"70.0","x":16.555238095238096,"y":22.32095238095238,"z":19.692380952380955,"a95":0.99,"info":"21/11/2014 at 03:01:58"},{"visible":true,"include":false,"step":"80.0","x":28.046666666666667,"y":16.735238095238095,"z":24.60380952380952,"a95":0.99,"info":"21/11/2014 at 03:01:58"},{"visible":true,"include":false,"step":"90.0","x":15.704761904761906,"y":20.006666666666668,"z":30.447619047619046,"a95":0.99,"info":"21/11/2014 at 03:01:58"}]},{"version":"v1.1.0","exported":"2016-11-28T14:00:02.665Z","volume":10.5,"added":"2016-11-28T13:57:04.787Z","format":"Utrecht","demagType":"Unknown","strat":null,"patch":1.1,"GEO":[{"dec":358.7772795104175,"inc":-25.67897756893688,"MAD":1.8010696744631174,"cm":[-2.4868995751603507e-14,-7.105427357601002e-15,0],"intensity":975.0124041306432,"type":"GC","origin":false,"forced":true,"remark":"","nSteps":6,"minStep":"100","maxStep":"270","steps":["100","150","180","210","240","270"],"group":"None","version":"v1.1.0"}],"TECT":[{"dec":342.90616590259594,"inc":-15.855718220812497,"MAD":1.8010696744634176,"cm":[-6.572520305780927e-14,3.552713678800501e-15,7.105427357601002e-15],"intensity":975.0124041306432,"type":"GC","origin":false,"forced":true,"remark":"","nSteps":6,"minStep":"100","maxStep":"270","steps":["100","150","180","210","240","270"],"group":"None","version":"v1.1.0"}],"interpreted":true,"name":"CP1.10A","coreAzi":76,"coreDip":34,"bedStrike":4,"bedDip":41,"data":[{"visible":true,"include":false,"step":"20","x":-198.47619047619048,"y":-274.85714285714283,"z":1106.2857142857142,"a95":3.1,"info":"\"14-11-29\" at \"18:11\""},{"visible":true,"include":true,"step":"100","x":183.52380952380952,"y":52.95238095238095,"z":538.0952380952381,"a95":2.6,"info":"\"15-01-31\" at \"07:57\""},{"visible":true,"include":true,"step":"150","x":322.3809523809524,"y":136,"z":347.6190476190476,"a95":2.2,"info":"\"15-01-31\" at \"12:18\""},{"visible":true,"include":true,"step":"180","x":376,"y":176.57142857142858,"z":298.1904761904762,"a95":1.9,"info":"\"15-01-31\" at \"15:44\""},{"visible":true,"include":true,"step":"210","x":404.4761904761905,"y":188.66666666666666,"z":257.7142857142857,"a95":1.8,"info":"\"15-02-01\" at \"09:01\""},{"visible":true,"include":true,"step":"240","x":379.23809523809524,"y":183.42857142857142,"z":240.76190476190476,"a95":2,"info":"\"15-02-01\" at \"13:57\""},{"visible":true,"include":true,"step":"270","x":359.7142857142857,"y":179.33333333333334,"z":237.52380952380952,"a95":1.9,"info":"\"15-02-02\" at \"17:34\""},{"visible":true,"include":false,"step":"300","x":336.1904761904762,"y":185.71428571428572,"z":226.28571428571428,"a95":1.9,"info":"\"15-02-02\" at \"21:11\""},{"visible":true,"include":false,"step":"320","x":271.04761904761904,"y":178.38095238095238,"z":168.95238095238096,"a95":1.9,"info":"\"15-02-03\" at \"15:20\""},{"visible":true,"include":false,"step":"340","x":254.1904761904762,"y":111.23809523809524,"z":130.95238095238096,"a95":1.8,"info":"\"15-02-03\" at \"23:05\""},{"visible":true,"include":false,"step":"370","x":253.61904761904762,"y":102.76190476190476,"z":124.76190476190476,"a95":2,"info":"\"15-02-04\" at \"17:15\""},{"visible":true,"include":false,"step":"400","x":141.04761904761904,"y":126.47619047619048,"z":141.42857142857142,"a95":2.6,"info":"\"15-02-04\" at \"22:53\""},{"visible":true,"include":false,"step":"420","x":107.14285714285714,"y":112.66666666666667,"z":113.61904761904762,"a95":3.7,"info":"\"15-02-09\" at \"16:52\""},{"visible":true,"include":false,"step":"450","x":67.14285714285714,"y":79.14285714285714,"z":171.42857142857142,"a95":2.6,"info":"\"15-02-09\" at \"21:14\""},{"visible":true,"include":false,"step":"480","x":15.523809523809524,"y":63.80952380952381,"z":254.85714285714286,"a95":3,"info":"\"15-02-10\" at \"14:33\""},{"visible":true,"include":false,"step":"500","x":-30.761904761904763,"y":58.666666666666664,"z":217.42857142857142,"a95":3.1,"info":"\"15-02-10\" at \"18:26\""},{"visible":true,"include":false,"step":"530","x":-24.857142857142858,"y":86.57142857142857,"z":164.95238095238096,"a95":3.7,"info":"\"15-02-10\" at \"22:21\""},{"visible":true,"include":false,"step":"550","x":-46.476190476190474,"y":125.42857142857143,"z":151.04761904761904,"a95":3.6,"info":"\"15-02-11\" at \"17:07\""},{"visible":true,"include":false,"step":"580","x":-100,"y":-14.095238095238095,"z":188.57142857142858,"a95":4.4,"info":"\"15-02-11\" at \"20:46\""}]},{"version":"v1.1.0","exported":"2016-11-28T14:00:02.665Z","volume":10.5,"added":"2016-11-28T13:57:04.787Z","format":"Utrecht","demagType":"Unknown","strat":null,"patch":1.1,"GEO":[{"dec":7.57790021701237,"inc":-39.286702447279616,"MAD":8.2460743379557,"cm":[-1.5987211554602254e-14,-1.9539925233402755e-14,0],"intensity":385.4663047645585,"type":"GC","origin":false,"forced":true,"remark":"","nSteps":6,"minStep":"150","maxStep":"300","steps":["150","180","210","240","270","300"],"group":"None","version":"v1.1.0"}],"TECT":[{"dec":337.86826202487873,"inc":-30.63528725848388,"MAD":8.246074337955731,"cm":[-1.7763568394002505e-14,-3.68594044175552e-14,1.9539925233402755e-14],"intensity":385.4663047645585,"type":"GC","origin":false,"forced":true,"remark":"","nSteps":6,"minStep":"150","maxStep":"300","steps":["150","180","210","240","270","300"],"group":"None","version":"v1.1.0"}],"interpreted":true,"name":"CP1.11A","coreAzi":104,"coreDip":20,"bedStrike":4,"bedDip":41,"data":[{"visible":true,"include":false,"step":"20","x":26.285714285714285,"y":-25.142857142857142,"z":254.66666666666666,"a95":3.1,"info":"\"14-11-29\" at \"18:13\""},{"visible":true,"include":false,"step":"100","x":98.57142857142857,"y":25.428571428571427,"z":135.23809523809524,"a95":2.4,"info":"\"15-01-31\" at \"08:01\""},{"visible":true,"include":true,"step":"150","x":146.28571428571428,"y":70.76190476190476,"z":103.04761904761905,"a95":2.1,"info":"\"15-01-31\" at \"12:20\""},{"visible":true,"include":true,"step":"180","x":175.61904761904762,"y":94.66666666666667,"z":86.19047619047619,"a95":1.7,"info":"\"15-01-31\" at \"15:47\""},{"visible":true,"include":true,"step":"210","x":183.8095238095238,"y":99.52380952380952,"z":74.66666666666667,"a95":1.6,"info":"\"15-02-01\" at \"09:03\""},{"visible":true,"include":true,"step":"240","x":192.0952380952381,"y":115.14285714285714,"z":59.904761904761905,"a95":1.6,"info":"\"15-02-01\" at \"13:59\""},{"visible":true,"include":true,"step":"270","x":176.28571428571428,"y":114.95238095238095,"z":57.142857142857146,"a95":1.6,"info":"\"15-02-02\" at \"17:36\""},{"visible":true,"include":true,"step":"300","x":163.61904761904762,"y":103.14285714285714,"z":46.285714285714285,"a95":1.7,"info":"\"15-02-02\" at \"21:13\""},{"visible":true,"include":false,"step":"320","x":138.85714285714286,"y":106.95238095238095,"z":48.57142857142857,"a95":2.1,"info":"\"15-02-03\" at \"15:22\""},{"visible":true,"include":false,"step":"340","x":126.95238095238095,"y":91.23809523809524,"z":45.42857142857143,"a95":1.6,"info":"\"15-02-03\" at \"23:07\""},{"visible":true,"include":false,"step":"370","x":121.23809523809524,"y":97.71428571428571,"z":44,"a95":1.7,"info":"\"15-02-04\" at \"17:22\""},{"visible":true,"include":false,"step":"400","x":89.71428571428571,"y":85.52380952380952,"z":45.333333333333336,"a95":1.9,"info":"\"15-02-04\" at \"22:56\""},{"visible":true,"include":false,"step":"420","x":75.23809523809524,"y":82.76190476190476,"z":38.19047619047619,"a95":1.8,"info":"\"15-02-09\" at \"16:54\""},{"visible":true,"include":false,"step":"450","x":53.142857142857146,"y":80,"z":35.42857142857143,"a95":2.4,"info":"\"15-02-09\" at \"21:17\""},{"visible":true,"include":false,"step":"480","x":33.02857142857143,"y":50.67619047619048,"z":27.514285714285712,"a95":7.5,"info":"\"15-02-10\" at \"14:35\""},{"visible":true,"include":false,"step":"500","x":-31.447619047619046,"y":44.95238095238095,"z":66.74285714285713,"a95":9.3,"info":"\"15-02-10\" at \"18:31\""},{"visible":true,"include":false,"step":"530","x":-12.142857142857142,"y":57.666666666666664,"z":0.5523809523809524,"a95":16,"info":"\"15-02-10\" at \"22:24\""},{"visible":true,"include":false,"step":"550","x":-48.666666666666664,"y":-7.714285714285714,"z":105.33333333333333,"a95":14.6,"info":"\"15-02-11\" at \"17:10\""},{"visible":true,"include":false,"step":"580","x":-175.8095238095238,"y":32,"z":97.42857142857143,"a95":10.3,"info":"\"15-02-11\" at \"20:48\""}]},{"version":"v1.1.0","exported":"2016-11-28T14:00:02.666Z","volume":10.5,"added":"2016-11-28T13:57:04.787Z","format":"Utrecht","demagType":"Unknown","strat":null,"patch":1.1,"GEO":[{"dec":297.908862231068,"inc":-0.0229033063889007,"MAD":13.735614841522354,"cm":[-3.552713678800501e-15,3.552713678800501e-15,0],"intensity":204.78225812464916,"type":"GC","origin":false,"forced":true,"remark":"","nSteps":5,"minStep":"150","maxStep":"270","steps":["150","180","210","240","270"],"group":"None","version":"v1.1.0"}],"TECT":[{"dec":124.42090005249486,"inc":-36.831355091826644,"MAD":13.735614841522308,"cm":[-1.4210854715202004e-14,1.0658141036401503e-14,-3.552713678800501e-15],"intensity":204.78225812464922,"type":"GC","origin":false,"forced":true,"remark":"","nSteps":5,"minStep":"150","maxStep":"270","steps":["150","180","210","240","270"],"group":"None","version":"v1.1.0"}],"interpreted":true,"name":"CP1.12A","coreAzi":97,"coreDip":22,"bedStrike":4,"bedDip":41,"data":[{"visible":true,"include":false,"step":"20","x":-671.9047619047619,"y":-154.76190476190476,"z":826.6666666666666,"a95":2.9,"info":"\"14-11-29\" at \"18:15\""},{"visible":true,"include":false,"step":"100","x":-298.2857142857143,"y":-132.28571428571428,"z":208.76190476190476,"a95":3,"info":"\"15-01-31\" at \"08:04\""},{"visible":true,"include":true,"step":"150","x":-158.85714285714286,"y":-22,"z":80.0952380952381,"a95":5,"info":"\"15-01-31\" at \"12:22\""},{"visible":true,"include":true,"step":"180","x":53.80952380952381,"y":111.14285714285714,"z":-60.19047619047619,"a95":4.6,"info":"\"15-01-31\" at \"15:51\""},{"visible":true,"include":true,"step":"210","x":89.23809523809524,"y":142.0952380952381,"z":-79.33333333333333,"a95":4.3,"info":"\"15-02-01\" at \"09:06\""},{"visible":true,"include":true,"step":"240","x":158.76190476190476,"y":177.9047619047619,"z":-122.66666666666667,"a95":3.4,"info":"\"15-02-01\" at \"14:01\""},{"visible":true,"include":true,"step":"270","x":106.95238095238095,"y":206.28571428571428,"z":-152.76190476190476,"a95":3.1,"info":"\"15-02-02\" at \"17:39\""},{"visible":true,"include":false,"step":"300","x":-13.142857142857142,"y":212.38095238095238,"z":-163.9047619047619,"a95":8.400001,"info":"\"15-02-02\" at \"21:16\""},{"visible":true,"include":false,"step":"320","x":-366.2857142857143,"y":157.33333333333334,"z":-147.52380952380952,"a95":14.7,"info":"\"15-02-03\" at \"15:26\""},{"visible":true,"include":false,"step":"340","x":-240.28571428571428,"y":183.8095238095238,"z":19.333333333333332,"a95":21.2,"info":"\"15-02-03\" at \"23:10\""},{"visible":true,"include":false,"step":"370","x":-198.95238095238096,"y":219.9047619047619,"z":-88.95238095238095,"a95":18.3,"info":"\"15-02-04\" at \"17:24\""},{"visible":true,"include":false,"step":"400","x":-290.2857142857143,"y":149.04761904761904,"z":-61.23809523809524,"a95":18.9,"info":"\"15-02-04\" at \"22:58\""},{"visible":true,"include":false,"step":"420","x":-326.0952380952381,"y":117.14285714285714,"z":-78.0952380952381,"a95":31.9,"info":"\"15-02-09\" at \"16:56\""},{"visible":true,"include":false,"step":"450","x":-275.04761904761904,"y":196.66666666666666,"z":-92.66666666666667,"a95":13.8,"info":"\"15-02-09\" at \"21:19\""},{"visible":true,"include":false,"step":"480","x":-450.2857142857143,"y":199.42857142857142,"z":-56.666666666666664,"a95":14.1,"info":"\"15-02-10\" at \"14:37\""},{"visible":true,"include":false,"step":"500","x":-372.6666666666667,"y":120.66666666666667,"z":-17.238095238095237,"a95":23.1,"info":"\"15-02-10\" at \"18:33\""},{"visible":true,"include":false,"step":"530","x":-392.2857142857143,"y":223.52380952380952,"z":50.095238095238095,"a95":18.9,"info":"\"15-02-10\" at \"22:26\""},{"visible":true,"include":false,"step":"550","x":-409.9047619047619,"y":45.714285714285715,"z":45.61904761904762,"a95":16.1,"info":"\"15-02-11\" at \"17:12\""},{"visible":true,"include":false,"step":"580","x":-280.3809523809524,"y":22.38095238095238,"z":254.38095238095238,"a95":16.7,"info":"\"15-02-11\" at \"20:51\""}]},{"version":"v1.1.0","exported":"2016-11-28T14:00:02.666Z","volume":10.5,"added":"2016-11-28T13:57:04.789Z","format":"Utrecht","demagType":"Unknown","strat":null,"patch":1.1,"GEO":[{"dec":304.45382954684175,"inc":-43.2164903704994,"MAD":1.2921108139739028,"cm":[-1.4210854715202004e-14,-5.684341886080802e-14,0],"intensity":1203.4476400002711,"type":"GC","origin":false,"forced":true,"remark":"","nSteps":5,"minStep":"100","maxStep":"240","steps":["100","150","180","210","240"],"group":"None","version":"v1.1.0"}],"TECT":[{"dec":295.8027440500754,"inc":-6.006280118205516,"MAD":1.292110813974102,"cm":[-1.7763568394002505e-14,-6.661338147750939e-14,4.973799150320701e-14],"intensity":1203.4476400002713,"type":"GC","origin":false,"forced":true,"remark":"","nSteps":5,"minStep":"100","maxStep":"240","steps":["100","150","180","210","240"],"group":"None","version":"v1.1.0"}],"interpreted":true,"name":"CP1.13A","coreAzi":87,"coreDip":27,"bedStrike":4,"bedDip":41,"data":[{"visible":true,"include":false,"step":"20","x":-84.85714285714286,"y":861.7142857142857,"z":-183.04761904761904,"a95":1.5,"info":"\"14-11-29\" at \"18:17\""},{"visible":true,"include":true,"step":"100","x":229.14285714285714,"y":638.3809523809524,"z":-247.04761904761904,"a95":1.8,"info":"\"15-01-31\" at \"08:08\""},{"visible":true,"include":true,"step":"150","x":300,"y":560.4761904761905,"z":-169.42857142857142,"a95":1.8,"info":"\"15-01-31\" at \"12:24\""},{"visible":true,"include":true,"step":"180","x":445.8095238095238,"y":418.4761904761905,"z":-46.19047619047619,"a95":1.8,"info":"\"15-01-31\" at \"15:54\""},{"visible":true,"include":true,"step":"210","x":479.3333333333333,"y":342.57142857142856,"z":19.238095238095237,"a95":1.8,"info":"\"15-02-01\" at \"09:08\""},{"visible":true,"include":true,"step":"240","x":500.95238095238096,"y":298.76190476190476,"z":54.666666666666664,"a95":1.8,"info":"\"15-02-01\" at \"14:03\""},{"visible":true,"include":false,"step":"270","x":511.8095238095238,"y":244.28571428571428,"z":50.76190476190476,"a95":1.7,"info":"\"15-02-02\" at \"17:41\""},{"visible":true,"include":false,"step":"300","x":447.6190476190476,"y":273.8095238095238,"z":-0.19047619047619047,"a95":1.9,"info":"\"15-02-02\" at \"21:18\""},{"visible":true,"include":false,"step":"320","x":435.42857142857144,"y":274.6666666666667,"z":52.76190476190476,"a95":1.9,"info":"\"15-02-03\" at \"15:29\""},{"visible":true,"include":false,"step":"340","x":439.23809523809524,"y":280.0952380952381,"z":49.714285714285715,"a95":2.1,"info":"\"15-02-03\" at \"23:13\""},{"visible":true,"include":false,"step":"370","x":414.4761904761905,"y":302.76190476190476,"z":49.61904761904762,"a95":2,"info":"\"15-02-04\" at \"17:26\""},{"visible":true,"include":false,"step":"400","x":280.76190476190476,"y":205.52380952380952,"z":91.71428571428571,"a95":2.6,"info":"\"15-02-04\" at \"23:00\""},{"visible":true,"include":false,"step":"420","x":332.76190476190476,"y":311.6190476190476,"z":34.38095238095238,"a95":2.2,"info":"\"15-02-09\" at \"16:58\""},{"visible":true,"include":false,"step":"450","x":278.4761904761905,"y":217.14285714285714,"z":12.380952380952381,"a95":3.3,"info":"\"15-02-09\" at \"21:21\""},{"visible":true,"include":false,"step":"480","x":211.14285714285714,"y":234.95238095238096,"z":65.71428571428571,"a95":3.2,"info":"\"15-02-10\" at \"14:39\""},{"visible":true,"include":false,"step":"500","x":156.66666666666666,"y":321.3333333333333,"z":70.38095238095238,"a95":3.8,"info":"\"15-02-10\" at \"18:35\""},{"visible":true,"include":false,"step":"530","x":203.52380952380952,"y":267.14285714285717,"z":26.761904761904763,"a95":3.6,"info":"\"15-02-10\" at \"22:28\""},{"visible":true,"include":false,"step":"550","x":77.61904761904762,"y":148.38095238095238,"z":-45.523809523809526,"a95":7.3,"info":"\"15-02-11\" at \"17:15\""},{"visible":true,"include":false,"step":"580","x":-237.42857142857142,"y":42.95238095238095,"z":31.714285714285715,"a95":5.6,"info":"\"15-02-11\" at \"20:53\""}]},{"version":"v1.1.0","exported":"2016-11-28T14:00:02.666Z","volume":10.5,"added":"2016-11-28T13:57:04.789Z","format":"Utrecht","demagType":"Unknown","strat":"5","patch":1.1,"GEO":[],"TECT":[],"interpreted":false,"name":"CP1.15A","coreAzi":47,"coreDip":31,"bedStrike":4,"bedDip":41,"data":[{"visible":true,"include":false,"step":"0.0","x":-87.8,"y":-26.843809523809526,"z":206.93333333333334,"a95":0.99,"info":"21/11/2014 at 03:01:58"},{"visible":true,"include":false,"step":"10.0","x":-27.959047619047617,"y":35.77809523809524,"z":110.1047619047619,"a95":0.99,"info":"21/11/2014 at 03:01:58"},{"visible":true,"include":false,"step":"15.0","x":-23.046666666666667,"y":14.223809523809523,"z":63.17238095238095,"a95":0.99,"info":"21/11/2014 at 03:01:58"},{"visible":true,"include":false,"step":"20.0","x":-1.4632380952380952,"y":7.814285714285714,"z":81.93714285714286,"a95":0.99,"info":"21/11/2014 at 03:01:58"},{"visible":true,"include":false,"step":"23.0","x":3.671809523809524,"y":20.74952380952381,"z":76.20952380952382,"a95":0.99,"info":"21/11/2014 at 03:01:58"},{"visible":true,"include":false,"step":"25.0","x":7.994666666666667,"y":3.908380952380952,"z":41.88380952380952,"a95":0.99,"info":"21/11/2014 at 03:01:58"},{"visible":true,"include":false,"step":"30.0","x":5.3640952380952385,"y":18.534285714285716,"z":32.22571428571429,"a95":0.99,"info":"21/11/2014 at 03:01:58"},{"visible":true,"include":false,"step":"33.0","x":11.415238095238095,"y":14.768571428571429,"z":35.7952380952381,"a95":0.99,"info":"21/11/2014 at 03:01:58"},{"visible":true,"include":false,"step":"35.0","x":14.02857142857143,"y":17.801904761904762,"z":33.607619047619046,"a95":0.99,"info":"21/11/2014 at 03:01:58"},{"visible":true,"include":false,"step":"40.0","x":13.113333333333333,"y":13.495238095238093,"z":30.916190476190476,"a95":0.99,"info":"21/11/2014 at 03:01:58"},{"visible":true,"include":false,"step":"45.0","x":12.933333333333334,"y":-10.173333333333332,"z":39.87619047619047,"a95":0.99,"info":"21/11/2014 at 03:01:58"},{"visible":true,"include":false,"step":"50.0","x":4.465523809523809,"y":6.084095238095238,"z":114,"a95":0.99,"info":"21/11/2014 at 03:01:58"},{"visible":true,"include":false,"step":"60.0","x":1.3214285714285714,"y":19.32952380952381,"z":17.7,"a95":0.99,"info":"21/11/2014 at 03:01:58"},{"visible":true,"include":false,"step":"70.0","x":9.339809523809524,"y":20.236190476190476,"z":19.34,"a95":0.99,"info":"21/11/2014 at 03:01:58"},{"visible":true,"include":false,"step":"80.0","x":1.2571428571428571,"y":9.970476190476191,"z":21.59047619047619,"a95":0.99,"info":"21/11/2014 at 03:01:58"},{"visible":true,"include":false,"step":"90.0","x":2.0948571428571428,"y":23.73333333333333,"z":7.728666666666666,"a95":0.99,"info":"21/11/2014 at 03:01:58"}]},{"version":"v1.1.0","exported":"2016-11-28T14:00:02.666Z","volume":10.5,"added":"2016-11-28T13:57:04.789Z","format":"Utrecht","demagType":"Unknown","strat":"6","patch":1.1,"GEO":[{"dec":133.451215059841,"inc":-42.651299041406894,"MAD":8.195859563204424,"cm":[-1.1102230246251565e-15,-1.8318679906315083e-15,0],"intensity":176.56909858482226,"type":"dir","forced":true,"remark":"","origin":false,"nSteps":7,"minStep":"23.0","maxStep":"45.0","steps":["23.0","25.0","30.0","33.0","35.0","40.0","45.0"],"group":"None","version":"v1.1.0"}],"TECT":[{"dec":185.94702331676422,"inc":-62.12032807527872,"MAD":8.195859563204404,"cm":[1.7763568394002505e-15,-2.220446049250313e-15,4.440892098500626e-16],"intensity":176.56909858482226,"type":"dir","forced":true,"remark":"","origin":false,"nSteps":7,"minStep":"23.0","maxStep":"45.0","steps":["23.0","25.0","30.0","33.0","35.0","40.0","45.0"],"group":"None","version":"v1.1.0"}],"interpreted":true,"name":"CP1.19A","coreAzi":11,"coreDip":17,"bedStrike":4,"bedDip":41,"data":[{"visible":true,"include":false,"step":"0.0","x":55.62190476190476,"y":127.03809523809525,"z":-24.93904761904762,"a95":0.99,"info":"21/11/2014 at 03:01:58"},{"visible":true,"include":false,"step":"10.0","x":86.59619047619047,"y":176.78095238095239,"z":-83.55142857142857,"a95":0.99,"info":"21/11/2014 at 03:01:58"},{"visible":true,"include":false,"step":"15.0","x":65.70190476190476,"y":123.17142857142856,"z":-100.4095238095238,"a95":0.99,"info":"21/11/2014 at 03:01:58"},{"visible":true,"include":false,"step":"20.0","x":68.78285714285714,"y":94.29238095238095,"z":-60.32380952380952,"a95":0.99,"info":"21/11/2014 at 03:01:58"},{"visible":true,"include":true,"step":"23.0","x":68.95714285714286,"y":94.18666666666667,"z":-56.5647619047619,"a95":0.99,"info":"21/11/2014 at 03:01:58"},{"visible":true,"include":true,"step":"25.0","x":60.590476190476195,"y":76.49428571428572,"z":-69.26,"a95":0.99,"info":"21/11/2014 at 03:01:58"},{"visible":true,"include":true,"step":"30.0","x":59.32666666666666,"y":62.913333333333334,"z":-69.21428571428571,"a95":0.99,"info":"21/11/2014 at 03:01:58"},{"visible":true,"include":true,"step":"33.0","x":52.55333333333333,"y":61.53523809523809,"z":-57.12380952380952,"a95":0.99,"info":"21/11/2014 at 03:01:58"},{"visible":true,"include":true,"step":"35.0","x":46.86571428571428,"y":47.97047619047619,"z":-48.91238095238096,"a95":0.99,"info":"21/11/2014 at 03:01:58"},{"visible":true,"include":true,"step":"40.0","x":43.58857142857143,"y":56.35333333333334,"z":-65.78285714285714,"a95":0.99,"info":"21/11/2014 at 03:01:58"},{"visible":true,"include":true,"step":"45.0","x":40.44857142857143,"y":9.654285714285715,"z":-35.21809523809524,"a95":0.99,"info":"21/11/2014 at 03:01:58"},{"visible":true,"include":false,"step":"50.0","x":30.25238095238095,"y":45.22952380952381,"z":63.099999999999994,"a95":0.99,"info":"21/11/2014 at 03:01:58"},{"visible":true,"include":false,"step":"60.0","x":21.430476190476192,"y":30.41142857142857,"z":-39.50380952380952,"a95":0.99,"info":"21/11/2014 at 03:01:58"},{"visible":true,"include":false,"step":"70.0","x":22.619999999999997,"y":29.54190476190476,"z":-21.33142857142857,"a95":0.99,"info":"21/11/2014 at 03:01:58"},{"visible":true,"include":false,"step":"80.0","x":8.425428571428572,"y":15.179999999999998,"z":-27.447619047619046,"a95":0.99,"info":"21/11/2014 at 03:01:58"},{"visible":true,"include":false,"step":"90.0","x":19.31142857142857,"y":10.082857142857144,"z":-14.270476190476192,"a95":0.99,"info":"21/11/2014 at 03:01:58"}]},{"version":"v1.1.0","exported":"2016-11-28T14:00:02.666Z","volume":10.5,"added":"2016-11-28T13:57:04.790Z","format":"Utrecht","demagType":"Unknown","strat":null,"patch":1.1,"GEO":[{"dec":150.6263459196823,"inc":-40.41574145816847,"MAD":5.736473429764164,"cm":[2.6645352591003757e-15,-8.881784197001252e-16,0],"intensity":279.5199495150046,"type":"dir","forced":true,"remark":"","origin":false,"nSteps":7,"minStep":"300","maxStep":"450","steps":["300","320","340","370","400","420","450"],"group":"None","version":"v1.1.0"}],"TECT":[{"dec":193.7500645183758,"inc":-49.82450522439724,"MAD":5.736473429764169,"cm":[6.217248937900877e-15,5.995204332975845e-15,4.440892098500626e-16],"intensity":279.5199495150046,"type":"dir","forced":true,"remark":"","origin":false,"nSteps":7,"minStep":"300","maxStep":"450","steps":["300","320","340","370","400","420","450"],"group":"None","version":"v1.1.0"}],"interpreted":true,"name":"CP1.20A","coreAzi":4,"coreDip":8,"bedStrike":4,"bedDip":41,"data":[{"visible":true,"include":false,"step":"20","x":-43.904761904761905,"y":200.76190476190476,"z":173.23809523809524,"a95":2.2,"info":"\"14-11-29\" at \"18:19\""},{"visible":true,"include":false,"step":"100","x":53.333333333333336,"y":134.85714285714286,"z":-34.285714285714285,"a95":1.8,"info":"\"15-01-31\" at \"08:12\""},{"visible":true,"include":false,"step":"150","x":96.85714285714286,"y":130.57142857142858,"z":-72.76190476190476,"a95":2,"info":"\"15-01-31\" at \"12:26\""},{"visible":true,"include":false,"step":"180","x":126.95238095238095,"y":140.28571428571428,"z":-122.47619047619048,"a95":1.9,"info":"\"15-01-31\" at \"15:58\""},{"visible":true,"include":false,"step":"210","x":147.14285714285714,"y":120.85714285714286,"z":-132,"a95":1.8,"info":"\"15-02-01\" at \"09:09\""},{"visible":true,"include":false,"step":"240","x":148.95238095238096,"y":109.33333333333333,"z":-160.0952380952381,"a95":2.1,"info":"\"15-02-01\" at \"14:05\""},{"visible":true,"include":false,"step":"270","x":134,"y":95.9047619047619,"z":-147.23809523809524,"a95":2.1,"info":"\"15-02-02\" at \"17:44\""},{"visible":true,"include":true,"step":"300","x":109.33333333333333,"y":95.33333333333333,"z":-134.38095238095238,"a95":2.2,"info":"\"15-02-02\" at \"21:21\""},{"visible":true,"include":true,"step":"320","x":100.85714285714286,"y":77.14285714285714,"z":-121.80952380952381,"a95":2.6,"info":"\"15-02-03\" at \"15:31\""},{"visible":true,"include":true,"step":"340","x":97.14285714285714,"y":52.285714285714285,"z":-115.71428571428571,"a95":2.2,"info":"\"15-02-03\" at \"23:15\""},{"visible":true,"include":true,"step":"370","x":96.76190476190476,"y":61.80952380952381,"z":-118.57142857142857,"a95":2.2,"info":"\"15-02-04\" at \"17:28\""},{"visible":true,"include":true,"step":"400","x":64.19047619047619,"y":45.42857142857143,"z":-101.61904761904762,"a95":2.6,"info":"\"15-02-04\" at \"23:03\""},{"visible":true,"include":true,"step":"420","x":59.80952380952381,"y":54.95238095238095,"z":-81.42857142857143,"a95":2.8,"info":"\"15-02-09\" at \"17:01\""},{"visible":true,"include":true,"step":"450","x":22.761904761904763,"y":40.857142857142854,"z":-70.88571428571429,"a95":3.6,"info":"\"15-02-09\" at \"21:24\""},{"visible":true,"include":false,"step":"480","x":31.123809523809523,"y":32.2,"z":-79.81904761904762,"a95":3.7,"info":"\"15-02-10\" at \"14:41\""},{"visible":true,"include":false,"step":"500","x":10.238095238095237,"y":30.533333333333335,"z":-75.72380952380952,"a95":5.2,"info":"\"15-02-10\" at \"18:37\""},{"visible":true,"include":false,"step":"530","x":11.390476190476189,"y":28.466666666666665,"z":-58.780952380952385,"a95":8.8,"info":"\"15-02-10\" at \"22:30\""},{"visible":true,"include":false,"step":"550","x":-56.46666666666666,"y":10.704761904761906,"z":-24.923809523809524,"a95":13.4,"info":"\"15-02-11\" at \"17:19\""},{"visible":true,"include":false,"step":"580","x":-26.476190476190474,"y":25.333333333333332,"z":125.14285714285714,"a95":15.2,"info":"\"15-02-11\" at \"20:55\""}]},{"version":"v1.1.0","exported":"2016-11-28T14:00:02.666Z","volume":10.5,"added":"2016-11-28T13:57:04.790Z","format":"Utrecht","demagType":"Unknown","strat":"7","patch":1.1,"GEO":[{"dec":106.5290761023428,"inc":-15.806891142847473,"MAD":16.685091761898445,"cm":[1.7763568394002505e-15,5.329070518200751e-15,0],"intensity":138.4307180877996,"type":"dir","forced":true,"remark":"","origin":false,"nSteps":5,"minStep":"30.0","maxStep":"45.0","steps":["30.0","33.0","35.0","40.0","45.0"],"group":"None","version":"v1.1.0"}],"TECT":[{"dec":115.4899262454382,"inc":-55.26514709316666,"MAD":16.68509176189844,"cm":[2.6645352591003757e-15,-1.7763568394002505e-15,-8.881784197001252e-16],"intensity":138.43071808779965,"type":"dir","forced":true,"remark":"","origin":false,"nSteps":5,"minStep":"30.0","maxStep":"45.0","steps":["30.0","33.0","35.0","40.0","45.0"],"group":"None","version":"v1.1.0"}],"interpreted":true,"name":"CP1.23A","coreAzi":49,"coreDip":38,"bedStrike":4,"bedDip":41,"data":[{"visible":true,"include":false,"step":"0.0","x":74.8104761904762,"y":46.81619047619048,"z":134.3047619047619,"a95":0.99,"info":"21/11/2014 at 03:01:58"},{"visible":true,"include":false,"step":"10.0","x":117,"y":142.0095238095238,"z":49.82952380952381,"a95":0.99,"info":"21/11/2014 at 03:01:58"},{"visible":true,"include":false,"step":"15.0","x":89.22857142857143,"y":115.76190476190476,"z":20.289523809523807,"a95":0.99,"info":"21/11/2014 at 03:01:58"},{"visible":true,"include":false,"step":"20.0","x":75.40285714285714,"y":97.5904761904762,"z":46.034285714285716,"a95":0.99,"info":"21/11/2014 at 03:01:58"},{"visible":true,"include":false,"step":"23.0","x":76.9352380952381,"y":98.39047619047618,"z":32.87428571428571,"a95":0.99,"info":"21/11/2014 at 03:01:58"},{"visible":true,"include":false,"step":"25.0","x":61.06285714285714,"y":98.55238095238094,"z":12.11047619047619,"a95":0.99,"info":"21/11/2014 at 03:01:58"},{"visible":true,"include":true,"step":"30.0","x":61.24666666666667,"y":79.01523809523809,"z":16.719047619047622,"a95":0.99,"info":"21/11/2014 at 03:01:58"},{"visible":true,"include":true,"step":"33.0","x":42.45619047619048,"y":70.96285714285715,"z":24.17904761904762,"a95":0.99,"info":"21/11/2014 at 03:01:58"},{"visible":true,"include":true,"step":"35.0","x":25.54285714285714,"y":61.43142857142857,"z":7.655047619047619,"a95":0.99,"info":"21/11/2014 at 03:01:58"},{"visible":true,"include":true,"step":"40.0","x":37.3552380952381,"y":60.02571428571429,"z":12.035238095238096,"a95":0.99,"info":"21/11/2014 at 03:01:58"},{"visible":true,"include":true,"step":"45.0","x":22.422857142857143,"y":8.834190476190477,"z":49.95142857142857,"a95":0.99,"info":"21/11/2014 at 03:01:58"},{"visible":true,"include":false,"step":"50.0","x":11.108571428571429,"y":21.078095238095237,"z":-26.874285714285715,"a95":0.99,"info":"21/11/2014 at 03:01:58"},{"visible":true,"include":false,"step":"60.0","x":23.01142857142857,"y":42.294285714285714,"z":19.078095238095237,"a95":0.99,"info":"21/11/2014 at 03:01:58"},{"visible":true,"include":false,"step":"70.0","x":15.262857142857142,"y":20.192380952380955,"z":2.767809523809524,"a95":0.99,"info":"21/11/2014 at 03:01:58"},{"visible":true,"include":false,"step":"80.0","x":42.46380952380952,"y":-7.117904761904762,"z":13.206666666666665,"a95":0.99,"info":"21/11/2014 at 03:01:58"},{"visible":true,"include":false,"step":"90.0","x":-12.637142857142857,"y":21.64190476190476,"z":16.684761904761906,"a95":0.99,"info":"21/11/2014 at 03:01:58"}]},{"version":"v1.1.0","exported":"2016-11-28T14:00:02.666Z","volume":10.5,"added":"2016-11-28T13:57:04.790Z","format":"Utrecht","demagType":"Unknown","strat":"8","patch":1.1,"GEO":[{"dec":131.4029778291109,"inc":-48.59433183146446,"MAD":17.32833353741632,"cm":[-3.9968028886505635e-15,-3.219646771412954e-15,0],"intensity":95.36299895240961,"type":"dir","forced":true,"remark":"","origin":false,"nSteps":7,"minStep":"23.0","maxStep":"45.0","steps":["23.0","25.0","30.0","33.0","35.0","40.0","45.0"],"group":"None","version":"v1.1.0"}],"TECT":[{"dec":197.37936432795016,"inc":-65.61003985191759,"MAD":17.328333537416338,"cm":[-3.9968028886505635e-15,-3.552713678800501e-15,2.220446049250313e-15],"intensity":95.36299895240961,"type":"dir","forced":true,"remark":"","origin":false,"nSteps":7,"minStep":"23.0","maxStep":"45.0","steps":["23.0","25.0","30.0","33.0","35.0","40.0","45.0"],"group":"None","version":"v1.1.0"}],"interpreted":true,"name":"CP1.26A","coreAzi":43,"coreDip":35,"bedStrike":4,"bedDip":41,"data":[{"visible":true,"include":false,"step":"0.0","x":21.437142857142856,"y":76.98190476190476,"z":62.20285714285714,"a95":0.99,"info":"21/11/2014 at 03:01:58"},{"visible":true,"include":false,"step":"10.0","x":64.01238095238095,"y":153.2,"z":-18.18285714285714,"a95":0.99,"info":"21/11/2014 at 03:01:58"},{"visible":true,"include":false,"step":"15.0","x":42.22380952380953,"y":96.67619047619048,"z":-55.81809523809524,"a95":0.99,"info":"21/11/2014 at 03:01:58"},{"visible":true,"include":false,"step":"20.0","x":53.645714285714284,"y":62.174285714285716,"z":-29.17238095238095,"a95":0.99,"info":"21/11/2014 at 03:01:58"},{"visible":true,"include":true,"step":"23.0","x":50.36095238095238,"y":58.149523809523814,"z":-24.35142857142857,"a95":0.99,"info":"21/11/2014 at 03:01:58"},{"visible":true,"include":true,"step":"25.0","x":52.061904761904756,"y":46.44952380952381,"z":-31.463809523809523,"a95":0.99,"info":"21/11/2014 at 03:01:58"},{"visible":true,"include":true,"step":"30.0","x":33.93333333333334,"y":40.81142857142857,"z":-31.35809523809524,"a95":0.99,"info":"21/11/2014 at 03:01:58"},{"visible":true,"include":true,"step":"33.0","x":33.73142857142857,"y":35.39523809523809,"z":-25.31047619047619,"a95":0.99,"info":"21/11/2014 at 03:01:58"},{"visible":true,"include":true,"step":"35.0","x":37.72666666666667,"y":36.67142857142857,"z":-29.741904761904763,"a95":0.99,"info":"21/11/2014 at 03:01:58"},{"visible":true,"include":true,"step":"40.0","x":29.551428571428573,"y":39.97428571428571,"z":-21.094285714285714,"a95":0.99,"info":"21/11/2014 at 03:01:58"},{"visible":true,"include":true,"step":"45.0","x":36.698095238095235,"y":-29.62190476190476,"z":-2.124952380952381,"a95":0.99,"info":"21/11/2014 at 03:01:58"},{"visible":true,"include":false,"step":"50.0","x":22.307619047619045,"y":20.812380952380952,"z":-20.07238095238095,"a95":0.99,"info":"21/11/2014 at 03:01:58"},{"visible":true,"include":false,"step":"60.0","x":23.743809523809524,"y":16.83047619047619,"z":-11.622857142857143,"a95":0.99,"info":"21/11/2014 at 03:01:58"},{"visible":true,"include":false,"step":"70.0","x":-1.1734285714285715,"y":23.674285714285716,"z":0.6529238095238095,"a95":0.99,"info":"21/11/2014 at 03:01:58"},{"visible":true,"include":false,"step":"80.0","x":20.62952380952381,"y":9.957142857142857,"z":-9.266285714285715,"a95":0.99,"info":"21/11/2014 at 03:01:58"},{"visible":true,"include":false,"step":"90.0","x":10.342857142857142,"y":6.285714285714286,"z":-9.688571428571429,"a95":0.99,"info":"21/11/2014 at 03:01:58"}]}]
