# Supplementary material for: Paleomagnetic constraints on the timing and distribution of Cenozoic rotations in Central and Eastern Anatolia
Source: Copernicus journal article supplement (doi:10.5194/se-9-295-2018), 2018-03-21
Supplement: Supplementary file 2 [file se-9-295-2018-supplement.zip › se-2017-66_DATA_dir files/dir files Ulukisla/CP2.dir]

[{"version":"v1.1.0","exported":"2016-11-28T14:04:31.347Z","volume":10.5,"added":"2016-11-28T14:00:14.402Z","format":"Utrecht","demagType":"Unknown","strat":null,"patch":1.1,"GEO":[{"dec":164.3294753420182,"inc":-62.888729919818594,"MAD":2.820923112073799,"cm":[0,1.021405182655144e-14,0],"intensity":1188.4030176780534,"type":"dir","forced":true,"remark":"","origin":false,"nSteps":7,"minStep":"300","maxStep":"450","steps":["300","320","340","370","400","420","450"],"group":"None","version":"v1.1.0"}],"TECT":[{"dec":171.75715008727275,"inc":-35.51926878349612,"MAD":2.8209231120738885,"cm":[3.552713678800501e-15,8.837375276016246e-14,-1.7763568394002505e-15],"intensity":1188.4030176780534,"type":"dir","forced":true,"remark":"","origin":false,"nSteps":7,"minStep":"300","maxStep":"450","steps":["300","320","340","370","400","420","450"],"group":"None","version":"v1.1.0"}],"interpreted":true,"name":"CP2.1A","coreAzi":360,"coreDip":20,"bedStrike":271,"bedDip":28,"data":[{"visible":true,"include":false,"step":"20","x":1031.142857142857,"y":231.42857142857142,"z":-436.95238095238096,"a95":1.7,"info":"\"14-11-29\" at \"18:21\""},{"visible":true,"include":false,"step":"100","x":1226.7619047619048,"y":330.57142857142856,"z":-1101.5238095238096,"a95":2,"info":"\"15-01-31\" at \"08:17\""},{"visible":true,"include":false,"step":"150","x":1230.6666666666667,"y":222.47619047619048,"z":-1126.6666666666667,"a95":2.1,"info":"\"15-01-31\" at \"12:29\""},{"visible":true,"include":false,"step":"180","x":1067.5238095238096,"y":208,"z":-1060,"a95":2.1,"info":"\"15-01-31\" at \"16:01\""},{"visible":true,"include":false,"step":"210","x":913.6190476190476,"y":169.04761904761904,"z":-962.952380952381,"a95":2.1,"info":"\"15-02-01\" at \"10:25\""},{"visible":true,"include":false,"step":"240","x":803.2380952380952,"y":143.33333333333334,"z":-895.8095238095239,"a95":2.1,"info":"\"15-02-01\" at \"14:11\""},{"visible":true,"include":false,"step":"270","x":686.6666666666666,"y":106.38095238095238,"z":-762.3809523809524,"a95":2.1,"info":"\"15-02-02\" at \"17:46\""},{"visible":true,"include":true,"step":"300","x":595.047619047619,"y":113.52380952380952,"z":-658.3809523809524,"a95":2.1,"info":"\"15-02-02\" at \"21:23\""},{"visible":true,"include":true,"step":"320","x":549.047619047619,"y":92.57142857142857,"z":-582.8571428571429,"a95":2.1,"info":"\"15-02-03\" at \"15:35\""},{"visible":true,"include":true,"step":"340","x":501.3333333333333,"y":52.285714285714285,"z":-506.1904761904762,"a95":2.2,"info":"\"15-02-03\" at \"23:17\""},{"visible":true,"include":true,"step":"370","x":507.5238095238095,"y":66.95238095238095,"z":-502.76190476190476,"a95":2,"info":"\"15-02-04\" at \"18:53\""},{"visible":true,"include":true,"step":"400","x":337.04761904761904,"y":107.52380952380952,"z":-349.42857142857144,"a95":2,"info":"\"15-02-04\" at \"23:05\""},{"visible":true,"include":true,"step":"420","x":306.2857142857143,"y":90.76190476190476,"z":-292.3809523809524,"a95":2.1,"info":"\"15-02-09\" at \"17:04\""},{"visible":true,"include":true,"step":"450","x":193.14285714285714,"y":48.285714285714285,"z":-216.1904761904762,"a95":2.8,"info":"\"15-02-09\" at \"21:27\""},{"visible":true,"include":false,"step":"480","x":77.71428571428571,"y":9.523809523809524,"z":-155.52380952380952,"a95":3.4,"info":"\"15-02-10\" at \"14:43\""},{"visible":true,"include":false,"step":"500","x":77.42857142857143,"y":88.76190476190476,"z":-111.23809523809524,"a95":4.9,"info":"\"15-02-10\" at \"18:40\""},{"visible":true,"include":false,"step":"530","x":59.62857142857143,"y":52.86666666666667,"z":-28.37142857142857,"a95":7,"info":"\"15-02-10\" at \"22:32\""},{"visible":true,"include":false,"step":"550","x":33.523809523809526,"y":120.38095238095238,"z":6.666666666666667,"a95":5.2,"info":"\"15-02-11\" at \"17:21\""},{"visible":true,"include":false,"step":"580","x":-68.19047619047619,"y":60.095238095238095,"z":143.14285714285714,"a95":4.3,"info":"\"15-02-11\" at \"20:57\""}]},{"version":"v1.1.0","exported":"2016-11-28T14:04:31.347Z","volume":10.5,"added":"2016-11-28T14:00:14.403Z","format":"Utrecht","demagType":"Unknown","strat":"1","patch":1.1,"GEO":[{"dec":149.94399950184118,"inc":-71.7644063574146,"MAD":1.007556328671275,"cm":[-1.0658141036401503e-14,-2.4868995751603507e-14,0],"intensity":2864.420407283097,"type":"dir","forced":true,"remark":"","origin":false,"nSteps":9,"minStep":"23.0","maxStep":"60.0","steps":["23.0","25.0","30.0","33.0","35.0","40.0","45.0","50.0","60.0"],"group":"None","version":"v1.1.0"}],"TECT":[{"dec":167.694139614616,"inc":-45.45928067076383,"MAD":1.0075563286712759,"cm":[3.552713678800501e-14,1.2079226507921703e-13,7.105427357601002e-15],"intensity":2864.420407283097,"type":"dir","forced":true,"remark":"","origin":false,"nSteps":9,"minStep":"23.0","maxStep":"60.0","steps":["23.0","25.0","30.0","33.0","35.0","40.0","45.0","50.0","60.0"],"group":"None","version":"v1.1.0"}],"interpreted":true,"name":"CP2.1B","coreAzi":360,"coreDip":20,"bedStrike":271,"bedDip":28,"data":[{"visible":true,"include":false,"step":"0.0","x":1188.857142857143,"y":318.0761904761905,"z":-790.6761904761905,"a95":0.99,"info":"21/11/2014 at 08:15:47"},{"visible":true,"include":false,"step":"10.0","x":1198.3809523809523,"y":276.15238095238095,"z":-834.8571428571429,"a95":0.99,"info":"21/11/2014 at 08:15:47"},{"visible":true,"include":false,"step":"15.0","x":1199.047619047619,"y":277.42857142857144,"z":-851.7523809523809,"a95":0.99,"info":"21/11/2014 at 08:15:47"},{"visible":true,"include":false,"step":"20.0","x":1136.2857142857142,"y":228.0857142857143,"z":-857.2285714285714,"a95":0.99,"info":"21/11/2014 at 08:15:47"},{"visible":true,"include":true,"step":"23.0","x":1162.952380952381,"y":235.0190476190476,"z":-816.6571428571428,"a95":0.99,"info":"21/11/2014 at 08:15:47"},{"visible":true,"include":true,"step":"25.0","x":1156.857142857143,"y":248.8,"z":-851.3428571428572,"a95":0.99,"info":"21/11/2014 at 08:15:47"},{"visible":true,"include":true,"step":"30.0","x":1163.4285714285713,"y":241.9142857142857,"z":-828.5428571428572,"a95":0.99,"info":"21/11/2014 at 08:15:47"},{"visible":true,"include":true,"step":"33.0","x":1187.6190476190477,"y":219.23809523809524,"z":-857.0095238095239,"a95":0.99,"info":"21/11/2014 at 08:15:47"},{"visible":true,"include":true,"step":"35.0","x":1151.904761904762,"y":220.23809523809524,"z":-829.3714285714285,"a95":0.99,"info":"21/11/2014 at 08:15:47"},{"visible":true,"include":true,"step":"40.0","x":1189.6190476190477,"y":216.86666666666665,"z":-812.2857142857143,"a95":0.99,"info":"21/11/2014 at 08:15:47"},{"visible":true,"include":true,"step":"45.0","x":1141.4285714285713,"y":225.53333333333333,"z":-840.2095238095238,"a95":0.99,"info":"21/11/2014 at 08:15:47"},{"visible":true,"include":true,"step":"50.0","x":1110.4761904761904,"y":218.78095238095236,"z":-858.742857142857,"a95":0.99,"info":"21/11/2014 at 08:15:47"},{"visible":true,"include":true,"step":"60.0","x":1132.3809523809523,"y":210.85714285714286,"z":-837.895238095238,"a95":0.99,"info":"21/11/2014 at 08:15:47"},{"visible":true,"include":false,"step":"70.0","x":1083.7142857142858,"y":186.4,"z":-842.8857142857142,"a95":0.99,"info":"21/11/2014 at 08:15:47"},{"visible":true,"include":false,"step":"80.0","x":933.5047619047618,"y":152.8,"z":-850.3238095238095,"a95":0.99,"info":"21/11/2014 at 08:15:47"},{"visible":true,"include":false,"step":"90.0","x":1094.3809523809523,"y":147.38095238095238,"z":-871.4190476190475,"a95":0.99,"info":"21/11/2014 at 08:15:47"}]},{"version":"v1.1.0","exported":"2016-11-28T14:04:31.347Z","volume":10.5,"added":"2016-11-28T14:00:14.404Z","format":"Utrecht","demagType":"Unknown","strat":"2","patch":1.1,"GEO":[{"dec":160.24572539658618,"inc":-67.10973775483814,"MAD":3.0701740822220738,"cm":[0,-4.618527782440651e-14,0],"intensity":2952.1609769020743,"type":"dir","forced":true,"remark":"","origin":false,"nSteps":7,"minStep":"25.0","maxStep":"50.0","steps":["25.0","30.0","33.0","35.0","40.0","45.0","50.0"],"group":"None","version":"v1.1.0"}],"TECT":[{"dec":170.63577973934707,"inc":-39.99026338197676,"MAD":3.0701740822221066,"cm":[-4.263256414560601e-14,-1.438849039914203e-13,2.842170943040401e-14],"intensity":2952.1609769020743,"type":"dir","forced":true,"remark":"","origin":false,"nSteps":7,"minStep":"25.0","maxStep":"50.0","steps":["25.0","30.0","33.0","35.0","40.0","45.0","50.0"],"group":"None","version":"v1.1.0"}],"interpreted":true,"name":"CP2.2A","coreAzi":342,"coreDip":19,"bedStrike":271,"bedDip":28,"data":[{"visible":true,"include":false,"step":"0.0","x":1091.142857142857,"y":-11.006666666666666,"z":-1076.4761904761904,"a95":0.99,"info":"21/11/2014 at 08:15:47"},{"visible":true,"include":false,"step":"10.0","x":1116.857142857143,"y":-13.944761904761904,"z":-1084.3809523809523,"a95":0.99,"info":"21/11/2014 at 08:15:47"},{"visible":true,"include":false,"step":"15.0","x":1137.7142857142858,"y":9.832380952380952,"z":-1093.4285714285713,"a95":0.99,"info":"21/11/2014 at 08:15:47"},{"visible":true,"include":false,"step":"20.0","x":1074,"y":-11.911428571428571,"z":-1049.4285714285713,"a95":0.99,"info":"21/11/2014 at 08:15:47"},{"visible":true,"include":false,"step":"23.0","x":1095.6190476190477,"y":0.6046857142857143,"z":-1067.7142857142858,"a95":0.99,"info":"21/11/2014 at 08:15:47"},{"visible":true,"include":true,"step":"25.0","x":1082.3809523809523,"y":2.3408571428571427,"z":-1041.7142857142858,"a95":0.99,"info":"21/11/2014 at 08:15:47"},{"visible":true,"include":true,"step":"30.0","x":1059.904761904762,"y":135.25714285714287,"z":-871.0095238095239,"a95":0.99,"info":"21/11/2014 at 08:15:47"},{"visible":true,"include":true,"step":"33.0","x":1058.095238095238,"y":18.15714285714286,"z":-1044.857142857143,"a95":0.99,"info":"21/11/2014 at 08:15:47"},{"visible":true,"include":true,"step":"35.0","x":1029.2380952380952,"y":3.7380000000000004,"z":-871.1142857142858,"a95":0.99,"info":"21/11/2014 at 08:15:47"},{"visible":true,"include":true,"step":"40.0","x":1086.1904761904761,"y":27.756190476190476,"z":-857.4571428571428,"a95":0.99,"info":"21/11/2014 at 08:15:47"},{"visible":true,"include":true,"step":"45.0","x":1136.857142857143,"y":-10.917142857142856,"z":-1029.142857142857,"a95":0.99,"info":"21/11/2014 at 08:15:47"},{"visible":true,"include":true,"step":"50.0","x":1053.2380952380952,"y":-48.23428571428571,"z":-996,"a95":0.99,"info":"21/11/2014 at 08:15:47"},{"visible":true,"include":false,"step":"60.0","x":1040.4761904761904,"y":40.60476190476191,"z":-917.5523809523809,"a95":0.99,"info":"21/11/2014 at 08:15:47"},{"visible":true,"include":false,"step":"70.0","x":965.047619047619,"y":40.52857142857143,"z":-850.4285714285714,"a95":0.99,"info":"21/11/2014 at 08:15:47"},{"visible":true,"include":false,"step":"80.0","x":1023.5238095238095,"y":43.14952380952381,"z":-949.0952380952381,"a95":0.99,"info":"21/11/2014 at 08:15:47"},{"visible":true,"include":false,"step":"90.0","x":1083.4285714285713,"y":-64.19142857142857,"z":-1009.3333333333334,"a95":0.99,"info":"21/11/2014 at 08:15:47"}]},{"version":"v1.1.0","exported":"2016-11-28T14:04:31.347Z","volume":10.5,"added":"2016-11-28T14:00:14.405Z","format":"Utrecht","demagType":"Unknown","strat":null,"patch":1.1,"GEO":[],"TECT":[],"interpreted":false,"name":"CP2.3A","coreAzi":26,"coreDip":53,"bedStrike":271,"bedDip":28,"data":[{"visible":true,"include":false,"step":"20","x":546,"y":223.8095238095238,"z":535.1428571428571,"a95":2.5,"info":"\"14-11-29\" at \"18:24\""},{"visible":true,"include":true,"step":"100","x":672.6666666666666,"y":585.8095238095239,"z":-266.6666666666667,"a95":1.6,"info":"\"15-01-31\" at \"08:21\""},{"visible":true,"include":true,"step":"150","x":731.4285714285714,"y":583.7142857142857,"z":-410.1904761904762,"a95":1.8,"info":"\"15-01-31\" at \"12:31\""},{"visible":true,"include":true,"step":"180","x":689.2380952380952,"y":616.952380952381,"z":-396.4761904761905,"a95":1.8,"info":"\"15-01-31\" at \"16:05\""},{"visible":true,"include":false,"step":"210","x":652,"y":637.5238095238095,"z":-318.4761904761905,"a95":1.7,"info":"\"15-02-01\" at \"09:14\""},{"visible":true,"include":false,"step":"240","x":596.5714285714286,"y":581.4285714285714,"z":-256.0952380952381,"a95":1.7,"info":"\"15-02-01\" at \"14:13\""},{"visible":true,"include":false,"step":"270","x":553.5238095238095,"y":505.6190476190476,"z":-205.23809523809524,"a95":1.8,"info":"\"15-02-02\" at \"17:48\""},{"visible":true,"include":false,"step":"300","x":555.7142857142857,"y":491.9047619047619,"z":-169.52380952380952,"a95":1.7,"info":"\"15-02-02\" at \"21:25\""},{"visible":true,"include":false,"step":"320","x":483.04761904761904,"y":525.4285714285714,"z":-189.9047619047619,"a95":1.9,"info":"\"15-02-03\" at \"15:38\""},{"visible":true,"include":false,"step":"340","x":449.8095238095238,"y":474.1904761904762,"z":-129.52380952380952,"a95":1.8,"info":"\"15-02-03\" at \"23:20\""},{"visible":true,"include":false,"step":"370","x":463.23809523809524,"y":495.6190476190476,"z":-150,"a95":1.8,"info":"\"15-02-04\" at \"18:56\""},{"visible":true,"include":false,"step":"400","x":401.23809523809524,"y":454,"z":8.19047619047619,"a95":1.8,"info":"\"15-02-04\" at \"23:07\""},{"visible":true,"include":false,"step":"420","x":349.14285714285717,"y":456.2857142857143,"z":70,"a95":1.5,"info":"\"15-02-09\" at \"17:06\""},{"visible":true,"include":false,"step":"450","x":330.95238095238096,"y":471.04761904761904,"z":91.42857142857143,"a95":1.6,"info":"\"15-02-09\" at \"21:32\""},{"visible":true,"include":false,"step":"480","x":337.3333333333333,"y":421.6190476190476,"z":79.80952380952381,"a95":4,"info":"\"15-02-10\" at \"14:46\""},{"visible":true,"include":false,"step":"500","x":213.42857142857142,"y":472.95238095238096,"z":209.14285714285714,"a95":1.9,"info":"\"15-02-10\" at \"18:42\""},{"visible":true,"include":false,"step":"530","x":276.0952380952381,"y":611.8095238095239,"z":176.57142857142858,"a95":1.4,"info":"\"15-02-10\" at \"22:34\""},{"visible":true,"include":false,"step":"550","x":203.61904761904762,"y":551.3333333333334,"z":134.66666666666666,"a95":1.6,"info":"\"15-02-11\" at \"17:23\""},{"visible":true,"include":false,"step":"580","x":144.76190476190476,"y":498.76190476190476,"z":276.76190476190476,"a95":1.9,"info":"\"15-02-11\" at \"21:00\""}]},{"version":"v1.1.0","exported":"2016-11-28T14:04:31.348Z","volume":10.5,"added":"2016-11-28T14:00:14.406Z","format":"Utrecht","demagType":"Unknown","strat":null,"patch":1.1,"GEO":[{"dec":152.05265535982448,"inc":-61.945009107531256,"MAD":4.291597626095713,"cm":[7.105427357601002e-15,2.4868995751603507e-14,0],"intensity":2258.143973284616,"type":"dir","forced":true,"remark":"","origin":false,"nSteps":9,"minStep":"240","maxStep":"450","steps":["240","270","300","320","340","370","400","420","450"],"group":"None","version":"v1.1.0"}],"TECT":[{"dec":164.68481580024059,"inc":-35.87245028767872,"MAD":4.291597626095674,"cm":[1.4210854715202004e-14,-7.105427357601002e-15,0],"intensity":2258.1439732846165,"type":"dir","forced":true,"remark":"","origin":false,"nSteps":9,"minStep":"240","maxStep":"450","steps":["240","270","300","320","340","370","400","420","450"],"group":"None","version":"v1.1.0"}],"interpreted":true,"name":"CP2.4A","coreAzi":41,"coreDip":36,"bedStrike":271,"bedDip":28,"data":[{"visible":true,"include":false,"step":"20","x":619.6190476190476,"y":234.28571428571428,"z":-163.9047619047619,"a95":2.2,"info":"\"14-11-29\" at \"18:26\""},{"visible":true,"include":false,"step":"100","x":923.3333333333334,"y":622.8571428571429,"z":-840.5714285714286,"a95":2.1,"info":"\"15-01-31\" at \"08:27\""},{"visible":true,"include":false,"step":"150","x":1010.3809523809524,"y":720.952380952381,"z":-1081.5238095238096,"a95":2.2,"info":"\"15-01-31\" at \"12:33\""},{"visible":true,"include":false,"step":"180","x":1115.8095238095239,"y":651.8095238095239,"z":-1162.952380952381,"a95":2.2,"info":"\"15-01-31\" at \"16:08\""},{"visible":true,"include":false,"step":"210","x":944.0952380952381,"y":665.4285714285714,"z":-988,"a95":2.1,"info":"\"15-02-01\" at \"09:16\""},{"visible":true,"include":true,"step":"240","x":932.2857142857143,"y":571.8095238095239,"z":-949.6190476190476,"a95":2.1,"info":"\"15-02-01\" at \"14:15\""},{"visible":true,"include":true,"step":"270","x":776.4761904761905,"y":519.4285714285714,"z":-792.2857142857143,"a95":2,"info":"\"15-02-02\" at \"17:50\""},{"visible":true,"include":true,"step":"300","x":704,"y":456.57142857142856,"z":-747.8095238095239,"a95":2.1,"info":"\"15-02-02\" at \"21:28\""},{"visible":true,"include":true,"step":"320","x":641.9047619047619,"y":467.8095238095238,"z":-771.2380952380952,"a95":2.3,"info":"\"15-02-03\" at \"15:42\""},{"visible":true,"include":true,"step":"340","x":644.7619047619048,"y":451.6190476190476,"z":-760.1904761904761,"a95":2.2,"info":"\"15-02-03\" at \"23:22\""},{"visible":true,"include":true,"step":"370","x":646.1904761904761,"y":451.42857142857144,"z":-759.6190476190476,"a95":2.1,"info":"\"15-02-04\" at \"18:58\""},{"visible":true,"include":true,"step":"400","x":551.6190476190476,"y":518,"z":-598.0952380952381,"a95":1.9,"info":"\"15-02-04\" at \"23:09\""},{"visible":true,"include":true,"step":"420","x":583.9047619047619,"y":438.85714285714283,"z":-541.9047619047619,"a95":2.2,"info":"\"15-02-09\" at \"17:09\""},{"visible":true,"include":true,"step":"450","x":501.5238095238095,"y":484.3809523809524,"z":-438.85714285714283,"a95":2.1,"info":"\"15-02-09\" at \"21:34\""},{"visible":true,"include":false,"step":"480","x":462.1904761904762,"y":332,"z":-396.3809523809524,"a95":3.5,"info":"\"15-02-10\" at \"14:48\""},{"visible":true,"include":false,"step":"500","x":404.76190476190476,"y":300.4761904761905,"z":-341.9047619047619,"a95":2.3,"info":"\"15-02-10\" at \"18:44\""},{"visible":true,"include":false,"step":"530","x":390.57142857142856,"y":288,"z":-334.85714285714283,"a95":2.3,"info":"\"15-02-10\" at \"22:36\""},{"visible":true,"include":false,"step":"550","x":179.14285714285714,"y":262.4761904761905,"z":-338.2857142857143,"a95":2.6,"info":"\"15-02-11\" at \"17:30\""},{"visible":true,"include":false,"step":"580","x":88.57142857142857,"y":31.80952380952381,"z":-123.71428571428571,"a95":5,"info":"\"15-02-11\" at \"21:03\""}]},{"version":"v1.1.0","exported":"2016-11-28T14:04:31.348Z","volume":10.5,"added":"2016-11-28T14:00:14.406Z","format":"Utrecht","demagType":"Unknown","strat":"3","patch":1.1,"GEO":[{"dec":280.400643151307,"inc":-29.49458975420995,"MAD":13.487051975710626,"cm":[-1.0658141036401503e-14,7.105427357601002e-15,0],"intensity":1156.8450576842326,"type":"GC","origin":false,"forced":true,"remark":"","nSteps":13,"minStep":"15.0","maxStep":"80.0","steps":["15.0","20.0","23.0","25.0","30.0","33.0","35.0","40.0","45.0","50.0","60.0","70.0","80.0"],"group":"None","version":"v1.1.0"}],"TECT":[{"dec":263.9884395157708,"inc":-30.0963679221575,"MAD":13.487051975710576,"cm":[-6.750155989720952e-14,3.197442310920451e-14,7.105427357601002e-15],"intensity":1156.8450576842324,"type":"GC","origin":false,"forced":true,"remark":"","nSteps":13,"minStep":"15.0","maxStep":"80.0","steps":["15.0","20.0","23.0","25.0","30.0","33.0","35.0","40.0","45.0","50.0","60.0","70.0","80.0"],"group":"None","version":"v1.1.0"}],"interpreted":true,"name":"CP2.5A","coreAzi":338,"coreDip":55,"bedStrike":271,"bedDip":28,"data":[{"visible":true,"include":false,"step":"0.0","x":519.2095238095238,"y":783.5714285714286,"z":926.7333333333333,"a95":0.99,"info":"21/11/2014 at 08:15:47"},{"visible":true,"include":false,"step":"10.0","x":795.0952380952381,"y":587.4190476190475,"z":498.447619047619,"a95":0.99,"info":"21/11/2014 at 08:15:47"},{"visible":true,"include":true,"step":"15.0","x":643.0666666666666,"y":571.4571428571429,"z":322.9142857142857,"a95":0.99,"info":"21/11/2014 at 08:15:47"},{"visible":true,"include":true,"step":"20.0","x":647.3904761904762,"y":599.104761904762,"z":259.5809523809524,"a95":0.99,"info":"21/11/2014 at 08:15:47"},{"visible":true,"include":true,"step":"23.0","x":551.7238095238096,"y":443.64761904761906,"z":96.24761904761905,"a95":0.99,"info":"21/11/2014 at 08:15:47"},{"visible":true,"include":true,"step":"25.0","x":440.1714285714286,"y":432.0571428571429,"z":14.323809523809524,"a95":0.99,"info":"21/11/2014 at 08:15:47"},{"visible":true,"include":true,"step":"30.0","x":467.6,"y":393.3333333333333,"z":-173.57142857142858,"a95":0.99,"info":"21/11/2014 at 08:15:47"},{"visible":true,"include":true,"step":"33.0","x":551.6666666666666,"y":521.8857142857144,"z":-21.516190476190474,"a95":0.99,"info":"21/11/2014 at 08:15:47"},{"visible":true,"include":true,"step":"35.0","x":510.9619047619048,"y":245.95238095238096,"z":-211.86666666666665,"a95":0.99,"info":"21/11/2014 at 08:15:47"},{"visible":true,"include":true,"step":"40.0","x":419.2952380952381,"y":504.4380952380953,"z":-402.16190476190474,"a95":0.99,"info":"21/11/2014 at 08:15:47"},{"visible":true,"include":true,"step":"45.0","x":332.23809523809524,"y":351.9428571428572,"z":-415.08571428571423,"a95":0.99,"info":"21/11/2014 at 08:15:47"},{"visible":true,"include":true,"step":"50.0","x":319.32380952380953,"y":170.4952380952381,"z":-545.9714285714285,"a95":0.99,"info":"21/11/2014 at 08:15:47"},{"visible":true,"include":true,"step":"60.0","x":307.5333333333333,"y":585.8857142857144,"z":-691.3523809523809,"a95":0.99,"info":"21/11/2014 at 08:15:47"},{"visible":true,"include":true,"step":"70.0","x":291.93333333333334,"y":381.9047619047619,"z":-568.4857142857143,"a95":0.99,"info":"21/11/2014 at 08:15:47"},{"visible":true,"include":true,"step":"80.0","x":-33.62285714285714,"y":200.30476190476188,"z":-932.2190476190475,"a95":0.99,"info":"21/11/2014 at 08:15:47"},{"visible":true,"include":false,"step":"90.0","x":345.8,"y":200.55238095238096,"z":-856.3142857142857,"a95":0.99,"info":"21/11/2014 at 08:15:47"}]},{"version":"v1.1.0","exported":"2016-11-28T14:04:31.348Z","volume":10.5,"added":"2016-11-28T14:00:14.407Z","format":"Utrecht","demagType":"Unknown","strat":"4","patch":1.1,"GEO":[{"dec":275.55797662496866,"inc":-8.652453352020197,"MAD":15.341621740576189,"cm":[-1.7763568394002505e-15,-7.105427357601002e-15,0],"intensity":1734.4596045769692,"type":"GC","origin":false,"forced":true,"remark":"","nSteps":10,"minStep":"20.0","maxStep":"60.0","steps":["20.0","23.0","25.0","30.0","33.0","35.0","40.0","45.0","50.0","60.0"],"group":"None","version":"v1.1.0"}],"TECT":[{"dec":270.92673548172553,"inc":-9.771210285087044,"MAD":15.34162174057614,"cm":[-1.7763568394002505e-15,9.059419880941277e-14,7.105427357601002e-15],"intensity":1734.4596045769692,"type":"GC","origin":false,"forced":true,"remark":"","nSteps":10,"minStep":"20.0","maxStep":"60.0","steps":["20.0","23.0","25.0","30.0","33.0","35.0","40.0","45.0","50.0","60.0"],"group":"None","version":"v1.1.0"}],"interpreted":true,"name":"CP2.6A","coreAzi":342,"coreDip":69,"bedStrike":271,"bedDip":28,"data":[{"visible":true,"include":false,"step":"0.0","x":764.7809523809524,"y":624.895238095238,"z":480.5238095238095,"a95":0.99,"info":"21/11/2014 at 08:15:47"},{"visible":true,"include":false,"step":"10.0","x":968.4761904761905,"y":544.3714285714285,"z":118.44761904761906,"a95":0.99,"info":"21/11/2014 at 08:15:47"},{"visible":true,"include":false,"step":"15.0","x":963.4285714285714,"y":510.2857142857143,"z":-7.9421904761904765,"a95":0.99,"info":"21/11/2014 at 08:15:47"},{"visible":true,"include":true,"step":"20.0","x":846.9238095238096,"y":490.93333333333334,"z":-76.93333333333332,"a95":0.99,"info":"21/11/2014 at 08:15:47"},{"visible":true,"include":true,"step":"23.0","x":896.9904761904761,"y":425.9238095238095,"z":-136.62857142857143,"a95":0.99,"info":"21/11/2014 at 08:15:47"},{"visible":true,"include":true,"step":"25.0","x":884.5523809523809,"y":338.32380952380953,"z":-189.2095238095238,"a95":0.99,"info":"21/11/2014 at 08:15:47"},{"visible":true,"include":true,"step":"30.0","x":901.3809523809524,"y":335.447619047619,"z":-275.95238095238096,"a95":0.99,"info":"21/11/2014 at 08:15:47"},{"visible":true,"include":true,"step":"33.0","x":700.5142857142857,"y":391.53333333333336,"z":-115.27619047619048,"a95":0.99,"info":"21/11/2014 at 08:15:47"},{"visible":true,"include":true,"step":"35.0","x":691.4,"y":324.15238095238095,"z":-125.47619047619048,"a95":0.99,"info":"21/11/2014 at 08:15:47"},{"visible":true,"include":true,"step":"40.0","x":704.0571428571429,"y":238.46666666666667,"z":-282.6,"a95":0.99,"info":"21/11/2014 at 08:15:47"},{"visible":true,"include":true,"step":"45.0","x":591.9238095238095,"y":371.04761904761904,"z":-515.4190476190475,"a95":0.99,"info":"21/11/2014 at 08:15:47"},{"visible":true,"include":true,"step":"50.0","x":536.3523809523809,"y":188.04761904761904,"z":-630.047619047619,"a95":0.99,"info":"21/11/2014 at 08:15:47"},{"visible":true,"include":true,"step":"60.0","x":510.25714285714287,"y":291.29523809523806,"z":-667.7333333333333,"a95":0.99,"info":"21/11/2014 at 08:15:47"},{"visible":true,"include":false,"step":"70.0","x":493.9619047619048,"y":423.2285714285714,"z":-669.2380952380952,"a95":0.99,"info":"21/11/2014 at 08:15:47"},{"visible":true,"include":false,"step":"80.0","x":639.6666666666666,"y":122.4095238095238,"z":-901.8,"a95":0.99,"info":"21/11/2014 at 08:15:47"},{"visible":true,"include":false,"step":"90.0","x":693.7714285714286,"y":310.4095238095238,"z":-972.2857142857143,"a95":0.99,"info":"21/11/2014 at 08:15:47"}]},{"version":"v1.1.0","exported":"2016-11-28T14:04:31.348Z","volume":10.5,"added":"2016-11-28T14:00:14.409Z","format":"Utrecht","demagType":"Unknown","strat":null,"patch":1.1,"GEO":[{"dec":175.81577168393073,"inc":-42.719801892919996,"MAD":3.016437626355466,"cm":[2.842170943040401e-14,1.6697754290362354e-13,0],"intensity":2376.3341630380537,"type":"dir","forced":true,"remark":"","origin":false,"nSteps":6,"minStep":"210","maxStep":"340","steps":["210","240","270","300","320","340"],"group":"None","version":"v1.1.0"}],"TECT":[{"dec":177.06276621968152,"inc":-14.803401262222506,"MAD":3.0164376263554598,"cm":[0,-1.4654943925052066e-13,8.881784197001252e-15],"intensity":2376.3341630380537,"type":"dir","forced":true,"remark":"","origin":false,"nSteps":6,"minStep":"210","maxStep":"340","steps":["210","240","270","300","320","340"],"group":"None","version":"v1.1.0"}],"interpreted":true,"name":"CP2.7A","coreAzi":320,"coreDip":69,"bedStrike":271,"bedDip":28,"data":[{"visible":true,"include":false,"step":"20","x":-795.4285714285714,"y":-327.9047619047619,"z":380.1904761904762,"a95":1.9,"info":"\"14-11-29\" at \"18:28\""},{"visible":true,"include":false,"step":"100","x":-440.6666666666667,"y":-512.3809523809524,"z":-946.2857142857143,"a95":2.4,"info":"\"15-01-31\" at \"08:30\""},{"visible":true,"include":false,"step":"150","x":-376.2857142857143,"y":-691.7142857142857,"z":-1469.7142857142858,"a95":2.6,"info":"\"15-01-31\" at \"12:36\""},{"visible":true,"include":false,"step":"180","x":-504.4761904761905,"y":-711.4285714285714,"z":-1589.7142857142858,"a95":2.6,"info":"\"15-01-31\" at \"16:12\""},{"visible":true,"include":true,"step":"210","x":-434.0952380952381,"y":-709.2380952380952,"z":-1392,"a95":2.6,"info":"\"15-02-01\" at \"09:18\""},{"visible":true,"include":true,"step":"240","x":-411.5238095238095,"y":-585.4285714285714,"z":-1102.4761904761904,"a95":2.5,"info":"\"15-02-01\" at \"14:17\""},{"visible":true,"include":true,"step":"270","x":-305.14285714285717,"y":-468.6666666666667,"z":-832.952380952381,"a95":2.6,"info":"\"15-02-02\" at \"17:52\""},{"visible":true,"include":true,"step":"300","x":-307.5238095238095,"y":-322.6666666666667,"z":-735.4285714285714,"a95":2.7,"info":"\"15-02-02\" at \"21:31\""},{"visible":true,"include":true,"step":"320","x":-329.9047619047619,"y":-335.7142857142857,"z":-705.6190476190476,"a95":2.9,"info":"\"15-02-03\" at \"15:44\""},{"visible":true,"include":true,"step":"340","x":-287.14285714285717,"y":-295.23809523809524,"z":-637.2380952380952,"a95":2.7,"info":"\"15-02-03\" at \"23:24\""},{"visible":true,"include":false,"step":"370","x":-287.3333333333333,"y":-281.3333333333333,"z":-644,"a95":2.7,"info":"\"15-02-04\" at \"19:00\""},{"visible":true,"include":false,"step":"400","x":-314.2857142857143,"y":-170,"z":-387.7142857142857,"a95":2.8,"info":"\"15-02-04\" at \"23:11\""},{"visible":true,"include":false,"step":"420","x":-367.7142857142857,"y":-155.33333333333334,"z":-291.3333333333333,"a95":2.9,"info":"\"15-02-09\" at \"17:11\""},{"visible":true,"include":false,"step":"450","x":-331.5238095238095,"y":-218.47619047619048,"z":-182.1904761904762,"a95":2.8,"info":"\"15-02-09\" at \"21:36\""},{"visible":true,"include":false,"step":"480","x":-396.3809523809524,"y":-220.76190476190476,"z":-99.33333333333333,"a95":2.5,"info":"\"15-02-10\" at \"14:50\""},{"visible":true,"include":false,"step":"500","x":-415.3333333333333,"y":-264.6666666666667,"z":-111.71428571428571,"a95":2.4,"info":"\"15-02-10\" at \"18:46\""},{"visible":true,"include":false,"step":"530","x":-341.04761904761904,"y":-208.28571428571428,"z":-71.9047619047619,"a95":2.7,"info":"\"15-02-10\" at \"22:39\""},{"visible":true,"include":false,"step":"550","x":-322.0952380952381,"y":-78.19047619047619,"z":142.76190476190476,"a95":3.4,"info":"\"15-02-11\" at \"17:32\""},{"visible":true,"include":false,"step":"580","x":0.47619047619047616,"y":-168.85714285714286,"z":204.66666666666666,"a95":5.3,"info":"\"15-02-11\" at \"21:05\""}]},{"version":"v1.1.0","exported":"2016-11-28T14:04:31.348Z","volume":10.5,"added":"2016-11-28T14:00:14.409Z","format":"Utrecht","demagType":"Unknown","strat":"5","patch":1.1,"GEO":[],"TECT":[],"interpreted":false,"name":"CP2.7B","coreAzi":320,"coreDip":69,"bedStrike":271,"bedDip":28,"data":[{"visible":true,"include":false,"step":"0.0","x":-160.7047619047619,"y":25.983809523809523,"z":-553.3809523809524,"a95":0.99,"info":"21/11/2014 at 08:15:47"},{"visible":true,"include":false,"step":"10.0","x":69.0104761904762,"y":92.87714285714286,"z":-596.5809523809525,"a95":0.99,"info":"21/11/2014 at 08:15:47"},{"visible":true,"include":false,"step":"15.0","x":84.75142857142858,"y":171.31428571428572,"z":-496.2476190476191,"a95":0.99,"info":"21/11/2014 at 08:15:47"},{"visible":true,"include":false,"step":"20.0","x":43.65904761904762,"y":207.75238095238097,"z":-500.4095238095238,"a95":0.99,"info":"21/11/2014 at 08:15:47"},{"visible":true,"include":false,"step":"23.0","x":18.953333333333333,"y":218.85714285714286,"z":-389.0571428571428,"a95":0.99,"info":"21/11/2014 at 08:15:47"},{"visible":true,"include":false,"step":"25.0","x":46.74285714285715,"y":121.94285714285715,"z":-503.5142857142857,"a95":0.99,"info":"21/11/2014 at 08:15:47"},{"visible":true,"include":false,"step":"30.0","x":1.9204761904761904,"y":250.67619047619047,"z":-406.3619047619048,"a95":0.99,"info":"21/11/2014 at 08:15:47"},{"visible":true,"include":false,"step":"33.0","x":13.166666666666666,"y":162.55238095238096,"z":-453.1333333333333,"a95":0.99,"info":"21/11/2014 at 08:15:47"},{"visible":true,"include":true,"step":"35.0","x":24.41238095238095,"y":178.59047619047618,"z":-431.3619047619048,"a95":0.99,"info":"21/11/2014 at 08:15:47"},{"visible":true,"include":true,"step":"40.0","x":-16.885714285714286,"y":198.85714285714286,"z":-483.9619047619048,"a95":0.99,"info":"21/11/2014 at 08:15:47"},{"visible":true,"include":true,"step":"45.0","x":15.813333333333333,"y":282.0857142857143,"z":-451.9619047619048,"a95":0.99,"info":"21/11/2014 at 08:15:47"},{"visible":true,"include":true,"step":"50.0","x":-67.07142857142857,"y":274.48571428571427,"z":-401.27619047619044,"a95":0.99,"info":"21/11/2014 at 08:15:47"},{"visible":true,"include":true,"step":"60.0","x":-74.31904761904762,"y":192.33333333333334,"z":-583.4666666666666,"a95":0.99,"info":"21/11/2014 at 08:15:47"},{"visible":true,"include":false,"step":"70.0","x":-199.52380952380952,"y":245.58095238095237,"z":-529.7142857142857,"a95":0.99,"info":"21/11/2014 at 08:15:47"},{"visible":true,"include":false,"step":"80.0","x":-66.98666666666666,"y":49.18095238095238,"z":-562.2666666666667,"a95":0.99,"info":"21/11/2014 at 08:15:47"},{"visible":true,"include":false,"step":"90.0","x":-59.41142857142857,"y":-72.85428571428572,"z":-634.152380952381,"a95":0.99,"info":"21/11/2014 at 08:15:47"}]},{"version":"v1.1.0","exported":"2016-11-28T14:04:31.348Z","volume":10.5,"added":"2016-11-28T14:00:14.409Z","format":"Utrecht","demagType":"Unknown","strat":null,"patch":1.1,"GEO":[{"dec":229.99284600643992,"inc":-22.87430527904328,"MAD":17.55633930624416,"cm":[-1.5987211554602254e-14,1.354472090042691e-14,0],"intensity":1248.9975735667026,"type":"GC","origin":false,"forced":true,"remark":"","nSteps":9,"minStep":"150","maxStep":"370","steps":["150","180","210","240","270","300","320","340","370"],"group":"None","version":"v1.1.0"}],"TECT":[{"dec":225.14791288357412,"inc":-3.4048404589608894,"MAD":17.556339306244087,"cm":[-3.6415315207705135e-14,-3.885780586188048e-14,0],"intensity":1248.9975735667024,"type":"GC","origin":false,"forced":true,"remark":"","nSteps":9,"minStep":"150","maxStep":"370","steps":["150","180","210","240","270","300","320","340","370"],"group":"None","version":"v1.1.0"}],"interpreted":true,"name":"CP2.8A","coreAzi":296,"coreDip":38,"bedStrike":271,"bedDip":28,"data":[{"visible":true,"include":false,"step":"20","x":444.3809523809524,"y":651.6190476190476,"z":182.0952380952381,"a95":1.9,"info":"\"14-11-29\" at \"18:30\""},{"visible":true,"include":false,"step":"100","x":548.952380952381,"y":334,"z":-530.1904761904761,"a95":4.3,"info":"\"15-01-31\" at \"08:38\""},{"visible":true,"include":true,"step":"150","x":588.4761904761905,"y":271.14285714285717,"z":-609.7142857142857,"a95":2.4,"info":"\"15-01-31\" at \"12:38\""},{"visible":true,"include":true,"step":"180","x":535.7142857142857,"y":284,"z":-619.047619047619,"a95":2.5,"info":"\"15-01-31\" at \"16:15\""},{"visible":true,"include":true,"step":"210","x":452.85714285714283,"y":264,"z":-563.047619047619,"a95":2.6,"info":"\"15-02-01\" at \"09:20\""},{"visible":true,"include":true,"step":"240","x":400.85714285714283,"y":244.38095238095238,"z":-488.2857142857143,"a95":2.7,"info":"\"15-02-01\" at \"14:19\""},{"visible":true,"include":true,"step":"270","x":311.3333333333333,"y":239.14285714285714,"z":-375.5238095238095,"a95":2.7,"info":"\"15-02-02\" at \"17:54\""},{"visible":true,"include":true,"step":"300","x":288.95238095238096,"y":182.0952380952381,"z":-298,"a95":3.1,"info":"\"15-02-02\" at \"21:33\""},{"visible":true,"include":true,"step":"320","x":305.3333333333333,"y":195.9047619047619,"z":-214.95238095238096,"a95":2.9,"info":"\"15-02-03\" at \"15:46\""},{"visible":true,"include":true,"step":"340","x":312.57142857142856,"y":192.85714285714286,"z":-106.47619047619048,"a95":2.5,"info":"\"15-02-03\" at \"23:27\""},{"visible":true,"include":true,"step":"370","x":317.7142857142857,"y":187.04761904761904,"z":-117.52380952380952,"a95":2.4,"info":"\"15-02-04\" at \"19:02\""},{"visible":true,"include":false,"step":"400","x":212.1904761904762,"y":166.1904761904762,"z":-73.42857142857143,"a95":2.7,"info":"\"15-02-04\" at \"23:14\""},{"visible":true,"include":false,"step":"420","x":156.85714285714286,"y":206,"z":-32.095238095238095,"a95":3.1,"info":"\"15-02-09\" at \"17:13\""},{"visible":true,"include":false,"step":"450","x":102.66666666666667,"y":241.33333333333334,"z":0.8571428571428571,"a95":3.9,"info":"\"15-02-09\" at \"21:38\""},{"visible":true,"include":false,"step":"480","x":27.714285714285715,"y":238.76190476190476,"z":80,"a95":3.7,"info":"\"15-02-10\" at \"14:51\""},{"visible":true,"include":false,"step":"500","x":53.142857142857146,"y":135.9047619047619,"z":54.666666666666664,"a95":6.5,"info":"\"15-02-10\" at \"18:49\""},{"visible":true,"include":false,"step":"530","x":-6.761904761904762,"y":212.0952380952381,"z":134.0952380952381,"a95":4.4,"info":"\"15-02-10\" at \"22:41\""},{"visible":true,"include":false,"step":"550","x":134.0952380952381,"y":246.85714285714286,"z":99.9047619047619,"a95":3.4,"info":"\"15-02-11\" at \"17:34\""},{"visible":true,"include":false,"step":"580","x":57.61904761904762,"y":173.52380952380952,"z":137.33333333333334,"a95":4.4,"info":"\"15-02-11\" at \"21:08\""}]},{"version":"v1.1.0","exported":"2016-11-28T14:04:31.348Z","volume":10.5,"added":"2016-11-28T14:00:14.409Z","format":"Utrecht","demagType":"Unknown","strat":null,"patch":1.1,"GEO":[{"dec":155.46712595582335,"inc":-68.8506313223601,"MAD":1.2323337823283973,"cm":[2.842170943040401e-14,4.263256414560601e-14,0],"intensity":2218.3367980673866,"type":"dir","forced":true,"remark":"","origin":false,"nSteps":4,"minStep":"370","maxStep":"450","steps":["370","400","420","450"],"group":"None","version":"v1.1.0"}],"TECT":[{"dec":168.89822838234818,"inc":-42.1158467632115,"MAD":1.232333782328333,"cm":[0,7.815970093361102e-14,-1.4210854715202004e-14],"intensity":2218.336798067386,"type":"dir","forced":true,"remark":"","origin":false,"nSteps":4,"minStep":"370","maxStep":"450","steps":["370","400","420","450"],"group":"None","version":"v1.1.0"}],"interpreted":true,"name":"CP2.9A","coreAzi":333,"coreDip":60,"bedStrike":271,"bedDip":28,"data":[{"visible":true,"include":false,"step":"20","x":424.95238095238096,"y":40.095238095238095,"z":-835.8095238095239,"a95":3.2,"info":"\"14-11-29\" at \"18:32\""},{"visible":true,"include":false,"step":"100","x":324,"y":37.23809523809524,"z":-1243.4285714285713,"a95":2.7,"info":"\"15-01-31\" at \"08:41\""},{"visible":true,"include":false,"step":"150","x":285.5238095238095,"y":-11.714285714285714,"z":-1319.4285714285713,"a95":2.7,"info":"\"15-01-31\" at \"12:41\""},{"visible":true,"include":false,"step":"180","x":292.1904761904762,"y":-44.476190476190474,"z":-1337.142857142857,"a95":2.7,"info":"\"15-01-31\" at \"16:19\""},{"visible":true,"include":false,"step":"210","x":288.4761904761905,"y":-32.476190476190474,"z":-1308.6666666666667,"a95":2.6,"info":"\"15-02-01\" at \"09:22\""},{"visible":true,"include":false,"step":"240","x":268.3809523809524,"y":-52,"z":-1257.8095238095239,"a95":2.7,"info":"\"15-02-01\" at \"14:21\""},{"visible":true,"include":false,"step":"270","x":348.4761904761905,"y":-7.809523809523809,"z":-1223.8095238095239,"a95":2.7,"info":"\"15-02-02\" at \"17:56\""},{"visible":true,"include":false,"step":"300","x":302.1904761904762,"y":0.6666666666666666,"z":-1220.952380952381,"a95":2.5,"info":"\"15-02-02\" at \"21:35\""},{"visible":true,"include":false,"step":"320","x":281.3333333333333,"y":-24.38095238095238,"z":-1253.6190476190477,"a95":3.2,"info":"\"15-02-03\" at \"15:48\""},{"visible":true,"include":false,"step":"340","x":218.1904761904762,"y":-13.428571428571429,"z":-1200.095238095238,"a95":2.7,"info":"\"15-02-03\" at \"23:29\""},{"visible":true,"include":true,"step":"370","x":216.57142857142858,"y":-10.476190476190476,"z":-1207.3333333333333,"a95":2.5,"info":"\"15-02-04\" at \"19:04\""},{"visible":true,"include":true,"step":"400","x":169.9047619047619,"y":-29.714285714285715,"z":-1055.6190476190477,"a95":2.5,"info":"\"15-02-04\" at \"23:16\""},{"visible":true,"include":true,"step":"420","x":124.19047619047619,"y":-9.428571428571429,"z":-1000.3809523809524,"a95":3,"info":"\"15-02-09\" at \"17:15\""},{"visible":true,"include":true,"step":"450","x":145.04761904761904,"y":-18.19047619047619,"z":-981.1428571428571,"a95":3,"info":"\"15-02-09\" at \"21:40\""},{"visible":true,"include":false,"step":"480","x":182.66666666666666,"y":69.52380952380952,"z":-913.2380952380952,"a95":3,"info":"\"15-02-10\" at \"14:53\""},{"visible":true,"include":false,"step":"500","x":101.42857142857143,"y":-100.85714285714286,"z":-978.8571428571429,"a95":3,"info":"\"15-02-10\" at \"18:51\""},{"visible":true,"include":false,"step":"530","x":147.14285714285714,"y":-138.1904761904762,"z":-953.9047619047619,"a95":2.8,"info":"\"15-02-10\" at \"22:43\""},{"visible":true,"include":false,"step":"550","x":52.285714285714285,"y":-30.19047619047619,"z":-861.1428571428571,"a95":2.9,"info":"\"15-02-11\" at \"17:36\""},{"visible":true,"include":false,"step":"580","x":154.66666666666666,"y":-190.95238095238096,"z":-751.7142857142857,"a95":2.9,"info":"\"15-02-11\" at \"21:10\""}]},{"version":"v1.1.0","exported":"2016-11-28T14:04:31.348Z","volume":10.5,"added":"2016-11-28T14:00:14.409Z","format":"Utrecht","demagType":"Unknown","strat":null,"patch":1.1,"GEO":[{"dec":136.0007293560124,"inc":37.01493420440958,"MAD":1.5505837984423656,"cm":[2.0463630789890885e-12,2.3856472353145364e-12,0],"intensity":20645.74606027807,"type":"dir","forced":true,"remark":"","origin":false,"nSteps":8,"minStep":"400","maxStep":"580","steps":["400","420","450","480","500","530","550","580"],"group":"None","version":"v1.1.0"}],"TECT":[{"dec":111.92599850989365,"inc":52.809149357699674,"MAD":1.5505837984424167,"cm":[2.3331336862497665e-12,9.094947017729282e-13,-1.1368683772161603e-13],"intensity":20645.74606027807,"type":"dir","forced":true,"remark":"","origin":false,"nSteps":8,"minStep":"400","maxStep":"580","steps":["400","420","450","480","500","530","550","580"],"group":"None","version":"v1.1.0"}],"interpreted":true,"name":"CP2.10A","coreAzi":335,"coreDip":66,"bedStrike":271,"bedDip":28,"data":[{"visible":true,"include":false,"step":"20","x":-21342.095238095237,"y":5138.952380952381,"z":5360.952380952381,"a95":2,"info":"\"14-11-29\" at \"18:36\""},{"visible":true,"include":false,"step":"100","x":-21297.904761904763,"y":4637.714285714285,"z":4867.809523809524,"a95":1.9,"info":"\"15-01-31\" at \"08:47\""},{"visible":true,"include":false,"step":"150","x":-21116.095238095237,"y":5536.285714285715,"z":4687.333333333333,"a95":1.9,"info":"\"15-01-31\" at \"12:44\""},{"visible":true,"include":false,"step":"180","x":-21323.52380952381,"y":4611.142857142857,"z":4641.142857142857,"a95":1.9,"info":"\"15-01-31\" at \"16:26\""},{"visible":true,"include":false,"step":"210","x":-20596.571428571428,"y":5463.047619047619,"z":4835.714285714285,"a95":1.9,"info":"\"15-02-01\" at \"09:24\""},{"visible":true,"include":false,"step":"240","x":-20533.52380952381,"y":4805.142857142857,"z":4760.190476190476,"a95":1.9,"info":"\"15-02-01\" at \"14:24\""},{"visible":true,"include":false,"step":"270","x":-20531.714285714286,"y":4637.714285714285,"z":4914.571428571428,"a95":2,"info":"\"15-02-02\" at \"17:59\""},{"visible":true,"include":false,"step":"300","x":-20643.809523809523,"y":4632.666666666667,"z":4822.666666666667,"a95":1.9,"info":"\"15-02-02\" at \"21:37\""},{"visible":true,"include":false,"step":"320","x":-20387.238095238095,"y":5159.523809523809,"z":4726.571428571428,"a95":2.3,"info":"\"15-02-03\" at \"15:50\""},{"visible":true,"include":false,"step":"340","x":-19662.095238095237,"y":4427.9047619047615,"z":4942.761904761905,"a95":2.2,"info":"\"15-02-03\" at \"23:31\""},{"visible":true,"include":false,"step":"370","x":-19682.285714285714,"y":4517.142857142857,"z":4916.571428571428,"a95":2,"info":"\"15-02-04\" at \"19:06\""},{"visible":true,"include":true,"step":"400","x":-18852.190476190477,"y":5507.333333333333,"z":4723.809523809524,"a95":2,"info":"\"15-02-04\" at \"23:18\""},{"visible":true,"include":true,"step":"420","x":-18821.333333333332,"y":4671.523809523809,"z":4832.666666666667,"a95":2,"info":"\"15-02-09\" at \"17:17\""},{"visible":true,"include":true,"step":"450","x":-18172.85714285714,"y":4826.476190476191,"z":4696.380952380952,"a95":2.1,"info":"\"15-02-09\" at \"21:43\""},{"visible":true,"include":true,"step":"480","x":-17894.095238095237,"y":5954.380952380952,"z":4757.142857142857,"a95":2.1,"info":"\"15-02-10\" at \"14:56\""},{"visible":true,"include":true,"step":"500","x":-17406.95238095238,"y":4351.714285714285,"z":4573.047619047619,"a95":2.1,"info":"\"15-02-10\" at \"18:53\""},{"visible":true,"include":true,"step":"530","x":-15774.666666666666,"y":4582.380952380952,"z":4194.666666666667,"a95":2.8,"info":"\"15-02-10\" at \"22:47\""},{"visible":true,"include":true,"step":"550","x":-10728.857142857143,"y":2737.4285714285716,"z":2840.190476190476,"a95":2.1,"info":"\"15-02-11\" at \"17:39\""},{"visible":true,"include":true,"step":"580","x":-396.57142857142856,"y":31.238095238095237,"z":281.8095238095238,"a95":2.6,"info":"\"15-02-11\" at \"21:13\""}]},{"version":"v1.1.0","exported":"2016-11-28T14:04:31.348Z","volume":10.5,"added":"2016-11-28T14:00:14.409Z","format":"Utrecht","demagType":"Unknown","strat":"6","patch":1.1,"GEO":[{"dec":182.4702621268907,"inc":-79.39274984730359,"MAD":3.220161046048673,"cm":[0,1.3766765505351941e-14,0],"intensity":1083.5145605907865,"type":"dir","forced":true,"remark":"","origin":false,"nSteps":6,"minStep":"30.0","maxStep":"50.0","steps":["30.0","33.0","35.0","40.0","45.0","50.0"],"group":"None","version":"v1.1.0"}],"TECT":[{"dec":181.43371352846452,"inc":-51.39536237970771,"MAD":3.2201610460486516,"cm":[-3.552713678800501e-14,-3.4638958368304884e-14,2.1316282072803006e-14],"intensity":1083.5145605907865,"type":"dir","forced":true,"remark":"","origin":false,"nSteps":6,"minStep":"30.0","maxStep":"50.0","steps":["30.0","33.0","35.0","40.0","45.0","50.0"],"group":"None","version":"v1.1.0"}],"interpreted":true,"name":"CP2.10C","coreAzi":335,"coreDip":66,"bedStrike":271,"bedDip":28,"data":[{"visible":true,"include":false,"step":"0.0","x":48.18190476190476,"y":-23.333333333333332,"z":-445.9047619047619,"a95":0.99,"info":"21/11/2014 at 08:15:47"},{"visible":true,"include":false,"step":"10.0","x":111.01904761904763,"y":-60.33428571428571,"z":-451.5619047619047,"a95":0.99,"info":"21/11/2014 at 08:15:47"},{"visible":true,"include":false,"step":"15.0","x":112.44761904761906,"y":-74.29428571428572,"z":-460.3619047619048,"a95":0.99,"info":"21/11/2014 at 08:15:47"},{"visible":true,"include":false,"step":"20.0","x":92.6352380952381,"y":-84.02857142857142,"z":-504.8952380952381,"a95":0.99,"info":"21/11/2014 at 08:15:47"},{"visible":true,"include":false,"step":"23.0","x":88.97999999999999,"y":-92.47047619047619,"z":-541.1714285714286,"a95":0.99,"info":"21/11/2014 at 08:15:47"},{"visible":true,"include":false,"step":"25.0","x":162.13333333333335,"y":-68.75523809523808,"z":-535.9047619047619,"a95":0.99,"info":"21/11/2014 at 08:15:47"},{"visible":true,"include":true,"step":"30.0","x":148.8190476190476,"y":-87.72190476190477,"z":-525.152380952381,"a95":0.99,"info":"21/11/2014 at 08:15:47"},{"visible":true,"include":true,"step":"33.0","x":126.87619047619049,"y":-37.79714285714286,"z":-540.0761904761905,"a95":0.99,"info":"21/11/2014 at 08:15:47"},{"visible":true,"include":true,"step":"35.0","x":129.01904761904763,"y":-55.05047619047619,"z":-524.4285714285714,"a95":0.99,"info":"21/11/2014 at 08:15:47"},{"visible":true,"include":true,"step":"40.0","x":132.8952380952381,"y":-25.287619047619046,"z":-553.0285714285715,"a95":0.99,"info":"21/11/2014 at 08:15:47"},{"visible":true,"include":true,"step":"45.0","x":191.63809523809525,"y":-66.33142857142857,"z":-591.4190476190475,"a95":0.99,"info":"21/11/2014 at 08:15:47"},{"visible":true,"include":true,"step":"50.0","x":111.3047619047619,"y":-12.431428571428572,"z":-521.895238095238,"a95":0.99,"info":"21/11/2014 at 08:15:47"},{"visible":true,"include":false,"step":"60.0","x":107.83809523809524,"y":-0.20242857142857146,"z":-571.0285714285715,"a95":0.99,"info":"21/11/2014 at 08:15:47"},{"visible":true,"include":false,"step":"70.0","x":104.75238095238096,"y":79.6352380952381,"z":-603.3619047619047,"a95":0.99,"info":"21/11/2014 at 08:15:47"},{"visible":true,"include":false,"step":"80.0","x":209.97142857142856,"y":17.364761904761906,"z":-513.047619047619,"a95":0.99,"info":"21/11/2014 at 08:15:47"},{"visible":true,"include":false,"step":"90.0","x":207.25714285714284,"y":73.79047619047618,"z":-476.6,"a95":0.99,"info":"21/11/2014 at 08:15:47"}]},{"version":"v1.1.0","exported":"2016-11-28T14:04:31.348Z","volume":10.5,"added":"2016-11-28T14:00:14.410Z","format":"Utrecht","demagType":"Unknown","strat":"7","patch":1.1,"GEO":[{"dec":181.21520156573442,"inc":-54.66765855352024,"MAD":4.45163373532674,"cm":[1.4210854715202004e-14,6.661338147750939e-14,0],"intensity":2335.3489972828907,"type":"dir","forced":true,"remark":"","origin":false,"nSteps":5,"minStep":"35.0","maxStep":"60.0","steps":["35.0","40.0","45.0","50.0","60.0"],"group":"None","version":"v1.1.0"}],"TECT":[{"dec":181.13926979086665,"inc":-26.667781342350516,"MAD":4.451633735326706,"cm":[0,1.092459456231154e-13,0],"intensity":2335.3489972828907,"type":"dir","forced":true,"remark":"","origin":false,"nSteps":5,"minStep":"35.0","maxStep":"60.0","steps":["35.0","40.0","45.0","50.0","60.0"],"group":"None","version":"v1.1.0"}],"interpreted":true,"name":"CP2.11A","coreAzi":332,"coreDip":60,"bedStrike":271,"bedDip":28,"data":[{"visible":true,"include":false,"step":"0.0","x":-100.80952380952381,"y":-145.51428571428573,"z":-935.5809523809525,"a95":0.99,"info":"21/11/2014 at 08:15:47"},{"visible":true,"include":false,"step":"10.0","x":-15.017142857142858,"y":-154.26666666666665,"z":-966.4761904761905,"a95":0.99,"info":"21/11/2014 at 08:15:47"},{"visible":true,"include":false,"step":"15.0","x":0.21142857142857144,"y":-185.94285714285715,"z":-1031.4285714285713,"a95":0.99,"info":"21/11/2014 at 08:15:47"},{"visible":true,"include":false,"step":"20.0","x":-59.71142857142858,"y":-240.39999999999998,"z":-1053.904761904762,"a95":0.99,"info":"21/11/2014 at 08:15:47"},{"visible":true,"include":false,"step":"23.0","x":-34.15809523809524,"y":-234.64761904761906,"z":-1121.5238095238096,"a95":0.99,"info":"21/11/2014 at 08:15:47"},{"visible":true,"include":false,"step":"25.0","x":-78.52666666666667,"y":-255.56190476190477,"z":-1120,"a95":0.99,"info":"21/11/2014 at 08:15:47"},{"visible":true,"include":false,"step":"30.0","x":-12.74,"y":-269.06666666666666,"z":-1193.6190476190477,"a95":0.99,"info":"21/11/2014 at 08:15:47"},{"visible":true,"include":false,"step":"33.0","x":31.581904761904763,"y":-310.64761904761906,"z":-1106.857142857143,"a95":0.99,"info":"21/11/2014 at 08:15:47"},{"visible":true,"include":true,"step":"35.0","x":-40.198095238095235,"y":-351.3619047619048,"z":-1064.4761904761904,"a95":0.99,"info":"21/11/2014 at 08:15:47"},{"visible":true,"include":true,"step":"40.0","x":37.49523809523809,"y":-343.50476190476195,"z":-1129.904761904762,"a95":0.99,"info":"21/11/2014 at 08:15:47"},{"visible":true,"include":true,"step":"45.0","x":9.198952380952381,"y":-325.7238095238095,"z":-1159.4285714285713,"a95":0.99,"info":"21/11/2014 at 08:15:47"},{"visible":true,"include":true,"step":"50.0","x":-196.96190476190475,"y":-272.70476190476194,"z":-1133.142857142857,"a95":0.99,"info":"21/11/2014 at 08:15:47"},{"visible":true,"include":true,"step":"60.0","x":14.376190476190475,"y":-368.96190476190475,"z":-1156.857142857143,"a95":0.99,"info":"21/11/2014 at 08:15:47"},{"visible":true,"include":false,"step":"70.0","x":-191.4952380952381,"y":-148.0857142857143,"z":-1015.5238095238095,"a95":0.99,"info":"21/11/2014 at 08:15:47"},{"visible":true,"include":false,"step":"80.0","x":-91.88380952380952,"y":-345.9047619047619,"z":-1150.2857142857142,"a95":0.99,"info":"21/11/2014 at 08:15:47"},{"visible":true,"include":false,"step":"90.0","x":-190.14285714285714,"y":-284.6190476190476,"z":-1203.047619047619,"a95":0.99,"info":"21/11/2014 at 08:15:47"}]},{"version":"v1.1.0","exported":"2016-11-28T14:04:31.348Z","volume":10.5,"added":"2016-11-28T14:00:14.410Z","format":"Utrecht","demagType":"Unknown","strat":null,"patch":1.1,"GEO":[{"dec":344.3622471448837,"inc":-48.75808730188595,"MAD":10.210868541219515,"cm":[-7.105427357601002e-15,-6.750155989720952e-14,0],"intensity":1784.9719574516819,"type":"GC","origin":false,"forced":true,"remark":"","nSteps":6,"minStep":"100","maxStep":"270","steps":["100","150","180","210","240","270"],"group":"None","version":"v1.1.0"}],"TECT":[{"dec":318.320082820305,"inc":-73.83302819031526,"MAD":10.210868541217975,"cm":[-1.4210854715202004e-14,2.4868995751603507e-14,-3.552713678800501e-15],"intensity":1784.9719574516819,"type":"GC","origin":false,"forced":true,"remark":"","nSteps":6,"minStep":"100","maxStep":"270","steps":["100","150","180","210","240","270"],"group":"None","version":"v1.1.0"}],"interpreted":true,"name":"CP2.12A","coreAzi":340,"coreDip":54,"bedStrike":271,"bedDip":28,"data":[{"visible":true,"include":false,"step":"20","x":-233.9047619047619,"y":252.1904761904762,"z":-232,"a95":2.7,"info":"\"14-11-29\" at \"18:39\""},{"visible":true,"include":true,"step":"100","x":-225.61904761904762,"y":176.0952380952381,"z":-862.3809523809524,"a95":2.9,"info":"\"15-01-31\" at \"08:50\""},{"visible":true,"include":true,"step":"150","x":-211.71428571428572,"y":116.28571428571429,"z":-999.4285714285714,"a95":2.9,"info":"\"15-01-31\" at \"12:46\""},{"visible":true,"include":true,"step":"180","x":-227.9047619047619,"y":63.80952380952381,"z":-1019.3333333333334,"a95":3,"info":"\"15-01-31\" at \"16:34\""},{"visible":true,"include":true,"step":"210","x":-233.04761904761904,"y":-23.714285714285715,"z":-961.1428571428571,"a95":2.9,"info":"\"15-02-01\" at \"09:27\""},{"visible":true,"include":true,"step":"240","x":-212.38095238095238,"y":6.761904761904762,"z":-952.7619047619048,"a95":2.8,"info":"\"15-02-01\" at \"14:26\""},{"visible":true,"include":true,"step":"270","x":-198.57142857142858,"y":-38.666666666666664,"z":-866,"a95":2.7,"info":"\"15-02-02\" at \"18:01\""},{"visible":true,"include":false,"step":"300","x":-224.95238095238096,"y":4.190476190476191,"z":-756.5714285714286,"a95":3.4,"info":"\"15-02-02\" at \"21:40\""},{"visible":true,"include":false,"step":"320","x":-152,"y":-105.23809523809524,"z":-725.1428571428571,"a95":2.8,"info":"\"15-02-03\" at \"15:53\""},{"visible":true,"include":false,"step":"340","x":-96.47619047619048,"y":-64.47619047619048,"z":-710.2857142857143,"a95":2.9,"info":"\"15-02-03\" at \"23:33\""},{"visible":true,"include":false,"step":"370","x":-123.9047619047619,"y":-74.95238095238095,"z":-701.6190476190476,"a95":2.8,"info":"\"15-02-04\" at \"19:09\""},{"visible":true,"include":false,"step":"400","x":-203.9047619047619,"y":7.619047619047619,"z":-672.2857142857143,"a95":2.7,"info":"\"15-02-04\" at \"23:20\""},{"visible":true,"include":false,"step":"420","x":-211.71428571428572,"y":6.9523809523809526,"z":-578.1904761904761,"a95":3.1,"info":"\"15-02-09\" at \"17:19\""},{"visible":true,"include":false,"step":"450","x":-184.95238095238096,"y":-159.61904761904762,"z":-556.7619047619048,"a95":3,"info":"\"15-02-09\" at \"21:45\""},{"visible":true,"include":false,"step":"480","x":-155.33333333333334,"y":-129.33333333333334,"z":-577.4285714285714,"a95":3.2,"info":"\"15-02-10\" at \"14:58\""},{"visible":true,"include":false,"step":"500","x":-212.66666666666666,"y":-91.52380952380952,"z":-370.6666666666667,"a95":3.2,"info":"\"15-02-10\" at \"18:55\""},{"visible":true,"include":false,"step":"530","x":-286.85714285714283,"y":97.71428571428571,"z":-355.23809523809524,"a95":2.9,"info":"\"15-02-10\" at \"22:49\""},{"visible":true,"include":false,"step":"550","x":-196.47619047619048,"y":96.76190476190476,"z":-428,"a95":3.8,"info":"\"15-02-11\" at \"17:41\""},{"visible":true,"include":false,"step":"580","x":-179.04761904761904,"y":15.238095238095237,"z":-489.23809523809524,"a95":3.6,"info":"\"15-02-11\" at \"21:15\""}]},{"version":"v1.1.0","exported":"2016-11-28T14:04:31.348Z","volume":10.5,"added":"2016-11-28T14:00:14.410Z","format":"Utrecht","demagType":"Unknown","strat":"8","patch":1.1,"GEO":[{"dec":282.4598179809329,"inc":-11.480810275233475,"MAD":19.183335439204928,"cm":[2.708944180085382e-14,-7.993605777301127e-15,0],"intensity":2119.782770220847,"type":"GC","origin":false,"forced":true,"remark":"","nSteps":12,"minStep":"20.0","maxStep":"80.0","steps":["20.0","23.0","25.0","30.0","33.0","35.0","40.0","45.0","50.0","60.0","70.0","80.0"],"group":"None","version":"v1.1.0"}],"TECT":[{"dec":275.6708088479397,"inc":-15.494761074666634,"MAD":19.18333543920491,"cm":[-4.618527782440651e-14,-3.552713678800501e-14,-1.4210854715202004e-14],"intensity":2119.782770220847,"type":"GC","origin":false,"forced":true,"remark":"","nSteps":12,"minStep":"20.0","maxStep":"80.0","steps":["20.0","23.0","25.0","30.0","33.0","35.0","40.0","45.0","50.0","60.0","70.0","80.0"],"group":"None","version":"v1.1.0"}],"interpreted":true,"name":"CP2.13B","coreAzi":1,"coreDip":32,"bedStrike":271,"bedDip":28,"data":[{"visible":true,"include":false,"step":"0.0","x":-3290.4761904761904,"y":128.33333333333334,"z":909.8190476190476,"a95":0.99,"info":"21/11/2014 at 08:15:47"},{"visible":true,"include":false,"step":"10.0","x":150.42857142857142,"y":235.1047619047619,"z":1713.904761904762,"a95":0.99,"info":"21/11/2014 at 08:15:47"},{"visible":true,"include":false,"step":"15.0","x":440.12380952380954,"y":226.76190476190476,"z":1108.4761904761904,"a95":0.99,"info":"21/11/2014 at 08:15:47"},{"visible":true,"include":true,"step":"20.0","x":929.0095238095239,"y":229.2761904761905,"z":1143.047619047619,"a95":0.99,"info":"21/11/2014 at 08:15:47"},{"visible":true,"include":true,"step":"23.0","x":999.3333333333334,"y":403.97142857142853,"z":1124.5714285714287,"a95":0.99,"info":"21/11/2014 at 08:15:47"},{"visible":true,"include":true,"step":"25.0","x":813.1142857142858,"y":477.2666666666667,"z":630.6476190476191,"a95":0.99,"info":"21/11/2014 at 08:15:47"},{"visible":true,"include":true,"step":"30.0","x":564.895238095238,"y":255.94285714285715,"z":846.152380952381,"a95":0.99,"info":"21/11/2014 at 08:15:47"},{"visible":true,"include":true,"step":"33.0","x":930.8285714285715,"y":54.71333333333333,"z":331.1904761904762,"a95":0.99,"info":"21/11/2014 at 08:15:47"},{"visible":true,"include":true,"step":"35.0","x":628.7238095238096,"y":201.85714285714286,"z":392.0190476190476,"a95":0.99,"info":"21/11/2014 at 08:15:47"},{"visible":true,"include":true,"step":"40.0","x":693.504761904762,"y":-68.84095238095239,"z":163.76190476190476,"a95":0.99,"info":"21/11/2014 at 08:15:47"},{"visible":true,"include":true,"step":"45.0","x":830.5238095238095,"y":465.0761904761905,"z":-95.29523809523809,"a95":0.99,"info":"21/11/2014 at 08:15:47"},{"visible":true,"include":true,"step":"50.0","x":698,"y":70.39142857142858,"z":295.68571428571425,"a95":0.99,"info":"21/11/2014 at 08:15:47"},{"visible":true,"include":true,"step":"60.0","x":1288.7619047619048,"y":358.9904761904762,"z":-137.15238095238095,"a95":0.99,"info":"21/11/2014 at 08:15:47"},{"visible":true,"include":true,"step":"70.0","x":1129.7142857142858,"y":517.5809523809525,"z":-115.42857142857143,"a95":0.99,"info":"21/11/2014 at 08:15:47"},{"visible":true,"include":true,"step":"80.0","x":1089.142857142857,"y":127.19999999999999,"z":-601.3238095238095,"a95":0.99,"info":"21/11/2014 at 08:15:47"},{"visible":true,"include":false,"step":"90.0","x":767.3714285714285,"y":442.39047619047625,"z":-561.0380952380953,"a95":0.99,"info":"21/11/2014 at 08:15:47"}]}]
