# Supplementary material for: Paleomagnetic constraints on the timing and distribution of Cenozoic rotations in Central and Eastern Anatolia
Source: Copernicus journal article supplement (doi:10.5194/se-9-295-2018), 2018-03-21
Supplement: Supplementary file 2 [file se-9-295-2018-supplement.zip › se-2017-66_DATA_dir files/dir files Ulukisla/CP3.dir]

[{"version":"v1.1.0","exported":"2016-11-28T14:09:56.088Z","volume":10.5,"added":"2016-11-28T14:04:44.020Z","format":"Utrecht","demagType":"Unknown","strat":null,"patch":1.1,"GEO":[],"TECT":[],"interpreted":false,"name":"CP3.1A","coreAzi":307,"coreDip":-1,"bedStrike":216,"bedDip":29,"data":[{"visible":true,"include":false,"step":"20","x":-6332.952380952381,"y":2289.1428571428573,"z":2008.952380952381,"a95":1.7,"info":"\"14-11-29\" at \"18:44\""},{"visible":true,"include":false,"step":"100","x":-5741.142857142857,"y":2826.190476190476,"z":3861.714285714286,"a95":1.8,"info":"\"15-01-31\" at \"08:57\""},{"visible":true,"include":false,"step":"150","x":-4270.380952380952,"y":2635.714285714286,"z":2812.6666666666665,"a95":1.8,"info":"\"15-01-31\" at \"12:50\""},{"visible":true,"include":true,"step":"180","x":-3837.904761904762,"y":2560.3809523809523,"z":2868.7619047619046,"a95":1.9,"info":"\"15-01-31\" at \"16:39\""},{"visible":true,"include":true,"step":"210","x":-3812.7619047619046,"y":2245.5238095238096,"z":2616.3809523809523,"a95":1.9,"info":"\"15-02-01\" at \"10:27\""},{"visible":true,"include":true,"step":"240","x":-3781.5238095238096,"y":1901.4285714285713,"z":2518,"a95":2,"info":"\"15-02-01\" at \"14:30\""},{"visible":true,"include":true,"step":"270","x":-3517.4285714285716,"y":1729.904761904762,"z":2395.4285714285716,"a95":1.9,"info":"\"15-02-02\" at \"18:05\""},{"visible":true,"include":true,"step":"300","x":-3275.0476190476193,"y":2138.6666666666665,"z":2271.3333333333335,"a95":1.9,"info":"\"15-02-02\" at \"21:43\""},{"visible":true,"include":true,"step":"320","x":-3272.5714285714284,"y":1995.142857142857,"z":2255.6190476190477,"a95":2.4,"info":"\"15-02-03\" at \"15:57\""},{"visible":true,"include":true,"step":"340","x":-3125.904761904762,"y":2150.3809523809523,"z":2225.4285714285716,"a95":1.9,"info":"\"15-02-03\" at \"23:36\""},{"visible":true,"include":true,"step":"370","x":-3236,"y":1783.3333333333333,"z":2250.3809523809523,"a95":1.9,"info":"\"15-02-04\" at \"19:11\""},{"visible":true,"include":false,"step":"400","x":-3060.4761904761904,"y":1771.142857142857,"z":2154.7619047619046,"a95":1.9,"info":"\"15-02-04\" at \"23:23\""},{"visible":true,"include":false,"step":"420","x":-2870.6666666666665,"y":1908.857142857143,"z":2191.1428571428573,"a95":1.9,"info":"\"15-02-09\" at \"17:21\""}]},{"version":"v1.1.0","exported":"2016-11-28T14:09:56.088Z","volume":10.5,"added":"2016-11-28T14:04:44.020Z","format":"Utrecht","demagType":"Unknown","strat":null,"patch":1.1,"GEO":[],"TECT":[],"interpreted":false,"name":"CP3.01B","coreAzi":307,"coreDip":-1,"bedStrike":216,"bedDip":29,"data":[{"visible":true,"include":false,"step":"20","x":-3494.8571428571427,"y":2719.0476190476193,"z":2531.714285714286,"a95":2,"info":"\"15-06-22\" at \"16:14\""},{"visible":true,"include":false,"step":"90","x":-2752.7619047619046,"y":1569.4285714285713,"z":1655.6190476190477,"a95":1.9,"info":"\"15-06-22\" at \"19:34\""},{"visible":true,"include":false,"step":"120","x":-2572.285714285714,"y":1405.4285714285713,"z":1356.1904761904761,"a95":6.8,"info":"\"15-06-22\" at \"22:01\""},{"visible":true,"include":false,"step":"150","x":-2206.7619047619046,"y":1469.4285714285713,"z":1399.7142857142858,"a95":2,"info":"\"15-06-23\" at \"20:25\""},{"visible":true,"include":false,"step":"180","x":-2138.3809523809523,"y":1207.7142857142858,"z":1392.1904761904761,"a95":2.1,"info":"\"15-06-24\" at \"16:52\""},{"visible":true,"include":true,"step":"210","x":-1969.7142857142858,"y":1179.7142857142858,"z":1338.857142857143,"a95":2.2,"info":"\"15-06-24\" at \"19:37\""},{"visible":true,"include":true,"step":"230","x":-1992.1904761904761,"y":1240.6666666666667,"z":1297.3333333333333,"a95":2.1,"info":"\"15-06-27\" at \"23:50\""},{"visible":true,"include":true,"step":"250","x":-1832.7619047619048,"y":1296.095238095238,"z":1211.047619047619,"a95":2,"info":"\"15-06-28\" at \"02:20\""},{"visible":true,"include":true,"step":"270","x":-1835.142857142857,"y":1273.2380952380952,"z":1149.3333333333333,"a95":2,"info":"\"15-06-28\" at \"17:58\""},{"visible":true,"include":true,"step":"300","x":-1830.857142857143,"y":1126.857142857143,"z":1139.904761904762,"a95":2.9,"info":"\"15-06-30\" at \"11:07\""},{"visible":true,"include":true,"step":"330","x":-1717.5238095238096,"y":1197.8095238095239,"z":1092.7619047619048,"a95":2,"info":"\"15-06-30\" at \"13:45\""},{"visible":true,"include":false,"step":"360","x":-1724.3809523809523,"y":1023.8095238095239,"z":1190.952380952381,"a95":2.1,"info":"\"15-07-01\" at \"09:07\""},{"visible":true,"include":false,"step":"380","x":-1732.3809523809523,"y":1118.7619047619048,"z":1146,"a95":2,"info":"\"15-07-01\" at \"14:02\""},{"visible":true,"include":false,"step":"410","x":-1635.904761904762,"y":1025.6190476190477,"z":1012.952380952381,"a95":2.1,"info":"\"15-07-02\" at \"09:25\""},{"visible":true,"include":false,"step":"430","x":-1529.2380952380952,"y":1196.5714285714287,"z":989.1428571428571,"a95":2.1,"info":"\"15-07-02\" at \"13:08\""}]},{"version":"v1.1.0","exported":"2016-11-28T14:09:56.088Z","volume":10.5,"added":"2016-11-28T14:04:44.021Z","format":"Utrecht","demagType":"Unknown","strat":"1","patch":1.1,"GEO":[],"TECT":[],"interpreted":false,"name":"CP3.2A","coreAzi":307,"coreDip":4,"bedStrike":216,"bedDip":29,"data":[{"visible":true,"include":false,"step":"0.0","x":-10189.52380952381,"y":6974,"z":7513.809523809524,"a95":0.99,"info":"21/11/2014 at 13:30:57"},{"visible":true,"include":false,"step":"10.0","x":-8903.904761904761,"y":6724.857142857143,"z":6616.190476190476,"a95":0.99,"info":"21/11/2014 at 13:30:57"},{"visible":true,"include":false,"step":"15.0","x":-7936,"y":5829.333333333333,"z":6138.380952380952,"a95":0.99,"info":"21/11/2014 at 13:30:57"},{"visible":true,"include":false,"step":"20.0","x":-7005.809523809524,"y":4951.333333333333,"z":5435.714285714285,"a95":0.99,"info":"21/11/2014 at 13:30:57"},{"visible":true,"include":false,"step":"23.0","x":-6319.428571428572,"y":4362.666666666667,"z":5072.380952380952,"a95":0.99,"info":"21/11/2014 at 13:30:57"},{"visible":true,"include":true,"step":"25.0","x":-5901.714285714285,"y":3991.714285714286,"z":4622.571428571428,"a95":0.99,"info":"21/11/2014 at 13:30:57"},{"visible":true,"include":true,"step":"30.0","x":-4780.761904761905,"y":3255.714285714286,"z":3855.2380952380954,"a95":0.99,"info":"21/11/2014 at 13:30:57"},{"visible":true,"include":true,"step":"33.0","x":-4087.4285714285716,"y":2811.1428571428573,"z":3434.285714285714,"a95":0.99,"info":"21/11/2014 at 13:30:57"},{"visible":true,"include":true,"step":"35.0","x":-3713.0476190476193,"y":2440.9523809523807,"z":2941.4285714285716,"a95":0.99,"info":"21/11/2014 at 13:30:57"},{"visible":true,"include":true,"step":"40.0","x":-3007.714285714286,"y":1972.2857142857142,"z":2411.4285714285716,"a95":0.99,"info":"21/11/2014 at 13:30:57"},{"visible":true,"include":true,"step":"45.0","x":-1973.904761904762,"y":1457.4285714285713,"z":1737.5238095238096,"a95":0.99,"info":"21/11/2014 at 13:30:57"},{"visible":true,"include":true,"step":"50.0","x":-1462.4761904761904,"y":900.4666666666666,"z":1095.7142857142858,"a95":0.99,"info":"21/11/2014 at 13:30:57"},{"visible":true,"include":false,"step":"60.0","x":-513.9333333333334,"y":400.99047619047616,"z":462.0571428571429,"a95":0.99,"info":"21/11/2014 at 13:30:57"},{"visible":true,"include":false,"step":"70.0","x":-122.34285714285713,"y":239.2,"z":158.41904761904763,"a95":0.99,"info":"21/11/2014 at 13:30:57"},{"visible":true,"include":false,"step":"80.0","x":-22.98,"y":755.2285714285714,"z":473.7523809523809,"a95":0.99,"info":"21/11/2014 at 13:30:57"},{"visible":true,"include":false,"step":"90.0","x":-32.25809523809524,"y":47.85142857142857,"z":-0.5742190476190476,"a95":0.99,"info":"21/11/2014 at 13:30:57"}]},{"version":"v1.1.0","exported":"2016-11-28T14:09:56.088Z","volume":10.5,"added":"2016-11-28T14:04:44.021Z","format":"Utrecht","demagType":"Unknown","strat":"2","patch":1.1,"GEO":[{"dec":326.9633001158669,"inc":-32.23649294926798,"MAD":18.408912025156692,"cm":[3.4638958368304884e-14,2.544631172440859e-13,0],"intensity":3203.1976755514956,"type":"GC","origin":false,"forced":true,"remark":"","nSteps":11,"minStep":"10.0","maxStep":"60.0","steps":["10.0","15.0","20.0","23.0","30.0","33.0","35.0","40.0","45.0","50.0","60.0"],"group":"None","version":"v1.1.0"}],"TECT":[{"dec":340.99748364314956,"inc":-58.15409124840861,"MAD":18.408912025171812,"cm":[1.4210854715202004e-14,1.7497114868092467e-13,9.059419880941277e-14],"intensity":3203.1976755514956,"type":"GC","origin":false,"forced":true,"remark":"","nSteps":11,"minStep":"10.0","maxStep":"60.0","steps":["10.0","15.0","20.0","23.0","30.0","33.0","35.0","40.0","45.0","50.0","60.0"],"group":"None","version":"v1.1.0"}],"interpreted":true,"name":"CP3.3A","coreAzi":11,"coreDip":11,"bedStrike":216,"bedDip":29,"data":[{"visible":true,"include":false,"step":"0.0","x":-2604.5714285714284,"y":-909.352380952381,"z":1843.2380952380952,"a95":0.99,"info":"21/11/2014 at 13:30:57"},{"visible":true,"include":true,"step":"10.0","x":-2126.5714285714284,"y":-660.8285714285714,"z":1944,"a95":0.99,"info":"21/11/2014 at 13:30:57"},{"visible":true,"include":true,"step":"15.0","x":-1967.3333333333333,"y":-607.5142857142857,"z":1850.6666666666667,"a95":0.99,"info":"21/11/2014 at 13:30:57"},{"visible":true,"include":true,"step":"20.0","x":-1797.7142857142858,"y":-505.9428571428571,"z":1747.3333333333333,"a95":0.99,"info":"21/11/2014 at 13:30:57"},{"visible":true,"include":true,"step":"23.0","x":-1668.2857142857142,"y":-443.2952380952381,"z":1632.1904761904761,"a95":0.99,"info":"21/11/2014 at 13:30:57"},{"visible":true,"include":false,"step":"25.0","x":-1573.2380952380952,"y":-443.95238095238096,"z":1544.4761904761904,"a95":0.99,"info":"21/11/2014 at 13:30:57"},{"visible":true,"include":true,"step":"30.0","x":-1368.6666666666667,"y":-356.0095238095238,"z":1328.952380952381,"a95":0.99,"info":"21/11/2014 at 13:30:57"},{"visible":true,"include":true,"step":"33.0","x":-1162.3809523809523,"y":-290.7238095238095,"z":1144.857142857143,"a95":0.99,"info":"21/11/2014 at 13:30:57"},{"visible":true,"include":true,"step":"35.0","x":-1052.4761904761904,"y":-283.0095238095238,"z":1017.1428571428571,"a95":0.99,"info":"21/11/2014 at 13:30:57"},{"visible":true,"include":true,"step":"40.0","x":-840.8761904761906,"y":-230.23809523809524,"z":827.5619047619048,"a95":0.99,"info":"21/11/2014 at 13:30:57"},{"visible":true,"include":true,"step":"45.0","x":-626.8380952380952,"y":-140.51428571428573,"z":591.8095238095239,"a95":0.99,"info":"21/11/2014 at 13:30:57"},{"visible":true,"include":true,"step":"50.0","x":-430.3047619047619,"y":-147.58095238095237,"z":380.5333333333333,"a95":0.99,"info":"21/11/2014 at 13:30:57"},{"visible":true,"include":true,"step":"60.0","x":-202.32380952380953,"y":-49.729523809523805,"z":137.3047619047619,"a95":0.99,"info":"21/11/2014 at 13:30:57"},{"visible":true,"include":false,"step":"70.0","x":-108.17142857142856,"y":-6.3696190476190475,"z":37.21904761904762,"a95":0.99,"info":"21/11/2014 at 13:30:57"},{"visible":true,"include":false,"step":"80.0","x":8.050095238095238,"y":-3.459428571428571,"z":2.754,"a95":0.99,"info":"21/11/2014 at 13:30:57"},{"visible":true,"include":false,"step":"90.0","x":-52.1152380952381,"y":-16.49047619047619,"z":16.089523809523808,"a95":0.99,"info":"21/11/2014 at 13:30:57"}]},{"version":"v1.1.0","exported":"2016-11-28T14:09:56.088Z","volume":10.5,"added":"2016-11-28T14:04:44.022Z","format":"Utrecht","demagType":"Unknown","strat":null,"patch":1.1,"GEO":[],"TECT":[],"interpreted":false,"name":"CP3.04A","coreAzi":14,"coreDip":20,"bedStrike":216,"bedDip":29,"data":[{"visible":true,"include":false,"step":"20","x":-2465.6190476190477,"y":-666.1904761904761,"z":4668.952380952381,"a95":2.2,"info":"\"15-06-22\" at \"16:16\""},{"visible":true,"include":true,"step":"90","x":-2280,"y":-863.3333333333334,"z":3254,"a95":2,"info":"\"15-06-22\" at \"19:36\""},{"visible":true,"include":true,"step":"120","x":-1938.952380952381,"y":-912.4761904761905,"z":2997.714285714286,"a95":2.1,"info":"\"15-06-22\" at \"22:03\""},{"visible":true,"include":true,"step":"150","x":-1690,"y":-762.7619047619048,"z":2897.6190476190477,"a95":2.2,"info":"\"15-06-23\" at \"20:28\""},{"visible":true,"include":true,"step":"180","x":-1597.7142857142858,"y":-736,"z":2818.6666666666665,"a95":2.2,"info":"\"15-06-24\" at \"16:54\""},{"visible":true,"include":true,"step":"210","x":-1450.1904761904761,"y":-770.5714285714286,"z":2686.4761904761904,"a95":2.5,"info":"\"15-06-24\" at \"19:39\""},{"visible":true,"include":true,"step":"230","x":-1477.6190476190477,"y":-848.7619047619048,"z":2615.0476190476193,"a95":2.4,"info":"\"15-06-27\" at \"23:52\""},{"visible":true,"include":true,"step":"250","x":-1343.6190476190477,"y":-759.7142857142857,"z":2607.0476190476193,"a95":2.4,"info":"\"15-06-28\" at \"02:22\""},{"visible":true,"include":true,"step":"270","x":-1400.2857142857142,"y":-676,"z":2567.2380952380954,"a95":2.3,"info":"\"15-06-28\" at \"18:01\""},{"visible":true,"include":true,"step":"300","x":-1335.8095238095239,"y":-668.4761904761905,"z":2479.4285714285716,"a95":2.4,"info":"\"15-06-30\" at \"11:09\""},{"visible":true,"include":true,"step":"330","x":-1320,"y":-595.6190476190476,"z":2384.285714285714,"a95":2.3,"info":"\"15-06-30\" at \"13:48\""},{"visible":true,"include":true,"step":"360","x":-1225.6190476190477,"y":-744.952380952381,"z":2319.809523809524,"a95":2.2,"info":"\"15-07-01\" at \"09:10\""},{"visible":true,"include":false,"step":"380","x":-1388.4761904761904,"y":-578.3809523809524,"z":2286.190476190476,"a95":2.2,"info":"\"15-07-01\" at \"14:05\""},{"visible":true,"include":false,"step":"410","x":-1268.857142857143,"y":-568.6666666666666,"z":2246.5714285714284,"a95":2.2,"info":"\"15-07-02\" at \"09:28\""},{"visible":true,"include":false,"step":"430","x":-1123.047619047619,"y":-576.7619047619048,"z":2242,"a95":2.4,"info":"\"15-07-02\" at \"13:11\""}]},{"version":"v1.1.0","exported":"2016-11-28T14:09:56.088Z","volume":10.5,"added":"2016-11-28T14:04:44.023Z","format":"Utrecht","demagType":"Unknown","strat":"3","patch":1.1,"GEO":[],"TECT":[],"interpreted":false,"name":"CP3.5A","coreAzi":304,"coreDip":38,"bedStrike":216,"bedDip":29,"data":[{"visible":true,"include":false,"step":"0.0","x":-11.993333333333334,"y":-15.994285714285715,"z":0.7196666666666667,"a95":0.99,"info":"21/11/2014 at 13:30:57"},{"visible":true,"include":false,"step":"10.0","x":11.856190476190475,"y":-26.17809523809524,"z":-8.035333333333332,"a95":0.99,"info":"21/11/2014 at 13:30:57"},{"visible":true,"include":false,"step":"15.0","x":0.4651428571428572,"y":-27.623809523809523,"z":-9.77142857142857,"a95":0.99,"info":"21/11/2014 at 13:30:57"},{"visible":true,"include":false,"step":"20.0","x":4.6540952380952385,"y":-16.82,"z":-12.205714285714285,"a95":0.99,"info":"21/11/2014 at 13:30:57"},{"visible":true,"include":false,"step":"23.0","x":3.9035238095238096,"y":-13.954285714285716,"z":-10.783809523809524,"a95":0.99,"info":"21/11/2014 at 13:30:57"},{"visible":true,"include":false,"step":"25.0","x":2.708952380952381,"y":-9.657142857142858,"z":-11.665714285714285,"a95":0.99,"info":"21/11/2014 at 13:30:57"},{"visible":true,"include":false,"step":"30.0","x":0.9699047619047618,"y":-14.019047619047617,"z":-13.878095238095238,"a95":0.99,"info":"21/11/2014 at 13:30:57"},{"visible":true,"include":false,"step":"33.0","x":1.6543809523809523,"y":-13.736190476190476,"z":-11.074285714285715,"a95":0.99,"info":"21/11/2014 at 13:30:57"},{"visible":true,"include":false,"step":"35.0","x":4.6540952380952385,"y":-10.913333333333334,"z":-7.631142857142857,"a95":0.99,"info":"21/11/2014 at 13:30:57"},{"visible":true,"include":false,"step":"40.0","x":3.4278095238095236,"y":-13.684761904761904,"z":-6.176666666666667,"a95":0.99,"info":"21/11/2014 at 13:30:57"},{"visible":true,"include":false,"step":"45.0","x":4.989714285714286,"y":-12.046666666666667,"z":1.1408571428571428,"a95":0.99,"info":"21/11/2014 at 13:30:57"},{"visible":true,"include":false,"step":"50.0","x":1.4007619047619049,"y":-13.123809523809525,"z":-13.233333333333333,"a95":0.99,"info":"21/11/2014 at 13:30:57"},{"visible":true,"include":false,"step":"60.0","x":6.6044761904761895,"y":-12.732380952380952,"z":-5.402190476190476,"a95":0.99,"info":"21/11/2014 at 13:30:57"},{"visible":true,"include":false,"step":"70.0","x":5.082190476190476,"y":-0.8927619047619049,"z":-13.88857142857143,"a95":0.99,"info":"21/11/2014 at 13:30:57"},{"visible":true,"include":false,"step":"80.0","x":0.5708571428571428,"y":-8.61104761904762,"z":-20.224761904761905,"a95":0.99,"info":"21/11/2014 at 13:30:57"},{"visible":true,"include":false,"step":"90.0","x":0.9461428571428572,"y":-6.072857142857143,"z":-8.67,"a95":0.99,"info":"21/11/2014 at 13:30:57"}]},{"version":"v1.1.0","exported":"2016-11-28T14:09:56.088Z","volume":10.5,"added":"2016-11-28T14:04:44.023Z","format":"Utrecht","demagType":"Unknown","strat":null,"patch":1.1,"GEO":[{"dec":297.4216073138829,"inc":-4.552019774263319,"MAD":0,"cm":[3.552713678800501e-15,-5.329070518200751e-15,0],"intensity":167.72859894035463,"type":"GC","origin":false,"forced":true,"remark":"","nSteps":2,"minStep":"180","maxStep":"360","steps":["180","360"],"group":"None","version":"v1.1.0"}],"TECT":[{"dec":295.7664860760285,"inc":-33.18110566260361,"MAD":8.138928373381774e-7,"cm":[1.7763568394002505e-15,-1.1546319456101628e-14,-7.105427357601002e-15],"intensity":167.72859894035463,"type":"GC","origin":false,"forced":true,"remark":"","nSteps":2,"minStep":"180","maxStep":"360","steps":["180","360"],"group":"None","version":"v1.1.0"}],"interpreted":true,"name":"CP3.05B","coreAzi":304,"coreDip":38,"bedStrike":216,"bedDip":29,"data":[{"visible":true,"include":false,"step":"20","x":-55.61904761904762,"y":109.42857142857143,"z":67.14285714285714,"a95":2.2,"info":"\"15-06-22\" at \"16:18\""},{"visible":true,"include":false,"step":"90","x":-68.85714285714286,"y":85.71428571428571,"z":64.47619047619048,"a95":2.6,"info":"\"15-06-22\" at \"19:39\""},{"visible":true,"include":false,"step":"120","x":-55.23809523809524,"y":87.71428571428571,"z":58.38095238095238,"a95":3.9,"info":"\"15-06-22\" at \"22:07\""},{"visible":true,"include":false,"step":"150","x":-47.04761904761905,"y":75.71428571428571,"z":64.66666666666667,"a95":2.5,"info":"\"15-06-23\" at \"20:32\""},{"visible":true,"include":true,"step":"180","x":-39.42857142857143,"y":80.85714285714286,"z":48.857142857142854,"a95":2.6,"info":"\"15-06-24\" at \"16:58\""},{"visible":true,"include":false,"step":"210","x":-42.095238095238095,"y":73.23809523809524,"z":47.333333333333336,"a95":2.6,"info":"\"15-06-24\" at \"19:43\""},{"visible":true,"include":false,"step":"230","x":-45.59047619047619,"y":65.19047619047619,"z":48.542857142857144,"a95":3,"info":"\"15-06-27\" at \"23:57\""},{"visible":true,"include":false,"step":"250","x":-46.457142857142856,"y":61.60952380952381,"z":48.22857142857143,"a95":3.1,"info":"\"15-06-28\" at \"02:24\""},{"visible":true,"include":false,"step":"270","x":-47.10476190476191,"y":50.561904761904756,"z":50.838095238095235,"a95":3,"info":"\"15-06-28\" at \"18:03\""},{"visible":true,"include":false,"step":"300","x":-38.23809523809524,"y":44.19047619047619,"z":43.36190476190476,"a95":2.9,"info":"\"15-06-30\" at \"11:12\""},{"visible":true,"include":false,"step":"330","x":-42.53333333333334,"y":33.76190476190476,"z":48.457142857142856,"a95":3.9,"info":"\"15-06-30\" at \"13:50\""},{"visible":true,"include":true,"step":"360","x":-42.67619047619048,"y":31.97142857142857,"z":44.20952380952381,"a95":3.7,"info":"\"15-07-01\" at \"09:12\""},{"visible":true,"include":false,"step":"380","x":-19.34285714285714,"y":29.64761904761905,"z":7,"a95":3.8,"info":"\"15-07-01\" at \"14:07\""},{"visible":true,"include":false,"step":"410","x":-35.38095238095238,"y":-0.5619047619047619,"z":44.8,"a95":3,"info":"\"15-07-02\" at \"09:30\""},{"visible":true,"include":false,"step":"430","x":-36.74285714285715,"y":12.00952380952381,"z":27.314285714285717,"a95":4,"info":"\"15-07-02\" at \"13:13\""}]},{"version":"v1.1.0","exported":"2016-11-28T14:09:56.088Z","volume":10.5,"added":"2016-11-28T14:04:44.023Z","format":"Utrecht","demagType":"Unknown","strat":null,"patch":1.1,"GEO":[],"TECT":[],"interpreted":false,"name":"CP3.6A","coreAzi":293,"coreDip":30,"bedStrike":216,"bedDip":29,"data":[{"visible":true,"include":false,"step":"20","x":-21.19047619047619,"y":-34.561904761904756,"z":25.257142857142856,"a95":2.3,"info":"\"14-11-29\" at \"18:46\""},{"visible":true,"include":false,"step":"100","x":-4.523809523809524,"y":-22.038095238095238,"z":4.142857142857143,"a95":3.4,"info":"\"15-01-31\" at \"09:00\""},{"visible":true,"include":false,"step":"150","x":2.761904761904762,"y":-18.276190476190475,"z":-5.666666666666667,"a95":5.1,"info":"\"15-01-31\" at \"12:54\""},{"visible":true,"include":false,"step":"180","x":-1.5333333333333334,"y":-15.314285714285715,"z":-1.1047619047619048,"a95":4.3,"info":"\"15-01-31\" at \"16:43\""},{"visible":true,"include":false,"step":"210","x":-7.199999999999999,"y":-10.41904761904762,"z":4.390476190476191,"a95":5.6,"info":"\"15-02-01\" at \"09:33\""},{"visible":true,"include":false,"step":"240","x":-4.133333333333333,"y":-7.257142857142857,"z":3.8285714285714287,"a95":7.1,"info":"\"15-02-01\" at \"14:33\""},{"visible":true,"include":false,"step":"270","x":-4.723809523809524,"y":-6.476190476190476,"z":4.809523809523809,"a95":5.6,"info":"\"15-02-02\" at \"18:08\""},{"visible":true,"include":false,"step":"300","x":-2.1714285714285717,"y":-7.761904761904762,"z":2.9904761904761905,"a95":3.9,"info":"\"15-02-02\" at \"21:46\""},{"visible":true,"include":false,"step":"320","x":-4.438095238095238,"y":-1.6095238095238094,"z":1.8761904761904762,"a95":6.4,"info":"\"15-02-03\" at \"16:00\""},{"visible":true,"include":false,"step":"340","x":-10.085714285714285,"y":-0.19047619047619047,"z":4.20952380952381,"a95":10.7,"info":"\"15-02-03\" at \"23:38\""},{"visible":true,"include":false,"step":"370","x":-8.876190476190477,"y":-0.19047619047619047,"z":4.2,"a95":4.1,"info":"\"15-02-04\" at \"19:13\""},{"visible":true,"include":false,"step":"400","x":-13.514285714285714,"y":-0.17142857142857143,"z":6.857142857142857,"a95":5.5,"info":"\"15-02-04\" at \"23:26\""},{"visible":true,"include":false,"step":"420","x":-5.3047619047619055,"y":3.9904761904761905,"z":4.0095238095238095,"a95":9.3,"info":"\"15-02-09\" at \"17:24\""}]},{"version":"v1.1.0","exported":"2016-11-28T14:09:56.088Z","volume":10.5,"added":"2016-11-28T14:04:44.025Z","format":"Utrecht","demagType":"Unknown","strat":null,"patch":1.1,"GEO":[],"TECT":[],"interpreted":false,"name":"CP3.06B","coreAzi":293,"coreDip":30,"bedStrike":216,"bedDip":29,"data":[{"visible":true,"include":false,"step":"20","x":-56.03809523809524,"y":35.59047619047619,"z":9.457142857142857,"a95":2.6,"info":"\"15-06-22\" at \"16:20\""},{"visible":true,"include":false,"step":"90","x":-55.476190476190474,"y":25.799999999999997,"z":12.866666666666665,"a95":4,"info":"\"15-06-22\" at \"19:42\""},{"visible":true,"include":false,"step":"120","x":-38.83809523809524,"y":26.047619047619047,"z":12.733333333333333,"a95":2.5,"info":"\"15-06-22\" at \"22:09\""},{"visible":true,"include":false,"step":"150","x":-30.219047619047622,"y":29.142857142857142,"z":14.552380952380954,"a95":2.6,"info":"\"15-06-23\" at \"20:34\""},{"visible":true,"include":false,"step":"180","x":-32.904761904761905,"y":30.885714285714286,"z":12.314285714285715,"a95":2.3,"info":"\"15-06-24\" at \"17:01\""},{"visible":true,"include":false,"step":"210","x":-33.41904761904762,"y":28.514285714285712,"z":14.323809523809524,"a95":2.5,"info":"\"15-06-24\" at \"19:46\""},{"visible":true,"include":false,"step":"230","x":-37.53333333333334,"y":30.333333333333332,"z":14.02857142857143,"a95":2,"info":"\"15-06-27\" at \"23:58\""},{"visible":true,"include":false,"step":"250","x":-30.923809523809524,"y":28.876190476190477,"z":20.133333333333333,"a95":2.4,"info":"\"15-06-28\" at \"02:26\""},{"visible":true,"include":false,"step":"270","x":-28.6,"y":24.228571428571428,"z":18.314285714285717,"a95":2.8,"info":"\"15-06-28\" at \"18:05\""},{"visible":true,"include":false,"step":"300","x":-23.00952380952381,"y":23.58095238095238,"z":10.695238095238095,"a95":2.8,"info":"\"15-06-30\" at \"11:14\""},{"visible":true,"include":false,"step":"330","x":-22.676190476190477,"y":16.61904761904762,"z":4.390476190476191,"a95":4.8,"info":"\"15-06-30\" at \"13:53\""},{"visible":true,"include":false,"step":"360","x":-20.714285714285715,"y":19.057142857142857,"z":15.828571428571427,"a95":2.4,"info":"\"15-07-01\" at \"09:14\""},{"visible":true,"include":false,"step":"380","x":-23.82857142857143,"y":19.447619047619046,"z":9.59047619047619,"a95":4.5,"info":"\"15-07-01\" at \"14:10\""},{"visible":true,"include":false,"step":"410","x":-17.914285714285715,"y":24.73333333333333,"z":10.914285714285715,"a95":2.6,"info":"\"15-07-02\" at \"09:33\""},{"visible":true,"include":false,"step":"430","x":-17.39047619047619,"y":13.514285714285714,"z":6.7714285714285705,"a95":4.1,"info":"\"15-07-02\" at \"13:15\""}]},{"version":"v1.1.0","exported":"2016-11-28T14:09:56.088Z","volume":10.5,"added":"2016-11-28T14:04:44.026Z","format":"Utrecht","demagType":"Unknown","strat":null,"patch":1.1,"GEO":[{"dec":291.6292288667539,"inc":-13.401360140133416,"MAD":10.263210145980596,"cm":[2.220446049250313e-16,-6.800116025829084e-16,0],"intensity":23.18046131655003,"type":"GC","origin":false,"forced":true,"remark":"","nSteps":4,"minStep":"100","maxStep":"210","steps":["100","150","180","210"],"group":"None","version":"v1.1.0"}],"TECT":[{"dec":287.2638621927798,"inc":-41.26657173865612,"MAD":10.263210145980487,"cm":[2.220446049250313e-16,-4.496403249731884e-15,-4.440892098500626e-16],"intensity":23.18046131655003,"type":"GC","origin":false,"forced":true,"remark":"","nSteps":4,"minStep":"100","maxStep":"210","steps":["100","150","180","210"],"group":"None","version":"v1.1.0"}],"interpreted":true,"name":"CP3.7A","coreAzi":259,"coreDip":43,"bedStrike":216,"bedDip":29,"data":[{"visible":true,"include":false,"step":"20","x":-12.295238095238094,"y":-8.323809523809524,"z":26.552380952380954,"a95":2.6,"info":"\"14-11-29\" at \"18:49\""},{"visible":true,"include":true,"step":"100","x":6.133333333333334,"y":-12.533333333333333,"z":4.723809523809524,"a95":2.9,"info":"\"15-01-31\" at \"09:03\""},{"visible":true,"include":true,"step":"150","x":13.342857142857142,"y":-13.00952380952381,"z":-4.380952380952381,"a95":6.4,"info":"\"15-01-31\" at \"12:56\""},{"visible":true,"include":true,"step":"180","x":8.676190476190476,"y":-10.723809523809523,"z":-3.857142857142857,"a95":4.1,"info":"\"15-01-31\" at \"16:47\""},{"visible":true,"include":true,"step":"210","x":6.628571428571428,"y":-6.79047619047619,"z":-3.695238095238095,"a95":5.4,"info":"\"15-02-01\" at \"09:36\""},{"visible":true,"include":false,"step":"240","x":6.552380952380952,"y":-8.657142857142858,"z":-0.26666666666666666,"a95":6.2,"info":"\"15-02-01\" at \"14:34\""},{"visible":true,"include":false,"step":"270","x":4.171428571428571,"y":-2.780952380952381,"z":0.20952380952380953,"a95":10.9,"info":"\"15-02-02\" at \"18:10\""},{"visible":true,"include":false,"step":"300","x":6.333333333333333,"y":-2.6095238095238096,"z":-3.4952380952380957,"a95":4.6,"info":"\"15-02-02\" at \"21:49\""},{"visible":true,"include":false,"step":"320","x":4.457142857142857,"y":-6.9714285714285715,"z":-6.761904761904762,"a95":5.2,"info":"\"15-02-03\" at \"16:02\""},{"visible":true,"include":false,"step":"340","x":4.161904761904762,"y":5.114285714285715,"z":-0.41904761904761906,"a95":10.2,"info":"\"15-02-03\" at \"23:41\""},{"visible":true,"include":false,"step":"370","x":6.714285714285714,"y":4.314285714285714,"z":-1.1333333333333333,"a95":5.5,"info":"\"15-02-04\" at \"19:15\""},{"visible":true,"include":false,"step":"400","x":-5.276190476190476,"y":-0.7523809523809524,"z":1.8857142857142857,"a95":14.4,"info":"\"15-02-04\" at \"23:28\""},{"visible":true,"include":false,"step":"420","x":4.3047619047619055,"y":-2.0285714285714285,"z":2.142857142857143,"a95":21.6,"info":"\"15-02-09\" at \"17:26\""}]},{"version":"v1.1.0","exported":"2016-11-28T14:09:56.088Z","volume":10.5,"added":"2016-11-28T14:04:44.026Z","format":"Utrecht","demagType":"Unknown","strat":null,"patch":1.1,"GEO":[],"TECT":[],"interpreted":false,"name":"CP3.07B","coreAzi":259,"coreDip":43,"bedStrike":216,"bedDip":29,"data":[{"visible":true,"include":false,"step":"20","x":7.295238095238095,"y":-19.73333333333333,"z":-3.2476190476190476,"a95":5.9,"info":"\"15-06-22\" at \"16:22\""},{"visible":true,"include":true,"step":"90","x":-6.152380952380952,"y":-15.619047619047619,"z":3.276190476190476,"a95":8.1,"info":"\"15-06-22\" at \"19:44\""},{"visible":true,"include":true,"step":"120","x":5.247619047619048,"y":-13.21904761904762,"z":-0.5904761904761905,"a95":7.3,"info":"\"15-06-22\" at \"22:11\""},{"visible":true,"include":true,"step":"150","x":12.095238095238095,"y":-9.380952380952381,"z":1.5047619047619047,"a95":4.5,"info":"\"15-06-23\" at \"20:36\""},{"visible":true,"include":true,"step":"180","x":4.419047619047619,"y":-11.619047619047619,"z":1.4952380952380953,"a95":3.7,"info":"\"15-06-24\" at \"17:03\""},{"visible":true,"include":true,"step":"210","x":-2.2095238095238097,"y":-7.4,"z":-0.6380952380952382,"a95":9,"info":"\"15-06-24\" at \"19:48\""},{"visible":true,"include":true,"step":"230","x":-4.942857142857143,"y":-8.980952380952381,"z":-0.980952380952381,"a95":5.8,"info":"\"15-06-28\" at \"00:00\""},{"visible":true,"include":false,"step":"250","x":-6.476190476190476,"y":7.809523809523809,"z":-7.466666666666667,"a95":10.4,"info":"\"15-06-28\" at \"02:28\""},{"visible":true,"include":false,"step":"270","x":-7.685714285714286,"y":2.0857142857142854,"z":-1.6285714285714288,"a95":12.4,"info":"\"15-06-28\" at \"18:07\""}]},{"version":"v1.1.0","exported":"2016-11-28T14:09:56.088Z","volume":10.5,"added":"2016-11-28T14:04:44.026Z","format":"Utrecht","demagType":"Unknown","strat":null,"patch":1.1,"GEO":[],"TECT":[],"interpreted":false,"name":"CP3.8A","coreAzi":260,"coreDip":41,"bedStrike":216,"bedDip":29,"data":[{"visible":true,"include":false,"step":"20","x":-1.2761904761904763,"y":-12.142857142857142,"z":44.18095238095238,"a95":3.1,"info":"\"14-11-29\" at \"18:51\""},{"visible":true,"include":false,"step":"100","x":2.419047619047619,"y":-6.752380952380953,"z":10.752380952380953,"a95":5,"info":"\"15-01-31\" at \"09:07\""},{"visible":true,"include":false,"step":"150","x":8.133333333333335,"y":-8.019047619047619,"z":-0.2,"a95":9.400001,"info":"\"15-01-31\" at \"12:58\""},{"visible":true,"include":false,"step":"180","x":1.9523809523809523,"y":-7.409523809523809,"z":0.0761904761904762,"a95":5.9,"info":"\"15-01-31\" at \"16:51\""},{"visible":true,"include":false,"step":"210","x":0.9714285714285713,"y":-6.333333333333333,"z":-1.6,"a95":8.5,"info":"\"15-02-01\" at \"09:38\""},{"visible":true,"include":false,"step":"240","x":1.2857142857142858,"y":-4.457142857142857,"z":2.9238095238095236,"a95":11.7,"info":"\"15-02-01\" at \"14:38\""},{"visible":true,"include":false,"step":"270","x":0.7142857142857143,"y":-1.2380952380952381,"z":2.123809523809524,"a95":19.4,"info":"\"15-02-02\" at \"18:12\""},{"visible":true,"include":false,"step":"300","x":-0.8761904761904761,"y":-3.0095238095238095,"z":1.0571428571428572,"a95":14.7,"info":"\"15-02-02\" at \"21:51\""},{"visible":true,"include":false,"step":"320","x":-0.6761904761904761,"y":-1.9904761904761903,"z":3.7904761904761903,"a95":12.3,"info":"\"15-02-03\" at \"16:05\""},{"visible":true,"include":false,"step":"340","x":-0.8761904761904761,"y":-2.1523809523809527,"z":1.4952380952380953,"a95":14.2,"info":"\"15-02-03\" at \"23:44\""},{"visible":true,"include":false,"step":"370","x":0.02857142857142857,"y":-1.7142857142857142,"z":0.2857142857142857,"a95":27.8,"info":"\"15-02-04\" at \"19:17\""},{"visible":true,"include":false,"step":"400","x":-9.114285714285714,"y":7.247619047619047,"z":4.6761904761904765,"a95":5.3,"info":"\"15-02-04\" at \"23:31\""},{"visible":true,"include":false,"step":"420","x":-6.961904761904761,"y":2.4476190476190474,"z":0.9714285714285713,"a95":8.3,"info":"\"15-02-09\" at \"17:28\""}]},{"version":"v1.1.0","exported":"2016-11-28T14:09:56.089Z","volume":10.5,"added":"2016-11-28T14:04:44.026Z","format":"Utrecht","demagType":"Unknown","strat":null,"patch":1.1,"GEO":[],"TECT":[],"interpreted":false,"name":"CP3.08B","coreAzi":260,"coreDip":41,"bedStrike":216,"bedDip":29,"data":[{"visible":true,"include":false,"step":"20","x":3.2,"y":-8.485714285714286,"z":9.085714285714285,"a95":8.400001,"info":"\"15-06-22\" at \"16:26\""},{"visible":true,"include":false,"step":"90","x":-6.723809523809523,"y":-6.39047619047619,"z":3.838095238095238,"a95":8.400001,"info":"\"15-06-22\" at \"19:46\""},{"visible":true,"include":false,"step":"120","x":0.18095238095238095,"y":-5.580952380952381,"z":4.285714285714286,"a95":14.5,"info":"\"15-06-22\" at \"22:13\""},{"visible":true,"include":false,"step":"150","x":8.095238095238095,"y":-0.5523809523809524,"z":-3.695238095238095,"a95":3.3,"info":"\"15-06-23\" at \"20:39\""},{"visible":true,"include":false,"step":"180","x":3.1333333333333333,"y":-2.5619047619047617,"z":0.8571428571428571,"a95":10.1,"info":"\"15-06-24\" at \"17:05\""},{"visible":true,"include":false,"step":"210","x":1.1619047619047618,"y":-2.8285714285714283,"z":-1.7999999999999998,"a95":15.2,"info":"\"15-06-24\" at \"19:50\""},{"visible":true,"include":false,"step":"230","x":-4.904761904761905,"y":-2.9142857142857146,"z":-1.3142857142857143,"a95":10.6,"info":"\"15-06-28\" at \"00:03\""},{"visible":true,"include":false,"step":"250","x":-5.980952380952381,"y":1.2,"z":3.6666666666666665,"a95":11.4,"info":"\"15-06-28\" at \"02:30\""},{"visible":true,"include":false,"step":"270","x":-6.990476190476191,"y":4.133333333333333,"z":0.3523809523809524,"a95":10.6,"info":"\"15-06-28\" at \"18:10\""}]},{"version":"v1.1.0","exported":"2016-11-28T14:09:56.089Z","volume":10.5,"added":"2016-11-28T14:04:44.026Z","format":"Utrecht","demagType":"Unknown","strat":null,"patch":1.1,"GEO":[],"TECT":[],"interpreted":false,"name":"CP3.9A","coreAzi":280,"coreDip":24,"bedStrike":216,"bedDip":29,"data":[{"visible":true,"include":false,"step":"20","x":-20.257142857142856,"y":8.79047619047619,"z":25.83809523809524,"a95":3.3,"info":"\"14-11-29\" at \"18:53\""},{"visible":true,"include":false,"step":"100","x":2.580952380952381,"y":2.619047619047619,"z":0.43809523809523804,"a95":10.9,"info":"\"15-01-31\" at \"09:10\""},{"visible":true,"include":false,"step":"150","x":5.657142857142857,"y":1.5619047619047617,"z":-2.761904761904762,"a95":21.7,"info":"\"15-01-31\" at \"13:00\""},{"visible":true,"include":false,"step":"180","x":2.1714285714285717,"y":4.266666666666667,"z":-4.352380952380953,"a95":7.5,"info":"\"15-01-31\" at \"16:55\""},{"visible":true,"include":false,"step":"210","x":0.009523809523809525,"y":9.019047619047619,"z":4.419047619047619,"a95":6.1,"info":"\"15-02-01\" at \"09:40\""},{"visible":true,"include":false,"step":"240","x":-0.08571428571428572,"y":11.342857142857142,"z":-0.06666666666666667,"a95":4.7,"info":"\"15-02-01\" at \"14:40\""},{"visible":true,"include":false,"step":"270","x":0.19047619047619047,"y":8.095238095238095,"z":2.5619047619047617,"a95":6.5,"info":"\"15-02-02\" at \"18:15\""},{"visible":true,"include":false,"step":"300","x":-4.8,"y":7.20952380952381,"z":2.3333333333333335,"a95":5.7,"info":"\"15-02-02\" at \"21:54\""},{"visible":true,"include":false,"step":"320","x":-1.5523809523809524,"y":10.276190476190477,"z":2.3333333333333335,"a95":4.5,"info":"\"15-02-03\" at \"16:07\""},{"visible":true,"include":false,"step":"340","x":0.2571428571428572,"y":13.790476190476191,"z":-2.4952380952380953,"a95":3.7,"info":"\"15-02-03\" at \"23:46\""},{"visible":true,"include":false,"step":"370","x":0.0761904761904762,"y":13.647619047619049,"z":-3.1238095238095234,"a95":3.4,"info":"\"15-02-04\" at \"19:20\""},{"visible":true,"include":false,"step":"400","x":-7.20952380952381,"y":8.447619047619048,"z":6.257142857142857,"a95":5.7,"info":"\"15-02-04\" at \"23:33\""},{"visible":true,"include":false,"step":"420","x":-1.7523809523809522,"y":14.761904761904763,"z":2.0571428571428574,"a95":5.7,"info":"\"15-02-09\" at \"17:30\""}]},{"version":"v1.1.0","exported":"2016-11-28T14:09:56.089Z","volume":10.5,"added":"2016-11-28T14:04:44.026Z","format":"Utrecht","demagType":"Unknown","strat":null,"patch":1.1,"GEO":[],"TECT":[],"interpreted":false,"name":"CP3.09B","coreAzi":280,"coreDip":24,"bedStrike":216,"bedDip":29,"data":[{"visible":true,"include":false,"step":"20","x":9.847619047619048,"y":-7.6571428571428575,"z":5.3047619047619055,"a95":7.8,"info":"\"15-06-22\" at \"16:28\""},{"visible":true,"include":false,"step":"90","x":-0.6666666666666666,"y":-4.8,"z":0.047619047619047616,"a95":19.8,"info":"\"15-06-22\" at \"19:52\""},{"visible":true,"include":false,"step":"120","x":8.79047619047619,"y":-5.257142857142857,"z":-1.3333333333333333,"a95":14.3,"info":"\"15-06-22\" at \"22:17\""},{"visible":true,"include":false,"step":"150","x":17.914285714285715,"y":-3.2476190476190476,"z":-3.161904761904762,"a95":2.7,"info":"\"15-06-23\" at \"20:42\""},{"visible":true,"include":false,"step":"180","x":13.628571428571428,"y":-3.7142857142857144,"z":-2.2857142857142856,"a95":4,"info":"\"15-06-24\" at \"17:08\""},{"visible":true,"include":false,"step":"210","x":13.133333333333335,"y":-4.228571428571429,"z":-5.219047619047619,"a95":3.5,"info":"\"15-06-24\" at \"19:52\""},{"visible":true,"include":false,"step":"230","x":10.428571428571429,"y":-3.5142857142857142,"z":-4.704761904761905,"a95":4.4,"info":"\"15-06-28\" at \"00:05\""},{"visible":true,"include":false,"step":"250","x":-5.866666666666667,"y":4.104761904761905,"z":-3.8666666666666667,"a95":11.3,"info":"\"15-06-28\" at \"02:32\""},{"visible":true,"include":false,"step":"270","x":-1.2095238095238094,"y":2.8476190476190473,"z":-0.6380952380952382,"a95":20.2,"info":"\"15-06-28\" at \"18:12\""}]},{"version":"v1.1.0","exported":"2016-11-28T14:09:56.089Z","volume":10.5,"added":"2016-11-28T14:04:44.026Z","format":"Utrecht","demagType":"Unknown","strat":"4","patch":1.1,"GEO":[],"TECT":[],"interpreted":false,"name":"CP3.10A","coreAzi":275,"coreDip":29,"bedStrike":216,"bedDip":29,"data":[{"visible":true,"include":false,"step":"0.0","x":-4.478761904761905,"y":-10.467619047619047,"z":22.606666666666666,"a95":0.99,"info":"21/11/2014 at 13:30:57"},{"visible":true,"include":false,"step":"10.0","x":13.505714285714285,"y":-13.861904761904762,"z":7.1380952380952385,"a95":0.99,"info":"21/11/2014 at 13:30:57"},{"visible":true,"include":false,"step":"15.0","x":5.438095238095238,"y":-21.99238095238095,"z":5.463904761904762,"a95":0.99,"info":"21/11/2014 at 13:30:57"},{"visible":true,"include":false,"step":"20.0","x":5.79047619047619,"y":-10.350476190476192,"z":6.31647619047619,"a95":0.99,"info":"21/11/2014 at 13:30:57"},{"visible":true,"include":false,"step":"23.0","x":2.170666666666667,"y":-5.375619047619048,"z":1.6055238095238096,"a95":0.99,"info":"21/11/2014 at 13:30:57"},{"visible":true,"include":false,"step":"25.0","x":-2.9556190476190474,"y":-6.572,"z":0.7731809523809523,"a95":0.99,"info":"21/11/2014 at 13:30:57"},{"visible":true,"include":false,"step":"30.0","x":0.7091714285714286,"y":-6.157619047619048,"z":2.559428571428571,"a95":0.99,"info":"21/11/2014 at 13:30:57"},{"visible":true,"include":false,"step":"33.0","x":2.2666666666666666,"y":-9.167238095238096,"z":-3.82,"a95":0.99,"info":"21/11/2014 at 13:30:57"},{"visible":true,"include":false,"step":"35.0","x":-1.0306666666666666,"y":-6.131714285714286,"z":2.1653333333333333,"a95":0.99,"info":"21/11/2014 at 13:30:57"},{"visible":true,"include":false,"step":"40.0","x":-1.2121904761904763,"y":-11.962857142857143,"z":0.884,"a95":0.99,"info":"21/11/2014 at 13:30:57"},{"visible":true,"include":false,"step":"45.0","x":-0.858047619047619,"y":-5.175809523809524,"z":6.318952380952381,"a95":0.99,"info":"21/11/2014 at 13:30:57"},{"visible":true,"include":false,"step":"50.0","x":0.7814095238095239,"y":-8.010666666666665,"z":-4.38847619047619,"a95":0.99,"info":"21/11/2014 at 13:30:57"},{"visible":true,"include":false,"step":"60.0","x":-2.4287619047619047,"y":-10.506666666666666,"z":4.379714285714286,"a95":0.99,"info":"21/11/2014 at 13:30:57"},{"visible":true,"include":false,"step":"70.0","x":-1.2103809523809523,"y":-8.386952380952382,"z":-8.21104761904762,"a95":0.99,"info":"21/11/2014 at 13:30:57"},{"visible":true,"include":false,"step":"80.0","x":-8.78752380952381,"y":-8.795238095238094,"z":-9.270666666666667,"a95":0.99,"info":"21/11/2014 at 13:30:57"},{"visible":true,"include":false,"step":"90.0","x":2.353047619047619,"y":-4.367809523809524,"z":-4.450190476190476,"a95":0.99,"info":"21/11/2014 at 13:30:57"}]},{"version":"v1.1.0","exported":"2016-11-28T14:09:56.089Z","volume":10.5,"added":"2016-11-28T14:04:44.026Z","format":"Utrecht","demagType":"Unknown","strat":null,"patch":1.1,"GEO":[],"TECT":[],"interpreted":false,"name":"CP3.10B","coreAzi":275,"coreDip":29,"bedStrike":216,"bedDip":29,"data":[{"visible":true,"include":false,"step":"20","x":-47.438095238095244,"y":-8.19047619047619,"z":19.495238095238093,"a95":2.5,"info":"\"15-06-22\" at \"16:30\""},{"visible":true,"include":false,"step":"90","x":-40.94285714285714,"y":6.257142857142857,"z":17.561904761904763,"a95":3.6,"info":"\"15-06-22\" at \"19:54\""},{"visible":true,"include":false,"step":"120","x":-29.771428571428572,"y":7.20952380952381,"z":16.895238095238096,"a95":2.9,"info":"\"15-06-22\" at \"22:19\""},{"visible":true,"include":false,"step":"150","x":-16.714285714285715,"y":12.047619047619047,"z":9.495238095238095,"a95":2.7,"info":"\"15-06-23\" at \"20:44\""},{"visible":true,"include":false,"step":"180","x":-19.61904761904762,"y":14.095238095238095,"z":8.980952380952381,"a95":2.5,"info":"\"15-06-24\" at \"17:11\""},{"visible":true,"include":false,"step":"210","x":-19.857142857142858,"y":12.638095238095238,"z":9.533333333333333,"a95":2.8,"info":"\"15-06-24\" at \"19:54\""},{"visible":true,"include":false,"step":"230","x":-19.866666666666667,"y":17.285714285714285,"z":13.238095238095237,"a95":3.2,"info":"\"15-06-28\" at \"00:08\""},{"visible":true,"include":false,"step":"250","x":-22.704761904761906,"y":14.628571428571428,"z":16.99047619047619,"a95":3.4,"info":"\"15-06-28\" at \"02:34\""},{"visible":true,"include":false,"step":"270","x":-19.38095238095238,"y":14,"z":11.695238095238095,"a95":2.6,"info":"\"15-06-28\" at \"18:26\""},{"visible":true,"include":false,"step":"300","x":-20.876190476190477,"y":9.561904761904762,"z":5.961904761904762,"a95":3.9,"info":"\"15-06-30\" at \"11:16\""},{"visible":true,"include":false,"step":"330","x":-17.685714285714283,"y":5.533333333333333,"z":10.6,"a95":4.3,"info":"\"15-06-30\" at \"13:57\""},{"visible":true,"include":false,"step":"360","x":-17.276190476190475,"y":10.571428571428571,"z":10.923809523809524,"a95":4.4,"info":"\"15-07-01\" at \"09:16\""},{"visible":true,"include":false,"step":"380","x":-9.714285714285714,"y":11.866666666666665,"z":10.19047619047619,"a95":7.1,"info":"\"15-07-01\" at \"14:13\""},{"visible":true,"include":false,"step":"410","x":-11.104761904761904,"y":7.380952380952381,"z":8.123809523809523,"a95":5,"info":"\"15-07-02\" at \"09:35\""},{"visible":true,"include":false,"step":"430","x":-14.838095238095239,"y":2.1714285714285717,"z":9.019047619047619,"a95":6.4,"info":"\"15-07-02\" at \"13:17\""}]},{"version":"v1.1.0","exported":"2016-11-28T14:09:56.089Z","volume":10.5,"added":"2016-11-28T14:04:44.026Z","format":"Utrecht","demagType":"Unknown","strat":"5","patch":1.1,"GEO":[{"dec":16.84708794708081,"inc":-37.515593239040236,"MAD":18.025812400701607,"cm":[-1.0658141036401503e-14,6.59916565837193e-13,0],"intensity":12447.28070112171,"type":"GC","origin":false,"forced":true,"remark":"","nSteps":8,"minStep":"10.0","maxStep":"50.0","steps":["10.0","15.0","20.0","23.0","25.0","40.0","45.0","50.0"],"group":"None","version":"v1.1.0"}],"TECT":[{"dec":41.157485048861304,"inc":-41.20758722992985,"MAD":18.025812400702335,"cm":[-5.719869022868806e-13,-1.4281908988778014e-12,1.5987211554602254e-13],"intensity":12447.280701121712,"type":"GC","origin":false,"forced":true,"remark":"","nSteps":8,"minStep":"10.0","maxStep":"50.0","steps":["10.0","15.0","20.0","23.0","25.0","40.0","45.0","50.0"],"group":"None","version":"v1.1.0"}],"interpreted":true,"name":"CP3.11A","coreAzi":327,"coreDip":17,"bedStrike":216,"bedDip":29,"data":[{"visible":true,"include":false,"step":"0.0","x":-8804.190476190477,"y":5060.761904761905,"z":9449.142857142857,"a95":0.99,"info":"21/11/2014 at 13:30:57"},{"visible":true,"include":true,"step":"10.0","x":-7245.142857142857,"y":4444.571428571428,"z":8366.952380952382,"a95":0.99,"info":"21/11/2014 at 13:30:57"},{"visible":true,"include":true,"step":"15.0","x":-6329.333333333333,"y":3709.3333333333335,"z":7611.428571428572,"a95":0.99,"info":"21/11/2014 at 13:30:57"},{"visible":true,"include":true,"step":"20.0","x":-5266,"y":3016.6666666666665,"z":6657.523809523809,"a95":0.99,"info":"21/11/2014 at 13:30:57"},{"visible":true,"include":true,"step":"23.0","x":-4546.666666666667,"y":2581.904761904762,"z":5764.285714285715,"a95":0.99,"info":"21/11/2014 at 13:30:57"},{"visible":true,"include":true,"step":"25.0","x":-3969.4285714285716,"y":2237.0476190476193,"z":4933.047619047619,"a95":0.99,"info":"21/11/2014 at 13:30:57"},{"visible":true,"include":false,"step":"30.0","x":-2744.285714285714,"y":1376.1904761904761,"z":3435.5238095238096,"a95":0.99,"info":"21/11/2014 at 13:30:57"},{"visible":true,"include":false,"step":"33.0","x":-1928.6666666666667,"y":1039.3333333333333,"z":2541.809523809524,"a95":0.99,"info":"21/11/2014 at 13:30:57"},{"visible":true,"include":false,"step":"35.0","x":-1655.8095238095239,"y":781.9428571428571,"z":2057.714285714286,"a95":0.99,"info":"21/11/2014 at 13:30:57"},{"visible":true,"include":true,"step":"40.0","x":-1158.4761904761904,"y":444.25714285714287,"z":1359.6190476190477,"a95":0.99,"info":"21/11/2014 at 13:30:57"},{"visible":true,"include":true,"step":"45.0","x":-627.8285714285714,"y":354.29523809523806,"z":783.0285714285714,"a95":0.99,"info":"21/11/2014 at 13:30:57"},{"visible":true,"include":true,"step":"50.0","x":-378.06666666666666,"y":194.56190476190477,"z":310.6,"a95":0.99,"info":"21/11/2014 at 13:30:57"},{"visible":true,"include":false,"step":"60.0","x":68.38666666666666,"y":-90.1704761904762,"z":-61.448571428571434,"a95":0.99,"info":"21/11/2014 at 13:30:57"},{"visible":true,"include":false,"step":"70.0","x":10.978095238095237,"y":39.69333333333333,"z":-187.45714285714286,"a95":0.99,"info":"21/11/2014 at 13:30:57"},{"visible":true,"include":false,"step":"80.0","x":-391.5238095238095,"y":-288.2857142857143,"z":-248.12380952380954,"a95":0.99,"info":"21/11/2014 at 13:30:57"},{"visible":true,"include":false,"step":"90.0","x":4.172190476190476,"y":17.3,"z":-171.9047619047619,"a95":0.99,"info":"21/11/2014 at 13:30:57"}]},{"version":"v1.1.0","exported":"2016-11-28T14:09:56.089Z","volume":10.5,"added":"2016-11-28T14:04:44.027Z","format":"Utrecht","demagType":"Unknown","strat":null,"patch":1.1,"GEO":[],"TECT":[],"interpreted":false,"name":"CP3.16A","coreAzi":345,"coreDip":5,"bedStrike":216,"bedDip":29,"data":[{"visible":true,"include":false,"step":"20","x":-5285.238095238095,"y":1992,"z":6780.285714285715,"a95":2.6,"info":"\"14-11-29\" at \"18:55\""},{"visible":true,"include":false,"step":"100","x":-2899.5238095238096,"y":1276.3809523809523,"z":2396.7619047619046,"a95":2.1,"info":"\"15-01-31\" at \"09:13\""},{"visible":true,"include":false,"step":"150","x":-1538.6666666666667,"y":834.952380952381,"z":1099.2380952380952,"a95":2.1,"info":"\"15-01-31\" at \"13:03\""},{"visible":true,"include":false,"step":"180","x":-1142.3809523809523,"y":817.8095238095239,"z":740.1904761904761,"a95":2,"info":"\"15-01-31\" at \"16:59\""},{"visible":true,"include":false,"step":"210","x":-1110.4761904761904,"y":785.047619047619,"z":861.4285714285714,"a95":2.5,"info":"\"15-02-01\" at \"09:42\""},{"visible":true,"include":false,"step":"240","x":-992.2857142857143,"y":778.1904761904761,"z":818.3809523809524,"a95":2.6,"info":"\"15-02-01\" at \"14:42\""},{"visible":true,"include":false,"step":"270","x":-1110.095238095238,"y":757.2380952380952,"z":820.1904761904761,"a95":2.5,"info":"\"15-02-02\" at \"18:17\""},{"visible":true,"include":false,"step":"300","x":-1084,"y":639.8095238095239,"z":578.1904761904761,"a95":2.6,"info":"\"15-02-02\" at \"21:56\""},{"visible":true,"include":false,"step":"320","x":-875.8095238095239,"y":618.3809523809524,"z":223.61904761904762,"a95":3.2,"info":"\"15-02-03\" at \"16:09\""},{"visible":true,"include":false,"step":"340","x":-897.5238095238095,"y":858.4761904761905,"z":520.0952380952381,"a95":2.6,"info":"\"15-02-03\" at \"23:48\""},{"visible":true,"include":false,"step":"370","x":-957.6190476190476,"y":793.7142857142857,"z":492.0952380952381,"a95":2.6,"info":"\"15-02-04\" at \"19:22\""},{"visible":true,"include":false,"step":"400","x":-697.047619047619,"y":496,"z":1072.1904761904761,"a95":3.2,"info":"\"15-02-04\" at \"23:35\""},{"visible":true,"include":false,"step":"420","x":-1752,"y":968.1904761904761,"z":1145.8095238095239,"a95":2.4,"info":"\"15-02-09\" at \"17:32\""}]},{"version":"v1.1.0","exported":"2016-11-28T14:09:56.089Z","volume":10.5,"added":"2016-11-28T14:04:44.027Z","format":"Utrecht","demagType":"Unknown","strat":"6","patch":1.1,"GEO":[],"TECT":[],"interpreted":false,"name":"CP3.18A","coreAzi":326,"coreDip":16,"bedStrike":216,"bedDip":29,"data":[{"visible":true,"include":false,"step":"0.0","x":-3259.1428571428573,"y":1188.7619047619048,"z":2621.5238095238096,"a95":0.99,"info":"21/11/2014 at 13:30:57"},{"visible":true,"include":false,"step":"10.0","x":-1955.6190476190477,"y":865.9904761904761,"z":1672.7619047619048,"a95":0.99,"info":"21/11/2014 at 13:30:57"},{"visible":true,"include":false,"step":"15.0","x":-1528,"y":720.047619047619,"z":1366.1904761904761,"a95":0.99,"info":"21/11/2014 at 13:30:57"},{"visible":true,"include":false,"step":"20.0","x":-1515.8095238095239,"y":535.4761904761905,"z":1079.904761904762,"a95":0.99,"info":"21/11/2014 at 13:30:57"},{"visible":true,"include":false,"step":"23.0","x":-1091.904761904762,"y":749.2857142857143,"z":871.0952380952381,"a95":0.99,"info":"21/11/2014 at 13:30:57"},{"visible":true,"include":false,"step":"25.0","x":-1504.3809523809523,"y":262.9142857142857,"z":1066.952380952381,"a95":0.99,"info":"21/11/2014 at 13:30:57"},{"visible":true,"include":false,"step":"30.0","x":-1066.2857142857142,"y":204.82857142857142,"z":393.6666666666667,"a95":0.99,"info":"21/11/2014 at 13:30:57"},{"visible":true,"include":false,"step":"33.0","x":-552.0380952380953,"y":-55.14380952380952,"z":556.6571428571428,"a95":0.99,"info":"21/11/2014 at 13:30:57"},{"visible":true,"include":false,"step":"35.0","x":-306.81904761904764,"y":-271.0857142857143,"z":277.12380952380954,"a95":0.99,"info":"21/11/2014 at 13:30:57"},{"visible":true,"include":false,"step":"40.0","x":-254.06666666666666,"y":94.39142857142858,"z":185.32380952380953,"a95":0.99,"info":"21/11/2014 at 13:30:57"},{"visible":true,"include":false,"step":"45.0","x":-80.54857142857142,"y":6.947428571428571,"z":28.846666666666664,"a95":0.99,"info":"21/11/2014 at 13:30:57"},{"visible":true,"include":false,"step":"50.0","x":67.25238095238095,"y":-289.67619047619047,"z":13.84,"a95":0.99,"info":"21/11/2014 at 13:30:57"},{"visible":true,"include":false,"step":"60.0","x":-2.3706666666666667,"y":65.65142857142857,"z":-205.86666666666665,"a95":0.99,"info":"21/11/2014 at 13:30:57"},{"visible":true,"include":false,"step":"70.0","x":-46.9847619047619,"y":-68.5247619047619,"z":-491.0380952380952,"a95":0.99,"info":"21/11/2014 at 13:30:57"},{"visible":true,"include":false,"step":"80.0","x":481.27619047619044,"y":-349.5333333333333,"z":-30.429523809523808,"a95":0.99,"info":"21/11/2014 at 13:30:57"},{"visible":true,"include":false,"step":"90.0","x":-53.70285714285714,"y":-380.81904761904764,"z":-162.23809523809524,"a95":0.99,"info":"21/11/2014 at 13:30:57"}]},{"version":"v1.1.0","exported":"2016-11-28T14:09:56.089Z","volume":10.5,"added":"2016-11-28T14:04:44.027Z","format":"Utrecht","demagType":"Unknown","strat":null,"patch":1.1,"GEO":[{"dec":335.67931097544135,"inc":-28.548526215228613,"MAD":12.591516467256401,"cm":[2.1316282072803006e-14,2.1316282072803006e-14,0],"intensity":2892.2702112798324,"type":"GC","origin":false,"forced":true,"remark":"","nSteps":4,"minStep":"100","maxStep":"210","steps":["100","150","180","210"],"group":"None","version":"v1.1.0"}],"TECT":[{"dec":350.94383830503824,"inc":-51.996896491597575,"MAD":12.59151646725661,"cm":[-4.973799150320701e-14,-4.263256414560601e-14,0],"intensity":2892.270211279833,"type":"GC","origin":false,"forced":true,"remark":"","nSteps":4,"minStep":"100","maxStep":"210","steps":["100","150","180","210"],"group":"None","version":"v1.1.0"}],"interpreted":true,"name":"CP3.19A","coreAzi":320,"coreDip":19,"bedStrike":216,"bedDip":29,"data":[{"visible":true,"include":false,"step":"20","x":-2907.809523809524,"y":1254.952380952381,"z":4816.190476190476,"a95":2.9,"info":"\"14-11-29\" at \"18:57\""},{"visible":true,"include":true,"step":"100","x":-1408.095238095238,"y":438.95238095238096,"z":1458.7619047619048,"a95":2.3,"info":"\"15-01-31\" at \"09:17\""},{"visible":true,"include":true,"step":"150","x":-814.3809523809524,"y":-15.904761904761905,"z":810.8571428571429,"a95":2.6,"info":"\"15-01-31\" at \"13:05\""},{"visible":true,"include":true,"step":"180","x":-549.5238095238095,"y":-101.9047619047619,"z":660.952380952381,"a95":2.8,"info":"\"15-01-31\" at \"17:02\""},{"visible":true,"include":true,"step":"210","x":-498.4761904761905,"y":-152.0952380952381,"z":697.1428571428571,"a95":2.8,"info":"\"15-02-01\" at \"09:45\""},{"visible":true,"include":false,"step":"240","x":-549.2380952380952,"y":-158.85714285714286,"z":540.7619047619048,"a95":3.5,"info":"\"15-02-01\" at \"14:44\""},{"visible":true,"include":false,"step":"270","x":-581.2380952380952,"y":-137.9047619047619,"z":607.7142857142857,"a95":3.2,"info":"\"15-02-02\" at \"18:19\""},{"visible":true,"include":false,"step":"300","x":-445.42857142857144,"y":-207.71428571428572,"z":596.7619047619048,"a95":2.9,"info":"\"15-02-02\" at \"21:59\""},{"visible":true,"include":false,"step":"320","x":-314.76190476190476,"y":-27.428571428571427,"z":502.57142857142856,"a95":4,"info":"\"15-02-03\" at \"16:11\""},{"visible":true,"include":false,"step":"340","x":-336.3809523809524,"y":71.42857142857143,"z":687.4285714285714,"a95":3.3,"info":"\"15-02-03\" at \"23:49\""},{"visible":true,"include":false,"step":"370","x":-356.3809523809524,"y":14.476190476190476,"z":647.8095238095239,"a95":3,"info":"\"15-02-04\" at \"19:24\""},{"visible":true,"include":false,"step":"400","x":-692.5714285714286,"y":221.52380952380952,"z":511.14285714285717,"a95":2.7,"info":"\"15-02-04\" at \"23:37\""},{"visible":true,"include":false,"step":"420","x":-867.5238095238095,"y":289.7142857142857,"z":489.9047619047619,"a95":7.7,"info":"\"15-02-09\" at \"17:34\""}]},{"version":"v1.1.0","exported":"2016-11-28T14:09:56.089Z","volume":10.5,"added":"2016-11-28T14:04:44.027Z","format":"Utrecht","demagType":"Unknown","strat":null,"patch":1.1,"GEO":[{"dec":281.46580583338886,"inc":-13.835520773198857,"MAD":2.568429598650752,"cm":[-4.263256414560601e-14,4.973799150320701e-14,0],"intensity":2267.0755873637872,"type":"GC","origin":false,"forced":true,"remark":"","nSteps":3,"minStep":"100","maxStep":"180","steps":["100","150","180"],"group":"None","version":"v1.1.0"}],"TECT":[{"dec":274.4490754576885,"inc":-39.59779451145129,"MAD":2.56842959864937,"cm":[-3.375077994860476e-14,0,5.684341886080802e-14],"intensity":2267.0755873637877,"type":"GC","origin":false,"forced":true,"remark":"","nSteps":3,"minStep":"100","maxStep":"180","steps":["100","150","180"],"group":"None","version":"v1.1.0"}],"interpreted":true,"name":"CP3.20A","coreAzi":333,"coreDip":14,"bedStrike":216,"bedDip":29,"data":[{"visible":true,"include":false,"step":"20","x":-1999.2380952380952,"y":240.57142857142858,"z":3582.4761904761904,"a95":2.8,"info":"\"14-11-29\" at \"18:59\""},{"visible":true,"include":true,"step":"100","x":-1358.4761904761904,"y":-91.23809523809524,"z":838.8571428571429,"a95":2.1,"info":"\"15-01-31\" at \"09:20\""},{"visible":true,"include":true,"step":"150","x":-851.2380952380952,"y":-244.57142857142858,"z":276.2857142857143,"a95":2.4,"info":"\"15-01-31\" at \"13:07\""},{"visible":true,"include":true,"step":"180","x":-658.2857142857143,"y":-207.71428571428572,"z":152.57142857142858,"a95":2.3,"info":"\"15-01-31\" at \"17:06\""},{"visible":true,"include":false,"step":"210","x":-622.5714285714286,"y":-302.0952380952381,"z":292.76190476190476,"a95":3.2,"info":"\"15-02-01\" at \"09:46\""},{"visible":true,"include":false,"step":"240","x":-743.1428571428571,"y":-170.76190476190476,"z":214.47619047619048,"a95":3.6,"info":"\"15-02-01\" at \"14:47\""},{"visible":true,"include":false,"step":"270","x":-606.0952380952381,"y":-188.38095238095238,"z":174.38095238095238,"a95":2.5,"info":"\"15-02-02\" at \"18:21\""},{"visible":true,"include":false,"step":"300","x":-765.4285714285714,"y":8.952380952380953,"z":209.52380952380952,"a95":2.1,"info":"\"15-02-02\" at \"22:01\""},{"visible":true,"include":false,"step":"320","x":-694.8571428571429,"y":220.85714285714286,"z":70.28571428571429,"a95":2.9,"info":"\"15-02-03\" at \"16:13\""},{"visible":true,"include":false,"step":"340","x":-956.7619047619048,"y":13.333333333333334,"z":178.38095238095238,"a95":2.4,"info":"\"15-02-03\" at \"23:52\""},{"visible":true,"include":false,"step":"370","x":-929.4285714285714,"y":-6.857142857142857,"z":116.95238095238095,"a95":2.3,"info":"\"15-02-04\" at \"19:26\""},{"visible":true,"include":false,"step":"400","x":-473.9047619047619,"y":2.5714285714285716,"z":241.23809523809524,"a95":3.2,"info":"\"15-02-04\" at \"23:39\""},{"visible":true,"include":false,"step":"420","x":-764.952380952381,"y":-27.714285714285715,"z":412.85714285714283,"a95":2.9,"info":"\"15-02-09\" at \"17:36\""}]},{"version":"v1.1.0","exported":"2016-11-28T14:09:56.089Z","volume":10.5,"added":"2016-11-28T14:04:44.027Z","format":"Utrecht","demagType":"Unknown","strat":"7","patch":1.1,"GEO":[{"dec":288.5193576053875,"inc":-2.2862182563170967,"MAD":6.09468536894372,"cm":[-2.842170943040401e-14,2.0961010704922955e-13,0],"intensity":4042.397905590218,"type":"GC","origin":false,"forced":true,"remark":"","nSteps":3,"minStep":"10.0","maxStep":"23.0","steps":["10.0","15.0","23.0"],"group":"None","version":"v1.1.0"}],"TECT":[{"dec":285.76479671421157,"inc":-29.797899614874165,"MAD":6.094685368944102,"cm":[-2.842170943040401e-14,1.1368683772161603e-13,1.1368683772161603e-13],"intensity":4042.397905590218,"type":"GC","origin":false,"forced":true,"remark":"","nSteps":3,"minStep":"10.0","maxStep":"23.0","steps":["10.0","15.0","23.0"],"group":"None","version":"v1.1.0"}],"interpreted":true,"name":"CP3.21A","coreAzi":327,"coreDip":24,"bedStrike":216,"bedDip":29,"data":[{"visible":true,"include":false,"step":"0.0","x":-2526.4761904761904,"y":1568.6666666666667,"z":3476.7619047619046,"a95":0.99,"info":"21/11/2014 at 13:30:57"},{"visible":true,"include":true,"step":"10.0","x":-1496.952380952381,"y":1203.142857142857,"z":1837.3333333333333,"a95":0.99,"info":"21/11/2014 at 13:30:57"},{"visible":true,"include":true,"step":"15.0","x":-1167.8095238095239,"y":794.9428571428571,"z":1282.2857142857142,"a95":0.99,"info":"21/11/2014 at 13:30:57"},{"visible":true,"include":false,"step":"20.0","x":-829.3333333333334,"y":195.01904761904763,"z":1523.047619047619,"a95":0.99,"info":"21/11/2014 at 13:30:57"},{"visible":true,"include":true,"step":"23.0","x":-895.647619047619,"y":517.7047619047619,"z":929.4571428571428,"a95":0.99,"info":"21/11/2014 at 13:30:57"},{"visible":true,"include":false,"step":"25.0","x":-393.79999999999995,"y":362.8095238095238,"z":626.5333333333334,"a95":0.99,"info":"21/11/2014 at 13:30:57"},{"visible":true,"include":false,"step":"30.0","x":-34.22952380952381,"y":173.88571428571427,"z":452.9428571428571,"a95":0.99,"info":"21/11/2014 at 13:30:57"},{"visible":true,"include":false,"step":"33.0","x":202.73333333333332,"y":61.18952380952381,"z":408.12380952380954,"a95":0.99,"info":"21/11/2014 at 13:30:57"},{"visible":true,"include":false,"step":"35.0","x":438.72380952380956,"y":241.83809523809526,"z":204.56190476190477,"a95":0.99,"info":"21/11/2014 at 13:30:57"},{"visible":true,"include":false,"step":"40.0","x":116.73333333333333,"y":-167.43809523809523,"z":270.6952380952381,"a95":0.99,"info":"21/11/2014 at 13:30:57"},{"visible":true,"include":false,"step":"45.0","x":374.49523809523805,"y":109.02857142857142,"z":-32.03142857142857,"a95":0.99,"info":"21/11/2014 at 13:30:57"},{"visible":true,"include":false,"step":"50.0","x":456.4380952380953,"y":-170.68571428571428,"z":-44.64666666666667,"a95":0.99,"info":"21/11/2014 at 13:30:57"},{"visible":true,"include":false,"step":"60.0","x":144.33333333333334,"y":-502.5904761904762,"z":17.12761904761905,"a95":0.99,"info":"21/11/2014 at 13:30:57"},{"visible":true,"include":false,"step":"70.0","x":622.952380952381,"y":-109.73333333333333,"z":187.06666666666666,"a95":0.99,"info":"21/11/2014 at 13:30:57"},{"visible":true,"include":false,"step":"80.0","x":330.0857142857143,"y":-572.2666666666667,"z":-374.50476190476195,"a95":0.99,"info":"21/11/2014 at 13:30:57"},{"visible":true,"include":false,"step":"90.0","x":416.57142857142856,"y":-710.2476190476191,"z":-229.62857142857143,"a95":0.99,"info":"21/11/2014 at 13:30:57"}]},{"version":"v1.1.0","exported":"2016-11-28T14:09:56.089Z","volume":10.5,"added":"2016-11-28T14:04:44.027Z","format":"Utrecht","demagType":"Unknown","strat":"8","patch":1.1,"GEO":[],"TECT":[],"interpreted":false,"name":"CP3.22A","coreAzi":355,"coreDip":14,"bedStrike":216,"bedDip":29,"data":[{"visible":true,"include":false,"step":"0.0","x":-2689.3333333333335,"y":273.8,"z":3219.6190476190477,"a95":0.99,"info":"21/11/2014 at 13:30:57"},{"visible":true,"include":false,"step":"10.0","x":-1113.2380952380952,"y":194.9904761904762,"z":2063.714285714286,"a95":0.99,"info":"21/11/2014 at 13:30:57"},{"visible":true,"include":false,"step":"15.0","x":-670.4,"y":247.84761904761905,"z":1847.047619047619,"a95":0.99,"info":"21/11/2014 at 13:30:57"},{"visible":true,"include":false,"step":"20.0","x":-580.6476190476191,"y":113.84761904761906,"z":1713.2380952380952,"a95":0.99,"info":"21/11/2014 at 13:30:57"},{"visible":true,"include":false,"step":"23.0","x":-558.4571428571429,"y":236.71428571428572,"z":748.9714285714285,"a95":0.99,"info":"21/11/2014 at 13:30:57"},{"visible":true,"include":false,"step":"25.0","x":-765.5904761904761,"y":135.7904761904762,"z":1076.6666666666667,"a95":0.99,"info":"21/11/2014 at 13:30:57"},{"visible":true,"include":false,"step":"30.0","x":-442.2952380952381,"y":-118.05714285714285,"z":760.4,"a95":0.99,"info":"21/11/2014 at 13:30:57"},{"visible":true,"include":false,"step":"33.0","x":-109.47619047619048,"y":93.46095238095238,"z":576.6285714285715,"a95":0.99,"info":"21/11/2014 at 13:30:57"},{"visible":true,"include":false,"step":"35.0","x":99.96190476190475,"y":45.56857142857143,"z":1004.7619047619048,"a95":0.99,"info":"21/11/2014 at 13:30:57"},{"visible":true,"include":false,"step":"40.0","x":-440.3238095238095,"y":-71.23238095238096,"z":271.6,"a95":0.99,"info":"21/11/2014 at 13:30:57"},{"visible":true,"include":false,"step":"45.0","x":-300.7238095238095,"y":177.44761904761904,"z":-212.0761904761905,"a95":0.99,"info":"21/11/2014 at 13:30:57"},{"visible":true,"include":false,"step":"50.0","x":412.447619047619,"y":-110.80000000000001,"z":435.7142857142857,"a95":0.99,"info":"21/11/2014 at 13:30:57"},{"visible":true,"include":false,"step":"60.0","x":-284.35238095238094,"y":-51.540952380952376,"z":285.9238095238095,"a95":0.99,"info":"21/11/2014 at 13:30:57"},{"visible":true,"include":false,"step":"70.0","x":401.1333333333333,"y":268.7333333333333,"z":-314.8095238095238,"a95":0.99,"info":"21/11/2014 at 13:30:57"},{"visible":true,"include":false,"step":"80.0","x":-415.7142857142857,"y":-229.8857142857143,"z":-272.35238095238094,"a95":0.99,"info":"21/11/2014 at 13:30:57"},{"visible":true,"include":false,"step":"90.0","x":-323.48571428571427,"y":-524.3619047619047,"z":78.98380952380953,"a95":0.99,"info":"21/11/2014 at 13:30:57"}]}]
