# Supplementary material for: Paleomagnetic constraints on the timing and distribution of Cenozoic rotations in Central and Eastern Anatolia
Source: Copernicus journal article supplement (doi:10.5194/se-9-295-2018), 2018-03-21
Supplement: Supplementary file 2 [file se-9-295-2018-supplement.zip › se-2017-66_DATA_dir files/dir files Ulukisla/EC1.dir]

[{"version":"v1.1.0","exported":"2016-11-16T15:33:51.183Z","volume":10.5,"added":"2016-11-16T15:09:44.057Z","format":"Utrecht","demagType":"Unknown","strat":"3","patch":1.1,"GEO":[],"TECT":[],"interpreted":false,"name":"EC1.1A","coreAzi":109,"coreDip":31,"bedStrike":303,"bedDip":26,"data":[{"visible":true,"include":false,"step":"0.0","x":-21000,"y":-14197.142857142857,"z":7288.857142857143,"a95":0.99,"info":"17/08/2014 at 13:39:26"},{"visible":true,"include":false,"step":"4.0","x":-18500.95238095238,"y":-13688.57142857143,"z":5835.428571428572,"a95":0.99,"info":"17/08/2014 at 13:39:26"},{"visible":true,"include":false,"step":"8.0","x":-14047.619047619048,"y":-10237.142857142857,"z":4450.666666666667,"a95":0.99,"info":"17/08/2014 at 13:39:26"},{"visible":true,"include":false,"step":"12.0","x":-9633.333333333334,"y":-7031.619047619048,"z":3195.5238095238096,"a95":0.99,"info":"17/08/2014 at 13:39:26"},{"visible":true,"include":false,"step":"16.0","x":-6676.476190476191,"y":-4687.047619047619,"z":1951.7142857142858,"a95":0.99,"info":"17/08/2014 at 13:39:26"},{"visible":true,"include":false,"step":"20.0","x":-4964.952380952381,"y":-3568.3809523809523,"z":1481.904761904762,"a95":0.99,"info":"17/08/2014 at 13:39:26"},{"visible":true,"include":false,"step":"25.0","x":-3741.3333333333335,"y":-2299.0476190476193,"z":1325.4285714285713,"a95":0.99,"info":"17/08/2014 at 13:39:26"},{"visible":true,"include":false,"step":"30.0","x":-2638,"y":-1394.095238095238,"z":799.0666666666667,"a95":0.99,"info":"17/08/2014 at 13:39:26"},{"visible":true,"include":false,"step":"35.0","x":-2370.6666666666665,"y":-1301.3333333333333,"z":427.85714285714283,"a95":0.99,"info":"17/08/2014 at 13:39:26"},{"visible":true,"include":false,"step":"40.0","x":-1964.2857142857142,"y":-1475.047619047619,"z":563.3523809523809,"a95":0.99,"info":"17/08/2014 at 13:39:26"},{"visible":true,"include":false,"step":"45.0","x":-1543.7142857142858,"y":-986.2857142857143,"z":432.39047619047625,"a95":0.99,"info":"17/08/2014 at 13:39:26"},{"visible":true,"include":false,"step":"50.0","x":-1321.2380952380952,"y":-1296.5714285714287,"z":346.81904761904764,"a95":0.99,"info":"17/08/2014 at 13:39:26"},{"visible":false,"include":false,"step":"60.0","x":-1366.1904761904761,"y":-689.4190476190475,"z":210.24761904761903,"a95":0.99,"info":"17/08/2014 at 13:39:26"},{"visible":false,"include":false,"step":"70.0","x":-855.2095238095238,"y":-1155.5238095238096,"z":27.375238095238096,"a95":0.99,"info":"17/08/2014 at 13:39:26"},{"visible":false,"include":false,"step":"80.0","x":-1765.7142857142858,"y":-1622.6666666666667,"z":-598.8380952380952,"a95":0.99,"info":"17/08/2014 at 13:39:26"},{"visible":false,"include":false,"step":"90.0","x":-1976.857142857143,"y":-1638.952380952381,"z":593.0285714285715,"a95":0.99,"info":"17/08/2014 at 13:39:26"},{"visible":false,"include":false,"step":"100.0","x":-1664.5714285714287,"y":-1077.904761904762,"z":-59.864761904761906,"a95":0.99,"info":"17/08/2014 at 13:39:26"}]},{"version":"v1.1.0","exported":"2016-11-16T15:33:51.184Z","volume":10.5,"added":"2016-11-16T15:09:44.057Z","format":"Utrecht","demagType":"Unknown","strat":"4","patch":1.1,"GEO":[],"TECT":[],"interpreted":false,"name":"EC1.2A","coreAzi":97,"coreDip":18,"bedStrike":303,"bedDip":26,"data":[{"visible":true,"include":false,"step":"0.0","x":-29870.47619047619,"y":-19092.380952380954,"z":9468.57142857143,"a95":0.99,"info":"17/08/2014 at 13:39:26"},{"visible":true,"include":false,"step":"4.0","x":-25220,"y":-17818.095238095237,"z":7593.523809523809,"a95":0.99,"info":"17/08/2014 at 13:39:26"},{"visible":true,"include":false,"step":"8.0","x":-18484.761904761905,"y":-12827.619047619048,"z":5761.428571428572,"a95":0.99,"info":"17/08/2014 at 13:39:26"},{"visible":true,"include":false,"step":"12.0","x":-12371.42857142857,"y":-8269.619047619048,"z":4372.666666666667,"a95":0.99,"info":"17/08/2014 at 13:39:26"},{"visible":true,"include":false,"step":"16.0","x":-8558.857142857143,"y":-5307.238095238095,"z":2966.4761904761904,"a95":0.99,"info":"17/08/2014 at 13:39:26"},{"visible":true,"include":false,"step":"20.0","x":-6078.571428571428,"y":-3825.809523809524,"z":1912.4761904761904,"a95":0.99,"info":"17/08/2014 at 13:39:26"},{"visible":true,"include":false,"step":"25.0","x":-4412,"y":-2691.3333333333335,"z":1780.7619047619048,"a95":0.99,"info":"17/08/2014 at 13:39:26"},{"visible":true,"include":false,"step":"30.0","x":-3234.3809523809523,"y":-1949.7142857142858,"z":831.4761904761905,"a95":0.99,"info":"17/08/2014 at 13:39:26"},{"visible":true,"include":false,"step":"35.0","x":-2477.4285714285716,"y":-1550.3809523809523,"z":176.41904761904763,"a95":0.99,"info":"17/08/2014 at 13:39:26"},{"visible":true,"include":false,"step":"40.0","x":-2211.0476190476193,"y":-1231.6190476190477,"z":439.4095238095238,"a95":0.99,"info":"17/08/2014 at 13:39:26"},{"visible":true,"include":false,"step":"45.0","x":-1729.142857142857,"y":-881.742857142857,"z":563.0857142857143,"a95":0.99,"info":"17/08/2014 at 13:39:26"},{"visible":false,"include":false,"step":"50.0","x":-1395.047619047619,"y":-1441.8095238095239,"z":202.0857142857143,"a95":0.99,"info":"17/08/2014 at 13:39:26"},{"visible":false,"include":false,"step":"60.0","x":-1077.7142857142858,"y":-612.7619047619048,"z":581.7523809523809,"a95":0.99,"info":"17/08/2014 at 13:39:26"},{"visible":false,"include":false,"step":"70.0","x":-1332.6666666666667,"y":-362.3333333333333,"z":-112.83809523809524,"a95":0.99,"info":"17/08/2014 at 13:39:26"},{"visible":false,"include":false,"step":"80.0","x":-119.42857142857143,"y":-324.02857142857147,"z":-335.68571428571425,"a95":0.99,"info":"17/08/2014 at 13:39:26"},{"visible":false,"include":false,"step":"90.0","x":-1383.047619047619,"y":15.402857142857142,"z":540.2190476190476,"a95":0.99,"info":"17/08/2014 at 13:39:26"},{"visible":false,"include":false,"step":"100.0","x":-661.5809523809525,"y":113.12380952380951,"z":38.98571428571429,"a95":0.99,"info":"17/08/2014 at 13:39:26"}]},{"version":"v1.1.0","exported":"2016-11-16T15:33:51.184Z","volume":10.5,"added":"2016-11-16T15:09:44.058Z","format":"Utrecht","demagType":"Unknown","strat":null,"patch":1.1,"GEO":[{"dec":17.72216399405528,"inc":67.60108171762941,"MAD":6.351512363842632,"cm":[7.105427357601002e-15,6.994405055138486e-14,0],"intensity":11018.567441074849,"type":"dir","forced":true,"remark":"","origin":false,"nSteps":7,"minStep":"210","maxStep":"370","steps":["210","240","270","300","320","340","370"],"group":"None","version":"v1.1.0"}],"TECT":[{"dec":25.228169912571843,"inc":42.05500363931045,"MAD":6.351512363842657,"cm":[-4.263256414560601e-14,9.237055564881302e-14,5.684341886080802e-14],"intensity":11018.567441074849,"type":"dir","forced":true,"remark":"","origin":false,"nSteps":7,"minStep":"210","maxStep":"370","steps":["210","240","270","300","320","340","370"],"group":"None","version":"v1.1.0"}],"interpreted":true,"name":"EC1.3A","coreAzi":95,"coreDip":19,"bedStrike":303,"bedDip":26,"data":[{"visible":false,"include":false,"step":"20","x":-30179.238095238095,"y":-19418.190476190477,"z":21053.714285714286,"a95":2.1,"info":"\"14-08-11\" at \"19:06\""},{"visible":false,"include":false,"step":"100","x":-22822.85714285714,"y":-14132,"z":9992.285714285714,"a95":2.1,"info":"\"14-08-11\" at \"21:51\""},{"visible":true,"include":false,"step":"150","x":-15303.52380952381,"y":-11137.619047619048,"z":6223.238095238095,"a95":2.1,"info":"\"14-08-12\" at \"00:46\""},{"visible":true,"include":false,"step":"180","x":-8410.666666666666,"y":-4016.095238095238,"z":3219.4285714285716,"a95":2,"info":"\"14-08-12\" at \"16:58\""},{"visible":true,"include":true,"step":"210","x":-7155.333333333333,"y":-3946.7619047619046,"z":3739.714285714286,"a95":2.3,"info":"\"14-08-12\" at \"19:55\""},{"visible":true,"include":true,"step":"240","x":-6526.857142857143,"y":-3056,"z":3191.5238095238096,"a95":2.2,"info":"\"14-08-12\" at \"23:15\""},{"visible":true,"include":true,"step":"270","x":-5478.0952380952385,"y":-1944,"z":1954.952380952381,"a95":2.3,"info":"\"14-08-13\" at \"16:34\""},{"visible":true,"include":true,"step":"300","x":-3782.4761904761904,"y":-841.6190476190476,"z":1209.4285714285713,"a95":2.4,"info":"\"14-08-13\" at \"19:36\""},{"visible":true,"include":true,"step":"320","x":-2603.3333333333335,"y":-987.4285714285714,"z":1249.3333333333333,"a95":2.6,"info":"\"14-08-13\" at \"22:44\""},{"visible":true,"include":true,"step":"340","x":-2152.5714285714284,"y":-335.8095238095238,"z":230.95238095238096,"a95":2.8,"info":"\"14-08-14\" at \"15:43\""},{"visible":true,"include":true,"step":"370","x":-1964.3809523809523,"y":-404.85714285714283,"z":653.8095238095239,"a95":2.7,"info":"\"14-08-14\" at \"18:48\""},{"visible":true,"include":false,"step":"400","x":-1786.6666666666667,"y":-185.14285714285714,"z":852.3809523809524,"a95":2.5,"info":"\"14-08-14\" at \"22:05\""},{"visible":true,"include":false,"step":"430","x":-1236.1904761904761,"y":-14.476190476190476,"z":624.2857142857143,"a95":2.7,"info":"\"14-08-15\" at \"14:42\""},{"visible":false,"include":false,"step":"460","x":-1114.5714285714287,"y":-620.0952380952381,"z":296.6666666666667,"a95":3.2,"info":"\"14-08-15\" at \"17:50\""},{"visible":false,"include":false,"step":"490","x":-927.047619047619,"y":520.952380952381,"z":881.9047619047619,"a95":3.8,"info":"\"14-08-15\" at \"21:10\""},{"visible":false,"include":false,"step":"510","x":-987.2380952380952,"y":592.952380952381,"z":394.4761904761905,"a95":5.2,"info":"\"14-08-16\" at \"00:24\""},{"visible":false,"include":false,"step":"540","x":-440.4761904761905,"y":546.4761904761905,"z":533.3333333333334,"a95":5.6,"info":"\"14-08-16\" at \"13:30\""},{"visible":false,"include":false,"step":"570","x":606.3809523809524,"y":834.8571428571429,"z":535.7142857142857,"a95":5.1,"info":"\"14-08-16\" at \"16:11\""},{"visible":false,"include":false,"step":"600","x":-679.4285714285714,"y":-96.47619047619048,"z":483.6190476190476,"a95":5.1,"info":"\"14-08-16\" at \"18:54\""},{"visible":false,"include":false,"step":"630","x":27.523809523809526,"y":-1294.4761904761904,"z":606.4761904761905,"a95":4.9,"info":"\"14-08-17\" at \"13:58\""}]},{"version":"v1.1.0","exported":"2016-11-16T15:33:51.184Z","volume":10.5,"added":"2016-11-16T15:09:44.059Z","format":"Utrecht","demagType":"Unknown","strat":"5","patch":1.1,"GEO":[{"dec":346.56370192326204,"inc":64.45168072474313,"MAD":8.921406291619261,"cm":[-6.394884621840902e-14,-2.948752353404416e-13,0],"intensity":6713.978423201778,"type":"dir","forced":true,"remark":"","origin":false,"nSteps":6,"minStep":"16.0","maxStep":"40.0","steps":["16.0","20.0","25.0","30.0","35.0","40.0"],"group":"None","version":"v1.1.0"}],"TECT":[{"dec":7.7513877827806255,"inc":42.89217802349168,"MAD":8.921406291619274,"cm":[-5.684341886080802e-14,-6.519229600598919e-13,2.4158453015843406e-13],"intensity":6713.978423201779,"type":"dir","forced":true,"remark":"","origin":false,"nSteps":6,"minStep":"16.0","maxStep":"40.0","steps":["16.0","20.0","25.0","30.0","35.0","40.0"],"group":"None","version":"v1.1.0"}],"interpreted":true,"name":"EC1.4A","coreAzi":106,"coreDip":19,"bedStrike":303,"bedDip":26,"data":[{"visible":false,"include":false,"step":"0.0","x":-21421.904761904763,"y":-11429.52380952381,"z":6343.714285714285,"a95":0.99,"info":"17/08/2014 at 13:39:26"},{"visible":true,"include":false,"step":"4.0","x":-17664.761904761905,"y":-10162.857142857143,"z":3402.7619047619046,"a95":0.99,"info":"17/08/2014 at 13:39:26"},{"visible":true,"include":false,"step":"8.0","x":-12360.952380952382,"y":-6900.0952380952385,"z":2207.1428571428573,"a95":0.99,"info":"17/08/2014 at 13:39:26"},{"visible":true,"include":false,"step":"12.0","x":-7801.523809523809,"y":-4091.4285714285716,"z":1367.142857142857,"a95":0.99,"info":"17/08/2014 at 13:39:26"},{"visible":true,"include":true,"step":"16.0","x":-5157.142857142857,"y":-2561.714285714286,"z":632.3238095238095,"a95":0.99,"info":"17/08/2014 at 13:39:26"},{"visible":true,"include":true,"step":"20.0","x":-3723.2380952380954,"y":-1404.6666666666667,"z":575.047619047619,"a95":0.99,"info":"17/08/2014 at 13:39:26"},{"visible":true,"include":true,"step":"25.0","x":-2526.095238095238,"y":-968.4761904761905,"z":377.7809523809524,"a95":0.99,"info":"17/08/2014 at 13:39:26"},{"visible":true,"include":true,"step":"30.0","x":-1829.2380952380952,"y":-184.58095238095237,"z":-239.59047619047618,"a95":0.99,"info":"17/08/2014 at 13:39:26"},{"visible":true,"include":true,"step":"35.0","x":-1484.1904761904761,"y":22.856190476190477,"z":-528.5714285714286,"a95":0.99,"info":"17/08/2014 at 13:39:26"},{"visible":true,"include":true,"step":"40.0","x":-969.3333333333334,"y":-122.78095238095239,"z":-51.5647619047619,"a95":0.99,"info":"17/08/2014 at 13:39:26"},{"visible":false,"include":false,"step":"45.0","x":-814.5809523809525,"y":-312.4761904761905,"z":-83.72666666666666,"a95":0.99,"info":"17/08/2014 at 13:39:26"},{"visible":false,"include":false,"step":"50.0","x":-151.05714285714285,"y":-85.5142857142857,"z":-653.1428571428571,"a95":0.99,"info":"17/08/2014 at 13:39:26"},{"visible":false,"include":false,"step":"60.0","x":-542.5428571428571,"y":-163.75238095238097,"z":163.65714285714287,"a95":0.99,"info":"17/08/2014 at 13:39:26"},{"visible":false,"include":false,"step":"70.0","x":-444.12380952380954,"y":110.78095238095239,"z":-291.9809523809524,"a95":0.99,"info":"17/08/2014 at 13:39:26"},{"visible":false,"include":false,"step":"80.0","x":12.031428571428572,"y":-509.3238095238095,"z":317.74285714285713,"a95":0.99,"info":"17/08/2014 at 13:39:26"},{"visible":false,"include":false,"step":"90.0","x":-506.1714285714286,"y":538.0095238095239,"z":295.0857142857143,"a95":0.99,"info":"17/08/2014 at 13:39:26"},{"visible":false,"include":false,"step":"100.0","x":-187.88571428571427,"y":-185.57142857142858,"z":206.52380952380952,"a95":0.99,"info":"17/08/2014 at 13:39:26"}]},{"version":"v1.1.0","exported":"2016-11-16T15:33:51.184Z","volume":10.5,"added":"2016-11-16T15:09:44.059Z","format":"Utrecht","demagType":"Unknown","strat":"6","patch":1.1,"GEO":[{"dec":352.66060595079176,"inc":64.67863004636575,"MAD":4.1895718769906525,"cm":[-1.4210854715202004e-14,-1.8918200339612667e-13,0],"intensity":4345.469658518695,"type":"dir","forced":true,"remark":"","origin":false,"nSteps":4,"minStep":"25.0","maxStep":"40.0","steps":["25.0","30.0","35.0","40.0"],"group":"None","version":"v1.1.0"}],"TECT":[{"dec":11.116298594868567,"inc":42.030959097484704,"MAD":4.18957187699066,"cm":[4.263256414560601e-14,-2.1316282072803006e-13,4.263256414560601e-14],"intensity":4345.469658518695,"type":"dir","forced":true,"remark":"","origin":false,"nSteps":4,"minStep":"25.0","maxStep":"40.0","steps":["25.0","30.0","35.0","40.0"],"group":"None","version":"v1.1.0"}],"interpreted":true,"name":"EC1.4B","coreAzi":106,"coreDip":19,"bedStrike":303,"bedDip":26,"data":[{"visible":false,"include":false,"step":"0.0","x":-21520.95238095238,"y":-11435.238095238095,"z":4671.047619047619,"a95":0.99,"info":"17/08/2014 at 13:39:26"},{"visible":true,"include":false,"step":"4.0","x":-18126.666666666668,"y":-11001.904761904761,"z":3277.3333333333335,"a95":0.99,"info":"17/08/2014 at 13:39:26"},{"visible":true,"include":false,"step":"8.0","x":-13257.142857142857,"y":-8152.380952380952,"z":2265.5238095238096,"a95":0.99,"info":"17/08/2014 at 13:39:26"},{"visible":true,"include":false,"step":"12.0","x":-8743.238095238095,"y":-5037.333333333333,"z":1426.095238095238,"a95":0.99,"info":"17/08/2014 at 13:39:26"},{"visible":true,"include":false,"step":"16.0","x":-5615.333333333333,"y":-2963.6190476190477,"z":807.9714285714286,"a95":0.99,"info":"17/08/2014 at 13:39:26"},{"visible":true,"include":false,"step":"20.0","x":-4195.428571428572,"y":-2085.904761904762,"z":427.04761904761904,"a95":0.99,"info":"17/08/2014 at 13:39:26"},{"visible":true,"include":true,"step":"25.0","x":-2945.2380952380954,"y":-1225.4285714285713,"z":532.6380952380953,"a95":0.99,"info":"17/08/2014 at 13:39:26"},{"visible":true,"include":true,"step":"30.0","x":-1821.6190476190477,"y":-671.3333333333334,"z":157.61904761904762,"a95":0.99,"info":"17/08/2014 at 13:39:26"},{"visible":true,"include":true,"step":"35.0","x":-1405.5238095238096,"y":-805.8666666666667,"z":77.1647619047619,"a95":0.99,"info":"17/08/2014 at 13:39:26"},{"visible":true,"include":true,"step":"40.0","x":-980.8571428571429,"y":-469.54285714285714,"z":239.34285714285713,"a95":0.99,"info":"17/08/2014 at 13:39:26"},{"visible":false,"include":false,"step":"45.0","x":-856.3904761904762,"y":-233.77142857142857,"z":-174.77142857142857,"a95":0.99,"info":"17/08/2014 at 13:39:26"},{"visible":false,"include":false,"step":"50.0","x":-783.2857142857143,"y":-136.17142857142858,"z":283.2,"a95":0.99,"info":"17/08/2014 at 13:39:26"},{"visible":false,"include":false,"step":"60.0","x":-543.6952380952381,"y":-197.9809523809524,"z":405.14285714285717,"a95":0.99,"info":"17/08/2014 at 13:39:26"},{"visible":false,"include":false,"step":"70.0","x":-259.06666666666666,"y":-40.62095238095238,"z":-167.01904761904763,"a95":0.99,"info":"17/08/2014 at 13:39:26"},{"visible":false,"include":false,"step":"80.0","x":-610.2666666666667,"y":-679.0857142857143,"z":-163.45714285714286,"a95":0.99,"info":"17/08/2014 at 13:39:26"},{"visible":false,"include":false,"step":"90.0","x":-101.07619047619048,"y":190.35238095238097,"z":-173.4,"a95":0.99,"info":"17/08/2014 at 13:39:26"},{"visible":false,"include":false,"step":"100.0","x":-559.7238095238096,"y":-80.94285714285714,"z":-265.7142857142857,"a95":0.99,"info":"17/08/2014 at 13:39:26"}]},{"version":"v1.1.0","exported":"2016-11-16T15:33:51.184Z","volume":10.5,"added":"2016-11-16T15:09:44.061Z","format":"Utrecht","demagType":"Unknown","strat":null,"patch":1.1,"GEO":[],"TECT":[],"interpreted":false,"name":"EC1.5A","coreAzi":105,"coreDip":14,"bedStrike":303,"bedDip":26,"data":[{"visible":false,"include":false,"step":"20","x":-17823.333333333332,"y":-18658.095238095237,"z":3135.0476190476193,"a95":1.5,"info":"\"14-08-11\" at \"19:10\""},{"visible":true,"include":true,"step":"100","x":-12372.952380952382,"y":-9409.333333333334,"z":1996.4761904761904,"a95":1.8,"info":"\"14-08-11\" at \"21:53\""},{"visible":true,"include":true,"step":"150","x":-8740.095238095239,"y":-5267.809523809524,"z":1469.2380952380952,"a95":2.2,"info":"\"14-08-12\" at \"00:48\""},{"visible":true,"include":true,"step":"180","x":-4960,"y":-2826.7619047619046,"z":1409.3333333333333,"a95":2.2,"info":"\"14-08-12\" at \"17:00\""},{"visible":true,"include":true,"step":"210","x":-4215.809523809524,"y":-1820.3809523809523,"z":1142.7619047619048,"a95":2.6,"info":"\"14-08-12\" at \"19:57\""},{"visible":true,"include":true,"step":"240","x":-4272.571428571428,"y":-1348.6666666666667,"z":1356.6666666666667,"a95":2.3,"info":"\"14-08-12\" at \"23:19\""},{"visible":false,"include":false,"step":"270","x":-2801.809523809524,"y":-1264.095238095238,"z":348.85714285714283,"a95":2.9,"info":"\"14-08-13\" at \"16:36\""},{"visible":true,"include":false,"step":"300","x":-2357.0476190476193,"y":-1110.7619047619048,"z":1189.047619047619,"a95":2.9,"info":"\"14-08-13\" at \"19:39\""},{"visible":true,"include":false,"step":"320","x":-1948.1904761904761,"y":-1405.904761904762,"z":1233.904761904762,"a95":2.9,"info":"\"14-08-13\" at \"22:46\""},{"visible":true,"include":false,"step":"340","x":-2072.9523809523807,"y":-873.2380952380952,"z":811.8095238095239,"a95":3,"info":"\"14-08-14\" at \"15:45\""},{"visible":true,"include":false,"step":"370","x":-1723.2380952380952,"y":-1085.3333333333333,"z":1115.6190476190477,"a95":2.7,"info":"\"14-08-14\" at \"18:52\""},{"visible":true,"include":false,"step":"400","x":-1699.4285714285713,"y":-1447.2380952380952,"z":807.6190476190476,"a95":2.3,"info":"\"14-08-14\" at \"22:08\""},{"visible":true,"include":false,"step":"430","x":-1648.095238095238,"y":-838.5714285714286,"z":599.6190476190476,"a95":2.3,"info":"\"14-08-15\" at \"14:45\""},{"visible":true,"include":false,"step":"460","x":-1423.8095238095239,"y":-753.8095238095239,"z":233.04761904761904,"a95":2.8,"info":"\"14-08-15\" at \"17:52\""},{"visible":false,"include":false,"step":"490","x":-1290.7619047619048,"y":-264.76190476190476,"z":362.6666666666667,"a95":3.7,"info":"\"14-08-15\" at \"21:12\""},{"visible":false,"include":false,"step":"510","x":-783.1428571428571,"y":-399.6190476190476,"z":646.8571428571429,"a95":3.9,"info":"\"14-08-16\" at \"00:27\""},{"visible":false,"include":false,"step":"540","x":-1045.4285714285713,"y":-208.1904761904762,"z":285.5238095238095,"a95":4.3,"info":"\"14-08-16\" at \"13:32\""},{"visible":false,"include":false,"step":"570","x":-802,"y":-826.4761904761905,"z":230.95238095238096,"a95":5,"info":"\"14-08-16\" at \"16:12\""},{"visible":false,"include":false,"step":"600","x":-643.7142857142857,"y":682.952380952381,"z":194.66666666666666,"a95":3.6,"info":"\"14-08-16\" at \"19:02\""},{"visible":false,"include":false,"step":"630","x":-105.71428571428571,"y":-825.8095238095239,"z":138.38095238095238,"a95":6.8,"info":"\"14-08-17\" at \"14:00\""},{"visible":false,"include":false,"step":"660","x":-247.23809523809524,"y":873.5238095238095,"z":-191.61904761904762,"a95":8,"info":"\"14-08-17\" at \"16:04\""}]},{"version":"v1.1.0","exported":"2016-11-16T15:33:51.184Z","volume":10.5,"added":"2016-11-16T15:09:44.065Z","format":"Utrecht","demagType":"Unknown","strat":"2","patch":1.1,"GEO":[],"TECT":[],"interpreted":false,"name":"EC1.5B","coreAzi":105,"coreDip":14,"bedStrike":303,"bedDip":26,"data":[{"visible":true,"include":false,"step":"0.0","x":-5929.142857142857,"y":-6861.523809523809,"z":3076.6666666666665,"a95":0.99,"info":"05/11/2014 at 22:47:31"},{"visible":true,"include":true,"step":"10.0","x":-4002.8571428571427,"y":-3492.7619047619046,"z":1593.047619047619,"a95":0.99,"info":"05/11/2014 at 22:47:31"},{"visible":true,"include":true,"step":"15.0","x":-2173.714285714286,"y":-1816.7619047619048,"z":972.7619047619048,"a95":0.99,"info":"05/11/2014 at 22:47:31"},{"visible":true,"include":true,"step":"20.0","x":-1180.2857142857142,"y":-1067.3333333333333,"z":966.8571428571429,"a95":0.99,"info":"05/11/2014 at 22:47:31"},{"visible":true,"include":true,"step":"25.0","x":-672.0857142857143,"y":-732.8761904761905,"z":476.2666666666667,"a95":0.99,"info":"05/11/2014 at 22:47:31"},{"visible":true,"include":true,"step":"30.0","x":-725.4380952380952,"y":-523.5809523809525,"z":420.6666666666667,"a95":0.99,"info":"05/11/2014 at 22:47:31"},{"visible":true,"include":true,"step":"35.0","x":-470,"y":-362.65714285714284,"z":826.4285714285714,"a95":0.99,"info":"05/11/2014 at 22:47:31"},{"visible":true,"include":true,"step":"40.0","x":-342.67619047619047,"y":-198.35238095238094,"z":395.1904761904762,"a95":0.99,"info":"05/11/2014 at 22:47:31"},{"visible":true,"include":false,"step":"45.0","x":-265.4761904761905,"y":-207.2,"z":65.87714285714286,"a95":0.99,"info":"05/11/2014 at 22:47:31"},{"visible":true,"include":false,"step":"50.0","x":-243.14285714285714,"y":-203.78095238095236,"z":733.2190476190476,"a95":0.99,"info":"05/11/2014 at 22:47:31"},{"visible":true,"include":false,"step":"60.0","x":-385.247619047619,"y":113.13333333333334,"z":199.34285714285713,"a95":0.99,"info":"05/11/2014 at 22:47:31"},{"visible":true,"include":false,"step":"70.0","x":-34.07142857142857,"y":-226.64761904761906,"z":234.9904761904762,"a95":0.99,"info":"05/11/2014 at 22:47:31"},{"visible":true,"include":false,"step":"80.0","x":-390.3047619047619,"y":99.11428571428571,"z":363.4,"a95":0.99,"info":"05/11/2014 at 22:47:31"},{"visible":true,"include":false,"step":"90.0","x":-141.75238095238097,"y":267.57142857142856,"z":215.04761904761904,"a95":0.99,"info":"05/11/2014 at 22:47:31"}]},{"version":"v1.1.0","exported":"2016-11-16T15:33:51.184Z","volume":10.5,"added":"2016-11-16T15:09:44.065Z","format":"Utrecht","demagType":"Unknown","strat":"7","patch":1.1,"GEO":[],"TECT":[],"interpreted":false,"name":"EC1.6A","coreAzi":97,"coreDip":15,"bedStrike":303,"bedDip":26,"data":[{"visible":true,"include":false,"step":"0.0","x":-15922.857142857143,"y":-12220,"z":4600.285714285715,"a95":0.99,"info":"17/08/2014 at 13:39:26"},{"visible":true,"include":false,"step":"4.0","x":-13319.047619047618,"y":-11425.714285714286,"z":3064.5714285714284,"a95":0.99,"info":"17/08/2014 at 13:39:26"},{"visible":true,"include":false,"step":"8.0","x":-10035.238095238095,"y":-8969.52380952381,"z":2163.0476190476193,"a95":0.99,"info":"17/08/2014 at 13:39:26"},{"visible":true,"include":false,"step":"12.0","x":-6831.809523809524,"y":-6214.0952380952385,"z":1832.2857142857142,"a95":0.99,"info":"17/08/2014 at 13:39:26"},{"visible":true,"include":false,"step":"16.0","x":-4644.952380952381,"y":-4524.0952380952385,"z":1304.095238095238,"a95":0.99,"info":"17/08/2014 at 13:39:26"},{"visible":true,"include":false,"step":"20.0","x":-3373.714285714286,"y":-3605.0476190476193,"z":906.5999999999999,"a95":0.99,"info":"17/08/2014 at 13:39:26"},{"visible":true,"include":false,"step":"25.0","x":-2323.0476190476193,"y":-2714.7619047619046,"z":843.0380952380953,"a95":0.99,"info":"17/08/2014 at 13:39:26"},{"visible":true,"include":false,"step":"30.0","x":-1848.5714285714287,"y":-1966.3809523809523,"z":441.5238095238095,"a95":0.99,"info":"17/08/2014 at 13:39:26"},{"visible":true,"include":false,"step":"35.0","x":-1472.5714285714287,"y":-1890,"z":169.28571428571428,"a95":0.99,"info":"17/08/2014 at 13:39:26"},{"visible":true,"include":false,"step":"40.0","x":-1452.857142857143,"y":-1272.7619047619048,"z":224.0761904761905,"a95":0.99,"info":"17/08/2014 at 13:39:26"},{"visible":true,"include":false,"step":"45.0","x":-809.6761904761905,"y":-1069.142857142857,"z":124.68571428571428,"a95":0.99,"info":"17/08/2014 at 13:39:26"},{"visible":false,"include":false,"step":"50.0","x":-587.3523809523809,"y":-1225.142857142857,"z":-139.7047619047619,"a95":0.99,"info":"17/08/2014 at 13:39:26"},{"visible":false,"include":false,"step":"60.0","x":-379.752380952381,"y":-669.8285714285714,"z":358.15238095238095,"a95":0.99,"info":"17/08/2014 at 13:39:26"},{"visible":false,"include":false,"step":"70.0","x":-672.9619047619047,"y":-425.60952380952375,"z":-393.552380952381,"a95":0.99,"info":"17/08/2014 at 13:39:26"},{"visible":false,"include":false,"step":"80.0","x":-397.00952380952384,"y":-619.7619047619048,"z":-0.10074285714285715,"a95":0.99,"info":"17/08/2014 at 13:39:26"},{"visible":false,"include":false,"step":"90.0","x":-561.3047619047619,"y":-226.9238095238095,"z":261.43809523809523,"a95":0.99,"info":"17/08/2014 at 13:39:26"},{"visible":false,"include":false,"step":"100.0","x":-630.1333333333333,"y":-319.5238095238095,"z":-200.56190476190477,"a95":0.99,"info":"17/08/2014 at 13:39:26"}]},{"version":"v1.1.0","exported":"2016-11-16T15:33:51.185Z","volume":10.5,"added":"2016-11-16T15:09:44.066Z","format":"Utrecht","demagType":"Unknown","strat":"8","patch":1.1,"GEO":[],"TECT":[],"interpreted":false,"name":"EC1.7A","coreAzi":101,"coreDip":17,"bedStrike":303,"bedDip":26,"data":[{"visible":true,"include":false,"step":"0.0","x":-15577.142857142857,"y":-13078.095238095239,"z":7988.857142857143,"a95":0.99,"info":"17/08/2014 at 13:39:26"},{"visible":true,"include":false,"step":"4.0","x":-13060,"y":-11583.809523809523,"z":5538.285714285715,"a95":0.99,"info":"17/08/2014 at 13:39:26"},{"visible":true,"include":false,"step":"8.0","x":-9750.47619047619,"y":-8635.619047619048,"z":3664,"a95":0.99,"info":"17/08/2014 at 13:39:26"},{"visible":true,"include":false,"step":"12.0","x":-6335.9047619047615,"y":-5600.285714285715,"z":2638.190476190476,"a95":0.99,"info":"17/08/2014 at 13:39:26"},{"visible":true,"include":false,"step":"16.0","x":-4226.380952380952,"y":-3882.6666666666665,"z":1754.5714285714287,"a95":0.99,"info":"17/08/2014 at 13:39:26"},{"visible":true,"include":false,"step":"20.0","x":-2934.9523809523807,"y":-2621.809523809524,"z":1070.6666666666667,"a95":0.99,"info":"17/08/2014 at 13:39:26"},{"visible":true,"include":false,"step":"25.0","x":-2068.3809523809523,"y":-1956.6666666666667,"z":833.352380952381,"a95":0.99,"info":"17/08/2014 at 13:39:26"},{"visible":true,"include":false,"step":"30.0","x":-1369.6190476190477,"y":-1372.5714285714287,"z":114.11428571428571,"a95":0.99,"info":"17/08/2014 at 13:39:26"},{"visible":true,"include":false,"step":"35.0","x":-1108.095238095238,"y":-1025.047619047619,"z":32.23619047619048,"a95":0.99,"info":"17/08/2014 at 13:39:26"},{"visible":false,"include":false,"step":"40.0","x":-679.3333333333334,"y":-1067.142857142857,"z":324.4190476190476,"a95":0.99,"info":"17/08/2014 at 13:39:26"},{"visible":false,"include":false,"step":"45.0","x":-647.552380952381,"y":-369.1904761904762,"z":239.71428571428572,"a95":0.99,"info":"17/08/2014 at 13:39:26"},{"visible":false,"include":false,"step":"50.0","x":-489.97142857142853,"y":-406.85714285714283,"z":-130.85714285714286,"a95":0.99,"info":"17/08/2014 at 13:39:26"},{"visible":false,"include":false,"step":"60.0","x":-290.23809523809524,"y":-268.02857142857147,"z":134.17142857142858,"a95":0.99,"info":"17/08/2014 at 13:39:26"},{"visible":false,"include":false,"step":"70.0","x":-443.81904761904764,"y":-581.7238095238096,"z":-235.47619047619048,"a95":0.99,"info":"17/08/2014 at 13:39:26"},{"visible":false,"include":false,"step":"80.0","x":-1354.857142857143,"y":-631.4666666666666,"z":-694.3523809523809,"a95":0.99,"info":"17/08/2014 at 13:39:26"},{"visible":false,"include":false,"step":"90.0","x":-631.5809523809525,"y":2.403142857142857,"z":-75.82761904761905,"a95":0.99,"info":"17/08/2014 at 13:39:26"},{"visible":false,"include":false,"step":"100.0","x":-569.3428571428572,"y":-244.1904761904762,"z":-246.2952380952381,"a95":0.99,"info":"17/08/2014 at 13:39:26"}]},{"version":"v1.1.0","exported":"2016-11-16T15:33:51.185Z","volume":10.5,"added":"2016-11-16T15:09:44.066Z","format":"Utrecht","demagType":"Unknown","strat":"3","patch":1.1,"GEO":[],"TECT":[],"interpreted":false,"name":"EC1.7B","coreAzi":101,"coreDip":17,"bedStrike":303,"bedDip":26,"data":[{"visible":false,"include":false,"step":"0.0","x":-13300.952380952382,"y":-10372.380952380952,"z":4031.3333333333335,"a95":0.99,"info":"05/11/2014 at 22:47:31"},{"visible":true,"include":false,"step":"10.0","x":-5730.285714285715,"y":-5559.523809523809,"z":1536.7619047619048,"a95":0.99,"info":"05/11/2014 at 22:47:31"},{"visible":true,"include":false,"step":"15.0","x":-3122.190476190476,"y":-3081.714285714286,"z":722.8,"a95":0.99,"info":"05/11/2014 at 22:47:31"},{"visible":true,"include":false,"step":"20.0","x":-1918.3809523809523,"y":-1896.952380952381,"z":845.0571428571429,"a95":0.99,"info":"05/11/2014 at 22:47:31"},{"visible":true,"include":false,"step":"25.0","x":-859.9904761904761,"y":-1181.3333333333333,"z":816.9428571428571,"a95":0.99,"info":"05/11/2014 at 22:47:31"},{"visible":true,"include":false,"step":"30.0","x":-599.5142857142857,"y":-1242.095238095238,"z":618.5904761904761,"a95":0.99,"info":"05/11/2014 at 22:47:31"},{"visible":true,"include":false,"step":"35.0","x":-374.43809523809523,"y":-895.9333333333333,"z":266.9809523809524,"a95":0.99,"info":"05/11/2014 at 22:47:31"},{"visible":true,"include":false,"step":"40.0","x":175.38095238095238,"y":-588.2380952380952,"z":212.73333333333332,"a95":0.99,"info":"05/11/2014 at 22:47:31"},{"visible":true,"include":false,"step":"45.0","x":-4.363333333333333,"y":-298.0952380952381,"z":141.52380952380952,"a95":0.99,"info":"05/11/2014 at 22:47:31"},{"visible":false,"include":false,"step":"50.0","x":-149.42857142857142,"y":58.99238095238095,"z":52.01047619047619,"a95":0.99,"info":"05/11/2014 at 22:47:31"},{"visible":false,"include":false,"step":"60.0","x":344.32380952380953,"y":-438.35238095238094,"z":532,"a95":0.99,"info":"05/11/2014 at 22:47:31"},{"visible":false,"include":false,"step":"70.0","x":185.6952380952381,"y":-72.81238095238095,"z":237.8095238095238,"a95":0.99,"info":"05/11/2014 at 22:47:31"},{"visible":false,"include":false,"step":"80.0","x":314.447619047619,"y":-926.9809523809523,"z":719.7523809523809,"a95":0.99,"info":"05/11/2014 at 22:47:31"},{"visible":false,"include":false,"step":"90.0","x":36.703809523809525,"y":43.14857142857143,"z":-370.4761904761905,"a95":0.99,"info":"05/11/2014 at 22:47:31"}]},{"version":"v1.1.0","exported":"2016-11-16T15:33:51.185Z","volume":10.5,"added":"2016-11-16T15:09:44.066Z","format":"Utrecht","demagType":"Unknown","strat":"1","patch":1.1,"GEO":[],"TECT":[],"interpreted":false,"name":"EC1.8A","coreAzi":101,"coreDip":13,"bedStrike":303,"bedDip":26,"data":[{"visible":true,"include":false,"step":"0.0","x":-15846.666666666666,"y":-8951.904761904761,"z":5995.047619047619,"a95":0.99,"info":"17/08/2014 at 18:14:15"},{"visible":true,"include":false,"step":"4.0","x":-13888.57142857143,"y":-8162.952380952381,"z":3488.285714285714,"a95":0.99,"info":"17/08/2014 at 18:14:15"},{"visible":true,"include":false,"step":"8.0","x":-10198.095238095239,"y":-5930.952380952381,"z":2568.9523809523807,"a95":0.99,"info":"17/08/2014 at 18:14:15"},{"visible":true,"include":false,"step":"12.0","x":-6560.571428571428,"y":-3802.9523809523807,"z":1654.952380952381,"a95":0.99,"info":"17/08/2014 at 18:14:15"},{"visible":true,"include":false,"step":"16.0","x":-4329.619047619048,"y":-2657.5238095238096,"z":1176.1904761904761,"a95":0.99,"info":"17/08/2014 at 18:14:15"},{"visible":true,"include":false,"step":"20.0","x":-3158.9523809523807,"y":-1859.4285714285713,"z":639.7809523809524,"a95":0.99,"info":"17/08/2014 at 18:14:15"},{"visible":true,"include":false,"step":"25.0","x":-2199.5238095238096,"y":-1225.142857142857,"z":337.9142857142857,"a95":0.99,"info":"17/08/2014 at 18:14:15"},{"visible":true,"include":false,"step":"30.0","x":-1333.3333333333333,"y":-814.9238095238096,"z":250.9047619047619,"a95":0.99,"info":"17/08/2014 at 18:14:15"},{"visible":true,"include":false,"step":"35.0","x":-975.5238095238095,"y":-443.2952380952381,"z":252.37142857142857,"a95":0.99,"info":"17/08/2014 at 18:14:15"},{"visible":false,"include":false,"step":"40.0","x":-589.3142857142857,"y":-596.895238095238,"z":-137.23809523809524,"a95":0.99,"info":"17/08/2014 at 18:14:15"},{"visible":false,"include":false,"step":"45.0","x":-668.2380952380952,"y":-182.2761904761905,"z":-17.619999999999997,"a95":0.99,"info":"17/08/2014 at 18:14:15"},{"visible":false,"include":false,"step":"50.0","x":-232.8952380952381,"y":-317.83809523809526,"z":-28.330476190476194,"a95":0.99,"info":"17/08/2014 at 18:14:15"},{"visible":false,"include":false,"step":"60.0","x":-541.4,"y":-48.38666666666667,"z":373.4761904761905,"a95":0.99,"info":"17/08/2014 at 18:14:15"},{"visible":false,"include":false,"step":"70.0","x":-754.6476190476191,"y":-57.80952380952381,"z":495.04761904761904,"a95":0.99,"info":"17/08/2014 at 18:14:15"},{"visible":false,"include":false,"step":"80.0","x":-537,"y":-195.67619047619047,"z":107.84761904761906,"a95":0.99,"info":"17/08/2014 at 18:14:15"},{"visible":false,"include":false,"step":"90.0","x":80.6952380952381,"y":-191.95238095238096,"z":-192.14285714285714,"a95":0.99,"info":"17/08/2014 at 18:14:15"},{"visible":false,"include":false,"step":"100.0","x":-729,"y":210.49523809523808,"z":-52.42285714285715,"a95":0.99,"info":"17/08/2014 at 18:14:15"}]},{"version":"v1.1.0","exported":"2016-11-16T15:33:51.185Z","volume":10.5,"added":"2016-11-16T15:09:44.067Z","format":"Utrecht","demagType":"Unknown","strat":"2","patch":1.1,"GEO":[],"TECT":[],"interpreted":false,"name":"EC1.8B","coreAzi":101,"coreDip":13,"bedStrike":303,"bedDip":26,"data":[{"visible":false,"include":false,"step":"0.0","x":-14919.047619047618,"y":-8674.666666666666,"z":7193.809523809524,"a95":0.99,"info":"17/08/2014 at 18:14:15"},{"visible":true,"include":false,"step":"4.0","x":-13545.714285714286,"y":-8170.952380952381,"z":4921.9047619047615,"a95":0.99,"info":"17/08/2014 at 18:14:15"},{"visible":true,"include":false,"step":"8.0","x":-10440.952380952382,"y":-6177.523809523809,"z":3612,"a95":0.99,"info":"17/08/2014 at 18:14:15"},{"visible":true,"include":false,"step":"12.0","x":-7037.142857142857,"y":-4076.4761904761904,"z":2577.4285714285716,"a95":0.99,"info":"17/08/2014 at 18:14:15"},{"visible":true,"include":false,"step":"16.0","x":-4843.809523809524,"y":-3089.904761904762,"z":1833.8095238095239,"a95":0.99,"info":"17/08/2014 at 18:14:15"},{"visible":true,"include":false,"step":"20.0","x":-3494.190476190476,"y":-2306.9523809523807,"z":1326.1904761904761,"a95":0.99,"info":"17/08/2014 at 18:14:15"},{"visible":true,"include":false,"step":"25.0","x":-2162.095238095238,"y":-1468.2857142857142,"z":800.9428571428571,"a95":0.99,"info":"17/08/2014 at 18:14:15"},{"visible":true,"include":false,"step":"30.0","x":-1600.2857142857142,"y":-1204.6666666666667,"z":894.0761904761904,"a95":0.99,"info":"17/08/2014 at 18:14:15"},{"visible":true,"include":false,"step":"35.0","x":-1464.5714285714287,"y":-757.047619047619,"z":510.6666666666667,"a95":0.99,"info":"17/08/2014 at 18:14:15"},{"visible":true,"include":false,"step":"40.0","x":-980.4761904761905,"y":-522.6571428571428,"z":300.2761904761905,"a95":0.99,"info":"17/08/2014 at 18:14:15"},{"visible":true,"include":false,"step":"45.0","x":-754.3428571428572,"y":-497.4190476190476,"z":530.3523809523809,"a95":0.99,"info":"17/08/2014 at 18:14:15"},{"visible":false,"include":false,"step":"50.0","x":-654.2952380952381,"y":-473.1142857142857,"z":224.0190476190476,"a95":0.99,"info":"17/08/2014 at 18:14:15"},{"visible":false,"include":false,"step":"60.0","x":-593.3714285714285,"y":-304.57142857142856,"z":-145.95238095238096,"a95":0.99,"info":"17/08/2014 at 18:14:15"},{"visible":false,"include":false,"step":"70.0","x":-89.22285714285715,"y":-75.55428571428573,"z":-73.73238095238096,"a95":0.99,"info":"17/08/2014 at 18:14:15"},{"visible":false,"include":false,"step":"80.0","x":-591.8380952380952,"y":-171.38095238095238,"z":-91.93333333333332,"a95":0.99,"info":"17/08/2014 at 18:14:15"},{"visible":false,"include":false,"step":"90.0","x":-522.7428571428571,"y":-172.54285714285714,"z":143.41904761904763,"a95":0.99,"info":"17/08/2014 at 18:14:15"},{"visible":false,"include":false,"step":"100.0","x":-406.2095238095238,"y":-120.6,"z":306.2761904761905,"a95":0.99,"info":"17/08/2014 at 18:14:15"}]},{"version":"v1.1.0","exported":"2016-11-16T15:33:51.185Z","volume":10.5,"added":"2016-11-16T15:09:44.067Z","format":"Utrecht","demagType":"Unknown","strat":"3","patch":1.1,"GEO":[],"TECT":[],"interpreted":false,"name":"EC1.9A","coreAzi":98,"coreDip":15,"bedStrike":303,"bedDip":26,"data":[{"visible":true,"include":false,"step":"0.0","x":-14289.52380952381,"y":-11037.142857142857,"z":4686,"a95":0.99,"info":"17/08/2014 at 18:14:15"},{"visible":true,"include":false,"step":"4.0","x":-12318.095238095239,"y":-10230.47619047619,"z":3390.8571428571427,"a95":0.99,"info":"17/08/2014 at 18:14:15"},{"visible":true,"include":false,"step":"8.0","x":-8981.42857142857,"y":-7405.238095238095,"z":2804.285714285714,"a95":0.99,"info":"17/08/2014 at 18:14:15"},{"visible":true,"include":false,"step":"12.0","x":-6053.333333333333,"y":-4974.285714285715,"z":2000.6666666666667,"a95":0.99,"info":"17/08/2014 at 18:14:15"},{"visible":true,"include":false,"step":"16.0","x":-4064.3809523809523,"y":-3424.9523809523807,"z":1406.857142857143,"a95":0.99,"info":"17/08/2014 at 18:14:15"},{"visible":true,"include":false,"step":"20.0","x":-2775.4285714285716,"y":-2173.5238095238096,"z":1003.5238095238095,"a95":0.99,"info":"17/08/2014 at 18:14:15"},{"visible":true,"include":false,"step":"25.0","x":-1776,"y":-1537.3333333333333,"z":614.3047619047619,"a95":0.99,"info":"17/08/2014 at 18:14:15"},{"visible":true,"include":false,"step":"30.0","x":-1339.3333333333333,"y":-1236.857142857143,"z":956.6666666666666,"a95":0.99,"info":"17/08/2014 at 18:14:15"},{"visible":true,"include":false,"step":"35.0","x":-881.1809523809524,"y":-498.00952380952384,"z":623.2190476190476,"a95":0.99,"info":"17/08/2014 at 18:14:15"},{"visible":false,"include":false,"step":"40.0","x":-639.7523809523809,"y":-720.1714285714286,"z":510.2666666666667,"a95":0.99,"info":"17/08/2014 at 18:14:15"},{"visible":false,"include":false,"step":"45.0","x":-549.3333333333334,"y":-432.2666666666667,"z":661.7523809523809,"a95":0.99,"info":"17/08/2014 at 18:14:15"},{"visible":false,"include":false,"step":"50.0","x":-302.95238095238096,"y":-70.99047619047619,"z":678.9809523809524,"a95":0.99,"info":"17/08/2014 at 18:14:15"},{"visible":false,"include":false,"step":"60.0","x":-361.96190476190475,"y":-466.23809523809524,"z":96.33333333333333,"a95":0.99,"info":"17/08/2014 at 18:14:15"},{"visible":false,"include":false,"step":"70.0","x":-693.2476190476191,"y":72.9342857142857,"z":353.65714285714284,"a95":0.99,"info":"17/08/2014 at 18:14:15"},{"visible":false,"include":false,"step":"80.0","x":39.03523809523809,"y":-518.9333333333334,"z":279.552380952381,"a95":0.99,"info":"17/08/2014 at 18:14:15"},{"visible":false,"include":false,"step":"90.0","x":-665.8095238095239,"y":-341.2,"z":-38.84857142857143,"a95":0.99,"info":"17/08/2014 at 18:14:15"},{"visible":false,"include":false,"step":"100.0","x":-344.3809523809524,"y":-45.26857142857143,"z":193.67619047619047,"a95":0.99,"info":"17/08/2014 at 18:14:15"}]},{"version":"v1.1.0","exported":"2016-11-16T15:33:51.186Z","volume":10.5,"added":"2016-11-16T15:09:44.067Z","format":"Utrecht","demagType":"Unknown","strat":"4","patch":1.1,"GEO":[],"TECT":[],"interpreted":false,"name":"EC1.10A","coreAzi":117,"coreDip":2,"bedStrike":303,"bedDip":26,"data":[{"visible":false,"include":false,"step":"0.0","x":-39844.76190476191,"y":-14060,"z":-4447.9047619047615,"a95":0.99,"info":"17/08/2014 at 18:14:15"},{"visible":true,"include":false,"step":"4.0","x":-36146.666666666664,"y":-12963.809523809523,"z":-5024.285714285715,"a95":0.99,"info":"17/08/2014 at 18:14:15"},{"visible":true,"include":false,"step":"8.0","x":-28853.333333333332,"y":-9580,"z":-3981.3333333333335,"a95":0.99,"info":"17/08/2014 at 18:14:15"},{"visible":true,"include":false,"step":"12.0","x":-22175.238095238095,"y":-6957.619047619048,"z":-2937.5238095238096,"a95":0.99,"info":"17/08/2014 at 18:14:15"},{"visible":true,"include":false,"step":"16.0","x":-17814.285714285714,"y":-6060.761904761905,"z":-2628.7619047619046,"a95":0.99,"info":"17/08/2014 at 18:14:15"},{"visible":true,"include":false,"step":"20.0","x":-14271.42857142857,"y":-4543.142857142857,"z":-2462.190476190476,"a95":0.99,"info":"17/08/2014 at 18:14:15"},{"visible":true,"include":false,"step":"25.0","x":-11820.952380952382,"y":-3547.1428571428573,"z":-2532,"a95":0.99,"info":"17/08/2014 at 18:14:15"},{"visible":true,"include":false,"step":"30.0","x":-9753.333333333334,"y":-2866.4761904761904,"z":-1910.952380952381,"a95":0.99,"info":"17/08/2014 at 18:14:15"},{"visible":true,"include":false,"step":"35.0","x":-8478.857142857143,"y":-2739.904761904762,"z":-1349.047619047619,"a95":0.99,"info":"17/08/2014 at 18:14:15"},{"visible":true,"include":false,"step":"40.0","x":-7391.9047619047615,"y":-2142.190476190476,"z":-1270.1904761904761,"a95":0.99,"info":"17/08/2014 at 18:14:15"},{"visible":true,"include":false,"step":"45.0","x":-6570.571428571428,"y":-1756.3809523809523,"z":-1177.4285714285713,"a95":0.99,"info":"17/08/2014 at 18:14:15"},{"visible":true,"include":false,"step":"50.0","x":-5266.285714285715,"y":-1095.6190476190477,"z":-1517.904761904762,"a95":0.99,"info":"17/08/2014 at 18:14:15"},{"visible":true,"include":false,"step":"60.0","x":-4154,"y":-1261.047619047619,"z":-1457.4285714285713,"a95":0.99,"info":"17/08/2014 at 18:14:15"},{"visible":true,"include":false,"step":"70.0","x":-3604.4761904761904,"y":-1393.904761904762,"z":-686.4,"a95":0.99,"info":"17/08/2014 at 18:14:15"},{"visible":true,"include":false,"step":"80.0","x":-1748.952380952381,"y":-229.64761904761906,"z":-641.5142857142857,"a95":0.99,"info":"17/08/2014 at 18:14:15"},{"visible":true,"include":false,"step":"90.0","x":-2106.9523809523807,"y":-704.8380952380952,"z":-643.8761904761905,"a95":0.99,"info":"17/08/2014 at 18:14:15"},{"visible":false,"include":false,"step":"100.0","x":-2363.5238095238096,"y":-328.2761904761905,"z":291.3047619047619,"a95":0.99,"info":"17/08/2014 at 18:14:15"}]},{"version":"v1.1.0","exported":"2016-11-16T15:33:51.186Z","volume":10.5,"added":"2016-11-16T15:09:44.067Z","format":"Utrecht","demagType":"Unknown","strat":"5","patch":1.1,"GEO":[],"TECT":[],"interpreted":false,"name":"EC1.11A","coreAzi":120,"coreDip":7,"bedStrike":303,"bedDip":26,"data":[{"visible":false,"include":false,"step":"0.0","x":-49907.619047619046,"y":-28372.380952380954,"z":-5146.571428571428,"a95":0.99,"info":"17/08/2014 at 18:14:15"},{"visible":true,"include":false,"step":"4.0","x":-42566.666666666664,"y":-24840.95238095238,"z":-6598.857142857143,"a95":0.99,"info":"17/08/2014 at 18:14:15"},{"visible":true,"include":false,"step":"8.0","x":-32123.809523809523,"y":-17820,"z":-5486.571428571428,"a95":0.99,"info":"17/08/2014 at 18:14:15"},{"visible":true,"include":false,"step":"12.0","x":-23503.809523809523,"y":-12991.42857142857,"z":-3996.285714285714,"a95":0.99,"info":"17/08/2014 at 18:14:15"},{"visible":true,"include":false,"step":"16.0","x":-18449.52380952381,"y":-10747.619047619048,"z":-3562.285714285714,"a95":0.99,"info":"17/08/2014 at 18:14:15"},{"visible":true,"include":false,"step":"20.0","x":-15348.57142857143,"y":-8642,"z":-3982.190476190476,"a95":0.99,"info":"17/08/2014 at 18:14:15"},{"visible":true,"include":false,"step":"25.0","x":-12740.952380952382,"y":-6909.523809523809,"z":-4137.333333333333,"a95":0.99,"info":"17/08/2014 at 18:14:15"},{"visible":true,"include":false,"step":"30.0","x":-10443.809523809523,"y":-5770,"z":-2893.809523809524,"a95":0.99,"info":"17/08/2014 at 18:14:15"},{"visible":true,"include":false,"step":"35.0","x":-8297.52380952381,"y":-4741.428571428572,"z":-2194.095238095238,"a95":0.99,"info":"17/08/2014 at 18:14:15"},{"visible":true,"include":false,"step":"40.0","x":-6877.809523809524,"y":-4511.714285714285,"z":-2356,"a95":0.99,"info":"17/08/2014 at 18:14:15"},{"visible":true,"include":false,"step":"45.0","x":-6015.714285714285,"y":-4058.285714285714,"z":-1495.7142857142858,"a95":0.99,"info":"17/08/2014 at 18:14:15"},{"visible":true,"include":false,"step":"50.0","x":-5481.428571428572,"y":-2100,"z":-1402.3809523809523,"a95":0.99,"info":"17/08/2014 at 18:14:15"},{"visible":true,"include":false,"step":"60.0","x":-4147.142857142857,"y":-2214.095238095238,"z":-788.0380952380953,"a95":0.99,"info":"17/08/2014 at 18:14:15"},{"visible":true,"include":false,"step":"70.0","x":-3350.8571428571427,"y":-1637.4285714285713,"z":-219.34285714285713,"a95":0.99,"info":"17/08/2014 at 18:14:15"},{"visible":true,"include":false,"step":"80.0","x":-2492.3809523809523,"y":-1433.142857142857,"z":-770.4190476190475,"a95":0.99,"info":"17/08/2014 at 18:14:15"},{"visible":false,"include":false,"step":"90.0","x":-1693.3333333333333,"y":-513.047619047619,"z":141.4,"a95":0.99,"info":"17/08/2014 at 18:14:15"},{"visible":false,"include":false,"step":"100.0","x":-2199.714285714286,"y":-811.2,"z":818.9904761904761,"a95":0.99,"info":"17/08/2014 at 18:14:15"}]},{"version":"v1.1.0","exported":"2016-11-16T15:33:51.186Z","volume":10.5,"added":"2016-11-16T15:09:44.068Z","format":"Utrecht","demagType":"Unknown","strat":"6","patch":1.1,"GEO":[],"TECT":[],"interpreted":false,"name":"EC1.12A","coreAzi":120,"coreDip":19,"bedStrike":303,"bedDip":26,"data":[{"visible":false,"include":false,"step":"0.0","x":-20765.714285714286,"y":-9670.47619047619,"z":6263.619047619048,"a95":0.99,"info":"17/08/2014 at 18:14:15"},{"visible":true,"include":false,"step":"4.0","x":-15918.095238095239,"y":-8700.47619047619,"z":2414.9523809523807,"a95":0.99,"info":"17/08/2014 at 18:14:15"},{"visible":true,"include":false,"step":"8.0","x":-10525.714285714286,"y":-6104.761904761905,"z":1257.904761904762,"a95":0.99,"info":"17/08/2014 at 18:14:15"},{"visible":true,"include":false,"step":"12.0","x":-5893.238095238095,"y":-3944.8571428571427,"z":1000.7619047619048,"a95":0.99,"info":"17/08/2014 at 18:14:15"},{"visible":true,"include":false,"step":"16.0","x":-3784.285714285714,"y":-2831.4285714285716,"z":418.0380952380952,"a95":0.99,"info":"17/08/2014 at 18:14:15"},{"visible":true,"include":false,"step":"20.0","x":-2181.714285714286,"y":-2200.7619047619046,"z":-62.49047619047619,"a95":0.99,"info":"17/08/2014 at 18:14:15"},{"visible":true,"include":false,"step":"25.0","x":-1392.857142857143,"y":-1606.7619047619048,"z":-242.0952380952381,"a95":0.99,"info":"17/08/2014 at 18:14:15"},{"visible":true,"include":false,"step":"30.0","x":-871.847619047619,"y":-952.2666666666667,"z":243.17142857142858,"a95":0.99,"info":"17/08/2014 at 18:14:15"},{"visible":true,"include":false,"step":"35.0","x":-819.2095238095238,"y":-926.7142857142857,"z":-110.56190476190477,"a95":0.99,"info":"17/08/2014 at 18:14:15"},{"visible":false,"include":false,"step":"40.0","x":-527.504761904762,"y":-866.8666666666667,"z":-328.0952380952381,"a95":0.99,"info":"17/08/2014 at 18:14:15"},{"visible":false,"include":false,"step":"45.0","x":-740.6285714285715,"y":-778.6380952380953,"z":192.2761904761905,"a95":0.99,"info":"17/08/2014 at 18:14:15"},{"visible":false,"include":false,"step":"50.0","x":-169.16190476190476,"y":-352.9142857142857,"z":78.1504761904762,"a95":0.99,"info":"17/08/2014 at 18:14:15"},{"visible":false,"include":false,"step":"60.0","x":-663.5904761904761,"y":-355.18095238095236,"z":137.22857142857143,"a95":0.99,"info":"17/08/2014 at 18:14:15"},{"visible":false,"include":false,"step":"70.0","x":5.185238095238096,"y":-571.6285714285715,"z":432.9428571428571,"a95":0.99,"info":"17/08/2014 at 18:14:15"},{"visible":false,"include":false,"step":"80.0","x":-398.2857142857143,"y":-441.00952380952384,"z":-10.515238095238095,"a95":0.99,"info":"17/08/2014 at 18:14:15"},{"visible":false,"include":false,"step":"90.0","x":-430.9809523809524,"y":-112.86666666666666,"z":-684.047619047619,"a95":0.99,"info":"17/08/2014 at 18:14:15"},{"visible":false,"include":false,"step":"100.0","x":-31.19142857142857,"y":-462.7142857142857,"z":532.3142857142857,"a95":0.99,"info":"17/08/2014 at 18:14:15"}]},{"version":"v1.1.0","exported":"2016-11-16T15:33:51.186Z","volume":10.5,"added":"2016-11-16T15:09:44.068Z","format":"Utrecht","demagType":"Unknown","strat":null,"patch":1.1,"GEO":[],"TECT":[],"interpreted":false,"name":"EC1.13A","coreAzi":178,"coreDip":6,"bedStrike":303,"bedDip":26,"data":[{"visible":false,"include":false,"step":"20","x":-29534.761904761905,"y":-6178.380952380952,"z":-27167.14285714286,"a95":2.2,"info":"\"14-08-11\" at \"19:13\""},{"visible":true,"include":false,"step":"100","x":-9978.57142857143,"y":-1478.1904761904761,"z":-7172.476190476191,"a95":2.9,"info":"\"14-08-11\" at \"21:56\""},{"visible":true,"include":false,"step":"150","x":-7182.285714285715,"y":-278.57142857142856,"z":-5669.809523809524,"a95":2.6,"info":"\"14-08-12\" at \"00:51\""},{"visible":true,"include":false,"step":"180","x":-5240.0952380952385,"y":-548.952380952381,"z":-2955.4285714285716,"a95":2.5,"info":"\"14-08-12\" at \"17:03\""},{"visible":true,"include":false,"step":"210","x":-4349.619047619048,"y":-781.7142857142857,"z":-2429.809523809524,"a95":2.8,"info":"\"14-08-12\" at \"20:00\""},{"visible":true,"include":false,"step":"240","x":-4181.333333333333,"y":-340,"z":-1960.1904761904761,"a95":2.6,"info":"\"14-08-12\" at \"23:21\""},{"visible":true,"include":false,"step":"270","x":-2954.3809523809523,"y":-317.9047619047619,"z":-927.3333333333334,"a95":2.9,"info":"\"14-08-13\" at \"16:38\""},{"visible":true,"include":false,"step":"300","x":-2438.9523809523807,"y":-724.8571428571429,"z":508.1904761904762,"a95":3,"info":"\"14-08-13\" at \"19:41\""},{"visible":true,"include":false,"step":"320","x":-2446,"y":-334.95238095238096,"z":333.8095238095238,"a95":4.8,"info":"\"14-08-13\" at \"22:48\""},{"visible":true,"include":false,"step":"340","x":-1423.3333333333333,"y":1.2380952380952381,"z":-451.9047619047619,"a95":7.1,"info":"\"14-08-14\" at \"15:47\""},{"visible":true,"include":false,"step":"370","x":-1331.8095238095239,"y":-313.42857142857144,"z":-543.7142857142857,"a95":4.1,"info":"\"14-08-14\" at \"18:55\""},{"visible":true,"include":false,"step":"400","x":-1274.095238095238,"y":-282.1904761904762,"z":-307.23809523809524,"a95":3.3,"info":"\"14-08-14\" at \"22:11\""},{"visible":false,"include":false,"step":"430","x":-1268.6666666666667,"y":135.71428571428572,"z":-272.85714285714283,"a95":4.2,"info":"\"14-08-15\" at \"14:48\""},{"visible":false,"include":false,"step":"460","x":-1251.904761904762,"y":-198.57142857142858,"z":-573.6190476190476,"a95":4.1,"info":"\"14-08-15\" at \"17:55\""},{"visible":false,"include":false,"step":"490","x":-846.2857142857143,"y":612.3809523809524,"z":-614.6666666666666,"a95":4.8,"info":"\"14-08-15\" at \"21:15\""},{"visible":false,"include":false,"step":"510","x":-243.8095238095238,"y":-230.66666666666666,"z":-227.52380952380952,"a95":11.3,"info":"\"14-08-16\" at \"00:30\""},{"visible":false,"include":false,"step":"540","x":-744.2857142857143,"y":270.0952380952381,"z":62.95238095238095,"a95":6,"info":"\"14-08-16\" at \"13:34\""},{"visible":false,"include":false,"step":"570","x":-570.8571428571429,"y":-808.8571428571429,"z":381.7142857142857,"a95":5.3,"info":"\"14-08-16\" at \"16:15\""},{"visible":false,"include":false,"step":"600","x":-1275.8095238095239,"y":716.5714285714286,"z":99.71428571428571,"a95":5,"info":"\"14-08-16\" at \"19:04\""},{"visible":false,"include":false,"step":"630","x":-1035.6190476190477,"y":-1467.8095238095239,"z":297.6190476190476,"a95":4.4,"info":"\"14-08-17\" at \"14:02\""}]},{"version":"v1.1.0","exported":"2016-11-16T15:33:51.186Z","volume":10.5,"added":"2016-11-16T15:09:44.068Z","format":"Utrecht","demagType":"Unknown","strat":"7","patch":1.1,"GEO":[],"TECT":[],"interpreted":false,"name":"EC1.13B","coreAzi":178,"coreDip":6,"bedStrike":303,"bedDip":26,"data":[{"visible":true,"include":false,"step":"0.0","x":-43552.380952380954,"y":-8391.238095238095,"z":-6543.238095238095,"a95":0.99,"info":"17/08/2014 at 18:14:15"},{"visible":true,"include":false,"step":"4.0","x":-33466.666666666664,"y":-6955.619047619048,"z":-10840.952380952382,"a95":0.99,"info":"17/08/2014 at 18:14:15"},{"visible":true,"include":false,"step":"8.0","x":-22169.52380952381,"y":-4857.047619047619,"z":-7647.619047619048,"a95":0.99,"info":"17/08/2014 at 18:14:15"},{"visible":true,"include":false,"step":"12.0","x":-12613.333333333334,"y":-3173.4285714285716,"z":-4283.238095238095,"a95":0.99,"info":"17/08/2014 at 18:14:15"},{"visible":true,"include":false,"step":"16.0","x":-7058.761904761905,"y":-2909.1428571428573,"z":-2310.4761904761904,"a95":0.99,"info":"17/08/2014 at 18:14:15"},{"visible":true,"include":false,"step":"20.0","x":-4445.142857142857,"y":-1943.5238095238096,"z":-1747.7142857142858,"a95":0.99,"info":"17/08/2014 at 18:14:15"},{"visible":true,"include":false,"step":"25.0","x":-2579.2380952380954,"y":-1044.857142857143,"z":-1638.4761904761904,"a95":0.99,"info":"17/08/2014 at 18:14:15"},{"visible":true,"include":false,"step":"30.0","x":-1238,"y":-903.3333333333334,"z":-567.2095238095238,"a95":0.99,"info":"17/08/2014 at 18:14:15"},{"visible":true,"include":false,"step":"35.0","x":-463.2190476190476,"y":-961.2380952380952,"z":-580.7428571428571,"a95":0.99,"info":"17/08/2014 at 18:14:15"},{"visible":false,"include":false,"step":"40.0","x":-1334.857142857143,"y":-595.3904761904762,"z":-516.6571428571428,"a95":0.99,"info":"17/08/2014 at 18:14:15"},{"visible":false,"include":false,"step":"45.0","x":-776.2476190476191,"y":-645.9904761904761,"z":453.02857142857147,"a95":0.99,"info":"17/08/2014 at 18:14:15"},{"visible":false,"include":false,"step":"50.0","x":-702.3047619047619,"y":-934.0761904761904,"z":-131.0952380952381,"a95":0.99,"info":"17/08/2014 at 18:14:15"},{"visible":false,"include":false,"step":"60.0","x":65.82761904761905,"y":-754.9333333333334,"z":-277.16190476190474,"a95":0.99,"info":"17/08/2014 at 18:14:15"},{"visible":false,"include":false,"step":"70.0","x":-9.107333333333333,"y":-404.9238095238095,"z":1210.6666666666667,"a95":0.99,"info":"17/08/2014 at 18:14:15"},{"visible":false,"include":false,"step":"80.0","x":-817.7142857142857,"y":189.7047619047619,"z":-7.102857142857142,"a95":0.99,"info":"17/08/2014 at 18:14:15"},{"visible":false,"include":false,"step":"90.0","x":-627.847619047619,"y":-1359.8095238095239,"z":-68.63619047619048,"a95":0.99,"info":"17/08/2014 at 18:14:15"},{"visible":false,"include":false,"step":"100.0","x":-756.2952380952381,"y":-129.8952380952381,"z":1168.3809523809523,"a95":0.99,"info":"17/08/2014 at 18:14:15"}]},{"version":"v1.1.0","exported":"2016-11-16T15:33:51.186Z","volume":10.5,"added":"2016-11-16T15:09:44.069Z","format":"Utrecht","demagType":"Unknown","strat":"8","patch":1.1,"GEO":[],"TECT":[],"interpreted":false,"name":"EC1.14A","coreAzi":180,"coreDip":7,"bedStrike":303,"bedDip":26,"data":[{"visible":false,"include":false,"step":"0.0","x":-59556.19047619047,"y":-9951.42857142857,"z":-9706.666666666666,"a95":0.99,"info":"17/08/2014 at 18:14:15"},{"visible":true,"include":false,"step":"4.0","x":-43983.80952380953,"y":-8533.142857142857,"z":-16098.095238095239,"a95":0.99,"info":"17/08/2014 at 18:14:15"},{"visible":true,"include":false,"step":"8.0","x":-28143.809523809523,"y":-6163.428571428572,"z":-11056.190476190477,"a95":0.99,"info":"17/08/2014 at 18:14:15"},{"visible":true,"include":false,"step":"12.0","x":-15100.952380952382,"y":-3794.9523809523807,"z":-6402,"a95":0.99,"info":"17/08/2014 at 18:14:15"},{"visible":true,"include":false,"step":"16.0","x":-9100.095238095239,"y":-2996.9523809523807,"z":-3962.190476190476,"a95":0.99,"info":"17/08/2014 at 18:14:15"},{"visible":true,"include":false,"step":"20.0","x":-5719.238095238095,"y":-2305.3333333333335,"z":-2687.809523809524,"a95":0.99,"info":"17/08/2014 at 18:14:15"},{"visible":true,"include":false,"step":"25.0","x":-3520.5714285714284,"y":-1650.857142857143,"z":-1500.7619047619048,"a95":0.99,"info":"17/08/2014 at 18:14:15"},{"visible":true,"include":false,"step":"30.0","x":-2307.3333333333335,"y":-1301.7142857142858,"z":-272.752380952381,"a95":0.99,"info":"17/08/2014 at 18:14:15"},{"visible":true,"include":false,"step":"35.0","x":-1952.7619047619048,"y":-1312.1904761904761,"z":-461.8952380952381,"a95":0.99,"info":"17/08/2014 at 18:14:15"},{"visible":false,"include":false,"step":"40.0","x":-1140,"y":-1487.5238095238096,"z":-1108.857142857143,"a95":0.99,"info":"17/08/2014 at 18:14:15"},{"visible":false,"include":false,"step":"45.0","x":-13.163809523809524,"y":-720.9428571428571,"z":328.22857142857146,"a95":0.99,"info":"17/08/2014 at 18:14:15"},{"visible":false,"include":false,"step":"50.0","x":-1425.2380952380952,"y":-472.7809523809524,"z":-714.495238095238,"a95":0.99,"info":"17/08/2014 at 18:14:15"},{"visible":false,"include":false,"step":"60.0","x":154.98095238095237,"y":-1466.6666666666667,"z":-669.0857142857143,"a95":0.99,"info":"17/08/2014 at 18:14:15"},{"visible":false,"include":false,"step":"70.0","x":-238.13333333333335,"y":-464.57142857142856,"z":88.58,"a95":0.99,"info":"17/08/2014 at 18:14:15"},{"visible":false,"include":false,"step":"80.0","x":-2790.9523809523807,"y":-1455.2380952380952,"z":-486.4190476190476,"a95":0.99,"info":"17/08/2014 at 18:14:15"},{"visible":false,"include":false,"step":"90.0","x":155.0095238095238,"y":-1108.2857142857142,"z":-1972.3809523809523,"a95":0.99,"info":"17/08/2014 at 18:14:15"},{"visible":false,"include":false,"step":"100.0","x":-1236.2857142857142,"y":-1762,"z":522.0380952380953,"a95":0.99,"info":"17/08/2014 at 18:14:15"}]},{"version":"v1.1.0","exported":"2016-11-16T15:33:51.186Z","volume":10.5,"added":"2016-11-16T15:09:44.069Z","format":"Utrecht","demagType":"Unknown","strat":null,"patch":1.1,"GEO":[],"TECT":[],"interpreted":false,"name":"EC1.15A","coreAzi":175,"coreDip":7,"bedStrike":303,"bedDip":26,"data":[{"visible":false,"include":false,"step":"20","x":-41249.71428571428,"y":-4072.285714285714,"z":-10175.809523809523,"a95":2.1,"info":"\"14-08-11\" at \"19:16\""},{"visible":true,"include":false,"step":"100","x":-14490.285714285714,"y":-2876.285714285714,"z":-6342.476190476191,"a95":2.6,"info":"\"14-08-11\" at \"21:58\""},{"visible":true,"include":false,"step":"150","x":-11828.761904761905,"y":-2219.1428571428573,"z":-4383.809523809524,"a95":4.3,"info":"\"14-08-12\" at \"00:54\""},{"visible":true,"include":false,"step":"180","x":-7315.238095238095,"y":-1867.4285714285713,"z":-1802.4761904761904,"a95":2.4,"info":"\"14-08-12\" at \"17:05\""},{"visible":true,"include":false,"step":"210","x":-6507.142857142857,"y":-2506.3809523809523,"z":-1241.6190476190477,"a95":2.8,"info":"\"14-08-12\" at \"20:03\""},{"visible":true,"include":false,"step":"240","x":-5309.238095238095,"y":-1794.5714285714287,"z":-838.1904761904761,"a95":2.5,"info":"\"14-08-12\" at \"23:24\""},{"visible":true,"include":false,"step":"270","x":-3587.4285714285716,"y":-168.1904761904762,"z":-33.142857142857146,"a95":3,"info":"\"14-08-13\" at \"16:41\""},{"visible":true,"include":false,"step":"300","x":-1661.6190476190477,"y":126.28571428571429,"z":957.3333333333334,"a95":5.2,"info":"\"14-08-13\" at \"19:44\""},{"visible":true,"include":false,"step":"320","x":-2101.809523809524,"y":-306.1904761904762,"z":789.3333333333334,"a95":4.5,"info":"\"14-08-13\" at \"22:51\""},{"visible":true,"include":false,"step":"340","x":-1443.8095238095239,"y":-794.6666666666666,"z":1547.4285714285713,"a95":4.3,"info":"\"14-08-14\" at \"15:50\""},{"visible":true,"include":false,"step":"370","x":-1365.6190476190477,"y":-710.1904761904761,"z":797.047619047619,"a95":4.3,"info":"\"14-08-14\" at \"18:58\""},{"visible":false,"include":false,"step":"400","x":-1586.3809523809523,"y":-1406.2857142857142,"z":956.6666666666666,"a95":2.5,"info":"\"14-08-14\" at \"22:15\""},{"visible":false,"include":false,"step":"430","x":-655.047619047619,"y":-638.3809523809524,"z":679.4285714285714,"a95":4.9,"info":"\"14-08-15\" at \"14:51\""},{"visible":false,"include":false,"step":"460","x":-576.1904761904761,"y":-1108.2857142857142,"z":603.3333333333334,"a95":5.3,"info":"\"14-08-15\" at \"17:58\""},{"visible":false,"include":false,"step":"490","x":-990.0952380952381,"y":-501.5238095238095,"z":-158.38095238095238,"a95":4.8,"info":"\"14-08-15\" at \"21:17\""},{"visible":false,"include":false,"step":"510","x":-491.5238095238095,"y":218.66666666666666,"z":324.1904761904762,"a95":9.8,"info":"\"14-08-16\" at \"00:32\""},{"visible":false,"include":false,"step":"540","x":-270.3809523809524,"y":857.2380952380952,"z":279.04761904761904,"a95":5.6,"info":"\"14-08-16\" at \"13:36\""},{"visible":false,"include":false,"step":"570","x":-624,"y":1495.3333333333333,"z":186.47619047619048,"a95":5.2,"info":"\"14-08-16\" at \"16:19\""},{"visible":false,"include":false,"step":"600","x":-482.4761904761905,"y":937.8095238095239,"z":98,"a95":7.2,"info":"\"14-08-16\" at \"19:06\""},{"visible":false,"include":false,"step":"630","x":-1567.8095238095239,"y":-1291.4285714285713,"z":-31.333333333333332,"a95":4.9,"info":"\"14-08-17\" at \"14:04\""}]},{"version":"v1.1.0","exported":"2016-11-16T15:33:51.186Z","volume":10.5,"added":"2016-11-16T15:09:44.069Z","format":"Utrecht","demagType":"Unknown","strat":null,"patch":1.1,"GEO":[],"TECT":[],"interpreted":false,"name":"EC1.16A","coreAzi":105,"coreDip":4,"bedStrike":303,"bedDip":26,"data":[{"visible":true,"include":false,"step":"20","x":-18152,"y":-12160.666666666666,"z":-4833.333333333333,"a95":1.8,"info":"\"14-08-11\" at \"19:18\""},{"visible":true,"include":false,"step":"100","x":-5633.047619047619,"y":-2598.9523809523807,"z":-704.3809523809524,"a95":1.7,"info":"\"14-08-11\" at \"22:02\""},{"visible":true,"include":false,"step":"150","x":-3878.6666666666665,"y":-1475.5238095238096,"z":-187.42857142857142,"a95":3.7,"info":"\"14-08-12\" at \"00:57\""},{"visible":true,"include":false,"step":"180","x":-3225.5238095238096,"y":-970,"z":-21.523809523809526,"a95":2.4,"info":"\"14-08-12\" at \"17:08\""},{"visible":true,"include":false,"step":"210","x":-2710.6666666666665,"y":-1057.8095238095239,"z":75.04761904761905,"a95":2.7,"info":"\"14-08-12\" at \"20:05\""},{"visible":true,"include":false,"step":"240","x":-2079.2380952380954,"y":-1107.904761904762,"z":608.4761904761905,"a95":2.4,"info":"\"14-08-12\" at \"23:27\""},{"visible":true,"include":false,"step":"270","x":-1991.4285714285713,"y":-930,"z":712.8571428571429,"a95":3,"info":"\"14-08-13\" at \"16:44\""},{"visible":true,"include":false,"step":"300","x":-1484.7619047619048,"y":-172.47619047619048,"z":419.7142857142857,"a95":3.1,"info":"\"14-08-13\" at \"19:46\""},{"visible":true,"include":false,"step":"320","x":-1566.6666666666667,"y":-805.047619047619,"z":611.4285714285714,"a95":3,"info":"\"14-08-13\" at \"22:53\""},{"visible":true,"include":false,"step":"340","x":-1391.5238095238096,"y":-736.952380952381,"z":716.8571428571429,"a95":2.9,"info":"\"14-08-14\" at \"15:53\""},{"visible":false,"include":false,"step":"370","x":-888.6666666666666,"y":-902.7619047619048,"z":850.5714285714286,"a95":2.6,"info":"\"14-08-14\" at \"19:00\""},{"visible":false,"include":false,"step":"400","x":-877.1428571428571,"y":-657.6190476190476,"z":936.8571428571429,"a95":2.6,"info":"\"14-08-14\" at \"22:18\""},{"visible":false,"include":false,"step":"430","x":-319.14285714285717,"y":-984.2857142857143,"z":831.1428571428571,"a95":2.9,"info":"\"14-08-15\" at \"14:54\""},{"visible":false,"include":false,"step":"460","x":-295.42857142857144,"y":-1083.142857142857,"z":981.9047619047619,"a95":3.6,"info":"\"14-08-15\" at \"18:00\""},{"visible":false,"include":false,"step":"490","x":-232.85714285714286,"y":-519.1428571428571,"z":898.8571428571429,"a95":3.2,"info":"\"14-08-15\" at \"21:19\""},{"visible":false,"include":false,"step":"510","x":-336.6666666666667,"y":-405.6190476190476,"z":320.4761904761905,"a95":5.2,"info":"\"14-08-16\" at \"00:35\""},{"visible":false,"include":false,"step":"540","x":-38.857142857142854,"y":48.19047619047619,"z":133.14285714285714,"a95":19.6,"info":"\"14-08-16\" at \"13:38\""},{"visible":false,"include":false,"step":"570","x":-210.47619047619048,"y":474.85714285714283,"z":422.76190476190476,"a95":7.2,"info":"\"14-08-16\" at \"16:24\""},{"visible":false,"include":false,"step":"600","x":178.1904761904762,"y":95.23809523809524,"z":208.76190476190476,"a95":18.3,"info":"\"14-08-16\" at \"19:08\""},{"visible":false,"include":false,"step":"630","x":-393.42857142857144,"y":-203.71428571428572,"z":-268.4761904761905,"a95":11.9,"info":"\"14-08-17\" at \"14:06\""},{"visible":false,"include":false,"step":"660","x":-478,"y":450.57142857142856,"z":337.3333333333333,"a95":6.7,"info":"\"14-08-17\" at \"16:07\""}]},{"version":"v1.1.0","exported":"2016-11-16T15:33:51.186Z","volume":10.5,"added":"2016-11-16T15:09:44.069Z","format":"Utrecht","demagType":"Unknown","strat":"4","patch":1.1,"GEO":[],"TECT":[],"interpreted":false,"name":"EC1.16B","coreAzi":105,"coreDip":4,"bedStrike":303,"bedDip":26,"data":[{"visible":true,"include":false,"step":"0.0","x":-7279.333333333333,"y":-7787.619047619048,"z":2436.095238095238,"a95":0.99,"info":"05/11/2014 at 22:47:31"},{"visible":true,"include":false,"step":"10.0","x":-3390.8571428571427,"y":-3565.809523809524,"z":658.7619047619048,"a95":0.99,"info":"05/11/2014 at 22:47:31"},{"visible":true,"include":false,"step":"15.0","x":-1562.095238095238,"y":-2259.0476190476193,"z":167.25714285714287,"a95":0.99,"info":"05/11/2014 at 22:47:31"},{"visible":true,"include":false,"step":"20.0","x":-1041.7142857142858,"y":-1641.904761904762,"z":261.9809523809524,"a95":0.99,"info":"05/11/2014 at 22:47:31"},{"visible":true,"include":false,"step":"25.0","x":-603.7142857142857,"y":-960,"z":-597.6380952380953,"a95":0.99,"info":"05/11/2014 at 22:47:31"},{"visible":true,"include":false,"step":"30.0","x":-516.5333333333334,"y":-846.2761904761904,"z":-331.2857142857143,"a95":0.99,"info":"05/11/2014 at 22:47:31"},{"visible":true,"include":false,"step":"35.0","x":-465.0380952380952,"y":-807.9333333333333,"z":-202.8095238095238,"a95":0.99,"info":"05/11/2014 at 22:47:31"},{"visible":true,"include":false,"step":"40.0","x":-186.0285714285714,"y":-371.7142857142857,"z":-56.521904761904764,"a95":0.99,"info":"05/11/2014 at 22:47:31"},{"visible":true,"include":false,"step":"45.0","x":-128.26666666666665,"y":-331.51428571428573,"z":-290.16190476190474,"a95":0.99,"info":"05/11/2014 at 22:47:31"},{"visible":false,"include":false,"step":"50.0","x":-87.93142857142857,"y":-412.2095238095238,"z":-143.76190476190476,"a95":0.99,"info":"05/11/2014 at 22:47:31"},{"visible":false,"include":false,"step":"60.0","x":207.28571428571428,"y":304.62857142857143,"z":-184.56190476190477,"a95":0.99,"info":"05/11/2014 at 22:47:31"},{"visible":false,"include":false,"step":"70.0","x":118.97142857142858,"y":-329.22857142857146,"z":-63.67238095238095,"a95":0.99,"info":"05/11/2014 at 22:47:31"},{"visible":false,"include":false,"step":"80.0","x":-598.7047619047619,"y":8.505428571428572,"z":55.99238095238095,"a95":0.99,"info":"05/11/2014 at 22:47:31"},{"visible":false,"include":false,"step":"90.0","x":-12.362857142857143,"y":143.88571428571427,"z":-506.08571428571423,"a95":0.99,"info":"05/11/2014 at 22:47:31"}]},{"version":"v1.1.0","exported":"2016-11-16T15:33:51.186Z","volume":10.5,"added":"2016-11-16T15:09:44.070Z","format":"Utrecht","demagType":"Unknown","strat":null,"patch":1.1,"GEO":[],"TECT":[],"interpreted":false,"name":"EC1.17A","coreAzi":105,"coreDip":-1,"bedStrike":303,"bedDip":26,"data":[{"visible":true,"include":false,"step":"20","x":-29963.714285714286,"y":-20796.190476190477,"z":7397.809523809524,"a95":2.1,"info":"\"14-08-11\" at \"19:21\""},{"visible":true,"include":false,"step":"100","x":-9474.095238095239,"y":-6564.0952380952385,"z":-1286.7619047619048,"a95":1.9,"info":"\"14-08-11\" at \"22:05\""},{"visible":true,"include":false,"step":"150","x":-6546.0952380952385,"y":-4639.238095238095,"z":-513.4285714285714,"a95":3.4,"info":"\"14-08-12\" at \"00:59\""},{"visible":true,"include":false,"step":"180","x":-5678.0952380952385,"y":-3380.8571428571427,"z":-586.3809523809524,"a95":2.1,"info":"\"14-08-12\" at \"17:10\""},{"visible":true,"include":false,"step":"210","x":-4833.714285714285,"y":-3128,"z":358.4761904761905,"a95":2.6,"info":"\"14-08-12\" at \"20:08\""},{"visible":true,"include":false,"step":"240","x":-3598.190476190476,"y":-2277.6190476190477,"z":903.5238095238095,"a95":2.4,"info":"\"14-08-12\" at \"23:30\""},{"visible":true,"include":false,"step":"270","x":-2823.1428571428573,"y":-1264.5714285714287,"z":1000.6666666666666,"a95":3,"info":"\"14-08-13\" at \"16:46\""},{"visible":true,"include":false,"step":"300","x":-1870.952380952381,"y":-147.61904761904762,"z":1715.8095238095239,"a95":3.4,"info":"\"14-08-13\" at \"19:49\""},{"visible":true,"include":false,"step":"320","x":-1799.904761904762,"y":284.0952380952381,"z":1690.4761904761904,"a95":3.4,"info":"\"14-08-13\" at \"22:56\""},{"visible":true,"include":false,"step":"340","x":-1661.4285714285713,"y":22.857142857142858,"z":1268.6666666666667,"a95":3.5,"info":"\"14-08-14\" at \"15:55\""},{"visible":true,"include":false,"step":"370","x":-1732.5714285714287,"y":143.61904761904762,"z":1624.6666666666667,"a95":3.4,"info":"\"14-08-14\" at \"19:03\""},{"visible":false,"include":false,"step":"400","x":-1785.7142857142858,"y":735.9047619047619,"z":1166,"a95":2.6,"info":"\"14-08-14\" at \"22:20\""},{"visible":false,"include":false,"step":"430","x":-675.5238095238095,"y":-1054.7619047619048,"z":696.8571428571429,"a95":3,"info":"\"14-08-15\" at \"14:57\""},{"visible":false,"include":false,"step":"460","x":-1163.142857142857,"y":786.1904761904761,"z":362.2857142857143,"a95":3.3,"info":"\"14-08-15\" at \"18:03\""},{"visible":false,"include":false,"step":"490","x":-1049.4285714285713,"y":178.28571428571428,"z":507.14285714285717,"a95":3.6,"info":"\"14-08-15\" at \"21:22\""},{"visible":false,"include":false,"step":"510","x":-702.4761904761905,"y":525.047619047619,"z":-160.1904761904762,"a95":4.9,"info":"\"14-08-16\" at \"00:37\""},{"visible":false,"include":false,"step":"540","x":-821.5238095238095,"y":600.5714285714286,"z":160.1904761904762,"a95":5.2,"info":"\"14-08-16\" at \"13:40\""},{"visible":false,"include":false,"step":"570","x":-146.95238095238096,"y":-15.904761904761905,"z":-256.6666666666667,"a95":23.1,"info":"\"14-08-16\" at \"16:26\""},{"visible":false,"include":false,"step":"600","x":-1420.952380952381,"y":422.85714285714283,"z":902.6666666666666,"a95":5.2,"info":"\"14-08-16\" at \"19:11\""},{"visible":false,"include":false,"step":"630","x":-73.23809523809524,"y":71.71428571428571,"z":-250.57142857142858,"a95":30.5,"info":"\"14-08-17\" at \"14:08\""}]},{"version":"v1.1.0","exported":"2016-11-16T15:33:51.187Z","volume":10.5,"added":"2016-11-16T15:09:44.070Z","format":"Utrecht","demagType":"Unknown","strat":"1","patch":1.1,"GEO":[],"TECT":[],"interpreted":false,"name":"EC1.18B","coreAzi":97,"coreDip":-2,"bedStrike":303,"bedDip":26,"data":[{"visible":true,"include":false,"step":"0.0","x":-26696.190476190477,"y":-17751.428571428572,"z":-1456.3809523809523,"a95":0.99,"info":"17/08/2014 at 23:43:28"},{"visible":true,"include":false,"step":"4.0","x":-20185.714285714286,"y":-14221.904761904761,"z":-3074.4761904761904,"a95":0.99,"info":"17/08/2014 at 23:43:28"},{"visible":true,"include":false,"step":"8.0","x":-12323.809523809523,"y":-8569.333333333334,"z":-2152.095238095238,"a95":0.99,"info":"17/08/2014 at 23:43:28"},{"visible":true,"include":false,"step":"12.0","x":-5807.428571428572,"y":-4162.666666666667,"z":-689.1333333333333,"a95":0.99,"info":"17/08/2014 at 23:43:28"},{"visible":true,"include":false,"step":"16.0","x":-3846.285714285714,"y":-2545.0476190476193,"z":-698.5714285714286,"a95":0.99,"info":"17/08/2014 at 23:43:28"},{"visible":true,"include":false,"step":"20.0","x":-2435.5238095238096,"y":-1514.7619047619048,"z":-660.4,"a95":0.99,"info":"17/08/2014 at 23:43:28"},{"visible":true,"include":false,"step":"25.0","x":-1202.3809523809523,"y":-665.4095238095239,"z":-388.64761904761906,"a95":0.99,"info":"17/08/2014 at 23:43:28"},{"visible":false,"include":false,"step":"30.0","x":-509.85714285714283,"y":74.19238095238094,"z":60.298095238095236,"a95":0.99,"info":"17/08/2014 at 23:43:28"},{"visible":false,"include":false,"step":"35.0","x":66.28,"y":-399.7904761904762,"z":-180.41904761904763,"a95":0.99,"info":"17/08/2014 at 23:43:28"},{"visible":false,"include":false,"step":"40.0","x":-279.12380952380954,"y":-223.41904761904763,"z":704.3047619047619,"a95":0.99,"info":"17/08/2014 at 23:43:28"},{"visible":false,"include":false,"step":"45.0","x":-278.32380952380953,"y":221.15238095238095,"z":-150.13333333333335,"a95":0.99,"info":"17/08/2014 at 23:43:28"},{"visible":false,"include":false,"step":"50.0","x":-270.7809523809524,"y":107.33333333333333,"z":574.7523809523809,"a95":0.99,"info":"17/08/2014 at 23:43:28"},{"visible":false,"include":false,"step":"60.0","x":-766.2666666666667,"y":419.0190476190476,"z":-86.34285714285714,"a95":0.99,"info":"17/08/2014 at 23:43:28"},{"visible":false,"include":false,"step":"70.0","x":-663.3238095238095,"y":78.2895238095238,"z":-421.9238095238095,"a95":0.99,"info":"17/08/2014 at 23:43:28"},{"visible":false,"include":false,"step":"80.0","x":1799.5238095238096,"y":418.6,"z":-190.06666666666666,"a95":0.99,"info":"17/08/2014 at 23:43:28"},{"visible":false,"include":false,"step":"90.0","x":73.57904761904763,"y":344.1142857142857,"z":109.96190476190475,"a95":0.99,"info":"17/08/2014 at 23:43:28"},{"visible":false,"include":false,"step":"100.0","x":-85.5247619047619,"y":604.4380952380952,"z":104.29523809523809,"a95":0.99,"info":"17/08/2014 at 23:43:28"}]},{"version":"v1.1.0","exported":"2016-11-16T15:33:51.187Z","volume":10.5,"added":"2016-11-16T15:09:44.070Z","format":"Utrecht","demagType":"Unknown","strat":null,"patch":1.1,"GEO":[{"dec":305.38882487673357,"inc":60.99050765469039,"MAD":3.74381050092968,"cm":[-3.197442310920451e-14,-4.973799150320701e-14,0],"intensity":9654.592420331428,"type":"dir","forced":true,"remark":"","origin":false,"nSteps":8,"minStep":"320","maxStep":"540","steps":["320","340","370","400","430","490","510","540"],"group":"None","version":"v1.1.0"}],"TECT":[{"dec":342.6490925790889,"inc":51.002176214753824,"MAD":3.743810500929588,"cm":[-1.2789769243681803e-13,-1.9761969838327786e-13,8.526512829121202e-14],"intensity":9654.59242033143,"type":"dir","forced":true,"remark":"","origin":false,"nSteps":8,"minStep":"320","maxStep":"540","steps":["320","340","370","400","430","490","510","540"],"group":"None","version":"v1.1.0"}],"interpreted":true,"name":"EC1.19A","coreAzi":155,"coreDip":34,"bedStrike":303,"bedDip":26,"data":[{"visible":false,"include":false,"step":"20","x":-49431.42857142857,"y":-9811.52380952381,"z":719.6190476190476,"a95":1.7,"info":"\"14-08-11\" at \"19:23\""},{"visible":true,"include":false,"step":"100","x":-25848.47619047619,"y":-2488,"z":3909.2380952380954,"a95":1.6,"info":"\"14-08-11\" at \"22:07\""},{"visible":true,"include":false,"step":"150","x":-18655.333333333332,"y":754.5714285714286,"z":3273.904761904762,"a95":3,"info":"\"14-08-12\" at \"01:02\""},{"visible":true,"include":false,"step":"180","x":-17143.428571428572,"y":41.42857142857143,"z":2977.904761904762,"a95":1.8,"info":"\"14-08-12\" at \"17:13\""},{"visible":true,"include":false,"step":"210","x":-14379.809523809523,"y":431.5238095238095,"z":2312.9523809523807,"a95":1.9,"info":"\"14-08-12\" at \"20:10\""},{"visible":true,"include":false,"step":"240","x":-11774.47619047619,"y":739.6190476190476,"z":2240.285714285714,"a95":1.9,"info":"\"14-08-12\" at \"23:32\""},{"visible":true,"include":false,"step":"270","x":-9473.42857142857,"y":534.7619047619048,"z":1800.2857142857142,"a95":2.1,"info":"\"14-08-13\" at \"16:49\""},{"visible":true,"include":false,"step":"300","x":-7811.714285714285,"y":1455.047619047619,"z":1219.7142857142858,"a95":1.9,"info":"\"14-08-13\" at \"19:52\""},{"visible":true,"include":true,"step":"320","x":-6561.9047619047615,"y":1826.3809523809523,"z":1226.1904761904761,"a95":2.1,"info":"\"14-08-13\" at \"22:58\""},{"visible":true,"include":true,"step":"340","x":-6070.0952380952385,"y":1377.3333333333333,"z":861.2380952380952,"a95":2,"info":"\"14-08-14\" at \"15:57\""},{"visible":true,"include":true,"step":"370","x":-5689.333333333333,"y":1551.4285714285713,"z":677.7142857142857,"a95":1.9,"info":"\"14-08-14\" at \"19:05\""},{"visible":true,"include":true,"step":"400","x":-5653.9047619047615,"y":1426.2857142857142,"z":507.23809523809524,"a95":2.1,"info":"\"14-08-14\" at \"22:25\""},{"visible":true,"include":true,"step":"430","x":-4377.714285714285,"y":958.5714285714286,"z":360.95238095238096,"a95":2,"info":"\"14-08-15\" at \"15:00\""},{"visible":false,"include":false,"step":"460","x":-5132.190476190476,"y":1543.142857142857,"z":-530.4761904761905,"a95":2.3,"info":"\"14-08-15\" at \"18:09\""},{"visible":true,"include":true,"step":"490","x":-3163.0476190476193,"y":774.0952380952381,"z":586.5714285714286,"a95":2.5,"info":"\"14-08-15\" at \"21:24\""},{"visible":true,"include":true,"step":"510","x":-2692.190476190476,"y":515.3333333333334,"z":354.4761904761905,"a95":3.3,"info":"\"14-08-16\" at \"00:39\""},{"visible":true,"include":true,"step":"540","x":-2517.714285714286,"y":532.0952380952381,"z":1056.1904761904761,"a95":2.6,"info":"\"14-08-16\" at \"13:42\""},{"visible":false,"include":false,"step":"570","x":-875.7142857142857,"y":-642.8571428571429,"z":-386.57142857142856,"a95":6.8,"info":"\"14-08-16\" at \"16:28\""},{"visible":true,"include":false,"step":"600","x":-1949.4285714285713,"y":391.23809523809524,"z":684.7619047619048,"a95":7,"info":"\"14-08-16\" at \"19:13\""},{"visible":false,"include":false,"step":"630","x":-714.0952380952381,"y":-358.76190476190476,"z":-203.9047619047619,"a95":9,"info":"\"14-08-17\" at \"14:11\""},{"visible":false,"include":false,"step":"660","x":-462.76190476190476,"y":659.5238095238095,"z":338.85714285714283,"a95":9.7,"info":"\"14-08-17\" at \"16:09\""}]},{"version":"v1.1.0","exported":"2016-11-16T15:33:51.187Z","volume":10.5,"added":"2016-11-16T15:09:44.071Z","format":"Utrecht","demagType":"Unknown","strat":"2","patch":1.1,"GEO":[{"dec":330.87072769513304,"inc":62.95408412352065,"MAD":3.2748311463803494,"cm":[0,4.263256414560601e-14,0],"intensity":10837.200887486442,"type":"dir","forced":true,"remark":"","origin":false,"nSteps":6,"minStep":"30.0","maxStep":"60.0","steps":["30.0","35.0","40.0","45.0","50.0","60.0"],"group":"None","version":"v1.1.0"}],"TECT":[{"dec":358.3451497115336,"inc":45.01744142828281,"MAD":3.2748311463803006,"cm":[1.1368683772161603e-13,5.080380560684716e-13,-1.7053025658242404e-13],"intensity":10837.200887486442,"type":"dir","forced":true,"remark":"","origin":false,"nSteps":6,"minStep":"30.0","maxStep":"60.0","steps":["30.0","35.0","40.0","45.0","50.0","60.0"],"group":"None","version":"v1.1.0"}],"interpreted":true,"name":"EC1.20A","coreAzi":144,"coreDip":38,"bedStrike":303,"bedDip":26,"data":[{"visible":true,"include":false,"step":"0.0","x":-32421.904761904763,"y":-8358.095238095239,"z":8261.52380952381,"a95":0.99,"info":"17/08/2014 at 23:43:28"},{"visible":true,"include":false,"step":"4.0","x":-30206.666666666668,"y":-8062.285714285715,"z":7137.428571428572,"a95":0.99,"info":"17/08/2014 at 23:43:28"},{"visible":true,"include":false,"step":"8.0","x":-24840.95238095238,"y":-6191.523809523809,"z":6026.571428571428,"a95":0.99,"info":"17/08/2014 at 23:43:28"},{"visible":true,"include":false,"step":"12.0","x":-19280.95238095238,"y":-4338,"z":4644.666666666667,"a95":0.99,"info":"17/08/2014 at 23:43:28"},{"visible":true,"include":false,"step":"16.0","x":-15132.380952380952,"y":-3045.714285714286,"z":3618,"a95":0.99,"info":"17/08/2014 at 23:43:28"},{"visible":true,"include":false,"step":"20.0","x":-12407.619047619048,"y":-2155.6190476190477,"z":2736.9523809523807,"a95":0.99,"info":"17/08/2014 at 23:43:28"},{"visible":true,"include":false,"step":"25.0","x":-9578.095238095239,"y":-1435.8095238095239,"z":2193.714285714286,"a95":0.99,"info":"17/08/2014 at 23:43:28"},{"visible":true,"include":true,"step":"30.0","x":-7320.952380952381,"y":-513.8666666666667,"z":1731.3333333333333,"a95":0.99,"info":"17/08/2014 at 23:43:28"},{"visible":true,"include":true,"step":"35.0","x":-6496.857142857143,"y":-599.2571428571429,"z":957.047619047619,"a95":0.99,"info":"17/08/2014 at 23:43:28"},{"visible":true,"include":true,"step":"40.0","x":-5128.476190476191,"y":30.90857142857143,"z":1162.095238095238,"a95":0.99,"info":"17/08/2014 at 23:43:28"},{"visible":true,"include":true,"step":"45.0","x":-4129.809523809524,"y":-10.661904761904761,"z":939.2285714285714,"a95":0.99,"info":"17/08/2014 at 23:43:28"},{"visible":true,"include":true,"step":"50.0","x":-3655.2380952380954,"y":-357.16190476190474,"z":475.45714285714286,"a95":0.99,"info":"17/08/2014 at 23:43:28"},{"visible":true,"include":true,"step":"60.0","x":-3272.4761904761904,"y":-70.06666666666668,"z":478.46666666666664,"a95":0.99,"info":"17/08/2014 at 23:43:28"},{"visible":false,"include":false,"step":"70.0","x":-1920.952380952381,"y":932.304761904762,"z":429.3238095238095,"a95":0.99,"info":"17/08/2014 at 23:43:28"},{"visible":false,"include":false,"step":"80.0","x":-1277.5238095238096,"y":-390.2666666666667,"z":-208.03809523809525,"a95":0.99,"info":"17/08/2014 at 23:43:28"},{"visible":false,"include":false,"step":"90.0","x":-1967.2380952380952,"y":658.0857142857143,"z":831.9809523809523,"a95":0.99,"info":"17/08/2014 at 23:43:28"},{"visible":false,"include":false,"step":"100.0","x":-1310.095238095238,"y":1202.952380952381,"z":441.7333333333333,"a95":0.99,"info":"17/08/2014 at 23:43:28"}]},{"version":"v1.1.0","exported":"2016-11-16T15:33:51.187Z","volume":10.5,"added":"2016-11-16T15:09:44.072Z","format":"Utrecht","demagType":"Unknown","strat":"3","patch":1.1,"GEO":[{"dec":343.87839123768623,"inc":68.94667957889423,"MAD":2.5453188585593645,"cm":[-1.2789769243681803e-13,-2.5579538487363607e-13,0],"intensity":12441.786124066222,"type":"dir","forced":true,"remark":"","origin":false,"nSteps":6,"minStep":"30.0","maxStep":"60.0","steps":["30.0","35.0","40.0","45.0","50.0","60.0"],"group":"None","version":"v1.1.0"}],"TECT":[{"dec":9.356230762628854,"inc":47.36922480404993,"MAD":2.5453188585593667,"cm":[-3.410605131648481e-13,-9.627854069549358e-13,3.410605131648481e-13],"intensity":12441.786124066222,"type":"dir","forced":true,"remark":"","origin":false,"nSteps":6,"minStep":"30.0","maxStep":"60.0","steps":["30.0","35.0","40.0","45.0","50.0","60.0"],"group":"None","version":"v1.1.0"}],"interpreted":true,"name":"EC1.21A","coreAzi":155,"coreDip":42,"bedStrike":303,"bedDip":26,"data":[{"visible":true,"include":false,"step":"0.0","x":-35104.76190476191,"y":-5780.952380952381,"z":12084.761904761905,"a95":0.99,"info":"17/08/2014 at 23:43:28"},{"visible":true,"include":false,"step":"4.0","x":-32336.190476190477,"y":-5300.952380952381,"z":11134.285714285714,"a95":0.99,"info":"17/08/2014 at 23:43:28"},{"visible":true,"include":false,"step":"8.0","x":-26265.714285714286,"y":-3681.1428571428573,"z":9437.904761904761,"a95":0.99,"info":"17/08/2014 at 23:43:28"},{"visible":true,"include":false,"step":"12.0","x":-20095.238095238095,"y":-2312,"z":7849.9047619047615,"a95":0.99,"info":"17/08/2014 at 23:43:28"},{"visible":true,"include":false,"step":"16.0","x":-16036.190476190477,"y":-1520.095238095238,"z":6506.380952380952,"a95":0.99,"info":"17/08/2014 at 23:43:28"},{"visible":true,"include":false,"step":"20.0","x":-13070.47619047619,"y":-1384.7619047619048,"z":4865.619047619048,"a95":0.99,"info":"17/08/2014 at 23:43:28"},{"visible":true,"include":false,"step":"25.0","x":-10570.47619047619,"y":-1183.3333333333333,"z":4115.047619047619,"a95":0.99,"info":"17/08/2014 at 23:43:28"},{"visible":true,"include":true,"step":"30.0","x":-8396,"y":-363.3047619047619,"z":2932.4761904761904,"a95":0.99,"info":"17/08/2014 at 23:43:28"},{"visible":true,"include":true,"step":"35.0","x":-6640.380952380952,"y":-337.06666666666666,"z":2677.3333333333335,"a95":0.99,"info":"17/08/2014 at 23:43:28"},{"visible":true,"include":true,"step":"40.0","x":-5911.714285714285,"y":-487.50476190476195,"z":2730.190476190476,"a95":0.99,"info":"17/08/2014 at 23:43:28"},{"visible":true,"include":true,"step":"45.0","x":-4981.9047619047615,"y":-219.33333333333334,"z":1967.4285714285713,"a95":0.99,"info":"17/08/2014 at 23:43:28"},{"visible":true,"include":true,"step":"50.0","x":-3880.9523809523807,"y":-563.5809523809525,"z":1414.952380952381,"a95":0.99,"info":"17/08/2014 at 23:43:28"},{"visible":true,"include":true,"step":"60.0","x":-3353.3333333333335,"y":-138.82857142857142,"z":1129.4285714285713,"a95":0.99,"info":"17/08/2014 at 23:43:28"},{"visible":true,"include":false,"step":"70.0","x":-2464.3809523809523,"y":308.25714285714287,"z":588.5619047619048,"a95":0.99,"info":"17/08/2014 at 23:43:28"},{"visible":false,"include":false,"step":"80.0","x":-3265.809523809524,"y":-1259.5238095238096,"z":330.5333333333333,"a95":0.99,"info":"17/08/2014 at 23:43:28"},{"visible":false,"include":false,"step":"90.0","x":-2327.3333333333335,"y":-183.85714285714286,"z":496.02857142857147,"a95":0.99,"info":"17/08/2014 at 23:43:28"},{"visible":false,"include":false,"step":"100.0","x":-2457.2380952380954,"y":-407.35238095238094,"z":404.95238095238096,"a95":0.99,"info":"17/08/2014 at 23:43:28"}]},{"version":"v1.1.0","exported":"2016-11-16T15:33:51.187Z","volume":10.5,"added":"2016-11-16T15:09:44.072Z","format":"Utrecht","demagType":"Unknown","strat":"4","patch":1.1,"GEO":[{"dec":318.71723745497644,"inc":61.61076431633324,"MAD":2.553108243775411,"cm":[-8.526512829121202e-13,-1.1368683772161603e-12,0],"intensity":23323.165244946573,"type":"dir","forced":true,"remark":"","origin":false,"nSteps":6,"minStep":"20.0","maxStep":"45.0","steps":["20.0","25.0","30.0","35.0","40.0","45.0"],"group":"None","version":"v1.1.0"}],"TECT":[{"dec":350.61072178156087,"inc":47.243227378762754,"MAD":2.5531082437756067,"cm":[-9.094947017729282e-13,-5.968558980384842e-13,5.115907697472721e-13],"intensity":23323.165244946573,"type":"dir","forced":true,"remark":"","origin":false,"nSteps":6,"minStep":"20.0","maxStep":"45.0","steps":["20.0","25.0","30.0","35.0","40.0","45.0"],"group":"None","version":"v1.1.0"}],"interpreted":true,"name":"EC1.22A","coreAzi":157,"coreDip":52,"bedStrike":303,"bedDip":26,"data":[{"visible":true,"include":false,"step":"0.0","x":-52119.04761904762,"y":3381.0476190476193,"z":18563.809523809523,"a95":0.99,"info":"17/08/2014 at 23:43:28"},{"visible":true,"include":false,"step":"4.0","x":-45990.47619047619,"y":2170.3809523809523,"z":16206.666666666666,"a95":0.99,"info":"17/08/2014 at 23:43:28"},{"visible":true,"include":false,"step":"8.0","x":-35641.90476190476,"y":2201.5238095238096,"z":13286.666666666666,"a95":0.99,"info":"17/08/2014 at 23:43:28"},{"visible":true,"include":false,"step":"12.0","x":-26194.285714285714,"y":1997.904761904762,"z":10545.714285714286,"a95":0.99,"info":"17/08/2014 at 23:43:28"},{"visible":true,"include":false,"step":"16.0","x":-20225.714285714286,"y":2311.6190476190477,"z":8705.142857142857,"a95":0.99,"info":"17/08/2014 at 23:43:28"},{"visible":true,"include":true,"step":"20.0","x":-15880,"y":1936.7619047619048,"z":7045.9047619047615,"a95":0.99,"info":"17/08/2014 at 23:43:28"},{"visible":true,"include":true,"step":"25.0","x":-12567.619047619048,"y":2242.285714285714,"z":5817.523809523809,"a95":0.99,"info":"17/08/2014 at 23:43:28"},{"visible":true,"include":true,"step":"30.0","x":-9553.333333333334,"y":1924.5714285714287,"z":4754.952380952381,"a95":0.99,"info":"17/08/2014 at 23:43:28"},{"visible":true,"include":true,"step":"35.0","x":-7568.190476190476,"y":1081.142857142857,"z":3764.190476190476,"a95":0.99,"info":"17/08/2014 at 23:43:28"},{"visible":true,"include":true,"step":"40.0","x":-6918.190476190476,"y":1853.047619047619,"z":3327.4285714285716,"a95":0.99,"info":"17/08/2014 at 23:43:28"},{"visible":true,"include":true,"step":"45.0","x":-5293.523809523809,"y":1298.095238095238,"z":2183.809523809524,"a95":0.99,"info":"17/08/2014 at 23:43:28"},{"visible":true,"include":false,"step":"50.0","x":-4840.285714285715,"y":367.14285714285717,"z":1439.142857142857,"a95":0.99,"info":"17/08/2014 at 23:43:28"},{"visible":false,"include":false,"step":"60.0","x":-3217.809523809524,"y":1388.2857142857142,"z":1834.857142857143,"a95":0.99,"info":"17/08/2014 at 23:43:28"},{"visible":false,"include":false,"step":"70.0","x":-2638.6666666666665,"y":1126.6666666666667,"z":802.7047619047619,"a95":0.99,"info":"17/08/2014 at 23:43:28"},{"visible":false,"include":false,"step":"80.0","x":1591.142857142857,"y":-22.5,"z":688.8285714285714,"a95":0.99,"info":"17/08/2014 at 23:43:28"},{"visible":false,"include":false,"step":"90.0","x":-1610.3809523809523,"y":575.4666666666666,"z":599.2095238095238,"a95":0.99,"info":"17/08/2014 at 23:43:28"},{"visible":false,"include":false,"step":"100.0","x":-681.6571428571428,"y":924.3714285714285,"z":272.34285714285716,"a95":0.99,"info":"17/08/2014 at 23:43:28"}]},{"version":"v1.1.0","exported":"2016-11-16T15:33:51.187Z","volume":10.5,"added":"2016-11-16T15:09:44.073Z","format":"Utrecht","demagType":"Unknown","strat":"5","patch":1.1,"GEO":[],"TECT":[],"interpreted":false,"name":"EC1.23A","coreAzi":150,"coreDip":51,"bedStrike":303,"bedDip":26,"data":[{"visible":true,"include":false,"step":"0.0","x":-34051.42857142857,"y":-9906.666666666666,"z":18405.714285714286,"a95":0.99,"info":"17/08/2014 at 23:43:28"},{"visible":true,"include":false,"step":"4.0","x":-30702.85714285714,"y":-8656.857142857143,"z":14828.57142857143,"a95":0.99,"info":"17/08/2014 at 23:43:28"},{"visible":true,"include":false,"step":"8.0","x":-24638.095238095237,"y":-6428.761904761905,"z":11521.904761904761,"a95":0.99,"info":"17/08/2014 at 23:43:28"},{"visible":true,"include":false,"step":"12.0","x":-18684.761904761905,"y":-4193.523809523809,"z":8738.666666666666,"a95":0.99,"info":"17/08/2014 at 23:43:28"},{"visible":true,"include":false,"step":"16.0","x":-14392.380952380952,"y":-3125.3333333333335,"z":6905.523809523809,"a95":0.99,"info":"17/08/2014 at 23:43:28"},{"visible":true,"include":false,"step":"20.0","x":-11255.238095238095,"y":-2929.2380952380954,"z":5476.476190476191,"a95":0.99,"info":"17/08/2014 at 23:43:28"},{"visible":true,"include":false,"step":"25.0","x":-9122.761904761905,"y":-2142.190476190476,"z":4140,"a95":0.99,"info":"17/08/2014 at 23:43:28"},{"visible":true,"include":false,"step":"30.0","x":-7309.809523809524,"y":-1466.1904761904761,"z":3241.2380952380954,"a95":0.99,"info":"17/08/2014 at 23:43:28"},{"visible":true,"include":false,"step":"35.0","x":-5933.9047619047615,"y":-1396.095238095238,"z":2876.095238095238,"a95":0.99,"info":"17/08/2014 at 23:43:28"},{"visible":true,"include":false,"step":"40.0","x":-5435.809523809524,"y":-1086.5714285714287,"z":2600.6666666666665,"a95":0.99,"info":"17/08/2014 at 23:43:28"},{"visible":true,"include":false,"step":"45.0","x":-4421.619047619048,"y":-1542.095238095238,"z":2120.7619047619046,"a95":0.99,"info":"17/08/2014 at 23:43:28"},{"visible":true,"include":false,"step":"50.0","x":-3229.3333333333335,"y":-1585.904761904762,"z":1387.5238095238096,"a95":0.99,"info":"17/08/2014 at 23:43:28"},{"visible":true,"include":false,"step":"60.0","x":-2772,"y":-641.2761904761904,"z":1573.8095238095239,"a95":0.99,"info":"17/08/2014 at 23:43:28"},{"visible":true,"include":false,"step":"70.0","x":-1636.6666666666667,"y":111.91428571428571,"z":648.5142857142857,"a95":0.99,"info":"17/08/2014 at 23:43:28"},{"visible":true,"include":false,"step":"80.0","x":-1373.4285714285713,"y":-590.3714285714285,"z":499.2285714285714,"a95":0.99,"info":"17/08/2014 at 23:43:28"},{"visible":true,"include":false,"step":"90.0","x":-1147.2380952380952,"y":-277.4190476190476,"z":281.49523809523805,"a95":0.99,"info":"17/08/2014 at 23:43:28"},{"visible":true,"include":false,"step":"100.0","x":-1517.7142857142858,"y":-75.52190476190476,"z":306.2095238095238,"a95":0.99,"info":"17/08/2014 at 23:43:28"}]}]
