# Supplementary material for: Paleomagnetic constraints on the timing and distribution of Cenozoic rotations in Central and Eastern Anatolia
Source: Copernicus journal article supplement (doi:10.5194/se-9-295-2018), 2018-03-21
Supplement: Supplementary file 2 [file se-9-295-2018-supplement.zip › se-2017-66_DATA_dir files/dir files Ulukisla/EM1.dir]

[{"version":"v1.1.0","exported":"2016-11-16T15:40:59.993Z","volume":10.5,"added":"2016-11-16T15:34:32.073Z","format":"Utrecht","demagType":"Unknown","strat":null,"patch":1.1,"GEO":[{"dec":5.871414628520938,"inc":52.32978900362812,"MAD":0.7553990453452386,"cm":[165.02953943648475,-32.67491329406112,307.79248247109354],"intensity":403.37382154683394,"type":"dir","forced":false,"remark":"","origin":false,"nSteps":4,"minStep":"150","maxStep":"240","steps":["150","180","210","240"],"group":"None","version":"v1.1.0"}],"TECT":[{"dec":91.5052006524491,"inc":52.77218474719937,"MAD":0.7553990453452243,"cm":[-72.23661034928966,173.57740404743086,296.1272835125311],"intensity":403.37382154683394,"type":"dir","forced":false,"remark":"","origin":false,"nSteps":4,"minStep":"150","maxStep":"240","steps":["150","180","210","240"],"group":"None","version":"v1.1.0"}],"interpreted":true,"name":"EM1.1A","coreAzi":337,"coreDip":36,"bedStrike":49,"bedDip":55,"data":[{"visible":true,"include":false,"step":"20","x":-399.14285714285717,"y":189.9047619047619,"z":873.1428571428571,"a95":2.8,"info":"\"14-11-29\" at \"21:29\""},{"visible":true,"include":false,"step":"100","x":-276,"y":120,"z":600.7619047619048,"a95":2.4,"info":"\"15-01-31\" at \"09:25\""},{"visible":true,"include":true,"step":"150","x":-212.85714285714286,"y":90.95238095238095,"z":486,"a95":2.6,"info":"\"15-01-31\" at \"13:10\""},{"visible":true,"include":true,"step":"180","x":-185.14285714285714,"y":62.095238095238095,"z":396.4761904761905,"a95":2.4,"info":"\"15-01-31\" at \"17:10\""},{"visible":true,"include":true,"step":"210","x":-127.61904761904762,"y":12.095238095238095,"z":251.23809523809524,"a95":2.6,"info":"\"15-02-01\" at \"09:49\""},{"visible":true,"include":true,"step":"240","x":-83.23809523809524,"y":-27.523809523809526,"z":122.85714285714286,"a95":2.7,"info":"\"15-02-01\" at \"14:50\""},{"visible":true,"include":false,"step":"270","x":-88.85714285714286,"y":-41.23809523809524,"z":64.66666666666667,"a95":2.6,"info":"\"15-02-02\" at \"18:25\""},{"visible":true,"include":false,"step":"300","x":-76,"y":-46.95238095238095,"z":46.857142857142854,"a95":2.4,"info":"\"15-02-02\" at \"22:04\""},{"visible":true,"include":false,"step":"320","x":-73.61904761904762,"y":-62.95238095238095,"z":35.714285714285715,"a95":2.5,"info":"\"15-02-03\" at \"16:16\""},{"visible":true,"include":false,"step":"340","x":-81.42857142857143,"y":-39.714285714285715,"z":33.04761904761905,"a95":2.7,"info":"\"15-02-03\" at \"23:54\""},{"visible":true,"include":false,"step":"370","x":-82.47619047619048,"y":-42.95238095238095,"z":32.666666666666664,"a95":2.6,"info":"\"15-02-04\" at \"19:28\""},{"visible":true,"include":false,"step":"400","x":-82.14285714285714,"y":-13.885714285714286,"z":22.476190476190474,"a95":2.7,"info":"\"15-02-04\" at \"23:42\""},{"visible":true,"include":false,"step":"420","x":-81.07619047619048,"y":-32.06666666666666,"z":33.49523809523809,"a95":2.9,"info":"\"15-02-09\" at \"17:40\""}]},{"version":"v1.1.0","exported":"2016-11-16T15:40:59.993Z","volume":10.5,"added":"2016-11-16T15:34:32.074Z","format":"Utrecht","demagType":"Unknown","strat":"1","patch":1.1,"GEO":[{"dec":349.7177066007494,"inc":54.56082730016886,"MAD":3.171040838014498,"cm":[-8.881784197001252e-15,-6.084022174945858e-14,0],"intensity":646.772814627746,"type":"dir","forced":true,"remark":"","origin":false,"nSteps":7,"minStep":"23.0","maxStep":"50.0","steps":["23.0","25.0","30.0","35.0","40.0","45.0","50.0"],"group":"None","version":"v1.1.0"}],"TECT":[{"dec":101.17304005734132,"inc":61.12138492913217,"MAD":3.171040838014567,"cm":[-1.199040866595169e-14,-6.661338147750939e-14,3.197442310920451e-14],"intensity":646.772814627746,"type":"dir","forced":true,"remark":"","origin":false,"nSteps":7,"minStep":"23.0","maxStep":"50.0","steps":["23.0","25.0","30.0","35.0","40.0","45.0","50.0"],"group":"None","version":"v1.1.0"}],"interpreted":true,"name":"EM1.3A","coreAzi":299,"coreDip":38,"bedStrike":49,"bedDip":55,"data":[{"visible":true,"include":false,"step":"0.0","x":-225.44761904761904,"y":236.66666666666666,"z":396.79999999999995,"a95":0.99,"info":"24/11/2014 at 19:15:10"},{"visible":true,"include":false,"step":"10.0","x":-169.75238095238097,"y":206.57142857142858,"z":367.6,"a95":0.99,"info":"24/11/2014 at 19:15:10"},{"visible":true,"include":false,"step":"15.0","x":-163.9904761904762,"y":177.33333333333334,"z":335.5238095238095,"a95":0.99,"info":"24/11/2014 at 19:15:10"},{"visible":true,"include":false,"step":"20.0","x":-162.74285714285713,"y":171.55238095238096,"z":327.96190476190475,"a95":0.99,"info":"24/11/2014 at 19:15:10"},{"visible":true,"include":true,"step":"23.0","x":-158.57142857142858,"y":159.9142857142857,"z":308.43809523809523,"a95":0.99,"info":"24/11/2014 at 19:15:10"},{"visible":true,"include":true,"step":"25.0","x":-146.21904761904761,"y":149.56190476190477,"z":296.1142857142857,"a95":0.99,"info":"24/11/2014 at 19:15:10"},{"visible":true,"include":true,"step":"30.0","x":-142.76190476190476,"y":152.76190476190476,"z":256.6190476190476,"a95":0.99,"info":"24/11/2014 at 19:15:10"},{"visible":false,"include":false,"step":"33.0","x":-125.95238095238095,"y":172,"z":278.12380952380954,"a95":0.99,"info":"24/11/2014 at 19:15:10"},{"visible":true,"include":true,"step":"35.0","x":-136.8952380952381,"y":153.6952380952381,"z":256.2,"a95":0.99,"info":"24/11/2014 at 19:15:10"},{"visible":true,"include":true,"step":"40.0","x":-143.57142857142858,"y":138.95238095238096,"z":235.2952380952381,"a95":0.99,"info":"24/11/2014 at 19:15:10"},{"visible":true,"include":true,"step":"45.0","x":-115.34285714285713,"y":157.26666666666665,"z":214.94285714285715,"a95":0.99,"info":"24/11/2014 at 19:15:10"},{"visible":true,"include":true,"step":"50.0","x":-96.87619047619049,"y":108.75238095238096,"z":221.54285714285712,"a95":0.99,"info":"24/11/2014 at 19:15:10"},{"visible":true,"include":false,"step":"60.0","x":-127.56190476190477,"y":142.33333333333334,"z":178.61904761904762,"a95":0.99,"info":"24/11/2014 at 19:15:10"},{"visible":true,"include":false,"step":"70.0","x":-133.78095238095239,"y":145.46666666666667,"z":176.6,"a95":0.99,"info":"24/11/2014 at 19:15:10"},{"visible":true,"include":false,"step":"80.0","x":-113.86666666666666,"y":130.22857142857143,"z":181.24761904761903,"a95":0.99,"info":"24/11/2014 at 19:15:10"},{"visible":true,"include":false,"step":"90.0","x":-118.14285714285714,"y":120.81904761904761,"z":151.28571428571428,"a95":0.99,"info":"24/11/2014 at 19:15:10"}]},{"version":"v1.1.0","exported":"2016-11-16T15:40:59.993Z","volume":10.5,"added":"2016-11-16T15:34:32.074Z","format":"Utrecht","demagType":"Unknown","strat":null,"patch":1.1,"GEO":[{"dec":357.83211136601113,"inc":56.077017582541174,"MAD":1.8705294734773865,"cm":[381.79834665244323,-85.10500503476213,286.9078472390364],"intensity":695.4963512507989,"type":"dir","forced":false,"remark":"","origin":false,"nSteps":7,"minStep":"100","maxStep":"300","steps":["100","150","180","210","240","270","300"],"group":"None","version":"v1.1.0"}],"TECT":[{"dec":99.88508229477566,"inc":56.3110850185509,"MAD":1.8705294734774127,"cm":[93.72369363721344,165.31447033238834,446.3361371719346],"intensity":695.4963512507987,"type":"dir","forced":false,"remark":"","origin":false,"nSteps":7,"minStep":"100","maxStep":"300","steps":["100","150","180","210","240","270","300"],"group":"None","version":"v1.1.0"}],"interpreted":true,"name":"EM1.4A","coreAzi":316,"coreDip":48,"bedStrike":49,"bedDip":55,"data":[{"visible":true,"include":false,"step":"20","x":-146.1904761904762,"y":420.2857142857143,"z":1102.5714285714287,"a95":2.8,"info":"\"14-11-29\" at \"21:34\""},{"visible":true,"include":true,"step":"100","x":-37.61904761904762,"y":351.04761904761904,"z":780.0952380952381,"a95":2.5,"info":"\"15-01-31\" at \"09:29\""},{"visible":true,"include":true,"step":"150","x":-4.571428571428571,"y":298.85714285714283,"z":661.9047619047619,"a95":2.4,"info":"\"15-01-31\" at \"13:12\""},{"visible":true,"include":true,"step":"180","x":21.61904761904762,"y":254.76190476190476,"z":549.047619047619,"a95":2.5,"info":"\"15-01-31\" at \"17:14\""},{"visible":true,"include":true,"step":"210","x":60.38095238095238,"y":182.85714285714286,"z":425.23809523809524,"a95":2.6,"info":"\"15-02-01\" at \"09:51\""},{"visible":true,"include":true,"step":"240","x":104.28571428571429,"y":125.14285714285714,"z":264.85714285714283,"a95":3,"info":"\"15-02-01\" at \"14:52\""},{"visible":true,"include":true,"step":"270","x":111.71428571428571,"y":118.66666666666667,"z":218,"a95":2.5,"info":"\"15-02-02\" at \"18:27\""},{"visible":true,"include":true,"step":"300","x":136.57142857142858,"y":96.66666666666667,"z":156.66666666666666,"a95":2.4,"info":"\"15-02-02\" at \"22:07\""},{"visible":true,"include":false,"step":"320","x":142,"y":94.95238095238095,"z":163.14285714285714,"a95":2.1,"info":"\"15-02-03\" at \"16:18\""},{"visible":true,"include":false,"step":"340","x":120.76190476190476,"y":117.42857142857143,"z":166.95238095238096,"a95":2.3,"info":"\"15-02-03\" at \"23:56\""},{"visible":true,"include":false,"step":"370","x":117.52380952380952,"y":129.04761904761904,"z":162.57142857142858,"a95":2.7,"info":"\"15-02-04\" at \"19:31\""},{"visible":true,"include":false,"step":"400","x":87.9047619047619,"y":45.333333333333336,"z":117.33333333333333,"a95":3.4,"info":"\"15-02-04\" at \"23:44\""},{"visible":true,"include":false,"step":"420","x":99.71428571428571,"y":48,"z":129.9047619047619,"a95":2.9,"info":"\"15-02-09\" at \"17:42\""}]},{"version":"v1.1.0","exported":"2016-11-16T15:40:59.993Z","volume":10.5,"added":"2016-11-16T15:34:32.074Z","format":"Utrecht","demagType":"Unknown","strat":null,"patch":1.1,"GEO":[{"dec":355.4698098380477,"inc":50.61069222549117,"MAD":2.4578671200580775,"cm":[552.0898692439445,-152.17348951211002,503.45453216500204],"intensity":787.3754676036883,"type":"dir","forced":false,"remark":"","origin":false,"nSteps":5,"minStep":"100","maxStep":"240","steps":["100","150","180","210","240"],"group":"None","version":"v1.1.0"}],"TECT":[{"dec":91.0627059658811,"inc":59.46461888497781,"MAD":2.4578671200581206,"cm":[74.61940968299133,262.88524868324527,711.8635756329152],"intensity":787.3754676036883,"type":"dir","forced":false,"remark":"","origin":false,"nSteps":5,"minStep":"100","maxStep":"240","steps":["100","150","180","210","240"],"group":"None","version":"v1.1.0"}],"interpreted":true,"name":"EM1.5A","coreAzi":257,"coreDip":28,"bedStrike":49,"bedDip":55,"data":[{"visible":true,"include":false,"step":"20","x":-1021.7142857142857,"y":1063.5238095238096,"z":690,"a95":1.8,"info":"\"14-11-29\" at \"21:36\""},{"visible":true,"include":true,"step":"100","x":-747.5238095238095,"y":830.6666666666666,"z":365.9047619047619,"a95":1.7,"info":"\"15-01-31\" at \"09:32\""},{"visible":true,"include":true,"step":"150","x":-533.7142857142857,"y":672,"z":308.1904761904762,"a95":1.8,"info":"\"15-01-31\" at \"13:14\""},{"visible":true,"include":true,"step":"180","x":-417.8095238095238,"y":570.3809523809524,"z":261.3333333333333,"a95":1.8,"info":"\"15-01-31\" at \"17:17\""},{"visible":true,"include":true,"step":"210","x":-293.42857142857144,"y":448.76190476190476,"z":207.9047619047619,"a95":1.9,"info":"\"15-02-01\" at \"09:53\""},{"visible":true,"include":true,"step":"240","x":-173.61904761904762,"y":339.04761904761904,"z":144.76190476190476,"a95":2,"info":"\"15-02-01\" at \"14:54\""},{"visible":true,"include":false,"step":"270","x":-150.85714285714286,"y":273.5238095238095,"z":149.33333333333334,"a95":2.1,"info":"\"15-02-02\" at \"18:29\""},{"visible":true,"include":false,"step":"300","x":-77.33333333333333,"y":234.57142857142858,"z":105.52380952380952,"a95":2.4,"info":"\"15-02-02\" at \"22:09\""},{"visible":true,"include":false,"step":"320","x":-66.47619047619048,"y":191.9047619047619,"z":93.71428571428571,"a95":2.5,"info":"\"15-02-03\" at \"16:20\""},{"visible":true,"include":false,"step":"340","x":-30.761904761904763,"y":192.1904761904762,"z":86.66666666666667,"a95":2.6,"info":"\"15-02-03\" at \"23:58\""},{"visible":true,"include":false,"step":"370","x":-46.476190476190474,"y":199.04761904761904,"z":85.71428571428571,"a95":2.7,"info":"\"15-02-04\" at \"19:33\""},{"visible":true,"include":false,"step":"400","x":-68.38095238095238,"y":128.66666666666666,"z":67.80952380952381,"a95":2.9,"info":"\"15-02-04\" at \"23:47\""},{"visible":true,"include":false,"step":"420","x":-90.47619047619048,"y":126.57142857142857,"z":57.61904761904762,"a95":2.7,"info":"\"15-02-09\" at \"17:44\""}]},{"version":"v1.1.0","exported":"2016-11-16T15:40:59.993Z","volume":10.5,"added":"2016-11-16T15:34:32.076Z","format":"Utrecht","demagType":"Unknown","strat":"5","patch":1.1,"GEO":[],"TECT":[],"interpreted":false,"name":"EM1.5B","coreAzi":257,"coreDip":28,"bedStrike":49,"bedDip":55,"data":[{"visible":true,"include":false,"step":"0.0","x":3.924666666666667,"y":156.40952380952382,"z":339.4095238095238,"a95":0.99,"info":"04/11/2014 at 01:37:23"},{"visible":true,"include":false,"step":"10.0","x":36.663809523809526,"y":106.13333333333334,"z":274.65714285714284,"a95":0.99,"info":"04/11/2014 at 01:37:23"},{"visible":true,"include":false,"step":"15.0","x":52.83428571428571,"y":74.14095238095238,"z":267.74285714285713,"a95":0.99,"info":"04/11/2014 at 01:37:23"},{"visible":true,"include":false,"step":"20.0","x":34.08380952380952,"y":81.63714285714286,"z":230.3904761904762,"a95":0.99,"info":"04/11/2014 at 01:37:23"},{"visible":true,"include":false,"step":"25.0","x":26.22285714285714,"y":74.36952380952381,"z":230.55238095238096,"a95":0.99,"info":"04/11/2014 at 01:37:23"},{"visible":true,"include":false,"step":"30.0","x":19.592380952380953,"y":65.22666666666666,"z":213.8857142857143,"a95":0.99,"info":"04/11/2014 at 01:37:23"},{"visible":true,"include":false,"step":"35.0","x":11.472380952380952,"y":18.753333333333334,"z":201.44761904761904,"a95":0.99,"info":"04/11/2014 at 01:37:23"},{"visible":true,"include":false,"step":"40.0","x":-2.353904761904762,"y":62.478095238095236,"z":195.26666666666668,"a95":0.99,"info":"04/11/2014 at 01:37:23"},{"visible":true,"include":false,"step":"45.0","x":3.1000952380952382,"y":62.84285714285714,"z":165.9047619047619,"a95":0.99,"info":"04/11/2014 at 01:37:23"},{"visible":true,"include":false,"step":"50.0","x":-21.207619047619048,"y":56.18952380952381,"z":170.1238095238095,"a95":0.99,"info":"04/11/2014 at 01:37:23"},{"visible":true,"include":false,"step":"60.0","x":-4.93952380952381,"y":70.8247619047619,"z":139.0095238095238,"a95":0.99,"info":"04/11/2014 at 01:37:23"},{"visible":true,"include":false,"step":"70.0","x":-3.3123809523809524,"y":73.28095238095239,"z":130.01904761904763,"a95":0.99,"info":"04/11/2014 at 01:37:23"},{"visible":true,"include":false,"step":"80.0","x":-39.60857142857143,"y":87.68857142857144,"z":120.34285714285713,"a95":0.99,"info":"04/11/2014 at 01:37:23"},{"visible":true,"include":false,"step":"90.0","x":-25.176190476190477,"y":70.66380952380953,"z":124.29523809523809,"a95":0.99,"info":"04/11/2014 at 01:37:23"}]},{"version":"v1.1.0","exported":"2016-11-16T15:40:59.993Z","volume":10.5,"added":"2016-11-16T15:34:32.076Z","format":"Utrecht","demagType":"Unknown","strat":null,"patch":1.1,"GEO":[{"dec":2.2130510015216487,"inc":56.415464821526896,"MAD":6.820543083667636,"cm":[201.31982302323314,30.052262781881645,123.97736744460408],"intensity":249.43635326685194,"type":"dir","forced":false,"remark":"","origin":false,"nSteps":6,"minStep":"180","maxStep":"320","steps":["180","210","240","270","300","320"],"group":"None","version":"v1.1.0"}],"TECT":[{"dec":98.98637717557921,"inc":53.908260921621135,"MAD":6.820543083667617,"cm":[82.12184839005434,133.66948130505898,179.42036970073653],"intensity":249.43635326685197,"type":"dir","forced":false,"remark":"","origin":false,"nSteps":6,"minStep":"180","maxStep":"320","steps":["180","210","240","270","300","320"],"group":"None","version":"v1.1.0"}],"interpreted":true,"name":"EM1.7A","coreAzi":196,"coreDip":29,"bedStrike":49,"bedDip":55,"data":[{"visible":false,"include":false,"step":"20","x":-796.6666666666666,"y":84.76190476190476,"z":-50.95238095238095,"a95":1.9,"info":"\"14-11-29\" at \"21:38\""},{"visible":true,"include":false,"step":"100","x":-613.5238095238095,"y":38.476190476190474,"z":-125.80952380952381,"a95":1.5,"info":"\"15-01-31\" at \"09:35\""},{"visible":true,"include":false,"step":"150","x":-478.0952380952381,"y":52.857142857142854,"z":-123.33333333333333,"a95":1.6,"info":"\"15-01-31\" at \"13:16\""},{"visible":true,"include":true,"step":"180","x":-369.3333333333333,"y":50.666666666666664,"z":-124.28571428571429,"a95":1.7,"info":"\"15-01-31\" at \"17:21\""},{"visible":true,"include":true,"step":"210","x":-254.57142857142858,"y":30.952380952380953,"z":-123.52380952380952,"a95":1.8,"info":"\"15-02-01\" at \"09:55\""},{"visible":true,"include":true,"step":"240","x":-187.8095238095238,"y":20.571428571428573,"z":-118.57142857142857,"a95":2.4,"info":"\"15-02-01\" at \"14:57\""},{"visible":true,"include":true,"step":"270","x":-164.47619047619048,"y":11.047619047619047,"z":-116,"a95":2.2,"info":"\"15-02-02\" at \"18:31\""},{"visible":true,"include":true,"step":"300","x":-137.61904761904762,"y":37.23809523809524,"z":-106.28571428571429,"a95":3.1,"info":"\"15-02-02\" at \"22:14\""},{"visible":true,"include":true,"step":"320","x":-123.80952380952381,"y":9.142857142857142,"z":-109.71428571428571,"a95":3.8,"info":"\"15-02-03\" at \"16:22\""},{"visible":true,"include":false,"step":"340","x":-120.57142857142857,"y":17.523809523809526,"z":-95.80952380952381,"a95":2.4,"info":"\"15-02-04\" at \"00:00\""},{"visible":true,"include":false,"step":"370","x":-117.61904761904762,"y":9.428571428571429,"z":-100.95238095238095,"a95":2.3,"info":"\"15-02-04\" at \"19:35\""},{"visible":true,"include":false,"step":"400","x":-130.28571428571428,"y":33.23809523809524,"z":-86,"a95":2.5,"info":"\"15-02-04\" at \"23:49\""},{"visible":true,"include":false,"step":"420","x":-118.85714285714286,"y":-14.571428571428571,"z":-71.52380952380952,"a95":3.3,"info":"\"15-02-09\" at \"17:46\""}]},{"version":"v1.1.0","exported":"2016-11-16T15:40:59.993Z","volume":10.5,"added":"2016-11-16T15:34:32.077Z","format":"Utrecht","demagType":"Unknown","strat":null,"patch":1.1,"GEO":[{"dec":357.5326197625454,"inc":49.45199438204755,"MAD":1.8890756283528911,"cm":[89.02875065385493,47.735332525831225,164.47252454952402],"intensity":277.10148030186974,"type":"dir","forced":false,"remark":"","origin":false,"nSteps":5,"minStep":"150","maxStep":"270","steps":["150","180","210","240","270"],"group":"None","version":"v1.1.0"}],"TECT":[{"dec":88.23986146188963,"inc":58.474016876449056,"MAD":1.8890756283528536,"cm":[-24.19683832385246,146.1608354055834,123.72354244323532],"intensity":277.10148030186974,"type":"dir","forced":false,"remark":"","origin":false,"nSteps":5,"minStep":"150","maxStep":"270","steps":["150","180","210","240","270"],"group":"None","version":"v1.1.0"}],"interpreted":true,"name":"EM1.8A","coreAzi":207,"coreDip":34,"bedStrike":49,"bedDip":55,"data":[{"visible":false,"include":false,"step":"20","x":-654.952380952381,"y":111.9047619047619,"z":77.52380952380952,"a95":1.4,"info":"\"14-11-29\" at \"21:42\""},{"visible":true,"include":false,"step":"100","x":-472.3809523809524,"y":97.42857142857143,"z":2.857142857142857,"a95":1.3,"info":"\"15-01-31\" at \"09:39\""},{"visible":true,"include":true,"step":"150","x":-344.0952380952381,"y":52.76190476190476,"z":-0.6666666666666666,"a95":1.4,"info":"\"15-01-31\" at \"13:18\""},{"visible":true,"include":true,"step":"180","x":-273.3333333333333,"y":21.047619047619047,"z":7.0476190476190474,"a95":1.3,"info":"\"15-01-31\" at \"17:25\""},{"visible":true,"include":true,"step":"210","x":-159.14285714285714,"y":-17.428571428571427,"z":10,"a95":1.4,"info":"\"15-02-01\" at \"09:57\""},{"visible":true,"include":true,"step":"240","x":-104.85714285714286,"y":-28.761904761904763,"z":11.428571428571429,"a95":2,"info":"\"15-02-01\" at \"14:59\""},{"visible":true,"include":true,"step":"270","x":-82.72380952380952,"y":-38.19047619047619,"z":13.399999999999999,"a95":1.8,"info":"\"15-02-02\" at \"18:34\""},{"visible":true,"include":false,"step":"300","x":-59.780952380952385,"y":-66.52380952380952,"z":19.314285714285717,"a95":2.4,"info":"\"15-02-02\" at \"22:16\""},{"visible":true,"include":false,"step":"320","x":-40.304761904761904,"y":-50.24761904761905,"z":4.514285714285714,"a95":3,"info":"\"15-02-03\" at \"16:24\""},{"visible":true,"include":false,"step":"340","x":-49.46666666666666,"y":-55.142857142857146,"z":5.828571428571429,"a95":2.8,"info":"\"15-02-04\" at \"00:02\""},{"visible":true,"include":false,"step":"370","x":-40.65714285714286,"y":-52.8,"z":4.895238095238095,"a95":2.5,"info":"\"15-02-04\" at \"19:37\""},{"visible":true,"include":false,"step":"400","x":-66.28571428571429,"y":-77.9047619047619,"z":20.952380952380953,"a95":2.3,"info":"\"15-02-04\" at \"23:52\""},{"visible":true,"include":false,"step":"420","x":-43.904761904761905,"y":-88.19047619047619,"z":22.666666666666668,"a95":3.2,"info":"\"15-02-09\" at \"17:52\""}]},{"version":"v1.1.0","exported":"2016-11-16T15:40:59.993Z","volume":10.5,"added":"2016-11-16T15:34:32.077Z","format":"Utrecht","demagType":"Unknown","strat":null,"patch":1.1,"GEO":[{"dec":345.52573509440157,"inc":47.58799059550357,"MAD":3.2866737461015667,"cm":[270.2053978915739,-0.738479047108263,147.66029839263567],"intensity":245.50062693021636,"type":"dir","forced":false,"remark":"","origin":false,"nSteps":5,"minStep":"180","maxStep":"300","steps":["180","210","240","270","300"],"group":"None","version":"v1.1.0"}],"TECT":[{"dec":89.6537919754237,"inc":66.60722714483381,"MAD":3.286673746101556,"cm":[113.13377592262718,135.80179881778093,252.1382285687609],"intensity":245.50062693021638,"type":"dir","forced":false,"remark":"","origin":false,"nSteps":5,"minStep":"180","maxStep":"300","steps":["180","210","240","270","300"],"group":"None","version":"v1.1.0"}],"interpreted":true,"name":"EM1.9A","coreAzi":195,"coreDip":31,"bedStrike":49,"bedDip":55,"data":[{"visible":false,"include":false,"step":"20","x":-833.047619047619,"y":154.47619047619048,"z":-91.71428571428571,"a95":1.5,"info":"\"14-11-29\" at \"21:44\""},{"visible":true,"include":false,"step":"100","x":-633.7142857142857,"y":168.57142857142858,"z":-171.42857142857142,"a95":1.6,"info":"\"15-01-31\" at \"09:42\""},{"visible":true,"include":false,"step":"150","x":-487.7142857142857,"y":126.85714285714286,"z":-168,"a95":1.8,"info":"\"15-01-31\" at \"13:21\""},{"visible":true,"include":true,"step":"180","x":-397.14285714285717,"y":121.71428571428571,"z":-165.71428571428572,"a95":1.8,"info":"\"15-01-31\" at \"17:29\""},{"visible":true,"include":true,"step":"210","x":-282.57142857142856,"y":69.33333333333333,"z":-150.0952380952381,"a95":2,"info":"\"15-02-01\" at \"09:59\""},{"visible":true,"include":true,"step":"240","x":-243.42857142857142,"y":69.33333333333333,"z":-146.47619047619048,"a95":3.5,"info":"\"15-02-01\" at \"15:01\""},{"visible":true,"include":true,"step":"270","x":-213.52380952380952,"y":53.904761904761905,"z":-138.28571428571428,"a95":2.2,"info":"\"15-02-02\" at \"18:36\""},{"visible":true,"include":true,"step":"300","x":-167.8095238095238,"y":38.95238095238095,"z":-136.95238095238096,"a95":2.3,"info":"\"15-02-02\" at \"22:19\""},{"visible":true,"include":false,"step":"320","x":-148.1904761904762,"y":20.571428571428573,"z":-149.8095238095238,"a95":2.4,"info":"\"15-02-03\" at \"16:27\""},{"visible":true,"include":false,"step":"340","x":-158.1904761904762,"y":32.57142857142857,"z":-137.9047619047619,"a95":2.5,"info":"\"15-02-04\" at \"00:05\""},{"visible":true,"include":false,"step":"370","x":-157.04761904761904,"y":28.952380952380953,"z":-140.95238095238096,"a95":2.5,"info":"\"15-02-04\" at \"19:40\""},{"visible":true,"include":false,"step":"400","x":-173.14285714285714,"y":2.6666666666666665,"z":-110.57142857142857,"a95":2.4,"info":"\"15-02-04\" at \"23:54\""},{"visible":true,"include":false,"step":"420","x":-167.42857142857142,"y":19.333333333333332,"z":-98.19047619047619,"a95":2.3,"info":"\"15-02-09\" at \"17:54\""}]},{"version":"v1.1.0","exported":"2016-11-16T15:40:59.993Z","volume":10.5,"added":"2016-11-16T15:34:32.082Z","format":"Utrecht","demagType":"Unknown","strat":null,"patch":1.1,"GEO":[{"dec":0.29573879911032463,"inc":51.69531470575704,"MAD":1.6268793408322213,"cm":[257.2855533905224,-32.039532197494545,480.7926562342545],"intensity":747.1409693745309,"type":"dir","forced":false,"remark":"","origin":false,"nSteps":5,"minStep":"150","maxStep":"270","steps":["150","180","210","240","270"],"group":"None","version":"v1.1.0"}],"TECT":[{"dec":91.56541457585683,"inc":56.26100567230873,"MAD":1.626879340832209,"cm":[-109.20655302889766,286.5471954272406,452.0493329980932],"intensity":747.1409693745309,"type":"dir","forced":false,"remark":"","origin":false,"nSteps":5,"minStep":"150","maxStep":"270","steps":["150","180","210","240","270"],"group":"None","version":"v1.1.0"}],"interpreted":true,"name":"EM1.10A","coreAzi":327,"coreDip":41,"bedStrike":49,"bedDip":55,"data":[{"visible":false,"include":false,"step":"20","x":-519.5238095238095,"y":504.1904761904762,"z":1619.142857142857,"a95":2.8,"info":"\"14-11-29\" at \"21:46\""},{"visible":true,"include":false,"step":"100","x":-424.85714285714283,"y":355.42857142857144,"z":1168.3809523809523,"a95":2.5,"info":"\"15-01-31\" at \"09:46\""},{"visible":true,"include":true,"step":"150","x":-319.42857142857144,"y":268.4761904761905,"z":889.6190476190476,"a95":2.4,"info":"\"15-01-31\" at \"13:23\""},{"visible":true,"include":true,"step":"180","x":-266.2857142857143,"y":174.28571428571428,"z":672.1904761904761,"a95":2.4,"info":"\"15-01-31\" at \"17:33\""},{"visible":true,"include":true,"step":"210","x":-169.14285714285714,"y":69.61904761904762,"z":382.1904761904762,"a95":2.5,"info":"\"15-02-01\" at \"10:01\""},{"visible":true,"include":true,"step":"240","x":-155.14285714285714,"y":39.42857142857143,"z":302.76190476190476,"a95":2.6,"info":"\"15-02-01\" at \"15:04\""},{"visible":true,"include":true,"step":"270","x":-139.23809523809524,"y":14.476190476190476,"z":210.47619047619048,"a95":2.4,"info":"\"15-02-02\" at \"18:38\""},{"visible":true,"include":false,"step":"300","x":-153.23809523809524,"y":29.047619047619047,"z":146.66666666666666,"a95":2.3,"info":"\"15-02-02\" at \"22:21\""},{"visible":true,"include":false,"step":"320","x":-148.95238095238096,"y":20.476190476190474,"z":134.1904761904762,"a95":2.2,"info":"\"15-02-03\" at \"16:29\""},{"visible":true,"include":false,"step":"340","x":-159.9047619047619,"y":37.523809523809526,"z":157.71428571428572,"a95":2.6,"info":"\"15-02-04\" at \"00:07\""},{"visible":true,"include":false,"step":"370","x":-142.38095238095238,"y":42.476190476190474,"z":142.38095238095238,"a95":2.1,"info":"\"15-02-04\" at \"19:42\""},{"visible":true,"include":false,"step":"400","x":-170.0952380952381,"y":-28.19047619047619,"z":76.66666666666667,"a95":2.1,"info":"\"15-02-04\" at \"23:56\""},{"visible":true,"include":false,"step":"420","x":-171.71428571428572,"y":-23.333333333333332,"z":94.19047619047619,"a95":2.8,"info":"\"15-02-09\" at \"17:57\""}]},{"version":"v1.1.0","exported":"2016-11-16T15:40:59.994Z","volume":10.5,"added":"2016-11-16T15:34:32.082Z","format":"Utrecht","demagType":"Unknown","strat":"2","patch":1.1,"GEO":[{"dec":338.01585348403574,"inc":60.24302412504976,"MAD":3.372948335680446,"cm":[6.217248937900877e-15,1.9539925233402755e-14,0],"intensity":539.5245005619078,"type":"dir","forced":true,"remark":"","origin":false,"nSteps":10,"minStep":"20.0","maxStep":"70.0","steps":["20.0","23.0","25.0","30.0","35.0","40.0","45.0","50.0","60.0","70.0"],"group":"None","version":"v1.1.0"}],"TECT":[{"dec":118.90346165328128,"inc":61.92353728526411,"MAD":3.372948335680451,"cm":[-2.3092638912203256e-14,7.105427357601002e-15,-1.3322676295501878e-14],"intensity":539.5245005619078,"type":"dir","forced":true,"remark":"","origin":false,"nSteps":10,"minStep":"20.0","maxStep":"70.0","steps":["20.0","23.0","25.0","30.0","35.0","40.0","45.0","50.0","60.0","70.0"],"group":"None","version":"v1.1.0"}],"interpreted":true,"name":"EM1.13A","coreAzi":145,"coreDip":37,"bedStrike":49,"bedDip":55,"data":[{"visible":true,"include":false,"step":"0.0","x":-433.5809523809524,"y":-50.35809523809524,"z":33.12380952380953,"a95":0.99,"info":"24/11/2014 at 19:15:10"},{"visible":true,"include":false,"step":"10.0","x":-415.7523809523809,"y":-41.400952380952376,"z":26.663809523809526,"a95":0.99,"info":"24/11/2014 at 19:15:10"},{"visible":true,"include":false,"step":"15.0","x":-383.0190476190476,"y":-47.74666666666666,"z":35.980000000000004,"a95":0.99,"info":"24/11/2014 at 19:15:10"},{"visible":true,"include":true,"step":"20.0","x":-354.1047619047619,"y":-21.935238095238095,"z":34.478095238095236,"a95":0.99,"info":"24/11/2014 at 19:15:10"},{"visible":true,"include":true,"step":"23.0","x":-341.2857142857143,"y":-19.224761904761905,"z":36.586666666666666,"a95":0.99,"info":"24/11/2014 at 19:15:10"},{"visible":true,"include":true,"step":"25.0","x":-312.3619047619048,"y":-42.85333333333333,"z":40.46666666666666,"a95":0.99,"info":"24/11/2014 at 19:15:10"},{"visible":true,"include":true,"step":"30.0","x":-306.95238095238096,"y":-35.45238095238095,"z":53.09619047619047,"a95":0.99,"info":"24/11/2014 at 19:15:10"},{"visible":true,"include":false,"step":"33.0","x":-281.6380952380952,"y":-33.25904761904762,"z":41.68380952380952,"a95":0.99,"info":"24/11/2014 at 19:15:10"},{"visible":true,"include":true,"step":"35.0","x":-267.37142857142857,"y":-39.52761904761905,"z":30.078095238095237,"a95":0.99,"info":"24/11/2014 at 19:15:10"},{"visible":true,"include":true,"step":"40.0","x":-245.9238095238095,"y":-47.84190476190476,"z":37.11238095238095,"a95":0.99,"info":"24/11/2014 at 19:15:10"},{"visible":true,"include":true,"step":"45.0","x":-234,"y":-18.79047619047619,"z":40.73238095238095,"a95":0.99,"info":"24/11/2014 at 19:15:10"},{"visible":true,"include":true,"step":"50.0","x":-210.9809523809524,"y":-26.377142857142854,"z":31.316190476190474,"a95":0.99,"info":"24/11/2014 at 19:15:10"},{"visible":true,"include":true,"step":"60.0","x":-173.82857142857142,"y":-37.75238095238095,"z":41.11714285714286,"a95":0.99,"info":"24/11/2014 at 19:15:10"},{"visible":true,"include":true,"step":"70.0","x":-178.62857142857143,"y":-26.955238095238094,"z":35.46190476190476,"a95":0.99,"info":"24/11/2014 at 19:15:10"},{"visible":false,"include":false,"step":"80.0","x":-205.14285714285714,"y":-36.772380952380956,"z":4.4093333333333335,"a95":0.99,"info":"24/11/2014 at 19:15:10"},{"visible":false,"include":false,"step":"90.0","x":-126.27619047619048,"y":-31.18761904761905,"z":-1.3209523809523809,"a95":0.99,"info":"24/11/2014 at 19:15:10"}]},{"version":"v1.1.0","exported":"2016-11-16T15:40:59.994Z","volume":10.5,"added":"2016-11-16T15:34:32.082Z","format":"Utrecht","demagType":"Unknown","strat":null,"patch":1.1,"GEO":[{"dec":3.71788335005823,"inc":52.192241725747586,"MAD":2.231779089244366,"cm":[416.5749536030625,141.58115233189932,632.8224795994938],"intensity":904.2755735533111,"type":"dir","forced":false,"remark":"","origin":false,"nSteps":5,"minStep":"150","maxStep":"270","steps":["150","180","210","240","270"],"group":"None","version":"v1.1.0"}],"TECT":[{"dec":91.65152685794271,"inc":54.09452398250062,"MAD":2.2317790892443834,"cm":[-45.93662541677257,543.6363340602837,544.4203964642478],"intensity":904.2755735533112,"type":"dir","forced":false,"remark":"","origin":false,"nSteps":5,"minStep":"150","maxStep":"270","steps":["150","180","210","240","270"],"group":"None","version":"v1.1.0"}],"interpreted":true,"name":"EM1.14A","coreAzi":197,"coreDip":30,"bedStrike":49,"bedDip":55,"data":[{"visible":false,"include":false,"step":"20","x":-1812.2857142857142,"y":251.33333333333334,"z":36.76190476190476,"a95":1.4,"info":"\"14-11-29\" at \"21:48\""},{"visible":true,"include":false,"step":"100","x":-1570.6666666666667,"y":94.47619047619048,"z":-149.52380952380952,"a95":1.5,"info":"\"15-01-31\" at \"09:49\""},{"visible":true,"include":true,"step":"150","x":-1302.3809523809523,"y":50.57142857142857,"z":-123.52380952380952,"a95":1.6,"info":"\"15-01-31\" at \"13:27\""},{"visible":true,"include":true,"step":"180","x":-999.6190476190476,"y":40.476190476190474,"z":-102.95238095238095,"a95":1.5,"info":"\"15-01-31\" at \"17:37\""},{"visible":true,"include":true,"step":"210","x":-622,"y":-43.23809523809524,"z":-49.523809523809526,"a95":1.6,"info":"\"15-02-01\" at \"10:03\""},{"visible":true,"include":true,"step":"240","x":-503.04761904761904,"y":-45.904761904761905,"z":-29.61904761904762,"a95":1.7,"info":"\"15-02-01\" at \"15:06\""},{"visible":true,"include":true,"step":"270","x":-412.57142857142856,"y":-69.9047619047619,"z":-16.571428571428573,"a95":1.7,"info":"\"15-02-02\" at \"18:40\""},{"visible":true,"include":false,"step":"300","x":-350.6666666666667,"y":-58.19047619047619,"z":0.47619047619047616,"a95":1.7,"info":"\"15-02-02\" at \"22:23\""},{"visible":true,"include":false,"step":"320","x":-343.8095238095238,"y":-139.52380952380952,"z":3.9047619047619047,"a95":2.1,"info":"\"15-02-03\" at \"16:31\""},{"visible":true,"include":false,"step":"340","x":-334,"y":-70.47619047619048,"z":-40.857142857142854,"a95":2.3,"info":"\"15-02-04\" at \"00:09\""},{"visible":true,"include":false,"step":"370","x":-336.1904761904762,"y":-87.61904761904762,"z":30.857142857142858,"a95":2.2,"info":"\"15-02-04\" at \"19:46\""},{"visible":true,"include":false,"step":"400","x":-354.76190476190476,"y":-155.23809523809524,"z":69.23809523809524,"a95":2.3,"info":"\"15-02-04\" at \"23:59\""},{"visible":true,"include":false,"step":"420","x":-403.8095238095238,"y":-116.47619047619048,"z":79.71428571428571,"a95":2.1,"info":"\"15-02-09\" at \"17:59\""}]},{"version":"v1.1.0","exported":"2016-11-16T15:40:59.994Z","volume":10.5,"added":"2016-11-16T15:34:32.083Z","format":"Utrecht","demagType":"Unknown","strat":"1","patch":1.1,"GEO":[{"dec":5.597241362279817,"inc":45.07297104839181,"MAD":0.8635426462105686,"cm":[0,1.4210854715202004e-14,0],"intensity":1903.2241014907408,"type":"dir","forced":true,"remark":"","origin":false,"nSteps":6,"minStep":"10.0","maxStep":"35.0","steps":["10.0","15.0","20.0","25.0","30.0","35.0"],"group":"None","version":"v1.1.0"}],"TECT":[{"dec":79.45069346743958,"inc":53.47424030197161,"MAD":0.8635426462106067,"cm":[6.483702463810914e-14,0,-2.1316282072803006e-14],"intensity":1903.2241014907408,"type":"dir","forced":true,"remark":"","origin":false,"nSteps":6,"minStep":"10.0","maxStep":"35.0","steps":["10.0","15.0","20.0","25.0","30.0","35.0"],"group":"None","version":"v1.1.0"}],"interpreted":true,"name":"EM1.14B","coreAzi":197,"coreDip":30,"bedStrike":49,"bedDip":55,"data":[{"visible":false,"include":false,"step":"0.0","x":-1334.3809523809523,"y":223.17142857142858,"z":-322.0095238095238,"a95":0.99,"info":"04/11/2014 at 06:06:15"},{"visible":true,"include":true,"step":"10.0","x":-1098.5714285714287,"y":163.82857142857142,"z":-262.32380952380953,"a95":0.99,"info":"04/11/2014 at 06:06:15"},{"visible":true,"include":true,"step":"15.0","x":-981.9047619047619,"y":140.67619047619047,"z":-260.29523809523806,"a95":0.99,"info":"04/11/2014 at 06:06:15"},{"visible":true,"include":true,"step":"20.0","x":-904.9809523809523,"y":128.38095238095238,"z":-234.8190476190476,"a95":0.99,"info":"04/11/2014 at 06:06:15"},{"visible":true,"include":true,"step":"25.0","x":-826.4380952380952,"y":139.40952380952382,"z":-222.7047619047619,"a95":0.99,"info":"04/11/2014 at 06:06:15"},{"visible":true,"include":true,"step":"30.0","x":-784.0666666666667,"y":106.14285714285714,"z":-194.62857142857143,"a95":0.99,"info":"04/11/2014 at 06:06:15"},{"visible":true,"include":true,"step":"35.0","x":-731.2380952380952,"y":94.44380952380952,"z":-193.03809523809525,"a95":0.99,"info":"04/11/2014 at 06:06:15"},{"visible":true,"include":false,"step":"40.0","x":-695.895238095238,"y":116.11428571428571,"z":-151.0857142857143,"a95":0.99,"info":"04/11/2014 at 06:06:15"},{"visible":true,"include":false,"step":"45.0","x":-673.495238095238,"y":90.82190476190476,"z":-129.47619047619048,"a95":0.99,"info":"04/11/2014 at 06:06:15"},{"visible":true,"include":false,"step":"50.0","x":-642.5333333333334,"y":86.31142857142856,"z":-103.98095238095237,"a95":0.99,"info":"04/11/2014 at 06:06:15"},{"visible":true,"include":false,"step":"60.0","x":-619.5904761904761,"y":80.96666666666667,"z":-79.25428571428571,"a95":0.99,"info":"04/11/2014 at 06:06:15"},{"visible":true,"include":false,"step":"70.0","x":-549.6285714285715,"y":66.04666666666667,"z":-95.38095238095238,"a95":0.99,"info":"04/11/2014 at 06:06:15"},{"visible":true,"include":false,"step":"80.0","x":-539.7619047619048,"y":132.1809523809524,"z":-74.74761904761905,"a95":0.99,"info":"04/11/2014 at 06:06:15"},{"visible":true,"include":false,"step":"90.0","x":-540.6380952380953,"y":98.36190476190475,"z":6.676,"a95":0.99,"info":"04/11/2014 at 06:06:15"}]},{"version":"v1.1.0","exported":"2016-11-16T15:40:59.994Z","volume":10.5,"added":"2016-11-16T15:34:32.083Z","format":"Utrecht","demagType":"Unknown","strat":"3","patch":1.1,"GEO":[{"dec":336.24047888454504,"inc":61.4116765982502,"MAD":2.307280225550792,"cm":[-1.5987211554602254e-14,-1.865174681370263e-14,0],"intensity":1235.9939625082638,"type":"dir","forced":true,"remark":"","origin":false,"nSteps":8,"minStep":"30.0","maxStep":"70.0","steps":["30.0","33.0","35.0","40.0","45.0","50.0","60.0","70.0"],"group":"None","version":"v1.1.0"}],"TECT":[{"dec":121.76436848592425,"inc":61.40316151316876,"MAD":2.3072802255507745,"cm":[-8.881784197001252e-16,-1.9539925233402755e-14,1.0658141036401503e-14],"intensity":1235.993962508264,"type":"dir","forced":true,"remark":"","origin":false,"nSteps":8,"minStep":"30.0","maxStep":"70.0","steps":["30.0","33.0","35.0","40.0","45.0","50.0","60.0","70.0"],"group":"None","version":"v1.1.0"}],"interpreted":true,"name":"EM1.15A","coreAzi":199,"coreDip":22,"bedStrike":49,"bedDip":55,"data":[{"visible":false,"include":false,"step":"0.0","x":-1182.3809523809523,"y":386.8285714285714,"z":-43.19904761904762,"a95":0.99,"info":"24/11/2014 at 19:15:10"},{"visible":true,"include":false,"step":"10.0","x":-970.4761904761905,"y":354.29523809523806,"z":-30.517142857142858,"a95":0.99,"info":"24/11/2014 at 19:15:10"},{"visible":true,"include":false,"step":"15.0","x":-880.6857142857143,"y":296.74285714285713,"z":-29.245714285714286,"a95":0.99,"info":"24/11/2014 at 19:15:10"},{"visible":true,"include":false,"step":"20.0","x":-806.104761904762,"y":278.56190476190477,"z":-19.557142857142857,"a95":0.99,"info":"24/11/2014 at 19:15:10"},{"visible":true,"include":false,"step":"23.0","x":-758.5714285714286,"y":269.16190476190474,"z":-0.3022190476190476,"a95":0.99,"info":"24/11/2014 at 19:15:10"},{"visible":true,"include":false,"step":"25.0","x":-728.7238095238096,"y":266.7142857142857,"z":-40.18,"a95":0.99,"info":"24/11/2014 at 19:15:10"},{"visible":true,"include":true,"step":"30.0","x":-675.6761904761905,"y":252.44761904761904,"z":7.867238095238095,"a95":0.99,"info":"24/11/2014 at 19:15:10"},{"visible":true,"include":true,"step":"33.0","x":-638.7714285714286,"y":232.02857142857144,"z":17.260952380952382,"a95":0.99,"info":"24/11/2014 at 19:15:10"},{"visible":true,"include":true,"step":"35.0","x":-633.5333333333334,"y":228.13333333333335,"z":23.50190476190476,"a95":0.99,"info":"24/11/2014 at 19:15:10"},{"visible":true,"include":true,"step":"40.0","x":-614.4571428571429,"y":218.0761904761905,"z":-8.32247619047619,"a95":0.99,"info":"24/11/2014 at 19:15:10"},{"visible":true,"include":true,"step":"45.0","x":-574.9714285714285,"y":206.74285714285716,"z":-6.427904761904761,"a95":0.99,"info":"24/11/2014 at 19:15:10"},{"visible":true,"include":true,"step":"50.0","x":-534.6952380952381,"y":138.6952380952381,"z":12.657142857142858,"a95":0.99,"info":"24/11/2014 at 19:15:10"},{"visible":true,"include":true,"step":"60.0","x":-520.495238095238,"y":165.8,"z":-28.9,"a95":0.99,"info":"24/11/2014 at 19:15:10"},{"visible":true,"include":true,"step":"70.0","x":-492.18095238095236,"y":152.25714285714287,"z":-10.063809523809525,"a95":0.99,"info":"24/11/2014 at 19:15:10"},{"visible":false,"include":false,"step":"80.0","x":-622.4095238095239,"y":53.90857142857143,"z":-8.91552380952381,"a95":0.99,"info":"24/11/2014 at 19:15:10"},{"visible":true,"include":false,"step":"90.0","x":-409.4380952380953,"y":99.11428571428571,"z":-35.90761904761904,"a95":0.99,"info":"24/11/2014 at 19:15:10"}]},{"version":"v1.1.0","exported":"2016-11-16T15:40:59.994Z","volume":10.5,"added":"2016-11-16T15:34:32.084Z","format":"Utrecht","demagType":"Unknown","strat":"2","patch":1.1,"GEO":[],"TECT":[],"interpreted":false,"name":"EM1.16B","coreAzi":206,"coreDip":55,"bedStrike":49,"bedDip":55,"data":[{"visible":false,"include":false,"step":"0.0","x":-1300,"y":361.16190476190474,"z":428.6666666666667,"a95":0.99,"info":"04/11/2014 at 06:06:15"},{"visible":true,"include":false,"step":"10.0","x":-1047.2380952380952,"y":303.57142857142856,"z":388.5238095238095,"a95":0.99,"info":"04/11/2014 at 06:06:15"},{"visible":true,"include":false,"step":"15.0","x":-907.152380952381,"y":261.7142857142857,"z":348.0095238095238,"a95":0.99,"info":"04/11/2014 at 06:06:15"},{"visible":true,"include":false,"step":"20.0","x":-802.2,"y":256.2095238095238,"z":330.57142857142856,"a95":0.99,"info":"04/11/2014 at 06:06:15"},{"visible":true,"include":false,"step":"25.0","x":-729.2571428571429,"y":214.59047619047618,"z":285.62857142857143,"a95":0.99,"info":"04/11/2014 at 06:06:15"},{"visible":true,"include":false,"step":"30.0","x":-647.2857142857143,"y":183.86666666666665,"z":251.02857142857144,"a95":0.99,"info":"04/11/2014 at 06:06:15"},{"visible":true,"include":false,"step":"35.0","x":-607.4857142857143,"y":183.28571428571428,"z":209.3904761904762,"a95":0.99,"info":"04/11/2014 at 06:06:15"},{"visible":true,"include":false,"step":"40.0","x":-538.9714285714285,"y":191.9047619047619,"z":239.15238095238095,"a95":0.99,"info":"04/11/2014 at 06:06:15"},{"visible":true,"include":false,"step":"45.0","x":-534.9619047619047,"y":199.66666666666666,"z":191.9142857142857,"a95":0.99,"info":"04/11/2014 at 06:06:15"},{"visible":true,"include":false,"step":"50.0","x":-481.152380952381,"y":146.0857142857143,"z":197.51428571428573,"a95":0.99,"info":"04/11/2014 at 06:06:15"},{"visible":true,"include":false,"step":"60.0","x":-406.3809523809524,"y":145.07619047619048,"z":158.75238095238097,"a95":0.99,"info":"04/11/2014 at 06:06:15"},{"visible":true,"include":false,"step":"70.0","x":-403.74285714285713,"y":77.05714285714286,"z":138.47619047619048,"a95":0.99,"info":"04/11/2014 at 06:06:15"},{"visible":true,"include":false,"step":"80.0","x":-266.74285714285713,"y":96.8,"z":124.18095238095239,"a95":0.99,"info":"04/11/2014 at 06:06:15"},{"visible":true,"include":false,"step":"90.0","x":-296.247619047619,"y":117.29523809523809,"z":143.03809523809525,"a95":0.99,"info":"04/11/2014 at 06:06:15"}]},{"version":"v1.1.0","exported":"2016-11-16T15:40:59.994Z","volume":10.5,"added":"2016-11-16T15:34:32.084Z","format":"Utrecht","demagType":"Unknown","strat":"4","patch":1.1,"GEO":[{"dec":350.1783544615334,"inc":48.789165468001656,"MAD":2.1319644775056914,"cm":[-7.105427357601002e-15,-1.532107773982716e-14,0],"intensity":1406.655266227136,"type":"dir","forced":true,"remark":"","origin":false,"nSteps":8,"minStep":"15.0","maxStep":"45.0","steps":["15.0","20.0","23.0","25.0","30.0","33.0","35.0","45.0"],"group":"None","version":"v1.1.0"}],"TECT":[{"dec":89.65724872443957,"inc":63.28165152304595,"MAD":2.1319644775056164,"cm":[-4.75175454539567e-14,-7.815970093361102e-14,2.1316282072803006e-14],"intensity":1406.655266227136,"type":"dir","forced":true,"remark":"","origin":false,"nSteps":8,"minStep":"15.0","maxStep":"45.0","steps":["15.0","20.0","23.0","25.0","30.0","33.0","35.0","45.0"],"group":"None","version":"v1.1.0"}],"interpreted":true,"name":"EM1.17A","coreAzi":294,"coreDip":29,"bedStrike":49,"bedDip":55,"data":[{"visible":false,"include":false,"step":"0.0","x":-625.7904761904762,"y":658.0952380952381,"z":740.3523809523809,"a95":0.99,"info":"24/11/2014 at 19:15:10"},{"visible":true,"include":false,"step":"10.0","x":-474.64761904761906,"y":563.6190476190476,"z":647.2476190476191,"a95":0.99,"info":"24/11/2014 at 19:15:10"},{"visible":true,"include":true,"step":"15.0","x":-416.3047619047619,"y":478.3619047619048,"z":598.4857142857143,"a95":0.99,"info":"24/11/2014 at 19:15:10"},{"visible":true,"include":true,"step":"20.0","x":-380.247619047619,"y":426.99047619047616,"z":547.2095238095238,"a95":0.99,"info":"24/11/2014 at 19:15:10"},{"visible":true,"include":true,"step":"23.0","x":-350.22857142857146,"y":406.3619047619048,"z":498.06666666666666,"a95":0.99,"info":"24/11/2014 at 19:15:10"},{"visible":true,"include":true,"step":"25.0","x":-338.5904761904762,"y":410.8857142857143,"z":491.0380952380952,"a95":0.99,"info":"24/11/2014 at 19:15:10"},{"visible":true,"include":true,"step":"30.0","x":-293.0952380952381,"y":382.1047619047619,"z":459.3714285714285,"a95":0.99,"info":"24/11/2014 at 19:15:10"},{"visible":true,"include":true,"step":"33.0","x":-309.77142857142854,"y":344.4190476190476,"z":457.3714285714285,"a95":0.99,"info":"24/11/2014 at 19:15:10"},{"visible":true,"include":true,"step":"35.0","x":-291.9904761904762,"y":290.3047619047619,"z":413.85714285714283,"a95":0.99,"info":"24/11/2014 at 19:15:10"},{"visible":false,"include":false,"step":"40.0","x":-254.13333333333335,"y":351.5904761904762,"z":389.1333333333333,"a95":0.99,"info":"24/11/2014 at 19:15:10"},{"visible":true,"include":true,"step":"45.0","x":-296.5333333333333,"y":294.8666666666667,"z":335.67619047619047,"a95":0.99,"info":"24/11/2014 at 19:15:10"},{"visible":true,"include":false,"step":"50.0","x":-261.752380952381,"y":244.1904761904762,"z":381.32380952380953,"a95":0.99,"info":"24/11/2014 at 19:15:10"},{"visible":true,"include":false,"step":"60.0","x":-252.31428571428575,"y":233.58095238095237,"z":290.4190476190476,"a95":0.99,"info":"24/11/2014 at 19:15:10"},{"visible":true,"include":false,"step":"70.0","x":-227.50476190476192,"y":194.52380952380952,"z":257.03809523809525,"a95":0.99,"info":"24/11/2014 at 19:15:10"},{"visible":true,"include":false,"step":"80.0","x":-313.4761904761905,"y":208.32380952380953,"z":252.68571428571425,"a95":0.99,"info":"24/11/2014 at 19:15:10"},{"visible":true,"include":false,"step":"90.0","x":-212.8,"y":138.76190476190476,"z":219.9142857142857,"a95":0.99,"info":"24/11/2014 at 19:15:10"}]},{"version":"v1.1.0","exported":"2016-11-16T15:40:59.994Z","volume":10.5,"added":"2016-11-16T15:34:32.084Z","format":"Utrecht","demagType":"Unknown","strat":"5","patch":1.1,"GEO":[{"dec":2.9716095120844557,"inc":50.1846334977813,"MAD":0,"cm":[0,1.5631940186722204e-13,0],"intensity":2240.153199895549,"type":"dir","forced":true,"remark":"","origin":false,"nSteps":1,"minStep":"30.0","maxStep":"30.0","steps":["30.0"],"group":"None","version":"v1.1.0"}],"TECT":[{"dec":88.37738052632278,"inc":54.890715190156286,"MAD":0,"cm":[-3.375077994860476e-14,1.7053025658242404e-13,-1.1368683772161603e-13],"intensity":2240.153199895549,"type":"dir","forced":true,"remark":"","origin":false,"nSteps":1,"minStep":"30.0","maxStep":"30.0","steps":["30.0"],"group":"None","version":"v1.1.0"}],"interpreted":true,"name":"EM1.18A","coreAzi":321,"coreDip":31,"bedStrike":49,"bedDip":55,"data":[{"visible":false,"include":false,"step":"0.0","x":-742.3047619047619,"y":811.8666666666667,"z":1519.8095238095239,"a95":0.99,"info":"24/11/2014 at 19:15:10"},{"visible":true,"include":false,"step":"10.0","x":-576.1714285714286,"y":678.1333333333333,"z":1307.904761904762,"a95":0.99,"info":"24/11/2014 at 19:15:10"},{"visible":true,"include":false,"step":"15.0","x":-517.847619047619,"y":610.0190476190476,"z":1177.047619047619,"a95":0.99,"info":"24/11/2014 at 19:15:10"},{"visible":true,"include":false,"step":"20.0","x":-500.39047619047625,"y":582.7142857142857,"z":1116.952380952381,"a95":0.99,"info":"24/11/2014 at 19:15:10"},{"visible":true,"include":false,"step":"23.0","x":-496.6952380952381,"y":554.9809523809524,"z":1062.3809523809523,"a95":0.99,"info":"24/11/2014 at 19:15:10"},{"visible":true,"include":false,"step":"25.0","x":-481.50476190476195,"y":526.2571428571429,"z":1010,"a95":0.99,"info":"24/11/2014 at 19:15:10"},{"visible":true,"include":true,"step":"30.0","x":-462.8285714285714,"y":479.6380952380952,"z":900.1714285714285,"a95":0.99,"info":"24/11/2014 at 19:15:10"},{"visible":false,"include":false,"step":"33.0","x":-404.5238095238095,"y":499.7809523809524,"z":884.8761904761906,"a95":0.99,"info":"24/11/2014 at 19:15:10"},{"visible":true,"include":false,"step":"35.0","x":-399.97142857142853,"y":437.1142857142857,"z":848.895238095238,"a95":0.99,"info":"24/11/2014 at 19:15:10"},{"visible":true,"include":false,"step":"40.0","x":-383.67619047619047,"y":431.91428571428577,"z":798.0952380952381,"a95":0.99,"info":"24/11/2014 at 19:15:10"},{"visible":true,"include":false,"step":"45.0","x":-405.68571428571425,"y":405.2666666666667,"z":704.7904761904762,"a95":0.99,"info":"24/11/2014 at 19:15:10"},{"visible":true,"include":false,"step":"50.0","x":-361.14285714285717,"y":315.85714285714283,"z":724.5142857142857,"a95":0.99,"info":"24/11/2014 at 19:15:10"},{"visible":true,"include":false,"step":"60.0","x":-369.37142857142857,"y":343.77142857142854,"z":581.047619047619,"a95":0.99,"info":"24/11/2014 at 19:15:10"},{"visible":true,"include":false,"step":"70.0","x":-338.6952380952381,"y":307.42857142857144,"z":566.5619047619048,"a95":0.99,"info":"24/11/2014 at 19:15:10"},{"visible":true,"include":false,"step":"80.0","x":-185.75238095238097,"y":239.9904761904762,"z":565.6190476190476,"a95":0.99,"info":"24/11/2014 at 19:15:10"},{"visible":true,"include":false,"step":"90.0","x":-251.9238095238095,"y":278.84761904761905,"z":465.1142857142857,"a95":0.99,"info":"24/11/2014 at 19:15:10"}]},{"version":"v1.1.0","exported":"2016-11-16T15:40:59.994Z","volume":10.5,"added":"2016-11-16T15:34:32.085Z","format":"Utrecht","demagType":"Unknown","strat":"6","patch":1.1,"GEO":[{"dec":349.23025869908963,"inc":47.16612703092303,"MAD":2.7071868034700675,"cm":[0,-7.438494264988549e-15,0],"intensity":1217.6521064845674,"type":"dir","forced":true,"remark":"","origin":false,"nSteps":9,"minStep":"25.0","maxStep":"70.0","steps":["25.0","30.0","33.0","35.0","40.0","45.0","50.0","60.0","70.0"],"group":"None","version":"v1.1.0"}],"TECT":[{"dec":86.61793970146454,"inc":64.39627525979131,"MAD":2.7071868034701443,"cm":[-3.375077994860476e-14,1.9539925233402755e-14,-7.105427357601002e-15],"intensity":1217.6521064845674,"type":"dir","forced":true,"remark":"","origin":false,"nSteps":9,"minStep":"25.0","maxStep":"70.0","steps":["25.0","30.0","33.0","35.0","40.0","45.0","50.0","60.0","70.0"],"group":"None","version":"v1.1.0"}],"interpreted":true,"name":"EM1.19A","coreAzi":301,"coreDip":26,"bedStrike":49,"bedDip":55,"data":[{"visible":false,"include":false,"step":"0.0","x":-577.3047619047619,"y":597.6190476190476,"z":883.3238095238095,"a95":0.99,"info":"24/11/2014 at 19:15:10"},{"visible":true,"include":false,"step":"10.0","x":-414.72380952380956,"y":515.1714285714286,"z":750.8095238095239,"a95":0.99,"info":"24/11/2014 at 19:15:10"},{"visible":true,"include":false,"step":"15.0","x":-380.552380952381,"y":422.0571428571429,"z":651.2476190476191,"a95":0.99,"info":"24/11/2014 at 19:15:10"},{"visible":true,"include":false,"step":"20.0","x":-367.32380952380953,"y":388.77142857142854,"z":617.6190476190476,"a95":0.99,"info":"24/11/2014 at 19:15:10"},{"visible":true,"include":false,"step":"23.0","x":-344.81904761904764,"y":377.76190476190476,"z":593.3619047619047,"a95":0.99,"info":"24/11/2014 at 19:15:10"},{"visible":true,"include":true,"step":"25.0","x":-354.0095238095238,"y":362.7809523809524,"z":563.152380952381,"a95":0.99,"info":"24/11/2014 at 19:15:10"},{"visible":true,"include":true,"step":"30.0","x":-290.9428571428572,"y":325.7142857142857,"z":516.552380952381,"a95":0.99,"info":"24/11/2014 at 19:15:10"},{"visible":true,"include":true,"step":"33.0","x":-293.37142857142857,"y":348.42857142857144,"z":476.0380952380952,"a95":0.99,"info":"24/11/2014 at 19:15:10"},{"visible":true,"include":true,"step":"35.0","x":-276.35238095238094,"y":332.76190476190476,"z":475.0380952380952,"a95":0.99,"info":"24/11/2014 at 19:15:10"},{"visible":true,"include":true,"step":"40.0","x":-284.83809523809526,"y":318.6666666666667,"z":465.60952380952375,"a95":0.99,"info":"24/11/2014 at 19:15:10"},{"visible":true,"include":true,"step":"45.0","x":-264.447619047619,"y":311.6095238095238,"z":410.83809523809526,"a95":0.99,"info":"24/11/2014 at 19:15:10"},{"visible":true,"include":true,"step":"50.0","x":-283.6380952380952,"y":266.1047619047619,"z":405.08571428571423,"a95":0.99,"info":"24/11/2014 at 19:15:10"},{"visible":true,"include":true,"step":"60.0","x":-261.6666666666667,"y":250.57142857142858,"z":344.85714285714283,"a95":0.99,"info":"24/11/2014 at 19:15:10"},{"visible":true,"include":true,"step":"70.0","x":-220.1142857142857,"y":266.76190476190476,"z":306.752380952381,"a95":0.99,"info":"24/11/2014 at 19:15:10"},{"visible":true,"include":false,"step":"80.0","x":-218.36190476190478,"y":151.43809523809523,"z":277.42857142857144,"a95":0.99,"info":"24/11/2014 at 19:15:10"},{"visible":true,"include":false,"step":"90.0","x":-139.25714285714287,"y":196.44761904761904,"z":216.1142857142857,"a95":0.99,"info":"24/11/2014 at 19:15:10"}]}]
