# Supplementary material for: Paleomagnetic constraints on the timing and distribution of Cenozoic rotations in Central and Eastern Anatolia
Source: Copernicus journal article supplement (doi:10.5194/se-9-295-2018), 2018-03-21
Supplement: Supplementary file 2 [file se-9-295-2018-supplement.zip › se-2017-66_DATA_dir files/dir files Ulukisla/EM2.dir]

[{"version":"v1.1.0","exported":"2016-11-22T23:52:48.497Z","volume":10.5,"added":"2016-11-22T23:45:25.042Z","format":"Utrecht","demagType":"Unknown","strat":null,"patch":1.1,"GEO":[{"dec":177.35128004943056,"inc":-40.87043999208491,"MAD":13.885637832115412,"cm":[-11.534217821200299,92.53312773275832,-115.77049532956397],"intensity":215.52296782446174,"type":"dir","forced":false,"remark":"","origin":false,"nSteps":6,"minStep":"150","maxStep":"300","steps":["150","180","210","240","270","300"],"group":"None","version":"v1.1.0"}],"TECT":[{"dec":168.07937089394943,"inc":12.918101752812785,"MAD":13.885637832115396,"cm":[-62.0749944205204,134.94187473666105,5.967495945042089],"intensity":215.5229678244618,"type":"dir","forced":false,"remark":"","origin":false,"nSteps":6,"minStep":"150","maxStep":"300","steps":["150","180","210","240","270","300"],"group":"None","version":"v1.1.0"}],"interpreted":true,"name":"EM2.1A","coreAzi":307,"coreDip":39,"bedStrike":230,"bedDip":62,"data":[{"visible":true,"include":false,"step":"20","x":-114.57142857142857,"y":88.47619047619048,"z":-1.9047619047619047,"a95":3.3,"info":"\"14-11-29\" at \"21:50\""},{"visible":true,"include":false,"step":"100","x":43.333333333333336,"y":15.428571428571429,"z":-218.85714285714286,"a95":2.8,"info":"\"15-01-31\" at \"09:57\""},{"visible":true,"include":true,"step":"150","x":74.38095238095238,"y":-12,"z":-221.33333333333334,"a95":3,"info":"\"15-01-31\" at \"13:29\""},{"visible":true,"include":true,"step":"180","x":64.47619047619048,"y":2.380952380952381,"z":-192.66666666666666,"a95":2.7,"info":"\"15-01-31\" at \"17:41\""},{"visible":true,"include":true,"step":"210","x":23.238095238095237,"y":33.61904761904762,"z":-137.52380952380952,"a95":3.3,"info":"\"15-02-01\" at \"10:05\""},{"visible":true,"include":true,"step":"240","x":12.952380952380953,"y":51.23809523809524,"z":-141.61904761904762,"a95":3,"info":"\"15-02-01\" at \"15:11\""},{"visible":true,"include":true,"step":"270","x":20.095238095238095,"y":84,"z":-66.66666666666667,"a95":3.7,"info":"\"15-02-02\" at \"18:42\""},{"visible":true,"include":true,"step":"300","x":39.42857142857143,"y":119.61904761904762,"z":-54.285714285714285,"a95":2.9,"info":"\"15-02-02\" at \"22:25\""},{"visible":true,"include":false,"step":"320","x":-8.571428571428571,"y":109.61904761904762,"z":-69.14285714285714,"a95":3.1,"info":"\"15-02-03\" at \"17:01\""},{"visible":false,"include":false,"step":"340","x":-12.952380952380953,"y":82.76190476190476,"z":-122.76190476190476,"a95":2.8,"info":"\"15-02-04\" at \"00:12\""},{"visible":false,"include":false,"step":"370","x":-17.904761904761905,"y":85.23809523809524,"z":-126.85714285714286,"a95":2.7,"info":"\"15-02-04\" at \"19:49\""},{"visible":false,"include":false,"step":"400","x":-45.80952380952381,"y":86,"z":-124.95238095238095,"a95":2.8,"info":"\"15-02-05\" at \"00:16\""},{"visible":false,"include":false,"step":"420","x":9.247619047619047,"y":28.009523809523813,"z":-5.428571428571429,"a95":13.7,"info":"\"15-02-09\" at \"18:01\""}]},{"version":"v1.1.0","exported":"2016-11-22T23:52:48.497Z","volume":10.5,"added":"2016-11-22T23:45:25.042Z","format":"Utrecht","demagType":"Unknown","strat":null,"patch":1.1,"GEO":[{"dec":134.94100626867248,"inc":-56.01722294579866,"MAD":12.428687898756898,"cm":[60.039192449085334,79.84253215749656,-0.8679922812048675],"intensity":55.84689143942311,"type":"dir","forced":false,"remark":"","origin":false,"nSteps":4,"minStep":"180","maxStep":"270","steps":["180","210","240","270"],"group":"None","version":"v1.1.0"}],"TECT":[{"dec":137.15992120250098,"inc":5.8720319110965224,"MAD":12.428687898756978,"cm":[61.61789341247193,78.51784476137968,4.297818899923929],"intensity":55.846891439423025,"type":"dir","forced":false,"remark":"","origin":false,"nSteps":4,"minStep":"180","maxStep":"270","steps":["180","210","240","270"],"group":"None","version":"v1.1.0"}],"interpreted":true,"name":"EM2.3A","coreAzi":284,"coreDip":24,"bedStrike":230,"bedDip":62,"data":[{"visible":false,"include":false,"step":"20","x":-273.8095238095238,"y":341.14285714285717,"z":136.76190476190476,"a95":1.8,"info":"\"14-11-29\" at \"21:52\""},{"visible":true,"include":false,"step":"100","x":-81.04761904761905,"y":140.66666666666666,"z":-91.23809523809524,"a95":2.4,"info":"\"15-01-31\" at \"10:00\""},{"visible":true,"include":false,"step":"150","x":11.714285714285714,"y":76.28571428571429,"z":-116.47619047619048,"a95":2.9,"info":"\"15-01-31\" at \"13:31\""},{"visible":true,"include":true,"step":"180","x":-7.714285714285714,"y":71.52380952380952,"z":-82.19047619047619,"a95":3.6,"info":"\"15-01-31\" at \"17:47\""},{"visible":true,"include":true,"step":"210","x":-21.047619047619047,"y":73.9047619047619,"z":-56.57142857142857,"a95":3.4,"info":"\"15-02-01\" at \"10:07\""},{"visible":true,"include":true,"step":"240","x":-32.666666666666664,"y":76.19047619047619,"z":-54.285714285714285,"a95":3.2,"info":"\"15-02-01\" at \"15:13\""},{"visible":true,"include":true,"step":"270","x":-37.80952380952381,"y":88.66666666666667,"z":-38.38095238095238,"a95":3.3,"info":"\"15-02-02\" at \"18:45\""},{"visible":true,"include":false,"step":"300","x":-31.333333333333332,"y":89.80952380952381,"z":-13.428571428571429,"a95":3,"info":"\"15-02-02\" at \"22:27\""},{"visible":true,"include":false,"step":"320","x":-65.58095238095238,"y":52.88571428571428,"z":13.304761904761904,"a95":3.8,"info":"\"15-02-03\" at \"17:04\""},{"visible":true,"include":false,"step":"340","x":-38.95238095238095,"y":107.80952380952381,"z":-54.19047619047619,"a95":2.9,"info":"\"15-02-04\" at \"00:14\""},{"visible":true,"include":false,"step":"370","x":-39.42857142857143,"y":104.95238095238095,"z":-59.714285714285715,"a95":2.9,"info":"\"15-02-04\" at \"19:51\""},{"visible":true,"include":false,"step":"400","x":-47.142857142857146,"y":99.9047619047619,"z":-45.23809523809524,"a95":3.1,"info":"\"15-02-05\" at \"00:18\""},{"visible":true,"include":false,"step":"420","x":-58.10476190476191,"y":46.2,"z":-53.77142857142857,"a95":5.4,"info":"\"15-02-09\" at \"18:04\""}]},{"version":"v1.1.0","exported":"2016-11-22T23:52:48.498Z","volume":10.5,"added":"2016-11-22T23:45:25.043Z","format":"Utrecht","demagType":"Unknown","strat":"1","patch":1.1,"GEO":[],"TECT":[],"interpreted":false,"name":"EM2.4A","coreAzi":279,"coreDip":25,"bedStrike":230,"bedDip":62,"data":[{"visible":true,"include":false,"step":"0.0","x":78.66095238095238,"y":115.37142857142858,"z":-18.454285714285714,"a95":0.99,"info":"24/11/2014 at 13:57:50"},{"visible":true,"include":false,"step":"10.0","x":195.95238095238096,"y":-5.715619047619048,"z":-63.58380952380952,"a95":0.99,"info":"24/11/2014 at 13:57:50"},{"visible":true,"include":false,"step":"15.0","x":191.59047619047618,"y":-21.70380952380952,"z":-16.938095238095237,"a95":0.99,"info":"24/11/2014 at 13:57:50"},{"visible":true,"include":false,"step":"20.0","x":218.67619047619047,"y":-37.214285714285715,"z":25.035238095238096,"a95":0.99,"info":"24/11/2014 at 13:57:50"},{"visible":true,"include":true,"step":"23.0","x":262.2666666666667,"y":-67.43333333333332,"z":42.42285714285714,"a95":0.99,"info":"24/11/2014 at 13:57:50"},{"visible":true,"include":true,"step":"25.0","x":225,"y":-29.100952380952382,"z":-5.060952380952381,"a95":0.99,"info":"24/11/2014 at 13:57:50"},{"visible":true,"include":true,"step":"30.0","x":207.1809523809524,"y":-66.14380952380952,"z":19.1,"a95":0.99,"info":"24/11/2014 at 13:57:50"},{"visible":true,"include":true,"step":"33.0","x":189.8952380952381,"y":-48.22857142857143,"z":-4.1417142857142855,"a95":0.99,"info":"24/11/2014 at 13:57:50"},{"visible":true,"include":true,"step":"35.0","x":185.2,"y":-89.75142857142858,"z":6.398285714285715,"a95":0.99,"info":"24/11/2014 at 13:57:50"},{"visible":true,"include":true,"step":"40.0","x":199.83809523809526,"y":35.65047619047619,"z":40.065714285714286,"a95":0.99,"info":"24/11/2014 at 13:57:50"},{"visible":true,"include":true,"step":"45.0","x":169.2761904761905,"y":-13.461904761904762,"z":-0.8695142857142857,"a95":0.99,"info":"24/11/2014 at 13:57:50"},{"visible":true,"include":true,"step":"50.0","x":130.2761904761905,"y":-16.90952380952381,"z":-27.978095238095236,"a95":0.99,"info":"24/11/2014 at 13:57:50"},{"visible":true,"include":false,"step":"60.0","x":102.29523809523809,"y":38.90857142857143,"z":38.118095238095236,"a95":0.99,"info":"24/11/2014 at 13:57:50"},{"visible":true,"include":false,"step":"70.0","x":168.2,"y":109.12380952380951,"z":-47.981904761904765,"a95":0.99,"info":"24/11/2014 at 13:57:50"},{"visible":true,"include":false,"step":"80.0","x":44.23428571428571,"y":90.78190476190477,"z":31.464761904761904,"a95":0.99,"info":"24/11/2014 at 13:57:50"},{"visible":true,"include":false,"step":"90.0","x":-13.505714285714285,"y":196.59047619047618,"z":60.94095238095238,"a95":0.99,"info":"24/11/2014 at 13:57:50"}]},{"version":"v1.1.0","exported":"2016-11-22T23:52:48.498Z","volume":10.5,"added":"2016-11-22T23:45:25.043Z","format":"Utrecht","demagType":"Unknown","strat":"2","patch":1.1,"GEO":[{"dec":180.5236130531269,"inc":-60.17913458844362,"MAD":4.1014118430274085,"cm":[1.7763568394002505e-15,-1.2712053631958042e-14,0],"intensity":746.4722208548262,"type":"dir","forced":true,"remark":"","origin":false,"nSteps":9,"minStep":"15.0","maxStep":"45.0","steps":["15.0","20.0","23.0","25.0","30.0","33.0","35.0","40.0","45.0"],"group":"None","version":"v1.1.0"}],"TECT":[{"dec":158.90483110397338,"inc":-4.217567489101315,"MAD":4.1014118430273605,"cm":[0,-3.6415315207705135e-14,-4.191091917959966e-15],"intensity":746.4722208548262,"type":"dir","forced":true,"remark":"","origin":false,"nSteps":9,"minStep":"15.0","maxStep":"45.0","steps":["15.0","20.0","23.0","25.0","30.0","33.0","35.0","40.0","45.0"],"group":"None","version":"v1.1.0"}],"interpreted":true,"name":"EM2.5A","coreAzi":260,"coreDip":43,"bedStrike":230,"bedDip":62,"data":[{"visible":true,"include":false,"step":"0.0","x":199.2761904761905,"y":-117.86666666666666,"z":-242.36190476190478,"a95":0.99,"info":"24/11/2014 at 13:57:50"},{"visible":true,"include":false,"step":"10.0","x":327.43809523809523,"y":-206.75238095238097,"z":-266.6190476190476,"a95":0.99,"info":"24/11/2014 at 13:57:50"},{"visible":true,"include":true,"step":"15.0","x":288.3619047619048,"y":-203.06666666666666,"z":-246.77142857142857,"a95":0.99,"info":"24/11/2014 at 13:57:50"},{"visible":true,"include":true,"step":"20.0","x":274.03809523809525,"y":-199.2761904761905,"z":-214.2,"a95":0.99,"info":"24/11/2014 at 13:57:50"},{"visible":true,"include":true,"step":"23.0","x":260.54285714285714,"y":-197.76190476190476,"z":-237.85714285714286,"a95":0.99,"info":"24/11/2014 at 13:57:50"},{"visible":true,"include":true,"step":"25.0","x":253.33333333333334,"y":-174.64761904761903,"z":-220.0857142857143,"a95":0.99,"info":"24/11/2014 at 13:57:50"},{"visible":true,"include":true,"step":"30.0","x":262.6190476190476,"y":-196.77142857142857,"z":-177.59047619047618,"a95":0.99,"info":"24/11/2014 at 13:57:50"},{"visible":true,"include":true,"step":"33.0","x":260.2190476190476,"y":-163.48571428571427,"z":-160.92380952380952,"a95":0.99,"info":"24/11/2014 at 13:57:50"},{"visible":true,"include":true,"step":"35.0","x":248.1047619047619,"y":-145.1238095238095,"z":-149.56190476190477,"a95":0.99,"info":"24/11/2014 at 13:57:50"},{"visible":true,"include":true,"step":"40.0","x":279.43809523809523,"y":-178.64761904761903,"z":-175.34285714285713,"a95":0.99,"info":"24/11/2014 at 13:57:50"},{"visible":true,"include":true,"step":"45.0","x":206.8857142857143,"y":-177.25714285714287,"z":-162.25714285714287,"a95":0.99,"info":"24/11/2014 at 13:57:50"},{"visible":true,"include":false,"step":"50.0","x":200.14285714285714,"y":-148.66666666666666,"z":-165.04761904761904,"a95":0.99,"info":"24/11/2014 at 13:57:50"},{"visible":true,"include":false,"step":"60.0","x":167.1809523809524,"y":-122.84761904761906,"z":-101.58095238095237,"a95":0.99,"info":"24/11/2014 at 13:57:50"},{"visible":true,"include":false,"step":"70.0","x":194.04761904761904,"y":-46.50952380952381,"z":-167.73333333333335,"a95":0.99,"info":"24/11/2014 at 13:57:50"},{"visible":true,"include":false,"step":"80.0","x":196.14285714285714,"y":-31.38285714285714,"z":-133.8095238095238,"a95":0.99,"info":"24/11/2014 at 13:57:50"},{"visible":true,"include":false,"step":"90.0","x":133.32380952380953,"y":-60.516190476190474,"z":-86.44095238095238,"a95":0.99,"info":"24/11/2014 at 13:57:50"}]},{"version":"v1.1.0","exported":"2016-11-22T23:52:48.498Z","volume":10.5,"added":"2016-11-22T23:45:25.044Z","format":"Utrecht","demagType":"Unknown","strat":null,"patch":1.1,"GEO":[{"dec":156.20117145428344,"inc":-61.27964849899853,"MAD":3.7143360923408886,"cm":[21.992821037841637,56.94063278100158,23.299548816921533],"intensity":434.31997567443443,"type":"dir","forced":false,"remark":"","origin":false,"nSteps":8,"minStep":"100","maxStep":"320","steps":["100","150","180","210","240","270","300","320"],"group":"None","version":"v1.1.0"}],"TECT":[{"dec":147.70517323150557,"inc":-0.24506218059076845,"MAD":3.7143360923409086,"cm":[45.77999018082085,36.98082792637611,28.379564455770208],"intensity":434.31997567443443,"type":"dir","forced":false,"remark":"","origin":false,"nSteps":8,"minStep":"100","maxStep":"320","steps":["100","150","180","210","240","270","300","320"],"group":"None","version":"v1.1.0"}],"interpreted":true,"name":"EM2.7A","coreAzi":265,"coreDip":46,"bedStrike":230,"bedDip":62,"data":[{"visible":true,"include":false,"step":"20","x":-184.85714285714286,"y":7.809523809523809,"z":107.71428571428571,"a95":2.6,"info":"\"14-11-29\" at \"21:54\""},{"visible":true,"include":true,"step":"100","x":77.71428571428571,"y":-115.71428571428571,"z":-223.61904761904762,"a95":2.8,"info":"\"15-01-31\" at \"10:03\""},{"visible":true,"include":true,"step":"150","x":-4.190476190476191,"y":-20.571428571428573,"z":-108.19047619047619,"a95":4,"info":"\"15-01-31\" at \"13:33\""},{"visible":true,"include":true,"step":"180","x":-28.523809523809526,"y":-1.638095238095238,"z":-71.74285714285713,"a95":4,"info":"\"15-01-31\" at \"17:51\""},{"visible":true,"include":true,"step":"210","x":-57.32380952380952,"y":7.809523809523809,"z":-29.447619047619046,"a95":4.2,"info":"\"15-02-01\" at \"10:09\""},{"visible":true,"include":true,"step":"240","x":-81.57142857142857,"y":40.16190476190476,"z":22.057142857142857,"a95":3.3,"info":"\"15-02-01\" at \"15:15\""},{"visible":true,"include":true,"step":"270","x":-131.33333333333334,"y":68.38095238095238,"z":70.57142857142857,"a95":2.6,"info":"\"15-02-02\" at \"18:47\""},{"visible":true,"include":true,"step":"300","x":-105.23809523809524,"y":62.57142857142857,"z":58.285714285714285,"a95":2.9,"info":"\"15-02-02\" at \"22:29\""},{"visible":true,"include":true,"step":"320","x":-136.47619047619048,"y":94.57142857142857,"z":90.28571428571429,"a95":2.7,"info":"\"15-02-03\" at \"17:06\""},{"visible":true,"include":false,"step":"340","x":-94.0952380952381,"y":74.47619047619048,"z":87.04761904761905,"a95":2.9,"info":"\"15-02-04\" at \"00:16\""},{"visible":true,"include":false,"step":"370","x":-103.23809523809524,"y":69.80952380952381,"z":83.04761904761905,"a95":2.7,"info":"\"15-02-04\" at \"19:55\""},{"visible":true,"include":false,"step":"400","x":-136.38095238095238,"y":73.42857142857143,"z":50.285714285714285,"a95":2.5,"info":"\"15-02-05\" at \"00:20\""},{"visible":true,"include":false,"step":"420","x":-137.61904761904762,"y":26.095238095238095,"z":-0.38095238095238093,"a95":2.6,"info":"\"15-02-09\" at \"18:09\""}]},{"version":"v1.1.0","exported":"2016-11-22T23:52:48.498Z","volume":10.5,"added":"2016-11-22T23:45:25.045Z","format":"Utrecht","demagType":"Unknown","strat":null,"patch":1.1,"GEO":[{"dec":171.08448596387075,"inc":-60.16121336362981,"MAD":3.019879212423855,"cm":[-43.940464512053225,142.61935471097132,-247.64970933990634],"intensity":703.7671035608454,"type":"dir","forced":false,"remark":"","origin":false,"nSteps":7,"minStep":"100","maxStep":"300","steps":["100","150","180","210","240","270","300"],"group":"None","version":"v1.1.0"}],"TECT":[{"dec":154.8930227790588,"inc":-1.7762255645197815,"MAD":3.019879212423873,"cm":[-160.50814740740128,240.43125443564807,-5.600875127472953],"intensity":703.7671035608454,"type":"dir","forced":false,"remark":"","origin":false,"nSteps":7,"minStep":"100","maxStep":"300","steps":["100","150","180","210","240","270","300"],"group":"None","version":"v1.1.0"}],"interpreted":true,"name":"EM2.9A","coreAzi":310,"coreDip":55,"bedStrike":230,"bedDip":62,"data":[{"visible":true,"include":false,"step":"20","x":36.095238095238095,"y":6,"z":-374.6666666666667,"a95":3.3,"info":"\"14-11-29\" at \"21:56\""},{"visible":true,"include":true,"step":"100","x":106.0952380952381,"y":-69.61904761904762,"z":-673.6190476190476,"a95":2.7,"info":"\"15-01-31\" at \"10:07\""},{"visible":true,"include":true,"step":"150","x":73.33333333333333,"y":-15.523809523809524,"z":-462.76190476190476,"a95":2.6,"info":"\"15-01-31\" at \"13:36\""},{"visible":true,"include":true,"step":"180","x":49.80952380952381,"y":32,"z":-368.4761904761905,"a95":2.7,"info":"\"15-01-31\" at \"17:55\""},{"visible":true,"include":true,"step":"210","x":17.333333333333332,"y":46.76190476190476,"z":-274.76190476190476,"a95":2.8,"info":"\"15-02-01\" at \"10:11\""},{"visible":true,"include":true,"step":"240","x":11.523809523809524,"y":99.9047619047619,"z":-141.52380952380952,"a95":2.9,"info":"\"15-02-01\" at \"15:17\""},{"visible":true,"include":true,"step":"270","x":-21.333333333333332,"y":165.8095238095238,"z":-32.857142857142854,"a95":2.2,"info":"\"15-02-02\" at \"18:49\""},{"visible":true,"include":true,"step":"300","x":-30.857142857142858,"y":146.76190476190476,"z":-18.095238095238095,"a95":2.2,"info":"\"15-02-02\" at \"22:31\""},{"visible":true,"include":false,"step":"320","x":-40.476190476190474,"y":158.57142857142858,"z":19.523809523809526,"a95":2.2,"info":"\"15-02-03\" at \"17:08\""},{"visible":true,"include":false,"step":"340","x":-61.80952380952381,"y":106,"z":27.333333333333332,"a95":3.3,"info":"\"15-02-04\" at \"00:18\""},{"visible":true,"include":false,"step":"370","x":-53.23809523809524,"y":109.80952380952381,"z":27.61904761904762,"a95":3.1,"info":"\"15-02-04\" at \"19:59\""},{"visible":true,"include":false,"step":"400","x":-36.285714285714285,"y":73.23809523809524,"z":74.95238095238095,"a95":3.7,"info":"\"15-02-05\" at \"00:23\""},{"visible":true,"include":false,"step":"420","x":-87.52380952380952,"y":60.76190476190476,"z":66,"a95":4.3,"info":"\"15-02-09\" at \"18:11\""}]},{"version":"v1.1.0","exported":"2016-11-22T23:52:48.498Z","volume":10.5,"added":"2016-11-22T23:45:25.045Z","format":"Utrecht","demagType":"Unknown","strat":"3","patch":1.1,"GEO":[{"dec":166.10523476140952,"inc":-57.35096544020694,"MAD":8.455502555434563,"cm":[23.555315887037143,-24.480608449192594,21.117219913681794],"intensity":364.0092656878063,"type":"dir","forced":false,"remark":"","origin":false,"nSteps":5,"minStep":"10.0","maxStep":"25.0","steps":["10.0","15.0","20.0","23.0","25.0"],"group":"None","version":"v1.1.0"}],"TECT":[{"dec":156.541861677135,"inc":-13.85636548396744,"MAD":8.455502555434546,"cm":[27.788678706607662,-27.444841007432572,-8.640608270327899],"intensity":364.0092656878063,"type":"dir","forced":false,"remark":"","origin":false,"nSteps":5,"minStep":"10.0","maxStep":"25.0","steps":["10.0","15.0","20.0","23.0","25.0"],"group":"None","version":"v1.1.0"}],"interpreted":true,"name":"EM2.11A","coreAzi":251,"coreDip":20,"bedStrike":235,"bedDip":45,"data":[{"visible":true,"include":false,"step":"0.0","x":127.16190476190476,"y":-40.65428571428571,"z":-23.66952380952381,"a95":0.99,"info":"24/11/2014 at 13:57:50"},{"visible":true,"include":true,"step":"10.0","x":141.59047619047618,"y":-59.26761904761904,"z":-27.392380952380954,"a95":0.99,"info":"24/11/2014 at 13:57:50"},{"visible":true,"include":true,"step":"15.0","x":133.8,"y":-52.23428571428572,"z":-9.77142857142857,"a95":0.99,"info":"24/11/2014 at 13:57:50"},{"visible":true,"include":true,"step":"20.0","x":-30.07333333333333,"y":-14.297142857142857,"z":7.570666666666667,"a95":0.99,"info":"24/11/2014 at 13:57:50"},{"visible":true,"include":true,"step":"23.0","x":-162.07619047619048,"y":147.88571428571427,"z":73.85904761904762,"a95":0.99,"info":"24/11/2014 at 13:57:50"},{"visible":true,"include":true,"step":"25.0","x":-155.9904761904762,"y":129.1238095238095,"z":64.56952380952382,"a95":0.99,"info":"24/11/2014 at 13:57:50"},{"visible":true,"include":false,"step":"30.0","x":-140.1904761904762,"y":122.19999999999999,"z":56.31333333333333,"a95":0.99,"info":"24/11/2014 at 13:57:50"},{"visible":true,"include":false,"step":"33.0","x":-123.48571428571428,"y":129.32380952380953,"z":58.54380952380953,"a95":0.99,"info":"24/11/2014 at 13:57:50"},{"visible":true,"include":false,"step":"35.0","x":-118.03809523809525,"y":77.24190476190476,"z":68.4952380952381,"a95":0.99,"info":"24/11/2014 at 13:57:50"},{"visible":true,"include":false,"step":"40.0","x":-117.98095238095237,"y":86.03238095238096,"z":71.06761904761905,"a95":0.99,"info":"24/11/2014 at 13:57:50"},{"visible":true,"include":false,"step":"45.0","x":-72.21619047619048,"y":91.76285714285714,"z":39.51714285714286,"a95":0.99,"info":"24/11/2014 at 13:57:50"},{"visible":true,"include":false,"step":"50.0","x":-89.76952380952382,"y":51.13904761904762,"z":48.971428571428575,"a95":0.99,"info":"24/11/2014 at 13:57:50"},{"visible":true,"include":false,"step":"60.0","x":-66.80571428571429,"y":74.3247619047619,"z":33.727619047619044,"a95":0.99,"info":"24/11/2014 at 13:57:50"},{"visible":true,"include":false,"step":"70.0","x":-44.724761904761905,"y":29.7647619047619,"z":27.636190476190478,"a95":0.99,"info":"24/11/2014 at 13:57:50"},{"visible":true,"include":false,"step":"80.0","x":-38.118095238095236,"y":15.66,"z":40.16571428571429,"a95":0.99,"info":"24/11/2014 at 13:57:50"},{"visible":true,"include":false,"step":"90.0","x":-61.95619047619047,"y":58.338095238095235,"z":35.1447619047619,"a95":0.99,"info":"24/11/2014 at 13:57:50"}]},{"version":"v1.1.0","exported":"2016-11-22T23:52:48.498Z","volume":10.5,"added":"2016-11-22T23:45:25.045Z","format":"Utrecht","demagType":"Unknown","strat":null,"patch":1.1,"GEO":[{"dec":183.9197191646576,"inc":-56.027649831072424,"MAD":9.9497423254529,"cm":[24.622243502515325,0.35065062638169,36.5494436072285],"intensity":108.91950636232772,"type":"dir","forced":false,"remark":"","origin":false,"nSteps":5,"minStep":"240","maxStep":"340","steps":["240","270","300","320","340"],"group":"None","version":"v1.1.0"}],"TECT":[{"dec":166.44242096055768,"inc":-16.199935935683783,"MAD":9.94974232545291,"cm":[41.00184268767951,-11.118468195923896,11.724684223804369],"intensity":108.91950636232772,"type":"dir","forced":false,"remark":"","origin":false,"nSteps":5,"minStep":"240","maxStep":"340","steps":["240","270","300","320","340"],"group":"None","version":"v1.1.0"}],"interpreted":true,"name":"EM2.12A","coreAzi":293,"coreDip":52,"bedStrike":235,"bedDip":45,"data":[{"visible":false,"include":false,"step":"20","x":-50.857142857142854,"y":1.7142857142857142,"z":228.38095238095238,"a95":3.3,"info":"\"14-11-29\" at \"21:59\""},{"visible":true,"include":false,"step":"100","x":-5.019047619047619,"y":-15.733333333333333,"z":41.41904761904762,"a95":4.2,"info":"\"15-01-31\" at \"10:10\""},{"visible":true,"include":false,"step":"150","x":-0.6857142857142857,"y":-8.352380952380953,"z":32.08571428571428,"a95":6,"info":"\"15-01-31\" at \"13:38\""},{"visible":true,"include":false,"step":"180","x":-2.6952380952380954,"y":-22.219047619047622,"z":30.514285714285712,"a95":2.9,"info":"\"15-01-31\" at \"17:59\""},{"visible":true,"include":false,"step":"210","x":8.114285714285714,"y":-27.40952380952381,"z":11.685714285714287,"a95":3.1,"info":"\"15-02-01\" at \"10:13\""},{"visible":true,"include":true,"step":"240","x":14.657142857142858,"y":-19.35238095238095,"z":-28.304761904761904,"a95":3.1,"info":"\"15-02-01\" at \"15:19\""},{"visible":true,"include":true,"step":"270","x":-29.152380952380955,"y":24.43809523809524,"z":50.67619047619048,"a95":2.7,"info":"\"15-02-02\" at \"18:52\""},{"visible":true,"include":true,"step":"300","x":-19.904761904761905,"y":33.733333333333334,"z":51.971428571428575,"a95":2.5,"info":"\"15-02-02\" at \"22:34\""},{"visible":true,"include":true,"step":"320","x":-17.076190476190476,"y":29.514285714285712,"z":48.42857142857143,"a95":2.8,"info":"\"15-02-03\" at \"17:11\""},{"visible":true,"include":true,"step":"340","x":-24.4,"y":45.67619047619048,"z":49.857142857142854,"a95":3,"info":"\"15-02-04\" at \"00:20\""},{"visible":true,"include":false,"step":"370","x":-29.923809523809524,"y":41.80952380952381,"z":45.457142857142856,"a95":2.6,"info":"\"15-02-04\" at \"20:02\""},{"visible":true,"include":false,"step":"400","x":-40.39047619047619,"y":31.285714285714285,"z":41.76190476190476,"a95":3.6,"info":"\"15-02-05\" at \"00:25\""},{"visible":true,"include":false,"step":"420","x":-38.61904761904762,"y":-6.895238095238096,"z":46.285714285714285,"a95":4.5,"info":"\"15-02-09\" at \"18:15\""}]},{"version":"v1.1.0","exported":"2016-11-22T23:52:48.499Z","volume":10.5,"added":"2016-11-22T23:45:25.048Z","format":"Utrecht","demagType":"Unknown","strat":null,"patch":1.1,"GEO":[{"dec":182.8278295105578,"inc":-51.59366208363452,"MAD":13.225377950113751,"cm":[31.495828495720207,2.079699840847693,49.29070311137821],"intensity":100.01565228976833,"type":"dir","forced":false,"remark":"","origin":false,"nSteps":6,"minStep":"240","maxStep":"370","steps":["240","270","300","320","340","370"],"group":"None","version":"v1.1.0"}],"TECT":[{"dec":167.91989392359915,"inc":-11.954719236597304,"MAD":13.225377950113762,"cm":[54.1425690446795,-13.777718607413112,17.45400998312218],"intensity":100.01565228976835,"type":"dir","forced":false,"remark":"","origin":false,"nSteps":6,"minStep":"240","maxStep":"370","steps":["240","270","300","320","340","370"],"group":"None","version":"v1.1.0"}],"interpreted":true,"name":"EM2.14A","coreAzi":256,"coreDip":27,"bedStrike":235,"bedDip":45,"data":[{"visible":false,"include":false,"step":"20","x":-524.5714285714286,"y":289.5238095238095,"z":382,"a95":2.1,"info":"\"14-11-29\" at \"22:01\""},{"visible":true,"include":false,"step":"100","x":-114,"y":77.61904761904762,"z":85.33333333333333,"a95":2.5,"info":"\"15-01-31\" at \"10:15\""},{"visible":true,"include":false,"step":"150","x":-36.13333333333333,"y":17.638095238095236,"z":47.50476190476191,"a95":4.7,"info":"\"15-01-31\" at \"13:40\""},{"visible":true,"include":false,"step":"180","x":-34.08571428571428,"y":7.7714285714285705,"z":29.35238095238095,"a95":3.6,"info":"\"15-01-31\" at \"18:05\""},{"visible":true,"include":false,"step":"210","x":-7.666666666666667,"y":-1.8190476190476192,"z":20.904761904761905,"a95":5.7,"info":"\"15-02-01\" at \"10:15\""},{"visible":true,"include":true,"step":"240","x":9.609523809523811,"y":-15.723809523809523,"z":0.12380952380952381,"a95":7.4,"info":"\"15-02-01\" at \"15:21\""},{"visible":true,"include":true,"step":"270","x":-51.733333333333334,"y":35.01904761904762,"z":14.866666666666665,"a95":2.3,"info":"\"15-02-02\" at \"18:54\""},{"visible":true,"include":true,"step":"300","x":-56.69523809523809,"y":45.885714285714286,"z":3.0857142857142854,"a95":2.2,"info":"\"15-02-02\" at \"22:38\""},{"visible":true,"include":true,"step":"320","x":-54.69523809523809,"y":36.4,"z":16.98095238095238,"a95":2.2,"info":"\"15-02-03\" at \"17:13\""},{"visible":true,"include":true,"step":"340","x":-64.52380952380952,"y":40.714285714285715,"z":25.276190476190475,"a95":2.2,"info":"\"15-02-04\" at \"00:23\""},{"visible":true,"include":true,"step":"370","x":-71.72380952380952,"y":38.04761904761905,"z":22.40952380952381,"a95":2.6,"info":"\"15-02-04\" at \"20:04\""},{"visible":false,"include":false,"step":"400","x":-40.91428571428572,"y":5.685714285714286,"z":11.666666666666666,"a95":4,"info":"\"15-02-05\" at \"00:27\""},{"visible":false,"include":false,"step":"420","x":-50.790476190476184,"y":-8.619047619047619,"z":23.876190476190477,"a95":5.1,"info":"\"15-02-09\" at \"18:17\""}]},{"version":"v1.1.0","exported":"2016-11-22T23:52:48.499Z","volume":10.5,"added":"2016-11-22T23:45:25.048Z","format":"Utrecht","demagType":"Unknown","strat":"4","patch":1.1,"GEO":[{"dec":211.81006746812204,"inc":-53.55437040741735,"MAD":8.464624138108247,"cm":[-3.1086244689504383e-15,1.3322676295501878e-15,0],"intensity":274.3650221454454,"type":"dir","forced":true,"remark":"","origin":false,"nSteps":9,"minStep":"23.0","maxStep":"60.0","steps":["23.0","25.0","30.0","33.0","35.0","40.0","45.0","50.0","60.0"],"group":"None","version":"v1.1.0"}],"TECT":[{"dec":181.63917336826242,"inc":-23.790818943623556,"MAD":8.464624138108245,"cm":[-2.6645352591003757e-15,2.220446049250313e-16,3.552713678800501e-15],"intensity":274.3650221454454,"type":"dir","forced":true,"remark":"","origin":false,"nSteps":9,"minStep":"23.0","maxStep":"60.0","steps":["23.0","25.0","30.0","33.0","35.0","40.0","45.0","50.0","60.0"],"group":"None","version":"v1.1.0"}],"interpreted":true,"name":"EM2.15A","coreAzi":263,"coreDip":29,"bedStrike":235,"bedDip":45,"data":[{"visible":true,"include":false,"step":"0.0","x":-290.85714285714283,"y":292.45714285714286,"z":96.99047619047619,"a95":0.99,"info":"24/11/2014 at 13:57:50"},{"visible":true,"include":false,"step":"10.0","x":-220.16190476190474,"y":218.84761904761905,"z":92.49333333333333,"a95":0.99,"info":"24/11/2014 at 13:57:50"},{"visible":true,"include":false,"step":"15.0","x":-196.15238095238095,"y":166.21904761904761,"z":92.43809523809524,"a95":0.99,"info":"24/11/2014 at 13:57:50"},{"visible":true,"include":false,"step":"20.0","x":-24.73428571428571,"y":95.56190476190476,"z":56.71809523809524,"a95":0.99,"info":"24/11/2014 at 13:57:50"},{"visible":true,"include":true,"step":"23.0","x":132.2095238095238,"y":-78.88095238095238,"z":-22.307619047619045,"a95":0.99,"info":"24/11/2014 at 13:57:50"},{"visible":true,"include":true,"step":"25.0","x":129.1238095238095,"y":-95.6952380952381,"z":-25.876190476190477,"a95":0.99,"info":"24/11/2014 at 13:57:50"},{"visible":true,"include":true,"step":"30.0","x":123.9047619047619,"y":-63.1752380952381,"z":7.033619047619047,"a95":0.99,"info":"24/11/2014 at 13:57:50"},{"visible":true,"include":true,"step":"33.0","x":129.23809523809524,"y":-61.836190476190474,"z":-11.551428571428572,"a95":0.99,"info":"24/11/2014 at 13:57:50"},{"visible":true,"include":true,"step":"35.0","x":121.72380952380952,"y":-77.80761904761906,"z":-7.568190476190476,"a95":0.99,"info":"24/11/2014 at 13:57:50"},{"visible":true,"include":true,"step":"40.0","x":125.79047619047618,"y":-46.41809523809523,"z":-1.9676190476190476,"a95":0.99,"info":"24/11/2014 at 13:57:50"},{"visible":true,"include":true,"step":"45.0","x":139.1047619047619,"y":-47.02571428571429,"z":-15.95047619047619,"a95":0.99,"info":"24/11/2014 at 13:57:50"},{"visible":true,"include":true,"step":"50.0","x":109.8952380952381,"y":-80.36095238095238,"z":-8.938190476190476,"a95":0.99,"info":"24/11/2014 at 13:57:50"},{"visible":true,"include":true,"step":"60.0","x":118.88571428571429,"y":-31.269523809523808,"z":12.600952380952382,"a95":0.99,"info":"24/11/2014 at 13:57:50"},{"visible":true,"include":false,"step":"70.0","x":125.8952380952381,"y":-39.896190476190476,"z":0.32111428571428574,"a95":0.99,"info":"24/11/2014 at 13:57:50"},{"visible":true,"include":false,"step":"80.0","x":97.74285714285713,"y":-72.04571428571428,"z":5.687428571428572,"a95":0.99,"info":"24/11/2014 at 13:57:50"},{"visible":true,"include":false,"step":"90.0","x":88.62761904761905,"y":-29.120952380952378,"z":19.234285714285715,"a95":0.99,"info":"24/11/2014 at 13:57:50"}]},{"version":"v1.1.0","exported":"2016-11-22T23:52:48.499Z","volume":10.5,"added":"2016-11-22T23:45:25.049Z","format":"Utrecht","demagType":"Unknown","strat":"5","patch":1.1,"GEO":[{"dec":349.46294848930347,"inc":55.81631384759784,"MAD":3.2545232350901148,"cm":[2.6645352591003757e-15,1.5987211554602254e-14,0],"intensity":316.00404946026157,"type":"dir","forced":true,"remark":"","origin":false,"nSteps":8,"minStep":"20.0","maxStep":"45.0","steps":["20.0","23.0","25.0","30.0","33.0","35.0","40.0","45.0"],"group":"None","version":"v1.1.0"}],"TECT":[{"dec":338.80937089071193,"inc":12.904442501211692,"MAD":3.2545232350901414,"cm":[1.9095836023552692e-14,5.684341886080802e-14,3.1086244689504383e-15],"intensity":316.0040494602616,"type":"dir","forced":true,"remark":"","origin":false,"nSteps":8,"minStep":"20.0","maxStep":"45.0","steps":["20.0","23.0","25.0","30.0","33.0","35.0","40.0","45.0"],"group":"None","version":"v1.1.0"}],"interpreted":true,"name":"EM2.16A","coreAzi":235,"coreDip":22,"bedStrike":235,"bedDip":45,"data":[{"visible":true,"include":false,"step":"0.0","x":-409.79999999999995,"y":268.4,"z":18.81142857142857,"a95":0.99,"info":"24/11/2014 at 13:57:50"},{"visible":true,"include":false,"step":"10.0","x":-314.1904761904762,"y":185.57142857142858,"z":8.622761904761905,"a95":0.99,"info":"24/11/2014 at 13:57:50"},{"visible":true,"include":false,"step":"15.0","x":-260.37142857142857,"y":148.66666666666666,"z":7.527809523809524,"a95":0.99,"info":"24/11/2014 at 13:57:50"},{"visible":true,"include":true,"step":"20.0","x":-216.73333333333332,"y":137.11428571428573,"z":24.38380952380952,"a95":0.99,"info":"24/11/2014 at 13:57:50"},{"visible":true,"include":true,"step":"23.0","x":-198.25714285714284,"y":126.6,"z":23.877142857142857,"a95":0.99,"info":"24/11/2014 at 13:57:50"},{"visible":true,"include":true,"step":"25.0","x":-187.53333333333333,"y":103.32380952380953,"z":12.157142857142858,"a95":0.99,"info":"24/11/2014 at 13:57:50"},{"visible":true,"include":true,"step":"30.0","x":-151.92380952380952,"y":80.99619047619048,"z":15.564761904761905,"a95":0.99,"info":"24/11/2014 at 13:57:50"},{"visible":true,"include":true,"step":"33.0","x":-118.72380952380952,"y":77.36857142857143,"z":15.903809523809525,"a95":0.99,"info":"24/11/2014 at 13:57:50"},{"visible":true,"include":true,"step":"35.0","x":-99.4095238095238,"y":45.925714285714285,"z":14.781904761904762,"a95":0.99,"info":"24/11/2014 at 13:57:50"},{"visible":true,"include":true,"step":"40.0","x":-68.45333333333333,"y":35.518095238095235,"z":7.430285714285715,"a95":0.99,"info":"24/11/2014 at 13:57:50"},{"visible":true,"include":true,"step":"45.0","x":-41.61333333333333,"y":40.50095238095238,"z":15.21904761904762,"a95":0.99,"info":"24/11/2014 at 13:57:50"},{"visible":true,"include":false,"step":"50.0","x":-15.343809523809526,"y":-1.474952380952381,"z":17.789523809523807,"a95":0.99,"info":"24/11/2014 at 13:57:50"},{"visible":true,"include":false,"step":"60.0","x":21.806666666666665,"y":-17.633333333333333,"z":16.502857142857142,"a95":0.99,"info":"24/11/2014 at 13:57:50"},{"visible":false,"include":false,"step":"70.0","x":97.43809523809524,"y":-42.444761904761904,"z":0.5968857142857142,"a95":0.99,"info":"24/11/2014 at 13:57:50"},{"visible":false,"include":false,"step":"80.0","x":56.16285714285715,"y":-50.836190476190474,"z":22.940952380952382,"a95":0.99,"info":"24/11/2014 at 13:57:50"},{"visible":false,"include":false,"step":"90.0","x":130.26666666666665,"y":-74.22666666666666,"z":21.20285714285714,"a95":0.99,"info":"24/11/2014 at 13:57:50"}]},{"version":"v1.1.0","exported":"2016-11-22T23:52:48.499Z","volume":10.5,"added":"2016-11-22T23:45:25.049Z","format":"Utrecht","demagType":"Unknown","strat":null,"patch":1.1,"GEO":[{"dec":344.77844624154875,"inc":62.33261656314065,"MAD":2.1023808099553696,"cm":[8.881784197001252e-16,2.5646151868841116e-14,0],"intensity":503.802511428379,"type":"dir","forced":true,"remark":"","origin":false,"nSteps":5,"minStep":"100","maxStep":"270","steps":["100","150","180","210","270"],"group":"None","version":"v1.1.0"}],"TECT":[{"dec":334.5370637836297,"inc":18.498964885113065,"MAD":2.1023808099553865,"cm":[2.3092638912203256e-14,3.730349362740526e-14,0],"intensity":503.80251142837903,"type":"dir","forced":true,"remark":"","origin":false,"nSteps":5,"minStep":"100","maxStep":"270","steps":["100","150","180","210","270"],"group":"None","version":"v1.1.0"}],"interpreted":true,"name":"EM2.17A","coreAzi":244,"coreDip":29,"bedStrike":235,"bedDip":45,"data":[{"visible":false,"include":false,"step":"20","x":-695.7142857142857,"y":393.9047619047619,"z":430.0952380952381,"a95":1.9,"info":"\"14-11-29\" at \"22:03\""},{"visible":true,"include":true,"step":"100","x":-330.85714285714283,"y":183.23809523809524,"z":138.95238095238096,"a95":1.8,"info":"\"15-01-31\" at \"10:18\""},{"visible":true,"include":true,"step":"150","x":-210.38095238095238,"y":119.9047619047619,"z":88.66666666666667,"a95":1.8,"info":"\"15-01-31\" at \"13:42\""},{"visible":true,"include":true,"step":"180","x":-166.28571428571428,"y":95.71428571428571,"z":85.9047619047619,"a95":1.9,"info":"\"15-01-31\" at \"18:09\""},{"visible":true,"include":true,"step":"210","x":-94.66666666666667,"y":47.523809523809526,"z":46.857142857142854,"a95":2.1,"info":"\"15-02-01\" at \"10:17\""},{"visible":false,"include":false,"step":"240","x":-36.00952380952381,"y":1.7428571428571429,"z":12.380952380952381,"a95":5,"info":"\"15-02-01\" at \"15:23\""},{"visible":true,"include":true,"step":"270","x":-85.80952380952381,"y":48.19047619047619,"z":24.285714285714285,"a95":2.1,"info":"\"15-02-02\" at \"18:58\""},{"visible":true,"include":false,"step":"300","x":-88.0952380952381,"y":52.38095238095238,"z":21.428571428571427,"a95":1.8,"info":"\"15-02-02\" at \"22:40\""},{"visible":true,"include":false,"step":"320","x":-69.54285714285714,"y":44.476190476190474,"z":28.123809523809523,"a95":2.3,"info":"\"15-02-03\" at \"17:15\""},{"visible":true,"include":false,"step":"340","x":-78.28571428571429,"y":56,"z":47.333333333333336,"a95":2.1,"info":"\"15-02-04\" at \"00:25\""},{"visible":true,"include":false,"step":"370","x":-84.76190476190476,"y":55.80952380952381,"z":50.95238095238095,"a95":2.5,"info":"\"15-02-04\" at \"20:07\""},{"visible":true,"include":false,"step":"400","x":-68.35238095238095,"y":27.723809523809525,"z":16.857142857142858,"a95":2.3,"info":"\"15-02-05\" at \"00:30\""},{"visible":true,"include":false,"step":"420","x":-74.52380952380952,"y":29.095238095238095,"z":13.695238095238096,"a95":2.3,"info":"\"15-02-09\" at \"18:19\""}]},{"version":"v1.1.0","exported":"2016-11-22T23:52:48.500Z","volume":10.5,"added":"2016-11-22T23:45:25.049Z","format":"Utrecht","demagType":"Unknown","strat":"6","patch":1.1,"GEO":[{"dec":343.00488767752245,"inc":58.22446504743216,"MAD":4.022886819569691,"cm":[2.6645352591003757e-15,1.509903313490213e-14,0],"intensity":404.3535550708225,"type":"dir","forced":true,"remark":"","origin":false,"nSteps":7,"minStep":"15.0","maxStep":"35.0","steps":["15.0","20.0","23.0","25.0","30.0","33.0","35.0"],"group":"None","version":"v1.1.0"}],"TECT":[{"dec":334.6700134635639,"inc":14.300108471446293,"MAD":4.022886819569672,"cm":[-1.7763568394002505e-14,-3.108624468950438e-14,2.220446049250313e-15],"intensity":404.35355507082255,"type":"dir","forced":true,"remark":"","origin":false,"nSteps":7,"minStep":"15.0","maxStep":"35.0","steps":["15.0","20.0","23.0","25.0","30.0","33.0","35.0"],"group":"None","version":"v1.1.0"}],"interpreted":true,"name":"EM2.18A","coreAzi":243,"coreDip":28,"bedStrike":235,"bedDip":45,"data":[{"visible":true,"include":false,"step":"0.0","x":-351.2666666666667,"y":234.28571428571428,"z":136.75238095238097,"a95":0.99,"info":"24/11/2014 at 13:57:50"},{"visible":true,"include":false,"step":"10.0","x":-270.06666666666666,"y":171.85714285714286,"z":99.82857142857144,"a95":0.99,"info":"24/11/2014 at 13:57:50"},{"visible":true,"include":true,"step":"15.0","x":-232.12380952380954,"y":145.54285714285714,"z":74.85333333333334,"a95":0.99,"info":"24/11/2014 at 13:57:50"},{"visible":true,"include":true,"step":"20.0","x":-191.63809523809525,"y":119.0095238095238,"z":67.43904761904761,"a95":0.99,"info":"24/11/2014 at 13:57:50"},{"visible":true,"include":true,"step":"23.0","x":-168.36190476190475,"y":108.11428571428571,"z":75.70666666666666,"a95":0.99,"info":"24/11/2014 at 13:57:50"},{"visible":true,"include":true,"step":"25.0","x":-143.93333333333334,"y":88.51809523809524,"z":56.697142857142865,"a95":0.99,"info":"24/11/2014 at 13:57:50"},{"visible":true,"include":true,"step":"30.0","x":-111.78095238095239,"y":87.4695238095238,"z":59.00857142857143,"a95":0.99,"info":"24/11/2014 at 13:57:50"},{"visible":true,"include":true,"step":"33.0","x":-95.93333333333332,"y":76.81904761904762,"z":45.85809523809524,"a95":0.99,"info":"24/11/2014 at 13:57:50"},{"visible":true,"include":true,"step":"35.0","x":-88.33238095238096,"y":62.30952380952381,"z":57.838095238095235,"a95":0.99,"info":"24/11/2014 at 13:57:50"},{"visible":true,"include":false,"step":"40.0","x":-63.074285714285715,"y":38.38380952380952,"z":36.27047619047619,"a95":0.99,"info":"24/11/2014 at 13:57:50"},{"visible":true,"include":false,"step":"45.0","x":-23.52190476190476,"y":9.163809523809524,"z":37.061904761904756,"a95":0.99,"info":"24/11/2014 at 13:57:50"},{"visible":true,"include":false,"step":"50.0","x":-18.002857142857142,"y":0.41783809523809523,"z":65.77333333333334,"a95":0.99,"info":"24/11/2014 at 13:57:50"},{"visible":true,"include":false,"step":"60.0","x":11.305714285714284,"y":-3.5606666666666666,"z":52.6152380952381,"a95":0.99,"info":"24/11/2014 at 13:57:50"},{"visible":false,"include":false,"step":"70.0","x":67.47999999999999,"y":-45.6552380952381,"z":18.90952380952381,"a95":0.99,"info":"24/11/2014 at 13:57:50"},{"visible":false,"include":false,"step":"80.0","x":111.02857142857142,"y":-62.48285714285715,"z":63.222857142857144,"a95":0.99,"info":"24/11/2014 at 13:57:50"},{"visible":false,"include":false,"step":"90.0","x":94.0352380952381,"y":-73.55142857142857,"z":21.278095238095236,"a95":0.99,"info":"24/11/2014 at 13:57:50"}]},{"version":"v1.1.0","exported":"2016-11-22T23:52:48.500Z","volume":10.5,"added":"2016-11-22T23:45:25.049Z","format":"Utrecht","demagType":"Unknown","strat":null,"patch":1.1,"GEO":[{"dec":344.9472423802229,"inc":65.27595788786022,"MAD":3.7738640926862224,"cm":[61.48737354079279,-40.04319422353504,131.31015229069635],"intensity":149.21627457700265,"type":"dir","forced":false,"remark":"","origin":false,"nSteps":5,"minStep":"150","maxStep":"270","steps":["150","180","210","240","270"],"group":"None","version":"v1.1.0"}],"TECT":[{"dec":333.8132955265063,"inc":21.36357010471895,"MAD":3.773864092686219,"cm":[119.95097188622779,-80.9798464958734,40.99438264236662],"intensity":149.21627457700268,"type":"dir","forced":false,"remark":"","origin":false,"nSteps":5,"minStep":"150","maxStep":"270","steps":["150","180","210","240","270"],"group":"None","version":"v1.1.0"}],"interpreted":true,"name":"EM2.19A","coreAzi":254,"coreDip":33,"bedStrike":235,"bedDip":45,"data":[{"visible":false,"include":false,"step":"20","x":-698.952380952381,"y":427.8095238095238,"z":481.3333333333333,"a95":2,"info":"\"14-11-29\" at \"22:05\""},{"visible":true,"include":false,"step":"100","x":-300.1904761904762,"y":217.33333333333334,"z":211.23809523809524,"a95":1.9,"info":"\"15-01-31\" at \"10:22\""},{"visible":true,"include":true,"step":"150","x":-185.71428571428572,"y":118.28571428571429,"z":142.85714285714286,"a95":2,"info":"\"15-01-31\" at \"13:44\""},{"visible":true,"include":true,"step":"180","x":-154.66666666666666,"y":99.23809523809524,"z":129.04761904761904,"a95":2.1,"info":"\"15-01-31\" at \"18:13\""},{"visible":true,"include":true,"step":"210","x":-65.80952380952381,"y":54.857142857142854,"z":77.42857142857143,"a95":2.3,"info":"\"15-02-01\" at \"10:19\""},{"visible":true,"include":true,"step":"240","x":-11.390476190476189,"y":21.095238095238095,"z":34.114285714285714,"a95":3.5,"info":"\"15-02-01\" at \"15:26\""},{"visible":true,"include":true,"step":"270","x":-74.38095238095238,"y":57.23809523809524,"z":64.47619047619048,"a95":2.1,"info":"\"15-02-02\" at \"19:00\""},{"visible":true,"include":false,"step":"300","x":-82.0952380952381,"y":62.285714285714285,"z":49.142857142857146,"a95":2,"info":"\"15-02-02\" at \"22:42\""},{"visible":true,"include":false,"step":"320","x":-81.71428571428571,"y":54.95238095238095,"z":37.523809523809526,"a95":2.1,"info":"\"15-02-03\" at \"17:18\""},{"visible":true,"include":false,"step":"340","x":-87.04761904761905,"y":74.28571428571429,"z":49.904761904761905,"a95":2,"info":"\"15-02-04\" at \"00:27\""},{"visible":true,"include":false,"step":"370","x":-91.04761904761905,"y":70.38095238095238,"z":47.904761904761905,"a95":2.2,"info":"\"15-02-04\" at \"20:12\""},{"visible":true,"include":false,"step":"400","x":-89.23809523809524,"y":13.523809523809524,"z":31.142857142857142,"a95":2.2,"info":"\"15-02-05\" at \"00:32\""},{"visible":true,"include":false,"step":"420","x":-68.25714285714287,"y":11.304761904761905,"z":35.333333333333336,"a95":2.9,"info":"\"15-02-09\" at \"18:21\""}]},{"version":"v1.1.0","exported":"2016-11-22T23:52:48.500Z","volume":10.5,"added":"2016-11-22T23:45:25.050Z","format":"Utrecht","demagType":"Unknown","strat":"7","patch":1.1,"GEO":[{"dec":7.39143331381058,"inc":43.168629879703786,"MAD":5.936183919929804,"cm":[-2.6645352591003757e-15,-1.0894063429134349e-14,0],"intensity":286.42513831137336,"type":"dir","forced":true,"remark":"","origin":false,"nSteps":6,"minStep":"25.0","maxStep":"45.0","steps":["25.0","30.0","33.0","35.0","40.0","45.0"],"group":"None","version":"v1.1.0"}],"TECT":[{"dec":354.6262530267826,"inc":5.904736589336292,"MAD":5.936183919929787,"cm":[-7.105427357601002e-15,-2.2315482794965646e-14,6.217248937900877e-15],"intensity":286.42513831137336,"type":"dir","forced":true,"remark":"","origin":false,"nSteps":6,"minStep":"25.0","maxStep":"45.0","steps":["25.0","30.0","33.0","35.0","40.0","45.0"],"group":"None","version":"v1.1.0"}],"interpreted":true,"name":"EM2.20A","coreAzi":231,"coreDip":9,"bedStrike":235,"bedDip":45,"data":[{"visible":true,"include":false,"step":"0.0","x":-404.3809523809524,"y":242.31428571428575,"z":-110.73333333333333,"a95":0.99,"info":"24/11/2014 at 13:57:50"},{"visible":true,"include":false,"step":"10.0","x":-309.7142857142857,"y":205.8095238095238,"z":-132.66666666666666,"a95":0.99,"info":"24/11/2014 at 13:57:50"},{"visible":true,"include":false,"step":"15.0","x":-248.34285714285713,"y":150.1809523809524,"z":-107.54285714285714,"a95":0.99,"info":"24/11/2014 at 13:57:50"},{"visible":true,"include":false,"step":"20.0","x":-201.24761904761903,"y":135.8761904761905,"z":-80.6257142857143,"a95":0.99,"info":"24/11/2014 at 13:57:50"},{"visible":true,"include":false,"step":"23.0","x":-168.2095238095238,"y":127.12380952380951,"z":-97.75238095238096,"a95":0.99,"info":"24/11/2014 at 13:57:50"},{"visible":true,"include":true,"step":"25.0","x":-169.0095238095238,"y":102.58095238095237,"z":-90.75047619047619,"a95":0.99,"info":"24/11/2014 at 13:57:50"},{"visible":true,"include":true,"step":"30.0","x":-140.4952380952381,"y":88.70380952380953,"z":-66.33428571428571,"a95":0.99,"info":"24/11/2014 at 13:57:50"},{"visible":true,"include":true,"step":"33.0","x":-116.72380952380952,"y":81.86,"z":-48.360952380952384,"a95":0.99,"info":"24/11/2014 at 13:57:50"},{"visible":true,"include":true,"step":"35.0","x":-79.72190476190477,"y":48.56952380952381,"z":-65.72857142857143,"a95":0.99,"info":"24/11/2014 at 13:57:50"},{"visible":true,"include":true,"step":"40.0","x":-67.55809523809523,"y":56.523809523809526,"z":-50.75523809523809,"a95":0.99,"info":"24/11/2014 at 13:57:50"},{"visible":true,"include":true,"step":"45.0","x":-40.727619047619044,"y":49.05809523809524,"z":-31.94952380952381,"a95":0.99,"info":"24/11/2014 at 13:57:50"},{"visible":true,"include":false,"step":"50.0","x":-30.494285714285713,"y":-4.198190476190477,"z":-23.694285714285712,"a95":0.99,"info":"24/11/2014 at 13:57:50"},{"visible":true,"include":false,"step":"60.0","x":-21.63142857142857,"y":22.08095238095238,"z":6.197428571428571,"a95":0.99,"info":"24/11/2014 at 13:57:50"},{"visible":false,"include":false,"step":"70.0","x":8.872095238095238,"y":-19.622857142857143,"z":-20.453333333333333,"a95":0.99,"info":"24/11/2014 at 13:57:50"},{"visible":false,"include":false,"step":"80.0","x":14.285714285714286,"y":-47.53333333333334,"z":9.13847619047619,"a95":0.99,"info":"24/11/2014 at 13:57:50"},{"visible":false,"include":false,"step":"90.0","x":32.19714285714286,"y":17.67904761904762,"z":1.2995238095238095,"a95":0.99,"info":"24/11/2014 at 13:57:50"}]},{"version":"v1.1.0","exported":"2016-11-22T23:52:48.500Z","volume":10.5,"added":"2016-11-22T23:45:25.050Z","format":"Utrecht","demagType":"Unknown","strat":"8","patch":1.1,"GEO":[{"dec":330.9313570959383,"inc":52.65737181753182,"MAD":3.168635781803482,"cm":[-5.773159728050814e-15,-8.215650382226158e-15,0],"intensity":309.1418670949144,"type":"dir","forced":true,"remark":"","origin":false,"nSteps":6,"minStep":"15.0","maxStep":"33.0","steps":["15.0","20.0","23.0","25.0","30.0","33.0"],"group":"None","version":"v1.1.0"}],"TECT":[{"dec":328.6272960540543,"inc":7.790141511664706,"MAD":3.168635781803483,"cm":[9.769962616701378e-15,2.353672812205332e-14,2.220446049250313e-16],"intensity":309.14186709491435,"type":"dir","forced":true,"remark":"","origin":false,"nSteps":6,"minStep":"15.0","maxStep":"33.0","steps":["15.0","20.0","23.0","25.0","30.0","33.0"],"group":"None","version":"v1.1.0"}],"interpreted":true,"name":"EM2.21A","coreAzi":228,"coreDip":5,"bedStrike":235,"bedDip":45,"data":[{"visible":true,"include":false,"step":"0.0","x":-294.9809523809524,"y":219.03809523809525,"z":-8.671904761904763,"a95":0.99,"info":"24/11/2014 at 13:57:50"},{"visible":true,"include":false,"step":"10.0","x":-221.73333333333332,"y":186.9142857142857,"z":-22.855238095238093,"a95":0.99,"info":"24/11/2014 at 13:57:50"},{"visible":true,"include":true,"step":"15.0","x":-181.07619047619048,"y":139.7238095238095,"z":-13.706666666666665,"a95":0.99,"info":"24/11/2014 at 13:57:50"},{"visible":true,"include":true,"step":"20.0","x":-147.7904761904762,"y":111.48571428571428,"z":-7.429047619047618,"a95":0.99,"info":"24/11/2014 at 13:57:50"},{"visible":true,"include":true,"step":"23.0","x":-120.02857142857142,"y":95.44761904761906,"z":-7.657523809523809,"a95":0.99,"info":"24/11/2014 at 13:57:50"},{"visible":true,"include":true,"step":"25.0","x":-109.72380952380952,"y":64.05904761904762,"z":-16.483809523809526,"a95":0.99,"info":"24/11/2014 at 13:57:50"},{"visible":true,"include":true,"step":"30.0","x":-74.88,"y":52.69047619047619,"z":-8.140476190476189,"a95":0.99,"info":"24/11/2014 at 13:57:50"},{"visible":true,"include":true,"step":"33.0","x":-68.76666666666667,"y":40.817142857142855,"z":-9.792380952380952,"a95":0.99,"info":"24/11/2014 at 13:57:50"},{"visible":true,"include":false,"step":"35.0","x":-48.07047619047619,"y":6.031333333333333,"z":-2.5902857142857143,"a95":0.99,"info":"24/11/2014 at 13:57:50"},{"visible":true,"include":false,"step":"40.0","x":-32.415238095238095,"y":17.44,"z":2.8138095238095238,"a95":0.99,"info":"24/11/2014 at 13:57:50"},{"visible":true,"include":false,"step":"45.0","x":-14.017142857142858,"y":-10.238095238095237,"z":13.94857142857143,"a95":0.99,"info":"24/11/2014 at 13:57:50"},{"visible":true,"include":false,"step":"50.0","x":-0.07576190476190477,"y":-15.587619047619047,"z":8.581238095238096,"a95":0.99,"info":"24/11/2014 at 13:57:50"},{"visible":true,"include":false,"step":"60.0","x":18.65047619047619,"y":-11.736190476190476,"z":16.922857142857143,"a95":0.99,"info":"24/11/2014 at 13:57:50"},{"visible":false,"include":false,"step":"70.0","x":31.254285714285714,"y":-81.02380952380952,"z":-18.759999999999998,"a95":0.99,"info":"24/11/2014 at 13:57:50"},{"visible":false,"include":false,"step":"80.0","x":133.74285714285713,"y":-74.46380952380953,"z":36.97142857142857,"a95":0.99,"info":"24/11/2014 at 13:57:50"},{"visible":false,"include":false,"step":"90.0","x":86.1952380952381,"y":-65.70857142857143,"z":16.663809523809523,"a95":0.99,"info":"24/11/2014 at 13:57:50"}]}]
