# Supplementary material for: Paleomagnetic constraints on the timing and distribution of Cenozoic rotations in Central and Eastern Anatolia
Source: Copernicus journal article supplement (doi:10.5194/se-9-295-2018), 2018-03-21
Supplement: Supplementary file 2 [file se-9-295-2018-supplement.zip › se-2017-66_DATA_dir files/dir files Ulukisla/EM3.dir]

[{"version":"v1.1.0","exported":"2016-11-17T15:28:20.636Z","volume":10.5,"added":"2016-11-17T15:07:47.157Z","format":"Utrecht","demagType":"Unknown","strat":null,"patch":1.1,"GEO":[],"TECT":[],"interpreted":false,"name":"EM3.1A","coreAzi":336,"coreDip":37,"bedStrike":289,"bedDip":25,"data":[{"visible":false,"include":false,"step":"20","x":-156.28571428571428,"y":104,"z":126.57142857142857,"a95":2.6,"info":"\"14-09-15\" at \"15:44\""},{"visible":true,"include":true,"step":"100","x":-86.57142857142857,"y":71.23809523809524,"z":100.57142857142857,"a95":3.5,"info":"\"14-09-15\" at \"19:40\""},{"visible":true,"include":true,"step":"150","x":-59,"y":46.31428571428572,"z":16.771428571428572,"a95":6.8,"info":"\"14-09-15\" at \"21:54\""},{"visible":true,"include":true,"step":"180","x":-51.95238095238095,"y":39.476190476190474,"z":0.06666666666666667,"a95":12.4,"info":"\"14-09-16\" at \"10:54\""},{"visible":true,"include":true,"step":"210","x":-32.457142857142856,"y":33,"z":-6.0095238095238095,"a95":10.1,"info":"\"14-09-16\" at \"13:32\""},{"visible":true,"include":true,"step":"240","x":-45.142857142857146,"y":25.80952380952381,"z":-4.771428571428571,"a95":6.3,"info":"\"14-09-16\" at \"16:13\""},{"visible":true,"include":true,"step":"270","x":-41.97142857142857,"y":22.152380952380952,"z":-15.704761904761906,"a95":7.4,"info":"\"14-09-16\" at \"19:06\""},{"visible":true,"include":true,"step":"300","x":-39.48571428571429,"y":23.895238095238096,"z":10.114285714285714,"a95":9.1,"info":"\"14-09-17\" at \"10:44\""},{"visible":true,"include":true,"step":"320","x":-30.38095238095238,"y":15.466666666666667,"z":-8.066666666666666,"a95":9.1,"info":"\"14-09-17\" at \"14:18\""},{"visible":true,"include":true,"step":"340","x":-46.78095238095238,"y":27.009523809523813,"z":-0.24761904761904763,"a95":6.7,"info":"\"14-09-17\" at \"17:06\""},{"visible":true,"include":true,"step":"370","x":-50.219047619047615,"y":43.95238095238095,"z":-2.0857142857142854,"a95":7.1,"info":"\"14-09-17\" at \"22:15\""},{"visible":true,"include":true,"step":"390","x":-52.38095238095238,"y":25.666666666666668,"z":-15.40952380952381,"a95":7.8,"info":"\"14-09-18\" at \"11:25\""},{"visible":true,"include":true,"step":"420","x":-32.79047619047619,"y":29.419047619047618,"z":-32.53333333333334,"a95":10.6,"info":"\"14-09-18\" at \"14:28\""},{"visible":true,"include":true,"step":"450","x":-24.704761904761902,"y":22.704761904761906,"z":-41.00952380952381,"a95":4.4,"info":"\"14-09-19\" at \"09:14\""},{"visible":true,"include":false,"step":"480","x":-24.504761904761907,"y":1.4571428571428573,"z":-47.923809523809524,"a95":9.7,"info":"\"14-09-19\" at \"13:22\""},{"visible":true,"include":false,"step":"510","x":-65.04761904761905,"y":19.561904761904763,"z":-22.885714285714286,"a95":11,"info":"\"14-09-19\" at \"16:03\""},{"visible":true,"include":false,"step":"540","x":-5.190476190476191,"y":-24.885714285714286,"z":-65.57142857142857,"a95":13,"info":"\"14-10-04\" at \"11:45\""},{"visible":true,"include":false,"step":"570","x":-104.85714285714286,"y":-22.285714285714285,"z":39.80952380952381,"a95":10.5,"info":"\"14-10-04\" at \"15:02\""},{"visible":true,"include":false,"step":"600","x":-49.828571428571436,"y":-62.400000000000006,"z":14.352380952380951,"a95":25.6,"info":"\"14-10-05\" at \"09:25\""}]},{"version":"v1.1.0","exported":"2016-11-17T15:28:20.636Z","volume":10.5,"added":"2016-11-17T15:07:47.157Z","format":"Utrecht","demagType":"Unknown","strat":"6","patch":1.1,"GEO":[],"TECT":[],"interpreted":false,"name":"EM3.1B","coreAzi":336,"coreDip":37,"bedStrike":289,"bedDip":25,"data":[{"visible":true,"include":false,"step":"0.0","x":-88.7,"y":72.03904761904762,"z":205.31428571428575,"a95":0.99,"info":"25/08/2014 at 11:46:22"},{"visible":true,"include":true,"step":"4.0","x":-69.58380952380952,"y":69.18380952380951,"z":166.11428571428573,"a95":0.99,"info":"25/08/2014 at 11:46:22"},{"visible":true,"include":true,"step":"8.0","x":-39.455238095238094,"y":60.01238095238095,"z":128.1238095238095,"a95":0.99,"info":"25/08/2014 at 11:46:22"},{"visible":true,"include":true,"step":"12.0","x":-9.43495238095238,"y":37.95809523809524,"z":70.43142857142857,"a95":0.99,"info":"25/08/2014 at 11:46:22"},{"visible":true,"include":true,"step":"16.0","x":-7.735619047619048,"y":41.14190476190476,"z":38.36666666666667,"a95":0.99,"info":"25/08/2014 at 11:46:22"},{"visible":true,"include":true,"step":"20.0","x":-18.964761904761904,"y":31.53238095238095,"z":14.327619047619047,"a95":0.99,"info":"25/08/2014 at 11:46:22"},{"visible":true,"include":true,"step":"25.0","x":-17.228571428571428,"y":24.714285714285715,"z":1.326,"a95":0.99,"info":"25/08/2014 at 11:46:22"},{"visible":true,"include":true,"step":"30.0","x":-4.067333333333333,"y":30.377142857142854,"z":7.585809523809523,"a95":0.99,"info":"25/08/2014 at 11:46:22"},{"visible":true,"include":true,"step":"35.0","x":-11.488571428571428,"y":32.83714285714286,"z":4.185809523809524,"a95":0.99,"info":"25/08/2014 at 11:46:22"},{"visible":true,"include":false,"step":"40.0","x":-4.4584761904761905,"y":17.580000000000002,"z":0.6932190476190476,"a95":0.99,"info":"25/08/2014 at 11:46:22"},{"visible":true,"include":false,"step":"45.0","x":-7.548,"y":26.30761904761905,"z":10.111428571428572,"a95":0.99,"info":"25/08/2014 at 11:46:22"},{"visible":true,"include":false,"step":"50.0","x":-6.834476190476191,"y":7.970000000000001,"z":-1.4884761904761905,"a95":0.99,"info":"25/08/2014 at 11:46:22"},{"visible":false,"include":false,"step":"60.0","x":-15.278095238095236,"y":11.455238095238096,"z":-15.943809523809524,"a95":0.99,"info":"25/08/2014 at 11:46:22"},{"visible":false,"include":false,"step":"70.0","x":-43.18952380952381,"y":3.2284761904761905,"z":9.896190476190476,"a95":0.99,"info":"25/08/2014 at 11:46:22"},{"visible":false,"include":false,"step":"80.0","x":6.350761904761906,"y":-10.337142857142858,"z":11.246666666666666,"a95":0.99,"info":"25/08/2014 at 11:46:22"},{"visible":false,"include":false,"step":"90.0","x":-54.02761904761904,"y":13.256190476190476,"z":-2.9032380952380956,"a95":0.99,"info":"25/08/2014 at 11:46:22"},{"visible":false,"include":false,"step":"100.0","x":-74.02380952380952,"y":-8.385238095238096,"z":-6.658285714285715,"a95":0.99,"info":"25/08/2014 at 11:46:22"}]},{"version":"v1.1.0","exported":"2016-11-17T15:28:20.636Z","volume":10.5,"added":"2016-11-17T15:07:47.158Z","format":"Utrecht","demagType":"Unknown","strat":"7","patch":1.1,"GEO":[],"TECT":[],"interpreted":false,"name":"EM3.2A","coreAzi":336,"coreDip":38,"bedStrike":289,"bedDip":25,"data":[{"visible":true,"include":false,"step":"0.0","x":-100.11428571428571,"y":54.35809523809524,"z":149.55238095238096,"a95":0.99,"info":"25/08/2014 at 11:46:22"},{"visible":true,"include":false,"step":"4.0","x":-77.52190476190476,"y":48.24285714285715,"z":125.17142857142856,"a95":0.99,"info":"25/08/2014 at 11:46:22"},{"visible":true,"include":false,"step":"8.0","x":-44.859047619047615,"y":32.42,"z":103.01904761904763,"a95":0.99,"info":"25/08/2014 at 11:46:22"},{"visible":true,"include":false,"step":"12.0","x":-31.72190476190476,"y":11.088571428571429,"z":46.9752380952381,"a95":0.99,"info":"25/08/2014 at 11:46:22"},{"visible":true,"include":false,"step":"16.0","x":-24.684761904761906,"y":-5.014857142857143,"z":33.6552380952381,"a95":0.99,"info":"25/08/2014 at 11:46:22"},{"visible":true,"include":false,"step":"20.0","x":-21.52095238095238,"y":-5.068476190476191,"z":20.61809523809524,"a95":0.99,"info":"25/08/2014 at 11:46:22"},{"visible":true,"include":false,"step":"25.0","x":-3.9616190476190476,"y":-18.64761904761905,"z":17.268571428571427,"a95":0.99,"info":"25/08/2014 at 11:46:22"},{"visible":true,"include":false,"step":"30.0","x":-1.0175238095238095,"y":0.4212952380952381,"z":9.375142857142857,"a95":0.99,"info":"25/08/2014 at 11:46:22"},{"visible":true,"include":false,"step":"35.0","x":-2.529238095238095,"y":-2.018190476190476,"z":4.849428571428571,"a95":0.99,"info":"25/08/2014 at 11:46:22"},{"visible":true,"include":false,"step":"40.0","x":-14.992380952380952,"y":5.533047619047619,"z":10.715238095238096,"a95":0.99,"info":"25/08/2014 at 11:46:22"},{"visible":true,"include":false,"step":"45.0","x":-3.6920952380952383,"y":-0.4853047619047619,"z":12.69047619047619,"a95":0.99,"info":"25/08/2014 at 11:46:22"},{"visible":true,"include":false,"step":"50.0","x":-16.99904761904762,"y":13.088571428571429,"z":-7.186,"a95":0.99,"info":"25/08/2014 at 11:46:22"},{"visible":true,"include":false,"step":"60.0","x":-19.63142857142857,"y":10.927619047619046,"z":11.005714285714285,"a95":0.99,"info":"25/08/2014 at 11:46:22"},{"visible":true,"include":false,"step":"70.0","x":-12.619047619047619,"y":-8.140380952380953,"z":-22.38190476190476,"a95":0.99,"info":"25/08/2014 at 11:46:22"},{"visible":true,"include":false,"step":"80.0","x":-59.758095238095244,"y":-40.92761904761905,"z":24.707619047619048,"a95":0.99,"info":"25/08/2014 at 11:46:22"},{"visible":true,"include":false,"step":"90.0","x":-43.58761904761905,"y":3.924857142857143,"z":-7.649333333333333,"a95":0.99,"info":"25/08/2014 at 11:46:22"},{"visible":true,"include":false,"step":"100.0","x":-49.17714285714286,"y":-24.226666666666667,"z":0.5081142857142857,"a95":0.99,"info":"25/08/2014 at 11:46:22"}]},{"version":"v1.1.0","exported":"2016-11-17T15:28:20.636Z","volume":10.5,"added":"2016-11-17T15:07:47.159Z","format":"Utrecht","demagType":"Unknown","strat":"8","patch":1.1,"GEO":[],"TECT":[],"interpreted":false,"name":"EM3.3A","coreAzi":301,"coreDip":28,"bedStrike":289,"bedDip":25,"data":[{"visible":true,"include":false,"step":"0.0","x":-97.67619047619047,"y":109.13333333333334,"z":64.57904761904763,"a95":0.99,"info":"25/08/2014 at 11:46:22"},{"visible":true,"include":false,"step":"4.0","x":-78.80857142857143,"y":97.88571428571429,"z":44.04095238095238,"a95":0.99,"info":"25/08/2014 at 11:46:22"},{"visible":true,"include":false,"step":"8.0","x":-44.950476190476195,"y":76.5647619047619,"z":32.00666666666667,"a95":0.99,"info":"25/08/2014 at 11:46:22"},{"visible":true,"include":false,"step":"12.0","x":-19.163809523809523,"y":66.01619047619047,"z":-2.5198095238095237,"a95":0.99,"info":"25/08/2014 at 11:46:22"},{"visible":true,"include":false,"step":"16.0","x":3.114190476190476,"y":34.07333333333333,"z":-25.219047619047622,"a95":0.99,"info":"25/08/2014 at 11:46:22"},{"visible":true,"include":false,"step":"20.0","x":-5.087523809523809,"y":34.59238095238096,"z":-24.582857142857144,"a95":0.99,"info":"25/08/2014 at 11:46:22"},{"visible":true,"include":false,"step":"25.0","x":7.997238095238096,"y":24.582857142857144,"z":-23.099047619047617,"a95":0.99,"info":"25/08/2014 at 11:46:22"},{"visible":true,"include":false,"step":"30.0","x":8.367238095238095,"y":30.508571428571425,"z":-25.067619047619047,"a95":0.99,"info":"25/08/2014 at 11:46:22"},{"visible":true,"include":false,"step":"35.0","x":-16.760952380952382,"y":13.88857142857143,"z":-33.705714285714286,"a95":0.99,"info":"25/08/2014 at 11:46:22"},{"visible":true,"include":false,"step":"40.0","x":11.057142857142857,"y":32.13428571428572,"z":-19.51904761904762,"a95":0.99,"info":"25/08/2014 at 11:46:22"},{"visible":true,"include":false,"step":"45.0","x":-4.529809523809524,"y":21.078095238095237,"z":-8.880952380952381,"a95":0.99,"info":"25/08/2014 at 11:46:22"},{"visible":true,"include":false,"step":"50.0","x":-25.37142857142857,"y":11.698095238095238,"z":-16.623809523809523,"a95":0.99,"info":"25/08/2014 at 11:46:22"},{"visible":true,"include":false,"step":"60.0","x":-7.460761904761904,"y":3.2371428571428575,"z":-17.413333333333334,"a95":0.99,"info":"25/08/2014 at 11:46:22"},{"visible":true,"include":false,"step":"70.0","x":-9.686666666666666,"y":-21.206666666666667,"z":2.431619047619048,"a95":0.99,"info":"25/08/2014 at 11:46:22"},{"visible":true,"include":false,"step":"80.0","x":45.026666666666664,"y":-6.9283809523809525,"z":11.438095238095238,"a95":0.99,"info":"25/08/2014 at 11:46:22"},{"visible":true,"include":false,"step":"90.0","x":-39.97428571428571,"y":-25.283809523809527,"z":-1.1244761904761904,"a95":0.99,"info":"25/08/2014 at 11:46:22"},{"visible":true,"include":false,"step":"100.0","x":17.04,"y":-13.814285714285715,"z":-9.812380952380952,"a95":0.99,"info":"25/08/2014 at 11:46:22"}]},{"version":"v1.1.0","exported":"2016-11-17T15:28:20.636Z","volume":10.5,"added":"2016-11-17T15:07:47.160Z","format":"Utrecht","demagType":"Unknown","strat":null,"patch":1.1,"GEO":[],"TECT":[],"interpreted":false,"name":"EM3.4A","coreAzi":301,"coreDip":28,"bedStrike":289,"bedDip":25,"data":[{"visible":false,"include":false,"step":"20","x":-110.57142857142857,"y":84.38095238095238,"z":183.33333333333334,"a95":2.6,"info":"\"14-09-15\" at \"15:46\""},{"visible":true,"include":true,"step":"100","x":-90.19047619047619,"y":45.714285714285715,"z":-7.619047619047619,"a95":4.6,"info":"\"14-09-15\" at \"19:43\""},{"visible":true,"include":true,"step":"150","x":-62.8,"y":22.676190476190477,"z":-44.62857142857143,"a95":5.4,"info":"\"14-09-15\" at \"21:56\""},{"visible":true,"include":true,"step":"180","x":-49.38095238095238,"y":16.123809523809523,"z":-60.161904761904765,"a95":5,"info":"\"14-09-16\" at \"10:56\""},{"visible":true,"include":true,"step":"210","x":-42.48571428571429,"y":17.638095238095236,"z":-57.36190476190476,"a95":5,"info":"\"14-09-16\" at \"13:34\""},{"visible":true,"include":true,"step":"240","x":-47.12380952380953,"y":12.476190476190476,"z":-56.161904761904765,"a95":4.9,"info":"\"14-09-16\" at \"16:15\""},{"visible":true,"include":true,"step":"270","x":-39.457142857142856,"y":13.733333333333333,"z":-56.838095238095235,"a95":5.5,"info":"\"14-09-16\" at \"19:08\""},{"visible":true,"include":true,"step":"300","x":-48.41904761904762,"y":6.714285714285714,"z":-48.31428571428572,"a95":5.2,"info":"\"14-09-17\" at \"10:48\""},{"visible":true,"include":false,"step":"320","x":-44.75238095238095,"y":7.428571428571429,"z":-53.171428571428564,"a95":6.1,"info":"\"14-09-17\" at \"13:57\""},{"visible":false,"include":false,"step":"340","x":-70.26666666666667,"y":5.314285714285714,"z":-43.51428571428571,"a95":5.4,"info":"\"14-09-17\" at \"17:11\""},{"visible":true,"include":false,"step":"370","x":-42.22857142857143,"y":-0.980952380952381,"z":-54.2952380952381,"a95":8.400001,"info":"\"14-09-17\" at \"22:17\""},{"visible":true,"include":false,"step":"390","x":-42.27619047619047,"y":-3.3333333333333335,"z":-52.87619047619048,"a95":7.1,"info":"\"14-09-18\" at \"11:27\""},{"visible":true,"include":false,"step":"420","x":-28.876190476190477,"y":3.5047619047619043,"z":-69.43809523809524,"a95":4.8,"info":"\"14-09-18\" at \"14:30\""},{"visible":true,"include":false,"step":"450","x":-30.97142857142857,"y":-10.628571428571428,"z":-78.47619047619048,"a95":4.8,"info":"\"14-09-19\" at \"09:16\""},{"visible":true,"include":false,"step":"480","x":-13.857142857142858,"y":-9.257142857142858,"z":-72.94285714285714,"a95":5.6,"info":"\"14-09-19\" at \"13:25\""},{"visible":true,"include":false,"step":"510","x":-3.3333333333333335,"y":1.3904761904761904,"z":-15.2,"a95":23.5,"info":"\"14-09-19\" at \"16:05\""},{"visible":false,"include":false,"step":"540","x":24.895238095238092,"y":-10.619047619047619,"z":-72.43809523809524,"a95":9.8,"info":"\"14-10-04\" at \"11:47\""},{"visible":false,"include":false,"step":"570","x":-32.79047619047619,"y":39.095238095238095,"z":39.59047619047619,"a95":20,"info":"\"14-10-04\" at \"15:04\""},{"visible":false,"include":false,"step":"600","x":-8.00952380952381,"y":-8.980952380952381,"z":47.4,"a95":29.3,"info":"\"14-10-05\" at \"09:27\""}]},{"version":"v1.1.0","exported":"2016-11-17T15:28:20.637Z","volume":10.5,"added":"2016-11-17T15:07:47.160Z","format":"Utrecht","demagType":"Unknown","strat":"1","patch":1.1,"GEO":[],"TECT":[],"interpreted":false,"name":"EM3.4B","coreAzi":301,"coreDip":28,"bedStrike":289,"bedDip":25,"data":[{"visible":true,"include":false,"step":"0.0","x":-115.97142857142858,"y":107.66666666666667,"z":174.0285714285714,"a95":0.99,"info":"25/08/2014 at 17:11:25"},{"visible":true,"include":false,"step":"4.0","x":-100.51428571428572,"y":99.64761904761905,"z":169.7047619047619,"a95":0.99,"info":"25/08/2014 at 17:11:25"},{"visible":true,"include":false,"step":"8.0","x":-77.56285714285714,"y":82.10095238095238,"z":143.67619047619047,"a95":0.99,"info":"25/08/2014 at 17:11:25"},{"visible":true,"include":false,"step":"12.0","x":-58.0295238095238,"y":63.13047619047619,"z":129.56190476190477,"a95":0.99,"info":"25/08/2014 at 17:11:25"},{"visible":true,"include":false,"step":"16.0","x":-55.174285714285716,"y":51.843809523809526,"z":103.9047619047619,"a95":0.99,"info":"25/08/2014 at 17:11:25"},{"visible":true,"include":false,"step":"20.0","x":-36.436190476190475,"y":43.245714285714286,"z":82.75428571428571,"a95":0.99,"info":"25/08/2014 at 17:11:25"},{"visible":true,"include":false,"step":"25.0","x":-17.634285714285713,"y":47.66095238095238,"z":59.19904761904762,"a95":0.99,"info":"25/08/2014 at 17:11:25"},{"visible":true,"include":false,"step":"30.0","x":-5.9077142857142855,"y":31.46857142857143,"z":25.40952380952381,"a95":0.99,"info":"25/08/2014 at 17:11:25"},{"visible":true,"include":false,"step":"35.0","x":-10.853333333333333,"y":5.776095238095238,"z":33.82666666666667,"a95":0.99,"info":"25/08/2014 at 17:11:25"},{"visible":true,"include":false,"step":"40.0","x":-20.065714285714286,"y":16.843809523809526,"z":22.463809523809523,"a95":0.99,"info":"25/08/2014 at 17:11:25"},{"visible":true,"include":false,"step":"45.0","x":-2.7230476190476187,"y":19.261904761904763,"z":13.22095238095238,"a95":0.99,"info":"25/08/2014 at 17:11:25"},{"visible":true,"include":false,"step":"50.0","x":-22.816190476190474,"y":14.156190476190474,"z":21.468571428571426,"a95":0.99,"info":"25/08/2014 at 17:11:25"},{"visible":true,"include":false,"step":"60.0","x":-15.018095238095238,"y":1.8357142857142856,"z":33.682857142857145,"a95":0.99,"info":"25/08/2014 at 17:11:25"},{"visible":true,"include":false,"step":"70.0","x":5.575523809523809,"y":4.215523809523809,"z":11.762857142857143,"a95":0.99,"info":"25/08/2014 at 17:11:25"},{"visible":true,"include":false,"step":"80.0","x":-30.303809523809523,"y":1.4654285714285715,"z":14.242857142857144,"a95":0.99,"info":"25/08/2014 at 17:11:25"},{"visible":true,"include":false,"step":"90.0","x":2.62,"y":-5.907619047619048,"z":16.134285714285713,"a95":0.99,"info":"25/08/2014 at 17:11:25"},{"visible":true,"include":false,"step":"100.0","x":-29.077142857142857,"y":4.760571428571429,"z":-2.3875238095238096,"a95":0.99,"info":"25/08/2014 at 17:11:25"}]},{"version":"v1.1.0","exported":"2016-11-17T15:28:20.637Z","volume":10.5,"added":"2016-11-17T15:07:47.168Z","format":"Utrecht","demagType":"Unknown","strat":null,"patch":1.1,"GEO":[{"dec":119.37097071931208,"inc":-19.078145243661197,"MAD":5.65917565594626,"cm":[5.773159728050814e-15,1.7763568394002505e-15,0],"intensity":113.15004306184757,"type":"dir","forced":true,"remark":"","origin":false,"nSteps":3,"minStep":"420","maxStep":"480","steps":["420","450","480"],"group":"None","version":"v1.1.0"}],"TECT":[{"dec":126.45605471342685,"inc":-12.963610296148808,"MAD":5.659175655946245,"cm":[-2.6645352591003757e-15,-8.881784197001252e-16,4.440892098500626e-16],"intensity":113.15004306184757,"type":"dir","forced":true,"remark":"","origin":false,"nSteps":3,"minStep":"420","maxStep":"480","steps":["420","450","480"],"group":"None","version":"v1.1.0"}],"interpreted":true,"name":"EM3.5A","coreAzi":297,"coreDip":26,"bedStrike":289,"bedDip":25,"data":[{"visible":false,"include":false,"step":"20","x":-205.61904761904762,"y":8.19047619047619,"z":-61.142857142857146,"a95":2.1,"info":"\"14-09-15\" at \"15:49\""},{"visible":false,"include":false,"step":"100","x":-94.66666666666667,"y":-9.714285714285714,"z":-39.04761904761905,"a95":4.1,"info":"\"14-09-15\" at \"19:45\""},{"visible":true,"include":false,"step":"150","x":-58.37142857142857,"y":-17.638095238095236,"z":-66.32380952380952,"a95":5.2,"info":"\"14-09-15\" at \"21:58\""},{"visible":true,"include":false,"step":"180","x":-34.2952380952381,"y":-24.676190476190477,"z":-77.58095238095238,"a95":3.6,"info":"\"14-09-16\" at \"10:59\""},{"visible":true,"include":false,"step":"210","x":-32.885714285714286,"y":-23.304761904761904,"z":-74.91428571428571,"a95":6.6,"info":"\"14-09-16\" at \"13:36\""},{"visible":true,"include":false,"step":"240","x":-34.74285714285715,"y":-22.095238095238095,"z":-74.92380952380952,"a95":3.4,"info":"\"14-09-16\" at \"16:17\""},{"visible":true,"include":false,"step":"270","x":-31.076190476190476,"y":-20.17142857142857,"z":-63.019047619047626,"a95":4.1,"info":"\"14-09-16\" at \"19:12\""},{"visible":true,"include":false,"step":"300","x":-22.571428571428573,"y":-16.885714285714286,"z":-58.91428571428572,"a95":4.3,"info":"\"14-09-17\" at \"10:53\""},{"visible":true,"include":false,"step":"320","x":-24.54285714285714,"y":-8.942857142857143,"z":-52.07619047619047,"a95":5.6,"info":"\"14-09-17\" at \"14:00\""},{"visible":true,"include":false,"step":"340","x":-17.228571428571428,"y":-11.666666666666666,"z":-53.96190476190476,"a95":4.8,"info":"\"14-09-17\" at \"17:14\""},{"visible":true,"include":false,"step":"370","x":-22.60952380952381,"y":-1.7333333333333332,"z":-53.51428571428571,"a95":6.6,"info":"\"14-09-17\" at \"22:19\""},{"visible":true,"include":false,"step":"390","x":-23.73333333333333,"y":-8.22857142857143,"z":-51.32380952380952,"a95":7.3,"info":"\"14-09-18\" at \"11:29\""},{"visible":true,"include":true,"step":"420","x":-9.857142857142858,"y":-4.342857142857143,"z":-59.55238095238095,"a95":6.4,"info":"\"14-09-18\" at \"14:32\""},{"visible":true,"include":true,"step":"450","x":-11.657142857142858,"y":-0.8380952380952381,"z":-59.36190476190476,"a95":7.4,"info":"\"14-09-19\" at \"09:19\""},{"visible":true,"include":true,"step":"480","x":1.723809523809524,"y":-1.5238095238095237,"z":-53.15238095238095,"a95":8.2,"info":"\"14-09-19\" at \"13:27\""},{"visible":true,"include":false,"step":"510","x":-8.180952380952382,"y":-4.419047619047619,"z":-36.561904761904756,"a95":14.2,"info":"\"14-09-19\" at \"16:07\""},{"visible":false,"include":false,"step":"540","x":2.0095238095238095,"y":46.01904761904762,"z":-40.34285714285714,"a95":11.5,"info":"\"14-10-04\" at \"11:49\""},{"visible":false,"include":false,"step":"570","x":-15.133333333333335,"y":54.95238095238095,"z":9.085714285714285,"a95":23.7,"info":"\"14-10-04\" at \"15:06\""},{"visible":false,"include":false,"step":"600","x":-75.6,"y":-46.42857142857143,"z":-14.21904761904762,"a95":19.2,"info":"\"14-10-05\" at \"09:29\""}]},{"version":"v1.1.0","exported":"2016-11-17T15:28:20.637Z","volume":10.5,"added":"2016-11-17T15:07:47.168Z","format":"Utrecht","demagType":"Unknown","strat":"2","patch":1.1,"GEO":[],"TECT":[],"interpreted":false,"name":"EM3.5B","coreAzi":297,"coreDip":26,"bedStrike":289,"bedDip":25,"data":[{"visible":true,"include":false,"step":"0.0","x":-90.0552380952381,"y":85.88285714285715,"z":88.01523809523809,"a95":0.99,"info":"25/08/2014 at 17:11:25"},{"visible":true,"include":false,"step":"4.0","x":-66.7352380952381,"y":84.09619047619047,"z":89.01523809523809,"a95":0.99,"info":"25/08/2014 at 17:11:25"},{"visible":true,"include":false,"step":"8.0","x":-45.80571428571428,"y":61.478095238095236,"z":56.94095238095238,"a95":0.99,"info":"25/08/2014 at 17:11:25"},{"visible":true,"include":false,"step":"12.0","x":-23.032380952380954,"y":55.201904761904764,"z":28.28952380952381,"a95":0.99,"info":"25/08/2014 at 17:11:25"},{"visible":true,"include":false,"step":"16.0","x":-4.604761904761905,"y":37.626666666666665,"z":23.72952380952381,"a95":0.99,"info":"25/08/2014 at 17:11:25"},{"visible":true,"include":false,"step":"20.0","x":-7.715428571428571,"y":25.155238095238094,"z":7.160190476190476,"a95":0.99,"info":"25/08/2014 at 17:11:25"},{"visible":true,"include":false,"step":"25.0","x":-12.394285714285713,"y":28.294285714285714,"z":-8.053619047619048,"a95":0.99,"info":"25/08/2014 at 17:11:25"},{"visible":true,"include":false,"step":"30.0","x":-17.119999999999997,"y":16.128571428571426,"z":-14.89809523809524,"a95":0.99,"info":"25/08/2014 at 17:11:25"},{"visible":true,"include":false,"step":"35.0","x":-16.014285714285716,"y":15.725714285714286,"z":-21.561904761904763,"a95":0.99,"info":"25/08/2014 at 17:11:25"},{"visible":true,"include":false,"step":"40.0","x":-7.64752380952381,"y":-0.21886666666666665,"z":-5.805809523809524,"a95":0.99,"info":"25/08/2014 at 17:11:25"},{"visible":true,"include":false,"step":"45.0","x":-11.432380952380953,"y":20.35142857142857,"z":-10.958095238095238,"a95":0.99,"info":"25/08/2014 at 17:11:25"},{"visible":true,"include":false,"step":"50.0","x":-23.581904761904763,"y":18.408571428571427,"z":-8.255714285714285,"a95":0.99,"info":"25/08/2014 at 17:11:25"},{"visible":true,"include":false,"step":"60.0","x":-25.612380952380953,"y":21.025714285714287,"z":-12.731428571428571,"a95":0.99,"info":"25/08/2014 at 17:11:25"},{"visible":true,"include":false,"step":"70.0","x":-12,"y":18.964761904761904,"z":-21.36,"a95":0.99,"info":"25/08/2014 at 17:11:25"},{"visible":true,"include":false,"step":"80.0","x":-1.294095238095238,"y":12.561904761904762,"z":19.974285714285713,"a95":0.99,"info":"25/08/2014 at 17:11:25"},{"visible":true,"include":false,"step":"90.0","x":-32.54,"y":6.372190476190476,"z":-12.588571428571429,"a95":0.99,"info":"25/08/2014 at 17:11:25"},{"visible":true,"include":false,"step":"100.0","x":2.125714285714286,"y":5.698285714285714,"z":15.772380952380953,"a95":0.99,"info":"25/08/2014 at 17:11:25"}]},{"version":"v1.1.0","exported":"2016-11-17T15:28:20.637Z","volume":10.5,"added":"2016-11-17T15:07:47.169Z","format":"Utrecht","demagType":"Unknown","strat":"3","patch":1.1,"GEO":[{"dec":156.6477729740526,"inc":-73.67272747868273,"MAD":6.234197065159843,"cm":[-2.4424906541753444e-15,-6.716849298982197e-15,0],"intensity":163.3512647716397,"type":"dir","forced":true,"remark":"","origin":false,"nSteps":5,"minStep":"25.0","maxStep":"45.0","steps":["25.0","30.0","35.0","40.0","45.0"],"group":"None","version":"v1.1.0"}],"TECT":[{"dec":181.31202631566717,"inc":-51.44008037268487,"MAD":6.234197065159872,"cm":[1.3322676295501878e-15,4.440892098500626e-16,1.7763568394002505e-15],"intensity":163.35126477163968,"type":"dir","forced":true,"remark":"","origin":false,"nSteps":5,"minStep":"25.0","maxStep":"45.0","steps":["25.0","30.0","35.0","40.0","45.0"],"group":"None","version":"v1.1.0"}],"interpreted":true,"name":"EM3.6A","coreAzi":305,"coreDip":9,"bedStrike":289,"bedDip":25,"data":[{"visible":true,"include":false,"step":"0.0","x":47.444761904761904,"y":36.01428571428571,"z":-23.29714285714286,"a95":0.99,"info":"25/08/2014 at 17:11:25"},{"visible":true,"include":false,"step":"4.0","x":60.31238095238095,"y":27.608571428571427,"z":-23.095238095238095,"a95":0.99,"info":"25/08/2014 at 17:11:25"},{"visible":true,"include":false,"step":"8.0","x":84.67714285714285,"y":8.43447619047619,"z":-44.67809523809524,"a95":0.99,"info":"25/08/2014 at 17:11:25"},{"visible":true,"include":false,"step":"12.0","x":92.0352380952381,"y":-9.921904761904763,"z":-47.275238095238095,"a95":0.99,"info":"25/08/2014 at 17:11:25"},{"visible":true,"include":false,"step":"16.0","x":99.26666666666667,"y":-30.483809523809523,"z":-34.09428571428572,"a95":0.99,"info":"25/08/2014 at 17:11:25"},{"visible":true,"include":false,"step":"20.0","x":93.58380952380952,"y":-27.419047619047618,"z":-45.72857142857143,"a95":0.99,"info":"25/08/2014 at 17:11:25"},{"visible":true,"include":true,"step":"25.0","x":94.09333333333333,"y":-18.01142857142857,"z":-44.626666666666665,"a95":0.99,"info":"25/08/2014 at 17:11:25"},{"visible":true,"include":true,"step":"30.0","x":102.56190476190477,"y":-11.357142857142858,"z":-36.53904761904762,"a95":0.99,"info":"25/08/2014 at 17:11:25"},{"visible":true,"include":true,"step":"35.0","x":64.20857142857143,"y":-10.707619047619048,"z":-40.17523809523809,"a95":0.99,"info":"25/08/2014 at 17:11:25"},{"visible":true,"include":true,"step":"40.0","x":47.98095238095238,"y":-9.200095238095239,"z":-6.512857142857143,"a95":0.99,"info":"25/08/2014 at 17:11:25"},{"visible":true,"include":true,"step":"45.0","x":52.31809523809524,"y":-11.795238095238094,"z":-21.395238095238096,"a95":0.99,"info":"25/08/2014 at 17:11:25"},{"visible":true,"include":false,"step":"50.0","x":50.544761904761906,"y":-15.285714285714286,"z":-21.416190476190476,"a95":0.99,"info":"25/08/2014 at 17:11:25"},{"visible":false,"include":false,"step":"60.0","x":22.432380952380953,"y":-18.044761904761906,"z":-3.789142857142857,"a95":0.99,"info":"25/08/2014 at 17:11:25"},{"visible":false,"include":false,"step":"70.0","x":15.56095238095238,"y":-17.803809523809523,"z":-4.622095238095238,"a95":0.99,"info":"25/08/2014 at 17:11:25"},{"visible":false,"include":false,"step":"80.0","x":145.86666666666665,"y":2.115142857142857,"z":55.17238095238095,"a95":0.99,"info":"25/08/2014 at 17:11:25"},{"visible":false,"include":false,"step":"90.0","x":-6.118190476190476,"y":-22.059047619047618,"z":-5.2945714285714285,"a95":0.99,"info":"25/08/2014 at 17:11:25"},{"visible":false,"include":false,"step":"100.0","x":7.806952380952381,"y":-5.276095238095238,"z":-6.086,"a95":0.99,"info":"25/08/2014 at 17:11:25"}]},{"version":"v1.1.0","exported":"2016-11-17T15:28:20.637Z","volume":10.5,"added":"2016-11-17T15:07:47.169Z","format":"Utrecht","demagType":"Unknown","strat":"4","patch":1.1,"GEO":[{"dec":103.71086997240826,"inc":-41.480217458358645,"MAD":17.85257764162772,"cm":[1.457167719820518e-16,1.7763568394002505e-15,0],"intensity":59.35306898830983,"type":"dir","forced":true,"remark":"","origin":false,"nSteps":4,"minStep":"35.0","maxStep":"50.0","steps":["35.0","40.0","45.0","50.0"],"group":"None","version":"v1.1.0"}],"TECT":[{"dec":125.24276787017902,"inc":-39.012489750511016,"MAD":17.85257764162772,"cm":[-2.1371793224034263e-15,2.6645352591003757e-15,4.163336342344337e-17],"intensity":59.35306898830982,"type":"dir","forced":true,"remark":"","origin":false,"nSteps":4,"minStep":"35.0","maxStep":"50.0","steps":["35.0","40.0","45.0","50.0"],"group":"None","version":"v1.1.0"}],"interpreted":true,"name":"EM3.7A","coreAzi":314,"coreDip":20,"bedStrike":289,"bedDip":25,"data":[{"visible":true,"include":false,"step":"0.0","x":-75.34285714285714,"y":109.21904761904761,"z":28.992380952380955,"a95":0.99,"info":"25/08/2014 at 17:11:25"},{"visible":true,"include":false,"step":"4.0","x":-62.31047619047619,"y":94.73428571428572,"z":17.754285714285714,"a95":0.99,"info":"25/08/2014 at 17:11:25"},{"visible":true,"include":false,"step":"8.0","x":-34.96190476190476,"y":72.96380952380953,"z":-0.669295238095238,"a95":0.99,"info":"25/08/2014 at 17:11:25"},{"visible":true,"include":false,"step":"12.0","x":-27.26666666666667,"y":51.21619047619048,"z":-23.089523809523808,"a95":0.99,"info":"25/08/2014 at 17:11:25"},{"visible":true,"include":false,"step":"16.0","x":-7.1162857142857145,"y":41.065714285714286,"z":-38.079047619047614,"a95":0.99,"info":"25/08/2014 at 17:11:25"},{"visible":true,"include":false,"step":"20.0","x":-5.591428571428572,"y":22.91142857142857,"z":-33.93714285714285,"a95":0.99,"info":"25/08/2014 at 17:11:25"},{"visible":true,"include":false,"step":"25.0","x":10.842857142857142,"y":24.239047619047618,"z":-34.64857142857143,"a95":0.99,"info":"25/08/2014 at 17:11:25"},{"visible":true,"include":false,"step":"30.0","x":4.063809523809524,"y":28.005714285714287,"z":-33.308571428571426,"a95":0.99,"info":"25/08/2014 at 17:11:25"},{"visible":true,"include":true,"step":"35.0","x":13.157142857142858,"y":14.174285714285716,"z":-40.614285714285714,"a95":0.99,"info":"25/08/2014 at 17:11:25"},{"visible":true,"include":true,"step":"40.0","x":8.244857142857143,"y":-0.10294285714285714,"z":-19.845714285714287,"a95":0.99,"info":"25/08/2014 at 17:11:25"},{"visible":true,"include":true,"step":"45.0","x":24.746666666666663,"y":19.456190476190475,"z":-28.376190476190477,"a95":0.99,"info":"25/08/2014 at 17:11:25"},{"visible":true,"include":true,"step":"50.0","x":-6.490857142857142,"y":13.304761904761904,"z":-11.57047619047619,"a95":0.99,"info":"25/08/2014 at 17:11:25"},{"visible":true,"include":false,"step":"60.0","x":-7.253809523809524,"y":-1.8832380952380954,"z":-12.54952380952381,"a95":0.99,"info":"25/08/2014 at 17:11:25"},{"visible":false,"include":false,"step":"70.0","x":-1.4835238095238095,"y":4.280380952380953,"z":11.20952380952381,"a95":0.99,"info":"25/08/2014 at 17:11:25"},{"visible":false,"include":false,"step":"80.0","x":-16.225714285714286,"y":-1.0986666666666667,"z":13.38952380952381,"a95":0.99,"info":"25/08/2014 at 17:11:25"},{"visible":false,"include":false,"step":"90.0","x":-24.944761904761908,"y":-16.568571428571428,"z":11.440000000000001,"a95":0.99,"info":"25/08/2014 at 17:11:25"},{"visible":false,"include":false,"step":"100.0","x":-5.484761904761905,"y":-13.229523809523808,"z":-12.762857142857142,"a95":0.99,"info":"25/08/2014 at 17:11:25"}]},{"version":"v1.1.0","exported":"2016-11-17T15:28:20.637Z","volume":10.5,"added":"2016-11-17T15:07:47.171Z","format":"Utrecht","demagType":"Unknown","strat":"5","patch":1.1,"GEO":[],"TECT":[],"interpreted":false,"name":"EM3.8A","coreAzi":315,"coreDip":14,"bedStrike":289,"bedDip":25,"data":[{"visible":true,"include":false,"step":"0.0","x":-199.46666666666667,"y":84.99238095238096,"z":6.770380952380952,"a95":0.99,"info":"25/08/2014 at 17:11:25"},{"visible":true,"include":false,"step":"4.0","x":-156.8190476190476,"y":44.17142857142857,"z":32.86,"a95":0.99,"info":"25/08/2014 at 17:11:25"},{"visible":true,"include":false,"step":"8.0","x":-109.54285714285714,"y":6.90247619047619,"z":37.29333333333333,"a95":0.99,"info":"25/08/2014 at 17:11:25"},{"visible":true,"include":false,"step":"12.0","x":-83.44857142857143,"y":1.5320952380952382,"z":-2.541142857142857,"a95":0.99,"info":"25/08/2014 at 17:11:25"},{"visible":true,"include":false,"step":"16.0","x":-48.20095238095238,"y":7.493333333333334,"z":-6.7382857142857135,"a95":0.99,"info":"25/08/2014 at 17:11:25"},{"visible":true,"include":false,"step":"20.0","x":-30.095238095238095,"y":-6.538285714285714,"z":-17.698095238095238,"a95":0.99,"info":"25/08/2014 at 17:11:25"},{"visible":true,"include":false,"step":"25.0","x":-10.787619047619048,"y":-12.093333333333334,"z":-25.333333333333332,"a95":0.99,"info":"25/08/2014 at 17:11:25"},{"visible":true,"include":false,"step":"30.0","x":-19.262857142857143,"y":4.92752380952381,"z":-17.04,"a95":0.99,"info":"25/08/2014 at 17:11:25"},{"visible":true,"include":false,"step":"35.0","x":-7.876571428571428,"y":5.297714285714285,"z":-2.225714285714286,"a95":0.99,"info":"25/08/2014 at 17:11:25"},{"visible":true,"include":false,"step":"40.0","x":-9.925714285714285,"y":3.4040952380952385,"z":-14.466666666666667,"a95":0.99,"info":"25/08/2014 at 17:11:25"},{"visible":true,"include":false,"step":"45.0","x":26.582857142857144,"y":-6.360952380952382,"z":10.22,"a95":0.99,"info":"25/08/2014 at 17:11:25"},{"visible":true,"include":false,"step":"50.0","x":-8.985714285714286,"y":-16.16190476190476,"z":4.056095238095238,"a95":0.99,"info":"25/08/2014 at 17:11:25"},{"visible":true,"include":false,"step":"60.0","x":-5.249619047619047,"y":12.69809523809524,"z":-2.8415238095238093,"a95":0.99,"info":"25/08/2014 at 17:11:25"},{"visible":true,"include":false,"step":"70.0","x":5.043428571428572,"y":16.81142857142857,"z":18.574285714285715,"a95":0.99,"info":"25/08/2014 at 17:11:25"},{"visible":true,"include":false,"step":"80.0","x":-36.95904761904762,"y":0.10207619047619049,"z":-18.931428571428572,"a95":0.99,"info":"25/08/2014 at 17:11:25"},{"visible":true,"include":false,"step":"90.0","x":-2.257904761904762,"y":-14.924761904761905,"z":45.26571428571429,"a95":0.99,"info":"25/08/2014 at 17:11:25"},{"visible":true,"include":false,"step":"100.0","x":-34.15809523809524,"y":-14.681904761904761,"z":12.893333333333333,"a95":0.99,"info":"25/08/2014 at 17:11:25"}]},{"version":"v1.1.0","exported":"2016-11-17T15:28:20.637Z","volume":10.5,"added":"2016-11-17T15:07:47.171Z","format":"Utrecht","demagType":"Unknown","strat":"6","patch":1.1,"GEO":[{"dec":134.86774664893102,"inc":-37.314664917681554,"MAD":10.285931453202345,"cm":[-7.993605777301127e-15,-6.661338147750939e-15,0],"intensity":150.8523445568073,"type":"dir","forced":true,"remark":"","origin":false,"nSteps":4,"minStep":"20.0","maxStep":"45.0","steps":["20.0","25.0","30.0","45.0"],"group":"None","version":"v1.1.0"}],"TECT":[{"dec":147.57019509463896,"inc":-23.75024765430641,"MAD":10.285931453202322,"cm":[-1.509903313490213e-14,-2.3092638912203256e-14,3.552713678800501e-15],"intensity":150.8523445568073,"type":"dir","forced":true,"remark":"","origin":false,"nSteps":4,"minStep":"20.0","maxStep":"45.0","steps":["20.0","25.0","30.0","45.0"],"group":"None","version":"v1.1.0"}],"interpreted":true,"name":"EM3.9A","coreAzi":317,"coreDip":12,"bedStrike":289,"bedDip":25,"data":[{"visible":true,"include":false,"step":"0.0","x":-64.02285714285715,"y":75.05714285714286,"z":-27.243809523809524,"a95":0.99,"info":"25/08/2014 at 17:11:25"},{"visible":true,"include":false,"step":"4.0","x":-36.13809523809524,"y":61.118095238095236,"z":-41.02285714285714,"a95":0.99,"info":"25/08/2014 at 17:11:25"},{"visible":true,"include":false,"step":"8.0","x":-3.38552380952381,"y":38.24095238095238,"z":-51.85333333333334,"a95":0.99,"info":"25/08/2014 at 17:11:25"},{"visible":true,"include":false,"step":"12.0","x":29.716190476190473,"y":24.177142857142858,"z":-76.20761904761905,"a95":0.99,"info":"25/08/2014 at 17:11:25"},{"visible":true,"include":false,"step":"16.0","x":34.684761904761906,"y":27.05809523809524,"z":-85.13809523809525,"a95":0.99,"info":"25/08/2014 at 17:11:25"},{"visible":true,"include":true,"step":"20.0","x":41.582857142857144,"y":1.3677142857142859,"z":-81.99333333333333,"a95":0.99,"info":"25/08/2014 at 17:11:25"},{"visible":true,"include":true,"step":"25.0","x":33.31809523809524,"y":6.682761904761905,"z":-62.01428571428571,"a95":0.99,"info":"25/08/2014 at 17:11:25"},{"visible":true,"include":true,"step":"30.0","x":0.8192857142857142,"y":6.031333333333333,"z":-50.71714285714285,"a95":0.99,"info":"25/08/2014 at 17:11:25"},{"visible":true,"include":false,"step":"35.0","x":26.10571428571429,"y":-16.728571428571428,"z":-64.46000000000001,"a95":0.99,"info":"25/08/2014 at 17:11:25"},{"visible":true,"include":false,"step":"40.0","x":2.309904761904762,"y":-3.296,"z":-61.787619047619046,"a95":0.99,"info":"25/08/2014 at 17:11:25"},{"visible":true,"include":true,"step":"45.0","x":32.62095238095238,"y":-5.403333333333333,"z":-49.28476190476191,"a95":0.99,"info":"25/08/2014 at 17:11:25"},{"visible":false,"include":false,"step":"50.0","x":3.2427619047619047,"y":-25.39428571428571,"z":-56.381904761904764,"a95":0.99,"info":"25/08/2014 at 17:11:25"},{"visible":false,"include":false,"step":"60.0","x":-11.229523809523808,"y":-11.634285714285713,"z":-17.036190476190477,"a95":0.99,"info":"25/08/2014 at 17:11:25"},{"visible":false,"include":false,"step":"70.0","x":-6.546380952380952,"y":-9.672380952380953,"z":-31.66761904761905,"a95":0.99,"info":"25/08/2014 at 17:11:25"},{"visible":false,"include":false,"step":"80.0","x":-10.724761904761905,"y":-9.550476190476191,"z":12.397142857142857,"a95":0.99,"info":"25/08/2014 at 17:11:25"},{"visible":false,"include":false,"step":"90.0","x":-23.075238095238095,"y":-24.872380952380954,"z":-9.558095238095238,"a95":0.99,"info":"25/08/2014 at 17:11:25"},{"visible":false,"include":false,"step":"100.0","x":5.616095238095238,"y":-12.210476190476191,"z":-20.467619047619046,"a95":0.99,"info":"25/08/2014 at 17:11:25"}]},{"version":"v1.1.0","exported":"2016-11-17T15:28:20.637Z","volume":10.5,"added":"2016-11-17T15:07:47.173Z","format":"Utrecht","demagType":"Unknown","strat":"7","patch":1.1,"GEO":[{"dec":125.42628235800305,"inc":-52.553515598929735,"MAD":4.1785120417200865,"cm":[0,3.1086244689504383e-15,0],"intensity":387.7374101454538,"type":"dir","forced":true,"remark":"","origin":false,"nSteps":7,"minStep":"20.0","maxStep":"50.0","steps":["20.0","25.0","30.0","35.0","40.0","45.0","50.0"],"group":"None","version":"v1.1.0"}],"TECT":[{"dec":149.28233155493268,"inc":-35.58603848041931,"MAD":4.178512041720113,"cm":[-2.042810365310288e-14,-2.9753977059954195e-14,2.220446049250313e-15],"intensity":387.7374101454538,"type":"dir","forced":true,"remark":"","origin":false,"nSteps":7,"minStep":"20.0","maxStep":"50.0","steps":["20.0","25.0","30.0","35.0","40.0","45.0","50.0"],"group":"None","version":"v1.1.0"}],"interpreted":true,"name":"EM3.11A","coreAzi":315,"coreDip":14,"bedStrike":283,"bedDip":29,"data":[{"visible":true,"include":false,"step":"0.0","x":87.09809523809524,"y":137.1047619047619,"z":-213.2952380952381,"a95":0.99,"info":"25/08/2014 at 17:11:25"},{"visible":true,"include":false,"step":"4.0","x":121.12380952380951,"y":116.6,"z":-227.56190476190477,"a95":0.99,"info":"25/08/2014 at 17:11:25"},{"visible":true,"include":false,"step":"8.0","x":149.65714285714287,"y":79.36571428571429,"z":-246.54285714285712,"a95":0.99,"info":"25/08/2014 at 17:11:25"},{"visible":true,"include":false,"step":"12.0","x":172.8,"y":76.6257142857143,"z":-274.42857142857144,"a95":0.99,"info":"25/08/2014 at 17:11:25"},{"visible":true,"include":false,"step":"16.0","x":158.76190476190476,"y":52.78857142857142,"z":-241.0761904761905,"a95":0.99,"info":"25/08/2014 at 17:11:25"},{"visible":true,"include":true,"step":"20.0","x":181.63809523809525,"y":31.07333333333333,"z":-224.0190476190476,"a95":0.99,"info":"25/08/2014 at 17:11:25"},{"visible":true,"include":true,"step":"25.0","x":141.95238095238096,"y":27.303809523809523,"z":-193.51428571428573,"a95":0.99,"info":"25/08/2014 at 17:11:25"},{"visible":true,"include":true,"step":"30.0","x":137.92380952380952,"y":15.100000000000001,"z":-172.9047619047619,"a95":0.99,"info":"25/08/2014 at 17:11:25"},{"visible":true,"include":true,"step":"35.0","x":107.18095238095239,"y":23.646666666666665,"z":-144.86666666666665,"a95":0.99,"info":"25/08/2014 at 17:11:25"},{"visible":true,"include":true,"step":"40.0","x":110.24761904761904,"y":13.041904761904762,"z":-125.25714285714287,"a95":0.99,"info":"25/08/2014 at 17:11:25"},{"visible":true,"include":true,"step":"45.0","x":98.48571428571428,"y":10.394285714285715,"z":-70.00761904761904,"a95":0.99,"info":"25/08/2014 at 17:11:25"},{"visible":true,"include":true,"step":"50.0","x":55.18571428571429,"y":12.57047619047619,"z":-79.87238095238095,"a95":0.99,"info":"25/08/2014 at 17:11:25"},{"visible":true,"include":false,"step":"60.0","x":16.526666666666667,"y":15.084761904761903,"z":-51.80571428571429,"a95":0.99,"info":"25/08/2014 at 17:11:25"},{"visible":true,"include":false,"step":"70.0","x":66.84190476190477,"y":-8.56342857142857,"z":-27.951428571428572,"a95":0.99,"info":"25/08/2014 at 17:11:25"},{"visible":false,"include":false,"step":"80.0","x":-14.634285714285713,"y":-4.495809523809524,"z":14.938095238095238,"a95":0.99,"info":"25/08/2014 at 17:11:25"},{"visible":false,"include":false,"step":"90.0","x":-4.62152380952381,"y":48.462857142857146,"z":-17.721904761904764,"a95":0.99,"info":"25/08/2014 at 17:11:25"},{"visible":true,"include":false,"step":"100.0","x":2.4014285714285712,"y":-1.4861904761904763,"z":9.994285714285715,"a95":0.99,"info":"25/08/2014 at 17:11:25"}]},{"version":"v1.1.0","exported":"2016-11-17T15:28:20.637Z","volume":10.5,"added":"2016-11-17T15:07:47.174Z","format":"Utrecht","demagType":"Unknown","strat":null,"patch":1.1,"GEO":[],"TECT":[],"interpreted":false,"name":"EM3.11B","coreAzi":315,"coreDip":14,"bedStrike":283,"bedDip":29,"data":[{"visible":false,"include":false,"step":"20","x":-122.76190476190476,"y":276.57142857142856,"z":173.14285714285714,"a95":2.2,"info":"\"14-09-15\" at \"15:51\""},{"visible":true,"include":false,"step":"100","x":-21.047619047619047,"y":124.76190476190476,"z":-38.57142857142857,"a95":5.7,"info":"\"14-09-15\" at \"19:47\""},{"visible":true,"include":false,"step":"150","x":17.904761904761905,"y":131.04761904761904,"z":-60.857142857142854,"a95":4.4,"info":"\"14-09-15\" at \"22:01\""},{"visible":true,"include":false,"step":"180","x":49.523809523809526,"y":123.14285714285714,"z":-79.23809523809524,"a95":3.8,"info":"\"14-09-16\" at \"11:01\""},{"visible":true,"include":false,"step":"210","x":59.333333333333336,"y":118.38095238095238,"z":-86.76190476190476,"a95":4,"info":"\"14-09-16\" at \"13:38\""},{"visible":true,"include":false,"step":"240","x":66.0952380952381,"y":115.33333333333333,"z":-94.95238095238095,"a95":3.8,"info":"\"14-09-16\" at \"16:22\""},{"visible":true,"include":true,"step":"270","x":55.904761904761905,"y":123.71428571428571,"z":-98.95238095238095,"a95":4.4,"info":"\"14-09-16\" at \"19:15\""},{"visible":true,"include":true,"step":"300","x":54.19047619047619,"y":108.95238095238095,"z":-98.66666666666667,"a95":3.7,"info":"\"14-09-17\" at \"10:57\""},{"visible":true,"include":true,"step":"320","x":56.95238095238095,"y":116.38095238095238,"z":-91.80952380952381,"a95":4.3,"info":"\"14-09-17\" at \"14:02\""},{"visible":false,"include":false,"step":"340","x":40.095238095238095,"y":114.47619047619048,"z":-95.42857142857143,"a95":5,"info":"\"14-09-17\" at \"17:17\""},{"visible":true,"include":true,"step":"370","x":65.42857142857143,"y":134.85714285714286,"z":-95.9047619047619,"a95":3.5,"info":"\"14-09-17\" at \"22:21\""},{"visible":true,"include":true,"step":"390","x":71.23809523809524,"y":117.80952380952381,"z":-101.9047619047619,"a95":4.1,"info":"\"14-09-18\" at \"11:31\""},{"visible":true,"include":true,"step":"420","x":65.42857142857143,"y":99.23809523809524,"z":-78.76190476190476,"a95":4.3,"info":"\"14-09-18\" at \"14:34\""},{"visible":true,"include":true,"step":"450","x":61.61904761904762,"y":80.19047619047619,"z":-74.28571428571429,"a95":4.8,"info":"\"14-09-19\" at \"09:22\""},{"visible":true,"include":true,"step":"480","x":69.23809523809524,"y":55.523809523809526,"z":-73.9047619047619,"a95":5.8,"info":"\"14-09-19\" at \"13:29\""},{"visible":true,"include":false,"step":"510","x":19.99047619047619,"y":64.08571428571429,"z":-22.876190476190477,"a95":7,"info":"\"14-09-19\" at \"16:09\""},{"visible":true,"include":false,"step":"540","x":38.57142857142857,"y":81.71428571428571,"z":-78.19047619047619,"a95":6.3,"info":"\"14-10-04\" at \"11:51\""},{"visible":false,"include":false,"step":"570","x":-77.52380952380952,"y":103.23809523809524,"z":21.142857142857142,"a95":11.6,"info":"\"14-10-04\" at \"15:07\""},{"visible":false,"include":false,"step":"600","x":-130.76190476190476,"y":6.571428571428571,"z":-42.57142857142857,"a95":12,"info":"\"14-10-05\" at \"09:31\""}]},{"version":"v1.1.0","exported":"2016-11-17T15:28:20.637Z","volume":10.5,"added":"2016-11-17T15:07:47.174Z","format":"Utrecht","demagType":"Unknown","strat":"8","patch":1.1,"GEO":[{"dec":129.26866044413532,"inc":-49.10425062587558,"MAD":21.375047891259726,"cm":[-74.95529062794726,47.40191194403666,-107.84432292169245],"intensity":106.94269062660645,"type":"dir","forced":false,"remark":"","origin":false,"nSteps":9,"minStep":"12.0","maxStep":"50.0","steps":["12.0","16.0","20.0","25.0","30.0","35.0","40.0","45.0","50.0"],"group":"None","version":"v1.1.0"}],"TECT":[{"dec":149.55741586836803,"inc":-31.376050962438224,"MAD":21.375047891259722,"cm":[-118.27954555627302,37.39971957687129,-64.08466988353344],"intensity":106.9426906266064,"type":"dir","forced":false,"remark":"","origin":false,"nSteps":9,"minStep":"12.0","maxStep":"50.0","steps":["12.0","16.0","20.0","25.0","30.0","35.0","40.0","45.0","50.0"],"group":"None","version":"v1.1.0"}],"interpreted":true,"name":"EM3.12A","coreAzi":309,"coreDip":11,"bedStrike":283,"bedDip":29,"data":[{"visible":true,"include":false,"step":"0.0","x":63.013333333333335,"y":-26.05809523809524,"z":-116.05714285714285,"a95":0.99,"info":"25/08/2014 at 17:11:25"},{"visible":true,"include":false,"step":"4.0","x":82.98857142857143,"y":-25.69047619047619,"z":-134.34285714285713,"a95":0.99,"info":"25/08/2014 at 17:11:25"},{"visible":true,"include":false,"step":"8.0","x":107.6,"y":-24.19142857142857,"z":-139.61904761904762,"a95":0.99,"info":"25/08/2014 at 17:11:25"},{"visible":true,"include":true,"step":"12.0","x":103.5904761904762,"y":-40.2952380952381,"z":-147.16190476190476,"a95":0.99,"info":"25/08/2014 at 17:11:25"},{"visible":true,"include":true,"step":"16.0","x":127.06666666666668,"y":-29.31238095238095,"z":-122.60952380952382,"a95":0.99,"info":"25/08/2014 at 17:11:25"},{"visible":true,"include":true,"step":"20.0","x":116.48571428571428,"y":-16.213333333333335,"z":-121.1047619047619,"a95":0.99,"info":"25/08/2014 at 17:11:25"},{"visible":true,"include":true,"step":"25.0","x":99.6,"y":-21.617142857142856,"z":-127.19047619047619,"a95":0.99,"info":"25/08/2014 at 17:11:25"},{"visible":true,"include":true,"step":"30.0","x":84.86857142857143,"y":-18.746666666666666,"z":-107.29523809523809,"a95":0.99,"info":"25/08/2014 at 17:11:25"},{"visible":true,"include":true,"step":"35.0","x":94.14285714285714,"y":-44.400952380952376,"z":-117.77142857142856,"a95":0.99,"info":"25/08/2014 at 17:11:25"},{"visible":true,"include":true,"step":"40.0","x":86.1895238095238,"y":-23.46952380952381,"z":-73.6504761904762,"a95":0.99,"info":"25/08/2014 at 17:11:25"},{"visible":true,"include":true,"step":"45.0","x":57.438095238095244,"y":-35.92285714285714,"z":-47.526666666666664,"a95":0.99,"info":"25/08/2014 at 17:11:25"},{"visible":true,"include":true,"step":"50.0","x":39.11714285714286,"y":-25.803809523809523,"z":-63.07904761904762,"a95":0.99,"info":"25/08/2014 at 17:11:25"},{"visible":true,"include":false,"step":"60.0","x":29.97142857142857,"y":12.653333333333334,"z":-23.154285714285713,"a95":0.99,"info":"25/08/2014 at 17:11:25"},{"visible":true,"include":false,"step":"70.0","x":17.726666666666667,"y":5.010571428571429,"z":-14.980952380952383,"a95":0.99,"info":"25/08/2014 at 17:11:25"},{"visible":false,"include":false,"step":"80.0","x":108.17142857142856,"y":-39.68571428571428,"z":33.764761904761905,"a95":0.99,"info":"25/08/2014 at 17:11:25"},{"visible":false,"include":false,"step":"90.0","x":28.135238095238098,"y":-1.301904761904762,"z":34.950476190476195,"a95":0.99,"info":"25/08/2014 at 17:11:25"},{"visible":false,"include":false,"step":"100.0","x":17.59714285714286,"y":15.272380952380953,"z":-6.99647619047619,"a95":0.99,"info":"25/08/2014 at 17:11:25"}]},{"version":"v1.1.0","exported":"2016-11-17T15:28:20.637Z","volume":10.5,"added":"2016-11-17T15:07:47.174Z","format":"Utrecht","demagType":"Unknown","strat":null,"patch":1.1,"GEO":[{"dec":162.52570440760826,"inc":-62.548340711339264,"MAD":6.913191021699902,"cm":[-1.3322676295501878e-15,-1.9984014443252818e-15,0],"intensity":224.39803920711964,"type":"dir","forced":true,"remark":"","origin":false,"nSteps":10,"minStep":"210","maxStep":"450","steps":["210","240","270","300","320","340","370","390","420","450"],"group":"None","version":"v1.1.0"}],"TECT":[{"dec":176.2682621556396,"inc":-35.698149094844396,"MAD":6.913191021699924,"cm":[-3.552713678800501e-15,-1.176836406102666e-14,3.552713678800501e-15],"intensity":224.39803920711958,"type":"dir","forced":true,"remark":"","origin":false,"nSteps":10,"minStep":"210","maxStep":"450","steps":["210","240","270","300","320","340","370","390","420","450"],"group":"None","version":"v1.1.0"}],"interpreted":true,"name":"EM3.12B","coreAzi":309,"coreDip":11,"bedStrike":283,"bedDip":29,"data":[{"visible":false,"include":false,"step":"20","x":-37.80952380952381,"y":20.761904761904763,"z":114.57142857142857,"a95":3.1,"info":"\"14-09-15\" at \"15:53\""},{"visible":true,"include":false,"step":"100","x":61,"y":-17.066666666666666,"z":-46.19047619047619,"a95":3.6,"info":"\"14-09-15\" at \"19:49\""},{"visible":true,"include":false,"step":"150","x":83.9047619047619,"y":-28,"z":-78.57142857142857,"a95":3.4,"info":"\"14-09-15\" at \"22:03\""},{"visible":true,"include":false,"step":"180","x":107.71428571428571,"y":-33.42857142857143,"z":-92.85714285714286,"a95":2.5,"info":"\"14-09-16\" at \"11:04\""},{"visible":true,"include":true,"step":"210","x":94.28571428571429,"y":-37.80952380952381,"z":-84.76190476190476,"a95":6.1,"info":"\"14-09-16\" at \"13:41\""},{"visible":true,"include":true,"step":"240","x":98.28571428571429,"y":-38.666666666666664,"z":-77.14285714285714,"a95":2.5,"info":"\"14-09-16\" at \"16:24\""},{"visible":true,"include":true,"step":"270","x":94.28571428571429,"y":-33.714285714285715,"z":-70.47619047619048,"a95":3.8,"info":"\"14-09-16\" at \"19:19\""},{"visible":true,"include":true,"step":"300","x":94.38095238095238,"y":-30.761904761904763,"z":-57.523809523809526,"a95":2.8,"info":"\"14-09-17\" at \"11:00\""},{"visible":true,"include":true,"step":"320","x":109.42857142857143,"y":-28.19047619047619,"z":-47.523809523809526,"a95":2.5,"info":"\"14-09-17\" at \"14:06\""},{"visible":true,"include":true,"step":"340","x":94.28571428571429,"y":-23.904761904761905,"z":-48.285714285714285,"a95":2.5,"info":"\"14-09-17\" at \"17:19\""},{"visible":true,"include":true,"step":"370","x":94.85714285714286,"y":-26.952380952380953,"z":-46.666666666666664,"a95":3.1,"info":"\"14-09-17\" at \"22:24\""},{"visible":true,"include":true,"step":"390","x":77.61904761904762,"y":-22.19047619047619,"z":-55.523809523809526,"a95":4.9,"info":"\"14-09-18\" at \"11:33\""},{"visible":true,"include":true,"step":"420","x":63.714285714285715,"y":-18.514285714285716,"z":-58.171428571428564,"a95":5,"info":"\"14-09-18\" at \"14:36\""},{"visible":true,"include":true,"step":"450","x":64.78095238095239,"y":-18.123809523809523,"z":-63.30476190476191,"a95":2.8,"info":"\"14-09-19\" at \"09:24\""},{"visible":true,"include":false,"step":"480","x":34.40952380952381,"y":-18.523809523809526,"z":-55.980952380952374,"a95":10.2,"info":"\"14-09-19\" at \"13:32\""},{"visible":true,"include":false,"step":"510","x":29.714285714285715,"y":-5.333333333333333,"z":-45.08571428571428,"a95":13.7,"info":"\"14-09-19\" at \"16:12\""},{"visible":true,"include":false,"step":"540","x":28.26666666666667,"y":-38.89523809523809,"z":-28.38095238095238,"a95":16.2,"info":"\"14-10-04\" at \"11:53\""},{"visible":false,"include":false,"step":"570","x":-165.9047619047619,"y":91.42857142857143,"z":8.095238095238095,"a95":22.3,"info":"\"14-10-04\" at \"15:09\""},{"visible":false,"include":false,"step":"600","x":-440.2857142857143,"y":-90.76190476190476,"z":75.61904761904762,"a95":17.5,"info":"\"14-10-05\" at \"09:33\""}]},{"version":"v1.1.0","exported":"2016-11-17T15:28:20.637Z","volume":10.5,"added":"2016-11-17T15:07:47.175Z","format":"Utrecht","demagType":"Unknown","strat":"1","patch":1.1,"GEO":[{"dec":156.85715692447366,"inc":-40.32709284107426,"MAD":4.5992461702940375,"cm":[-1.199040866595169e-14,-2.020605904817785e-14,0],"intensity":183.70804995218245,"type":"dir","forced":true,"remark":"","origin":false,"nSteps":7,"minStep":"16.0","maxStep":"45.0","steps":["16.0","20.0","25.0","30.0","35.0","40.0","45.0"],"group":"None","version":"v1.1.0"}],"TECT":[{"dec":165.182771828373,"inc":-15.517922563162953,"MAD":4.599246170294018,"cm":[-6.217248937900877e-15,-2.2315482794965646e-14,7.771561172376096e-15],"intensity":183.70804995218245,"type":"dir","forced":true,"remark":"","origin":false,"nSteps":7,"minStep":"16.0","maxStep":"45.0","steps":["16.0","20.0","25.0","30.0","35.0","40.0","45.0"],"group":"None","version":"v1.1.0"}],"interpreted":true,"name":"EM3.13A","coreAzi":310,"coreDip":16,"bedStrike":283,"bedDip":29,"data":[{"visible":true,"include":false,"step":"0.0","x":27.842857142857145,"y":-19.239047619047618,"z":-96.76190476190476,"a95":0.99,"info":"25/08/2014 at 22:43:42"},{"visible":true,"include":false,"step":"4.0","x":41.519999999999996,"y":-28.816190476190474,"z":-93.76857142857143,"a95":0.99,"info":"25/08/2014 at 22:43:42"},{"visible":true,"include":false,"step":"8.0","x":46.05619047619047,"y":-22.133333333333333,"z":-95.57142857142857,"a95":0.99,"info":"25/08/2014 at 22:43:42"},{"visible":true,"include":false,"step":"12.0","x":43.48095238095238,"y":-34.00476190476191,"z":-101.26666666666667,"a95":0.99,"info":"25/08/2014 at 22:43:42"},{"visible":true,"include":true,"step":"16.0","x":54.8752380952381,"y":-43.360952380952384,"z":-99.63809523809525,"a95":0.99,"info":"25/08/2014 at 22:43:42"},{"visible":true,"include":true,"step":"20.0","x":54.402857142857144,"y":-35.9,"z":-96.75238095238095,"a95":0.99,"info":"25/08/2014 at 22:43:42"},{"visible":true,"include":true,"step":"25.0","x":49.00190476190476,"y":-37.61333333333333,"z":-82.54857142857142,"a95":0.99,"info":"25/08/2014 at 22:43:42"},{"visible":true,"include":true,"step":"30.0","x":30.419047619047618,"y":-34.026666666666664,"z":-79.75619047619048,"a95":0.99,"info":"25/08/2014 at 22:43:42"},{"visible":true,"include":true,"step":"35.0","x":25.664761904761907,"y":-21.724761904761905,"z":-66.56095238095239,"a95":0.99,"info":"25/08/2014 at 22:43:42"},{"visible":true,"include":true,"step":"40.0","x":36.83904761904762,"y":-19.576190476190476,"z":-54.71333333333333,"a95":0.99,"info":"25/08/2014 at 22:43:42"},{"visible":true,"include":true,"step":"45.0","x":22.337142857142858,"y":-27.88190476190476,"z":-51.0647619047619,"a95":0.99,"info":"25/08/2014 at 22:43:42"},{"visible":true,"include":false,"step":"50.0","x":10.175238095238095,"y":-29.655238095238094,"z":-25.70380952380952,"a95":0.99,"info":"25/08/2014 at 22:43:42"},{"visible":false,"include":false,"step":"60.0","x":17.13904761904762,"y":9.98,"z":-39.06952380952381,"a95":0.99,"info":"25/08/2014 at 22:43:42"},{"visible":true,"include":false,"step":"70.0","x":0.15593333333333334,"y":-16.213333333333335,"z":-28.10380952380952,"a95":0.99,"info":"25/08/2014 at 22:43:42"},{"visible":true,"include":false,"step":"80.0","x":-2.345047619047619,"y":-21.884761904761906,"z":-18.55142857142857,"a95":0.99,"info":"25/08/2014 at 22:43:42"},{"visible":false,"include":false,"step":"90.0","x":-4.955333333333333,"y":4.084,"z":-17.883809523809525,"a95":0.99,"info":"25/08/2014 at 22:43:42"},{"visible":false,"include":false,"step":"100.0","x":24.304761904761904,"y":-19.136190476190478,"z":-6.657714285714286,"a95":0.99,"info":"25/08/2014 at 22:43:42"}]},{"version":"v1.1.0","exported":"2016-11-17T15:28:20.637Z","volume":10.5,"added":"2016-11-17T15:07:47.176Z","format":"Utrecht","demagType":"Unknown","strat":null,"patch":1.1,"GEO":[{"dec":144.03315992397575,"inc":-41.019740330642556,"MAD":4.758756328243516,"cm":[2.220446049250313e-15,4.884981308350689e-15,0],"intensity":304.68972359500265,"type":"dir","forced":true,"remark":"","origin":false,"nSteps":12,"minStep":"180","maxStep":"540","steps":["180","210","240","270","300","320","340","370","390","420","480","540"],"group":"None","version":"v1.1.0"}],"TECT":[{"dec":155.85887176290908,"inc":-19.505416973055006,"MAD":4.7587563282435,"cm":[-1.3322676295501878e-14,-2.4868995751603507e-14,2.220446049250313e-15],"intensity":304.68972359500265,"type":"dir","forced":true,"remark":"","origin":false,"nSteps":12,"minStep":"180","maxStep":"540","steps":["180","210","240","270","300","320","340","370","390","420","480","540"],"group":"None","version":"v1.1.0"}],"interpreted":true,"name":"EM3.14A","coreAzi":315,"coreDip":8,"bedStrike":283,"bedDip":29,"data":[{"visible":false,"include":false,"step":"20","x":-44.857142857142854,"y":65.61904761904762,"z":-115.04761904761905,"a95":2.8,"info":"\"14-09-15\" at \"15:56\""},{"visible":true,"include":false,"step":"100","x":54.095238095238095,"y":-18.476190476190474,"z":-144.95238095238096,"a95":3.3,"info":"\"14-09-15\" at \"19:54\""},{"visible":true,"include":false,"step":"150","x":86.38095238095238,"y":-26.761904761904763,"z":-156.47619047619048,"a95":3.8,"info":"\"14-09-15\" at \"22:05\""},{"visible":true,"include":true,"step":"180","x":95.33333333333333,"y":-31.142857142857142,"z":-155.52380952380952,"a95":2.5,"info":"\"14-09-16\" at \"11:06\""},{"visible":true,"include":true,"step":"210","x":79.9047619047619,"y":-29.333333333333332,"z":-146.1904761904762,"a95":3.2,"info":"\"14-09-16\" at \"13:43\""},{"visible":true,"include":true,"step":"240","x":92.28571428571429,"y":-31.904761904761905,"z":-144,"a95":2.5,"info":"\"14-09-16\" at \"16:26\""},{"visible":true,"include":true,"step":"270","x":81.80952380952381,"y":-14.761904761904763,"z":-130.47619047619048,"a95":4,"info":"\"14-09-16\" at \"19:21\""},{"visible":true,"include":true,"step":"300","x":90.0952380952381,"y":-18.285714285714285,"z":-129.14285714285714,"a95":2.5,"info":"\"14-09-17\" at \"11:03\""},{"visible":true,"include":true,"step":"320","x":86.66666666666667,"y":-22.952380952380953,"z":-119.61904761904762,"a95":2.4,"info":"\"14-09-17\" at \"14:08\""},{"visible":true,"include":true,"step":"340","x":74.0952380952381,"y":-15.80952380952381,"z":-120.0952380952381,"a95":2.7,"info":"\"14-09-17\" at \"17:22\""},{"visible":true,"include":true,"step":"370","x":80.76190476190476,"y":-11.047619047619047,"z":-97.61904761904762,"a95":2.7,"info":"\"14-09-17\" at \"22:26\""},{"visible":true,"include":true,"step":"390","x":76.28571428571429,"y":-4.571428571428571,"z":-100.66666666666667,"a95":3.3,"info":"\"14-09-18\" at \"11:35\""},{"visible":true,"include":true,"step":"420","x":65.80952380952381,"y":-14.285714285714286,"z":-102.47619047619048,"a95":3.1,"info":"\"14-09-18\" at \"14:38\""},{"visible":false,"include":false,"step":"450","x":55.142857142857146,"y":-45.80952380952381,"z":-121.23809523809524,"a95":2.5,"info":"\"14-09-19\" at \"09:33\""},{"visible":true,"include":true,"step":"480","x":66.95238095238095,"y":-11.714285714285714,"z":-96.38095238095238,"a95":4.2,"info":"\"14-09-19\" at \"13:34\""},{"visible":false,"include":false,"step":"510","x":23.80952380952381,"y":-35.333333333333336,"z":-95.42857142857143,"a95":5.5,"info":"\"14-09-19\" at \"16:14\""},{"visible":true,"include":true,"step":"540","x":69.14285714285714,"y":12.571428571428571,"z":-100.28571428571429,"a95":4.5,"info":"\"14-10-04\" at \"11:55\""},{"visible":false,"include":false,"step":"570","x":-125.9047619047619,"y":71.71428571428571,"z":-102.66666666666667,"a95":22,"info":"\"14-10-04\" at \"15:12\""},{"visible":false,"include":false,"step":"600","x":-362.0952380952381,"y":154.85714285714286,"z":-17.714285714285715,"a95":21.6,"info":"\"14-10-05\" at \"09:35\""}]},{"version":"v1.1.0","exported":"2016-11-17T15:28:20.637Z","volume":10.5,"added":"2016-11-17T15:07:47.176Z","format":"Utrecht","demagType":"Unknown","strat":"2","patch":1.1,"GEO":[],"TECT":[],"interpreted":false,"name":"EM3.14B","coreAzi":315,"coreDip":8,"bedStrike":283,"bedDip":29,"data":[{"visible":true,"include":false,"step":"0.0","x":-125.5047619047619,"y":147.8,"z":-25.824761904761907,"a95":0.99,"info":"25/08/2014 at 22:43:42"},{"visible":true,"include":true,"step":"4.0","x":-109.75238095238096,"y":140.36190476190475,"z":-34.745714285714286,"a95":0.99,"info":"25/08/2014 at 22:43:42"},{"visible":true,"include":true,"step":"8.0","x":-73.9752380952381,"y":118.4,"z":-51.62761904761905,"a95":0.99,"info":"25/08/2014 at 22:43:42"},{"visible":true,"include":true,"step":"12.0","x":-61.88857142857143,"y":110.45714285714286,"z":-70.20666666666666,"a95":0.99,"info":"25/08/2014 at 22:43:42"},{"visible":true,"include":true,"step":"16.0","x":-46.743809523809524,"y":100.02857142857142,"z":-67.66095238095238,"a95":0.99,"info":"25/08/2014 at 22:43:42"},{"visible":true,"include":true,"step":"20.0","x":-37.079047619047614,"y":80.96380952380953,"z":-75.76952380952382,"a95":0.99,"info":"25/08/2014 at 22:43:42"},{"visible":false,"include":false,"step":"25.0","x":-54.55714285714286,"y":74.06380952380952,"z":-91.41238095238096,"a95":0.99,"info":"25/08/2014 at 22:43:42"},{"visible":true,"include":false,"step":"30.0","x":-42.597142857142856,"y":32.46761904761905,"z":-76.76285714285714,"a95":0.99,"info":"25/08/2014 at 22:43:42"},{"visible":true,"include":false,"step":"35.0","x":-44.955238095238094,"y":21.74857142857143,"z":-46.4,"a95":0.99,"info":"25/08/2014 at 22:43:42"},{"visible":true,"include":false,"step":"40.0","x":-51.60190476190477,"y":28.794285714285714,"z":-53.89809523809523,"a95":0.99,"info":"25/08/2014 at 22:43:42"},{"visible":true,"include":false,"step":"45.0","x":-16.224761904761905,"y":42.53904761904762,"z":-41.156190476190474,"a95":0.99,"info":"25/08/2014 at 22:43:42"},{"visible":true,"include":false,"step":"50.0","x":-23.946666666666665,"y":14.576190476190478,"z":-26.94952380952381,"a95":0.99,"info":"25/08/2014 at 22:43:42"},{"visible":true,"include":false,"step":"60.0","x":-41.201904761904764,"y":23.002857142857142,"z":-37.13428571428572,"a95":0.99,"info":"25/08/2014 at 22:43:42"},{"visible":true,"include":false,"step":"70.0","x":-31.44952380952381,"y":4.812476190476191,"z":-14.545714285714284,"a95":0.99,"info":"25/08/2014 at 22:43:42"},{"visible":false,"include":false,"step":"80.0","x":-80.66952380952381,"y":-8.944095238095239,"z":-20.68095238095238,"a95":0.99,"info":"25/08/2014 at 22:43:42"},{"visible":false,"include":false,"step":"90.0","x":-55.476190476190474,"y":17.456190476190475,"z":-19.396190476190476,"a95":0.99,"info":"25/08/2014 at 22:43:42"},{"visible":false,"include":false,"step":"100.0","x":-11.52095238095238,"y":7.732952380952381,"z":11.68,"a95":0.99,"info":"25/08/2014 at 22:43:42"}]},{"version":"v1.1.0","exported":"2016-11-17T15:28:20.637Z","volume":10.5,"added":"2016-11-17T15:07:47.177Z","format":"Utrecht","demagType":"Unknown","strat":"3","patch":1.1,"GEO":[{"dec":121.07885200815485,"inc":-27.337259962812755,"MAD":11.397850830032967,"cm":[-4.440892098500626e-16,0,0],"intensity":108.8411236540937,"type":"dir","forced":true,"remark":"","origin":false,"nSteps":5,"minStep":"20.0","maxStep":"40.0","steps":["20.0","25.0","30.0","35.0","40.0"],"group":"None","version":"v1.1.0"}],"TECT":[{"dec":131.77369122043,"inc":-15.545454014124813,"MAD":11.397850830032977,"cm":[1.7763568394002505e-15,1.7763568394002505e-15,2.4424906541753444e-15],"intensity":108.84112365409369,"type":"dir","forced":true,"remark":"","origin":false,"nSteps":5,"minStep":"20.0","maxStep":"40.0","steps":["20.0","25.0","30.0","35.0","40.0"],"group":"None","version":"v1.1.0"}],"interpreted":true,"name":"EM3.15B","coreAzi":320,"coreDip":9,"bedStrike":283,"bedDip":29,"data":[{"visible":false,"include":false,"step":"0.0","x":-16.19047619047619,"y":46.98380952380952,"z":-35.859047619047615,"a95":0.99,"info":"25/08/2014 at 22:43:42"},{"visible":false,"include":false,"step":"4.0","x":-6.855619047619047,"y":36.766666666666666,"z":-37.33238095238095,"a95":0.99,"info":"25/08/2014 at 22:43:42"},{"visible":true,"include":false,"step":"8.0","x":5.039904761904761,"y":24.732380952380954,"z":-45.875238095238096,"a95":0.99,"info":"25/08/2014 at 22:43:42"},{"visible":true,"include":false,"step":"12.0","x":12.268571428571429,"y":27.104761904761908,"z":-47.586666666666666,"a95":0.99,"info":"25/08/2014 at 22:43:42"},{"visible":true,"include":false,"step":"16.0","x":11.335238095238095,"y":32.5752380952381,"z":-46.35142857142857,"a95":0.99,"info":"25/08/2014 at 22:43:42"},{"visible":true,"include":true,"step":"20.0","x":12.97904761904762,"y":16.785714285714285,"z":-57.80952380952381,"a95":0.99,"info":"25/08/2014 at 22:43:42"},{"visible":true,"include":true,"step":"25.0","x":22.337142857142858,"y":28.76571428571429,"z":-52.74571428571429,"a95":0.99,"info":"25/08/2014 at 22:43:42"},{"visible":true,"include":true,"step":"30.0","x":15.54,"y":21.353333333333335,"z":-48.86952380952381,"a95":0.99,"info":"25/08/2014 at 22:43:42"},{"visible":true,"include":true,"step":"35.0","x":18.093333333333334,"y":-5.372190476190476,"z":-37.4752380952381,"a95":0.99,"info":"25/08/2014 at 22:43:42"},{"visible":true,"include":true,"step":"40.0","x":19.17142857142857,"y":7.388666666666667,"z":-43.325714285714284,"a95":0.99,"info":"25/08/2014 at 22:43:42"},{"visible":true,"include":false,"step":"45.0","x":18.901904761904763,"y":8.35152380952381,"z":-13.981904761904762,"a95":0.99,"info":"25/08/2014 at 22:43:42"},{"visible":true,"include":false,"step":"50.0","x":14.430476190476192,"y":13.541904761904762,"z":-20.947619047619046,"a95":0.99,"info":"25/08/2014 at 22:43:42"},{"visible":true,"include":false,"step":"60.0","x":12.194285714285714,"y":18.15142857142857,"z":-27.255238095238095,"a95":0.99,"info":"25/08/2014 at 22:43:42"},{"visible":true,"include":false,"step":"70.0","x":-2.410285714285714,"y":8.164571428571428,"z":-26.454285714285714,"a95":0.99,"info":"25/08/2014 at 22:43:42"},{"visible":false,"include":false,"step":"80.0","x":-26.364761904761902,"y":9.78190476190476,"z":-16.03333333333333,"a95":0.99,"info":"25/08/2014 at 22:43:42"},{"visible":false,"include":false,"step":"90.0","x":-17.14952380952381,"y":8.810857142857142,"z":-16.99809523809524,"a95":0.99,"info":"25/08/2014 at 22:43:42"},{"visible":false,"include":false,"step":"100.0","x":0.3435714285714286,"y":-16.51047619047619,"z":6.677238095238096,"a95":0.99,"info":"25/08/2014 at 22:43:42"}]}]
