# Supplementary material for: Paleomagnetic constraints on the timing and distribution of Cenozoic rotations in Central and Eastern Anatolia
Source: Copernicus journal article supplement (doi:10.5194/se-9-295-2018), 2018-03-21
Supplement: Supplementary file 2 [file se-9-295-2018-supplement.zip › se-2017-66_DATA_dir files/dir files Ulukisla/EM4.dir]

[{"version":"v1.1.0","exported":"2016-11-23T00:04:11.908Z","volume":10.5,"added":"2016-11-22T23:53:38.003Z","format":"Utrecht","demagType":"Unknown","strat":"7","patch":1.1,"GEO":[{"dec":197.57349632089415,"inc":-74.32190093754356,"MAD":18.038942093604994,"cm":[11.041734338989947,50.94942628183859,-175.30726496998392],"intensity":162.35298890907353,"type":"dir","forced":false,"remark":"","origin":false,"nSteps":7,"minStep":"25.0","maxStep":"60.0","steps":["25.0","30.0","35.0","40.0","45.0","50.0","60.0"],"group":"None","version":"v1.1.0"}],"TECT":[{"dec":176.65591529688209,"inc":-14.032038382249574,"MAD":18.038942093604994,"cm":[-141.48336452890732,80.59730215104155,-83.28825568152776],"intensity":162.35298890907353,"type":"dir","forced":false,"remark":"","origin":false,"nSteps":7,"minStep":"25.0","maxStep":"60.0","steps":["25.0","30.0","35.0","40.0","45.0","50.0","60.0"],"group":"None","version":"v1.1.0"}],"interpreted":true,"name":"EM4.1B","coreAzi":306,"coreDip":49,"bedStrike":259,"bedDip":62,"data":[{"visible":true,"include":false,"step":"0.0","x":153.31428571428572,"y":106.56190476190477,"z":-77.71333333333334,"a95":0.99,"info":"04/11/2014 at 06:06:15"},{"visible":true,"include":false,"step":"10.0","x":174.9047619047619,"y":48.82190476190476,"z":-253.75238095238097,"a95":0.99,"info":"04/11/2014 at 06:06:15"},{"visible":true,"include":false,"step":"15.0","x":185.8952380952381,"y":23.204761904761906,"z":-241.28571428571428,"a95":0.99,"info":"04/11/2014 at 06:06:15"},{"visible":true,"include":false,"step":"20.0","x":163.74285714285713,"y":15.880952380952381,"z":-215.28571428571428,"a95":0.99,"info":"04/11/2014 at 06:06:15"},{"visible":true,"include":true,"step":"25.0","x":127.65714285714287,"y":21.391428571428573,"z":-209,"a95":0.99,"info":"04/11/2014 at 06:06:15"},{"visible":true,"include":true,"step":"30.0","x":126.72380952380952,"y":9.964761904761904,"z":-213.82857142857142,"a95":0.99,"info":"04/11/2014 at 06:06:15"},{"visible":true,"include":true,"step":"35.0","x":91.62,"y":25.61619047619048,"z":-158.86666666666665,"a95":0.99,"info":"04/11/2014 at 06:06:15"},{"visible":true,"include":true,"step":"40.0","x":109.70476190476191,"y":72.35333333333334,"z":-157.48571428571427,"a95":0.99,"info":"04/11/2014 at 06:06:15"},{"visible":true,"include":true,"step":"45.0","x":54.94285714285714,"y":33.31142857142857,"z":-133.22857142857143,"a95":0.99,"info":"04/11/2014 at 06:06:15"},{"visible":true,"include":true,"step":"50.0","x":72.92952380952381,"y":48.756190476190476,"z":-133.74285714285713,"a95":0.99,"info":"04/11/2014 at 06:06:15"},{"visible":true,"include":true,"step":"60.0","x":38.034285714285716,"y":60.768571428571434,"z":-79.47904761904762,"a95":0.99,"info":"04/11/2014 at 06:06:15"},{"visible":true,"include":false,"step":"70.0","x":28.355238095238096,"y":30.448571428571427,"z":-83.75142857142858,"a95":0.99,"info":"04/11/2014 at 06:06:15"},{"visible":true,"include":false,"step":"80.0","x":-51.57238095238095,"y":45.198095238095235,"z":-97.4857142857143,"a95":0.99,"info":"04/11/2014 at 06:06:15"},{"visible":true,"include":false,"step":"90.0","x":36.36,"y":77.33714285714285,"z":-57.14380952380952,"a95":0.99,"info":"04/11/2014 at 06:06:15"}]},{"version":"v1.1.0","exported":"2016-11-23T00:04:11.908Z","volume":10.5,"added":"2016-11-22T23:53:38.003Z","format":"Utrecht","demagType":"Unknown","strat":"1","patch":1.1,"GEO":[{"dec":215.8348814629649,"inc":-71.58020559779746,"MAD":7.565793151372218,"cm":[-71.71886642800023,2.894744286586115,-334.2756105033917],"intensity":401.7244449899638,"type":"dir","forced":false,"remark":"","origin":false,"nSteps":10,"minStep":"23.0","maxStep":"70.0","steps":["23.0","25.0","30.0","33.0","35.0","40.0","45.0","50.0","60.0","70.0"],"group":"None","version":"v1.1.0"}],"TECT":[{"dec":182.78739732606147,"inc":-14.74754194336854,"MAD":7.565793151372208,"cm":[-324.49275382992266,52.029010661714565,-94.28464289084272],"intensity":401.72444498996373,"type":"dir","forced":false,"remark":"","origin":false,"nSteps":10,"minStep":"23.0","maxStep":"70.0","steps":["23.0","25.0","30.0","33.0","35.0","40.0","45.0","50.0","60.0","70.0"],"group":"None","version":"v1.1.0"}],"interpreted":true,"name":"EM4.2B","coreAzi":310,"coreDip":52,"bedStrike":259,"bedDip":62,"data":[{"visible":true,"include":false,"step":"0.0","x":371.81904761904764,"y":-94.75619047619048,"z":-222.8095238095238,"a95":0.99,"info":"25/11/2014 at 10:57:17"},{"visible":true,"include":false,"step":"10.0","x":363.7238095238095,"y":-118.77142857142856,"z":-542.2285714285714,"a95":0.99,"info":"25/11/2014 at 10:57:17"},{"visible":true,"include":false,"step":"15.0","x":339.1333333333333,"y":-116.21904761904761,"z":-521.6,"a95":0.99,"info":"25/11/2014 at 10:57:17"},{"visible":true,"include":false,"step":"20.0","x":295.3809523809524,"y":-109.07619047619048,"z":-467.4761904761905,"a95":0.99,"info":"25/11/2014 at 10:57:17"},{"visible":true,"include":true,"step":"23.0","x":282.9428571428572,"y":-114.92380952380952,"z":-452.4,"a95":0.99,"info":"25/11/2014 at 10:57:17"},{"visible":true,"include":true,"step":"25.0","x":257.02857142857147,"y":-90.13142857142857,"z":-392.3238095238095,"a95":0.99,"info":"25/11/2014 at 10:57:17"},{"visible":true,"include":true,"step":"30.0","x":205.97142857142856,"y":-75.80190476190475,"z":-364.97142857142853,"a95":0.99,"info":"25/11/2014 at 10:57:17"},{"visible":true,"include":true,"step":"33.0","x":209.12380952380954,"y":-58.47904761904762,"z":-335.81904761904764,"a95":0.99,"info":"25/11/2014 at 10:57:17"},{"visible":true,"include":true,"step":"35.0","x":176.15238095238095,"y":-80.47714285714285,"z":-327.552380952381,"a95":0.99,"info":"25/11/2014 at 10:57:17"},{"visible":true,"include":true,"step":"40.0","x":168.88571428571427,"y":-56.023809523809526,"z":-273.50476190476195,"a95":0.99,"info":"25/11/2014 at 10:57:17"},{"visible":true,"include":true,"step":"45.0","x":130.54285714285714,"y":-38.19714285714286,"z":-226.49523809523808,"a95":0.99,"info":"25/11/2014 at 10:57:17"},{"visible":true,"include":true,"step":"50.0","x":100.34285714285713,"y":-44.90380952380953,"z":-231.12380952380954,"a95":0.99,"info":"25/11/2014 at 10:57:17"},{"visible":true,"include":true,"step":"60.0","x":80.77428571428571,"y":4.085809523809524,"z":-182.8761904761905,"a95":0.99,"info":"25/11/2014 at 10:57:17"},{"visible":true,"include":true,"step":"70.0","x":65.49428571428572,"y":24.06095238095238,"z":-144.53333333333333,"a95":0.99,"info":"25/11/2014 at 10:57:17"},{"visible":false,"include":false,"step":"80.0","x":160.95238095238096,"y":-16.644761904761907,"z":-95.33333333333333,"a95":0.99,"info":"25/11/2014 at 10:57:17"},{"visible":false,"include":false,"step":"90.0","x":30.313333333333336,"y":48.96190476190476,"z":-78.0247619047619,"a95":0.99,"info":"25/11/2014 at 10:57:17"}]},{"version":"v1.1.0","exported":"2016-11-23T00:04:11.909Z","volume":10.5,"added":"2016-11-22T23:53:38.004Z","format":"Utrecht","demagType":"Unknown","strat":"8","patch":1.1,"GEO":[{"dec":222.63512366007657,"inc":-75.00162025484215,"MAD":7.22357023371421,"cm":[-205.77785649198063,1.1172513271952813,-368.98772659975543],"intensity":285.60018503427125,"type":"dir","forced":false,"remark":"","origin":false,"nSteps":7,"minStep":"20.0","maxStep":"50.0","steps":["20.0","25.0","30.0","35.0","40.0","45.0","50.0"],"group":"None","version":"v1.1.0"}],"TECT":[{"dec":181.69748782328293,"inc":-18.541712724239282,"MAD":7.223570233714218,"cm":[-420.2815564879977,42.81254684360538,5.311870010485054],"intensity":285.60018503427136,"type":"dir","forced":false,"remark":"","origin":false,"nSteps":7,"minStep":"20.0","maxStep":"50.0","steps":["20.0","25.0","30.0","35.0","40.0","45.0","50.0"],"group":"None","version":"v1.1.0"}],"interpreted":true,"name":"EM4.3B","coreAzi":336,"coreDip":55,"bedStrike":259,"bedDip":62,"data":[{"visible":true,"include":false,"step":"0.0","x":65.4647619047619,"y":-130.64761904761903,"z":-499.00952380952384,"a95":0.99,"info":"04/11/2014 at 06:06:15"},{"visible":true,"include":false,"step":"10.0","x":156.74285714285713,"y":-143.56190476190477,"z":-654.9428571428571,"a95":0.99,"info":"04/11/2014 at 06:06:15"},{"visible":true,"include":false,"step":"15.0","x":150.16190476190476,"y":-142.45714285714286,"z":-627.152380952381,"a95":0.99,"info":"04/11/2014 at 06:06:15"},{"visible":true,"include":true,"step":"20.0","x":132.86666666666665,"y":-122.55238095238094,"z":-544.2857142857143,"a95":0.99,"info":"04/11/2014 at 06:06:15"},{"visible":true,"include":true,"step":"25.0","x":109.31428571428572,"y":-104.22857142857144,"z":-497.46666666666664,"a95":0.99,"info":"04/11/2014 at 06:06:15"},{"visible":true,"include":true,"step":"30.0","x":76.09619047619047,"y":-97.80000000000001,"z":-445.5619047619047,"a95":0.99,"info":"04/11/2014 at 06:06:15"},{"visible":true,"include":true,"step":"35.0","x":35.30095238095238,"y":-75.71142857142857,"z":-395.0380952380952,"a95":0.99,"info":"04/11/2014 at 06:06:15"},{"visible":true,"include":true,"step":"40.0","x":39.75904761904762,"y":-55.5,"z":-363.0761904761905,"a95":0.99,"info":"04/11/2014 at 06:06:15"},{"visible":true,"include":true,"step":"45.0","x":-3.394285714285714,"y":-72.19047619047619,"z":-330.8095238095238,"a95":0.99,"info":"04/11/2014 at 06:06:15"},{"visible":true,"include":true,"step":"50.0","x":11.018095238095238,"y":-50.75428571428571,"z":-296.16190476190474,"a95":0.99,"info":"04/11/2014 at 06:06:15"},{"visible":true,"include":false,"step":"60.0","x":-19.65809523809524,"y":5.55552380952381,"z":-214.60000000000002,"a95":0.99,"info":"04/11/2014 at 06:06:15"},{"visible":true,"include":false,"step":"70.0","x":-92.22761904761904,"y":-12.621904761904762,"z":-190.0095238095238,"a95":0.99,"info":"04/11/2014 at 06:06:15"},{"visible":true,"include":false,"step":"80.0","x":-56.15238095238095,"y":-27.94952380952381,"z":-171.8095238095238,"a95":0.99,"info":"04/11/2014 at 06:06:15"},{"visible":true,"include":false,"step":"90.0","x":-106.08571428571429,"y":21.621904761904762,"z":-115.1047619047619,"a95":0.99,"info":"04/11/2014 at 06:06:16"}]},{"version":"v1.1.0","exported":"2016-11-23T00:04:11.909Z","volume":10.5,"added":"2016-11-22T23:53:38.004Z","format":"Utrecht","demagType":"Unknown","strat":null,"patch":1.1,"GEO":[{"dec":218.12777602906579,"inc":-67.372024207303,"MAD":11.185368159040344,"cm":[94.25676579205151,-9.624456288474056,-773.483338211406],"intensity":385.76241910135514,"type":"dir","forced":false,"remark":"","origin":false,"nSteps":7,"minStep":"240","maxStep":"400","steps":["240","270","300","320","340","370","400"],"group":"None","version":"v1.1.0"}],"TECT":[{"dec":186.31572792342752,"inc":-12.183007477900418,"MAD":11.18536815904028,"cm":[-625.2825139566132,130.2398113458027,-446.44463467242423],"intensity":385.7624191013552,"type":"dir","forced":false,"remark":"","origin":false,"nSteps":7,"minStep":"240","maxStep":"400","steps":["240","270","300","320","340","370","400"],"group":"None","version":"v1.1.0"}],"interpreted":true,"name":"EM4.4A","coreAzi":278,"coreDip":65,"bedStrike":259,"bedDip":62,"data":[{"visible":false,"include":false,"step":"20","x":961.8095238095239,"y":252.28571428571428,"z":574.7619047619048,"a95":1.9,"info":"\"14-11-30\" at \"14:37\""},{"visible":true,"include":false,"step":"100","x":536.7619047619048,"y":102.0952380952381,"z":-602.7619047619048,"a95":2.2,"info":"\"15-01-31\" at \"11:23\""},{"visible":true,"include":false,"step":"150","x":536.8571428571429,"y":40.666666666666664,"z":-774.7619047619048,"a95":2.3,"info":"\"15-01-31\" at \"14:44\""},{"visible":true,"include":false,"step":"180","x":516.1904761904761,"y":25.142857142857142,"z":-823.8095238095239,"a95":2.4,"info":"\"15-02-01\" at \"08:13\""},{"visible":true,"include":false,"step":"210","x":504.6666666666667,"y":10.476190476190476,"z":-824.6666666666666,"a95":2.4,"info":"\"15-02-01\" at \"11:25\""},{"visible":true,"include":true,"step":"240","x":439.8095238095238,"y":23.047619047619047,"z":-834.7619047619048,"a95":2.4,"info":"\"15-02-02\" at \"16:09\""},{"visible":true,"include":true,"step":"270","x":427.8095238095238,"y":45.523809523809526,"z":-789.9047619047619,"a95":2.4,"info":"\"15-02-02\" at \"20:04\""},{"visible":true,"include":true,"step":"300","x":384.2857142857143,"y":89.14285714285714,"z":-739.5238095238095,"a95":2.5,"info":"\"15-02-02\" at \"23:43\""},{"visible":true,"include":true,"step":"320","x":337.14285714285717,"y":108.47619047619048,"z":-640.0952380952381,"a95":2.6,"info":"\"15-02-03\" at \"18:20\""},{"visible":true,"include":true,"step":"340","x":287.7142857142857,"y":97.71428571428571,"z":-671.9047619047619,"a95":2.6,"info":"\"15-02-04\" at \"16:14\""},{"visible":true,"include":true,"step":"370","x":336.2857142857143,"y":124.19047619047619,"z":-616.0952380952381,"a95":2.4,"info":"\"15-02-04\" at \"21:19\""},{"visible":true,"include":true,"step":"400","x":218.85714285714286,"y":155.9047619047619,"z":-547.8095238095239,"a95":2.4,"info":"\"15-02-05\" at \"01:31\""},{"visible":false,"include":false,"step":"420","x":51.61904761904762,"y":196.28571428571428,"z":-183.8095238095238,"a95":4.1,"info":"\"15-02-09\" at \"20:09\""},{"visible":false,"include":false,"step":"450","x":113.33333333333333,"y":77.71428571428571,"z":-470.95238095238096,"a95":3,"info":"\"15-02-09\" at \"22:27\""}]},{"version":"v1.1.0","exported":"2016-11-23T00:04:11.909Z","volume":10.5,"added":"2016-11-22T23:53:38.006Z","format":"Utrecht","demagType":"Unknown","strat":"2","patch":1.1,"GEO":[{"dec":138.86741706013777,"inc":-78.01486941373545,"MAD":6.2833716629313185,"cm":[-25.278273532239837,112.18290733008219,-452.53287754576496],"intensity":487.9249134875305,"type":"dir","forced":false,"remark":"","origin":false,"nSteps":10,"minStep":"20.0","maxStep":"60.0","steps":["20.0","23.0","25.0","30.0","33.0","35.0","40.0","45.0","50.0","60.0"],"group":"None","version":"v1.1.0"}],"TECT":[{"dec":162.72490957569937,"inc":-17.49747386573591,"MAD":6.283371662931324,"cm":[-393.4298294606937,183.74432058098716,-171.64205491199323],"intensity":487.92491348753055,"type":"dir","forced":false,"remark":"","origin":false,"nSteps":10,"minStep":"20.0","maxStep":"60.0","steps":["20.0","23.0","25.0","30.0","33.0","35.0","40.0","45.0","50.0","60.0"],"group":"None","version":"v1.1.0"}],"interpreted":true,"name":"EM4.5A","coreAzi":308,"coreDip":59,"bedStrike":259,"bedDip":62,"data":[{"visible":true,"include":false,"step":"0.0","x":330.2095238095238,"y":130.37142857142857,"z":-340.03809523809525,"a95":0.99,"info":"25/11/2014 at 10:57:17"},{"visible":true,"include":false,"step":"10.0","x":257.37142857142857,"y":72.99238095238096,"z":-714.9428571428571,"a95":0.99,"info":"25/11/2014 at 10:57:17"},{"visible":true,"include":false,"step":"15.0","x":250.87619047619046,"y":55.02,"z":-715.495238095238,"a95":0.99,"info":"25/11/2014 at 10:57:17"},{"visible":true,"include":true,"step":"20.0","x":224.71428571428572,"y":31.155238095238094,"z":-655.1428571428571,"a95":0.99,"info":"25/11/2014 at 10:57:17"},{"visible":true,"include":true,"step":"23.0","x":230.61904761904762,"y":33.17714285714286,"z":-645.4761904761905,"a95":0.99,"info":"25/11/2014 at 10:57:17"},{"visible":true,"include":true,"step":"25.0","x":195.0952380952381,"y":56.796190476190475,"z":-577.9904761904761,"a95":0.99,"info":"25/11/2014 at 10:57:17"},{"visible":true,"include":true,"step":"30.0","x":161.0857142857143,"y":48.07714285714286,"z":-498.5904761904762,"a95":0.99,"info":"25/11/2014 at 10:57:17"},{"visible":true,"include":true,"step":"33.0","x":138.6952380952381,"y":61.645714285714284,"z":-475.81904761904764,"a95":0.99,"info":"25/11/2014 at 10:57:17"},{"visible":true,"include":true,"step":"35.0","x":128.03809523809525,"y":29.18,"z":-445.35238095238094,"a95":0.99,"info":"25/11/2014 at 10:57:17"},{"visible":true,"include":true,"step":"40.0","x":103.66666666666667,"y":66.7752380952381,"z":-387.6952380952381,"a95":0.99,"info":"25/11/2014 at 10:57:17"},{"visible":true,"include":true,"step":"45.0","x":119.45714285714286,"y":60.94666666666667,"z":-307.4761904761905,"a95":0.99,"info":"25/11/2014 at 10:57:17"},{"visible":true,"include":true,"step":"50.0","x":65.04476190476191,"y":45.04095238095238,"z":-228.7047619047619,"a95":0.99,"info":"25/11/2014 at 10:57:17"},{"visible":true,"include":true,"step":"60.0","x":73.15333333333334,"y":58.67714285714286,"z":-192.17142857142858,"a95":0.99,"info":"25/11/2014 at 10:57:17"},{"visible":true,"include":false,"step":"70.0","x":95.45714285714286,"y":77.84857142857143,"z":-160.35238095238097,"a95":0.99,"info":"25/11/2014 at 10:57:17"},{"visible":true,"include":false,"step":"80.0","x":20.17047619047619,"y":3.520857142857143,"z":-131.47619047619048,"a95":0.99,"info":"25/11/2014 at 10:57:17"},{"visible":true,"include":false,"step":"90.0","x":59.850476190476186,"y":-0.7136857142857143,"z":-116.92380952380952,"a95":0.99,"info":"25/11/2014 at 10:57:17"}]},{"version":"v1.1.0","exported":"2016-11-23T00:04:11.909Z","volume":10.5,"added":"2016-11-22T23:53:38.007Z","format":"Utrecht","demagType":"Unknown","strat":"3","patch":1.1,"GEO":[{"dec":177.87548200879337,"inc":-79.73467235858146,"MAD":8.059444684359221,"cm":[-43.69774125697858,71.23942365706404,-307.6047544549537],"intensity":317.1167004471607,"type":"dir","forced":false,"remark":"","origin":false,"nSteps":8,"minStep":"30.0","maxStep":"70.0","steps":["30.0","33.0","35.0","40.0","45.0","50.0","60.0","70.0"],"group":"None","version":"v1.1.0"}],"TECT":[{"dec":170.65523415645566,"inc":-17.848044119399106,"MAD":8.059444684359201,"cm":[-280.88869056988216,117.34467370917515,-94.53572922059193],"intensity":317.1167004471608,"type":"dir","forced":false,"remark":"","origin":false,"nSteps":8,"minStep":"30.0","maxStep":"70.0","steps":["30.0","33.0","35.0","40.0","45.0","50.0","60.0","70.0"],"group":"None","version":"v1.1.0"}],"interpreted":true,"name":"EM4.6A","coreAzi":335,"coreDip":56,"bedStrike":259,"bedDip":62,"data":[{"visible":true,"include":false,"step":"0.0","x":384.1904761904762,"y":-63.09238095238096,"z":-387.2761904761905,"a95":0.99,"info":"25/11/2014 at 10:57:17"},{"visible":true,"include":false,"step":"10.0","x":314.9142857142857,"y":32.39142857142857,"z":-636.8190476190476,"a95":0.99,"info":"25/11/2014 at 10:57:17"},{"visible":true,"include":false,"step":"15.0","x":291.87619047619046,"y":29.855238095238096,"z":-634.2285714285714,"a95":0.99,"info":"25/11/2014 at 10:57:17"},{"visible":true,"include":false,"step":"20.0","x":260.247619047619,"y":19.871428571428574,"z":-578.0095238095239,"a95":0.99,"info":"25/11/2014 at 10:57:17"},{"visible":true,"include":false,"step":"23.0","x":242.69523809523812,"y":41.28,"z":-547.3142857142857,"a95":0.99,"info":"25/11/2014 at 10:57:17"},{"visible":true,"include":false,"step":"25.0","x":231.67619047619047,"y":36.75142857142857,"z":-488.152380952381,"a95":0.99,"info":"25/11/2014 at 10:57:17"},{"visible":true,"include":true,"step":"30.0","x":176.28571428571428,"y":28.082857142857144,"z":-434.18095238095236,"a95":0.99,"info":"25/11/2014 at 10:57:17"},{"visible":true,"include":true,"step":"33.0","x":172.86666666666665,"y":48.58,"z":-406.847619047619,"a95":0.99,"info":"25/11/2014 at 10:57:17"},{"visible":true,"include":true,"step":"35.0","x":153.6,"y":25.43047619047619,"z":-373.752380952381,"a95":0.99,"info":"25/11/2014 at 10:57:17"},{"visible":true,"include":true,"step":"40.0","x":114.83809523809524,"y":43.163809523809526,"z":-325.9047619047619,"a95":0.99,"info":"25/11/2014 at 10:57:17"},{"visible":true,"include":true,"step":"45.0","x":100.43809523809523,"y":78.93904761904761,"z":-272.8666666666667,"a95":0.99,"info":"25/11/2014 at 10:57:17"},{"visible":true,"include":true,"step":"50.0","x":92.85428571428572,"y":40.28095238095238,"z":-224.32380952380953,"a95":0.99,"info":"25/11/2014 at 10:57:17"},{"visible":true,"include":true,"step":"60.0","x":58.595238095238095,"y":42.12285714285714,"z":-166.22857142857143,"a95":0.99,"info":"25/11/2014 at 10:57:17"},{"visible":true,"include":true,"step":"70.0","x":44.26285714285714,"y":62.179047619047616,"z":-147.8761904761905,"a95":0.99,"info":"25/11/2014 at 10:57:17"},{"visible":false,"include":false,"step":"80.0","x":209.1904761904762,"y":25.096190476190475,"z":-106.51428571428572,"a95":0.99,"info":"25/11/2014 at 10:57:17"},{"visible":false,"include":false,"step":"90.0","x":17.125714285714285,"y":54.0247619047619,"z":-114.8952380952381,"a95":0.99,"info":"25/11/2014 at 10:57:17"}]},{"version":"v1.1.0","exported":"2016-11-23T00:04:11.909Z","volume":10.5,"added":"2016-11-22T23:53:38.007Z","format":"Utrecht","demagType":"Unknown","strat":"1","patch":1.1,"GEO":[{"dec":61.0220419089805,"inc":-88.4180314951679,"MAD":6.73880905637629,"cm":[-1.8990762552469331,19.12573158879971,-380.4362913064566],"intensity":312.44024948961646,"type":"dir","forced":false,"remark":"","origin":false,"nSteps":6,"minStep":"25.0","maxStep":"50.0","steps":["25.0","30.0","35.0","40.0","45.0","50.0"],"group":"None","version":"v1.1.0"}],"TECT":[{"dec":167.28810363081448,"inc":-28.47766696232303,"MAD":6.738809056376291,"cm":[-328.7615062938305,82.66135178520561,-173.7358476046187],"intensity":312.44024948961635,"type":"dir","forced":false,"remark":"","origin":false,"nSteps":6,"minStep":"25.0","maxStep":"50.0","steps":["25.0","30.0","35.0","40.0","45.0","50.0"],"group":"None","version":"v1.1.0"}],"interpreted":true,"name":"EM4.7A","coreAzi":303,"coreDip":52,"bedStrike":259,"bedDip":62,"data":[{"visible":true,"include":false,"step":"0.0","x":428.74285714285713,"y":150.61904761904762,"z":-497.1333333333333,"a95":0.99,"info":"04/11/2014 at 10:38:33"},{"visible":true,"include":false,"step":"10.0","x":433.6,"y":36.67809523809524,"z":-553.3428571428572,"a95":0.99,"info":"04/11/2014 at 10:38:33"},{"visible":true,"include":false,"step":"15.0","x":405.6380952380952,"y":35.73428571428571,"z":-544.1904761904761,"a95":0.99,"info":"04/11/2014 at 10:38:33"},{"visible":true,"include":false,"step":"20.0","x":362.18095238095236,"y":2.4965714285714284,"z":-485.1904761904762,"a95":0.99,"info":"04/11/2014 at 10:38:33"},{"visible":true,"include":true,"step":"25.0","x":324.48571428571427,"y":16.795238095238094,"z":-447.1904761904762,"a95":0.99,"info":"04/11/2014 at 10:38:33"},{"visible":true,"include":true,"step":"30.0","x":268.552380952381,"y":6.45952380952381,"z":-379.9904761904762,"a95":0.99,"info":"04/11/2014 at 10:38:33"},{"visible":true,"include":true,"step":"35.0","x":217.8857142857143,"y":4.881619047619047,"z":-321.8857142857143,"a95":0.99,"info":"04/11/2014 at 10:38:33"},{"visible":true,"include":true,"step":"40.0","x":222.42857142857142,"y":15.401904761904762,"z":-273.54285714285714,"a95":0.99,"info":"04/11/2014 at 10:38:33"},{"visible":true,"include":true,"step":"45.0","x":159.1809523809524,"y":-2.166190476190476,"z":-238.0952380952381,"a95":0.99,"info":"04/11/2014 at 10:38:33"},{"visible":true,"include":true,"step":"50.0","x":132.05714285714285,"y":11.571428571428571,"z":-201.0952380952381,"a95":0.99,"info":"04/11/2014 at 10:38:33"},{"visible":true,"include":false,"step":"60.0","x":141.6095238095238,"y":7.072,"z":-144.1809523809524,"a95":0.99,"info":"04/11/2014 at 10:38:33"},{"visible":true,"include":false,"step":"70.0","x":82.04095238095238,"y":17.89428571428571,"z":-139.7238095238095,"a95":0.99,"info":"04/11/2014 at 10:38:33"},{"visible":true,"include":false,"step":"80.0","x":283.3619047619048,"y":-4.656761904761905,"z":-113.27619047619048,"a95":0.99,"info":"04/11/2014 at 10:38:33"},{"visible":true,"include":false,"step":"90.0","x":77.05333333333333,"y":-3.4386666666666668,"z":-59.582857142857144,"a95":0.99,"info":"04/11/2014 at 10:38:33"}]},{"version":"v1.1.0","exported":"2016-11-23T00:04:11.909Z","volume":10.5,"added":"2016-11-22T23:53:38.008Z","format":"Utrecht","demagType":"Unknown","strat":null,"patch":1.1,"GEO":[{"dec":228.83199842810686,"inc":-67.11757234164111,"MAD":9.256949184871658,"cm":[45.32319907935789,-147.51658584452173,-839.0267269160175],"intensity":479.11321145190215,"type":"dir","forced":false,"remark":"","origin":false,"nSteps":9,"minStep":"180","maxStep":"400","steps":["180","210","240","270","300","320","340","370","400"],"group":"None","version":"v1.1.0"}],"TECT":[{"dec":189.37405208052442,"inc":-15.06958637982802,"MAD":9.256949184871639,"cm":[-719.7110292980228,1.1910039684094849,-458.03471459022023],"intensity":479.1132114519021,"type":"dir","forced":false,"remark":"","origin":false,"nSteps":9,"minStep":"180","maxStep":"400","steps":["180","210","240","270","300","320","340","370","400"],"group":"None","version":"v1.1.0"}],"interpreted":true,"name":"EM4.8A","coreAzi":326,"coreDip":50,"bedStrike":259,"bedDip":62,"data":[{"visible":false,"include":false,"step":"20","x":940.8571428571429,"y":157.23809523809524,"z":334.57142857142856,"a95":1.8,"info":"\"14-11-30\" at \"14:39\""},{"visible":true,"include":false,"step":"100","x":764.8571428571429,"y":-180.1904761904762,"z":-495.42857142857144,"a95":1.9,"info":"\"15-01-31\" at \"11:25\""},{"visible":true,"include":false,"step":"150","x":769.9047619047619,"y":-170.85714285714286,"z":-659.8095238095239,"a95":2.1,"info":"\"15-01-31\" at \"14:48\""},{"visible":true,"include":true,"step":"180","x":748.1904761904761,"y":-208.47619047619048,"z":-705.8095238095239,"a95":2.2,"info":"\"15-02-01\" at \"08:16\""},{"visible":true,"include":true,"step":"210","x":733.047619047619,"y":-145.52380952380952,"z":-698.2857142857143,"a95":2.1,"info":"\"15-02-01\" at \"11:27\""},{"visible":true,"include":true,"step":"240","x":694.1904761904761,"y":-139.71428571428572,"z":-679.3333333333334,"a95":2.2,"info":"\"15-02-02\" at \"16:13\""},{"visible":true,"include":true,"step":"270","x":675.4285714285714,"y":-126.19047619047619,"z":-632,"a95":2,"info":"\"15-02-02\" at \"20:06\""},{"visible":true,"include":true,"step":"300","x":636.8571428571429,"y":-110.38095238095238,"z":-560.952380952381,"a95":2.1,"info":"\"15-02-02\" at \"23:45\""},{"visible":true,"include":true,"step":"320","x":582.0952380952381,"y":-30,"z":-472.95238095238096,"a95":2.1,"info":"\"15-02-03\" at \"18:23\""},{"visible":true,"include":true,"step":"340","x":536.2857142857143,"y":-43.333333333333336,"z":-498.95238095238096,"a95":2.5,"info":"\"15-02-04\" at \"16:16\""},{"visible":true,"include":true,"step":"370","x":600.952380952381,"y":-55.523809523809526,"z":-477.42857142857144,"a95":2.1,"info":"\"15-02-04\" at \"21:25\""},{"visible":true,"include":true,"step":"400","x":474.57142857142856,"y":-13.428571428571429,"z":-364.2857142857143,"a95":2.2,"info":"\"15-02-05\" at \"01:33\""},{"visible":true,"include":false,"step":"420","x":332,"y":-16,"z":-63.23809523809524,"a95":3.1,"info":"\"15-02-09\" at \"20:11\""},{"visible":true,"include":false,"step":"450","x":364.1904761904762,"y":20.571428571428573,"z":-319.23809523809524,"a95":2.6,"info":"\"15-02-09\" at \"22:29\""}]},{"version":"v1.1.0","exported":"2016-11-23T00:04:11.909Z","volume":10.5,"added":"2016-11-22T23:53:38.010Z","format":"Utrecht","demagType":"Unknown","strat":"2","patch":1.1,"GEO":[{"dec":197.26059290665256,"inc":-80.20751991245886,"MAD":5.16823646388447,"cm":[-32.1518419969906,1.5906859563805913,-402.46423366620286],"intensity":299.70010595476447,"type":"dir","forced":false,"remark":"","origin":false,"nSteps":6,"minStep":"25.0","maxStep":"50.0","steps":["25.0","30.0","35.0","40.0","45.0","50.0"],"group":"None","version":"v1.1.0"}],"TECT":[{"dec":173.89444247274753,"inc":-19.29060328016716,"MAD":5.168236463884507,"cm":[-364.3832962548183,66.16993874029089,-160.8107061849885],"intensity":299.7001059547645,"type":"dir","forced":false,"remark":"","origin":false,"nSteps":6,"minStep":"25.0","maxStep":"50.0","steps":["25.0","30.0","35.0","40.0","45.0","50.0"],"group":"None","version":"v1.1.0"}],"interpreted":true,"name":"EM4.9B","coreAzi":342,"coreDip":52,"bedStrike":259,"bedDip":62,"data":[{"visible":true,"include":false,"step":"0.0","x":404.1714285714286,"y":-54.86761904761905,"z":-493.39047619047625,"a95":0.99,"info":"04/11/2014 at 10:38:33"},{"visible":true,"include":false,"step":"10.0","x":395.20000000000005,"y":-51.331428571428575,"z":-588.6476190476191,"a95":0.99,"info":"04/11/2014 at 10:38:33"},{"visible":true,"include":false,"step":"15.0","x":361.752380952381,"y":-32.978095238095236,"z":-591.5904761904761,"a95":0.99,"info":"04/11/2014 at 10:38:33"},{"visible":true,"include":false,"step":"20.0","x":326.03809523809525,"y":-38.26380952380952,"z":-522.1619047619048,"a95":0.99,"info":"04/11/2014 at 10:38:33"},{"visible":true,"include":true,"step":"25.0","x":297.93333333333334,"y":-16.557142857142857,"z":-468.4,"a95":0.99,"info":"04/11/2014 at 10:38:33"},{"visible":true,"include":true,"step":"30.0","x":266.6095238095238,"y":-16.316190476190474,"z":-415.06666666666666,"a95":0.99,"info":"04/11/2014 at 10:38:33"},{"visible":true,"include":true,"step":"35.0","x":241.63809523809522,"y":-25.880000000000003,"z":-373.4,"a95":0.99,"info":"04/11/2014 at 10:38:33"},{"visible":true,"include":true,"step":"40.0","x":217.7238095238095,"y":-0.36246666666666666,"z":-299.2095238095238,"a95":0.99,"info":"04/11/2014 at 10:38:33"},{"visible":true,"include":true,"step":"45.0","x":169.23809523809524,"y":-3.756190476190476,"z":-250.26666666666668,"a95":0.99,"info":"04/11/2014 at 10:38:33"},{"visible":true,"include":true,"step":"50.0","x":146.64761904761903,"y":12.336190476190476,"z":-211.30476190476188,"a95":0.99,"info":"04/11/2014 at 10:38:33"},{"visible":true,"include":false,"step":"60.0","x":121.1047619047619,"y":23.86095238095238,"z":-138.7238095238095,"a95":0.99,"info":"04/11/2014 at 10:38:33"},{"visible":true,"include":false,"step":"70.0","x":129.7904761904762,"y":20.34952380952381,"z":-146.73333333333335,"a95":0.99,"info":"04/11/2014 at 10:38:33"},{"visible":true,"include":false,"step":"80.0","x":60.145714285714284,"y":-2.8824761904761904,"z":-119.77142857142856,"a95":0.99,"info":"04/11/2014 at 10:38:33"},{"visible":true,"include":false,"step":"90.0","x":100.6952380952381,"y":17.756190476190476,"z":-81.44285714285714,"a95":0.99,"info":"04/11/2014 at 10:38:33"}]},{"version":"v1.1.0","exported":"2016-11-23T00:04:11.909Z","volume":10.5,"added":"2016-11-22T23:53:38.010Z","format":"Utrecht","demagType":"Unknown","strat":"4","patch":1.1,"GEO":[{"dec":187.74664678918882,"inc":-59.624660226541934,"MAD":6.527751720614704,"cm":[-51.77873492435322,35.282819088912206,-193.49529705379334],"intensity":433.6856666750298,"type":"dir","forced":false,"remark":"","origin":false,"nSteps":11,"minStep":"10.0","maxStep":"60.0","steps":["10.0","15.0","20.0","23.0","30.0","33.0","35.0","40.0","45.0","50.0","60.0"],"group":"None","version":"v1.1.0"}],"TECT":[{"dec":178.35421211551693,"inc":1.0176113007663983,"MAD":6.527751720614686,"cm":[-189.51001339374832,62.0550675757265,-40.01834712774146],"intensity":433.6856666750298,"type":"dir","forced":false,"remark":"","origin":false,"nSteps":11,"minStep":"10.0","maxStep":"60.0","steps":["10.0","15.0","20.0","23.0","30.0","33.0","35.0","40.0","45.0","50.0","60.0"],"group":"None","version":"v1.1.0"}],"interpreted":true,"name":"EM4.11A","coreAzi":309,"coreDip":40,"bedStrike":259,"bedDip":62,"data":[{"visible":true,"include":false,"step":"0.0","x":251.14285714285714,"y":-169.4,"z":-153.94285714285715,"a95":0.99,"info":"25/11/2014 at 10:57:17"},{"visible":true,"include":true,"step":"10.0","x":218.9904761904762,"y":-127.22857142857144,"z":-341.5333333333333,"a95":0.99,"info":"25/11/2014 at 10:57:17"},{"visible":true,"include":true,"step":"15.0","x":203.77142857142857,"y":-105.1047619047619,"z":-309.7809523809524,"a95":0.99,"info":"25/11/2014 at 10:57:17"},{"visible":true,"include":true,"step":"20.0","x":166.58095238095237,"y":-75.77714285714285,"z":-268.4095238095238,"a95":0.99,"info":"25/11/2014 at 10:57:17"},{"visible":true,"include":true,"step":"23.0","x":163.2761904761905,"y":-38.18380952380952,"z":-227.83809523809526,"a95":0.99,"info":"25/11/2014 at 10:57:17"},{"visible":true,"include":false,"step":"25.0","x":162.3047619047619,"y":-46.11619047619048,"z":-181.94285714285715,"a95":0.99,"info":"25/11/2014 at 10:57:17"},{"visible":true,"include":true,"step":"30.0","x":112.34285714285713,"y":-9.459619047619046,"z":-169.45714285714286,"a95":0.99,"info":"25/11/2014 at 10:57:17"},{"visible":true,"include":true,"step":"33.0","x":89.73333333333333,"y":9.425047619047618,"z":-157.71428571428572,"a95":0.99,"info":"25/11/2014 at 10:57:17"},{"visible":true,"include":true,"step":"35.0","x":75.21142857142857,"y":-9.539047619047619,"z":-143.53333333333333,"a95":0.99,"info":"25/11/2014 at 10:57:17"},{"visible":true,"include":true,"step":"40.0","x":79.39333333333333,"y":36.011428571428574,"z":-96.00952380952381,"a95":0.99,"info":"25/11/2014 at 10:57:17"},{"visible":true,"include":true,"step":"45.0","x":57.91619047619048,"y":39.87809523809524,"z":-84.21523809523809,"a95":0.99,"info":"25/11/2014 at 10:57:17"},{"visible":true,"include":true,"step":"50.0","x":28.652380952380955,"y":22.408571428571427,"z":-65.11047619047619,"a95":0.99,"info":"25/11/2014 at 10:57:17"},{"visible":true,"include":true,"step":"60.0","x":10.34,"y":59.18,"z":-10.172380952380953,"a95":0.99,"info":"25/11/2014 at 10:57:17"},{"visible":false,"include":false,"step":"70.0","x":-35.684761904761906,"y":85.64857142857143,"z":-11.798095238095238,"a95":0.99,"info":"25/11/2014 at 10:57:17"},{"visible":false,"include":false,"step":"80.0","x":-170.41904761904763,"y":59.89904761904762,"z":26.58,"a95":0.99,"info":"25/11/2014 at 10:57:17"},{"visible":false,"include":false,"step":"90.0","x":-22.68095238095238,"y":109.47619047619048,"z":-9.607619047619048,"a95":0.99,"info":"25/11/2014 at 10:57:17"}]},{"version":"v1.1.0","exported":"2016-11-23T00:04:11.910Z","volume":10.5,"added":"2016-11-22T23:53:38.010Z","format":"Utrecht","demagType":"Unknown","strat":null,"patch":1.1,"GEO":[{"dec":185.43214379895872,"inc":-56.48699569986145,"MAD":2.922672765758147,"cm":[-79.54940293915453,-74.3016398463593,-268.91946023415767],"intensity":837.9157816528203,"type":"dir","forced":false,"remark":"","origin":false,"nSteps":7,"minStep":"150","maxStep":"320","steps":["150","180","210","240","270","300","320"],"group":"None","version":"v1.1.0"}],"TECT":[{"dec":178.01193454990505,"inc":4.36787623382446,"MAD":2.9226727657581284,"cm":[-279.34536961004727,-35.46523808040186,-69.82047443115304],"intensity":837.9157816528203,"type":"dir","forced":false,"remark":"","origin":false,"nSteps":7,"minStep":"150","maxStep":"320","steps":["150","180","210","240","270","300","320"],"group":"None","version":"v1.1.0"}],"interpreted":true,"name":"EM4.12A","coreAzi":315,"coreDip":40,"bedStrike":259,"bedDip":62,"data":[{"visible":false,"include":false,"step":"20","x":788.0952380952381,"y":731.1428571428571,"z":249.9047619047619,"a95":1.6,"info":"\"14-11-30\" at \"14:41\""},{"visible":true,"include":false,"step":"100","x":489.5238095238095,"y":-389.42857142857144,"z":-599.4285714285714,"a95":2.3,"info":"\"15-01-31\" at \"11:27\""},{"visible":true,"include":true,"step":"150","x":410.0952380952381,"y":-342.2857142857143,"z":-589.4285714285714,"a95":2.3,"info":"\"15-01-31\" at \"14:50\""},{"visible":true,"include":true,"step":"180","x":342.3809523809524,"y":-230.38095238095238,"z":-439.8095238095238,"a95":2.4,"info":"\"15-02-01\" at \"08:18\""},{"visible":true,"include":true,"step":"210","x":251.04761904761904,"y":-133.04761904761904,"z":-252.0952380952381,"a95":2.4,"info":"\"15-02-01\" at \"11:29\""},{"visible":true,"include":true,"step":"240","x":148.57142857142858,"y":-81.23809523809524,"z":-84,"a95":2.9,"info":"\"15-02-02\" at \"16:15\""},{"visible":true,"include":true,"step":"270","x":120.95238095238095,"y":-30.476190476190474,"z":-5.142857142857143,"a95":3.9,"info":"\"15-02-02\" at \"20:08\""},{"visible":true,"include":true,"step":"300","x":86.95238095238095,"y":21.238095238095237,"z":65.80952380952381,"a95":2.3,"info":"\"15-02-02\" at \"23:47\""},{"visible":true,"include":true,"step":"320","x":65.33333333333333,"y":34.666666666666664,"z":74.76190476190476,"a95":4,"info":"\"15-02-03\" at \"18:25\""},{"visible":true,"include":false,"step":"340","x":54.74285714285714,"y":5.314285714285714,"z":70.21904761904761,"a95":5.4,"info":"\"15-02-04\" at \"16:18\""},{"visible":true,"include":false,"step":"370","x":71.23809523809524,"y":32.095238095238095,"z":73.52380952380952,"a95":4.2,"info":"\"15-02-04\" at \"21:27\""},{"visible":false,"include":false,"step":"400","x":18.19047619047619,"y":60.476190476190474,"z":86.28571428571429,"a95":3.2,"info":"\"15-02-05\" at \"01:35\""},{"visible":false,"include":false,"step":"420","x":16.38095238095238,"y":-18.285714285714285,"z":231.42857142857142,"a95":2.9,"info":"\"15-02-09\" at \"20:13\""},{"visible":false,"include":false,"step":"450","x":24.19047619047619,"y":4.4,"z":46.41904761904762,"a95":6,"info":"\"15-02-09\" at \"22:31\""}]},{"version":"v1.1.0","exported":"2016-11-23T00:04:11.910Z","volume":10.5,"added":"2016-11-22T23:53:38.010Z","format":"Utrecht","demagType":"Unknown","strat":"3","patch":1.1,"GEO":[{"dec":189.80077004397296,"inc":-66.12210384196433,"MAD":15.15639807375448,"cm":[-37.8374059696016,9.403153258413722,-139.12147884373053],"intensity":115.05269498267091,"type":"dir","forced":false,"remark":"","origin":false,"nSteps":9,"minStep":"20.0","maxStep":"80.0","steps":["20.0","25.0","30.0","35.0","40.0","45.0","50.0","60.0","80.0"],"group":"None","version":"v1.1.0"}],"TECT":[{"dec":177.30276631529114,"inc":-5.461549001383666,"MAD":15.15639807375448,"cm":[-138.14016010435068,28.900033614490823,-30.93474875931402],"intensity":115.05269498267097,"type":"dir","forced":false,"remark":"","origin":false,"nSteps":9,"minStep":"20.0","maxStep":"80.0","steps":["20.0","25.0","30.0","35.0","40.0","45.0","50.0","60.0","80.0"],"group":"None","version":"v1.1.0"}],"interpreted":true,"name":"EM4.12B","coreAzi":315,"coreDip":40,"bedStrike":259,"bedDip":62,"data":[{"visible":true,"include":false,"step":"0.0","x":117.5047619047619,"y":-18.953333333333333,"z":-168.22857142857143,"a95":0.99,"info":"04/11/2014 at 10:38:33"},{"visible":true,"include":false,"step":"10.0","x":169.01904761904763,"y":-69.32380952380952,"z":-204.83809523809526,"a95":0.99,"info":"04/11/2014 at 10:38:33"},{"visible":true,"include":false,"step":"15.0","x":153.96190476190475,"y":-63.9752380952381,"z":-193.03809523809525,"a95":0.99,"info":"04/11/2014 at 10:38:33"},{"visible":true,"include":true,"step":"20.0","x":121.20952380952382,"y":-42.05809523809524,"z":-173.51428571428573,"a95":0.99,"info":"04/11/2014 at 10:38:33"},{"visible":true,"include":true,"step":"25.0","x":122.6952380952381,"y":-30.459999999999997,"z":-143.54285714285714,"a95":0.99,"info":"04/11/2014 at 10:38:33"},{"visible":true,"include":true,"step":"30.0","x":92.24095238095238,"y":-32.77809523809524,"z":-137.9904761904762,"a95":0.99,"info":"04/11/2014 at 10:38:33"},{"visible":true,"include":true,"step":"35.0","x":102.98095238095237,"y":-33.68095238095238,"z":-137.11428571428573,"a95":0.99,"info":"04/11/2014 at 10:38:33"},{"visible":true,"include":true,"step":"40.0","x":84.76952380952382,"y":-17.364761904761906,"z":-94.32190476190476,"a95":0.99,"info":"04/11/2014 at 10:38:33"},{"visible":true,"include":true,"step":"45.0","x":58.84095238095239,"y":-15.257142857142856,"z":-113.14285714285714,"a95":0.99,"info":"04/11/2014 at 10:38:33"},{"visible":true,"include":true,"step":"50.0","x":62.21523809523809,"y":1.2197142857142858,"z":-70.9504761904762,"a95":0.99,"info":"04/11/2014 at 10:38:33"},{"visible":true,"include":true,"step":"60.0","x":58.599999999999994,"y":-14.924761904761905,"z":-78.33428571428571,"a95":0.99,"info":"04/11/2014 at 10:38:33"},{"visible":false,"include":false,"step":"70.0","x":-18.967619047619046,"y":-17.930476190476192,"z":-92.05142857142857,"a95":0.99,"info":"04/11/2014 at 10:38:33"},{"visible":true,"include":true,"step":"80.0","x":62.36095238095238,"y":4.349619047619048,"z":-86.22,"a95":0.99,"info":"04/11/2014 at 10:38:33"},{"visible":true,"include":false,"step":"90.0","x":-5.293619047619048,"y":19.48,"z":-38.92952380952381,"a95":0.99,"info":"04/11/2014 at 10:38:33"}]},{"version":"v1.1.0","exported":"2016-11-23T00:04:11.910Z","volume":10.5,"added":"2016-11-22T23:53:38.010Z","format":"Utrecht","demagType":"Unknown","strat":null,"patch":1.1,"GEO":[{"dec":180.25331435939486,"inc":-57.02080349753674,"MAD":4.394917918391342,"cm":[-30.43635959864296,-75.3469762631285,-229.6317044438485],"intensity":496.1498749497962,"type":"dir","forced":false,"remark":"","origin":false,"nSteps":7,"minStep":"180","maxStep":"340","steps":["180","210","240","270","300","320","340"],"group":"None","version":"v1.1.0"}],"TECT":[{"dec":177.9218740892336,"inc":-12.115528917558123,"MAD":4.3949179183914024,"cm":[-185.2618131599456,-61.80150425125517,-145.57779075248],"intensity":496.1498749497962,"type":"dir","forced":false,"remark":"","origin":false,"nSteps":7,"minStep":"180","maxStep":"340","steps":["180","210","240","270","300","320","340"],"group":"None","version":"v1.1.0"}],"interpreted":true,"name":"EM4.13A","coreAzi":313,"coreDip":40,"bedStrike":265,"bedDip":45,"data":[{"visible":true,"include":false,"step":"20","x":755.1428571428571,"y":47.904761904761905,"z":322.76190476190476,"a95":2.1,"info":"\"14-11-30\" at \"14:43\""},{"visible":true,"include":false,"step":"100","x":420.1904761904762,"y":-318.4761904761905,"z":-362.2857142857143,"a95":2.1,"info":"\"15-01-31\" at \"11:30\""},{"visible":true,"include":false,"step":"150","x":378.57142857142856,"y":-263.5238095238095,"z":-422.57142857142856,"a95":2.2,"info":"\"15-01-31\" at \"14:52\""},{"visible":true,"include":true,"step":"180","x":333.7142857142857,"y":-202.28571428571428,"z":-387.3333333333333,"a95":2.2,"info":"\"15-02-01\" at \"08:20\""},{"visible":true,"include":true,"step":"210","x":274.4761904761905,"y":-140.95238095238096,"z":-283.42857142857144,"a95":2.4,"info":"\"15-02-01\" at \"11:31\""},{"visible":true,"include":true,"step":"240","x":216.28571428571428,"y":-103.04761904761905,"z":-170.85714285714286,"a95":2.5,"info":"\"15-02-02\" at \"16:18\""},{"visible":true,"include":true,"step":"270","x":172.76190476190476,"y":-74,"z":-63.523809523809526,"a95":2.1,"info":"\"15-02-02\" at \"20:10\""},{"visible":true,"include":true,"step":"300","x":132.66666666666666,"y":14.571428571428571,"z":14.761904761904763,"a95":2.6,"info":"\"15-02-02\" at \"23:49\""},{"visible":true,"include":true,"step":"320","x":134.38095238095238,"y":-0.38095238095238093,"z":23.714285714285715,"a95":2.6,"info":"\"15-02-03\" at \"18:28\""},{"visible":true,"include":true,"step":"340","x":121.61904761904762,"y":-9.428571428571429,"z":17.61904761904762,"a95":3,"info":"\"15-02-04\" at \"16:20\""},{"visible":true,"include":false,"step":"370","x":126.0952380952381,"y":14,"z":25.61904761904762,"a95":3.3,"info":"\"15-02-04\" at \"21:30\""},{"visible":false,"include":false,"step":"400","x":49.142857142857146,"y":61.61904761904762,"z":61.714285714285715,"a95":3.2,"info":"\"15-02-05\" at \"01:38\""},{"visible":false,"include":false,"step":"420","x":21.142857142857142,"y":-8.19047619047619,"z":147.04761904761904,"a95":3.2,"info":"\"15-02-09\" at \"20:15\""},{"visible":false,"include":false,"step":"450","x":35.40952380952381,"y":53.857142857142854,"z":30.104761904761908,"a95":4.3,"info":"\"15-02-09\" at \"22:33\""}]},{"version":"v1.1.0","exported":"2016-11-23T00:04:11.910Z","volume":10.5,"added":"2016-11-22T23:53:38.011Z","format":"Utrecht","demagType":"Unknown","strat":"5","patch":1.1,"GEO":[{"dec":196.29425679817388,"inc":-63.39831861922973,"MAD":9.685859131752695,"cm":[-68.7801768138446,60.718116616366224,-187.26555473012547],"intensity":372.34367742560215,"type":"dir","forced":false,"remark":"","origin":false,"nSteps":10,"minStep":"23.0","maxStep":"70.0","steps":["23.0","25.0","30.0","33.0","35.0","40.0","45.0","50.0","60.0","70.0"],"group":"None","version":"v1.1.0"}],"TECT":[{"dec":184.9469187592691,"inc":-19.708712116112277,"MAD":9.685859131752691,"cm":[-179.15674011760532,70.37481462439683,-80.22492339278729],"intensity":372.3436774256022,"type":"dir","forced":false,"remark":"","origin":false,"nSteps":10,"minStep":"23.0","maxStep":"70.0","steps":["23.0","25.0","30.0","33.0","35.0","40.0","45.0","50.0","60.0","70.0"],"group":"None","version":"v1.1.0"}],"interpreted":true,"name":"EM4.13B","coreAzi":313,"coreDip":40,"bedStrike":265,"bedDip":45,"data":[{"visible":true,"include":false,"step":"0.0","x":428.7809523809524,"y":-247.2095238095238,"z":-295.9809523809524,"a95":0.99,"info":"25/11/2014 at 10:57:17"},{"visible":true,"include":false,"step":"10.0","x":324.9428571428572,"y":-162.95238095238096,"z":-470.45714285714286,"a95":0.99,"info":"25/11/2014 at 10:57:17"},{"visible":true,"include":false,"step":"15.0","x":269.15238095238095,"y":-109.70476190476191,"z":-421.31428571428575,"a95":0.99,"info":"25/11/2014 at 10:57:17"},{"visible":true,"include":false,"step":"20.0","x":213.61904761904762,"y":-93.25047619047619,"z":-356.34285714285716,"a95":0.99,"info":"25/11/2014 at 10:57:17"},{"visible":true,"include":true,"step":"23.0","x":190.59047619047618,"y":-65.88,"z":-328.5238095238095,"a95":0.99,"info":"25/11/2014 at 10:57:17"},{"visible":true,"include":true,"step":"25.0","x":176.8761904761905,"y":-70.98857142857143,"z":-293.5238095238095,"a95":0.99,"info":"25/11/2014 at 10:57:17"},{"visible":true,"include":true,"step":"30.0","x":135.98095238095237,"y":-59.459047619047624,"z":-274.2095238095238,"a95":0.99,"info":"25/11/2014 at 10:57:17"},{"visible":true,"include":true,"step":"33.0","x":133.23809523809524,"y":-9.549523809523809,"z":-222.42857142857142,"a95":0.99,"info":"25/11/2014 at 10:57:17"},{"visible":true,"include":true,"step":"35.0","x":83.97047619047619,"y":-57.83047619047619,"z":-217.24761904761903,"a95":0.99,"info":"25/11/2014 at 10:57:17"},{"visible":true,"include":true,"step":"40.0","x":53.18,"y":5.844476190476191,"z":-179.25714285714287,"a95":0.99,"info":"25/11/2014 at 10:57:17"},{"visible":true,"include":true,"step":"45.0","x":71.1047619047619,"y":16.81714285714286,"z":-141.33333333333334,"a95":0.99,"info":"25/11/2014 at 10:57:17"},{"visible":true,"include":true,"step":"50.0","x":21.527619047619048,"y":12.182857142857143,"z":-127.52380952380952,"a95":0.99,"info":"25/11/2014 at 10:57:17"},{"visible":true,"include":true,"step":"60.0","x":-4.226857142857143,"y":62.346666666666664,"z":-66.20857142857143,"a95":0.99,"info":"25/11/2014 at 10:57:17"},{"visible":true,"include":true,"step":"70.0","x":-14.661904761904761,"y":77.58666666666666,"z":-52.97238095238096,"a95":0.99,"info":"25/11/2014 at 10:57:17"},{"visible":false,"include":false,"step":"80.0","x":-167.2,"y":85.0247619047619,"z":-33.74285714285715,"a95":0.99,"info":"25/11/2014 at 10:57:17"},{"visible":false,"include":false,"step":"90.0","x":-32.91428571428572,"y":94.86380952380952,"z":-19.98952380952381,"a95":0.99,"info":"25/11/2014 at 10:57:17"}]},{"version":"v1.1.0","exported":"2016-11-23T00:04:11.910Z","volume":10.5,"added":"2016-11-22T23:53:38.011Z","format":"Utrecht","demagType":"Unknown","strat":"6","patch":1.1,"GEO":[{"dec":192.05465385223218,"inc":-68.00931078933374,"MAD":9.956801450883793,"cm":[-84.34846313469734,35.42347769009773,-161.7141300633465],"intensity":490.21513213061075,"type":"dir","forced":false,"remark":"","origin":false,"nSteps":11,"minStep":"15.0","maxStep":"60.0","steps":["15.0","20.0","23.0","25.0","30.0","33.0","35.0","40.0","45.0","50.0","60.0"],"group":"None","version":"v1.1.0"}],"TECT":[{"dec":181.89038342253215,"inc":-23.73608039282531,"MAD":9.956801450883795,"cm":[-172.84423245747436,43.16585427584593,-52.74965590232949],"intensity":490.21513213061075,"type":"dir","forced":false,"remark":"","origin":false,"nSteps":11,"minStep":"15.0","maxStep":"60.0","steps":["15.0","20.0","23.0","25.0","30.0","33.0","35.0","40.0","45.0","50.0","60.0"],"group":"None","version":"v1.1.0"}],"interpreted":true,"name":"EM4.15B","coreAzi":314,"coreDip":47,"bedStrike":265,"bedDip":45,"data":[{"visible":true,"include":false,"step":"0.0","x":241.30476190476188,"y":-175.54285714285714,"z":-247.61904761904762,"a95":0.99,"info":"25/11/2014 at 10:57:18"},{"visible":true,"include":false,"step":"10.0","x":189.22857142857143,"y":-152.38095238095238,"z":-453.4761904761905,"a95":0.99,"info":"25/11/2014 at 10:57:18"},{"visible":true,"include":true,"step":"15.0","x":157.8095238095238,"y":-128.4952380952381,"z":-390.7333333333333,"a95":0.99,"info":"25/11/2014 at 10:57:18"},{"visible":true,"include":true,"step":"20.0","x":127.51428571428572,"y":-113.35238095238095,"z":-322.45714285714286,"a95":0.99,"info":"25/11/2014 at 10:57:18"},{"visible":true,"include":true,"step":"23.0","x":128.36190476190475,"y":-55.81619047619048,"z":-264.74285714285713,"a95":0.99,"info":"25/11/2014 at 10:57:18"},{"visible":true,"include":true,"step":"25.0","x":94.9895238095238,"y":-64.08666666666666,"z":-222.1809523809524,"a95":0.99,"info":"25/11/2014 at 10:57:18"},{"visible":true,"include":true,"step":"30.0","x":54.49047619047619,"y":-9.194952380952381,"z":-202.32380952380953,"a95":0.99,"info":"25/11/2014 at 10:57:18"},{"visible":true,"include":true,"step":"33.0","x":62.09619047619047,"y":-23.027619047619048,"z":-183.8,"a95":0.99,"info":"25/11/2014 at 10:57:18"},{"visible":true,"include":true,"step":"35.0","x":3.6523809523809527,"y":-33.55142857142857,"z":-142.2095238095238,"a95":0.99,"info":"25/11/2014 at 10:57:18"},{"visible":true,"include":true,"step":"40.0","x":7.9708571428571435,"y":-1.7673333333333332,"z":-100.81904761904761,"a95":0.99,"info":"25/11/2014 at 10:57:18"},{"visible":true,"include":true,"step":"45.0","x":21.745714285714286,"y":5.208666666666667,"z":-79.5104761904762,"a95":0.99,"info":"25/11/2014 at 10:57:18"},{"visible":true,"include":true,"step":"50.0","x":-46.82857142857143,"y":-18.62095238095238,"z":-26.75047619047619,"a95":0.99,"info":"25/11/2014 at 10:57:18"},{"visible":true,"include":true,"step":"60.0","x":-74.99904761904762,"y":45.95619047619048,"z":3.826857142857143,"a95":0.99,"info":"25/11/2014 at 10:57:18"},{"visible":false,"include":false,"step":"70.0","x":-36.301904761904765,"y":40.69333333333333,"z":112.11428571428571,"a95":0.99,"info":"25/11/2014 at 10:57:18"},{"visible":false,"include":false,"step":"80.0","x":-53.32,"y":23.027619047619048,"z":80.03809523809524,"a95":0.99,"info":"25/11/2014 at 10:57:18"},{"visible":false,"include":false,"step":"90.0","x":-106.20952380952382,"y":104.51428571428572,"z":93.84190476190477,"a95":0.99,"info":"25/11/2014 at 10:57:18"}]},{"version":"v1.1.0","exported":"2016-11-23T00:04:11.910Z","volume":10.5,"added":"2016-11-22T23:53:38.011Z","format":"Utrecht","demagType":"Unknown","strat":"7","patch":1.1,"GEO":[{"dec":184.2071746496034,"inc":-57.75824772206999,"MAD":12.924319951352674,"cm":[-23.85945997960811,71.99154118938785,4.137480882687562],"intensity":258.254554158807,"type":"dir","forced":false,"remark":"","origin":false,"nSteps":7,"minStep":"23.0","maxStep":"45.0","steps":["23.0","25.0","30.0","33.0","35.0","40.0","45.0"],"group":"None","version":"v1.1.0"}],"TECT":[{"dec":180.0268340421892,"inc":-13.043929811443654,"MAD":12.924319951352693,"cm":[-12.179003552898354,70.96963366724225,24.169351480591736],"intensity":258.25455415880697,"type":"dir","forced":false,"remark":"","origin":false,"nSteps":7,"minStep":"23.0","maxStep":"45.0","steps":["23.0","25.0","30.0","33.0","35.0","40.0","45.0"],"group":"None","version":"v1.1.0"}],"interpreted":true,"name":"EM4.16A","coreAzi":310,"coreDip":46,"bedStrike":265,"bedDip":45,"data":[{"visible":true,"include":false,"step":"0.0","x":92.44666666666667,"y":-252.46666666666667,"z":-123.38095238095238,"a95":0.99,"info":"25/11/2014 at 10:57:18"},{"visible":true,"include":false,"step":"10.0","x":43.93523809523809,"y":-159.24761904761903,"z":-322.18095238095236,"a95":0.99,"info":"25/11/2014 at 10:57:18"},{"visible":true,"include":false,"step":"15.0","x":34.76190476190476,"y":-107.01904761904763,"z":-244.1142857142857,"a95":0.99,"info":"25/11/2014 at 10:57:18"},{"visible":true,"include":false,"step":"20.0","x":23.461904761904762,"y":-79.62857142857143,"z":-157.3904761904762,"a95":0.99,"info":"25/11/2014 at 10:57:18"},{"visible":true,"include":true,"step":"23.0","x":10.539047619047619,"y":-18.875238095238096,"z":-153.55238095238096,"a95":0.99,"info":"25/11/2014 at 10:57:18"},{"visible":true,"include":true,"step":"25.0","x":-18.63142857142857,"y":-8.540095238095239,"z":-139.34285714285713,"a95":0.99,"info":"25/11/2014 at 10:57:18"},{"visible":true,"include":true,"step":"30.0","x":-65.83047619047619,"y":3.0286666666666666,"z":-60,"a95":0.99,"info":"25/11/2014 at 10:57:18"},{"visible":true,"include":true,"step":"33.0","x":-49.58761904761904,"y":40.58857142857143,"z":-25.048571428571428,"a95":0.99,"info":"25/11/2014 at 10:57:18"},{"visible":true,"include":true,"step":"35.0","x":-79.1,"y":7.490761904761905,"z":-26.536190476190477,"a95":0.99,"info":"25/11/2014 at 10:57:18"},{"visible":true,"include":true,"step":"40.0","x":-79.87904761904763,"y":78.31904761904762,"z":27.95714285714286,"a95":0.99,"info":"25/11/2014 at 10:57:18"},{"visible":true,"include":true,"step":"45.0","x":-92.5495238095238,"y":93.97333333333333,"z":54.61428571428572,"a95":0.99,"info":"25/11/2014 at 10:57:18"},{"visible":true,"include":false,"step":"50.0","x":-105.48571428571428,"y":26.127619047619046,"z":39.352380952380955,"a95":0.99,"info":"25/11/2014 at 10:57:18"},{"visible":false,"include":false,"step":"60.0","x":-156.41904761904763,"y":120.18095238095239,"z":126.46666666666667,"a95":0.99,"info":"25/11/2014 at 10:57:18"},{"visible":false,"include":false,"step":"70.0","x":-140.5047619047619,"y":121.02857142857142,"z":131.36190476190475,"a95":0.99,"info":"25/11/2014 at 10:57:18"},{"visible":false,"include":false,"step":"80.0","x":-93.97714285714285,"y":7.83847619047619,"z":169.38095238095238,"a95":0.99,"info":"25/11/2014 at 10:57:18"},{"visible":false,"include":false,"step":"90.0","x":-148.06666666666666,"y":50.03619047619048,"z":155.28571428571428,"a95":0.99,"info":"25/11/2014 at 10:57:18"}]},{"version":"v1.1.0","exported":"2016-11-23T00:04:11.910Z","volume":10.5,"added":"2016-11-22T23:53:38.011Z","format":"Utrecht","demagType":"Unknown","strat":null,"patch":1.1,"GEO":[{"dec":186.06411708607965,"inc":-51.272885079547144,"MAD":4.004649884563575,"cm":[-52.644716202907745,-90.38765155599602,-193.3546671662123],"intensity":602.67893251018,"type":"dir","forced":false,"remark":"","origin":false,"nSteps":6,"minStep":"180","maxStep":"320","steps":["180","210","240","270","300","320"],"group":"None","version":"v1.1.0"}],"TECT":[{"dec":181.9438627725676,"inc":-6.747052283941918,"MAD":4.004649884563572,"cm":[-175.8432637782481,-79.60917528029441,-105.20906238463678],"intensity":602.67893251018,"type":"dir","forced":false,"remark":"","origin":false,"nSteps":6,"minStep":"180","maxStep":"320","steps":["180","210","240","270","300","320"],"group":"None","version":"v1.1.0"}],"interpreted":true,"name":"EM4.17A","coreAzi":305,"coreDip":40,"bedStrike":265,"bedDip":45,"data":[{"visible":true,"include":false,"step":"20","x":762.6666666666666,"y":-493.14285714285717,"z":406,"a95":2,"info":"\"14-11-30\" at \"14:45\""},{"visible":true,"include":false,"step":"100","x":451.6190476190476,"y":-412.0952380952381,"z":-323.6190476190476,"a95":2,"info":"\"15-01-31\" at \"11:32\""},{"visible":true,"include":false,"step":"150","x":341.3333333333333,"y":-337.8095238095238,"z":-338.95238095238096,"a95":2.1,"info":"\"15-01-31\" at \"14:53\""},{"visible":true,"include":true,"step":"180","x":306.3809523809524,"y":-287.04761904761904,"z":-325.14285714285717,"a95":2.3,"info":"\"15-02-01\" at \"08:21\""},{"visible":true,"include":true,"step":"210","x":267.6190476190476,"y":-197.42857142857142,"z":-263.14285714285717,"a95":2.2,"info":"\"15-02-01\" at \"11:34\""},{"visible":true,"include":true,"step":"240","x":188.76190476190476,"y":-110.0952380952381,"z":-111.80952380952381,"a95":2.5,"info":"\"15-02-02\" at \"16:21\""},{"visible":true,"include":true,"step":"270","x":131.14285714285714,"y":-49.61904761904762,"z":-15.238095238095237,"a95":2.7,"info":"\"15-02-02\" at \"20:13\""},{"visible":true,"include":true,"step":"300","x":106.95238095238095,"y":12.666666666666666,"z":72.76190476190476,"a95":3.5,"info":"\"15-02-02\" at \"23:52\""},{"visible":true,"include":true,"step":"320","x":56.95238095238095,"y":61.714285714285715,"z":98.38095238095238,"a95":3.2,"info":"\"15-02-03\" at \"18:30\""},{"visible":true,"include":false,"step":"340","x":53.61904761904762,"y":52,"z":91.61904761904762,"a95":3.9,"info":"\"15-02-04\" at \"16:22\""},{"visible":false,"include":false,"step":"370","x":64.76190476190476,"y":70.38095238095238,"z":93.9047619047619,"a95":3.3,"info":"\"15-02-04\" at \"21:33\""},{"visible":false,"include":false,"step":"400","x":-2.9523809523809526,"y":78.66666666666667,"z":89.33333333333333,"a95":3.5,"info":"\"15-02-05\" at \"01:40\""},{"visible":false,"include":false,"step":"420","x":-48.76190476190476,"y":98,"z":194.0952380952381,"a95":2.8,"info":"\"15-02-09\" at \"20:18\""},{"visible":false,"include":false,"step":"450","x":16.857142857142858,"y":87.33333333333333,"z":64.28571428571429,"a95":3.4,"info":"\"15-02-09\" at \"22:34\""}]},{"version":"v1.1.0","exported":"2016-11-23T00:04:11.910Z","volume":10.5,"added":"2016-11-22T23:53:38.011Z","format":"Utrecht","demagType":"Unknown","strat":"4","patch":1.1,"GEO":[{"dec":157.67500183634547,"inc":-61.8796714472345,"MAD":16.72286425398519,"cm":[10.727704563673111,155.82336723761512,23.837270544662836],"intensity":155.32616158446191,"type":"dir","forced":false,"remark":"","origin":false,"nSteps":9,"minStep":"20.0","maxStep":"70.0","steps":["20.0","25.0","30.0","35.0","40.0","45.0","50.0","60.0","70.0"],"group":"None","version":"v1.1.0"}],"TECT":[{"dec":166.52356059179033,"inc":-17.787233912657772,"MAD":16.722864253985165,"cm":[28.36347295151966,154.2804374311097,18.901876036188305],"intensity":155.3261615844619,"type":"dir","forced":false,"remark":"","origin":false,"nSteps":9,"minStep":"20.0","maxStep":"70.0","steps":["20.0","25.0","30.0","35.0","40.0","45.0","50.0","60.0","70.0"],"group":"None","version":"v1.1.0"}],"interpreted":true,"name":"EM4.17B","coreAzi":305,"coreDip":40,"bedStrike":265,"bedDip":45,"data":[{"visible":true,"include":false,"step":"0.0","x":-81.90571428571428,"y":86.83809523809524,"z":-214.25714285714284,"a95":0.99,"info":"04/11/2014 at 10:38:33"},{"visible":true,"include":false,"step":"10.0","x":9.684761904761904,"y":13.88190476190476,"z":-225.46666666666667,"a95":0.99,"info":"04/11/2014 at 10:38:33"},{"visible":true,"include":false,"step":"15.0","x":-22.64095238095238,"y":49.32761904761905,"z":-191.98095238095237,"a95":0.99,"info":"04/11/2014 at 10:38:33"},{"visible":true,"include":true,"step":"20.0","x":-57.988571428571426,"y":78.36095238095238,"z":-162.21904761904761,"a95":0.99,"info":"04/11/2014 at 10:38:33"},{"visible":true,"include":true,"step":"25.0","x":-61.95428571428571,"y":74.50857142857143,"z":-119.48571428571428,"a95":0.99,"info":"04/11/2014 at 10:38:33"},{"visible":true,"include":true,"step":"30.0","x":-86.43714285714286,"y":86.55142857142857,"z":-111.57142857142857,"a95":0.99,"info":"04/11/2014 at 10:38:33"},{"visible":true,"include":true,"step":"35.0","x":-99.26666666666667,"y":102.06666666666668,"z":-91.05047619047619,"a95":0.99,"info":"04/11/2014 at 10:38:33"},{"visible":true,"include":true,"step":"40.0","x":-88.48857142857143,"y":114.80000000000001,"z":-73.14952380952381,"a95":0.99,"info":"04/11/2014 at 10:38:33"},{"visible":true,"include":true,"step":"45.0","x":-121.48571428571428,"y":85.92380952380952,"z":-57.41428571428572,"a95":0.99,"info":"04/11/2014 at 10:38:33"},{"visible":true,"include":true,"step":"50.0","x":-129.59047619047618,"y":121.35238095238095,"z":-36.701904761904764,"a95":0.99,"info":"04/11/2014 at 10:38:33"},{"visible":true,"include":true,"step":"60.0","x":-121.63809523809525,"y":105.0095238095238,"z":-30.79619047619048,"a95":0.99,"info":"04/11/2014 at 10:38:33"},{"visible":true,"include":true,"step":"70.0","x":-100.32380952380953,"y":114.9047619047619,"z":-17.31047619047619,"a95":0.99,"info":"04/11/2014 at 10:38:33"},{"visible":false,"include":false,"step":"80.0","x":-30.70952380952381,"y":153.61904761904762,"z":-91.73619047619047,"a95":0.99,"info":"04/11/2014 at 10:38:33"},{"visible":false,"include":false,"step":"90.0","x":-127.88571428571429,"y":114.15238095238094,"z":28.77714285714286,"a95":0.99,"info":"04/11/2014 at 10:38:33"}]},{"version":"v1.1.0","exported":"2016-11-23T00:04:11.911Z","volume":10.5,"added":"2016-11-22T23:53:38.012Z","format":"Utrecht","demagType":"Unknown","strat":"5","patch":1.1,"GEO":[{"dec":218.41782888345693,"inc":-43.92890288628914,"MAD":11.380380016557273,"cm":[-313.52164210330204,-66.04229765871912,-6.497806242832116],"intensity":284.64778497496945,"type":"dir","forced":false,"remark":"","origin":false,"nSteps":8,"minStep":"20.0","maxStep":"60.0","steps":["20.0","25.0","30.0","35.0","40.0","45.0","50.0","60.0"],"group":"None","version":"v1.1.0"}],"TECT":[{"dec":204.91054372575726,"inc":-6.930204631366812,"MAD":11.380380016557202,"cm":[-228.64744558830242,-73.46782767965318,212.1849442235248],"intensity":284.6477849749695,"type":"dir","forced":false,"remark":"","origin":false,"nSteps":8,"minStep":"20.0","maxStep":"60.0","steps":["20.0","25.0","30.0","35.0","40.0","45.0","50.0","60.0"],"group":"None","version":"v1.1.0"}],"interpreted":true,"name":"EM4.20B","coreAzi":350,"coreDip":45,"bedStrike":265,"bedDip":45,"data":[{"visible":true,"include":false,"step":"0.0","x":-275.8285714285714,"y":-223.44761904761904,"z":-345.1333333333333,"a95":0.99,"info":"04/11/2014 at 10:38:33"},{"visible":true,"include":false,"step":"10.0","x":-150.7047619047619,"y":-232.15238095238095,"z":-441.08571428571423,"a95":0.99,"info":"04/11/2014 at 10:38:33"},{"visible":true,"include":false,"step":"15.0","x":-147.15238095238095,"y":-194.17142857142858,"z":-410.35238095238094,"a95":0.99,"info":"04/11/2014 at 10:38:33"},{"visible":true,"include":true,"step":"20.0","x":-188.0857142857143,"y":-194.53333333333333,"z":-355.34285714285716,"a95":0.99,"info":"04/11/2014 at 10:38:33"},{"visible":true,"include":true,"step":"25.0","x":-167.37142857142857,"y":-165.1904761904762,"z":-286.16190476190474,"a95":0.99,"info":"04/11/2014 at 10:38:33"},{"visible":true,"include":true,"step":"30.0","x":-197.15238095238095,"y":-149.92380952380952,"z":-253.28571428571428,"a95":0.99,"info":"04/11/2014 at 10:38:33"},{"visible":true,"include":true,"step":"35.0","x":-212.42857142857142,"y":-137.21904761904761,"z":-233.8857142857143,"a95":0.99,"info":"04/11/2014 at 10:38:33"},{"visible":true,"include":true,"step":"40.0","x":-215.02857142857144,"y":-117.8952380952381,"z":-172.07619047619048,"a95":0.99,"info":"04/11/2014 at 10:38:33"},{"visible":true,"include":true,"step":"45.0","x":-234.35238095238094,"y":-105.77142857142856,"z":-173.9047619047619,"a95":0.99,"info":"04/11/2014 at 10:38:33"},{"visible":true,"include":true,"step":"50.0","x":-211.36190476190478,"y":-38.29714285714286,"z":-129.93333333333334,"a95":0.99,"info":"04/11/2014 at 10:38:33"},{"visible":true,"include":true,"step":"60.0","x":-219.1904761904762,"y":-47.02095238095238,"z":-113.8952380952381,"a95":0.99,"info":"04/11/2014 at 10:38:33"},{"visible":false,"include":false,"step":"70.0","x":-265.48571428571427,"y":-72.55809523809523,"z":-81.60095238095238,"a95":0.99,"info":"04/11/2014 at 10:38:33"},{"visible":true,"include":false,"step":"80.0","x":-180.2095238095238,"y":-12.99047619047619,"z":-79.41428571428571,"a95":0.99,"info":"04/11/2014 at 10:38:33"},{"visible":true,"include":false,"step":"90.0","x":-250.73333333333332,"y":-2.0736190476190477,"z":-19.25142857142857,"a95":0.99,"info":"04/11/2014 at 10:38:33"}]},{"version":"v1.1.0","exported":"2016-11-23T00:04:11.911Z","volume":10.5,"added":"2016-11-22T23:53:38.012Z","format":"Utrecht","demagType":"Unknown","strat":null,"patch":1.1,"GEO":[{"dec":220.13707001824977,"inc":-56.57115073855898,"MAD":1.764251545420738,"cm":[-2.1316282072803006e-14,2.4868995751603507e-14,0],"intensity":881.5685772885652,"type":"dir","forced":true,"remark":"","origin":false,"nSteps":3,"minStep":"150","maxStep":"210","steps":["150","180","210"],"group":"None","version":"v1.1.0"}],"TECT":[{"dec":199.29723353066188,"inc":-18.38132589965074,"MAD":1.7642515454208294,"cm":[7.105427357601002e-15,-2.1316282072803006e-14,0],"intensity":881.5685772885654,"type":"dir","forced":true,"remark":"","origin":false,"nSteps":3,"minStep":"150","maxStep":"210","steps":["150","180","210"],"group":"None","version":"v1.1.0"}],"interpreted":true,"name":"EM4.21A","coreAzi":13,"coreDip":43,"bedStrike":265,"bedDip":45,"data":[{"visible":false,"include":false,"step":"20","x":-86.95238095238095,"y":36,"z":-503.23809523809524,"a95":3.4,"info":"\"14-11-30\" at \"14:47\""},{"visible":true,"include":false,"step":"100","x":120.38095238095238,"y":-214.38095238095238,"z":-509.7142857142857,"a95":2.4,"info":"\"15-01-31\" at \"11:34\""},{"visible":true,"include":true,"step":"150","x":134.28571428571428,"y":-141.71428571428572,"z":-480.6666666666667,"a95":2.7,"info":"\"15-01-31\" at \"14:55\""},{"visible":true,"include":true,"step":"180","x":120.66666666666667,"y":-103.04761904761905,"z":-415.42857142857144,"a95":2.9,"info":"\"15-02-01\" at \"08:23\""},{"visible":true,"include":true,"step":"210","x":115.33333333333333,"y":-85.52380952380952,"z":-333.7142857142857,"a95":2.9,"info":"\"15-02-01\" at \"11:36\""},{"visible":true,"include":false,"step":"240","x":60.57142857142857,"y":-103.33333333333333,"z":-175.52380952380952,"a95":3.3,"info":"\"15-02-02\" at \"16:22\""},{"visible":true,"include":false,"step":"270","x":40.38095238095238,"y":-100.66666666666667,"z":-49.714285714285715,"a95":3.6,"info":"\"15-02-02\" at \"20:15\""},{"visible":true,"include":false,"step":"300","x":25.142857142857142,"y":-101.42857142857143,"z":49.523809523809526,"a95":4.6,"info":"\"15-02-02\" at \"23:54\""},{"visible":true,"include":false,"step":"320","x":45.23809523809524,"y":-116.66666666666667,"z":91.52380952380952,"a95":3.1,"info":"\"15-02-03\" at \"18:32\""},{"visible":true,"include":false,"step":"340","x":28,"y":-117.80952380952381,"z":87.04761904761905,"a95":3.6,"info":"\"15-02-04\" at \"16:24\""},{"visible":true,"include":false,"step":"370","x":41.904761904761905,"y":-116.76190476190476,"z":85.42857142857143,"a95":2.2,"info":"\"15-02-04\" at \"21:36\""},{"visible":false,"include":false,"step":"400","x":-13.714285714285714,"y":-84.76190476190476,"z":92.47619047619048,"a95":3.9,"info":"\"15-02-05\" at \"01:43\""},{"visible":false,"include":false,"step":"420","x":52.285714285714285,"y":-83.33333333333333,"z":-14,"a95":4.1,"info":"\"15-02-09\" at \"20:20\""},{"visible":false,"include":false,"step":"450","x":3.104761904761905,"y":-5.704761904761905,"z":78.39047619047619,"a95":5.4,"info":"\"15-02-09\" at \"22:36\""}]},{"version":"v1.1.0","exported":"2016-11-23T00:04:11.911Z","volume":10.5,"added":"2016-11-22T23:53:38.012Z","format":"Utrecht","demagType":"Unknown","strat":null,"patch":1.1,"GEO":[{"dec":172.5821045573914,"inc":-69.37219139991022,"MAD":3.612181466320128,"cm":[47.64553366562821,31.01065669891409,-148.93824847140132],"intensity":385.45028001980614,"type":"dir","forced":false,"remark":"","origin":false,"nSteps":8,"minStep":"180","maxStep":"370","steps":["180","210","240","270","300","320","340","370"],"group":"None","version":"v1.1.0"}],"TECT":[{"dec":174.06498123672498,"inc":-24.38614259571027,"MAD":3.6121814663201146,"cm":[-70.32939811382927,41.332125809860955,-136.96638529907122],"intensity":385.45028001980614,"type":"dir","forced":false,"remark":"","origin":false,"nSteps":8,"minStep":"180","maxStep":"370","steps":["180","210","240","270","300","320","340","370"],"group":"None","version":"v1.1.0"}],"interpreted":true,"name":"EM4.23A","coreAzi":350,"coreDip":55,"bedStrike":265,"bedDip":45,"data":[{"visible":true,"include":false,"step":"20","x":467.9047619047619,"y":364.4761904761905,"z":89.33333333333333,"a95":1.5,"info":"\"14-11-30\" at \"14:49\""},{"visible":true,"include":false,"step":"100","x":227.71428571428572,"y":62.666666666666664,"z":-380.0952380952381,"a95":2.4,"info":"\"15-01-31\" at \"11:36\""},{"visible":true,"include":false,"step":"150","x":210.66666666666666,"y":33.714285714285715,"z":-399.8095238095238,"a95":2.5,"info":"\"15-01-31\" at \"14:57\""},{"visible":true,"include":true,"step":"180","x":186.66666666666666,"y":36.666666666666664,"z":-354.0952380952381,"a95":2.4,"info":"\"15-02-01\" at \"08:25\""},{"visible":true,"include":true,"step":"210","x":166.57142857142858,"y":33.23809523809524,"z":-292.3809523809524,"a95":2.5,"info":"\"15-02-01\" at \"11:38\""},{"visible":true,"include":true,"step":"240","x":135.71428571428572,"y":31.238095238095237,"z":-148.0952380952381,"a95":2.6,"info":"\"15-02-02\" at \"16:25\""},{"visible":true,"include":true,"step":"270","x":103.04761904761905,"y":54.476190476190474,"z":-46.38095238095238,"a95":2.4,"info":"\"15-02-02\" at \"20:17\""},{"visible":true,"include":true,"step":"300","x":87.42857142857143,"y":50.76190476190476,"z":-0.09523809523809523,"a95":2.7,"info":"\"15-02-02\" at \"23:56\""},{"visible":true,"include":true,"step":"320","x":95.23809523809524,"y":39.23809523809524,"z":18.857142857142858,"a95":2.4,"info":"\"15-02-03\" at \"18:35\""},{"visible":true,"include":true,"step":"340","x":85.9047619047619,"y":32.31428571428572,"z":16.476190476190474,"a95":3,"info":"\"15-02-04\" at \"16:27\""},{"visible":true,"include":true,"step":"370","x":95.04761904761905,"y":32.57142857142857,"z":20.285714285714285,"a95":2.7,"info":"\"15-02-04\" at \"21:39\""},{"visible":false,"include":false,"step":"400","x":56.84761904761905,"y":29,"z":12.923809523809522,"a95":3.2,"info":"\"15-02-05\" at \"01:45\""},{"visible":false,"include":false,"step":"420","x":43.6,"y":25,"z":74.3047619047619,"a95":3,"info":"\"15-02-09\" at \"20:21\""},{"visible":false,"include":false,"step":"450","x":63.00952380952381,"y":-7.076190476190476,"z":13.819047619047618,"a95":4.2,"info":"\"15-02-09\" at \"22:39\""}]},{"version":"v1.1.0","exported":"2016-11-23T00:04:11.911Z","volume":10.5,"added":"2016-11-22T23:53:38.012Z","format":"Utrecht","demagType":"Unknown","strat":"8","patch":1.1,"GEO":[{"dec":177.62908552648105,"inc":-75.39088390020106,"MAD":17.577281532561926,"cm":[-51.21241893002423,46.15346327258852,-124.70953207334578],"intensity":221.3488902593542,"type":"dir","forced":false,"remark":"","origin":false,"nSteps":8,"minStep":"25.0","maxStep":"60.0","steps":["25.0","30.0","33.0","35.0","40.0","45.0","50.0","60.0"],"group":"None","version":"v1.1.0"}],"TECT":[{"dec":175.7685984399983,"inc":-30.403354060778863,"MAD":17.57728153256196,"cm":[-123.00029065628948,52.43408822728992,-49.26374229504318],"intensity":221.3488902593542,"type":"dir","forced":false,"remark":"","origin":false,"nSteps":8,"minStep":"25.0","maxStep":"60.0","steps":["25.0","30.0","33.0","35.0","40.0","45.0","50.0","60.0"],"group":"None","version":"v1.1.0"}],"interpreted":true,"name":"EM4.23B","coreAzi":350,"coreDip":55,"bedStrike":265,"bedDip":45,"data":[{"visible":true,"include":false,"step":"0.0","x":123.06666666666668,"y":161.85714285714286,"z":-214.86666666666665,"a95":0.99,"info":"25/11/2014 at 10:57:18"},{"visible":true,"include":false,"step":"10.0","x":110.52380952380952,"y":32.09142857142857,"z":-365.49523809523805,"a95":0.99,"info":"25/11/2014 at 10:57:18"},{"visible":true,"include":false,"step":"15.0","x":104.0095238095238,"y":40.89142857142857,"z":-342.35238095238094,"a95":0.99,"info":"25/11/2014 at 10:57:18"},{"visible":true,"include":false,"step":"20.0","x":91.64285714285714,"y":25.655238095238094,"z":-286.447619047619,"a95":0.99,"info":"25/11/2014 at 10:57:18"},{"visible":true,"include":false,"step":"23.0","x":81.02285714285715,"y":73.24285714285713,"z":-248.02857142857144,"a95":0.99,"info":"25/11/2014 at 10:57:18"},{"visible":true,"include":true,"step":"25.0","x":77.9342857142857,"y":27.54285714285714,"z":-234.59047619047618,"a95":0.99,"info":"25/11/2014 at 10:57:18"},{"visible":true,"include":true,"step":"30.0","x":27.024761904761903,"y":51.12095238095238,"z":-212.60000000000002,"a95":0.99,"info":"25/11/2014 at 10:57:18"},{"visible":true,"include":true,"step":"33.0","x":36.10190476190476,"y":48.10095238095238,"z":-163.8,"a95":0.99,"info":"25/11/2014 at 10:57:18"},{"visible":true,"include":true,"step":"35.0","x":33.555238095238096,"y":1.5614285714285714,"z":-151.63809523809525,"a95":0.99,"info":"25/11/2014 at 10:57:18"},{"visible":true,"include":true,"step":"40.0","x":15.960952380952381,"y":54.37238095238095,"z":-120.71428571428571,"a95":0.99,"info":"25/11/2014 at 10:57:18"},{"visible":true,"include":true,"step":"45.0","x":14.711428571428572,"y":46.09142857142857,"z":-84.22952380952381,"a95":0.99,"info":"25/11/2014 at 10:57:18"},{"visible":true,"include":true,"step":"50.0","x":-2.9767619047619047,"y":13.574285714285715,"z":-83.78285714285714,"a95":0.99,"info":"25/11/2014 at 10:57:18"},{"visible":true,"include":true,"step":"60.0","x":-13.096190476190475,"y":50.110476190476184,"z":-34.09238095238096,"a95":0.99,"info":"25/11/2014 at 10:57:18"},{"visible":false,"include":false,"step":"70.0","x":-24.40857142857143,"y":106.26666666666667,"z":16.64857142857143,"a95":0.99,"info":"25/11/2014 at 10:57:18"},{"visible":false,"include":false,"step":"80.0","x":-38.660000000000004,"y":34.7,"z":25.03047619047619,"a95":0.99,"info":"25/11/2014 at 10:57:18"},{"visible":false,"include":false,"step":"90.0","x":-34.73809523809524,"y":57.16571428571429,"z":44.63142857142857,"a95":0.99,"info":"25/11/2014 at 10:57:18"}]},{"version":"v1.1.0","exported":"2016-11-23T00:04:11.911Z","volume":10.5,"added":"2016-11-22T23:53:38.012Z","format":"Utrecht","demagType":"Unknown","strat":null,"patch":1.1,"GEO":[{"dec":183.63718921742952,"inc":-65.39418153678149,"MAD":3.2320359971984334,"cm":[134.27306091555087,82.52632398333436,-282.6895334198375],"intensity":483.0550641607413,"type":"dir","forced":false,"remark":"","origin":false,"nSteps":7,"minStep":"180","maxStep":"340","steps":["180","210","240","270","300","320","340"],"group":"None","version":"v1.1.0"}],"TECT":[{"dec":178.83022733174266,"inc":-20.598420906311883,"MAD":3.2320359971984427,"cm":[-101.78824826379746,103.17901243361555,-289.3898153901935],"intensity":483.0550641607411,"type":"dir","forced":false,"remark":"","origin":false,"nSteps":7,"minStep":"180","maxStep":"340","steps":["180","210","240","270","300","320","340"],"group":"None","version":"v1.1.0"}],"interpreted":true,"name":"EM4.24A","coreAzi":359,"coreDip":61,"bedStrike":265,"bedDip":45,"data":[{"visible":true,"include":false,"step":"20","x":202.66666666666666,"y":-356.95238095238096,"z":-502.76190476190476,"a95":2.5,"info":"\"14-11-30\" at \"14:51\""},{"visible":true,"include":false,"step":"100","x":294.95238095238096,"y":102.95238095238095,"z":-470,"a95":2.3,"info":"\"15-01-31\" at \"11:38\""},{"visible":true,"include":false,"step":"150","x":301.6190476190476,"y":77.33333333333333,"z":-501.23809523809524,"a95":2.4,"info":"\"15-01-31\" at \"14:59\""},{"visible":true,"include":true,"step":"180","x":272.57142857142856,"y":80,"z":-473.04761904761904,"a95":2.4,"info":"\"15-02-01\" at \"08:28\""},{"visible":true,"include":true,"step":"210","x":274.0952380952381,"y":67.71428571428571,"z":-419.42857142857144,"a95":2.3,"info":"\"15-02-01\" at \"11:40\""},{"visible":true,"include":true,"step":"240","x":256.4761904761905,"y":90.95238095238095,"z":-247.42857142857142,"a95":2.1,"info":"\"15-02-02\" at \"16:29\""},{"visible":true,"include":true,"step":"270","x":256.4761904761905,"y":78.38095238095238,"z":-119.14285714285714,"a95":1.9,"info":"\"15-02-02\" at \"20:20\""},{"visible":true,"include":true,"step":"300","x":241.23809523809524,"y":101.04761904761905,"z":-39.23809523809524,"a95":1.8,"info":"\"15-02-02\" at \"23:58\""},{"visible":true,"include":true,"step":"320","x":246.85714285714286,"y":91.9047619047619,"z":10.666666666666666,"a95":1.6,"info":"\"15-02-03\" at \"18:37\""},{"visible":true,"include":true,"step":"340","x":224.76190476190476,"y":84,"z":7.619047619047619,"a95":2.6,"info":"\"15-02-04\" at \"16:30\""},{"visible":true,"include":false,"step":"370","x":231.71428571428572,"y":86,"z":8.666666666666666,"a95":2,"info":"\"15-02-04\" at \"21:43\""},{"visible":false,"include":false,"step":"400","x":183.61904761904762,"y":94.28571428571429,"z":12,"a95":1.9,"info":"\"15-02-05\" at \"01:47\""},{"visible":false,"include":false,"step":"420","x":171.04761904761904,"y":30.761904761904763,"z":-55.142857142857146,"a95":2.4,"info":"\"15-02-09\" at \"20:24\""},{"visible":false,"include":false,"step":"450","x":246.38095238095238,"y":93.80952380952381,"z":-15.80952380952381,"a95":1.5,"info":"\"15-02-09\" at \"22:40\""}]}]
