# Supplementary material for: Paleomagnetic constraints on the timing and distribution of Cenozoic rotations in Central and Eastern Anatolia
Source: Copernicus journal article supplement (doi:10.5194/se-9-295-2018), 2018-03-21
Supplement: Supplementary file 2 [file se-9-295-2018-supplement.zip › se-2017-66_DATA_dir files/dir files Ulukisla/EM5.dir]

[{"version":"v1.1.0","exported":"2016-11-24T13:58:37.543Z","volume":10.5,"added":"2016-11-24T13:50:55.113Z","format":"Utrecht","demagType":"Unknown","strat":null,"patch":1.1,"GEO":[{"dec":340.2388973310108,"inc":70.36422154854486,"MAD":1.9511968356798481,"cm":[1.1368683772161603e-12,5.684341886080801e-13,0],"intensity":96903.00850857832,"type":"dir","forced":true,"remark":"","origin":false,"nSteps":4,"minStep":"180","maxStep":"270","steps":["180","210","240","270"],"group":"None","version":"v1.1.0"}],"TECT":[{"dec":346.4580505086907,"inc":37.59660388022857,"MAD":1.9511968356797451,"cm":[9.094947017729282e-13,9.208633855450898e-12,1.8189894035458565e-12],"intensity":96903.00850857832,"type":"dir","forced":true,"remark":"","origin":false,"nSteps":4,"minStep":"180","maxStep":"270","steps":["180","210","240","270"],"group":"None","version":"v1.1.0"}],"interpreted":true,"name":"EM5.01A","coreAzi":317,"coreDip":55,"bedStrike":261,"bedDip":33,"data":[{"visible":true,"include":false,"step":"20","x":-55054.857142857145,"y":48077.52380952381,"z":188386.95238095237,"a95":3.1,"info":"\"14-11-30\" at \"17:45\""},{"visible":true,"include":false,"step":"100","x":-32299.04761904762,"y":29676.380952380954,"z":131147.52380952382,"a95":2.7,"info":"\"15-02-10\" at \"16:22\""},{"visible":true,"include":false,"step":"150","x":-23149.52380952381,"y":13942.761904761905,"z":74105.33333333333,"a95":2.7,"info":"\"15-02-10\" at \"20:21\""},{"visible":true,"include":true,"step":"180","x":-16612.190476190477,"y":9295.047619047618,"z":59995.619047619046,"a95":2.7,"info":"\"15-02-11\" at \"15:50\""},{"visible":true,"include":true,"step":"210","x":-15222.57142857143,"y":7277.714285714285,"z":50835.42857142857,"a95":2.7,"info":"\"15-02-11\" at \"19:19\""},{"visible":true,"include":true,"step":"240","x":-13729.42857142857,"y":5004.571428571428,"z":44347.52380952381,"a95":2.7,"info":"\"15-02-11\" at \"23:16\""},{"visible":true,"include":true,"step":"270","x":-12291.904761904761,"y":4090.285714285714,"z":31522.571428571428,"a95":2.7,"info":"\"15-02-12\" at \"17:28\""},{"visible":true,"include":false,"step":"300","x":-6644.380952380952,"y":2898.5714285714284,"z":27675.52380952381,"a95":2.7,"info":"\"15-02-13\" at \"15:48\""},{"visible":true,"include":false,"step":"320","x":-5449.809523809524,"y":3286.3809523809523,"z":26716.571428571428,"a95":2.8,"info":"\"15-02-13\" at \"20:43\""},{"visible":true,"include":false,"step":"340","x":-10419.809523809523,"y":2424.8571428571427,"z":22400.85714285714,"a95":2.7,"info":"\"15-02-14\" at \"00:44\""},{"visible":true,"include":false,"step":"370","x":-5511.809523809524,"y":6754.285714285715,"z":25790.095238095237,"a95":2.5,"info":"\"15-02-16\" at \"18:09\""},{"visible":false,"include":false,"step":"390","x":-6143.523809523809,"y":8195.142857142857,"z":19949.238095238095,"a95":2.6,"info":"\"15-02-16\" at \"21:53\""},{"visible":false,"include":false,"step":"420","x":-6705.809523809524,"y":-643.6190476190476,"z":18439.714285714286,"a95":2.8,"info":"\"15-02-17\" at \"17:28\""},{"visible":false,"include":false,"step":"450","x":-5049.619047619048,"y":-181.04761904761904,"z":13879.238095238095,"a95":2.7,"info":"\"15-03-08\" at \"20:33\""},{"visible":false,"include":false,"step":"470","x":-8357.52380952381,"y":1400.4761904761904,"z":6940.571428571428,"a95":2.4,"info":"\"15-03-09\" at \"10:45\""},{"visible":false,"include":false,"step":"490","x":-6632.380952380952,"y":5261.619047619048,"z":9762.666666666666,"a95":2.4,"info":"\"15-03-09\" at \"14:00\""},{"visible":false,"include":false,"step":"510","x":-5615.333333333333,"y":4825.9047619047615,"z":10424.952380952382,"a95":2.5,"info":"\"15-04-21\" at \"10:09\""}]},{"version":"v1.1.0","exported":"2016-11-24T13:58:37.543Z","volume":10.5,"added":"2016-11-24T13:50:55.114Z","format":"Utrecht","demagType":"Unknown","strat":"6","patch":1.1,"GEO":[{"dec":356.2304682904086,"inc":58.25830006692901,"MAD":2.667269244632593,"cm":[0,3.907985046680551e-13,0],"intensity":18825.482463741882,"type":"dir","forced":true,"remark":"","origin":false,"nSteps":3,"minStep":"15.0","maxStep":"25.0","steps":["15.0","20.0","25.0"],"group":"None","version":"v1.1.0"}],"TECT":[{"dec":354.04169289696483,"inc":25.333909206932336,"MAD":2.667269244632623,"cm":[-4.547473508864641e-13,-3.694822225952521e-12,-1.1368683772161603e-13],"intensity":18825.482463741882,"type":"dir","forced":true,"remark":"","origin":false,"nSteps":3,"minStep":"15.0","maxStep":"25.0","steps":["15.0","20.0","25.0"],"group":"None","version":"v1.1.0"}],"interpreted":true,"name":"EM5.01B","coreAzi":317,"coreDip":55,"bedStrike":261,"bedDip":33,"data":[{"visible":true,"include":false,"step":"0.0","x":-14779.047619047618,"y":25834.285714285714,"z":80255.23809523809,"a95":0.99,"info":"04/11/2014 at 10:38:33"},{"visible":true,"include":false,"step":"10.0","x":-3228.3809523809523,"y":7182.476190476191,"z":22384.761904761905,"a95":0.99,"info":"04/11/2014 at 10:38:33"},{"visible":true,"include":true,"step":"15.0","x":-2517.4285714285716,"y":4835.238095238095,"z":12655.238095238095,"a95":0.99,"info":"04/11/2014 at 10:38:33"},{"visible":true,"include":true,"step":"20.0","x":-1260.3809523809523,"y":3088.9523809523807,"z":9931.42857142857,"a95":0.99,"info":"04/11/2014 at 10:38:33"},{"visible":true,"include":true,"step":"25.0","x":-420.54285714285714,"y":1801.047619047619,"z":4715.047619047619,"a95":0.99,"info":"04/11/2014 at 10:38:33"},{"visible":true,"include":false,"step":"30.0","x":-361.3619047619048,"y":556.3619047619047,"z":1905.904761904762,"a95":0.99,"info":"04/11/2014 at 10:38:33"},{"visible":false,"include":false,"step":"35.0","x":-718.5714285714286,"y":515.8,"z":2287.714285714286,"a95":0.99,"info":"04/11/2014 at 10:38:33"},{"visible":false,"include":false,"step":"40.0","x":-842.9904761904761,"y":1119.8095238095239,"z":506.2285714285714,"a95":0.99,"info":"04/11/2014 at 10:38:33"},{"visible":false,"include":false,"step":"45.0","x":-198.0857142857143,"y":270.50476190476195,"z":-1642.095238095238,"a95":0.99,"info":"04/11/2014 at 10:38:33"},{"visible":false,"include":false,"step":"50.0","x":495.4380952380953,"y":986,"z":1005.5238095238095,"a95":0.99,"info":"04/11/2014 at 10:38:33"},{"visible":false,"include":false,"step":"60.0","x":-50.917142857142856,"y":70.25047619047619,"z":-1733.2380952380952,"a95":0.99,"info":"04/11/2014 at 10:38:33"},{"visible":false,"include":false,"step":"70.0","x":641.2380952380952,"y":-329.247619047619,"z":-3180,"a95":0.99,"info":"04/11/2014 at 10:38:33"},{"visible":false,"include":false,"step":"80.0","x":125.63809523809525,"y":-773.495238095238,"z":-701.0857142857143,"a95":0.99,"info":"04/11/2014 at 10:38:33"},{"visible":false,"include":false,"step":"90.0","x":842.0380952380953,"y":347.9809523809524,"z":-3158.4761904761904,"a95":0.99,"info":"04/11/2014 at 10:38:33"}]},{"version":"v1.1.0","exported":"2016-11-24T13:58:37.543Z","volume":10.5,"added":"2016-11-24T13:50:55.115Z","format":"Utrecht","demagType":"Unknown","strat":"7","patch":1.1,"GEO":[{"dec":351.6662268645466,"inc":57.49505670785602,"MAD":2.395019190169713,"cm":[0,7.958078640513122e-13,0],"intensity":66140.46510493857,"type":"dir","forced":true,"remark":"","origin":false,"nSteps":3,"minStep":"10.0","maxStep":"20.0","steps":["10.0","15.0","20.0"],"group":"None","version":"v1.1.0"}],"TECT":[{"dec":351.3934190820192,"inc":24.496302463970736,"MAD":2.395019190169716,"cm":[1.3642420526593924e-12,3.979039320256561e-12,0],"intensity":66140.46510493857,"type":"dir","forced":true,"remark":"","origin":false,"nSteps":3,"minStep":"10.0","maxStep":"20.0","steps":["10.0","15.0","20.0"],"group":"None","version":"v1.1.0"}],"interpreted":true,"name":"EM5.03B","coreAzi":315,"coreDip":59,"bedStrike":261,"bedDip":33,"data":[{"visible":true,"include":false,"step":"0.0","x":-12171.42857142857,"y":56778.09523809524,"z":158895.2380952381,"a95":0.99,"info":"04/11/2014 at 10:38:33"},{"visible":true,"include":true,"step":"10.0","x":-2664.8571428571427,"y":14820.952380952382,"z":42221.90476190476,"a95":0.99,"info":"04/11/2014 at 10:38:33"},{"visible":true,"include":true,"step":"15.0","x":-2871.714285714286,"y":8006.857142857143,"z":22209.52380952381,"a95":0.99,"info":"04/11/2014 at 10:38:33"},{"visible":true,"include":true,"step":"20.0","x":-409.81904761904764,"y":5481.047619047619,"z":20650.47619047619,"a95":0.99,"info":"04/11/2014 at 10:38:33"},{"visible":true,"include":false,"step":"25.0","x":-1299.4285714285713,"y":3172.6666666666665,"z":7883.333333333333,"a95":0.99,"info":"04/11/2014 at 10:38:33"},{"visible":false,"include":false,"step":"30.0","x":-582.4285714285714,"y":1954.6666666666667,"z":1900.952380952381,"a95":0.99,"info":"04/11/2014 at 10:38:33"},{"visible":false,"include":false,"step":"35.0","x":-3.2612380952380953,"y":228.41904761904763,"z":8714.666666666666,"a95":0.99,"info":"04/11/2014 at 10:38:33"},{"visible":false,"include":false,"step":"40.0","x":-2135.0476190476193,"y":2510.190476190476,"z":426.5809523809524,"a95":0.99,"info":"04/11/2014 at 10:38:33"},{"visible":false,"include":false,"step":"45.0","x":-548.2380952380952,"y":-1526.3809523809523,"z":-2848.095238095238,"a95":0.99,"info":"04/11/2014 at 10:38:33"},{"visible":false,"include":false,"step":"50.0","x":-428.9047619047619,"y":-639.7047619047619,"z":7051.238095238095,"a95":0.99,"info":"04/11/2014 at 10:38:33"},{"visible":false,"include":false,"step":"60.0","x":-1724.6666666666667,"y":557.0190476190476,"z":-2962.095238095238,"a95":0.99,"info":"04/11/2014 at 10:38:33"},{"visible":false,"include":false,"step":"70.0","x":-1627.6190476190477,"y":-4816.666666666667,"z":-6095.238095238095,"a95":0.99,"info":"04/11/2014 at 10:38:33"},{"visible":false,"include":false,"step":"80.0","x":3360.7619047619046,"y":2503.6190476190477,"z":2330.8571428571427,"a95":0.99,"info":"04/11/2014 at 10:38:33"},{"visible":false,"include":false,"step":"90.0","x":-2860.095238095238,"y":-231.43809523809523,"z":-4562.666666666667,"a95":0.99,"info":"04/11/2014 at 10:38:33"}]},{"version":"v1.1.0","exported":"2016-11-24T13:58:37.543Z","volume":10.5,"added":"2016-11-24T13:50:55.115Z","format":"Utrecht","demagType":"Unknown","strat":null,"patch":1.1,"GEO":[{"dec":336.74427664887554,"inc":54.436971489180834,"MAD":1.7151259499969926,"cm":[4.547473508864641e-13,-1.4779288903810084e-12,0],"intensity":136805.9694656381,"type":"dir","forced":true,"remark":"","origin":false,"nSteps":7,"minStep":"150","maxStep":"320","steps":["150","180","210","240","270","300","320"],"group":"None","version":"v1.1.0"}],"TECT":[{"dec":342.1117148571632,"inc":22.03863618498583,"MAD":1.7151259499970553,"cm":[1.8189894035458565e-12,4.547473508864641e-13,9.094947017729282e-13],"intensity":136805.9694656381,"type":"dir","forced":true,"remark":"","origin":false,"nSteps":7,"minStep":"150","maxStep":"320","steps":["150","180","210","240","270","300","320"],"group":"None","version":"v1.1.0"}],"interpreted":true,"name":"EM5.04A","coreAzi":323,"coreDip":56,"bedStrike":261,"bedDip":33,"data":[{"visible":false,"include":false,"step":"20","x":-45832,"y":75335.04761904762,"z":297686.6666666667,"a95":3.1,"info":"\"14-11-30\" at \"17:47\""},{"visible":true,"include":false,"step":"100","x":15150.952380952382,"y":42048.380952380954,"z":206725.42857142858,"a95":2.7,"info":"\"15-02-10\" at \"16:24\""},{"visible":true,"include":true,"step":"150","x":2338.4761904761904,"y":16079.333333333334,"z":104935.71428571429,"a95":2.8,"info":"\"15-02-10\" at \"20:23\""},{"visible":true,"include":true,"step":"180","x":2353.714285714286,"y":12478.47619047619,"z":85334.28571428571,"a95":2.7,"info":"\"15-02-11\" at \"15:52\""},{"visible":true,"include":true,"step":"210","x":548.952380952381,"y":9956.857142857143,"z":68377.61904761905,"a95":2.7,"info":"\"15-02-11\" at \"19:26\""},{"visible":true,"include":true,"step":"240","x":-1057.3333333333333,"y":9004.857142857143,"z":61996.09523809524,"a95":2.7,"info":"\"15-02-11\" at \"23:18\""},{"visible":true,"include":true,"step":"270","x":-969.8095238095239,"y":4536,"z":43992.09523809524,"a95":2.5,"info":"\"15-02-12\" at \"17:30\""},{"visible":true,"include":true,"step":"300","x":787.4285714285714,"y":2533.1428571428573,"z":36501.52380952381,"a95":2.7,"info":"\"15-02-13\" at \"15:50\""},{"visible":true,"include":true,"step":"320","x":560.4761904761905,"y":1392.952380952381,"z":30718.95238095238,"a95":2.7,"info":"\"15-02-13\" at \"20:45\""},{"visible":false,"include":false,"step":"340","x":-6977.809523809524,"y":2578.3809523809523,"z":24451.14285714286,"a95":2.7,"info":"\"15-02-14\" at \"00:46\""},{"visible":false,"include":false,"step":"370","x":-9611.52380952381,"y":1661.142857142857,"z":29282.571428571428,"a95":3.4,"info":"\"15-02-16\" at \"18:12\""},{"visible":false,"include":false,"step":"390","x":-9648,"y":-1034.952380952381,"z":16096.666666666666,"a95":2.6,"info":"\"15-02-16\" at \"21:55\""},{"visible":false,"include":false,"step":"420","x":-11090.952380952382,"y":-340.1904761904762,"z":18218.95238095238,"a95":2.8,"info":"\"15-02-17\" at \"17:30\""},{"visible":false,"include":false,"step":"450","x":-2784.5714285714284,"y":614.0952380952381,"z":13588.380952380952,"a95":2.6,"info":"\"15-03-08\" at \"20:35\""},{"visible":false,"include":false,"step":"470","x":-6652.571428571428,"y":-3634.5714285714284,"z":10463.047619047618,"a95":2.6,"info":"\"15-03-09\" at \"10:47\""},{"visible":false,"include":false,"step":"490","x":-4324.761904761905,"y":-3496.3809523809523,"z":12760.857142857143,"a95":2.6,"info":"\"15-03-09\" at \"14:03\""},{"visible":false,"include":false,"step":"510","x":3339.714285714286,"y":5464.380952380952,"z":10731.619047619048,"a95":2.4,"info":"\"15-04-21\" at \"10:11\""}]},{"version":"v1.1.0","exported":"2016-11-24T13:58:37.543Z","volume":10.5,"added":"2016-11-24T13:50:55.117Z","format":"Utrecht","demagType":"Unknown","strat":null,"patch":1.1,"GEO":[{"dec":324.13939900943313,"inc":53.51822275805476,"MAD":3.2257322329595706,"cm":[2.2737367544323206e-13,-1.3642420526593924e-12,0],"intensity":235065.75789485968,"type":"dir","forced":true,"remark":"","origin":false,"nSteps":8,"minStep":"150","maxStep":"340","steps":["150","180","210","240","270","300","320","340"],"group":"None","version":"v1.1.0"}],"TECT":[{"dec":334.0741678958682,"inc":22.67125721579955,"MAD":3.225732232959586,"cm":[-1.4551915228366852e-11,-3.183231456205249e-11,-2.2737367544323206e-13],"intensity":235065.7578948597,"type":"dir","forced":true,"remark":"","origin":false,"nSteps":8,"minStep":"150","maxStep":"340","steps":["150","180","210","240","270","300","320","340"],"group":"None","version":"v1.1.0"}],"interpreted":true,"name":"EM5.05A","coreAzi":322,"coreDip":32,"bedStrike":261,"bedDip":33,"data":[{"visible":true,"include":false,"step":"20","x":-121278.28571428571,"y":50710.380952380954,"z":265086.09523809527,"a95":2.9,"info":"\"14-11-30\" at \"17:51\""},{"visible":true,"include":false,"step":"100","x":-97617.80952380953,"y":38072.666666666664,"z":220553.42857142858,"a95":2.5,"info":"\"15-02-10\" at \"16:26\""},{"visible":true,"include":true,"step":"150","x":-61731.52380952381,"y":13541.809523809523,"z":150098.09523809524,"a95":2.7,"info":"\"15-02-10\" at \"20:25\""},{"visible":true,"include":true,"step":"180","x":-52720.380952380954,"y":6151.619047619048,"z":133493.80952380953,"a95":2.6,"info":"\"15-02-11\" at \"15:55\""},{"visible":true,"include":true,"step":"210","x":-50249.90476190476,"y":5742.952380952381,"z":122420.47619047618,"a95":2.6,"info":"\"15-02-11\" at \"19:28\""},{"visible":true,"include":true,"step":"240","x":-43202.380952380954,"y":196.76190476190476,"z":112143.90476190476,"a95":2.7,"info":"\"15-02-11\" at \"23:20\""},{"visible":true,"include":true,"step":"270","x":-34544.76190476191,"y":-2647.0476190476193,"z":91681.71428571429,"a95":2.6,"info":"\"15-02-12\" at \"17:32\""},{"visible":true,"include":true,"step":"300","x":-28656.285714285714,"y":-4812.0952380952385,"z":77402.19047619047,"a95":2.6,"info":"\"15-02-13\" at \"15:53\""},{"visible":true,"include":true,"step":"320","x":-23297.04761904762,"y":-4899.619047619048,"z":70208.38095238095,"a95":2.6,"info":"\"15-02-13\" at \"20:47\""},{"visible":true,"include":true,"step":"340","x":-27891.14285714286,"y":-6861.9047619047615,"z":67109.33333333333,"a95":2.6,"info":"\"15-02-14\" at \"00:48\""},{"visible":false,"include":false,"step":"370","x":-28688.85714285714,"y":1787.8095238095239,"z":62922,"a95":2.5,"info":"\"15-02-16\" at \"18:17\""},{"visible":false,"include":false,"step":"390","x":-22507.619047619046,"y":-8789.238095238095,"z":61770.380952380954,"a95":2.5,"info":"\"15-02-16\" at \"21:57\""},{"visible":false,"include":false,"step":"420","x":-27216.95238095238,"y":-9167.52380952381,"z":61020.666666666664,"a95":2.5,"info":"\"15-02-17\" at \"17:34\""},{"visible":false,"include":false,"step":"450","x":-21951.428571428572,"y":-6783.523809523809,"z":60494.76190476191,"a95":2.5,"info":"\"15-03-08\" at \"20:39\""},{"visible":false,"include":false,"step":"470","x":-23074.47619047619,"y":-13227.333333333334,"z":61193.04761904762,"a95":2.4,"info":"\"15-03-09\" at \"10:49\""},{"visible":false,"include":false,"step":"490","x":-22437.238095238095,"y":-4196.476190476191,"z":61360,"a95":2.5,"info":"\"15-03-09\" at \"14:06\""},{"visible":false,"include":false,"step":"510","x":-14696.857142857143,"y":850.1904761904761,"z":16734.85714285714,"a95":67.6,"info":"\"15-04-21\" at \"10:16\""}]},{"version":"v1.1.0","exported":"2016-11-24T13:58:37.543Z","volume":10.5,"added":"2016-11-24T13:50:55.117Z","format":"Utrecht","demagType":"Unknown","strat":"8","patch":1.1,"GEO":[{"dec":356.90694255465473,"inc":58.56791592500065,"MAD":3.0910863091944307,"cm":[-2.842170943040401e-14,-4.618527782440651e-14,0],"intensity":10765.519767477352,"type":"dir","forced":true,"remark":"","origin":false,"nSteps":4,"minStep":"10.0","maxStep":"25.0","steps":["10.0","15.0","20.0","25.0"],"group":"None","version":"v1.1.0"}],"TECT":[{"dec":354.4135000978275,"inc":25.663739529721354,"MAD":3.09108630919449,"cm":[0,1.3855583347321954e-13,2.842170943040401e-14],"intensity":10765.51976747735,"type":"dir","forced":true,"remark":"","origin":false,"nSteps":4,"minStep":"10.0","maxStep":"25.0","steps":["10.0","15.0","20.0","25.0"],"group":"None","version":"v1.1.0"}],"interpreted":true,"name":"EM5.06B","coreAzi":315,"coreDip":33,"bedStrike":261,"bedDip":33,"data":[{"visible":true,"include":false,"step":"0.0","x":-17342.85714285714,"y":11531.42857142857,"z":25997.14285714286,"a95":0.99,"info":"04/11/2014 at 10:38:33"},{"visible":true,"include":true,"step":"10.0","x":-4313.047619047619,"y":2785.904761904762,"z":6740.190476190476,"a95":0.99,"info":"04/11/2014 at 10:38:33"},{"visible":true,"include":true,"step":"15.0","x":-2650.5714285714284,"y":1691.904761904762,"z":3803.2380952380954,"a95":0.99,"info":"04/11/2014 at 10:38:33"},{"visible":true,"include":true,"step":"20.0","x":-1515.2380952380952,"y":1456.2857142857142,"z":2920.5714285714284,"a95":0.99,"info":"04/11/2014 at 10:38:33"},{"visible":true,"include":true,"step":"25.0","x":-1101.047619047619,"y":1135.3333333333333,"z":1698.2857142857142,"a95":0.99,"info":"04/11/2014 at 10:38:33"},{"visible":true,"include":false,"step":"30.0","x":-473.85714285714283,"y":622.7714285714286,"z":1012.0952380952381,"a95":0.99,"info":"04/11/2014 at 10:38:33"},{"visible":false,"include":false,"step":"35.0","x":-170.28571428571428,"y":242.86666666666665,"z":1284.2857142857142,"a95":0.99,"info":"04/11/2014 at 10:38:33"},{"visible":false,"include":false,"step":"40.0","x":-894.4666666666666,"y":671.0952380952381,"z":539.7714285714286,"a95":0.99,"info":"04/11/2014 at 10:38:33"},{"visible":false,"include":false,"step":"45.0","x":-583.0095238095239,"y":63.93047619047619,"z":-374.43809523809523,"a95":0.99,"info":"04/11/2014 at 10:38:33"},{"visible":false,"include":false,"step":"50.0","x":-184.22857142857143,"y":-841.2285714285714,"z":888.2380952380952,"a95":0.99,"info":"04/11/2014 at 10:38:33"},{"visible":false,"include":false,"step":"60.0","x":-537.9142857142857,"y":127.63809523809525,"z":-399.9047619047619,"a95":0.99,"info":"04/11/2014 at 10:38:33"},{"visible":false,"include":false,"step":"70.0","x":441.1142857142857,"y":-446.42857142857144,"z":-261.54285714285714,"a95":0.99,"info":"04/11/2014 at 10:38:33"},{"visible":false,"include":false,"step":"80.0","x":463.65714285714284,"y":-94.15142857142857,"z":1115.047619047619,"a95":0.99,"info":"04/11/2014 at 10:38:33"},{"visible":false,"include":false,"step":"90.0","x":-160.6,"y":-376.22857142857146,"z":-238.36190476190478,"a95":0.99,"info":"04/11/2014 at 10:38:33"}]},{"version":"v1.1.0","exported":"2016-11-24T13:58:37.543Z","volume":10.5,"added":"2016-11-24T13:50:55.118Z","format":"Utrecht","demagType":"Unknown","strat":null,"patch":1.1,"GEO":[{"dec":349.7850574775331,"inc":60.57321463388996,"MAD":2.3382548880329788,"cm":[-7.105427357601002e-14,-3.659295089164516e-13,0],"intensity":9548.865382136653,"type":"dir","forced":true,"remark":"","origin":false,"nSteps":10,"minStep":"150","maxStep":"390","steps":["150","180","210","240","270","300","320","340","370","390"],"group":"None","version":"v1.1.0"}],"TECT":[{"dec":350.3266118475274,"inc":27.577103078519308,"MAD":2.3382548880330027,"cm":[-2.2737367544323206e-13,-7.744915819785092e-13,4.263256414560601e-14],"intensity":9548.865382136653,"type":"dir","forced":true,"remark":"","origin":false,"nSteps":10,"minStep":"150","maxStep":"390","steps":["150","180","210","240","270","300","320","340","370","390"],"group":"None","version":"v1.1.0"}],"interpreted":true,"name":"EM5.08A","coreAzi":317,"coreDip":45,"bedStrike":261,"bedDip":33,"data":[{"visible":false,"include":false,"step":"20","x":-6234.761904761905,"y":2945.809523809524,"z":15055.52380952381,"a95":2.9,"info":"\"14-11-30\" at \"17:53\""},{"visible":true,"include":false,"step":"100","x":-3660.7619047619046,"y":3116.9523809523807,"z":10028.952380952382,"a95":2.5,"info":"\"15-02-10\" at \"16:28\""},{"visible":true,"include":true,"step":"150","x":-2232.285714285714,"y":1802,"z":6280,"a95":2.5,"info":"\"15-02-10\" at \"20:27\""},{"visible":true,"include":true,"step":"180","x":-1924,"y":1425.3333333333333,"z":5341.428571428572,"a95":2.6,"info":"\"15-02-11\" at \"15:57\""},{"visible":true,"include":true,"step":"210","x":-1777.6190476190477,"y":1447.142857142857,"z":4796.761904761905,"a95":2.5,"info":"\"15-02-11\" at \"19:31\""},{"visible":true,"include":true,"step":"240","x":-1520.6666666666667,"y":1179.3333333333333,"z":4168.476190476191,"a95":2.6,"info":"\"15-02-11\" at \"23:22\""},{"visible":true,"include":true,"step":"270","x":-1318.5714285714287,"y":965.4285714285714,"z":3346,"a95":2.7,"info":"\"15-02-12\" at \"17:34\""},{"visible":true,"include":true,"step":"300","x":-1087.142857142857,"y":728.952380952381,"z":3139.809523809524,"a95":2.5,"info":"\"15-02-13\" at \"15:55\""},{"visible":true,"include":true,"step":"320","x":-992.5714285714286,"y":877.1428571428571,"z":3063.714285714286,"a95":2.6,"info":"\"15-02-13\" at \"20:48\""},{"visible":true,"include":true,"step":"340","x":-1000.7619047619048,"y":1000.4761904761905,"z":2810,"a95":2.7,"info":"\"15-02-14\" at \"00:50\""},{"visible":true,"include":true,"step":"370","x":-1053.5238095238096,"y":1232.7619047619048,"z":2848.6666666666665,"a95":2.7,"info":"\"15-02-16\" at \"18:21\""},{"visible":true,"include":true,"step":"390","x":-614.8571428571429,"y":716.6666666666666,"z":2479.6190476190477,"a95":2.8,"info":"\"15-02-16\" at \"21:59\""},{"visible":false,"include":false,"step":"420","x":-654,"y":952,"z":2323.3333333333335,"a95":2.6,"info":"\"15-02-17\" at \"17:36\""},{"visible":false,"include":false,"step":"450","x":-544.5714285714286,"y":365.7142857142857,"z":1494,"a95":2.6,"info":"\"15-03-08\" at \"20:41\""},{"visible":false,"include":false,"step":"470","x":-633.3333333333334,"y":282.6666666666667,"z":1516.952380952381,"a95":3.2,"info":"\"15-03-09\" at \"10:55\""},{"visible":false,"include":false,"step":"490","x":-638.6666666666666,"y":265.04761904761904,"z":1619.904761904762,"a95":2.9,"info":"\"15-03-09\" at \"14:08\""},{"visible":false,"include":false,"step":"510","x":-425.14285714285717,"y":2.4761904761904763,"z":1427.904761904762,"a95":2.9,"info":"\"15-04-21\" at \"10:18\""}]},{"version":"v1.1.0","exported":"2016-11-24T13:58:37.543Z","volume":10.5,"added":"2016-11-24T13:50:55.122Z","format":"Utrecht","demagType":"Unknown","strat":"1","patch":1.1,"GEO":[],"TECT":[],"interpreted":false,"name":"EM5.09B","coreAzi":315,"coreDip":48,"bedStrike":261,"bedDip":33,"data":[{"visible":false,"include":false,"step":"0.0","x":-8130,"y":9577.142857142857,"z":16344.761904761905,"a95":0.99,"info":"04/11/2014 at 15:10:19"},{"visible":true,"include":false,"step":"10.0","x":-2490.190476190476,"y":3463.2380952380954,"z":8449.714285714286,"a95":0.99,"info":"04/11/2014 at 15:10:19"},{"visible":true,"include":false,"step":"15.0","x":-652,"y":2100.6666666666665,"z":5445.9047619047615,"a95":0.99,"info":"04/11/2014 at 15:10:19"},{"visible":true,"include":false,"step":"20.0","x":-334.8285714285714,"y":1192.5714285714287,"z":4607.142857142857,"a95":0.99,"info":"04/11/2014 at 15:10:19"},{"visible":true,"include":false,"step":"25.0","x":-614.6,"y":552.5619047619048,"z":3006.190476190476,"a95":0.99,"info":"04/11/2014 at 15:10:19"},{"visible":true,"include":false,"step":"30.0","x":-351.74285714285713,"y":878.2190476190475,"z":1304,"a95":0.99,"info":"04/11/2014 at 15:10:19"},{"visible":true,"include":false,"step":"35.0","x":-542.5619047619048,"y":355.84761904761905,"z":1395.142857142857,"a95":0.99,"info":"04/11/2014 at 15:10:19"},{"visible":true,"include":false,"step":"40.0","x":-494.4095238095238,"y":209.53333333333333,"z":922.9428571428571,"a95":0.99,"info":"04/11/2014 at 15:10:19"},{"visible":true,"include":false,"step":"45.0","x":520.1714285714286,"y":2.9844761904761903,"z":571.8190476190476,"a95":0.99,"info":"04/11/2014 at 15:10:19"},{"visible":true,"include":false,"step":"50.0","x":201.6095238095238,"y":-110.26666666666667,"z":1187.2380952380952,"a95":0.99,"info":"04/11/2014 at 15:10:19"},{"visible":true,"include":false,"step":"60.0","x":-221.38095238095238,"y":948.4952380952382,"z":584.2761904761904,"a95":0.99,"info":"04/11/2014 at 15:10:19"},{"visible":true,"include":false,"step":"70.0","x":-66.3495238095238,"y":291.37142857142857,"z":408.87619047619046,"a95":0.99,"info":"04/11/2014 at 15:10:19"},{"visible":true,"include":false,"step":"80.0","x":890.1619047619048,"y":788.2666666666667,"z":272.2857142857143,"a95":0.99,"info":"04/11/2014 at 15:10:19"},{"visible":true,"include":false,"step":"90.0","x":828.7523809523809,"y":186.75238095238097,"z":-395.1714285714286,"a95":0.99,"info":"04/11/2014 at 15:10:19"}]},{"version":"v1.1.0","exported":"2016-11-24T13:58:37.543Z","volume":10.5,"added":"2016-11-24T13:50:55.122Z","format":"Utrecht","demagType":"Unknown","strat":null,"patch":1.1,"GEO":[{"dec":350.19968808039897,"inc":55.77719730711483,"MAD":2.450228957643178,"cm":[5.684341886080802e-14,-8.01136934569513e-13,0],"intensity":25348.151776694318,"type":"dir","forced":true,"remark":"","origin":false,"nSteps":11,"minStep":"100","maxStep":"390","steps":["100","150","180","210","240","270","300","320","340","370","390"],"group":"None","version":"v1.1.0"}],"TECT":[{"dec":350.51182872810733,"inc":22.779054198457974,"MAD":2.450228957643248,"cm":[-1.1368683772161603e-13,-1.70219394135529e-12,0],"intensity":25348.151776694318,"type":"dir","forced":true,"remark":"","origin":false,"nSteps":11,"minStep":"100","maxStep":"390","steps":["100","150","180","210","240","270","300","320","340","370","390"],"group":"None","version":"v1.1.0"}],"interpreted":true,"name":"EM5.10A","coreAzi":308,"coreDip":14,"bedStrike":261,"bedDip":33,"data":[{"visible":true,"include":false,"step":"20","x":-17795.809523809523,"y":9623.42857142857,"z":16997.14285714286,"a95":2.4,"info":"\"14-11-30\" at \"17:55\""},{"visible":true,"include":true,"step":"100","x":-14476.952380952382,"y":7925.809523809524,"z":12988.095238095239,"a95":2.2,"info":"\"15-02-10\" at \"16:30\""},{"visible":true,"include":true,"step":"150","x":-9029.238095238095,"y":4822.190476190476,"z":8183.428571428572,"a95":2.1,"info":"\"15-02-10\" at \"20:30\""},{"visible":true,"include":true,"step":"180","x":-8116,"y":4119.238095238095,"z":6983.047619047619,"a95":2.1,"info":"\"15-02-11\" at \"15:59\""},{"visible":true,"include":true,"step":"210","x":-7541.9047619047615,"y":3407.904761904762,"z":6042.952380952381,"a95":2.1,"info":"\"15-02-11\" at \"19:33\""},{"visible":true,"include":true,"step":"240","x":-5858.476190476191,"y":3373.5238095238096,"z":4972.476190476191,"a95":2.1,"info":"\"15-02-11\" at \"23:25\""},{"visible":true,"include":true,"step":"270","x":-4933.428571428572,"y":2570.5714285714284,"z":4019.904761904762,"a95":2.1,"info":"\"15-02-12\" at \"17:36\""},{"visible":true,"include":true,"step":"300","x":-4063.4285714285716,"y":2586,"z":3462.7619047619046,"a95":2.1,"info":"\"15-02-13\" at \"15:57\""},{"visible":true,"include":true,"step":"320","x":-3651.2380952380954,"y":2171.0476190476193,"z":2893.809523809524,"a95":2,"info":"\"15-02-13\" at \"20:50\""},{"visible":true,"include":true,"step":"340","x":-3555.4285714285716,"y":2031.4285714285713,"z":2558.8571428571427,"a95":2,"info":"\"15-02-14\" at \"00:52\""},{"visible":true,"include":true,"step":"370","x":-3368.5714285714284,"y":2261.904761904762,"z":2603.1428571428573,"a95":2,"info":"\"15-02-16\" at \"18:23\""},{"visible":true,"include":true,"step":"390","x":-3424.4761904761904,"y":1850.6666666666667,"z":2061.4285714285716,"a95":1.9,"info":"\"15-02-16\" at \"22:01\""},{"visible":true,"include":false,"step":"420","x":-3269.6190476190477,"y":1873.2380952380952,"z":2043.8095238095239,"a95":2,"info":"\"15-02-17\" at \"17:38\""},{"visible":true,"include":false,"step":"450","x":-2388.8571428571427,"y":1367.6190476190477,"z":1290.6666666666667,"a95":1.9,"info":"\"15-03-08\" at \"20:43\""},{"visible":true,"include":false,"step":"470","x":-1941.6190476190477,"y":770.6666666666666,"z":1148.5714285714287,"a95":2.1,"info":"\"15-03-09\" at \"10:57\""},{"visible":true,"include":false,"step":"490","x":-2476.190476190476,"y":1046.2857142857142,"z":1102.6666666666667,"a95":1.9,"info":"\"15-03-09\" at \"14:10\""},{"visible":true,"include":false,"step":"510","x":-2665.5238095238096,"y":1099.5238095238096,"z":1084,"a95":2,"info":"\"15-04-21\" at \"10:21\""}]},{"version":"v1.1.0","exported":"2016-11-24T13:58:37.543Z","volume":10.5,"added":"2016-11-24T13:50:55.123Z","format":"Utrecht","demagType":"Unknown","strat":"2","patch":1.1,"GEO":[{"dec":356.92064851112184,"inc":61.27389710338397,"MAD":1.9133575573279606,"cm":[-1.1368683772161603e-13,-9.237055564881302e-13,0],"intensity":22737.1515268636,"type":"dir","forced":true,"remark":"","origin":false,"nSteps":3,"minStep":"10.0","maxStep":"20.0","steps":["10.0","15.0","20.0"],"group":"None","version":"v1.1.0"}],"TECT":[{"dec":354.2298122984776,"inc":28.364778213261577,"MAD":1.9133575573279822,"cm":[-6.821210263296962e-13,-4.320099833421409e-12,0],"intensity":22737.1515268636,"type":"dir","forced":true,"remark":"","origin":false,"nSteps":3,"minStep":"10.0","maxStep":"20.0","steps":["10.0","15.0","20.0"],"group":"None","version":"v1.1.0"}],"interpreted":true,"name":"EM5.11B","coreAzi":292,"coreDip":15,"bedStrike":261,"bedDip":33,"data":[{"visible":true,"include":false,"step":"0.0","x":-46972.380952380954,"y":27642.85714285714,"z":30181.904761904763,"a95":0.99,"info":"04/11/2014 at 15:10:19"},{"visible":true,"include":true,"step":"10.0","x":-13053.333333333334,"y":7225.333333333333,"z":6905.9047619047615,"a95":0.99,"info":"04/11/2014 at 15:10:19"},{"visible":true,"include":true,"step":"15.0","x":-7276.190476190476,"y":3788.9523809523807,"z":3536.285714285714,"a95":0.99,"info":"04/11/2014 at 15:10:19"},{"visible":true,"include":true,"step":"20.0","x":-4748.857142857143,"y":2696.9523809523807,"z":3174.190476190476,"a95":0.99,"info":"04/11/2014 at 15:10:19"},{"visible":true,"include":false,"step":"25.0","x":-3400.190476190476,"y":2176.9523809523807,"z":1061.7142857142858,"a95":0.99,"info":"04/11/2014 at 15:10:19"},{"visible":false,"include":false,"step":"30.0","x":-1061.047619047619,"y":166.33333333333334,"z":-254.1904761904762,"a95":0.99,"info":"04/11/2014 at 15:10:19"},{"visible":false,"include":false,"step":"35.0","x":-936.9238095238096,"y":503.79999999999995,"z":1403.3333333333333,"a95":0.99,"info":"04/11/2014 at 15:10:19"},{"visible":false,"include":false,"step":"40.0","x":128.7904761904762,"y":722.8571428571429,"z":-79.18761904761905,"a95":0.99,"info":"04/11/2014 at 15:10:19"},{"visible":false,"include":false,"step":"45.0","x":140.8952380952381,"y":616.0952380952381,"z":-1000.2857142857143,"a95":0.99,"info":"04/11/2014 at 15:10:19"},{"visible":false,"include":false,"step":"50.0","x":319.4666666666667,"y":223.36190476190478,"z":896.7142857142857,"a95":0.99,"info":"04/11/2014 at 15:10:19"},{"visible":false,"include":false,"step":"60.0","x":-46.93238095238095,"y":272.34285714285716,"z":-15.227619047619047,"a95":0.99,"info":"04/11/2014 at 15:10:19"},{"visible":false,"include":false,"step":"70.0","x":165.6095238095238,"y":274.93333333333334,"z":-992.6666666666666,"a95":0.99,"info":"04/11/2014 at 15:10:19"},{"visible":false,"include":false,"step":"80.0","x":124.26666666666667,"y":407.25714285714287,"z":1216.095238095238,"a95":0.99,"info":"04/11/2014 at 15:10:19"},{"visible":false,"include":false,"step":"90.0","x":336.51428571428573,"y":580.2761904761904,"z":-1164.7619047619048,"a95":0.99,"info":"04/11/2014 at 15:10:19"}]},{"version":"v1.1.0","exported":"2016-11-24T13:58:37.544Z","volume":10.5,"added":"2016-11-24T13:50:55.123Z","format":"Utrecht","demagType":"Unknown","strat":null,"patch":1.1,"GEO":[{"dec":356.676722462656,"inc":53.44916504587698,"MAD":2.3113055135143696,"cm":[4.547473508864641e-13,2.163602630389505e-12,0],"intensity":48756.83703334947,"type":"dir","forced":true,"remark":"","origin":false,"nSteps":6,"minStep":"150","maxStep":"300","steps":["150","180","210","240","270","300"],"group":"None","version":"v1.1.0"}],"TECT":[{"dec":354.60683139112,"inc":20.546464464931994,"MAD":2.311305513514312,"cm":[6.821210263296962e-13,1.1368683772161603e-12,2.2737367544323206e-13],"intensity":48756.83703334947,"type":"dir","forced":true,"remark":"","origin":false,"nSteps":6,"minStep":"150","maxStep":"300","steps":["150","180","210","240","270","300"],"group":"None","version":"v1.1.0"}],"interpreted":true,"name":"EM5.12A","coreAzi":301,"coreDip":15,"bedStrike":261,"bedDip":33,"data":[{"visible":true,"include":false,"step":"20","x":-62990,"y":43427.90476190476,"z":54360.09523809524,"a95":1.9,"info":"\"14-11-30\" at \"17:57\""},{"visible":true,"include":false,"step":"100","x":-49431.90476190476,"y":34540.95238095238,"z":38630,"a95":1.9,"info":"\"15-02-10\" at \"16:33\""},{"visible":true,"include":true,"step":"150","x":-25493.52380952381,"y":16538.47619047619,"z":19890.47619047619,"a95":1.9,"info":"\"15-02-10\" at \"20:31\""},{"visible":true,"include":true,"step":"180","x":-21925.809523809523,"y":15039.42857142857,"z":16652.285714285714,"a95":1.8,"info":"\"15-02-11\" at \"16:01\""},{"visible":true,"include":true,"step":"210","x":-18101.14285714286,"y":13953.809523809523,"z":13955.714285714286,"a95":1.7,"info":"\"15-02-11\" at \"19:36\""},{"visible":true,"include":true,"step":"240","x":-14785.714285714286,"y":11202.285714285714,"z":10761.619047619048,"a95":1.8,"info":"\"15-02-11\" at \"23:27\""},{"visible":true,"include":true,"step":"270","x":-11488.666666666666,"y":9366.666666666666,"z":9390,"a95":1.8,"info":"\"15-02-12\" at \"17:39\""},{"visible":true,"include":true,"step":"300","x":-7890.571428571428,"y":7026.285714285715,"z":6707.142857142857,"a95":1.8,"info":"\"15-02-13\" at \"15:59\""},{"visible":true,"include":false,"step":"320","x":-7996,"y":4947.142857142857,"z":5782.0952380952385,"a95":1.9,"info":"\"15-02-13\" at \"20:52\""},{"visible":true,"include":false,"step":"340","x":-7289.428571428572,"y":3292.6666666666665,"z":5575.714285714285,"a95":1.9,"info":"\"15-02-14\" at \"00:56\""},{"visible":true,"include":false,"step":"370","x":-5636.476190476191,"y":4724.857142857143,"z":4816.285714285715,"a95":1.8,"info":"\"15-02-16\" at \"18:25\""},{"visible":true,"include":false,"step":"390","x":-5988.380952380952,"y":2275.809523809524,"z":4319.047619047619,"a95":2,"info":"\"15-02-16\" at \"22:03\""},{"visible":true,"include":false,"step":"420","x":-6945.523809523809,"y":1625.4285714285713,"z":3439.4285714285716,"a95":2,"info":"\"15-02-17\" at \"17:40\""},{"visible":true,"include":false,"step":"450","x":-4966.761904761905,"y":2827.5238095238096,"z":2270.3809523809523,"a95":1.8,"info":"\"15-03-08\" at \"20:45\""},{"visible":true,"include":false,"step":"470","x":-4616.190476190476,"y":241.61904761904762,"z":1555.5238095238096,"a95":1.9,"info":"\"15-03-09\" at \"11:00\""},{"visible":true,"include":false,"step":"490","x":-5318.761904761905,"y":2067.5238095238096,"z":2808.9523809523807,"a95":2.1,"info":"\"15-03-09\" at \"14:12\""},{"visible":true,"include":false,"step":"510","x":-3960,"y":-412.85714285714283,"z":3174.5714285714284,"a95":2.3,"info":"\"15-04-21\" at \"10:23\""}]},{"version":"v1.1.0","exported":"2016-11-24T13:58:37.544Z","volume":10.5,"added":"2016-11-24T13:50:55.124Z","format":"Utrecht","demagType":"Unknown","strat":null,"patch":1.1,"GEO":[{"dec":352.14332649711525,"inc":62.732597477194155,"MAD":2.2017948415914534,"cm":[2.5011104298755527e-12,5.7198690228688065e-12,0],"intensity":208283.3529701323,"type":"dir","forced":true,"remark":"","origin":false,"nSteps":7,"minStep":"150","maxStep":"320","steps":["150","180","210","240","270","300","320"],"group":"None","version":"v1.1.0"}],"TECT":[{"dec":351.60321346929555,"inc":29.735875384951857,"MAD":2.2017948415914086,"cm":[-1.8189894035458565e-12,-1.361399881716352e-11,0],"intensity":208283.3529701323,"type":"dir","forced":true,"remark":"","origin":false,"nSteps":7,"minStep":"150","maxStep":"320","steps":["150","180","210","240","270","300","320"],"group":"None","version":"v1.1.0"}],"interpreted":true,"name":"EM5.13A","coreAzi":350,"coreDip":28,"bedStrike":261,"bedDip":33,"data":[{"visible":true,"include":false,"step":"20","x":-290994.09523809527,"y":39910.76190476191,"z":394619.8095238095,"a95":2.6,"info":"\"14-11-30\" at \"17:59\""},{"visible":true,"include":false,"step":"100","x":-154673.7142857143,"y":13184.47619047619,"z":260922.66666666666,"a95":2.4,"info":"\"15-02-10\" at \"16:35\""},{"visible":true,"include":true,"step":"150","x":-94672.57142857143,"y":2470.285714285714,"z":144916.85714285713,"a95":2.4,"info":"\"15-02-10\" at \"20:33\""},{"visible":true,"include":true,"step":"180","x":-82863.04761904762,"y":-116.85714285714286,"z":122779.52380952382,"a95":2.3,"info":"\"15-02-11\" at \"16:03\""},{"visible":true,"include":true,"step":"210","x":-75557.90476190476,"y":3927.5238095238096,"z":103846.85714285714,"a95":2.4,"info":"\"15-02-11\" at \"19:38\""},{"visible":true,"include":true,"step":"240","x":-42435.333333333336,"y":2645.714285714286,"z":55148.09523809524,"a95":2.4,"info":"\"15-02-11\" at \"23:30\""},{"visible":true,"include":true,"step":"270","x":-33478.95238095238,"y":3466.6666666666665,"z":40469.04761904762,"a95":2.4,"info":"\"15-02-12\" at \"17:41\""},{"visible":true,"include":true,"step":"300","x":-24862.285714285714,"y":244.38095238095238,"z":31360.571428571428,"a95":2.3,"info":"\"15-02-13\" at \"16:01\""},{"visible":true,"include":true,"step":"320","x":-24001.428571428572,"y":1704.095238095238,"z":26200.095238095237,"a95":2.3,"info":"\"15-02-13\" at \"20:54\""},{"visible":true,"include":false,"step":"340","x":-23315.14285714286,"y":1918,"z":23793.333333333332,"a95":2.6,"info":"\"15-02-14\" at \"00:58\""},{"visible":true,"include":false,"step":"370","x":-21452.380952380954,"y":4021.1428571428573,"z":20652.47619047619,"a95":2.6,"info":"\"15-02-16\" at \"18:30\""},{"visible":true,"include":false,"step":"390","x":-23423.04761904762,"y":4741.619047619048,"z":17448,"a95":2.7,"info":"\"15-02-16\" at \"22:05\""},{"visible":true,"include":false,"step":"420","x":-23709.904761904763,"y":3521.904761904762,"z":16447.428571428572,"a95":2.9,"info":"\"15-02-17\" at \"17:42\""},{"visible":true,"include":false,"step":"450","x":-15980.666666666666,"y":3272.4761904761904,"z":10306.47619047619,"a95":2.3,"info":"\"15-03-08\" at \"20:47\""},{"visible":true,"include":false,"step":"470","x":-13613.142857142857,"y":3071.4285714285716,"z":11046.952380952382,"a95":3,"info":"\"15-03-09\" at \"11:02\""},{"visible":true,"include":false,"step":"490","x":-21759.238095238095,"y":5823.238095238095,"z":12460.57142857143,"a95":3.2,"info":"\"15-03-09\" at \"14:14\""},{"visible":true,"include":false,"step":"510","x":-23456.666666666668,"y":2240.4761904761904,"z":13807.142857142857,"a95":2.4,"info":"\"15-04-21\" at \"10:25\""}]},{"version":"v1.1.0","exported":"2016-11-24T13:58:37.544Z","volume":10.5,"added":"2016-11-24T13:50:55.124Z","format":"Utrecht","demagType":"Unknown","strat":null,"patch":1.1,"GEO":[{"dec":19.051494871773343,"inc":58.852830878761964,"MAD":1.7623572744735736,"cm":[-1.8189894035458565e-12,1.2164491636212915e-11,0],"intensity":321217.47878910345,"type":"dir","forced":true,"remark":"","origin":false,"nSteps":5,"minStep":"150","maxStep":"270","steps":["150","180","210","240","270"],"group":"None","version":"v1.1.0"}],"TECT":[{"dec":6.987794893414161,"inc":27.979436584687843,"MAD":1.7623572744735605,"cm":[0,4.197886482870672e-11,-1.8189894035458565e-12],"intensity":321217.47878910345,"type":"dir","forced":true,"remark":"","origin":false,"nSteps":5,"minStep":"150","maxStep":"270","steps":["150","180","210","240","270"],"group":"None","version":"v1.1.0"}],"interpreted":true,"name":"EM5.15A","coreAzi":27,"coreDip":40,"bedStrike":261,"bedDip":33,"data":[{"visible":true,"include":false,"step":"20","x":-314164,"y":-13519.809523809523,"z":630304.8571428572,"a95":2.9,"info":"\"14-11-30\" at \"18:05\""},{"visible":true,"include":false,"step":"100","x":-156192.19047619047,"y":-11730,"z":443198.38095238095,"a95":2.6,"info":"\"15-02-10\" at \"16:37\""},{"visible":true,"include":true,"step":"150","x":-79885.80952380953,"y":-17891.619047619046,"z":237783.2380952381,"a95":2.6,"info":"\"15-02-10\" at \"20:35\""},{"visible":true,"include":true,"step":"180","x":-67894.38095238095,"y":-10723.904761904761,"z":201311.14285714287,"a95":2.6,"info":"\"15-02-11\" at \"16:05\""},{"visible":true,"include":true,"step":"210","x":-58657.142857142855,"y":-15339.52380952381,"z":172122.57142857142,"a95":2.7,"info":"\"15-02-11\" at \"19:40\""},{"visible":true,"include":true,"step":"240","x":-37662,"y":-10909.904761904761,"z":91275.14285714286,"a95":2.6,"info":"\"15-02-11\" at \"23:32\""},{"visible":true,"include":true,"step":"270","x":-29955.904761904763,"y":-7594.666666666667,"z":62992.28571428572,"a95":2.6,"info":"\"15-02-12\" at \"17:43\""},{"visible":true,"include":false,"step":"300","x":-18065.238095238095,"y":-11126.190476190477,"z":52587.619047619046,"a95":2.5,"info":"\"15-02-13\" at \"16:04\""},{"visible":true,"include":false,"step":"320","x":-17489.428571428572,"y":-3776.095238095238,"z":37403.71428571428,"a95":2.7,"info":"\"15-02-13\" at \"20:56\""},{"visible":true,"include":false,"step":"340","x":-17775.238095238095,"y":-6563.238095238095,"z":33261.80952380953,"a95":2.8,"info":"\"15-02-14\" at \"01:00\""},{"visible":true,"include":false,"step":"370","x":550.1904761904761,"y":-20197.14285714286,"z":24998.95238095238,"a95":2.3,"info":"\"15-02-16\" at \"18:31\""},{"visible":true,"include":false,"step":"390","x":-20429.52380952381,"y":-682.0952380952381,"z":23835.04761904762,"a95":3.3,"info":"\"15-02-16\" at \"22:07\""},{"visible":true,"include":false,"step":"420","x":-15441.52380952381,"y":-2976.7619047619046,"z":19551.904761904763,"a95":3.4,"info":"\"15-02-17\" at \"17:44\""},{"visible":true,"include":false,"step":"450","x":-12243.52380952381,"y":-1200.2857142857142,"z":16292.57142857143,"a95":3.4,"info":"\"15-03-08\" at \"20:49\""},{"visible":true,"include":false,"step":"470","x":-5980.952380952381,"y":-4478.952380952381,"z":14109.238095238095,"a95":3.8,"info":"\"15-03-09\" at \"11:04\""},{"visible":true,"include":false,"step":"490","x":-14657.333333333334,"y":-730.1904761904761,"z":23020.285714285714,"a95":3.2,"info":"\"15-03-09\" at \"14:17\""},{"visible":true,"include":false,"step":"510","x":9111.619047619048,"y":-11431.333333333334,"z":37662.95238095238,"a95":2.5,"info":"\"15-04-21\" at \"10:27\""}]},{"version":"v1.1.0","exported":"2016-11-24T13:58:37.544Z","volume":10.5,"added":"2016-11-24T13:50:55.124Z","format":"Utrecht","demagType":"Unknown","strat":"3","patch":1.1,"GEO":[{"dec":21.691327895101097,"inc":70.15527168726314,"MAD":1.4850118425008303,"cm":[1.3642420526593924e-12,-1.0231815394945443e-12,0],"intensity":187948.7395557004,"type":"dir","forced":true,"remark":"","origin":false,"nSteps":4,"minStep":"10.0","maxStep":"25.0","steps":["10.0","15.0","20.0","25.0"],"group":"None","version":"v1.1.0"}],"TECT":[{"dec":3.8904169465437803,"inc":39.040880618575684,"MAD":1.485011842500927,"cm":[0,2.262368070660159e-11,0],"intensity":187948.7395557004,"type":"dir","forced":true,"remark":"","origin":false,"nSteps":4,"minStep":"10.0","maxStep":"25.0","steps":["10.0","15.0","20.0","25.0"],"group":"None","version":"v1.1.0"}],"interpreted":true,"name":"EM5.15B","coreAzi":27,"coreDip":40,"bedStrike":261,"bedDip":33,"data":[{"visible":true,"include":false,"step":"0.0","x":-174771.42857142858,"y":-2468.4761904761904,"z":306228.5714285714,"a95":0.99,"info":"04/11/2014 at 15:10:19"},{"visible":true,"include":true,"step":"10.0","x":-81525.71428571429,"y":-5095.142857142857,"z":138942.85714285713,"a95":0.99,"info":"04/11/2014 at 15:10:19"},{"visible":true,"include":true,"step":"15.0","x":-41315.23809523809,"y":-2973.0476190476193,"z":67216.19047619047,"a95":0.99,"info":"04/11/2014 at 15:10:19"},{"visible":true,"include":true,"step":"20.0","x":-23071.428571428572,"y":-850.1904761904761,"z":48305.71428571428,"a95":0.99,"info":"04/11/2014 at 15:10:19"},{"visible":true,"include":true,"step":"25.0","x":-13851.42857142857,"y":-831.6761904761905,"z":22899.04761904762,"a95":0.99,"info":"04/11/2014 at 15:10:19"},{"visible":true,"include":false,"step":"30.0","x":-11193.333333333334,"y":-1075.2380952380952,"z":11503.809523809523,"a95":0.99,"info":"04/11/2014 at 15:10:19"},{"visible":true,"include":false,"step":"35.0","x":-4660.761904761905,"y":-2735.2380952380954,"z":12876.190476190477,"a95":0.99,"info":"04/11/2014 at 15:10:19"},{"visible":true,"include":false,"step":"40.0","x":-3891.904761904762,"y":3942.285714285714,"z":1657.7142857142858,"a95":0.99,"info":"04/11/2014 at 15:10:19"},{"visible":true,"include":false,"step":"45.0","x":-1429.3333333333333,"y":-1325.5238095238096,"z":-2993.904761904762,"a95":0.99,"info":"04/11/2014 at 15:10:19"},{"visible":true,"include":false,"step":"50.0","x":-3631.904761904762,"y":-918.0285714285714,"z":5915.809523809524,"a95":0.99,"info":"04/11/2014 at 15:10:19"},{"visible":true,"include":false,"step":"60.0","x":-1178.2857142857142,"y":-573.8761904761905,"z":-2268.285714285714,"a95":0.99,"info":"04/11/2014 at 15:10:19"},{"visible":true,"include":false,"step":"70.0","x":-457.6,"y":1077.5238095238096,"z":-4735.809523809524,"a95":0.99,"info":"04/11/2014 at 15:10:19"},{"visible":true,"include":false,"step":"80.0","x":-5173.142857142857,"y":-693.5809523809525,"z":7248.666666666667,"a95":0.99,"info":"04/11/2014 at 15:10:19"},{"visible":true,"include":false,"step":"90.0","x":1936.1904761904761,"y":3736.8571428571427,"z":-4834,"a95":0.99,"info":"04/11/2014 at 15:10:19"}]}]
