# Supplementary material for: Paleomagnetic constraints on the timing and distribution of Cenozoic rotations in Central and Eastern Anatolia
Source: Copernicus journal article supplement (doi:10.5194/se-9-295-2018), 2018-03-21
Supplement: Supplementary file 2 [file se-9-295-2018-supplement.zip › se-2017-66_DATA_dir files/dir files Ulukisla/ER1.dir]

[{"version":"v1.1.0","exported":"2016-11-23T21:52:54.858Z","volume":10.5,"added":"2016-11-23T21:44:26.255Z","format":"Utrecht","demagType":"Unknown","strat":"1","patch":1.1,"GEO":[],"TECT":[],"interpreted":false,"name":"ER1.1A","coreAzi":57,"coreDip":60,"bedStrike":287,"bedDip":22,"data":[{"visible":true,"include":false,"step":"0.0","x":-34.01619047619048,"y":-79.88380952380952,"z":162.64761904761903,"a95":0.99,"info":"25/08/2014 at 00:56:08"},{"visible":true,"include":false,"step":"4.0","x":-24.46857142857143,"y":-76.18476190476191,"z":145.38095238095238,"a95":0.99,"info":"25/08/2014 at 00:56:08"},{"visible":true,"include":false,"step":"8.0","x":-25.420952380952382,"y":-58.05904761904762,"z":121.57142857142857,"a95":0.99,"info":"25/08/2014 at 00:56:08"},{"visible":true,"include":false,"step":"12.0","x":-13.836190476190476,"y":-60.00857142857143,"z":77.03428571428572,"a95":0.99,"info":"25/08/2014 at 00:56:08"},{"visible":true,"include":false,"step":"16.0","x":-59.105714285714285,"y":-80.91428571428571,"z":72.0904761904762,"a95":0.99,"info":"25/08/2014 at 00:56:08"},{"visible":true,"include":false,"step":"20.0","x":-39.01428571428571,"y":-62.54761904761905,"z":62.42761904761905,"a95":0.99,"info":"25/08/2014 at 00:56:08"},{"visible":true,"include":false,"step":"25.0","x":-38.579047619047614,"y":-37.14666666666667,"z":51.671428571428564,"a95":0.99,"info":"25/08/2014 at 00:56:08"},{"visible":true,"include":false,"step":"30.0","x":-21.744761904761905,"y":-69.88,"z":37.46952380952381,"a95":0.99,"info":"25/08/2014 at 00:56:08"},{"visible":true,"include":false,"step":"35.0","x":12.724761904761905,"y":-12.132380952380952,"z":2.422857142857143,"a95":0.99,"info":"25/08/2014 at 00:56:08"},{"visible":true,"include":false,"step":"40.0","x":-28.48190476190476,"y":-26.01238095238095,"z":-3.7035238095238094,"a95":0.99,"info":"25/08/2014 at 00:56:08"},{"visible":true,"include":false,"step":"45.0","x":1.818285714285714,"y":-21.792380952380952,"z":-20.08857142857143,"a95":0.99,"info":"25/08/2014 at 00:56:08"},{"visible":true,"include":false,"step":"50.0","x":4.24447619047619,"y":-10.831428571428571,"z":16.107619047619046,"a95":0.99,"info":"25/08/2014 at 00:56:08"},{"visible":true,"include":false,"step":"60.0","x":-10.837142857142858,"y":27.027619047619048,"z":14.63238095238095,"a95":0.99,"info":"25/08/2014 at 00:56:08"},{"visible":true,"include":false,"step":"70.0","x":19.985714285714284,"y":29.514285714285712,"z":-7.928952380952381,"a95":0.99,"info":"25/08/2014 at 00:56:08"},{"visible":true,"include":false,"step":"80.0","x":13.74952380952381,"y":16.595238095238095,"z":27.934285714285714,"a95":0.99,"info":"25/08/2014 at 00:56:08"},{"visible":true,"include":false,"step":"90.0","x":16.137142857142855,"y":21.215238095238096,"z":-10.822857142857142,"a95":0.99,"info":"25/08/2014 at 00:56:08"},{"visible":true,"include":false,"step":"100.0","x":49.19523809523809,"y":50.06,"z":14.555238095238096,"a95":0.99,"info":"25/08/2014 at 00:56:08"}]},{"version":"v1.1.0","exported":"2016-11-23T21:52:54.858Z","volume":10.5,"added":"2016-11-23T21:44:26.256Z","format":"Utrecht","demagType":"Unknown","strat":"6","patch":1.1,"GEO":[{"dec":352.59962839412196,"inc":53.57650565209946,"MAD":4.673485789910546,"cm":[-8.881784197001252e-16,4.6629367034256575e-15,0],"intensity":284.5734668180336,"type":"dir","forced":true,"remark":"","origin":false,"nSteps":11,"minStep":"4.0","maxStep":"60.0","steps":["4.0","8.0","12.0","16.0","20.0","25.0","30.0","35.0","40.0","50.0","60.0"],"group":"None","version":"v1.1.0"}],"TECT":[{"dec":0.009642088654686631,"inc":32.92243303740793,"MAD":4.6734857899105275,"cm":[-8.881784197001252e-16,-3.2529534621517087e-14,3.1086244689504383e-15],"intensity":284.5734668180336,"type":"dir","forced":true,"remark":"","origin":false,"nSteps":11,"minStep":"4.0","maxStep":"60.0","steps":["4.0","8.0","12.0","16.0","20.0","25.0","30.0","35.0","40.0","50.0","60.0"],"group":"None","version":"v1.1.0"}],"interpreted":true,"name":"ER1.1B","coreAzi":57,"coreDip":60,"bedStrike":287,"bedDip":22,"data":[{"visible":false,"include":false,"step":"0.0","x":-57.852380952380955,"y":-136.41904761904763,"z":199.95238095238096,"a95":0.99,"info":"26/10/2014 at 07:43:38"},{"visible":true,"include":true,"step":"4.0","x":-42.67714285714286,"y":-132.9904761904762,"z":185.16190476190476,"a95":0.99,"info":"26/10/2014 at 07:43:38"},{"visible":true,"include":true,"step":"8.0","x":-42.586666666666666,"y":-128.03809523809525,"z":168.53333333333333,"a95":0.99,"info":"26/10/2014 at 07:43:38"},{"visible":true,"include":true,"step":"12.0","x":-40.06285714285715,"y":-106.6,"z":189.15238095238095,"a95":0.99,"info":"26/10/2014 at 07:43:38"},{"visible":true,"include":true,"step":"16.0","x":-35.78476190476191,"y":-87.17428571428572,"z":118.94285714285715,"a95":0.99,"info":"26/10/2014 at 07:43:38"},{"visible":true,"include":true,"step":"20.0","x":-24.634285714285717,"y":-77.45523809523809,"z":114.06666666666668,"a95":0.99,"info":"26/10/2014 at 07:43:38"},{"visible":true,"include":true,"step":"25.0","x":-29.22190476190476,"y":-48.079047619047614,"z":97.62857142857142,"a95":0.99,"info":"26/10/2014 at 07:43:38"},{"visible":true,"include":true,"step":"30.0","x":-5.59752380952381,"y":-52.73047619047619,"z":97.88571428571429,"a95":0.99,"info":"26/10/2014 at 07:43:38"},{"visible":true,"include":true,"step":"35.0","x":-6.416857142857142,"y":-49.231428571428566,"z":85.5495238095238,"a95":0.99,"info":"26/10/2014 at 07:43:38"},{"visible":true,"include":true,"step":"40.0","x":-19.99809523809524,"y":-47.710476190476186,"z":96.85714285714286,"a95":0.99,"info":"26/10/2014 at 07:43:38"},{"visible":false,"include":false,"step":"45.0","x":5.994,"y":-35.58571428571428,"z":66.59238095238095,"a95":0.99,"info":"26/10/2014 at 07:43:38"},{"visible":true,"include":true,"step":"50.0","x":-10.611428571428572,"y":-47.83238095238095,"z":72.72761904761904,"a95":0.99,"info":"26/10/2014 at 07:43:38"},{"visible":true,"include":true,"step":"60.0","x":-4.588,"y":-24.52,"z":47.084761904761905,"a95":0.99,"info":"26/10/2014 at 07:43:38"},{"visible":false,"include":false,"step":"70.0","x":10.751428571428571,"y":-36.71523809523809,"z":5.077333333333333,"a95":0.99,"info":"26/10/2014 at 07:43:38"},{"visible":false,"include":false,"step":"80.0","x":12.743809523809524,"y":-31.97047619047619,"z":43.00476190476191,"a95":0.99,"info":"26/10/2014 at 07:43:38"},{"visible":false,"include":false,"step":"90.0","x":3.070952380952381,"y":-34.618095238095236,"z":17.162857142857142,"a95":0.99,"info":"26/10/2014 at 07:43:38"},{"visible":false,"include":false,"step":"100.0","x":-1.9266666666666667,"y":-32.07238095238095,"z":-16.18190476190476,"a95":0.99,"info":"26/10/2014 at 07:43:38"}]},{"version":"v1.1.0","exported":"2016-11-23T21:52:54.858Z","volume":10.5,"added":"2016-11-23T21:44:26.256Z","format":"Utrecht","demagType":"Unknown","strat":"2","patch":1.1,"GEO":[],"TECT":[],"interpreted":false,"name":"ER1.2A","coreAzi":42,"coreDip":58,"bedStrike":287,"bedDip":22,"data":[{"visible":true,"include":false,"step":"0.0","x":-53.06285714285714,"y":-9.270190476190477,"z":110.36190476190475,"a95":0.99,"info":"25/08/2014 at 00:56:08"},{"visible":true,"include":false,"step":"4.0","x":-43.48952380952381,"y":-26.194285714285716,"z":93.52952380952381,"a95":0.99,"info":"25/08/2014 at 00:56:08"},{"visible":true,"include":false,"step":"8.0","x":-50.5247619047619,"y":-18.803809523809523,"z":63.733333333333334,"a95":0.99,"info":"25/08/2014 at 00:56:08"},{"visible":true,"include":false,"step":"12.0","x":-49.79333333333334,"y":-11.578095238095237,"z":47.96095238095238,"a95":0.99,"info":"25/08/2014 at 00:56:08"},{"visible":true,"include":false,"step":"16.0","x":-30.513333333333332,"y":-12.358095238095236,"z":49.32,"a95":0.99,"info":"25/08/2014 at 00:56:08"},{"visible":true,"include":false,"step":"20.0","x":-30.067619047619047,"y":-8.636952380952382,"z":7.928285714285714,"a95":0.99,"info":"25/08/2014 at 00:56:08"},{"visible":true,"include":false,"step":"25.0","x":-25.43904761904762,"y":-1.0683809523809524,"z":4.51,"a95":0.99,"info":"25/08/2014 at 00:56:08"},{"visible":true,"include":false,"step":"30.0","x":-35.156190476190474,"y":8.923333333333332,"z":-20.555238095238096,"a95":0.99,"info":"25/08/2014 at 00:56:08"},{"visible":true,"include":false,"step":"35.0","x":-13.900952380952381,"y":29.564761904761905,"z":15.022857142857143,"a95":0.99,"info":"25/08/2014 at 00:56:08"},{"visible":true,"include":false,"step":"40.0","x":-6.689047619047619,"y":33.33047619047619,"z":-0.771295238095238,"a95":0.99,"info":"25/08/2014 at 00:56:08"},{"visible":true,"include":false,"step":"45.0","x":-23.891428571428573,"y":2.6003809523809522,"z":-14.251428571428571,"a95":0.99,"info":"25/08/2014 at 00:56:08"},{"visible":true,"include":false,"step":"50.0","x":-24.12952380952381,"y":18.082857142857144,"z":-5.858666666666666,"a95":0.99,"info":"25/08/2014 at 00:56:08"},{"visible":true,"include":false,"step":"60.0","x":-33.36952380952381,"y":8.290952380952382,"z":-18.045714285714286,"a95":0.99,"info":"25/08/2014 at 00:56:08"},{"visible":true,"include":false,"step":"70.0","x":-4.475238095238096,"y":10.896190476190476,"z":-36.58095238095238,"a95":0.99,"info":"25/08/2014 at 00:56:08"},{"visible":true,"include":false,"step":"80.0","x":3.9678095238095237,"y":-2.3132380952380953,"z":-22.955238095238094,"a95":0.99,"info":"25/08/2014 at 00:56:08"},{"visible":true,"include":false,"step":"90.0","x":0.49685714285714283,"y":9.543809523809523,"z":-28.452380952380953,"a95":0.99,"info":"25/08/2014 at 00:56:08"},{"visible":true,"include":false,"step":"100.0","x":-39.83714285714286,"y":3.007904761904762,"z":4.913619047619048,"a95":0.99,"info":"25/08/2014 at 00:56:08"}]},{"version":"v1.1.0","exported":"2016-11-23T21:52:54.858Z","volume":10.5,"added":"2016-11-23T21:44:26.258Z","format":"Utrecht","demagType":"Unknown","strat":null,"patch":1.1,"GEO":[],"TECT":[],"interpreted":false,"name":"ER1.2B","coreAzi":42,"coreDip":58,"bedStrike":287,"bedDip":22,"data":[{"visible":true,"include":false,"step":"20","x":-100.0952380952381,"y":-91.33333333333333,"z":152.47619047619048,"a95":3,"info":"\"14-09-15\" at \"15:22\""},{"visible":true,"include":false,"step":"100","x":-49.333333333333336,"y":-42.38095238095238,"z":96.19047619047619,"a95":3,"info":"\"14-09-15\" at \"19:24\""},{"visible":true,"include":false,"step":"150","x":-59.77142857142857,"y":-0.21904761904761902,"z":72.54285714285714,"a95":4.4,"info":"\"14-09-15\" at \"21:37\""},{"visible":true,"include":false,"step":"180","x":-25.62857142857143,"y":-6.371428571428572,"z":73.56190476190476,"a95":4.9,"info":"\"14-09-16\" at \"10:35\""},{"visible":true,"include":false,"step":"210","x":-16.952380952380953,"y":8.123809523809523,"z":26.923809523809524,"a95":14.5,"info":"\"14-09-16\" at \"13:16\""},{"visible":true,"include":false,"step":"240","x":-28.666666666666668,"y":4.828571428571429,"z":33.714285714285715,"a95":4.8,"info":"\"14-09-16\" at \"15:57\""},{"visible":true,"include":false,"step":"270","x":-38.095238095238095,"y":9.761904761904763,"z":51.733333333333334,"a95":4.3,"info":"\"14-09-16\" at \"18:47\""},{"visible":true,"include":false,"step":"300","x":-10.380952380952381,"y":22.066666666666666,"z":57.36190476190476,"a95":3.5,"info":"\"14-09-17\" at \"11:10\""},{"visible":true,"include":false,"step":"320","x":-20.438095238095237,"y":12.40952380952381,"z":9.019047619047619,"a95":6.4,"info":"\"14-09-17\" at \"13:31\""},{"visible":true,"include":false,"step":"340","x":-47.42857142857143,"y":14.752380952380953,"z":-23.123809523809523,"a95":3.8,"info":"\"14-09-17\" at \"16:46\""},{"visible":true,"include":false,"step":"370","x":-70.97142857142858,"y":14.380952380952381,"z":13.980952380952383,"a95":6.6,"info":"\"14-09-17\" at \"21:57\""},{"visible":true,"include":false,"step":"390","x":-39.81904761904762,"y":40.40952380952381,"z":-49.171428571428564,"a95":6.9,"info":"\"14-09-18\" at \"11:10\""},{"visible":true,"include":false,"step":"420","x":-66.57142857142857,"y":25.19047619047619,"z":-5.076190476190476,"a95":8.400001,"info":"\"14-09-18\" at \"14:12\""}]},{"version":"v1.1.0","exported":"2016-11-23T21:52:54.858Z","volume":10.5,"added":"2016-11-23T21:44:26.259Z","format":"Utrecht","demagType":"Unknown","strat":"7","patch":1.1,"GEO":[{"dec":357.4867415694899,"inc":56.313723965342426,"MAD":4.700347681421547,"cm":[-2.4424906541753444e-15,-1.0880185641326534e-14,0],"intensity":337.807998957451,"type":"dir","forced":true,"remark":"","origin":false,"nSteps":11,"minStep":"4.0","maxStep":"50.0","steps":["4.0","8.0","12.0","16.0","20.0","25.0","30.0","35.0","40.0","45.0","50.0"],"group":"None","version":"v1.1.0"}],"TECT":[{"dec":3.904703379848911,"inc":35.14569399964611,"MAD":4.700347681421635,"cm":[-4.440892098500626e-16,-1.1213252548714081e-14,4.440892098500626e-16],"intensity":337.807998957451,"type":"dir","forced":true,"remark":"","origin":false,"nSteps":11,"minStep":"4.0","maxStep":"50.0","steps":["4.0","8.0","12.0","16.0","20.0","25.0","30.0","35.0","40.0","45.0","50.0"],"group":"None","version":"v1.1.0"}],"interpreted":true,"name":"ER1.2C","coreAzi":42,"coreDip":58,"bedStrike":287,"bedDip":22,"data":[{"visible":false,"include":false,"step":"0.0","x":-47.794285714285714,"y":-88.0552380952381,"z":264.1142857142857,"a95":0.99,"info":"26/10/2014 at 07:43:38"},{"visible":true,"include":true,"step":"4.0","x":-26.423809523809524,"y":-95.07333333333334,"z":245.97142857142856,"a95":0.99,"info":"26/10/2014 at 07:43:38"},{"visible":true,"include":true,"step":"8.0","x":-20.777142857142856,"y":-102.39047619047618,"z":207.0761904761905,"a95":0.99,"info":"26/10/2014 at 07:43:38"},{"visible":true,"include":true,"step":"12.0","x":-19.945714285714285,"y":-92.42380952380952,"z":242.43809523809523,"a95":0.99,"info":"26/10/2014 at 07:43:38"},{"visible":true,"include":true,"step":"16.0","x":-22.082857142857144,"y":-87.86761904761904,"z":145.84761904761905,"a95":0.99,"info":"26/10/2014 at 07:43:38"},{"visible":true,"include":true,"step":"20.0","x":-28.867619047619048,"y":-66.02952380952381,"z":136.8761904761905,"a95":0.99,"info":"26/10/2014 at 07:43:38"},{"visible":true,"include":true,"step":"25.0","x":-11.962857142857143,"y":-52.23047619047619,"z":136.9142857142857,"a95":0.99,"info":"26/10/2014 at 07:43:38"},{"visible":true,"include":true,"step":"30.0","x":-8.726761904761904,"y":-30.232380952380954,"z":93.85619047619048,"a95":0.99,"info":"26/10/2014 at 07:43:38"},{"visible":true,"include":true,"step":"35.0","x":-15.462857142857144,"y":-45.93714285714285,"z":108.9904761904762,"a95":0.99,"info":"26/10/2014 at 07:43:38"},{"visible":true,"include":true,"step":"40.0","x":-15.665714285714287,"y":-16.440952380952382,"z":96.15238095238095,"a95":0.99,"info":"26/10/2014 at 07:43:38"},{"visible":true,"include":true,"step":"45.0","x":-1.8315238095238098,"y":-24.964761904761904,"z":63.68857142857143,"a95":0.99,"info":"26/10/2014 at 07:43:38"},{"visible":true,"include":true,"step":"50.0","x":-17.64,"y":-35.44952380952381,"z":62.4704761904762,"a95":0.99,"info":"26/10/2014 at 07:43:38"},{"visible":false,"include":false,"step":"60.0","x":0.3796952380952381,"y":-10.229523809523808,"z":54.26761904761904,"a95":0.99,"info":"26/10/2014 at 07:43:38"},{"visible":false,"include":false,"step":"70.0","x":-5.483904761904762,"y":-36.31619047619048,"z":37.27142857142857,"a95":0.99,"info":"26/10/2014 at 07:43:38"},{"visible":false,"include":false,"step":"80.0","x":-23.237142857142857,"y":-25.28952380952381,"z":46.29714285714286,"a95":0.99,"info":"26/10/2014 at 07:43:38"},{"visible":false,"include":false,"step":"90.0","x":-14.655238095238095,"y":-0.31056190476190476,"z":22.078095238095237,"a95":0.99,"info":"26/10/2014 at 07:43:38"},{"visible":false,"include":false,"step":"100.0","x":-9.66,"y":-26.483809523809523,"z":42.32,"a95":0.99,"info":"26/10/2014 at 07:43:38"}]},{"version":"v1.1.0","exported":"2016-11-23T21:52:54.858Z","volume":10.5,"added":"2016-11-23T21:44:26.259Z","format":"Utrecht","demagType":"Unknown","strat":"3","patch":1.1,"GEO":[{"dec":7.742053831880867,"inc":61.49936380339714,"MAD":3.774386923490081,"cm":[6.661338147750939e-16,2.3869795029440866e-15,0],"intensity":395.486802980225,"type":"dir","forced":true,"remark":"","origin":false,"nSteps":11,"minStep":"4.0","maxStep":"50.0","steps":["4.0","8.0","12.0","16.0","20.0","25.0","30.0","35.0","40.0","45.0","50.0"],"group":"None","version":"v1.1.0"}],"TECT":[{"dec":11.276093671635294,"inc":39.672469170629086,"MAD":3.774386923490067,"cm":[5.773159728050814e-15,-2.4778790130852713e-14,0],"intensity":395.4868029802249,"type":"dir","forced":true,"remark":"","origin":false,"nSteps":11,"minStep":"4.0","maxStep":"50.0","steps":["4.0","8.0","12.0","16.0","20.0","25.0","30.0","35.0","40.0","45.0","50.0"],"group":"None","version":"v1.1.0"}],"interpreted":true,"name":"ER1.3A","coreAzi":57,"coreDip":35,"bedStrike":287,"bedDip":22,"data":[{"visible":false,"include":false,"step":"0.0","x":-182.51428571428573,"y":-111.85714285714286,"z":253.21904761904764,"a95":0.99,"info":"25/08/2014 at 00:56:08"},{"visible":true,"include":true,"step":"4.0","x":-168.45714285714286,"y":-108.16190476190476,"z":245.22857142857143,"a95":0.99,"info":"25/08/2014 at 00:56:08"},{"visible":true,"include":true,"step":"8.0","x":-149.83809523809524,"y":-101.19999999999999,"z":204.54285714285712,"a95":0.99,"info":"25/08/2014 at 00:56:08"},{"visible":true,"include":true,"step":"12.0","x":-144.25714285714287,"y":-87.19714285714286,"z":173.54285714285714,"a95":0.99,"info":"25/08/2014 at 00:56:08"},{"visible":true,"include":true,"step":"16.0","x":-114.80000000000001,"y":-77.6,"z":153.7904761904762,"a95":0.99,"info":"25/08/2014 at 00:56:08"},{"visible":true,"include":true,"step":"20.0","x":-95.11142857142856,"y":-75.07809523809524,"z":128.33333333333334,"a95":0.99,"info":"25/08/2014 at 00:56:08"},{"visible":true,"include":true,"step":"25.0","x":-66.72190476190477,"y":-51.224761904761905,"z":112.6,"a95":0.99,"info":"25/08/2014 at 00:56:08"},{"visible":true,"include":true,"step":"30.0","x":-55.63238095238095,"y":-39.78,"z":102.17142857142856,"a95":0.99,"info":"25/08/2014 at 00:56:08"},{"visible":true,"include":true,"step":"35.0","x":-54.97904761904762,"y":-34.49809523809524,"z":74.6,"a95":0.99,"info":"25/08/2014 at 00:56:08"},{"visible":true,"include":true,"step":"40.0","x":-34.61619047619048,"y":-27.23428571428571,"z":84.58285714285714,"a95":0.99,"info":"25/08/2014 at 00:56:08"},{"visible":true,"include":false,"step":"45.0","x":-48.22190476190476,"y":-21.760952380952382,"z":69.79047619047618,"a95":0.99,"info":"25/08/2014 at 00:56:08"},{"visible":true,"include":false,"step":"50.0","x":-45.81904761904762,"y":-37.640952380952385,"z":53.49714285714286,"a95":0.99,"info":"25/08/2014 at 00:56:08"},{"visible":false,"include":false,"step":"60.0","x":-26.82,"y":-41.81428571428572,"z":43.62,"a95":0.99,"info":"25/08/2014 at 00:56:08"},{"visible":false,"include":false,"step":"70.0","x":-19.683809523809526,"y":-8.491619047619048,"z":47.09142857142857,"a95":0.99,"info":"25/08/2014 at 00:56:08"},{"visible":false,"include":false,"step":"80.0","x":-55.30476190476191,"y":-20.7,"z":49.3552380952381,"a95":0.99,"info":"25/08/2014 at 00:56:08"},{"visible":false,"include":false,"step":"90.0","x":-36.20952380952381,"y":23.354285714285716,"z":32.526666666666664,"a95":0.99,"info":"25/08/2014 at 00:56:08"},{"visible":false,"include":false,"step":"100.0","x":-10.352380952380953,"y":-16.46666666666667,"z":40.23142857142857,"a95":0.99,"info":"25/08/2014 at 00:56:08"}]},{"version":"v1.1.0","exported":"2016-11-23T21:52:54.858Z","volume":10.5,"added":"2016-11-23T21:44:26.259Z","format":"Utrecht","demagType":"Unknown","strat":"4","patch":1.1,"GEO":[],"TECT":[],"interpreted":false,"name":"ER1.3B","coreAzi":57,"coreDip":35,"bedStrike":287,"bedDip":22,"data":[{"visible":false,"include":false,"step":"0.0","x":-75.07047619047619,"y":-66.8352380952381,"z":123.32380952380953,"a95":0.99,"info":"25/08/2014 at 00:56:08"},{"visible":true,"include":false,"step":"4.0","x":-61.275238095238095,"y":-57.480952380952374,"z":110.55238095238094,"a95":0.99,"info":"25/08/2014 at 00:56:08"},{"visible":true,"include":false,"step":"8.0","x":-52.24857142857143,"y":-54.90857142857143,"z":98.56190476190477,"a95":0.99,"info":"25/08/2014 at 00:56:08"},{"visible":true,"include":false,"step":"12.0","x":-32.796190476190475,"y":-32.359047619047615,"z":79.5,"a95":0.99,"info":"25/08/2014 at 00:56:08"},{"visible":true,"include":false,"step":"16.0","x":-25,"y":-13.069523809523808,"z":76.47238095238096,"a95":0.99,"info":"25/08/2014 at 00:56:08"},{"visible":true,"include":false,"step":"20.0","x":-32.679047619047616,"y":-30.875238095238096,"z":62.27809523809523,"a95":0.99,"info":"25/08/2014 at 00:56:08"},{"visible":true,"include":false,"step":"25.0","x":-29.677142857142858,"y":-7.104,"z":57.005714285714284,"a95":0.99,"info":"25/08/2014 at 00:56:08"},{"visible":true,"include":false,"step":"30.0","x":-33.936190476190475,"y":-15.063809523809523,"z":38.642857142857146,"a95":0.99,"info":"25/08/2014 at 00:56:08"},{"visible":true,"include":false,"step":"35.0","x":-16.23333333333333,"y":-0.3996666666666667,"z":43.41904761904762,"a95":0.99,"info":"25/08/2014 at 00:56:08"},{"visible":true,"include":false,"step":"40.0","x":-24.177142857142858,"y":-1.2924761904761906,"z":41.32,"a95":0.99,"info":"25/08/2014 at 00:56:08"},{"visible":true,"include":false,"step":"45.0","x":-15.656190476190474,"y":5.411047619047619,"z":46.37619047619047,"a95":0.99,"info":"25/08/2014 at 00:56:08"},{"visible":true,"include":false,"step":"50.0","x":-31.520952380952384,"y":-7.862666666666668,"z":40.04761904761905,"a95":0.99,"info":"25/08/2014 at 00:56:08"},{"visible":true,"include":false,"step":"60.0","x":-10.375238095238094,"y":-13.393333333333333,"z":44.22190476190476,"a95":0.99,"info":"25/08/2014 at 00:56:08"},{"visible":true,"include":false,"step":"70.0","x":-8.443047619047618,"y":-39.53523809523809,"z":21.857142857142858,"a95":0.99,"info":"25/08/2014 at 00:56:08"},{"visible":true,"include":false,"step":"80.0","x":-19.037142857142857,"y":-0.3520857142857143,"z":23.761904761904763,"a95":0.99,"info":"25/08/2014 at 00:56:08"},{"visible":true,"include":false,"step":"90.0","x":4.942095238095239,"y":-14.811428571428573,"z":23.52190476190476,"a95":0.99,"info":"25/08/2014 at 00:56:08"},{"visible":true,"include":false,"step":"100.0","x":-11.17047619047619,"y":-19.52952380952381,"z":57.239999999999995,"a95":0.99,"info":"25/08/2014 at 00:56:08"}]},{"version":"v1.1.0","exported":"2016-11-23T21:52:54.858Z","volume":10.5,"added":"2016-11-23T21:44:26.262Z","format":"Utrecht","demagType":"Unknown","strat":null,"patch":1.1,"GEO":[],"TECT":[],"interpreted":false,"name":"ER1.3C","coreAzi":57,"coreDip":35,"bedStrike":287,"bedDip":22,"data":[{"visible":true,"include":false,"step":"20","x":-71.9047619047619,"y":-65.42857142857143,"z":3.8095238095238093,"a95":1.8,"info":"\"14-11-03\" at \"17:35\""},{"visible":true,"include":false,"step":"100","x":-34.142857142857146,"y":-26.6,"z":-11.619047619047619,"a95":3.1,"info":"\"14-11-03\" at \"22:35\""},{"visible":true,"include":false,"step":"150","x":-14.942857142857143,"y":-22.79047619047619,"z":-25.276190476190475,"a95":4.4,"info":"\"14-11-04\" at \"19:34\""},{"visible":true,"include":false,"step":"180","x":-30.123809523809523,"y":-26.038095238095234,"z":-23.00952380952381,"a95":3.4,"info":"\"14-11-04\" at \"22:49\""},{"visible":true,"include":false,"step":"210","x":-18.476190476190474,"y":-29.45714285714286,"z":-20.438095238095237,"a95":4.2,"info":"\"14-11-05\" at \"18:09\""},{"visible":true,"include":false,"step":"240","x":-34.19047619047619,"y":-20.066666666666666,"z":-41.076190476190476,"a95":3.1,"info":"\"14-11-06\" at \"15:53\""},{"visible":true,"include":false,"step":"270","x":5.571428571428571,"y":6.076190476190476,"z":21.923809523809524,"a95":7.2,"info":"\"14-11-06\" at \"22:04\""},{"visible":true,"include":false,"step":"300","x":25.066666666666666,"y":4.914285714285715,"z":31.428571428571427,"a95":3.6,"info":"\"14-11-07\" at \"17:35\""},{"visible":true,"include":false,"step":"320","x":27.142857142857142,"y":-4.276190476190476,"z":15.666666666666666,"a95":4.7,"info":"\"14-11-15\" at \"00:53\""},{"visible":true,"include":false,"step":"340","x":-6.038095238095238,"y":21.276190476190475,"z":9.085714285714285,"a95":6.4,"info":"\"14-11-15\" at \"21:44\""},{"visible":true,"include":false,"step":"360","x":-5.9714285714285715,"y":21.59047619047619,"z":9.514285714285714,"a95":6.3,"info":"\"14-11-16\" at \"00:54\""},{"visible":true,"include":false,"step":"380","x":-0.26666666666666666,"y":11.361904761904762,"z":-7.133333333333334,"a95":10.8,"info":"\"14-11-16\" at \"18:53\""},{"visible":true,"include":false,"step":"400","x":-4.3619047619047615,"y":16.133333333333333,"z":13.97142857142857,"a95":11.6,"info":"\"14-11-16\" at \"22:56\""}]},{"version":"v1.1.0","exported":"2016-11-23T21:52:54.858Z","volume":10.5,"added":"2016-11-23T21:44:26.263Z","format":"Utrecht","demagType":"Unknown","strat":"5","patch":1.1,"GEO":[{"dec":351.5319379437572,"inc":55.85151303218935,"MAD":2.3196841967864232,"cm":[-3.552713678800501e-15,-3.2307490016592055e-14,0],"intensity":1240.3584281182925,"type":"dir","forced":true,"remark":"","origin":false,"nSteps":11,"minStep":"4.0","maxStep":"50.0","steps":["4.0","8.0","12.0","16.0","20.0","25.0","30.0","35.0","40.0","45.0","50.0"],"group":"None","version":"v1.1.0"}],"TECT":[{"dec":359.8027733997072,"inc":35.27325404630262,"MAD":2.319684196786325,"cm":[-3.552713678800501e-15,-1.226796442210798e-13,3.552713678800501e-15],"intensity":1240.3584281182925,"type":"dir","forced":true,"remark":"","origin":false,"nSteps":11,"minStep":"4.0","maxStep":"50.0","steps":["4.0","8.0","12.0","16.0","20.0","25.0","30.0","35.0","40.0","45.0","50.0"],"group":"None","version":"v1.1.0"}],"interpreted":true,"name":"ER1.4A","coreAzi":73,"coreDip":19,"bedStrike":287,"bedDip":22,"data":[{"visible":false,"include":false,"step":"0.0","x":-655.2952380952381,"y":-478.39047619047625,"z":333.8095238095238,"a95":0.99,"info":"25/08/2014 at 00:56:08"},{"visible":true,"include":true,"step":"4.0","x":-607.6761904761905,"y":-460.847619047619,"z":316.29523809523806,"a95":0.99,"info":"25/08/2014 at 00:56:08"},{"visible":true,"include":true,"step":"8.0","x":-544.7904761904762,"y":-429.3047619047619,"z":260.8,"a95":0.99,"info":"25/08/2014 at 00:56:08"},{"visible":true,"include":true,"step":"12.0","x":-483.95238095238096,"y":-373.35238095238094,"z":221.0190476190476,"a95":0.99,"info":"25/08/2014 at 00:56:08"},{"visible":true,"include":true,"step":"16.0","x":-467.39047619047625,"y":-337.54285714285714,"z":175,"a95":0.99,"info":"25/08/2014 at 00:56:08"},{"visible":true,"include":true,"step":"20.0","x":-431.5809523809524,"y":-326.0571428571428,"z":177.9904761904762,"a95":0.99,"info":"25/08/2014 at 00:56:08"},{"visible":true,"include":true,"step":"25.0","x":-402.99047619047616,"y":-289.1714285714286,"z":177.4,"a95":0.99,"info":"25/08/2014 at 00:56:08"},{"visible":true,"include":true,"step":"30.0","x":-380.6380952380952,"y":-246.76190476190476,"z":171.54285714285714,"a95":0.99,"info":"25/08/2014 at 00:56:08"},{"visible":true,"include":true,"step":"35.0","x":-341.76190476190476,"y":-226.66666666666666,"z":161.21904761904761,"a95":0.99,"info":"25/08/2014 at 00:56:08"},{"visible":true,"include":true,"step":"40.0","x":-308.31428571428575,"y":-222.77142857142857,"z":141.0952380952381,"a95":0.99,"info":"25/08/2014 at 00:56:08"},{"visible":true,"include":true,"step":"45.0","x":-312.4,"y":-220.43809523809523,"z":143.8761904761905,"a95":0.99,"info":"25/08/2014 at 00:56:08"},{"visible":true,"include":true,"step":"50.0","x":-320.04761904761904,"y":-209.87619047619046,"z":161.14285714285714,"a95":0.99,"info":"25/08/2014 at 00:56:08"},{"visible":true,"include":false,"step":"60.0","x":-256.9238095238095,"y":-134.78095238095239,"z":121.75238095238096,"a95":0.99,"info":"25/08/2014 at 00:56:08"},{"visible":true,"include":false,"step":"70.0","x":-169.35238095238097,"y":-67.20761904761905,"z":106.03809523809525,"a95":0.99,"info":"25/08/2014 at 00:56:08"},{"visible":true,"include":false,"step":"80.0","x":-82.77333333333334,"y":12.848571428571429,"z":102,"a95":0.99,"info":"25/08/2014 at 00:56:08"},{"visible":true,"include":false,"step":"90.0","x":-84.01333333333334,"y":46.58571428571428,"z":70.18190476190476,"a95":0.99,"info":"25/08/2014 at 00:56:08"},{"visible":true,"include":false,"step":"100.0","x":-16.793333333333333,"y":82.05619047619048,"z":141.37142857142857,"a95":0.99,"info":"25/08/2014 at 00:56:08"}]},{"version":"v1.1.0","exported":"2016-11-23T21:52:54.858Z","volume":10.5,"added":"2016-11-23T21:44:26.263Z","format":"Utrecht","demagType":"Unknown","strat":"6","patch":1.1,"GEO":[{"dec":0.12051238038299061,"inc":62.17118795965906,"MAD":2.3731135128005127,"cm":[-1.7763568394002505e-15,-1.1324274851176597e-14,0],"intensity":971.3698018170454,"type":"dir","forced":true,"remark":"","origin":false,"nSteps":12,"minStep":"4.0","maxStep":"60.0","steps":["4.0","8.0","12.0","16.0","20.0","25.0","30.0","35.0","40.0","45.0","50.0","60.0"],"group":"None","version":"v1.1.0"}],"TECT":[{"dec":6.6945221276970415,"inc":40.73850025822549,"MAD":2.3731135128003245,"cm":[-1.7763568394002505e-15,2.042810365310288e-14,0],"intensity":971.3698018170455,"type":"dir","forced":true,"remark":"","origin":false,"nSteps":12,"minStep":"4.0","maxStep":"60.0","steps":["4.0","8.0","12.0","16.0","20.0","25.0","30.0","35.0","40.0","45.0","50.0","60.0"],"group":"None","version":"v1.1.0"}],"interpreted":true,"name":"ER1.4B","coreAzi":73,"coreDip":19,"bedStrike":287,"bedDip":22,"data":[{"visible":false,"include":false,"step":"0.0","x":-624.2380952380952,"y":-306.81904761904764,"z":352.8,"a95":0.99,"info":"25/08/2014 at 00:56:08"},{"visible":true,"include":true,"step":"4.0","x":-573.4761904761905,"y":-284.4190476190476,"z":321.64761904761906,"a95":0.99,"info":"25/08/2014 at 00:56:08"},{"visible":true,"include":true,"step":"8.0","x":-504.6380952380952,"y":-306.3619047619048,"z":262.65714285714284,"a95":0.99,"info":"25/08/2014 at 00:56:08"},{"visible":true,"include":true,"step":"12.0","x":-461.91428571428577,"y":-261.31428571428575,"z":252.1904761904762,"a95":0.99,"info":"25/08/2014 at 00:56:08"},{"visible":true,"include":true,"step":"16.0","x":-442.152380952381,"y":-251.85714285714286,"z":230.50476190476192,"a95":0.99,"info":"25/08/2014 at 00:56:08"},{"visible":true,"include":true,"step":"20.0","x":-411.9428571428571,"y":-224.55238095238096,"z":196.7238095238095,"a95":0.99,"info":"25/08/2014 at 00:56:08"},{"visible":true,"include":true,"step":"25.0","x":-355.7142857142857,"y":-209.84761904761905,"z":185.95238095238096,"a95":0.99,"info":"25/08/2014 at 00:56:08"},{"visible":true,"include":true,"step":"30.0","x":-338.8095238095238,"y":-215.1047619047619,"z":161.7904761904762,"a95":0.99,"info":"25/08/2014 at 00:56:08"},{"visible":true,"include":true,"step":"35.0","x":-313.51428571428573,"y":-186.36190476190475,"z":180.9142857142857,"a95":0.99,"info":"25/08/2014 at 00:56:08"},{"visible":true,"include":true,"step":"40.0","x":-292.32380952380953,"y":-152.92380952380952,"z":129.58095238095237,"a95":0.99,"info":"25/08/2014 at 00:56:08"},{"visible":true,"include":true,"step":"45.0","x":-238.8952380952381,"y":-143.1047619047619,"z":125.17142857142856,"a95":0.99,"info":"25/08/2014 at 00:56:08"},{"visible":true,"include":true,"step":"50.0","x":-242.65714285714287,"y":-142.73333333333335,"z":143.26666666666665,"a95":0.99,"info":"25/08/2014 at 00:56:08"},{"visible":true,"include":true,"step":"60.0","x":-202.63809523809522,"y":-101.51428571428572,"z":116.82857142857144,"a95":0.99,"info":"25/08/2014 at 00:56:08"},{"visible":true,"include":false,"step":"70.0","x":-145.55238095238096,"y":-74.16952380952381,"z":94.79047619047618,"a95":0.99,"info":"25/08/2014 at 00:56:08"},{"visible":true,"include":false,"step":"80.0","x":-114.16190476190476,"y":-72.26190476190476,"z":97.1047619047619,"a95":0.99,"info":"25/08/2014 at 00:56:08"},{"visible":true,"include":false,"step":"90.0","x":-111.72380952380952,"y":-34.80761904761905,"z":107.76190476190476,"a95":0.99,"info":"25/08/2014 at 00:56:08"},{"visible":true,"include":false,"step":"100.0","x":-76.37047619047618,"y":-69.23047619047618,"z":91.81904761904762,"a95":0.99,"info":"25/08/2014 at 00:56:08"}]},{"version":"v1.1.0","exported":"2016-11-23T21:52:54.859Z","volume":10.5,"added":"2016-11-23T21:44:26.263Z","format":"Utrecht","demagType":"Unknown","strat":"7","patch":1.1,"GEO":[{"dec":7.7356217524477415,"inc":50.92117556487757,"MAD":2.173179736600942,"cm":[-1.7763568394002505e-15,8.881784197001252e-15,0],"intensity":1300.4783917067386,"type":"dir","forced":true,"remark":"","origin":false,"nSteps":12,"minStep":"4.0","maxStep":"60.0","steps":["4.0","8.0","12.0","16.0","20.0","25.0","30.0","35.0","40.0","45.0","50.0","60.0"],"group":"None","version":"v1.1.0"}],"TECT":[{"dec":10.328685255754351,"inc":29.12300817855338,"MAD":2.1731797366008307,"cm":[-3.552713678800501e-15,-1.2434497875801753e-14,-3.552713678800501e-15],"intensity":1300.4783917067386,"type":"dir","forced":true,"remark":"","origin":false,"nSteps":12,"minStep":"4.0","maxStep":"60.0","steps":["4.0","8.0","12.0","16.0","20.0","25.0","30.0","35.0","40.0","45.0","50.0","60.0"],"group":"None","version":"v1.1.0"}],"interpreted":true,"name":"ER1.5A","coreAzi":34,"coreDip":25,"bedStrike":287,"bedDip":22,"data":[{"visible":false,"include":false,"step":"0.0","x":-469.6666666666667,"y":-260.43809523809523,"z":768.6761904761905,"a95":0.99,"info":"25/08/2014 at 00:56:08"},{"visible":true,"include":true,"step":"4.0","x":-420.99047619047616,"y":-257.9428571428572,"z":723.3428571428572,"a95":0.99,"info":"25/08/2014 at 00:56:08"},{"visible":true,"include":true,"step":"8.0","x":-374.0761904761905,"y":-235.48571428571427,"z":649.895238095238,"a95":0.99,"info":"25/08/2014 at 00:56:08"},{"visible":true,"include":true,"step":"12.0","x":-326.35238095238094,"y":-200.9142857142857,"z":629.7523809523809,"a95":0.99,"info":"25/08/2014 at 00:56:08"},{"visible":true,"include":true,"step":"16.0","x":-313.7333333333333,"y":-179.48571428571427,"z":595.4380952380952,"a95":0.99,"info":"25/08/2014 at 00:56:08"},{"visible":true,"include":true,"step":"20.0","x":-287.9809523809524,"y":-177.94285714285715,"z":492.6285714285715,"a95":0.99,"info":"25/08/2014 at 00:56:08"},{"visible":true,"include":true,"step":"25.0","x":-255.03809523809525,"y":-190.8952380952381,"z":480.93333333333334,"a95":0.99,"info":"25/08/2014 at 00:56:08"},{"visible":true,"include":true,"step":"30.0","x":-268.6952380952381,"y":-148.07619047619048,"z":459.14285714285717,"a95":0.99,"info":"25/08/2014 at 00:56:08"},{"visible":true,"include":true,"step":"35.0","x":-280.2857142857143,"y":-155.88571428571427,"z":480.3047619047619,"a95":0.99,"info":"25/08/2014 at 00:56:08"},{"visible":true,"include":true,"step":"40.0","x":-247.0095238095238,"y":-145.3047619047619,"z":452.7714285714286,"a95":0.99,"info":"25/08/2014 at 00:56:08"},{"visible":true,"include":true,"step":"45.0","x":-244.42857142857142,"y":-121.35238095238095,"z":445.2095238095238,"a95":0.99,"info":"25/08/2014 at 00:56:08"},{"visible":true,"include":true,"step":"50.0","x":-221.69523809523812,"y":-128.41904761904763,"z":403.7904761904762,"a95":0.99,"info":"25/08/2014 at 00:56:08"},{"visible":true,"include":true,"step":"60.0","x":-165.94285714285715,"y":-90.61714285714285,"z":383.57142857142856,"a95":0.99,"info":"25/08/2014 at 00:56:08"},{"visible":true,"include":false,"step":"70.0","x":-137.41904761904763,"y":-41.4247619047619,"z":320.97142857142853,"a95":0.99,"info":"25/08/2014 at 00:56:08"},{"visible":true,"include":false,"step":"80.0","x":-121.78095238095239,"y":-151.16190476190476,"z":314.2761904761905,"a95":0.99,"info":"25/08/2014 at 00:56:08"},{"visible":true,"include":false,"step":"90.0","x":-173.5047619047619,"y":-18.068571428571428,"z":225.26666666666668,"a95":0.99,"info":"25/08/2014 at 00:56:08"},{"visible":true,"include":false,"step":"100.0","x":-171.06666666666666,"y":-63.26190476190476,"z":261.752380952381,"a95":0.99,"info":"25/08/2014 at 00:56:08"}]},{"version":"v1.1.0","exported":"2016-11-23T21:52:54.859Z","volume":10.5,"added":"2016-11-23T21:44:26.263Z","format":"Utrecht","demagType":"Unknown","strat":"8","patch":1.1,"GEO":[{"dec":358.3361219942797,"inc":58.491329516505175,"MAD":3.4098552594292286,"cm":[5.329070518200751e-15,-5.906386491005833e-14,0],"intensity":1253.5573582275524,"type":"dir","forced":true,"remark":"","origin":false,"nSteps":12,"minStep":"4.0","maxStep":"60.0","steps":["4.0","8.0","12.0","16.0","20.0","25.0","30.0","35.0","40.0","45.0","50.0","60.0"],"group":"None","version":"v1.1.0"}],"TECT":[{"dec":4.874615537876309,"inc":37.228608407761044,"MAD":3.409855259429231,"cm":[-1.5987211554602254e-14,5.3734794391857577e-14,-1.7763568394002505e-15],"intensity":1253.5573582275524,"type":"dir","forced":true,"remark":"","origin":false,"nSteps":12,"minStep":"4.0","maxStep":"60.0","steps":["4.0","8.0","12.0","16.0","20.0","25.0","30.0","35.0","40.0","45.0","50.0","60.0"],"group":"None","version":"v1.1.0"}],"interpreted":true,"name":"ER1.5B","coreAzi":34,"coreDip":25,"bedStrike":287,"bedDip":22,"data":[{"visible":false,"include":false,"step":"0.0","x":-614.7142857142857,"y":-279.447619047619,"z":654.895238095238,"a95":0.99,"info":"26/10/2014 at 07:43:38"},{"visible":true,"include":true,"step":"4.0","x":-553.6,"y":-265.2666666666667,"z":600.2285714285714,"a95":0.99,"info":"26/10/2014 at 07:43:38"},{"visible":true,"include":true,"step":"8.0","x":-478.4761904761905,"y":-255.9238095238095,"z":558.5428571428571,"a95":0.99,"info":"26/10/2014 at 07:43:38"},{"visible":true,"include":true,"step":"12.0","x":-411.9047619047619,"y":-239.2095238095238,"z":606.6761904761905,"a95":0.99,"info":"26/10/2014 at 07:43:38"},{"visible":true,"include":true,"step":"16.0","x":-410.00952380952384,"y":-195.32380952380953,"z":477.04761904761904,"a95":0.99,"info":"26/10/2014 at 07:43:38"},{"visible":true,"include":true,"step":"20.0","x":-363.85714285714283,"y":-188.58095238095237,"z":432.2476190476191,"a95":0.99,"info":"26/10/2014 at 07:43:38"},{"visible":true,"include":true,"step":"25.0","x":-317.2666666666667,"y":-166.0095238095238,"z":415.9619047619048,"a95":0.99,"info":"26/10/2014 at 07:43:38"},{"visible":true,"include":true,"step":"30.0","x":-288.9238095238095,"y":-161.46666666666667,"z":404.72380952380956,"a95":0.99,"info":"26/10/2014 at 07:43:38"},{"visible":true,"include":true,"step":"35.0","x":-293.83809523809526,"y":-126.51428571428572,"z":359.22857142857146,"a95":0.99,"info":"26/10/2014 at 07:43:38"},{"visible":true,"include":true,"step":"40.0","x":-268.9047619047619,"y":-162.7047619047619,"z":387.23809523809524,"a95":0.99,"info":"26/10/2014 at 07:43:38"},{"visible":true,"include":true,"step":"45.0","x":-234.52380952380952,"y":-91.4447619047619,"z":317.12380952380954,"a95":0.99,"info":"26/10/2014 at 07:43:38"},{"visible":true,"include":true,"step":"50.0","x":-227.75238095238097,"y":-144.2095238095238,"z":306.8666666666667,"a95":0.99,"info":"26/10/2014 at 07:43:38"},{"visible":true,"include":true,"step":"60.0","x":-221.9904761904762,"y":-83.27904761904762,"z":320.84761904761905,"a95":0.99,"info":"26/10/2014 at 07:43:38"},{"visible":true,"include":false,"step":"70.0","x":-185.01904761904763,"y":-90.71333333333334,"z":245.59047619047618,"a95":0.99,"info":"26/10/2014 at 07:43:38"},{"visible":true,"include":false,"step":"80.0","x":-133.07619047619048,"y":-147.03809523809525,"z":229.8952380952381,"a95":0.99,"info":"26/10/2014 at 07:43:38"},{"visible":true,"include":false,"step":"90.0","x":-147.1809523809524,"y":-42.7,"z":201.1809523809524,"a95":0.99,"info":"26/10/2014 at 07:43:38"},{"visible":true,"include":false,"step":"100.0","x":-150.34285714285713,"y":-71.48666666666666,"z":210.93333333333334,"a95":0.99,"info":"26/10/2014 at 07:43:38"}]},{"version":"v1.1.0","exported":"2016-11-23T21:52:54.859Z","volume":10.5,"added":"2016-11-23T21:44:26.263Z","format":"Utrecht","demagType":"Unknown","strat":null,"patch":1.1,"GEO":[],"TECT":[],"interpreted":false,"name":"ER1.6A","coreAzi":32,"coreDip":18,"bedStrike":287,"bedDip":22,"data":[{"visible":false,"include":false,"step":"20","x":-727.4285714285714,"y":-278.6666666666667,"z":601.4285714285714,"a95":2.4,"info":"\"14-09-15\" at \"15:25\""},{"visible":true,"include":false,"step":"100","x":-501.23809523809524,"y":-189.52380952380952,"z":435.42857142857144,"a95":2.4,"info":"\"14-09-15\" at \"19:26\""},{"visible":true,"include":false,"step":"150","x":-353.5238095238095,"y":-118,"z":246,"a95":2.4,"info":"\"14-09-15\" at \"21:39\""},{"visible":true,"include":false,"step":"180","x":-198,"y":-91.33333333333333,"z":164,"a95":2.5,"info":"\"14-09-16\" at \"10:37\""},{"visible":true,"include":false,"step":"210","x":-174.1904761904762,"y":11.333333333333334,"z":53.04761904761905,"a95":3.3,"info":"\"14-09-16\" at \"13:18\""},{"visible":true,"include":false,"step":"240","x":-94.19047619047619,"y":-18.095238095238095,"z":-19.047619047619047,"a95":2.9,"info":"\"14-09-16\" at \"15:59\""},{"visible":true,"include":false,"step":"270","x":-87.9047619047619,"y":-28.571428571428573,"z":91.52380952380952,"a95":3.4,"info":"\"14-09-16\" at \"18:49\""},{"visible":true,"include":false,"step":"300","x":-99.61904761904762,"y":6.476190476190476,"z":-13.714285714285714,"a95":2.8,"info":"\"14-09-17\" at \"10:26\""},{"visible":true,"include":false,"step":"320","x":-80.97142857142858,"y":14.552380952380954,"z":-38.81904761904762,"a95":3.4,"info":"\"14-09-17\" at \"13:33\""},{"visible":true,"include":false,"step":"340","x":-28.638095238095236,"y":21.095238095238095,"z":37.68571428571428,"a95":5.4,"info":"\"14-09-17\" at \"16:49\""},{"visible":true,"include":false,"step":"370","x":-7.057142857142857,"y":76.58095238095238,"z":-5.066666666666667,"a95":4.1,"info":"\"14-09-17\" at \"21:59\""},{"visible":true,"include":false,"step":"390","x":6.323809523809524,"y":49.714285714285715,"z":37.2,"a95":4,"info":"\"14-09-18\" at \"11:12\""},{"visible":true,"include":false,"step":"420","x":-19.904761904761905,"y":46,"z":9.647619047619047,"a95":5.6,"info":"\"14-09-18\" at \"14:15\""}]},{"version":"v1.1.0","exported":"2016-11-23T21:52:54.859Z","volume":10.5,"added":"2016-11-23T21:44:26.263Z","format":"Utrecht","demagType":"Unknown","strat":"8","patch":1.1,"GEO":[{"dec":10.2797492811427,"inc":61.91890583644653,"MAD":2.97096032040556,"cm":[-7.993605777301127e-15,4.5630166312093934e-14,0],"intensity":1100.6450456678972,"type":"dir","forced":true,"remark":"","origin":false,"nSteps":13,"minStep":"4.0","maxStep":"70.0","steps":["4.0","8.0","12.0","16.0","20.0","25.0","30.0","35.0","40.0","45.0","50.0","60.0","70.0"],"group":"None","version":"v1.1.0"}],"TECT":[{"dec":12.875854197329033,"inc":40.00947443211867,"MAD":2.970960320405635,"cm":[-2.6645352591003757e-14,1.1313172620930345e-13,5.329070518200751e-15],"intensity":1100.6450456678972,"type":"dir","forced":true,"remark":"","origin":false,"nSteps":13,"minStep":"4.0","maxStep":"70.0","steps":["4.0","8.0","12.0","16.0","20.0","25.0","30.0","35.0","40.0","45.0","50.0","60.0","70.0"],"group":"None","version":"v1.1.0"}],"interpreted":true,"name":"ER1.6B","coreAzi":32,"coreDip":18,"bedStrike":287,"bedDip":22,"data":[{"visible":false,"include":false,"step":"0.0","x":-619.952380952381,"y":-137.57142857142858,"z":541.2380952380952,"a95":0.99,"info":"25/08/2014 at 00:56:08"},{"visible":true,"include":true,"step":"4.0","x":-573.2666666666667,"y":-157.1047619047619,"z":524.4571428571429,"a95":0.99,"info":"25/08/2014 at 00:56:08"},{"visible":true,"include":true,"step":"8.0","x":-508.6761904761905,"y":-135.6952380952381,"z":484.552380952381,"a95":0.99,"info":"25/08/2014 at 00:56:08"},{"visible":true,"include":true,"step":"12.0","x":-466.25714285714287,"y":-122.6,"z":456.54285714285714,"a95":0.99,"info":"25/08/2014 at 00:56:08"},{"visible":true,"include":true,"step":"16.0","x":-460.0190476190476,"y":-105.78095238095239,"z":436.81904761904764,"a95":0.99,"info":"25/08/2014 at 00:56:08"},{"visible":true,"include":true,"step":"20.0","x":-397.27619047619044,"y":-89.65523809523809,"z":418.9238095238095,"a95":0.99,"info":"25/08/2014 at 00:56:08"},{"visible":true,"include":true,"step":"25.0","x":-366.7809523809524,"y":-78.6504761904762,"z":412.54285714285714,"a95":0.99,"info":"25/08/2014 at 00:56:08"},{"visible":true,"include":true,"step":"30.0","x":-348.8095238095238,"y":-83.00761904761904,"z":345.752380952381,"a95":0.99,"info":"25/08/2014 at 00:56:08"},{"visible":true,"include":true,"step":"35.0","x":-331.50476190476195,"y":-97.35238095238095,"z":343.1047619047619,"a95":0.99,"info":"25/08/2014 at 00:56:08"},{"visible":true,"include":true,"step":"40.0","x":-342.76190476190476,"y":-40.46190476190476,"z":297.1047619047619,"a95":0.99,"info":"25/08/2014 at 00:56:08"},{"visible":true,"include":true,"step":"45.0","x":-306.18095238095236,"y":-63.99904761904762,"z":281.3904761904762,"a95":0.99,"info":"25/08/2014 at 00:56:08"},{"visible":true,"include":true,"step":"50.0","x":-285.5333333333333,"y":-56.18,"z":253.0095238095238,"a95":0.99,"info":"25/08/2014 at 00:56:08"},{"visible":true,"include":true,"step":"60.0","x":-253.38095238095238,"y":-68.37714285714286,"z":284.76190476190476,"a95":0.99,"info":"25/08/2014 at 00:56:08"},{"visible":true,"include":true,"step":"70.0","x":-197.33333333333334,"y":-99.9904761904762,"z":218.17142857142858,"a95":0.99,"info":"25/08/2014 at 00:56:08"},{"visible":false,"include":false,"step":"80.0","x":-325.85714285714283,"y":-102.17142857142856,"z":176.77142857142857,"a95":0.99,"info":"25/08/2014 at 00:56:08"},{"visible":false,"include":false,"step":"90.0","x":-188.8952380952381,"y":-95.39047619047619,"z":205.16190476190474,"a95":0.99,"info":"25/08/2014 at 00:56:08"},{"visible":true,"include":false,"step":"100.0","x":-196.73333333333332,"y":-105.17142857142856,"z":208.54285714285712,"a95":0.99,"info":"25/08/2014 at 00:56:08"}]},{"version":"v1.1.0","exported":"2016-11-23T21:52:54.859Z","volume":10.5,"added":"2016-11-23T21:44:26.263Z","format":"Utrecht","demagType":"Unknown","strat":"1","patch":1.1,"GEO":[{"dec":357.8741942888574,"inc":60.18207323041313,"MAD":3.4354169865942628,"cm":[-5.329070518200751e-15,-1.9317880628477724e-14,0],"intensity":967.8304458901036,"type":"dir","forced":true,"remark":"","origin":false,"nSteps":12,"minStep":"4.0","maxStep":"60.0","steps":["4.0","8.0","12.0","16.0","20.0","25.0","30.0","35.0","40.0","45.0","50.0","60.0"],"group":"None","version":"v1.1.0"}],"TECT":[{"dec":4.91005846191365,"inc":38.9354461907691,"MAD":3.435416986594302,"cm":[5.329070518200751e-15,-3.883005028626485e-14,8.881784197001252e-15],"intensity":967.8304458901038,"type":"dir","forced":true,"remark":"","origin":false,"nSteps":12,"minStep":"4.0","maxStep":"60.0","steps":["4.0","8.0","12.0","16.0","20.0","25.0","30.0","35.0","40.0","45.0","50.0","60.0"],"group":"None","version":"v1.1.0"}],"interpreted":true,"name":"ER1.7A","coreAzi":24,"coreDip":21,"bedStrike":287,"bedDip":22,"data":[{"visible":false,"include":false,"step":"0.0","x":-497.4857142857143,"y":-111.45714285714286,"z":574.895238095238,"a95":0.99,"info":"25/08/2014 at 06:21:23"},{"visible":true,"include":true,"step":"4.0","x":-455.6952380952381,"y":-129.0857142857143,"z":520.0095238095239,"a95":0.99,"info":"25/08/2014 at 06:21:23"},{"visible":true,"include":true,"step":"8.0","x":-416.1142857142857,"y":-116.36190476190475,"z":486.8857142857143,"a95":0.99,"info":"25/08/2014 at 06:21:23"},{"visible":true,"include":true,"step":"12.0","x":-371.4190476190476,"y":-121.93333333333332,"z":423.08571428571423,"a95":0.99,"info":"25/08/2014 at 06:21:23"},{"visible":true,"include":true,"step":"16.0","x":-330.97142857142853,"y":-136.74285714285713,"z":373.6095238095238,"a95":0.99,"info":"25/08/2014 at 06:21:23"},{"visible":true,"include":true,"step":"20.0","x":-304.31428571428575,"y":-152.57142857142858,"z":346.7904761904762,"a95":0.99,"info":"25/08/2014 at 06:21:23"},{"visible":true,"include":true,"step":"25.0","x":-294.62857142857143,"y":-131.9047619047619,"z":294.2857142857143,"a95":0.99,"info":"25/08/2014 at 06:21:23"},{"visible":true,"include":true,"step":"30.0","x":-302.34285714285716,"y":-85.47333333333333,"z":314.77142857142854,"a95":0.99,"info":"25/08/2014 at 06:21:23"},{"visible":true,"include":true,"step":"35.0","x":-285.7904761904762,"y":-58.25142857142857,"z":294.22857142857146,"a95":0.99,"info":"25/08/2014 at 06:21:23"},{"visible":true,"include":true,"step":"40.0","x":-225.24761904761903,"y":-79.64952380952381,"z":269.6190476190476,"a95":0.99,"info":"25/08/2014 at 06:21:23"},{"visible":true,"include":true,"step":"45.0","x":-225.1047619047619,"y":-56.40190476190477,"z":266.64761904761906,"a95":0.99,"info":"25/08/2014 at 06:21:23"},{"visible":true,"include":true,"step":"50.0","x":-208.9809523809524,"y":-88.95142857142858,"z":227.39999999999998,"a95":0.99,"info":"25/08/2014 at 06:21:23"},{"visible":true,"include":true,"step":"60.0","x":-172.8,"y":-79.1152380952381,"z":185.92380952380952,"a95":0.99,"info":"25/08/2014 at 06:21:23"},{"visible":true,"include":false,"step":"70.0","x":-151.62857142857143,"y":-65.07047619047619,"z":173.06666666666666,"a95":0.99,"info":"25/08/2014 at 06:21:23"},{"visible":true,"include":false,"step":"80.0","x":-123.48571428571428,"y":-67.32000000000001,"z":200.96190476190475,"a95":0.99,"info":"25/08/2014 at 06:21:23"},{"visible":true,"include":false,"step":"90.0","x":-110.94285714285715,"y":-57.480952380952374,"z":150.47619047619048,"a95":0.99,"info":"25/08/2014 at 06:21:23"},{"visible":true,"include":false,"step":"100.0","x":-117.05714285714285,"y":-41.105714285714285,"z":137.44761904761904,"a95":0.99,"info":"25/08/2014 at 06:21:23"}]},{"version":"v1.1.0","exported":"2016-11-23T21:52:54.859Z","volume":10.5,"added":"2016-11-23T21:44:26.264Z","format":"Utrecht","demagType":"Unknown","strat":null,"patch":1.1,"GEO":[{"dec":1.1098239355929422,"inc":58.0337503361118,"MAD":4.01028355542583,"cm":[-1.7763568394002505e-15,1.3766765505351941e-14,0],"intensity":645.9169860241075,"type":"dir","forced":true,"remark":"","origin":false,"nSteps":7,"minStep":"100","maxStep":"300","steps":["100","150","180","210","240","270","300"],"group":"None","version":"v1.1.0"}],"TECT":[{"dec":6.601698165951291,"inc":36.57253784026199,"MAD":4.010283555425759,"cm":[-1.7763568394002505e-15,-1.2212453270876722e-15,8.881784197001252e-16],"intensity":645.9169860241076,"type":"dir","forced":true,"remark":"","origin":false,"nSteps":7,"minStep":"100","maxStep":"300","steps":["100","150","180","210","240","270","300"],"group":"None","version":"v1.1.0"}],"interpreted":true,"name":"ER1.7B","coreAzi":24,"coreDip":21,"bedStrike":287,"bedDip":22,"data":[{"visible":false,"include":false,"step":"20","x":-560.1904761904761,"y":-148.0952380952381,"z":715.7142857142857,"a95":2.6,"info":"\"14-11-03\" at \"17:38\""},{"visible":true,"include":true,"step":"100","x":-303.42857142857144,"y":-104.57142857142857,"z":376.1904761904762,"a95":2.4,"info":"\"14-11-03\" at \"22:37\""},{"visible":true,"include":true,"step":"150","x":-170.47619047619048,"y":-39.523809523809526,"z":234,"a95":2.7,"info":"\"14-11-04\" at \"19:37\""},{"visible":true,"include":true,"step":"180","x":-195.14285714285714,"y":-51.523809523809526,"z":215.33333333333334,"a95":2.4,"info":"\"14-11-04\" at \"22:51\""},{"visible":true,"include":true,"step":"210","x":-152.1904761904762,"y":-50.76190476190476,"z":185.61904761904762,"a95":2.7,"info":"\"14-11-05\" at \"18:11\""},{"visible":true,"include":true,"step":"240","x":-80.76190476190476,"y":-55.714285714285715,"z":122.28571428571429,"a95":2.5,"info":"\"14-11-06\" at \"15:55\""},{"visible":true,"include":true,"step":"270","x":-110.0952380952381,"y":-34.76190476190476,"z":102.76190476190476,"a95":2.9,"info":"\"14-11-06\" at \"22:06\""},{"visible":true,"include":true,"step":"300","x":-88.38095238095238,"y":-51.142857142857146,"z":113.14285714285714,"a95":2.9,"info":"\"14-11-07\" at \"17:37\""},{"visible":true,"include":false,"step":"320","x":-86.85714285714286,"y":-20.19047619047619,"z":91.80952380952381,"a95":2.5,"info":"\"14-11-15\" at \"00:55\""},{"visible":true,"include":false,"step":"340","x":-48.666666666666664,"y":31.047619047619047,"z":89.71428571428571,"a95":3.1,"info":"\"14-11-15\" at \"21:46\""},{"visible":true,"include":false,"step":"360","x":-49.904761904761905,"y":22.857142857142858,"z":87.61904761904762,"a95":2.8,"info":"\"14-11-16\" at \"00:57\""},{"visible":true,"include":false,"step":"380","x":-75.04761904761905,"y":-4.666666666666667,"z":73.14285714285714,"a95":3.1,"info":"\"14-11-16\" at \"18:55\""},{"visible":true,"include":false,"step":"400","x":-41.83809523809524,"y":-2,"z":83.80952380952381,"a95":3.1,"info":"\"14-11-16\" at \"22:58\""}]},{"version":"v1.1.0","exported":"2016-11-23T21:52:54.859Z","volume":10.5,"added":"2016-11-23T21:44:26.264Z","format":"Utrecht","demagType":"Unknown","strat":null,"patch":1.1,"GEO":[],"TECT":[],"interpreted":false,"name":"ER1.9A","coreAzi":359,"coreDip":23,"bedStrike":287,"bedDip":22,"data":[{"visible":false,"include":false,"step":"20","x":-447.14285714285717,"y":10.952380952380953,"z":707.3333333333334,"a95":3.3,"info":"\"14-09-15\" at \"15:28\""},{"visible":true,"include":true,"step":"100","x":-307.7142857142857,"y":-36.476190476190474,"z":487.14285714285717,"a95":2.7,"info":"\"14-09-15\" at \"19:29\""},{"visible":true,"include":true,"step":"150","x":-167.23809523809524,"y":-42.095238095238095,"z":267.04761904761904,"a95":2.8,"info":"\"14-09-15\" at \"21:41\""},{"visible":true,"include":true,"step":"180","x":-176.38095238095238,"y":-44.19047619047619,"z":241.23809523809524,"a95":2.9,"info":"\"14-09-16\" at \"10:39\""},{"visible":true,"include":true,"step":"210","x":-105.04761904761905,"y":-91.80952380952381,"z":117.33333333333333,"a95":4,"info":"\"14-09-16\" at \"13:21\""},{"visible":true,"include":true,"step":"240","x":-39.714285714285715,"y":-39.714285714285715,"z":98.66666666666667,"a95":2.9,"info":"\"14-09-16\" at \"16:01\""},{"visible":true,"include":false,"step":"270","x":-35.77142857142857,"y":4.552380952380952,"z":18.847619047619048,"a95":5.8,"info":"\"14-09-16\" at \"18:52\""},{"visible":true,"include":false,"step":"300","x":-1.5619047619047617,"y":1.3047619047619048,"z":-15.876190476190475,"a95":5.9,"info":"\"14-09-17\" at \"10:29\""},{"visible":true,"include":false,"step":"320","x":34.95238095238095,"y":-48.86666666666667,"z":12.847619047619048,"a95":2.3,"info":"\"14-09-17\" at \"13:36\""},{"visible":true,"include":false,"step":"340","x":-10.304761904761905,"y":-25.580952380952382,"z":10.876190476190477,"a95":5.4,"info":"\"14-09-17\" at \"16:52\""},{"visible":true,"include":false,"step":"370","x":-26.6,"y":-78.99047619047619,"z":22.01904761904762,"a95":3.3,"info":"\"14-09-17\" at \"22:02\""},{"visible":true,"include":false,"step":"390","x":-41.666666666666664,"y":-14.323809523809524,"z":-30.514285714285712,"a95":5.2,"info":"\"14-09-18\" at \"11:14\""},{"visible":true,"include":false,"step":"420","x":-23.19047619047619,"y":-34.20952380952381,"z":46.438095238095244,"a95":4.6,"info":"\"14-09-18\" at \"14:17\""}]},{"version":"v1.1.0","exported":"2016-11-23T21:52:54.859Z","volume":10.5,"added":"2016-11-23T21:44:26.264Z","format":"Utrecht","demagType":"Unknown","strat":"2","patch":1.1,"GEO":[{"dec":355.7401783343426,"inc":56.50645503003105,"MAD":3.7144927309876388,"cm":[-2.6645352591003757e-15,-2.6645352591003757e-15,0],"intensity":633.3240545406941,"type":"dir","forced":true,"remark":"","origin":false,"nSteps":11,"minStep":"4.0","maxStep":"50.0","steps":["4.0","8.0","12.0","16.0","20.0","25.0","30.0","35.0","40.0","45.0","50.0"],"group":"None","version":"v1.1.0"}],"TECT":[{"dec":2.773516462536975,"inc":35.49046993367246,"MAD":3.7144927309875757,"cm":[-8.881784197001252e-16,-4.218847493575595e-15,8.881784197001252e-16],"intensity":633.324054540694,"type":"dir","forced":true,"remark":"","origin":false,"nSteps":11,"minStep":"4.0","maxStep":"50.0","steps":["4.0","8.0","12.0","16.0","20.0","25.0","30.0","35.0","40.0","45.0","50.0"],"group":"None","version":"v1.1.0"}],"interpreted":true,"name":"ER1.9B","coreAzi":359,"coreDip":23,"bedStrike":287,"bedDip":22,"data":[{"visible":false,"include":false,"step":"0.0","x":-283.45714285714286,"y":20.092380952380953,"z":405.3619047619048,"a95":0.99,"info":"25/08/2014 at 06:21:23"},{"visible":true,"include":true,"step":"4.0","x":-261.6,"y":-18.628571428571426,"z":370.57142857142856,"a95":0.99,"info":"25/08/2014 at 06:21:23"},{"visible":true,"include":true,"step":"8.0","x":-216.30476190476188,"y":-9.98952380952381,"z":349.5904761904762,"a95":0.99,"info":"25/08/2014 at 06:21:23"},{"visible":true,"include":true,"step":"12.0","x":-193.8761904761905,"y":3.4949523809523813,"z":299.6190476190476,"a95":0.99,"info":"25/08/2014 at 06:21:23"},{"visible":true,"include":true,"step":"16.0","x":-158.05714285714285,"y":12.156190476190476,"z":227.7238095238095,"a95":0.99,"info":"25/08/2014 at 06:21:23"},{"visible":true,"include":true,"step":"20.0","x":-143.57142857142858,"y":-23.456190476190475,"z":226.86666666666665,"a95":0.99,"info":"25/08/2014 at 06:21:23"},{"visible":true,"include":true,"step":"25.0","x":-139.5047619047619,"y":-24.18285714285714,"z":187.8095238095238,"a95":0.99,"info":"25/08/2014 at 06:21:23"},{"visible":true,"include":true,"step":"30.0","x":-119.32380952380953,"y":-12.577142857142857,"z":174.51428571428573,"a95":0.99,"info":"25/08/2014 at 06:21:23"},{"visible":true,"include":true,"step":"35.0","x":-122.42857142857143,"y":-10.515238095238095,"z":177.1047619047619,"a95":0.99,"info":"25/08/2014 at 06:21:23"},{"visible":true,"include":true,"step":"40.0","x":-92.99904761904762,"y":-28.156190476190474,"z":193.5047619047619,"a95":0.99,"info":"25/08/2014 at 06:21:23"},{"visible":true,"include":true,"step":"45.0","x":-134.77142857142857,"y":-6.598,"z":181.31428571428572,"a95":0.99,"info":"25/08/2014 at 06:21:23"},{"visible":true,"include":true,"step":"50.0","x":-98.21904761904761,"y":18.467619047619046,"z":150.6095238095238,"a95":0.99,"info":"25/08/2014 at 06:21:23"},{"visible":false,"include":false,"step":"60.0","x":-118.4,"y":-21.154285714285713,"z":102.01904761904763,"a95":0.99,"info":"25/08/2014 at 06:21:23"},{"visible":false,"include":false,"step":"70.0","x":-80.9895238095238,"y":-0.7578095238095238,"z":113.73333333333333,"a95":0.99,"info":"25/08/2014 at 06:21:23"},{"visible":false,"include":false,"step":"80.0","x":-123.34285714285713,"y":19.578095238095237,"z":76.33333333333333,"a95":0.99,"info":"25/08/2014 at 06:21:23"},{"visible":false,"include":false,"step":"90.0","x":-109.88571428571429,"y":-6.296952380952381,"z":84.1647619047619,"a95":0.99,"info":"25/08/2014 at 06:21:23"},{"visible":false,"include":false,"step":"100.0","x":-98.27619047619048,"y":15.732380952380952,"z":43.72095238095238,"a95":0.99,"info":"25/08/2014 at 06:21:23"}]},{"version":"v1.1.0","exported":"2016-11-23T21:52:54.859Z","volume":10.5,"added":"2016-11-23T21:44:26.264Z","format":"Utrecht","demagType":"Unknown","strat":"3","patch":1.1,"GEO":[{"dec":353.365486845029,"inc":64.99181774406577,"MAD":3.1926323607681755,"cm":[-3.552713678800501e-15,-2.531308496145357e-14,0],"intensity":980.4644506298754,"type":"dir","forced":true,"remark":"","origin":false,"nSteps":7,"minStep":"4.0","maxStep":"30.0","steps":["4.0","8.0","12.0","16.0","20.0","25.0","30.0"],"group":"None","version":"v1.1.0"}],"TECT":[{"dec":3.3630307405454687,"inc":44.04134470371373,"MAD":3.1926323607680374,"cm":[-7.105427357601002e-15,-4.440892098500626e-14,7.105427357601002e-15],"intensity":980.4644506298755,"type":"dir","forced":true,"remark":"","origin":false,"nSteps":7,"minStep":"4.0","maxStep":"30.0","steps":["4.0","8.0","12.0","16.0","20.0","25.0","30.0"],"group":"None","version":"v1.1.0"}],"interpreted":true,"name":"ER1.10A","coreAzi":357,"coreDip":23,"bedStrike":287,"bedDip":22,"data":[{"visible":false,"include":false,"step":"0.0","x":-424.50476190476195,"y":7.918095238095238,"z":507.76190476190476,"a95":0.99,"info":"25/08/2014 at 06:21:23"},{"visible":true,"include":true,"step":"4.0","x":-397.552380952381,"y":-4.219904761904762,"z":468.6666666666667,"a95":0.99,"info":"25/08/2014 at 06:21:23"},{"visible":true,"include":true,"step":"8.0","x":-381.83809523809526,"y":14.41904761904762,"z":442.31428571428575,"a95":0.99,"info":"25/08/2014 at 06:21:23"},{"visible":true,"include":true,"step":"12.0","x":-328.0761904761905,"y":-23.596190476190475,"z":395.3238095238095,"a95":0.99,"info":"25/08/2014 at 06:21:23"},{"visible":true,"include":true,"step":"16.0","x":-317.02857142857147,"y":-35.760000000000005,"z":354.67619047619047,"a95":0.99,"info":"25/08/2014 at 06:21:23"},{"visible":true,"include":true,"step":"20.0","x":-288.83809523809526,"y":-27.87809523809524,"z":298.48571428571427,"a95":0.99,"info":"25/08/2014 at 06:21:23"},{"visible":true,"include":true,"step":"25.0","x":-291.9428571428572,"y":-15.462857142857144,"z":284.1142857142857,"a95":0.99,"info":"25/08/2014 at 06:21:23"},{"visible":true,"include":true,"step":"30.0","x":-272.57142857142856,"y":-10.46952380952381,"z":246.8952380952381,"a95":0.99,"info":"25/08/2014 at 06:21:23"},{"visible":true,"include":false,"step":"35.0","x":-235.05714285714285,"y":17.444761904761904,"z":248.58095238095237,"a95":0.99,"info":"25/08/2014 at 06:21:23"},{"visible":true,"include":false,"step":"40.0","x":-240.48571428571427,"y":32.80380952380953,"z":241.13333333333335,"a95":0.99,"info":"25/08/2014 at 06:21:23"},{"visible":true,"include":false,"step":"45.0","x":-241.1047619047619,"y":19.56,"z":185.4,"a95":0.99,"info":"25/08/2014 at 06:21:23"},{"visible":true,"include":false,"step":"50.0","x":-254.05714285714285,"y":13.22,"z":183.84761904761905,"a95":0.99,"info":"25/08/2014 at 06:21:23"},{"visible":true,"include":false,"step":"60.0","x":-235.51428571428573,"y":60.731428571428566,"z":231.9238095238095,"a95":0.99,"info":"25/08/2014 at 06:21:23"},{"visible":true,"include":false,"step":"70.0","x":-234.16190476190474,"y":46.955238095238094,"z":183.8952380952381,"a95":0.99,"info":"25/08/2014 at 06:21:23"},{"visible":true,"include":false,"step":"80.0","x":-170.40952380952382,"y":9.218285714285715,"z":200.63809523809522,"a95":0.99,"info":"25/08/2014 at 06:21:23"},{"visible":true,"include":false,"step":"90.0","x":-243.37142857142857,"y":85.79333333333334,"z":197.2,"a95":0.99,"info":"25/08/2014 at 06:21:23"},{"visible":true,"include":false,"step":"100.0","x":-213.7904761904762,"y":17.697142857142858,"z":166.93333333333334,"a95":0.99,"info":"25/08/2014 at 06:21:23"}]},{"version":"v1.1.0","exported":"2016-11-23T21:52:54.859Z","volume":10.5,"added":"2016-11-23T21:44:26.264Z","format":"Utrecht","demagType":"Unknown","strat":"4","patch":1.1,"GEO":[],"TECT":[],"interpreted":false,"name":"ER1.10B","coreAzi":357,"coreDip":23,"bedStrike":287,"bedDip":22,"data":[{"visible":true,"include":false,"step":"0.0","x":-260.1333333333333,"y":60.80095238095238,"z":497.64761904761906,"a95":0.99,"info":"25/08/2014 at 06:21:23"},{"visible":true,"include":false,"step":"4.0","x":-205.0190476190476,"y":53.89047619047619,"z":467.06666666666666,"a95":0.99,"info":"25/08/2014 at 06:21:23"},{"visible":true,"include":false,"step":"8.0","x":-151.82857142857142,"y":41.87904761904762,"z":368.6952380952381,"a95":0.99,"info":"25/08/2014 at 06:21:23"},{"visible":true,"include":false,"step":"12.0","x":-69.57238095238095,"y":201.24761904761903,"z":319.35238095238094,"a95":0.99,"info":"25/08/2014 at 06:21:23"},{"visible":true,"include":false,"step":"16.0","x":-68.34571428571428,"y":145.4,"z":300.7333333333333,"a95":0.99,"info":"25/08/2014 at 06:21:23"},{"visible":true,"include":false,"step":"20.0","x":-77.62666666666667,"y":196.33333333333334,"z":260,"a95":0.99,"info":"25/08/2014 at 06:21:23"},{"visible":true,"include":false,"step":"25.0","x":-148.8190476190476,"y":46.33238095238095,"z":172.57142857142858,"a95":0.99,"info":"25/08/2014 at 06:21:23"},{"visible":true,"include":false,"step":"30.0","x":-134.41904761904763,"y":50.709523809523816,"z":155.63809523809525,"a95":0.99,"info":"25/08/2014 at 06:21:23"},{"visible":true,"include":false,"step":"35.0","x":-138.8095238095238,"y":77.06190476190476,"z":99.63809523809525,"a95":0.99,"info":"25/08/2014 at 06:21:23"},{"visible":true,"include":false,"step":"40.0","x":-124.57142857142857,"y":112.55238095238094,"z":86.1752380952381,"a95":0.99,"info":"25/08/2014 at 06:21:23"},{"visible":true,"include":false,"step":"45.0","x":-101.04761904761905,"y":77.14952380952381,"z":87.01142857142857,"a95":0.99,"info":"25/08/2014 at 06:21:23"},{"visible":true,"include":false,"step":"50.0","x":-130.4952380952381,"y":41.45142857142857,"z":128.1904761904762,"a95":0.99,"info":"25/08/2014 at 06:21:23"},{"visible":true,"include":false,"step":"60.0","x":-58.81428571428571,"y":65.95904761904762,"z":127.98095238095237,"a95":0.99,"info":"25/08/2014 at 06:21:23"},{"visible":true,"include":false,"step":"70.0","x":-110.96190476190475,"y":47.549523809523805,"z":113.15238095238094,"a95":0.99,"info":"25/08/2014 at 06:21:23"},{"visible":true,"include":false,"step":"80.0","x":-127.01904761904763,"y":89.0247619047619,"z":143.1809523809524,"a95":0.99,"info":"25/08/2014 at 06:21:23"},{"visible":true,"include":false,"step":"90.0","x":-134.55238095238096,"y":52.53333333333334,"z":70.34190476190477,"a95":0.99,"info":"25/08/2014 at 06:21:23"},{"visible":true,"include":false,"step":"100.0","x":-75.49333333333333,"y":-62.275238095238095,"z":195.21904761904764,"a95":0.99,"info":"25/08/2014 at 06:21:23"}]},{"version":"v1.1.0","exported":"2016-11-23T21:52:54.859Z","volume":10.5,"added":"2016-11-23T21:44:26.264Z","format":"Utrecht","demagType":"Unknown","strat":null,"patch":1.1,"GEO":[{"dec":356.23255520858504,"inc":60.82098649881157,"MAD":3.1807724363047134,"cm":[8.881784197001252e-16,3.941291737419306e-15,0],"intensity":492.6911521719986,"type":"dir","forced":true,"remark":"","origin":false,"nSteps":6,"minStep":"100","maxStep":"270","steps":["100","150","180","210","240","270"],"group":"None","version":"v1.1.0"}],"TECT":[{"dec":4.016026963024331,"inc":39.69908724939911,"MAD":3.1807724363046828,"cm":[-2.6645352591003757e-15,2.1593837828959295e-14,2.6645352591003757e-15],"intensity":492.6911521719987,"type":"dir","forced":true,"remark":"","origin":false,"nSteps":6,"minStep":"100","maxStep":"270","steps":["100","150","180","210","240","270"],"group":"None","version":"v1.1.0"}],"interpreted":true,"name":"ER1.10C","coreAzi":357,"coreDip":23,"bedStrike":287,"bedDip":22,"data":[{"visible":false,"include":false,"step":"20","x":-338,"y":-24.19047619047619,"z":526.952380952381,"a95":3.4,"info":"\"14-11-03\" at \"17:40\""},{"visible":true,"include":true,"step":"100","x":-237.14285714285714,"y":8.095238095238095,"z":297.23809523809524,"a95":3.9,"info":"\"14-11-03\" at \"22:41\""},{"visible":true,"include":true,"step":"150","x":-105.14285714285714,"y":0.19047619047619047,"z":140.95238095238096,"a95":3.6,"info":"\"14-11-04\" at \"19:39\""},{"visible":true,"include":true,"step":"180","x":-114,"y":-4.571428571428571,"z":153.23809523809524,"a95":3.4,"info":"\"14-11-04\" at \"22:54\""},{"visible":true,"include":true,"step":"210","x":-98.95238095238095,"y":-18.38095238095238,"z":121.14285714285714,"a95":3.1,"info":"\"14-11-05\" at \"18:14\""},{"visible":true,"include":true,"step":"240","x":-55.523809523809526,"y":-7.619047619047619,"z":96.85714285714286,"a95":3.5,"info":"\"14-11-06\" at \"15:58\""},{"visible":true,"include":true,"step":"270","x":-72.66666666666667,"y":-2,"z":85.80952380952381,"a95":3.4,"info":"\"14-11-06\" at \"22:09\""},{"visible":true,"include":false,"step":"300","x":-76.95238095238095,"y":-2.6666666666666665,"z":61.80952380952381,"a95":3,"info":"\"14-11-07\" at \"17:39\""},{"visible":true,"include":false,"step":"320","x":-56.99047619047619,"y":0.942857238095238,"z":49.647619047619045,"a95":3.2,"info":"\"14-11-15\" at \"00:58\""},{"visible":true,"include":false,"step":"340","x":-49.93333333333333,"y":16.847619047619048,"z":44.857142857142854,"a95":3.4,"info":"\"14-11-15\" at \"21:49\""},{"visible":true,"include":false,"step":"360","x":-52.93333333333333,"y":15.466666666666667,"z":55.27619047619047,"a95":3.4,"info":"\"14-11-16\" at \"01:00\""},{"visible":true,"include":false,"step":"380","x":-63.18095238095238,"y":12.866666666666665,"z":48.34285714285714,"a95":2.9,"info":"\"14-11-16\" at \"18:57\""},{"visible":true,"include":false,"step":"400","x":-69.01904761904763,"y":-1.9333333333333333,"z":58.476190476190474,"a95":2.9,"info":"\"14-11-16\" at \"23:00\""}]},{"version":"v1.1.0","exported":"2016-11-23T21:52:54.859Z","volume":10.5,"added":"2016-11-23T21:44:26.264Z","format":"Utrecht","demagType":"Unknown","strat":"5","patch":1.1,"GEO":[{"dec":353.5774179341231,"inc":56.655280820096955,"MAD":2.438252897765367,"cm":[5.329070518200751e-15,3.3306690738754696e-14,0],"intensity":1249.4655136299548,"type":"dir","forced":true,"remark":"","origin":false,"nSteps":11,"minStep":"4.0","maxStep":"50.0","steps":["4.0","8.0","12.0","16.0","20.0","25.0","30.0","35.0","40.0","45.0","50.0"],"group":"None","version":"v1.1.0"}],"TECT":[{"dec":1.3621557172897383,"inc":35.84575714805982,"MAD":2.438252897765474,"cm":[-1.0658141036401503e-14,9.237055564881302e-14,8.881784197001252e-15],"intensity":1249.4655136299548,"type":"dir","forced":true,"remark":"","origin":false,"nSteps":11,"minStep":"4.0","maxStep":"50.0","steps":["4.0","8.0","12.0","16.0","20.0","25.0","30.0","35.0","40.0","45.0","50.0"],"group":"None","version":"v1.1.0"}],"interpreted":true,"name":"ER1.11A","coreAzi":96,"coreDip":27,"bedStrike":287,"bedDip":22,"data":[{"visible":false,"include":false,"step":"0.0","x":-756.3047619047619,"y":-477.2952380952381,"z":291.93333333333334,"a95":0.99,"info":"25/08/2014 at 06:21:23"},{"visible":true,"include":true,"step":"4.0","x":-696.0285714285715,"y":-470.5619047619047,"z":267.0761904761905,"a95":0.99,"info":"25/08/2014 at 06:21:23"},{"visible":true,"include":true,"step":"8.0","x":-613.7333333333333,"y":-409.99047619047616,"z":221.7238095238095,"a95":0.99,"info":"25/08/2014 at 06:21:23"},{"visible":true,"include":true,"step":"12.0","x":-549.8285714285714,"y":-372.552380952381,"z":195.54285714285712,"a95":0.99,"info":"25/08/2014 at 06:21:23"},{"visible":true,"include":true,"step":"16.0","x":-505.95238095238096,"y":-343.84761904761905,"z":156.57142857142858,"a95":0.99,"info":"25/08/2014 at 06:21:23"},{"visible":true,"include":true,"step":"20.0","x":-476.0761904761905,"y":-305.68571428571425,"z":117.94285714285715,"a95":0.99,"info":"25/08/2014 at 06:21:23"},{"visible":true,"include":true,"step":"25.0","x":-441.91428571428577,"y":-290.6190476190476,"z":114.84761904761906,"a95":0.99,"info":"25/08/2014 at 06:21:23"},{"visible":true,"include":true,"step":"30.0","x":-396.5619047619047,"y":-284.15238095238095,"z":124.67619047619047,"a95":0.99,"info":"25/08/2014 at 06:21:23"},{"visible":true,"include":true,"step":"35.0","x":-370.4,"y":-230.50476190476192,"z":145.1904761904762,"a95":0.99,"info":"25/08/2014 at 06:21:23"},{"visible":true,"include":true,"step":"40.0","x":-360.70476190476194,"y":-236.85714285714286,"z":118.74285714285713,"a95":0.99,"info":"25/08/2014 at 06:21:23"},{"visible":true,"include":true,"step":"45.0","x":-280.8666666666667,"y":-199.47619047619048,"z":109.33333333333333,"a95":0.99,"info":"25/08/2014 at 06:21:23"},{"visible":true,"include":true,"step":"50.0","x":-276.65714285714284,"y":-204.16190476190474,"z":132.66666666666666,"a95":0.99,"info":"25/08/2014 at 06:21:23"},{"visible":true,"include":false,"step":"60.0","x":-285.5904761904762,"y":-159.0095238095238,"z":131.2095238095238,"a95":0.99,"info":"25/08/2014 at 06:21:23"},{"visible":true,"include":false,"step":"70.0","x":-262.1714285714286,"y":-110.55238095238094,"z":81.82761904761905,"a95":0.99,"info":"25/08/2014 at 06:21:23"},{"visible":true,"include":false,"step":"80.0","x":-177.24761904761903,"y":-135.86666666666665,"z":86.60761904761905,"a95":0.99,"info":"25/08/2014 at 06:21:23"},{"visible":true,"include":false,"step":"90.0","x":-182.40952380952382,"y":-123.48571428571428,"z":72.32190476190476,"a95":0.99,"info":"25/08/2014 at 06:21:23"},{"visible":true,"include":false,"step":"100.0","x":-208.0761904761905,"y":-128.22857142857143,"z":47.89523809523809,"a95":0.99,"info":"25/08/2014 at 06:21:23"}]},{"version":"v1.1.0","exported":"2016-11-23T21:52:54.860Z","volume":10.5,"added":"2016-11-23T21:44:26.264Z","format":"Utrecht","demagType":"Unknown","strat":null,"patch":1.1,"GEO":[],"TECT":[],"interpreted":false,"name":"ER1.11B","coreAzi":96,"coreDip":27,"bedStrike":287,"bedDip":22,"data":[{"visible":false,"include":false,"step":"20","x":-766.0952380952381,"y":-572,"z":484.95238095238096,"a95":1.9,"info":"\"14-11-03\" at \"17:42\""},{"visible":true,"include":true,"step":"100","x":-427.8095238095238,"y":-284.2857142857143,"z":254.38095238095238,"a95":2,"info":"\"14-11-03\" at \"22:43\""},{"visible":true,"include":true,"step":"150","x":-265.8095238095238,"y":-149.14285714285714,"z":142.66666666666666,"a95":2,"info":"\"14-11-04\" at \"19:41\""},{"visible":true,"include":true,"step":"180","x":-269.5238095238095,"y":-132.76190476190476,"z":154,"a95":2,"info":"\"14-11-04\" at \"22:56\""},{"visible":true,"include":true,"step":"210","x":-192.38095238095238,"y":-122.85714285714286,"z":175.52380952380952,"a95":2.4,"info":"\"14-11-05\" at \"18:16\""},{"visible":true,"include":true,"step":"240","x":-122.47619047619048,"y":-88.66666666666667,"z":137.52380952380952,"a95":2.4,"info":"\"14-11-06\" at \"16:00\""},{"visible":true,"include":true,"step":"270","x":-108.19047619047619,"y":-95.42857142857143,"z":124,"a95":2.8,"info":"\"14-11-06\" at \"22:11\""},{"visible":true,"include":false,"step":"300","x":-113.23809523809524,"y":-94.76190476190476,"z":108.47619047619048,"a95":2.4,"info":"\"14-11-07\" at \"17:42\""},{"visible":true,"include":false,"step":"320","x":-118.0952380952381,"y":-93.23809523809524,"z":65.42857142857143,"a95":2.1,"info":"\"14-11-15\" at \"01:00\""},{"visible":true,"include":false,"step":"340","x":-119.04761904761905,"y":4.285714285714286,"z":44.095238095238095,"a95":2.6,"info":"\"14-11-15\" at \"21:51\""},{"visible":true,"include":false,"step":"360","x":-123.9047619047619,"y":2.857142857142857,"z":41.714285714285715,"a95":2.5,"info":"\"14-11-16\" at \"01:03\""},{"visible":true,"include":false,"step":"380","x":-118.85714285714286,"y":-44,"z":138.76190476190476,"a95":3.2,"info":"\"14-11-16\" at \"18:59\""},{"visible":true,"include":false,"step":"400","x":-72.47619047619048,"y":-55.04761904761905,"z":78.38095238095238,"a95":2.9,"info":"\"14-11-16\" at \"23:02\""}]},{"version":"v1.1.0","exported":"2016-11-23T21:52:54.860Z","volume":10.5,"added":"2016-11-23T21:44:26.265Z","format":"Utrecht","demagType":"Unknown","strat":null,"patch":1.1,"GEO":[{"dec":348.80393120956376,"inc":60.68158585145941,"MAD":3.8075999260954734,"cm":[-5.329070518200751e-15,-2.609024107869118e-14,0],"intensity":610.5370967314441,"type":"dir","forced":true,"remark":"","origin":false,"nSteps":5,"minStep":"100","maxStep":"240","steps":["100","150","180","210","240"],"group":"None","version":"v1.1.0"}],"TECT":[{"dec":359.3412830559717,"inc":40.297647763681965,"MAD":3.8075999260955,"cm":[0,-7.815970093361102e-14,3.552713678800501e-15],"intensity":610.5370967314441,"type":"dir","forced":true,"remark":"","origin":false,"nSteps":5,"minStep":"100","maxStep":"240","steps":["100","150","180","210","240"],"group":"None","version":"v1.1.0"}],"interpreted":true,"name":"ER1.12A","coreAzi":94,"coreDip":26,"bedStrike":287,"bedDip":22,"data":[{"visible":false,"include":false,"step":"20","x":-757.2380952380952,"y":-453.04761904761904,"z":241.42857142857142,"a95":2.1,"info":"\"14-11-03\" at \"17:48\""},{"visible":true,"include":true,"step":"100","x":-402.1904761904762,"y":-238.76190476190476,"z":127.23809523809524,"a95":1.8,"info":"\"14-11-03\" at \"22:50\""},{"visible":true,"include":true,"step":"150","x":-182.47619047619048,"y":-111.33333333333333,"z":52.666666666666664,"a95":2.2,"info":"\"14-11-04\" at \"19:46\""},{"visible":true,"include":true,"step":"180","x":-201.42857142857142,"y":-100.28571428571429,"z":55.523809523809526,"a95":2.1,"info":"\"14-11-04\" at \"23:00\""},{"visible":true,"include":true,"step":"210","x":-124.66666666666667,"y":-47.61904761904762,"z":41.23809523809524,"a95":2.5,"info":"\"14-11-05\" at \"18:18\""},{"visible":true,"include":true,"step":"240","x":-105.52380952380952,"y":-44.76190476190476,"z":58.76190476190476,"a95":2.8,"info":"\"14-11-06\" at \"16:04\""},{"visible":true,"include":false,"step":"270","x":-95.61904761904762,"y":-52.38095238095238,"z":21.523809523809526,"a95":4,"info":"\"14-11-06\" at \"22:13\""},{"visible":true,"include":false,"step":"300","x":-100.47619047619048,"y":-35.80952380952381,"z":34.19047619047619,"a95":13.9,"info":"\"14-11-07\" at \"17:45\""},{"visible":true,"include":false,"step":"320","x":-59.352380952380955,"y":-37.22857142857143,"z":30.114285714285714,"a95":2.7,"info":"\"14-11-15\" at \"01:03\""},{"visible":true,"include":false,"step":"340","x":-67.74285714285713,"y":-23.695238095238096,"z":30.114285714285714,"a95":2.7,"info":"\"14-11-15\" at \"21:53\""},{"visible":true,"include":false,"step":"360","x":-63.904761904761905,"y":-25.076190476190476,"z":21.895238095238096,"a95":3.6,"info":"\"14-11-16\" at \"01:05\""},{"visible":true,"include":false,"step":"380","x":-62.971428571428575,"y":-38.01904761904762,"z":23.323809523809523,"a95":2.3,"info":"\"14-11-16\" at \"19:02\""},{"visible":true,"include":false,"step":"400","x":-8.2,"y":-31.276190476190475,"z":18.41904761904762,"a95":4.6,"info":"\"14-11-16\" at \"23:05\""}]},{"version":"v1.1.0","exported":"2016-11-23T21:52:54.860Z","volume":10.5,"added":"2016-11-23T21:44:26.265Z","format":"Utrecht","demagType":"Unknown","strat":"6","patch":1.1,"GEO":[{"dec":3.232856988491392,"inc":62.24043782923122,"MAD":2.29126602428708,"cm":[1.7763568394002505e-15,-1.1102230246251565e-15,0],"intensity":929.8049548474975,"type":"dir","forced":true,"remark":"","origin":false,"nSteps":11,"minStep":"4.0","maxStep":"50.0","steps":["4.0","8.0","12.0","16.0","20.0","25.0","30.0","35.0","40.0","45.0","50.0"],"group":"None","version":"v1.1.0"}],"TECT":[{"dec":8.603567703919452,"inc":40.617732716490664,"MAD":2.29126602428715,"cm":[-3.552713678800501e-15,2.1760371282653068e-14,2.6645352591003757e-15],"intensity":929.8049548474974,"type":"dir","forced":true,"remark":"","origin":false,"nSteps":11,"minStep":"4.0","maxStep":"50.0","steps":["4.0","8.0","12.0","16.0","20.0","25.0","30.0","35.0","40.0","45.0","50.0"],"group":"None","version":"v1.1.0"}],"interpreted":true,"name":"ER1.12B","coreAzi":94,"coreDip":26,"bedStrike":287,"bedDip":22,"data":[{"visible":false,"include":false,"step":"0.0","x":-612.7523809523809,"y":-337.7333333333333,"z":272.14285714285717,"a95":0.99,"info":"25/08/2014 at 06:21:23"},{"visible":true,"include":true,"step":"4.0","x":-559.6095238095238,"y":-318.87619047619046,"z":240.25714285714284,"a95":0.99,"info":"25/08/2014 at 06:21:23"},{"visible":true,"include":true,"step":"8.0","x":-489.87619047619046,"y":-281.37142857142857,"z":218.9809523809524,"a95":0.99,"info":"25/08/2014 at 06:21:23"},{"visible":true,"include":true,"step":"12.0","x":-430.4,"y":-247.17142857142858,"z":210.60000000000002,"a95":0.99,"info":"25/08/2014 at 06:21:23"},{"visible":true,"include":true,"step":"16.0","x":-355.9047619047619,"y":-195.0761904761905,"z":188.7238095238095,"a95":0.99,"info":"25/08/2014 at 06:21:23"},{"visible":true,"include":true,"step":"20.0","x":-312.552380952381,"y":-206.53333333333333,"z":170.66666666666666,"a95":0.99,"info":"25/08/2014 at 06:21:23"},{"visible":true,"include":true,"step":"25.0","x":-301.6095238095238,"y":-176.34285714285713,"z":135.66666666666666,"a95":0.99,"info":"25/08/2014 at 06:21:23"},{"visible":true,"include":true,"step":"30.0","x":-247.37142857142857,"y":-161.77142857142857,"z":123.46666666666667,"a95":0.99,"info":"25/08/2014 at 06:21:23"},{"visible":true,"include":true,"step":"35.0","x":-223.60000000000002,"y":-142.84761904761905,"z":125.46666666666667,"a95":0.99,"info":"25/08/2014 at 06:21:23"},{"visible":true,"include":true,"step":"40.0","x":-203.15238095238095,"y":-104.4095238095238,"z":111.28571428571429,"a95":0.99,"info":"25/08/2014 at 06:21:23"},{"visible":true,"include":true,"step":"45.0","x":-209.12380952380954,"y":-113.55238095238094,"z":97.87619047619049,"a95":0.99,"info":"25/08/2014 at 06:21:23"},{"visible":true,"include":true,"step":"50.0","x":-186.56190476190477,"y":-118.37142857142858,"z":101.18095238095239,"a95":0.99,"info":"25/08/2014 at 06:21:23"},{"visible":true,"include":false,"step":"60.0","x":-146.7047619047619,"y":-72.6047619047619,"z":102.19047619047619,"a95":0.99,"info":"25/08/2014 at 06:21:23"},{"visible":true,"include":false,"step":"70.0","x":-119.80952380952381,"y":-89.71523809523809,"z":41.77809523809524,"a95":0.99,"info":"25/08/2014 at 06:21:23"},{"visible":true,"include":false,"step":"80.0","x":-131.6,"y":-86.84190476190477,"z":90.02095238095238,"a95":0.99,"info":"25/08/2014 at 06:21:23"},{"visible":true,"include":false,"step":"90.0","x":-61.978095238095236,"y":-44.7,"z":62.46380952380952,"a95":0.99,"info":"25/08/2014 at 06:21:23"},{"visible":true,"include":false,"step":"100.0","x":-44.53523809523809,"y":-62.231428571428566,"z":61.94952380952381,"a95":0.99,"info":"25/08/2014 at 06:21:23"}]},{"version":"v1.1.0","exported":"2016-11-23T21:52:54.860Z","volume":10.5,"added":"2016-11-23T21:44:26.265Z","format":"Utrecht","demagType":"Unknown","strat":null,"patch":1.1,"GEO":[],"TECT":[],"interpreted":false,"name":"ER1.13A","coreAzi":39,"coreDip":32,"bedStrike":287,"bedDip":22,"data":[{"visible":true,"include":false,"step":"20","x":-362.0952380952381,"y":-296.57142857142856,"z":545.047619047619,"a95":2.5,"info":"\"14-09-15\" at \"15:30\""},{"visible":true,"include":false,"step":"100","x":-223.14285714285714,"y":-163.52380952380952,"z":276.76190476190476,"a95":2.6,"info":"\"14-09-15\" at \"19:31\""},{"visible":true,"include":false,"step":"150","x":-133.04761904761904,"y":-87.71428571428571,"z":142.66666666666666,"a95":3,"info":"\"14-09-15\" at \"21:43\""},{"visible":true,"include":false,"step":"180","x":-123.04761904761905,"y":-78.95238095238095,"z":112.66666666666667,"a95":3.6,"info":"\"14-09-16\" at \"10:42\""},{"visible":true,"include":false,"step":"210","x":-79.61904761904762,"y":-46.95238095238095,"z":68.85714285714286,"a95":5.3,"info":"\"14-09-16\" at \"13:23\""},{"visible":true,"include":false,"step":"240","x":-48.838095238095235,"y":-37.266666666666666,"z":41.40952380952381,"a95":2.9,"info":"\"14-09-16\" at \"16:03\""},{"visible":true,"include":false,"step":"270","x":-54.15238095238095,"y":-14.933333333333334,"z":17.59047619047619,"a95":3.4,"info":"\"14-09-16\" at \"18:54\""},{"visible":true,"include":false,"step":"300","x":-42.94285714285714,"y":-7.076190476190476,"z":25.571428571428573,"a95":2.4,"info":"\"14-09-17\" at \"10:32\""},{"visible":true,"include":false,"step":"320","x":-28.104761904761908,"y":-25.657142857142855,"z":20.485714285714284,"a95":3.9,"info":"\"14-09-17\" at \"13:38\""},{"visible":true,"include":false,"step":"340","x":-43.666666666666664,"y":-5.9523809523809526,"z":30.009523809523813,"a95":2.8,"info":"\"14-09-17\" at \"16:54\""},{"visible":true,"include":false,"step":"370","x":-33.37142857142857,"y":9.314285714285713,"z":11.904761904761905,"a95":4.1,"info":"\"14-09-17\" at \"22:05\""},{"visible":true,"include":false,"step":"390","x":-6.171428571428571,"y":14.571428571428571,"z":21.00952380952381,"a95":6,"info":"\"14-09-18\" at \"11:16\""},{"visible":true,"include":false,"step":"420","x":-13.961904761904762,"y":3.580952380952381,"z":15.600000000000001,"a95":6.9,"info":"\"14-09-18\" at \"14:19\""}]},{"version":"v1.1.0","exported":"2016-11-23T21:52:54.860Z","volume":10.5,"added":"2016-11-23T21:44:26.265Z","format":"Utrecht","demagType":"Unknown","strat":"7","patch":1.1,"GEO":[{"dec":348.70541524859397,"inc":51.33867988741518,"MAD":3.0306651988195044,"cm":[5.329070518200751e-15,4.729550084903167e-14,0],"intensity":557.9343808725513,"type":"dir","forced":true,"remark":"","origin":false,"nSteps":11,"minStep":"4.0","maxStep":"50.0","steps":["4.0","8.0","12.0","16.0","20.0","25.0","30.0","35.0","40.0","45.0","50.0"],"group":"None","version":"v1.1.0"}],"TECT":[{"dec":356.7469889940711,"inc":31.19360811923828,"MAD":3.0306651988196176,"cm":[1.2434497875801753e-14,8.515410598874951e-14,-1.1102230246251565e-14],"intensity":557.9343808725514,"type":"dir","forced":true,"remark":"","origin":false,"nSteps":11,"minStep":"4.0","maxStep":"50.0","steps":["4.0","8.0","12.0","16.0","20.0","25.0","30.0","35.0","40.0","45.0","50.0"],"group":"None","version":"v1.1.0"}],"interpreted":true,"name":"ER1.13B","coreAzi":39,"coreDip":32,"bedStrike":287,"bedDip":22,"data":[{"visible":false,"include":false,"step":"0.0","x":-248.94285714285715,"y":-215.1142857142857,"z":378.42857142857144,"a95":0.99,"info":"25/08/2014 at 06:21:23"},{"visible":true,"include":true,"step":"4.0","x":-216.64761904761906,"y":-200.36190476190478,"z":333.16190476190474,"a95":0.99,"info":"25/08/2014 at 06:21:23"},{"visible":true,"include":true,"step":"8.0","x":-175.23809523809524,"y":-180.47619047619048,"z":283,"a95":0.99,"info":"25/08/2014 at 06:21:23"},{"visible":true,"include":true,"step":"12.0","x":-143.35238095238097,"y":-154.33333333333334,"z":262.8,"a95":0.99,"info":"25/08/2014 at 06:21:23"},{"visible":true,"include":true,"step":"16.0","x":-129.8761904761905,"y":-143.84761904761905,"z":222.71428571428572,"a95":0.99,"info":"25/08/2014 at 06:21:23"},{"visible":true,"include":true,"step":"20.0","x":-109.8952380952381,"y":-134.36190476190475,"z":186.6095238095238,"a95":0.99,"info":"25/08/2014 at 06:21:23"},{"visible":true,"include":true,"step":"25.0","x":-90.4352380952381,"y":-104.08571428571429,"z":166.6,"a95":0.99,"info":"25/08/2014 at 06:21:23"},{"visible":true,"include":true,"step":"30.0","x":-64.71428571428571,"y":-87.59333333333333,"z":134.83809523809524,"a95":0.99,"info":"25/08/2014 at 06:21:23"},{"visible":true,"include":true,"step":"35.0","x":-75.3247619047619,"y":-89.92857142857143,"z":110.16190476190476,"a95":0.99,"info":"25/08/2014 at 06:21:23"},{"visible":true,"include":true,"step":"40.0","x":-75.9752380952381,"y":-67.9342857142857,"z":108.93333333333332,"a95":0.99,"info":"25/08/2014 at 06:21:23"},{"visible":true,"include":true,"step":"45.0","x":-45.90571428571428,"y":-65.38095238095238,"z":90.15714285714286,"a95":0.99,"info":"25/08/2014 at 06:21:23"},{"visible":true,"include":true,"step":"50.0","x":-41.27428571428571,"y":-72.08761904761904,"z":79.80095238095238,"a95":0.99,"info":"25/08/2014 at 06:21:23"},{"visible":true,"include":false,"step":"60.0","x":-25.482857142857142,"y":-40.98285714285714,"z":50.465714285714284,"a95":0.99,"info":"25/08/2014 at 06:21:23"},{"visible":true,"include":false,"step":"70.0","x":-22.795238095238094,"y":-47.287619047619046,"z":37.27619047619047,"a95":0.99,"info":"25/08/2014 at 06:21:23"},{"visible":true,"include":false,"step":"80.0","x":-37.21333333333333,"y":-35.63238095238095,"z":63.58190476190477,"a95":0.99,"info":"25/08/2014 at 06:21:23"},{"visible":true,"include":false,"step":"90.0","x":-45.62095238095238,"y":-11.517142857142858,"z":35.07809523809524,"a95":0.99,"info":"25/08/2014 at 06:21:23"},{"visible":true,"include":false,"step":"100.0","x":-7.822857142857143,"y":-26.79619047619048,"z":24.743809523809524,"a95":0.99,"info":"25/08/2014 at 06:21:23"}]},{"version":"v1.1.0","exported":"2016-11-23T21:52:54.860Z","volume":10.5,"added":"2016-11-23T21:44:26.265Z","format":"Utrecht","demagType":"Unknown","strat":"8","patch":1.1,"GEO":[{"dec":350.3342338481952,"inc":55.69012716873819,"MAD":2.005896363893618,"cm":[-1.7763568394002505e-15,2.220446049250313e-15,0],"intensity":491.77738439672237,"type":"dir","forced":true,"remark":"","origin":false,"nSteps":12,"minStep":"4.0","maxStep":"60.0","steps":["4.0","8.0","12.0","16.0","20.0","25.0","30.0","35.0","40.0","45.0","50.0","60.0"],"group":"None","version":"v1.1.0"}],"TECT":[{"dec":358.9547728128938,"inc":35.25100085559463,"MAD":2.005896363893635,"cm":[4.440892098500626e-15,-2.89906987305244e-14,0],"intensity":491.77738439672237,"type":"dir","forced":true,"remark":"","origin":false,"nSteps":12,"minStep":"4.0","maxStep":"60.0","steps":["4.0","8.0","12.0","16.0","20.0","25.0","30.0","35.0","40.0","45.0","50.0","60.0"],"group":"None","version":"v1.1.0"}],"interpreted":true,"name":"ER1.14A","coreAzi":38,"coreDip":30,"bedStrike":287,"bedDip":22,"data":[{"visible":false,"include":false,"step":"0.0","x":-249.35238095238094,"y":-163.1238095238095,"z":321.9428571428572,"a95":0.99,"info":"25/08/2014 at 06:21:23"},{"visible":true,"include":true,"step":"4.0","x":-209.37142857142857,"y":-159.64761904761903,"z":290.6,"a95":0.99,"info":"25/08/2014 at 06:21:23"},{"visible":true,"include":true,"step":"8.0","x":-182.52380952380952,"y":-139.6952380952381,"z":256.5904761904762,"a95":0.99,"info":"25/08/2014 at 06:21:23"},{"visible":true,"include":true,"step":"12.0","x":-148.83809523809524,"y":-129.53333333333333,"z":236,"a95":0.99,"info":"25/08/2014 at 06:21:23"},{"visible":true,"include":true,"step":"16.0","x":-141.8095238095238,"y":-114.97142857142858,"z":199.7238095238095,"a95":0.99,"info":"25/08/2014 at 06:21:23"},{"visible":true,"include":true,"step":"20.0","x":-126.8952380952381,"y":-103.56190476190477,"z":169.46666666666667,"a95":0.99,"info":"25/08/2014 at 06:21:23"},{"visible":true,"include":true,"step":"25.0","x":-109.9047619047619,"y":-90.50857142857143,"z":163.8190476190476,"a95":0.99,"info":"25/08/2014 at 06:21:23"},{"visible":true,"include":true,"step":"30.0","x":-100.24761904761904,"y":-82.33238095238096,"z":134.15238095238095,"a95":0.99,"info":"25/08/2014 at 06:21:23"},{"visible":true,"include":true,"step":"35.0","x":-93.37619047619049,"y":-69.88666666666666,"z":117.95238095238095,"a95":0.99,"info":"25/08/2014 at 06:21:23"},{"visible":true,"include":true,"step":"40.0","x":-83.56095238095239,"y":-55.96952380952381,"z":103.66666666666667,"a95":0.99,"info":"25/08/2014 at 06:21:23"},{"visible":true,"include":true,"step":"45.0","x":-67.31714285714285,"y":-50.41809523809523,"z":104.24761904761904,"a95":0.99,"info":"25/08/2014 at 06:21:23"},{"visible":true,"include":true,"step":"50.0","x":-68.4152380952381,"y":-66.73904761904762,"z":97.70476190476191,"a95":0.99,"info":"25/08/2014 at 06:21:23"},{"visible":true,"include":true,"step":"60.0","x":-58.07714285714285,"y":-34.992380952380955,"z":73.31142857142856,"a95":0.99,"info":"25/08/2014 at 06:21:23"},{"visible":true,"include":false,"step":"70.0","x":-46.775238095238095,"y":-39.83428571428571,"z":64.35428571428572,"a95":0.99,"info":"25/08/2014 at 06:21:23"},{"visible":true,"include":false,"step":"80.0","x":-61.73047619047619,"y":-46.65428571428571,"z":58.69333333333333,"a95":0.99,"info":"25/08/2014 at 06:21:23"},{"visible":true,"include":false,"step":"90.0","x":-37.55809523809524,"y":-10.932380952380953,"z":22.760952380952382,"a95":0.99,"info":"25/08/2014 at 06:21:23"},{"visible":true,"include":false,"step":"100.0","x":-24.985714285714288,"y":-23.569523809523808,"z":21.65142857142857,"a95":0.99,"info":"25/08/2014 at 06:21:23"}]},{"version":"v1.1.0","exported":"2016-11-23T21:52:54.860Z","volume":10.5,"added":"2016-11-23T21:44:26.266Z","format":"Utrecht","demagType":"Unknown","strat":null,"patch":1.1,"GEO":[{"dec":355.4145646566587,"inc":56.79222699619504,"MAD":2.967315908271848,"cm":[-4.440892098500626e-15,-5.062616992290714e-14,0],"intensity":463.03586290927404,"type":"dir","forced":true,"remark":"","origin":false,"nSteps":4,"minStep":"100","maxStep":"210","steps":["100","150","180","210"],"group":"None","version":"v1.1.0"}],"TECT":[{"dec":2.6155874762054623,"inc":35.8023017986593,"MAD":2.9673159082717873,"cm":[0,-5.113964807179627e-15,3.552713678800501e-15],"intensity":463.03586290927404,"type":"dir","forced":true,"remark":"","origin":false,"nSteps":4,"minStep":"100","maxStep":"210","steps":["100","150","180","210"],"group":"None","version":"v1.1.0"}],"interpreted":true,"name":"ER1.14B","coreAzi":38,"coreDip":30,"bedStrike":287,"bedDip":22,"data":[{"visible":false,"include":false,"step":"20","x":-317.23809523809524,"y":-306.57142857142856,"z":446.0952380952381,"a95":2.5,"info":"\"14-09-15\" at \"15:33\""},{"visible":true,"include":true,"step":"100","x":-186.76190476190476,"y":-140.57142857142858,"z":291.42857142857144,"a95":2.8,"info":"\"14-09-15\" at \"19:33\""},{"visible":true,"include":true,"step":"150","x":-117.04761904761905,"y":-66.66666666666667,"z":148.38095238095238,"a95":3,"info":"\"14-09-15\" at \"21:45\""},{"visible":true,"include":true,"step":"180","x":-79.23809523809524,"y":-63.904761904761905,"z":118.28571428571429,"a95":3.4,"info":"\"14-09-16\" at \"10:44\""},{"visible":true,"include":true,"step":"210","x":-58.48571428571429,"y":-29.98095238095238,"z":62.36190476190476,"a95":3.6,"info":"\"14-09-16\" at \"13:25\""},{"visible":true,"include":false,"step":"240","x":-47.53333333333334,"y":-11.457142857142857,"z":27.047619047619047,"a95":3.1,"info":"\"14-09-16\" at \"16:05\""},{"visible":true,"include":false,"step":"270","x":-36.42857142857143,"y":-3.342857142857143,"z":17.65714285714286,"a95":4.6,"info":"\"14-09-16\" at \"18:57\""},{"visible":true,"include":false,"step":"300","x":-23.095238095238095,"y":-10.371428571428572,"z":21.676190476190477,"a95":3.7,"info":"\"14-09-17\" at \"10:34\""},{"visible":true,"include":false,"step":"320","x":-22.666666666666668,"y":4.847619047619047,"z":19.304761904761904,"a95":4.7,"info":"\"14-09-17\" at \"13:41\""},{"visible":true,"include":false,"step":"340","x":-13.047619047619047,"y":-5.561904761904762,"z":24.638095238095236,"a95":4.5,"info":"\"14-09-17\" at \"16:57\""},{"visible":true,"include":false,"step":"370","x":-16.866666666666667,"y":0.7047619047619048,"z":-0.49523809523809526,"a95":6.3,"info":"\"14-09-17\" at \"22:07\""},{"visible":true,"include":false,"step":"390","x":-6.352380952380953,"y":1.0571428571428572,"z":12.142857142857142,"a95":23.6,"info":"\"14-09-18\" at \"11:18\""},{"visible":true,"include":false,"step":"420","x":-30.05714285714286,"y":-12.380952380952381,"z":-1.657142857142857,"a95":5.3,"info":"\"14-09-18\" at \"14:21\""}]},{"version":"v1.1.0","exported":"2016-11-23T21:52:54.860Z","volume":10.5,"added":"2016-11-23T21:44:26.267Z","format":"Utrecht","demagType":"Unknown","strat":"1","patch":1.1,"GEO":[{"dec":333.20615582756534,"inc":61.343177605556946,"MAD":4.277788713005601,"cm":[-7.993605777301127e-15,-7.327471962526033e-15,0],"intensity":364.14667093097717,"type":"dir","forced":true,"remark":"","origin":false,"nSteps":9,"minStep":"4.0","maxStep":"40.0","steps":["4.0","8.0","12.0","16.0","20.0","25.0","30.0","35.0","40.0"],"group":"None","version":"v1.1.0"}],"TECT":[{"dec":349.93975878094534,"inc":43.15194724804965,"MAD":4.277788713005616,"cm":[-1.1546319456101628e-14,-3.164135620181696e-14,2.6645352591003757e-15],"intensity":364.14667093097717,"type":"dir","forced":true,"remark":"","origin":false,"nSteps":9,"minStep":"4.0","maxStep":"40.0","steps":["4.0","8.0","12.0","16.0","20.0","25.0","30.0","35.0","40.0"],"group":"None","version":"v1.1.0"}],"interpreted":true,"name":"ER1.15A","coreAzi":30,"coreDip":44,"bedStrike":287,"bedDip":22,"data":[{"visible":false,"include":false,"step":"0.0","x":-127.45714285714286,"y":-75.59809523809524,"z":206.7904761904762,"a95":0.99,"info":"25/08/2014 at 11:46:22"},{"visible":true,"include":true,"step":"4.0","x":-108.20952380952382,"y":-93.44190476190477,"z":189.1904761904762,"a95":0.99,"info":"25/08/2014 at 11:46:22"},{"visible":true,"include":true,"step":"8.0","x":-103.28571428571429,"y":-89.27142857142857,"z":162.83809523809524,"a95":0.99,"info":"25/08/2014 at 11:46:22"},{"visible":true,"include":true,"step":"12.0","x":-95.24761904761905,"y":-73.02285714285715,"z":152.35238095238097,"a95":0.99,"info":"25/08/2014 at 11:46:22"},{"visible":true,"include":true,"step":"16.0","x":-91.47809523809524,"y":-68.95333333333333,"z":133.74285714285713,"a95":0.99,"info":"25/08/2014 at 11:46:22"},{"visible":true,"include":true,"step":"20.0","x":-89.87333333333333,"y":-78.51142857142857,"z":143.4952380952381,"a95":0.99,"info":"25/08/2014 at 11:46:22"},{"visible":true,"include":true,"step":"25.0","x":-60.73047619047619,"y":-68.46285714285715,"z":146.3904761904762,"a95":0.99,"info":"25/08/2014 at 11:46:22"},{"visible":true,"include":true,"step":"30.0","x":-61.417142857142856,"y":-54.30190476190476,"z":118.48571428571428,"a95":0.99,"info":"25/08/2014 at 11:46:22"},{"visible":true,"include":true,"step":"35.0","x":-38.51714285714286,"y":-61.31904761904762,"z":118.61904761904762,"a95":0.99,"info":"25/08/2014 at 11:46:22"},{"visible":true,"include":true,"step":"40.0","x":-50.93714285714286,"y":-48.44571428571429,"z":106.0095238095238,"a95":0.99,"info":"25/08/2014 at 11:46:22"},{"visible":true,"include":false,"step":"45.0","x":-41.27333333333333,"y":-32.72571428571429,"z":114.39047619047618,"a95":0.99,"info":"25/08/2014 at 11:46:22"},{"visible":true,"include":false,"step":"50.0","x":-44.875238095238096,"y":-51.24952380952381,"z":86.76,"a95":0.99,"info":"25/08/2014 at 11:46:22"},{"visible":true,"include":false,"step":"60.0","x":-57.74380952380952,"y":-53.011428571428574,"z":78.25619047619048,"a95":0.99,"info":"25/08/2014 at 11:46:22"},{"visible":true,"include":false,"step":"70.0","x":-36.735238095238095,"y":-26.51238095238095,"z":73.42190476190476,"a95":0.99,"info":"25/08/2014 at 11:46:22"},{"visible":true,"include":false,"step":"80.0","x":-78.91333333333334,"y":-30.606666666666666,"z":46.11238095238095,"a95":0.99,"info":"25/08/2014 at 11:46:22"},{"visible":true,"include":false,"step":"90.0","x":-52.49714285714286,"y":-23.517142857142858,"z":54.70285714285714,"a95":0.99,"info":"25/08/2014 at 11:46:22"},{"visible":true,"include":false,"step":"100.0","x":-39.343809523809526,"y":-12.205714285714285,"z":48.66952380952381,"a95":0.99,"info":"25/08/2014 at 11:46:22"}]},{"version":"v1.1.0","exported":"2016-11-23T21:52:54.860Z","volume":10.5,"added":"2016-11-23T21:44:26.267Z","format":"Utrecht","demagType":"Unknown","strat":null,"patch":1.1,"GEO":[{"dec":339.7956659750404,"inc":56.37590448155431,"MAD":3.258383501854678,"cm":[-1.0658141036401503e-14,1.5987211554602254e-14,0],"intensity":914.8345426156642,"type":"dir","forced":true,"remark":"","origin":false,"nSteps":3,"minStep":"100","maxStep":"180","steps":["100","150","180"],"group":"None","version":"v1.1.0"}],"TECT":[{"dec":352.086123376372,"inc":37.361098495247916,"MAD":3.258383501854699,"cm":[0,5.1736392947532295e-14,7.105427357601002e-15],"intensity":914.8345426156641,"type":"dir","forced":true,"remark":"","origin":false,"nSteps":3,"minStep":"100","maxStep":"180","steps":["100","150","180"],"group":"None","version":"v1.1.0"}],"interpreted":true,"name":"ER1.16A","coreAzi":19,"coreDip":39,"bedStrike":287,"bedDip":22,"data":[{"visible":false,"include":false,"step":"20","x":-333.7142857142857,"y":-260.76190476190476,"z":840,"a95":3.2,"info":"\"14-09-15\" at \"15:36\""},{"visible":true,"include":true,"step":"100","x":-248.95238095238096,"y":-220.47619047619048,"z":559.6190476190476,"a95":2.8,"info":"\"14-09-15\" at \"19:35\""},{"visible":true,"include":true,"step":"150","x":-121.52380952380952,"y":-156.47619047619048,"z":298.85714285714283,"a95":2.8,"info":"\"14-09-15\" at \"21:48\""},{"visible":true,"include":true,"step":"180","x":-108.28571428571429,"y":-67.52380952380952,"z":231.8095238095238,"a95":2.7,"info":"\"14-09-16\" at \"10:46\""},{"visible":true,"include":false,"step":"210","x":-52.60952380952381,"y":42.50476190476191,"z":59.99047619047619,"a95":3.6,"info":"\"14-09-16\" at \"13:27\""},{"visible":true,"include":false,"step":"240","x":-19.123809523809523,"y":-73.26666666666667,"z":57.44761904761905,"a95":2.9,"info":"\"14-09-16\" at \"16:07\""},{"visible":true,"include":false,"step":"270","x":-89.42857142857143,"y":-46.95238095238095,"z":38.95238095238095,"a95":3.3,"info":"\"14-09-16\" at \"18:59\""},{"visible":true,"include":false,"step":"300","x":-60.285714285714285,"y":-61.42857142857143,"z":44.095238095238095,"a95":2.4,"info":"\"14-09-17\" at \"10:38\""},{"visible":true,"include":false,"step":"320","x":-52.74285714285714,"y":-14.057142857142857,"z":38.39047619047619,"a95":3.6,"info":"\"14-09-17\" at \"13:43\""},{"visible":true,"include":false,"step":"340","x":14.504761904761907,"y":-41.476190476190474,"z":7.152380952380952,"a95":8.1,"info":"\"14-09-17\" at \"16:59\""},{"visible":true,"include":false,"step":"370","x":-30.228571428571428,"y":-7.619047619047619,"z":25.904761904761905,"a95":4.7,"info":"\"14-09-17\" at \"22:09\""},{"visible":true,"include":false,"step":"390","x":-1.6952380952380952,"y":-29.17142857142857,"z":-29.895238095238092,"a95":5.4,"info":"\"14-09-18\" at \"11:20\""},{"visible":true,"include":false,"step":"420","x":-16.45714285714286,"y":-3.2857142857142856,"z":-37.49523809523809,"a95":7.4,"info":"\"14-09-18\" at \"14:23\""}]},{"version":"v1.1.0","exported":"2016-11-23T21:52:54.860Z","volume":10.5,"added":"2016-11-23T21:44:26.267Z","format":"Utrecht","demagType":"Unknown","strat":"2","patch":1.1,"GEO":[{"dec":329.227077395076,"inc":59.02834076841618,"MAD":2.4890383682148296,"cm":[-1.0658141036401503e-14,-1.0658141036401503e-14,0],"intensity":891.6496818269161,"type":"dir","forced":true,"remark":"","origin":false,"nSteps":12,"minStep":"4.0","maxStep":"60.0","steps":["4.0","8.0","12.0","16.0","20.0","25.0","30.0","35.0","40.0","45.0","50.0","60.0"],"group":"None","version":"v1.1.0"}],"TECT":[{"dec":346.3032234054187,"inc":41.71512996786638,"MAD":2.4890383682149055,"cm":[5.329070518200751e-15,5.3512749786932545e-14,5.329070518200751e-15],"intensity":891.6496818269162,"type":"dir","forced":true,"remark":"","origin":false,"nSteps":12,"minStep":"4.0","maxStep":"60.0","steps":["4.0","8.0","12.0","16.0","20.0","25.0","30.0","35.0","40.0","45.0","50.0","60.0"],"group":"None","version":"v1.1.0"}],"interpreted":true,"name":"ER1.16B","coreAzi":19,"coreDip":39,"bedStrike":287,"bedDip":22,"data":[{"visible":false,"include":false,"step":"0.0","x":-308.25714285714287,"y":-216.75238095238097,"z":517.5904761904761,"a95":0.99,"info":"25/08/2014 at 11:46:22"},{"visible":true,"include":true,"step":"4.0","x":-283.3904761904762,"y":-230.53333333333333,"z":484.53333333333336,"a95":0.99,"info":"25/08/2014 at 11:46:22"},{"visible":true,"include":true,"step":"8.0","x":-257.8666666666667,"y":-218.74285714285716,"z":446.18095238095236,"a95":0.99,"info":"25/08/2014 at 11:46:22"},{"visible":true,"include":true,"step":"12.0","x":-233.05714285714285,"y":-229.73333333333332,"z":426.9619047619048,"a95":0.99,"info":"25/08/2014 at 11:46:22"},{"visible":true,"include":true,"step":"16.0","x":-213.67619047619047,"y":-182.2095238095238,"z":406.847619047619,"a95":0.99,"info":"25/08/2014 at 11:46:22"},{"visible":true,"include":true,"step":"20.0","x":-207.54285714285712,"y":-175.8952380952381,"z":359.0190476190476,"a95":0.99,"info":"25/08/2014 at 11:46:22"},{"visible":true,"include":true,"step":"25.0","x":-172.01904761904763,"y":-183.24761904761903,"z":341.15238095238095,"a95":0.99,"info":"25/08/2014 at 11:46:22"},{"visible":true,"include":true,"step":"30.0","x":-180.21904761904761,"y":-148.78095238095239,"z":312.2761904761905,"a95":0.99,"info":"25/08/2014 at 11:46:22"},{"visible":true,"include":true,"step":"35.0","x":-180.8952380952381,"y":-137.6952380952381,"z":280.16190476190474,"a95":0.99,"info":"25/08/2014 at 11:46:22"},{"visible":true,"include":true,"step":"40.0","x":-182.03809523809525,"y":-124.70476190476191,"z":300.8857142857143,"a95":0.99,"info":"25/08/2014 at 11:46:22"},{"visible":true,"include":true,"step":"45.0","x":-139.52380952380952,"y":-152.61904761904762,"z":250.65714285714287,"a95":0.99,"info":"25/08/2014 at 11:46:22"},{"visible":true,"include":true,"step":"50.0","x":-160.15238095238095,"y":-130.2952380952381,"z":241.05714285714285,"a95":0.99,"info":"25/08/2014 at 11:46:22"},{"visible":true,"include":true,"step":"60.0","x":-141.61904761904762,"y":-96.5142857142857,"z":227.8190476190476,"a95":0.99,"info":"25/08/2014 at 11:46:22"},{"visible":true,"include":false,"step":"70.0","x":-106.92380952380952,"y":-90.1152380952381,"z":187.74285714285713,"a95":0.99,"info":"25/08/2014 at 11:46:22"},{"visible":true,"include":false,"step":"80.0","x":-126.72380952380952,"y":-144.21904761904761,"z":185.83809523809524,"a95":0.99,"info":"25/08/2014 at 11:46:22"},{"visible":true,"include":false,"step":"90.0","x":-125.4,"y":-99.61904761904762,"z":169.44761904761904,"a95":0.99,"info":"25/08/2014 at 11:46:22"},{"visible":true,"include":false,"step":"100.0","x":-63.36857142857143,"y":-105.39047619047618,"z":133.24761904761903,"a95":0.99,"info":"25/08/2014 at 11:46:22"}]},{"version":"v1.1.0","exported":"2016-11-23T21:52:54.860Z","volume":10.5,"added":"2016-11-23T21:44:26.267Z","format":"Utrecht","demagType":"Unknown","strat":null,"patch":1.1,"GEO":[{"dec":340.6888847382584,"inc":54.42683673788848,"MAD":5.436358863573044,"cm":[8.881784197001252e-15,1.0658141036401503e-14,0],"intensity":618.7417613643319,"type":"dir","forced":true,"remark":"","origin":false,"nSteps":5,"minStep":"100","maxStep":"240","steps":["100","150","180","210","240"],"group":"None","version":"v1.1.0"}],"TECT":[{"dec":352.0170740525957,"inc":35.34793394380186,"MAD":5.436358863573051,"cm":[-5.329070518200751e-15,-4.440892098500626e-15,3.552713678800501e-15],"intensity":618.7417613643319,"type":"dir","forced":true,"remark":"","origin":false,"nSteps":5,"minStep":"100","maxStep":"240","steps":["100","150","180","210","240"],"group":"None","version":"v1.1.0"}],"interpreted":true,"name":"ER1.16C","coreAzi":19,"coreDip":39,"bedStrike":287,"bedDip":22,"data":[{"visible":false,"include":false,"step":"20","x":-345.9047619047619,"y":-292.57142857142856,"z":786.8571428571429,"a95":2.6,"info":"\"14-11-03\" at \"17:51\""},{"visible":true,"include":true,"step":"100","x":-216.66666666666666,"y":-198.0952380952381,"z":473.6190476190476,"a95":2.7,"info":"\"14-11-03\" at \"22:53\""},{"visible":true,"include":true,"step":"150","x":-46.38095238095238,"y":-99.14285714285714,"z":215.52380952380952,"a95":2.8,"info":"\"14-11-04\" at \"19:48\""},{"visible":true,"include":true,"step":"180","x":-59.23809523809524,"y":-88.28571428571429,"z":204.76190476190476,"a95":2.8,"info":"\"14-11-04\" at \"23:02\""},{"visible":true,"include":true,"step":"210","x":-42,"y":-11.619047619047619,"z":108,"a95":3.4,"info":"\"14-11-05\" at \"18:20\""},{"visible":true,"include":true,"step":"240","x":-5.533333333333333,"y":-27.695238095238096,"z":57.87619047619048,"a95":3.3,"info":"\"14-11-06\" at \"16:06\""},{"visible":true,"include":false,"step":"270","x":-77.31428571428572,"y":8.77142857142857,"z":27.304761904761904,"a95":3.1,"info":"\"14-11-06\" at \"22:16\""},{"visible":true,"include":false,"step":"300","x":-29.35238095238095,"y":-59.95238095238095,"z":37.86666666666667,"a95":2.6,"info":"\"14-11-07\" at \"17:47\""},{"visible":true,"include":false,"step":"320","x":-32.24761904761905,"y":43.17142857142857,"z":51.22857142857143,"a95":3.1,"info":"\"14-11-15\" at \"01:07\""},{"visible":true,"include":false,"step":"340","x":-20.276190476190475,"y":42.18095238095238,"z":60.780952380952385,"a95":3.2,"info":"\"14-11-15\" at \"21:56\""},{"visible":true,"include":false,"step":"360","x":-19.238095238095237,"y":46.98095238095238,"z":58.57142857142857,"a95":2.7,"info":"\"14-11-16\" at \"01:07\""},{"visible":true,"include":false,"step":"380","x":-20.41904761904762,"y":27.866666666666667,"z":6.133333333333334,"a95":5.4,"info":"\"14-11-16\" at \"19:04\""},{"visible":true,"include":false,"step":"400","x":15.00952380952381,"y":60.8,"z":0.9142857142857143,"a95":3.9,"info":"\"14-11-16\" at \"23:07\""}]},{"version":"v1.1.0","exported":"2016-11-23T21:52:54.860Z","volume":10.5,"added":"2016-11-23T21:44:26.267Z","format":"Utrecht","demagType":"Unknown","strat":"3","patch":1.1,"GEO":[{"dec":354.2075683266672,"inc":51.24539736082616,"MAD":2.5429261092697066,"cm":[3.552713678800501e-15,3.019806626980426e-14,0],"intensity":976.1815095058571,"type":"dir","forced":true,"remark":"","origin":false,"nSteps":12,"minStep":"4.0","maxStep":"60.0","steps":["4.0","8.0","12.0","16.0","20.0","25.0","30.0","35.0","40.0","45.0","50.0","60.0"],"group":"None","version":"v1.1.0"}],"TECT":[{"dec":0.6611588203637098,"inc":30.45504260897334,"MAD":2.5429261092698074,"cm":[0,-1.6375789613221059e-15,-3.552713678800501e-15],"intensity":976.1815095058571,"type":"dir","forced":true,"remark":"","origin":false,"nSteps":12,"minStep":"4.0","maxStep":"60.0","steps":["4.0","8.0","12.0","16.0","20.0","25.0","30.0","35.0","40.0","45.0","50.0","60.0"],"group":"None","version":"v1.1.0"}],"interpreted":true,"name":"ER1.17A","coreAzi":34,"coreDip":19,"bedStrike":287,"bedDip":22,"data":[{"visible":false,"include":false,"step":"0.0","x":-405.04761904761904,"y":-216.46666666666667,"z":493.5142857142857,"a95":0.99,"info":"25/08/2014 at 11:46:22"},{"visible":true,"include":true,"step":"4.0","x":-371.9428571428572,"y":-229.40952380952382,"z":459.2190476190476,"a95":0.99,"info":"25/08/2014 at 11:46:22"},{"visible":true,"include":true,"step":"8.0","x":-343.70476190476194,"y":-231.31428571428575,"z":434.12380952380954,"a95":0.99,"info":"25/08/2014 at 11:46:22"},{"visible":true,"include":true,"step":"12.0","x":-304.1047619047619,"y":-222.25714285714284,"z":388.9904761904762,"a95":0.99,"info":"25/08/2014 at 11:46:22"},{"visible":true,"include":true,"step":"16.0","x":-299.0857142857143,"y":-199.30476190476188,"z":369.0190476190476,"a95":0.99,"info":"25/08/2014 at 11:46:22"},{"visible":true,"include":true,"step":"20.0","x":-285.93333333333334,"y":-203.0857142857143,"z":328.29523809523806,"a95":0.99,"info":"25/08/2014 at 11:46:22"},{"visible":true,"include":true,"step":"25.0","x":-272.0952380952381,"y":-187.7904761904762,"z":313.54285714285714,"a95":0.99,"info":"25/08/2014 at 11:46:22"},{"visible":true,"include":true,"step":"30.0","x":-229.67619047619047,"y":-196.68571428571425,"z":323.7238095238095,"a95":0.99,"info":"25/08/2014 at 11:46:22"},{"visible":true,"include":true,"step":"35.0","x":-236.28571428571428,"y":-169.96190476190475,"z":304.8095238095238,"a95":0.99,"info":"25/08/2014 at 11:46:22"},{"visible":true,"include":true,"step":"40.0","x":-233.03809523809525,"y":-159.7904761904762,"z":292.62857142857143,"a95":0.99,"info":"25/08/2014 at 11:46:22"},{"visible":true,"include":true,"step":"45.0","x":-228.7904761904762,"y":-153.04761904761904,"z":265.77142857142854,"a95":0.99,"info":"25/08/2014 at 11:46:22"},{"visible":true,"include":true,"step":"50.0","x":-221.0190476190476,"y":-168.59047619047618,"z":234.1142857142857,"a95":0.99,"info":"25/08/2014 at 11:46:22"},{"visible":true,"include":true,"step":"60.0","x":-225.1047619047619,"y":-129.8095238095238,"z":224.46666666666667,"a95":0.99,"info":"25/08/2014 at 11:46:22"},{"visible":true,"include":false,"step":"70.0","x":-209.28571428571428,"y":-97.39047619047619,"z":244.59047619047618,"a95":0.99,"info":"25/08/2014 at 11:46:22"},{"visible":true,"include":false,"step":"80.0","x":-218,"y":-120.41904761904763,"z":188.48571428571427,"a95":0.99,"info":"25/08/2014 at 11:46:22"},{"visible":true,"include":false,"step":"90.0","x":-171.32380952380953,"y":-129.86666666666665,"z":191.94285714285715,"a95":0.99,"info":"25/08/2014 at 11:46:22"},{"visible":true,"include":false,"step":"100.0","x":-149.66666666666666,"y":-82.97999999999999,"z":175.06666666666666,"a95":0.99,"info":"25/08/2014 at 11:46:22"}]},{"version":"v1.1.0","exported":"2016-11-23T21:52:54.860Z","volume":10.5,"added":"2016-11-23T21:44:26.267Z","format":"Utrecht","demagType":"Unknown","strat":"4","patch":1.1,"GEO":[{"dec":3.077439890971789,"inc":53.10621248938386,"MAD":2.3383947914300753,"cm":[-3.552713678800501e-15,8.604228440844963e-15,0],"intensity":1169.218832346551,"type":"dir","forced":true,"remark":"","origin":false,"nSteps":12,"minStep":"4.0","maxStep":"60.0","steps":["4.0","8.0","12.0","16.0","20.0","25.0","30.0","35.0","40.0","45.0","50.0","60.0"],"group":"None","version":"v1.1.0"}],"TECT":[{"dec":7.241234148194508,"inc":31.549365444088195,"MAD":2.3383947914301664,"cm":[-2.6645352591003757e-14,1.383337888682945e-13,5.329070518200751e-15],"intensity":1169.218832346551,"type":"dir","forced":true,"remark":"","origin":false,"nSteps":12,"minStep":"4.0","maxStep":"60.0","steps":["4.0","8.0","12.0","16.0","20.0","25.0","30.0","35.0","40.0","45.0","50.0","60.0"],"group":"None","version":"v1.1.0"}],"interpreted":true,"name":"ER1.17B","coreAzi":34,"coreDip":19,"bedStrike":287,"bedDip":22,"data":[{"visible":true,"include":false,"step":"0.0","x":-539.5904761904761,"y":-205.61904761904762,"z":659.447619047619,"a95":0.99,"info":"25/08/2014 at 11:46:22"},{"visible":true,"include":true,"step":"4.0","x":-500.552380952381,"y":-223.71428571428572,"z":619.847619047619,"a95":0.99,"info":"25/08/2014 at 11:46:22"},{"visible":true,"include":true,"step":"8.0","x":-434.7142857142857,"y":-214.60000000000002,"z":565.3428571428572,"a95":0.99,"info":"25/08/2014 at 11:46:22"},{"visible":true,"include":true,"step":"12.0","x":-397,"y":-205.15238095238095,"z":508.8952380952381,"a95":0.99,"info":"25/08/2014 at 11:46:22"},{"visible":true,"include":true,"step":"16.0","x":-369.447619047619,"y":-201.37142857142857,"z":462.4380952380953,"a95":0.99,"info":"25/08/2014 at 11:46:22"},{"visible":true,"include":true,"step":"20.0","x":-346.1142857142857,"y":-196.59047619047618,"z":411.152380952381,"a95":0.99,"info":"25/08/2014 at 11:46:22"},{"visible":true,"include":true,"step":"25.0","x":-306.03809523809525,"y":-167.48571428571427,"z":395.5904761904762,"a95":0.99,"info":"25/08/2014 at 11:46:22"},{"visible":true,"include":true,"step":"30.0","x":-308.67619047619047,"y":-146.77142857142857,"z":372.81904761904764,"a95":0.99,"info":"25/08/2014 at 11:46:22"},{"visible":true,"include":true,"step":"35.0","x":-269.2190476190476,"y":-172.4,"z":345.68571428571425,"a95":0.99,"info":"25/08/2014 at 11:46:22"},{"visible":true,"include":true,"step":"40.0","x":-230.37142857142857,"y":-125.36190476190475,"z":359.15238095238095,"a95":0.99,"info":"25/08/2014 at 11:46:22"},{"visible":true,"include":true,"step":"45.0","x":-244.32380952380953,"y":-147.65714285714287,"z":297.1333333333333,"a95":0.99,"info":"25/08/2014 at 11:46:22"},{"visible":true,"include":true,"step":"50.0","x":-214.84761904761905,"y":-127.54285714285714,"z":263.2666666666667,"a95":0.99,"info":"25/08/2014 at 11:46:22"},{"visible":true,"include":true,"step":"60.0","x":-194.1904761904762,"y":-113.68571428571428,"z":257.97142857142853,"a95":0.99,"info":"25/08/2014 at 11:46:22"},{"visible":true,"include":false,"step":"70.0","x":-185.22857142857143,"y":-112.88571428571429,"z":222.49523809523808,"a95":0.99,"info":"25/08/2014 at 11:46:22"},{"visible":true,"include":false,"step":"80.0","x":-190.11428571428573,"y":-129.67619047619047,"z":214.3904761904762,"a95":0.99,"info":"25/08/2014 at 11:46:22"},{"visible":true,"include":false,"step":"90.0","x":-193.9047619047619,"y":-75.2352380952381,"z":206.82857142857142,"a95":0.99,"info":"25/08/2014 at 11:46:22"},{"visible":true,"include":false,"step":"100.0","x":-159.1904761904762,"y":-36.90952380952381,"z":194.51428571428573,"a95":0.99,"info":"25/08/2014 at 11:46:22"}]},{"version":"v1.1.0","exported":"2016-11-23T21:52:54.860Z","volume":10.5,"added":"2016-11-23T21:44:26.267Z","format":"Utrecht","demagType":"Unknown","strat":"5","patch":1.1,"GEO":[{"dec":355.196454385102,"inc":53.84541831106396,"MAD":3.7281387774474997,"cm":[-3.552713678800501e-15,1.4654943925052066e-14,0],"intensity":961.8889812001148,"type":"dir","forced":true,"remark":"","origin":false,"nSteps":13,"minStep":"4.0","maxStep":"70.0","steps":["4.0","8.0","12.0","16.0","20.0","25.0","30.0","35.0","40.0","45.0","50.0","60.0","70.0"],"group":"None","version":"v1.1.0"}],"TECT":[{"dec":1.8683170452922582,"inc":32.91808302862148,"MAD":3.728138777447551,"cm":[-3.552713678800501e-15,2.578492974691926e-14,-2.6645352591003757e-15],"intensity":961.8889812001148,"type":"dir","forced":true,"remark":"","origin":false,"nSteps":13,"minStep":"4.0","maxStep":"70.0","steps":["4.0","8.0","12.0","16.0","20.0","25.0","30.0","35.0","40.0","45.0","50.0","60.0","70.0"],"group":"None","version":"v1.1.0"}],"interpreted":true,"name":"ER1.18A","coreAzi":43,"coreDip":24,"bedStrike":287,"bedDip":22,"data":[{"visible":false,"include":false,"step":"0.0","x":-496.2095238095238,"y":-236.30476190476188,"z":543.5333333333334,"a95":0.99,"info":"25/08/2014 at 11:46:22"},{"visible":true,"include":true,"step":"4.0","x":-449.83809523809526,"y":-266.64761904761906,"z":490.93333333333334,"a95":0.99,"info":"25/08/2014 at 11:46:22"},{"visible":true,"include":true,"step":"8.0","x":-375.70476190476194,"y":-250.1904761904762,"z":446.7904761904762,"a95":0.99,"info":"25/08/2014 at 11:46:22"},{"visible":true,"include":true,"step":"12.0","x":-317.2666666666667,"y":-245.46666666666667,"z":390.1047619047619,"a95":0.99,"info":"25/08/2014 at 11:46:22"},{"visible":true,"include":true,"step":"16.0","x":-286.87619047619046,"y":-219.0095238095238,"z":354.8952380952381,"a95":0.99,"info":"25/08/2014 at 11:46:22"},{"visible":true,"include":true,"step":"20.0","x":-264.50476190476195,"y":-207.8857142857143,"z":311.6380952380952,"a95":0.99,"info":"25/08/2014 at 11:46:22"},{"visible":true,"include":true,"step":"25.0","x":-223.9904761904762,"y":-226.63809523809522,"z":297.0857142857143,"a95":0.99,"info":"25/08/2014 at 11:46:22"},{"visible":true,"include":true,"step":"30.0","x":-196.73333333333332,"y":-166.88571428571427,"z":262.50476190476195,"a95":0.99,"info":"25/08/2014 at 11:46:22"},{"visible":true,"include":true,"step":"35.0","x":-224.05714285714285,"y":-166.32380952380953,"z":246.2952380952381,"a95":0.99,"info":"25/08/2014 at 11:46:22"},{"visible":true,"include":true,"step":"40.0","x":-163.8952380952381,"y":-151.35238095238097,"z":236.2,"a95":0.99,"info":"25/08/2014 at 11:46:22"},{"visible":true,"include":true,"step":"45.0","x":-191.93333333333334,"y":-160.9047619047619,"z":221.9809523809524,"a95":0.99,"info":"25/08/2014 at 11:46:22"},{"visible":true,"include":true,"step":"50.0","x":-161.7238095238095,"y":-181.35238095238097,"z":204.14285714285714,"a95":0.99,"info":"25/08/2014 at 11:46:22"},{"visible":true,"include":true,"step":"60.0","x":-161.24761904761903,"y":-130.2095238095238,"z":187.06666666666666,"a95":0.99,"info":"25/08/2014 at 11:46:22"},{"visible":true,"include":true,"step":"70.0","x":-135.73333333333335,"y":-119.19047619047619,"z":167.44761904761904,"a95":0.99,"info":"25/08/2014 at 11:46:22"},{"visible":true,"include":false,"step":"80.0","x":-179.38095238095238,"y":-141.57142857142858,"z":144.15238095238095,"a95":0.99,"info":"25/08/2014 at 11:46:22"},{"visible":true,"include":false,"step":"90.0","x":-117.41904761904763,"y":-118.22857142857144,"z":120.85714285714286,"a95":0.99,"info":"25/08/2014 at 11:46:22"},{"visible":true,"include":false,"step":"100.0","x":-76.45619047619047,"y":-111.54285714285714,"z":111.23809523809524,"a95":0.99,"info":"25/08/2014 at 11:46:22"}]},{"version":"v1.1.0","exported":"2016-11-23T21:52:54.860Z","volume":10.5,"added":"2016-11-23T21:44:26.268Z","format":"Utrecht","demagType":"Unknown","strat":null,"patch":1.1,"GEO":[{"dec":3.7224593980032523,"inc":56.541167524444006,"MAD":3.2259446440625843,"cm":[-1.7763568394002505e-14,9.325873406851315e-15,0],"intensity":1121.2229353470696,"type":"dir","forced":true,"remark":"","origin":false,"nSteps":4,"minStep":"100","maxStep":"210","steps":["100","150","180","210"],"group":"None","version":"v1.1.0"}],"TECT":[{"dec":8.115628486435128,"inc":34.92607896981299,"MAD":3.225944644062463,"cm":[0,-2.042810365310288e-14,7.105427357601002e-15],"intensity":1121.2229353470698,"type":"dir","forced":true,"remark":"","origin":false,"nSteps":4,"minStep":"100","maxStep":"210","steps":["100","150","180","210"],"group":"None","version":"v1.1.0"}],"interpreted":true,"name":"ER1.18B","coreAzi":43,"coreDip":24,"bedStrike":287,"bedDip":22,"data":[{"visible":false,"include":false,"step":"20","x":-608.0952380952381,"y":-472.1904761904762,"z":802.0952380952381,"a95":2.4,"info":"\"14-09-15\" at \"15:39\""},{"visible":true,"include":true,"step":"100","x":-545.5238095238095,"y":-316.2857142857143,"z":691.7142857142857,"a95":2.7,"info":"\"14-09-15\" at \"19:37\""},{"visible":true,"include":true,"step":"150","x":-318.4761904761905,"y":-213.04761904761904,"z":399.14285714285717,"a95":2.6,"info":"\"14-09-15\" at \"21:50\""},{"visible":true,"include":true,"step":"180","x":-198.85714285714286,"y":-131.71428571428572,"z":216.47619047619048,"a95":2.6,"info":"\"14-09-16\" at \"10:48\""},{"visible":true,"include":true,"step":"210","x":-138.57142857142858,"y":-22.19047619047619,"z":129.61904761904762,"a95":3,"info":"\"14-09-16\" at \"13:29\""},{"visible":true,"include":false,"step":"240","x":-121.71428571428571,"y":-36.095238095238095,"z":90.19047619047619,"a95":2.6,"info":"\"14-09-16\" at \"16:09\""},{"visible":true,"include":false,"step":"270","x":-91.33333333333333,"y":-64.0952380952381,"z":96.57142857142857,"a95":2.7,"info":"\"14-09-16\" at \"19:02\""},{"visible":true,"include":false,"step":"300","x":-15.22857142857143,"y":-57.23809523809524,"z":36.41904761904762,"a95":3.3,"info":"\"14-09-17\" at \"10:40\""},{"visible":true,"include":false,"step":"320","x":-66.57142857142857,"y":-49.42857142857143,"z":114,"a95":3.5,"info":"\"14-09-17\" at \"14:15\""},{"visible":true,"include":false,"step":"340","x":-77.52380952380952,"y":-61.142857142857146,"z":-22.476190476190474,"a95":2.7,"info":"\"14-09-17\" at \"17:02\""},{"visible":true,"include":false,"step":"370","x":-45.87619047619047,"y":-52.95238095238095,"z":-10.504761904761905,"a95":4,"info":"\"14-09-17\" at \"22:11\""},{"visible":true,"include":false,"step":"390","x":-95.23809523809524,"y":2.5714285714285716,"z":14.761904761904763,"a95":3.8,"info":"\"14-09-18\" at \"11:22\""},{"visible":true,"include":false,"step":"420","x":-54.266666666666666,"y":-7.171428571428571,"z":34.25714285714285,"a95":5.4,"info":"\"14-09-18\" at \"14:25\""}]}]
