# Supplementary material for: Paleomagnetic constraints on the timing and distribution of Cenozoic rotations in Central and Eastern Anatolia
Source: Copernicus journal article supplement (doi:10.5194/se-9-295-2018), 2018-03-21
Supplement: Supplementary file 2 [file se-9-295-2018-supplement.zip › se-2017-66_DATA_dir files/dir files Ulukisla/ER2.dir]

[{"version":"v1.1.0","exported":"2016-11-23T21:41:57.092Z","volume":10.5,"added":"2016-11-23T21:35:36.445Z","format":"Utrecht","demagType":"Unknown","strat":"5","patch":1.1,"GEO":[{"dec":6.414490886388023,"inc":50.82221416725534,"MAD":2.3196482162436696,"cm":[-1.7763568394002505e-15,2.842170943040401e-14,0],"intensity":1046.8113709928398,"type":"dir","forced":true,"remark":"","origin":false,"nSteps":12,"minStep":"10.0","maxStep":"60.0","steps":["10.0","15.0","20.0","23.0","25.0","30.0","33.0","35.0","40.0","45.0","50.0","60.0"],"group":"None","version":"v1.1.0"}],"TECT":[{"dec":18.29462225453716,"inc":49.35774712494543,"MAD":2.3196482162437575,"cm":[8.881784197001252e-15,8.881784197001252e-16,3.552713678800501e-15],"intensity":1046.81137099284,"type":"dir","forced":true,"remark":"","origin":false,"nSteps":12,"minStep":"10.0","maxStep":"60.0","steps":["10.0","15.0","20.0","23.0","25.0","30.0","33.0","35.0","40.0","45.0","50.0","60.0"],"group":"None","version":"v1.1.0"}],"interpreted":true,"name":"ER2.3A","coreAzi":132,"coreDip":52,"bedStrike":4,"bedDip":10,"data":[{"visible":false,"include":false,"step":"0.0","x":-599.047619047619,"y":-359.83809523809526,"z":336.95238095238096,"a95":0.99,"info":"26/11/2014 at 07:38:11"},{"visible":true,"include":true,"step":"10.0","x":-539.2285714285714,"y":-328.57142857142856,"z":269.87619047619046,"a95":0.99,"info":"26/11/2014 at 07:38:11"},{"visible":true,"include":true,"step":"15.0","x":-500.4380952380953,"y":-334.1047619047619,"z":241.73333333333332,"a95":0.99,"info":"26/11/2014 at 07:38:11"},{"visible":true,"include":true,"step":"20.0","x":-463.6952380952381,"y":-294.68571428571425,"z":232.0190476190476,"a95":0.99,"info":"26/11/2014 at 07:38:11"},{"visible":true,"include":true,"step":"23.0","x":-432.1714285714286,"y":-294.9047619047619,"z":234.28571428571428,"a95":0.99,"info":"26/11/2014 at 07:38:11"},{"visible":true,"include":true,"step":"25.0","x":-413.5238095238095,"y":-285.2761904761905,"z":175.52380952380952,"a95":0.99,"info":"26/11/2014 at 07:38:11"},{"visible":true,"include":true,"step":"30.0","x":-375.9809523809524,"y":-251.9904761904762,"z":209.9238095238095,"a95":0.99,"info":"26/11/2014 at 07:38:11"},{"visible":true,"include":true,"step":"33.0","x":-361.7904761904762,"y":-269.54285714285714,"z":188.51428571428573,"a95":0.99,"info":"26/11/2014 at 07:38:11"},{"visible":true,"include":true,"step":"35.0","x":-373.6952380952381,"y":-256.9809523809524,"z":184.37142857142857,"a95":0.99,"info":"26/11/2014 at 07:38:11"},{"visible":true,"include":true,"step":"40.0","x":-333.51428571428573,"y":-219.66666666666666,"z":181.38095238095238,"a95":0.99,"info":"26/11/2014 at 07:38:11"},{"visible":true,"include":true,"step":"45.0","x":-302.1714285714286,"y":-222.37142857142857,"z":174.37142857142857,"a95":0.99,"info":"26/11/2014 at 07:38:11"},{"visible":true,"include":true,"step":"50.0","x":-317.22857142857146,"y":-216.55238095238096,"z":121,"a95":0.99,"info":"26/11/2014 at 07:38:11"},{"visible":true,"include":true,"step":"60.0","x":-275.752380952381,"y":-185.59047619047618,"z":139.0952380952381,"a95":0.99,"info":"26/11/2014 at 07:38:11"},{"visible":true,"include":false,"step":"70.0","x":-207.0761904761905,"y":-169.74285714285713,"z":140.83809523809524,"a95":0.99,"info":"26/11/2014 at 07:38:11"},{"visible":true,"include":false,"step":"80.0","x":-218.34285714285713,"y":-174.8,"z":125.27619047619048,"a95":0.99,"info":"26/11/2014 at 07:38:11"},{"visible":true,"include":false,"step":"90.0","x":-207.85714285714286,"y":-156.9714285714286,"z":95.47619047619048,"a95":0.99,"info":"26/11/2014 at 07:38:11"}]},{"version":"v1.1.0","exported":"2016-11-23T21:41:57.092Z","volume":10.5,"added":"2016-11-23T21:35:36.446Z","format":"Utrecht","demagType":"Unknown","strat":null,"patch":1.1,"GEO":[{"dec":358.76539158753957,"inc":52.4978227809356,"MAD":5.511565401006973,"cm":[159.89714441829156,-15.125275375189542,286.5466051379771],"intensity":366.99628968695436,"type":"dir","forced":false,"remark":"","origin":false,"nSteps":4,"minStep":"100","maxStep":"210","steps":["100","150","180","210"],"group":"None","version":"v1.1.0"}],"TECT":[{"dec":11.801422045016977,"inc":52.27181388318844,"MAD":5.511565401006965,"cm":[156.39837069611593,34.90951993339843,286.75024450908325],"intensity":366.9962896869543,"type":"dir","forced":false,"remark":"","origin":false,"nSteps":4,"minStep":"100","maxStep":"210","steps":["100","150","180","210"],"group":"None","version":"v1.1.0"}],"interpreted":true,"name":"ER2.4A","coreAzi":115,"coreDip":45,"bedStrike":4,"bedDip":10,"data":[{"visible":false,"include":false,"step":"20","x":-643.1428571428571,"y":-477.7142857142857,"z":292.85714285714283,"a95":1.9,"info":"\"14-11-03\" at \"17:54\""},{"visible":true,"include":true,"step":"100","x":-409.9047619047619,"y":-234.0952380952381,"z":223.52380952380952,"a95":2,"info":"\"14-11-03\" at \"22:56\""},{"visible":true,"include":true,"step":"150","x":-294.3809523809524,"y":-182.38095238095238,"z":152.47619047619048,"a95":2.1,"info":"\"14-11-04\" at \"19:50\""},{"visible":true,"include":true,"step":"180","x":-201.23809523809524,"y":-101.9047619047619,"z":121.33333333333333,"a95":4.4,"info":"\"14-11-04\" at \"23:05\""},{"visible":true,"include":true,"step":"210","x":-134.85714285714286,"y":-35.714285714285715,"z":83.23809523809524,"a95":2.6,"info":"\"14-11-05\" at \"18:22\""},{"visible":false,"include":false,"step":"240","x":-82.85714285714286,"y":8.476190476190476,"z":46.476190476190474,"a95":2.8,"info":"\"14-11-06\" at \"16:09\""},{"visible":false,"include":false,"step":"270","x":-43.97142857142857,"y":-12.980952380952383,"z":49.590476190476195,"a95":3.8,"info":"\"14-11-06\" at \"22:18\""},{"visible":false,"include":false,"step":"300","x":-24.247619047619047,"y":-22.16190476190476,"z":28.066666666666666,"a95":5.3,"info":"\"14-11-07\" at \"17:49\""},{"visible":false,"include":false,"step":"320","x":-39.476190476190474,"y":-10.628571428571428,"z":9.685714285714287,"a95":4.9,"info":"\"14-11-15\" at \"01:09\""},{"visible":false,"include":false,"step":"340","x":-48.7047619047619,"y":27.152380952380955,"z":22.02857142857143,"a95":3.6,"info":"\"14-11-15\" at \"21:59\""},{"visible":false,"include":false,"step":"360","x":-45.857142857142854,"y":22.371428571428574,"z":17.876190476190477,"a95":3.3,"info":"\"14-11-16\" at \"01:10\""},{"visible":false,"include":false,"step":"380","x":-33.076190476190476,"y":-2.657142857142857,"z":-20.857142857142858,"a95":4.2,"info":"\"14-11-16\" at \"19:06\""},{"visible":false,"include":false,"step":"400","x":-59.67619047619048,"y":26.40952380952381,"z":26.552380952380954,"a95":4.1,"info":"\"14-11-16\" at \"23:10\""}]},{"version":"v1.1.0","exported":"2016-11-23T21:41:57.092Z","volume":10.5,"added":"2016-11-23T21:35:36.447Z","format":"Utrecht","demagType":"Unknown","strat":null,"patch":1.1,"GEO":[],"TECT":[],"interpreted":false,"name":"ER2.6A","coreAzi":150,"coreDip":62,"bedStrike":4,"bedDip":10,"data":[{"visible":false,"include":false,"step":"20","x":-667.6190476190476,"y":-209.71428571428572,"z":486.3809523809524,"a95":2.1,"info":"\"14-11-03\" at \"17:57\""},{"visible":true,"include":true,"step":"100","x":-340.6666666666667,"y":-102.28571428571429,"z":220.85714285714286,"a95":2.2,"info":"\"14-11-03\" at \"22:59\""},{"visible":true,"include":true,"step":"150","x":-218.47619047619048,"y":-47.523809523809526,"z":140.95238095238096,"a95":2.2,"info":"\"14-11-04\" at \"19:53\""},{"visible":true,"include":true,"step":"180","x":-208.0952380952381,"y":-11.714285714285714,"z":120.47619047619048,"a95":2.3,"info":"\"14-11-04\" at \"23:07\""},{"visible":true,"include":true,"step":"210","x":-86.76190476190476,"y":-51.142857142857146,"z":100.85714285714286,"a95":3.1,"info":"\"14-11-05\" at \"18:24\""},{"visible":false,"include":false,"step":"240","x":-8.276190476190477,"y":-10.676190476190476,"z":79.8,"a95":3.8,"info":"\"14-11-06\" at \"16:12\""},{"visible":false,"include":false,"step":"270","x":-23.904761904761905,"y":-13.619047619047619,"z":114.28571428571429,"a95":3.2,"info":"\"14-11-06\" at \"22:20\""},{"visible":false,"include":false,"step":"300","x":17.628571428571426,"y":15.104761904761904,"z":49.19047619047619,"a95":4.4,"info":"\"14-11-07\" at \"17:52\""},{"visible":false,"include":false,"step":"320","x":-24.076190476190476,"y":-38.34285714285714,"z":52.06666666666667,"a95":2.8,"info":"\"14-11-15\" at \"01:12\""},{"visible":false,"include":false,"step":"340","x":-46.542857142857144,"y":3.2285714285714286,"z":11.895238095238096,"a95":4.9,"info":"\"14-11-15\" at \"22:01\""},{"visible":false,"include":false,"step":"360","x":-49.476190476190474,"y":-5.228571428571429,"z":6.742857142857143,"a95":4.1,"info":"\"14-11-16\" at \"01:12\""},{"visible":false,"include":false,"step":"380","x":-25.114285714285714,"y":-5.733333333333333,"z":16.133333333333333,"a95":6.7,"info":"\"14-11-16\" at \"19:09\""},{"visible":false,"include":false,"step":"400","x":29.095238095238095,"y":-2.019047619047619,"z":38.58095238095238,"a95":4.1,"info":"\"14-11-16\" at \"23:12\""}]},{"version":"v1.1.0","exported":"2016-11-23T21:41:57.092Z","volume":10.5,"added":"2016-11-23T21:35:36.447Z","format":"Utrecht","demagType":"Unknown","strat":"1","patch":1.1,"GEO":[{"dec":355.93238530905285,"inc":51.37767800648517,"MAD":3.0327953526202984,"cm":[-1.7763568394002505e-15,-1.509903313490213e-14,0],"intensity":820.7268250026385,"type":"dir","forced":true,"remark":"","origin":false,"nSteps":11,"minStep":"4.0","maxStep":"50.0","steps":["4.0","8.0","12.0","16.0","20.0","25.0","30.0","35.0","40.0","45.0","50.0"],"group":"None","version":"v1.1.0"}],"TECT":[{"dec":8.570116044745134,"inc":51.68549128336311,"MAD":3.0327953526202927,"cm":[0,-1.1934897514720433e-14,-3.552713678800501e-15],"intensity":820.7268250026386,"type":"dir","forced":true,"remark":"","origin":false,"nSteps":11,"minStep":"4.0","maxStep":"50.0","steps":["4.0","8.0","12.0","16.0","20.0","25.0","30.0","35.0","40.0","45.0","50.0"],"group":"None","version":"v1.1.0"}],"interpreted":true,"name":"ER2.6B","coreAzi":150,"coreDip":62,"bedStrike":4,"bedDip":10,"data":[{"visible":false,"include":false,"step":"0.0","x":-555.495238095238,"y":-169.41904761904763,"z":299.22857142857146,"a95":0.99,"info":"26/10/2014 at 07:43:38"},{"visible":true,"include":true,"step":"4.0","x":-511.9428571428571,"y":-170.32380952380953,"z":268.5333333333333,"a95":0.99,"info":"26/10/2014 at 07:43:38"},{"visible":true,"include":true,"step":"8.0","x":-474.4190476190476,"y":-147.66666666666666,"z":236.60000000000002,"a95":0.99,"info":"26/10/2014 at 07:43:38"},{"visible":true,"include":true,"step":"12.0","x":-411.6380952380952,"y":-139.0857142857143,"z":213.95238095238096,"a95":0.99,"info":"26/10/2014 at 07:43:38"},{"visible":true,"include":true,"step":"16.0","x":-374.77142857142854,"y":-115.18095238095239,"z":184.51428571428573,"a95":0.99,"info":"26/10/2014 at 07:43:38"},{"visible":true,"include":true,"step":"20.0","x":-334.8666666666667,"y":-104.79047619047618,"z":177.86666666666665,"a95":0.99,"info":"26/10/2014 at 07:43:38"},{"visible":true,"include":true,"step":"25.0","x":-322.5809523809524,"y":-133.35238095238097,"z":132.7047619047619,"a95":0.99,"info":"26/10/2014 at 07:43:38"},{"visible":true,"include":true,"step":"30.0","x":-254.17142857142858,"y":-60.87238095238095,"z":135.42857142857142,"a95":0.99,"info":"26/10/2014 at 07:43:38"},{"visible":true,"include":true,"step":"35.0","x":-255.51428571428573,"y":-75.28666666666666,"z":101.31428571428572,"a95":0.99,"info":"26/10/2014 at 07:43:38"},{"visible":true,"include":true,"step":"40.0","x":-227.49523809523808,"y":-78.4152380952381,"z":112.96190476190475,"a95":0.99,"info":"26/10/2014 at 07:43:38"},{"visible":true,"include":true,"step":"45.0","x":-211.03809523809525,"y":-35.29904761904762,"z":99.24761904761904,"a95":0.99,"info":"26/10/2014 at 07:43:38"},{"visible":true,"include":true,"step":"50.0","x":-201.24761904761903,"y":-42.94952380952381,"z":77.10571428571428,"a95":0.99,"info":"26/10/2014 at 07:43:38"},{"visible":false,"include":false,"step":"60.0","x":-206.9142857142857,"y":-64.60285714285715,"z":50.3352380952381,"a95":0.99,"info":"26/10/2014 at 07:43:38"},{"visible":false,"include":false,"step":"70.0","x":-135.9047619047619,"y":-75.25523809523808,"z":87.04190476190476,"a95":0.99,"info":"26/10/2014 at 07:43:38"},{"visible":false,"include":false,"step":"80.0","x":-158.58095238095237,"y":-63.74095238095238,"z":64.39619047619047,"a95":0.99,"info":"26/10/2014 at 07:43:38"},{"visible":false,"include":false,"step":"90.0","x":-97.86666666666666,"y":-72.13904761904762,"z":60.22190476190477,"a95":0.99,"info":"26/10/2014 at 07:43:38"},{"visible":false,"include":false,"step":"100.0","x":-88.35904761904762,"y":-52.90571428571428,"z":76.10857142857142,"a95":0.99,"info":"26/10/2014 at 07:43:38"}]},{"version":"v1.1.0","exported":"2016-11-23T21:41:57.092Z","volume":10.5,"added":"2016-11-23T21:35:36.448Z","format":"Utrecht","demagType":"Unknown","strat":null,"patch":1.1,"GEO":[{"dec":349.18157928574215,"inc":51.824211478918684,"MAD":5.608976231336733,"cm":[4.440892098500626e-15,6.661338147750939e-16,0],"intensity":445.27732926194267,"type":"dir","forced":true,"remark":"","origin":false,"nSteps":7,"minStep":"100","maxStep":"320","steps":["100","150","180","210","240","300","320"],"group":"None","version":"v1.1.0"}],"TECT":[{"dec":2.162667082798805,"inc":53.28556346589783,"MAD":5.608976231336701,"cm":[3.552713678800501e-15,-1.637578961322106e-14,-3.9968028886505635e-15],"intensity":445.27732926194267,"type":"dir","forced":true,"remark":"","origin":false,"nSteps":7,"minStep":"100","maxStep":"320","steps":["100","150","180","210","240","300","320"],"group":"None","version":"v1.1.0"}],"interpreted":true,"name":"ER2.8A","coreAzi":99,"coreDip":57,"bedStrike":4,"bedDip":10,"data":[{"visible":false,"include":false,"step":"20","x":-408.4761904761905,"y":-414.95238095238096,"z":493.23809523809524,"a95":2.3,"info":"\"14-11-03\" at \"17:58\""},{"visible":true,"include":true,"step":"100","x":-204.28571428571428,"y":-205.23809523809524,"z":210.76190476190476,"a95":3.6,"info":"\"14-11-03\" at \"23:01\""},{"visible":true,"include":true,"step":"150","x":-137.23809523809524,"y":-126,"z":116.28571428571429,"a95":2.2,"info":"\"14-11-04\" at \"19:55\""},{"visible":true,"include":true,"step":"180","x":-138.38095238095238,"y":-111.9047619047619,"z":123.61904761904762,"a95":2.3,"info":"\"14-11-04\" at \"23:09\""},{"visible":true,"include":true,"step":"210","x":-113.23809523809524,"y":-97.71428571428571,"z":94.19047619047619,"a95":2.5,"info":"\"14-11-05\" at \"18:26\""},{"visible":true,"include":true,"step":"240","x":-88.76190476190476,"y":-85.14285714285714,"z":47.04761904761905,"a95":2.3,"info":"\"14-11-06\" at \"16:14\""},{"visible":false,"include":false,"step":"270","x":-87.80952380952381,"y":-51.04761904761905,"z":82.38095238095238,"a95":2.9,"info":"\"14-11-06\" at \"22:22\""},{"visible":true,"include":true,"step":"300","x":-58.38095238095238,"y":-84.57142857142857,"z":47.04761904761905,"a95":2.7,"info":"\"14-11-07\" at \"17:54\""},{"visible":true,"include":true,"step":"320","x":-49.714285714285715,"y":-68.77142857142857,"z":31.466666666666665,"a95":2.4,"info":"\"14-11-15\" at \"01:15\""},{"visible":false,"include":false,"step":"340","x":-69.80952380952381,"y":-90,"z":35.333333333333336,"a95":2.5,"info":"\"14-11-15\" at \"22:03\""},{"visible":false,"include":false,"step":"360","x":-75.52380952380952,"y":-85.33333333333333,"z":37.523809523809526,"a95":2.3,"info":"\"14-11-16\" at \"01:14\""},{"visible":false,"include":false,"step":"380","x":-45.99047619047619,"y":-6.942857142857143,"z":17.35238095238095,"a95":4.2,"info":"\"14-11-16\" at \"19:13\""},{"visible":false,"include":false,"step":"400","x":-14.247619047619047,"y":-8.58095238095238,"z":7.733333333333333,"a95":12.1,"info":"\"14-11-16\" at \"23:14\""}]},{"version":"v1.1.0","exported":"2016-11-23T21:41:57.092Z","volume":10.5,"added":"2016-11-23T21:35:36.449Z","format":"Utrecht","demagType":"Unknown","strat":"2","patch":1.1,"GEO":[{"dec":0.07981134733375939,"inc":53.736232271964965,"MAD":2.1186750497084303,"cm":[0,-1.7985612998927536e-14,0],"intensity":1000.8237690306365,"type":"dir","forced":true,"remark":"","origin":false,"nSteps":12,"minStep":"4.0","maxStep":"60.0","steps":["4.0","8.0","12.0","16.0","20.0","25.0","30.0","35.0","40.0","45.0","50.0","60.0"],"group":"None","version":"v1.1.0"}],"TECT":[{"dec":13.635570126564062,"inc":53.23289393150827,"MAD":2.1186750497085365,"cm":[7.105427357601002e-15,-3.108624468950438e-14,-5.329070518200751e-15],"intensity":1000.8237690306366,"type":"dir","forced":true,"remark":"","origin":false,"nSteps":12,"minStep":"4.0","maxStep":"60.0","steps":["4.0","8.0","12.0","16.0","20.0","25.0","30.0","35.0","40.0","45.0","50.0","60.0"],"group":"None","version":"v1.1.0"}],"interpreted":true,"name":"ER2.9B","coreAzi":121,"coreDip":35,"bedStrike":4,"bedDip":10,"data":[{"visible":false,"include":false,"step":"0.0","x":-632.7428571428571,"y":-359.6,"z":133.4952380952381,"a95":0.99,"info":"26/10/2014 at 07:43:38"},{"visible":true,"include":true,"step":"4.0","x":-609.047619047619,"y":-361.42857142857144,"z":150.1809523809524,"a95":0.99,"info":"26/10/2014 at 07:43:38"},{"visible":true,"include":true,"step":"8.0","x":-564.0952380952381,"y":-330.96190476190475,"z":156.40952380952382,"a95":0.99,"info":"26/10/2014 at 07:43:38"},{"visible":true,"include":true,"step":"12.0","x":-501.5142857142857,"y":-296.8952380952381,"z":137.2095238095238,"a95":0.99,"info":"26/10/2014 at 07:43:38"},{"visible":true,"include":true,"step":"16.0","x":-446.0380952380952,"y":-263.5238095238095,"z":117.95238095238095,"a95":0.99,"info":"26/10/2014 at 07:43:38"},{"visible":true,"include":true,"step":"20.0","x":-412.12380952380954,"y":-257.64761904761906,"z":110.21904761904761,"a95":0.99,"info":"26/10/2014 at 07:43:38"},{"visible":true,"include":true,"step":"25.0","x":-388.8952380952381,"y":-217.8095238095238,"z":87.68761904761905,"a95":0.99,"info":"26/10/2014 at 07:43:38"},{"visible":true,"include":true,"step":"30.0","x":-339.0095238095238,"y":-206.66666666666666,"z":81.54476190476191,"a95":0.99,"info":"26/10/2014 at 07:43:38"},{"visible":true,"include":true,"step":"35.0","x":-312.49523809523805,"y":-216.74285714285716,"z":71.66666666666667,"a95":0.99,"info":"26/10/2014 at 07:43:38"},{"visible":true,"include":true,"step":"40.0","x":-282.7809523809524,"y":-194.05714285714285,"z":89.88666666666666,"a95":0.99,"info":"26/10/2014 at 07:43:38"},{"visible":true,"include":true,"step":"45.0","x":-291.22857142857146,"y":-180.11428571428573,"z":57.75428571428571,"a95":0.99,"info":"26/10/2014 at 07:43:38"},{"visible":true,"include":true,"step":"50.0","x":-279.2190476190476,"y":-164.64761904761903,"z":52.18857142857143,"a95":0.99,"info":"26/10/2014 at 07:43:38"},{"visible":true,"include":true,"step":"60.0","x":-213.65714285714287,"y":-166.74285714285713,"z":63.921904761904756,"a95":0.99,"info":"26/10/2014 at 07:43:38"},{"visible":true,"include":false,"step":"70.0","x":-181.17142857142858,"y":-142.3904761904762,"z":15.167619047619047,"a95":0.99,"info":"26/10/2014 at 07:43:38"},{"visible":true,"include":false,"step":"80.0","x":-171.76190476190476,"y":-131.2095238095238,"z":34.14190476190476,"a95":0.99,"info":"26/10/2014 at 07:43:38"},{"visible":false,"include":false,"step":"90.0","x":-115.85714285714286,"y":-125.46666666666667,"z":49.41238095238096,"a95":0.99,"info":"26/10/2014 at 07:43:38"},{"visible":false,"include":false,"step":"100.0","x":-140.82857142857142,"y":-61.471428571428575,"z":30.666666666666668,"a95":0.99,"info":"26/10/2014 at 07:43:38"}]},{"version":"v1.1.0","exported":"2016-11-23T21:41:57.092Z","volume":10.5,"added":"2016-11-23T21:35:36.449Z","format":"Utrecht","demagType":"Unknown","strat":null,"patch":1.1,"GEO":[{"dec":347.9596109458807,"inc":57.59003645101528,"MAD":11.660756269049434,"cm":[7.993605777301127e-15,4.884981308350689e-15,0],"intensity":493.4254740208479,"type":"dir","forced":true,"remark":"","origin":false,"nSteps":7,"minStep":"100","maxStep":"300","steps":["100","150","180","210","240","270","300"],"group":"None","version":"v1.1.0"}],"TECT":[{"dec":4.083674582426113,"inc":58.99538041229189,"MAD":11.660756269049426,"cm":[6.217248937900877e-15,9.769962616701378e-15,-2.220446049250313e-15],"intensity":493.4254740208479,"type":"dir","forced":true,"remark":"","origin":false,"nSteps":7,"minStep":"100","maxStep":"300","steps":["100","150","180","210","240","270","300"],"group":"None","version":"v1.1.0"}],"interpreted":true,"name":"ER2.10A","coreAzi":106,"coreDip":31,"bedStrike":4,"bedDip":10,"data":[{"visible":false,"include":false,"step":"20","x":-723.4285714285714,"y":-542.3809523809524,"z":184.28571428571428,"a95":1.6,"info":"\"14-11-03\" at \"18:01\""},{"visible":true,"include":true,"step":"100","x":-338.95238095238096,"y":-216.38095238095238,"z":110.95238095238095,"a95":2.1,"info":"\"14-11-03\" at \"23:05\""},{"visible":true,"include":true,"step":"150","x":-182.1904761904762,"y":-70.28571428571429,"z":44.57142857142857,"a95":1.9,"info":"\"14-11-04\" at \"19:57\""},{"visible":true,"include":true,"step":"180","x":-190.85714285714286,"y":-69.14285714285714,"z":77.42857142857143,"a95":2.1,"info":"\"14-11-04\" at \"23:12\""},{"visible":true,"include":true,"step":"210","x":-135.23809523809524,"y":-84.57142857142857,"z":-18.571428571428573,"a95":2.3,"info":"\"14-11-05\" at \"18:28\""},{"visible":true,"include":true,"step":"240","x":-83.42857142857143,"y":-37.142857142857146,"z":31.523809523809526,"a95":2.7,"info":"\"14-11-06\" at \"16:16\""},{"visible":true,"include":true,"step":"270","x":-82.0952380952381,"y":-47.142857142857146,"z":-25.428571428571427,"a95":2.9,"info":"\"14-11-06\" at \"22:24\""},{"visible":true,"include":true,"step":"300","x":-67.52380952380952,"y":-55.04761904761905,"z":-43.333333333333336,"a95":2.8,"info":"\"14-11-07\" at \"17:56\""},{"visible":true,"include":false,"step":"320","x":-82.4095238095238,"y":-0.7714285714285714,"z":-4.438095238095238,"a95":2.6,"info":"\"14-11-15\" at \"01:17\""},{"visible":true,"include":false,"step":"340","x":-59.25714285714286,"y":0.8857142857142858,"z":-31.219047619047622,"a95":3.5,"info":"\"14-11-15\" at \"22:06\""},{"visible":true,"include":false,"step":"360","x":-59.80952380952381,"y":-5.571428571428571,"z":-38.72380952380953,"a95":3.3,"info":"\"14-11-16\" at \"01:16\""},{"visible":true,"include":false,"step":"380","x":-57.12380952380952,"y":19.914285714285715,"z":14.342857142857142,"a95":3.4,"info":"\"14-11-16\" at \"19:15\""},{"visible":true,"include":false,"step":"400","x":-69.44761904761906,"y":4.380952380952381,"z":-31.142857142857142,"a95":2.5,"info":"\"14-11-16\" at \"23:16\""}]},{"version":"v1.1.0","exported":"2016-11-23T21:41:57.092Z","volume":10.5,"added":"2016-11-23T21:35:36.450Z","format":"Utrecht","demagType":"Unknown","strat":null,"patch":1.1,"GEO":[],"TECT":[],"interpreted":false,"name":"ER2.12A","coreAzi":57,"coreDip":15,"bedStrike":4,"bedDip":10,"data":[{"visible":false,"include":false,"step":"20","x":-742.6666666666666,"y":-408,"z":379.8095238095238,"a95":1.8,"info":"\"14-11-03\" at \"18:03\""},{"visible":true,"include":true,"step":"100","x":-375.23809523809524,"y":-156.47619047619048,"z":195.23809523809524,"a95":2.5,"info":"\"14-11-03\" at \"23:07\""},{"visible":true,"include":true,"step":"150","x":-134.66666666666666,"y":-79.9047619047619,"z":68.76190476190476,"a95":2.1,"info":"\"14-11-04\" at \"19:59\""},{"visible":true,"include":true,"step":"180","x":-155.61904761904762,"y":-65.52380952380952,"z":41.61904761904762,"a95":2,"info":"\"14-11-04\" at \"23:14\""},{"visible":true,"include":true,"step":"210","x":-93.42857142857143,"y":-35.904761904761905,"z":35.61904761904762,"a95":2.9,"info":"\"14-11-05\" at \"18:30\""},{"visible":false,"include":false,"step":"240","x":-92.28571428571429,"y":-31.428571428571427,"z":7.809523809523809,"a95":2.3,"info":"\"14-11-06\" at \"16:18\""},{"visible":false,"include":false,"step":"270","x":-69.04761904761905,"y":-3.2285714285714286,"z":2.8285714285714283,"a95":3.5,"info":"\"14-11-06\" at \"22:26\""},{"visible":false,"include":false,"step":"300","x":-89.00952380952381,"y":4.619047619047619,"z":0.9714285714285713,"a95":2.5,"info":"\"14-11-07\" at \"17:59\""},{"visible":false,"include":false,"step":"320","x":-71.58095238095238,"y":-9.847619047619048,"z":-2.5238095238095237,"a95":2.4,"info":"\"14-11-15\" at \"01:20\""},{"visible":false,"include":false,"step":"340","x":-58.69523809523809,"y":-15.666666666666666,"z":-18.333333333333332,"a95":3.1,"info":"\"14-11-15\" at \"22:08\""},{"visible":false,"include":false,"step":"360","x":-67.85714285714286,"y":-11.285714285714286,"z":-24.780952380952378,"a95":3,"info":"\"14-11-16\" at \"01:18\""},{"visible":false,"include":false,"step":"380","x":-34,"y":-2,"z":-22.60952380952381,"a95":3.7,"info":"\"14-11-16\" at \"19:18\""},{"visible":false,"include":false,"step":"400","x":-50.019047619047626,"y":10.41904761904762,"z":-12.095238095238095,"a95":3,"info":"\"14-11-16\" at \"23:19\""}]},{"version":"v1.1.0","exported":"2016-11-23T21:41:57.092Z","volume":10.5,"added":"2016-11-23T21:35:36.452Z","format":"Utrecht","demagType":"Unknown","strat":"3","patch":1.1,"GEO":[{"dec":359.48618958294986,"inc":55.523240842281595,"MAD":2.735599909659301,"cm":[-7.105427357601002e-15,-1.9317880628477724e-14,0],"intensity":1002.3344369254766,"type":"dir","forced":true,"remark":"","origin":false,"nSteps":11,"minStep":"4.0","maxStep":"50.0","steps":["4.0","8.0","12.0","16.0","20.0","25.0","30.0","35.0","40.0","45.0","50.0"],"group":"None","version":"v1.1.0"}],"TECT":[{"dec":13.977451215914527,"inc":55.04157177958324,"MAD":2.735599909659189,"cm":[-5.329070518200751e-15,-2.5757174171303632e-14,1.7763568394002505e-15],"intensity":1002.3344369254766,"type":"dir","forced":true,"remark":"","origin":false,"nSteps":11,"minStep":"4.0","maxStep":"50.0","steps":["4.0","8.0","12.0","16.0","20.0","25.0","30.0","35.0","40.0","45.0","50.0"],"group":"None","version":"v1.1.0"}],"interpreted":true,"name":"ER2.12B","coreAzi":57,"coreDip":15,"bedStrike":4,"bedDip":10,"data":[{"visible":false,"include":false,"step":"0.0","x":-530.3619047619047,"y":-293.3047619047619,"z":340.1142857142857,"a95":0.99,"info":"26/10/2014 at 07:43:38"},{"visible":true,"include":true,"step":"4.0","x":-493.76190476190476,"y":-311.56190476190477,"z":324.50476190476195,"a95":0.99,"info":"26/10/2014 at 07:43:38"},{"visible":true,"include":true,"step":"8.0","x":-455.5809523809524,"y":-293.5904761904762,"z":313.3619047619048,"a95":0.99,"info":"26/10/2014 at 07:43:38"},{"visible":true,"include":true,"step":"12.0","x":-409.5142857142857,"y":-257.95238095238096,"z":321.3047619047619,"a95":0.99,"info":"26/10/2014 at 07:43:38"},{"visible":true,"include":true,"step":"16.0","x":-382.02857142857147,"y":-232.0095238095238,"z":280.50476190476195,"a95":0.99,"info":"26/10/2014 at 07:43:38"},{"visible":true,"include":true,"step":"20.0","x":-372.37142857142857,"y":-220.39999999999998,"z":252.46666666666667,"a95":0.99,"info":"26/10/2014 at 07:43:38"},{"visible":true,"include":true,"step":"25.0","x":-333.43809523809523,"y":-250.14285714285714,"z":242.1142857142857,"a95":0.99,"info":"26/10/2014 at 07:43:38"},{"visible":true,"include":true,"step":"30.0","x":-288.8,"y":-224.1047619047619,"z":228.53333333333333,"a95":0.99,"info":"26/10/2014 at 07:43:38"},{"visible":true,"include":true,"step":"35.0","x":-295.4095238095238,"y":-202.37142857142857,"z":192.74285714285713,"a95":0.99,"info":"26/10/2014 at 07:43:38"},{"visible":true,"include":true,"step":"40.0","x":-263.4666666666667,"y":-193.36190476190475,"z":186.44761904761904,"a95":0.99,"info":"26/10/2014 at 07:43:38"},{"visible":true,"include":true,"step":"45.0","x":-249.2095238095238,"y":-188.0952380952381,"z":187.21904761904761,"a95":0.99,"info":"26/10/2014 at 07:43:38"},{"visible":true,"include":true,"step":"50.0","x":-241.93333333333334,"y":-180.78095238095239,"z":145.62857142857143,"a95":0.99,"info":"26/10/2014 at 07:43:38"},{"visible":true,"include":false,"step":"60.0","x":-219.59047619047618,"y":-152.6,"z":134.51428571428573,"a95":0.99,"info":"26/10/2014 at 07:43:38"},{"visible":true,"include":false,"step":"70.0","x":-187.62857142857143,"y":-138.15238095238095,"z":91.40380952380953,"a95":0.99,"info":"26/10/2014 at 07:43:38"},{"visible":true,"include":false,"step":"80.0","x":-179.62857142857143,"y":-152.56190476190477,"z":70.60095238095238,"a95":0.99,"info":"26/10/2014 at 07:43:38"},{"visible":true,"include":false,"step":"90.0","x":-155.54285714285714,"y":-102.81904761904761,"z":102.03809523809525,"a95":0.99,"info":"26/10/2014 at 07:43:38"},{"visible":true,"include":false,"step":"100.0","x":-141.0285714285714,"y":-65.75523809523808,"z":72.99619047619048,"a95":0.99,"info":"26/10/2014 at 07:43:38"}]},{"version":"v1.1.0","exported":"2016-11-23T21:41:57.093Z","volume":10.5,"added":"2016-11-23T21:35:36.452Z","format":"Utrecht","demagType":"Unknown","strat":null,"patch":1.1,"GEO":[],"TECT":[],"interpreted":false,"name":"ER2.14A","coreAzi":126,"coreDip":27,"bedStrike":4,"bedDip":10,"data":[{"visible":true,"include":false,"step":"20","x":-142.1904761904762,"y":-59.714285714285715,"z":10.285714285714286,"a95":1.7,"info":"\"14-11-03\" at \"18:05\""},{"visible":true,"include":false,"step":"100","x":-84.63809523809525,"y":31.35238095238095,"z":-2.2,"a95":2.2,"info":"\"14-11-03\" at \"23:09\""},{"visible":true,"include":false,"step":"150","x":-56.67619047619048,"y":22.19047619047619,"z":-3.4285714285714284,"a95":3.2,"info":"\"14-11-04\" at \"20:01\""},{"visible":true,"include":false,"step":"180","x":-70.60952380952381,"y":49.03809523809524,"z":-6.752380952380953,"a95":2.7,"info":"\"14-11-04\" at \"23:16\""},{"visible":true,"include":false,"step":"210","x":-47.25714285714285,"y":35.38095238095238,"z":4.904761904761905,"a95":4.8,"info":"\"14-11-05\" at \"18:32\""},{"visible":true,"include":false,"step":"240","x":-43.76190476190476,"y":12.80952380952381,"z":4.523809523809524,"a95":4.4,"info":"\"14-11-06\" at \"16:20\""},{"visible":true,"include":false,"step":"270","x":-26.82857142857143,"y":28.895238095238092,"z":3.4095238095238094,"a95":4.5,"info":"\"14-11-06\" at \"22:28\""},{"visible":true,"include":false,"step":"300","x":-67.64761904761905,"y":11.752380952380953,"z":3.3904761904761904,"a95":4,"info":"\"14-11-07\" at \"18:01\""},{"visible":true,"include":false,"step":"320","x":-27.56190476190476,"y":1.3714285714285714,"z":13.152380952380952,"a95":6,"info":"\"14-11-15\" at \"01:22\""},{"visible":true,"include":false,"step":"340","x":-27.923809523809524,"y":38.06666666666666,"z":0.06666666666666667,"a95":7.3,"info":"\"14-11-15\" at \"22:10\""},{"visible":true,"include":false,"step":"360","x":-33.561904761904756,"y":31.914285714285718,"z":-7.219047619047619,"a95":6,"info":"\"14-11-16\" at \"01:20\""},{"visible":true,"include":false,"step":"380","x":-35.17142857142857,"y":32.49523809523809,"z":3.8857142857142852,"a95":9.6,"info":"\"14-11-16\" at \"19:20\""},{"visible":true,"include":false,"step":"400","x":-50.07619047619047,"y":15.333333333333334,"z":14.714285714285714,"a95":13.3,"info":"\"14-11-16\" at \"23:21\""}]},{"version":"v1.1.0","exported":"2016-11-23T21:41:57.093Z","volume":10.5,"added":"2016-11-23T21:35:36.453Z","format":"Utrecht","demagType":"Unknown","strat":"4","patch":1.1,"GEO":[{"dec":6.038549799379382,"inc":51.70602584563529,"MAD":4.613369395189318,"cm":[1.7763568394002505e-15,-1.7985612998927536e-14,0],"intensity":745.4837001303857,"type":"dir","forced":true,"remark":"","origin":false,"nSteps":12,"minStep":"4.0","maxStep":"60.0","steps":["4.0","8.0","12.0","16.0","20.0","25.0","30.0","35.0","40.0","45.0","50.0","60.0"],"group":"None","version":"v1.1.0"}],"TECT":[{"dec":18.31185787434856,"inc":50.272257942620264,"MAD":4.613369395189313,"cm":[1.0658141036401503e-14,-1.687538997430238e-14,0],"intensity":745.4837001303857,"type":"dir","forced":true,"remark":"","origin":false,"nSteps":12,"minStep":"4.0","maxStep":"60.0","steps":["4.0","8.0","12.0","16.0","20.0","25.0","30.0","35.0","40.0","45.0","50.0","60.0"],"group":"None","version":"v1.1.0"}],"interpreted":true,"name":"ER2.14B","coreAzi":126,"coreDip":27,"bedStrike":4,"bedDip":10,"data":[{"visible":false,"include":false,"step":"0.0","x":-476.16190476190474,"y":-237.58095238095237,"z":49.87619047619048,"a95":0.99,"info":"26/10/2014 at 07:43:38"},{"visible":true,"include":true,"step":"4.0","x":-450.4380952380953,"y":-257.49523809523805,"z":47.457142857142856,"a95":0.99,"info":"26/10/2014 at 07:43:38"},{"visible":true,"include":true,"step":"8.0","x":-412.2857142857143,"y":-225.2,"z":25.301904761904762,"a95":0.99,"info":"26/10/2014 at 07:43:38"},{"visible":true,"include":true,"step":"12.0","x":-373.8095238095238,"y":-253.1904761904762,"z":90.3104761904762,"a95":0.99,"info":"26/10/2014 at 07:43:38"},{"visible":true,"include":true,"step":"16.0","x":-342.31428571428575,"y":-209.17142857142858,"z":16.65714285714286,"a95":0.99,"info":"26/10/2014 at 07:43:38"},{"visible":true,"include":true,"step":"20.0","x":-309.84761904761905,"y":-225.2,"z":40.668571428571425,"a95":0.99,"info":"26/10/2014 at 07:43:38"},{"visible":true,"include":true,"step":"25.0","x":-303.45714285714286,"y":-196.68571428571425,"z":23.54190476190476,"a95":0.99,"info":"26/10/2014 at 07:43:38"},{"visible":true,"include":true,"step":"30.0","x":-264.9428571428572,"y":-165.4,"z":-5.09752380952381,"a95":0.99,"info":"26/10/2014 at 07:43:38"},{"visible":true,"include":true,"step":"35.0","x":-240.04761904761904,"y":-165.6,"z":-11.418095238095239,"a95":0.99,"info":"26/10/2014 at 07:43:38"},{"visible":true,"include":true,"step":"40.0","x":-241.67619047619047,"y":-183.85714285714286,"z":48.10857142857143,"a95":0.99,"info":"26/10/2014 at 07:43:38"},{"visible":true,"include":true,"step":"45.0","x":-213.62857142857143,"y":-123,"z":7.195428571428572,"a95":0.99,"info":"26/10/2014 at 07:43:38"},{"visible":true,"include":true,"step":"50.0","x":-223.53333333333333,"y":-173.48571428571427,"z":16.232380952380954,"a95":0.99,"info":"26/10/2014 at 07:43:38"},{"visible":true,"include":true,"step":"60.0","x":-182.1904761904762,"y":-131.14285714285714,"z":19.531428571428574,"a95":0.99,"info":"26/10/2014 at 07:43:38"},{"visible":true,"include":false,"step":"70.0","x":-194.83809523809524,"y":-131.2,"z":2.9995238095238097,"a95":0.99,"info":"26/10/2014 at 07:43:38"},{"visible":true,"include":false,"step":"80.0","x":-148.25714285714287,"y":-94.91238095238096,"z":-11.033333333333333,"a95":0.99,"info":"26/10/2014 at 07:43:38"},{"visible":true,"include":false,"step":"90.0","x":-115.95238095238095,"y":-105.34285714285713,"z":-9.15857142857143,"a95":0.99,"info":"26/10/2014 at 07:43:38"},{"visible":true,"include":false,"step":"100.0","x":-105.4952380952381,"y":-71.17619047619048,"z":16.685714285714283,"a95":0.99,"info":"26/10/2014 at 07:43:38"}]},{"version":"v1.1.0","exported":"2016-11-23T21:41:57.093Z","volume":10.5,"added":"2016-11-23T21:35:36.453Z","format":"Utrecht","demagType":"Unknown","strat":"6","patch":1.1,"GEO":[{"dec":9.258895820439534,"inc":58.165849435364294,"MAD":3.646952647391678,"cm":[-1.7763568394002505e-15,1.021405182655144e-14,0],"intensity":562.9998122247284,"type":"dir","forced":true,"remark":"","origin":false,"nSteps":11,"minStep":"10.0","maxStep":"50.0","steps":["10.0","15.0","20.0","23.0","25.0","30.0","33.0","35.0","40.0","45.0","50.0"],"group":"None","version":"v1.1.0"}],"TECT":[{"dec":24.381092293753227,"inc":55.92208691288919,"MAD":3.6469526473915983,"cm":[8.881784197001252e-16,-2.6645352591003757e-15,-3.552713678800501e-15],"intensity":562.9998122247284,"type":"dir","forced":true,"remark":"","origin":false,"nSteps":11,"minStep":"10.0","maxStep":"50.0","steps":["10.0","15.0","20.0","23.0","25.0","30.0","33.0","35.0","40.0","45.0","50.0"],"group":"None","version":"v1.1.0"}],"interpreted":true,"name":"ER2.15B","coreAzi":128,"coreDip":28,"bedStrike":4,"bedDip":10,"data":[{"visible":false,"include":false,"step":"0.0","x":-392.72380952380956,"y":-175.7238095238095,"z":120.0095238095238,"a95":0.99,"info":"26/11/2014 at 07:38:11"},{"visible":true,"include":true,"step":"10.0","x":-322.9142857142857,"y":-163.73333333333335,"z":50.56,"a95":0.99,"info":"26/11/2014 at 07:38:11"},{"visible":true,"include":true,"step":"15.0","x":-275.42857142857144,"y":-131.16190476190476,"z":46.243809523809524,"a95":0.99,"info":"26/11/2014 at 07:38:11"},{"visible":true,"include":true,"step":"20.0","x":-238.61904761904762,"y":-145.40952380952382,"z":56.65714285714286,"a95":0.99,"info":"26/11/2014 at 07:38:11"},{"visible":true,"include":true,"step":"23.0","x":-238.75238095238097,"y":-102.6,"z":44.481904761904765,"a95":0.99,"info":"26/11/2014 at 07:38:11"},{"visible":true,"include":true,"step":"25.0","x":-219.77142857142857,"y":-114.74285714285713,"z":50.81904761904762,"a95":0.99,"info":"26/11/2014 at 07:38:11"},{"visible":true,"include":true,"step":"30.0","x":-202.14285714285714,"y":-120.58095238095237,"z":57.07619047619047,"a95":0.99,"info":"26/11/2014 at 07:38:11"},{"visible":true,"include":true,"step":"33.0","x":-193.15238095238095,"y":-118.96190476190475,"z":27,"a95":0.99,"info":"26/11/2014 at 07:38:11"},{"visible":true,"include":true,"step":"35.0","x":-183.44761904761904,"y":-111.34285714285713,"z":43.13428571428572,"a95":0.99,"info":"26/11/2014 at 07:38:11"},{"visible":true,"include":true,"step":"40.0","x":-173.66666666666666,"y":-72.11619047619048,"z":36.99047619047619,"a95":0.99,"info":"26/11/2014 at 07:38:11"},{"visible":true,"include":true,"step":"45.0","x":-156.15238095238095,"y":-97.07619047619048,"z":28.040952380952383,"a95":0.99,"info":"26/11/2014 at 07:38:11"},{"visible":true,"include":true,"step":"50.0","x":-168.1904761904762,"y":-93.83619047619047,"z":46.614285714285714,"a95":0.99,"info":"26/11/2014 at 07:38:11"},{"visible":true,"include":false,"step":"60.0","x":-147,"y":-77.97904761904762,"z":18.256190476190476,"a95":0.99,"info":"26/11/2014 at 07:38:11"},{"visible":true,"include":false,"step":"70.0","x":-118.26666666666667,"y":-78.99619047619048,"z":4.878952380952381,"a95":0.99,"info":"26/11/2014 at 07:38:11"},{"visible":true,"include":false,"step":"80.0","x":-188.0952380952381,"y":-75.6952380952381,"z":13.74952380952381,"a95":0.99,"info":"26/11/2014 at 07:38:11"},{"visible":true,"include":false,"step":"90.0","x":-105.6,"y":-62.99142857142857,"z":25.32857142857143,"a95":0.99,"info":"26/11/2014 at 07:38:11"}]},{"version":"v1.1.0","exported":"2016-11-23T21:41:57.093Z","volume":10.5,"added":"2016-11-23T21:35:36.454Z","format":"Utrecht","demagType":"Unknown","strat":"5","patch":1.1,"GEO":[{"dec":5.345642625291191,"inc":44.313643041843065,"MAD":3.934638543250884,"cm":[0,8.715250743307479e-15,0],"intensity":743.6221646725509,"type":"dir","forced":true,"remark":"","origin":false,"nSteps":12,"minStep":"4.0","maxStep":"60.0","steps":["4.0","8.0","12.0","16.0","20.0","25.0","30.0","35.0","40.0","45.0","50.0","60.0"],"group":"None","version":"v1.1.0"}],"TECT":[{"dec":14.908141377038987,"inc":43.239912803916226,"MAD":3.9346385432508963,"cm":[7.993605777301127e-15,-1.865174681370263e-14,-2.6645352591003757e-15],"intensity":743.6221646725509,"type":"dir","forced":true,"remark":"","origin":false,"nSteps":12,"minStep":"4.0","maxStep":"60.0","steps":["4.0","8.0","12.0","16.0","20.0","25.0","30.0","35.0","40.0","45.0","50.0","60.0"],"group":"None","version":"v1.1.0"}],"interpreted":true,"name":"ER2.16A","coreAzi":124,"coreDip":22,"bedStrike":4,"bedDip":10,"data":[{"visible":false,"include":false,"step":"0.0","x":-421.9619047619048,"y":-303.02857142857147,"z":-27.843809523809526,"a95":0.99,"info":"26/10/2014 at 07:43:38"},{"visible":true,"include":true,"step":"4.0","x":-394.81904761904764,"y":-306.2,"z":-28.45714285714286,"a95":0.99,"info":"26/10/2014 at 07:43:38"},{"visible":true,"include":true,"step":"8.0","x":-364.48571428571427,"y":-302.4761904761905,"z":-13.294285714285715,"a95":0.99,"info":"26/10/2014 at 07:43:38"},{"visible":true,"include":true,"step":"12.0","x":-334.18095238095236,"y":-287.56190476190477,"z":25.527619047619048,"a95":0.99,"info":"26/10/2014 at 07:43:38"},{"visible":true,"include":true,"step":"16.0","x":-311.03809523809525,"y":-257.8095238095238,"z":-23.236190476190476,"a95":0.99,"info":"26/10/2014 at 07:43:38"},{"visible":true,"include":true,"step":"20.0","x":-289.5333333333333,"y":-266.9142857142857,"z":-20.891428571428573,"a95":0.99,"info":"26/10/2014 at 07:43:38"},{"visible":true,"include":true,"step":"25.0","x":-277.7904761904762,"y":-216.61904761904762,"z":-44.423809523809524,"a95":0.99,"info":"26/10/2014 at 07:43:38"},{"visible":true,"include":true,"step":"30.0","x":-262.51428571428573,"y":-219.84761904761905,"z":-45.789523809523814,"a95":0.99,"info":"26/10/2014 at 07:43:38"},{"visible":true,"include":true,"step":"35.0","x":-246.36190476190478,"y":-181.6095238095238,"z":-14.155238095238095,"a95":0.99,"info":"26/10/2014 at 07:43:38"},{"visible":true,"include":true,"step":"40.0","x":-226.22857142857143,"y":-176,"z":-29.322857142857142,"a95":0.99,"info":"26/10/2014 at 07:43:38"},{"visible":true,"include":true,"step":"45.0","x":-228.64761904761906,"y":-153.1904761904762,"z":-39.166666666666664,"a95":0.99,"info":"26/10/2014 at 07:43:38"},{"visible":true,"include":true,"step":"50.0","x":-198.65714285714287,"y":-161.8,"z":1.487142857142857,"a95":0.99,"info":"26/10/2014 at 07:43:38"},{"visible":true,"include":true,"step":"60.0","x":-194.95238095238096,"y":-141.96190476190475,"z":-37.0752380952381,"a95":0.99,"info":"26/10/2014 at 07:43:38"},{"visible":true,"include":false,"step":"70.0","x":-171.2952380952381,"y":-134.44761904761904,"z":-25.75142857142857,"a95":0.99,"info":"26/10/2014 at 07:43:38"},{"visible":true,"include":false,"step":"80.0","x":-119.97142857142858,"y":-131.82857142857142,"z":-6.839619047619048,"a95":0.99,"info":"26/10/2014 at 07:43:38"},{"visible":true,"include":false,"step":"90.0","x":-148.88571428571427,"y":-102.24761904761904,"z":11.804761904761905,"a95":0.99,"info":"26/10/2014 at 07:43:38"},{"visible":true,"include":false,"step":"100.0","x":-98.37142857142858,"y":-77.92,"z":4.7115238095238094,"a95":0.99,"info":"26/10/2014 at 07:43:38"}]},{"version":"v1.1.0","exported":"2016-11-23T21:41:57.093Z","volume":10.5,"added":"2016-11-23T21:35:36.454Z","format":"Utrecht","demagType":"Unknown","strat":null,"patch":1.1,"GEO":[],"TECT":[],"interpreted":false,"name":"ER2.18A","coreAzi":129,"coreDip":15,"bedStrike":4,"bedDip":10,"data":[{"visible":true,"include":false,"step":"20","x":-591.6190476190476,"y":-231.42857142857142,"z":-115.42857142857143,"a95":1.7,"info":"\"14-11-03\" at \"18:07\""},{"visible":true,"include":false,"step":"100","x":-294.76190476190476,"y":-124,"z":20.761904761904763,"a95":1.8,"info":"\"14-11-03\" at \"23:12\""},{"visible":true,"include":false,"step":"150","x":-126.57142857142857,"y":-56.95238095238095,"z":43.142857142857146,"a95":2.3,"info":"\"14-11-04\" at \"20:03\""},{"visible":true,"include":false,"step":"180","x":-133.8095238095238,"y":-25.428571428571427,"z":30.38095238095238,"a95":2.3,"info":"\"14-11-04\" at \"23:21\""},{"visible":true,"include":false,"step":"210","x":-69.68571428571428,"y":14.476190476190476,"z":41.82857142857143,"a95":3.9,"info":"\"14-11-05\" at \"18:34\""},{"visible":true,"include":false,"step":"240","x":-57.904761904761905,"y":-10.914285714285715,"z":39.114285714285714,"a95":2.7,"info":"\"14-11-06\" at \"16:22\""},{"visible":true,"include":false,"step":"270","x":-35.16190476190476,"y":6.285714285714286,"z":44.22857142857143,"a95":5,"info":"\"14-11-06\" at \"22:30\""},{"visible":true,"include":false,"step":"300","x":-39.60952380952381,"y":40.86666666666667,"z":55.69523809523809,"a95":2.7,"info":"\"14-11-07\" at \"18:04\""},{"visible":true,"include":false,"step":"320","x":-18.8,"y":33.16190476190476,"z":29.64761904761905,"a95":4.1,"info":"\"14-11-15\" at \"01:25\""},{"visible":true,"include":false,"step":"340","x":-20,"y":28.885714285714286,"z":16.780952380952378,"a95":6.1,"info":"\"14-11-15\" at \"22:13\""},{"visible":true,"include":false,"step":"360","x":-30.685714285714283,"y":30.047619047619047,"z":10.352380952380953,"a95":5.8,"info":"\"14-11-16\" at \"01:22\""},{"visible":true,"include":false,"step":"380","x":-20.742857142857144,"y":46.304761904761904,"z":70.85714285714286,"a95":3.3,"info":"\"14-11-16\" at \"19:23\""},{"visible":true,"include":false,"step":"400","x":-16.695238095238096,"y":26.514285714285712,"z":47.561904761904756,"a95":3.5,"info":"\"14-11-16\" at \"23:23\""}]},{"version":"v1.1.0","exported":"2016-11-23T21:41:57.093Z","volume":10.5,"added":"2016-11-23T21:35:36.454Z","format":"Utrecht","demagType":"Unknown","strat":"7","patch":1.1,"GEO":[{"dec":4.612607781989425,"inc":59.53029638900249,"MAD":6.002519943493105,"cm":[-1.3322676295501878e-15,-2.6645352591003757e-15,0],"intensity":356.86912330976753,"type":"dir","forced":true,"remark":"","origin":false,"nSteps":11,"minStep":"10.0","maxStep":"60.0","steps":["10.0","15.0","20.0","23.0","25.0","30.0","35.0","40.0","45.0","50.0","60.0"],"group":"None","version":"v1.1.0"}],"TECT":[{"dec":20.998378653724842,"inc":57.97986260105529,"MAD":6.002519943493088,"cm":[-1.5543122344752192e-15,-2.220446049250313e-15,0],"intensity":356.86912330976753,"type":"dir","forced":true,"remark":"","origin":false,"nSteps":11,"minStep":"10.0","maxStep":"60.0","steps":["10.0","15.0","20.0","23.0","25.0","30.0","35.0","40.0","45.0","50.0","60.0"],"group":"None","version":"v1.1.0"}],"interpreted":true,"name":"ER2.19A","coreAzi":77,"coreDip":40,"bedStrike":4,"bedDip":10,"data":[{"visible":false,"include":false,"step":"0.0","x":-219.95238095238096,"y":-132.45714285714286,"z":246.0761904761905,"a95":0.99,"info":"26/11/2014 at 07:38:11"},{"visible":true,"include":true,"step":"10.0","x":-158.36190476190475,"y":-112.17142857142856,"z":157.6,"a95":0.99,"info":"26/11/2014 at 07:38:11"},{"visible":true,"include":true,"step":"15.0","x":-136.38095238095238,"y":-108.06666666666668,"z":132.2095238095238,"a95":0.99,"info":"26/11/2014 at 07:38:11"},{"visible":true,"include":true,"step":"20.0","x":-112.78095238095239,"y":-114.78095238095239,"z":132.01904761904763,"a95":0.99,"info":"26/11/2014 at 07:38:11"},{"visible":true,"include":true,"step":"23.0","x":-98.57142857142857,"y":-107.33333333333333,"z":139.8095238095238,"a95":0.99,"info":"26/11/2014 at 07:38:11"},{"visible":true,"include":true,"step":"25.0","x":-85.98380952380953,"y":-84.25523809523808,"z":106.82857142857144,"a95":0.99,"info":"26/11/2014 at 07:38:11"},{"visible":true,"include":true,"step":"30.0","x":-95.33333333333333,"y":-78.88857142857144,"z":102.12380952380951,"a95":0.99,"info":"26/11/2014 at 07:38:11"},{"visible":false,"include":false,"step":"33.0","x":-80.94190476190477,"y":-90.95238095238095,"z":114.5904761904762,"a95":0.99,"info":"26/11/2014 at 07:38:11"},{"visible":true,"include":true,"step":"35.0","x":-80.58,"y":-59.45333333333333,"z":127.35238095238095,"a95":0.99,"info":"26/11/2014 at 07:38:11"},{"visible":true,"include":true,"step":"40.0","x":-76.24190476190476,"y":-58.56,"z":95.34285714285714,"a95":0.99,"info":"26/11/2014 at 07:38:11"},{"visible":true,"include":true,"step":"45.0","x":-64.72952380952381,"y":-59.005714285714284,"z":103.05714285714285,"a95":0.99,"info":"26/11/2014 at 07:38:11"},{"visible":true,"include":true,"step":"50.0","x":-65.39428571428572,"y":-72.39333333333333,"z":80.66095238095238,"a95":0.99,"info":"26/11/2014 at 07:38:11"},{"visible":true,"include":true,"step":"60.0","x":-53.22857142857143,"y":-33.95142857142857,"z":89.85333333333334,"a95":0.99,"info":"26/11/2014 at 07:38:11"},{"visible":true,"include":false,"step":"70.0","x":-50.43142857142857,"y":-41.81904761904762,"z":66.94,"a95":0.99,"info":"26/11/2014 at 07:38:11"},{"visible":true,"include":false,"step":"80.0","x":-86.97428571428571,"y":-79.87238095238095,"z":36.73428571428571,"a95":0.99,"info":"26/11/2014 at 07:38:11"},{"visible":true,"include":false,"step":"90.0","x":-66.29809523809524,"y":-61.46666666666666,"z":63.50095238095238,"a95":0.99,"info":"26/11/2014 at 07:38:11"}]},{"version":"v1.1.0","exported":"2016-11-23T21:41:57.093Z","volume":10.5,"added":"2016-11-23T21:35:36.454Z","format":"Utrecht","demagType":"Unknown","strat":"8","patch":1.1,"GEO":[{"dec":349.1619781660087,"inc":68.06773887055044,"MAD":4.421308069761354,"cm":[-6.439293542825908e-15,-1.2545520178264269e-14,0],"intensity":507.8454996187258,"type":"dir","forced":true,"remark":"","origin":false,"nSteps":12,"minStep":"10.0","maxStep":"60.0","steps":["10.0","15.0","20.0","23.0","25.0","30.0","33.0","35.0","40.0","45.0","50.0","60.0"],"group":"None","version":"v1.1.0"}],"TECT":[{"dec":14.494622915288915,"inc":68.45712074734709,"MAD":4.4213080697613965,"cm":[-7.993605777301127e-15,-2.4202861936828413e-14,3.552713678800501e-15],"intensity":507.84549961872574,"type":"dir","forced":true,"remark":"","origin":false,"nSteps":12,"minStep":"10.0","maxStep":"60.0","steps":["10.0","15.0","20.0","23.0","25.0","30.0","33.0","35.0","40.0","45.0","50.0","60.0"],"group":"None","version":"v1.1.0"}],"interpreted":true,"name":"ER2.20B","coreAzi":86,"coreDip":40,"bedStrike":4,"bedDip":10,"data":[{"visible":false,"include":false,"step":"0.0","x":-336.0857142857143,"y":-170.1047619047619,"z":303.8952380952381,"a95":0.99,"info":"26/11/2014 at 07:38:11"},{"visible":true,"include":true,"step":"10.0","x":-257.34285714285716,"y":-137.1047619047619,"z":226.22857142857143,"a95":0.99,"info":"26/11/2014 at 07:38:11"},{"visible":true,"include":true,"step":"15.0","x":-230.75238095238097,"y":-110.8952380952381,"z":186.47619047619048,"a95":0.99,"info":"26/11/2014 at 07:38:11"},{"visible":true,"include":true,"step":"20.0","x":-202.2,"y":-132.51428571428573,"z":155.7238095238095,"a95":0.99,"info":"26/11/2014 at 07:38:11"},{"visible":true,"include":true,"step":"23.0","x":-185.15238095238095,"y":-110.21904761904761,"z":129.38095238095238,"a95":0.99,"info":"26/11/2014 at 07:38:11"},{"visible":true,"include":true,"step":"25.0","x":-203.37142857142857,"y":-83.05714285714286,"z":133.62857142857143,"a95":0.99,"info":"26/11/2014 at 07:38:11"},{"visible":true,"include":true,"step":"30.0","x":-169.9142857142857,"y":-79.64190476190477,"z":129.75238095238097,"a95":0.99,"info":"26/11/2014 at 07:38:11"},{"visible":true,"include":true,"step":"33.0","x":-145.63809523809525,"y":-78.09809523809524,"z":127.71428571428571,"a95":0.99,"info":"26/11/2014 at 07:38:11"},{"visible":true,"include":true,"step":"35.0","x":-159.26666666666665,"y":-86.36,"z":110.58095238095237,"a95":0.99,"info":"26/11/2014 at 07:38:11"},{"visible":true,"include":true,"step":"40.0","x":-153.25714285714287,"y":-52.415238095238095,"z":124.66666666666667,"a95":0.99,"info":"26/11/2014 at 07:38:11"},{"visible":true,"include":true,"step":"45.0","x":-145.95238095238096,"y":-57.93619047619048,"z":94.54666666666667,"a95":0.99,"info":"26/11/2014 at 07:38:11"},{"visible":true,"include":true,"step":"50.0","x":-153.11428571428573,"y":-66.04666666666667,"z":92.56285714285714,"a95":0.99,"info":"26/11/2014 at 07:38:11"},{"visible":true,"include":true,"step":"60.0","x":-112.80952380952381,"y":-48.63619047619048,"z":67.70095238095239,"a95":0.99,"info":"26/11/2014 at 07:38:11"},{"visible":true,"include":false,"step":"70.0","x":-107.25714285714287,"y":-54.944761904761904,"z":83.22095238095238,"a95":0.99,"info":"26/11/2014 at 07:38:11"},{"visible":true,"include":false,"step":"80.0","x":-99.19999999999999,"y":-56.07619047619047,"z":75.92666666666666,"a95":0.99,"info":"26/11/2014 at 07:38:11"},{"visible":true,"include":false,"step":"90.0","x":-72.82000000000001,"y":-55.62761904761905,"z":88.38571428571429,"a95":0.99,"info":"26/11/2014 at 07:38:11"}]},{"version":"v1.1.0","exported":"2016-11-23T21:41:57.093Z","volume":10.5,"added":"2016-11-23T21:35:36.455Z","format":"Utrecht","demagType":"Unknown","strat":null,"patch":1.1,"GEO":[],"TECT":[],"interpreted":false,"name":"ER2.22A","coreAzi":100,"coreDip":54,"bedStrike":4,"bedDip":10,"data":[{"visible":false,"include":false,"step":"20","x":-476.4761904761905,"y":-561.047619047619,"z":625.3333333333334,"a95":2.2,"info":"\"14-11-03\" at \"18:10\""},{"visible":true,"include":true,"step":"100","x":-225.04761904761904,"y":-230.47619047619048,"z":225.71428571428572,"a95":2.2,"info":"\"14-11-03\" at \"23:18\""},{"visible":true,"include":true,"step":"150","x":-160,"y":-118.95238095238095,"z":101.61904761904762,"a95":2.2,"info":"\"14-11-04\" at \"20:05\""},{"visible":true,"include":true,"step":"180","x":-155.61904761904762,"y":-101.80952380952381,"z":103.33333333333333,"a95":2.2,"info":"\"14-11-04\" at \"23:23\""},{"visible":true,"include":true,"step":"210","x":-120.66666666666667,"y":-35.80952380952381,"z":61.904761904761905,"a95":3,"info":"\"14-11-05\" at \"18:35\""},{"visible":true,"include":true,"step":"240","x":-100.28571428571429,"y":-25.714285714285715,"z":42.57142857142857,"a95":3.1,"info":"\"14-11-06\" at \"16:24\""},{"visible":true,"include":true,"step":"270","x":-70.44761904761906,"y":-23.228571428571428,"z":-1.2571428571428571,"a95":3.8,"info":"\"14-11-06\" at \"22:32\""},{"visible":true,"include":false,"step":"300","x":-101.52380952380952,"y":-4.9523809523809526,"z":32.666666666666664,"a95":3.2,"info":"\"14-11-07\" at \"18:07\""},{"visible":true,"include":false,"step":"320","x":-94,"y":-28.666666666666668,"z":20.952380952380953,"a95":2.8,"info":"\"14-11-15\" at \"01:27\""},{"visible":true,"include":false,"step":"340","x":-79.11428571428571,"y":-20.295238095238094,"z":21.18095238095238,"a95":3.6,"info":"\"14-11-15\" at \"22:15\""},{"visible":true,"include":false,"step":"360","x":-79.72380952380952,"y":-14.657142857142858,"z":26.80952380952381,"a95":3.2,"info":"\"14-11-16\" at \"01:24\""},{"visible":true,"include":false,"step":"380","x":-63.10476190476191,"y":9.676190476190476,"z":3.7333333333333334,"a95":4,"info":"\"14-11-16\" at \"19:25\""},{"visible":true,"include":false,"step":"400","x":-77.84761904761905,"y":2.0285714285714285,"z":-20.523809523809526,"a95":3,"info":"\"14-11-16\" at \"23:26\""}]}]
