# Supplementary material for: Paleomagnetic constraints on the timing and distribution of Cenozoic rotations in Central and Eastern Anatolia
Source: Copernicus journal article supplement (doi:10.5194/se-9-295-2018), 2018-03-21
Supplement: Supplementary file 2 [file se-9-295-2018-supplement.zip › se-2017-66_DATA_dir files/dir files Ulukisla/GM2.dir]

[{"version":"v1.1.0","exported":"2017-06-26T09:20:31.243Z","volume":10.5,"added":"2017-06-26T09:10:20.494Z","format":"Utrecht","demagType":"Unknown","strat":"8","patch":1.1,"GEO":[{"dec":5.436311062746768,"inc":55.83498423802493,"MAD":11.367740968212038,"cm":[4.440892098500626e-16,-6.078471059822732e-15,0],"intensity":104.73146443466923,"type":"dir","forced":true,"remark":"","origin":false,"nSteps":11,"minStep":"8.0","maxStep":"60.0","steps":["8.0","12.0","16.0","20.0","25.0","30.0","35.0","40.0","45.0","50.0","60.0"],"group":"None","version":"v1.1.0"}],"TECT":[{"dec":353.96206804674597,"inc":1.4510686239594703,"MAD":11.367740968212068,"cm":[2.4424906541753444e-15,9.409140133698202e-15,-3.3306690738754696e-16],"intensity":104.73146443466923,"type":"dir","forced":true,"remark":"","origin":false,"nSteps":11,"minStep":"8.0","maxStep":"60.0","steps":["8.0","12.0","16.0","20.0","25.0","30.0","35.0","40.0","45.0","50.0","60.0"],"group":"None","version":"v1.1.0"}],"interpreted":true,"name":"GM2.1B","coreAzi":269,"coreDip":50,"bedStrike":250,"bedDip":57,"data":[{"visible":true,"include":false,"step":"0.0","x":-47.766666666666666,"y":41.415238095238095,"z":38.78285714285715,"a95":0.99,"info":"26/10/2014 at 18:57:51"},{"visible":true,"include":false,"step":"4.0","x":-37.97904761904762,"y":36.950476190476195,"z":35.796190476190475,"a95":0.99,"info":"26/10/2014 at 18:57:51"},{"visible":true,"include":true,"step":"8.0","x":-35.772380952380956,"y":40.55619047619047,"z":41.74095238095238,"a95":0.99,"info":"26/10/2014 at 18:57:51"},{"visible":true,"include":true,"step":"12.0","x":-33.163809523809526,"y":33.137142857142855,"z":9.186285714285715,"a95":0.99,"info":"26/10/2014 at 18:57:51"},{"visible":true,"include":true,"step":"16.0","x":-29.502857142857142,"y":38.53523809523809,"z":31.697142857142858,"a95":0.99,"info":"26/10/2014 at 18:57:51"},{"visible":true,"include":true,"step":"20.0","x":-30.386666666666667,"y":31.732380952380954,"z":26.794285714285714,"a95":0.99,"info":"26/10/2014 at 18:57:51"},{"visible":true,"include":true,"step":"25.0","x":-28.39619047619048,"y":33.23904761904762,"z":33.11619047619048,"a95":0.99,"info":"26/10/2014 at 18:57:51"},{"visible":true,"include":true,"step":"30.0","x":-26.064761904761905,"y":22.50190476190476,"z":24.406666666666666,"a95":0.99,"info":"26/10/2014 at 18:57:51"},{"visible":true,"include":true,"step":"35.0","x":-26.244761904761905,"y":26.83238095238095,"z":28.05047619047619,"a95":0.99,"info":"26/10/2014 at 18:57:51"},{"visible":true,"include":true,"step":"40.0","x":-25.73428571428571,"y":16.380000000000003,"z":29.0752380952381,"a95":0.99,"info":"26/10/2014 at 18:57:51"},{"visible":true,"include":true,"step":"45.0","x":-24.03333333333333,"y":23.922857142857143,"z":28.76380952380952,"a95":0.99,"info":"26/10/2014 at 18:57:51"},{"visible":true,"include":true,"step":"50.0","x":-27,"y":10.574285714285715,"z":37.14952380952381,"a95":0.99,"info":"26/10/2014 at 18:57:51"},{"visible":true,"include":true,"step":"60.0","x":-25.87809523809524,"y":11.366666666666665,"z":25.13142857142857,"a95":0.99,"info":"26/10/2014 at 18:57:51"},{"visible":true,"include":false,"step":"70.0","x":-21.534285714285716,"y":19.728571428571428,"z":23.13904761904762,"a95":0.99,"info":"26/10/2014 at 18:57:51"},{"visible":true,"include":false,"step":"80.0","x":-26.86952380952381,"y":7.550380952380952,"z":21.035238095238096,"a95":0.99,"info":"26/10/2014 at 18:57:51"},{"visible":true,"include":false,"step":"90.0","x":-19.03047619047619,"y":16.047619047619047,"z":21.376190476190477,"a95":0.99,"info":"26/10/2014 at 18:57:51"},{"visible":true,"include":false,"step":"100.0","x":-17.33809523809524,"y":20.068571428571428,"z":19.417142857142856,"a95":0.99,"info":"26/10/2014 at 18:57:51"}]},{"version":"v1.1.0","exported":"2017-06-26T09:20:31.243Z","volume":10.5,"added":"2017-06-26T09:10:20.494Z","format":"Utrecht","demagType":"Unknown","strat":"1","patch":1.1,"GEO":[{"dec":3.669779241281219,"inc":51.039889153047554,"MAD":3.852543047196037,"cm":[-1.1102230246251565e-15,-1.4710455076283324e-15,0],"intensity":159.3615472159635,"type":"dir","forced":true,"remark":"","origin":false,"nSteps":12,"minStep":"15.0","maxStep":"70.0","steps":["15.0","20.0","23.0","25.0","30.0","33.0","35.0","40.0","45.0","50.0","60.0","70.0"],"group":"None","version":"v1.1.0"}],"TECT":[{"dec":354.64801972793094,"inc":-3.4095878365189227,"MAD":3.85254304719608,"cm":[-1.3322676295501878e-15,9.992007221626409e-16,1.4797191250082165e-15],"intensity":159.3615472159635,"type":"dir","forced":true,"remark":"","origin":false,"nSteps":12,"minStep":"15.0","maxStep":"70.0","steps":["15.0","20.0","23.0","25.0","30.0","33.0","35.0","40.0","45.0","50.0","60.0","70.0"],"group":"None","version":"v1.1.0"}],"interpreted":true,"name":"GM2.2A","coreAzi":261,"coreDip":49,"bedStrike":250,"bedDip":57,"data":[{"visible":true,"include":false,"step":"0.0","x":-64.76,"y":73.8742857142857,"z":57.798095238095236,"a95":0.99,"info":"26/11/2014 at 02:25:55"},{"visible":true,"include":false,"step":"10.0","x":-58.10190476190477,"y":55.39047619047619,"z":45.12,"a95":0.99,"info":"26/11/2014 at 02:25:55"},{"visible":true,"include":true,"step":"15.0","x":-54.12952380952381,"y":61.825714285714284,"z":43.0752380952381,"a95":0.99,"info":"26/11/2014 at 02:25:55"},{"visible":true,"include":true,"step":"20.0","x":-58.36,"y":51.69809523809524,"z":36.78,"a95":0.99,"info":"26/11/2014 at 02:25:55"},{"visible":true,"include":true,"step":"23.0","x":-54.697142857142865,"y":52.43904761904762,"z":43.88285714285714,"a95":0.99,"info":"26/11/2014 at 02:25:55"},{"visible":true,"include":true,"step":"25.0","x":-60.666666666666664,"y":57.60857142857143,"z":38.80571428571428,"a95":0.99,"info":"26/11/2014 at 02:25:55"},{"visible":true,"include":true,"step":"30.0","x":-54.92666666666667,"y":48.40952380952381,"z":42.30666666666667,"a95":0.99,"info":"26/11/2014 at 02:25:55"},{"visible":true,"include":true,"step":"33.0","x":-50.80571428571429,"y":55.09142857142857,"z":40.48285714285714,"a95":0.99,"info":"26/11/2014 at 02:25:55"},{"visible":true,"include":true,"step":"35.0","x":-49.92857142857143,"y":47.53238095238095,"z":41.61904761904762,"a95":0.99,"info":"26/11/2014 at 02:25:55"},{"visible":true,"include":true,"step":"40.0","x":-48.44095238095238,"y":46.19333333333333,"z":42.96476190476191,"a95":0.99,"info":"26/11/2014 at 02:25:55"},{"visible":true,"include":true,"step":"45.0","x":-42.65238095238095,"y":45.88,"z":42.95428571428571,"a95":0.99,"info":"26/11/2014 at 02:25:55"},{"visible":true,"include":true,"step":"50.0","x":-43.137142857142855,"y":49.73428571428572,"z":39.36857142857143,"a95":0.99,"info":"26/11/2014 at 02:25:55"},{"visible":true,"include":true,"step":"60.0","x":-39.60285714285714,"y":44.214285714285715,"z":40.30571428571428,"a95":0.99,"info":"26/11/2014 at 02:25:55"},{"visible":true,"include":true,"step":"70.0","x":-41.65238095238095,"y":37.99142857142857,"z":36.03523809523809,"a95":0.99,"info":"26/11/2014 at 02:25:55"},{"visible":true,"include":false,"step":"80.0","x":-31.067619047619047,"y":32.39809523809524,"z":32.145714285714284,"a95":0.99,"info":"26/11/2014 at 02:25:55"},{"visible":true,"include":false,"step":"90.0","x":-30.416190476190476,"y":34.01619047619048,"z":31.695238095238096,"a95":0.99,"info":"26/11/2014 at 02:25:55"}]},{"version":"v1.1.0","exported":"2017-06-26T09:20:31.243Z","volume":10.5,"added":"2017-06-26T09:10:20.495Z","format":"Utrecht","demagType":"Unknown","strat":"2","patch":1.1,"GEO":[{"dec":358.0185690064124,"inc":48.829660203118536,"MAD":4.9793339908872865,"cm":[0,-1.124100812432971e-15,0],"intensity":89.89721996715542,"type":"dir","forced":true,"remark":"","origin":false,"nSteps":12,"minStep":"15.0","maxStep":"70.0","steps":["15.0","20.0","23.0","25.0","30.0","33.0","35.0","40.0","45.0","50.0","60.0","70.0"],"group":"None","version":"v1.1.0"}],"TECT":[{"dec":351.82889556992825,"inc":-6.605913854228975,"MAD":4.97933399088727,"cm":[-1.5543122344752192e-15,-6.300515664747763e-15,9.71445146547012e-17],"intensity":89.89721996715544,"type":"dir","forced":true,"remark":"","origin":false,"nSteps":12,"minStep":"15.0","maxStep":"70.0","steps":["15.0","20.0","23.0","25.0","30.0","33.0","35.0","40.0","45.0","50.0","60.0","70.0"],"group":"None","version":"v1.1.0"}],"interpreted":true,"name":"GM2.3A","coreAzi":256,"coreDip":57,"bedStrike":250,"bedDip":57,"data":[{"visible":true,"include":false,"step":"0.0","x":-33.29047619047619,"y":51.68095238095238,"z":44.68380952380952,"a95":0.99,"info":"26/11/2014 at 02:25:55"},{"visible":true,"include":false,"step":"10.0","x":-30.354285714285716,"y":29.388571428571428,"z":31.940952380952382,"a95":0.99,"info":"26/11/2014 at 02:25:55"},{"visible":true,"include":true,"step":"15.0","x":-33.904761904761905,"y":41.02857142857143,"z":34.71333333333333,"a95":0.99,"info":"26/11/2014 at 02:25:55"},{"visible":true,"include":true,"step":"20.0","x":-24.343809523809526,"y":29.571428571428573,"z":25.32095238095238,"a95":0.99,"info":"26/11/2014 at 02:25:55"},{"visible":true,"include":true,"step":"23.0","x":-25.93047619047619,"y":29.194285714285716,"z":25.08666666666667,"a95":0.99,"info":"26/11/2014 at 02:25:55"},{"visible":true,"include":true,"step":"25.0","x":-28.33904761904762,"y":32.06476190476191,"z":22.451428571428572,"a95":0.99,"info":"26/11/2014 at 02:25:55"},{"visible":true,"include":true,"step":"30.0","x":-24.565714285714286,"y":23.64952380952381,"z":22.84095238095238,"a95":0.99,"info":"26/11/2014 at 02:25:55"},{"visible":true,"include":true,"step":"33.0","x":-19.526666666666667,"y":28.93142857142857,"z":23.099047619047617,"a95":0.99,"info":"26/11/2014 at 02:25:55"},{"visible":true,"include":true,"step":"35.0","x":-19.184761904761906,"y":20.735238095238095,"z":21.964761904761904,"a95":0.99,"info":"26/11/2014 at 02:25:55"},{"visible":true,"include":true,"step":"40.0","x":-15.368571428571428,"y":18.82,"z":20.78,"a95":0.99,"info":"26/11/2014 at 02:25:55"},{"visible":true,"include":true,"step":"45.0","x":-13.598095238095238,"y":21.354285714285716,"z":17.274285714285714,"a95":0.99,"info":"26/11/2014 at 02:25:55"},{"visible":true,"include":true,"step":"50.0","x":-12.91047619047619,"y":21.564761904761905,"z":14.391428571428573,"a95":0.99,"info":"26/11/2014 at 02:25:55"},{"visible":true,"include":true,"step":"60.0","x":-11.615238095238094,"y":20.739047619047618,"z":20.335238095238097,"a95":0.99,"info":"26/11/2014 at 02:25:55"},{"visible":true,"include":true,"step":"70.0","x":-13.850476190476192,"y":15.083809523809524,"z":16.78761904761905,"a95":0.99,"info":"26/11/2014 at 02:25:55"},{"visible":true,"include":false,"step":"80.0","x":-19.02,"y":8.505428571428572,"z":9.783809523809524,"a95":0.99,"info":"26/11/2014 at 02:25:55"},{"visible":true,"include":false,"step":"90.0","x":-8.709047619047618,"y":12.714285714285714,"z":15.608571428571427,"a95":0.99,"info":"26/11/2014 at 02:25:55"}]},{"version":"v1.1.0","exported":"2017-06-26T09:20:31.243Z","volume":10.5,"added":"2017-06-26T09:10:20.495Z","format":"Utrecht","demagType":"Unknown","strat":"3","patch":1.1,"GEO":[{"dec":23.39048330707186,"inc":74.5606651070964,"MAD":7.134965867756325,"cm":[-2.7755575615628914e-16,5.551115123125783e-17,0],"intensity":96.10605360175025,"type":"dir","forced":true,"remark":"","origin":false,"nSteps":11,"minStep":"23.0","maxStep":"80.0","steps":["23.0","25.0","30.0","33.0","35.0","40.0","45.0","50.0","60.0","70.0","80.0"],"group":"None","version":"v1.1.0"}],"TECT":[{"dec":351.3177039678468,"inc":21.26840413089748,"MAD":7.134965867756315,"cm":[2.220446049250313e-16,7.108896804552955e-15,8.881784197001252e-16],"intensity":96.10605360175025,"type":"dir","forced":true,"remark":"","origin":false,"nSteps":11,"minStep":"23.0","maxStep":"80.0","steps":["23.0","25.0","30.0","33.0","35.0","40.0","45.0","50.0","60.0","70.0","80.0"],"group":"None","version":"v1.1.0"}],"interpreted":true,"name":"GM2.4A","coreAzi":291,"coreDip":65,"bedStrike":250,"bedDip":57,"data":[{"visible":true,"include":false,"step":"0.0","x":-36.98380952380952,"y":45.79047619047619,"z":86.81333333333333,"a95":0.99,"info":"26/11/2014 at 02:25:55"},{"visible":true,"include":false,"step":"10.0","x":-38.18095238095238,"y":24.843809523809526,"z":78.00190476190475,"a95":0.99,"info":"26/11/2014 at 02:25:55"},{"visible":true,"include":false,"step":"15.0","x":-45.34571428571429,"y":29.824761904761907,"z":75.06857142857143,"a95":0.99,"info":"26/11/2014 at 02:25:55"},{"visible":true,"include":false,"step":"20.0","x":-33.58571428571428,"y":13.284761904761906,"z":59.584761904761905,"a95":0.99,"info":"26/11/2014 at 02:25:55"},{"visible":true,"include":true,"step":"23.0","x":-30.9,"y":11.608571428571429,"z":58.70095238095238,"a95":0.99,"info":"26/11/2014 at 02:25:55"},{"visible":true,"include":true,"step":"25.0","x":-27.916190476190476,"y":21.18190476190476,"z":53.731428571428566,"a95":0.99,"info":"26/11/2014 at 02:25:55"},{"visible":true,"include":true,"step":"30.0","x":-27.963809523809523,"y":19.801904761904762,"z":50.980952380952374,"a95":0.99,"info":"26/11/2014 at 02:25:55"},{"visible":true,"include":true,"step":"33.0","x":-26.422857142857143,"y":17.595238095238095,"z":52.87714285714286,"a95":0.99,"info":"26/11/2014 at 02:25:55"},{"visible":true,"include":true,"step":"35.0","x":-22.445714285714285,"y":4.930952380952381,"z":44.43047619047619,"a95":0.99,"info":"26/11/2014 at 02:25:55"},{"visible":true,"include":true,"step":"40.0","x":-21.50190476190476,"y":11.16,"z":46.829523809523806,"a95":0.99,"info":"26/11/2014 at 02:25:55"},{"visible":true,"include":true,"step":"45.0","x":-17.091428571428573,"y":18.31714285714286,"z":48.561904761904756,"a95":0.99,"info":"26/11/2014 at 02:25:55"},{"visible":true,"include":true,"step":"50.0","x":-8.784857142857144,"y":6.257142857142857,"z":40.13142857142857,"a95":0.99,"info":"26/11/2014 at 02:25:55"},{"visible":true,"include":true,"step":"60.0","x":-18.584761904761905,"y":22.100952380952382,"z":39.40190476190477,"a95":0.99,"info":"26/11/2014 at 02:25:55"},{"visible":true,"include":true,"step":"70.0","x":-13.267619047619048,"y":4.056380952380953,"z":24.783809523809527,"a95":0.99,"info":"26/11/2014 at 02:25:55"},{"visible":true,"include":true,"step":"80.0","x":-15.97904761904762,"y":8.624,"z":22.72,"a95":0.99,"info":"26/11/2014 at 02:25:55"},{"visible":true,"include":false,"step":"90.0","x":-18.589523809523808,"y":13.64857142857143,"z":17.553333333333335,"a95":0.99,"info":"26/11/2014 at 02:25:55"}]},{"version":"v1.1.0","exported":"2017-06-26T09:20:31.244Z","volume":10.5,"added":"2017-06-26T09:10:20.497Z","format":"Utrecht","demagType":"Unknown","strat":"1","patch":1.1,"GEO":[{"dec":0.09472523498567398,"inc":56.222352256450435,"MAD":5.428076228132221,"cm":[-2.6645352591003757e-15,-1.149080830487037e-14,0],"intensity":245.35127433706324,"type":"dir","forced":true,"remark":"","origin":false,"nSteps":12,"minStep":"8.0","maxStep":"70.0","steps":["8.0","12.0","16.0","20.0","25.0","30.0","35.0","40.0","45.0","50.0","60.0","70.0"],"group":"None","version":"v1.1.0"}],"TECT":[{"dec":351.0133580306646,"inc":0.8487014307636326,"MAD":5.428076228132175,"cm":[1.7763568394002505e-15,-3.1086244689504383e-15,-1.1102230246251565e-16],"intensity":245.35127433706327,"type":"dir","forced":true,"remark":"","origin":false,"nSteps":12,"minStep":"8.0","maxStep":"70.0","steps":["8.0","12.0","16.0","20.0","25.0","30.0","35.0","40.0","45.0","50.0","60.0","70.0"],"group":"None","version":"v1.1.0"}],"interpreted":true,"name":"GM2.5B","coreAzi":291,"coreDip":73,"bedStrike":250,"bedDip":57,"data":[{"visible":true,"include":false,"step":"0.0","x":2.0315238095238093,"y":87.71619047619048,"z":185.6,"a95":0.99,"info":"27/10/2014 at 00:27:45"},{"visible":true,"include":false,"step":"4.0","x":12.957142857142859,"y":91.85142857142857,"z":161.32380952380953,"a95":0.99,"info":"27/10/2014 at 00:27:45"},{"visible":true,"include":true,"step":"8.0","x":8.450952380952382,"y":87.51238095238095,"z":142.7904761904762,"a95":0.99,"info":"27/10/2014 at 00:27:45"},{"visible":true,"include":true,"step":"12.0","x":1.9882857142857142,"y":77.4752380952381,"z":119.3047619047619,"a95":0.99,"info":"27/10/2014 at 00:27:45"},{"visible":true,"include":true,"step":"16.0","x":-2.3503809523809522,"y":78.85904761904762,"z":106.15238095238094,"a95":0.99,"info":"27/10/2014 at 00:27:45"},{"visible":true,"include":true,"step":"20.0","x":-11.372380952380952,"y":63.92761904761905,"z":103.45714285714286,"a95":0.99,"info":"27/10/2014 at 00:27:45"},{"visible":true,"include":true,"step":"25.0","x":-5.898000000000001,"y":52.13047619047619,"z":97.67619047619047,"a95":0.99,"info":"27/10/2014 at 00:27:45"},{"visible":true,"include":true,"step":"30.0","x":-13.74,"y":52.27333333333333,"z":92.47333333333333,"a95":0.99,"info":"27/10/2014 at 00:27:45"},{"visible":true,"include":true,"step":"35.0","x":-9.652380952380952,"y":41.13238095238095,"z":82.25428571428571,"a95":0.99,"info":"27/10/2014 at 00:27:45"},{"visible":true,"include":true,"step":"40.0","x":-9.891428571428571,"y":56.58095238095238,"z":78.21714285714286,"a95":0.99,"info":"27/10/2014 at 00:27:45"},{"visible":true,"include":true,"step":"45.0","x":-12.196190476190477,"y":45.906666666666666,"z":67.21714285714286,"a95":0.99,"info":"27/10/2014 at 00:27:45"},{"visible":true,"include":true,"step":"50.0","x":-12.435238095238095,"y":38.03619047619048,"z":72.32666666666667,"a95":0.99,"info":"27/10/2014 at 00:27:45"},{"visible":true,"include":true,"step":"60.0","x":-13.667619047619047,"y":31.392380952380954,"z":74.77142857142857,"a95":0.99,"info":"27/10/2014 at 00:27:45"},{"visible":true,"include":true,"step":"70.0","x":-9.97904761904762,"y":37.43238095238095,"z":68.35809523809523,"a95":0.99,"info":"27/10/2014 at 00:27:45"},{"visible":true,"include":false,"step":"80.0","x":-3.034,"y":34.5752380952381,"z":63.28952380952381,"a95":0.99,"info":"27/10/2014 at 00:27:45"},{"visible":true,"include":false,"step":"90.0","x":-0.16561904761904764,"y":32.47047619047619,"z":51.68666666666667,"a95":0.99,"info":"27/10/2014 at 00:27:45"},{"visible":true,"include":false,"step":"100.0","x":-3.062190476190476,"y":27.68952380952381,"z":50.432380952380946,"a95":0.99,"info":"27/10/2014 at 00:27:45"}]},{"version":"v1.1.0","exported":"2017-06-26T09:20:31.244Z","volume":10.5,"added":"2017-06-26T09:10:20.497Z","format":"Utrecht","demagType":"Unknown","strat":"4","patch":1.1,"GEO":[{"dec":358.4618270630626,"inc":62.63478747763124,"MAD":5.967385384319679,"cm":[6.661338147750939e-16,3.7192471324942744e-15,0],"intensity":115.04870154410317,"type":"dir","forced":true,"remark":"","origin":false,"nSteps":11,"minStep":"15.0","maxStep":"60.0","steps":["15.0","20.0","23.0","25.0","30.0","33.0","35.0","40.0","45.0","50.0","60.0"],"group":"None","version":"v1.1.0"}],"TECT":[{"dec":348.4291665414608,"inc":6.778257757579999,"MAD":5.9673853843196705,"cm":[4.440892098500626e-16,4.496403249731884e-15,4.996003610813204e-16],"intensity":115.04870154410317,"type":"dir","forced":true,"remark":"","origin":false,"nSteps":11,"minStep":"15.0","maxStep":"60.0","steps":["15.0","20.0","23.0","25.0","30.0","33.0","35.0","40.0","45.0","50.0","60.0"],"group":"None","version":"v1.1.0"}],"interpreted":true,"name":"GM2.6A","coreAzi":85,"coreDip":53,"bedStrike":250,"bedDip":57,"data":[{"visible":true,"include":false,"step":"0.0","x":-37.60190476190476,"y":-29.299047619047617,"z":61.97428571428571,"a95":0.99,"info":"26/11/2014 at 02:25:55"},{"visible":true,"include":false,"step":"10.0","x":-33.62380952380953,"y":-37.95238095238095,"z":42.320952380952384,"a95":0.99,"info":"26/11/2014 at 02:25:55"},{"visible":true,"include":true,"step":"15.0","x":-38.227619047619044,"y":-29.48761904761905,"z":46.73142857142857,"a95":0.99,"info":"26/11/2014 at 02:25:55"},{"visible":true,"include":true,"step":"20.0","x":-32.74190476190476,"y":-33.88761904761905,"z":42.53238095238095,"a95":0.99,"info":"26/11/2014 at 02:25:55"},{"visible":true,"include":true,"step":"23.0","x":-30.795238095238098,"y":-35.936190476190475,"z":43.86571428571428,"a95":0.99,"info":"26/11/2014 at 02:25:55"},{"visible":true,"include":true,"step":"25.0","x":-34.96190476190476,"y":-23.42761904761905,"z":39.24190476190476,"a95":0.99,"info":"26/11/2014 at 02:25:55"},{"visible":true,"include":true,"step":"30.0","x":-33.511428571428574,"y":-21.12952380952381,"z":38.64380952380952,"a95":0.99,"info":"26/11/2014 at 02:25:55"},{"visible":true,"include":true,"step":"33.0","x":-28.674285714285713,"y":-19.12952380952381,"z":47.13238095238095,"a95":0.99,"info":"26/11/2014 at 02:25:55"},{"visible":true,"include":true,"step":"35.0","x":-27.41142857142857,"y":-27.106666666666666,"z":40.994285714285716,"a95":0.99,"info":"26/11/2014 at 02:25:55"},{"visible":true,"include":true,"step":"40.0","x":-21.428571428571427,"y":-23.252380952380953,"z":35.682857142857145,"a95":0.99,"info":"26/11/2014 at 02:25:55"},{"visible":true,"include":true,"step":"45.0","x":-21.052380952380954,"y":-20.635238095238094,"z":38.30571428571428,"a95":0.99,"info":"26/11/2014 at 02:25:55"},{"visible":true,"include":true,"step":"50.0","x":-16.32190476190476,"y":-18.68095238095238,"z":32.65904761904762,"a95":0.99,"info":"26/11/2014 at 02:25:55"},{"visible":true,"include":true,"step":"60.0","x":-21.486666666666668,"y":-23.89047619047619,"z":35.859047619047615,"a95":0.99,"info":"26/11/2014 at 02:25:55"},{"visible":true,"include":false,"step":"70.0","x":-15.95047619047619,"y":-20.86095238095238,"z":27.861904761904764,"a95":0.99,"info":"26/11/2014 at 02:25:55"},{"visible":true,"include":false,"step":"80.0","x":-5.809904761904762,"y":-19.714285714285715,"z":28.334285714285713,"a95":0.99,"info":"26/11/2014 at 02:25:55"},{"visible":true,"include":false,"step":"90.0","x":-7.1982857142857135,"y":-17.915238095238095,"z":22.898095238095237,"a95":0.99,"info":"26/11/2014 at 02:25:55"}]},{"version":"v1.1.0","exported":"2017-06-26T09:20:31.244Z","volume":10.5,"added":"2017-06-26T09:10:20.499Z","format":"Utrecht","demagType":"Unknown","strat":null,"patch":1.1,"GEO":[{"dec":320.4959211801441,"inc":-2.714040015145777,"MAD":23.09902220178915,"cm":[1.9539925233402755e-14,-8.881784197001252e-15,0],"intensity":743.7500982297615,"type":"GC","origin":false,"forced":true,"remark":"","nSteps":10,"minStep":"150","maxStep":"390","steps":["150","180","210","240","270","300","320","340","370","390"],"group":"None","version":"v1.1.0"}],"TECT":[{"dec":304.8189918288946,"inc":-54.63171421421916,"MAD":23.09902220178884,"cm":[1.199040866595169e-14,-3.552713678800501e-15,0],"intensity":743.7500982297616,"type":"GC","origin":false,"forced":true,"remark":"","nSteps":10,"minStep":"150","maxStep":"390","steps":["150","180","210","240","270","300","320","340","370","390"],"group":"None","version":"v1.1.0"}],"interpreted":true,"name":"GM2.7A","coreAzi":195,"coreDip":45,"bedStrike":250,"bedDip":57,"data":[{"visible":true,"include":false,"step":"20","x":-788.0952380952381,"y":-185.61904761904762,"z":47.523809523809526,"a95":1.4,"info":"\"14-11-30\" at \"18:34\""},{"visible":true,"include":false,"step":"100","x":-379.5238095238095,"y":-209.04761904761904,"z":-250.76190476190476,"a95":2,"info":"\"15-02-10\" at \"17:00\""},{"visible":true,"include":true,"step":"150","x":-198.57142857142858,"y":-224.1904761904762,"z":-315.5238095238095,"a95":2.3,"info":"\"15-02-10\" at \"20:56\""},{"visible":true,"include":true,"step":"180","x":-114.19047619047619,"y":-224.95238095238096,"z":-342.95238095238096,"a95":2.7,"info":"\"15-02-11\" at \"16:26\""},{"visible":true,"include":true,"step":"210","x":-107.80952380952381,"y":-254.38095238095238,"z":-364,"a95":2.6,"info":"\"15-02-11\" at \"20:04\""},{"visible":true,"include":true,"step":"240","x":-37.523809523809526,"y":-226.38095238095238,"z":-365.8095238095238,"a95":2.8,"info":"\"15-02-11\" at \"23:53\""},{"visible":true,"include":true,"step":"270","x":-32,"y":-278.0952380952381,"z":-423.42857142857144,"a95":2.6,"info":"\"15-02-12\" at \"18:40\""},{"visible":true,"include":true,"step":"300","x":-55.904761904761905,"y":-280.95238095238096,"z":-369.6190476190476,"a95":2.4,"info":"\"15-02-13\" at \"16:26\""},{"visible":true,"include":true,"step":"320","x":-28.571428571428573,"y":-176.0952380952381,"z":-324.1904761904762,"a95":2.9,"info":"\"15-02-13\" at \"21:16\""},{"visible":true,"include":true,"step":"340","x":-22.285714285714285,"y":-169.8095238095238,"z":-292.57142857142856,"a95":2.9,"info":"\"15-02-14\" at \"01:21\""},{"visible":true,"include":true,"step":"370","x":5.0476190476190474,"y":-160.28571428571428,"z":-282.0952380952381,"a95":3.2,"info":"\"15-02-16\" at \"18:52\""},{"visible":true,"include":true,"step":"390","x":24.095238095238095,"y":-99.33333333333333,"z":-331.04761904761904,"a95":3.2,"info":"\"15-02-16\" at \"22:28\""},{"visible":true,"include":false,"step":"420","x":56,"y":-108.38095238095238,"z":-236.47619047619048,"a95":4.1,"info":"\"15-02-17\" at \"21:37\""},{"visible":true,"include":false,"step":"450","x":-84.57142857142857,"y":-67.61904761904762,"z":-207.71428571428572,"a95":7.7,"info":"\"15-03-08\" at \"21:09\""},{"visible":true,"include":false,"step":"470","x":15.047619047619047,"y":-81.04761904761905,"z":-160.1904761904762,"a95":10.6,"info":"\"15-03-09\" at \"11:27\""},{"visible":true,"include":false,"step":"490","x":-54.666666666666664,"y":-210.85714285714286,"z":-214.95238095238096,"a95":7.1,"info":"\"15-03-09\" at \"14:36\""},{"visible":true,"include":false,"step":"510","x":-216.28571428571428,"y":-502.0952380952381,"z":-174.28571428571428,"a95":4.5,"info":"\"15-04-21\" at \"10:46\""}]},{"version":"v1.1.0","exported":"2017-06-26T09:20:31.244Z","volume":10.5,"added":"2017-06-26T09:10:20.504Z","format":"Utrecht","demagType":"Unknown","strat":null,"patch":1.1,"GEO":[{"dec":42.01607340930366,"inc":-74.67235854632244,"MAD":20.957162668424647,"cm":[-7.105427357601002e-15,7.549516567451064e-15,0],"intensity":734.4213944191024,"type":"GC","origin":false,"forced":true,"remark":"","nSteps":9,"minStep":"180","maxStep":"390","steps":["180","210","240","270","300","320","340","370","390"],"group":"None","version":"v1.1.0"}],"TECT":[{"dec":142.52071815667693,"inc":-38.997742833826344,"MAD":20.95716266842451,"cm":[-2.842170943040401e-14,3.597122599785507e-14,1.0658141036401503e-14],"intensity":734.4213944191024,"type":"GC","origin":false,"forced":true,"remark":"","nSteps":9,"minStep":"180","maxStep":"390","steps":["180","210","240","270","300","320","340","370","390"],"group":"None","version":"v1.1.0"}],"interpreted":true,"name":"GM2.8A","coreAzi":179,"coreDip":50,"bedStrike":250,"bedDip":57,"data":[{"visible":true,"include":false,"step":"20","x":-1008.7619047619048,"y":-229.8095238095238,"z":388.2857142857143,"a95":1.8,"info":"\"14-11-30\" at \"18:36\""},{"visible":true,"include":false,"step":"100","x":-657.047619047619,"y":-175.8095238095238,"z":-37.61904761904762,"a95":1.6,"info":"\"15-02-10\" at \"17:02\""},{"visible":true,"include":false,"step":"150","x":-413.42857142857144,"y":-171.14285714285714,"z":-116.0952380952381,"a95":1.7,"info":"\"15-02-10\" at \"20:59\""},{"visible":true,"include":true,"step":"180","x":-372,"y":-173.33333333333334,"z":-127.42857142857143,"a95":1.8,"info":"\"15-02-11\" at \"16:28\""},{"visible":true,"include":true,"step":"210","x":-359.04761904761904,"y":-202.38095238095238,"z":-129.14285714285714,"a95":1.9,"info":"\"15-02-11\" at \"20:06\""},{"visible":true,"include":true,"step":"240","x":-354.2857142857143,"y":-180.66666666666666,"z":-155.42857142857142,"a95":1.9,"info":"\"15-02-11\" at \"23:55\""},{"visible":true,"include":true,"step":"270","x":-253.42857142857142,"y":-172.57142857142858,"z":-163.42857142857142,"a95":2,"info":"\"15-02-12\" at \"18:43\""},{"visible":true,"include":true,"step":"300","x":-274.0952380952381,"y":-142.28571428571428,"z":-137.42857142857142,"a95":2.3,"info":"\"15-02-13\" at \"16:28\""},{"visible":true,"include":true,"step":"320","x":-218.95238095238096,"y":-61.904761904761905,"z":-107.9047619047619,"a95":2.2,"info":"\"15-02-13\" at \"21:55\""},{"visible":true,"include":true,"step":"340","x":-230,"y":-7.904761904761905,"z":-146.1904761904762,"a95":2.8,"info":"\"15-02-14\" at \"01:23\""},{"visible":true,"include":true,"step":"370","x":-310.57142857142856,"y":-6.857142857142857,"z":-139.71428571428572,"a95":2.6,"info":"\"15-02-16\" at \"18:55\""},{"visible":true,"include":true,"step":"390","x":-276.0952380952381,"y":-13.523809523809524,"z":-163.14285714285714,"a95":3.1,"info":"\"15-02-16\" at \"22:30\""},{"visible":true,"include":false,"step":"420","x":-239.52380952380952,"y":-20.761904761904763,"z":-161.52380952380952,"a95":3.4,"info":"\"15-02-17\" at \"21:39\""},{"visible":true,"include":false,"step":"450","x":-274.57142857142856,"y":-55.61904761904762,"z":-167.8095238095238,"a95":4.2,"info":"\"15-03-08\" at \"21:11\""},{"visible":true,"include":false,"step":"470","x":-330.95238095238096,"y":-11.714285714285714,"z":-165.42857142857142,"a95":4.8,"info":"\"15-03-09\" at \"11:29\""},{"visible":true,"include":false,"step":"490","x":-339.3333333333333,"y":-1.1428571428571428,"z":-109.33333333333333,"a95":5.5,"info":"\"15-03-09\" at \"14:38\""},{"visible":true,"include":false,"step":"510","x":-498.85714285714283,"y":-8.666666666666666,"z":86.0952380952381,"a95":6.2,"info":"\"15-04-21\" at \"10:48\""}]},{"version":"v1.1.0","exported":"2017-06-26T09:20:31.244Z","volume":10.5,"added":"2017-06-26T09:10:20.504Z","format":"Utrecht","demagType":"Unknown","strat":"5","patch":1.1,"GEO":[],"TECT":[],"interpreted":false,"name":"GM2.9A","coreAzi":269,"coreDip":34,"bedStrike":250,"bedDip":57,"data":[{"visible":true,"include":false,"step":"0.0","x":-269.7809523809524,"y":42.900952380952376,"z":92.39714285714285,"a95":0.99,"info":"26/11/2014 at 02:25:55"},{"visible":true,"include":false,"step":"10.0","x":-167.44761904761904,"y":39.074285714285715,"z":-30.834285714285713,"a95":0.99,"info":"26/11/2014 at 02:25:55"},{"visible":true,"include":false,"step":"15.0","x":-120.98095238095237,"y":33.13142857142857,"z":-28.54190476190476,"a95":0.99,"info":"26/11/2014 at 02:25:55"},{"visible":true,"include":false,"step":"20.0","x":-49.50095238095238,"y":59.915238095238095,"z":-27.152380952380955,"a95":0.99,"info":"26/11/2014 at 02:25:55"},{"visible":true,"include":false,"step":"23.0","x":-59.17047619047619,"y":49.10952380952381,"z":-74.3295238095238,"a95":0.99,"info":"26/11/2014 at 02:25:55"},{"visible":true,"include":false,"step":"25.0","x":-30.139047619047616,"y":77.54666666666667,"z":-82.21238095238095,"a95":0.99,"info":"26/11/2014 at 02:25:55"},{"visible":true,"include":false,"step":"30.0","x":-44.54571428571429,"y":18.513333333333332,"z":-26.58,"a95":0.99,"info":"26/11/2014 at 02:25:55"},{"visible":true,"include":false,"step":"33.0","x":-25.57333333333333,"y":70.7647619047619,"z":-26.522857142857145,"a95":0.99,"info":"26/11/2014 at 02:25:55"},{"visible":true,"include":false,"step":"35.0","x":4.077904761904762,"y":27.254285714285714,"z":-34.511428571428574,"a95":0.99,"info":"26/11/2014 at 02:25:55"},{"visible":true,"include":false,"step":"40.0","x":-0.5259333333333334,"y":-2.5960952380952382,"z":-21.045714285714286,"a95":0.99,"info":"26/11/2014 at 02:25:55"},{"visible":true,"include":false,"step":"45.0","x":-21.944761904761904,"y":72.30190476190475,"z":-87.75904761904762,"a95":0.99,"info":"26/11/2014 at 02:25:55"},{"visible":true,"include":false,"step":"50.0","x":-71.66857142857143,"y":33.66095238095238,"z":-55.55238095238095,"a95":0.99,"info":"26/11/2014 at 02:25:55"},{"visible":true,"include":false,"step":"60.0","x":38.72285714285714,"y":-17.880000000000003,"z":-21.738095238095237,"a95":0.99,"info":"26/11/2014 at 02:25:55"},{"visible":true,"include":false,"step":"70.0","x":-27.632380952380952,"y":-7.923238095238095,"z":-51.69047619047619,"a95":0.99,"info":"26/11/2014 at 02:25:55"},{"visible":true,"include":false,"step":"80.0","x":-55.91428571428572,"y":6.665428571428571,"z":35.11523809523809,"a95":0.99,"info":"26/11/2014 at 02:25:55"},{"visible":true,"include":false,"step":"90.0","x":51.201904761904764,"y":51.05047619047619,"z":59.8352380952381,"a95":0.99,"info":"26/11/2014 at 02:25:55"}]},{"version":"v1.1.0","exported":"2017-06-26T09:20:31.244Z","volume":10.5,"added":"2017-06-26T09:10:20.504Z","format":"Utrecht","demagType":"Unknown","strat":"2","patch":1.1,"GEO":[{"dec":6.075755987023797,"inc":-34.38273877706734,"MAD":6.706356228486641,"cm":[-6.17284001691587e-14,-1.4210854715202004e-14,0],"intensity":442.2929012838405,"type":"GC","origin":false,"forced":true,"remark":"","nSteps":10,"minStep":"0.0","maxStep":"40.0","steps":["0.0","4.0","8.0","12.0","16.0","20.0","25.0","30.0","35.0","40.0"],"group":"None","version":"v1.1.0"}],"TECT":[{"dec":80.9038605652197,"inc":-68.31948910895443,"MAD":6.706356228486653,"cm":[-9.459100169806334e-14,0,5.1958437552457326e-14],"intensity":442.29290128384054,"type":"GC","origin":false,"forced":true,"remark":"","nSteps":10,"minStep":"0.0","maxStep":"40.0","steps":["0.0","4.0","8.0","12.0","16.0","20.0","25.0","30.0","35.0","40.0"],"group":"None","version":"v1.1.0"}],"interpreted":true,"name":"GM2.10A","coreAzi":267,"coreDip":35,"bedStrike":250,"bedDip":57,"data":[{"visible":true,"include":true,"step":"0.0","x":-302.5333333333333,"y":103.52380952380952,"z":-94.6152380952381,"a95":0.99,"info":"27/10/2014 at 00:27:45"},{"visible":true,"include":true,"step":"4.0","x":-280.6666666666667,"y":66.78476190476191,"z":-122.43809523809523,"a95":0.99,"info":"27/10/2014 at 00:27:45"},{"visible":true,"include":true,"step":"8.0","x":-233.8095238095238,"y":31.580952380952382,"z":-137.63809523809525,"a95":0.99,"info":"27/10/2014 at 00:27:45"},{"visible":true,"include":true,"step":"12.0","x":-157.13333333333335,"y":-2.7483809523809524,"z":-156.6,"a95":0.99,"info":"27/10/2014 at 00:27:45"},{"visible":true,"include":true,"step":"16.0","x":-126.37142857142858,"y":-25.137142857142855,"z":-187.98095238095237,"a95":0.99,"info":"27/10/2014 at 00:27:45"},{"visible":true,"include":true,"step":"20.0","x":-127.39047619047618,"y":-58.005714285714284,"z":-175.62857142857143,"a95":0.99,"info":"27/10/2014 at 00:27:45"},{"visible":true,"include":true,"step":"25.0","x":-85.99142857142857,"y":-59.70571428571428,"z":-200.39999999999998,"a95":0.99,"info":"27/10/2014 at 00:27:45"},{"visible":true,"include":true,"step":"30.0","x":-58.005714285714284,"y":-63.92857142857143,"z":-164.6095238095238,"a95":0.99,"info":"27/10/2014 at 00:27:45"},{"visible":true,"include":true,"step":"35.0","x":-94.63428571428571,"y":-63.58571428571428,"z":-177.8952380952381,"a95":0.99,"info":"27/10/2014 at 00:27:45"},{"visible":true,"include":true,"step":"40.0","x":-30.866666666666667,"y":-64.95904761904762,"z":-193.44761904761904,"a95":0.99,"info":"27/10/2014 at 00:27:45"},{"visible":true,"include":false,"step":"45.0","x":3.1520952380952383,"y":-56.01428571428571,"z":-189.04761904761904,"a95":0.99,"info":"27/10/2014 at 00:27:45"},{"visible":true,"include":false,"step":"50.0","x":4.972095238095238,"y":-53.42857142857143,"z":-194.0857142857143,"a95":0.99,"info":"27/10/2014 at 00:27:45"},{"visible":true,"include":false,"step":"60.0","x":-27.343809523809526,"y":-86.06285714285714,"z":-209.39999999999998,"a95":0.99,"info":"27/10/2014 at 00:27:45"},{"visible":true,"include":false,"step":"70.0","x":6.514666666666666,"y":-71.42,"z":-188.05714285714285,"a95":0.99,"info":"27/10/2014 at 00:27:45"},{"visible":true,"include":false,"step":"80.0","x":1.9001904761904764,"y":-101.45714285714286,"z":-85.14,"a95":0.99,"info":"27/10/2014 at 00:27:45"},{"visible":true,"include":false,"step":"90.0","x":-2.8445714285714283,"y":-93.59904761904761,"z":-137.84761904761905,"a95":0.99,"info":"27/10/2014 at 00:27:45"},{"visible":true,"include":false,"step":"100.0","x":26.54952380952381,"y":-69.3952380952381,"z":-163.2761904761905,"a95":0.99,"info":"27/10/2014 at 00:27:45"}]},{"version":"v1.1.0","exported":"2017-06-26T09:20:31.244Z","volume":10.5,"added":"2017-06-26T09:10:20.504Z","format":"Utrecht","demagType":"Unknown","strat":null,"patch":1.1,"GEO":[{"dec":315.3247659701469,"inc":-13.333498733030165,"MAD":10.44508872002863,"cm":[-1.5987211554602254e-14,1.2434497875801753e-14,0],"intensity":396.067403045368,"type":"GC","origin":false,"forced":true,"remark":"","nSteps":8,"minStep":"150","maxStep":"340","steps":["150","180","210","240","270","300","320","340"],"group":"None","version":"v1.1.0"}],"TECT":[{"dec":285.35005613280043,"inc":-60.12931240059533,"MAD":10.445088720028481,"cm":[-2.19824158875781e-14,1.2434497875801753e-14,2.7533531010703882e-14],"intensity":396.06740304536817,"type":"GC","origin":false,"forced":true,"remark":"","nSteps":8,"minStep":"150","maxStep":"340","steps":["150","180","210","240","270","300","320","340"],"group":"None","version":"v1.1.0"}],"interpreted":true,"name":"GM2.12A","coreAzi":248,"coreDip":18,"bedStrike":250,"bedDip":57,"data":[{"visible":true,"include":false,"step":"20","x":-353.14285714285717,"y":203.71428571428572,"z":-63.80952380952381,"a95":1.6,"info":"\"14-11-30\" at \"18:38\""},{"visible":true,"include":false,"step":"100","x":-150.28571428571428,"y":146.95238095238096,"z":-204.28571428571428,"a95":2.3,"info":"\"15-02-10\" at \"17:04\""},{"visible":true,"include":true,"step":"150","x":-71.80952380952381,"y":107.04761904761905,"z":-208.47619047619048,"a95":2.6,"info":"\"15-02-10\" at \"21:01\""},{"visible":true,"include":true,"step":"180","x":-31.714285714285715,"y":71.23809523809524,"z":-222.66666666666666,"a95":2.7,"info":"\"15-02-11\" at \"16:30\""},{"visible":true,"include":true,"step":"210","x":-28.761904761904763,"y":69.61904761904762,"z":-211.23809523809524,"a95":2.9,"info":"\"15-02-11\" at \"20:10\""},{"visible":true,"include":true,"step":"240","x":18.38095238095238,"y":52.857142857142854,"z":-206,"a95":2.8,"info":"\"15-02-11\" at \"23:58\""},{"visible":true,"include":true,"step":"270","x":43.23809523809524,"y":49.333333333333336,"z":-188.85714285714286,"a95":2.9,"info":"\"15-02-12\" at \"18:45\""},{"visible":true,"include":true,"step":"300","x":43.04761904761905,"y":36.19047619047619,"z":-168.76190476190476,"a95":3.2,"info":"\"15-02-13\" at \"16:31\""},{"visible":true,"include":true,"step":"320","x":46.38095238095238,"y":45.714285714285715,"z":-157.23809523809524,"a95":2.8,"info":"\"15-02-13\" at \"21:57\""},{"visible":true,"include":true,"step":"340","x":29.904761904761905,"y":36.476190476190474,"z":-158.28571428571428,"a95":3.3,"info":"\"15-02-14\" at \"01:25\""},{"visible":true,"include":false,"step":"370","x":-5.428571428571429,"y":39.523809523809526,"z":-179.14285714285714,"a95":2.9,"info":"\"15-02-16\" at \"18:57\""},{"visible":true,"include":false,"step":"390","x":28.476190476190474,"y":43.04761904761905,"z":-171.8095238095238,"a95":3.8,"info":"\"15-02-16\" at \"22:33\""},{"visible":true,"include":false,"step":"420","x":10.952380952380953,"y":54.857142857142854,"z":-153.52380952380952,"a95":5.5,"info":"\"15-02-17\" at \"21:41\""},{"visible":true,"include":false,"step":"450","x":-69.42857142857143,"y":-30.761904761904763,"z":-164,"a95":9.1,"info":"\"15-03-08\" at \"21:14\""},{"visible":true,"include":false,"step":"470","x":48.95238095238095,"y":178.0952380952381,"z":-67.04761904761905,"a95":12.6,"info":"\"15-03-09\" at \"11:31\""},{"visible":true,"include":false,"step":"490","x":-433.3333333333333,"y":-361.14285714285717,"z":-116.19047619047619,"a95":4.4,"info":"\"15-03-09\" at \"14:40\""},{"visible":true,"include":false,"step":"510","x":-431.6190476190476,"y":550.4761904761905,"z":336.1904761904762,"a95":2.7,"info":"\"15-04-21\" at \"10:50\""}]},{"version":"v1.1.0","exported":"2017-06-26T09:20:31.244Z","volume":10.5,"added":"2017-06-26T09:10:20.505Z","format":"Utrecht","demagType":"Unknown","strat":"3","patch":1.1,"GEO":[{"dec":1.1711201068315518,"inc":48.75104825548983,"MAD":2.8995477003209555,"cm":[0,-1.2545520178264269e-14,0],"intensity":324.0845473750103,"type":"dir","forced":true,"remark":"","origin":false,"nSteps":4,"minStep":"4.0","maxStep":"16.0","steps":["4.0","8.0","12.0","16.0"],"group":"None","version":"v1.1.0"}],"TECT":[{"dec":353.85548967290714,"inc":-6.093591213067551,"MAD":2.899547700320929,"cm":[3.552713678800501e-15,1.3322676295501878e-14,5.329070518200751e-15],"intensity":324.0845473750104,"type":"dir","forced":true,"remark":"","origin":false,"nSteps":4,"minStep":"4.0","maxStep":"16.0","steps":["4.0","8.0","12.0","16.0"],"group":"None","version":"v1.1.0"}],"interpreted":true,"name":"GM2.15B","coreAzi":249,"coreDip":14,"bedStrike":250,"bedDip":57,"data":[{"visible":true,"include":false,"step":"0.0","x":-192.8095238095238,"y":150.54285714285714,"z":-18.044761904761906,"a95":0.99,"info":"27/10/2014 at 00:27:45"},{"visible":true,"include":true,"step":"4.0","x":-175.88571428571427,"y":133.8095238095238,"z":-7.733142857142856,"a95":0.99,"info":"27/10/2014 at 00:27:45"},{"visible":true,"include":true,"step":"8.0","x":-155.2761904761905,"y":111.25714285714287,"z":-20.38095238095238,"a95":0.99,"info":"27/10/2014 at 00:27:45"},{"visible":true,"include":true,"step":"12.0","x":-133.58095238095237,"y":107,"z":-9.231047619047619,"a95":0.99,"info":"27/10/2014 at 00:27:45"},{"visible":true,"include":true,"step":"16.0","x":-74.08761904761904,"y":72.1895238095238,"z":-2.684095238095238,"a95":0.99,"info":"27/10/2014 at 00:27:45"},{"visible":true,"include":false,"step":"20.0","x":-83.22666666666666,"y":38.7,"z":-9.686666666666666,"a95":0.99,"info":"27/10/2014 at 00:27:45"},{"visible":true,"include":false,"step":"25.0","x":-71.35428571428572,"y":47.523809523809526,"z":9.081809523809524,"a95":0.99,"info":"27/10/2014 at 00:27:45"},{"visible":true,"include":false,"step":"30.0","x":-91.01238095238095,"y":31.29047619047619,"z":33.62380952380953,"a95":0.99,"info":"27/10/2014 at 00:27:45"},{"visible":true,"include":false,"step":"35.0","x":-104.46666666666667,"y":3.924,"z":32.34761904761905,"a95":0.99,"info":"27/10/2014 at 00:27:45"},{"visible":true,"include":false,"step":"40.0","x":-95.36190476190475,"y":-7.886952380952382,"z":1.4846666666666668,"a95":0.99,"info":"27/10/2014 at 00:27:45"},{"visible":true,"include":false,"step":"45.0","x":-91.16,"y":8.195809523809524,"z":34.026666666666664,"a95":0.99,"info":"27/10/2014 at 00:27:45"},{"visible":true,"include":false,"step":"50.0","x":-56.24761904761905,"y":-14.27142857142857,"z":92.38761904761905,"a95":0.99,"info":"27/10/2014 at 00:27:45"},{"visible":true,"include":false,"step":"60.0","x":-117.12380952380951,"y":-9.187142857142858,"z":57.01238095238095,"a95":0.99,"info":"27/10/2014 at 00:27:45"},{"visible":true,"include":false,"step":"70.0","x":-54.07238095238095,"y":2.5744761904761906,"z":45.74857142857143,"a95":0.99,"info":"27/10/2014 at 00:27:45"},{"visible":true,"include":false,"step":"80.0","x":-158.2,"y":-86.58,"z":30.152380952380955,"a95":0.99,"info":"27/10/2014 at 00:27:45"},{"visible":true,"include":false,"step":"90.0","x":-73.50285714285714,"y":-50.89809523809523,"z":29.54190476190476,"a95":0.99,"info":"27/10/2014 at 00:27:45"},{"visible":true,"include":false,"step":"100.0","x":-102.96190476190475,"y":-133.24761904761903,"z":36.25333333333334,"a95":0.99,"info":"27/10/2014 at 00:27:45"}]},{"version":"v1.1.0","exported":"2017-06-26T09:20:31.244Z","volume":10.5,"added":"2017-06-26T09:10:20.506Z","format":"Utrecht","demagType":"Unknown","strat":null,"patch":1.1,"GEO":[],"TECT":[],"interpreted":false,"name":"GM2.16A","coreAzi":246,"coreDip":17,"bedStrike":250,"bedDip":57,"data":[{"visible":true,"include":false,"step":"20","x":-459.7142857142857,"y":389.3333333333333,"z":-16.285714285714285,"a95":1.4,"info":"\"14-11-30\" at \"18:40\""},{"visible":true,"include":false,"step":"100","x":-282.0952380952381,"y":283.5238095238095,"z":-149.33333333333334,"a95":1.7,"info":"\"15-02-10\" at \"17:07\""},{"visible":true,"include":false,"step":"150","x":-208,"y":250.95238095238096,"z":-158.47619047619048,"a95":1.7,"info":"\"15-02-10\" at \"21:03\""},{"visible":true,"include":false,"step":"180","x":-166.1904761904762,"y":220.38095238095238,"z":-165.8095238095238,"a95":1.9,"info":"\"15-02-11\" at \"16:33\""},{"visible":true,"include":false,"step":"210","x":-152.66666666666666,"y":238.57142857142858,"z":-155.33333333333334,"a95":1.9,"info":"\"15-02-11\" at \"20:13\""},{"visible":true,"include":false,"step":"240","x":-127.23809523809524,"y":223.8095238095238,"z":-140.57142857142858,"a95":1.8,"info":"\"15-02-12\" at \"00:07\""},{"visible":true,"include":false,"step":"270","x":-97.33333333333333,"y":242.47619047619048,"z":-149.14285714285714,"a95":1.9,"info":"\"15-02-12\" at \"18:47\""},{"visible":true,"include":false,"step":"300","x":-90.0952380952381,"y":242,"z":-128.76190476190476,"a95":1.7,"info":"\"15-02-13\" at \"16:33\""},{"visible":true,"include":false,"step":"320","x":-101.9047619047619,"y":234.95238095238096,"z":-135.9047619047619,"a95":1.5,"info":"\"15-02-13\" at \"21:59\""},{"visible":true,"include":false,"step":"340","x":-114.28571428571429,"y":249.52380952380952,"z":-136.28571428571428,"a95":1.8,"info":"\"15-02-14\" at \"01:27\""},{"visible":true,"include":false,"step":"370","x":-132.66666666666666,"y":254.57142857142858,"z":-116.0952380952381,"a95":2,"info":"\"15-02-16\" at \"18:59\""},{"visible":true,"include":false,"step":"390","x":-121.23809523809524,"y":230.28571428571428,"z":-95.42857142857143,"a95":2.2,"info":"\"15-02-16\" at \"22:35\""},{"visible":true,"include":false,"step":"420","x":-119.04761904761905,"y":227.71428571428572,"z":-65.61904761904762,"a95":3.2,"info":"\"15-02-17\" at \"21:43\""},{"visible":true,"include":false,"step":"450","x":-156.1904761904762,"y":100.38095238095238,"z":-153.14285714285714,"a95":7.8,"info":"\"15-03-08\" at \"21:16\""},{"visible":true,"include":false,"step":"470","x":-193.9047619047619,"y":300.0952380952381,"z":-78.28571428571429,"a95":6.5,"info":"\"15-03-09\" at \"11:33\""},{"visible":true,"include":false,"step":"490","x":750.7619047619048,"y":-508.3809523809524,"z":-78.76190476190476,"a95":2.2,"info":"\"15-03-09\" at \"14:43\""},{"visible":true,"include":false,"step":"510","x":-1108.2857142857142,"y":189.52380952380952,"z":637.1428571428571,"a95":3.2,"info":"\"15-04-21\" at \"10:52\""}]},{"version":"v1.1.0","exported":"2017-06-26T09:20:31.244Z","volume":10.5,"added":"2017-06-26T09:10:20.506Z","format":"Utrecht","demagType":"Unknown","strat":"8","patch":1.1,"GEO":[],"TECT":[],"interpreted":false,"name":"GM2.16B","coreAzi":246,"coreDip":17,"bedStrike":250,"bedDip":57,"data":[{"visible":true,"include":false,"step":"0.0","x":-134.1809523809524,"y":241.42857142857142,"z":159.88571428571427,"a95":0.99,"info":"26/11/2014 at 02:25:55"},{"visible":true,"include":false,"step":"10.0","x":-76.0647619047619,"y":232.47619047619048,"z":127.17142857142856,"a95":0.99,"info":"26/11/2014 at 02:25:55"},{"visible":true,"include":true,"step":"15.0","x":-73.01333333333334,"y":165.37142857142857,"z":153.36190476190475,"a95":0.99,"info":"26/11/2014 at 02:25:55"},{"visible":true,"include":true,"step":"20.0","x":-40.80285714285714,"y":132.86666666666665,"z":143.64761904761903,"a95":0.99,"info":"26/11/2014 at 02:25:55"},{"visible":true,"include":true,"step":"23.0","x":-19.64095238095238,"y":121.73333333333333,"z":176.2761904761905,"a95":0.99,"info":"26/11/2014 at 02:25:55"},{"visible":true,"include":true,"step":"25.0","x":-45.72666666666667,"y":126.5904761904762,"z":174.1904761904762,"a95":0.99,"info":"26/11/2014 at 02:25:55"},{"visible":true,"include":true,"step":"30.0","x":-33.88952380952381,"y":85.8,"z":150.26666666666665,"a95":0.99,"info":"26/11/2014 at 02:25:55"},{"visible":true,"include":true,"step":"33.0","x":-53.915238095238095,"y":114.0952380952381,"z":154.32380952380953,"a95":0.99,"info":"26/11/2014 at 02:25:55"},{"visible":true,"include":true,"step":"35.0","x":-12.651428571428571,"y":24.228571428571428,"z":121.55238095238094,"a95":0.99,"info":"26/11/2014 at 02:25:55"},{"visible":true,"include":true,"step":"40.0","x":-21.156190476190474,"y":20.20285714285714,"z":146.58095238095237,"a95":0.99,"info":"26/11/2014 at 02:25:55"},{"visible":true,"include":true,"step":"45.0","x":-35.745714285714286,"y":15.143809523809523,"z":120.73333333333333,"a95":0.99,"info":"26/11/2014 at 02:25:55"},{"visible":true,"include":true,"step":"50.0","x":-48.87428571428571,"y":38.31428571428572,"z":138.42857142857142,"a95":0.99,"info":"26/11/2014 at 02:25:55"},{"visible":true,"include":false,"step":"60.0","x":-37.09809523809523,"y":61.08761904761904,"z":94.34,"a95":0.99,"info":"26/11/2014 at 02:25:55"},{"visible":true,"include":false,"step":"70.0","x":7.234380952380953,"y":44.256190476190476,"z":134.1238095238095,"a95":0.99,"info":"26/11/2014 at 02:25:55"},{"visible":true,"include":false,"step":"80.0","x":-33.494285714285716,"y":-28.373333333333335,"z":147.73333333333335,"a95":0.99,"info":"26/11/2014 at 02:25:55"},{"visible":true,"include":false,"step":"90.0","x":13.789523809523809,"y":45.593333333333334,"z":85.12380952380951,"a95":0.99,"info":"26/11/2014 at 02:25:55"}]},{"version":"v1.1.0","exported":"2017-06-26T09:20:31.244Z","volume":10.5,"added":"2017-06-26T09:10:20.507Z","format":"Utrecht","demagType":"Unknown","strat":null,"patch":1.1,"GEO":[],"TECT":[],"interpreted":false,"name":"GM2.18A","coreAzi":211,"coreDip":35,"bedStrike":250,"bedDip":57,"data":[{"visible":true,"include":false,"step":"20","x":-78.2,"y":23.65714285714286,"z":24.73333333333333,"a95":2.5,"info":"\"14-11-30\" at \"18:43\""},{"visible":true,"include":false,"step":"100","x":-35.42857142857143,"y":17.323809523809523,"z":-45.695238095238096,"a95":2.9,"info":"\"15-02-10\" at \"17:09\""},{"visible":true,"include":false,"step":"150","x":-17.904761904761905,"y":4.961904761904762,"z":-51.88571428571428,"a95":3.2,"info":"\"15-02-10\" at \"21:05\""},{"visible":true,"include":false,"step":"180","x":-6.666666666666667,"y":4.847619047619047,"z":-49.38095238095238,"a95":3.8,"info":"\"15-02-11\" at \"16:35\""},{"visible":true,"include":false,"step":"210","x":2.3714285714285714,"y":6.323809523809524,"z":-45.00952380952381,"a95":5.2,"info":"\"15-02-11\" at \"20:15\""},{"visible":true,"include":false,"step":"240","x":-3.2,"y":-0.8952381904761905,"z":-41.82857142857143,"a95":4.5,"info":"\"15-02-12\" at \"00:09\""},{"visible":true,"include":false,"step":"270","x":-5.742857142857143,"y":-8.133333333333335,"z":-41.666666666666664,"a95":3.6,"info":"\"15-02-12\" at \"18:49\""},{"visible":true,"include":false,"step":"300","x":0.9047619047619048,"y":-3.5047619047619043,"z":-35.142857142857146,"a95":5.3,"info":"\"15-02-13\" at \"16:35\""},{"visible":true,"include":false,"step":"320","x":7.199999999999999,"y":-5.2,"z":-31.847619047619045,"a95":6.1,"info":"\"15-02-13\" at \"22:01\""},{"visible":true,"include":false,"step":"340","x":-6.6380952380952385,"y":-7.6,"z":-25.257142857142856,"a95":5.3,"info":"\"15-02-14\" at \"01:30\""},{"visible":true,"include":false,"step":"370","x":-6.800000000000001,"y":-4.514285714285714,"z":-19.428571428571427,"a95":8.400001,"info":"\"15-02-16\" at \"19:02\""},{"visible":true,"include":false,"step":"390","x":-11.885714285714286,"y":-8.438095238095238,"z":-11.619047619047619,"a95":15.9,"info":"\"15-02-16\" at \"22:37\""},{"visible":true,"include":false,"step":"420","x":-6.561904761904763,"y":-27.133333333333333,"z":-12.180952380952382,"a95":14.7,"info":"\"15-02-17\" at \"21:45\""},{"visible":true,"include":false,"step":"450","x":-31.80952380952381,"y":-60.27619047619047,"z":-51.37142857142857,"a95":10.9,"info":"\"15-03-08\" at \"21:20\""},{"visible":true,"include":false,"step":"470","x":-54.095238095238095,"y":290.1904761904762,"z":4.285714285714286,"a95":2.5,"info":"\"15-03-09\" at \"11:35\""},{"visible":true,"include":false,"step":"490","x":-481.23809523809524,"y":-360.57142857142856,"z":-128.28571428571428,"a95":3.9,"info":"\"15-03-09\" at \"14:44\""},{"visible":true,"include":false,"step":"510","x":-1182.095238095238,"y":-426.6666666666667,"z":845.9047619047619,"a95":2.3,"info":"\"15-04-21\" at \"10:54\""}]},{"version":"v1.1.0","exported":"2017-06-26T09:20:31.244Z","volume":10.5,"added":"2017-06-26T09:10:20.507Z","format":"Utrecht","demagType":"Unknown","strat":null,"patch":1.1,"GEO":[{"dec":353.746500642055,"inc":-39.965578937784514,"MAD":20.700700341996072,"cm":[-3.019806626980426e-14,1.4210854715202004e-14,0],"intensity":1283.753372376655,"type":"GC","origin":false,"forced":true,"remark":"","nSteps":11,"minStep":"100","maxStep":"390","steps":["100","150","180","210","240","270","300","320","340","370","390"],"group":"None","version":"v1.1.0"}],"TECT":[{"dec":106.18664213326116,"inc":-76.95870852167056,"MAD":20.70070034199636,"cm":[-6.927791673660977e-14,9.414691248821327e-14,2.930988785010413e-14],"intensity":1283.753372376655,"type":"GC","origin":false,"forced":true,"remark":"","nSteps":11,"minStep":"100","maxStep":"390","steps":["100","150","180","210","240","270","300","320","340","370","390"],"group":"None","version":"v1.1.0"}],"interpreted":true,"name":"GM2.19A","coreAzi":228,"coreDip":31,"bedStrike":250,"bedDip":57,"data":[{"visible":true,"include":false,"step":"20","x":-930,"y":-44.95238095238095,"z":-495.7142857142857,"a95":1.8,"info":"\"14-11-30\" at \"18:45\""},{"visible":true,"include":true,"step":"100","x":-765.1428571428571,"y":7.0476190476190474,"z":-309.3333333333333,"a95":1.6,"info":"\"15-02-10\" at \"17:11\""},{"visible":true,"include":true,"step":"150","x":-645.3333333333334,"y":-33.904761904761905,"z":-321.04761904761904,"a95":1.7,"info":"\"15-02-10\" at \"21:07\""},{"visible":true,"include":true,"step":"180","x":-555.9047619047619,"y":-45.80952380952381,"z":-324.6666666666667,"a95":1.7,"info":"\"15-02-11\" at \"16:37\""},{"visible":true,"include":true,"step":"210","x":-498.2857142857143,"y":-35.80952380952381,"z":-297.9047619047619,"a95":1.9,"info":"\"15-02-11\" at \"20:17\""},{"visible":true,"include":true,"step":"240","x":-454.3809523809524,"y":-42.476190476190474,"z":-266.1904761904762,"a95":1.7,"info":"\"15-02-12\" at \"00:11\""},{"visible":true,"include":true,"step":"270","x":-412.95238095238096,"y":-68.19047619047619,"z":-249.52380952380952,"a95":1.6,"info":"\"15-02-12\" at \"18:51\""},{"visible":true,"include":true,"step":"300","x":-378.76190476190476,"y":-88.66666666666667,"z":-247.9047619047619,"a95":1.8,"info":"\"15-02-13\" at \"16:37\""},{"visible":true,"include":true,"step":"320","x":-350.85714285714283,"y":-88.76190476190476,"z":-240.1904761904762,"a95":1.8,"info":"\"15-02-13\" at \"22:03\""},{"visible":true,"include":true,"step":"340","x":-355.42857142857144,"y":-79.9047619047619,"z":-202.85714285714286,"a95":1.8,"info":"\"15-02-14\" at \"01:32\""},{"visible":true,"include":true,"step":"370","x":-411.5238095238095,"y":-100.38095238095238,"z":-201.23809523809524,"a95":1.8,"info":"\"15-02-16\" at \"19:04\""},{"visible":true,"include":true,"step":"390","x":-376.3809523809524,"y":-122.28571428571429,"z":-266.57142857142856,"a95":2.1,"info":"\"15-02-16\" at \"22:39\""},{"visible":true,"include":false,"step":"420","x":-326.2857142857143,"y":-198.95238095238096,"z":-272.6666666666667,"a95":2.7,"info":"\"15-02-17\" at \"21:47\""},{"visible":true,"include":false,"step":"450","x":-328.95238095238096,"y":-344.57142857142856,"z":-188.1904761904762,"a95":3,"info":"\"15-03-08\" at \"21:22\""},{"visible":true,"include":false,"step":"470","x":-499.6190476190476,"y":-205.04761904761904,"z":25.333333333333332,"a95":3.5,"info":"\"15-03-09\" at \"11:43\""},{"visible":true,"include":false,"step":"490","x":-597.7142857142857,"y":-365.04761904761904,"z":-107.71428571428571,"a95":3.7,"info":"\"15-03-09\" at \"14:47\""},{"visible":true,"include":false,"step":"510","x":-338.6666666666667,"y":-645.7142857142857,"z":39.80952380952381,"a95":3.3,"info":"\"15-04-21\" at \"10:56\""}]},{"version":"v1.1.0","exported":"2017-06-26T09:20:31.244Z","volume":10.5,"added":"2017-06-26T09:10:20.507Z","format":"Utrecht","demagType":"Unknown","strat":null,"patch":1.1,"GEO":[],"TECT":[],"interpreted":false,"name":"GM2.20A","coreAzi":229,"coreDip":31,"bedStrike":250,"bedDip":57,"data":[{"visible":true,"include":false,"step":"20","x":-659.5238095238095,"y":478,"z":353.9047619047619,"a95":1.6,"info":"\"14-11-30\" at \"18:47\""},{"visible":true,"include":false,"step":"100","x":-225.8095238095238,"y":312.6666666666667,"z":105.04761904761905,"a95":1.5,"info":"\"15-02-10\" at \"17:12\""},{"visible":true,"include":false,"step":"150","x":-81.52380952380952,"y":250.57142857142858,"z":57.04761904761905,"a95":1.6,"info":"\"15-02-10\" at \"21:09\""},{"visible":true,"include":false,"step":"180","x":-48.57142857142857,"y":209.8095238095238,"z":37.142857142857146,"a95":1.6,"info":"\"15-02-11\" at \"16:39\""},{"visible":true,"include":false,"step":"210","x":12.095238095238095,"y":205.8095238095238,"z":73.04761904761905,"a95":1.8,"info":"\"15-02-11\" at \"20:19\""},{"visible":true,"include":false,"step":"240","x":16.285714285714285,"y":220.47619047619048,"z":108.76190476190476,"a95":1.8,"info":"\"15-02-12\" at \"00:13\""},{"visible":true,"include":false,"step":"270","x":56.285714285714285,"y":179.9047619047619,"z":115.9047619047619,"a95":2,"info":"\"15-02-12\" at \"18:53\""},{"visible":true,"include":false,"step":"300","x":107.04761904761905,"y":182.85714285714286,"z":195.52380952380952,"a95":2,"info":"\"15-02-13\" at \"16:39\""},{"visible":true,"include":false,"step":"320","x":80.19047619047619,"y":221.9047619047619,"z":211.9047619047619,"a95":2.1,"info":"\"15-02-13\" at \"22:05\""},{"visible":true,"include":false,"step":"340","x":79.9047619047619,"y":197.42857142857142,"z":201.71428571428572,"a95":2.1,"info":"\"15-02-14\" at \"01:34\""},{"visible":true,"include":false,"step":"370","x":85.33333333333333,"y":200.28571428571428,"z":181.04761904761904,"a95":2.1,"info":"\"15-02-16\" at \"19:06\""},{"visible":true,"include":false,"step":"390","x":47.333333333333336,"y":178,"z":218.0952380952381,"a95":3.2,"info":"\"15-02-16\" at \"22:45\""},{"visible":true,"include":false,"step":"420","x":134.38095238095238,"y":202.47619047619048,"z":269.23809523809524,"a95":3.8,"info":"\"15-02-17\" at \"21:49\""},{"visible":true,"include":false,"step":"450","x":35.23809523809524,"y":29.428571428571427,"z":129.61904761904762,"a95":10.6,"info":"\"15-03-08\" at \"21:24\""},{"visible":true,"include":false,"step":"470","x":-153.52380952380952,"y":307.5238095238095,"z":374.1904761904762,"a95":5.1,"info":"\"15-03-09\" at \"11:45\""},{"visible":true,"include":false,"step":"490","x":-169.52380952380952,"y":-63.523809523809526,"z":273.9047619047619,"a95":7.8,"info":"\"15-03-09\" at \"14:48\""},{"visible":true,"include":false,"step":"510","x":-271.8095238095238,"y":129.9047619047619,"z":329.6190476190476,"a95":5.6,"info":"\"15-04-21\" at \"10:57\""}]},{"version":"v1.1.0","exported":"2017-06-26T09:20:31.244Z","volume":10.5,"added":"2017-06-26T09:10:20.507Z","format":"Utrecht","demagType":"Unknown","strat":null,"patch":1.1,"GEO":[{"dec":16.661743361812853,"inc":-42.90978953941616,"MAD":7.561559711128671,"cm":[-3.552713678800501e-15,-7.105427357601002e-15,0],"intensity":1206.9420740317355,"type":"GC","origin":false,"forced":true,"remark":"","nSteps":10,"minStep":"100","maxStep":"370","steps":["100","150","180","210","240","270","300","320","340","370"],"group":"None","version":"v1.1.0"}],"TECT":[{"dec":99.85458577742543,"inc":-59.71899111818708,"MAD":7.561559711128681,"cm":[-7.460698725481052e-14,3.552713678800501e-15,3.197442310920451e-14],"intensity":1206.9420740317355,"type":"GC","origin":false,"forced":true,"remark":"","nSteps":10,"minStep":"100","maxStep":"370","steps":["100","150","180","210","240","270","300","320","340","370"],"group":"None","version":"v1.1.0"}],"interpreted":true,"name":"GM2.21A","coreAzi":233,"coreDip":33,"bedStrike":250,"bedDip":57,"data":[{"visible":true,"include":false,"step":"20","x":-993.6190476190476,"y":155.14285714285714,"z":-22,"a95":1.4,"info":"\"14-11-30\" at \"18:49\""},{"visible":true,"include":true,"step":"100","x":-602,"y":-142.85714285714286,"z":-234.28571428571428,"a95":1.9,"info":"\"15-02-10\" at \"17:14\""},{"visible":true,"include":true,"step":"150","x":-455.04761904761904,"y":-235.14285714285714,"z":-273.9047619047619,"a95":2,"info":"\"15-02-10\" at \"21:11\""},{"visible":true,"include":true,"step":"180","x":-408,"y":-270,"z":-282.76190476190476,"a95":2.1,"info":"\"15-02-11\" at \"16:41\""},{"visible":true,"include":true,"step":"210","x":-378,"y":-311.5238095238095,"z":-250.1904761904762,"a95":1.8,"info":"\"15-02-11\" at \"20:21\""},{"visible":true,"include":true,"step":"240","x":-360.95238095238096,"y":-367.7142857142857,"z":-246.66666666666666,"a95":2,"info":"\"15-02-12\" at \"00:15\""},{"visible":true,"include":true,"step":"270","x":-333.23809523809524,"y":-380.3809523809524,"z":-283.6190476190476,"a95":2,"info":"\"15-02-12\" at \"18:56\""},{"visible":true,"include":true,"step":"300","x":-309.8095238095238,"y":-441.6190476190476,"z":-306.4761904761905,"a95":2,"info":"\"15-02-13\" at \"16:42\""},{"visible":true,"include":true,"step":"320","x":-262.6666666666667,"y":-462.1904761904762,"z":-318,"a95":2.1,"info":"\"15-02-13\" at \"22:07\""},{"visible":true,"include":true,"step":"340","x":-278,"y":-448.95238095238096,"z":-329.6190476190476,"a95":2.2,"info":"\"15-02-14\" at \"01:37\""},{"visible":true,"include":true,"step":"370","x":-291.04761904761904,"y":-465.6190476190476,"z":-303.23809523809524,"a95":2.2,"info":"\"15-02-16\" at \"19:09\""},{"visible":true,"include":false,"step":"390","x":-218.47619047619048,"y":-471.6190476190476,"z":-235.8095238095238,"a95":2.2,"info":"\"15-02-16\" at \"22:48\""},{"visible":true,"include":false,"step":"420","x":-243.14285714285714,"y":-383.14285714285717,"z":-195.42857142857142,"a95":2.7,"info":"\"15-02-17\" at \"21:51\""},{"visible":true,"include":false,"step":"450","x":-220.95238095238096,"y":-454.6666666666667,"z":-110.85714285714286,"a95":3.1,"info":"\"15-03-08\" at \"21:27\""},{"visible":true,"include":false,"step":"470","x":-147.04761904761904,"y":-61.23809523809524,"z":-78.76190476190476,"a95":15.5,"info":"\"15-03-09\" at \"11:49\""},{"visible":true,"include":false,"step":"490","x":303.6190476190476,"y":-179.14285714285714,"z":-11.523809523809524,"a95":5.9,"info":"\"15-03-09\" at \"14:50\""},{"visible":true,"include":false,"step":"510","x":-135.23809523809524,"y":-747.2380952380952,"z":-28.19047619047619,"a95":4.4,"info":"\"15-04-21\" at \"10:59\""}]},{"version":"v1.1.0","exported":"2017-06-26T09:20:31.244Z","volume":10.5,"added":"2017-06-26T09:10:20.508Z","format":"Utrecht","demagType":"Unknown","strat":"4","patch":1.1,"GEO":[],"TECT":[],"interpreted":false,"name":"GM2.22B","coreAzi":229,"coreDip":34,"bedStrike":250,"bedDip":57,"data":[{"visible":true,"include":false,"step":"0.0","x":-565.6285714285715,"y":282.6666666666667,"z":-81.08857142857143,"a95":0.99,"info":"27/10/2014 at 00:27:45"},{"visible":true,"include":false,"step":"4.0","x":-504.20000000000005,"y":238.25714285714284,"z":-80.62095238095237,"a95":0.99,"info":"27/10/2014 at 00:27:45"},{"visible":true,"include":false,"step":"8.0","x":-353.3047619047619,"y":203.49523809523808,"z":-54.03523809523809,"a95":0.99,"info":"27/10/2014 at 00:27:45"},{"visible":true,"include":false,"step":"12.0","x":-265.49523809523805,"y":149.8952380952381,"z":-41.111428571428576,"a95":0.99,"info":"27/10/2014 at 00:27:45"},{"visible":true,"include":false,"step":"16.0","x":-179.1238095238095,"y":113.65714285714287,"z":-83.05904761904762,"a95":0.99,"info":"27/10/2014 at 00:27:45"},{"visible":true,"include":false,"step":"20.0","x":-174.66666666666666,"y":110.4952380952381,"z":-88.80095238095238,"a95":0.99,"info":"27/10/2014 at 00:27:45"},{"visible":true,"include":false,"step":"25.0","x":-152.41904761904763,"y":46.47047619047619,"z":-96.98095238095237,"a95":0.99,"info":"27/10/2014 at 00:27:45"},{"visible":true,"include":false,"step":"30.0","x":-111.53333333333333,"y":122.6952380952381,"z":77.44380952380952,"a95":0.99,"info":"27/10/2014 at 00:27:45"},{"visible":true,"include":false,"step":"35.0","x":-292.35238095238094,"y":135.42857142857142,"z":27.578095238095237,"a95":0.99,"info":"27/10/2014 at 00:27:45"},{"visible":true,"include":false,"step":"40.0","x":-187.83809523809524,"y":243.58095238095237,"z":87.92380952380952,"a95":0.99,"info":"27/10/2014 at 00:27:45"},{"visible":true,"include":false,"step":"45.0","x":-87.27714285714285,"y":25.52857142857143,"z":16.44190476190476,"a95":0.99,"info":"27/10/2014 at 00:27:45"},{"visible":true,"include":false,"step":"50.0","x":-86.66571428571429,"y":-72.90285714285714,"z":16.28761904761905,"a95":0.99,"info":"27/10/2014 at 00:27:45"},{"visible":true,"include":false,"step":"60.0","x":-17.391428571428573,"y":-24.12761904761905,"z":-113.19999999999999,"a95":0.99,"info":"27/10/2014 at 00:27:45"},{"visible":true,"include":false,"step":"70.0","x":-25.566666666666666,"y":-80.08,"z":-53.1447619047619,"a95":0.99,"info":"27/10/2014 at 00:27:45"},{"visible":true,"include":false,"step":"80.0","x":130.33333333333334,"y":-206.54285714285712,"z":3.5567619047619043,"a95":0.99,"info":"27/10/2014 at 00:27:45"},{"visible":true,"include":false,"step":"90.0","x":129.68571428571428,"y":-96.17142857142856,"z":36.05428571428571,"a95":0.99,"info":"27/10/2014 at 00:27:45"},{"visible":true,"include":false,"step":"100.0","x":124.24761904761904,"y":-218.2095238095238,"z":172.32380952380953,"a95":0.99,"info":"27/10/2014 at 00:27:45"}]}]
