# Supplementary material for: Paleomagnetic constraints on the timing and distribution of Cenozoic rotations in Central and Eastern Anatolia
Source: Copernicus journal article supplement (doi:10.5194/se-9-295-2018), 2018-03-21
Supplement: Supplementary file 2 [file se-9-295-2018-supplement.zip › se-2017-66_DATA_dir files/dir files Ulukisla/HB1.dir]

[{"version":"v1.1.0","exported":"2016-11-23T11:01:17.450Z","volume":10.5,"added":"2016-11-23T10:39:45.278Z","format":"Utrecht","demagType":"Unknown","strat":"8","patch":1.1,"GEO":[],"TECT":[],"interpreted":false,"name":"HB1.1A","coreAzi":37,"coreDip":21,"bedStrike":218,"bedDip":26,"data":[{"visible":true,"include":false,"step":"0.0","x":-379.67619047619047,"y":198,"z":940.0666666666667,"a95":0.99,"info":"27/08/2014 at 07:32:28"},{"visible":true,"include":true,"step":"4.0","x":-337.68571428571425,"y":-127.25714285714287,"z":584,"a95":0.99,"info":"27/08/2014 at 07:32:28"},{"visible":true,"include":true,"step":"8.0","x":-282.6095238095238,"y":-162.21904761904761,"z":451.7047619047619,"a95":0.99,"info":"27/08/2014 at 07:32:28"},{"visible":true,"include":true,"step":"12.0","x":-199.78095238095236,"y":-133.2095238095238,"z":444.2857142857143,"a95":0.99,"info":"27/08/2014 at 07:32:28"},{"visible":true,"include":true,"step":"16.0","x":-194.1238095238095,"y":-138.13333333333335,"z":407.2095238095238,"a95":0.99,"info":"27/08/2014 at 07:32:28"},{"visible":true,"include":true,"step":"20.0","x":-141.22857142857143,"y":-105.85714285714286,"z":372.0571428571428,"a95":0.99,"info":"27/08/2014 at 07:32:28"},{"visible":true,"include":true,"step":"25.0","x":-92.36761904761904,"y":-47.84285714285714,"z":386.552380952381,"a95":0.99,"info":"27/08/2014 at 07:32:28"},{"visible":true,"include":true,"step":"30.0","x":-24.386666666666667,"y":-46.36761904761905,"z":279.4666666666667,"a95":0.99,"info":"27/08/2014 at 07:32:28"},{"visible":true,"include":true,"step":"35.0","x":-42.92857142857143,"y":-97.06666666666668,"z":233.74285714285716,"a95":0.99,"info":"27/08/2014 at 07:32:28"},{"visible":true,"include":true,"step":"40.0","x":-16.77047619047619,"y":2.9386666666666668,"z":204.49523809523808,"a95":0.99,"info":"27/08/2014 at 07:32:28"},{"visible":true,"include":false,"step":"45.0","x":-54.50761904761905,"y":-110.16190476190476,"z":166.8095238095238,"a95":0.99,"info":"27/08/2014 at 07:32:28"},{"visible":true,"include":false,"step":"50.0","x":-30.415238095238095,"y":-163.2,"z":84.93714285714286,"a95":0.99,"info":"27/08/2014 at 07:32:28"},{"visible":true,"include":false,"step":"60.0","x":-25.640000000000004,"y":-63.857142857142854,"z":11.617142857142857,"a95":0.99,"info":"27/08/2014 at 07:32:28"},{"visible":false,"include":false,"step":"70.0","x":126.11428571428571,"y":-166.42857142857142,"z":-77.95904761904762,"a95":0.99,"info":"27/08/2014 at 07:32:28"},{"visible":false,"include":false,"step":"80.0","x":141.85714285714286,"y":-281.5238095238095,"z":-237.84761904761905,"a95":0.99,"info":"27/08/2014 at 07:32:28"},{"visible":false,"include":false,"step":"90.0","x":151.15238095238095,"y":49.46,"z":-126.75238095238096,"a95":0.99,"info":"27/08/2014 at 07:32:28"},{"visible":false,"include":false,"step":"100.0","x":134.9142857142857,"y":-6.968190476190476,"z":-291.8666666666667,"a95":0.99,"info":"27/08/2014 at 07:32:28"}]},{"version":"v1.1.0","exported":"2016-11-23T11:01:17.450Z","volume":10.5,"added":"2016-11-23T10:39:45.279Z","format":"Utrecht","demagType":"Unknown","strat":null,"patch":1.1,"GEO":[],"TECT":[],"interpreted":false,"name":"HB1.2A","coreAzi":50,"coreDip":24,"bedStrike":218,"bedDip":26,"data":[{"visible":false,"include":false,"step":"20","x":733.2380952380952,"y":160.66666666666666,"z":-468.57142857142856,"a95":2.3,"info":"\"14-09-15\" at \"16:19\""},{"visible":true,"include":false,"step":"100","x":-262.3809523809524,"y":247.14285714285714,"z":-257.3333333333333,"a95":4,"info":"\"14-09-15\" at \"20:20\""},{"visible":true,"include":true,"step":"150","x":-346.4761904761905,"y":263.5238095238095,"z":-490.4761904761905,"a95":3.5,"info":"\"14-09-15\" at \"22:55\""},{"visible":true,"include":true,"step":"180","x":-274,"y":123.04761904761905,"z":-349.14285714285717,"a95":3.7,"info":"\"14-09-16\" at \"11:53\""},{"visible":true,"include":true,"step":"210","x":-186.1904761904762,"y":47.42857142857143,"z":-268.2857142857143,"a95":4.5,"info":"\"14-09-16\" at \"14:38\""},{"visible":true,"include":true,"step":"240","x":-178.47619047619048,"y":30.476190476190474,"z":-132,"a95":4.7,"info":"\"14-09-16\" at \"17:23\""},{"visible":true,"include":true,"step":"270","x":-84.38095238095238,"y":-2.857142857142857,"z":-52.76190476190476,"a95":7.8,"info":"\"14-09-16\" at \"20:33\""},{"visible":false,"include":false,"step":"300","x":-257.23809523809524,"y":215.42857142857142,"z":383.14285714285717,"a95":3.3,"info":"\"14-09-17\" at \"11:36\""},{"visible":true,"include":false,"step":"320","x":-75.71428571428571,"y":68.47619047619048,"z":214,"a95":4.1,"info":"\"14-09-17\" at \"15:07\""},{"visible":true,"include":false,"step":"340","x":-109.71428571428571,"y":13.333333333333334,"z":296.1904761904762,"a95":4.3,"info":"\"14-09-17\" at \"20:52\""},{"visible":true,"include":false,"step":"370","x":-84.0952380952381,"y":-77.52380952380952,"z":273.3333333333333,"a95":3.3,"info":"\"14-09-18\" at \"09:43\""},{"visible":true,"include":false,"step":"390","x":-35.333333333333336,"y":-18.285714285714285,"z":247.23809523809524,"a95":4.7,"info":"\"14-09-18\" at \"12:39\""},{"visible":false,"include":false,"step":"420","x":-114.0952380952381,"y":-48.666666666666664,"z":173.8095238095238,"a95":5.4,"info":"\"14-09-18\" at \"16:14\""},{"visible":false,"include":false,"step":"450","x":87.9047619047619,"y":47.23809523809524,"z":218.95238095238096,"a95":4.4,"info":"\"14-09-19\" at \"10:59\""},{"visible":false,"include":false,"step":"480","x":-67.14285714285714,"y":-152.1904761904762,"z":81.80952380952381,"a95":8.7,"info":"\"14-09-19\" at \"13:53\""},{"visible":false,"include":false,"step":"510","x":233.9047619047619,"y":158.85714285714286,"z":669.6190476190476,"a95":2.5,"info":"\"14-09-19\" at \"16:32\""},{"visible":false,"include":false,"step":"540","x":-180.95238095238096,"y":-444.2857142857143,"z":-208,"a95":3.4,"info":"\"14-10-04\" at \"12:11\""},{"visible":false,"include":false,"step":"570","x":-91.14285714285714,"y":147.33333333333334,"z":114.47619047619048,"a95":9.3,"info":"\"14-10-04\" at \"15:28\""}]},{"version":"v1.1.0","exported":"2016-11-23T11:01:17.450Z","volume":10.5,"added":"2016-11-23T10:39:45.279Z","format":"Utrecht","demagType":"Unknown","strat":"1","patch":1.1,"GEO":[{"dec":167.03708687711946,"inc":-60.19225868033503,"MAD":11.919385304970929,"cm":[-1.7763568394002505e-15,-2.6645352591003757e-15,0],"intensity":731.5634318356086,"type":"dir","forced":true,"remark":"","origin":false,"nSteps":7,"minStep":"20.0","maxStep":"50.0","steps":["20.0","25.0","30.0","35.0","40.0","45.0","50.0"],"group":"None","version":"v1.1.0"}],"TECT":[{"dec":151.28728257163027,"inc":-37.634538087791974,"MAD":11.919385304970929,"cm":[2.1316282072803006e-14,8.881784197001252e-15,-3.552713678800501e-15],"intensity":731.5634318356085,"type":"dir","forced":true,"remark":"","origin":false,"nSteps":7,"minStep":"20.0","maxStep":"50.0","steps":["20.0","25.0","30.0","35.0","40.0","45.0","50.0"],"group":"None","version":"v1.1.0"}],"interpreted":true,"name":"HB1.3A","coreAzi":56,"coreDip":25,"bedStrike":218,"bedDip":26,"data":[{"visible":true,"include":false,"step":"0.0","x":380.97142857142853,"y":99.76190476190476,"z":379.2666666666667,"a95":0.99,"info":"27/08/2014 at 12:57:25"},{"visible":true,"include":false,"step":"4.0","x":264.3809523809524,"y":47.28285714285715,"z":124.66666666666667,"a95":0.99,"info":"27/08/2014 at 12:57:25"},{"visible":true,"include":false,"step":"8.0","x":294.29523809523806,"y":52.049523809523805,"z":18.767619047619046,"a95":0.99,"info":"27/08/2014 at 12:57:25"},{"visible":true,"include":false,"step":"12.0","x":292.6095238095238,"y":75.78666666666666,"z":-30.212380952380954,"a95":0.99,"info":"27/08/2014 at 12:57:25"},{"visible":true,"include":false,"step":"16.0","x":259.02857142857147,"y":147.8952380952381,"z":-122.4952380952381,"a95":0.99,"info":"27/08/2014 at 12:57:25"},{"visible":true,"include":true,"step":"20.0","x":280.3047619047619,"y":143.61904761904762,"z":-167.62857142857143,"a95":0.99,"info":"27/08/2014 at 12:57:25"},{"visible":true,"include":true,"step":"25.0","x":265.1142857142857,"y":152.95238095238096,"z":-111.24761904761904,"a95":0.99,"info":"27/08/2014 at 12:57:25"},{"visible":true,"include":true,"step":"30.0","x":216.1809523809524,"y":214,"z":-132.9904761904762,"a95":0.99,"info":"27/08/2014 at 12:57:25"},{"visible":true,"include":true,"step":"35.0","x":226.64761904761906,"y":111.88571428571429,"z":-160.05714285714285,"a95":0.99,"info":"27/08/2014 at 12:57:25"},{"visible":true,"include":true,"step":"40.0","x":151.8,"y":194.92380952380952,"z":-179.93333333333334,"a95":0.99,"info":"27/08/2014 at 12:57:25"},{"visible":true,"include":true,"step":"45.0","x":246.02857142857144,"y":189.17142857142858,"z":-194.6095238095238,"a95":0.99,"info":"27/08/2014 at 12:57:25"},{"visible":true,"include":true,"step":"50.0","x":258.552380952381,"y":83.7104761904762,"z":-271.84761904761905,"a95":0.99,"info":"27/08/2014 at 12:57:25"},{"visible":true,"include":false,"step":"60.0","x":251.9809523809524,"y":75.62,"z":-248.58095238095237,"a95":0.99,"info":"27/08/2014 at 12:57:25"},{"visible":false,"include":false,"step":"70.0","x":264.74285714285713,"y":67.33904761904762,"z":-371.81904761904764,"a95":0.99,"info":"27/08/2014 at 12:57:25"},{"visible":false,"include":false,"step":"80.0","x":339.83809523809526,"y":-34.235238095238095,"z":-397.25714285714287,"a95":0.99,"info":"27/08/2014 at 12:57:25"},{"visible":false,"include":false,"step":"90.0","x":244.8857142857143,"y":-14.597142857142858,"z":-343.02857142857147,"a95":0.99,"info":"27/08/2014 at 12:57:25"},{"visible":false,"include":false,"step":"100.0","x":356.54285714285714,"y":127.91428571428571,"z":-540.7523809523809,"a95":0.99,"info":"27/08/2014 at 12:57:25"}]},{"version":"v1.1.0","exported":"2016-11-23T11:01:17.450Z","volume":10.5,"added":"2016-11-23T10:39:45.281Z","format":"Utrecht","demagType":"Unknown","strat":"2","patch":1.1,"GEO":[],"TECT":[],"interpreted":false,"name":"HB1.5A","coreAzi":9,"coreDip":14,"bedStrike":218,"bedDip":26,"data":[{"visible":true,"include":false,"step":"0.0","x":-368.67619047619047,"y":-373.2666666666667,"z":953.7142857142857,"a95":0.99,"info":"27/08/2014 at 12:57:25"},{"visible":true,"include":false,"step":"4.0","x":-311.9142857142857,"y":-401.847619047619,"z":832.1714285714285,"a95":0.99,"info":"27/08/2014 at 12:57:25"},{"visible":true,"include":false,"step":"8.0","x":-221.61904761904762,"y":-378.06666666666666,"z":726.9619047619047,"a95":0.99,"info":"27/08/2014 at 12:57:25"},{"visible":true,"include":true,"step":"12.0","x":-190.64761904761903,"y":-302.31428571428575,"z":657.0380952380953,"a95":0.99,"info":"27/08/2014 at 12:57:25"},{"visible":true,"include":true,"step":"16.0","x":-272.22857142857146,"y":-271.31428571428575,"z":536.7333333333333,"a95":0.99,"info":"27/08/2014 at 12:57:25"},{"visible":true,"include":true,"step":"20.0","x":-269.247619047619,"y":-307.54285714285714,"z":562.5619047619048,"a95":0.99,"info":"27/08/2014 at 12:57:25"},{"visible":true,"include":true,"step":"25.0","x":-309.0190476190476,"y":-207.57142857142858,"z":569.0761904761905,"a95":0.99,"info":"27/08/2014 at 12:57:25"},{"visible":true,"include":true,"step":"30.0","x":-232.31428571428575,"y":-187.53333333333333,"z":536.6571428571428,"a95":0.99,"info":"27/08/2014 at 12:57:25"},{"visible":true,"include":true,"step":"35.0","x":-311.5333333333333,"y":-428.79999999999995,"z":662.9904761904761,"a95":0.99,"info":"27/08/2014 at 12:57:25"},{"visible":true,"include":true,"step":"40.0","x":-320.2857142857143,"y":-408.0190476190476,"z":570.6285714285715,"a95":0.99,"info":"27/08/2014 at 12:57:25"},{"visible":true,"include":true,"step":"45.0","x":-162.03809523809525,"y":-315.2190476190476,"z":542.8,"a95":0.99,"info":"27/08/2014 at 12:57:25"},{"visible":true,"include":true,"step":"50.0","x":-195.54285714285712,"y":-503.42857142857144,"z":406.74285714285713,"a95":0.99,"info":"27/08/2014 at 12:57:25"},{"visible":true,"include":false,"step":"60.0","x":-333.64761904761906,"y":-366.85714285714283,"z":421.1333333333333,"a95":0.99,"info":"27/08/2014 at 12:57:25"},{"visible":false,"include":false,"step":"70.0","x":-62.34095238095239,"y":-366.0190476190476,"z":430.39047619047625,"a95":0.99,"info":"27/08/2014 at 12:57:25"},{"visible":false,"include":false,"step":"80.0","x":-218.1047619047619,"y":-961.7142857142857,"z":461.3333333333333,"a95":0.99,"info":"27/08/2014 at 12:57:25"},{"visible":false,"include":false,"step":"90.0","x":-187.55238095238096,"y":-520.2,"z":239.34285714285713,"a95":0.99,"info":"27/08/2014 at 12:57:25"},{"visible":false,"include":false,"step":"100.0","x":-33.72380952380953,"y":-571.847619047619,"z":251.87619047619046,"a95":0.99,"info":"27/08/2014 at 12:57:25"}]},{"version":"v1.1.0","exported":"2016-11-23T11:01:17.451Z","volume":10.5,"added":"2016-11-23T10:39:45.281Z","format":"Utrecht","demagType":"Unknown","strat":null,"patch":1.1,"GEO":[],"TECT":[],"interpreted":false,"name":"HB1.6A","coreAzi":16,"coreDip":13,"bedStrike":218,"bedDip":26,"data":[{"visible":true,"include":false,"step":"20","x":-1371.4285714285713,"y":-591.6190476190476,"z":107.23809523809524,"a95":2.3,"info":"\"14-09-15\" at \"16:21\""},{"visible":true,"include":false,"step":"100","x":-168.28571428571428,"y":-37.523809523809526,"z":126.95238095238095,"a95":7.5,"info":"\"14-09-15\" at \"20:22\""},{"visible":true,"include":false,"step":"150","x":165.42857142857142,"y":-11.80952380952381,"z":-238,"a95":4.9,"info":"\"14-09-15\" at \"22:58\""},{"visible":true,"include":false,"step":"180","x":42.285714285714285,"y":-64.76190476190476,"z":-114.76190476190476,"a95":8.6,"info":"\"14-09-16\" at \"11:55\""},{"visible":true,"include":false,"step":"210","x":-18.571428571428573,"y":-116.0952380952381,"z":2.0952380952380953,"a95":10,"info":"\"14-09-16\" at \"14:40\""},{"visible":true,"include":false,"step":"240","x":-122.28571428571429,"y":-17.047619047619047,"z":-18.38095238095238,"a95":6.4,"info":"\"14-09-16\" at \"17:26\""},{"visible":true,"include":false,"step":"270","x":-41.333333333333336,"y":-42.38095238095238,"z":154.47619047619048,"a95":5.8,"info":"\"14-09-16\" at \"20:36\""},{"visible":true,"include":false,"step":"300","x":-74.57142857142857,"y":-2.2857142857142856,"z":115.52380952380952,"a95":6.2,"info":"\"14-09-17\" at \"11:40\""},{"visible":true,"include":false,"step":"320","x":14.761904761904763,"y":-90,"z":118.47619047619048,"a95":6.4,"info":"\"14-09-17\" at \"15:10\""},{"visible":true,"include":false,"step":"370","x":-120.57142857142857,"y":-136.1904761904762,"z":96.95238095238095,"a95":5,"info":"\"14-09-18\" at \"09:45\""},{"visible":true,"include":false,"step":"390","x":-131.23809523809524,"y":-108.85714285714286,"z":160.28571428571428,"a95":4.4,"info":"\"14-09-18\" at \"12:41\""}]},{"version":"v1.1.0","exported":"2016-11-23T11:01:17.451Z","volume":10.5,"added":"2016-11-23T10:39:45.282Z","format":"Utrecht","demagType":"Unknown","strat":null,"patch":1.1,"GEO":[{"dec":189.82987518169102,"inc":-52.30351490677604,"MAD":4.659801594411096,"cm":[1.0658141036401503e-14,-4.973799150320701e-14,0],"intensity":902.8604480550312,"type":"dir","forced":true,"remark":"","origin":false,"nSteps":5,"minStep":"90","maxStep":"210","steps":["90","120","150","180","210"],"group":"None","version":"v1.1.0"}],"TECT":[{"dec":169.63849718907136,"inc":-35.77717614533377,"MAD":4.659801594411043,"cm":[3.907985046680551e-14,4.440892098500626e-14,-3.8191672047105385e-14],"intensity":902.8604480550312,"type":"dir","forced":true,"remark":"","origin":false,"nSteps":5,"minStep":"90","maxStep":"210","steps":["90","120","150","180","210"],"group":"None","version":"v1.1.0"}],"interpreted":true,"name":"HB1.7A","coreAzi":4,"coreDip":11,"bedStrike":218,"bedDip":26,"data":[{"visible":true,"include":false,"step":"20","x":-1505.7142857142858,"y":-1379.8095238095239,"z":1481.904761904762,"a95":1.8,"info":"\"15-06-22\" at \"15:56\""},{"visible":true,"include":true,"step":"90","x":469.14285714285717,"y":-68.76190476190476,"z":-508.0952380952381,"a95":2.7,"info":"\"15-06-22\" at \"19:14\""},{"visible":true,"include":true,"step":"120","x":634.8571428571429,"y":-35.42857142857143,"z":-698.952380952381,"a95":2.4,"info":"\"15-06-22\" at \"21:42\""},{"visible":true,"include":true,"step":"150","x":632.0952380952381,"y":-61.142857142857146,"z":-718.2857142857143,"a95":2.8,"info":"\"15-06-23\" at \"20:07\""},{"visible":true,"include":true,"step":"180","x":26,"y":-70.47619047619048,"z":-157.42857142857142,"a95":7.1,"info":"\"15-06-24\" at \"16:27\""},{"visible":true,"include":true,"step":"210","x":103.52380952380952,"y":15.904761904761905,"z":-187.9047619047619,"a95":7.1,"info":"\"15-06-24\" at \"19:19\""},{"visible":true,"include":false,"step":"230","x":111.71428571428571,"y":35.714285714285715,"z":-90.85714285714286,"a95":7.9,"info":"\"15-06-27\" at \"23:31\""},{"visible":true,"include":false,"step":"250","x":192.0952380952381,"y":-39.142857142857146,"z":-17.238095238095237,"a95":4.4,"info":"\"15-06-28\" at \"02:03\""},{"visible":true,"include":false,"step":"270","x":16.01904761904762,"y":44.83809523809524,"z":-17.19047619047619,"a95":26.8,"info":"\"15-06-28\" at \"17:41\""}]},{"version":"v1.1.0","exported":"2016-11-23T11:01:17.451Z","volume":10.5,"added":"2016-11-23T10:39:45.282Z","format":"Utrecht","demagType":"Unknown","strat":null,"patch":1.1,"GEO":[{"dec":193.9009998352537,"inc":-45.07733367538951,"MAD":1.9584879807883468,"cm":[2.842170943040401e-14,-8.348877145181177e-14,0],"intensity":1218.7938500745695,"type":"dir","forced":true,"remark":"","origin":false,"nSteps":3,"minStep":"90","maxStep":"150","steps":["90","120","150"],"group":"None","version":"v1.1.0"}],"TECT":[{"dec":176.5375880098254,"inc":-30.664106840175645,"MAD":1.9584879807882771,"cm":[0,7.105427357601002e-15,-2.842170943040401e-14],"intensity":1218.7938500745695,"type":"dir","forced":true,"remark":"","origin":false,"nSteps":3,"minStep":"90","maxStep":"150","steps":["90","120","150"],"group":"None","version":"v1.1.0"}],"interpreted":true,"name":"HB1.8A","coreAzi":0,"coreDip":12,"bedStrike":218,"bedDip":26,"data":[{"visible":false,"include":false,"step":"20","x":-2266.7619047619046,"y":-130.66666666666666,"z":-223.33333333333334,"a95":1.5,"info":"\"15-06-22\" at \"15:59\""},{"visible":true,"include":true,"step":"90","x":348.95238095238096,"y":-122.85714285714286,"z":-491.3333333333333,"a95":2.9,"info":"\"15-06-22\" at \"19:16\""},{"visible":true,"include":true,"step":"120","x":314.3809523809524,"y":-101.14285714285714,"z":-500.4761904761905,"a95":3.2,"info":"\"15-06-22\" at \"21:44\""},{"visible":true,"include":true,"step":"150","x":336.3809523809524,"y":-84.0952380952381,"z":-495.04761904761904,"a95":3,"info":"\"15-06-23\" at \"20:10\""},{"visible":false,"include":false,"step":"180","x":-226.85714285714286,"y":286,"z":31.047619047619047,"a95":3.6,"info":"\"15-06-24\" at \"16:29\""},{"visible":true,"include":true,"step":"210","x":-77.52380952380952,"y":-110.95238095238095,"z":-73.61904761904762,"a95":8.8,"info":"\"15-06-24\" at \"19:22\""},{"visible":true,"include":true,"step":"230","x":-162.95238095238096,"y":-141.52380952380952,"z":84.0952380952381,"a95":4.9,"info":"\"15-06-27\" at \"23:33\""},{"visible":true,"include":false,"step":"250","x":-190.38095238095238,"y":-177.9047619047619,"z":148.76190476190476,"a95":4,"info":"\"15-06-28\" at \"02:05\""},{"visible":true,"include":false,"step":"270","x":-137.04761904761904,"y":-102,"z":160.47619047619048,"a95":5.9,"info":"\"15-06-28\" at \"17:43\""}]},{"version":"v1.1.0","exported":"2016-11-23T11:01:17.451Z","volume":10.5,"added":"2016-11-23T10:39:45.282Z","format":"Utrecht","demagType":"Unknown","strat":"3","patch":1.1,"GEO":[{"dec":98.45272949299067,"inc":-3.8542423178421905,"MAD":11.28254743143835,"cm":[-6.217248937900877e-15,-4.440892098500626e-15,0],"intensity":387.59382549741264,"type":"GC","origin":false,"forced":true,"remark":"","nSteps":5,"minStep":"4.0","maxStep":"20.0","steps":["4.0","8.0","12.0","16.0","20.0"],"group":"None","version":"v1.1.0"}],"TECT":[{"dec":276.7113900197057,"inc":-18.667913339132145,"MAD":11.282547431438376,"cm":[-2.6645352591003757e-15,-4.440892098500626e-15,1.3322676295501878e-14],"intensity":387.5938254974127,"type":"GC","origin":false,"forced":true,"remark":"","nSteps":5,"minStep":"4.0","maxStep":"20.0","steps":["4.0","8.0","12.0","16.0","20.0"],"group":"None","version":"v1.1.0"}],"interpreted":true,"name":"HB1.9A","coreAzi":3,"coreDip":13,"bedStrike":218,"bedDip":26,"data":[{"visible":true,"include":false,"step":"0.0","x":-239.30476190476188,"y":188.41904761904763,"z":428.8857142857143,"a95":0.99,"info":"27/08/2014 at 12:57:25"},{"visible":true,"include":true,"step":"4.0","x":-138.57142857142858,"y":50.30380952380953,"z":329.3047619047619,"a95":0.99,"info":"27/08/2014 at 12:57:25"},{"visible":true,"include":true,"step":"8.0","x":-68.29714285714286,"y":29.077142857142857,"z":254.8190476190476,"a95":0.99,"info":"27/08/2014 at 12:57:25"},{"visible":true,"include":true,"step":"12.0","x":-26.43904761904762,"y":11.735238095238095,"z":176.8952380952381,"a95":0.99,"info":"27/08/2014 at 12:57:25"},{"visible":true,"include":true,"step":"16.0","x":33.01238095238095,"y":-3.6462857142857144,"z":116.08571428571429,"a95":0.99,"info":"27/08/2014 at 12:57:25"},{"visible":true,"include":true,"step":"20.0","x":87.74857142857142,"y":16.88952380952381,"z":49.021904761904764,"a95":0.99,"info":"27/08/2014 at 12:57:25"},{"visible":true,"include":false,"step":"25.0","x":40.32190476190476,"y":28.768571428571427,"z":15.115238095238096,"a95":0.99,"info":"27/08/2014 at 12:57:25"},{"visible":true,"include":false,"step":"30.0","x":94.46095238095238,"y":51.02285714285714,"z":-31.578095238095237,"a95":0.99,"info":"27/08/2014 at 12:57:25"},{"visible":true,"include":false,"step":"35.0","x":48.808571428571426,"y":-22.383809523809525,"z":-21.00857142857143,"a95":0.99,"info":"27/08/2014 at 12:57:25"},{"visible":true,"include":false,"step":"40.0","x":21.82952380952381,"y":76.26666666666667,"z":-23.346666666666664,"a95":0.99,"info":"27/08/2014 at 12:57:25"},{"visible":true,"include":false,"step":"45.0","x":68.88571428571429,"y":14.972380952380954,"z":-58.90095238095238,"a95":0.99,"info":"27/08/2014 at 12:57:25"},{"visible":true,"include":false,"step":"50.0","x":-69.03714285714285,"y":-199.1904761904762,"z":-40.11238095238095,"a95":0.99,"info":"27/08/2014 at 12:57:25"},{"visible":true,"include":false,"step":"60.0","x":101.21904761904761,"y":-16.35809523809524,"z":-62.852380952380955,"a95":0.99,"info":"27/08/2014 at 12:57:25"},{"visible":false,"include":false,"step":"70.0","x":65.36571428571429,"y":-188.65714285714287,"z":-104.34285714285713,"a95":0.99,"info":"27/08/2014 at 12:57:25"},{"visible":false,"include":false,"step":"80.0","x":-42.124761904761904,"y":-299.29523809523806,"z":-289.0095238095238,"a95":0.99,"info":"27/08/2014 at 12:57:25"},{"visible":false,"include":false,"step":"90.0","x":83.15714285714286,"y":-130.6952380952381,"z":-277.552380952381,"a95":0.99,"info":"27/08/2014 at 12:57:25"},{"visible":false,"include":false,"step":"100.0","x":202.26666666666668,"y":-303.2190476190476,"z":-401.25714285714287,"a95":0.99,"info":"27/08/2014 at 12:57:25"}]},{"version":"v1.1.0","exported":"2016-11-23T11:01:17.451Z","volume":10.5,"added":"2016-11-23T10:39:45.288Z","format":"Utrecht","demagType":"Unknown","strat":null,"patch":1.1,"GEO":[{"dec":166.78143523567815,"inc":-54.01781227462734,"MAD":6.531579068555497,"cm":[-2824.239790264135,1154.240171390859,-2455.9756993595875],"intensity":6760.2106321758365,"type":"dir","forced":false,"remark":"","origin":false,"nSteps":7,"minStep":"180","maxStep":"330","steps":["180","210","230","250","270","300","330"],"group":"None","version":"v1.1.0"}],"TECT":[{"dec":153.64941792159289,"inc":-31.77109622585958,"MAD":6.531579068555481,"cm":[-3322.0650081053677,1791.427393261441,-1046.465182699751],"intensity":6760.2106321758365,"type":"dir","forced":false,"remark":"","origin":false,"nSteps":7,"minStep":"180","maxStep":"330","steps":["180","210","230","250","270","300","330"],"group":"None","version":"v1.1.0"}],"interpreted":true,"name":"HB1.11B","coreAzi":13,"coreDip":7,"bedStrike":218,"bedDip":26,"data":[{"visible":true,"include":false,"step":"20","x":6607.047619047619,"y":2673.809523809524,"z":-2469.6190476190477,"a95":1.4,"info":"\"15-06-22\" at \"16:01\""},{"visible":true,"include":false,"step":"90","x":8676.666666666666,"y":3806.6666666666665,"z":-8494.857142857143,"a95":1.8,"info":"\"15-06-22\" at \"19:21\""},{"visible":true,"include":false,"step":"120","x":8834.190476190477,"y":3112,"z":-8649.619047619048,"a95":1.8,"info":"\"15-06-22\" at \"21:48\""},{"visible":true,"include":false,"step":"150","x":9089.619047619048,"y":3171.6190476190477,"z":-8552.857142857143,"a95":1.9,"info":"\"15-06-23\" at \"20:12\""},{"visible":true,"include":true,"step":"180","x":5039.9047619047615,"y":2508.7619047619046,"z":-5045.619047619048,"a95":1.9,"info":"\"15-06-24\" at \"16:38\""},{"visible":true,"include":true,"step":"210","x":3233.2380952380954,"y":2477.904761904762,"z":-3897.3333333333335,"a95":2.1,"info":"\"15-06-24\" at \"19:24\""},{"visible":true,"include":true,"step":"230","x":2388,"y":1799.4285714285713,"z":-2890.4761904761904,"a95":2.1,"info":"\"15-06-27\" at \"23:35\""},{"visible":true,"include":true,"step":"250","x":2096.285714285714,"y":1976.952380952381,"z":-2906.6666666666665,"a95":2.1,"info":"\"15-06-28\" at \"02:07\""},{"visible":true,"include":true,"step":"270","x":1084.1904761904761,"y":1312.4761904761904,"z":-2201.5238095238096,"a95":2.5,"info":"\"15-06-28\" at \"17:45\""},{"visible":true,"include":true,"step":"300","x":1149.047619047619,"y":1317.2380952380952,"z":-1577.904761904762,"a95":6.8,"info":"\"15-06-28\" at \"20:45\""},{"visible":true,"include":true,"step":"330","x":-53.04761904761905,"y":927.047619047619,"z":-891.047619047619,"a95":3.1,"info":"\"15-06-30\" at \"13:28\""},{"visible":true,"include":false,"step":"360","x":-130.57142857142858,"y":462.85714285714283,"z":-778.2857142857143,"a95":3.9,"info":"\"15-07-01\" at \"08:54\""},{"visible":true,"include":false,"step":"380","x":-802.3809523809524,"y":648,"z":-1005.2380952380952,"a95":2.7,"info":"\"15-07-01\" at \"13:48\""},{"visible":true,"include":false,"step":"410","x":-896.0952380952381,"y":1466.1904761904761,"z":-805.9047619047619,"a95":2.5,"info":"\"15-07-02\" at \"09:12\""},{"visible":true,"include":false,"step":"430","x":-801.7142857142857,"y":807.047619047619,"z":-1072.5714285714287,"a95":3.3,"info":"\"15-07-02\" at \"12:55\""}]},{"version":"v1.1.0","exported":"2016-11-23T11:01:17.451Z","volume":10.5,"added":"2016-11-23T10:39:45.289Z","format":"Utrecht","demagType":"Unknown","strat":null,"patch":1.1,"GEO":[{"dec":179.55535520599005,"inc":-47.15045419591536,"MAD":5.080599374030758,"cm":[-2873.264387973005,-1114.3929772686497,-3828.8620207956405],"intensity":8559.69614926841,"type":"dir","forced":false,"remark":"","origin":false,"nSteps":6,"minStep":"240","maxStep":"370","steps":["240","270","300","320","340","370"],"group":"None","version":"v1.1.0"}],"TECT":[{"dec":165.21150290133664,"inc":-28.267046651744206,"MAD":5.080599374030739,"cm":[-3851.1243801567166,137.21073718328054,-3050.855379632902],"intensity":8559.696149268411,"type":"dir","forced":false,"remark":"","origin":false,"nSteps":6,"minStep":"240","maxStep":"370","steps":["240","270","300","320","340","370"],"group":"None","version":"v1.1.0"}],"interpreted":true,"name":"HB1.12A","coreAzi":8,"coreDip":4,"bedStrike":218,"bedDip":26,"data":[{"visible":false,"include":false,"step":"20","x":2965.2380952380954,"y":-63.42857142857143,"z":-995.1428571428571,"a95":6.9,"info":"\"14-09-15\" at \"16:24\""},{"visible":true,"include":false,"step":"100","x":8556.57142857143,"y":-177.71428571428572,"z":-8587.333333333334,"a95":2.3,"info":"\"14-09-15\" at \"20:29\""},{"visible":true,"include":false,"step":"150","x":10824.952380952382,"y":-271.8095238095238,"z":-9690.380952380952,"a95":2.3,"info":"\"14-09-15\" at \"23:00\""},{"visible":true,"include":false,"step":"180","x":10200.095238095239,"y":270.4761904761905,"z":-8571.619047619048,"a95":2.2,"info":"\"14-09-16\" at \"11:58\""},{"visible":true,"include":false,"step":"210","x":9692.095238095239,"y":177.52380952380952,"z":-8447.238095238095,"a95":2.4,"info":"\"14-09-16\" at \"14:43\""},{"visible":true,"include":true,"step":"240","x":7137.619047619048,"y":-404.57142857142856,"z":-6998.857142857143,"a95":2.3,"info":"\"14-09-16\" at \"17:28\""},{"visible":true,"include":true,"step":"270","x":5313.142857142857,"y":-266.1904761904762,"z":-4914.476190476191,"a95":3.4,"info":"\"14-09-16\" at \"20:41\""},{"visible":true,"include":true,"step":"300","x":3007.4285714285716,"y":-464.76190476190476,"z":-2972.8571428571427,"a95":2.3,"info":"\"14-09-17\" at \"11:42\""},{"visible":true,"include":true,"step":"320","x":2595.3333333333335,"y":-916.0952380952381,"z":-2327.3333333333335,"a95":2.4,"info":"\"14-09-17\" at \"15:13\""},{"visible":true,"include":true,"step":"340","x":2367.4285714285716,"y":-920.7619047619048,"z":-1495.047619047619,"a95":2,"info":"\"14-09-17\" at \"20:55\""},{"visible":true,"include":true,"step":"370","x":1240.4761904761904,"y":-1249.6190476190477,"z":-852.4761904761905,"a95":1.9,"info":"\"14-09-18\" at \"09:48\""},{"visible":true,"include":false,"step":"390","x":1039.142857142857,"y":-1476.1904761904761,"z":-1051.904761904762,"a95":2.4,"info":"\"14-09-18\" at \"12:47\""},{"visible":true,"include":false,"step":"420","x":876.952380952381,"y":-1523.6190476190477,"z":-585.1428571428571,"a95":2.7,"info":"\"14-09-18\" at \"16:18\""},{"visible":true,"include":false,"step":"450","x":478.95238095238096,"y":-1420.5714285714287,"z":150.47619047619048,"a95":2,"info":"\"14-09-19\" at \"11:03\""},{"visible":false,"include":false,"step":"480","x":433.14285714285717,"y":-699.4285714285714,"z":-92.38095238095238,"a95":2.9,"info":"\"14-09-19\" at \"13:56\""},{"visible":false,"include":false,"step":"510","x":178.57142857142858,"y":-1283.5238095238096,"z":727.4285714285714,"a95":2.7,"info":"\"14-09-19\" at \"16:34\""},{"visible":false,"include":false,"step":"540","x":834.3809523809524,"y":-702.7619047619048,"z":-357.42857142857144,"a95":2.4,"info":"\"14-10-04\" at \"12:13\""},{"visible":false,"include":false,"step":"570","x":2106.8571428571427,"y":-444.2857142857143,"z":-344.1904761904762,"a95":1.6,"info":"\"14-10-04\" at \"15:31\""},{"visible":false,"include":false,"step":"600","x":-362.2857142857143,"y":267.23809523809524,"z":-16.857142857142858,"a95":5.6,"info":"\"14-10-05\" at \"09:38\""}]},{"version":"v1.1.0","exported":"2016-11-23T11:01:17.451Z","volume":10.5,"added":"2016-11-23T10:39:45.289Z","format":"Utrecht","demagType":"Unknown","strat":null,"patch":1.1,"GEO":[{"dec":186.6863736792741,"inc":-51.714507818694315,"MAD":8.196499545233879,"cm":[-2067.6493404741473,-465.5160302134745,-2476.659535701899],"intensity":7691.028285652246,"type":"dir","forced":false,"remark":"","origin":false,"nSteps":7,"minStep":"150","maxStep":"300","steps":["150","180","210","230","250","270","300"],"group":"None","version":"v1.1.0"}],"TECT":[{"dec":167.88033262554575,"inc":-34.356027755609325,"MAD":8.196499545233882,"cm":[-2679.6102451687952,317.7582089797481,-1828.7810366319006],"intensity":7691.028285652246,"type":"dir","forced":false,"remark":"","origin":false,"nSteps":7,"minStep":"150","maxStep":"300","steps":["150","180","210","230","250","270","300"],"group":"None","version":"v1.1.0"}],"interpreted":true,"name":"HB1.12B","coreAzi":8,"coreDip":4,"bedStrike":218,"bedDip":26,"data":[{"visible":false,"include":false,"step":"20","x":3761.6190476190477,"y":-619.6190476190476,"z":-2346.190476190476,"a95":1.8,"info":"\"15-06-22\" at \"16:03\""},{"visible":true,"include":false,"step":"90","x":6081.333333333333,"y":-564.6666666666666,"z":-6016.285714285715,"a95":2.3,"info":"\"15-06-22\" at \"19:23\""},{"visible":true,"include":false,"step":"120","x":5964.857142857143,"y":-111.33333333333333,"z":-5958.761904761905,"a95":2.2,"info":"\"15-06-22\" at \"21:50\""},{"visible":true,"include":true,"step":"150","x":6101.333333333333,"y":-253.9047619047619,"z":-5619.9047619047615,"a95":2.3,"info":"\"15-06-23\" at \"20:14\""},{"visible":true,"include":true,"step":"180","x":3723.1428571428573,"y":406.1904761904762,"z":-3448,"a95":2.3,"info":"\"15-06-24\" at \"16:40\""},{"visible":true,"include":true,"step":"210","x":2047.047619047619,"y":-657.047619047619,"z":-2685.904761904762,"a95":2.8,"info":"\"15-06-24\" at \"19:26\""},{"visible":true,"include":true,"step":"230","x":1618.4761904761904,"y":-235.23809523809524,"z":-1605.8095238095239,"a95":2.4,"info":"\"15-06-27\" at \"23:37\""},{"visible":true,"include":true,"step":"250","x":1633.7142857142858,"y":-153.23809523809524,"z":-1315.6190476190477,"a95":2.2,"info":"\"15-06-28\" at \"02:10\""},{"visible":true,"include":true,"step":"270","x":754.2857142857143,"y":-138.57142857142858,"z":-809.2380952380952,"a95":2.9,"info":"\"15-06-28\" at \"17:47\""},{"visible":true,"include":true,"step":"300","x":384.95238095238096,"y":-180.76190476190476,"z":-475.04761904761904,"a95":3.6,"info":"\"15-06-28\" at \"20:47\""},{"visible":true,"include":false,"step":"330","x":-253.14285714285714,"y":55.61904761904762,"z":-343.7142857142857,"a95":6.9,"info":"\"15-06-30\" at \"13:33\""},{"visible":false,"include":false,"step":"360","x":-86.28571428571429,"y":-141.71428571428572,"z":-50,"a95":11.5,"info":"\"15-07-01\" at \"08:56\""},{"visible":false,"include":false,"step":"380","x":-48.857142857142854,"y":384,"z":200.28571428571428,"a95":3.9,"info":"\"15-07-01\" at \"13:51\""},{"visible":false,"include":false,"step":"410","x":-475.3333333333333,"y":314.2857142857143,"z":-146.76190476190476,"a95":5,"info":"\"15-07-02\" at \"09:14\""},{"visible":false,"include":false,"step":"430","x":-307.04761904761904,"y":351.04761904761904,"z":-228.95238095238096,"a95":5.4,"info":"\"15-07-02\" at \"12:57\""}]},{"version":"v1.1.0","exported":"2016-11-23T11:01:17.451Z","volume":10.5,"added":"2016-11-23T10:39:45.289Z","format":"Utrecht","demagType":"Unknown","strat":null,"patch":1.1,"GEO":[{"dec":182.87686060933453,"inc":-56.162071933015405,"MAD":3.794160205952573,"cm":[-4092.1939092176526,-224.0535103100886,-4934.510410244531],"intensity":11568.638473738143,"type":"dir","forced":false,"remark":"","origin":false,"nSteps":8,"minStep":"120","maxStep":"300","steps":["120","150","180","210","230","250","270","300"],"group":"None","version":"v1.1.0"}],"TECT":[{"dec":162.93338567954856,"inc":-37.30878968440372,"MAD":3.794160205952607,"cm":[-5277.980482619748,1293.6840918828293,-3408.0709280216397],"intensity":11568.638473738145,"type":"dir","forced":false,"remark":"","origin":false,"nSteps":8,"minStep":"120","maxStep":"300","steps":["120","150","180","210","230","250","270","300"],"group":"None","version":"v1.1.0"}],"interpreted":true,"name":"HB1.13A","coreAzi":10,"coreDip":8,"bedStrike":218,"bedDip":26,"data":[{"visible":false,"include":false,"step":"20","x":5091.523809523809,"y":2945.2380952380954,"z":-2196.6666666666665,"a95":1.5,"info":"\"15-06-22\" at \"16:05\""},{"visible":true,"include":false,"step":"90","x":9467.142857142857,"y":1147.4285714285713,"z":-9566.285714285714,"a95":1.9,"info":"\"15-06-22\" at \"19:25\""},{"visible":true,"include":true,"step":"120","x":9293.52380952381,"y":906.8571428571429,"z":-9374.47619047619,"a95":1.9,"info":"\"15-06-22\" at \"21:53\""},{"visible":true,"include":true,"step":"150","x":9184.857142857143,"y":864.8571428571429,"z":-8991.714285714286,"a95":2,"info":"\"15-06-23\" at \"20:17\""},{"visible":true,"include":true,"step":"180","x":5529.9047619047615,"y":710.2857142857143,"z":-5638.952380952381,"a95":2.1,"info":"\"15-06-24\" at \"16:42\""},{"visible":true,"include":true,"step":"210","x":3643.3333333333335,"y":295.9047619047619,"z":-4041.2380952380954,"a95":2.4,"info":"\"15-06-24\" at \"19:28\""},{"visible":true,"include":true,"step":"230","x":2717.0476190476193,"y":678,"z":-2789.714285714286,"a95":2.1,"info":"\"15-06-27\" at \"23:40\""},{"visible":true,"include":true,"step":"250","x":2381.904761904762,"y":561.2380952380952,"z":-2954.8571428571427,"a95":2.2,"info":"\"15-06-28\" at \"02:12\""},{"visible":true,"include":true,"step":"270","x":1114.4761904761904,"y":-3.4285714285714284,"z":-2239.4285714285716,"a95":2.8,"info":"\"15-06-28\" at \"17:50\""},{"visible":true,"include":true,"step":"300","x":696.5714285714286,"y":-94.0952380952381,"z":-1698.2857142857142,"a95":2.6,"info":"\"15-06-30\" at \"10:58\""},{"visible":true,"include":false,"step":"330","x":450.1904761904762,"y":511.23809523809524,"z":-1379.5238095238096,"a95":3.3,"info":"\"15-06-30\" at \"13:35\""},{"visible":false,"include":false,"step":"360","x":190.85714285714286,"y":340.76190476190476,"z":-901.3333333333334,"a95":4,"info":"\"15-07-01\" at \"08:58\""},{"visible":false,"include":false,"step":"380","x":375.8095238095238,"y":34.57142857142857,"z":-1448.1904761904761,"a95":2.9,"info":"\"15-07-01\" at \"13:53\""},{"visible":false,"include":false,"step":"410","x":-112.57142857142857,"y":697.7142857142857,"z":-1028.5714285714287,"a95":3.9,"info":"\"15-07-02\" at \"09:16\""},{"visible":false,"include":false,"step":"430","x":568.3809523809524,"y":792.8571428571429,"z":-1116.7619047619048,"a95":3.2,"info":"\"15-07-02\" at \"12:59\""}]},{"version":"v1.1.0","exported":"2016-11-23T11:01:17.451Z","volume":10.5,"added":"2016-11-23T10:39:45.289Z","format":"Utrecht","demagType":"Unknown","strat":"4","patch":1.1,"GEO":[{"dec":187.1529499158242,"inc":-49.198249484503776,"MAD":10.597867845419634,"cm":[-2917.121212918949,154.03314757306433,-3710.6422612324823],"intensity":4913.975601363285,"type":"dir","forced":false,"remark":"","origin":false,"nSteps":6,"minStep":"8.0","maxStep":"30.0","steps":["8.0","12.0","16.0","20.0","25.0","30.0"],"group":"None","version":"v1.1.0"}],"TECT":[{"dec":169.5504655977752,"inc":-32.24140057586382,"MAD":10.597867845419593,"cm":[-3799.1131565303963,1282.931355460247,-2494.597108414919],"intensity":4913.975601363285,"type":"dir","forced":false,"remark":"","origin":false,"nSteps":6,"minStep":"8.0","maxStep":"30.0","steps":["8.0","12.0","16.0","20.0","25.0","30.0"],"group":"None","version":"v1.1.0"}],"interpreted":true,"name":"HB1.14A","coreAzi":356,"coreDip":21,"bedStrike":218,"bedDip":26,"data":[{"visible":true,"include":false,"step":"0.0","x":2102.8571428571427,"y":-817.104761904762,"z":-4852.857142857143,"a95":0.99,"info":"27/08/2014 at 12:57:25"},{"visible":true,"include":false,"step":"4.0","x":3016.095238095238,"y":-650.6761904761905,"z":-5405.047619047619,"a95":0.99,"info":"27/08/2014 at 12:57:25"},{"visible":true,"include":true,"step":"8.0","x":3429.1428571428573,"y":-553.4285714285714,"z":-6280.380952380952,"a95":0.99,"info":"27/08/2014 at 12:57:25"},{"visible":true,"include":true,"step":"12.0","x":3252,"y":-184,"z":-5637.619047619048,"a95":0.99,"info":"27/08/2014 at 12:57:25"},{"visible":true,"include":true,"step":"16.0","x":2836.7619047619046,"y":-149.37142857142857,"z":-4229.333333333333,"a95":0.99,"info":"27/08/2014 at 12:57:25"},{"visible":true,"include":true,"step":"20.0","x":2131.1428571428573,"y":213.0857142857143,"z":-3339.904761904762,"a95":0.99,"info":"27/08/2014 at 12:57:25"},{"visible":true,"include":true,"step":"25.0","x":1827.5238095238096,"y":551.3238095238095,"z":-2842.5714285714284,"a95":0.99,"info":"27/08/2014 at 12:57:25"},{"visible":true,"include":true,"step":"30.0","x":1028.2857142857142,"y":-176.59047619047618,"z":-2009.4285714285713,"a95":0.99,"info":"27/08/2014 at 12:57:25"},{"visible":true,"include":false,"step":"35.0","x":896.3809523809524,"y":-1539.3333333333333,"z":-2171.714285714286,"a95":0.99,"info":"27/08/2014 at 12:57:25"},{"visible":true,"include":false,"step":"40.0","x":222.62857142857143,"y":-620.4380952380952,"z":-2405.3333333333335,"a95":0.99,"info":"27/08/2014 at 12:57:25"},{"visible":false,"include":false,"step":"45.0","x":1776.4761904761904,"y":-1175.2380952380952,"z":-1643.7142857142858,"a95":0.99,"info":"27/08/2014 at 12:57:25"},{"visible":false,"include":false,"step":"50.0","x":713.5619047619048,"y":-1894.095238095238,"z":-1722.095238095238,"a95":0.99,"info":"27/08/2014 at 12:57:25"},{"visible":false,"include":false,"step":"60.0","x":626.2,"y":-1204.1904761904761,"z":-1151.5238095238096,"a95":0.99,"info":"27/08/2014 at 12:57:25"},{"visible":false,"include":false,"step":"70.0","x":2356.7619047619046,"y":-1626.5714285714287,"z":-675.8285714285714,"a95":0.99,"info":"27/08/2014 at 12:57:25"},{"visible":false,"include":false,"step":"80.0","x":983.4285714285714,"y":-3072.7619047619046,"z":-1130.857142857143,"a95":0.99,"info":"27/08/2014 at 12:57:25"},{"visible":false,"include":false,"step":"90.0","x":585.2952380952381,"y":-1477.047619047619,"z":339.5809523809524,"a95":0.99,"info":"27/08/2014 at 12:57:25"},{"visible":false,"include":false,"step":"100.0","x":466.3714285714285,"y":-2046.857142857143,"z":-109.02857142857142,"a95":0.99,"info":"27/08/2014 at 12:57:25"}]},{"version":"v1.1.0","exported":"2016-11-23T11:01:17.451Z","volume":10.5,"added":"2016-11-23T10:39:45.290Z","format":"Utrecht","demagType":"Unknown","strat":null,"patch":1.1,"GEO":[{"dec":183.64752887586272,"inc":-48.96216390953584,"MAD":5.152621447403112,"cm":[-2793.157012222556,-586.2553617445742,-3359.7581911615475],"intensity":9411.20450287907,"type":"dir","forced":false,"remark":"","origin":false,"nSteps":7,"minStep":"150","maxStep":"300","steps":["150","180","210","230","250","270","300"],"group":"None","version":"v1.1.0"}],"TECT":[{"dec":167.2408857799951,"inc":-31.032859631748448,"MAD":5.152621447403122,"cm":[-3621.552924453719,474.0430542586548,-2468.4072081545332],"intensity":9411.204502879073,"type":"dir","forced":false,"remark":"","origin":false,"nSteps":7,"minStep":"150","maxStep":"300","steps":["150","180","210","230","250","270","300"],"group":"None","version":"v1.1.0"}],"interpreted":true,"name":"HB1.15A","coreAzi":353,"coreDip":27,"bedStrike":218,"bedDip":26,"data":[{"visible":true,"include":false,"step":"20","x":1706.6666666666667,"y":-4916,"z":-5595.619047619048,"a95":2,"info":"\"15-06-22\" at \"16:08\""},{"visible":true,"include":false,"step":"90","x":4191.523809523809,"y":-1968.6666666666667,"z":-10348,"a95":2.3,"info":"\"15-06-22\" at \"19:27\""},{"visible":true,"include":false,"step":"120","x":4303.142857142857,"y":-1750.952380952381,"z":-10316.857142857143,"a95":2.2,"info":"\"15-06-22\" at \"21:55\""},{"visible":true,"include":true,"step":"150","x":4152.285714285715,"y":-1760.6666666666667,"z":-9388,"a95":2.2,"info":"\"15-06-23\" at \"20:19\""},{"visible":true,"include":true,"step":"180","x":2675.3333333333335,"y":-880.2857142857143,"z":-6272,"a95":2.4,"info":"\"15-06-24\" at \"16:44\""},{"visible":true,"include":true,"step":"210","x":1462.952380952381,"y":-1114.6666666666667,"z":-3813.3333333333335,"a95":2.6,"info":"\"15-06-24\" at \"19:30\""},{"visible":true,"include":true,"step":"230","x":1136.5714285714287,"y":-1032,"z":-2979.6190476190477,"a95":2.4,"info":"\"15-06-27\" at \"23:42\""},{"visible":true,"include":true,"step":"250","x":1502.3809523809523,"y":-635.3333333333334,"z":-2597.1428571428573,"a95":2.3,"info":"\"15-06-28\" at \"02:14\""},{"visible":true,"include":true,"step":"270","x":756.6666666666666,"y":-617.3333333333334,"z":-1730,"a95":2.7,"info":"\"15-06-28\" at \"17:52\""},{"visible":true,"include":true,"step":"300","x":685.5238095238095,"y":-415.7142857142857,"z":-742.5714285714286,"a95":2.4,"info":"\"15-06-30\" at \"11:00\""},{"visible":true,"include":false,"step":"330","x":406.2857142857143,"y":-398.95238095238096,"z":-53.904761904761905,"a95":4.4,"info":"\"15-06-30\" at \"13:37\""},{"visible":false,"include":false,"step":"360","x":639.1428571428571,"y":-372.4761904761905,"z":427.04761904761904,"a95":3.2,"info":"\"15-07-01\" at \"09:00\""},{"visible":false,"include":false,"step":"380","x":108,"y":-437.3333333333333,"z":116.66666666666667,"a95":4.4,"info":"\"15-07-01\" at \"13:55\""},{"visible":false,"include":false,"step":"410","x":-30.952380952380953,"y":-858.4761904761905,"z":319.6190476190476,"a95":4.2,"info":"\"15-07-02\" at \"09:18\""},{"visible":false,"include":false,"step":"430","x":86.95238095238095,"y":-709.3333333333334,"z":314.85714285714283,"a95":4.2,"info":"\"15-07-02\" at \"13:02\""}]},{"version":"v1.1.0","exported":"2016-11-23T11:01:17.451Z","volume":10.5,"added":"2016-11-23T10:39:45.290Z","format":"Utrecht","demagType":"Unknown","strat":null,"patch":1.1,"GEO":[{"dec":182.9652338194571,"inc":-49.10704736062947,"MAD":3.264967374125567,"cm":[-4178.673382111909,-1285.2814537997158,-4192.738989832515],"intensity":11715.250536341578,"type":"dir","forced":false,"remark":"","origin":false,"nSteps":7,"minStep":"150","maxStep":"340","steps":["150","180","210","240","300","320","340"],"group":"None","version":"v1.1.0"}],"TECT":[{"dec":166.69631425741136,"inc":-30.976210443746933,"MAD":3.2649673741256073,"cm":[-5213.053277371415,38.66443764644123,-3084.623230681911],"intensity":11715.250536341578,"type":"dir","forced":false,"remark":"","origin":false,"nSteps":7,"minStep":"150","maxStep":"340","steps":["150","180","210","240","300","320","340"],"group":"None","version":"v1.1.0"}],"interpreted":true,"name":"HB1.16A","coreAzi":359,"coreDip":20,"bedStrike":218,"bedDip":26,"data":[{"visible":false,"include":false,"step":"20","x":-359.23809523809524,"y":-1750.2857142857142,"z":1227.4285714285713,"a95":2.3,"info":"\"14-09-15\" at \"16:26\""},{"visible":true,"include":false,"step":"100","x":2714.6666666666665,"y":-2030.5714285714287,"z":-7409.714285714285,"a95":2.6,"info":"\"14-09-15\" at \"20:32\""},{"visible":true,"include":true,"step":"150","x":5363.428571428572,"y":-1582.095238095238,"z":-10338.666666666666,"a95":2.6,"info":"\"14-09-15\" at \"23:02\""},{"visible":true,"include":true,"step":"180","x":5620.857142857143,"y":-1942.3809523809523,"z":-10365.333333333334,"a95":2.6,"info":"\"14-09-16\" at \"12:00\""},{"visible":true,"include":true,"step":"210","x":4099.238095238095,"y":-1220.1904761904761,"z":-8291.238095238095,"a95":2.6,"info":"\"14-09-16\" at \"14:45\""},{"visible":true,"include":true,"step":"240","x":2599.3333333333335,"y":-1315.904761904762,"z":-6436.571428571428,"a95":2.6,"info":"\"14-09-16\" at \"17:30\""},{"visible":false,"include":false,"step":"270","x":3667.714285714286,"y":-910.1904761904761,"z":-1943.904761904762,"a95":2.4,"info":"\"14-09-16\" at \"20:44\""},{"visible":true,"include":true,"step":"300","x":278,"y":-1025.6190476190477,"z":-1166.7619047619048,"a95":2.7,"info":"\"14-09-17\" at \"11:45\""},{"visible":true,"include":true,"step":"320","x":20.571428571428573,"y":-1279.047619047619,"z":-653.047619047619,"a95":2.9,"info":"\"14-09-17\" at \"15:16\""},{"visible":true,"include":true,"step":"340","x":-351.3333333333333,"y":-1140.857142857143,"z":-121.33333333333333,"a95":2.3,"info":"\"14-09-17\" at \"20:59\""},{"visible":true,"include":false,"step":"370","x":-651.047619047619,"y":-1330.4761904761904,"z":-182.0952380952381,"a95":2.8,"info":"\"14-09-18\" at \"09:50\""},{"visible":false,"include":false,"step":"390","x":-508.3809523809524,"y":-868.6666666666666,"z":-708.3809523809524,"a95":4.1,"info":"\"14-09-18\" at \"12:50\""},{"visible":false,"include":false,"step":"420","x":-663.7142857142857,"y":-1231.6190476190477,"z":151.9047619047619,"a95":2.5,"info":"\"14-09-18\" at \"16:21\""},{"visible":false,"include":false,"step":"450","x":-818.2857142857143,"y":-780.5714285714286,"z":70.95238095238095,"a95":2.9,"info":"\"14-09-19\" at \"11:06\""},{"visible":false,"include":false,"step":"480","x":-623.1428571428571,"y":-503.3333333333333,"z":183.14285714285714,"a95":4.5,"info":"\"14-09-19\" at \"13:58\""},{"visible":false,"include":false,"step":"510","x":-293.8095238095238,"y":-738.6666666666666,"z":804.6666666666666,"a95":2.7,"info":"\"14-09-19\" at \"16:36\""},{"visible":false,"include":false,"step":"540","x":-95.33333333333333,"y":-57.42857142857143,"z":77.42857142857143,"a95":18.1,"info":"\"14-10-04\" at \"12:15\""},{"visible":false,"include":false,"step":"570","x":347.3333333333333,"y":-224.66666666666666,"z":206.85714285714286,"a95":6.7,"info":"\"14-10-04\" at \"15:33\""}]},{"version":"v1.1.0","exported":"2016-11-23T11:01:17.451Z","volume":10.5,"added":"2016-11-23T10:39:45.290Z","format":"Utrecht","demagType":"Unknown","strat":"5","patch":1.1,"GEO":[{"dec":184.82248746711403,"inc":-39.41025850780814,"MAD":19.25038714487146,"cm":[344.85796155071324,155.10903378268577,576.5317246679108],"intensity":830.803703113182,"type":"dir","forced":false,"remark":"","origin":false,"nSteps":5,"minStep":"16.0","maxStep":"40.0","steps":["16.0","20.0","25.0","30.0","40.0"],"group":"None","version":"v1.1.0"}],"TECT":[{"dec":172.48827360698874,"inc":-22.660569268123627,"MAD":19.250387144871485,"cm":[494.84381785767624,-36.86410794472513,478.6912251419967],"intensity":830.803703113182,"type":"dir","forced":false,"remark":"","origin":false,"nSteps":5,"minStep":"16.0","maxStep":"40.0","steps":["16.0","20.0","25.0","30.0","40.0"],"group":"None","version":"v1.1.0"}],"interpreted":true,"name":"HB1.17A","coreAzi":8,"coreDip":39,"bedStrike":218,"bedDip":26,"data":[{"visible":true,"include":false,"step":"0.0","x":-1004.1904761904761,"y":-36.73142857142857,"z":1623.3333333333333,"a95":0.99,"info":"27/08/2014 at 12:57:25"},{"visible":true,"include":false,"step":"4.0","x":-847.4095238095238,"y":54.919999999999995,"z":1413.7142857142858,"a95":0.99,"info":"27/08/2014 at 12:57:25"},{"visible":true,"include":false,"step":"8.0","x":-616.0095238095239,"y":100.6952380952381,"z":925.0095238095239,"a95":0.99,"info":"27/08/2014 at 12:57:25"},{"visible":true,"include":false,"step":"12.0","x":-318.1904761904762,"y":188.11428571428573,"z":438.447619047619,"a95":0.99,"info":"27/08/2014 at 12:57:25"},{"visible":true,"include":true,"step":"16.0","x":-205.9238095238095,"y":159.54285714285714,"z":260.48571428571427,"a95":0.99,"info":"27/08/2014 at 12:57:25"},{"visible":true,"include":true,"step":"20.0","x":-307,"y":30.719047619047622,"z":339.9428571428572,"a95":0.99,"info":"27/08/2014 at 12:57:25"},{"visible":true,"include":true,"step":"25.0","x":-86.96000000000001,"y":213.86666666666665,"z":607.3428571428572,"a95":0.99,"info":"27/08/2014 at 12:57:25"},{"visible":true,"include":true,"step":"30.0","x":-262.0095238095238,"y":-18.429523809523808,"z":926.6380952380953,"a95":0.99,"info":"27/08/2014 at 12:57:25"},{"visible":true,"include":false,"step":"35.0","x":-214.86666666666665,"y":-546.4095238095239,"z":982.2857142857143,"a95":0.99,"info":"27/08/2014 at 12:57:25"},{"visible":true,"include":true,"step":"40.0","x":-235.85714285714286,"y":142.32380952380953,"z":1090.5714285714287,"a95":0.99,"info":"27/08/2014 at 12:57:25"},{"visible":false,"include":false,"step":"45.0","x":197.58095238095237,"y":-324.9047619047619,"z":1133.6190476190477,"a95":0.99,"info":"27/08/2014 at 12:57:25"},{"visible":false,"include":false,"step":"50.0","x":-227.94285714285715,"y":-857.695238095238,"z":1199.047619047619,"a95":0.99,"info":"27/08/2014 at 12:57:25"},{"visible":false,"include":false,"step":"60.0","x":-270.4095238095238,"y":-137.03809523809525,"z":789.1142857142858,"a95":0.99,"info":"27/08/2014 at 12:57:25"},{"visible":false,"include":false,"step":"70.0","x":252.26666666666668,"y":-565.9619047619047,"z":693.6095238095238,"a95":0.99,"info":"27/08/2014 at 12:57:25"},{"visible":false,"include":false,"step":"80.0","x":1202,"y":-1302.3809523809523,"z":625.0095238095239,"a95":0.99,"info":"27/08/2014 at 12:57:25"},{"visible":false,"include":false,"step":"90.0","x":400.9238095238095,"y":-728.3904761904762,"z":206.21904761904764,"a95":0.99,"info":"27/08/2014 at 12:57:25"},{"visible":false,"include":false,"step":"100.0","x":760.5904761904761,"y":-970.0952380952381,"z":-2.8535238095238094,"a95":0.99,"info":"27/08/2014 at 12:57:25"}]},{"version":"v1.1.0","exported":"2016-11-23T11:01:17.451Z","volume":10.5,"added":"2016-11-23T10:39:45.290Z","format":"Utrecht","demagType":"Unknown","strat":null,"patch":1.1,"GEO":[{"dec":173.5319138068851,"inc":-55.86614041770663,"MAD":4.393178806334088,"cm":[-1.4210854715202004e-14,-5.062616992290714e-14,0],"intensity":4508.962885615148,"type":"dir","forced":true,"remark":"","origin":false,"nSteps":10,"minStep":"210","maxStep":"430","steps":["210","230","250","270","300","330","360","380","410","430"],"group":"None","version":"v1.1.0"}],"TECT":[{"dec":157.2123465077916,"inc":-34.86495837657003,"MAD":4.393178806334095,"cm":[-2.842170943040401e-14,-3.197442310920451e-14,-1.4210854715202004e-14],"intensity":4508.962885615148,"type":"dir","forced":true,"remark":"","origin":false,"nSteps":10,"minStep":"210","maxStep":"430","steps":["210","230","250","270","300","330","360","380","410","430"],"group":"None","version":"v1.1.0"}],"interpreted":true,"name":"HB1.17B","coreAzi":8,"coreDip":39,"bedStrike":218,"bedDip":26,"data":[{"visible":false,"include":false,"step":"20","x":889.1428571428571,"y":-385.7142857142857,"z":2797.1428571428573,"a95":2.5,"info":"\"15-06-22\" at \"16:10\""},{"visible":false,"include":false,"step":"90","x":464.0952380952381,"y":-113.42857142857143,"z":-1382.2857142857142,"a95":2.5,"info":"\"15-06-22\" at \"19:29\""},{"visible":true,"include":false,"step":"120","x":899.5238095238095,"y":160.76190476190476,"z":-2923.4285714285716,"a95":2.5,"info":"\"15-06-22\" at \"21:57\""},{"visible":true,"include":false,"step":"150","x":1258.4761904761904,"y":246.38095238095238,"z":-3746.5714285714284,"a95":2.5,"info":"\"15-06-23\" at \"20:21\""},{"visible":true,"include":false,"step":"180","x":1136,"y":365.23809523809524,"z":-3540.9523809523807,"a95":2.5,"info":"\"15-06-24\" at \"16:47\""},{"visible":true,"include":true,"step":"210","x":869.047619047619,"y":365.6190476190476,"z":-3003.0476190476193,"a95":2.7,"info":"\"15-06-24\" at \"19:32\""},{"visible":true,"include":true,"step":"230","x":816.3809523809524,"y":446.4761904761905,"z":-2718.9523809523807,"a95":5,"info":"\"15-06-27\" at \"23:45\""},{"visible":true,"include":true,"step":"250","x":820.1904761904761,"y":580.7619047619048,"z":-2443.1428571428573,"a95":3,"info":"\"15-06-28\" at \"02:16\""},{"visible":true,"include":true,"step":"270","x":567.1428571428571,"y":439.7142857142857,"z":-2133.809523809524,"a95":2.7,"info":"\"15-06-28\" at \"17:54\""},{"visible":true,"include":true,"step":"300","x":792.1904761904761,"y":239.23809523809524,"z":-1849.8095238095239,"a95":2.6,"info":"\"15-06-30\" at \"11:03\""},{"visible":true,"include":true,"step":"330","x":400,"y":98.38095238095238,"z":-1378.3809523809523,"a95":2.8,"info":"\"15-06-30\" at \"13:41\""},{"visible":true,"include":true,"step":"360","x":446.2857142857143,"y":14.857142857142858,"z":-1375.4285714285713,"a95":2.7,"info":"\"15-07-01\" at \"09:03\""},{"visible":true,"include":true,"step":"380","x":422.3809523809524,"y":45.333333333333336,"z":-1495.6190476190477,"a95":2.6,"info":"\"15-07-01\" at \"13:57\""},{"visible":true,"include":true,"step":"410","x":442,"y":272.1904761904762,"z":-1355.7142857142858,"a95":2.8,"info":"\"15-07-02\" at \"09:20\""},{"visible":true,"include":true,"step":"430","x":613.8095238095239,"y":146.57142857142858,"z":-1224.1904761904761,"a95":2.7,"info":"\"15-07-02\" at \"13:04\""}]},{"version":"v1.1.0","exported":"2016-11-23T11:01:17.451Z","volume":10.5,"added":"2016-11-23T10:39:45.291Z","format":"Utrecht","demagType":"Unknown","strat":null,"patch":1.1,"GEO":[{"dec":185.12463417610232,"inc":-57.61357973437202,"MAD":2.44561335793335,"cm":[-7.105427357601002e-15,-3.2862601528904634e-14,0],"intensity":5728.082900437607,"type":"dir","forced":true,"remark":"","origin":false,"nSteps":13,"minStep":"210","maxStep":"540","steps":["210","240","270","300","320","340","370","390","420","450","480","510","540"],"group":"None","version":"v1.1.0"}],"TECT":[{"dec":163.4638921879556,"inc":-39.16358642730764,"MAD":2.4456133579332837,"cm":[4.973799150320701e-14,1.3500311979441904e-13,-1.0658141036401503e-14],"intensity":5728.082900437607,"type":"dir","forced":true,"remark":"","origin":false,"nSteps":13,"minStep":"210","maxStep":"540","steps":["210","240","270","300","320","340","370","390","420","450","480","510","540"],"group":"None","version":"v1.1.0"}],"interpreted":true,"name":"HB1.18A","coreAzi":12,"coreDip":34,"bedStrike":218,"bedDip":26,"data":[{"visible":false,"include":false,"step":"20","x":-905.9047619047619,"y":-494.1904761904762,"z":1436.3809523809523,"a95":2.9,"info":"\"14-09-15\" at \"16:29\""},{"visible":false,"include":false,"step":"100","x":-416,"y":-530.4761904761905,"z":553.2380952380952,"a95":3.2,"info":"\"14-09-15\" at \"20:37\""},{"visible":true,"include":false,"step":"150","x":1256.1904761904761,"y":216.28571428571428,"z":-3313.5238095238096,"a95":2.7,"info":"\"14-09-15\" at \"23:05\""},{"visible":true,"include":false,"step":"180","x":1623.6190476190477,"y":270.95238095238096,"z":-4122.380952380952,"a95":2.8,"info":"\"14-09-16\" at \"12:03\""},{"visible":true,"include":true,"step":"210","x":1877.4285714285713,"y":429.6190476190476,"z":-4211.809523809524,"a95":2.8,"info":"\"14-09-16\" at \"14:48\""},{"visible":true,"include":true,"step":"240","x":1543.5238095238096,"y":240.85714285714286,"z":-3771.6190476190477,"a95":2.8,"info":"\"14-09-16\" at \"17:33\""},{"visible":true,"include":true,"step":"270","x":1279.5238095238096,"y":171.33333333333334,"z":-3154.4761904761904,"a95":2.7,"info":"\"14-09-16\" at \"20:52\""},{"visible":true,"include":true,"step":"300","x":1125.7142857142858,"y":170.1904761904762,"z":-2435.6190476190477,"a95":2.8,"info":"\"14-09-17\" at \"11:48\""},{"visible":true,"include":true,"step":"320","x":1023.2380952380952,"y":140.76190476190476,"z":-2247.2380952380954,"a95":2.8,"info":"\"14-09-17\" at \"15:19\""},{"visible":true,"include":true,"step":"340","x":948.0952380952381,"y":138.1904761904762,"z":-2009.2380952380952,"a95":2.8,"info":"\"14-09-17\" at \"21:05\""},{"visible":true,"include":true,"step":"370","x":877.3333333333334,"y":-21.428571428571427,"z":-1741.142857142857,"a95":2.8,"info":"\"14-09-18\" at \"09:53\""},{"visible":true,"include":true,"step":"390","x":677.1428571428571,"y":138.95238095238096,"z":-1611.2380952380952,"a95":2.8,"info":"\"14-09-18\" at \"12:52\""},{"visible":true,"include":true,"step":"420","x":765.047619047619,"y":96.66666666666667,"z":-1431.047619047619,"a95":3,"info":"\"14-09-18\" at \"16:24\""},{"visible":true,"include":true,"step":"450","x":479.9047619047619,"y":94.38095238095238,"z":-1326.7619047619048,"a95":2.7,"info":"\"14-09-19\" at \"11:10\""},{"visible":true,"include":true,"step":"480","x":558.0952380952381,"y":77.61904761904762,"z":-1099.7142857142858,"a95":3.6,"info":"\"14-09-19\" at \"14:01\""},{"visible":true,"include":true,"step":"510","x":390.3809523809524,"y":-112.28571428571429,"z":-793.2380952380952,"a95":4.7,"info":"\"14-09-19\" at \"16:39\""},{"visible":true,"include":true,"step":"540","x":496.76190476190476,"y":145.61904761904762,"z":-969.2380952380952,"a95":5.6,"info":"\"14-10-04\" at \"12:17\""},{"visible":true,"include":false,"step":"570","x":277.5238095238095,"y":-132.57142857142858,"z":-400,"a95":9.7,"info":"\"14-10-04\" at \"15:35\""},{"visible":false,"include":false,"step":"600","x":-456.95238095238096,"y":291.3333333333333,"z":-170.47619047619048,"a95":9.400001,"info":"\"14-10-05\" at \"09:40\""},{"visible":false,"include":false,"step":"630","x":305.7142857142857,"y":-648.0952380952381,"z":304.57142857142856,"a95":4.2,"info":"\"14-10-05\" at \"12:27\""},{"visible":false,"include":false,"step":"660","x":-712.2857142857143,"y":811.5238095238095,"z":23.523809523809526,"a95":5.4,"info":"\"14-10-05\" at \"16:01\""}]},{"version":"v1.1.0","exported":"2016-11-23T11:01:17.452Z","volume":10.5,"added":"2016-11-23T10:39:45.291Z","format":"Utrecht","demagType":"Unknown","strat":"6","patch":1.1,"GEO":[{"dec":36.165907600039816,"inc":-28.275468118241562,"MAD":13.15158574610759,"cm":[1.4210854715202004e-14,1.4210854715202004e-14,0],"intensity":5722.664536496868,"type":"GC","origin":false,"forced":true,"remark":"","nSteps":8,"minStep":"4.0","maxStep":"35.0","steps":["4.0","8.0","12.0","16.0","20.0","25.0","30.0","35.0"],"group":"None","version":"v1.1.0"}],"TECT":[{"dec":49.7025394170991,"inc":-25.98430845542766,"MAD":13.151585746107594,"cm":[1.1368683772161603e-13,2.4158453015843406e-13,-2.842170943040401e-14],"intensity":5722.664536496868,"type":"GC","origin":false,"forced":true,"remark":"","nSteps":8,"minStep":"4.0","maxStep":"35.0","steps":["4.0","8.0","12.0","16.0","20.0","25.0","30.0","35.0"],"group":"None","version":"v1.1.0"}],"interpreted":true,"name":"HB1.19A","coreAzi":10,"coreDip":35,"bedStrike":218,"bedDip":26,"data":[{"visible":true,"include":false,"step":"0.0","x":-1415.2380952380952,"y":-727.2952380952381,"z":3323.0476190476193,"a95":0.99,"info":"27/08/2014 at 12:57:25"},{"visible":true,"include":true,"step":"4.0","x":-1233.047619047619,"y":-604.9619047619047,"z":3106.9523809523807,"a95":0.99,"info":"27/08/2014 at 12:57:25"},{"visible":true,"include":true,"step":"8.0","x":-968.5714285714286,"y":-543.4285714285714,"z":2612.190476190476,"a95":0.99,"info":"27/08/2014 at 12:57:25"},{"visible":true,"include":true,"step":"12.0","x":-704.2380952380952,"y":-568.0285714285715,"z":2222.5714285714284,"a95":0.99,"info":"27/08/2014 at 12:57:25"},{"visible":true,"include":true,"step":"16.0","x":-471.3714285714285,"y":-600.6761904761905,"z":1970.857142857143,"a95":0.99,"info":"27/08/2014 at 12:57:25"},{"visible":true,"include":true,"step":"20.0","x":-436.9238095238095,"y":-708.1714285714286,"z":1799.904761904762,"a95":0.99,"info":"27/08/2014 at 12:57:25"},{"visible":true,"include":true,"step":"25.0","x":-440.64761904761906,"y":-554.5809523809525,"z":1918.2857142857142,"a95":0.99,"info":"27/08/2014 at 12:57:25"},{"visible":true,"include":true,"step":"30.0","x":-385.1142857142857,"y":-905.0380952380953,"z":1945.047619047619,"a95":0.99,"info":"27/08/2014 at 12:57:25"},{"visible":true,"include":true,"step":"35.0","x":-368.0190476190476,"y":-1429.6190476190477,"z":1996.5714285714287,"a95":0.99,"info":"27/08/2014 at 12:57:25"},{"visible":true,"include":false,"step":"40.0","x":-290.03809523809525,"y":-1093.904761904762,"z":1993.8095238095239,"a95":0.99,"info":"27/08/2014 at 12:57:25"},{"visible":true,"include":false,"step":"45.0","x":34.24095238095238,"y":-1632,"z":1837.3333333333333,"a95":0.99,"info":"27/08/2014 at 12:57:25"},{"visible":true,"include":false,"step":"50.0","x":-34.74857142857143,"y":-2574,"z":1772.1904761904761,"a95":0.99,"info":"27/08/2014 at 12:57:25"},{"visible":true,"include":false,"step":"60.0","x":482.76190476190476,"y":-1960.5714285714287,"z":1615.2380952380952,"a95":0.99,"info":"27/08/2014 at 12:57:25"},{"visible":false,"include":false,"step":"70.0","x":510.46666666666664,"y":-2407.904761904762,"z":1099.4285714285713,"a95":0.99,"info":"27/08/2014 at 12:57:25"},{"visible":false,"include":false,"step":"80.0","x":1070.095238095238,"y":-3532.7619047619046,"z":818.0761904761904,"a95":0.99,"info":"27/08/2014 at 12:57:25"},{"visible":false,"include":false,"step":"90.0","x":698.6571428571428,"y":-2497.6190476190477,"z":603.6380952380953,"a95":0.99,"info":"27/08/2014 at 12:57:25"},{"visible":false,"include":false,"step":"100.0","x":356.9904761904762,"y":-2936.3809523809523,"z":464.0952380952381,"a95":0.99,"info":"27/08/2014 at 12:57:25"}]},{"version":"v1.1.0","exported":"2016-11-23T11:01:17.452Z","volume":10.5,"added":"2016-11-23T10:39:45.291Z","format":"Utrecht","demagType":"Unknown","strat":null,"patch":1.1,"GEO":[{"dec":183.57022382716713,"inc":-53.30510394355888,"MAD":5.698345327071612,"cm":[-7.105427357601002e-15,3.0142555118573e-14,0],"intensity":3443.5096437597886,"type":"dir","forced":true,"remark":"","origin":false,"nSteps":9,"minStep":"180","maxStep":"380","steps":["180","210","230","250","270","300","330","360","380"],"group":"None","version":"v1.1.0"}],"TECT":[{"dec":164.95398676401715,"inc":-34.929874803837876,"MAD":5.698345327071669,"cm":[-4.263256414560601e-14,8.704148513061227e-14,2.842170943040401e-14],"intensity":3443.5096437597886,"type":"dir","forced":true,"remark":"","origin":false,"nSteps":9,"minStep":"180","maxStep":"380","steps":["180","210","230","250","270","300","330","360","380"],"group":"None","version":"v1.1.0"}],"interpreted":true,"name":"HB1.19B","coreAzi":10,"coreDip":35,"bedStrike":218,"bedDip":26,"data":[{"visible":false,"include":false,"step":"20","x":107.61904761904762,"y":-648.2857142857143,"z":1711.6190476190477,"a95":2.8,"info":"\"15-06-22\" at \"16:12\""},{"visible":true,"include":false,"step":"90","x":148.1904761904762,"y":-10.285714285714286,"z":-1246.7619047619048,"a95":3.1,"info":"\"15-06-22\" at \"19:31\""},{"visible":true,"include":false,"step":"120","x":556.8571428571429,"y":56.76190476190476,"z":-2170.4761904761904,"a95":3,"info":"\"15-06-22\" at \"21:59\""},{"visible":true,"include":false,"step":"150","x":795.3333333333334,"y":59.904761904761905,"z":-2790.6666666666665,"a95":3.2,"info":"\"15-06-23\" at \"20:23\""},{"visible":true,"include":true,"step":"180","x":634,"y":102.57142857142857,"z":-2584.3809523809523,"a95":3.2,"info":"\"15-06-24\" at \"16:49\""},{"visible":true,"include":true,"step":"210","x":669.2380952380952,"y":267.8095238095238,"z":-2000,"a95":3.2,"info":"\"15-06-24\" at \"19:35\""},{"visible":true,"include":true,"step":"230","x":592.0952380952381,"y":261.23809523809524,"z":-1678.7619047619048,"a95":3.2,"info":"\"15-06-27\" at \"23:47\""},{"visible":true,"include":true,"step":"250","x":472.57142857142856,"y":3.142857142857143,"z":-1404.3809523809523,"a95":3.3,"info":"\"15-06-28\" at \"02:18\""},{"visible":true,"include":true,"step":"270","x":409.7142857142857,"y":-86.0952380952381,"z":-1224.5714285714287,"a95":3.3,"info":"\"15-06-28\" at \"17:56\""},{"visible":true,"include":true,"step":"300","x":496.76190476190476,"y":10.571428571428571,"z":-983.5238095238095,"a95":3,"info":"\"15-06-30\" at \"11:05\""},{"visible":true,"include":true,"step":"330","x":449.14285714285717,"y":135.8095238095238,"z":-918.0952380952381,"a95":3,"info":"\"15-06-30\" at \"13:43\""},{"visible":true,"include":true,"step":"360","x":343.23809523809524,"y":95.9047619047619,"z":-807.2380952380952,"a95":3.1,"info":"\"15-07-01\" at \"09:05\""},{"visible":true,"include":true,"step":"380","x":424.1904761904762,"y":61.80952380952381,"z":-688.3809523809524,"a95":2.9,"info":"\"15-07-01\" at \"13:59\""},{"visible":true,"include":false,"step":"410","x":330.95238095238096,"y":109.04761904761905,"z":-806.4761904761905,"a95":3.2,"info":"\"15-07-02\" at \"09:22\""},{"visible":true,"include":false,"step":"430","x":442,"y":25.61904761904762,"z":-775.9047619047619,"a95":3.1,"info":"\"15-07-02\" at \"13:06\""}]},{"version":"v1.1.0","exported":"2016-11-23T11:01:17.452Z","volume":10.5,"added":"2016-11-23T10:39:45.291Z","format":"Utrecht","demagType":"Unknown","strat":null,"patch":1.1,"GEO":[{"dec":177.873723328486,"inc":-61.64107923963392,"MAD":4.926763395076809,"cm":[0,1.2168044349891716e-13,0],"intensity":4660.369856761807,"type":"dir","forced":true,"remark":"","origin":false,"nSteps":12,"minStep":"240","maxStep":"540","steps":["240","270","300","320","340","370","390","420","450","480","510","540"],"group":"None","version":"v1.1.0"}],"TECT":[{"dec":156.79057652638176,"inc":-41.05130361008626,"MAD":4.9267633950768035,"cm":[6.394884621840902e-14,1.3500311979441904e-13,1.4210854715202004e-14],"intensity":4660.369856761806,"type":"dir","forced":true,"remark":"","origin":false,"nSteps":12,"minStep":"240","maxStep":"540","steps":["240","270","300","320","340","370","390","420","450","480","510","540"],"group":"None","version":"v1.1.0"}],"interpreted":true,"name":"HB1.20A","coreAzi":13,"coreDip":34,"bedStrike":218,"bedDip":26,"data":[{"visible":false,"include":false,"step":"20","x":-1011.4285714285714,"y":52.76190476190476,"z":1765.7142857142858,"a95":2.8,"info":"\"14-09-15\" at \"16:31\""},{"visible":false,"include":false,"step":"100","x":-529.8095238095239,"y":-42.666666666666664,"z":1256.1904761904761,"a95":3,"info":"\"14-09-15\" at \"20:39\""},{"visible":true,"include":false,"step":"150","x":1249.2380952380952,"y":449.7142857142857,"z":-2678.5714285714284,"a95":2.7,"info":"\"14-09-15\" at \"23:07\""},{"visible":true,"include":false,"step":"180","x":1839.8095238095239,"y":488.85714285714283,"z":-3819.4285714285716,"a95":2.7,"info":"\"14-09-16\" at \"12:06\""},{"visible":true,"include":false,"step":"210","x":1838.095238095238,"y":565.2380952380952,"z":-3689.6190476190477,"a95":2.8,"info":"\"14-09-16\" at \"14:50\""},{"visible":true,"include":true,"step":"240","x":1762.7619047619048,"y":560,"z":-3166.6666666666665,"a95":2.7,"info":"\"14-09-16\" at \"17:35\""},{"visible":true,"include":true,"step":"270","x":1288.952380952381,"y":274.85714285714283,"z":-2528.095238095238,"a95":2.7,"info":"\"14-09-16\" at \"20:55\""},{"visible":true,"include":true,"step":"300","x":1053.6190476190477,"y":222.28571428571428,"z":-1922.1904761904761,"a95":2.7,"info":"\"14-09-17\" at \"11:50\""},{"visible":true,"include":true,"step":"320","x":968.2857142857143,"y":66,"z":-1640.952380952381,"a95":2.8,"info":"\"14-09-17\" at \"15:22\""},{"visible":true,"include":true,"step":"340","x":971.1428571428571,"y":49.333333333333336,"z":-1725.5238095238096,"a95":2.6,"info":"\"14-09-17\" at \"21:07\""},{"visible":true,"include":true,"step":"370","x":825.6190476190476,"y":265.7142857142857,"z":-1719.904761904762,"a95":2.9,"info":"\"14-09-18\" at \"09:55\""},{"visible":true,"include":true,"step":"390","x":872.4761904761905,"y":201.33333333333334,"z":-1242.857142857143,"a95":2.9,"info":"\"14-09-18\" at \"12:55\""},{"visible":true,"include":true,"step":"420","x":732.4761904761905,"y":268.85714285714283,"z":-941.6190476190476,"a95":2.6,"info":"\"14-09-18\" at \"16:26\""},{"visible":true,"include":true,"step":"450","x":462.1904761904762,"y":291.5238095238095,"z":-916.5714285714286,"a95":2.7,"info":"\"14-09-19\" at \"11:13\""},{"visible":true,"include":true,"step":"480","x":323.7142857142857,"y":281.5238095238095,"z":-870.3809523809524,"a95":3.2,"info":"\"14-09-19\" at \"14:03\""},{"visible":true,"include":true,"step":"510","x":291.6190476190476,"y":104.76190476190476,"z":-836.0952380952381,"a95":2.9,"info":"\"14-09-19\" at \"16:41\""},{"visible":true,"include":true,"step":"540","x":292.85714285714283,"y":239.33333333333334,"z":-938.7619047619048,"a95":2.8,"info":"\"14-10-04\" at \"12:19\""},{"visible":false,"include":false,"step":"570","x":227.71428571428572,"y":-244.1904761904762,"z":-384,"a95":4.3,"info":"\"14-10-04\" at \"15:37\""},{"visible":false,"include":false,"step":"600","x":-746.0952380952381,"y":343.6190476190476,"z":629.2380952380952,"a95":2.2,"info":"\"14-10-05\" at \"09:43\""},{"visible":false,"include":false,"step":"630","x":-818.7619047619048,"y":-45.04761904761905,"z":200.1904761904762,"a95":2.7,"info":"\"14-10-05\" at \"12:32\""},{"visible":false,"include":false,"step":"660","x":-704,"y":557.8095238095239,"z":-40.857142857142854,"a95":2.3,"info":"\"14-10-05\" at \"16:03\""}]},{"version":"v1.1.0","exported":"2016-11-23T11:01:17.452Z","volume":10.5,"added":"2016-11-23T10:39:45.292Z","format":"Utrecht","demagType":"Unknown","strat":"7","patch":1.1,"GEO":[],"TECT":[],"interpreted":false,"name":"HB1.20B","coreAzi":13,"coreDip":34,"bedStrike":218,"bedDip":26,"data":[{"visible":true,"include":false,"step":"0.0","x":-189.6095238095238,"y":-160.85714285714286,"z":823.7523809523809,"a95":0.99,"info":"27/08/2014 at 12:57:25"},{"visible":true,"include":false,"step":"4.0","x":-103.97142857142858,"y":-67.86,"z":640.0571428571429,"a95":0.99,"info":"27/08/2014 at 12:57:25"},{"visible":true,"include":false,"step":"8.0","x":56.62285714285714,"y":21.18190476190476,"z":305.2857142857143,"a95":0.99,"info":"27/08/2014 at 12:57:25"},{"visible":true,"include":false,"step":"12.0","x":96.93333333333332,"y":10.088571428571429,"z":214.42857142857142,"a95":0.99,"info":"27/08/2014 at 12:57:25"},{"visible":true,"include":false,"step":"16.0","x":173.5047619047619,"y":-38.34285714285714,"z":195.76190476190476,"a95":0.99,"info":"27/08/2014 at 12:57:25"},{"visible":true,"include":false,"step":"20.0","x":88.88,"y":-32.92761904761905,"z":287.96190476190475,"a95":0.99,"info":"27/08/2014 at 12:57:25"},{"visible":true,"include":false,"step":"25.0","x":39.163809523809526,"y":-18.926666666666666,"z":446.87619047619046,"a95":0.99,"info":"27/08/2014 at 12:57:25"},{"visible":true,"include":false,"step":"30.0","x":-27.022857142857145,"y":-131.1809523809524,"z":563.5904761904761,"a95":0.99,"info":"27/08/2014 at 12:57:25"},{"visible":true,"include":false,"step":"35.0","x":-181.21904761904761,"y":-619.1333333333333,"z":656.3142857142857,"a95":0.99,"info":"27/08/2014 at 12:57:25"},{"visible":true,"include":false,"step":"40.0","x":-168.26666666666665,"y":-344.6380952380952,"z":763.9238095238095,"a95":0.99,"info":"27/08/2014 at 12:57:25"},{"visible":true,"include":false,"step":"45.0","x":-138.6,"y":-739.952380952381,"z":744.1428571428571,"a95":0.99,"info":"27/08/2014 at 12:57:25"},{"visible":true,"include":false,"step":"50.0","x":-309.45714285714286,"y":-1227.904761904762,"z":707.8761904761905,"a95":0.99,"info":"27/08/2014 at 12:57:25"},{"visible":false,"include":false,"step":"60.0","x":-214.39999999999998,"y":-613.4095238095239,"z":486.42857142857144,"a95":0.99,"info":"27/08/2014 at 12:57:25"},{"visible":false,"include":false,"step":"70.0","x":173.4952380952381,"y":-953.9047619047619,"z":533.5428571428571,"a95":0.99,"info":"27/08/2014 at 12:57:25"},{"visible":false,"include":false,"step":"80.0","x":-388.7142857142857,"y":-1662.3809523809523,"z":20.384761904761906,"a95":0.99,"info":"27/08/2014 at 12:57:25"},{"visible":false,"include":false,"step":"90.0","x":-365.6666666666667,"y":-978.8571428571429,"z":448.85714285714283,"a95":0.99,"info":"27/08/2014 at 12:57:25"},{"visible":false,"include":false,"step":"100.0","x":-258.6380952380952,"y":-1117.142857142857,"z":253.94285714285715,"a95":0.99,"info":"27/08/2014 at 12:57:25"}]},{"version":"v1.1.0","exported":"2016-11-23T11:01:17.452Z","volume":10.5,"added":"2016-11-23T10:39:45.292Z","format":"Utrecht","demagType":"Unknown","strat":"8","patch":1.1,"GEO":[],"TECT":[],"interpreted":false,"name":"HB1.21A","coreAzi":51,"coreDip":49,"bedStrike":218,"bedDip":26,"data":[{"visible":true,"include":false,"step":"0.0","x":-1921.2380952380952,"y":-2027.4285714285713,"z":5047.809523809524,"a95":0.99,"info":"27/08/2014 at 12:57:25"},{"visible":true,"include":false,"step":"4.0","x":-1737.7142857142858,"y":-1923.047619047619,"z":4861.047619047619,"a95":0.99,"info":"27/08/2014 at 12:57:25"},{"visible":true,"include":false,"step":"8.0","x":-1481.2380952380952,"y":-1693.3333333333333,"z":4277.428571428572,"a95":0.99,"info":"27/08/2014 at 12:57:25"},{"visible":true,"include":false,"step":"12.0","x":-1168.857142857143,"y":-1468.4761904761904,"z":3706.8571428571427,"a95":0.99,"info":"27/08/2014 at 12:57:25"},{"visible":true,"include":false,"step":"16.0","x":-1022.952380952381,"y":-1390.6666666666667,"z":3263.4285714285716,"a95":0.99,"info":"27/08/2014 at 12:57:25"},{"visible":true,"include":false,"step":"20.0","x":-993.8095238095239,"y":-1326.1904761904761,"z":2843.1428571428573,"a95":0.99,"info":"27/08/2014 at 12:57:25"},{"visible":true,"include":false,"step":"25.0","x":-732.1904761904761,"y":-1316.1904761904761,"z":2683.6190476190477,"a95":0.99,"info":"27/08/2014 at 12:57:25"},{"visible":true,"include":false,"step":"30.0","x":-795.5523809523809,"y":-1217.2380952380952,"z":2474.190476190476,"a95":0.99,"info":"27/08/2014 at 12:57:25"},{"visible":true,"include":false,"step":"35.0","x":-1011.8095238095239,"y":-1439.904761904762,"z":2126.8571428571427,"a95":0.99,"info":"27/08/2014 at 12:57:25"},{"visible":true,"include":false,"step":"40.0","x":-948.6380952380953,"y":-955.6190476190476,"z":2181.3333333333335,"a95":0.99,"info":"27/08/2014 at 12:57:25"},{"visible":true,"include":false,"step":"45.0","x":-506.57142857142856,"y":-887.8285714285715,"z":1675.904761904762,"a95":0.99,"info":"27/08/2014 at 12:57:25"},{"visible":true,"include":false,"step":"50.0","x":-819.4952380952382,"y":-1607.904761904762,"z":1331.5238095238096,"a95":0.99,"info":"27/08/2014 at 12:57:25"},{"visible":true,"include":false,"step":"60.0","x":-626.4285714285714,"y":-1027.3333333333333,"z":951.8761904761906,"a95":0.99,"info":"27/08/2014 at 12:57:25"},{"visible":true,"include":false,"step":"70.0","x":-413.552380952381,"y":-1051.047619047619,"z":806.0857142857143,"a95":0.99,"info":"27/08/2014 at 12:57:25"},{"visible":true,"include":false,"step":"80.0","x":-545.0952380952381,"y":-1611.5238095238096,"z":561.0285714285715,"a95":0.99,"info":"27/08/2014 at 12:57:25"},{"visible":true,"include":false,"step":"90.0","x":-395.8857142857143,"y":-1168.6666666666667,"z":369.06666666666666,"a95":0.99,"info":"27/08/2014 at 12:57:25"},{"visible":true,"include":false,"step":"100.0","x":6.947238095238095,"y":-1077.047619047619,"z":134.2761904761905,"a95":0.99,"info":"27/08/2014 at 12:57:25"}]},{"version":"v1.1.0","exported":"2016-11-23T11:01:17.452Z","volume":10.5,"added":"2016-11-23T10:39:45.292Z","format":"Utrecht","demagType":"Unknown","strat":null,"patch":1.1,"GEO":[{"dec":294.9178101289956,"inc":-15.195572319184631,"MAD":2.5242580721009604,"cm":[-6.394884621840902e-14,2.6290081223123707e-13,0],"intensity":4910.28713478466,"type":"GC","origin":false,"forced":true,"remark":"","nSteps":5,"minStep":"100","maxStep":"240","steps":["100","150","180","210","240"],"group":"None","version":"v1.1.0"}],"TECT":[{"dec":291.34049036423573,"inc":-40.364789266971506,"MAD":2.524258072101016,"cm":[1.2612133559741778e-13,2.7000623958883807e-13,1.2789769243681803e-13],"intensity":4910.287134784659,"type":"GC","origin":false,"forced":true,"remark":"","nSteps":5,"minStep":"100","maxStep":"240","steps":["100","150","180","210","240"],"group":"None","version":"v1.1.0"}],"interpreted":true,"name":"HB1.22A","coreAzi":49,"coreDip":51,"bedStrike":218,"bedDip":26,"data":[{"visible":false,"include":false,"step":"20","x":-704.7619047619048,"y":-3202.285714285714,"z":690.5714285714286,"a95":6.3,"info":"\"14-09-15\" at \"16:34\""},{"visible":true,"include":true,"step":"100","x":-576.952380952381,"y":-2414.190476190476,"z":4933.142857142857,"a95":3.1,"info":"\"14-09-15\" at \"20:42\""},{"visible":true,"include":true,"step":"150","x":421.5238095238095,"y":-718.6666666666666,"z":1138.4761904761904,"a95":2.9,"info":"\"14-09-15\" at \"23:09\""},{"visible":true,"include":true,"step":"180","x":907.4285714285714,"y":-97.42857142857143,"z":-110.76190476190476,"a95":1.8,"info":"\"14-09-16\" at \"12:08\""},{"visible":true,"include":true,"step":"210","x":1036.5714285714287,"y":66.19047619047619,"z":-449.14285714285717,"a95":2,"info":"\"14-09-16\" at \"14:52\""},{"visible":true,"include":true,"step":"240","x":1065.4285714285713,"y":176.57142857142858,"z":-589.7142857142857,"a95":2.3,"info":"\"14-09-16\" at \"17:38\""},{"visible":true,"include":false,"step":"270","x":758.0952380952381,"y":-19.333333333333332,"z":-625.9047619047619,"a95":2.4,"info":"\"14-09-16\" at \"20:58\""},{"visible":true,"include":false,"step":"300","x":926.7619047619048,"y":168.66666666666666,"z":-458.0952380952381,"a95":2.2,"info":"\"14-09-17\" at \"11:53\""},{"visible":true,"include":false,"step":"320","x":892.4761904761905,"y":231.33333333333334,"z":-426.1904761904762,"a95":2.1,"info":"\"14-09-17\" at \"15:26\""},{"visible":true,"include":false,"step":"340","x":826.952380952381,"y":79.14285714285714,"z":-319.7142857142857,"a95":1.9,"info":"\"14-09-17\" at \"21:10\""},{"visible":true,"include":false,"step":"370","x":601.6190476190476,"y":180.76190476190476,"z":-719.047619047619,"a95":2.4,"info":"\"14-09-18\" at \"09:57\""},{"visible":true,"include":false,"step":"390","x":625.4285714285714,"y":179.71428571428572,"z":-346.95238095238096,"a95":2.4,"info":"\"14-09-18\" at \"12:58\""},{"visible":true,"include":false,"step":"420","x":693.6190476190476,"y":75.23809523809524,"z":-334.6666666666667,"a95":2,"info":"\"14-09-18\" at \"16:29\""},{"visible":true,"include":false,"step":"450","x":508.95238095238096,"y":117.14285714285714,"z":-241.23809523809524,"a95":1.9,"info":"\"14-09-19\" at \"11:16\""},{"visible":true,"include":false,"step":"480","x":438.76190476190476,"y":-37.333333333333336,"z":-156.47619047619048,"a95":2.7,"info":"\"14-09-19\" at \"14:05\""},{"visible":true,"include":false,"step":"510","x":414.2857142857143,"y":13.904761904761905,"z":-208.38095238095238,"a95":2.4,"info":"\"14-09-19\" at \"16:44\""},{"visible":true,"include":false,"step":"540","x":475.04761904761904,"y":2.5714285714285716,"z":-199.14285714285714,"a95":2.4,"info":"\"14-10-04\" at \"12:21\""},{"visible":false,"include":false,"step":"570","x":595.8095238095239,"y":53.61904761904762,"z":133.8095238095238,"a95":1.6,"info":"\"14-10-04\" at \"15:39\""},{"visible":false,"include":false,"step":"600","x":-336.3809523809524,"y":152.66666666666666,"z":804.6666666666666,"a95":3,"info":"\"14-10-05\" at \"09:45\""},{"visible":false,"include":false,"step":"630","x":-301.04761904761904,"y":-407.14285714285717,"z":211.8095238095238,"a95":2.9,"info":"\"14-10-05\" at \"12:34\""},{"visible":false,"include":false,"step":"660","x":-722.1904761904761,"y":582.3809523809524,"z":-51.04761904761905,"a95":2.5,"info":"\"14-10-05\" at \"16:05\""}]}]
