# Supplementary material for: Paleomagnetic constraints on the timing and distribution of Cenozoic rotations in Central and Eastern Anatolia
Source: Copernicus journal article supplement (doi:10.5194/se-9-295-2018), 2018-03-21
Supplement: Supplementary file 2 [file se-9-295-2018-supplement.zip › se-2017-66_DATA_dir files/dir files Ulukisla/HG2.dir]

[{"version":"v1.1.0","exported":"2016-11-17T16:06:19.689Z","volume":10.5,"added":"2016-11-17T15:39:43.917Z","format":"Utrecht","demagType":"Unknown","strat":"1","patch":1.1,"GEO":[{"dec":178.44168838174232,"inc":34.91967604015658,"MAD":5.314156960048874,"cm":[8.881784197001252e-15,1.0047518372857667e-14,0],"intensity":1109.9530439472655,"type":"dir","forced":true,"remark":"","origin":false,"nSteps":11,"minStep":"20.0","maxStep":"60.0","steps":["20.0","23.0","25.0","30.0","33.0","35.0","40.0","45.0","50.0","55.0","60.0"],"group":"None","version":"v1.1.0"}],"TECT":[{"dec":177.91697925754693,"inc":-24.87804066040276,"MAD":5.3141569600488925,"cm":[-7.105427357601002e-15,7.66053886991358e-15,-1.3322676295501878e-15],"intensity":1109.9530439472655,"type":"dir","forced":true,"remark":"","origin":false,"nSteps":11,"minStep":"20.0","maxStep":"60.0","steps":["20.0","23.0","25.0","30.0","33.0","35.0","40.0","45.0","50.0","55.0","60.0"],"group":"None","version":"v1.1.0"}],"interpreted":true,"name":"HG2.04","coreAzi":226,"coreDip":61,"bedStrike":83,"bedDip":60,"data":[{"visible":true,"include":false,"step":"0.0","x":-336.6190476190476,"y":-298.8857142857143,"z":1179.3333333333333,"a95":0.99,"info":"08/07/2015 at 13:44:31"},{"visible":true,"include":false,"step":"10.0","x":37.829523809523806,"y":-485.76190476190476,"z":889.7047619047619,"a95":0.99,"info":"08/07/2015 at 13:44:31"},{"visible":true,"include":false,"step":"15.0","x":169.17142857142858,"y":-512.7809523809524,"z":740.7523809523809,"a95":0.99,"info":"08/07/2015 at 13:44:31"},{"visible":true,"include":true,"step":"20.0","x":187.9904761904762,"y":-491.46666666666664,"z":622.2666666666667,"a95":0.99,"info":"08/07/2015 at 13:44:31"},{"visible":true,"include":true,"step":"23.0","x":182.92380952380952,"y":-441.23809523809524,"z":564.6190476190476,"a95":0.99,"info":"08/07/2015 at 13:44:31"},{"visible":true,"include":true,"step":"25.0","x":154.53333333333333,"y":-446.9238095238095,"z":542.8571428571429,"a95":0.99,"info":"08/07/2015 at 13:44:31"},{"visible":true,"include":true,"step":"30.0","x":166.32380952380953,"y":-366.8285714285714,"z":493.1714285714286,"a95":0.99,"info":"08/07/2015 at 13:44:31"},{"visible":true,"include":true,"step":"33.0","x":151.56190476190477,"y":-344.87619047619046,"z":418.7333333333333,"a95":0.99,"info":"08/07/2015 at 13:44:31"},{"visible":true,"include":true,"step":"35.0","x":117.6952380952381,"y":-333.81904761904764,"z":395.3333333333333,"a95":0.99,"info":"08/07/2015 at 13:44:31"},{"visible":true,"include":true,"step":"40.0","x":117.48571428571428,"y":-320.65714285714284,"z":399.6380952380952,"a95":0.99,"info":"08/07/2015 at 13:44:31"},{"visible":true,"include":true,"step":"45.0","x":55.820952380952384,"y":-265.5904761904762,"z":360.0857142857143,"a95":0.99,"info":"08/07/2015 at 13:44:31"},{"visible":true,"include":true,"step":"50.0","x":7.780571428571428,"y":-252.0761904761905,"z":275.50476190476195,"a95":0.99,"info":"08/07/2015 at 13:44:31"},{"visible":true,"include":true,"step":"55.0","x":-35.9,"y":-208.48571428571427,"z":296.2190476190476,"a95":0.99,"info":"08/07/2015 at 13:44:31"},{"visible":true,"include":true,"step":"60.0","x":7.259047619047619,"y":-142.16190476190476,"z":267.8952380952381,"a95":0.99,"info":"08/07/2015 at 13:44:31"},{"visible":true,"include":false,"step":"65.0","x":-37.1,"y":-215.63809523809522,"z":202.7238095238095,"a95":0.99,"info":"08/07/2015 at 13:44:31"},{"visible":true,"include":false,"step":"70.0","x":-62.05619047619048,"y":-192.32380952380953,"z":184.23809523809524,"a95":0.99,"info":"08/07/2015 at 13:44:31"},{"visible":true,"include":false,"step":"80.0","x":-34.79047619047619,"y":-157.32380952380953,"z":164.98095238095237,"a95":0.99,"info":"08/07/2015 at 13:44:31"}]},{"version":"v1.1.0","exported":"2016-11-17T16:06:19.689Z","volume":10.5,"added":"2016-11-17T15:39:43.917Z","format":"Utrecht","demagType":"Unknown","strat":null,"patch":1.1,"GEO":[{"dec":179.0650293677495,"inc":13.58997908206545,"MAD":2.423974242117078,"cm":[-7.105427357601002e-15,-2.049471703458039e-13,0],"intensity":1651.0583591186048,"type":"dir","forced":true,"remark":"","origin":false,"nSteps":8,"minStep":"300","maxStep":"450","steps":["300","320","340","360","380","400","420","450"],"group":"None","version":"v1.1.0"}],"TECT":[{"dec":181.50490710538642,"inc":-46.01987368036245,"MAD":2.4239742421170622,"cm":[-1.4210854715202004e-14,-7.388534228880417e-14,7.105427357601002e-15],"intensity":1651.0583591186048,"type":"dir","forced":true,"remark":"","origin":false,"nSteps":8,"minStep":"300","maxStep":"450","steps":["300","320","340","360","380","400","420","450"],"group":"None","version":"v1.1.0"}],"interpreted":true,"name":"HG2.6A","coreAzi":207,"coreDip":57,"bedStrike":83,"bedDip":60,"data":[{"visible":true,"include":false,"step":"20","x":-191.8095238095238,"y":-211.61904761904762,"z":1533.5238095238096,"a95":2.9,"info":"\"14-11-03\" at \"20:26\""},{"visible":true,"include":false,"step":"150","x":312.85714285714283,"y":-366.0952380952381,"z":838.2857142857143,"a95":2.6,"info":"\"14-11-04\" at \"15:28\""},{"visible":true,"include":false,"step":"180","x":330.76190476190476,"y":-389.5238095238095,"z":816.8571428571429,"a95":2.7,"info":"\"14-11-04\" at \"20:51\""},{"visible":true,"include":false,"step":"210","x":402.85714285714283,"y":-362.3809523809524,"z":774.3809523809524,"a95":2.7,"info":"\"14-11-05\" at \"15:39\""},{"visible":true,"include":false,"step":"240","x":382,"y":-459.9047619047619,"z":690.952380952381,"a95":3,"info":"\"14-11-05\" at \"21:54\""},{"visible":true,"include":false,"step":"270","x":486.3809523809524,"y":-382.1904761904762,"z":690.3809523809524,"a95":2.3,"info":"\"14-11-06\" at \"20:23\""},{"visible":true,"include":true,"step":"300","x":486.6666666666667,"y":-436.2857142857143,"z":662.0952380952381,"a95":2.2,"info":"\"14-11-07\" at \"14:23\""},{"visible":true,"include":true,"step":"320","x":563.047619047619,"y":-396.57142857142856,"z":579.9047619047619,"a95":2.1,"info":"\"14-11-07\" at \"19:10\""},{"visible":true,"include":true,"step":"340","x":548.5714285714286,"y":-391.6190476190476,"z":580.5714285714286,"a95":2.1,"info":"\"14-11-15\" at \"18:28\""},{"visible":true,"include":true,"step":"360","x":546.7619047619048,"y":-402.85714285714283,"z":565.1428571428571,"a95":2.1,"info":"\"14-11-15\" at \"22:50\""},{"visible":true,"include":true,"step":"380","x":478.76190476190476,"y":-382,"z":554.0952380952381,"a95":2.2,"info":"\"14-11-16\" at \"01:56\""},{"visible":true,"include":true,"step":"400","x":470.57142857142856,"y":-377.14285714285717,"z":519.2380952380952,"a95":2.1,"info":"\"14-11-16\" at \"21:06\""},{"visible":true,"include":true,"step":"420","x":468.95238095238096,"y":-345.7142857142857,"z":533.7142857142857,"a95":2.3,"info":"\"14-11-17\" at \"00:06\""},{"visible":true,"include":true,"step":"450","x":424.85714285714283,"y":-334.2857142857143,"z":478.6666666666667,"a95":2.2,"info":"\"14-11-17\" at \"02:25\""},{"visible":false,"include":false,"step":"610","x":-191.8095238095238,"y":-17.61904761904762,"z":39.61904761904762,"a95":5.2,"info":"\"14-11-28\" at \"22:14\""}]},{"version":"v1.1.0","exported":"2016-11-17T16:06:19.689Z","volume":10.5,"added":"2016-11-17T15:39:43.918Z","format":"Utrecht","demagType":"Unknown","strat":"1","patch":1.1,"GEO":[{"dec":181.61789064506235,"inc":20.960229968946365,"MAD":3.584449485033887,"cm":[0,3.197442310920451e-14,0],"intensity":1066.086006044919,"type":"dir","forced":true,"remark":"","origin":false,"nSteps":9,"minStep":"16.0","maxStep":"60.0","steps":["16.0","20.0","25.0","30.0","35.0","40.0","45.0","50.0","60.0"],"group":"None","version":"v1.1.0"}],"TECT":[{"dec":183.2809328506147,"inc":-38.36938475157208,"MAD":3.5844494850339332,"cm":[3.552713678800501e-15,3.9968028886505635e-15,0],"intensity":1066.086006044919,"type":"dir","forced":true,"remark":"","origin":false,"nSteps":9,"minStep":"16.0","maxStep":"60.0","steps":["16.0","20.0","25.0","30.0","35.0","40.0","45.0","50.0","60.0"],"group":"None","version":"v1.1.0"}],"interpreted":true,"name":"HG2.6B","coreAzi":207,"coreDip":57,"bedStrike":83,"bedDip":60,"data":[{"visible":true,"include":false,"step":"0.0","x":-48.12190476190476,"y":-174.64761904761903,"z":921.3333333333334,"a95":0.99,"info":"26/10/2014 at 13:22:09"},{"visible":true,"include":false,"step":"4.0","x":63.610476190476184,"y":-246.2761904761905,"z":876.0190476190477,"a95":0.99,"info":"26/10/2014 at 13:22:09"},{"visible":true,"include":false,"step":"8.0","x":272.247619047619,"y":-304.6952380952381,"z":784.5619047619048,"a95":0.99,"info":"26/10/2014 at 13:22:09"},{"visible":true,"include":false,"step":"12.0","x":388.2761904761905,"y":-332.3047619047619,"z":688.152380952381,"a95":0.99,"info":"26/10/2014 at 13:22:09"},{"visible":true,"include":true,"step":"16.0","x":417.6190476190476,"y":-340.67619047619047,"z":665.847619047619,"a95":0.99,"info":"26/10/2014 at 13:22:09"},{"visible":true,"include":true,"step":"20.0","x":425.1904761904762,"y":-304.95238095238096,"z":608.0952380952381,"a95":0.99,"info":"26/10/2014 at 13:22:09"},{"visible":true,"include":true,"step":"25.0","x":391.3333333333333,"y":-293.12380952380954,"z":528.7238095238096,"a95":0.99,"info":"26/10/2014 at 13:22:09"},{"visible":true,"include":true,"step":"30.0","x":321.2761904761905,"y":-227.59047619047618,"z":492.2095238095238,"a95":0.99,"info":"26/10/2014 at 13:22:09"},{"visible":true,"include":true,"step":"35.0","x":274.6,"y":-219.14285714285714,"z":393.12380952380954,"a95":0.99,"info":"26/10/2014 at 13:22:09"},{"visible":true,"include":true,"step":"40.0","x":250.25714285714284,"y":-209.1809523809524,"z":303.8,"a95":0.99,"info":"26/10/2014 at 13:22:09"},{"visible":true,"include":true,"step":"45.0","x":195.01904761904763,"y":-134.35238095238097,"z":284.25714285714287,"a95":0.99,"info":"26/10/2014 at 13:22:09"},{"visible":true,"include":true,"step":"50.0","x":113.02857142857142,"y":-145.64761904761903,"z":278.5904761904762,"a95":0.99,"info":"26/10/2014 at 13:22:09"},{"visible":true,"include":true,"step":"60.0","x":85.03619047619047,"y":-122.9904761904762,"z":152.0095238095238,"a95":0.99,"info":"26/10/2014 at 13:22:09"},{"visible":true,"include":false,"step":"70.0","x":71.33619047619047,"y":-38.618095238095236,"z":115.48571428571428,"a95":0.99,"info":"26/10/2014 at 13:22:09"},{"visible":false,"include":false,"step":"80.0","x":-45.33238095238095,"y":-32.25142857142857,"z":101.55238095238094,"a95":0.99,"info":"26/10/2014 at 13:22:09"},{"visible":false,"include":false,"step":"90.0","x":33.212380952380954,"y":-77.34571428571428,"z":-6.513523809523809,"a95":0.99,"info":"26/10/2014 at 13:22:09"},{"visible":false,"include":false,"step":"100.0","x":-23.57238095238095,"y":-29.793333333333333,"z":102.24761904761904,"a95":0.99,"info":"26/10/2014 at 13:22:09"}]},{"version":"v1.1.0","exported":"2016-11-17T16:06:19.689Z","volume":10.5,"added":"2016-11-17T15:39:43.918Z","format":"Utrecht","demagType":"Unknown","strat":null,"patch":1.1,"GEO":[{"dec":180.87899033186585,"inc":17.203174447719405,"MAD":3.2691213258545924,"cm":[0,4.574118861455645e-14,0],"intensity":1715.7439036339726,"type":"dir","forced":true,"remark":"","origin":false,"nSteps":8,"minStep":"300","maxStep":"450","steps":["300","320","340","360","380","400","420","450"],"group":"None","version":"v1.1.0"}],"TECT":[{"dec":183.17977451423482,"inc":-42.18997402681538,"MAD":3.2691213258545755,"cm":[1.4210854715202004e-14,3.064215547965432e-14,0],"intensity":1715.7439036339724,"type":"dir","forced":true,"remark":"","origin":false,"nSteps":8,"minStep":"300","maxStep":"450","steps":["300","320","340","360","380","400","420","450"],"group":"None","version":"v1.1.0"}],"interpreted":true,"name":"HG2.7A","coreAzi":208,"coreDip":61,"bedStrike":83,"bedDip":60,"data":[{"visible":false,"include":false,"step":"20","x":-331.42857142857144,"y":-250.28571428571428,"z":1748.4761904761904,"a95":2.8,"info":"\"14-11-03\" at \"20:28\""},{"visible":true,"include":false,"step":"150","x":310.3809523809524,"y":-371.5238095238095,"z":880.1904761904761,"a95":2.7,"info":"\"14-11-04\" at \"15:31\""},{"visible":true,"include":false,"step":"180","x":330.2857142857143,"y":-395.8095238095238,"z":829.6190476190476,"a95":2.6,"info":"\"14-11-04\" at \"20:53\""},{"visible":true,"include":false,"step":"210","x":377.7142857142857,"y":-427.8095238095238,"z":768.952380952381,"a95":2.5,"info":"\"14-11-05\" at \"15:45\""},{"visible":true,"include":false,"step":"240","x":485.14285714285717,"y":-369.9047619047619,"z":717.2380952380952,"a95":3.2,"info":"\"14-11-05\" at \"21:57\""},{"visible":true,"include":false,"step":"270","x":516.7619047619048,"y":-417.5238095238095,"z":697.047619047619,"a95":2.2,"info":"\"14-11-06\" at \"20:25\""},{"visible":true,"include":true,"step":"300","x":532.2857142857143,"y":-454.1904761904762,"z":721.047619047619,"a95":2.2,"info":"\"14-11-07\" at \"14:25\""},{"visible":true,"include":true,"step":"320","x":516.4761904761905,"y":-414,"z":642.0952380952381,"a95":3.2,"info":"\"14-11-07\" at \"19:12\""},{"visible":true,"include":true,"step":"340","x":557.6190476190476,"y":-359.8095238095238,"z":583.9047619047619,"a95":2,"info":"\"14-11-15\" at \"18:31\""},{"visible":true,"include":true,"step":"360","x":572.2857142857143,"y":-382.3809523809524,"z":598.0952380952381,"a95":2,"info":"\"14-11-15\" at \"22:52\""},{"visible":true,"include":true,"step":"380","x":505.3333333333333,"y":-386.76190476190476,"z":575.3333333333334,"a95":2.3,"info":"\"14-11-16\" at \"01:58\""},{"visible":true,"include":true,"step":"400","x":503.6190476190476,"y":-357.42857142857144,"z":519.3333333333334,"a95":2.1,"info":"\"14-11-16\" at \"21:09\""},{"visible":true,"include":true,"step":"420","x":513.1428571428571,"y":-314,"z":541.7142857142857,"a95":2.1,"info":"\"14-11-17\" at \"00:09\""},{"visible":true,"include":true,"step":"450","x":462.6666666666667,"y":-337.6190476190476,"z":430.85714285714283,"a95":2,"info":"\"14-11-17\" at \"02:27\""},{"visible":false,"include":false,"step":"610","x":-116.38095238095238,"y":65.9047619047619,"z":96.47619047619048,"a95":7.3,"info":"\"14-11-28\" at \"22:16\""}]},{"version":"v1.1.0","exported":"2016-11-17T16:06:19.689Z","volume":10.5,"added":"2016-11-17T15:39:43.919Z","format":"Utrecht","demagType":"Unknown","strat":null,"patch":1.1,"GEO":[{"dec":181.35736371898454,"inc":18.30409450638156,"MAD":3.362535613412243,"cm":[-1.7763568394002505e-15,-2.6173507805538065e-14,0],"intensity":885.646831500024,"type":"dir","forced":true,"remark":"","origin":false,"nSteps":11,"minStep":"20.0","maxStep":"60.0","steps":["20.0","23.0","25.0","30.0","33.0","35.0","40.0","45.0","50.0","55.0","60.0"],"group":"None","version":"v1.1.0"}],"TECT":[{"dec":183.5401021983122,"inc":-41.02936822499043,"MAD":3.362535613412203,"cm":[-3.552713678800501e-15,-9.769962616701378e-15,-2.6645352591003757e-15],"intensity":885.6468315000238,"type":"dir","forced":true,"remark":"","origin":false,"nSteps":11,"minStep":"20.0","maxStep":"60.0","steps":["20.0","23.0","25.0","30.0","33.0","35.0","40.0","45.0","50.0","55.0","60.0"],"group":"None","version":"v1.1.0"}],"interpreted":true,"name":"HG2.7B","coreAzi":208,"coreDip":61,"bedStrike":83,"bedDip":60,"data":[{"visible":true,"include":false,"step":"0.0","x":72.59904761904761,"y":-201.60000000000002,"z":818.7047619047619,"a95":0.99,"info":"08/07/2015 at 13:44:31"},{"visible":true,"include":false,"step":"10.0","x":350.76190476190476,"y":-294.8,"z":627.5714285714286,"a95":0.99,"info":"08/07/2015 at 13:44:31"},{"visible":true,"include":false,"step":"15.0","x":426.0952380952381,"y":-286.6952380952381,"z":536.8095238095239,"a95":0.99,"info":"08/07/2015 at 13:44:31"},{"visible":true,"include":true,"step":"20.0","x":387.57142857142856,"y":-282.50476190476195,"z":485.9809523809524,"a95":0.99,"info":"08/07/2015 at 13:44:31"},{"visible":true,"include":true,"step":"23.0","x":386.9142857142857,"y":-261.3619047619048,"z":424.7142857142857,"a95":0.99,"info":"08/07/2015 at 13:44:31"},{"visible":true,"include":true,"step":"25.0","x":362.7809523809524,"y":-257.7238095238095,"z":430.5142857142857,"a95":0.99,"info":"08/07/2015 at 13:44:31"},{"visible":true,"include":true,"step":"30.0","x":294.06666666666666,"y":-218.41904761904763,"z":341.84761904761905,"a95":0.99,"info":"08/07/2015 at 13:44:31"},{"visible":true,"include":true,"step":"33.0","x":299.9142857142857,"y":-193.58095238095237,"z":313.57142857142856,"a95":0.99,"info":"08/07/2015 at 13:44:31"},{"visible":true,"include":true,"step":"35.0","x":261.2666666666667,"y":-179.71428571428572,"z":250.67619047619047,"a95":0.99,"info":"08/07/2015 at 13:44:31"},{"visible":true,"include":true,"step":"40.0","x":227.1047619047619,"y":-168.96190476190475,"z":278.65714285714284,"a95":0.99,"info":"08/07/2015 at 13:44:31"},{"visible":true,"include":true,"step":"45.0","x":183.7904761904762,"y":-157.92380952380952,"z":200.71428571428572,"a95":0.99,"info":"08/07/2015 at 13:44:31"},{"visible":true,"include":true,"step":"50.0","x":133.8095238095238,"y":-151.6952380952381,"z":242.48571428571427,"a95":0.99,"info":"08/07/2015 at 13:44:31"},{"visible":true,"include":true,"step":"55.0","x":141.63809523809525,"y":-91.94,"z":173.11428571428573,"a95":0.99,"info":"08/07/2015 at 13:44:31"},{"visible":true,"include":true,"step":"60.0","x":133.31428571428572,"y":-89.45333333333333,"z":126.14285714285714,"a95":0.99,"info":"08/07/2015 at 13:44:31"},{"visible":true,"include":false,"step":"65.0","x":89.04857142857142,"y":-64.94571428571427,"z":161.54285714285714,"a95":0.99,"info":"08/07/2015 at 13:44:31"},{"visible":true,"include":false,"step":"70.0","x":62.21714285714285,"y":-62.48571428571429,"z":157.47619047619048,"a95":0.99,"info":"08/07/2015 at 13:44:31"},{"visible":true,"include":false,"step":"80.0","x":80.17333333333333,"y":-78.3552380952381,"z":62.24857142857143,"a95":0.99,"info":"08/07/2015 at 13:44:31"}]},{"version":"v1.1.0","exported":"2016-11-17T16:06:19.689Z","volume":10.5,"added":"2016-11-17T15:39:43.920Z","format":"Utrecht","demagType":"Unknown","strat":"2","patch":1.1,"GEO":[{"dec":173.5330631137051,"inc":20.9404178539052,"MAD":3.206546894573418,"cm":[-6.217248937900877e-15,-3.7969627442180354e-14,0],"intensity":520.3614742781456,"type":"dir","forced":true,"remark":"","origin":false,"nSteps":8,"minStep":"20.0","maxStep":"60.0","steps":["20.0","25.0","30.0","35.0","40.0","45.0","50.0","60.0"],"group":"None","version":"v1.1.0"}],"TECT":[{"dec":173.64114149676072,"inc":-39.05699921670026,"MAD":3.206546894573379,"cm":[-8.881784197001252e-15,-5.262457136723242e-14,-8.881784197001252e-16],"intensity":520.3614742781456,"type":"dir","forced":true,"remark":"","origin":false,"nSteps":8,"minStep":"20.0","maxStep":"60.0","steps":["20.0","25.0","30.0","35.0","40.0","45.0","50.0","60.0"],"group":"None","version":"v1.1.0"}],"interpreted":true,"name":"HG2.8B","coreAzi":205,"coreDip":53,"bedStrike":83,"bedDip":60,"data":[{"visible":true,"include":false,"step":"0.0","x":-113.71428571428571,"y":-141.6,"z":403.1333333333333,"a95":0.99,"info":"26/10/2014 at 13:22:09"},{"visible":true,"include":false,"step":"4.0","x":-47.34952380952381,"y":-161.14285714285714,"z":382.5809523809524,"a95":0.99,"info":"26/10/2014 at 13:22:09"},{"visible":true,"include":false,"step":"8.0","x":65.88095238095238,"y":-195.21904761904764,"z":347.04761904761904,"a95":0.99,"info":"26/10/2014 at 13:22:09"},{"visible":true,"include":false,"step":"12.0","x":135.84761904761905,"y":-203.53333333333333,"z":311.68571428571425,"a95":0.99,"info":"26/10/2014 at 13:22:09"},{"visible":true,"include":false,"step":"16.0","x":158.21904761904761,"y":-203.06666666666666,"z":310.67619047619047,"a95":0.99,"info":"26/10/2014 at 13:22:09"},{"visible":true,"include":true,"step":"20.0","x":172.22857142857143,"y":-186.8952380952381,"z":294.16190476190474,"a95":0.99,"info":"26/10/2014 at 13:22:09"},{"visible":true,"include":true,"step":"25.0","x":147.64761904761903,"y":-179.03809523809525,"z":257.3904761904762,"a95":0.99,"info":"26/10/2014 at 13:22:09"},{"visible":true,"include":true,"step":"30.0","x":130.94285714285715,"y":-144.03809523809525,"z":242.2095238095238,"a95":0.99,"info":"26/10/2014 at 13:22:09"},{"visible":true,"include":true,"step":"35.0","x":104.1047619047619,"y":-123,"z":216.84761904761905,"a95":0.99,"info":"26/10/2014 at 13:22:09"},{"visible":true,"include":true,"step":"40.0","x":90.11904761904762,"y":-127.4095238095238,"z":165.1809523809524,"a95":0.99,"info":"26/10/2014 at 13:22:09"},{"visible":true,"include":true,"step":"45.0","x":93.73428571428572,"y":-96.85714285714286,"z":157.6095238095238,"a95":0.99,"info":"26/10/2014 at 13:22:09"},{"visible":true,"include":true,"step":"50.0","x":77.55142857142857,"y":-69.21714285714286,"z":133.47619047619048,"a95":0.99,"info":"26/10/2014 at 13:22:09"},{"visible":true,"include":true,"step":"60.0","x":34.71619047619048,"y":-73.54285714285714,"z":105.9904761904762,"a95":0.99,"info":"26/10/2014 at 13:22:09"},{"visible":true,"include":false,"step":"70.0","x":26.224761904761905,"y":-31.642857142857142,"z":59.81523809523809,"a95":0.99,"info":"26/10/2014 at 13:22:09"},{"visible":true,"include":false,"step":"80.0","x":107.65714285714287,"y":-2.506095238095238,"z":84.84666666666666,"a95":0.99,"info":"26/10/2014 at 13:22:09"},{"visible":true,"include":false,"step":"90.0","x":-4.677809523809524,"y":-7.697523809523809,"z":33.36,"a95":0.99,"info":"26/10/2014 at 13:22:09"},{"visible":true,"include":false,"step":"100.0","x":-8.263333333333334,"y":2.6056190476190477,"z":37.07047619047619,"a95":0.99,"info":"26/10/2014 at 13:22:09"}]},{"version":"v1.1.0","exported":"2016-11-17T16:06:19.690Z","volume":10.5,"added":"2016-11-17T15:39:43.920Z","format":"Utrecht","demagType":"Unknown","strat":null,"patch":1.1,"GEO":[{"dec":174.82072784929812,"inc":15.924937249979264,"MAD":1.6571085548548878,"cm":[-2.1316282072803006e-14,-9.50350909079134e-14,0],"intensity":1379.8284063023932,"type":"dir","forced":true,"remark":"","origin":false,"nSteps":8,"minStep":"300","maxStep":"450","steps":["300","320","340","360","380","400","420","450"],"group":"None","version":"v1.1.0"}],"TECT":[{"dec":175.43600048694066,"inc":-44.041540819859655,"MAD":1.6571085548548055,"cm":[-7.105427357601002e-15,-1.1790568521519162e-13,7.105427357601002e-15],"intensity":1379.8284063023932,"type":"dir","forced":true,"remark":"","origin":false,"nSteps":8,"minStep":"300","maxStep":"450","steps":["300","320","340","360","380","400","420","450"],"group":"None","version":"v1.1.0"}],"interpreted":true,"name":"HG2.9A","coreAzi":219,"coreDip":57,"bedStrike":83,"bedDip":60,"data":[{"visible":false,"include":false,"step":"20","x":-97.80952380952381,"y":-389.3333333333333,"z":1266.4761904761904,"a95":2.7,"info":"\"14-11-03\" at \"20:31\""},{"visible":true,"include":false,"step":"150","x":229.23809523809524,"y":-491.7142857142857,"z":624.7619047619048,"a95":2.4,"info":"\"14-11-04\" at \"15:33\""},{"visible":true,"include":false,"step":"180","x":227.52380952380952,"y":-521.2380952380952,"z":611.9047619047619,"a95":2.7,"info":"\"14-11-04\" at \"20:55\""},{"visible":true,"include":false,"step":"210","x":281.04761904761904,"y":-510.0952380952381,"z":567.5238095238095,"a95":2.3,"info":"\"14-11-05\" at \"15:47\""},{"visible":true,"include":false,"step":"240","x":292.4761904761905,"y":-527.7142857142857,"z":537.9047619047619,"a95":2.6,"info":"\"14-11-05\" at \"21:59\""},{"visible":false,"include":false,"step":"270","x":402.95238095238096,"y":-0.7619047619047619,"z":8.095238095238095,"a95":3.5,"info":"\"14-11-06\" at \"20:28\""},{"visible":true,"include":true,"step":"300","x":318,"y":-521.6190476190476,"z":508.0952380952381,"a95":2,"info":"\"14-11-07\" at \"14:27\""},{"visible":true,"include":true,"step":"320","x":332.1904761904762,"y":-486.2857142857143,"z":467.3333333333333,"a95":2.2,"info":"\"14-11-07\" at \"19:14\""},{"visible":true,"include":true,"step":"340","x":312.6666666666667,"y":-496.3809523809524,"z":437.3333333333333,"a95":1.9,"info":"\"14-11-15\" at \"18:33\""},{"visible":true,"include":true,"step":"360","x":297.6190476190476,"y":-490.6666666666667,"z":429.8095238095238,"a95":2,"info":"\"14-11-15\" at \"22:55\""},{"visible":true,"include":true,"step":"380","x":301.8095238095238,"y":-464.6666666666667,"z":414.0952380952381,"a95":2,"info":"\"14-11-16\" at \"02:03\""},{"visible":true,"include":true,"step":"400","x":284.4761904761905,"y":-456.1904761904762,"z":376.76190476190476,"a95":1.9,"info":"\"14-11-16\" at \"21:11\""},{"visible":true,"include":true,"step":"420","x":281.3333333333333,"y":-417.8095238095238,"z":377.42857142857144,"a95":2,"info":"\"14-11-17\" at \"00:11\""},{"visible":true,"include":true,"step":"450","x":260.85714285714283,"y":-392.95238095238096,"z":347.7142857142857,"a95":2,"info":"\"14-11-17\" at \"02:30\""},{"visible":false,"include":false,"step":"610","x":-417.23809523809524,"y":192,"z":83.04761904761905,"a95":4.6,"info":"\"14-11-28\" at \"22:19\""}]},{"version":"v1.1.0","exported":"2016-11-17T16:06:19.690Z","volume":10.5,"added":"2016-11-17T15:39:43.923Z","format":"Utrecht","demagType":"Unknown","strat":"3","patch":1.1,"GEO":[{"dec":176.57821398599742,"inc":24.73447774825715,"MAD":2.760221459747408,"cm":[-1.0658141036401503e-14,-5.1458837191376006e-14,0],"intensity":665.0701055580754,"type":"dir","forced":true,"remark":"","origin":false,"nSteps":10,"minStep":"16.0","maxStep":"70.0","steps":["16.0","20.0","25.0","30.0","35.0","40.0","45.0","50.0","60.0","70.0"],"group":"None","version":"v1.1.0"}],"TECT":[{"dec":176.9757361180633,"inc":-35.157989225140525,"MAD":2.760221459747274,"cm":[-3.552713678800501e-15,-8.12128142513302e-14,-4.440892098500626e-16],"intensity":665.0701055580754,"type":"dir","forced":true,"remark":"","origin":false,"nSteps":10,"minStep":"16.0","maxStep":"70.0","steps":["16.0","20.0","25.0","30.0","35.0","40.0","45.0","50.0","60.0","70.0"],"group":"None","version":"v1.1.0"}],"interpreted":true,"name":"HG2.9B","coreAzi":219,"coreDip":57,"bedStrike":83,"bedDip":60,"data":[{"visible":false,"include":false,"step":"0.0","x":-153.13333333333335,"y":-255.71428571428572,"z":544.1238095238095,"a95":0.99,"info":"26/10/2014 at 13:22:09"},{"visible":true,"include":false,"step":"4.0","x":-73.07809523809524,"y":-283.752380952381,"z":516,"a95":0.99,"info":"26/10/2014 at 13:22:09"},{"visible":true,"include":false,"step":"8.0","x":61.978095238095236,"y":-319.6666666666667,"z":465.3333333333333,"a95":0.99,"info":"26/10/2014 at 13:22:09"},{"visible":true,"include":false,"step":"12.0","x":147.88571428571427,"y":-340.12380952380954,"z":426.7904761904762,"a95":0.99,"info":"26/10/2014 at 13:22:09"},{"visible":true,"include":true,"step":"16.0","x":181.84761904761905,"y":-333.93333333333334,"z":399.3333333333333,"a95":0.99,"info":"26/10/2014 at 13:22:09"},{"visible":true,"include":true,"step":"20.0","x":175.0857142857143,"y":-322.247619047619,"z":368.48571428571427,"a95":0.99,"info":"26/10/2014 at 13:22:09"},{"visible":true,"include":true,"step":"25.0","x":169.57142857142858,"y":-292.48571428571427,"z":328.0571428571428,"a95":0.99,"info":"26/10/2014 at 13:22:09"},{"visible":true,"include":true,"step":"30.0","x":147.94285714285715,"y":-256.8,"z":315.5809523809524,"a95":0.99,"info":"26/10/2014 at 13:22:09"},{"visible":true,"include":true,"step":"35.0","x":130.4,"y":-234.87619047619046,"z":263.03809523809525,"a95":0.99,"info":"26/10/2014 at 13:22:09"},{"visible":true,"include":true,"step":"40.0","x":99.51428571428572,"y":-191.75238095238097,"z":218.82857142857142,"a95":0.99,"info":"26/10/2014 at 13:22:09"},{"visible":true,"include":true,"step":"45.0","x":108.22857142857144,"y":-153.33333333333334,"z":183.71428571428572,"a95":0.99,"info":"26/10/2014 at 13:22:09"},{"visible":true,"include":true,"step":"50.0","x":61.766666666666666,"y":-158.83809523809524,"z":183.6952380952381,"a95":0.99,"info":"26/10/2014 at 13:22:09"},{"visible":true,"include":true,"step":"60.0","x":21.81142857142857,"y":-102.35238095238095,"z":138.32380952380953,"a95":0.99,"info":"26/10/2014 at 13:22:09"},{"visible":true,"include":true,"step":"70.0","x":27.155238095238094,"y":-67.12285714285714,"z":88.30380952380953,"a95":0.99,"info":"26/10/2014 at 13:22:09"},{"visible":true,"include":false,"step":"80.0","x":21.900952380952383,"y":-43.4,"z":49.013333333333335,"a95":0.99,"info":"26/10/2014 at 13:22:09"},{"visible":false,"include":false,"step":"90.0","x":-25.514285714285712,"y":-12.729523809523808,"z":27.06190476190476,"a95":0.99,"info":"26/10/2014 at 13:22:09"},{"visible":false,"include":false,"step":"100.0","x":-6.741904761904762,"y":-4.733714285714286,"z":27.787619047619046,"a95":0.99,"info":"26/10/2014 at 13:22:09"}]},{"version":"v1.1.0","exported":"2016-11-17T16:06:19.690Z","volume":10.5,"added":"2016-11-17T15:39:43.923Z","format":"Utrecht","demagType":"Unknown","strat":"3","patch":1.1,"GEO":[{"dec":184.10065779487135,"inc":21.73891796696991,"MAD":2.9528644661160928,"cm":[-8.881784197001252e-16,-7.882583474838611e-15,0],"intensity":409.8878090072808,"type":"dir","forced":true,"remark":"","origin":false,"nSteps":11,"minStep":"20.0","maxStep":"60.0","steps":["20.0","23.0","25.0","30.0","33.0","35.0","40.0","45.0","50.0","55.0","60.0"],"group":"None","version":"v1.1.0"}],"TECT":[{"dec":185.96984381616184,"inc":-37.17095297261088,"MAD":2.9528644661159786,"cm":[-6.661338147750939e-15,-1.637578961322106e-14,4.440892098500626e-16],"intensity":409.8878090072808,"type":"dir","forced":true,"remark":"","origin":false,"nSteps":11,"minStep":"20.0","maxStep":"60.0","steps":["20.0","23.0","25.0","30.0","33.0","35.0","40.0","45.0","50.0","55.0","60.0"],"group":"None","version":"v1.1.0"}],"interpreted":true,"name":"HG2.10","coreAzi":225,"coreDip":60,"bedStrike":83,"bedDip":60,"data":[{"visible":true,"include":false,"step":"0.0","x":-0.023785714285714285,"y":-192.98095238095237,"z":267.447619047619,"a95":0.99,"info":"08/07/2015 at 13:44:31"},{"visible":true,"include":false,"step":"10.0","x":93.45428571428572,"y":-231.30476190476188,"z":249.76190476190476,"a95":0.99,"info":"08/07/2015 at 13:44:31"},{"visible":true,"include":false,"step":"15.0","x":125.80000000000001,"y":-209.53333333333333,"z":219.68571428571425,"a95":0.99,"info":"08/07/2015 at 13:44:31"},{"visible":true,"include":true,"step":"20.0","x":125.03809523809525,"y":-200.85714285714286,"z":208.97142857142856,"a95":0.99,"info":"08/07/2015 at 13:44:31"},{"visible":true,"include":true,"step":"23.0","x":133.4,"y":-180.55238095238096,"z":196.2,"a95":0.99,"info":"08/07/2015 at 13:44:31"},{"visible":true,"include":true,"step":"25.0","x":129.05714285714285,"y":-179.24761904761903,"z":200.7047619047619,"a95":0.99,"info":"08/07/2015 at 13:44:31"},{"visible":true,"include":true,"step":"30.0","x":113.82857142857144,"y":-156.35238095238097,"z":156.92380952380952,"a95":0.99,"info":"08/07/2015 at 13:44:31"},{"visible":true,"include":true,"step":"33.0","x":102.67619047619047,"y":-147.9714285714286,"z":165.56190476190477,"a95":0.99,"info":"08/07/2015 at 13:44:31"},{"visible":true,"include":true,"step":"35.0","x":93.86380952380952,"y":-129.45714285714286,"z":145.06666666666666,"a95":0.99,"info":"08/07/2015 at 13:44:31"},{"visible":true,"include":true,"step":"40.0","x":87.15619047619047,"y":-121.82857142857144,"z":132.22857142857143,"a95":0.99,"info":"08/07/2015 at 13:44:31"},{"visible":true,"include":true,"step":"45.0","x":73.33428571428571,"y":-98.88571428571429,"z":121.94285714285715,"a95":0.99,"info":"08/07/2015 at 13:44:31"},{"visible":true,"include":true,"step":"50.0","x":49.93428571428571,"y":-76.29523809523809,"z":93.07904761904763,"a95":0.99,"info":"08/07/2015 at 13:44:31"},{"visible":true,"include":true,"step":"55.0","x":35.72857142857143,"y":-68.99428571428572,"z":91.44095238095238,"a95":0.99,"info":"08/07/2015 at 13:44:31"},{"visible":true,"include":true,"step":"60.0","x":27.303809523809523,"y":-47.49809523809524,"z":79.33333333333333,"a95":0.99,"info":"08/07/2015 at 13:44:31"},{"visible":false,"include":false,"step":"65.0","x":11.02095238095238,"y":-51.712380952380954,"z":62.03142857142858,"a95":0.99,"info":"08/07/2015 at 13:44:31"},{"visible":false,"include":false,"step":"70.0","x":14.844761904761905,"y":-19.68190476190476,"z":56.27904761904762,"a95":0.99,"info":"08/07/2015 at 13:44:31"},{"visible":false,"include":false,"step":"80.0","x":30.580952380952382,"y":-6.189619047619048,"z":14.001904761904763,"a95":0.99,"info":"08/07/2015 at 13:44:31"}]},{"version":"v1.1.0","exported":"2016-11-17T16:06:19.690Z","volume":10.5,"added":"2016-11-17T15:39:43.924Z","format":"Utrecht","demagType":"Unknown","strat":null,"patch":1.1,"GEO":[{"dec":197.5388641537905,"inc":16.68626842911326,"MAD":1.5731486065895737,"cm":[2.842170943040401e-14,-1.0658141036401503e-14,0],"intensity":1363.7101120990742,"type":"dir","forced":true,"remark":"","origin":false,"nSteps":6,"minStep":"320","maxStep":"420","steps":["320","340","360","380","400","420"],"group":"None","version":"v1.1.0"}],"TECT":[{"dec":203.1700391467852,"inc":-37.66668418096717,"MAD":1.5731486065896205,"cm":[-7.105427357601002e-15,7.460698725481052e-14,-2.1316282072803006e-14],"intensity":1363.7101120990742,"type":"dir","forced":true,"remark":"","origin":false,"nSteps":6,"minStep":"320","maxStep":"420","steps":["320","340","360","380","400","420"],"group":"None","version":"v1.1.0"}],"interpreted":true,"name":"HG2.11A","coreAzi":228,"coreDip":54,"bedStrike":83,"bedDip":60,"data":[{"visible":false,"include":false,"step":"20","x":-250.28571428571428,"y":-265.3333333333333,"z":1137.6190476190477,"a95":3,"info":"\"14-11-03\" at \"20:33\""},{"visible":true,"include":false,"step":"150","x":237.9047619047619,"y":-356.0952380952381,"z":649.6190476190476,"a95":2.7,"info":"\"14-11-04\" at \"15:36\""},{"visible":true,"include":false,"step":"180","x":240.38095238095238,"y":-368.6666666666667,"z":637.8095238095239,"a95":2.6,"info":"\"14-11-04\" at \"20:57\""},{"visible":true,"include":false,"step":"210","x":336.0952380952381,"y":-372.57142857142856,"z":592.2857142857143,"a95":2.4,"info":"\"14-11-05\" at \"15:50\""},{"visible":true,"include":false,"step":"240","x":363.04761904761904,"y":-359.8095238095238,"z":574.7619047619048,"a95":2.6,"info":"\"14-11-05\" at \"22:01\""},{"visible":true,"include":false,"step":"270","x":358.57142857142856,"y":-368.57142857142856,"z":572.1904761904761,"a95":2.5,"info":"\"14-11-06\" at \"20:30\""},{"visible":true,"include":false,"step":"300","x":373.42857142857144,"y":-350.76190476190476,"z":569.5238095238095,"a95":2.4,"info":"\"14-11-07\" at \"14:29\""},{"visible":true,"include":true,"step":"320","x":382.2857142857143,"y":-347.8095238095238,"z":521.6190476190476,"a95":2.2,"info":"\"14-11-07\" at \"19:16\""},{"visible":true,"include":true,"step":"340","x":366.85714285714283,"y":-358.85714285714283,"z":497.3333333333333,"a95":2.3,"info":"\"14-11-15\" at \"18:35\""},{"visible":true,"include":true,"step":"360","x":329.3333333333333,"y":-337.5238095238095,"z":485.9047619047619,"a95":2.2,"info":"\"14-11-15\" at \"22:58\""},{"visible":true,"include":true,"step":"380","x":353.14285714285717,"y":-329.04761904761904,"z":502.2857142857143,"a95":2.3,"info":"\"14-11-16\" at \"02:05\""},{"visible":true,"include":true,"step":"400","x":306.95238095238096,"y":-330.57142857142856,"z":480,"a95":2.3,"info":"\"14-11-16\" at \"21:14\""},{"visible":true,"include":true,"step":"420","x":310,"y":-291.42857142857144,"z":464.1904761904762,"a95":2.3,"info":"\"14-11-17\" at \"00:14\""},{"visible":false,"include":false,"step":"450","x":305.6190476190476,"y":-287.6190476190476,"z":407.6190476190476,"a95":2.2,"info":"\"14-11-17\" at \"02:32\""},{"visible":false,"include":false,"step":"610","x":-68.85714285714286,"y":40.38095238095238,"z":88.0952380952381,"a95":9.5,"info":"\"14-11-28\" at \"22:21\""}]},{"version":"v1.1.0","exported":"2016-11-17T16:06:19.690Z","volume":10.5,"added":"2016-11-17T15:39:43.924Z","format":"Utrecht","demagType":"Unknown","strat":"4","patch":1.1,"GEO":[{"dec":199.84993286579666,"inc":24.377444825569437,"MAD":2.565169273612955,"cm":[-3.552713678800501e-15,2.4868995751603507e-14,0],"intensity":661.5624956878077,"type":"dir","forced":true,"remark":"","origin":false,"nSteps":7,"minStep":"25.0","maxStep":"60.0","steps":["25.0","30.0","35.0","40.0","45.0","50.0","60.0"],"group":"None","version":"v1.1.0"}],"TECT":[{"dec":201.3080714809045,"inc":-29.828316844039232,"MAD":2.5651692736130114,"cm":[-1.2434497875801753e-14,4.263256414560601e-14,-2.3092638912203256e-14],"intensity":661.5624956878075,"type":"dir","forced":true,"remark":"","origin":false,"nSteps":7,"minStep":"25.0","maxStep":"60.0","steps":["25.0","30.0","35.0","40.0","45.0","50.0","60.0"],"group":"None","version":"v1.1.0"}],"interpreted":true,"name":"HG2.11B","coreAzi":228,"coreDip":54,"bedStrike":83,"bedDip":60,"data":[{"visible":true,"include":false,"step":"0.0","x":-3.4788571428571426,"y":-178.04761904761904,"z":548.6666666666666,"a95":0.99,"info":"26/10/2014 at 13:22:09"},{"visible":true,"include":false,"step":"4.0","x":61.921904761904756,"y":-202.36190476190478,"z":537.0285714285715,"a95":0.99,"info":"26/10/2014 at 13:22:09"},{"visible":true,"include":false,"step":"8.0","x":158.53333333333333,"y":-231.75238095238097,"z":519.5142857142857,"a95":0.99,"info":"26/10/2014 at 13:22:09"},{"visible":true,"include":false,"step":"12.0","x":224.23809523809524,"y":-250.24761904761903,"z":482.552380952381,"a95":0.99,"info":"26/10/2014 at 13:22:09"},{"visible":true,"include":false,"step":"16.0","x":251.9047619047619,"y":-253.2095238095238,"z":457.08571428571423,"a95":0.99,"info":"26/10/2014 at 13:22:09"},{"visible":true,"include":false,"step":"20.0","x":237.96190476190475,"y":-246.32380952380953,"z":413.3238095238095,"a95":0.99,"info":"26/10/2014 at 13:22:09"},{"visible":true,"include":true,"step":"25.0","x":222.60000000000002,"y":-220.39999999999998,"z":383.4666666666667,"a95":0.99,"info":"26/10/2014 at 13:22:09"},{"visible":true,"include":true,"step":"30.0","x":189.37142857142857,"y":-197.8857142857143,"z":386.0761904761905,"a95":0.99,"info":"26/10/2014 at 13:22:09"},{"visible":true,"include":true,"step":"35.0","x":147.46666666666667,"y":-173.0952380952381,"z":317.2,"a95":0.99,"info":"26/10/2014 at 13:22:09"},{"visible":true,"include":true,"step":"40.0","x":127.57142857142857,"y":-140.55238095238096,"z":277.04761904761904,"a95":0.99,"info":"26/10/2014 at 13:22:09"},{"visible":true,"include":true,"step":"45.0","x":112.47619047619048,"y":-106.18095238095239,"z":234.40952380952382,"a95":0.99,"info":"26/10/2014 at 13:22:09"},{"visible":true,"include":true,"step":"50.0","x":101.83809523809524,"y":-107.19047619047619,"z":182.26666666666665,"a95":0.99,"info":"26/10/2014 at 13:22:09"},{"visible":true,"include":true,"step":"60.0","x":52.80666666666667,"y":-73.37047619047618,"z":141.42857142857142,"a95":0.99,"info":"26/10/2014 at 13:22:09"},{"visible":true,"include":false,"step":"70.0","x":64.82666666666667,"y":-24.077142857142857,"z":57.78476190476191,"a95":0.99,"info":"26/10/2014 at 13:22:09"},{"visible":true,"include":false,"step":"80.0","x":72.11619047619048,"y":-53.712380952380954,"z":67.91904761904762,"a95":0.99,"info":"26/10/2014 at 13:22:09"},{"visible":true,"include":false,"step":"90.0","x":18.83047619047619,"y":-40.013333333333335,"z":44.21809523809524,"a95":0.99,"info":"26/10/2014 at 13:22:09"},{"visible":true,"include":false,"step":"100.0","x":-22.037142857142857,"y":31.04380952380952,"z":76.76952380952382,"a95":0.99,"info":"26/10/2014 at 13:22:09"}]},{"version":"v1.1.0","exported":"2016-11-17T16:06:19.690Z","volume":10.5,"added":"2016-11-17T15:39:43.925Z","format":"Utrecht","demagType":"Unknown","strat":"4","patch":1.1,"GEO":[{"dec":188.04605945626318,"inc":24.01833337431644,"MAD":2.248616155327245,"cm":[-1.4210854715202004e-14,1.9984014443252818e-14,0],"intensity":1205.2925032399564,"type":"dir","forced":true,"remark":"","origin":false,"nSteps":10,"minStep":"20.0","maxStep":"55.0","steps":["20.0","23.0","25.0","30.0","33.0","35.0","40.0","45.0","50.0","55.0"],"group":"None","version":"v1.1.0"}],"TECT":[{"dec":189.63656527361832,"inc":-34.08398100659533,"MAD":2.2486161553272717,"cm":[-1.7763568394002505e-15,-1.4210854715202004e-14,0],"intensity":1205.2925032399562,"type":"dir","forced":true,"remark":"","origin":false,"nSteps":10,"minStep":"20.0","maxStep":"55.0","steps":["20.0","23.0","25.0","30.0","33.0","35.0","40.0","45.0","50.0","55.0"],"group":"None","version":"v1.1.0"}],"interpreted":true,"name":"HG2.13","coreAzi":203,"coreDip":47,"bedStrike":83,"bedDip":60,"data":[{"visible":true,"include":false,"step":"0.0","x":-166.57142857142858,"y":-139.8190476190476,"z":1136.6666666666667,"a95":0.99,"info":"08/07/2015 at 13:44:31"},{"visible":true,"include":false,"step":"10.0","x":206.22857142857143,"y":-213.38095238095238,"z":935.2380952380952,"a95":0.99,"info":"08/07/2015 at 13:44:31"},{"visible":true,"include":false,"step":"15.0","x":299.7809523809524,"y":-226.24761904761903,"z":853.4095238095238,"a95":0.99,"info":"08/07/2015 at 13:44:31"},{"visible":true,"include":true,"step":"20.0","x":320.7142857142857,"y":-225.8190476190476,"z":792.5809523809525,"a95":0.99,"info":"08/07/2015 at 13:44:31"},{"visible":true,"include":true,"step":"23.0","x":326.4190476190476,"y":-194.2095238095238,"z":719.152380952381,"a95":0.99,"info":"08/07/2015 at 13:44:31"},{"visible":true,"include":true,"step":"25.0","x":275.1047619047619,"y":-184.96190476190475,"z":704.5619047619048,"a95":0.99,"info":"08/07/2015 at 13:44:31"},{"visible":true,"include":true,"step":"30.0","x":243.0952380952381,"y":-176.4952380952381,"z":594.8095238095239,"a95":0.99,"info":"08/07/2015 at 13:44:31"},{"visible":true,"include":true,"step":"33.0","x":225.21904761904764,"y":-124.31428571428572,"z":575.6095238095238,"a95":0.99,"info":"08/07/2015 at 13:44:31"},{"visible":true,"include":true,"step":"35.0","x":190.11428571428573,"y":-144.68571428571428,"z":525.104761904762,"a95":0.99,"info":"08/07/2015 at 13:44:31"},{"visible":true,"include":true,"step":"40.0","x":197.71428571428572,"y":-117.25714285714287,"z":456.65714285714284,"a95":0.99,"info":"08/07/2015 at 13:44:31"},{"visible":true,"include":true,"step":"45.0","x":136.23809523809524,"y":-82.91047619047619,"z":400.46666666666664,"a95":0.99,"info":"08/07/2015 at 13:44:31"},{"visible":true,"include":true,"step":"50.0","x":145.9714285714286,"y":-68.93047619047618,"z":345.64761904761906,"a95":0.99,"info":"08/07/2015 at 13:44:31"},{"visible":true,"include":true,"step":"55.0","x":150.84761904761905,"y":-62.93619047619048,"z":278.3904761904762,"a95":0.99,"info":"08/07/2015 at 13:44:31"},{"visible":true,"include":false,"step":"60.0","x":139.37142857142857,"y":18.81904761904762,"z":210.58095238095237,"a95":0.99,"info":"08/07/2015 at 13:44:31"},{"visible":true,"include":false,"step":"65.0","x":84.52380952380952,"y":-71.77142857142857,"z":204.52380952380952,"a95":0.99,"info":"08/07/2015 at 13:44:31"},{"visible":true,"include":false,"step":"70.0","x":83.95904761904762,"y":4.411904761904762,"z":205.25714285714284,"a95":0.99,"info":"08/07/2015 at 13:44:31"},{"visible":true,"include":false,"step":"80.0","x":221.0761904761905,"y":-14.24,"z":85.72,"a95":0.99,"info":"08/07/2015 at 13:44:31"}]},{"version":"v1.1.0","exported":"2016-11-17T16:06:19.690Z","volume":10.5,"added":"2016-11-17T15:39:43.926Z","format":"Utrecht","demagType":"Unknown","strat":"1","patch":1.1,"GEO":[{"dec":186.4051224242821,"inc":22.53365688575381,"MAD":2.831969254275687,"cm":[-7.105427357601002e-15,8.326672684688674e-14,0],"intensity":1221.353370086734,"type":"dir","forced":true,"remark":"","origin":false,"nSteps":12,"minStep":"15.0","maxStep":"60.0","steps":["15.0","20.0","23.0","25.0","30.0","33.0","35.0","40.0","45.0","50.0","55.0","60.0"],"group":"None","version":"v1.1.0"}],"TECT":[{"dec":188.33021308402505,"inc":-35.90916418478362,"MAD":2.8319692542756716,"cm":[1.2434497875801753e-14,6.350475700855895e-14,-1.509903313490213e-14],"intensity":1221.353370086734,"type":"dir","forced":true,"remark":"","origin":false,"nSteps":12,"minStep":"15.0","maxStep":"60.0","steps":["15.0","20.0","23.0","25.0","30.0","33.0","35.0","40.0","45.0","50.0","55.0","60.0"],"group":"None","version":"v1.1.0"}],"interpreted":true,"name":"HG2.15","coreAzi":180,"coreDip":54,"bedStrike":83,"bedDip":60,"data":[{"visible":true,"include":false,"step":"0.0","x":75.47238095238096,"y":138.06666666666666,"z":1171.047619047619,"a95":0.99,"info":"09/07/2015 at 11:23:07"},{"visible":true,"include":false,"step":"10.0","x":413.3047619047619,"y":112.63809523809525,"z":915.847619047619,"a95":0.99,"info":"09/07/2015 at 11:23:07"},{"visible":true,"include":true,"step":"15.0","x":457.8095238095238,"y":106.52380952380952,"z":825.9238095238096,"a95":0.99,"info":"09/07/2015 at 11:23:07"},{"visible":true,"include":true,"step":"20.0","x":442.25714285714287,"y":86.79809523809524,"z":746.6666666666666,"a95":0.99,"info":"09/07/2015 at 11:23:07"},{"visible":true,"include":true,"step":"23.0","x":429.57142857142856,"y":91.03333333333333,"z":707.7047619047619,"a95":0.99,"info":"09/07/2015 at 11:23:07"},{"visible":true,"include":true,"step":"25.0","x":410.1714285714286,"y":67.48190476190476,"z":662.2857142857143,"a95":0.99,"info":"09/07/2015 at 11:23:07"},{"visible":true,"include":true,"step":"30.0","x":345.14285714285717,"y":37.80380952380953,"z":543.895238095238,"a95":0.99,"info":"09/07/2015 at 11:23:07"},{"visible":true,"include":true,"step":"33.0","x":329.49523809523805,"y":57.68476190476191,"z":493.81904761904764,"a95":0.99,"info":"09/07/2015 at 11:23:07"},{"visible":true,"include":true,"step":"35.0","x":288.18095238095236,"y":51.642857142857146,"z":449.1142857142857,"a95":0.99,"info":"09/07/2015 at 11:23:07"},{"visible":true,"include":true,"step":"40.0","x":269.85714285714283,"y":69.63714285714286,"z":433.7714285714286,"a95":0.99,"info":"09/07/2015 at 11:23:07"},{"visible":true,"include":true,"step":"45.0","x":263.6095238095238,"y":56.38666666666666,"z":317.1142857142857,"a95":0.99,"info":"09/07/2015 at 11:23:07"},{"visible":true,"include":true,"step":"50.0","x":179.66666666666666,"y":21.280952380952378,"z":293.16190476190474,"a95":0.99,"info":"09/07/2015 at 11:23:07"},{"visible":true,"include":true,"step":"55.0","x":132.55238095238096,"y":71.52666666666667,"z":244.03809523809525,"a95":0.99,"info":"09/07/2015 at 11:23:07"},{"visible":true,"include":true,"step":"60.0","x":105.51428571428572,"y":33.275238095238095,"z":248.7047619047619,"a95":0.99,"info":"09/07/2015 at 11:23:07"},{"visible":true,"include":false,"step":"65.0","x":84.35142857142857,"y":6.8505714285714285,"z":162.9142857142857,"a95":0.99,"info":"09/07/2015 at 11:23:07"},{"visible":true,"include":false,"step":"70.0","x":63.30952380952381,"y":32.73428571428571,"z":139.8095238095238,"a95":0.99,"info":"09/07/2015 at 11:23:07"},{"visible":true,"include":false,"step":"80.0","x":89.06761904761905,"y":61.16,"z":68.37904761904763,"a95":0.99,"info":"09/07/2015 at 11:23:07"}]},{"version":"v1.1.0","exported":"2016-11-17T16:06:19.690Z","volume":10.5,"added":"2016-11-17T15:39:43.926Z","format":"Utrecht","demagType":"Unknown","strat":null,"patch":1.1,"GEO":[{"dec":338.5670622515305,"inc":65.31374712889475,"MAD":4.4833265309770285,"cm":[-3.197442310920451e-14,-1.3322676295501878e-13,0],"intensity":7759.00290541045,"type":"dir","forced":true,"remark":"","origin":false,"nSteps":10,"minStep":"210","maxStep":"420","steps":["210","240","270","300","320","340","360","380","400","420"],"group":"None","version":"v1.1.0"}],"TECT":[{"dec":183.0958863983337,"inc":53.57008432235157,"MAD":4.483326530977025,"cm":[-2.842170943040401e-14,1.6109336087311021e-13,2.842170943040401e-14],"intensity":7759.002905410449,"type":"dir","forced":true,"remark":"","origin":false,"nSteps":10,"minStep":"210","maxStep":"420","steps":["210","240","270","300","320","340","360","380","400","420"],"group":"None","version":"v1.1.0"}],"interpreted":true,"name":"HG2.16A","coreAzi":223,"coreDip":52,"bedStrike":83,"bedDip":60,"data":[{"visible":false,"include":false,"step":"20","x":-20505.04761904762,"y":12564.380952380952,"z":16183.333333333334,"a95":2.1,"info":"\"14-11-03\" at \"20:38\""},{"visible":true,"include":false,"step":"150","x":-7090.857142857143,"y":4320.857142857143,"z":5082.0952380952385,"a95":2.1,"info":"\"14-11-04\" at \"15:39\""},{"visible":true,"include":false,"step":"180","x":-6549.523809523809,"y":3554.4761904761904,"z":4790.0952380952385,"a95":2.1,"info":"\"14-11-04\" at \"20:59\""},{"visible":true,"include":true,"step":"210","x":-4046.8571428571427,"y":2615.3333333333335,"z":3795.0476190476193,"a95":74.6,"info":"\"14-11-05\" at \"15:55\""},{"visible":true,"include":true,"step":"240","x":-3900.4761904761904,"y":1990.7619047619048,"z":2875.4285714285716,"a95":2.2,"info":"\"14-11-05\" at \"22:03\""},{"visible":true,"include":true,"step":"270","x":-2776.095238095238,"y":1494.1904761904761,"z":2162.095238095238,"a95":2.1,"info":"\"14-11-06\" at \"20:33\""},{"visible":true,"include":true,"step":"300","x":-2565.3333333333335,"y":1048.1904761904761,"z":2316.285714285714,"a95":2.2,"info":"\"14-11-07\" at \"14:32\""},{"visible":true,"include":true,"step":"320","x":-1614,"y":997.5238095238095,"z":1510,"a95":2.1,"info":"\"14-11-07\" at \"19:19\""},{"visible":true,"include":true,"step":"340","x":-1166.2857142857142,"y":578.8571428571429,"z":1252.7619047619048,"a95":2.2,"info":"\"14-11-15\" at \"18:38\""},{"visible":true,"include":true,"step":"360","x":-1222.952380952381,"y":640.6666666666666,"z":1159.6190476190477,"a95":2.2,"info":"\"14-11-15\" at \"23:00\""},{"visible":true,"include":true,"step":"380","x":-1332.952380952381,"y":422.3809523809524,"z":1205.5238095238096,"a95":2.3,"info":"\"14-11-16\" at \"02:07\""},{"visible":true,"include":true,"step":"400","x":-1212.3809523809523,"y":389.23809523809524,"z":1054.6666666666667,"a95":2.2,"info":"\"14-11-16\" at \"21:16\""},{"visible":true,"include":true,"step":"420","x":-1134.3809523809523,"y":472.85714285714283,"z":1085.5238095238096,"a95":2.3,"info":"\"14-11-17\" at \"00:27\""},{"visible":true,"include":false,"step":"450","x":-1064.4761904761904,"y":158.85714285714286,"z":857.6190476190476,"a95":2.4,"info":"\"14-11-17\" at \"02:34\""},{"visible":true,"include":false,"step":"610","x":-587.1428571428571,"y":412.3809523809524,"z":326.85714285714283,"a95":3.2,"info":"\"14-11-28\" at \"22:24\""}]},{"version":"v1.1.0","exported":"2016-11-17T16:06:19.690Z","volume":10.5,"added":"2016-11-17T15:39:43.927Z","format":"Utrecht","demagType":"Unknown","strat":"5","patch":1.1,"GEO":[{"dec":345.2339978936661,"inc":60.091732562615526,"MAD":4.528434988673031,"cm":[6.394884621840902e-14,2.7711166694643907e-13,0],"intensity":16542.231889656137,"type":"dir","forced":true,"remark":"","origin":false,"nSteps":10,"minStep":"12.0","maxStep":"60.0","steps":["12.0","16.0","20.0","25.0","30.0","35.0","40.0","45.0","50.0","60.0"],"group":"None","version":"v1.1.0"}],"TECT":[{"dec":180.6192372112981,"inc":59.4587219974435,"MAD":4.5284349886730615,"cm":[-9.947598300641403e-14,4.298783551348606e-13,-4.263256414560601e-14],"intensity":16542.231889656137,"type":"dir","forced":true,"remark":"","origin":false,"nSteps":10,"minStep":"12.0","maxStep":"60.0","steps":["12.0","16.0","20.0","25.0","30.0","35.0","40.0","45.0","50.0","60.0"],"group":"None","version":"v1.1.0"}],"interpreted":true,"name":"HG2.16B","coreAzi":223,"coreDip":52,"bedStrike":83,"bedDip":60,"data":[{"visible":true,"include":false,"step":"0.0","x":-17628.571428571428,"y":9608.57142857143,"z":10350.47619047619,"a95":0.99,"info":"26/10/2014 at 13:22:09"},{"visible":true,"include":false,"step":"4.0","x":-16069.52380952381,"y":8915.238095238095,"z":9777.142857142857,"a95":0.99,"info":"26/10/2014 at 13:22:09"},{"visible":true,"include":false,"step":"8.0","x":-13320,"y":7478.285714285715,"z":8289.142857142857,"a95":0.99,"info":"26/10/2014 at 13:22:09"},{"visible":true,"include":true,"step":"12.0","x":-10417.142857142857,"y":5852.476190476191,"z":6902.761904761905,"a95":0.99,"info":"26/10/2014 at 13:22:09"},{"visible":true,"include":true,"step":"16.0","x":-8433.52380952381,"y":4816.190476190476,"z":5354.571428571428,"a95":0.99,"info":"26/10/2014 at 13:22:09"},{"visible":true,"include":true,"step":"20.0","x":-7163.047619047619,"y":3824.095238095238,"z":4635.619047619048,"a95":0.99,"info":"26/10/2014 at 13:22:09"},{"visible":true,"include":true,"step":"25.0","x":-5721.619047619048,"y":3078.4761904761904,"z":3768.190476190476,"a95":0.99,"info":"26/10/2014 at 13:22:09"},{"visible":true,"include":true,"step":"30.0","x":-4447.714285714285,"y":2416.190476190476,"z":3375.6190476190477,"a95":0.99,"info":"26/10/2014 at 13:22:09"},{"visible":true,"include":true,"step":"35.0","x":-3696.5714285714284,"y":2181.5238095238096,"z":2833.1428571428573,"a95":0.99,"info":"26/10/2014 at 13:22:09"},{"visible":true,"include":true,"step":"40.0","x":-2718.8571428571427,"y":1631.3333333333333,"z":2805.5238095238096,"a95":0.99,"info":"26/10/2014 at 13:22:09"},{"visible":true,"include":true,"step":"45.0","x":-1919.7142857142858,"y":1383.142857142857,"z":2303.714285714286,"a95":0.99,"info":"26/10/2014 at 13:22:09"},{"visible":true,"include":true,"step":"50.0","x":-1629.3333333333333,"y":1540.6666666666667,"z":2413.3333333333335,"a95":0.99,"info":"26/10/2014 at 13:22:09"},{"visible":true,"include":true,"step":"60.0","x":-1558.952380952381,"y":1243.6190476190477,"z":2033.904761904762,"a95":0.99,"info":"26/10/2014 at 13:22:09"},{"visible":true,"include":false,"step":"70.0","x":-1185.4285714285713,"y":766.152380952381,"z":1276,"a95":0.99,"info":"26/10/2014 at 13:22:09"},{"visible":true,"include":false,"step":"80.0","x":-1359.047619047619,"y":192.9142857142857,"z":849.6285714285715,"a95":0.99,"info":"26/10/2014 at 13:22:09"},{"visible":true,"include":false,"step":"90.0","x":-369.8952380952381,"y":279.48571428571427,"z":1267.7142857142858,"a95":0.99,"info":"26/10/2014 at 13:22:09"},{"visible":true,"include":false,"step":"100.0","x":-232.38095238095238,"y":739.1619047619048,"z":952.152380952381,"a95":0.99,"info":"26/10/2014 at 13:22:09"}]},{"version":"v1.1.0","exported":"2016-11-17T16:06:19.690Z","volume":10.5,"added":"2016-11-17T15:39:43.927Z","format":"Utrecht","demagType":"Unknown","strat":"5","patch":1.1,"GEO":[{"dec":355.64487649937445,"inc":70.72858210693013,"MAD":5.110353404403139,"cm":[2.842170943040401e-14,2.0694557179012918e-13,0],"intensity":8384.263733821632,"type":"dir","forced":true,"remark":"","origin":false,"nSteps":8,"minStep":"20.0","maxStep":"45.0","steps":["20.0","23.0","25.0","30.0","33.0","35.0","40.0","45.0"],"group":"None","version":"v1.1.0"}],"TECT":[{"dec":171.66321463382565,"inc":49.24468780485264,"MAD":5.110353404403151,"cm":[-1.4210854715202004e-14,-5.062616992290714e-13,2.842170943040401e-14],"intensity":8384.263733821632,"type":"dir","forced":true,"remark":"","origin":false,"nSteps":8,"minStep":"20.0","maxStep":"45.0","steps":["20.0","23.0","25.0","30.0","33.0","35.0","40.0","45.0"],"group":"None","version":"v1.1.0"}],"interpreted":true,"name":"HG2.18","coreAzi":225,"coreDip":59,"bedStrike":83,"bedDip":60,"data":[{"visible":true,"include":false,"step":"0.0","x":-14166.666666666666,"y":5926.857142857143,"z":9568.57142857143,"a95":0.99,"info":"08/07/2015 at 13:44:31"},{"visible":true,"include":false,"step":"10.0","x":-9110.380952380952,"y":3716.9523809523807,"z":6755.238095238095,"a95":0.99,"info":"08/07/2015 at 13:44:31"},{"visible":true,"include":false,"step":"15.0","x":-6652.380952380952,"y":2666.7619047619046,"z":5066.0952380952385,"a95":0.99,"info":"08/07/2015 at 13:44:31"},{"visible":true,"include":true,"step":"20.0","x":-4698.571428571428,"y":1938.095238095238,"z":4128.666666666667,"a95":0.99,"info":"08/07/2015 at 13:44:31"},{"visible":true,"include":true,"step":"23.0","x":-3783.3333333333335,"y":1504.952380952381,"z":3588.9523809523807,"a95":0.99,"info":"08/07/2015 at 13:44:31"},{"visible":true,"include":true,"step":"25.0","x":-3148.4761904761904,"y":1112.1904761904761,"z":3498.285714285714,"a95":0.99,"info":"08/07/2015 at 13:44:31"},{"visible":true,"include":true,"step":"30.0","x":-2640.285714285714,"y":747.447619047619,"z":2810.4761904761904,"a95":0.99,"info":"08/07/2015 at 13:44:31"},{"visible":true,"include":true,"step":"33.0","x":-1986.4761904761904,"y":663.8190476190476,"z":2812.3809523809523,"a95":0.99,"info":"08/07/2015 at 13:44:31"},{"visible":true,"include":true,"step":"35.0","x":-1693.6190476190477,"y":709.6285714285715,"z":2202.095238095238,"a95":0.99,"info":"08/07/2015 at 13:44:31"},{"visible":true,"include":true,"step":"40.0","x":-1698.095238095238,"y":568.0666666666666,"z":2247.4285714285716,"a95":0.99,"info":"08/07/2015 at 13:44:31"},{"visible":true,"include":true,"step":"45.0","x":-1155.4285714285713,"y":319.8095238095238,"z":1432.6666666666667,"a95":0.99,"info":"08/07/2015 at 13:44:31"},{"visible":true,"include":false,"step":"50.0","x":-954.8571428571429,"y":27.245714285714286,"z":1505.4285714285713,"a95":0.99,"info":"08/07/2015 at 13:44:31"},{"visible":true,"include":false,"step":"55.0","x":-484.3714285714285,"y":171.07619047619048,"z":1158.5714285714287,"a95":0.99,"info":"08/07/2015 at 13:44:31"},{"visible":true,"include":false,"step":"60.0","x":-994.1904761904761,"y":491.8095238095238,"z":1000.0952380952381,"a95":0.99,"info":"08/07/2015 at 13:44:31"},{"visible":true,"include":false,"step":"65.0","x":-776.5809523809525,"y":280.42857142857144,"z":308.95238095238096,"a95":0.99,"info":"08/07/2015 at 13:44:31"},{"visible":true,"include":false,"step":"70.0","x":-148.24761904761903,"y":171.2761904761905,"z":715.0952380952381,"a95":0.99,"info":"08/07/2015 at 13:44:31"},{"visible":true,"include":false,"step":"80.0","x":-944.742857142857,"y":222.1047619047619,"z":459.91428571428577,"a95":0.99,"info":"08/07/2015 at 13:44:31"}]}]
