# Supplementary material for: Paleomagnetic constraints on the timing and distribution of Cenozoic rotations in Central and Eastern Anatolia
Source: Copernicus journal article supplement (doi:10.5194/se-9-295-2018), 2018-03-21
Supplement: Supplementary file 2 [file se-9-295-2018-supplement.zip › se-2017-66_DATA_dir files/dir files Ulukisla/HP1.dir]

[{"version":"v1.1.0","exported":"2016-11-18T10:44:32.363Z","volume":10.5,"added":"2016-11-18T10:20:34.726Z","format":"Utrecht","demagType":"Unknown","strat":null,"patch":1.1,"GEO":[{"dec":161.8936996123058,"inc":16.893968254791695,"MAD":4.254981427740275,"cm":[1.7763568394002505e-14,7.37188088351104e-14,0],"intensity":740.1271693144157,"type":"dir","forced":true,"remark":"","origin":false,"nSteps":10,"minStep":"100","maxStep":"400","steps":["100","150","180","210","270","300","320","340","370","400"],"group":"None","version":"v1.1.0"}],"TECT":[{"dec":139.82939343808897,"inc":-59.76062115960856,"MAD":4.254981427740274,"cm":[1.509903313490213e-14,5.3290705182007514e-14,1.4210854715202004e-14],"intensity":740.1271693144157,"type":"dir","forced":true,"remark":"","origin":false,"nSteps":10,"minStep":"100","maxStep":"400","steps":["100","150","180","210","270","300","320","340","370","400"],"group":"None","version":"v1.1.0"}],"interpreted":true,"name":"HP1.1A","coreAzi":101,"coreDip":56,"bedStrike":93,"bedDip":85,"data":[{"visible":false,"include":false,"step":"20","x":-253.14285714285714,"y":160.47619047619048,"z":721.2380952380952,"a95":2.5,"info":"\"14-08-11\" at \"17:11\""},{"visible":true,"include":true,"step":"100","x":123.42857142857143,"y":400.4761904761905,"z":259.6190476190476,"a95":1.9,"info":"\"14-08-11\" at \"20:51\""},{"visible":true,"include":true,"step":"150","x":138.38095238095238,"y":394.6666666666667,"z":252.76190476190476,"a95":2.8,"info":"\"14-08-11\" at \"23:21\""},{"visible":true,"include":true,"step":"180","x":139.14285714285714,"y":397.23809523809524,"z":256.3809523809524,"a95":2.2,"info":"\"14-08-12\" at \"15:46\""},{"visible":true,"include":true,"step":"210","x":117.52380952380952,"y":369.14285714285717,"z":248.66666666666666,"a95":2,"info":"\"14-08-12\" at \"18:27\""},{"visible":false,"include":false,"step":"240","x":129.9047619047619,"y":318.76190476190476,"z":254,"a95":2,"info":"\"14-08-12\" at \"21:31\""},{"visible":true,"include":true,"step":"270","x":102.57142857142857,"y":375.5238095238095,"z":216.38095238095238,"a95":1.9,"info":"\"14-08-13\" at \"15:33\""},{"visible":true,"include":true,"step":"300","x":92.38095238095238,"y":383.5238095238095,"z":214.66666666666666,"a95":2.3,"info":"\"14-08-13\" at \"18:09\""},{"visible":true,"include":true,"step":"320","x":64.66666666666667,"y":370.2857142857143,"z":216.57142857142858,"a95":2.3,"info":"\"14-08-13\" at \"21:15\""},{"visible":true,"include":true,"step":"340","x":32.095238095238095,"y":356.57142857142856,"z":192.85714285714286,"a95":6.8,"info":"\"14-08-14\" at \"14:14\""},{"visible":true,"include":true,"step":"370","x":61.42857142857143,"y":298.1904761904762,"z":146,"a95":2.2,"info":"\"14-08-14\" at \"17:19\""},{"visible":true,"include":true,"step":"400","x":61.333333333333336,"y":217.23809523809524,"z":103.80952380952381,"a95":3.6,"info":"\"14-08-14\" at \"20:28\""},{"visible":false,"include":false,"step":"430","x":-1.1428571428571428,"y":217.42857142857142,"z":-38.285714285714285,"a95":5.3,"info":"\"14-08-14\" at \"23:49\""},{"visible":false,"include":false,"step":"460","x":-27.047619047619047,"y":138,"z":26.952380952380953,"a95":4.6,"info":"\"14-08-15\" at \"16:28\""},{"visible":false,"include":false,"step":"490","x":25.80952380952381,"y":115.14285714285714,"z":95.80952380952381,"a95":7,"info":"\"14-08-15\" at \"19:30\""},{"visible":false,"include":false,"step":"510","x":48.57142857142857,"y":104.57142857142857,"z":14.857142857142858,"a95":11.5,"info":"\"14-08-16\" at \"01:09\""},{"visible":false,"include":false,"step":"540","x":-16.476190476190474,"y":142.38095238095238,"z":39.23809523809524,"a95":7.9,"info":"\"14-08-16\" at \"12:57\""}]},{"version":"v1.1.0","exported":"2016-11-18T10:44:32.363Z","volume":10.5,"added":"2016-11-18T10:20:34.728Z","format":"Utrecht","demagType":"Unknown","strat":"7","patch":1.1,"GEO":[{"dec":142.26227031819826,"inc":33.64399046403766,"MAD":7.585288644410528,"cm":[-1.5987211554602254e-14,-1.0658141036401503e-14,0],"intensity":623.8745255737438,"type":"dir","forced":true,"remark":"","origin":false,"nSteps":5,"minStep":"8.0","maxStep":"25.0","steps":["8.0","12.0","16.0","20.0","25.0"],"group":"None","version":"v1.1.0"}],"TECT":[{"dec":141.16569012431614,"inc":-35.45750343159722,"MAD":7.585288644410543,"cm":[-2.842170943040401e-14,-4.263256414560601e-14,-1.5987211554602254e-14],"intensity":623.8745255737439,"type":"dir","forced":true,"remark":"","origin":false,"nSteps":5,"minStep":"8.0","maxStep":"25.0","steps":["8.0","12.0","16.0","20.0","25.0"],"group":"None","version":"v1.1.0"}],"interpreted":true,"name":"HP1.1B","coreAzi":101,"coreDip":56,"bedStrike":93,"bedDip":85,"data":[{"visible":true,"include":false,"step":"0.0","x":-219.48571428571427,"y":524.7333333333333,"z":624.1333333333333,"a95":0.99,"info":"16/08/2014 at 10:23:18"},{"visible":true,"include":false,"step":"4.0","x":-45.1447619047619,"y":368.16190476190474,"z":458.552380952381,"a95":0.99,"info":"16/08/2014 at 10:23:18"},{"visible":true,"include":true,"step":"8.0","x":92.99047619047619,"y":277.95238095238096,"z":313.4095238095238,"a95":0.99,"info":"16/08/2014 at 10:23:18"},{"visible":true,"include":true,"step":"12.0","x":42.965714285714284,"y":214.65714285714287,"z":303.8666666666667,"a95":0.99,"info":"16/08/2014 at 10:23:18"},{"visible":true,"include":true,"step":"16.0","x":97.91428571428571,"y":160.9904761904762,"z":286.03809523809525,"a95":0.99,"info":"16/08/2014 at 10:23:18"},{"visible":true,"include":true,"step":"20.0","x":44.70761904761905,"y":77.02285714285715,"z":187.2761904761905,"a95":0.99,"info":"16/08/2014 at 10:23:18"},{"visible":true,"include":true,"step":"25.0","x":50.11333333333334,"y":74.56952380952382,"z":181.0285714285714,"a95":0.99,"info":"16/08/2014 at 10:23:18"},{"visible":true,"include":false,"step":"30.0","x":26.954285714285714,"y":136.7238095238095,"z":10.796190476190477,"a95":0.99,"info":"16/08/2014 at 10:23:18"},{"visible":true,"include":false,"step":"35.0","x":61.32,"y":111.70476190476191,"z":1.8366666666666667,"a95":0.99,"info":"16/08/2014 at 10:23:18"},{"visible":true,"include":false,"step":"40.0","x":66.4752380952381,"y":85.77238095238096,"z":81.80190476190475,"a95":0.99,"info":"16/08/2014 at 10:23:18"},{"visible":true,"include":false,"step":"45.0","x":46.74095238095238,"y":52.24952380952381,"z":-71.47142857142858,"a95":0.99,"info":"16/08/2014 at 10:23:18"},{"visible":false,"include":false,"step":"50.0","x":61.27809523809523,"y":22.85142857142857,"z":-37.06666666666666,"a95":0.99,"info":"16/08/2014 at 10:23:18"},{"visible":false,"include":false,"step":"60.0","x":86.11333333333334,"y":50.493333333333325,"z":100.05714285714285,"a95":0.99,"info":"16/08/2014 at 10:23:18"},{"visible":false,"include":false,"step":"70.0","x":57.13809523809524,"y":188.0285714285714,"z":25.61047619047619,"a95":0.99,"info":"16/08/2014 at 10:23:18"},{"visible":false,"include":false,"step":"80.0","x":89.79238095238095,"y":108.80952380952381,"z":-101.44761904761906,"a95":0.99,"info":"16/08/2014 at 10:23:18"},{"visible":false,"include":false,"step":"90.0","x":129.36190476190475,"y":191.54285714285714,"z":9.874285714285715,"a95":0.99,"info":"16/08/2014 at 10:23:18"},{"visible":false,"include":false,"step":"100.0","x":-64.23714285714286,"y":162.93333333333334,"z":-20.354285714285716,"a95":0.99,"info":"16/08/2014 at 10:23:18"}]},{"version":"v1.1.0","exported":"2016-11-18T10:44:32.363Z","volume":10.5,"added":"2016-11-18T10:20:34.729Z","format":"Utrecht","demagType":"Unknown","strat":"8","patch":1.1,"GEO":[],"TECT":[],"interpreted":false,"name":"HP1.2A","coreAzi":107,"coreDip":60,"bedStrike":93,"bedDip":85,"data":[{"visible":false,"include":false,"step":"0.0","x":-265.81904761904764,"y":-13.442857142857143,"z":734.5333333333334,"a95":0.99,"info":"16/08/2014 at 10:23:18"},{"visible":true,"include":false,"step":"4.0","x":-181.47619047619048,"y":30.594285714285714,"z":620.7333333333333,"a95":0.99,"info":"16/08/2014 at 10:23:18"},{"visible":true,"include":false,"step":"8.0","x":-72.39714285714285,"y":22.30857142857143,"z":434.53333333333336,"a95":0.99,"info":"16/08/2014 at 10:23:18"},{"visible":true,"include":false,"step":"12.0","x":-21.569523809523808,"y":53.02,"z":352.4190476190476,"a95":0.99,"info":"16/08/2014 at 10:23:18"},{"visible":true,"include":false,"step":"16.0","x":-11.69047619047619,"y":26.934285714285714,"z":273.65714285714284,"a95":0.99,"info":"16/08/2014 at 10:23:18"},{"visible":true,"include":false,"step":"20.0","x":-82.89428571428572,"y":-29.745714285714286,"z":182.26666666666665,"a95":0.99,"info":"16/08/2014 at 10:23:18"},{"visible":true,"include":false,"step":"25.0","x":-36.28285714285715,"y":30.55809523809524,"z":159.64761904761903,"a95":0.99,"info":"16/08/2014 at 10:23:18"},{"visible":true,"include":false,"step":"30.0","x":-9.995238095238095,"y":104.92380952380952,"z":132.55238095238096,"a95":0.99,"info":"16/08/2014 at 10:23:18"},{"visible":true,"include":false,"step":"35.0","x":1.9583809523809523,"y":-17.36952380952381,"z":227.64761904761906,"a95":0.99,"info":"16/08/2014 at 10:23:18"},{"visible":true,"include":false,"step":"40.0","x":-56.98952380952381,"y":0.0025952380952380953,"z":106.28571428571429,"a95":0.99,"info":"16/08/2014 at 10:23:18"},{"visible":false,"include":false,"step":"45.0","x":-30.460952380952378,"y":-77.59238095238095,"z":105.31428571428572,"a95":0.99,"info":"16/08/2014 at 10:23:18"},{"visible":false,"include":false,"step":"50.0","x":-161.45714285714286,"y":76.3,"z":46.54571428571429,"a95":0.99,"info":"16/08/2014 at 10:23:18"},{"visible":false,"include":false,"step":"60.0","x":-134.47619047619048,"y":114.42857142857143,"z":16.656190476190474,"a95":0.99,"info":"16/08/2014 at 10:23:18"},{"visible":false,"include":false,"step":"70.0","x":-213.21904761904764,"y":-101.92380952380952,"z":50.3752380952381,"a95":0.99,"info":"16/08/2014 at 10:23:18"},{"visible":false,"include":false,"step":"80.0","x":-103.66666666666667,"y":123.4,"z":99.19999999999999,"a95":0.99,"info":"16/08/2014 at 10:23:18"},{"visible":false,"include":false,"step":"90.0","x":-125.98095238095237,"y":-37.28380952380952,"z":-18.307619047619045,"a95":0.99,"info":"16/08/2014 at 10:23:18"},{"visible":false,"include":false,"step":"100.0","x":-7.992,"y":37.712380952380954,"z":-123.3047619047619,"a95":0.99,"info":"16/08/2014 at 10:23:18"}]},{"version":"v1.1.0","exported":"2016-11-18T10:44:32.363Z","volume":10.5,"added":"2016-11-18T10:20:34.730Z","format":"Utrecht","demagType":"Unknown","strat":"1","patch":1.1,"GEO":[{"dec":161.36582565345861,"inc":37.92578390081452,"MAD":8.532271174770745,"cm":[7.105427357601002e-15,1.3322676295501878e-14,0],"intensity":532.4913724522253,"type":"dir","forced":true,"remark":"","origin":false,"nSteps":4,"minStep":"20.0","maxStep":"35.0","steps":["20.0","25.0","30.0","35.0"],"group":"None","version":"v1.1.0"}],"TECT":[{"dec":159.7288924220568,"inc":-42.600451382224804,"MAD":8.532271174770742,"cm":[7.105427357601002e-15,1.865174681370263e-14,3.552713678800501e-15],"intensity":532.4913724522252,"type":"dir","forced":true,"remark":"","origin":false,"nSteps":4,"minStep":"20.0","maxStep":"35.0","steps":["20.0","25.0","30.0","35.0"],"group":"None","version":"v1.1.0"}],"interpreted":true,"name":"HP1.2B","coreAzi":107,"coreDip":60,"bedStrike":93,"bedDip":85,"data":[{"visible":true,"include":false,"step":"0.0","x":-180.52380952380952,"y":-9.947619047619048,"z":583.4,"a95":0.99,"info":"16/08/2014 at 15:50:16"},{"visible":true,"include":false,"step":"4.0","x":-135.17142857142858,"y":27.36952380952381,"z":513.7428571428571,"a95":0.99,"info":"16/08/2014 at 15:50:16"},{"visible":true,"include":false,"step":"8.0","x":-114.88571428571429,"y":88.20476190476191,"z":442.65714285714284,"a95":0.99,"info":"16/08/2014 at 15:50:16"},{"visible":true,"include":false,"step":"12.0","x":-79.69333333333333,"y":135.8190476190476,"z":340.9904761904762,"a95":0.99,"info":"16/08/2014 at 15:50:16"},{"visible":true,"include":false,"step":"16.0","x":6.310285714285714,"y":126.51428571428572,"z":315.6952380952381,"a95":0.99,"info":"16/08/2014 at 15:50:16"},{"visible":true,"include":true,"step":"20.0","x":53.25333333333333,"y":157.32380952380953,"z":250.82857142857142,"a95":0.99,"info":"16/08/2014 at 15:50:16"},{"visible":true,"include":true,"step":"25.0","x":-21.257142857142856,"y":222.66666666666666,"z":248.30476190476188,"a95":0.99,"info":"16/08/2014 at 15:50:16"},{"visible":true,"include":true,"step":"30.0","x":44.87428571428571,"y":194.67619047619047,"z":241.74285714285716,"a95":0.99,"info":"16/08/2014 at 15:50:16"},{"visible":true,"include":true,"step":"35.0","x":37.944761904761904,"y":184.28571428571428,"z":147.33333333333334,"a95":0.99,"info":"16/08/2014 at 15:50:16"},{"visible":true,"include":false,"step":"40.0","x":-40.796190476190475,"y":209.87619047619046,"z":144.92380952380952,"a95":0.99,"info":"16/08/2014 at 15:50:16"},{"visible":true,"include":false,"step":"45.0","x":-56.94380952380952,"y":186.9142857142857,"z":92.85619047619048,"a95":0.99,"info":"16/08/2014 at 15:50:16"},{"visible":true,"include":false,"step":"50.0","x":-45.074285714285715,"y":121.94285714285715,"z":118.63809523809525,"a95":0.99,"info":"16/08/2014 at 15:50:16"},{"visible":false,"include":false,"step":"60.0","x":-56.68571428571429,"y":178,"z":-29.46761904761905,"a95":0.99,"info":"16/08/2014 at 15:50:16"},{"visible":false,"include":false,"step":"70.0","x":59.68666666666667,"y":74.5495238095238,"z":125.54285714285714,"a95":0.99,"info":"16/08/2014 at 15:50:16"},{"visible":false,"include":false,"step":"80.0","x":31.432380952380953,"y":58.967619047619046,"z":19.40285714285714,"a95":0.99,"info":"16/08/2014 at 15:50:16"},{"visible":false,"include":false,"step":"90.0","x":-6.452095238095238,"y":66.42952380952381,"z":9.192,"a95":0.99,"info":"16/08/2014 at 15:50:16"},{"visible":false,"include":false,"step":"100.0","x":-49.88857142857143,"y":12.034285714285714,"z":-16.137142857142855,"a95":0.99,"info":"16/08/2014 at 15:50:16"}]},{"version":"v1.1.0","exported":"2016-11-18T10:44:32.363Z","volume":10.5,"added":"2016-11-18T10:20:34.730Z","format":"Utrecht","demagType":"Unknown","strat":"2","patch":1.1,"GEO":[{"dec":173.67044331651505,"inc":43.50282222894659,"MAD":10.061980938710466,"cm":[-414.95123543602796,-66.90386373012652,92.97360016101221],"intensity":504.68462877388583,"type":"dir","forced":false,"remark":"","origin":false,"nSteps":6,"minStep":"8.0","maxStep":"30.0","steps":["8.0","12.0","16.0","20.0","25.0","30.0"],"group":"None","version":"v1.1.0"}],"TECT":[{"dec":174.06789508890006,"inc":-40.770065788032625,"MAD":10.061980938710471,"cm":[-126.50384933701544,-51.786976784679354,-408.1906787730776],"intensity":504.6846287738859,"type":"dir","forced":false,"remark":"","origin":false,"nSteps":6,"minStep":"8.0","maxStep":"30.0","steps":["8.0","12.0","16.0","20.0","25.0","30.0"],"group":"None","version":"v1.1.0"}],"interpreted":true,"name":"HP1.3A","coreAzi":102,"coreDip":59,"bedStrike":93,"bedDip":85,"data":[{"visible":true,"include":false,"step":"0.0","x":-211.17142857142858,"y":506.87619047619046,"z":467.85714285714283,"a95":0.99,"info":"16/08/2014 at 15:50:16"},{"visible":true,"include":false,"step":"4.0","x":-125.45714285714286,"y":582,"z":396.4,"a95":0.99,"info":"16/08/2014 at 15:50:16"},{"visible":true,"include":true,"step":"8.0","x":-93.40761904761905,"y":626.6857142857143,"z":298.23809523809524,"a95":0.99,"info":"16/08/2014 at 15:50:16"},{"visible":true,"include":true,"step":"12.0","x":-8.038666666666668,"y":516.7428571428571,"z":215.60000000000002,"a95":0.99,"info":"16/08/2014 at 15:50:16"},{"visible":true,"include":true,"step":"16.0","x":-68.64761904761905,"y":455.7047619047619,"z":103.84761904761906,"a95":0.99,"info":"16/08/2014 at 15:50:16"},{"visible":true,"include":true,"step":"20.0","x":-33.139047619047616,"y":311.15238095238095,"z":-3.077047619047619,"a95":0.99,"info":"16/08/2014 at 15:50:16"},{"visible":true,"include":true,"step":"25.0","x":10.923809523809524,"y":338.83809523809526,"z":-29.598095238095237,"a95":0.99,"info":"16/08/2014 at 15:50:16"},{"visible":true,"include":true,"step":"30.0","x":12.135238095238096,"y":269.6380952380952,"z":-42.473333333333336,"a95":0.99,"info":"16/08/2014 at 15:50:16"},{"visible":true,"include":false,"step":"35.0","x":-52.95809523809523,"y":196.16190476190474,"z":29.41238095238095,"a95":0.99,"info":"16/08/2014 at 15:50:16"},{"visible":true,"include":false,"step":"40.0","x":-95.54285714285714,"y":256.7333333333333,"z":99,"a95":0.99,"info":"16/08/2014 at 15:50:16"},{"visible":true,"include":false,"step":"45.0","x":76.51714285714286,"y":315.83809523809526,"z":24.156190476190474,"a95":0.99,"info":"16/08/2014 at 15:50:16"},{"visible":true,"include":false,"step":"50.0","x":-47.12761904761904,"y":237.96190476190475,"z":-138.9142857142857,"a95":0.99,"info":"16/08/2014 at 15:50:16"},{"visible":false,"include":false,"step":"60.0","x":-122.86666666666666,"y":223.15238095238095,"z":68.50761904761904,"a95":0.99,"info":"16/08/2014 at 15:50:16"},{"visible":false,"include":false,"step":"70.0","x":-113.36190476190475,"y":122.36190476190475,"z":46.56666666666666,"a95":0.99,"info":"16/08/2014 at 15:50:16"},{"visible":false,"include":false,"step":"80.0","x":-113.35238095238095,"y":141.41904761904763,"z":101.19999999999999,"a95":0.99,"info":"16/08/2014 at 15:50:16"},{"visible":false,"include":false,"step":"90.0","x":-130.93333333333334,"y":166.8952380952381,"z":139.17142857142858,"a95":0.99,"info":"16/08/2014 at 15:50:16"},{"visible":false,"include":false,"step":"100.0","x":-214.83809523809526,"y":118.74285714285713,"z":56.574285714285715,"a95":0.99,"info":"16/08/2014 at 15:50:16"}]},{"version":"v1.1.0","exported":"2016-11-18T10:44:32.363Z","volume":10.5,"added":"2016-11-18T10:20:34.731Z","format":"Utrecht","demagType":"Unknown","strat":"8","patch":1.1,"GEO":[{"dec":151.58361972320319,"inc":31.51865348304346,"MAD":25.83101631209273,"cm":[-39.39073606075162,23.705355943401678,141.737248769929],"intensity":250.43905130434877,"type":"dir","forced":false,"remark":"","origin":false,"nSteps":5,"minStep":"15.0","maxStep":"40.0","steps":["15.0","20.0","25.0","30.0","40.0"],"group":"None","version":"v1.1.0"}],"TECT":[{"dec":145.74237303372433,"inc":-42.77867393290151,"MAD":25.83101631209276,"cm":[-145.66696884900387,18.135654592401927,-25.597927563151227],"intensity":250.43905130434882,"type":"dir","forced":false,"remark":"","origin":false,"nSteps":5,"minStep":"15.0","maxStep":"40.0","steps":["15.0","20.0","25.0","30.0","40.0"],"group":"None","version":"v1.1.0"}],"interpreted":true,"name":"HP1.3B","coreAzi":102,"coreDip":59,"bedStrike":93,"bedDip":85,"data":[{"visible":true,"include":false,"step":"0.0","x":13.976190476190476,"y":49.82761904761905,"z":462.0190476190476,"a95":0.99,"info":"05/11/2014 at 13:44:22"},{"visible":true,"include":false,"step":"10.0","x":52.44,"y":54.55428571428572,"z":352.8,"a95":0.99,"info":"05/11/2014 at 13:44:22"},{"visible":true,"include":true,"step":"15.0","x":-5.012666666666667,"y":98.60952380952382,"z":246.9238095238095,"a95":0.99,"info":"05/11/2014 at 13:44:22"},{"visible":true,"include":true,"step":"20.0","x":-26.978095238095236,"y":55.91047619047619,"z":164.9904761904762,"a95":0.99,"info":"05/11/2014 at 13:44:22"},{"visible":true,"include":true,"step":"25.0","x":-76.22285714285715,"y":45.43047619047619,"z":112.53333333333333,"a95":0.99,"info":"05/11/2014 at 13:44:22"},{"visible":true,"include":true,"step":"30.0","x":-84.20190476190476,"y":47.47047619047619,"z":89.90190476190476,"a95":0.99,"info":"05/11/2014 at 13:44:22"},{"visible":false,"include":false,"step":"35.0","x":-52.41619047619048,"y":119.44761904761906,"z":117.44761904761906,"a95":0.99,"info":"05/11/2014 at 13:44:22"},{"visible":true,"include":true,"step":"40.0","x":-38.107619047619046,"y":-79.41428571428571,"z":73.9152380952381,"a95":0.99,"info":"05/11/2014 at 13:44:22"},{"visible":true,"include":false,"step":"45.0","x":-76.46095238095238,"y":-3.5009523809523806,"z":-35.3552380952381,"a95":0.99,"info":"05/11/2014 at 13:44:22"},{"visible":true,"include":false,"step":"50.0","x":-58.53809523809524,"y":3.239714285714286,"z":-27.77714285714286,"a95":0.99,"info":"05/11/2014 at 13:44:22"},{"visible":false,"include":false,"step":"60.0","x":15.52190476190476,"y":-24.56,"z":-29.44190476190476,"a95":0.99,"info":"05/11/2014 at 13:44:22"},{"visible":false,"include":false,"step":"70.0","x":-28.98952380952381,"y":32.92857142857143,"z":116.5047619047619,"a95":0.99,"info":"05/11/2014 at 13:44:22"},{"visible":false,"include":false,"step":"80.0","x":-130.24761904761903,"y":144.61904761904762,"z":37.21809523809524,"a95":0.99,"info":"05/11/2014 at 13:44:22"},{"visible":false,"include":false,"step":"90.0","x":-0.1339047619047619,"y":0.9775238095238095,"z":81.62095238095237,"a95":0.99,"info":"05/11/2014 at 13:44:22"}]},{"version":"v1.1.0","exported":"2016-11-18T10:44:32.363Z","volume":10.5,"added":"2016-11-18T10:20:34.731Z","format":"Utrecht","demagType":"Unknown","strat":"3","patch":1.1,"GEO":[{"dec":178.62321469170934,"inc":37.828388775708724,"MAD":3.7848127359121446,"cm":[0,-2.220446049250313e-14,0],"intensity":888.3291488326607,"type":"dir","forced":true,"remark":"","origin":false,"nSteps":2,"minStep":"8.0","maxStep":"12.0","steps":["8.0","12.0"],"group":"None","version":"v1.1.0"}],"TECT":[{"dec":177.93140981745285,"inc":-46.978563712405865,"MAD":3.7848127359121433,"cm":[0,-5.240252676230739e-14,-1.4210854715202004e-14],"intensity":888.3291488326607,"type":"dir","forced":true,"remark":"","origin":false,"nSteps":2,"minStep":"8.0","maxStep":"12.0","steps":["8.0","12.0"],"group":"None","version":"v1.1.0"}],"interpreted":true,"name":"HP1.4A","coreAzi":100,"coreDip":63,"bedStrike":93,"bedDip":85,"data":[{"visible":true,"include":false,"step":"0.0","x":-220.2,"y":288.8,"z":514.3047619047619,"a95":0.99,"info":"16/08/2014 at 15:50:16"},{"visible":true,"include":false,"step":"4.0","x":-163.61904761904762,"y":345.8952380952381,"z":420.2476190476191,"a95":0.99,"info":"16/08/2014 at 15:50:16"},{"visible":true,"include":true,"step":"8.0","x":-54.37142857142857,"y":377.9809523809524,"z":268.29523809523806,"a95":0.99,"info":"16/08/2014 at 15:50:16"},{"visible":true,"include":true,"step":"12.0","x":-70.74095238095238,"y":308.1047619047619,"z":281.9428571428572,"a95":0.99,"info":"16/08/2014 at 15:50:16"},{"visible":true,"include":false,"step":"16.0","x":-123.5904761904762,"y":266.22857142857146,"z":229.87619047619046,"a95":0.99,"info":"16/08/2014 at 15:50:16"},{"visible":true,"include":false,"step":"20.0","x":-182.23809523809524,"y":338.29523809523806,"z":146.42857142857142,"a95":0.99,"info":"16/08/2014 at 15:50:16"},{"visible":true,"include":false,"step":"25.0","x":-142.0285714285714,"y":205.25714285714284,"z":104.44761904761906,"a95":0.99,"info":"16/08/2014 at 15:50:16"},{"visible":true,"include":false,"step":"30.0","x":-121.86666666666666,"y":237.73333333333332,"z":93.97428571428571,"a95":0.99,"info":"16/08/2014 at 15:50:16"},{"visible":true,"include":false,"step":"35.0","x":-174.1047619047619,"y":198.78095238095236,"z":75.43809523809524,"a95":0.99,"info":"16/08/2014 at 15:50:16"},{"visible":false,"include":false,"step":"40.0","x":-128.0095238095238,"y":140.3047619047619,"z":148.9904761904762,"a95":0.99,"info":"16/08/2014 at 15:50:16"},{"visible":false,"include":false,"step":"45.0","x":-127.66666666666667,"y":87.60190476190476,"z":97.29523809523809,"a95":0.99,"info":"16/08/2014 at 15:50:16"},{"visible":false,"include":false,"step":"50.0","x":-106.02857142857142,"y":73.41714285714286,"z":118.44761904761906,"a95":0.99,"info":"16/08/2014 at 15:50:16"},{"visible":false,"include":false,"step":"60.0","x":-34.026666666666664,"y":179.43809523809523,"z":170.76190476190476,"a95":0.99,"info":"16/08/2014 at 15:50:16"},{"visible":false,"include":false,"step":"70.0","x":-69.50190476190475,"y":132.8095238095238,"z":61.483809523809526,"a95":0.99,"info":"16/08/2014 at 15:50:16"},{"visible":false,"include":false,"step":"80.0","x":-110.92380952380952,"y":-56.63809523809524,"z":152.0857142857143,"a95":0.99,"info":"16/08/2014 at 15:50:16"},{"visible":false,"include":false,"step":"90.0","x":26.32857142857143,"y":176.04761904761904,"z":128.24761904761903,"a95":0.99,"info":"16/08/2014 at 15:50:16"},{"visible":false,"include":false,"step":"100.0","x":-101.91428571428571,"y":-44.78380952380952,"z":51.48190476190476,"a95":0.99,"info":"16/08/2014 at 15:50:16"}]},{"version":"v1.1.0","exported":"2016-11-18T10:44:32.363Z","volume":10.5,"added":"2016-11-18T10:20:34.739Z","format":"Utrecht","demagType":"Unknown","strat":null,"patch":1.1,"GEO":[{"dec":153.43864615530538,"inc":27.919308909286325,"MAD":6.336683051977708,"cm":[-7.105427357601002e-15,1.7763568394002505e-15,0],"intensity":715.0796539999063,"type":"dir","forced":true,"remark":"","origin":false,"nSteps":8,"minStep":"100","maxStep":"320","steps":["100","150","180","210","240","270","300","320"],"group":"None","version":"v1.1.0"}],"TECT":[{"dec":143.7435672520338,"inc":-46.45665031353837,"MAD":6.336683051977685,"cm":[-1.2434497875801753e-14,8.881784197001252e-16,1.0658141036401503e-14],"intensity":715.0796539999064,"type":"dir","forced":true,"remark":"","origin":false,"nSteps":8,"minStep":"100","maxStep":"320","steps":["100","150","180","210","240","270","300","320"],"group":"None","version":"v1.1.0"}],"interpreted":true,"name":"HP1.4B","coreAzi":100,"coreDip":63,"bedStrike":93,"bedDip":85,"data":[{"visible":false,"include":false,"step":"20","x":-270.2857142857143,"y":-373.9047619047619,"z":927.7142857142857,"a95":3.1,"info":"\"14-08-11\" at \"17:14\""},{"visible":true,"include":true,"step":"100","x":113.42857142857143,"y":251.14285714285714,"z":320.0952380952381,"a95":2.3,"info":"\"14-08-11\" at \"20:53\""},{"visible":true,"include":true,"step":"150","x":112.0952380952381,"y":286,"z":297.7142857142857,"a95":2.3,"info":"\"14-08-11\" at \"23:24\""},{"visible":true,"include":true,"step":"180","x":118,"y":288.85714285714283,"z":215.14285714285714,"a95":2.1,"info":"\"14-08-12\" at \"15:48\""},{"visible":true,"include":true,"step":"210","x":108.47619047619048,"y":238.38095238095238,"z":243.71428571428572,"a95":2.2,"info":"\"14-08-12\" at \"18:29\""},{"visible":true,"include":true,"step":"240","x":91.80952380952381,"y":276.3809523809524,"z":200.57142857142858,"a95":2.3,"info":"\"14-08-12\" at \"21:34\""},{"visible":true,"include":true,"step":"270","x":58.857142857142854,"y":256.4761904761905,"z":177.14285714285714,"a95":2.1,"info":"\"14-08-13\" at \"15:36\""},{"visible":true,"include":true,"step":"300","x":61.904761904761905,"y":235.33333333333334,"z":195.23809523809524,"a95":2.3,"info":"\"14-08-13\" at \"18:12\""},{"visible":true,"include":true,"step":"320","x":53.904761904761905,"y":203.23809523809524,"z":206.0952380952381,"a95":2,"info":"\"14-08-13\" at \"21:18\""},{"visible":false,"include":false,"step":"340","x":16.285714285714285,"y":197.61904761904762,"z":154.47619047619048,"a95":2.4,"info":"\"14-08-14\" at \"14:17\""},{"visible":false,"include":false,"step":"370","x":46,"y":238.28571428571428,"z":52.095238095238095,"a95":1.7,"info":"\"14-08-14\" at \"17:21\""},{"visible":false,"include":false,"step":"400","x":43.61904761904762,"y":158.85714285714286,"z":30.952380952380953,"a95":5.4,"info":"\"14-08-14\" at \"20:31\""},{"visible":false,"include":false,"step":"430","x":16.952380952380953,"y":196.85714285714286,"z":71.52380952380952,"a95":2.6,"info":"\"14-08-14\" at \"23:53\""},{"visible":false,"include":false,"step":"460","x":-5.714285714285714,"y":130.85714285714286,"z":41.61904761904762,"a95":3.5,"info":"\"14-08-15\" at \"16:30\""},{"visible":false,"include":false,"step":"490","x":-172.76190476190476,"y":169.04761904761904,"z":104,"a95":5,"info":"\"14-08-15\" at \"19:35\""},{"visible":false,"include":false,"step":"510","x":13.80952380952381,"y":31.523809523809526,"z":130,"a95":10,"info":"\"14-08-16\" at \"01:11\""},{"visible":false,"include":false,"step":"540","x":76.76190476190476,"y":156.0952380952381,"z":134.85714285714286,"a95":5.6,"info":"\"14-08-16\" at \"13:00\""}]},{"version":"v1.1.0","exported":"2016-11-18T10:44:32.363Z","volume":10.5,"added":"2016-11-18T10:20:34.740Z","format":"Utrecht","demagType":"Unknown","strat":"4","patch":1.1,"GEO":[{"dec":136.8787923611706,"inc":25.922373570904334,"MAD":7.473109641723655,"cm":[0,-7.105427357601002e-15,0],"intensity":1137.7261908523833,"type":"dir","forced":true,"remark":"","origin":false,"nSteps":4,"minStep":"4.0","maxStep":"16.0","steps":["4.0","8.0","12.0","16.0"],"group":"None","version":"v1.1.0"}],"TECT":[{"dec":130.0734476778607,"inc":-35.656476672685315,"MAD":7.473109641723667,"cm":[-1.1723955140041653e-13,-1.2789769243681803e-13,-4.263256414560601e-14],"intensity":1137.7261908523833,"type":"dir","forced":true,"remark":"","origin":false,"nSteps":4,"minStep":"4.0","maxStep":"16.0","steps":["4.0","8.0","12.0","16.0"],"group":"None","version":"v1.1.0"}],"interpreted":true,"name":"HP1.5A","coreAzi":101,"coreDip":61,"bedStrike":93,"bedDip":85,"data":[{"visible":false,"include":false,"step":"0.0","x":128.54285714285714,"y":237.30476190476188,"z":619.3142857142857,"a95":0.99,"info":"16/08/2014 at 15:50:16"},{"visible":true,"include":true,"step":"4.0","x":206.60000000000002,"y":321.96190476190475,"z":541.2,"a95":0.99,"info":"16/08/2014 at 15:50:16"},{"visible":true,"include":true,"step":"8.0","x":262.6095238095238,"y":315.12380952380954,"z":501.9428571428571,"a95":0.99,"info":"16/08/2014 at 15:50:16"},{"visible":true,"include":true,"step":"12.0","x":305.1333333333333,"y":339.22857142857146,"z":352.62857142857143,"a95":0.99,"info":"16/08/2014 at 15:50:16"},{"visible":true,"include":true,"step":"16.0","x":245.50476190476192,"y":273.8857142857143,"z":316.1142857142857,"a95":0.99,"info":"16/08/2014 at 15:50:16"},{"visible":true,"include":false,"step":"20.0","x":39.63238095238095,"y":140.3047619047619,"z":242.87619047619046,"a95":0.99,"info":"16/08/2014 at 15:50:16"},{"visible":true,"include":false,"step":"25.0","x":73.5495238095238,"y":165.2952380952381,"z":98.19047619047619,"a95":0.99,"info":"16/08/2014 at 15:50:16"},{"visible":true,"include":false,"step":"30.0","x":108.0952380952381,"y":249.71428571428572,"z":27.634285714285717,"a95":0.99,"info":"16/08/2014 at 15:50:16"},{"visible":true,"include":false,"step":"35.0","x":99.66666666666667,"y":330.9428571428572,"z":-67.12190476190476,"a95":0.99,"info":"16/08/2014 at 15:50:16"},{"visible":true,"include":false,"step":"40.0","x":207.33333333333334,"y":320.2,"z":-133.1238095238095,"a95":0.99,"info":"16/08/2014 at 15:50:16"},{"visible":true,"include":false,"step":"45.0","x":170.88571428571427,"y":225.8190476190476,"z":3.1663809523809525,"a95":0.99,"info":"16/08/2014 at 15:50:16"},{"visible":true,"include":false,"step":"50.0","x":113.72380952380952,"y":166.77142857142857,"z":-89.92571428571429,"a95":0.99,"info":"16/08/2014 at 15:50:16"},{"visible":false,"include":false,"step":"60.0","x":43.38380952380952,"y":154.51428571428573,"z":-88.55238095238094,"a95":0.99,"info":"16/08/2014 at 15:50:16"},{"visible":false,"include":false,"step":"70.0","x":11.155238095238095,"y":404.4190476190476,"z":-172.07619047619048,"a95":0.99,"info":"16/08/2014 at 15:50:16"},{"visible":false,"include":false,"step":"80.0","x":-68.58380952380952,"y":110.15238095238094,"z":43.19714285714286,"a95":0.99,"info":"16/08/2014 at 15:50:16"},{"visible":false,"include":false,"step":"90.0","x":259.3047619047619,"y":258.74285714285713,"z":-110.79047619047618,"a95":0.99,"info":"16/08/2014 at 15:50:16"},{"visible":false,"include":false,"step":"100.0","x":14.573333333333334,"y":319.70476190476194,"z":-200.43809523809523,"a95":0.99,"info":"16/08/2014 at 15:50:16"}]},{"version":"v1.1.0","exported":"2016-11-18T10:44:32.363Z","volume":10.5,"added":"2016-11-18T10:20:34.741Z","format":"Utrecht","demagType":"Unknown","strat":"5","patch":1.1,"GEO":[{"dec":161.93245198391344,"inc":42.38182233662681,"MAD":15.667132851674324,"cm":[-45.51947003150526,28.851762410730124,135.77172184805835],"intensity":103.44426206510927,"type":"dir","forced":false,"remark":"","origin":false,"nSteps":7,"minStep":"20.0","maxStep":"60.0","steps":["20.0","25.0","30.0","40.0","45.0","50.0","60.0"],"group":"None","version":"v1.1.0"}],"TECT":[{"dec":161.17079697994075,"inc":-44.921538599456795,"MAD":15.667132851674312,"cm":[-135.26145177926264,30.418214528924125,-46.01606987976496],"intensity":103.44426206510929,"type":"dir","forced":false,"remark":"","origin":false,"nSteps":7,"minStep":"20.0","maxStep":"60.0","steps":["20.0","25.0","30.0","40.0","45.0","50.0","60.0"],"group":"None","version":"v1.1.0"}],"interpreted":true,"name":"HP1.6A","coreAzi":98,"coreDip":39,"bedStrike":89,"bedDip":90,"data":[{"visible":true,"include":false,"step":"0.0","x":-333.1904761904762,"y":56.11714285714286,"z":352,"a95":0.99,"info":"16/08/2014 at 15:50:16"},{"visible":true,"include":false,"step":"4.0","x":-276.752380952381,"y":54.396190476190476,"z":333.7142857142857,"a95":0.99,"info":"16/08/2014 at 15:50:16"},{"visible":true,"include":false,"step":"8.0","x":-201.8095238095238,"y":82.92190476190476,"z":282.6952380952381,"a95":0.99,"info":"16/08/2014 at 15:50:16"},{"visible":true,"include":false,"step":"12.0","x":-157.43809523809523,"y":95.15238095238095,"z":236.46666666666667,"a95":0.99,"info":"16/08/2014 at 15:50:16"},{"visible":true,"include":false,"step":"16.0","x":-116.9047619047619,"y":74.69142857142857,"z":208.03809523809525,"a95":0.99,"info":"16/08/2014 at 15:50:16"},{"visible":true,"include":true,"step":"20.0","x":-96.52380952380952,"y":81.65714285714286,"z":156.5047619047619,"a95":0.99,"info":"16/08/2014 at 15:50:16"},{"visible":true,"include":true,"step":"25.0","x":-108.0952380952381,"y":69.74380952380952,"z":136.65714285714287,"a95":0.99,"info":"16/08/2014 at 15:50:16"},{"visible":true,"include":true,"step":"30.0","x":-84.48761904761905,"y":52.80380952380953,"z":111.78095238095239,"a95":0.99,"info":"16/08/2014 at 15:50:16"},{"visible":false,"include":false,"step":"35.0","x":-102.58095238095237,"y":52.14,"z":90.90571428571428,"a95":0.99,"info":"16/08/2014 at 15:50:16"},{"visible":true,"include":true,"step":"40.0","x":-87.84285714285714,"y":28.608571428571427,"z":108.78095238095239,"a95":0.99,"info":"16/08/2014 at 15:50:16"},{"visible":true,"include":true,"step":"45.0","x":-65.34380952380953,"y":27.16,"z":115.23809523809524,"a95":0.99,"info":"16/08/2014 at 15:50:16"},{"visible":true,"include":true,"step":"50.0","x":-72.02285714285715,"y":13.239047619047618,"z":76.52952380952381,"a95":0.99,"info":"16/08/2014 at 15:50:16"},{"visible":true,"include":true,"step":"60.0","x":-70.51523809523809,"y":14.215238095238094,"z":82.50571428571428,"a95":0.99,"info":"16/08/2014 at 15:50:16"},{"visible":false,"include":false,"step":"70.0","x":-42.19619047619047,"y":15.253333333333334,"z":78.99142857142857,"a95":0.99,"info":"16/08/2014 at 15:50:16"},{"visible":false,"include":false,"step":"80.0","x":-76.92952380952381,"y":1.7742857142857142,"z":77.93333333333332,"a95":0.99,"info":"16/08/2014 at 15:50:16"},{"visible":false,"include":false,"step":"90.0","x":-74.86857142857143,"y":21.17809523809524,"z":89.47999999999999,"a95":0.99,"info":"16/08/2014 at 15:50:16"},{"visible":false,"include":false,"step":"100.0","x":-55.99238095238095,"y":23.561904761904763,"z":51.67809523809524,"a95":0.99,"info":"16/08/2014 at 15:50:16"}]},{"version":"v1.1.0","exported":"2016-11-18T10:44:32.364Z","volume":10.5,"added":"2016-11-18T10:20:34.741Z","format":"Utrecht","demagType":"Unknown","strat":"6","patch":1.1,"GEO":[{"dec":138.15417210066528,"inc":61.61257070322941,"MAD":12.616109374314481,"cm":[-5.329070518200751e-15,-7.327471962526033e-15,0],"intensity":173.57415007860533,"type":"dir","forced":true,"remark":"","origin":false,"nSteps":5,"minStep":"30.0","maxStep":"60.0","steps":["30.0","40.0","45.0","50.0","60.0"],"group":"None","version":"v1.1.0"}],"TECT":[{"dec":159.53429732007305,"inc":-21.07873215400792,"MAD":12.61610937431445,"cm":[-1.0658141036401503e-14,-2.942091015256665e-14,-5.329070518200751e-15],"intensity":173.5741500786053,"type":"dir","forced":true,"remark":"","origin":false,"nSteps":5,"minStep":"30.0","maxStep":"60.0","steps":["30.0","40.0","45.0","50.0","60.0"],"group":"None","version":"v1.1.0"}],"interpreted":true,"name":"HP1.7A","coreAzi":94,"coreDip":32,"bedStrike":89,"bedDip":90,"data":[{"visible":false,"include":false,"step":"0.0","x":-400.65714285714284,"y":68.98190476190476,"z":376.25714285714287,"a95":0.99,"info":"16/08/2014 at 15:50:16"},{"visible":false,"include":false,"step":"4.0","x":-316.9238095238095,"y":47.44571428571429,"z":309.0761904761905,"a95":0.99,"info":"16/08/2014 at 15:50:16"},{"visible":true,"include":false,"step":"8.0","x":-223.59047619047618,"y":64.30761904761906,"z":248.55238095238096,"a95":0.99,"info":"16/08/2014 at 15:50:16"},{"visible":true,"include":false,"step":"12.0","x":-171.93333333333334,"y":71.28095238095239,"z":206.31428571428575,"a95":0.99,"info":"16/08/2014 at 15:50:16"},{"visible":true,"include":false,"step":"16.0","x":-139.01904761904763,"y":56.65904761904761,"z":166.1809523809524,"a95":0.99,"info":"16/08/2014 at 15:50:16"},{"visible":true,"include":false,"step":"20.0","x":-96.20952380952382,"y":34.96,"z":153.93333333333334,"a95":0.99,"info":"16/08/2014 at 15:50:16"},{"visible":true,"include":false,"step":"25.0","x":-75.59619047619047,"y":34.62857142857143,"z":129.78095238095239,"a95":0.99,"info":"16/08/2014 at 15:50:16"},{"visible":true,"include":true,"step":"30.0","x":-54.320952380952384,"y":20.993333333333332,"z":100.41904761904763,"a95":0.99,"info":"16/08/2014 at 15:50:16"},{"visible":true,"include":false,"step":"35.0","x":-81.28666666666666,"y":51.05619047619048,"z":64.81142857142856,"a95":0.99,"info":"16/08/2014 at 15:50:16"},{"visible":true,"include":true,"step":"40.0","x":-50.3752380952381,"y":44.81238095238095,"z":66.53238095238096,"a95":0.99,"info":"16/08/2014 at 15:50:16"},{"visible":true,"include":true,"step":"45.0","x":-53.142857142857146,"y":22.58857142857143,"z":81.17333333333333,"a95":0.99,"info":"16/08/2014 at 15:50:16"},{"visible":true,"include":true,"step":"50.0","x":-59.05238095238095,"y":36.36952380952381,"z":36.56476190476191,"a95":0.99,"info":"16/08/2014 at 15:50:16"},{"visible":true,"include":true,"step":"60.0","x":-39.32857142857143,"y":31.604761904761908,"z":35.93047619047619,"a95":0.99,"info":"16/08/2014 at 15:50:16"},{"visible":false,"include":false,"step":"70.0","x":-37.3352380952381,"y":26.388571428571428,"z":41.31047619047619,"a95":0.99,"info":"16/08/2014 at 15:50:16"},{"visible":false,"include":false,"step":"80.0","x":-9.374190476190476,"y":-19.240952380952383,"z":20.64952380952381,"a95":0.99,"info":"16/08/2014 at 15:50:16"},{"visible":false,"include":false,"step":"90.0","x":-5.967619047619047,"y":37.14,"z":38.74095238095238,"a95":0.99,"info":"16/08/2014 at 15:50:16"},{"visible":false,"include":false,"step":"100.0","x":-4.981809523809524,"y":20.398095238095237,"z":37.739999999999995,"a95":0.99,"info":"16/08/2014 at 15:50:16"}]},{"version":"v1.1.0","exported":"2016-11-18T10:44:32.364Z","volume":10.5,"added":"2016-11-18T10:20:34.742Z","format":"Utrecht","demagType":"Unknown","strat":"7","patch":1.1,"GEO":[],"TECT":[],"interpreted":false,"name":"HP1.8A","coreAzi":103,"coreDip":37,"bedStrike":89,"bedDip":90,"data":[{"visible":true,"include":false,"step":"0.0","x":-352.04761904761904,"y":49.73809523809524,"z":-307.2666666666667,"a95":0.99,"info":"16/08/2014 at 15:50:16"},{"visible":true,"include":true,"step":"4.0","x":-306.7904761904762,"y":10.964761904761904,"z":-295.3333333333333,"a95":0.99,"info":"16/08/2014 at 15:50:16"},{"visible":true,"include":true,"step":"8.0","x":-213.0952380952381,"y":-30.015238095238097,"z":-253.85714285714286,"a95":0.99,"info":"16/08/2014 at 15:50:16"},{"visible":true,"include":true,"step":"12.0","x":-164.62857142857143,"y":-48.79904761904762,"z":-202.15238095238095,"a95":0.99,"info":"16/08/2014 at 15:50:16"},{"visible":true,"include":true,"step":"16.0","x":-130.96190476190475,"y":-44.618095238095236,"z":-162.86666666666665,"a95":0.99,"info":"16/08/2014 at 15:50:16"},{"visible":true,"include":true,"step":"20.0","x":-90.95142857142858,"y":-69.35047619047619,"z":-123.9904761904762,"a95":0.99,"info":"16/08/2014 at 15:50:16"},{"visible":true,"include":true,"step":"25.0","x":-72.31428571428572,"y":-50.37809523809524,"z":-87.12952380952382,"a95":0.99,"info":"16/08/2014 at 15:50:16"},{"visible":true,"include":true,"step":"30.0","x":-58.10476190476191,"y":-45.47238095238095,"z":-91.69142857142857,"a95":0.99,"info":"16/08/2014 at 15:50:16"},{"visible":true,"include":true,"step":"35.0","x":-67.74571428571429,"y":-35.26571428571429,"z":-69.65142857142857,"a95":0.99,"info":"16/08/2014 at 15:50:16"},{"visible":true,"include":true,"step":"40.0","x":-60.1552380952381,"y":-18.687619047619048,"z":-55.8447619047619,"a95":0.99,"info":"16/08/2014 at 15:50:16"},{"visible":false,"include":false,"step":"45.0","x":-52.69904761904762,"y":-37.91428571428572,"z":-55.89523809523809,"a95":0.99,"info":"16/08/2014 at 15:50:16"},{"visible":true,"include":true,"step":"50.0","x":-62.33428571428571,"y":-23.26952380952381,"z":-47.20285714285714,"a95":0.99,"info":"16/08/2014 at 15:50:16"},{"visible":true,"include":false,"step":"60.0","x":-52.51047619047619,"y":-8.931047619047618,"z":-38.91619047619048,"a95":0.99,"info":"16/08/2014 at 15:50:16"},{"visible":false,"include":false,"step":"70.0","x":-40.53047619047619,"y":22.933333333333334,"z":-18.959047619047617,"a95":0.99,"info":"16/08/2014 at 15:50:16"},{"visible":false,"include":false,"step":"80.0","x":-7.991142857142857,"y":-20.380000000000003,"z":-49.81047619047619,"a95":0.99,"info":"16/08/2014 at 15:50:16"},{"visible":false,"include":false,"step":"90.0","x":-25.76380952380952,"y":3.461142857142857,"z":-56.719047619047615,"a95":0.99,"info":"16/08/2014 at 15:50:16"},{"visible":false,"include":false,"step":"100.0","x":-21.41142857142857,"y":-21.00857142857143,"z":-23.423809523809524,"a95":0.99,"info":"16/08/2014 at 15:50:16"}]},{"version":"v1.1.0","exported":"2016-11-18T10:44:32.364Z","volume":10.5,"added":"2016-11-18T10:20:34.743Z","format":"Utrecht","demagType":"Unknown","strat":"8","patch":1.1,"GEO":[{"dec":147.42732761253728,"inc":54.533902720901885,"MAD":30.686270459971414,"cm":[-35.041047751985396,-6.339709447610069,82.28898163647536],"intensity":109.94169711132726,"type":"dir","forced":false,"remark":"","origin":false,"nSteps":8,"minStep":"16.0","maxStep":"50.0","steps":["16.0","20.0","25.0","30.0","35.0","40.0","45.0","50.0"],"group":"None","version":"v1.1.0"}],"TECT":[{"dec":158.54456173921403,"inc":-29.625903532236684,"MAD":30.686270459971386,"cm":[-82.39774799023388,-5.513095170165296,-34.92506764471366],"intensity":109.94169711132724,"type":"dir","forced":false,"remark":"","origin":false,"nSteps":8,"minStep":"16.0","maxStep":"50.0","steps":["16.0","20.0","25.0","30.0","35.0","40.0","45.0","50.0"],"group":"None","version":"v1.1.0"}],"interpreted":true,"name":"HP1.9A","coreAzi":133,"coreDip":46,"bedStrike":89,"bedDip":90,"data":[{"visible":true,"include":false,"step":"0.0","x":-237.31428571428575,"y":-21.98190476190476,"z":257.7238095238095,"a95":0.99,"info":"16/08/2014 at 15:50:16"},{"visible":true,"include":false,"step":"4.0","x":-192.75238095238097,"y":-10.131428571428572,"z":247.69523809523812,"a95":0.99,"info":"16/08/2014 at 15:50:16"},{"visible":true,"include":false,"step":"8.0","x":-123.96190476190475,"y":17.61809523809524,"z":217.0095238095238,"a95":0.99,"info":"16/08/2014 at 15:50:16"},{"visible":true,"include":false,"step":"12.0","x":-85.98190476190476,"y":32.639047619047616,"z":161.0952380952381,"a95":0.99,"info":"16/08/2014 at 15:50:16"},{"visible":true,"include":true,"step":"16.0","x":-50.31428571428571,"y":37.67619047619048,"z":136.8095238095238,"a95":0.99,"info":"16/08/2014 at 15:50:16"},{"visible":true,"include":true,"step":"20.0","x":-51.421904761904756,"y":27.645714285714284,"z":106.46666666666667,"a95":0.99,"info":"16/08/2014 at 15:50:16"},{"visible":true,"include":true,"step":"25.0","x":-36.58190476190477,"y":34.695238095238096,"z":79.67999999999999,"a95":0.99,"info":"16/08/2014 at 15:50:16"},{"visible":true,"include":true,"step":"30.0","x":-43.84285714285714,"y":37.074285714285715,"z":64.43047619047618,"a95":0.99,"info":"16/08/2014 at 15:50:16"},{"visible":true,"include":true,"step":"35.0","x":-74.2647619047619,"y":48.195238095238096,"z":45.47904761904762,"a95":0.99,"info":"16/08/2014 at 15:50:16"},{"visible":true,"include":true,"step":"40.0","x":-49.787619047619046,"y":18.606666666666666,"z":52.55238095238095,"a95":0.99,"info":"16/08/2014 at 15:50:16"},{"visible":true,"include":true,"step":"45.0","x":-20.074285714285715,"y":25.125714285714285,"z":60.56285714285714,"a95":0.99,"info":"16/08/2014 at 15:50:16"},{"visible":true,"include":true,"step":"50.0","x":-20.17047619047619,"y":10.58952380952381,"z":34.60952380952381,"a95":0.99,"info":"16/08/2014 at 15:50:16"},{"visible":false,"include":false,"step":"60.0","x":-21.236190476190476,"y":49.45809523809523,"z":36.46666666666666,"a95":0.99,"info":"16/08/2014 at 15:50:16"},{"visible":false,"include":false,"step":"70.0","x":-3.8532380952380954,"y":32.94,"z":6.220095238095238,"a95":0.99,"info":"16/08/2014 at 15:50:16"},{"visible":false,"include":false,"step":"80.0","x":-41.63619047619048,"y":29.61904761904762,"z":13.480952380952383,"a95":0.99,"info":"16/08/2014 at 15:50:16"},{"visible":false,"include":false,"step":"90.0","x":-20.02952380952381,"y":19.719047619047622,"z":22.467619047619046,"a95":0.99,"info":"16/08/2014 at 15:50:16"},{"visible":false,"include":false,"step":"100.0","x":-12.668571428571429,"y":23.14952380952381,"z":31.21047619047619,"a95":0.99,"info":"16/08/2014 at 15:50:16"}]},{"version":"v1.1.0","exported":"2016-11-18T10:44:32.364Z","volume":10.5,"added":"2016-11-18T10:20:34.743Z","format":"Utrecht","demagType":"Unknown","strat":"1","patch":1.1,"GEO":[{"dec":172.7364683227404,"inc":59.2006070017545,"MAD":6.323472113682644,"cm":[0,4.6074255521944e-15,0],"intensity":167.35574899866003,"type":"dir","forced":true,"remark":"","origin":false,"nSteps":8,"minStep":"25.0","maxStep":"70.0","steps":["25.0","30.0","35.0","40.0","45.0","50.0","60.0","70.0"],"group":"None","version":"v1.1.0"}],"TECT":[{"dec":175.27894840584827,"inc":-30.595727538722624,"MAD":6.323472113682631,"cm":[-1.3322676295501878e-15,6.217248937900877e-15,-1.3322676295501878e-15],"intensity":167.35574899866003,"type":"dir","forced":true,"remark":"","origin":false,"nSteps":8,"minStep":"25.0","maxStep":"70.0","steps":["25.0","30.0","35.0","40.0","45.0","50.0","60.0","70.0"],"group":"None","version":"v1.1.0"}],"interpreted":true,"name":"HP1.10A","coreAzi":101,"coreDip":27,"bedStrike":89,"bedDip":90,"data":[{"visible":true,"include":false,"step":"0.0","x":-301.34285714285716,"y":26.700000000000003,"z":144.15238095238095,"a95":0.99,"info":"16/08/2014 at 21:17:10"},{"visible":true,"include":false,"step":"4.0","x":-268.64761904761906,"y":40.93333333333334,"z":138.0952380952381,"a95":0.99,"info":"16/08/2014 at 21:17:10"},{"visible":true,"include":false,"step":"8.0","x":-203.50476190476192,"y":64.10857142857142,"z":125.24761904761904,"a95":0.99,"info":"16/08/2014 at 21:17:10"},{"visible":true,"include":false,"step":"12.0","x":-155.5047619047619,"y":67.88666666666666,"z":110.60952380952382,"a95":0.99,"info":"16/08/2014 at 21:17:10"},{"visible":true,"include":false,"step":"16.0","x":-125.31428571428572,"y":66.0352380952381,"z":98.53333333333333,"a95":0.99,"info":"16/08/2014 at 21:17:10"},{"visible":true,"include":false,"step":"20.0","x":-110.23809523809524,"y":61.3352380952381,"z":86.56095238095239,"a95":0.99,"info":"16/08/2014 at 21:17:10"},{"visible":true,"include":true,"step":"25.0","x":-87.19809523809525,"y":58.6447619047619,"z":74.28190476190477,"a95":0.99,"info":"16/08/2014 at 21:17:10"},{"visible":true,"include":true,"step":"30.0","x":-68.85809523809523,"y":56.539047619047615,"z":58.090476190476195,"a95":0.99,"info":"16/08/2014 at 21:17:10"},{"visible":true,"include":true,"step":"35.0","x":-71.96666666666667,"y":46.992380952380955,"z":57.32190476190476,"a95":0.99,"info":"16/08/2014 at 21:17:10"},{"visible":true,"include":true,"step":"40.0","x":-62.12,"y":42.674285714285716,"z":31.08857142857143,"a95":0.99,"info":"16/08/2014 at 21:17:10"},{"visible":true,"include":true,"step":"45.0","x":-41.913333333333334,"y":41.126666666666665,"z":40.111428571428576,"a95":0.99,"info":"16/08/2014 at 21:17:10"},{"visible":true,"include":true,"step":"50.0","x":-44.523809523809526,"y":23.406666666666666,"z":30.70285714285714,"a95":0.99,"info":"16/08/2014 at 21:17:10"},{"visible":true,"include":true,"step":"60.0","x":-52.51047619047619,"y":23.26952380952381,"z":33.494285714285716,"a95":0.99,"info":"16/08/2014 at 21:17:10"},{"visible":true,"include":true,"step":"70.0","x":-25.066666666666666,"y":28.75238095238095,"z":13.844761904761905,"a95":0.99,"info":"16/08/2014 at 21:17:10"},{"visible":false,"include":false,"step":"80.0","x":2.1124761904761904,"y":13.901904761904762,"z":26.32,"a95":0.99,"info":"16/08/2014 at 21:17:10"},{"visible":false,"include":false,"step":"90.0","x":-61.01523809523809,"y":7.386,"z":23.64857142857143,"a95":0.99,"info":"16/08/2014 at 21:17:10"},{"visible":false,"include":false,"step":"100.0","x":-14.19809523809524,"y":20.298095238095236,"z":16.826666666666668,"a95":0.99,"info":"16/08/2014 at 21:17:10"}]},{"version":"v1.1.0","exported":"2016-11-18T10:44:32.364Z","volume":10.5,"added":"2016-11-18T10:20:34.743Z","format":"Utrecht","demagType":"Unknown","strat":"1","patch":1.1,"GEO":[{"dec":142.85104875040076,"inc":51.74661526449001,"MAD":4.0107323548553,"cm":[-1.3100631690576847e-14,-1.554312234475219e-14,0],"intensity":226.2509967635677,"type":"dir","forced":true,"remark":"","origin":false,"nSteps":7,"minStep":"10.0","maxStep":"40.0","steps":["10.0","15.0","20.0","25.0","30.0","35.0","40.0"],"group":"None","version":"v1.1.0"}],"TECT":[{"dec":154.05754494060648,"inc":-29.99651231884826,"MAD":4.010732354855432,"cm":[-3.552713678800501e-15,-2.3314683517128287e-14,-8.881784197001252e-15],"intensity":226.2509967635677,"type":"dir","forced":true,"remark":"","origin":false,"nSteps":7,"minStep":"10.0","maxStep":"40.0","steps":["10.0","15.0","20.0","25.0","30.0","35.0","40.0"],"group":"None","version":"v1.1.0"}],"interpreted":true,"name":"HP1.10B","coreAzi":101,"coreDip":27,"bedStrike":89,"bedDip":90,"data":[{"visible":true,"include":false,"step":"0.0","x":-124.78095238095239,"y":89.52000000000001,"z":152.48571428571427,"a95":0.99,"info":"05/11/2014 at 18:18:16"},{"visible":true,"include":true,"step":"10.0","x":-74.99142857142857,"y":62.19047619047619,"z":127.4095238095238,"a95":0.99,"info":"05/11/2014 at 18:18:16"},{"visible":true,"include":true,"step":"15.0","x":-69.19619047619047,"y":62.40380952380953,"z":115.77142857142856,"a95":0.99,"info":"05/11/2014 at 18:18:16"},{"visible":true,"include":true,"step":"20.0","x":-56.93047619047619,"y":59.73238095238096,"z":91.3742857142857,"a95":0.99,"info":"05/11/2014 at 18:18:16"},{"visible":true,"include":true,"step":"25.0","x":-51.203809523809525,"y":47.49714285714286,"z":78.88380952380952,"a95":0.99,"info":"05/11/2014 at 18:18:16"},{"visible":true,"include":true,"step":"30.0","x":-53.52571428571429,"y":39.70285714285714,"z":81.94666666666667,"a95":0.99,"info":"05/11/2014 at 18:18:16"},{"visible":true,"include":true,"step":"35.0","x":-49.94095238095238,"y":35.08190476190477,"z":64.09238095238095,"a95":0.99,"info":"05/11/2014 at 18:18:16"},{"visible":true,"include":true,"step":"40.0","x":-43.95428571428571,"y":19.2,"z":46.99523809523809,"a95":0.99,"info":"05/11/2014 at 18:18:16"},{"visible":false,"include":false,"step":"45.0","x":-25.022857142857145,"y":17.653333333333336,"z":50.82666666666666,"a95":0.99,"info":"05/11/2014 at 18:18:16"},{"visible":false,"include":false,"step":"50.0","x":-42.285714285714285,"y":22.494285714285713,"z":36.51428571428571,"a95":0.99,"info":"05/11/2014 at 18:18:16"},{"visible":false,"include":false,"step":"60.0","x":-27.362857142857145,"y":22.956190476190475,"z":17.48190476190476,"a95":0.99,"info":"05/11/2014 at 18:18:16"},{"visible":false,"include":false,"step":"70.0","x":-29.85238095238095,"y":23.10952380952381,"z":24.831428571428575,"a95":0.99,"info":"05/11/2014 at 18:18:16"},{"visible":false,"include":false,"step":"80.0","x":-38.00190476190476,"y":1.1376190476190478,"z":13.563809523809523,"a95":0.99,"info":"05/11/2014 at 18:18:16"},{"visible":false,"include":false,"step":"90.0","x":6.213333333333333,"y":9.203619047619048,"z":13.87047619047619,"a95":0.99,"info":"05/11/2014 at 18:18:16"}]},{"version":"v1.1.0","exported":"2016-11-18T10:44:32.364Z","volume":10.5,"added":"2016-11-18T10:20:34.744Z","format":"Utrecht","demagType":"Unknown","strat":null,"patch":1.1,"GEO":[{"dec":151.9518789735571,"inc":22.87202642350709,"MAD":7.069324383928736,"cm":[4.440892098500626e-16,7.771561172376096e-16,0],"intensity":128.68164482273963,"type":"dir","forced":true,"remark":"","origin":false,"nSteps":8,"minStep":"180","maxStep":"370","steps":["180","210","240","270","300","320","340","370"],"group":"None","version":"v1.1.0"}],"TECT":[{"dec":131.85074282881067,"inc":-55.14487922043815,"MAD":7.069324383928773,"cm":[1.1102230246251565e-15,-2.220446049250313e-16,-1.3322676295501878e-15],"intensity":128.68164482273963,"type":"dir","forced":true,"remark":"","origin":false,"nSteps":8,"minStep":"180","maxStep":"370","steps":["180","210","240","270","300","320","340","370"],"group":"None","version":"v1.1.0"}],"interpreted":true,"name":"HP1.11A","coreAzi":95,"coreDip":22,"bedStrike":89,"bedDip":90,"data":[{"visible":false,"include":false,"step":"20","x":-145.04761904761904,"y":78,"z":44,"a95":2.1,"info":"\"14-08-11\" at \"17:21\""},{"visible":true,"include":false,"step":"100","x":-39.142857142857146,"y":119.23809523809524,"z":64.19047619047619,"a95":2.2,"info":"\"14-08-11\" at \"20:55\""},{"visible":true,"include":false,"step":"150","x":-26.666666666666668,"y":104.85714285714286,"z":57.904761904761905,"a95":2.1,"info":"\"14-08-11\" at \"23:26\""},{"visible":true,"include":true,"step":"180","x":-18.752380952380953,"y":74.19047619047619,"z":51.46666666666666,"a95":2.9,"info":"\"14-08-12\" at \"15:51\""},{"visible":true,"include":true,"step":"210","x":-12.761904761904763,"y":70.06666666666668,"z":48.77142857142857,"a95":2.7,"info":"\"14-08-12\" at \"18:31\""},{"visible":true,"include":true,"step":"240","x":-8.380952380952381,"y":52.37142857142857,"z":44.53333333333334,"a95":3,"info":"\"14-08-12\" at \"21:36\""},{"visible":true,"include":true,"step":"270","x":-6.990476190476191,"y":44.095238095238095,"z":32.75238095238095,"a95":3.1,"info":"\"14-08-13\" at \"15:40\""},{"visible":true,"include":true,"step":"300","x":-19.076190476190476,"y":33.19047619047619,"z":39.10476190476191,"a95":6,"info":"\"14-08-13\" at \"18:17\""},{"visible":true,"include":true,"step":"320","x":-7.3047619047619055,"y":35.647619047619045,"z":26.533333333333335,"a95":7,"info":"\"14-08-13\" at \"21:20\""},{"visible":true,"include":true,"step":"340","x":0.29523809523809524,"y":27.895238095238092,"z":35.36190476190476,"a95":6.5,"info":"\"14-08-14\" at \"14:20\""},{"visible":true,"include":true,"step":"370","x":-9.504761904761905,"y":27.923809523809524,"z":21.561904761904763,"a95":4.8,"info":"\"14-08-14\" at \"17:24\""},{"visible":false,"include":false,"step":"400","x":-32.647619047619045,"y":6.933333333333333,"z":12.209523809523809,"a95":17.6,"info":"\"14-08-14\" at \"20:36\""},{"visible":false,"include":false,"step":"430","x":-36.87619047619047,"y":30.495238095238093,"z":39.076190476190476,"a95":10.4,"info":"\"14-08-14\" at \"23:57\""},{"visible":false,"include":false,"step":"460","x":-53.11428571428572,"y":-0.9619047619047618,"z":17.35238095238095,"a95":8,"info":"\"14-08-15\" at \"16:32\""},{"visible":false,"include":false,"step":"490","x":-110.47619047619048,"y":-326.57142857142856,"z":24.761904761904763,"a95":4.4,"info":"\"14-08-15\" at \"19:37\""}]},{"version":"v1.1.0","exported":"2016-11-18T10:44:32.364Z","volume":10.5,"added":"2016-11-18T10:20:34.745Z","format":"Utrecht","demagType":"Unknown","strat":"2","patch":1.1,"GEO":[{"dec":107.25156435574405,"inc":60.818609634102216,"MAD":3.864528504610358,"cm":[-1.9984014443252818e-15,3.3306690738754696e-16,0],"intensity":107.95711045308079,"type":"dir","forced":true,"remark":"","origin":false,"nSteps":7,"minStep":"16.0","maxStep":"45.0","steps":["16.0","20.0","25.0","30.0","35.0","40.0","45.0"],"group":"None","version":"v1.1.0"}],"TECT":[{"dec":151.0603368196123,"inc":-8.783650289611904,"MAD":3.864528504610387,"cm":[1.7763568394002505e-15,7.438494264988549e-15,-2.4424906541753444e-15],"intensity":107.95711045308079,"type":"dir","forced":true,"remark":"","origin":false,"nSteps":7,"minStep":"16.0","maxStep":"45.0","steps":["16.0","20.0","25.0","30.0","35.0","40.0","45.0"],"group":"None","version":"v1.1.0"}],"interpreted":true,"name":"HP1.11B","coreAzi":95,"coreDip":22,"bedStrike":89,"bedDip":90,"data":[{"visible":true,"include":false,"step":"0.0","x":-121.63809523809525,"y":11.263809523809524,"z":112.87619047619049,"a95":0.99,"info":"16/08/2014 at 21:17:10"},{"visible":true,"include":false,"step":"4.0","x":-107.92380952380952,"y":5.815047619047619,"z":99.46666666666667,"a95":0.99,"info":"16/08/2014 at 21:17:10"},{"visible":true,"include":false,"step":"8.0","x":-85.47619047619048,"y":17.932380952380953,"z":79.4,"a95":0.99,"info":"16/08/2014 at 21:17:10"},{"visible":true,"include":false,"step":"12.0","x":-69.87714285714286,"y":15.016190476190475,"z":67.1647619047619,"a95":0.99,"info":"16/08/2014 at 21:17:10"},{"visible":true,"include":true,"step":"16.0","x":-52.580000000000005,"y":13.399999999999999,"z":63.65714285714286,"a95":0.99,"info":"16/08/2014 at 21:17:10"},{"visible":true,"include":true,"step":"20.0","x":-52.08761904761904,"y":11.038095238095238,"z":63.772380952380956,"a95":0.99,"info":"16/08/2014 at 21:17:10"},{"visible":true,"include":true,"step":"25.0","x":-37.415238095238095,"y":4.310666666666667,"z":46.938095238095244,"a95":0.99,"info":"16/08/2014 at 21:17:10"},{"visible":true,"include":true,"step":"30.0","x":-33.304761904761904,"y":4.4283809523809525,"z":38.78095238095238,"a95":0.99,"info":"16/08/2014 at 21:17:10"},{"visible":true,"include":true,"step":"35.0","x":-29.992380952380955,"y":-1.474952380952381,"z":39.611428571428576,"a95":0.99,"info":"16/08/2014 at 21:17:10"},{"visible":true,"include":true,"step":"40.0","x":-22.183809523809526,"y":-0.49655238095238097,"z":21.484761904761903,"a95":0.99,"info":"16/08/2014 at 21:17:10"},{"visible":true,"include":true,"step":"45.0","x":-14.633333333333335,"y":2.270857142857143,"z":19.35809523809524,"a95":0.99,"info":"16/08/2014 at 21:17:10"},{"visible":true,"include":false,"step":"50.0","x":-15.447619047619046,"y":2.154095238095238,"z":23.421904761904763,"a95":0.99,"info":"16/08/2014 at 21:17:10"},{"visible":true,"include":false,"step":"60.0","x":-16.592380952380953,"y":2.9240000000000004,"z":18.833333333333332,"a95":0.99,"info":"16/08/2014 at 21:17:10"},{"visible":true,"include":false,"step":"70.0","x":-16.674285714285716,"y":6.750190476190475,"z":15.076190476190478,"a95":0.99,"info":"16/08/2014 at 21:17:10"},{"visible":true,"include":false,"step":"80.0","x":-7.984952380952381,"y":-1.5796190476190475,"z":16.107619047619046,"a95":0.99,"info":"16/08/2014 at 21:17:10"},{"visible":true,"include":false,"step":"90.0","x":-1.7390476190476192,"y":2.5096190476190476,"z":5.391523809523809,"a95":0.99,"info":"16/08/2014 at 21:17:10"},{"visible":false,"include":false,"step":"100.0","x":-6.125238095238095,"y":7.429333333333333,"z":4.015809523809524,"a95":0.99,"info":"16/08/2014 at 21:17:10"}]},{"version":"v1.1.0","exported":"2016-11-18T10:44:32.364Z","volume":10.5,"added":"2016-11-18T10:20:34.745Z","format":"Utrecht","demagType":"Unknown","strat":"3","patch":1.1,"GEO":[{"dec":143.21132872891553,"inc":72.79075684452148,"MAD":2.7492624676199924,"cm":[-2.886579864025407e-15,-2.7755575615628914e-15,0],"intensity":251.74864532801323,"type":"dir","forced":true,"remark":"","origin":false,"nSteps":7,"minStep":"25.0","maxStep":"60.0","steps":["25.0","30.0","35.0","40.0","45.0","50.0","60.0"],"group":"None","version":"v1.1.0"}],"TECT":[{"dec":168.7334156353113,"inc":-13.88638124693252,"MAD":2.749262467620007,"cm":[0,-2.842170943040401e-14,-3.1086244689504383e-15],"intensity":251.74864532801325,"type":"dir","forced":true,"remark":"","origin":false,"nSteps":7,"minStep":"25.0","maxStep":"60.0","steps":["25.0","30.0","35.0","40.0","45.0","50.0","60.0"],"group":"None","version":"v1.1.0"}],"interpreted":true,"name":"HP1.12A","coreAzi":86,"coreDip":28,"bedStrike":89,"bedDip":90,"data":[{"visible":true,"include":false,"step":"0.0","x":-357.2857142857143,"y":2.7327619047619045,"z":245.44761904761904,"a95":0.99,"info":"16/08/2014 at 21:17:10"},{"visible":true,"include":false,"step":"4.0","x":-317.6,"y":10.233333333333334,"z":219.62857142857143,"a95":0.99,"info":"16/08/2014 at 21:17:10"},{"visible":true,"include":false,"step":"8.0","x":-258.93333333333334,"y":29.120952380952378,"z":187.14285714285714,"a95":0.99,"info":"16/08/2014 at 21:17:10"},{"visible":true,"include":false,"step":"12.0","x":-213.2952380952381,"y":25.880000000000003,"z":148.34285714285713,"a95":0.99,"info":"16/08/2014 at 21:17:10"},{"visible":true,"include":false,"step":"16.0","x":-174.3904761904762,"y":45.81619047619048,"z":129.15238095238095,"a95":0.99,"info":"16/08/2014 at 21:17:10"},{"visible":true,"include":false,"step":"20.0","x":-151.8761904761905,"y":47.85619047619048,"z":110.86666666666666,"a95":0.99,"info":"16/08/2014 at 21:17:10"},{"visible":true,"include":true,"step":"25.0","x":-134.73333333333335,"y":46.745714285714286,"z":103.28571428571429,"a95":0.99,"info":"16/08/2014 at 21:17:10"},{"visible":true,"include":true,"step":"30.0","x":-98.43809523809523,"y":35.15809523809524,"z":73.2247619047619,"a95":0.99,"info":"16/08/2014 at 21:17:10"},{"visible":true,"include":true,"step":"35.0","x":-99.83809523809524,"y":33.021904761904764,"z":72.87904761904763,"a95":0.99,"info":"16/08/2014 at 21:17:10"},{"visible":true,"include":true,"step":"40.0","x":-83.13904761904762,"y":22.635238095238094,"z":67.91333333333334,"a95":0.99,"info":"16/08/2014 at 21:17:10"},{"visible":true,"include":true,"step":"45.0","x":-64.84761904761905,"y":24.15904761904762,"z":58.97714285714286,"a95":0.99,"info":"16/08/2014 at 21:17:10"},{"visible":true,"include":true,"step":"50.0","x":-73.59333333333333,"y":13.734285714285715,"z":50.81523809523809,"a95":0.99,"info":"16/08/2014 at 21:17:10"},{"visible":true,"include":true,"step":"60.0","x":-57.72571428571429,"y":19.116190476190475,"z":45.03523809523809,"a95":0.99,"info":"16/08/2014 at 21:17:10"},{"visible":true,"include":false,"step":"70.0","x":-31.17238095238095,"y":4.795999999999999,"z":42.43047619047619,"a95":0.99,"info":"16/08/2014 at 21:17:10"},{"visible":true,"include":false,"step":"80.0","x":-28.199047619047615,"y":-1.045904761904762,"z":34.26285714285714,"a95":0.99,"info":"16/08/2014 at 21:17:10"},{"visible":true,"include":false,"step":"90.0","x":-43.52761904761905,"y":4.219904761904762,"z":29.243809523809524,"a95":0.99,"info":"16/08/2014 at 21:17:10"},{"visible":true,"include":false,"step":"100.0","x":-10.80952380952381,"y":-12.89809523809524,"z":30.58857142857143,"a95":0.99,"info":"16/08/2014 at 21:17:10"}]},{"version":"v1.1.0","exported":"2016-11-18T10:44:32.364Z","volume":10.5,"added":"2016-11-18T10:20:34.746Z","format":"Utrecht","demagType":"Unknown","strat":"4","patch":1.1,"GEO":[{"dec":152.52532949560987,"inc":67.65385615368272,"MAD":9.143232940737123,"cm":[-31.130193295188224,5.961077865228449,97.68503062527279],"intensity":193.97724761817764,"type":"dir","forced":false,"remark":"","origin":false,"nSteps":13,"minStep":"16.0","maxStep":"100.0","steps":["16.0","20.0","25.0","30.0","35.0","40.0","45.0","50.0","60.0","70.0","80.0","90.0","100.0"],"group":"None","version":"v1.1.0"}],"TECT":[{"dec":168.61541005551896,"inc":-19.89698382660411,"MAD":9.143232940737128,"cm":[-97.57561524963293,7.120887019626068,-31.229487169675142],"intensity":193.97724761817764,"type":"dir","forced":false,"remark":"","origin":false,"nSteps":13,"minStep":"16.0","maxStep":"100.0","steps":["16.0","20.0","25.0","30.0","35.0","40.0","45.0","50.0","60.0","70.0","80.0","90.0","100.0"],"group":"None","version":"v1.1.0"}],"interpreted":true,"name":"HP1.13A","coreAzi":87,"coreDip":32,"bedStrike":89,"bedDip":90,"data":[{"visible":false,"include":false,"step":"0.0","x":-324.4095238095238,"y":38.20666666666667,"z":202.54285714285712,"a95":0.99,"info":"16/08/2014 at 21:17:10"},{"visible":true,"include":false,"step":"4.0","x":-284.8,"y":33.881904761904764,"z":193.86666666666665,"a95":0.99,"info":"16/08/2014 at 21:17:10"},{"visible":true,"include":false,"step":"8.0","x":-235.8857142857143,"y":49.76952380952381,"z":163.45714285714286,"a95":0.99,"info":"16/08/2014 at 21:17:10"},{"visible":true,"include":false,"step":"12.0","x":-190,"y":43.10476190476191,"z":135.15238095238095,"a95":0.99,"info":"16/08/2014 at 21:17:10"},{"visible":true,"include":true,"step":"16.0","x":-164.2952380952381,"y":68.00952380952381,"z":127.24761904761904,"a95":0.99,"info":"16/08/2014 at 21:17:10"},{"visible":true,"include":true,"step":"20.0","x":-138.98095238095237,"y":56.59904761904762,"z":108.02857142857142,"a95":0.99,"info":"16/08/2014 at 21:17:10"},{"visible":true,"include":true,"step":"25.0","x":-119.82857142857144,"y":50.90571428571428,"z":89.59714285714286,"a95":0.99,"info":"16/08/2014 at 21:17:10"},{"visible":true,"include":true,"step":"30.0","x":-97.92380952380952,"y":52.69047619047619,"z":75.66857142857143,"a95":0.99,"info":"16/08/2014 at 21:17:10"},{"visible":true,"include":true,"step":"35.0","x":-92.14190476190477,"y":38.51714285714286,"z":67.9752380952381,"a95":0.99,"info":"16/08/2014 at 21:17:10"},{"visible":true,"include":true,"step":"40.0","x":-84.36761904761904,"y":30.88952380952381,"z":57.028571428571425,"a95":0.99,"info":"16/08/2014 at 21:17:10"},{"visible":true,"include":true,"step":"45.0","x":-73.1752380952381,"y":31.55047619047619,"z":40.55238095238095,"a95":0.99,"info":"16/08/2014 at 21:17:10"},{"visible":true,"include":true,"step":"50.0","x":-63.21999999999999,"y":20.86095238095238,"z":52.94571428571428,"a95":0.99,"info":"16/08/2014 at 21:17:10"},{"visible":true,"include":true,"step":"60.0","x":-56.55904761904762,"y":21.240000000000002,"z":30.88380952380952,"a95":0.99,"info":"16/08/2014 at 21:17:10"},{"visible":true,"include":true,"step":"70.0","x":-39.88285714285714,"y":23.871428571428574,"z":28.219047619047622,"a95":0.99,"info":"16/08/2014 at 21:17:10"},{"visible":true,"include":true,"step":"80.0","x":-57.357142857142854,"y":-1.1972380952380952,"z":16.36,"a95":0.99,"info":"16/08/2014 at 21:17:10"},{"visible":true,"include":true,"step":"90.0","x":-33.10666666666667,"y":17.15714285714286,"z":15.310476190476189,"a95":0.99,"info":"16/08/2014 at 21:17:10"},{"visible":true,"include":true,"step":"100.0","x":-26.316190476190474,"y":-2.9005714285714284,"z":10.797142857142857,"a95":0.99,"info":"16/08/2014 at 21:17:10"}]},{"version":"v1.1.0","exported":"2016-11-18T10:44:32.364Z","volume":10.5,"added":"2016-11-18T10:20:34.746Z","format":"Utrecht","demagType":"Unknown","strat":"2","patch":1.1,"GEO":[{"dec":111.89324137183519,"inc":84.3183707540607,"MAD":4.027314068997277,"cm":[-1.1102230246251565e-15,-8.881784197001252e-16,0],"intensity":132.9079277474881,"type":"dir","forced":true,"remark":"","origin":false,"nSteps":4,"minStep":"20.0","maxStep":"35.0","steps":["20.0","25.0","30.0","35.0"],"group":"None","version":"v1.1.0"}],"TECT":[{"dec":173.76331179744682,"inc":-2.2071659127859475,"MAD":4.027314068997265,"cm":[0,2.1316282072803006e-14,-1.2490009027033011e-15],"intensity":132.9079277474881,"type":"dir","forced":true,"remark":"","origin":false,"nSteps":4,"minStep":"20.0","maxStep":"35.0","steps":["20.0","25.0","30.0","35.0"],"group":"None","version":"v1.1.0"}],"interpreted":true,"name":"HP1.13B","coreAzi":87,"coreDip":32,"bedStrike":89,"bedDip":90,"data":[{"visible":true,"include":false,"step":"0.0","x":-116.80000000000001,"y":-0.49828571428571433,"z":85.10190476190476,"a95":0.99,"info":"05/11/2014 at 18:18:16"},{"visible":true,"include":false,"step":"10.0","x":-92.60285714285715,"y":4.971619047619048,"z":61.70857142857143,"a95":0.99,"info":"05/11/2014 at 18:18:16"},{"visible":true,"include":false,"step":"15.0","x":-75.08285714285714,"y":7.555619047619048,"z":52.63619047619047,"a95":0.99,"info":"05/11/2014 at 18:18:16"},{"visible":true,"include":true,"step":"20.0","x":-65.94857142857143,"y":6.026095238095238,"z":41.72285714285714,"a95":0.99,"info":"05/11/2014 at 18:18:16"},{"visible":true,"include":true,"step":"25.0","x":-54.43904761904762,"y":1.0285714285714287,"z":43.10285714285714,"a95":0.99,"info":"05/11/2014 at 18:18:16"},{"visible":true,"include":true,"step":"30.0","x":-46.89714285714286,"y":1.7898095238095237,"z":38.48952380952381,"a95":0.99,"info":"05/11/2014 at 18:18:16"},{"visible":true,"include":true,"step":"35.0","x":-40.82285714285714,"y":1.5164761904761905,"z":37.06476190476191,"a95":0.99,"info":"05/11/2014 at 18:18:16"},{"visible":true,"include":false,"step":"40.0","x":-30.228571428571428,"y":2.834,"z":21.112380952380953,"a95":0.99,"info":"05/11/2014 at 18:18:16"},{"visible":false,"include":false,"step":"45.0","x":-30.77904761904762,"y":-4.929238095238095,"z":30.173333333333332,"a95":0.99,"info":"05/11/2014 at 18:18:16"},{"visible":false,"include":false,"step":"50.0","x":-33.91619047619048,"y":1.8798095238095238,"z":17.17904761904762,"a95":0.99,"info":"05/11/2014 at 18:18:16"},{"visible":false,"include":false,"step":"60.0","x":-18.675238095238097,"y":-4.997523809523809,"z":12.404761904761905,"a95":0.99,"info":"05/11/2014 at 18:18:16"},{"visible":false,"include":false,"step":"70.0","x":-21.276190476190475,"y":-7.486380952380952,"z":16.614285714285714,"a95":0.99,"info":"05/11/2014 at 18:18:16"},{"visible":false,"include":false,"step":"80.0","x":-14.707619047619048,"y":4.494095238095238,"z":14.802857142857144,"a95":0.99,"info":"05/11/2014 at 18:18:16"},{"visible":false,"include":false,"step":"90.0","x":-2.5107619047619045,"y":-2.777809523809524,"z":11.70952380952381,"a95":0.99,"info":"05/11/2014 at 18:18:16"}]},{"version":"v1.1.0","exported":"2016-11-18T10:44:32.364Z","volume":10.5,"added":"2016-11-18T10:20:34.746Z","format":"Utrecht","demagType":"Unknown","strat":"5","patch":1.1,"GEO":[{"dec":184.3567991470934,"inc":74.2938144166243,"MAD":11.494223681827844,"cm":[-25.0493875853293,7.555461500279029,105.08910839075469],"intensity":102.89774081951285,"type":"dir","forced":false,"remark":"","origin":false,"nSteps":8,"minStep":"16.0","maxStep":"50.0","steps":["16.0","20.0","25.0","30.0","35.0","40.0","45.0","50.0"],"group":"None","version":"v1.1.0"}],"TECT":[{"dec":180.5038133803765,"inc":-15.635831700869778,"MAD":11.494223681827895,"cm":[-104.94889161373139,8.95011253082719,-25.17743342719473],"intensity":102.89774081951282,"type":"dir","forced":false,"remark":"","origin":false,"nSteps":8,"minStep":"16.0","maxStep":"50.0","steps":["16.0","20.0","25.0","30.0","35.0","40.0","45.0","50.0"],"group":"None","version":"v1.1.0"}],"interpreted":true,"name":"HP1.14A","coreAzi":83,"coreDip":34,"bedStrike":89,"bedDip":90,"data":[{"visible":true,"include":false,"step":"0.0","x":-256.4666666666667,"y":12.423809523809522,"z":163.03809523809525,"a95":0.99,"info":"16/08/2014 at 21:17:10"},{"visible":true,"include":false,"step":"4.0","x":-231.28571428571428,"y":17.854285714285716,"z":146.6095238095238,"a95":0.99,"info":"16/08/2014 at 21:17:10"},{"visible":true,"include":false,"step":"8.0","x":-195.43809523809523,"y":34.93142857142857,"z":125.67619047619047,"a95":0.99,"info":"16/08/2014 at 21:17:10"},{"visible":true,"include":false,"step":"12.0","x":-162.48571428571427,"y":25.713333333333335,"z":94.34380952380953,"a95":0.99,"info":"16/08/2014 at 21:17:10"},{"visible":true,"include":true,"step":"16.0","x":-136.5047619047619,"y":43.31809523809524,"z":96.05714285714286,"a95":0.99,"info":"16/08/2014 at 21:17:10"},{"visible":true,"include":true,"step":"20.0","x":-116.43809523809523,"y":31.380000000000003,"z":73.58285714285714,"a95":0.99,"info":"16/08/2014 at 21:17:10"},{"visible":true,"include":true,"step":"25.0","x":-96.13333333333333,"y":28.165714285714287,"z":74.53809523809524,"a95":0.99,"info":"16/08/2014 at 21:17:10"},{"visible":true,"include":true,"step":"30.0","x":-75.0352380952381,"y":30.063809523809525,"z":57.86,"a95":0.99,"info":"16/08/2014 at 21:17:10"},{"visible":true,"include":true,"step":"35.0","x":-75.13428571428571,"y":22.39047619047619,"z":52.53142857142858,"a95":0.99,"info":"16/08/2014 at 21:17:10"},{"visible":true,"include":true,"step":"40.0","x":-65.21238095238095,"y":26.17238095238095,"z":51.1647619047619,"a95":0.99,"info":"16/08/2014 at 21:17:10"},{"visible":true,"include":true,"step":"45.0","x":-54.75238095238095,"y":15.008571428571429,"z":55.09619047619047,"a95":0.99,"info":"16/08/2014 at 21:17:10"},{"visible":true,"include":true,"step":"50.0","x":-57.88095238095238,"y":9.768571428571429,"z":38.78,"a95":0.99,"info":"16/08/2014 at 21:17:10"},{"visible":true,"include":false,"step":"60.0","x":-39.52761904761905,"y":13.056190476190476,"z":35.25714285714285,"a95":0.99,"info":"16/08/2014 at 21:17:10"},{"visible":false,"include":false,"step":"70.0","x":-39.57809523809524,"y":1.6194285714285717,"z":40.63619047619048,"a95":0.99,"info":"16/08/2014 at 21:17:10"},{"visible":false,"include":false,"step":"80.0","x":-27.43142857142857,"y":-15.254285714285713,"z":43.00380952380952,"a95":0.99,"info":"16/08/2014 at 21:17:10"},{"visible":false,"include":false,"step":"90.0","x":-25.477142857142855,"y":-0.12198095238095237,"z":13.849523809523808,"a95":0.99,"info":"16/08/2014 at 21:17:10"},{"visible":false,"include":false,"step":"100.0","x":-6.1596190476190475,"y":-7.711333333333333,"z":18.738095238095237,"a95":0.99,"info":"16/08/2014 at 21:17:10"}]},{"version":"v1.1.0","exported":"2016-11-18T10:44:32.364Z","volume":10.5,"added":"2016-11-18T10:20:34.747Z","format":"Utrecht","demagType":"Unknown","strat":null,"patch":1.1,"GEO":[{"dec":175.81362146643505,"inc":27.317870110139047,"MAD":5.4079938824004925,"cm":[4.440892098500626e-16,3.497202527569243e-15,0],"intensity":52.629893301566185,"type":"dir","forced":true,"remark":"","origin":false,"nSteps":5,"minStep":"150","maxStep":"270","steps":["150","180","210","240","270"],"group":"None","version":"v1.1.0"}],"TECT":[{"dec":176.28196458298544,"inc":-55.67309510701601,"MAD":5.4079938824005005,"cm":[6.661338147750939e-16,5.009881398621019e-15,0],"intensity":52.62989330156618,"type":"dir","forced":true,"remark":"","origin":false,"nSteps":5,"minStep":"150","maxStep":"270","steps":["150","180","210","240","270"],"group":"None","version":"v1.1.0"}],"interpreted":true,"name":"HP1.15A","coreAzi":121,"coreDip":36,"bedStrike":85,"bedDip":83,"data":[{"visible":false,"include":false,"step":"20","x":-62.857142857142854,"y":35.333333333333336,"z":115.71428571428571,"a95":2.4,"info":"\"14-08-11\" at \"17:28\""},{"visible":true,"include":false,"step":"100","x":-11.40952380952381,"y":59.828571428571436,"z":60.857142857142854,"a95":2.3,"info":"\"14-08-11\" at \"20:57\""},{"visible":true,"include":true,"step":"150","x":-1.4666666666666668,"y":28.228571428571428,"z":28.361904761904764,"a95":3,"info":"\"14-08-11\" at \"23:28\""},{"visible":true,"include":true,"step":"180","x":-5.238095238095238,"y":21.876190476190477,"z":18.552380952380954,"a95":5.2,"info":"\"14-08-12\" at \"15:56\""},{"visible":true,"include":true,"step":"210","x":0.047619047619047616,"y":21.276190476190475,"z":18,"a95":2.9,"info":"\"14-08-12\" at \"18:34\""},{"visible":true,"include":true,"step":"240","x":-0.6761904761904761,"y":10.676190476190476,"z":13.352380952380951,"a95":19.1,"info":"\"14-08-12\" at \"21:39\""},{"visible":true,"include":true,"step":"270","x":-2.9047619047619047,"y":9.485714285714286,"z":8.085714285714285,"a95":8.7,"info":"\"14-08-13\" at \"15:44\""},{"visible":false,"include":false,"step":"300","x":-6.857142857142857,"y":8.180952380952382,"z":4.914285714285715,"a95":22.8,"info":"\"14-08-13\" at \"18:21\""},{"visible":false,"include":false,"step":"320","x":-8.533333333333333,"y":5.6380952380952385,"z":5.219047619047619,"a95":16.1,"info":"\"14-08-13\" at \"21:28\""},{"visible":false,"include":false,"step":"340","x":-10.266666666666666,"y":7.095238095238095,"z":4.0476190476190474,"a95":14.6,"info":"\"14-08-14\" at \"14:23\""},{"visible":false,"include":false,"step":"370","x":-12.77142857142857,"y":13.838095238095239,"z":3.895238095238095,"a95":8.6,"info":"\"14-08-14\" at \"17:29\""},{"visible":false,"include":false,"step":"400","x":-10.628571428571428,"y":-2.5619047619047617,"z":7.990476190476191,"a95":60.7,"info":"\"14-08-14\" at \"20:38\""},{"visible":false,"include":false,"step":"430","x":-29.123809523809523,"y":10.380952380952381,"z":11.40952380952381,"a95":10.3,"info":"\"14-08-15\" at \"13:56\""},{"visible":false,"include":false,"step":"460","x":-53.95238095238095,"y":-49.095238095238095,"z":-8.457142857142857,"a95":6.7,"info":"\"14-08-15\" at \"16:35\""},{"visible":false,"include":false,"step":"490","x":-490.4761904761905,"y":259.3333333333333,"z":232.47619047619048,"a95":3.2,"info":"\"14-08-15\" at \"19:42\""}]},{"version":"v1.1.0","exported":"2016-11-18T10:44:32.364Z","volume":10.5,"added":"2016-11-18T10:20:34.747Z","format":"Utrecht","demagType":"Unknown","strat":"6","patch":1.1,"GEO":[],"TECT":[],"interpreted":false,"name":"HP1.15B","coreAzi":121,"coreDip":36,"bedStrike":85,"bedDip":83,"data":[{"visible":false,"include":false,"step":"0.0","x":-260.15238095238095,"y":-94.66666666666667,"z":142.04761904761904,"a95":0.99,"info":"16/08/2014 at 21:17:10"},{"visible":true,"include":false,"step":"4.0","x":-245.49523809523808,"y":-92.34857142857143,"z":131.66666666666666,"a95":0.99,"info":"16/08/2014 at 21:17:10"},{"visible":true,"include":false,"step":"8.0","x":-216.23809523809524,"y":-75.24380952380952,"z":123.18095238095239,"a95":0.99,"info":"16/08/2014 at 21:17:10"},{"visible":true,"include":false,"step":"12.0","x":-198.21904761904764,"y":-71.94,"z":95.35238095238095,"a95":0.99,"info":"16/08/2014 at 21:17:10"},{"visible":true,"include":true,"step":"16.0","x":-170.71428571428572,"y":-39.315238095238094,"z":99.72380952380952,"a95":0.99,"info":"16/08/2014 at 21:17:10"},{"visible":true,"include":true,"step":"20.0","x":-158.1047619047619,"y":-32.074285714285715,"z":95.63809523809525,"a95":0.99,"info":"16/08/2014 at 21:17:10"},{"visible":true,"include":true,"step":"25.0","x":-140.32380952380953,"y":-16.66952380952381,"z":84.50857142857143,"a95":0.99,"info":"16/08/2014 at 21:17:10"},{"visible":true,"include":true,"step":"30.0","x":-122.01904761904763,"y":-10.67904761904762,"z":84.79047619047618,"a95":0.99,"info":"16/08/2014 at 21:17:10"},{"visible":true,"include":true,"step":"35.0","x":-114.91428571428571,"y":-5.8262857142857145,"z":74.93047619047618,"a95":0.99,"info":"16/08/2014 at 21:17:10"},{"visible":true,"include":true,"step":"40.0","x":-107.58095238095237,"y":6.366095238095237,"z":74.17809523809524,"a95":0.99,"info":"16/08/2014 at 21:17:10"},{"visible":true,"include":true,"step":"45.0","x":-90.11619047619048,"y":-0.30363809523809526,"z":68.8742857142857,"a95":0.99,"info":"16/08/2014 at 21:17:10"},{"visible":true,"include":true,"step":"50.0","x":-83.46380952380953,"y":0.031142857142857146,"z":61.40761904761904,"a95":0.99,"info":"16/08/2014 at 21:17:10"},{"visible":true,"include":true,"step":"60.0","x":-76.17999999999999,"y":7.650761904761905,"z":59.21523809523809,"a95":0.99,"info":"16/08/2014 at 21:17:10"},{"visible":false,"include":false,"step":"70.0","x":-61.40190476190477,"y":6.018380952380952,"z":61.54190476190477,"a95":0.99,"info":"16/08/2014 at 21:17:10"},{"visible":false,"include":false,"step":"80.0","x":-52.41809523809523,"y":-4.583238095238095,"z":51.13428571428571,"a95":0.99,"info":"16/08/2014 at 21:17:10"},{"visible":false,"include":false,"step":"90.0","x":-57.24380952380952,"y":3.7293333333333334,"z":47.96476190476191,"a95":0.99,"info":"16/08/2014 at 21:17:10"},{"visible":false,"include":false,"step":"100.0","x":-44.523809523809526,"y":-2.6107619047619046,"z":44.99904761904762,"a95":0.99,"info":"16/08/2014 at 21:17:10"}]},{"version":"v1.1.0","exported":"2016-11-18T10:44:32.364Z","volume":10.5,"added":"2016-11-18T10:20:34.750Z","format":"Utrecht","demagType":"Unknown","strat":"7","patch":1.1,"GEO":[],"TECT":[],"interpreted":false,"name":"HP1.17A","coreAzi":97,"coreDip":45,"bedStrike":85,"bedDip":83,"data":[{"visible":false,"include":false,"step":"0.0","x":-341.6190476190476,"y":-92.21904761904761,"z":263.5238095238095,"a95":0.99,"info":"16/08/2014 at 21:17:10"},{"visible":true,"include":false,"step":"4.0","x":-305.56190476190477,"y":-93.64571428571428,"z":222.9238095238095,"a95":0.99,"info":"16/08/2014 at 21:17:10"},{"visible":true,"include":false,"step":"8.0","x":-257.0952380952381,"y":-63.05047619047619,"z":185.06666666666666,"a95":0.99,"info":"16/08/2014 at 21:17:10"},{"visible":true,"include":true,"step":"12.0","x":-223.12380952380954,"y":-60.43047619047619,"z":133.25714285714287,"a95":0.99,"info":"16/08/2014 at 21:17:10"},{"visible":true,"include":true,"step":"16.0","x":-185.65714285714287,"y":-16.163809523809523,"z":127.55238095238094,"a95":0.99,"info":"16/08/2014 at 21:17:10"},{"visible":true,"include":true,"step":"20.0","x":-173.73333333333335,"y":-9.668571428571429,"z":105.77142857142856,"a95":0.99,"info":"16/08/2014 at 21:17:10"},{"visible":true,"include":true,"step":"25.0","x":-150.54285714285714,"y":2.0813333333333333,"z":85.41904761904762,"a95":0.99,"info":"16/08/2014 at 21:17:10"},{"visible":true,"include":true,"step":"30.0","x":-131.1809523809524,"y":8.231238095238094,"z":72.03619047619047,"a95":0.99,"info":"16/08/2014 at 21:17:10"},{"visible":true,"include":true,"step":"35.0","x":-121.98095238095237,"y":1.474952380952381,"z":64.72857142857143,"a95":0.99,"info":"16/08/2014 at 21:17:10"},{"visible":true,"include":true,"step":"40.0","x":-121.86666666666666,"y":17.36,"z":52.36857142857143,"a95":0.99,"info":"16/08/2014 at 21:17:10"},{"visible":true,"include":false,"step":"45.0","x":-108.71428571428571,"y":9.36104761904762,"z":46.12571428571429,"a95":0.99,"info":"16/08/2014 at 21:17:10"},{"visible":true,"include":false,"step":"50.0","x":-99.88571428571429,"y":-5.7355238095238095,"z":34.13428571428572,"a95":0.99,"info":"16/08/2014 at 21:17:10"},{"visible":true,"include":false,"step":"60.0","x":-89.61809523809524,"y":2.8140952380952378,"z":23.003809523809522,"a95":0.99,"info":"16/08/2014 at 21:17:10"},{"visible":true,"include":false,"step":"70.0","x":-85.78666666666666,"y":2.6704761904761902,"z":25.208571428571428,"a95":0.99,"info":"16/08/2014 at 21:17:10"},{"visible":false,"include":false,"step":"80.0","x":-85.71523809523809,"y":-15.852380952380951,"z":11.217142857142857,"a95":0.99,"info":"16/08/2014 at 21:17:10"},{"visible":false,"include":false,"step":"90.0","x":-66.74,"y":3.314095238095238,"z":4.893523809523809,"a95":0.99,"info":"16/08/2014 at 21:17:10"},{"visible":false,"include":false,"step":"100.0","x":-61.63238095238095,"y":3.603047619047619,"z":5.798857142857143,"a95":0.99,"info":"16/08/2014 at 21:17:10"}]},{"version":"v1.1.0","exported":"2016-11-18T10:44:32.364Z","volume":10.5,"added":"2016-11-18T10:20:34.751Z","format":"Utrecht","demagType":"Unknown","strat":null,"patch":1.1,"GEO":[{"dec":160.1886589970734,"inc":46.82419504470607,"MAD":7.9709137342436485,"cm":[-1.3322676295501878e-15,1.1102230246251565e-15,0],"intensity":144.40144219479424,"type":"dir","forced":true,"remark":"","origin":false,"nSteps":4,"minStep":"180","maxStep":"270","steps":["180","210","240","270"],"group":"None","version":"v1.1.0"}],"TECT":[{"dec":162.73257915252407,"inc":-34.589923080468445,"MAD":7.970913734243645,"cm":[8.881784197001252e-16,5.10702591327572e-15,2.220446049250313e-15],"intensity":144.40144219479424,"type":"dir","forced":true,"remark":"","origin":false,"nSteps":4,"minStep":"180","maxStep":"270","steps":["180","210","240","270"],"group":"None","version":"v1.1.0"}],"interpreted":true,"name":"HP1.18A","coreAzi":111,"coreDip":45,"bedStrike":85,"bedDip":83,"data":[{"visible":false,"include":false,"step":"20","x":-230.95238095238096,"y":-71.42857142857143,"z":298.95238095238096,"a95":4,"info":"\"14-08-11\" at \"17:31\""},{"visible":false,"include":false,"step":"100","x":-141.04761904761904,"y":9.714285714285714,"z":190.57142857142858,"a95":2.6,"info":"\"14-08-11\" at \"21:00\""},{"visible":true,"include":false,"step":"150","x":-50.19047619047619,"y":45.904761904761905,"z":111.80952380952381,"a95":2.7,"info":"\"14-08-11\" at \"23:30\""},{"visible":true,"include":true,"step":"180","x":-17.076190476190476,"y":51.44761904761905,"z":74.23809523809524,"a95":2.8,"info":"\"14-08-12\" at \"15:58\""},{"visible":true,"include":true,"step":"210","x":-13.428571428571429,"y":54.666666666666664,"z":77.04761904761905,"a95":3.1,"info":"\"14-08-12\" at \"18:36\""},{"visible":true,"include":true,"step":"240","x":-9.047619047619047,"y":19.8,"z":48.17142857142857,"a95":6,"info":"\"14-08-12\" at \"21:41\""},{"visible":true,"include":true,"step":"270","x":-24.02857142857143,"y":17.295238095238094,"z":45.91428571428572,"a95":7.5,"info":"\"14-08-13\" at \"15:47\""},{"visible":false,"include":false,"step":"300","x":-34.6,"y":6.961904761904761,"z":32.20952380952381,"a95":12.7,"info":"\"14-08-13\" at \"18:24\""},{"visible":false,"include":false,"step":"320","x":-32.076190476190476,"y":10.723809523809523,"z":26.80952380952381,"a95":12.2,"info":"\"14-08-13\" at \"21:31\""},{"visible":false,"include":false,"step":"340","x":-32.857142857142854,"y":9.133333333333335,"z":29.771428571428572,"a95":14.1,"info":"\"14-08-14\" at \"14:25\""},{"visible":false,"include":false,"step":"370","x":-30.961904761904766,"y":0.38095238095238093,"z":23.276190476190475,"a95":7.7,"info":"\"14-08-14\" at \"17:31\""},{"visible":false,"include":false,"step":"400","x":-25.228571428571428,"y":-11.20952380952381,"z":22.057142857142857,"a95":26.8,"info":"\"14-08-14\" at \"20:41\""},{"visible":false,"include":false,"step":"430","x":-47.904761904761905,"y":-1.8857142857142857,"z":18.428571428571427,"a95":9.3,"info":"\"14-08-15\" at \"13:59\""},{"visible":false,"include":false,"step":"460","x":-50.971428571428575,"y":-6.552380952380952,"z":27.885714285714286,"a95":10.3,"info":"\"14-08-15\" at \"16:37\""},{"visible":false,"include":false,"step":"490","x":-105.14285714285714,"y":86.76190476190476,"z":91.80952380952381,"a95":7.9,"info":"\"14-08-15\" at \"19:55\""}]},{"version":"v1.1.0","exported":"2016-11-18T10:44:32.364Z","volume":10.5,"added":"2016-11-18T10:20:34.752Z","format":"Utrecht","demagType":"Unknown","strat":"8","patch":1.1,"GEO":[{"dec":166.42202864661408,"inc":29.967931209328086,"MAD":4.455376651476153,"cm":[-1.7763568394002505e-15,-8.326672684688674e-15,0],"intensity":139.59671765722575,"type":"dir","forced":true,"remark":"","origin":false,"nSteps":7,"minStep":"16.0","maxStep":"45.0","steps":["16.0","20.0","25.0","30.0","35.0","40.0","45.0"],"group":"None","version":"v1.1.0"}],"TECT":[{"dec":162.85027070603348,"inc":-52.1251635749589,"MAD":4.455376651476221,"cm":[-1.5543122344752192e-15,-1.2212453270876722e-14,-8.881784197001252e-16],"intensity":139.59671765722572,"type":"dir","forced":true,"remark":"","origin":false,"nSteps":7,"minStep":"16.0","maxStep":"45.0","steps":["16.0","20.0","25.0","30.0","35.0","40.0","45.0"],"group":"None","version":"v1.1.0"}],"interpreted":true,"name":"HP1.19A","coreAzi":100,"coreDip":40,"bedStrike":85,"bedDip":83,"data":[{"visible":true,"include":false,"step":"0.0","x":-95.4095238095238,"y":83.35142857142857,"z":114.80952380952381,"a95":0.99,"info":"16/08/2014 at 21:17:10"},{"visible":true,"include":false,"step":"4.0","x":-82.62095238095237,"y":86.55047619047619,"z":103.88571428571429,"a95":0.99,"info":"16/08/2014 at 21:17:10"},{"visible":true,"include":false,"step":"8.0","x":-56.476190476190474,"y":83.4695238095238,"z":84.87047619047618,"a95":0.99,"info":"16/08/2014 at 21:17:10"},{"visible":true,"include":false,"step":"12.0","x":-45.11619047619048,"y":62.640952380952385,"z":47.32380952380952,"a95":0.99,"info":"16/08/2014 at 21:17:10"},{"visible":true,"include":true,"step":"16.0","x":-24.972380952380952,"y":81.92476190476191,"z":55.60285714285715,"a95":0.99,"info":"16/08/2014 at 21:17:10"},{"visible":true,"include":true,"step":"20.0","x":-13.884761904761904,"y":73.38857142857144,"z":52.17619047619048,"a95":0.99,"info":"16/08/2014 at 21:17:10"},{"visible":true,"include":true,"step":"25.0","x":-9.609523809523811,"y":59.526666666666664,"z":44.66761904761905,"a95":0.99,"info":"16/08/2014 at 21:17:10"},{"visible":true,"include":true,"step":"30.0","x":-4.814380952380953,"y":56.042857142857144,"z":43.08761904761905,"a95":0.99,"info":"16/08/2014 at 21:17:10"},{"visible":true,"include":true,"step":"35.0","x":-4.195047619047619,"y":42.41047619047619,"z":36.38761904761905,"a95":0.99,"info":"16/08/2014 at 21:17:10"},{"visible":true,"include":true,"step":"40.0","x":-10.084761904761905,"y":31.313333333333336,"z":27.952380952380953,"a95":0.99,"info":"16/08/2014 at 21:17:10"},{"visible":true,"include":true,"step":"45.0","x":-4.3025714285714285,"y":29.847619047619045,"z":22.737142857142857,"a95":0.99,"info":"16/08/2014 at 21:17:10"},{"visible":false,"include":false,"step":"50.0","x":-9.770476190476192,"y":14.96952380952381,"z":22.34285714285714,"a95":0.99,"info":"16/08/2014 at 21:17:10"},{"visible":false,"include":false,"step":"60.0","x":-0.34974285714285713,"y":19.62952380952381,"z":8.812952380952382,"a95":0.99,"info":"16/08/2014 at 21:17:10"},{"visible":false,"include":false,"step":"70.0","x":-7.662571428571428,"y":13.158095238095237,"z":11.144761904761904,"a95":0.99,"info":"16/08/2014 at 21:17:10"},{"visible":false,"include":false,"step":"80.0","x":24.186666666666667,"y":4.425714285714285,"z":7.532285714285714,"a95":0.99,"info":"16/08/2014 at 21:17:10"},{"visible":false,"include":false,"step":"90.0","x":6.395714285714286,"y":14.164761904761903,"z":0.07240761904761904,"a95":0.99,"info":"16/08/2014 at 21:17:10"},{"visible":false,"include":false,"step":"100.0","x":-3.070095238095238,"y":0.7932761904761905,"z":-1.9399047619047618,"a95":0.99,"info":"16/08/2014 at 21:17:10"}]},{"version":"v1.1.0","exported":"2016-11-18T10:44:32.364Z","volume":10.5,"added":"2016-11-18T10:20:34.752Z","format":"Utrecht","demagType":"Unknown","strat":null,"patch":1.1,"GEO":[{"dec":169.73754381840206,"inc":38.13659771191027,"MAD":8.884469040815887,"cm":[-8.881784197001252e-16,-1.5279444376403717e-14,0],"intensity":154.7316119803311,"type":"dir","forced":true,"remark":"","origin":false,"nSteps":4,"minStep":"150","maxStep":"240","steps":["150","180","210","240"],"group":"None","version":"v1.1.0"}],"TECT":[{"dec":169.18521041848885,"inc":-44.598018294229384,"MAD":8.88446904081589,"cm":[-8.881784197001252e-16,-1.9317880628477724e-14,-3.552713678800501e-15],"intensity":154.7316119803311,"type":"dir","forced":true,"remark":"","origin":false,"nSteps":4,"minStep":"150","maxStep":"240","steps":["150","180","210","240"],"group":"None","version":"v1.1.0"}],"interpreted":true,"name":"HP1.20A","coreAzi":86,"coreDip":44,"bedStrike":85,"bedDip":83,"data":[{"visible":true,"include":false,"step":"20","x":-184.57142857142858,"y":-30.38095238095238,"z":239.61904761904762,"a95":2.5,"info":"\"14-08-11\" at \"17:33\""},{"visible":true,"include":false,"step":"100","x":-111.80952380952381,"y":45.42857142857143,"z":126.38095238095238,"a95":2.2,"info":"\"14-08-11\" at \"21:02\""},{"visible":true,"include":true,"step":"150","x":-49.714285714285715,"y":74.47619047619048,"z":62.38095238095238,"a95":2.2,"info":"\"14-08-11\" at \"23:33\""},{"visible":true,"include":true,"step":"180","x":-31.009523809523813,"y":75.9047619047619,"z":37.21904761904762,"a95":2.4,"info":"\"14-08-12\" at \"16:01\""},{"visible":true,"include":true,"step":"210","x":-21.504761904761907,"y":76.28571428571429,"z":36.59047619047619,"a95":2.3,"info":"\"14-08-12\" at \"18:38\""},{"visible":true,"include":true,"step":"240","x":-26.4,"y":29.485714285714288,"z":23.295238095238094,"a95":4.7,"info":"\"14-08-12\" at \"21:46\""},{"visible":true,"include":false,"step":"270","x":-31.780952380952378,"y":23.638095238095236,"z":27.523809523809526,"a95":7.7,"info":"\"14-08-13\" at \"15:49\""},{"visible":true,"include":false,"step":"300","x":-45.46666666666666,"y":21.904761904761905,"z":18.83809523809524,"a95":10.2,"info":"\"14-08-13\" at \"18:26\""},{"visible":false,"include":false,"step":"320","x":-50.51428571428571,"y":32.82857142857143,"z":43.02857142857143,"a95":9,"info":"\"14-08-13\" at \"21:34\""},{"visible":false,"include":false,"step":"340","x":-44.7047619047619,"y":18.095238095238095,"z":8.666666666666666,"a95":14.1,"info":"\"14-08-14\" at \"14:27\""},{"visible":false,"include":false,"step":"370","x":-43.72380952380953,"y":26.104761904761908,"z":36.59047619047619,"a95":8.8,"info":"\"14-08-14\" at \"17:33\""},{"visible":false,"include":false,"step":"400","x":-50.25714285714286,"y":-7.076190476190476,"z":24.323809523809523,"a95":15.7,"info":"\"14-08-14\" at \"20:43\""},{"visible":false,"include":false,"step":"430","x":-55.53333333333334,"y":10.542857142857143,"z":28.923809523809524,"a95":9.400001,"info":"\"14-08-15\" at \"14:01\""},{"visible":false,"include":false,"step":"460","x":-94.47619047619048,"y":3.7142857142857144,"z":11.333333333333334,"a95":7.3,"info":"\"14-08-15\" at \"16:40\""},{"visible":false,"include":false,"step":"490","x":-184.85714285714286,"y":75.9047619047619,"z":104.76190476190476,"a95":6.2,"info":"\"14-08-15\" at \"20:01\""}]},{"version":"v1.1.0","exported":"2016-11-18T10:44:32.364Z","volume":10.5,"added":"2016-11-18T10:20:34.753Z","format":"Utrecht","demagType":"Unknown","strat":"3","patch":1.1,"GEO":[],"TECT":[],"interpreted":false,"name":"HP1.20B","coreAzi":86,"coreDip":44,"bedStrike":85,"bedDip":83,"data":[{"visible":true,"include":false,"step":"0.0","x":-159.9714285714286,"y":-104.26666666666667,"z":150.66666666666666,"a95":0.99,"info":"05/11/2014 at 18:18:16"},{"visible":true,"include":true,"step":"10.0","x":-114.20952380952382,"y":-73.47142857142858,"z":121.9904761904762,"a95":0.99,"info":"05/11/2014 at 18:18:16"},{"visible":true,"include":true,"step":"15.0","x":-96.5047619047619,"y":-65.11428571428571,"z":105.19999999999999,"a95":0.99,"info":"05/11/2014 at 18:18:16"},{"visible":true,"include":true,"step":"20.0","x":-95.11333333333334,"y":-47.11904761904762,"z":96.46666666666667,"a95":0.99,"info":"05/11/2014 at 18:18:16"},{"visible":true,"include":true,"step":"25.0","x":-79.28857142857143,"y":-43.049523809523805,"z":93.02952380952381,"a95":0.99,"info":"05/11/2014 at 18:18:16"},{"visible":true,"include":true,"step":"30.0","x":-72.8,"y":-37.47047619047619,"z":80.68380952380951,"a95":0.99,"info":"05/11/2014 at 18:18:16"},{"visible":true,"include":true,"step":"35.0","x":-55.56095238095238,"y":-39.53047619047619,"z":68.57428571428571,"a95":0.99,"info":"05/11/2014 at 18:18:16"},{"visible":true,"include":true,"step":"40.0","x":-43.86380952380952,"y":-19.931428571428572,"z":56.394285714285715,"a95":0.99,"info":"05/11/2014 at 18:18:16"},{"visible":true,"include":true,"step":"45.0","x":-60.78857142857142,"y":-30.384761904761906,"z":60.049523809523805,"a95":0.99,"info":"05/11/2014 at 18:18:16"},{"visible":true,"include":true,"step":"50.0","x":-49.831428571428575,"y":-40.46476190476191,"z":48.343809523809526,"a95":0.99,"info":"05/11/2014 at 18:18:16"},{"visible":true,"include":true,"step":"60.0","x":-37.34095238095238,"y":-34.92952380952381,"z":46.37619047619047,"a95":0.99,"info":"05/11/2014 at 18:18:16"},{"visible":true,"include":true,"step":"70.0","x":-40.75809523809524,"y":-20.307619047619045,"z":39.859047619047615,"a95":0.99,"info":"05/11/2014 at 18:18:16"},{"visible":true,"include":false,"step":"80.0","x":-36.87619047619047,"y":-13.373333333333331,"z":35.54666666666667,"a95":0.99,"info":"05/11/2014 at 18:18:16"},{"visible":true,"include":false,"step":"90.0","x":-28.32857142857143,"y":-17.453333333333333,"z":28.078095238095237,"a95":0.99,"info":"05/11/2014 at 18:18:16"}]},{"version":"v1.1.0","exported":"2016-11-18T10:44:32.364Z","volume":10.5,"added":"2016-11-18T10:20:34.753Z","format":"Utrecht","demagType":"Unknown","strat":"1","patch":1.1,"GEO":[],"TECT":[],"interpreted":false,"name":"HP1.21A","coreAzi":105,"coreDip":38,"bedStrike":85,"bedDip":83,"data":[{"visible":true,"include":false,"step":"0.0","x":-175.2761904761905,"y":-52.0295238095238,"z":128.33333333333334,"a95":0.99,"info":"17/08/2014 at 02:43:39"},{"visible":true,"include":true,"step":"4.0","x":-167.38095238095238,"y":-45.84571428571429,"z":124.4095238095238,"a95":0.99,"info":"17/08/2014 at 02:43:39"},{"visible":true,"include":true,"step":"8.0","x":-146.2,"y":-36.60476190476191,"z":111.73333333333333,"a95":0.99,"info":"17/08/2014 at 02:43:39"},{"visible":true,"include":true,"step":"12.0","x":-133.61904761904762,"y":-29.815238095238094,"z":102.72380952380952,"a95":0.99,"info":"17/08/2014 at 02:43:39"},{"visible":true,"include":true,"step":"16.0","x":-118.6,"y":-26.29714285714286,"z":92.79619047619047,"a95":0.99,"info":"17/08/2014 at 02:43:39"},{"visible":true,"include":true,"step":"20.0","x":-108.70476190476191,"y":-19.826666666666668,"z":83.91714285714286,"a95":0.99,"info":"17/08/2014 at 02:43:39"},{"visible":true,"include":true,"step":"25.0","x":-85.17809523809524,"y":-14.400952380952381,"z":77.76380952380953,"a95":0.99,"info":"17/08/2014 at 02:43:39"},{"visible":true,"include":true,"step":"30.0","x":-80.72571428571429,"y":-16.633333333333333,"z":70.24476190476192,"a95":0.99,"info":"17/08/2014 at 02:43:39"},{"visible":true,"include":true,"step":"35.0","x":-84.0104761904762,"y":-14.846666666666666,"z":63.24476190476191,"a95":0.99,"info":"17/08/2014 at 02:43:39"},{"visible":true,"include":true,"step":"40.0","x":-59.086666666666666,"y":-11.878095238095238,"z":51.10476190476191,"a95":0.99,"info":"17/08/2014 at 02:43:39"},{"visible":true,"include":true,"step":"45.0","x":-65.46666666666667,"y":-5.161904761904762,"z":54.63333333333333,"a95":0.99,"info":"17/08/2014 at 02:43:39"},{"visible":true,"include":true,"step":"50.0","x":-56.02285714285714,"y":-14.342857142857142,"z":45.139047619047616,"a95":0.99,"info":"17/08/2014 at 02:43:39"},{"visible":false,"include":false,"step":"60.0","x":-47.018095238095235,"y":-6.813333333333334,"z":27.314285714285717,"a95":0.99,"info":"17/08/2014 at 02:43:39"},{"visible":false,"include":false,"step":"70.0","x":-36.56952380952381,"y":-13.087619047619047,"z":28.156190476190474,"a95":0.99,"info":"17/08/2014 at 02:43:39"},{"visible":false,"include":false,"step":"80.0","x":-38.455238095238094,"y":-11.452380952380953,"z":16.192380952380955,"a95":0.99,"info":"17/08/2014 at 02:43:39"},{"visible":false,"include":false,"step":"90.0","x":-27.85142857142857,"y":-14.258095238095239,"z":29.114285714285714,"a95":0.99,"info":"17/08/2014 at 02:43:39"},{"visible":false,"include":false,"step":"100.0","x":-38.325714285714284,"y":1.737904761904762,"z":33.23714285714286,"a95":0.99,"info":"17/08/2014 at 02:43:39"}]},{"version":"v1.1.0","exported":"2016-11-18T10:44:32.364Z","volume":10.5,"added":"2016-11-18T10:20:34.754Z","format":"Utrecht","demagType":"Unknown","strat":null,"patch":1.1,"GEO":[{"dec":177.59355193689566,"inc":37.55655584697281,"MAD":2.5650391102513166,"cm":[0,1.7069679003611782e-15,0],"intensity":124.0395434717139,"type":"dir","forced":true,"remark":"","origin":false,"nSteps":3,"minStep":"180","maxStep":"240","steps":["180","210","240"],"group":"None","version":"v1.1.0"}],"TECT":[{"dec":177.92731560399955,"inc":-45.377663138187586,"MAD":2.565039110251298,"cm":[0,2.6367796834847468e-15,0],"intensity":124.0395434717139,"type":"dir","forced":true,"remark":"","origin":false,"nSteps":3,"minStep":"180","maxStep":"240","steps":["180","210","240"],"group":"None","version":"v1.1.0"}],"interpreted":true,"name":"HP1.22A","coreAzi":109,"coreDip":47,"bedStrike":85,"bedDip":83,"data":[{"visible":false,"include":false,"step":"20","x":-294,"y":-9.619047619047619,"z":337.04761904761904,"a95":2.4,"info":"\"14-08-11\" at \"17:36\""},{"visible":true,"include":false,"step":"100","x":-111.23809523809524,"y":35.80952380952381,"z":145.61904761904762,"a95":2.4,"info":"\"14-08-11\" at \"21:04\""},{"visible":true,"include":false,"step":"150","x":-46.19047619047619,"y":68.0952380952381,"z":81.9047619047619,"a95":2.3,"info":"\"14-08-11\" at \"23:35\""},{"visible":true,"include":true,"step":"180","x":-18.628571428571426,"y":60.10476190476191,"z":52.142857142857146,"a95":2.8,"info":"\"14-08-12\" at \"16:03\""},{"visible":true,"include":true,"step":"210","x":-12.466666666666667,"y":58.95238095238095,"z":50.25714285714286,"a95":3.6,"info":"\"14-08-12\" at \"18:40\""},{"visible":true,"include":true,"step":"240","x":-11.390476190476189,"y":29.495238095238093,"z":28.20952380952381,"a95":5,"info":"\"14-08-12\" at \"21:48\""},{"visible":true,"include":false,"step":"270","x":-50.53333333333334,"y":22.276190476190475,"z":45.20952380952381,"a95":9.5,"info":"\"14-08-13\" at \"15:52\""},{"visible":false,"include":false,"step":"300","x":-167.33333333333334,"y":56.38095238095238,"z":75.52380952380952,"a95":9.5,"info":"\"14-08-13\" at \"18:30\""},{"visible":false,"include":false,"step":"320","x":-88.76190476190476,"y":33.04761904761905,"z":41.80952380952381,"a95":7.9,"info":"\"14-08-13\" at \"21:37\""},{"visible":false,"include":false,"step":"340","x":-106.66666666666667,"y":40.285714285714285,"z":40.285714285714285,"a95":14.1,"info":"\"14-08-14\" at \"14:30\""},{"visible":false,"include":false,"step":"370","x":-70.03809523809524,"y":-3.1523809523809527,"z":37.59047619047619,"a95":8.5,"info":"\"14-08-14\" at \"17:36\""},{"visible":false,"include":false,"step":"400","x":-72.4857142857143,"y":4.2,"z":28.342857142857145,"a95":14.2,"info":"\"14-08-14\" at \"20:45\""},{"visible":false,"include":false,"step":"430","x":-93.04761904761905,"y":18.38095238095238,"z":34.76190476190476,"a95":11.9,"info":"\"14-08-15\" at \"14:04\""},{"visible":false,"include":false,"step":"460","x":-112.76190476190476,"y":9.428571428571429,"z":51.142857142857146,"a95":8.2,"info":"\"14-08-15\" at \"16:42\""},{"visible":false,"include":false,"step":"490","x":-87.14285714285714,"y":56.19047619047619,"z":70.95238095238095,"a95":13.1,"info":"\"14-08-15\" at \"20:07\""}]},{"version":"v1.1.0","exported":"2016-11-18T10:44:32.364Z","volume":10.5,"added":"2016-11-18T10:20:34.754Z","format":"Utrecht","demagType":"Unknown","strat":"2","patch":1.1,"GEO":[],"TECT":[],"interpreted":false,"name":"HP1.22B","coreAzi":109,"coreDip":47,"bedStrike":85,"bedDip":83,"data":[{"visible":true,"include":false,"step":"0.0","x":-891.1333333333333,"y":-126.47619047619048,"z":576.6,"a95":0.99,"info":"17/08/2014 at 02:43:39"},{"visible":true,"include":true,"step":"4.0","x":-867.257142857143,"y":-118.55238095238094,"z":545.3619047619047,"a95":0.99,"info":"17/08/2014 at 02:43:39"},{"visible":true,"include":true,"step":"8.0","x":-820.8761904761906,"y":-101.9047619047619,"z":514.2952380952381,"a95":0.99,"info":"17/08/2014 at 02:43:39"},{"visible":true,"include":true,"step":"12.0","x":-790.9428571428571,"y":-76.6257142857143,"z":485.4190476190476,"a95":0.99,"info":"17/08/2014 at 02:43:39"},{"visible":true,"include":true,"step":"16.0","x":-773.1619047619048,"y":-68.86761904761904,"z":471.16190476190474,"a95":0.99,"info":"17/08/2014 at 02:43:39"},{"visible":true,"include":true,"step":"20.0","x":-746.4190476190475,"y":-54.81238095238095,"z":450.49523809523805,"a95":0.99,"info":"17/08/2014 at 02:43:39"},{"visible":true,"include":true,"step":"25.0","x":-716.1714285714286,"y":-51.76190476190476,"z":439.1047619047619,"a95":0.99,"info":"17/08/2014 at 02:43:39"},{"visible":true,"include":true,"step":"30.0","x":-701.8095238095239,"y":-34.63809523809524,"z":427.0571428571429,"a95":0.99,"info":"17/08/2014 at 02:43:39"},{"visible":true,"include":true,"step":"35.0","x":-694.7714285714286,"y":-25.27809523809524,"z":405.87619047619046,"a95":0.99,"info":"17/08/2014 at 02:43:39"},{"visible":true,"include":true,"step":"40.0","x":-664.1619047619048,"y":-18.198095238095238,"z":400.4,"a95":0.99,"info":"17/08/2014 at 02:43:39"},{"visible":true,"include":true,"step":"45.0","x":-662.4190476190475,"y":-17.346666666666664,"z":400.87619047619046,"a95":0.99,"info":"17/08/2014 at 02:43:39"},{"visible":true,"include":true,"step":"50.0","x":-636.4380952380952,"y":-20.931428571428572,"z":378.87619047619046,"a95":0.99,"info":"17/08/2014 at 02:43:39"},{"visible":true,"include":true,"step":"60.0","x":-637.9714285714285,"y":-4.003619047619047,"z":368.2,"a95":0.99,"info":"17/08/2014 at 02:43:39"},{"visible":true,"include":true,"step":"70.0","x":-630.6,"y":0.5372095238095238,"z":368.2857142857143,"a95":0.99,"info":"17/08/2014 at 02:43:39"},{"visible":true,"include":false,"step":"80.0","x":-612.504761904762,"y":-5.954380952380952,"z":351.5904761904762,"a95":0.99,"info":"17/08/2014 at 02:43:39"},{"visible":true,"include":false,"step":"90.0","x":-600.2190476190476,"y":-1.3054285714285716,"z":335.3619047619048,"a95":0.99,"info":"17/08/2014 at 02:43:39"},{"visible":true,"include":false,"step":"100.0","x":-595.2190476190476,"y":-0.4481142857142857,"z":334.0952380952381,"a95":0.99,"info":"17/08/2014 at 02:43:39"}]}]
