# Supplementary material for: Paleomagnetic constraints on the timing and distribution of Cenozoic rotations in Central and Eastern Anatolia
Source: Copernicus journal article supplement (doi:10.5194/se-9-295-2018), 2018-03-21
Supplement: Supplementary file 2 [file se-9-295-2018-supplement.zip › se-2017-66_DATA_dir files/dir files Ulukisla/HP2.dir]

[{"version":"v1.1.0","exported":"2016-11-23T15:43:28.783Z","volume":10.5,"added":"2016-11-23T15:36:48.541Z","format":"Utrecht","demagType":"Unknown","strat":null,"patch":1.1,"GEO":[],"TECT":[],"interpreted":false,"name":"HP2.1A","coreAzi":316,"coreDip":21,"bedStrike":251,"bedDip":51,"data":[{"visible":true,"include":false,"step":"20","x":-19573.714285714286,"y":11613.42857142857,"z":18630.85714285714,"a95":2.3,"info":"\"14-11-03\" at \"21:44\""},{"visible":true,"include":false,"step":"150","x":-9474.952380952382,"y":5858.190476190476,"z":9012.285714285714,"a95":2.2,"info":"\"14-11-04\" at \"16:43\""},{"visible":true,"include":false,"step":"180","x":-8628.761904761905,"y":5188.190476190476,"z":7785.619047619048,"a95":2.3,"info":"\"14-11-04\" at \"21:57\""},{"visible":true,"include":false,"step":"210","x":-7485.9047619047615,"y":4879.428571428572,"z":6567.809523809524,"a95":2.3,"info":"\"14-11-05\" at \"17:22\""},{"visible":true,"include":false,"step":"240","x":-5593.333333333333,"y":3230.8571428571427,"z":4370.0952380952385,"a95":2.5,"info":"\"14-11-05\" at \"22:59\""},{"visible":true,"include":false,"step":"270","x":-4559.619047619048,"y":2612.9523809523807,"z":3734.6666666666665,"a95":2.2,"info":"\"14-11-06\" at \"21:22\""},{"visible":true,"include":false,"step":"300","x":-3512.095238095238,"y":1998.6666666666667,"z":2749.3333333333335,"a95":2.2,"info":"\"14-11-07\" at \"15:26\""},{"visible":true,"include":false,"step":"320","x":-2092.9523809523807,"y":1292.4761904761904,"z":2059.0476190476193,"a95":2.4,"info":"\"14-11-07\" at \"20:08\""},{"visible":true,"include":false,"step":"340","x":-1900.3809523809523,"y":889.047619047619,"z":1345.047619047619,"a95":2.1,"info":"\"14-11-15\" at \"20:05\""},{"visible":true,"include":false,"step":"360","x":-1781.4285714285713,"y":871.3333333333334,"z":1166.952380952381,"a95":2.5,"info":"\"14-11-15\" at \"23:57\""},{"visible":true,"include":false,"step":"380","x":-1828.952380952381,"y":1035.047619047619,"z":979.9047619047619,"a95":1.9,"info":"\"14-11-16\" at \"03:06\""},{"visible":true,"include":false,"step":"400","x":-1466.4761904761904,"y":736.8571428571429,"z":903.047619047619,"a95":1.9,"info":"\"14-11-16\" at \"22:12\""},{"visible":true,"include":false,"step":"420","x":-1379.2380952380952,"y":701.9047619047619,"z":1066.4761904761904,"a95":2.1,"info":"\"14-11-17\" at \"01:28\""},{"visible":true,"include":false,"step":"450","x":-1321.2380952380952,"y":612,"z":864.7619047619048,"a95":2,"info":"\"14-11-17\" at \"04:15\""},{"visible":true,"include":false,"step":"610","x":-482.3809523809524,"y":-80.28571428571429,"z":367.6190476190476,"a95":5.1,"info":"\"14-11-28\" at \"23:17\""}]},{"version":"v1.1.0","exported":"2016-11-23T15:43:28.783Z","volume":10.5,"added":"2016-11-23T15:36:48.542Z","format":"Utrecht","demagType":"Unknown","strat":"1","patch":1.1,"GEO":[],"TECT":[],"interpreted":false,"name":"HP2.1B","coreAzi":316,"coreDip":21,"bedStrike":251,"bedDip":51,"data":[{"visible":true,"include":false,"step":"0.0","x":-16508.571428571428,"y":14152.380952380952,"z":8708.761904761905,"a95":0.99,"info":"23/09/2014 at 01:58:34"},{"visible":true,"include":false,"step":"5.0","x":-12508.57142857143,"y":10556.190476190477,"z":7826.952380952381,"a95":0.99,"info":"23/09/2014 at 01:58:34"},{"visible":true,"include":false,"step":"10.0","x":-7353.9047619047615,"y":6351.142857142857,"z":6502.476190476191,"a95":0.99,"info":"23/09/2014 at 01:58:34"},{"visible":true,"include":false,"step":"15.0","x":-5241.523809523809,"y":4593.047619047619,"z":5420.761904761905,"a95":0.99,"info":"23/09/2014 at 01:58:34"},{"visible":true,"include":false,"step":"20.0","x":-4005.809523809524,"y":3530.285714285714,"z":4330.476190476191,"a95":0.99,"info":"23/09/2014 at 01:58:34"},{"visible":true,"include":false,"step":"25.0","x":-3456.6666666666665,"y":2742.285714285714,"z":3482.5714285714284,"a95":0.99,"info":"23/09/2014 at 01:58:34"},{"visible":true,"include":false,"step":"30.0","x":-2863.4285714285716,"y":2144.7619047619046,"z":2942.3809523809523,"a95":0.99,"info":"23/09/2014 at 01:58:34"},{"visible":true,"include":false,"step":"35.0","x":-2276.190476190476,"y":1892.952380952381,"z":2268.4761904761904,"a95":0.99,"info":"23/09/2014 at 01:58:34"},{"visible":true,"include":false,"step":"40.0","x":-2036.7619047619048,"y":1624.095238095238,"z":1995.3333333333333,"a95":0.99,"info":"23/09/2014 at 01:58:34"},{"visible":true,"include":false,"step":"45.0","x":-1656.3809523809523,"y":1200.4761904761904,"z":1645.7142857142858,"a95":0.99,"info":"23/09/2014 at 01:58:34"},{"visible":true,"include":false,"step":"50.0","x":-1590.1904761904761,"y":1237.5238095238096,"z":1532.4761904761904,"a95":0.99,"info":"23/09/2014 at 01:58:34"},{"visible":true,"include":false,"step":"60.0","x":-1164.6666666666667,"y":835.2666666666667,"z":1132.7619047619048,"a95":0.99,"info":"23/09/2014 at 01:58:34"},{"visible":true,"include":false,"step":"70.0","x":-971.8095238095239,"y":742.7904761904762,"z":783.5999999999999,"a95":0.99,"info":"23/09/2014 at 01:58:34"},{"visible":true,"include":false,"step":"80.0","x":-577.8095238095239,"y":628.0857142857143,"z":622.895238095238,"a95":0.99,"info":"23/09/2014 at 01:58:34"},{"visible":true,"include":false,"step":"90.0","x":-529.4285714285714,"y":554.2285714285714,"z":357.1333333333333,"a95":0.99,"info":"23/09/2014 at 01:58:34"},{"visible":true,"include":false,"step":"100.0","x":-232.02857142857144,"y":618.1428571428571,"z":301.22857142857146,"a95":0.99,"info":"23/09/2014 at 01:58:34"}]},{"version":"v1.1.0","exported":"2016-11-23T15:43:28.783Z","volume":10.5,"added":"2016-11-23T15:36:48.542Z","format":"Utrecht","demagType":"Unknown","strat":null,"patch":1.1,"GEO":[],"TECT":[],"interpreted":false,"name":"HP2.2A","coreAzi":300,"coreDip":26,"bedStrike":251,"bedDip":51,"data":[{"visible":true,"include":false,"step":"20","x":-2123.1428571428573,"y":1399.3333333333333,"z":1804,"a95":2.2,"info":"\"14-11-03\" at \"21:46\""},{"visible":true,"include":false,"step":"150","x":-1270.2857142857142,"y":834.8571428571429,"z":1062,"a95":2.1,"info":"\"14-11-04\" at \"16:46\""},{"visible":true,"include":false,"step":"180","x":-1160.6666666666667,"y":714.4761904761905,"z":945.5238095238095,"a95":2.1,"info":"\"14-11-04\" at \"21:59\""},{"visible":true,"include":false,"step":"210","x":-978,"y":563.2380952380952,"z":757.1428571428571,"a95":3.3,"info":"\"14-11-05\" at \"17:24\""},{"visible":true,"include":false,"step":"240","x":-737.7142857142857,"y":426.0952380952381,"z":455.42857142857144,"a95":2,"info":"\"14-11-05\" at \"23:02\""},{"visible":true,"include":false,"step":"270","x":-619.1428571428571,"y":423.23809523809524,"z":411.14285714285717,"a95":2,"info":"\"14-11-06\" at \"21:26\""},{"visible":true,"include":false,"step":"300","x":-499.7142857142857,"y":233.52380952380952,"z":454.3809523809524,"a95":2.2,"info":"\"14-11-07\" at \"15:30\""},{"visible":true,"include":false,"step":"320","x":-430.76190476190476,"y":189.04761904761904,"z":376.2857142857143,"a95":2.2,"info":"\"14-11-07\" at \"20:11\""},{"visible":true,"include":false,"step":"340","x":-438.3809523809524,"y":230.76190476190476,"z":416.4761904761905,"a95":2.2,"info":"\"14-11-15\" at \"20:07\""},{"visible":true,"include":false,"step":"360","x":-428.76190476190476,"y":210.47619047619048,"z":378.6666666666667,"a95":2.4,"info":"\"14-11-15\" at \"23:59\""},{"visible":true,"include":false,"step":"380","x":-395.8095238095238,"y":217.52380952380952,"z":406.0952380952381,"a95":2.2,"info":"\"14-11-16\" at \"03:10\""},{"visible":true,"include":false,"step":"400","x":-339.04761904761904,"y":230.57142857142858,"z":338.4761904761905,"a95":2,"info":"\"14-11-16\" at \"22:14\""},{"visible":true,"include":false,"step":"420","x":-336.85714285714283,"y":182.0952380952381,"z":307.23809523809524,"a95":1.9,"info":"\"14-11-17\" at \"01:30\""},{"visible":true,"include":false,"step":"450","x":-310.57142857142856,"y":140,"z":272.3809523809524,"a95":2.2,"info":"\"14-11-17\" at \"04:17\""},{"visible":true,"include":false,"step":"610","x":-302.2857142857143,"y":56.38095238095238,"z":94.95238095238095,"a95":9.5,"info":"\"14-11-28\" at \"23:19\""}]},{"version":"v1.1.0","exported":"2016-11-23T15:43:28.783Z","volume":10.5,"added":"2016-11-23T15:36:48.544Z","format":"Utrecht","demagType":"Unknown","strat":"1","patch":1.1,"GEO":[],"TECT":[],"interpreted":false,"name":"HP2.2B","coreAzi":316,"coreDip":21,"bedStrike":251,"bedDip":51,"data":[{"visible":true,"include":false,"step":"0.0","x":-1590.3809523809523,"y":1268.4761904761904,"z":1373.047619047619,"a95":0.99,"info":"28/09/2014 at 16:02:25"},{"visible":true,"include":false,"step":"10.0","x":-1280.095238095238,"y":982.4761904761905,"z":969.5238095238095,"a95":0.99,"info":"28/09/2014 at 16:02:25"},{"visible":true,"include":false,"step":"15.0","x":-995.5238095238095,"y":816.7238095238096,"z":731.2190476190476,"a95":0.99,"info":"28/09/2014 at 16:02:25"},{"visible":true,"include":false,"step":"20.0","x":-773.2571428571429,"y":686.5714285714286,"z":625.9142857142857,"a95":0.99,"info":"28/09/2014 at 16:02:25"},{"visible":true,"include":false,"step":"25.0","x":-655.1904761904761,"y":651.8761904761905,"z":493.8285714285714,"a95":0.99,"info":"28/09/2014 at 16:02:25"},{"visible":true,"include":false,"step":"30.0","x":-570.9142857142857,"y":532.4,"z":350.9904761904762,"a95":0.99,"info":"28/09/2014 at 16:02:25"},{"visible":true,"include":false,"step":"35.0","x":-421.6666666666667,"y":488.31428571428575,"z":451.60952380952375,"a95":0.99,"info":"28/09/2014 at 16:02:25"},{"visible":true,"include":false,"step":"40.0","x":-439.6,"y":495.2190476190476,"z":360.34285714285716,"a95":0.99,"info":"28/09/2014 at 16:02:25"},{"visible":true,"include":false,"step":"45.0","x":-403.54285714285714,"y":338.54285714285714,"z":333.77142857142854,"a95":0.99,"info":"28/09/2014 at 16:02:25"},{"visible":true,"include":false,"step":"50.0","x":-386.5809523809524,"y":323.3809523809524,"z":257.9047619047619,"a95":0.99,"info":"28/09/2014 at 16:02:25"},{"visible":true,"include":false,"step":"60.0","x":-160.84761904761905,"y":304.0095238095238,"z":285.76190476190476,"a95":0.99,"info":"28/09/2014 at 16:02:25"},{"visible":true,"include":false,"step":"70.0","x":-158.6,"y":284.0571428571428,"z":212.23809523809524,"a95":0.99,"info":"28/09/2014 at 16:02:25"},{"visible":true,"include":false,"step":"80.0","x":-169.1904761904762,"y":94.65333333333334,"z":296.2,"a95":0.99,"info":"28/09/2014 at 16:02:25"},{"visible":true,"include":false,"step":"90.0","x":-57.24666666666667,"y":149.04761904761904,"z":282.5809523809524,"a95":0.99,"info":"28/09/2014 at 16:02:25"}]},{"version":"v1.1.0","exported":"2016-11-23T15:43:28.784Z","volume":10.5,"added":"2016-11-23T15:36:48.544Z","format":"Utrecht","demagType":"Unknown","strat":null,"patch":1.1,"GEO":[],"TECT":[],"interpreted":false,"name":"HP2.4A","coreAzi":274,"coreDip":19,"bedStrike":251,"bedDip":51,"data":[{"visible":true,"include":false,"step":"20","x":-7114.0952380952385,"y":4664.285714285715,"z":950.3809523809524,"a95":1.6,"info":"\"14-11-03\" at \"21:48\""},{"visible":true,"include":false,"step":"150","x":-4270.0952380952385,"y":2862.9523809523807,"z":861.5238095238095,"a95":1.7,"info":"\"14-11-04\" at \"16:48\""},{"visible":true,"include":false,"step":"180","x":-3158.5714285714284,"y":2099.4285714285716,"z":700.0952380952381,"a95":2.2,"info":"\"14-11-04\" at \"22:02\""},{"visible":true,"include":false,"step":"210","x":-2715.1428571428573,"y":1837.6190476190477,"z":548.8571428571429,"a95":2.7,"info":"\"14-11-05\" at \"17:26\""},{"visible":true,"include":false,"step":"240","x":-2151.809523809524,"y":1463.142857142857,"z":303.6190476190476,"a95":2.4,"info":"\"14-11-05\" at \"23:04\""},{"visible":true,"include":false,"step":"270","x":-1803.047619047619,"y":1261.6190476190477,"z":318.4761904761905,"a95":1.8,"info":"\"14-11-06\" at \"21:28\""},{"visible":true,"include":false,"step":"300","x":-1456.6666666666667,"y":1155.7142857142858,"z":383.23809523809524,"a95":1.8,"info":"\"14-11-07\" at \"15:32\""},{"visible":true,"include":false,"step":"320","x":-1179.4285714285713,"y":1036.7619047619048,"z":474.76190476190476,"a95":1.8,"info":"\"14-11-07\" at \"20:13\""},{"visible":true,"include":false,"step":"340","x":-907.047619047619,"y":881.8095238095239,"z":441.7142857142857,"a95":1.8,"info":"\"14-11-15\" at \"20:09\""},{"visible":true,"include":false,"step":"360","x":-920.6666666666666,"y":842.6666666666666,"z":264.6666666666667,"a95":1.9,"info":"\"14-11-16\" at \"00:02\""},{"visible":true,"include":false,"step":"380","x":-906.952380952381,"y":813.8095238095239,"z":278.6666666666667,"a95":1.7,"info":"\"14-11-16\" at \"03:12\""},{"visible":true,"include":false,"step":"400","x":-871.7142857142857,"y":649.8095238095239,"z":142.28571428571428,"a95":1.7,"info":"\"14-11-16\" at \"22:17\""},{"visible":true,"include":false,"step":"420","x":-727.1428571428571,"y":527.3333333333334,"z":93.42857142857143,"a95":1.7,"info":"\"14-11-17\" at \"01:32\""},{"visible":true,"include":false,"step":"450","x":-653.9047619047619,"y":532.4761904761905,"z":150.0952380952381,"a95":1.9,"info":"\"14-11-17\" at \"04:20\""},{"visible":true,"include":false,"step":"610","x":-278.1904761904762,"y":595.7142857142857,"z":-184.66666666666666,"a95":7,"info":"\"14-11-28\" at \"23:21\""}]},{"version":"v1.1.0","exported":"2016-11-23T15:43:28.784Z","volume":10.5,"added":"2016-11-23T15:36:48.545Z","format":"Utrecht","demagType":"Unknown","strat":"2","patch":1.1,"GEO":[],"TECT":[],"interpreted":false,"name":"HP2.4B","coreAzi":274,"coreDip":19,"bedStrike":251,"bedDip":51,"data":[{"visible":true,"include":false,"step":"0.0","x":-3389.0476190476193,"y":2106.7619047619046,"z":1453.4285714285713,"a95":0.99,"info":"28/09/2014 at 16:02:25"},{"visible":true,"include":false,"step":"10.0","x":-2127.904761904762,"y":1087.904761904762,"z":821.3809523809524,"a95":0.99,"info":"28/09/2014 at 16:02:25"},{"visible":true,"include":false,"step":"15.0","x":-1614.3809523809523,"y":749.2285714285714,"z":667.9142857142857,"a95":0.99,"info":"28/09/2014 at 16:02:25"},{"visible":true,"include":false,"step":"20.0","x":-1274,"y":644.504761904762,"z":463.20000000000005,"a95":0.99,"info":"28/09/2014 at 16:02:25"},{"visible":true,"include":false,"step":"25.0","x":-1037.8095238095239,"y":451.18095238095236,"z":326.6380952380952,"a95":0.99,"info":"28/09/2014 at 16:02:25"},{"visible":true,"include":false,"step":"30.0","x":-857.2476190476191,"y":342.81904761904764,"z":178.15238095238095,"a95":0.99,"info":"28/09/2014 at 16:02:25"},{"visible":true,"include":false,"step":"35.0","x":-744.504761904762,"y":190.4952380952381,"z":173.24761904761903,"a95":0.99,"info":"28/09/2014 at 16:02:25"},{"visible":true,"include":false,"step":"40.0","x":-645.2,"y":212.9142857142857,"z":-6.939809523809523,"a95":0.99,"info":"28/09/2014 at 16:02:25"},{"visible":true,"include":false,"step":"45.0","x":-642.1809523809524,"y":141.75238095238097,"z":153.62857142857143,"a95":0.99,"info":"28/09/2014 at 16:02:25"},{"visible":true,"include":false,"step":"50.0","x":-621.3047619047619,"y":56.112380952380946,"z":-52.97238095238096,"a95":0.99,"info":"28/09/2014 at 16:02:25"},{"visible":true,"include":false,"step":"60.0","x":-297.752380952381,"y":201.95238095238096,"z":57.68571428571429,"a95":0.99,"info":"28/09/2014 at 16:02:25"},{"visible":true,"include":false,"step":"70.0","x":-409.6190476190476,"y":88.61904761904762,"z":-160.66666666666666,"a95":0.99,"info":"28/09/2014 at 16:02:25"},{"visible":true,"include":false,"step":"80.0","x":-345.6190476190476,"y":-86.62666666666667,"z":143.2952380952381,"a95":0.99,"info":"28/09/2014 at 16:02:25"},{"visible":true,"include":false,"step":"90.0","x":-164.45714285714286,"y":83.68095238095238,"z":-115.56190476190477,"a95":0.99,"info":"28/09/2014 at 16:02:25"}]},{"version":"v1.1.0","exported":"2016-11-23T15:43:28.784Z","volume":10.5,"added":"2016-11-23T15:36:48.545Z","format":"Utrecht","demagType":"Unknown","strat":"4","patch":1.1,"GEO":[],"TECT":[],"interpreted":false,"name":"HP2.6B","coreAzi":331,"coreDip":23,"bedStrike":251,"bedDip":51,"data":[{"visible":true,"include":false,"step":"0.0","x":-1897.7142857142858,"y":1071.7142857142858,"z":2630,"a95":0.99,"info":"05/11/2014 at 18:18:16"},{"visible":true,"include":false,"step":"10.0","x":-1377.7142857142858,"y":789.1238095238094,"z":1841.142857142857,"a95":0.99,"info":"05/11/2014 at 18:18:16"},{"visible":true,"include":false,"step":"15.0","x":-958.952380952381,"y":471.6,"z":1310.3809523809523,"a95":0.99,"info":"05/11/2014 at 18:18:16"},{"visible":true,"include":false,"step":"20.0","x":-771.8761904761905,"y":552.2761904761904,"z":1012.3809523809524,"a95":0.99,"info":"05/11/2014 at 18:18:16"},{"visible":true,"include":false,"step":"25.0","x":-461.4761904761905,"y":338.43809523809523,"z":758.7619047619048,"a95":0.99,"info":"05/11/2014 at 18:18:16"},{"visible":true,"include":false,"step":"30.0","x":-446.9809523809524,"y":157.32380952380953,"z":581.5904761904761,"a95":0.99,"info":"05/11/2014 at 18:18:16"},{"visible":true,"include":false,"step":"35.0","x":-581.2761904761904,"y":216.38095238095238,"z":540.6761904761905,"a95":0.99,"info":"05/11/2014 at 18:18:16"},{"visible":true,"include":false,"step":"40.0","x":-355.04761904761904,"y":162.2095238095238,"z":358.6666666666667,"a95":0.99,"info":"05/11/2014 at 18:18:16"},{"visible":true,"include":false,"step":"45.0","x":-176.75238095238097,"y":209.47619047619048,"z":162.68571428571428,"a95":0.99,"info":"05/11/2014 at 18:18:16"},{"visible":true,"include":false,"step":"50.0","x":-222.71428571428572,"y":242.9238095238095,"z":306.2095238095238,"a95":0.99,"info":"05/11/2014 at 18:18:16"},{"visible":true,"include":false,"step":"60.0","x":-462.8666666666667,"y":173.6095238095238,"z":41.50857142857143,"a95":0.99,"info":"05/11/2014 at 18:18:16"},{"visible":true,"include":false,"step":"70.0","x":-405.76190476190476,"y":73.76095238095238,"z":-4.102666666666667,"a95":0.99,"info":"05/11/2014 at 18:18:16"},{"visible":true,"include":false,"step":"80.0","x":-242.35238095238094,"y":-99.02857142857142,"z":59.66285714285715,"a95":0.99,"info":"05/11/2014 at 18:18:16"},{"visible":true,"include":false,"step":"90.0","x":-306.1333333333333,"y":76.73904761904762,"z":-122.9047619047619,"a95":0.99,"info":"05/11/2014 at 18:18:16"}]},{"version":"v1.1.0","exported":"2016-11-23T15:43:28.784Z","volume":10.5,"added":"2016-11-23T15:36:48.545Z","format":"Utrecht","demagType":"Unknown","strat":null,"patch":1.1,"GEO":[],"TECT":[],"interpreted":false,"name":"HP2.7A","coreAzi":315,"coreDip":5,"bedStrike":251,"bedDip":51,"data":[{"visible":true,"include":false,"step":"20","x":-8019.428571428572,"y":2520.8571428571427,"z":4970.666666666667,"a95":2,"info":"\"14-11-03\" at \"21:51\""},{"visible":true,"include":false,"step":"150","x":-7259.333333333333,"y":2137.809523809524,"z":3704.4761904761904,"a95":1.9,"info":"\"14-11-04\" at \"16:51\""},{"visible":true,"include":false,"step":"180","x":-5440.952380952381,"y":1168.952380952381,"z":2685.3333333333335,"a95":2,"info":"\"14-11-04\" at \"22:04\""},{"visible":true,"include":false,"step":"210","x":-5026,"y":1156,"z":2473.904761904762,"a95":2,"info":"\"14-11-05\" at \"17:29\""},{"visible":true,"include":false,"step":"240","x":-4625.619047619048,"y":1012.1904761904761,"z":2100.095238095238,"a95":2,"info":"\"14-11-05\" at \"23:11\""},{"visible":true,"include":false,"step":"270","x":-3990.285714285714,"y":754.1904761904761,"z":1917.5238095238096,"a95":2.1,"info":"\"14-11-06\" at \"21:30\""},{"visible":true,"include":false,"step":"300","x":-3761.1428571428573,"y":1010.4761904761905,"z":1683.5238095238096,"a95":1.8,"info":"\"14-11-07\" at \"15:34\""},{"visible":true,"include":false,"step":"320","x":-3031.1428571428573,"y":547.3333333333334,"z":1371.142857142857,"a95":1.9,"info":"\"14-11-07\" at \"20:15\""},{"visible":true,"include":false,"step":"340","x":-2455.0476190476193,"y":388.57142857142856,"z":1018.2857142857143,"a95":1.8,"info":"\"14-11-15\" at \"20:12\""},{"visible":true,"include":false,"step":"360","x":-2272,"y":404.0952380952381,"z":808.7619047619048,"a95":2,"info":"\"14-11-16\" at \"00:04\""},{"visible":true,"include":false,"step":"380","x":-2157.3333333333335,"y":414.85714285714283,"z":820.8571428571429,"a95":1.9,"info":"\"14-11-16\" at \"03:14\""},{"visible":true,"include":false,"step":"400","x":-1991.8095238095239,"y":432.0952380952381,"z":690.1904761904761,"a95":1.7,"info":"\"14-11-16\" at \"22:19\""},{"visible":true,"include":false,"step":"420","x":-1896.1904761904761,"y":349.6190476190476,"z":800.6666666666666,"a95":1.8,"info":"\"14-11-17\" at \"01:34\""},{"visible":true,"include":false,"step":"450","x":-1757.7142857142858,"y":345.42857142857144,"z":679.6190476190476,"a95":1.9,"info":"\"14-11-17\" at \"04:23\""},{"visible":true,"include":false,"step":"610","x":-402.85714285714283,"y":386.1904761904762,"z":46.95238095238095,"a95":7.2,"info":"\"14-11-28\" at \"23:23\""}]},{"version":"v1.1.0","exported":"2016-11-23T15:43:28.784Z","volume":10.5,"added":"2016-11-23T15:36:48.552Z","format":"Utrecht","demagType":"Unknown","strat":"3","patch":1.1,"GEO":[],"TECT":[],"interpreted":false,"name":"HP2.7B","coreAzi":315,"coreDip":5,"bedStrike":251,"bedDip":51,"data":[{"visible":true,"include":false,"step":"0.0","x":-7305.809523809524,"y":2616.5714285714284,"z":4604.952380952381,"a95":0.99,"info":"28/09/2014 at 16:02:25"},{"visible":true,"include":false,"step":"10.0","x":-6277.619047619048,"y":1991.142857142857,"z":3755.714285714286,"a95":0.99,"info":"28/09/2014 at 16:02:25"},{"visible":true,"include":false,"step":"15.0","x":-5252,"y":1653.7142857142858,"z":3097.809523809524,"a95":0.99,"info":"28/09/2014 at 16:02:25"},{"visible":true,"include":false,"step":"20.0","x":-4409.809523809524,"y":1292.952380952381,"z":2579.2380952380954,"a95":0.99,"info":"28/09/2014 at 16:02:25"},{"visible":true,"include":false,"step":"25.0","x":-3705.6190476190477,"y":1018.6666666666666,"z":2235.2380952380954,"a95":0.99,"info":"28/09/2014 at 16:02:25"},{"visible":true,"include":false,"step":"30.0","x":-3201.714285714286,"y":767.3428571428572,"z":1889.047619047619,"a95":0.99,"info":"28/09/2014 at 16:02:25"},{"visible":true,"include":false,"step":"35.0","x":-2740.8571428571427,"y":700.7619047619048,"z":1613.6190476190477,"a95":0.99,"info":"28/09/2014 at 16:02:25"},{"visible":true,"include":false,"step":"40.0","x":-2390,"y":594.3047619047619,"z":1460.095238095238,"a95":0.99,"info":"28/09/2014 at 16:02:25"},{"visible":true,"include":false,"step":"45.0","x":-2256.6666666666665,"y":461.7714285714286,"z":1270.1904761904761,"a95":0.99,"info":"28/09/2014 at 16:02:25"},{"visible":true,"include":false,"step":"50.0","x":-1910.095238095238,"y":510.9238095238095,"z":1209.904761904762,"a95":0.99,"info":"28/09/2014 at 16:02:25"},{"visible":true,"include":false,"step":"60.0","x":-1521.7142857142858,"y":405.83809523809526,"z":940.3809523809524,"a95":0.99,"info":"28/09/2014 at 16:02:25"},{"visible":true,"include":false,"step":"70.0","x":-1256.3809523809523,"y":148.36190476190475,"z":670.1428571428571,"a95":0.99,"info":"28/09/2014 at 16:02:25"},{"visible":true,"include":false,"step":"80.0","x":-982,"y":303.32380952380953,"z":573.2761904761904,"a95":0.99,"info":"28/09/2014 at 16:02:25"},{"visible":true,"include":false,"step":"90.0","x":-950.5809523809525,"y":179.67619047619047,"z":450.4761904761905,"a95":0.99,"info":"28/09/2014 at 16:02:25"}]},{"version":"v1.1.0","exported":"2016-11-23T15:43:28.784Z","volume":10.5,"added":"2016-11-23T15:36:48.552Z","format":"Utrecht","demagType":"Unknown","strat":null,"patch":1.1,"GEO":[{"dec":328.0739062845273,"inc":73.29059923973837,"MAD":3.8013093529534827,"cm":[-7.105427357601002e-15,-2.1316282072803006e-14,0],"intensity":4112.572720996861,"type":"dir","forced":true,"remark":"","origin":false,"nSteps":5,"minStep":"240","maxStep":"340","steps":["240","270","300","320","340"],"group":"None","version":"v1.1.0"}],"TECT":[{"dec":337.9498753288538,"inc":32.723007857168156,"MAD":3.8013093529535174,"cm":[1.4210854715202004e-14,2.3447910280083306e-13,2.842170943040401e-14],"intensity":4112.572720996861,"type":"dir","forced":true,"remark":"","origin":false,"nSteps":5,"minStep":"240","maxStep":"340","steps":["240","270","300","320","340"],"group":"None","version":"v1.1.0"}],"interpreted":true,"name":"HP2.8A","coreAzi":314,"coreDip":14,"bedStrike":253,"bedDip":41,"data":[{"visible":true,"include":false,"step":"20","x":-8668.285714285714,"y":1452.1904761904761,"z":5143.714285714285,"a95":2.1,"info":"\"14-11-03\" at \"21:54\""},{"visible":true,"include":false,"step":"150","x":-4040.9523809523807,"y":754.3809523809524,"z":2766.5714285714284,"a95":2.1,"info":"\"14-11-04\" at \"16:53\""},{"visible":true,"include":false,"step":"180","x":-3653.3333333333335,"y":489.9047619047619,"z":2400.7619047619046,"a95":2,"info":"\"14-11-04\" at \"22:06\""},{"visible":true,"include":false,"step":"210","x":-3281.3333333333335,"y":534.2857142857143,"z":2171.904761904762,"a95":2.2,"info":"\"14-11-05\" at \"17:32\""},{"visible":true,"include":true,"step":"240","x":-2708.6666666666665,"y":340.1904761904762,"z":1645.6190476190477,"a95":2.2,"info":"\"14-11-05\" at \"23:12\""},{"visible":true,"include":true,"step":"270","x":-1898.2857142857142,"y":108.66666666666667,"z":1128.7619047619048,"a95":2.3,"info":"\"14-11-06\" at \"21:32\""},{"visible":true,"include":true,"step":"300","x":-1674,"y":45.523809523809526,"z":995.3333333333334,"a95":2.1,"info":"\"14-11-07\" at \"15:37\""},{"visible":true,"include":true,"step":"320","x":-1330.1904761904761,"y":165.14285714285714,"z":618.4761904761905,"a95":2.2,"info":"\"14-11-07\" at \"20:17\""},{"visible":true,"include":true,"step":"340","x":-844.2857142857143,"y":-138.47619047619048,"z":415.7142857142857,"a95":2.1,"info":"\"14-11-15\" at \"20:14\""},{"visible":true,"include":false,"step":"360","x":-901.5238095238095,"y":-70.85714285714286,"z":191.23809523809524,"a95":2.1,"info":"\"14-11-16\" at \"00:06\""},{"visible":true,"include":false,"step":"380","x":-793.4285714285714,"y":-7.714285714285714,"z":255.9047619047619,"a95":2.3,"info":"\"14-11-16\" at \"03:16\""},{"visible":true,"include":false,"step":"400","x":-636,"y":2.0952380952380953,"z":57.61904761904762,"a95":2.4,"info":"\"14-11-16\" at \"22:21\""},{"visible":false,"include":false,"step":"420","x":-726.6666666666666,"y":40.57142857142857,"z":128.1904761904762,"a95":2.1,"info":"\"14-11-17\" at \"01:36\""},{"visible":false,"include":false,"step":"450","x":-862.0952380952381,"y":14.285714285714286,"z":-42.476190476190474,"a95":2.1,"info":"\"14-11-17\" at \"04:25\""},{"visible":false,"include":false,"step":"610","x":378.85714285714283,"y":725.8095238095239,"z":-391.42857142857144,"a95":6.7,"info":"\"14-11-28\" at \"23:26\""}]},{"version":"v1.1.0","exported":"2016-11-23T15:43:28.785Z","volume":10.5,"added":"2016-11-23T15:36:48.553Z","format":"Utrecht","demagType":"Unknown","strat":"2","patch":1.1,"GEO":[{"dec":319.03292604796155,"inc":73.49808794019027,"MAD":6.873100815597036,"cm":[-1.2434497875801753e-14,-1.2434497875801753e-14,0],"intensity":2635.9485363579156,"type":"dir","forced":true,"remark":"","origin":false,"nSteps":6,"minStep":"50.0","maxStep":"100.0","steps":["50.0","60.0","70.0","80.0","90.0","100.0"],"group":"None","version":"v1.1.0"}],"TECT":[{"dec":335.0376312655443,"inc":33.59637802743537,"MAD":6.873100815597045,"cm":[-5.684341886080802e-14,-1.723066134218243e-13,0],"intensity":2635.9485363579156,"type":"dir","forced":true,"remark":"","origin":false,"nSteps":6,"minStep":"50.0","maxStep":"100.0","steps":["50.0","60.0","70.0","80.0","90.0","100.0"],"group":"None","version":"v1.1.0"}],"interpreted":true,"name":"HP2.8B","coreAzi":314,"coreDip":14,"bedStrike":253,"bedDip":41,"data":[{"visible":false,"include":false,"step":"0.0","x":-9010.190476190477,"y":3795.714285714286,"z":8766,"a95":0.99,"info":"23/09/2014 at 01:58:34"},{"visible":false,"include":false,"step":"5.0","x":-8098.190476190476,"y":3344.3809523809523,"z":7677.047619047619,"a95":0.99,"info":"23/09/2014 at 01:58:34"},{"visible":false,"include":false,"step":"10.0","x":-6508.0952380952385,"y":2557.904761904762,"z":5912.380952380952,"a95":0.99,"info":"23/09/2014 at 01:58:34"},{"visible":true,"include":false,"step":"15.0","x":-5258.0952380952385,"y":1981.3333333333333,"z":4679.714285714285,"a95":0.99,"info":"23/09/2014 at 01:58:34"},{"visible":true,"include":false,"step":"20.0","x":-4272.571428571428,"y":1442.5714285714287,"z":3703.3333333333335,"a95":0.99,"info":"23/09/2014 at 01:58:34"},{"visible":true,"include":false,"step":"25.0","x":-3395.6190476190477,"y":1198,"z":3030.4761904761904,"a95":0.99,"info":"23/09/2014 at 01:58:34"},{"visible":true,"include":false,"step":"30.0","x":-2902.8571428571427,"y":861.4666666666666,"z":2400,"a95":0.99,"info":"23/09/2014 at 01:58:34"},{"visible":true,"include":false,"step":"35.0","x":-2580.8571428571427,"y":879.7714285714286,"z":1972.1904761904761,"a95":0.99,"info":"23/09/2014 at 01:58:34"},{"visible":true,"include":false,"step":"40.0","x":-2344.3809523809523,"y":563.847619047619,"z":1553.2380952380952,"a95":0.99,"info":"23/09/2014 at 01:58:34"},{"visible":true,"include":false,"step":"45.0","x":-1864.857142857143,"y":384.06666666666666,"z":1255.2380952380952,"a95":0.99,"info":"23/09/2014 at 01:58:34"},{"visible":true,"include":true,"step":"50.0","x":-1652.1904761904761,"y":-31.975238095238097,"z":1090.7619047619048,"a95":0.99,"info":"23/09/2014 at 01:58:34"},{"visible":true,"include":true,"step":"60.0","x":-1499.8095238095239,"y":64.22095238095238,"z":928.0571428571429,"a95":0.99,"info":"23/09/2014 at 01:58:34"},{"visible":true,"include":true,"step":"70.0","x":-1163.4285714285713,"y":233.26666666666668,"z":629.1333333333333,"a95":0.99,"info":"23/09/2014 at 01:58:34"},{"visible":true,"include":true,"step":"80.0","x":-1014.0952380952381,"y":-53.68095238095238,"z":722.895238095238,"a95":0.99,"info":"23/09/2014 at 01:58:34"},{"visible":true,"include":true,"step":"90.0","x":-1095.7142857142858,"y":-36.00952380952381,"z":306.85714285714283,"a95":0.99,"info":"23/09/2014 at 01:58:34"},{"visible":true,"include":true,"step":"100.0","x":-589.4,"y":67.0952380952381,"z":295.6952380952381,"a95":0.99,"info":"23/09/2014 at 01:58:34"}]},{"version":"v1.1.0","exported":"2016-11-23T15:43:28.785Z","volume":10.5,"added":"2016-11-23T15:36:48.553Z","format":"Utrecht","demagType":"Unknown","strat":"5","patch":1.1,"GEO":[],"TECT":[],"interpreted":false,"name":"HP2.9B","coreAzi":339,"coreDip":26,"bedStrike":253,"bedDip":41,"data":[{"visible":true,"include":false,"step":"0.0","x":-1948.2857142857142,"y":618.2285714285714,"z":2985.0476190476193,"a95":0.99,"info":"05/11/2014 at 18:18:16"},{"visible":true,"include":false,"step":"10.0","x":-1406.2857142857142,"y":418.3047619047619,"z":2018.2857142857142,"a95":0.99,"info":"05/11/2014 at 18:18:16"},{"visible":true,"include":false,"step":"15.0","x":-1037.6190476190477,"y":251.51428571428573,"z":1357.904761904762,"a95":0.99,"info":"05/11/2014 at 18:18:16"},{"visible":true,"include":true,"step":"20.0","x":-669.2,"y":261.04761904761904,"z":936.6666666666666,"a95":0.99,"info":"05/11/2014 at 18:18:16"},{"visible":true,"include":true,"step":"25.0","x":-561.2476190476191,"y":229.37142857142857,"z":612.4190476190475,"a95":0.99,"info":"05/11/2014 at 18:18:16"},{"visible":true,"include":true,"step":"30.0","x":-240.55238095238096,"y":255.32380952380953,"z":303.1333333333333,"a95":0.99,"info":"05/11/2014 at 18:18:16"},{"visible":true,"include":false,"step":"35.0","x":-246.21904761904764,"y":-50.93047619047619,"z":331.97142857142853,"a95":0.99,"info":"05/11/2014 at 18:18:16"},{"visible":true,"include":false,"step":"40.0","x":-105.3047619047619,"y":-229.46666666666667,"z":402.27619047619044,"a95":0.99,"info":"05/11/2014 at 18:18:16"},{"visible":true,"include":false,"step":"45.0","x":-18.799047619047617,"y":-78.08095238095238,"z":157.92380952380952,"a95":0.99,"info":"05/11/2014 at 18:18:16"},{"visible":true,"include":false,"step":"50.0","x":107.1047619047619,"y":-181.0285714285714,"z":308.96190476190475,"a95":0.99,"info":"05/11/2014 at 18:18:16"},{"visible":true,"include":false,"step":"60.0","x":-144.2761904761905,"y":104.82857142857144,"z":84.56952380952382,"a95":0.99,"info":"05/11/2014 at 18:18:16"},{"visible":true,"include":false,"step":"70.0","x":-177.7904761904762,"y":2.437809523809524,"z":79.06666666666668,"a95":0.99,"info":"05/11/2014 at 18:18:16"},{"visible":true,"include":false,"step":"80.0","x":-369.16190476190474,"y":68.96285714285715,"z":-38.56,"a95":0.99,"info":"05/11/2014 at 18:18:16"},{"visible":true,"include":false,"step":"90.0","x":-15.894285714285713,"y":-4.2,"z":-24.875238095238096,"a95":0.99,"info":"05/11/2014 at 18:18:16"}]},{"version":"v1.1.0","exported":"2016-11-23T15:43:28.785Z","volume":10.5,"added":"2016-11-23T15:36:48.553Z","format":"Utrecht","demagType":"Unknown","strat":null,"patch":1.1,"GEO":[{"dec":258.93250203459803,"inc":69.1295603387909,"MAD":5.0673411153286105,"cm":[1.7763568394002505e-15,7.105427357601002e-15,0],"intensity":3189.353850922559,"type":"dir","forced":true,"remark":"","origin":false,"nSteps":10,"minStep":"270","maxStep":"610","steps":["270","300","320","340","360","380","400","420","450","610"],"group":"None","version":"v1.1.0"}],"TECT":[{"dec":314.05852415906634,"inc":42.92456043744138,"MAD":5.0673411153285945,"cm":[-2.4513724383723456e-13,-2.0961010704922955e-13,5.3290705182007514e-14],"intensity":3189.353850922559,"type":"dir","forced":true,"remark":"","origin":false,"nSteps":10,"minStep":"270","maxStep":"610","steps":["270","300","320","340","360","380","400","420","450","610"],"group":"None","version":"v1.1.0"}],"interpreted":true,"name":"HP2.10A","coreAzi":207,"coreDip":14,"bedStrike":253,"bedDip":41,"data":[{"visible":false,"include":false,"step":"20","x":-9193.333333333334,"y":5472.571428571428,"z":6311.619047619048,"a95":2.1,"info":"\"14-11-03\" at \"21:56\""},{"visible":true,"include":false,"step":"150","x":-4589.428571428572,"y":2448.285714285714,"z":2798.190476190476,"a95":2,"info":"\"14-11-04\" at \"16:55\""},{"visible":true,"include":false,"step":"180","x":-4250.0952380952385,"y":1907.7142857142858,"z":2490,"a95":2,"info":"\"14-11-04\" at \"22:08\""},{"visible":true,"include":false,"step":"210","x":-3785.0476190476193,"y":1726.6666666666667,"z":2256.6666666666665,"a95":2,"info":"\"14-11-05\" at \"17:35\""},{"visible":true,"include":false,"step":"240","x":-3340.285714285714,"y":1403.5238095238096,"z":1760.4761904761904,"a95":1.9,"info":"\"14-11-05\" at \"23:15\""},{"visible":true,"include":true,"step":"270","x":-2278.7619047619046,"y":732.4761904761905,"z":1025.4285714285713,"a95":1.8,"info":"\"14-11-06\" at \"21:34\""},{"visible":true,"include":true,"step":"300","x":-1984.7619047619048,"y":791.8095238095239,"z":871.2380952380952,"a95":1.9,"info":"\"14-11-07\" at \"15:39\""},{"visible":true,"include":true,"step":"320","x":-1544.952380952381,"y":617.047619047619,"z":819.6190476190476,"a95":1.9,"info":"\"14-11-07\" at \"20:19\""},{"visible":true,"include":true,"step":"340","x":-1379.3333333333333,"y":431.5238095238095,"z":743.6190476190476,"a95":1.9,"info":"\"14-11-15\" at \"20:16\""},{"visible":true,"include":true,"step":"360","x":-1309.047619047619,"y":373.23809523809524,"z":671.2380952380952,"a95":1.8,"info":"\"14-11-16\" at \"00:09\""},{"visible":true,"include":true,"step":"380","x":-1168.857142857143,"y":315.6190476190476,"z":689.047619047619,"a95":1.9,"info":"\"14-11-16\" at \"03:19\""},{"visible":true,"include":true,"step":"400","x":-1041.7142857142858,"y":213.61904761904762,"z":626.0952380952381,"a95":1.9,"info":"\"14-11-16\" at \"22:24\""},{"visible":true,"include":true,"step":"420","x":-949.6190476190476,"y":150.28571428571428,"z":624,"a95":2,"info":"\"14-11-17\" at \"01:38\""},{"visible":true,"include":true,"step":"450","x":-861.3333333333334,"y":264.6666666666667,"z":599.7142857142857,"a95":2.7,"info":"\"14-11-17\" at \"04:27\""},{"visible":true,"include":true,"step":"610","x":-410.2857142857143,"y":298.1904761904762,"z":345.23809523809524,"a95":7.2,"info":"\"14-11-28\" at \"23:28\""}]},{"version":"v1.1.0","exported":"2016-11-23T15:43:28.785Z","volume":10.5,"added":"2016-11-23T15:36:48.553Z","format":"Utrecht","demagType":"Unknown","strat":"6","patch":1.1,"GEO":[{"dec":253.30836173770427,"inc":61.42810689145198,"MAD":1.8460113895234558,"cm":[-7.238654120556021e-14,2.1316282072803006e-14,0],"intensity":3266.9817928941757,"type":"dir","forced":true,"remark":"","origin":false,"nSteps":9,"minStep":"15.0","maxStep":"60.0","steps":["15.0","20.0","25.0","30.0","35.0","40.0","45.0","50.0","60.0"],"group":"None","version":"v1.1.0"}],"TECT":[{"dec":303.3997688494018,"inc":41.384631813684116,"MAD":1.846011389523492,"cm":[-1.438849039914203e-13,-5.3290705182007514e-14,7.105427357601002e-14],"intensity":3266.9817928941757,"type":"dir","forced":true,"remark":"","origin":false,"nSteps":9,"minStep":"15.0","maxStep":"60.0","steps":["15.0","20.0","25.0","30.0","35.0","40.0","45.0","50.0","60.0"],"group":"None","version":"v1.1.0"}],"interpreted":true,"name":"HP2.10B","coreAzi":207,"coreDip":14,"bedStrike":253,"bedDip":41,"data":[{"visible":false,"include":false,"step":"0.0","x":-3623.3333333333335,"y":1866.5714285714287,"z":2493.1428571428573,"a95":0.99,"info":"05/11/2014 at 18:18:16"},{"visible":true,"include":false,"step":"10.0","x":-2773.3333333333335,"y":1370.2857142857142,"z":1929.7142857142858,"a95":0.99,"info":"05/11/2014 at 18:18:16"},{"visible":true,"include":true,"step":"15.0","x":-2206.285714285714,"y":1019.047619047619,"z":1554,"a95":0.99,"info":"05/11/2014 at 18:18:16"},{"visible":true,"include":true,"step":"20.0","x":-1738.4761904761904,"y":811.5999999999999,"z":1174.6666666666667,"a95":0.99,"info":"05/11/2014 at 18:18:16"},{"visible":true,"include":true,"step":"25.0","x":-1377.8095238095239,"y":568.952380952381,"z":904.647619047619,"a95":0.99,"info":"05/11/2014 at 18:18:16"},{"visible":true,"include":true,"step":"30.0","x":-1001.9047619047619,"y":411.2190476190476,"z":718.0571428571429,"a95":0.99,"info":"05/11/2014 at 18:18:16"},{"visible":true,"include":true,"step":"35.0","x":-924.5714285714286,"y":386.3333333333333,"z":594.4857142857143,"a95":0.99,"info":"05/11/2014 at 18:18:16"},{"visible":true,"include":true,"step":"40.0","x":-741.8095238095239,"y":317.8,"z":509.0952380952381,"a95":0.99,"info":"05/11/2014 at 18:18:16"},{"visible":true,"include":true,"step":"45.0","x":-649.8190476190476,"y":229.36190476190478,"z":471.7142857142857,"a95":0.99,"info":"05/11/2014 at 18:18:16"},{"visible":true,"include":true,"step":"50.0","x":-447.6285714285715,"y":267.42857142857144,"z":377.0095238095238,"a95":0.99,"info":"05/11/2014 at 18:18:16"},{"visible":true,"include":true,"step":"60.0","x":-273.37142857142857,"y":183.0952380952381,"z":200.8,"a95":0.99,"info":"05/11/2014 at 18:18:16"},{"visible":true,"include":false,"step":"70.0","x":-196.96190476190475,"y":99.56190476190477,"z":165.66666666666666,"a95":0.99,"info":"05/11/2014 at 18:18:16"},{"visible":true,"include":false,"step":"80.0","x":-202.0857142857143,"y":135.55238095238096,"z":264.1047619047619,"a95":0.99,"info":"05/11/2014 at 18:18:16"},{"visible":false,"include":false,"step":"90.0","x":-52.93904761904762,"y":168.64761904761903,"z":67.59809523809524,"a95":0.99,"info":"05/11/2014 at 18:18:16"}]},{"version":"v1.1.0","exported":"2016-11-23T15:43:28.785Z","volume":10.5,"added":"2016-11-23T15:36:48.553Z","format":"Utrecht","demagType":"Unknown","strat":"4","patch":1.1,"GEO":[],"TECT":[],"interpreted":false,"name":"HP2.11A","coreAzi":302,"coreDip":0,"bedStrike":253,"bedDip":41,"data":[{"visible":true,"include":false,"step":"0.0","x":-28240.95238095238,"y":22415.238095238095,"z":2754.285714285714,"a95":0.99,"info":"28/09/2014 at 16:02:25"},{"visible":true,"include":false,"step":"10.0","x":-12779.047619047618,"y":7701.9047619047615,"z":5241.238095238095,"a95":0.99,"info":"28/09/2014 at 16:02:25"},{"visible":true,"include":false,"step":"15.0","x":-8231.142857142857,"y":5486.476190476191,"z":3378.3809523809523,"a95":0.99,"info":"28/09/2014 at 16:02:25"},{"visible":true,"include":false,"step":"20.0","x":-5757.714285714285,"y":3916,"z":3030.4761904761904,"a95":0.99,"info":"28/09/2014 at 16:02:25"},{"visible":true,"include":false,"step":"25.0","x":-4124.380952380952,"y":3244.9523809523807,"z":2580.8571428571427,"a95":0.99,"info":"28/09/2014 at 16:02:25"},{"visible":true,"include":false,"step":"30.0","x":-3235.6190476190477,"y":2810.4761904761904,"z":1568.095238095238,"a95":0.99,"info":"28/09/2014 at 16:02:25"},{"visible":true,"include":false,"step":"35.0","x":-2689.714285714286,"y":2476.3809523809523,"z":1649.142857142857,"a95":0.99,"info":"28/09/2014 at 16:02:25"},{"visible":true,"include":false,"step":"40.0","x":-2885.904761904762,"y":1894.3809523809523,"z":1669.904761904762,"a95":0.99,"info":"28/09/2014 at 16:02:25"},{"visible":true,"include":false,"step":"45.0","x":-2207.4285714285716,"y":1705.5238095238096,"z":363.5238095238095,"a95":0.99,"info":"28/09/2014 at 16:02:25"},{"visible":true,"include":false,"step":"50.0","x":-1936.2857142857142,"y":870.5333333333334,"z":1493.7142857142858,"a95":0.99,"info":"28/09/2014 at 16:02:25"},{"visible":true,"include":false,"step":"60.0","x":-859.4190476190475,"y":651.2666666666667,"z":598.7904761904762,"a95":0.99,"info":"28/09/2014 at 16:02:25"},{"visible":true,"include":false,"step":"70.0","x":-1016.6666666666666,"y":1463.142857142857,"z":-358.50476190476195,"a95":0.99,"info":"28/09/2014 at 16:02:25"},{"visible":true,"include":false,"step":"80.0","x":-1016.1904761904761,"y":731.2095238095238,"z":797.3809523809524,"a95":0.99,"info":"28/09/2014 at 16:02:25"},{"visible":true,"include":false,"step":"90.0","x":-671.6380952380953,"y":1556,"z":465.20000000000005,"a95":0.99,"info":"28/09/2014 at 16:02:25"}]},{"version":"v1.1.0","exported":"2016-11-23T15:43:28.785Z","volume":10.5,"added":"2016-11-23T15:36:48.554Z","format":"Utrecht","demagType":"Unknown","strat":"3","patch":1.1,"GEO":[],"TECT":[],"interpreted":false,"name":"HP2.11B","coreAzi":302,"coreDip":0,"bedStrike":253,"bedDip":41,"data":[{"visible":true,"include":false,"step":"0.0","x":-29477.14285714286,"y":19844.761904761905,"z":18245.714285714286,"a95":0.99,"info":"23/09/2014 at 01:58:34"},{"visible":true,"include":false,"step":"5.0","x":-26140.95238095238,"y":16737.14285714286,"z":15983.809523809523,"a95":0.99,"info":"23/09/2014 at 01:58:34"},{"visible":true,"include":false,"step":"10.0","x":-19920.95238095238,"y":12120.952380952382,"z":11847.619047619048,"a95":0.99,"info":"23/09/2014 at 01:58:34"},{"visible":true,"include":false,"step":"15.0","x":-15291.42857142857,"y":8776.285714285714,"z":8906.380952380952,"a95":0.99,"info":"23/09/2014 at 01:58:34"},{"visible":true,"include":false,"step":"20.0","x":-12022.857142857143,"y":7072.857142857143,"z":6934.666666666667,"a95":0.99,"info":"23/09/2014 at 01:58:34"},{"visible":true,"include":false,"step":"25.0","x":-9999.047619047618,"y":5461.047619047619,"z":5394.0952380952385,"a95":0.99,"info":"23/09/2014 at 01:58:34"},{"visible":true,"include":false,"step":"30.0","x":-8225.238095238095,"y":4394.666666666667,"z":4372.666666666667,"a95":0.99,"info":"23/09/2014 at 01:58:34"},{"visible":true,"include":false,"step":"35.0","x":-7005.428571428572,"y":3037.2380952380954,"z":3677.3333333333335,"a95":0.99,"info":"23/09/2014 at 01:58:34"},{"visible":true,"include":false,"step":"40.0","x":-5993.142857142857,"y":2934.9523809523807,"z":3284.285714285714,"a95":0.99,"info":"23/09/2014 at 01:58:34"},{"visible":true,"include":false,"step":"45.0","x":-5661.619047619048,"y":2560.285714285714,"z":2420.3809523809523,"a95":0.99,"info":"23/09/2014 at 01:58:34"},{"visible":true,"include":false,"step":"50.0","x":-4433.142857142857,"y":2818.190476190476,"z":2661.714285714286,"a95":0.99,"info":"23/09/2014 at 01:58:34"},{"visible":true,"include":false,"step":"60.0","x":-3678.285714285714,"y":2200.285714285714,"z":1848.857142857143,"a95":0.99,"info":"23/09/2014 at 01:58:34"},{"visible":true,"include":false,"step":"70.0","x":-3452.7619047619046,"y":2074.3809523809523,"z":1612.4761904761904,"a95":0.99,"info":"23/09/2014 at 01:58:34"},{"visible":true,"include":false,"step":"80.0","x":-1790.857142857143,"y":1554.7619047619048,"z":859.4952380952382,"a95":0.99,"info":"23/09/2014 at 01:58:34"},{"visible":true,"include":false,"step":"90.0","x":-2132.285714285714,"y":760.047619047619,"z":1023.3333333333334,"a95":0.99,"info":"23/09/2014 at 01:58:34"},{"visible":true,"include":false,"step":"100.0","x":-2552.6666666666665,"y":494.1047619047619,"z":2302,"a95":0.99,"info":"23/09/2014 at 01:58:34"}]},{"version":"v1.1.0","exported":"2016-11-23T15:43:28.785Z","volume":10.5,"added":"2016-11-23T15:36:48.554Z","format":"Utrecht","demagType":"Unknown","strat":null,"patch":1.1,"GEO":[],"TECT":[],"interpreted":false,"name":"HP2.12A","coreAzi":301,"coreDip":11,"bedStrike":253,"bedDip":41,"data":[{"visible":true,"include":false,"step":"20","x":-22936.190476190477,"y":18277.238095238095,"z":13116.761904761905,"a95":1.9,"info":"\"14-11-03\" at \"21:58\""},{"visible":true,"include":false,"step":"150","x":-11014.190476190477,"y":6883.619047619048,"z":6181.523809523809,"a95":2,"info":"\"14-11-04\" at \"16:57\""},{"visible":true,"include":false,"step":"180","x":-10018.380952380952,"y":5281.523809523809,"z":5405.523809523809,"a95":2,"info":"\"14-11-04\" at \"22:11\""},{"visible":true,"include":false,"step":"210","x":-9215.142857142857,"y":5231.333333333333,"z":4914.190476190476,"a95":2.2,"info":"\"14-11-05\" at \"17:41\""},{"visible":true,"include":false,"step":"240","x":-7815.9047619047615,"y":3679.809523809524,"z":3776.8571428571427,"a95":5.2,"info":"\"14-11-05\" at \"23:17\""},{"visible":true,"include":false,"step":"270","x":-6389.428571428572,"y":3086.7619047619046,"z":3472.3809523809523,"a95":2.1,"info":"\"14-11-06\" at \"21:36\""},{"visible":true,"include":false,"step":"300","x":-6297.142857142857,"y":2981.714285714286,"z":3200.6666666666665,"a95":2.2,"info":"\"14-11-07\" at \"15:44\""},{"visible":true,"include":false,"step":"320","x":-4523.333333333333,"y":1801.6190476190477,"z":2193.714285714286,"a95":2.2,"info":"\"14-11-07\" at \"20:22\""},{"visible":true,"include":false,"step":"340","x":-3443.809523809524,"y":1540.1904761904761,"z":1277.4285714285713,"a95":3,"info":"\"14-11-15\" at \"20:18\""},{"visible":true,"include":false,"step":"360","x":-3345.2380952380954,"y":1722.4761904761904,"z":724,"a95":2.2,"info":"\"14-11-16\" at \"00:11\""},{"visible":true,"include":false,"step":"380","x":-2559.0476190476193,"y":497.23809523809524,"z":711.2380952380952,"a95":2.7,"info":"\"14-11-16\" at \"03:21\""},{"visible":true,"include":false,"step":"400","x":-2316.4761904761904,"y":89.61904761904762,"z":304,"a95":2.4,"info":"\"14-11-16\" at \"22:26\""},{"visible":true,"include":false,"step":"420","x":-1869.6190476190477,"y":586.0952380952381,"z":501.04761904761904,"a95":2.2,"info":"\"14-11-17\" at \"01:41\""},{"visible":true,"include":false,"step":"450","x":-2078.7619047619046,"y":558.3809523809524,"z":273.04761904761904,"a95":2.8,"info":"\"14-11-17\" at \"04:29\""},{"visible":true,"include":false,"step":"610","x":-1577.6190476190477,"y":769.4285714285714,"z":1569.2380952380952,"a95":3.1,"info":"\"14-11-28\" at \"23:30\""}]},{"version":"v1.1.0","exported":"2016-11-23T15:43:28.785Z","volume":10.5,"added":"2016-11-23T15:36:48.554Z","format":"Utrecht","demagType":"Unknown","strat":"7","patch":1.1,"GEO":[],"TECT":[],"interpreted":false,"name":"HP2.14B","coreAzi":40,"coreDip":39,"bedStrike":275,"bedDip":41,"data":[{"visible":true,"include":false,"step":"0.0","x":-13455.238095238095,"y":-5862.761904761905,"z":35287.619047619046,"a95":0.99,"info":"05/11/2014 at 18:18:16"},{"visible":true,"include":false,"step":"10.0","x":-8460,"y":-6210.285714285715,"z":23640.95238095238,"a95":0.99,"info":"05/11/2014 at 18:18:16"},{"visible":true,"include":false,"step":"15.0","x":-6235.428571428572,"y":-5006.666666666667,"z":16631.428571428572,"a95":0.99,"info":"05/11/2014 at 18:18:16"},{"visible":true,"include":false,"step":"20.0","x":-4669.809523809524,"y":-3685.904761904762,"z":12715.238095238095,"a95":0.99,"info":"05/11/2014 at 18:18:16"},{"visible":true,"include":false,"step":"25.0","x":-3077.714285714286,"y":-2635.6190476190477,"z":8650.095238095239,"a95":0.99,"info":"05/11/2014 at 18:18:16"},{"visible":true,"include":false,"step":"30.0","x":-1711.2380952380952,"y":-2214.9523809523807,"z":6127.714285714285,"a95":0.99,"info":"05/11/2014 at 18:18:16"},{"visible":true,"include":false,"step":"35.0","x":-1591.2380952380952,"y":-735.3904761904762,"z":5143.809523809524,"a95":0.99,"info":"05/11/2014 at 18:18:16"},{"visible":true,"include":false,"step":"40.0","x":-1423.142857142857,"y":-537.1619047619048,"z":4446.666666666667,"a95":0.99,"info":"05/11/2014 at 18:18:16"},{"visible":true,"include":false,"step":"45.0","x":-1001.4285714285714,"y":-1242.857142857143,"z":2942.3809523809523,"a95":0.99,"info":"05/11/2014 at 18:18:16"},{"visible":true,"include":false,"step":"50.0","x":-1311.4285714285713,"y":-364.5809523809524,"z":2931.6190476190477,"a95":0.99,"info":"05/11/2014 at 18:18:16"},{"visible":true,"include":false,"step":"60.0","x":-508.50476190476195,"y":-84.74095238095238,"z":2035.6190476190477,"a95":0.99,"info":"05/11/2014 at 18:18:16"},{"visible":true,"include":false,"step":"70.0","x":-577.047619047619,"y":-655.1714285714286,"z":171.0285714285714,"a95":0.99,"info":"05/11/2014 at 18:18:16"},{"visible":true,"include":false,"step":"80.0","x":-1082.1904761904761,"y":-988.4761904761905,"z":1978.1904761904761,"a95":0.99,"info":"05/11/2014 at 18:18:16"},{"visible":true,"include":false,"step":"90.0","x":317,"y":763.4666666666666,"z":-190.2761904761905,"a95":0.99,"info":"05/11/2014 at 18:18:16"}]},{"version":"v1.1.0","exported":"2016-11-23T15:43:28.785Z","volume":10.5,"added":"2016-11-23T15:36:48.554Z","format":"Utrecht","demagType":"Unknown","strat":null,"patch":1.1,"GEO":[],"TECT":[],"interpreted":false,"name":"HP2.16A","coreAzi":331,"coreDip":11,"bedStrike":275,"bedDip":41,"data":[{"visible":true,"include":false,"step":"20","x":-53189.71428571428,"y":61659.90476190476,"z":52297.04761904762,"a95":2.3,"info":"\"14-11-03\" at \"22:03\""},{"visible":true,"include":false,"step":"150","x":-23346.95238095238,"y":29061.714285714286,"z":30751.14285714286,"a95":2.4,"info":"\"14-11-04\" at \"17:01\""},{"visible":true,"include":false,"step":"180","x":-20944.190476190477,"y":24733.619047619046,"z":26870.380952380954,"a95":2.3,"info":"\"14-11-04\" at \"22:13\""},{"visible":true,"include":false,"step":"210","x":-15343.809523809523,"y":19881.619047619046,"z":19270.571428571428,"a95":2.6,"info":"\"14-11-05\" at \"17:43\""},{"visible":true,"include":false,"step":"240","x":-13602.285714285714,"y":16947.619047619046,"z":16442,"a95":2.4,"info":"\"14-11-05\" at \"23:20\""},{"visible":true,"include":false,"step":"270","x":-9932.666666666666,"y":12605.619047619048,"z":12903.619047619048,"a95":2.4,"info":"\"14-11-06\" at \"21:39\""},{"visible":true,"include":false,"step":"300","x":-7654.761904761905,"y":11286.952380952382,"z":9736.095238095239,"a95":3.3,"info":"\"14-11-07\" at \"15:46\""},{"visible":true,"include":false,"step":"320","x":-6419.9047619047615,"y":6329.619047619048,"z":7568.476190476191,"a95":2.6,"info":"\"14-11-07\" at \"20:24\""},{"visible":true,"include":false,"step":"340","x":-4877.619047619048,"y":3581.0476190476193,"z":4953.714285714285,"a95":2.7,"info":"\"14-11-15\" at \"20:22\""},{"visible":true,"include":false,"step":"360","x":-5290.476190476191,"y":2822.9523809523807,"z":3229.3333333333335,"a95":3.6,"info":"\"14-11-16\" at \"00:16\""},{"visible":true,"include":false,"step":"380","x":-3149.1428571428573,"y":884.0952380952381,"z":3105.0476190476193,"a95":4.1,"info":"\"14-11-16\" at \"03:23\""},{"visible":true,"include":false,"step":"400","x":-2194.9523809523807,"y":-321.04761904761904,"z":1728.6666666666667,"a95":4.5,"info":"\"14-11-16\" at \"22:28\""},{"visible":true,"include":false,"step":"420","x":-3992.9523809523807,"y":1084.095238095238,"z":2644.5714285714284,"a95":2.8,"info":"\"14-11-17\" at \"01:44\""},{"visible":true,"include":false,"step":"450","x":-2384.095238095238,"y":-141.23809523809524,"z":531.5238095238095,"a95":6.9,"info":"\"14-11-17\" at \"04:32\""},{"visible":true,"include":false,"step":"610","x":-1382,"y":112.28571428571429,"z":1544.095238095238,"a95":6.7,"info":"\"14-11-28\" at \"23:32\""}]},{"version":"v1.1.0","exported":"2016-11-23T15:43:28.786Z","volume":10.5,"added":"2016-11-23T15:36:48.554Z","format":"Utrecht","demagType":"Unknown","strat":"5","patch":1.1,"GEO":[],"TECT":[],"interpreted":false,"name":"HP2.18A","coreAzi":313,"coreDip":19,"bedStrike":273,"bedDip":32,"data":[{"visible":true,"include":false,"step":"0.0","x":-6230.857142857143,"y":3433.0476190476193,"z":6164.476190476191,"a95":0.99,"info":"28/09/2014 at 16:02:25"},{"visible":true,"include":false,"step":"10.0","x":-4615.333333333333,"y":2796.5714285714284,"z":4690.761904761905,"a95":0.99,"info":"28/09/2014 at 16:02:25"},{"visible":true,"include":false,"step":"15.0","x":-3508.8571428571427,"y":2091.1428571428573,"z":3573.714285714286,"a95":0.99,"info":"28/09/2014 at 16:02:25"},{"visible":true,"include":false,"step":"20.0","x":-2779.1428571428573,"y":1475.5238095238096,"z":2911.5238095238096,"a95":0.99,"info":"28/09/2014 at 16:02:25"},{"visible":true,"include":false,"step":"25.0","x":-2536.7619047619046,"y":1012.952380952381,"z":2200.9523809523807,"a95":0.99,"info":"28/09/2014 at 16:02:25"},{"visible":true,"include":false,"step":"30.0","x":-2041.5238095238096,"y":631.5904761904761,"z":1775.4285714285713,"a95":0.99,"info":"28/09/2014 at 16:02:25"},{"visible":true,"include":false,"step":"35.0","x":-1777.142857142857,"y":833.1809523809524,"z":1549.7142857142858,"a95":0.99,"info":"28/09/2014 at 16:02:25"},{"visible":true,"include":false,"step":"40.0","x":-1620.2857142857142,"y":652.1714285714286,"z":1415.5238095238096,"a95":0.99,"info":"28/09/2014 at 16:02:25"},{"visible":true,"include":false,"step":"45.0","x":-1322.1904761904761,"y":296.67619047619047,"z":1113.6190476190477,"a95":0.99,"info":"28/09/2014 at 16:02:25"},{"visible":true,"include":false,"step":"50.0","x":-1384.3809523809523,"y":358.6190476190476,"z":1156.857142857143,"a95":0.99,"info":"28/09/2014 at 16:02:25"},{"visible":true,"include":false,"step":"60.0","x":-888.2095238095238,"y":412.08571428571423,"z":724.5904761904761,"a95":0.99,"info":"28/09/2014 at 16:02:25"},{"visible":true,"include":false,"step":"70.0","x":-868.5619047619048,"y":224.24761904761903,"z":599.7238095238096,"a95":0.99,"info":"28/09/2014 at 16:02:25"},{"visible":true,"include":false,"step":"80.0","x":-964.2857142857143,"y":428.9428571428571,"z":307.54285714285714,"a95":0.99,"info":"28/09/2014 at 16:02:25"},{"visible":true,"include":false,"step":"90.0","x":-528.7238095238096,"y":184.59047619047618,"z":527.952380952381,"a95":0.99,"info":"28/09/2014 at 16:02:25"}]},{"version":"v1.1.0","exported":"2016-11-23T15:43:28.786Z","volume":10.5,"added":"2016-11-23T15:36:48.555Z","format":"Utrecht","demagType":"Unknown","strat":"4","patch":1.1,"GEO":[],"TECT":[],"interpreted":false,"name":"HP2.18B","coreAzi":313,"coreDip":19,"bedStrike":273,"bedDip":32,"data":[{"visible":true,"include":false,"step":"0.0","x":-6612.285714285715,"y":4155.333333333333,"z":6927.9047619047615,"a95":0.99,"info":"23/09/2014 at 01:58:34"},{"visible":true,"include":false,"step":"5.0","x":-5999.238095238095,"y":3448.8571428571427,"z":6186.0952380952385,"a95":0.99,"info":"23/09/2014 at 01:58:34"},{"visible":true,"include":false,"step":"10.0","x":-4702.380952380952,"y":2696.9523809523807,"z":4770.285714285715,"a95":0.99,"info":"23/09/2014 at 01:58:34"},{"visible":true,"include":false,"step":"15.0","x":-3545.4285714285716,"y":1974.6666666666667,"z":3742.5714285714284,"a95":0.99,"info":"23/09/2014 at 01:58:34"},{"visible":true,"include":false,"step":"20.0","x":-2826.7619047619046,"y":1642.3809523809523,"z":3050.5714285714284,"a95":0.99,"info":"23/09/2014 at 01:58:34"},{"visible":true,"include":false,"step":"25.0","x":-2397.4285714285716,"y":1293.047619047619,"z":2382.4761904761904,"a95":0.99,"info":"23/09/2014 at 01:58:34"},{"visible":true,"include":false,"step":"30.0","x":-1992.4761904761904,"y":1003.8095238095239,"z":1803.7142857142858,"a95":0.99,"info":"23/09/2014 at 01:58:34"},{"visible":true,"include":false,"step":"35.0","x":-1671.142857142857,"y":874.895238095238,"z":1453.3333333333333,"a95":0.99,"info":"23/09/2014 at 01:58:34"},{"visible":true,"include":false,"step":"40.0","x":-1628.5714285714287,"y":693.2571428571429,"z":1299.7142857142858,"a95":0.99,"info":"23/09/2014 at 01:58:34"},{"visible":true,"include":false,"step":"45.0","x":-1335.4285714285713,"y":481,"z":1310.6666666666667,"a95":0.99,"info":"23/09/2014 at 01:58:34"},{"visible":true,"include":false,"step":"50.0","x":-1050.952380952381,"y":414.8095238095238,"z":940.0190476190477,"a95":0.99,"info":"23/09/2014 at 01:58:34"},{"visible":true,"include":false,"step":"60.0","x":-1061.142857142857,"y":293.85714285714283,"z":765.7333333333333,"a95":0.99,"info":"23/09/2014 at 01:58:34"},{"visible":true,"include":false,"step":"70.0","x":-1029.047619047619,"y":252.36190476190478,"z":645.8190476190476,"a95":0.99,"info":"23/09/2014 at 01:58:34"},{"visible":true,"include":false,"step":"80.0","x":-164.06666666666666,"y":327.7238095238095,"z":295.03809523809525,"a95":0.99,"info":"23/09/2014 at 01:58:34"},{"visible":true,"include":false,"step":"90.0","x":-744.2095238095238,"y":-17.496190476190478,"z":388.2666666666667,"a95":0.99,"info":"23/09/2014 at 01:58:34"},{"visible":true,"include":false,"step":"100.0","x":-481.5238095238095,"y":-84.0657142857143,"z":49.68380952380952,"a95":0.99,"info":"23/09/2014 at 01:58:34"}]}]
