# Supplementary material for: Paleomagnetic constraints on the timing and distribution of Cenozoic rotations in Central and Eastern Anatolia
Source: Copernicus journal article supplement (doi:10.5194/se-9-295-2018), 2018-03-21
Supplement: Supplementary file 2 [file se-9-295-2018-supplement.zip › se-2017-66_DATA_dir files/dir files Ulukisla/HP3.dir]

[{"version":"v1.1.0","exported":"2016-11-18T11:12:36.343Z","volume":10.5,"added":"2016-11-18T10:55:09.082Z","format":"Utrecht","demagType":"Unknown","strat":null,"patch":1.1,"GEO":[{"dec":150.51414976334166,"inc":22.667722491911494,"MAD":5.437467413410271,"cm":[-5.329070518200751e-15,-1.1102230246251565e-14,0],"intensity":218.80960153374443,"type":"dir","forced":true,"remark":"","origin":false,"nSteps":7,"minStep":"210","maxStep":"490","steps":["210","270","300","340","400","460","490"],"group":"None","version":"v1.1.0"}],"TECT":[{"dec":150.69335929748627,"inc":-22.309555470920365,"MAD":5.4374674134102525,"cm":[3.552713678800501e-15,6.217248937900877e-15,-8.881784197001252e-16],"intensity":218.80960153374443,"type":"dir","forced":true,"remark":"","origin":false,"nSteps":7,"minStep":"210","maxStep":"490","steps":["210","270","300","340","400","460","490"],"group":"None","version":"v1.1.0"}],"interpreted":true,"name":"HP3.1A","coreAzi":268,"coreDip":56,"bedStrike":111,"bedDip":66,"data":[{"visible":false,"include":false,"step":"20","x":206.28571428571428,"y":-665.7142857142857,"z":2.2857142857142856,"a95":2.7,"info":"\"14-08-11\" at \"18:11\""},{"visible":false,"include":false,"step":"100","x":399.8095238095238,"y":-789.4285714285714,"z":-399.6190476190476,"a95":1.7,"info":"\"14-08-11\" at \"21:19\""},{"visible":false,"include":false,"step":"150","x":101.52380952380952,"y":-344.6666666666667,"z":-138.76190476190476,"a95":1.9,"info":"\"14-08-12\" at \"00:10\""},{"visible":true,"include":false,"step":"180","x":-97.52380952380952,"y":-69.23809523809524,"z":34.57142857142857,"a95":2.6,"info":"\"14-08-12\" at \"16:26\""},{"visible":true,"include":true,"step":"210","x":-61.523809523809526,"y":-96,"z":7.0476190476190474,"a95":2.1,"info":"\"14-08-12\" at \"19:24\""},{"visible":false,"include":false,"step":"240","x":22.095238095238095,"y":-94.95238095238095,"z":10.095238095238095,"a95":8.2,"info":"\"14-08-12\" at \"22:38\""},{"visible":true,"include":true,"step":"270","x":-62.53333333333334,"y":-69.21904761904761,"z":8.485714285714286,"a95":5,"info":"\"14-08-13\" at \"16:05\""},{"visible":true,"include":true,"step":"300","x":-86.28571428571429,"y":-114.47619047619048,"z":15.047619047619047,"a95":3.2,"info":"\"14-08-13\" at \"19:05\""},{"visible":true,"include":false,"step":"320","x":-77.61904761904762,"y":-71.9047619047619,"z":8.285714285714286,"a95":2.5,"info":"\"14-08-13\" at \"22:13\""},{"visible":true,"include":true,"step":"340","x":-79.42857142857143,"y":-101.71428571428571,"z":8.952380952380953,"a95":3.3,"info":"\"14-08-14\" at \"15:12\""},{"visible":true,"include":false,"step":"370","x":-100.19047619047619,"y":-76.95238095238095,"z":-21.142857142857142,"a95":2.5,"info":"\"14-08-14\" at \"18:15\""},{"visible":true,"include":true,"step":"400","x":-44.2952380952381,"y":-81.39047619047619,"z":4.066666666666667,"a95":7.8,"info":"\"14-08-14\" at \"21:31\""},{"visible":true,"include":false,"step":"430","x":-79.14285714285714,"y":-59.904761904761905,"z":-13.619047619047619,"a95":2.5,"info":"\"14-08-15\" at \"14:08\""},{"visible":true,"include":true,"step":"460","x":-34.79047619047619,"y":-58.38095238095238,"z":19.45714285714286,"a95":9.1,"info":"\"14-08-15\" at \"17:19\""},{"visible":true,"include":true,"step":"490","x":-50.76190476190476,"y":-91.61904761904762,"z":1.2380952380952381,"a95":5.5,"info":"\"14-08-15\" at \"20:33\""},{"visible":true,"include":false,"step":"510","x":-69.04761904761905,"y":-93.71428571428571,"z":29.333333333333332,"a95":4.5,"info":"\"14-08-15\" at \"23:45\""},{"visible":false,"include":false,"step":"540","x":-82.98095238095237,"y":-38.53333333333334,"z":-9,"a95":6.7,"info":"\"14-08-16\" at \"13:02\""},{"visible":false,"include":false,"step":"570","x":-36.60952380952381,"y":-73.66666666666667,"z":-10.647619047619047,"a95":8.6,"info":"\"14-08-16\" at \"15:44\""},{"visible":false,"include":false,"step":"600","x":-104.66666666666667,"y":-41.523809523809526,"z":2.6666666666666665,"a95":10.8,"info":"\"14-08-16\" at \"18:25\""}]},{"version":"v1.1.0","exported":"2016-11-18T11:12:36.344Z","volume":10.5,"added":"2016-11-18T10:55:09.082Z","format":"Utrecht","demagType":"Unknown","strat":"1","patch":1.1,"GEO":[],"TECT":[],"interpreted":false,"name":"HP3.1B","coreAzi":268,"coreDip":56,"bedStrike":111,"bedDip":66,"data":[{"visible":false,"include":false,"step":"0.0","x":322.83809523809526,"y":-876.895238095238,"z":219.33333333333334,"a95":0.99,"info":"15/08/2014 at 18:05:38"},{"visible":true,"include":false,"step":"4.0","x":592.3714285714285,"y":-1029.5238095238096,"z":-123.48571428571428,"a95":0.99,"info":"15/08/2014 at 18:05:38"},{"visible":true,"include":false,"step":"8.0","x":589.3428571428572,"y":-874.1428571428571,"z":-230.15238095238095,"a95":0.99,"info":"15/08/2014 at 18:05:38"},{"visible":true,"include":true,"step":"12.0","x":361.6,"y":-544.5809523809525,"z":-116.38095238095238,"a95":0.99,"info":"15/08/2014 at 18:05:38"},{"visible":true,"include":true,"step":"16.0","x":198.50476190476192,"y":-333.5238095238095,"z":-8.758761904761904,"a95":0.99,"info":"15/08/2014 at 18:05:38"},{"visible":true,"include":true,"step":"20.0","x":106.55238095238094,"y":-234.8190476190476,"z":74.00571428571428,"a95":0.99,"info":"15/08/2014 at 18:05:38"},{"visible":true,"include":true,"step":"25.0","x":19.90952380952381,"y":-74.36,"z":146.56190476190477,"a95":0.99,"info":"15/08/2014 at 18:05:38"},{"visible":true,"include":false,"step":"30.0","x":-11.942857142857143,"y":7.843714285714285,"z":180.33333333333334,"a95":0.99,"info":"15/08/2014 at 18:05:38"},{"visible":true,"include":false,"step":"35.0","x":-37.582857142857144,"y":-7.976000000000001,"z":213.17142857142858,"a95":0.99,"info":"15/08/2014 at 18:05:38"},{"visible":true,"include":false,"step":"40.0","x":-56.11619047619048,"y":78.70761904761905,"z":221.21904761904764,"a95":0.99,"info":"15/08/2014 at 18:05:38"},{"visible":true,"include":false,"step":"45.0","x":-62.275238095238095,"y":78.21619047619048,"z":217.16190476190474,"a95":0.99,"info":"15/08/2014 at 18:05:38"},{"visible":true,"include":false,"step":"50.0","x":-83.82380952380952,"y":21.50190476190476,"z":227.96190476190475,"a95":0.99,"info":"15/08/2014 at 18:05:38"},{"visible":true,"include":false,"step":"60.0","x":-90.90380952380953,"y":80.10952380952381,"z":230.76190476190476,"a95":0.99,"info":"15/08/2014 at 18:05:38"},{"visible":true,"include":false,"step":"70.0","x":-110.45714285714286,"y":58.467619047619046,"z":210.21904761904764,"a95":0.99,"info":"15/08/2014 at 18:05:38"},{"visible":true,"include":false,"step":"80.0","x":-114.4952380952381,"y":-5.266571428571429,"z":188.04761904761904,"a95":0.99,"info":"15/08/2014 at 18:05:38"},{"visible":true,"include":false,"step":"90.0","x":-63.212380952380954,"y":115.9047619047619,"z":174.21904761904761,"a95":0.99,"info":"15/08/2014 at 18:05:38"},{"visible":true,"include":false,"step":"100.0","x":-119.79047619047618,"y":61.85333333333334,"z":159.65714285714287,"a95":0.99,"info":"15/08/2014 at 18:05:38"}]},{"version":"v1.1.0","exported":"2016-11-18T11:12:36.344Z","volume":10.5,"added":"2016-11-18T10:55:09.082Z","format":"Utrecht","demagType":"Unknown","strat":"2","patch":1.1,"GEO":[{"dec":66.74045255482321,"inc":-37.47712547421054,"MAD":1.7069549008706582,"cm":[0,-3.552713678800501e-15,0],"intensity":521.9210491202085,"type":"GC","origin":false,"forced":true,"remark":"","nSteps":5,"minStep":"8.0","maxStep":"25.0","steps":["8.0","12.0","16.0","20.0","25.0"],"group":"None","version":"v1.1.0"}],"TECT":[{"dec":237.0406895125405,"inc":-14.980976752965331,"MAD":1.7069549008701348,"cm":[1.0658141036401503e-14,1.7763568394002505e-15,0],"intensity":521.9210491202086,"type":"GC","origin":false,"forced":true,"remark":"","nSteps":5,"minStep":"8.0","maxStep":"25.0","steps":["8.0","12.0","16.0","20.0","25.0"],"group":"None","version":"v1.1.0"}],"interpreted":true,"name":"HP3.2A","coreAzi":276,"coreDip":57,"bedStrike":111,"bedDip":66,"data":[{"visible":false,"include":false,"step":"0.0","x":-33.881904761904764,"y":-331.7238095238095,"z":-82.84571428571428,"a95":0.99,"info":"15/08/2014 at 18:05:38"},{"visible":true,"include":false,"step":"4.0","x":76.38952380952381,"y":-377.04761904761904,"z":-138.17142857142858,"a95":0.99,"info":"15/08/2014 at 18:05:38"},{"visible":true,"include":true,"step":"8.0","x":94.38285714285715,"y":-349.62857142857143,"z":-178.11428571428573,"a95":0.99,"info":"15/08/2014 at 18:05:38"},{"visible":true,"include":true,"step":"12.0","x":38.107619047619046,"y":-263.96190476190475,"z":-126.87619047619049,"a95":0.99,"info":"15/08/2014 at 18:05:38"},{"visible":true,"include":true,"step":"16.0","x":-6.996571428571428,"y":-197.49523809523808,"z":-85.65333333333334,"a95":0.99,"info":"15/08/2014 at 18:05:38"},{"visible":true,"include":true,"step":"20.0","x":-56.61904761904762,"y":-160.58095238095237,"z":-56.493333333333325,"a95":0.99,"info":"15/08/2014 at 18:05:38"},{"visible":true,"include":true,"step":"25.0","x":-69.57904761904763,"y":-127.08571428571429,"z":-32.906666666666666,"a95":0.99,"info":"15/08/2014 at 18:05:38"},{"visible":true,"include":false,"step":"30.0","x":-70.34761904761905,"y":-80.91047619047619,"z":-14.595238095238095,"a95":0.99,"info":"15/08/2014 at 18:05:38"},{"visible":true,"include":false,"step":"35.0","x":-89.30285714285714,"y":-93.31904761904762,"z":-0.6774857142857142,"a95":0.99,"info":"15/08/2014 at 18:05:38"},{"visible":true,"include":false,"step":"40.0","x":-79.53428571428572,"y":-67.07047619047619,"z":8.033428571428571,"a95":0.99,"info":"15/08/2014 at 18:05:38"},{"visible":true,"include":false,"step":"45.0","x":-82.86190476190475,"y":-54.43619047619048,"z":0.45144761904761904,"a95":0.99,"info":"15/08/2014 at 18:05:38"},{"visible":true,"include":false,"step":"50.0","x":-84.1352380952381,"y":-53.859047619047615,"z":6.328380952380952,"a95":0.99,"info":"15/08/2014 at 18:05:38"},{"visible":true,"include":false,"step":"60.0","x":-79.59238095238095,"y":-25.126666666666665,"z":27.390476190476193,"a95":0.99,"info":"15/08/2014 at 18:05:38"},{"visible":true,"include":false,"step":"70.0","x":-95.1447619047619,"y":-49.43047619047619,"z":14.099047619047619,"a95":0.99,"info":"15/08/2014 at 18:05:38"},{"visible":true,"include":false,"step":"80.0","x":-62.37904761904762,"y":-36.833333333333336,"z":16.44952380952381,"a95":0.99,"info":"15/08/2014 at 18:05:38"},{"visible":true,"include":false,"step":"90.0","x":-74.11238095238095,"y":-0.4212952380952381,"z":17.493333333333332,"a95":0.99,"info":"15/08/2014 at 18:05:38"},{"visible":true,"include":false,"step":"100.0","x":-76.33428571428571,"y":-0.7015809523809524,"z":24.891428571428573,"a95":0.99,"info":"15/08/2014 at 18:05:38"}]},{"version":"v1.1.0","exported":"2016-11-18T11:12:36.344Z","volume":10.5,"added":"2016-11-18T10:55:09.083Z","format":"Utrecht","demagType":"Unknown","strat":null,"patch":1.1,"GEO":[{"dec":150.3712300096887,"inc":15.013177653213326,"MAD":7.364025812453414,"cm":[-8.881784197001252e-15,-1.687538997430238e-14,0],"intensity":262.51179867663933,"type":"dir","forced":true,"remark":"","origin":false,"nSteps":10,"minStep":"150","maxStep":"430","steps":["150","180","210","270","300","320","340","370","400","430"],"group":"None","version":"v1.1.0"}],"TECT":[{"dec":144.05175232799502,"inc":-27.023671355585975,"MAD":7.364025812453425,"cm":[-3.552713678800501e-15,-2.3092638912203256e-14,-1.7319479184152442e-14],"intensity":262.51179867663933,"type":"dir","forced":true,"remark":"","origin":false,"nSteps":10,"minStep":"150","maxStep":"430","steps":["150","180","210","270","300","320","340","370","400","430"],"group":"None","version":"v1.1.0"}],"interpreted":true,"name":"HP3.2B","coreAzi":276,"coreDip":57,"bedStrike":111,"bedDip":66,"data":[{"visible":false,"include":false,"step":"20","x":186.85714285714286,"y":-452.6666666666667,"z":225.42857142857142,"a95":2.5,"info":"\"14-08-11\" at \"18:14\""},{"visible":false,"include":false,"step":"100","x":142.1904761904762,"y":-349.9047619047619,"z":-177.9047619047619,"a95":1.7,"info":"\"14-08-11\" at \"21:22\""},{"visible":true,"include":true,"step":"150","x":-56.857142857142854,"y":-108.95238095238095,"z":6.476190476190476,"a95":3.4,"info":"\"14-08-12\" at \"00:14\""},{"visible":true,"include":true,"step":"180","x":-81.04761904761905,"y":-125.61904761904762,"z":-9.238095238095237,"a95":2.4,"info":"\"14-08-12\" at \"16:28\""},{"visible":true,"include":true,"step":"210","x":-76.85714285714286,"y":-97.14285714285714,"z":-23.714285714285715,"a95":2.5,"info":"\"14-08-12\" at \"19:26\""},{"visible":false,"include":false,"step":"240","x":15.904761904761905,"y":-99.52380952380952,"z":-5.238095238095238,"a95":7.4,"info":"\"14-08-12\" at \"22:40\""},{"visible":true,"include":true,"step":"270","x":-83.80952380952381,"y":-92.0952380952381,"z":-6.666666666666667,"a95":2.5,"info":"\"14-08-13\" at \"16:07\""},{"visible":true,"include":true,"step":"300","x":-57.04761904761905,"y":-106.19047619047619,"z":-8.095238095238095,"a95":3.2,"info":"\"14-08-13\" at \"19:07\""},{"visible":true,"include":true,"step":"320","x":-93.14285714285714,"y":-100.0952380952381,"z":-6.857142857142857,"a95":2.9,"info":"\"14-08-13\" at \"22:15\""},{"visible":true,"include":true,"step":"340","x":-96.0952380952381,"y":-90.76190476190476,"z":-8.19047619047619,"a95":3.1,"info":"\"14-08-14\" at \"15:15\""},{"visible":true,"include":true,"step":"370","x":-91.52380952380952,"y":-91.61904761904762,"z":-16.666666666666668,"a95":4.3,"info":"\"14-08-14\" at \"18:17\""},{"visible":true,"include":true,"step":"400","x":-71.23809523809524,"y":-89.80952380952381,"z":-12,"a95":5.9,"info":"\"14-08-14\" at \"21:33\""},{"visible":true,"include":true,"step":"430","x":-82.85714285714286,"y":-112.19047619047619,"z":-28.571428571428573,"a95":2.6,"info":"\"14-08-15\" at \"14:11\""},{"visible":true,"include":false,"step":"460","x":-58.285714285714285,"y":-96.38095238095238,"z":-1.5238095238095237,"a95":6.9,"info":"\"14-08-15\" at \"17:21\""},{"visible":true,"include":false,"step":"490","x":-58,"y":-104.28571428571429,"z":18.571428571428573,"a95":4,"info":"\"14-08-15\" at \"20:36\""},{"visible":false,"include":false,"step":"510","x":-47.542857142857144,"y":-76.74285714285713,"z":-18.46666666666667,"a95":5.6,"info":"\"14-08-15\" at \"23:47\""},{"visible":false,"include":false,"step":"540","x":-56.30476190476191,"y":-14.095238095238095,"z":3.2190476190476187,"a95":10.8,"info":"\"14-08-16\" at \"13:04\""},{"visible":false,"include":false,"step":"570","x":-55.23809523809524,"y":-89.71428571428571,"z":-20,"a95":7.1,"info":"\"14-08-16\" at \"15:46\""},{"visible":false,"include":false,"step":"600","x":-56.72380952380953,"y":-47.99047619047619,"z":38.58095238095238,"a95":14.5,"info":"\"14-08-16\" at \"18:27\""}]},{"version":"v1.1.0","exported":"2016-11-18T11:12:36.344Z","volume":10.5,"added":"2016-11-18T10:55:09.084Z","format":"Utrecht","demagType":"Unknown","strat":null,"patch":1.1,"GEO":[{"dec":144.07909238262238,"inc":11.965383672338843,"MAD":13.773933028647551,"cm":[-9.769962616701378e-15,-1.3322676295501878e-14,0],"intensity":197.3368495733792,"type":"dir","forced":true,"remark":"","origin":false,"nSteps":10,"minStep":"150","maxStep":"430","steps":["150","180","210","270","300","320","340","370","400","430"],"group":"None","version":"v1.1.0"}],"TECT":[{"dec":137.38093486085438,"inc":-23.794125074261952,"MAD":13.77393302864754,"cm":[1.3322676295501878e-15,4.440892098500626e-16,-5.995204332975845e-15],"intensity":197.33684957337917,"type":"dir","forced":true,"remark":"","origin":false,"nSteps":10,"minStep":"150","maxStep":"430","steps":["150","180","210","270","300","320","340","370","400","430"],"group":"None","version":"v1.1.0"}],"interpreted":true,"name":"HP3.3A","coreAzi":284,"coreDip":57,"bedStrike":111,"bedDip":66,"data":[{"visible":false,"include":false,"step":"20","x":-38.38095238095238,"y":-584.8571428571429,"z":333.3333333333333,"a95":2.7,"info":"\"14-08-11\" at \"18:17\""},{"visible":false,"include":false,"step":"100","x":-0.5714285714285714,"y":-317.14285714285717,"z":-193.71428571428572,"a95":2.1,"info":"\"14-08-11\" at \"21:24\""},{"visible":true,"include":true,"step":"150","x":-109.04761904761905,"y":-18.857142857142858,"z":14.857142857142858,"a95":4.1,"info":"\"14-08-12\" at \"00:16\""},{"visible":true,"include":true,"step":"180","x":-103.33333333333333,"y":-101.52380952380952,"z":-26.761904761904763,"a95":3.1,"info":"\"14-08-12\" at \"16:31\""},{"visible":true,"include":true,"step":"210","x":-83.80952380952381,"y":-97.14285714285714,"z":-39.523809523809526,"a95":3.3,"info":"\"14-08-12\" at \"19:28\""},{"visible":false,"include":false,"step":"240","x":17.428571428571427,"y":-102.57142857142857,"z":-39.333333333333336,"a95":6.6,"info":"\"14-08-12\" at \"22:43\""},{"visible":true,"include":true,"step":"270","x":-75.80952380952381,"y":-55.80952380952381,"z":-27.238095238095237,"a95":5.1,"info":"\"14-08-13\" at \"16:09\""},{"visible":true,"include":true,"step":"300","x":-59.714285714285715,"y":-83.33333333333333,"z":-32.857142857142854,"a95":3.2,"info":"\"14-08-13\" at \"19:09\""},{"visible":true,"include":true,"step":"320","x":-100.0952380952381,"y":-65.71428571428571,"z":-33.42857142857143,"a95":2.9,"info":"\"14-08-13\" at \"22:17\""},{"visible":true,"include":true,"step":"340","x":-83.33333333333333,"y":-73.42857142857143,"z":-25.714285714285715,"a95":3.3,"info":"\"14-08-14\" at \"15:17\""},{"visible":true,"include":true,"step":"370","x":-55.61904761904762,"y":-76.38095238095238,"z":-30.095238095238095,"a95":4.3,"info":"\"14-08-14\" at \"18:19\""},{"visible":true,"include":true,"step":"400","x":-93.80952380952381,"y":-68.28571428571429,"z":-12,"a95":4.2,"info":"\"14-08-14\" at \"21:37\""},{"visible":true,"include":true,"step":"430","x":-71.80952380952381,"y":-53.142857142857146,"z":-47.23809523809524,"a95":3.4,"info":"\"14-08-15\" at \"14:15\""},{"visible":true,"include":false,"step":"460","x":-44.857142857142854,"y":-85.33333333333333,"z":-9.142857142857142,"a95":6.8,"info":"\"14-08-15\" at \"17:23\""},{"visible":true,"include":false,"step":"490","x":-60,"y":-76.0952380952381,"z":-5.809523809523809,"a95":4.9,"info":"\"14-08-15\" at \"20:39\""},{"visible":false,"include":false,"step":"510","x":-73.47619047619048,"y":-37.08571428571428,"z":-9.342857142857142,"a95":8.1,"info":"\"14-08-15\" at \"23:49\""},{"visible":false,"include":false,"step":"540","x":-80.81904761904762,"y":-9.542857142857143,"z":-18.714285714285715,"a95":7.8,"info":"\"14-08-16\" at \"13:06\""},{"visible":false,"include":false,"step":"570","x":-92.0952380952381,"y":-45.04761904761905,"z":-23.61904761904762,"a95":10,"info":"\"14-08-16\" at \"15:48\""},{"visible":false,"include":false,"step":"600","x":-213.04761904761904,"y":-56.095238095238095,"z":35.04761904761905,"a95":16.9,"info":"\"14-08-16\" at \"18:29\""}]},{"version":"v1.1.0","exported":"2016-11-18T11:12:36.344Z","volume":10.5,"added":"2016-11-18T10:55:09.085Z","format":"Utrecht","demagType":"Unknown","strat":"3","patch":1.1,"GEO":[{"dec":50.97322168612857,"inc":-41.292174265168036,"MAD":6.223302437916929,"cm":[-6.217248937900877e-15,1.5987211554602254e-14,0],"intensity":699.6489719372707,"type":"GC","origin":false,"forced":true,"remark":"","nSteps":11,"minStep":"8.0","maxStep":"60.0","steps":["8.0","12.0","16.0","20.0","25.0","30.0","35.0","40.0","45.0","50.0","60.0"],"group":"None","version":"v1.1.0"}],"TECT":[{"dec":224.3965428450809,"inc":-19.03779722722339,"MAD":6.223302437916845,"cm":[-5.329070518200751e-15,2.9504176879413535e-14,-5.329070518200751e-15],"intensity":699.6489719372707,"type":"GC","origin":false,"forced":true,"remark":"","nSteps":11,"minStep":"8.0","maxStep":"60.0","steps":["8.0","12.0","16.0","20.0","25.0","30.0","35.0","40.0","45.0","50.0","60.0"],"group":"None","version":"v1.1.0"}],"interpreted":true,"name":"HP3.3B","coreAzi":284,"coreDip":57,"bedStrike":111,"bedDip":66,"data":[{"visible":false,"include":false,"step":"0.0","x":-221.47619047619048,"y":-535.0761904761905,"z":-15.745714285714287,"a95":0.99,"info":"15/08/2014 at 18:05:38"},{"visible":true,"include":false,"step":"4.0","x":-29.089523809523808,"y":-817.5047619047618,"z":-431.42857142857144,"a95":0.99,"info":"15/08/2014 at 18:05:38"},{"visible":true,"include":true,"step":"8.0","x":-9.746666666666666,"y":-706.8285714285714,"z":-516.6476190476191,"a95":0.99,"info":"15/08/2014 at 18:05:38"},{"visible":true,"include":true,"step":"12.0","x":-93.65238095238095,"y":-410.20000000000005,"z":-325.6666666666667,"a95":0.99,"info":"15/08/2014 at 18:05:38"},{"visible":true,"include":true,"step":"16.0","x":-144.03809523809525,"y":-213.42857142857142,"z":-179.52380952380952,"a95":0.99,"info":"15/08/2014 at 18:05:38"},{"visible":true,"include":true,"step":"20.0","x":-175.59047619047618,"y":-116.65714285714287,"z":-74.73619047619047,"a95":0.99,"info":"15/08/2014 at 18:05:38"},{"visible":true,"include":true,"step":"25.0","x":-181.6952380952381,"y":-9.376571428571427,"z":21.235238095238095,"a95":0.99,"info":"15/08/2014 at 18:05:38"},{"visible":true,"include":true,"step":"30.0","x":-180.9714285714286,"y":64.76380952380953,"z":37.29047619047619,"a95":0.99,"info":"15/08/2014 at 18:05:38"},{"visible":true,"include":true,"step":"35.0","x":-186.9047619047619,"y":52.94761904761905,"z":75.29142857142857,"a95":0.99,"info":"15/08/2014 at 18:05:38"},{"visible":true,"include":true,"step":"40.0","x":-162.11428571428573,"y":138.1238095238095,"z":102.01904761904763,"a95":0.99,"info":"15/08/2014 at 18:05:38"},{"visible":true,"include":true,"step":"45.0","x":-166.64761904761903,"y":146.38095238095238,"z":87.05714285714286,"a95":0.99,"info":"15/08/2014 at 18:05:38"},{"visible":true,"include":true,"step":"50.0","x":-179.04761904761904,"y":95.74285714285713,"z":92.03619047619047,"a95":0.99,"info":"15/08/2014 at 18:05:38"},{"visible":true,"include":true,"step":"60.0","x":-127.81904761904761,"y":154.61904761904762,"z":109.64761904761905,"a95":0.99,"info":"15/08/2014 at 18:05:38"},{"visible":false,"include":false,"step":"70.0","x":-130.40952380952382,"y":141.7238095238095,"z":95.52380952380952,"a95":0.99,"info":"15/08/2014 at 18:05:38"},{"visible":false,"include":false,"step":"80.0","x":-77.44666666666667,"y":83.81809523809524,"z":99.15238095238094,"a95":0.99,"info":"15/08/2014 at 18:05:38"},{"visible":false,"include":false,"step":"90.0","x":-85.90857142857142,"y":151.44761904761904,"z":112,"a95":0.99,"info":"15/08/2014 at 18:05:38"},{"visible":false,"include":false,"step":"100.0","x":-90.74761904761905,"y":124.58095238095237,"z":112.68571428571428,"a95":0.99,"info":"15/08/2014 at 18:05:38"}]},{"version":"v1.1.0","exported":"2016-11-18T11:12:36.344Z","volume":10.5,"added":"2016-11-18T10:55:09.095Z","format":"Utrecht","demagType":"Unknown","strat":"4","patch":1.1,"GEO":[{"dec":81.17542319601284,"inc":-25.54221750097009,"MAD":5.6042212785415275,"cm":[1.7763568394002505e-15,2.19824158875781e-14,0],"intensity":259.6227216803229,"type":"GC","origin":false,"forced":true,"remark":"","nSteps":5,"minStep":"8.0","maxStep":"25.0","steps":["8.0","12.0","16.0","20.0","25.0"],"group":"None","version":"v1.1.0"}],"TECT":[{"dec":254.6325461298486,"inc":-13.566204314993492,"MAD":5.604221278541596,"cm":[-3.552713678800501e-15,1.7319479184152442e-14,7.105427357601002e-15],"intensity":259.6227216803229,"type":"GC","origin":false,"forced":true,"remark":"","nSteps":5,"minStep":"8.0","maxStep":"25.0","steps":["8.0","12.0","16.0","20.0","25.0"],"group":"None","version":"v1.1.0"}],"interpreted":true,"name":"HP3.4A","coreAzi":297,"coreDip":49,"bedStrike":111,"bedDip":66,"data":[{"visible":false,"include":false,"step":"0.0","x":-55.78285714285715,"y":-98.82857142857144,"z":-16.88952380952381,"a95":0.99,"info":"15/08/2014 at 18:05:38"},{"visible":false,"include":false,"step":"4.0","x":-18.621904761904762,"y":-135.8190476190476,"z":-72.8752380952381,"a95":0.99,"info":"15/08/2014 at 18:05:38"},{"visible":true,"include":true,"step":"8.0","x":-12.041904761904762,"y":-146.1904761904762,"z":-90.50190476190475,"a95":0.99,"info":"15/08/2014 at 18:05:38"},{"visible":true,"include":true,"step":"12.0","x":-20.355238095238093,"y":-115.14285714285714,"z":-69.62285714285714,"a95":0.99,"info":"15/08/2014 at 18:05:38"},{"visible":true,"include":true,"step":"16.0","x":-23.760952380952382,"y":-100.57142857142857,"z":-57.277142857142856,"a95":0.99,"info":"15/08/2014 at 18:05:38"},{"visible":true,"include":true,"step":"20.0","x":-25.952380952380953,"y":-95.62857142857143,"z":-56.864761904761906,"a95":0.99,"info":"15/08/2014 at 18:05:38"},{"visible":true,"include":true,"step":"25.0","x":-36.72190476190476,"y":-75.42095238095237,"z":-35.65047619047619,"a95":0.99,"info":"15/08/2014 at 18:05:38"},{"visible":true,"include":false,"step":"30.0","x":-28.474285714285717,"y":-73.74,"z":-28.60571428571429,"a95":0.99,"info":"15/08/2014 at 18:05:38"},{"visible":true,"include":false,"step":"35.0","x":-30.864761904761902,"y":-62.93047619047619,"z":-21.517142857142858,"a95":0.99,"info":"15/08/2014 at 18:05:38"},{"visible":true,"include":false,"step":"40.0","x":-27.81904761904762,"y":-62.948571428571434,"z":-35.936190476190475,"a95":0.99,"info":"15/08/2014 at 18:05:38"},{"visible":false,"include":false,"step":"45.0","x":-19.038095238095238,"y":-26.756190476190476,"z":-23.089523809523808,"a95":0.99,"info":"15/08/2014 at 18:05:38"},{"visible":false,"include":false,"step":"50.0","x":-23.32857142857143,"y":-48.36,"z":-22.323809523809523,"a95":0.99,"info":"15/08/2014 at 18:05:38"},{"visible":false,"include":false,"step":"60.0","x":-4.498095238095238,"y":-5.104857142857143,"z":-15.365714285714287,"a95":0.99,"info":"15/08/2014 at 18:05:38"},{"visible":false,"include":false,"step":"70.0","x":1.4553333333333334,"y":-2.9257142857142857,"z":-14.835238095238097,"a95":0.99,"info":"15/08/2014 at 18:05:38"},{"visible":false,"include":false,"step":"80.0","x":25.606666666666666,"y":-16.371428571428574,"z":-10.008571428571429,"a95":0.99,"info":"15/08/2014 at 18:05:38"},{"visible":false,"include":false,"step":"90.0","x":14.38952380952381,"y":-7.927619047619047,"z":-20.14952380952381,"a95":0.99,"info":"15/08/2014 at 18:05:38"},{"visible":false,"include":false,"step":"100.0","x":-17.447619047619046,"y":-2.5632380952380953,"z":4.591904761904762,"a95":0.99,"info":"15/08/2014 at 18:05:38"}]},{"version":"v1.1.0","exported":"2016-11-18T11:12:36.344Z","volume":10.5,"added":"2016-11-18T10:55:09.095Z","format":"Utrecht","demagType":"Unknown","strat":null,"patch":1.1,"GEO":[{"dec":167.18146395633175,"inc":-2.8284923037657186,"MAD":6.802309071903435,"cm":[-3.552713678800501e-15,-1.63202784619898e-14,0],"intensity":95.68824331806417,"type":"dir","forced":true,"remark":"","origin":false,"nSteps":9,"minStep":"180","maxStep":"430","steps":["180","210","270","300","320","340","370","400","430"],"group":"None","version":"v1.1.0"}],"TECT":[{"dec":138.7468305140232,"inc":-51.089130269323405,"MAD":6.802309071903455,"cm":[1.7763568394002505e-15,-1.4432899320127035e-14,-9.103828801926284e-15],"intensity":95.68824331806417,"type":"dir","forced":true,"remark":"","origin":false,"nSteps":9,"minStep":"180","maxStep":"430","steps":["180","210","270","300","320","340","370","400","430"],"group":"None","version":"v1.1.0"}],"interpreted":true,"name":"HP3.5A","coreAzi":288,"coreDip":47,"bedStrike":111,"bedDip":66,"data":[{"visible":false,"include":false,"step":"20","x":38.285714285714285,"y":-161.8095238095238,"z":-68,"a95":2.2,"info":"\"14-08-11\" at \"18:20\""},{"visible":true,"include":false,"step":"100","x":1.8095238095238095,"y":-98.85714285714286,"z":-74.19047619047619,"a95":1.9,"info":"\"14-08-11\" at \"21:27\""},{"visible":true,"include":false,"step":"150","x":5.171428571428571,"y":-63.409523809523805,"z":-38.95238095238095,"a95":2.2,"info":"\"14-08-12\" at \"00:19\""},{"visible":true,"include":true,"step":"180","x":-18.65714285714286,"y":-49.095238095238095,"z":-28.742857142857144,"a95":2.9,"info":"\"14-08-12\" at \"16:33\""},{"visible":true,"include":true,"step":"210","x":-12.2,"y":-42.05714285714286,"z":-20.61904761904762,"a95":4.4,"info":"\"14-08-12\" at \"19:30\""},{"visible":false,"include":false,"step":"240","x":83.23809523809524,"y":-48.857142857142854,"z":-23.61904761904762,"a95":6.7,"info":"\"14-08-12\" at \"22:45\""},{"visible":true,"include":true,"step":"270","x":-15.619047619047619,"y":-40.48571428571429,"z":-11.038095238095238,"a95":7.6,"info":"\"14-08-13\" at \"16:12\""},{"visible":true,"include":true,"step":"300","x":-10.295238095238094,"y":-34.77142857142857,"z":-19.371428571428574,"a95":6.2,"info":"\"14-08-13\" at \"19:11\""},{"visible":true,"include":true,"step":"320","x":-21.16190476190476,"y":-41.75238095238095,"z":-14.914285714285715,"a95":4.3,"info":"\"14-08-13\" at \"22:20\""},{"visible":true,"include":true,"step":"340","x":-16.904761904761905,"y":-37.23809523809524,"z":-20.40952380952381,"a95":4.6,"info":"\"14-08-14\" at \"15:19\""},{"visible":true,"include":true,"step":"370","x":-12.323809523809524,"y":-33.12380952380953,"z":-13.304761904761904,"a95":12.1,"info":"\"14-08-14\" at \"18:22\""},{"visible":true,"include":true,"step":"400","x":-10.114285714285714,"y":-29.571428571428573,"z":-12.685714285714285,"a95":18.6,"info":"\"14-08-14\" at \"21:40\""},{"visible":true,"include":true,"step":"430","x":-17.895238095238096,"y":-31.38095238095238,"z":-7.914285714285714,"a95":7.7,"info":"\"14-08-15\" at \"14:17\""},{"visible":true,"include":false,"step":"460","x":-16.323809523809523,"y":-47.21904761904762,"z":-8.685714285714287,"a95":7.5,"info":"\"14-08-15\" at \"17:26\""},{"visible":false,"include":false,"step":"490","x":-35.266666666666666,"y":-1.8285714285714285,"z":-36.76190476190476,"a95":10.2,"info":"\"14-08-15\" at \"20:44\""},{"visible":false,"include":false,"step":"510","x":-10.447619047619048,"y":-22.82857142857143,"z":-0.3619047619047619,"a95":28.8,"info":"\"14-08-15\" at \"23:52\""},{"visible":false,"include":false,"step":"540","x":-32.51428571428571,"y":10.114285714285714,"z":-3.7142857142857144,"a95":19.1,"info":"\"14-08-16\" at \"13:08\""},{"visible":false,"include":false,"step":"570","x":-5.085714285714285,"y":-50.904761904761905,"z":5.857142857142857,"a95":18.4,"info":"\"14-08-16\" at \"15:50\""},{"visible":false,"include":false,"step":"600","x":-68.24761904761905,"y":-54.666666666666664,"z":25.342857142857145,"a95":19.5,"info":"\"14-08-16\" at \"18:31\""}]},{"version":"v1.1.0","exported":"2016-11-18T11:12:36.344Z","volume":10.5,"added":"2016-11-18T10:55:09.096Z","format":"Utrecht","demagType":"Unknown","strat":"5","patch":1.1,"GEO":[{"dec":181.5387136578192,"inc":-6.50687981734207,"MAD":4.954453533806802,"cm":[0,7.438494264988549e-15,0],"intensity":101.90436018794875,"type":"dir","forced":true,"remark":"","origin":false,"nSteps":3,"minStep":"25.0","maxStep":"35.0","steps":["25.0","30.0","35.0"],"group":"None","version":"v1.1.0"}],"TECT":[{"dec":150.97368115062778,"inc":-64.40835380905528,"MAD":4.954453533806784,"cm":[-6.217248937900877e-15,6.217248937900877e-15,5.329070518200751e-15],"intensity":101.90436018794877,"type":"dir","forced":true,"remark":"","origin":false,"nSteps":3,"minStep":"25.0","maxStep":"35.0","steps":["25.0","30.0","35.0"],"group":"None","version":"v1.1.0"}],"interpreted":true,"name":"HP3.5B","coreAzi":288,"coreDip":47,"bedStrike":111,"bedDip":66,"data":[{"visible":false,"include":false,"step":"0.0","x":-24.137142857142855,"y":-71.0104761904762,"z":-15.914285714285715,"a95":0.99,"info":"15/08/2014 at 18:05:38"},{"visible":true,"include":false,"step":"4.0","x":14.688571428571427,"y":-110.57142857142857,"z":-45.756190476190476,"a95":0.99,"info":"15/08/2014 at 18:05:38"},{"visible":true,"include":false,"step":"8.0","x":18.162857142857142,"y":-117.71428571428571,"z":-59.88,"a95":0.99,"info":"15/08/2014 at 18:05:38"},{"visible":true,"include":false,"step":"12.0","x":9.207714285714285,"y":-86.27142857142857,"z":-43.17142857142857,"a95":0.99,"info":"15/08/2014 at 18:05:38"},{"visible":true,"include":false,"step":"16.0","x":15.404761904761905,"y":-71.50095238095238,"z":-24.215238095238096,"a95":0.99,"info":"15/08/2014 at 18:05:38"},{"visible":true,"include":false,"step":"20.0","x":9.80952380952381,"y":-60.66095238095239,"z":-16.26952380952381,"a95":0.99,"info":"15/08/2014 at 18:05:38"},{"visible":true,"include":true,"step":"25.0","x":-9.842857142857142,"y":-51.71142857142858,"z":-12.153333333333332,"a95":0.99,"info":"15/08/2014 at 18:05:38"},{"visible":true,"include":true,"step":"30.0","x":-5.816952380952381,"y":-33.656190476190474,"z":-13.74095238095238,"a95":0.99,"info":"15/08/2014 at 18:05:38"},{"visible":true,"include":true,"step":"35.0","x":-2.0543809523809524,"y":-46.22571428571429,"z":-13.366666666666665,"a95":0.99,"info":"15/08/2014 at 18:05:38"},{"visible":false,"include":false,"step":"40.0","x":-6.123523809523809,"y":-23.216190476190476,"z":-15.59047619047619,"a95":0.99,"info":"15/08/2014 at 18:05:38"},{"visible":true,"include":false,"step":"45.0","x":3.9739999999999998,"y":-33.41238095238095,"z":1.1994285714285713,"a95":0.99,"info":"15/08/2014 at 18:05:38"},{"visible":true,"include":false,"step":"50.0","x":9.801904761904762,"y":-41.105714285714285,"z":-4.519523809523809,"a95":0.99,"info":"15/08/2014 at 18:05:38"},{"visible":true,"include":false,"step":"60.0","x":-4.453238095238095,"y":-21.055238095238096,"z":-9.612380952380953,"a95":0.99,"info":"15/08/2014 at 18:05:38"},{"visible":false,"include":false,"step":"70.0","x":10.104761904761904,"y":-28.06190476190476,"z":-6.443047619047619,"a95":0.99,"info":"15/08/2014 at 18:05:38"},{"visible":false,"include":false,"step":"80.0","x":1.8817142857142857,"y":-36.35333333333333,"z":2.1432380952380954,"a95":0.99,"info":"15/08/2014 at 18:05:38"},{"visible":false,"include":false,"step":"90.0","x":-3.321142857142857,"y":-17.531428571428574,"z":0.6957428571428571,"a95":0.99,"info":"15/08/2014 at 18:05:38"},{"visible":false,"include":false,"step":"100.0","x":-6.457428571428571,"y":-36.373333333333335,"z":-13.630476190476191,"a95":0.99,"info":"15/08/2014 at 18:05:38"}]},{"version":"v1.1.0","exported":"2016-11-18T11:12:36.344Z","volume":10.5,"added":"2016-11-18T10:55:09.097Z","format":"Utrecht","demagType":"Unknown","strat":"6","patch":1.1,"GEO":[],"TECT":[],"interpreted":false,"name":"HP3.6A","coreAzi":282,"coreDip":52,"bedStrike":111,"bedDip":66,"data":[{"visible":true,"include":false,"step":"0.0","x":52.07523809523809,"y":-90.9342857142857,"z":-17.891428571428573,"a95":0.99,"info":"15/08/2014 at 18:05:38"},{"visible":true,"include":false,"step":"4.0","x":64.60190476190476,"y":-99.13333333333334,"z":-39.72857142857143,"a95":0.99,"info":"15/08/2014 at 18:05:38"},{"visible":true,"include":true,"step":"8.0","x":43.831428571428575,"y":-83.90190476190476,"z":-37.434285714285714,"a95":0.99,"info":"15/08/2014 at 18:05:38"},{"visible":true,"include":true,"step":"12.0","x":20.923809523809524,"y":-39.74095238095238,"z":-15.711428571428572,"a95":0.99,"info":"15/08/2014 at 18:05:38"},{"visible":true,"include":true,"step":"16.0","x":-0.8589333333333334,"y":-22.415238095238095,"z":-5.468380952380953,"a95":0.99,"info":"15/08/2014 at 18:05:38"},{"visible":true,"include":true,"step":"20.0","x":-0.11363809523809525,"y":-12.760952380952382,"z":11.73904761904762,"a95":0.99,"info":"15/08/2014 at 18:05:38"},{"visible":true,"include":false,"step":"25.0","x":-2.1592380952380954,"y":-10.632380952380952,"z":24.17238095238095,"a95":0.99,"info":"15/08/2014 at 18:05:38"},{"visible":true,"include":false,"step":"30.0","x":-3.441047619047619,"y":-1.5285714285714287,"z":20.94,"a95":0.99,"info":"15/08/2014 at 18:05:38"},{"visible":true,"include":false,"step":"35.0","x":6.593904761904763,"y":7.437904761904762,"z":23.886666666666667,"a95":0.99,"info":"15/08/2014 at 18:05:38"},{"visible":true,"include":false,"step":"40.0","x":1.8632380952380951,"y":19.653333333333336,"z":26.695238095238096,"a95":0.99,"info":"15/08/2014 at 18:05:38"},{"visible":true,"include":false,"step":"45.0","x":9.725714285714286,"y":36.76190476190476,"z":34.62857142857143,"a95":0.99,"info":"15/08/2014 at 18:05:38"},{"visible":true,"include":false,"step":"50.0","x":12.630476190476191,"y":40.88285714285714,"z":18.80952380952381,"a95":0.99,"info":"15/08/2014 at 18:05:38"},{"visible":false,"include":false,"step":"60.0","x":0.9593333333333334,"y":29.959047619047617,"z":12.721904761904764,"a95":0.99,"info":"15/08/2014 at 18:05:38"},{"visible":false,"include":false,"step":"70.0","x":15.883809523809523,"y":42.06857142857143,"z":18.540952380952383,"a95":0.99,"info":"15/08/2014 at 18:05:38"},{"visible":false,"include":false,"step":"80.0","x":2.2755238095238095,"y":34.18952380952381,"z":11.540952380952382,"a95":0.99,"info":"15/08/2014 at 18:05:38"},{"visible":false,"include":false,"step":"90.0","x":-14.649523809523808,"y":2.0761904761904764,"z":-8.849428571428572,"a95":0.99,"info":"15/08/2014 at 18:05:38"},{"visible":false,"include":false,"step":"100.0","x":2.6455238095238096,"y":6.02352380952381,"z":12.614285714285714,"a95":0.99,"info":"15/08/2014 at 18:05:38"}]},{"version":"v1.1.0","exported":"2016-11-18T11:12:36.345Z","volume":10.5,"added":"2016-11-18T10:55:09.097Z","format":"Utrecht","demagType":"Unknown","strat":"7","patch":1.1,"GEO":[],"TECT":[],"interpreted":false,"name":"HP3.7A","coreAzi":287,"coreDip":52,"bedStrike":111,"bedDip":66,"data":[{"visible":true,"include":false,"step":"0.0","x":-53.84,"y":27.547619047619047,"z":23.447619047619046,"a95":0.99,"info":"15/08/2014 at 18:05:38"},{"visible":true,"include":false,"step":"4.0","x":-49.42380952380953,"y":22.698095238095238,"z":10.92952380952381,"a95":0.99,"info":"15/08/2014 at 18:05:38"},{"visible":true,"include":false,"step":"8.0","x":-44.701904761904764,"y":7.412857142857142,"z":0.8046666666666666,"a95":0.99,"info":"15/08/2014 at 18:05:38"},{"visible":true,"include":true,"step":"12.0","x":-39.042857142857144,"y":8.082476190476191,"z":10.841904761904763,"a95":0.99,"info":"15/08/2014 at 18:05:38"},{"visible":true,"include":true,"step":"16.0","x":-38.846666666666664,"y":12.937142857142858,"z":13.2,"a95":0.99,"info":"15/08/2014 at 18:05:38"},{"visible":true,"include":true,"step":"20.0","x":-31.744761904761905,"y":10.653333333333332,"z":17.053333333333335,"a95":0.99,"info":"15/08/2014 at 18:05:38"},{"visible":true,"include":true,"step":"25.0","x":-29.916190476190476,"y":2.020857142857143,"z":18.96666666666667,"a95":0.99,"info":"15/08/2014 at 18:05:38"},{"visible":true,"include":true,"step":"30.0","x":-31.979047619047616,"y":0.981904761904762,"z":17.473333333333333,"a95":0.99,"info":"15/08/2014 at 18:05:38"},{"visible":true,"include":false,"step":"35.0","x":-29.054285714285715,"y":-1.34,"z":18.64095238095238,"a95":0.99,"info":"15/08/2014 at 18:05:38"},{"visible":true,"include":false,"step":"40.0","x":-37.30095238095238,"y":0.7439714285714286,"z":16.865714285714287,"a95":0.99,"info":"15/08/2014 at 18:05:38"},{"visible":false,"include":false,"step":"45.0","x":-22.714285714285715,"y":4.194761904761905,"z":29.61619047619048,"a95":0.99,"info":"15/08/2014 at 18:05:38"},{"visible":true,"include":false,"step":"50.0","x":-22.24190476190476,"y":4.808952380952381,"z":15.861904761904762,"a95":0.99,"info":"15/08/2014 at 18:05:38"},{"visible":false,"include":false,"step":"60.0","x":-23.217142857142857,"y":5.92752380952381,"z":20.86095238095238,"a95":0.99,"info":"15/08/2014 at 18:05:38"},{"visible":false,"include":false,"step":"70.0","x":-6.253904761904762,"y":11.008571428571429,"z":15.02190476190476,"a95":0.99,"info":"15/08/2014 at 18:05:38"},{"visible":false,"include":false,"step":"80.0","x":-1.731047619047619,"y":16.045714285714286,"z":17.176190476190477,"a95":0.99,"info":"15/08/2014 at 18:05:38"},{"visible":false,"include":false,"step":"90.0","x":5.839809523809524,"y":3.1384761904761906,"z":17.780952380952378,"a95":0.99,"info":"15/08/2014 at 18:05:38"},{"visible":false,"include":false,"step":"100.0","x":1.6156190476190475,"y":8.728666666666665,"z":-0.7291142857142857,"a95":0.99,"info":"15/08/2014 at 18:05:38"}]},{"version":"v1.1.0","exported":"2016-11-18T11:12:36.345Z","volume":10.5,"added":"2016-11-18T10:55:09.098Z","format":"Utrecht","demagType":"Unknown","strat":"8","patch":1.1,"GEO":[{"dec":171.43716266652325,"inc":-11.886896370064493,"MAD":3.628338700148423,"cm":[-8.881784197001252e-16,-8.881784197001252e-16,0],"intensity":145.35438236449,"type":"dir","forced":true,"remark":"","origin":false,"nSteps":4,"minStep":"16.0","maxStep":"30.0","steps":["16.0","20.0","25.0","30.0"],"group":"None","version":"v1.1.0"}],"TECT":[{"dec":129.12401677540527,"inc":-59.46915279023674,"MAD":3.6283387001484,"cm":[7.105427357601002e-15,-2.6645352591003757e-15,-5.329070518200751e-15],"intensity":145.35438236449,"type":"dir","forced":true,"remark":"","origin":false,"nSteps":4,"minStep":"16.0","maxStep":"30.0","steps":["16.0","20.0","25.0","30.0"],"group":"None","version":"v1.1.0"}],"interpreted":true,"name":"HP3.8A","coreAzi":281,"coreDip":60,"bedStrike":111,"bedDip":66,"data":[{"visible":true,"include":false,"step":"0.0","x":-3.1502857142857144,"y":-116.55238095238094,"z":-41.03904761904762,"a95":0.99,"info":"15/08/2014 at 18:05:38"},{"visible":true,"include":false,"step":"4.0","x":1.7812380952380953,"y":-133.65714285714287,"z":-70.38380952380952,"a95":0.99,"info":"15/08/2014 at 18:05:38"},{"visible":true,"include":false,"step":"8.0","x":6.679333333333333,"y":-129.51428571428573,"z":-71.03142857142858,"a95":0.99,"info":"15/08/2014 at 18:05:38"},{"visible":true,"include":false,"step":"12.0","x":-9.773333333333333,"y":-99.87619047619049,"z":-45.54190476190476,"a95":0.99,"info":"15/08/2014 at 18:05:38"},{"visible":true,"include":true,"step":"16.0","x":-12.842857142857142,"y":-78.67238095238095,"z":-33.140952380952385,"a95":0.99,"info":"15/08/2014 at 18:05:38"},{"visible":true,"include":true,"step":"20.0","x":-9.462285714285715,"y":-69.85619047619048,"z":-24.240952380952383,"a95":0.99,"info":"15/08/2014 at 18:05:38"},{"visible":true,"include":true,"step":"25.0","x":-15.841904761904763,"y":-60.88571428571428,"z":-21.082857142857144,"a95":0.99,"info":"15/08/2014 at 18:05:38"},{"visible":true,"include":true,"step":"30.0","x":-15.37047619047619,"y":-54.34,"z":-18.236190476190476,"a95":0.99,"info":"15/08/2014 at 18:05:38"},{"visible":true,"include":false,"step":"35.0","x":-18.51142857142857,"y":-46.492380952380955,"z":-10.869523809523809,"a95":0.99,"info":"15/08/2014 at 18:05:38"},{"visible":true,"include":false,"step":"40.0","x":-9.477333333333334,"y":-34.80380952380953,"z":-11.34095238095238,"a95":0.99,"info":"15/08/2014 at 18:05:38"},{"visible":false,"include":false,"step":"45.0","x":-20.356190476190477,"y":-28.200952380952383,"z":8.622761904761905,"a95":0.99,"info":"15/08/2014 at 18:05:38"},{"visible":false,"include":false,"step":"50.0","x":-12.38952380952381,"y":-15.903809523809525,"z":2.4486666666666665,"a95":0.99,"info":"15/08/2014 at 18:05:38"},{"visible":false,"include":false,"step":"60.0","x":-10.257142857142858,"y":-0.42301904761904763,"z":9.257428571428571,"a95":0.99,"info":"15/08/2014 at 18:05:38"},{"visible":false,"include":false,"step":"70.0","x":-15.650476190476192,"y":-12.383809523809523,"z":-7.6670476190476196,"a95":0.99,"info":"15/08/2014 at 18:05:38"},{"visible":false,"include":false,"step":"80.0","x":-24.004761904761907,"y":-14.213333333333335,"z":-3.0398095238095237,"a95":0.99,"info":"15/08/2014 at 18:05:38"},{"visible":false,"include":false,"step":"90.0","x":2.2737142857142856,"y":3.3600000000000003,"z":-0.9891428571428571,"a95":0.99,"info":"15/08/2014 at 18:05:38"},{"visible":false,"include":false,"step":"100.0","x":-18.624761904761904,"y":3.2899047619047614,"z":-0.7272190476190475,"a95":0.99,"info":"15/08/2014 at 18:05:38"}]},{"version":"v1.1.0","exported":"2016-11-18T11:12:36.345Z","volume":10.5,"added":"2016-11-18T10:55:09.098Z","format":"Utrecht","demagType":"Unknown","strat":"1","patch":1.1,"GEO":[],"TECT":[],"interpreted":false,"name":"HP3.9A","coreAzi":272,"coreDip":50,"bedStrike":111,"bedDip":66,"data":[{"visible":true,"include":false,"step":"0.0","x":-27.978095238095236,"y":3.0615238095238095,"z":53.12666666666667,"a95":0.99,"info":"15/08/2014 at 23:32:29"},{"visible":false,"include":false,"step":"4.0","x":-13.596190476190475,"y":-11.033333333333333,"z":34.666666666666664,"a95":0.99,"info":"15/08/2014 at 23:32:29"},{"visible":true,"include":false,"step":"8.0","x":-10.94095238095238,"y":-18.97904761904762,"z":22.193333333333335,"a95":0.99,"info":"15/08/2014 at 23:32:29"},{"visible":true,"include":false,"step":"12.0","x":-9.488761904761905,"y":-15.202857142857143,"z":25.404761904761905,"a95":0.99,"info":"15/08/2014 at 23:32:29"},{"visible":true,"include":false,"step":"16.0","x":-13.974285714285713,"y":-7.5823809523809516,"z":18.29619047619048,"a95":0.99,"info":"15/08/2014 at 23:32:29"},{"visible":true,"include":false,"step":"20.0","x":-16.726666666666667,"y":-18.765714285714285,"z":23.473333333333333,"a95":0.99,"info":"15/08/2014 at 23:32:29"},{"visible":true,"include":false,"step":"25.0","x":-16.513333333333332,"y":-11.485714285714286,"z":26.39714285714286,"a95":0.99,"info":"15/08/2014 at 23:32:29"},{"visible":true,"include":false,"step":"30.0","x":-10.043809523809523,"y":8.354095238095239,"z":30.23333333333333,"a95":0.99,"info":"15/08/2014 at 23:32:29"},{"visible":true,"include":false,"step":"35.0","x":-9.379523809523809,"y":-0.0596904761904762,"z":27.154285714285713,"a95":0.99,"info":"15/08/2014 at 23:32:29"},{"visible":true,"include":false,"step":"40.0","x":-14.957142857142859,"y":-1.5821904761904761,"z":34.8447619047619,"a95":0.99,"info":"15/08/2014 at 23:32:29"},{"visible":false,"include":false,"step":"45.0","x":-17.18285714285714,"y":-5.2241904761904765,"z":35.25333333333334,"a95":0.99,"info":"15/08/2014 at 23:32:29"},{"visible":false,"include":false,"step":"50.0","x":-10.754285714285714,"y":-1.4022857142857144,"z":23.276190476190475,"a95":0.99,"info":"15/08/2014 at 23:32:29"},{"visible":false,"include":false,"step":"60.0","x":-20.12666666666667,"y":-3.8720952380952376,"z":25.67809523809524,"a95":0.99,"info":"15/08/2014 at 23:32:29"},{"visible":false,"include":false,"step":"70.0","x":-10.99047619047619,"y":-8.021904761904763,"z":21.893333333333334,"a95":0.99,"info":"15/08/2014 at 23:32:29"},{"visible":false,"include":false,"step":"80.0","x":-1.2130476190476192,"y":-11.262857142857143,"z":20.63047619047619,"a95":0.99,"info":"15/08/2014 at 23:32:29"},{"visible":false,"include":false,"step":"90.0","x":-12.38190476190476,"y":9.758095238095237,"z":26.484761904761903,"a95":0.99,"info":"15/08/2014 at 23:32:29"},{"visible":false,"include":false,"step":"100.0","x":-12.143809523809525,"y":2.1929523809523808,"z":19.570476190476192,"a95":0.99,"info":"15/08/2014 at 23:32:29"}]},{"version":"v1.1.0","exported":"2016-11-18T11:12:36.345Z","volume":10.5,"added":"2016-11-18T10:55:09.099Z","format":"Utrecht","demagType":"Unknown","strat":null,"patch":1.1,"GEO":[],"TECT":[],"interpreted":false,"name":"HP3.10A","coreAzi":249,"coreDip":43,"bedStrike":111,"bedDip":66,"data":[{"visible":true,"include":false,"step":"20","x":2232.7619047619046,"y":-348.85714285714283,"z":-1719.904761904762,"a95":2.2,"info":"\"14-08-11\" at \"18:27\""},{"visible":true,"include":false,"step":"100","x":924.8571428571429,"y":39.333333333333336,"z":-1036,"a95":2.3,"info":"\"14-08-11\" at \"21:29\""},{"visible":true,"include":false,"step":"150","x":574,"y":367.6190476190476,"z":-835.047619047619,"a95":2.7,"info":"\"14-08-12\" at \"00:21\""},{"visible":true,"include":false,"step":"180","x":162.57142857142858,"y":499.9047619047619,"z":-594.1904761904761,"a95":2.5,"info":"\"14-08-12\" at \"16:36\""},{"visible":true,"include":false,"step":"210","x":-27.047619047619047,"y":132.57142857142858,"z":-72.95238095238095,"a95":3.1,"info":"\"14-08-12\" at \"19:33\""},{"visible":true,"include":false,"step":"240","x":87.04761904761905,"y":58.19047619047619,"z":-57.714285714285715,"a95":7.9,"info":"\"14-08-12\" at \"22:48\""},{"visible":true,"include":false,"step":"270","x":-101.33333333333333,"y":124.19047619047619,"z":14.666666666666666,"a95":3.4,"info":"\"14-08-13\" at \"16:14\""},{"visible":true,"include":false,"step":"300","x":-10.8,"y":-21.085714285714285,"z":56.44761904761905,"a95":6.7,"info":"\"14-08-13\" at \"19:14\""},{"visible":true,"include":false,"step":"320","x":-204.1904761904762,"y":-6.571428571428571,"z":20.38095238095238,"a95":3.4,"info":"\"14-08-13\" at \"22:22\""},{"visible":true,"include":false,"step":"340","x":-92.66666666666667,"y":-27.80952380952381,"z":42.95238095238095,"a95":4.6,"info":"\"14-08-14\" at \"15:22\""},{"visible":true,"include":false,"step":"370","x":-130.85714285714286,"y":-88,"z":35.04761904761905,"a95":3.1,"info":"\"14-08-14\" at \"18:24\""},{"visible":true,"include":false,"step":"400","x":-89.80952380952381,"y":-46.38095238095238,"z":38,"a95":7.4,"info":"\"14-08-14\" at \"21:42\""},{"visible":true,"include":false,"step":"430","x":89.80952380952381,"y":39.904761904761905,"z":49.42857142857143,"a95":3.9,"info":"\"14-08-15\" at \"14:20\""},{"visible":true,"include":false,"step":"460","x":22.095238095238095,"y":-115.52380952380952,"z":18.571428571428573,"a95":7,"info":"\"14-08-15\" at \"17:28\""},{"visible":true,"include":false,"step":"490","x":-176.95238095238096,"y":-197.04761904761904,"z":26.761904761904763,"a95":3.3,"info":"\"14-08-15\" at \"20:47\""},{"visible":true,"include":false,"step":"510","x":0.9523809523809523,"y":-150.85714285714286,"z":177.9047619047619,"a95":4.6,"info":"\"14-08-15\" at \"23:54\""},{"visible":true,"include":false,"step":"540","x":-211.61904761904762,"y":22.38095238095238,"z":140.47619047619048,"a95":4.7,"info":"\"14-08-16\" at \"13:11\""},{"visible":true,"include":false,"step":"570","x":17.142857142857142,"y":-118.38095238095238,"z":72,"a95":12.7,"info":"\"14-08-16\" at \"15:52\""},{"visible":true,"include":false,"step":"600","x":-156.47619047619048,"y":-72.76190476190476,"z":8.285714285714286,"a95":12.6,"info":"\"14-08-16\" at \"18:33\""}]},{"version":"v1.1.0","exported":"2016-11-18T11:12:36.345Z","volume":10.5,"added":"2016-11-18T10:55:09.099Z","format":"Utrecht","demagType":"Unknown","strat":"2","patch":1.1,"GEO":[{"dec":280.9453517495384,"inc":-2.1528004981852424,"MAD":11.91545831708684,"cm":[7.105427357601002e-15,5.329070518200751e-15,0],"intensity":1566.458249047246,"type":"GC","origin":false,"forced":true,"remark":"","nSteps":4,"minStep":"12.0","maxStep":"25.0","steps":["12.0","16.0","20.0","25.0"],"group":"None","version":"v1.1.0"}],"TECT":[{"dec":288.8671852916654,"inc":-10.058864795865377,"MAD":11.915458317086594,"cm":[0,-7.105427357601002e-15,1.4210854715202004e-14],"intensity":1566.458249047246,"type":"GC","origin":false,"forced":true,"remark":"","nSteps":4,"minStep":"12.0","maxStep":"25.0","steps":["12.0","16.0","20.0","25.0"],"group":"None","version":"v1.1.0"}],"interpreted":true,"name":"HP3.10B","coreAzi":249,"coreDip":43,"bedStrike":111,"bedDip":66,"data":[{"visible":false,"include":false,"step":"0.0","x":900.8285714285715,"y":33.24095238095238,"z":-512.3238095238095,"a95":0.99,"info":"15/08/2014 at 23:32:29"},{"visible":true,"include":false,"step":"4.0","x":1111.904761904762,"y":-214.6095238095238,"z":-780.2952380952381,"a95":0.99,"info":"15/08/2014 at 23:32:29"},{"visible":true,"include":false,"step":"8.0","x":1053.2380952380952,"y":-218.62857142857143,"z":-797.695238095238,"a95":0.99,"info":"15/08/2014 at 23:32:29"},{"visible":true,"include":true,"step":"12.0","x":799.2095238095238,"y":-89.55428571428573,"z":-698.6952380952381,"a95":0.99,"info":"15/08/2014 at 23:32:29"},{"visible":true,"include":true,"step":"16.0","x":572.4285714285714,"y":8.636095238095239,"z":-629.9619047619047,"a95":0.99,"info":"15/08/2014 at 23:32:29"},{"visible":true,"include":true,"step":"20.0","x":441.18095238095236,"y":88.75238095238095,"z":-574.1809523809524,"a95":0.99,"info":"15/08/2014 at 23:32:29"},{"visible":true,"include":true,"step":"25.0","x":300.2857142857143,"y":182.8095238095238,"z":-413.152380952381,"a95":0.99,"info":"15/08/2014 at 23:32:29"},{"visible":true,"include":false,"step":"30.0","x":306.7904761904762,"y":305.5238095238095,"z":-391.8857142857143,"a95":0.99,"info":"15/08/2014 at 23:32:29"},{"visible":true,"include":false,"step":"35.0","x":171.54285714285714,"y":329.22857142857146,"z":-331.4761904761905,"a95":0.99,"info":"15/08/2014 at 23:32:29"},{"visible":true,"include":false,"step":"40.0","x":106.87619047619049,"y":378.752380952381,"z":-314.93333333333334,"a95":0.99,"info":"15/08/2014 at 23:32:29"},{"visible":true,"include":false,"step":"45.0","x":99.80952380952381,"y":478.8857142857143,"z":-266.2095238095238,"a95":0.99,"info":"15/08/2014 at 23:32:29"},{"visible":true,"include":false,"step":"50.0","x":11.663809523809524,"y":433.4095238095238,"z":-180.68571428571428,"a95":0.99,"info":"15/08/2014 at 23:32:29"},{"visible":true,"include":false,"step":"60.0","x":-179.9047619047619,"y":412.3619047619048,"z":-185.01904761904763,"a95":0.99,"info":"15/08/2014 at 23:32:29"},{"visible":false,"include":false,"step":"70.0","x":-11,"y":535.5238095238095,"z":-90.54095238095238,"a95":0.99,"info":"15/08/2014 at 23:32:29"},{"visible":false,"include":false,"step":"80.0","x":-88.28476190476191,"y":235.35238095238094,"z":-98.73333333333333,"a95":0.99,"info":"15/08/2014 at 23:32:29"},{"visible":false,"include":false,"step":"90.0","x":-173.41904761904763,"y":273.1904761904762,"z":-282.2666666666667,"a95":0.99,"info":"15/08/2014 at 23:32:29"},{"visible":false,"include":false,"step":"100.0","x":-50.919999999999995,"y":403.8666666666667,"z":-158.68571428571428,"a95":0.99,"info":"15/08/2014 at 23:32:29"}]},{"version":"v1.1.0","exported":"2016-11-18T11:12:36.345Z","volume":10.5,"added":"2016-11-18T10:55:09.099Z","format":"Utrecht","demagType":"Unknown","strat":"3","patch":1.1,"GEO":[{"dec":100.71988460695803,"inc":-6.189778962813953,"MAD":3.680687147906491,"cm":[0,4.796163466380676e-14,0],"intensity":2996.5461117531686,"type":"GC","origin":false,"forced":true,"remark":"","nSteps":5,"minStep":"8.0","maxStep":"25.0","steps":["8.0","12.0","16.0","20.0","25.0"],"group":"None","version":"v1.1.0"}],"TECT":[{"dec":281.10349319883477,"inc":-6.78975414694753,"MAD":3.6806871479065433,"cm":[0,-4.085620730620576e-14,-7.105427357601002e-15],"intensity":2996.5461117531695,"type":"GC","origin":false,"forced":true,"remark":"","nSteps":5,"minStep":"8.0","maxStep":"25.0","steps":["8.0","12.0","16.0","20.0","25.0"],"group":"None","version":"v1.1.0"}],"interpreted":true,"name":"HP3.11A","coreAzi":268,"coreDip":45,"bedStrike":111,"bedDip":66,"data":[{"visible":false,"include":false,"step":"0.0","x":1588.857142857143,"y":419.85714285714283,"z":-1276.952380952381,"a95":0.99,"info":"15/08/2014 at 23:32:29"},{"visible":true,"include":false,"step":"4.0","x":1842.5714285714287,"y":-74.84666666666666,"z":-1409.904761904762,"a95":0.99,"info":"15/08/2014 at 23:32:29"},{"visible":true,"include":true,"step":"8.0","x":1709.8095238095239,"y":-90.96857142857142,"z":-1342.1904761904761,"a95":0.99,"info":"15/08/2014 at 23:32:29"},{"visible":true,"include":true,"step":"12.0","x":1298.1904761904761,"y":193.66666666666666,"z":-1090.952380952381,"a95":0.99,"info":"15/08/2014 at 23:32:29"},{"visible":true,"include":true,"step":"16.0","x":944.6761904761905,"y":425.1142857142857,"z":-859.1142857142858,"a95":0.99,"info":"15/08/2014 at 23:32:29"},{"visible":true,"include":true,"step":"20.0","x":599.2857142857143,"y":579.1809523809524,"z":-707,"a95":0.99,"info":"15/08/2014 at 23:32:29"},{"visible":true,"include":true,"step":"25.0","x":500.0952380952381,"y":739.4857142857143,"z":-574.847619047619,"a95":0.99,"info":"15/08/2014 at 23:32:29"},{"visible":true,"include":false,"step":"30.0","x":464.81904761904764,"y":883.7142857142857,"z":-445.4095238095238,"a95":0.99,"info":"15/08/2014 at 23:32:29"},{"visible":true,"include":false,"step":"35.0","x":339.7238095238095,"y":776.4666666666666,"z":-370.0761904761905,"a95":0.99,"info":"15/08/2014 at 23:32:29"},{"visible":true,"include":false,"step":"40.0","x":307.0190476190476,"y":911.1142857142858,"z":-301.95238095238096,"a95":0.99,"info":"15/08/2014 at 23:32:29"},{"visible":true,"include":false,"step":"45.0","x":297.67619047619047,"y":899.6095238095238,"z":-256.0190476190476,"a95":0.99,"info":"15/08/2014 at 23:32:29"},{"visible":true,"include":false,"step":"50.0","x":200.77142857142857,"y":703.6380952380953,"z":-197.02857142857144,"a95":0.99,"info":"15/08/2014 at 23:32:29"},{"visible":true,"include":false,"step":"60.0","x":103.79047619047618,"y":877.2095238095238,"z":-89.66190476190476,"a95":0.99,"info":"15/08/2014 at 23:32:29"},{"visible":true,"include":false,"step":"70.0","x":50.142857142857146,"y":880.9333333333333,"z":-129.56190476190477,"a95":0.99,"info":"15/08/2014 at 23:32:29"},{"visible":false,"include":false,"step":"80.0","x":-114.25714285714287,"y":476.9047619047619,"z":-181.04761904761904,"a95":0.99,"info":"15/08/2014 at 23:32:29"},{"visible":false,"include":false,"step":"90.0","x":-63.95142857142857,"y":630,"z":-56.09809523809523,"a95":0.99,"info":"15/08/2014 at 23:32:29"},{"visible":false,"include":false,"step":"100.0","x":-136.8095238095238,"y":748.6380952380953,"z":-69.48476190476191,"a95":0.99,"info":"15/08/2014 at 23:32:29"}]},{"version":"v1.1.0","exported":"2016-11-18T11:12:36.345Z","volume":10.5,"added":"2016-11-18T10:55:09.100Z","format":"Utrecht","demagType":"Unknown","strat":"4","patch":1.1,"GEO":[{"dec":279.6746997354518,"inc":-3.7108166915805523,"MAD":8.718230948348959,"cm":[-7.105427357601002e-15,-1.9539925233402755e-13,0],"intensity":4250.049120687191,"type":"GC","origin":false,"forced":true,"remark":"","nSteps":5,"minStep":"8.0","maxStep":"25.0","steps":["8.0","12.0","16.0","20.0","25.0"],"group":"None","version":"v1.1.0"}],"TECT":[{"dec":289.7949808106756,"inc":-11.849954546836546,"MAD":8.718230948349161,"cm":[-5.684341886080802e-14,-7.105427357601002e-15,-1.1368683772161603e-13],"intensity":4250.049120687192,"type":"GC","origin":false,"forced":true,"remark":"","nSteps":5,"minStep":"8.0","maxStep":"25.0","steps":["8.0","12.0","16.0","20.0","25.0"],"group":"None","version":"v1.1.0"}],"interpreted":true,"name":"HP3.12A","coreAzi":261,"coreDip":39,"bedStrike":111,"bedDip":66,"data":[{"visible":false,"include":false,"step":"0.0","x":2011.047619047619,"y":-465.23809523809524,"z":-1454.4761904761904,"a95":0.99,"info":"15/08/2014 at 23:32:29"},{"visible":true,"include":false,"step":"4.0","x":2463.2380952380954,"y":-935.152380952381,"z":-1776.7619047619048,"a95":0.99,"info":"15/08/2014 at 23:32:29"},{"visible":true,"include":true,"step":"8.0","x":2346,"y":-875.1619047619048,"z":-1736,"a95":0.99,"info":"15/08/2014 at 23:32:29"},{"visible":true,"include":true,"step":"12.0","x":1893.3333333333333,"y":-516.1714285714286,"z":-1552.3809523809523,"a95":0.99,"info":"15/08/2014 at 23:32:29"},{"visible":true,"include":true,"step":"16.0","x":1502.857142857143,"y":-251.63809523809522,"z":-1287.904761904762,"a95":0.99,"info":"15/08/2014 at 23:32:29"},{"visible":true,"include":true,"step":"20.0","x":1164.857142857143,"y":-69.70857142857143,"z":-1144.2857142857142,"a95":0.99,"info":"15/08/2014 at 23:32:29"},{"visible":true,"include":true,"step":"25.0","x":938.4285714285714,"y":200.7047619047619,"z":-875.6190476190476,"a95":0.99,"info":"15/08/2014 at 23:32:29"},{"visible":true,"include":false,"step":"30.0","x":789.0571428571429,"y":393.2857142857143,"z":-752.7047619047619,"a95":0.99,"info":"15/08/2014 at 23:32:29"},{"visible":true,"include":false,"step":"35.0","x":544.3523809523809,"y":296.2666666666667,"z":-651.9333333333334,"a95":0.99,"info":"15/08/2014 at 23:32:29"},{"visible":true,"include":false,"step":"40.0","x":394.8095238095238,"y":545.9619047619047,"z":-567.5904761904761,"a95":0.99,"info":"15/08/2014 at 23:32:29"},{"visible":true,"include":false,"step":"45.0","x":425.6190476190476,"y":636.7619047619048,"z":-519.6095238095238,"a95":0.99,"info":"15/08/2014 at 23:32:29"},{"visible":true,"include":false,"step":"50.0","x":213.9142857142857,"y":342.42857142857144,"z":-484.83809523809526,"a95":0.99,"info":"15/08/2014 at 23:32:29"},{"visible":true,"include":false,"step":"60.0","x":107.37142857142858,"y":583.7047619047619,"z":-352.77142857142854,"a95":0.99,"info":"15/08/2014 at 23:32:29"},{"visible":true,"include":false,"step":"70.0","x":230.7238095238095,"y":644.7904761904762,"z":-371.83809523809526,"a95":0.99,"info":"15/08/2014 at 23:32:29"},{"visible":false,"include":false,"step":"80.0","x":-163.94285714285715,"y":183.6,"z":-298.5904761904762,"a95":0.99,"info":"15/08/2014 at 23:32:29"},{"visible":false,"include":false,"step":"90.0","x":60.394285714285715,"y":579.3238095238095,"z":-293.8666666666667,"a95":0.99,"info":"15/08/2014 at 23:32:29"},{"visible":false,"include":false,"step":"100.0","x":163.48571428571427,"y":748.4571428571429,"z":-287.93333333333334,"a95":0.99,"info":"15/08/2014 at 23:32:29"}]},{"version":"v1.1.0","exported":"2016-11-18T11:12:36.345Z","volume":10.5,"added":"2016-11-18T10:55:09.100Z","format":"Utrecht","demagType":"Unknown","strat":null,"patch":1.1,"GEO":[],"TECT":[],"interpreted":false,"name":"HP3.13A","coreAzi":279,"coreDip":31,"bedStrike":111,"bedDip":66,"data":[{"visible":false,"include":false,"step":"20","x":-2198.7619047619046,"y":1906.2857142857142,"z":1733.047619047619,"a95":2.1,"info":"\"14-08-11\" at \"18:34\""},{"visible":true,"include":false,"step":"100","x":-224.0952380952381,"y":36.76190476190476,"z":121.14285714285714,"a95":2.2,"info":"\"14-08-11\" at \"21:31\""},{"visible":true,"include":false,"step":"150","x":-93.71428571428571,"y":-53.142857142857146,"z":14.857142857142858,"a95":3.5,"info":"\"14-08-12\" at \"00:24\""},{"visible":true,"include":false,"step":"180","x":-100.19047619047619,"y":-72.38095238095238,"z":29.238095238095237,"a95":3.1,"info":"\"14-08-12\" at \"16:39\""},{"visible":true,"include":false,"step":"210","x":-100.28571428571429,"y":-69.80952380952381,"z":22.666666666666668,"a95":3.1,"info":"\"14-08-12\" at \"19:35\""},{"visible":true,"include":false,"step":"240","x":-104.66666666666667,"y":-55.42857142857143,"z":6.857142857142857,"a95":3.7,"info":"\"14-08-12\" at \"22:52\""},{"visible":true,"include":false,"step":"270","x":-85.80952380952381,"y":-40.76190476190476,"z":20.19047619047619,"a95":4.9,"info":"\"14-08-13\" at \"16:16\""},{"visible":true,"include":false,"step":"300","x":-78.76190476190476,"y":-53.61904761904762,"z":1.7142857142857142,"a95":4.8,"info":"\"14-08-13\" at \"19:16\""},{"visible":true,"include":false,"step":"320","x":-104.57142857142857,"y":-59.333333333333336,"z":-11.619047619047619,"a95":4.7,"info":"\"14-08-13\" at \"22:24\""},{"visible":true,"include":false,"step":"340","x":-64.27619047619048,"y":-60.57142857142857,"z":-8.114285714285714,"a95":5.1,"info":"\"14-08-14\" at \"15:24\""},{"visible":true,"include":false,"step":"370","x":-83.9047619047619,"y":-57.23809523809524,"z":3.5238095238095237,"a95":3.9,"info":"\"14-08-14\" at \"18:27\""},{"visible":true,"include":false,"step":"400","x":-94.66666666666667,"y":-34.476190476190474,"z":-3.4285714285714284,"a95":5.7,"info":"\"14-08-14\" at \"21:44\""},{"visible":false,"include":false,"step":"430","x":-61.019047619047626,"y":-16.16190476190476,"z":-17.39047619047619,"a95":7.8,"info":"\"14-08-15\" at \"14:22\""},{"visible":true,"include":false,"step":"460","x":-59.5047619047619,"y":-31.97142857142857,"z":10.609523809523811,"a95":9.900001,"info":"\"14-08-15\" at \"17:31\""},{"visible":false,"include":false,"step":"490","x":-57.23809523809524,"y":-94.19047619047619,"z":-16.285714285714285,"a95":7.6,"info":"\"14-08-15\" at \"20:50\""},{"visible":true,"include":false,"step":"510","x":-70.27619047619048,"y":-46.02857142857143,"z":14.171428571428573,"a95":14.4,"info":"\"14-08-15\" at \"23:56\""},{"visible":false,"include":false,"step":"540","x":-60.57142857142857,"y":29.761904761904763,"z":42.94285714285714,"a95":13.6,"info":"\"14-08-16\" at \"13:13\""},{"visible":false,"include":false,"step":"570","x":-17.314285714285717,"y":86.25714285714287,"z":-3.4000000000000004,"a95":20.9,"info":"\"14-08-16\" at \"15:54\""},{"visible":false,"include":false,"step":"600","x":-214,"y":7.0476190476190474,"z":67.61904761904762,"a95":13.3,"info":"\"14-08-16\" at \"18:35\""}]},{"version":"v1.1.0","exported":"2016-11-18T11:12:36.345Z","volume":10.5,"added":"2016-11-18T10:55:09.100Z","format":"Utrecht","demagType":"Unknown","strat":"5","patch":1.1,"GEO":[{"dec":170.7943296956679,"inc":-6.552553982197455,"MAD":21.831729143820237,"cm":[-1.7763568394002505e-15,7.105427357601002e-15,0],"intensity":360.50928727927703,"type":"dir","forced":true,"remark":"","origin":false,"nSteps":5,"minStep":"35.0","maxStep":"80.0","steps":["35.0","40.0","45.0","50.0","80.0"],"group":"None","version":"v1.1.0"}],"TECT":[{"dec":137.1099996036799,"inc":-56.177505878016184,"MAD":21.831729143820244,"cm":[-1.2434497875801753e-14,1.0658141036401503e-14,1.0658141036401503e-14],"intensity":360.50928727927703,"type":"dir","forced":true,"remark":"","origin":false,"nSteps":5,"minStep":"35.0","maxStep":"80.0","steps":["35.0","40.0","45.0","50.0","80.0"],"group":"None","version":"v1.1.0"}],"interpreted":true,"name":"HP3.13B","coreAzi":279,"coreDip":31,"bedStrike":111,"bedDip":66,"data":[{"visible":false,"include":false,"step":"0.0","x":-2118.5714285714284,"y":1255.142857142857,"z":1274.7619047619048,"a95":0.99,"info":"15/08/2014 at 23:32:29"},{"visible":false,"include":false,"step":"4.0","x":-1761.7142857142858,"y":969.7142857142857,"z":1017.1428571428571,"a95":0.99,"info":"15/08/2014 at 23:32:29"},{"visible":false,"include":false,"step":"8.0","x":-1189.3333333333333,"y":562.152380952381,"z":649.2666666666667,"a95":0.99,"info":"15/08/2014 at 23:32:29"},{"visible":true,"include":false,"step":"12.0","x":-733.5142857142857,"y":294.22857142857146,"z":380,"a95":0.99,"info":"15/08/2014 at 23:32:29"},{"visible":true,"include":false,"step":"16.0","x":-457.35238095238094,"y":133.6095238095238,"z":219.21904761904764,"a95":0.99,"info":"15/08/2014 at 23:32:29"},{"visible":true,"include":false,"step":"20.0","x":-283.8285714285714,"y":-4.3262857142857145,"z":98.42857142857143,"a95":0.99,"info":"15/08/2014 at 23:32:29"},{"visible":true,"include":false,"step":"25.0","x":-174.11428571428573,"y":-65.79047619047618,"z":61.906666666666666,"a95":0.99,"info":"15/08/2014 at 23:32:29"},{"visible":true,"include":false,"step":"30.0","x":-103.33333333333333,"y":-59.381904761904764,"z":-56.22380952380953,"a95":0.99,"info":"15/08/2014 at 23:32:29"},{"visible":true,"include":true,"step":"35.0","x":-6.485619047619048,"y":-180.2761904761905,"z":-75.42095238095237,"a95":0.99,"info":"15/08/2014 at 23:32:29"},{"visible":true,"include":true,"step":"40.0","x":30.08761904761905,"y":-82.42857142857143,"z":-19.903809523809525,"a95":0.99,"info":"15/08/2014 at 23:32:29"},{"visible":true,"include":true,"step":"45.0","x":47.80095238095238,"y":-81.15809523809523,"z":-3.0908571428571427,"a95":0.99,"info":"15/08/2014 at 23:32:29"},{"visible":true,"include":true,"step":"50.0","x":22.72952380952381,"y":-158.8190476190476,"z":-15.414285714285715,"a95":0.99,"info":"15/08/2014 at 23:32:29"},{"visible":false,"include":false,"step":"60.0","x":58.59428571428572,"y":-31.420952380952382,"z":-36.41238095238095,"a95":0.99,"info":"15/08/2014 at 23:32:29"},{"visible":true,"include":false,"step":"70.0","x":55.67333333333334,"y":-114.73333333333333,"z":-63.586666666666666,"a95":0.99,"info":"15/08/2014 at 23:32:29"},{"visible":true,"include":true,"step":"80.0","x":-93.35904761904762,"y":-127.82857142857144,"z":-82.91238095238096,"a95":0.99,"info":"15/08/2014 at 23:32:29"},{"visible":true,"include":false,"step":"90.0","x":-60.41809523809523,"y":-58.07619047619047,"z":-30.43047619047619,"a95":0.99,"info":"15/08/2014 at 23:32:29"},{"visible":false,"include":false,"step":"100.0","x":-4.157238095238095,"y":-13.272380952380953,"z":27.388571428571428,"a95":0.99,"info":"15/08/2014 at 23:32:29"}]},{"version":"v1.1.0","exported":"2016-11-18T11:12:36.345Z","volume":10.5,"added":"2016-11-18T10:55:09.100Z","format":"Utrecht","demagType":"Unknown","strat":null,"patch":1.1,"GEO":[],"TECT":[],"interpreted":false,"name":"HP3.14A","coreAzi":283,"coreDip":35,"bedStrike":111,"bedDip":66,"data":[{"visible":false,"include":false,"step":"20","x":-2276.190476190476,"y":2506.5714285714284,"z":1924.3809523809523,"a95":1.9,"info":"\"14-08-11\" at \"18:37\""},{"visible":true,"include":false,"step":"100","x":-521.4285714285714,"y":362,"z":301.42857142857144,"a95":2,"info":"\"14-08-11\" at \"21:34\""},{"visible":true,"include":false,"step":"150","x":-336.4761904761905,"y":232.38095238095238,"z":178.0952380952381,"a95":2,"info":"\"14-08-12\" at \"00:26\""},{"visible":true,"include":false,"step":"180","x":-178.0952380952381,"y":56.19047619047619,"z":86.47619047619048,"a95":2.4,"info":"\"14-08-12\" at \"16:41\""},{"visible":true,"include":false,"step":"210","x":-43.74285714285715,"y":-38.733333333333334,"z":-25.219047619047622,"a95":4.5,"info":"\"14-08-12\" at \"19:37\""},{"visible":true,"include":false,"step":"240","x":-88.74285714285713,"y":-31.152380952380955,"z":11.847619047619048,"a95":4.7,"info":"\"14-08-12\" at \"22:54\""},{"visible":true,"include":false,"step":"270","x":-100,"y":-12.666666666666666,"z":32.57142857142857,"a95":5.5,"info":"\"14-08-13\" at \"16:18\""},{"visible":true,"include":false,"step":"300","x":-58.980952380952374,"y":-33.42857142857143,"z":12.733333333333333,"a95":6.8,"info":"\"14-08-13\" at \"19:18\""},{"visible":true,"include":false,"step":"320","x":-99.23809523809524,"y":-38.666666666666664,"z":5.142857142857143,"a95":5,"info":"\"14-08-13\" at \"22:26\""},{"visible":true,"include":false,"step":"340","x":-38.08571428571428,"y":-29.228571428571428,"z":-0.01904761904761905,"a95":9.2,"info":"\"14-08-14\" at \"15:26\""},{"visible":true,"include":false,"step":"370","x":-67.1047619047619,"y":-5.666666666666667,"z":25.62857142857143,"a95":9.1,"info":"\"14-08-14\" at \"18:29\""},{"visible":false,"include":false,"step":"400","x":-100.19047619047619,"y":-5.904761904761905,"z":-1.5238095238095237,"a95":7.5,"info":"\"14-08-14\" at \"21:46\""},{"visible":false,"include":false,"step":"430","x":-101.80952380952381,"y":-8.19047619047619,"z":-5.809523809523809,"a95":6.9,"info":"\"14-08-15\" at \"14:24\""},{"visible":false,"include":false,"step":"460","x":-111.33333333333333,"y":-34.095238095238095,"z":41.61904761904762,"a95":7.5,"info":"\"14-08-15\" at \"17:33\""},{"visible":false,"include":false,"step":"490","x":-88.57142857142857,"y":-29.80952380952381,"z":-32.38095238095238,"a95":9.400001,"info":"\"14-08-15\" at \"20:52\""},{"visible":false,"include":false,"step":"510","x":-123.14285714285714,"y":6.285714285714286,"z":23.142857142857142,"a95":12.7,"info":"\"14-08-16\" at \"00:07\""},{"visible":false,"include":false,"step":"540","x":-148.76190476190476,"y":62.19047619047619,"z":28.571428571428573,"a95":9.400001,"info":"\"14-08-16\" at \"13:14\""},{"visible":false,"include":false,"step":"570","x":-113.80952380952381,"y":-64.0952380952381,"z":19.142857142857142,"a95":13.9,"info":"\"14-08-16\" at \"15:56\""},{"visible":false,"include":false,"step":"600","x":-151.52380952380952,"y":-76.19047619047619,"z":15.142857142857142,"a95":14.2,"info":"\"14-08-16\" at \"18:37\""}]},{"version":"v1.1.0","exported":"2016-11-18T11:12:36.345Z","volume":10.5,"added":"2016-11-18T10:55:09.101Z","format":"Utrecht","demagType":"Unknown","strat":"6","patch":1.1,"GEO":[],"TECT":[],"interpreted":false,"name":"HP3.14B","coreAzi":283,"coreDip":35,"bedStrike":111,"bedDip":66,"data":[{"visible":true,"include":true,"step":"0.0","x":-2064.4761904761904,"y":1730.857142857143,"z":1668.2857142857142,"a95":0.99,"info":"15/08/2014 at 23:32:29"},{"visible":true,"include":true,"step":"4.0","x":-1743.904761904762,"y":1382.2857142857142,"z":1283.8095238095239,"a95":0.99,"info":"15/08/2014 at 23:32:29"},{"visible":true,"include":true,"step":"8.0","x":-1226.3809523809523,"y":885.0761904761904,"z":872.9809523809523,"a95":0.99,"info":"15/08/2014 at 23:32:29"},{"visible":true,"include":true,"step":"12.0","x":-828.7523809523809,"y":523.9333333333334,"z":503.0571428571429,"a95":0.99,"info":"15/08/2014 at 23:32:29"},{"visible":true,"include":true,"step":"16.0","x":-540.495238095238,"y":304.14285714285717,"z":315.6190476190476,"a95":0.99,"info":"15/08/2014 at 23:32:29"},{"visible":true,"include":false,"step":"20.0","x":-351.93333333333334,"y":153.1047619047619,"z":150.58095238095237,"a95":0.99,"info":"15/08/2014 at 23:32:29"},{"visible":true,"include":false,"step":"25.0","x":-243.85714285714286,"y":32.98571428571429,"z":92.96190476190476,"a95":0.99,"info":"15/08/2014 at 23:32:29"},{"visible":false,"include":false,"step":"30.0","x":-128.1809523809524,"y":-0.031142857142857146,"z":-4.1574285714285715,"a95":0.99,"info":"15/08/2014 at 23:32:29"},{"visible":false,"include":false,"step":"35.0","x":-83.82095238095238,"y":-93.1247619047619,"z":-0.9840952380952381,"a95":0.99,"info":"15/08/2014 at 23:32:29"},{"visible":false,"include":false,"step":"40.0","x":-70.33142857142857,"y":-50.70285714285714,"z":-42.64952380952381,"a95":0.99,"info":"15/08/2014 at 23:32:29"},{"visible":false,"include":false,"step":"45.0","x":-13.90952380952381,"y":-110.91428571428571,"z":-62.8,"a95":0.99,"info":"15/08/2014 at 23:32:29"},{"visible":false,"include":false,"step":"50.0","x":24.303809523809523,"y":-241.8095238095238,"z":-56.63047619047619,"a95":0.99,"info":"15/08/2014 at 23:32:29"},{"visible":false,"include":false,"step":"60.0","x":63.48190476190476,"y":-137.5047619047619,"z":-78.19619047619047,"a95":0.99,"info":"15/08/2014 at 23:32:29"},{"visible":false,"include":false,"step":"70.0","x":16.29047619047619,"y":-28.114285714285714,"z":-47.10476190476191,"a95":0.99,"info":"15/08/2014 at 23:32:29"},{"visible":false,"include":false,"step":"80.0","x":27.71047619047619,"y":-162.77142857142857,"z":-110.74285714285713,"a95":0.99,"info":"15/08/2014 at 23:32:29"},{"visible":false,"include":false,"step":"90.0","x":-0.039642857142857146,"y":-38.78857142857142,"z":-40.55238095238095,"a95":0.99,"info":"15/08/2014 at 23:32:29"},{"visible":false,"include":false,"step":"100.0","x":25.26,"y":-22.01809523809524,"z":-94.56,"a95":0.99,"info":"15/08/2014 at 23:32:29"}]},{"version":"v1.1.0","exported":"2016-11-18T11:12:36.345Z","volume":10.5,"added":"2016-11-18T10:55:09.101Z","format":"Utrecht","demagType":"Unknown","strat":"7","patch":1.1,"GEO":[],"TECT":[],"interpreted":false,"name":"HP3.15A","coreAzi":281,"coreDip":42,"bedStrike":111,"bedDip":66,"data":[{"visible":true,"include":true,"step":"0.0","x":-1578.5714285714287,"y":2000.857142857143,"z":1721.3333333333333,"a95":0.99,"info":"15/08/2014 at 23:32:29"},{"visible":true,"include":true,"step":"4.0","x":-1376.095238095238,"y":1548.1904761904761,"z":1409.142857142857,"a95":0.99,"info":"15/08/2014 at 23:32:29"},{"visible":true,"include":true,"step":"8.0","x":-977.1428571428571,"y":940.152380952381,"z":942.7904761904762,"a95":0.99,"info":"15/08/2014 at 23:32:29"},{"visible":true,"include":true,"step":"12.0","x":-609.4,"y":547.0380952380953,"z":607.4,"a95":0.99,"info":"15/08/2014 at 23:32:29"},{"visible":true,"include":true,"step":"16.0","x":-384.57142857142856,"y":294.6380952380952,"z":353.3809523809524,"a95":0.99,"info":"15/08/2014 at 23:32:29"},{"visible":true,"include":true,"step":"20.0","x":-241.0761904761905,"y":111.36190476190475,"z":190.95238095238096,"a95":0.99,"info":"15/08/2014 at 23:32:29"},{"visible":true,"include":false,"step":"25.0","x":-161.74285714285713,"y":3.989714285714286,"z":55.22380952380953,"a95":0.99,"info":"15/08/2014 at 23:32:29"},{"visible":false,"include":false,"step":"30.0","x":-152.52380952380952,"y":-81.09619047619047,"z":14.595238095238095,"a95":0.99,"info":"15/08/2014 at 23:32:29"},{"visible":false,"include":false,"step":"35.0","x":-12.535238095238096,"y":-153.64761904761903,"z":-39.11047619047619,"a95":0.99,"info":"15/08/2014 at 23:32:29"},{"visible":false,"include":false,"step":"40.0","x":-89.63333333333333,"y":-75.8295238095238,"z":-54.168571428571425,"a95":0.99,"info":"15/08/2014 at 23:32:29"},{"visible":false,"include":false,"step":"45.0","x":-13.229523809523808,"y":-108.13333333333334,"z":-46.79047619047619,"a95":0.99,"info":"15/08/2014 at 23:32:29"},{"visible":false,"include":false,"step":"50.0","x":-11.203809523809523,"y":-144.63809523809525,"z":-59.20571428571428,"a95":0.99,"info":"15/08/2014 at 23:32:29"},{"visible":false,"include":false,"step":"60.0","x":2.561809523809524,"y":-64.63142857142857,"z":-138.28571428571428,"a95":0.99,"info":"15/08/2014 at 23:32:29"},{"visible":false,"include":false,"step":"70.0","x":30.052380952380954,"y":-33.79238095238095,"z":-126.32380952380953,"a95":0.99,"info":"15/08/2014 at 23:32:29"},{"visible":false,"include":false,"step":"80.0","x":120.15238095238094,"y":-177.2761904761905,"z":-146.1238095238095,"a95":0.99,"info":"15/08/2014 at 23:32:29"},{"visible":false,"include":false,"step":"90.0","x":-16.004761904761907,"y":2.9066666666666667,"z":-102.4952380952381,"a95":0.99,"info":"15/08/2014 at 23:32:29"},{"visible":false,"include":false,"step":"100.0","x":101.38095238095238,"y":-99.42857142857143,"z":-194.25714285714287,"a95":0.99,"info":"15/08/2014 at 23:32:29"}]},{"version":"v1.1.0","exported":"2016-11-18T11:12:36.345Z","volume":10.5,"added":"2016-11-18T10:55:09.102Z","format":"Utrecht","demagType":"Unknown","strat":"8","patch":1.1,"GEO":[],"TECT":[],"interpreted":false,"name":"HP3.16A","coreAzi":288,"coreDip":38,"bedStrike":111,"bedDip":66,"data":[{"visible":true,"include":false,"step":"0.0","x":-2387.904761904762,"y":1902.3809523809523,"z":2582,"a95":0.99,"info":"15/08/2014 at 23:32:29"},{"visible":true,"include":false,"step":"4.0","x":-2016.952380952381,"y":1567.047619047619,"z":2111.0476190476193,"a95":0.99,"info":"15/08/2014 at 23:32:29"},{"visible":true,"include":false,"step":"8.0","x":-1464.1904761904761,"y":1028.6666666666667,"z":1518.4761904761904,"a95":0.99,"info":"15/08/2014 at 23:32:29"},{"visible":true,"include":false,"step":"12.0","x":-1035.6190476190477,"y":659.7714285714286,"z":1082.7619047619048,"a95":0.99,"info":"15/08/2014 at 23:32:29"},{"visible":true,"include":false,"step":"16.0","x":-736.5809523809525,"y":422.83809523809526,"z":754.1904761904761,"a95":0.99,"info":"15/08/2014 at 23:32:29"},{"visible":true,"include":false,"step":"20.0","x":-539.7238095238096,"y":298.96190476190475,"z":490.3333333333333,"a95":0.99,"info":"15/08/2014 at 23:32:29"},{"visible":true,"include":false,"step":"25.0","x":-332.8285714285714,"y":134.62857142857143,"z":299.87619047619046,"a95":0.99,"info":"15/08/2014 at 23:32:29"},{"visible":true,"include":false,"step":"30.0","x":-177.0952380952381,"y":40.74285714285715,"z":210.60000000000002,"a95":0.99,"info":"15/08/2014 at 23:32:29"},{"visible":false,"include":false,"step":"35.0","x":-71.92761904761905,"y":18.45714285714286,"z":118.48571428571428,"a95":0.99,"info":"15/08/2014 at 23:32:29"},{"visible":false,"include":false,"step":"40.0","x":-36.98285714285714,"y":86.54761904761905,"z":102.26666666666667,"a95":0.99,"info":"15/08/2014 at 23:32:29"},{"visible":false,"include":false,"step":"45.0","x":26.625714285714285,"y":34.404761904761905,"z":3.439047619047619,"a95":0.99,"info":"15/08/2014 at 23:32:29"},{"visible":false,"include":false,"step":"50.0","x":-8.987428571428572,"y":-65.39142857142858,"z":23.286666666666665,"a95":0.99,"info":"15/08/2014 at 23:32:29"},{"visible":false,"include":false,"step":"60.0","x":74.09714285714286,"y":-47.61523809523809,"z":-0.2745142857142857,"a95":0.99,"info":"15/08/2014 at 23:32:29"},{"visible":false,"include":false,"step":"70.0","x":114.02857142857142,"y":-28.07238095238095,"z":-0.7058190476190477,"a95":0.99,"info":"15/08/2014 at 23:32:29"},{"visible":false,"include":false,"step":"80.0","x":309.45714285714286,"y":-96.45714285714286,"z":-97.34285714285714,"a95":0.99,"info":"15/08/2014 at 23:32:29"},{"visible":false,"include":false,"step":"90.0","x":44.50857142857143,"y":-164.40952380952382,"z":-47.87619047619047,"a95":0.99,"info":"15/08/2014 at 23:32:29"},{"visible":false,"include":false,"step":"100.0","x":129.56190476190477,"y":-77.08380952380952,"z":-213.24761904761903,"a95":0.99,"info":"15/08/2014 at 23:32:29"}]},{"version":"v1.1.0","exported":"2016-11-18T11:12:36.345Z","volume":10.5,"added":"2016-11-18T10:55:09.103Z","format":"Utrecht","demagType":"Unknown","strat":"1","patch":1.1,"GEO":[{"dec":161.54962437105178,"inc":-20.271270617523793,"MAD":23.973098510829175,"cm":[-406.67503419677104,2.0571202858613717,-254.50084930727274],"intensity":327.8538012154633,"type":"dir","forced":false,"remark":"","origin":false,"nSteps":7,"minStep":"12.0","maxStep":"40.0","steps":["12.0","16.0","20.0","25.0","30.0","35.0","40.0"],"group":"None","version":"v1.1.0"}],"TECT":[{"dec":108.89651469252738,"inc":-53.38349783408918,"MAD":23.973098510829168,"cm":[20.252591416482304,165.93928132185414,-449.68153724190427],"intensity":327.8538012154633,"type":"dir","forced":false,"remark":"","origin":false,"nSteps":7,"minStep":"12.0","maxStep":"40.0","steps":["12.0","16.0","20.0","25.0","30.0","35.0","40.0"],"group":"None","version":"v1.1.0"}],"interpreted":true,"name":"HP3.17A","coreAzi":233,"coreDip":44,"bedStrike":111,"bedDip":66,"data":[{"visible":false,"include":false,"step":"0.0","x":-32.860952380952384,"y":144.2952380952381,"z":365.42857142857144,"a95":0.99,"info":"16/08/2014 at 04:56:40"},{"visible":false,"include":false,"step":"4.0","x":49.70761904761904,"y":-220.23809523809524,"z":223.2761904761905,"a95":0.99,"info":"16/08/2014 at 04:56:40"},{"visible":false,"include":false,"step":"8.0","x":300.18095238095236,"y":-394.7809523809524,"z":65.56666666666668,"a95":0.99,"info":"16/08/2014 at 04:56:40"},{"visible":true,"include":true,"step":"12.0","x":384.7142857142857,"y":-452.2095238095238,"z":53.28000000000001,"a95":0.99,"info":"16/08/2014 at 04:56:40"},{"visible":true,"include":true,"step":"16.0","x":449.152380952381,"y":-442.95238095238096,"z":-44.46666666666666,"a95":0.99,"info":"16/08/2014 at 04:56:40"},{"visible":true,"include":true,"step":"20.0","x":358.0571428571428,"y":-429.5904761904762,"z":-20.596190476190475,"a95":0.99,"info":"16/08/2014 at 04:56:40"},{"visible":true,"include":true,"step":"25.0","x":390.06666666666666,"y":-293.04761904761904,"z":-35.642857142857146,"a95":0.99,"info":"16/08/2014 at 04:56:40"},{"visible":true,"include":true,"step":"30.0","x":346.2666666666667,"y":-275.3333333333333,"z":10.436190476190475,"a95":0.99,"info":"16/08/2014 at 04:56:40"},{"visible":true,"include":true,"step":"35.0","x":271.87619047619046,"y":-226.0095238095238,"z":65.97238095238096,"a95":0.99,"info":"16/08/2014 at 04:56:40"},{"visible":true,"include":true,"step":"40.0","x":263.4761904761905,"y":-163.01904761904763,"z":-42.41904761904762,"a95":0.99,"info":"16/08/2014 at 04:56:40"},{"visible":true,"include":false,"step":"45.0","x":216.23809523809524,"y":-86.11809523809524,"z":-34.450476190476195,"a95":0.99,"info":"16/08/2014 at 04:56:40"},{"visible":true,"include":false,"step":"50.0","x":244.21904761904764,"y":-93.41428571428571,"z":-8.168857142857142,"a95":0.99,"info":"16/08/2014 at 04:56:40"},{"visible":true,"include":false,"step":"60.0","x":165.44761904761904,"y":-91.09238095238095,"z":-114.01904761904763,"a95":0.99,"info":"16/08/2014 at 04:56:40"},{"visible":true,"include":false,"step":"70.0","x":74.89714285714285,"y":-66.50761904761904,"z":-99.85714285714286,"a95":0.99,"info":"16/08/2014 at 04:56:40"},{"visible":true,"include":false,"step":"80.0","x":118.28571428571429,"y":-56.51523809523809,"z":46.35047619047619,"a95":0.99,"info":"16/08/2014 at 04:56:40"},{"visible":true,"include":false,"step":"90.0","x":164.45714285714286,"y":-15.674285714285716,"z":-144.1238095238095,"a95":0.99,"info":"16/08/2014 at 04:56:40"},{"visible":false,"include":false,"step":"100.0","x":8.609523809523811,"y":71.39238095238095,"z":23.37904761904762,"a95":0.99,"info":"16/08/2014 at 04:56:40"}]},{"version":"v1.1.0","exported":"2016-11-18T11:12:36.346Z","volume":10.5,"added":"2016-11-18T10:55:09.103Z","format":"Utrecht","demagType":"Unknown","strat":null,"patch":1.1,"GEO":[{"dec":156.4390840517326,"inc":26.18858183398662,"MAD":7.412201047572265,"cm":[-8.881784197001252e-16,2.6645352591003757e-15,0],"intensity":293.92948079860867,"type":"dir","forced":true,"remark":"","origin":false,"nSteps":10,"minStep":"210","maxStep":"460","steps":["210","240","270","300","320","340","370","400","430","460"],"group":"None","version":"v1.1.0"}],"TECT":[{"dec":157.48811438120003,"inc":-23.865051836827334,"MAD":7.412201047572269,"cm":[6.217248937900877e-15,2.2648549702353193e-14,4.440892098500626e-16],"intensity":293.9294807986087,"type":"dir","forced":true,"remark":"","origin":false,"nSteps":10,"minStep":"210","maxStep":"460","steps":["210","240","270","300","320","340","370","400","430","460"],"group":"None","version":"v1.1.0"}],"interpreted":true,"name":"HP3.18A","coreAzi":240,"coreDip":44,"bedStrike":111,"bedDip":66,"data":[{"visible":false,"include":false,"step":"20","x":-644.952380952381,"y":574.7619047619048,"z":953.9047619047619,"a95":2.5,"info":"\"14-08-11\" at \"18:43\""},{"visible":false,"include":false,"step":"100","x":-758.8571428571429,"y":350.85714285714283,"z":506.85714285714283,"a95":2,"info":"\"14-08-11\" at \"21:36\""},{"visible":false,"include":false,"step":"150","x":-404.0952380952381,"y":157.14285714285714,"z":312.1904761904762,"a95":2.8,"info":"\"14-08-12\" at \"00:29\""},{"visible":false,"include":false,"step":"180","x":-391.23809523809524,"y":79.42857142857143,"z":264.3809523809524,"a95":2.1,"info":"\"14-08-12\" at \"16:43\""},{"visible":true,"include":true,"step":"210","x":-33.61904761904762,"y":-139.9047619047619,"z":90,"a95":2.3,"info":"\"14-08-12\" at \"19:40\""},{"visible":true,"include":true,"step":"240","x":-38.57142857142857,"y":-125.61904761904762,"z":55.523809523809526,"a95":2.8,"info":"\"14-08-12\" at \"22:57\""},{"visible":true,"include":true,"step":"270","x":-40.76190476190476,"y":-135.23809523809524,"z":64.66666666666667,"a95":4,"info":"\"14-08-13\" at \"16:20\""},{"visible":true,"include":true,"step":"300","x":-31.428571428571427,"y":-153.9047619047619,"z":48.76190476190476,"a95":2.7,"info":"\"14-08-13\" at \"19:21\""},{"visible":true,"include":true,"step":"320","x":-11.904761904761905,"y":-121.14285714285714,"z":68.28571428571429,"a95":3.1,"info":"\"14-08-13\" at \"22:29\""},{"visible":true,"include":true,"step":"340","x":-40.95238095238095,"y":-154.66666666666666,"z":44.666666666666664,"a95":2.4,"info":"\"14-08-14\" at \"15:28\""},{"visible":true,"include":true,"step":"370","x":-49.04761904761905,"y":-138.85714285714286,"z":43.523809523809526,"a95":4.2,"info":"\"14-08-14\" at \"18:31\""},{"visible":true,"include":true,"step":"400","x":-61.904761904761905,"y":-122.66666666666667,"z":42.57142857142857,"a95":4.4,"info":"\"14-08-14\" at \"21:49\""},{"visible":true,"include":true,"step":"430","x":-20.952380952380953,"y":-91.33333333333333,"z":43.523809523809526,"a95":4.5,"info":"\"14-08-15\" at \"14:26\""},{"visible":true,"include":true,"step":"460","x":-29.904761904761905,"y":-109.80952380952381,"z":51.42857142857143,"a95":8,"info":"\"14-08-15\" at \"17:35\""},{"visible":false,"include":false,"step":"490","x":-97.23809523809524,"y":-107.04761904761905,"z":87.42857142857143,"a95":3.8,"info":"\"14-08-15\" at \"20:55\""},{"visible":false,"include":false,"step":"510","x":-76.47619047619048,"y":-40,"z":56.57142857142857,"a95":10,"info":"\"14-08-16\" at \"00:09\""},{"visible":false,"include":false,"step":"540","x":-72.19047619047619,"y":-73.14285714285714,"z":79.42857142857143,"a95":9.3,"info":"\"14-08-16\" at \"13:16\""},{"visible":false,"include":false,"step":"570","x":25.142857142857142,"y":-115.04761904761905,"z":-84.47619047619048,"a95":11.6,"info":"\"14-08-16\" at \"15:58\""},{"visible":false,"include":false,"step":"600","x":-190.95238095238096,"y":-38.95238095238095,"z":110.95238095238095,"a95":16.1,"info":"\"14-08-16\" at \"18:39\""}]},{"version":"v1.1.0","exported":"2016-11-18T11:12:36.346Z","volume":10.5,"added":"2016-11-18T10:55:09.103Z","format":"Utrecht","demagType":"Unknown","strat":"2","patch":1.1,"GEO":[{"dec":186.95138827808526,"inc":-49.79308697595715,"MAD":3.236029829052957,"cm":[-7.105427357601002e-15,-7.105427357601002e-15,0],"intensity":1531.7934158213836,"type":"dir","forced":true,"remark":"","origin":false,"nSteps":7,"minStep":"4.0","maxStep":"30.0","steps":["4.0","8.0","12.0","16.0","20.0","25.0","30.0"],"group":"None","version":"v1.1.0"}],"TECT":[{"dec":40.48138369106141,"inc":-61.97373051916237,"MAD":3.236029829052964,"cm":[1.4210854715202004e-14,2.1316282072803006e-14,1.4210854715202004e-14],"intensity":1531.7934158213834,"type":"dir","forced":true,"remark":"","origin":false,"nSteps":7,"minStep":"4.0","maxStep":"30.0","steps":["4.0","8.0","12.0","16.0","20.0","25.0","30.0"],"group":"None","version":"v1.1.0"}],"interpreted":true,"name":"HP3.18B","coreAzi":240,"coreDip":44,"bedStrike":111,"bedDip":66,"data":[{"visible":true,"include":false,"step":"0.0","x":985.6190476190476,"y":-472.0380952380952,"z":-14.596190476190475,"a95":0.99,"info":"16/08/2014 at 04:56:40"},{"visible":true,"include":true,"step":"4.0","x":1042.7619047619048,"y":-578.6857142857143,"z":-258.2,"a95":0.99,"info":"16/08/2014 at 04:56:40"},{"visible":true,"include":true,"step":"8.0","x":967.5238095238095,"y":-615.4571428571429,"z":-306.37142857142857,"a95":0.99,"info":"16/08/2014 at 04:56:40"},{"visible":true,"include":true,"step":"12.0","x":775.4,"y":-499.5142857142857,"z":-271.2095238095238,"a95":0.99,"info":"16/08/2014 at 04:56:40"},{"visible":true,"include":true,"step":"16.0","x":610.152380952381,"y":-408.0380952380952,"z":-225.12380952380954,"a95":0.99,"info":"16/08/2014 at 04:56:40"},{"visible":true,"include":true,"step":"20.0","x":472,"y":-358.34285714285716,"z":-168.7904761904762,"a95":0.99,"info":"16/08/2014 at 04:56:40"},{"visible":true,"include":true,"step":"25.0","x":311.57142857142856,"y":-257.7904761904762,"z":-91.49238095238096,"a95":0.99,"info":"16/08/2014 at 04:56:40"},{"visible":true,"include":true,"step":"30.0","x":265.3904761904762,"y":-156.1809523809524,"z":-50.18190476190476,"a95":0.99,"info":"16/08/2014 at 04:56:40"},{"visible":true,"include":false,"step":"35.0","x":227.1142857142857,"y":-142.3904761904762,"z":-29.164761904761907,"a95":0.99,"info":"16/08/2014 at 04:56:40"},{"visible":true,"include":false,"step":"40.0","x":125.6952380952381,"y":-69.45619047619047,"z":18.549523809523812,"a95":0.99,"info":"16/08/2014 at 04:56:40"},{"visible":false,"include":false,"step":"45.0","x":109.0952380952381,"y":-26.463809523809523,"z":-21.477142857142855,"a95":0.99,"info":"16/08/2014 at 04:56:40"},{"visible":false,"include":false,"step":"50.0","x":39.66095238095238,"y":-73.49238095238096,"z":-4.573619047619048,"a95":0.99,"info":"16/08/2014 at 04:56:40"},{"visible":false,"include":false,"step":"60.0","x":-6.021333333333333,"y":19.791428571428572,"z":-23.463809523809523,"a95":0.99,"info":"16/08/2014 at 04:56:40"},{"visible":false,"include":false,"step":"70.0","x":-75.33047619047619,"y":44.80285714285714,"z":19.367619047619048,"a95":0.99,"info":"16/08/2014 at 04:56:40"},{"visible":false,"include":false,"step":"80.0","x":-150.0285714285714,"y":-7.322857142857143,"z":-8.918666666666667,"a95":0.99,"info":"16/08/2014 at 04:56:40"},{"visible":false,"include":false,"step":"90.0","x":50.78190476190476,"y":67.52190476190476,"z":-45.77904761904762,"a95":0.99,"info":"16/08/2014 at 04:56:40"},{"visible":false,"include":false,"step":"100.0","x":-104.13333333333334,"y":26.39619047619048,"z":-10.497142857142856,"a95":0.99,"info":"16/08/2014 at 04:56:40"}]}]
