# Supplementary material for: Paleomagnetic constraints on the timing and distribution of Cenozoic rotations in Central and Eastern Anatolia
Source: Copernicus journal article supplement (doi:10.5194/se-9-295-2018), 2018-03-21
Supplement: Supplementary file 2 [file se-9-295-2018-supplement.zip › se-2017-66_DATA_dir files/dir files Ulukisla/HP4.dir]

[{"version":"v1.1.0","exported":"2016-11-24T16:59:55.029Z","volume":10.5,"added":"2016-11-24T16:45:09.328Z","format":"Utrecht","demagType":"Unknown","strat":"6","patch":1.1,"GEO":[{"dec":293.7191015695836,"inc":-18.508314557238858,"MAD":3.99900680903683,"cm":[-5.3290705182007514e-14,0,0],"intensity":2604.07342167757,"type":"GC","origin":false,"forced":true,"remark":"","nSteps":12,"minStep":"4.0","maxStep":"60.0","steps":["4.0","8.0","12.0","16.0","20.0","25.0","30.0","35.0","40.0","45.0","50.0","60.0"],"group":"None","version":"v1.1.0"}],"TECT":[{"dec":271.3153167052893,"inc":-7.279744314096396,"MAD":3.999006809036533,"cm":[0,1.4921397450962104e-13,9.059419880941277e-14],"intensity":2604.0734216775695,"type":"GC","origin":false,"forced":true,"remark":"","nSteps":12,"minStep":"4.0","maxStep":"60.0","steps":["4.0","8.0","12.0","16.0","20.0","25.0","30.0","35.0","40.0","45.0","50.0","60.0"],"group":"None","version":"v1.1.0"}],"interpreted":true,"name":"HP4.1A","coreAzi":73,"coreDip":59,"bedStrike":289,"bedDip":81,"data":[{"visible":true,"include":false,"step":"0.0","x":593.552380952381,"y":-370.02857142857147,"z":9.399142857142857,"a95":0.99,"info":"17/08/2014 at 23:43:28"},{"visible":true,"include":true,"step":"4.0","x":760.0952380952381,"y":-252.05714285714285,"z":-262.87619047619046,"a95":0.99,"info":"17/08/2014 at 23:43:28"},{"visible":true,"include":true,"step":"8.0","x":947.8380952380952,"y":-50.82285714285714,"z":-620.7333333333333,"a95":0.99,"info":"17/08/2014 at 23:43:28"},{"visible":true,"include":true,"step":"12.0","x":1089.047619047619,"y":76.39904761904762,"z":-856.4857142857143,"a95":0.99,"info":"17/08/2014 at 23:43:28"},{"visible":true,"include":true,"step":"16.0","x":1157.6190476190477,"y":180.7047619047619,"z":-1006.6666666666666,"a95":0.99,"info":"17/08/2014 at 23:43:28"},{"visible":true,"include":true,"step":"20.0","x":1189.8095238095239,"y":237.0761904761905,"z":-1097.6190476190477,"a95":0.99,"info":"17/08/2014 at 23:43:28"},{"visible":true,"include":true,"step":"25.0","x":1201.5238095238096,"y":315.85714285714283,"z":-1180.857142857143,"a95":0.99,"info":"17/08/2014 at 23:43:28"},{"visible":true,"include":true,"step":"30.0","x":1238.2857142857142,"y":387.16190476190474,"z":-1220.7619047619048,"a95":0.99,"info":"17/08/2014 at 23:43:28"},{"visible":true,"include":true,"step":"35.0","x":1241.8095238095239,"y":381.1047619047619,"z":-1253.6190476190477,"a95":0.99,"info":"17/08/2014 at 23:43:28"},{"visible":true,"include":true,"step":"40.0","x":1259.5238095238096,"y":400.97142857142853,"z":-1260,"a95":0.99,"info":"17/08/2014 at 23:43:28"},{"visible":true,"include":true,"step":"45.0","x":1264.2857142857142,"y":433.31428571428575,"z":-1279.2380952380952,"a95":0.99,"info":"17/08/2014 at 23:43:28"},{"visible":true,"include":true,"step":"50.0","x":1269.3333333333333,"y":430.85714285714283,"z":-1319.142857142857,"a95":0.99,"info":"17/08/2014 at 23:43:28"},{"visible":true,"include":true,"step":"60.0","x":1285.142857142857,"y":470.87619047619046,"z":-1334.095238095238,"a95":0.99,"info":"17/08/2014 at 23:43:28"},{"visible":true,"include":false,"step":"70.0","x":1297.4285714285713,"y":461.83809523809526,"z":-1355.142857142857,"a95":0.99,"info":"17/08/2014 at 23:43:28"},{"visible":true,"include":false,"step":"80.0","x":1288,"y":462.5809523809524,"z":-1359.8095238095239,"a95":0.99,"info":"17/08/2014 at 23:43:28"},{"visible":true,"include":false,"step":"90.0","x":1331.7142857142858,"y":493.54285714285714,"z":-1401.7142857142858,"a95":0.99,"info":"17/08/2014 at 23:43:28"},{"visible":true,"include":false,"step":"100.0","x":1293.4285714285713,"y":484.0571428571429,"z":-1403.142857142857,"a95":0.99,"info":"17/08/2014 at 23:43:28"}]},{"version":"v1.1.0","exported":"2016-11-24T16:59:55.029Z","volume":10.5,"added":"2016-11-24T16:45:09.330Z","format":"Utrecht","demagType":"Unknown","strat":"7","patch":1.1,"GEO":[{"dec":306.11470937519243,"inc":-20.390430881209017,"MAD":5.491068281439511,"cm":[0,1.0658141036401503e-14,0],"intensity":1890.6471515356793,"type":"GC","origin":false,"forced":true,"remark":"","nSteps":14,"minStep":"4.0","maxStep":"80.0","steps":["4.0","8.0","12.0","16.0","20.0","25.0","30.0","35.0","40.0","45.0","50.0","60.0","70.0","80.0"],"group":"None","version":"v1.1.0"}],"TECT":[{"dec":270.4291200542432,"inc":-19.083992434188087,"MAD":5.491068281439681,"cm":[1.4210854715202004e-14,4.75175454539567e-14,-4.440892098500626e-15],"intensity":1890.647151535679,"type":"GC","origin":false,"forced":true,"remark":"","nSteps":14,"minStep":"4.0","maxStep":"80.0","steps":["4.0","8.0","12.0","16.0","20.0","25.0","30.0","35.0","40.0","45.0","50.0","60.0","70.0","80.0"],"group":"None","version":"v1.1.0"}],"interpreted":true,"name":"HP4.2A","coreAzi":62,"coreDip":10,"bedStrike":289,"bedDip":81,"data":[{"visible":true,"include":false,"step":"0.0","x":364.0761904761905,"y":-206.69523809523812,"z":549.3523809523809,"a95":0.99,"info":"17/08/2014 at 23:43:28"},{"visible":true,"include":true,"step":"4.0","x":511.9619047619048,"y":-98.77142857142856,"z":438.1714285714286,"a95":0.99,"info":"17/08/2014 at 23:43:28"},{"visible":true,"include":true,"step":"8.0","x":712.3809523809524,"y":63.81333333333333,"z":301.48571428571427,"a95":0.99,"info":"17/08/2014 at 23:43:28"},{"visible":true,"include":true,"step":"12.0","x":881.2952380952381,"y":171.86666666666665,"z":212.8095238095238,"a95":0.99,"info":"17/08/2014 at 23:43:28"},{"visible":true,"include":true,"step":"16.0","x":975.8095238095239,"y":251.85714285714286,"z":140.4,"a95":0.99,"info":"17/08/2014 at 23:43:28"},{"visible":true,"include":true,"step":"20.0","x":1046.952380952381,"y":295.06666666666666,"z":83.89333333333333,"a95":0.99,"info":"17/08/2014 at 23:43:28"},{"visible":true,"include":true,"step":"25.0","x":1081.6190476190477,"y":346.9238095238095,"z":37.51238095238095,"a95":0.99,"info":"17/08/2014 at 23:43:28"},{"visible":true,"include":true,"step":"30.0","x":1127.5238095238096,"y":391.5904761904762,"z":6.908952380952381,"a95":0.99,"info":"17/08/2014 at 23:43:28"},{"visible":true,"include":true,"step":"35.0","x":1166,"y":392.7333333333333,"z":-38.034285714285716,"a95":0.99,"info":"17/08/2014 at 23:43:28"},{"visible":true,"include":true,"step":"40.0","x":1183.4285714285713,"y":445.06666666666666,"z":-34.23142857142857,"a95":0.99,"info":"17/08/2014 at 23:43:28"},{"visible":true,"include":true,"step":"45.0","x":1213.7142857142858,"y":429.6190476190476,"z":-76.0247619047619,"a95":0.99,"info":"17/08/2014 at 23:43:28"},{"visible":true,"include":true,"step":"50.0","x":1237.7142857142858,"y":420.6380952380952,"z":-95.5142857142857,"a95":0.99,"info":"17/08/2014 at 23:43:28"},{"visible":true,"include":true,"step":"60.0","x":1270.3809523809523,"y":459.4095238095238,"z":-90.55904761904762,"a95":0.99,"info":"17/08/2014 at 23:43:28"},{"visible":true,"include":true,"step":"70.0","x":1306.4761904761904,"y":474.2666666666667,"z":-132.7904761904762,"a95":0.99,"info":"17/08/2014 at 23:43:28"},{"visible":true,"include":true,"step":"80.0","x":1316.952380952381,"y":457.12380952380954,"z":-120.04761904761905,"a95":0.99,"info":"17/08/2014 at 23:43:28"},{"visible":true,"include":false,"step":"90.0","x":1324.857142857143,"y":505.0380952380952,"z":-126.01904761904763,"a95":0.99,"info":"17/08/2014 at 23:43:28"},{"visible":true,"include":false,"step":"100.0","x":1335.8095238095239,"y":483.847619047619,"z":-179.41904761904763,"a95":0.99,"info":"17/08/2014 at 23:43:28"}]},{"version":"v1.1.0","exported":"2016-11-24T16:59:55.029Z","volume":10.5,"added":"2016-11-24T16:45:09.331Z","format":"Utrecht","demagType":"Unknown","strat":null,"patch":1.1,"GEO":[{"dec":153.3363477515004,"inc":-64.26787540374694,"MAD":8.98551057065862,"cm":[-1.0658141036401503e-14,8.881784197001252e-16,0],"intensity":936.6316259453811,"type":"dir","forced":true,"remark":"","origin":false,"nSteps":3,"minStep":"630","maxStep":"680","steps":["630","660","680"],"group":"None","version":"v1.1.0"}],"TECT":[{"dec":180.66784901631814,"inc":9.135329994393743,"MAD":8.985510570658612,"cm":[1.4210854715202004e-14,2.1316282072803006e-14,-1.4210854715202004e-14],"intensity":936.6316259453813,"type":"dir","forced":true,"remark":"","origin":false,"nSteps":3,"minStep":"630","maxStep":"680","steps":["630","660","680"],"group":"None","version":"v1.1.0"}],"interpreted":true,"name":"HP4.3A","coreAzi":54,"coreDip":35,"bedStrike":289,"bedDip":81,"data":[{"visible":true,"include":false,"step":"20","x":1046.5714285714287,"y":143.9047619047619,"z":-321.04761904761904,"a95":2.5,"info":"\"14-08-11\" at \"18:48\""},{"visible":true,"include":false,"step":"100","x":1319.047619047619,"y":472.3809523809524,"z":-840.6666666666666,"a95":2.1,"info":"\"14-08-11\" at \"21:39\""},{"visible":true,"include":false,"step":"150","x":1428.5714285714287,"y":604.2857142857143,"z":-1004.4761904761905,"a95":2.3,"info":"\"14-08-12\" at \"00:31\""},{"visible":true,"include":false,"step":"180","x":1444.952380952381,"y":554.5714285714286,"z":-1008.0952380952381,"a95":2.1,"info":"\"14-08-12\" at \"16:46\""},{"visible":true,"include":false,"step":"210","x":1422.5714285714287,"y":667.7142857142857,"z":-1022.6666666666666,"a95":4.1,"info":"\"14-08-12\" at \"19:43\""},{"visible":true,"include":false,"step":"240","x":1382.095238095238,"y":566.5714285714286,"z":-1005.6190476190476,"a95":2.2,"info":"\"14-08-12\" at \"23:00\""},{"visible":true,"include":false,"step":"270","x":1316.2857142857142,"y":575.8095238095239,"z":-962.1904761904761,"a95":2.1,"info":"\"14-08-13\" at \"16:23\""},{"visible":true,"include":false,"step":"300","x":1303.5238095238096,"y":585.1428571428571,"z":-960.7619047619048,"a95":2.1,"info":"\"14-08-13\" at \"19:23\""},{"visible":true,"include":false,"step":"320","x":1189.8095238095239,"y":499.5238095238095,"z":-857.2380952380952,"a95":2.3,"info":"\"14-08-13\" at \"22:31\""},{"visible":true,"include":false,"step":"340","x":1123.142857142857,"y":515.1428571428571,"z":-814.5714285714286,"a95":2.2,"info":"\"14-08-14\" at \"15:31\""},{"visible":true,"include":false,"step":"370","x":1037.4285714285713,"y":462.57142857142856,"z":-746.7619047619048,"a95":3.5,"info":"\"14-08-14\" at \"18:34\""},{"visible":true,"include":false,"step":"400","x":997.3333333333334,"y":536.5714285714286,"z":-732.2857142857143,"a95":4.2,"info":"\"14-08-14\" at \"21:51\""},{"visible":true,"include":false,"step":"430","x":912.2857142857143,"y":535.8095238095239,"z":-701.4285714285714,"a95":3,"info":"\"14-08-15\" at \"14:29\""},{"visible":true,"include":false,"step":"460","x":859.047619047619,"y":451.6190476190476,"z":-703.6190476190476,"a95":2.4,"info":"\"14-08-15\" at \"17:38\""},{"visible":true,"include":false,"step":"490","x":809.2380952380952,"y":433.5238095238095,"z":-628.952380952381,"a95":3.9,"info":"\"14-08-15\" at \"20:57\""},{"visible":true,"include":false,"step":"510","x":746.7619047619048,"y":452,"z":-626.2857142857143,"a95":2.3,"info":"\"14-08-16\" at \"00:12\""},{"visible":true,"include":false,"step":"540","x":829.1428571428571,"y":500.85714285714283,"z":-646.7619047619048,"a95":2.2,"info":"\"14-08-16\" at \"13:19\""},{"visible":true,"include":false,"step":"570","x":778.3809523809524,"y":452.85714285714283,"z":-631.047619047619,"a95":2.5,"info":"\"14-08-16\" at \"16:01\""},{"visible":true,"include":false,"step":"600","x":758.952380952381,"y":571.8095238095239,"z":-615.6190476190476,"a95":2.3,"info":"\"14-08-16\" at \"18:41\""},{"visible":true,"include":true,"step":"630","x":716.6666666666666,"y":349.3333333333333,"z":-540.2857142857143,"a95":2.8,"info":"\"14-08-17\" at \"13:43\""},{"visible":true,"include":true,"step":"660","x":492.1904761904762,"y":418.3809523809524,"z":-467.42857142857144,"a95":2.7,"info":"\"14-08-17\" at \"15:58\""},{"visible":true,"include":true,"step":"680","x":-90,"y":120,"z":26.19047619047619,"a95":8,"info":"\"14-08-22\" at \"10:34\""}]},{"version":"v1.1.0","exported":"2016-11-24T16:59:55.029Z","volume":10.5,"added":"2016-11-24T16:45:09.332Z","format":"Utrecht","demagType":"Unknown","strat":"8","patch":1.1,"GEO":[{"dec":296.73852976223253,"inc":-22.186789703360777,"MAD":2.8693361309180374,"cm":[-8.526512829121202e-14,-6.750155989720952e-14,0],"intensity":2281.7085910788815,"type":"GC","origin":false,"forced":true,"remark":"","nSteps":7,"minStep":"4.0","maxStep":"30.0","steps":["4.0","8.0","12.0","16.0","20.0","25.0","30.0"],"group":"None","version":"v1.1.0"}],"TECT":[{"dec":267.93098475005706,"inc":-10.499179811601703,"MAD":2.8693361309173597,"cm":[0,3.5083047578154947e-14,1.0835776720341528e-13],"intensity":2281.7085910788815,"type":"GC","origin":false,"forced":true,"remark":"","nSteps":7,"minStep":"4.0","maxStep":"30.0","steps":["4.0","8.0","12.0","16.0","20.0","25.0","30.0"],"group":"None","version":"v1.1.0"}],"interpreted":true,"name":"HP4.4A","coreAzi":59,"coreDip":36,"bedStrike":289,"bedDip":81,"data":[{"visible":true,"include":false,"step":"0.0","x":797.0761904761904,"y":208.8190476190476,"z":-234.87619047619046,"a95":0.99,"info":"17/08/2014 at 23:43:28"},{"visible":true,"include":true,"step":"4.0","x":857.847619047619,"y":257.8857142857143,"z":-304.12380952380954,"a95":0.99,"info":"17/08/2014 at 23:43:28"},{"visible":true,"include":true,"step":"8.0","x":941.1904761904761,"y":354.87619047619046,"z":-433.2952380952381,"a95":0.99,"info":"17/08/2014 at 23:43:28"},{"visible":true,"include":true,"step":"12.0","x":995.4285714285714,"y":427.81904761904764,"z":-507.85714285714283,"a95":0.99,"info":"17/08/2014 at 23:43:28"},{"visible":true,"include":true,"step":"16.0","x":1041.142857142857,"y":476.1333333333333,"z":-563.3809523809524,"a95":0.99,"info":"17/08/2014 at 23:43:28"},{"visible":true,"include":true,"step":"20.0","x":1053.5238095238096,"y":492.3333333333333,"z":-594.8380952380952,"a95":0.99,"info":"17/08/2014 at 23:43:28"},{"visible":true,"include":true,"step":"25.0","x":1065.904761904762,"y":513.104761904762,"z":-624.2190476190476,"a95":0.99,"info":"17/08/2014 at 23:43:28"},{"visible":true,"include":true,"step":"30.0","x":1055.5238095238096,"y":534.9619047619047,"z":-653.2666666666667,"a95":0.99,"info":"17/08/2014 at 23:43:28"},{"visible":true,"include":false,"step":"35.0","x":1055.904761904762,"y":526.3904761904762,"z":-704.9238095238095,"a95":0.99,"info":"17/08/2014 at 23:43:28"},{"visible":true,"include":false,"step":"40.0","x":1051.6190476190477,"y":524.1428571428571,"z":-683.4666666666666,"a95":0.99,"info":"17/08/2014 at 23:43:28"},{"visible":true,"include":false,"step":"45.0","x":1053.8095238095239,"y":529.5714285714286,"z":-701.2857142857143,"a95":0.99,"info":"17/08/2014 at 23:43:28"},{"visible":true,"include":false,"step":"50.0","x":1019.2380952380952,"y":498.0190476190476,"z":-683.9809523809524,"a95":0.99,"info":"17/08/2014 at 23:43:28"},{"visible":true,"include":false,"step":"60.0","x":1077.142857142857,"y":545.4095238095239,"z":-760.9619047619047,"a95":0.99,"info":"17/08/2014 at 23:43:28"},{"visible":true,"include":false,"step":"70.0","x":1045.047619047619,"y":509.02857142857147,"z":-727.9904761904761,"a95":0.99,"info":"17/08/2014 at 23:43:28"},{"visible":true,"include":false,"step":"80.0","x":1006.5714285714286,"y":531,"z":-716.0285714285715,"a95":0.99,"info":"17/08/2014 at 23:43:28"},{"visible":true,"include":false,"step":"90.0","x":1038.5714285714287,"y":605.7904761904762,"z":-707.847619047619,"a95":0.99,"info":"17/08/2014 at 23:43:28"},{"visible":true,"include":false,"step":"100.0","x":1078.1904761904761,"y":670.9047619047619,"z":-720.9333333333334,"a95":0.99,"info":"17/08/2014 at 23:43:28"}]},{"version":"v1.1.0","exported":"2016-11-24T16:59:55.029Z","volume":10.5,"added":"2016-11-24T16:45:09.333Z","format":"Utrecht","demagType":"Unknown","strat":null,"patch":1.1,"GEO":[{"dec":286.0811644133518,"inc":-15.26682998714207,"MAD":1.8979610650393475,"cm":[0,1.0658141036401503e-14,0],"intensity":2785.2980967085637,"type":"GC","origin":false,"forced":true,"remark":"","nSteps":10,"minStep":"20","maxStep":"340","steps":["20","100","150","180","210","240","270","300","320","340"],"group":"None","version":"v1.1.0"}],"TECT":[{"dec":93.46870488071659,"inc":-0.4198654957293381,"MAD":1.8979610650394831,"cm":[-1.2034817586936697e-13,9.60819965256654e-14,-4.973799150320701e-14],"intensity":2785.298096708565,"type":"GC","origin":false,"forced":true,"remark":"","nSteps":10,"minStep":"20","maxStep":"340","steps":["20","100","150","180","210","240","270","300","320","340"],"group":"None","version":"v1.1.0"}],"interpreted":true,"name":"HP4.5A","coreAzi":17,"coreDip":26,"bedStrike":289,"bedDip":81,"data":[{"visible":true,"include":true,"step":"20","x":-235.42857142857142,"y":-352,"z":2249.904761904762,"a95":3.2,"info":"\"14-08-11\" at \"18:50\""},{"visible":true,"include":true,"step":"100","x":208.0952380952381,"y":-117.80952380952381,"z":1116.952380952381,"a95":2.7,"info":"\"14-08-11\" at \"21:41\""},{"visible":true,"include":true,"step":"150","x":333.5238095238095,"y":-47.23809523809524,"z":848.7619047619048,"a95":2.7,"info":"\"14-08-12\" at \"00:34\""},{"visible":true,"include":true,"step":"180","x":340.76190476190476,"y":-26.857142857142858,"z":841.2380952380952,"a95":2.7,"info":"\"14-08-12\" at \"16:48\""},{"visible":true,"include":true,"step":"210","x":358,"y":-23.61904761904762,"z":850.3809523809524,"a95":2.6,"info":"\"14-08-12\" at \"19:45\""},{"visible":true,"include":true,"step":"240","x":375.8095238095238,"y":14.761904761904763,"z":679.5238095238095,"a95":2.6,"info":"\"14-08-12\" at \"23:03\""},{"visible":true,"include":true,"step":"270","x":394.4761904761905,"y":2.0952380952380953,"z":626.2857142857143,"a95":2.6,"info":"\"14-08-13\" at \"16:25\""},{"visible":true,"include":true,"step":"300","x":391.5238095238095,"y":5.904761904761905,"z":598.8571428571429,"a95":2.6,"info":"\"14-08-13\" at \"19:26\""},{"visible":true,"include":true,"step":"320","x":407.23809523809524,"y":23.428571428571427,"z":601.4285714285714,"a95":2.4,"info":"\"14-08-13\" at \"22:34\""},{"visible":true,"include":true,"step":"340","x":390.95238095238096,"y":31.142857142857142,"z":512.4761904761905,"a95":2.6,"info":"\"14-08-14\" at \"15:33\""},{"visible":true,"include":false,"step":"370","x":359.8095238095238,"y":38.76190476190476,"z":508.4761904761905,"a95":2.6,"info":"\"14-08-14\" at \"18:37\""},{"visible":true,"include":false,"step":"400","x":356.4761904761905,"y":69.71428571428571,"z":455.6190476190476,"a95":2.9,"info":"\"14-08-14\" at \"21:54\""},{"visible":true,"include":false,"step":"430","x":324.1904761904762,"y":40.57142857142857,"z":428.57142857142856,"a95":2.4,"info":"\"14-08-15\" at \"14:32\""},{"visible":true,"include":false,"step":"460","x":265.23809523809524,"y":17.904761904761905,"z":406.0952380952381,"a95":2.7,"info":"\"14-08-15\" at \"17:40\""},{"visible":true,"include":false,"step":"490","x":256.76190476190476,"y":57.714285714285715,"z":411.23809523809524,"a95":3.2,"info":"\"14-08-15\" at \"21:00\""},{"visible":true,"include":false,"step":"510","x":309.04761904761904,"y":40.095238095238095,"z":340.2857142857143,"a95":2.3,"info":"\"14-08-16\" at \"00:15\""},{"visible":true,"include":false,"step":"540","x":243.04761904761904,"y":68.85714285714286,"z":365.7142857142857,"a95":2.7,"info":"\"14-08-16\" at \"13:21\""},{"visible":true,"include":false,"step":"570","x":265.9047619047619,"y":-22.476190476190474,"z":345.04761904761904,"a95":3.6,"info":"\"14-08-16\" at \"16:03\""},{"visible":true,"include":false,"step":"600","x":92.95238095238095,"y":23.714285714285715,"z":346.95238095238096,"a95":3.8,"info":"\"14-08-16\" at \"18:43\""},{"visible":true,"include":false,"step":"630","x":103.14285714285714,"y":-121.71428571428571,"z":230,"a95":6.9,"info":"\"14-08-17\" at \"13:45\""},{"visible":true,"include":false,"step":"660","x":118.95238095238095,"y":118.38095238095238,"z":168.76190476190476,"a95":6.4,"info":"\"14-08-17\" at \"16:00\""},{"visible":true,"include":false,"step":"680","x":-76.19047619047619,"y":-16.857142857142858,"z":96.57142857142857,"a95":18.7,"info":"\"14-08-22\" at \"10:37\""}]},{"version":"v1.1.0","exported":"2016-11-24T16:59:55.029Z","volume":10.5,"added":"2016-11-24T16:45:09.334Z","format":"Utrecht","demagType":"Unknown","strat":"1","patch":1.1,"GEO":[{"dec":297.16544877868284,"inc":-17.16025066889637,"MAD":4.287462521597594,"cm":[-2.842170943040401e-14,8.881784197001252e-14,0],"intensity":2429.607840943036,"type":"GC","origin":false,"forced":true,"remark":"","nSteps":6,"minStep":"4.0","maxStep":"25.0","steps":["4.0","8.0","12.0","16.0","20.0","25.0"],"group":"None","version":"v1.1.0"}],"TECT":[{"dec":273.0570945074818,"inc":-10.381041304344983,"MAD":4.287462521592467,"cm":[-2.842170943040401e-14,9.237055564881302e-14,0],"intensity":2429.607840943036,"type":"GC","origin":false,"forced":true,"remark":"","nSteps":6,"minStep":"4.0","maxStep":"25.0","steps":["4.0","8.0","12.0","16.0","20.0","25.0"],"group":"None","version":"v1.1.0"}],"interpreted":true,"name":"HP4.6A","coreAzi":29,"coreDip":24,"bedStrike":289,"bedDip":81,"data":[{"visible":true,"include":false,"step":"0.0","x":-528.5142857142857,"y":-385.42857142857144,"z":1599.8095238095239,"a95":0.99,"info":"18/08/2014 at 05:09:54"},{"visible":true,"include":true,"step":"4.0","x":-439.1142857142857,"y":-340.68571428571425,"z":1464.857142857143,"a95":0.99,"info":"18/08/2014 at 05:09:54"},{"visible":true,"include":true,"step":"8.0","x":-294.23809523809524,"y":-278.02857142857147,"z":1271.4285714285713,"a95":0.99,"info":"18/08/2014 at 05:09:54"},{"visible":true,"include":true,"step":"12.0","x":-185.22857142857143,"y":-232.37142857142857,"z":1096.095238095238,"a95":0.99,"info":"18/08/2014 at 05:09:54"},{"visible":true,"include":true,"step":"16.0","x":-133.7238095238095,"y":-192.13333333333335,"z":1010.0952380952381,"a95":0.99,"info":"18/08/2014 at 05:09:54"},{"visible":true,"include":true,"step":"20.0","x":-109.68571428571428,"y":-172.83809523809524,"z":938.5142857142857,"a95":0.99,"info":"18/08/2014 at 05:09:54"},{"visible":true,"include":true,"step":"25.0","x":-83.1247619047619,"y":-146.53333333333333,"z":857.4000000000001,"a95":0.99,"info":"18/08/2014 at 05:09:54"},{"visible":true,"include":false,"step":"30.0","x":-70.56095238095239,"y":-128.61904761904762,"z":804.104761904762,"a95":0.99,"info":"18/08/2014 at 05:09:54"},{"visible":true,"include":false,"step":"35.0","x":-71.56857142857143,"y":-165.93333333333334,"z":767.3619047619047,"a95":0.99,"info":"18/08/2014 at 05:09:54"},{"visible":true,"include":false,"step":"40.0","x":-77.86952380952381,"y":-138.8952380952381,"z":747.0571428571429,"a95":0.99,"info":"18/08/2014 at 05:09:54"},{"visible":true,"include":false,"step":"45.0","x":-80.1752380952381,"y":-124.01904761904763,"z":739.3428571428572,"a95":0.99,"info":"18/08/2014 at 05:09:54"},{"visible":true,"include":false,"step":"50.0","x":-69.41714285714286,"y":-188.21904761904761,"z":737.8857142857144,"a95":0.99,"info":"18/08/2014 at 05:09:54"},{"visible":true,"include":false,"step":"60.0","x":-20.045714285714286,"y":-273.23809523809524,"z":788.1714285714285,"a95":0.99,"info":"18/08/2014 at 05:09:54"},{"visible":true,"include":false,"step":"70.0","x":38.75714285714285,"y":-267.4761904761905,"z":781.2095238095238,"a95":0.99,"info":"18/08/2014 at 05:09:54"},{"visible":true,"include":false,"step":"80.0","x":-73.42571428571429,"y":-221.96190476190475,"z":627.5904761904761,"a95":0.99,"info":"18/08/2014 at 05:09:54"},{"visible":true,"include":false,"step":"90.0","x":20.114285714285714,"y":-305.83809523809526,"z":718.2190476190476,"a95":0.99,"info":"18/08/2014 at 05:09:54"},{"visible":true,"include":false,"step":"100.0","x":-110.12380952380951,"y":-134.1904761904762,"z":618.0857142857143,"a95":0.99,"info":"18/08/2014 at 05:09:54"}]},{"version":"v1.1.0","exported":"2016-11-24T16:59:55.029Z","volume":10.5,"added":"2016-11-24T16:45:09.343Z","format":"Utrecht","demagType":"Unknown","strat":"2","patch":1.1,"GEO":[],"TECT":[],"interpreted":false,"name":"HP4.7A","coreAzi":102,"coreDip":39,"bedStrike":289,"bedDip":81,"data":[{"visible":true,"include":false,"step":"0.0","x":-1307.8095238095239,"y":-943.3904761904762,"z":948.6285714285715,"a95":0.99,"info":"18/08/2014 at 05:09:54"},{"visible":true,"include":false,"step":"4.0","x":-1260.7619047619048,"y":-908.4095238095238,"z":900.8857142857142,"a95":0.99,"info":"18/08/2014 at 05:09:54"},{"visible":true,"include":true,"step":"8.0","x":-1145.5238095238096,"y":-765.1238095238095,"z":777.7904761904762,"a95":0.99,"info":"18/08/2014 at 05:09:54"},{"visible":true,"include":true,"step":"12.0","x":-1047.5238095238096,"y":-691.8571428571429,"z":691.7333333333333,"a95":0.99,"info":"18/08/2014 at 05:09:54"},{"visible":true,"include":true,"step":"16.0","x":-897.8,"y":-645.6380952380953,"z":580.2761904761904,"a95":0.99,"info":"18/08/2014 at 05:09:54"},{"visible":true,"include":true,"step":"20.0","x":-802.7047619047619,"y":-580.9428571428571,"z":514.3809523809524,"a95":0.99,"info":"18/08/2014 at 05:09:54"},{"visible":true,"include":true,"step":"25.0","x":-725.5809523809525,"y":-466.25714285714287,"z":494.6285714285715,"a95":0.99,"info":"18/08/2014 at 05:09:54"},{"visible":true,"include":true,"step":"30.0","x":-642.9904761904761,"y":-457.1333333333333,"z":436.2476190476191,"a95":0.99,"info":"18/08/2014 at 05:09:54"},{"visible":true,"include":true,"step":"35.0","x":-583.8190476190476,"y":-423.87619047619046,"z":380.1047619047619,"a95":0.99,"info":"18/08/2014 at 05:09:54"},{"visible":true,"include":true,"step":"40.0","x":-592.7333333333333,"y":-422.7333333333333,"z":370.37142857142857,"a95":0.99,"info":"18/08/2014 at 05:09:54"},{"visible":true,"include":true,"step":"45.0","x":-642.7428571428571,"y":-310.16190476190474,"z":413.6285714285715,"a95":0.99,"info":"18/08/2014 at 05:09:54"},{"visible":true,"include":true,"step":"50.0","x":-602.9142857142857,"y":-345.93333333333334,"z":375.3904761904762,"a95":0.99,"info":"18/08/2014 at 05:09:54"},{"visible":true,"include":true,"step":"60.0","x":-578.0380952380953,"y":-331.64761904761906,"z":334,"a95":0.99,"info":"18/08/2014 at 05:09:54"},{"visible":true,"include":true,"step":"70.0","x":-538.1619047619048,"y":-304,"z":352.2095238095238,"a95":0.99,"info":"18/08/2014 at 05:09:54"},{"visible":true,"include":false,"step":"80.0","x":-539.5428571428571,"y":-330.9428571428572,"z":296.12380952380954,"a95":0.99,"info":"18/08/2014 at 05:09:54"},{"visible":true,"include":false,"step":"90.0","x":-438.5142857142857,"y":-251.0952380952381,"z":264.4666666666667,"a95":0.99,"info":"18/08/2014 at 05:09:54"},{"visible":true,"include":false,"step":"100.0","x":-440.65714285714284,"y":-253.95238095238096,"z":275.8666666666667,"a95":0.99,"info":"18/08/2014 at 05:09:54"}]},{"version":"v1.1.0","exported":"2016-11-24T16:59:55.029Z","volume":10.5,"added":"2016-11-24T16:45:09.344Z","format":"Utrecht","demagType":"Unknown","strat":null,"patch":1.1,"GEO":[],"TECT":[],"interpreted":false,"name":"HP4.8A","coreAzi":102,"coreDip":42,"bedStrike":289,"bedDip":81,"data":[{"visible":false,"include":false,"step":"20","x":-833.4285714285714,"y":1089.3333333333333,"z":933.3333333333334,"a95":2,"info":"\"14-08-11\" at \"18:54\""},{"visible":true,"include":true,"step":"100","x":-526.4761904761905,"y":723.6190476190476,"z":511.8095238095238,"a95":1.7,"info":"\"14-08-11\" at \"21:43\""},{"visible":true,"include":true,"step":"150","x":-361.9047619047619,"y":482.6666666666667,"z":352.1904761904762,"a95":2,"info":"\"14-08-12\" at \"00:36\""},{"visible":true,"include":true,"step":"180","x":-357.23809523809524,"y":488.4761904761905,"z":342.1904761904762,"a95":1.9,"info":"\"14-08-12\" at \"16:50\""},{"visible":true,"include":true,"step":"210","x":-359.8095238095238,"y":476.76190476190476,"z":347.9047619047619,"a95":2.5,"info":"\"14-08-12\" at \"19:47\""},{"visible":true,"include":true,"step":"240","x":-265.23809523809524,"y":355.04761904761904,"z":236.95238095238096,"a95":2.1,"info":"\"14-08-12\" at \"23:06\""},{"visible":true,"include":true,"step":"270","x":-267.23809523809524,"y":362.6666666666667,"z":241.71428571428572,"a95":2.1,"info":"\"14-08-13\" at \"16:27\""},{"visible":true,"include":true,"step":"300","x":-222.66666666666666,"y":328.2857142857143,"z":220.28571428571428,"a95":2,"info":"\"14-08-13\" at \"19:29\""},{"visible":true,"include":true,"step":"320","x":-224.28571428571428,"y":332,"z":205.04761904761904,"a95":1.9,"info":"\"14-08-13\" at \"22:36\""},{"visible":true,"include":true,"step":"340","x":-204.28571428571428,"y":269.9047619047619,"z":223.8095238095238,"a95":2.1,"info":"\"14-08-14\" at \"15:36\""},{"visible":true,"include":true,"step":"370","x":-172.28571428571428,"y":289.04761904761904,"z":185.9047619047619,"a95":2.2,"info":"\"14-08-14\" at \"18:39\""},{"visible":true,"include":true,"step":"400","x":-163.61904761904762,"y":236.76190476190476,"z":151.42857142857142,"a95":2.6,"info":"\"14-08-14\" at \"21:57\""},{"visible":true,"include":true,"step":"430","x":-171.04761904761904,"y":235.8095238095238,"z":139.23809523809524,"a95":2,"info":"\"14-08-15\" at \"14:34\""},{"visible":true,"include":true,"step":"460","x":-161.71428571428572,"y":214,"z":150.66666666666666,"a95":2.5,"info":"\"14-08-15\" at \"17:42\""},{"visible":false,"include":false,"step":"490","x":-208.95238095238096,"y":251.8095238095238,"z":112.76190476190476,"a95":3,"info":"\"14-08-15\" at \"21:03\""},{"visible":false,"include":false,"step":"510","x":-175.14285714285714,"y":170.66666666666666,"z":124,"a95":3.6,"info":"\"14-08-16\" at \"00:17\""},{"visible":false,"include":false,"step":"540","x":-130.47619047619048,"y":190.57142857142858,"z":151.33333333333334,"a95":3.9,"info":"\"14-08-16\" at \"13:23\""},{"visible":false,"include":false,"step":"570","x":-263.6190476190476,"y":86.19047619047619,"z":89.71428571428571,"a95":8.1,"info":"\"14-08-16\" at \"16:04\""},{"visible":false,"include":false,"step":"600","x":-443.3333333333333,"y":439.04761904761904,"z":196.1904761904762,"a95":6,"info":"\"14-08-16\" at \"18:46\""},{"visible":false,"include":false,"step":"630","x":-9423.333333333334,"y":617.4285714285714,"z":3783.3333333333335,"a95":15,"info":"\"14-08-17\" at \"13:48\""}]},{"version":"v1.1.0","exported":"2016-11-24T16:59:55.029Z","volume":10.5,"added":"2016-11-24T16:45:09.344Z","format":"Utrecht","demagType":"Unknown","strat":"3","patch":1.1,"GEO":[{"dec":315.3471246642058,"inc":-24.00085496316911,"MAD":20.27756590452196,"cm":[-8.526512829121202e-14,-1.9184653865522705e-13,0],"intensity":11543.269592662595,"type":"GC","origin":false,"forced":true,"remark":"","nSteps":14,"minStep":"4.0","maxStep":"80.0","steps":["4.0","8.0","12.0","16.0","20.0","25.0","30.0","35.0","40.0","45.0","50.0","60.0","70.0","80.0"],"group":"None","version":"v1.1.0"}],"TECT":[{"dec":266.54628618047525,"inc":-27.65034853430899,"MAD":20.27756590454089,"cm":[0,-3.019806626980426e-14,1.6342482922482304e-13],"intensity":11543.269592662593,"type":"GC","origin":false,"forced":true,"remark":"","nSteps":14,"minStep":"4.0","maxStep":"80.0","steps":["4.0","8.0","12.0","16.0","20.0","25.0","30.0","35.0","40.0","45.0","50.0","60.0","70.0","80.0"],"group":"None","version":"v1.1.0"}],"interpreted":true,"name":"HP4.9A","coreAzi":109,"coreDip":45,"bedStrike":289,"bedDip":81,"data":[{"visible":true,"include":false,"step":"0.0","x":-5341.9047619047615,"y":-2274.095238095238,"z":2923.0476190476193,"a95":0.99,"info":"18/08/2014 at 05:09:54"},{"visible":true,"include":true,"step":"4.0","x":-5196,"y":-2211.0476190476193,"z":2814.6666666666665,"a95":0.99,"info":"18/08/2014 at 05:09:54"},{"visible":true,"include":true,"step":"8.0","x":-4939.714285714285,"y":-2082.4761904761904,"z":2636.8571428571427,"a95":0.99,"info":"18/08/2014 at 05:09:54"},{"visible":true,"include":true,"step":"12.0","x":-4755.428571428572,"y":-1990,"z":2502.4761904761904,"a95":0.99,"info":"18/08/2014 at 05:09:54"},{"visible":true,"include":true,"step":"16.0","x":-4626.952380952381,"y":-1900.095238095238,"z":2445.1428571428573,"a95":0.99,"info":"18/08/2014 at 05:09:54"},{"visible":true,"include":true,"step":"20.0","x":-4558.857142857143,"y":-1844,"z":2384.4761904761904,"a95":0.99,"info":"18/08/2014 at 05:09:54"},{"visible":true,"include":true,"step":"25.0","x":-4496.190476190476,"y":-1772,"z":2342.3809523809523,"a95":0.99,"info":"18/08/2014 at 05:09:54"},{"visible":true,"include":true,"step":"30.0","x":-4457.428571428572,"y":-1714.952380952381,"z":2319.809523809524,"a95":0.99,"info":"18/08/2014 at 05:09:54"},{"visible":true,"include":true,"step":"35.0","x":-4429.428571428572,"y":-1684.6666666666667,"z":2299.3333333333335,"a95":0.99,"info":"18/08/2014 at 05:09:54"},{"visible":true,"include":true,"step":"40.0","x":-4443.238095238095,"y":-1660.1904761904761,"z":2291.714285714286,"a95":0.99,"info":"18/08/2014 at 05:09:54"},{"visible":true,"include":true,"step":"45.0","x":-4406.666666666667,"y":-1650.5714285714287,"z":2278.3809523809523,"a95":0.99,"info":"18/08/2014 at 05:09:54"},{"visible":true,"include":true,"step":"50.0","x":-4375.619047619048,"y":-1627.6190476190477,"z":2291.4285714285716,"a95":0.99,"info":"18/08/2014 at 05:09:54"},{"visible":true,"include":true,"step":"60.0","x":-4382,"y":-1645.047619047619,"z":2234.3809523809523,"a95":0.99,"info":"18/08/2014 at 05:09:54"},{"visible":true,"include":true,"step":"70.0","x":-4401.047619047619,"y":-1724,"z":2219.3333333333335,"a95":0.99,"info":"18/08/2014 at 05:09:54"},{"visible":true,"include":true,"step":"80.0","x":-4434.761904761905,"y":-1696.6666666666667,"z":2207.809523809524,"a95":0.99,"info":"18/08/2014 at 05:09:54"},{"visible":true,"include":false,"step":"90.0","x":-4305.047619047619,"y":-1485.904761904762,"z":2275.6190476190477,"a95":0.99,"info":"18/08/2014 at 05:09:54"},{"visible":true,"include":false,"step":"100.0","x":-4310,"y":-1536.952380952381,"z":2197.2380952380954,"a95":0.99,"info":"18/08/2014 at 05:09:54"}]},{"version":"v1.1.0","exported":"2016-11-24T16:59:55.029Z","volume":10.5,"added":"2016-11-24T16:45:09.345Z","format":"Utrecht","demagType":"Unknown","strat":null,"patch":1.1,"GEO":[],"TECT":[],"interpreted":false,"name":"HP4.10A","coreAzi":111,"coreDip":42,"bedStrike":289,"bedDip":81,"data":[{"visible":true,"include":false,"step":"20","x":-4063.2380952380954,"y":-2026.3809523809523,"z":2607.3333333333335,"a95":2.3,"info":"\"14-08-11\" at \"18:59\""},{"visible":true,"include":true,"step":"100","x":-3291.904761904762,"y":-1564,"z":1757.6190476190477,"a95":2,"info":"\"14-08-11\" at \"21:46\""},{"visible":true,"include":true,"step":"150","x":-3038.9523809523807,"y":-1232.952380952381,"z":1545.8095238095239,"a95":1.9,"info":"\"14-08-12\" at \"00:39\""},{"visible":true,"include":true,"step":"180","x":-2975.6190476190477,"y":-1260.4761904761904,"z":1550.5714285714287,"a95":2,"info":"\"14-08-12\" at \"16:53\""},{"visible":true,"include":true,"step":"210","x":-2783.4285714285716,"y":-1404.6666666666667,"z":1503.2380952380952,"a95":2,"info":"\"14-08-12\" at \"19:49\""},{"visible":true,"include":true,"step":"240","x":-2678.7619047619046,"y":-1139.047619047619,"z":1385.904761904762,"a95":2,"info":"\"14-08-12\" at \"23:08\""},{"visible":true,"include":true,"step":"270","x":-2632.4761904761904,"y":-1163.904761904762,"z":1379.4285714285713,"a95":2,"info":"\"14-08-13\" at \"16:29\""},{"visible":true,"include":true,"step":"300","x":-2430.285714285714,"y":-1028.5714285714287,"z":1271.4285714285713,"a95":2,"info":"\"14-08-13\" at \"19:31\""},{"visible":true,"include":true,"step":"320","x":-2341.5238095238096,"y":-975.7142857142857,"z":1206.952380952381,"a95":2.2,"info":"\"14-08-13\" at \"22:38\""},{"visible":true,"include":true,"step":"340","x":-2239.714285714286,"y":-972.8571428571429,"z":1186,"a95":2,"info":"\"14-08-14\" at \"15:38\""},{"visible":true,"include":true,"step":"370","x":-2006,"y":-903.2380952380952,"z":1056.857142857143,"a95":2.1,"info":"\"14-08-14\" at \"18:42\""},{"visible":true,"include":true,"step":"400","x":-1780.1904761904761,"y":-809.1428571428571,"z":953.4285714285714,"a95":2,"info":"\"14-08-14\" at \"22:00\""},{"visible":true,"include":true,"step":"430","x":-1737.2380952380952,"y":-712.1904761904761,"z":924.2857142857143,"a95":2.2,"info":"\"14-08-15\" at \"14:37\""},{"visible":true,"include":true,"step":"460","x":-1693.6190476190477,"y":-732.1904761904761,"z":902.5714285714286,"a95":2.2,"info":"\"14-08-15\" at \"17:44\""},{"visible":true,"include":true,"step":"490","x":-1685.5238095238096,"y":-666.6666666666666,"z":898.0952380952381,"a95":2.4,"info":"\"14-08-15\" at \"21:05\""},{"visible":true,"include":true,"step":"510","x":-1624.2857142857142,"y":-722.4761904761905,"z":881.1428571428571,"a95":2.2,"info":"\"14-08-16\" at \"00:19\""},{"visible":true,"include":true,"step":"540","x":-1629.8095238095239,"y":-605.8095238095239,"z":862.1904761904761,"a95":2.2,"info":"\"14-08-16\" at \"13:25\""},{"visible":true,"include":true,"step":"570","x":-1577.3333333333333,"y":-764.8571428571429,"z":847.2380952380952,"a95":2.7,"info":"\"14-08-16\" at \"16:06\""},{"visible":true,"include":true,"step":"600","x":-1522.2857142857142,"y":-533.4285714285714,"z":788.4761904761905,"a95":2.3,"info":"\"14-08-16\" at \"18:48\""},{"visible":true,"include":false,"step":"630","x":-1193.5238095238096,"y":-394.1904761904762,"z":616,"a95":3.4,"info":"\"14-08-17\" at \"13:51\""},{"visible":true,"include":false,"step":"660","x":-632.0952380952381,"y":27.904761904761905,"z":307.8095238095238,"a95":11.8,"info":"\"14-08-17\" at \"16:02\""},{"visible":true,"include":false,"step":"680","x":-719.4285714285714,"y":-62.285714285714285,"z":108.95238095238095,"a95":20.5,"info":"\"14-08-22\" at \"10:39\""}]},{"version":"v1.1.0","exported":"2016-11-24T16:59:55.030Z","volume":10.5,"added":"2016-11-24T16:45:09.346Z","format":"Utrecht","demagType":"Unknown","strat":"4","patch":1.1,"GEO":[],"TECT":[],"interpreted":false,"name":"HP4.11A","coreAzi":46,"coreDip":46,"bedStrike":285,"bedDip":55,"data":[{"visible":true,"include":false,"step":"0.0","x":-1612,"y":-1041.2380952380952,"z":3193.1428571428573,"a95":0.99,"info":"18/08/2014 at 05:09:54"},{"visible":true,"include":true,"step":"4.0","x":-1535.7142857142858,"y":-940.1619047619048,"z":3016.095238095238,"a95":0.99,"info":"18/08/2014 at 05:09:54"},{"visible":true,"include":true,"step":"8.0","x":-1419.3333333333333,"y":-775.4380952380952,"z":2677.714285714286,"a95":0.99,"info":"18/08/2014 at 05:09:54"},{"visible":true,"include":true,"step":"12.0","x":-1312.952380952381,"y":-652.447619047619,"z":2372.6666666666665,"a95":0.99,"info":"18/08/2014 at 05:09:54"},{"visible":true,"include":true,"step":"16.0","x":-1218.6666666666667,"y":-577.0857142857143,"z":2167.2380952380954,"a95":0.99,"info":"18/08/2014 at 05:09:54"},{"visible":true,"include":true,"step":"20.0","x":-1147.4285714285713,"y":-499,"z":2011.5238095238096,"a95":0.99,"info":"18/08/2014 at 05:09:54"},{"visible":true,"include":true,"step":"25.0","x":-1071.4285714285713,"y":-433.81904761904764,"z":1899.3333333333333,"a95":0.99,"info":"18/08/2014 at 05:09:54"},{"visible":true,"include":true,"step":"30.0","x":-973.1428571428571,"y":-402.4380952380953,"z":1770.7619047619048,"a95":0.99,"info":"18/08/2014 at 05:09:54"},{"visible":true,"include":true,"step":"35.0","x":-938.952380952381,"y":-393.25714285714287,"z":1694.5714285714287,"a95":0.99,"info":"18/08/2014 at 05:09:54"},{"visible":true,"include":true,"step":"40.0","x":-957.047619047619,"y":-359.84761904761905,"z":1659.5238095238096,"a95":0.99,"info":"18/08/2014 at 05:09:54"},{"visible":true,"include":true,"step":"45.0","x":-902.7142857142857,"y":-340.54285714285714,"z":1608.2857142857142,"a95":0.99,"info":"18/08/2014 at 05:09:54"},{"visible":true,"include":true,"step":"50.0","x":-886.2190476190475,"y":-361.2190476190476,"z":1559.3333333333333,"a95":0.99,"info":"18/08/2014 at 05:09:54"},{"visible":true,"include":true,"step":"60.0","x":-840.9619047619047,"y":-336.7238095238095,"z":1522.7619047619048,"a95":0.99,"info":"18/08/2014 at 05:09:54"},{"visible":true,"include":false,"step":"70.0","x":-780.2666666666667,"y":-354.2095238095238,"z":1447.6190476190477,"a95":0.99,"info":"18/08/2014 at 05:09:54"},{"visible":true,"include":false,"step":"80.0","x":-705.847619047619,"y":-406.45714285714286,"z":1423.047619047619,"a95":0.99,"info":"18/08/2014 at 05:09:54"},{"visible":true,"include":false,"step":"90.0","x":-745.5904761904761,"y":-246.86666666666665,"z":1378.3809523809523,"a95":0.99,"info":"18/08/2014 at 05:09:54"},{"visible":true,"include":false,"step":"100.0","x":-735.9428571428571,"y":-382.06666666666666,"z":1305.6190476190477,"a95":0.99,"info":"18/08/2014 at 05:09:54"}]},{"version":"v1.1.0","exported":"2016-11-24T16:59:55.030Z","volume":10.5,"added":"2016-11-24T16:45:09.346Z","format":"Utrecht","demagType":"Unknown","strat":"5","patch":1.1,"GEO":[],"TECT":[],"interpreted":false,"name":"HP4.12A","coreAzi":68,"coreDip":50,"bedStrike":285,"bedDip":55,"data":[{"visible":true,"include":false,"step":"0.0","x":-980.952380952381,"y":-838.8,"z":1688.5714285714287,"a95":0.99,"info":"18/08/2014 at 05:09:54"},{"visible":true,"include":true,"step":"4.0","x":-882.7142857142857,"y":-729.2666666666667,"z":1503.3333333333333,"a95":0.99,"info":"18/08/2014 at 05:09:54"},{"visible":true,"include":true,"step":"8.0","x":-719.9142857142857,"y":-559.4,"z":1183.2380952380952,"a95":0.99,"info":"18/08/2014 at 05:09:54"},{"visible":true,"include":true,"step":"12.0","x":-582.1142857142856,"y":-421.8666666666667,"z":916.5142857142857,"a95":0.99,"info":"18/08/2014 at 05:09:54"},{"visible":true,"include":true,"step":"16.0","x":-503,"y":-340.247619047619,"z":767.7333333333333,"a95":0.99,"info":"18/08/2014 at 05:09:54"},{"visible":true,"include":true,"step":"20.0","x":-444.8285714285714,"y":-279.5333333333333,"z":667.1142857142856,"a95":0.99,"info":"18/08/2014 at 05:09:54"},{"visible":true,"include":true,"step":"25.0","x":-412.49523809523805,"y":-222.25714285714284,"z":589.2095238095238,"a95":0.99,"info":"18/08/2014 at 05:09:54"},{"visible":true,"include":true,"step":"30.0","x":-349.22857142857146,"y":-208.3904761904762,"z":538.7809523809524,"a95":0.99,"info":"18/08/2014 at 05:09:54"},{"visible":true,"include":true,"step":"35.0","x":-345.93333333333334,"y":-206.49523809523808,"z":471.8095238095238,"a95":0.99,"info":"18/08/2014 at 05:09:54"},{"visible":true,"include":true,"step":"40.0","x":-316.0095238095238,"y":-186.41904761904763,"z":465.2952380952381,"a95":0.99,"info":"18/08/2014 at 05:09:54"},{"visible":true,"include":true,"step":"45.0","x":-304.9142857142857,"y":-170.67619047619047,"z":429.9047619047619,"a95":0.99,"info":"18/08/2014 at 05:09:54"},{"visible":true,"include":true,"step":"50.0","x":-288.14285714285717,"y":-172.15238095238095,"z":415.447619047619,"a95":0.99,"info":"18/08/2014 at 05:09:54"},{"visible":true,"include":true,"step":"60.0","x":-269.6190476190476,"y":-160.94285714285715,"z":407.7523809523809,"a95":0.99,"info":"18/08/2014 at 05:09:54"},{"visible":true,"include":true,"step":"70.0","x":-244.71428571428572,"y":-192.8952380952381,"z":344.7142857142857,"a95":0.99,"info":"18/08/2014 at 05:09:54"},{"visible":true,"include":false,"step":"80.0","x":-194.11428571428573,"y":-177.22857142857143,"z":376.97142857142853,"a95":0.99,"info":"18/08/2014 at 05:09:54"},{"visible":true,"include":false,"step":"90.0","x":-263.51428571428573,"y":-160.7047619047619,"z":365.6666666666667,"a95":0.99,"info":"18/08/2014 at 05:09:54"},{"visible":true,"include":false,"step":"100.0","x":-225.44761904761904,"y":-189.98095238095237,"z":341.4761904761905,"a95":0.99,"info":"18/08/2014 at 05:09:54"}]},{"version":"v1.1.0","exported":"2016-11-24T16:59:55.030Z","volume":10.5,"added":"2016-11-24T16:45:09.346Z","format":"Utrecht","demagType":"Unknown","strat":null,"patch":1.1,"GEO":[],"TECT":[],"interpreted":false,"name":"HP4.13A","coreAzi":75,"coreDip":44,"bedStrike":285,"bedDip":55,"data":[{"visible":true,"include":false,"step":"20","x":-1960.1904761904761,"y":-898.3809523809524,"z":2043.904761904762,"a95":2.4,"info":"\"14-08-11\" at \"19:02\""},{"visible":true,"include":true,"step":"100","x":-1574.857142857143,"y":-658.1904761904761,"z":1675.6190476190477,"a95":2.4,"info":"\"14-08-11\" at \"21:48\""},{"visible":true,"include":true,"step":"150","x":-1339.142857142857,"y":-602.4761904761905,"z":1434.7619047619048,"a95":2.3,"info":"\"14-08-12\" at \"00:41\""},{"visible":true,"include":true,"step":"180","x":-1260.2857142857142,"y":-623.4285714285714,"z":1374.3809523809523,"a95":2.4,"info":"\"14-08-12\" at \"16:55\""},{"visible":true,"include":true,"step":"210","x":-1195.904761904762,"y":-576.6666666666666,"z":1286.857142857143,"a95":2.3,"info":"\"14-08-12\" at \"19:52\""},{"visible":true,"include":true,"step":"240","x":-1085.142857142857,"y":-581.5238095238095,"z":1190.4761904761904,"a95":2.3,"info":"\"14-08-12\" at \"23:11\""},{"visible":true,"include":true,"step":"270","x":-1059.4285714285713,"y":-555.047619047619,"z":1161.142857142857,"a95":2.5,"info":"\"14-08-13\" at \"16:31\""},{"visible":true,"include":true,"step":"300","x":-938.5714285714286,"y":-480.4761904761905,"z":1020.1904761904761,"a95":2.4,"info":"\"14-08-13\" at \"19:33\""},{"visible":true,"include":true,"step":"320","x":-866.4761904761905,"y":-429.23809523809524,"z":943.1428571428571,"a95":2.4,"info":"\"14-08-13\" at \"22:41\""},{"visible":true,"include":true,"step":"340","x":-847.2380952380952,"y":-436.76190476190476,"z":970.4761904761905,"a95":2.3,"info":"\"14-08-14\" at \"15:40\""},{"visible":true,"include":true,"step":"370","x":-722.5714285714286,"y":-404.2857142857143,"z":804.1904761904761,"a95":2.4,"info":"\"14-08-14\" at \"18:44\""},{"visible":true,"include":true,"step":"400","x":-629.2380952380952,"y":-368.57142857142856,"z":711.5238095238095,"a95":2.4,"info":"\"14-08-14\" at \"22:02\""},{"visible":true,"include":true,"step":"430","x":-611.6190476190476,"y":-313.04761904761904,"z":635.9047619047619,"a95":2.7,"info":"\"14-08-15\" at \"14:39\""},{"visible":true,"include":true,"step":"460","x":-532.7619047619048,"y":-278.95238095238096,"z":592.3809523809524,"a95":2.4,"info":"\"14-08-15\" at \"17:47\""},{"visible":true,"include":true,"step":"490","x":-521.9047619047619,"y":-225.71428571428572,"z":534.8571428571429,"a95":2.9,"info":"\"14-08-15\" at \"21:07\""},{"visible":true,"include":true,"step":"510","x":-482.6666666666667,"y":-236.38095238095238,"z":521.9047619047619,"a95":2.6,"info":"\"14-08-16\" at \"00:21\""},{"visible":true,"include":true,"step":"540","x":-456.57142857142856,"y":-212.76190476190476,"z":501.9047619047619,"a95":2.9,"info":"\"14-08-16\" at \"13:27\""},{"visible":true,"include":false,"step":"570","x":-575.8095238095239,"y":-306.1904761904762,"z":490.3809523809524,"a95":3,"info":"\"14-08-16\" at \"16:09\""},{"visible":true,"include":false,"step":"600","x":-747.2380952380952,"y":-167.8095238095238,"z":482.85714285714283,"a95":5.8,"info":"\"14-08-16\" at \"18:50\""},{"visible":true,"include":false,"step":"630","x":-1950.952380952381,"y":147.14285714285714,"z":821.7142857142857,"a95":12.6,"info":"\"14-08-17\" at \"13:54\""}]},{"version":"v1.1.0","exported":"2016-11-24T16:59:55.030Z","volume":10.5,"added":"2016-11-24T16:45:09.349Z","format":"Utrecht","demagType":"Unknown","strat":"6","patch":1.1,"GEO":[],"TECT":[],"interpreted":false,"name":"HP4.14A","coreAzi":81,"coreDip":48,"bedStrike":285,"bedDip":55,"data":[{"visible":true,"include":false,"step":"0.0","x":-1105.7142857142858,"y":-738.6476190476191,"z":1345.6190476190477,"a95":0.99,"info":"18/08/2014 at 05:09:54"},{"visible":true,"include":true,"step":"4.0","x":-1025.6190476190477,"y":-662.4666666666666,"z":1222.095238095238,"a95":0.99,"info":"18/08/2014 at 05:09:54"},{"visible":true,"include":true,"step":"8.0","x":-878.1904761904761,"y":-544.8095238095239,"z":1015.3333333333334,"a95":0.99,"info":"18/08/2014 at 05:09:54"},{"visible":true,"include":true,"step":"12.0","x":-739.1238095238095,"y":-442.02857142857147,"z":828.8761904761906,"a95":0.99,"info":"18/08/2014 at 05:09:54"},{"visible":true,"include":true,"step":"16.0","x":-647.1238095238095,"y":-360.8,"z":714.8095238095239,"a95":0.99,"info":"18/08/2014 at 05:09:54"},{"visible":true,"include":true,"step":"20.0","x":-581.7238095238096,"y":-316.85714285714283,"z":607.8095238095239,"a95":0.99,"info":"18/08/2014 at 05:09:54"},{"visible":true,"include":true,"step":"25.0","x":-532.3333333333334,"y":-269.6952380952381,"z":544.4095238095239,"a95":0.99,"info":"18/08/2014 at 05:09:54"},{"visible":true,"include":true,"step":"30.0","x":-473.152380952381,"y":-246.9904761904762,"z":500.7809523809524,"a95":0.99,"info":"18/08/2014 at 05:09:54"},{"visible":true,"include":true,"step":"35.0","x":-441.2857142857143,"y":-243.42857142857142,"z":471.3333333333333,"a95":0.99,"info":"18/08/2014 at 05:09:54"},{"visible":true,"include":true,"step":"40.0","x":-442.8666666666667,"y":-214.84761904761905,"z":448.847619047619,"a95":0.99,"info":"18/08/2014 at 05:09:54"},{"visible":true,"include":true,"step":"45.0","x":-394.93333333333334,"y":-213.95238095238096,"z":442.1904761904762,"a95":0.99,"info":"18/08/2014 at 05:09:54"},{"visible":true,"include":true,"step":"50.0","x":-400.7047619047619,"y":-228.46666666666667,"z":425.46666666666664,"a95":0.99,"info":"18/08/2014 at 05:09:54"},{"visible":true,"include":true,"step":"60.0","x":-372.2095238095238,"y":-203.69523809523812,"z":386.7142857142857,"a95":0.99,"info":"18/08/2014 at 05:09:54"},{"visible":true,"include":false,"step":"70.0","x":-374.67619047619047,"y":-195.1904761904762,"z":373.1047619047619,"a95":0.99,"info":"18/08/2014 at 05:09:54"},{"visible":true,"include":false,"step":"80.0","x":-373.62857142857143,"y":-221.86666666666665,"z":362.42857142857144,"a95":0.99,"info":"18/08/2014 at 05:09:54"},{"visible":true,"include":false,"step":"90.0","x":-321.85714285714283,"y":-180.05714285714285,"z":357.6190476190476,"a95":0.99,"info":"18/08/2014 at 05:09:54"},{"visible":true,"include":false,"step":"100.0","x":-309.04761904761904,"y":-161.5047619047619,"z":334.29523809523806,"a95":0.99,"info":"18/08/2014 at 05:09:54"}]}]
