# Supplementary material for: Paleomagnetic constraints on the timing and distribution of Cenozoic rotations in Central and Eastern Anatolia
Source: Copernicus journal article supplement (doi:10.5194/se-9-295-2018), 2018-03-21
Supplement: Supplementary file 2 [file se-9-295-2018-supplement.zip › se-2017-66_DATA_dir files/dir files Ulukisla/HP6.dir]

[{"version":"v1.1.0","exported":"2016-11-18T11:33:04.380Z","volume":10.5,"added":"2016-11-18T11:23:51.474Z","format":"Utrecht","demagType":"Unknown","strat":"2","patch":1.1,"GEO":[{"dec":136.0152047418038,"inc":-7.471398245788675,"MAD":6.680320338174249,"cm":[-2084.0823122598754,2520.290274701745,-521.4690329113841],"intensity":2259.094572406129,"type":"dir","forced":false,"remark":"","origin":false,"nSteps":6,"minStep":"25.0","maxStep":"50.0","steps":["25.0","30.0","35.0","40.0","45.0","50.0"],"group":"None","version":"v1.1.0"}],"TECT":[{"dec":139.2409672194043,"inc":-47.068521393109926,"MAD":6.680320338174305,"cm":[-1391.6582667935988,1665.2177898389427,-2501.505364012866],"intensity":2259.094572406129,"type":"dir","forced":false,"remark":"","origin":false,"nSteps":6,"minStep":"25.0","maxStep":"50.0","steps":["25.0","30.0","35.0","40.0","45.0","50.0"],"group":"None","version":"v1.1.0"}],"interpreted":true,"name":"HP6.1A","coreAzi":114,"coreDip":65,"bedStrike":39,"bedDip":40,"data":[{"visible":true,"include":false,"step":"0.0","x":5754.190476190476,"y":1336.2857142857142,"z":3234.9523809523807,"a95":0.99,"info":"29/09/2014 at 10:14:33"},{"visible":true,"include":false,"step":"10.0","x":6077.523809523809,"y":1878.1904761904761,"z":2387.809523809524,"a95":0.99,"info":"29/09/2014 at 10:14:33"},{"visible":true,"include":false,"step":"15.0","x":5664.190476190476,"y":1865.2380952380952,"z":1929.2380952380952,"a95":0.99,"info":"29/09/2014 at 10:14:33"},{"visible":true,"include":false,"step":"20.0","x":4922.571428571428,"y":1540.952380952381,"z":1732.095238095238,"a95":0.99,"info":"29/09/2014 at 10:14:33"},{"visible":true,"include":true,"step":"25.0","x":4220.380952380952,"y":1408.6666666666667,"z":1204.857142857143,"a95":0.99,"info":"29/09/2014 at 10:14:33"},{"visible":true,"include":true,"step":"30.0","x":3727.1428571428573,"y":1045.6190476190477,"z":1040.2857142857142,"a95":0.99,"info":"29/09/2014 at 10:14:33"},{"visible":true,"include":true,"step":"35.0","x":3069.2380952380954,"y":861.7333333333333,"z":915.2952380952381,"a95":0.99,"info":"29/09/2014 at 10:14:33"},{"visible":true,"include":true,"step":"40.0","x":2704.8571428571427,"y":890.8285714285715,"z":732.9714285714285,"a95":0.99,"info":"29/09/2014 at 10:14:33"},{"visible":true,"include":true,"step":"45.0","x":2506.5714285714284,"y":542.495238095238,"z":631.0857142857143,"a95":0.99,"info":"29/09/2014 at 10:14:33"},{"visible":true,"include":true,"step":"50.0","x":2223.714285714286,"y":523.5142857142857,"z":627.504761904762,"a95":0.99,"info":"29/09/2014 at 10:14:33"},{"visible":true,"include":false,"step":"60.0","x":1792.3809523809523,"y":283.9142857142857,"z":424.18095238095236,"a95":0.99,"info":"29/09/2014 at 10:14:33"},{"visible":true,"include":false,"step":"70.0","x":1313.7142857142858,"y":34.82285714285714,"z":25.419047619047618,"a95":0.99,"info":"29/09/2014 at 10:14:33"},{"visible":true,"include":false,"step":"80.0","x":1101.5238095238096,"y":286.0571428571428,"z":344.50476190476195,"a95":0.99,"info":"29/09/2014 at 10:14:33"},{"visible":false,"include":false,"step":"90.0","x":1042.6666666666667,"y":343.12380952380954,"z":97.5142857142857,"a95":0.99,"info":"29/09/2014 at 10:14:33"}]},{"version":"v1.1.0","exported":"2016-11-18T11:33:04.380Z","volume":10.5,"added":"2016-11-18T11:23:51.475Z","format":"Utrecht","demagType":"Unknown","strat":null,"patch":1.1,"GEO":[{"dec":156.547871642269,"inc":-1.5725940911311624,"MAD":11.63129002009293,"cm":[2.4868995751603507e-14,4.618527782440651e-14,0],"intensity":907.516338564714,"type":"dir","forced":true,"remark":"","origin":false,"nSteps":5,"minStep":"150","maxStep":"270","steps":["150","180","210","240","270"],"group":"None","version":"v1.1.0"}],"TECT":[{"dec":163.95751887714016,"inc":-36.20809505682382,"MAD":11.631290020092933,"cm":[3.552713678800501e-14,6.039613253960852e-14,-7.105427357601002e-15],"intensity":907.5163385647141,"type":"dir","forced":true,"remark":"","origin":false,"nSteps":5,"minStep":"150","maxStep":"270","steps":["150","180","210","240","270"],"group":"None","version":"v1.1.0"}],"interpreted":true,"name":"HP6.2A","coreAzi":104,"coreDip":49,"bedStrike":39,"bedDip":40,"data":[{"visible":false,"include":false,"step":"20","x":-668.8571428571429,"y":-520.7619047619048,"z":2363.4285714285716,"a95":2.8,"info":"\"14-11-30\" at \"18:11\""},{"visible":false,"include":false,"step":"100","x":-424.0952380952381,"y":-70,"z":1023.1428571428571,"a95":2.7,"info":"\"15-02-10\" at \"16:40\""},{"visible":true,"include":true,"step":"150","x":264.3809523809524,"y":430.76190476190476,"z":167.23809523809524,"a95":2,"info":"\"15-02-10\" at \"20:39\""},{"visible":true,"include":true,"step":"180","x":247.14285714285714,"y":345.6190476190476,"z":43.333333333333336,"a95":1.6,"info":"\"15-02-11\" at \"16:08\""},{"visible":true,"include":true,"step":"210","x":163.42857142857142,"y":403.14285714285717,"z":278,"a95":2,"info":"\"15-02-11\" at \"19:44\""},{"visible":true,"include":true,"step":"240","x":220.95238095238096,"y":316.85714285714283,"z":114.95238095238095,"a95":2,"info":"\"15-02-11\" at \"23:36\""},{"visible":true,"include":true,"step":"270","x":175.71428571428572,"y":255.61904761904762,"z":231.23809523809524,"a95":2.1,"info":"\"15-02-12\" at \"18:21\""},{"visible":true,"include":false,"step":"300","x":45.23809523809524,"y":220.1904761904762,"z":139.04761904761904,"a95":1.9,"info":"\"15-02-13\" at \"16:07\""},{"visible":true,"include":false,"step":"320","x":62.476190476190474,"y":222.38095238095238,"z":208.1904761904762,"a95":2.4,"info":"\"15-02-13\" at \"21:00\""},{"visible":true,"include":false,"step":"340","x":-2.9523809523809526,"y":268.0952380952381,"z":293.5238095238095,"a95":2.7,"info":"\"15-02-14\" at \"01:04\""},{"visible":false,"include":false,"step":"370","x":7.714285714285714,"y":132.28571428571428,"z":292,"a95":3,"info":"\"15-02-16\" at \"18:35\""},{"visible":false,"include":false,"step":"390","x":173.71428571428572,"y":242.76190476190476,"z":272.0952380952381,"a95":2.2,"info":"\"15-02-16\" at \"22:10\""},{"visible":false,"include":false,"step":"420","x":311.9047619047619,"y":302.3809523809524,"z":55.714285714285715,"a95":2.1,"info":"\"15-02-17\" at \"17:46\""},{"visible":false,"include":false,"step":"450","x":-98.38095238095238,"y":117.80952380952381,"z":-42.19047619047619,"a95":4.3,"info":"\"15-03-08\" at \"20:53\""},{"visible":false,"include":false,"step":"470","x":-117.52380952380952,"y":122.38095238095238,"z":44,"a95":4.9,"info":"\"15-03-09\" at \"11:09\""},{"visible":false,"include":false,"step":"490","x":-105.61904761904762,"y":229.71428571428572,"z":1.619047619047619,"a95":4.3,"info":"\"15-03-09\" at \"14:21\""},{"visible":false,"include":false,"step":"510","x":69.23809523809524,"y":67.14285714285714,"z":136.95238095238096,"a95":7.1,"info":"\"15-04-21\" at \"10:30\""}]},{"version":"v1.1.0","exported":"2016-11-18T11:33:04.381Z","volume":10.5,"added":"2016-11-18T11:23:51.475Z","format":"Utrecht","demagType":"Unknown","strat":null,"patch":1.1,"GEO":[{"dec":165.81571461758472,"inc":9.038907103769096,"MAD":15.539827902273435,"cm":[-1.0658141036401503e-14,-4.440892098500626e-14,0],"intensity":455.7228540767854,"type":"dir","forced":true,"remark":"","origin":false,"nSteps":4,"minStep":"180","maxStep":"270","steps":["180","210","240","270"],"group":"None","version":"v1.1.0"}],"TECT":[{"dec":168.94575147919545,"inc":-22.82108289406211,"MAD":15.539827902273444,"cm":[-1.7763568394002505e-14,-1.2434497875801753e-14,2.1316282072803006e-14],"intensity":455.72285407678555,"type":"dir","forced":true,"remark":"","origin":false,"nSteps":4,"minStep":"180","maxStep":"270","steps":["180","210","240","270"],"group":"None","version":"v1.1.0"}],"interpreted":true,"name":"HP6.3A","coreAzi":99,"coreDip":40,"bedStrike":39,"bedDip":40,"data":[{"visible":false,"include":false,"step":"20","x":-1208.3809523809523,"y":-836,"z":1822.095238095238,"a95":2.7,"info":"\"14-11-30\" at \"18:13\""},{"visible":true,"include":false,"step":"100","x":-734.0952380952381,"y":21.904761904761905,"z":230.1904761904762,"a95":2.6,"info":"\"15-02-10\" at \"16:42\""},{"visible":true,"include":false,"step":"150","x":-41.23809523809524,"y":216.47619047619048,"z":94.47619047619048,"a95":3.7,"info":"\"15-02-10\" at \"20:41\""},{"visible":true,"include":true,"step":"180","x":46.285714285714285,"y":316.85714285714283,"z":116.0952380952381,"a95":2.3,"info":"\"15-02-11\" at \"16:10\""},{"visible":true,"include":true,"step":"210","x":-18.952380952380953,"y":285.42857142857144,"z":140.76190476190476,"a95":2.9,"info":"\"15-02-11\" at \"19:47\""},{"visible":true,"include":true,"step":"240","x":67.04761904761905,"y":114.95238095238095,"z":70.38095238095238,"a95":4.3,"info":"\"15-02-11\" at \"23:38\""},{"visible":true,"include":true,"step":"270","x":121.04761904761905,"y":78.47619047619048,"z":36.857142857142854,"a95":3.3,"info":"\"15-02-12\" at \"18:23\""},{"visible":true,"include":false,"step":"300","x":157.52380952380952,"y":-37.714285714285715,"z":-30.38095238095238,"a95":3,"info":"\"15-02-13\" at \"16:10\""},{"visible":true,"include":false,"step":"320","x":144.28571428571428,"y":-125.04761904761905,"z":29.904761904761905,"a95":2.2,"info":"\"15-02-13\" at \"21:02\""},{"visible":true,"include":false,"step":"340","x":14,"y":-116.28571428571429,"z":75.71428571428571,"a95":4.5,"info":"\"15-02-14\" at \"01:06\""},{"visible":true,"include":false,"step":"370","x":-40.095238095238095,"y":-61.61904761904762,"z":197.52380952380952,"a95":3.8,"info":"\"15-02-16\" at \"18:36\""},{"visible":true,"include":false,"step":"390","x":97.80952380952381,"y":157.8095238095238,"z":272.1904761904762,"a95":2.6,"info":"\"15-02-16\" at \"22:12\""},{"visible":true,"include":false,"step":"420","x":150,"y":99.33333333333333,"z":99.80952380952381,"a95":3.2,"info":"\"15-02-17\" at \"17:48\""},{"visible":true,"include":false,"step":"450","x":129.71428571428572,"y":46.285714285714285,"z":61.523809523809526,"a95":4.1,"info":"\"15-03-08\" at \"20:55\""},{"visible":true,"include":false,"step":"470","x":41.80952380952381,"y":12.40952380952381,"z":71.81904761904762,"a95":8.1,"info":"\"15-03-09\" at \"11:11\""},{"visible":true,"include":false,"step":"490","x":-6.190476190476191,"y":-90,"z":112.76190476190476,"a95":6.3,"info":"\"15-03-09\" at \"14:23\""},{"visible":true,"include":false,"step":"510","x":229.04761904761904,"y":-2.380952380952381,"z":110.95238095238095,"a95":3.3,"info":"\"15-04-21\" at \"10:32\""}]},{"version":"v1.1.0","exported":"2016-11-18T11:33:04.381Z","volume":10.5,"added":"2016-11-18T11:23:51.475Z","format":"Utrecht","demagType":"Unknown","strat":"5","patch":1.1,"GEO":[{"dec":156.32238360476572,"inc":-11.511405995190843,"MAD":11.370977802163374,"cm":[7.105427357601002e-15,-7.105427357601002e-15,0],"intensity":1673.0869616444,"type":"dir","forced":true,"remark":"","origin":false,"nSteps":8,"minStep":"20.0","maxStep":"45.0","steps":["20.0","23.0","25.0","30.0","33.0","35.0","40.0","45.0"],"group":"None","version":"v1.1.0"}],"TECT":[{"dec":168.8630872270337,"inc":-45.43573588359594,"MAD":11.37097780216339,"cm":[-1.4210854715202004e-14,-9.769962616701378e-14,1.4210854715202004e-14],"intensity":1673.0869616444,"type":"dir","forced":true,"remark":"","origin":false,"nSteps":8,"minStep":"20.0","maxStep":"45.0","steps":["20.0","23.0","25.0","30.0","33.0","35.0","40.0","45.0"],"group":"None","version":"v1.1.0"}],"interpreted":true,"name":"HP6.4A","coreAzi":107,"coreDip":45,"bedStrike":39,"bedDip":40,"data":[{"visible":false,"include":false,"step":"0.0","x":409.57142857142856,"y":247.30476190476188,"z":64.8742857142857,"a95":0.99,"info":"08/07/2015 at 08:20:22"},{"visible":true,"include":false,"step":"10.0","x":1000,"y":610.8190476190476,"z":208.62857142857143,"a95":0.99,"info":"08/07/2015 at 08:20:22"},{"visible":true,"include":false,"step":"15.0","x":1143.7142857142858,"y":537.104761904762,"z":557.4666666666666,"a95":0.99,"info":"08/07/2015 at 08:20:22"},{"visible":true,"include":true,"step":"20.0","x":688.9428571428571,"y":575.0190476190476,"z":532.7142857142857,"a95":0.99,"info":"08/07/2015 at 08:20:22"},{"visible":true,"include":true,"step":"23.0","x":621.9142857142857,"y":701.1904761904761,"z":215.21904761904764,"a95":0.99,"info":"08/07/2015 at 08:20:22"},{"visible":true,"include":true,"step":"25.0","x":801.2857142857143,"y":842.9714285714286,"z":128.45714285714286,"a95":0.99,"info":"08/07/2015 at 08:20:22"},{"visible":true,"include":true,"step":"30.0","x":361.70476190476194,"y":765.2190476190476,"z":306.5809523809524,"a95":0.99,"info":"08/07/2015 at 08:20:22"},{"visible":true,"include":true,"step":"33.0","x":439.3714285714285,"y":782.8857142857142,"z":389.752380952381,"a95":0.99,"info":"08/07/2015 at 08:20:22"},{"visible":true,"include":true,"step":"35.0","x":525.0571428571429,"y":672.7047619047619,"z":203.76190476190476,"a95":0.99,"info":"08/07/2015 at 08:20:22"},{"visible":true,"include":true,"step":"40.0","x":419.7904761904762,"y":728.8190476190476,"z":339.4666666666667,"a95":0.99,"info":"08/07/2015 at 08:20:22"},{"visible":true,"include":true,"step":"45.0","x":480.7714285714286,"y":373.95238095238096,"z":195.60000000000002,"a95":0.99,"info":"08/07/2015 at 08:20:22"},{"visible":true,"include":false,"step":"50.0","x":580.0095238095239,"y":260.35238095238094,"z":272.6,"a95":0.99,"info":"08/07/2015 at 08:20:22"},{"visible":true,"include":false,"step":"55.0","x":360.34285714285716,"y":427.2190476190476,"z":188.66666666666666,"a95":0.99,"info":"08/07/2015 at 08:20:22"},{"visible":true,"include":false,"step":"60.0","x":277.1333333333333,"y":277.85714285714283,"z":195.43809523809523,"a95":0.99,"info":"08/07/2015 at 08:20:22"},{"visible":false,"include":false,"step":"65.0","x":299.43809523809523,"y":-48.296190476190475,"z":-85.73333333333333,"a95":0.99,"info":"08/07/2015 at 08:20:22"},{"visible":false,"include":false,"step":"70.0","x":-198.14285714285714,"y":-95.96190476190476,"z":74.87904761904763,"a95":0.99,"info":"08/07/2015 at 08:20:22"},{"visible":false,"include":false,"step":"80.0","x":247.05714285714285,"y":86.53619047619047,"z":83.61047619047619,"a95":0.99,"info":"08/07/2015 at 08:20:22"}]},{"version":"v1.1.0","exported":"2016-11-18T11:33:04.381Z","volume":10.5,"added":"2016-11-18T11:23:51.476Z","format":"Utrecht","demagType":"Unknown","strat":"3","patch":1.1,"GEO":[{"dec":146.30118404869688,"inc":-10.519308524945657,"MAD":9.197558884397473,"cm":[3.197442310920451e-14,1.9539925233402755e-14,0],"intensity":988.0911194865398,"type":"dir","forced":true,"remark":"","origin":false,"nSteps":6,"minStep":"20.0","maxStep":"45.0","steps":["20.0","25.0","30.0","35.0","40.0","45.0"],"group":"None","version":"v1.1.0"}],"TECT":[{"dec":154.91593412300733,"inc":-48.00853864425171,"MAD":9.197558884397441,"cm":[3.552713678800501e-15,-7.993605777301127e-14,-5.329070518200751e-15],"intensity":988.0911194865398,"type":"dir","forced":true,"remark":"","origin":false,"nSteps":6,"minStep":"20.0","maxStep":"45.0","steps":["20.0","25.0","30.0","35.0","40.0","45.0"],"group":"None","version":"v1.1.0"}],"interpreted":true,"name":"HP6.4B","coreAzi":107,"coreDip":45,"bedStrike":39,"bedDip":40,"data":[{"visible":true,"include":false,"step":"0.0","x":445.6,"y":429.3809523809524,"z":747.6380952380953,"a95":0.99,"info":"29/09/2014 at 10:14:33"},{"visible":true,"include":false,"step":"10.0","x":638.1619047619048,"y":525.9333333333334,"z":368.6666666666667,"a95":0.99,"info":"29/09/2014 at 10:14:33"},{"visible":true,"include":false,"step":"15.0","x":609.8,"y":301.1333333333333,"z":333.3904761904762,"a95":0.99,"info":"29/09/2014 at 10:14:33"},{"visible":true,"include":true,"step":"20.0","x":486.5238095238095,"y":344.2761904761905,"z":237.30476190476188,"a95":0.99,"info":"29/09/2014 at 10:14:33"},{"visible":true,"include":true,"step":"25.0","x":378.8952380952381,"y":381.77142857142854,"z":206.6095238095238,"a95":0.99,"info":"29/09/2014 at 10:14:33"},{"visible":true,"include":true,"step":"30.0","x":388.02857142857147,"y":308.3333333333333,"z":269.7333333333333,"a95":0.99,"info":"29/09/2014 at 10:14:33"},{"visible":true,"include":true,"step":"35.0","x":385.42857142857144,"y":374.43809523809523,"z":199.8,"a95":0.99,"info":"29/09/2014 at 10:14:33"},{"visible":true,"include":true,"step":"40.0","x":359.1904761904762,"y":329.2095238095238,"z":227.1809523809524,"a95":0.99,"info":"29/09/2014 at 10:14:33"},{"visible":true,"include":true,"step":"45.0","x":95.65714285714286,"y":316.77142857142854,"z":210.36190476190478,"a95":0.99,"info":"29/09/2014 at 10:14:33"},{"visible":true,"include":false,"step":"50.0","x":223.8952380952381,"y":334.0190476190476,"z":-144.35238095238097,"a95":0.99,"info":"29/09/2014 at 10:14:33"},{"visible":false,"include":false,"step":"60.0","x":181.40952380952382,"y":349.3333333333333,"z":-5.390857142857143,"a95":0.99,"info":"29/09/2014 at 10:14:33"},{"visible":false,"include":false,"step":"70.0","x":281.62857142857143,"y":228.39999999999998,"z":-138.28571428571428,"a95":0.99,"info":"29/09/2014 at 10:14:33"},{"visible":false,"include":false,"step":"80.0","x":172.9714285714286,"y":224.58095238095237,"z":-178.76190476190476,"a95":0.99,"info":"29/09/2014 at 10:14:33"},{"visible":false,"include":false,"step":"90.0","x":42.02952380952381,"y":295.56190476190477,"z":44.3,"a95":0.99,"info":"29/09/2014 at 10:14:33"}]},{"version":"v1.1.0","exported":"2016-11-18T11:33:04.381Z","volume":10.5,"added":"2016-11-18T11:23:51.477Z","format":"Utrecht","demagType":"Unknown","strat":null,"patch":1.1,"GEO":[{"dec":61.52662346263838,"inc":-11.20238010429601,"MAD":11.734347718784957,"cm":[-1.4210854715202004e-14,1.8829382497642655e-13,0],"intensity":6245.854857623121,"type":"GC","origin":false,"forced":true,"remark":"","nSteps":3,"minStep":"100","maxStep":"180","steps":["100","150","180"],"group":"None","version":"v1.1.0"}],"TECT":[{"dec":49.19868235495875,"inc":-22.978860465465335,"MAD":11.73434771878606,"cm":[-5.10702591327572e-14,0,0],"intensity":6245.854857623121,"type":"GC","origin":false,"forced":true,"remark":"","nSteps":3,"minStep":"100","maxStep":"180","steps":["100","150","180"],"group":"None","version":"v1.1.0"}],"interpreted":true,"name":"HP6.6A","coreAzi":119,"coreDip":46,"bedStrike":39,"bedDip":40,"data":[{"visible":false,"include":false,"step":"20","x":-3489.3333333333335,"y":-2810.8571428571427,"z":3019.5238095238096,"a95":2.1,"info":"\"14-11-30\" at \"18:17\""},{"visible":true,"include":true,"step":"100","x":-3727.809523809524,"y":-1786.2857142857142,"z":1957.5238095238096,"a95":2,"info":"\"15-02-10\" at \"16:44\""},{"visible":true,"include":true,"step":"150","x":-1853.3333333333333,"y":-783.9047619047619,"z":1186.7619047619048,"a95":2.1,"info":"\"15-02-10\" at \"20:43\""},{"visible":true,"include":true,"step":"180","x":-1285.6190476190477,"y":-601.047619047619,"z":902,"a95":2.2,"info":"\"15-02-11\" at \"16:12\""},{"visible":true,"include":false,"step":"210","x":-950.4761904761905,"y":-602.3809523809524,"z":623.7142857142857,"a95":2.3,"info":"\"15-02-11\" at \"19:50\""},{"visible":true,"include":false,"step":"240","x":-544.2857142857143,"y":-43.42857142857143,"z":530.6666666666666,"a95":2.5,"info":"\"15-02-11\" at \"23:40\""},{"visible":true,"include":false,"step":"270","x":-142.95238095238096,"y":-66.95238095238095,"z":319.04761904761904,"a95":3.7,"info":"\"15-02-12\" at \"18:25\""},{"visible":true,"include":false,"step":"300","x":-27.333333333333332,"y":215.04761904761904,"z":419.14285714285717,"a95":2.8,"info":"\"15-02-13\" at \"16:12\""},{"visible":true,"include":false,"step":"320","x":4.476190476190476,"y":169.61904761904762,"z":490.0952380952381,"a95":2.9,"info":"\"15-02-13\" at \"21:03\""},{"visible":true,"include":false,"step":"340","x":43.904761904761905,"y":124.0952380952381,"z":528.5714285714286,"a95":3,"info":"\"15-02-14\" at \"01:08\""},{"visible":true,"include":false,"step":"370","x":-158.1904761904762,"y":292.4761904761905,"z":555.8095238095239,"a95":2.8,"info":"\"15-02-16\" at \"18:38\""},{"visible":true,"include":false,"step":"390","x":-48.476190476190474,"y":39.04761904761905,"z":470.1904761904762,"a95":3.2,"info":"\"15-02-16\" at \"22:14\""},{"visible":true,"include":false,"step":"420","x":-103.52380952380952,"y":-237.71428571428572,"z":386.85714285714283,"a95":3.5,"info":"\"15-02-17\" at \"17:50\""},{"visible":true,"include":false,"step":"450","x":257.6190476190476,"y":-133.14285714285714,"z":219.52380952380952,"a95":2.7,"info":"\"15-03-08\" at \"20:57\""},{"visible":true,"include":false,"step":"470","x":139.33333333333334,"y":4.285714285714286,"z":439.42857142857144,"a95":3.2,"info":"\"15-03-09\" at \"11:13\""},{"visible":true,"include":false,"step":"490","x":337.7142857142857,"y":193.8095238095238,"z":379.3333333333333,"a95":3.1,"info":"\"15-03-09\" at \"14:25\""},{"visible":true,"include":false,"step":"510","x":59.714285714285715,"y":284.0952380952381,"z":207.14285714285714,"a95":4,"info":"\"15-04-21\" at \"10:34\""}]},{"version":"v1.1.0","exported":"2016-11-18T11:33:04.381Z","volume":10.5,"added":"2016-11-18T11:23:51.477Z","format":"Utrecht","demagType":"Unknown","strat":null,"patch":1.1,"GEO":[{"dec":139.47735525802318,"inc":9.49740132160818,"MAD":3.173038351962184,"cm":[-5.684341886080802e-14,-7.105427357601002e-14,0],"intensity":5864.852824887968,"type":"dir","forced":true,"remark":"","origin":false,"nSteps":11,"minStep":"240","maxStep":"490","steps":["240","270","300","320","340","370","390","420","450","470","490"],"group":"None","version":"v1.1.0"}],"TECT":[{"dec":140.9284358054012,"inc":-29.80218491027148,"MAD":3.1730383519621457,"cm":[-2.2737367544323206e-13,-2.7000623958883807e-13,-1.4210854715202004e-14],"intensity":5864.852824887967,"type":"dir","forced":true,"remark":"","origin":false,"nSteps":11,"minStep":"240","maxStep":"490","steps":["240","270","300","320","340","370","390","420","450","470","490"],"group":"None","version":"v1.1.0"}],"interpreted":true,"name":"HP6.7A","coreAzi":103,"coreDip":45,"bedStrike":39,"bedDip":40,"data":[{"visible":false,"include":false,"step":"20","x":-2203.3333333333335,"y":-557.2380952380952,"z":9838.952380952382,"a95":3,"info":"\"14-11-30\" at \"18:22\""},{"visible":false,"include":false,"step":"100","x":-1229.904761904762,"y":411.3333333333333,"z":6247.619047619048,"a95":2.7,"info":"\"15-02-10\" at \"16:49\""},{"visible":false,"include":false,"step":"150","x":870,"y":1603.5238095238096,"z":3829.4285714285716,"a95":2.4,"info":"\"15-02-10\" at \"20:46\""},{"visible":true,"include":false,"step":"180","x":1345.4285714285713,"y":1902.4761904761904,"z":3301.5238095238096,"a95":2.3,"info":"\"15-02-11\" at \"16:14\""},{"visible":true,"include":false,"step":"210","x":1205.4285714285713,"y":2140.095238095238,"z":3048.7619047619046,"a95":2.1,"info":"\"15-02-11\" at \"19:52\""},{"visible":true,"include":true,"step":"240","x":1782.2857142857142,"y":1963.047619047619,"z":2614.8571428571427,"a95":2.1,"info":"\"15-02-11\" at \"23:42\""},{"visible":true,"include":true,"step":"270","x":1561.904761904762,"y":1897.5238095238096,"z":2446.5714285714284,"a95":2.1,"info":"\"15-02-12\" at \"18:28\""},{"visible":true,"include":true,"step":"300","x":1477.4285714285713,"y":1838,"z":2120.3809523809523,"a95":2,"info":"\"15-02-13\" at \"16:14\""},{"visible":true,"include":true,"step":"320","x":1380.3809523809523,"y":1736.7619047619048,"z":2220,"a95":2.1,"info":"\"15-02-13\" at \"21:05\""},{"visible":true,"include":true,"step":"340","x":1259.8095238095239,"y":1771.3333333333333,"z":2117.904761904762,"a95":2.1,"info":"\"15-02-14\" at \"01:10\""},{"visible":true,"include":true,"step":"370","x":1361.047619047619,"y":1794.5714285714287,"z":1917.904761904762,"a95":1.8,"info":"\"15-02-16\" at \"18:40\""},{"visible":true,"include":true,"step":"390","x":1181.4285714285713,"y":1814.857142857143,"z":1888.7619047619048,"a95":1.9,"info":"\"15-02-16\" at \"22:16\""},{"visible":true,"include":true,"step":"420","x":1145.142857142857,"y":1565.142857142857,"z":1696.095238095238,"a95":2.1,"info":"\"15-02-17\" at \"17:53\""},{"visible":true,"include":true,"step":"450","x":966.2857142857143,"y":1624,"z":1587.5238095238096,"a95":1.9,"info":"\"15-03-08\" at \"20:59\""},{"visible":true,"include":true,"step":"470","x":975.3333333333334,"y":1514.095238095238,"z":1497.142857142857,"a95":1.9,"info":"\"15-03-09\" at \"11:15\""},{"visible":true,"include":true,"step":"490","x":989.1428571428571,"y":1339.4285714285713,"z":1361.2380952380952,"a95":1.9,"info":"\"15-03-09\" at \"14:27\""},{"visible":true,"include":false,"step":"510","x":542.5714285714286,"y":1384.2857142857142,"z":1304.5714285714287,"a95":2.1,"info":"\"15-04-21\" at \"10:35\""}]},{"version":"v1.1.0","exported":"2016-11-18T11:33:04.381Z","volume":10.5,"added":"2016-11-18T11:23:51.480Z","format":"Utrecht","demagType":"Unknown","strat":"4","patch":1.1,"GEO":[{"dec":152.8657720442102,"inc":-20.256462032020014,"MAD":3.794297427705061,"cm":[1.5631940186722204e-13,1.6697754290362354e-13,0],"intensity":5191.580907314091,"type":"dir","forced":true,"remark":"","origin":false,"nSteps":7,"minStep":"10.0","maxStep":"40.0","steps":["10.0","15.0","20.0","25.0","30.0","35.0","40.0"],"group":"None","version":"v1.1.0"}],"TECT":[{"dec":170.1288494346055,"inc":-54.75510351194637,"MAD":3.7942974277051005,"cm":[9.947598300641403e-14,6.261657858885883e-14,-5.684341886080802e-14],"intensity":5191.580907314092,"type":"dir","forced":true,"remark":"","origin":false,"nSteps":7,"minStep":"10.0","maxStep":"40.0","steps":["10.0","15.0","20.0","25.0","30.0","35.0","40.0"],"group":"None","version":"v1.1.0"}],"interpreted":true,"name":"HP6.7B","coreAzi":103,"coreDip":45,"bedStrike":39,"bedDip":40,"data":[{"visible":true,"include":false,"step":"0.0","x":1550.3809523809523,"y":2272.3809523809523,"z":1868.3809523809523,"a95":0.99,"info":"29/09/2014 at 10:14:33"},{"visible":true,"include":true,"step":"10.0","x":2554.5714285714284,"y":2562.7619047619046,"z":781.4666666666666,"a95":0.99,"info":"29/09/2014 at 10:14:33"},{"visible":true,"include":true,"step":"15.0","x":2341.6190476190477,"y":2392.8571428571427,"z":503.2857142857143,"a95":0.99,"info":"29/09/2014 at 10:14:33"},{"visible":true,"include":true,"step":"20.0","x":1840,"y":1935.2380952380952,"z":458.4,"a95":0.99,"info":"29/09/2014 at 10:14:33"},{"visible":true,"include":true,"step":"25.0","x":1527.2380952380952,"y":1707.047619047619,"z":336.84761904761905,"a95":0.99,"info":"29/09/2014 at 10:14:33"},{"visible":true,"include":true,"step":"30.0","x":1356.952380952381,"y":1349.6190476190477,"z":473.16190476190474,"a95":0.99,"info":"29/09/2014 at 10:14:33"},{"visible":true,"include":true,"step":"35.0","x":958.952380952381,"y":1278.5714285714287,"z":414.8666666666667,"a95":0.99,"info":"29/09/2014 at 10:14:33"},{"visible":true,"include":true,"step":"40.0","x":803.2,"y":1274.4761904761904,"z":195,"a95":0.99,"info":"29/09/2014 at 10:14:33"},{"visible":true,"include":false,"step":"45.0","x":499.81904761904764,"y":899.2476190476191,"z":368.15238095238095,"a95":0.99,"info":"29/09/2014 at 10:14:33"},{"visible":false,"include":false,"step":"50.0","x":416.72380952380956,"y":1024.2857142857142,"z":349.50476190476195,"a95":0.99,"info":"29/09/2014 at 10:14:33"},{"visible":false,"include":false,"step":"60.0","x":197.75238095238097,"y":937.9714285714286,"z":143.8095238095238,"a95":0.99,"info":"29/09/2014 at 10:14:33"},{"visible":false,"include":false,"step":"70.0","x":77.34095238095239,"y":587.4095238095239,"z":-74.5247619047619,"a95":0.99,"info":"29/09/2014 at 10:14:33"},{"visible":false,"include":false,"step":"80.0","x":-855.6666666666666,"y":1241.2380952380952,"z":267.3619047619048,"a95":0.99,"info":"29/09/2014 at 10:14:33"},{"visible":false,"include":false,"step":"90.0","x":-342.4,"y":429.42857142857144,"z":-7.85647619047619,"a95":0.99,"info":"29/09/2014 at 10:14:33"}]},{"version":"v1.1.0","exported":"2016-11-18T11:33:04.381Z","volume":10.5,"added":"2016-11-18T11:23:51.480Z","format":"Utrecht","demagType":"Unknown","strat":"5","patch":1.1,"GEO":[{"dec":142.27865940367246,"inc":-4.106117180423527,"MAD":3.4417173089788182,"cm":[2.5579538487363607e-13,2.984279490192421e-13,0],"intensity":5262.797956546362,"type":"dir","forced":true,"remark":"","origin":false,"nSteps":6,"minStep":"10.0","maxStep":"35.0","steps":["10.0","15.0","20.0","25.0","30.0","35.0"],"group":"None","version":"v1.1.0"}],"TECT":[{"dec":147.1800288986475,"inc":-42.75371221426623,"MAD":3.4417173089788413,"cm":[-1.8474111129762605e-13,-2.8421709430404007e-13,5.684341886080802e-14],"intensity":5262.797956546363,"type":"dir","forced":true,"remark":"","origin":false,"nSteps":6,"minStep":"10.0","maxStep":"35.0","steps":["10.0","15.0","20.0","25.0","30.0","35.0"],"group":"None","version":"v1.1.0"}],"interpreted":true,"name":"HP6.8A","coreAzi":104,"coreDip":41,"bedStrike":39,"bedDip":40,"data":[{"visible":true,"include":false,"step":"0.0","x":549.8,"y":2024.2857142857142,"z":2977.809523809524,"a95":0.99,"info":"29/09/2014 at 10:14:33"},{"visible":true,"include":true,"step":"10.0","x":1968.2857142857142,"y":2088.9523809523807,"z":1971.3333333333333,"a95":0.99,"info":"29/09/2014 at 10:14:33"},{"visible":true,"include":true,"step":"15.0","x":1855.2380952380952,"y":1864.952380952381,"z":1696.4761904761904,"a95":0.99,"info":"29/09/2014 at 10:14:33"},{"visible":true,"include":true,"step":"20.0","x":1605.047619047619,"y":1614.095238095238,"z":1488,"a95":0.99,"info":"29/09/2014 at 10:14:33"},{"visible":true,"include":true,"step":"25.0","x":1191.6190476190477,"y":1501.2380952380952,"z":1144.5714285714287,"a95":0.99,"info":"29/09/2014 at 10:14:33"},{"visible":true,"include":true,"step":"30.0","x":897.0761904761904,"y":1043.5238095238096,"z":1039.5238095238096,"a95":0.99,"info":"29/09/2014 at 10:14:33"},{"visible":true,"include":true,"step":"35.0","x":958.6666666666666,"y":1300.952380952381,"z":792.4571428571428,"a95":0.99,"info":"29/09/2014 at 10:14:33"},{"visible":true,"include":false,"step":"40.0","x":823.1619047619048,"y":1324.857142857143,"z":626.7047619047619,"a95":0.99,"info":"29/09/2014 at 10:14:33"},{"visible":false,"include":false,"step":"45.0","x":726.7428571428571,"y":764.6952380952381,"z":265.50476190476195,"a95":0.99,"info":"29/09/2014 at 10:14:33"},{"visible":false,"include":false,"step":"50.0","x":470.3238095238095,"y":1081.3333333333333,"z":417.3238095238095,"a95":0.99,"info":"29/09/2014 at 10:14:33"},{"visible":false,"include":false,"step":"60.0","x":420.97142857142853,"y":706.6476190476191,"z":349.12380952380954,"a95":0.99,"info":"29/09/2014 at 10:14:33"},{"visible":false,"include":false,"step":"70.0","x":643.6,"y":354.77142857142854,"z":194.53333333333333,"a95":0.99,"info":"29/09/2014 at 10:14:33"},{"visible":false,"include":false,"step":"80.0","x":347.247619047619,"y":507.7714285714286,"z":371.50476190476195,"a95":0.99,"info":"29/09/2014 at 10:14:33"},{"visible":false,"include":false,"step":"90.0","x":-66.60761904761905,"y":480.8857142857143,"z":-127.06666666666668,"a95":0.99,"info":"29/09/2014 at 10:14:33"}]},{"version":"v1.1.0","exported":"2016-11-18T11:33:04.381Z","volume":10.5,"added":"2016-11-18T11:23:51.480Z","format":"Utrecht","demagType":"Unknown","strat":"6","patch":1.1,"GEO":[{"dec":145.29609174860195,"inc":-1.344747196921008,"MAD":25.751744298272797,"cm":[-413.8676372565363,465.43154362903084,804.0633439204096],"intensity":970.0033391241584,"type":"dir","forced":false,"remark":"","origin":false,"nSteps":7,"minStep":"33.0","maxStep":"65.0","steps":["33.0","40.0","45.0","50.0","55.0","60.0","65.0"],"group":"None","version":"v1.1.0"}],"TECT":[{"dec":150.28723498345926,"inc":-39.40299832880383,"MAD":25.751744298272804,"cm":[-647.5238053056871,753.9728811598034,216.0292110981959],"intensity":970.0033391241583,"type":"dir","forced":false,"remark":"","origin":false,"nSteps":7,"minStep":"33.0","maxStep":"65.0","steps":["33.0","40.0","45.0","50.0","55.0","60.0","65.0"],"group":"None","version":"v1.1.0"}],"interpreted":true,"name":"HP6.8B","coreAzi":104,"coreDip":41,"bedStrike":39,"bedDip":40,"data":[{"visible":false,"include":false,"step":"0.0","x":-3662,"y":-1704.095238095238,"z":6364.666666666667,"a95":0.99,"info":"08/07/2015 at 08:20:22"},{"visible":false,"include":false,"step":"10.0","x":-1069.4285714285713,"y":-54.668571428571425,"z":3865.714285714286,"a95":0.99,"info":"08/07/2015 at 08:20:22"},{"visible":true,"include":false,"step":"15.0","x":-267.1904761904762,"y":396.00952380952384,"z":2885.0476190476193,"a95":0.99,"info":"08/07/2015 at 08:20:22"},{"visible":true,"include":false,"step":"20.0","x":-77.66,"y":559.9047619047619,"z":2403.2380952380954,"a95":0.99,"info":"08/07/2015 at 08:20:22"},{"visible":true,"include":false,"step":"23.0","x":33.0752380952381,"y":592.4857142857143,"z":2065.2380952380954,"a95":0.99,"info":"08/07/2015 at 08:20:22"},{"visible":true,"include":false,"step":"25.0","x":153.9142857142857,"y":408.08571428571423,"z":1723.8095238095239,"a95":0.99,"info":"08/07/2015 at 08:20:22"},{"visible":true,"include":false,"step":"30.0","x":-61.84571428571429,"y":682.4761904761905,"z":1578.3809523809523,"a95":0.99,"info":"08/07/2015 at 08:20:22"},{"visible":true,"include":true,"step":"33.0","x":-38.67333333333333,"y":541.2571428571429,"z":1259.7142857142858,"a95":0.99,"info":"08/07/2015 at 08:20:22"},{"visible":false,"include":false,"step":"35.0","x":-141,"y":-9.97904761904762,"z":1435.5238095238096,"a95":0.99,"info":"08/07/2015 at 08:20:22"},{"visible":true,"include":true,"step":"40.0","x":-14.633333333333335,"y":608.1904761904761,"z":1240,"a95":0.99,"info":"08/07/2015 at 08:20:22"},{"visible":true,"include":true,"step":"45.0","x":-119.77142857142856,"y":404.8285714285714,"z":901.5047619047618,"a95":0.99,"info":"08/07/2015 at 08:20:22"},{"visible":true,"include":true,"step":"50.0","x":-217.74285714285716,"y":-138.46666666666667,"z":889.6095238095238,"a95":0.99,"info":"08/07/2015 at 08:20:22"},{"visible":true,"include":true,"step":"55.0","x":-356.65714285714284,"y":383.6190476190476,"z":733.5809523809525,"a95":0.99,"info":"08/07/2015 at 08:20:22"},{"visible":true,"include":true,"step":"60.0","x":-354.9428571428572,"y":209.75238095238097,"z":901.3714285714285,"a95":0.99,"info":"08/07/2015 at 08:20:22"},{"visible":true,"include":true,"step":"65.0","x":-611.6476190476191,"y":13.650476190476192,"z":681.5809523809525,"a95":0.99,"info":"08/07/2015 at 08:20:22"},{"visible":true,"include":false,"step":"70.0","x":-375.0095238095238,"y":175.25714285714287,"z":569.6285714285715,"a95":0.99,"info":"08/07/2015 at 08:20:22"},{"visible":false,"include":false,"step":"80.0","x":-884.0666666666667,"y":434.79999999999995,"z":308.50476190476195,"a95":0.99,"info":"08/07/2015 at 08:20:22"}]},{"version":"v1.1.0","exported":"2016-11-18T11:33:04.381Z","volume":10.5,"added":"2016-11-18T11:23:51.480Z","format":"Utrecht","demagType":"Unknown","strat":"6","patch":1.1,"GEO":[{"dec":120.01064775360749,"inc":5.895233560003491,"MAD":19.344473360196304,"cm":[-654.30316585387,671.3031528216326,669.8675744828502],"intensity":1579.0946732032178,"type":"dir","forced":false,"remark":"","origin":false,"nSteps":9,"minStep":"25.0","maxStep":"90.0","steps":["25.0","30.0","35.0","40.0","45.0","50.0","60.0","80.0","90.0"],"group":"None","version":"v1.1.0"}],"TECT":[{"dec":118.2501244526498,"inc":-33.56306671492119,"MAD":19.34447336019629,"cm":[-787.8404332683199,836.2079446431969,-86.87259752870511],"intensity":1579.0946732032176,"type":"dir","forced":false,"remark":"","origin":false,"nSteps":9,"minStep":"25.0","maxStep":"90.0","steps":["25.0","30.0","35.0","40.0","45.0","50.0","60.0","80.0","90.0"],"group":"None","version":"v1.1.0"}],"interpreted":true,"name":"HP6.9A","coreAzi":97,"coreDip":41,"bedStrike":39,"bedDip":40,"data":[{"visible":false,"include":false,"step":"0.0","x":-2033.3333333333333,"y":-895.6095238095238,"z":5248.761904761905,"a95":0.99,"info":"29/09/2014 at 10:14:33"},{"visible":false,"include":false,"step":"10.0","x":-108.16190476190476,"y":532.7619047619048,"z":3158.285714285714,"a95":0.99,"info":"29/09/2014 at 10:14:33"},{"visible":true,"include":false,"step":"15.0","x":313.2,"y":747.6095238095238,"z":2386.8571428571427,"a95":0.99,"info":"29/09/2014 at 10:14:33"},{"visible":true,"include":false,"step":"20.0","x":345.6190476190476,"y":800.695238095238,"z":2113.3333333333335,"a95":0.99,"info":"29/09/2014 at 10:14:33"},{"visible":true,"include":true,"step":"25.0","x":488.42857142857144,"y":916.8666666666667,"z":1746,"a95":0.99,"info":"29/09/2014 at 10:14:33"},{"visible":true,"include":true,"step":"30.0","x":215.87619047619046,"y":642.9047619047619,"z":1287.7142857142858,"a95":0.99,"info":"29/09/2014 at 10:14:33"},{"visible":true,"include":true,"step":"35.0","x":141,"y":713.6857142857143,"z":1220.857142857143,"a95":0.99,"info":"29/09/2014 at 10:14:33"},{"visible":true,"include":true,"step":"40.0","x":145.0285714285714,"y":749.2666666666667,"z":1013.7142857142857,"a95":0.99,"info":"29/09/2014 at 10:14:33"},{"visible":true,"include":true,"step":"45.0","x":-367.6095238095238,"y":528.5238095238095,"z":933.3904761904762,"a95":0.99,"info":"29/09/2014 at 10:14:33"},{"visible":true,"include":true,"step":"50.0","x":-276.6666666666667,"y":395.16190476190474,"z":999.5238095238095,"a95":0.99,"info":"29/09/2014 at 10:14:33"},{"visible":true,"include":true,"step":"60.0","x":-118.20952380952382,"y":424.0571428571429,"z":768.4666666666666,"a95":0.99,"info":"29/09/2014 at 10:14:33"},{"visible":false,"include":false,"step":"70.0","x":-266.76190476190476,"y":-54.87333333333333,"z":670.6952380952381,"a95":0.99,"info":"29/09/2014 at 10:14:33"},{"visible":true,"include":true,"step":"80.0","x":-74.80857142857143,"y":488.4,"z":502.74285714285713,"a95":0.99,"info":"29/09/2014 at 10:14:33"},{"visible":true,"include":true,"step":"90.0","x":-298.02857142857147,"y":249.66666666666666,"z":550.2285714285714,"a95":0.99,"info":"29/09/2014 at 10:14:33"}]},{"version":"v1.1.0","exported":"2016-11-18T11:33:04.381Z","volume":10.5,"added":"2016-11-18T11:23:51.481Z","format":"Utrecht","demagType":"Unknown","strat":"8","patch":1.1,"GEO":[{"dec":37.9162875230877,"inc":-26.635351140414738,"MAD":10.813829040811965,"cm":[-1.9184653865522705e-13,-5.684341886080802e-14,0],"intensity":6178.113361223684,"type":"GC","origin":false,"forced":true,"remark":"","nSteps":6,"minStep":"10.0","maxStep":"30.0","steps":["10.0","15.0","20.0","23.0","25.0","30.0"],"group":"None","version":"v1.1.0"}],"TECT":[{"dec":20.379842153556865,"inc":-19.42416256878001,"MAD":10.813829040812294,"cm":[-9.094947017729282e-13,-2.5579538487363607e-13,-9.14823772291129e-14],"intensity":6178.113361223684,"type":"GC","origin":false,"forced":true,"remark":"","nSteps":6,"minStep":"10.0","maxStep":"30.0","steps":["10.0","15.0","20.0","23.0","25.0","30.0"],"group":"None","version":"v1.1.0"}],"interpreted":true,"name":"HP6.9B","coreAzi":97,"coreDip":41,"bedStrike":39,"bedDip":40,"data":[{"visible":false,"include":false,"step":"0.0","x":-4189.714285714285,"y":-2925.5238095238096,"z":7236.0952380952385,"a95":0.99,"info":"08/07/2015 at 08:20:22"},{"visible":true,"include":true,"step":"10.0","x":-939.0190476190477,"y":-478.5142857142857,"z":4167.333333333333,"a95":0.99,"info":"08/07/2015 at 08:20:22"},{"visible":true,"include":true,"step":"15.0","x":-365.68571428571425,"y":-69.16190476190476,"z":3104.5714285714284,"a95":0.99,"info":"08/07/2015 at 08:20:22"},{"visible":true,"include":true,"step":"20.0","x":-157.07619047619048,"y":61.364761904761906,"z":2666.7619047619046,"a95":0.99,"info":"08/07/2015 at 08:20:22"},{"visible":true,"include":true,"step":"23.0","x":-52.69904761904762,"y":14.977142857142857,"z":2301.6190476190477,"a95":0.99,"info":"08/07/2015 at 08:20:22"},{"visible":true,"include":true,"step":"25.0","x":-2.367142857142857,"y":35.23714285714286,"z":2065.2380952380954,"a95":0.99,"info":"08/07/2015 at 08:20:22"},{"visible":true,"include":true,"step":"30.0","x":26.020952380952384,"y":288.7809523809524,"z":1940,"a95":0.99,"info":"08/07/2015 at 08:20:22"},{"visible":true,"include":false,"step":"33.0","x":51.166666666666664,"y":38.6447619047619,"z":1642.6666666666667,"a95":0.99,"info":"08/07/2015 at 08:20:22"},{"visible":true,"include":false,"step":"35.0","x":-4.070857142857143,"y":-223.60000000000002,"z":1563.6190476190477,"a95":0.99,"info":"08/07/2015 at 08:20:22"},{"visible":true,"include":false,"step":"40.0","x":-105.78095238095239,"y":-7.484666666666667,"z":1631.2380952380952,"a95":0.99,"info":"08/07/2015 at 08:20:22"},{"visible":true,"include":false,"step":"45.0","x":13.93904761904762,"y":-81.03333333333333,"z":1242.952380952381,"a95":0.99,"info":"08/07/2015 at 08:20:22"},{"visible":true,"include":false,"step":"50.0","x":-325.5809523809524,"y":-69.60761904761905,"z":1112.952380952381,"a95":0.99,"info":"08/07/2015 at 08:20:22"},{"visible":true,"include":false,"step":"55.0","x":-145.77142857142857,"y":-141.01904761904763,"z":1074.5714285714287,"a95":0.99,"info":"08/07/2015 at 08:20:22"},{"visible":true,"include":false,"step":"60.0","x":-379.02857142857147,"y":-92.64761904761905,"z":608.8380952380952,"a95":0.99,"info":"08/07/2015 at 08:20:22"},{"visible":true,"include":false,"step":"65.0","x":-463.85714285714283,"y":-187.8,"z":476,"a95":0.99,"info":"08/07/2015 at 08:20:22"},{"visible":true,"include":false,"step":"70.0","x":-259.22857142857146,"y":-79.21238095238095,"z":615.6571428571428,"a95":0.99,"info":"08/07/2015 at 08:20:22"},{"visible":true,"include":false,"step":"80.0","x":-470.4190476190476,"y":89.89714285714285,"z":225.33333333333334,"a95":0.99,"info":"08/07/2015 at 08:20:22"}]},{"version":"v1.1.0","exported":"2016-11-18T11:33:04.381Z","volume":10.5,"added":"2016-11-18T11:23:51.481Z","format":"Utrecht","demagType":"Unknown","strat":"7","patch":1.1,"GEO":[],"TECT":[],"interpreted":false,"name":"HP6.10A","coreAzi":95,"coreDip":41,"bedStrike":39,"bedDip":40,"data":[{"visible":true,"include":false,"step":"0.0","x":-7634.190476190476,"y":2230.5714285714284,"z":-6111.333333333333,"a95":0.99,"info":"29/09/2014 at 10:14:33"},{"visible":true,"include":true,"step":"10.0","x":-4407.619047619048,"y":995.2380952380952,"z":-4647.619047619048,"a95":0.99,"info":"29/09/2014 at 10:14:33"},{"visible":true,"include":true,"step":"15.0","x":-3113.904761904762,"y":507.23809523809524,"z":-3681.714285714286,"a95":0.99,"info":"29/09/2014 at 10:14:33"},{"visible":true,"include":true,"step":"20.0","x":-2227.809523809524,"y":105.76190476190476,"z":-2807.4285714285716,"a95":0.99,"info":"29/09/2014 at 10:14:33"},{"visible":true,"include":true,"step":"25.0","x":-1581.8095238095239,"y":-69.24952380952381,"z":-2206.3809523809523,"a95":0.99,"info":"29/09/2014 at 10:14:33"},{"visible":true,"include":false,"step":"30.0","x":-1308.5714285714287,"y":-34.82285714285714,"z":-2024.5714285714287,"a95":0.99,"info":"29/09/2014 at 10:14:33"},{"visible":true,"include":false,"step":"35.0","x":-1144.5714285714287,"y":-186.6095238095238,"z":-1576.4761904761904,"a95":0.99,"info":"29/09/2014 at 10:14:33"},{"visible":true,"include":false,"step":"40.0","x":-837.4952380952382,"y":-119.5904761904762,"z":-1428.952380952381,"a95":0.99,"info":"29/09/2014 at 10:14:33"},{"visible":true,"include":false,"step":"45.0","x":-1085.5238095238096,"y":-221.49523809523808,"z":-1363.7142857142858,"a95":0.99,"info":"29/09/2014 at 10:14:33"},{"visible":true,"include":false,"step":"50.0","x":-1059.047619047619,"y":29.22,"z":-1079.7142857142858,"a95":0.99,"info":"29/09/2014 at 10:14:33"},{"visible":true,"include":false,"step":"60.0","x":-556.5428571428571,"y":218.75238095238097,"z":-736.1238095238095,"a95":0.99,"info":"29/09/2014 at 10:14:33"},{"visible":true,"include":false,"step":"70.0","x":-1005.8095238095239,"y":-585.1333333333333,"z":-845.0380952380953,"a95":0.99,"info":"29/09/2014 at 10:14:33"},{"visible":true,"include":false,"step":"80.0","x":-732.2571428571429,"y":-57.06095238095238,"z":-558.8571428571429,"a95":0.99,"info":"29/09/2014 at 10:14:33"},{"visible":true,"include":false,"step":"90.0","x":-469.9238095238095,"y":140.61904761904762,"z":-425.68571428571425,"a95":0.99,"info":"29/09/2014 at 10:14:33"}]},{"version":"v1.1.0","exported":"2016-11-18T11:33:04.381Z","volume":10.5,"added":"2016-11-18T11:23:51.481Z","format":"Utrecht","demagType":"Unknown","strat":"7","patch":1.1,"GEO":[],"TECT":[],"interpreted":false,"name":"HP6.11A","coreAzi":93,"coreDip":42,"bedStrike":39,"bedDip":40,"data":[{"visible":true,"include":false,"step":"0.0","x":-5101.142857142857,"y":3110.8571428571427,"z":-5651.047619047619,"a95":0.99,"info":"08/07/2015 at 08:20:22"},{"visible":true,"include":false,"step":"10.0","x":-2905.714285714286,"y":1725.8095238095239,"z":-4205.428571428572,"a95":0.99,"info":"08/07/2015 at 08:20:22"},{"visible":true,"include":false,"step":"15.0","x":-1951.4285714285713,"y":1124.2857142857142,"z":-3410.4761904761904,"a95":0.99,"info":"08/07/2015 at 08:20:22"},{"visible":true,"include":true,"step":"20.0","x":-1448.2857142857142,"y":850.1904761904761,"z":-2546.8571428571427,"a95":0.99,"info":"08/07/2015 at 08:20:22"},{"visible":true,"include":true,"step":"23.0","x":-1198.4761904761904,"y":627.7619047619048,"z":-2213.0476190476193,"a95":0.99,"info":"08/07/2015 at 08:20:22"},{"visible":true,"include":true,"step":"25.0","x":-988.1904761904761,"y":434.1142857142857,"z":-2097.904761904762,"a95":0.99,"info":"08/07/2015 at 08:20:22"},{"visible":true,"include":true,"step":"30.0","x":-867.5238095238095,"y":396.0380952380952,"z":-1507.7142857142858,"a95":0.99,"info":"08/07/2015 at 08:20:22"},{"visible":true,"include":true,"step":"33.0","x":-769.504761904762,"y":436.54285714285714,"z":-1404.7619047619048,"a95":0.99,"info":"08/07/2015 at 08:20:22"},{"visible":true,"include":false,"step":"35.0","x":-508.6761904761905,"y":138.1904761904762,"z":-1351.4285714285713,"a95":0.99,"info":"08/07/2015 at 08:20:22"},{"visible":true,"include":false,"step":"40.0","x":-651.0857142857143,"y":211.21904761904764,"z":-1110.952380952381,"a95":0.99,"info":"08/07/2015 at 08:20:22"},{"visible":true,"include":false,"step":"45.0","x":-569.3047619047619,"y":255.75238095238097,"z":-1261.5238095238096,"a95":0.99,"info":"08/07/2015 at 08:20:22"},{"visible":true,"include":false,"step":"50.0","x":-811.0761904761904,"y":-109.78095238095239,"z":-895.2761904761904,"a95":0.99,"info":"08/07/2015 at 08:20:22"},{"visible":true,"include":false,"step":"55.0","x":-575.6380952380953,"y":50.56,"z":-816.1809523809524,"a95":0.99,"info":"08/07/2015 at 08:20:22"},{"visible":true,"include":false,"step":"60.0","x":-591.2666666666667,"y":216.9142857142857,"z":-875.4666666666666,"a95":0.99,"info":"08/07/2015 at 08:20:22"},{"visible":true,"include":false,"step":"65.0","x":-721.8761904761905,"y":34.925714285714285,"z":-591.9428571428571,"a95":0.99,"info":"08/07/2015 at 08:20:22"},{"visible":true,"include":false,"step":"70.0","x":-793.152380952381,"y":-57.203809523809525,"z":-618.3142857142857,"a95":0.99,"info":"08/07/2015 at 08:20:22"},{"visible":true,"include":false,"step":"80.0","x":-218.42857142857142,"y":133.31428571428572,"z":-591.5904761904761,"a95":0.99,"info":"08/07/2015 at 08:20:22"}]},{"version":"v1.1.0","exported":"2016-11-18T11:33:04.381Z","volume":10.5,"added":"2016-11-18T11:23:51.481Z","format":"Utrecht","demagType":"Unknown","strat":"8","patch":1.1,"GEO":[],"TECT":[],"interpreted":false,"name":"HP6.11B","coreAzi":93,"coreDip":42,"bedStrike":39,"bedDip":40,"data":[{"visible":true,"include":false,"step":"0.0","x":-3473.809523809524,"y":2359.1428571428573,"z":-3614.4761904761904,"a95":0.99,"info":"29/09/2014 at 10:14:33"},{"visible":true,"include":false,"step":"10.0","x":-2058.3809523809523,"y":1249.4285714285713,"z":-2768.095238095238,"a95":0.99,"info":"29/09/2014 at 10:14:33"},{"visible":true,"include":false,"step":"15.0","x":-1386.095238095238,"y":731.3619047619047,"z":-2165.4285714285716,"a95":0.99,"info":"29/09/2014 at 10:14:33"},{"visible":true,"include":true,"step":"20.0","x":-1039.7142857142858,"y":587.6380952380953,"z":-1684.2857142857142,"a95":0.99,"info":"29/09/2014 at 10:14:33"},{"visible":true,"include":true,"step":"25.0","x":-806.7714285714286,"y":378.45714285714286,"z":-1494.7619047619048,"a95":0.99,"info":"29/09/2014 at 10:14:33"},{"visible":true,"include":true,"step":"30.0","x":-800.5238095238095,"y":322.5809523809524,"z":-1192,"a95":0.99,"info":"29/09/2014 at 10:14:33"},{"visible":true,"include":true,"step":"35.0","x":-722.4857142857143,"y":183.85714285714286,"z":-748.1714285714286,"a95":0.99,"info":"29/09/2014 at 10:14:33"},{"visible":true,"include":false,"step":"40.0","x":-671.104761904762,"y":296.84761904761905,"z":-786.1714285714285,"a95":0.99,"info":"29/09/2014 at 10:14:33"},{"visible":true,"include":false,"step":"45.0","x":-726.5428571428571,"y":32.339999999999996,"z":-796.5714285714286,"a95":0.99,"info":"29/09/2014 at 10:14:33"},{"visible":true,"include":false,"step":"50.0","x":-644.3809523809524,"y":190.44761904761904,"z":-660.7523809523809,"a95":0.99,"info":"29/09/2014 at 10:14:33"},{"visible":true,"include":false,"step":"60.0","x":-653.2571428571429,"y":459.0952380952381,"z":-543.552380952381,"a95":0.99,"info":"29/09/2014 at 10:14:33"},{"visible":true,"include":false,"step":"70.0","x":-743.2761904761904,"y":148.8761904761905,"z":-515.1809523809524,"a95":0.99,"info":"29/09/2014 at 10:14:33"},{"visible":true,"include":false,"step":"80.0","x":-1216.095238095238,"y":-3.8729523809523805,"z":-138.76190476190476,"a95":0.99,"info":"29/09/2014 at 10:14:33"},{"visible":true,"include":false,"step":"90.0","x":-513.0857142857143,"y":368.1714285714286,"z":-452.7142857142857,"a95":0.99,"info":"29/09/2014 at 10:14:33"}]},{"version":"v1.1.0","exported":"2016-11-18T11:33:04.381Z","volume":10.5,"added":"2016-11-18T11:23:51.481Z","format":"Utrecht","demagType":"Unknown","strat":null,"patch":1.1,"GEO":[],"TECT":[],"interpreted":false,"name":"HP6.12A","coreAzi":69,"coreDip":40,"bedStrike":33,"bedDip":50,"data":[{"visible":false,"include":false,"step":"20","x":-181.33333333333334,"y":-196.95238095238096,"z":492.95238095238096,"a95":2.8,"info":"\"14-11-30\" at \"18:24\""},{"visible":true,"include":true,"step":"100","x":-110.0952380952381,"y":-103.71428571428571,"z":236.85714285714286,"a95":2.6,"info":"\"15-02-10\" at \"16:51\""},{"visible":true,"include":true,"step":"150","x":-50.666666666666664,"y":-38.95238095238095,"z":152.85714285714286,"a95":2.8,"info":"\"15-02-10\" at \"20:48\""},{"visible":true,"include":true,"step":"180","x":-20.857142857142858,"y":-20.857142857142858,"z":111.80952380952381,"a95":3.1,"info":"\"15-02-11\" at \"16:17\""},{"visible":true,"include":true,"step":"210","x":-2.6666666666666665,"y":-9.076190476190476,"z":93.08571428571429,"a95":3.1,"info":"\"15-02-11\" at \"19:55\""},{"visible":true,"include":false,"step":"240","x":1.9714285714285713,"y":-12.2,"z":43.285714285714285,"a95":3.7,"info":"\"15-02-11\" at \"23:44\""},{"visible":true,"include":false,"step":"270","x":0.8761904761904761,"y":-6.942857142857143,"z":45.83809523809524,"a95":3.9,"info":"\"15-02-12\" at \"18:30\""},{"visible":true,"include":false,"step":"300","x":14.2,"y":16.64761904761905,"z":24.114285714285714,"a95":5,"info":"\"15-02-13\" at \"16:16\""},{"visible":true,"include":false,"step":"320","x":1.0285714285714287,"y":28.80952380952381,"z":-4.447619047619048,"a95":5.4,"info":"\"15-02-13\" at \"21:08\""},{"visible":true,"include":false,"step":"340","x":31.142857142857142,"y":12.8,"z":12.028571428571428,"a95":4.8,"info":"\"15-02-14\" at \"01:12\""},{"visible":true,"include":false,"step":"370","x":55.15238095238095,"y":-3.6285714285714286,"z":32.38095238095238,"a95":2.8,"info":"\"15-02-16\" at \"18:42\""},{"visible":false,"include":false,"step":"390","x":69.57142857142857,"y":-9.971428571428572,"z":43.57142857142857,"a95":4.3,"info":"\"15-02-16\" at \"22:18\""},{"visible":false,"include":false,"step":"420","x":9.952380952380953,"y":60.77142857142857,"z":-6.561904761904763,"a95":10.3,"info":"\"15-02-17\" at \"17:55\""},{"visible":false,"include":false,"step":"450","x":5.6,"y":5.504761904761905,"z":74.83809523809524,"a95":12.2,"info":"\"15-03-08\" at \"21:01\""},{"visible":false,"include":false,"step":"470","x":-46.72380952380953,"y":45.15238095238095,"z":49.87619047619048,"a95":15.4,"info":"\"15-03-09\" at \"11:17\""},{"visible":false,"include":false,"step":"490","x":-40.34285714285714,"y":32.72380952380953,"z":55.87619047619048,"a95":17.3,"info":"\"15-03-09\" at \"14:29\""},{"visible":false,"include":false,"step":"510","x":73.61904761904762,"y":26.38095238095238,"z":77.71428571428571,"a95":12.6,"info":"\"15-04-21\" at \"10:37\""}]},{"version":"v1.1.0","exported":"2016-11-18T11:33:04.382Z","volume":10.5,"added":"2016-11-18T11:23:51.481Z","format":"Utrecht","demagType":"Unknown","strat":null,"patch":1.1,"GEO":[{"dec":165.20861831483626,"inc":23.626043547493424,"MAD":11.993442855859286,"cm":[4.440892098500626e-15,4.274358644806853e-15,0],"intensity":147.37202465459194,"type":"dir","forced":true,"remark":"","origin":false,"nSteps":6,"minStep":"210","maxStep":"340","steps":["210","240","270","300","320","340"],"group":"None","version":"v1.1.0"}],"TECT":[{"dec":162.63117189231673,"inc":-15.203292942381868,"MAD":11.993442855859287,"cm":[-8.881784197001252e-16,8.881784197001252e-16,3.219646771412954e-15],"intensity":147.37202465459194,"type":"dir","forced":true,"remark":"","origin":false,"nSteps":6,"minStep":"210","maxStep":"340","steps":["210","240","270","300","320","340"],"group":"None","version":"v1.1.0"}],"interpreted":true,"name":"HP6.13A","coreAzi":71,"coreDip":40,"bedStrike":33,"bedDip":50,"data":[{"visible":false,"include":false,"step":"20","x":-206,"y":-93.52380952380952,"z":329.5238095238095,"a95":2.6,"info":"\"14-11-30\" at \"18:26\""},{"visible":true,"include":false,"step":"100","x":-66.28571428571429,"y":60.39047619047619,"z":-14.695238095238096,"a95":4.6,"info":"\"15-02-10\" at \"16:53\""},{"visible":true,"include":false,"step":"150","x":-64.76190476190476,"y":70.38095238095238,"z":3.7142857142857144,"a95":3.2,"info":"\"15-02-10\" at \"20:50\""},{"visible":true,"include":false,"step":"180","x":-22.46666666666667,"y":75.22857142857143,"z":9.723809523809523,"a95":2.4,"info":"\"15-02-11\" at \"16:19\""},{"visible":true,"include":true,"step":"210","x":-31.20952380952381,"y":66.62857142857143,"z":18.847619047619048,"a95":3.5,"info":"\"15-02-11\" at \"19:57\""},{"visible":true,"include":true,"step":"240","x":-22.114285714285714,"y":76.71428571428571,"z":20.40952380952381,"a95":2.6,"info":"\"15-02-11\" at \"23:47\""},{"visible":true,"include":true,"step":"270","x":-22.16190476190476,"y":67.87619047619049,"z":11.523809523809524,"a95":2.7,"info":"\"15-02-12\" at \"18:33\""},{"visible":true,"include":true,"step":"300","x":-15.00952380952381,"y":85.8952380952381,"z":3.8,"a95":2,"info":"\"15-02-13\" at \"16:19\""},{"visible":true,"include":true,"step":"320","x":-25.123809523809523,"y":69.02857142857142,"z":29.4,"a95":2.4,"info":"\"15-02-13\" at \"21:10\""},{"visible":true,"include":true,"step":"340","x":-50.5047619047619,"y":52.24761904761905,"z":11.314285714285713,"a95":2.1,"info":"\"15-02-14\" at \"01:15\""},{"visible":true,"include":false,"step":"370","x":-92.38095238095238,"y":35.333333333333336,"z":25.714285714285715,"a95":2.7,"info":"\"15-02-16\" at \"18:47\""},{"visible":true,"include":false,"step":"390","x":-100.95238095238095,"y":50.19047619047619,"z":60.095238095238095,"a95":2.8,"info":"\"15-02-16\" at \"22:22\""},{"visible":true,"include":false,"step":"420","x":-69.08571428571429,"y":52.68571428571429,"z":15.828571428571427,"a95":7.3,"info":"\"15-02-17\" at \"17:57\""},{"visible":false,"include":false,"step":"450","x":-114.47619047619048,"y":59.714285714285715,"z":76.28571428571429,"a95":5.4,"info":"\"15-03-08\" at \"21:03\""},{"visible":false,"include":false,"step":"470","x":-106.76190476190476,"y":171.71428571428572,"z":50.57142857142857,"a95":5.9,"info":"\"15-03-09\" at \"11:19\""},{"visible":false,"include":false,"step":"490","x":-157.42857142857142,"y":-12.666666666666666,"z":80.47619047619048,"a95":10.3,"info":"\"15-03-09\" at \"14:31\""},{"visible":false,"include":false,"step":"510","x":41.333333333333336,"y":172.38095238095238,"z":126.28571428571429,"a95":8.3,"info":"\"15-04-21\" at \"10:39\""}]},{"version":"v1.1.0","exported":"2016-11-18T11:33:04.382Z","volume":10.5,"added":"2016-11-18T11:23:51.481Z","format":"Utrecht","demagType":"Unknown","strat":null,"patch":1.1,"GEO":[],"TECT":[],"interpreted":false,"name":"HP6.14A","coreAzi":83,"coreDip":43,"bedStrike":33,"bedDip":50,"data":[{"visible":false,"include":false,"step":"20","x":-229.8095238095238,"y":-99.42857142857143,"z":326.95238095238096,"a95":2.6,"info":"\"14-11-30\" at \"18:30\""},{"visible":true,"include":false,"step":"100","x":-254.47619047619048,"y":-0.8571428571428571,"z":-1378.952380952381,"a95":3.4,"info":"\"15-02-10\" at \"16:55\""},{"visible":true,"include":false,"step":"150","x":-206.38095238095238,"y":5.523809523809524,"z":-1062.095238095238,"a95":3.6,"info":"\"15-02-10\" at \"20:52\""},{"visible":true,"include":false,"step":"180","x":-146.85714285714286,"y":23.714285714285715,"z":-833.1428571428571,"a95":3.5,"info":"\"15-02-11\" at \"16:21\""},{"visible":true,"include":false,"step":"210","x":-141.04761904761904,"y":10.380952380952381,"z":-719.2380952380952,"a95":3.5,"info":"\"15-02-11\" at \"19:59\""},{"visible":true,"include":false,"step":"240","x":-133.71428571428572,"y":63.523809523809526,"z":-563.047619047619,"a95":3.6,"info":"\"15-02-11\" at \"23:49\""},{"visible":true,"include":false,"step":"270","x":-108.28571428571429,"y":19.523809523809526,"z":-488.3809523809524,"a95":3.7,"info":"\"15-02-12\" at \"18:35\""},{"visible":true,"include":false,"step":"300","x":-40.38095238095238,"y":6.285714285714286,"z":-388.1904761904762,"a95":3.4,"info":"\"15-02-13\" at \"16:21\""},{"visible":true,"include":false,"step":"320","x":-96.57142857142857,"y":8.857142857142858,"z":-317.7142857142857,"a95":3.7,"info":"\"15-02-13\" at \"21:12\""},{"visible":true,"include":false,"step":"340","x":-80.76190476190476,"y":2.4761904761904763,"z":-266.85714285714283,"a95":3.7,"info":"\"15-02-14\" at \"01:17\""},{"visible":true,"include":false,"step":"370","x":-89.71428571428571,"y":49.23809523809524,"z":-272.95238095238096,"a95":3.1,"info":"\"15-02-16\" at \"18:49\""},{"visible":true,"include":false,"step":"390","x":-116.38095238095238,"y":60.857142857142854,"z":-268.95238095238096,"a95":3.2,"info":"\"15-02-16\" at \"22:24\""},{"visible":true,"include":false,"step":"420","x":-182.85714285714286,"y":-47.904761904761905,"z":-119.23809523809524,"a95":4.1,"info":"\"15-02-17\" at \"21:32\""},{"visible":false,"include":false,"step":"450","x":-66.19047619047619,"y":26.38095238095238,"z":-46.714285714285715,"a95":14.9,"info":"\"15-03-08\" at \"21:05\""},{"visible":false,"include":false,"step":"470","x":-172.57142857142858,"y":386.3809523809524,"z":64.57142857142857,"a95":3.7,"info":"\"15-03-09\" at \"11:22\""},{"visible":false,"include":false,"step":"490","x":-105.33333333333333,"y":-3.5238095238095237,"z":-28.095238095238095,"a95":24,"info":"\"15-03-09\" at \"14:32\""},{"visible":false,"include":false,"step":"510","x":50.476190476190474,"y":153.42857142857142,"z":-6.095238095238095,"a95":11.3,"info":"\"15-04-21\" at \"10:41\""}]},{"version":"v1.1.0","exported":"2016-11-18T11:33:04.382Z","volume":10.5,"added":"2016-11-18T11:23:51.481Z","format":"Utrecht","demagType":"Unknown","strat":null,"patch":1.1,"GEO":[],"TECT":[],"interpreted":false,"name":"HP06.15A","coreAzi":97,"coreDip":52,"bedStrike":33,"bedDip":50,"data":[{"visible":false,"include":false,"step":"20","x":-203.04761904761904,"y":-188.76190476190476,"z":333.42857142857144,"a95":2.5,"info":"\"14-11-30\" at \"18:32\""},{"visible":true,"include":false,"step":"100","x":-1314.5714285714287,"y":-302.0952380952381,"z":-553.2380952380952,"a95":2,"info":"\"15-02-10\" at \"16:57\""},{"visible":true,"include":false,"step":"150","x":-1018,"y":-212,"z":-455.04761904761904,"a95":2.1,"info":"\"15-02-10\" at \"20:54\""},{"visible":true,"include":false,"step":"180","x":-736.6666666666666,"y":-153.52380952380952,"z":-396.3809523809524,"a95":2.1,"info":"\"15-02-11\" at \"16:23\""},{"visible":true,"include":false,"step":"210","x":-620.5714285714286,"y":-154.47619047619048,"z":-348,"a95":2.3,"info":"\"15-02-11\" at \"20:01\""},{"visible":true,"include":false,"step":"240","x":-484.57142857142856,"y":-94.76190476190476,"z":-304.4761904761905,"a95":2.2,"info":"\"15-02-11\" at \"23:51\""},{"visible":true,"include":false,"step":"270","x":-417.7142857142857,"y":-78.0952380952381,"z":-279.23809523809524,"a95":2.2,"info":"\"15-02-12\" at \"18:37\""},{"visible":true,"include":false,"step":"300","x":-326.1904761904762,"y":-58.95238095238095,"z":-199.71428571428572,"a95":2.4,"info":"\"15-02-13\" at \"16:23\""},{"visible":true,"include":false,"step":"320","x":-326.1904761904762,"y":-37.904761904761905,"z":-161.14285714285714,"a95":2.1,"info":"\"15-02-13\" at \"21:14\""},{"visible":true,"include":false,"step":"340","x":-296.6666666666667,"y":-27.238095238095237,"z":-151.33333333333334,"a95":2.2,"info":"\"15-02-14\" at \"01:19\""},{"visible":true,"include":false,"step":"370","x":-232.85714285714286,"y":-7.904761904761905,"z":-141.33333333333334,"a95":2.5,"info":"\"15-02-16\" at \"18:50\""},{"visible":true,"include":false,"step":"390","x":-224.47619047619048,"y":-48.57142857142857,"z":-109.80952380952381,"a95":2.5,"info":"\"15-02-16\" at \"22:26\""},{"visible":true,"include":false,"step":"420","x":-174.85714285714286,"y":-64,"z":-127.14285714285714,"a95":3.7,"info":"\"15-02-17\" at \"21:35\""},{"visible":false,"include":false,"step":"450","x":-154.95238095238096,"y":-11.80952380952381,"z":14.380952380952381,"a95":6.7,"info":"\"15-03-08\" at \"21:07\""},{"visible":false,"include":false,"step":"470","x":-362.95238095238096,"y":384.6666666666667,"z":183.33333333333334,"a95":4.4,"info":"\"15-03-09\" at \"11:25\""},{"visible":false,"include":false,"step":"490","x":-179.9047619047619,"y":-16,"z":89.61904761904762,"a95":14.9,"info":"\"15-03-09\" at \"14:34\""},{"visible":false,"include":false,"step":"510","x":74.19047619047619,"y":-224.38095238095238,"z":179.42857142857142,"a95":8,"info":"\"15-04-21\" at \"10:43\""}]},{"version":"v1.1.0","exported":"2016-11-18T11:33:04.382Z","volume":10.5,"added":"2016-11-18T11:23:51.482Z","format":"Utrecht","demagType":"Unknown","strat":"1","patch":1.1,"GEO":[],"TECT":[],"interpreted":false,"name":"HP6.15B","coreAzi":97,"coreDip":52,"bedStrike":33,"bedDip":50,"data":[{"visible":true,"include":false,"step":"0.0","x":-235.2095238095238,"y":-230.42857142857142,"z":238.95238095238096,"a95":0.99,"info":"29/09/2014 at 14:50:03"},{"visible":true,"include":false,"step":"10.0","x":-196.39999999999998,"y":-190.17142857142858,"z":217.15238095238095,"a95":0.99,"info":"29/09/2014 at 14:50:03"},{"visible":true,"include":true,"step":"15.0","x":-184.15238095238095,"y":-176.73333333333335,"z":206.33333333333334,"a95":0.99,"info":"29/09/2014 at 14:50:03"},{"visible":true,"include":true,"step":"20.0","x":-156.35238095238097,"y":-129.21904761904761,"z":183.9904761904762,"a95":0.99,"info":"29/09/2014 at 14:50:03"},{"visible":true,"include":true,"step":"25.0","x":-144.23809523809524,"y":-120.12380952380951,"z":172.64761904761903,"a95":0.99,"info":"29/09/2014 at 14:50:03"},{"visible":true,"include":true,"step":"30.0","x":-117.18095238095239,"y":-130.42857142857142,"z":142.83809523809524,"a95":0.99,"info":"29/09/2014 at 14:50:03"},{"visible":true,"include":true,"step":"35.0","x":-100.51428571428572,"y":-94.76285714285714,"z":157.0095238095238,"a95":0.99,"info":"29/09/2014 at 14:50:03"},{"visible":true,"include":true,"step":"40.0","x":-95.14285714285714,"y":-111.93333333333332,"z":141.86666666666665,"a95":0.99,"info":"29/09/2014 at 14:50:03"},{"visible":true,"include":true,"step":"45.0","x":-72.98857142857143,"y":-99.15238095238094,"z":147.68571428571428,"a95":0.99,"info":"29/09/2014 at 14:50:03"},{"visible":true,"include":true,"step":"50.0","x":-80.0247619047619,"y":-94.12285714285714,"z":115.76190476190476,"a95":0.99,"info":"29/09/2014 at 14:50:03"},{"visible":true,"include":true,"step":"60.0","x":-76.28,"y":-54.41047619047619,"z":109.48571428571428,"a95":0.99,"info":"29/09/2014 at 14:50:03"},{"visible":true,"include":false,"step":"70.0","x":-61.528571428571425,"y":-69.47904761904762,"z":118.64761904761905,"a95":0.99,"info":"29/09/2014 at 14:50:03"},{"visible":true,"include":false,"step":"80.0","x":-53.6504761904762,"y":-41.03142857142857,"z":73.5304761904762,"a95":0.99,"info":"29/09/2014 at 14:50:03"},{"visible":true,"include":false,"step":"90.0","x":-49.17714285714286,"y":-45.388571428571424,"z":95.5142857142857,"a95":0.99,"info":"29/09/2014 at 14:50:03"}]}]
