# Supplementary material for: Paleomagnetic constraints on the timing and distribution of Cenozoic rotations in Central and Eastern Anatolia
Source: Copernicus journal article supplement (doi:10.5194/se-9-295-2018), 2018-03-21
Supplement: Supplementary file 2 [file se-9-295-2018-supplement.zip › se-2017-66_DATA_dir files/dir files Ulukisla/KG1.dir]

[{"version":"v1.1.0","exported":"2017-05-17T14:41:35.988Z","volume":10.5,"added":"2017-05-17T14:38:08.052Z","format":"Utrecht","demagType":"Unknown","strat":null,"patch":1.1,"GEO":[],"TECT":[],"interpreted":false,"name":"KG1.1A","coreAzi":264,"coreDip":41,"bedStrike":229,"bedDip":46,"data":[{"visible":true,"include":false,"step":"20","x":-196.0952380952381,"y":158.57142857142858,"z":131.9047619047619,"a95":2,"info":"\"14-09-15\" at \"15:03\""},{"visible":true,"include":false,"step":"100","x":-138.85714285714286,"y":107.71428571428571,"z":119.23809523809524,"a95":2.1,"info":"\"14-09-15\" at \"19:06\""},{"visible":true,"include":false,"step":"150","x":-100.28571428571429,"y":73.14285714285714,"z":92,"a95":2.4,"info":"\"14-09-15\" at \"21:18\""},{"visible":true,"include":false,"step":"180","x":-91.04761904761905,"y":68.85714285714286,"z":83.33333333333333,"a95":2.3,"info":"\"14-09-16\" at \"10:19\""},{"visible":true,"include":false,"step":"210","x":-69.9047619047619,"y":55.333333333333336,"z":71.04761904761905,"a95":2.6,"info":"\"14-09-16\" at \"12:58\""},{"visible":true,"include":false,"step":"240","x":-60.857142857142854,"y":48,"z":63.333333333333336,"a95":3,"info":"\"14-09-16\" at \"15:41\""},{"visible":true,"include":false,"step":"270","x":-63.15238095238095,"y":30.62857142857143,"z":44.21904761904762,"a95":3,"info":"\"14-09-16\" at \"18:30\""},{"visible":true,"include":false,"step":"300","x":-76.28571428571429,"y":40.95238095238095,"z":42.476190476190474,"a95":3.8,"info":"\"14-09-17\" at \"09:48\""},{"visible":true,"include":false,"step":"320","x":-72.07619047619048,"y":42.333333333333336,"z":39.904761904761905,"a95":3.2,"info":"\"14-09-17\" at \"13:14\""},{"visible":true,"include":false,"step":"340","x":7.942857142857143,"y":25.37142857142857,"z":32.76190476190476,"a95":8.1,"info":"\"14-09-17\" at \"16:27\""},{"visible":true,"include":false,"step":"370","x":-50.94285714285714,"y":26.695238095238096,"z":12.600000000000001,"a95":4.6,"info":"\"14-09-17\" at \"21:37\""},{"visible":true,"include":false,"step":"390","x":-62.209523809523816,"y":16.257142857142856,"z":45.82857142857143,"a95":7.5,"info":"\"14-09-18\" at \"10:54\""},{"visible":true,"include":false,"step":"420","x":-64.11428571428571,"y":38.438095238095244,"z":21.885714285714286,"a95":10.2,"info":"\"14-09-18\" at \"13:55\""}]},{"version":"v1.1.0","exported":"2017-05-17T14:41:35.988Z","volume":10.5,"added":"2017-05-17T14:38:08.053Z","format":"Utrecht","demagType":"Unknown","strat":"8","patch":1.1,"GEO":[],"TECT":[],"interpreted":false,"name":"KG1.2A","coreAzi":269,"coreDip":38,"bedStrike":229,"bedDip":46,"data":[{"visible":true,"include":false,"step":"0.0","x":-110.37142857142858,"y":78.26,"z":76.6257142857143,"a95":0.99,"info":"26/08/2014 at 09:48:10"},{"visible":true,"include":false,"step":"4.0","x":-103.3047619047619,"y":77.01809523809524,"z":75.62095238095237,"a95":0.99,"info":"26/08/2014 at 09:48:10"},{"visible":true,"include":false,"step":"8.0","x":-97.82857142857144,"y":73.49142857142857,"z":73.96380952380953,"a95":0.99,"info":"26/08/2014 at 09:48:10"},{"visible":true,"include":false,"step":"12.0","x":-92.27333333333334,"y":68.30190476190475,"z":59.78857142857142,"a95":0.99,"info":"26/08/2014 at 09:48:10"},{"visible":true,"include":false,"step":"16.0","x":-88.3352380952381,"y":57.3495238095238,"z":63.23904761904762,"a95":0.99,"info":"26/08/2014 at 09:48:10"},{"visible":true,"include":false,"step":"20.0","x":-90.25333333333333,"y":58.55333333333333,"z":57.19809523809524,"a95":0.99,"info":"26/08/2014 at 09:48:10"},{"visible":true,"include":false,"step":"25.0","x":-81.66,"y":56.758095238095244,"z":56.959047619047624,"a95":0.99,"info":"26/08/2014 at 09:48:10"},{"visible":true,"include":false,"step":"30.0","x":-82.13333333333333,"y":58.357142857142854,"z":49.219047619047615,"a95":0.99,"info":"26/08/2014 at 09:48:10"},{"visible":true,"include":false,"step":"35.0","x":-87.38095238095238,"y":47.75333333333334,"z":60.63619047619047,"a95":0.99,"info":"26/08/2014 at 09:48:10"},{"visible":true,"include":false,"step":"40.0","x":-80.04857142857142,"y":49.81428571428571,"z":61.13047619047619,"a95":0.99,"info":"26/08/2014 at 09:48:10"},{"visible":true,"include":false,"step":"45.0","x":-72.87142857142857,"y":42.65904761904762,"z":63.921904761904756,"a95":0.99,"info":"26/08/2014 at 09:48:10"},{"visible":true,"include":false,"step":"50.0","x":-71.50285714285714,"y":42.07809523809524,"z":53.7047619047619,"a95":0.99,"info":"26/08/2014 at 09:48:10"},{"visible":true,"include":false,"step":"60.0","x":-65.23047619047618,"y":37.14,"z":63.387619047619054,"a95":0.99,"info":"26/08/2014 at 09:48:10"},{"visible":true,"include":false,"step":"70.0","x":-69.03428571428572,"y":42.60095238095238,"z":45.37809523809524,"a95":0.99,"info":"26/08/2014 at 09:48:10"},{"visible":true,"include":false,"step":"80.0","x":-49.50380952380952,"y":59.83428571428571,"z":40.724761904761905,"a95":0.99,"info":"26/08/2014 at 09:48:10"},{"visible":true,"include":false,"step":"90.0","x":-67.31714285714285,"y":40.38952380952381,"z":50.42095238095238,"a95":0.99,"info":"26/08/2014 at 09:48:10"},{"visible":true,"include":false,"step":"100.0","x":-66.82190476190476,"y":27.272380952380953,"z":47.99523809523809,"a95":0.99,"info":"26/08/2014 at 09:48:10"}]},{"version":"v1.1.0","exported":"2017-05-17T14:41:35.988Z","volume":10.5,"added":"2017-05-17T14:38:08.053Z","format":"Utrecht","demagType":"Unknown","strat":"7","patch":1.1,"GEO":[],"TECT":[],"interpreted":false,"name":"KG1.3A","coreAzi":277,"coreDip":49,"bedStrike":229,"bedDip":46,"data":[{"visible":true,"include":false,"step":"0.0","x":-149.54285714285714,"y":143.4952380952381,"z":204.05714285714285,"a95":0.99,"info":"18/08/2014 at 05:09:54"},{"visible":true,"include":false,"step":"4.0","x":-146.13333333333335,"y":138.35238095238097,"z":201.74285714285716,"a95":0.99,"info":"18/08/2014 at 05:09:54"},{"visible":true,"include":false,"step":"8.0","x":-132.85714285714286,"y":134.9904761904762,"z":185.94285714285715,"a95":0.99,"info":"18/08/2014 at 05:09:54"},{"visible":true,"include":false,"step":"12.0","x":-118.0952380952381,"y":122.37142857142858,"z":182.6095238095238,"a95":0.99,"info":"18/08/2014 at 05:09:54"},{"visible":true,"include":false,"step":"16.0","x":-111.03809523809525,"y":126.63809523809525,"z":191,"a95":0.99,"info":"18/08/2014 at 05:09:54"},{"visible":true,"include":false,"step":"20.0","x":-106.61904761904762,"y":128,"z":170.61904761904762,"a95":0.99,"info":"18/08/2014 at 05:09:54"},{"visible":true,"include":false,"step":"25.0","x":-108.65714285714287,"y":128.4,"z":165,"a95":0.99,"info":"18/08/2014 at 05:09:54"},{"visible":true,"include":false,"step":"30.0","x":-100.83809523809524,"y":125.64761904761905,"z":168.43809523809523,"a95":0.99,"info":"18/08/2014 at 05:09:54"},{"visible":true,"include":false,"step":"35.0","x":-83.78666666666666,"y":114.8952380952381,"z":159.96190476190475,"a95":0.99,"info":"18/08/2014 at 05:09:54"},{"visible":true,"include":false,"step":"40.0","x":-84.0847619047619,"y":124.81904761904761,"z":156.8095238095238,"a95":0.99,"info":"18/08/2014 at 05:09:54"},{"visible":true,"include":false,"step":"45.0","x":-83.43714285714286,"y":114.24761904761904,"z":152.8190476190476,"a95":0.99,"info":"18/08/2014 at 05:09:54"},{"visible":true,"include":false,"step":"50.0","x":-74.75333333333333,"y":117.26666666666667,"z":140.34285714285713,"a95":0.99,"info":"18/08/2014 at 05:09:54"},{"visible":true,"include":false,"step":"60.0","x":-72.3352380952381,"y":98.73333333333333,"z":130.8761904761905,"a95":0.99,"info":"18/08/2014 at 05:09:54"},{"visible":true,"include":false,"step":"70.0","x":-62.88666666666666,"y":80.97999999999999,"z":112.11428571428571,"a95":0.99,"info":"18/08/2014 at 05:09:54"},{"visible":true,"include":false,"step":"80.0","x":-54.93904761904762,"y":75.79904761904761,"z":95.62857142857143,"a95":0.99,"info":"18/08/2014 at 05:09:54"},{"visible":true,"include":false,"step":"90.0","x":-67.11333333333334,"y":80.6257142857143,"z":94.67142857142856,"a95":0.99,"info":"18/08/2014 at 05:09:54"},{"visible":true,"include":false,"step":"100.0","x":-47.04,"y":68.08380952380952,"z":73.11047619047619,"a95":0.99,"info":"18/08/2014 at 05:09:54"}]},{"version":"v1.1.0","exported":"2017-05-17T14:41:35.988Z","volume":10.5,"added":"2017-05-17T14:38:08.055Z","format":"Utrecht","demagType":"Unknown","strat":"1","patch":1.1,"GEO":[{"dec":1.931267051750865,"inc":54.74188524242948,"MAD":3.1066646007712975,"cm":[0,1.0103029524088925e-14,0],"intensity":267.74040349128853,"type":"dir","forced":true,"remark":"","origin":false,"nSteps":9,"minStep":"12.0","maxStep":"50.0","steps":["12.0","16.0","20.0","25.0","30.0","35.0","40.0","45.0","50.0"],"group":"None","version":"v1.1.0"}],"TECT":[{"dec":343.05126399315753,"inc":15.25992786626134,"MAD":3.106664600771392,"cm":[5.329070518200751e-15,1.354472090042691e-14,4.884981308350689e-15],"intensity":267.7404034912886,"type":"dir","forced":true,"remark":"","origin":false,"nSteps":9,"minStep":"12.0","maxStep":"50.0","steps":["12.0","16.0","20.0","25.0","30.0","35.0","40.0","45.0","50.0"],"group":"None","version":"v1.1.0"}],"interpreted":true,"name":"KG1.4A","coreAzi":261,"coreDip":45,"bedStrike":229,"bedDip":46,"data":[{"visible":true,"include":false,"step":"0.0","x":-112.27619047619048,"y":80.96190476190476,"z":88.12190476190476,"a95":0.99,"info":"26/08/2014 at 15:13:45"},{"visible":true,"include":false,"step":"4.0","x":-113.57142857142857,"y":85.23333333333333,"z":86.37238095238095,"a95":0.99,"info":"26/08/2014 at 15:13:45"},{"visible":true,"include":false,"step":"8.0","x":-110.55238095238094,"y":78.78666666666666,"z":82.70761904761905,"a95":0.99,"info":"26/08/2014 at 15:13:45"},{"visible":true,"include":true,"step":"12.0","x":-104.48571428571428,"y":83.90857142857142,"z":76.67333333333333,"a95":0.99,"info":"26/08/2014 at 15:13:45"},{"visible":true,"include":true,"step":"16.0","x":-96.74285714285713,"y":78.31142857142856,"z":77.29142857142857,"a95":0.99,"info":"26/08/2014 at 15:13:45"},{"visible":true,"include":true,"step":"20.0","x":-91.88571428571429,"y":68.4342857142857,"z":68.22190476190477,"a95":0.99,"info":"26/08/2014 at 15:13:45"},{"visible":true,"include":true,"step":"25.0","x":-89.40666666666667,"y":82.63714285714286,"z":69.81238095238095,"a95":0.99,"info":"26/08/2014 at 15:13:45"},{"visible":true,"include":true,"step":"30.0","x":-80.99142857142857,"y":78.56666666666668,"z":67.5552380952381,"a95":0.99,"info":"26/08/2014 at 15:13:45"},{"visible":true,"include":true,"step":"35.0","x":-76.04190476190476,"y":80.9447619047619,"z":62.80190476190476,"a95":0.99,"info":"26/08/2014 at 15:13:45"},{"visible":true,"include":true,"step":"40.0","x":-84.45904761904762,"y":68.1352380952381,"z":60.95428571428571,"a95":0.99,"info":"26/08/2014 at 15:13:45"},{"visible":true,"include":true,"step":"45.0","x":-76.21428571428571,"y":75.18190476190476,"z":59.23904761904762,"a95":0.99,"info":"26/08/2014 at 15:13:45"},{"visible":true,"include":true,"step":"50.0","x":-80.2895238095238,"y":60.691428571428574,"z":52.29904761904762,"a95":0.99,"info":"26/08/2014 at 15:13:45"},{"visible":true,"include":false,"step":"60.0","x":-79.03333333333333,"y":66.85428571428572,"z":40.10095238095238,"a95":0.99,"info":"26/08/2014 at 15:13:45"},{"visible":true,"include":false,"step":"70.0","x":-56.52761904761904,"y":59.65714285714286,"z":64.23714285714286,"a95":0.99,"info":"26/08/2014 at 15:13:45"},{"visible":true,"include":false,"step":"80.0","x":-68.82285714285715,"y":46.72095238095238,"z":53.94952380952381,"a95":0.99,"info":"26/08/2014 at 15:13:45"},{"visible":true,"include":false,"step":"90.0","x":-67.17714285714285,"y":47.6647619047619,"z":45.67142857142857,"a95":0.99,"info":"26/08/2014 at 15:13:45"},{"visible":true,"include":false,"step":"100.0","x":-54.413333333333334,"y":49.067619047619054,"z":44.10666666666667,"a95":0.99,"info":"26/08/2014 at 15:13:45"}]},{"version":"v1.1.0","exported":"2017-05-17T14:41:35.988Z","volume":10.5,"added":"2017-05-17T14:38:08.055Z","format":"Utrecht","demagType":"Unknown","strat":"5","patch":1.1,"GEO":[{"dec":9.985829881960399,"inc":56.90837490582109,"MAD":3.17062412350357,"cm":[-2.220446049250313e-15,6.994405055138486e-15,0],"intensity":275.64279361129917,"type":"dir","forced":true,"remark":"","origin":false,"nSteps":10,"minStep":"10.0","maxStep":"60.0","steps":["10.0","15.0","20.0","25.0","30.0","35.0","40.0","45.0","50.0","60.0"],"group":"None","version":"v1.1.0"}],"TECT":[{"dec":345.7560762430994,"inc":19.557091884722077,"MAD":3.1706241235036505,"cm":[-6.217248937900877e-15,-2.2870594307278225e-14,1.9984014443252818e-15],"intensity":275.64279361129917,"type":"dir","forced":true,"remark":"","origin":false,"nSteps":10,"minStep":"10.0","maxStep":"60.0","steps":["10.0","15.0","20.0","25.0","30.0","35.0","40.0","45.0","50.0","60.0"],"group":"None","version":"v1.1.0"}],"interpreted":true,"name":"KG1.4B","coreAzi":261,"coreDip":45,"bedStrike":229,"bedDip":46,"data":[{"visible":true,"include":false,"step":"0.0","x":-144.64761904761903,"y":97.34285714285714,"z":96.88571428571429,"a95":0.99,"info":"05/11/2014 at 22:47:31"},{"visible":true,"include":true,"step":"10.0","x":-137.65714285714287,"y":86.38666666666666,"z":83.77809523809523,"a95":0.99,"info":"05/11/2014 at 22:47:31"},{"visible":true,"include":true,"step":"15.0","x":-118.20952380952382,"y":86.11904761904762,"z":79.86190476190475,"a95":0.99,"info":"05/11/2014 at 22:47:31"},{"visible":true,"include":true,"step":"20.0","x":-113.39047619047618,"y":85.86285714285714,"z":65.67999999999999,"a95":0.99,"info":"05/11/2014 at 22:47:31"},{"visible":true,"include":true,"step":"25.0","x":-111.18095238095239,"y":80.37904761904763,"z":83.28,"a95":0.99,"info":"05/11/2014 at 22:47:31"},{"visible":true,"include":true,"step":"30.0","x":-96.95238095238095,"y":75.7895238095238,"z":68.23142857142857,"a95":0.99,"info":"05/11/2014 at 22:47:31"},{"visible":true,"include":true,"step":"35.0","x":-89.63238095238096,"y":75.29333333333334,"z":53.67238095238095,"a95":0.99,"info":"05/11/2014 at 22:47:31"},{"visible":true,"include":true,"step":"40.0","x":-85.0352380952381,"y":50.909523809523805,"z":57.26380952380952,"a95":0.99,"info":"05/11/2014 at 22:47:31"},{"visible":true,"include":true,"step":"45.0","x":-83.11428571428571,"y":62.478095238095236,"z":58.56666666666667,"a95":0.99,"info":"05/11/2014 at 22:47:31"},{"visible":true,"include":true,"step":"50.0","x":-83.98380952380953,"y":59.24666666666667,"z":53.19619047619047,"a95":0.99,"info":"05/11/2014 at 22:47:31"},{"visible":true,"include":true,"step":"60.0","x":-68.80095238095238,"y":50.49047619047619,"z":37.12952380952381,"a95":0.99,"info":"05/11/2014 at 22:47:31"},{"visible":true,"include":false,"step":"70.0","x":-54.733333333333334,"y":37.542857142857144,"z":57.85333333333334,"a95":0.99,"info":"05/11/2014 at 22:47:31"},{"visible":true,"include":false,"step":"80.0","x":-50.89523809523809,"y":15.256190476190476,"z":35.67142857142857,"a95":0.99,"info":"05/11/2014 at 22:47:31"},{"visible":true,"include":false,"step":"90.0","x":-60.51714285714285,"y":51.8447619047619,"z":41.08,"a95":0.99,"info":"05/11/2014 at 22:47:31"}]},{"version":"v1.1.0","exported":"2017-05-17T14:41:35.988Z","volume":10.5,"added":"2017-05-17T14:38:08.055Z","format":"Utrecht","demagType":"Unknown","strat":"2","patch":1.1,"GEO":[{"dec":350.1079408035408,"inc":42.2694976170082,"MAD":2.5835131593835223,"cm":[3.552713678800501e-15,-1.3322676295501878e-15,0],"intensity":396.26017810515276,"type":"dir","forced":true,"remark":"","origin":false,"nSteps":9,"minStep":"16.0","maxStep":"60.0","steps":["16.0","20.0","25.0","30.0","35.0","40.0","45.0","50.0","60.0"],"group":"None","version":"v1.1.0"}],"TECT":[{"dec":341.47883662637,"inc":0.6580062453588653,"MAD":2.5835131593836196,"cm":[1.0658141036401503e-14,2.531308496145357e-14,2.3314683517128287e-15],"intensity":396.2601781051529,"type":"dir","forced":true,"remark":"","origin":false,"nSteps":9,"minStep":"16.0","maxStep":"60.0","steps":["16.0","20.0","25.0","30.0","35.0","40.0","45.0","50.0","60.0"],"group":"None","version":"v1.1.0"}],"interpreted":true,"name":"KG1.5A","coreAzi":274,"coreDip":41,"bedStrike":229,"bedDip":46,"data":[{"visible":true,"include":false,"step":"0.0","x":-103.96190476190475,"y":194.74285714285713,"z":158.88571428571427,"a95":0.99,"info":"26/08/2014 at 15:13:45"},{"visible":true,"include":false,"step":"4.0","x":-102.14285714285714,"y":190.95238095238096,"z":155.7904761904762,"a95":0.99,"info":"26/08/2014 at 15:13:45"},{"visible":true,"include":false,"step":"8.0","x":-92.8752380952381,"y":186.44761904761904,"z":157.1809523809524,"a95":0.99,"info":"26/08/2014 at 15:13:45"},{"visible":true,"include":false,"step":"12.0","x":-94.57714285714285,"y":192.32380952380953,"z":152.61904761904762,"a95":0.99,"info":"26/08/2014 at 15:13:45"},{"visible":true,"include":true,"step":"16.0","x":-93.78857142857143,"y":177.7047619047619,"z":141,"a95":0.99,"info":"26/08/2014 at 15:13:45"},{"visible":true,"include":true,"step":"20.0","x":-83.18190476190476,"y":165.63809523809525,"z":127.67619047619047,"a95":0.99,"info":"26/08/2014 at 15:13:45"},{"visible":true,"include":true,"step":"25.0","x":-77.5657142857143,"y":169.0095238095238,"z":121.80000000000001,"a95":0.99,"info":"26/08/2014 at 15:13:45"},{"visible":true,"include":true,"step":"30.0","x":-76.67904761904762,"y":142.07619047619048,"z":118.08571428571429,"a95":0.99,"info":"26/08/2014 at 15:13:45"},{"visible":true,"include":true,"step":"35.0","x":-77.81714285714285,"y":123.03809523809525,"z":105.86666666666666,"a95":0.99,"info":"26/08/2014 at 15:13:45"},{"visible":true,"include":true,"step":"40.0","x":-74.3847619047619,"y":142.65714285714287,"z":105.02857142857142,"a95":0.99,"info":"26/08/2014 at 15:13:45"},{"visible":true,"include":true,"step":"45.0","x":-68.93142857142857,"y":113.70476190476191,"z":100.44761904761906,"a95":0.99,"info":"26/08/2014 at 15:13:45"},{"visible":true,"include":true,"step":"50.0","x":-74.95714285714286,"y":111.22857142857144,"z":97.85714285714286,"a95":0.99,"info":"26/08/2014 at 15:13:45"},{"visible":true,"include":true,"step":"60.0","x":-61.69428571428571,"y":104.0095238095238,"z":90.26666666666667,"a95":0.99,"info":"26/08/2014 at 15:13:45"},{"visible":true,"include":false,"step":"70.0","x":-43.25333333333334,"y":58.39809523809523,"z":75.93333333333332,"a95":0.99,"info":"26/08/2014 at 15:13:45"},{"visible":true,"include":false,"step":"80.0","x":-58.82761904761905,"y":96.46666666666667,"z":95.33333333333333,"a95":0.99,"info":"26/08/2014 at 15:13:45"},{"visible":true,"include":false,"step":"90.0","x":-41.8352380952381,"y":86.38380952380952,"z":75.32857142857144,"a95":0.99,"info":"26/08/2014 at 15:13:45"},{"visible":true,"include":false,"step":"100.0","x":-42.78857142857142,"y":83.90190476190476,"z":73.55428571428573,"a95":0.99,"info":"26/08/2014 at 15:13:45"}]},{"version":"v1.1.0","exported":"2017-05-17T14:41:35.988Z","volume":10.5,"added":"2017-05-17T14:38:08.056Z","format":"Utrecht","demagType":"Unknown","strat":null,"patch":1.1,"GEO":[{"dec":2.6698018882981955,"inc":65.52858212909467,"MAD":2.667860697353423,"cm":[0,-6.6058269965196814e-15,0],"intensity":228.55782618255944,"type":"dir","forced":true,"remark":"","origin":false,"nSteps":4,"minStep":"150","maxStep":"240","steps":["150","180","210","240"],"group":"None","version":"v1.1.0"}],"TECT":[{"dec":337.3399969909027,"inc":24.62758500122993,"MAD":2.6678606973534222,"cm":[-1.4210854715202004e-14,-2.398081733190338e-14,-5.329070518200751e-15],"intensity":228.5578261825594,"type":"dir","forced":true,"remark":"","origin":false,"nSteps":4,"minStep":"150","maxStep":"240","steps":["150","180","210","240"],"group":"None","version":"v1.1.0"}],"interpreted":true,"name":"KG1.6A","coreAzi":262,"coreDip":57,"bedStrike":229,"bedDip":46,"data":[{"visible":true,"include":false,"step":"20","x":-194.38095238095238,"y":181.61904761904762,"z":344.4761904761905,"a95":2.2,"info":"\"14-09-15\" at \"15:06\""},{"visible":true,"include":false,"step":"100","x":-123.04761904761905,"y":114.47619047619048,"z":147.71428571428572,"a95":2.5,"info":"\"14-09-15\" at \"19:09\""},{"visible":true,"include":true,"step":"150","x":-82.95238095238095,"y":59.333333333333336,"z":100.85714285714286,"a95":3.8,"info":"\"14-09-15\" at \"21:20\""},{"visible":true,"include":true,"step":"180","x":-59.904761904761905,"y":48.666666666666664,"z":83.61904761904762,"a95":2.9,"info":"\"14-09-16\" at \"10:21\""},{"visible":true,"include":true,"step":"210","x":-54.400000000000006,"y":39.41904761904762,"z":65.60952380952381,"a95":4,"info":"\"14-09-16\" at \"13:00\""},{"visible":true,"include":true,"step":"240","x":-46.2,"y":28.495238095238093,"z":66.00952380952381,"a95":3.8,"info":"\"14-09-16\" at \"15:43\""},{"visible":true,"include":false,"step":"270","x":-70.53333333333333,"y":-9.495238095238095,"z":61.53333333333334,"a95":4.1,"info":"\"14-09-16\" at \"18:32\""},{"visible":true,"include":false,"step":"300","x":-22.59047619047619,"y":2.1809523809523808,"z":1.0095238095238095,"a95":5.6,"info":"\"14-09-17\" at \"09:55\""},{"visible":true,"include":false,"step":"320","x":-23.41904761904762,"y":21.285714285714285,"z":28.866666666666667,"a95":3.6,"info":"\"14-09-17\" at \"13:16\""},{"visible":true,"include":false,"step":"340","x":34.48571428571429,"y":-0.41904761904761906,"z":41.84761904761905,"a95":7.2,"info":"\"14-09-17\" at \"16:29\""},{"visible":true,"include":false,"step":"370","x":-60.2952380952381,"y":15.866666666666665,"z":0.5047619047619047,"a95":6.3,"info":"\"14-09-17\" at \"21:39\""},{"visible":true,"include":false,"step":"390","x":-75.42857142857143,"y":32.885714285714286,"z":1.0380952380952382,"a95":5.3,"info":"\"14-09-18\" at \"10:56\""},{"visible":true,"include":false,"step":"420","x":-71.21904761904761,"y":6.647619047619047,"z":27.64761904761905,"a95":11,"info":"\"14-09-18\" at \"13:57\""}]},{"version":"v1.1.0","exported":"2017-05-17T14:41:35.988Z","volume":10.5,"added":"2017-05-17T14:38:08.059Z","format":"Utrecht","demagType":"Unknown","strat":"3","patch":1.1,"GEO":[{"dec":358.35930265847804,"inc":45.598978314767784,"MAD":3.869695075297523,"cm":[1.7763568394002505e-15,3.341771304121721e-14,0],"intensity":438.5140531840562,"type":"dir","forced":true,"remark":"","origin":false,"nSteps":5,"minStep":"20.0","maxStep":"40.0","steps":["20.0","25.0","30.0","35.0","40.0"],"group":"None","version":"v1.1.0"}],"TECT":[{"dec":345.5059901240555,"inc":6.151534737243891,"MAD":3.869695075297502,"cm":[1.9539925233402755e-14,5.728750807065808e-14,1.509903313490213e-14],"intensity":438.51405318405625,"type":"dir","forced":true,"remark":"","origin":false,"nSteps":5,"minStep":"20.0","maxStep":"40.0","steps":["20.0","25.0","30.0","35.0","40.0"],"group":"None","version":"v1.1.0"}],"interpreted":true,"name":"KG1.6B","coreAzi":262,"coreDip":57,"bedStrike":229,"bedDip":46,"data":[{"visible":true,"include":false,"step":"0.0","x":-225.67619047619047,"y":283.64761904761906,"z":311.3047619047619,"a95":0.99,"info":"26/08/2014 at 15:13:45"},{"visible":true,"include":false,"step":"4.0","x":-206.15238095238095,"y":252.44761904761904,"z":285.9142857142857,"a95":0.99,"info":"26/08/2014 at 15:13:45"},{"visible":true,"include":false,"step":"8.0","x":-148.5047619047619,"y":240.47619047619048,"z":243.21904761904764,"a95":0.99,"info":"26/08/2014 at 15:13:45"},{"visible":true,"include":false,"step":"12.0","x":-133.8190476190476,"y":221.68571428571425,"z":232.50476190476192,"a95":0.99,"info":"26/08/2014 at 15:13:45"},{"visible":true,"include":false,"step":"16.0","x":-140.1238095238095,"y":179.28571428571428,"z":199.1142857142857,"a95":0.99,"info":"26/08/2014 at 15:13:45"},{"visible":true,"include":true,"step":"20.0","x":-123.01904761904763,"y":193.22857142857143,"z":174.6,"a95":0.99,"info":"26/08/2014 at 15:13:45"},{"visible":true,"include":true,"step":"25.0","x":-110.91428571428571,"y":140.41904761904763,"z":110.78095238095239,"a95":0.99,"info":"26/08/2014 at 15:13:45"},{"visible":true,"include":true,"step":"30.0","x":-85.44857142857143,"y":139.1238095238095,"z":91.3847619047619,"a95":0.99,"info":"26/08/2014 at 15:13:45"},{"visible":true,"include":true,"step":"35.0","x":-66.90666666666667,"y":113.68571428571428,"z":83.18095238095238,"a95":0.99,"info":"26/08/2014 at 15:13:45"},{"visible":true,"include":true,"step":"40.0","x":-63.93904761904762,"y":107.73333333333333,"z":83.78571428571429,"a95":0.99,"info":"26/08/2014 at 15:13:45"},{"visible":true,"include":false,"step":"45.0","x":-97.11428571428571,"y":115.75238095238096,"z":51.62666666666667,"a95":0.99,"info":"26/08/2014 at 15:13:45"},{"visible":true,"include":false,"step":"50.0","x":-74.57333333333334,"y":102.34285714285713,"z":71.25619047619048,"a95":0.99,"info":"26/08/2014 at 15:13:45"},{"visible":true,"include":false,"step":"60.0","x":-70.75714285714287,"y":96.87619047619049,"z":80.4152380952381,"a95":0.99,"info":"26/08/2014 at 15:13:45"},{"visible":true,"include":false,"step":"70.0","x":-77.15333333333334,"y":85.19904761904762,"z":53.40857142857143,"a95":0.99,"info":"26/08/2014 at 15:13:45"},{"visible":true,"include":false,"step":"80.0","x":-47.254285714285714,"y":42.086666666666666,"z":90.84380952380953,"a95":0.99,"info":"26/08/2014 at 15:13:45"},{"visible":true,"include":false,"step":"90.0","x":-70.84476190476191,"y":61.12857142857143,"z":48.72190476190476,"a95":0.99,"info":"26/08/2014 at 15:13:45"},{"visible":true,"include":false,"step":"100.0","x":-74.01809523809524,"y":29.139047619047616,"z":69.08,"a95":0.99,"info":"26/08/2014 at 15:13:45"}]},{"version":"v1.1.0","exported":"2017-05-17T14:41:35.988Z","volume":10.5,"added":"2017-05-17T14:38:08.060Z","format":"Utrecht","demagType":"Unknown","strat":null,"patch":1.1,"GEO":[],"TECT":[],"interpreted":false,"name":"KG1.7A","coreAzi":261,"coreDip":58,"bedStrike":229,"bedDip":46,"data":[{"visible":true,"include":false,"step":"20","x":-111.9047619047619,"y":117.23809523809524,"z":65.9047619047619,"a95":2,"info":"\"14-09-15\" at \"15:08\""},{"visible":true,"include":false,"step":"100","x":-85.14285714285714,"y":31.428571428571427,"z":83.04761904761905,"a95":2.8,"info":"\"14-09-15\" at \"19:11\""},{"visible":true,"include":false,"step":"150","x":-74.31428571428572,"y":-4.171428571428571,"z":48.780952380952385,"a95":3.7,"info":"\"14-09-15\" at \"21:22\""},{"visible":true,"include":false,"step":"180","x":-52.19047619047619,"y":4.6380952380952385,"z":36.05714285714286,"a95":3.4,"info":"\"14-09-16\" at \"10:23\""},{"visible":true,"include":false,"step":"210","x":-63.8,"y":-24.371428571428574,"z":29.6,"a95":5.1,"info":"\"14-09-16\" at \"13:05\""},{"visible":true,"include":false,"step":"240","x":-44.79047619047619,"y":-13.352380952380951,"z":16.057142857142857,"a95":4.1,"info":"\"14-09-16\" at \"15:45\""},{"visible":true,"include":false,"step":"270","x":-39.05714285714286,"y":-11.180952380952382,"z":15.657142857142858,"a95":6,"info":"\"14-09-16\" at \"18:34\""},{"visible":true,"include":false,"step":"300","x":-46.714285714285715,"y":-8.657142857142858,"z":-7.980952380952381,"a95":3.8,"info":"\"14-09-17\" at \"10:00\""},{"visible":true,"include":false,"step":"320","x":-15.047619047619047,"y":-21.504761904761907,"z":-2.8380952380952382,"a95":5.8,"info":"\"14-09-17\" at \"13:19\""},{"visible":true,"include":false,"step":"340","x":35.16190476190476,"y":-5.3619047619047615,"z":-4.9714285714285715,"a95":9.1,"info":"\"14-09-17\" at \"16:32\""},{"visible":true,"include":false,"step":"370","x":-34.89523809523809,"y":-8.323809523809524,"z":8.685714285714287,"a95":6.6,"info":"\"14-09-17\" at \"21:41\""},{"visible":true,"include":false,"step":"390","x":-32.05714285714286,"y":5.066666666666667,"z":3.5142857142857142,"a95":8.3,"info":"\"14-09-18\" at \"10:59\""},{"visible":true,"include":false,"step":"420","x":-40.15238095238095,"y":-11.819047619047618,"z":-8.076190476190476,"a95":20.2,"info":"\"14-09-18\" at \"14:00\""}]},{"version":"v1.1.0","exported":"2017-05-17T14:41:35.988Z","volume":10.5,"added":"2017-05-17T14:38:08.060Z","format":"Utrecht","demagType":"Unknown","strat":"4","patch":1.1,"GEO":[{"dec":352.6099418559891,"inc":51.07812681165073,"MAD":3.4336062446341193,"cm":[5.329070518200751e-15,7.840950111415168e-15,0],"intensity":597.4853654382886,"type":"dir","forced":true,"remark":"","origin":false,"nSteps":7,"minStep":"8.0","maxStep":"35.0","steps":["8.0","12.0","16.0","20.0","25.0","30.0","35.0"],"group":"None","version":"v1.1.0"}],"TECT":[{"dec":339.6428610386169,"inc":9.442967255772126,"MAD":3.433606244634173,"cm":[1.2434497875801753e-14,2.220446049250313e-14,-3.1086244689504383e-15],"intensity":597.4853654382886,"type":"dir","forced":true,"remark":"","origin":false,"nSteps":7,"minStep":"8.0","maxStep":"35.0","steps":["8.0","12.0","16.0","20.0","25.0","30.0","35.0"],"group":"None","version":"v1.1.0"}],"interpreted":true,"name":"KG1.7B","coreAzi":261,"coreDip":58,"bedStrike":229,"bedDip":46,"data":[{"visible":true,"include":false,"step":"0.0","x":-221.69523809523812,"y":287.54285714285714,"z":351.43809523809523,"a95":0.99,"info":"26/08/2014 at 15:13:45"},{"visible":true,"include":false,"step":"4.0","x":-199.21904761904764,"y":260.96190476190475,"z":325.70476190476194,"a95":0.99,"info":"26/08/2014 at 15:13:45"},{"visible":true,"include":true,"step":"8.0","x":-173.65714285714287,"y":256.7904761904762,"z":268.37142857142857,"a95":0.99,"info":"26/08/2014 at 15:13:45"},{"visible":true,"include":true,"step":"12.0","x":-125.81904761904761,"y":234.33333333333334,"z":256.2761904761905,"a95":0.99,"info":"26/08/2014 at 15:13:45"},{"visible":true,"include":true,"step":"16.0","x":-139.67619047619047,"y":188.92380952380952,"z":198.2095238095238,"a95":0.99,"info":"26/08/2014 at 15:13:45"},{"visible":true,"include":true,"step":"20.0","x":-139.66666666666666,"y":171.85714285714286,"z":174.9142857142857,"a95":0.99,"info":"26/08/2014 at 15:13:45"},{"visible":true,"include":true,"step":"25.0","x":-117.46666666666667,"y":181.88571428571427,"z":168.65714285714287,"a95":0.99,"info":"26/08/2014 at 15:13:45"},{"visible":true,"include":true,"step":"30.0","x":-111.80000000000001,"y":157.3904761904762,"z":160.85714285714286,"a95":0.99,"info":"26/08/2014 at 15:13:45"},{"visible":true,"include":true,"step":"35.0","x":-95.15523809523809,"y":112.5047619047619,"z":116.79047619047618,"a95":0.99,"info":"26/08/2014 at 15:13:45"},{"visible":true,"include":false,"step":"40.0","x":-53.26190476190476,"y":53.18666666666667,"z":141.0285714285714,"a95":0.99,"info":"26/08/2014 at 15:13:45"},{"visible":true,"include":false,"step":"45.0","x":-77.93142857142857,"y":119.8952380952381,"z":100.08571428571429,"a95":0.99,"info":"26/08/2014 at 15:13:45"},{"visible":true,"include":false,"step":"50.0","x":-44.156190476190474,"y":122.28571428571429,"z":96.22857142857143,"a95":0.99,"info":"26/08/2014 at 15:13:45"},{"visible":true,"include":false,"step":"60.0","x":-63.07523809523809,"y":93.33619047619047,"z":121.02857142857142,"a95":0.99,"info":"26/08/2014 at 15:13:45"},{"visible":true,"include":false,"step":"70.0","x":-73.5352380952381,"y":110.57142857142857,"z":86.5304761904762,"a95":0.99,"info":"26/08/2014 at 15:13:45"},{"visible":true,"include":false,"step":"80.0","x":-63.145714285714284,"y":68.60380952380953,"z":38.118095238095236,"a95":0.99,"info":"26/08/2014 at 15:13:45"},{"visible":true,"include":false,"step":"90.0","x":-55.71523809523809,"y":77.08952380952381,"z":67.53904761904762,"a95":0.99,"info":"26/08/2014 at 15:13:45"},{"visible":true,"include":false,"step":"100.0","x":-13.760952380952382,"y":30.37142857142857,"z":73.37333333333333,"a95":0.99,"info":"26/08/2014 at 15:13:45"}]},{"version":"v1.1.0","exported":"2017-05-17T14:41:35.989Z","volume":10.5,"added":"2017-05-17T14:38:08.060Z","format":"Utrecht","demagType":"Unknown","strat":"8","patch":1.1,"GEO":[],"TECT":[],"interpreted":false,"name":"KG1.8A","coreAzi":262,"coreDip":59,"bedStrike":229,"bedDip":46,"data":[{"visible":true,"include":false,"step":"0.0","x":-196.04761904761904,"y":134.9142857142857,"z":249.41904761904763,"a95":0.99,"info":"18/08/2014 at 05:09:54"},{"visible":true,"include":false,"step":"4.0","x":-158.34285714285713,"y":94.1257142857143,"z":189.8952380952381,"a95":0.99,"info":"18/08/2014 at 05:09:54"},{"visible":true,"include":false,"step":"8.0","x":-123.1047619047619,"y":71.82095238095238,"z":152.04761904761904,"a95":0.99,"info":"18/08/2014 at 05:09:54"},{"visible":true,"include":false,"step":"12.0","x":-122.18095238095239,"y":39.111428571428576,"z":111.68571428571428,"a95":0.99,"info":"18/08/2014 at 05:09:54"},{"visible":true,"include":false,"step":"16.0","x":-93.71238095238095,"y":41.49047619047619,"z":105.16190476190476,"a95":0.99,"info":"18/08/2014 at 05:09:54"},{"visible":true,"include":false,"step":"20.0","x":-96.19047619047619,"y":41.78285714285715,"z":71.85619047619048,"a95":0.99,"info":"18/08/2014 at 05:09:54"},{"visible":true,"include":false,"step":"25.0","x":-63.331428571428575,"y":42.14190476190476,"z":64.05428571428573,"a95":0.99,"info":"18/08/2014 at 05:09:54"},{"visible":true,"include":false,"step":"30.0","x":-30.95714285714286,"y":20.568571428571428,"z":70.86952380952381,"a95":0.99,"info":"18/08/2014 at 05:09:54"},{"visible":true,"include":false,"step":"35.0","x":-36.01428571428571,"y":-28.066666666666666,"z":-10.382857142857143,"a95":0.99,"info":"18/08/2014 at 05:09:54"},{"visible":true,"include":false,"step":"40.0","x":-25.194285714285716,"y":-9.861904761904762,"z":12.125714285714285,"a95":0.99,"info":"18/08/2014 at 05:09:54"},{"visible":true,"include":false,"step":"45.0","x":-25.30666666666667,"y":-13.103809523809524,"z":-21.426666666666666,"a95":0.99,"info":"18/08/2014 at 05:09:54"},{"visible":true,"include":false,"step":"50.0","x":-8.576095238095238,"y":-4.361714285714286,"z":-11.703809523809523,"a95":0.99,"info":"18/08/2014 at 05:09:54"},{"visible":true,"include":false,"step":"60.0","x":-31.520952380952384,"y":-12.081904761904761,"z":-5.725809523809524,"a95":0.99,"info":"18/08/2014 at 05:09:54"},{"visible":true,"include":false,"step":"70.0","x":2.962666666666667,"y":6.661142857142856,"z":-21.731428571428573,"a95":0.99,"info":"18/08/2014 at 05:09:54"},{"visible":true,"include":false,"step":"80.0","x":-10.371428571428572,"y":-6.693142857142858,"z":47.668571428571425,"a95":0.99,"info":"18/08/2014 at 05:09:54"},{"visible":true,"include":false,"step":"90.0","x":9.174285714285714,"y":-25.009523809523813,"z":18.304761904761904,"a95":0.99,"info":"18/08/2014 at 05:09:54"},{"visible":true,"include":false,"step":"100.0","x":66.42571428571429,"y":22.62761904761905,"z":53.00857142857143,"a95":0.99,"info":"18/08/2014 at 05:09:54"}]},{"version":"v1.1.0","exported":"2017-05-17T14:41:35.989Z","volume":10.5,"added":"2017-05-17T14:38:08.060Z","format":"Utrecht","demagType":"Unknown","strat":"6","patch":1.1,"GEO":[],"TECT":[],"interpreted":false,"name":"KG1.8B","coreAzi":262,"coreDip":59,"bedStrike":229,"bedDip":46,"data":[{"visible":true,"include":false,"step":"0.0","x":-197.13333333333335,"y":217.23809523809524,"z":414.5142857142857,"a95":0.99,"info":"05/11/2014 at 22:47:31"},{"visible":true,"include":false,"step":"10.0","x":-132.0285714285714,"y":212.54285714285712,"z":306.54285714285714,"a95":0.99,"info":"05/11/2014 at 22:47:31"},{"visible":true,"include":false,"step":"15.0","x":-136.7238095238095,"y":154.3047619047619,"z":254.47619047619048,"a95":0.99,"info":"05/11/2014 at 22:47:31"},{"visible":true,"include":false,"step":"20.0","x":-143.03809523809525,"y":161.04761904761904,"z":203.74285714285716,"a95":0.99,"info":"05/11/2014 at 22:47:31"},{"visible":true,"include":false,"step":"25.0","x":-156.55238095238096,"y":130.6,"z":180.46666666666667,"a95":0.99,"info":"05/11/2014 at 22:47:31"},{"visible":true,"include":false,"step":"30.0","x":-145.1047619047619,"y":98.37142857142858,"z":158.96190476190475,"a95":0.99,"info":"05/11/2014 at 22:47:31"},{"visible":true,"include":false,"step":"35.0","x":-136.25714285714287,"y":114.78095238095239,"z":146.44761904761904,"a95":0.99,"info":"05/11/2014 at 22:47:31"},{"visible":true,"include":false,"step":"40.0","x":-138.06666666666666,"y":74.34857142857143,"z":64.52285714285715,"a95":0.99,"info":"05/11/2014 at 22:47:31"},{"visible":true,"include":false,"step":"45.0","x":-21.547619047619047,"y":90.77333333333334,"z":116.70476190476191,"a95":0.99,"info":"05/11/2014 at 22:47:31"},{"visible":true,"include":false,"step":"50.0","x":-55.203809523809525,"y":95.66666666666667,"z":54.86857142857143,"a95":0.99,"info":"05/11/2014 at 22:47:31"},{"visible":true,"include":false,"step":"60.0","x":-29.174285714285713,"y":90.2752380952381,"z":69.62666666666667,"a95":0.99,"info":"05/11/2014 at 22:47:31"},{"visible":true,"include":false,"step":"70.0","x":-79.11142857142856,"y":33.95333333333333,"z":130.13333333333335,"a95":0.99,"info":"05/11/2014 at 22:47:31"},{"visible":true,"include":false,"step":"80.0","x":-22.442857142857143,"y":43.153333333333336,"z":119.45714285714286,"a95":0.99,"info":"05/11/2014 at 22:47:31"},{"visible":true,"include":false,"step":"90.0","x":-85.44857142857143,"y":51.798095238095236,"z":34.44952380952381,"a95":0.99,"info":"05/11/2014 at 22:47:31"}]},{"version":"v1.1.0","exported":"2017-05-17T14:41:35.989Z","volume":10.5,"added":"2017-05-17T14:38:08.060Z","format":"Utrecht","demagType":"Unknown","strat":"5","patch":1.1,"GEO":[],"TECT":[],"interpreted":false,"name":"KG1.9A","coreAzi":266,"coreDip":56,"bedStrike":229,"bedDip":46,"data":[{"visible":true,"include":false,"step":"0.0","x":-87.42285714285715,"y":161.68571428571428,"z":151.9904761904762,"a95":0.99,"info":"26/08/2014 at 15:13:45"},{"visible":true,"include":false,"step":"4.0","x":-59.32,"y":140.93333333333334,"z":124.67619047619047,"a95":0.99,"info":"26/08/2014 at 15:13:45"},{"visible":true,"include":false,"step":"8.0","x":-33.09428571428572,"y":126.58095238095237,"z":90.7247619047619,"a95":0.99,"info":"26/08/2014 at 15:13:45"},{"visible":true,"include":false,"step":"12.0","x":-11.874285714285715,"y":85.29333333333334,"z":83.1152380952381,"a95":0.99,"info":"26/08/2014 at 15:13:45"},{"visible":true,"include":false,"step":"16.0","x":-2.351238095238095,"y":61.932380952380946,"z":39.74190476190476,"a95":0.99,"info":"26/08/2014 at 15:13:45"},{"visible":true,"include":false,"step":"20.0","x":-14.399047619047618,"y":57.31714285714286,"z":30.962857142857143,"a95":0.99,"info":"26/08/2014 at 15:13:45"},{"visible":true,"include":false,"step":"25.0","x":-10.527619047619048,"y":16.7,"z":9.392190476190475,"a95":0.99,"info":"26/08/2014 at 15:13:45"},{"visible":true,"include":false,"step":"30.0","x":41.56476190476191,"y":32.00380952380952,"z":13.264761904761905,"a95":0.99,"info":"26/08/2014 at 15:13:45"},{"visible":true,"include":false,"step":"35.0","x":24.86857142857143,"y":51.26761904761904,"z":12.887619047619047,"a95":0.99,"info":"26/08/2014 at 15:13:45"},{"visible":true,"include":false,"step":"40.0","x":40.04571428571429,"y":40.6,"z":42.05142857142857,"a95":0.99,"info":"26/08/2014 at 15:13:45"},{"visible":true,"include":false,"step":"45.0","x":2.8084761904761906,"y":7.974285714285715,"z":44.19714285714286,"a95":0.99,"info":"26/08/2014 at 15:13:45"},{"visible":true,"include":false,"step":"50.0","x":7.597333333333334,"y":7.5296190476190485,"z":23.80095238095238,"a95":0.99,"info":"26/08/2014 at 15:13:45"},{"visible":true,"include":false,"step":"60.0","x":-16.55142857142857,"y":19.18285714285714,"z":15.307619047619047,"a95":0.99,"info":"26/08/2014 at 15:13:45"},{"visible":true,"include":false,"step":"70.0","x":13.713333333333335,"y":1.4611428571428573,"z":3.043047619047619,"a95":0.99,"info":"26/08/2014 at 15:13:45"},{"visible":true,"include":false,"step":"80.0","x":17.517142857142858,"y":-14.034285714285716,"z":-0.1970761904761905,"a95":0.99,"info":"26/08/2014 at 15:13:45"},{"visible":true,"include":false,"step":"90.0","x":-15.555238095238096,"y":-10.078095238095237,"z":11.84,"a95":0.99,"info":"26/08/2014 at 15:13:45"},{"visible":true,"include":false,"step":"100.0","x":-28.514285714285712,"y":29.01047619047619,"z":-31.23619047619048,"a95":0.99,"info":"26/08/2014 at 15:13:45"}]},{"version":"v1.1.0","exported":"2017-05-17T14:41:35.989Z","volume":10.5,"added":"2017-05-17T14:38:08.060Z","format":"Utrecht","demagType":"Unknown","strat":null,"patch":1.1,"GEO":[],"TECT":[],"interpreted":false,"name":"KG1.10A","coreAzi":265,"coreDip":59,"bedStrike":229,"bedDip":46,"data":[{"visible":true,"include":false,"step":"20","x":-139.14285714285714,"y":153.8095238095238,"z":46.095238095238095,"a95":2.3,"info":"\"14-09-15\" at \"15:11\""},{"visible":true,"include":false,"step":"100","x":-63.23809523809524,"y":73.14285714285714,"z":51.333333333333336,"a95":3.5,"info":"\"14-09-15\" at \"19:13\""},{"visible":true,"include":false,"step":"150","x":-58.599999999999994,"y":30.714285714285715,"z":22.752380952380953,"a95":4.2,"info":"\"14-09-15\" at \"21:24\""},{"visible":true,"include":false,"step":"180","x":-37.82857142857143,"y":34.22857142857143,"z":11.752380952380953,"a95":3.7,"info":"\"14-09-16\" at \"10:25\""},{"visible":true,"include":false,"step":"210","x":-48.91428571428572,"y":34.6,"z":15.161904761904761,"a95":4.2,"info":"\"14-09-16\" at \"13:07\""},{"visible":true,"include":false,"step":"240","x":-41.94285714285714,"y":15.40952380952381,"z":11.876190476190477,"a95":4.1,"info":"\"14-09-16\" at \"15:47\""},{"visible":true,"include":false,"step":"270","x":-48.7047619047619,"y":30.676190476190477,"z":-13.714285714285714,"a95":4.1,"info":"\"14-09-16\" at \"18:36\""},{"visible":true,"include":false,"step":"300","x":-38.40952380952381,"y":25.876190476190477,"z":-4.485714285714286,"a95":2.5,"info":"\"14-09-17\" at \"10:03\""},{"visible":true,"include":false,"step":"320","x":-52.44761904761905,"y":39.63809523809524,"z":-19.02857142857143,"a95":2.7,"info":"\"14-09-17\" at \"13:21\""},{"visible":true,"include":false,"step":"340","x":18.666666666666668,"y":10.380952380952381,"z":-29.571428571428573,"a95":8.7,"info":"\"14-09-17\" at \"16:35\""},{"visible":true,"include":false,"step":"370","x":-14.390476190476189,"y":33.23809523809524,"z":-28.238095238095237,"a95":3.9,"info":"\"14-09-17\" at \"21:44\""},{"visible":true,"include":false,"step":"390","x":-22.485714285714284,"y":17.6,"z":12.923809523809522,"a95":10.2,"info":"\"14-09-18\" at \"11:01\""},{"visible":true,"include":false,"step":"420","x":-48.561904761904756,"y":6.3619047619047615,"z":-23.761904761904763,"a95":9,"info":"\"14-09-18\" at \"14:03\""}]},{"version":"v1.1.0","exported":"2017-05-17T14:41:35.989Z","volume":10.5,"added":"2017-05-17T14:38:08.060Z","format":"Utrecht","demagType":"Unknown","strat":"6","patch":1.1,"GEO":[{"dec":358.53491358603213,"inc":47.29863190995551,"MAD":2.944868406484785,"cm":[1.7763568394002505e-15,2.9531932455029164e-14,0],"intensity":558.3191656441893,"type":"dir","forced":true,"remark":"","origin":false,"nSteps":6,"minStep":"8.0","maxStep":"30.0","steps":["8.0","12.0","16.0","20.0","25.0","30.0"],"group":"None","version":"v1.1.0"}],"TECT":[{"dec":344.82583033128117,"inc":7.716019392139598,"MAD":2.9448684064848183,"cm":[2.6645352591003757e-14,6.306066779870889e-14,1.1546319456101628e-14],"intensity":558.3191656441893,"type":"dir","forced":true,"remark":"","origin":false,"nSteps":6,"minStep":"8.0","maxStep":"30.0","steps":["8.0","12.0","16.0","20.0","25.0","30.0"],"group":"None","version":"v1.1.0"}],"interpreted":true,"name":"KG1.10B","coreAzi":265,"coreDip":59,"bedStrike":229,"bedDip":46,"data":[{"visible":true,"include":false,"step":"0.0","x":-225.94285714285715,"y":261.7904761904762,"z":234.94285714285715,"a95":0.99,"info":"26/08/2014 at 15:13:45"},{"visible":true,"include":false,"step":"4.0","x":-201.49523809523808,"y":248.2761904761905,"z":211.73333333333332,"a95":0.99,"info":"26/08/2014 at 15:13:45"},{"visible":true,"include":true,"step":"8.0","x":-155.62857142857143,"y":229.73333333333332,"z":217.69523809523812,"a95":0.99,"info":"26/08/2014 at 15:13:45"},{"visible":true,"include":true,"step":"12.0","x":-125.95238095238095,"y":207.14285714285714,"z":194.74285714285713,"a95":0.99,"info":"26/08/2014 at 15:13:45"},{"visible":true,"include":true,"step":"16.0","x":-118.96190476190475,"y":195.84761904761905,"z":173.42857142857142,"a95":0.99,"info":"26/08/2014 at 15:13:45"},{"visible":true,"include":true,"step":"20.0","x":-105.05714285714285,"y":185.58095238095237,"z":136.15238095238095,"a95":0.99,"info":"26/08/2014 at 15:13:45"},{"visible":true,"include":true,"step":"25.0","x":-91.13333333333333,"y":162.86666666666665,"z":134.25714285714287,"a95":0.99,"info":"26/08/2014 at 15:13:45"},{"visible":true,"include":true,"step":"30.0","x":-76.78571428571429,"y":130.53333333333333,"z":139.95238095238096,"a95":0.99,"info":"26/08/2014 at 15:13:45"},{"visible":true,"include":false,"step":"35.0","x":-48.17619047619048,"y":156.0952380952381,"z":86.72857142857143,"a95":0.99,"info":"26/08/2014 at 15:13:45"},{"visible":true,"include":false,"step":"40.0","x":-69.72952380952381,"y":85.79809523809524,"z":66.67619047619048,"a95":0.99,"info":"26/08/2014 at 15:13:45"},{"visible":true,"include":false,"step":"45.0","x":-52.74380952380952,"y":112.80000000000001,"z":47.13142857142857,"a95":0.99,"info":"26/08/2014 at 15:13:45"},{"visible":true,"include":false,"step":"50.0","x":-67.35619047619048,"y":88.65809523809523,"z":60.86761904761905,"a95":0.99,"info":"26/08/2014 at 15:13:45"},{"visible":true,"include":false,"step":"60.0","x":-84.87238095238095,"y":30.984761904761903,"z":80.24,"a95":0.99,"info":"26/08/2014 at 15:13:45"},{"visible":true,"include":false,"step":"70.0","x":-53.24857142857143,"y":6.407619047619048,"z":32.66285714285714,"a95":0.99,"info":"26/08/2014 at 15:13:45"},{"visible":true,"include":false,"step":"80.0","x":2.410285714285714,"y":45.611428571428576,"z":43.63142857142857,"a95":0.99,"info":"26/08/2014 at 15:13:45"},{"visible":true,"include":false,"step":"90.0","x":-35.94571428571429,"y":15.187619047619048,"z":31.85238095238095,"a95":0.99,"info":"26/08/2014 at 15:13:45"},{"visible":true,"include":false,"step":"100.0","x":-55.37619047619048,"y":50.37619047619048,"z":78.14,"a95":0.99,"info":"26/08/2014 at 15:13:45"}]},{"version":"v1.1.0","exported":"2017-05-17T14:41:35.989Z","volume":10.5,"added":"2017-05-17T14:38:08.060Z","format":"Utrecht","demagType":"Unknown","strat":"7","patch":1.1,"GEO":[{"dec":355.15950834731194,"inc":60.57606133266318,"MAD":4.649745750925976,"cm":[-4.440892098500626e-16,-3.1058489113888754e-14,0],"intensity":474.1439966633365,"type":"dir","forced":true,"remark":"","origin":false,"nSteps":8,"minStep":"4.0","maxStep":"35.0","steps":["4.0","8.0","12.0","16.0","20.0","25.0","30.0","35.0"],"group":"None","version":"v1.1.0"}],"TECT":[{"dec":336.8137742517295,"inc":18.64693463188257,"MAD":4.649745750926005,"cm":[8.881784197001252e-16,-2.930988785010413e-14,-1.9317880628477724e-14],"intensity":474.14399666333657,"type":"dir","forced":true,"remark":"","origin":false,"nSteps":8,"minStep":"4.0","maxStep":"35.0","steps":["4.0","8.0","12.0","16.0","20.0","25.0","30.0","35.0"],"group":"None","version":"v1.1.0"}],"interpreted":true,"name":"KG1.11B","coreAzi":269,"coreDip":57,"bedStrike":229,"bedDip":46,"data":[{"visible":true,"include":false,"step":"0.0","x":-212.51428571428573,"y":200.34285714285713,"z":315.64761904761906,"a95":0.99,"info":"26/08/2014 at 15:13:45"},{"visible":true,"include":true,"step":"4.0","x":-177.6095238095238,"y":177.8,"z":273.06666666666666,"a95":0.99,"info":"26/08/2014 at 15:13:45"},{"visible":true,"include":true,"step":"8.0","x":-172.8761904761905,"y":155.3904761904762,"z":230.58095238095237,"a95":0.99,"info":"26/08/2014 at 15:13:45"},{"visible":true,"include":true,"step":"12.0","x":-122.77142857142856,"y":152.35238095238097,"z":240.26666666666668,"a95":0.99,"info":"26/08/2014 at 15:13:45"},{"visible":true,"include":true,"step":"16.0","x":-114.75238095238096,"y":138.3904761904762,"z":225.84761904761905,"a95":0.99,"info":"26/08/2014 at 15:13:45"},{"visible":true,"include":true,"step":"20.0","x":-99.42857142857143,"y":99.4952380952381,"z":164.63809523809525,"a95":0.99,"info":"26/08/2014 at 15:13:45"},{"visible":true,"include":true,"step":"25.0","x":-39.03904761904762,"y":74.18190476190476,"z":112.12380952380951,"a95":0.99,"info":"26/08/2014 at 15:13:45"},{"visible":true,"include":true,"step":"30.0","x":-40.90952380952381,"y":85.29047619047618,"z":87.91809523809523,"a95":0.99,"info":"26/08/2014 at 15:13:45"},{"visible":true,"include":true,"step":"35.0","x":-45.48761904761905,"y":60.58761904761904,"z":70.75238095238095,"a95":0.99,"info":"26/08/2014 at 15:13:45"},{"visible":true,"include":false,"step":"40.0","x":-11.093333333333334,"y":1.699904761904762,"z":120.96190476190475,"a95":0.99,"info":"26/08/2014 at 15:13:45"},{"visible":true,"include":false,"step":"45.0","x":-42.94,"y":64.20190476190476,"z":142.95238095238096,"a95":0.99,"info":"26/08/2014 at 15:13:45"},{"visible":true,"include":false,"step":"50.0","x":-70.69809523809525,"y":34.019999999999996,"z":108.56190476190477,"a95":0.99,"info":"26/08/2014 at 15:13:45"},{"visible":true,"include":false,"step":"60.0","x":-11.994285714285715,"y":3.390285714285714,"z":44.339999999999996,"a95":0.99,"info":"26/08/2014 at 15:13:45"},{"visible":true,"include":false,"step":"70.0","x":-9.646666666666667,"y":16.438095238095237,"z":11.696190476190477,"a95":0.99,"info":"26/08/2014 at 15:13:45"},{"visible":true,"include":false,"step":"80.0","x":14.38,"y":-14.113333333333333,"z":38.13142857142857,"a95":0.99,"info":"26/08/2014 at 15:13:45"},{"visible":true,"include":false,"step":"90.0","x":-35.92,"y":42.05714285714286,"z":62.57523809523809,"a95":0.99,"info":"26/08/2014 at 15:13:45"},{"visible":true,"include":false,"step":"100.0","x":-28.44190476190476,"y":51.7952380952381,"z":58.94952380952381,"a95":0.99,"info":"26/08/2014 at 15:13:45"}]},{"version":"v1.1.0","exported":"2017-05-17T14:41:35.989Z","volume":10.5,"added":"2017-05-17T14:38:08.061Z","format":"Utrecht","demagType":"Unknown","strat":"8","patch":1.1,"GEO":[],"TECT":[],"interpreted":false,"name":"KG1.12A","coreAzi":273,"coreDip":56,"bedStrike":229,"bedDip":46,"data":[{"visible":true,"include":false,"step":"0.0","x":-63.05904761904762,"y":41.92,"z":56.656190476190474,"a95":0.99,"info":"26/08/2014 at 15:13:45"},{"visible":true,"include":false,"step":"4.0","x":-56.39142857142857,"y":43.674285714285716,"z":51.68476190476191,"a95":0.99,"info":"26/08/2014 at 15:13:45"},{"visible":true,"include":false,"step":"8.0","x":-40.75333333333334,"y":36.480000000000004,"z":54.78285714285715,"a95":0.99,"info":"26/08/2014 at 15:13:45"},{"visible":true,"include":false,"step":"12.0","x":-51.231428571428566,"y":24.585714285714282,"z":33.57142857142857,"a95":0.99,"info":"26/08/2014 at 15:13:45"},{"visible":true,"include":false,"step":"16.0","x":-47.91904761904762,"y":23.027619047619048,"z":26.362857142857145,"a95":0.99,"info":"26/08/2014 at 15:13:45"},{"visible":true,"include":false,"step":"20.0","x":-35.98571428571429,"y":22.136190476190478,"z":12.890476190476189,"a95":0.99,"info":"26/08/2014 at 15:13:45"},{"visible":true,"include":false,"step":"25.0","x":-18.46095238095238,"y":15.104761904761904,"z":8.285333333333332,"a95":0.99,"info":"26/08/2014 at 15:13:45"},{"visible":true,"include":false,"step":"30.0","x":-11.139047619047618,"y":-23.81714285714286,"z":5.221523809523809,"a95":0.99,"info":"26/08/2014 at 15:13:45"},{"visible":true,"include":false,"step":"35.0","x":-20.781904761904762,"y":4.456857142857142,"z":-15.286666666666665,"a95":0.99,"info":"26/08/2014 at 15:13:45"},{"visible":true,"include":false,"step":"40.0","x":-0.15504761904761905,"y":-22.004761904761907,"z":29.696190476190477,"a95":0.99,"info":"26/08/2014 at 15:13:45"},{"visible":true,"include":false,"step":"45.0","x":-10.152380952380952,"y":-8.022761904761905,"z":23.98190476190476,"a95":0.99,"info":"26/08/2014 at 15:13:45"},{"visible":true,"include":false,"step":"50.0","x":-0.7012380952380953,"y":-29.88285714285714,"z":21.934285714285714,"a95":0.99,"info":"26/08/2014 at 15:13:45"},{"visible":true,"include":false,"step":"60.0","x":-7.095238095238095,"y":-20.295238095238094,"z":18.197142857142858,"a95":0.99,"info":"26/08/2014 at 15:13:45"},{"visible":true,"include":false,"step":"70.0","x":9.582857142857144,"y":-18.75047619047619,"z":31.285714285714285,"a95":0.99,"info":"26/08/2014 at 15:13:45"},{"visible":true,"include":false,"step":"80.0","x":19.18190476190476,"y":-24.282857142857143,"z":12.129523809523809,"a95":0.99,"info":"26/08/2014 at 15:13:45"},{"visible":true,"include":false,"step":"90.0","x":-5.068095238095238,"y":-10.667619047619048,"z":-6.7358095238095235,"a95":0.99,"info":"26/08/2014 at 15:13:45"},{"visible":true,"include":false,"step":"100.0","x":14.563809523809523,"y":-17.371428571428574,"z":-1.9524761904761907,"a95":0.99,"info":"26/08/2014 at 15:13:45"}]},{"version":"v1.1.0","exported":"2017-05-17T14:41:35.989Z","volume":10.5,"added":"2017-05-17T14:38:08.061Z","format":"Utrecht","demagType":"Unknown","strat":"7","patch":1.1,"GEO":[],"TECT":[],"interpreted":false,"name":"KG1.12B","coreAzi":273,"coreDip":56,"bedStrike":229,"bedDip":46,"data":[{"visible":true,"include":false,"step":"0.0","x":-122.47619047619048,"y":68.8247619047619,"z":119.93333333333332,"a95":0.99,"info":"05/11/2014 at 22:47:31"},{"visible":true,"include":false,"step":"10.0","x":-99.21904761904761,"y":59.90190476190477,"z":67.26666666666667,"a95":0.99,"info":"05/11/2014 at 22:47:31"},{"visible":true,"include":false,"step":"15.0","x":-83.40285714285714,"y":51.23428571428572,"z":61.05904761904762,"a95":0.99,"info":"05/11/2014 at 22:47:31"},{"visible":true,"include":false,"step":"20.0","x":-72.33428571428571,"y":45.99142857142857,"z":63.69523809523809,"a95":0.99,"info":"05/11/2014 at 22:47:31"},{"visible":true,"include":false,"step":"25.0","x":-54.3552380952381,"y":56.722857142857144,"z":58.021904761904764,"a95":0.99,"info":"05/11/2014 at 22:47:31"},{"visible":true,"include":false,"step":"30.0","x":-40.831428571428575,"y":50.27428571428571,"z":56.26095238095238,"a95":0.99,"info":"05/11/2014 at 22:47:31"},{"visible":true,"include":false,"step":"35.0","x":-34.25142857142857,"y":64.75619047619048,"z":51.39809523809523,"a95":0.99,"info":"05/11/2014 at 22:47:31"},{"visible":true,"include":false,"step":"40.0","x":-43.49714285714286,"y":-2.6246666666666667,"z":31.59904761904762,"a95":0.99,"info":"05/11/2014 at 22:47:31"},{"visible":true,"include":false,"step":"45.0","x":-56.85142857142858,"y":34.174285714285716,"z":37.33047619047619,"a95":0.99,"info":"05/11/2014 at 22:47:31"},{"visible":true,"include":false,"step":"50.0","x":-24.600952380952382,"y":14.235238095238095,"z":25.385714285714286,"a95":0.99,"info":"05/11/2014 at 22:47:31"},{"visible":true,"include":false,"step":"60.0","x":-23.514285714285716,"y":26.299999999999997,"z":11.988571428571428,"a95":0.99,"info":"05/11/2014 at 22:47:31"},{"visible":true,"include":false,"step":"70.0","x":-47.44190476190476,"y":-2.3979999999999997,"z":16.81714285714286,"a95":0.99,"info":"05/11/2014 at 22:47:31"},{"visible":true,"include":false,"step":"80.0","x":-12.972380952380954,"y":-1.1228571428571428,"z":35.331428571428575,"a95":0.99,"info":"05/11/2014 at 22:47:31"},{"visible":true,"include":false,"step":"90.0","x":-13.097142857142858,"y":51.29238095238096,"z":12.014285714285714,"a95":0.99,"info":"05/11/2014 at 22:47:31"}]},{"version":"v1.1.0","exported":"2017-05-17T14:41:35.989Z","volume":10.5,"added":"2017-05-17T14:38:08.061Z","format":"Utrecht","demagType":"Unknown","strat":"1","patch":1.1,"GEO":[],"TECT":[],"interpreted":false,"name":"KG1.13B","coreAzi":271,"coreDip":56,"bedStrike":229,"bedDip":46,"data":[{"visible":true,"include":false,"step":"0.0","x":-69.16095238095238,"y":51.021904761904764,"z":89.15142857142857,"a95":0.99,"info":"26/08/2014 at 20:40:45"},{"visible":true,"include":false,"step":"4.0","x":-55.90761904761904,"y":46.59619047619047,"z":78.01142857142857,"a95":0.99,"info":"26/08/2014 at 20:40:45"},{"visible":true,"include":false,"step":"8.0","x":-47.23142857142857,"y":39.90571428571428,"z":74.82190476190476,"a95":0.99,"info":"26/08/2014 at 20:40:45"},{"visible":true,"include":false,"step":"12.0","x":-34.75714285714285,"y":41.354285714285716,"z":61.54666666666667,"a95":0.99,"info":"26/08/2014 at 20:40:45"},{"visible":true,"include":false,"step":"16.0","x":-44.13428571428572,"y":20.615238095238094,"z":48.44,"a95":0.99,"info":"26/08/2014 at 20:40:45"},{"visible":true,"include":false,"step":"20.0","x":-33.670476190476194,"y":19.19904761904762,"z":60.36761904761905,"a95":0.99,"info":"26/08/2014 at 20:40:45"},{"visible":true,"include":false,"step":"25.0","x":-32.71809523809524,"y":6.319428571428571,"z":20.82,"a95":0.99,"info":"26/08/2014 at 20:40:45"},{"visible":true,"include":false,"step":"30.0","x":-40.825714285714284,"y":34.406666666666666,"z":19.65904761904762,"a95":0.99,"info":"26/08/2014 at 20:40:45"},{"visible":true,"include":false,"step":"35.0","x":-51.94571428571428,"y":26.771428571428572,"z":-0.8449619047619047,"a95":0.99,"info":"26/08/2014 at 20:40:45"},{"visible":true,"include":false,"step":"40.0","x":-42.35333333333333,"y":36.62380952380953,"z":-4.311047619047619,"a95":0.99,"info":"26/08/2014 at 20:40:45"},{"visible":true,"include":false,"step":"45.0","x":-25.788571428571426,"y":-21.281904761904762,"z":25.37809523809524,"a95":0.99,"info":"26/08/2014 at 20:40:45"},{"visible":true,"include":false,"step":"50.0","x":-7.523333333333333,"y":0.9974285714285716,"z":27.77714285714286,"a95":0.99,"info":"26/08/2014 at 20:40:45"},{"visible":true,"include":false,"step":"60.0","x":-25.245714285714286,"y":3.460285714285714,"z":8.656761904761904,"a95":0.99,"info":"26/08/2014 at 20:40:45"},{"visible":true,"include":false,"step":"70.0","x":-6.195714285714287,"y":-18.596190476190475,"z":-4.540857142857143,"a95":0.99,"info":"26/08/2014 at 20:40:45"},{"visible":true,"include":false,"step":"80.0","x":-23.603809523809524,"y":4.097047619047619,"z":-7.220000000000001,"a95":0.99,"info":"26/08/2014 at 20:40:45"},{"visible":true,"include":false,"step":"90.0","x":-12.355238095238095,"y":-3.3460952380952382,"z":-0.8663714285714286,"a95":0.99,"info":"26/08/2014 at 20:40:45"},{"visible":true,"include":false,"step":"100.0","x":11.636190476190476,"y":21.404761904761905,"z":26.723809523809525,"a95":0.99,"info":"26/08/2014 at 20:40:45"}]},{"version":"v1.1.0","exported":"2017-05-17T14:41:35.989Z","volume":10.5,"added":"2017-05-17T14:38:08.061Z","format":"Utrecht","demagType":"Unknown","strat":null,"patch":1.1,"GEO":[],"TECT":[],"interpreted":false,"name":"KG1.14A","coreAzi":269,"coreDip":59,"bedStrike":229,"bedDip":46,"data":[{"visible":true,"include":false,"step":"20","x":-94.76190476190476,"y":92.0952380952381,"z":84,"a95":2.1,"info":"\"14-09-15\" at \"15:13\""},{"visible":true,"include":false,"step":"100","x":-61.714285714285715,"y":49.714285714285715,"z":86.95238095238095,"a95":2.6,"info":"\"14-09-15\" at \"19:16\""},{"visible":true,"include":false,"step":"150","x":-40.46666666666666,"y":27.35238095238095,"z":77.02857142857142,"a95":4.7,"info":"\"14-09-15\" at \"21:26\""},{"visible":true,"include":false,"step":"180","x":-39.44761904761905,"y":24.447619047619046,"z":63.161904761904765,"a95":4.1,"info":"\"14-09-16\" at \"10:28\""},{"visible":true,"include":false,"step":"210","x":-24.390476190476193,"y":-11.152380952380952,"z":57.590476190476195,"a95":5.1,"info":"\"14-09-16\" at \"13:09\""},{"visible":true,"include":false,"step":"240","x":-31.571428571428573,"y":-3.1904761904761907,"z":61.03809523809524,"a95":3.3,"info":"\"14-09-16\" at \"15:49\""},{"visible":true,"include":false,"step":"270","x":-17.295238095238094,"y":10.40952380952381,"z":48.39047619047619,"a95":4.5,"info":"\"14-09-16\" at \"18:38\""},{"visible":true,"include":false,"step":"300","x":-11.761904761904763,"y":-5.447619047619048,"z":57.62857142857143,"a95":2.9,"info":"\"14-09-17\" at \"10:06\""},{"visible":true,"include":false,"step":"320","x":-9.057142857142857,"y":-1.9238095238095236,"z":59.99047619047619,"a95":3.3,"info":"\"14-09-17\" at \"13:24\""},{"visible":true,"include":false,"step":"340","x":41.266666666666666,"y":5.571428571428571,"z":54.84761904761905,"a95":4.8,"info":"\"14-09-17\" at \"16:38\""},{"visible":true,"include":false,"step":"370","x":1.0380952380952382,"y":-9.752380952380953,"z":30.64761904761905,"a95":12.5,"info":"\"14-09-17\" at \"21:46\""},{"visible":true,"include":false,"step":"390","x":-13.952380952380953,"y":-14.704761904761906,"z":23.780952380952378,"a95":7.4,"info":"\"14-09-18\" at \"11:03\""},{"visible":true,"include":false,"step":"420","x":-32.2,"y":10.609523809523811,"z":4.885714285714285,"a95":13,"info":"\"14-09-18\" at \"14:05\""}]},{"version":"v1.1.0","exported":"2017-05-17T14:41:35.989Z","volume":10.5,"added":"2017-05-17T14:38:08.062Z","format":"Utrecht","demagType":"Unknown","strat":"2","patch":1.1,"GEO":[{"dec":351.6444980541387,"inc":56.71038503540479,"MAD":4.601572709584873,"cm":[-2.220446049250313e-15,-9.43689570931383e-16,0],"intensity":195.84085556952635,"type":"dir","forced":true,"remark":"","origin":false,"nSteps":12,"minStep":"8.0","maxStep":"70.0","steps":["8.0","12.0","16.0","20.0","25.0","30.0","35.0","40.0","45.0","50.0","60.0","70.0"],"group":"None","version":"v1.1.0"}],"TECT":[{"dec":336.7966578283508,"inc":14.371836276204347,"MAD":4.601572709584849,"cm":[4.440892098500626e-16,-3.219646771412954e-15,-2.0539125955565396e-15],"intensity":195.84085556952638,"type":"dir","forced":true,"remark":"","origin":false,"nSteps":12,"minStep":"8.0","maxStep":"70.0","steps":["8.0","12.0","16.0","20.0","25.0","30.0","35.0","40.0","45.0","50.0","60.0","70.0"],"group":"None","version":"v1.1.0"}],"interpreted":true,"name":"KG1.14B","coreAzi":269,"coreDip":59,"bedStrike":229,"bedDip":46,"data":[{"visible":true,"include":false,"step":"0.0","x":-77.8742857142857,"y":96.53333333333333,"z":143.45714285714286,"a95":0.99,"info":"26/08/2014 at 20:40:45"},{"visible":true,"include":false,"step":"4.0","x":-72.10952380952381,"y":92.46761904761904,"z":134.03809523809525,"a95":0.99,"info":"26/08/2014 at 20:40:45"},{"visible":true,"include":true,"step":"8.0","x":-68.35428571428572,"y":84.37333333333333,"z":122.23809523809524,"a95":0.99,"info":"26/08/2014 at 20:40:45"},{"visible":true,"include":true,"step":"12.0","x":-54.505714285714284,"y":80.41142857142857,"z":101.34285714285713,"a95":0.99,"info":"26/08/2014 at 20:40:45"},{"visible":true,"include":true,"step":"16.0","x":-45.1447619047619,"y":61.25428571428571,"z":88.15904761904761,"a95":0.99,"info":"26/08/2014 at 20:40:45"},{"visible":true,"include":true,"step":"20.0","x":-34.301904761904765,"y":50.31714285714286,"z":82.17904761904762,"a95":0.99,"info":"26/08/2014 at 20:40:45"},{"visible":true,"include":true,"step":"25.0","x":-14.417142857142856,"y":47.78380952380952,"z":67.38952380952381,"a95":0.99,"info":"26/08/2014 at 20:40:45"},{"visible":true,"include":true,"step":"30.0","x":-33.90571428571428,"y":53.086666666666666,"z":81.43238095238095,"a95":0.99,"info":"26/08/2014 at 20:40:45"},{"visible":true,"include":true,"step":"35.0","x":-40.660000000000004,"y":47.875238095238096,"z":68.20857142857143,"a95":0.99,"info":"26/08/2014 at 20:40:45"},{"visible":true,"include":true,"step":"40.0","x":-31.934285714285714,"y":47.60190476190476,"z":60.55047619047619,"a95":0.99,"info":"26/08/2014 at 20:40:45"},{"visible":true,"include":true,"step":"45.0","x":-28.61714285714286,"y":55.87904761904762,"z":66.08,"a95":0.99,"info":"26/08/2014 at 20:40:45"},{"visible":true,"include":true,"step":"50.0","x":-25.004761904761907,"y":33.09142857142857,"z":49.89333333333333,"a95":0.99,"info":"26/08/2014 at 20:40:45"},{"visible":true,"include":true,"step":"60.0","x":-21.606666666666666,"y":43.73904761904762,"z":45.74285714285715,"a95":0.99,"info":"26/08/2014 at 20:40:45"},{"visible":true,"include":true,"step":"70.0","x":-14.928571428571429,"y":19.395238095238096,"z":21.461904761904762,"a95":0.99,"info":"26/08/2014 at 20:40:45"},{"visible":true,"include":false,"step":"80.0","x":-12.077142857142857,"y":25.30666666666667,"z":20.795238095238094,"a95":0.99,"info":"26/08/2014 at 20:40:45"},{"visible":true,"include":false,"step":"90.0","x":-6.673238095238095,"y":21.017142857142858,"z":17.68095238095238,"a95":0.99,"info":"26/08/2014 at 20:40:45"},{"visible":true,"include":false,"step":"100.0","x":0.700352380952381,"y":15.933333333333334,"z":21.49904761904762,"a95":0.99,"info":"26/08/2014 at 20:40:45"}]},{"version":"v1.1.0","exported":"2017-05-17T14:41:35.989Z","volume":10.5,"added":"2017-05-17T14:38:08.062Z","format":"Utrecht","demagType":"Unknown","strat":"3","patch":1.1,"GEO":[{"dec":13.063139293241193,"inc":61.96869022736816,"MAD":8.53396485285983,"cm":[-6.661338147750939e-16,-1.3322676295501878e-15,0],"intensity":115.0984001151242,"type":"dir","forced":true,"remark":"","origin":false,"nSteps":10,"minStep":"8.0","maxStep":"50.0","steps":["8.0","12.0","16.0","20.0","25.0","30.0","35.0","40.0","45.0","50.0"],"group":"None","version":"v1.1.0"}],"TECT":[{"dec":343.71911914605107,"inc":24.50454670641556,"MAD":8.533964852859823,"cm":[-1.5543122344752192e-15,-5.218048215738236e-15,5.551115123125783e-16],"intensity":115.0984001151242,"type":"dir","forced":true,"remark":"","origin":false,"nSteps":10,"minStep":"8.0","maxStep":"50.0","steps":["8.0","12.0","16.0","20.0","25.0","30.0","35.0","40.0","45.0","50.0"],"group":"None","version":"v1.1.0"}],"interpreted":true,"name":"KG1.15A","coreAzi":211,"coreDip":46,"bedStrike":229,"bedDip":46,"data":[{"visible":true,"include":false,"step":"0.0","x":-86.88952380952381,"y":29.71047619047619,"z":38.798095238095236,"a95":0.99,"info":"26/08/2014 at 20:40:45"},{"visible":true,"include":false,"step":"4.0","x":-78.51904761904763,"y":31.106666666666666,"z":31.62190476190476,"a95":0.99,"info":"26/08/2014 at 20:40:45"},{"visible":true,"include":true,"step":"8.0","x":-74.16666666666667,"y":18.556190476190476,"z":22.455238095238094,"a95":0.99,"info":"26/08/2014 at 20:40:45"},{"visible":true,"include":true,"step":"12.0","x":-59.40380952380953,"y":7.642952380952382,"z":24.940952380952382,"a95":0.99,"info":"26/08/2014 at 20:40:45"},{"visible":true,"include":true,"step":"16.0","x":-58.41238095238096,"y":12.234285714285715,"z":21.984761904761903,"a95":0.99,"info":"26/08/2014 at 20:40:45"},{"visible":true,"include":true,"step":"20.0","x":-59.95619047619047,"y":8.141238095238096,"z":12.162857142857142,"a95":0.99,"info":"26/08/2014 at 20:40:45"},{"visible":true,"include":true,"step":"25.0","x":-45.89047619047619,"y":7.614380952380952,"z":8.564190476190477,"a95":0.99,"info":"26/08/2014 at 20:40:45"},{"visible":true,"include":true,"step":"30.0","x":-41.75714285714285,"y":6.599714285714286,"z":27.935238095238095,"a95":0.99,"info":"26/08/2014 at 20:40:45"},{"visible":true,"include":true,"step":"35.0","x":-46.62761904761904,"y":-4.479333333333334,"z":20.103809523809524,"a95":0.99,"info":"26/08/2014 at 20:40:45"},{"visible":true,"include":true,"step":"40.0","x":-30.545714285714286,"y":1.7751428571428571,"z":3.0354285714285716,"a95":0.99,"info":"26/08/2014 at 20:40:45"},{"visible":true,"include":true,"step":"45.0","x":-21.486666666666668,"y":8.950952380952382,"z":6.8320952380952376,"a95":0.99,"info":"26/08/2014 at 20:40:45"},{"visible":true,"include":true,"step":"50.0","x":-32.61523809523809,"y":2.5407619047619048,"z":14.963809523809525,"a95":0.99,"info":"26/08/2014 at 20:40:45"},{"visible":true,"include":false,"step":"60.0","x":-13.67904761904762,"y":3.3193333333333337,"z":-0.9406666666666668,"a95":0.99,"info":"26/08/2014 at 20:40:45"},{"visible":true,"include":false,"step":"70.0","x":-26.254285714285714,"y":4.482,"z":17.32857142857143,"a95":0.99,"info":"26/08/2014 at 20:40:45"},{"visible":true,"include":false,"step":"80.0","x":-16.415238095238095,"y":-3.513904761904762,"z":8.815428571428571,"a95":0.99,"info":"26/08/2014 at 20:40:45"},{"visible":true,"include":false,"step":"90.0","x":-9.847619047619048,"y":2.667904761904762,"z":1.016190476190476,"a95":0.99,"info":"26/08/2014 at 20:40:45"},{"visible":true,"include":false,"step":"100.0","x":-4.662,"y":11.139047619047618,"z":18.734285714285715,"a95":0.99,"info":"26/08/2014 at 20:40:45"}]},{"version":"v1.1.0","exported":"2017-05-17T14:41:35.989Z","volume":10.5,"added":"2017-05-17T14:38:08.062Z","format":"Utrecht","demagType":"Unknown","strat":"8","patch":1.1,"GEO":[{"dec":14.73167267985184,"inc":63.39961677691792,"MAD":2.570588847724221,"cm":[-1.7763568394002505e-15,4.3298697960381105e-15,0],"intensity":223.56979584778327,"type":"dir","forced":true,"remark":"","origin":false,"nSteps":5,"minStep":"10.0","maxStep":"30.0","steps":["10.0","15.0","20.0","25.0","30.0"],"group":"None","version":"v1.1.0"}],"TECT":[{"dec":343.3316138425157,"inc":26.08906078584044,"MAD":2.570588847724201,"cm":[8.881784197001252e-16,-4.884981308350689e-15,8.881784197001252e-16],"intensity":223.56979584778327,"type":"dir","forced":true,"remark":"","origin":false,"nSteps":5,"minStep":"10.0","maxStep":"30.0","steps":["10.0","15.0","20.0","25.0","30.0"],"group":"None","version":"v1.1.0"}],"interpreted":true,"name":"KG1.15B","coreAzi":211,"coreDip":46,"bedStrike":229,"bedDip":46,"data":[{"visible":true,"include":false,"step":"0.0","x":-158,"y":28.77904761904762,"z":66.66857142857143,"a95":0.99,"info":"05/11/2014 at 22:47:31"},{"visible":true,"include":true,"step":"10.0","x":-134.07619047619048,"y":20.210476190476193,"z":52.333333333333336,"a95":0.99,"info":"05/11/2014 at 22:47:31"},{"visible":true,"include":true,"step":"15.0","x":-122.79047619047618,"y":13.13238095238095,"z":43.65904761904762,"a95":0.99,"info":"05/11/2014 at 22:47:31"},{"visible":true,"include":true,"step":"20.0","x":-111.8952380952381,"y":16.081904761904763,"z":33.56761904761905,"a95":0.99,"info":"05/11/2014 at 22:47:31"},{"visible":true,"include":true,"step":"25.0","x":-84.99714285714286,"y":10.691428571428572,"z":33.666666666666664,"a95":0.99,"info":"05/11/2014 at 22:47:31"},{"visible":true,"include":true,"step":"30.0","x":-70.1,"y":10.628571428571428,"z":33.36666666666667,"a95":0.99,"info":"05/11/2014 at 22:47:31"},{"visible":true,"include":false,"step":"35.0","x":-59.417142857142856,"y":23.463809523809523,"z":23.135238095238094,"a95":0.99,"info":"05/11/2014 at 22:47:31"},{"visible":true,"include":false,"step":"40.0","x":-53.450476190476195,"y":-32.60285714285714,"z":18.16761904761905,"a95":0.99,"info":"05/11/2014 at 22:47:31"},{"visible":true,"include":false,"step":"45.0","x":-40.00095238095238,"y":11.16952380952381,"z":20.41904761904762,"a95":0.99,"info":"05/11/2014 at 22:47:31"},{"visible":true,"include":false,"step":"50.0","x":-31.848571428571432,"y":11.527619047619048,"z":19.634285714285713,"a95":0.99,"info":"05/11/2014 at 22:47:31"},{"visible":true,"include":false,"step":"60.0","x":-27.201904761904764,"y":3.3712380952380956,"z":8.802190476190477,"a95":0.99,"info":"05/11/2014 at 22:47:31"},{"visible":true,"include":false,"step":"70.0","x":-20.72,"y":-16.63047619047619,"z":25.133333333333333,"a95":0.99,"info":"05/11/2014 at 22:47:31"},{"visible":true,"include":false,"step":"80.0","x":-25.23333333333333,"y":4.0710476190476195,"z":10.478095238095237,"a95":0.99,"info":"05/11/2014 at 22:47:31"},{"visible":true,"include":false,"step":"90.0","x":-19.476190476190474,"y":-0.7240666666666666,"z":26.741904761904763,"a95":0.99,"info":"05/11/2014 at 22:47:31"}]},{"version":"v1.1.0","exported":"2017-05-17T14:41:35.989Z","volume":10.5,"added":"2017-05-17T14:38:08.062Z","format":"Utrecht","demagType":"Unknown","strat":"4","patch":1.1,"GEO":[{"dec":10.003016750911797,"inc":53.76405030252043,"MAD":3.0624154692608827,"cm":[-8.881784197001252e-16,2.55351295663786e-15,0],"intensity":212.45689809366692,"type":"dir","forced":true,"remark":"","origin":false,"nSteps":6,"minStep":"4.0","maxStep":"25.0","steps":["4.0","8.0","12.0","16.0","20.0","25.0"],"group":"None","version":"v1.1.0"}],"TECT":[{"dec":347.7144925686966,"inc":17.021353924650086,"MAD":3.0624154692609573,"cm":[5.329070518200751e-15,1.176836406102666e-14,3.1086244689504383e-15],"intensity":212.4568980936669,"type":"dir","forced":true,"remark":"","origin":false,"nSteps":6,"minStep":"4.0","maxStep":"25.0","steps":["4.0","8.0","12.0","16.0","20.0","25.0"],"group":"None","version":"v1.1.0"}],"interpreted":true,"name":"KG1.16B","coreAzi":211,"coreDip":44,"bedStrike":229,"bedDip":46,"data":[{"visible":true,"include":false,"step":"0.0","x":-133.2,"y":25.461904761904766,"z":30.31238095238095,"a95":0.99,"info":"26/08/2014 at 20:40:45"},{"visible":true,"include":true,"step":"4.0","x":-128.2952380952381,"y":29.15809523809524,"z":27.25142857142857,"a95":0.99,"info":"26/08/2014 at 20:40:45"},{"visible":true,"include":true,"step":"8.0","x":-121,"y":26.843809523809526,"z":22.91904761904762,"a95":0.99,"info":"26/08/2014 at 20:40:45"},{"visible":true,"include":true,"step":"12.0","x":-104.1047619047619,"y":19.053333333333335,"z":13.557142857142857,"a95":0.99,"info":"26/08/2014 at 20:40:45"},{"visible":true,"include":true,"step":"16.0","x":-92.60380952380953,"y":16.38190476190476,"z":10.624761904761906,"a95":0.99,"info":"26/08/2014 at 20:40:45"},{"visible":true,"include":true,"step":"20.0","x":-80.2104761904762,"y":26.101904761904763,"z":15.863809523809524,"a95":0.99,"info":"26/08/2014 at 20:40:45"},{"visible":true,"include":true,"step":"25.0","x":-76.26190476190476,"y":15.491428571428571,"z":8.814190476190477,"a95":0.99,"info":"26/08/2014 at 20:40:45"},{"visible":true,"include":false,"step":"30.0","x":-58.86095238095238,"y":30.363809523809522,"z":19.146666666666665,"a95":0.99,"info":"26/08/2014 at 20:40:45"},{"visible":true,"include":false,"step":"35.0","x":-52.20666666666666,"y":18.570476190476192,"z":12.577142857142857,"a95":0.99,"info":"26/08/2014 at 20:40:45"},{"visible":true,"include":false,"step":"40.0","x":-41.787619047619046,"y":20.04,"z":6.527333333333334,"a95":0.99,"info":"26/08/2014 at 20:40:45"},{"visible":true,"include":false,"step":"45.0","x":-34.153333333333336,"y":6.424952380952381,"z":14.626666666666669,"a95":0.99,"info":"26/08/2014 at 20:40:45"},{"visible":true,"include":false,"step":"50.0","x":-30.331428571428575,"y":-2.6202857142857146,"z":15.847619047619048,"a95":0.99,"info":"26/08/2014 at 20:40:45"},{"visible":true,"include":false,"step":"60.0","x":-38.156190476190474,"y":1.500952380952381,"z":-7.090857142857142,"a95":0.99,"info":"26/08/2014 at 20:40:45"},{"visible":true,"include":false,"step":"70.0","x":-11.891428571428571,"y":-2.334,"z":0.47978095238095236,"a95":0.99,"info":"26/08/2014 at 20:40:45"},{"visible":true,"include":false,"step":"80.0","x":-17.430476190476192,"y":5.122095238095238,"z":7.528476190476191,"a95":0.99,"info":"26/08/2014 at 20:40:45"},{"visible":true,"include":false,"step":"90.0","x":-11.094285714285714,"y":12.215238095238094,"z":-2.3208571428571427,"a95":0.99,"info":"26/08/2014 at 20:40:45"},{"visible":true,"include":false,"step":"100.0","x":-8.78752380952381,"y":7.839333333333333,"z":8.664285714285715,"a95":0.99,"info":"26/08/2014 at 20:40:45"}]},{"version":"v1.1.0","exported":"2017-05-17T14:41:35.989Z","volume":10.5,"added":"2017-05-17T14:38:08.062Z","format":"Utrecht","demagType":"Unknown","strat":null,"patch":1.1,"GEO":[{"dec":355.72758407128003,"inc":49.51840888338239,"MAD":3.675735843004616,"cm":[4.440892098500626e-16,4.218847493575595e-15,0],"intensity":153.55539495481065,"type":"dir","forced":true,"remark":"","origin":false,"nSteps":7,"minStep":"100","maxStep":"300","steps":["100","150","180","210","240","270","300"],"group":"None","version":"v1.1.0"}],"TECT":[{"dec":342.1364856923585,"inc":8.863096909377088,"MAD":3.675735843004636,"cm":[-2.220446049250313e-15,-7.105427357601002e-15,2.858824288409778e-15],"intensity":153.55539495481062,"type":"dir","forced":true,"remark":"","origin":false,"nSteps":7,"minStep":"100","maxStep":"300","steps":["100","150","180","210","240","270","300"],"group":"None","version":"v1.1.0"}],"interpreted":true,"name":"KG1.17A","coreAzi":200,"coreDip":27,"bedStrike":229,"bedDip":46,"data":[{"visible":true,"include":false,"step":"20","x":-142.1904761904762,"y":35.333333333333336,"z":-54.19047619047619,"a95":2.1,"info":"\"14-09-15\" at \"15:17\""},{"visible":true,"include":true,"step":"100","x":-101.71428571428571,"y":27.428571428571427,"z":-17.904761904761905,"a95":2.7,"info":"\"14-09-15\" at \"19:19\""},{"visible":true,"include":true,"step":"150","x":-74.76190476190476,"y":21.6,"z":-17.933333333333334,"a95":4,"info":"\"14-09-15\" at \"21:29\""},{"visible":true,"include":true,"step":"180","x":-70.5142857142857,"y":15.904761904761905,"z":-8.647619047619047,"a95":2.6,"info":"\"14-09-16\" at \"10:30\""},{"visible":true,"include":true,"step":"210","x":-51.84761904761905,"y":15.600000000000001,"z":-11.58095238095238,"a95":7.5,"info":"\"14-09-16\" at \"13:11\""},{"visible":true,"include":true,"step":"240","x":-59.15238095238095,"y":15.457142857142859,"z":-11.371428571428572,"a95":3,"info":"\"14-09-16\" at \"15:52\""},{"visible":true,"include":true,"step":"270","x":-52.67619047619048,"y":14.638095238095238,"z":-13.77142857142857,"a95":3.7,"info":"\"14-09-16\" at \"18:40\""},{"visible":true,"include":true,"step":"300","x":-41.923809523809524,"y":20.752380952380953,"z":-7.114285714285715,"a95":6.6,"info":"\"14-09-17\" at \"10:09\""},{"visible":true,"include":false,"step":"320","x":-27.43809523809524,"y":-0.1619047619047619,"z":-5.723809523809524,"a95":4,"info":"\"14-09-17\" at \"13:26\""},{"visible":true,"include":false,"step":"340","x":56.92380952380953,"y":2.4571428571428573,"z":-0.0380952380952381,"a95":5.3,"info":"\"14-09-17\" at \"16:40\""},{"visible":true,"include":false,"step":"370","x":-5.038095238095238,"y":-8.19047619047619,"z":-3.542857142857143,"a95":26.9,"info":"\"14-09-17\" at \"21:51\""},{"visible":true,"include":false,"step":"390","x":-25.495238095238093,"y":2.9714285714285715,"z":6.247619047619047,"a95":6,"info":"\"14-09-18\" at \"11:05\""},{"visible":true,"include":false,"step":"420","x":-2.0476190476190474,"y":4.590476190476191,"z":1.980952380952381,"a95":54.7,"info":"\"14-09-18\" at \"14:07\""}]},{"version":"v1.1.0","exported":"2017-05-17T14:41:35.989Z","volume":10.5,"added":"2017-05-17T14:38:08.062Z","format":"Utrecht","demagType":"Unknown","strat":"5","patch":1.1,"GEO":[],"TECT":[],"interpreted":false,"name":"KG1.18B","coreAzi":214,"coreDip":30,"bedStrike":229,"bedDip":46,"data":[{"visible":true,"include":false,"step":"0.0","x":-154.47619047619048,"y":46.875238095238096,"z":0.9563809523809523,"a95":0.99,"info":"26/08/2014 at 20:40:45"},{"visible":true,"include":false,"step":"4.0","x":-138.95238095238096,"y":42.92190476190476,"z":-0.2952952380952381,"a95":0.99,"info":"26/08/2014 at 20:40:45"},{"visible":true,"include":false,"step":"8.0","x":-134.24761904761903,"y":33.005714285714284,"z":-10.016190476190477,"a95":0.99,"info":"26/08/2014 at 20:40:45"},{"visible":true,"include":false,"step":"12.0","x":-118.74285714285713,"y":23.759999999999998,"z":-9.28447619047619,"a95":0.99,"info":"26/08/2014 at 20:40:45"},{"visible":true,"include":false,"step":"16.0","x":-95.85714285714286,"y":17.953333333333333,"z":-9.083047619047619,"a95":0.99,"info":"26/08/2014 at 20:40:45"},{"visible":true,"include":false,"step":"20.0","x":-93.17904761904762,"y":5.219904761904762,"z":0.05414857142857142,"a95":0.99,"info":"26/08/2014 at 20:40:45"},{"visible":true,"include":false,"step":"25.0","x":-76.6952380952381,"y":-1.5700952380952382,"z":-8.253142857142857,"a95":0.99,"info":"26/08/2014 at 20:40:45"},{"visible":true,"include":false,"step":"30.0","x":-61.994285714285716,"y":0.5302952380952382,"z":-6.482000000000001,"a95":0.99,"info":"26/08/2014 at 20:40:45"},{"visible":true,"include":false,"step":"35.0","x":-46.60666666666667,"y":6.234666666666667,"z":6.41152380952381,"a95":0.99,"info":"26/08/2014 at 20:40:45"},{"visible":true,"include":false,"step":"40.0","x":-48.787619047619046,"y":-11.024761904761906,"z":-10.09142857142857,"a95":0.99,"info":"26/08/2014 at 20:40:45"},{"visible":true,"include":false,"step":"45.0","x":-39.55809523809524,"y":-7.873047619047619,"z":-7.033619047619047,"a95":0.99,"info":"26/08/2014 at 20:40:45"},{"visible":true,"include":false,"step":"50.0","x":-41.668571428571425,"y":0.7128285714285715,"z":-12.413333333333334,"a95":0.99,"info":"26/08/2014 at 20:40:45"},{"visible":true,"include":false,"step":"60.0","x":-27.746666666666663,"y":-7.534857142857143,"z":-5.381428571428572,"a95":0.99,"info":"26/08/2014 at 20:40:45"},{"visible":true,"include":false,"step":"70.0","x":-38.74095238095238,"y":-1.0527619047619048,"z":-4.140476190476191,"a95":0.99,"info":"26/08/2014 at 20:40:45"},{"visible":true,"include":false,"step":"80.0","x":-53.12571428571429,"y":-2.1246666666666667,"z":-19.85904761904762,"a95":0.99,"info":"26/08/2014 at 20:40:45"},{"visible":true,"include":false,"step":"90.0","x":-29.975238095238097,"y":13.423809523809522,"z":-6.479523809523809,"a95":0.99,"info":"26/08/2014 at 20:40:45"},{"visible":true,"include":false,"step":"100.0","x":-38.15714285714286,"y":5.240666666666667,"z":-20.94952380952381,"a95":0.99,"info":"26/08/2014 at 20:40:45"}]},{"version":"v1.1.0","exported":"2017-05-17T14:41:35.989Z","volume":10.5,"added":"2017-05-17T14:38:08.062Z","format":"Utrecht","demagType":"Unknown","strat":"6","patch":1.1,"GEO":[],"TECT":[],"interpreted":false,"name":"KG1.19A","coreAzi":185,"coreDip":41,"bedStrike":229,"bedDip":46,"data":[{"visible":true,"include":false,"step":"0.0","x":-103.9047619047619,"y":19.68190476190476,"z":37.75904761904762,"a95":0.99,"info":"26/08/2014 at 20:40:45"},{"visible":true,"include":false,"step":"4.0","x":-91.53238095238096,"y":26.624761904761904,"z":33.640952380952385,"a95":0.99,"info":"26/08/2014 at 20:40:45"},{"visible":true,"include":false,"step":"8.0","x":-84.0247619047619,"y":23.089523809523808,"z":27.33809523809524,"a95":0.99,"info":"26/08/2014 at 20:40:45"},{"visible":true,"include":false,"step":"12.0","x":-70.95809523809524,"y":18.85142857142857,"z":19.128571428571426,"a95":0.99,"info":"26/08/2014 at 20:40:45"},{"visible":true,"include":false,"step":"16.0","x":-67.71523809523809,"y":19.624761904761904,"z":16.62761904761905,"a95":0.99,"info":"26/08/2014 at 20:40:45"},{"visible":true,"include":false,"step":"20.0","x":-50.663809523809526,"y":18.813333333333333,"z":25.905714285714286,"a95":0.99,"info":"26/08/2014 at 20:40:45"},{"visible":true,"include":false,"step":"25.0","x":-45.99333333333333,"y":19.37047619047619,"z":31.74857142857143,"a95":0.99,"info":"26/08/2014 at 20:40:45"},{"visible":true,"include":false,"step":"30.0","x":-27.538095238095234,"y":22.55809523809524,"z":20.895238095238096,"a95":0.99,"info":"26/08/2014 at 20:40:45"},{"visible":true,"include":false,"step":"35.0","x":-24.824761904761907,"y":19.14761904761905,"z":23.81904761904762,"a95":0.99,"info":"26/08/2014 at 20:40:45"},{"visible":true,"include":false,"step":"40.0","x":-14.36095238095238,"y":25.49809523809524,"z":20.135238095238094,"a95":0.99,"info":"26/08/2014 at 20:40:45"},{"visible":true,"include":false,"step":"45.0","x":-27.06857142857143,"y":18.524761904761903,"z":13.046666666666667,"a95":0.99,"info":"26/08/2014 at 20:40:45"},{"visible":true,"include":false,"step":"50.0","x":-17.786666666666665,"y":8.164666666666667,"z":29.983809523809523,"a95":0.99,"info":"26/08/2014 at 20:40:45"},{"visible":true,"include":false,"step":"60.0","x":-16.75809523809524,"y":12.142857142857142,"z":15.056190476190476,"a95":0.99,"info":"26/08/2014 at 20:40:45"},{"visible":true,"include":false,"step":"70.0","x":1.3029523809523809,"y":2.8988571428571426,"z":14.869523809523809,"a95":0.99,"info":"26/08/2014 at 20:40:45"},{"visible":true,"include":false,"step":"80.0","x":-21.333333333333332,"y":1.3105714285714285,"z":32.205714285714286,"a95":0.99,"info":"26/08/2014 at 20:40:45"},{"visible":true,"include":false,"step":"90.0","x":-19.433333333333334,"y":7.056476190476191,"z":2.701142857142857,"a95":0.99,"info":"26/08/2014 at 20:40:45"},{"visible":true,"include":false,"step":"100.0","x":-15.12,"y":11.143809523809525,"z":20.02,"a95":0.99,"info":"26/08/2014 at 20:40:45"}]},{"version":"v1.1.0","exported":"2017-05-17T14:41:35.989Z","volume":10.5,"added":"2017-05-17T14:38:08.063Z","format":"Utrecht","demagType":"Unknown","strat":"7","patch":1.1,"GEO":[{"dec":9.428463887746375,"inc":62.117241396590735,"MAD":4.408192137389239,"cm":[-1.7763568394002505e-15,-2.6645352591003757e-15,0],"intensity":167.3676095470313,"type":"dir","forced":true,"remark":"","origin":false,"nSteps":5,"minStep":"12.0","maxStep":"30.0","steps":["12.0","16.0","20.0","25.0","30.0"],"group":"None","version":"v1.1.0"}],"TECT":[{"dec":342.1581880132091,"inc":23.55982970617903,"MAD":4.4081921373891975,"cm":[-3.552713678800501e-15,-1.8207657603852567e-14,4.440892098500626e-16],"intensity":167.36760954703132,"type":"dir","forced":true,"remark":"","origin":false,"nSteps":5,"minStep":"12.0","maxStep":"30.0","steps":["12.0","16.0","20.0","25.0","30.0"],"group":"None","version":"v1.1.0"}],"interpreted":true,"name":"KG1.20B","coreAzi":173,"coreDip":34,"bedStrike":229,"bedDip":46,"data":[{"visible":true,"include":false,"step":"0.0","x":-143.38095238095238,"y":-27.044761904761906,"z":13.814285714285715,"a95":0.99,"info":"26/08/2014 at 20:40:45"},{"visible":true,"include":false,"step":"4.0","x":-130.6,"y":-19.25047619047619,"z":2.9321904761904762,"a95":0.99,"info":"26/08/2014 at 20:40:45"},{"visible":true,"include":false,"step":"8.0","x":-113.03809523809525,"y":-16.34952380952381,"z":6.3762857142857134,"a95":0.99,"info":"26/08/2014 at 20:40:45"},{"visible":true,"include":true,"step":"12.0","x":-102.9904761904762,"y":-14.225714285714286,"z":18.024761904761903,"a95":0.99,"info":"26/08/2014 at 20:40:45"},{"visible":true,"include":true,"step":"16.0","x":-97.83809523809524,"y":-4.278666666666667,"z":7.052476190476191,"a95":0.99,"info":"26/08/2014 at 20:40:45"},{"visible":true,"include":true,"step":"20.0","x":-86.11714285714285,"y":-15.164761904761903,"z":8.090761904761905,"a95":0.99,"info":"26/08/2014 at 20:40:45"},{"visible":true,"include":true,"step":"25.0","x":-67.21619047619048,"y":-17.302857142857142,"z":9.665714285714285,"a95":0.99,"info":"26/08/2014 at 20:40:45"},{"visible":true,"include":true,"step":"30.0","x":-60.78476190476191,"y":-7.1662857142857135,"z":9.030190476190475,"a95":0.99,"info":"26/08/2014 at 20:40:45"},{"visible":true,"include":false,"step":"35.0","x":-55.61619047619048,"y":-7.833333333333333,"z":-13.440000000000001,"a95":0.99,"info":"26/08/2014 at 20:40:45"},{"visible":true,"include":false,"step":"40.0","x":-52.43333333333333,"y":6.189619047619048,"z":-7.102857142857142,"a95":0.99,"info":"26/08/2014 at 20:40:45"},{"visible":true,"include":false,"step":"45.0","x":-51.43047619047619,"y":10.432380952380953,"z":-4.256285714285714,"a95":0.99,"info":"26/08/2014 at 20:40:45"},{"visible":true,"include":false,"step":"50.0","x":-52.037142857142854,"y":-8.791809523809523,"z":-11.564761904761905,"a95":0.99,"info":"26/08/2014 at 20:40:45"},{"visible":true,"include":false,"step":"60.0","x":-40.75142857142857,"y":1.4801904761904763,"z":-5.475904761904762,"a95":0.99,"info":"26/08/2014 at 20:40:45"},{"visible":true,"include":false,"step":"70.0","x":-16.096190476190475,"y":-10.737142857142857,"z":-1.4808571428571429,"a95":0.99,"info":"26/08/2014 at 20:40:45"},{"visible":true,"include":false,"step":"80.0","x":2.737142857142857,"y":13.497142857142856,"z":-0.20274285714285714,"a95":0.99,"info":"26/08/2014 at 20:40:45"},{"visible":true,"include":false,"step":"90.0","x":-19.11809523809524,"y":2.5580000000000003,"z":-1.3612380952380951,"a95":0.99,"info":"26/08/2014 at 20:40:45"},{"visible":true,"include":false,"step":"100.0","x":-26.175238095238093,"y":-3.3668571428571425,"z":-14.704761904761906,"a95":0.99,"info":"26/08/2014 at 20:40:45"}]},{"version":"v1.1.0","exported":"2017-05-17T14:41:35.989Z","volume":10.5,"added":"2017-05-17T14:38:08.063Z","format":"Utrecht","demagType":"Unknown","strat":"8","patch":1.1,"GEO":[],"TECT":[],"interpreted":false,"name":"KG1.21B","coreAzi":165,"coreDip":28,"bedStrike":229,"bedDip":46,"data":[{"visible":true,"include":false,"step":"0.0","x":-248.43809523809523,"y":-64.29714285714286,"z":28.55714285714286,"a95":0.99,"info":"26/08/2014 at 20:40:45"},{"visible":true,"include":false,"step":"4.0","x":-223.33333333333334,"y":-56.98190476190476,"z":18.865714285714287,"a95":0.99,"info":"26/08/2014 at 20:40:45"},{"visible":true,"include":false,"step":"8.0","x":-192.9142857142857,"y":-47.76857142857143,"z":13.159047619047618,"a95":0.99,"info":"26/08/2014 at 20:40:45"},{"visible":true,"include":false,"step":"12.0","x":-170.15238095238095,"y":-48.61047619047619,"z":18.84095238095238,"a95":0.99,"info":"26/08/2014 at 20:40:45"},{"visible":true,"include":false,"step":"16.0","x":-170.63809523809525,"y":-44.166666666666664,"z":4.078761904761905,"a95":0.99,"info":"26/08/2014 at 20:40:45"},{"visible":true,"include":false,"step":"20.0","x":-133.85714285714286,"y":-50.948571428571434,"z":11.525714285714285,"a95":0.99,"info":"26/08/2014 at 20:40:45"},{"visible":true,"include":false,"step":"25.0","x":-124.76190476190476,"y":-48.17523809523809,"z":-5.633333333333333,"a95":0.99,"info":"26/08/2014 at 20:40:45"},{"visible":true,"include":false,"step":"30.0","x":-102.1047619047619,"y":-41.561904761904756,"z":9.717142857142857,"a95":0.99,"info":"26/08/2014 at 20:40:45"},{"visible":true,"include":false,"step":"35.0","x":-105.45714285714286,"y":-67.24190476190476,"z":-1.2630476190476192,"a95":0.99,"info":"26/08/2014 at 20:40:45"},{"visible":true,"include":false,"step":"40.0","x":-109.77142857142856,"y":-55.465714285714284,"z":-17.99904761904762,"a95":0.99,"info":"26/08/2014 at 20:40:45"},{"visible":true,"include":false,"step":"45.0","x":-90.50761904761904,"y":-28.539047619047622,"z":-28.59142857142857,"a95":0.99,"info":"26/08/2014 at 20:40:45"},{"visible":true,"include":false,"step":"50.0","x":-75.44095238095238,"y":-16.29619047619048,"z":-26.286666666666665,"a95":0.99,"info":"26/08/2014 at 20:40:45"},{"visible":true,"include":false,"step":"60.0","x":-96.81904761904762,"y":-18.961904761904762,"z":-3.4491428571428573,"a95":0.99,"info":"26/08/2014 at 20:40:45"},{"visible":true,"include":false,"step":"70.0","x":-60.13428571428571,"y":-28.725714285714286,"z":-16.312380952380952,"a95":0.99,"info":"26/08/2014 at 20:40:45"},{"visible":true,"include":false,"step":"80.0","x":-68.00285714285714,"y":-5.872190476190476,"z":1.032,"a95":0.99,"info":"26/08/2014 at 20:40:45"},{"visible":true,"include":false,"step":"90.0","x":-40.72666666666667,"y":-27.81238095238095,"z":-4.511333333333333,"a95":0.99,"info":"26/08/2014 at 20:40:45"},{"visible":true,"include":false,"step":"100.0","x":-27.723809523809525,"y":-30.21809523809524,"z":-1.751047619047619,"a95":0.99,"info":"26/08/2014 at 20:40:45"}]},{"version":"v1.1.0","exported":"2017-05-17T14:41:35.989Z","volume":10.5,"added":"2017-05-17T14:38:08.063Z","format":"Utrecht","demagType":"Unknown","strat":null,"patch":1.1,"GEO":[],"TECT":[],"interpreted":false,"name":"KG1.22A","coreAzi":232,"coreDip":45,"bedStrike":229,"bedDip":46,"data":[{"visible":true,"include":false,"step":"20","x":-98.38095238095238,"y":39.61904761904762,"z":70.85714285714286,"a95":2.3,"info":"\"14-09-15\" at \"15:19\""},{"visible":true,"include":false,"step":"100","x":-70.37142857142857,"y":27.05714285714286,"z":34.91428571428572,"a95":2.6,"info":"\"14-09-15\" at \"19:22\""},{"visible":true,"include":false,"step":"150","x":-50.30476190476191,"y":20.152380952380952,"z":33.38095238095238,"a95":5.2,"info":"\"14-09-15\" at \"21:31\""},{"visible":true,"include":false,"step":"180","x":-52.63809523809524,"y":20.00952380952381,"z":24.2,"a95":2.5,"info":"\"14-09-16\" at \"10:32\""},{"visible":true,"include":false,"step":"210","x":-37.095238095238095,"y":17.895238095238096,"z":21.80952380952381,"a95":2.7,"info":"\"14-09-16\" at \"13:13\""},{"visible":true,"include":false,"step":"240","x":-34.885714285714286,"y":17.45714285714286,"z":17.714285714285715,"a95":3.5,"info":"\"14-09-16\" at \"15:54\""},{"visible":true,"include":false,"step":"270","x":-41.08571428571428,"y":10.485714285714286,"z":13.2,"a95":3.2,"info":"\"14-09-16\" at \"18:42\""},{"visible":true,"include":false,"step":"300","x":-37.304761904761904,"y":11.628571428571428,"z":15.533333333333333,"a95":2.4,"info":"\"14-09-17\" at \"10:13\""},{"visible":true,"include":false,"step":"320","x":-30.37142857142857,"y":17.638095238095236,"z":1.8952380952380952,"a95":3.5,"info":"\"14-09-17\" at \"13:28\""},{"visible":true,"include":false,"step":"340","x":49.32380952380952,"y":10.914285714285715,"z":3.8666666666666667,"a95":5.6,"info":"\"14-09-17\" at \"16:43\""},{"visible":true,"include":false,"step":"370","x":-14.333333333333334,"y":12.19047619047619,"z":4.980952380952381,"a95":11,"info":"\"14-09-17\" at \"21:53\""},{"visible":true,"include":false,"step":"390","x":-23.16190476190476,"y":-0.9714285714285713,"z":6.333333333333333,"a95":4.9,"info":"\"14-09-18\" at \"11:07\""},{"visible":true,"include":false,"step":"420","x":-14.285714285714286,"y":7.761904761904762,"z":19.39047619047619,"a95":9.8,"info":"\"14-09-18\" at \"14:10\""}]}]
