# Supplementary material for: Paleomagnetic constraints on the timing and distribution of Cenozoic rotations in Central and Eastern Anatolia
Source: Copernicus journal article supplement (doi:10.5194/se-9-295-2018), 2018-03-21
Supplement: Supplementary file 2 [file se-9-295-2018-supplement.zip › se-2017-66_DATA_dir files/dir files Ulukisla/KG2.dir]

[{"version":"v1.1.0","exported":"2016-11-18T13:49:56.147Z","volume":10.5,"added":"2016-11-18T13:23:23.758Z","format":"Utrecht","demagType":"Unknown","strat":"3","patch":1.1,"GEO":[],"TECT":[],"interpreted":false,"name":"KG2.1B","coreAzi":285,"coreDip":37,"bedStrike":251,"bedDip":36,"data":[{"visible":true,"include":false,"step":"0.0","x":-1329.047619047619,"y":1096.857142857143,"z":1492.4761904761904,"a95":0.99,"info":"17/08/2014 at 02:43:39"},{"visible":true,"include":false,"step":"4.0","x":-1291.7142857142858,"y":1071.142857142857,"z":1464.7619047619048,"a95":0.99,"info":"17/08/2014 at 02:43:39"},{"visible":true,"include":false,"step":"8.0","x":-1240.1904761904761,"y":1022.952380952381,"z":1409.904761904762,"a95":0.99,"info":"17/08/2014 at 02:43:39"},{"visible":true,"include":false,"step":"12.0","x":-1188,"y":996.2857142857143,"z":1351.4285714285713,"a95":0.99,"info":"17/08/2014 at 02:43:39"},{"visible":true,"include":true,"step":"16.0","x":-1153.6190476190477,"y":964.8571428571429,"z":1308.1904761904761,"a95":0.99,"info":"17/08/2014 at 02:43:39"},{"visible":true,"include":true,"step":"20.0","x":-1122.7619047619048,"y":920.9047619047619,"z":1277.5238095238096,"a95":0.99,"info":"17/08/2014 at 02:43:39"},{"visible":true,"include":true,"step":"25.0","x":-1084.5714285714287,"y":900.647619047619,"z":1233.8095238095239,"a95":0.99,"info":"17/08/2014 at 02:43:39"},{"visible":true,"include":true,"step":"30.0","x":-1033.904761904762,"y":857.7523809523809,"z":1189.5238095238096,"a95":0.99,"info":"17/08/2014 at 02:43:39"},{"visible":true,"include":true,"step":"35.0","x":-1006.3809523809524,"y":834.5809523809525,"z":1154.5714285714287,"a95":0.99,"info":"17/08/2014 at 02:43:39"},{"visible":true,"include":true,"step":"40.0","x":-976.4761904761905,"y":809.2666666666667,"z":1124.2857142857142,"a95":0.99,"info":"17/08/2014 at 02:43:39"},{"visible":true,"include":true,"step":"45.0","x":-924.9333333333333,"y":783.5047619047618,"z":1090.095238095238,"a95":0.99,"info":"17/08/2014 at 02:43:39"},{"visible":true,"include":true,"step":"50.0","x":-896.5809523809525,"y":738.104761904762,"z":1040.095238095238,"a95":0.99,"info":"17/08/2014 at 02:43:39"},{"visible":true,"include":true,"step":"60.0","x":-840.9619047619047,"y":707,"z":972.0952380952381,"a95":0.99,"info":"17/08/2014 at 02:43:39"},{"visible":true,"include":true,"step":"70.0","x":-763.0761904761905,"y":630.3714285714285,"z":891.8571428571429,"a95":0.99,"info":"17/08/2014 at 02:43:39"},{"visible":true,"include":true,"step":"80.0","x":-728.847619047619,"y":580.6571428571428,"z":820.6380952380953,"a95":0.99,"info":"17/08/2014 at 02:43:39"},{"visible":true,"include":true,"step":"90.0","x":-638.5714285714286,"y":534.9428571428571,"z":765.0571428571429,"a95":0.99,"info":"17/08/2014 at 02:43:39"},{"visible":true,"include":false,"step":"100.0","x":-603.9333333333334,"y":480.31428571428575,"z":696.8380952380952,"a95":0.99,"info":"17/08/2014 at 02:43:39"}]},{"version":"v1.1.0","exported":"2016-11-18T13:49:56.148Z","volume":10.5,"added":"2016-11-18T13:23:23.758Z","format":"Utrecht","demagType":"Unknown","strat":"4","patch":1.1,"GEO":[],"TECT":[],"interpreted":false,"name":"KG2.2A","coreAzi":284,"coreDip":34,"bedStrike":251,"bedDip":36,"data":[{"visible":true,"include":false,"step":"0.0","x":-960,"y":728.2285714285714,"z":834.0857142857143,"a95":0.99,"info":"17/08/2014 at 02:43:39"},{"visible":true,"include":true,"step":"4.0","x":-936.7333333333333,"y":709.3047619047619,"z":806.6095238095238,"a95":0.99,"info":"17/08/2014 at 02:43:39"},{"visible":true,"include":true,"step":"8.0","x":-895.5714285714286,"y":688.552380952381,"z":765.2571428571429,"a95":0.99,"info":"17/08/2014 at 02:43:39"},{"visible":true,"include":true,"step":"12.0","x":-856.2285714285714,"y":657.1333333333333,"z":724.0095238095239,"a95":0.99,"info":"17/08/2014 at 02:43:39"},{"visible":true,"include":true,"step":"16.0","x":-819.5523809523809,"y":631.8666666666667,"z":697.3428571428572,"a95":0.99,"info":"17/08/2014 at 02:43:39"},{"visible":true,"include":true,"step":"20.0","x":-790.7809523809525,"y":601.2952380952381,"z":674.0571428571429,"a95":0.99,"info":"17/08/2014 at 02:43:39"},{"visible":true,"include":true,"step":"25.0","x":-766.6476190476191,"y":573.495238095238,"z":644.6380952380953,"a95":0.99,"info":"17/08/2014 at 02:43:39"},{"visible":true,"include":true,"step":"30.0","x":-727.5619047619048,"y":542.895238095238,"z":611.552380952381,"a95":0.99,"info":"17/08/2014 at 02:43:39"},{"visible":true,"include":true,"step":"35.0","x":-701.0857142857143,"y":518.8285714285714,"z":578.1238095238095,"a95":0.99,"info":"17/08/2014 at 02:43:39"},{"visible":true,"include":true,"step":"40.0","x":-670.9333333333334,"y":499.1333333333333,"z":559,"a95":0.99,"info":"17/08/2014 at 02:43:39"},{"visible":true,"include":true,"step":"45.0","x":-647.1619047619048,"y":473.4761904761905,"z":532.7428571428571,"a95":0.99,"info":"17/08/2014 at 02:43:39"},{"visible":true,"include":true,"step":"50.0","x":-614.7428571428571,"y":440.9809523809524,"z":506.2666666666667,"a95":0.99,"info":"17/08/2014 at 02:43:39"},{"visible":true,"include":true,"step":"60.0","x":-562.1904761904761,"y":384.8952380952381,"z":467.8095238095238,"a95":0.99,"info":"17/08/2014 at 02:43:39"},{"visible":true,"include":true,"step":"70.0","x":-500.7047619047619,"y":366.54285714285714,"z":414.60952380952375,"a95":0.99,"info":"17/08/2014 at 02:43:39"},{"visible":true,"include":true,"step":"80.0","x":-480.74285714285713,"y":334.2761904761905,"z":389.15238095238095,"a95":0.99,"info":"17/08/2014 at 02:43:39"},{"visible":true,"include":true,"step":"90.0","x":-437.8285714285714,"y":296.16190476190474,"z":331.6,"a95":0.99,"info":"17/08/2014 at 02:43:39"},{"visible":true,"include":true,"step":"100.0","x":-379.5809523809524,"y":249.86666666666665,"z":307.03809523809525,"a95":0.99,"info":"17/08/2014 at 02:43:39"}]},{"version":"v1.1.0","exported":"2016-11-18T13:49:56.148Z","volume":10.5,"added":"2016-11-18T13:23:23.759Z","format":"Utrecht","demagType":"Unknown","strat":null,"patch":1.1,"GEO":[{"dec":58.80162154058854,"inc":-14.706434121658761,"MAD":12.209097022030715,"cm":[6.661338147750939e-15,1.0658141036401503e-14,0],"intensity":302.01770457632284,"type":"GC","origin":false,"forced":true,"remark":"","nSteps":5,"minStep":"250","maxStep":"360","steps":["250","270","300","330","360"],"group":"None","version":"v1.1.0"}],"TECT":[{"dec":70.02292007676152,"inc":-18.996530936886415,"MAD":12.209097022030708,"cm":[-1.7763568394002505e-15,-1.7319479184152442e-14,-1.7763568394002505e-15],"intensity":302.01770457632284,"type":"GC","origin":false,"forced":true,"remark":"","nSteps":5,"minStep":"250","maxStep":"360","steps":["250","270","300","330","360"],"group":"None","version":"v1.1.0"}],"interpreted":true,"name":"KG2.02B","coreAzi":284,"coreDip":34,"bedStrike":251,"bedDip":36,"data":[{"visible":true,"include":false,"step":"20","x":-1260.095238095238,"y":1294.3809523809523,"z":1401.142857142857,"a95":1.8,"info":"\"15-06-22\" at \"16:32\""},{"visible":true,"include":false,"step":"90","x":-1026.3809523809523,"y":1116.7619047619048,"z":1206.857142857143,"a95":1.8,"info":"\"15-06-22\" at \"19:56\""},{"visible":true,"include":false,"step":"120","x":-854.6666666666666,"y":826.7619047619048,"z":957.6190476190476,"a95":1.8,"info":"\"15-06-22\" at \"22:21\""},{"visible":true,"include":false,"step":"150","x":-841.047619047619,"y":841.047619047619,"z":982.4761904761905,"a95":1.9,"info":"\"15-06-23\" at \"20:47\""},{"visible":true,"include":false,"step":"180","x":-208.76190476190476,"y":116.28571428571429,"z":182,"a95":1.8,"info":"\"15-06-24\" at \"17:15\""},{"visible":true,"include":false,"step":"210","x":-107.52380952380952,"y":65.52380952380952,"z":84.0952380952381,"a95":2.1,"info":"\"15-06-24\" at \"19:56\""},{"visible":true,"include":false,"step":"230","x":-110,"y":61.142857142857146,"z":76.0952380952381,"a95":2.5,"info":"\"15-06-28\" at \"00:11\""},{"visible":true,"include":true,"step":"250","x":-119.33333333333333,"y":62.095238095238095,"z":74.95238095238095,"a95":2.9,"info":"\"15-06-28\" at \"02:37\""},{"visible":true,"include":true,"step":"270","x":-87.52380952380952,"y":43.142857142857146,"z":57.714285714285715,"a95":2.2,"info":"\"15-06-28\" at \"18:29\""},{"visible":true,"include":true,"step":"300","x":-105.52380952380952,"y":42.19047619047619,"z":87.04761904761905,"a95":2.4,"info":"\"15-06-30\" at \"11:18\""},{"visible":true,"include":true,"step":"330","x":-128.47619047619048,"y":9.714285714285714,"z":35.523809523809526,"a95":5.9,"info":"\"15-06-30\" at \"14:00\""},{"visible":true,"include":true,"step":"360","x":-161.04761904761904,"y":-15.428571428571429,"z":27.142857142857142,"a95":5.8,"info":"\"15-07-01\" at \"09:19\""},{"visible":true,"include":false,"step":"380","x":-116.57142857142857,"y":5.619047619047619,"z":-183.04761904761904,"a95":4.5,"info":"\"15-07-01\" at \"14:15\""},{"visible":true,"include":false,"step":"410","x":-108.66666666666667,"y":-43.23809523809524,"z":-13.238095238095237,"a95":7.7,"info":"\"15-07-02\" at \"09:37\""},{"visible":true,"include":false,"step":"430","x":-140.38095238095238,"y":-58.57142857142857,"z":6.476190476190476,"a95":9.7,"info":"\"15-07-02\" at \"13:20\""}]},{"version":"v1.1.0","exported":"2016-11-18T13:49:56.148Z","volume":10.5,"added":"2016-11-18T13:23:23.761Z","format":"Utrecht","demagType":"Unknown","strat":"5","patch":1.1,"GEO":[],"TECT":[],"interpreted":false,"name":"KG2.3A","coreAzi":330,"coreDip":44,"bedStrike":251,"bedDip":36,"data":[{"visible":true,"include":false,"step":"0.0","x":-203.96190476190475,"y":324.8285714285714,"z":659.6761904761905,"a95":0.99,"info":"17/08/2014 at 02:43:39"},{"visible":true,"include":true,"step":"4.0","x":-166.17142857142858,"y":295.752380952381,"z":579.2,"a95":0.99,"info":"17/08/2014 at 02:43:39"},{"visible":true,"include":true,"step":"8.0","x":-123.75238095238096,"y":254.1904761904762,"z":466.5238095238095,"a95":0.99,"info":"17/08/2014 at 02:43:39"},{"visible":true,"include":true,"step":"12.0","x":-112.74285714285713,"y":215.44761904761904,"z":387.29523809523806,"a95":0.99,"info":"17/08/2014 at 02:43:39"},{"visible":true,"include":true,"step":"16.0","x":-67.67904761904762,"y":172.07619047619048,"z":345.8,"a95":0.99,"info":"17/08/2014 at 02:43:39"},{"visible":true,"include":true,"step":"20.0","x":-50.73714285714286,"y":133.8095238095238,"z":241.93333333333334,"a95":0.99,"info":"17/08/2014 at 02:43:39"},{"visible":true,"include":true,"step":"25.0","x":-49.37238095238095,"y":129.84761904761905,"z":219.87619047619046,"a95":0.99,"info":"17/08/2014 at 02:43:39"},{"visible":true,"include":true,"step":"30.0","x":-16.485714285714284,"y":105.42857142857143,"z":188.9047619047619,"a95":0.99,"info":"17/08/2014 at 02:43:39"},{"visible":true,"include":true,"step":"35.0","x":-32.71714285714285,"y":99.02857142857142,"z":177.57142857142858,"a95":0.99,"info":"17/08/2014 at 02:43:39"},{"visible":true,"include":true,"step":"40.0","x":-63.346666666666664,"y":57.534285714285716,"z":146.1238095238095,"a95":0.99,"info":"17/08/2014 at 02:43:39"},{"visible":true,"include":true,"step":"45.0","x":-46.473333333333336,"y":80.73047619047618,"z":141.04761904761904,"a95":0.99,"info":"17/08/2014 at 02:43:39"},{"visible":true,"include":true,"step":"50.0","x":-17.99809523809524,"y":51.828571428571436,"z":116.5904761904762,"a95":0.99,"info":"17/08/2014 at 02:43:39"},{"visible":true,"include":true,"step":"60.0","x":-15.38190476190476,"y":39.42285714285714,"z":78.41619047619048,"a95":0.99,"info":"17/08/2014 at 02:43:39"},{"visible":false,"include":false,"step":"70.0","x":1.4456190476190476,"y":90.50095238095238,"z":96.44761904761906,"a95":0.99,"info":"17/08/2014 at 02:43:39"},{"visible":false,"include":false,"step":"80.0","x":-45.605714285714285,"y":10.67047619047619,"z":43.179047619047616,"a95":0.99,"info":"17/08/2014 at 02:43:39"},{"visible":false,"include":false,"step":"90.0","x":-16.11809523809524,"y":48.55428571428571,"z":51.07333333333333,"a95":0.99,"info":"17/08/2014 at 02:43:39"},{"visible":false,"include":false,"step":"100.0","x":-10.992380952380952,"y":65.87619047619049,"z":76.51523809523809,"a95":0.99,"info":"17/08/2014 at 02:43:39"}]},{"version":"v1.1.0","exported":"2016-11-18T13:49:56.148Z","volume":10.5,"added":"2016-11-18T13:23:23.762Z","format":"Utrecht","demagType":"Unknown","strat":null,"patch":1.1,"GEO":[],"TECT":[],"interpreted":false,"name":"KG2.03B","coreAzi":330,"coreDip":44,"bedStrike":251,"bedDip":36,"data":[{"visible":false,"include":false,"step":"20","x":-129.23809523809524,"y":153.42857142857142,"z":637.2380952380952,"a95":2.8,"info":"\"15-06-22\" at \"16:35\""},{"visible":true,"include":false,"step":"90","x":-115.80952380952381,"y":103.80952380952381,"z":442.95238095238096,"a95":2.7,"info":"\"15-06-22\" at \"19:58\""},{"visible":true,"include":true,"step":"120","x":-94,"y":99.33333333333333,"z":375.7142857142857,"a95":2.8,"info":"\"15-06-22\" at \"22:24\""},{"visible":true,"include":true,"step":"150","x":-80.19047619047619,"y":93.14285714285714,"z":380.85714285714283,"a95":3,"info":"\"15-06-23\" at \"20:49\""},{"visible":true,"include":true,"step":"180","x":-17.047619047619047,"y":47.80952380952381,"z":264.4761904761905,"a95":2.6,"info":"\"15-06-24\" at \"17:17\""},{"visible":true,"include":true,"step":"210","x":-22.285714285714285,"y":51.42857142857143,"z":230.85714285714286,"a95":3,"info":"\"15-06-24\" at \"19:58\""},{"visible":true,"include":true,"step":"230","x":-55.904761904761905,"y":31.333333333333332,"z":202,"a95":3.1,"info":"\"15-06-28\" at \"00:13\""},{"visible":true,"include":true,"step":"250","x":-53.714285714285715,"y":65.80952380952381,"z":211.42857142857142,"a95":2.9,"info":"\"15-06-28\" at \"02:39\""},{"visible":true,"include":true,"step":"270","x":-45.904761904761905,"y":44,"z":213.9047619047619,"a95":2.9,"info":"\"15-06-28\" at \"18:31\""},{"visible":true,"include":true,"step":"300","x":-53.04761904761905,"y":56.476190476190474,"z":207.04761904761904,"a95":3.4,"info":"\"15-06-30\" at \"11:20\""},{"visible":false,"include":false,"step":"330","x":-55.904761904761905,"y":-14.666666666666666,"z":150,"a95":3.4,"info":"\"15-06-30\" at \"14:02\""},{"visible":false,"include":false,"step":"360","x":-75.71428571428571,"y":17.238095238095237,"z":137.23809523809524,"a95":4.6,"info":"\"15-07-01\" at \"09:21\""},{"visible":false,"include":false,"step":"380","x":-48.666666666666664,"y":25.333333333333332,"z":137.04761904761904,"a95":4.4,"info":"\"15-07-01\" at \"14:17\""},{"visible":false,"include":false,"step":"410","x":-29.142857142857142,"y":-30.571428571428573,"z":157.04761904761904,"a95":5.3,"info":"\"15-07-02\" at \"09:40\""},{"visible":false,"include":false,"step":"430","x":-81.52380952380952,"y":50.95238095238095,"z":129.52380952380952,"a95":6.8,"info":"\"15-07-02\" at \"13:23\""}]},{"version":"v1.1.0","exported":"2016-11-18T13:49:56.148Z","volume":10.5,"added":"2016-11-18T13:23:23.763Z","format":"Utrecht","demagType":"Unknown","strat":"6","patch":1.1,"GEO":[],"TECT":[],"interpreted":false,"name":"KG2.4A","coreAzi":331,"coreDip":46,"bedStrike":251,"bedDip":36,"data":[{"visible":true,"include":false,"step":"0.0","x":-141.86666666666665,"y":154.6,"z":381.22857142857146,"a95":0.99,"info":"17/08/2014 at 02:43:39"},{"visible":true,"include":true,"step":"4.0","x":-125.9904761904762,"y":118.4,"z":323.1142857142857,"a95":0.99,"info":"17/08/2014 at 02:43:39"},{"visible":true,"include":true,"step":"8.0","x":-101.3047619047619,"y":95.57142857142857,"z":256.1047619047619,"a95":0.99,"info":"17/08/2014 at 02:43:39"},{"visible":true,"include":true,"step":"12.0","x":-77.18761904761905,"y":76.14666666666666,"z":210.40952380952382,"a95":0.99,"info":"17/08/2014 at 02:43:39"},{"visible":true,"include":true,"step":"16.0","x":-52.925714285714285,"y":82.00666666666667,"z":190.75238095238097,"a95":0.99,"info":"17/08/2014 at 02:43:39"},{"visible":true,"include":true,"step":"20.0","x":-56.60190476190477,"y":55.75904761904762,"z":145.21904761904761,"a95":0.99,"info":"17/08/2014 at 02:43:39"},{"visible":false,"include":false,"step":"25.0","x":-64.84285714285714,"y":63.03333333333334,"z":98.79047619047618,"a95":0.99,"info":"17/08/2014 at 02:43:39"},{"visible":true,"include":true,"step":"30.0","x":-38.37428571428571,"y":8.099714285714285,"z":87.68380952380951,"a95":0.99,"info":"17/08/2014 at 02:43:39"},{"visible":true,"include":true,"step":"35.0","x":-26.459999999999997,"y":-7.508,"z":53.785714285714285,"a95":0.99,"info":"17/08/2014 at 02:43:39"},{"visible":true,"include":true,"step":"40.0","x":-36.60666666666667,"y":6.430952380952381,"z":71.86666666666667,"a95":0.99,"info":"17/08/2014 at 02:43:39"},{"visible":true,"include":true,"step":"45.0","x":-18.772380952380953,"y":1.315809523809524,"z":45.97142857142857,"a95":0.99,"info":"17/08/2014 at 02:43:39"},{"visible":true,"include":true,"step":"50.0","x":-11.67047619047619,"y":6.646380952380953,"z":43.825714285714284,"a95":0.99,"info":"17/08/2014 at 02:43:39"},{"visible":true,"include":true,"step":"60.0","x":-29.44190476190476,"y":3.9421904761904765,"z":33.24857142857143,"a95":0.99,"info":"17/08/2014 at 02:43:39"},{"visible":true,"include":false,"step":"70.0","x":-13.24095238095238,"y":-4.640285714285715,"z":34.88761904761905,"a95":0.99,"info":"17/08/2014 at 02:43:39"},{"visible":true,"include":false,"step":"80.0","x":-1.3663809523809523,"y":-14.25047619047619,"z":20.549523809523812,"a95":0.99,"info":"17/08/2014 at 02:43:39"},{"visible":true,"include":false,"step":"90.0","x":-9.004190476190477,"y":18.84952380952381,"z":54.86285714285714,"a95":0.99,"info":"17/08/2014 at 02:43:39"},{"visible":true,"include":false,"step":"100.0","x":-4.062095238095238,"y":29.137142857142855,"z":62.140952380952385,"a95":0.99,"info":"17/08/2014 at 02:43:39"}]},{"version":"v1.1.0","exported":"2016-11-18T13:49:56.148Z","volume":10.5,"added":"2016-11-18T13:23:23.764Z","format":"Utrecht","demagType":"Unknown","strat":null,"patch":1.1,"GEO":[{"dec":81.13054740681201,"inc":-10.71258405857879,"MAD":26.385342412802448,"cm":[-2.220446049250313e-15,1.587618925213974e-14,0],"intensity":590.1311203698929,"type":"GC","origin":false,"forced":true,"remark":"","nSteps":10,"minStep":"90","maxStep":"330","steps":["90","120","150","180","210","230","250","270","300","330"],"group":"None","version":"v1.1.0"}],"TECT":[{"dec":85.44055014740763,"inc":-2.7969945660680047,"MAD":26.38534241280221,"cm":[0,1.4654943925052066e-14,3.552713678800501e-15],"intensity":590.1311203698929,"type":"GC","origin":false,"forced":true,"remark":"","nSteps":10,"minStep":"90","maxStep":"330","steps":["90","120","150","180","210","230","250","270","300","330"],"group":"None","version":"v1.1.0"}],"interpreted":true,"name":"KG2.04B","coreAzi":331,"coreDip":46,"bedStrike":251,"bedDip":36,"data":[{"visible":true,"include":false,"step":"20","x":-151.42857142857142,"y":235.14285714285714,"z":578.4761904761905,"a95":3.5,"info":"\"15-06-22\" at \"16:37\""},{"visible":true,"include":true,"step":"90","x":-154.76190476190476,"y":124.0952380952381,"z":367.5238095238095,"a95":2.3,"info":"\"15-06-22\" at \"20:02\""},{"visible":true,"include":true,"step":"120","x":-116.28571428571429,"y":101.23809523809524,"z":312.76190476190476,"a95":2.2,"info":"\"15-06-22\" at \"22:26\""},{"visible":true,"include":true,"step":"150","x":-106.19047619047619,"y":108.95238095238095,"z":312.2857142857143,"a95":2.4,"info":"\"15-06-23\" at \"20:51\""},{"visible":true,"include":true,"step":"180","x":-102.47619047619048,"y":93.42857142857143,"z":226.0952380952381,"a95":2.3,"info":"\"15-06-24\" at \"17:19\""},{"visible":true,"include":true,"step":"210","x":-104.19047619047619,"y":74.66666666666667,"z":204.66666666666666,"a95":2.7,"info":"\"15-06-24\" at \"20:00\""},{"visible":true,"include":true,"step":"230","x":-96.47619047619048,"y":67.42857142857143,"z":165.04761904761904,"a95":2.8,"info":"\"15-06-28\" at \"00:15\""},{"visible":true,"include":true,"step":"250","x":-90,"y":67.71428571428571,"z":189.42857142857142,"a95":3.1,"info":"\"15-06-28\" at \"02:41\""},{"visible":true,"include":true,"step":"270","x":-91.04761904761905,"y":48.095238095238095,"z":173.33333333333334,"a95":2.8,"info":"\"15-06-28\" at \"18:33\""},{"visible":true,"include":true,"step":"300","x":-85.52380952380952,"y":66.47619047619048,"z":179.71428571428572,"a95":3.3,"info":"\"15-06-30\" at \"11:22\""},{"visible":true,"include":true,"step":"330","x":-94.76190476190476,"y":31.904761904761905,"z":144,"a95":3.7,"info":"\"15-06-30\" at \"14:04\""},{"visible":true,"include":false,"step":"360","x":-88.0952380952381,"y":53.523809523809526,"z":93.71428571428571,"a95":7.2,"info":"\"15-07-01\" at \"09:23\""},{"visible":true,"include":false,"step":"380","x":-48.95238095238095,"y":58.76190476190476,"z":107.33333333333333,"a95":5.8,"info":"\"15-07-01\" at \"14:19\""},{"visible":true,"include":false,"step":"410","x":-132.66666666666666,"y":76.38095238095238,"z":83.9047619047619,"a95":6.4,"info":"\"15-07-02\" at \"09:43\""},{"visible":true,"include":false,"step":"430","x":-125.04761904761905,"y":45.333333333333336,"z":96.57142857142857,"a95":6.9,"info":"\"15-07-02\" at \"13:25\""}]},{"version":"v1.1.0","exported":"2016-11-18T13:49:56.148Z","volume":10.5,"added":"2016-11-18T13:23:23.766Z","format":"Utrecht","demagType":"Unknown","strat":null,"patch":1.1,"GEO":[],"TECT":[],"interpreted":false,"name":"KG2.5A","coreAzi":307,"coreDip":35,"bedStrike":251,"bedDip":36,"data":[{"visible":true,"include":false,"step":"20","x":-344.6666666666667,"y":308.0952380952381,"z":768.2857142857143,"a95":2.2,"info":"\"14-08-11\" at \"16:16\""},{"visible":true,"include":true,"step":"100","x":-228.38095238095238,"y":182.76190476190476,"z":418.4761904761905,"a95":2.4,"info":"\"14-08-11\" at \"20:12\""},{"visible":true,"include":true,"step":"150","x":-150.47619047619048,"y":164.57142857142858,"z":329.14285714285717,"a95":2.6,"info":"\"14-08-11\" at \"22:47\""},{"visible":true,"include":true,"step":"180","x":-147.42857142857142,"y":153.52380952380952,"z":320.95238095238096,"a95":2.7,"info":"\"14-08-12\" at \"15:12\""},{"visible":true,"include":true,"step":"210","x":-96.95238095238095,"y":82.85714285714286,"z":223.04761904761904,"a95":2.7,"info":"\"14-08-12\" at \"17:54\""},{"visible":true,"include":true,"step":"240","x":-91.52380952380952,"y":86.66666666666667,"z":229.04761904761904,"a95":2.7,"info":"\"14-08-12\" at \"20:58\""},{"visible":true,"include":true,"step":"270","x":-94,"y":71.71428571428571,"z":214.95238095238096,"a95":2.8,"info":"\"14-08-13\" at \"14:56\""},{"visible":true,"include":true,"step":"300","x":-88.95238095238095,"y":54.666666666666664,"z":187.42857142857142,"a95":2.9,"info":"\"14-08-13\" at \"17:37\""},{"visible":true,"include":true,"step":"320","x":-76.38095238095238,"y":70.66666666666667,"z":156.38095238095238,"a95":2.8,"info":"\"14-08-13\" at \"20:43\""},{"visible":false,"include":false,"step":"340","x":-22.666666666666668,"y":35.333333333333336,"z":163.61904761904762,"a95":3,"info":"\"14-08-14\" at \"13:36\""},{"visible":true,"include":false,"step":"370","x":-90.85714285714286,"y":14.952380952380953,"z":149.52380952380952,"a95":3.2,"info":"\"14-08-14\" at \"16:44\""},{"visible":true,"include":false,"step":"400","x":-73.52380952380952,"y":29.904761904761905,"z":140.1904761904762,"a95":3.9,"info":"\"14-08-14\" at \"19:55\""},{"visible":true,"include":false,"step":"430","x":-62.76190476190476,"y":16.095238095238095,"z":111.52380952380952,"a95":6.1,"info":"\"14-08-14\" at \"23:04\""},{"visible":false,"include":false,"step":"460","x":-76.76190476190476,"y":31.704761904761902,"z":18.133333333333333,"a95":6.5,"info":"\"14-08-15\" at \"15:49\""},{"visible":false,"include":false,"step":"490","x":-3.238095238095238,"y":165.52380952380952,"z":40.666666666666664,"a95":3.5,"info":"\"14-08-15\" at \"18:56\""},{"visible":false,"include":false,"step":"510","x":262.95238095238096,"y":127.80952380952381,"z":13.428571428571429,"a95":3.8,"info":"\"14-08-15\" at \"22:07\""}]},{"version":"v1.1.0","exported":"2016-11-18T13:49:56.148Z","volume":10.5,"added":"2016-11-18T13:23:23.766Z","format":"Utrecht","demagType":"Unknown","strat":"7","patch":1.1,"GEO":[{"dec":120.85305235117346,"inc":-12.387701435622386,"MAD":6.9485085174932255,"cm":[2.398081733190338e-14,7.105427357601002e-15,0],"intensity":1542.3839679545345,"type":"GC","origin":false,"forced":true,"remark":"","nSteps":7,"minStep":"4.0","maxStep":"30.0","steps":["4.0","8.0","12.0","16.0","20.0","25.0","30.0"],"group":"None","version":"v1.1.0"}],"TECT":[{"dec":300.2211489965045,"inc":-15.383816624948567,"MAD":6.948508517492396,"cm":[-3.197442310920451e-14,1.0080825063596421e-13,1.4210854715202004e-14],"intensity":1542.3839679545345,"type":"GC","origin":false,"forced":true,"remark":"","nSteps":7,"minStep":"4.0","maxStep":"30.0","steps":["4.0","8.0","12.0","16.0","20.0","25.0","30.0"],"group":"None","version":"v1.1.0"}],"interpreted":true,"name":"KG2.5B","coreAzi":307,"coreDip":35,"bedStrike":251,"bedDip":36,"data":[{"visible":true,"include":false,"step":"0.0","x":-977.6190476190476,"y":185.73333333333335,"z":452.8952380952381,"a95":0.99,"info":"17/08/2014 at 02:43:39"},{"visible":true,"include":true,"step":"4.0","x":-933.5238095238095,"y":153.45714285714286,"z":406.8095238095238,"a95":0.99,"info":"17/08/2014 at 02:43:39"},{"visible":true,"include":true,"step":"8.0","x":-835.1619047619048,"y":109.4952380952381,"z":358.2857142857143,"a95":0.99,"info":"17/08/2014 at 02:43:39"},{"visible":true,"include":true,"step":"12.0","x":-753,"y":58.586666666666666,"z":311.49523809523805,"a95":0.99,"info":"17/08/2014 at 02:43:39"},{"visible":true,"include":true,"step":"16.0","x":-668.5428571428571,"y":24.823809523809523,"z":284.0571428571428,"a95":0.99,"info":"17/08/2014 at 02:43:39"},{"visible":true,"include":true,"step":"20.0","x":-609.9904761904761,"y":3.629047619047619,"z":255.86666666666665,"a95":0.99,"info":"17/08/2014 at 02:43:39"},{"visible":true,"include":true,"step":"25.0","x":-530.8761904761905,"y":3.9265714285714286,"z":230.57142857142858,"a95":0.99,"info":"17/08/2014 at 02:43:39"},{"visible":true,"include":true,"step":"30.0","x":-481.7047619047619,"y":-11.204761904761906,"z":189.71428571428572,"a95":0.99,"info":"17/08/2014 at 02:43:39"},{"visible":true,"include":false,"step":"35.0","x":-414.6761904761905,"y":-21.684761904761906,"z":220.59047619047618,"a95":0.99,"info":"17/08/2014 at 02:43:39"},{"visible":true,"include":false,"step":"40.0","x":-393.4380952380953,"y":-38.28,"z":231.94285714285715,"a95":0.99,"info":"17/08/2014 at 02:43:39"},{"visible":true,"include":false,"step":"45.0","x":-333.70476190476194,"y":-2.5459047619047617,"z":198.48571428571427,"a95":0.99,"info":"17/08/2014 at 02:43:39"},{"visible":true,"include":false,"step":"50.0","x":-306.65714285714284,"y":-5.220761904761905,"z":206.9238095238095,"a95":0.99,"info":"17/08/2014 at 02:43:39"},{"visible":true,"include":false,"step":"60.0","x":-273.31428571428575,"y":46.007619047619045,"z":201.9904761904762,"a95":0.99,"info":"17/08/2014 at 02:43:39"},{"visible":true,"include":false,"step":"70.0","x":-225.14285714285714,"y":39.80095238095238,"z":197.71428571428572,"a95":0.99,"info":"17/08/2014 at 02:43:39"},{"visible":true,"include":false,"step":"80.0","x":-252.41904761904763,"y":43.00666666666667,"z":155.1904761904762,"a95":0.99,"info":"17/08/2014 at 02:43:39"},{"visible":true,"include":false,"step":"90.0","x":-198.04761904761904,"y":75.31619047619049,"z":122.45714285714286,"a95":0.99,"info":"17/08/2014 at 02:43:39"},{"visible":true,"include":false,"step":"100.0","x":-179.8095238095238,"y":20.54285714285714,"z":130.63809523809525,"a95":0.99,"info":"17/08/2014 at 02:43:39"}]},{"version":"v1.1.0","exported":"2016-11-18T13:49:56.148Z","volume":10.5,"added":"2016-11-18T13:23:23.767Z","format":"Utrecht","demagType":"Unknown","strat":null,"patch":1.1,"GEO":[],"TECT":[],"interpreted":false,"name":"KG2.05C","coreAzi":307,"coreDip":35,"bedStrike":251,"bedDip":36,"data":[{"visible":true,"include":false,"step":"20","x":-209.8095238095238,"y":260.2857142857143,"z":425.23809523809524,"a95":2.2,"info":"\"15-06-22\" at \"16:39\""},{"visible":true,"include":false,"step":"90","x":-139.71428571428572,"y":190.85714285714286,"z":292.95238095238096,"a95":2.3,"info":"\"15-06-22\" at \"20:04\""},{"visible":true,"include":false,"step":"120","x":-85.52380952380952,"y":143.14285714285714,"z":225.71428571428572,"a95":2.3,"info":"\"15-06-22\" at \"22:28\""},{"visible":true,"include":false,"step":"150","x":-94.85714285714286,"y":147.71428571428572,"z":225.52380952380952,"a95":2.5,"info":"\"15-06-23\" at \"20:53\""},{"visible":true,"include":false,"step":"180","x":-40.19047619047619,"y":66.57142857142857,"z":136.28571428571428,"a95":2.6,"info":"\"15-06-24\" at \"17:21\""},{"visible":true,"include":false,"step":"210","x":-37.42857142857143,"y":74.28571428571429,"z":126.85714285714286,"a95":2.9,"info":"\"15-06-24\" at \"20:03\""},{"visible":true,"include":false,"step":"230","x":-39.61904761904762,"y":61.80952380952381,"z":109.04761904761905,"a95":2.3,"info":"\"15-06-28\" at \"00:17\""},{"visible":true,"include":false,"step":"250","x":-32.76190476190476,"y":65.80952380952381,"z":121.9047619047619,"a95":2.5,"info":"\"15-06-28\" at \"02:43\""},{"visible":true,"include":false,"step":"270","x":-38,"y":73.71428571428571,"z":118.95238095238095,"a95":2.6,"info":"\"15-06-28\" at \"18:35\""},{"visible":true,"include":false,"step":"300","x":-39.714285714285715,"y":59.42857142857143,"z":122.47619047619048,"a95":2.4,"info":"\"15-06-30\" at \"11:24\""},{"visible":true,"include":false,"step":"330","x":-27.428571428571427,"y":67.52380952380952,"z":104.57142857142857,"a95":3,"info":"\"15-06-30\" at \"14:07\""},{"visible":true,"include":false,"step":"360","x":-10.619047619047619,"y":42.42857142857143,"z":82.9047619047619,"a95":3.5,"info":"\"15-07-01\" at \"09:25\""},{"visible":true,"include":false,"step":"380","x":-10.99047619047619,"y":26.799999999999997,"z":78.77142857142857,"a95":4.1,"info":"\"15-07-01\" at \"14:23\""},{"visible":true,"include":false,"step":"410","x":-28.895238095238092,"y":38.95238095238095,"z":53.857142857142854,"a95":4.2,"info":"\"15-07-02\" at \"09:45\""},{"visible":true,"include":false,"step":"430","x":-14.857142857142858,"y":47.523809523809526,"z":80.47619047619048,"a95":4.2,"info":"\"15-07-02\" at \"13:28\""}]},{"version":"v1.1.0","exported":"2016-11-18T13:49:56.148Z","volume":10.5,"added":"2016-11-18T13:23:23.768Z","format":"Utrecht","demagType":"Unknown","strat":"8","patch":1.1,"GEO":[],"TECT":[],"interpreted":false,"name":"KG2.6A","coreAzi":304,"coreDip":37,"bedStrike":251,"bedDip":36,"data":[{"visible":true,"include":false,"step":"0.0","x":-412.5142857142857,"y":344.87619047619046,"z":534.4857142857143,"a95":0.99,"info":"17/08/2014 at 02:43:39"},{"visible":true,"include":true,"step":"4.0","x":-367.6190476190476,"y":319.8,"z":491.25714285714287,"a95":0.99,"info":"17/08/2014 at 02:43:39"},{"visible":true,"include":true,"step":"8.0","x":-321.25714285714287,"y":275.70476190476194,"z":419.6761904761905,"a95":0.99,"info":"17/08/2014 at 02:43:39"},{"visible":true,"include":true,"step":"12.0","x":-278.45714285714286,"y":251,"z":346.34285714285716,"a95":0.99,"info":"17/08/2014 at 02:43:39"},{"visible":true,"include":true,"step":"16.0","x":-239.42857142857142,"y":203.82857142857142,"z":305.57142857142856,"a95":0.99,"info":"17/08/2014 at 02:43:39"},{"visible":true,"include":true,"step":"20.0","x":-209.0190476190476,"y":171.31428571428572,"z":244.30476190476188,"a95":0.99,"info":"17/08/2014 at 02:43:39"},{"visible":true,"include":true,"step":"25.0","x":-183.54285714285714,"y":180.6952380952381,"z":237.8857142857143,"a95":0.99,"info":"17/08/2014 at 02:43:39"},{"visible":true,"include":true,"step":"30.0","x":-161.73333333333335,"y":143.40952380952382,"z":183.40952380952382,"a95":0.99,"info":"17/08/2014 at 02:43:39"},{"visible":true,"include":true,"step":"35.0","x":-162.15238095238095,"y":117.16190476190476,"z":176.4,"a95":0.99,"info":"17/08/2014 at 02:43:39"},{"visible":true,"include":true,"step":"40.0","x":-136.8095238095238,"y":140.65714285714287,"z":167.85714285714286,"a95":0.99,"info":"17/08/2014 at 02:43:39"},{"visible":true,"include":true,"step":"45.0","x":-117.19047619047619,"y":129.38095238095238,"z":147.05714285714285,"a95":0.99,"info":"17/08/2014 at 02:43:39"},{"visible":false,"include":false,"step":"50.0","x":-120.4095238095238,"y":58.308571428571426,"z":156.95238095238096,"a95":0.99,"info":"17/08/2014 at 02:43:39"},{"visible":true,"include":true,"step":"60.0","x":-136.9714285714286,"y":101.5047619047619,"z":133.63809523809525,"a95":0.99,"info":"17/08/2014 at 02:43:39"},{"visible":true,"include":false,"step":"70.0","x":-115.47619047619048,"y":100.19999999999999,"z":106.6952380952381,"a95":0.99,"info":"17/08/2014 at 02:43:39"},{"visible":false,"include":false,"step":"80.0","x":-124.04761904761905,"y":18.256190476190476,"z":135.76190476190476,"a95":0.99,"info":"17/08/2014 at 02:43:39"},{"visible":false,"include":false,"step":"90.0","x":-104.54285714285714,"y":89.56190476190476,"z":73.51523809523809,"a95":0.99,"info":"17/08/2014 at 02:43:39"},{"visible":false,"include":false,"step":"100.0","x":-108,"y":41.52761904761905,"z":81.30952380952381,"a95":0.99,"info":"17/08/2014 at 02:43:39"}]},{"version":"v1.1.0","exported":"2016-11-18T13:49:56.148Z","volume":10.5,"added":"2016-11-18T13:23:23.769Z","format":"Utrecht","demagType":"Unknown","strat":"””","patch":1.1,"GEO":[],"TECT":[],"interpreted":false,"name":"KG2.6B”","coreAzi":304,"coreDip":37,"bedStrike":251,"bedDip":36,"data":[{"visible":true,"include":false,"step":"20","x":-1110.952380952381,"y":1048.3809523809523,"z":1283.7142857142858,"a95":2.1,"info":"\"14-08-11\" at \"16:27\""},{"visible":true,"include":true,"step":"100","x":-745.7142857142857,"y":750.6666666666666,"z":839.1428571428571,"a95":2.1,"info":"\"14-08-11\" at \"20:15\""},{"visible":true,"include":true,"step":"150","x":-615.9047619047619,"y":663.2380952380952,"z":719.4285714285714,"a95":2.2,"info":"\"14-08-11\" at \"22:50\""},{"visible":true,"include":true,"step":"180","x":-389.9047619047619,"y":415.6190476190476,"z":465.8095238095238,"a95":3,"info":"\"14-08-12\" at \"15:14\""},{"visible":true,"include":true,"step":"210","x":-79.71428571428571,"y":129.23809523809524,"z":132,"a95":2.3,"info":"\"14-08-12\" at \"17:56\""},{"visible":true,"include":true,"step":"240","x":-81.61904761904762,"y":127.42857142857143,"z":126.19047619047619,"a95":3,"info":"\"14-08-12\" at \"21:01\""},{"visible":true,"include":true,"step":"270","x":-95.42857142857143,"y":105.71428571428571,"z":103.52380952380952,"a95":3.1,"info":"\"14-08-13\" at \"14:58\""},{"visible":true,"include":true,"step":"300","x":-105.52380952380952,"y":111.23809523809524,"z":94.66666666666667,"a95":5.2,"info":"\"14-08-13\" at \"17:40\""},{"visible":true,"include":true,"step":"320","x":-104.38095238095238,"y":103.23809523809524,"z":84,"a95":4.6,"info":"\"14-08-13\" at \"20:45\""},{"visible":false,"include":false,"step":"340","x":-152.28571428571428,"y":71.14285714285714,"z":65.42857142857143,"a95":4.1,"info":"\"14-08-14\" at \"13:39\""},{"visible":false,"include":false,"step":"370","x":-42.76190476190476,"y":81.9047619047619,"z":66.38095238095238,"a95":5.4,"info":"\"14-08-14\" at \"16:46\""},{"visible":false,"include":false,"step":"400","x":-68.57142857142857,"y":122.0952380952381,"z":110.38095238095238,"a95":5.3,"info":"\"14-08-14\" at \"19:58\""},{"visible":false,"include":false,"step":"430","x":-135.52380952380952,"y":110.66666666666667,"z":23.80952380952381,"a95":6.8,"info":"\"14-08-14\" at \"23:08\""},{"visible":false,"include":false,"step":"460","x":-126.76190476190476,"y":125.42857142857143,"z":57.23809523809524,"a95":6.7,"info":"\"14-08-15\" at \"15:52\""},{"visible":false,"include":false,"step":"490","x":-35.61904761904762,"y":318.3809523809524,"z":85.9047619047619,"a95":4.7,"info":"\"14-08-15\" at \"18:59\""},{"visible":false,"include":false,"step":"510","x":245.8095238095238,"y":40.285714285714285,"z":-64.28571428571429,"a95":5.9,"info":"\"14-08-15\" at \"22:10\""}]},{"version":"v1.1.0","exported":"2016-11-18T13:49:56.148Z","volume":10.5,"added":"2016-11-18T13:23:23.769Z","format":"Utrecht","demagType":"Unknown","strat":null,"patch":1.1,"GEO":[],"TECT":[],"interpreted":false,"name":"KG2.06B","coreAzi":304,"coreDip":37,"bedStrike":251,"bedDip":36,"data":[{"visible":true,"include":false,"step":"20","x":-301.6190476190476,"y":298.3809523809524,"z":631.2380952380952,"a95":2.3,"info":"\"15-06-22\" at \"16:41\""},{"visible":true,"include":false,"step":"90","x":-186.85714285714286,"y":241.23809523809524,"z":351.42857142857144,"a95":2,"info":"\"15-06-22\" at \"20:06\""},{"visible":true,"include":false,"step":"120","x":-106.76190476190476,"y":208.85714285714286,"z":287.7142857142857,"a95":2.6,"info":"\"15-06-22\" at \"22:30\""},{"visible":true,"include":false,"step":"150","x":-103.42857142857143,"y":208.95238095238096,"z":280,"a95":2.4,"info":"\"15-06-23\" at \"20:56\""},{"visible":true,"include":false,"step":"180","x":-55.714285714285715,"y":135.42857142857142,"z":156.0952380952381,"a95":2.3,"info":"\"15-06-24\" at \"17:23\""},{"visible":true,"include":false,"step":"210","x":-27.047619047619047,"y":109.52380952380952,"z":100.0952380952381,"a95":2.3,"info":"\"15-06-24\" at \"20:05\""},{"visible":true,"include":false,"step":"230","x":-38.57142857142857,"y":82.57142857142857,"z":98.19047619047619,"a95":2.4,"info":"\"15-06-28\" at \"00:19\""},{"visible":true,"include":false,"step":"250","x":-33.142857142857146,"y":81.9047619047619,"z":96.38095238095238,"a95":2.5,"info":"\"15-06-28\" at \"02:45\""},{"visible":true,"include":false,"step":"270","x":-34.095238095238095,"y":89.14285714285714,"z":96.0952380952381,"a95":2.3,"info":"\"15-06-28\" at \"18:37\""},{"visible":true,"include":false,"step":"300","x":-33.523809523809526,"y":81.33333333333333,"z":94.19047619047619,"a95":2.7,"info":"\"15-06-30\" at \"11:28\""},{"visible":true,"include":false,"step":"330","x":-34.57142857142857,"y":69.71428571428571,"z":80.95238095238095,"a95":3.3,"info":"\"15-06-30\" at \"14:09\""},{"visible":true,"include":false,"step":"360","x":-25.666666666666668,"y":28.761904761904763,"z":18.095238095238095,"a95":5.3,"info":"\"15-07-01\" at \"09:27\""},{"visible":true,"include":false,"step":"380","x":-37.13333333333333,"y":17.723809523809525,"z":50.07619047619047,"a95":5.6,"info":"\"15-07-01\" at \"14:25\""},{"visible":true,"include":false,"step":"410","x":-48.94285714285714,"y":0.819047619047619,"z":40.266666666666666,"a95":4.7,"info":"\"15-07-02\" at \"09:47\""},{"visible":true,"include":false,"step":"430","x":-57.57142857142857,"y":14.961904761904762,"z":22.895238095238096,"a95":6.2,"info":"\"15-07-02\" at \"13:30\""}]},{"version":"v1.1.0","exported":"2016-11-18T13:49:56.148Z","volume":10.5,"added":"2016-11-18T13:23:23.769Z","format":"Utrecht","demagType":"Unknown","strat":"1","patch":1.1,"GEO":[{"dec":76.60629127625288,"inc":-7.464365395345574,"MAD":9.889768009874702,"cm":[7.771561172376096e-16,-1.554312234475219e-14,0],"intensity":1151.4728166490181,"type":"GC","origin":false,"forced":true,"remark":"","nSteps":6,"minStep":"4.0","maxStep":"100.0","steps":["4.0","8.0","60.0","80.0","90.0","100.0"],"group":"None","version":"v1.1.0"}],"TECT":[{"dec":79.91120360292257,"inc":-2.760639719405021,"MAD":9.889768009874498,"cm":[-2.6645352591003757e-15,-1.3100631690576847e-14,0],"intensity":1151.4728166490183,"type":"GC","origin":false,"forced":true,"remark":"","nSteps":6,"minStep":"4.0","maxStep":"100.0","steps":["4.0","8.0","60.0","80.0","90.0","100.0"],"group":"None","version":"v1.1.0"}],"interpreted":true,"name":"KG2.7A","coreAzi":296,"coreDip":26,"bedStrike":251,"bedDip":36,"data":[{"visible":true,"include":false,"step":"0.0","x":-836.9714285714286,"y":414.25714285714287,"z":628.2,"a95":0.99,"info":"17/08/2014 at 08:12:11"},{"visible":true,"include":true,"step":"4.0","x":-792.4095238095238,"y":389.3047619047619,"z":572.5904761904761,"a95":0.99,"info":"17/08/2014 at 08:12:11"},{"visible":true,"include":true,"step":"8.0","x":-729.3428571428572,"y":362.9047619047619,"z":508.3238095238095,"a95":0.99,"info":"17/08/2014 at 08:12:11"},{"visible":true,"include":false,"step":"12.0","x":-651.8285714285714,"y":312.1904761904762,"z":457.1714285714286,"a95":0.99,"info":"17/08/2014 at 08:12:11"},{"visible":true,"include":false,"step":"16.0","x":-592.8380952380952,"y":253.95238095238096,"z":404.14285714285717,"a95":0.99,"info":"17/08/2014 at 08:12:11"},{"visible":true,"include":false,"step":"20.0","x":-551.5428571428571,"y":215.39999999999998,"z":350.23809523809524,"a95":0.99,"info":"17/08/2014 at 08:12:11"},{"visible":true,"include":false,"step":"25.0","x":-492.6666666666667,"y":159.25714285714287,"z":312.4,"a95":0.99,"info":"17/08/2014 at 08:12:11"},{"visible":true,"include":false,"step":"30.0","x":-436.2095238095238,"y":133.74285714285713,"z":249.23809523809524,"a95":0.99,"info":"17/08/2014 at 08:12:11"},{"visible":true,"include":false,"step":"35.0","x":-403.5904761904762,"y":118.26666666666667,"z":240.0857142857143,"a95":0.99,"info":"17/08/2014 at 08:12:11"},{"visible":true,"include":false,"step":"40.0","x":-374.54285714285714,"y":87.33714285714285,"z":209.73333333333332,"a95":0.99,"info":"17/08/2014 at 08:12:11"},{"visible":true,"include":false,"step":"45.0","x":-295.6666666666667,"y":91.9857142857143,"z":201.94285714285715,"a95":0.99,"info":"17/08/2014 at 08:12:11"},{"visible":true,"include":false,"step":"50.0","x":-294.7333333333333,"y":51.22380952380953,"z":149.34285714285713,"a95":0.99,"info":"17/08/2014 at 08:12:11"},{"visible":true,"include":true,"step":"60.0","x":-237.14285714285714,"y":43.93047619047619,"z":94.70476190476191,"a95":0.99,"info":"17/08/2014 at 08:12:11"},{"visible":true,"include":false,"step":"70.0","x":-146.9142857142857,"y":44.46476190476191,"z":86.75333333333333,"a95":0.99,"info":"17/08/2014 at 08:12:11"},{"visible":true,"include":true,"step":"80.0","x":-140.66666666666666,"y":18.92095238095238,"z":70.16761904761904,"a95":0.99,"info":"17/08/2014 at 08:12:11"},{"visible":true,"include":true,"step":"90.0","x":-138.48571428571427,"y":14.828571428571427,"z":55.39523809523809,"a95":0.99,"info":"17/08/2014 at 08:12:11"},{"visible":true,"include":true,"step":"100.0","x":-96.43809523809524,"y":7.534,"z":42.518095238095235,"a95":0.99,"info":"17/08/2014 at 08:12:11"}]},{"version":"v1.1.0","exported":"2016-11-18T13:49:56.148Z","volume":10.5,"added":"2016-11-18T13:23:23.770Z","format":"Utrecht","demagType":"Unknown","strat":null,"patch":1.1,"GEO":[{"dec":99.82984926990696,"inc":-0.010310311898785158,"MAD":6.226754676917982,"cm":[0,2.220446049250313e-15,0],"intensity":1142.7653375825,"type":"GC","origin":false,"forced":true,"remark":"","nSteps":9,"minStep":"100","maxStep":"340","steps":["100","150","180","210","240","270","300","320","340"],"group":"None","version":"v1.1.0"}],"TECT":[{"dec":275.0096543898325,"inc":-16.45668585671511,"MAD":6.226754676918212,"cm":[5.329070518200751e-15,-5.1514348342607263e-14,0],"intensity":1142.7653375825,"type":"GC","origin":false,"forced":true,"remark":"","nSteps":9,"minStep":"100","maxStep":"340","steps":["100","150","180","210","240","270","300","320","340"],"group":"None","version":"v1.1.0"}],"interpreted":true,"name":"KG2.8A","coreAzi":290,"coreDip":23,"bedStrike":251,"bedDip":36,"data":[{"visible":false,"include":false,"step":"20","x":-933.7142857142857,"y":171.61904761904762,"z":413.5238095238095,"a95":2.1,"info":"\"14-08-11\" at \"16:31\""},{"visible":true,"include":true,"step":"100","x":-632.2857142857143,"y":-35.23809523809524,"z":268.76190476190476,"a95":1.7,"info":"\"14-08-11\" at \"20:17\""},{"visible":true,"include":true,"step":"150","x":-605.5238095238095,"y":-39.523809523809526,"z":253.42857142857142,"a95":1.7,"info":"\"14-08-11\" at \"22:53\""},{"visible":true,"include":true,"step":"180","x":-514.2857142857143,"y":-131.14285714285714,"z":190.66666666666666,"a95":1.9,"info":"\"14-08-12\" at \"15:17\""},{"visible":true,"include":true,"step":"210","x":-477.7142857142857,"y":-165.23809523809524,"z":157.23809523809524,"a95":1.6,"info":"\"14-08-12\" at \"17:58\""},{"visible":true,"include":true,"step":"240","x":-486.57142857142856,"y":-175.52380952380952,"z":155.52380952380952,"a95":1.8,"info":"\"14-08-12\" at \"21:03\""},{"visible":true,"include":true,"step":"270","x":-451.42857142857144,"y":-175.9047619047619,"z":159.52380952380952,"a95":1.7,"info":"\"14-08-13\" at \"15:00\""},{"visible":true,"include":true,"step":"300","x":-423.3333333333333,"y":-196.1904761904762,"z":146.47619047619048,"a95":1.7,"info":"\"14-08-13\" at \"17:42\""},{"visible":true,"include":true,"step":"320","x":-450.0952380952381,"y":-188.47619047619048,"z":146.95238095238096,"a95":1.6,"info":"\"14-08-13\" at \"20:47\""},{"visible":true,"include":true,"step":"340","x":-395.8095238095238,"y":-252.47619047619048,"z":138.85714285714286,"a95":1.7,"info":"\"14-08-14\" at \"13:41\""},{"visible":true,"include":false,"step":"370","x":-407.14285714285717,"y":-204.85714285714286,"z":118.57142857142857,"a95":1.8,"info":"\"14-08-14\" at \"16:48\""},{"visible":true,"include":false,"step":"400","x":-406.3809523809524,"y":-143.71428571428572,"z":130.28571428571428,"a95":2.5,"info":"\"14-08-14\" at \"20:00\""},{"visible":true,"include":false,"step":"430","x":-449.9047619047619,"y":-124.95238095238095,"z":127.80952380952381,"a95":2.8,"info":"\"14-08-14\" at \"23:12\""},{"visible":true,"include":false,"step":"460","x":-378.85714285714283,"y":-214.66666666666666,"z":111.33333333333333,"a95":2.7,"info":"\"14-08-15\" at \"15:54\""},{"visible":true,"include":false,"step":"490","x":-235.8095238095238,"y":-53.42857142857143,"z":128.66666666666666,"a95":4.5,"info":"\"14-08-15\" at \"19:01\""},{"visible":true,"include":false,"step":"510","x":-271.23809523809524,"y":-206,"z":192.66666666666666,"a95":4.8,"info":"\"14-08-15\" at \"22:12\""}]},{"version":"v1.1.0","exported":"2016-11-18T13:49:56.148Z","volume":10.5,"added":"2016-11-18T13:23:23.770Z","format":"Utrecht","demagType":"Unknown","strat":"2","patch":1.1,"GEO":[{"dec":77.83649810758004,"inc":-3.5448659614215527,"MAD":12.374180665497972,"cm":[-3.1086244689504383e-15,5.329070518200751e-15,0],"intensity":1048.4420892942455,"type":"GC","origin":false,"forced":true,"remark":"","nSteps":10,"minStep":"8.0","maxStep":"50.0","steps":["8.0","12.0","16.0","20.0","25.0","30.0","35.0","40.0","45.0","50.0"],"group":"None","version":"v1.1.0"}],"TECT":[{"dec":258.61333674045227,"inc":-1.1352410254034413,"MAD":12.37418066549787,"cm":[7.105427357601002e-15,2.398081733190338e-14,0],"intensity":1048.4420892942458,"type":"GC","origin":false,"forced":true,"remark":"","nSteps":10,"minStep":"8.0","maxStep":"50.0","steps":["8.0","12.0","16.0","20.0","25.0","30.0","35.0","40.0","45.0","50.0"],"group":"None","version":"v1.1.0"}],"interpreted":true,"name":"KG2.8B","coreAzi":290,"coreDip":23,"bedStrike":251,"bedDip":36,"data":[{"visible":true,"include":false,"step":"0.0","x":-761.3714285714285,"y":227.77142857142857,"z":434.4095238095238,"a95":0.99,"info":"17/08/2014 at 08:12:11"},{"visible":true,"include":false,"step":"4.0","x":-715.3142857142857,"y":190.9047619047619,"z":381.04761904761904,"a95":0.99,"info":"17/08/2014 at 08:12:11"},{"visible":true,"include":true,"step":"8.0","x":-654.504761904762,"y":152.06666666666666,"z":308.3904761904762,"a95":0.99,"info":"17/08/2014 at 08:12:11"},{"visible":true,"include":true,"step":"12.0","x":-594.7238095238096,"y":97.17142857142856,"z":280.0857142857143,"a95":0.99,"info":"17/08/2014 at 08:12:11"},{"visible":true,"include":true,"step":"16.0","x":-543.552380952381,"y":83.54857142857142,"z":240.55238095238096,"a95":0.99,"info":"17/08/2014 at 08:12:11"},{"visible":true,"include":true,"step":"20.0","x":-511.76190476190476,"y":39.82285714285714,"z":217.8857142857143,"a95":0.99,"info":"17/08/2014 at 08:12:11"},{"visible":true,"include":true,"step":"25.0","x":-479.20000000000005,"y":15.371428571428572,"z":177.07619047619048,"a95":0.99,"info":"17/08/2014 at 08:12:11"},{"visible":true,"include":true,"step":"30.0","x":-406.60952380952375,"y":16.28857142857143,"z":129.45714285714286,"a95":0.99,"info":"17/08/2014 at 08:12:11"},{"visible":true,"include":true,"step":"35.0","x":-384.8666666666667,"y":-1.282,"z":137.96190476190475,"a95":0.99,"info":"17/08/2014 at 08:12:11"},{"visible":true,"include":true,"step":"40.0","x":-346.12380952380954,"y":10.067619047619047,"z":134.35238095238097,"a95":0.99,"info":"17/08/2014 at 08:12:11"},{"visible":true,"include":true,"step":"45.0","x":-336.57142857142856,"y":11.82095238095238,"z":110.37142857142858,"a95":0.99,"info":"17/08/2014 at 08:12:11"},{"visible":true,"include":true,"step":"50.0","x":-304.7142857142857,"y":-8.015809523809523,"z":89.57809523809524,"a95":0.99,"info":"17/08/2014 at 08:12:11"},{"visible":true,"include":false,"step":"60.0","x":-287.6952380952381,"y":77.94190476190477,"z":93.22857142857143,"a95":0.99,"info":"17/08/2014 at 08:12:11"},{"visible":true,"include":false,"step":"70.0","x":-222.9904761904762,"y":33.168571428571425,"z":77.22952380952381,"a95":0.99,"info":"17/08/2014 at 08:12:11"},{"visible":true,"include":false,"step":"80.0","x":-253.8190476190476,"y":73.43809523809524,"z":60.80952380952381,"a95":0.99,"info":"17/08/2014 at 08:12:11"},{"visible":true,"include":false,"step":"90.0","x":-233.93333333333334,"y":91.77142857142857,"z":76.77428571428571,"a95":0.99,"info":"17/08/2014 at 08:12:11"},{"visible":true,"include":false,"step":"100.0","x":-149.93333333333334,"y":44.973333333333336,"z":70.2352380952381,"a95":0.99,"info":"17/08/2014 at 08:12:11"}]},{"version":"v1.1.0","exported":"2016-11-18T13:49:56.148Z","volume":10.5,"added":"2016-11-18T13:23:23.770Z","format":"Utrecht","demagType":"Unknown","strat":"3","patch":1.1,"GEO":[{"dec":68.99696720306304,"inc":-2.2925191594133683,"MAD":16.083481524855028,"cm":[8.881784197001252e-16,2.3314683517128287e-15,0],"intensity":1411.5928798073835,"type":"GC","origin":false,"forced":true,"remark":"","nSteps":11,"minStep":"4.0","maxStep":"50.0","steps":["4.0","8.0","12.0","16.0","20.0","25.0","30.0","35.0","40.0","45.0","50.0"],"group":"None","version":"v1.1.0"}],"TECT":[{"dec":70.72790679709516,"inc":-3.0317779248242602,"MAD":16.083481524855173,"cm":[1.2434497875801753e-14,3.108624468950438e-14,0],"intensity":1411.5928798073835,"type":"GC","origin":false,"forced":true,"remark":"","nSteps":11,"minStep":"4.0","maxStep":"50.0","steps":["4.0","8.0","12.0","16.0","20.0","25.0","30.0","35.0","40.0","45.0","50.0"],"group":"None","version":"v1.1.0"}],"interpreted":true,"name":"KG2.9A","coreAzi":308,"coreDip":38,"bedStrike":251,"bedDip":36,"data":[{"visible":true,"include":false,"step":"0.0","x":-741.2095238095238,"y":112.63809523809525,"z":655.4571428571429,"a95":0.99,"info":"17/08/2014 at 08:12:11"},{"visible":true,"include":true,"step":"4.0","x":-712.7428571428571,"y":91.24857142857142,"z":631.447619047619,"a95":0.99,"info":"17/08/2014 at 08:12:11"},{"visible":true,"include":true,"step":"8.0","x":-671.8857142857144,"y":66.21523809523809,"z":594,"a95":0.99,"info":"17/08/2014 at 08:12:11"},{"visible":true,"include":true,"step":"12.0","x":-636.7428571428571,"y":70.61904761904762,"z":544.2,"a95":0.99,"info":"17/08/2014 at 08:12:11"},{"visible":true,"include":true,"step":"16.0","x":-585.4761904761905,"y":57.73904761904762,"z":520.1619047619048,"a95":0.99,"info":"17/08/2014 at 08:12:11"},{"visible":true,"include":true,"step":"20.0","x":-536.2476190476191,"y":64.92761904761905,"z":482.9428571428571,"a95":0.99,"info":"17/08/2014 at 08:12:11"},{"visible":true,"include":true,"step":"25.0","x":-491.91428571428577,"y":60.17619047619048,"z":466.14285714285717,"a95":0.99,"info":"17/08/2014 at 08:12:11"},{"visible":true,"include":true,"step":"30.0","x":-432.0761904761905,"y":66.62,"z":398.4,"a95":0.99,"info":"17/08/2014 at 08:12:11"},{"visible":true,"include":true,"step":"35.0","x":-380.15238095238095,"y":55.68380952380952,"z":397.9619047619048,"a95":0.99,"info":"17/08/2014 at 08:12:11"},{"visible":true,"include":true,"step":"40.0","x":-374.3904761904762,"y":59.55047619047619,"z":373.12380952380954,"a95":0.99,"info":"17/08/2014 at 08:12:11"},{"visible":true,"include":true,"step":"45.0","x":-323.62857142857143,"y":83.82095238095238,"z":354.6952380952381,"a95":0.99,"info":"17/08/2014 at 08:12:11"},{"visible":true,"include":true,"step":"50.0","x":-302.2095238095238,"y":68.08380952380952,"z":336.5809523809524,"a95":0.99,"info":"17/08/2014 at 08:12:11"},{"visible":true,"include":false,"step":"60.0","x":-259.5333333333333,"y":73.24285714285713,"z":282.6095238095238,"a95":0.99,"info":"17/08/2014 at 08:12:11"},{"visible":true,"include":false,"step":"70.0","x":-206.7904761904762,"y":90.41809523809523,"z":238.0761904761905,"a95":0.99,"info":"17/08/2014 at 08:12:11"},{"visible":true,"include":false,"step":"80.0","x":-217.60000000000002,"y":60.02571428571429,"z":206.42857142857142,"a95":0.99,"info":"17/08/2014 at 08:12:11"},{"visible":true,"include":false,"step":"90.0","x":-166.15238095238095,"y":61.948571428571434,"z":187.2761904761905,"a95":0.99,"info":"17/08/2014 at 08:12:11"},{"visible":true,"include":false,"step":"100.0","x":-102.67619047619047,"y":74.46285714285715,"z":181,"a95":0.99,"info":"17/08/2014 at 08:12:11"}]},{"version":"v1.1.0","exported":"2016-11-18T13:49:56.148Z","volume":10.5,"added":"2016-11-18T13:23:23.770Z","format":"Utrecht","demagType":"Unknown","strat":null,"patch":1.1,"GEO":[{"dec":298.2093034011925,"inc":-14.856911206612097,"MAD":25.342399802094846,"cm":[-1.7763568394002505e-15,3.552713678800501e-14,0],"intensity":1049.7849299227776,"type":"GC","origin":false,"forced":true,"remark":"","nSteps":10,"minStep":"90","maxStep":"330","steps":["90","120","150","180","210","230","250","270","300","330"],"group":"None","version":"v1.1.0"}],"TECT":[{"dec":283.79830742202614,"inc":-38.63501983376232,"MAD":25.342399802094604,"cm":[0,7.416289804496046e-14,7.993605777301127e-15],"intensity":1049.7849299227776,"type":"GC","origin":false,"forced":true,"remark":"","nSteps":10,"minStep":"90","maxStep":"330","steps":["90","120","150","180","210","230","250","270","300","330"],"group":"None","version":"v1.1.0"}],"interpreted":true,"name":"KG2.09B","coreAzi":308,"coreDip":38,"bedStrike":251,"bedDip":36,"data":[{"visible":true,"include":false,"step":"20","x":-498,"y":442.6666666666667,"z":860.5714285714286,"a95":2.6,"info":"\"15-06-22\" at \"16:43\""},{"visible":true,"include":true,"step":"90","x":-356.6666666666667,"y":338.1904761904762,"z":561.8095238095239,"a95":2.5,"info":"\"15-06-22\" at \"20:08\""},{"visible":true,"include":true,"step":"120","x":-278.85714285714283,"y":292.1904761904762,"z":460.76190476190476,"a95":2.5,"info":"\"15-06-22\" at \"22:31\""},{"visible":true,"include":true,"step":"150","x":-277.6190476190476,"y":278.4761904761905,"z":455.04761904761904,"a95":2.7,"info":"\"15-06-23\" at \"20:58\""},{"visible":true,"include":true,"step":"180","x":-169.61904761904762,"y":220.47619047619048,"z":304,"a95":2.6,"info":"\"15-06-24\" at \"17:27\""},{"visible":true,"include":true,"step":"210","x":-168.76190476190476,"y":186.95238095238096,"z":281.42857142857144,"a95":2.7,"info":"\"15-06-24\" at \"20:07\""},{"visible":true,"include":true,"step":"230","x":-179.04761904761904,"y":196.47619047619048,"z":267.8095238095238,"a95":2.5,"info":"\"15-06-28\" at \"00:21\""},{"visible":true,"include":true,"step":"250","x":-171.14285714285714,"y":189.14285714285714,"z":270,"a95":2.8,"info":"\"15-06-28\" at \"02:48\""},{"visible":true,"include":true,"step":"270","x":-157.42857142857142,"y":181.61904761904762,"z":269.42857142857144,"a95":2.8,"info":"\"15-06-28\" at \"18:39\""},{"visible":true,"include":true,"step":"300","x":-169.04761904761904,"y":190.66666666666666,"z":266.57142857142856,"a95":2.8,"info":"\"15-06-30\" at \"11:29\""},{"visible":true,"include":true,"step":"330","x":-138,"y":153.23809523809524,"z":222.95238095238096,"a95":3.2,"info":"\"15-06-30\" at \"14:12\""},{"visible":true,"include":false,"step":"360","x":-172.76190476190476,"y":164.47619047619048,"z":211.04761904761904,"a95":4.2,"info":"\"15-07-01\" at \"09:30\""},{"visible":true,"include":false,"step":"380","x":-157.14285714285714,"y":169.14285714285714,"z":202.95238095238096,"a95":3.7,"info":"\"15-07-01\" at \"14:27\""},{"visible":true,"include":false,"step":"410","x":-170,"y":138.38095238095238,"z":174.38095238095238,"a95":3.5,"info":"\"15-07-02\" at \"09:50\""},{"visible":true,"include":false,"step":"430","x":-168.47619047619048,"y":162.66666666666666,"z":280.3809523809524,"a95":4.3,"info":"\"15-07-02\" at \"13:33\""}]},{"version":"v1.1.0","exported":"2016-11-18T13:49:56.148Z","volume":10.5,"added":"2016-11-18T13:23:23.770Z","format":"Utrecht","demagType":"Unknown","strat":"4","patch":1.1,"GEO":[{"dec":17.658263531198713,"inc":-28.185733586095406,"MAD":29.105044139990063,"cm":[-6.661338147750939e-16,1.0269562977782698e-15,0],"intensity":374.8440287464216,"type":"GC","origin":false,"forced":true,"remark":"","nSteps":10,"minStep":"4.0","maxStep":"45.0","steps":["4.0","8.0","12.0","16.0","20.0","25.0","30.0","35.0","40.0","45.0"],"group":"None","version":"v1.1.0"}],"TECT":[{"dec":41.774561626023456,"inc":-52.91468220968741,"MAD":29.105044139992124,"cm":[-8.881784197001252e-16,-8.104628079763643e-15,1.9984014443252818e-15],"intensity":374.8440287464216,"type":"GC","origin":false,"forced":true,"remark":"","nSteps":10,"minStep":"4.0","maxStep":"45.0","steps":["4.0","8.0","12.0","16.0","20.0","25.0","30.0","35.0","40.0","45.0"],"group":"None","version":"v1.1.0"}],"interpreted":true,"name":"KG2.10A","coreAzi":343,"coreDip":48,"bedStrike":251,"bedDip":36,"data":[{"visible":true,"include":false,"step":"0.0","x":-100.15238095238094,"y":102.54285714285714,"z":296.2857142857143,"a95":0.99,"info":"17/08/2014 at 08:12:11"},{"visible":true,"include":true,"step":"4.0","x":-89.94666666666667,"y":85.23047619047618,"z":276.552380952381,"a95":0.99,"info":"17/08/2014 at 08:12:11"},{"visible":true,"include":true,"step":"8.0","x":-74.97619047619048,"y":70.98380952380953,"z":250.15238095238095,"a95":0.99,"info":"17/08/2014 at 08:12:11"},{"visible":true,"include":true,"step":"12.0","x":-66.23809523809524,"y":58.26380952380952,"z":212.54285714285712,"a95":0.99,"info":"17/08/2014 at 08:12:11"},{"visible":true,"include":true,"step":"16.0","x":-64.4504761904762,"y":47.25904761904762,"z":169.85714285714286,"a95":0.99,"info":"17/08/2014 at 08:12:11"},{"visible":true,"include":true,"step":"20.0","x":-51.976190476190474,"y":36.24857142857143,"z":150.2761904761905,"a95":0.99,"info":"17/08/2014 at 08:12:11"},{"visible":true,"include":true,"step":"25.0","x":-38.82,"y":36.34857142857143,"z":120.13333333333334,"a95":0.99,"info":"17/08/2014 at 08:12:11"},{"visible":true,"include":true,"step":"30.0","x":-29.50095238095238,"y":20.002857142857142,"z":96.94285714285714,"a95":0.99,"info":"17/08/2014 at 08:12:11"},{"visible":true,"include":true,"step":"35.0","x":-23.81904761904762,"y":23.268571428571427,"z":75.65714285714286,"a95":0.99,"info":"17/08/2014 at 08:12:11"},{"visible":true,"include":true,"step":"40.0","x":-18.497142857142858,"y":8.675047619047618,"z":78.17904761904762,"a95":0.99,"info":"17/08/2014 at 08:12:11"},{"visible":true,"include":true,"step":"45.0","x":-13.436190476190477,"y":7.8376190476190475,"z":71.52571428571429,"a95":0.99,"info":"17/08/2014 at 08:12:11"},{"visible":true,"include":false,"step":"50.0","x":-21.32,"y":-8.596285714285713,"z":57.49809523809524,"a95":0.99,"info":"17/08/2014 at 08:12:11"},{"visible":true,"include":false,"step":"60.0","x":-1.2703809523809524,"y":-11.018095238095238,"z":35.894285714285715,"a95":0.99,"info":"17/08/2014 at 08:12:11"},{"visible":false,"include":false,"step":"70.0","x":-5.493619047619047,"y":-9.051333333333334,"z":29.92761904761905,"a95":0.99,"info":"17/08/2014 at 08:12:11"},{"visible":false,"include":false,"step":"80.0","x":1.1108571428571428,"y":-49.12857142857143,"z":32.10285714285714,"a95":0.99,"info":"17/08/2014 at 08:12:11"},{"visible":false,"include":false,"step":"90.0","x":20.22952380952381,"y":-64.36285714285714,"z":21.395238095238096,"a95":0.99,"info":"17/08/2014 at 08:12:11"},{"visible":false,"include":false,"step":"100.0","x":-0.07047619047619047,"y":-59.08095238095238,"z":20.569523809523808,"a95":0.99,"info":"17/08/2014 at 08:12:11"}]},{"version":"v1.1.0","exported":"2016-11-18T13:49:56.149Z","volume":10.5,"added":"2016-11-18T13:23:23.771Z","format":"Utrecht","demagType":"Unknown","strat":"5","patch":1.1,"GEO":[],"TECT":[],"interpreted":false,"name":"KG2.11A","coreAzi":335,"coreDip":51,"bedStrike":251,"bedDip":36,"data":[{"visible":true,"include":false,"step":"0.0","x":-133.5047619047619,"y":129.5047619047619,"z":375.8952380952381,"a95":0.99,"info":"17/08/2014 at 08:12:11"},{"visible":true,"include":true,"step":"4.0","x":-117.28571428571429,"y":110.15238095238094,"z":337.3904761904762,"a95":0.99,"info":"17/08/2014 at 08:12:11"},{"visible":true,"include":true,"step":"8.0","x":-100.73333333333333,"y":75.92476190476191,"z":279.57142857142856,"a95":0.99,"info":"17/08/2014 at 08:12:11"},{"visible":true,"include":true,"step":"12.0","x":-85,"y":70.62095238095237,"z":219.67619047619047,"a95":0.99,"info":"17/08/2014 at 08:12:11"},{"visible":true,"include":true,"step":"16.0","x":-71.12857142857143,"y":55.80761904761905,"z":180.9047619047619,"a95":0.99,"info":"17/08/2014 at 08:12:11"},{"visible":true,"include":true,"step":"20.0","x":-54.05238095238095,"y":38.47904761904762,"z":138.34285714285713,"a95":0.99,"info":"17/08/2014 at 08:12:11"},{"visible":true,"include":false,"step":"25.0","x":-49.03619047619048,"y":7.741619047619048,"z":106.62857142857142,"a95":0.99,"info":"17/08/2014 at 08:12:11"},{"visible":true,"include":false,"step":"30.0","x":-33.26095238095238,"y":-3.1704761904761902,"z":99.4095238095238,"a95":0.99,"info":"17/08/2014 at 08:12:11"},{"visible":true,"include":false,"step":"35.0","x":-24.80666666666667,"y":11.93047619047619,"z":73.2,"a95":0.99,"info":"17/08/2014 at 08:12:11"},{"visible":true,"include":false,"step":"40.0","x":-19.527619047619048,"y":1.8123809523809524,"z":52.551428571428566,"a95":0.99,"info":"17/08/2014 at 08:12:11"},{"visible":true,"include":false,"step":"45.0","x":-18.84095238095238,"y":-0.4334,"z":45.037142857142854,"a95":0.99,"info":"17/08/2014 at 08:12:11"},{"visible":false,"include":false,"step":"50.0","x":-20.035238095238096,"y":-24.82,"z":31.643809523809523,"a95":0.99,"info":"17/08/2014 at 08:12:11"},{"visible":false,"include":false,"step":"60.0","x":-18.70952380952381,"y":-13.311428571428573,"z":26.536190476190477,"a95":0.99,"info":"17/08/2014 at 08:12:11"},{"visible":false,"include":false,"step":"70.0","x":-3.0375238095238095,"y":-27.775238095238095,"z":14.572380952380952,"a95":0.99,"info":"17/08/2014 at 08:12:11"},{"visible":false,"include":false,"step":"80.0","x":0.28455238095238095,"y":-46.114285714285714,"z":22.18952380952381,"a95":0.99,"info":"17/08/2014 at 08:12:11"},{"visible":false,"include":false,"step":"90.0","x":9.59047619047619,"y":-70.09619047619047,"z":4.642857142857143,"a95":0.99,"info":"17/08/2014 at 08:12:11"},{"visible":false,"include":false,"step":"100.0","x":7.6739999999999995,"y":-46.10476190476191,"z":11.605714285714285,"a95":0.99,"info":"17/08/2014 at 08:12:11"}]},{"version":"v1.1.0","exported":"2016-11-18T13:49:56.149Z","volume":10.5,"added":"2016-11-18T13:23:23.771Z","format":"Utrecht","demagType":"Unknown","strat":null,"patch":1.1,"GEO":[{"dec":307.2817269748884,"inc":-26.34046141221443,"MAD":26.716485316361602,"cm":[2.220446049250313e-16,1.7763568394002505e-15,0],"intensity":269.9471435623284,"type":"GC","origin":false,"forced":true,"remark":"","nSteps":8,"minStep":"100","maxStep":"320","steps":["100","150","180","210","240","270","300","320"],"group":"None","version":"v1.1.0"}],"TECT":[{"dec":285.52713905407256,"inc":-52.85491379267819,"MAD":26.716485316360156,"cm":[-6.217248937900877e-15,-1.7319479184152442e-14,-1.3322676295501878e-15],"intensity":269.94714356232834,"type":"GC","origin":false,"forced":true,"remark":"","nSteps":8,"minStep":"100","maxStep":"320","steps":["100","150","180","210","240","270","300","320"],"group":"None","version":"v1.1.0"}],"interpreted":true,"name":"KG2.12A","coreAzi":315,"coreDip":39,"bedStrike":251,"bedDip":36,"data":[{"visible":false,"include":false,"step":"20","x":-110.19047619047619,"y":-20.952380952380953,"z":428.3809523809524,"a95":2.8,"info":"\"14-08-11\" at \"16:35\""},{"visible":true,"include":true,"step":"100","x":-78.38095238095238,"y":16,"z":185.52380952380952,"a95":2.4,"info":"\"14-08-11\" at \"20:20\""},{"visible":true,"include":true,"step":"150","x":-74.76190476190476,"y":33.04761904761905,"z":181.23809523809524,"a95":2.7,"info":"\"14-08-11\" at \"22:55\""},{"visible":true,"include":true,"step":"180","x":-57.714285714285715,"y":12.380952380952381,"z":133.9047619047619,"a95":3.1,"info":"\"14-08-12\" at \"15:19\""},{"visible":true,"include":true,"step":"210","x":-58.38095238095238,"y":14.761904761904763,"z":112,"a95":2.9,"info":"\"14-08-12\" at \"18:01\""},{"visible":true,"include":true,"step":"240","x":-52.19047619047619,"y":1.7142857142857142,"z":108.76190476190476,"a95":3.4,"info":"\"14-08-12\" at \"21:05\""},{"visible":true,"include":true,"step":"270","x":-42.23809523809524,"y":8.676190476190476,"z":84.5047619047619,"a95":3.1,"info":"\"14-08-13\" at \"15:03\""},{"visible":true,"include":true,"step":"300","x":-32.58095238095238,"y":-4.657142857142857,"z":78.80952380952381,"a95":4.6,"info":"\"14-08-13\" at \"17:44\""},{"visible":true,"include":true,"step":"320","x":-27.62857142857143,"y":-0.5714285714285714,"z":62.25714285714286,"a95":5.2,"info":"\"14-08-13\" at \"20:49\""},{"visible":true,"include":false,"step":"340","x":-22.371428571428574,"y":-17.38095238095238,"z":56.65714285714286,"a95":4.3,"info":"\"14-08-14\" at \"13:43\""},{"visible":true,"include":false,"step":"370","x":-24.82857142857143,"y":-19.752380952380953,"z":54.523809523809526,"a95":4.3,"info":"\"14-08-14\" at \"16:50\""},{"visible":true,"include":false,"step":"400","x":-7.123809523809523,"y":7.285714285714286,"z":47.60952380952381,"a95":13.2,"info":"\"14-08-14\" at \"20:02\""},{"visible":false,"include":false,"step":"430","x":-50.7047619047619,"y":45.04761904761905,"z":52.666666666666664,"a95":8.8,"info":"\"14-08-14\" at \"23:18\""},{"visible":false,"include":false,"step":"460","x":5.752380952380952,"y":29.504761904761907,"z":65.36190476190475,"a95":11.7,"info":"\"14-08-15\" at \"15:57\""},{"visible":false,"include":false,"step":"490","x":189.04761904761904,"y":204.38095238095238,"z":-13.142857142857142,"a95":3.4,"info":"\"14-08-15\" at \"19:03\""},{"visible":false,"include":false,"step":"510","x":-116,"y":30.857142857142858,"z":60.19047619047619,"a95":10.8,"info":"\"14-08-15\" at \"22:16\""}]},{"version":"v1.1.0","exported":"2016-11-18T13:49:56.149Z","volume":10.5,"added":"2016-11-18T13:23:23.771Z","format":"Utrecht","demagType":"Unknown","strat":"6","patch":1.1,"GEO":[],"TECT":[],"interpreted":false,"name":"KG2.12B","coreAzi":315,"coreDip":39,"bedStrike":251,"bedDip":36,"data":[{"visible":true,"include":false,"step":"0.0","x":-151.0952380952381,"y":72.91333333333334,"z":325.4761904761905,"a95":0.99,"info":"17/08/2014 at 08:12:11"},{"visible":true,"include":true,"step":"4.0","x":-136.56190476190477,"y":62.30952380952381,"z":285.70476190476194,"a95":0.99,"info":"17/08/2014 at 08:12:11"},{"visible":true,"include":true,"step":"8.0","x":-117.07619047619048,"y":54.93047619047619,"z":241.62857142857143,"a95":0.99,"info":"17/08/2014 at 08:12:11"},{"visible":true,"include":true,"step":"12.0","x":-101.5047619047619,"y":47.56857142857143,"z":186.65714285714287,"a95":0.99,"info":"17/08/2014 at 08:12:11"},{"visible":true,"include":true,"step":"16.0","x":-89.6752380952381,"y":44.40952380952381,"z":155.68571428571428,"a95":0.99,"info":"17/08/2014 at 08:12:11"},{"visible":true,"include":true,"step":"20.0","x":-77.72666666666666,"y":38.49809523809524,"z":123.51428571428572,"a95":0.99,"info":"17/08/2014 at 08:12:11"},{"visible":true,"include":true,"step":"25.0","x":-53.567619047619054,"y":18.67047619047619,"z":110.62857142857142,"a95":0.99,"info":"17/08/2014 at 08:12:11"},{"visible":true,"include":true,"step":"30.0","x":-46.37714285714286,"y":2.4005714285714284,"z":86.86857142857143,"a95":0.99,"info":"17/08/2014 at 08:12:11"},{"visible":true,"include":true,"step":"35.0","x":-47.875238095238096,"y":24.64952380952381,"z":73.55904761904762,"a95":0.99,"info":"17/08/2014 at 08:12:11"},{"visible":true,"include":true,"step":"40.0","x":-35.210476190476186,"y":14.764761904761905,"z":48.18,"a95":0.99,"info":"17/08/2014 at 08:12:11"},{"visible":true,"include":true,"step":"45.0","x":-20.265714285714285,"y":7.13952380952381,"z":42.666666666666664,"a95":0.99,"info":"17/08/2014 at 08:12:11"},{"visible":true,"include":true,"step":"50.0","x":-26.473333333333336,"y":0.7811714285714285,"z":35.663809523809526,"a95":0.99,"info":"17/08/2014 at 08:12:11"},{"visible":true,"include":true,"step":"60.0","x":-9.572380952380954,"y":13.295238095238094,"z":17.166666666666668,"a95":0.99,"info":"17/08/2014 at 08:12:11"},{"visible":true,"include":false,"step":"70.0","x":-8.922285714285714,"y":-4.4559999999999995,"z":20.49047619047619,"a95":0.99,"info":"17/08/2014 at 08:12:11"},{"visible":false,"include":false,"step":"80.0","x":-1.7865714285714287,"y":-8.452666666666667,"z":27.26380952380952,"a95":0.99,"info":"17/08/2014 at 08:12:11"},{"visible":false,"include":false,"step":"90.0","x":-6.0362857142857145,"y":-4.746666666666667,"z":16.17809523809524,"a95":0.99,"info":"17/08/2014 at 08:12:11"},{"visible":false,"include":false,"step":"100.0","x":-25.540952380952383,"y":-12.986666666666668,"z":-7.829428571428572,"a95":0.99,"info":"17/08/2014 at 08:12:11"}]},{"version":"v1.1.0","exported":"2016-11-18T13:49:56.149Z","volume":10.5,"added":"2016-11-18T13:23:23.771Z","format":"Utrecht","demagType":"Unknown","strat":null,"patch":1.1,"GEO":[],"TECT":[],"interpreted":false,"name":"KG2.13A","coreAzi":329,"coreDip":44,"bedStrike":251,"bedDip":36,"data":[{"visible":false,"include":false,"step":"20","x":-98,"y":11.904761904761905,"z":116.76190476190476,"a95":2.6,"info":"\"14-08-11\" at \"16:38\""},{"visible":true,"include":true,"step":"100","x":-95.42857142857143,"y":8,"z":135.9047619047619,"a95":2.3,"info":"\"14-08-11\" at \"20:23\""},{"visible":true,"include":true,"step":"150","x":-90.95238095238095,"y":23.428571428571427,"z":128.85714285714286,"a95":2.6,"info":"\"14-08-11\" at \"22:58\""},{"visible":true,"include":true,"step":"180","x":-72.47619047619048,"y":8.476190476190476,"z":93.04761904761905,"a95":3.6,"info":"\"14-08-12\" at \"15:21\""},{"visible":true,"include":true,"step":"210","x":-68.76190476190476,"y":4.857142857142857,"z":81.9047619047619,"a95":3.1,"info":"\"14-08-12\" at \"18:03\""},{"visible":true,"include":true,"step":"240","x":-56.96190476190476,"y":-1,"z":75.05714285714286,"a95":3.1,"info":"\"14-08-12\" at \"21:07\""},{"visible":true,"include":true,"step":"270","x":-52.53333333333334,"y":8.666666666666666,"z":56.68571428571429,"a95":3.6,"info":"\"14-08-13\" at \"15:05\""},{"visible":true,"include":true,"step":"300","x":-46.49523809523809,"y":7.523809523809524,"z":51.8,"a95":3.8,"info":"\"14-08-13\" at \"17:46\""},{"visible":true,"include":false,"step":"320","x":-34.4,"y":-12.066666666666666,"z":31.38095238095238,"a95":5.2,"info":"\"14-08-13\" at \"20:51\""},{"visible":true,"include":false,"step":"340","x":-22.82857142857143,"y":2.5619047619047617,"z":32.285714285714285,"a95":5.6,"info":"\"14-08-14\" at \"13:46\""},{"visible":true,"include":false,"step":"370","x":-27.104761904761908,"y":-4.3619047619047615,"z":12.790476190476191,"a95":8.2,"info":"\"14-08-14\" at \"16:52\""},{"visible":true,"include":false,"step":"400","x":-24.276190476190475,"y":-13.933333333333334,"z":12.733333333333333,"a95":27.9,"info":"\"14-08-14\" at \"20:05\""},{"visible":true,"include":false,"step":"430","x":-65.04761904761905,"y":33.923809523809524,"z":8.561904761904762,"a95":11.3,"info":"\"14-08-14\" at \"23:22\""},{"visible":false,"include":false,"step":"460","x":-23.552380952380954,"y":1.2285714285714286,"z":-56.80952380952381,"a95":11.4,"info":"\"14-08-15\" at \"15:59\""},{"visible":false,"include":false,"step":"490","x":-24.666666666666668,"y":-204.95238095238096,"z":-67.23809523809524,"a95":4.3,"info":"\"14-08-15\" at \"19:06\""},{"visible":false,"include":false,"step":"510","x":-73.61904761904762,"y":-322.76190476190476,"z":-127.42857142857143,"a95":3.1,"info":"\"14-08-15\" at \"22:19\""}]},{"version":"v1.1.0","exported":"2016-11-18T13:49:56.149Z","volume":10.5,"added":"2016-11-18T13:23:23.772Z","format":"Utrecht","demagType":"Unknown","strat":"7","patch":1.1,"GEO":[],"TECT":[],"interpreted":false,"name":"KG2.13B","coreAzi":329,"coreDip":44,"bedStrike":251,"bedDip":36,"data":[{"visible":true,"include":false,"step":"0.0","x":-104.34285714285713,"y":65.73238095238096,"z":338.6666666666667,"a95":0.99,"info":"17/08/2014 at 08:12:11"},{"visible":true,"include":true,"step":"4.0","x":-87.83047619047619,"y":51.90761904761904,"z":294.22857142857146,"a95":0.99,"info":"17/08/2014 at 08:12:11"},{"visible":true,"include":true,"step":"8.0","x":-75.66095238095238,"y":42.859047619047615,"z":240.0190476190476,"a95":0.99,"info":"17/08/2014 at 08:12:11"},{"visible":true,"include":true,"step":"12.0","x":-67.23714285714286,"y":31.094285714285714,"z":191.84761904761905,"a95":0.99,"info":"17/08/2014 at 08:12:11"},{"visible":true,"include":true,"step":"16.0","x":-55.24285714285714,"y":25.684761904761906,"z":150.78095238095239,"a95":0.99,"info":"17/08/2014 at 08:12:11"},{"visible":true,"include":true,"step":"20.0","x":-48.80190476190476,"y":4.446476190476191,"z":116.95238095238095,"a95":0.99,"info":"17/08/2014 at 08:12:11"},{"visible":true,"include":true,"step":"25.0","x":-44.70857142857143,"y":13.80190476190476,"z":98.1047619047619,"a95":0.99,"info":"17/08/2014 at 08:12:11"},{"visible":true,"include":true,"step":"30.0","x":-33.915238095238095,"y":16.504761904761907,"z":70.67904761904762,"a95":0.99,"info":"17/08/2014 at 08:12:11"},{"visible":true,"include":true,"step":"35.0","x":-24.228571428571428,"y":-0.3451619047619048,"z":48.22,"a95":0.99,"info":"17/08/2014 at 08:12:11"},{"visible":true,"include":true,"step":"40.0","x":-23.239047619047618,"y":14.737142857142858,"z":55.41904761904762,"a95":0.99,"info":"17/08/2014 at 08:12:11"},{"visible":true,"include":false,"step":"45.0","x":-12.61142857142857,"y":-4.393714285714286,"z":37.80761904761905,"a95":0.99,"info":"17/08/2014 at 08:12:11"},{"visible":true,"include":false,"step":"50.0","x":-11.798095238095238,"y":-34.67333333333333,"z":37.41238095238095,"a95":0.99,"info":"17/08/2014 at 08:12:11"},{"visible":false,"include":false,"step":"60.0","x":-2.7027619047619047,"y":-19.33142857142857,"z":21.26666666666667,"a95":0.99,"info":"17/08/2014 at 08:12:11"},{"visible":false,"include":false,"step":"70.0","x":-0.8448380952380952,"y":-30.56857142857143,"z":-0.15678095238095238,"a95":0.99,"info":"17/08/2014 at 08:12:11"},{"visible":false,"include":false,"step":"80.0","x":-2.1213333333333333,"y":-56.6447619047619,"z":0.010703809523809523,"a95":0.99,"info":"17/08/2014 at 08:12:11"},{"visible":false,"include":false,"step":"90.0","x":40.26761904761905,"y":-46.084761904761905,"z":13.167619047619047,"a95":0.99,"info":"17/08/2014 at 08:12:11"},{"visible":false,"include":false,"step":"100.0","x":6.092666666666666,"y":-48.624761904761904,"z":0.615152380952381,"a95":0.99,"info":"17/08/2014 at 08:12:11"}]},{"version":"v1.1.0","exported":"2016-11-18T13:49:56.149Z","volume":10.5,"added":"2016-11-18T13:23:23.772Z","format":"Utrecht","demagType":"Unknown","strat":"8","patch":1.1,"GEO":[{"dec":27.643768131191962,"inc":-1.7866831182891936,"MAD":18.842755529726748,"cm":[-7.549516567451064e-15,-3.552713678800501e-15,0],"intensity":366.1212855321689,"type":"GC","origin":false,"forced":true,"remark":"","nSteps":9,"minStep":"8.0","maxStep":"45.0","steps":["8.0","12.0","16.0","20.0","25.0","30.0","35.0","40.0","45.0"],"group":"None","version":"v1.1.0"}],"TECT":[{"dec":34.03936479837563,"inc":-20.90204380635749,"MAD":18.842755529726272,"cm":[-7.549516567451064e-15,-6.217248937900877e-15,7.105427357601002e-15],"intensity":366.1212855321688,"type":"GC","origin":false,"forced":true,"remark":"","nSteps":9,"minStep":"8.0","maxStep":"45.0","steps":["8.0","12.0","16.0","20.0","25.0","30.0","35.0","40.0","45.0"],"group":"None","version":"v1.1.0"}],"interpreted":true,"name":"KG2.14A","coreAzi":264,"coreDip":48,"bedStrike":242,"bedDip":36,"data":[{"visible":true,"include":false,"step":"0.0","x":-238.26666666666668,"y":-153.98095238095237,"z":-127.04761904761905,"a95":0.99,"info":"17/08/2014 at 08:12:11"},{"visible":true,"include":false,"step":"4.0","x":-211.2,"y":-156.1904761904762,"z":-135.2095238095238,"a95":0.99,"info":"17/08/2014 at 08:12:11"},{"visible":true,"include":true,"step":"8.0","x":-181.4952380952381,"y":-149.15238095238095,"z":-124.76190476190476,"a95":0.99,"info":"17/08/2014 at 08:12:11"},{"visible":true,"include":true,"step":"12.0","x":-151.34285714285713,"y":-127.43809523809523,"z":-116.18095238095239,"a95":0.99,"info":"17/08/2014 at 08:12:11"},{"visible":true,"include":true,"step":"16.0","x":-138.56190476190477,"y":-106.48571428571428,"z":-105.97142857142858,"a95":0.99,"info":"17/08/2014 at 08:12:11"},{"visible":true,"include":true,"step":"20.0","x":-124.03809523809525,"y":-97.67619047619047,"z":-92.02285714285715,"a95":0.99,"info":"17/08/2014 at 08:12:11"},{"visible":true,"include":true,"step":"25.0","x":-97.60952380952382,"y":-84.39428571428572,"z":-73.82000000000001,"a95":0.99,"info":"17/08/2014 at 08:12:11"},{"visible":true,"include":true,"step":"30.0","x":-71.76,"y":-67.65428571428572,"z":-68.78285714285714,"a95":0.99,"info":"17/08/2014 at 08:12:11"},{"visible":true,"include":true,"step":"35.0","x":-66.04095238095238,"y":-70.61428571428571,"z":-72.21238095238095,"a95":0.99,"info":"17/08/2014 at 08:12:11"},{"visible":true,"include":true,"step":"40.0","x":-65.28380952380952,"y":-63.56666666666667,"z":-71.36380952380952,"a95":0.99,"info":"17/08/2014 at 08:12:11"},{"visible":true,"include":true,"step":"45.0","x":-57.47714285714286,"y":-53.78857142857142,"z":-64.32000000000001,"a95":0.99,"info":"17/08/2014 at 08:12:11"},{"visible":false,"include":false,"step":"50.0","x":-53.36761904761905,"y":-67.72190476190477,"z":-47.81809523809524,"a95":0.99,"info":"17/08/2014 at 08:12:11"},{"visible":false,"include":false,"step":"60.0","x":-53.57714285714285,"y":-38.005714285714284,"z":-57.81428571428571,"a95":0.99,"info":"17/08/2014 at 08:12:11"},{"visible":false,"include":false,"step":"70.0","x":-41.14,"y":-51.29333333333334,"z":-66.68190476190476,"a95":0.99,"info":"17/08/2014 at 08:12:11"},{"visible":false,"include":false,"step":"80.0","x":-26.035238095238096,"y":-29.05809523809524,"z":-53.6152380952381,"a95":0.99,"info":"17/08/2014 at 08:12:11"},{"visible":false,"include":false,"step":"90.0","x":-29.70952380952381,"y":-53.50761904761905,"z":-24.77809523809524,"a95":0.99,"info":"17/08/2014 at 08:12:11"},{"visible":false,"include":false,"step":"100.0","x":-34.29714285714286,"y":-33.670476190476194,"z":-33.03238095238095,"a95":0.99,"info":"17/08/2014 at 08:12:11"}]},{"version":"v1.1.0","exported":"2016-11-18T13:49:56.149Z","volume":10.5,"added":"2016-11-18T13:23:23.772Z","format":"Utrecht","demagType":"Unknown","strat":null,"patch":1.1,"GEO":[],"TECT":[],"interpreted":false,"name":"KG2.14B","coreAzi":264,"coreDip":48,"bedStrike":242,"bedDip":36,"data":[{"visible":true,"include":false,"step":"20","x":-410.76190476190476,"y":233.61904761904762,"z":378.4761904761905,"a95":2.2,"info":"\"15-06-22\" at \"16:45\""},{"visible":true,"include":true,"step":"90","x":-285.8095238095238,"y":195.8095238095238,"z":239.04761904761904,"a95":2.1,"info":"\"15-06-22\" at \"20:10\""},{"visible":true,"include":true,"step":"120","x":-215.42857142857142,"y":155.42857142857142,"z":174.95238095238096,"a95":2,"info":"\"15-06-22\" at \"22:33\""},{"visible":true,"include":true,"step":"150","x":-147.23809523809524,"y":119.61904761904762,"z":125.52380952380952,"a95":2.2,"info":"\"15-06-23\" at \"21:01\""},{"visible":true,"include":true,"step":"180","x":-72.23809523809524,"y":51,"z":35.2952380952381,"a95":2,"info":"\"15-06-24\" at \"17:29\""},{"visible":true,"include":true,"step":"210","x":-49.92380952380953,"y":42.39047619047619,"z":25.038095238095234,"a95":2.4,"info":"\"15-06-24\" at \"20:09\""},{"visible":true,"include":false,"step":"230","x":-48.34285714285714,"y":33.91428571428572,"z":10.047619047619047,"a95":2.3,"info":"\"15-06-28\" at \"00:23\""},{"visible":true,"include":false,"step":"250","x":-40.333333333333336,"y":26.066666666666666,"z":25.142857142857142,"a95":3.5,"info":"\"15-06-28\" at \"02:50\""},{"visible":true,"include":false,"step":"270","x":-45.06666666666666,"y":6.380952380952381,"z":-4.085714285714285,"a95":3.3,"info":"\"15-06-28\" at \"18:41\""},{"visible":true,"include":false,"step":"300","x":-46.34285714285714,"y":16.628571428571426,"z":-7.800000000000001,"a95":3.5,"info":"\"15-06-30\" at \"11:32\""},{"visible":true,"include":false,"step":"330","x":-35.51428571428571,"y":17.65714285714286,"z":-9.952380952380953,"a95":6,"info":"\"15-06-30\" at \"14:15\""},{"visible":false,"include":false,"step":"360","x":-22.371428571428574,"y":4.419047619047619,"z":18.01904761904762,"a95":9,"info":"\"15-07-01\" at \"09:34\""},{"visible":false,"include":false,"step":"380","x":-18.19047619047619,"y":78.57142857142857,"z":-70.66666666666667,"a95":3.1,"info":"\"15-07-01\" at \"14:29\""},{"visible":false,"include":false,"step":"410","x":-35.38095238095238,"y":6.219047619047619,"z":-5.352380952380953,"a95":15.6,"info":"\"15-07-02\" at \"09:52\""}]},{"version":"v1.1.0","exported":"2016-11-18T13:49:56.149Z","volume":10.5,"added":"2016-11-18T13:23:23.772Z","format":"Utrecht","demagType":"Unknown","strat":"1","patch":1.1,"GEO":[],"TECT":[],"interpreted":false,"name":"KG2.15A","coreAzi":283,"coreDip":37,"bedStrike":242,"bedDip":36,"data":[{"visible":true,"include":false,"step":"0.0","x":-363.57142857142856,"y":307.0190476190476,"z":418.2190476190476,"a95":0.99,"info":"17/08/2014 at 13:39:26"},{"visible":true,"include":true,"step":"4.0","x":-347.2761904761905,"y":292.9809523809524,"z":387.93333333333334,"a95":0.99,"info":"17/08/2014 at 13:39:26"},{"visible":true,"include":true,"step":"8.0","x":-311.4666666666667,"y":270.4666666666667,"z":340.6190476190476,"a95":0.99,"info":"17/08/2014 at 13:39:26"},{"visible":true,"include":true,"step":"12.0","x":-279.34285714285716,"y":245.75238095238097,"z":314.1333333333333,"a95":0.99,"info":"17/08/2014 at 13:39:26"},{"visible":true,"include":true,"step":"16.0","x":-260.0952380952381,"y":235.7238095238095,"z":274.1714285714286,"a95":0.99,"info":"17/08/2014 at 13:39:26"},{"visible":true,"include":true,"step":"20.0","x":-240.9238095238095,"y":218.04761904761904,"z":254.2,"a95":0.99,"info":"17/08/2014 at 13:39:26"},{"visible":true,"include":true,"step":"25.0","x":-226.85714285714286,"y":216.67619047619047,"z":242.02857142857144,"a95":0.99,"info":"17/08/2014 at 13:39:26"},{"visible":true,"include":true,"step":"30.0","x":-214.53333333333333,"y":205.66666666666666,"z":222.8857142857143,"a95":0.99,"info":"17/08/2014 at 13:39:26"},{"visible":true,"include":true,"step":"35.0","x":-218.93333333333334,"y":183.8952380952381,"z":199.30476190476188,"a95":0.99,"info":"17/08/2014 at 13:39:26"},{"visible":true,"include":true,"step":"40.0","x":-206.23809523809524,"y":170.23809523809524,"z":173.64761904761903,"a95":0.99,"info":"17/08/2014 at 13:39:26"},{"visible":true,"include":true,"step":"45.0","x":-180.0285714285714,"y":171.15238095238095,"z":171.98095238095237,"a95":0.99,"info":"17/08/2014 at 13:39:26"},{"visible":true,"include":true,"step":"50.0","x":-206.05714285714285,"y":150.66666666666666,"z":170.98095238095237,"a95":0.99,"info":"17/08/2014 at 13:39:26"},{"visible":true,"include":true,"step":"60.0","x":-177.0952380952381,"y":150.06666666666666,"z":165.65714285714287,"a95":0.99,"info":"17/08/2014 at 13:39:26"},{"visible":true,"include":false,"step":"70.0","x":-147.5047619047619,"y":115.42857142857143,"z":113.72380952380952,"a95":0.99,"info":"17/08/2014 at 13:39:26"},{"visible":true,"include":false,"step":"80.0","x":-189.8761904761905,"y":89.50095238095238,"z":111.47619047619048,"a95":0.99,"info":"17/08/2014 at 13:39:26"},{"visible":true,"include":false,"step":"90.0","x":-126.80000000000001,"y":106.51428571428572,"z":89.79619047619047,"a95":0.99,"info":"17/08/2014 at 13:39:26"},{"visible":true,"include":false,"step":"100.0","x":-122.02857142857142,"y":90.38285714285715,"z":97.19047619047619,"a95":0.99,"info":"17/08/2014 at 13:39:26"}]},{"version":"v1.1.0","exported":"2016-11-18T13:49:56.149Z","volume":10.5,"added":"2016-11-18T13:23:23.773Z","format":"Utrecht","demagType":"Unknown","strat":null,"patch":1.1,"GEO":[],"TECT":[],"interpreted":false,"name":"KG2.15B","coreAzi":283,"coreDip":37,"bedStrike":242,"bedDip":36,"data":[{"visible":true,"include":false,"step":"20","x":-455.23809523809524,"y":294.95238095238096,"z":403.7142857142857,"a95":1.8,"info":"\"15-06-22\" at \"16:47\""},{"visible":true,"include":true,"step":"90","x":-301.14285714285717,"y":204.76190476190476,"z":286.4761904761905,"a95":2,"info":"\"15-06-22\" at \"20:12\""},{"visible":true,"include":true,"step":"120","x":-228.95238095238096,"y":135.9047619047619,"z":220.47619047619048,"a95":2,"info":"\"15-06-22\" at \"22:36\""},{"visible":true,"include":true,"step":"150","x":-142.85714285714286,"y":77.42857142857143,"z":133.14285714285714,"a95":2.1,"info":"\"15-06-23\" at \"21:03\""},{"visible":true,"include":true,"step":"180","x":-82.57142857142857,"y":47.23809523809524,"z":70.28571428571429,"a95":2.3,"info":"\"15-06-24\" at \"17:31\""},{"visible":false,"include":false,"step":"210","x":-72.56190476190476,"y":2.104761904761905,"z":-3.0571428571428574,"a95":2.8,"info":"\"15-06-24\" at \"20:12\""},{"visible":true,"include":false,"step":"230","x":-72.57142857142857,"y":50.19047619047619,"z":48.476190476190474,"a95":2.2,"info":"\"15-06-28\" at \"00:25\""},{"visible":true,"include":false,"step":"250","x":-72.14285714285714,"y":28.771428571428572,"z":50.86666666666667,"a95":2.7,"info":"\"15-06-28\" at \"02:52\""},{"visible":true,"include":false,"step":"270","x":-63.828571428571436,"y":20.02857142857143,"z":37.53333333333334,"a95":2.8,"info":"\"15-06-28\" at \"18:44\""},{"visible":true,"include":false,"step":"300","x":-58.22857142857143,"y":39.12380952380953,"z":40.50476190476191,"a95":2.7,"info":"\"15-06-30\" at \"11:34\""},{"visible":true,"include":false,"step":"330","x":-40.32380952380952,"y":20.53333333333333,"z":37.21904761904762,"a95":3.6,"info":"\"15-06-30\" at \"14:17\""},{"visible":true,"include":false,"step":"360","x":-46.34285714285714,"y":18.714285714285715,"z":18.866666666666667,"a95":4.6,"info":"\"15-07-01\" at \"09:37\""},{"visible":true,"include":false,"step":"380","x":-69.07619047619048,"y":13.40952380952381,"z":-23.666666666666668,"a95":5.6,"info":"\"15-07-01\" at \"14:31\""},{"visible":true,"include":false,"step":"410","x":-57.23809523809524,"y":42.666666666666664,"z":71.52380952380952,"a95":3.4,"info":"\"15-07-02\" at \"09:55\""},{"visible":true,"include":false,"step":"430","x":-42.81904761904762,"y":48.48571428571429,"z":27.323809523809523,"a95":6.6,"info":"\"15-07-02\" at \"13:36\""}]},{"version":"v1.1.0","exported":"2016-11-18T13:49:56.149Z","volume":10.5,"added":"2016-11-18T13:23:23.773Z","format":"Utrecht","demagType":"Unknown","strat":null,"patch":1.1,"GEO":[{"dec":281.72762319739365,"inc":-7.759835829740547,"MAD":3.7134945353396573,"cm":[-2.220446049250313e-15,4.440892098500626e-15,0],"intensity":230.49483631778176,"type":"GC","origin":false,"forced":true,"remark":"","nSteps":8,"minStep":"100","maxStep":"340","steps":["100","150","180","210","240","270","320","340"],"group":"None","version":"v1.1.0"}],"TECT":[{"dec":271.60407956908585,"inc":-28.781482231675724,"MAD":3.7134945353398305,"cm":[-5.717648576819556e-15,3.1086244689504383e-15,1.7763568394002505e-15],"intensity":230.49483631778176,"type":"GC","origin":false,"forced":true,"remark":"","nSteps":8,"minStep":"100","maxStep":"340","steps":["100","150","180","210","240","270","320","340"],"group":"None","version":"v1.1.0"}],"interpreted":true,"name":"KG2.16A","coreAzi":285,"coreDip":38,"bedStrike":242,"bedDip":36,"data":[{"visible":true,"include":false,"step":"20","x":-249.8095238095238,"y":128.47619047619048,"z":128.95238095238096,"a95":1.9,"info":"\"14-08-11\" at \"16:41\""},{"visible":true,"include":true,"step":"100","x":-115.04761904761905,"y":42.19047619047619,"z":122.57142857142857,"a95":2.1,"info":"\"14-08-11\" at \"20:26\""},{"visible":true,"include":true,"step":"150","x":-112.95238095238095,"y":42.19047619047619,"z":119.42857142857143,"a95":2.3,"info":"\"14-08-11\" at \"23:00\""},{"visible":true,"include":true,"step":"180","x":-71.9047619047619,"y":-3.4285714285714284,"z":76.95238095238095,"a95":4.4,"info":"\"14-08-12\" at \"15:24\""},{"visible":true,"include":true,"step":"210","x":-71.33333333333333,"y":-10.952380952380953,"z":68,"a95":3.7,"info":"\"14-08-12\" at \"18:05\""},{"visible":true,"include":true,"step":"240","x":-67.52380952380952,"y":-20.095238095238095,"z":65.14285714285714,"a95":4.9,"info":"\"14-08-12\" at \"21:09\""},{"visible":true,"include":true,"step":"270","x":-57.18095238095238,"y":-22.942857142857143,"z":56.99047619047619,"a95":5.3,"info":"\"14-08-13\" at \"15:07\""},{"visible":true,"include":false,"step":"300","x":-65.39047619047619,"y":-14.495238095238093,"z":44.37142857142857,"a95":5.9,"info":"\"14-08-13\" at \"17:48\""},{"visible":true,"include":true,"step":"320","x":-45.05714285714286,"y":-35.20952380952381,"z":41.50476190476191,"a95":7.4,"info":"\"14-08-13\" at \"20:54\""},{"visible":true,"include":true,"step":"340","x":-43.076190476190476,"y":-43.93333333333334,"z":45.12380952380953,"a95":7.3,"info":"\"14-08-14\" at \"13:51\""},{"visible":true,"include":false,"step":"370","x":-88.76190476190476,"y":-42.285714285714285,"z":33.42857142857143,"a95":7.3,"info":"\"14-08-14\" at \"16:54\""},{"visible":false,"include":false,"step":"400","x":-105.9047619047619,"y":-3.4285714285714284,"z":29.428571428571427,"a95":5.8,"info":"\"14-08-14\" at \"20:08\""},{"visible":false,"include":false,"step":"430","x":-81.63809523809525,"y":9.82857142857143,"z":-13.180952380952382,"a95":11.8,"info":"\"14-08-14\" at \"23:25\""},{"visible":false,"include":false,"step":"460","x":-21.523809523809526,"y":-96.47619047619048,"z":-15.142857142857142,"a95":11.4,"info":"\"14-08-15\" at \"16:02\""},{"visible":false,"include":false,"step":"490","x":143.9047619047619,"y":-116,"z":69.52380952380952,"a95":7,"info":"\"14-08-15\" at \"19:08\""},{"visible":false,"include":false,"step":"510","x":138.66666666666666,"y":-686.952380952381,"z":9.047619047619047,"a95":4.5,"info":"\"14-08-15\" at \"22:21\""}]},{"version":"v1.1.0","exported":"2016-11-18T13:49:56.149Z","volume":10.5,"added":"2016-11-18T13:23:23.775Z","format":"Utrecht","demagType":"Unknown","strat":"2","patch":1.1,"GEO":[],"TECT":[],"interpreted":false,"name":"KG2.16B","coreAzi":285,"coreDip":38,"bedStrike":242,"bedDip":36,"data":[{"visible":true,"include":false,"step":"0.0","x":-485.02857142857147,"y":370.18095238095236,"z":515.3714285714285,"a95":0.99,"info":"17/08/2014 at 13:39:26"},{"visible":true,"include":false,"step":"4.0","x":-458.0761904761905,"y":345.4095238095238,"z":470.23809523809524,"a95":0.99,"info":"17/08/2014 at 13:39:26"},{"visible":true,"include":true,"step":"8.0","x":-412.4380952380953,"y":320.9238095238095,"z":411.4190476190476,"a95":0.99,"info":"17/08/2014 at 13:39:26"},{"visible":true,"include":true,"step":"12.0","x":-372.7333333333333,"y":293.85714285714283,"z":364.43809523809523,"a95":0.99,"info":"17/08/2014 at 13:39:26"},{"visible":true,"include":true,"step":"16.0","x":-348.2761904761905,"y":269.32380952380953,"z":324.6666666666667,"a95":0.99,"info":"17/08/2014 at 13:39:26"},{"visible":true,"include":true,"step":"20.0","x":-315.1714285714286,"y":257.65714285714284,"z":325.57142857142856,"a95":0.99,"info":"17/08/2014 at 13:39:26"},{"visible":true,"include":true,"step":"25.0","x":-288.7238095238095,"y":239.53333333333333,"z":282.3333333333333,"a95":0.99,"info":"17/08/2014 at 13:39:26"},{"visible":true,"include":true,"step":"30.0","x":-290.57142857142856,"y":233.8190476190476,"z":252.47619047619048,"a95":0.99,"info":"17/08/2014 at 13:39:26"},{"visible":true,"include":true,"step":"35.0","x":-276.9428571428572,"y":230.9142857142857,"z":246.8,"a95":0.99,"info":"17/08/2014 at 13:39:26"},{"visible":true,"include":true,"step":"40.0","x":-266.1714285714286,"y":229.04761904761904,"z":245.54285714285712,"a95":0.99,"info":"17/08/2014 at 13:39:26"},{"visible":true,"include":true,"step":"45.0","x":-256.54285714285714,"y":216.39999999999998,"z":230.21904761904764,"a95":0.99,"info":"17/08/2014 at 13:39:26"},{"visible":true,"include":false,"step":"50.0","x":-259.76190476190476,"y":178.9714285714286,"z":248.8095238095238,"a95":0.99,"info":"17/08/2014 at 13:39:26"},{"visible":true,"include":false,"step":"60.0","x":-258.7809523809524,"y":198.38095238095238,"z":231.9904761904762,"a95":0.99,"info":"17/08/2014 at 13:39:26"},{"visible":true,"include":false,"step":"70.0","x":-212.33333333333334,"y":180.48571428571427,"z":209.15238095238095,"a95":0.99,"info":"17/08/2014 at 13:39:26"},{"visible":true,"include":false,"step":"80.0","x":-234.7904761904762,"y":161.07619047619048,"z":173.3904761904762,"a95":0.99,"info":"17/08/2014 at 13:39:26"},{"visible":true,"include":false,"step":"90.0","x":-202.54285714285712,"y":139.68571428571428,"z":175.42857142857142,"a95":0.99,"info":"17/08/2014 at 13:39:26"},{"visible":true,"include":false,"step":"100.0","x":-160.58095238095237,"y":133.98095238095237,"z":155.75238095238097,"a95":0.99,"info":"17/08/2014 at 13:39:26"}]}]
