# Supplementary material for: Paleomagnetic constraints on the timing and distribution of Cenozoic rotations in Central and Eastern Anatolia
Source: Copernicus journal article supplement (doi:10.5194/se-9-295-2018), 2018-03-21
Supplement: Supplementary file 2 [file se-9-295-2018-supplement.zip › se-2017-66_DATA_dir files/dir files Ulukisla/KL1.dir]

[{"version":"v1.1.0","exported":"2016-11-23T11:12:37.877Z","volume":10.5,"added":"2016-11-23T11:03:00.396Z","format":"Utrecht","demagType":"Unknown","strat":null,"patch":1.1,"GEO":[],"TECT":[],"interpreted":false,"name":"KL1.1A","coreAzi":309,"coreDip":62,"bedStrike":30,"bedDip":16,"data":[{"visible":true,"include":false,"step":"20","x":-747.6190476190476,"y":808.4761904761905,"z":2291.1428571428573,"a95":2.6,"info":"\"15-02-12\" at \"15:08\""},{"visible":true,"include":true,"step":"100","x":-663.7142857142857,"y":475.6190476190476,"z":1591.5238095238096,"a95":2.6,"info":"\"15-02-12\" at \"23:05\""},{"visible":true,"include":true,"step":"120","x":-613.1428571428571,"y":360.85714285714283,"z":1246.7619047619048,"a95":2.5,"info":"\"15-02-13\" at \"18:17\""},{"visible":true,"include":true,"step":"150","x":-549.1428571428571,"y":154,"z":641.4285714285714,"a95":2.3,"info":"\"15-02-13\" at \"22:57\""},{"visible":true,"include":true,"step":"180","x":-530.7619047619048,"y":18.285714285714285,"z":232.85714285714286,"a95":2.3,"info":"\"15-02-16\" at \"15:54\""},{"visible":true,"include":true,"step":"210","x":-508.1904761904762,"y":-97.23809523809524,"z":-36.095238095238095,"a95":2.7,"info":"\"15-02-16\" at \"20:01\""},{"visible":true,"include":false,"step":"240","x":-460.76190476190476,"y":-36.19047619047619,"z":5.619047619047619,"a95":2.3,"info":"\"15-02-17\" at \"15:53\""},{"visible":true,"include":false,"step":"270","x":-429.23809523809524,"y":-152.28571428571428,"z":-126.76190476190476,"a95":2.4,"info":"\"15-02-17\" at \"22:36\""},{"visible":true,"include":false,"step":"300","x":-444.2857142857143,"y":-171.23809523809524,"z":-173.61904761904762,"a95":2.8,"info":"\"15-03-08\" at \"18:16\""},{"visible":true,"include":false,"step":"320","x":-362.76190476190476,"y":-162.66666666666666,"z":-151.71428571428572,"a95":2.8,"info":"\"15-03-09\" at \"08:56\""},{"visible":true,"include":false,"step":"350","x":-478.85714285714283,"y":-191.33333333333334,"z":-98.95238095238095,"a95":3.6,"info":"\"15-03-09\" at \"12:23\""},{"visible":true,"include":false,"step":"380","x":-437.5238095238095,"y":-223.8095238095238,"z":-39.61904761904762,"a95":3.3,"info":"\"15-04-21\" at \"08:12\""},{"visible":true,"include":false,"step":"410","x":-602,"y":-377.04761904761904,"z":-165.52380952380952,"a95":2.9,"info":"\"15-04-21\" at \"11:39\""},{"visible":true,"include":false,"step":"440","x":-397.8095238095238,"y":-272.0952380952381,"z":-225.9047619047619,"a95":2.8,"info":"\"15-04-22\" at \"14:27\""}]},{"version":"v1.1.0","exported":"2016-11-23T11:12:37.877Z","volume":10.5,"added":"2016-11-23T11:03:00.397Z","format":"Utrecht","demagType":"Unknown","strat":null,"patch":1.1,"GEO":[{"dec":148.3619792217288,"inc":-22.2410552784323,"MAD":2.461381291694742,"cm":[-8.526512829121202e-14,-1.5631940186722204e-13,0],"intensity":2230.898715622267,"type":"dir","forced":true,"remark":"","origin":false,"nSteps":4,"minStep":"180","maxStep":"250","steps":["180","210","230","250"],"group":"None","version":"v1.1.0"}],"TECT":[{"dec":152.9406449692426,"inc":-36.039763910025066,"MAD":2.461381291694767,"cm":[1.4210854715202004e-14,4.263256414560601e-14,2.842170943040401e-14],"intensity":2230.898715622267,"type":"dir","forced":true,"remark":"","origin":false,"nSteps":4,"minStep":"180","maxStep":"250","steps":["180","210","230","250"],"group":"None","version":"v1.1.0"}],"interpreted":true,"name":"KL1.02A","coreAzi":249,"coreDip":51,"bedStrike":30,"bedDip":16,"data":[{"visible":true,"include":false,"step":"20","x":-598.8571428571429,"y":-254.95238095238096,"z":1106.4761904761904,"a95":2.2,"info":"\"15-06-22\" at \"16:50\""},{"visible":true,"include":false,"step":"90","x":-147.04761904761904,"y":-863.4285714285714,"z":-253.23809523809524,"a95":2.1,"info":"\"15-06-22\" at \"20:14\""},{"visible":true,"include":false,"step":"120","x":-38.857142857142854,"y":-943.6190476190476,"z":-409.3333333333333,"a95":2,"info":"\"15-06-22\" at \"22:38\""},{"visible":true,"include":false,"step":"150","x":137.23809523809524,"y":-1006.1904761904761,"z":-506.1904761904762,"a95":2.2,"info":"\"15-06-23\" at \"21:05\""},{"visible":true,"include":true,"step":"180","x":134.1904761904762,"y":-1033.2380952380952,"z":-509.14285714285717,"a95":2.1,"info":"\"15-06-24\" at \"17:34\""},{"visible":true,"include":true,"step":"210","x":110.28571428571429,"y":-1042.095238095238,"z":-476.6666666666667,"a95":2,"info":"\"15-06-24\" at \"20:14\""},{"visible":true,"include":true,"step":"230","x":142.38095238095238,"y":-979.3333333333334,"z":-431.9047619047619,"a95":2,"info":"\"15-06-28\" at \"00:27\""},{"visible":true,"include":true,"step":"250","x":83.04761904761905,"y":-1005.7142857142857,"z":-369.7142857142857,"a95":2,"info":"\"15-06-28\" at \"02:54\""},{"visible":true,"include":false,"step":"270","x":163.61904761904762,"y":-985.6190476190476,"z":-397.42857142857144,"a95":1.9,"info":"\"15-06-28\" at \"18:46\""},{"visible":true,"include":false,"step":"300","x":134.47619047619048,"y":-888.8571428571429,"z":-258.1904761904762,"a95":2.1,"info":"\"15-06-30\" at \"11:37\""},{"visible":true,"include":false,"step":"330","x":103.14285714285714,"y":-899.8095238095239,"z":-174.57142857142858,"a95":2.2,"info":"\"15-06-30\" at \"14:19\""},{"visible":false,"include":false,"step":"360","x":249.04761904761904,"y":-952.952380952381,"z":-544.6666666666666,"a95":2.1,"info":"\"15-07-01\" at \"09:39\""},{"visible":false,"include":false,"step":"380","x":132.85714285714286,"y":-896,"z":-150.28571428571428,"a95":2.4,"info":"\"15-07-01\" at \"14:33\""},{"visible":false,"include":false,"step":"410","x":55.333333333333336,"y":-935.4285714285714,"z":-124.19047619047619,"a95":2.2,"info":"\"15-07-02\" at \"09:57\""},{"visible":false,"include":false,"step":"430","x":172.38095238095238,"y":-855.1428571428571,"z":-124.19047619047619,"a95":2.2,"info":"\"15-07-02\" at \"13:38\""}]},{"version":"v1.1.0","exported":"2016-11-23T11:12:37.877Z","volume":10.5,"added":"2016-11-23T11:03:00.397Z","format":"Utrecht","demagType":"Unknown","strat":"6","patch":1.1,"GEO":[{"dec":174.70216868752686,"inc":-14.781248681751293,"MAD":15.058109159942857,"cm":[-243.54213338322387,-2.653503640370034,-107.15968702968306],"intensity":152.5360058040943,"type":"dir","forced":false,"remark":"","origin":false,"nSteps":5,"minStep":"20.0","maxStep":"35.0","steps":["20.0","23.0","25.0","30.0","35.0"],"group":"None","version":"v1.1.0"}],"TECT":[{"dec":179.39805944970635,"inc":-23.531046499726724,"MAD":15.058109159942855,"cm":[-226.45943502961055,-32.241605119201516,-135.93974225416264],"intensity":152.5360058040943,"type":"dir","forced":false,"remark":"","origin":false,"nSteps":5,"minStep":"20.0","maxStep":"35.0","steps":["20.0","23.0","25.0","30.0","35.0"],"group":"None","version":"v1.1.0"}],"interpreted":true,"name":"KL1.02B","coreAzi":249,"coreDip":51,"bedStrike":30,"bedDip":16,"data":[{"visible":true,"include":false,"step":"0.0","x":-103.25714285714287,"y":-154.14285714285714,"z":197.65714285714287,"a95":0.99,"info":"08/07/2015 at 13:44:31"},{"visible":true,"include":false,"step":"10.0","x":52.772380952380956,"y":-285.16190476190474,"z":30.634285714285717,"a95":0.99,"info":"08/07/2015 at 13:44:31"},{"visible":true,"include":false,"step":"15.0","x":126.51428571428572,"y":-322.1904761904762,"z":-2.3724761904761906,"a95":0.99,"info":"08/07/2015 at 13:44:31"},{"visible":true,"include":true,"step":"20.0","x":152.1238095238095,"y":-281.1714285714286,"z":-30.622857142857146,"a95":0.99,"info":"08/07/2015 at 13:44:31"},{"visible":true,"include":true,"step":"23.0","x":163.82857142857142,"y":-264.0761904761905,"z":-27.59142857142857,"a95":0.99,"info":"08/07/2015 at 13:44:31"},{"visible":true,"include":true,"step":"25.0","x":143.0857142857143,"y":-258.54285714285714,"z":-14.869523809523809,"a95":0.99,"info":"08/07/2015 at 13:44:31"},{"visible":true,"include":true,"step":"30.0","x":125.54285714285714,"y":-189.47619047619048,"z":-50.86761904761905,"a95":0.99,"info":"08/07/2015 at 13:44:31"},{"visible":true,"include":false,"step":"33.0","x":117.3047619047619,"y":-138.1047619047619,"z":-2.2722857142857142,"a95":0.99,"info":"08/07/2015 at 13:44:31"},{"visible":true,"include":true,"step":"35.0","x":101.37142857142858,"y":-138.8095238095238,"z":-10.019047619047619,"a95":0.99,"info":"08/07/2015 at 13:44:31"},{"visible":true,"include":false,"step":"40.0","x":69.70285714285714,"y":-66.00761904761904,"z":-4.975333333333333,"a95":0.99,"info":"08/07/2015 at 13:44:31"},{"visible":true,"include":false,"step":"45.0","x":55.37809523809524,"y":-54.68666666666667,"z":-40.36761904761905,"a95":0.99,"info":"08/07/2015 at 13:44:31"},{"visible":true,"include":false,"step":"50.0","x":24.515238095238097,"y":-51.203809523809525,"z":-12.872380952380952,"a95":0.99,"info":"08/07/2015 at 13:44:31"},{"visible":false,"include":false,"step":"55.0","x":37.84857142857143,"y":31.132380952380952,"z":-35.95333333333333,"a95":0.99,"info":"08/07/2015 at 13:44:31"},{"visible":false,"include":false,"step":"60.0","x":48.168571428571425,"y":35.32857142857143,"z":-14.665714285714287,"a95":0.99,"info":"08/07/2015 at 13:44:31"},{"visible":false,"include":false,"step":"65.0","x":5.875047619047619,"y":67.54857142857142,"z":-14.35142857142857,"a95":0.99,"info":"08/07/2015 at 13:44:31"},{"visible":false,"include":false,"step":"70.0","x":-4.34752380952381,"y":94.01238095238095,"z":18.792380952380952,"a95":0.99,"info":"08/07/2015 at 13:44:31"},{"visible":false,"include":false,"step":"80.0","x":-56.808571428571426,"y":52.10952380952381,"z":-32.91238095238095,"a95":0.99,"info":"08/07/2015 at 13:44:31"}]},{"version":"v1.1.0","exported":"2016-11-23T11:12:37.877Z","volume":10.5,"added":"2016-11-23T11:03:00.397Z","format":"Utrecht","demagType":"Unknown","strat":null,"patch":1.1,"GEO":[{"dec":146.95950416241533,"inc":-22.53597426774521,"MAD":4.818771817444241,"cm":[-8.526512829121202e-14,-7.105427357601002e-14,0],"intensity":2584.9268396687576,"type":"dir","forced":true,"remark":"","origin":false,"nSteps":6,"minStep":"210","maxStep":"360","steps":["210","250","270","300","330","360"],"group":"None","version":"v1.1.0"}],"TECT":[{"dec":151.41032296294662,"inc":-36.536797917807945,"MAD":4.818771817444252,"cm":[-4.263256414560601e-14,-7.105427357601002e-14,2.842170943040401e-14],"intensity":2584.9268396687576,"type":"dir","forced":true,"remark":"","origin":false,"nSteps":6,"minStep":"210","maxStep":"360","steps":["210","250","270","300","330","360"],"group":"None","version":"v1.1.0"}],"interpreted":true,"name":"KL1.03A","coreAzi":298,"coreDip":60,"bedStrike":30,"bedDip":16,"data":[{"visible":false,"include":false,"step":"20","x":-1314.7619047619048,"y":-83.14285714285714,"z":-660.7619047619048,"a95":2,"info":"\"15-06-22\" at \"16:52\""},{"visible":true,"include":false,"step":"90","x":-886,"y":-376.76190476190476,"z":-964.0952380952381,"a95":2.2,"info":"\"15-06-22\" at \"20:16\""},{"visible":true,"include":false,"step":"120","x":-821.5238095238095,"y":-428.2857142857143,"z":-1096.6666666666667,"a95":2.2,"info":"\"15-06-22\" at \"22:40\""},{"visible":true,"include":false,"step":"150","x":-715.3333333333334,"y":-520.5714285714286,"z":-1189.142857142857,"a95":2.5,"info":"\"15-06-23\" at \"21:07\""},{"visible":true,"include":false,"step":"180","x":-663.7142857142857,"y":-598.6666666666666,"z":-1196.095238095238,"a95":2.4,"info":"\"15-06-24\" at \"17:35\""},{"visible":true,"include":true,"step":"210","x":-734.6666666666666,"y":-508.3809523809524,"z":-1167.6190476190477,"a95":2.6,"info":"\"15-06-24\" at \"20:17\""},{"visible":true,"include":false,"step":"230","x":-669.3333333333334,"y":-560.7619047619048,"z":-1125.142857142857,"a95":2.3,"info":"\"15-06-28\" at \"00:29\""},{"visible":true,"include":true,"step":"250","x":-626.952380952381,"y":-580.5714285714286,"z":-1010,"a95":2.3,"info":"\"15-06-28\" at \"02:56\""},{"visible":true,"include":true,"step":"270","x":-644.0952380952381,"y":-561.1428571428571,"z":-939.4285714285714,"a95":2.3,"info":"\"15-06-28\" at \"18:48\""},{"visible":true,"include":true,"step":"300","x":-589.3333333333334,"y":-571.9047619047619,"z":-790.952380952381,"a95":2.4,"info":"\"15-06-30\" at \"11:39\""},{"visible":true,"include":true,"step":"330","x":-604.7619047619048,"y":-559.9047619047619,"z":-686.2857142857143,"a95":2.5,"info":"\"15-06-30\" at \"14:21\""},{"visible":true,"include":true,"step":"360","x":-561.9047619047619,"y":-566,"z":-793.6190476190476,"a95":2.3,"info":"\"15-07-01\" at \"09:41\""},{"visible":true,"include":false,"step":"380","x":-590.6666666666666,"y":-543.4285714285714,"z":-660.952380952381,"a95":2.4,"info":"\"15-07-01\" at \"14:35\""},{"visible":true,"include":false,"step":"410","x":-549.8095238095239,"y":-620.4761904761905,"z":-664.6666666666666,"a95":2.5,"info":"\"15-07-02\" at \"09:59\""},{"visible":true,"include":false,"step":"430","x":-556.5714285714286,"y":-604.6666666666666,"z":-586.3809523809524,"a95":2.6,"info":"\"15-07-02\" at \"13:41\""}]},{"version":"v1.1.0","exported":"2016-11-23T11:12:37.877Z","volume":10.5,"added":"2016-11-23T11:03:00.399Z","format":"Utrecht","demagType":"Unknown","strat":"3","patch":1.1,"GEO":[{"dec":162.83046438320116,"inc":-21.69068133291862,"MAD":10.60798962036619,"cm":[-468.2518531070641,110.78857330400928,-269.0443978854567],"intensity":530.6614262175871,"type":"dir","forced":false,"remark":"","origin":false,"nSteps":8,"minStep":"16.0","maxStep":"50.0","steps":["16.0","20.0","25.0","30.0","35.0","40.0","45.0","50.0"],"group":"None","version":"v1.1.0"}],"TECT":[{"dec":168.79168932881294,"inc":-32.89550844156618,"MAD":10.60798962036619,"cm":[-424.779302009356,35.491906068144715,-349.60214978540927],"intensity":530.6614262175871,"type":"dir","forced":false,"remark":"","origin":false,"nSteps":8,"minStep":"16.0","maxStep":"50.0","steps":["16.0","20.0","25.0","30.0","35.0","40.0","45.0","50.0"],"group":"None","version":"v1.1.0"}],"interpreted":true,"name":"KL1.3B","coreAzi":298,"coreDip":60,"bedStrike":30,"bedDip":16,"data":[{"visible":false,"include":false,"step":"0.0","x":-605.1714285714286,"y":262.8285714285714,"z":196.13333333333335,"a95":0.99,"info":"27/10/2014 at 05:59:30"},{"visible":true,"include":false,"step":"4.0","x":-540.4571428571429,"y":-124.80952380952381,"z":11.099047619047619,"a95":0.99,"info":"27/10/2014 at 05:59:30"},{"visible":true,"include":false,"step":"8.0","x":-396.5238095238095,"y":-325.8095238095238,"z":-304.1904761904762,"a95":0.99,"info":"27/10/2014 at 05:59:30"},{"visible":true,"include":false,"step":"12.0","x":-279.8285714285714,"y":-481.0952380952381,"z":-434.5904761904762,"a95":0.99,"info":"27/10/2014 at 05:59:30"},{"visible":true,"include":true,"step":"16.0","x":-233.30476190476188,"y":-523.104761904762,"z":-543.2190476190476,"a95":0.99,"info":"27/10/2014 at 05:59:30"},{"visible":true,"include":true,"step":"20.0","x":-239.14285714285714,"y":-507.2952380952381,"z":-545.0857142857143,"a95":0.99,"info":"27/10/2014 at 05:59:30"},{"visible":true,"include":true,"step":"25.0","x":-214.85714285714286,"y":-491.02857142857147,"z":-469.91428571428577,"a95":0.99,"info":"27/10/2014 at 05:59:30"},{"visible":true,"include":true,"step":"30.0","x":-136.62857142857143,"y":-394.74285714285713,"z":-404.60952380952375,"a95":0.99,"info":"27/10/2014 at 05:59:30"},{"visible":true,"include":true,"step":"35.0","x":-113.28571428571429,"y":-358.2666666666667,"z":-365.4761904761905,"a95":0.99,"info":"27/10/2014 at 05:59:30"},{"visible":true,"include":true,"step":"40.0","x":-131.38095238095238,"y":-291.1047619047619,"z":-446.91428571428577,"a95":0.99,"info":"27/10/2014 at 05:59:30"},{"visible":true,"include":true,"step":"45.0","x":-1.5989523809523811,"y":-160.03809523809525,"z":-165.3904761904762,"a95":0.99,"info":"27/10/2014 at 05:59:30"},{"visible":true,"include":true,"step":"50.0","x":-54.37714285714286,"y":-165.85714285714286,"z":-193.9904761904762,"a95":0.99,"info":"27/10/2014 at 05:59:30"},{"visible":true,"include":false,"step":"60.0","x":33.8447619047619,"y":-47.902857142857144,"z":-125.82857142857144,"a95":0.99,"info":"27/10/2014 at 05:59:30"},{"visible":false,"include":false,"step":"70.0","x":116.94285714285715,"y":79.81142857142856,"z":-25.675238095238093,"a95":0.99,"info":"27/10/2014 at 05:59:30"},{"visible":false,"include":false,"step":"80.0","x":-183.2952380952381,"y":35.4247619047619,"z":-97.95238095238095,"a95":0.99,"info":"27/10/2014 at 05:59:30"},{"visible":false,"include":false,"step":"90.0","x":45.56857142857143,"y":83.66285714285715,"z":83.50380952380952,"a95":0.99,"info":"27/10/2014 at 05:59:30"},{"visible":false,"include":false,"step":"100.0","x":98.24761904761904,"y":197.69523809523812,"z":42.30761904761905,"a95":0.99,"info":"27/10/2014 at 05:59:30"}]},{"version":"v1.1.0","exported":"2016-11-23T11:12:37.878Z","volume":10.5,"added":"2016-11-23T11:03:00.399Z","format":"Utrecht","demagType":"Unknown","strat":null,"patch":1.1,"GEO":[{"dec":161.13142149091755,"inc":-22.778406268834193,"MAD":3.1414573254246987,"cm":[0,1.4210854715202004e-14,0],"intensity":2417.51137946469,"type":"dir","forced":true,"remark":"","origin":false,"nSteps":6,"minStep":"210","maxStep":"350","steps":["210","240","270","300","320","350"],"group":"None","version":"v1.1.0"}],"TECT":[{"dec":167.239360276693,"inc":-34.30436350612007,"MAD":3.14145732542472,"cm":[-1.4210854715202004e-14,8.526512829121202e-14,-1.4210854715202004e-14],"intensity":2417.5113794646904,"type":"dir","forced":true,"remark":"","origin":false,"nSteps":6,"minStep":"210","maxStep":"350","steps":["210","240","270","300","320","350"],"group":"None","version":"v1.1.0"}],"interpreted":true,"name":"KL1.4A","coreAzi":303,"coreDip":60,"bedStrike":30,"bedDip":16,"data":[{"visible":true,"include":false,"step":"20","x":-555.3333333333334,"y":9.714285714285714,"z":1619.6190476190477,"a95":2.7,"info":"\"15-02-12\" at \"15:12\""},{"visible":true,"include":false,"step":"100","x":-645.5238095238095,"y":-457.42857142857144,"z":-210.57142857142858,"a95":2,"info":"\"15-02-12\" at \"23:07\""},{"visible":true,"include":false,"step":"120","x":-664.4761904761905,"y":-481.04761904761904,"z":-447.7142857142857,"a95":2.1,"info":"\"15-02-13\" at \"18:19\""},{"visible":true,"include":false,"step":"150","x":-631.3333333333334,"y":-605.047619047619,"z":-702.5714285714286,"a95":2.3,"info":"\"15-02-13\" at \"22:59\""},{"visible":true,"include":false,"step":"180","x":-652.3809523809524,"y":-682.6666666666666,"z":-870.0952380952381,"a95":2.4,"info":"\"15-02-16\" at \"15:57\""},{"visible":true,"include":true,"step":"210","x":-498.3809523809524,"y":-693.6190476190476,"z":-963.3333333333334,"a95":2.4,"info":"\"15-02-16\" at \"20:03\""},{"visible":true,"include":true,"step":"240","x":-544,"y":-716.0952380952381,"z":-954.8571428571429,"a95":2.5,"info":"\"15-02-17\" at \"15:55\""},{"visible":true,"include":true,"step":"270","x":-576.952380952381,"y":-738.4761904761905,"z":-948.1904761904761,"a95":2.5,"info":"\"15-02-17\" at \"22:38\""},{"visible":true,"include":true,"step":"300","x":-574.4761904761905,"y":-746.8571428571429,"z":-841.4285714285714,"a95":2.3,"info":"\"15-03-08\" at \"18:18\""},{"visible":true,"include":true,"step":"320","x":-529.8095238095239,"y":-676.2857142857143,"z":-785.3333333333334,"a95":2.4,"info":"\"15-03-09\" at \"08:58\""},{"visible":true,"include":true,"step":"350","x":-537.7142857142857,"y":-700.1904761904761,"z":-718.3809523809524,"a95":2.1,"info":"\"15-03-09\" at \"12:25\""},{"visible":false,"include":false,"step":"380","x":-516.952380952381,"y":-625.2380952380952,"z":-626.3809523809524,"a95":2.5,"info":"\"15-04-21\" at \"08:14\""},{"visible":false,"include":false,"step":"410","x":-685.6190476190476,"y":-674.2857142857143,"z":-643.047619047619,"a95":2.1,"info":"\"15-04-21\" at \"11:40\""},{"visible":false,"include":false,"step":"440","x":-497.6190476190476,"y":-649.7142857142857,"z":-624.1904761904761,"a95":2.1,"info":"\"15-04-22\" at \"14:29\""}]},{"version":"v1.1.0","exported":"2016-11-23T11:12:37.878Z","volume":10.5,"added":"2016-11-23T11:03:00.399Z","format":"Utrecht","demagType":"Unknown","strat":"4","patch":1.1,"GEO":[{"dec":156.44133916507076,"inc":-28.561937363863432,"MAD":4.323776652981922,"cm":[1.9539925233402755e-14,3.197442310920451e-14,0],"intensity":922.2743642035814,"type":"dir","forced":true,"remark":"","origin":false,"nSteps":6,"minStep":"25.0","maxStep":"50.0","steps":["25.0","30.0","35.0","40.0","45.0","50.0"],"group":"None","version":"v1.1.0"}],"TECT":[{"dec":163.62312924617083,"inc":-40.869808523541636,"MAD":4.323776652981929,"cm":[7.105427357601002e-15,-1.4210854715202004e-14,-7.105427357601002e-15],"intensity":922.2743642035814,"type":"dir","forced":true,"remark":"","origin":false,"nSteps":6,"minStep":"25.0","maxStep":"50.0","steps":["25.0","30.0","35.0","40.0","45.0","50.0"],"group":"None","version":"v1.1.0"}],"interpreted":true,"name":"KL1.4B","coreAzi":303,"coreDip":60,"bedStrike":30,"bedDip":16,"data":[{"visible":true,"include":false,"step":"0.0","x":-659.1428571428571,"y":-13.66,"z":-57.45619047619047,"a95":0.99,"info":"04/11/2014 at 15:10:19"},{"visible":true,"include":false,"step":"10.0","x":-507.4761904761905,"y":-292.0571428571428,"z":-545.0380952380953,"a95":0.99,"info":"04/11/2014 at 15:10:19"},{"visible":true,"include":false,"step":"15.0","x":-419.6,"y":-354.8666666666667,"z":-583.1714285714286,"a95":0.99,"info":"04/11/2014 at 15:10:19"},{"visible":true,"include":false,"step":"20.0","x":-349.34285714285716,"y":-375.8666666666667,"z":-578.1619047619048,"a95":0.99,"info":"04/11/2014 at 15:10:19"},{"visible":true,"include":true,"step":"25.0","x":-261.3809523809524,"y":-336.16190476190474,"z":-539.4380952380952,"a95":0.99,"info":"04/11/2014 at 15:10:19"},{"visible":true,"include":true,"step":"30.0","x":-276.0857142857143,"y":-298.70476190476194,"z":-460.3238095238095,"a95":0.99,"info":"04/11/2014 at 15:10:19"},{"visible":true,"include":true,"step":"35.0","x":-188.40952380952382,"y":-245.1142857142857,"z":-385.45714285714286,"a95":0.99,"info":"04/11/2014 at 15:10:19"},{"visible":true,"include":true,"step":"40.0","x":-121.45714285714286,"y":-186.45714285714286,"z":-331.34285714285716,"a95":0.99,"info":"04/11/2014 at 15:10:19"},{"visible":true,"include":true,"step":"45.0","x":-160.84761904761905,"y":-220.7238095238095,"z":-308.04761904761904,"a95":0.99,"info":"04/11/2014 at 15:10:19"},{"visible":true,"include":true,"step":"50.0","x":-113.61904761904762,"y":-55.58190476190477,"z":-206.55238095238096,"a95":0.99,"info":"04/11/2014 at 15:10:19"},{"visible":true,"include":false,"step":"60.0","x":92.47142857142858,"y":28.793333333333333,"z":-135.21904761904761,"a95":0.99,"info":"04/11/2014 at 15:10:19"},{"visible":false,"include":false,"step":"70.0","x":-96.57142857142857,"y":-65.88190476190476,"z":-44.44285714285714,"a95":0.99,"info":"04/11/2014 at 15:10:19"},{"visible":false,"include":false,"step":"80.0","x":255.22857142857143,"y":68.36857142857143,"z":-174.31428571428572,"a95":0.99,"info":"04/11/2014 at 15:10:19"},{"visible":false,"include":false,"step":"90.0","x":142.23809523809524,"y":168.6,"z":50.348571428571425,"a95":0.99,"info":"04/11/2014 at 15:10:19"}]},{"version":"v1.1.0","exported":"2016-11-23T11:12:37.878Z","volume":10.5,"added":"2016-11-23T11:03:00.404Z","format":"Utrecht","demagType":"Unknown","strat":null,"patch":1.1,"GEO":[{"dec":153.41188419977834,"inc":-21.744424322789083,"MAD":5.584826751629773,"cm":[3.552713678800501e-14,3.907985046680551e-14,0],"intensity":2328.587683261993,"type":"dir","forced":true,"remark":"","origin":false,"nSteps":8,"minStep":"210","maxStep":"380","steps":["210","230","250","270","300","330","360","380"],"group":"None","version":"v1.1.0"}],"TECT":[{"dec":158.4921942528706,"inc":-34.738239060975914,"MAD":5.584826751629777,"cm":[-2.1316282072803006e-14,-3.552713678800501e-14,1.0658141036401503e-14],"intensity":2328.587683261993,"type":"dir","forced":true,"remark":"","origin":false,"nSteps":8,"minStep":"210","maxStep":"380","steps":["210","230","250","270","300","330","360","380"],"group":"None","version":"v1.1.0"}],"interpreted":true,"name":"KL1.05A","coreAzi":286,"coreDip":61,"bedStrike":30,"bedDip":16,"data":[{"visible":true,"include":false,"step":"20","x":-885.6190476190476,"y":-764.7619047619048,"z":-587.2380952380952,"a95":1.9,"info":"\"15-06-22\" at \"16:54\""},{"visible":true,"include":false,"step":"90","x":-675.1428571428571,"y":-715.1428571428571,"z":-762.1904761904761,"a95":2.2,"info":"\"15-06-22\" at \"20:18\""},{"visible":true,"include":false,"step":"120","x":-643.1428571428571,"y":-762.7619047619048,"z":-865.047619047619,"a95":2.4,"info":"\"15-06-22\" at \"22:42\""},{"visible":true,"include":false,"step":"150","x":-520.5714285714286,"y":-852.4761904761905,"z":-1004.952380952381,"a95":2.4,"info":"\"15-06-23\" at \"21:10\""},{"visible":true,"include":false,"step":"180","x":-430.0952380952381,"y":-900.4761904761905,"z":-1018.7619047619048,"a95":2.5,"info":"\"15-06-24\" at \"17:37\""},{"visible":true,"include":true,"step":"210","x":-446.1904761904762,"y":-843.1428571428571,"z":-1000.3809523809524,"a95":2.5,"info":"\"15-06-24\" at \"20:19\""},{"visible":true,"include":true,"step":"230","x":-435.23809523809524,"y":-842.1904761904761,"z":-921.4285714285714,"a95":2.3,"info":"\"15-06-28\" at \"00:31\""},{"visible":true,"include":true,"step":"250","x":-385.9047619047619,"y":-846.7619047619048,"z":-771.3333333333334,"a95":2.3,"info":"\"15-06-28\" at \"02:58\""},{"visible":true,"include":true,"step":"270","x":-467.14285714285717,"y":-797.2380952380952,"z":-724.1904761904761,"a95":2.3,"info":"\"15-06-28\" at \"18:51\""},{"visible":true,"include":true,"step":"300","x":-427.3333333333333,"y":-753.5238095238095,"z":-654.952380952381,"a95":2.2,"info":"\"15-06-30\" at \"11:41\""},{"visible":true,"include":true,"step":"330","x":-432.95238095238096,"y":-760.7619047619048,"z":-514,"a95":2.4,"info":"\"15-06-30\" at \"14:23\""},{"visible":true,"include":true,"step":"360","x":-418.4761904761905,"y":-741.6190476190476,"z":-554.5714285714286,"a95":2.3,"info":"\"15-07-01\" at \"09:43\""},{"visible":true,"include":true,"step":"380","x":-409.6190476190476,"y":-704.3809523809524,"z":-514.5714285714286,"a95":2.9,"info":"\"15-07-01\" at \"14:38\""},{"visible":true,"include":false,"step":"410","x":-422.2857142857143,"y":-807.2380952380952,"z":-475.8095238095238,"a95":2.3,"info":"\"15-07-02\" at \"10:02\""},{"visible":true,"include":false,"step":"430","x":-336.4761904761905,"y":-735.2380952380952,"z":-464.57142857142856,"a95":2.6,"info":"\"15-07-02\" at \"13:44\""}]},{"version":"v1.1.0","exported":"2016-11-23T11:12:37.878Z","volume":10.5,"added":"2016-11-23T11:03:00.404Z","format":"Utrecht","demagType":"Unknown","strat":"8","patch":1.1,"GEO":[{"dec":156.19983319174946,"inc":-34.23430589715385,"MAD":5.3729687792184375,"cm":[-9.992007221626409e-15,3.108624468950438e-14,0],"intensity":1007.4421683933082,"type":"dir","forced":true,"remark":"","origin":false,"nSteps":8,"minStep":"23.0","maxStep":"55.0","steps":["23.0","25.0","30.0","33.0","40.0","45.0","50.0","55.0"],"group":"None","version":"v1.1.0"}],"TECT":[{"dec":165.11986334001438,"inc":-46.44197394252451,"MAD":5.372968779218448,"cm":[-1.8457457784393227e-14,-1.7319479184152442e-14,8.881784197001252e-15],"intensity":1007.4421683933082,"type":"dir","forced":true,"remark":"","origin":false,"nSteps":8,"minStep":"23.0","maxStep":"55.0","steps":["23.0","25.0","30.0","33.0","40.0","45.0","50.0","55.0"],"group":"None","version":"v1.1.0"}],"interpreted":true,"name":"KL1.05B","coreAzi":286,"coreDip":61,"bedStrike":30,"bedDip":16,"data":[{"visible":true,"include":false,"step":"0.0","x":-481.2857142857143,"y":-468.68571428571425,"z":-237.33333333333334,"a95":0.99,"info":"08/07/2015 at 13:44:31"},{"visible":true,"include":false,"step":"10.0","x":-275.81904761904764,"y":-655.504761904762,"z":-628.5238095238095,"a95":0.99,"info":"08/07/2015 at 13:44:31"},{"visible":true,"include":false,"step":"15.0","x":-246.41904761904763,"y":-664.6285714285715,"z":-718.1714285714286,"a95":0.99,"info":"08/07/2015 at 13:44:31"},{"visible":true,"include":false,"step":"20.0","x":-179.73333333333335,"y":-622.4666666666666,"z":-693.6,"a95":0.99,"info":"08/07/2015 at 13:44:31"},{"visible":true,"include":true,"step":"23.0","x":-156.82857142857142,"y":-583.0571428571429,"z":-657.3523809523809,"a95":0.99,"info":"08/07/2015 at 13:44:31"},{"visible":true,"include":true,"step":"25.0","x":-170.57142857142858,"y":-536.5238095238095,"z":-558.7904761904762,"a95":0.99,"info":"08/07/2015 at 13:44:31"},{"visible":true,"include":true,"step":"30.0","x":-152.4952380952381,"y":-482.02857142857147,"z":-545.104761904762,"a95":0.99,"info":"08/07/2015 at 13:44:31"},{"visible":true,"include":true,"step":"33.0","x":-68.07047619047619,"y":-335.62857142857143,"z":-421.0952380952381,"a95":0.99,"info":"08/07/2015 at 13:44:31"},{"visible":false,"include":false,"step":"35.0","x":-183.22857142857143,"y":-383.9904761904762,"z":-444.3047619047619,"a95":0.99,"info":"08/07/2015 at 13:44:31"},{"visible":true,"include":true,"step":"40.0","x":-98.96190476190475,"y":-242.04761904761904,"z":-336.37142857142857,"a95":0.99,"info":"08/07/2015 at 13:44:31"},{"visible":true,"include":true,"step":"45.0","x":-61.790476190476184,"y":-130.7904761904762,"z":-265.03809523809525,"a95":0.99,"info":"08/07/2015 at 13:44:31"},{"visible":true,"include":true,"step":"50.0","x":-41.635238095238094,"y":-127.53333333333333,"z":-219.33333333333334,"a95":0.99,"info":"08/07/2015 at 13:44:31"},{"visible":true,"include":true,"step":"55.0","x":-4.93247619047619,"y":-0.6003619047619048,"z":-147.7047619047619,"a95":0.99,"info":"08/07/2015 at 13:44:31"},{"visible":false,"include":false,"step":"60.0","x":142.63809523809525,"y":67.5352380952381,"z":-131.16190476190476,"a95":0.99,"info":"08/07/2015 at 13:44:31"},{"visible":false,"include":false,"step":"65.0","x":40.53333333333334,"y":52.32285714285714,"z":-110.26666666666667,"a95":0.99,"info":"08/07/2015 at 13:44:31"},{"visible":false,"include":false,"step":"70.0","x":35.14666666666667,"y":96.5904761904762,"z":-12.903809523809525,"a95":0.99,"info":"08/07/2015 at 13:44:31"},{"visible":false,"include":false,"step":"80.0","x":563.0190476190476,"y":174.31428571428572,"z":-263.0190476190476,"a95":0.99,"info":"08/07/2015 at 13:44:31"}]},{"version":"v1.1.0","exported":"2016-11-23T11:12:37.878Z","volume":10.5,"added":"2016-11-23T11:03:00.404Z","format":"Utrecht","demagType":"Unknown","strat":"7","patch":1.1,"GEO":[],"TECT":[],"interpreted":false,"name":"KL1.06A","coreAzi":246,"coreDip":-5,"bedStrike":30,"bedDip":16,"data":[{"visible":true,"include":false,"step":"0.0","x":-2375.5238095238096,"y":894.3809523809524,"z":-131.85714285714286,"a95":0.99,"info":"08/07/2015 at 13:44:31"},{"visible":true,"include":false,"step":"10.0","x":-801.2476190476191,"y":103.70476190476191,"z":-90.9647619047619,"a95":0.99,"info":"08/07/2015 at 13:44:31"},{"visible":true,"include":false,"step":"15.0","x":-344.12380952380954,"y":1.4005714285714286,"z":-88.38380952380952,"a95":0.99,"info":"08/07/2015 at 13:44:31"},{"visible":true,"include":false,"step":"20.0","x":-197.02857142857144,"y":-121.9047619047619,"z":18.65047619047619,"a95":0.99,"info":"08/07/2015 at 13:44:31"},{"visible":true,"include":false,"step":"23.0","x":-88.24476190476192,"y":-68.93714285714286,"z":-74.29714285714286,"a95":0.99,"info":"08/07/2015 at 13:44:31"},{"visible":true,"include":false,"step":"25.0","x":-101.91428571428571,"y":-183.55238095238096,"z":-59.43047619047619,"a95":0.99,"info":"08/07/2015 at 13:44:31"},{"visible":true,"include":false,"step":"30.0","x":-19.799047619047617,"y":-84.42571428571429,"z":-104.76190476190476,"a95":0.99,"info":"08/07/2015 at 13:44:31"},{"visible":true,"include":false,"step":"33.0","x":85.88285714285715,"y":-63.149523809523814,"z":59.87238095238095,"a95":0.99,"info":"08/07/2015 at 13:44:31"},{"visible":true,"include":false,"step":"35.0","x":-99.23809523809524,"y":-238.0761904761905,"z":-125.65714285714287,"a95":0.99,"info":"08/07/2015 at 13:44:31"},{"visible":true,"include":false,"step":"40.0","x":-248.1047619047619,"y":-5.426666666666667,"z":45.22190476190476,"a95":0.99,"info":"08/07/2015 at 13:44:31"},{"visible":true,"include":false,"step":"45.0","x":-152.56190476190477,"y":166.74285714285713,"z":-138.15238095238095,"a95":0.99,"info":"08/07/2015 at 13:44:31"},{"visible":true,"include":false,"step":"50.0","x":-243.78095238095236,"y":-368,"z":-83.81238095238095,"a95":0.99,"info":"08/07/2015 at 13:44:31"},{"visible":true,"include":false,"step":"55.0","x":-322.2095238095238,"y":-60.94095238095238,"z":58.76095238095238,"a95":0.99,"info":"08/07/2015 at 13:44:31"},{"visible":true,"include":false,"step":"60.0","x":-89.81619047619049,"y":84.81333333333333,"z":7.054952380952381,"a95":0.99,"info":"08/07/2015 at 13:44:31"},{"visible":true,"include":false,"step":"65.0","x":-547.4666666666666,"y":-320.2095238095238,"z":-149.28571428571428,"a95":0.99,"info":"08/07/2015 at 13:44:31"},{"visible":true,"include":false,"step":"70.0","x":-359.06666666666666,"y":-112.87619047619049,"z":105.12380952380951,"a95":0.99,"info":"08/07/2015 at 13:44:31"},{"visible":true,"include":false,"step":"80.0","x":-752.9428571428571,"y":-47.74190476190476,"z":-394.3809523809524,"a95":0.99,"info":"08/07/2015 at 13:44:31"}]},{"version":"v1.1.0","exported":"2016-11-23T11:12:37.879Z","volume":10.5,"added":"2016-11-23T11:03:00.404Z","format":"Utrecht","demagType":"Unknown","strat":"5","patch":1.1,"GEO":[],"TECT":[],"interpreted":false,"name":"KL1.6B","coreAzi":246,"coreDip":-5,"bedStrike":30,"bedDip":16,"data":[{"visible":true,"include":true,"step":"0.0","x":-12596.190476190477,"y":5016.666666666667,"z":-3460.3809523809523,"a95":0.99,"info":"04/11/2014 at 15:10:19"},{"visible":true,"include":true,"step":"10.0","x":-7403.142857142857,"y":2670,"z":-2277.0476190476193,"a95":0.99,"info":"04/11/2014 at 15:10:19"},{"visible":true,"include":true,"step":"15.0","x":-5112.761904761905,"y":1723.142857142857,"z":-1721.2380952380952,"a95":0.99,"info":"04/11/2014 at 15:10:19"},{"visible":true,"include":true,"step":"20.0","x":-3952.7619047619046,"y":1228.4761904761904,"z":-1287.8095238095239,"a95":0.99,"info":"04/11/2014 at 15:10:19"},{"visible":true,"include":true,"step":"25.0","x":-2953.2380952380954,"y":1091.142857142857,"z":-1134.5714285714287,"a95":0.99,"info":"04/11/2014 at 15:10:19"},{"visible":true,"include":true,"step":"30.0","x":-2578.7619047619046,"y":714.8666666666667,"z":-901.6380952380953,"a95":0.99,"info":"04/11/2014 at 15:10:19"},{"visible":true,"include":true,"step":"35.0","x":-2324.9523809523807,"y":741.5619047619048,"z":-687,"a95":0.99,"info":"04/11/2014 at 15:10:19"},{"visible":true,"include":true,"step":"40.0","x":-1906.857142857143,"y":714.7142857142857,"z":-468.8095238095238,"a95":0.99,"info":"04/11/2014 at 15:10:19"},{"visible":true,"include":false,"step":"45.0","x":-1775.904761904762,"y":-111.67619047619047,"z":-662.2857142857143,"a95":0.99,"info":"04/11/2014 at 15:10:19"},{"visible":true,"include":false,"step":"50.0","x":-1890.4761904761904,"y":414.08571428571423,"z":-434.60952380952375,"a95":0.99,"info":"04/11/2014 at 15:10:19"},{"visible":true,"include":false,"step":"60.0","x":-1240.857142857143,"y":167.8190476190476,"z":-293.2095238095238,"a95":0.99,"info":"04/11/2014 at 15:10:19"},{"visible":true,"include":false,"step":"70.0","x":-1491.047619047619,"y":-735.552380952381,"z":-455.50476190476195,"a95":0.99,"info":"04/11/2014 at 15:10:19"},{"visible":true,"include":false,"step":"80.0","x":-1517.904761904762,"y":-284.2857142857143,"z":-87.81714285714285,"a95":0.99,"info":"04/11/2014 at 15:10:19"},{"visible":true,"include":false,"step":"90.0","x":-917.742857142857,"y":152.85714285714286,"z":97.65714285714287,"a95":0.99,"info":"04/11/2014 at 15:10:19"}]},{"version":"v1.1.0","exported":"2016-11-23T11:12:37.879Z","volume":10.5,"added":"2016-11-23T11:03:00.405Z","format":"Utrecht","demagType":"Unknown","strat":null,"patch":1.1,"GEO":[],"TECT":[],"interpreted":false,"name":"KL1.7A","coreAzi":242,"coreDip":0,"bedStrike":30,"bedDip":16,"data":[{"visible":false,"include":false,"step":"20","x":-1945.3333333333333,"y":1288,"z":3103.3333333333335,"a95":2.4,"info":"\"15-02-12\" at \"15:15\""},{"visible":true,"include":false,"step":"100","x":-1570.2857142857142,"y":103.33333333333333,"z":175.33333333333334,"a95":2,"info":"\"15-02-12\" at \"23:09\""},{"visible":true,"include":true,"step":"120","x":-1412.3809523809523,"y":-236.66666666666666,"z":113.33333333333333,"a95":2.4,"info":"\"15-02-13\" at \"18:24\""},{"visible":true,"include":true,"step":"150","x":-825.4285714285714,"y":-499.6190476190476,"z":-25.142857142857142,"a95":2.4,"info":"\"15-02-13\" at \"23:01\""},{"visible":true,"include":true,"step":"180","x":-517.5238095238095,"y":-678.3809523809524,"z":-33.523809523809526,"a95":2.9,"info":"\"15-02-16\" at \"15:59\""},{"visible":true,"include":true,"step":"210","x":-219.8095238095238,"y":-1014.7619047619048,"z":-46.19047619047619,"a95":2.9,"info":"\"15-02-16\" at \"20:04\""},{"visible":true,"include":false,"step":"240","x":-228.1904761904762,"y":-715.9047619047619,"z":75.23809523809524,"a95":3.4,"info":"\"15-02-17\" at \"15:57\""},{"visible":true,"include":false,"step":"270","x":-141.8095238095238,"y":-808.952380952381,"z":20.952380952380953,"a95":3.1,"info":"\"15-02-17\" at \"22:40\""},{"visible":true,"include":false,"step":"300","x":-420.76190476190476,"y":-819.5238095238095,"z":30.095238095238095,"a95":3.2,"info":"\"15-03-08\" at \"18:20\""},{"visible":true,"include":false,"step":"320","x":-239.8095238095238,"y":-663.9047619047619,"z":7.619047619047619,"a95":3.7,"info":"\"15-03-09\" at \"09:00\""},{"visible":true,"include":false,"step":"350","x":-378.4761904761905,"y":-728.0952380952381,"z":74.0952380952381,"a95":3.3,"info":"\"15-03-09\" at \"12:27\""},{"visible":true,"include":false,"step":"380","x":-307.7142857142857,"y":-577.4285714285714,"z":98.19047619047619,"a95":4.3,"info":"\"15-04-21\" at \"08:17\""},{"visible":true,"include":false,"step":"410","x":-624.3809523809524,"y":-362.0952380952381,"z":66.0952380952381,"a95":5.1,"info":"\"15-04-21\" at \"11:42\""},{"visible":true,"include":false,"step":"440","x":-87.14285714285714,"y":-657.047619047619,"z":88.66666666666667,"a95":3.5,"info":"\"15-04-22\" at \"14:31\""}]},{"version":"v1.1.0","exported":"2016-11-23T11:12:37.879Z","volume":10.5,"added":"2016-11-23T11:03:00.405Z","format":"Utrecht","demagType":"Unknown","strat":"4","patch":1.1,"GEO":[],"TECT":[],"interpreted":false,"name":"KL1.7B","coreAzi":242,"coreDip":0,"bedStrike":30,"bedDip":16,"data":[{"visible":false,"include":false,"step":"0.0","x":2567.5238095238096,"y":-1478.1904761904761,"z":218.0095238095238,"a95":0.99,"info":"27/10/2014 at 05:59:30"},{"visible":true,"include":false,"step":"4.0","x":-265.2095238095238,"y":-220.8952380952381,"z":-167.0095238095238,"a95":0.99,"info":"27/10/2014 at 05:59:30"},{"visible":true,"include":false,"step":"8.0","x":-1403.6190476190477,"y":141.68571428571428,"z":-162.24761904761903,"a95":0.99,"info":"27/10/2014 at 05:59:30"},{"visible":true,"include":false,"step":"12.0","x":-1344.095238095238,"y":146.21904761904761,"z":-88.70952380952382,"a95":0.99,"info":"27/10/2014 at 05:59:30"},{"visible":true,"include":false,"step":"16.0","x":-1087.2380952380952,"y":111.70476190476191,"z":-81.78285714285714,"a95":0.99,"info":"27/10/2014 at 05:59:30"},{"visible":true,"include":false,"step":"20.0","x":-868.3333333333334,"y":-62.019047619047626,"z":-112.26666666666667,"a95":0.99,"info":"27/10/2014 at 05:59:30"},{"visible":true,"include":false,"step":"25.0","x":-687.047619047619,"y":20.145714285714284,"z":-81.36571428571429,"a95":0.99,"info":"27/10/2014 at 05:59:30"},{"visible":true,"include":false,"step":"30.0","x":-576.4285714285714,"y":-65.12857142857143,"z":-154.0095238095238,"a95":0.99,"info":"27/10/2014 at 05:59:30"},{"visible":true,"include":false,"step":"35.0","x":-773.8190476190476,"y":-263.1047619047619,"z":-197.86666666666665,"a95":0.99,"info":"27/10/2014 at 05:59:30"},{"visible":true,"include":false,"step":"40.0","x":-611.1142857142856,"y":109.54285714285714,"z":-205.30476190476188,"a95":0.99,"info":"27/10/2014 at 05:59:30"},{"visible":true,"include":false,"step":"45.0","x":-598.7047619047619,"y":129.85714285714286,"z":-173.2761904761905,"a95":0.99,"info":"27/10/2014 at 05:59:30"},{"visible":true,"include":false,"step":"50.0","x":-776.7238095238096,"y":-236.74285714285716,"z":-118.26666666666667,"a95":0.99,"info":"27/10/2014 at 05:59:30"},{"visible":true,"include":false,"step":"60.0","x":-701.9714285714285,"y":173.2761904761905,"z":-109.34285714285713,"a95":0.99,"info":"27/10/2014 at 05:59:30"},{"visible":true,"include":false,"step":"70.0","x":-186.14285714285714,"y":300.22857142857146,"z":-23.91142857142857,"a95":0.99,"info":"27/10/2014 at 05:59:30"},{"visible":true,"include":false,"step":"80.0","x":-1361.4285714285713,"y":-188.88571428571427,"z":-103.56190476190477,"a95":0.99,"info":"27/10/2014 at 05:59:30"},{"visible":true,"include":false,"step":"90.0","x":-530.6952380952381,"y":63.06571428571429,"z":-127.56190476190477,"a95":0.99,"info":"27/10/2014 at 05:59:30"},{"visible":true,"include":false,"step":"100.0","x":-948.2380952380952,"y":412.9809523809524,"z":44.44571428571429,"a95":0.99,"info":"27/10/2014 at 05:59:30"}]},{"version":"v1.1.0","exported":"2016-11-23T11:12:37.879Z","volume":10.5,"added":"2016-11-23T11:03:00.405Z","format":"Utrecht","demagType":"Unknown","strat":null,"patch":1.1,"GEO":[],"TECT":[],"interpreted":false,"name":"KL1.08B","coreAzi":235,"coreDip":7,"bedStrike":30,"bedDip":16,"data":[{"visible":false,"include":false,"step":"20","x":-6185.047619047619,"y":2627.809523809524,"z":69.80952380952381,"a95":1.5,"info":"\"15-06-22\" at \"16:56\""},{"visible":true,"include":false,"step":"90","x":-3172.095238095238,"y":1804.6666666666667,"z":-844.952380952381,"a95":1.6,"info":"\"15-06-22\" at \"20:20\""},{"visible":true,"include":true,"step":"120","x":-1704.095238095238,"y":1018.952380952381,"z":-603.9047619047619,"a95":1.7,"info":"\"15-06-22\" at \"22:44\""},{"visible":true,"include":true,"step":"150","x":-568.2857142857143,"y":503.5238095238095,"z":-427.3333333333333,"a95":3.1,"info":"\"15-06-23\" at \"21:12\""},{"visible":true,"include":true,"step":"180","x":-434.95238095238096,"y":424.3809523809524,"z":-424.76190476190476,"a95":2.9,"info":"\"15-06-24\" at \"17:39\""},{"visible":true,"include":true,"step":"210","x":-277.6190476190476,"y":431.7142857142857,"z":-450.3809523809524,"a95":3,"info":"\"15-06-24\" at \"20:21\""},{"visible":true,"include":false,"step":"230","x":-352.3809523809524,"y":348.3809523809524,"z":-482.6666666666667,"a95":3.8,"info":"\"15-06-28\" at \"00:33\""},{"visible":true,"include":false,"step":"250","x":-323.5238095238095,"y":251.71428571428572,"z":-407.6190476190476,"a95":4.1,"info":"\"15-06-28\" at \"03:01\""},{"visible":true,"include":false,"step":"270","x":-235.14285714285714,"y":206.76190476190476,"z":-419.3333333333333,"a95":3.7,"info":"\"15-06-28\" at \"18:53\""},{"visible":true,"include":false,"step":"300","x":-428.1904761904762,"y":407.3333333333333,"z":-270.4761904761905,"a95":3,"info":"\"15-06-30\" at \"11:43\""},{"visible":true,"include":false,"step":"330","x":-316.4761904761905,"y":320.76190476190476,"z":-250,"a95":3.7,"info":"\"15-06-30\" at \"14:26\""},{"visible":true,"include":false,"step":"360","x":-502.76190476190476,"y":366.6666666666667,"z":-234.0952380952381,"a95":2.9,"info":"\"15-07-01\" at \"09:45\""},{"visible":true,"include":false,"step":"380","x":-431.5238095238095,"y":288.1904761904762,"z":-186.0952380952381,"a95":3.4,"info":"\"15-07-01\" at \"14:40\""},{"visible":true,"include":false,"step":"410","x":-440.76190476190476,"y":322.4761904761905,"z":-253.8095238095238,"a95":3.4,"info":"\"15-07-02\" at \"10:04\""},{"visible":true,"include":false,"step":"430","x":-288.76190476190476,"y":132.66666666666666,"z":-192.47619047619048,"a95":5.1,"info":"\"15-07-02\" at \"13:46\""}]},{"version":"v1.1.0","exported":"2016-11-23T11:12:37.879Z","volume":10.5,"added":"2016-11-23T11:03:00.405Z","format":"Utrecht","demagType":"Unknown","strat":null,"patch":1.1,"GEO":[],"TECT":[],"interpreted":false,"name":"KL1.9A","coreAzi":238,"coreDip":12,"bedStrike":30,"bedDip":16,"data":[{"visible":false,"include":false,"step":"20","x":-3174,"y":1850.4761904761904,"z":340.2857142857143,"a95":1.7,"info":"\"15-02-12\" at \"15:19\""},{"visible":true,"include":false,"step":"100","x":-2036,"y":1076.6666666666667,"z":-583.3333333333334,"a95":1.7,"info":"\"15-02-12\" at \"23:11\""},{"visible":true,"include":true,"step":"120","x":-1128.952380952381,"y":724.6666666666666,"z":-521.7142857142857,"a95":1.9,"info":"\"15-02-13\" at \"18:26\""},{"visible":true,"include":true,"step":"150","x":-681.1428571428571,"y":492.76190476190476,"z":-481.5238095238095,"a95":2.1,"info":"\"15-02-13\" at \"23:04\""},{"visible":true,"include":true,"step":"180","x":-401.9047619047619,"y":394.57142857142856,"z":-479.6190476190476,"a95":2.3,"info":"\"15-02-16\" at \"16:01\""},{"visible":true,"include":true,"step":"210","x":-265.6190476190476,"y":356.95238095238096,"z":-458,"a95":3,"info":"\"15-02-16\" at \"20:06\""},{"visible":true,"include":true,"step":"240","x":-270.2857142857143,"y":360.6666666666667,"z":-445.6190476190476,"a95":2.6,"info":"\"15-02-17\" at \"15:59\""},{"visible":true,"include":true,"step":"270","x":-241.42857142857142,"y":334.4761904761905,"z":-446.2857142857143,"a95":3.1,"info":"\"15-02-17\" at \"22:42\""},{"visible":true,"include":false,"step":"300","x":-291.8095238095238,"y":419.42857142857144,"z":-432.1904761904762,"a95":2.7,"info":"\"15-03-08\" at \"18:22\""},{"visible":true,"include":false,"step":"320","x":-320,"y":453.04761904761904,"z":-442.95238095238096,"a95":2.3,"info":"\"15-03-09\" at \"09:02\""},{"visible":true,"include":false,"step":"350","x":-378.57142857142856,"y":470,"z":-341.14285714285717,"a95":3,"info":"\"15-03-09\" at \"12:29\""},{"visible":true,"include":false,"step":"380","x":-388.0952380952381,"y":461.6190476190476,"z":-316.95238095238096,"a95":2.4,"info":"\"15-04-21\" at \"08:19\""},{"visible":true,"include":false,"step":"410","x":-445.04761904761904,"y":356.57142857142856,"z":-258.85714285714283,"a95":3.2,"info":"\"15-04-21\" at \"11:44\""},{"visible":true,"include":false,"step":"440","x":-246.66666666666666,"y":260.76190476190476,"z":-216.1904761904762,"a95":3.6,"info":"\"15-04-22\" at \"14:33\""}]},{"version":"v1.1.0","exported":"2016-11-23T11:12:37.879Z","volume":10.5,"added":"2016-11-23T11:03:00.406Z","format":"Utrecht","demagType":"Unknown","strat":"5","patch":1.1,"GEO":[],"TECT":[],"interpreted":false,"name":"KL1.9B","coreAzi":238,"coreDip":12,"bedStrike":30,"bedDip":16,"data":[{"visible":true,"include":false,"step":"0.0","x":-2976.285714285714,"y":524.0952380952381,"z":-406.53333333333336,"a95":0.99,"info":"27/10/2014 at 05:59:30"},{"visible":true,"include":true,"step":"4.0","x":-2226.285714285714,"y":531.3619047619047,"z":-351.1333333333333,"a95":0.99,"info":"27/10/2014 at 05:59:30"},{"visible":true,"include":true,"step":"8.0","x":-1320.5714285714287,"y":745.6380952380953,"z":-320.34285714285716,"a95":0.99,"info":"27/10/2014 at 05:59:30"},{"visible":true,"include":true,"step":"12.0","x":-865.5047619047618,"y":678.7333333333333,"z":-321.48571428571427,"a95":0.99,"info":"27/10/2014 at 05:59:30"},{"visible":true,"include":true,"step":"16.0","x":-666.0952380952381,"y":601.5619047619048,"z":-349.85714285714283,"a95":0.99,"info":"27/10/2014 at 05:59:30"},{"visible":true,"include":true,"step":"20.0","x":-557.3238095238095,"y":518.104761904762,"z":-324.50476190476195,"a95":0.99,"info":"27/10/2014 at 05:59:30"},{"visible":true,"include":false,"step":"25.0","x":-574.5714285714286,"y":400.72380952380956,"z":-363.14285714285717,"a95":0.99,"info":"27/10/2014 at 05:59:30"},{"visible":true,"include":false,"step":"30.0","x":-411.34285714285716,"y":508.2952380952381,"z":-304.7238095238095,"a95":0.99,"info":"27/10/2014 at 05:59:30"},{"visible":true,"include":false,"step":"35.0","x":-540.4666666666666,"y":311.8952380952381,"z":-217.40952380952382,"a95":0.99,"info":"27/10/2014 at 05:59:30"},{"visible":true,"include":false,"step":"40.0","x":-552.1714285714286,"y":211.53333333333333,"z":-303.84761904761905,"a95":0.99,"info":"27/10/2014 at 05:59:30"},{"visible":true,"include":false,"step":"45.0","x":-273.247619047619,"y":475.6761904761905,"z":-107.4952380952381,"a95":0.99,"info":"27/10/2014 at 05:59:30"},{"visible":true,"include":false,"step":"50.0","x":-376.4761904761905,"y":339.67619047619047,"z":-130.74285714285713,"a95":0.99,"info":"27/10/2014 at 05:59:30"},{"visible":true,"include":false,"step":"60.0","x":-439.3047619047619,"y":175.43809523809523,"z":-130.1904761904762,"a95":0.99,"info":"27/10/2014 at 05:59:30"},{"visible":true,"include":false,"step":"70.0","x":-229.65714285714287,"y":232.9238095238095,"z":-34.789523809523814,"a95":0.99,"info":"27/10/2014 at 05:59:30"},{"visible":true,"include":false,"step":"80.0","x":-1135.047619047619,"y":-41.57047619047619,"z":-86.22190476190477,"a95":0.99,"info":"27/10/2014 at 05:59:30"},{"visible":true,"include":false,"step":"90.0","x":-425.42857142857144,"y":233.95238095238096,"z":-21.82,"a95":0.99,"info":"27/10/2014 at 05:59:30"},{"visible":true,"include":false,"step":"100.0","x":-410.76190476190476,"y":211.96190476190475,"z":6.163428571428571,"a95":0.99,"info":"27/10/2014 at 05:59:30"}]},{"version":"v1.1.0","exported":"2016-11-23T11:12:37.879Z","volume":10.5,"added":"2016-11-23T11:03:00.406Z","format":"Utrecht","demagType":"Unknown","strat":null,"patch":1.1,"GEO":[],"TECT":[],"interpreted":false,"name":"KL1.11A","coreAzi":246,"coreDip":-6,"bedStrike":30,"bedDip":16,"data":[{"visible":false,"include":false,"step":"20","x":-2038,"y":1856.952380952381,"z":213.9047619047619,"a95":1.6,"info":"\"15-02-12\" at \"15:23\""},{"visible":true,"include":false,"step":"100","x":-1527.2380952380952,"y":1204.857142857143,"z":-716.2857142857143,"a95":1.8,"info":"\"15-02-12\" at \"23:13\""},{"visible":true,"include":true,"step":"120","x":-1045.8095238095239,"y":817.3333333333334,"z":-595.1428571428571,"a95":2.1,"info":"\"15-02-13\" at \"18:28\""},{"visible":true,"include":true,"step":"150","x":-697.1428571428571,"y":612.7619047619048,"z":-543.6190476190476,"a95":2.3,"info":"\"15-02-13\" at \"23:05\""},{"visible":true,"include":true,"step":"180","x":-443.23809523809524,"y":493.5238095238095,"z":-503.04761904761904,"a95":2.3,"info":"\"15-02-16\" at \"16:03\""},{"visible":true,"include":true,"step":"210","x":-310.57142857142856,"y":400.6666666666667,"z":-459.04761904761904,"a95":2.9,"info":"\"15-02-16\" at \"20:08\""},{"visible":true,"include":true,"step":"240","x":-381.6190476190476,"y":432.2857142857143,"z":-417.9047619047619,"a95":2.6,"info":"\"15-02-17\" at \"16:02\""},{"visible":true,"include":false,"step":"270","x":-299.6190476190476,"y":428.95238095238096,"z":-449.9047619047619,"a95":2.9,"info":"\"15-02-17\" at \"22:44\""},{"visible":true,"include":false,"step":"300","x":-428,"y":423.7142857142857,"z":-461.5238095238095,"a95":3,"info":"\"15-03-08\" at \"18:24\""},{"visible":true,"include":false,"step":"320","x":-355.9047619047619,"y":497.9047619047619,"z":-489.7142857142857,"a95":2.3,"info":"\"15-03-09\" at \"09:04\""},{"visible":true,"include":false,"step":"350","x":-398.3809523809524,"y":559.3333333333334,"z":-444.85714285714283,"a95":2.3,"info":"\"15-03-09\" at \"12:31\""},{"visible":true,"include":false,"step":"380","x":-438.0952380952381,"y":544.6666666666666,"z":-405.04761904761904,"a95":2.5,"info":"\"15-04-21\" at \"08:21\""},{"visible":true,"include":false,"step":"410","x":-464.76190476190476,"y":486.95238095238096,"z":-416.76190476190476,"a95":2.5,"info":"\"15-04-21\" at \"11:45\""},{"visible":true,"include":false,"step":"440","x":-308.85714285714283,"y":412.85714285714283,"z":-310.1904761904762,"a95":2.7,"info":"\"15-04-22\" at \"14:35\""}]},{"version":"v1.1.0","exported":"2016-11-23T11:12:37.879Z","volume":10.5,"added":"2016-11-23T11:03:00.406Z","format":"Utrecht","demagType":"Unknown","strat":"6","patch":1.1,"GEO":[],"TECT":[],"interpreted":false,"name":"KL1.11B","coreAzi":246,"coreDip":-6,"bedStrike":30,"bedDip":16,"data":[{"visible":false,"include":false,"step":"0.0","x":-2307.714285714286,"y":1799.5238095238096,"z":-1001.3333333333334,"a95":0.99,"info":"04/11/2014 at 15:10:19"},{"visible":true,"include":true,"step":"10.0","x":-1203.5238095238096,"y":1082.4761904761904,"z":-757.0952380952381,"a95":0.99,"info":"04/11/2014 at 15:10:19"},{"visible":true,"include":true,"step":"15.0","x":-776.8190476190476,"y":776.7619047619048,"z":-627.495238095238,"a95":0.99,"info":"04/11/2014 at 15:10:19"},{"visible":true,"include":true,"step":"20.0","x":-552.9619047619047,"y":670.0761904761905,"z":-551.5619047619048,"a95":0.99,"info":"04/11/2014 at 15:10:19"},{"visible":true,"include":true,"step":"25.0","x":-385.56190476190477,"y":586.8761904761905,"z":-460.447619047619,"a95":0.99,"info":"04/11/2014 at 15:10:19"},{"visible":true,"include":false,"step":"30.0","x":-371.7809523809524,"y":379.95238095238096,"z":-422.2857142857143,"a95":0.99,"info":"04/11/2014 at 15:10:19"},{"visible":true,"include":false,"step":"35.0","x":-337.97142857142853,"y":355.2,"z":-367.0571428571428,"a95":0.99,"info":"04/11/2014 at 15:10:19"},{"visible":true,"include":false,"step":"40.0","x":-185.58095238095237,"y":359.1904761904762,"z":-296.0952380952381,"a95":0.99,"info":"04/11/2014 at 15:10:19"},{"visible":true,"include":false,"step":"45.0","x":-246.58095238095237,"y":121.78095238095239,"z":-283.25714285714287,"a95":0.99,"info":"04/11/2014 at 15:10:19"},{"visible":true,"include":false,"step":"50.0","x":-208.2952380952381,"y":193.52380952380952,"z":-253.36190476190478,"a95":0.99,"info":"04/11/2014 at 15:10:19"},{"visible":true,"include":false,"step":"60.0","x":-37.544761904761906,"y":38.674285714285716,"z":-173.57142857142858,"a95":0.99,"info":"04/11/2014 at 15:10:19"},{"visible":false,"include":false,"step":"70.0","x":-98.91428571428571,"y":-62.544761904761906,"z":-108.02857142857142,"a95":0.99,"info":"04/11/2014 at 15:10:19"},{"visible":false,"include":false,"step":"80.0","x":-339.97142857142853,"y":50.233333333333334,"z":-149.93333333333334,"a95":0.99,"info":"04/11/2014 at 15:10:19"},{"visible":false,"include":false,"step":"90.0","x":-87.20380952380953,"y":-114.14285714285714,"z":1.1446666666666667,"a95":0.99,"info":"04/11/2014 at 15:10:19"}]},{"version":"v1.1.0","exported":"2016-11-23T11:12:37.879Z","volume":10.5,"added":"2016-11-23T11:03:00.406Z","format":"Utrecht","demagType":"Unknown","strat":"1","patch":1.1,"GEO":[],"TECT":[],"interpreted":false,"name":"KL1.12","coreAzi":239,"coreDip":-7,"bedStrike":30,"bedDip":16,"data":[{"visible":true,"include":false,"step":"0.0","x":-1083.8095238095239,"y":1012.7619047619048,"z":-744.7904761904762,"a95":0.99,"info":"07/07/2015 at 15:53:18"},{"visible":true,"include":true,"step":"10.0","x":-373.9238095238095,"y":510.9619047619048,"z":-521.9142857142857,"a95":0.99,"info":"07/07/2015 at 15:53:18"},{"visible":true,"include":true,"step":"15.0","x":-162.1904761904762,"y":322.3333333333333,"z":-486.6380952380952,"a95":0.99,"info":"07/07/2015 at 15:53:18"},{"visible":true,"include":true,"step":"20.0","x":-69.06095238095239,"y":259.0952380952381,"z":-427.12380952380954,"a95":0.99,"info":"07/07/2015 at 15:53:18"},{"visible":true,"include":true,"step":"23.0","x":-5.613428571428572,"y":173.93333333333334,"z":-400.6666666666667,"a95":0.99,"info":"07/07/2015 at 15:53:18"},{"visible":true,"include":false,"step":"25.0","x":-36.584761904761905,"y":97.25714285714287,"z":-410.1333333333333,"a95":0.99,"info":"07/07/2015 at 15:53:18"},{"visible":true,"include":false,"step":"30.0","x":-80.74095238095238,"y":111.93333333333332,"z":-361.7809523809524,"a95":0.99,"info":"07/07/2015 at 15:53:18"},{"visible":true,"include":false,"step":"33.0","x":-32.41619047619048,"y":2.255238095238095,"z":-264.9047619047619,"a95":0.99,"info":"07/07/2015 at 15:53:18"},{"visible":true,"include":false,"step":"35.0","x":-21.15714285714286,"y":28.475238095238097,"z":-289.9238095238095,"a95":0.99,"info":"07/07/2015 at 15:53:18"},{"visible":true,"include":false,"step":"40.0","x":-27.64761904761905,"y":19.504761904761907,"z":-234.73333333333332,"a95":0.99,"info":"07/07/2015 at 15:53:18"},{"visible":true,"include":false,"step":"45.0","x":-20.49809523809524,"y":87.46285714285715,"z":-175.93333333333334,"a95":0.99,"info":"07/07/2015 at 15:53:18"},{"visible":false,"include":false,"step":"50.0","x":-98.58095238095237,"y":-106.06666666666668,"z":-207.67619047619047,"a95":0.99,"info":"07/07/2015 at 15:53:18"},{"visible":false,"include":false,"step":"55.0","x":-100.58095238095237,"y":33.59142857142857,"z":-215.7238095238095,"a95":0.99,"info":"07/07/2015 at 15:53:18"},{"visible":false,"include":false,"step":"60.0","x":-220.86666666666665,"y":-43.17619047619048,"z":-139.0857142857143,"a95":0.99,"info":"07/07/2015 at 15:53:18"},{"visible":false,"include":false,"step":"65.0","x":-121.83809523809524,"y":-96.54285714285714,"z":-134.40952380952382,"a95":0.99,"info":"07/07/2015 at 15:53:18"},{"visible":false,"include":false,"step":"70.0","x":-127.52380952380952,"y":16.154285714285713,"z":-108.6,"a95":0.99,"info":"07/07/2015 at 15:53:18"},{"visible":false,"include":false,"step":"80.0","x":28.00095238095238,"y":-35.163809523809526,"z":-331.93333333333334,"a95":0.99,"info":"07/07/2015 at 15:53:18"}]},{"version":"v1.1.0","exported":"2016-11-23T11:12:37.880Z","volume":10.5,"added":"2016-11-23T11:03:00.406Z","format":"Utrecht","demagType":"Unknown","strat":null,"patch":1.1,"GEO":[],"TECT":[],"interpreted":false,"name":"KL1.14A","coreAzi":243,"coreDip":-1,"bedStrike":30,"bedDip":16,"data":[{"visible":false,"include":false,"step":"20","x":-892.7619047619048,"y":542,"z":-225.23809523809524,"a95":1.6,"info":"\"15-02-12\" at \"15:26\""},{"visible":true,"include":true,"step":"100","x":-487.7142857142857,"y":329.14285714285717,"z":-294.1904761904762,"a95":1.9,"info":"\"15-02-12\" at \"23:15\""},{"visible":true,"include":true,"step":"120","x":-241.9047619047619,"y":206,"z":-225.61904761904762,"a95":2.6,"info":"\"15-02-13\" at \"18:30\""},{"visible":true,"include":true,"step":"150","x":-124.76190476190476,"y":125.80952380952381,"z":-200.1904761904762,"a95":2.9,"info":"\"15-02-13\" at \"23:08\""},{"visible":true,"include":true,"step":"180","x":-52.95238095238095,"y":82.47619047619048,"z":-186.57142857142858,"a95":3.3,"info":"\"15-02-16\" at \"16:05\""},{"visible":true,"include":true,"step":"210","x":-1.5238095238095237,"y":72.57142857142857,"z":-170.85714285714286,"a95":4.3,"info":"\"15-02-16\" at \"20:10\""},{"visible":true,"include":false,"step":"240","x":-11.238095238095237,"y":87.04761904761905,"z":-148.1904761904762,"a95":3.8,"info":"\"15-02-17\" at \"16:04\""},{"visible":true,"include":false,"step":"270","x":-13.428571428571429,"y":84.76190476190476,"z":-156.95238095238096,"a95":4.1,"info":"\"15-02-17\" at \"22:46\""},{"visible":true,"include":false,"step":"300","x":-69.34285714285714,"y":-8.152380952380952,"z":-31.314285714285717,"a95":2.6,"info":"\"15-03-08\" at \"18:26\""},{"visible":true,"include":false,"step":"320","x":-54.095238095238095,"y":118.19047619047619,"z":-164.0952380952381,"a95":3.6,"info":"\"15-03-09\" at \"09:06\""},{"visible":true,"include":false,"step":"350","x":-107.80952380952381,"y":120.47619047619048,"z":-136.0952380952381,"a95":3.6,"info":"\"15-03-09\" at \"12:34\""},{"visible":true,"include":false,"step":"380","x":-141.23809523809524,"y":124.38095238095238,"z":-108.66666666666667,"a95":3.6,"info":"\"15-04-21\" at \"08:23\""},{"visible":true,"include":false,"step":"410","x":-217.71428571428572,"y":87.42857142857143,"z":-85.42857142857143,"a95":4.7,"info":"\"15-04-21\" at \"11:47\""},{"visible":true,"include":false,"step":"440","x":-94.66666666666667,"y":97.80952380952381,"z":-71.61904761904762,"a95":5.9,"info":"\"15-04-22\" at \"14:37\""}]},{"version":"v1.1.0","exported":"2016-11-23T11:12:37.880Z","volume":10.5,"added":"2016-11-23T11:03:00.407Z","format":"Utrecht","demagType":"Unknown","strat":"7","patch":1.1,"GEO":[],"TECT":[],"interpreted":false,"name":"KL1.14B","coreAzi":243,"coreDip":-1,"bedStrike":30,"bedDip":16,"data":[{"visible":true,"include":false,"step":"0.0","x":-873.4285714285714,"y":405.60952380952375,"z":-265.6,"a95":0.99,"info":"04/11/2014 at 15:10:19"},{"visible":true,"include":false,"step":"10.0","x":-387.7904761904762,"y":161.42857142857142,"z":-213.7904761904762,"a95":0.99,"info":"04/11/2014 at 15:10:19"},{"visible":true,"include":false,"step":"15.0","x":-181.57142857142858,"y":85.6247619047619,"z":-159.45714285714286,"a95":0.99,"info":"04/11/2014 at 15:10:19"},{"visible":true,"include":false,"step":"20.0","x":-128.7238095238095,"y":43.1552380952381,"z":-115.42857142857143,"a95":0.99,"info":"04/11/2014 at 15:10:19"},{"visible":true,"include":false,"step":"25.0","x":-53.50380952380952,"y":45.50190476190476,"z":-91.92095238095237,"a95":0.99,"info":"04/11/2014 at 15:10:19"},{"visible":true,"include":false,"step":"30.0","x":-57.75142857142857,"y":11.977142857142857,"z":-106.78095238095239,"a95":0.99,"info":"04/11/2014 at 15:10:19"},{"visible":true,"include":false,"step":"35.0","x":-48.938095238095244,"y":42.653333333333336,"z":-67.16571428571429,"a95":0.99,"info":"04/11/2014 at 15:10:19"},{"visible":true,"include":false,"step":"40.0","x":-0.8598095238095238,"y":62.0247619047619,"z":-68.58761904761904,"a95":0.99,"info":"04/11/2014 at 15:10:19"},{"visible":true,"include":false,"step":"45.0","x":-48.99142857142857,"y":24.115238095238094,"z":-72.37238095238095,"a95":0.99,"info":"04/11/2014 at 15:10:19"},{"visible":true,"include":false,"step":"50.0","x":-49.27904761904762,"y":52.77904761904762,"z":-50.85619047619048,"a95":0.99,"info":"04/11/2014 at 15:10:19"},{"visible":false,"include":false,"step":"60.0","x":52.03047619047619,"y":52.770476190476195,"z":-4.078761904761905,"a95":0.99,"info":"04/11/2014 at 15:10:19"},{"visible":false,"include":false,"step":"70.0","x":-57.229523809523805,"y":-84.1752380952381,"z":-15.181904761904761,"a95":0.99,"info":"04/11/2014 at 15:10:19"},{"visible":false,"include":false,"step":"80.0","x":-92.88666666666666,"y":3.1791428571428573,"z":17.85809523809524,"a95":0.99,"info":"04/11/2014 at 15:10:19"},{"visible":false,"include":false,"step":"90.0","x":65.23047619047618,"y":6.6196190476190475,"z":3.2979999999999996,"a95":0.99,"info":"04/11/2014 at 15:10:19"}]},{"version":"v1.1.0","exported":"2016-11-23T11:12:37.880Z","volume":10.5,"added":"2016-11-23T11:03:00.407Z","format":"Utrecht","demagType":"Unknown","strat":"8","patch":1.1,"GEO":[],"TECT":[],"interpreted":false,"name":"KL1.15B","coreAzi":234,"coreDip":16,"bedStrike":30,"bedDip":16,"data":[{"visible":true,"include":false,"step":"0.0","x":-228.54285714285712,"y":52.03142857142858,"z":-1.0747619047619048,"a95":0.99,"info":"04/11/2014 at 15:10:19"},{"visible":true,"include":false,"step":"10.0","x":-134.34285714285713,"y":15.653333333333334,"z":-11.400952380952381,"a95":0.99,"info":"04/11/2014 at 15:10:19"},{"visible":true,"include":false,"step":"15.0","x":-91.78571428571429,"y":-7.8376190476190475,"z":-32.12190476190476,"a95":0.99,"info":"04/11/2014 at 15:10:19"},{"visible":true,"include":false,"step":"20.0","x":-69.76571428571428,"y":11.666666666666666,"z":-22.39428571428571,"a95":0.99,"info":"04/11/2014 at 15:10:19"},{"visible":true,"include":false,"step":"25.0","x":-65.92666666666666,"y":-11.977142857142857,"z":-21.905714285714286,"a95":0.99,"info":"04/11/2014 at 15:10:19"},{"visible":true,"include":false,"step":"30.0","x":-39.785714285714285,"y":-7.219904761904762,"z":-14.007619047619048,"a95":0.99,"info":"04/11/2014 at 15:10:19"},{"visible":true,"include":false,"step":"35.0","x":-43.83428571428571,"y":-10.282857142857143,"z":7.486285714285714,"a95":0.99,"info":"04/11/2014 at 15:10:19"},{"visible":true,"include":false,"step":"40.0","x":-30.32857142857143,"y":1.0450476190476192,"z":-25.363809523809522,"a95":0.99,"info":"04/11/2014 at 15:10:19"},{"visible":true,"include":false,"step":"45.0","x":-57.455238095238094,"y":-6.2622857142857145,"z":-14.811428571428573,"a95":0.99,"info":"04/11/2014 at 15:10:19"},{"visible":true,"include":false,"step":"50.0","x":-47.79047619047619,"y":15.065714285714286,"z":-10.377142857142857,"a95":0.99,"info":"04/11/2014 at 15:10:19"},{"visible":true,"include":false,"step":"60.0","x":-45.54,"y":2.378095238095238,"z":-22.32,"a95":0.99,"info":"04/11/2014 at 15:10:19"},{"visible":true,"include":false,"step":"70.0","x":-77.00666666666667,"y":6.097904761904762,"z":-13.540952380952382,"a95":0.99,"info":"04/11/2014 at 15:10:19"},{"visible":true,"include":false,"step":"80.0","x":-61.701904761904764,"y":14.852380952380951,"z":6.104285714285714,"a95":0.99,"info":"04/11/2014 at 15:10:19"},{"visible":true,"include":false,"step":"90.0","x":-85.59619047619047,"y":27.982857142857142,"z":16.875238095238096,"a95":0.99,"info":"04/11/2014 at 15:10:19"}]},{"version":"v1.1.0","exported":"2016-11-23T11:12:37.880Z","volume":10.5,"added":"2016-11-23T11:03:00.407Z","format":"Utrecht","demagType":"Unknown","strat":"2","patch":1.1,"GEO":[],"TECT":[],"interpreted":false,"name":"KL1.16A","coreAzi":231,"coreDip":12,"bedStrike":30,"bedDip":16,"data":[{"visible":true,"include":false,"step":"0.0","x":-170.75238095238097,"y":33.83238095238095,"z":-7.491333333333334,"a95":0.99,"info":"07/07/2015 at 15:53:18"},{"visible":true,"include":false,"step":"10.0","x":-78.62,"y":3.081428571428571,"z":-13.602857142857143,"a95":0.99,"info":"07/07/2015 at 15:53:18"},{"visible":true,"include":false,"step":"15.0","x":-25.959047619047617,"y":-17.60952380952381,"z":-7.330190476190476,"a95":0.99,"info":"07/07/2015 at 15:53:18"},{"visible":true,"include":false,"step":"20.0","x":-14.484761904761905,"y":-11.713333333333333,"z":8.97095238095238,"a95":0.99,"info":"07/07/2015 at 15:53:18"},{"visible":true,"include":false,"step":"23.0","x":-18.735238095238095,"y":2.571047619047619,"z":-0.26759047619047616,"a95":0.99,"info":"07/07/2015 at 15:53:18"},{"visible":true,"include":false,"step":"25.0","x":-19.540952380952383,"y":-0.5969047619047619,"z":-3.0291428571428574,"a95":0.99,"info":"07/07/2015 at 15:53:18"},{"visible":true,"include":false,"step":"30.0","x":-4.583619047619048,"y":-12.795238095238094,"z":25.173333333333332,"a95":0.99,"info":"07/07/2015 at 15:53:18"},{"visible":true,"include":false,"step":"33.0","x":-8.26247619047619,"y":0.5320285714285714,"z":-6.6734285714285715,"a95":0.99,"info":"07/07/2015 at 15:53:18"},{"visible":true,"include":false,"step":"35.0","x":-28.708571428571428,"y":-12.646666666666667,"z":13.424761904761905,"a95":0.99,"info":"07/07/2015 at 15:53:18"},{"visible":true,"include":false,"step":"40.0","x":-19.14952380952381,"y":-7.104857142857143,"z":-4.766285714285714,"a95":0.99,"info":"07/07/2015 at 15:53:18"},{"visible":true,"include":false,"step":"45.0","x":-14.292380952380952,"y":12.25904761904762,"z":-3.459809523809524,"a95":0.99,"info":"07/07/2015 at 15:53:18"},{"visible":true,"include":false,"step":"50.0","x":-40.817142857142855,"y":-24.70285714285714,"z":-11.560952380952381,"a95":0.99,"info":"07/07/2015 at 15:53:18"},{"visible":true,"include":false,"step":"55.0","x":-60.6152380952381,"y":-0.5674952380952382,"z":-18.232380952380954,"a95":0.99,"info":"07/07/2015 at 15:53:18"},{"visible":true,"include":false,"step":"60.0","x":-53.8847619047619,"y":11.732380952380952,"z":-8.175714285714285,"a95":0.99,"info":"07/07/2015 at 15:53:18"},{"visible":true,"include":false,"step":"65.0","x":-72.92761904761905,"y":-8.315142857142856,"z":4.109619047619048,"a95":0.99,"info":"07/07/2015 at 15:53:18"},{"visible":true,"include":false,"step":"70.0","x":-91.85619047619048,"y":10.625714285714285,"z":21.384761904761906,"a95":0.99,"info":"07/07/2015 at 15:53:18"},{"visible":true,"include":false,"step":"80.0","x":-133.78095238095239,"y":-43.86380952380952,"z":17.164761904761903,"a95":0.99,"info":"07/07/2015 at 15:53:18"}]},{"version":"v1.1.0","exported":"2016-11-23T11:12:37.880Z","volume":10.5,"added":"2016-11-23T11:03:00.407Z","format":"Utrecht","demagType":"Unknown","strat":"6","patch":1.1,"GEO":[],"TECT":[],"interpreted":false,"name":"KL1.16B","coreAzi":231,"coreDip":12,"bedStrike":30,"bedDip":16,"data":[{"visible":true,"include":false,"step":"0.0","x":317.68571428571425,"y":10.033333333333333,"z":-94.41047619047619,"a95":0.99,"info":"27/10/2014 at 05:59:30"},{"visible":true,"include":false,"step":"4.0","x":1.517047619047619,"y":67.33047619047619,"z":-65.52190476190476,"a95":0.99,"info":"27/10/2014 at 05:59:30"},{"visible":true,"include":false,"step":"8.0","x":-133.8095238095238,"y":76.08761904761904,"z":-44.7047619047619,"a95":0.99,"info":"27/10/2014 at 05:59:30"},{"visible":true,"include":false,"step":"12.0","x":-161.3904761904762,"y":65.27238095238096,"z":-45.70952380952381,"a95":0.99,"info":"27/10/2014 at 05:59:30"},{"visible":true,"include":false,"step":"16.0","x":-163.24761904761903,"y":58.87047619047619,"z":-30.663809523809526,"a95":0.99,"info":"27/10/2014 at 05:59:30"},{"visible":true,"include":false,"step":"20.0","x":-169.6095238095238,"y":57.54666666666667,"z":-32.36190476190476,"a95":0.99,"info":"27/10/2014 at 05:59:30"},{"visible":true,"include":false,"step":"25.0","x":-131.2,"y":45.16761904761905,"z":-26.905714285714286,"a95":0.99,"info":"27/10/2014 at 05:59:30"},{"visible":true,"include":false,"step":"30.0","x":-152.6952380952381,"y":56.6752380952381,"z":-69.16,"a95":0.99,"info":"27/10/2014 at 05:59:30"},{"visible":true,"include":false,"step":"35.0","x":-136.17142857142858,"y":23.27904761904762,"z":-43.45619047619048,"a95":0.99,"info":"27/10/2014 at 05:59:30"},{"visible":true,"include":false,"step":"40.0","x":-122.9047619047619,"y":13.803809523809523,"z":-50.973333333333336,"a95":0.99,"info":"27/10/2014 at 05:59:30"},{"visible":true,"include":false,"step":"45.0","x":-120.16190476190476,"y":24.538095238095234,"z":-36.31238095238095,"a95":0.99,"info":"27/10/2014 at 05:59:30"},{"visible":true,"include":false,"step":"50.0","x":-127.28571428571429,"y":32.57238095238095,"z":-39.88380952380952,"a95":0.99,"info":"27/10/2014 at 05:59:30"},{"visible":true,"include":false,"step":"60.0","x":-167.57142857142858,"y":36.885714285714286,"z":-38.80761904761905,"a95":0.99,"info":"27/10/2014 at 05:59:30"},{"visible":true,"include":false,"step":"70.0","x":-192.2952380952381,"y":19.713333333333335,"z":-52.88095238095238,"a95":0.99,"info":"27/10/2014 at 05:59:30"},{"visible":true,"include":false,"step":"80.0","x":-179.68571428571428,"y":20.87333333333333,"z":-54.13714285714286,"a95":0.99,"info":"27/10/2014 at 05:59:30"},{"visible":true,"include":false,"step":"90.0","x":-159.8190476190476,"y":14.405714285714286,"z":-52.08761904761904,"a95":0.99,"info":"27/10/2014 at 05:59:30"},{"visible":true,"include":false,"step":"100.0","x":-176.3047619047619,"y":23.045714285714286,"z":2.419714285714286,"a95":0.99,"info":"27/10/2014 at 05:59:30"}]},{"version":"v1.1.0","exported":"2016-11-23T11:12:37.880Z","volume":10.5,"added":"2016-11-23T11:03:00.407Z","format":"Utrecht","demagType":"Unknown","strat":null,"patch":1.1,"GEO":[],"TECT":[],"interpreted":false,"name":"KL1.17A","coreAzi":212,"coreDip":38,"bedStrike":30,"bedDip":16,"data":[{"visible":false,"include":false,"step":"20","x":-337.8095238095238,"y":78.0952380952381,"z":-140.47619047619048,"a95":1.9,"info":"\"15-02-12\" at \"15:30\""},{"visible":true,"include":true,"step":"100","x":-205.9047619047619,"y":22,"z":-34.19047619047619,"a95":1.6,"info":"\"15-02-12\" at \"23:18\""},{"visible":true,"include":true,"step":"120","x":-148,"y":12.095238095238095,"z":-36.76190476190476,"a95":2.2,"info":"\"15-02-13\" at \"18:32\""},{"visible":true,"include":true,"step":"150","x":-118.95238095238095,"y":-2.1904761904761907,"z":-42.38095238095238,"a95":2.1,"info":"\"15-02-13\" at \"23:10\""},{"visible":true,"include":true,"step":"180","x":-98.57142857142857,"y":-10.19047619047619,"z":-41.714285714285715,"a95":2.6,"info":"\"15-02-16\" at \"16:07\""},{"visible":true,"include":true,"step":"210","x":-87.80952380952381,"y":-8,"z":-43.04761904761905,"a95":2.8,"info":"\"15-02-16\" at \"20:11\""},{"visible":true,"include":false,"step":"240","x":-73.53333333333333,"y":-8.561904761904762,"z":-41.82857142857143,"a95":2.3,"info":"\"15-02-17\" at \"16:06\""},{"visible":true,"include":false,"step":"270","x":-59,"y":-12.142857142857142,"z":-35.55238095238095,"a95":3.2,"info":"\"15-02-17\" at \"22:49\""},{"visible":true,"include":false,"step":"300","x":-75.02857142857142,"y":-15.00952380952381,"z":-35.97142857142857,"a95":3.1,"info":"\"15-03-08\" at \"18:28\""},{"visible":true,"include":false,"step":"320","x":-66.68571428571428,"y":-5.190476190476191,"z":-18.35238095238095,"a95":3.6,"info":"\"15-03-09\" at \"09:08\""},{"visible":true,"include":false,"step":"350","x":-72.60952380952381,"y":6.266666666666667,"z":-7.819047619047619,"a95":3.4,"info":"\"15-03-09\" at \"12:36\""},{"visible":true,"include":false,"step":"380","x":-84.57142857142857,"y":7.352380952380953,"z":-5.619047619047619,"a95":3.7,"info":"\"15-04-21\" at \"08:26\""},{"visible":true,"include":false,"step":"410","x":-100.38095238095238,"y":-5.333333333333333,"z":-10.285714285714286,"a95":3.7,"info":"\"15-04-21\" at \"11:49\""},{"visible":true,"include":false,"step":"440","x":-81.63809523809525,"y":6.133333333333334,"z":-6.180952380952381,"a95":4.8,"info":"\"15-04-22\" at \"14:40\""}]},{"version":"v1.1.0","exported":"2016-11-23T11:12:37.881Z","volume":10.5,"added":"2016-11-23T11:03:00.408Z","format":"Utrecht","demagType":"Unknown","strat":"3","patch":1.1,"GEO":[],"TECT":[],"interpreted":false,"name":"KL1.18A","coreAzi":230,"coreDip":11,"bedStrike":30,"bedDip":16,"data":[{"visible":true,"include":true,"step":"0.0","x":-178.66666666666666,"y":118.53333333333333,"z":-59.959047619047624,"a95":0.99,"info":"07/07/2015 at 15:53:18"},{"visible":true,"include":true,"step":"10.0","x":-11.242857142857142,"y":31.583809523809524,"z":-82.11714285714285,"a95":0.99,"info":"07/07/2015 at 15:53:18"},{"visible":true,"include":true,"step":"15.0","x":25.58857142857143,"y":37.14857142857143,"z":-77.91809523809523,"a95":0.99,"info":"07/07/2015 at 15:53:18"},{"visible":true,"include":true,"step":"20.0","x":45.53904761904762,"y":33.8,"z":-60.1247619047619,"a95":0.99,"info":"07/07/2015 at 15:53:18"},{"visible":true,"include":true,"step":"23.0","x":46.70761904761905,"y":21.43619047619048,"z":-71.66285714285715,"a95":0.99,"info":"07/07/2015 at 15:53:18"},{"visible":true,"include":false,"step":"25.0","x":62.58857142857143,"y":-16.871428571428574,"z":-24.923809523809524,"a95":0.99,"info":"07/07/2015 at 15:53:18"},{"visible":true,"include":false,"step":"30.0","x":58.54761904761905,"y":-11.154285714285715,"z":-45.894285714285715,"a95":0.99,"info":"07/07/2015 at 15:53:18"},{"visible":true,"include":false,"step":"33.0","x":33.10476190476191,"y":-7.73904761904762,"z":-70.05142857142857,"a95":0.99,"info":"07/07/2015 at 15:53:18"},{"visible":true,"include":false,"step":"35.0","x":43.41428571428572,"y":-47.4847619047619,"z":-60.074285714285715,"a95":0.99,"info":"07/07/2015 at 15:53:18"},{"visible":false,"include":false,"step":"40.0","x":-21.227619047619047,"y":18.574285714285715,"z":14.333333333333334,"a95":0.99,"info":"07/07/2015 at 15:53:18"},{"visible":false,"include":false,"step":"45.0","x":8.658000000000001,"y":-26.056190476190473,"z":-16.38952380952381,"a95":0.99,"info":"07/07/2015 at 15:53:18"},{"visible":false,"include":false,"step":"50.0","x":-27.898095238095237,"y":-39.71714285714285,"z":21.591428571428573,"a95":0.99,"info":"07/07/2015 at 15:53:18"},{"visible":false,"include":false,"step":"55.0","x":-4.5959047619047615,"y":10.531428571428572,"z":-1.1125714285714285,"a95":0.99,"info":"07/07/2015 at 15:53:18"},{"visible":false,"include":false,"step":"60.0","x":24.964761904761904,"y":6.8696190476190475,"z":-10.878095238095238,"a95":0.99,"info":"07/07/2015 at 15:53:18"},{"visible":false,"include":false,"step":"65.0","x":-14.688571428571427,"y":1.2457142857142858,"z":-2.837142857142857,"a95":0.99,"info":"07/07/2015 at 15:53:18"},{"visible":false,"include":false,"step":"70.0","x":-8.607809523809525,"y":52.08380952380952,"z":35.29047619047619,"a95":0.99,"info":"07/07/2015 at 15:53:18"},{"visible":false,"include":false,"step":"80.0","x":120.70476190476191,"y":36.00666666666667,"z":2.5953333333333335,"a95":0.99,"info":"07/07/2015 at 15:53:18"}]},{"version":"v1.1.0","exported":"2016-11-23T11:12:37.881Z","volume":10.5,"added":"2016-11-23T11:03:00.408Z","format":"Utrecht","demagType":"Unknown","strat":"1","patch":1.1,"GEO":[],"TECT":[],"interpreted":false,"name":"KL1.18B","coreAzi":230,"coreDip":11,"bedStrike":30,"bedDip":16,"data":[{"visible":true,"include":false,"step":"0.0","x":-182.28571428571428,"y":40.513333333333335,"z":-78.43047619047618,"a95":0.99,"info":"04/11/2014 at 19:40:30"},{"visible":true,"include":true,"step":"10.0","x":-102.60952380952382,"y":23.697142857142858,"z":-60.69523809523809,"a95":0.99,"info":"04/11/2014 at 19:40:30"},{"visible":true,"include":true,"step":"15.0","x":-73.56,"y":24.552380952380954,"z":-43.98571428571429,"a95":0.99,"info":"04/11/2014 at 19:40:30"},{"visible":true,"include":true,"step":"20.0","x":-52.31904761904762,"y":29.067619047619047,"z":-30.972380952380952,"a95":0.99,"info":"04/11/2014 at 19:40:30"},{"visible":true,"include":true,"step":"25.0","x":-30.16095238095238,"y":16.86952380952381,"z":-37.81333333333333,"a95":0.99,"info":"04/11/2014 at 19:40:30"},{"visible":true,"include":false,"step":"30.0","x":-23.64190476190476,"y":0.8927619047619049,"z":-12.825714285714284,"a95":0.99,"info":"04/11/2014 at 19:40:30"},{"visible":true,"include":false,"step":"35.0","x":-26.039047619047622,"y":5.2804761904761905,"z":-21.14190476190476,"a95":0.99,"info":"04/11/2014 at 19:40:30"},{"visible":true,"include":false,"step":"40.0","x":-27.744761904761905,"y":15.55904761904762,"z":5.9424761904761905,"a95":0.99,"info":"04/11/2014 at 19:40:30"},{"visible":true,"include":false,"step":"45.0","x":-14.244761904761905,"y":15.453333333333333,"z":-10.758095238095237,"a95":0.99,"info":"04/11/2014 at 19:40:30"},{"visible":true,"include":false,"step":"50.0","x":-59.881904761904764,"y":16.07238095238095,"z":-34.26761904761905,"a95":0.99,"info":"04/11/2014 at 19:40:30"},{"visible":true,"include":false,"step":"60.0","x":-16.69904761904762,"y":43.12952380952381,"z":10.054285714285713,"a95":0.99,"info":"04/11/2014 at 19:40:30"},{"visible":true,"include":false,"step":"70.0","x":-63.846666666666664,"y":-8.06342857142857,"z":-17.880000000000003,"a95":0.99,"info":"04/11/2014 at 19:40:30"},{"visible":true,"include":false,"step":"80.0","x":-32.235238095238095,"y":28.477142857142855,"z":-4.482952380952381,"a95":0.99,"info":"04/11/2014 at 19:40:30"},{"visible":true,"include":false,"step":"90.0","x":-37.839999999999996,"y":-21.571428571428573,"z":2.1634285714285717,"a95":0.99,"info":"04/11/2014 at 19:40:30"}]},{"version":"v1.1.0","exported":"2016-11-23T11:12:37.881Z","volume":10.5,"added":"2016-11-23T11:03:00.408Z","format":"Utrecht","demagType":"Unknown","strat":null,"patch":1.1,"GEO":[],"TECT":[],"interpreted":false,"name":"KL1.19A","coreAzi":198,"coreDip":15,"bedStrike":30,"bedDip":16,"data":[{"visible":true,"include":false,"step":"20","x":-597.7142857142857,"y":-35.04761904761905,"z":-87.61904761904762,"a95":1.7,"info":"\"15-02-12\" at \"15:35\""},{"visible":true,"include":false,"step":"100","x":-188.38095238095238,"y":-14.285714285714286,"z":-172.1904761904762,"a95":2.8,"info":"\"15-02-12\" at \"23:20\""},{"visible":true,"include":false,"step":"120","x":-60.76190476190476,"y":-42,"z":-132.1904761904762,"a95":4.3,"info":"\"15-02-13\" at \"18:35\""},{"visible":true,"include":false,"step":"150","x":-7.619047619047619,"y":-40.57142857142857,"z":-150.28571428571428,"a95":3.6,"info":"\"15-02-13\" at \"23:12\""},{"visible":true,"include":false,"step":"180","x":32.285714285714285,"y":-53.61904761904762,"z":-140.28571428571428,"a95":3.3,"info":"\"15-02-16\" at \"16:09\""},{"visible":true,"include":false,"step":"210","x":59.04761904761905,"y":-21.904761904761905,"z":-128.38095238095238,"a95":3.5,"info":"\"15-02-16\" at \"20:13\""},{"visible":true,"include":false,"step":"240","x":78.95238095238095,"y":-41.80952380952381,"z":-109.04761904761905,"a95":3.2,"info":"\"15-02-17\" at \"16:08\""},{"visible":true,"include":false,"step":"270","x":21.61904761904762,"y":-10.19047619047619,"z":-119.42857142857143,"a95":4.1,"info":"\"15-02-17\" at \"22:51\""},{"visible":true,"include":false,"step":"300","x":-30.857142857142858,"y":-11.238095238095237,"z":-121.14285714285714,"a95":4.2,"info":"\"15-03-08\" at \"18:30\""},{"visible":true,"include":false,"step":"320","x":-33.904761904761905,"y":-13.428571428571429,"z":-136.0952380952381,"a95":3.1,"info":"\"15-03-09\" at \"09:10\""},{"visible":true,"include":false,"step":"350","x":-80.66666666666667,"y":-21.142857142857142,"z":-123.04761904761905,"a95":4,"info":"\"15-03-09\" at \"12:38\""},{"visible":true,"include":false,"step":"380","x":-102.57142857142857,"y":22.285714285714285,"z":-92.38095238095238,"a95":4.2,"info":"\"15-04-21\" at \"08:28\""},{"visible":true,"include":false,"step":"410","x":-178.57142857142858,"y":72,"z":-130,"a95":4.4,"info":"\"15-04-21\" at \"11:51\""},{"visible":true,"include":false,"step":"440","x":-143.33333333333334,"y":-36.57142857142857,"z":-51.904761904761905,"a95":5.1,"info":"\"15-04-22\" at \"14:42\""}]}]
