# Supplementary material for: Paleomagnetic constraints on the timing and distribution of Cenozoic rotations in Central and Eastern Anatolia
Source: Copernicus journal article supplement (doi:10.5194/se-9-295-2018), 2018-03-21
Supplement: Supplementary file 2 [file se-9-295-2018-supplement.zip › se-2017-66_DATA_dir files/dir files Ulukisla/PC1.dir]

[{"version":"v1.1.0","exported":"2016-11-23T12:07:53.139Z","volume":10.5,"added":"2016-11-23T11:22:58.328Z","format":"Utrecht","demagType":"Unknown","strat":null,"patch":1.1,"GEO":[{"dec":91.68056270034663,"inc":-38.00261792096922,"MAD":8.91013188574944,"cm":[-3.375077994860476e-14,6.217248937900877e-15,0],"intensity":756.9495829986394,"type":"dir","forced":true,"remark":"","origin":false,"nSteps":8,"minStep":"200","maxStep":"380","steps":["200","225","250","275","300","320","340","380"],"group":"None","version":"v1.1.0"}],"TECT":[{"dec":105.3662623798977,"inc":-76.39612888994407,"MAD":8.910131885749438,"cm":[-4.263256414560601e-14,4.1744385725905886e-14,1.0658141036401503e-14],"intensity":756.9495829986394,"type":"dir","forced":true,"remark":"","origin":false,"nSteps":8,"minStep":"200","maxStep":"380","steps":["200","225","250","275","300","320","340","380"],"group":"None","version":"v1.1.0"}],"interpreted":true,"name":"PC 1.1","coreAzi":345,"coreDip":29,"bedStrike":356,"bedDip":39,"data":[{"visible":false,"include":false,"step":"20","x":-322.85714285714283,"y":1427.904761904762,"z":9.333333333333334,"a95":1.7,"info":"\"13-11-02\" at \"18:31\""},{"visible":true,"include":false,"step":"80","x":-209.14285714285714,"y":902.2857142857143,"z":-122.19047619047619,"a95":1.9,"info":"\"13-11-03\" at \"14:55\""},{"visible":true,"include":false,"step":"150","x":181.14285714285714,"y":616.0952380952381,"z":-351.6190476190476,"a95":2.5,"info":"\"13-11-04\" at \"12:16\""},{"visible":true,"include":false,"step":"180","x":233.61904761904762,"y":527.3333333333334,"z":-326.4761904761905,"a95":2.2,"info":"\"13-11-05\" at \"07:27\""},{"visible":true,"include":true,"step":"200","x":242.38095238095238,"y":463.5238095238095,"z":-363.9047619047619,"a95":2.3,"info":"\"13-11-05\" at \"11:57\""},{"visible":true,"include":true,"step":"225","x":214.47619047619048,"y":449.8095238095238,"z":-327.23809523809524,"a95":2.5,"info":"\"13-11-05\" at \"16:35\""},{"visible":true,"include":true,"step":"250","x":232.28571428571428,"y":419.23809523809524,"z":-320,"a95":2.3,"info":"\"13-11-06\" at \"10:21\""},{"visible":true,"include":true,"step":"275","x":228.1904761904762,"y":361.9047619047619,"z":-235.9047619047619,"a95":2.4,"info":"\"13-11-06\" at \"15:12\""},{"visible":true,"include":true,"step":"300","x":200.76190476190476,"y":339.5238095238095,"z":-171.9047619047619,"a95":2.3,"info":"\"13-11-07\" at \"03:50\""},{"visible":true,"include":true,"step":"320","x":195.61904761904762,"y":248.66666666666666,"z":-94.38095238095238,"a95":2.6,"info":"\"13-11-07\" at \"07:14\""},{"visible":true,"include":true,"step":"340","x":137.42857142857142,"y":244.95238095238096,"z":-76.0952380952381,"a95":2.5,"info":"\"13-11-07\" at \"11:22\""},{"visible":true,"include":true,"step":"380","x":142,"y":102.76190476190476,"z":40.57142857142857,"a95":2.6,"info":"\"13-11-08\" at \"10:06\""},{"visible":false,"include":false,"step":"420","x":126.47619047619048,"y":60.38095238095238,"z":50,"a95":4.8,"info":"\"13-11-08\" at \"13:55\""},{"visible":false,"include":false,"step":"450","x":125.80952380952381,"y":124.0952380952381,"z":126.95238095238095,"a95":4.4,"info":"\"13-11-08\" at \"18:57\""},{"visible":false,"include":false,"step":"500","x":120.85714285714286,"y":141.23809523809524,"z":136.76190476190476,"a95":4.6,"info":"\"13-11-10\" at \"10:59\""},{"visible":false,"include":false,"step":"530","x":141.23809523809524,"y":85.23809523809524,"z":233.61904761904762,"a95":6.4,"info":"\"13-11-10\" at \"13:49\""}]},{"version":"v1.1.0","exported":"2016-11-23T12:07:53.139Z","volume":10.5,"added":"2016-11-23T11:22:58.328Z","format":"Utrecht","demagType":"Unknown","strat":"6","patch":1.1,"GEO":[],"TECT":[],"interpreted":false,"name":"PC 1.2","coreAzi":310,"coreDip":31,"bedStrike":356,"bedDip":39,"data":[{"visible":false,"include":false,"step":"0.0","x":-392.0952380952381,"y":1022.5714285714286,"z":-0.9482190476190476,"a95":0.99,"info":"11/11/2013 at 12:15:13"},{"visible":true,"include":true,"step":"4.0","x":-271.0952380952381,"y":878.3809523809524,"z":-75.85809523809523,"a95":0.99,"info":"11/11/2013 at 12:15:13"},{"visible":true,"include":true,"step":"8.0","x":-120.86666666666666,"y":700.5238095238095,"z":-78.70666666666666,"a95":0.99,"info":"11/11/2013 at 12:15:13"},{"visible":true,"include":true,"step":"12.0","x":35.065714285714286,"y":557.847619047619,"z":-147.0857142857143,"a95":0.99,"info":"11/11/2013 at 12:15:13"},{"visible":true,"include":true,"step":"16.0","x":102.70476190476191,"y":447.8285714285714,"z":-190.31428571428572,"a95":0.99,"info":"11/11/2013 at 12:15:13"},{"visible":true,"include":true,"step":"20.0","x":158.64761904761903,"y":333.54285714285714,"z":-179.67619047619047,"a95":0.99,"info":"11/11/2013 at 12:15:13"},{"visible":true,"include":false,"step":"25.0","x":156.0095238095238,"y":266.2190476190476,"z":-150.59047619047618,"a95":0.99,"info":"11/11/2013 at 12:15:13"},{"visible":true,"include":false,"step":"30.0","x":168.78095238095239,"y":212.2,"z":-136.8761904761905,"a95":0.99,"info":"11/11/2013 at 12:15:13"},{"visible":true,"include":false,"step":"35.0","x":86.10666666666667,"y":119.83809523809524,"z":-57.8552380952381,"a95":0.99,"info":"11/11/2013 at 12:15:13"},{"visible":true,"include":false,"step":"40.0","x":-1.8843809523809525,"y":84.54476190476191,"z":-30.337142857142858,"a95":0.99,"info":"11/11/2013 at 12:15:13"},{"visible":true,"include":false,"step":"45.0","x":200.13333333333335,"y":154.07619047619048,"z":-13.87047619047619,"a95":0.99,"info":"11/11/2013 at 12:15:13"},{"visible":true,"include":false,"step":"50.0","x":-66.75809523809524,"y":57.05904761904762,"z":36.20095238095238,"a95":0.99,"info":"11/11/2013 at 12:15:13"},{"visible":false,"include":false,"step":"60.0","x":-52.94190476190476,"y":-21.431428571428572,"z":91.0142857142857,"a95":0.99,"info":"11/11/2013 at 12:15:13"},{"visible":false,"include":false,"step":"70.0","x":17.685714285714283,"y":97.77142857142856,"z":117.68571428571428,"a95":0.99,"info":"11/11/2013 at 12:15:13"},{"visible":false,"include":false,"step":"80.0","x":-355.42857142857144,"y":1.3131428571428572,"z":-27.772380952380953,"a95":0.99,"info":"11/11/2013 at 12:15:13"},{"visible":false,"include":false,"step":"90.0","x":506.5809523809524,"y":144.51428571428573,"z":-107.58095238095237,"a95":0.99,"info":"11/11/2013 at 12:15:13"},{"visible":false,"include":false,"step":"100.0","x":70.0247619047619,"y":123.19047619047619,"z":108.29523809523809,"a95":0.99,"info":"11/11/2013 at 12:15:13"}]},{"version":"v1.1.0","exported":"2016-11-23T12:07:53.140Z","volume":10.5,"added":"2016-11-23T11:22:58.329Z","format":"Utrecht","demagType":"Unknown","strat":"7","patch":1.1,"GEO":[{"dec":299.2366023078805,"inc":-17.8940154810171,"MAD":4.262306522332994,"cm":[-6.394884621840902e-14,5.684341886080802e-14,0],"intensity":860.5076198908695,"type":"GC","origin":false,"forced":true,"remark":"","nSteps":6,"minStep":"4.0","maxStep":"25.0","steps":["4.0","8.0","12.0","16.0","20.0","25.0"],"group":"None","version":"v1.1.0"}],"TECT":[{"dec":118.71652726128991,"inc":-15.196273131841018,"MAD":4.262306522333024,"cm":[-4.796163466380676e-14,4.04121180963557e-14,-6.394884621840902e-14],"intensity":860.5076198908696,"type":"GC","origin":false,"forced":true,"remark":"","nSteps":6,"minStep":"4.0","maxStep":"25.0","steps":["4.0","8.0","12.0","16.0","20.0","25.0"],"group":"None","version":"v1.1.0"}],"interpreted":true,"name":"PC 1.3A","coreAzi":318,"coreDip":34,"bedStrike":356,"bedDip":39,"data":[{"visible":true,"include":false,"step":"0.0","x":-126.22857142857144,"y":640.3047619047619,"z":505.68571428571425,"a95":0.99,"info":"11/11/2013 at 12:15:13"},{"visible":true,"include":true,"step":"4.0","x":18.717142857142857,"y":574.3904761904762,"z":258.2,"a95":0.99,"info":"11/11/2013 at 12:15:13"},{"visible":true,"include":true,"step":"8.0","x":147.2952380952381,"y":483.39047619047625,"z":77.71904761904761,"a95":0.99,"info":"11/11/2013 at 12:15:13"},{"visible":true,"include":true,"step":"12.0","x":238.21904761904764,"y":406.1333333333333,"z":-51.85333333333334,"a95":0.99,"info":"11/11/2013 at 12:15:13"},{"visible":true,"include":true,"step":"16.0","x":262.1714285714286,"y":365.15238095238095,"z":-161.82857142857142,"a95":0.99,"info":"11/11/2013 at 12:15:13"},{"visible":true,"include":true,"step":"20.0","x":258.1142857142857,"y":307.02857142857147,"z":-197.15238095238095,"a95":0.99,"info":"11/11/2013 at 12:15:13"},{"visible":true,"include":true,"step":"25.0","x":232.83809523809526,"y":245.7238095238095,"z":-190.33333333333334,"a95":0.99,"info":"11/11/2013 at 12:15:13"},{"visible":true,"include":false,"step":"30.0","x":175.9142857142857,"y":162.8952380952381,"z":-177.1047619047619,"a95":0.99,"info":"11/11/2013 at 12:15:13"},{"visible":true,"include":false,"step":"35.0","x":143.0285714285714,"y":88.31523809523809,"z":-143.75238095238097,"a95":0.99,"info":"11/11/2013 at 12:15:13"},{"visible":true,"include":false,"step":"40.0","x":64.89142857142858,"y":131.17142857142858,"z":-59.976190476190474,"a95":0.99,"info":"11/11/2013 at 12:15:13"},{"visible":true,"include":false,"step":"45.0","x":158.34285714285713,"y":130.68571428571428,"z":-26.11047619047619,"a95":0.99,"info":"11/11/2013 at 12:15:13"},{"visible":true,"include":false,"step":"50.0","x":126.88571428571429,"y":-18.30095238095238,"z":11.162857142857142,"a95":0.99,"info":"11/11/2013 at 12:15:13"},{"visible":false,"include":false,"step":"60.0","x":-58.60190476190477,"y":114.72380952380952,"z":-39.794285714285714,"a95":0.99,"info":"11/11/2013 at 12:15:13"},{"visible":false,"include":false,"step":"70.0","x":87.75142857142858,"y":158.75238095238097,"z":-0.25815238095238097,"a95":0.99,"info":"11/11/2013 at 12:15:13"},{"visible":false,"include":false,"step":"80.0","x":322.45714285714286,"y":15.738095238095237,"z":186.32380952380953,"a95":0.99,"info":"11/11/2013 at 12:15:13"},{"visible":false,"include":false,"step":"90.0","x":28.805714285714284,"y":68.54476190476191,"z":-216.66666666666666,"a95":0.99,"info":"11/11/2013 at 12:15:13"},{"visible":false,"include":false,"step":"100.0","x":43.26857142857143,"y":91.42095238095237,"z":223.58095238095237,"a95":0.99,"info":"11/11/2013 at 12:15:13"}]},{"version":"v1.1.0","exported":"2016-11-23T12:07:53.140Z","volume":10.5,"added":"2016-11-23T11:22:58.330Z","format":"Utrecht","demagType":"Unknown","strat":"8","patch":1.1,"GEO":[{"dec":268.93220272127445,"inc":-28.64151921223601,"MAD":4.112662286231886,"cm":[-7.105427357601002e-15,-2.0605739337042905e-13,0],"intensity":1266.789892717477,"type":"GC","origin":false,"forced":true,"remark":"","nSteps":5,"minStep":"4.0","maxStep":"20.0","steps":["4.0","8.0","12.0","16.0","20.0"],"group":"None","version":"v1.1.0"}],"TECT":[{"dec":88.61545835728492,"inc":-10.31636605653813,"MAD":4.112662286231913,"cm":[-1.4210854715202004e-14,-8.881784197001252e-14,1.2079226507921703e-13],"intensity":1266.789892717477,"type":"GC","origin":false,"forced":true,"remark":"","nSteps":5,"minStep":"4.0","maxStep":"20.0","steps":["4.0","8.0","12.0","16.0","20.0"],"group":"None","version":"v1.1.0"}],"interpreted":true,"name":"PC 1.3B","coreAzi":318,"coreDip":34,"bedStrike":356,"bedDip":39,"data":[{"visible":true,"include":false,"step":"0.0","x":174.7047619047619,"y":675.0095238095239,"z":1152.6666666666667,"a95":0.99,"info":"11/11/2013 at 12:15:13"},{"visible":true,"include":true,"step":"4.0","x":292.0571428571428,"y":586.0095238095239,"z":818.742857142857,"a95":0.99,"info":"11/11/2013 at 12:15:13"},{"visible":true,"include":true,"step":"8.0","x":319.0571428571428,"y":473.0952380952381,"z":504.8952380952381,"a95":0.99,"info":"11/11/2013 at 12:15:13"},{"visible":true,"include":true,"step":"12.0","x":299.3619047619048,"y":410.447619047619,"z":173.44761904761904,"a95":0.99,"info":"11/11/2013 at 12:15:13"},{"visible":true,"include":true,"step":"16.0","x":294.6380952380952,"y":327.9047619047619,"z":19.443809523809524,"a95":0.99,"info":"11/11/2013 at 12:15:13"},{"visible":true,"include":true,"step":"20.0","x":254.95238095238096,"y":247.2,"z":-36.88666666666667,"a95":0.99,"info":"11/11/2013 at 12:15:13"},{"visible":true,"include":false,"step":"25.0","x":250.9904761904762,"y":180.8761904761905,"z":-50.99142857142857,"a95":0.99,"info":"11/11/2013 at 12:15:13"},{"visible":true,"include":false,"step":"30.0","x":228.7238095238095,"y":148.36190476190475,"z":-22.313333333333333,"a95":0.99,"info":"11/11/2013 at 12:15:13"},{"visible":true,"include":false,"step":"35.0","x":160.7047619047619,"y":111.67619047619047,"z":16.014285714285716,"a95":0.99,"info":"11/11/2013 at 12:15:13"},{"visible":true,"include":false,"step":"40.0","x":125.95238095238095,"y":143.33333333333334,"z":14.871428571428572,"a95":0.99,"info":"11/11/2013 at 12:15:13"},{"visible":true,"include":false,"step":"45.0","x":128.2761904761905,"y":100.78095238095239,"z":25.636190476190478,"a95":0.99,"info":"11/11/2013 at 12:15:13"},{"visible":true,"include":false,"step":"50.0","x":88.13904761904762,"y":49.79904761904762,"z":76.95619047619047,"a95":0.99,"info":"11/11/2013 at 12:15:13"},{"visible":false,"include":false,"step":"60.0","x":32.91809523809523,"y":84.9895238095238,"z":74.74761904761905,"a95":0.99,"info":"11/11/2013 at 12:15:13"},{"visible":false,"include":false,"step":"70.0","x":143.67619047619047,"y":111.62857142857142,"z":138.1047619047619,"a95":0.99,"info":"11/11/2013 at 12:15:13"},{"visible":false,"include":false,"step":"80.0","x":349.3333333333333,"y":-19.65714285714286,"z":173.82857142857142,"a95":0.99,"info":"11/11/2013 at 12:15:13"},{"visible":false,"include":false,"step":"90.0","x":-102.79047619047618,"y":92.42,"z":-77.09238095238095,"a95":0.99,"info":"11/11/2013 at 12:15:13"},{"visible":false,"include":false,"step":"100.0","x":-11.086666666666666,"y":90.79333333333334,"z":62.578095238095244,"a95":0.99,"info":"11/11/2013 at 12:15:13"}]},{"version":"v1.1.0","exported":"2016-11-23T12:07:53.140Z","volume":10.5,"added":"2016-11-23T11:22:58.331Z","format":"Utrecht","demagType":"Unknown","strat":"1","patch":1.1,"GEO":[],"TECT":[],"interpreted":false,"name":"PC 1.4","coreAzi":335,"coreDip":47,"bedStrike":356,"bedDip":39,"data":[{"visible":true,"include":false,"step":"0.0","x":71.30380952380953,"y":310.31428571428575,"z":914.1619047619048,"a95":0.99,"info":"28/11/2013 at 23:08:57"},{"visible":true,"include":true,"step":"4.0","x":236.84761904761905,"y":305.83809523809526,"z":765.6666666666666,"a95":0.99,"info":"28/11/2013 at 23:08:57"},{"visible":true,"include":true,"step":"8.0","x":331.1714285714286,"y":247.05714285714285,"z":518.104761904762,"a95":0.99,"info":"28/11/2013 at 23:08:57"},{"visible":true,"include":true,"step":"12.0","x":359.4666666666667,"y":166.03809523809525,"z":304.8666666666667,"a95":0.99,"info":"28/11/2013 at 23:08:57"},{"visible":true,"include":true,"step":"16.0","x":412.49523809523805,"y":154.1809523809524,"z":142.3904761904762,"a95":0.99,"info":"28/11/2013 at 23:08:57"},{"visible":true,"include":true,"step":"20.0","x":376.93333333333334,"y":91.73714285714286,"z":41.41809523809523,"a95":0.99,"info":"28/11/2013 at 23:08:57"},{"visible":true,"include":false,"step":"25.0","x":308.54285714285714,"y":100.95238095238095,"z":30.624761904761904,"a95":0.99,"info":"28/11/2013 at 23:08:57"},{"visible":true,"include":false,"step":"30.0","x":314.8952380952381,"y":42.74095238095238,"z":14.138095238095238,"a95":0.99,"info":"28/11/2013 at 23:08:57"},{"visible":true,"include":false,"step":"35.0","x":217.68571428571425,"y":11.785714285714286,"z":90.17142857142856,"a95":0.99,"info":"28/11/2013 at 23:08:57"},{"visible":true,"include":false,"step":"40.0","x":204.67619047619047,"y":40.13809523809524,"z":26.32190476190476,"a95":0.99,"info":"28/11/2013 at 23:08:57"},{"visible":true,"include":false,"step":"45.0","x":183.22857142857143,"y":26.39428571428571,"z":25.417142857142856,"a95":0.99,"info":"28/11/2013 at 23:08:57"},{"visible":true,"include":false,"step":"50.0","x":57.76095238095238,"y":-27.899047619047618,"z":63.42857142857143,"a95":0.99,"info":"28/11/2013 at 23:08:57"},{"visible":false,"include":false,"step":"60.0","x":46.00666666666667,"y":7.050380952380952,"z":27.366666666666667,"a95":0.99,"info":"28/11/2013 at 23:08:57"},{"visible":false,"include":false,"step":"70.0","x":51.450476190476195,"y":65.05904761904762,"z":82.32190476190476,"a95":0.99,"info":"28/11/2013 at 23:08:57"},{"visible":false,"include":false,"step":"80.0","x":-241.68571428571425,"y":-110.95238095238095,"z":-50.413333333333334,"a95":0.99,"info":"28/11/2013 at 23:08:57"},{"visible":false,"include":false,"step":"90.0","x":-88.67238095238095,"y":34.142857142857146,"z":-37.25714285714285,"a95":0.99,"info":"28/11/2013 at 23:08:57"},{"visible":false,"include":false,"step":"100.0","x":-50.21142857142858,"y":64.50571428571428,"z":90.77619047619048,"a95":0.99,"info":"28/11/2013 at 23:08:57"}]},{"version":"v1.1.0","exported":"2016-11-23T12:07:53.140Z","volume":10.5,"added":"2016-11-23T11:22:58.331Z","format":"Utrecht","demagType":"Unknown","strat":null,"patch":1.1,"GEO":[{"dec":273.2870573694972,"inc":-3.548084898808133,"MAD":0.7142727524427794,"cm":[0,8.260059303211165e-14,0],"intensity":1437.6502118106735,"type":"GC","origin":false,"forced":true,"remark":"","nSteps":4,"minStep":"80","maxStep":"200","steps":["80","150","180","200"],"group":"None","version":"v1.1.0"}],"TECT":[{"dec":94.90104558568157,"inc":-35.09587239832584,"MAD":0.7142727524430371,"cm":[-7.105427357601002e-15,-9.769962616701378e-14,-2.1316282072803006e-14],"intensity":1437.650211810674,"type":"GC","origin":false,"forced":true,"remark":"","nSteps":4,"minStep":"80","maxStep":"200","steps":["80","150","180","200"],"group":"None","version":"v1.1.0"}],"interpreted":true,"name":"PC 1.5A","coreAzi":336,"coreDip":46,"bedStrike":356,"bedDip":39,"data":[{"visible":false,"include":false,"step":"20","x":657.047619047619,"y":483.42857142857144,"z":1166.4761904761904,"a95":2.4,"info":"\"13-11-02\" at \"18:35\""},{"visible":true,"include":true,"step":"80","x":465.23809523809524,"y":426.4761904761905,"z":748.952380952381,"a95":2.3,"info":"\"13-11-03\" at \"14:58\""},{"visible":true,"include":true,"step":"150","x":483.9047619047619,"y":289.23809523809524,"z":292.0952380952381,"a95":2.2,"info":"\"13-11-04\" at \"12:19\""},{"visible":true,"include":true,"step":"180","x":479.23809523809524,"y":272.95238095238096,"z":223.23809523809524,"a95":2.3,"info":"\"13-11-05\" at \"07:29\""},{"visible":true,"include":true,"step":"200","x":446.1904761904762,"y":232.57142857142858,"z":146.47619047619048,"a95":2.1,"info":"\"13-11-05\" at \"11:59\""},{"visible":true,"include":false,"step":"225","x":421.9047619047619,"y":193.61904761904762,"z":156.38095238095238,"a95":2.8,"info":"\"13-11-05\" at \"16:38\""},{"visible":true,"include":false,"step":"250","x":412.6666666666667,"y":166,"z":110.76190476190476,"a95":2.2,"info":"\"13-11-06\" at \"10:23\""},{"visible":true,"include":false,"step":"275","x":382.85714285714283,"y":152,"z":126,"a95":2.3,"info":"\"13-11-06\" at \"15:16\""},{"visible":true,"include":false,"step":"300","x":367.23809523809524,"y":106.38095238095238,"z":130.47619047619048,"a95":2.3,"info":"\"13-11-07\" at \"03:52\""},{"visible":true,"include":false,"step":"320","x":360.4761904761905,"y":39.523809523809526,"z":174.38095238095238,"a95":2.7,"info":"\"13-11-07\" at \"07:16\""},{"visible":true,"include":false,"step":"340","x":319.9047619047619,"y":52.095238095238095,"z":170.57142857142858,"a95":2.3,"info":"\"13-11-07\" at \"11:24\""},{"visible":true,"include":false,"step":"380","x":314.76190476190476,"y":-52.38095238095238,"z":223.8095238095238,"a95":3.3,"info":"\"13-11-08\" at \"10:09\""},{"visible":true,"include":false,"step":"420","x":206,"y":-4.666666666666667,"z":201.14285714285714,"a95":4.8,"info":"\"13-11-08\" at \"13:57\""},{"visible":false,"include":false,"step":"450","x":235.9047619047619,"y":-35.142857142857146,"z":232.95238095238096,"a95":4.8,"info":"\"13-11-08\" at \"19:00\""},{"visible":false,"include":false,"step":"500","x":188.28571428571428,"y":-24,"z":224.38095238095238,"a95":5.5,"info":"\"13-11-10\" at \"11:02\""},{"visible":false,"include":false,"step":"530","x":167.8095238095238,"y":11.714285714285714,"z":250,"a95":6.8,"info":"\"13-11-10\" at \"13:52\""},{"visible":false,"include":false,"step":"560","x":99.42857142857143,"y":320.6666666666667,"z":291.9047619047619,"a95":9.6,"info":"\"13-11-10\" at \"23:01\""}]},{"version":"v1.1.0","exported":"2016-11-23T12:07:53.140Z","volume":10.5,"added":"2016-11-23T11:22:58.332Z","format":"Utrecht","demagType":"Unknown","strat":"2","patch":1.1,"GEO":[],"TECT":[],"interpreted":false,"name":"PC 1.5B","coreAzi":336,"coreDip":46,"bedStrike":356,"bedDip":39,"data":[{"visible":false,"include":false,"step":"0.0","x":75.38857142857144,"y":419.1714285714286,"z":896.5809523809525,"a95":0.99,"info":"28/11/2013 at 23:08:57"},{"visible":true,"include":true,"step":"4.0","x":222.50476190476192,"y":396.4190476190476,"z":751.2380952380952,"a95":0.99,"info":"28/11/2013 at 23:08:57"},{"visible":true,"include":true,"step":"8.0","x":314.9238095238095,"y":337.65714285714284,"z":527.0857142857143,"a95":0.99,"info":"28/11/2013 at 23:08:57"},{"visible":true,"include":true,"step":"12.0","x":354.1047619047619,"y":282.04761904761904,"z":334.8095238095238,"a95":0.99,"info":"28/11/2013 at 23:08:57"},{"visible":true,"include":true,"step":"16.0","x":343.3619047619048,"y":191.0095238095238,"z":171.14285714285714,"a95":0.99,"info":"28/11/2013 at 23:08:57"},{"visible":true,"include":true,"step":"20.0","x":329.34285714285716,"y":167.6952380952381,"z":92.48666666666666,"a95":0.99,"info":"28/11/2013 at 23:08:57"},{"visible":true,"include":false,"step":"25.0","x":296.2,"y":69.95428571428572,"z":87.71904761904761,"a95":0.99,"info":"28/11/2013 at 23:08:57"},{"visible":true,"include":false,"step":"30.0","x":264.7809523809524,"y":55.13333333333333,"z":50.55809523809524,"a95":0.99,"info":"28/11/2013 at 23:08:57"},{"visible":true,"include":false,"step":"35.0","x":169.92380952380952,"y":-12.858095238095236,"z":49.30761904761905,"a95":0.99,"info":"28/11/2013 at 23:08:57"},{"visible":true,"include":false,"step":"40.0","x":191.88571428571427,"y":-11.712380952380952,"z":106.77142857142856,"a95":0.99,"info":"28/11/2013 at 23:08:57"},{"visible":true,"include":false,"step":"45.0","x":180.83809523809524,"y":3.9646666666666666,"z":24.219047619047622,"a95":0.99,"info":"28/11/2013 at 23:08:57"},{"visible":true,"include":false,"step":"50.0","x":32.47142857142857,"y":-68.29333333333334,"z":86.36952380952381,"a95":0.99,"info":"28/11/2013 at 23:08:57"},{"visible":false,"include":false,"step":"60.0","x":-42.978095238095236,"y":27.686666666666664,"z":44.18666666666667,"a95":0.99,"info":"28/11/2013 at 23:08:57"},{"visible":false,"include":false,"step":"70.0","x":5.577333333333333,"y":22.644761904761907,"z":119.04761904761905,"a95":0.99,"info":"28/11/2013 at 23:08:57"},{"visible":false,"include":false,"step":"80.0","x":-102.3047619047619,"y":-41.6552380952381,"z":176.78095238095239,"a95":0.99,"info":"28/11/2013 at 23:08:57"},{"visible":false,"include":false,"step":"90.0","x":-227.35238095238094,"y":163.84761904761905,"z":-98.46666666666667,"a95":0.99,"info":"28/11/2013 at 23:08:57"},{"visible":false,"include":false,"step":"100.0","x":-69.7,"y":0.8270190476190477,"z":112.65714285714287,"a95":0.99,"info":"28/11/2013 at 23:08:57"}]},{"version":"v1.1.0","exported":"2016-11-23T12:07:53.140Z","volume":10.5,"added":"2016-11-23T11:22:58.334Z","format":"Utrecht","demagType":"Unknown","strat":"3","patch":1.1,"GEO":[],"TECT":[],"interpreted":false,"name":"PC 1.6A","coreAzi":343,"coreDip":43,"bedStrike":356,"bedDip":39,"data":[{"visible":true,"include":false,"step":"0.0","x":-19.34857142857143,"y":144.0952380952381,"z":880.8095238095239,"a95":0.99,"info":"28/11/2013 at 23:08:57"},{"visible":true,"include":true,"step":"4.0","x":101.11428571428571,"y":131.74285714285713,"z":754.6476190476191,"a95":0.99,"info":"28/11/2013 at 23:08:57"},{"visible":true,"include":true,"step":"8.0","x":198.21904761904764,"y":129.57142857142858,"z":507.5809523809524,"a95":0.99,"info":"28/11/2013 at 23:08:57"},{"visible":true,"include":true,"step":"12.0","x":261.76190476190476,"y":109.42857142857143,"z":302.9809523809524,"a95":0.99,"info":"28/11/2013 at 23:08:57"},{"visible":true,"include":true,"step":"16.0","x":271.23809523809524,"y":67.97999999999999,"z":178.3047619047619,"a95":0.99,"info":"28/11/2013 at 23:08:57"},{"visible":true,"include":true,"step":"20.0","x":279.31428571428575,"y":52.12761904761905,"z":87.39904761904762,"a95":0.99,"info":"28/11/2013 at 23:08:57"},{"visible":true,"include":false,"step":"25.0","x":229.51428571428573,"y":-0.48271428571428576,"z":70.52952380952381,"a95":0.99,"info":"28/11/2013 at 23:08:57"},{"visible":true,"include":false,"step":"30.0","x":225.61904761904762,"y":-9.039238095238096,"z":55.8447619047619,"a95":0.99,"info":"28/11/2013 at 23:08:57"},{"visible":true,"include":false,"step":"35.0","x":149.33333333333334,"y":-59.3247619047619,"z":47.57714285714286,"a95":0.99,"info":"28/11/2013 at 23:08:57"},{"visible":true,"include":false,"step":"40.0","x":113.35238095238095,"y":-22.21238095238095,"z":100.86666666666666,"a95":0.99,"info":"28/11/2013 at 23:08:57"},{"visible":true,"include":false,"step":"45.0","x":124.9047619047619,"y":-7.9388571428571435,"z":112.95238095238095,"a95":0.99,"info":"28/11/2013 at 23:08:57"},{"visible":true,"include":false,"step":"50.0","x":46.2447619047619,"y":-64.52761904761904,"z":76.36952380952381,"a95":0.99,"info":"28/11/2013 at 23:08:57"},{"visible":false,"include":false,"step":"60.0","x":-38.27142857142857,"y":7.534,"z":13.186666666666667,"a95":0.99,"info":"28/11/2013 at 23:08:57"},{"visible":false,"include":false,"step":"70.0","x":15.029523809523809,"y":28.68,"z":53.5295238095238,"a95":0.99,"info":"28/11/2013 at 23:08:57"},{"visible":false,"include":false,"step":"80.0","x":966.1904761904761,"y":13.731428571428571,"z":218.76190476190476,"a95":0.99,"info":"28/11/2013 at 23:08:57"},{"visible":false,"include":false,"step":"90.0","x":-108.5904761904762,"y":52.10190476190477,"z":-260.5333333333333,"a95":0.99,"info":"28/11/2013 at 23:08:57"},{"visible":false,"include":false,"step":"100.0","x":-48.72095238095238,"y":96.70476190476191,"z":35.81333333333333,"a95":0.99,"info":"28/11/2013 at 23:08:57"}]},{"version":"v1.1.0","exported":"2016-11-23T12:07:53.140Z","volume":10.5,"added":"2016-11-23T11:22:58.335Z","format":"Utrecht","demagType":"Unknown","strat":"4","patch":1.1,"GEO":[],"TECT":[],"interpreted":false,"name":"PC 1.6B","coreAzi":343,"coreDip":43,"bedStrike":356,"bedDip":39,"data":[{"visible":true,"include":true,"step":"0.0","x":-223.40952380952382,"y":282.0761904761905,"z":199.28571428571428,"a95":0.99,"info":"28/11/2013 at 23:08:57"},{"visible":true,"include":true,"step":"4.0","x":-52.82666666666666,"y":247.38095238095238,"z":219.9238095238095,"a95":0.99,"info":"28/11/2013 at 23:08:57"},{"visible":true,"include":true,"step":"8.0","x":117.80000000000001,"y":199.8952380952381,"z":189.76190476190476,"a95":0.99,"info":"28/11/2013 at 23:08:57"},{"visible":true,"include":true,"step":"12.0","x":202.73333333333332,"y":162.9047619047619,"z":143.61904761904762,"a95":0.99,"info":"28/11/2013 at 23:08:57"},{"visible":true,"include":true,"step":"16.0","x":244.13333333333335,"y":129.54285714285714,"z":70.22952380952381,"a95":0.99,"info":"28/11/2013 at 23:08:57"},{"visible":true,"include":false,"step":"20.0","x":237.40952380952382,"y":67.38666666666666,"z":12.293333333333335,"a95":0.99,"info":"28/11/2013 at 23:08:57"},{"visible":true,"include":false,"step":"25.0","x":212.55238095238096,"y":53.68285714285714,"z":24.099047619047617,"a95":0.99,"info":"28/11/2013 at 23:08:57"},{"visible":true,"include":false,"step":"30.0","x":163.2952380952381,"y":50.34,"z":53.99809523809524,"a95":0.99,"info":"28/11/2013 at 23:08:57"},{"visible":true,"include":false,"step":"35.0","x":97.70476190476191,"y":-23.947619047619046,"z":132.05714285714285,"a95":0.99,"info":"28/11/2013 at 23:08:57"},{"visible":true,"include":false,"step":"40.0","x":100.38095238095238,"y":-11.715238095238096,"z":68.30857142857143,"a95":0.99,"info":"28/11/2013 at 23:08:57"},{"visible":true,"include":false,"step":"45.0","x":66.21809523809523,"y":23.461904761904762,"z":94.5304761904762,"a95":0.99,"info":"28/11/2013 at 23:08:57"},{"visible":true,"include":false,"step":"50.0","x":-12.290476190476191,"y":-76.82380952380952,"z":124.95238095238095,"a95":0.99,"info":"28/11/2013 at 23:08:57"},{"visible":false,"include":false,"step":"60.0","x":-58.54761904761905,"y":-1.3763809523809525,"z":22.549523809523812,"a95":0.99,"info":"28/11/2013 at 23:08:57"},{"visible":false,"include":false,"step":"70.0","x":-41.83238095238095,"y":1.4005714285714286,"z":48.08,"a95":0.99,"info":"28/11/2013 at 23:08:57"},{"visible":false,"include":false,"step":"80.0","x":-160.37142857142857,"y":-166.8,"z":68.97047619047619,"a95":0.99,"info":"28/11/2013 at 23:08:57"},{"visible":false,"include":false,"step":"90.0","x":-203.64761904761906,"y":22.39428571428571,"z":13.270476190476192,"a95":0.99,"info":"28/11/2013 at 23:08:57"},{"visible":false,"include":false,"step":"100.0","x":-67.3295238095238,"y":17.910476190476192,"z":52.0047619047619,"a95":0.99,"info":"28/11/2013 at 23:08:57"}]},{"version":"v1.1.0","exported":"2016-11-23T12:07:53.141Z","volume":10.5,"added":"2016-11-23T11:22:58.335Z","format":"Utrecht","demagType":"Unknown","strat":"5","patch":1.1,"GEO":[],"TECT":[],"interpreted":false,"name":"PC 1.7","coreAzi":348,"coreDip":50,"bedStrike":356,"bedDip":39,"data":[{"visible":true,"include":false,"step":"0.0","x":-115.71428571428571,"y":641.9904761904761,"z":1395.2380952380952,"a95":0.99,"info":"28/11/2013 at 23:08:57"},{"visible":true,"include":true,"step":"4.0","x":62.9352380952381,"y":552.6476190476191,"z":1176,"a95":0.99,"info":"28/11/2013 at 23:08:57"},{"visible":true,"include":true,"step":"8.0","x":186.2761904761905,"y":432.3238095238095,"z":821.104761904762,"a95":0.99,"info":"28/11/2013 at 23:08:57"},{"visible":true,"include":true,"step":"12.0","x":269.6666666666667,"y":322.56190476190477,"z":515.9714285714285,"a95":0.99,"info":"28/11/2013 at 23:08:57"},{"visible":true,"include":true,"step":"16.0","x":304.6095238095238,"y":243.6095238095238,"z":352.25714285714287,"a95":0.99,"info":"28/11/2013 at 23:08:57"},{"visible":true,"include":true,"step":"20.0","x":296.5333333333333,"y":161.5047619047619,"z":238.9809523809524,"a95":0.99,"info":"28/11/2013 at 23:08:57"},{"visible":true,"include":true,"step":"25.0","x":290.04761904761904,"y":87.38666666666666,"z":193.6952380952381,"a95":0.99,"info":"28/11/2013 at 23:08:57"},{"visible":true,"include":false,"step":"30.0","x":277.8095238095238,"y":73.85047619047619,"z":167,"a95":0.99,"info":"28/11/2013 at 23:08:57"},{"visible":true,"include":false,"step":"35.0","x":167.74285714285713,"y":-4.617809523809524,"z":231.48571428571427,"a95":0.99,"info":"28/11/2013 at 23:08:57"},{"visible":true,"include":false,"step":"40.0","x":140.75238095238097,"y":48.65809523809524,"z":182.7238095238095,"a95":0.99,"info":"28/11/2013 at 23:08:57"},{"visible":true,"include":false,"step":"45.0","x":175.26666666666665,"y":7.579809523809523,"z":145.2952380952381,"a95":0.99,"info":"28/11/2013 at 23:08:57"},{"visible":true,"include":false,"step":"50.0","x":55.389523809523816,"y":-46.23714285714286,"z":123.19047619047619,"a95":0.99,"info":"28/11/2013 at 23:08:57"},{"visible":false,"include":false,"step":"60.0","x":7.043238095238094,"y":-31.704761904761902,"z":101.15238095238094,"a95":0.99,"info":"28/11/2013 at 23:08:57"},{"visible":false,"include":false,"step":"70.0","x":-47.839999999999996,"y":17.534285714285716,"z":219.33333333333334,"a95":0.99,"info":"28/11/2013 at 23:08:57"},{"visible":false,"include":false,"step":"80.0","x":-1039.904761904762,"y":55.45333333333333,"z":-189.34285714285713,"a95":0.99,"info":"28/11/2013 at 23:08:57"},{"visible":false,"include":false,"step":"90.0","x":-176.83809523809524,"y":-94.12380952380951,"z":160.67619047619047,"a95":0.99,"info":"28/11/2013 at 23:08:57"},{"visible":false,"include":false,"step":"100.0","x":-96.14285714285714,"y":48.478095238095236,"z":148.04761904761904,"a95":0.99,"info":"28/11/2013 at 23:08:57"}]},{"version":"v1.1.0","exported":"2016-11-23T12:07:53.141Z","volume":10.5,"added":"2016-11-23T11:22:58.335Z","format":"Utrecht","demagType":"Unknown","strat":"6","patch":1.1,"GEO":[],"TECT":[],"interpreted":false,"name":"PC 1.8","coreAzi":264,"coreDip":29,"bedStrike":356,"bedDip":39,"data":[{"visible":false,"include":false,"step":"0.0","x":-1160.3809523809523,"y":818.3809523809524,"z":-273.87619047619046,"a95":0.99,"info":"28/11/2013 at 23:08:57"},{"visible":true,"include":false,"step":"4.0","x":-859.0761904761904,"y":689.447619047619,"z":-307.3333333333333,"a95":0.99,"info":"28/11/2013 at 23:08:57"},{"visible":true,"include":true,"step":"8.0","x":-552.5333333333334,"y":571.6,"z":-263.3904761904762,"a95":0.99,"info":"28/11/2013 at 23:08:57"},{"visible":true,"include":true,"step":"12.0","x":-276.8,"y":424.34285714285716,"z":-227.24761904761903,"a95":0.99,"info":"28/11/2013 at 23:08:57"},{"visible":true,"include":true,"step":"16.0","x":-132.43809523809523,"y":302.32380952380953,"z":-182.88571428571427,"a95":0.99,"info":"28/11/2013 at 23:08:57"},{"visible":true,"include":true,"step":"20.0","x":-29.726666666666667,"y":248.69523809523812,"z":-162.03809523809525,"a95":0.99,"info":"28/11/2013 at 23:08:57"},{"visible":true,"include":true,"step":"25.0","x":39.854285714285716,"y":198.12380952380954,"z":-148.5047619047619,"a95":0.99,"info":"28/11/2013 at 23:08:57"},{"visible":true,"include":false,"step":"30.0","x":100.78095238095239,"y":165.1904761904762,"z":-50.28000000000001,"a95":0.99,"info":"28/11/2013 at 23:08:57"},{"visible":true,"include":false,"step":"35.0","x":11.07047619047619,"y":176.06666666666666,"z":-19.816190476190474,"a95":0.99,"info":"28/11/2013 at 23:08:57"},{"visible":true,"include":false,"step":"40.0","x":60.60857142857143,"y":234.45714285714288,"z":-38.72190476190476,"a95":0.99,"info":"28/11/2013 at 23:08:57"},{"visible":true,"include":false,"step":"45.0","x":95.54285714285714,"y":248.97142857142856,"z":-26.51047619047619,"a95":0.99,"info":"28/11/2013 at 23:08:57"},{"visible":true,"include":false,"step":"50.0","x":20.283809523809524,"y":146.0952380952381,"z":2.782285714285714,"a95":0.99,"info":"28/11/2013 at 23:08:57"},{"visible":false,"include":false,"step":"60.0","x":32.79238095238095,"y":210.75238095238097,"z":10.353333333333333,"a95":0.99,"info":"28/11/2013 at 23:08:57"},{"visible":false,"include":false,"step":"70.0","x":190.36190476190475,"y":73.20380952380953,"z":-6.4788571428571435,"a95":0.99,"info":"28/11/2013 at 23:08:57"},{"visible":false,"include":false,"step":"80.0","x":550.5428571428571,"y":-31.039047619047622,"z":240.6095238095238,"a95":0.99,"info":"28/11/2013 at 23:08:57"},{"visible":false,"include":false,"step":"90.0","x":-31.059047619047618,"y":6.033904761904762,"z":-48.78857142857142,"a95":0.99,"info":"28/11/2013 at 23:08:57"},{"visible":false,"include":false,"step":"100.0","x":16.705714285714286,"y":196.71428571428572,"z":85.01714285714286,"a95":0.99,"info":"28/11/2013 at 23:08:57"}]},{"version":"v1.1.0","exported":"2016-11-23T12:07:53.141Z","volume":10.5,"added":"2016-11-23T11:22:58.335Z","format":"Utrecht","demagType":"Unknown","strat":null,"patch":1.1,"GEO":[{"dec":278.7305662010066,"inc":-13.053622754051123,"MAD":4.236358485417064,"cm":[3.552713678800501e-15,-1.509903313490213e-14,0],"intensity":735.5624623744893,"type":"GC","origin":false,"forced":true,"remark":"","nSteps":5,"minStep":"80","maxStep":"225","steps":["80","150","180","200","225"],"group":"None","version":"v1.1.0"}],"TECT":[{"dec":99.70040968349906,"inc":-24.989934857288443,"MAD":4.236358485416948,"cm":[2.1316282072803006e-14,1.3655743202889425e-14,1.7763568394002505e-15],"intensity":735.5624623744892,"type":"GC","origin":false,"forced":true,"remark":"","nSteps":5,"minStep":"80","maxStep":"225","steps":["80","150","180","200","225"],"group":"None","version":"v1.1.0"}],"interpreted":true,"name":"PC 1.9","coreAzi":276,"coreDip":40,"bedStrike":356,"bedDip":39,"data":[{"visible":false,"include":false,"step":"20","x":-322.95238095238096,"y":597.8095238095239,"z":646.3809523809524,"a95":2.1,"info":"\"13-11-02\" at \"18:39\""},{"visible":true,"include":true,"step":"80","x":-286,"y":437.7142857142857,"z":345.04761904761904,"a95":2.2,"info":"\"13-11-03\" at \"15:01\""},{"visible":true,"include":true,"step":"150","x":-15.619047619047619,"y":241.04761904761904,"z":7.428571428571429,"a95":2,"info":"\"13-11-04\" at \"12:22\""},{"visible":true,"include":true,"step":"180","x":25.333333333333332,"y":213.8095238095238,"z":-27.523809523809526,"a95":2.1,"info":"\"13-11-05\" at \"07:32\""},{"visible":true,"include":true,"step":"200","x":15.714285714285714,"y":222.85714285714286,"z":-66,"a95":2.1,"info":"\"13-11-05\" at \"12:02\""},{"visible":true,"include":true,"step":"225","x":31.333333333333332,"y":186.95238095238096,"z":-51.80952380952381,"a95":3.5,"info":"\"13-11-05\" at \"16:41\""},{"visible":true,"include":false,"step":"250","x":82.95238095238095,"y":172.66666666666666,"z":-50.76190476190476,"a95":2.1,"info":"\"13-11-06\" at \"10:26\""},{"visible":true,"include":false,"step":"275","x":79.33333333333333,"y":166.38095238095238,"z":-2.0952380952380953,"a95":2,"info":"\"13-11-06\" at \"15:18\""},{"visible":true,"include":false,"step":"300","x":106.95238095238095,"y":179.04761904761904,"z":-3.619047619047619,"a95":2.3,"info":"\"13-11-07\" at \"03:55\""},{"visible":true,"include":false,"step":"320","x":98.19047619047619,"y":136.38095238095238,"z":33.61904761904762,"a95":3.3,"info":"\"13-11-07\" at \"07:18\""},{"visible":true,"include":false,"step":"340","x":69.80952380952381,"y":159.23809523809524,"z":55.523809523809526,"a95":2.3,"info":"\"13-11-07\" at \"11:27\""},{"visible":true,"include":false,"step":"380","x":98.28571428571429,"y":102.76190476190476,"z":130.0952380952381,"a95":3.8,"info":"\"13-11-08\" at \"10:12\""},{"visible":true,"include":false,"step":"420","x":75.61904761904762,"y":125.71428571428571,"z":166.0952380952381,"a95":5.1,"info":"\"13-11-08\" at \"13:59\""},{"visible":false,"include":false,"step":"450","x":107.42857142857143,"y":104.0952380952381,"z":220.85714285714286,"a95":5.9,"info":"\"13-11-08\" at \"19:02\""},{"visible":false,"include":false,"step":"500","x":125.14285714285714,"y":123.14285714285714,"z":187.61904761904762,"a95":5.5,"info":"\"13-11-10\" at \"11:04\""},{"visible":false,"include":false,"step":"530","x":113.04761904761905,"y":66.76190476190476,"z":211.04761904761904,"a95":6.2,"info":"\"13-11-10\" at \"13:55\""},{"visible":false,"include":false,"step":"560","x":-269.6190476190476,"y":339.8095238095238,"z":138.1904761904762,"a95":5,"info":"\"13-11-10\" at \"23:03\""}]},{"version":"v1.1.0","exported":"2016-11-23T12:07:53.141Z","volume":10.5,"added":"2016-11-23T11:22:58.336Z","format":"Utrecht","demagType":"Unknown","strat":"7","patch":1.1,"GEO":[],"TECT":[],"interpreted":false,"name":"PC 1.10","coreAzi":305,"coreDip":13,"bedStrike":356,"bedDip":39,"data":[{"visible":false,"include":false,"step":"0.0","x":756.7904761904762,"y":598.7047619047619,"z":941.9714285714286,"a95":0.99,"info":"28/11/2013 at 23:08:57"},{"visible":true,"include":true,"step":"4.0","x":739.6666666666666,"y":455.2095238095238,"z":738.3619047619047,"a95":0.99,"info":"28/11/2013 at 23:08:57"},{"visible":true,"include":true,"step":"8.0","x":639.9142857142857,"y":231.45714285714288,"z":477.1904761904762,"a95":0.99,"info":"28/11/2013 at 23:08:57"},{"visible":true,"include":true,"step":"12.0","x":504.00952380952384,"y":46.65809523809524,"z":294.70476190476194,"a95":0.99,"info":"28/11/2013 at 23:08:57"},{"visible":true,"include":true,"step":"16.0","x":377.56190476190477,"y":-85.28095238095239,"z":208,"a95":0.99,"info":"28/11/2013 at 23:08:57"},{"visible":true,"include":false,"step":"20.0","x":284.3333333333333,"y":-119.94285714285715,"z":137.17142857142858,"a95":0.99,"info":"28/11/2013 at 23:08:57"},{"visible":true,"include":false,"step":"25.0","x":197.1809523809524,"y":-116.88571428571429,"z":152.67619047619047,"a95":0.99,"info":"28/11/2013 at 23:08:57"},{"visible":true,"include":false,"step":"30.0","x":218.93333333333334,"y":-28.872380952380954,"z":126.34285714285713,"a95":0.99,"info":"28/11/2013 at 23:08:57"},{"visible":true,"include":false,"step":"35.0","x":143.36190476190475,"y":-83.50571428571428,"z":110.23809523809524,"a95":0.99,"info":"28/11/2013 at 23:08:57"},{"visible":true,"include":false,"step":"40.0","x":97.04761904761905,"y":-40.84952380952381,"z":135.46666666666667,"a95":0.99,"info":"28/11/2013 at 23:08:57"},{"visible":true,"include":false,"step":"45.0","x":153.11428571428573,"y":33.60095238095238,"z":88.52000000000001,"a95":0.99,"info":"28/11/2013 at 23:08:57"},{"visible":true,"include":false,"step":"50.0","x":88.83619047619047,"y":-22.9,"z":154.48571428571427,"a95":0.99,"info":"28/11/2013 at 23:08:57"},{"visible":false,"include":false,"step":"60.0","x":37.126666666666665,"y":101.53333333333333,"z":116.67619047619047,"a95":0.99,"info":"28/11/2013 at 23:08:57"},{"visible":false,"include":false,"step":"70.0","x":144.55238095238096,"y":-0.6730285714285714,"z":33.56476190476191,"a95":0.99,"info":"28/11/2013 at 23:08:57"},{"visible":false,"include":false,"step":"80.0","x":-102.97142857142858,"y":-19.742857142857144,"z":50.09809523809523,"a95":0.99,"info":"28/11/2013 at 23:08:57"},{"visible":false,"include":false,"step":"90.0","x":-3.8946666666666667,"y":168.07619047619048,"z":-251.97142857142856,"a95":0.99,"info":"28/11/2013 at 23:08:57"},{"visible":false,"include":false,"step":"100.0","x":119.71428571428571,"y":134.48571428571427,"z":115.87619047619049,"a95":0.99,"info":"28/11/2013 at 23:08:57"}]},{"version":"v1.1.0","exported":"2016-11-23T12:07:53.141Z","volume":10.5,"added":"2016-11-23T11:22:58.336Z","format":"Utrecht","demagType":"Unknown","strat":"8","patch":1.1,"GEO":[],"TECT":[],"interpreted":false,"name":"PC 1.11","coreAzi":323,"coreDip":18,"bedStrike":356,"bedDip":39,"data":[{"visible":true,"include":false,"step":"0.0","x":-496.95238095238096,"y":516.447619047619,"z":429.7523809523809,"a95":0.99,"info":"28/11/2013 at 23:08:57"},{"visible":true,"include":true,"step":"4.0","x":-298.22857142857146,"y":405.99047619047616,"z":351.5238095238095,"a95":0.99,"info":"28/11/2013 at 23:08:57"},{"visible":true,"include":true,"step":"8.0","x":-91.35142857142857,"y":280.35238095238094,"z":307.1047619047619,"a95":0.99,"info":"28/11/2013 at 23:08:57"},{"visible":true,"include":true,"step":"12.0","x":76.07428571428571,"y":176.8190476190476,"z":263.37142857142857,"a95":0.99,"info":"28/11/2013 at 23:08:57"},{"visible":true,"include":true,"step":"16.0","x":169.04761904761904,"y":71.31142857142856,"z":218.13333333333335,"a95":0.99,"info":"28/11/2013 at 23:08:57"},{"visible":true,"include":false,"step":"20.0","x":168.1904761904762,"y":35.95619047619048,"z":177.78095238095239,"a95":0.99,"info":"28/11/2013 at 23:08:57"},{"visible":true,"include":false,"step":"25.0","x":185.9142857142857,"y":-21.861904761904764,"z":203.16190476190474,"a95":0.99,"info":"28/11/2013 at 23:08:57"},{"visible":true,"include":false,"step":"30.0","x":142.78095238095239,"y":6.028761904761905,"z":220.05714285714285,"a95":0.99,"info":"28/11/2013 at 23:08:57"},{"visible":true,"include":false,"step":"35.0","x":64.77238095238096,"y":-40.584761904761905,"z":193.77142857142857,"a95":0.99,"info":"28/11/2013 at 23:08:57"},{"visible":true,"include":false,"step":"40.0","x":25.153333333333336,"y":-9.353238095238096,"z":176.88571428571427,"a95":0.99,"info":"28/11/2013 at 23:08:57"},{"visible":true,"include":false,"step":"45.0","x":35.70666666666667,"y":2.6696190476190473,"z":150.6952380952381,"a95":0.99,"info":"28/11/2013 at 23:08:57"},{"visible":true,"include":false,"step":"50.0","x":-35.76761904761905,"y":-19.866666666666667,"z":190.57142857142858,"a95":0.99,"info":"28/11/2013 at 23:08:57"},{"visible":false,"include":false,"step":"60.0","x":-56.932380952380946,"y":11.502857142857144,"z":121.32380952380953,"a95":0.99,"info":"28/11/2013 at 23:08:57"},{"visible":false,"include":false,"step":"70.0","x":-89.04761904761905,"y":89.7752380952381,"z":157.94285714285715,"a95":0.99,"info":"28/11/2013 at 23:08:57"},{"visible":false,"include":false,"step":"80.0","x":-325.3619047619048,"y":-89.12952380952382,"z":-0.031481904761904766,"a95":0.99,"info":"28/11/2013 at 23:08:57"},{"visible":false,"include":false,"step":"90.0","x":-98.76190476190476,"y":76.89714285714285,"z":-81.69238095238094,"a95":0.99,"info":"28/11/2013 at 23:08:57"},{"visible":false,"include":false,"step":"100.0","x":-20.654285714285713,"y":66.62952380952382,"z":134.6952380952381,"a95":0.99,"info":"28/11/2013 at 23:08:57"}]},{"version":"v1.1.0","exported":"2016-11-23T12:07:53.141Z","volume":10.5,"added":"2016-11-23T11:22:58.336Z","format":"Utrecht","demagType":"Unknown","strat":"1","patch":1.1,"GEO":[],"TECT":[],"interpreted":false,"name":"PC 1.12A","coreAzi":307,"coreDip":20,"bedStrike":356,"bedDip":39,"data":[{"visible":true,"include":false,"step":"0.0","x":-464.2476190476191,"y":1088.4761904761904,"z":1860.3809523809523,"a95":0.99,"info":"29/11/2013 at 04:49:30"},{"visible":true,"include":true,"step":"4.0","x":-303.5904761904762,"y":868.1142857142858,"z":1527.7142857142858,"a95":0.99,"info":"29/11/2013 at 04:49:30"},{"visible":true,"include":true,"step":"8.0","x":-87.40857142857142,"y":655.7333333333333,"z":1106.095238095238,"a95":0.99,"info":"29/11/2013 at 04:49:30"},{"visible":true,"include":true,"step":"12.0","x":39.857142857142854,"y":487.39047619047625,"z":741.895238095238,"a95":0.99,"info":"29/11/2013 at 04:49:30"},{"visible":true,"include":true,"step":"16.0","x":127.62857142857142,"y":369.12380952380954,"z":512.8,"a95":0.99,"info":"29/11/2013 at 04:49:30"},{"visible":true,"include":true,"step":"20.0","x":181.25714285714287,"y":251.53333333333333,"z":370.4,"a95":0.99,"info":"29/11/2013 at 04:49:30"},{"visible":true,"include":false,"step":"25.0","x":189.04761904761904,"y":199.8,"z":270.43809523809523,"a95":0.99,"info":"29/11/2013 at 04:49:30"},{"visible":true,"include":false,"step":"30.0","x":191.82857142857142,"y":187.46666666666667,"z":180.8190476190476,"a95":0.99,"info":"29/11/2013 at 04:49:30"},{"visible":true,"include":false,"step":"35.0","x":67.52857142857142,"y":108.45714285714286,"z":168.66666666666666,"a95":0.99,"info":"29/11/2013 at 04:49:30"},{"visible":true,"include":false,"step":"40.0","x":137.7904761904762,"y":127.1047619047619,"z":130.68571428571428,"a95":0.99,"info":"29/11/2013 at 04:49:30"},{"visible":true,"include":false,"step":"45.0","x":87.86380952380952,"y":153.34285714285713,"z":185.9142857142857,"a95":0.99,"info":"29/11/2013 at 04:49:30"},{"visible":true,"include":false,"step":"50.0","x":25.079047619047618,"y":67.77333333333334,"z":154.8952380952381,"a95":0.99,"info":"29/11/2013 at 04:49:30"},{"visible":false,"include":false,"step":"60.0","x":-35.843809523809526,"y":156.07619047619048,"z":111.43809523809523,"a95":0.99,"info":"29/11/2013 at 04:49:30"},{"visible":false,"include":false,"step":"70.0","x":51.65428571428571,"y":186.83809523809524,"z":148.7904761904762,"a95":0.99,"info":"29/11/2013 at 04:49:30"},{"visible":false,"include":false,"step":"80.0","x":-254.83809523809526,"y":31.026666666666664,"z":252.26666666666668,"a95":0.99,"info":"29/11/2013 at 04:49:30"},{"visible":false,"include":false,"step":"90.0","x":-83.06285714285714,"y":144.96190476190475,"z":32.30380952380953,"a95":0.99,"info":"29/11/2013 at 04:49:30"},{"visible":false,"include":false,"step":"100.0","x":27.432380952380953,"y":133.13333333333335,"z":111.55238095238094,"a95":0.99,"info":"29/11/2013 at 04:49:30"}]},{"version":"v1.1.0","exported":"2016-11-23T12:07:53.142Z","volume":10.5,"added":"2016-11-23T11:22:58.336Z","format":"Utrecht","demagType":"Unknown","strat":null,"patch":1.1,"GEO":[],"TECT":[],"interpreted":false,"name":"PC 1.13A","coreAzi":304,"coreDip":15,"bedStrike":356,"bedDip":39,"data":[{"visible":false,"include":false,"step":"20","x":-473.7142857142857,"y":1059.047619047619,"z":993.047619047619,"a95":2.1,"info":"\"13-11-02\" at \"18:42\""},{"visible":true,"include":true,"step":"80","x":-403.6190476190476,"y":672.952380952381,"z":752,"a95":2.3,"info":"\"13-11-03\" at \"15:03\""},{"visible":true,"include":true,"step":"150","x":25.904761904761905,"y":397.23809523809524,"z":468.76190476190476,"a95":2.4,"info":"\"13-11-04\" at \"12:25\""},{"visible":true,"include":true,"step":"180","x":95.33333333333333,"y":336.57142857142856,"z":422,"a95":3.1,"info":"\"13-11-05\" at \"07:34\""},{"visible":true,"include":true,"step":"200","x":132.47619047619048,"y":300.0952380952381,"z":380.6666666666667,"a95":3.2,"info":"\"13-11-05\" at \"12:04\""},{"visible":true,"include":false,"step":"225","x":133.23809523809524,"y":256.6666666666667,"z":388.2857142857143,"a95":3.6,"info":"\"13-11-05\" at \"16:43\""},{"visible":true,"include":false,"step":"250","x":152.28571428571428,"y":224.0952380952381,"z":370.95238095238096,"a95":3.3,"info":"\"13-11-06\" at \"10:28\""},{"visible":true,"include":false,"step":"275","x":97.71428571428571,"y":184.1904761904762,"z":408.76190476190476,"a95":3.6,"info":"\"13-11-06\" at \"15:22\""},{"visible":true,"include":false,"step":"300","x":130.0952380952381,"y":155.9047619047619,"z":376.95238095238096,"a95":3.4,"info":"\"13-11-07\" at \"03:57\""},{"visible":true,"include":false,"step":"320","x":114.57142857142857,"y":93.71428571428571,"z":420.95238095238096,"a95":3.5,"info":"\"13-11-07\" at \"07:21\""},{"visible":true,"include":false,"step":"340","x":111.14285714285714,"y":120.38095238095238,"z":411.23809523809524,"a95":3.4,"info":"\"13-11-07\" at \"11:29\""},{"visible":true,"include":false,"step":"380","x":69.23809523809524,"y":42,"z":456.76190476190476,"a95":4.3,"info":"\"13-11-08\" at \"10:14\""},{"visible":true,"include":false,"step":"420","x":2.0952380952380953,"y":22.19047619047619,"z":442.3809523809524,"a95":6.6,"info":"\"13-11-08\" at \"14:01\""},{"visible":false,"include":false,"step":"450","x":-9.238095238095237,"y":51.42857142857143,"z":469.23809523809524,"a95":6.7,"info":"\"13-11-08\" at \"19:04\""},{"visible":false,"include":false,"step":"500","x":51.333333333333336,"y":35.333333333333336,"z":403.7142857142857,"a95":6.7,"info":"\"13-11-10\" at \"11:06\""},{"visible":false,"include":false,"step":"530","x":50.95238095238095,"y":-83.14285714285714,"z":492.4761904761905,"a95":6.8,"info":"\"13-11-10\" at \"13:58\""},{"visible":false,"include":false,"step":"560","x":-265.7142857142857,"y":213.61904761904762,"z":-1.4285714285714286,"a95":4.8,"info":"\"13-11-10\" at \"23:07\""}]},{"version":"v1.1.0","exported":"2016-11-23T12:07:53.142Z","volume":10.5,"added":"2016-11-23T11:22:58.336Z","format":"Utrecht","demagType":"Unknown","strat":"2","patch":1.1,"GEO":[],"TECT":[],"interpreted":false,"name":"PC 1.13B","coreAzi":304,"coreDip":15,"bedStrike":356,"bedDip":39,"data":[{"visible":true,"include":false,"step":"0.0","x":-539.0666666666666,"y":1359.3333333333333,"z":1177.7142857142858,"a95":0.99,"info":"29/11/2013 at 04:49:30"},{"visible":true,"include":false,"step":"4.0","x":-469.3619047619048,"y":1134.1904761904761,"z":951.6761904761905,"a95":0.99,"info":"29/11/2013 at 04:49:30"},{"visible":true,"include":false,"step":"8.0","x":-354.7904761904762,"y":881.7619047619048,"z":663.4857142857143,"a95":0.99,"info":"29/11/2013 at 04:49:30"},{"visible":true,"include":false,"step":"12.0","x":-168.07619047619048,"y":634.2571428571429,"z":475.3714285714285,"a95":0.99,"info":"29/11/2013 at 04:49:30"},{"visible":true,"include":false,"step":"16.0","x":-82.66761904761904,"y":482.20000000000005,"z":340.8857142857143,"a95":0.99,"info":"29/11/2013 at 04:49:30"},{"visible":true,"include":false,"step":"20.0","x":-53.691428571428574,"y":397.6,"z":272.85714285714283,"a95":0.99,"info":"29/11/2013 at 04:49:30"},{"visible":true,"include":false,"step":"25.0","x":3.0727619047619052,"y":275.4761904761905,"z":249.66666666666666,"a95":0.99,"info":"29/11/2013 at 04:49:30"},{"visible":true,"include":false,"step":"30.0","x":25.459999999999997,"y":244.25714285714284,"z":264.247619047619,"a95":0.99,"info":"29/11/2013 at 04:49:30"},{"visible":true,"include":false,"step":"35.0","x":-31.68857142857143,"y":201.82857142857142,"z":176.2,"a95":0.99,"info":"29/11/2013 at 04:49:30"},{"visible":true,"include":false,"step":"40.0","x":-35.425714285714285,"y":210.51428571428573,"z":150.11428571428573,"a95":0.99,"info":"29/11/2013 at 04:49:30"},{"visible":true,"include":false,"step":"45.0","x":0.6880190476190476,"y":250.9238095238095,"z":180.22857142857143,"a95":0.99,"info":"29/11/2013 at 04:49:30"},{"visible":true,"include":false,"step":"50.0","x":-67.55714285714286,"y":205.69523809523812,"z":166.42857142857142,"a95":0.99,"info":"29/11/2013 at 04:49:30"},{"visible":false,"include":false,"step":"60.0","x":-100.18095238095239,"y":203.28571428571428,"z":149.92380952380952,"a95":0.99,"info":"29/11/2013 at 04:49:30"},{"visible":false,"include":false,"step":"70.0","x":-175.54285714285714,"y":65.93619047619048,"z":202.86666666666665,"a95":0.99,"info":"29/11/2013 at 04:49:30"},{"visible":false,"include":false,"step":"80.0","x":-328.8857142857143,"y":224.82857142857142,"z":53.17714285714286,"a95":0.99,"info":"29/11/2013 at 04:49:30"},{"visible":false,"include":false,"step":"90.0","x":-5.200285714285714,"y":239,"z":100.06666666666668,"a95":0.99,"info":"29/11/2013 at 04:49:30"},{"visible":false,"include":false,"step":"100.0","x":114.61904761904762,"y":13.976190476190476,"z":68.10857142857142,"a95":0.99,"info":"29/11/2013 at 04:49:30"}]},{"version":"v1.1.0","exported":"2016-11-23T12:07:53.142Z","volume":10.5,"added":"2016-11-23T11:22:58.337Z","format":"Utrecht","demagType":"Unknown","strat":"3","patch":1.1,"GEO":[],"TECT":[],"interpreted":false,"name":"PC 1.14","coreAzi":326,"coreDip":17,"bedStrike":356,"bedDip":39,"data":[{"visible":true,"include":false,"step":"0.0","x":-342.8952380952381,"y":610.4380952380952,"z":1448.1904761904761,"a95":0.99,"info":"29/11/2013 at 04:49:30"},{"visible":true,"include":true,"step":"4.0","x":-211.78095238095236,"y":449.39047619047625,"z":1144.3809523809523,"a95":0.99,"info":"29/11/2013 at 04:49:30"},{"visible":true,"include":true,"step":"8.0","x":-55.846666666666664,"y":291.34285714285716,"z":787.4666666666666,"a95":0.99,"info":"29/11/2013 at 04:49:30"},{"visible":true,"include":true,"step":"12.0","x":77.93809523809524,"y":183.65714285714287,"z":545.7809523809524,"a95":0.99,"info":"29/11/2013 at 04:49:30"},{"visible":true,"include":true,"step":"16.0","x":123.66666666666667,"y":74.08095238095238,"z":360.0095238095238,"a95":0.99,"info":"29/11/2013 at 04:49:30"},{"visible":true,"include":true,"step":"20.0","x":146.17142857142858,"y":37.854285714285716,"z":241.23809523809524,"a95":0.99,"info":"29/11/2013 at 04:49:30"},{"visible":true,"include":false,"step":"25.0","x":123,"y":-56.37904761904762,"z":212.46666666666667,"a95":0.99,"info":"29/11/2013 at 04:49:30"},{"visible":true,"include":false,"step":"30.0","x":143.9047619047619,"y":-59.12190476190476,"z":209.23809523809524,"a95":0.99,"info":"29/11/2013 at 04:49:30"},{"visible":true,"include":false,"step":"35.0","x":62.94761904761905,"y":-50.980952380952374,"z":189.78095238095239,"a95":0.99,"info":"29/11/2013 at 04:49:30"},{"visible":true,"include":false,"step":"40.0","x":55.13047619047619,"y":-47.01047619047619,"z":145.94285714285715,"a95":0.99,"info":"29/11/2013 at 04:49:30"},{"visible":true,"include":false,"step":"45.0","x":73.77238095238096,"y":-28.583809523809524,"z":191,"a95":0.99,"info":"29/11/2013 at 04:49:30"},{"visible":true,"include":false,"step":"50.0","x":12.83904761904762,"y":-98.51428571428572,"z":134.0952380952381,"a95":0.99,"info":"29/11/2013 at 04:49:30"},{"visible":false,"include":false,"step":"60.0","x":-50.415238095238095,"y":-18.2,"z":112.0095238095238,"a95":0.99,"info":"29/11/2013 at 04:49:30"},{"visible":false,"include":false,"step":"70.0","x":-33.12571428571429,"y":3.973333333333333,"z":131.75238095238097,"a95":0.99,"info":"29/11/2013 at 04:49:30"},{"visible":false,"include":false,"step":"80.0","x":134.76190476190476,"y":-13.061904761904762,"z":187.95238095238096,"a95":0.99,"info":"29/11/2013 at 04:49:30"},{"visible":false,"include":false,"step":"90.0","x":-75.98190476190476,"y":89.37714285714286,"z":36.02285714285714,"a95":0.99,"info":"29/11/2013 at 04:49:30"},{"visible":false,"include":false,"step":"100.0","x":111.9904761904762,"y":70.09238095238095,"z":108.9904761904762,"a95":0.99,"info":"29/11/2013 at 04:49:30"}]},{"version":"v1.1.0","exported":"2016-11-23T12:07:53.142Z","volume":10.5,"added":"2016-11-23T11:22:58.337Z","format":"Utrecht","demagType":"Unknown","strat":null,"patch":1.1,"GEO":[{"dec":306.5306947351298,"inc":-18.315038630526807,"MAD":1.942355711924443,"cm":[1.9539925233402755e-14,3.552713678800501e-15,0],"intensity":855.786339283002,"type":"GC","origin":false,"forced":true,"remark":"","nSteps":6,"minStep":"80","maxStep":"250","steps":["80","150","180","200","225","250"],"group":"None","version":"v1.1.0"}],"TECT":[{"dec":125.12314839065124,"inc":-12.115208127413316,"MAD":1.9423557119241313,"cm":[1.9539925233402755e-14,-1.199040866595169e-14,3.552713678800501e-15],"intensity":855.786339283002,"type":"GC","origin":false,"forced":true,"remark":"","nSteps":6,"minStep":"80","maxStep":"250","steps":["80","150","180","200","225","250"],"group":"None","version":"v1.1.0"}],"interpreted":true,"name":"PC 1.15A","coreAzi":331,"coreDip":37,"bedStrike":356,"bedDip":39,"data":[{"visible":false,"include":false,"step":"20","x":-127.61904761904762,"y":905.4285714285714,"z":728.4761904761905,"a95":2.1,"info":"\"13-11-02\" at \"18:45\""},{"visible":true,"include":true,"step":"80","x":-8.19047619047619,"y":558.6666666666666,"z":452.2857142857143,"a95":2.2,"info":"\"13-11-03\" at \"15:06\""},{"visible":true,"include":true,"step":"150","x":150.76190476190476,"y":358.6666666666667,"z":56.76190476190476,"a95":2.2,"info":"\"13-11-04\" at \"12:27\""},{"visible":true,"include":true,"step":"180","x":178.85714285714286,"y":308.1904761904762,"z":-37.714285714285715,"a95":2.5,"info":"\"13-11-05\" at \"07:37\""},{"visible":true,"include":true,"step":"200","x":192,"y":308.95238095238096,"z":-76.28571428571429,"a95":2.5,"info":"\"13-11-05\" at \"12:07\""},{"visible":true,"include":true,"step":"225","x":195.71428571428572,"y":252.0952380952381,"z":-97.14285714285714,"a95":3,"info":"\"13-11-05\" at \"16:45\""},{"visible":true,"include":true,"step":"250","x":194.57142857142858,"y":207.42857142857142,"z":-119.52380952380952,"a95":2.2,"info":"\"13-11-06\" at \"10:31\""},{"visible":true,"include":false,"step":"275","x":206.85714285714286,"y":200.1904761904762,"z":-104.47619047619048,"a95":2.5,"info":"\"13-11-06\" at \"15:25\""},{"visible":true,"include":false,"step":"300","x":184.57142857142858,"y":175.8095238095238,"z":-99.04761904761905,"a95":2.3,"info":"\"13-11-07\" at \"03:59\""},{"visible":true,"include":false,"step":"320","x":171.42857142857142,"y":107.9047619047619,"z":-64.28571428571429,"a95":3.2,"info":"\"13-11-07\" at \"07:23\""},{"visible":true,"include":false,"step":"340","x":161.9047619047619,"y":105.61904761904762,"z":-73.04761904761905,"a95":2.4,"info":"\"13-11-07\" at \"11:32\""},{"visible":true,"include":false,"step":"380","x":120.47619047619048,"y":38.95238095238095,"z":2.761904761904762,"a95":3.5,"info":"\"13-11-08\" at \"10:17\""},{"visible":true,"include":false,"step":"420","x":58.08571428571428,"y":-3.0571428571428574,"z":42.15238095238095,"a95":7.5,"info":"\"13-11-08\" at \"14:04\""},{"visible":false,"include":false,"step":"450","x":76.85714285714286,"y":-55.714285714285715,"z":74.66666666666667,"a95":6.5,"info":"\"13-11-08\" at \"19:07\""},{"visible":false,"include":false,"step":"500","x":130,"y":-30.952380952380953,"z":74.57142857142857,"a95":5.2,"info":"\"13-11-10\" at \"11:08\""},{"visible":false,"include":false,"step":"530","x":-18.761904761904763,"y":-155.9047619047619,"z":175.14285714285714,"a95":6,"info":"\"13-11-10\" at \"14:00\""},{"visible":false,"include":false,"step":"560","x":-176.47619047619048,"y":188.76190476190476,"z":-36,"a95":7.8,"info":"\"13-11-10\" at \"23:09\""}]},{"version":"v1.1.0","exported":"2016-11-23T12:07:53.142Z","volume":10.5,"added":"2016-11-23T11:22:58.337Z","format":"Utrecht","demagType":"Unknown","strat":"4","patch":1.1,"GEO":[],"TECT":[],"interpreted":false,"name":"PC 1.15B","coreAzi":330,"coreDip":37,"bedStrike":356,"bedDip":39,"data":[{"visible":true,"include":false,"step":"0.0","x":-275.51428571428573,"y":718,"z":-225.86666666666665,"a95":0.99,"info":"29/11/2013 at 04:49:30"},{"visible":true,"include":true,"step":"4.0","x":-165.77142857142857,"y":603.2476190476191,"z":-160.61904761904762,"a95":0.99,"info":"29/11/2013 at 04:49:30"},{"visible":true,"include":true,"step":"8.0","x":-78.39142857142858,"y":509.1333333333333,"z":-131.32380952380953,"a95":0.99,"info":"29/11/2013 at 04:49:30"},{"visible":true,"include":false,"step":"12.0","x":8.420095238095238,"y":385.95238095238096,"z":-160.7047619047619,"a95":0.99,"info":"29/11/2013 at 04:49:30"},{"visible":true,"include":false,"step":"16.0","x":37.17619047619048,"y":339.35238095238094,"z":-152.9904761904762,"a95":0.99,"info":"29/11/2013 at 04:49:30"},{"visible":true,"include":false,"step":"20.0","x":53.36857142857143,"y":255.57142857142858,"z":-144.2,"a95":0.99,"info":"29/11/2013 at 04:49:30"},{"visible":true,"include":false,"step":"25.0","x":77.63714285714286,"y":208.53333333333333,"z":-128.83809523809524,"a95":0.99,"info":"29/11/2013 at 04:49:30"},{"visible":true,"include":false,"step":"30.0","x":101.34285714285713,"y":184.68571428571428,"z":-86.8552380952381,"a95":0.99,"info":"29/11/2013 at 04:49:30"},{"visible":true,"include":false,"step":"35.0","x":83.04761904761905,"y":132.4952380952381,"z":-119.02857142857142,"a95":0.99,"info":"29/11/2013 at 04:49:30"},{"visible":true,"include":false,"step":"40.0","x":29.127619047619046,"y":137.13333333333335,"z":-73.91809523809523,"a95":0.99,"info":"29/11/2013 at 04:49:30"},{"visible":true,"include":false,"step":"45.0","x":71.16380952380953,"y":95.17714285714285,"z":10.26,"a95":0.99,"info":"29/11/2013 at 04:49:30"},{"visible":true,"include":false,"step":"50.0","x":-41.43142857142857,"y":15.380952380952381,"z":57.28000000000001,"a95":0.99,"info":"29/11/2013 at 04:49:30"},{"visible":false,"include":false,"step":"60.0","x":-37.68857142857143,"y":96.11428571428571,"z":-6.686,"a95":0.99,"info":"29/11/2013 at 04:49:30"},{"visible":false,"include":false,"step":"70.0","x":-40.91142857142857,"y":84.30190476190475,"z":59.881904761904764,"a95":0.99,"info":"29/11/2013 at 04:49:30"},{"visible":false,"include":false,"step":"80.0","x":132.14285714285714,"y":51.957142857142856,"z":26.698095238095238,"a95":0.99,"info":"29/11/2013 at 04:49:30"},{"visible":false,"include":false,"step":"90.0","x":-69.96761904761904,"y":0.6219904761904762,"z":11.540952380952382,"a95":0.99,"info":"29/11/2013 at 04:49:30"},{"visible":false,"include":false,"step":"100.0","x":-94.78190476190477,"y":94.77714285714285,"z":78.87142857142857,"a95":0.99,"info":"29/11/2013 at 04:49:30"}]},{"version":"v1.1.0","exported":"2016-11-23T12:07:53.142Z","volume":10.5,"added":"2016-11-23T11:22:58.337Z","format":"Utrecht","demagType":"Unknown","strat":"5","patch":1.1,"GEO":[{"dec":289.57524011702895,"inc":-30.36706100019369,"MAD":3.0550377795323986,"cm":[-8.881784197001252e-15,0,0],"intensity":1076.8697132285479,"type":"GC","origin":false,"forced":true,"remark":"","nSteps":5,"minStep":"4.0","maxStep":"20.0","steps":["4.0","8.0","12.0","16.0","20.0"],"group":"None","version":"v1.1.0"},{"dec":55.783192395660535,"inc":-52.936674873464696,"MAD":15.360837141077365,"cm":[-5.329070518200751e-15,1.4210854715202004e-14,0],"intensity":380.8642339591591,"type":"dir","forced":true,"remark":"","origin":false,"nSteps":6,"minStep":"20.0","maxStep":"45.0","steps":["20.0","25.0","30.0","35.0","40.0","45.0"],"group":"None","version":"v1.1.0"}],"TECT":[{"dec":106.30340678973539,"inc":-6.014735907757505,"MAD":3.0550377795322268,"cm":[8.526512829121202e-14,-2.8133051444001467e-13,3.907985046680551e-14],"intensity":1076.8697132285477,"type":"GC","origin":false,"forced":true,"remark":"","nSteps":5,"minStep":"4.0","maxStep":"20.0","steps":["4.0","8.0","12.0","16.0","20.0"],"group":"None","version":"v1.1.0"},{"dec":338.1915015847288,"inc":-71.42250757263741,"MAD":15.360837141077377,"cm":[-8.881784197001252e-16,4.440892098500626e-15,-8.881784197001252e-15],"intensity":380.8642339591591,"type":"dir","forced":true,"remark":"","origin":false,"nSteps":6,"minStep":"20.0","maxStep":"45.0","steps":["20.0","25.0","30.0","35.0","40.0","45.0"],"group":"None","version":"v1.1.0"}],"interpreted":true,"name":"PC 1.16B","coreAzi":328,"coreDip":30,"bedStrike":356,"bedDip":39,"data":[{"visible":false,"include":false,"step":"0.0","x":52.5,"y":783.1142857142858,"z":1075.2380952380952,"a95":0.99,"info":"29/11/2013 at 04:49:30"},{"visible":true,"include":false,"step":"4.0","x":99.8952380952381,"y":592.7904761904762,"z":741.7333333333333,"a95":0.99,"info":"29/11/2013 at 04:49:30"},{"visible":true,"include":false,"step":"8.0","x":143.0095238095238,"y":469.60952380952375,"z":400.4095238095238,"a95":0.99,"info":"29/11/2013 at 04:49:30"},{"visible":true,"include":false,"step":"12.0","x":181.98095238095237,"y":363.1142857142857,"z":128.3904761904762,"a95":0.99,"info":"29/11/2013 at 04:49:30"},{"visible":true,"include":false,"step":"16.0","x":198.87619047619046,"y":250.3904761904762,"z":-13.46,"a95":0.99,"info":"29/11/2013 at 04:49:30"},{"visible":true,"include":true,"step":"20.0","x":173.03809523809525,"y":207.26666666666668,"z":-74.60190476190476,"a95":0.99,"info":"29/11/2013 at 04:49:30"},{"visible":true,"include":true,"step":"25.0","x":162.84761904761905,"y":146.54285714285714,"z":-114.57142857142857,"a95":0.99,"info":"29/11/2013 at 04:49:30"},{"visible":true,"include":true,"step":"30.0","x":156.17142857142858,"y":122.15238095238094,"z":-69.29523809523809,"a95":0.99,"info":"29/11/2013 at 04:49:30"},{"visible":true,"include":true,"step":"35.0","x":91.12761904761905,"y":-8.810857142857142,"z":-65.18571428571428,"a95":0.99,"info":"29/11/2013 at 04:49:30"},{"visible":true,"include":true,"step":"40.0","x":97.18095238095238,"y":56.82761904761905,"z":-100.92380952380952,"a95":0.99,"info":"29/11/2013 at 04:49:30"},{"visible":true,"include":true,"step":"45.0","x":105.63809523809525,"y":44.23428571428571,"z":10.224761904761905,"a95":0.99,"info":"29/11/2013 at 04:49:30"},{"visible":true,"include":false,"step":"50.0","x":-7.702190476190476,"y":-5.368666666666667,"z":23.073333333333334,"a95":0.99,"info":"29/11/2013 at 04:49:30"},{"visible":false,"include":false,"step":"60.0","x":44.285714285714285,"y":85.97428571428571,"z":-15.504761904761907,"a95":0.99,"info":"29/11/2013 at 04:49:30"},{"visible":false,"include":false,"step":"70.0","x":-12.154285714285715,"y":75.47619047619048,"z":-19.625714285714285,"a95":0.99,"info":"29/11/2013 at 04:49:30"},{"visible":false,"include":false,"step":"80.0","x":228.31428571428575,"y":-58.567619047619054,"z":126.85714285714286,"a95":0.99,"info":"29/11/2013 at 04:49:30"},{"visible":false,"include":false,"step":"90.0","x":-23.557142857142857,"y":102.03809523809525,"z":-129.2761904761905,"a95":0.99,"info":"29/11/2013 at 04:49:30"},{"visible":false,"include":false,"step":"100.0","x":-73.71619047619048,"y":155.8952380952381,"z":68.64952380952381,"a95":0.99,"info":"29/11/2013 at 04:49:30"}]},{"version":"v1.1.0","exported":"2016-11-23T12:07:53.142Z","volume":10.5,"added":"2016-11-23T11:22:58.337Z","format":"Utrecht","demagType":"Unknown","strat":"6","patch":1.1,"GEO":[{"dec":312.46517549573366,"inc":-24.171894027994103,"MAD":3.940799976231614,"cm":[-1.1102230246251565e-14,-6.217248937900877e-15,0],"intensity":370.67467595834677,"type":"GC","origin":false,"forced":true,"remark":"","nSteps":6,"minStep":"4.0","maxStep":"25.0","steps":["4.0","8.0","12.0","16.0","20.0","25.0"],"group":"None","version":"v1.1.0"},{"dec":90.63085841192009,"inc":-65.18799881934684,"MAD":8.904923087555876,"cm":[-2.098321516541546e-14,-2.6645352591003757e-15,0],"intensity":229.1785888364638,"type":"dir","forced":true,"remark":"","origin":false,"nSteps":3,"minStep":"25.0","maxStep":"35.0","steps":["25.0","30.0","35.0"],"group":"None","version":"v1.1.0"}],"TECT":[{"dec":127.55774547040659,"inc":-4.430182084587509,"MAD":3.9407999762318324,"cm":[-3.8191672047105385e-14,2.55351295663786e-14,1.7763568394002505e-15],"intensity":370.67467595834677,"type":"GC","origin":false,"forced":true,"remark":"","nSteps":6,"minStep":"4.0","maxStep":"25.0","steps":["4.0","8.0","12.0","16.0","20.0","25.0"],"group":"None","version":"v1.1.0"},{"dec":258.16363576301876,"inc":-75.61185615395475,"MAD":8.904923087555886,"cm":[-2.1760371282653068e-14,-7.105427357601002e-15,0],"intensity":229.17858883646383,"type":"dir","forced":true,"remark":"","origin":false,"nSteps":3,"minStep":"25.0","maxStep":"35.0","steps":["25.0","30.0","35.0"],"group":"None","version":"v1.1.0"}],"interpreted":true,"name":"PC 1.17B","coreAzi":280,"coreDip":48,"bedStrike":356,"bedDip":39,"data":[{"visible":true,"include":false,"step":"0.0","x":-329.3047619047619,"y":318.4761904761905,"z":528.0095238095239,"a95":0.99,"info":"29/11/2013 at 04:49:30"},{"visible":true,"include":false,"step":"4.0","x":-215.50476190476192,"y":252.50476190476192,"z":304.14285714285717,"a95":0.99,"info":"29/11/2013 at 04:49:30"},{"visible":true,"include":false,"step":"8.0","x":-132.93333333333334,"y":183.95238095238096,"z":81.52285714285715,"a95":0.99,"info":"29/11/2013 at 04:49:30"},{"visible":true,"include":false,"step":"12.0","x":-63.325714285714284,"y":132.75238095238097,"z":-69.83047619047619,"a95":0.99,"info":"29/11/2013 at 04:49:30"},{"visible":true,"include":false,"step":"16.0","x":-13.760952380952382,"y":69.06666666666668,"z":-139.8761904761905,"a95":0.99,"info":"29/11/2013 at 04:49:30"},{"visible":true,"include":false,"step":"20.0","x":6.583333333333333,"y":52.163809523809526,"z":-115.97142857142858,"a95":0.99,"info":"29/11/2013 at 04:49:30"},{"visible":true,"include":true,"step":"25.0","x":33.210476190476186,"y":28.078095238095237,"z":-144.63809523809525,"a95":0.99,"info":"29/11/2013 at 04:49:30"},{"visible":true,"include":true,"step":"30.0","x":44.801904761904765,"y":-11.72,"z":-107.9904761904762,"a95":0.99,"info":"29/11/2013 at 04:49:30"},{"visible":true,"include":true,"step":"35.0","x":30.73619047619048,"y":0.25692380952380955,"z":-73.60666666666667,"a95":0.99,"info":"29/11/2013 at 04:49:30"},{"visible":true,"include":false,"step":"40.0","x":68.31809523809524,"y":60.697142857142865,"z":-44.976190476190474,"a95":0.99,"info":"29/11/2013 at 04:49:30"},{"visible":true,"include":false,"step":"45.0","x":54.820952380952384,"y":56.13714285714286,"z":13.227619047619047,"a95":0.99,"info":"29/11/2013 at 04:49:30"},{"visible":true,"include":false,"step":"50.0","x":26.288571428571426,"y":4.051142857142857,"z":23.444761904761904,"a95":0.99,"info":"29/11/2013 at 04:49:30"},{"visible":false,"include":false,"step":"60.0","x":-67.8952380952381,"y":37.96857142857143,"z":-28.227619047619047,"a95":0.99,"info":"29/11/2013 at 04:49:30"},{"visible":false,"include":false,"step":"70.0","x":-22.898095238095237,"y":130.85714285714286,"z":77.88857142857144,"a95":0.99,"info":"29/11/2013 at 04:49:30"},{"visible":false,"include":false,"step":"80.0","x":-19.004761904761907,"y":102.67619047619047,"z":50.92476190476191,"a95":0.99,"info":"29/11/2013 at 04:49:30"},{"visible":false,"include":false,"step":"90.0","x":56.2952380952381,"y":66.0647619047619,"z":-43.10666666666667,"a95":0.99,"info":"29/11/2013 at 04:49:30"},{"visible":false,"include":false,"step":"100.0","x":60.67238095238095,"y":21.031428571428574,"z":49.06571428571429,"a95":0.99,"info":"29/11/2013 at 04:49:30"}]},{"version":"v1.1.0","exported":"2016-11-23T12:07:53.142Z","volume":10.5,"added":"2016-11-23T11:22:58.338Z","format":"Utrecht","demagType":"Unknown","strat":"7","patch":1.1,"GEO":[{"dec":276.09284821046776,"inc":-15.166825350604238,"MAD":3.5344403858021924,"cm":[7.105427357601002e-15,2.4868995751603507e-14,0],"intensity":1208.7921852213285,"type":"GC","origin":false,"forced":true,"remark":"","nSteps":5,"minStep":"4.0","maxStep":"20.0","steps":["4.0","8.0","12.0","16.0","20.0"],"group":"None","version":"v1.1.0"}],"TECT":[{"dec":96.60770711505006,"inc":-23.24573857448599,"MAD":3.534440385802252,"cm":[-1.4210854715202004e-14,1.2434497875801753e-14,-2.842170943040401e-14],"intensity":1208.7921852213283,"type":"GC","origin":false,"forced":true,"remark":"","nSteps":5,"minStep":"4.0","maxStep":"20.0","steps":["4.0","8.0","12.0","16.0","20.0"],"group":"None","version":"v1.1.0"}],"interpreted":true,"name":"PC 1.18","coreAzi":341,"coreDip":20,"bedStrike":356,"bedDip":39,"data":[{"visible":false,"include":false,"step":"0.0","x":164.56190476190477,"y":485.1142857142857,"z":1241.3333333333333,"a95":0.99,"info":"29/11/2013 at 04:49:30"},{"visible":true,"include":true,"step":"4.0","x":238.49523809523808,"y":390.25714285714287,"z":887.352380952381,"a95":0.99,"info":"29/11/2013 at 04:49:30"},{"visible":true,"include":true,"step":"8.0","x":339.0190476190476,"y":345.9238095238095,"z":518.1333333333333,"a95":0.99,"info":"29/11/2013 at 04:49:30"},{"visible":true,"include":true,"step":"12.0","x":386.752380952381,"y":276.8952380952381,"z":275.96190476190475,"a95":0.99,"info":"29/11/2013 at 04:49:30"},{"visible":true,"include":true,"step":"16.0","x":383.51428571428573,"y":197.52380952380952,"z":124.22857142857144,"a95":0.99,"info":"29/11/2013 at 04:49:30"},{"visible":true,"include":true,"step":"20.0","x":350.1904761904762,"y":150.13333333333335,"z":19.623809523809523,"a95":0.99,"info":"29/11/2013 at 04:49:30"},{"visible":true,"include":false,"step":"25.0","x":284.64761904761906,"y":100.32380952380953,"z":-2.126857142857143,"a95":0.99,"info":"29/11/2013 at 04:49:30"},{"visible":true,"include":false,"step":"30.0","x":272.8,"y":88.3742857142857,"z":-7.643047619047619,"a95":0.99,"info":"29/11/2013 at 04:49:30"},{"visible":true,"include":false,"step":"35.0","x":208.17142857142858,"y":5.509714285714286,"z":-82.57619047619048,"a95":0.99,"info":"29/11/2013 at 04:49:30"},{"visible":true,"include":false,"step":"40.0","x":182.98095238095237,"y":47.11904761904762,"z":-28.39714285714286,"a95":0.99,"info":"29/11/2013 at 04:49:30"},{"visible":true,"include":false,"step":"45.0","x":113.62857142857142,"y":55.078095238095244,"z":9.668571428571429,"a95":0.99,"info":"29/11/2013 at 04:49:30"},{"visible":true,"include":false,"step":"50.0","x":78.20571428571428,"y":-14.075238095238095,"z":-12.484761904761905,"a95":0.99,"info":"29/11/2013 at 04:49:30"},{"visible":false,"include":false,"step":"60.0","x":60.46190476190476,"y":47.54571428571429,"z":-57.50285714285714,"a95":0.99,"info":"29/11/2013 at 04:49:30"},{"visible":false,"include":false,"step":"70.0","x":4.408285714285714,"y":-2.8798095238095236,"z":118.68571428571428,"a95":0.99,"info":"29/11/2013 at 04:49:30"},{"visible":false,"include":false,"step":"80.0","x":-234.77142857142857,"y":52.201904761904764,"z":-3.848952380952381,"a95":0.99,"info":"29/11/2013 at 04:49:30"},{"visible":false,"include":false,"step":"90.0","x":3.654190476190476,"y":172.93333333333334,"z":-263.8,"a95":0.99,"info":"29/11/2013 at 04:49:30"},{"visible":false,"include":false,"step":"100.0","x":-15.697142857142856,"y":43.505714285714284,"z":31.34095238095238,"a95":0.99,"info":"29/11/2013 at 04:49:30"}]},{"version":"v1.1.0","exported":"2016-11-23T12:07:53.142Z","volume":10.5,"added":"2016-11-23T11:22:58.338Z","format":"Utrecht","demagType":"Unknown","strat":"8","patch":1.1,"GEO":[{"dec":78.2356009572892,"inc":-66.37878200962889,"MAD":7.673120750063951,"cm":[-1.1546319456101628e-14,5.329070518200751e-15,0],"intensity":475.3578686801132,"type":"dir","forced":true,"remark":"","origin":false,"nSteps":6,"minStep":"20.0","maxStep":"45.0","steps":["20.0","25.0","30.0","35.0","40.0","45.0"],"group":"None","version":"v1.1.0"}],"TECT":[{"dec":277.41721518521194,"inc":-74.12942094019239,"MAD":7.673120750063958,"cm":[-1.9984014443252818e-14,-1.3322676295501878e-15,-5.329070518200751e-15],"intensity":475.3578686801132,"type":"dir","forced":true,"remark":"","origin":false,"nSteps":6,"minStep":"20.0","maxStep":"45.0","steps":["20.0","25.0","30.0","35.0","40.0","45.0"],"group":"None","version":"v1.1.0"}],"interpreted":true,"name":"PC 1.20A","coreAzi":345,"coreDip":32,"bedStrike":356,"bedDip":39,"data":[{"visible":true,"include":false,"step":"0.0","x":-17.040952380952383,"y":298.2190476190476,"z":-434.9428571428571,"a95":0.99,"info":"29/11/2013 at 04:49:30"},{"visible":true,"include":false,"step":"4.0","x":105.4952380952381,"y":264.9142857142857,"z":-347.64761904761906,"a95":0.99,"info":"29/11/2013 at 04:49:30"},{"visible":true,"include":false,"step":"8.0","x":201.48571428571427,"y":234.96190476190475,"z":-296.74285714285713,"a95":0.99,"info":"29/11/2013 at 04:49:30"},{"visible":true,"include":false,"step":"12.0","x":270.6380952380952,"y":218.50476190476192,"z":-251.51428571428573,"a95":0.99,"info":"29/11/2013 at 04:49:30"},{"visible":true,"include":false,"step":"16.0","x":275.1714285714286,"y":197,"z":-245.77142857142857,"a95":0.99,"info":"29/11/2013 at 04:49:30"},{"visible":true,"include":true,"step":"20.0","x":258.97142857142853,"y":140.7904761904762,"z":-217.14285714285714,"a95":0.99,"info":"29/11/2013 at 04:49:30"},{"visible":true,"include":true,"step":"25.0","x":263.31428571428575,"y":140.9047619047619,"z":-142.0952380952381,"a95":0.99,"info":"29/11/2013 at 04:49:30"},{"visible":true,"include":true,"step":"30.0","x":223.38095238095238,"y":120.08571428571429,"z":-121.61904761904762,"a95":0.99,"info":"29/11/2013 at 04:49:30"},{"visible":true,"include":true,"step":"35.0","x":115.88571428571429,"y":51.006666666666675,"z":-91.39809523809524,"a95":0.99,"info":"29/11/2013 at 04:49:30"},{"visible":true,"include":true,"step":"40.0","x":70.54476190476191,"y":10.697142857142856,"z":-82.19904761904762,"a95":0.99,"info":"29/11/2013 at 04:49:30"},{"visible":true,"include":true,"step":"45.0","x":102.31428571428572,"y":55.061904761904756,"z":-21.77047619047619,"a95":0.99,"info":"29/11/2013 at 04:49:30"},{"visible":true,"include":false,"step":"50.0","x":16.228571428571428,"y":16.428571428571427,"z":1.0451428571428572,"a95":0.99,"info":"29/11/2013 at 04:49:30"},{"visible":false,"include":false,"step":"60.0","x":-62.287619047619046,"y":3.07447619047619,"z":5.424285714285714,"a95":0.99,"info":"29/11/2013 at 04:49:30"},{"visible":false,"include":false,"step":"70.0","x":184.23809523809524,"y":21.70285714285714,"z":-3.4925714285714284,"a95":0.99,"info":"29/11/2013 at 04:49:30"},{"visible":false,"include":false,"step":"80.0","x":1081.904761904762,"y":183.0952380952381,"z":157.24761904761903,"a95":0.99,"info":"29/11/2013 at 04:49:30"},{"visible":false,"include":false,"step":"90.0","x":26.754285714285714,"y":76.84285714285714,"z":-17.899047619047618,"a95":0.99,"info":"29/11/2013 at 04:49:30"},{"visible":false,"include":false,"step":"100.0","x":-36.462857142857146,"y":92.36571428571429,"z":118.66666666666667,"a95":0.99,"info":"29/11/2013 at 04:49:30"}]},{"version":"v1.1.0","exported":"2016-11-23T12:07:53.142Z","volume":10.5,"added":"2016-11-23T11:22:58.338Z","format":"Utrecht","demagType":"Unknown","strat":null,"patch":1.1,"GEO":[{"dec":290.0773485018102,"inc":-18.67505315524402,"MAD":2.373257793022021,"cm":[0,3.552713678800501e-15,0],"intensity":863.9669305840688,"type":"GC","origin":false,"forced":true,"remark":"","nSteps":6,"minStep":"80","maxStep":"250","steps":["80","150","180","200","225","250"],"group":"None","version":"v1.1.0"}],"TECT":[{"dec":109.86310066621934,"inc":-17.185908084538102,"MAD":2.373257793022292,"cm":[-2.1316282072803006e-14,8.881784197001252e-15,-1.7763568394002505e-14],"intensity":863.9669305840688,"type":"GC","origin":false,"forced":true,"remark":"","nSteps":6,"minStep":"80","maxStep":"250","steps":["80","150","180","200","225","250"],"group":"None","version":"v1.1.0"}],"interpreted":true,"name":"PC 1.20B","coreAzi":345,"coreDip":32,"bedStrike":356,"bedDip":39,"data":[{"visible":false,"include":false,"step":"20","x":51.904761904761905,"y":448.1904761904762,"z":800.0952380952381,"a95":2.6,"info":"\"13-11-02\" at \"18:48\""},{"visible":true,"include":true,"step":"80","x":138.38095238095238,"y":312.95238095238096,"z":564.0952380952381,"a95":2.5,"info":"\"13-11-03\" at \"15:09\""},{"visible":true,"include":true,"step":"150","x":271.8095238095238,"y":272.4761904761905,"z":199.33333333333334,"a95":2.1,"info":"\"13-11-04\" at \"12:31\""},{"visible":true,"include":true,"step":"180","x":320,"y":237.8095238095238,"z":64.0952380952381,"a95":2,"info":"\"13-11-05\" at \"07:39\""},{"visible":true,"include":true,"step":"200","x":301.04761904761904,"y":244.47619047619048,"z":31.428571428571427,"a95":1.9,"info":"\"13-11-05\" at \"12:09\""},{"visible":true,"include":true,"step":"225","x":282.85714285714283,"y":211.8095238095238,"z":16.38095238095238,"a95":2.5,"info":"\"13-11-05\" at \"16:49\""},{"visible":true,"include":true,"step":"250","x":277.8095238095238,"y":198.66666666666666,"z":-6,"a95":1.8,"info":"\"13-11-06\" at \"10:34\""},{"visible":true,"include":false,"step":"275","x":249.42857142857142,"y":176.76190476190476,"z":13.80952380952381,"a95":1.9,"info":"\"13-11-06\" at \"15:27\""},{"visible":true,"include":false,"step":"300","x":268.6666666666667,"y":153.42857142857142,"z":-9.714285714285714,"a95":1.6,"info":"\"13-11-07\" at \"04:02\""},{"visible":true,"include":false,"step":"320","x":245.14285714285714,"y":115.33333333333333,"z":22.38095238095238,"a95":2.2,"info":"\"13-11-07\" at \"07:25\""},{"visible":true,"include":false,"step":"340","x":209.23809523809524,"y":86.85714285714286,"z":29.047619047619047,"a95":2,"info":"\"13-11-07\" at \"11:34\""},{"visible":false,"include":false,"step":"380","x":159.9047619047619,"y":13.047619047619047,"z":64.57142857142857,"a95":3.1,"info":"\"13-11-08\" at \"10:19\""},{"visible":false,"include":false,"step":"420","x":83.61904761904762,"y":-39.42857142857143,"z":78.47619047619048,"a95":5.5,"info":"\"13-11-08\" at \"14:43\""},{"visible":false,"include":false,"step":"450","x":32.76190476190476,"y":-51.61904761904762,"z":124.38095238095238,"a95":7.2,"info":"\"13-11-08\" at \"19:09\""},{"visible":false,"include":false,"step":"500","x":42.476190476190474,"y":5.333333333333333,"z":161.8095238095238,"a95":8,"info":"\"13-11-10\" at \"11:11\""},{"visible":false,"include":false,"step":"530","x":66.0952380952381,"y":-204.1904761904762,"z":184.57142857142858,"a95":6,"info":"\"13-11-10\" at \"14:06\""},{"visible":false,"include":false,"step":"560","x":-597.5238095238095,"y":165.33333333333334,"z":-157.42857142857142,"a95":4.6,"info":"\"13-11-10\" at \"23:13\""}]},{"version":"v1.1.0","exported":"2016-11-23T12:07:53.142Z","volume":10.5,"added":"2016-11-23T11:22:58.338Z","format":"Utrecht","demagType":"Unknown","strat":"1","patch":1.1,"GEO":[{"dec":74.54543927522127,"inc":-72.80133405527825,"MAD":4.693514648741536,"cm":[-9.992007221626409e-16,1.3322676295501878e-15,0],"intensity":641.5739522904561,"type":"dir","forced":true,"remark":"","origin":false,"nSteps":7,"minStep":"12.0","maxStep":"40.0","steps":["12.0","16.0","20.0","25.0","30.0","35.0","40.0"],"group":"None","version":"v1.1.0"}],"TECT":[{"dec":274.87704757300594,"inc":-67.63383562882795,"MAD":4.6935146487415285,"cm":[1.1657341758564144e-15,0,0],"intensity":641.5739522904561,"type":"dir","forced":true,"remark":"","origin":false,"nSteps":7,"minStep":"12.0","maxStep":"40.0","steps":["12.0","16.0","20.0","25.0","30.0","35.0","40.0"],"group":"None","version":"v1.1.0"}],"interpreted":true,"name":"PC 1.21A","coreAzi":326,"coreDip":37,"bedStrike":356,"bedDip":39,"data":[{"visible":true,"include":false,"step":"0.0","x":213.57142857142858,"y":474.18095238095236,"z":-808.2476190476191,"a95":0.99,"info":"29/11/2013 at 10:32:47"},{"visible":true,"include":false,"step":"4.0","x":229.52380952380952,"y":381.1142857142857,"z":-631.0666666666666,"a95":0.99,"info":"29/11/2013 at 10:32:47"},{"visible":true,"include":false,"step":"8.0","x":303.49523809523805,"y":295.7333333333333,"z":-434.6190476190476,"a95":0.99,"info":"29/11/2013 at 10:32:47"},{"visible":true,"include":true,"step":"12.0","x":331.9238095238095,"y":178.76190476190476,"z":-337.2,"a95":0.99,"info":"29/11/2013 at 10:32:47"},{"visible":true,"include":true,"step":"16.0","x":333.0857142857143,"y":151.96190476190475,"z":-319.0952380952381,"a95":0.99,"info":"29/11/2013 at 10:32:47"},{"visible":true,"include":true,"step":"20.0","x":307.1047619047619,"y":105,"z":-267.06666666666666,"a95":0.99,"info":"29/11/2013 at 10:32:47"},{"visible":true,"include":true,"step":"25.0","x":224.74285714285716,"y":57.94380952380952,"z":-197.95238095238096,"a95":0.99,"info":"29/11/2013 at 10:32:47"},{"visible":true,"include":true,"step":"30.0","x":233.9904761904762,"y":48.44571428571429,"z":-181.6,"a95":0.99,"info":"29/11/2013 at 10:32:47"},{"visible":true,"include":true,"step":"35.0","x":122.84761904761906,"y":27.082857142857144,"z":-95.27619047619048,"a95":0.99,"info":"29/11/2013 at 10:32:47"},{"visible":true,"include":true,"step":"40.0","x":96.65714285714286,"y":37.45904761904762,"z":-88.45714285714286,"a95":0.99,"info":"29/11/2013 at 10:32:47"},{"visible":true,"include":false,"step":"45.0","x":89.68571428571428,"y":41.27619047619047,"z":-81.18285714285715,"a95":0.99,"info":"29/11/2013 at 10:32:47"},{"visible":true,"include":false,"step":"50.0","x":33.53619047619048,"y":-16.18857142857143,"z":-71.07238095238095,"a95":0.99,"info":"29/11/2013 at 10:32:47"},{"visible":false,"include":false,"step":"60.0","x":-59.66285714285715,"y":10.76095238095238,"z":-47.82190476190476,"a95":0.99,"info":"29/11/2013 at 10:32:47"},{"visible":false,"include":false,"step":"70.0","x":13.725714285714286,"y":32.27142857142857,"z":10.986666666666666,"a95":0.99,"info":"29/11/2013 at 10:32:47"},{"visible":false,"include":false,"step":"80.0","x":-69.53619047619047,"y":-37.19714285714286,"z":14.8,"a95":0.99,"info":"29/11/2013 at 10:32:47"},{"visible":false,"include":false,"step":"90.0","x":-183.85714285714286,"y":62.739999999999995,"z":-80.84571428571428,"a95":0.99,"info":"29/11/2013 at 10:32:47"},{"visible":false,"include":false,"step":"100.0","x":-31.122857142857146,"y":36.88380952380952,"z":88.50380952380952,"a95":0.99,"info":"29/11/2013 at 10:32:47"}]},{"version":"v1.1.0","exported":"2016-11-23T12:07:53.143Z","volume":10.5,"added":"2016-11-23T11:22:58.338Z","format":"Utrecht","demagType":"Unknown","strat":"2","patch":1.1,"GEO":[{"dec":45.34615672813675,"inc":-59.99747181187573,"MAD":6.969135440548634,"cm":[9.769962616701378e-15,-9.769962616701378e-15,0],"intensity":550.6381587924753,"type":"dir","forced":true,"remark":"","origin":false,"nSteps":6,"minStep":"20.0","maxStep":"45.0","steps":["20.0","25.0","30.0","35.0","40.0","45.0"],"group":"None","version":"v1.1.0"}],"TECT":[{"dec":318.47726611971365,"inc":-65.74820305636294,"MAD":6.969135440548637,"cm":[-1.509903313490213e-14,-9.769962616701378e-15,-7.105427357601002e-15],"intensity":550.6381587924753,"type":"dir","forced":true,"remark":"","origin":false,"nSteps":6,"minStep":"20.0","maxStep":"45.0","steps":["20.0","25.0","30.0","35.0","40.0","45.0"],"group":"None","version":"v1.1.0"}],"interpreted":true,"name":"PC 1.22A","coreAzi":336,"coreDip":47,"bedStrike":356,"bedDip":39,"data":[{"visible":true,"include":false,"step":"0.0","x":251.65714285714287,"y":718.4190476190475,"z":-510.91428571428577,"a95":0.99,"info":"29/11/2013 at 10:32:47"},{"visible":true,"include":false,"step":"4.0","x":253.94285714285715,"y":626.3428571428572,"z":-372.03809523809525,"a95":0.99,"info":"29/11/2013 at 10:32:47"},{"visible":true,"include":false,"step":"8.0","x":257.247619047619,"y":504.7523809523809,"z":-271.62857142857143,"a95":0.99,"info":"29/11/2013 at 10:32:47"},{"visible":true,"include":false,"step":"12.0","x":261.03809523809525,"y":396.06666666666666,"z":-221.0857142857143,"a95":0.99,"info":"29/11/2013 at 10:32:47"},{"visible":true,"include":false,"step":"16.0","x":274.4095238095238,"y":300.7333333333333,"z":-195.77142857142857,"a95":0.99,"info":"29/11/2013 at 10:32:47"},{"visible":true,"include":true,"step":"20.0","x":254.44761904761904,"y":210.49523809523808,"z":-178.62857142857143,"a95":0.99,"info":"29/11/2013 at 10:32:47"},{"visible":true,"include":true,"step":"25.0","x":235.14285714285714,"y":174.9904761904762,"z":-180.17142857142858,"a95":0.99,"info":"29/11/2013 at 10:32:47"},{"visible":true,"include":true,"step":"30.0","x":215.8,"y":105.57142857142857,"z":-131.23809523809524,"a95":0.99,"info":"29/11/2013 at 10:32:47"},{"visible":true,"include":true,"step":"35.0","x":137.41904761904763,"y":61.31333333333333,"z":-119.43809523809523,"a95":0.99,"info":"29/11/2013 at 10:32:47"},{"visible":true,"include":true,"step":"40.0","x":112.31428571428572,"y":70.5104761904762,"z":-96.27619047619048,"a95":0.99,"info":"29/11/2013 at 10:32:47"},{"visible":true,"include":true,"step":"45.0","x":152.9142857142857,"y":47.198095238095235,"z":-87.55333333333333,"a95":0.99,"info":"29/11/2013 at 10:32:47"},{"visible":true,"include":false,"step":"50.0","x":84.33238095238096,"y":-37.507619047619045,"z":-62.8447619047619,"a95":0.99,"info":"29/11/2013 at 10:32:47"},{"visible":false,"include":false,"step":"60.0","x":-93.16095238095238,"y":-29.482857142857142,"z":73.67714285714285,"a95":0.99,"info":"29/11/2013 at 10:32:47"},{"visible":false,"include":false,"step":"70.0","x":51.99142857142857,"y":43.65428571428571,"z":22.834285714285713,"a95":0.99,"info":"29/11/2013 at 10:32:47"},{"visible":false,"include":false,"step":"80.0","x":-236.2095238095238,"y":-139.0952380952381,"z":32.892380952380954,"a95":0.99,"info":"29/11/2013 at 10:32:47"},{"visible":false,"include":false,"step":"90.0","x":-202.04761904761904,"y":-109.76190476190476,"z":-37.60857142857143,"a95":0.99,"info":"29/11/2013 at 10:32:47"},{"visible":false,"include":false,"step":"100.0","x":-32.05428571428571,"y":38.62190476190476,"z":112.73333333333333,"a95":0.99,"info":"29/11/2013 at 10:32:47"}]},{"version":"v1.1.0","exported":"2016-11-23T12:07:53.143Z","volume":10.5,"added":"2016-11-23T11:22:58.340Z","format":"Utrecht","demagType":"Unknown","strat":"3","patch":1.1,"GEO":[{"dec":291.3526955732624,"inc":-33.64004002579036,"MAD":2.2158316477357056,"cm":[-1.4210854715202004e-14,6.039613253960852e-14,0],"intensity":1285.2976242467466,"type":"GC","origin":false,"forced":true,"remark":"","nSteps":5,"minStep":"4.0","maxStep":"20.0","steps":["4.0","8.0","12.0","16.0","20.0"],"group":"None","version":"v1.1.0"}],"TECT":[{"dec":106.90450639304993,"inc":-2.4617442396307077,"MAD":2.215831647735478,"cm":[7.105427357601002e-15,-2.042810365310288e-14,-6.572520305780927e-14],"intensity":1285.2976242467469,"type":"GC","origin":false,"forced":true,"remark":"","nSteps":5,"minStep":"4.0","maxStep":"20.0","steps":["4.0","8.0","12.0","16.0","20.0"],"group":"None","version":"v1.1.0"}],"interpreted":true,"name":"PC 1.23","coreAzi":285,"coreDip":23,"bedStrike":356,"bedDip":39,"data":[{"visible":true,"include":false,"step":"0.0","x":-652.552380952381,"y":942.847619047619,"z":875.6095238095238,"a95":0.99,"info":"29/11/2013 at 10:32:47"},{"visible":true,"include":true,"step":"4.0","x":-504.1333333333333,"y":792.695238095238,"z":648.2476190476191,"a95":0.99,"info":"29/11/2013 at 10:32:47"},{"visible":true,"include":true,"step":"8.0","x":-308.5333333333333,"y":633.8761904761905,"z":349.2190476190476,"a95":0.99,"info":"29/11/2013 at 10:32:47"},{"visible":true,"include":true,"step":"12.0","x":-121.58095238095237,"y":477.27619047619044,"z":91.53142857142858,"a95":0.99,"info":"29/11/2013 at 10:32:47"},{"visible":true,"include":true,"step":"16.0","x":-5.594952380952381,"y":383.1047619047619,"z":-38.76571428571429,"a95":0.99,"info":"29/11/2013 at 10:32:47"},{"visible":true,"include":true,"step":"20.0","x":34.24857142857143,"y":268.9809523809524,"z":-96.84761904761905,"a95":0.99,"info":"29/11/2013 at 10:32:47"},{"visible":true,"include":false,"step":"25.0","x":62.2952380952381,"y":150.8952380952381,"z":-135.62857142857143,"a95":0.99,"info":"29/11/2013 at 10:32:47"},{"visible":true,"include":false,"step":"30.0","x":106.19047619047619,"y":133.8952380952381,"z":-112.42857142857143,"a95":0.99,"info":"29/11/2013 at 10:32:47"},{"visible":true,"include":false,"step":"35.0","x":80.43809523809524,"y":52.43428571428571,"z":-86.03714285714285,"a95":0.99,"info":"29/11/2013 at 10:32:47"},{"visible":true,"include":false,"step":"40.0","x":25.675238095238093,"y":93.75333333333333,"z":-119.46666666666667,"a95":0.99,"info":"29/11/2013 at 10:32:47"},{"visible":true,"include":false,"step":"45.0","x":143.0095238095238,"y":110.29523809523809,"z":4.504952380952381,"a95":0.99,"info":"29/11/2013 at 10:32:47"},{"visible":true,"include":false,"step":"50.0","x":24.12095238095238,"y":12.926666666666666,"z":-34.455238095238094,"a95":0.99,"info":"29/11/2013 at 10:32:47"},{"visible":false,"include":false,"step":"60.0","x":-16.356190476190477,"y":58.52761904761904,"z":22.63047619047619,"a95":0.99,"info":"29/11/2013 at 10:32:47"},{"visible":false,"include":false,"step":"70.0","x":55.18,"y":85.59619047619047,"z":-12.430476190476192,"a95":0.99,"info":"29/11/2013 at 10:32:47"},{"visible":false,"include":false,"step":"80.0","x":-102.51428571428572,"y":15.672380952380953,"z":-26.416190476190476,"a95":0.99,"info":"29/11/2013 at 10:32:47"},{"visible":false,"include":false,"step":"90.0","x":78.04666666666667,"y":57.01523809523809,"z":-74.4352380952381,"a95":0.99,"info":"29/11/2013 at 10:32:47"},{"visible":false,"include":false,"step":"100.0","x":172.55238095238096,"y":-59.24952380952381,"z":53.833333333333336,"a95":0.99,"info":"29/11/2013 at 10:32:47"}]},{"version":"v1.1.0","exported":"2016-11-23T12:07:53.143Z","volume":10.5,"added":"2016-11-23T11:22:58.340Z","format":"Utrecht","demagType":"Unknown","strat":"4","patch":1.1,"GEO":[{"dec":64.76853420711626,"inc":-51.976452068477485,"MAD":10.92449305604201,"cm":[-1.2212453270876722e-14,5.329070518200751e-15,0],"intensity":426.3874687877554,"type":"dir","forced":true,"remark":"","origin":false,"nSteps":7,"minStep":"20.0","maxStep":"50.0","steps":["20.0","25.0","30.0","35.0","40.0","45.0","50.0"],"group":"None","version":"v1.1.0"}],"TECT":[{"dec":343.48033724300296,"inc":-76.7909749009572,"MAD":10.924493056042015,"cm":[-2.6645352591003757e-15,-1.1546319456101628e-14,0],"intensity":426.3874687877554,"type":"dir","forced":true,"remark":"","origin":false,"nSteps":7,"minStep":"20.0","maxStep":"50.0","steps":["20.0","25.0","30.0","35.0","40.0","45.0","50.0"],"group":"None","version":"v1.1.0"}],"interpreted":true,"name":"PC 1.24A","coreAzi":258,"coreDip":77,"bedStrike":356,"bedDip":39,"data":[{"visible":true,"include":false,"step":"0.0","x":-287.74285714285713,"y":466.81904761904764,"z":-700.0190476190476,"a95":0.99,"info":"29/11/2013 at 10:32:47"},{"visible":true,"include":false,"step":"4.0","x":-266.0761904761905,"y":379.3333333333333,"z":-525.5333333333334,"a95":0.99,"info":"29/11/2013 at 10:32:47"},{"visible":true,"include":false,"step":"8.0","x":-259.8952380952381,"y":256.06666666666666,"z":-400.81904761904764,"a95":0.99,"info":"29/11/2013 at 10:32:47"},{"visible":true,"include":false,"step":"12.0","x":-237.15238095238095,"y":168.6,"z":-332.9809523809524,"a95":0.99,"info":"29/11/2013 at 10:32:47"},{"visible":true,"include":false,"step":"16.0","x":-186.5047619047619,"y":111.4952380952381,"z":-334.8666666666667,"a95":0.99,"info":"29/11/2013 at 10:32:47"},{"visible":true,"include":true,"step":"20.0","x":-148.75238095238097,"y":62.241904761904756,"z":-292.22857142857146,"a95":0.99,"info":"29/11/2013 at 10:32:47"},{"visible":true,"include":true,"step":"25.0","x":-151.54285714285714,"y":26.847619047619045,"z":-248.60000000000002,"a95":0.99,"info":"29/11/2013 at 10:32:47"},{"visible":true,"include":true,"step":"30.0","x":-54.19238095238095,"y":-1.8815238095238096,"z":-199.9904761904762,"a95":0.99,"info":"29/11/2013 at 10:32:47"},{"visible":true,"include":true,"step":"35.0","x":-73.5047619047619,"y":25.313333333333336,"z":-166.01904761904763,"a95":0.99,"info":"29/11/2013 at 10:32:47"},{"visible":true,"include":true,"step":"40.0","x":-80.50285714285714,"y":56.16571428571429,"z":-219.66666666666666,"a95":0.99,"info":"29/11/2013 at 10:32:47"},{"visible":true,"include":true,"step":"45.0","x":14.49047619047619,"y":56.98571428571429,"z":-111.12380952380951,"a95":0.99,"info":"29/11/2013 at 10:32:47"},{"visible":true,"include":true,"step":"50.0","x":-53.87333333333333,"y":-36.87238095238096,"z":-82.07809523809524,"a95":0.99,"info":"29/11/2013 at 10:32:47"},{"visible":false,"include":false,"step":"60.0","x":-7.421142857142857,"y":51.01523809523809,"z":-95.46666666666667,"a95":0.99,"info":"29/11/2013 at 10:32:47"},{"visible":false,"include":false,"step":"70.0","x":44.55809523809524,"y":92.46285714285715,"z":-13.134285714285713,"a95":0.99,"info":"29/11/2013 at 10:32:47"},{"visible":false,"include":false,"step":"80.0","x":690.6,"y":-342.247619047619,"z":120.19999999999999,"a95":0.99,"info":"29/11/2013 at 10:32:47"},{"visible":false,"include":false,"step":"90.0","x":-88.52380952380952,"y":81.67428571428572,"z":-38.76285714285714,"a95":0.99,"info":"29/11/2013 at 10:32:47"},{"visible":false,"include":false,"step":"100.0","x":48.58,"y":-1.866,"z":58.54380952380953,"a95":0.99,"info":"29/11/2013 at 10:32:47"}]},{"version":"v1.1.0","exported":"2016-11-23T12:07:53.143Z","volume":10.5,"added":"2016-11-23T11:22:58.341Z","format":"Utrecht","demagType":"Unknown","strat":"5","patch":1.1,"GEO":[{"dec":57.69799209187079,"inc":-46.08653723576536,"MAD":7.496428029829833,"cm":[-4.696243394164412e-14,2.3092638912203256e-14,0],"intensity":643.4609653733347,"type":"dir","forced":true,"remark":"","origin":false,"nSteps":8,"minStep":"16.0","maxStep":"50.0","steps":["16.0","20.0","25.0","30.0","35.0","40.0","45.0","50.0"],"group":"None","version":"v1.1.0"}],"TECT":[{"dec":359.69198869590576,"inc":-70.76040676063737,"MAD":7.496428029829838,"cm":[-2.398081733190338e-14,2.0317081350640365e-14,-6.217248937900877e-15],"intensity":643.4609653733346,"type":"dir","forced":true,"remark":"","origin":false,"nSteps":8,"minStep":"16.0","maxStep":"50.0","steps":["16.0","20.0","25.0","30.0","35.0","40.0","45.0","50.0"],"group":"None","version":"v1.1.0"}],"interpreted":true,"name":"PC 1.25","coreAzi":299,"coreDip":85,"bedStrike":356,"bedDip":39,"data":[{"visible":true,"include":false,"step":"0.0","x":-172.95238095238096,"y":907.7904761904762,"z":-658.8380952380952,"a95":0.99,"info":"29/11/2013 at 10:32:47"},{"visible":true,"include":false,"step":"4.0","x":-112.87619047619049,"y":736.2952380952381,"z":-487.7047619047619,"a95":0.99,"info":"29/11/2013 at 10:32:47"},{"visible":true,"include":false,"step":"8.0","x":-99.62857142857142,"y":590.1619047619048,"z":-371.0190476190476,"a95":0.99,"info":"29/11/2013 at 10:32:47"},{"visible":true,"include":false,"step":"12.0","x":-124.46666666666667,"y":451.2285714285714,"z":-336.83809523809526,"a95":0.99,"info":"29/11/2013 at 10:32:47"},{"visible":true,"include":true,"step":"16.0","x":-97.6,"y":364.4761904761905,"z":-391.3047619047619,"a95":0.99,"info":"29/11/2013 at 10:32:47"},{"visible":true,"include":true,"step":"20.0","x":-122.91428571428571,"y":307.6190476190476,"z":-336.02857142857147,"a95":0.99,"info":"29/11/2013 at 10:32:47"},{"visible":true,"include":true,"step":"25.0","x":-118.19047619047619,"y":234.73333333333332,"z":-302.4666666666667,"a95":0.99,"info":"29/11/2013 at 10:32:47"},{"visible":true,"include":true,"step":"30.0","x":-108.83809523809524,"y":180,"z":-266.15238095238095,"a95":0.99,"info":"29/11/2013 at 10:32:47"},{"visible":true,"include":true,"step":"35.0","x":-72.46761904761904,"y":143.3047619047619,"z":-175.38095238095238,"a95":0.99,"info":"29/11/2013 at 10:32:47"},{"visible":true,"include":true,"step":"40.0","x":-126.52380952380952,"y":98.95238095238095,"z":-187.85714285714286,"a95":0.99,"info":"29/11/2013 at 10:32:47"},{"visible":true,"include":true,"step":"45.0","x":-22.173333333333332,"y":78.81333333333333,"z":-135.14285714285714,"a95":0.99,"info":"29/11/2013 at 10:32:47"},{"visible":true,"include":true,"step":"50.0","x":-60.55904761904762,"y":21.713333333333335,"z":-98.47619047619048,"a95":0.99,"info":"29/11/2013 at 10:32:47"},{"visible":false,"include":false,"step":"60.0","x":-66.2352380952381,"y":62.06380952380952,"z":-66.79619047619047,"a95":0.99,"info":"29/11/2013 at 10:32:47"},{"visible":false,"include":false,"step":"70.0","x":79.64380952380952,"y":47.89809523809524,"z":-13.878095238095238,"a95":0.99,"info":"29/11/2013 at 10:32:47"},{"visible":false,"include":false,"step":"80.0","x":-62.01428571428571,"y":129.13333333333335,"z":-18.722857142857144,"a95":0.99,"info":"29/11/2013 at 10:32:47"},{"visible":false,"include":false,"step":"90.0","x":-160.45714285714286,"y":-62.171428571428564,"z":-212.36190476190478,"a95":0.99,"info":"29/11/2013 at 10:32:47"},{"visible":false,"include":false,"step":"100.0","x":100.25714285714287,"y":8.826380952380953,"z":-14.338095238095239,"a95":0.99,"info":"29/11/2013 at 10:32:47"}]},{"version":"v1.1.0","exported":"2016-11-23T12:07:53.143Z","volume":10.5,"added":"2016-11-23T11:22:58.341Z","format":"Utrecht","demagType":"Unknown","strat":null,"patch":1.1,"GEO":[{"dec":90.84249395656695,"inc":-45.320552951042394,"MAD":7.281481708096996,"cm":[2.6645352591003757e-15,0,0],"intensity":502.18189692219283,"type":"dir","forced":true,"remark":"","origin":false,"nSteps":7,"minStep":"250","maxStep":"420","steps":["250","275","300","320","340","380","420"],"group":"None","version":"v1.1.0"}],"TECT":[{"dec":117.46033137411399,"inc":-83.46959386774516,"MAD":7.281481708096996,"cm":[-3.1086244689504383e-15,2.142730437526552e-14,5.329070518200751e-15],"intensity":502.18189692219283,"type":"dir","forced":true,"remark":"","origin":false,"nSteps":7,"minStep":"250","maxStep":"420","steps":["250","275","300","320","340","380","420"],"group":"None","version":"v1.1.0"}],"interpreted":true,"name":"PC 1.26","coreAzi":342,"coreDip":43,"bedStrike":356,"bedDip":39,"data":[{"visible":false,"include":false,"step":"20","x":-328.57142857142856,"y":239.14285714285714,"z":220.66666666666666,"a95":2.1,"info":"\"13-11-02\" at \"18:51\""},{"visible":true,"include":false,"step":"80","x":-108.95238095238095,"y":316.2857142857143,"z":171.8095238095238,"a95":2.2,"info":"\"13-11-03\" at \"15:12\""},{"visible":true,"include":false,"step":"150","x":41.80952380952381,"y":338.3809523809524,"z":-70.38095238095238,"a95":1.7,"info":"\"13-11-04\" at \"12:35\""},{"visible":true,"include":false,"step":"180","x":118.0952380952381,"y":312.95238095238096,"z":-208.95238095238096,"a95":2.2,"info":"\"13-11-05\" at \"07:41\""},{"visible":true,"include":false,"step":"200","x":102.28571428571429,"y":320.57142857142856,"z":-227.61904761904762,"a95":2.3,"info":"\"13-11-05\" at \"12:12\""},{"visible":true,"include":false,"step":"225","x":98.57142857142857,"y":288.3809523809524,"z":-245.33333333333334,"a95":2.7,"info":"\"13-11-05\" at \"16:51\""},{"visible":true,"include":true,"step":"250","x":98.66666666666667,"y":259.9047619047619,"z":-256.2857142857143,"a95":2.6,"info":"\"13-11-06\" at \"10:37\""},{"visible":true,"include":true,"step":"275","x":96.95238095238095,"y":234.0952380952381,"z":-212.66666666666666,"a95":3,"info":"\"13-11-06\" at \"15:30\""},{"visible":true,"include":true,"step":"300","x":121.52380952380952,"y":177.04761904761904,"z":-208.66666666666666,"a95":3.3,"info":"\"13-11-07\" at \"04:04\""},{"visible":true,"include":true,"step":"320","x":114.76190476190476,"y":161.23809523809524,"z":-173.23809523809524,"a95":3.5,"info":"\"13-11-07\" at \"07:28\""},{"visible":true,"include":true,"step":"340","x":102.47619047619048,"y":179.61904761904762,"z":-160.38095238095238,"a95":2.5,"info":"\"13-11-07\" at \"11:36\""},{"visible":true,"include":true,"step":"380","x":95.52380952380952,"y":108,"z":-94.57142857142857,"a95":3,"info":"\"13-11-08\" at \"10:23\""},{"visible":true,"include":true,"step":"420","x":92.47619047619048,"y":87.04761904761905,"z":-52.38095238095238,"a95":4.5,"info":"\"13-11-08\" at \"14:51\""},{"visible":true,"include":false,"step":"450","x":0.09523809523809523,"y":70.6952380952381,"z":-26,"a95":7.6,"info":"\"13-11-08\" at \"19:12\""},{"visible":false,"include":false,"step":"500","x":34.82857142857143,"y":58.10476190476191,"z":21.333333333333332,"a95":5.4,"info":"\"13-11-10\" at \"11:13\""},{"visible":false,"include":false,"step":"530","x":-119.23809523809524,"y":-26,"z":89.23809523809524,"a95":7,"info":"\"13-11-10\" at \"14:08\""}]}]
