# Supplementary material for: Paleomagnetic constraints on the timing and distribution of Cenozoic rotations in Central and Eastern Anatolia
Source: Copernicus journal article supplement (doi:10.5194/se-9-295-2018), 2018-03-21
Supplement: Supplementary file 2 [file se-9-295-2018-supplement.zip › se-2017-66_DATA_dir files/dir files Ulukisla/PC2.dir]

[{"version":"v1.1.0","exported":"2016-11-23T14:37:58.614Z","volume":10.5,"added":"2016-11-23T14:22:05.962Z","format":"Utrecht","demagType":"Unknown","strat":"6","patch":1.1,"GEO":[{"dec":326.37409495456876,"inc":-40.15056848459124,"MAD":4.142835205445827,"cm":[-7.194245199571014e-14,6.039613253960852e-14,0],"intensity":783.2063117925866,"type":"GC","origin":false,"forced":true,"remark":"","nSteps":5,"minStep":"0.0","maxStep":"16.0","steps":["0.0","4.0","8.0","12.0","16.0"],"group":"None","version":"v1.1.0"}],"TECT":[{"dec":308.5010151207393,"inc":-19.538708840138803,"MAD":4.142835205445995,"cm":[1.5987211554602254e-14,-1.7763568394002505e-14,-1.0658141036401503e-14],"intensity":783.2063117925865,"type":"GC","origin":false,"forced":true,"remark":"","nSteps":5,"minStep":"0.0","maxStep":"16.0","steps":["0.0","4.0","8.0","12.0","16.0"],"group":"None","version":"v1.1.0"}],"interpreted":true,"name":"PC 2.1","coreAzi":311,"coreDip":25,"bedStrike":351,"bedDip":36,"data":[{"visible":true,"include":true,"step":"0.0","x":-140.93333333333334,"y":549.847619047619,"z":48.48952380952381,"a95":0.99,"info":"29/11/2013 at 10:32:47"},{"visible":true,"include":true,"step":"4.0","x":-102.12380952380951,"y":490.3809523809524,"z":-18.22,"a95":0.99,"info":"29/11/2013 at 10:32:47"},{"visible":true,"include":true,"step":"8.0","x":-50.86952380952381,"y":386.8095238095238,"z":-108.83809523809524,"a95":0.99,"info":"29/11/2013 at 10:32:47"},{"visible":true,"include":true,"step":"12.0","x":0.07135714285714286,"y":283.77142857142854,"z":-158.11428571428573,"a95":0.99,"info":"29/11/2013 at 10:32:47"},{"visible":true,"include":true,"step":"16.0","x":34.89142857142857,"y":218.16190476190474,"z":-159.52380952380952,"a95":0.99,"info":"29/11/2013 at 10:32:47"},{"visible":true,"include":false,"step":"20.0","x":44.00666666666667,"y":146.71428571428572,"z":-112.86666666666666,"a95":0.99,"info":"29/11/2013 at 10:32:47"},{"visible":true,"include":false,"step":"25.0","x":46.74666666666666,"y":103.65714285714287,"z":-54.161904761904765,"a95":0.99,"info":"29/11/2013 at 10:32:47"},{"visible":true,"include":false,"step":"30.0","x":40.76380952380952,"y":67.53333333333333,"z":-24.357142857142858,"a95":0.99,"info":"29/11/2013 at 10:32:47"},{"visible":true,"include":false,"step":"35.0","x":36.12,"y":39.29714285714286,"z":4.879047619047618,"a95":0.99,"info":"29/11/2013 at 10:32:47"},{"visible":true,"include":false,"step":"40.0","x":33.68571428571428,"y":42.450476190476195,"z":17.217142857142857,"a95":0.99,"info":"29/11/2013 at 10:32:47"},{"visible":true,"include":false,"step":"45.0","x":26.798095238095236,"y":22.752380952380953,"z":13.905714285714286,"a95":0.99,"info":"29/11/2013 at 10:32:47"},{"visible":true,"include":false,"step":"50.0","x":15.085714285714285,"y":2.122952380952381,"z":39.66285714285714,"a95":0.99,"info":"29/11/2013 at 10:32:47"},{"visible":false,"include":false,"step":"60.0","x":20.24190476190476,"y":-10.194285714285716,"z":46.462857142857146,"a95":0.99,"info":"29/11/2013 at 10:32:47"},{"visible":false,"include":false,"step":"70.0","x":15.328571428571427,"y":-34.179047619047616,"z":31.216190476190473,"a95":0.99,"info":"29/11/2013 at 10:32:47"},{"visible":false,"include":false,"step":"80.0","x":8.491523809523809,"y":-17.642857142857142,"z":63.14190476190476,"a95":0.99,"info":"29/11/2013 at 10:32:47"},{"visible":false,"include":false,"step":"90.0","x":-10.161904761904761,"y":-5.886,"z":19.128571428571426,"a95":0.99,"info":"29/11/2013 at 10:32:47"},{"visible":false,"include":false,"step":"100.0","x":48.850476190476186,"y":-58.735238095238095,"z":29.744761904761905,"a95":0.99,"info":"29/11/2013 at 10:32:47"}]},{"version":"v1.1.0","exported":"2016-11-23T14:37:58.614Z","volume":10.5,"added":"2016-11-23T14:22:05.963Z","format":"Utrecht","demagType":"Unknown","strat":"7","patch":1.1,"GEO":[],"TECT":[],"interpreted":false,"name":"PC 2.2A","coreAzi":8,"coreDip":58,"bedStrike":351,"bedDip":36,"data":[{"visible":false,"include":false,"step":"0.0","x":170.14285714285714,"y":199.83809523809526,"z":684.8190476190476,"a95":0.99,"info":"29/11/2013 at 10:32:47"},{"visible":true,"include":false,"step":"4.0","x":70.03999999999999,"y":283.3904761904762,"z":374.2761904761905,"a95":0.99,"info":"29/11/2013 at 10:32:47"},{"visible":true,"include":true,"step":"8.0","x":138.54285714285714,"y":242.97142857142856,"z":229.21904761904764,"a95":0.99,"info":"29/11/2013 at 10:32:47"},{"visible":false,"include":false,"step":"12.0","x":186.55238095238096,"y":292.14285714285717,"z":70.24571428571429,"a95":0.99,"info":"29/11/2013 at 10:32:47"},{"visible":true,"include":true,"step":"16.0","x":200.1047619047619,"y":133.4952380952381,"z":-6.480761904761905,"a95":0.99,"info":"29/11/2013 at 10:32:47"},{"visible":true,"include":true,"step":"20.0","x":154.8761904761905,"y":91.34476190476191,"z":-38.78857142857142,"a95":0.99,"info":"29/11/2013 at 10:32:47"},{"visible":true,"include":false,"step":"25.0","x":80.15238095238095,"y":31.293333333333333,"z":-28.30666666666667,"a95":0.99,"info":"29/11/2013 at 10:32:47"},{"visible":true,"include":false,"step":"30.0","x":96.12380952380951,"y":31.04380952380952,"z":22.777142857142856,"a95":0.99,"info":"29/11/2013 at 10:32:47"},{"visible":true,"include":false,"step":"35.0","x":58.325714285714284,"y":0.5908476190476191,"z":8.335619047619048,"a95":0.99,"info":"29/11/2013 at 10:32:47"},{"visible":true,"include":false,"step":"40.0","x":52.71523809523809,"y":-20.401904761904763,"z":14.853333333333333,"a95":0.99,"info":"29/11/2013 at 10:32:47"},{"visible":true,"include":false,"step":"45.0","x":66.39142857142858,"y":-53.20857142857143,"z":33.170476190476194,"a95":0.99,"info":"29/11/2013 at 10:32:47"},{"visible":true,"include":false,"step":"50.0","x":48.89142857142857,"y":-57.034285714285716,"z":39.36190476190476,"a95":0.99,"info":"29/11/2013 at 10:32:47"},{"visible":true,"include":false,"step":"60.0","x":38.23904761904762,"y":-41.701904761904764,"z":30.176190476190477,"a95":0.99,"info":"29/11/2013 at 10:32:47"},{"visible":false,"include":false,"step":"70.0","x":27.857142857142858,"y":-43.70095238095238,"z":28.795238095238098,"a95":0.99,"info":"29/11/2013 at 10:32:47"},{"visible":false,"include":false,"step":"80.0","x":125.67619047619047,"y":-46.62571428571429,"z":40.92190476190476,"a95":0.99,"info":"29/11/2013 at 10:32:47"},{"visible":false,"include":false,"step":"90.0","x":82.46190476190476,"y":-34.72190476190476,"z":-20.11809523809524,"a95":0.99,"info":"29/11/2013 at 10:32:47"},{"visible":false,"include":false,"step":"100.0","x":41.68,"y":-35.89714285714286,"z":20.895238095238096,"a95":0.99,"info":"29/11/2013 at 10:32:47"}]},{"version":"v1.1.0","exported":"2016-11-23T14:37:58.614Z","volume":10.5,"added":"2016-11-23T14:22:05.963Z","format":"Utrecht","demagType":"Unknown","strat":null,"patch":1.1,"GEO":[{"dec":121.75383454065866,"inc":-36.546572258984504,"MAD":3.675542092247832,"cm":[-138.35477969681727,195.8061454136419,-240.0328050439935],"intensity":416.42697867864973,"type":"dir","forced":false,"remark":"","origin":false,"nSteps":8,"minStep":"225","maxStep":"420","steps":["225","250","275","300","320","340","380","420"],"group":"None","version":"v1.1.0"}],"TECT":[{"dec":155.8159476645286,"inc":-57.08313912324452,"MAD":3.675542092247859,"cm":[-165.55708345861774,24.057558834923555,-295.1439057876199],"intensity":416.4269786786498,"type":"dir","forced":false,"remark":"","origin":false,"nSteps":8,"minStep":"225","maxStep":"420","steps":["225","250","275","300","320","340","380","420"],"group":"None","version":"v1.1.0"}],"interpreted":true,"name":"PC 2.3A","coreAzi":305,"coreDip":34,"bedStrike":351,"bedDip":36,"data":[{"visible":false,"include":false,"step":"20","x":-291.5238095238095,"y":378.1904761904762,"z":-339.9047619047619,"a95":2.2,"info":"\"13-11-02\" at \"18:53\""},{"visible":true,"include":false,"step":"80","x":-8.857142857142858,"y":293.8095238095238,"z":-429.3333333333333,"a95":2.5,"info":"\"13-11-03\" at \"15:15\""},{"visible":true,"include":false,"step":"150","x":70.76190476190476,"y":86,"z":-590.4761904761905,"a95":3.3,"info":"\"13-11-04\" at \"12:38\""},{"visible":true,"include":false,"step":"180","x":76.57142857142857,"y":68.47619047619048,"z":-533.4285714285714,"a95":3,"info":"\"13-11-05\" at \"07:44\""},{"visible":true,"include":false,"step":"200","x":86.47619047619048,"y":-38.76190476190476,"z":-549.8095238095239,"a95":3.2,"info":"\"13-11-05\" at \"12:14\""},{"visible":true,"include":true,"step":"225","x":74.76190476190476,"y":8.952380952380953,"z":-506.4761904761905,"a95":3.5,"info":"\"13-11-05\" at \"16:54\""},{"visible":true,"include":true,"step":"250","x":69.52380952380952,"y":3.9047619047619047,"z":-497.14285714285717,"a95":3.8,"info":"\"13-11-06\" at \"10:40\""},{"visible":true,"include":true,"step":"275","x":63.142857142857146,"y":5.0476190476190474,"z":-442.4761904761905,"a95":3.8,"info":"\"13-11-06\" at \"15:32\""},{"visible":true,"include":true,"step":"300","x":74.76190476190476,"y":-4.285714285714286,"z":-365.3333333333333,"a95":3.8,"info":"\"13-11-07\" at \"04:07\""},{"visible":true,"include":true,"step":"320","x":56.476190476190474,"y":2,"z":-316,"a95":4,"info":"\"13-11-07\" at \"07:31\""},{"visible":true,"include":true,"step":"340","x":69.61904761904762,"y":-0.47619047619047616,"z":-295.8095238095238,"a95":3.3,"info":"\"13-11-07\" at \"11:38\""},{"visible":true,"include":true,"step":"380","x":70.66666666666667,"y":-13.142857142857142,"z":-148.76190476190476,"a95":4.8,"info":"\"13-11-08\" at \"10:25\""},{"visible":true,"include":true,"step":"420","x":40.476190476190474,"y":-10.19047619047619,"z":-91.9047619047619,"a95":7.1,"info":"\"13-11-08\" at \"14:53\""},{"visible":true,"include":false,"step":"450","x":28.24761904761905,"y":20.361904761904764,"z":-31.676190476190477,"a95":10.5,"info":"\"13-11-08\" at \"19:14\""}]},{"version":"v1.1.0","exported":"2016-11-23T14:37:58.615Z","volume":10.5,"added":"2016-11-23T14:22:05.965Z","format":"Utrecht","demagType":"Unknown","strat":"8","patch":1.1,"GEO":[],"TECT":[],"interpreted":false,"name":"PC 2.3B","coreAzi":305,"coreDip":34,"bedStrike":351,"bedDip":36,"data":[{"visible":true,"include":false,"step":"0.0","x":-262.247619047619,"y":548.0761904761905,"z":576.4095238095239,"a95":0.99,"info":"29/11/2013 at 10:32:47"},{"visible":true,"include":false,"step":"4.0","x":-224.62857142857143,"y":475.49523809523805,"z":464.60952380952375,"a95":0.99,"info":"29/11/2013 at 10:32:47"},{"visible":true,"include":false,"step":"8.0","x":-158.7238095238095,"y":363.14285714285717,"z":310.45714285714286,"a95":0.99,"info":"29/11/2013 at 10:32:47"},{"visible":true,"include":false,"step":"12.0","x":-107.87619047619049,"y":267.6190476190476,"z":207.86666666666665,"a95":0.99,"info":"29/11/2013 at 10:32:47"},{"visible":true,"include":false,"step":"16.0","x":-80.94380952380952,"y":205.87619047619046,"z":127.70476190476191,"a95":0.99,"info":"29/11/2013 at 10:32:47"},{"visible":true,"include":false,"step":"20.0","x":-42.81333333333333,"y":143.01904761904763,"z":86.70571428571428,"a95":0.99,"info":"29/11/2013 at 10:32:47"},{"visible":true,"include":false,"step":"25.0","x":-22.63904761904762,"y":92.41428571428571,"z":51.74380952380952,"a95":0.99,"info":"29/11/2013 at 10:32:47"},{"visible":true,"include":false,"step":"30.0","x":-13.694285714285714,"y":68.06,"z":37.97904761904762,"a95":0.99,"info":"29/11/2013 at 10:32:47"},{"visible":true,"include":false,"step":"35.0","x":-4.390666666666666,"y":27.495238095238093,"z":22.96666666666667,"a95":0.99,"info":"29/11/2013 at 10:32:47"},{"visible":true,"include":false,"step":"40.0","x":-10.712380952380952,"y":38.28857142857142,"z":29.85809523809524,"a95":0.99,"info":"29/11/2013 at 10:32:47"},{"visible":true,"include":false,"step":"45.0","x":0.4624952380952381,"y":9.221714285714286,"z":32.67619047619048,"a95":0.99,"info":"29/11/2013 at 10:32:47"},{"visible":false,"include":false,"step":"50.0","x":19.65714285714286,"y":-26.719047619047622,"z":26.282857142857146,"a95":0.99,"info":"29/11/2013 at 10:32:47"},{"visible":false,"include":false,"step":"60.0","x":29.145714285714284,"y":-17.526666666666667,"z":20.293333333333333,"a95":0.99,"info":"29/11/2013 at 10:32:47"},{"visible":false,"include":false,"step":"70.0","x":25.76571428571429,"y":-54.336190476190474,"z":26.11904761904762,"a95":0.99,"info":"29/11/2013 at 10:32:47"},{"visible":false,"include":false,"step":"80.0","x":104.83809523809524,"y":-85.45904761904762,"z":31.485714285714288,"a95":0.99,"info":"29/11/2013 at 10:32:47"},{"visible":false,"include":false,"step":"90.0","x":63.79142857142857,"y":-78.68476190476191,"z":43.298095238095236,"a95":0.99,"info":"29/11/2013 at 10:32:47"},{"visible":false,"include":false,"step":"100.0","x":59.37238095238095,"y":-106.38095238095238,"z":14.600952380952382,"a95":0.99,"info":"29/11/2013 at 10:32:47"}]},{"version":"v1.1.0","exported":"2016-11-23T14:37:58.615Z","volume":10.5,"added":"2016-11-23T14:22:05.965Z","format":"Utrecht","demagType":"Unknown","strat":"1","patch":1.1,"GEO":[{"dec":107.84633766614223,"inc":-47.49241555624021,"MAD":7.324326499684309,"cm":[26.3162426110179,31.569866413100595,-98.77263400202585],"intensity":209.19215690479044,"type":"dir","forced":false,"remark":"","origin":false,"nSteps":6,"minStep":"20.0","maxStep":"45.0","steps":["20.0","25.0","30.0","35.0","40.0","45.0"],"group":"None","version":"v1.1.0"}],"TECT":[{"dec":160.88829610458288,"inc":-71.94350949735656,"MAD":7.324326499684338,"cm":[16.17953841643657,-32.43076504925012,-100.65635763901113],"intensity":209.19215690479044,"type":"dir","forced":false,"remark":"","origin":false,"nSteps":6,"minStep":"20.0","maxStep":"45.0","steps":["20.0","25.0","30.0","35.0","40.0","45.0"],"group":"None","version":"v1.1.0"}],"interpreted":true,"name":"PC 2.4","coreAzi":344,"coreDip":68,"bedStrike":351,"bedDip":36,"data":[{"visible":true,"include":false,"step":"0.0","x":-29.545714285714286,"y":265.31428571428575,"z":-368.42857142857144,"a95":0.99,"info":"29/11/2013 at 16:17:06"},{"visible":true,"include":false,"step":"4.0","x":-10.404761904761905,"y":229.46666666666667,"z":-317.35238095238094,"a95":0.99,"info":"29/11/2013 at 16:17:06"},{"visible":true,"include":false,"step":"8.0","x":-2.642857142857143,"y":200.95238095238096,"z":-276.97142857142853,"a95":0.99,"info":"29/11/2013 at 16:17:06"},{"visible":true,"include":false,"step":"12.0","x":10.630476190476191,"y":182.16190476190476,"z":-256.14285714285717,"a95":0.99,"info":"29/11/2013 at 16:17:06"},{"visible":true,"include":false,"step":"16.0","x":25.497142857142858,"y":148.37142857142857,"z":-221.34285714285713,"a95":0.99,"info":"29/11/2013 at 16:17:06"},{"visible":true,"include":true,"step":"20.0","x":46.32380952380952,"y":117.74285714285713,"z":-189.05714285714285,"a95":0.99,"info":"29/11/2013 at 16:17:06"},{"visible":true,"include":true,"step":"25.0","x":46.227619047619044,"y":61.52761904761904,"z":-132.51428571428573,"a95":0.99,"info":"29/11/2013 at 16:17:06"},{"visible":true,"include":true,"step":"30.0","x":49.8447619047619,"y":25.080952380952382,"z":-82.57619047619048,"a95":0.99,"info":"29/11/2013 at 16:17:06"},{"visible":true,"include":true,"step":"35.0","x":52.25333333333333,"y":11.183809523809524,"z":-60.08952380952381,"a95":0.99,"info":"29/11/2013 at 16:17:06"},{"visible":true,"include":true,"step":"40.0","x":52.074285714285715,"y":10.956190476190477,"z":-29.872380952380954,"a95":0.99,"info":"29/11/2013 at 16:17:06"},{"visible":true,"include":true,"step":"45.0","x":67.60095238095238,"y":-0.8875714285714286,"z":-18.073333333333334,"a95":0.99,"info":"29/11/2013 at 16:17:06"},{"visible":true,"include":false,"step":"50.0","x":31.051428571428573,"y":-4.50447619047619,"z":18.017142857142858,"a95":0.99,"info":"29/11/2013 at 16:17:06"},{"visible":true,"include":false,"step":"60.0","x":37.212380952380954,"y":-11.64,"z":6.852857142857142,"a95":0.99,"info":"29/11/2013 at 16:17:06"},{"visible":false,"include":false,"step":"70.0","x":38.796190476190475,"y":-6.320285714285714,"z":32.603809523809524,"a95":0.99,"info":"29/11/2013 at 16:17:06"},{"visible":false,"include":false,"step":"80.0","x":51.1647619047619,"y":-27.125714285714285,"z":39.09809523809523,"a95":0.99,"info":"29/11/2013 at 16:17:06"},{"visible":false,"include":false,"step":"90.0","x":37.23904761904762,"y":-27.34190476190476,"z":-1.4644761904761905,"a95":0.99,"info":"29/11/2013 at 16:17:06"},{"visible":false,"include":false,"step":"100.0","x":40.62380952380953,"y":-5.283904761904762,"z":24.31714285714286,"a95":0.99,"info":"29/11/2013 at 16:17:06"}]},{"version":"v1.1.0","exported":"2016-11-23T14:37:58.615Z","volume":10.5,"added":"2016-11-23T14:22:05.965Z","format":"Utrecht","demagType":"Unknown","strat":"2","patch":1.1,"GEO":[{"dec":332.9793587844722,"inc":-12.524769495911384,"MAD":1.6199631199612767,"cm":[1.0658141036401503e-14,-1.7763568394002505e-14,0],"intensity":514.2058942607689,"type":"GC","origin":false,"forced":true,"remark":"","nSteps":5,"minStep":"4.0","maxStep":"20.0","steps":["4.0","8.0","12.0","16.0","20.0"],"group":"None","version":"v1.1.0"}],"TECT":[{"dec":149.17394392091524,"inc":-0.11831307858296282,"MAD":1.6199631199604223,"cm":[2.398081733190338e-14,-1.0658141036401503e-14,3.552713678800501e-15],"intensity":514.2058942607688,"type":"GC","origin":false,"forced":true,"remark":"","nSteps":5,"minStep":"4.0","maxStep":"20.0","steps":["4.0","8.0","12.0","16.0","20.0"],"group":"None","version":"v1.1.0"}],"interpreted":true,"name":"PC 2.5","coreAzi":342,"coreDip":67,"bedStrike":351,"bedDip":36,"data":[{"visible":false,"include":false,"step":"0.0","x":19.005714285714287,"y":345.25714285714287,"z":176.38095238095238,"a95":0.99,"info":"29/11/2013 at 16:17:06"},{"visible":true,"include":true,"step":"4.0","x":33.59619047619047,"y":344.22857142857146,"z":112.86666666666666,"a95":0.99,"info":"29/11/2013 at 16:17:06"},{"visible":true,"include":true,"step":"8.0","x":43.2447619047619,"y":290.7809523809524,"z":22.08095238095238,"a95":0.99,"info":"29/11/2013 at 16:17:06"},{"visible":true,"include":true,"step":"12.0","x":51.96,"y":262.247619047619,"z":-74.15428571428572,"a95":0.99,"info":"29/11/2013 at 16:17:06"},{"visible":true,"include":true,"step":"16.0","x":47.8,"y":200.9904761904762,"z":-98.0952380952381,"a95":0.99,"info":"29/11/2013 at 16:17:06"},{"visible":true,"include":true,"step":"20.0","x":47.78857142857142,"y":163.3047619047619,"z":-98.93333333333332,"a95":0.99,"info":"29/11/2013 at 16:17:06"},{"visible":true,"include":false,"step":"25.0","x":39.08857142857143,"y":124.94285714285715,"z":-81.71523809523809,"a95":0.99,"info":"29/11/2013 at 16:17:06"},{"visible":true,"include":false,"step":"30.0","x":31.354285714285716,"y":77.43619047619048,"z":-56.30095238095238,"a95":0.99,"info":"29/11/2013 at 16:17:06"},{"visible":true,"include":false,"step":"35.0","x":6.201047619047619,"y":47.266666666666666,"z":-53.13619047619047,"a95":0.99,"info":"29/11/2013 at 16:17:06"},{"visible":true,"include":false,"step":"40.0","x":9.536190476190475,"y":18.315238095238094,"z":-32.85142857142857,"a95":0.99,"info":"29/11/2013 at 16:17:06"},{"visible":true,"include":false,"step":"45.0","x":30.576190476190476,"y":1.930857142857143,"z":-7.070095238095239,"a95":0.99,"info":"29/11/2013 at 16:17:06"},{"visible":true,"include":false,"step":"50.0","x":47.93523809523809,"y":1.4083809523809525,"z":6.6237142857142866,"a95":0.99,"info":"29/11/2013 at 16:17:06"},{"visible":false,"include":false,"step":"60.0","x":31.92761904761905,"y":-12.83904761904762,"z":15.598095238095238,"a95":0.99,"info":"29/11/2013 at 16:17:06"},{"visible":false,"include":false,"step":"70.0","x":32.25714285714285,"y":-7.245047619047618,"z":18.83142857142857,"a95":0.99,"info":"29/11/2013 at 16:17:06"},{"visible":false,"include":false,"step":"80.0","x":4.459428571428571,"y":-25.677142857142858,"z":71.71904761904761,"a95":0.99,"info":"29/11/2013 at 16:17:06"},{"visible":false,"include":false,"step":"90.0","x":26.636190476190478,"y":-10.763809523809524,"z":-17.31714285714286,"a95":0.99,"info":"29/11/2013 at 16:17:06"},{"visible":false,"include":false,"step":"100.0","x":38.639047619047616,"y":-17.83142857142857,"z":23.762857142857143,"a95":0.99,"info":"29/11/2013 at 16:17:06"}]},{"version":"v1.1.0","exported":"2016-11-23T14:37:58.615Z","volume":10.5,"added":"2016-11-23T14:22:05.966Z","format":"Utrecht","demagType":"Unknown","strat":"3","patch":1.1,"GEO":[{"dec":120.46357165861627,"inc":-40.70416985826523,"MAD":1.39838383588782,"cm":[-68.64952254699668,118.36816170422364,-259.6802238670728],"intensity":254.01832805479836,"type":"dir","forced":false,"remark":"","origin":false,"nSteps":4,"minStep":"12.0","maxStep":"25.0","steps":["12.0","16.0","20.0","25.0"],"group":"None","version":"v1.1.0"}],"TECT":[{"dec":160.40104691690522,"inc":-60.64667446626525,"MAD":1.398383835887913,"cm":[-95.6991059614691,-52.41618655022991,-272.4918747862547],"intensity":254.01832805479833,"type":"dir","forced":false,"remark":"","origin":false,"nSteps":4,"minStep":"12.0","maxStep":"25.0","steps":["12.0","16.0","20.0","25.0"],"group":"None","version":"v1.1.0"}],"interpreted":true,"name":"PC 2.6","coreAzi":364,"coreDip":38,"bedStrike":351,"bedDip":36,"data":[{"visible":true,"include":false,"step":"0.0","x":207.96190476190475,"y":327.48571428571427,"z":-395.76190476190476,"a95":0.99,"info":"29/11/2013 at 16:17:06"},{"visible":true,"include":false,"step":"4.0","x":214.02857142857144,"y":297.37142857142857,"z":-353.8952380952381,"a95":0.99,"info":"29/11/2013 at 16:17:06"},{"visible":true,"include":false,"step":"8.0","x":215.82857142857142,"y":260.4666666666667,"z":-312.37142857142857,"a95":0.99,"info":"29/11/2013 at 16:17:06"},{"visible":true,"include":true,"step":"12.0","x":200.32380952380953,"y":201.26666666666668,"z":-281.9904761904762,"a95":0.99,"info":"29/11/2013 at 16:17:06"},{"visible":true,"include":true,"step":"16.0","x":185.65714285714287,"y":155.0095238095238,"z":-241.2,"a95":0.99,"info":"29/11/2013 at 16:17:06"},{"visible":true,"include":true,"step":"20.0","x":160.15238095238095,"y":107.16190476190476,"z":-193.57142857142858,"a95":0.99,"info":"29/11/2013 at 16:17:06"},{"visible":true,"include":true,"step":"25.0","x":124.07619047619048,"y":28.036190476190477,"z":-112.57142857142857,"a95":0.99,"info":"29/11/2013 at 16:17:06"},{"visible":true,"include":false,"step":"30.0","x":84.9647619047619,"y":-10.64857142857143,"z":-75.24571428571429,"a95":0.99,"info":"29/11/2013 at 16:17:06"},{"visible":true,"include":false,"step":"35.0","x":75.32666666666667,"y":-40.09428571428572,"z":-21.335238095238097,"a95":0.99,"info":"29/11/2013 at 16:17:06"},{"visible":true,"include":false,"step":"40.0","x":41.9,"y":-38.860952380952384,"z":-42.420952380952386,"a95":0.99,"info":"29/11/2013 at 16:17:06"},{"visible":true,"include":false,"step":"45.0","x":46.53809523809524,"y":-55.58190476190477,"z":6.896285714285715,"a95":0.99,"info":"29/11/2013 at 16:17:06"},{"visible":true,"include":false,"step":"50.0","x":13.44190476190476,"y":-71.5247619047619,"z":29.859999999999996,"a95":0.99,"info":"29/11/2013 at 16:17:06"},{"visible":false,"include":false,"step":"60.0","x":18.412380952380953,"y":-79.47619047619048,"z":17.278095238095236,"a95":0.99,"info":"29/11/2013 at 16:17:06"},{"visible":false,"include":false,"step":"70.0","x":7.4581904761904765,"y":-40.542857142857144,"z":31.51047619047619,"a95":0.99,"info":"29/11/2013 at 16:17:06"},{"visible":false,"include":false,"step":"80.0","x":135.52380952380952,"y":-4.328857142857143,"z":43.06666666666666,"a95":0.99,"info":"29/11/2013 at 16:17:06"},{"visible":false,"include":false,"step":"90.0","x":-72.95619047619047,"y":-42.09238095238096,"z":7.347809523809524,"a95":0.99,"info":"29/11/2013 at 16:17:06"},{"visible":false,"include":false,"step":"100.0","x":5.668952380952381,"y":-10.775238095238095,"z":5.16047619047619,"a95":0.99,"info":"29/11/2013 at 16:17:06"}]},{"version":"v1.1.0","exported":"2016-11-23T14:37:58.615Z","volume":10.5,"added":"2016-11-23T14:22:05.969Z","format":"Utrecht","demagType":"Unknown","strat":"4","patch":1.1,"GEO":[{"dec":123.96780442322932,"inc":-64.63069717718832,"MAD":2.7187640773890456,"cm":[-27.295026149756026,-2.571069957931999,-205.31438284934157],"intensity":212.35787941823904,"type":"dir","forced":false,"remark":"","origin":false,"nSteps":4,"minStep":"16.0","maxStep":"30.0","steps":["16.0","20.0","25.0","30.0"],"group":"None","version":"v1.1.0"}],"TECT":[{"dec":214.53521946902825,"inc":-66.24523677643235,"MAD":2.7187640773890513,"cm":[-45.9702204556738,-120.48160629377136,-162.10041959902472],"intensity":212.35787941823904,"type":"dir","forced":false,"remark":"","origin":false,"nSteps":4,"minStep":"16.0","maxStep":"30.0","steps":["16.0","20.0","25.0","30.0"],"group":"None","version":"v1.1.0"}],"interpreted":true,"name":"PC 2.7","coreAzi":334,"coreDip":23,"bedStrike":351,"bedDip":36,"data":[{"visible":true,"include":false,"step":"0.0","x":232.49523809523808,"y":103.42857142857143,"z":-27.414285714285718,"a95":0.99,"info":"29/11/2013 at 16:17:06"},{"visible":true,"include":false,"step":"4.0","x":262.54285714285714,"y":89.84666666666666,"z":-97.08571428571429,"a95":0.99,"info":"29/11/2013 at 16:17:06"},{"visible":true,"include":false,"step":"8.0","x":283.4190476190476,"y":60.67333333333334,"z":-185.8761904761905,"a95":0.99,"info":"29/11/2013 at 16:17:06"},{"visible":true,"include":false,"step":"12.0","x":273.9809523809524,"y":32.21619047619048,"z":-210.60000000000002,"a95":0.99,"info":"29/11/2013 at 16:17:06"},{"visible":true,"include":true,"step":"16.0","x":251.36190476190478,"y":9.04695238095238,"z":-178.45714285714286,"a95":0.99,"info":"29/11/2013 at 16:17:06"},{"visible":true,"include":true,"step":"20.0","x":211.9238095238095,"y":-6.602285714285714,"z":-130.06666666666666,"a95":0.99,"info":"29/11/2013 at 16:17:06"},{"visible":true,"include":true,"step":"25.0","x":150.63809523809525,"y":-21.101904761904763,"z":-66.9047619047619,"a95":0.99,"info":"29/11/2013 at 16:17:06"},{"visible":true,"include":true,"step":"30.0","x":105.46666666666667,"y":-38.44761904761905,"z":-31.64190476190476,"a95":0.99,"info":"29/11/2013 at 16:17:06"},{"visible":true,"include":false,"step":"35.0","x":55.97714285714286,"y":-30.973333333333336,"z":8.296000000000001,"a95":0.99,"info":"29/11/2013 at 16:17:06"},{"visible":true,"include":false,"step":"40.0","x":46.957142857142856,"y":-29.726666666666667,"z":14.667619047619047,"a95":0.99,"info":"29/11/2013 at 16:17:06"},{"visible":true,"include":false,"step":"45.0","x":31.966666666666665,"y":-31.23619047619048,"z":45.43904761904762,"a95":0.99,"info":"29/11/2013 at 16:17:06"},{"visible":true,"include":false,"step":"50.0","x":-2.9353333333333333,"y":-20.70380952380952,"z":81.08285714285714,"a95":0.99,"info":"29/11/2013 at 16:17:06"},{"visible":false,"include":false,"step":"60.0","x":-16.739047619047618,"y":-5.629047619047618,"z":37.65714285714286,"a95":0.99,"info":"29/11/2013 at 16:17:06"},{"visible":false,"include":false,"step":"70.0","x":28.51047619047619,"y":8.329809523809523,"z":41.88380952380952,"a95":0.99,"info":"29/11/2013 at 16:17:06"},{"visible":false,"include":false,"step":"80.0","x":-11.608571428571429,"y":-27.047619047619047,"z":41.8352380952381,"a95":0.99,"info":"29/11/2013 at 16:17:06"},{"visible":false,"include":false,"step":"90.0","x":-14.936190476190477,"y":-27.359999999999996,"z":25.025714285714283,"a95":0.99,"info":"29/11/2013 at 16:17:06"},{"visible":false,"include":false,"step":"100.0","x":3.4859047619047616,"y":-1.0874285714285714,"z":38.51047619047619,"a95":0.99,"info":"29/11/2013 at 16:17:06"}]},{"version":"v1.1.0","exported":"2016-11-23T14:37:58.615Z","volume":10.5,"added":"2016-11-23T14:22:05.969Z","format":"Utrecht","demagType":"Unknown","strat":"5","patch":1.1,"GEO":[{"dec":117.70256983450884,"inc":-64.30106528788704,"MAD":3.878887900702468,"cm":[24.169300598376054,1.1614042575869217,-175.71421040802676],"intensity":206.8108032854077,"type":"dir","forced":false,"remark":"","origin":false,"nSteps":4,"minStep":"16.0","maxStep":"30.0","steps":["16.0","20.0","25.0","30.0"],"group":"None","version":"v1.1.0"}],"TECT":[{"dec":214.78105780752972,"inc":-68.96315179299668,"MAD":3.87888790070248,"cm":[7.865170494747119,-101.77882187965898,-145.05239812032653],"intensity":206.8108032854077,"type":"dir","forced":false,"remark":"","origin":false,"nSteps":4,"minStep":"16.0","maxStep":"30.0","steps":["16.0","20.0","25.0","30.0"],"group":"None","version":"v1.1.0"}],"interpreted":true,"name":"PC 2.8","coreAzi":342,"coreDip":67,"bedStrike":351,"bedDip":36,"data":[{"visible":true,"include":false,"step":"0.0","x":32.26761904761905,"y":155.38095238095238,"z":-418.00952380952384,"a95":0.99,"info":"29/11/2013 at 16:17:06"},{"visible":true,"include":false,"step":"4.0","x":47.71714285714285,"y":135.21904761904761,"z":-383.31428571428575,"a95":0.99,"info":"29/11/2013 at 16:17:06"},{"visible":true,"include":false,"step":"8.0","x":66.94380952380952,"y":97.9904761904762,"z":-346.7238095238095,"a95":0.99,"info":"29/11/2013 at 16:17:06"},{"visible":true,"include":false,"step":"12.0","x":83.4152380952381,"y":74.70476190476191,"z":-306.15238095238095,"a95":0.99,"info":"29/11/2013 at 16:17:06"},{"visible":true,"include":true,"step":"16.0","x":99.16190476190476,"y":44.21523809523809,"z":-250.03809523809525,"a95":0.99,"info":"29/11/2013 at 16:17:06"},{"visible":true,"include":true,"step":"20.0","x":88.15238095238095,"y":14.621904761904762,"z":-197.03809523809525,"a95":0.99,"info":"29/11/2013 at 16:17:06"},{"visible":true,"include":true,"step":"25.0","x":87.3,"y":-1.7725714285714285,"z":-109.52380952380952,"a95":0.99,"info":"29/11/2013 at 16:17:06"},{"visible":true,"include":true,"step":"30.0","x":83.32857142857144,"y":-22.771428571428572,"z":-55.01809523809524,"a95":0.99,"info":"29/11/2013 at 16:17:06"},{"visible":true,"include":false,"step":"35.0","x":68.09714285714286,"y":-27.707619047619048,"z":-23.454285714285714,"a95":0.99,"info":"29/11/2013 at 16:17:06"},{"visible":true,"include":false,"step":"40.0","x":53.980952380952374,"y":-34.19428571428572,"z":-10.581904761904761,"a95":0.99,"info":"29/11/2013 at 16:17:06"},{"visible":true,"include":false,"step":"45.0","x":50.75142857142857,"y":-18.047619047619047,"z":22.232380952380954,"a95":0.99,"info":"29/11/2013 at 16:17:06"},{"visible":true,"include":false,"step":"50.0","x":30.62190476190476,"y":-35.29047619047619,"z":39.11238095238095,"a95":0.99,"info":"29/11/2013 at 16:17:06"},{"visible":false,"include":false,"step":"60.0","x":23.81142857142857,"y":-41.03047619047619,"z":21.106666666666666,"a95":0.99,"info":"29/11/2013 at 16:17:06"},{"visible":false,"include":false,"step":"70.0","x":45.69333333333333,"y":-29.639047619047616,"z":52.455238095238094,"a95":0.99,"info":"29/11/2013 at 16:17:06"},{"visible":false,"include":false,"step":"80.0","x":34.093333333333334,"y":-29.367619047619048,"z":59.10476190476191,"a95":0.99,"info":"29/11/2013 at 16:17:06"},{"visible":false,"include":false,"step":"90.0","x":3.487714285714286,"y":-13.935238095238095,"z":14.340952380952382,"a95":0.99,"info":"29/11/2013 at 16:17:06"},{"visible":false,"include":false,"step":"100.0","x":7.8757142857142854,"y":-6.565904761904761,"z":31.88095238095238,"a95":0.99,"info":"29/11/2013 at 16:17:06"}]},{"version":"v1.1.0","exported":"2016-11-23T14:37:58.616Z","volume":10.5,"added":"2016-11-23T14:22:05.969Z","format":"Utrecht","demagType":"Unknown","strat":null,"patch":1.1,"GEO":[{"dec":123.46176910885333,"inc":-45.48873319559857,"MAD":4.07099238166064,"cm":[-66.2077937080654,48.99451916439156,-241.74751001611335],"intensity":466.1904761904762,"type":"dir","forced":false,"remark":"","origin":false,"nSteps":9,"minStep":"200","maxStep":"420","steps":["200","225","250","275","300","320","340","380","420"],"group":"None","version":"v1.1.0"}],"TECT":[{"dec":171.09038101979672,"inc":-61.7527242838567,"MAD":4.070992381660623,"cm":[-89.57276632838064,-98.52611210746453,-217.93374731807637],"intensity":466.1904761904762,"type":"dir","forced":false,"remark":"","origin":false,"nSteps":9,"minStep":"200","maxStep":"420","steps":["200","225","250","275","300","320","340","380","420"],"group":"None","version":"v1.1.0"}],"interpreted":true,"name":"PC 2.9A","coreAzi":325,"coreDip":40,"bedStrike":351,"bedDip":36,"data":[{"visible":true,"include":false,"step":"20","x":-7.0476190476190474,"y":130.66666666666666,"z":-391.8095238095238,"a95":2.8,"info":"\"13-11-02\" at \"18:56\""},{"visible":true,"include":false,"step":"80","x":121.23809523809524,"y":113.23809523809524,"z":-413.3333333333333,"a95":3,"info":"\"13-11-03\" at \"15:18\""},{"visible":true,"include":false,"step":"150","x":131.9047619047619,"y":94.76190476190476,"z":-464.95238095238096,"a95":2.8,"info":"\"13-11-04\" at \"12:41\""},{"visible":true,"include":false,"step":"180","x":157.8095238095238,"y":71.23809523809524,"z":-438.1904761904762,"a95":3,"info":"\"13-11-05\" at \"07:46\""},{"visible":true,"include":true,"step":"200","x":141.71428571428572,"y":48.95238095238095,"z":-393.5238095238095,"a95":3,"info":"\"13-11-05\" at \"12:17\""},{"visible":true,"include":true,"step":"225","x":154.95238095238096,"y":49.523809523809526,"z":-369.8095238095238,"a95":3.3,"info":"\"13-11-05\" at \"16:56\""},{"visible":true,"include":true,"step":"250","x":136.76190476190476,"y":29.428571428571427,"z":-350.6666666666667,"a95":3.4,"info":"\"13-11-06\" at \"10:43\""},{"visible":true,"include":true,"step":"275","x":151.52380952380952,"y":27.61904761904762,"z":-308.3809523809524,"a95":3.3,"info":"\"13-11-06\" at \"15:34\""},{"visible":true,"include":true,"step":"300","x":141.71428571428572,"y":5.714285714285714,"z":-220.28571428571428,"a95":3,"info":"\"13-11-07\" at \"04:09\""},{"visible":true,"include":true,"step":"320","x":142.28571428571428,"y":-0.8571428571428571,"z":-199.71428571428572,"a95":3.1,"info":"\"13-11-07\" at \"07:33\""},{"visible":true,"include":true,"step":"340","x":132.57142857142858,"y":-18.571428571428573,"z":-158.57142857142858,"a95":2.6,"info":"\"13-11-07\" at \"11:41\""},{"visible":true,"include":true,"step":"380","x":107.14285714285714,"y":-55.333333333333336,"z":-19.238095238095237,"a95":2.1,"info":"\"13-11-08\" at \"10:28\""},{"visible":true,"include":true,"step":"420","x":81.71428571428571,"y":-67.04761904761905,"z":54,"a95":3.5,"info":"\"13-11-08\" at \"14:55\""},{"visible":true,"include":false,"step":"450","x":78.66666666666667,"y":-67.61904761904762,"z":90.85714285714286,"a95":4.8,"info":"\"13-11-08\" at \"19:16\""}]},{"version":"v1.1.0","exported":"2016-11-23T14:37:58.616Z","volume":10.5,"added":"2016-11-23T14:22:05.969Z","format":"Utrecht","demagType":"Unknown","strat":"6","patch":1.1,"GEO":[{"dec":123.26771777642978,"inc":-52.58700708297635,"MAD":4.887212390601643,"cm":[-9.081177774295256,-28.348958803323125,-136.43467913276965],"intensity":250.99830899684235,"type":"dir","forced":false,"remark":"","origin":false,"nSteps":5,"minStep":"20.0","maxStep":"40.0","steps":["20.0","25.0","30.0","35.0","40.0"],"group":"None","version":"v1.1.0"}],"TECT":[{"dec":185.1644725974548,"inc":-65.07365486008013,"MAD":4.887212390601641,"cm":[-20.747351236905885,-102.00627917334239,-93.08501141926811],"intensity":250.99830899684227,"type":"dir","forced":false,"remark":"","origin":false,"nSteps":5,"minStep":"20.0","maxStep":"40.0","steps":["20.0","25.0","30.0","35.0","40.0"],"group":"None","version":"v1.1.0"}],"interpreted":true,"name":"PC 2.9B","coreAzi":325,"coreDip":40,"bedStrike":351,"bedDip":36,"data":[{"visible":true,"include":false,"step":"0.0","x":110.42857142857143,"y":205.46666666666667,"z":-180.59047619047618,"a95":0.99,"info":"29/11/2013 at 16:17:06"},{"visible":true,"include":false,"step":"4.0","x":115.64761904761905,"y":177.25714285714287,"z":-261.9428571428572,"a95":0.99,"info":"29/11/2013 at 16:17:06"},{"visible":true,"include":false,"step":"8.0","x":137.25714285714287,"y":137.8,"z":-339.45714285714286,"a95":0.99,"info":"29/11/2013 at 16:17:06"},{"visible":true,"include":false,"step":"12.0","x":155.22857142857143,"y":89.65523809523809,"z":-337.1904761904762,"a95":0.99,"info":"29/11/2013 at 16:17:06"},{"visible":true,"include":false,"step":"16.0","x":157.93333333333334,"y":49.04190476190477,"z":-298.84761904761905,"a95":0.99,"info":"29/11/2013 at 16:17:06"},{"visible":true,"include":true,"step":"20.0","x":146.58095238095237,"y":9.818095238095239,"z":-228.73333333333332,"a95":0.99,"info":"29/11/2013 at 16:17:06"},{"visible":true,"include":true,"step":"25.0","x":126.73333333333333,"y":-21.068571428571428,"z":-125.87619047619049,"a95":0.99,"info":"29/11/2013 at 16:17:06"},{"visible":true,"include":true,"step":"30.0","x":103.01904761904763,"y":-39.55428571428571,"z":-52.45238095238095,"a95":0.99,"info":"29/11/2013 at 16:17:06"},{"visible":true,"include":true,"step":"35.0","x":78.7647619047619,"y":-45.81333333333333,"z":-8.409333333333333,"a95":0.99,"info":"29/11/2013 at 16:17:06"},{"visible":true,"include":true,"step":"40.0","x":95.82857142857144,"y":-45.53619047619048,"z":10.766666666666666,"a95":0.99,"info":"29/11/2013 at 16:17:06"},{"visible":true,"include":false,"step":"45.0","x":77.80571428571429,"y":-48.38,"z":49.92857142857143,"a95":0.99,"info":"29/11/2013 at 16:17:06"},{"visible":true,"include":false,"step":"50.0","x":41.05142857142857,"y":-45.44,"z":64.2352380952381,"a95":0.99,"info":"29/11/2013 at 16:17:06"},{"visible":false,"include":false,"step":"60.0","x":20.175238095238097,"y":-19.54190476190476,"z":59.448571428571434,"a95":0.99,"info":"29/11/2013 at 16:17:06"},{"visible":false,"include":false,"step":"70.0","x":61.90095238095238,"y":-47.201904761904764,"z":63.33238095238095,"a95":0.99,"info":"29/11/2013 at 16:17:06"},{"visible":false,"include":false,"step":"80.0","x":95.4857142857143,"y":33.64952380952381,"z":25.72095238095238,"a95":0.99,"info":"29/11/2013 at 16:17:06"},{"visible":false,"include":false,"step":"90.0","x":5.380857142857143,"y":3.171333333333333,"z":-1.3184761904761904,"a95":0.99,"info":"29/11/2013 at 16:17:06"},{"visible":false,"include":false,"step":"100.0","x":11.987619047619049,"y":-7.785714285714286,"z":23.218095238095238,"a95":0.99,"info":"29/11/2013 at 16:17:06"}]},{"version":"v1.1.0","exported":"2016-11-23T14:37:58.616Z","volume":10.5,"added":"2016-11-23T14:22:05.969Z","format":"Utrecht","demagType":"Unknown","strat":"7","patch":1.1,"GEO":[{"dec":105.80151985869804,"inc":-58.41433216931152,"MAD":2.7044447474265616,"cm":[-12.303456418845439,-11.438574707274041,-179.91973613512596],"intensity":363.82736424002155,"type":"dir","forced":false,"remark":"","origin":false,"nSteps":6,"minStep":"16.0","maxStep":"40.0","steps":["16.0","20.0","25.0","30.0","35.0","40.0"],"group":"None","version":"v1.1.0"}],"TECT":[{"dec":198.8431536952883,"inc":-75.61262378836884,"MAD":2.704444747426612,"cm":[-28.452015385364653,-113.39656334195378,-137.7861739249004],"intensity":363.82736424002155,"type":"dir","forced":false,"remark":"","origin":false,"nSteps":6,"minStep":"16.0","maxStep":"40.0","steps":["16.0","20.0","25.0","30.0","35.0","40.0"],"group":"None","version":"v1.1.0"}],"interpreted":true,"name":"PC 2.10","coreAzi":350,"coreDip":25,"bedStrike":351,"bedDip":36,"data":[{"visible":true,"include":false,"step":"0.0","x":334.9047619047619,"y":252.0190476190476,"z":-312.9142857142857,"a95":0.99,"info":"29/11/2013 at 16:17:06"},{"visible":true,"include":false,"step":"4.0","x":356.02857142857147,"y":245.06666666666666,"z":-300.0857142857143,"a95":0.99,"info":"29/11/2013 at 16:17:06"},{"visible":true,"include":false,"step":"8.0","x":368.1142857142857,"y":207.35238095238094,"z":-283.3904761904762,"a95":0.99,"info":"29/11/2013 at 16:17:06"},{"visible":true,"include":false,"step":"12.0","x":336.06666666666666,"y":145.7047619047619,"z":-263.51428571428573,"a95":0.99,"info":"29/11/2013 at 16:17:06"},{"visible":true,"include":true,"step":"16.0","x":297.552380952381,"y":91.51333333333334,"z":-207.82857142857142,"a95":0.99,"info":"29/11/2013 at 16:17:06"},{"visible":true,"include":true,"step":"20.0","x":235.8190476190476,"y":34.88,"z":-148.68571428571428,"a95":0.99,"info":"29/11/2013 at 16:17:06"},{"visible":true,"include":true,"step":"25.0","x":177.64761904761903,"y":-10.723809523809523,"z":-90.22857142857143,"a95":0.99,"info":"29/11/2013 at 16:17:06"},{"visible":true,"include":true,"step":"30.0","x":114.35238095238095,"y":-42.92952380952381,"z":-44.18095238095238,"a95":0.99,"info":"29/11/2013 at 16:17:06"},{"visible":true,"include":true,"step":"35.0","x":72.67999999999999,"y":-68.75523809523808,"z":-18.51904761904762,"a95":0.99,"info":"29/11/2013 at 16:17:06"},{"visible":true,"include":true,"step":"40.0","x":54.63714285714286,"y":-84.39238095238095,"z":-1.868095238095238,"a95":0.99,"info":"29/11/2013 at 16:17:06"},{"visible":true,"include":false,"step":"45.0","x":42.86666666666667,"y":-78.65904761904761,"z":21.65047619047619,"a95":0.99,"info":"29/11/2013 at 16:17:06"},{"visible":true,"include":false,"step":"50.0","x":18.061904761904763,"y":-73.40285714285714,"z":47.97428571428571,"a95":0.99,"info":"29/11/2013 at 16:17:06"},{"visible":false,"include":false,"step":"60.0","x":-9.164571428571428,"y":-62.60476190476191,"z":62.18761904761905,"a95":0.99,"info":"29/11/2013 at 16:17:06"},{"visible":false,"include":false,"step":"70.0","x":21.094285714285714,"y":-40.59809523809523,"z":52.852380952380955,"a95":0.99,"info":"29/11/2013 at 16:17:06"},{"visible":false,"include":false,"step":"80.0","x":92.75238095238095,"y":-35.705714285714286,"z":61.82190476190476,"a95":0.99,"info":"29/11/2013 at 16:17:06"},{"visible":false,"include":false,"step":"90.0","x":-3.913238095238095,"y":0.09775238095238095,"z":-38.976190476190474,"a95":0.99,"info":"29/11/2013 at 16:17:06"},{"visible":false,"include":false,"step":"100.0","x":8.663333333333334,"y":-23.540952380952383,"z":18.53904761904762,"a95":0.99,"info":"29/11/2013 at 16:17:06"}]},{"version":"v1.1.0","exported":"2016-11-23T14:37:58.616Z","volume":10.5,"added":"2016-11-23T14:22:05.970Z","format":"Utrecht","demagType":"Unknown","strat":"8","patch":1.1,"GEO":[{"dec":103.96257739031569,"inc":-56.2983090057061,"MAD":5.227677792935889,"cm":[12.268548069511965,-3.071830904563093,-156.99455829119196],"intensity":333.30373368579126,"type":"dir","forced":false,"remark":"","origin":false,"nSteps":6,"minStep":"20.0","maxStep":"45.0","steps":["20.0","25.0","30.0","35.0","40.0","45.0"],"group":"None","version":"v1.1.0"}],"TECT":[{"dec":190.26840890616515,"inc":-76.74316242057263,"MAD":5.227677792935882,"cm":[-2.133775629410663,-94.0045239734763,-126.35600984508051],"intensity":333.3037336857913,"type":"dir","forced":false,"remark":"","origin":false,"nSteps":6,"minStep":"20.0","maxStep":"45.0","steps":["20.0","25.0","30.0","35.0","40.0","45.0"],"group":"None","version":"v1.1.0"}],"interpreted":true,"name":"PC 2.11","coreAzi":4,"coreDip":38,"bedStrike":351,"bedDip":36,"data":[{"visible":true,"include":false,"step":"0.0","x":265.12380952380954,"y":414.97142857142853,"z":-404.6666666666667,"a95":0.99,"info":"29/11/2013 at 16:17:06"},{"visible":true,"include":false,"step":"4.0","x":306.5809523809524,"y":398.68571428571425,"z":-383.3333333333333,"a95":0.99,"info":"29/11/2013 at 16:17:06"},{"visible":true,"include":false,"step":"8.0","x":338.3333333333333,"y":349.64761904761906,"z":-362.03809523809525,"a95":0.99,"info":"29/11/2013 at 16:17:06"},{"visible":true,"include":false,"step":"12.0","x":338.8857142857143,"y":274.3333333333333,"z":-316.37142857142857,"a95":0.99,"info":"29/11/2013 at 16:17:06"},{"visible":true,"include":false,"step":"16.0","x":299.8285714285714,"y":195.45714285714288,"z":-269,"a95":0.99,"info":"29/11/2013 at 16:17:06"},{"visible":true,"include":true,"step":"20.0","x":249.83809523809526,"y":121.65714285714287,"z":-212.85714285714286,"a95":0.99,"info":"29/11/2013 at 16:17:06"},{"visible":true,"include":true,"step":"25.0","x":194.41904761904763,"y":34.59428571428572,"z":-141.38095238095238,"a95":0.99,"info":"29/11/2013 at 16:17:06"},{"visible":true,"include":true,"step":"30.0","x":140.03809523809525,"y":-9.595238095238095,"z":-81.6952380952381,"a95":0.99,"info":"29/11/2013 at 16:17:06"},{"visible":true,"include":true,"step":"35.0","x":81.21619047619048,"y":-49.27904761904762,"z":-46.72190476190476,"a95":0.99,"info":"29/11/2013 at 16:17:06"},{"visible":true,"include":true,"step":"40.0","x":61.73238095238096,"y":-58.526666666666664,"z":-30.00095238095238,"a95":0.99,"info":"29/11/2013 at 16:17:06"},{"visible":true,"include":true,"step":"45.0","x":59.45428571428571,"y":-62.37142857142857,"z":-10.424761904761905,"a95":0.99,"info":"29/11/2013 at 16:17:06"},{"visible":true,"include":false,"step":"50.0","x":27.34190476190476,"y":-81.92476190476191,"z":-5.567142857142857,"a95":0.99,"info":"29/11/2013 at 16:17:06"},{"visible":false,"include":false,"step":"60.0","x":-1.5654285714285716,"y":-70.64761904761905,"z":10.685714285714287,"a95":0.99,"info":"29/11/2013 at 16:17:06"},{"visible":false,"include":false,"step":"70.0","x":30.46761904761905,"y":-71.80952380952381,"z":12.197142857142856,"a95":0.99,"info":"29/11/2013 at 16:17:06"},{"visible":false,"include":false,"step":"80.0","x":8.204285714285714,"y":-37.02095238095238,"z":49.54571428571429,"a95":0.99,"info":"29/11/2013 at 16:17:06"},{"visible":false,"include":false,"step":"90.0","x":-15.998095238095237,"y":-34.46095238095238,"z":-25.162857142857142,"a95":0.99,"info":"29/11/2013 at 16:17:06"},{"visible":false,"include":false,"step":"100.0","x":6.591238095238095,"y":-37.56095238095238,"z":20.721904761904764,"a95":0.99,"info":"29/11/2013 at 16:17:06"}]},{"version":"v1.1.0","exported":"2016-11-23T14:37:58.616Z","volume":10.5,"added":"2016-11-23T14:22:05.970Z","format":"Utrecht","demagType":"Unknown","strat":"1","patch":1.1,"GEO":[{"dec":105.62615235383498,"inc":-36.97624654539307,"MAD":5.1446097683788325,"cm":[-1.0641020757584392,79.1916192271705,-118.93453185739051],"intensity":340.7742681669577,"type":"dir","forced":false,"remark":"","origin":false,"nSteps":7,"minStep":"16.0","maxStep":"45.0","steps":["16.0","20.0","25.0","30.0","35.0","40.0","45.0"],"group":"None","version":"v1.1.0"}],"TECT":[{"dec":135.8973349969005,"inc":-65.98992790257044,"MAD":5.1446097683788405,"cm":[-14.331969390464932,-4.578398127564991,-142.0968003199288],"intensity":340.7742681669577,"type":"dir","forced":false,"remark":"","origin":false,"nSteps":7,"minStep":"16.0","maxStep":"45.0","steps":["16.0","20.0","25.0","30.0","35.0","40.0","45.0"],"group":"None","version":"v1.1.0"}],"interpreted":true,"name":"PC 2.12","coreAzi":304,"coreDip":24,"bedStrike":351,"bedDip":36,"data":[{"visible":true,"include":false,"step":"0.0","x":-17,"y":253.17142857142858,"z":-504.85714285714283,"a95":0.99,"info":"29/11/2013 at 22:03:38"},{"visible":true,"include":false,"step":"4.0","x":25.639047619047616,"y":229.44761904761904,"z":-457.1142857142857,"a95":0.99,"info":"29/11/2013 at 22:03:38"},{"visible":true,"include":false,"step":"8.0","x":80.21523809523809,"y":190.88571428571427,"z":-407.3238095238095,"a95":0.99,"info":"29/11/2013 at 22:03:38"},{"visible":true,"include":false,"step":"12.0","x":117.86666666666666,"y":139.96190476190475,"z":-351.6,"a95":0.99,"info":"29/11/2013 at 22:03:38"},{"visible":true,"include":true,"step":"16.0","x":119.24761904761904,"y":98.16190476190476,"z":-293.49523809523805,"a95":0.99,"info":"29/11/2013 at 22:03:38"},{"visible":true,"include":true,"step":"20.0","x":122.34285714285713,"y":68.44285714285714,"z":-224.46666666666667,"a95":0.99,"info":"29/11/2013 at 22:03:38"},{"visible":true,"include":true,"step":"25.0","x":88.67904761904762,"y":54.48285714285715,"z":-141.32380952380953,"a95":0.99,"info":"29/11/2013 at 22:03:38"},{"visible":true,"include":true,"step":"30.0","x":86.52190476190476,"y":35.30571428571428,"z":-89.2647619047619,"a95":0.99,"info":"29/11/2013 at 22:03:38"},{"visible":true,"include":true,"step":"35.0","x":59.325714285714284,"y":16.145714285714284,"z":-41.79047619047619,"a95":0.99,"info":"29/11/2013 at 22:03:38"},{"visible":true,"include":true,"step":"40.0","x":46.760000000000005,"y":28.644761904761904,"z":2.0764761904761904,"a95":0.99,"info":"29/11/2013 at 22:03:38"},{"visible":true,"include":true,"step":"45.0","x":49.06952380952381,"y":2.6246666666666667,"z":25.996190476190474,"a95":0.99,"info":"29/11/2013 at 22:03:38"},{"visible":true,"include":false,"step":"50.0","x":21.100952380952382,"y":7.0685714285714285,"z":13.32952380952381,"a95":0.99,"info":"29/11/2013 at 22:03:38"},{"visible":false,"include":false,"step":"60.0","x":14.260952380952382,"y":-10.788571428571428,"z":-14.405714285714286,"a95":0.99,"info":"29/11/2013 at 22:03:38"},{"visible":false,"include":false,"step":"70.0","x":13.818095238095239,"y":5.933619047619048,"z":36.804761904761904,"a95":0.99,"info":"29/11/2013 at 22:03:38"},{"visible":false,"include":false,"step":"80.0","x":30.343809523809526,"y":1.750952380952381,"z":55.04857142857143,"a95":0.99,"info":"29/11/2013 at 22:03:38"},{"visible":false,"include":false,"step":"90.0","x":-10.07047619047619,"y":12.188571428571429,"z":-0.5836666666666667,"a95":0.99,"info":"29/11/2013 at 22:03:38"},{"visible":false,"include":false,"step":"100.0","x":-15.836190476190476,"y":14.82952380952381,"z":23.30952380952381,"a95":0.99,"info":"29/11/2013 at 22:03:38"}]},{"version":"v1.1.0","exported":"2016-11-23T14:37:58.616Z","volume":10.5,"added":"2016-11-23T14:22:05.970Z","format":"Utrecht","demagType":"Unknown","strat":null,"patch":1.1,"GEO":[{"dec":128.25621440951903,"inc":-42.15162423454429,"MAD":2.3693361412992795,"cm":[-128.32880343718423,134.3866103968358,-270.78625078606757],"intensity":542.615574488979,"type":"dir","forced":false,"remark":"","origin":false,"nSteps":9,"minStep":"200","maxStep":"420","steps":["200","225","250","275","300","320","340","380","420"],"group":"None","version":"v1.1.0"}],"TECT":[{"dec":169.6716464144606,"inc":-57.00220897542573,"MAD":2.3693361412992346,"cm":[-156.59334267989985,-44.06866705845233,-285.28882570541066],"intensity":542.615574488979,"type":"dir","forced":false,"remark":"","origin":false,"nSteps":9,"minStep":"200","maxStep":"420","steps":["200","225","250","275","300","320","340","380","420"],"group":"None","version":"v1.1.0"}],"interpreted":true,"name":"PC 2.13A","coreAzi":346,"coreDip":47,"bedStrike":351,"bedDip":36,"data":[{"visible":true,"include":false,"step":"20","x":-12.571428571428571,"y":245.8095238095238,"z":-468.76190476190476,"a95":2.7,"info":"\"13-11-02\" at \"18:58\""},{"visible":true,"include":false,"step":"80","x":32.95238095238095,"y":283.7142857142857,"z":-491.04761904761904,"a95":2.6,"info":"\"13-11-03\" at \"15:22\""},{"visible":true,"include":false,"step":"150","x":70.0952380952381,"y":251.33333333333334,"z":-544.8571428571429,"a95":2.7,"info":"\"13-11-04\" at \"12:44\""},{"visible":true,"include":false,"step":"180","x":84.38095238095238,"y":233.9047619047619,"z":-532.3809523809524,"a95":2.7,"info":"\"13-11-05\" at \"07:49\""},{"visible":true,"include":true,"step":"200","x":70.85714285714286,"y":198.85714285714286,"z":-492.76190476190476,"a95":3,"info":"\"13-11-05\" at \"12:19\""},{"visible":true,"include":true,"step":"225","x":79.71428571428571,"y":184.85714285714286,"z":-471.42857142857144,"a95":3.3,"info":"\"13-11-05\" at \"16:59\""},{"visible":true,"include":true,"step":"250","x":64,"y":161.14285714285714,"z":-448.3809523809524,"a95":3.4,"info":"\"13-11-06\" at \"10:46\""},{"visible":true,"include":true,"step":"275","x":75.33333333333333,"y":145.8095238095238,"z":-400.76190476190476,"a95":3.3,"info":"\"13-11-06\" at \"15:36\""},{"visible":true,"include":true,"step":"300","x":76.85714285714286,"y":103.52380952380952,"z":-309.8095238095238,"a95":3.3,"info":"\"13-11-07\" at \"04:12\""},{"visible":true,"include":true,"step":"320","x":71.42857142857143,"y":94.66666666666667,"z":-280.76190476190476,"a95":3.8,"info":"\"13-11-07\" at \"07:35\""},{"visible":true,"include":true,"step":"340","x":74.0952380952381,"y":69.42857142857143,"z":-235.52380952380952,"a95":2.9,"info":"\"13-11-07\" at \"11:44\""},{"visible":true,"include":true,"step":"380","x":60.57142857142857,"y":-12.761904761904763,"z":-95.23809523809524,"a95":4.9,"info":"\"13-11-08\" at \"10:31\""},{"visible":true,"include":true,"step":"420","x":55.63809523809524,"y":-51.38095238095238,"z":-11.533333333333333,"a95":3.1,"info":"\"13-11-08\" at \"14:58\""},{"visible":true,"include":false,"step":"450","x":41.99047619047619,"y":-52.2,"z":29.419047619047618,"a95":5.7,"info":"\"13-11-08\" at \"19:18\""}]},{"version":"v1.1.0","exported":"2016-11-23T14:37:58.617Z","volume":10.5,"added":"2016-11-23T14:22:05.970Z","format":"Utrecht","demagType":"Unknown","strat":"2","patch":1.1,"GEO":[{"dec":118.18360404372709,"inc":-45.809334104631965,"MAD":5.435078663426559,"cm":[11.587539561883487,5.426991985968872,-91.97202529593166],"intensity":172.80421248791703,"type":"dir","forced":false,"remark":"","origin":false,"nSteps":5,"minStep":"25.0","maxStep":"45.0","steps":["25.0","30.0","35.0","40.0","45.0"],"group":"None","version":"v1.1.0"}],"TECT":[{"dec":167.2213306703212,"inc":-65.02683716878784,"MAD":5.435078663426555,"cm":[2.9164247456574737,-49.32027231889934,-78.62303706447624],"intensity":172.80421248791706,"type":"dir","forced":false,"remark":"","origin":false,"nSteps":5,"minStep":"25.0","maxStep":"45.0","steps":["25.0","30.0","35.0","40.0","45.0"],"group":"None","version":"v1.1.0"}],"interpreted":true,"name":"PC 2.13B","coreAzi":346,"coreDip":47,"bedStrike":351,"bedDip":36,"data":[{"visible":false,"include":false,"step":"0.0","x":-7.026476190476191,"y":240.36190476190478,"z":14.011428571428572,"a95":0.99,"info":"29/11/2013 at 22:03:38"},{"visible":true,"include":false,"step":"4.0","x":29.101904761904763,"y":236.8,"z":-64.22380952380952,"a95":0.99,"info":"29/11/2013 at 22:03:38"},{"visible":true,"include":false,"step":"8.0","x":66.77809523809523,"y":227.42857142857142,"z":-150.36190476190475,"a95":0.99,"info":"29/11/2013 at 22:03:38"},{"visible":true,"include":false,"step":"12.0","x":79.00666666666667,"y":189.7238095238095,"z":-220.44761904761904,"a95":0.99,"info":"29/11/2013 at 22:03:38"},{"visible":true,"include":false,"step":"16.0","x":85.49333333333333,"y":148.01904761904763,"z":-218.93333333333334,"a95":0.99,"info":"29/11/2013 at 22:03:38"},{"visible":true,"include":false,"step":"20.0","x":102.19999999999999,"y":126.26666666666667,"z":-180.93333333333334,"a95":0.99,"info":"29/11/2013 at 22:03:38"},{"visible":true,"include":true,"step":"25.0","x":89.35142857142857,"y":56.3495238095238,"z":-141.03809523809525,"a95":0.99,"info":"29/11/2013 at 22:03:38"},{"visible":true,"include":true,"step":"30.0","x":68.41047619047619,"y":32.352380952380955,"z":-92.54380952380953,"a95":0.99,"info":"29/11/2013 at 22:03:38"},{"visible":true,"include":true,"step":"35.0","x":67.59238095238095,"y":-3.686095238095238,"z":-53.887619047619054,"a95":0.99,"info":"29/11/2013 at 22:03:38"},{"visible":true,"include":true,"step":"40.0","x":62.50380952380952,"y":-12.408571428571427,"z":-19.777142857142856,"a95":0.99,"info":"29/11/2013 at 22:03:38"},{"visible":true,"include":true,"step":"45.0","x":62.07904761904762,"y":-32.26190476190476,"z":4.788952380952381,"a95":0.99,"info":"29/11/2013 at 22:03:38"},{"visible":true,"include":false,"step":"50.0","x":41.60666666666667,"y":-25.640000000000004,"z":-2.6041904761904764,"a95":0.99,"info":"29/11/2013 at 22:03:38"},{"visible":false,"include":false,"step":"60.0","x":49.57238095238095,"y":-32.68666666666667,"z":-6.932857142857143,"a95":0.99,"info":"29/11/2013 at 22:03:38"},{"visible":false,"include":false,"step":"70.0","x":35.88952380952381,"y":-17.21238095238095,"z":23.517142857142858,"a95":0.99,"info":"29/11/2013 at 22:03:38"},{"visible":false,"include":false,"step":"80.0","x":42.44380952380953,"y":-12.038095238095238,"z":36.99714285714286,"a95":0.99,"info":"29/11/2013 at 22:03:38"},{"visible":false,"include":false,"step":"90.0","x":-12.885714285714286,"y":-20.18,"z":-6.3806666666666665,"a95":0.99,"info":"29/11/2013 at 22:03:38"},{"visible":false,"include":false,"step":"100.0","x":-13.927619047619048,"y":-13.162857142857144,"z":7.502,"a95":0.99,"info":"29/11/2013 at 22:03:38"}]},{"version":"v1.1.0","exported":"2016-11-23T14:37:58.617Z","volume":10.5,"added":"2016-11-23T14:22:05.970Z","format":"Utrecht","demagType":"Unknown","strat":"3","patch":1.1,"GEO":[{"dec":304.36236290599845,"inc":-34.493935293239154,"MAD":20.693154432473648,"cm":[-1.4432899320127035e-14,7.66053886991358e-15,0],"intensity":404.367521033923,"type":"GC","origin":false,"forced":true,"remark":"","nSteps":12,"minStep":"0.0","maxStep":"50.0","steps":["0.0","4.0","8.0","12.0","16.0","20.0","25.0","30.0","35.0","40.0","45.0","50.0"],"group":"None","version":"v1.1.0"}],"TECT":[{"dec":295.68736388977936,"inc":-6.082366714271645,"MAD":20.69315443247366,"cm":[-1.3322676295501878e-14,9.769962616701378e-15,-6.106226635438361e-16],"intensity":404.3675210339231,"type":"GC","origin":false,"forced":true,"remark":"","nSteps":12,"minStep":"0.0","maxStep":"50.0","steps":["0.0","4.0","8.0","12.0","16.0","20.0","25.0","30.0","35.0","40.0","45.0","50.0"],"group":"None","version":"v1.1.0"}],"interpreted":true,"name":"PC 2.14","coreAzi":313,"coreDip":15,"bedStrike":351,"bedDip":36,"data":[{"visible":true,"include":true,"step":"0.0","x":5.579047619047619,"y":376.23809523809524,"z":73.23809523809524,"a95":0.99,"info":"29/11/2013 at 22:03:38"},{"visible":true,"include":true,"step":"4.0","x":35.45142857142857,"y":337.03809523809525,"z":9.68952380952381,"a95":0.99,"info":"29/11/2013 at 22:03:38"},{"visible":true,"include":true,"step":"8.0","x":84.08,"y":272.8666666666667,"z":-67.50285714285714,"a95":0.99,"info":"29/11/2013 at 22:03:38"},{"visible":true,"include":true,"step":"12.0","x":106.77142857142856,"y":209.87619047619046,"z":-119.62857142857142,"a95":0.99,"info":"29/11/2013 at 22:03:38"},{"visible":true,"include":true,"step":"16.0","x":115.05714285714285,"y":164.7238095238095,"z":-120.5047619047619,"a95":0.99,"info":"29/11/2013 at 22:03:38"},{"visible":true,"include":true,"step":"20.0","x":101.04761904761905,"y":133.28571428571428,"z":-112.45714285714286,"a95":0.99,"info":"29/11/2013 at 22:03:38"},{"visible":true,"include":true,"step":"25.0","x":109.07619047619048,"y":93.95238095238095,"z":-60.775238095238095,"a95":0.99,"info":"29/11/2013 at 22:03:38"},{"visible":true,"include":true,"step":"30.0","x":82.6152380952381,"y":75.21809523809523,"z":-22.768571428571427,"a95":0.99,"info":"29/11/2013 at 22:03:38"},{"visible":true,"include":true,"step":"35.0","x":65.90761904761905,"y":50.11904761904762,"z":1.6754285714285713,"a95":0.99,"info":"29/11/2013 at 22:03:38"},{"visible":true,"include":true,"step":"40.0","x":43.35333333333333,"y":36.25333333333334,"z":7.674571428571428,"a95":0.99,"info":"29/11/2013 at 22:03:38"},{"visible":true,"include":true,"step":"45.0","x":40.97238095238095,"y":40.91619047619048,"z":26.43904761904762,"a95":0.99,"info":"29/11/2013 at 22:03:38"},{"visible":true,"include":true,"step":"50.0","x":10.79047619047619,"y":13.116190476190477,"z":34.68952380952381,"a95":0.99,"info":"29/11/2013 at 22:03:38"},{"visible":false,"include":false,"step":"60.0","x":2.362761904761905,"y":-1.2145714285714286,"z":8.360190476190477,"a95":0.99,"info":"29/11/2013 at 22:03:38"},{"visible":false,"include":false,"step":"70.0","x":36.88666666666667,"y":-14.378095238095238,"z":24.094285714285714,"a95":0.99,"info":"29/11/2013 at 22:03:38"},{"visible":false,"include":false,"step":"80.0","x":14.345714285714285,"y":-13.689523809523811,"z":52.917142857142856,"a95":0.99,"info":"29/11/2013 at 22:03:38"},{"visible":false,"include":false,"step":"90.0","x":23.94190476190476,"y":-8.263238095238094,"z":11.197142857142856,"a95":0.99,"info":"29/11/2013 at 22:03:38"},{"visible":false,"include":false,"step":"100.0","x":3.908761904761905,"y":-39.83904761904762,"z":52.86095238095238,"a95":0.99,"info":"29/11/2013 at 22:03:38"}]},{"version":"v1.1.0","exported":"2016-11-23T14:37:58.617Z","volume":10.5,"added":"2016-11-23T14:22:05.970Z","format":"Utrecht","demagType":"Unknown","strat":null,"patch":1.1,"GEO":[],"TECT":[],"interpreted":false,"name":"PC 2.15A","coreAzi":14,"coreDip":313,"bedStrike":351,"bedDip":36,"data":[{"visible":true,"include":false,"step":"20","x":220.0952380952381,"y":287.7142857142857,"z":-298.3809523809524,"a95":2.1,"info":"\"13-11-02\" at \"19:01\""},{"visible":true,"include":false,"step":"80","x":298,"y":276.2857142857143,"z":-356.1904761904762,"a95":2.1,"info":"\"13-11-03\" at \"15:24\""},{"visible":true,"include":false,"step":"150","x":266.57142857142856,"y":279.7142857142857,"z":-422,"a95":2.4,"info":"\"13-11-04\" at \"12:46\""},{"visible":true,"include":false,"step":"180","x":278.6666666666667,"y":255.52380952380952,"z":-407.42857142857144,"a95":2.3,"info":"\"13-11-05\" at \"07:51\""},{"visible":true,"include":false,"step":"200","x":243.23809523809524,"y":214.85714285714286,"z":-383.04761904761904,"a95":2.5,"info":"\"13-11-05\" at \"12:22\""},{"visible":true,"include":false,"step":"225","x":234.28571428571428,"y":198.57142857142858,"z":-370.3809523809524,"a95":3,"info":"\"13-11-05\" at \"17:02\""},{"visible":true,"include":true,"step":"250","x":199.61904761904762,"y":178.76190476190476,"z":-350.6666666666667,"a95":2.8,"info":"\"13-11-06\" at \"10:48\""},{"visible":true,"include":true,"step":"275","x":195.71428571428572,"y":144.1904761904762,"z":-316.95238095238096,"a95":2.8,"info":"\"13-11-06\" at \"15:39\""},{"visible":true,"include":true,"step":"300","x":149.23809523809524,"y":97.23809523809524,"z":-248.95238095238096,"a95":2.8,"info":"\"13-11-07\" at \"04:14\""},{"visible":true,"include":true,"step":"320","x":140.0952380952381,"y":76.95238095238095,"z":-223.33333333333334,"a95":3.2,"info":"\"13-11-07\" at \"07:36\""},{"visible":true,"include":true,"step":"340","x":108.47619047619048,"y":36.38095238095238,"z":-185.52380952380952,"a95":3.1,"info":"\"13-11-07\" at \"11:46\""},{"visible":true,"include":true,"step":"380","x":53.04761904761905,"y":-52.38095238095238,"z":-87.71428571428571,"a95":3.8,"info":"\"13-11-08\" at \"10:33\""},{"visible":true,"include":false,"step":"420","x":-6,"y":-95.23809523809524,"z":-35.61904761904762,"a95":3.8,"info":"\"13-11-08\" at \"15:00\""},{"visible":true,"include":false,"step":"450","x":5.523809523809524,"y":-110.19047619047619,"z":-5.619047619047619,"a95":3.6,"info":"\"13-11-08\" at \"19:21\""}]},{"version":"v1.1.0","exported":"2016-11-23T14:37:58.617Z","volume":10.5,"added":"2016-11-23T14:22:05.970Z","format":"Utrecht","demagType":"Unknown","strat":"4","patch":1.1,"GEO":[{"dec":104.27978579723663,"inc":-54.727037676735506,"MAD":2.1973874021863686,"cm":[-1.378415798348826,45.64271165704231,-156.92840652423482],"intensity":288.1572091144448,"type":"dir","forced":false,"remark":"","origin":false,"nSteps":5,"minStep":"16.0","maxStep":"35.0","steps":["16.0","20.0","25.0","30.0","35.0"],"group":"None","version":"v1.1.0"}],"TECT":[{"dec":183.53039993697453,"inc":-76.47920139377706,"MAD":2.1973874021863558,"cm":[-17.14836815791731,-53.9248489395365,-153.32881682229615],"intensity":288.15720911444475,"type":"dir","forced":false,"remark":"","origin":false,"nSteps":5,"minStep":"16.0","maxStep":"35.0","steps":["16.0","20.0","25.0","30.0","35.0"],"group":"None","version":"v1.1.0"}],"interpreted":true,"name":"PC 2.15B","coreAzi":19,"coreDip":53,"bedStrike":351,"bedDip":36,"data":[{"visible":true,"include":false,"step":"0.0","x":242.17142857142858,"y":335.4666666666667,"z":-264.18095238095236,"a95":0.99,"info":"29/11/2013 at 22:03:38"},{"visible":true,"include":false,"step":"4.0","x":245.60000000000002,"y":292.77142857142854,"z":-255.84761904761905,"a95":0.99,"info":"29/11/2013 at 22:03:38"},{"visible":true,"include":false,"step":"8.0","x":248.28571428571428,"y":243.39999999999998,"z":-261.6,"a95":0.99,"info":"29/11/2013 at 22:03:38"},{"visible":true,"include":false,"step":"12.0","x":217.21904761904764,"y":187.32380952380953,"z":-253.64761904761906,"a95":0.99,"info":"29/11/2013 at 22:03:38"},{"visible":true,"include":true,"step":"16.0","x":186.86666666666665,"y":134.9714285714286,"z":-214.1047619047619,"a95":0.99,"info":"29/11/2013 at 22:03:38"},{"visible":true,"include":true,"step":"20.0","x":151.7238095238095,"y":95.70476190476191,"z":-173.06666666666666,"a95":0.99,"info":"29/11/2013 at 22:03:38"},{"visible":true,"include":true,"step":"25.0","x":99.14285714285714,"y":26.293333333333333,"z":-106.5904761904762,"a95":0.99,"info":"29/11/2013 at 22:03:38"},{"visible":true,"include":true,"step":"30.0","x":55.973333333333336,"y":-7.835047619047619,"z":-55.92857142857143,"a95":0.99,"info":"29/11/2013 at 22:03:38"},{"visible":true,"include":true,"step":"35.0","x":32.63619047619048,"y":-31.11047619047619,"z":-36.160000000000004,"a95":0.99,"info":"29/11/2013 at 22:03:38"},{"visible":true,"include":false,"step":"40.0","x":33.48761904761905,"y":-54.69904761904762,"z":-19.426666666666666,"a95":0.99,"info":"29/11/2013 at 22:03:38"},{"visible":true,"include":false,"step":"45.0","x":25.336190476190474,"y":-57.86,"z":-1.8234285714285714,"a95":0.99,"info":"29/11/2013 at 22:03:38"},{"visible":true,"include":false,"step":"50.0","x":-3.446285714285714,"y":-69.65428571428572,"z":14.171428571428573,"a95":0.99,"info":"29/11/2013 at 22:03:38"},{"visible":false,"include":false,"step":"60.0","x":-22.67047619047619,"y":-55.05047619047619,"z":-20.104761904761904,"a95":0.99,"info":"29/11/2013 at 22:03:38"},{"visible":false,"include":false,"step":"70.0","x":-0.9663809523809525,"y":-34.84571428571429,"z":17.985714285714284,"a95":0.99,"info":"29/11/2013 at 22:03:38"},{"visible":false,"include":false,"step":"80.0","x":-203.05714285714285,"y":-36.65047619047619,"z":-79.30666666666667,"a95":0.99,"info":"29/11/2013 at 22:03:38"},{"visible":false,"include":false,"step":"90.0","x":-9.866666666666665,"y":-37.37714285714286,"z":5.292666666666666,"a95":0.99,"info":"29/11/2013 at 22:03:38"},{"visible":false,"include":false,"step":"100.0","x":-4.847047619047619,"y":-18.01904761904762,"z":26.632380952380952,"a95":0.99,"info":"29/11/2013 at 22:03:38"}]},{"version":"v1.1.0","exported":"2016-11-23T14:37:58.617Z","volume":10.5,"added":"2016-11-23T14:22:05.970Z","format":"Utrecht","demagType":"Unknown","strat":"5","patch":1.1,"GEO":[{"dec":112.24419161061337,"inc":-39.03580441212711,"MAD":7.449282725510022,"cm":[-106.1478584029717,145.52808941409108,-221.88852646574253],"intensity":344.5282054927367,"type":"dir","forced":false,"remark":"","origin":false,"nSteps":7,"minStep":"16.0","maxStep":"45.0","steps":["16.0","20.0","25.0","30.0","35.0","40.0","45.0"],"group":"None","version":"v1.1.0"}],"TECT":[{"dec":148.4767941781306,"inc":-64.14090737479695,"MAD":7.449282725510036,"cm":[-130.34869327027238,-7.269968385729328,-254.23744128588632],"intensity":344.5282054927367,"type":"dir","forced":false,"remark":"","origin":false,"nSteps":7,"minStep":"16.0","maxStep":"45.0","steps":["16.0","20.0","25.0","30.0","35.0","40.0","45.0"],"group":"None","version":"v1.1.0"}],"interpreted":true,"name":"PC 2.16","coreAzi":342,"coreDip":26,"bedStrike":351,"bedDip":36,"data":[{"visible":true,"include":false,"step":"0.0","x":78.62285714285714,"y":488.34285714285716,"z":-551.552380952381,"a95":0.99,"info":"29/11/2013 at 22:03:38"},{"visible":true,"include":false,"step":"4.0","x":130.0952380952381,"y":417.1904761904762,"z":-500.8952380952381,"a95":0.99,"info":"29/11/2013 at 22:03:38"},{"visible":true,"include":false,"step":"8.0","x":180.83809523809524,"y":348.8666666666667,"z":-457.45714285714286,"a95":0.99,"info":"29/11/2013 at 22:03:38"},{"visible":true,"include":false,"step":"12.0","x":180.16190476190476,"y":291.37142857142857,"z":-416.3238095238095,"a95":0.99,"info":"29/11/2013 at 22:03:38"},{"visible":true,"include":true,"step":"16.0","x":198.0095238095238,"y":220.86666666666665,"z":-358.3619047619048,"a95":0.99,"info":"29/11/2013 at 22:03:38"},{"visible":true,"include":true,"step":"20.0","x":183.25714285714287,"y":193.31428571428572,"z":-332.5809523809524,"a95":0.99,"info":"29/11/2013 at 22:03:38"},{"visible":true,"include":true,"step":"25.0","x":165.31428571428572,"y":124.9047619047619,"z":-263.9904761904762,"a95":0.99,"info":"29/11/2013 at 22:03:38"},{"visible":true,"include":true,"step":"30.0","x":126.28571428571429,"y":92.51238095238095,"z":-227.1142857142857,"a95":0.99,"info":"29/11/2013 at 22:03:38"},{"visible":true,"include":true,"step":"35.0","x":89.05238095238094,"y":64.42571428571429,"z":-179.37142857142857,"a95":0.99,"info":"29/11/2013 at 22:03:38"},{"visible":true,"include":true,"step":"40.0","x":114.88571428571429,"y":20.846666666666664,"z":-130.73333333333335,"a95":0.99,"info":"29/11/2013 at 22:03:38"},{"visible":true,"include":true,"step":"45.0","x":71.44,"y":22.357142857142858,"z":-106.81904761904761,"a95":0.99,"info":"29/11/2013 at 22:03:38"},{"visible":true,"include":false,"step":"50.0","x":55.988571428571426,"y":-12.858095238095236,"z":-111.26666666666667,"a95":0.99,"info":"29/11/2013 at 22:03:38"},{"visible":false,"include":false,"step":"60.0","x":70.59904761904761,"y":-6.534857142857143,"z":-75.95619047619047,"a95":0.99,"info":"29/11/2013 at 22:03:38"},{"visible":false,"include":false,"step":"70.0","x":48.80761904761905,"y":-30.865714285714283,"z":-26.792380952380952,"a95":0.99,"info":"29/11/2013 at 22:03:38"},{"visible":false,"include":false,"step":"80.0","x":93.45809523809524,"y":-48.63428571428572,"z":-4.413047619047619,"a95":0.99,"info":"29/11/2013 at 22:03:38"},{"visible":false,"include":false,"step":"90.0","x":19.634285714285713,"y":-10.637142857142857,"z":-48.727619047619044,"a95":0.99,"info":"29/11/2013 at 22:03:38"},{"visible":false,"include":false,"step":"100.0","x":34.325714285714284,"y":-59.542857142857144,"z":11.549523809523809,"a95":0.99,"info":"29/11/2013 at 22:03:38"}]},{"version":"v1.1.0","exported":"2016-11-23T14:37:58.617Z","volume":10.5,"added":"2016-11-23T14:22:05.970Z","format":"Utrecht","demagType":"Unknown","strat":null,"patch":1.1,"GEO":[{"dec":112.61194454423031,"inc":-49.954476877122374,"MAD":5.140157616615806,"cm":[-71.60909776221149,199.04052120791215,-223.64987432684472],"intensity":259.18781220471163,"type":"dir","forced":false,"remark":"","origin":false,"nSteps":6,"minStep":"250","maxStep":"380","steps":["250","275","300","320","340","380"],"group":"None","version":"v1.1.0"}],"TECT":[{"dec":172.13587563210592,"inc":-70.286871114169,"MAD":5.140157616615816,"cm":[-97.71238313219638,34.230863665175164,-289.9048057670169],"intensity":259.18781220471163,"type":"dir","forced":false,"remark":"","origin":false,"nSteps":6,"minStep":"250","maxStep":"380","steps":["250","275","300","320","340","380"],"group":"None","version":"v1.1.0"}],"interpreted":true,"name":"PC 2.17A","coreAzi":320,"coreDip":19,"bedStrike":351,"bedDip":36,"data":[{"visible":true,"include":false,"step":"20","x":79.80952380952381,"y":499.9047619047619,"z":-82.0952380952381,"a95":1.7,"info":"\"13-11-02\" at \"19:03\""},{"visible":true,"include":false,"step":"80","x":202.38095238095238,"y":330.1904761904762,"z":-290.85714285714283,"a95":2.1,"info":"\"13-11-03\" at \"15:27\""},{"visible":true,"include":false,"step":"150","x":242.66666666666666,"y":222.38095238095238,"z":-389.9047619047619,"a95":2.9,"info":"\"13-11-04\" at \"12:48\""},{"visible":true,"include":false,"step":"180","x":250.57142857142858,"y":190.76190476190476,"z":-384.0952380952381,"a95":2.7,"info":"\"13-11-05\" at \"07:54\""},{"visible":true,"include":false,"step":"200","x":229.61904761904762,"y":167.61904761904762,"z":-361.7142857142857,"a95":2.7,"info":"\"13-11-05\" at \"12:24\""},{"visible":true,"include":false,"step":"225","x":216.0952380952381,"y":167.14285714285714,"z":-337.3333333333333,"a95":3,"info":"\"13-11-05\" at \"17:04\""},{"visible":true,"include":true,"step":"250","x":202,"y":140.66666666666666,"z":-333.42857142857144,"a95":3.1,"info":"\"13-11-06\" at \"10:51\""},{"visible":true,"include":true,"step":"275","x":192.38095238095238,"y":122.76190476190476,"z":-295.8095238095238,"a95":3.5,"info":"\"13-11-06\" at \"15:41\""},{"visible":true,"include":true,"step":"300","x":166.57142857142858,"y":117.61904761904762,"z":-259.5238095238095,"a95":3.2,"info":"\"13-11-07\" at \"04:16\""},{"visible":true,"include":true,"step":"320","x":154.85714285714286,"y":100.76190476190476,"z":-234.57142857142858,"a95":3.3,"info":"\"13-11-07\" at \"07:38\""},{"visible":true,"include":true,"step":"340","x":127.61904761904762,"y":93.61904761904762,"z":-225.23809523809524,"a95":3,"info":"\"13-11-07\" at \"11:48\""},{"visible":true,"include":true,"step":"380","x":68.28571428571429,"y":63.23809523809524,"z":-125.33333333333333,"a95":4.8,"info":"\"13-11-08\" at \"10:35\""},{"visible":false,"include":false,"step":"420","x":20.952380952380953,"y":149.42857142857142,"z":-99.23809523809524,"a95":5.7,"info":"\"13-11-08\" at \"15:03\""},{"visible":false,"include":false,"step":"450","x":0.9523809523809523,"y":221.14285714285714,"z":-76.0952380952381,"a95":6.3,"info":"\"13-11-08\" at \"19:24\""}]},{"version":"v1.1.0","exported":"2016-11-23T14:37:58.617Z","volume":10.5,"added":"2016-11-23T14:22:05.971Z","format":"Utrecht","demagType":"Unknown","strat":"6","patch":1.1,"GEO":[{"dec":113.78026774721218,"inc":-40.224883779913725,"MAD":9.668165693837317,"cm":[-58.31979281290657,53.613266632819105,-104.2032170152776],"intensity":210.42156742983383,"type":"dir","forced":false,"remark":"","origin":false,"nSteps":6,"minStep":"25.0","maxStep":"60.0","steps":["25.0","30.0","35.0","45.0","50.0","60.0"],"group":"None","version":"v1.1.0"}],"TECT":[{"dec":152.3219688964234,"inc":-64.12791066127707,"MAD":9.668165693837349,"cm":[-69.21074370854876,-15.149491080793272,-110.06478503325977],"intensity":210.42156742983383,"type":"dir","forced":false,"remark":"","origin":false,"nSteps":6,"minStep":"25.0","maxStep":"60.0","steps":["25.0","30.0","35.0","45.0","50.0","60.0"],"group":"None","version":"v1.1.0"}],"interpreted":true,"name":"PC 2.17B","coreAzi":320,"coreDip":19,"bedStrike":351,"bedDip":36,"data":[{"visible":true,"include":false,"step":"0.0","x":32.787619047619046,"y":187.66666666666666,"z":-300.34285714285716,"a95":0.99,"info":"29/11/2013 at 22:03:38"},{"visible":true,"include":false,"step":"4.0","x":68.96761904761904,"y":175.2,"z":-289.6095238095238,"a95":0.99,"info":"29/11/2013 at 22:03:38"},{"visible":true,"include":false,"step":"8.0","x":95.02666666666667,"y":149.75238095238097,"z":-271.8,"a95":0.99,"info":"29/11/2013 at 22:03:38"},{"visible":true,"include":false,"step":"12.0","x":101.47619047619048,"y":124.55238095238094,"z":-242.47619047619048,"a95":0.99,"info":"29/11/2013 at 22:03:38"},{"visible":true,"include":false,"step":"16.0","x":107.06666666666668,"y":108.95238095238095,"z":-219.62857142857143,"a95":0.99,"info":"29/11/2013 at 22:03:38"},{"visible":true,"include":false,"step":"20.0","x":112.04761904761905,"y":74.6,"z":-205.23809523809524,"a95":0.99,"info":"29/11/2013 at 22:03:38"},{"visible":true,"include":true,"step":"25.0","x":93.72857142857143,"y":37.049523809523805,"z":-177.14285714285714,"a95":0.99,"info":"29/11/2013 at 22:03:38"},{"visible":true,"include":true,"step":"30.0","x":98.28571428571429,"y":28.316190476190474,"z":-165.11428571428573,"a95":0.99,"info":"29/11/2013 at 22:03:38"},{"visible":true,"include":true,"step":"35.0","x":94.13047619047619,"y":21.485714285714284,"z":-139.82857142857142,"a95":0.99,"info":"29/11/2013 at 22:03:38"},{"visible":false,"include":false,"step":"40.0","x":1.9345714285714284,"y":-13.72857142857143,"z":-67.26,"a95":0.99,"info":"29/11/2013 at 22:03:38"},{"visible":true,"include":true,"step":"45.0","x":71.24095238095238,"y":-8.808285714285713,"z":-99.51428571428572,"a95":0.99,"info":"29/11/2013 at 22:03:38"},{"visible":true,"include":true,"step":"50.0","x":64.14190476190477,"y":-28.61809523809524,"z":-77.78476190476191,"a95":0.99,"info":"29/11/2013 at 22:03:38"},{"visible":true,"include":true,"step":"60.0","x":15.040952380952382,"y":-27.92761904761905,"z":6.877428571428571,"a95":0.99,"info":"29/11/2013 at 22:03:38"},{"visible":true,"include":false,"step":"70.0","x":0.8219238095238095,"y":-32.39142857142857,"z":-24.723809523809525,"a95":0.99,"info":"29/11/2013 at 22:03:38"},{"visible":false,"include":false,"step":"80.0","x":109.5904761904762,"y":-20.76952380952381,"z":-29.33809523809524,"a95":0.99,"info":"29/11/2013 at 22:03:38"},{"visible":false,"include":false,"step":"90.0","x":46.55142857142857,"y":3.1558095238095243,"z":-0.028333333333333332,"a95":0.99,"info":"29/11/2013 at 22:03:38"},{"visible":false,"include":false,"step":"100.0","x":75.70952380952382,"y":-23.497142857142858,"z":-29.87047619047619,"a95":0.99,"info":"29/11/2013 at 22:03:38"}]}]
