# Supplementary material for: Paleomagnetic constraints on the timing and distribution of Cenozoic rotations in Central and Eastern Anatolia
Source: Copernicus journal article supplement (doi:10.5194/se-9-295-2018), 2018-03-21
Supplement: Supplementary file 2 [file se-9-295-2018-supplement.zip › se-2017-66_DATA_dir files/dir files Ulukisla/PC3.dir]

[{"version":"v1.1.0","exported":"2016-11-23T15:12:56.512Z","volume":10.5,"added":"2016-11-23T14:38:43.141Z","format":"Utrecht","demagType":"Unknown","strat":null,"patch":1.1,"GEO":[{"dec":66.0269711861738,"inc":-19.278801406946993,"MAD":7.46118586078531,"cm":[-3.9968028886505635e-15,4.440892098500626e-16,0],"intensity":127.55892293705554,"type":"dir","forced":true,"remark":"","origin":false,"nSteps":7,"minStep":"200","maxStep":"340","steps":["200","225","250","275","300","320","340"],"group":"None","version":"v1.1.0"}],"TECT":[{"dec":64.62300027946935,"inc":-67.26380120167057,"MAD":7.4611858607852914,"cm":[-7.216449660063518e-15,1.1102230246251565e-15,-4.440892098500626e-16],"intensity":127.55892293705554,"type":"dir","forced":true,"remark":"","origin":false,"nSteps":7,"minStep":"200","maxStep":"340","steps":["200","225","250","275","300","320","340"],"group":"None","version":"v1.1.0"}],"interpreted":true,"name":"PC 3.1A","coreAzi":8,"coreDip":54,"bedStrike":337,"bedDip":48,"data":[{"visible":true,"include":false,"step":"20","x":56.285714285714285,"y":113.9047619047619,"z":197.42857142857142,"a95":2.7,"info":"\"13-11-02\" at \"19:06\""},{"visible":true,"include":false,"step":"80","x":53.523809523809526,"y":75.04761904761905,"z":114.76190476190476,"a95":2.3,"info":"\"13-11-03\" at \"15:30\""},{"visible":true,"include":false,"step":"150","x":56.542857142857144,"y":71,"z":21.447619047619046,"a95":1.6,"info":"\"13-11-04\" at \"12:52\""},{"visible":true,"include":false,"step":"180","x":60.352380952380955,"y":68.54285714285714,"z":15.428571428571429,"a95":2.6,"info":"\"13-11-05\" at \"07:57\""},{"visible":true,"include":true,"step":"200","x":55.37142857142857,"y":67.12380952380951,"z":9.571428571428571,"a95":2.7,"info":"\"13-11-05\" at \"12:27\""},{"visible":true,"include":true,"step":"225","x":40.16190476190476,"y":58.8,"z":6.704761904761905,"a95":6.4,"info":"\"13-11-05\" at \"17:09\""},{"visible":true,"include":true,"step":"250","x":38.39047619047619,"y":58.13333333333333,"z":5.342857142857143,"a95":2.7,"info":"\"13-11-06\" at \"10:53\""},{"visible":true,"include":true,"step":"275","x":43.78095238095238,"y":50.24761904761905,"z":-1.2952380952380953,"a95":2.8,"info":"\"13-11-06\" at \"15:44\""},{"visible":true,"include":true,"step":"300","x":37.142857142857146,"y":45.438095238095244,"z":-9.22857142857143,"a95":3.8,"info":"\"13-11-07\" at \"04:18\""},{"visible":true,"include":true,"step":"320","x":24.4,"y":33.333333333333336,"z":-10.342857142857142,"a95":6.3,"info":"\"13-11-07\" at \"07:40\""},{"visible":true,"include":true,"step":"340","x":17.333333333333332,"y":36.904761904761905,"z":3.2095238095238097,"a95":4.2,"info":"\"13-11-07\" at \"11:51\""},{"visible":true,"include":false,"step":"380","x":9.971428571428572,"y":19.057142857142857,"z":15.276190476190477,"a95":9.5,"info":"\"13-11-08\" at \"10:37\""},{"visible":false,"include":false,"step":"420","x":-28.17142857142857,"y":34.666666666666664,"z":0.942857238095238,"a95":7,"info":"\"13-11-08\" at \"15:05\""},{"visible":false,"include":false,"step":"450","x":21.2,"y":47.17142857142857,"z":10.17142857142857,"a95":8.3,"info":"\"13-11-08\" at \"19:27\""},{"visible":false,"include":false,"step":"500","x":208.85714285714286,"y":162.0952380952381,"z":-11.619047619047619,"a95":2.7,"info":"\"13-11-10\" at \"11:17\""},{"visible":false,"include":false,"step":"530","x":-948.5714285714286,"y":-742,"z":-103.14285714285714,"a95":2.6,"info":"\"13-11-10\" at \"14:15\""}]},{"version":"v1.1.0","exported":"2016-11-23T15:12:56.512Z","volume":10.5,"added":"2016-11-23T14:38:43.141Z","format":"Utrecht","demagType":"Unknown","strat":"7","patch":1.1,"GEO":[{"dec":66.16288015596604,"inc":-28.32060678088999,"MAD":11.322270651893312,"cm":[16.769115619123173,39.87352287135334,-29.183536065050003],"intensity":45.53747386329574,"type":"dir","forced":false,"remark":"","origin":false,"nSteps":4,"minStep":"20.0","maxStep":"35.0","steps":["20.0","25.0","30.0","35.0"],"group":"None","version":"v1.1.0"}],"TECT":[{"dec":63.88625203627345,"inc":-76.30370046982489,"MAD":11.322270651893314,"cm":[2.7029216143340755,6.7356464470350454,-51.67305994197791],"intensity":45.53747386329573,"type":"dir","forced":false,"remark":"","origin":false,"nSteps":4,"minStep":"20.0","maxStep":"35.0","steps":["20.0","25.0","30.0","35.0"],"group":"None","version":"v1.1.0"}],"interpreted":true,"name":"PC 3.1B","coreAzi":8,"coreDip":54,"bedStrike":337,"bedDip":48,"data":[{"visible":true,"include":false,"step":"0.0","x":46.43142857142857,"y":109.88571428571429,"z":45.85142857142857,"a95":0.99,"info":"29/11/2013 at 22:03:38"},{"visible":true,"include":false,"step":"4.0","x":57.960952380952385,"y":100.67619047619047,"z":32.73428571428571,"a95":0.99,"info":"29/11/2013 at 22:03:38"},{"visible":true,"include":false,"step":"8.0","x":61.506666666666675,"y":91.31523809523809,"z":23.744761904761905,"a95":0.99,"info":"29/11/2013 at 22:03:38"},{"visible":true,"include":false,"step":"12.0","x":59.88666666666666,"y":81.39714285714285,"z":8.161238095238096,"a95":0.99,"info":"29/11/2013 at 22:03:38"},{"visible":true,"include":false,"step":"16.0","x":60.971428571428575,"y":66.40380952380953,"z":-1.8359999999999999,"a95":0.99,"info":"29/11/2013 at 22:03:38"},{"visible":true,"include":true,"step":"20.0","x":49.50380952380952,"y":55.12666666666667,"z":-14.884761904761904,"a95":0.99,"info":"29/11/2013 at 22:03:38"},{"visible":true,"include":true,"step":"25.0","x":39.50380952380952,"y":40.26380952380952,"z":-6.14647619047619,"a95":0.99,"info":"29/11/2013 at 22:03:38"},{"visible":true,"include":true,"step":"30.0","x":31.402857142857144,"y":31.98857142857143,"z":-13.371428571428572,"a95":0.99,"info":"29/11/2013 at 22:03:38"},{"visible":true,"include":true,"step":"35.0","x":19.9,"y":21.227619047619047,"z":-7.947142857142857,"a95":0.99,"info":"29/11/2013 at 22:03:38"},{"visible":true,"include":false,"step":"40.0","x":24.42571428571429,"y":10.407619047619047,"z":-12.392380952380952,"a95":0.99,"info":"29/11/2013 at 22:03:38"},{"visible":true,"include":false,"step":"45.0","x":29.464761904761904,"y":8.321238095238096,"z":-9.458285714285713,"a95":0.99,"info":"29/11/2013 at 22:03:38"},{"visible":true,"include":false,"step":"50.0","x":4.577428571428571,"y":-8.212190476190475,"z":-8.423142857142857,"a95":0.99,"info":"29/11/2013 at 22:03:38"},{"visible":false,"include":false,"step":"60.0","x":9.638095238095238,"y":3.4516190476190474,"z":-7.959142857142857,"a95":0.99,"info":"29/11/2013 at 22:03:38"},{"visible":false,"include":false,"step":"70.0","x":19.62666666666667,"y":8.944095238095239,"z":15.588571428571429,"a95":0.99,"info":"29/11/2013 at 22:03:38"},{"visible":false,"include":false,"step":"80.0","x":26.59904761904762,"y":-12.455238095238096,"z":-16.404761904761905,"a95":0.99,"info":"29/11/2013 at 22:03:38"},{"visible":false,"include":false,"step":"90.0","x":-8.125047619047619,"y":4.522666666666667,"z":20.722857142857144,"a95":0.99,"info":"29/11/2013 at 22:03:38"},{"visible":false,"include":false,"step":"100.0","x":13.991428571428571,"y":1.3132380952380953,"z":2.6866666666666665,"a95":0.99,"info":"29/11/2013 at 22:03:38"}]},{"version":"v1.1.0","exported":"2016-11-23T15:12:56.512Z","volume":10.5,"added":"2016-11-23T14:38:43.142Z","format":"Utrecht","demagType":"Unknown","strat":"8","patch":1.1,"GEO":[],"TECT":[],"interpreted":false,"name":"PC 3.2","coreAzi":18,"coreDip":55,"bedStrike":337,"bedDip":48,"data":[{"visible":true,"include":false,"step":"0.0","x":20.67904761904762,"y":7.911142857142856,"z":227.71428571428572,"a95":0.99,"info":"29/11/2013 at 22:03:38"},{"visible":true,"include":false,"step":"4.0","x":36.195238095238096,"y":16.08095238095238,"z":200.25714285714284,"a95":0.99,"info":"29/11/2013 at 22:03:38"},{"visible":true,"include":false,"step":"8.0","x":48.44190476190476,"y":17.773333333333333,"z":176.76190476190476,"a95":0.99,"info":"29/11/2013 at 22:03:38"},{"visible":true,"include":false,"step":"12.0","x":54.71619047619048,"y":22.036190476190477,"z":146.47619047619048,"a95":0.99,"info":"29/11/2013 at 22:03:38"},{"visible":true,"include":false,"step":"16.0","x":49.73238095238096,"y":20.666666666666668,"z":116.53333333333333,"a95":0.99,"info":"29/11/2013 at 22:03:38"},{"visible":true,"include":false,"step":"20.0","x":50.79714285714286,"y":12.17047619047619,"z":103.23809523809524,"a95":0.99,"info":"29/11/2013 at 22:03:38"},{"visible":true,"include":false,"step":"25.0","x":35.862857142857145,"y":6.331523809523809,"z":85.07714285714285,"a95":0.99,"info":"29/11/2013 at 22:03:38"},{"visible":true,"include":false,"step":"30.0","x":46.29714285714286,"y":11.65047619047619,"z":67.0352380952381,"a95":0.99,"info":"29/11/2013 at 22:03:38"},{"visible":true,"include":false,"step":"35.0","x":23.226666666666667,"y":6.27704761904762,"z":59.595238095238095,"a95":0.99,"info":"29/11/2013 at 22:03:38"},{"visible":true,"include":false,"step":"40.0","x":18.777142857142856,"y":-2.2587619047619047,"z":51.78476190476191,"a95":0.99,"info":"29/11/2013 at 22:03:38"},{"visible":true,"include":false,"step":"45.0","x":17.293333333333333,"y":-0.10207619047619049,"z":57.67238095238095,"a95":0.99,"info":"29/11/2013 at 22:03:38"},{"visible":true,"include":false,"step":"50.0","x":-3.6339047619047617,"y":-18.295238095238094,"z":57.11904761904762,"a95":0.99,"info":"29/11/2013 at 22:03:38"},{"visible":true,"include":false,"step":"60.0","x":4.886666666666667,"y":-4.759619047619047,"z":31.253333333333337,"a95":0.99,"info":"29/11/2013 at 22:03:38"},{"visible":true,"include":false,"step":"70.0","x":-1.1954285714285713,"y":-5.022666666666667,"z":43.03238095238095,"a95":0.99,"info":"29/11/2013 at 22:03:38"},{"visible":true,"include":false,"step":"80.0","x":-22.89047619047619,"y":-6.990666666666667,"z":18.737142857142857,"a95":0.99,"info":"29/11/2013 at 22:03:38"},{"visible":true,"include":false,"step":"90.0","x":0.7540952380952382,"y":-11.8,"z":42.703809523809525,"a95":0.99,"info":"29/11/2013 at 22:03:38"},{"visible":true,"include":false,"step":"100.0","x":-0.3224285714285714,"y":-11.083809523809524,"z":42.25904761904762,"a95":0.99,"info":"29/11/2013 at 22:03:38"}]},{"version":"v1.1.0","exported":"2016-11-23T15:12:56.512Z","volume":10.5,"added":"2016-11-23T14:38:43.143Z","format":"Utrecht","demagType":"Unknown","strat":"1","patch":1.1,"GEO":[],"TECT":[],"interpreted":false,"name":"PC 3.3A","coreAzi":51,"coreDip":62,"bedStrike":337,"bedDip":48,"data":[{"visible":true,"include":false,"step":"0.0","x":79.32095238095238,"y":-299.6190476190476,"z":240.48571428571427,"a95":0.99,"info":"30/11/2013 at 03:44:25"},{"visible":true,"include":false,"step":"4.0","x":88.12380952380951,"y":-244.78095238095236,"z":240.04761904761904,"a95":0.99,"info":"30/11/2013 at 03:44:25"},{"visible":true,"include":false,"step":"8.0","x":81.76,"y":-204.1142857142857,"z":204.76190476190476,"a95":0.99,"info":"30/11/2013 at 03:44:25"},{"visible":true,"include":false,"step":"12.0","x":57.36666666666667,"y":-166.76190476190476,"z":174.77142857142857,"a95":0.99,"info":"30/11/2013 at 03:44:25"},{"visible":true,"include":false,"step":"16.0","x":28.600952380952382,"y":-159.40952380952382,"z":133.2095238095238,"a95":0.99,"info":"30/11/2013 at 03:44:25"},{"visible":true,"include":false,"step":"20.0","x":-16.864761904761906,"y":-152.3047619047619,"z":122.24761904761904,"a95":0.99,"info":"30/11/2013 at 03:44:25"},{"visible":true,"include":false,"step":"25.0","x":-9.807619047619047,"y":-125.87619047619049,"z":98.34285714285713,"a95":0.99,"info":"30/11/2013 at 03:44:25"},{"visible":true,"include":false,"step":"30.0","x":-33.846666666666664,"y":-116.77142857142856,"z":81.81714285714285,"a95":0.99,"info":"30/11/2013 at 03:44:25"},{"visible":true,"include":false,"step":"35.0","x":-33.01619047619048,"y":-110.71428571428571,"z":77.89428571428572,"a95":0.99,"info":"30/11/2013 at 03:44:25"},{"visible":true,"include":false,"step":"40.0","x":-48.19047619047619,"y":-109.44761904761906,"z":68.77428571428571,"a95":0.99,"info":"30/11/2013 at 03:44:25"},{"visible":true,"include":false,"step":"45.0","x":-23.137142857142855,"y":-77.07904761904763,"z":55.37904761904762,"a95":0.99,"info":"30/11/2013 at 03:44:25"},{"visible":true,"include":false,"step":"50.0","x":-48.81047619047619,"y":-84.49809523809525,"z":61.333333333333336,"a95":0.99,"info":"30/11/2013 at 03:44:25"},{"visible":true,"include":false,"step":"60.0","x":-28.83238095238095,"y":-48.333333333333336,"z":51.201904761904764,"a95":0.99,"info":"30/11/2013 at 03:44:25"},{"visible":true,"include":false,"step":"70.0","x":0.617552380952381,"y":-63.48571428571429,"z":58.511428571428574,"a95":0.99,"info":"30/11/2013 at 03:44:25"},{"visible":true,"include":false,"step":"80.0","x":-72.93142857142857,"y":-43.56952380952381,"z":47.48952380952381,"a95":0.99,"info":"30/11/2013 at 03:44:25"},{"visible":true,"include":false,"step":"90.0","x":-34.11714285714286,"y":-28.216190476190473,"z":18.165714285714287,"a95":0.99,"info":"30/11/2013 at 03:44:25"},{"visible":true,"include":false,"step":"100.0","x":8.916095238095238,"y":-20.00190476190476,"z":34.12095238095238,"a95":0.99,"info":"30/11/2013 at 03:44:25"}]},{"version":"v1.1.0","exported":"2016-11-23T15:12:56.512Z","volume":10.5,"added":"2016-11-23T14:38:43.144Z","format":"Utrecht","demagType":"Unknown","strat":null,"patch":1.1,"GEO":[{"dec":75.00889534284624,"inc":-39.62532649767253,"MAD":9.226266574935954,"cm":[52.595797836518884,-24.892306555352626,-60.47876357881563],"intensity":92.6826399388351,"type":"dir","forced":false,"remark":"","origin":false,"nSteps":5,"minStep":"250","maxStep":"340","steps":["250","275","300","320","340"],"group":"None","version":"v1.1.0"}],"TECT":[{"dec":138.2600514739678,"inc":-83.49318016085192,"MAD":9.226266574935961,"cm":[35.340039099424615,-65.54432660022003,-38.71238311836043],"intensity":92.68263993883508,"type":"dir","forced":false,"remark":"","origin":false,"nSteps":5,"minStep":"250","maxStep":"340","steps":["250","275","300","320","340"],"group":"None","version":"v1.1.0"}],"interpreted":true,"name":"PC 3.4A","coreAzi":36,"coreDip":51,"bedStrike":337,"bedDip":48,"data":[{"visible":false,"include":false,"step":"20","x":45.523809523809526,"y":-238.85714285714286,"z":399.6190476190476,"a95":2.5,"info":"\"13-11-02\" at \"19:08\""},{"visible":true,"include":false,"step":"80","x":84,"y":-122.95238095238095,"z":230.66666666666666,"a95":2.5,"info":"\"13-11-03\" at \"15:32\""},{"visible":true,"include":false,"step":"150","x":116,"y":-56.857142857142854,"z":72.38095238095238,"a95":2.4,"info":"\"13-11-04\" at \"12:55\""},{"visible":true,"include":false,"step":"180","x":134.1904761904762,"y":-49.23809523809524,"z":35.142857142857146,"a95":2.6,"info":"\"13-11-05\" at \"07:59\""},{"visible":true,"include":false,"step":"200","x":130.57142857142858,"y":-34.19047619047619,"z":12.476190476190476,"a95":2.4,"info":"\"13-11-05\" at \"12:29\""},{"visible":true,"include":false,"step":"225","x":121.71428571428571,"y":-30.476190476190474,"z":-18.19047619047619,"a95":4.2,"info":"\"13-11-05\" at \"17:12\""},{"visible":true,"include":true,"step":"250","x":95.61904761904762,"y":-28.857142857142858,"z":-36.38095238095238,"a95":2.4,"info":"\"13-11-06\" at \"10:56\""},{"visible":true,"include":true,"step":"275","x":83.9047619047619,"y":-45.333333333333336,"z":-27.714285714285715,"a95":2.9,"info":"\"13-11-06\" at \"15:46\""},{"visible":true,"include":true,"step":"300","x":67.4857142857143,"y":-39.22857142857143,"z":-32.4,"a95":2.8,"info":"\"13-11-07\" at \"04:22\""},{"visible":true,"include":true,"step":"320","x":36.24761904761905,"y":-68.78095238095239,"z":-29.17142857142857,"a95":4,"info":"\"13-11-07\" at \"07:43\""},{"visible":true,"include":true,"step":"340","x":15.533333333333333,"y":-73.06666666666668,"z":-21.485714285714284,"a95":3,"info":"\"13-11-07\" at \"11:53\""},{"visible":true,"include":false,"step":"380","x":-10.666666666666666,"y":-110.47619047619048,"z":-2.0952380952380953,"a95":2.1,"info":"\"13-11-08\" at \"10:40\""},{"visible":true,"include":false,"step":"420","x":-22.304761904761904,"y":-77.8952380952381,"z":2.723809523809524,"a95":3.4,"info":"\"13-11-08\" at \"15:07\""},{"visible":false,"include":false,"step":"450","x":-28.476190476190474,"y":-97.04761904761905,"z":4.666666666666667,"a95":3.8,"info":"\"13-11-08\" at \"19:29\""},{"visible":false,"include":false,"step":"500","x":-69.52380952380952,"y":-98.28571428571429,"z":9.619047619047619,"a95":2,"info":"\"13-11-10\" at \"11:19\""},{"visible":false,"include":false,"step":"530","x":-53.80952380952381,"y":-112.38095238095238,"z":32.95238095238095,"a95":3.4,"info":"\"13-11-10\" at \"14:17\""},{"visible":false,"include":false,"step":"560","x":-28.657142857142855,"y":-48.27619047619047,"z":25.73333333333333,"a95":9,"info":"\"13-11-10\" at \"23:16\""},{"visible":false,"include":false,"step":"580","x":-84.57142857142857,"y":-67.42857142857143,"z":32.285714285714285,"a95":4.8,"info":"\"13-11-11\" at \"01:18\""}]},{"version":"v1.1.0","exported":"2016-11-23T15:12:56.512Z","volume":10.5,"added":"2016-11-23T14:38:43.145Z","format":"Utrecht","demagType":"Unknown","strat":null,"patch":1.1,"GEO":[{"dec":99.39760330874026,"inc":-17.405815929078184,"MAD":2.829881812842542,"cm":[4.440892098500626e-15,7.105427357601002e-15,0],"intensity":415.4807285875778,"type":"dir","forced":true,"remark":"","origin":false,"nSteps":3,"minStep":"300","maxStep":"340","steps":["300","320","340"],"group":"None","version":"v1.1.0"}],"TECT":[{"dec":125.21502242338255,"inc":-53.02563232636902,"MAD":2.829881812842622,"cm":[1.0658141036401503e-14,-3.552713678800501e-15,0],"intensity":415.48072858757774,"type":"dir","forced":true,"remark":"","origin":false,"nSteps":3,"minStep":"300","maxStep":"340","steps":["300","320","340"],"group":"None","version":"v1.1.0"}],"interpreted":true,"name":"PC 3.5","coreAzi":346,"coreDip":47,"bedStrike":337,"bedDip":48,"data":[{"visible":false,"include":false,"step":"20","x":-179.04761904761904,"y":690.8571428571429,"z":751.1428571428571,"a95":2.4,"info":"\"13-11-02\" at \"19:10\""},{"visible":true,"include":false,"step":"80","x":-115.14285714285714,"y":578.1904761904761,"z":540.7619047619048,"a95":2.3,"info":"\"13-11-03\" at \"15:35\""},{"visible":true,"include":false,"step":"150","x":-40,"y":438.76190476190476,"z":206.28571428571428,"a95":2.2,"info":"\"13-11-04\" at \"12:57\""},{"visible":true,"include":false,"step":"180","x":-25.142857142857142,"y":387.3333333333333,"z":89.33333333333333,"a95":2,"info":"\"13-11-05\" at \"08:01\""},{"visible":true,"include":false,"step":"200","x":-33.714285714285715,"y":376.4761904761905,"z":60.285714285714285,"a95":2.2,"info":"\"13-11-05\" at \"12:34\""},{"visible":true,"include":false,"step":"225","x":-28,"y":287.04761904761904,"z":-51.714285714285715,"a95":3.1,"info":"\"13-11-05\" at \"17:16\""},{"visible":true,"include":false,"step":"250","x":-22.666666666666668,"y":263.14285714285717,"z":-79.71428571428571,"a95":1.6,"info":"\"13-11-06\" at \"11:00\""},{"visible":true,"include":false,"step":"275","x":-10.095238095238095,"y":218.85714285714286,"z":-100.85714285714286,"a95":2.5,"info":"\"13-11-06\" at \"15:48\""},{"visible":true,"include":true,"step":"300","x":-23.238095238095237,"y":211.61904761904762,"z":-110.28571428571429,"a95":2.7,"info":"\"13-11-07\" at \"04:24\""},{"visible":true,"include":true,"step":"320","x":-18,"y":148.66666666666666,"z":-88,"a95":3.3,"info":"\"13-11-07\" at \"07:45\""},{"visible":true,"include":true,"step":"340","x":0.19047619047619047,"y":154.76190476190476,"z":-84.28571428571429,"a95":2.6,"info":"\"13-11-07\" at \"11:55\""},{"visible":true,"include":false,"step":"380","x":-39.61904761904762,"y":71.61904761904762,"z":-68.38095238095238,"a95":4.4,"info":"\"13-11-08\" at \"10:42\""},{"visible":false,"include":false,"step":"420","x":-48.857142857142854,"y":124.85714285714286,"z":-61.80952380952381,"a95":5.7,"info":"\"13-11-08\" at \"15:10\""},{"visible":false,"include":false,"step":"450","x":-80.76190476190476,"y":140,"z":-14.571428571428571,"a95":5.6,"info":"\"13-11-08\" at \"19:32\""},{"visible":false,"include":false,"step":"500","x":-71.71428571428571,"y":150.1904761904762,"z":-27.523809523809526,"a95":5,"info":"\"13-11-10\" at \"11:23\""},{"visible":false,"include":false,"step":"530","x":-219.14285714285714,"y":-75.71428571428571,"z":162.1904761904762,"a95":4.9,"info":"\"13-11-10\" at \"14:20\""}]},{"version":"v1.1.0","exported":"2016-11-23T15:12:56.513Z","volume":10.5,"added":"2016-11-23T14:38:43.145Z","format":"Utrecht","demagType":"Unknown","strat":"2","patch":1.1,"GEO":[],"TECT":[],"interpreted":false,"name":"PC 3.6","coreAzi":345,"coreDip":55,"bedStrike":337,"bedDip":48,"data":[{"visible":true,"include":false,"step":"0.0","x":180.2,"y":582.4666666666666,"z":625.0285714285715,"a95":0.99,"info":"30/11/2013 at 03:44:25"},{"visible":true,"include":false,"step":"4.0","x":191.7238095238095,"y":579.1428571428571,"z":638.0761904761905,"a95":0.99,"info":"30/11/2013 at 03:44:25"},{"visible":true,"include":false,"step":"8.0","x":185.8190476190476,"y":528.447619047619,"z":640.3428571428572,"a95":0.99,"info":"30/11/2013 at 03:44:25"},{"visible":true,"include":false,"step":"12.0","x":154.94285714285715,"y":472.1047619047619,"z":588.7714285714286,"a95":0.99,"info":"30/11/2013 at 03:44:25"},{"visible":true,"include":false,"step":"16.0","x":135.75238095238097,"y":411.2285714285714,"z":504.6952380952381,"a95":0.99,"info":"30/11/2013 at 03:44:25"},{"visible":true,"include":false,"step":"20.0","x":121.06666666666668,"y":339.7333333333333,"z":452.46666666666664,"a95":0.99,"info":"30/11/2013 at 03:44:25"},{"visible":true,"include":false,"step":"25.0","x":106.45714285714286,"y":267.3809523809524,"z":400.60952380952375,"a95":0.99,"info":"30/11/2013 at 03:44:25"},{"visible":true,"include":false,"step":"30.0","x":94.89904761904762,"y":219.69523809523812,"z":353.752380952381,"a95":0.99,"info":"30/11/2013 at 03:44:25"},{"visible":true,"include":false,"step":"35.0","x":101.36190476190475,"y":160.65714285714287,"z":328.76190476190476,"a95":0.99,"info":"30/11/2013 at 03:44:25"},{"visible":true,"include":false,"step":"40.0","x":113.55238095238094,"y":134.86666666666665,"z":304.5904761904762,"a95":0.99,"info":"30/11/2013 at 03:44:25"},{"visible":true,"include":false,"step":"45.0","x":132.1047619047619,"y":90.27333333333334,"z":273.37142857142857,"a95":0.99,"info":"30/11/2013 at 03:44:25"},{"visible":true,"include":false,"step":"50.0","x":143.1809523809524,"y":54.84285714285714,"z":278.1047619047619,"a95":0.99,"info":"30/11/2013 at 03:44:25"},{"visible":true,"include":false,"step":"60.0","x":204.26666666666668,"y":9.187142857142858,"z":258.49523809523805,"a95":0.99,"info":"30/11/2013 at 03:44:25"},{"visible":true,"include":false,"step":"70.0","x":281.45714285714286,"y":-28.364761904761902,"z":235.37142857142857,"a95":0.99,"info":"30/11/2013 at 03:44:25"},{"visible":true,"include":false,"step":"80.0","x":308.93333333333334,"y":-67.82285714285715,"z":232.37142857142857,"a95":0.99,"info":"30/11/2013 at 03:44:25"},{"visible":true,"include":false,"step":"90.0","x":316.0190476190476,"y":-116.02857142857142,"z":166.35238095238097,"a95":0.99,"info":"30/11/2013 at 03:44:25"},{"visible":true,"include":false,"step":"100.0","x":359.43809523809523,"y":-103.35238095238095,"z":186.7238095238095,"a95":0.99,"info":"30/11/2013 at 03:44:25"}]},{"version":"v1.1.0","exported":"2016-11-23T15:12:56.513Z","volume":10.5,"added":"2016-11-23T14:38:43.147Z","format":"Utrecht","demagType":"Unknown","strat":"3","patch":1.1,"GEO":[{"dec":330.6271718484371,"inc":-30.633008327928287,"MAD":3.915775528927191,"cm":[-1.0658141036401503e-14,3.552713678800501e-15,0],"intensity":1085.7602169966895,"type":"GC","origin":false,"forced":true,"remark":"","nSteps":5,"minStep":"4.0","maxStep":"20.0","steps":["4.0","8.0","12.0","16.0","20.0"],"group":"None","version":"v1.1.0"}],"TECT":[{"dec":309.6365067349011,"inc":-15.662531700232341,"MAD":3.91577552893042,"cm":[-7.460698725481052e-14,7.460698725481052e-14,-2.3092638912203256e-14],"intensity":1085.7602169966897,"type":"GC","origin":false,"forced":true,"remark":"","nSteps":5,"minStep":"4.0","maxStep":"20.0","steps":["4.0","8.0","12.0","16.0","20.0"],"group":"None","version":"v1.1.0"}],"interpreted":true,"name":"PC 3.7","coreAzi":351,"coreDip":61,"bedStrike":337,"bedDip":48,"data":[{"visible":true,"include":false,"step":"0.0","x":124.1047619047619,"y":347.62857142857143,"z":810.1904761904761,"a95":0.99,"info":"30/11/2013 at 03:44:25"},{"visible":true,"include":true,"step":"4.0","x":141.8095238095238,"y":334.6190476190476,"z":719.5333333333334,"a95":0.99,"info":"30/11/2013 at 03:44:25"},{"visible":true,"include":true,"step":"8.0","x":136.9904761904762,"y":311.7333333333333,"z":545.1333333333333,"a95":0.99,"info":"30/11/2013 at 03:44:25"},{"visible":true,"include":true,"step":"12.0","x":107.52380952380952,"y":274.9047619047619,"z":381.81904761904764,"a95":0.99,"info":"30/11/2013 at 03:44:25"},{"visible":true,"include":true,"step":"16.0","x":90.34571428571428,"y":235.68571428571425,"z":257.7904761904762,"a95":0.99,"info":"30/11/2013 at 03:44:25"},{"visible":true,"include":true,"step":"20.0","x":72.52000000000001,"y":210.15238095238095,"z":194.88571428571427,"a95":0.99,"info":"30/11/2013 at 03:44:25"},{"visible":true,"include":false,"step":"25.0","x":32.62571428571429,"y":179.47619047619048,"z":137.52380952380952,"a95":0.99,"info":"30/11/2013 at 03:44:25"},{"visible":true,"include":false,"step":"30.0","x":38.170476190476194,"y":129.83809523809524,"z":114.4952380952381,"a95":0.99,"info":"30/11/2013 at 03:44:25"},{"visible":true,"include":false,"step":"35.0","x":43.87904761904762,"y":100.48571428571428,"z":82.39904761904762,"a95":0.99,"info":"30/11/2013 at 03:44:25"},{"visible":true,"include":false,"step":"40.0","x":49.780952380952385,"y":78.96571428571428,"z":98.83809523809524,"a95":0.99,"info":"30/11/2013 at 03:44:25"},{"visible":true,"include":false,"step":"45.0","x":73.70666666666666,"y":55.13619047619047,"z":89.8295238095238,"a95":0.99,"info":"30/11/2013 at 03:44:25"},{"visible":true,"include":false,"step":"50.0","x":77.1,"y":27.459999999999997,"z":90.89714285714285,"a95":0.99,"info":"30/11/2013 at 03:44:25"},{"visible":false,"include":false,"step":"60.0","x":93.75047619047619,"y":4.2432380952380955,"z":56.597142857142856,"a95":0.99,"info":"30/11/2013 at 03:44:25"},{"visible":false,"include":false,"step":"70.0","x":107.17142857142856,"y":-13.931428571428572,"z":73.05809523809523,"a95":0.99,"info":"30/11/2013 at 03:44:25"},{"visible":false,"include":false,"step":"80.0","x":38.3447619047619,"y":-38.44857142857143,"z":58.72571428571429,"a95":0.99,"info":"30/11/2013 at 03:44:25"},{"visible":false,"include":false,"step":"90.0","x":154.4,"y":-66.28190476190477,"z":53.34,"a95":0.99,"info":"30/11/2013 at 03:44:25"},{"visible":false,"include":false,"step":"100.0","x":151.37142857142857,"y":-76.82190476190476,"z":52.98285714285715,"a95":0.99,"info":"30/11/2013 at 03:44:25"}]},{"version":"v1.1.0","exported":"2016-11-23T15:12:56.513Z","volume":10.5,"added":"2016-11-23T14:38:43.147Z","format":"Utrecht","demagType":"Unknown","strat":"4","patch":1.1,"GEO":[],"TECT":[],"interpreted":false,"name":"PC 3.8","coreAzi":61,"coreDip":49,"bedStrike":337,"bedDip":48,"data":[{"visible":true,"include":false,"step":"0.0","x":-137.28571428571428,"y":-282.8666666666667,"z":289.62857142857143,"a95":0.99,"info":"30/11/2013 at 03:44:25"},{"visible":true,"include":true,"step":"4.0","x":-114.35238095238095,"y":-284.04761904761904,"z":267.0761904761905,"a95":0.99,"info":"30/11/2013 at 03:44:25"},{"visible":true,"include":true,"step":"8.0","x":-98.31428571428572,"y":-255.77142857142857,"z":210.67619047619047,"a95":0.99,"info":"30/11/2013 at 03:44:25"},{"visible":true,"include":true,"step":"12.0","x":-105.55238095238094,"y":-225.9238095238095,"z":179.7238095238095,"a95":0.99,"info":"30/11/2013 at 03:44:25"},{"visible":true,"include":true,"step":"16.0","x":-108.15238095238094,"y":-210.46666666666667,"z":154.6095238095238,"a95":0.99,"info":"30/11/2013 at 03:44:25"},{"visible":true,"include":false,"step":"20.0","x":-123.18095238095239,"y":-185.24761904761903,"z":143.11428571428573,"a95":0.99,"info":"30/11/2013 at 03:44:25"},{"visible":true,"include":false,"step":"25.0","x":-128.67619047619047,"y":-182.66666666666666,"z":123.74285714285713,"a95":0.99,"info":"30/11/2013 at 03:44:25"},{"visible":true,"include":false,"step":"30.0","x":-117.54285714285714,"y":-166.5047619047619,"z":110.32380952380953,"a95":0.99,"info":"30/11/2013 at 03:44:25"},{"visible":true,"include":false,"step":"35.0","x":-120.53333333333333,"y":-159.2761904761905,"z":104.8952380952381,"a95":0.99,"info":"30/11/2013 at 03:44:25"},{"visible":true,"include":false,"step":"40.0","x":-120.41904761904763,"y":-142.22857142857143,"z":106.24761904761904,"a95":0.99,"info":"30/11/2013 at 03:44:25"},{"visible":true,"include":false,"step":"45.0","x":-110.95238095238095,"y":-125.72380952380952,"z":99.64761904761905,"a95":0.99,"info":"30/11/2013 at 03:44:25"},{"visible":true,"include":false,"step":"50.0","x":-110.97142857142858,"y":-121.31428571428572,"z":91.93142857142857,"a95":0.99,"info":"30/11/2013 at 03:44:25"},{"visible":true,"include":false,"step":"60.0","x":-80.53238095238096,"y":-99,"z":84.42857142857143,"a95":0.99,"info":"30/11/2013 at 03:44:25"},{"visible":true,"include":false,"step":"70.0","x":-87.23333333333333,"y":-85.66190476190476,"z":82.97238095238096,"a95":0.99,"info":"30/11/2013 at 03:44:25"},{"visible":true,"include":false,"step":"80.0","x":-26.015238095238097,"y":-91.8047619047619,"z":82.15428571428572,"a95":0.99,"info":"30/11/2013 at 03:44:25"},{"visible":true,"include":false,"step":"90.0","x":-40.71714285714285,"y":-53.24952380952381,"z":69.75523809523808,"a95":0.99,"info":"30/11/2013 at 03:44:25"},{"visible":true,"include":false,"step":"100.0","x":-58.62190476190476,"y":-44.78380952380952,"z":79.55047619047619,"a95":0.99,"info":"30/11/2013 at 03:44:25"}]},{"version":"v1.1.0","exported":"2016-11-23T15:12:56.513Z","volume":10.5,"added":"2016-11-23T14:38:43.148Z","format":"Utrecht","demagType":"Unknown","strat":"5","patch":1.1,"GEO":[],"TECT":[],"interpreted":false,"name":"PC 3.9","coreAzi":76,"coreDip":49,"bedStrike":337,"bedDip":48,"data":[{"visible":true,"include":false,"step":"0.0","x":-209.45714285714288,"y":-353.9809523809524,"z":222.9809523809524,"a95":0.99,"info":"30/11/2013 at 03:44:25"},{"visible":true,"include":false,"step":"4.0","x":-172.22857142857143,"y":-327.0952380952381,"z":206.57142857142858,"a95":0.99,"info":"30/11/2013 at 03:44:25"},{"visible":true,"include":false,"step":"8.0","x":-131.38095238095238,"y":-280.1047619047619,"z":156.1047619047619,"a95":0.99,"info":"30/11/2013 at 03:44:25"},{"visible":true,"include":false,"step":"12.0","x":-123.41904761904763,"y":-232.8857142857143,"z":124.44761904761906,"a95":0.99,"info":"30/11/2013 at 03:44:25"},{"visible":true,"include":false,"step":"16.0","x":-123.56190476190477,"y":-207.48571428571427,"z":100.87619047619049,"a95":0.99,"info":"30/11/2013 at 03:44:25"},{"visible":true,"include":false,"step":"20.0","x":-132.06666666666666,"y":-174.44761904761904,"z":89.2752380952381,"a95":0.99,"info":"30/11/2013 at 03:44:25"},{"visible":true,"include":false,"step":"25.0","x":-142.4,"y":-157.57142857142858,"z":77.87333333333333,"a95":0.99,"info":"30/11/2013 at 03:44:25"},{"visible":true,"include":false,"step":"30.0","x":-131.71428571428572,"y":-137.25714285714287,"z":66.00952380952381,"a95":0.99,"info":"30/11/2013 at 03:44:25"},{"visible":true,"include":false,"step":"35.0","x":-127.78095238095239,"y":-121.60952380952382,"z":56.881904761904764,"a95":0.99,"info":"30/11/2013 at 03:44:25"},{"visible":true,"include":false,"step":"40.0","x":-116.84761904761906,"y":-113.55238095238094,"z":53.41238095238096,"a95":0.99,"info":"30/11/2013 at 03:44:25"},{"visible":true,"include":false,"step":"45.0","x":-112.19999999999999,"y":-93.15238095238095,"z":42.30666666666667,"a95":0.99,"info":"30/11/2013 at 03:44:25"},{"visible":true,"include":false,"step":"50.0","x":-100.27619047619048,"y":-89.20095238095239,"z":41.24666666666666,"a95":0.99,"info":"30/11/2013 at 03:44:25"},{"visible":true,"include":false,"step":"60.0","x":-80.83047619047619,"y":-80.66761904761904,"z":22.200952380952383,"a95":0.99,"info":"30/11/2013 at 03:44:25"},{"visible":true,"include":false,"step":"70.0","x":-71.96380952380953,"y":-43.88476190476191,"z":25.578095238095237,"a95":0.99,"info":"30/11/2013 at 03:44:25"},{"visible":false,"include":false,"step":"80.0","x":-190.11428571428573,"y":-48.80476190476191,"z":3.843238095238095,"a95":0.99,"info":"30/11/2013 at 03:44:25"},{"visible":true,"include":false,"step":"90.0","x":-50.55714285714286,"y":-15.824761904761905,"z":9.006190476190476,"a95":0.99,"info":"30/11/2013 at 03:44:25"},{"visible":false,"include":false,"step":"100.0","x":-27.14095238095238,"y":-36.29714285714286,"z":46.74285714285715,"a95":0.99,"info":"30/11/2013 at 03:44:25"}]},{"version":"v1.1.0","exported":"2016-11-23T15:12:56.513Z","volume":10.5,"added":"2016-11-23T14:38:43.149Z","format":"Utrecht","demagType":"Unknown","strat":"6","patch":1.1,"GEO":[],"TECT":[],"interpreted":false,"name":"PC 3.10","coreAzi":301,"coreDip":41,"bedStrike":337,"bedDip":48,"data":[{"visible":false,"include":false,"step":"0.0","x":-126.80952380952381,"y":299.29523809523806,"z":354.3809523809524,"a95":0.99,"info":"30/11/2013 at 03:44:25"},{"visible":true,"include":false,"step":"4.0","x":-103.65714285714287,"y":274.1714285714286,"z":283.3333333333333,"a95":0.99,"info":"30/11/2013 at 03:44:25"},{"visible":true,"include":false,"step":"8.0","x":-69.54380952380953,"y":233.95238095238096,"z":195.63809523809522,"a95":0.99,"info":"30/11/2013 at 03:44:25"},{"visible":true,"include":false,"step":"12.0","x":-33.77809523809524,"y":200.1047619047619,"z":139.48571428571427,"a95":0.99,"info":"30/11/2013 at 03:44:25"},{"visible":true,"include":false,"step":"16.0","x":-3.234857142857143,"y":150.74285714285713,"z":102.51428571428572,"a95":0.99,"info":"30/11/2013 at 03:44:25"},{"visible":true,"include":false,"step":"20.0","x":-11.366666666666665,"y":137.8952380952381,"z":90.34571428571428,"a95":0.99,"info":"30/11/2013 at 03:44:25"},{"visible":true,"include":false,"step":"25.0","x":3.670952380952381,"y":97.11428571428571,"z":80.13809523809525,"a95":0.99,"info":"30/11/2013 at 03:44:25"},{"visible":true,"include":false,"step":"30.0","x":8.75047619047619,"y":80.16666666666667,"z":57.81142857142857,"a95":0.99,"info":"30/11/2013 at 03:44:25"},{"visible":true,"include":false,"step":"35.0","x":34.304761904761904,"y":41.02285714285714,"z":38.663809523809526,"a95":0.99,"info":"30/11/2013 at 03:44:25"},{"visible":true,"include":false,"step":"40.0","x":15.114285714285714,"y":56.93428571428571,"z":53.44380952380952,"a95":0.99,"info":"30/11/2013 at 03:44:25"},{"visible":true,"include":false,"step":"45.0","x":28.976190476190474,"y":58.82380952380952,"z":40.82666666666667,"a95":0.99,"info":"30/11/2013 at 03:44:25"},{"visible":true,"include":false,"step":"50.0","x":3.795142857142857,"y":49.019047619047626,"z":43.1647619047619,"a95":0.99,"info":"30/11/2013 at 03:44:26"},{"visible":false,"include":false,"step":"60.0","x":4.849619047619048,"y":47.90571428571428,"z":44.84190476190476,"a95":0.99,"info":"30/11/2013 at 03:44:26"},{"visible":false,"include":false,"step":"70.0","x":1.516952380952381,"y":32.266666666666666,"z":38.381904761904764,"a95":0.99,"info":"30/11/2013 at 03:44:26"},{"visible":false,"include":false,"step":"80.0","x":-51.21333333333333,"y":71.03142857142858,"z":35.703809523809525,"a95":0.99,"info":"30/11/2013 at 03:44:26"},{"visible":false,"include":false,"step":"90.0","x":-15.75904761904762,"y":-2.6134285714285714,"z":-19.17047619047619,"a95":0.99,"info":"30/11/2013 at 03:44:26"},{"visible":false,"include":false,"step":"100.0","x":25.19142857142857,"y":19.456190476190475,"z":-1.139047619047619,"a95":0.99,"info":"30/11/2013 at 03:44:26"}]},{"version":"v1.1.0","exported":"2016-11-23T15:12:56.513Z","volume":10.5,"added":"2016-11-23T14:38:43.149Z","format":"Utrecht","demagType":"Unknown","strat":"7","patch":1.1,"GEO":[],"TECT":[],"interpreted":false,"name":"PC 3.11","coreAzi":336,"coreDip":29,"bedStrike":337,"bedDip":48,"data":[{"visible":true,"include":false,"step":"0.0","x":-65.4095238095238,"y":186.95238095238096,"z":343.9047619047619,"a95":0.99,"info":"30/11/2013 at 03:44:26"},{"visible":true,"include":false,"step":"4.0","x":-29.346666666666664,"y":174.33333333333334,"z":273.83809523809526,"a95":0.99,"info":"30/11/2013 at 03:44:26"},{"visible":true,"include":false,"step":"8.0","x":-16.88952380952381,"y":144.13333333333335,"z":214.78095238095236,"a95":0.99,"info":"30/11/2013 at 03:44:26"},{"visible":true,"include":false,"step":"12.0","x":-7.348952380952381,"y":128.6952380952381,"z":184.23809523809524,"a95":0.99,"info":"30/11/2013 at 03:44:26"},{"visible":true,"include":false,"step":"16.0","x":-6.617714285714286,"y":128.43809523809523,"z":145.6095238095238,"a95":0.99,"info":"30/11/2013 at 03:44:26"},{"visible":true,"include":false,"step":"20.0","x":-33.05238095238095,"y":127.19047619047619,"z":62.01714285714285,"a95":0.99,"info":"30/11/2013 at 03:44:26"},{"visible":true,"include":false,"step":"25.0","x":-17.061904761904763,"y":123.61904761904762,"z":55.69619047619047,"a95":0.99,"info":"30/11/2013 at 03:44:26"},{"visible":true,"include":false,"step":"30.0","x":-63.850476190476186,"y":85.12190476190476,"z":75.32857142857144,"a95":0.99,"info":"30/11/2013 at 03:44:26"},{"visible":true,"include":false,"step":"35.0","x":-86.77428571428571,"y":79.39047619047619,"z":64.75333333333333,"a95":0.99,"info":"30/11/2013 at 03:44:26"},{"visible":true,"include":false,"step":"40.0","x":-93.63428571428571,"y":78.65428571428572,"z":87.8047619047619,"a95":0.99,"info":"30/11/2013 at 03:44:26"},{"visible":true,"include":false,"step":"45.0","x":-69.40285714285714,"y":47.20666666666667,"z":66.73904761904762,"a95":0.99,"info":"30/11/2013 at 03:44:26"},{"visible":true,"include":false,"step":"50.0","x":-63.58380952380952,"y":17.71238095238095,"z":57.73714285714286,"a95":0.99,"info":"30/11/2013 at 03:44:26"},{"visible":false,"include":false,"step":"60.0","x":-22.69904761904762,"y":88.46095238095238,"z":13.418095238095237,"a95":0.99,"info":"30/11/2013 at 03:44:26"},{"visible":false,"include":false,"step":"70.0","x":-79.06952380952382,"y":43.77333333333333,"z":16.047619047619047,"a95":0.99,"info":"30/11/2013 at 03:44:26"},{"visible":false,"include":false,"step":"80.0","x":-112.15238095238094,"y":-21.557142857142857,"z":39.22,"a95":0.99,"info":"30/11/2013 at 03:44:26"},{"visible":false,"include":false,"step":"90.0","x":-7.815809523809524,"y":69.56666666666668,"z":-0.3192190476190476,"a95":0.99,"info":"30/11/2013 at 03:44:26"},{"visible":false,"include":false,"step":"100.0","x":-31.493333333333332,"y":72.51619047619047,"z":-1.2504761904761905,"a95":0.99,"info":"30/11/2013 at 03:44:26"}]},{"version":"v1.1.0","exported":"2016-11-23T15:12:56.513Z","volume":10.5,"added":"2016-11-23T14:38:43.150Z","format":"Utrecht","demagType":"Unknown","strat":null,"patch":1.1,"GEO":[{"dec":83.45641083816207,"inc":-48.62130983104217,"MAD":8.348720531217342,"cm":[-1.6653345369377348e-16,4.440892098500626e-16,0],"intensity":90.77119724578446,"type":"dir","forced":true,"remark":"","origin":false,"nSteps":6,"minStep":"200","maxStep":"320","steps":["200","225","250","275","300","320"],"group":"None","version":"v1.1.0"}],"TECT":[{"dec":192.47033384154363,"inc":-76.70686602853033,"MAD":8.348720531217326,"cm":[1.5543122344752192e-15,1.1102230246251565e-15,-4.440892098500626e-16],"intensity":90.77119724578446,"type":"dir","forced":true,"remark":"","origin":false,"nSteps":6,"minStep":"200","maxStep":"320","steps":["200","225","250","275","300","320"],"group":"None","version":"v1.1.0"}],"interpreted":true,"name":"PC 3.12A","coreAzi":340,"coreDip":31,"bedStrike":337,"bedDip":48,"data":[{"visible":false,"include":false,"step":"20","x":-24.285714285714285,"y":161.9047619047619,"z":103.80952380952381,"a95":2,"info":"\"13-11-02\" at \"19:13\""},{"visible":true,"include":false,"step":"80","x":0.7619047619047619,"y":93.61904761904762,"z":72.47619047619048,"a95":2.7,"info":"\"13-11-03\" at \"15:38\""},{"visible":true,"include":false,"step":"150","x":22.61904761904762,"y":54.03809523809524,"z":-11.076190476190476,"a95":3.3,"info":"\"13-11-04\" at \"13:00\""},{"visible":true,"include":false,"step":"180","x":37.076190476190476,"y":39.99047619047619,"z":-21.104761904761904,"a95":4.1,"info":"\"13-11-05\" at \"08:03\""},{"visible":true,"include":true,"step":"200","x":34.91428571428572,"y":41.695238095238096,"z":-28.82857142857143,"a95":4.4,"info":"\"13-11-05\" at \"12:36\""},{"visible":true,"include":true,"step":"225","x":23.133333333333333,"y":32.83809523809524,"z":-21.152380952380952,"a95":10.3,"info":"\"13-11-05\" at \"17:24\""},{"visible":true,"include":true,"step":"250","x":17.923809523809524,"y":30.799999999999997,"z":-31.01904761904762,"a95":4,"info":"\"13-11-06\" at \"11:02\""},{"visible":true,"include":true,"step":"275","x":33.48571428571429,"y":30.79047619047619,"z":-20.81904761904762,"a95":4,"info":"\"13-11-06\" at \"15:51\""},{"visible":true,"include":true,"step":"300","x":30.64761904761905,"y":24.17142857142857,"z":-29.495238095238093,"a95":3.7,"info":"\"13-11-07\" at \"04:26\""},{"visible":true,"include":true,"step":"320","x":16.847619047619048,"y":19.142857142857142,"z":-14.285714285714286,"a95":10.9,"info":"\"13-11-07\" at \"07:49\""},{"visible":true,"include":false,"step":"340","x":37.77142857142857,"y":7.904761904761905,"z":-25.323809523809523,"a95":3.8,"info":"\"13-11-07\" at \"11:57\""},{"visible":true,"include":false,"step":"380","x":22.40952380952381,"y":9.114285714285714,"z":-12.980952380952383,"a95":5.4,"info":"\"13-11-08\" at \"10:44\""},{"visible":false,"include":false,"step":"420","x":-16.54285714285714,"y":26.75238095238095,"z":-6.3619047619047615,"a95":11.5,"info":"\"13-11-08\" at \"15:15\""},{"visible":false,"include":false,"step":"450","x":-31.038095238095234,"y":46.74285714285715,"z":-6.419047619047619,"a95":13.1,"info":"\"13-11-08\" at \"19:34\""},{"visible":false,"include":false,"step":"500","x":-4.285714285714286,"y":52.76190476190476,"z":-30.923809523809524,"a95":8.7,"info":"\"13-11-10\" at \"11:25\""},{"visible":false,"include":false,"step":"530","x":306.76190476190476,"y":-36.57142857142857,"z":90.28571428571429,"a95":3.6,"info":"\"13-11-10\" at \"14:23\""}]},{"version":"v1.1.0","exported":"2016-11-23T15:12:56.514Z","volume":10.5,"added":"2016-11-23T14:38:43.150Z","format":"Utrecht","demagType":"Unknown","strat":"8","patch":1.1,"GEO":[],"TECT":[],"interpreted":false,"name":"PC 3.12B","coreAzi":340,"coreDip":31,"bedStrike":337,"bedDip":48,"data":[{"visible":true,"include":false,"step":"0.0","x":-60.54571428571429,"y":77.94380952380952,"z":158.3047619047619,"a95":0.99,"info":"30/11/2013 at 03:44:26"},{"visible":true,"include":false,"step":"4.0","x":-39.90190476190477,"y":68.68571428571428,"z":129.47619047619048,"a95":0.99,"info":"30/11/2013 at 03:44:26"},{"visible":true,"include":false,"step":"8.0","x":-31.120952380952378,"y":69.94761904761906,"z":106.3047619047619,"a95":0.99,"info":"30/11/2013 at 03:44:26"},{"visible":true,"include":false,"step":"12.0","x":-32.86,"y":56.854285714285716,"z":92.30666666666667,"a95":0.99,"info":"30/11/2013 at 03:44:26"},{"visible":true,"include":false,"step":"16.0","x":-23.185714285714283,"y":49.338095238095235,"z":74.22857142857143,"a95":0.99,"info":"30/11/2013 at 03:44:26"},{"visible":true,"include":false,"step":"20.0","x":-33.10857142857143,"y":53.19619047619047,"z":89.91333333333334,"a95":0.99,"info":"30/11/2013 at 03:44:26"},{"visible":true,"include":false,"step":"25.0","x":-30.929523809523808,"y":49.965714285714284,"z":81.35809523809523,"a95":0.99,"info":"30/11/2013 at 03:44:26"},{"visible":true,"include":false,"step":"30.0","x":-30.486666666666668,"y":35.304761904761904,"z":68.44,"a95":0.99,"info":"30/11/2013 at 03:44:26"},{"visible":true,"include":false,"step":"35.0","x":-26.003809523809526,"y":28.06,"z":47.724761904761905,"a95":0.99,"info":"30/11/2013 at 03:44:26"},{"visible":true,"include":false,"step":"40.0","x":-39.023809523809526,"y":26.995238095238093,"z":55.85333333333334,"a95":0.99,"info":"30/11/2013 at 03:44:26"},{"visible":true,"include":false,"step":"45.0","x":-33.18761904761905,"y":37.71523809523809,"z":46.388571428571424,"a95":0.99,"info":"30/11/2013 at 03:44:26"},{"visible":true,"include":false,"step":"50.0","x":-21.516190476190474,"y":34.35047619047619,"z":26.76571428571429,"a95":0.99,"info":"30/11/2013 at 03:44:26"},{"visible":true,"include":false,"step":"60.0","x":-26.818095238095236,"y":40.78190476190476,"z":42.70095238095238,"a95":0.99,"info":"30/11/2013 at 03:44:26"},{"visible":false,"include":false,"step":"70.0","x":-7.023809523809524,"y":35.55047619047619,"z":51.31428571428571,"a95":0.99,"info":"30/11/2013 at 03:44:26"},{"visible":false,"include":false,"step":"80.0","x":-35.48380952380952,"y":26.643809523809523,"z":48.317142857142855,"a95":0.99,"info":"30/11/2013 at 03:44:26"},{"visible":false,"include":false,"step":"90.0","x":-11.963809523809525,"y":39.86380952380952,"z":40.84761904761905,"a95":0.99,"info":"30/11/2013 at 03:44:26"},{"visible":false,"include":false,"step":"100.0","x":-10.549523809523809,"y":-9.226095238095237,"z":-31.76380952380952,"a95":0.99,"info":"30/11/2013 at 03:44:26"}]},{"version":"v1.1.0","exported":"2016-11-23T15:12:56.514Z","volume":10.5,"added":"2016-11-23T14:38:43.151Z","format":"Utrecht","demagType":"Unknown","strat":"1","patch":1.1,"GEO":[],"TECT":[],"interpreted":false,"name":"PC 3.13","coreAzi":350,"coreDip":22,"bedStrike":337,"bedDip":48,"data":[{"visible":true,"include":false,"step":"0.0","x":-101.33333333333333,"y":204.34285714285713,"z":346.552380952381,"a95":0.99,"info":"30/11/2013 at 09:35:19"},{"visible":true,"include":false,"step":"4.0","x":-70.58857142857143,"y":166.37142857142857,"z":273.0095238095238,"a95":0.99,"info":"30/11/2013 at 09:35:19"},{"visible":true,"include":false,"step":"8.0","x":-53.45142857142857,"y":135.67619047619047,"z":210.52380952380952,"a95":0.99,"info":"30/11/2013 at 09:35:19"},{"visible":true,"include":false,"step":"12.0","x":-34.16285714285714,"y":121.43809523809523,"z":165.43809523809523,"a95":0.99,"info":"30/11/2013 at 09:35:19"},{"visible":true,"include":false,"step":"16.0","x":-21.41904761904762,"y":97.73333333333333,"z":147.34285714285713,"a95":0.99,"info":"30/11/2013 at 09:35:19"},{"visible":true,"include":false,"step":"20.0","x":-16.450476190476188,"y":100.61904761904762,"z":99.60952380952382,"a95":0.99,"info":"30/11/2013 at 09:35:19"},{"visible":true,"include":false,"step":"25.0","x":-25.076190476190476,"y":58.80666666666667,"z":67.29142857142857,"a95":0.99,"info":"30/11/2013 at 09:35:19"},{"visible":true,"include":false,"step":"30.0","x":-10.752380952380953,"y":59.07619047619047,"z":56.640952380952385,"a95":0.99,"info":"30/11/2013 at 09:35:19"},{"visible":true,"include":false,"step":"35.0","x":16.98095238095238,"y":56.49619047619048,"z":25.254285714285714,"a95":0.99,"info":"30/11/2013 at 09:35:19"},{"visible":true,"include":false,"step":"40.0","x":-15.086666666666666,"y":50.68190476190476,"z":36.406666666666666,"a95":0.99,"info":"30/11/2013 at 09:35:19"},{"visible":true,"include":false,"step":"45.0","x":-15.671428571428573,"y":59.94666666666667,"z":33.48380952380952,"a95":0.99,"info":"30/11/2013 at 09:35:19"},{"visible":true,"include":false,"step":"50.0","x":-24.623809523809523,"y":29.4,"z":36.98285714285714,"a95":0.99,"info":"30/11/2013 at 09:35:19"},{"visible":false,"include":false,"step":"60.0","x":-12.625714285714285,"y":48.011428571428574,"z":21.534285714285716,"a95":0.99,"info":"30/11/2013 at 09:35:19"},{"visible":false,"include":false,"step":"70.0","x":5.703333333333333,"y":26.582857142857144,"z":34.43047619047619,"a95":0.99,"info":"30/11/2013 at 09:35:19"},{"visible":false,"include":false,"step":"80.0","x":67.33142857142857,"y":47.772380952380956,"z":61.400000000000006,"a95":0.99,"info":"30/11/2013 at 09:35:19"},{"visible":false,"include":false,"step":"90.0","x":-8.560190476190476,"y":15.553333333333333,"z":8.906095238095238,"a95":0.99,"info":"30/11/2013 at 09:35:19"},{"visible":false,"include":false,"step":"100.0","x":6.513714285714286,"y":10.737142857142857,"z":51.49047619047619,"a95":0.99,"info":"30/11/2013 at 09:35:19"}]},{"version":"v1.1.0","exported":"2016-11-23T15:12:56.514Z","volume":10.5,"added":"2016-11-23T14:38:43.151Z","format":"Utrecht","demagType":"Unknown","strat":"2","patch":1.1,"GEO":[],"TECT":[],"interpreted":false,"name":"PC 3.14","coreAzi":355,"coreDip":54,"bedStrike":337,"bedDip":48,"data":[{"visible":true,"include":false,"step":"0.0","x":42.4247619047619,"y":76.1257142857143,"z":181.82857142857142,"a95":0.99,"info":"30/11/2013 at 09:35:19"},{"visible":true,"include":false,"step":"4.0","x":58.89142857142857,"y":80.08952380952381,"z":175.96190476190475,"a95":0.99,"info":"30/11/2013 at 09:35:19"},{"visible":true,"include":false,"step":"8.0","x":70.88666666666666,"y":75.12952380952382,"z":155.2095238095238,"a95":0.99,"info":"30/11/2013 at 09:35:19"},{"visible":true,"include":false,"step":"12.0","x":68.96666666666667,"y":59.396190476190476,"z":131.1238095238095,"a95":0.99,"info":"30/11/2013 at 09:35:19"},{"visible":true,"include":false,"step":"16.0","x":61.540952380952376,"y":44.33428571428571,"z":116.8952380952381,"a95":0.99,"info":"30/11/2013 at 09:35:19"},{"visible":true,"include":false,"step":"20.0","x":53.57714285714285,"y":45.336190476190474,"z":90.94095238095238,"a95":0.99,"info":"30/11/2013 at 09:35:19"},{"visible":true,"include":false,"step":"25.0","x":48.39904761904762,"y":23.577142857142857,"z":78.46666666666667,"a95":0.99,"info":"30/11/2013 at 09:35:19"},{"visible":true,"include":false,"step":"30.0","x":35.327619047619045,"y":18.293333333333333,"z":71.75619047619048,"a95":0.99,"info":"30/11/2013 at 09:35:19"},{"visible":true,"include":false,"step":"35.0","x":31.18761904761905,"y":-8.261523809523808,"z":61.39904761904762,"a95":0.99,"info":"30/11/2013 at 09:35:19"},{"visible":true,"include":false,"step":"40.0","x":30.861904761904764,"y":-0.5908476190476191,"z":69.66952380952381,"a95":0.99,"info":"30/11/2013 at 09:35:19"},{"visible":false,"include":false,"step":"45.0","x":72.71238095238095,"y":43.11047619047619,"z":2.633714285714286,"a95":0.99,"info":"30/11/2013 at 09:35:19"},{"visible":false,"include":false,"step":"50.0","x":13.214285714285714,"y":-0.8780571428571429,"z":90.27333333333334,"a95":0.99,"info":"30/11/2013 at 09:35:19"},{"visible":false,"include":false,"step":"60.0","x":-6.659142857142858,"y":-12.625714285714285,"z":39.402857142857144,"a95":0.99,"info":"30/11/2013 at 09:35:19"},{"visible":false,"include":false,"step":"70.0","x":4.69904761904762,"y":7.393809523809525,"z":44.44285714285714,"a95":0.99,"info":"30/11/2013 at 09:35:19"},{"visible":false,"include":false,"step":"80.0","x":-21.055238095238096,"y":-35.894285714285715,"z":66.87047619047618,"a95":0.99,"info":"30/11/2013 at 09:35:19"},{"visible":false,"include":false,"step":"90.0","x":27.55714285714286,"y":14.071428571428571,"z":27.003809523809526,"a95":0.99,"info":"30/11/2013 at 09:35:19"},{"visible":false,"include":false,"step":"100.0","x":13.384761904761904,"y":6.736380952380952,"z":34.233333333333334,"a95":0.99,"info":"30/11/2013 at 09:35:19"}]},{"version":"v1.1.0","exported":"2016-11-23T15:12:56.514Z","volume":10.5,"added":"2016-11-23T14:38:43.151Z","format":"Utrecht","demagType":"Unknown","strat":"3","patch":1.1,"GEO":[],"TECT":[],"interpreted":false,"name":"PC 3.15","coreAzi":6,"coreDip":54,"bedStrike":337,"bedDip":48,"data":[{"visible":true,"include":false,"step":"0.0","x":61.92476190476191,"y":-3.7267619047619047,"z":314.9238095238095,"a95":0.99,"info":"30/11/2013 at 09:35:19"},{"visible":true,"include":false,"step":"4.0","x":70.08571428571429,"y":-6.028761904761905,"z":235.31428571428575,"a95":0.99,"info":"30/11/2013 at 09:35:19"},{"visible":true,"include":false,"step":"8.0","x":64.77619047619048,"y":-19.573333333333334,"z":144.85714285714286,"a95":0.99,"info":"30/11/2013 at 09:35:19"},{"visible":true,"include":false,"step":"12.0","x":62.94190476190476,"y":-45.862857142857145,"z":97.82857142857144,"a95":0.99,"info":"30/11/2013 at 09:35:19"},{"visible":true,"include":false,"step":"16.0","x":40.31904761904762,"y":-53.768571428571434,"z":78.18666666666667,"a95":0.99,"info":"30/11/2013 at 09:35:19"},{"visible":true,"include":false,"step":"20.0","x":20.754285714285714,"y":-51.44761904761905,"z":51.201904761904764,"a95":0.99,"info":"30/11/2013 at 09:35:19"},{"visible":true,"include":false,"step":"25.0","x":9.456190476190477,"y":-73.55714285714286,"z":47.79238095238095,"a95":0.99,"info":"30/11/2013 at 09:35:19"},{"visible":true,"include":false,"step":"30.0","x":-2.1275238095238094,"y":-66.93904761904761,"z":38.97142857142857,"a95":0.99,"info":"30/11/2013 at 09:35:19"},{"visible":true,"include":false,"step":"35.0","x":-3.152952380952381,"y":-77.91714285714286,"z":47.61523809523809,"a95":0.99,"info":"30/11/2013 at 09:35:19"},{"visible":true,"include":false,"step":"40.0","x":-8.295904761904762,"y":-59.45428571428571,"z":44.21904761904762,"a95":0.99,"info":"30/11/2013 at 09:35:19"},{"visible":false,"include":false,"step":"45.0","x":33.96095238095238,"y":-22.215238095238096,"z":-7.260857142857144,"a95":0.99,"info":"30/11/2013 at 09:35:19"},{"visible":false,"include":false,"step":"50.0","x":-9.324,"y":-43.46476190476191,"z":54.11142857142857,"a95":0.99,"info":"30/11/2013 at 09:35:19"},{"visible":false,"include":false,"step":"60.0","x":-14.536190476190475,"y":-37.64380952380952,"z":31.045714285714286,"a95":0.99,"info":"30/11/2013 at 09:35:19"},{"visible":false,"include":false,"step":"70.0","x":-7.841333333333334,"y":-7.35752380952381,"z":16.34095238095238,"a95":0.99,"info":"30/11/2013 at 09:35:19"},{"visible":false,"include":false,"step":"80.0","x":-32.153333333333336,"y":-27.423809523809524,"z":23.006666666666668,"a95":0.99,"info":"30/11/2013 at 09:35:19"},{"visible":false,"include":false,"step":"90.0","x":11.235238095238095,"y":-22.18952380952381,"z":12.721904761904764,"a95":0.99,"info":"30/11/2013 at 09:35:19"},{"visible":false,"include":false,"step":"100.0","x":8.615714285714287,"y":-8.911999999999999,"z":13.643809523809523,"a95":0.99,"info":"30/11/2013 at 09:35:19"}]},{"version":"v1.1.0","exported":"2016-11-23T15:12:56.514Z","volume":10.5,"added":"2016-11-23T14:38:43.152Z","format":"Utrecht","demagType":"Unknown","strat":"4","patch":1.1,"GEO":[],"TECT":[],"interpreted":false,"name":"PC 3.16A","coreAzi":18,"coreDip":45,"bedStrike":337,"bedDip":48,"data":[{"visible":true,"include":false,"step":"0.0","x":66.59809523809524,"y":-59.99619047619048,"z":320.447619047619,"a95":0.99,"info":"30/11/2013 at 09:35:19"},{"visible":true,"include":false,"step":"4.0","x":67.92857142857143,"y":-62.53047619047619,"z":252.97142857142856,"a95":0.99,"info":"30/11/2013 at 09:35:19"},{"visible":true,"include":false,"step":"8.0","x":67.50666666666667,"y":-65.66952380952381,"z":173.57142857142858,"a95":0.99,"info":"30/11/2013 at 09:35:19"},{"visible":true,"include":false,"step":"12.0","x":76.54190476190476,"y":-82.74857142857142,"z":113.17142857142856,"a95":0.99,"info":"30/11/2013 at 09:35:19"},{"visible":true,"include":false,"step":"16.0","x":44.097142857142856,"y":-81.93904761904761,"z":98.45714285714286,"a95":0.99,"info":"30/11/2013 at 09:35:19"},{"visible":true,"include":false,"step":"20.0","x":16.260952380952382,"y":-65.6647619047619,"z":62.032380952380954,"a95":0.99,"info":"30/11/2013 at 09:35:19"},{"visible":true,"include":false,"step":"25.0","x":0.39554285714285714,"y":-94.42190476190476,"z":57.8,"a95":0.99,"info":"30/11/2013 at 09:35:19"},{"visible":true,"include":false,"step":"30.0","x":17.803809523809523,"y":-82.76952380952382,"z":54.69904761904762,"a95":0.99,"info":"30/11/2013 at 09:35:19"},{"visible":true,"include":false,"step":"35.0","x":14.644761904761905,"y":-93.64857142857143,"z":52.98476190476191,"a95":0.99,"info":"30/11/2013 at 09:35:19"},{"visible":true,"include":false,"step":"40.0","x":-23.31904761904762,"y":-81.49142857142857,"z":51.539047619047615,"a95":0.99,"info":"30/11/2013 at 09:35:19"},{"visible":false,"include":false,"step":"45.0","x":6.000190476190476,"y":-35.54,"z":11.699047619047619,"a95":0.99,"info":"30/11/2013 at 09:35:19"},{"visible":false,"include":false,"step":"50.0","x":-18.217142857142857,"y":-58.864761904761906,"z":47.182857142857145,"a95":0.99,"info":"30/11/2013 at 09:35:19"},{"visible":false,"include":false,"step":"60.0","x":-22.705714285714286,"y":-56.153333333333336,"z":33.126666666666665,"a95":0.99,"info":"30/11/2013 at 09:35:19"},{"visible":false,"include":false,"step":"70.0","x":1.85,"y":-27.138095238095236,"z":16.612380952380953,"a95":0.99,"info":"30/11/2013 at 09:35:19"},{"visible":false,"include":false,"step":"80.0","x":-37.29714285714286,"y":-32.93714285714285,"z":28.579047619047618,"a95":0.99,"info":"30/11/2013 at 09:35:19"},{"visible":false,"include":false,"step":"90.0","x":-18.407619047619047,"y":-10.91047619047619,"z":9.558095238095238,"a95":0.99,"info":"30/11/2013 at 09:35:19"},{"visible":false,"include":false,"step":"100.0","x":2.5547619047619046,"y":-8.140380952380953,"z":30.82761904761905,"a95":0.99,"info":"30/11/2013 at 09:35:19"}]},{"version":"v1.1.0","exported":"2016-11-23T15:12:56.514Z","volume":10.5,"added":"2016-11-23T14:38:43.152Z","format":"Utrecht","demagType":"Unknown","strat":null,"patch":1.1,"GEO":[],"TECT":[],"interpreted":false,"name":"PC 3.16B","coreAzi":18,"coreDip":45,"bedStrike":337,"bedDip":48,"data":[{"visible":true,"include":false,"step":"20","x":36.19047619047619,"y":-90,"z":364.76190476190476,"a95":2.9,"info":"\"13-11-02\" at \"19:19\""},{"visible":true,"include":false,"step":"80","x":26.38095238095238,"y":-88.76190476190476,"z":288.3809523809524,"a95":2.9,"info":"\"13-11-03\" at \"15:41\""},{"visible":true,"include":false,"step":"150","x":44.285714285714285,"y":-66.66666666666667,"z":162.0952380952381,"a95":2.9,"info":"\"13-11-04\" at \"13:02\""},{"visible":true,"include":false,"step":"180","x":62.095238095238095,"y":-58.857142857142854,"z":102.57142857142857,"a95":3.1,"info":"\"13-11-05\" at \"08:06\""},{"visible":true,"include":false,"step":"200","x":58.666666666666664,"y":-59.333333333333336,"z":96.28571428571429,"a95":3.1,"info":"\"13-11-05\" at \"12:39\""},{"visible":true,"include":false,"step":"225","x":46.18095238095238,"y":-63.27619047619047,"z":33.7047619047619,"a95":4.9,"info":"\"13-11-05\" at \"17:30\""},{"visible":true,"include":false,"step":"250","x":37.8,"y":-65.34285714285714,"z":11.961904761904762,"a95":1.9,"info":"\"13-11-06\" at \"11:07\""},{"visible":true,"include":false,"step":"275","x":47.50476190476191,"y":-74.79047619047618,"z":10.942857142857143,"a95":2.4,"info":"\"13-11-06\" at \"15:53\""},{"visible":true,"include":false,"step":"300","x":45.57142857142857,"y":-71.92380952380952,"z":-4.780952380952381,"a95":2.6,"info":"\"13-11-07\" at \"04:29\""},{"visible":true,"include":false,"step":"320","x":26.19047619047619,"y":-94.28571428571429,"z":13.714285714285714,"a95":2.8,"info":"\"13-11-07\" at \"07:51\""},{"visible":true,"include":false,"step":"340","x":13.761904761904763,"y":-91.98095238095237,"z":6.942857142857143,"a95":2.2,"info":"\"13-11-07\" at \"11:59\""},{"visible":true,"include":false,"step":"380","x":11.619047619047619,"y":-97.9047619047619,"z":21.523809523809526,"a95":2.6,"info":"\"13-11-08\" at \"10:47\""},{"visible":false,"include":false,"step":"420","x":-33.61904761904762,"y":-95.33333333333333,"z":19.904761904761905,"a95":3.4,"info":"\"13-11-08\" at \"15:25\""},{"visible":false,"include":false,"step":"450","x":-19.523809523809526,"y":-99.61904761904762,"z":19.047619047619047,"a95":4.1,"info":"\"13-11-08\" at \"19:41\""},{"visible":false,"include":false,"step":"500","x":-4.390476190476191,"y":-87.66666666666667,"z":8.266666666666666,"a95":2.7,"info":"\"13-11-10\" at \"11:27\""},{"visible":false,"include":false,"step":"530","x":-47.04761904761905,"y":-91.71428571428571,"z":29.714285714285715,"a95":3.6,"info":"\"13-11-10\" at \"14:25\""},{"visible":false,"include":false,"step":"560","x":-69.17142857142856,"y":-47.352380952380955,"z":0.47619047619047616,"a95":5.8,"info":"\"13-11-10\" at \"23:19\""}]},{"version":"v1.1.0","exported":"2016-11-23T15:12:56.514Z","volume":10.5,"added":"2016-11-23T14:38:43.153Z","format":"Utrecht","demagType":"Unknown","strat":"5","patch":1.1,"GEO":[],"TECT":[],"interpreted":false,"name":"PC 3.17B","coreAzi":26,"coreDip":42,"bedStrike":337,"bedDip":48,"data":[{"visible":true,"include":false,"step":"0.0","x":-14.872380952380952,"y":-87.90190476190476,"z":161.48571428571427,"a95":0.99,"info":"30/11/2013 at 09:35:19"},{"visible":true,"include":false,"step":"4.0","x":-3.7228571428571433,"y":-82.55619047619048,"z":149.9904761904762,"a95":0.99,"info":"30/11/2013 at 09:35:19"},{"visible":true,"include":false,"step":"8.0","x":2.819904761904762,"y":-81.37904761904763,"z":128.59047619047618,"a95":0.99,"info":"30/11/2013 at 09:35:19"},{"visible":true,"include":false,"step":"12.0","x":25.269523809523808,"y":-88.56857142857143,"z":101.74285714285713,"a95":0.99,"info":"30/11/2013 at 09:35:19"},{"visible":true,"include":false,"step":"16.0","x":16.96095238095238,"y":-93.04476190476191,"z":81.36666666666667,"a95":0.99,"info":"30/11/2013 at 09:35:19"},{"visible":true,"include":false,"step":"20.0","x":2.744190476190476,"y":-68.88,"z":62.668571428571425,"a95":0.99,"info":"30/11/2013 at 09:35:19"},{"visible":true,"include":false,"step":"25.0","x":-12.455238095238096,"y":-88.34761904761905,"z":60.32761904761905,"a95":0.99,"info":"30/11/2013 at 09:35:19"},{"visible":true,"include":false,"step":"30.0","x":-4.7377142857142855,"y":-77.18095238095238,"z":56.16952380952381,"a95":0.99,"info":"30/11/2013 at 09:35:19"},{"visible":true,"include":false,"step":"35.0","x":-13.764761904761905,"y":-81.27333333333334,"z":53.03333333333334,"a95":0.99,"info":"30/11/2013 at 09:35:19"},{"visible":true,"include":false,"step":"40.0","x":-6.984190476190476,"y":-56.409523809523805,"z":43.53619047619048,"a95":0.99,"info":"30/11/2013 at 09:35:19"},{"visible":true,"include":false,"step":"45.0","x":-0.13301904761904762,"y":-25.134285714285717,"z":2.6658095238095236,"a95":0.99,"info":"30/11/2013 at 09:35:19"},{"visible":true,"include":false,"step":"50.0","x":-2.2226666666666666,"y":-41.62571428571429,"z":42.43047619047619,"a95":0.99,"info":"30/11/2013 at 09:35:19"},{"visible":false,"include":false,"step":"60.0","x":-10.673333333333332,"y":-29.045714285714286,"z":19.13142857142857,"a95":0.99,"info":"30/11/2013 at 09:35:19"},{"visible":false,"include":false,"step":"70.0","x":1.0994285714285714,"y":0.12976190476190477,"z":10.485714285714286,"a95":0.99,"info":"30/11/2013 at 09:35:19"},{"visible":false,"include":false,"step":"80.0","x":5.558761904761904,"y":-19.593333333333334,"z":13.104761904761904,"a95":0.99,"info":"30/11/2013 at 09:35:19"},{"visible":false,"include":false,"step":"90.0","x":-19.99809523809524,"y":-9.667619047619048,"z":6.450571428571428,"a95":0.99,"info":"30/11/2013 at 09:35:19"},{"visible":false,"include":false,"step":"100.0","x":-14.099047619047619,"y":-15.855238095238095,"z":28.298095238095236,"a95":0.99,"info":"30/11/2013 at 09:35:19"}]}]
