# Supplementary material for: Paleomagnetic constraints on the timing and distribution of Cenozoic rotations in Central and Eastern Anatolia
Source: Copernicus journal article supplement (doi:10.5194/se-9-295-2018), 2018-03-21
Supplement: Supplementary file 2 [file se-9-295-2018-supplement.zip › se-2017-66_DATA_dir files/dir files Ulukisla/PC4.dir]

[{"version":"v1.1.0","exported":"2016-11-28T14:17:35.468Z","volume":10.5,"added":"2016-11-28T14:13:23.529Z","format":"Utrecht","demagType":"Unknown","strat":null,"patch":1.1,"GEO":[{"dec":165.00364529468425,"inc":-52.02776586072294,"MAD":6.404856898678282,"cm":[8.881784197001252e-16,0,0],"intensity":339.82557884344317,"type":"dir","forced":true,"remark":"","origin":false,"nSteps":7,"minStep":"200","maxStep":"340","steps":["200","225","250","275","300","320","340"],"group":"None","version":"v1.1.0"}],"TECT":[{"dec":225.1270591011746,"inc":-56.17124733947589,"MAD":6.404856898678267,"cm":[-3.1086244689504383e-15,1.2878587085651816e-14,-5.329070518200751e-15],"intensity":339.8255788434431,"type":"dir","forced":true,"remark":"","origin":false,"nSteps":7,"minStep":"200","maxStep":"340","steps":["200","225","250","275","300","320","340"],"group":"None","version":"v1.1.0"}],"interpreted":true,"name":"PC4.1A","coreAzi":29,"coreDip":50,"bedStrike":20,"bedDip":40,"data":[{"visible":true,"include":false,"step":"20","x":20.666666666666668,"y":149.23809523809524,"z":-445.7142857142857,"a95":3.2,"info":"\"13-11-03\" at \"11:14\""},{"visible":true,"include":false,"step":"80","x":49.42857142857143,"y":123.42857142857143,"z":-373.04761904761904,"a95":3.2,"info":"\"13-11-04\" at \"08:02\""},{"visible":true,"include":false,"step":"150","x":44,"y":110.85714285714286,"z":-285.7142857142857,"a95":3.7,"info":"\"13-11-04\" at \"13:21\""},{"visible":true,"include":false,"step":"180","x":47.80952380952381,"y":104.57142857142857,"z":-231.42857142857142,"a95":3.2,"info":"\"13-11-05\" at \"08:20\""},{"visible":true,"include":true,"step":"200","x":49.714285714285715,"y":91.04761904761905,"z":-218.47619047619048,"a95":2.9,"info":"\"13-11-05\" at \"13:00\""},{"visible":true,"include":true,"step":"225","x":43.714285714285715,"y":92.57142857142857,"z":-223.52380952380952,"a95":3.8,"info":"\"13-11-06\" at \"07:26\""},{"visible":true,"include":true,"step":"250","x":29.142857142857142,"y":69.33333333333333,"z":-156,"a95":3.3,"info":"\"13-11-06\" at \"11:18\""},{"visible":true,"include":true,"step":"275","x":19.238095238095237,"y":56.666666666666664,"z":-131.52380952380952,"a95":3.9,"info":"\"13-11-06\" at \"16:00\""},{"visible":true,"include":true,"step":"300","x":9.523809523809524,"y":80.0952380952381,"z":-115.9047619047619,"a95":3.3,"info":"\"13-11-07\" at \"04:39\""},{"visible":true,"include":true,"step":"320","x":27.428571428571427,"y":70.57142857142857,"z":-83.9047619047619,"a95":3.3,"info":"\"13-11-07\" at \"08:02\""},{"visible":true,"include":true,"step":"340","x":3.7142857142857144,"y":62.19047619047619,"z":-80.0952380952381,"a95":5.4,"info":"\"13-11-07\" at \"13:37\""},{"visible":true,"include":false,"step":"380","x":4.019047619047619,"y":60.4952380952381,"z":-48.142857142857146,"a95":4.1,"info":"\"13-11-08\" at \"10:55\""},{"visible":true,"include":false,"step":"420","x":-1.0952380952380953,"y":19.53333333333333,"z":-51.51428571428571,"a95":7.2,"info":"\"13-11-08\" at \"15:57\""},{"visible":true,"include":false,"step":"450","x":8.695238095238095,"y":28.609523809523807,"z":-29.695238095238096,"a95":7.1,"info":"\"13-11-08\" at \"19:58\""},{"visible":true,"include":false,"step":"500","x":-12.885714285714286,"y":43.095238095238095,"z":-23.53333333333333,"a95":5.4,"info":"\"13-11-10\" at \"11:33\""},{"visible":true,"include":false,"step":"530","x":-52.161904761904765,"y":-9.352380952380953,"z":-17.54285714285714,"a95":6.9,"info":"\"13-11-10\" at \"14:50\""},{"visible":true,"include":false,"step":"560","x":15.495238095238093,"y":70.21904761904761,"z":-33.16190476190476,"a95":6.2,"info":"\"13-11-10\" at \"23:28\""}]},{"version":"v1.1.0","exported":"2016-11-28T14:17:35.468Z","volume":10.5,"added":"2016-11-28T14:13:23.529Z","format":"Utrecht","demagType":"Unknown","strat":"6","patch":1.1,"GEO":[{"dec":170.38510199138943,"inc":-52.67301613872741,"MAD":4.07688006053927,"cm":[6.217248937900877e-15,-8.659739592076221e-15,0],"intensity":468.47758954863264,"type":"dir","forced":true,"remark":"","origin":false,"nSteps":6,"minStep":"20.0","maxStep":"45.0","steps":["20.0","25.0","30.0","35.0","40.0","45.0"],"group":"None","version":"v1.1.0"}],"TECT":[{"dec":228.11038031369455,"inc":-53.29826314112748,"MAD":4.076880060539277,"cm":[-7.105427357601002e-15,8.881784197001252e-15,7.105427357601002e-15],"intensity":468.4775895486326,"type":"dir","forced":true,"remark":"","origin":false,"nSteps":6,"minStep":"20.0","maxStep":"45.0","steps":["20.0","25.0","30.0","35.0","40.0","45.0"],"group":"None","version":"v1.1.0"}],"interpreted":true,"name":"PC4.1B","coreAzi":29,"coreDip":50,"bedStrike":20,"bedDip":40,"data":[{"visible":true,"include":false,"step":"0.0","x":14.237142857142858,"y":162.28571428571428,"z":-315.3809523809524,"a95":0.99,"info":"30/11/2013 at 09:35:19"},{"visible":true,"include":false,"step":"4.0","x":14.940000000000001,"y":146.36190476190475,"z":-350.9809523809524,"a95":0.99,"info":"30/11/2013 at 09:35:19"},{"visible":true,"include":false,"step":"8.0","x":29.795238095238098,"y":135.17142857142858,"z":-344.77142857142854,"a95":0.99,"info":"30/11/2013 at 09:35:19"},{"visible":true,"include":false,"step":"12.0","x":44.32380952380952,"y":124.83809523809524,"z":-317.35238095238094,"a95":0.99,"info":"30/11/2013 at 09:35:19"},{"visible":true,"include":false,"step":"16.0","x":42.36761904761905,"y":113.66666666666667,"z":-292.3809523809524,"a95":0.99,"info":"30/11/2013 at 09:35:19"},{"visible":true,"include":true,"step":"20.0","x":33.23142857142857,"y":137.7047619047619,"z":-282.34285714285716,"a95":0.99,"info":"30/11/2013 at 09:35:19"},{"visible":true,"include":true,"step":"25.0","x":39.22571428571429,"y":89.29142857142857,"z":-222.31428571428575,"a95":0.99,"info":"30/11/2013 at 09:35:19"},{"visible":true,"include":true,"step":"30.0","x":26.095238095238095,"y":76.26666666666667,"z":-190.8,"a95":0.99,"info":"30/11/2013 at 09:35:19"},{"visible":true,"include":true,"step":"35.0","x":34.859047619047615,"y":44.46952380952381,"z":-156.51428571428573,"a95":0.99,"info":"30/11/2013 at 09:35:19"},{"visible":true,"include":true,"step":"40.0","x":31.185714285714283,"y":43.33047619047619,"z":-137.75238095238097,"a95":0.99,"info":"30/11/2013 at 09:35:19"},{"visible":true,"include":true,"step":"45.0","x":31.156190476190474,"y":57.85809523809524,"z":-138.46666666666667,"a95":0.99,"info":"30/11/2013 at 09:35:19"},{"visible":true,"include":false,"step":"50.0","x":21.66095238095238,"y":22.015238095238097,"z":-100.58095238095237,"a95":0.99,"info":"30/11/2013 at 09:35:19"},{"visible":true,"include":false,"step":"60.0","x":23.23333333333333,"y":27.24952380952381,"z":-81.22380952380952,"a95":0.99,"info":"30/11/2013 at 09:35:19"},{"visible":true,"include":false,"step":"70.0","x":44.88380952380952,"y":30.115238095238094,"z":-75.14952380952381,"a95":0.99,"info":"30/11/2013 at 09:35:19"},{"visible":true,"include":false,"step":"80.0","x":59.91904761904762,"y":31.036190476190477,"z":-44.96476190476191,"a95":0.99,"info":"30/11/2013 at 09:35:19"},{"visible":true,"include":false,"step":"90.0","x":30.120952380952378,"y":3.332285714285714,"z":-34.89523809523809,"a95":0.99,"info":"30/11/2013 at 09:35:19"},{"visible":true,"include":false,"step":"100.0","x":30.139047619047616,"y":10.92095238095238,"z":-28.144761904761904,"a95":0.99,"info":"30/11/2013 at 09:35:19"}]},{"version":"v1.1.0","exported":"2016-11-28T14:17:35.468Z","volume":10.5,"added":"2016-11-28T14:13:23.530Z","format":"Utrecht","demagType":"Unknown","strat":null,"patch":1.1,"GEO":[{"dec":139.57235383895386,"inc":-40.945041548153156,"MAD":6.388574503941274,"cm":[1.7763568394002505e-15,1.7763568394002505e-15,0],"intensity":204.33500082550293,"type":"dir","forced":true,"remark":"","origin":false,"nSteps":3,"minStep":"275","maxStep":"320","steps":["275","300","320"],"group":"None","version":"v1.1.0"}],"TECT":[{"dec":187.59322458612303,"inc":-67.56159338666754,"MAD":6.388574503941289,"cm":[-1.2434497875801753e-14,-7.771561172376096e-15,5.329070518200751e-15],"intensity":204.33500082550293,"type":"dir","forced":true,"remark":"","origin":false,"nSteps":3,"minStep":"275","maxStep":"320","steps":["275","300","320"],"group":"None","version":"v1.1.0"}],"interpreted":true,"name":"PC4.2A","coreAzi":14,"coreDip":48,"bedStrike":20,"bedDip":40,"data":[{"visible":true,"include":false,"step":"20","x":-2.0952380952380953,"y":112.57142857142857,"z":-7.523809523809524,"a95":2.2,"info":"\"13-11-03\" at \"11:18\""},{"visible":true,"include":false,"step":"80","x":19.333333333333332,"y":71.42857142857143,"z":-183.52380952380952,"a95":3,"info":"\"13-11-04\" at \"08:04\""},{"visible":true,"include":false,"step":"150","x":16.571428571428573,"y":83.9047619047619,"z":-216.47619047619048,"a95":3.4,"info":"\"13-11-04\" at \"13:24\""},{"visible":true,"include":false,"step":"180","x":-1.1428571428571428,"y":94.28571428571429,"z":-184.0952380952381,"a95":3.5,"info":"\"13-11-05\" at \"08:23\""},{"visible":true,"include":false,"step":"200","x":14.571428571428571,"y":73.14285714285714,"z":-186.47619047619048,"a95":3.4,"info":"\"13-11-05\" at \"13:03\""},{"visible":true,"include":false,"step":"225","x":15.80952380952381,"y":70.57142857142857,"z":-194.38095238095238,"a95":3.9,"info":"\"13-11-06\" at \"07:28\""},{"visible":true,"include":false,"step":"250","x":7.428571428571429,"y":70.85714285714286,"z":-124.0952380952381,"a95":3.9,"info":"\"13-11-06\" at \"11:21\""},{"visible":true,"include":true,"step":"275","x":13.142857142857142,"y":68.38095238095238,"z":-93.33333333333333,"a95":2.8,"info":"\"13-11-06\" at \"16:03\""},{"visible":true,"include":true,"step":"300","x":7.619047619047619,"y":57.23809523809524,"z":-87.61904761904762,"a95":4,"info":"\"13-11-07\" at \"04:41\""},{"visible":true,"include":true,"step":"320","x":14.514285714285714,"y":66.2,"z":-57.91428571428572,"a95":3.8,"info":"\"13-11-07\" at \"08:06\""},{"visible":true,"include":false,"step":"340","x":1.5619047619047617,"y":46.266666666666666,"z":-60.18095238095238,"a95":5.6,"info":"\"13-11-07\" at \"13:39\""},{"visible":true,"include":false,"step":"380","x":-9.952380952380953,"y":33.44761904761905,"z":-31.695238095238096,"a95":4.4,"info":"\"13-11-08\" at \"10:57\""},{"visible":true,"include":false,"step":"420","x":-2.4,"y":28.43809523809524,"z":-26.495238095238093,"a95":4.6,"info":"\"13-11-08\" at \"16:02\""},{"visible":true,"include":false,"step":"450","x":3.723809523809524,"y":23.38095238095238,"z":-12.238095238095237,"a95":8.1,"info":"\"13-11-08\" at \"20:00\""},{"visible":true,"include":false,"step":"500","x":-16.085714285714285,"y":34.77142857142857,"z":-4.9714285714285715,"a95":8.7,"info":"\"13-11-10\" at \"11:36\""},{"visible":true,"include":false,"step":"530","x":4.542857142857143,"y":-53.523809523809526,"z":-31.342857142857145,"a95":5.1,"info":"\"13-11-10\" at \"15:46\""},{"visible":true,"include":false,"step":"560","x":-30.685714285714283,"y":26.19047619047619,"z":1.0761904761904764,"a95":17.5,"info":"\"13-11-10\" at \"23:33\""}]},{"version":"v1.1.0","exported":"2016-11-28T14:17:35.468Z","volume":10.5,"added":"2016-11-28T14:13:23.532Z","format":"Utrecht","demagType":"Unknown","strat":"7","patch":1.1,"GEO":[{"dec":152.67171433890815,"inc":-51.61739950667893,"MAD":4.491753682516127,"cm":[-1.5987211554602254e-14,-3.108624468950438e-14,0],"intensity":328.984306467711,"type":"dir","forced":true,"remark":"","origin":false,"nSteps":7,"minStep":"25.0","maxStep":"60.0","steps":["25.0","30.0","35.0","40.0","45.0","50.0","60.0"],"group":"None","version":"v1.1.0"}],"TECT":[{"dec":220.1171605184389,"inc":-63.372102577806935,"MAD":4.491753682516061,"cm":[-2.0650148258027912e-14,-1.1546319456101628e-14,9.769962616701378e-15],"intensity":328.984306467711,"type":"dir","forced":true,"remark":"","origin":false,"nSteps":7,"minStep":"25.0","maxStep":"60.0","steps":["25.0","30.0","35.0","40.0","45.0","50.0","60.0"],"group":"None","version":"v1.1.0"}],"interpreted":true,"name":"PC4.2B","coreAzi":14,"coreDip":48,"bedStrike":20,"bedDip":40,"data":[{"visible":true,"include":false,"step":"0.0","x":11.68,"y":127.17142857142856,"z":-295.9142857142857,"a95":0.99,"info":"30/11/2013 at 09:35:19"},{"visible":true,"include":false,"step":"4.0","x":8.556666666666667,"y":119.65714285714287,"z":-305.8952380952381,"a95":0.99,"info":"30/11/2013 at 09:35:19"},{"visible":true,"include":false,"step":"8.0","x":24.406666666666666,"y":106.73333333333333,"z":-302.65714285714284,"a95":0.99,"info":"30/11/2013 at 09:35:19"},{"visible":true,"include":false,"step":"12.0","x":28.769523809523808,"y":99.14285714285714,"z":-281.0952380952381,"a95":0.99,"info":"30/11/2013 at 09:35:19"},{"visible":true,"include":false,"step":"16.0","x":33.99904761904762,"y":84.12952380952382,"z":-259.9904761904762,"a95":0.99,"info":"30/11/2013 at 09:35:19"},{"visible":true,"include":false,"step":"20.0","x":60.086666666666666,"y":80.29428571428572,"z":-235.63809523809522,"a95":0.99,"info":"30/11/2013 at 09:35:19"},{"visible":true,"include":true,"step":"25.0","x":28.579047619047618,"y":93.73809523809524,"z":-204.7047619047619,"a95":0.99,"info":"30/11/2013 at 09:35:19"},{"visible":true,"include":true,"step":"30.0","x":31.422857142857143,"y":74.38,"z":-174.3047619047619,"a95":0.99,"info":"30/11/2013 at 09:35:19"},{"visible":true,"include":true,"step":"35.0","x":38.417142857142856,"y":52.352380952380955,"z":-148.93333333333334,"a95":0.99,"info":"30/11/2013 at 09:35:19"},{"visible":true,"include":true,"step":"40.0","x":30.39428571428571,"y":56.578095238095244,"z":-132.35238095238097,"a95":0.99,"info":"30/11/2013 at 09:35:19"},{"visible":true,"include":true,"step":"45.0","x":30.05047619047619,"y":73.24666666666667,"z":-123.31428571428572,"a95":0.99,"info":"30/11/2013 at 09:35:19"},{"visible":true,"include":true,"step":"50.0","x":15.74095238095238,"y":43.54380952380952,"z":-95.8,"a95":0.99,"info":"30/11/2013 at 09:35:19"},{"visible":true,"include":true,"step":"60.0","x":25.544761904761906,"y":56.272380952380956,"z":-83.04190476190476,"a95":0.99,"info":"30/11/2013 at 09:35:19"},{"visible":true,"include":false,"step":"70.0","x":25.762857142857143,"y":25.228571428571428,"z":-66.25904761904762,"a95":0.99,"info":"30/11/2013 at 09:35:19"},{"visible":true,"include":false,"step":"80.0","x":27.040952380952383,"y":11.461904761904762,"z":-35.817142857142855,"a95":0.99,"info":"30/11/2013 at 09:35:19"},{"visible":true,"include":false,"step":"90.0","x":32.61333333333333,"y":22.186666666666667,"z":-25.428571428571427,"a95":0.99,"info":"30/11/2013 at 09:35:19"},{"visible":true,"include":false,"step":"100.0","x":47.80095238095238,"y":20.537142857142857,"z":-22.621904761904762,"a95":0.99,"info":"30/11/2013 at 09:35:19"}]},{"version":"v1.1.0","exported":"2016-11-28T14:17:35.468Z","volume":10.5,"added":"2016-11-28T14:13:23.533Z","format":"Utrecht","demagType":"Unknown","strat":"8","patch":1.1,"GEO":[{"dec":8.6756719057812,"inc":-21.049751883213087,"MAD":3.294096442779663,"cm":[4.440892098500626e-15,0,0],"intensity":140.80752584375725,"type":"GC","origin":false,"forced":true,"remark":"","nSteps":6,"minStep":"4.0","maxStep":"30.0","steps":["4.0","8.0","12.0","16.0","20.0","30.0"],"group":"None","version":"v1.1.0"}],"TECT":[{"dec":357.9173804501546,"inc":-9.053117028741545,"MAD":3.29409644277971,"cm":[-7.882583474838611e-15,4.440892098500626e-16,0],"intensity":140.80752584375722,"type":"GC","origin":false,"forced":true,"remark":"","nSteps":6,"minStep":"4.0","maxStep":"30.0","steps":["4.0","8.0","12.0","16.0","20.0","30.0"],"group":"None","version":"v1.1.0"}],"interpreted":true,"name":"PC4.3B","coreAzi":11,"coreDip":53,"bedStrike":20,"bedDip":40,"data":[{"visible":true,"include":false,"step":"0.0","x":-20.49142857142857,"y":80.70095238095239,"z":232.9142857142857,"a95":0.99,"info":"30/11/2013 at 09:35:19"},{"visible":true,"include":true,"step":"4.0","x":-31.253333333333337,"y":79.31428571428572,"z":128.48571428571427,"a95":0.99,"info":"30/11/2013 at 09:35:19"},{"visible":true,"include":true,"step":"8.0","x":-8.708190476190477,"y":75.74476190476192,"z":36.817142857142855,"a95":0.99,"info":"30/11/2013 at 09:35:19"},{"visible":true,"include":true,"step":"12.0","x":2.25,"y":66.26095238095238,"z":-12.298095238095238,"a95":0.99,"info":"30/11/2013 at 09:35:19"},{"visible":true,"include":true,"step":"16.0","x":12.483809523809525,"y":65.55047619047619,"z":-42.65047619047619,"a95":0.99,"info":"30/11/2013 at 09:35:19"},{"visible":true,"include":true,"step":"20.0","x":23.062857142857144,"y":53.9704761904762,"z":-61.7,"a95":0.99,"info":"30/11/2013 at 09:35:19"},{"visible":true,"include":false,"step":"25.0","x":9.441142857142857,"y":49.796190476190475,"z":-64.58285714285714,"a95":0.99,"info":"30/11/2013 at 09:35:19"},{"visible":true,"include":true,"step":"30.0","x":21.13047619047619,"y":41.71714285714285,"z":-57.241904761904756,"a95":0.99,"info":"30/11/2013 at 09:35:19"},{"visible":true,"include":false,"step":"35.0","x":12.124761904761906,"y":18.183809523809526,"z":-53.28666666666667,"a95":0.99,"info":"30/11/2013 at 09:35:19"},{"visible":true,"include":false,"step":"40.0","x":24.45809523809524,"y":28.56190476190476,"z":-54.12666666666667,"a95":0.99,"info":"30/11/2013 at 09:35:19"},{"visible":true,"include":false,"step":"45.0","x":8.147047619047619,"y":23.866666666666667,"z":-42.61238095238095,"a95":0.99,"info":"30/11/2013 at 09:35:19"},{"visible":true,"include":false,"step":"50.0","x":31.465714285714284,"y":-0.008650761904761904,"z":-45.53904761904762,"a95":0.99,"info":"30/11/2013 at 09:35:19"},{"visible":true,"include":false,"step":"60.0","x":14.711428571428572,"y":23.554285714285715,"z":-26.935238095238095,"a95":0.99,"info":"30/11/2013 at 09:35:19"},{"visible":true,"include":false,"step":"70.0","x":42.00285714285714,"y":4.4741904761904765,"z":-11.434285714285714,"a95":0.99,"info":"30/11/2013 at 09:35:19"},{"visible":true,"include":false,"step":"80.0","x":48.06952380952381,"y":-15.305714285714286,"z":-27.077142857142857,"a95":0.99,"info":"30/11/2013 at 09:35:19"},{"visible":true,"include":false,"step":"90.0","x":24.20285714285714,"y":11.346666666666668,"z":-12.305714285714286,"a95":0.99,"info":"30/11/2013 at 09:35:19"},{"visible":true,"include":false,"step":"100.0","x":47.25809523809524,"y":-2.3833333333333333,"z":-7.007142857142857,"a95":0.99,"info":"30/11/2013 at 09:35:19"}]},{"version":"v1.1.0","exported":"2016-11-28T14:17:35.468Z","volume":10.5,"added":"2016-11-28T14:13:23.533Z","format":"Utrecht","demagType":"Unknown","strat":"4","patch":1.1,"GEO":[],"TECT":[],"interpreted":false,"name":"PC4.4A","coreAzi":2,"coreDip":49,"bedStrike":20,"bedDip":40,"data":[{"visible":true,"include":false,"step":"0.0","x":-108.01904761904763,"y":324.0571428571428,"z":-77.24,"a95":0.99,"info":"29/09/2014 at 23:49:41"},{"visible":true,"include":false,"step":"10.0","x":-47.58571428571428,"y":259.7904761904762,"z":-188.24761904761903,"a95":0.99,"info":"29/09/2014 at 23:49:41"},{"visible":true,"include":false,"step":"15.0","x":-25.325714285714287,"y":192.6095238095238,"z":-192.32380952380953,"a95":0.99,"info":"29/09/2014 at 23:49:41"},{"visible":true,"include":false,"step":"20.0","x":80.96000000000001,"y":216.7904761904762,"z":-99.58095238095237,"a95":0.99,"info":"29/09/2014 at 23:49:41"},{"visible":true,"include":false,"step":"25.0","x":50.16952380952381,"y":201.7047619047619,"z":-78.62190476190476,"a95":0.99,"info":"29/09/2014 at 23:49:41"},{"visible":true,"include":false,"step":"30.0","x":15.235238095238095,"y":178.73333333333335,"z":-103.33333333333333,"a95":0.99,"info":"29/09/2014 at 23:49:41"},{"visible":true,"include":false,"step":"35.0","x":84.8047619047619,"y":197.74285714285716,"z":-56.900000000000006,"a95":0.99,"info":"29/09/2014 at 23:49:41"},{"visible":true,"include":false,"step":"40.0","x":-34.38952380952381,"y":128.0857142857143,"z":-45.423809523809524,"a95":0.99,"info":"29/09/2014 at 23:49:41"},{"visible":true,"include":false,"step":"45.0","x":7.961142857142857,"y":119.29523809523809,"z":-39.896190476190476,"a95":0.99,"info":"29/09/2014 at 23:49:41"},{"visible":true,"include":false,"step":"50.0","x":23.49809523809524,"y":138.53333333333333,"z":-59.91619047619048,"a95":0.99,"info":"29/09/2014 at 23:49:41"},{"visible":true,"include":false,"step":"60.0","x":-5.752666666666666,"y":162.92380952380952,"z":-85.53428571428572,"a95":0.99,"info":"29/09/2014 at 23:49:41"},{"visible":true,"include":false,"step":"70.0","x":8.286285714285714,"y":-36.29333333333333,"z":-119.71428571428571,"a95":0.99,"info":"29/09/2014 at 23:49:41"},{"visible":true,"include":false,"step":"80.0","x":-33.54571428571429,"y":132.58095238095237,"z":-50.23714285714286,"a95":0.99,"info":"29/09/2014 at 23:49:41"},{"visible":true,"include":false,"step":"90.0","x":0.9461428571428572,"y":171.2952380952381,"z":-55.40095238095238,"a95":0.99,"info":"29/09/2014 at 23:49:41"}]},{"version":"v1.1.0","exported":"2016-11-28T14:17:35.468Z","volume":10.5,"added":"2016-11-28T14:13:23.534Z","format":"Utrecht","demagType":"Unknown","strat":"1","patch":1.1,"GEO":[{"dec":7.5768512972395,"inc":-28.31566593934671,"MAD":3.641401949759345,"cm":[-1.586925035823583e-14,3.552713678800501e-15,0],"intensity":349.24860308058715,"type":"GC","origin":false,"forced":true,"remark":"","nSteps":4,"minStep":"8.0","maxStep":"20.0","steps":["8.0","12.0","16.0","20.0"],"group":"None","version":"v1.1.0"}],"TECT":[{"dec":352.3730635401906,"inc":-13.982177715622058,"MAD":3.641401949759201,"cm":[-1.3752887717544127e-14,3.552713678800501e-15,-5.329070518200751e-15],"intensity":349.2486030805872,"type":"GC","origin":false,"forced":true,"remark":"","nSteps":4,"minStep":"8.0","maxStep":"20.0","steps":["8.0","12.0","16.0","20.0"],"group":"None","version":"v1.1.0"}],"interpreted":true,"name":"PC4.4B","coreAzi":2,"coreDip":49,"bedStrike":20,"bedDip":40,"data":[{"visible":true,"include":false,"step":"0.0","x":-85.90190476190476,"y":225.87619047619046,"z":267.49523809523805,"a95":0.99,"info":"01/12/2013 at 18:52:41"},{"visible":true,"include":false,"step":"4.0","x":-85.3495238095238,"y":203.57142857142858,"z":256.56190476190477,"a95":0.99,"info":"01/12/2013 at 18:52:41"},{"visible":true,"include":true,"step":"8.0","x":-53.76285714285714,"y":181.2952380952381,"z":165.2761904761905,"a95":0.99,"info":"01/12/2013 at 18:52:41"},{"visible":true,"include":true,"step":"12.0","x":-30.38190476190476,"y":159.1809523809524,"z":84.21904761904761,"a95":0.99,"info":"01/12/2013 at 18:52:41"},{"visible":true,"include":true,"step":"16.0","x":-21.7,"y":134.63809523809525,"z":47.98571428571429,"a95":0.99,"info":"01/12/2013 at 18:52:41"},{"visible":true,"include":true,"step":"20.0","x":-17.86952380952381,"y":102.18095238095239,"z":25.73333333333333,"a95":0.99,"info":"01/12/2013 at 18:52:41"},{"visible":true,"include":false,"step":"25.0","x":-22.185714285714283,"y":102.53333333333333,"z":12.977142857142857,"a95":0.99,"info":"01/12/2013 at 18:52:41"},{"visible":true,"include":false,"step":"30.0","x":-19.746666666666666,"y":86.40285714285714,"z":-5.687428571428572,"a95":0.99,"info":"01/12/2013 at 18:52:41"},{"visible":true,"include":false,"step":"35.0","x":-14.993333333333334,"y":66.90190476190476,"z":11.903809523809523,"a95":0.99,"info":"01/12/2013 at 18:52:41"},{"visible":true,"include":false,"step":"40.0","x":-47.58857142857143,"y":54.80476190476191,"z":-2.310761904761905,"a95":0.99,"info":"01/12/2013 at 18:52:41"},{"visible":true,"include":false,"step":"45.0","x":-31.293333333333333,"y":39.76190476190476,"z":-1.0785714285714285,"a95":0.99,"info":"01/12/2013 at 18:52:41"},{"visible":true,"include":false,"step":"50.0","x":-39.639047619047616,"y":0.25865714285714286,"z":11.539047619047619,"a95":0.99,"info":"01/12/2013 at 18:52:41"},{"visible":true,"include":false,"step":"60.0","x":-40.73714285714286,"y":29.208571428571428,"z":-21.116190476190475,"a95":0.99,"info":"01/12/2013 at 18:52:41"},{"visible":true,"include":false,"step":"70.0","x":2.361809523809524,"y":-3.936952380952381,"z":26.477142857142855,"a95":0.99,"info":"01/12/2013 at 18:52:41"},{"visible":true,"include":false,"step":"80.0","x":20.078095238095237,"y":-11.347619047619048,"z":23.66952380952381,"a95":0.99,"info":"01/12/2013 at 18:52:41"},{"visible":true,"include":false,"step":"90.0","x":-28.627619047619046,"y":8.22,"z":-0.24303809523809522,"a95":0.99,"info":"01/12/2013 at 18:52:41"},{"visible":true,"include":false,"step":"100.0","x":-6.795619047619048,"y":-0.04238857142857143,"z":40.672380952380955,"a95":0.99,"info":"01/12/2013 at 18:52:41"}]},{"version":"v1.1.0","exported":"2016-11-28T14:17:35.468Z","volume":10.5,"added":"2016-11-28T14:13:23.537Z","format":"Utrecht","demagType":"Unknown","strat":"2","patch":1.1,"GEO":[{"dec":334.536742218393,"inc":-32.949598252462714,"MAD":13.904346936954093,"cm":[-1.3322676295501878e-14,-1.0658141036401503e-14,0],"intensity":415.6865045361885,"type":"GC","origin":false,"forced":true,"remark":"","nSteps":6,"minStep":"8.0","maxStep":"30.0","steps":["8.0","12.0","16.0","20.0","25.0","30.0"],"group":"None","version":"v1.1.0"}],"TECT":[{"dec":326.0758726562226,"inc":-1.8435992754353336,"MAD":13.904346936954662,"cm":[-3.9968028886505635e-15,-1.7763568394002505e-14,7.105427357601002e-15],"intensity":415.6865045361886,"type":"GC","origin":false,"forced":true,"remark":"","nSteps":6,"minStep":"8.0","maxStep":"30.0","steps":["8.0","12.0","16.0","20.0","25.0","30.0"],"group":"None","version":"v1.1.0"}],"interpreted":true,"name":"PC4.5A","coreAzi":4,"coreDip":35,"bedStrike":20,"bedDip":40,"data":[{"visible":true,"include":false,"step":"0.0","x":111.79047619047618,"y":164.95238095238096,"z":-84.77428571428571,"a95":0.99,"info":"01/12/2013 at 18:52:41"},{"visible":true,"include":false,"step":"4.0","x":121.02857142857142,"y":141.9904761904762,"z":-93.02000000000001,"a95":0.99,"info":"01/12/2013 at 18:52:41"},{"visible":true,"include":true,"step":"8.0","x":119.26666666666667,"y":138.96190476190475,"z":-167.07619047619048,"a95":0.99,"info":"01/12/2013 at 18:52:41"},{"visible":true,"include":true,"step":"12.0","x":121.95238095238095,"y":109.57142857142857,"z":-201.04761904761904,"a95":0.99,"info":"01/12/2013 at 18:52:41"},{"visible":true,"include":true,"step":"16.0","x":108.67619047619047,"y":101.18095238095239,"z":-202.93333333333334,"a95":0.99,"info":"01/12/2013 at 18:52:41"},{"visible":true,"include":true,"step":"20.0","x":101.95238095238095,"y":67.45809523809524,"z":-228.67619047619047,"a95":0.99,"info":"01/12/2013 at 18:52:41"},{"visible":true,"include":true,"step":"25.0","x":95.70476190476191,"y":73.45428571428572,"z":-181.40952380952382,"a95":0.99,"info":"01/12/2013 at 18:52:41"},{"visible":true,"include":true,"step":"30.0","x":88.40285714285714,"y":53.56666666666667,"z":-137.22857142857143,"a95":0.99,"info":"01/12/2013 at 18:52:41"},{"visible":true,"include":false,"step":"35.0","x":68.96285714285715,"y":31.26571428571429,"z":-124.87619047619049,"a95":0.99,"info":"01/12/2013 at 18:52:41"},{"visible":true,"include":false,"step":"40.0","x":43.30380952380953,"y":28.972380952380952,"z":-112.61904761904762,"a95":0.99,"info":"01/12/2013 at 18:52:41"},{"visible":true,"include":false,"step":"45.0","x":59.14857142857142,"y":20.25809523809524,"z":-89.15142857142857,"a95":0.99,"info":"01/12/2013 at 18:52:41"},{"visible":true,"include":false,"step":"50.0","x":62.53142857142858,"y":-18.254285714285714,"z":-61.24285714285714,"a95":0.99,"info":"01/12/2013 at 18:52:41"},{"visible":true,"include":false,"step":"60.0","x":57.22857142857143,"y":-5.698285714285714,"z":-39.94857142857143,"a95":0.99,"info":"01/12/2013 at 18:52:41"},{"visible":true,"include":false,"step":"70.0","x":71.56952380952382,"y":-17.1,"z":-30.600952380952382,"a95":0.99,"info":"01/12/2013 at 18:52:41"},{"visible":true,"include":false,"step":"80.0","x":71.19619047619047,"y":-39.317142857142855,"z":-14.733333333333333,"a95":0.99,"info":"01/12/2013 at 18:52:41"},{"visible":true,"include":false,"step":"90.0","x":55.275238095238095,"y":-53.66285714285715,"z":-14.437142857142858,"a95":0.99,"info":"01/12/2013 at 18:52:41"},{"visible":true,"include":false,"step":"100.0","x":95.42857142857143,"y":-42.260000000000005,"z":13.141904761904764,"a95":0.99,"info":"01/12/2013 at 18:52:41"}]},{"version":"v1.1.0","exported":"2016-11-28T14:17:35.468Z","volume":10.5,"added":"2016-11-28T14:13:23.537Z","format":"Utrecht","demagType":"Unknown","strat":"5","patch":1.1,"GEO":[{"dec":12.102735892297403,"inc":-21.241955188801477,"MAD":21.63519617574327,"cm":[7.105427357601002e-15,4.440892098500626e-15,0],"intensity":230.52842892254438,"type":"GC","origin":false,"forced":true,"remark":"","nSteps":5,"minStep":"10.0","maxStep":"30.0","steps":["10.0","15.0","20.0","25.0","30.0"],"group":"None","version":"v1.1.0"}],"TECT":[{"dec":0.2764775647625015,"inc":-11.257957249372224,"MAD":21.635196175743033,"cm":[3.9968028886505635e-15,-2.220446049250313e-16,-1.7763568394002505e-15],"intensity":230.52842892254438,"type":"GC","origin":false,"forced":true,"remark":"","nSteps":5,"minStep":"10.0","maxStep":"30.0","steps":["10.0","15.0","20.0","25.0","30.0"],"group":"None","version":"v1.1.0"}],"interpreted":true,"name":"PC4.5B","coreAzi":4,"coreDip":35,"bedStrike":20,"bedDip":40,"data":[{"visible":true,"include":false,"step":"0.0","x":-10.184761904761904,"y":178.1238095238095,"z":17.21238095238095,"a95":0.99,"info":"29/09/2014 at 23:49:41"},{"visible":true,"include":true,"step":"10.0","x":30.27714285714286,"y":136.77142857142857,"z":-79.37809523809524,"a95":0.99,"info":"29/09/2014 at 23:49:41"},{"visible":true,"include":true,"step":"15.0","x":36.44952380952381,"y":116.81904761904761,"z":-95.13238095238096,"a95":0.99,"info":"29/09/2014 at 23:49:41"},{"visible":true,"include":true,"step":"20.0","x":61.57904761904762,"y":117.37142857142858,"z":-98.47619047619048,"a95":0.99,"info":"29/09/2014 at 23:49:41"},{"visible":true,"include":true,"step":"25.0","x":35.205714285714286,"y":72.65619047619047,"z":-80.4752380952381,"a95":0.99,"info":"29/09/2014 at 23:49:41"},{"visible":true,"include":true,"step":"30.0","x":26.255238095238095,"y":40.57047619047619,"z":-56.62666666666667,"a95":0.99,"info":"29/09/2014 at 23:49:41"},{"visible":true,"include":false,"step":"35.0","x":35.360952380952384,"y":49.36761904761905,"z":-46.59619047619047,"a95":0.99,"info":"29/09/2014 at 23:49:41"},{"visible":true,"include":false,"step":"40.0","x":67.10285714285715,"y":6.268380952380952,"z":-43.679047619047616,"a95":0.99,"info":"29/09/2014 at 23:49:41"},{"visible":true,"include":false,"step":"45.0","x":32.78380952380952,"y":4.918857142857143,"z":-38.16761904761905,"a95":0.99,"info":"29/09/2014 at 23:49:41"},{"visible":true,"include":false,"step":"50.0","x":9.912380952380952,"y":29.14666666666667,"z":-41.40952380952381,"a95":0.99,"info":"29/09/2014 at 23:49:41"},{"visible":true,"include":false,"step":"60.0","x":40.98761904761905,"y":-5.715619047619048,"z":-32.63809523809524,"a95":0.99,"info":"29/09/2014 at 23:49:41"},{"visible":true,"include":false,"step":"70.0","x":22.096190476190475,"y":-43.11333333333333,"z":-34.285714285714285,"a95":0.99,"info":"29/09/2014 at 23:49:41"},{"visible":true,"include":false,"step":"80.0","x":63.56380952380952,"y":-21.84952380952381,"z":-5.590476190476191,"a95":0.99,"info":"29/09/2014 at 23:49:41"},{"visible":true,"include":false,"step":"90.0","x":16.932380952380953,"y":-27.217142857142854,"z":-10.457142857142857,"a95":0.99,"info":"29/09/2014 at 23:49:41"}]},{"version":"v1.1.0","exported":"2016-11-28T14:17:35.468Z","volume":10.5,"added":"2016-11-28T14:13:23.537Z","format":"Utrecht","demagType":"Unknown","strat":"6","patch":1.1,"GEO":[{"dec":155.3430348493058,"inc":-52.01388977037157,"MAD":3.030127267536886,"cm":[-6.217248937900877e-15,-9.769962616701378e-15,0],"intensity":238.65267537372915,"type":"dir","forced":true,"remark":"","origin":false,"nSteps":5,"minStep":"15.0","maxStep":"35.0","steps":["15.0","20.0","25.0","30.0","35.0"],"group":"None","version":"v1.1.0"}],"TECT":[{"dec":221.81448660562924,"inc":-61.863790059092125,"MAD":3.0301272675369892,"cm":[-1.021405182655144e-14,-1.2434497875801753e-14,6.217248937900877e-15],"intensity":238.65267537372912,"type":"dir","forced":true,"remark":"","origin":false,"nSteps":5,"minStep":"15.0","maxStep":"35.0","steps":["15.0","20.0","25.0","30.0","35.0"],"group":"None","version":"v1.1.0"}],"interpreted":true,"name":"PC4.6A","coreAzi":39,"coreDip":19,"bedStrike":20,"bedDip":40,"data":[{"visible":true,"include":false,"step":"0.0","x":137.52380952380952,"y":122.94285714285715,"z":-90.71428571428571,"a95":0.99,"info":"29/09/2014 at 23:49:41"},{"visible":true,"include":false,"step":"10.0","x":116.5904761904762,"y":97.5142857142857,"z":-95.31428571428572,"a95":0.99,"info":"29/09/2014 at 23:49:41"},{"visible":true,"include":true,"step":"15.0","x":106.85714285714286,"y":86.35904761904762,"z":-82.19714285714286,"a95":0.99,"info":"29/09/2014 at 23:49:41"},{"visible":true,"include":true,"step":"20.0","x":108.79047619047618,"y":84.39714285714285,"z":-82.41428571428571,"a95":0.99,"info":"29/09/2014 at 23:49:41"},{"visible":true,"include":true,"step":"25.0","x":69.9695238095238,"y":64.4504761904762,"z":-58.07047619047619,"a95":0.99,"info":"29/09/2014 at 23:49:41"},{"visible":true,"include":true,"step":"30.0","x":52.07714285714285,"y":55.33047619047619,"z":-37.95333333333333,"a95":0.99,"info":"29/09/2014 at 23:49:41"},{"visible":true,"include":true,"step":"35.0","x":48.49619047619048,"y":41.71809523809524,"z":-45.93047619047619,"a95":0.99,"info":"29/09/2014 at 23:49:41"},{"visible":true,"include":false,"step":"40.0","x":101.48571428571428,"y":-25.75238095238095,"z":-45.304761904761904,"a95":0.99,"info":"29/09/2014 at 23:49:41"},{"visible":true,"include":false,"step":"45.0","x":40.980000000000004,"y":20.33904761904762,"z":-30.669523809523806,"a95":0.99,"info":"29/09/2014 at 23:49:41"},{"visible":true,"include":false,"step":"50.0","x":38.41142857142857,"y":21.48095238095238,"z":-32.037142857142854,"a95":0.99,"info":"29/09/2014 at 23:49:41"},{"visible":true,"include":false,"step":"60.0","x":29.30952380952381,"y":27.66,"z":-26.089523809523808,"a95":0.99,"info":"29/09/2014 at 23:49:41"},{"visible":true,"include":false,"step":"70.0","x":10.462857142857143,"y":8.195809523809524,"z":-20.759047619047617,"a95":0.99,"info":"29/09/2014 at 23:49:41"},{"visible":true,"include":false,"step":"80.0","x":14.69142857142857,"y":2.4291428571428573,"z":-23.826666666666668,"a95":0.99,"info":"29/09/2014 at 23:49:41"},{"visible":true,"include":false,"step":"90.0","x":10.885714285714286,"y":26.11809523809524,"z":-14.427619047619048,"a95":0.99,"info":"29/09/2014 at 23:49:41"}]},{"version":"v1.1.0","exported":"2016-11-28T14:17:35.468Z","volume":10.5,"added":"2016-11-28T14:13:23.538Z","format":"Utrecht","demagType":"Unknown","strat":"3","patch":1.1,"GEO":[{"dec":167.6245520315066,"inc":-48.749578649854854,"MAD":2.2546434470494248,"cm":[3.552713678800501e-15,2.708944180085382e-14,0],"intensity":429.7842333500395,"type":"dir","forced":true,"remark":"","origin":false,"nSteps":4,"minStep":"25.0","maxStep":"40.0","steps":["25.0","30.0","35.0","40.0"],"group":"None","version":"v1.1.0"}],"TECT":[{"dec":220.91496889869472,"inc":-53.406132131207215,"MAD":2.254643447049485,"cm":[1.0658141036401503e-14,0,-3.552713678800501e-15],"intensity":429.7842333500395,"type":"dir","forced":true,"remark":"","origin":false,"nSteps":4,"minStep":"25.0","maxStep":"40.0","steps":["25.0","30.0","35.0","40.0"],"group":"None","version":"v1.1.0"}],"interpreted":true,"name":"PC4.6B","coreAzi":39,"coreDip":19,"bedStrike":20,"bedDip":40,"data":[{"visible":true,"include":false,"step":"0.0","x":230.93333333333334,"y":206.9809523809524,"z":-359.97142857142853,"a95":0.99,"info":"01/12/2013 at 18:52:41"},{"visible":true,"include":false,"step":"4.0","x":239.66666666666666,"y":186.73333333333335,"z":-362.0761904761905,"a95":0.99,"info":"01/12/2013 at 18:52:41"},{"visible":true,"include":false,"step":"8.0","x":245.37142857142857,"y":199.63809523809522,"z":-324.2,"a95":0.99,"info":"01/12/2013 at 18:52:41"},{"visible":true,"include":false,"step":"12.0","x":239.14285714285714,"y":194.7238095238095,"z":-287.8,"a95":0.99,"info":"01/12/2013 at 18:52:41"},{"visible":true,"include":false,"step":"16.0","x":223.69523809523812,"y":185.58095238095237,"z":-244.28571428571428,"a95":0.99,"info":"01/12/2013 at 18:52:41"},{"visible":true,"include":false,"step":"20.0","x":206.3904761904762,"y":143.85714285714286,"z":-230.64761904761906,"a95":0.99,"info":"01/12/2013 at 18:52:41"},{"visible":true,"include":true,"step":"25.0","x":167.54285714285714,"y":146.9142857142857,"z":-179.36190476190475,"a95":0.99,"info":"01/12/2013 at 18:52:41"},{"visible":true,"include":true,"step":"30.0","x":134.51428571428573,"y":116.64761904761905,"z":-139.65714285714287,"a95":0.99,"info":"01/12/2013 at 18:52:41"},{"visible":true,"include":true,"step":"35.0","x":114.15238095238094,"y":98.44761904761906,"z":-125.4952380952381,"a95":0.99,"info":"01/12/2013 at 18:52:41"},{"visible":true,"include":true,"step":"40.0","x":70.05428571428573,"y":78.14,"z":-99.22857142857144,"a95":0.99,"info":"01/12/2013 at 18:52:41"},{"visible":true,"include":false,"step":"45.0","x":76.38666666666666,"y":68.32000000000001,"z":-91.62952380952382,"a95":0.99,"info":"01/12/2013 at 18:52:41"},{"visible":true,"include":false,"step":"50.0","x":71.97809523809524,"y":34.73714285714286,"z":-78.84761904761905,"a95":0.99,"info":"01/12/2013 at 18:52:41"},{"visible":true,"include":false,"step":"60.0","x":42.09238095238096,"y":45.894285714285715,"z":-63.580000000000005,"a95":0.99,"info":"01/12/2013 at 18:52:41"},{"visible":true,"include":false,"step":"70.0","x":60.43714285714286,"y":22.15047619047619,"z":-40.99047619047619,"a95":0.99,"info":"01/12/2013 at 18:52:41"},{"visible":true,"include":false,"step":"80.0","x":61.67619047619048,"y":-4.7051428571428575,"z":-32.71333333333333,"a95":0.99,"info":"01/12/2013 at 18:52:41"},{"visible":true,"include":false,"step":"90.0","x":41.331428571428575,"y":13.915238095238097,"z":-47.184761904761906,"a95":0.99,"info":"01/12/2013 at 18:52:41"},{"visible":true,"include":false,"step":"100.0","x":43.72380952380953,"y":25.472380952380952,"z":-16.463809523809523,"a95":0.99,"info":"01/12/2013 at 18:52:41"}]},{"version":"v1.1.0","exported":"2016-11-28T14:17:35.468Z","volume":10.5,"added":"2016-11-28T14:13:23.538Z","format":"Utrecht","demagType":"Unknown","strat":"7","patch":1.1,"GEO":[{"dec":163.61727152150752,"inc":-33.86745657643872,"MAD":3.1432739681768553,"cm":[5.329070518200751e-15,1.9984014443252818e-14,0],"intensity":333.60080175376885,"type":"dir","forced":true,"remark":"","origin":false,"nSteps":4,"minStep":"45.0","maxStep":"70.0","steps":["45.0","50.0","60.0","70.0"],"group":"None","version":"v1.1.0"}],"TECT":[{"dec":198.36401439872762,"inc":-48.0295138813038,"MAD":3.143273968176826,"cm":[2.3092638912203256e-14,3.197442310920451e-14,-2.6645352591003757e-14],"intensity":333.6008017537688,"type":"dir","forced":true,"remark":"","origin":false,"nSteps":4,"minStep":"45.0","maxStep":"70.0","steps":["45.0","50.0","60.0","70.0"],"group":"None","version":"v1.1.0"}],"interpreted":true,"name":"PC4.7A","coreAzi":353,"coreDip":23,"bedStrike":20,"bedDip":40,"data":[{"visible":true,"include":false,"step":"0.0","x":234.67619047619047,"y":301.3809523809524,"z":-648.3809523809524,"a95":0.99,"info":"29/09/2014 at 23:49:41"},{"visible":true,"include":false,"step":"10.0","x":209.95238095238096,"y":241.03809523809525,"z":-639.5809523809525,"a95":0.99,"info":"29/09/2014 at 23:49:41"},{"visible":true,"include":false,"step":"15.0","x":148.9904761904762,"y":188.8952380952381,"z":-537.9047619047619,"a95":0.99,"info":"29/09/2014 at 23:49:41"},{"visible":true,"include":false,"step":"20.0","x":109.24761904761904,"y":175.8095238095238,"z":-456.5904761904762,"a95":0.99,"info":"29/09/2014 at 23:49:41"},{"visible":true,"include":false,"step":"25.0","x":89.17809523809524,"y":116.80952380952381,"z":-373.5238095238095,"a95":0.99,"info":"29/09/2014 at 23:49:41"},{"visible":true,"include":false,"step":"30.0","x":49.3495238095238,"y":97.25714285714287,"z":-293.34285714285716,"a95":0.99,"info":"29/09/2014 at 23:49:41"},{"visible":true,"include":false,"step":"35.0","x":32.51904761904762,"y":72.48380952380953,"z":-259.37142857142857,"a95":0.99,"info":"29/09/2014 at 23:49:41"},{"visible":true,"include":false,"step":"40.0","x":76.70285714285714,"y":5.882571428571429,"z":-244.0095238095238,"a95":0.99,"info":"29/09/2014 at 23:49:41"},{"visible":true,"include":true,"step":"45.0","x":40.92285714285714,"y":30.97047619047619,"z":-213.78095238095236,"a95":0.99,"info":"29/09/2014 at 23:49:41"},{"visible":true,"include":true,"step":"50.0","x":27.774285714285714,"y":23.585714285714285,"z":-171.28571428571428,"a95":0.99,"info":"29/09/2014 at 23:49:41"},{"visible":true,"include":true,"step":"60.0","x":39.339999999999996,"y":26.669523809523806,"z":-140.03809523809525,"a95":0.99,"info":"29/09/2014 at 23:49:41"},{"visible":true,"include":true,"step":"70.0","x":19.81714285714286,"y":4.467238095238095,"z":-112.32380952380953,"a95":0.99,"info":"29/09/2014 at 23:49:41"},{"visible":true,"include":false,"step":"80.0","x":113.56190476190477,"y":-0.5891238095238096,"z":-89.92857142857143,"a95":0.99,"info":"29/09/2014 at 23:49:41"},{"visible":true,"include":false,"step":"90.0","x":11.68952380952381,"y":8.300476190476191,"z":-53.89904761904762,"a95":0.99,"info":"29/09/2014 at 23:49:41"}]},{"version":"v1.1.0","exported":"2016-11-28T14:17:35.468Z","volume":10.5,"added":"2016-11-28T14:13:23.538Z","format":"Utrecht","demagType":"Unknown","strat":"4","patch":1.1,"GEO":[{"dec":190.0857220242905,"inc":-33.22870837141224,"MAD":3.203758366026988,"cm":[-3.552713678800501e-15,2.5979218776228663e-14,0],"intensity":273.1454632505015,"type":"dir","forced":true,"remark":"","origin":false,"nSteps":4,"minStep":"50.0","maxStep":"80.0","steps":["50.0","60.0","70.0","80.0"],"group":"None","version":"v1.1.0"}],"TECT":[{"dec":216.36115042566965,"inc":-30.820798225414126,"MAD":3.203758366026957,"cm":[1.0658141036401503e-14,-8.881784197001252e-16,-1.7763568394002505e-14],"intensity":273.1454632505015,"type":"dir","forced":true,"remark":"","origin":false,"nSteps":4,"minStep":"50.0","maxStep":"80.0","steps":["50.0","60.0","70.0","80.0"],"group":"None","version":"v1.1.0"}],"interpreted":true,"name":"PC4.7B","coreAzi":353,"coreDip":23,"bedStrike":20,"bedDip":40,"data":[{"visible":true,"include":false,"step":"0.0","x":212.77142857142857,"y":-236.06666666666666,"z":-523.2761904761904,"a95":0.99,"info":"01/12/2013 at 18:52:41"},{"visible":true,"include":false,"step":"4.0","x":224.73333333333332,"y":-258.48571428571427,"z":-533.3619047619047,"a95":0.99,"info":"01/12/2013 at 18:52:41"},{"visible":true,"include":false,"step":"8.0","x":200.31428571428575,"y":-248.68571428571425,"z":-568.9238095238095,"a95":0.99,"info":"01/12/2013 at 18:52:41"},{"visible":true,"include":false,"step":"12.0","x":165.45714285714286,"y":-198.95238095238096,"z":-543.2380952380952,"a95":0.99,"info":"01/12/2013 at 18:52:41"},{"visible":true,"include":false,"step":"16.0","x":145.46666666666667,"y":-158.15238095238095,"z":-489.4190476190476,"a95":0.99,"info":"01/12/2013 at 18:52:41"},{"visible":true,"include":false,"step":"20.0","x":117.5904761904762,"y":-136.52380952380952,"z":-453.9619047619048,"a95":0.99,"info":"01/12/2013 at 18:52:41"},{"visible":true,"include":false,"step":"25.0","x":89.61714285714285,"y":-93.27238095238096,"z":-364.54285714285714,"a95":0.99,"info":"01/12/2013 at 18:52:41"},{"visible":true,"include":false,"step":"30.0","x":70.1504761904762,"y":-74.35142857142857,"z":-303.0761904761905,"a95":0.99,"info":"01/12/2013 at 18:52:41"},{"visible":true,"include":false,"step":"35.0","x":63.07142857142857,"y":-49.76190476190476,"z":-273.7904761904762,"a95":0.99,"info":"01/12/2013 at 18:52:41"},{"visible":true,"include":false,"step":"40.0","x":28.15047619047619,"y":-60.32761904761905,"z":-231.02857142857144,"a95":0.99,"info":"01/12/2013 at 18:52:41"},{"visible":true,"include":false,"step":"45.0","x":44.40380952380953,"y":-37.425714285714285,"z":-210,"a95":0.99,"info":"01/12/2013 at 18:52:41"},{"visible":true,"include":true,"step":"50.0","x":37.84952380952381,"y":-51.62,"z":-176.62857142857143,"a95":0.99,"info":"01/12/2013 at 18:52:41"},{"visible":true,"include":true,"step":"60.0","x":33.04666666666667,"y":-35.640952380952385,"z":-143.04761904761904,"a95":0.99,"info":"01/12/2013 at 18:52:41"},{"visible":true,"include":true,"step":"70.0","x":9.82,"y":-17.554285714285715,"z":-102.66666666666667,"a95":0.99,"info":"01/12/2013 at 18:52:41"},{"visible":true,"include":true,"step":"80.0","x":17.532380952380954,"y":-21.18285714285714,"z":-80.74476190476192,"a95":0.99,"info":"01/12/2013 at 18:52:41"},{"visible":true,"include":false,"step":"90.0","x":21.235238095238095,"y":-2.7163809523809523,"z":-71.95809523809524,"a95":0.99,"info":"01/12/2013 at 18:52:41"},{"visible":true,"include":false,"step":"100.0","x":25.906666666666666,"y":-24.772380952380953,"z":-68.4352380952381,"a95":0.99,"info":"01/12/2013 at 18:52:41"}]},{"version":"v1.1.0","exported":"2016-11-28T14:17:35.468Z","volume":10.5,"added":"2016-11-28T14:13:23.538Z","format":"Utrecht","demagType":"Unknown","strat":null,"patch":1.1,"GEO":[{"dec":148.36424204978886,"inc":-44.337140892333295,"MAD":4.747280891606639,"cm":[1.2434497875801753e-14,1.5987211554602254e-14,0],"intensity":521.2559575128427,"type":"dir","forced":true,"remark":"","origin":false,"nSteps":6,"minStep":"275","maxStep":"420","steps":["275","300","320","340","380","420"],"group":"None","version":"v1.1.0"}],"TECT":[{"dec":202.53176360340532,"inc":-63.61801830171715,"MAD":4.747280891606678,"cm":[-6.217248937900877e-15,-1.9317880628477724e-14,1.0658141036401503e-14],"intensity":521.2559575128427,"type":"dir","forced":true,"remark":"","origin":false,"nSteps":6,"minStep":"275","maxStep":"420","steps":["275","300","320","340","380","420"],"group":"None","version":"v1.1.0"}],"interpreted":true,"name":"PC4.8A","coreAzi":12,"coreDip":51,"bedStrike":20,"bedDip":40,"data":[{"visible":true,"include":false,"step":"20","x":177.42857142857142,"y":146.66666666666666,"z":-531.5238095238095,"a95":2.6,"info":"\"13-11-03\" at \"11:21\""},{"visible":true,"include":false,"step":"80","x":99.14285714285714,"y":152.1904761904762,"z":-552.4761904761905,"a95":2.6,"info":"\"13-11-04\" at \"08:07\""},{"visible":true,"include":false,"step":"150","x":62.285714285714285,"y":177.33333333333334,"z":-547.9047619047619,"a95":2.9,"info":"\"13-11-04\" at \"13:27\""},{"visible":true,"include":false,"step":"180","x":32.666666666666664,"y":185.61904761904762,"z":-493.04761904761904,"a95":3,"info":"\"13-11-05\" at \"08:25\""},{"visible":true,"include":false,"step":"200","x":38.95238095238095,"y":172,"z":-488.6666666666667,"a95":3.3,"info":"\"13-11-05\" at \"13:05\""},{"visible":true,"include":false,"step":"225","x":46.19047619047619,"y":167.52380952380952,"z":-490.57142857142856,"a95":3.6,"info":"\"13-11-06\" at \"07:30\""},{"visible":true,"include":false,"step":"250","x":32.95238095238095,"y":184.47619047619048,"z":-371.6190476190476,"a95":3.3,"info":"\"13-11-06\" at \"11:24\""},{"visible":true,"include":true,"step":"275","x":23.238095238095237,"y":164.85714285714286,"z":-327.7142857142857,"a95":3.2,"info":"\"13-11-06\" at \"16:05\""},{"visible":true,"include":true,"step":"300","x":9.142857142857142,"y":154.0952380952381,"z":-310.3809523809524,"a95":3.1,"info":"\"13-11-07\" at \"04:44\""},{"visible":true,"include":true,"step":"320","x":24.761904761904763,"y":162.38095238095238,"z":-244.66666666666666,"a95":3.1,"info":"\"13-11-07\" at \"08:09\""},{"visible":true,"include":true,"step":"340","x":4.380952380952381,"y":136.38095238095238,"z":-246.95238095238096,"a95":5.2,"info":"\"13-11-07\" at \"13:42\""},{"visible":true,"include":true,"step":"380","x":-15.619047619047619,"y":120.66666666666667,"z":-145.9047619047619,"a95":4.3,"info":"\"13-11-08\" at \"10:59\""},{"visible":true,"include":true,"step":"420","x":4.285714285714286,"y":89.42857142857143,"z":-126.47619047619048,"a95":5.5,"info":"\"13-11-08\" at \"16:05\""},{"visible":true,"include":false,"step":"450","x":18.98095238095238,"y":47.8,"z":-76.9047619047619,"a95":5.1,"info":"\"13-11-08\" at \"20:03\""},{"visible":true,"include":false,"step":"500","x":-1.7904761904761906,"y":62.980952380952374,"z":-45.06666666666666,"a95":5.6,"info":"\"13-11-10\" at \"11:38\""},{"visible":true,"include":false,"step":"530","x":-33.666666666666664,"y":39.76190476190476,"z":-35.36190476190476,"a95":5.6,"info":"\"13-11-10\" at \"14:55\""},{"visible":true,"include":false,"step":"560","x":-43.438095238095244,"y":58.438095238095244,"z":-13.114285714285714,"a95":7.2,"info":"\"13-11-10\" at \"23:36\""}]},{"version":"v1.1.0","exported":"2016-11-28T14:17:35.468Z","volume":10.5,"added":"2016-11-28T14:13:23.539Z","format":"Utrecht","demagType":"Unknown","strat":"5","patch":1.1,"GEO":[{"dec":162.83743932662594,"inc":-54.06290354223501,"MAD":3.663231924828084,"cm":[1.7763568394002505e-15,-1.426636586643326e-14,0],"intensity":683.3590943874868,"type":"dir","forced":true,"remark":"","origin":false,"nSteps":6,"minStep":"12.0","maxStep":"35.0","steps":["12.0","16.0","20.0","25.0","30.0","35.0"],"group":"None","version":"v1.1.0"}],"TECT":[{"dec":228.01588850790964,"inc":-58.00837099574969,"MAD":3.6632319248280956,"cm":[8.881784197001252e-16,1.7763568394002505e-15,-7.105427357601002e-15],"intensity":683.3590943874868,"type":"dir","forced":true,"remark":"","origin":false,"nSteps":6,"minStep":"12.0","maxStep":"35.0","steps":["12.0","16.0","20.0","25.0","30.0","35.0"],"group":"None","version":"v1.1.0"}],"interpreted":true,"name":"PC4.8B","coreAzi":12,"coreDip":51,"bedStrike":20,"bedDip":40,"data":[{"visible":true,"include":false,"step":"0.0","x":33.32190476190476,"y":232.32380952380953,"z":-381.5333333333333,"a95":0.99,"info":"01/12/2013 at 18:52:41"},{"visible":true,"include":false,"step":"4.0","x":59.473333333333336,"y":204.74285714285716,"z":-385.5333333333333,"a95":0.99,"info":"01/12/2013 at 18:52:41"},{"visible":true,"include":false,"step":"8.0","x":53.58571428571428,"y":188.2095238095238,"z":-447.20000000000005,"a95":0.99,"info":"01/12/2013 at 18:52:41"},{"visible":true,"include":true,"step":"12.0","x":55.26190476190476,"y":147.9047619047619,"z":-439.60952380952375,"a95":0.99,"info":"01/12/2013 at 18:52:41"},{"visible":true,"include":true,"step":"16.0","x":41.62190476190476,"y":139.35238095238097,"z":-410.847619047619,"a95":0.99,"info":"01/12/2013 at 18:52:41"},{"visible":true,"include":true,"step":"20.0","x":42.18095238095238,"y":102.26666666666667,"z":-382.23809523809524,"a95":0.99,"info":"01/12/2013 at 18:52:41"},{"visible":true,"include":true,"step":"25.0","x":22.484761904761903,"y":98.97142857142858,"z":-308.0095238095238,"a95":0.99,"info":"01/12/2013 at 18:52:41"},{"visible":true,"include":true,"step":"30.0","x":33.04,"y":69.55619047619048,"z":-264.2095238095238,"a95":0.99,"info":"01/12/2013 at 18:52:41"},{"visible":true,"include":true,"step":"35.0","x":51.63904761904762,"y":23.78857142857143,"z":-213.13333333333335,"a95":0.99,"info":"01/12/2013 at 18:52:41"},{"visible":true,"include":false,"step":"40.0","x":2.0966666666666667,"y":46.415238095238095,"z":-199.54285714285712,"a95":0.99,"info":"01/12/2013 at 18:52:41"},{"visible":true,"include":false,"step":"45.0","x":34.406666666666666,"y":22.82,"z":-177.83809523809524,"a95":0.99,"info":"01/12/2013 at 18:52:41"},{"visible":true,"include":false,"step":"50.0","x":44.425714285714285,"y":-20.52190476190476,"z":-126.9904761904762,"a95":0.99,"info":"01/12/2013 at 18:52:41"},{"visible":true,"include":false,"step":"60.0","x":64.61809523809524,"y":12.813333333333333,"z":-81.1504761904762,"a95":0.99,"info":"01/12/2013 at 18:52:41"},{"visible":true,"include":false,"step":"70.0","x":100.53333333333333,"y":-14.912380952380953,"z":-68.34476190476191,"a95":0.99,"info":"01/12/2013 at 18:52:41"},{"visible":true,"include":false,"step":"80.0","x":75.44571428571427,"y":-18.057142857142857,"z":-77.33333333333333,"a95":0.99,"info":"01/12/2013 at 18:52:41"},{"visible":true,"include":false,"step":"90.0","x":87.85428571428572,"y":-41.09428571428572,"z":-54.87238095238095,"a95":0.99,"info":"01/12/2013 at 18:52:41"},{"visible":true,"include":false,"step":"100.0","x":117.0095238095238,"y":-23.452380952380953,"z":-66.30095238095238,"a95":0.99,"info":"01/12/2013 at 18:52:41"}]},{"version":"v1.1.0","exported":"2016-11-28T14:17:35.468Z","volume":10.5,"added":"2016-11-28T14:13:23.539Z","format":"Utrecht","demagType":"Unknown","strat":"8","patch":1.1,"GEO":[{"dec":49.66955646251563,"inc":-14.731043340271839,"MAD":22.11617168084159,"cm":[1.0658141036401503e-14,2.6201263381153694e-14,0],"intensity":766.5858997967973,"type":"GC","origin":false,"forced":true,"remark":"","nSteps":7,"minStep":"10.0","maxStep":"40.0","steps":["10.0","15.0","20.0","25.0","30.0","35.0","40.0"],"group":"None","version":"v1.1.0"}],"TECT":[{"dec":33.59860120621772,"inc":-30.166252982290167,"MAD":22.11617168084168,"cm":[-4.440892098500626e-16,1.687538997430238e-14,-3.552713678800501e-15],"intensity":766.5858997967971,"type":"GC","origin":false,"forced":true,"remark":"","nSteps":7,"minStep":"10.0","maxStep":"40.0","steps":["10.0","15.0","20.0","25.0","30.0","35.0","40.0"],"group":"None","version":"v1.1.0"}],"interpreted":true,"name":"PC4.9A","coreAzi":1,"coreDip":50,"bedStrike":20,"bedDip":40,"data":[{"visible":true,"include":false,"step":"0.0","x":-39.33238095238095,"y":158.7904761904762,"z":-484.7523809523809,"a95":0.99,"info":"29/09/2014 at 23:49:41"},{"visible":true,"include":true,"step":"10.0","x":6.917238095238095,"y":150.0285714285714,"z":-516.447619047619,"a95":0.99,"info":"29/09/2014 at 23:49:41"},{"visible":true,"include":true,"step":"15.0","x":23.48857142857143,"y":124.79047619047618,"z":-480.74285714285713,"a95":0.99,"info":"29/09/2014 at 23:49:41"},{"visible":true,"include":true,"step":"20.0","x":16.962857142857143,"y":124.3047619047619,"z":-409.7142857142857,"a95":0.99,"info":"29/09/2014 at 23:49:41"},{"visible":true,"include":true,"step":"25.0","x":7.273142857142856,"y":63.656190476190474,"z":-364.7142857142857,"a95":0.99,"info":"29/09/2014 at 23:49:41"},{"visible":true,"include":true,"step":"30.0","x":46.35142857142857,"y":38.27619047619047,"z":-303.65714285714284,"a95":0.99,"info":"29/09/2014 at 23:49:41"},{"visible":true,"include":true,"step":"35.0","x":49.483809523809526,"y":42.201904761904764,"z":-248.94285714285715,"a95":0.99,"info":"29/09/2014 at 23:49:41"},{"visible":true,"include":true,"step":"40.0","x":55.532380952380954,"y":31.64761904761905,"z":-225.67619047619047,"a95":0.99,"info":"29/09/2014 at 23:49:41"},{"visible":true,"include":false,"step":"45.0","x":45.298095238095236,"y":-7.603142857142857,"z":-192.46666666666667,"a95":0.99,"info":"29/09/2014 at 23:49:41"},{"visible":true,"include":false,"step":"50.0","x":64.74952380952381,"y":24.857142857142858,"z":-153.23809523809524,"a95":0.99,"info":"29/09/2014 at 23:49:41"},{"visible":true,"include":false,"step":"60.0","x":80.18095238095238,"y":-0.44205714285714287,"z":-123.05714285714285,"a95":0.99,"info":"29/09/2014 at 23:49:41"},{"visible":true,"include":false,"step":"70.0","x":109.3047619047619,"y":-46.88666666666667,"z":-97.29523809523809,"a95":0.99,"info":"29/09/2014 at 23:49:41"},{"visible":true,"include":false,"step":"80.0","x":47.70666666666667,"y":-7.570285714285714,"z":-78.78285714285714,"a95":0.99,"info":"29/09/2014 at 23:49:41"},{"visible":true,"include":false,"step":"90.0","x":68.76190476190476,"y":-21.740952380952383,"z":-67.57714285714285,"a95":0.99,"info":"29/09/2014 at 23:49:41"}]},{"version":"v1.1.0","exported":"2016-11-28T14:17:35.468Z","volume":10.5,"added":"2016-11-28T14:13:23.539Z","format":"Utrecht","demagType":"Unknown","strat":"6","patch":1.1,"GEO":[{"dec":28.70219322396275,"inc":-24.281027371695945,"MAD":6.842489382395654,"cm":[-5.329070518200751e-15,-9.325873406851315e-15,0],"intensity":356.85480361300733,"type":"GC","origin":false,"forced":true,"remark":"","nSteps":8,"minStep":"4.0","maxStep":"35.0","steps":["4.0","8.0","12.0","16.0","20.0","25.0","30.0","35.0"],"group":"None","version":"v1.1.0"}],"TECT":[{"dec":10.012653867715812,"inc":-23.806991578283583,"MAD":6.842489382396297,"cm":[-3.9968028886505635e-15,-9.769962616701378e-15,8.881784197001252e-15],"intensity":356.8548036130073,"type":"GC","origin":false,"forced":true,"remark":"","nSteps":8,"minStep":"4.0","maxStep":"35.0","steps":["4.0","8.0","12.0","16.0","20.0","25.0","30.0","35.0"],"group":"None","version":"v1.1.0"}],"interpreted":true,"name":"PC4.9B","coreAzi":1,"coreDip":50,"bedStrike":20,"bedDip":40,"data":[{"visible":true,"include":false,"step":"0.0","x":-51.72380952380953,"y":147.31428571428572,"z":-115.51428571428572,"a95":0.99,"info":"01/12/2013 at 18:52:41"},{"visible":true,"include":true,"step":"4.0","x":-30.228571428571428,"y":135.36190476190475,"z":-127.82857142857144,"a95":0.99,"info":"01/12/2013 at 18:52:41"},{"visible":true,"include":true,"step":"8.0","x":-13.116190476190477,"y":130.88571428571427,"z":-232.05714285714285,"a95":0.99,"info":"01/12/2013 at 18:52:41"},{"visible":true,"include":true,"step":"12.0","x":3.734380952380952,"y":117.31428571428572,"z":-296.06666666666666,"a95":0.99,"info":"01/12/2013 at 18:52:41"},{"visible":true,"include":true,"step":"16.0","x":27.080952380952382,"y":83.97142857142858,"z":-282.9904761904762,"a95":0.99,"info":"01/12/2013 at 18:52:41"},{"visible":true,"include":true,"step":"20.0","x":32.92190476190476,"y":82.42761904761905,"z":-273.37142857142857,"a95":0.99,"info":"01/12/2013 at 18:52:41"},{"visible":true,"include":true,"step":"25.0","x":25.71809523809524,"y":66.85333333333334,"z":-239.39999999999998,"a95":0.99,"info":"01/12/2013 at 18:52:41"},{"visible":true,"include":true,"step":"30.0","x":17.043809523809525,"y":43.23619047619048,"z":-193.28571428571428,"a95":0.99,"info":"01/12/2013 at 18:52:41"},{"visible":true,"include":true,"step":"35.0","x":25.038095238095234,"y":38.385714285714286,"z":-183.82857142857142,"a95":0.99,"info":"01/12/2013 at 18:52:41"},{"visible":true,"include":false,"step":"40.0","x":-8.798095238095238,"y":33.70952380952381,"z":-140.61904761904762,"a95":0.99,"info":"01/12/2013 at 18:52:41"},{"visible":true,"include":false,"step":"45.0","x":25.447619047619046,"y":48.34190476190476,"z":-125.14285714285714,"a95":0.99,"info":"01/12/2013 at 18:52:41"},{"visible":true,"include":false,"step":"50.0","x":34.843809523809526,"y":-39.30761904761905,"z":-97.4095238095238,"a95":0.99,"info":"01/12/2013 at 18:52:41"},{"visible":true,"include":false,"step":"60.0","x":43.67809523809524,"y":3.0780000000000003,"z":-70.69714285714286,"a95":0.99,"info":"01/12/2013 at 18:52:41"},{"visible":true,"include":false,"step":"70.0","x":50.483809523809526,"y":-1.526,"z":-61.603809523809524,"a95":0.99,"info":"01/12/2013 at 18:52:41"},{"visible":true,"include":false,"step":"80.0","x":57.88666666666666,"y":-28.804761904761904,"z":-52.05428571428572,"a95":0.99,"info":"01/12/2013 at 18:52:41"},{"visible":true,"include":false,"step":"90.0","x":85.08190476190477,"y":-43.026666666666664,"z":-49.84571428571429,"a95":0.99,"info":"01/12/2013 at 18:52:41"},{"visible":true,"include":false,"step":"100.0","x":94.2895238095238,"y":-17.85047619047619,"z":-32.71714285714285,"a95":0.99,"info":"01/12/2013 at 18:52:41"}]},{"version":"v1.1.0","exported":"2016-11-28T14:17:35.468Z","volume":10.5,"added":"2016-11-28T14:13:23.539Z","format":"Utrecht","demagType":"Unknown","strat":"7","patch":1.1,"GEO":[{"dec":3.3016721348225246,"inc":-38.83775264611449,"MAD":9.420490468859885,"cm":[1.9539925233402755e-14,3.552713678800501e-15,0],"intensity":259.1745355966019,"type":"GC","origin":false,"forced":true,"remark":"","nSteps":5,"minStep":"4.0","maxStep":"20.0","steps":["4.0","8.0","12.0","16.0","20.0"],"group":"None","version":"v1.1.0"}],"TECT":[{"dec":342.4002760888256,"inc":-19.666030609150063,"MAD":9.420490468859844,"cm":[-7.993605777301127e-15,1.2434497875801753e-14,1.7763568394002505e-15],"intensity":259.17453559660197,"type":"GC","origin":false,"forced":true,"remark":"","nSteps":5,"minStep":"4.0","maxStep":"20.0","steps":["4.0","8.0","12.0","16.0","20.0"],"group":"None","version":"v1.1.0"}],"interpreted":true,"name":"PC4.10A","coreAzi":1,"coreDip":58,"bedStrike":20,"bedDip":40,"data":[{"visible":true,"include":false,"step":"0.0","x":-15.24,"y":173.33333333333334,"z":63.88095238095238,"a95":0.99,"info":"01/12/2013 at 18:52:41"},{"visible":true,"include":true,"step":"4.0","x":-4.261142857142857,"y":167.85714285714286,"z":53.64190476190476,"a95":0.99,"info":"01/12/2013 at 18:52:41"},{"visible":true,"include":true,"step":"8.0","x":1.235047619047619,"y":149.53333333333333,"z":3.2205714285714286,"a95":0.99,"info":"01/12/2013 at 18:52:41"},{"visible":true,"include":true,"step":"12.0","x":-2.140761904761905,"y":125.35238095238095,"z":-35.00952380952381,"a95":0.99,"info":"01/12/2013 at 18:52:41"},{"visible":true,"include":true,"step":"16.0","x":-4.846095238095238,"y":99.16190476190476,"z":-36.51619047619048,"a95":0.99,"info":"01/12/2013 at 18:52:41"},{"visible":true,"include":true,"step":"20.0","x":-19.666666666666668,"y":90.2104761904762,"z":-53.703809523809525,"a95":0.99,"info":"01/12/2013 at 18:52:41"},{"visible":true,"include":false,"step":"25.0","x":-0.1471142857142857,"y":78.34285714285714,"z":-53.25047619047619,"a95":0.99,"info":"01/12/2013 at 18:52:41"},{"visible":true,"include":false,"step":"30.0","x":-4.526380952380952,"y":52.13238095238095,"z":-17.700952380952383,"a95":0.99,"info":"01/12/2013 at 18:52:41"},{"visible":true,"include":false,"step":"35.0","x":13.35142857142857,"y":45.86761904761905,"z":-28.963809523809523,"a95":0.99,"info":"01/12/2013 at 18:52:41"},{"visible":true,"include":false,"step":"40.0","x":3.545809523809524,"y":35.81238095238095,"z":-4.55847619047619,"a95":0.99,"info":"01/12/2013 at 18:52:41"},{"visible":true,"include":false,"step":"45.0","x":16.997142857142858,"y":34.71619047619048,"z":-15.970476190476191,"a95":0.99,"info":"01/12/2013 at 18:52:41"},{"visible":true,"include":false,"step":"50.0","x":21.986666666666668,"y":7.143809523809525,"z":-12.350476190476192,"a95":0.99,"info":"01/12/2013 at 18:52:41"},{"visible":true,"include":false,"step":"60.0","x":34.275238095238095,"y":1.1903809523809525,"z":-17.81809523809524,"a95":0.99,"info":"01/12/2013 at 18:52:41"},{"visible":true,"include":false,"step":"70.0","x":51.18857142857143,"y":-1.0718095238095238,"z":7.656285714285715,"a95":0.99,"info":"01/12/2013 at 18:52:41"},{"visible":true,"include":false,"step":"80.0","x":122.87619047619049,"y":-25.701904761904764,"z":22.39428571428571,"a95":0.99,"info":"01/12/2013 at 18:52:41"},{"visible":true,"include":false,"step":"90.0","x":62.42476190476191,"y":-10.382857142857143,"z":4.753047619047619,"a95":0.99,"info":"01/12/2013 at 18:52:41"},{"visible":true,"include":false,"step":"100.0","x":69.66190476190476,"y":-13.493333333333334,"z":12.5,"a95":0.99,"info":"01/12/2013 at 18:52:41"}]},{"version":"v1.1.0","exported":"2016-11-28T14:17:35.468Z","volume":10.5,"added":"2016-11-28T14:13:23.540Z","format":"Utrecht","demagType":"Unknown","strat":null,"patch":1.1,"GEO":[{"dec":145.6248817363193,"inc":-37.10322846227573,"MAD":3.9484677980298786,"cm":[-2.1316282072803006e-14,-2.4868995751603507e-14,0],"intensity":432.4721741405979,"type":"dir","forced":true,"remark":"","origin":false,"nSteps":6,"minStep":"275","maxStep":"420","steps":["275","300","320","340","380","420"],"group":"None","version":"v1.1.0"}],"TECT":[{"dec":186.81252229671986,"inc":-61.501459218253345,"MAD":3.9484677980298994,"cm":[-1.2434497875801753e-14,-2.275957200481571e-14,3.552713678800501e-15],"intensity":432.47217414059793,"type":"dir","forced":true,"remark":"","origin":false,"nSteps":6,"minStep":"275","maxStep":"420","steps":["275","300","320","340","380","420"],"group":"None","version":"v1.1.0"}],"interpreted":true,"name":"PC4.10B","coreAzi":1,"coreDip":58,"bedStrike":20,"bedDip":40,"data":[{"visible":true,"include":false,"step":"20","x":50,"y":162.95238095238096,"z":292.95238095238096,"a95":2.6,"info":"\"13-11-03\" at \"11:24\""},{"visible":true,"include":false,"step":"80","x":-19.333333333333332,"y":182.57142857142858,"z":24.285714285714285,"a95":2,"info":"\"13-11-04\" at \"08:10\""},{"visible":true,"include":false,"step":"150","x":-51.61904761904762,"y":165.61904761904762,"z":-207.52380952380952,"a95":3.4,"info":"\"13-11-04\" at \"13:32\""},{"visible":true,"include":false,"step":"180","x":-47.904761904761905,"y":155.8095238095238,"z":-267.6190476190476,"a95":3,"info":"\"13-11-05\" at \"08:29\""},{"visible":true,"include":false,"step":"200","x":-45.904761904761905,"y":151.8095238095238,"z":-278.2857142857143,"a95":2.8,"info":"\"13-11-05\" at \"13:10\""},{"visible":true,"include":false,"step":"225","x":-49.80952380952381,"y":153.42857142857142,"z":-285.5238095238095,"a95":3.1,"info":"\"13-11-06\" at \"07:35\""},{"visible":true,"include":false,"step":"250","x":-48.666666666666664,"y":137.9047619047619,"z":-283.5238095238095,"a95":3.1,"info":"\"13-11-06\" at \"11:26\""},{"visible":true,"include":true,"step":"275","x":-52.095238095238095,"y":143.42857142857142,"z":-262.57142857142856,"a95":3,"info":"\"13-11-06\" at \"16:07\""},{"visible":true,"include":true,"step":"300","x":-66.95238095238095,"y":122.57142857142857,"z":-248.57142857142858,"a95":3.3,"info":"\"13-11-07\" at \"04:46\""},{"visible":true,"include":true,"step":"320","x":-58.857142857142854,"y":109.04761904761905,"z":-221.14285714285714,"a95":3.6,"info":"\"13-11-07\" at \"08:11\""},{"visible":true,"include":true,"step":"340","x":-62.285714285714285,"y":104.57142857142857,"z":-202.57142857142858,"a95":5.2,"info":"\"13-11-07\" at \"13:45\""},{"visible":true,"include":true,"step":"380","x":-60.95238095238095,"y":99.9047619047619,"z":-141.52380952380952,"a95":4.5,"info":"\"13-11-08\" at \"11:01\""},{"visible":true,"include":true,"step":"420","x":-29.904761904761905,"y":72.19047619047619,"z":-103.23809523809524,"a95":5,"info":"\"13-11-08\" at \"16:07\""},{"visible":true,"include":false,"step":"450","x":-19.238095238095237,"y":71.42857142857143,"z":-71.14285714285714,"a95":4.4,"info":"\"13-11-08\" at \"20:05\""},{"visible":true,"include":false,"step":"500","x":-35.82857142857143,"y":48.06666666666666,"z":-47.923809523809524,"a95":5.3,"info":"\"13-11-10\" at \"11:40\""},{"visible":true,"include":false,"step":"530","x":-59.06666666666667,"y":-4.190476190476191,"z":-19.142857142857142,"a95":6.3,"info":"\"13-11-10\" at \"14:57\""},{"visible":true,"include":false,"step":"560","x":-103.42857142857143,"y":67.9047619047619,"z":6.9523809523809526,"a95":5.4,"info":"\"13-11-10\" at \"23:38\""}]},{"version":"v1.1.0","exported":"2016-11-28T14:17:35.468Z","volume":10.5,"added":"2016-11-28T14:13:23.540Z","format":"Utrecht","demagType":"Unknown","strat":"8","patch":1.1,"GEO":[{"dec":153.08343513087698,"inc":-33.5472946586933,"MAD":2.6730800387150695,"cm":[-7.105427357601002e-15,-7.993605777301127e-15,0],"intensity":445.4863207104524,"type":"dir","forced":true,"remark":"","origin":false,"nSteps":5,"minStep":"20.0","maxStep":"40.0","steps":["20.0","25.0","30.0","35.0","40.0"],"group":"None","version":"v1.1.0"}],"TECT":[{"dec":188.95968588615958,"inc":-54.54808821354324,"MAD":2.6730800387150313,"cm":[-3.552713678800501e-15,-9.325873406851315e-15,7.105427357601002e-15],"intensity":445.48632071045245,"type":"dir","forced":true,"remark":"","origin":false,"nSteps":5,"minStep":"20.0","maxStep":"40.0","steps":["20.0","25.0","30.0","35.0","40.0"],"group":"None","version":"v1.1.0"}],"interpreted":true,"name":"PC4.11A","coreAzi":12,"coreDip":57,"bedStrike":20,"bedDip":40,"data":[{"visible":true,"include":false,"step":"0.0","x":-148.95238095238096,"y":254.28571428571428,"z":-12.604761904761904,"a95":0.99,"info":"01/12/2013 at 18:52:41"},{"visible":true,"include":false,"step":"4.0","x":-112.65714285714287,"y":246.0190476190476,"z":-33.30761904761905,"a95":0.99,"info":"01/12/2013 at 18:52:41"},{"visible":true,"include":false,"step":"8.0","x":-88.63428571428571,"y":241.38095238095238,"z":-152.26666666666665,"a95":0.99,"info":"01/12/2013 at 18:52:41"},{"visible":true,"include":false,"step":"12.0","x":-75.5352380952381,"y":222.30476190476188,"z":-236.49523809523808,"a95":0.99,"info":"01/12/2013 at 18:52:41"},{"visible":true,"include":false,"step":"16.0","x":-60.19428571428571,"y":181.32380952380953,"z":-250.39999999999998,"a95":0.99,"info":"01/12/2013 at 18:52:41"},{"visible":true,"include":true,"step":"20.0","x":-69.22571428571429,"y":166.76190476190476,"z":-254.0857142857143,"a95":0.99,"info":"01/12/2013 at 18:52:41"},{"visible":true,"include":true,"step":"25.0","x":-60.01714285714285,"y":144.57142857142858,"z":-223,"a95":0.99,"info":"01/12/2013 at 18:52:41"},{"visible":true,"include":true,"step":"30.0","x":-54.31428571428571,"y":107.33333333333333,"z":-151.86666666666665,"a95":0.99,"info":"01/12/2013 at 18:52:41"},{"visible":true,"include":true,"step":"35.0","x":-55.666666666666664,"y":82.65428571428572,"z":-155.0095238095238,"a95":0.99,"info":"01/12/2013 at 18:52:41"},{"visible":true,"include":true,"step":"40.0","x":-34.1552380952381,"y":67.17428571428572,"z":-110.66666666666667,"a95":0.99,"info":"01/12/2013 at 18:52:41"},{"visible":true,"include":false,"step":"45.0","x":-14.462857142857144,"y":58.64190476190476,"z":-85.32666666666667,"a95":0.99,"info":"01/12/2013 at 18:52:41"},{"visible":true,"include":false,"step":"50.0","x":1.7566666666666666,"y":30.51047619047619,"z":-76.6257142857143,"a95":0.99,"info":"01/12/2013 at 18:52:41"},{"visible":true,"include":false,"step":"60.0","x":19.837142857142858,"y":27.479047619047616,"z":-50.03523809523809,"a95":0.99,"info":"01/12/2013 at 18:52:41"},{"visible":true,"include":false,"step":"70.0","x":52.14666666666666,"y":15.810476190476189,"z":-27.31047619047619,"a95":0.99,"info":"01/12/2013 at 18:52:41"},{"visible":true,"include":false,"step":"80.0","x":-51.49904761904762,"y":-0.3858285714285714,"z":-20.536190476190477,"a95":0.99,"info":"01/12/2013 at 18:52:41"},{"visible":true,"include":false,"step":"90.0","x":41.139047619047616,"y":25.74952380952381,"z":12.403809523809525,"a95":0.99,"info":"01/12/2013 at 18:52:41"},{"visible":true,"include":false,"step":"100.0","x":81.27619047619048,"y":-5.937047619047619,"z":13.109523809523811,"a95":0.99,"info":"01/12/2013 at 18:52:41"}]},{"version":"v1.1.0","exported":"2016-11-28T14:17:35.468Z","volume":10.5,"added":"2016-11-28T14:13:23.540Z","format":"Utrecht","demagType":"Unknown","strat":"1","patch":1.1,"GEO":[{"dec":145.7153838433294,"inc":-40.727110981946595,"MAD":4.350794126418836,"cm":[2.220446049250313e-15,4.440892098500626e-15,0],"intensity":192.16886984523887,"type":"dir","forced":true,"remark":"","origin":false,"nSteps":4,"minStep":"35.0","maxStep":"50.0","steps":["35.0","40.0","45.0","50.0"],"group":"None","version":"v1.1.0"}],"TECT":[{"dec":193.30173086003947,"inc":-63.549264315960656,"MAD":4.350794126418814,"cm":[5.329070518200751e-15,-1.1102230246251565e-15,-3.552713678800501e-15],"intensity":192.16886984523887,"type":"dir","forced":true,"remark":"","origin":false,"nSteps":4,"minStep":"35.0","maxStep":"50.0","steps":["35.0","40.0","45.0","50.0"],"group":"None","version":"v1.1.0"}],"interpreted":true,"name":"PC4.12A","coreAzi":322,"coreDip":44,"bedStrike":20,"bedDip":40,"data":[{"visible":true,"include":false,"step":"0.0","x":-27.93142857142857,"y":49.78380952380952,"z":-229.86666666666665,"a95":0.99,"info":"30/09/2014 at 04:17:41"},{"visible":true,"include":false,"step":"10.0","x":-1.1742857142857144,"y":3.4481904761904767,"z":-284.9047619047619,"a95":0.99,"info":"30/09/2014 at 04:17:41"},{"visible":true,"include":false,"step":"15.0","x":-9.696190476190477,"y":4.258761904761904,"z":-265.84761904761905,"a95":0.99,"info":"30/09/2014 at 04:17:41"},{"visible":true,"include":false,"step":"20.0","x":-11.355238095238096,"y":0.4238857142857143,"z":-238.8190476190476,"a95":0.99,"info":"30/09/2014 at 04:17:41"},{"visible":true,"include":false,"step":"25.0","x":-30.624761904761904,"y":-2.877238095238095,"z":-209.34285714285713,"a95":0.99,"info":"30/09/2014 at 04:17:41"},{"visible":true,"include":false,"step":"30.0","x":-95.03142857142858,"y":-19.355238095238093,"z":-148.55238095238096,"a95":0.99,"info":"30/09/2014 at 04:17:41"},{"visible":true,"include":true,"step":"35.0","x":-7.342761904761905,"y":-2.3503809523809522,"z":-136.88571428571427,"a95":0.99,"info":"30/09/2014 at 04:17:41"},{"visible":true,"include":true,"step":"40.0","x":-11.414285714285715,"y":-3.975047619047619,"z":-100.80000000000001,"a95":0.99,"info":"30/09/2014 at 04:17:41"},{"visible":true,"include":true,"step":"45.0","x":-4.5448571428571425,"y":-12.930476190476192,"z":-82.37047619047618,"a95":0.99,"info":"30/09/2014 at 04:17:41"},{"visible":true,"include":true,"step":"50.0","x":6.565714285714286,"y":-2.0813333333333333,"z":-55.23047619047619,"a95":0.99,"info":"30/09/2014 at 04:17:41"},{"visible":true,"include":false,"step":"60.0","x":15.027619047619046,"y":8.500285714285715,"z":-29.101904761904763,"a95":0.99,"info":"30/09/2014 at 04:17:41"},{"visible":true,"include":false,"step":"70.0","x":-11.974285714285715,"y":-21.472380952380952,"z":-44.89714285714286,"a95":0.99,"info":"30/09/2014 at 04:17:41"},{"visible":true,"include":false,"step":"80.0","x":45.86190476190476,"y":-24.666666666666668,"z":-17.232380952380954,"a95":0.99,"info":"30/09/2014 at 04:17:41"},{"visible":true,"include":false,"step":"90.0","x":26.975238095238097,"y":-2.939523809523809,"z":-9.305333333333333,"a95":0.99,"info":"30/09/2014 at 04:17:41"}]},{"version":"v1.1.0","exported":"2016-11-28T14:17:35.469Z","volume":10.5,"added":"2016-11-28T14:13:23.540Z","format":"Utrecht","demagType":"Unknown","strat":"1","patch":1.1,"GEO":[{"dec":143.41908279489178,"inc":-41.767449229408115,"MAD":2.5366603683737687,"cm":[-9.769962616701378e-15,-1.5987211554602254e-14,0],"intensity":418.4318239455329,"type":"dir","forced":true,"remark":"","origin":false,"nSteps":6,"minStep":"20.0","maxStep":"45.0","steps":["20.0","25.0","30.0","35.0","40.0","45.0"],"group":"None","version":"v1.1.0"}],"TECT":[{"dec":193.23545141830903,"inc":-65.5646872038995,"MAD":2.536660368373811,"cm":[-1.9095836023552692e-14,-3.175237850427948e-14,7.105427357601002e-15],"intensity":418.4318239455329,"type":"dir","forced":true,"remark":"","origin":false,"nSteps":6,"minStep":"20.0","maxStep":"45.0","steps":["20.0","25.0","30.0","35.0","40.0","45.0"],"group":"None","version":"v1.1.0"}],"interpreted":true,"name":"PC4.12B","coreAzi":322,"coreDip":44,"bedStrike":20,"bedDip":40,"data":[{"visible":true,"include":false,"step":"0.0","x":-106.91428571428571,"y":124.22857142857144,"z":-27.72285714285714,"a95":0.99,"info":"02/12/2013 at 00:36:48"},{"visible":true,"include":false,"step":"4.0","x":-90.85238095238095,"y":84.70380952380953,"z":-118.02857142857142,"a95":0.99,"info":"02/12/2013 at 00:36:48"},{"visible":true,"include":false,"step":"8.0","x":-56.36952380952381,"y":50.84285714285714,"z":-248.78095238095236,"a95":0.99,"info":"02/12/2013 at 00:36:48"},{"visible":true,"include":false,"step":"12.0","x":-28.152380952380955,"y":19.576190476190476,"z":-307.42857142857144,"a95":0.99,"info":"02/12/2013 at 00:36:48"},{"visible":true,"include":false,"step":"16.0","x":-25.84,"y":12.222857142857142,"z":-314.8857142857143,"a95":0.99,"info":"02/12/2013 at 00:36:48"},{"visible":true,"include":true,"step":"20.0","x":-16.847619047619048,"y":9.694285714285716,"z":-310.67619047619047,"a95":0.99,"info":"02/12/2013 at 00:36:48"},{"visible":true,"include":true,"step":"25.0","x":-10.795238095238094,"y":-11.097142857142856,"z":-262.14285714285717,"a95":0.99,"info":"02/12/2013 at 00:36:48"},{"visible":true,"include":true,"step":"30.0","x":-0.8413142857142857,"y":-10.80952380952381,"z":-225.9904761904762,"a95":0.99,"info":"02/12/2013 at 00:36:48"},{"visible":true,"include":true,"step":"35.0","x":-9.262285714285715,"y":-6.691428571428572,"z":-179.8,"a95":0.99,"info":"02/12/2013 at 00:36:48"},{"visible":true,"include":true,"step":"40.0","x":-8.915238095238095,"y":-11.607619047619048,"z":-157.15238095238095,"a95":0.99,"info":"02/12/2013 at 00:36:48"},{"visible":true,"include":true,"step":"45.0","x":2.4481904761904763,"y":0.9844761904761905,"z":-107.37142857142858,"a95":0.99,"info":"02/12/2013 at 00:36:48"},{"visible":true,"include":false,"step":"50.0","x":6.000190476190476,"y":-8.470857142857144,"z":-87.46000000000001,"a95":0.99,"info":"02/12/2013 at 00:36:48"},{"visible":true,"include":false,"step":"60.0","x":20.34285714285714,"y":4.312380952380953,"z":-65.19904761904762,"a95":0.99,"info":"02/12/2013 at 00:36:48"},{"visible":true,"include":false,"step":"70.0","x":48.12095238095238,"y":11.277142857142858,"z":-46.92857142857143,"a95":0.99,"info":"02/12/2013 at 00:36:48"},{"visible":true,"include":false,"step":"80.0","x":15.045714285714284,"y":-22.37047619047619,"z":-24.96857142857143,"a95":0.99,"info":"02/12/2013 at 00:36:48"},{"visible":true,"include":false,"step":"90.0","x":51.28285714285715,"y":-16.223809523809525,"z":-30.155238095238094,"a95":0.99,"info":"02/12/2013 at 00:36:48"},{"visible":true,"include":false,"step":"100.0","x":48.1447619047619,"y":-16.444761904761904,"z":-16.114285714285714,"a95":0.99,"info":"02/12/2013 at 00:36:48"}]},{"version":"v1.1.0","exported":"2016-11-28T14:17:35.469Z","volume":10.5,"added":"2016-11-28T14:13:23.541Z","format":"Utrecht","demagType":"Unknown","strat":"2","patch":1.1,"GEO":[{"dec":64.50909484171007,"inc":-11.775959425825528,"MAD":7.343658929297452,"cm":[-7.993605777301127e-15,-2.5091040356528538e-14,0],"intensity":184.73916165864824,"type":"GC","origin":false,"forced":true,"remark":"","nSteps":8,"minStep":"4.0","maxStep":"35.0","steps":["4.0","8.0","12.0","16.0","20.0","25.0","30.0","35.0"],"group":"None","version":"v1.1.0"}],"TECT":[{"dec":49.47173770178904,"inc":-36.6884186703488,"MAD":7.343658929297444,"cm":[-7.549516567451064e-15,-3.774758283725532e-14,1.865174681370263e-14],"intensity":184.73916165864821,"type":"GC","origin":false,"forced":true,"remark":"","nSteps":8,"minStep":"4.0","maxStep":"35.0","steps":["4.0","8.0","12.0","16.0","20.0","25.0","30.0","35.0"],"group":"None","version":"v1.1.0"}],"interpreted":true,"name":"PC4.13B","coreAzi":323,"coreDip":64,"bedStrike":20,"bedDip":40,"data":[{"visible":true,"include":false,"step":"0.0","x":-195.0857142857143,"y":102.66666666666667,"z":250.1904761904762,"a95":0.99,"info":"02/12/2013 at 00:36:48"},{"visible":true,"include":true,"step":"4.0","x":-152.4,"y":22.443809523809524,"z":102.70476190476191,"a95":0.99,"info":"02/12/2013 at 00:36:48"},{"visible":true,"include":true,"step":"8.0","x":-117.04761904761905,"y":-29.823809523809523,"z":-60.97428571428571,"a95":0.99,"info":"02/12/2013 at 00:36:48"},{"visible":true,"include":true,"step":"12.0","x":-92.14190476190477,"y":-62.016190476190474,"z":-146.38095238095238,"a95":0.99,"info":"02/12/2013 at 00:36:48"},{"visible":true,"include":true,"step":"16.0","x":-81.90380952380953,"y":-61.18190476190476,"z":-172.43809523809523,"a95":0.99,"info":"02/12/2013 at 00:36:48"},{"visible":true,"include":true,"step":"20.0","x":-73.14761904761905,"y":-62.10476190476191,"z":-176.71428571428572,"a95":0.99,"info":"02/12/2013 at 00:36:48"},{"visible":true,"include":true,"step":"25.0","x":-55.93714285714286,"y":-41.915238095238095,"z":-171.42857142857142,"a95":0.99,"info":"02/12/2013 at 00:36:48"},{"visible":true,"include":true,"step":"30.0","x":-29.837142857142858,"y":-34.67523809523809,"z":-151.1904761904762,"a95":0.99,"info":"02/12/2013 at 00:36:48"},{"visible":true,"include":true,"step":"35.0","x":-29.656190476190474,"y":-29.437142857142856,"z":-133.28571428571428,"a95":0.99,"info":"02/12/2013 at 00:36:48"},{"visible":true,"include":false,"step":"40.0","x":-22.61904761904762,"y":6.7675238095238095,"z":-106.4095238095238,"a95":0.99,"info":"02/12/2013 at 00:36:48"},{"visible":true,"include":false,"step":"45.0","x":-1.8825714285714286,"y":26.47047619047619,"z":-101.28571428571429,"a95":0.99,"info":"02/12/2013 at 00:36:48"},{"visible":true,"include":false,"step":"50.0","x":1.3760000000000001,"y":27.25047619047619,"z":-69.9504761904762,"a95":0.99,"info":"02/12/2013 at 00:36:48"},{"visible":true,"include":false,"step":"60.0","x":16.44,"y":57.64380952380952,"z":-81.77904761904762,"a95":0.99,"info":"02/12/2013 at 00:36:48"},{"visible":true,"include":false,"step":"70.0","x":29.388571428571428,"y":94.88380952380952,"z":-44.13142857142857,"a95":0.99,"info":"02/12/2013 at 00:36:48"},{"visible":true,"include":false,"step":"80.0","x":46.77333333333333,"y":47.38,"z":-50.12380952380952,"a95":0.99,"info":"02/12/2013 at 00:36:48"},{"visible":true,"include":false,"step":"90.0","x":67.00571428571428,"y":99.28571428571429,"z":-50.36571428571429,"a95":0.99,"info":"02/12/2013 at 00:36:48"},{"visible":true,"include":false,"step":"100.0","x":42.66095238095238,"y":104.61904761904762,"z":-19.059047619047618,"a95":0.99,"info":"02/12/2013 at 00:36:48"}]},{"version":"v1.1.0","exported":"2016-11-28T14:17:35.469Z","volume":10.5,"added":"2016-11-28T14:13:23.541Z","format":"Utrecht","demagType":"Unknown","strat":"3","patch":1.1,"GEO":[{"dec":19.554615011996134,"inc":-27.4165739507635,"MAD":0.5535722101374726,"cm":[4.440892098500626e-15,-5.329070518200751e-15,0],"intensity":418.24548753680284,"type":"GC","origin":false,"forced":true,"remark":"","nSteps":5,"minStep":"8.0","maxStep":"25.0","steps":["8.0","12.0","16.0","20.0","25.0"],"group":"None","version":"v1.1.0"}],"TECT":[{"dec":1.253282191515666,"inc":-20.383052836391062,"MAD":0.5535722101373105,"cm":[9.769962616701378e-15,-1.7763568394002505e-15,-1.7763568394002505e-15],"intensity":418.24548753680284,"type":"GC","origin":false,"forced":true,"remark":"","nSteps":5,"minStep":"8.0","maxStep":"25.0","steps":["8.0","12.0","16.0","20.0","25.0"],"group":"None","version":"v1.1.0"}],"interpreted":true,"name":"PC4.14B","coreAzi":334,"coreDip":60,"bedStrike":20,"bedDip":40,"data":[{"visible":true,"include":false,"step":"0.0","x":-147.4,"y":370.16190476190474,"z":800.9904761904761,"a95":0.99,"info":"02/12/2013 at 00:36:48"},{"visible":true,"include":false,"step":"4.0","x":-148.9142857142857,"y":287.97142857142853,"z":582.6761904761905,"a95":0.99,"info":"02/12/2013 at 00:36:48"},{"visible":true,"include":true,"step":"8.0","x":-133.05714285714285,"y":203.93333333333334,"z":306.4,"a95":0.99,"info":"02/12/2013 at 00:36:48"},{"visible":true,"include":true,"step":"12.0","x":-106.45714285714286,"y":147.44761904761904,"z":135.4,"a95":0.99,"info":"02/12/2013 at 00:36:48"},{"visible":true,"include":true,"step":"16.0","x":-82.07142857142857,"y":107.35238095238095,"z":46.81809523809524,"a95":0.99,"info":"02/12/2013 at 00:36:48"},{"visible":true,"include":true,"step":"20.0","x":-74.32000000000001,"y":85.83238095238096,"z":-19.33238095238095,"a95":0.99,"info":"02/12/2013 at 00:36:48"},{"visible":true,"include":true,"step":"25.0","x":-59.27904761904762,"y":65.67999999999999,"z":-50.96952380952381,"a95":0.99,"info":"02/12/2013 at 00:36:48"},{"visible":true,"include":false,"step":"30.0","x":-31.106666666666666,"y":66.80952380952381,"z":-59.92285714285715,"a95":0.99,"info":"02/12/2013 at 00:36:48"},{"visible":true,"include":false,"step":"35.0","x":-12.39809523809524,"y":42.60857142857143,"z":-65.58952380952381,"a95":0.99,"info":"02/12/2013 at 00:36:48"},{"visible":true,"include":false,"step":"40.0","x":8.19552380952381,"y":42.021904761904764,"z":-78.51333333333334,"a95":0.99,"info":"02/12/2013 at 00:36:48"},{"visible":true,"include":false,"step":"45.0","x":22.813333333333333,"y":27.82095238095238,"z":-74.32380952380952,"a95":0.99,"info":"02/12/2013 at 00:36:48"},{"visible":true,"include":false,"step":"50.0","x":37.28285714285715,"y":21.473333333333333,"z":-55.96,"a95":0.99,"info":"02/12/2013 at 00:36:48"},{"visible":true,"include":false,"step":"60.0","x":70.87619047619049,"y":52.18476190476191,"z":-67.70190476190476,"a95":0.99,"info":"02/12/2013 at 00:36:48"},{"visible":true,"include":false,"step":"70.0","x":86.75428571428571,"y":39.561904761904756,"z":-56.96857142857142,"a95":0.99,"info":"02/12/2013 at 00:36:48"},{"visible":true,"include":false,"step":"80.0","x":134.75238095238097,"y":5.086666666666666,"z":-44.78190476190476,"a95":0.99,"info":"02/12/2013 at 00:36:48"},{"visible":true,"include":false,"step":"90.0","x":113.17142857142856,"y":40.35809523809524,"z":-51.45142857142857,"a95":0.99,"info":"02/12/2013 at 00:36:48"},{"visible":true,"include":false,"step":"100.0","x":112.5904761904762,"y":44.52095238095238,"z":-40.579047619047614,"a95":0.99,"info":"02/12/2013 at 00:36:48"}]},{"version":"v1.1.0","exported":"2016-11-28T14:17:35.469Z","volume":10.5,"added":"2016-11-28T14:13:23.541Z","format":"Utrecht","demagType":"Unknown","strat":null,"patch":1.1,"GEO":[{"dec":147.56348939239012,"inc":-31.32584280557286,"MAD":2.9148115764433236,"cm":[-3.552713678800501e-15,-5.329070518200751e-15,0],"intensity":503.5184144108273,"type":"dir","forced":true,"remark":"","origin":false,"nSteps":4,"minStep":"225","maxStep":"300","steps":["225","250","275","300"],"group":"None","version":"v1.1.0"}],"TECT":[{"dec":180.48967158417864,"inc":-56.461791971966996,"MAD":2.9148115764432734,"cm":[-2.1316282072803006e-14,-6.772360450213455e-15,1.4210854715202004e-14],"intensity":503.5184144108273,"type":"dir","forced":true,"remark":"","origin":false,"nSteps":4,"minStep":"225","maxStep":"300","steps":["225","250","275","300"],"group":"None","version":"v1.1.0"}],"interpreted":true,"name":"PC4.15A","coreAzi":323,"coreDip":60,"bedStrike":20,"bedDip":40,"data":[{"visible":true,"include":false,"step":"20","x":-311.42857142857144,"y":412.2857142857143,"z":580.8571428571429,"a95":2.3,"info":"\"13-11-03\" at \"11:27\""},{"visible":true,"include":false,"step":"80","x":-192.95238095238096,"y":146.57142857142858,"z":77.14285714285714,"a95":1.8,"info":"\"13-11-04\" at \"08:12\""},{"visible":true,"include":false,"step":"150","x":-153.42857142857142,"y":43.714285714285715,"z":-171.61904761904762,"a95":2.5,"info":"\"13-11-04\" at \"13:34\""},{"visible":true,"include":false,"step":"180","x":-142.47619047619048,"y":12.476190476190476,"z":-222.85714285714286,"a95":3,"info":"\"13-11-05\" at \"08:32\""},{"visible":true,"include":false,"step":"200","x":-140.28571428571428,"y":-12.857142857142858,"z":-234.85714285714286,"a95":3.5,"info":"\"13-11-05\" at \"13:13\""},{"visible":true,"include":true,"step":"225","x":-141.8095238095238,"y":-9.333333333333334,"z":-233.61904761904762,"a95":3,"info":"\"13-11-06\" at \"07:37\""},{"visible":true,"include":true,"step":"250","x":-137.52380952380952,"y":-22.761904761904763,"z":-235.14285714285714,"a95":3.5,"info":"\"13-11-06\" at \"11:28\""},{"visible":true,"include":true,"step":"275","x":-103.80952380952381,"y":-19.142857142857142,"z":-226.57142857142858,"a95":3.4,"info":"\"13-11-06\" at \"16:10\""},{"visible":true,"include":true,"step":"300","x":-104.57142857142857,"y":-19.238095238095237,"z":-204.57142857142858,"a95":3.3,"info":"\"13-11-07\" at \"04:47\""},{"visible":true,"include":false,"step":"320","x":-96.95238095238095,"y":-22.285714285714285,"z":-181.33333333333334,"a95":3.4,"info":"\"13-11-07\" at \"08:13\""},{"visible":true,"include":false,"step":"340","x":-89.9047619047619,"y":-12,"z":-171.61904761904762,"a95":5.9,"info":"\"13-11-07\" at \"13:47\""},{"visible":true,"include":false,"step":"380","x":-58.95238095238095,"y":10.285714285714286,"z":-100.76190476190476,"a95":5.1,"info":"\"13-11-08\" at \"11:04\""},{"visible":true,"include":false,"step":"420","x":-67.07619047619048,"y":1.5428571428571427,"z":-63.647619047619045,"a95":4.7,"info":"\"13-11-08\" at \"16:09\""},{"visible":true,"include":false,"step":"450","x":-12.095238095238095,"y":-13.647619047619049,"z":-48.352380952380955,"a95":6.1,"info":"\"13-11-08\" at \"20:07\""},{"visible":true,"include":false,"step":"500","x":-22.371428571428574,"y":17.876190476190477,"z":-35.34285714285714,"a95":7.7,"info":"\"13-11-10\" at \"11:42\""}]},{"version":"v1.1.0","exported":"2016-11-28T14:17:35.469Z","volume":10.5,"added":"2016-11-28T14:13:23.541Z","format":"Utrecht","demagType":"Unknown","strat":null,"patch":1.1,"GEO":[{"dec":156.60464264803136,"inc":-36.72331576298027,"MAD":8.5077434415437,"cm":[3.552713678800501e-15,9.769962616701378e-15,0],"intensity":275.02550283725384,"type":"dir","forced":true,"remark":"","origin":false,"nSteps":6,"minStep":"275","maxStep":"420","steps":["275","300","320","340","380","420"],"group":"None","version":"v1.1.0"}],"TECT":[{"dec":196.3173343977863,"inc":-54.2942381094303,"MAD":8.507743441543683,"cm":[6.217248937900877e-15,1.509903313490213e-14,-2.6645352591003757e-15],"intensity":275.02550283725384,"type":"dir","forced":true,"remark":"","origin":false,"nSteps":6,"minStep":"275","maxStep":"420","steps":["275","300","320","340","380","420"],"group":"None","version":"v1.1.0"}],"interpreted":true,"name":"PC4.16A","coreAzi":359,"coreDip":17,"bedStrike":20,"bedDip":40,"data":[{"visible":true,"include":false,"step":"20","x":144.95238095238096,"y":-6.190476190476191,"z":-271.23809523809524,"a95":2.6,"info":"\"13-11-03\" at \"11:31\""},{"visible":true,"include":false,"step":"80","x":202,"y":20.952380952380953,"z":-304.2857142857143,"a95":2.4,"info":"\"13-11-04\" at \"08:15\""},{"visible":true,"include":false,"step":"150","x":175.42857142857142,"y":40.857142857142854,"z":-292.57142857142856,"a95":2.8,"info":"\"13-11-04\" at \"13:41\""},{"visible":true,"include":false,"step":"180","x":149.9047619047619,"y":49.142857142857146,"z":-259.23809523809524,"a95":2.8,"info":"\"13-11-05\" at \"08:35\""},{"visible":true,"include":false,"step":"200","x":142.95238095238096,"y":53.04761904761905,"z":-256.4761904761905,"a95":3.1,"info":"\"13-11-05\" at \"13:16\""},{"visible":true,"include":false,"step":"225","x":138.0952380952381,"y":52.76190476190476,"z":-260.85714285714283,"a95":3.4,"info":"\"13-11-06\" at \"07:40\""},{"visible":true,"include":false,"step":"250","x":80.95238095238095,"y":50.095238095238095,"z":-196.57142857142858,"a95":3.6,"info":"\"13-11-06\" at \"11:31\""},{"visible":true,"include":true,"step":"275","x":84.47619047619048,"y":42.857142857142854,"z":-165.14285714285714,"a95":3.2,"info":"\"13-11-06\" at \"16:12\""},{"visible":true,"include":true,"step":"300","x":68.0952380952381,"y":48.95238095238095,"z":-147.42857142857142,"a95":3.3,"info":"\"13-11-07\" at \"04:50\""},{"visible":true,"include":true,"step":"320","x":58,"y":45.42857142857143,"z":-118.85714285714286,"a95":3.4,"info":"\"13-11-07\" at \"08:15\""},{"visible":true,"include":true,"step":"340","x":27.523809523809526,"y":43.142857142857146,"z":-122.95238095238095,"a95":5.7,"info":"\"13-11-07\" at \"13:49\""},{"visible":true,"include":true,"step":"380","x":27.142857142857142,"y":35.714285714285715,"z":-85.9047619047619,"a95":5.5,"info":"\"13-11-08\" at \"11:06\""},{"visible":true,"include":true,"step":"420","x":0.14285714285714285,"y":48.21904761904762,"z":-80.18095238095238,"a95":5.9,"info":"\"13-11-08\" at \"16:11\""},{"visible":true,"include":false,"step":"450","x":1.2666666666666668,"y":4.476190476190476,"z":-55.095238095238095,"a95":6.7,"info":"\"13-11-08\" at \"20:10\""},{"visible":true,"include":false,"step":"500","x":-0.4666666666666667,"y":45.40952380952381,"z":-43.27619047619047,"a95":6.9,"info":"\"13-11-10\" at \"11:45\""},{"visible":true,"include":false,"step":"530","x":-11.761904761904763,"y":25.742857142857144,"z":-7.419047619047619,"a95":9.3,"info":"\"13-11-10\" at \"15:04\""},{"visible":true,"include":false,"step":"560","x":-22.8,"y":59.028571428571425,"z":-23.485714285714284,"a95":5.5,"info":"\"13-11-10\" at \"23:41\""}]}]
