# Supplementary material for: Paleomagnetic constraints on the timing and distribution of Cenozoic rotations in Central and Eastern Anatolia
Source: Copernicus journal article supplement (doi:10.5194/se-9-295-2018), 2018-03-21
Supplement: Supplementary file 2 [file se-9-295-2018-supplement.zip › se-2017-66_DATA_dir files/dir files Ulukisla/TC1.dir]

[{"version":"v1.1.0","exported":"2017-06-26T09:21:24.393Z","volume":10.5,"added":"2017-06-26T09:21:18.834Z","format":"Utrecht","demagType":"Unknown","strat":null,"patch":1.1,"GEO":[],"TECT":[],"interpreted":false,"name":"TC1.1A","coreAzi":26,"coreDip":26,"bedStrike":251,"bedDip":58,"data":[{"visible":true,"include":false,"step":"20","x":-93.23809523809524,"y":12.857142857142858,"z":377.14285714285717,"a95":2.4,"info":"\"15-02-12\" at \"14:44\""},{"visible":true,"include":false,"step":"100","x":-27.38095238095238,"y":-42.36190476190476,"z":66.97142857142858,"a95":4.2,"info":"\"15-02-12\" at \"22:42\""},{"visible":true,"include":false,"step":"120","x":4.838095238095238,"y":-33.4,"z":22.4,"a95":3.9,"info":"\"15-02-13\" at \"17:56\""},{"visible":true,"include":false,"step":"150","x":15.352380952380951,"y":0.9523809523809523,"z":-2.6476190476190475,"a95":12,"info":"\"15-02-13\" at \"22:38\""},{"visible":true,"include":false,"step":"180","x":30.16190476190476,"y":-13.104761904761904,"z":-54.171428571428564,"a95":4,"info":"\"15-02-16\" at \"15:37\""},{"visible":true,"include":false,"step":"210","x":25.914285714285718,"y":-17.114285714285714,"z":-61.63809523809524,"a95":4.5,"info":"\"15-02-16\" at \"19:39\""},{"visible":true,"include":false,"step":"240","x":27.580952380952382,"y":-8.485714285714286,"z":-61.219047619047615,"a95":4.7,"info":"\"15-02-17\" at \"15:35\""},{"visible":true,"include":false,"step":"270","x":21.228571428571428,"y":-4.523809523809524,"z":-57.10476190476191,"a95":5.5,"info":"\"15-02-17\" at \"22:19\""},{"visible":true,"include":false,"step":"300","x":10.571428571428571,"y":-6.20952380952381,"z":-45.89523809523809,"a95":7.3,"info":"\"15-03-08\" at \"18:00\""}]},{"version":"v1.1.0","exported":"2017-06-26T09:21:24.393Z","volume":10.5,"added":"2017-06-26T09:21:18.835Z","format":"Utrecht","demagType":"Unknown","strat":"1","patch":1.1,"GEO":[],"TECT":[],"interpreted":false,"name":"TC1.2A","coreAzi":52,"coreDip":30,"bedStrike":251,"bedDip":58,"data":[{"visible":true,"include":false,"step":"0.0","x":-36.07333333333333,"y":-31.335238095238093,"z":95.99047619047619,"a95":0.99,"info":"25/11/2014 at 16:06:43"},{"visible":true,"include":false,"step":"10.0","x":11.457142857142857,"y":-18.740952380952383,"z":4.611428571428571,"a95":0.99,"info":"25/11/2014 at 16:06:43"},{"visible":true,"include":false,"step":"15.0","x":23.055238095238096,"y":-7.752,"z":-20.555238095238096,"a95":0.99,"info":"25/11/2014 at 16:06:43"},{"visible":true,"include":false,"step":"20.0","x":32.67809523809524,"y":-6.606571428571429,"z":-29.423809523809524,"a95":0.99,"info":"25/11/2014 at 16:06:43"},{"visible":true,"include":false,"step":"23.0","x":30.65809523809524,"y":-2.1056190476190477,"z":-30.919047619047618,"a95":0.99,"info":"25/11/2014 at 16:06:43"},{"visible":true,"include":false,"step":"25.0","x":32.44190476190476,"y":-1.0847619047619048,"z":-38.25047619047619,"a95":0.99,"info":"25/11/2014 at 16:06:43"},{"visible":true,"include":false,"step":"30.0","x":31.120952380952378,"y":-10.257142857142858,"z":-37.254285714285714,"a95":0.99,"info":"25/11/2014 at 16:06:43"},{"visible":true,"include":false,"step":"33.0","x":30.347619047619045,"y":-6.387714285714286,"z":-41.896190476190476,"a95":0.99,"info":"25/11/2014 at 16:06:43"},{"visible":true,"include":false,"step":"35.0","x":25.465714285714284,"y":0.8330761904761904,"z":-33.76285714285714,"a95":0.99,"info":"25/11/2014 at 16:06:43"},{"visible":true,"include":false,"step":"40.0","x":20.196190476190477,"y":0.2707714285714286,"z":-28.40095238095238,"a95":0.99,"info":"25/11/2014 at 16:06:43"},{"visible":true,"include":false,"step":"45.0","x":24.316190476190474,"y":-0.5718190476190477,"z":-23.221904761904764,"a95":0.99,"info":"25/11/2014 at 16:06:43"},{"visible":true,"include":false,"step":"50.0","x":13.58952380952381,"y":-5.278666666666667,"z":-20.561904761904763,"a95":0.99,"info":"25/11/2014 at 16:06:43"},{"visible":true,"include":false,"step":"60.0","x":7.869523809523809,"y":-8.668952380952382,"z":-13.366666666666665,"a95":0.99,"info":"25/11/2014 at 16:06:43"},{"visible":true,"include":false,"step":"70.0","x":10.297142857142857,"y":-2.4654285714285713,"z":-7.786666666666667,"a95":0.99,"info":"25/11/2014 at 16:06:43"},{"visible":true,"include":false,"step":"80.0","x":9.484285714285713,"y":-5.783904761904762,"z":-3.996857142857143,"a95":0.99,"info":"25/11/2014 at 16:06:43"},{"visible":true,"include":false,"step":"90.0","x":7.592952380952381,"y":-2.2240952380952383,"z":-10.822857142857142,"a95":0.99,"info":"25/11/2014 at 16:06:43"}]},{"version":"v1.1.0","exported":"2017-06-26T09:21:24.393Z","volume":10.5,"added":"2017-06-26T09:21:18.835Z","format":"Utrecht","demagType":"Unknown","strat":"1","patch":1.1,"GEO":[],"TECT":[],"interpreted":false,"name":"TC1.2B","coreAzi":52,"coreDip":30,"bedStrike":251,"bedDip":58,"data":[{"visible":true,"include":false,"step":"0.0","x":-114.6,"y":-127.03809523809525,"z":127.45714285714286,"a95":0.99,"info":"03/11/2014 at 21:03:34"},{"visible":true,"include":false,"step":"10.0","x":-62.006666666666675,"y":-93.44857142857143,"z":81.82761904761905,"a95":0.99,"info":"03/11/2014 at 21:03:34"},{"visible":true,"include":false,"step":"15.0","x":-43.56,"y":-79.92,"z":55.78285714285715,"a95":0.99,"info":"03/11/2014 at 21:03:34"},{"visible":true,"include":false,"step":"20.0","x":-33.7552380952381,"y":-63.69428571428571,"z":42.860952380952384,"a95":0.99,"info":"03/11/2014 at 21:03:34"},{"visible":true,"include":false,"step":"25.0","x":-22.89428571428571,"y":-52.555238095238096,"z":32.94380952380953,"a95":0.99,"info":"03/11/2014 at 21:03:34"},{"visible":true,"include":false,"step":"30.0","x":-13.682857142857141,"y":-39.00857142857143,"z":30.04380952380952,"a95":0.99,"info":"03/11/2014 at 21:03:34"},{"visible":true,"include":false,"step":"35.0","x":-9.242952380952381,"y":-36.01238095238095,"z":19.666666666666668,"a95":0.99,"info":"03/11/2014 at 21:03:34"},{"visible":true,"include":false,"step":"40.0","x":-16.857142857142858,"y":-31.755238095238095,"z":16.28857142857143,"a95":0.99,"info":"03/11/2014 at 21:03:34"},{"visible":true,"include":false,"step":"45.0","x":-0.8324952380952381,"y":-29.348571428571432,"z":3.8684761904761906,"a95":0.99,"info":"03/11/2014 at 21:03:34"},{"visible":true,"include":false,"step":"50.0","x":-10.940000000000001,"y":-23.736190476190476,"z":20.36952380952381,"a95":0.99,"info":"03/11/2014 at 21:03:34"},{"visible":true,"include":false,"step":"60.0","x":-7.171809523809524,"y":-15.100000000000001,"z":7.974857142857143,"a95":0.99,"info":"03/11/2014 at 21:03:34"},{"visible":true,"include":false,"step":"70.0","x":-17.75142857142857,"y":-6.031333333333333,"z":14.36,"a95":0.99,"info":"03/11/2014 at 21:03:34"},{"visible":true,"include":false,"step":"80.0","x":-2.347714285714286,"y":-13.343809523809526,"z":6.848476190476191,"a95":0.99,"info":"03/11/2014 at 21:03:34"},{"visible":true,"include":false,"step":"90.0","x":-4.567714285714286,"y":-0.751752380952381,"z":5.781904761904762,"a95":0.99,"info":"03/11/2014 at 21:03:34"}]},{"version":"v1.1.0","exported":"2017-06-26T09:21:24.393Z","volume":10.5,"added":"2017-06-26T09:21:18.836Z","format":"Utrecht","demagType":"Unknown","strat":"2","patch":1.1,"GEO":[],"TECT":[],"interpreted":false,"name":"TC1.3A","coreAzi":40,"coreDip":27,"bedStrike":251,"bedDip":58,"data":[{"visible":true,"include":false,"step":"0.0","x":-22.44190476190476,"y":-13.54952380952381,"z":58.1647619047619,"a95":0.99,"info":"25/11/2014 at 16:06:43"},{"visible":true,"include":false,"step":"10.0","x":3.195238095238095,"y":-16.32857142857143,"z":1.0741904761904761,"a95":0.99,"info":"25/11/2014 at 16:06:43"},{"visible":true,"include":false,"step":"15.0","x":13.928571428571429,"y":-8.714761904761904,"z":-15.231428571428571,"a95":0.99,"info":"25/11/2014 at 16:06:43"},{"visible":true,"include":false,"step":"20.0","x":21.645714285714284,"y":-9.857142857142858,"z":-19.47047619047619,"a95":0.99,"info":"25/11/2014 at 16:06:43"},{"visible":true,"include":false,"step":"23.0","x":20.293333333333333,"y":-5.908476190476191,"z":-20.88952380952381,"a95":0.99,"info":"25/11/2014 at 16:06:43"},{"visible":true,"include":false,"step":"25.0","x":23.607619047619046,"y":-11.543809523809523,"z":-24.474285714285717,"a95":0.99,"info":"25/11/2014 at 16:06:43"},{"visible":true,"include":false,"step":"30.0","x":17.438095238095237,"y":-10.556190476190476,"z":-24.03047619047619,"a95":0.99,"info":"25/11/2014 at 16:06:43"},{"visible":true,"include":false,"step":"33.0","x":18.19904761904762,"y":-6.422380952380952,"z":-23.391428571428573,"a95":0.99,"info":"25/11/2014 at 16:06:43"},{"visible":true,"include":false,"step":"35.0","x":12.866666666666665,"y":-3.5269523809523813,"z":-18.34952380952381,"a95":0.99,"info":"25/11/2014 at 16:06:43"},{"visible":true,"include":false,"step":"40.0","x":14.346666666666666,"y":-2.5494285714285714,"z":-17.423809523809524,"a95":0.99,"info":"25/11/2014 at 16:06:43"},{"visible":true,"include":false,"step":"45.0","x":17.583809523809524,"y":-4.250095238095238,"z":-17.045714285714286,"a95":0.99,"info":"25/11/2014 at 16:06:43"},{"visible":true,"include":false,"step":"50.0","x":4.487619047619047,"y":-5.605714285714286,"z":-11.20952380952381,"a95":0.99,"info":"25/11/2014 at 16:06:43"},{"visible":true,"include":false,"step":"60.0","x":3.560857142857143,"y":-4.950857142857143,"z":-8.19152380952381,"a95":0.99,"info":"25/11/2014 at 16:06:43"},{"visible":true,"include":false,"step":"70.0","x":8.939904761904762,"y":-1.1003809523809525,"z":-5.645238095238095,"a95":0.99,"info":"25/11/2014 at 16:06:43"},{"visible":true,"include":false,"step":"80.0","x":-5.102476190476191,"y":-4.8643809523809525,"z":-3.517142857142857,"a95":0.99,"info":"25/11/2014 at 16:06:43"},{"visible":true,"include":false,"step":"90.0","x":4.4347619047619045,"y":1.6401904761904764,"z":-2.1520952380952383,"a95":0.99,"info":"25/11/2014 at 16:06:43"}]},{"version":"v1.1.0","exported":"2017-06-26T09:21:24.394Z","volume":10.5,"added":"2017-06-26T09:21:18.837Z","format":"Utrecht","demagType":"Unknown","strat":"2","patch":1.1,"GEO":[],"TECT":[],"interpreted":false,"name":"TC1.4B","coreAzi":63,"coreDip":27,"bedStrike":251,"bedDip":58,"data":[{"visible":true,"include":false,"step":"0.0","x":-152.24761904761903,"y":-27.274285714285714,"z":56.76095238095238,"a95":0.99,"info":"03/11/2014 at 21:03:34"},{"visible":true,"include":false,"step":"10.0","x":-47.36,"y":-17.19904761904762,"z":10.405714285714286,"a95":0.99,"info":"03/11/2014 at 21:03:34"},{"visible":true,"include":false,"step":"15.0","x":-12.440000000000001,"y":-10.495238095238095,"z":-15.651428571428571,"a95":0.99,"info":"03/11/2014 at 21:03:34"},{"visible":true,"include":false,"step":"20.0","x":3.885904761904762,"y":-7.301238095238095,"z":-18.22095238095238,"a95":0.99,"info":"03/11/2014 at 21:03:34"},{"visible":true,"include":false,"step":"25.0","x":8.799809523809524,"y":-1.4282857142857144,"z":-27.6,"a95":0.99,"info":"03/11/2014 at 21:03:34"},{"visible":true,"include":false,"step":"30.0","x":16.415238095238095,"y":3.219809523809524,"z":-17.398095238095237,"a95":0.99,"info":"03/11/2014 at 21:03:34"},{"visible":true,"include":false,"step":"35.0","x":14.607619047619048,"y":2.422190476190476,"z":-19.84952380952381,"a95":0.99,"info":"03/11/2014 at 21:03:34"},{"visible":true,"include":false,"step":"40.0","x":14.30952380952381,"y":6.381714285714286,"z":-18.80857142857143,"a95":0.99,"info":"03/11/2014 at 21:03:34"},{"visible":true,"include":false,"step":"45.0","x":13.732380952380952,"y":-16.218095238095238,"z":-23.446666666666665,"a95":0.99,"info":"03/11/2014 at 21:03:34"},{"visible":true,"include":false,"step":"50.0","x":10.421904761904763,"y":1.1652380952380952,"z":-9.825714285714286,"a95":0.99,"info":"03/11/2014 at 21:03:34"},{"visible":true,"include":false,"step":"60.0","x":1.7830476190476192,"y":9.429333333333332,"z":-7.940857142857143,"a95":0.99,"info":"03/11/2014 at 21:03:34"},{"visible":true,"include":false,"step":"70.0","x":0.16033333333333333,"y":-0.4386,"z":-2.237047619047619,"a95":0.99,"info":"03/11/2014 at 21:03:34"},{"visible":true,"include":false,"step":"80.0","x":2.5354285714285716,"y":-4.770952380952381,"z":-7.513333333333334,"a95":0.99,"info":"03/11/2014 at 21:03:34"},{"visible":true,"include":false,"step":"90.0","x":6.999142857142857,"y":-3.3331428571428567,"z":-3.362190476190476,"a95":0.99,"info":"03/11/2014 at 21:03:34"}]},{"version":"v1.1.0","exported":"2017-06-26T09:21:24.394Z","volume":10.5,"added":"2017-06-26T09:21:18.837Z","format":"Utrecht","demagType":"Unknown","strat":null,"patch":1.1,"GEO":[],"TECT":[],"interpreted":false,"name":"TC1.6A","coreAzi":71,"coreDip":19,"bedStrike":251,"bedDip":58,"data":[{"visible":true,"include":false,"step":"20","x":-201.8095238095238,"y":-82.57142857142857,"z":321.8095238095238,"a95":2.4,"info":"\"15-02-12\" at \"14:46\""},{"visible":true,"include":false,"step":"100","x":-96.95238095238095,"y":-46.666666666666664,"z":98.57142857142857,"a95":2.9,"info":"\"15-02-12\" at \"22:44\""},{"visible":true,"include":false,"step":"120","x":-58.08571428571428,"y":-21.65714285714286,"z":55.23809523809524,"a95":3.3,"info":"\"15-02-13\" at \"17:58\""},{"visible":true,"include":false,"step":"150","x":-36.06666666666666,"y":-6.0476190476190474,"z":25.571428571428573,"a95":4.2,"info":"\"15-02-13\" at \"22:40\""},{"visible":true,"include":false,"step":"180","x":-13.266666666666667,"y":6.885714285714285,"z":6.838095238095238,"a95":11.4,"info":"\"15-02-16\" at \"15:39\""},{"visible":true,"include":false,"step":"210","x":-4.8,"y":20.914285714285715,"z":-1.580952380952381,"a95":11.7,"info":"\"15-02-16\" at \"19:41\""},{"visible":true,"include":false,"step":"240","x":-2.9428571428571426,"y":23.257142857142856,"z":1.9047619047619047,"a95":8.400001,"info":"\"15-02-17\" at \"15:37\""},{"visible":true,"include":false,"step":"270","x":-6.904761904761905,"y":20.361904761904764,"z":4.523809523809524,"a95":8,"info":"\"15-02-17\" at \"22:21\""},{"visible":true,"include":false,"step":"300","x":-10.58095238095238,"y":23.34285714285714,"z":9.952380952380953,"a95":7.6,"info":"\"15-03-08\" at \"18:02\""}]},{"version":"v1.1.0","exported":"2017-06-26T09:21:24.394Z","volume":10.5,"added":"2017-06-26T09:21:18.838Z","format":"Utrecht","demagType":"Unknown","strat":"3","patch":1.1,"GEO":[],"TECT":[],"interpreted":false,"name":"TC1.6B","coreAzi":71,"coreDip":19,"bedStrike":251,"bedDip":58,"data":[{"visible":true,"include":false,"step":"0.0","x":-153.45714285714286,"y":-6.942285714285715,"z":101.5047619047619,"a95":0.99,"info":"03/11/2014 at 21:03:34"},{"visible":true,"include":false,"step":"10.0","x":-49.03809523809524,"y":-9.970476190476191,"z":41.96952380952381,"a95":0.99,"info":"03/11/2014 at 21:03:34"},{"visible":true,"include":false,"step":"15.0","x":-15.11142857142857,"y":-6.742476190476191,"z":13.803809523809523,"a95":0.99,"info":"03/11/2014 at 21:03:34"},{"visible":true,"include":false,"step":"20.0","x":-2.198857142857143,"y":3.007904761904762,"z":10.757142857142858,"a95":0.99,"info":"03/11/2014 at 21:03:34"},{"visible":true,"include":false,"step":"25.0","x":7.4634285714285715,"y":9.944761904761904,"z":-6.754666666666667,"a95":0.99,"info":"03/11/2014 at 21:03:34"},{"visible":true,"include":false,"step":"30.0","x":11.287619047619048,"y":15.822857142857142,"z":1.8624761904761906,"a95":0.99,"info":"03/11/2014 at 21:03:34"},{"visible":true,"include":false,"step":"35.0","x":17.66190476190476,"y":8.382666666666667,"z":-1.9739047619047618,"a95":0.99,"info":"03/11/2014 at 21:03:34"},{"visible":true,"include":false,"step":"40.0","x":11.676190476190476,"y":15.625714285714285,"z":-4.559809523809524,"a95":0.99,"info":"03/11/2014 at 21:03:34"},{"visible":true,"include":false,"step":"45.0","x":14.913333333333334,"y":-15.296190476190478,"z":-13.192380952380953,"a95":0.99,"info":"03/11/2014 at 21:03:34"},{"visible":true,"include":false,"step":"50.0","x":12.453333333333333,"y":-0.35814285714285715,"z":-7.062571428571428,"a95":0.99,"info":"03/11/2014 at 21:03:34"},{"visible":true,"include":false,"step":"60.0","x":7.9708571428571435,"y":14.260952380952382,"z":-4.612666666666667,"a95":0.99,"info":"03/11/2014 at 21:03:34"},{"visible":true,"include":false,"step":"70.0","x":2.0006666666666666,"y":3.1532380952380956,"z":-4.236761904761904,"a95":0.99,"info":"03/11/2014 at 21:03:34"},{"visible":true,"include":false,"step":"80.0","x":-10.571428571428571,"y":1.045904761904762,"z":1.3864761904761904,"a95":0.99,"info":"03/11/2014 at 21:03:34"},{"visible":true,"include":false,"step":"90.0","x":2.478952380952381,"y":-3.68,"z":-1.428,"a95":0.99,"info":"03/11/2014 at 21:03:34"}]},{"version":"v1.1.0","exported":"2017-06-26T09:21:24.394Z","volume":10.5,"added":"2017-06-26T09:21:18.838Z","format":"Utrecht","demagType":"Unknown","strat":"3","patch":1.1,"GEO":[],"TECT":[],"interpreted":false,"name":"TC1.7A","coreAzi":17,"coreDip":43,"bedStrike":251,"bedDip":58,"data":[{"visible":true,"include":false,"step":"0.0","x":-101.44761904761906,"y":52.24952380952381,"z":171.33333333333334,"a95":0.99,"info":"25/11/2014 at 16:06:43"},{"visible":true,"include":false,"step":"10.0","x":-58.980952380952374,"y":38.272380952380956,"z":89.66571428571429,"a95":0.99,"info":"25/11/2014 at 16:06:43"},{"visible":true,"include":false,"step":"15.0","x":-41.17619047619048,"y":29.686666666666664,"z":62.81333333333333,"a95":0.99,"info":"25/11/2014 at 16:06:43"},{"visible":true,"include":false,"step":"20.0","x":-32.065714285714286,"y":23.227619047619047,"z":43.965714285714284,"a95":0.99,"info":"25/11/2014 at 16:06:43"},{"visible":true,"include":false,"step":"23.0","x":-27.454285714285714,"y":26.126666666666665,"z":31.508571428571425,"a95":0.99,"info":"25/11/2014 at 16:06:43"},{"visible":true,"include":false,"step":"25.0","x":-23.005714285714287,"y":10.40952380952381,"z":25.035238095238096,"a95":0.99,"info":"25/11/2014 at 16:06:43"},{"visible":true,"include":false,"step":"30.0","x":-8.882666666666667,"y":12.282857142857143,"z":18.292380952380952,"a95":0.99,"info":"25/11/2014 at 16:06:43"},{"visible":true,"include":false,"step":"33.0","x":-12.986666666666668,"y":18.013333333333332,"z":17.462857142857143,"a95":0.99,"info":"25/11/2014 at 16:06:43"},{"visible":true,"include":false,"step":"35.0","x":-11.594285714285714,"y":7.8558095238095245,"z":18.075238095238095,"a95":0.99,"info":"25/11/2014 at 16:06:43"},{"visible":true,"include":false,"step":"40.0","x":-7.828190476190476,"y":29.564761904761905,"z":11.108571428571429,"a95":0.99,"info":"25/11/2014 at 16:06:43"},{"visible":true,"include":false,"step":"45.0","x":-2.175047619047619,"y":12.181904761904761,"z":6.964380952380953,"a95":0.99,"info":"25/11/2014 at 16:06:43"},{"visible":true,"include":false,"step":"50.0","x":-3.1238095238095234,"y":8.727809523809523,"z":1.2995238095238095,"a95":0.99,"info":"25/11/2014 at 16:06:43"},{"visible":true,"include":false,"step":"60.0","x":-2.611142857142857,"y":9.776190476190477,"z":4.412476190476191,"a95":0.99,"info":"25/11/2014 at 16:06:43"},{"visible":true,"include":false,"step":"70.0","x":8.153238095238095,"y":4.36,"z":-2.427238095238095,"a95":0.99,"info":"25/11/2014 at 16:06:43"},{"visible":true,"include":false,"step":"80.0","x":-17.643809523809523,"y":-4.1783809523809525,"z":-1.887047619047619,"a95":0.99,"info":"25/11/2014 at 16:06:43"},{"visible":true,"include":false,"step":"90.0","x":2.552952380952381,"y":1.3936190476190475,"z":-1.0351428571428571,"a95":0.99,"info":"25/11/2014 at 16:06:43"}]},{"version":"v1.1.0","exported":"2017-06-26T09:21:24.394Z","volume":10.5,"added":"2017-06-26T09:21:18.843Z","format":"Utrecht","demagType":"Unknown","strat":"4","patch":1.1,"GEO":[],"TECT":[],"interpreted":false,"name":"TC1.9A","coreAzi":53,"coreDip":15,"bedStrike":251,"bedDip":58,"data":[{"visible":true,"include":false,"step":"0.0","x":-112.63809523809525,"y":-11.379999999999999,"z":116.16190476190476,"a95":0.99,"info":"25/11/2014 at 16:06:43"},{"visible":true,"include":false,"step":"10.0","x":-83.63047619047619,"y":-20.931428571428572,"z":81.65714285714286,"a95":0.99,"info":"25/11/2014 at 16:06:43"},{"visible":true,"include":false,"step":"15.0","x":-69.79047619047618,"y":-14.774285714285714,"z":72.4952380952381,"a95":0.99,"info":"25/11/2014 at 16:06:43"},{"visible":true,"include":false,"step":"20.0","x":-48.99714285714286,"y":-11.563809523809525,"z":54.52571428571429,"a95":0.99,"info":"25/11/2014 at 16:06:43"},{"visible":true,"include":false,"step":"23.0","x":-46.063809523809525,"y":-10.01047619047619,"z":54.08857142857143,"a95":0.99,"info":"25/11/2014 at 16:06:43"},{"visible":true,"include":false,"step":"25.0","x":-35.71714285714285,"y":-12.857142857142858,"z":56.09428571428572,"a95":0.99,"info":"25/11/2014 at 16:06:43"},{"visible":true,"include":false,"step":"30.0","x":-23.326666666666668,"y":-6.834095238095237,"z":40.27714285714286,"a95":0.99,"info":"25/11/2014 at 16:06:43"},{"visible":true,"include":false,"step":"33.0","x":-28.830476190476194,"y":-10.485714285714286,"z":30.675238095238093,"a95":0.99,"info":"25/11/2014 at 16:06:43"},{"visible":true,"include":false,"step":"35.0","x":-25.342857142857145,"y":-12.433333333333334,"z":45.77809523809524,"a95":0.99,"info":"25/11/2014 at 16:06:43"},{"visible":true,"include":false,"step":"40.0","x":-28.32190476190476,"y":8.238190476190477,"z":36.86952380952381,"a95":0.99,"info":"25/11/2014 at 16:06:43"},{"visible":true,"include":false,"step":"45.0","x":-11.325714285714286,"y":-8.033142857142858,"z":23.01238095238095,"a95":0.99,"info":"25/11/2014 at 16:06:43"},{"visible":true,"include":false,"step":"50.0","x":-15.61142857142857,"y":-3.7760952380952384,"z":27.226666666666667,"a95":0.99,"info":"25/11/2014 at 16:06:43"},{"visible":true,"include":false,"step":"60.0","x":-18.447619047619046,"y":-2.357333333333333,"z":22.298095238095236,"a95":0.99,"info":"25/11/2014 at 16:06:43"},{"visible":true,"include":false,"step":"70.0","x":-9.997142857142856,"y":-6.24152380952381,"z":13.631428571428572,"a95":0.99,"info":"25/11/2014 at 16:06:43"},{"visible":true,"include":false,"step":"80.0","x":-12.765714285714285,"y":-7.143809523809525,"z":20.363809523809522,"a95":0.99,"info":"25/11/2014 at 16:06:43"},{"visible":true,"include":false,"step":"90.0","x":-6.361333333333333,"y":2.9066666666666667,"z":6.082857142857143,"a95":0.99,"info":"25/11/2014 at 16:06:43"}]},{"version":"v1.1.0","exported":"2017-06-26T09:21:24.394Z","volume":10.5,"added":"2017-06-26T09:21:18.844Z","format":"Utrecht","demagType":"Unknown","strat":"5","patch":1.1,"GEO":[],"TECT":[],"interpreted":false,"name":"TC1.10A","coreAzi":50,"coreDip":12,"bedStrike":251,"bedDip":58,"data":[{"visible":true,"include":false,"step":"0.0","x":-105.52380952380952,"y":-14.149523809523808,"z":103.29523809523809,"a95":0.99,"info":"25/11/2014 at 16:06:43"},{"visible":true,"include":false,"step":"10.0","x":-69.99333333333333,"y":-10.390476190476189,"z":69.54666666666667,"a95":0.99,"info":"25/11/2014 at 16:06:43"},{"visible":true,"include":false,"step":"15.0","x":-64.9152380952381,"y":-5.6005714285714285,"z":56.97714285714286,"a95":0.99,"info":"25/11/2014 at 16:06:43"},{"visible":true,"include":false,"step":"20.0","x":-44.61619047619048,"y":-2.318380952380952,"z":45.25809523809524,"a95":0.99,"info":"25/11/2014 at 16:06:43"},{"visible":true,"include":false,"step":"23.0","x":-38.61333333333333,"y":1.0960952380952382,"z":40.77714285714286,"a95":0.99,"info":"25/11/2014 at 16:06:43"},{"visible":true,"include":false,"step":"25.0","x":-32.91238095238095,"y":-3.7423809523809526,"z":39.93904761904762,"a95":0.99,"info":"25/11/2014 at 16:06:43"},{"visible":true,"include":false,"step":"30.0","x":-20.565714285714286,"y":-10.130476190476191,"z":22.56095238095238,"a95":0.99,"info":"25/11/2014 at 16:06:43"},{"visible":true,"include":false,"step":"33.0","x":-30.42761904761905,"y":1.1116190476190477,"z":25.20380952380952,"a95":0.99,"info":"25/11/2014 at 16:06:43"},{"visible":true,"include":false,"step":"35.0","x":-24.115238095238094,"y":-1.1211428571428572,"z":28.545714285714286,"a95":0.99,"info":"25/11/2014 at 16:06:43"},{"visible":true,"include":false,"step":"40.0","x":-13.302857142857144,"y":11.794285714285715,"z":18.70285714285714,"a95":0.99,"info":"25/11/2014 at 16:06:43"},{"visible":true,"include":false,"step":"45.0","x":-16.44857142857143,"y":-4.26047619047619,"z":15.480952380952383,"a95":0.99,"info":"25/11/2014 at 16:06:43"},{"visible":true,"include":false,"step":"50.0","x":-17.213333333333335,"y":-2.7483809523809524,"z":9.379619047619048,"a95":0.99,"info":"25/11/2014 at 16:06:43"},{"visible":true,"include":false,"step":"60.0","x":-11.244761904761905,"y":9.894285714285715,"z":15.334285714285713,"a95":0.99,"info":"25/11/2014 at 16:06:43"},{"visible":true,"include":false,"step":"70.0","x":-6.280285714285714,"y":1.7024761904761907,"z":13.268571428571429,"a95":0.99,"info":"25/11/2014 at 16:06:43"},{"visible":true,"include":false,"step":"80.0","x":-2.996095238095238,"y":-8.489904761904763,"z":13.703809523809522,"a95":0.99,"info":"25/11/2014 at 16:06:43"},{"visible":true,"include":false,"step":"90.0","x":-7.077619047619048,"y":-4.736285714285715,"z":6.531142857142857,"a95":0.99,"info":"25/11/2014 at 16:06:43"}]},{"version":"v1.1.0","exported":"2017-06-26T09:21:24.394Z","volume":10.5,"added":"2017-06-26T09:21:18.844Z","format":"Utrecht","demagType":"Unknown","strat":null,"patch":1.1,"GEO":[],"TECT":[],"interpreted":false,"name":"TC1.11A","coreAzi":26,"coreDip":33,"bedStrike":251,"bedDip":58,"data":[{"visible":true,"include":false,"step":"20","x":-25.047619047619047,"y":-29.61904761904762,"z":159.23809523809524,"a95":2.5,"info":"\"15-02-12\" at \"14:48\""},{"visible":true,"include":false,"step":"100","x":-11.219047619047618,"y":-14.933333333333334,"z":47.67619047619048,"a95":3.7,"info":"\"15-02-12\" at \"22:46\""},{"visible":true,"include":false,"step":"120","x":-8.514285714285714,"y":-11.133333333333335,"z":35.904761904761905,"a95":2.9,"info":"\"15-02-13\" at \"18:00\""},{"visible":true,"include":false,"step":"150","x":-8.647619047619047,"y":-8.352380952380953,"z":29.447619047619046,"a95":2.9,"info":"\"15-02-13\" at \"22:43\""},{"visible":true,"include":false,"step":"180","x":-3.238095238095238,"y":-6.523809523809524,"z":22.304761904761904,"a95":3.9,"info":"\"15-02-16\" at \"15:41\""},{"visible":true,"include":false,"step":"210","x":-10.79047619047619,"y":-4.419047619047619,"z":16.64761904761905,"a95":6.6,"info":"\"15-02-16\" at \"19:43\""},{"visible":true,"include":false,"step":"240","x":-2.4761904761904763,"y":-4.257142857142857,"z":16.447619047619046,"a95":3.9,"info":"\"15-02-17\" at \"15:39\""},{"visible":true,"include":false,"step":"270","x":-3.5333333333333337,"y":-6.39047619047619,"z":14.733333333333333,"a95":4.4,"info":"\"15-02-17\" at \"22:23\""},{"visible":true,"include":false,"step":"300","x":-2.7333333333333334,"y":-5,"z":18.38095238095238,"a95":4.1,"info":"\"15-03-08\" at \"18:04\""}]},{"version":"v1.1.0","exported":"2017-06-26T09:21:24.394Z","volume":10.5,"added":"2017-06-26T09:21:18.844Z","format":"Utrecht","demagType":"Unknown","strat":"6","patch":1.1,"GEO":[],"TECT":[],"interpreted":false,"name":"TC1.13A","coreAzi":30,"coreDip":32,"bedStrike":251,"bedDip":58,"data":[{"visible":true,"include":false,"step":"0.0","x":-1.686095238095238,"y":16.132380952380952,"z":49.392380952380954,"a95":0.99,"info":"25/11/2014 at 16:06:43"},{"visible":true,"include":false,"step":"10.0","x":11.258095238095237,"y":9.882857142857143,"z":20.239047619047618,"a95":0.99,"info":"25/11/2014 at 16:06:43"},{"visible":true,"include":false,"step":"15.0","x":8.01047619047619,"y":14.715238095238094,"z":16.740952380952383,"a95":0.99,"info":"25/11/2014 at 16:06:43"},{"visible":true,"include":false,"step":"20.0","x":15.257142857142856,"y":10.555238095238096,"z":6.337238095238095,"a95":0.99,"info":"25/11/2014 at 16:06:43"},{"visible":true,"include":false,"step":"23.0","x":16.917142857142856,"y":12.794285714285715,"z":8.753142857142857,"a95":0.99,"info":"25/11/2014 at 16:06:43"},{"visible":true,"include":false,"step":"25.0","x":15.243809523809524,"y":8.143809523809525,"z":8.885333333333334,"a95":0.99,"info":"25/11/2014 at 16:06:43"},{"visible":true,"include":false,"step":"30.0","x":16.01047619047619,"y":5.623904761904762,"z":-0.03966666666666666,"a95":0.99,"info":"25/11/2014 at 16:06:43"},{"visible":true,"include":false,"step":"33.0","x":7.0009523809523815,"y":12.320000000000002,"z":-2.0267619047619045,"a95":0.99,"info":"25/11/2014 at 16:06:43"},{"visible":true,"include":false,"step":"35.0","x":14.995238095238093,"y":4.282190476190476,"z":10.14,"a95":0.99,"info":"25/11/2014 at 16:06:43"},{"visible":true,"include":false,"step":"40.0","x":8.034285714285714,"y":22.918095238095237,"z":-2.410190476190476,"a95":0.99,"info":"25/11/2014 at 16:06:43"},{"visible":true,"include":false,"step":"45.0","x":7.185904761904761,"y":6.410285714285715,"z":0.306,"a95":0.99,"info":"25/11/2014 at 16:06:43"},{"visible":true,"include":false,"step":"50.0","x":-1.8394285714285714,"y":11.008571428571429,"z":7.104095238095239,"a95":0.99,"info":"25/11/2014 at 16:06:43"},{"visible":true,"include":false,"step":"60.0","x":-4.643523809523809,"y":27.322857142857142,"z":4.954571428571429,"a95":0.99,"info":"25/11/2014 at 16:06:43"},{"visible":true,"include":false,"step":"70.0","x":3.3987619047619044,"y":0.046714285714285715,"z":1.1692380952380952,"a95":0.99,"info":"25/11/2014 at 16:06:43"},{"visible":true,"include":false,"step":"80.0","x":15.804761904761904,"y":1.7258095238095237,"z":7.5876190476190475,"a95":0.99,"info":"25/11/2014 at 16:06:43"},{"visible":true,"include":false,"step":"90.0","x":4.447904761904762,"y":8.922380952380953,"z":-2.376190476190476,"a95":0.99,"info":"25/11/2014 at 16:06:43"}]},{"version":"v1.1.0","exported":"2017-06-26T09:21:24.394Z","volume":10.5,"added":"2017-06-26T09:21:18.844Z","format":"Utrecht","demagType":"Unknown","strat":"4","patch":1.1,"GEO":[],"TECT":[],"interpreted":false,"name":"TC1.13B","coreAzi":30,"coreDip":32,"bedStrike":251,"bedDip":58,"data":[{"visible":true,"include":false,"step":"0.0","x":-29.033333333333335,"y":-6.751904761904761,"z":31.920952380952382,"a95":0.99,"info":"03/11/2014 at 21:03:34"},{"visible":true,"include":false,"step":"10.0","x":-6.395714285714286,"y":-7.242476190476191,"z":10.712380952380952,"a95":0.99,"info":"03/11/2014 at 21:03:34"},{"visible":true,"include":false,"step":"15.0","x":1.094095238095238,"y":-8.97695238095238,"z":-2.4026666666666667,"a95":0.99,"info":"03/11/2014 at 21:03:34"},{"visible":true,"include":false,"step":"20.0","x":1.3813333333333333,"y":-5.586666666666666,"z":3.893619047619048,"a95":0.99,"info":"03/11/2014 at 21:03:34"},{"visible":true,"include":false,"step":"25.0","x":4.081428571428571,"y":-2.622952380952381,"z":-1.293904761904762,"a95":0.99,"info":"03/11/2014 at 21:03:34"},{"visible":true,"include":false,"step":"30.0","x":3.598666666666667,"y":5.0381904761904766,"z":9.50047619047619,"a95":0.99,"info":"03/11/2014 at 21:03:34"},{"visible":true,"include":false,"step":"35.0","x":4.1140952380952385,"y":-2.3884761904761906,"z":2.0525714285714285,"a95":0.99,"info":"03/11/2014 at 21:03:34"},{"visible":true,"include":false,"step":"40.0","x":5.229333333333334,"y":2.587428571428571,"z":0.5427428571428572,"a95":0.99,"info":"03/11/2014 at 21:03:34"},{"visible":true,"include":false,"step":"45.0","x":9.387428571428572,"y":-32.203809523809525,"z":-3.8041904761904766,"a95":0.99,"info":"03/11/2014 at 21:03:34"},{"visible":true,"include":false,"step":"50.0","x":6.619523809523809,"y":-10.173333333333332,"z":-1.4607619047619047,"a95":0.99,"info":"03/11/2014 at 21:03:34"},{"visible":true,"include":false,"step":"60.0","x":3.2727619047619045,"y":12.552380952380954,"z":3.2035238095238094,"a95":0.99,"info":"03/11/2014 at 21:03:34"},{"visible":true,"include":false,"step":"70.0","x":-3.7546666666666666,"y":0.461952380952381,"z":4.071142857142857,"a95":0.99,"info":"03/11/2014 at 21:03:34"},{"visible":true,"include":false,"step":"80.0","x":-2.4297142857142857,"y":-2.955142857142857,"z":5.3505714285714285,"a95":0.99,"info":"03/11/2014 at 21:03:34"},{"visible":true,"include":false,"step":"90.0","x":3.1520952380952383,"y":-1.7145714285714286,"z":3.146857142857143,"a95":0.99,"info":"03/11/2014 at 21:03:34"}]},{"version":"v1.1.0","exported":"2017-06-26T09:21:24.394Z","volume":10.5,"added":"2017-06-26T09:21:18.845Z","format":"Utrecht","demagType":"Unknown","strat":null,"patch":1.1,"GEO":[],"TECT":[],"interpreted":false,"name":"TC1.14A","coreAzi":29,"coreDip":27,"bedStrike":251,"bedDip":58,"data":[{"visible":true,"include":false,"step":"20","x":-10.628571428571428,"y":-2.2952380952380955,"z":65.56190476190476,"a95":2.5,"info":"\"15-02-12\" at \"14:50\""},{"visible":true,"include":false,"step":"100","x":1.3523809523809522,"y":13.02857142857143,"z":18.295238095238094,"a95":5.7,"info":"\"15-02-12\" at \"22:48\""},{"visible":true,"include":false,"step":"120","x":-1.3333333333333333,"y":18.438095238095237,"z":12.885714285714286,"a95":3.2,"info":"\"15-02-13\" at \"18:02\""},{"visible":true,"include":false,"step":"150","x":0.7809523809523808,"y":18.26666666666667,"z":4.742857142857143,"a95":3.9,"info":"\"15-02-13\" at \"22:45\""},{"visible":true,"include":false,"step":"180","x":7.019047619047619,"y":19.685714285714283,"z":-0.8095238095238095,"a95":3.7,"info":"\"15-02-16\" at \"15:43\""},{"visible":true,"include":false,"step":"210","x":-4.266666666666667,"y":20.98095238095238,"z":-4.152380952380953,"a95":5.7,"info":"\"15-02-16\" at \"19:45\""},{"visible":true,"include":false,"step":"240","x":5.447619047619048,"y":21.361904761904764,"z":-5.923809523809524,"a95":4.9,"info":"\"15-02-17\" at \"15:41\""},{"visible":true,"include":false,"step":"270","x":4.904761904761905,"y":20.59047619047619,"z":-5.523809523809524,"a95":2.9,"info":"\"15-02-17\" at \"22:25\""},{"visible":true,"include":false,"step":"300","x":1.9904761904761903,"y":21.561904761904763,"z":-3.7714285714285714,"a95":3.9,"info":"\"15-03-08\" at \"18:06\""}]},{"version":"v1.1.0","exported":"2017-06-26T09:21:24.394Z","volume":10.5,"added":"2017-06-26T09:21:18.845Z","format":"Utrecht","demagType":"Unknown","strat":null,"patch":1.1,"GEO":[],"TECT":[],"interpreted":false,"name":"TC1.16A","coreAzi":72,"coreDip":45,"bedStrike":251,"bedDip":58,"data":[{"visible":true,"include":false,"step":"20","x":-26.523809523809526,"y":-21.65714285714286,"z":19.333333333333332,"a95":2.5,"info":"\"15-02-12\" at \"14:52\""},{"visible":true,"include":false,"step":"100","x":-12.295238095238094,"y":-11.761904761904763,"z":21.704761904761906,"a95":3.6,"info":"\"15-02-12\" at \"22:53\""},{"visible":true,"include":false,"step":"120","x":-5.857142857142857,"y":-5.723809523809524,"z":16.057142857142857,"a95":7.4,"info":"\"15-02-13\" at \"18:04\""},{"visible":true,"include":false,"step":"150","x":-5.961904761904762,"y":-1.6095238095238094,"z":10.961904761904762,"a95":7.4,"info":"\"15-02-13\" at \"22:47\""},{"visible":true,"include":false,"step":"180","x":-0.7238095238095238,"y":1.0380952380952382,"z":6.219047619047619,"a95":14.6,"info":"\"15-02-16\" at \"15:45\""},{"visible":true,"include":false,"step":"210","x":-12.133333333333335,"y":6.885714285714285,"z":-1.0095238095238095,"a95":10.4,"info":"\"15-02-16\" at \"19:52\""},{"visible":true,"include":false,"step":"240","x":-2.4666666666666663,"y":6.095238095238095,"z":0.9142857142857143,"a95":13.7,"info":"\"15-02-17\" at \"15:44\""},{"visible":true,"include":false,"step":"270","x":-3.276190476190476,"y":5.285714285714286,"z":2,"a95":13.8,"info":"\"15-02-17\" at \"22:27\""},{"visible":true,"include":false,"step":"300","x":-3.4000000000000004,"y":1.1047619047619048,"z":2.6761904761904765,"a95":38.6,"info":"\"15-03-08\" at \"18:08\""}]},{"version":"v1.1.0","exported":"2017-06-26T09:21:24.394Z","volume":10.5,"added":"2017-06-26T09:21:18.845Z","format":"Utrecht","demagType":"Unknown","strat":"7","patch":1.1,"GEO":[],"TECT":[],"interpreted":false,"name":"TC1.17A","coreAzi":74,"coreDip":43,"bedStrike":251,"bedDip":58,"data":[{"visible":true,"include":false,"step":"0.0","x":-7.971714285714286,"y":-14.050476190476191,"z":29.33904761904762,"a95":0.99,"info":"25/11/2014 at 16:06:43"},{"visible":true,"include":false,"step":"10.0","x":1.1893333333333334,"y":-7.2545714285714284,"z":8.122857142857143,"a95":0.99,"info":"25/11/2014 at 16:06:43"},{"visible":true,"include":false,"step":"15.0","x":-1.798,"y":4.533904761904762,"z":4.878380952380953,"a95":0.99,"info":"25/11/2014 at 16:06:43"},{"visible":true,"include":false,"step":"20.0","x":6.6670476190476196,"y":0.17993333333333333,"z":-2.1142857142857143,"a95":0.99,"info":"25/11/2014 at 16:06:43"},{"visible":true,"include":false,"step":"23.0","x":5.426666666666667,"y":5.402380952380953,"z":-1.3235238095238095,"a95":0.99,"info":"25/11/2014 at 16:06:43"},{"visible":true,"include":false,"step":"25.0","x":6.980666666666666,"y":-4.728476190476191,"z":4.272666666666667,"a95":0.99,"info":"25/11/2014 at 16:06:43"},{"visible":true,"include":false,"step":"30.0","x":7.64752380952381,"y":-4.703428571428572,"z":-1.7472380952380953,"a95":0.99,"info":"25/11/2014 at 16:06:43"},{"visible":true,"include":false,"step":"33.0","x":-1.8341904761904761,"y":-0.1955047619047619,"z":-7.191619047619048,"a95":0.99,"info":"25/11/2014 at 16:06:43"},{"visible":true,"include":false,"step":"35.0","x":5.6786666666666665,"y":2.3746666666666667,"z":1.6162857142857143,"a95":0.99,"info":"25/11/2014 at 16:06:43"},{"visible":true,"include":false,"step":"40.0","x":3.936952380952381,"y":7.0495238095238095,"z":-11.827619047619047,"a95":0.99,"info":"25/11/2014 at 16:06:43"},{"visible":true,"include":false,"step":"45.0","x":10.522857142857143,"y":3.829714285714286,"z":-3.264,"a95":0.99,"info":"25/11/2014 at 16:06:43"},{"visible":true,"include":false,"step":"50.0","x":1.9028571428571428,"y":2.250095238095238,"z":-1.8466666666666667,"a95":0.99,"info":"25/11/2014 at 16:06:43"},{"visible":true,"include":false,"step":"60.0","x":11.622857142857143,"y":-10.044761904761904,"z":-6.502190476190476,"a95":0.99,"info":"25/11/2014 at 16:06:43"},{"visible":true,"include":false,"step":"70.0","x":-2.509809523809524,"y":-2.706857142857143,"z":-1.8007619047619048,"a95":0.99,"info":"25/11/2014 at 16:06:43"},{"visible":true,"include":false,"step":"80.0","x":0.7576190476190476,"y":-5.755333333333333,"z":1.5394285714285716,"a95":0.99,"info":"25/11/2014 at 16:06:43"},{"visible":true,"include":false,"step":"90.0","x":2.5582857142857143,"y":4.884190476190476,"z":-2.2905714285714285,"a95":0.99,"info":"25/11/2014 at 16:06:43"}]},{"version":"v1.1.0","exported":"2017-06-26T09:21:24.394Z","volume":10.5,"added":"2017-06-26T09:21:18.845Z","format":"Utrecht","demagType":"Unknown","strat":"8","patch":1.1,"GEO":[],"TECT":[],"interpreted":false,"name":"TC1.18A","coreAzi":76,"coreDip":40,"bedStrike":251,"bedDip":58,"data":[{"visible":true,"include":false,"step":"0.0","x":-18.07904761904762,"y":-0.9758095238095239,"z":48.65238095238095,"a95":0.99,"info":"25/11/2014 at 16:06:43"},{"visible":true,"include":false,"step":"10.0","x":2.957333333333333,"y":3.6523809523809527,"z":29.173333333333332,"a95":0.99,"info":"25/11/2014 at 16:06:43"},{"visible":true,"include":false,"step":"15.0","x":5.019619047619048,"y":6.163714285714285,"z":23.128571428571426,"a95":0.99,"info":"25/11/2014 at 16:06:43"},{"visible":true,"include":false,"step":"20.0","x":8.39990476190476,"y":8.194857142857144,"z":16.20952380952381,"a95":0.99,"info":"25/11/2014 at 16:06:43"},{"visible":true,"include":false,"step":"23.0","x":8.78657142857143,"y":6.348857142857143,"z":11.88952380952381,"a95":0.99,"info":"25/11/2014 at 16:06:43"},{"visible":true,"include":false,"step":"25.0","x":11.981904761904762,"y":-3.2907619047619043,"z":19.56095238095238,"a95":0.99,"info":"25/11/2014 at 16:06:43"},{"visible":true,"include":false,"step":"30.0","x":14.856190476190477,"y":1.7397142857142858,"z":2.8635238095238096,"a95":0.99,"info":"25/11/2014 at 16:06:43"},{"visible":true,"include":false,"step":"33.0","x":5.576380952380952,"y":7.750285714285714,"z":-0.751152380952381,"a95":0.99,"info":"25/11/2014 at 16:06:43"},{"visible":true,"include":false,"step":"35.0","x":10.696190476190477,"y":7.256285714285714,"z":10.767619047619048,"a95":0.99,"info":"25/11/2014 at 16:06:43"},{"visible":true,"include":false,"step":"40.0","x":6.999142857142857,"y":2.4931428571428573,"z":10.369523809523809,"a95":0.99,"info":"25/11/2014 at 16:06:43"},{"visible":true,"include":false,"step":"45.0","x":7.025619047619048,"y":8.544380952380951,"z":9.418,"a95":0.99,"info":"25/11/2014 at 16:06:43"},{"visible":true,"include":false,"step":"50.0","x":1.7442857142857144,"y":5.50447619047619,"z":11.103809523809524,"a95":0.99,"info":"25/11/2014 at 16:06:43"},{"visible":true,"include":false,"step":"60.0","x":13.553333333333333,"y":-2.604761904761905,"z":0.5710761904761904,"a95":0.99,"info":"25/11/2014 at 16:06:43"},{"visible":true,"include":false,"step":"70.0","x":-0.3233047619047619,"y":1.398857142857143,"z":1.5193333333333332,"a95":0.99,"info":"25/11/2014 at 16:06:43"},{"visible":true,"include":false,"step":"80.0","x":-2.14247619047619,"y":-2.9827619047619045,"z":4.59752380952381,"a95":0.99,"info":"25/11/2014 at 16:06:43"},{"visible":true,"include":false,"step":"90.0","x":0.5576380952380953,"y":6.366095238095237,"z":-4.2109523809523814,"a95":0.99,"info":"25/11/2014 at 16:06:43"}]},{"version":"v1.1.0","exported":"2017-06-26T09:21:24.394Z","volume":10.5,"added":"2017-06-26T09:21:18.845Z","format":"Utrecht","demagType":"Unknown","strat":null,"patch":1.1,"GEO":[],"TECT":[],"interpreted":false,"name":"TC1.19A","coreAzi":70,"coreDip":35,"bedStrike":251,"bedDip":58,"data":[{"visible":true,"include":false,"step":"20","x":-13.333333333333334,"y":-21.99047619047619,"z":19.333333333333332,"a95":4.4,"info":"\"15-02-12\" at \"14:54\""},{"visible":true,"include":false,"step":"100","x":-10.780952380952382,"y":-8.276190476190477,"z":17.495238095238093,"a95":3.8,"info":"\"15-02-12\" at \"22:58\""},{"visible":true,"include":false,"step":"120","x":-8.095238095238095,"y":-3.380952380952381,"z":13.838095238095239,"a95":6.8,"info":"\"15-02-13\" at \"18:07\""},{"visible":true,"include":false,"step":"150","x":-6.285714285714286,"y":-0.5238095238095238,"z":9.476190476190476,"a95":6.2,"info":"\"15-02-13\" at \"22:50\""},{"visible":true,"include":false,"step":"180","x":0.3238095238095238,"y":4.523809523809524,"z":0.7047619047619048,"a95":12.4,"info":"\"15-02-16\" at \"15:47\""},{"visible":true,"include":false,"step":"210","x":-10.504761904761905,"y":5.838095238095238,"z":-0.6380952380952382,"a95":8.900001,"info":"\"15-02-16\" at \"19:54\""},{"visible":true,"include":false,"step":"240","x":0.9523809523809523,"y":7.133333333333334,"z":-2.3333333333333335,"a95":12.1,"info":"\"15-02-17\" at \"15:46\""},{"visible":true,"include":false,"step":"270","x":-1.9333333333333333,"y":6.6571428571428575,"z":-0.2761904761904762,"a95":19.4,"info":"\"15-02-17\" at \"22:29\""},{"visible":true,"include":false,"step":"300","x":2.123809523809524,"y":10.742857142857142,"z":1.5904761904761904,"a95":11.8,"info":"\"15-03-08\" at \"18:10\""}]},{"version":"v1.1.0","exported":"2017-06-26T09:21:24.394Z","volume":10.5,"added":"2017-06-26T09:21:18.846Z","format":"Utrecht","demagType":"Unknown","strat":"5","patch":1.1,"GEO":[],"TECT":[],"interpreted":false,"name":"TC1.20B","coreAzi":64,"coreDip":46,"bedStrike":251,"bedDip":58,"data":[{"visible":true,"include":false,"step":"0.0","x":-13.836190476190476,"y":-22.086666666666666,"z":16.14952380952381,"a95":0.99,"info":"03/11/2014 at 21:03:34"},{"visible":true,"include":false,"step":"10.0","x":-6.504095238095239,"y":-22.592380952380953,"z":6.33847619047619,"a95":0.99,"info":"03/11/2014 at 21:03:34"},{"visible":true,"include":false,"step":"15.0","x":-5.6847619047619045,"y":-24.929523809523808,"z":2.295047619047619,"a95":0.99,"info":"03/11/2014 at 21:03:34"},{"visible":true,"include":false,"step":"20.0","x":-5.3139047619047615,"y":-16.586666666666666,"z":2.079047619047619,"a95":0.99,"info":"03/11/2014 at 21:03:34"},{"visible":true,"include":false,"step":"25.0","x":-4.755333333333333,"y":-16.335238095238097,"z":3.900571428571429,"a95":0.99,"info":"03/11/2014 at 21:03:34"},{"visible":true,"include":false,"step":"30.0","x":-7.689809523809523,"y":-10.955238095238096,"z":12.984761904761905,"a95":0.99,"info":"03/11/2014 at 21:03:34"},{"visible":true,"include":false,"step":"35.0","x":-2.7106666666666666,"y":-13.486666666666668,"z":8.52142857142857,"a95":0.99,"info":"03/11/2014 at 21:03:34"},{"visible":true,"include":false,"step":"40.0","x":-6.696095238095237,"y":-4.315904761904762,"z":3.6449523809523807,"a95":0.99,"info":"03/11/2014 at 21:03:34"},{"visible":true,"include":false,"step":"45.0","x":-1.5619047619047617,"y":-45.20952380952381,"z":-3.6020952380952385,"a95":0.99,"info":"03/11/2014 at 21:03:34"},{"visible":true,"include":false,"step":"50.0","x":3.0137142857142853,"y":-17.637142857142855,"z":-2.233904761904762,"a95":0.99,"info":"03/11/2014 at 21:03:34"},{"visible":true,"include":false,"step":"60.0","x":0.4457619047619048,"y":12.899047619047618,"z":-1.1125714285714285,"a95":0.99,"info":"03/11/2014 at 21:03:34"},{"visible":true,"include":false,"step":"70.0","x":1.3205714285714285,"y":-4.806380952380953,"z":1.1648571428571428,"a95":0.99,"info":"03/11/2014 at 21:03:34"},{"visible":true,"include":false,"step":"80.0","x":-5.7208571428571435,"y":0.9931428571428572,"z":-0.16559047619047618,"a95":0.99,"info":"03/11/2014 at 21:03:34"},{"visible":true,"include":false,"step":"90.0","x":-0.3374,"y":-0.9092,"z":4.100761904761905,"a95":0.99,"info":"03/11/2014 at 21:03:34"}]},{"version":"v1.1.0","exported":"2017-06-26T09:21:24.394Z","volume":10.5,"added":"2017-06-26T09:21:18.846Z","format":"Utrecht","demagType":"Unknown","strat":null,"patch":1.1,"GEO":[],"TECT":[],"interpreted":false,"name":"TC1.21A","coreAzi":56,"coreDip":47,"bedStrike":251,"bedDip":58,"data":[{"visible":true,"include":false,"step":"20","x":8.352380952380953,"y":-31.723809523809525,"z":26.761904761904763,"a95":2.4,"info":"\"15-02-12\" at \"14:56\""},{"visible":true,"include":false,"step":"100","x":12.428571428571429,"y":-16.723809523809525,"z":12.742857142857144,"a95":3.5,"info":"\"15-02-12\" at \"23:00\""},{"visible":true,"include":false,"step":"120","x":-10.371428571428572,"y":-13.638095238095238,"z":23.752380952380953,"a95":4.1,"info":"\"15-02-13\" at \"18:09\""},{"visible":true,"include":false,"step":"150","x":15.142857142857142,"y":-14.78095238095238,"z":5.228571428571429,"a95":3.7,"info":"\"15-02-13\" at \"22:52\""},{"visible":true,"include":false,"step":"180","x":16.20952380952381,"y":-11.980952380952381,"z":0.2,"a95":3.2,"info":"\"15-02-16\" at \"15:49\""},{"visible":true,"include":false,"step":"210","x":1.6857142857142857,"y":-11.104761904761904,"z":-4.733333333333333,"a95":11.9,"info":"\"15-02-16\" at \"19:55\""},{"visible":true,"include":false,"step":"240","x":12.19047619047619,"y":-9.104761904761904,"z":-5.190476190476191,"a95":6.3,"info":"\"15-02-17\" at \"15:48\""},{"visible":true,"include":false,"step":"270","x":10.038095238095238,"y":-9.180952380952382,"z":-5.171428571428571,"a95":5.8,"info":"\"15-02-17\" at \"22:31\""},{"visible":true,"include":false,"step":"300","x":16.247619047619047,"y":-8.714285714285714,"z":-1.4190476190476191,"a95":4.5,"info":"\"15-03-08\" at \"18:13\""}]},{"version":"v1.1.0","exported":"2017-06-26T09:21:24.394Z","volume":10.5,"added":"2017-06-26T09:21:18.846Z","format":"Utrecht","demagType":"Unknown","strat":null,"patch":1.1,"GEO":[],"TECT":[],"interpreted":false,"name":"TC1.22A","coreAzi":63,"coreDip":48,"bedStrike":251,"bedDip":58,"data":[{"visible":true,"include":false,"step":"20","x":-14.304761904761904,"y":-20.73333333333333,"z":69.62857142857143,"a95":2.3,"info":"\"15-02-12\" at \"15:01\""},{"visible":true,"include":false,"step":"100","x":-12.41904761904762,"y":-16.39047619047619,"z":27.83809523809524,"a95":2.8,"info":"\"15-02-12\" at \"23:02\""},{"visible":true,"include":false,"step":"120","x":-14.2,"y":-15.257142857142856,"z":23.495238095238093,"a95":4.5,"info":"\"15-02-13\" at \"18:14\""},{"visible":true,"include":false,"step":"150","x":-10.447619047619048,"y":-13.266666666666667,"z":17.79047619047619,"a95":2.2,"info":"\"15-02-13\" at \"22:54\""},{"visible":true,"include":false,"step":"180","x":-7.380952380952381,"y":-9.59047619047619,"z":13.99047619047619,"a95":2.9,"info":"\"15-02-16\" at \"15:51\""},{"visible":true,"include":false,"step":"210","x":-19.428571428571427,"y":-9.552380952380952,"z":11.552380952380952,"a95":4.7,"info":"\"15-02-16\" at \"19:57\""},{"visible":true,"include":false,"step":"240","x":-7.057142857142857,"y":-7.933333333333333,"z":9.523809523809524,"a95":5.5,"info":"\"15-02-17\" at \"15:50\""},{"visible":true,"include":false,"step":"270","x":-7.333333333333333,"y":-8.695238095238095,"z":1.8761904761904762,"a95":6.5,"info":"\"15-02-17\" at \"22:34\""},{"visible":true,"include":false,"step":"300","x":-10.038095238095238,"y":-9.333333333333334,"z":11.019047619047619,"a95":5.2,"info":"\"15-03-08\" at \"18:15\""}]},{"version":"v1.1.0","exported":"2017-06-26T09:21:24.394Z","volume":10.5,"added":"2017-06-26T09:21:18.846Z","format":"Utrecht","demagType":"Unknown","strat":"6","patch":1.1,"GEO":[],"TECT":[],"interpreted":false,"name":"TC1.22B","coreAzi":63,"coreDip":48,"bedStrike":251,"bedDip":58,"data":[{"visible":true,"include":false,"step":"0.0","x":-15.502857142857144,"y":2.808095238095238,"z":8.305428571428571,"a95":0.99,"info":"03/11/2014 at 21:03:34"},{"visible":true,"include":false,"step":"10.0","x":-7.785904761904762,"y":-2.9844761904761903,"z":-4.552190476190477,"a95":0.99,"info":"03/11/2014 at 21:03:34"},{"visible":true,"include":false,"step":"15.0","x":2.1803809523809523,"y":-11.623809523809523,"z":-6.868,"a95":0.99,"info":"03/11/2014 at 21:03:34"},{"visible":true,"include":false,"step":"20.0","x":-1.0042857142857142,"y":0.9083333333333333,"z":-6.359904761904762,"a95":0.99,"info":"03/11/2014 at 21:03:34"},{"visible":true,"include":false,"step":"25.0","x":3.1846666666666668,"y":8.024476190476191,"z":-4.669333333333333,"a95":0.99,"info":"03/11/2014 at 21:03:34"},{"visible":true,"include":false,"step":"30.0","x":2.286095238095238,"y":6.070285714285714,"z":5.906571428571429,"a95":0.99,"info":"03/11/2014 at 21:03:34"},{"visible":true,"include":false,"step":"35.0","x":-1.7654285714285713,"y":-0.1609047619047619,"z":-7.024761904761905,"a95":0.99,"info":"03/11/2014 at 21:03:34"},{"visible":true,"include":false,"step":"40.0","x":10.65047619047619,"y":-0.30364761904761906,"z":-5.396571428571429,"a95":0.99,"info":"03/11/2014 at 21:03:34"},{"visible":true,"include":false,"step":"45.0","x":-0.444,"y":-40.22380952380953,"z":-11.28190476190476,"a95":0.99,"info":"03/11/2014 at 21:03:34"},{"visible":true,"include":false,"step":"50.0","x":6.78952380952381,"y":-12.97142857142857,"z":-5.698761904761905,"a95":0.99,"info":"03/11/2014 at 21:03:34"},{"visible":true,"include":false,"step":"60.0","x":-3.2771428571428567,"y":9.376571428571427,"z":5.796952380952381,"a95":0.99,"info":"03/11/2014 at 21:03:34"},{"visible":true,"include":false,"step":"70.0","x":4.825904761904762,"y":-2.1488571428571426,"z":-11.567619047619047,"a95":0.99,"info":"03/11/2014 at 21:03:34"},{"visible":true,"include":false,"step":"80.0","x":-8.314380952380953,"y":4.1082857142857145,"z":5.453238095238095,"a95":0.99,"info":"03/11/2014 at 21:03:34"},{"visible":true,"include":false,"step":"90.0","x":5.877714285714286,"y":-1.9256190476190478,"z":0.8443333333333334,"a95":0.99,"info":"03/11/2014 at 21:03:34"}]}]
