# Supplementary material for: Paleomagnetic constraints on the timing and distribution of Cenozoic rotations in Central and Eastern Anatolia
Source: Copernicus journal article supplement (doi:10.5194/se-9-295-2018), 2018-03-21
Supplement: Supplementary file 2 [file se-9-295-2018-supplement.zip › se-2017-66_DATA_dir files/dir files Ulukisla/TC2.dir]

[{"version":"v1.1.0","exported":"2016-11-30T16:10:37.896Z","volume":10.5,"added":"2016-11-30T15:58:24.403Z","format":"Utrecht","demagType":"Unknown","strat":null,"patch":1.1,"GEO":[{"dec":27.890427655155406,"inc":-28.10353870279475,"MAD":5.094095081494363,"cm":[-9.769962616701378e-15,3.552713678800501e-15,0],"intensity":793.3928749164905,"type":"GC","origin":false,"forced":true,"remark":"","nSteps":7,"minStep":"100","maxStep":"410","steps":["100","120","150","320","350","380","410"],"group":"None","version":"v1.1.0"}],"TECT":[{"dec":71.61693130614321,"inc":-39.292449865675714,"MAD":5.094095081495469,"cm":[-1.7763568394002505e-14,2.7533531010703882e-14,1.7763568394002505e-14],"intensity":793.3928749164905,"type":"GC","origin":false,"forced":true,"remark":"","nSteps":7,"minStep":"100","maxStep":"410","steps":["100","120","150","320","350","380","410"],"group":"None","version":"v1.1.0"}],"interpreted":true,"name":"TC2.1A","coreAzi":249,"coreDip":13,"bedStrike":239,"bedDip":59,"data":[{"visible":true,"include":false,"step":"20","x":-492.6666666666667,"y":4.380952380952381,"z":163.8095238095238,"a95":1.7,"info":"\"15-02-09\" at \"15:52\""},{"visible":true,"include":true,"step":"100","x":-444.2857142857143,"y":27.904761904761905,"z":-151.14285714285714,"a95":1.7,"info":"\"15-02-12\" at \"22:26\""},{"visible":true,"include":true,"step":"120","x":-422,"y":24.285714285714285,"z":-165.71428571428572,"a95":1.9,"info":"\"15-02-13\" at \"17:38\""},{"visible":true,"include":true,"step":"150","x":-384.2857142857143,"y":-22.571428571428573,"z":-173.14285714285714,"a95":1.9,"info":"\"15-02-13\" at \"22:18\""},{"visible":true,"include":false,"step":"180","x":-333.3333333333333,"y":-67.52380952380952,"z":-177.14285714285714,"a95":1.9,"info":"\"15-02-16\" at \"15:20\""},{"visible":true,"include":false,"step":"210","x":-339.04761904761904,"y":-79.52380952380952,"z":-185.23809523809524,"a95":2,"info":"\"15-02-16\" at \"19:22\""},{"visible":true,"include":false,"step":"240","x":-313.6190476190476,"y":-77.61904761904762,"z":-184.28571428571428,"a95":1.9,"info":"\"15-02-17\" at \"15:16\""},{"visible":true,"include":false,"step":"270","x":-309.6190476190476,"y":-86.95238095238095,"z":-189.52380952380952,"a95":2,"info":"\"15-02-17\" at \"22:03\""},{"visible":true,"include":false,"step":"300","x":-308.95238095238096,"y":-112.38095238095238,"z":-186,"a95":2,"info":"\"15-03-08\" at \"17:44\""},{"visible":true,"include":true,"step":"320","x":-314.2857142857143,"y":-92.76190476190476,"z":-192,"a95":2.1,"info":"\"15-03-09\" at \"08:40\""},{"visible":true,"include":true,"step":"350","x":-313.42857142857144,"y":-76,"z":-189.33333333333334,"a95":2.1,"info":"\"15-03-09\" at \"12:06\""},{"visible":true,"include":true,"step":"380","x":-283.8095238095238,"y":-65.14285714285714,"z":-169.04761904761904,"a95":2,"info":"\"15-04-21\" at \"07:48\""},{"visible":true,"include":true,"step":"410","x":-281.8095238095238,"y":-58.76190476190476,"z":-167.14285714285714,"a95":2.2,"info":"\"15-04-21\" at \"11:21\""},{"visible":true,"include":false,"step":"440","x":-129.52380952380952,"y":-55.42857142857143,"z":-101.04761904761905,"a95":2.8,"info":"\"15-04-22\" at \"14:09\""}]},{"version":"v1.1.0","exported":"2016-11-30T16:10:37.897Z","volume":10.5,"added":"2016-11-30T15:58:24.403Z","format":"Utrecht","demagType":"Unknown","strat":"7","patch":1.1,"GEO":[{"dec":20.780942547374025,"inc":-24.97511007047793,"MAD":8.610345546719476,"cm":[-7.605027718682322e-15,3.552713678800501e-15,0],"intensity":373.40553143117916,"type":"GC","origin":false,"forced":true,"remark":"","nSteps":7,"minStep":"10.0","maxStep":"40.0","steps":["10.0","15.0","20.0","25.0","30.0","35.0","40.0"],"group":"None","version":"v1.1.0"}],"TECT":[{"dec":64.85834859882732,"inc":-44.280941646760446,"MAD":8.610345546719131,"cm":[-2.2648549702353193e-14,8.881784197001252e-15,1.7319479184152442e-14],"intensity":373.40553143117916,"type":"GC","origin":false,"forced":true,"remark":"","nSteps":7,"minStep":"10.0","maxStep":"40.0","steps":["10.0","15.0","20.0","25.0","30.0","35.0","40.0"],"group":"None","version":"v1.1.0"}],"interpreted":true,"name":"TC2.1B","coreAzi":249,"coreDip":13,"bedStrike":239,"bedDip":59,"data":[{"visible":true,"include":false,"step":"0.0","x":-366.2761904761905,"y":38.75809523809524,"z":-125.16190476190476,"a95":0.99,"info":"03/11/2014 at 21:03:34"},{"visible":true,"include":true,"step":"10.0","x":-262.25714285714287,"y":-20.444761904761904,"z":-129.5047619047619,"a95":0.99,"info":"03/11/2014 at 21:03:34"},{"visible":true,"include":true,"step":"15.0","x":-214.24761904761903,"y":-45.43714285714285,"z":-128.56190476190477,"a95":0.99,"info":"03/11/2014 at 21:03:34"},{"visible":true,"include":true,"step":"20.0","x":-177.94285714285715,"y":-37.03809523809524,"z":-105.95238095238095,"a95":0.99,"info":"03/11/2014 at 21:03:34"},{"visible":true,"include":true,"step":"25.0","x":-144.93333333333334,"y":-36.38666666666667,"z":-92.94666666666667,"a95":0.99,"info":"03/11/2014 at 21:03:34"},{"visible":true,"include":true,"step":"30.0","x":-113.93333333333332,"y":-43.00476190476191,"z":-93.82761904761905,"a95":0.99,"info":"03/11/2014 at 21:03:34"},{"visible":true,"include":true,"step":"35.0","x":-89.38190476190476,"y":-24.175238095238097,"z":-53.505714285714284,"a95":0.99,"info":"03/11/2014 at 21:03:34"},{"visible":true,"include":true,"step":"40.0","x":-64.22761904761904,"y":-18.122857142857143,"z":-47.56,"a95":0.99,"info":"03/11/2014 at 21:03:34"},{"visible":true,"include":false,"step":"45.0","x":-58.32285714285714,"y":-57.20857142857143,"z":-42.49047619047619,"a95":0.99,"info":"03/11/2014 at 21:03:34"},{"visible":true,"include":false,"step":"50.0","x":-31.274285714285714,"y":-26.959047619047617,"z":-26.22,"a95":0.99,"info":"03/11/2014 at 21:03:34"},{"visible":false,"include":false,"step":"60.0","x":-23.602857142857143,"y":3.7051428571428575,"z":-28.51809523809524,"a95":0.99,"info":"03/11/2014 at 21:03:34"},{"visible":false,"include":false,"step":"70.0","x":-11.458095238095238,"y":-12.85904761904762,"z":-6.421619047619048,"a95":0.99,"info":"03/11/2014 at 21:03:34"},{"visible":false,"include":false,"step":"80.0","x":-83.65238095238095,"y":6.841904761904762,"z":0.1297047619047619,"a95":0.99,"info":"03/11/2014 at 21:03:34"},{"visible":false,"include":false,"step":"90.0","x":5.274285714285715,"y":-14.861904761904762,"z":4.081904761904762,"a95":0.99,"info":"03/11/2014 at 21:03:34"}]},{"version":"v1.1.0","exported":"2016-11-30T16:10:37.897Z","volume":10.5,"added":"2016-11-30T15:58:24.404Z","format":"Utrecht","demagType":"Unknown","strat":"8","patch":1.1,"GEO":[{"dec":27.635441643804143,"inc":-29.54906034228106,"MAD":10.226142695218558,"cm":[-3.547162563677375e-14,8.881784197001252e-15,0],"intensity":526.1126323604593,"type":"GC","origin":false,"forced":true,"remark":"","nSteps":9,"minStep":"10.0","maxStep":"40.0","steps":["10.0","15.0","20.0","23.0","25.0","30.0","33.0","35.0","40.0"],"group":"None","version":"v1.1.0"}],"TECT":[{"dec":73.31348309004568,"inc":-39.94953576999806,"MAD":10.226142695217822,"cm":[-2.3092638912203256e-14,-1.7763568394002505e-14,2.7533531010703882e-14],"intensity":526.1126323604592,"type":"GC","origin":false,"forced":true,"remark":"","nSteps":9,"minStep":"10.0","maxStep":"40.0","steps":["10.0","15.0","20.0","23.0","25.0","30.0","33.0","35.0","40.0"],"group":"None","version":"v1.1.0"}],"interpreted":true,"name":"TC2.02","coreAzi":251,"coreDip":14,"bedStrike":239,"bedDip":59,"data":[{"visible":true,"include":false,"step":"0.0","x":-470.34285714285716,"y":54.21047619047619,"z":-157.31428571428572,"a95":0.99,"info":"07/07/2015 at 15:53:18"},{"visible":true,"include":true,"step":"10.0","x":-374.18095238095236,"y":-17.32190476190476,"z":-180.13333333333335,"a95":0.99,"info":"07/07/2015 at 15:53:18"},{"visible":true,"include":true,"step":"15.0","x":-316.9238095238095,"y":-41.01619047619048,"z":-175.88571428571427,"a95":0.99,"info":"07/07/2015 at 15:53:18"},{"visible":true,"include":true,"step":"20.0","x":-257.3619047619048,"y":-42.796190476190475,"z":-150.01904761904763,"a95":0.99,"info":"07/07/2015 at 15:53:18"},{"visible":true,"include":true,"step":"23.0","x":-231.97142857142856,"y":-40.47142857142857,"z":-138.64761904761903,"a95":0.99,"info":"07/07/2015 at 15:53:18"},{"visible":true,"include":true,"step":"25.0","x":-211.54285714285712,"y":-46.19047619047619,"z":-133.2095238095238,"a95":0.99,"info":"07/07/2015 at 15:53:18"},{"visible":true,"include":true,"step":"30.0","x":-172.41904761904763,"y":-40.92761904761905,"z":-96.12380952380951,"a95":0.99,"info":"07/07/2015 at 15:53:18"},{"visible":true,"include":true,"step":"33.0","x":-136.48571428571427,"y":-36.06095238095238,"z":-91.63333333333333,"a95":0.99,"info":"07/07/2015 at 15:53:18"},{"visible":true,"include":true,"step":"35.0","x":-129.0095238095238,"y":-29.85333333333333,"z":-83.36571428571429,"a95":0.99,"info":"07/07/2015 at 15:53:18"},{"visible":true,"include":true,"step":"40.0","x":-88.67999999999999,"y":-29.07333333333333,"z":-65.63428571428571,"a95":0.99,"info":"07/07/2015 at 15:53:18"},{"visible":true,"include":false,"step":"45.0","x":-74.86666666666667,"y":-28.229523809523812,"z":-41.40190476190477,"a95":0.99,"info":"07/07/2015 at 15:53:18"},{"visible":true,"include":false,"step":"50.0","x":-68.74380952380952,"y":-16.984761904761903,"z":-41.8447619047619,"a95":0.99,"info":"07/07/2015 at 15:53:18"},{"visible":true,"include":false,"step":"55.0","x":-40.574285714285715,"y":-26.258095238095237,"z":-22.91142857142857,"a95":0.99,"info":"07/07/2015 at 15:53:18"},{"visible":true,"include":false,"step":"60.0","x":-31.443809523809527,"y":-18.899047619047618,"z":-15.136190476190476,"a95":0.99,"info":"07/07/2015 at 15:53:18"},{"visible":true,"include":false,"step":"65.0","x":-34.15142857142857,"y":-14.115238095238096,"z":-11.793333333333333,"a95":0.99,"info":"07/07/2015 at 15:53:18"},{"visible":true,"include":false,"step":"70.0","x":-1.6791428571428573,"y":-16.123809523809523,"z":-11.746666666666666,"a95":0.99,"info":"07/07/2015 at 15:53:18"},{"visible":true,"include":false,"step":"80.0","x":25.024761904761903,"y":-41.20666666666667,"z":21.091428571428573,"a95":0.99,"info":"07/07/2015 at 15:53:18"}]},{"version":"v1.1.0","exported":"2016-11-30T16:10:37.897Z","volume":10.5,"added":"2016-11-30T15:58:24.405Z","format":"Utrecht","demagType":"Unknown","strat":"1","patch":1.1,"GEO":[{"dec":17.275980326724834,"inc":-33.25325313387725,"MAD":16.29563850850242,"cm":[-2.398081733190338e-14,1.4210854715202004e-14,0],"intensity":418.7995628163821,"type":"GC","origin":false,"forced":true,"remark":"","nSteps":4,"minStep":"10.0","maxStep":"23.0","steps":["10.0","15.0","20.0","23.0"],"group":"None","version":"v1.1.0"}],"TECT":[{"dec":75.37226606463395,"inc":-49.418795333418764,"MAD":16.295638508501078,"cm":[-2.1316282072803006e-14,3.108624468950438e-14,1.4210854715202004e-14],"intensity":418.7995628163821,"type":"GC","origin":false,"forced":true,"remark":"","nSteps":4,"minStep":"10.0","maxStep":"23.0","steps":["10.0","15.0","20.0","23.0"],"group":"None","version":"v1.1.0"}],"interpreted":true,"name":"TC2.3A","coreAzi":248,"coreDip":17,"bedStrike":239,"bedDip":59,"data":[{"visible":true,"include":false,"step":"0.0","x":-304.8095238095238,"y":104.52380952380952,"z":-73.22095238095238,"a95":0.99,"info":"25/11/2014 at 21:16:41"},{"visible":true,"include":true,"step":"10.0","x":-238.9142857142857,"y":42.21333333333333,"z":-93.21619047619048,"a95":0.99,"info":"25/11/2014 at 21:16:41"},{"visible":true,"include":true,"step":"15.0","x":-190.6095238095238,"y":16.862857142857145,"z":-89.21619047619048,"a95":0.99,"info":"25/11/2014 at 21:16:41"},{"visible":true,"include":true,"step":"20.0","x":-159.62857142857143,"y":1.5770476190476193,"z":-75.9952380952381,"a95":0.99,"info":"25/11/2014 at 21:16:41"},{"visible":true,"include":true,"step":"23.0","x":-138.48571428571427,"y":3.9309523809523808,"z":-82.37714285714286,"a95":0.99,"info":"25/11/2014 at 21:16:41"},{"visible":true,"include":false,"step":"25.0","x":-123.21904761904761,"y":-4.4559999999999995,"z":-67.5552380952381,"a95":0.99,"info":"25/11/2014 at 21:16:41"},{"visible":true,"include":false,"step":"30.0","x":-95.92380952380952,"y":-13.781904761904762,"z":-49.55904761904762,"a95":0.99,"info":"25/11/2014 at 21:16:41"},{"visible":true,"include":false,"step":"33.0","x":-80.35142857142857,"y":-14.274285714285714,"z":-48.66285714285714,"a95":0.99,"info":"25/11/2014 at 21:16:41"},{"visible":true,"include":false,"step":"35.0","x":-68.4447619047619,"y":-8.809999999999999,"z":-42.1647619047619,"a95":0.99,"info":"25/11/2014 at 21:16:41"},{"visible":true,"include":false,"step":"40.0","x":-62.415238095238095,"y":-10.034285714285714,"z":-29.184761904761906,"a95":0.99,"info":"25/11/2014 at 21:16:41"},{"visible":true,"include":false,"step":"45.0","x":-39.976190476190474,"y":-10.363809523809524,"z":-24.70285714285714,"a95":0.99,"info":"25/11/2014 at 21:16:41"},{"visible":true,"include":false,"step":"50.0","x":-35.455238095238094,"y":-8.544380952380951,"z":-18.234285714285715,"a95":0.99,"info":"25/11/2014 at 21:16:41"},{"visible":false,"include":false,"step":"60.0","x":-21.62761904761905,"y":-9.92,"z":-24.213333333333335,"a95":0.99,"info":"25/11/2014 at 21:16:41"},{"visible":false,"include":false,"step":"70.0","x":-19.235238095238095,"y":-12.071428571428571,"z":-0.5817809523809524,"a95":0.99,"info":"25/11/2014 at 21:16:41"},{"visible":false,"include":false,"step":"80.0","x":-58.462857142857146,"y":-7.645619047619047,"z":-16.115238095238094,"a95":0.99,"info":"25/11/2014 at 21:16:41"},{"visible":false,"include":false,"step":"90.0","x":-28.61619047619048,"y":-3.9318095238095236,"z":1.984,"a95":0.99,"info":"25/11/2014 at 21:16:41"}]},{"version":"v1.1.0","exported":"2016-11-30T16:10:37.897Z","volume":10.5,"added":"2016-11-30T15:58:24.407Z","format":"Utrecht","demagType":"Unknown","strat":"2","patch":1.1,"GEO":[{"dec":16.786399305624627,"inc":-24.701637344023123,"MAD":11.134758671172653,"cm":[-3.68594044175552e-14,1.5987211554602254e-14,0],"intensity":562.8939570669544,"type":"GC","origin":false,"forced":true,"remark":"","nSteps":6,"minStep":"10.0","maxStep":"30.0","steps":["10.0","15.0","20.0","23.0","25.0","30.0"],"group":"None","version":"v1.1.0"}],"TECT":[{"dec":62.725804839381226,"inc":-47.600304030497114,"MAD":11.134758671170909,"cm":[-3.197442310920451e-14,5.46229728115577e-14,4.263256414560601e-14],"intensity":562.8939570669544,"type":"GC","origin":false,"forced":true,"remark":"","nSteps":6,"minStep":"10.0","maxStep":"30.0","steps":["10.0","15.0","20.0","23.0","25.0","30.0"],"group":"None","version":"v1.1.0"}],"interpreted":true,"name":"TC2.4A","coreAzi":249,"coreDip":14,"bedStrike":239,"bedDip":59,"data":[{"visible":true,"include":false,"step":"0.0","x":-459.2285714285714,"y":100.83809523809524,"z":-85.89333333333333,"a95":0.99,"info":"25/11/2014 at 21:16:41"},{"visible":true,"include":true,"step":"10.0","x":-368.4095238095238,"y":27.80857142857143,"z":-125.13333333333334,"a95":0.99,"info":"25/11/2014 at 21:16:41"},{"visible":true,"include":true,"step":"15.0","x":-302.5809523809524,"y":3.3227619047619052,"z":-125.4095238095238,"a95":0.99,"info":"25/11/2014 at 21:16:41"},{"visible":true,"include":true,"step":"20.0","x":-248.47619047619048,"y":-9.715238095238096,"z":-107.81904761904761,"a95":0.99,"info":"25/11/2014 at 21:16:41"},{"visible":true,"include":true,"step":"23.0","x":-213.58095238095237,"y":-7.359238095238096,"z":-110.52380952380952,"a95":0.99,"info":"25/11/2014 at 21:16:41"},{"visible":true,"include":true,"step":"25.0","x":-200.58095238095237,"y":-12.517142857142858,"z":-95.29523809523809,"a95":0.99,"info":"25/11/2014 at 21:16:41"},{"visible":true,"include":true,"step":"30.0","x":-156.2952380952381,"y":-14.320000000000002,"z":-78.22,"a95":0.99,"info":"25/11/2014 at 21:16:41"},{"visible":true,"include":false,"step":"33.0","x":-135.53333333333333,"y":-23.154285714285713,"z":-58.90571428571428,"a95":0.99,"info":"25/11/2014 at 21:16:41"},{"visible":true,"include":false,"step":"35.0","x":-115.88571428571429,"y":-18.04,"z":-60.649523809523814,"a95":0.99,"info":"25/11/2014 at 21:16:41"},{"visible":true,"include":false,"step":"40.0","x":-94.24285714285713,"y":-17.312380952380952,"z":-45.26380952380952,"a95":0.99,"info":"25/11/2014 at 21:16:41"},{"visible":true,"include":false,"step":"45.0","x":-80.45904761904762,"y":-13.292380952380952,"z":-32.92190476190476,"a95":0.99,"info":"25/11/2014 at 21:16:41"},{"visible":true,"include":false,"step":"50.0","x":-61.0247619047619,"y":-9.707619047619048,"z":-17.428571428571427,"a95":0.99,"info":"25/11/2014 at 21:16:41"},{"visible":false,"include":false,"step":"60.0","x":-36.32476190476191,"y":-11.765714285714287,"z":98.13333333333334,"a95":0.99,"info":"25/11/2014 at 21:16:41"},{"visible":false,"include":false,"step":"70.0","x":-45.82857142857143,"y":-2.7786666666666666,"z":7.064476190476191,"a95":0.99,"info":"25/11/2014 at 21:16:41"},{"visible":false,"include":false,"step":"80.0","x":-51.60952380952381,"y":-9.420761904761905,"z":-27.176190476190477,"a95":0.99,"info":"25/11/2014 at 21:16:41"},{"visible":false,"include":false,"step":"90.0","x":16.05142857142857,"y":-15.26,"z":5.356285714285714,"a95":0.99,"info":"25/11/2014 at 21:16:41"}]},{"version":"v1.1.0","exported":"2016-11-30T16:10:37.897Z","volume":10.5,"added":"2016-11-30T15:58:24.408Z","format":"Utrecht","demagType":"Unknown","strat":null,"patch":1.1,"GEO":[{"dec":42.48833317680044,"inc":-34.711399925300846,"MAD":14.214139276093128,"cm":[-8.115730310009894e-14,7.105427357601002e-15,0],"intensity":1223.3312165174739,"type":"GC","origin":false,"forced":true,"remark":"","nSteps":12,"minStep":"100","maxStep":"410","steps":["100","120","150","180","210","240","270","300","320","350","380","410"],"group":"None","version":"v1.1.0"}],"TECT":[{"dec":84.01599301271932,"inc":-29.573833880509913,"MAD":14.214139276094809,"cm":[-6.572520305780927e-14,6.572520305780927e-14,7.105427357601002e-14],"intensity":1223.3312165174736,"type":"GC","origin":false,"forced":true,"remark":"","nSteps":12,"minStep":"100","maxStep":"410","steps":["100","120","150","180","210","240","270","300","320","350","380","410"],"group":"None","version":"v1.1.0"}],"interpreted":true,"name":"TC2.7A","coreAzi":180,"coreDip":27,"bedStrike":239,"bedDip":59,"data":[{"visible":true,"include":false,"step":"20","x":-819.9047619047619,"y":-637.5238095238095,"z":-232.76190476190476,"a95":1.5,"info":"\"15-02-09\" at \"15:54\""},{"visible":true,"include":true,"step":"100","x":-640.0952380952381,"y":-426.2857142857143,"z":125.71428571428571,"a95":1.7,"info":"\"15-02-12\" at \"22:28\""},{"visible":true,"include":true,"step":"120","x":-573.8095238095239,"y":-464.95238095238096,"z":122.66666666666667,"a95":1.7,"info":"\"15-02-13\" at \"17:40\""},{"visible":true,"include":true,"step":"150","x":-546.8571428571429,"y":-418.4761904761905,"z":133.71428571428572,"a95":1.8,"info":"\"15-02-13\" at \"22:21\""},{"visible":true,"include":true,"step":"180","x":-447.04761904761904,"y":-416.76190476190476,"z":150.28571428571428,"a95":1.6,"info":"\"15-02-16\" at \"15:22\""},{"visible":true,"include":true,"step":"210","x":-404,"y":-433.14285714285717,"z":155.04761904761904,"a95":1.8,"info":"\"15-02-16\" at \"19:24\""},{"visible":true,"include":true,"step":"240","x":-390.1904761904762,"y":-414.95238095238096,"z":175.14285714285714,"a95":1.7,"info":"\"15-02-17\" at \"15:18\""},{"visible":true,"include":true,"step":"270","x":-392,"y":-399.04761904761904,"z":176.47619047619048,"a95":1.8,"info":"\"15-02-17\" at \"22:04\""},{"visible":true,"include":true,"step":"300","x":-378.0952380952381,"y":-409.04761904761904,"z":176.0952380952381,"a95":1.7,"info":"\"15-03-08\" at \"17:46\""},{"visible":true,"include":true,"step":"320","x":-398.85714285714283,"y":-400.4761904761905,"z":178.76190476190476,"a95":1.8,"info":"\"15-03-09\" at \"08:42\""},{"visible":true,"include":true,"step":"350","x":-386.85714285714283,"y":-424.76190476190476,"z":171.9047619047619,"a95":1.9,"info":"\"15-03-09\" at \"12:09\""},{"visible":true,"include":true,"step":"380","x":-405.14285714285717,"y":-349.6190476190476,"z":164.57142857142858,"a95":1.8,"info":"\"15-04-21\" at \"07:51\""},{"visible":true,"include":true,"step":"410","x":-299.9047619047619,"y":-312.2857142857143,"z":134,"a95":2,"info":"\"15-04-21\" at \"11:24\""},{"visible":false,"include":false,"step":"440","x":-154.57142857142858,"y":-130.57142857142858,"z":169.14285714285714,"a95":2.9,"info":"\"15-04-22\" at \"14:11\""}]},{"version":"v1.1.0","exported":"2016-11-30T16:10:37.897Z","volume":10.5,"added":"2016-11-30T15:58:24.408Z","format":"Utrecht","demagType":"Unknown","strat":"8","patch":1.1,"GEO":[{"dec":25.743472585105337,"inc":-29.53278314339359,"MAD":15.661799381408095,"cm":[-1.4654943925052066e-14,7.105427357601002e-15,0],"intensity":787.7753534826085,"type":"GC","origin":false,"forced":true,"remark":"","nSteps":7,"minStep":"10.0","maxStep":"40.0","steps":["10.0","15.0","20.0","25.0","30.0","35.0","40.0"],"group":"None","version":"v1.1.0"}],"TECT":[{"dec":72.65596539445926,"inc":-41.518421781528446,"MAD":15.66179938140725,"cm":[0,0,1.4210854715202004e-14],"intensity":787.7753534826082,"type":"GC","origin":false,"forced":true,"remark":"","nSteps":7,"minStep":"10.0","maxStep":"40.0","steps":["10.0","15.0","20.0","25.0","30.0","35.0","40.0"],"group":"None","version":"v1.1.0"}],"interpreted":true,"name":"TC2.7B","coreAzi":180,"coreDip":27,"bedStrike":239,"bedDip":59,"data":[{"visible":true,"include":false,"step":"0.0","x":-718.6857142857143,"y":-383.6190476190476,"z":99.15238095238094,"a95":0.99,"info":"03/11/2014 at 21:03:34"},{"visible":true,"include":true,"step":"10.0","x":-500.39047619047625,"y":-360.74285714285713,"z":102.63809523809525,"a95":0.99,"info":"03/11/2014 at 21:03:34"},{"visible":true,"include":true,"step":"15.0","x":-403.3238095238095,"y":-330.9904761904762,"z":92.17428571428572,"a95":0.99,"info":"03/11/2014 at 21:03:34"},{"visible":true,"include":true,"step":"20.0","x":-320.50476190476195,"y":-275.70476190476194,"z":97.80000000000001,"a95":0.99,"info":"03/11/2014 at 21:03:34"},{"visible":true,"include":true,"step":"25.0","x":-248.43809523809523,"y":-227.59047619047618,"z":73.27714285714285,"a95":0.99,"info":"03/11/2014 at 21:03:34"},{"visible":true,"include":true,"step":"30.0","x":-177.68571428571428,"y":-191.6,"z":46.705714285714286,"a95":0.99,"info":"03/11/2014 at 21:03:34"},{"visible":true,"include":true,"step":"35.0","x":-124.75238095238096,"y":-152.34285714285713,"z":58.10857142857143,"a95":0.99,"info":"03/11/2014 at 21:03:34"},{"visible":true,"include":true,"step":"40.0","x":-106.52380952380952,"y":-121.48571428571428,"z":37.72095238095238,"a95":0.99,"info":"03/11/2014 at 21:03:34"},{"visible":true,"include":false,"step":"45.0","x":-56.308571428571426,"y":-146.54285714285714,"z":5.498571428571428,"a95":0.99,"info":"03/11/2014 at 21:03:34"},{"visible":true,"include":false,"step":"50.0","x":-45.360952380952384,"y":-84.00285714285714,"z":20.408571428571427,"a95":0.99,"info":"03/11/2014 at 21:03:34"},{"visible":true,"include":false,"step":"60.0","x":-17.84285714285714,"y":-42.61523809523809,"z":2.094761904761905,"a95":0.99,"info":"03/11/2014 at 21:03:34"},{"visible":false,"include":false,"step":"70.0","x":1.9495238095238094,"y":-13.30857142857143,"z":10.386666666666667,"a95":0.99,"info":"03/11/2014 at 21:03:34"},{"visible":false,"include":false,"step":"80.0","x":30.525714285714283,"y":-15.424761904761905,"z":9.91904761904762,"a95":0.99,"info":"03/11/2014 at 21:03:34"},{"visible":false,"include":false,"step":"90.0","x":-10.67904761904762,"y":-37.04761904761905,"z":-64.77142857142857,"a95":0.99,"info":"03/11/2014 at 21:03:34"}]},{"version":"v1.1.0","exported":"2016-11-30T16:10:37.897Z","volume":10.5,"added":"2016-11-30T15:58:24.424Z","format":"Utrecht","demagType":"Unknown","strat":"3","patch":1.1,"GEO":[{"dec":148.2685986670487,"inc":-23.844803662571778,"MAD":11.91960804729471,"cm":[-6.927791673660977e-14,0,0],"intensity":1100.0279235936307,"type":"GC","origin":false,"forced":true,"remark":"","nSteps":6,"minStep":"10.0","maxStep":"30.0","steps":["10.0","15.0","20.0","23.0","25.0","30.0"],"group":"None","version":"v1.1.0"}],"TECT":[{"dec":328.18182089036804,"inc":-35.15072002712272,"MAD":11.919608047292494,"cm":[-1.4210854715202004e-14,3.197442310920451e-14,8.881784197001252e-15],"intensity":1100.0279235936305,"type":"GC","origin":false,"forced":true,"remark":"","nSteps":6,"minStep":"10.0","maxStep":"30.0","steps":["10.0","15.0","20.0","23.0","25.0","30.0"],"group":"None","version":"v1.1.0"}],"interpreted":true,"name":"TC2.8A","coreAzi":183,"coreDip":27,"bedStrike":239,"bedDip":59,"data":[{"visible":true,"include":false,"step":"0.0","x":-785.2095238095238,"y":-619.5333333333334,"z":457.2857142857143,"a95":0.99,"info":"25/11/2014 at 21:16:41"},{"visible":true,"include":true,"step":"10.0","x":-568.9714285714285,"y":-524.7714285714286,"z":267.7238095238095,"a95":0.99,"info":"25/11/2014 at 21:16:41"},{"visible":true,"include":true,"step":"15.0","x":-436.68571428571425,"y":-415.0380952380952,"z":175.43809523809523,"a95":0.99,"info":"25/11/2014 at 21:16:41"},{"visible":true,"include":true,"step":"20.0","x":-339.7142857142857,"y":-328.8095238095238,"z":126.43809523809523,"a95":0.99,"info":"25/11/2014 at 21:16:41"},{"visible":true,"include":true,"step":"23.0","x":-276.77142857142854,"y":-281.9809523809524,"z":98.03809523809525,"a95":0.99,"info":"25/11/2014 at 21:16:41"},{"visible":true,"include":true,"step":"25.0","x":-256.0761904761905,"y":-256.15238095238095,"z":90.97428571428571,"a95":0.99,"info":"25/11/2014 at 21:16:41"},{"visible":true,"include":true,"step":"30.0","x":-183.14285714285714,"y":-208.60000000000002,"z":58.69904761904762,"a95":0.99,"info":"25/11/2014 at 21:16:41"},{"visible":true,"include":false,"step":"33.0","x":-145.03809523809525,"y":-152.55238095238096,"z":36.88666666666667,"a95":0.99,"info":"25/11/2014 at 21:16:41"},{"visible":true,"include":false,"step":"35.0","x":-116.67619047619047,"y":-147.76190476190476,"z":42.44,"a95":0.99,"info":"25/11/2014 at 21:16:41"},{"visible":true,"include":false,"step":"40.0","x":-85.99809523809525,"y":-116.51428571428572,"z":40.81142857142857,"a95":0.99,"info":"25/11/2014 at 21:16:41"},{"visible":true,"include":false,"step":"45.0","x":-59.147619047619045,"y":-97.72380952380952,"z":24.343809523809526,"a95":0.99,"info":"25/11/2014 at 21:16:41"},{"visible":true,"include":false,"step":"50.0","x":-44.14380952380952,"y":-68.12,"z":20.432380952380953,"a95":0.99,"info":"25/11/2014 at 21:16:41"},{"visible":false,"include":false,"step":"60.0","x":-6.432761904761905,"y":-54.12095238095238,"z":110.21904761904761,"a95":0.99,"info":"25/11/2014 at 21:16:41"},{"visible":false,"include":false,"step":"70.0","x":6.443333333333333,"y":-21.654285714285713,"z":12.387619047619047,"a95":0.99,"info":"25/11/2014 at 21:16:41"},{"visible":false,"include":false,"step":"80.0","x":177.24761904761903,"y":-33.354285714285716,"z":15.171428571428573,"a95":0.99,"info":"25/11/2014 at 21:16:41"},{"visible":false,"include":false,"step":"90.0","x":46.55904761904762,"y":-38.15047619047619,"z":-0.8197809523809523,"a95":0.99,"info":"25/11/2014 at 21:16:41"}]},{"version":"v1.1.0","exported":"2016-11-30T16:10:37.897Z","volume":10.5,"added":"2016-11-30T15:58:24.424Z","format":"Utrecht","demagType":"Unknown","strat":"4","patch":1.1,"GEO":[{"dec":21.98616561361223,"inc":-28.927220899858224,"MAD":8.964252407563842,"cm":[-3.730349362740526e-14,8.881784197001252e-15,0],"intensity":922.9079079506379,"type":"GC","origin":false,"forced":true,"remark":"","nSteps":9,"minStep":"10.0","maxStep":"40.0","steps":["10.0","15.0","20.0","23.0","25.0","30.0","33.0","35.0","40.0"],"group":"None","version":"v1.1.0"}],"TECT":[{"dec":70.58277120376698,"inc":-44.48824762548075,"MAD":8.96425240756537,"cm":[-4.263256414560601e-14,1.1368683772161603e-13,2.7533531010703882e-14],"intensity":922.9079079506378,"type":"GC","origin":false,"forced":true,"remark":"","nSteps":9,"minStep":"10.0","maxStep":"40.0","steps":["10.0","15.0","20.0","23.0","25.0","30.0","33.0","35.0","40.0"],"group":"None","version":"v1.1.0"}],"interpreted":true,"name":"TC2.10","coreAzi":247,"coreDip":30,"bedStrike":239,"bedDip":59,"data":[{"visible":true,"include":false,"step":"0.0","x":-926.8857142857142,"y":143.45714285714286,"z":23.97047619047619,"a95":0.99,"info":"07/07/2015 at 15:53:18"},{"visible":true,"include":true,"step":"10.0","x":-725.3714285714285,"y":36.846666666666664,"z":-69.80285714285714,"a95":0.99,"info":"07/07/2015 at 15:53:18"},{"visible":true,"include":true,"step":"15.0","x":-607.8,"y":-0.33911428571428576,"z":-97.04761904761905,"a95":0.99,"info":"07/07/2015 at 15:53:18"},{"visible":true,"include":true,"step":"20.0","x":-508.7047619047619,"y":-25.419047619047618,"z":-81.41714285714286,"a95":0.99,"info":"07/07/2015 at 15:53:18"},{"visible":true,"include":true,"step":"23.0","x":-447.60952380952375,"y":-27.947619047619046,"z":-87.34857142857143,"a95":0.99,"info":"07/07/2015 at 15:53:18"},{"visible":true,"include":true,"step":"25.0","x":-404.39047619047625,"y":-35.36571428571428,"z":-89.95333333333333,"a95":0.99,"info":"07/07/2015 at 15:53:18"},{"visible":true,"include":true,"step":"30.0","x":-302.70476190476194,"y":-38.19619047619047,"z":-62.352380952380955,"a95":0.99,"info":"07/07/2015 at 15:53:18"},{"visible":true,"include":true,"step":"33.0","x":-263.8666666666667,"y":-32.31333333333333,"z":-63.320952380952384,"a95":0.99,"info":"07/07/2015 at 15:53:18"},{"visible":true,"include":true,"step":"35.0","x":-237.2761904761905,"y":-29.731428571428573,"z":-64.39428571428572,"a95":0.99,"info":"07/07/2015 at 15:53:18"},{"visible":true,"include":true,"step":"40.0","x":-190.3047619047619,"y":-28.504761904761907,"z":-45.203809523809525,"a95":0.99,"info":"07/07/2015 at 15:53:18"},{"visible":false,"include":false,"step":"45.0","x":-134.0095238095238,"y":-43.41238095238095,"z":-13.159047619047618,"a95":0.99,"info":"07/07/2015 at 15:53:18"},{"visible":false,"include":false,"step":"50.0","x":-94.85904761904762,"y":-25.831428571428575,"z":-21.74952380952381,"a95":0.99,"info":"07/07/2015 at 15:53:18"},{"visible":false,"include":false,"step":"55.0","x":-64.26285714285714,"y":-30.137142857142855,"z":-22.264761904761905,"a95":0.99,"info":"07/07/2015 at 15:53:18"},{"visible":false,"include":false,"step":"60.0","x":-48.78000000000001,"y":-22.86857142857143,"z":-11.67047619047619,"a95":0.99,"info":"07/07/2015 at 15:53:18"},{"visible":false,"include":false,"step":"65.0","x":-48.58,"y":-13.32095238095238,"z":-11.166666666666666,"a95":0.99,"info":"07/07/2015 at 15:53:18"},{"visible":false,"include":false,"step":"70.0","x":-63.65714285714286,"y":-32.40761904761904,"z":-21.32095238095238,"a95":0.99,"info":"07/07/2015 at 15:53:18"},{"visible":false,"include":false,"step":"80.0","x":-282.32380952380953,"y":43.438095238095244,"z":40.488571428571426,"a95":0.99,"info":"07/07/2015 at 15:53:18"}]},{"version":"v1.1.0","exported":"2016-11-30T16:10:37.897Z","volume":10.5,"added":"2016-11-30T15:58:24.424Z","format":"Utrecht","demagType":"Unknown","strat":null,"patch":1.1,"GEO":[{"dec":30.09134778167038,"inc":-30.365205174934296,"MAD":11.139485602079466,"cm":[-3.6415315207705135e-14,1.0658141036401503e-14,0],"intensity":968.3851719588861,"type":"GC","origin":false,"forced":true,"remark":"","nSteps":11,"minStep":"100","maxStep":"410","steps":["100","120","180","210","240","270","300","320","350","380","410"],"group":"None","version":"v1.1.0"}],"TECT":[{"dec":75.13333893136098,"inc":-38.16159174674005,"MAD":11.139485602078858,"cm":[-3.730349362740526e-14,9.769962616701378e-15,3.552713678800501e-14],"intensity":968.3851719588861,"type":"GC","origin":false,"forced":true,"remark":"","nSteps":11,"minStep":"100","maxStep":"410","steps":["100","120","180","210","240","270","300","320","350","380","410"],"group":"None","version":"v1.1.0"}],"interpreted":true,"name":"TC2.11A","coreAzi":250,"coreDip":28,"bedStrike":239,"bedDip":59,"data":[{"visible":true,"include":false,"step":"20","x":-741.047619047619,"y":116.66666666666667,"z":-225.23809523809524,"a95":1.7,"info":"\"15-02-09\" at \"15:56\""},{"visible":true,"include":true,"step":"100","x":-618.8571428571429,"y":103.23809523809524,"z":-19.80952380952381,"a95":1.5,"info":"\"15-02-12\" at \"22:30\""},{"visible":true,"include":true,"step":"120","x":-587.9047619047619,"y":98.66666666666667,"z":-39.333333333333336,"a95":1.6,"info":"\"15-02-13\" at \"17:42\""},{"visible":true,"include":false,"step":"150","x":-542.4761904761905,"y":42.38095238095238,"z":-60.857142857142854,"a95":1.6,"info":"\"15-02-13\" at \"22:23\""},{"visible":true,"include":true,"step":"180","x":-463.7142857142857,"y":-27.714285714285715,"z":-75.23809523809524,"a95":1.6,"info":"\"15-02-16\" at \"15:24\""},{"visible":true,"include":true,"step":"210","x":-448.95238095238096,"y":-29.714285714285715,"z":-85.04761904761905,"a95":1.7,"info":"\"15-02-16\" at \"19:26\""},{"visible":true,"include":true,"step":"240","x":-445.04761904761904,"y":-24,"z":-81.14285714285714,"a95":1.7,"info":"\"15-02-17\" at \"15:20\""},{"visible":true,"include":true,"step":"270","x":-431.3333333333333,"y":-27.80952380952381,"z":-89.04761904761905,"a95":1.7,"info":"\"15-02-17\" at \"22:06\""},{"visible":true,"include":true,"step":"300","x":-425.14285714285717,"y":-39.714285714285715,"z":-88.57142857142857,"a95":1.7,"info":"\"15-03-08\" at \"17:48\""},{"visible":true,"include":true,"step":"320","x":-424.3809523809524,"y":-26,"z":-96.38095238095238,"a95":1.8,"info":"\"15-03-09\" at \"08:44\""},{"visible":true,"include":true,"step":"350","x":-421.23809523809524,"y":13.523809523809524,"z":-87.23809523809524,"a95":1.7,"info":"\"15-03-09\" at \"12:11\""},{"visible":true,"include":true,"step":"380","x":-385.23809523809524,"y":-5.523809523809524,"z":-74.0952380952381,"a95":1.8,"info":"\"15-04-21\" at \"07:54\""},{"visible":true,"include":true,"step":"410","x":-339.7142857142857,"y":-6.285714285714286,"z":-77.71428571428571,"a95":2.2,"info":"\"15-04-21\" at \"11:25\""},{"visible":false,"include":false,"step":"440","x":-174.66666666666666,"y":-5.142857142857143,"z":-67.04761904761905,"a95":2.9,"info":"\"15-04-22\" at \"14:13\""}]},{"version":"v1.1.0","exported":"2016-11-30T16:10:37.898Z","volume":10.5,"added":"2016-11-30T15:58:24.425Z","format":"Utrecht","demagType":"Unknown","strat":"4","patch":1.1,"GEO":[{"dec":36.37020190335596,"inc":-30.47067334196926,"MAD":10.156609595223099,"cm":[-9.43689570931383e-16,-4.440892098500626e-16,0],"intensity":340.01891167006727,"type":"GC","origin":false,"forced":true,"remark":"","nSteps":8,"minStep":"10.0","maxStep":"45.0","steps":["10.0","15.0","20.0","23.0","25.0","30.0","35.0","45.0"],"group":"None","version":"v1.1.0"}],"TECT":[{"dec":77.3497240891931,"inc":-33.054730316190934,"MAD":10.15660959522246,"cm":[9.547918011776346e-15,-4.107825191113079e-15,-9.103828801926284e-15],"intensity":340.0189116700673,"type":"GC","origin":false,"forced":true,"remark":"","nSteps":8,"minStep":"10.0","maxStep":"45.0","steps":["10.0","15.0","20.0","23.0","25.0","30.0","35.0","45.0"],"group":"None","version":"v1.1.0"}],"interpreted":true,"name":"TC2.12A","coreAzi":232,"coreDip":43,"bedStrike":239,"bedDip":59,"data":[{"visible":true,"include":false,"step":"0.0","x":-441.4761904761905,"y":148.36190476190475,"z":155.1238095238095,"a95":0.99,"info":"25/11/2014 at 21:16:41"},{"visible":true,"include":true,"step":"10.0","x":-298.49523809523805,"y":33.03904761904762,"z":70.08,"a95":0.99,"info":"25/11/2014 at 21:16:41"},{"visible":true,"include":true,"step":"15.0","x":-225.0857142857143,"y":3.5234285714285716,"z":45.775238095238095,"a95":0.99,"info":"25/11/2014 at 21:16:41"},{"visible":true,"include":true,"step":"20.0","x":-163.93333333333334,"y":-13.28095238095238,"z":31.87142857142857,"a95":0.99,"info":"25/11/2014 at 21:16:41"},{"visible":true,"include":true,"step":"23.0","x":-138.14285714285714,"y":-14.406666666666668,"z":18.094285714285714,"a95":0.99,"info":"25/11/2014 at 21:16:41"},{"visible":true,"include":true,"step":"25.0","x":-118.6952380952381,"y":-22.635238095238094,"z":25.74761904761905,"a95":0.99,"info":"25/11/2014 at 21:16:41"},{"visible":true,"include":true,"step":"30.0","x":-84.52095238095238,"y":-31.1,"z":11.55904761904762,"a95":0.99,"info":"25/11/2014 at 21:16:41"},{"visible":false,"include":false,"step":"33.0","x":-74.5904761904762,"y":-7.931904761904762,"z":-2.9025714285714286,"a95":0.99,"info":"25/11/2014 at 21:16:41"},{"visible":true,"include":true,"step":"35.0","x":-59.76285714285714,"y":-13.136190476190476,"z":4.881523809523809,"a95":0.99,"info":"25/11/2014 at 21:16:41"},{"visible":false,"include":false,"step":"40.0","x":-38.444761904761904,"y":-16.452380952380953,"z":11.586666666666666,"a95":0.99,"info":"25/11/2014 at 21:16:41"},{"visible":true,"include":true,"step":"45.0","x":-33.450476190476195,"y":-14.422857142857143,"z":1.1824761904761905,"a95":0.99,"info":"25/11/2014 at 21:16:41"},{"visible":false,"include":false,"step":"50.0","x":-20.397142857142857,"y":-9.847619047619048,"z":7.139333333333333,"a95":0.99,"info":"25/11/2014 at 21:16:41"},{"visible":false,"include":false,"step":"60.0","x":-12.162857142857142,"y":-10.553333333333333,"z":81.68476190476191,"a95":0.99,"info":"25/11/2014 at 21:16:41"},{"visible":false,"include":false,"step":"70.0","x":1.7724761904761905,"y":-11.980952380952381,"z":1.8379047619047617,"a95":0.99,"info":"25/11/2014 at 21:16:41"},{"visible":false,"include":false,"step":"80.0","x":-0.18764761904761904,"y":5.815904761904762,"z":-7.245142857142857,"a95":0.99,"info":"25/11/2014 at 21:16:41"},{"visible":false,"include":false,"step":"90.0","x":-7.745333333333333,"y":-4.52352380952381,"z":1.2888571428571427,"a95":0.99,"info":"25/11/2014 at 21:16:41"}]},{"version":"v1.1.0","exported":"2016-11-30T16:10:37.898Z","volume":10.5,"added":"2016-11-30T15:58:24.425Z","format":"Utrecht","demagType":"Unknown","strat":"1","patch":1.1,"GEO":[{"dec":300.3738209958699,"inc":-50.71152336156836,"MAD":2.4096031479236792,"cm":[75.48643816432939,-108.41303787991001,-102.55821823254595],"intensity":143.71973183533586,"type":"dir","forced":false,"remark":"","origin":false,"nSteps":4,"minStep":"15.0","maxStep":"30.0","steps":["15.0","20.0","25.0","30.0"],"group":"None","version":"v1.1.0"}],"TECT":[{"dec":187.81267273441856,"inc":-61.05155272197499,"MAD":2.4096031479237108,"cm":[-49.97501012521661,-33.028194396559066,-156.14548982922963],"intensity":143.7197318353359,"type":"dir","forced":false,"remark":"","origin":false,"nSteps":4,"minStep":"15.0","maxStep":"30.0","steps":["15.0","20.0","25.0","30.0"],"group":"None","version":"v1.1.0"}],"interpreted":true,"name":"TC2.13B","coreAzi":220,"coreDip":20,"bedStrike":239,"bedDip":59,"data":[{"visible":true,"include":false,"step":"0.0","x":305.0571428571428,"y":278.8285714285714,"z":-49.36571428571429,"a95":0.99,"info":"04/11/2014 at 01:37:23"},{"visible":true,"include":false,"step":"10.0","x":221.51428571428573,"y":204.9238095238095,"z":-44.35619047619048,"a95":0.99,"info":"04/11/2014 at 01:37:23"},{"visible":true,"include":true,"step":"15.0","x":159.59047619047618,"y":179.1238095238095,"z":-38.272380952380956,"a95":0.99,"info":"04/11/2014 at 01:37:23"},{"visible":true,"include":true,"step":"20.0","x":114.25714285714287,"y":144.2095238095238,"z":-25.493333333333332,"a95":0.99,"info":"04/11/2014 at 01:37:23"},{"visible":true,"include":true,"step":"25.0","x":78.22857142857143,"y":113.54285714285714,"z":-16.445714285714285,"a95":0.99,"info":"04/11/2014 at 01:37:23"},{"visible":true,"include":true,"step":"30.0","x":49.642857142857146,"y":89.40761904761905,"z":-15.515238095238095,"a95":0.99,"info":"04/11/2014 at 01:37:23"},{"visible":true,"include":false,"step":"35.0","x":20.02,"y":53.99619047619048,"z":-1.5564761904761906,"a95":0.99,"info":"04/11/2014 at 01:37:23"},{"visible":false,"include":false,"step":"40.0","x":10.467619047619047,"y":36.9847619047619,"z":-6.317047619047618,"a95":0.99,"info":"04/11/2014 at 01:37:23"},{"visible":false,"include":false,"step":"45.0","x":-5.772,"y":34.21904761904762,"z":-2.767809523809524,"a95":0.99,"info":"04/11/2014 at 01:37:23"},{"visible":false,"include":false,"step":"50.0","x":0.7708285714285714,"y":24.899047619047618,"z":3.4043809523809525,"a95":0.99,"info":"04/11/2014 at 01:37:23"},{"visible":false,"include":false,"step":"60.0","x":2.3864761904761904,"y":13.154285714285715,"z":0.1511142857142857,"a95":0.99,"info":"04/11/2014 at 01:37:23"},{"visible":false,"include":false,"step":"70.0","x":-12.951428571428572,"y":8.762380952380951,"z":2.3113333333333332,"a95":0.99,"info":"04/11/2014 at 01:37:23"},{"visible":false,"include":false,"step":"80.0","x":-11.784761904761904,"y":20.099047619047617,"z":-9.918095238095239,"a95":0.99,"info":"04/11/2014 at 01:37:23"},{"visible":false,"include":false,"step":"90.0","x":-5.047809523809524,"y":-1.2050476190476191,"z":9.86,"a95":0.99,"info":"04/11/2014 at 01:37:23"}]},{"version":"v1.1.0","exported":"2016-11-30T16:10:37.898Z","volume":10.5,"added":"2016-11-30T15:58:24.425Z","format":"Utrecht","demagType":"Unknown","strat":"5","patch":1.1,"GEO":[{"dec":35.8232527467668,"inc":-25.942730802892786,"MAD":8.885292007923484,"cm":[-1.1074474670635936e-14,4.440892098500626e-15,0],"intensity":460.6504821526653,"type":"GC","origin":false,"forced":true,"remark":"","nSteps":6,"minStep":"10.0","maxStep":"30.0","steps":["10.0","15.0","20.0","23.0","25.0","30.0"],"group":"None","version":"v1.1.0"}],"TECT":[{"dec":72.12239030632304,"inc":-31.915958244902292,"MAD":8.885292007923653,"cm":[-1.0658141036401503e-14,6.217248937900877e-15,6.217248937900877e-15],"intensity":460.6504821526653,"type":"GC","origin":false,"forced":true,"remark":"","nSteps":6,"minStep":"10.0","maxStep":"30.0","steps":["10.0","15.0","20.0","23.0","25.0","30.0"],"group":"None","version":"v1.1.0"}],"interpreted":true,"name":"TC2.14A","coreAzi":218,"coreDip":14,"bedStrike":239,"bedDip":59,"data":[{"visible":true,"include":false,"step":"0.0","x":-558.8857142857144,"y":36.626666666666665,"z":-42.69047619047619,"a95":0.99,"info":"25/11/2014 at 21:16:41"},{"visible":true,"include":true,"step":"10.0","x":-358.0095238095238,"y":-42.78666666666667,"z":-74.8847619047619,"a95":0.99,"info":"25/11/2014 at 21:16:41"},{"visible":true,"include":true,"step":"15.0","x":-262.5238095238095,"y":-55.01047619047619,"z":-62.80380952380953,"a95":0.99,"info":"25/11/2014 at 21:16:41"},{"visible":true,"include":true,"step":"20.0","x":-186.55238095238096,"y":-62.567619047619054,"z":-41.114285714285714,"a95":0.99,"info":"25/11/2014 at 21:16:41"},{"visible":true,"include":true,"step":"23.0","x":-153.67619047619047,"y":-56.01428571428571,"z":-37.44571428571429,"a95":0.99,"info":"25/11/2014 at 21:16:41"},{"visible":true,"include":true,"step":"25.0","x":-133.76190476190476,"y":-53.290476190476184,"z":-22.773333333333333,"a95":0.99,"info":"25/11/2014 at 21:16:41"},{"visible":true,"include":true,"step":"30.0","x":-82.00285714285714,"y":-54.42666666666667,"z":-20.705714285714286,"a95":0.99,"info":"25/11/2014 at 21:16:41"},{"visible":true,"include":false,"step":"33.0","x":-78.08190476190477,"y":-26.06095238095238,"z":-21.84952380952381,"a95":0.99,"info":"25/11/2014 at 21:16:41"},{"visible":true,"include":false,"step":"35.0","x":-54.780952380952385,"y":-31.78,"z":-16.515238095238097,"a95":0.99,"info":"25/11/2014 at 21:16:41"},{"visible":false,"include":false,"step":"40.0","x":-32.58761904761905,"y":-35.9847619047619,"z":-6.033142857142857,"a95":0.99,"info":"25/11/2014 at 21:16:41"},{"visible":false,"include":false,"step":"45.0","x":-8.864095238095237,"y":-28.095238095238095,"z":-11.166666666666666,"a95":0.99,"info":"25/11/2014 at 21:16:41"},{"visible":false,"include":false,"step":"50.0","x":-11.182857142857143,"y":-13.3,"z":0.6919619047619048,"a95":0.99,"info":"25/11/2014 at 21:16:41"},{"visible":false,"include":false,"step":"60.0","x":15.438095238095238,"y":-10.662857142857142,"z":74.65809523809523,"a95":0.99,"info":"25/11/2014 at 21:16:41"},{"visible":false,"include":false,"step":"70.0","x":-22.346666666666664,"y":-8.410285714285715,"z":5.211428571428572,"a95":0.99,"info":"25/11/2014 at 21:16:41"},{"visible":false,"include":false,"step":"80.0","x":18.106666666666666,"y":7.824666666666667,"z":-18.061904761904763,"a95":0.99,"info":"25/11/2014 at 21:16:41"},{"visible":false,"include":false,"step":"90.0","x":-19.504761904761907,"y":-4.990666666666667,"z":-5.244190476190476,"a95":0.99,"info":"25/11/2014 at 21:16:41"}]},{"version":"v1.1.0","exported":"2016-11-30T16:10:37.898Z","volume":10.5,"added":"2016-11-30T15:58:24.425Z","format":"Utrecht","demagType":"Unknown","strat":"2","patch":1.1,"GEO":[{"dec":35.094713298283864,"inc":-28.552759157236817,"MAD":7.237248372759391,"cm":[-1.3225531780847177e-14,0,0],"intensity":490.4732937695321,"type":"GC","origin":false,"forced":true,"remark":"","nSteps":5,"minStep":"10.0","maxStep":"30.0","steps":["10.0","15.0","20.0","25.0","30.0"],"group":"None","version":"v1.1.0"}],"TECT":[{"dec":74.74325605942693,"inc":-33.45437972077059,"MAD":7.237248372759254,"cm":[3.552713678800501e-15,8.43769498715119e-15,1.1546319456101628e-14],"intensity":490.4732937695321,"type":"GC","origin":false,"forced":true,"remark":"","nSteps":5,"minStep":"10.0","maxStep":"30.0","steps":["10.0","15.0","20.0","25.0","30.0"],"group":"None","version":"v1.1.0"}],"interpreted":true,"name":"TC2.14B","coreAzi":218,"coreDip":14,"bedStrike":239,"bedDip":59,"data":[{"visible":true,"include":false,"step":"0.0","x":-551.047619047619,"y":-2.244,"z":-116.85714285714286,"a95":0.99,"info":"04/11/2014 at 01:37:23"},{"visible":true,"include":true,"step":"10.0","x":-361.5333333333333,"y":-74.85238095238095,"z":-94.92857142857143,"a95":0.99,"info":"04/11/2014 at 01:37:23"},{"visible":true,"include":true,"step":"15.0","x":-284.0952380952381,"y":-83.70666666666666,"z":-83.80857142857143,"a95":0.99,"info":"04/11/2014 at 01:37:23"},{"visible":true,"include":true,"step":"20.0","x":-202.71428571428572,"y":-89.34285714285714,"z":-53.039047619047615,"a95":0.99,"info":"04/11/2014 at 01:37:23"},{"visible":true,"include":true,"step":"25.0","x":-149.61904761904762,"y":-88.13428571428571,"z":-40.38285714285714,"a95":0.99,"info":"04/11/2014 at 01:37:23"},{"visible":true,"include":true,"step":"30.0","x":-91.5952380952381,"y":-64.58952380952381,"z":-30.74761904761905,"a95":0.99,"info":"04/11/2014 at 01:37:23"},{"visible":false,"include":false,"step":"35.0","x":-59.78952380952381,"y":-77.88285714285715,"z":-12.201904761904762,"a95":0.99,"info":"04/11/2014 at 01:37:23"},{"visible":false,"include":false,"step":"40.0","x":-51.595238095238095,"y":-52.4704761904762,"z":-24.222857142857144,"a95":0.99,"info":"04/11/2014 at 01:37:23"},{"visible":false,"include":false,"step":"45.0","x":-57.061904761904756,"y":-21.378095238095238,"z":-25.782857142857146,"a95":0.99,"info":"04/11/2014 at 01:37:23"},{"visible":false,"include":false,"step":"50.0","x":-43.73047619047619,"y":-42.29238095238095,"z":10.622857142857143,"a95":0.99,"info":"04/11/2014 at 01:37:23"},{"visible":false,"include":false,"step":"60.0","x":3.1476190476190475,"y":-18.606666666666666,"z":4.149904761904762,"a95":0.99,"info":"04/11/2014 at 01:37:23"},{"visible":false,"include":false,"step":"70.0","x":39.055238095238096,"y":5.939619047619048,"z":-15.794285714285715,"a95":0.99,"info":"04/11/2014 at 01:37:23"},{"visible":false,"include":false,"step":"80.0","x":27.768571428571427,"y":-23.97142857142857,"z":-14.057142857142857,"a95":0.99,"info":"04/11/2014 at 01:37:23"},{"visible":false,"include":false,"step":"90.0","x":1.0994285714285714,"y":-17.98952380952381,"z":17.272380952380953,"a95":0.99,"info":"04/11/2014 at 01:37:23"}]},{"version":"v1.1.0","exported":"2016-11-30T16:10:37.898Z","volume":10.5,"added":"2016-11-30T15:58:24.425Z","format":"Utrecht","demagType":"Unknown","strat":"5","patch":1.1,"GEO":[{"dec":26.631702056884308,"inc":-25.51853625208432,"MAD":7.150863091077081,"cm":[-1.2323475573339238e-14,8.881784197001252e-16,0],"intensity":533.8920997300812,"type":"GC","origin":false,"forced":true,"remark":"","nSteps":9,"minStep":"10.0","maxStep":"40.0","steps":["10.0","15.0","20.0","23.0","25.0","30.0","33.0","35.0","40.0"],"group":"None","version":"v1.1.0"}],"TECT":[{"dec":67.97898076667246,"inc":-39.4946260461552,"MAD":7.150863091075904,"cm":[-1.6431300764452317e-14,8.215650382226158e-15,1.865174681370263e-14],"intensity":533.8920997300812,"type":"GC","origin":false,"forced":true,"remark":"","nSteps":9,"minStep":"10.0","maxStep":"40.0","steps":["10.0","15.0","20.0","23.0","25.0","30.0","33.0","35.0","40.0"],"group":"None","version":"v1.1.0"}],"interpreted":true,"name":"TC2.15","coreAzi":219,"coreDip":13,"bedStrike":239,"bedDip":59,"data":[{"visible":true,"include":false,"step":"0.0","x":-589.2285714285714,"y":-69.16761904761904,"z":-118.77142857142856,"a95":0.99,"info":"07/07/2015 at 15:53:18"},{"visible":true,"include":true,"step":"10.0","x":-412.14285714285717,"y":-128.93333333333334,"z":-119.88571428571429,"a95":0.99,"info":"07/07/2015 at 15:53:18"},{"visible":true,"include":true,"step":"15.0","x":-325.9904761904762,"y":-131.04761904761904,"z":-104.0952380952381,"a95":0.99,"info":"07/07/2015 at 15:53:18"},{"visible":true,"include":true,"step":"20.0","x":-250.9238095238095,"y":-122.36190476190475,"z":-83.28380952380952,"a95":0.99,"info":"07/07/2015 at 15:53:18"},{"visible":true,"include":true,"step":"23.0","x":-213.39999999999998,"y":-111.17142857142856,"z":-71.78285714285714,"a95":0.99,"info":"07/07/2015 at 15:53:18"},{"visible":true,"include":true,"step":"25.0","x":-191.2761904761905,"y":-103.05714285714285,"z":-68.56,"a95":0.99,"info":"07/07/2015 at 15:53:18"},{"visible":true,"include":true,"step":"30.0","x":-138.15238095238095,"y":-88.05714285714286,"z":-42.66285714285714,"a95":0.99,"info":"07/07/2015 at 15:53:18"},{"visible":true,"include":true,"step":"33.0","x":-105.83809523809524,"y":-74.3742857142857,"z":-41.68190476190476,"a95":0.99,"info":"07/07/2015 at 15:53:18"},{"visible":true,"include":true,"step":"35.0","x":-94.10571428571428,"y":-69.15523809523809,"z":-38.772380952380956,"a95":0.99,"info":"07/07/2015 at 15:53:18"},{"visible":true,"include":true,"step":"40.0","x":-68.20571428571428,"y":-54.787619047619046,"z":-23.476190476190474,"a95":0.99,"info":"07/07/2015 at 15:53:18"},{"visible":false,"include":false,"step":"45.0","x":-50.68476190476191,"y":-52.406666666666666,"z":-1.4783809523809524,"a95":0.99,"info":"07/07/2015 at 15:53:18"},{"visible":false,"include":false,"step":"50.0","x":-33.88476190476191,"y":-30.20285714285714,"z":-11.47904761904762,"a95":0.99,"info":"07/07/2015 at 15:53:18"},{"visible":false,"include":false,"step":"55.0","x":-22.982857142857142,"y":-36.859047619047615,"z":-4.73104761904762,"a95":0.99,"info":"07/07/2015 at 15:53:18"},{"visible":false,"include":false,"step":"60.0","x":-14.3,"y":-31.195238095238096,"z":-3.5555238095238093,"a95":0.99,"info":"07/07/2015 at 15:53:18"},{"visible":false,"include":false,"step":"65.0","x":-5.001142857142857,"y":-15.921904761904763,"z":-0.013851428571428574,"a95":0.99,"info":"07/07/2015 at 15:53:18"},{"visible":false,"include":false,"step":"70.0","x":0.04669047619047619,"y":-21.944761904761904,"z":-16.742857142857144,"a95":0.99,"info":"07/07/2015 at 15:53:18"},{"visible":false,"include":false,"step":"80.0","x":-51.3352380952381,"y":-30.56857142857143,"z":35.58095238095238,"a95":0.99,"info":"07/07/2015 at 15:53:18"}]},{"version":"v1.1.0","exported":"2016-11-30T16:10:37.898Z","volume":10.5,"added":"2016-11-30T15:58:24.426Z","format":"Utrecht","demagType":"Unknown","strat":null,"patch":1.1,"GEO":[{"dec":35.665941281145194,"inc":-26.641678430924088,"MAD":6.557293334142107,"cm":[-2.55351295663786e-14,1.7763568394002505e-15,0],"intensity":828.2975190385104,"type":"GC","origin":false,"forced":true,"remark":"","nSteps":10,"minStep":"100","maxStep":"350","steps":["100","120","150","180","210","240","270","300","320","350"],"group":"None","version":"v1.1.0"}],"TECT":[{"dec":72.82831195543997,"inc":-32.304412624253466,"MAD":6.557293334141452,"cm":[-3.907985046680551e-14,1.2878587085651816e-14,2.3092638912203256e-14],"intensity":828.2975190385102,"type":"GC","origin":false,"forced":true,"remark":"","nSteps":10,"minStep":"100","maxStep":"350","steps":["100","120","150","180","210","240","270","300","320","350"],"group":"None","version":"v1.1.0"}],"interpreted":true,"name":"TC2.16A","coreAzi":229,"coreDip":7,"bedStrike":239,"bedDip":59,"data":[{"visible":true,"include":false,"step":"20","x":-680.0952380952381,"y":59.904761904761905,"z":288.2857142857143,"a95":2,"info":"\"15-02-09\" at \"15:58\""},{"visible":true,"include":true,"step":"100","x":-478.57142857142856,"y":38.95238095238095,"z":-153.23809523809524,"a95":2,"info":"\"15-02-12\" at \"22:32\""},{"visible":true,"include":true,"step":"120","x":-436.3809523809524,"y":23.61904761904762,"z":-160,"a95":2,"info":"\"15-02-13\" at \"17:44\""},{"visible":true,"include":true,"step":"150","x":-377.7142857142857,"y":-4.190476190476191,"z":-157.52380952380952,"a95":2,"info":"\"15-02-13\" at \"22:26\""},{"visible":true,"include":true,"step":"180","x":-300.6666666666667,"y":-69.23809523809524,"z":-134.57142857142858,"a95":2.2,"info":"\"15-02-16\" at \"15:26\""},{"visible":true,"include":true,"step":"210","x":-273.9047619047619,"y":-103.33333333333333,"z":-125.9047619047619,"a95":2.2,"info":"\"15-02-16\" at \"19:28\""},{"visible":true,"include":true,"step":"240","x":-275.5238095238095,"y":-94.28571428571429,"z":-122.85714285714286,"a95":2.2,"info":"\"15-02-17\" at \"15:22\""},{"visible":true,"include":true,"step":"270","x":-272.95238095238096,"y":-104.85714285714286,"z":-123.04761904761905,"a95":2.2,"info":"\"15-02-17\" at \"22:09\""},{"visible":true,"include":true,"step":"300","x":-284.1904761904762,"y":-102.57142857142857,"z":-124.38095238095238,"a95":2.2,"info":"\"15-03-08\" at \"17:50\""},{"visible":true,"include":true,"step":"320","x":-293.7142857142857,"y":-96.19047619047619,"z":-126.0952380952381,"a95":2.3,"info":"\"15-03-09\" at \"08:46\""},{"visible":true,"include":true,"step":"350","x":-299.5238095238095,"y":-91.14285714285714,"z":-125.9047619047619,"a95":2.4,"info":"\"15-03-09\" at \"12:13\""},{"visible":false,"include":false,"step":"380","x":-295.9047619047619,"y":-83.04761904761905,"z":-95.04761904761905,"a95":2.4,"info":"\"15-04-21\" at \"07:56\""},{"visible":false,"include":false,"step":"410","x":-262.3809523809524,"y":-60.476190476190474,"z":-107.71428571428571,"a95":2.8,"info":"\"15-04-21\" at \"11:27\""},{"visible":false,"include":false,"step":"440","x":-184.0952380952381,"y":-21.428571428571427,"z":2.1904761904761907,"a95":4.1,"info":"\"15-04-22\" at \"14:15\""}]},{"version":"v1.1.0","exported":"2016-11-30T16:10:37.898Z","volume":10.5,"added":"2016-11-30T15:58:24.426Z","format":"Utrecht","demagType":"Unknown","strat":"7","patch":1.1,"GEO":[{"dec":217.50202385571757,"inc":-63.994292590352664,"MAD":19.557386627851038,"cm":[-6.661338147750939e-16,4.718447854656915e-16,0],"intensity":29.782263951656994,"type":"dir","forced":true,"remark":"","origin":false,"nSteps":6,"minStep":"45.0","maxStep":"70.0","steps":["45.0","50.0","55.0","60.0","65.0","70.0"],"group":"None","version":"v1.1.0"}],"TECT":[{"dec":174.5564266863222,"inc":-18.975228583916092,"MAD":19.55738662785106,"cm":[2.220446049250313e-16,2.0816681711721685e-15,-9.71445146547012e-17],"intensity":29.782263951656994,"type":"dir","forced":true,"remark":"","origin":false,"nSteps":6,"minStep":"45.0","maxStep":"70.0","steps":["45.0","50.0","55.0","60.0","65.0","70.0"],"group":"None","version":"v1.1.0"}],"interpreted":true,"name":"TC2.17A","coreAzi":235,"coreDip":11,"bedStrike":239,"bedDip":59,"data":[{"visible":false,"include":false,"step":"0.0","x":-122.73333333333333,"y":58.35809523809524,"z":13.968571428571428,"a95":0.99,"info":"07/07/2015 at 15:53:18"},{"visible":false,"include":false,"step":"10.0","x":-61.50952380952381,"y":23.398095238095237,"z":-10.078095238095237,"a95":0.99,"info":"07/07/2015 at 15:53:18"},{"visible":false,"include":false,"step":"15.0","x":-35.04380952380952,"y":17.93619047619048,"z":-8.717809523809525,"a95":0.99,"info":"07/07/2015 at 15:53:18"},{"visible":false,"include":false,"step":"20.0","x":-14.494285714285715,"y":5.352285714285714,"z":-0.3632952380952381,"a95":0.99,"info":"07/07/2015 at 15:53:18"},{"visible":false,"include":false,"step":"23.0","x":-6.82647619047619,"y":3.408380952380952,"z":-4.322380952380952,"a95":0.99,"info":"07/07/2015 at 15:53:18"},{"visible":true,"include":false,"step":"25.0","x":-1.1443809523809523,"y":-0.6098761904761905,"z":-5.708857142857143,"a95":0.99,"info":"07/07/2015 at 15:53:18"},{"visible":true,"include":false,"step":"30.0","x":7.168285714285714,"y":-2.7293333333333334,"z":2.7578095238095237,"a95":0.99,"info":"07/07/2015 at 15:53:18"},{"visible":true,"include":false,"step":"33.0","x":12.987619047619049,"y":-2.968952380952381,"z":-4.931904761904762,"a95":0.99,"info":"07/07/2015 at 15:53:18"},{"visible":true,"include":false,"step":"35.0","x":10.464761904761904,"y":-2.3642857142857143,"z":-4.84,"a95":0.99,"info":"07/07/2015 at 15:53:18"},{"visible":true,"include":false,"step":"40.0","x":12.497142857142856,"y":-2.1600952380952383,"z":5.225333333333333,"a95":0.99,"info":"07/07/2015 at 15:53:18"},{"visible":true,"include":true,"step":"45.0","x":17.614285714285714,"y":-3.2509523809523806,"z":-1.016857142857143,"a95":0.99,"info":"07/07/2015 at 15:53:18"},{"visible":true,"include":true,"step":"50.0","x":12.527619047619046,"y":4.849619047619048,"z":10.370476190476191,"a95":0.99,"info":"07/07/2015 at 15:53:18"},{"visible":true,"include":true,"step":"55.0","x":16.397142857142857,"y":-4.633333333333333,"z":6.009809523809524,"a95":0.99,"info":"07/07/2015 at 15:53:18"},{"visible":true,"include":true,"step":"60.0","x":14.86761904761905,"y":-2.8253333333333335,"z":2.4467619047619045,"a95":0.99,"info":"07/07/2015 at 15:53:18"},{"visible":true,"include":true,"step":"65.0","x":8.952190476190477,"y":0.08564285714285715,"z":-1.6616190476190476,"a95":0.99,"info":"07/07/2015 at 15:53:18"},{"visible":true,"include":true,"step":"70.0","x":11.103809523809524,"y":-4.264857142857143,"z":3.4182857142857146,"a95":0.99,"info":"07/07/2015 at 15:53:18"},{"visible":true,"include":false,"step":"80.0","x":50.39904761904762,"y":-19.45714285714286,"z":18.694285714285712,"a95":0.99,"info":"07/07/2015 at 15:53:18"}]},{"version":"v1.1.0","exported":"2016-11-30T16:10:37.898Z","volume":10.5,"added":"2016-11-30T15:58:24.426Z","format":"Utrecht","demagType":"Unknown","strat":"3","patch":1.1,"GEO":[],"TECT":[],"interpreted":false,"name":"TC2.17B","coreAzi":235,"coreDip":11,"bedStrike":239,"bedDip":59,"data":[{"visible":true,"include":false,"step":"0.0","x":-173.47619047619048,"y":96,"z":-6.611142857142857,"a95":0.99,"info":"04/11/2014 at 01:37:23"},{"visible":true,"include":false,"step":"10.0","x":-78.11714285714285,"y":33.90190476190477,"z":-14.470476190476191,"a95":0.99,"info":"04/11/2014 at 01:37:23"},{"visible":true,"include":false,"step":"15.0","x":-67.10190476190476,"y":28.947619047619046,"z":-17.950476190476188,"a95":0.99,"info":"04/11/2014 at 01:37:23"},{"visible":true,"include":false,"step":"20.0","x":-25.59904761904762,"y":7.892095238095239,"z":-3.097809523809524,"a95":0.99,"info":"04/11/2014 at 01:37:23"},{"visible":true,"include":false,"step":"25.0","x":-7.754095238095239,"y":13.609523809523811,"z":-3.318761904761905,"a95":0.99,"info":"04/11/2014 at 01:37:23"},{"visible":true,"include":false,"step":"30.0","x":-0.5417809523809524,"y":-2.7587619047619047,"z":-2.0286666666666666,"a95":0.99,"info":"04/11/2014 at 01:37:23"},{"visible":true,"include":false,"step":"35.0","x":8.959333333333333,"y":-34.537142857142854,"z":3.915714285714286,"a95":0.99,"info":"04/11/2014 at 01:37:23"},{"visible":true,"include":false,"step":"40.0","x":12.103809523809524,"y":-13.352380952380951,"z":-1.7245714285714286,"a95":0.99,"info":"04/11/2014 at 01:37:23"},{"visible":true,"include":false,"step":"45.0","x":7.540095238095239,"y":-5.174952380952381,"z":-2.3421904761904764,"a95":0.99,"info":"04/11/2014 at 01:37:23"},{"visible":true,"include":false,"step":"50.0","x":-9.564761904761905,"y":-11.359047619047619,"z":8.445238095238095,"a95":0.99,"info":"04/11/2014 at 01:37:23"},{"visible":true,"include":false,"step":"60.0","x":6.461809523809524,"y":1.250857142857143,"z":5.252952380952381,"a95":0.99,"info":"04/11/2014 at 01:37:23"},{"visible":true,"include":false,"step":"70.0","x":17.398095238095237,"y":12.475238095238096,"z":-6.388190476190475,"a95":0.99,"info":"04/11/2014 at 01:37:23"},{"visible":true,"include":false,"step":"80.0","x":2.338952380952381,"y":3.0960952380952382,"z":10.568571428571428,"a95":0.99,"info":"04/11/2014 at 01:37:23"},{"visible":true,"include":false,"step":"90.0","x":7.452857142857143,"y":2.107333333333333,"z":2.2213333333333334,"a95":0.99,"info":"04/11/2014 at 01:37:23"}]},{"version":"v1.1.0","exported":"2016-11-30T16:10:37.898Z","volume":10.5,"added":"2016-11-30T15:58:24.426Z","format":"Utrecht","demagType":"Unknown","strat":null,"patch":1.1,"GEO":[{"dec":28.006041510992873,"inc":-24.841996229454132,"MAD":6.942263224101916,"cm":[4.884981308350689e-15,-5.329070518200751e-15,0],"intensity":631.5932701960305,"type":"GC","origin":false,"forced":true,"remark":"","nSteps":5,"minStep":"100","maxStep":"210","steps":["100","120","150","180","210"],"group":"None","version":"v1.1.0"}],"TECT":[{"dec":67.72864076827346,"inc":-38.09231026403763,"MAD":6.942263224102194,"cm":[0,-2.042810365310288e-14,-1.0658141036401503e-14],"intensity":631.5932701960305,"type":"GC","origin":false,"forced":true,"remark":"","nSteps":5,"minStep":"100","maxStep":"210","steps":["100","120","150","180","210"],"group":"None","version":"v1.1.0"}],"interpreted":true,"name":"TC2.18A","coreAzi":226,"coreDip":4,"bedStrike":239,"bedDip":59,"data":[{"visible":false,"include":false,"step":"20","x":-552.7619047619048,"y":-6.571428571428571,"z":288.95238095238096,"a95":2.2,"info":"\"15-02-09\" at \"15:59\""},{"visible":true,"include":true,"step":"100","x":-391.7142857142857,"y":56.38095238095238,"z":-146.57142857142858,"a95":2,"info":"\"15-02-12\" at \"22:34\""},{"visible":true,"include":true,"step":"120","x":-358.85714285714283,"y":19.523809523809526,"z":-125.14285714285714,"a95":2.1,"info":"\"15-02-13\" at \"17:46\""},{"visible":true,"include":true,"step":"150","x":-295.42857142857144,"y":-10.571428571428571,"z":-130.76190476190476,"a95":2.2,"info":"\"15-02-13\" at \"22:27\""},{"visible":true,"include":true,"step":"180","x":-224.38095238095238,"y":-64.19047619047619,"z":-108.95238095238095,"a95":2.3,"info":"\"15-02-16\" at \"15:28\""},{"visible":true,"include":true,"step":"210","x":-187.8095238095238,"y":-84.66666666666667,"z":-102.95238095238095,"a95":2.8,"info":"\"15-02-16\" at \"19:29\""},{"visible":true,"include":false,"step":"240","x":-217.61904761904762,"y":-85.52380952380952,"z":-84.38095238095238,"a95":2.8,"info":"\"15-02-17\" at \"15:26\""},{"visible":true,"include":false,"step":"270","x":-201.8095238095238,"y":-95.71428571428571,"z":-94.28571428571429,"a95":2.8,"info":"\"15-02-17\" at \"22:11\""},{"visible":true,"include":false,"step":"300","x":-208.57142857142858,"y":-101.61904761904762,"z":-93.9047619047619,"a95":2.5,"info":"\"15-03-08\" at \"17:52\""},{"visible":true,"include":false,"step":"320","x":-212.76190476190476,"y":-96,"z":-97.14285714285714,"a95":2.6,"info":"\"15-03-09\" at \"08:48\""},{"visible":true,"include":false,"step":"350","x":-221.42857142857142,"y":-82.95238095238095,"z":-93.61904761904762,"a95":2.6,"info":"\"15-03-09\" at \"12:15\""},{"visible":true,"include":false,"step":"380","x":-214.47619047619048,"y":-86.95238095238095,"z":-81.04761904761905,"a95":2.5,"info":"\"15-04-21\" at \"07:58\""},{"visible":false,"include":false,"step":"410","x":-179.9047619047619,"y":-33.04761904761905,"z":-73.52380952380952,"a95":3.5,"info":"\"15-04-21\" at \"11:29\""},{"visible":false,"include":false,"step":"440","x":-118.76190476190476,"y":-49.142857142857146,"z":-24.666666666666668,"a95":4.5,"info":"\"15-04-22\" at \"14:17\""}]},{"version":"v1.1.0","exported":"2016-11-30T16:10:37.898Z","volume":10.5,"added":"2016-11-30T15:58:24.427Z","format":"Utrecht","demagType":"Unknown","strat":null,"patch":1.1,"GEO":[{"dec":45.939663089502574,"inc":-26.792708251107282,"MAD":4.188300669731574,"cm":[-7.271960811294775e-15,4.440892098500626e-16,0],"intensity":320.0122163201029,"type":"GC","origin":false,"forced":true,"remark":"","nSteps":9,"minStep":"100","maxStep":"320","steps":["100","120","150","180","210","240","270","300","320"],"group":"None","version":"v1.1.0"}],"TECT":[{"dec":76.99722283708275,"inc":-23.895242869948092,"MAD":4.18830066973178,"cm":[-6.217248937900877e-15,2.475797344914099e-14,1.2434497875801753e-14],"intensity":320.0122163201029,"type":"GC","origin":false,"forced":true,"remark":"","nSteps":9,"minStep":"100","maxStep":"320","steps":["100","120","150","180","210","240","270","300","320"],"group":"None","version":"v1.1.0"}],"interpreted":true,"name":"TC2.19A","coreAzi":230,"coreDip":4,"bedStrike":239,"bedDip":59,"data":[{"visible":false,"include":false,"step":"20","x":-252.85714285714286,"y":20.285714285714285,"z":-344.6666666666667,"a95":2.6,"info":"\"15-02-09\" at \"16:01\""},{"visible":true,"include":true,"step":"100","x":-197.9047619047619,"y":61.61904761904762,"z":-75.71428571428571,"a95":2.7,"info":"\"15-02-12\" at \"22:36\""},{"visible":true,"include":true,"step":"120","x":-173.23809523809524,"y":49.04761904761905,"z":-71.33333333333333,"a95":2.5,"info":"\"15-02-13\" at \"17:48\""},{"visible":true,"include":true,"step":"150","x":-130.0952380952381,"y":10.476190476190476,"z":-57.23809523809524,"a95":3.1,"info":"\"15-02-13\" at \"22:30\""},{"visible":true,"include":true,"step":"180","x":-86.47619047619048,"y":-17.61904761904762,"z":-38.095238095238095,"a95":3.4,"info":"\"15-02-16\" at \"15:30\""},{"visible":true,"include":true,"step":"210","x":-72.08571428571429,"y":-21.65714285714286,"z":-37.84761904761905,"a95":4.3,"info":"\"15-02-16\" at \"19:31\""},{"visible":true,"include":true,"step":"240","x":-77.87619047619049,"y":-35.59047619047619,"z":-31.361904761904764,"a95":3.5,"info":"\"15-02-17\" at \"15:28\""},{"visible":true,"include":true,"step":"270","x":-80.0952380952381,"y":-43.523809523809526,"z":-35.80952380952381,"a95":4.1,"info":"\"15-02-17\" at \"22:13\""},{"visible":true,"include":true,"step":"300","x":-92.0952380952381,"y":-40.666666666666664,"z":-40.857142857142854,"a95":3.4,"info":"\"15-03-08\" at \"17:54\""},{"visible":true,"include":true,"step":"320","x":-98.28571428571429,"y":-39.61904761904762,"z":-43.42857142857143,"a95":3.1,"info":"\"15-03-09\" at \"08:50\""},{"visible":false,"include":false,"step":"350","x":-116.66666666666667,"y":-45.42857142857143,"z":-35.61904761904762,"a95":3.4,"info":"\"15-03-09\" at \"12:18\""},{"visible":false,"include":false,"step":"380","x":-114.57142857142857,"y":-40.476190476190474,"z":-35.714285714285715,"a95":3.6,"info":"\"15-04-21\" at \"08:00\""},{"visible":false,"include":false,"step":"410","x":-113.14285714285714,"y":-9.142857142857142,"z":-46.57142857142857,"a95":4.4,"info":"\"15-04-21\" at \"11:31\""},{"visible":false,"include":false,"step":"440","x":-74.88571428571429,"y":-23.304761904761904,"z":12.714285714285714,"a95":7.6,"info":"\"15-04-22\" at \"14:21\""}]},{"version":"v1.1.0","exported":"2016-11-30T16:10:37.898Z","volume":10.5,"added":"2016-11-30T15:58:24.427Z","format":"Utrecht","demagType":"Unknown","strat":"6","patch":1.1,"GEO":[{"dec":31.864479526985633,"inc":-27.543120104817273,"MAD":5.227790004910621,"cm":[-4.96269692007445e-14,0,0],"intensity":2252.8415650436245,"type":"GC","origin":false,"forced":true,"remark":"","nSteps":8,"minStep":"10.0","maxStep":"35.0","steps":["10.0","15.0","20.0","23.0","25.0","30.0","33.0","35.0"],"group":"None","version":"v1.1.0"}],"TECT":[{"dec":72.40699573529105,"inc":-35.78913362874608,"MAD":5.227790004910564,"cm":[-1.0658141036401503e-14,-8.526512829121202e-14,4.263256414560601e-14],"intensity":2252.8415650436245,"type":"GC","origin":false,"forced":true,"remark":"","nSteps":8,"minStep":"10.0","maxStep":"35.0","steps":["10.0","15.0","20.0","23.0","25.0","30.0","33.0","35.0"],"group":"None","version":"v1.1.0"}],"interpreted":true,"name":"TC2.21A","coreAzi":224,"coreDip":15,"bedStrike":239,"bedDip":59,"data":[{"visible":true,"include":false,"step":"0.0","x":-1850,"y":-525.3714285714285,"z":-442.76190476190476,"a95":0.99,"info":"07/07/2015 at 15:53:18"},{"visible":true,"include":true,"step":"10.0","x":-1516.2857142857142,"y":-588.6285714285715,"z":-467.49523809523805,"a95":0.99,"info":"07/07/2015 at 15:53:18"},{"visible":true,"include":true,"step":"15.0","x":-1289.7142857142858,"y":-564.0380952380953,"z":-412.81904761904764,"a95":0.99,"info":"07/07/2015 at 15:53:18"},{"visible":true,"include":true,"step":"20.0","x":-1058.952380952381,"y":-501.5142857142857,"z":-332.2,"a95":0.99,"info":"07/07/2015 at 15:53:18"},{"visible":true,"include":true,"step":"23.0","x":-920.2857142857143,"y":-453.8285714285714,"z":-305.87619047619046,"a95":0.99,"info":"07/07/2015 at 15:53:18"},{"visible":true,"include":true,"step":"25.0","x":-820.0952380952381,"y":-415.8666666666667,"z":-273.97142857142853,"a95":0.99,"info":"07/07/2015 at 15:53:18"},{"visible":true,"include":true,"step":"30.0","x":-629.0952380952381,"y":-333.74285714285713,"z":-213.1142857142857,"a95":0.99,"info":"07/07/2015 at 15:53:18"},{"visible":true,"include":true,"step":"33.0","x":-525.7714285714286,"y":-296.9047619047619,"z":-178.43809523809523,"a95":0.99,"info":"07/07/2015 at 15:53:18"},{"visible":true,"include":true,"step":"35.0","x":-469.4190476190476,"y":-268.31428571428575,"z":-163.31428571428572,"a95":0.99,"info":"07/07/2015 at 15:53:18"},{"visible":false,"include":false,"step":"40.0","x":-358.0952380952381,"y":-239.04761904761904,"z":-98.65714285714287,"a95":0.99,"info":"07/07/2015 at 15:53:18"},{"visible":false,"include":false,"step":"45.0","x":-249.8095238095238,"y":-190.22857142857143,"z":-95.71428571428571,"a95":0.99,"info":"07/07/2015 at 15:53:18"},{"visible":false,"include":false,"step":"50.0","x":-179.73333333333335,"y":-142.01904761904763,"z":-35.214285714285715,"a95":0.99,"info":"07/07/2015 at 15:53:18"},{"visible":false,"include":false,"step":"55.0","x":-128.98095238095237,"y":-140.4952380952381,"z":-34.859047619047615,"a95":0.99,"info":"07/07/2015 at 15:53:18"},{"visible":false,"include":false,"step":"60.0","x":-110.66666666666667,"y":-122.70476190476191,"z":-27.78,"a95":0.99,"info":"07/07/2015 at 15:53:18"},{"visible":false,"include":false,"step":"65.0","x":-58.43619047619048,"y":-82.56761904761905,"z":-29.762857142857143,"a95":0.99,"info":"07/07/2015 at 15:53:18"},{"visible":false,"include":false,"step":"70.0","x":-55.51809523809524,"y":-115.66666666666667,"z":-19.264761904761905,"a95":0.99,"info":"07/07/2015 at 15:53:18"},{"visible":false,"include":false,"step":"80.0","x":254.84761904761905,"y":-136.51428571428573,"z":-69.46190476190476,"a95":0.99,"info":"07/07/2015 at 15:53:18"}]},{"version":"v1.1.0","exported":"2016-11-30T16:10:37.898Z","volume":10.5,"added":"2016-11-30T15:58:24.427Z","format":"Utrecht","demagType":"Unknown","strat":"4","patch":1.1,"GEO":[{"dec":42.94102364114269,"inc":-31.841630200959663,"MAD":9.440627263090443,"cm":[-4.4478309924045334e-14,-3.552713678800501e-15,0],"intensity":1551.4876712365758,"type":"GC","origin":false,"forced":true,"remark":"","nSteps":7,"minStep":"10.0","maxStep":"45.0","steps":["10.0","15.0","20.0","25.0","30.0","35.0","45.0"],"group":"None","version":"v1.1.0"}],"TECT":[{"dec":81.0817310114428,"inc":-28.23909641545019,"MAD":9.440627263091077,"cm":[-1.0658141036401503e-14,-3.019806626980426e-14,2.1316282072803006e-14],"intensity":1551.4876712365758,"type":"GC","origin":false,"forced":true,"remark":"","nSteps":7,"minStep":"10.0","maxStep":"45.0","steps":["10.0","15.0","20.0","25.0","30.0","35.0","45.0"],"group":"None","version":"v1.1.0"}],"interpreted":true,"name":"TC2.21B","coreAzi":224,"coreDip":15,"bedStrike":239,"bedDip":59,"data":[{"visible":true,"include":false,"step":"0.0","x":-1559.2380952380952,"y":-353.4095238095238,"z":-377.8857142857143,"a95":0.99,"info":"04/11/2014 at 01:37:23"},{"visible":true,"include":true,"step":"10.0","x":-1174.3809523809523,"y":-434.7809523809524,"z":-353.8095238095238,"a95":0.99,"info":"04/11/2014 at 01:37:23"},{"visible":true,"include":true,"step":"15.0","x":-1015.3333333333334,"y":-413,"z":-323.35238095238094,"a95":0.99,"info":"04/11/2014 at 01:37:23"},{"visible":true,"include":true,"step":"20.0","x":-811.9428571428571,"y":-376.81904761904764,"z":-245.82857142857142,"a95":0.99,"info":"04/11/2014 at 01:37:23"},{"visible":true,"include":true,"step":"25.0","x":-630.7047619047619,"y":-313,"z":-204.64761904761906,"a95":0.99,"info":"04/11/2014 at 01:37:23"},{"visible":true,"include":true,"step":"30.0","x":-451.8285714285714,"y":-266.447619047619,"z":-147.8952380952381,"a95":0.99,"info":"04/11/2014 at 01:37:23"},{"visible":true,"include":true,"step":"35.0","x":-340.06666666666666,"y":-254.1904761904762,"z":-92.72190476190477,"a95":0.99,"info":"04/11/2014 at 01:37:23"},{"visible":false,"include":false,"step":"40.0","x":-297.68571428571425,"y":-196.76190476190476,"z":-28.401904761904763,"a95":0.99,"info":"04/11/2014 at 01:37:23"},{"visible":true,"include":true,"step":"45.0","x":-204.28571428571428,"y":-132.05714285714285,"z":-76.40761904761905,"a95":0.99,"info":"04/11/2014 at 01:37:23"},{"visible":true,"include":false,"step":"50.0","x":-136.9047619047619,"y":-126.66666666666667,"z":-23.652380952380952,"a95":0.99,"info":"04/11/2014 at 01:37:23"},{"visible":true,"include":false,"step":"60.0","x":-32.65809523809524,"y":-80.05142857142857,"z":-35.91142857142857,"a95":0.99,"info":"04/11/2014 at 01:37:23"},{"visible":true,"include":false,"step":"70.0","x":15.664761904761903,"y":-34.24285714285715,"z":-60.79428571428572,"a95":0.99,"info":"04/11/2014 at 01:37:23"},{"visible":true,"include":false,"step":"80.0","x":-24.422857142857143,"y":-67.71809523809523,"z":-29.303809523809523,"a95":0.99,"info":"04/11/2014 at 01:37:23"},{"visible":true,"include":false,"step":"90.0","x":-65.39238095238095,"y":-64.98857142857143,"z":-18.49047619047619,"a95":0.99,"info":"04/11/2014 at 01:37:23"}]},{"version":"v1.1.0","exported":"2016-11-30T16:10:37.898Z","volume":10.5,"added":"2016-11-30T15:58:24.427Z","format":"Utrecht","demagType":"Unknown","strat":"6","patch":1.1,"GEO":[{"dec":33.26474758031384,"inc":-30.034865643567233,"MAD":3.814138972094532,"cm":[1.1102230246251565e-14,1.7763568394002505e-15,0],"intensity":1746.6332943013267,"type":"GC","origin":false,"forced":true,"remark":"","nSteps":8,"minStep":"10.0","maxStep":"35.0","steps":["10.0","15.0","20.0","23.0","25.0","30.0","33.0","35.0"],"group":"None","version":"v1.1.0"}],"TECT":[{"dec":75.79851157890482,"inc":-35.45097627873572,"MAD":3.8141389720979766,"cm":[-3.552713678800501e-15,-1.2967404927621828e-13,1.5987211554602254e-14],"intensity":1746.6332943013267,"type":"GC","origin":false,"forced":true,"remark":"","nSteps":8,"minStep":"10.0","maxStep":"35.0","steps":["10.0","15.0","20.0","23.0","25.0","30.0","33.0","35.0"],"group":"None","version":"v1.1.0"}],"interpreted":true,"name":"TC2.22A","coreAzi":228,"coreDip":20,"bedStrike":239,"bedDip":59,"data":[{"visible":true,"include":false,"step":"0.0","x":-1770.857142857143,"y":9.926666666666668,"z":-160.25714285714287,"a95":0.99,"info":"25/11/2014 at 21:16:41"},{"visible":true,"include":true,"step":"10.0","x":-1322.5714285714287,"y":-156.4,"z":-288.35238095238094,"a95":0.99,"info":"25/11/2014 at 21:16:41"},{"visible":true,"include":true,"step":"15.0","x":-1099.3333333333333,"y":-200.83809523809526,"z":-263.03809523809525,"a95":0.99,"info":"25/11/2014 at 21:16:41"},{"visible":true,"include":true,"step":"20.0","x":-888.0571428571429,"y":-200.64761904761906,"z":-213.51428571428573,"a95":0.99,"info":"25/11/2014 at 21:16:41"},{"visible":true,"include":true,"step":"23.0","x":-757.3238095238095,"y":-200.9238095238095,"z":-193.98095238095237,"a95":0.99,"info":"25/11/2014 at 21:16:41"},{"visible":true,"include":true,"step":"25.0","x":-694.9142857142857,"y":-181.61904761904762,"z":-168.37142857142857,"a95":0.99,"info":"25/11/2014 at 21:16:41"},{"visible":true,"include":true,"step":"30.0","x":-500.49523809523805,"y":-169.9047619047619,"z":-134.7047619047619,"a95":0.99,"info":"25/11/2014 at 21:16:41"},{"visible":true,"include":true,"step":"33.0","x":-443.1047619047619,"y":-139.61904761904762,"z":-122.62857142857142,"a95":0.99,"info":"25/11/2014 at 21:16:41"},{"visible":true,"include":true,"step":"35.0","x":-357.9238095238095,"y":-124.75238095238096,"z":-95.85714285714286,"a95":0.99,"info":"25/11/2014 at 21:16:41"},{"visible":false,"include":false,"step":"40.0","x":-272.1333333333333,"y":-124.32380952380953,"z":-64.23142857142857,"a95":0.99,"info":"25/11/2014 at 21:16:41"},{"visible":false,"include":false,"step":"45.0","x":-193.84761904761905,"y":-115.75238095238096,"z":-63.35333333333334,"a95":0.99,"info":"25/11/2014 at 21:16:41"},{"visible":false,"include":false,"step":"50.0","x":-167.6,"y":-77.19238095238094,"z":-20.596190476190475,"a95":0.99,"info":"25/11/2014 at 21:16:41"},{"visible":false,"include":false,"step":"60.0","x":-63.69523809523809,"y":-92.53809523809524,"z":27.27904761904762,"a95":0.99,"info":"25/11/2014 at 21:16:41"},{"visible":false,"include":false,"step":"70.0","x":-36.11238095238095,"y":-101.4095238095238,"z":-294.35238095238094,"a95":0.99,"info":"25/11/2014 at 21:16:41"},{"visible":false,"include":false,"step":"80.0","x":230.51428571428573,"y":-73.13142857142857,"z":66.33809523809524,"a95":0.99,"info":"25/11/2014 at 21:16:41"},{"visible":false,"include":false,"step":"90.0","x":-25.16,"y":-100.70476190476191,"z":-53.13809523809524,"a95":0.99,"info":"25/11/2014 at 21:16:41"}]},{"version":"v1.1.0","exported":"2016-11-30T16:10:37.898Z","volume":10.5,"added":"2016-11-30T15:58:24.428Z","format":"Utrecht","demagType":"Unknown","strat":null,"patch":1.1,"GEO":[{"dec":247.51387308499295,"inc":-54.70272990439806,"MAD":7.778516122316259,"cm":[-6.969376944798022,-5.426452232151468,-10.490392745222],"intensity":26.102169743263154,"type":"dir","forced":false,"remark":"","origin":false,"nSteps":5,"minStep":"210","maxStep":"320","steps":["210","240","270","300","320"],"group":"None","version":"v1.1.0"}],"TECT":[{"dec":190.07989964273824,"inc":-29.582933184911386,"MAD":7.778516122316253,"cm":[-13.355515748811897,-1.5892729171757651,-2.67793753726243],"intensity":26.102169743263154,"type":"dir","forced":false,"remark":"","origin":false,"nSteps":5,"minStep":"210","maxStep":"320","steps":["210","240","270","300","320"],"group":"None","version":"v1.1.0"}],"interpreted":true,"name":"TC2.23A","coreAzi":215,"coreDip":12,"bedStrike":239,"bedDip":59,"data":[{"visible":true,"include":false,"step":"20","x":-46.76190476190476,"y":42.285714285714285,"z":97.14285714285714,"a95":2.5,"info":"\"15-02-09\" at \"16:04\""},{"visible":true,"include":false,"step":"100","x":-16.142857142857142,"y":18.333333333333332,"z":19.514285714285716,"a95":6,"info":"\"15-02-12\" at \"22:38\""},{"visible":true,"include":false,"step":"120","x":-8.247619047619047,"y":17.97142857142857,"z":8.514285714285714,"a95":4.7,"info":"\"15-02-13\" at \"17:51\""},{"visible":true,"include":false,"step":"150","x":6.580952380952381,"y":14.438095238095238,"z":9.6,"a95":5.1,"info":"\"15-02-13\" at \"22:32\""},{"visible":true,"include":false,"step":"180","x":15.97142857142857,"y":7.533333333333333,"z":11.495238095238095,"a95":4.1,"info":"\"15-02-16\" at \"15:32\""},{"visible":true,"include":true,"step":"210","x":26.104761904761908,"y":6.504761904761905,"z":11.82857142857143,"a95":4.5,"info":"\"15-02-16\" at \"19:33\""},{"visible":true,"include":true,"step":"240","x":18.59047619047619,"y":0.42857142857142855,"z":7.247619047619047,"a95":5.3,"info":"\"15-02-17\" at \"15:30\""},{"visible":true,"include":true,"step":"270","x":10.066666666666666,"y":0.2761904761904762,"z":6.580952380952381,"a95":9.400001,"info":"\"15-02-17\" at \"22:15\""},{"visible":true,"include":true,"step":"300","x":2.9904761904761905,"y":-2.980952380952381,"z":2.657142857142857,"a95":22,"info":"\"15-03-08\" at \"17:56\""},{"visible":true,"include":true,"step":"320","x":2.723809523809524,"y":-1.9904761904761903,"z":3.923809523809524,"a95":18.9,"info":"\"15-03-09\" at \"08:52\""},{"visible":true,"include":false,"step":"380","x":-9.723809523809523,"y":-0.7523809523809524,"z":-0.9904761904761905,"a95":12.5,"info":"\"15-04-21\" at \"08:02\""},{"visible":true,"include":false,"step":"410","x":-16.952380952380953,"y":-2.0666666666666664,"z":-4.6380952380952385,"a95":10.5,"info":"\"15-04-21\" at \"11:33\""},{"visible":true,"include":false,"step":"440","x":-12.657142857142858,"y":0.48571428571428565,"z":-1.4476190476190476,"a95":9.5,"info":"\"15-04-22\" at \"14:23\""}]},{"version":"v1.1.0","exported":"2016-11-30T16:10:37.898Z","volume":10.5,"added":"2016-11-30T15:58:24.428Z","format":"Utrecht","demagType":"Unknown","strat":"7","patch":1.1,"GEO":[],"TECT":[],"interpreted":false,"name":"TC2.24A","coreAzi":203,"coreDip":16,"bedStrike":239,"bedDip":59,"data":[{"visible":true,"include":false,"step":"0.0","x":-71.02380952380952,"y":83.39047619047619,"z":-18.684761904761906,"a95":0.99,"info":"25/11/2014 at 21:16:41"},{"visible":true,"include":false,"step":"10.0","x":-36.118095238095236,"y":46.801904761904765,"z":-20.4,"a95":0.99,"info":"25/11/2014 at 21:16:41"},{"visible":true,"include":false,"step":"15.0","x":-22.12952380952381,"y":36.38476190476191,"z":-17.09047619047619,"a95":0.99,"info":"25/11/2014 at 21:16:41"},{"visible":true,"include":false,"step":"20.0","x":-11.763809523809524,"y":33.59428571428572,"z":-5.735904761904761,"a95":0.99,"info":"25/11/2014 at 21:16:41"},{"visible":true,"include":false,"step":"23.0","x":-11.862857142857143,"y":29.462857142857143,"z":-8.078190476190477,"a95":0.99,"info":"25/11/2014 at 21:16:41"},{"visible":true,"include":false,"step":"25.0","x":-14.07047619047619,"y":30.556190476190473,"z":5.480285714285714,"a95":0.99,"info":"25/11/2014 at 21:16:41"},{"visible":true,"include":false,"step":"30.0","x":-4.276190476190476,"y":15.401904761904762,"z":-8.700857142857142,"a95":0.99,"info":"25/11/2014 at 21:16:41"},{"visible":true,"include":false,"step":"33.0","x":-12.86095238095238,"y":23.54285714285714,"z":-22.104761904761904,"a95":0.99,"info":"25/11/2014 at 21:16:41"},{"visible":true,"include":false,"step":"35.0","x":1.5883809523809524,"y":27.10285714285714,"z":-7.872285714285715,"a95":0.99,"info":"25/11/2014 at 21:16:41"},{"visible":true,"include":false,"step":"40.0","x":0.2730952380952381,"y":13.652380952380952,"z":0.020778095238095238,"a95":0.99,"info":"25/11/2014 at 21:16:41"},{"visible":true,"include":false,"step":"45.0","x":2.8304761904761904,"y":6.541714285714286,"z":-5.968857142857143,"a95":0.99,"info":"25/11/2014 at 21:16:41"},{"visible":true,"include":false,"step":"50.0","x":-0.5012666666666666,"y":18.397142857142857,"z":4.508190476190476,"a95":0.99,"info":"25/11/2014 at 21:16:41"},{"visible":true,"include":false,"step":"60.0","x":2.850761904761905,"y":8.200095238095239,"z":30.271428571428572,"a95":0.99,"info":"25/11/2014 at 21:16:41"},{"visible":true,"include":false,"step":"70.0","x":-5.35,"y":5.978571428571429,"z":-1.9020952380952383,"a95":0.99,"info":"25/11/2014 at 21:16:41"},{"visible":true,"include":false,"step":"80.0","x":-0.3144952380952381,"y":1.3624761904761904,"z":-1.8485714285714285,"a95":0.99,"info":"25/11/2014 at 21:16:41"},{"visible":true,"include":false,"step":"90.0","x":-0.04404761904761905,"y":10.308571428571428,"z":2.5034285714285716,"a95":0.99,"info":"25/11/2014 at 21:16:41"}]},{"version":"v1.1.0","exported":"2016-11-30T16:10:37.898Z","volume":10.5,"added":"2016-11-30T15:58:24.428Z","format":"Utrecht","demagType":"Unknown","strat":"8","patch":1.1,"GEO":[{"dec":202.9502582681751,"inc":-71.90242904226473,"MAD":11.949209548973343,"cm":[-9.43689570931383e-16,1.7763568394002505e-15,0],"intensity":85.58704578844659,"type":"dir","forced":true,"remark":"","origin":false,"nSteps":10,"minStep":"15.0","maxStep":"50.0","steps":["15.0","20.0","23.0","25.0","30.0","33.0","35.0","40.0","45.0","50.0"],"group":"None","version":"v1.1.0"}],"TECT":[{"dec":164.44655037846928,"inc":-19.44268446238478,"MAD":11.94920954897332,"cm":[-1.3322676295501878e-15,1.4432899320127035e-15,1.4432899320127035e-15],"intensity":85.58704578844657,"type":"dir","forced":true,"remark":"","origin":false,"nSteps":10,"minStep":"15.0","maxStep":"50.0","steps":["15.0","20.0","23.0","25.0","30.0","33.0","35.0","40.0","45.0","50.0"],"group":"None","version":"v1.1.0"}],"interpreted":true,"name":"TC2.25A","coreAzi":256,"coreDip":23,"bedStrike":239,"bedDip":59,"data":[{"visible":true,"include":false,"step":"0.0","x":42.163809523809526,"y":-3.181714285714286,"z":7.759523809523809,"a95":0.99,"info":"25/11/2014 at 21:16:41"},{"visible":true,"include":false,"step":"10.0","x":61.42095238095238,"y":-12.845714285714285,"z":-12.772380952380953,"a95":0.99,"info":"25/11/2014 at 21:16:41"},{"visible":true,"include":true,"step":"15.0","x":59.37238095238095,"y":-17.213333333333335,"z":-14.041904761904762,"a95":0.99,"info":"25/11/2014 at 21:16:41"},{"visible":true,"include":true,"step":"20.0","x":51.86952380952381,"y":-9.00457142857143,"z":-13.243809523809524,"a95":0.99,"info":"25/11/2014 at 21:16:41"},{"visible":true,"include":true,"step":"23.0","x":53.42952380952381,"y":-17.33809523809524,"z":-12.794285714285715,"a95":0.99,"info":"25/11/2014 at 21:16:41"},{"visible":true,"include":true,"step":"25.0","x":44.864761904761906,"y":-10.445714285714287,"z":4.338190476190476,"a95":0.99,"info":"25/11/2014 at 21:16:41"},{"visible":true,"include":true,"step":"30.0","x":46.59047619047619,"y":-16.940952380952382,"z":-10.427619047619046,"a95":0.99,"info":"25/11/2014 at 21:16:41"},{"visible":true,"include":true,"step":"33.0","x":29.75142857142857,"y":-9.39390476190476,"z":-26.216190476190473,"a95":0.99,"info":"25/11/2014 at 21:16:41"},{"visible":true,"include":true,"step":"35.0","x":38.00666666666667,"y":0.3858285714285714,"z":-6.766666666666667,"a95":0.99,"info":"25/11/2014 at 21:16:41"},{"visible":true,"include":true,"step":"40.0","x":33.864761904761906,"y":-9.913333333333334,"z":-0.10578095238095238,"a95":0.99,"info":"25/11/2014 at 21:16:41"},{"visible":true,"include":true,"step":"45.0","x":22.03333333333333,"y":-10.680952380952382,"z":-6.106761904761904,"a95":0.99,"info":"25/11/2014 at 21:16:41"},{"visible":true,"include":true,"step":"50.0","x":23.12666666666667,"y":-3.2587619047619047,"z":4.044761904761905,"a95":0.99,"info":"25/11/2014 at 21:16:41"},{"visible":true,"include":false,"step":"60.0","x":15.736190476190476,"y":-0.6297809523809524,"z":10.823809523809524,"a95":0.99,"info":"25/11/2014 at 21:16:41"},{"visible":true,"include":false,"step":"70.0","x":8.452761904761905,"y":-7.813428571428571,"z":-0.018888571428571428,"a95":0.99,"info":"25/11/2014 at 21:16:41"},{"visible":true,"include":false,"step":"80.0","x":3.406666666666667,"y":-13.773333333333333,"z":-1.7459999999999998,"a95":0.99,"info":"25/11/2014 at 21:16:41"},{"visible":true,"include":false,"step":"90.0","x":14.891428571428573,"y":-2.865142857142857,"z":-6.2509523809523815,"a95":0.99,"info":"25/11/2014 at 21:16:41"}]},{"version":"v1.1.0","exported":"2016-11-30T16:10:37.898Z","volume":10.5,"added":"2016-11-30T15:58:24.428Z","format":"Utrecht","demagType":"Unknown","strat":null,"patch":1.1,"GEO":[{"dec":218.85116474505247,"inc":-63.14954236318913,"MAD":16.24901292354398,"cm":[-20.68051435918241,-4.4545090416946955,-40.87581092807873],"intensity":20.138322128235746,"type":"dir","forced":false,"remark":"","origin":false,"nSteps":5,"minStep":"240","maxStep":"350","steps":["240","270","300","320","350"],"group":"None","version":"v1.1.0"}],"TECT":[{"dec":175.65069979262512,"inc":-19.035439408668594,"MAD":16.249012923543926,"cm":[-44.29827894585557,9.736475607900932,-7.824434111349433],"intensity":20.138322128235746,"type":"dir","forced":false,"remark":"","origin":false,"nSteps":5,"minStep":"240","maxStep":"350","steps":["240","270","300","320","350"],"group":"None","version":"v1.1.0"}],"interpreted":true,"name":"TC2.26A","coreAzi":256,"coreDip":36,"bedStrike":239,"bedDip":59,"data":[{"visible":false,"include":false,"step":"20","x":42.77142857142857,"y":25.4,"z":-31.780952380952378,"a95":2.3,"info":"\"15-02-09\" at \"16:06\""},{"visible":true,"include":false,"step":"100","x":44.16190476190476,"y":-7.523809523809524,"z":-9.028571428571428,"a95":3.2,"info":"\"15-02-12\" at \"22:40\""},{"visible":true,"include":false,"step":"120","x":50.00952380952381,"y":-16.476190476190474,"z":-14.961904761904762,"a95":1.3,"info":"\"15-02-13\" at \"17:53\""},{"visible":true,"include":false,"step":"150","x":51.38095238095238,"y":-20.761904761904763,"z":-16.780952380952378,"a95":2,"info":"\"15-02-13\" at \"22:34\""},{"visible":true,"include":false,"step":"180","x":52.790476190476184,"y":-20.142857142857142,"z":-17.952380952380953,"a95":2.3,"info":"\"15-02-16\" at \"15:34\""},{"visible":true,"include":false,"step":"210","x":54.36190476190476,"y":-25.142857142857142,"z":-18.59047619047619,"a95":2.1,"info":"\"15-02-16\" at \"19:36\""},{"visible":true,"include":true,"step":"240","x":48.63809523809524,"y":-23.847619047619048,"z":-20.152380952380952,"a95":3.2,"info":"\"15-02-17\" at \"15:32\""},{"visible":true,"include":true,"step":"270","x":43.77142857142857,"y":-16.895238095238096,"z":-15.866666666666665,"a95":2.4,"info":"\"15-02-17\" at \"22:17\""},{"visible":true,"include":true,"step":"300","x":36.523809523809526,"y":-19.59047619047619,"z":-15.714285714285714,"a95":2.3,"info":"\"15-03-08\" at \"17:58\""},{"visible":true,"include":true,"step":"320","x":33.38095238095238,"y":-17.323809523809523,"z":-16.114285714285714,"a95":3,"info":"\"15-03-09\" at \"08:54\""},{"visible":true,"include":true,"step":"350","x":30.43809523809524,"y":-17.285714285714285,"z":-14.561904761904762,"a95":3,"info":"\"15-03-09\" at \"12:20\""},{"visible":false,"include":false,"step":"380","x":27.428571428571427,"y":-6.580952380952381,"z":-1.9904761904761903,"a95":4.1,"info":"\"15-04-21\" at \"08:06\""},{"visible":false,"include":false,"step":"410","x":16.133333333333333,"y":-12.028571428571428,"z":-11.038095238095238,"a95":7.2,"info":"\"15-04-21\" at \"11:35\""},{"visible":false,"include":false,"step":"440","x":18.83809523809524,"y":-12.571428571428571,"z":-10.59047619047619,"a95":4.7,"info":"\"15-04-22\" at \"14:25\""}]}]
