# Supplementary material for: Paleomagnetic constraints on the timing and distribution of Cenozoic rotations in Central and Eastern Anatolia
Source: Copernicus journal article supplement (doi:10.5194/se-9-295-2018), 2018-03-21
Supplement: Supplementary file 2 [file se-9-295-2018-supplement.zip › se-2017-66_DATA_dir files/dir files Ulukisla/TT1.dir]

[{"version":"v1.1.0","exported":"2016-11-18T09:56:15.392Z","volume":10.5,"added":"2016-11-18T09:15:19.290Z","format":"Utrecht","demagType":"Unknown","strat":"5","patch":1.1,"GEO":[{"dec":352.4944460398277,"inc":15.017308359085977,"MAD":2.055915812672044,"cm":[-1.4210854715202004e-14,-7.438494264988549e-14,0],"intensity":784.8624477207306,"type":"dir","forced":true,"remark":"","origin":false,"nSteps":10,"minStep":"4.0","maxStep":"45.0","steps":["4.0","8.0","12.0","16.0","20.0","25.0","30.0","35.0","40.0","45.0"],"group":"None","version":"v1.1.0"}],"TECT":[{"dec":324.8044399535263,"inc":28.322452602580043,"MAD":2.0559158126720107,"cm":[5.329070518200751e-15,-3.019806626980426e-14,-5.773159728050814e-14],"intensity":784.8624477207308,"type":"dir","forced":true,"remark":"","origin":false,"nSteps":10,"minStep":"4.0","maxStep":"45.0","steps":["4.0","8.0","12.0","16.0","20.0","25.0","30.0","35.0","40.0","45.0"],"group":"None","version":"v1.1.0"}],"interpreted":true,"name":"TT 1.1B","coreAzi":184,"coreDip":50,"bedStrike":148,"bedDip":63,"data":[{"visible":true,"include":false,"step":"0.0","x":-601.9809523809524,"y":147.8,"z":-323.51428571428573,"a95":0.99,"info":"19/01/2014 at 14:50:44"},{"visible":true,"include":true,"step":"4.0","x":-567.6476190476191,"y":131.82857142857142,"z":-273.247619047619,"a95":0.99,"info":"19/01/2014 at 14:50:44"},{"visible":true,"include":true,"step":"8.0","x":-501.3047619047619,"y":116.86666666666666,"z":-243.04761904761904,"a95":0.99,"info":"19/01/2014 at 14:50:44"},{"visible":true,"include":true,"step":"12.0","x":-441.08571428571423,"y":95.18190476190476,"z":-198.43809523809523,"a95":0.99,"info":"19/01/2014 at 14:50:44"},{"visible":true,"include":true,"step":"16.0","x":-384.9142857142857,"y":86.08,"z":-174.06666666666666,"a95":0.99,"info":"19/01/2014 at 14:50:44"},{"visible":true,"include":true,"step":"20.0","x":-317.752380952381,"y":63.55238095238095,"z":-141.93333333333334,"a95":0.99,"info":"19/01/2014 at 14:50:44"},{"visible":true,"include":true,"step":"25.0","x":-271.25714285714287,"y":63.0647619047619,"z":-127.34285714285713,"a95":0.99,"info":"19/01/2014 at 14:50:44"},{"visible":true,"include":true,"step":"30.0","x":-241.2952380952381,"y":38.881904761904764,"z":-100.16190476190476,"a95":0.99,"info":"19/01/2014 at 14:50:44"},{"visible":true,"include":true,"step":"35.0","x":-197.53333333333333,"y":16.99142857142857,"z":-74.54666666666667,"a95":0.99,"info":"19/01/2014 at 14:50:44"},{"visible":true,"include":true,"step":"40.0","x":-180.57142857142858,"y":25.016190476190477,"z":-63.555238095238096,"a95":0.99,"info":"19/01/2014 at 14:50:44"},{"visible":true,"include":true,"step":"45.0","x":-128.61904761904762,"y":28.258095238095237,"z":-51.7047619047619,"a95":0.99,"info":"19/01/2014 at 14:50:44"},{"visible":false,"include":false,"step":"50.0","x":-139.62857142857143,"y":-8.214761904761904,"z":-12.244761904761905,"a95":0.99,"info":"19/01/2014 at 14:50:44"},{"visible":false,"include":false,"step":"60.0","x":-147.53333333333333,"y":27.846666666666664,"z":-34.51714285714286,"a95":0.99,"info":"19/01/2014 at 14:50:44"},{"visible":false,"include":false,"step":"70.0","x":-78.5952380952381,"y":-4.5070476190476185,"z":4.321142857142857,"a95":0.99,"info":"19/01/2014 at 14:50:44"},{"visible":false,"include":false,"step":"80.0","x":-35.45904761904762,"y":-44.28285714285715,"z":9.01,"a95":0.99,"info":"19/01/2014 at 14:50:44"},{"visible":false,"include":false,"step":"90.0","x":-49.91904761904762,"y":-10.086666666666666,"z":-14.693333333333333,"a95":0.99,"info":"19/01/2014 at 14:50:44"},{"visible":false,"include":false,"step":"100.0","x":-36.2952380952381,"y":-31.25142857142857,"z":25.045714285714286,"a95":0.99,"info":"19/01/2014 at 14:50:44"}]},{"version":"v1.1.0","exported":"2016-11-18T09:56:15.392Z","volume":10.5,"added":"2016-11-18T09:15:19.291Z","format":"Utrecht","demagType":"Unknown","strat":"6","patch":1.1,"GEO":[{"dec":351.7438084654621,"inc":9.740783652044753,"MAD":4.0567768650444656,"cm":[-5.329070518200751e-15,-2.9726221484338566e-14,0],"intensity":647.0212214255575,"type":"dir","forced":true,"remark":"","origin":false,"nSteps":10,"minStep":"4.0","maxStep":"45.0","steps":["4.0","8.0","12.0","16.0","20.0","25.0","30.0","35.0","40.0","45.0"],"group":"None","version":"v1.1.0"}],"TECT":[{"dec":329.86732628040033,"inc":25.492993702152194,"MAD":4.056776865044513,"cm":[-1.021405182655144e-14,-4.6629367034256575e-14,-3.419486915845482e-14],"intensity":647.0212214255574,"type":"dir","forced":true,"remark":"","origin":false,"nSteps":10,"minStep":"4.0","maxStep":"45.0","steps":["4.0","8.0","12.0","16.0","20.0","25.0","30.0","35.0","40.0","45.0"],"group":"None","version":"v1.1.0"}],"interpreted":true,"name":"TT 1.2B","coreAzi":174,"coreDip":38,"bedStrike":148,"bedDip":63,"data":[{"visible":true,"include":false,"step":"0.0","x":-368.1333333333333,"y":58.35619047619048,"z":-383.8666666666667,"a95":0.99,"info":"19/01/2014 at 14:50:44"},{"visible":true,"include":true,"step":"4.0","x":-375.6095238095238,"y":46.76095238095238,"z":-365.84761904761905,"a95":0.99,"info":"19/01/2014 at 14:50:44"},{"visible":true,"include":true,"step":"8.0","x":-339.70476190476194,"y":25.29619047619048,"z":-325.77142857142854,"a95":0.99,"info":"19/01/2014 at 14:50:44"},{"visible":true,"include":true,"step":"12.0","x":-309.18095238095236,"y":20.435238095238095,"z":-273.2,"a95":0.99,"info":"19/01/2014 at 14:50:44"},{"visible":true,"include":true,"step":"16.0","x":-279.3809523809524,"y":11.665714285714285,"z":-244.3904761904762,"a95":0.99,"info":"19/01/2014 at 14:50:44"},{"visible":true,"include":true,"step":"20.0","x":-217.82857142857142,"y":0.1635047619047619,"z":-222.13333333333335,"a95":0.99,"info":"19/01/2014 at 14:50:44"},{"visible":true,"include":true,"step":"25.0","x":-203.41904761904763,"y":-4.0381904761904766,"z":-172.34285714285713,"a95":0.99,"info":"19/01/2014 at 14:50:44"},{"visible":true,"include":true,"step":"30.0","x":-164.0285714285714,"y":-9.366190476190477,"z":-134.28571428571428,"a95":0.99,"info":"19/01/2014 at 14:50:44"},{"visible":true,"include":true,"step":"35.0","x":-153.8,"y":-17.393333333333334,"z":-122.74285714285713,"a95":0.99,"info":"19/01/2014 at 14:50:44"},{"visible":true,"include":true,"step":"40.0","x":-142.1809523809524,"y":5.265714285714286,"z":-82.96571428571428,"a95":0.99,"info":"19/01/2014 at 14:50:44"},{"visible":true,"include":true,"step":"45.0","x":-109.63809523809525,"y":-9.347999999999999,"z":-60.49904761904762,"a95":0.99,"info":"19/01/2014 at 14:50:44"},{"visible":false,"include":false,"step":"50.0","x":-90.89333333333333,"y":-18.47047619047619,"z":-75.44190476190477,"a95":0.99,"info":"19/01/2014 at 14:50:44"},{"visible":false,"include":false,"step":"60.0","x":-92.77238095238096,"y":6.353142857142857,"z":-29.347619047619045,"a95":0.99,"info":"19/01/2014 at 14:50:44"},{"visible":false,"include":false,"step":"70.0","x":-70.84666666666666,"y":-3.3452380952380953,"z":-34.58571428571428,"a95":0.99,"info":"19/01/2014 at 14:50:44"},{"visible":false,"include":false,"step":"80.0","x":-53.32,"y":8.260666666666665,"z":-1.750952380952381,"a95":0.99,"info":"19/01/2014 at 14:50:44"},{"visible":false,"include":false,"step":"90.0","x":-93.7104761904762,"y":51.79333333333334,"z":-14.28,"a95":0.99,"info":"19/01/2014 at 14:50:44"},{"visible":false,"include":false,"step":"100.0","x":-61.6552380952381,"y":6.114380952380952,"z":-5.815904761904762,"a95":0.99,"info":"19/01/2014 at 14:50:44"}]},{"version":"v1.1.0","exported":"2016-11-18T09:56:15.393Z","volume":10.5,"added":"2016-11-18T09:15:19.292Z","format":"Utrecht","demagType":"Unknown","strat":"7","patch":1.1,"GEO":[{"dec":352.6415437711679,"inc":13.928890677285501,"MAD":3.8108841365842347,"cm":[3.552713678800501e-15,8.97025509427607e-15,0],"intensity":667.3619663473369,"type":"dir","forced":true,"remark":"","origin":false,"nSteps":9,"minStep":"4.0","maxStep":"40.0","steps":["4.0","8.0","12.0","16.0","20.0","25.0","30.0","35.0","40.0"],"group":"None","version":"v1.1.0"}],"TECT":[{"dec":326.0030708436214,"inc":28.024943235523306,"MAD":3.8108841365843373,"cm":[-2.6645352591003757e-14,-1.9539925233402755e-14,1.3322676295501878e-14],"intensity":667.3619663473369,"type":"dir","forced":true,"remark":"","origin":false,"nSteps":9,"minStep":"4.0","maxStep":"40.0","steps":["4.0","8.0","12.0","16.0","20.0","25.0","30.0","35.0","40.0"],"group":"None","version":"v1.1.0"}],"interpreted":true,"name":"TT 1.3B","coreAzi":151,"coreDip":53,"bedStrike":148,"bedDip":63,"data":[{"visible":true,"include":false,"step":"0.0","x":-497.54285714285714,"y":-160.1809523809524,"z":-210.2095238095238,"a95":0.99,"info":"19/01/2014 at 14:50:44"},{"visible":true,"include":true,"step":"4.0","x":-464.1714285714286,"y":-155.8095238095238,"z":-190.15238095238095,"a95":0.99,"info":"19/01/2014 at 14:50:44"},{"visible":true,"include":true,"step":"8.0","x":-394.91428571428577,"y":-153.4,"z":-164.94285714285715,"a95":0.99,"info":"19/01/2014 at 14:50:44"},{"visible":true,"include":true,"step":"12.0","x":-344.81904761904764,"y":-140.8761904761905,"z":-118.95238095238095,"a95":0.99,"info":"19/01/2014 at 14:50:44"},{"visible":true,"include":true,"step":"16.0","x":-283.6952380952381,"y":-133.25714285714287,"z":-110.26666666666667,"a95":0.99,"info":"19/01/2014 at 14:50:44"},{"visible":true,"include":true,"step":"20.0","x":-238.8952380952381,"y":-124.74285714285713,"z":-118.77142857142856,"a95":0.99,"info":"19/01/2014 at 14:50:44"},{"visible":true,"include":true,"step":"25.0","x":-199.94285714285715,"y":-85.79428571428572,"z":-70.03428571428572,"a95":0.99,"info":"19/01/2014 at 14:50:44"},{"visible":true,"include":true,"step":"30.0","x":-170.77142857142857,"y":-84.50571428571428,"z":-71.17428571428572,"a95":0.99,"info":"19/01/2014 at 14:50:44"},{"visible":true,"include":true,"step":"35.0","x":-131.82857142857142,"y":-82.04857142857142,"z":-53.18190476190476,"a95":0.99,"info":"19/01/2014 at 14:50:44"},{"visible":true,"include":true,"step":"40.0","x":-112.0095238095238,"y":-69.55333333333333,"z":-60.04571428571429,"a95":0.99,"info":"19/01/2014 at 14:50:44"},{"visible":false,"include":false,"step":"45.0","x":-63.52095238095238,"y":-61.93333333333333,"z":-51.74952380952381,"a95":0.99,"info":"19/01/2014 at 14:50:44"},{"visible":false,"include":false,"step":"50.0","x":-44.593333333333334,"y":-66.74380952380952,"z":-27.754285714285714,"a95":0.99,"info":"19/01/2014 at 14:50:44"},{"visible":false,"include":false,"step":"60.0","x":-30.75238095238095,"y":-41.03619047619048,"z":-24.21142857142857,"a95":0.99,"info":"19/01/2014 at 14:50:44"},{"visible":false,"include":false,"step":"70.0","x":9.439428571428572,"y":-46.772380952380956,"z":-14.445714285714287,"a95":0.99,"info":"19/01/2014 at 14:50:44"},{"visible":false,"include":false,"step":"80.0","x":21.576190476190476,"y":-60.645714285714284,"z":-40.08,"a95":0.99,"info":"19/01/2014 at 14:50:44"},{"visible":false,"include":false,"step":"90.0","x":89.39047619047619,"y":-38.04666666666667,"z":-20.84190476190476,"a95":0.99,"info":"19/01/2014 at 14:50:44"},{"visible":false,"include":false,"step":"100.0","x":65.91904761904762,"y":-43.47142857142857,"z":-27.231428571428573,"a95":0.99,"info":"19/01/2014 at 14:50:44"}]},{"version":"v1.1.0","exported":"2016-11-18T09:56:15.393Z","volume":10.5,"added":"2016-11-18T09:15:19.293Z","format":"Utrecht","demagType":"Unknown","strat":"8","patch":1.1,"GEO":[{"dec":7.296468869642524,"inc":25.38746973537536,"MAD":4.505101544899198,"cm":[3.552713678800501e-15,3.197442310920451e-14,0],"intensity":923.4498527957928,"type":"dir","forced":true,"remark":"","origin":false,"nSteps":8,"minStep":"4.0","maxStep":"35.0","steps":["4.0","8.0","12.0","16.0","20.0","25.0","30.0","35.0"],"group":"None","version":"v1.1.0"}],"TECT":[{"dec":318.0819353902289,"inc":44.78524217517103,"MAD":4.5051015448991985,"cm":[3.730349362740526e-14,6.616929226765933e-14,1.4210854715202004e-14],"intensity":923.4498527957928,"type":"dir","forced":true,"remark":"","origin":false,"nSteps":8,"minStep":"4.0","maxStep":"35.0","steps":["4.0","8.0","12.0","16.0","20.0","25.0","30.0","35.0"],"group":"None","version":"v1.1.0"}],"interpreted":true,"name":"TT 1.4","coreAzi":173,"coreDip":52,"bedStrike":148,"bedDip":63,"data":[{"visible":true,"include":false,"step":"0.0","x":-801.9238095238096,"y":-95.87619047619049,"z":-148.92380952380952,"a95":0.99,"info":"19/01/2014 at 14:50:44"},{"visible":true,"include":true,"step":"4.0","x":-730.0666666666666,"y":-116.19999999999999,"z":-150.51428571428573,"a95":0.99,"info":"19/01/2014 at 14:50:44"},{"visible":true,"include":true,"step":"8.0","x":-609.8285714285714,"y":-130.4,"z":-125.58095238095237,"a95":0.99,"info":"19/01/2014 at 14:50:44"},{"visible":true,"include":true,"step":"12.0","x":-507.2666666666667,"y":-114.61904761904762,"z":-92.28761904761905,"a95":0.99,"info":"19/01/2014 at 14:50:44"},{"visible":true,"include":true,"step":"16.0","x":-400.4761904761905,"y":-115.27619047619048,"z":-96.44761904761906,"a95":0.99,"info":"19/01/2014 at 14:50:44"},{"visible":true,"include":true,"step":"20.0","x":-336.1142857142857,"y":-126.34285714285713,"z":-90.65238095238095,"a95":0.99,"info":"19/01/2014 at 14:50:44"},{"visible":true,"include":true,"step":"25.0","x":-278.9904761904762,"y":-96.81904761904762,"z":-52.73428571428572,"a95":0.99,"info":"19/01/2014 at 14:50:44"},{"visible":true,"include":true,"step":"30.0","x":-193.8095238095238,"y":-75.27238095238096,"z":-57.457142857142856,"a95":0.99,"info":"19/01/2014 at 14:50:44"},{"visible":true,"include":true,"step":"35.0","x":-154.48571428571427,"y":-85.43047619047618,"z":-21.740952380952383,"a95":0.99,"info":"19/01/2014 at 14:50:44"},{"visible":false,"include":false,"step":"40.0","x":-140.48571428571427,"y":-48.802857142857135,"z":-49.603809523809524,"a95":0.99,"info":"19/01/2014 at 14:50:44"},{"visible":false,"include":false,"step":"45.0","x":-103.9904761904762,"y":-60.3847619047619,"z":-15.697142857142856,"a95":0.99,"info":"19/01/2014 at 14:50:44"},{"visible":false,"include":false,"step":"50.0","x":-74.8752380952381,"y":-60.01809523809524,"z":-13.67047619047619,"a95":0.99,"info":"19/01/2014 at 14:50:44"},{"visible":false,"include":false,"step":"60.0","x":-57.87333333333333,"y":-35.43523809523809,"z":-20.027619047619048,"a95":0.99,"info":"19/01/2014 at 14:50:44"},{"visible":false,"include":false,"step":"70.0","x":-17.38095238095238,"y":-23.825714285714284,"z":17.759047619047617,"a95":0.99,"info":"19/01/2014 at 14:50:44"},{"visible":false,"include":false,"step":"80.0","x":10.066666666666666,"y":-58.69428571428571,"z":11.373333333333333,"a95":0.99,"info":"19/01/2014 at 14:50:44"},{"visible":false,"include":false,"step":"90.0","x":73.6504761904762,"y":-41.34095238095238,"z":-39.298095238095236,"a95":0.99,"info":"19/01/2014 at 14:50:44"},{"visible":false,"include":false,"step":"100.0","x":56.011428571428574,"y":-75.44571428571427,"z":-10.737142857142857,"a95":0.99,"info":"19/01/2014 at 14:50:44"}]},{"version":"v1.1.0","exported":"2016-11-18T09:56:15.393Z","volume":10.5,"added":"2016-11-18T09:15:19.294Z","format":"Utrecht","demagType":"Unknown","strat":"1","patch":1.1,"GEO":[{"dec":3.265620574292882,"inc":26.31688889847113,"MAD":3.2505045597615423,"cm":[-3.552713678800501e-15,-8.881784197001252e-15,0],"intensity":433.50574889674834,"type":"dir","forced":true,"remark":"","origin":false,"nSteps":4,"minStep":"25.0","maxStep":"40.0","steps":["25.0","30.0","35.0","40.0"],"group":"None","version":"v1.1.0"}],"TECT":[{"dec":315.6633049991287,"inc":41.48240243192551,"MAD":3.2505045597615805,"cm":[2.1316282072803006e-14,-3.552713678800501e-15,-2.1316282072803006e-14],"intensity":433.5057488967484,"type":"dir","forced":true,"remark":"","origin":false,"nSteps":4,"minStep":"25.0","maxStep":"40.0","steps":["25.0","30.0","35.0","40.0"],"group":"None","version":"v1.1.0"}],"interpreted":true,"name":"TT 1.5","coreAzi":171,"coreDip":55,"bedStrike":148,"bedDip":63,"data":[{"visible":true,"include":false,"step":"0.0","x":-564.5714285714286,"y":25.63142857142857,"z":186.6,"a95":0.99,"info":"19/01/2014 at 20:25:16"},{"visible":true,"include":false,"step":"4.0","x":-567.6380952380953,"y":9.478666666666665,"z":155.01904761904763,"a95":0.99,"info":"19/01/2014 at 20:25:16"},{"visible":true,"include":false,"step":"8.0","x":-506.7714285714286,"y":-11.57047619047619,"z":80.20571428571428,"a95":0.99,"info":"19/01/2014 at 20:25:16"},{"visible":true,"include":false,"step":"12.0","x":-469.5904761904762,"y":-21.34190476190476,"z":31.46857142857143,"a95":0.99,"info":"19/01/2014 at 20:25:16"},{"visible":true,"include":false,"step":"16.0","x":-395.4095238095238,"y":-36.986666666666665,"z":-9.879999999999999,"a95":0.99,"info":"19/01/2014 at 20:25:16"},{"visible":true,"include":false,"step":"20.0","x":-347.1333333333333,"y":-41.938095238095244,"z":-29.7352380952381,"a95":0.99,"info":"19/01/2014 at 20:25:16"},{"visible":true,"include":true,"step":"25.0","x":-270.65714285714284,"y":-57.49809523809524,"z":-24.474285714285717,"a95":0.99,"info":"19/01/2014 at 20:25:16"},{"visible":true,"include":true,"step":"30.0","x":-219.65714285714287,"y":-31.02,"z":-38.22190476190476,"a95":0.99,"info":"19/01/2014 at 20:25:16"},{"visible":true,"include":true,"step":"35.0","x":-166.21904761904761,"y":-38.637142857142855,"z":-35.275238095238095,"a95":0.99,"info":"19/01/2014 at 20:25:16"},{"visible":true,"include":true,"step":"40.0","x":-150.63809523809525,"y":-32.14666666666667,"z":-24.52952380952381,"a95":0.99,"info":"19/01/2014 at 20:25:16"},{"visible":true,"include":false,"step":"45.0","x":-109.63809523809525,"y":-46.03904761904762,"z":-31.143809523809523,"a95":0.99,"info":"19/01/2014 at 20:25:16"},{"visible":true,"include":false,"step":"50.0","x":-97.83809523809524,"y":-56.448571428571434,"z":-18.13904761904762,"a95":0.99,"info":"19/01/2014 at 20:25:16"},{"visible":true,"include":false,"step":"60.0","x":-54.19047619047619,"y":-28.788571428571426,"z":-14.109523809523811,"a95":0.99,"info":"19/01/2014 at 20:25:16"},{"visible":false,"include":false,"step":"70.0","x":-21.704761904761906,"y":-42.44380952380953,"z":-15.246666666666666,"a95":0.99,"info":"19/01/2014 at 20:25:16"},{"visible":false,"include":false,"step":"80.0","x":7.503047619047619,"y":-56.04571428571429,"z":-5.686190476190476,"a95":0.99,"info":"19/01/2014 at 20:25:16"},{"visible":false,"include":false,"step":"90.0","x":-23.913333333333334,"y":-49.21714285714285,"z":-31.134285714285717,"a95":0.99,"info":"19/01/2014 at 20:25:16"},{"visible":false,"include":false,"step":"100.0","x":15.515238095238095,"y":-54.25047619047619,"z":-29.213333333333335,"a95":0.99,"info":"19/01/2014 at 20:25:16"}]},{"version":"v1.1.0","exported":"2016-11-18T09:56:15.393Z","volume":10.5,"added":"2016-11-18T09:15:19.294Z","format":"Utrecht","demagType":"Unknown","strat":"2","patch":1.1,"GEO":[{"dec":4.857110928427403,"inc":25.709481493076627,"MAD":2.980862200555359,"cm":[0,1.887379141862766e-15,0],"intensity":619.7783978004117,"type":"dir","forced":true,"remark":"","origin":false,"nSteps":10,"minStep":"4.0","maxStep":"50.0","steps":["4.0","8.0","12.0","16.0","20.0","25.0","30.0","35.0","45.0","50.0"],"group":"None","version":"v1.1.0"}],"TECT":[{"dec":316.92063043370894,"inc":42.72516500878425,"MAD":2.9808622005554954,"cm":[-1.7763568394002505e-15,3.197442310920451e-14,2.6645352591003757e-14],"intensity":619.7783978004118,"type":"dir","forced":true,"remark":"","origin":false,"nSteps":10,"minStep":"4.0","maxStep":"50.0","steps":["4.0","8.0","12.0","16.0","20.0","25.0","30.0","35.0","45.0","50.0"],"group":"None","version":"v1.1.0"}],"interpreted":true,"name":"TT 1.6B","coreAzi":167,"coreDip":36,"bedStrike":148,"bedDip":63,"data":[{"visible":true,"include":false,"step":"0.0","x":-414.4857142857143,"y":-99.45714285714286,"z":-226.8190476190476,"a95":0.99,"info":"19/01/2014 at 20:25:16"},{"visible":true,"include":true,"step":"4.0","x":-421.02857142857147,"y":-113.48571428571428,"z":-208.77142857142857,"a95":0.99,"info":"19/01/2014 at 20:25:16"},{"visible":true,"include":true,"step":"8.0","x":-379.6380952380952,"y":-128.45714285714286,"z":-191.41904761904763,"a95":0.99,"info":"19/01/2014 at 20:25:16"},{"visible":true,"include":true,"step":"12.0","x":-361.50476190476195,"y":-99.21904761904761,"z":-184.67619047619047,"a95":0.99,"info":"19/01/2014 at 20:25:16"},{"visible":true,"include":true,"step":"16.0","x":-309.8095238095238,"y":-99.73333333333333,"z":-147.51428571428573,"a95":0.99,"info":"19/01/2014 at 20:25:16"},{"visible":true,"include":true,"step":"20.0","x":-255.0190476190476,"y":-104.77142857142856,"z":-137.0952380952381,"a95":0.99,"info":"19/01/2014 at 20:25:16"},{"visible":true,"include":true,"step":"25.0","x":-216.51428571428573,"y":-93.9047619047619,"z":-128.92380952380952,"a95":0.99,"info":"19/01/2014 at 20:25:16"},{"visible":true,"include":true,"step":"30.0","x":-175.84761904761905,"y":-74.13904761904762,"z":-107.31428571428572,"a95":0.99,"info":"19/01/2014 at 20:25:16"},{"visible":true,"include":true,"step":"35.0","x":-154.9904761904762,"y":-52.96666666666666,"z":-85.23333333333333,"a95":0.99,"info":"19/01/2014 at 20:25:16"},{"visible":false,"include":false,"step":"40.0","x":-114.94285714285715,"y":-68.06857142857143,"z":-65.48190476190476,"a95":0.99,"info":"19/01/2014 at 20:25:16"},{"visible":true,"include":true,"step":"45.0","x":-143.40952380952382,"y":-34.64952380952381,"z":-59.24952380952381,"a95":0.99,"info":"19/01/2014 at 20:25:16"},{"visible":true,"include":true,"step":"50.0","x":-115.62857142857142,"y":-37.88095238095238,"z":-61.80666666666667,"a95":0.99,"info":"19/01/2014 at 20:25:16"},{"visible":false,"include":false,"step":"60.0","x":-63.061904761904756,"y":-72.45428571428572,"z":-67.98190476190476,"a95":0.99,"info":"19/01/2014 at 20:25:16"},{"visible":false,"include":false,"step":"70.0","x":-43.14857142857143,"y":18.429523809523808,"z":-4.3028571428571425,"a95":0.99,"info":"19/01/2014 at 20:25:16"},{"visible":false,"include":false,"step":"80.0","x":-104.48571428571428,"y":-8.985619047619048,"z":-21.447619047619046,"a95":0.99,"info":"19/01/2014 at 20:25:16"},{"visible":false,"include":false,"step":"90.0","x":-18.055238095238096,"y":-37.775238095238095,"z":-1.4147619047619049,"a95":0.99,"info":"19/01/2014 at 20:25:16"},{"visible":false,"include":false,"step":"100.0","x":17.20285714285714,"y":-2.9585714285714286,"z":-69.42571428571429,"a95":0.99,"info":"19/01/2014 at 20:25:16"}]},{"version":"v1.1.0","exported":"2016-11-18T09:56:15.393Z","volume":10.5,"added":"2016-11-18T09:15:19.295Z","format":"Utrecht","demagType":"Unknown","strat":"3","patch":1.1,"GEO":[],"TECT":[],"interpreted":false,"name":"TT 1.7","coreAzi":178,"coreDip":39,"bedStrike":148,"bedDip":63,"data":[{"visible":true,"include":false,"step":"0.0","x":-455.3619047619048,"y":-284.12380952380954,"z":225.45714285714288,"a95":0.99,"info":"19/01/2014 at 20:25:16"},{"visible":true,"include":false,"step":"4.0","x":-430.74285714285713,"y":-292.2666666666667,"z":163.8190476190476,"a95":0.99,"info":"19/01/2014 at 20:25:16"},{"visible":true,"include":false,"step":"8.0","x":-351.0761904761905,"y":-284.15238095238095,"z":70.85047619047619,"a95":0.99,"info":"19/01/2014 at 20:25:16"},{"visible":true,"include":true,"step":"12.0","x":-314.9142857142857,"y":-236.04761904761904,"z":38.08571428571428,"a95":0.99,"info":"19/01/2014 at 20:25:16"},{"visible":true,"include":true,"step":"16.0","x":-250.47619047619048,"y":-211.84761904761905,"z":15.92,"a95":0.99,"info":"19/01/2014 at 20:25:16"},{"visible":true,"include":true,"step":"20.0","x":-214.67619047619047,"y":-193.51428571428573,"z":14.574285714285715,"a95":0.99,"info":"19/01/2014 at 20:25:16"},{"visible":true,"include":true,"step":"25.0","x":-163.36190476190475,"y":-170.6,"z":-16.48952380952381,"a95":0.99,"info":"19/01/2014 at 20:25:16"},{"visible":true,"include":false,"step":"30.0","x":-150.22857142857143,"y":-117.70476190476191,"z":-11.531428571428572,"a95":0.99,"info":"19/01/2014 at 20:25:16"},{"visible":false,"include":false,"step":"35.0","x":-120.34285714285713,"y":-110.19999999999999,"z":-9.612380952380953,"a95":0.99,"info":"19/01/2014 at 20:25:16"},{"visible":false,"include":false,"step":"40.0","x":-98.56190476190477,"y":-110.60952380952382,"z":-14.508571428571429,"a95":0.99,"info":"19/01/2014 at 20:25:16"},{"visible":false,"include":false,"step":"45.0","x":-131.43809523809523,"y":-85.65619047619047,"z":1.5885714285714285,"a95":0.99,"info":"19/01/2014 at 20:25:16"},{"visible":false,"include":false,"step":"50.0","x":-85.47238095238096,"y":-82.23809523809524,"z":-2.0853333333333333,"a95":0.99,"info":"19/01/2014 at 20:25:16"},{"visible":false,"include":false,"step":"60.0","x":-43.61238095238095,"y":-68.94,"z":-23.016190476190474,"a95":0.99,"info":"19/01/2014 at 20:25:16"},{"visible":false,"include":false,"step":"70.0","x":-62.47428571428571,"y":-40.17714285714286,"z":-4.624,"a95":0.99,"info":"19/01/2014 at 20:25:16"},{"visible":false,"include":false,"step":"80.0","x":-35.44095238095238,"y":-56.84095238095239,"z":16.17047619047619,"a95":0.99,"info":"19/01/2014 at 20:25:16"},{"visible":false,"include":false,"step":"90.0","x":1.376952380952381,"y":-51.41142857142857,"z":-31.081904761904763,"a95":0.99,"info":"19/01/2014 at 20:25:16"},{"visible":false,"include":false,"step":"100.0","x":-8.462380952380952,"y":-8.260666666666665,"z":-18.717142857142857,"a95":0.99,"info":"19/01/2014 at 20:25:16"}]},{"version":"v1.1.0","exported":"2016-11-18T09:56:15.393Z","volume":10.5,"added":"2016-11-18T09:15:19.299Z","format":"Utrecht","demagType":"Unknown","strat":"4","patch":1.1,"GEO":[{"dec":17.201743484626263,"inc":27.110022874070726,"MAD":6.4348168440514195,"cm":[-5.329070518200751e-15,1.2434497875801753e-14,0],"intensity":430.23705215528014,"type":"dir","forced":true,"remark":"","origin":false,"nSteps":6,"minStep":"20.0","maxStep":"45.0","steps":["20.0","25.0","30.0","35.0","40.0","45.0"],"group":"None","version":"v1.1.0"}],"TECT":[{"dec":318.2333112961221,"inc":53.83133615067533,"MAD":6.434816844051379,"cm":[-7.549516567451064e-15,3.552713678800501e-15,0],"intensity":430.2370521552801,"type":"dir","forced":true,"remark":"","origin":false,"nSteps":6,"minStep":"20.0","maxStep":"45.0","steps":["20.0","25.0","30.0","35.0","40.0","45.0"],"group":"None","version":"v1.1.0"}],"interpreted":true,"name":"TT 1.8B","coreAzi":176,"coreDip":51,"bedStrike":148,"bedDip":63,"data":[{"visible":false,"include":false,"step":"0.0","x":-446.7333333333333,"y":-4.146285714285715,"z":289.4095238095238,"a95":0.99,"info":"19/01/2014 at 20:25:16"},{"visible":true,"include":false,"step":"4.0","x":-429.60952380952375,"y":-32.359047619047615,"z":194.46666666666667,"a95":0.99,"info":"19/01/2014 at 20:25:16"},{"visible":true,"include":false,"step":"8.0","x":-402.2857142857143,"y":-68.29238095238095,"z":98.73333333333333,"a95":0.99,"info":"19/01/2014 at 20:25:16"},{"visible":true,"include":false,"step":"12.0","x":-376.5333333333333,"y":-68.20952380952382,"z":24.88952380952381,"a95":0.99,"info":"19/01/2014 at 20:25:16"},{"visible":true,"include":false,"step":"16.0","x":-305.6380952380952,"y":-69.76190476190476,"z":-11.572380952380954,"a95":0.99,"info":"19/01/2014 at 20:25:16"},{"visible":true,"include":true,"step":"20.0","x":-282,"y":-79.0657142857143,"z":-30.392380952380954,"a95":0.99,"info":"19/01/2014 at 20:25:16"},{"visible":true,"include":true,"step":"25.0","x":-222.0952380952381,"y":-68.14380952380952,"z":-42.52857142857143,"a95":0.99,"info":"19/01/2014 at 20:25:16"},{"visible":true,"include":true,"step":"30.0","x":-185.26666666666665,"y":-69.62666666666667,"z":-42.9247619047619,"a95":0.99,"info":"19/01/2014 at 20:25:16"},{"visible":true,"include":true,"step":"35.0","x":-179.5047619047619,"y":-60.402857142857144,"z":-57.91047619047619,"a95":0.99,"info":"19/01/2014 at 20:25:16"},{"visible":true,"include":true,"step":"40.0","x":-154.4952380952381,"y":-63.224761904761905,"z":-36.579047619047614,"a95":0.99,"info":"19/01/2014 at 20:25:16"},{"visible":true,"include":true,"step":"45.0","x":-117.74285714285713,"y":-77.28,"z":0.9715238095238096,"a95":0.99,"info":"19/01/2014 at 20:25:16"},{"visible":true,"include":false,"step":"50.0","x":-104.46666666666667,"y":-72.67142857142856,"z":-17.65142857142857,"a95":0.99,"info":"19/01/2014 at 20:25:16"},{"visible":false,"include":false,"step":"60.0","x":-83.73047619047618,"y":-25.10285714285714,"z":-20.289523809523807,"a95":0.99,"info":"19/01/2014 at 20:25:16"},{"visible":false,"include":false,"step":"70.0","x":-31.19238095238095,"y":-51.03333333333334,"z":-23.095238095238095,"a95":0.99,"info":"19/01/2014 at 20:25:16"},{"visible":false,"include":false,"step":"80.0","x":-80.87714285714286,"y":-116.13333333333334,"z":12.751428571428571,"a95":0.99,"info":"19/01/2014 at 20:25:16"},{"visible":false,"include":false,"step":"90.0","x":-34.05714285714286,"y":-27.847619047619045,"z":-23.761904761904763,"a95":0.99,"info":"19/01/2014 at 20:25:16"},{"visible":false,"include":false,"step":"100.0","x":12.69809523809524,"y":-88.21238095238095,"z":-36.67619047619048,"a95":0.99,"info":"19/01/2014 at 20:25:16"}]},{"version":"v1.1.0","exported":"2016-11-18T09:56:15.393Z","volume":10.5,"added":"2016-11-18T09:15:19.299Z","format":"Utrecht","demagType":"Unknown","strat":"5","patch":1.1,"GEO":[{"dec":28.856251073079363,"inc":24.392744104196225,"MAD":16.277002608023356,"cm":[273.7990067448904,183.40962369834105,49.12901955138842],"intensity":271.21120741028255,"type":"dir","forced":false,"remark":"","origin":false,"nSteps":7,"minStep":"16.0","maxStep":"45.0","steps":["16.0","20.0","25.0","30.0","35.0","40.0","45.0"],"group":"None","version":"v1.1.0"}],"TECT":[{"dec":327.11453704580816,"inc":63.66724719515356,"MAD":16.27700260802336,"cm":[163.61715492667528,7.081801759966946,290.1687809177086],"intensity":271.21120741028255,"type":"dir","forced":false,"remark":"","origin":false,"nSteps":7,"minStep":"16.0","maxStep":"45.0","steps":["16.0","20.0","25.0","30.0","35.0","40.0","45.0"],"group":"None","version":"v1.1.0"}],"interpreted":true,"name":"TT 1.9B","coreAzi":165,"coreDip":50,"bedStrike":148,"bedDip":63,"data":[{"visible":false,"include":false,"step":"0.0","x":-645.5428571428571,"y":-329.34285714285716,"z":246.48571428571427,"a95":0.99,"info":"19/01/2014 at 20:25:16"},{"visible":true,"include":false,"step":"4.0","x":-611.9238095238095,"y":-357.9238095238095,"z":140.85714285714286,"a95":0.99,"info":"19/01/2014 at 20:25:16"},{"visible":true,"include":false,"step":"8.0","x":-512.7714285714286,"y":-375.8952380952381,"z":23.29047619047619,"a95":0.99,"info":"19/01/2014 at 20:25:16"},{"visible":true,"include":false,"step":"12.0","x":-446.8095238095238,"y":-339.54285714285714,"z":-72.14952380952381,"a95":0.99,"info":"19/01/2014 at 20:25:16"},{"visible":true,"include":true,"step":"16.0","x":-339.6095238095238,"y":-347.8285714285714,"z":-96.41904761904762,"a95":0.99,"info":"19/01/2014 at 20:25:16"},{"visible":true,"include":true,"step":"20.0","x":-279.3619047619048,"y":-307,"z":-110.38095238095238,"a95":0.99,"info":"19/01/2014 at 20:25:16"},{"visible":true,"include":true,"step":"25.0","x":-222.76190476190476,"y":-299.06666666666666,"z":-136.0952380952381,"a95":0.99,"info":"19/01/2014 at 20:25:16"},{"visible":true,"include":true,"step":"30.0","x":-144.44761904761904,"y":-227.66666666666666,"z":-139.46666666666667,"a95":0.99,"info":"19/01/2014 at 20:25:16"},{"visible":true,"include":true,"step":"35.0","x":-142.82857142857142,"y":-206.60000000000002,"z":-98.56190476190477,"a95":0.99,"info":"19/01/2014 at 20:25:16"},{"visible":true,"include":true,"step":"40.0","x":-120.6,"y":-174.21904761904761,"z":-73.4,"a95":0.99,"info":"19/01/2014 at 20:25:16"},{"visible":true,"include":true,"step":"45.0","x":-135.06666666666666,"y":-173.7904761904762,"z":-58.62380952380952,"a95":0.99,"info":"19/01/2014 at 20:25:16"},{"visible":true,"include":false,"step":"50.0","x":-65.43142857142857,"y":-149.25714285714287,"z":-75.33809523809524,"a95":0.99,"info":"19/01/2014 at 20:25:16"},{"visible":true,"include":false,"step":"60.0","x":-62.163809523809526,"y":-72.84095238095239,"z":-57.082857142857144,"a95":0.99,"info":"19/01/2014 at 20:25:16"},{"visible":false,"include":false,"step":"70.0","x":9.587619047619048,"y":-71.18666666666667,"z":0.10578095238095238,"a95":0.99,"info":"19/01/2014 at 20:25:16"},{"visible":false,"include":false,"step":"80.0","x":-82.57047619047619,"y":-40.32857142857143,"z":0.15174285714285712,"a95":0.99,"info":"19/01/2014 at 20:25:16"},{"visible":false,"include":false,"step":"90.0","x":-32.90761904761904,"y":-21.94190476190476,"z":-34.224761904761905,"a95":0.99,"info":"19/01/2014 at 20:25:16"},{"visible":false,"include":false,"step":"100.0","x":51.08761904761904,"y":-30.16190476190476,"z":-51.96190476190476,"a95":0.99,"info":"19/01/2014 at 20:25:16"}]},{"version":"v1.1.0","exported":"2016-11-18T09:56:15.393Z","volume":10.5,"added":"2016-11-18T09:15:19.299Z","format":"Utrecht","demagType":"Unknown","strat":"6","patch":1.1,"GEO":[{"dec":13.135565252564845,"inc":33.30023241548361,"MAD":5.328856831584313,"cm":[3.552713678800501e-15,2.6645352591003757e-15,0],"intensity":863.5244299162404,"type":"dir","forced":true,"remark":"","origin":false,"nSteps":6,"minStep":"16.0","maxStep":"40.0","steps":["16.0","20.0","25.0","30.0","35.0","40.0"],"group":"None","version":"v1.1.0"}],"TECT":[{"dec":307.5172090758736,"inc":50.99445937339271,"MAD":5.328856831584338,"cm":[5.329070518200751e-15,-1.1546319456101628e-14,0],"intensity":863.5244299162403,"type":"dir","forced":true,"remark":"","origin":false,"nSteps":6,"minStep":"16.0","maxStep":"40.0","steps":["16.0","20.0","25.0","30.0","35.0","40.0"],"group":"None","version":"v1.1.0"}],"interpreted":true,"name":"TT 1.10","coreAzi":160,"coreDip":52,"bedStrike":148,"bedDip":63,"data":[{"visible":true,"include":false,"step":"0.0","x":-842.8095238095239,"y":-299.29523809523806,"z":470.5809523809524,"a95":0.99,"info":"19/01/2014 at 20:25:16"},{"visible":true,"include":false,"step":"4.0","x":-799.104761904762,"y":-304.6666666666667,"z":346.0095238095238,"a95":0.99,"info":"19/01/2014 at 20:25:16"},{"visible":true,"include":false,"step":"8.0","x":-731.2666666666667,"y":-302.62857142857143,"z":200.94285714285715,"a95":0.99,"info":"19/01/2014 at 20:25:16"},{"visible":true,"include":false,"step":"12.0","x":-657.7904761904762,"y":-271.96190476190475,"z":113.0952380952381,"a95":0.99,"info":"19/01/2014 at 20:25:16"},{"visible":true,"include":true,"step":"16.0","x":-560.6190476190476,"y":-242.05714285714285,"z":38.62190476190476,"a95":0.99,"info":"19/01/2014 at 20:25:16"},{"visible":true,"include":true,"step":"20.0","x":-507.2666666666667,"y":-234.8190476190476,"z":11.129523809523809,"a95":0.99,"info":"19/01/2014 at 20:25:16"},{"visible":true,"include":true,"step":"25.0","x":-408.57142857142856,"y":-240.06666666666666,"z":-26.45809523809524,"a95":0.99,"info":"19/01/2014 at 20:25:16"},{"visible":true,"include":true,"step":"30.0","x":-348.95238095238096,"y":-173.21904761904761,"z":-23.856190476190477,"a95":0.99,"info":"19/01/2014 at 20:25:16"},{"visible":true,"include":true,"step":"35.0","x":-271.2190476190476,"y":-193.9047619047619,"z":-24.013333333333332,"a95":0.99,"info":"19/01/2014 at 20:25:16"},{"visible":true,"include":true,"step":"40.0","x":-205.17142857142858,"y":-154.2095238095238,"z":8.411238095238096,"a95":0.99,"info":"19/01/2014 at 20:25:16"},{"visible":true,"include":false,"step":"45.0","x":-190.53333333333333,"y":-133.8,"z":-28.239047619047618,"a95":0.99,"info":"19/01/2014 at 20:25:16"},{"visible":true,"include":false,"step":"50.0","x":-142.17142857142858,"y":-148.0857142857143,"z":-41.944761904761904,"a95":0.99,"info":"19/01/2014 at 20:25:16"},{"visible":true,"include":false,"step":"60.0","x":-64.8742857142857,"y":-84.47714285714285,"z":-37.71333333333333,"a95":0.99,"info":"19/01/2014 at 20:25:16"},{"visible":false,"include":false,"step":"70.0","x":-22.51142857142857,"y":-90.55333333333333,"z":-21.53904761904762,"a95":0.99,"info":"19/01/2014 at 20:25:16"},{"visible":false,"include":false,"step":"80.0","x":-16.37238095238095,"y":-132.6095238095238,"z":45.28380952380952,"a95":0.99,"info":"19/01/2014 at 20:25:16"},{"visible":false,"include":false,"step":"90.0","x":9.271142857142857,"y":-72.73904761904762,"z":-62.03333333333334,"a95":0.99,"info":"19/01/2014 at 20:25:16"},{"visible":false,"include":false,"step":"100.0","x":127.65714285714287,"y":-97.68571428571428,"z":-46.48380952380952,"a95":0.99,"info":"19/01/2014 at 20:25:16"}]},{"version":"v1.1.0","exported":"2016-11-18T09:56:15.393Z","volume":10.5,"added":"2016-11-18T09:15:19.300Z","format":"Utrecht","demagType":"Unknown","strat":"7","patch":1.1,"GEO":[{"dec":5.915095147677505,"inc":13.058795562342931,"MAD":4.227300856972274,"cm":[-1.0658141036401503e-14,3.597122599785507e-14,0],"intensity":811.173573959513,"type":"dir","forced":true,"remark":"","origin":false,"nSteps":9,"minStep":"4.0","maxStep":"40.0","steps":["4.0","8.0","12.0","16.0","20.0","25.0","30.0","35.0","40.0"],"group":"None","version":"v1.1.0"}],"TECT":[{"dec":333.23659668240555,"inc":39.48954095022215,"MAD":4.227300856972328,"cm":[3.552713678800501e-15,1.3766765505351941e-14,-1.7763568394002505e-15],"intensity":811.173573959513,"type":"dir","forced":true,"remark":"","origin":false,"nSteps":9,"minStep":"4.0","maxStep":"40.0","steps":["4.0","8.0","12.0","16.0","20.0","25.0","30.0","35.0","40.0"],"group":"None","version":"v1.1.0"}],"interpreted":true,"name":"TT 1.11","coreAzi":169,"coreDip":54,"bedStrike":148,"bedDip":63,"data":[{"visible":true,"include":false,"step":"0.0","x":-592.1428571428571,"y":-112.76190476190476,"z":-317.1047619047619,"a95":0.99,"info":"19/01/2014 at 20:25:16"},{"visible":true,"include":true,"step":"4.0","x":-566.0666666666666,"y":-131.92380952380952,"z":-270.3619047619048,"a95":0.99,"info":"19/01/2014 at 20:25:16"},{"visible":true,"include":true,"step":"8.0","x":-498.3714285714285,"y":-159.92380952380952,"z":-203.17142857142858,"a95":0.99,"info":"19/01/2014 at 20:25:16"},{"visible":true,"include":true,"step":"12.0","x":-423.95238095238096,"y":-129.5047619047619,"z":-166.6095238095238,"a95":0.99,"info":"19/01/2014 at 20:25:16"},{"visible":true,"include":true,"step":"16.0","x":-358.83809523809526,"y":-137.8095238095238,"z":-136.77142857142857,"a95":0.99,"info":"19/01/2014 at 20:25:16"},{"visible":true,"include":true,"step":"20.0","x":-315.84761904761905,"y":-127.37142857142858,"z":-127.33333333333333,"a95":0.99,"info":"19/01/2014 at 20:25:16"},{"visible":true,"include":true,"step":"25.0","x":-273.93333333333334,"y":-111.92380952380952,"z":-124.0952380952381,"a95":0.99,"info":"19/01/2014 at 20:25:16"},{"visible":true,"include":true,"step":"30.0","x":-216.50476190476192,"y":-75.14380952380952,"z":-63.64190476190476,"a95":0.99,"info":"19/01/2014 at 20:25:16"},{"visible":true,"include":true,"step":"35.0","x":-220.03809523809525,"y":-86.63809523809525,"z":-57.75333333333333,"a95":0.99,"info":"19/01/2014 at 20:25:16"},{"visible":true,"include":true,"step":"40.0","x":-156.32380952380953,"y":-59.31333333333333,"z":-45.205714285714286,"a95":0.99,"info":"19/01/2014 at 20:25:16"},{"visible":true,"include":false,"step":"45.0","x":-125.8952380952381,"y":-73.95333333333333,"z":-33.33238095238095,"a95":0.99,"info":"19/01/2014 at 20:25:16"},{"visible":true,"include":false,"step":"50.0","x":-130.48571428571427,"y":-70.80761904761906,"z":-35.705714285714286,"a95":0.99,"info":"19/01/2014 at 20:25:16"},{"visible":false,"include":false,"step":"60.0","x":-70.12952380952382,"y":-31.904761904761905,"z":-28.90095238095238,"a95":0.99,"info":"19/01/2014 at 20:25:16"},{"visible":false,"include":false,"step":"70.0","x":-25.283809523809527,"y":-54.843809523809526,"z":-16.363809523809522,"a95":0.99,"info":"19/01/2014 at 20:25:16"},{"visible":false,"include":false,"step":"80.0","x":-89.75714285714287,"y":-54.39047619047619,"z":0.5320380952380953,"a95":0.99,"info":"19/01/2014 at 20:25:16"},{"visible":false,"include":false,"step":"90.0","x":-20.223809523809525,"y":-23.568571428571428,"z":-36.10952380952381,"a95":0.99,"info":"19/01/2014 at 20:25:16"},{"visible":false,"include":false,"step":"100.0","x":56.56380952380952,"y":-56.11904761904762,"z":-4.9261904761904765,"a95":0.99,"info":"19/01/2014 at 20:25:16"}]},{"version":"v1.1.0","exported":"2016-11-18T09:56:15.393Z","volume":10.5,"added":"2016-11-18T09:15:19.300Z","format":"Utrecht","demagType":"Unknown","strat":"8","patch":1.1,"GEO":[{"dec":5.397959078428073,"inc":25.88307240895649,"MAD":4.777176523782355,"cm":[-3.1086244689504383e-15,2.7255975254547593e-14,0],"intensity":379.24589890084053,"type":"dir","forced":true,"remark":"","origin":false,"nSteps":11,"minStep":"4.0","maxStep":"50.0","steps":["4.0","8.0","12.0","16.0","20.0","25.0","30.0","35.0","40.0","45.0","50.0"],"group":"None","version":"v1.1.0"}],"TECT":[{"dec":316.84916935599944,"inc":43.239481561054895,"MAD":4.777176523782384,"cm":[-1.3322676295501878e-14,1.532107773982716e-14,2.2648549702353193e-14],"intensity":379.24589890084053,"type":"dir","forced":true,"remark":"","origin":false,"nSteps":11,"minStep":"4.0","maxStep":"50.0","steps":["4.0","8.0","12.0","16.0","20.0","25.0","30.0","35.0","40.0","45.0","50.0"],"group":"None","version":"v1.1.0"}],"interpreted":true,"name":"TT 1.12B","coreAzi":159,"coreDip":61,"bedStrike":148,"bedDip":63,"data":[{"visible":true,"include":false,"step":"0.0","x":-297.5333333333333,"y":-103.46666666666667,"z":-42.88476190476191,"a95":0.99,"info":"19/01/2014 at 20:25:16"},{"visible":true,"include":true,"step":"4.0","x":-284.12380952380954,"y":-105.0952380952381,"z":-28.329523809523806,"a95":0.99,"info":"19/01/2014 at 20:25:16"},{"visible":true,"include":true,"step":"8.0","x":-252.26666666666668,"y":-108.24761904761904,"z":-6.227714285714287,"a95":0.99,"info":"19/01/2014 at 20:25:16"},{"visible":true,"include":true,"step":"12.0","x":-229.8952380952381,"y":-94.16666666666667,"z":5.70447619047619,"a95":0.99,"info":"19/01/2014 at 20:25:16"},{"visible":true,"include":true,"step":"16.0","x":-187.9047619047619,"y":-87.97428571428571,"z":-3.204190476190476,"a95":0.99,"info":"19/01/2014 at 20:25:16"},{"visible":true,"include":true,"step":"20.0","x":-162.51428571428573,"y":-92.88666666666666,"z":10.32095238095238,"a95":0.99,"info":"19/01/2014 at 20:25:16"},{"visible":true,"include":true,"step":"25.0","x":-149.88571428571427,"y":-68.75523809523808,"z":5.496666666666667,"a95":0.99,"info":"19/01/2014 at 20:25:16"},{"visible":true,"include":true,"step":"30.0","x":-113.45714285714286,"y":-62.50952380952381,"z":-3.042952380952381,"a95":0.99,"info":"19/01/2014 at 20:25:16"},{"visible":true,"include":true,"step":"35.0","x":-111.29523809523809,"y":-41.91428571428572,"z":8.523333333333333,"a95":0.99,"info":"19/01/2014 at 20:25:16"},{"visible":true,"include":true,"step":"40.0","x":-75.23904761904762,"y":-51.29333333333334,"z":5.727714285714286,"a95":0.99,"info":"19/01/2014 at 20:25:16"},{"visible":true,"include":true,"step":"45.0","x":-88.08,"y":-32.082857142857144,"z":13.04952380952381,"a95":0.99,"info":"19/01/2014 at 20:25:16"},{"visible":true,"include":true,"step":"50.0","x":-69.89714285714285,"y":-29.934285714285714,"z":12.092380952380953,"a95":0.99,"info":"19/01/2014 at 20:25:16"},{"visible":false,"include":false,"step":"60.0","x":-19.940952380952382,"y":-16.86,"z":-24.231428571428573,"a95":0.99,"info":"19/01/2014 at 20:25:16"},{"visible":false,"include":false,"step":"70.0","x":-18.675238095238097,"y":-11.246666666666666,"z":-12.462857142857144,"a95":0.99,"info":"19/01/2014 at 20:25:16"},{"visible":false,"include":false,"step":"80.0","x":-61.6152380952381,"y":-18.86,"z":-0.9608571428571429,"a95":0.99,"info":"19/01/2014 at 20:25:16"},{"visible":false,"include":false,"step":"90.0","x":-27.535238095238096,"y":-18.215238095238096,"z":7.289238095238096,"a95":0.99,"info":"19/01/2014 at 20:25:16"},{"visible":false,"include":false,"step":"100.0","x":15.477142857142857,"y":-20.219047619047622,"z":-17.383809523809525,"a95":0.99,"info":"19/01/2014 at 20:25:16"}]},{"version":"v1.1.0","exported":"2016-11-18T09:56:15.393Z","volume":10.5,"added":"2016-11-18T09:15:19.301Z","format":"Utrecht","demagType":"Unknown","strat":null,"patch":1.1,"GEO":[{"dec":10.116829089722671,"inc":34.606329392394706,"MAD":9.995835540533868,"cm":[8.881784197001252e-16,1.5543122344752192e-15,0],"intensity":371.7038418307591,"type":"dir","forced":true,"remark":"","origin":false,"nSteps":8,"minStep":"80","maxStep":"300","steps":["80","150","180","200","225","250","275","300"],"group":"None","version":"v1.1.0"}],"TECT":[{"dec":305.29668448821985,"inc":48.56123614742075,"MAD":9.995835540533818,"cm":[-7.105427357601002e-15,4.218847493575595e-15,7.993605777301127e-15],"intensity":371.7038418307591,"type":"dir","forced":true,"remark":"","origin":false,"nSteps":8,"minStep":"80","maxStep":"300","steps":["80","150","180","200","225","250","275","300"],"group":"None","version":"v1.1.0"}],"interpreted":true,"name":"TT 1.13A","coreAzi":150,"coreDip":47,"bedStrike":148,"bedDip":63,"data":[{"visible":true,"include":false,"step":"20","x":-281.14285714285717,"y":-106,"z":97.52380952380952,"a95":1.8,"info":"\"13-11-03\" at \"12:57\""},{"visible":true,"include":true,"step":"80","x":-256.85714285714283,"y":-102.76190476190476,"z":28.857142857142858,"a95":1.9,"info":"\"13-11-04\" at \"09:41\""},{"visible":true,"include":true,"step":"150","x":-117.71428571428571,"y":-101.42857142857143,"z":-14.095238095238095,"a95":2.5,"info":"\"13-11-04\" at \"15:28\""},{"visible":true,"include":true,"step":"180","x":-144.85714285714286,"y":-94.19047619047619,"z":-5.809523809523809,"a95":2.3,"info":"\"13-11-05\" at \"09:56\""},{"visible":true,"include":true,"step":"200","x":-130.0952380952381,"y":-86.66666666666667,"z":-12.285714285714286,"a95":3.2,"info":"\"13-11-05\" at \"14:25\""},{"visible":true,"include":true,"step":"225","x":-120.76190476190476,"y":-90.85714285714286,"z":5.523809523809524,"a95":2.3,"info":"\"13-11-06\" at \"08:45\""},{"visible":true,"include":true,"step":"250","x":-110.95238095238095,"y":-86.47619047619048,"z":-17.714285714285715,"a95":2.8,"info":"\"13-11-06\" at \"13:18\""},{"visible":true,"include":true,"step":"275","x":-77.61904761904762,"y":-74.85714285714286,"z":-19.047619047619047,"a95":2.3,"info":"\"13-11-07\" at \"02:27\""},{"visible":true,"include":true,"step":"300","x":-71.71428571428571,"y":-70.85714285714286,"z":-21.047619047619047,"a95":2.4,"info":"\"13-11-07\" at \"05:56\""},{"visible":false,"include":false,"step":"320","x":-58.69523809523809,"y":-65.65714285714286,"z":-15.600000000000001,"a95":2.7,"info":"\"13-11-07\" at \"09:27\""},{"visible":false,"include":false,"step":"340","x":-58.69523809523809,"y":-52.60952380952381,"z":-25.142857142857142,"a95":3.8,"info":"\"13-11-07\" at \"15:06\""},{"visible":false,"include":false,"step":"380","x":-24.904761904761905,"y":-55.714285714285715,"z":-15.78095238095238,"a95":4.1,"info":"\"13-11-08\" at \"12:14\""},{"visible":false,"include":false,"step":"420","x":-101.80952380952381,"y":-15.333333333333334,"z":-40,"a95":8.3,"info":"\"13-11-08\" at \"17:18\""}]},{"version":"v1.1.0","exported":"2016-11-18T09:56:15.393Z","volume":10.5,"added":"2016-11-18T09:15:19.301Z","format":"Utrecht","demagType":"Unknown","strat":"1","patch":1.1,"GEO":[{"dec":3.2339534988737455,"inc":32.26837355534693,"MAD":5.142719932255527,"cm":[0,-1.3877787807814457e-14,0],"intensity":357.50573995390744,"type":"dir","forced":true,"remark":"","origin":false,"nSteps":10,"minStep":"4.0","maxStep":"45.0","steps":["4.0","8.0","12.0","16.0","20.0","25.0","30.0","35.0","40.0","45.0"],"group":"None","version":"v1.1.0"}],"TECT":[{"dec":307.7911551555554,"inc":42.61166907385214,"MAD":5.142719932255454,"cm":[-1.5543122344752192e-15,-2.220446049250313e-15,-4.440892098500626e-15],"intensity":357.50573995390744,"type":"dir","forced":true,"remark":"","origin":false,"nSteps":10,"minStep":"4.0","maxStep":"45.0","steps":["4.0","8.0","12.0","16.0","20.0","25.0","30.0","35.0","40.0","45.0"],"group":"None","version":"v1.1.0"}],"interpreted":true,"name":"TT 1.13B","coreAzi":150,"coreDip":47,"bedStrike":148,"bedDip":63,"data":[{"visible":true,"include":false,"step":"0.0","x":-265.87619047619046,"y":-113.05714285714285,"z":-18.056190476190476,"a95":0.99,"info":"20/01/2014 at 01:54:40"},{"visible":true,"include":true,"step":"4.0","x":-257.6380952380952,"y":-109.19999999999999,"z":-19.514285714285716,"a95":0.99,"info":"20/01/2014 at 01:54:40"},{"visible":true,"include":true,"step":"8.0","x":-230.37142857142857,"y":-107.79047619047618,"z":-10.778095238095238,"a95":0.99,"info":"20/01/2014 at 01:54:40"},{"visible":true,"include":true,"step":"12.0","x":-198.14285714285714,"y":-101.42857142857143,"z":-14.251428571428571,"a95":0.99,"info":"20/01/2014 at 01:54:40"},{"visible":true,"include":true,"step":"16.0","x":-168.77142857142857,"y":-97.76190476190476,"z":-22.83809523809524,"a95":0.99,"info":"20/01/2014 at 01:54:40"},{"visible":true,"include":true,"step":"20.0","x":-149.47619047619048,"y":-86.99904761904762,"z":-20.824761904761903,"a95":0.99,"info":"20/01/2014 at 01:54:40"},{"visible":true,"include":true,"step":"25.0","x":-114.41904761904763,"y":-85.63238095238096,"z":-21.259999999999998,"a95":0.99,"info":"20/01/2014 at 01:54:40"},{"visible":true,"include":true,"step":"30.0","x":-100.9904761904762,"y":-76.84285714285714,"z":-18.883809523809525,"a95":0.99,"info":"20/01/2014 at 01:54:40"},{"visible":true,"include":true,"step":"35.0","x":-90.08285714285714,"y":-46.137142857142855,"z":-24.432380952380953,"a95":0.99,"info":"20/01/2014 at 01:54:40"},{"visible":true,"include":true,"step":"40.0","x":-78.54285714285714,"y":-53.331428571428575,"z":-18.252380952380953,"a95":0.99,"info":"20/01/2014 at 01:54:40"},{"visible":true,"include":true,"step":"45.0","x":-65.91714285714286,"y":-40.537142857142854,"z":-6.964952380952381,"a95":0.99,"info":"20/01/2014 at 01:54:40"},{"visible":false,"include":false,"step":"50.0","x":-62.0295238095238,"y":-42.26952380952381,"z":-8.805333333333333,"a95":0.99,"info":"20/01/2014 at 01:54:40"},{"visible":false,"include":false,"step":"60.0","x":-31.732380952380954,"y":-32.25809523809524,"z":-6.373142857142858,"a95":0.99,"info":"20/01/2014 at 01:54:40"},{"visible":false,"include":false,"step":"70.0","x":-21.571428571428573,"y":-19.067619047619047,"z":10.798095238095238,"a95":0.99,"info":"20/01/2014 at 01:54:40"},{"visible":false,"include":false,"step":"80.0","x":-35.29047619047619,"y":-14.831428571428571,"z":11.45142857142857,"a95":0.99,"info":"20/01/2014 at 01:54:40"},{"visible":false,"include":false,"step":"90.0","x":-2.3812380952380954,"y":-17.226666666666667,"z":-2.1759999999999997,"a95":0.99,"info":"20/01/2014 at 01:54:40"},{"visible":false,"include":false,"step":"100.0","x":5.7755238095238095,"y":-26.434285714285714,"z":8.342571428571429,"a95":0.99,"info":"20/01/2014 at 01:54:40"}]},{"version":"v1.1.0","exported":"2016-11-18T09:56:15.393Z","volume":10.5,"added":"2016-11-18T09:15:19.302Z","format":"Utrecht","demagType":"Unknown","strat":null,"patch":1.1,"GEO":[{"dec":356.4865382124126,"inc":27.40561279538572,"MAD":9.148964379249831,"cm":[122.13530816810241,10.314799085673977,20.395409831650312],"intensity":70.38496927772827,"type":"dir","forced":false,"remark":"","origin":false,"nSteps":8,"minStep":"150","maxStep":"320","steps":["150","180","200","225","250","275","300","320"],"group":"None","version":"v1.1.0"}],"TECT":[{"dec":312.3981000983671,"inc":35.89059702039346,"MAD":9.148964379249849,"cm":[91.24770364597323,-39.11570095045383,74.72094647545259],"intensity":70.38496927772829,"type":"dir","forced":false,"remark":"","origin":false,"nSteps":8,"minStep":"150","maxStep":"320","steps":["150","180","200","225","250","275","300","320"],"group":"None","version":"v1.1.0"}],"interpreted":true,"name":"TT 1.14A","coreAzi":160,"coreDip":61,"bedStrike":148,"bedDip":63,"data":[{"visible":true,"include":false,"step":"20","x":-264.6666666666667,"y":-95.80952380952381,"z":28.761904761904763,"a95":1.7,"info":"\"13-11-03\" at \"12:59\""},{"visible":true,"include":false,"step":"80","x":-246.47619047619048,"y":-72.38095238095238,"z":1.4285714285714286,"a95":1.9,"info":"\"13-11-04\" at \"09:44\""},{"visible":true,"include":true,"step":"150","x":-127.14285714285714,"y":-66.0952380952381,"z":-35.04761904761905,"a95":2.3,"info":"\"13-11-04\" at \"15:31\""},{"visible":true,"include":true,"step":"180","x":-151.52380952380952,"y":-58.095238095238095,"z":-33.714285714285715,"a95":2.3,"info":"\"13-11-05\" at \"09:59\""},{"visible":true,"include":true,"step":"200","x":-126.66666666666667,"y":-54.857142857142854,"z":-40.857142857142854,"a95":2,"info":"\"13-11-05\" at \"14:27\""},{"visible":true,"include":true,"step":"225","x":-123.52380952380952,"y":-54.57142857142857,"z":-33.80952380952381,"a95":2.5,"info":"\"13-11-06\" at \"08:47\""},{"visible":true,"include":true,"step":"250","x":-112.28571428571429,"y":-51.42857142857143,"z":-39.904761904761905,"a95":3.1,"info":"\"13-11-06\" at \"13:20\""},{"visible":true,"include":true,"step":"275","x":-78.57142857142857,"y":-47.23809523809524,"z":-34.857142857142854,"a95":3,"info":"\"13-11-07\" at \"02:29\""},{"visible":true,"include":true,"step":"300","x":-74.77142857142857,"y":-42.19047619047619,"z":-37.476190476190474,"a95":2.9,"info":"\"13-11-07\" at \"05:57\""},{"visible":true,"include":true,"step":"320","x":-62.971428571428575,"y":-37.24761904761905,"z":-33.076190476190476,"a95":3,"info":"\"13-11-07\" at \"09:30\""},{"visible":false,"include":false,"step":"340","x":-67.97142857142858,"y":-34.63809523809524,"z":-41.05714285714286,"a95":4,"info":"\"13-11-07\" at \"15:09\""},{"visible":false,"include":false,"step":"380","x":-12.323809523809524,"y":-40.76190476190476,"z":-20.885714285714286,"a95":5.6,"info":"\"13-11-08\" at \"12:17\""},{"visible":false,"include":false,"step":"420","x":-210.85714285714286,"y":35.333333333333336,"z":-16.857142857142858,"a95":6.7,"info":"\"13-11-08\" at \"17:23\""}]},{"version":"v1.1.0","exported":"2016-11-18T09:56:15.393Z","volume":10.5,"added":"2016-11-18T09:15:19.302Z","format":"Utrecht","demagType":"Unknown","strat":"2","patch":1.1,"GEO":[{"dec":8.533766129090964,"inc":38.43205307409639,"MAD":4.03370086532468,"cm":[5.329070518200751e-15,-1.6764367671839864e-14,0],"intensity":271.83521656191886,"type":"dir","forced":true,"remark":"","origin":false,"nSteps":7,"minStep":"16.0","maxStep":"45.0","steps":["16.0","20.0","25.0","30.0","35.0","40.0","45.0"],"group":"None","version":"v1.1.0"}],"TECT":[{"dec":299.5402177675016,"inc":47.374834009576226,"MAD":4.0337008653247715,"cm":[2.4424906541753444e-15,3.9968028886505635e-15,-3.1086244689504383e-15],"intensity":271.83521656191886,"type":"dir","forced":true,"remark":"","origin":false,"nSteps":7,"minStep":"16.0","maxStep":"45.0","steps":["16.0","20.0","25.0","30.0","35.0","40.0","45.0"],"group":"None","version":"v1.1.0"}],"interpreted":true,"name":"TT 1.14B","coreAzi":160,"coreDip":61,"bedStrike":148,"bedDip":63,"data":[{"visible":true,"include":false,"step":"0.0","x":-265.48571428571427,"y":-107.6952380952381,"z":190.74285714285713,"a95":0.99,"info":"20/01/2014 at 01:54:40"},{"visible":true,"include":false,"step":"4.0","x":-256.77142857142854,"y":-98.81904761904761,"z":151.41904761904763,"a95":0.99,"info":"20/01/2014 at 01:54:40"},{"visible":true,"include":false,"step":"8.0","x":-233.71428571428572,"y":-95.58095238095238,"z":108.28571428571429,"a95":0.99,"info":"20/01/2014 at 01:54:40"},{"visible":true,"include":false,"step":"12.0","x":-204.2095238095238,"y":-87.55047619047619,"z":76.72095238095238,"a95":0.99,"info":"20/01/2014 at 01:54:40"},{"visible":true,"include":true,"step":"16.0","x":-178.16190476190476,"y":-76.82000000000001,"z":48.62190476190476,"a95":0.99,"info":"20/01/2014 at 01:54:40"},{"visible":true,"include":true,"step":"20.0","x":-164.0095238095238,"y":-63.25428571428571,"z":42.14952380952381,"a95":0.99,"info":"20/01/2014 at 01:54:40"},{"visible":true,"include":true,"step":"25.0","x":-131.1904761904762,"y":-59.22095238095238,"z":27.208571428571428,"a95":0.99,"info":"20/01/2014 at 01:54:40"},{"visible":true,"include":true,"step":"30.0","x":-106.04761904761905,"y":-49.65428571428571,"z":24.361904761904764,"a95":0.99,"info":"20/01/2014 at 01:54:40"},{"visible":true,"include":true,"step":"35.0","x":-102.11428571428571,"y":-23.72952380952381,"z":8.550380952380952,"a95":0.99,"info":"20/01/2014 at 01:54:40"},{"visible":true,"include":true,"step":"40.0","x":-84.8247619047619,"y":-39.80666666666667,"z":19.085714285714285,"a95":0.99,"info":"20/01/2014 at 01:54:40"},{"visible":true,"include":true,"step":"45.0","x":-63.44285714285714,"y":-30.638095238095236,"z":14.42,"a95":0.99,"info":"20/01/2014 at 01:54:40"},{"visible":true,"include":false,"step":"50.0","x":-50.831428571428575,"y":-28.06190476190476,"z":4.296571428571428,"a95":0.99,"info":"20/01/2014 at 01:54:40"},{"visible":true,"include":false,"step":"60.0","x":-27.85047619047619,"y":-15.894285714285713,"z":7.472476190476191,"a95":0.99,"info":"20/01/2014 at 01:54:40"},{"visible":true,"include":false,"step":"70.0","x":-27.007619047619045,"y":-13.57047619047619,"z":11.232380952380952,"a95":0.99,"info":"20/01/2014 at 01:54:40"},{"visible":false,"include":false,"step":"80.0","x":-15.184761904761904,"y":-12.574285714285715,"z":13.116190476190477,"a95":0.99,"info":"20/01/2014 at 01:54:40"},{"visible":false,"include":false,"step":"90.0","x":5.172095238095238,"y":-5.629904761904761,"z":1.87,"a95":0.99,"info":"20/01/2014 at 01:54:40"},{"visible":false,"include":false,"step":"100.0","x":3.4718095238095237,"y":-14.018095238095238,"z":6.082857142857143,"a95":0.99,"info":"20/01/2014 at 01:54:40"}]},{"version":"v1.1.0","exported":"2016-11-18T09:56:15.393Z","volume":10.5,"added":"2016-11-18T09:15:19.302Z","format":"Utrecht","demagType":"Unknown","strat":null,"patch":1.1,"GEO":[{"dec":6.164945397147335,"inc":22.14588737730816,"MAD":5.746769866329203,"cm":[1.7763568394002505e-15,-6.38378239159465e-15,0],"intensity":252.46925840567067,"type":"dir","forced":true,"remark":"","origin":false,"nSteps":9,"minStep":"150","maxStep":"340","steps":["150","180","200","225","250","275","300","320","340"],"group":"None","version":"v1.1.0"}],"TECT":[{"dec":322.03878667527084,"inc":42.92956267966215,"MAD":5.746769866329172,"cm":[-7.105427357601002e-15,-1.4654943925052066e-14,-4.440892098500626e-16],"intensity":252.46925840567067,"type":"dir","forced":true,"remark":"","origin":false,"nSteps":9,"minStep":"150","maxStep":"340","steps":["150","180","200","225","250","275","300","320","340"],"group":"None","version":"v1.1.0"}],"interpreted":true,"name":"TT 1.15A","coreAzi":147,"coreDip":52,"bedStrike":148,"bedDip":63,"data":[{"visible":false,"include":false,"step":"20","x":-267.14285714285717,"y":-158.0952380952381,"z":115.71428571428571,"a95":1.8,"info":"\"13-11-03\" at \"13:02\""},{"visible":true,"include":false,"step":"80","x":-249.42857142857142,"y":-117.14285714285714,"z":36.76190476190476,"a95":1.9,"info":"\"13-11-04\" at \"09:46\""},{"visible":true,"include":true,"step":"150","x":-127.33333333333333,"y":-99.80952380952381,"z":-11.142857142857142,"a95":2,"info":"\"13-11-04\" at \"15:34\""},{"visible":true,"include":true,"step":"180","x":-145.42857142857142,"y":-99.61904761904762,"z":-16.095238095238095,"a95":2.2,"info":"\"13-11-05\" at \"10:01\""},{"visible":true,"include":true,"step":"200","x":-126.0952380952381,"y":-87.04761904761905,"z":-19.61904761904762,"a95":1.9,"info":"\"13-11-05\" at \"14:30\""},{"visible":true,"include":true,"step":"225","x":-134.47619047619048,"y":-86.66666666666667,"z":-13.714285714285714,"a95":2.2,"info":"\"13-11-06\" at \"08:49\""},{"visible":true,"include":true,"step":"250","x":-123.61904761904762,"y":-78.76190476190476,"z":-29.523809523809526,"a95":2.7,"info":"\"13-11-06\" at \"13:25\""},{"visible":true,"include":true,"step":"275","x":-81.42857142857143,"y":-78.47619047619048,"z":-25.61904761904762,"a95":2.6,"info":"\"13-11-07\" at \"02:31\""},{"visible":true,"include":true,"step":"300","x":-84.38095238095238,"y":-70.38095238095238,"z":-31.80952380952381,"a95":2.1,"info":"\"13-11-07\" at \"05:59\""},{"visible":true,"include":true,"step":"320","x":-62.60952380952381,"y":-66.68571428571428,"z":-21.304761904761904,"a95":2.7,"info":"\"13-11-07\" at \"09:32\""},{"visible":true,"include":true,"step":"340","x":-73.03809523809524,"y":-49.828571428571436,"z":-23.504761904761907,"a95":2.6,"info":"\"13-11-07\" at \"15:12\""},{"visible":false,"include":false,"step":"380","x":-15.704761904761906,"y":-51.561904761904756,"z":-6.485714285714285,"a95":4.7,"info":"\"13-11-08\" at \"12:19\""},{"visible":false,"include":false,"step":"420","x":-122.76190476190476,"y":57.714285714285715,"z":-23.142857142857142,"a95":6.4,"info":"\"13-11-08\" at \"17:26\""}]},{"version":"v1.1.0","exported":"2016-11-18T09:56:15.393Z","volume":10.5,"added":"2016-11-18T09:15:19.302Z","format":"Utrecht","demagType":"Unknown","strat":"3","patch":1.1,"GEO":[{"dec":2.4319254496114695,"inc":26.95929438135332,"MAD":4.7103770883575296,"cm":[-2.220446049250313e-15,1.73749903353837e-14,0],"intensity":329.6357048459664,"type":"dir","forced":true,"remark":"","origin":false,"nSteps":11,"minStep":"4.0","maxStep":"50.0","steps":["4.0","8.0","12.0","16.0","20.0","25.0","30.0","35.0","40.0","45.0","50.0"],"group":"None","version":"v1.1.0"}],"TECT":[{"dec":314.5999762317824,"inc":40.909822660122444,"MAD":4.7103770883575775,"cm":[1.5987211554602254e-14,3.6415315207705135e-14,1.9984014443252818e-14],"intensity":329.6357048459664,"type":"dir","forced":true,"remark":"","origin":false,"nSteps":11,"minStep":"4.0","maxStep":"50.0","steps":["4.0","8.0","12.0","16.0","20.0","25.0","30.0","35.0","40.0","45.0","50.0"],"group":"None","version":"v1.1.0"}],"interpreted":true,"name":"TT 1.15B","coreAzi":147,"coreDip":52,"bedStrike":148,"bedDip":63,"data":[{"visible":true,"include":false,"step":"0.0","x":-250.53333333333333,"y":-125.58095238095237,"z":-54.864761904761906,"a95":0.99,"info":"20/01/2014 at 01:54:40"},{"visible":true,"include":true,"step":"4.0","x":-234.40952380952382,"y":-119.74285714285713,"z":-43.85047619047619,"a95":0.99,"info":"20/01/2014 at 01:54:40"},{"visible":true,"include":true,"step":"8.0","x":-205.31428571428575,"y":-122.71428571428571,"z":-25.165714285714287,"a95":0.99,"info":"20/01/2014 at 01:54:40"},{"visible":true,"include":true,"step":"12.0","x":-172.2952380952381,"y":-109.84761904761906,"z":-10.392380952380952,"a95":0.99,"info":"20/01/2014 at 01:54:40"},{"visible":true,"include":true,"step":"16.0","x":-150.7238095238095,"y":-99.4095238095238,"z":-10.562857142857142,"a95":0.99,"info":"20/01/2014 at 01:54:40"},{"visible":true,"include":true,"step":"20.0","x":-134.54285714285714,"y":-89.75142857142858,"z":-11.331428571428571,"a95":0.99,"info":"20/01/2014 at 01:54:40"},{"visible":true,"include":true,"step":"25.0","x":-103.67619047619047,"y":-82.53619047619047,"z":-8.207238095238095,"a95":0.99,"info":"20/01/2014 at 01:54:40"},{"visible":true,"include":true,"step":"30.0","x":-91.68571428571428,"y":-67.86285714285714,"z":-4.274571428571429,"a95":0.99,"info":"20/01/2014 at 01:54:40"},{"visible":true,"include":true,"step":"35.0","x":-93.94,"y":-37.836190476190474,"z":-7.750095238095239,"a95":0.99,"info":"20/01/2014 at 01:54:40"},{"visible":true,"include":true,"step":"40.0","x":-71.58666666666666,"y":-42.95142857142857,"z":1.0313333333333334,"a95":0.99,"info":"20/01/2014 at 01:54:40"},{"visible":true,"include":true,"step":"45.0","x":-59.03333333333334,"y":-42.36761904761905,"z":1.0918095238095238,"a95":0.99,"info":"20/01/2014 at 01:54:40"},{"visible":true,"include":true,"step":"50.0","x":-53.71333333333333,"y":-34.68761904761905,"z":1.4695238095238095,"a95":0.99,"info":"20/01/2014 at 01:54:40"},{"visible":false,"include":false,"step":"60.0","x":-32.49142857142857,"y":-30.509523809523813,"z":-2.8277142857142854,"a95":0.99,"info":"20/01/2014 at 01:54:40"},{"visible":false,"include":false,"step":"70.0","x":-26.854285714285716,"y":-19.075238095238095,"z":5.761142857142857,"a95":0.99,"info":"20/01/2014 at 01:54:40"},{"visible":false,"include":false,"step":"80.0","x":8.179619047619047,"y":-11.935238095238095,"z":9.963809523809525,"a95":0.99,"info":"20/01/2014 at 01:54:40"},{"visible":false,"include":false,"step":"90.0","x":-6.755142857142857,"y":-17.655238095238094,"z":2.3346666666666667,"a95":0.99,"info":"20/01/2014 at 01:54:40"},{"visible":false,"include":false,"step":"100.0","x":3.308857142857143,"y":-8.966571428571429,"z":5.789428571428571,"a95":0.99,"info":"20/01/2014 at 01:54:40"}]},{"version":"v1.1.0","exported":"2016-11-18T09:56:15.393Z","volume":10.5,"added":"2016-11-18T09:15:19.302Z","format":"Utrecht","demagType":"Unknown","strat":null,"patch":1.1,"GEO":[{"dec":0.8687296840334966,"inc":19.939436873579012,"MAD":4.992516417910933,"cm":[0,-2.3314683517128287e-15,0],"intensity":230.25775047830382,"type":"dir","forced":true,"remark":"","origin":false,"nSteps":7,"minStep":"150","maxStep":"300","steps":["150","180","200","225","250","275","300"],"group":"None","version":"v1.1.0"}],"TECT":[{"dec":322.7724415498121,"inc":37.54603008737096,"MAD":4.992516417910904,"cm":[1.0658141036401503e-14,1.687538997430238e-14,8.881784197001252e-16],"intensity":230.2577504783038,"type":"dir","forced":true,"remark":"","origin":false,"nSteps":7,"minStep":"150","maxStep":"300","steps":["150","180","200","225","250","275","300"],"group":"None","version":"v1.1.0"}],"interpreted":true,"name":"TT 1.16A","coreAzi":147,"coreDip":59,"bedStrike":148,"bedDip":63,"data":[{"visible":true,"include":false,"step":"20","x":-252,"y":-93.9047619047619,"z":53.523809523809526,"a95":1.7,"info":"\"13-11-03\" at \"13:04\""},{"visible":true,"include":false,"step":"80","x":-225.42857142857142,"y":-76.38095238095238,"z":36.095238095238095,"a95":1.9,"info":"\"13-11-04\" at \"09:48\""},{"visible":true,"include":true,"step":"150","x":-120.57142857142857,"y":-71.71428571428571,"z":-8.380952380952381,"a95":4,"info":"\"13-11-04\" at \"15:39\""},{"visible":true,"include":true,"step":"180","x":-139.9047619047619,"y":-74.95238095238095,"z":-7.0476190476190474,"a95":2.2,"info":"\"13-11-05\" at \"10:04\""},{"visible":true,"include":true,"step":"200","x":-106.38095238095238,"y":-64.85714285714286,"z":-16.857142857142858,"a95":3.5,"info":"\"13-11-05\" at \"14:32\""},{"visible":true,"include":true,"step":"225","x":-112.66666666666667,"y":-71.23809523809524,"z":-12,"a95":2.7,"info":"\"13-11-06\" at \"08:52\""},{"visible":true,"include":true,"step":"250","x":-103.9047619047619,"y":-62.095238095238095,"z":-19.61904761904762,"a95":2.8,"info":"\"13-11-06\" at \"13:27\""},{"visible":true,"include":true,"step":"275","x":-67.58095238095238,"y":-58.42857142857143,"z":-19.34285714285714,"a95":2.1,"info":"\"13-11-07\" at \"02:33\""},{"visible":true,"include":true,"step":"300","x":-69.5047619047619,"y":-54.94285714285714,"z":-20.73333333333333,"a95":3.3,"info":"\"13-11-07\" at \"06:01\""},{"visible":false,"include":false,"step":"320","x":-51.99047619047619,"y":-43.81904761904762,"z":-19.61904761904762,"a95":3.1,"info":"\"13-11-07\" at \"09:35\""},{"visible":false,"include":false,"step":"340","x":-55.81904761904762,"y":-38.647619047619045,"z":-23.485714285714284,"a95":3.3,"info":"\"13-11-07\" at \"15:14\""},{"visible":false,"include":false,"step":"380","x":-21.54285714285714,"y":-37.06666666666666,"z":-9.133333333333335,"a95":5.8,"info":"\"13-11-08\" at \"12:21\""},{"visible":false,"include":false,"step":"420","x":-113.14285714285714,"y":33.80952380952381,"z":-33.333333333333336,"a95":9.2,"info":"\"13-11-08\" at \"17:29\""}]},{"version":"v1.1.0","exported":"2016-11-18T09:56:15.394Z","volume":10.5,"added":"2016-11-18T09:15:19.303Z","format":"Utrecht","demagType":"Unknown","strat":"4","patch":1.1,"GEO":[{"dec":349.63935888351017,"inc":39.571459695320755,"MAD":6.541166102297852,"cm":[-2.220446049250313e-15,-2.2926105458509483e-14,0],"intensity":259.66612938038776,"type":"dir","forced":true,"remark":"","origin":false,"nSteps":11,"minStep":"4.0","maxStep":"50.0","steps":["4.0","8.0","12.0","16.0","20.0","25.0","30.0","35.0","40.0","45.0","50.0"],"group":"None","version":"v1.1.0"}],"TECT":[{"dec":296.5300429787377,"inc":32.85277909606474,"MAD":6.541166102297867,"cm":[-6.661338147750939e-15,-1.5987211554602254e-14,-2.020605904817785e-14],"intensity":259.66612938038776,"type":"dir","forced":true,"remark":"","origin":false,"nSteps":11,"minStep":"4.0","maxStep":"50.0","steps":["4.0","8.0","12.0","16.0","20.0","25.0","30.0","35.0","40.0","45.0","50.0"],"group":"None","version":"v1.1.0"}],"interpreted":true,"name":"TT 1.16B","coreAzi":147,"coreDip":59,"bedStrike":148,"bedDip":63,"data":[{"visible":false,"include":false,"step":"0.0","x":-236.68571428571425,"y":-11.936190476190475,"z":34.19047619047619,"a95":0.99,"info":"20/01/2014 at 01:54:40"},{"visible":true,"include":true,"step":"4.0","x":-211.06666666666666,"y":-36.08571428571428,"z":31.0752380952381,"a95":0.99,"info":"20/01/2014 at 01:54:40"},{"visible":true,"include":true,"step":"8.0","x":-180.68571428571428,"y":-56.506666666666675,"z":35.24666666666666,"a95":0.99,"info":"20/01/2014 at 01:54:40"},{"visible":true,"include":true,"step":"12.0","x":-151.92380952380952,"y":-60.71333333333333,"z":35.04857142857143,"a95":0.99,"info":"20/01/2014 at 01:54:40"},{"visible":true,"include":true,"step":"16.0","x":-133.42857142857142,"y":-56.419999999999995,"z":30.071428571428573,"a95":0.99,"info":"20/01/2014 at 01:54:40"},{"visible":true,"include":true,"step":"20.0","x":-124.33333333333333,"y":-47.39809523809524,"z":23.60952380952381,"a95":0.99,"info":"20/01/2014 at 01:54:40"},{"visible":true,"include":true,"step":"25.0","x":-102.60952380952382,"y":-49.66285714285715,"z":20.302857142857142,"a95":0.99,"info":"20/01/2014 at 01:54:40"},{"visible":true,"include":true,"step":"30.0","x":-76.25714285714287,"y":-37.20857142857143,"z":21.262857142857143,"a95":0.99,"info":"20/01/2014 at 01:54:40"},{"visible":true,"include":true,"step":"35.0","x":-98.53333333333333,"y":-7.782285714285714,"z":7.91504761904762,"a95":0.99,"info":"20/01/2014 at 01:54:40"},{"visible":true,"include":true,"step":"40.0","x":-58.99904761904762,"y":-24.17142857142857,"z":14.007619047619048,"a95":0.99,"info":"20/01/2014 at 01:54:40"},{"visible":true,"include":true,"step":"45.0","x":-51.413333333333334,"y":-16.196190476190477,"z":17.337142857142858,"a95":0.99,"info":"20/01/2014 at 01:54:40"},{"visible":true,"include":true,"step":"50.0","x":-39.906666666666666,"y":-17.201904761904764,"z":8.916190476190476,"a95":0.99,"info":"20/01/2014 at 01:54:40"},{"visible":false,"include":false,"step":"60.0","x":-25.58,"y":-16.52,"z":11.437142857142858,"a95":0.99,"info":"20/01/2014 at 01:54:40"},{"visible":false,"include":false,"step":"70.0","x":-20.239047619047618,"y":-21.239047619047618,"z":3.015904761904762,"a95":0.99,"info":"20/01/2014 at 01:54:40"},{"visible":false,"include":false,"step":"80.0","x":-41.07333333333333,"y":-13.967619047619047,"z":5.038285714285714,"a95":0.99,"info":"20/01/2014 at 01:54:40"},{"visible":false,"include":false,"step":"90.0","x":7.315428571428571,"y":-12.396190476190476,"z":9.276285714285715,"a95":0.99,"info":"20/01/2014 at 01:54:40"},{"visible":false,"include":false,"step":"100.0","x":-8.414,"y":-6.7493333333333325,"z":9.859047619047619,"a95":0.99,"info":"20/01/2014 at 01:54:40"}]},{"version":"v1.1.0","exported":"2016-11-18T09:56:15.394Z","volume":10.5,"added":"2016-11-18T09:15:19.303Z","format":"Utrecht","demagType":"Unknown","strat":"5","patch":1.1,"GEO":[{"dec":106.79376256843341,"inc":-0.08863888579283806,"MAD":4.299419563576099,"cm":[-5.329070518200751e-15,9.325873406851315e-15,0],"intensity":399.35767058515574,"type":"GC","origin":false,"forced":true,"remark":"","nSteps":6,"minStep":"4.0","maxStep":"25.0","steps":["4.0","8.0","12.0","16.0","20.0","25.0"],"group":"None","version":"v1.1.0"}],"TECT":[{"dec":306.23030175444086,"inc":-35.892515883051324,"MAD":4.299419563576725,"cm":[-3.552713678800501e-15,1.7763568394002505e-15,1.7763568394002505e-15],"intensity":399.3576705851558,"type":"GC","origin":false,"forced":true,"remark":"","nSteps":6,"minStep":"4.0","maxStep":"25.0","steps":["4.0","8.0","12.0","16.0","20.0","25.0"],"group":"None","version":"v1.1.0"}],"interpreted":true,"name":"TT 1.17A","coreAzi":159,"coreDip":56,"bedStrike":148,"bedDip":63,"data":[{"visible":true,"include":false,"step":"0.0","x":-264.4666666666667,"y":-100.31428571428572,"z":165.46666666666667,"a95":0.99,"info":"20/01/2014 at 01:54:40"},{"visible":true,"include":true,"step":"4.0","x":-245.34285714285713,"y":-103.18095238095239,"z":128.03809523809525,"a95":0.99,"info":"20/01/2014 at 01:54:40"},{"visible":true,"include":true,"step":"8.0","x":-213.15238095238095,"y":-100.20952380952382,"z":84.25809523809524,"a95":0.99,"info":"20/01/2014 at 01:54:40"},{"visible":true,"include":true,"step":"12.0","x":-177.15238095238095,"y":-91.37333333333333,"z":53.080000000000005,"a95":0.99,"info":"20/01/2014 at 01:54:40"},{"visible":true,"include":true,"step":"16.0","x":-148.78095238095239,"y":-79.05142857142857,"z":30.48857142857143,"a95":0.99,"info":"20/01/2014 at 01:54:40"},{"visible":true,"include":true,"step":"20.0","x":-123.56190476190477,"y":-75.07047619047619,"z":21.695238095238096,"a95":0.99,"info":"20/01/2014 at 01:54:40"},{"visible":true,"include":true,"step":"25.0","x":-95.09619047619047,"y":-58.37238095238095,"z":4.205333333333333,"a95":0.99,"info":"20/01/2014 at 01:54:40"},{"visible":true,"include":false,"step":"30.0","x":-66.66380952380953,"y":-50.4352380952381,"z":-4.840571428571429,"a95":0.99,"info":"20/01/2014 at 01:54:40"},{"visible":false,"include":false,"step":"35.0","x":-89.86190476190475,"y":-19.413333333333334,"z":-2.2483809523809524,"a95":0.99,"info":"20/01/2014 at 01:54:40"},{"visible":true,"include":false,"step":"40.0","x":-53.83238095238095,"y":-39.92857142857143,"z":1.887047619047619,"a95":0.99,"info":"20/01/2014 at 01:54:40"},{"visible":true,"include":false,"step":"45.0","x":-35.864761904761906,"y":-34.09238095238096,"z":0.9941904761904762,"a95":0.99,"info":"20/01/2014 at 01:54:40"},{"visible":false,"include":false,"step":"50.0","x":-36.38285714285714,"y":-29.753333333333337,"z":-8.615809523809522,"a95":0.99,"info":"20/01/2014 at 01:54:40"},{"visible":false,"include":false,"step":"60.0","x":-17.24952380952381,"y":-15.237142857142858,"z":-0.7272190476190475,"a95":0.99,"info":"20/01/2014 at 01:54:40"},{"visible":false,"include":false,"step":"70.0","x":1.5196190476190476,"y":-24.291428571428572,"z":11.762857142857143,"a95":0.99,"info":"20/01/2014 at 01:54:40"},{"visible":false,"include":false,"step":"80.0","x":15.543809523809525,"y":-11.678095238095239,"z":14.188571428571427,"a95":0.99,"info":"20/01/2014 at 01:54:40"},{"visible":false,"include":false,"step":"90.0","x":3.673619047619048,"y":-7.1455238095238105,"z":-4.335047619047619,"a95":0.99,"info":"20/01/2014 at 01:54:40"},{"visible":false,"include":false,"step":"100.0","x":7.47047619047619,"y":-10.854285714285714,"z":3.474285714285714,"a95":0.99,"info":"20/01/2014 at 01:54:40"}]},{"version":"v1.1.0","exported":"2016-11-18T09:56:15.394Z","volume":10.5,"added":"2016-11-18T09:15:19.303Z","format":"Utrecht","demagType":"Unknown","strat":null,"patch":1.1,"GEO":[{"dec":5.10068932391448,"inc":18.69305278298465,"MAD":5.070340783715376,"cm":[-1.7763568394002505e-15,9.547918011776346e-15,0],"intensity":246.0076733128424,"type":"dir","forced":true,"remark":"","origin":false,"nSteps":5,"minStep":"180","maxStep":"275","steps":["180","200","225","250","275"],"group":"None","version":"v1.1.0"}],"TECT":[{"dec":326.0171040864283,"inc":40.89098418844907,"MAD":5.070340783715393,"cm":[5.329070518200751e-15,2.398081733190338e-14,1.7763568394002505e-15],"intensity":246.0076733128424,"type":"dir","forced":true,"remark":"","origin":false,"nSteps":5,"minStep":"180","maxStep":"275","steps":["180","200","225","250","275"],"group":"None","version":"v1.1.0"}],"interpreted":true,"name":"TT 1.18A","coreAzi":150,"coreDip":52,"bedStrike":148,"bedDip":63,"data":[{"visible":false,"include":false,"step":"20","x":-221.9047619047619,"y":-115.14285714285714,"z":33.23809523809524,"a95":1.7,"info":"\"13-11-03\" at \"13:06\""},{"visible":true,"include":false,"step":"80","x":-212,"y":-94.66666666666667,"z":11.142857142857142,"a95":1.9,"info":"\"13-11-04\" at \"09:51\""},{"visible":true,"include":false,"step":"150","x":-106.0952380952381,"y":-78.28571428571429,"z":-24.38095238095238,"a95":2.3,"info":"\"13-11-04\" at \"15:41\""},{"visible":true,"include":true,"step":"180","x":-132.57142857142858,"y":-76.0952380952381,"z":-28.666666666666668,"a95":2.3,"info":"\"13-11-05\" at \"10:06\""},{"visible":true,"include":true,"step":"200","x":-111.23809523809524,"y":-73.42857142857143,"z":-26.571428571428573,"a95":2.6,"info":"\"13-11-05\" at \"14:34\""},{"visible":true,"include":true,"step":"225","x":-110.57142857142857,"y":-75.33333333333333,"z":-28.095238095238095,"a95":2.5,"info":"\"13-11-06\" at \"08:54\""},{"visible":true,"include":true,"step":"250","x":-87.42857142857143,"y":-67.04761904761905,"z":-28.761904761904763,"a95":3.1,"info":"\"13-11-06\" at \"13:30\""},{"visible":true,"include":true,"step":"275","x":-63.93333333333333,"y":-56.733333333333334,"z":-36.61904761904762,"a95":3.4,"info":"\"13-11-07\" at \"02:36\""},{"visible":true,"include":false,"step":"300","x":-64.84761904761905,"y":-58.22857142857143,"z":-36.58095238095238,"a95":2.9,"info":"\"13-11-07\" at \"06:04\""},{"visible":true,"include":false,"step":"320","x":-50.62857142857143,"y":-53.904761904761905,"z":-37.51428571428571,"a95":2.6,"info":"\"13-11-07\" at \"09:37\""},{"visible":false,"include":false,"step":"340","x":-53.523809523809526,"y":-49.81904761904762,"z":-38.38095238095238,"a95":2.8,"info":"\"13-11-07\" at \"15:16\""},{"visible":false,"include":false,"step":"380","x":5.295238095238095,"y":-31.333333333333332,"z":-14.266666666666667,"a95":6.4,"info":"\"13-11-08\" at \"12:23\""},{"visible":false,"include":false,"step":"420","x":-126.47619047619048,"y":57.80952380952381,"z":-33.904761904761905,"a95":7.1,"info":"\"13-11-08\" at \"17:31\""}]},{"version":"v1.1.0","exported":"2016-11-18T09:56:15.394Z","volume":10.5,"added":"2016-11-18T09:15:19.303Z","format":"Utrecht","demagType":"Unknown","strat":null,"patch":1.1,"GEO":[{"dec":7.158016884623066,"inc":30.41345692609475,"MAD":3.0428018057819393,"cm":[1.7763568394002505e-15,1.4988010832439613e-15,0],"intensity":242.0155164531432,"type":"dir","forced":true,"remark":"","origin":false,"nSteps":5,"minStep":"150","maxStep":"250","steps":["150","180","200","225","250"],"group":"None","version":"v1.1.0"}],"TECT":[{"dec":311.0480917505971,"inc":45.6465558885026,"MAD":3.0428018057819055,"cm":[-9.769962616701378e-15,-4.440892098500626e-15,0],"intensity":242.01551645314322,"type":"dir","forced":true,"remark":"","origin":false,"nSteps":5,"minStep":"150","maxStep":"250","steps":["150","180","200","225","250"],"group":"None","version":"v1.1.0"}],"interpreted":true,"name":"TT 1.19A","coreAzi":156,"coreDip":54,"bedStrike":148,"bedDip":63,"data":[{"visible":true,"include":false,"step":"20","x":-237.42857142857142,"y":-83.42857142857143,"z":58.476190476190474,"a95":1.9,"info":"\"13-11-03\" at \"13:08\""},{"visible":true,"include":false,"step":"80","x":-225.04761904761904,"y":-80.76190476190476,"z":41.333333333333336,"a95":2,"info":"\"13-11-04\" at \"09:54\""},{"visible":true,"include":true,"step":"150","x":-114,"y":-63.142857142857146,"z":1.2380952380952381,"a95":2.5,"info":"\"13-11-04\" at \"15:44\""},{"visible":true,"include":true,"step":"180","x":-139.61904761904762,"y":-65.71428571428571,"z":2.0952380952380953,"a95":2.4,"info":"\"13-11-05\" at \"10:09\""},{"visible":true,"include":true,"step":"200","x":-105.14285714285714,"y":-58.857142857142854,"z":-6.095238095238095,"a95":2.9,"info":"\"13-11-05\" at \"14:37\""},{"visible":true,"include":true,"step":"225","x":-113.04761904761905,"y":-55.80952380952381,"z":-7.238095238095238,"a95":2.6,"info":"\"13-11-06\" at \"08:57\""},{"visible":true,"include":true,"step":"250","x":-103.23809523809524,"y":-43.333333333333336,"z":-7.714285714285714,"a95":3.2,"info":"\"13-11-06\" at \"13:32\""},{"visible":true,"include":false,"step":"275","x":-56.838095238095235,"y":-48.46666666666666,"z":-9.6,"a95":2.5,"info":"\"13-11-07\" at \"02:38\""},{"visible":true,"include":false,"step":"300","x":-72.54285714285714,"y":-40.076190476190476,"z":-14.266666666666667,"a95":3.1,"info":"\"13-11-07\" at \"06:05\""},{"visible":false,"include":false,"step":"320","x":-56.08571428571428,"y":-44.666666666666664,"z":-16.257142857142856,"a95":3.5,"info":"\"13-11-07\" at \"09:41\""},{"visible":false,"include":false,"step":"340","x":-72.66666666666667,"y":-34.59047619047619,"z":-9.104761904761904,"a95":2.5,"info":"\"13-11-07\" at \"15:18\""},{"visible":false,"include":false,"step":"380","x":-30.038095238095234,"y":-41.25714285714285,"z":10.257142857142858,"a95":7.5,"info":"\"13-11-08\" at \"12:25\""},{"visible":false,"include":false,"step":"420","x":-140.1904761904762,"y":75.52380952380952,"z":-21.333333333333332,"a95":7.3,"info":"\"13-11-08\" at \"17:33\""}]},{"version":"v1.1.0","exported":"2016-11-18T09:56:15.394Z","volume":10.5,"added":"2016-11-18T09:15:19.304Z","format":"Utrecht","demagType":"Unknown","strat":"6","patch":1.1,"GEO":[{"dec":211.33609158382518,"inc":-17.086597309756954,"MAD":3.8300250452685236,"cm":[-104.4101179380725,-95.05048220988263,-38.21486656267748],"intensity":169.58278144422056,"type":"dir","forced":false,"remark":"","origin":false,"nSteps":8,"minStep":"4.0","maxStep":"40.0","steps":["4.0","8.0","12.0","16.0","20.0","25.0","30.0","40.0"],"group":"None","version":"v1.1.0"}],"TECT":[{"dec":164.3709914637003,"inc":-63.44384615223406,"MAD":3.830025045268541,"cm":[-47.0345859850529,-3.2304373033672364,-138.46932843998468],"intensity":169.58278144422053,"type":"dir","forced":false,"remark":"","origin":false,"nSteps":8,"minStep":"4.0","maxStep":"40.0","steps":["4.0","8.0","12.0","16.0","20.0","25.0","30.0","40.0"],"group":"None","version":"v1.1.0"}],"interpreted":true,"name":"TT 1.19B","coreAzi":156,"coreDip":54,"bedStrike":148,"bedDip":63,"data":[{"visible":true,"include":false,"step":"0.0","x":134.5047619047619,"y":213.1142857142857,"z":6.443047619047619,"a95":0.99,"info":"20/01/2014 at 01:54:40"},{"visible":true,"include":true,"step":"4.0","x":126.19047619047619,"y":199.96190476190475,"z":8.586857142857143,"a95":0.99,"info":"20/01/2014 at 01:54:40"},{"visible":true,"include":true,"step":"8.0","x":108.5904761904762,"y":177.1238095238095,"z":7.400666666666666,"a95":0.99,"info":"20/01/2014 at 01:54:40"},{"visible":true,"include":true,"step":"12.0","x":84.47333333333333,"y":152.74285714285713,"z":6.964380952380953,"a95":0.99,"info":"20/01/2014 at 01:54:40"},{"visible":true,"include":true,"step":"16.0","x":65.22,"y":132.57142857142858,"z":4.811047619047619,"a95":0.99,"info":"20/01/2014 at 01:54:40"},{"visible":true,"include":true,"step":"20.0","x":53.142857142857146,"y":116.63809523809525,"z":1.1767619047619047,"a95":0.99,"info":"20/01/2014 at 01:54:40"},{"visible":true,"include":true,"step":"25.0","x":47.727619047619044,"y":103.54285714285714,"z":-2.8258095238095238,"a95":0.99,"info":"20/01/2014 at 01:54:40"},{"visible":true,"include":true,"step":"30.0","x":39.15904761904762,"y":85.50571428571428,"z":-4.996095238095238,"a95":0.99,"info":"20/01/2014 at 01:54:40"},{"visible":false,"include":false,"step":"35.0","x":-4.239142857142857,"y":93.10666666666667,"z":-0.3928857142857143,"a95":0.99,"info":"20/01/2014 at 01:54:40"},{"visible":true,"include":true,"step":"40.0","x":22.31142857142857,"y":66.31619047619049,"z":-1.7226666666666668,"a95":0.99,"info":"20/01/2014 at 01:54:40"},{"visible":false,"include":false,"step":"45.0","x":23.799047619047617,"y":60.63238095238095,"z":-3.993142857142857,"a95":0.99,"info":"20/01/2014 at 01:54:40"},{"visible":false,"include":false,"step":"50.0","x":14.039047619047619,"y":43.11238095238095,"z":2.7464761904761907,"a95":0.99,"info":"20/01/2014 at 01:54:40"},{"visible":false,"include":false,"step":"60.0","x":14.144761904761905,"y":39.611428571428576,"z":3.3150476190476192,"a95":0.99,"info":"20/01/2014 at 01:54:40"},{"visible":false,"include":false,"step":"70.0","x":20.44,"y":18.95809523809524,"z":6.280571428571428,"a95":0.99,"info":"20/01/2014 at 01:54:40"},{"visible":false,"include":false,"step":"80.0","x":51.768571428571434,"y":23.295238095238094,"z":5.840476190476191,"a95":0.99,"info":"20/01/2014 at 01:54:40"},{"visible":false,"include":false,"step":"90.0","x":-4.9157142857142855,"y":18.55047619047619,"z":1.2466666666666666,"a95":0.99,"info":"20/01/2014 at 01:54:40"},{"visible":false,"include":false,"step":"100.0","x":-8.208761904761904,"y":12.836190476190476,"z":4.166857142857143,"a95":0.99,"info":"20/01/2014 at 01:54:40"}]},{"version":"v1.1.0","exported":"2016-11-18T09:56:15.394Z","volume":10.5,"added":"2016-11-18T09:15:19.304Z","format":"Utrecht","demagType":"Unknown","strat":"7","patch":1.1,"GEO":[{"dec":3.7131080708970785,"inc":32.302250999757284,"MAD":5.245947074444872,"cm":[0,4.884981308350689e-15,0],"intensity":315.31677882163035,"type":"dir","forced":true,"remark":"","origin":false,"nSteps":8,"minStep":"8.0","maxStep":"45.0","steps":["8.0","12.0","16.0","20.0","25.0","30.0","40.0","45.0"],"group":"None","version":"v1.1.0"}],"TECT":[{"dec":307.8264812610297,"inc":43.01733274432747,"MAD":5.2459470744448335,"cm":[-1.84297022087776e-14,1.5543122344752192e-15,6.661338147750939e-15],"intensity":315.3167788216304,"type":"dir","forced":true,"remark":"","origin":false,"nSteps":8,"minStep":"8.0","maxStep":"45.0","steps":["8.0","12.0","16.0","20.0","25.0","30.0","40.0","45.0"],"group":"None","version":"v1.1.0"}],"interpreted":true,"name":"TT 1.20B","coreAzi":156,"coreDip":49,"bedStrike":148,"bedDip":63,"data":[{"visible":true,"include":false,"step":"0.0","x":-309.6952380952381,"y":-98.13333333333334,"z":19.695238095238096,"a95":0.99,"info":"20/01/2014 at 01:54:40"},{"visible":true,"include":false,"step":"4.0","x":-280.8952380952381,"y":-93.17619047619048,"z":2.626857142857143,"a95":0.99,"info":"20/01/2014 at 01:54:40"},{"visible":true,"include":true,"step":"8.0","x":-237.8952380952381,"y":-95.6,"z":-7.723714285714286,"a95":0.99,"info":"20/01/2014 at 01:54:40"},{"visible":true,"include":true,"step":"12.0","x":-199.31428571428575,"y":-66.44285714285714,"z":-21.782857142857143,"a95":0.99,"info":"20/01/2014 at 01:54:40"},{"visible":true,"include":true,"step":"16.0","x":-164.15238095238095,"y":-90.37809523809524,"z":-4.353904761904762,"a95":0.99,"info":"20/01/2014 at 01:54:40"},{"visible":true,"include":true,"step":"20.0","x":-140.25714285714287,"y":-58.95809523809523,"z":-26.725714285714286,"a95":0.99,"info":"20/01/2014 at 01:54:40"},{"visible":true,"include":true,"step":"25.0","x":-119.97142857142858,"y":-57.58095238095238,"z":-23.643809523809523,"a95":0.99,"info":"20/01/2014 at 01:54:40"},{"visible":true,"include":true,"step":"30.0","x":-84.3047619047619,"y":-44.296190476190475,"z":-23.415238095238095,"a95":0.99,"info":"20/01/2014 at 01:54:40"},{"visible":false,"include":false,"step":"35.0","x":-115.91428571428571,"y":-13.113333333333333,"z":-1.5577142857142858,"a95":0.99,"info":"20/01/2014 at 01:54:40"},{"visible":true,"include":true,"step":"40.0","x":-66.27714285714285,"y":-33.10666666666667,"z":-8.868380952380951,"a95":0.99,"info":"20/01/2014 at 01:54:40"},{"visible":true,"include":true,"step":"45.0","x":-52.338095238095235,"y":-26.906666666666666,"z":-5.744761904761905,"a95":0.99,"info":"20/01/2014 at 01:54:40"},{"visible":false,"include":false,"step":"50.0","x":-34.679047619047616,"y":-17.11142857142857,"z":-14.547619047619047,"a95":0.99,"info":"20/01/2014 at 01:54:40"},{"visible":false,"include":false,"step":"60.0","x":-29.275238095238095,"y":-28.89714285714286,"z":-0.5704476190476191,"a95":0.99,"info":"20/01/2014 at 01:54:40"},{"visible":false,"include":false,"step":"70.0","x":-15.862857142857143,"y":-28.33238095238095,"z":3.32,"a95":0.99,"info":"20/01/2014 at 01:54:40"},{"visible":false,"include":false,"step":"80.0","x":11.712380952380952,"y":0.2802857142857143,"z":-7.222476190476191,"a95":0.99,"info":"20/01/2014 at 01:54:40"},{"visible":false,"include":false,"step":"90.0","x":2.3362857142857143,"y":-12.456190476190475,"z":-9.225333333333333,"a95":0.99,"info":"20/01/2014 at 01:54:40"},{"visible":false,"include":false,"step":"100.0","x":-9.315238095238096,"y":-26.935238095238095,"z":6.06647619047619,"a95":0.99,"info":"20/01/2014 at 01:54:40"}]},{"version":"v1.1.0","exported":"2016-11-18T09:56:15.394Z","volume":10.5,"added":"2016-11-18T09:15:19.304Z","format":"Utrecht","demagType":"Unknown","strat":null,"patch":1.1,"GEO":[{"dec":9.00420397070883,"inc":23.887157341679462,"MAD":8.349098345212164,"cm":[8.881784197001252e-16,1.887379141862766e-15,0],"intensity":165.8433151202303,"type":"dir","forced":true,"remark":"","origin":false,"nSteps":6,"minStep":"200","maxStep":"320","steps":["200","225","250","275","300","320"],"group":"None","version":"v1.1.0"}],"TECT":[{"dec":320.6957597715397,"inc":45.91968532150384,"MAD":8.349098345212191,"cm":[-7.993605777301127e-15,5.551115123125783e-15,5.773159728050814e-15],"intensity":165.84331512023033,"type":"dir","forced":true,"remark":"","origin":false,"nSteps":6,"minStep":"200","maxStep":"320","steps":["200","225","250","275","300","320"],"group":"None","version":"v1.1.0"}],"interpreted":true,"name":"TT 1.21A","coreAzi":184,"coreDip":59,"bedStrike":148,"bedDip":63,"data":[{"visible":true,"include":false,"step":"20","x":-245.9047619047619,"y":0.8571428571428571,"z":62.666666666666664,"a95":2,"info":"\"13-11-03\" at \"13:12\""},{"visible":true,"include":false,"step":"80","x":-195.61904761904762,"y":7.904761904761905,"z":50.95238095238095,"a95":2,"info":"\"13-11-04\" at \"09:57\""},{"visible":true,"include":false,"step":"150","x":-117.04761904761905,"y":-4.857142857142857,"z":0.09523809523809523,"a95":3.7,"info":"\"13-11-04\" at \"15:48\""},{"visible":true,"include":false,"step":"180","x":-145.8095238095238,"y":-9.523809523809524,"z":-1.7142857142857142,"a95":2.4,"info":"\"13-11-05\" at \"10:12\""},{"visible":true,"include":true,"step":"200","x":-111.42857142857143,"y":-7.238095238095238,"z":-1.0476190476190477,"a95":2.8,"info":"\"13-11-05\" at \"14:39\""},{"visible":true,"include":true,"step":"225","x":-115.9047619047619,"y":-4.9523809523809526,"z":0.38095238095238093,"a95":2.9,"info":"\"13-11-06\" at \"08:59\""},{"visible":true,"include":true,"step":"250","x":-92.66666666666667,"y":-8.6,"z":-18.17142857142857,"a95":3.4,"info":"\"13-11-06\" at \"13:35\""},{"visible":true,"include":true,"step":"275","x":-68.06666666666668,"y":-11.304761904761905,"z":-17.01904761904762,"a95":3.4,"info":"\"13-11-07\" at \"02:40\""},{"visible":true,"include":true,"step":"300","x":-64.91428571428571,"y":-5.495238095238095,"z":-22.295238095238094,"a95":3,"info":"\"13-11-07\" at \"06:08\""},{"visible":true,"include":true,"step":"320","x":-52.07619047619047,"y":-7.20952380952381,"z":-22.64761904761905,"a95":4.8,"info":"\"13-11-07\" at \"09:44\""},{"visible":true,"include":false,"step":"340","x":-57.13333333333333,"y":6.447619047619048,"z":-18.83809523809524,"a95":3.2,"info":"\"13-11-07\" at \"15:21\""},{"visible":true,"include":false,"step":"380","x":-40.95238095238095,"y":-7.238095238095238,"z":-11.447619047619048,"a95":8.6,"info":"\"13-11-08\" at \"12:28\""},{"visible":false,"include":false,"step":"420","x":-311.42857142857144,"y":160.95238095238096,"z":4.666666666666667,"a95":7.3,"info":"\"13-11-08\" at \"17:36\""}]},{"version":"v1.1.0","exported":"2016-11-18T09:56:15.394Z","volume":10.5,"added":"2016-11-18T09:15:19.304Z","format":"Utrecht","demagType":"Unknown","strat":null,"patch":1.1,"GEO":[{"dec":357.5157030761822,"inc":33.91783561374156,"MAD":2.9993308981867712,"cm":[4.440892098500626e-16,1.4682699500667695e-14,0],"intensity":203.10920646432274,"type":"dir","forced":true,"remark":"","origin":false,"nSteps":8,"minStep":"150","maxStep":"320","steps":["150","180","200","225","250","275","300","320"],"group":"None","version":"v1.1.0"}],"TECT":[{"dec":304.6614626791801,"inc":38.140974494575815,"MAD":2.9993308981866624,"cm":[1.1102230246251565e-14,6.661338147750939e-15,-4.884981308350689e-15],"intensity":203.10920646432274,"type":"dir","forced":true,"remark":"","origin":false,"nSteps":8,"minStep":"150","maxStep":"320","steps":["150","180","200","225","250","275","300","320"],"group":"None","version":"v1.1.0"}],"interpreted":true,"name":"TT 1.21B","coreAzi":184,"coreDip":59,"bedStrike":148,"bedDip":63,"data":[{"visible":true,"include":false,"step":"20","x":-261.7142857142857,"y":19.904761904761905,"z":83.04761904761905,"a95":1.8,"info":"\"13-11-03\" at \"13:14\""},{"visible":true,"include":false,"step":"80","x":-212.66666666666666,"y":17.80952380952381,"z":68.85714285714286,"a95":1.8,"info":"\"13-11-04\" at \"10:00\""},{"visible":true,"include":true,"step":"150","x":-142.28571428571428,"y":14.857142857142858,"z":16.19047619047619,"a95":4.9,"info":"\"13-11-04\" at \"15:53\""},{"visible":true,"include":true,"step":"180","x":-126.28571428571429,"y":8.761904761904763,"z":9.904761904761905,"a95":2.4,"info":"\"13-11-05\" at \"10:15\""},{"visible":true,"include":true,"step":"200","x":-130.57142857142858,"y":15.238095238095237,"z":4.761904761904762,"a95":2.5,"info":"\"13-11-05\" at \"14:41\""},{"visible":true,"include":true,"step":"225","x":-143.42857142857142,"y":10.19047619047619,"z":7.333333333333333,"a95":2.3,"info":"\"13-11-06\" at \"09:01\""},{"visible":true,"include":true,"step":"250","x":-106.38095238095238,"y":5.428571428571429,"z":4.857142857142857,"a95":3,"info":"\"13-11-06\" at \"13:37\""},{"visible":true,"include":true,"step":"275","x":-82.15238095238095,"y":14.285714285714286,"z":-0.6380952380952382,"a95":3,"info":"\"13-11-07\" at \"02:43\""},{"visible":true,"include":true,"step":"300","x":-78.23809523809524,"y":8.952380952380953,"z":0.18095238095238095,"a95":3.1,"info":"\"13-11-07\" at \"06:10\""},{"visible":true,"include":true,"step":"320","x":-59.22857142857143,"y":7.409523809523809,"z":-3.961904761904762,"a95":3,"info":"\"13-11-07\" at \"09:47\""},{"visible":false,"include":false,"step":"340","x":-68.16190476190476,"y":16.80952380952381,"z":-7.133333333333334,"a95":2.6,"info":"\"13-11-07\" at \"15:23\""},{"visible":false,"include":false,"step":"380","x":-43.714285714285715,"y":-2.0095238095238095,"z":-2.5333333333333337,"a95":7.2,"info":"\"13-11-08\" at \"12:31\""},{"visible":false,"include":false,"step":"420","x":-406.76190476190476,"y":83.04761904761905,"z":37.04761904761905,"a95":5.8,"info":"\"13-11-08\" at \"17:40\""}]},{"version":"v1.1.0","exported":"2016-11-18T09:56:15.394Z","volume":10.5,"added":"2016-11-18T09:15:19.305Z","format":"Utrecht","demagType":"Unknown","strat":"8","patch":1.1,"GEO":[{"dec":2.6780037800525633,"inc":40.63259730267132,"MAD":2.6945586280732905,"cm":[-1.7763568394002505e-15,1.84297022087776e-14,0],"intensity":526.3413321317299,"type":"dir","forced":true,"remark":"","origin":false,"nSteps":8,"minStep":"12.0","maxStep":"50.0","steps":["12.0","16.0","20.0","25.0","30.0","40.0","45.0","50.0"],"group":"None","version":"v1.1.0"}],"TECT":[{"dec":296.3828331524169,"inc":42.872296445428994,"MAD":2.6945586280733145,"cm":[2.220446049250313e-14,2.930988785010413e-14,2.042810365310288e-14],"intensity":526.34133213173,"type":"dir","forced":true,"remark":"","origin":false,"nSteps":8,"minStep":"12.0","maxStep":"50.0","steps":["12.0","16.0","20.0","25.0","30.0","40.0","45.0","50.0"],"group":"None","version":"v1.1.0"}],"interpreted":true,"name":"TT 1.22","coreAzi":76,"coreDip":55,"bedStrike":148,"bedDip":63,"data":[{"visible":true,"include":false,"step":"0.0","x":-166.4952380952381,"y":-275.3904761904762,"z":286.56190476190477,"a95":0.99,"info":"20/01/2014 at 01:54:40"},{"visible":true,"include":false,"step":"4.0","x":-129.77142857142857,"y":-290.247619047619,"z":278.45714285714286,"a95":0.99,"info":"20/01/2014 at 01:54:40"},{"visible":true,"include":false,"step":"8.0","x":-107.93333333333332,"y":-284.67619047619047,"z":263.6095238095238,"a95":0.99,"info":"20/01/2014 at 01:54:40"},{"visible":true,"include":true,"step":"12.0","x":-93.93904761904761,"y":-276.8095238095238,"z":250.35238095238094,"a95":0.99,"info":"20/01/2014 at 01:54:40"},{"visible":true,"include":true,"step":"16.0","x":-72.82095238095238,"y":-250.76190476190476,"z":224.49523809523808,"a95":0.99,"info":"20/01/2014 at 01:54:40"},{"visible":true,"include":true,"step":"20.0","x":-62.10285714285715,"y":-213.51428571428573,"z":200.94285714285715,"a95":0.99,"info":"20/01/2014 at 01:54:40"},{"visible":true,"include":true,"step":"25.0","x":-39.49809523809524,"y":-193.59047619047618,"z":174.03809523809525,"a95":0.99,"info":"20/01/2014 at 01:54:40"},{"visible":true,"include":true,"step":"30.0","x":-29.446666666666665,"y":-180.4952380952381,"z":150.66666666666666,"a95":0.99,"info":"20/01/2014 at 01:54:40"},{"visible":false,"include":false,"step":"35.0","x":-65.6895238095238,"y":-130.22857142857143,"z":134.68571428571428,"a95":0.99,"info":"20/01/2014 at 01:54:40"},{"visible":true,"include":true,"step":"40.0","x":-33.38476190476191,"y":-140.03809523809525,"z":135.21904761904761,"a95":0.99,"info":"20/01/2014 at 01:54:40"},{"visible":true,"include":true,"step":"45.0","x":-17.99047619047619,"y":-116.6,"z":110.87619047619049,"a95":0.99,"info":"20/01/2014 at 01:54:40"},{"visible":true,"include":true,"step":"50.0","x":-26.937142857142856,"y":-104.46666666666667,"z":91.77714285714285,"a95":0.99,"info":"20/01/2014 at 01:54:40"},{"visible":false,"include":false,"step":"60.0","x":-8.31447619047619,"y":-77.38857142857144,"z":66.33238095238096,"a95":0.99,"info":"20/01/2014 at 01:54:40"},{"visible":false,"include":false,"step":"70.0","x":0.8060666666666666,"y":-54.41428571428572,"z":69.07333333333334,"a95":0.99,"info":"20/01/2014 at 01:54:40"},{"visible":false,"include":false,"step":"80.0","x":64.75333333333333,"y":-47.64857142857143,"z":15.59047619047619,"a95":0.99,"info":"20/01/2014 at 01:54:40"},{"visible":false,"include":false,"step":"90.0","x":23.075238095238095,"y":1.1721904761904762,"z":45.35619047619048,"a95":0.99,"info":"20/01/2014 at 01:54:40"},{"visible":false,"include":false,"step":"100.0","x":31.226666666666667,"y":34.212380952380954,"z":46.72,"a95":0.99,"info":"20/01/2014 at 01:54:40"}]},{"version":"v1.1.0","exported":"2016-11-18T09:56:15.394Z","volume":10.5,"added":"2016-11-18T09:15:19.305Z","format":"Utrecht","demagType":"Unknown","strat":null,"patch":1.1,"GEO":[{"dec":6.081712856106947,"inc":20.30403595845657,"MAD":4.008619895308666,"cm":[-7.105427357601002e-15,2.8976820942716586e-14,0],"intensity":411.6610233990353,"type":"dir","forced":true,"remark":"","origin":false,"nSteps":5,"minStep":"150","maxStep":"250","steps":["150","180","200","225","250"],"group":"None","version":"v1.1.0"}],"TECT":[{"dec":324.39070891474216,"inc":42.29496519024836,"MAD":4.0086198953086525,"cm":[-1.0658141036401503e-14,2.3092638912203256e-14,1.0658141036401503e-14],"intensity":411.66102339903523,"type":"dir","forced":true,"remark":"","origin":false,"nSteps":5,"minStep":"150","maxStep":"250","steps":["150","180","200","225","250"],"group":"None","version":"v1.1.0"}],"interpreted":true,"name":"TT 1.24","coreAzi":182,"coreDip":41,"bedStrike":148,"bedDip":63,"data":[{"visible":true,"include":false,"step":"20","x":-449.5238095238095,"y":-9.714285714285714,"z":-108.0952380952381,"a95":1.8,"info":"\"13-11-03\" at \"13:16\""},{"visible":true,"include":false,"step":"80","x":-379.04761904761904,"y":-51.61904761904762,"z":-88,"a95":1.8,"info":"\"13-11-04\" at \"10:02\""},{"visible":true,"include":true,"step":"150","x":-242.85714285714286,"y":-20.38095238095238,"z":-112.0952380952381,"a95":2.2,"info":"\"13-11-04\" at \"15:58\""},{"visible":true,"include":true,"step":"180","x":-197.52380952380952,"y":-14.666666666666666,"z":-102.19047619047619,"a95":2.8,"info":"\"13-11-05\" at \"10:18\""},{"visible":true,"include":true,"step":"200","x":-160.28571428571428,"y":-15.238095238095237,"z":-100.47619047619048,"a95":2.7,"info":"\"13-11-05\" at \"14:44\""},{"visible":true,"include":true,"step":"225","x":-170.57142857142858,"y":-12.857142857142858,"z":-96.47619047619048,"a95":2.9,"info":"\"13-11-06\" at \"09:03\""},{"visible":true,"include":true,"step":"250","x":-115.71428571428571,"y":-2.1904761904761907,"z":-88.85714285714286,"a95":3.3,"info":"\"13-11-06\" at \"13:39\""},{"visible":false,"include":false,"step":"275","x":-86.47619047619048,"y":-19.238095238095237,"z":-62.095238095238095,"a95":4.1,"info":"\"13-11-07\" at \"02:45\""},{"visible":false,"include":false,"step":"300","x":-79.9047619047619,"y":-23.523809523809526,"z":-75.61904761904762,"a95":3.7,"info":"\"13-11-07\" at \"06:12\""},{"visible":false,"include":false,"step":"320","x":-64.36190476190475,"y":-35.41904761904762,"z":-57.07619047619047,"a95":3.4,"info":"\"13-11-07\" at \"09:49\""},{"visible":false,"include":false,"step":"340","x":-76.28571428571429,"y":-2.6666666666666665,"z":-59.42857142857143,"a95":4.2,"info":"\"13-11-07\" at \"15:26\""},{"visible":false,"include":false,"step":"380","x":-23.133333333333333,"y":-1.580952380952381,"z":-44.77142857142857,"a95":8.1,"info":"\"13-11-08\" at \"12:35\""},{"visible":false,"include":false,"step":"420","x":-288,"y":77.23809523809524,"z":-73.42857142857143,"a95":5.5,"info":"\"13-11-08\" at \"17:43\""}]},{"version":"v1.1.0","exported":"2016-11-18T09:56:15.394Z","volume":10.5,"added":"2016-11-18T09:15:19.306Z","format":"Utrecht","demagType":"Unknown","strat":null,"patch":1.1,"GEO":[{"dec":2.381248485411618,"inc":33.237608031921106,"MAD":4.17579413875567,"cm":[0,3.5915714846623814e-14,0],"intensity":388.6073512806825,"type":"dir","forced":true,"remark":"","origin":false,"nSteps":4,"minStep":"180","maxStep":"250","steps":["180","200","225","250"],"group":"None","version":"v1.1.0"}],"TECT":[{"dec":306.35391055039145,"inc":42.04188621014447,"MAD":4.175794138755715,"cm":[7.105427357601002e-15,3.730349362740526e-14,3.019806626980426e-14],"intensity":388.6073512806825,"type":"dir","forced":true,"remark":"","origin":false,"nSteps":4,"minStep":"180","maxStep":"250","steps":["180","200","225","250"],"group":"None","version":"v1.1.0"}],"interpreted":true,"name":"TT 1.25A","coreAzi":179,"coreDip":41,"bedStrike":148,"bedDip":63,"data":[{"visible":false,"include":false,"step":"20","x":-449.6190476190476,"y":13.523809523809524,"z":-4.095238095238095,"a95":1.6,"info":"\"13-11-03\" at \"13:20\""},{"visible":false,"include":false,"step":"80","x":-379.7142857142857,"y":27.238095238095237,"z":-0.09523809523809523,"a95":1.7,"info":"\"13-11-04\" at \"10:04\""},{"visible":true,"include":false,"step":"150","x":-262.57142857142856,"y":-1.4285714285714286,"z":-48.476190476190474,"a95":2.3,"info":"\"13-11-04\" at \"16:01\""},{"visible":true,"include":true,"step":"180","x":-231.8095238095238,"y":-24.476190476190474,"z":-49.80952380952381,"a95":2.1,"info":"\"13-11-05\" at \"10:24\""},{"visible":true,"include":true,"step":"200","x":-177.33333333333334,"y":-5.238095238095238,"z":-57.04761904761905,"a95":2.1,"info":"\"13-11-05\" at \"14:46\""},{"visible":true,"include":true,"step":"225","x":-189.14285714285714,"y":-2.6666666666666665,"z":-51.80952380952381,"a95":2.5,"info":"\"13-11-06\" at \"09:07\""},{"visible":true,"include":true,"step":"250","x":-140.95238095238096,"y":-1.3333333333333333,"z":-56.95238095238095,"a95":3.2,"info":"\"13-11-06\" at \"13:41\""},{"visible":true,"include":false,"step":"275","x":-95.14285714285714,"y":-10.761904761904763,"z":-44,"a95":3.4,"info":"\"13-11-07\" at \"02:47\""},{"visible":false,"include":false,"step":"300","x":-93.04761904761905,"y":16,"z":-43.23809523809524,"a95":2.6,"info":"\"13-11-07\" at \"06:14\""},{"visible":true,"include":false,"step":"320","x":-88,"y":-3.8095238095238093,"z":-40.38095238095238,"a95":2.7,"info":"\"13-11-07\" at \"09:51\""},{"visible":false,"include":false,"step":"340","x":-114.0952380952381,"y":-19.523809523809526,"z":-32.19047619047619,"a95":2.7,"info":"\"13-11-07\" at \"15:31\""},{"visible":false,"include":false,"step":"380","x":-45.89523809523809,"y":-24.952380952380953,"z":-2.4095238095238094,"a95":7.9,"info":"\"13-11-08\" at \"12:37\""},{"visible":false,"include":false,"step":"420","x":-62.57142857142857,"y":76.66666666666667,"z":-5.0476190476190474,"a95":12,"info":"\"13-11-08\" at \"17:45\""}]}]
