# Supplementary material for: Paleomagnetic constraints on the timing and distribution of Cenozoic rotations in Central and Eastern Anatolia
Source: Copernicus journal article supplement (doi:10.5194/se-9-295-2018), 2018-03-21
Supplement: Supplementary file 2 [file se-9-295-2018-supplement.zip › se-2017-66_DATA_dir files/dir files Ulukisla/YK1.dir]

[{"version":"v1.1.0","exported":"2016-11-28T14:22:36.857Z","volume":10.5,"added":"2016-11-28T14:17:59.534Z","format":"Utrecht","demagType":"Unknown","strat":null,"patch":1.1,"GEO":[{"dec":22.385522476683718,"inc":-33.218679652992904,"MAD":3.7345619045756044,"cm":[-3.980149543281186e-14,1.4210854715202004e-14,0],"intensity":2170.7590989696755,"type":"GC","origin":false,"forced":true,"remark":"","nSteps":5,"minStep":"100","maxStep":"240","steps":["100","150","180","210","240"],"group":"None","version":"v1.1.0"}],"TECT":[{"dec":15.291180977772001,"inc":-13.8606623615367,"MAD":3.73456190457578,"cm":[7.460698725481052e-14,4.263256414560601e-14,-5.684341886080802e-14],"intensity":2170.759098969675,"type":"GC","origin":false,"forced":true,"remark":"","nSteps":5,"minStep":"100","maxStep":"240","steps":["100","150","180","210","240"],"group":"None","version":"v1.1.0"}],"interpreted":true,"name":"YK1.1A","coreAzi":64,"coreDip":17,"bedStrike":69,"bedDip":25,"data":[{"visible":true,"include":false,"step":"20","x":-985.6190476190476,"y":-87.04761904761905,"z":2071.4285714285716,"a95":2.9,"info":"\"14-11-30\" at \"14:21\""},{"visible":true,"include":true,"step":"100","x":-761.047619047619,"y":5.238095238095238,"z":1253.3333333333333,"a95":2.4,"info":"\"15-01-31\" at \"11:05\""},{"visible":true,"include":true,"step":"150","x":-441.14285714285717,"y":151.33333333333334,"z":898.2857142857143,"a95":2.6,"info":"\"15-01-31\" at \"14:28\""},{"visible":true,"include":true,"step":"180","x":-380.4761904761905,"y":185.04761904761904,"z":806.5714285714286,"a95":2.7,"info":"\"15-02-01\" at \"07:57\""},{"visible":true,"include":true,"step":"210","x":-256.95238095238096,"y":277.9047619047619,"z":757.7142857142857,"a95":2.7,"info":"\"15-02-01\" at \"11:09\""},{"visible":true,"include":true,"step":"240","x":-167.61904761904762,"y":299.42857142857144,"z":684.952380952381,"a95":2.7,"info":"\"15-02-02\" at \"15:47\""},{"visible":true,"include":false,"step":"270","x":-175.61904761904762,"y":301.3333333333333,"z":519.8095238095239,"a95":2.6,"info":"\"15-02-02\" at \"19:46\""},{"visible":true,"include":false,"step":"300","x":-188.95238095238096,"y":283.14285714285717,"z":468.4761904761905,"a95":2.7,"info":"\"15-02-02\" at \"23:23\""},{"visible":true,"include":false,"step":"320","x":-82.76190476190476,"y":356.1904761904762,"z":508.0952380952381,"a95":2.7,"info":"\"15-02-03\" at \"17:59\""},{"visible":true,"include":false,"step":"340","x":-90.57142857142857,"y":290.3809523809524,"z":494.4761904761905,"a95":2.6,"info":"\"15-02-04\" at \"15:54\""},{"visible":true,"include":false,"step":"370","x":-64.0952380952381,"y":334.4761904761905,"z":507.6190476190476,"a95":2.7,"info":"\"15-02-04\" at \"20:58\""},{"visible":true,"include":false,"step":"400","x":-81.33333333333333,"y":306.3809523809524,"z":382.4761904761905,"a95":2.9,"info":"\"15-02-05\" at \"01:10\""},{"visible":true,"include":false,"step":"420","x":-60.095238095238095,"y":313.14285714285717,"z":375.42857142857144,"a95":2.7,"info":"\"15-02-09\" at \"19:51\""},{"visible":true,"include":false,"step":"450","x":-154.1904761904762,"y":323.6190476190476,"z":285.42857142857144,"a95":4.1,"info":"\"15-02-09\" at \"22:08\""},{"visible":true,"include":false,"step":"500","x":-28.761904761904763,"y":190.47619047619048,"z":297.8095238095238,"a95":3.3,"info":"\"15-02-10\" at \"19:02\""},{"visible":true,"include":false,"step":"530","x":-225.8095238095238,"y":287.3333333333333,"z":164.95238095238096,"a95":3.8,"info":"\"15-02-10\" at \"22:55\""},{"visible":true,"include":false,"step":"550","x":-762.4761904761905,"y":-288.85714285714283,"z":176.38095238095238,"a95":7.8,"info":"\"15-02-11\" at \"17:47\""},{"visible":true,"include":false,"step":"580","x":-1921.7142857142858,"y":279.5238095238095,"z":296.6666666666667,"a95":12.2,"info":"\"15-02-11\" at \"21:25\""}]},{"version":"v1.1.0","exported":"2016-11-28T14:22:36.857Z","volume":10.5,"added":"2016-11-28T14:17:59.535Z","format":"Utrecht","demagType":"Unknown","strat":"4","patch":1.1,"GEO":[],"TECT":[],"interpreted":false,"name":"YK1.2B","coreAzi":68,"coreDip":17,"bedStrike":69,"bedDip":25,"data":[{"visible":true,"include":false,"step":"0.0","x":-527.3904761904762,"y":-59.84285714285714,"z":733.3238095238095,"a95":0.99,"info":"07/07/2015 at 21:32:23"},{"visible":true,"include":false,"step":"10.0","x":-146.82857142857142,"y":177.2,"z":274.18095238095236,"a95":0.99,"info":"07/07/2015 at 21:32:23"},{"visible":true,"include":false,"step":"15.0","x":-102.0095238095238,"y":210.0857142857143,"z":119.36190476190475,"a95":0.99,"info":"07/07/2015 at 21:32:23"},{"visible":true,"include":false,"step":"20.0","x":79.01523809523809,"y":257.447619047619,"z":150.9714285714286,"a95":0.99,"info":"07/07/2015 at 21:32:23"},{"visible":true,"include":false,"step":"23.0","x":65.27904761904762,"y":289.4190476190476,"z":-13.375238095238094,"a95":0.99,"info":"07/07/2015 at 21:32:23"},{"visible":true,"include":false,"step":"25.0","x":75.16666666666667,"y":313.0761904761905,"z":21.961904761904762,"a95":0.99,"info":"07/07/2015 at 21:32:23"},{"visible":true,"include":false,"step":"30.0","x":168,"y":174.07619047619048,"z":46.59142857142857,"a95":0.99,"info":"07/07/2015 at 21:32:23"},{"visible":true,"include":false,"step":"33.0","x":129.9714285714286,"y":94.7895238095238,"z":-15.550476190476191,"a95":0.99,"info":"07/07/2015 at 21:32:23"},{"visible":true,"include":false,"step":"35.0","x":112.12380952380951,"y":9.374857142857143,"z":6.8050476190476195,"a95":0.99,"info":"07/07/2015 at 21:32:23"},{"visible":true,"include":false,"step":"40.0","x":17.155238095238094,"y":176.34285714285713,"z":99.75238095238096,"a95":0.99,"info":"07/07/2015 at 21:32:23"},{"visible":true,"include":false,"step":"45.0","x":150.24761904761903,"y":66.68761904761905,"z":33.31904761904762,"a95":0.99,"info":"07/07/2015 at 21:32:23"},{"visible":true,"include":false,"step":"50.0","x":86.57809523809524,"y":85.64571428571428,"z":56.61333333333334,"a95":0.99,"info":"07/07/2015 at 21:32:23"},{"visible":true,"include":false,"step":"55.0","x":28.19047619047619,"y":72.6952380952381,"z":-81.16380952380953,"a95":0.99,"info":"07/07/2015 at 21:32:23"},{"visible":true,"include":false,"step":"60.0","x":-2.9361904761904762,"y":155.59047619047618,"z":-44.076190476190476,"a95":0.99,"info":"07/07/2015 at 21:32:23"},{"visible":true,"include":false,"step":"65.0","x":1.1558095238095238,"y":-21.197142857142858,"z":-39.950476190476195,"a95":0.99,"info":"07/07/2015 at 21:32:23"},{"visible":true,"include":false,"step":"70.0","x":146.05714285714285,"y":33.624761904761904,"z":-98.44761904761906,"a95":0.99,"info":"07/07/2015 at 21:32:23"},{"visible":true,"include":false,"step":"80.0","x":360.87619047619046,"y":121.31428571428572,"z":-51.97428571428571,"a95":0.99,"info":"07/07/2015 at 21:32:23"}]},{"version":"v1.1.0","exported":"2016-11-28T14:22:36.857Z","volume":10.5,"added":"2016-11-28T14:17:59.535Z","format":"Utrecht","demagType":"Unknown","strat":null,"patch":1.1,"GEO":[{"dec":38.6534236132249,"inc":-31.367124700669095,"MAD":3.751870577031888,"cm":[-2.3092638912203256e-14,-5.329070518200751e-15,0],"intensity":461.76984774912427,"type":"GC","origin":false,"forced":true,"remark":"","nSteps":7,"minStep":"150","maxStep":"320","steps":["150","180","210","240","270","300","320"],"group":"None","version":"v1.1.0"}],"TECT":[{"dec":29.336815894122083,"inc":-16.824307617552407,"MAD":3.751870577031859,"cm":[-2.1316282072803006e-14,1.7763568394002505e-15,-8.881784197001252e-15],"intensity":461.7698477491243,"type":"GC","origin":false,"forced":true,"remark":"","nSteps":7,"minStep":"150","maxStep":"320","steps":["150","180","210","240","270","300","320"],"group":"None","version":"v1.1.0"}],"interpreted":true,"name":"YK1.3A","coreAzi":68,"coreDip":26,"bedStrike":69,"bedDip":25,"data":[{"visible":true,"include":false,"step":"20","x":-607.2380952380952,"y":-260.95238095238096,"z":1022.7619047619048,"a95":2.9,"info":"\"14-11-30\" at \"14:22\""},{"visible":true,"include":false,"step":"100","x":-324.2857142857143,"y":-92.85714285714286,"z":493.14285714285717,"a95":2.6,"info":"\"15-01-31\" at \"11:08\""},{"visible":true,"include":true,"step":"150","x":-154.66666666666666,"y":41.142857142857146,"z":302.6666666666667,"a95":3.1,"info":"\"15-01-31\" at \"14:30\""},{"visible":true,"include":true,"step":"180","x":-112.85714285714286,"y":43.333333333333336,"z":255.04761904761904,"a95":3.1,"info":"\"15-02-01\" at \"07:59\""},{"visible":true,"include":true,"step":"210","x":-40.285714285714285,"y":114.76190476190476,"z":185.42857142857142,"a95":2.9,"info":"\"15-02-01\" at \"11:11\""},{"visible":true,"include":true,"step":"240","x":-12.666666666666666,"y":122.76190476190476,"z":155.33333333333334,"a95":2.7,"info":"\"15-02-02\" at \"15:49\""},{"visible":true,"include":true,"step":"270","x":34.19047619047619,"y":152.85714285714286,"z":99.61904761904762,"a95":2.3,"info":"\"15-02-02\" at \"19:48\""},{"visible":true,"include":true,"step":"300","x":18.761904761904763,"y":150,"z":92.57142857142857,"a95":2.5,"info":"\"15-02-02\" at \"23:25\""},{"visible":true,"include":true,"step":"320","x":39.80952380952381,"y":180.66666666666666,"z":85.71428571428571,"a95":2.2,"info":"\"15-02-03\" at \"18:01\""},{"visible":true,"include":false,"step":"340","x":53.42857142857143,"y":130.28571428571428,"z":95.23809523809524,"a95":2.1,"info":"\"15-02-04\" at \"15:57\""},{"visible":true,"include":false,"step":"370","x":73.23809523809524,"y":148.66666666666666,"z":89.71428571428571,"a95":2.1,"info":"\"15-02-04\" at \"21:01\""},{"visible":true,"include":false,"step":"400","x":42.57142857142857,"y":174.85714285714286,"z":61.61904761904762,"a95":2.2,"info":"\"15-02-05\" at \"01:13\""},{"visible":true,"include":false,"step":"420","x":66.57142857142857,"y":109.9047619047619,"z":19.333333333333332,"a95":3.9,"info":"\"15-02-09\" at \"19:53\""},{"visible":true,"include":false,"step":"450","x":-31.047619047619047,"y":96.85714285714286,"z":17.80952380952381,"a95":8.6,"info":"\"15-02-09\" at \"22:10\""},{"visible":true,"include":false,"step":"500","x":-24.085714285714285,"y":41.923809523809524,"z":6.6380952380952385,"a95":20.7,"info":"\"15-02-10\" at \"19:04\""},{"visible":true,"include":false,"step":"530","x":-79.80952380952381,"y":161.52380952380952,"z":-11.904761904761905,"a95":9.3,"info":"\"15-02-10\" at \"22:57\""},{"visible":true,"include":false,"step":"550","x":-1241.904761904762,"y":47.714285714285715,"z":478.2857142857143,"a95":7.4,"info":"\"15-02-11\" at \"17:56\""},{"visible":true,"include":false,"step":"580","x":-1357.3333333333333,"y":-120.76190476190476,"z":383.5238095238095,"a95":14.6,"info":"\"15-02-11\" at \"21:28\""}]},{"version":"v1.1.0","exported":"2016-11-28T14:22:36.857Z","volume":10.5,"added":"2016-11-28T14:17:59.536Z","format":"Utrecht","demagType":"Unknown","strat":"1","patch":1.1,"GEO":[],"TECT":[],"interpreted":false,"name":"YK1.4A","coreAzi":118,"coreDip":28,"bedStrike":69,"bedDip":25,"data":[{"visible":true,"include":false,"step":"0.0","x":-1090.7619047619048,"y":-558.3619047619047,"z":553.447619047619,"a95":0.99,"info":"25/11/2014 at 05:42:32"},{"visible":true,"include":false,"step":"10.0","x":-699.4285714285714,"y":-380.81904761904764,"z":342.03809523809525,"a95":0.99,"info":"25/11/2014 at 05:42:32"},{"visible":true,"include":false,"step":"15.0","x":-551.104761904762,"y":-300.2,"z":261.29523809523806,"a95":0.99,"info":"25/11/2014 at 05:42:32"},{"visible":true,"include":false,"step":"20.0","x":-439.0380952380952,"y":-250.93333333333334,"z":216.30476190476188,"a95":0.99,"info":"25/11/2014 at 05:42:32"},{"visible":true,"include":false,"step":"23.0","x":-368.67619047619047,"y":-220.71428571428572,"z":177.8,"a95":0.99,"info":"25/11/2014 at 05:42:32"},{"visible":true,"include":false,"step":"25.0","x":-325.3619047619048,"y":-178.28571428571428,"z":170.0952380952381,"a95":0.99,"info":"25/11/2014 at 05:42:32"},{"visible":true,"include":false,"step":"30.0","x":-256.447619047619,"y":-150.7047619047619,"z":127.68571428571428,"a95":0.99,"info":"25/11/2014 at 05:42:32"},{"visible":true,"include":false,"step":"33.0","x":-233,"y":-137.2,"z":120.54285714285714,"a95":0.99,"info":"25/11/2014 at 05:42:32"},{"visible":true,"include":false,"step":"35.0","x":-233.26666666666668,"y":-113.71428571428571,"z":100.52380952380952,"a95":0.99,"info":"25/11/2014 at 05:42:32"},{"visible":true,"include":false,"step":"40.0","x":-159.4952380952381,"y":-87.23619047619047,"z":105.98095238095237,"a95":0.99,"info":"25/11/2014 at 05:42:32"},{"visible":true,"include":false,"step":"45.0","x":-172.1904761904762,"y":-97.76190476190476,"z":76.04095238095238,"a95":0.99,"info":"25/11/2014 at 05:42:32"},{"visible":true,"include":false,"step":"50.0","x":-140.23809523809524,"y":-115.51428571428572,"z":109.98095238095237,"a95":0.99,"info":"25/11/2014 at 05:42:32"},{"visible":true,"include":false,"step":"60.0","x":-127.4,"y":-85.63428571428571,"z":85.06666666666668,"a95":0.99,"info":"25/11/2014 at 05:42:32"},{"visible":true,"include":false,"step":"70.0","x":-106.68571428571428,"y":-54.45619047619047,"z":37.582857142857144,"a95":0.99,"info":"25/11/2014 at 05:42:32"},{"visible":true,"include":false,"step":"80.0","x":-165.65714285714287,"y":-80.2752380952381,"z":-15.443809523809524,"a95":0.99,"info":"25/11/2014 at 05:42:32"},{"visible":true,"include":false,"step":"90.0","x":-121.46666666666667,"y":2.8694285714285717,"z":17.364761904761906,"a95":0.99,"info":"25/11/2014 at 05:42:32"}]},{"version":"v1.1.0","exported":"2016-11-28T14:22:36.857Z","volume":10.5,"added":"2016-11-28T14:17:59.536Z","format":"Utrecht","demagType":"Unknown","strat":"2","patch":1.1,"GEO":[],"TECT":[],"interpreted":false,"name":"YK1.5A","coreAzi":107,"coreDip":28,"bedStrike":69,"bedDip":25,"data":[{"visible":true,"include":false,"step":"0.0","x":-1323.6190476190477,"y":-581.104761904762,"z":597.6571428571428,"a95":0.99,"info":"25/11/2014 at 05:42:32"},{"visible":true,"include":false,"step":"10.0","x":-887.2095238095238,"y":-443.64761904761906,"z":338.6952380952381,"a95":0.99,"info":"25/11/2014 at 05:42:32"},{"visible":true,"include":false,"step":"15.0","x":-702.7142857142857,"y":-334.0857142857143,"z":248.68571428571425,"a95":0.99,"info":"25/11/2014 at 05:42:32"},{"visible":true,"include":false,"step":"20.0","x":-585.4095238095239,"y":-288.9428571428572,"z":227.28571428571428,"a95":0.99,"info":"25/11/2014 at 05:42:32"},{"visible":true,"include":false,"step":"23.0","x":-501.14285714285717,"y":-252.02857142857144,"z":181.4,"a95":0.99,"info":"25/11/2014 at 05:42:32"},{"visible":true,"include":false,"step":"25.0","x":-457.18095238095236,"y":-218.69523809523812,"z":184.21904761904761,"a95":0.99,"info":"25/11/2014 at 05:42:32"},{"visible":true,"include":false,"step":"30.0","x":-378.03809523809525,"y":-181.25714285714287,"z":157.84761904761905,"a95":0.99,"info":"25/11/2014 at 05:42:32"},{"visible":true,"include":false,"step":"33.0","x":-369.70476190476194,"y":-162.16190476190476,"z":99.01904761904763,"a95":0.99,"info":"25/11/2014 at 05:42:32"},{"visible":true,"include":false,"step":"35.0","x":-346.6,"y":-152.1809523809524,"z":115.5047619047619,"a95":0.99,"info":"25/11/2014 at 05:42:32"},{"visible":true,"include":false,"step":"40.0","x":-283.8857142857143,"y":-168.33333333333334,"z":122.57142857142857,"a95":0.99,"info":"25/11/2014 at 05:42:32"},{"visible":true,"include":false,"step":"45.0","x":-270.1714285714286,"y":-132.41904761904763,"z":78.13238095238096,"a95":0.99,"info":"25/11/2014 at 05:42:32"},{"visible":true,"include":false,"step":"50.0","x":-208.87619047619046,"y":-127.55238095238094,"z":81.07142857142857,"a95":0.99,"info":"25/11/2014 at 05:42:32"},{"visible":true,"include":false,"step":"60.0","x":-165.65714285714287,"y":-119.5904761904762,"z":54.65238095238095,"a95":0.99,"info":"25/11/2014 at 05:42:32"},{"visible":true,"include":false,"step":"70.0","x":-195.97142857142856,"y":-101.80000000000001,"z":16.242857142857144,"a95":0.99,"info":"25/11/2014 at 05:42:32"},{"visible":true,"include":false,"step":"80.0","x":-61.41619047619048,"y":-96.24761904761905,"z":83.17714285714285,"a95":0.99,"info":"25/11/2014 at 05:42:32"},{"visible":true,"include":false,"step":"90.0","x":-75.84,"y":-32.01428571428571,"z":49.73428571428572,"a95":0.99,"info":"25/11/2014 at 05:42:32"}]},{"version":"v1.1.0","exported":"2016-11-28T14:22:36.857Z","volume":10.5,"added":"2016-11-28T14:17:59.537Z","format":"Utrecht","demagType":"Unknown","strat":null,"patch":1.1,"GEO":[{"dec":351.1830138135701,"inc":-41.642539012081144,"MAD":11.035118831798815,"cm":[-1.9539925233402755e-14,-7.105427357601002e-15,0],"intensity":1309.784192294855,"type":"GC","origin":false,"forced":true,"remark":"","nSteps":9,"minStep":"150","maxStep":"370","steps":["150","180","210","240","270","300","320","340","370"],"group":"None","version":"v1.1.0"}],"TECT":[{"dec":350.7026633792063,"inc":-16.656246377524205,"MAD":11.035118831798927,"cm":[9.237055564881302e-14,-2.1316282072803006e-14,7.105427357601002e-15],"intensity":1309.7841922948553,"type":"GC","origin":false,"forced":true,"remark":"","nSteps":9,"minStep":"150","maxStep":"370","steps":["150","180","210","240","270","300","320","340","370"],"group":"None","version":"v1.1.0"}],"interpreted":true,"name":"YK1.6A","coreAzi":84,"coreDip":7,"bedStrike":79,"bedDip":25,"data":[{"visible":true,"include":false,"step":"20","x":-974.2857142857143,"y":-1503.904761904762,"z":1804.2857142857142,"a95":2.4,"info":"\"14-11-30\" at \"14:24\""},{"visible":true,"include":false,"step":"100","x":-773.7142857142857,"y":-733.2380952380952,"z":836.0952380952381,"a95":2.1,"info":"\"15-01-31\" at \"11:10\""},{"visible":true,"include":true,"step":"150","x":-395.04761904761904,"y":-472,"z":713.1428571428571,"a95":2.6,"info":"\"15-01-31\" at \"14:32\""},{"visible":true,"include":true,"step":"180","x":-249.42857142857142,"y":-317.6190476190476,"z":608,"a95":2.6,"info":"\"15-02-01\" at \"08:01\""},{"visible":true,"include":true,"step":"210","x":-100.38095238095238,"y":-166.95238095238096,"z":542.0952380952381,"a95":2.7,"info":"\"15-02-01\" at \"11:13\""},{"visible":true,"include":true,"step":"240","x":-119.14285714285714,"y":-95.61904761904762,"z":482.57142857142856,"a95":2.8,"info":"\"15-02-02\" at \"15:52\""},{"visible":true,"include":true,"step":"270","x":-12.952380952380953,"y":-111.71428571428571,"z":469.14285714285717,"a95":2.8,"info":"\"15-02-02\" at \"19:51\""},{"visible":true,"include":true,"step":"300","x":12.285714285714286,"y":-104.66666666666667,"z":450.3809523809524,"a95":2.7,"info":"\"15-02-02\" at \"23:28\""},{"visible":true,"include":true,"step":"320","x":-8.571428571428571,"y":-48.666666666666664,"z":444.95238095238096,"a95":3,"info":"\"15-02-03\" at \"18:04\""},{"visible":true,"include":true,"step":"340","x":14.952380952380953,"y":-80.95238095238095,"z":425.42857142857144,"a95":2.7,"info":"\"15-02-04\" at \"15:59\""},{"visible":true,"include":true,"step":"370","x":17.714285714285715,"y":-53.714285714285715,"z":425.6190476190476,"a95":2.7,"info":"\"15-02-04\" at \"21:03\""},{"visible":true,"include":false,"step":"400","x":69.23809523809524,"y":47.04761904761905,"z":364.3809523809524,"a95":2.7,"info":"\"15-02-05\" at \"01:15\""},{"visible":true,"include":false,"step":"420","x":56.19047619047619,"y":88.66666666666667,"z":327.8095238095238,"a95":3.4,"info":"\"15-02-09\" at \"19:55\""},{"visible":true,"include":false,"step":"450","x":-84.19047619047619,"y":98.38095238095238,"z":114.0952380952381,"a95":7.8,"info":"\"15-02-09\" at \"22:13\""},{"visible":true,"include":false,"step":"500","x":-64.85714285714286,"y":47.142857142857146,"z":199.23809523809524,"a95":6.9,"info":"\"15-02-10\" at \"19:06\""},{"visible":true,"include":false,"step":"530","x":-90.85714285714286,"y":213.9047619047619,"z":236.28571428571428,"a95":6.6,"info":"\"15-02-10\" at \"22:59\""},{"visible":true,"include":false,"step":"550","x":-451.23809523809524,"y":-342.1904761904762,"z":163.52380952380952,"a95":10.5,"info":"\"15-02-11\" at \"18:00\""},{"visible":true,"include":false,"step":"580","x":-1274.6666666666667,"y":64.95238095238095,"z":592.0952380952381,"a95":14.4,"info":"\"15-02-11\" at \"21:31\""}]},{"version":"v1.1.0","exported":"2016-11-28T14:22:36.857Z","volume":10.5,"added":"2016-11-28T14:17:59.537Z","format":"Utrecht","demagType":"Unknown","strat":"2","patch":1.1,"GEO":[],"TECT":[],"interpreted":false,"name":"YK1.6B","coreAzi":84,"coreDip":7,"bedStrike":79,"bedDip":25,"data":[{"visible":true,"include":false,"step":"0.0","x":-1456.3809523809523,"y":-470.4,"z":735.8285714285714,"a95":0.99,"info":"04/11/2014 at 19:40:30"},{"visible":true,"include":false,"step":"10.0","x":-677.4666666666666,"y":-252.2952380952381,"z":396.64761904761906,"a95":0.99,"info":"04/11/2014 at 19:40:30"},{"visible":true,"include":true,"step":"15.0","x":-404.9428571428571,"y":-67.31428571428572,"z":264.25714285714287,"a95":0.99,"info":"04/11/2014 at 19:40:30"},{"visible":true,"include":true,"step":"20.0","x":-138.65714285714287,"y":125.23809523809524,"z":183.41904761904763,"a95":0.99,"info":"04/11/2014 at 19:40:30"},{"visible":true,"include":true,"step":"25.0","x":-35.00666666666667,"y":130.71428571428572,"z":53.415238095238095,"a95":0.99,"info":"04/11/2014 at 19:40:30"},{"visible":true,"include":false,"step":"30.0","x":-105.63809523809525,"y":172.6,"z":56.651428571428575,"a95":0.99,"info":"04/11/2014 at 19:40:30"},{"visible":true,"include":false,"step":"35.0","x":-116.84761904761906,"y":202.93333333333334,"z":70.13714285714286,"a95":0.99,"info":"04/11/2014 at 19:40:30"},{"visible":true,"include":false,"step":"40.0","x":-65.89142857142858,"y":182.05714285714285,"z":-48.61238095238095,"a95":0.99,"info":"04/11/2014 at 19:40:30"},{"visible":true,"include":false,"step":"45.0","x":-84.93333333333332,"y":213.7047619047619,"z":-15.19142857142857,"a95":0.99,"info":"04/11/2014 at 19:40:30"},{"visible":true,"include":false,"step":"50.0","x":-139.41904761904763,"y":95.07619047619048,"z":-75.91904761904762,"a95":0.99,"info":"04/11/2014 at 19:40:30"},{"visible":true,"include":false,"step":"60.0","x":105.77142857142856,"y":20.228571428571428,"z":94.52952380952381,"a95":0.99,"info":"04/11/2014 at 19:40:30"},{"visible":true,"include":false,"step":"70.0","x":-112.55238095238094,"y":191.25714285714287,"z":170.04761904761904,"a95":0.99,"info":"04/11/2014 at 19:40:30"},{"visible":true,"include":false,"step":"80.0","x":-85.72666666666666,"y":182.4,"z":193.3047619047619,"a95":0.99,"info":"04/11/2014 at 19:40:30"},{"visible":true,"include":false,"step":"90.0","x":159.75238095238097,"y":44.640952380952385,"z":48.83238095238095,"a95":0.99,"info":"04/11/2014 at 19:40:30"}]},{"version":"v1.1.0","exported":"2016-11-28T14:22:36.857Z","volume":10.5,"added":"2016-11-28T14:17:59.538Z","format":"Utrecht","demagType":"Unknown","strat":"5","patch":1.1,"GEO":[],"TECT":[],"interpreted":false,"name":"YK1.7A","coreAzi":109,"coreDip":28,"bedStrike":79,"bedDip":25,"data":[{"visible":true,"include":false,"step":"0.0","x":-1193.2380952380952,"y":-628.495238095238,"z":1110.6666666666667,"a95":0.99,"info":"07/07/2015 at 21:32:23"},{"visible":true,"include":false,"step":"10.0","x":-413.50476190476195,"y":-47.537142857142854,"z":513.1333333333333,"a95":0.99,"info":"07/07/2015 at 21:32:23"},{"visible":true,"include":false,"step":"15.0","x":-58.049523809523805,"y":-26.89619047619048,"z":317.25714285714287,"a95":0.99,"info":"07/07/2015 at 21:32:23"},{"visible":true,"include":false,"step":"20.0","x":0.7461619047619047,"y":-102.46666666666667,"z":283.4761904761905,"a95":0.99,"info":"07/07/2015 at 21:32:23"},{"visible":true,"include":false,"step":"23.0","x":14.887619047619047,"y":-40.44095238095238,"z":281.31428571428575,"a95":0.99,"info":"07/07/2015 at 21:32:23"},{"visible":true,"include":false,"step":"25.0","x":41.78,"y":-32.95619047619048,"z":272.8952380952381,"a95":0.99,"info":"07/07/2015 at 21:32:23"},{"visible":true,"include":false,"step":"30.0","x":67.0904761904762,"y":-127.36190476190475,"z":311.4761904761905,"a95":0.99,"info":"07/07/2015 at 21:32:23"},{"visible":true,"include":false,"step":"33.0","x":146.21904761904761,"y":-130.6,"z":320.83809523809526,"a95":0.99,"info":"07/07/2015 at 21:32:23"},{"visible":true,"include":false,"step":"35.0","x":24.31904761904762,"y":-76.8847619047619,"z":219.7047619047619,"a95":0.99,"info":"07/07/2015 at 21:32:23"},{"visible":true,"include":false,"step":"40.0","x":211.73333333333332,"y":-42.41809523809523,"z":149,"a95":0.99,"info":"07/07/2015 at 21:32:23"},{"visible":true,"include":false,"step":"45.0","x":-47.44857142857143,"y":-102.0095238095238,"z":-18.48952380952381,"a95":0.99,"info":"07/07/2015 at 21:32:23"},{"visible":true,"include":false,"step":"50.0","x":21.591428571428573,"y":-145.1809523809524,"z":18.76952380952381,"a95":0.99,"info":"07/07/2015 at 21:32:23"},{"visible":true,"include":false,"step":"55.0","x":-109.27619047619048,"y":-52.83428571428571,"z":44.56857142857143,"a95":0.99,"info":"07/07/2015 at 21:32:23"},{"visible":true,"include":false,"step":"60.0","x":161.42857142857142,"y":-47.42952380952381,"z":51.663809523809526,"a95":0.99,"info":"07/07/2015 at 21:32:23"},{"visible":true,"include":false,"step":"65.0","x":-126.91428571428571,"y":-213.86666666666665,"z":68.15333333333334,"a95":0.99,"info":"07/07/2015 at 21:32:23"},{"visible":true,"include":false,"step":"70.0","x":98.75238095238096,"y":-64.26952380952382,"z":-21.88095238095238,"a95":0.99,"info":"07/07/2015 at 21:32:23"},{"visible":true,"include":false,"step":"80.0","x":283.752380952381,"y":12.076190476190476,"z":-155.63809523809525,"a95":0.99,"info":"07/07/2015 at 21:32:23"}]},{"version":"v1.1.0","exported":"2016-11-28T14:22:36.857Z","volume":10.5,"added":"2016-11-28T14:17:59.538Z","format":"Utrecht","demagType":"Unknown","strat":"3","patch":1.1,"GEO":[],"TECT":[],"interpreted":false,"name":"YK1.7B","coreAzi":109,"coreDip":28,"bedStrike":79,"bedDip":25,"data":[{"visible":true,"include":false,"step":"0.0","x":-1967.047619047619,"y":-773.8380952380952,"z":1001.2380952380952,"a95":0.99,"info":"25/11/2014 at 05:42:32"},{"visible":true,"include":false,"step":"10.0","x":-892.8,"y":-333.0095238095238,"z":544.7238095238096,"a95":0.99,"info":"25/11/2014 at 05:42:32"},{"visible":true,"include":false,"step":"15.0","x":-577.7047619047619,"y":-245.39999999999998,"z":522.7142857142857,"a95":0.99,"info":"25/11/2014 at 05:42:32"},{"visible":true,"include":false,"step":"20.0","x":-502.0190476190476,"y":-245.6095238095238,"z":320.9904761904762,"a95":0.99,"info":"25/11/2014 at 05:42:32"},{"visible":true,"include":false,"step":"23.0","x":-118.65714285714287,"y":-111.04761904761905,"z":256.15238095238095,"a95":0.99,"info":"25/11/2014 at 05:42:32"},{"visible":true,"include":false,"step":"25.0","x":-203.9904761904762,"y":-247.0190476190476,"z":166.34285714285713,"a95":0.99,"info":"25/11/2014 at 05:42:32"},{"visible":true,"include":false,"step":"30.0","x":-317.43809523809523,"y":-67.47333333333333,"z":224.15238095238095,"a95":0.99,"info":"25/11/2014 at 05:42:32"},{"visible":true,"include":false,"step":"33.0","x":-231.7047619047619,"y":-105.80000000000001,"z":385.7809523809524,"a95":0.99,"info":"25/11/2014 at 05:42:32"},{"visible":true,"include":false,"step":"35.0","x":-333.1047619047619,"y":-43.18190476190476,"z":271.50476190476195,"a95":0.99,"info":"25/11/2014 at 05:42:32"},{"visible":true,"include":false,"step":"40.0","x":-173.93333333333334,"y":77.57714285714285,"z":437.54285714285714,"a95":0.99,"info":"25/11/2014 at 05:42:32"},{"visible":true,"include":false,"step":"45.0","x":-167.7047619047619,"y":-121.78095238095239,"z":273.35238095238094,"a95":0.99,"info":"25/11/2014 at 05:42:32"},{"visible":true,"include":false,"step":"50.0","x":-179.54285714285714,"y":-193.9714285714286,"z":55.05714285714286,"a95":0.99,"info":"25/11/2014 at 05:42:32"},{"visible":true,"include":false,"step":"60.0","x":80.28761904761905,"y":7.282190476190475,"z":13.256190476190476,"a95":0.99,"info":"25/11/2014 at 05:42:32"},{"visible":true,"include":false,"step":"70.0","x":-83.9952380952381,"y":349.4666666666667,"z":218.02857142857144,"a95":0.99,"info":"25/11/2014 at 05:42:32"},{"visible":true,"include":false,"step":"80.0","x":-211.1904761904762,"y":4.790761904761904,"z":28.611428571428572,"a95":0.99,"info":"25/11/2014 at 05:42:32"},{"visible":true,"include":false,"step":"90.0","x":-83.39047619047619,"y":-117.9904761904762,"z":199.60000000000002,"a95":0.99,"info":"25/11/2014 at 05:42:32"}]},{"version":"v1.1.0","exported":"2016-11-28T14:22:36.857Z","volume":10.5,"added":"2016-11-28T14:17:59.539Z","format":"Utrecht","demagType":"Unknown","strat":null,"patch":1.1,"GEO":[],"TECT":[],"interpreted":false,"name":"YK1.8A","coreAzi":85,"coreDip":6,"bedStrike":79,"bedDip":25,"data":[{"visible":true,"include":false,"step":"20","x":-1803.2380952380952,"y":-1087.3333333333333,"z":1836,"a95":2.3,"info":"\"14-11-30\" at \"14:26\""},{"visible":true,"include":false,"step":"100","x":-1218.4761904761904,"y":-625.1428571428571,"z":546.4761904761905,"a95":1.9,"info":"\"15-01-31\" at \"11:11\""},{"visible":true,"include":false,"step":"150","x":-810,"y":-342.3809523809524,"z":360.4761904761905,"a95":1.8,"info":"\"15-01-31\" at \"14:34\""},{"visible":true,"include":false,"step":"180","x":-620.7619047619048,"y":-231.04761904761904,"z":347.23809523809524,"a95":2.1,"info":"\"15-02-01\" at \"08:03\""},{"visible":true,"include":false,"step":"210","x":-512.1904761904761,"y":-164.85714285714286,"z":274.85714285714283,"a95":2.2,"info":"\"15-02-01\" at \"11:15\""},{"visible":true,"include":false,"step":"240","x":-413.6190476190476,"y":-88.85714285714286,"z":245.42857142857142,"a95":2.2,"info":"\"15-02-02\" at \"15:54\""},{"visible":true,"include":false,"step":"270","x":-334.2857142857143,"y":-91.04761904761905,"z":152.85714285714286,"a95":2.2,"info":"\"15-02-02\" at \"19:53\""},{"visible":true,"include":false,"step":"300","x":-275.9047619047619,"y":-145.61904761904762,"z":144.85714285714286,"a95":2.6,"info":"\"15-02-02\" at \"23:30\""},{"visible":true,"include":false,"step":"320","x":-312.3809523809524,"y":-106.47619047619048,"z":148.66666666666666,"a95":2.5,"info":"\"15-02-03\" at \"18:06\""},{"visible":true,"include":false,"step":"340","x":-242.85714285714286,"y":-118.95238095238095,"z":125.23809523809524,"a95":2.7,"info":"\"15-02-04\" at \"16:02\""},{"visible":true,"include":false,"step":"370","x":-296.6666666666667,"y":-99.23809523809524,"z":149.8095238095238,"a95":2.4,"info":"\"15-02-04\" at \"21:05\""},{"visible":true,"include":false,"step":"400","x":-248.28571428571428,"y":101.61904761904762,"z":79.33333333333333,"a95":2.8,"info":"\"15-02-05\" at \"01:17\""},{"visible":true,"include":false,"step":"420","x":-170.28571428571428,"y":186.28571428571428,"z":-101.80952380952381,"a95":3.3,"info":"\"15-02-09\" at \"19:57\""},{"visible":true,"include":false,"step":"450","x":-158.85714285714286,"y":250.1904761904762,"z":8,"a95":3.5,"info":"\"15-02-09\" at \"22:15\""},{"visible":true,"include":false,"step":"500","x":-156.47619047619048,"y":104.19047619047619,"z":-47.23809523809524,"a95":5.2,"info":"\"15-02-10\" at \"19:08\""},{"visible":true,"include":false,"step":"530","x":-129.42857142857142,"y":206.0952380952381,"z":136.76190476190476,"a95":6.4,"info":"\"15-02-10\" at \"23:02\""},{"visible":true,"include":false,"step":"550","x":-221.14285714285714,"y":-25.333333333333332,"z":-10.095238095238095,"a95":19.3,"info":"\"15-02-11\" at \"18:02\""},{"visible":true,"include":false,"step":"580","x":-1118.4761904761904,"y":-251.8095238095238,"z":459.7142857142857,"a95":15.5,"info":"\"15-02-11\" at \"21:33\""}]},{"version":"v1.1.0","exported":"2016-11-28T14:22:36.858Z","volume":10.5,"added":"2016-11-28T14:17:59.539Z","format":"Utrecht","demagType":"Unknown","strat":"3","patch":1.1,"GEO":[],"TECT":[],"interpreted":false,"name":"YK1.8B","coreAzi":85,"coreDip":6,"bedStrike":79,"bedDip":25,"data":[{"visible":true,"include":false,"step":"0.0","x":-1032.3809523809523,"y":-825.3904761904762,"z":330.62857142857143,"a95":0.99,"info":"04/11/2014 at 19:40:30"},{"visible":true,"include":false,"step":"10.0","x":-384.23809523809524,"y":-340.35238095238094,"z":115,"a95":0.99,"info":"04/11/2014 at 19:40:30"},{"visible":true,"include":false,"step":"15.0","x":-136.33333333333334,"y":-76.27142857142857,"z":67.90190476190476,"a95":0.99,"info":"04/11/2014 at 19:40:30"},{"visible":true,"include":false,"step":"20.0","x":-27.42761904761905,"y":-123.61904761904762,"z":198.39999999999998,"a95":0.99,"info":"04/11/2014 at 19:40:30"},{"visible":true,"include":false,"step":"25.0","x":20.365714285714287,"y":-98.1047619047619,"z":197.65714285714287,"a95":0.99,"info":"04/11/2014 at 19:40:30"},{"visible":true,"include":false,"step":"30.0","x":10.024761904761906,"y":-145.58095238095237,"z":163.7904761904762,"a95":0.99,"info":"04/11/2014 at 19:40:30"},{"visible":true,"include":false,"step":"35.0","x":65.03238095238096,"y":-31.231428571428573,"z":142.86666666666665,"a95":0.99,"info":"04/11/2014 at 19:40:30"},{"visible":true,"include":false,"step":"40.0","x":-75.31333333333333,"y":-115.79047619047618,"z":104.15238095238094,"a95":0.99,"info":"04/11/2014 at 19:40:30"},{"visible":true,"include":false,"step":"45.0","x":-72.03142857142858,"y":-111.93333333333332,"z":63.33428571428571,"a95":0.99,"info":"04/11/2014 at 19:40:30"},{"visible":true,"include":false,"step":"50.0","x":-71.20666666666666,"y":-104.13333333333334,"z":49.460952380952385,"a95":0.99,"info":"04/11/2014 at 19:40:30"},{"visible":true,"include":false,"step":"60.0","x":68.17238095238095,"y":-80.3352380952381,"z":-137.71428571428572,"a95":0.99,"info":"04/11/2014 at 19:40:30"},{"visible":true,"include":false,"step":"70.0","x":-5.283047619047619,"y":53.73714285714286,"z":94.44285714285714,"a95":0.99,"info":"04/11/2014 at 19:40:30"},{"visible":true,"include":false,"step":"80.0","x":-59.59904761904762,"y":45.0247619047619,"z":-24.662857142857142,"a95":0.99,"info":"04/11/2014 at 19:40:30"},{"visible":true,"include":false,"step":"90.0","x":-124.79047619047618,"y":20.718095238095238,"z":-21.871428571428574,"a95":0.99,"info":"04/11/2014 at 19:40:30"}]},{"version":"v1.1.0","exported":"2016-11-28T14:22:36.858Z","volume":10.5,"added":"2016-11-28T14:17:59.539Z","format":"Utrecht","demagType":"Unknown","strat":"4","patch":1.1,"GEO":[],"TECT":[],"interpreted":false,"name":"YK1.9A","coreAzi":76,"coreDip":10,"bedStrike":79,"bedDip":25,"data":[{"visible":true,"include":false,"step":"0.0","x":-1411.3333333333333,"y":-1352,"z":1156.3809523809523,"a95":0.99,"info":"25/11/2014 at 05:42:32"},{"visible":true,"include":false,"step":"10.0","x":-473.50476190476195,"y":-566.8,"z":503.04761904761904,"a95":0.99,"info":"25/11/2014 at 05:42:32"},{"visible":true,"include":false,"step":"15.0","x":-188.48571428571427,"y":-280.7333333333333,"z":336.1904761904762,"a95":0.99,"info":"25/11/2014 at 05:42:32"},{"visible":true,"include":false,"step":"20.0","x":-91.9752380952381,"y":-204.42857142857142,"z":164.4,"a95":0.99,"info":"25/11/2014 at 05:42:32"},{"visible":true,"include":false,"step":"23.0","x":-62.72190476190477,"y":-202.03809523809525,"z":161.34285714285713,"a95":0.99,"info":"25/11/2014 at 05:42:32"},{"visible":true,"include":false,"step":"25.0","x":-81.62761904761905,"y":-97.06666666666668,"z":210.8,"a95":0.99,"info":"25/11/2014 at 05:42:32"},{"visible":true,"include":false,"step":"30.0","x":-25.951428571428572,"y":-138.84761904761905,"z":145.15238095238095,"a95":0.99,"info":"25/11/2014 at 05:42:32"},{"visible":true,"include":false,"step":"33.0","x":15.956190476190475,"y":-92.3952380952381,"z":85.5657142857143,"a95":0.99,"info":"25/11/2014 at 05:42:32"},{"visible":true,"include":false,"step":"35.0","x":39.91809523809523,"y":-77.39904761904762,"z":283.76190476190476,"a95":0.99,"info":"25/11/2014 at 05:42:32"},{"visible":true,"include":false,"step":"40.0","x":91.60095238095238,"y":-16.261904761904763,"z":118.77142857142856,"a95":0.99,"info":"25/11/2014 at 05:42:32"},{"visible":true,"include":false,"step":"45.0","x":-38.99809523809524,"y":-146.31428571428572,"z":81.75904761904762,"a95":0.99,"info":"25/11/2014 at 05:42:32"},{"visible":true,"include":false,"step":"50.0","x":-142.36190476190475,"y":-60.013333333333335,"z":21.915238095238095,"a95":0.99,"info":"25/11/2014 at 05:42:32"},{"visible":true,"include":false,"step":"60.0","x":-55.94285714285714,"y":-153.93333333333334,"z":142.3904761904762,"a95":0.99,"info":"25/11/2014 at 05:42:32"},{"visible":true,"include":false,"step":"70.0","x":3.3749523809523807,"y":51.203809523809525,"z":-100.3047619047619,"a95":0.99,"info":"25/11/2014 at 05:42:32"},{"visible":true,"include":false,"step":"80.0","x":-186.86666666666665,"y":-39.07047619047619,"z":143.04761904761904,"a95":0.99,"info":"25/11/2014 at 05:42:32"},{"visible":true,"include":false,"step":"90.0","x":-26.726666666666667,"y":-141.52380952380952,"z":223.34285714285713,"a95":0.99,"info":"25/11/2014 at 05:42:32"}]},{"version":"v1.1.0","exported":"2016-11-28T14:22:36.858Z","volume":10.5,"added":"2016-11-28T14:17:59.540Z","format":"Utrecht","demagType":"Unknown","strat":"6","patch":1.1,"GEO":[],"TECT":[],"interpreted":false,"name":"YK1.10A","coreAzi":120,"coreDip":48,"bedStrike":79,"bedDip":25,"data":[{"visible":true,"include":false,"step":"0.0","x":-1197.8095238095239,"y":-565.7523809523809,"z":931.6761904761905,"a95":0.99,"info":"07/07/2015 at 21:32:23"},{"visible":true,"include":false,"step":"10.0","x":-621.4571428571429,"y":-182.8190476190476,"z":577.0095238095239,"a95":0.99,"info":"07/07/2015 at 21:32:23"},{"visible":true,"include":false,"step":"15.0","x":-403.7333333333333,"y":-143.77142857142857,"z":287.29523809523806,"a95":0.99,"info":"07/07/2015 at 21:32:23"},{"visible":true,"include":false,"step":"20.0","x":-282.9142857142857,"y":2.8158095238095235,"z":215.68571428571425,"a95":0.99,"info":"07/07/2015 at 21:32:23"},{"visible":true,"include":false,"step":"23.0","x":-146.0952380952381,"y":-94.40666666666667,"z":175.17142857142858,"a95":0.99,"info":"07/07/2015 at 21:32:23"},{"visible":true,"include":false,"step":"25.0","x":-142.93333333333334,"y":-87.02571428571429,"z":173.62857142857143,"a95":0.99,"info":"07/07/2015 at 21:32:23"},{"visible":true,"include":false,"step":"30.0","x":-107.81904761904761,"y":-57.850476190476186,"z":80.63142857142857,"a95":0.99,"info":"07/07/2015 at 21:32:23"},{"visible":true,"include":false,"step":"33.0","x":-60.08571428571428,"y":-85.0304761904762,"z":46.04,"a95":0.99,"info":"07/07/2015 at 21:32:23"},{"visible":true,"include":false,"step":"35.0","x":-142.75238095238097,"y":11.294285714285715,"z":48.93333333333333,"a95":0.99,"info":"07/07/2015 at 21:32:23"},{"visible":true,"include":false,"step":"40.0","x":-115.34285714285713,"y":-21.228571428571428,"z":151.0857142857143,"a95":0.99,"info":"07/07/2015 at 21:32:23"},{"visible":true,"include":false,"step":"45.0","x":-142.32380952380953,"y":-36.66285714285714,"z":41.96,"a95":0.99,"info":"07/07/2015 at 21:32:23"},{"visible":true,"include":false,"step":"50.0","x":-222.46666666666667,"y":-93.92666666666666,"z":112.05714285714285,"a95":0.99,"info":"07/07/2015 at 21:32:23"},{"visible":true,"include":false,"step":"55.0","x":-71.86952380952381,"y":18.444761904761904,"z":-23.34095238095238,"a95":0.99,"info":"07/07/2015 at 21:32:23"},{"visible":true,"include":false,"step":"60.0","x":-119.84761904761906,"y":-36.1,"z":160.04761904761904,"a95":0.99,"info":"07/07/2015 at 21:32:23"},{"visible":true,"include":false,"step":"65.0","x":-113.97142857142858,"y":62.76571428571428,"z":36.210476190476186,"a95":0.99,"info":"07/07/2015 at 21:32:23"},{"visible":true,"include":false,"step":"70.0","x":72.70476190476191,"y":-108.73333333333333,"z":77.40095238095239,"a95":0.99,"info":"07/07/2015 at 21:32:23"},{"visible":true,"include":false,"step":"80.0","x":87.33619047619047,"y":-19.407619047619047,"z":18.240952380952383,"a95":0.99,"info":"07/07/2015 at 21:32:23"}]},{"version":"v1.1.0","exported":"2016-11-28T14:22:36.858Z","volume":10.5,"added":"2016-11-28T14:17:59.540Z","format":"Utrecht","demagType":"Unknown","strat":"4","patch":1.1,"GEO":[{"dec":13.06032842633806,"inc":-5.965267265664526,"MAD":9.88992512470974,"cm":[-8.43769498715119e-15,1.7763568394002505e-15,0],"intensity":604.4299238107421,"type":"GC","origin":false,"forced":true,"remark":"","nSteps":5,"minStep":"10.0","maxStep":"35.0","steps":["10.0","15.0","25.0","30.0","35.0"],"group":"None","version":"v1.1.0"}],"TECT":[{"dec":194.06509622821986,"inc":-16.83530439279271,"MAD":9.88992512470977,"cm":[-1.0658141036401503e-14,3.552713678800501e-15,-1.7763568394002505e-15],"intensity":604.429923810742,"type":"GC","origin":false,"forced":true,"remark":"","nSteps":5,"minStep":"10.0","maxStep":"35.0","steps":["10.0","15.0","25.0","30.0","35.0"],"group":"None","version":"v1.1.0"}],"interpreted":true,"name":"YK1.10B","coreAzi":120,"coreDip":48,"bedStrike":79,"bedDip":25,"data":[{"visible":true,"include":false,"step":"0.0","x":-610.152380952381,"y":-152.0095238095238,"z":609.9428571428571,"a95":0.99,"info":"04/11/2014 at 19:40:30"},{"visible":true,"include":true,"step":"10.0","x":-317.1142857142857,"y":-66.73428571428572,"z":419.4,"a95":0.99,"info":"04/11/2014 at 19:40:30"},{"visible":true,"include":true,"step":"15.0","x":-127.85714285714286,"y":-70.42,"z":282.8952380952381,"a95":0.99,"info":"04/11/2014 at 19:40:30"},{"visible":true,"include":false,"step":"20.0","x":-152.4952380952381,"y":-104.57142857142857,"z":159.33333333333334,"a95":0.99,"info":"04/11/2014 at 19:40:30"},{"visible":true,"include":true,"step":"25.0","x":-34.15142857142857,"y":-31.32857142857143,"z":144.6095238095238,"a95":0.99,"info":"04/11/2014 at 19:40:30"},{"visible":true,"include":true,"step":"30.0","x":-33.574285714285715,"y":-41.38380952380952,"z":137.6,"a95":0.99,"info":"04/11/2014 at 19:40:30"},{"visible":true,"include":true,"step":"35.0","x":6.446857142857143,"y":-13.065714285714286,"z":92.90190476190476,"a95":0.99,"info":"04/11/2014 at 19:40:30"},{"visible":true,"include":false,"step":"40.0","x":33.733333333333334,"y":-47.63428571428572,"z":67.77714285714285,"a95":0.99,"info":"04/11/2014 at 19:40:30"},{"visible":true,"include":false,"step":"45.0","x":32.438095238095244,"y":-132.36190476190475,"z":43.91809523809523,"a95":0.99,"info":"04/11/2014 at 19:40:30"},{"visible":true,"include":false,"step":"50.0","x":97.23809523809524,"y":-40.46,"z":106.91428571428571,"a95":0.99,"info":"04/11/2014 at 19:40:30"},{"visible":true,"include":false,"step":"60.0","x":19.315238095238094,"y":-45.264761904761905,"z":71.32285714285715,"a95":0.99,"info":"04/11/2014 at 19:40:30"},{"visible":true,"include":false,"step":"70.0","x":-56.38095238095238,"y":-99.71428571428571,"z":58.3447619047619,"a95":0.99,"info":"04/11/2014 at 19:40:30"},{"visible":true,"include":false,"step":"80.0","x":112.82857142857144,"y":-83.58190476190477,"z":37.74857142857143,"a95":0.99,"info":"04/11/2014 at 19:40:30"},{"visible":true,"include":false,"step":"90.0","x":11.050476190476191,"y":-33.21142857142858,"z":14.269523809523811,"a95":0.99,"info":"04/11/2014 at 19:40:30"}]},{"version":"v1.1.0","exported":"2016-11-28T14:22:36.858Z","volume":10.5,"added":"2016-11-28T14:17:59.540Z","format":"Utrecht","demagType":"Unknown","strat":null,"patch":1.1,"GEO":[{"dec":30.08518805751646,"inc":-40.28846633516179,"MAD":19.372389904038474,"cm":[-3.6415315207705135e-14,3.375077994860476e-14,0],"intensity":1424.8593422245988,"type":"GC","origin":false,"forced":true,"remark":"","nSteps":8,"minStep":"150","maxStep":"340","steps":["150","180","210","240","270","300","320","340"],"group":"None","version":"v1.1.0"}],"TECT":[{"dec":21.25480268318904,"inc":-20.063934794538923,"MAD":19.37238990403822,"cm":[-6.927791673660977e-14,3.907985046680551e-14,-1.7763568394002505e-14],"intensity":1424.8593422245988,"type":"GC","origin":false,"forced":true,"remark":"","nSteps":8,"minStep":"150","maxStep":"340","steps":["150","180","210","240","270","300","320","340"],"group":"None","version":"v1.1.0"}],"interpreted":true,"name":"YK1.11A","coreAzi":54,"coreDip":12,"bedStrike":79,"bedDip":25,"data":[{"visible":true,"include":false,"step":"20","x":-1354.095238095238,"y":-730.952380952381,"z":2325.1428571428573,"a95":2.6,"info":"\"14-11-30\" at \"14:28\""},{"visible":true,"include":false,"step":"100","x":-1004.1904761904761,"y":-403.3333333333333,"z":1152.952380952381,"a95":2.1,"info":"\"15-01-31\" at \"11:13\""},{"visible":true,"include":true,"step":"150","x":-654.8571428571429,"y":-129.42857142857142,"z":810.8571428571429,"a95":2.2,"info":"\"15-01-31\" at \"14:36\""},{"visible":true,"include":true,"step":"180","x":-531.4285714285714,"y":-54.857142857142854,"z":732.4761904761905,"a95":2.4,"info":"\"15-02-01\" at \"08:05\""},{"visible":true,"include":true,"step":"210","x":-406.76190476190476,"y":-29.428571428571427,"z":635.6190476190476,"a95":2.4,"info":"\"15-02-01\" at \"11:17\""},{"visible":true,"include":true,"step":"240","x":-335.14285714285717,"y":-6.761904761904762,"z":500.95238095238096,"a95":2.5,"info":"\"15-02-02\" at \"15:57\""},{"visible":true,"include":true,"step":"270","x":-316.3809523809524,"y":42.857142857142854,"z":433.04761904761904,"a95":2.4,"info":"\"15-02-02\" at \"19:55\""},{"visible":true,"include":true,"step":"300","x":-243.8095238095238,"y":22.38095238095238,"z":358.1904761904762,"a95":2.6,"info":"\"15-02-02\" at \"23:33\""},{"visible":true,"include":true,"step":"320","x":-217.52380952380952,"y":87.23809523809524,"z":311.6190476190476,"a95":2.6,"info":"\"15-02-03\" at \"18:09\""},{"visible":true,"include":true,"step":"340","x":-201.14285714285714,"y":45.80952380952381,"z":325.14285714285717,"a95":2.8,"info":"\"15-02-04\" at \"16:04\""},{"visible":true,"include":false,"step":"370","x":-210.1904761904762,"y":77.33333333333333,"z":315.3333333333333,"a95":2.4,"info":"\"15-02-04\" at \"21:08\""},{"visible":true,"include":false,"step":"400","x":-72.57142857142857,"y":78.57142857142857,"z":188.76190476190476,"a95":3.2,"info":"\"15-02-05\" at \"01:19\""},{"visible":true,"include":false,"step":"420","x":-81.04761904761905,"y":65.14285714285714,"z":144.57142857142858,"a95":3.5,"info":"\"15-02-09\" at \"20:00\""},{"visible":true,"include":false,"step":"450","x":-72.47619047619048,"y":19.523809523809526,"z":143.52380952380952,"a95":4.1,"info":"\"15-02-09\" at \"22:17\""},{"visible":true,"include":false,"step":"500","x":-61.333333333333336,"y":86.76190476190476,"z":66.95238095238095,"a95":4.9,"info":"\"15-02-10\" at \"19:11\""},{"visible":true,"include":false,"step":"530","x":-50.38095238095238,"y":-94.38095238095238,"z":85.80952380952381,"a95":6.5,"info":"\"15-02-10\" at \"23:03\""},{"visible":true,"include":false,"step":"550","x":-79.04761904761905,"y":-58.38095238095238,"z":92.95238095238095,"a95":15.3,"info":"\"15-02-11\" at \"18:04\""},{"visible":true,"include":false,"step":"580","x":-5.238095238095238,"y":256.85714285714283,"z":165.8095238095238,"a95":13.3,"info":"\"15-02-11\" at \"21:40\""}]},{"version":"v1.1.0","exported":"2016-11-28T14:22:36.858Z","volume":10.5,"added":"2016-11-28T14:17:59.541Z","format":"Utrecht","demagType":"Unknown","strat":"5","patch":1.1,"GEO":[{"dec":345.7400447484156,"inc":-19.41950330582243,"MAD":15.713780386633935,"cm":[-8.881784197001252e-16,-1.0658141036401503e-14,0],"intensity":1090.4389566943414,"type":"GC","origin":false,"forced":true,"remark":"","nSteps":8,"minStep":"15.0","maxStep":"40.0","steps":["15.0","20.0","23.0","25.0","30.0","33.0","35.0","40.0"],"group":"None","version":"v1.1.0"}],"TECT":[{"dec":165.91122973786275,"inc":-5.543367684201126,"MAD":15.713780386634003,"cm":[3.6637359812630166e-15,2.5757174171303632e-14,-1.0658141036401503e-14],"intensity":1090.4389566943414,"type":"GC","origin":false,"forced":true,"remark":"","nSteps":8,"minStep":"15.0","maxStep":"40.0","steps":["15.0","20.0","23.0","25.0","30.0","33.0","35.0","40.0"],"group":"None","version":"v1.1.0"}],"interpreted":true,"name":"YK1.12A","coreAzi":100,"coreDip":47,"bedStrike":79,"bedDip":25,"data":[{"visible":true,"include":false,"step":"0.0","x":-1002.3809523809524,"y":-554.3428571428572,"z":1041.7142857142858,"a95":0.99,"info":"25/11/2014 at 05:42:32"},{"visible":true,"include":false,"step":"10.0","x":-548.7714285714286,"y":-391.08571428571423,"z":762.1619047619048,"a95":0.99,"info":"25/11/2014 at 05:42:32"},{"visible":true,"include":true,"step":"15.0","x":-433.7047619047619,"y":-322.84761904761905,"z":611.0952380952381,"a95":0.99,"info":"25/11/2014 at 05:42:32"},{"visible":true,"include":true,"step":"20.0","x":-302.45714285714286,"y":-249.52380952380952,"z":467.3714285714285,"a95":0.99,"info":"25/11/2014 at 05:42:32"},{"visible":true,"include":true,"step":"23.0","x":-210.2761904761905,"y":-219.26666666666668,"z":401.8285714285714,"a95":0.99,"info":"25/11/2014 at 05:42:32"},{"visible":true,"include":true,"step":"25.0","x":-233.22857142857143,"y":-219.03809523809525,"z":341.37142857142857,"a95":0.99,"info":"25/11/2014 at 05:42:32"},{"visible":true,"include":true,"step":"30.0","x":-155.38095238095238,"y":-213.83809523809526,"z":382.1904761904762,"a95":0.99,"info":"25/11/2014 at 05:42:32"},{"visible":true,"include":true,"step":"33.0","x":-209.3904761904762,"y":-118.4095238095238,"z":233.64761904761906,"a95":0.99,"info":"25/11/2014 at 05:42:32"},{"visible":true,"include":true,"step":"35.0","x":-121.13333333333334,"y":-150.1809523809524,"z":286.3333333333333,"a95":0.99,"info":"25/11/2014 at 05:42:32"},{"visible":true,"include":true,"step":"40.0","x":-121.97142857142858,"y":-131.40952380952382,"z":209.83809523809526,"a95":0.99,"info":"25/11/2014 at 05:42:32"},{"visible":true,"include":false,"step":"45.0","x":-6.860857142857143,"y":-76.40857142857142,"z":191.9142857142857,"a95":0.99,"info":"25/11/2014 at 05:42:32"},{"visible":true,"include":false,"step":"50.0","x":-145.78095238095239,"y":-134.48571428571427,"z":69.56190476190476,"a95":0.99,"info":"25/11/2014 at 05:42:32"},{"visible":true,"include":false,"step":"60.0","x":30.72190476190476,"y":-155.48571428571427,"z":163.61904761904762,"a95":0.99,"info":"25/11/2014 at 05:42:32"},{"visible":true,"include":false,"step":"70.0","x":-43.73904761904762,"y":-75.83047619047619,"z":148.0095238095238,"a95":0.99,"info":"25/11/2014 at 05:42:32"},{"visible":true,"include":false,"step":"80.0","x":-3.5960952380952382,"y":-81.36666666666667,"z":228.65714285714287,"a95":0.99,"info":"25/11/2014 at 05:42:32"},{"visible":true,"include":false,"step":"90.0","x":-129.68571428571428,"y":-72.11333333333334,"z":123.28571428571429,"a95":0.99,"info":"25/11/2014 at 05:42:32"}]},{"version":"v1.1.0","exported":"2016-11-28T14:22:36.858Z","volume":10.5,"added":"2016-11-28T14:17:59.541Z","format":"Utrecht","demagType":"Unknown","strat":"5","patch":1.1,"GEO":[],"TECT":[],"interpreted":false,"name":"YK1.12B","coreAzi":100,"coreDip":47,"bedStrike":79,"bedDip":25,"data":[{"visible":true,"include":false,"step":"0.0","x":-874.2476190476191,"y":-222.21904761904764,"z":954.7619047619048,"a95":0.99,"info":"04/11/2014 at 19:40:30"},{"visible":true,"include":false,"step":"10.0","x":-429.97142857142853,"y":-164.65714285714287,"z":566.4285714285714,"a95":0.99,"info":"04/11/2014 at 19:40:30"},{"visible":true,"include":false,"step":"15.0","x":-363.45714285714286,"y":-125.52380952380952,"z":374.23809523809524,"a95":0.99,"info":"04/11/2014 at 19:40:30"},{"visible":true,"include":false,"step":"20.0","x":-276.8285714285714,"y":-43.450476190476195,"z":309.03809523809525,"a95":0.99,"info":"04/11/2014 at 19:40:30"},{"visible":true,"include":false,"step":"25.0","x":-211.2761904761905,"y":-16.724761904761905,"z":224.1142857142857,"a95":0.99,"info":"04/11/2014 at 19:40:30"},{"visible":true,"include":false,"step":"30.0","x":-208.36190476190478,"y":-123.12380952380951,"z":48.537142857142854,"a95":0.99,"info":"04/11/2014 at 19:40:30"},{"visible":true,"include":false,"step":"35.0","x":-122.62857142857142,"y":-65.39904761904762,"z":35.77142857142857,"a95":0.99,"info":"04/11/2014 at 19:40:30"},{"visible":true,"include":false,"step":"40.0","x":-17.947619047619046,"y":-56.18,"z":31.24761904761905,"a95":0.99,"info":"04/11/2014 at 19:40:30"},{"visible":true,"include":false,"step":"45.0","x":-9.762857142857143,"y":-28.044761904761906,"z":-0.1825904761904762,"a95":0.99,"info":"04/11/2014 at 19:40:30"},{"visible":true,"include":false,"step":"50.0","x":-73.58761904761904,"y":-77.74285714285713,"z":37.938095238095244,"a95":0.99,"info":"04/11/2014 at 19:40:30"},{"visible":true,"include":false,"step":"60.0","x":21.7,"y":-7.849714285714286,"z":-16.86,"a95":0.99,"info":"04/11/2014 at 19:40:30"},{"visible":true,"include":false,"step":"70.0","x":-120.80000000000001,"y":-72.61238095238095,"z":0.9003714285714286,"a95":0.99,"info":"04/11/2014 at 19:40:30"},{"visible":true,"include":false,"step":"80.0","x":67.39047619047619,"y":-32.15238095238095,"z":66.14380952380952,"a95":0.99,"info":"04/11/2014 at 19:40:30"},{"visible":true,"include":false,"step":"90.0","x":23.216190476190476,"y":-158.31428571428572,"z":-30.612380952380953,"a95":0.99,"info":"04/11/2014 at 19:40:30"}]},{"version":"v1.1.0","exported":"2016-11-28T14:22:36.858Z","volume":10.5,"added":"2016-11-28T14:17:59.541Z","format":"Utrecht","demagType":"Unknown","strat":null,"patch":1.1,"GEO":[{"dec":138.16122434638464,"inc":-20.518417739324782,"MAD":4.350872099579952,"cm":[0,-2.220446049250313e-15,0],"intensity":334.063408784074,"type":"dir","forced":true,"remark":"","origin":false,"nSteps":5,"minStep":"420","maxStep":"550","steps":["420","450","500","530","550"],"group":"None","version":"v1.1.0"}],"TECT":[{"dec":129.41572610810567,"inc":-41.11053534735292,"MAD":4.350872099579947,"cm":[-2.6645352591003757e-15,-2.220446049250313e-15,1.0658141036401503e-14],"intensity":334.063408784074,"type":"dir","forced":true,"remark":"","origin":false,"nSteps":5,"minStep":"420","maxStep":"550","steps":["420","450","500","530","550"],"group":"None","version":"v1.1.0"}],"interpreted":true,"name":"YK1.13A","coreAzi":96,"coreDip":44,"bedStrike":79,"bedDip":25,"data":[{"visible":true,"include":false,"step":"20","x":-207.9047619047619,"y":-8.095238095238095,"z":1220.5714285714287,"a95":3.4,"info":"\"14-11-30\" at \"14:30\""},{"visible":true,"include":false,"step":"100","x":21.333333333333332,"y":25.238095238095237,"z":432.3809523809524,"a95":2.9,"info":"\"15-01-31\" at \"11:16\""},{"visible":true,"include":false,"step":"150","x":99.42857142857143,"y":92.66666666666667,"z":298.3809523809524,"a95":3.1,"info":"\"15-01-31\" at \"14:38\""},{"visible":true,"include":false,"step":"180","x":136.76190476190476,"y":118.47619047619048,"z":250.95238095238096,"a95":3.1,"info":"\"15-02-01\" at \"08:07\""},{"visible":true,"include":false,"step":"210","x":170.76190476190476,"y":150.66666666666666,"z":222.0952380952381,"a95":2.8,"info":"\"15-02-01\" at \"11:19\""},{"visible":true,"include":false,"step":"240","x":217.04761904761904,"y":169.42857142857142,"z":169.8095238095238,"a95":2.2,"info":"\"15-02-02\" at \"16:01\""},{"visible":true,"include":false,"step":"270","x":200.47619047619048,"y":180.95238095238096,"z":160.47619047619048,"a95":2.7,"info":"\"15-02-02\" at \"19:57\""},{"visible":true,"include":false,"step":"300","x":230.0952380952381,"y":176.1904761904762,"z":143.33333333333334,"a95":2,"info":"\"15-02-02\" at \"23:35\""},{"visible":true,"include":false,"step":"320","x":219.23809523809524,"y":190.76190476190476,"z":149.33333333333334,"a95":2.3,"info":"\"15-02-03\" at \"18:11\""},{"visible":true,"include":false,"step":"340","x":186.66666666666666,"y":167.8095238095238,"z":153.33333333333334,"a95":2.8,"info":"\"15-02-04\" at \"16:07\""},{"visible":true,"include":false,"step":"370","x":192.28571428571428,"y":181.33333333333334,"z":161.33333333333334,"a95":3.4,"info":"\"15-02-04\" at \"21:11\""},{"visible":true,"include":false,"step":"400","x":192.28571428571428,"y":173.8095238095238,"z":88.95238095238095,"a95":3.3,"info":"\"15-02-05\" at \"01:22\""},{"visible":true,"include":true,"step":"420","x":209.61904761904762,"y":169.42857142857142,"z":74.66666666666667,"a95":2.5,"info":"\"15-02-09\" at \"20:02\""},{"visible":true,"include":true,"step":"450","x":180.1904761904762,"y":162.38095238095238,"z":48.095238095238095,"a95":2.2,"info":"\"15-02-09\" at \"22:19\""},{"visible":true,"include":true,"step":"500","x":101.52380952380952,"y":80.38095238095238,"z":49.42857142857143,"a95":3,"info":"\"15-02-10\" at \"19:13\""},{"visible":true,"include":true,"step":"530","x":69.61904761904762,"y":64.85714285714286,"z":28.952380952380953,"a95":4.3,"info":"\"15-02-10\" at \"23:06\""},{"visible":true,"include":true,"step":"550","x":27.133333333333333,"y":44.75238095238095,"z":23.685714285714283,"a95":9.7,"info":"\"15-02-11\" at \"18:12\""},{"visible":true,"include":false,"step":"580","x":-25.523809523809526,"y":94.95238095238095,"z":-45.80952380952381,"a95":21.7,"info":"\"15-02-11\" at \"21:42\""}]},{"version":"v1.1.0","exported":"2016-11-28T14:22:36.858Z","volume":10.5,"added":"2016-11-28T14:17:59.541Z","format":"Utrecht","demagType":"Unknown","strat":"6","patch":1.1,"GEO":[{"dec":125.12864858762947,"inc":-9.411554411247796,"MAD":3.6380055958465083,"cm":[-2.042810365310288e-14,-1.9539925233402755e-14,0],"intensity":380.76887231648817,"type":"dir","forced":true,"remark":"","origin":false,"nSteps":7,"minStep":"30.0","maxStep":"60.0","steps":["30.0","33.0","35.0","40.0","45.0","50.0","60.0"],"group":"None","version":"v1.1.0"}],"TECT":[{"dec":119.08589973185121,"inc":-26.664630451972684,"MAD":3.638005595846495,"cm":[-4.3520742565306136e-14,-2.842170943040401e-14,-5.329070518200751e-15],"intensity":380.76887231648817,"type":"dir","forced":true,"remark":"","origin":false,"nSteps":7,"minStep":"30.0","maxStep":"60.0","steps":["30.0","33.0","35.0","40.0","45.0","50.0","60.0"],"group":"None","version":"v1.1.0"}],"interpreted":true,"name":"YK1.15A","coreAzi":113,"coreDip":48,"bedStrike":79,"bedDip":25,"data":[{"visible":true,"include":false,"step":"0.0","x":-243.3904761904762,"y":-95.3047619047619,"z":623.7904761904762,"a95":0.99,"info":"25/11/2014 at 05:42:32"},{"visible":true,"include":false,"step":"10.0","x":-3.4568571428571424,"y":-34.30095238095238,"z":391.68571428571425,"a95":0.99,"info":"25/11/2014 at 05:42:32"},{"visible":true,"include":false,"step":"15.0","x":129.41904761904763,"y":-5.483714285714286,"z":300.25714285714287,"a95":0.99,"info":"25/11/2014 at 05:42:32"},{"visible":true,"include":false,"step":"20.0","x":184.16190476190476,"y":19.07238095238095,"z":239.35238095238094,"a95":0.99,"info":"25/11/2014 at 05:42:32"},{"visible":true,"include":false,"step":"23.0","x":199.16190476190474,"y":39.47904761904762,"z":206.22857142857143,"a95":0.99,"info":"25/11/2014 at 05:42:32"},{"visible":true,"include":false,"step":"25.0","x":201.78095238095236,"y":58.27333333333333,"z":165.74285714285713,"a95":0.99,"info":"25/11/2014 at 05:42:32"},{"visible":true,"include":true,"step":"30.0","x":221.44761904761904,"y":51.41142857142857,"z":133.2,"a95":0.99,"info":"25/11/2014 at 05:42:32"},{"visible":true,"include":true,"step":"33.0","x":175.83809523809524,"y":44.92857142857143,"z":117.37142857142858,"a95":0.99,"info":"25/11/2014 at 05:42:32"},{"visible":true,"include":true,"step":"35.0","x":197.0952380952381,"y":63.23809523809524,"z":114.33333333333333,"a95":0.99,"info":"25/11/2014 at 05:42:32"},{"visible":true,"include":true,"step":"40.0","x":176.83809523809524,"y":50.35809523809524,"z":115.39047619047618,"a95":0.99,"info":"25/11/2014 at 05:42:32"},{"visible":true,"include":true,"step":"45.0","x":175.78095238095239,"y":46.50380952380952,"z":121.25714285714287,"a95":0.99,"info":"25/11/2014 at 05:42:32"},{"visible":true,"include":true,"step":"50.0","x":137.06666666666666,"y":9.283142857142858,"z":78.47809523809524,"a95":0.99,"info":"25/11/2014 at 05:42:32"},{"visible":true,"include":true,"step":"60.0","x":91.30285714285714,"y":20.87904761904762,"z":71.60761904761905,"a95":0.99,"info":"25/11/2014 at 05:42:32"},{"visible":true,"include":false,"step":"70.0","x":119.35238095238095,"y":-35.642857142857146,"z":65.5142857142857,"a95":0.99,"info":"25/11/2014 at 05:42:32"},{"visible":true,"include":false,"step":"80.0","x":202.1809523809524,"y":0.3711238095238095,"z":88.40571428571428,"a95":0.99,"info":"25/11/2014 at 05:42:32"},{"visible":true,"include":false,"step":"90.0","x":58.28000000000001,"y":-58.45238095238095,"z":31.155238095238094,"a95":0.99,"info":"25/11/2014 at 05:42:32"}]},{"version":"v1.1.0","exported":"2016-11-28T14:22:36.858Z","volume":10.5,"added":"2016-11-28T14:17:59.541Z","format":"Utrecht","demagType":"Unknown","strat":"6","patch":1.1,"GEO":[{"dec":22.191194852689364,"inc":-23.656350544005416,"MAD":2.806632398793761,"cm":[-1.9539925233402755e-14,-1.0658141036401503e-14,0],"intensity":349.7161998417374,"type":"GC","origin":false,"forced":true,"remark":"","nSteps":4,"minStep":"10.0","maxStep":"25.0","steps":["10.0","15.0","20.0","25.0"],"group":"None","version":"v1.1.0"}],"TECT":[{"dec":19.121057769856804,"inc":-2.2756892237453967,"MAD":2.8066323987941817,"cm":[2.042810365310288e-14,7.105427357601002e-15,-3.552713678800501e-15],"intensity":349.71619984173736,"type":"GC","origin":false,"forced":true,"remark":"","nSteps":4,"minStep":"10.0","maxStep":"25.0","steps":["10.0","15.0","20.0","25.0"],"group":"None","version":"v1.1.0"}],"interpreted":true,"name":"YK1.15B","coreAzi":113,"coreDip":48,"bedStrike":79,"bedDip":25,"data":[{"visible":true,"include":false,"step":"0.0","x":-132.78095238095239,"y":-43.34095238095238,"z":266.0857142857143,"a95":0.99,"info":"04/11/2014 at 19:40:30"},{"visible":true,"include":true,"step":"10.0","x":71.99714285714286,"y":-39.333333333333336,"z":185.8095238095238,"a95":0.99,"info":"04/11/2014 at 19:40:30"},{"visible":true,"include":true,"step":"15.0","x":121.25714285714287,"y":-17.25047619047619,"z":138.8952380952381,"a95":0.99,"info":"04/11/2014 at 19:40:30"},{"visible":true,"include":true,"step":"20.0","x":162.33333333333334,"y":13.13238095238095,"z":100.45714285714286,"a95":0.99,"info":"04/11/2014 at 19:40:30"},{"visible":true,"include":true,"step":"25.0","x":155.1809523809524,"y":19.01047619047619,"z":79.29142857142857,"a95":0.99,"info":"04/11/2014 at 19:40:30"},{"visible":true,"include":false,"step":"30.0","x":165.93333333333334,"y":-12.815238095238096,"z":63.84095238095239,"a95":0.99,"info":"04/11/2014 at 19:40:30"},{"visible":true,"include":false,"step":"35.0","x":151.82857142857142,"y":7.9206666666666665,"z":46.8447619047619,"a95":0.99,"info":"04/11/2014 at 19:40:30"},{"visible":true,"include":false,"step":"40.0","x":161.32380952380953,"y":13.964761904761904,"z":55.39714285714285,"a95":0.99,"info":"04/11/2014 at 19:40:30"},{"visible":true,"include":false,"step":"45.0","x":125.68571428571428,"y":3.150571428571429,"z":31.758095238095237,"a95":0.99,"info":"04/11/2014 at 19:40:30"},{"visible":true,"include":false,"step":"50.0","x":122.81904761904761,"y":-13.866666666666665,"z":58.65904761904761,"a95":0.99,"info":"04/11/2014 at 19:40:30"},{"visible":true,"include":false,"step":"60.0","x":117.52380952380952,"y":2.3694285714285717,"z":7.916380952380952,"a95":0.99,"info":"04/11/2014 at 19:40:30"},{"visible":true,"include":false,"step":"70.0","x":58.467619047619046,"y":-11.78,"z":-2.2288571428571426,"a95":0.99,"info":"04/11/2014 at 19:40:30"},{"visible":true,"include":false,"step":"80.0","x":47.23809523809524,"y":-23.38857142857143,"z":26.318095238095236,"a95":0.99,"info":"04/11/2014 at 19:40:30"},{"visible":true,"include":false,"step":"90.0","x":53.174285714285716,"y":-21.738095238095237,"z":-8.57552380952381,"a95":0.99,"info":"04/11/2014 at 19:40:30"}]},{"version":"v1.1.0","exported":"2016-11-28T14:22:36.858Z","volume":10.5,"added":"2016-11-28T14:17:59.542Z","format":"Utrecht","demagType":"Unknown","strat":"7","patch":1.1,"GEO":[],"TECT":[],"interpreted":false,"name":"YK1.16A","coreAzi":137,"coreDip":49,"bedStrike":79,"bedDip":25,"data":[{"visible":true,"include":false,"step":"0.0","x":-969.5238095238095,"y":-364.1333333333333,"z":585.4666666666666,"a95":0.99,"info":"25/11/2014 at 05:42:32"},{"visible":true,"include":false,"step":"10.0","x":-386.54285714285714,"y":-292.7238095238095,"z":306.15238095238095,"a95":0.99,"info":"25/11/2014 at 05:42:32"},{"visible":true,"include":false,"step":"15.0","x":-214.59047619047618,"y":-152.63809523809525,"z":218.2095238095238,"a95":0.99,"info":"25/11/2014 at 05:42:32"},{"visible":true,"include":false,"step":"20.0","x":-130.04761904761904,"y":-184.94285714285715,"z":249.41904761904763,"a95":0.99,"info":"25/11/2014 at 05:42:32"},{"visible":true,"include":false,"step":"23.0","x":-117.58095238095237,"y":-134.9714285714286,"z":127.37142857142858,"a95":0.99,"info":"25/11/2014 at 05:42:32"},{"visible":true,"include":false,"step":"25.0","x":-157.0952380952381,"y":-63.36666666666667,"z":131.1238095238095,"a95":0.99,"info":"25/11/2014 at 05:42:32"},{"visible":true,"include":false,"step":"30.0","x":-137.0857142857143,"y":-135.2761904761905,"z":93.27428571428571,"a95":0.99,"info":"25/11/2014 at 05:42:32"},{"visible":true,"include":false,"step":"33.0","x":-150.7904761904762,"y":-41.80095238095238,"z":-0.10451428571428571,"a95":0.99,"info":"25/11/2014 at 05:42:32"},{"visible":true,"include":false,"step":"35.0","x":-131.52380952380952,"y":-85.3742857142857,"z":22.607619047619046,"a95":0.99,"info":"25/11/2014 at 05:42:32"},{"visible":true,"include":false,"step":"40.0","x":-120.39047619047618,"y":-90.76285714285714,"z":5.582952380952381,"a95":0.99,"info":"25/11/2014 at 05:42:32"},{"visible":true,"include":false,"step":"45.0","x":-34.89904761904762,"y":35.20666666666667,"z":42.78285714285715,"a95":0.99,"info":"25/11/2014 at 05:42:32"},{"visible":true,"include":false,"step":"50.0","x":-68.19904761904762,"y":-17.684761904761906,"z":-6.123809523809523,"a95":0.99,"info":"25/11/2014 at 05:42:32"},{"visible":true,"include":false,"step":"60.0","x":-53.92666666666667,"y":-29.112380952380953,"z":-13.965714285714284,"a95":0.99,"info":"25/11/2014 at 05:42:32"},{"visible":true,"include":false,"step":"70.0","x":-17.31047619047619,"y":-52.478095238095236,"z":-11.993333333333334,"a95":0.99,"info":"25/11/2014 at 05:42:32"},{"visible":true,"include":false,"step":"80.0","x":-40.885714285714286,"y":-0.5986380952380953,"z":-1.2485714285714284,"a95":0.99,"info":"25/11/2014 at 05:42:32"},{"visible":true,"include":false,"step":"90.0","x":-66.68380952380951,"y":-146.94285714285715,"z":66.39238095238095,"a95":0.99,"info":"25/11/2014 at 05:42:32"}]},{"version":"v1.1.0","exported":"2016-11-28T14:22:36.858Z","volume":10.5,"added":"2016-11-28T14:17:59.542Z","format":"Utrecht","demagType":"Unknown","strat":null,"patch":1.1,"GEO":[{"dec":142.71097915642713,"inc":-29.98091327992714,"MAD":7.837367761241266,"cm":[2.220446049250313e-15,4.440892098500626e-15,0],"intensity":328.70207064630046,"type":"dir","forced":true,"remark":"","origin":false,"nSteps":4,"minStep":"450","maxStep":"550","steps":["450","500","530","550"],"group":"None","version":"v1.1.0"}],"TECT":[{"dec":131.0916583461484,"inc":-51.361303729092654,"MAD":7.83736776124125,"cm":[-8.881784197001252e-15,-8.881784197001252e-16,4.884981308350689e-15],"intensity":328.70207064630046,"type":"dir","forced":true,"remark":"","origin":false,"nSteps":4,"minStep":"450","maxStep":"550","steps":["450","500","530","550"],"group":"None","version":"v1.1.0"}],"interpreted":true,"name":"YK1.17A","coreAzi":114,"coreDip":33,"bedStrike":79,"bedDip":25,"data":[{"visible":true,"include":false,"step":"20","x":-398.95238095238096,"y":-344,"z":2631.6190476190477,"a95":3,"info":"\"14-11-30\" at \"14:32\""},{"visible":true,"include":false,"step":"100","x":-482.76190476190476,"y":-320.6666666666667,"z":837.9047619047619,"a95":2.8,"info":"\"15-01-31\" at \"11:18\""},{"visible":true,"include":false,"step":"150","x":-206.1904761904762,"y":-151.14285714285714,"z":542.7619047619048,"a95":4,"info":"\"15-01-31\" at \"14:40\""},{"visible":true,"include":false,"step":"180","x":-34.38095238095238,"y":-58.19047619047619,"z":447.42857142857144,"a95":4.8,"info":"\"15-02-01\" at \"08:09\""},{"visible":true,"include":false,"step":"210","x":112.19047619047619,"y":27.714285714285715,"z":413.6190476190476,"a95":4.2,"info":"\"15-02-01\" at \"11:21\""},{"visible":true,"include":false,"step":"240","x":162.85714285714286,"y":69.52380952380952,"z":339.42857142857144,"a95":4.8,"info":"\"15-02-02\" at \"16:03\""},{"visible":true,"include":false,"step":"270","x":197.9047619047619,"y":115.04761904761905,"z":291.04761904761904,"a95":4.7,"info":"\"15-02-02\" at \"20:00\""},{"visible":true,"include":false,"step":"300","x":176.76190476190476,"y":108.19047619047619,"z":282.85714285714283,"a95":4.5,"info":"\"15-02-02\" at \"23:39\""},{"visible":true,"include":false,"step":"320","x":227.42857142857142,"y":118.85714285714286,"z":275.3333333333333,"a95":4.7,"info":"\"15-02-03\" at \"18:14\""},{"visible":true,"include":false,"step":"340","x":196.57142857142858,"y":116.19047619047619,"z":252.57142857142858,"a95":5.4,"info":"\"15-02-04\" at \"16:09\""},{"visible":true,"include":false,"step":"370","x":251.04761904761904,"y":149.04761904761904,"z":261.14285714285717,"a95":4.1,"info":"\"15-02-04\" at \"21:13\""},{"visible":true,"include":false,"step":"400","x":278.85714285714283,"y":160.47619047619048,"z":204,"a95":3.8,"info":"\"15-02-05\" at \"01:26\""},{"visible":true,"include":false,"step":"420","x":291.04761904761904,"y":96.47619047619048,"z":81.33333333333333,"a95":2.9,"info":"\"15-02-09\" at \"20:04\""},{"visible":true,"include":true,"step":"450","x":238.66666666666666,"y":126.0952380952381,"z":84.95238095238095,"a95":2.7,"info":"\"15-02-09\" at \"22:22\""},{"visible":true,"include":true,"step":"500","x":142.57142857142858,"y":61.04761904761905,"z":78,"a95":2.5,"info":"\"15-02-10\" at \"19:17\""},{"visible":true,"include":true,"step":"530","x":108.47619047619048,"y":58,"z":55.714285714285715,"a95":4.2,"info":"\"15-02-10\" at \"23:13\""},{"visible":true,"include":true,"step":"550","x":31.704761904761902,"y":0.8095238095238095,"z":52.30476190476191,"a95":7.8,"info":"\"15-02-11\" at \"18:14\""},{"visible":true,"include":false,"step":"580","x":-364.85714285714283,"y":-65.14285714285714,"z":228.1904761904762,"a95":5.9,"info":"\"15-02-11\" at \"21:49\""}]},{"version":"v1.1.0","exported":"2016-11-28T14:22:36.858Z","volume":10.5,"added":"2016-11-28T14:17:59.542Z","format":"Utrecht","demagType":"Unknown","strat":"7","patch":1.1,"GEO":[{"dec":26.31691323412292,"inc":-20.481899097128945,"MAD":5.3160416926244665,"cm":[-3.552713678800501e-14,1.7763568394002505e-15,0],"intensity":840.3463763496521,"type":"GC","origin":false,"forced":true,"remark":"","nSteps":7,"minStep":"10.0","maxStep":"33.0","steps":["10.0","15.0","20.0","23.0","25.0","30.0","33.0"],"group":"None","version":"v1.1.0"}],"TECT":[{"dec":23.60397903848218,"inc":-0.1300130111615877,"MAD":5.316041692624152,"cm":[-6.838973831690964e-14,-1.9539925233402755e-14,-1.9484414082171497e-14],"intensity":840.3463763496521,"type":"GC","origin":false,"forced":true,"remark":"","nSteps":7,"minStep":"10.0","maxStep":"33.0","steps":["10.0","15.0","20.0","23.0","25.0","30.0","33.0"],"group":"None","version":"v1.1.0"}],"interpreted":true,"name":"YK1.18B","coreAzi":115,"coreDip":30,"bedStrike":79,"bedDip":25,"data":[{"visible":true,"include":false,"step":"0.0","x":-896.4000000000001,"y":-373.0952380952381,"z":937.2380952380952,"a95":0.99,"info":"07/07/2015 at 21:32:23"},{"visible":true,"include":true,"step":"10.0","x":-393.552380952381,"y":-215.65714285714287,"z":554.0761904761905,"a95":0.99,"info":"07/07/2015 at 21:32:23"},{"visible":true,"include":true,"step":"15.0","x":-194.52380952380952,"y":-143.88571428571427,"z":425.8285714285714,"a95":0.99,"info":"07/07/2015 at 21:32:23"},{"visible":true,"include":true,"step":"20.0","x":-71.93142857142857,"y":-105.16190476190476,"z":378.84761904761905,"a95":0.99,"info":"07/07/2015 at 21:32:23"},{"visible":true,"include":true,"step":"23.0","x":-18.835238095238097,"y":-45.17333333333333,"z":287.95238095238096,"a95":0.99,"info":"07/07/2015 at 21:32:23"},{"visible":true,"include":true,"step":"25.0","x":-8.929333333333332,"y":-48.59428571428572,"z":251.9238095238095,"a95":0.99,"info":"07/07/2015 at 21:32:23"},{"visible":true,"include":true,"step":"30.0","x":34.70666666666667,"y":-16.18,"z":239.77142857142857,"a95":0.99,"info":"07/07/2015 at 21:32:23"},{"visible":true,"include":true,"step":"33.0","x":45.28380952380952,"y":-10.766666666666666,"z":176.41904761904763,"a95":0.99,"info":"07/07/2015 at 21:32:23"},{"visible":true,"include":false,"step":"35.0","x":62.406666666666666,"y":-10.92,"z":147.93333333333334,"a95":0.99,"info":"07/07/2015 at 21:32:23"},{"visible":true,"include":false,"step":"40.0","x":52.36952380952381,"y":7.488952380952381,"z":172.43809523809523,"a95":0.99,"info":"07/07/2015 at 21:32:23"},{"visible":true,"include":false,"step":"45.0","x":61.42095238095238,"y":-4.077142857142857,"z":140.78095238095239,"a95":0.99,"info":"07/07/2015 at 21:32:23"},{"visible":true,"include":false,"step":"50.0","x":34.973333333333336,"y":-17.453333333333333,"z":81.48476190476191,"a95":0.99,"info":"07/07/2015 at 21:32:23"},{"visible":true,"include":false,"step":"55.0","x":25.848571428571432,"y":-34.46761904761905,"z":93.26761904761904,"a95":0.99,"info":"07/07/2015 at 21:32:23"},{"visible":true,"include":false,"step":"60.0","x":18.20952380952381,"y":-50.28380952380952,"z":89.67238095238095,"a95":0.99,"info":"07/07/2015 at 21:32:23"},{"visible":true,"include":false,"step":"65.0","x":25.522857142857145,"y":-33.13809523809524,"z":63.39333333333333,"a95":0.99,"info":"07/07/2015 at 21:32:23"},{"visible":true,"include":false,"step":"70.0","x":11.25904761904762,"y":-59.72380952380953,"z":74.30857142857143,"a95":0.99,"info":"07/07/2015 at 21:32:23"},{"visible":true,"include":false,"step":"80.0","x":-59.63428571428571,"y":-60.08571428571428,"z":-24.508571428571425,"a95":0.99,"info":"07/07/2015 at 21:32:23"}]},{"version":"v1.1.0","exported":"2016-11-28T14:22:36.858Z","volume":10.5,"added":"2016-11-28T14:17:59.543Z","format":"Utrecht","demagType":"Unknown","strat":null,"patch":1.1,"GEO":[{"dec":145.21067677839108,"inc":-35.222127992833116,"MAD":5.446192469823681,"cm":[1.4210854715202004e-14,2.1316282072803006e-14,0],"intensity":405.6774632295164,"type":"dir","forced":true,"remark":"","origin":false,"nSteps":4,"minStep":"450","maxStep":"550","steps":["450","500","530","550"],"group":"None","version":"v1.1.0"}],"TECT":[{"dec":131.77442155761457,"inc":-56.99504082991812,"MAD":5.4461924698236714,"cm":[3.3306690738754696e-14,3.552713678800501e-15,-8.881784197001252e-15],"intensity":405.6774632295164,"type":"dir","forced":true,"remark":"","origin":false,"nSteps":4,"minStep":"450","maxStep":"550","steps":["450","500","530","550"],"group":"None","version":"v1.1.0"}],"interpreted":true,"name":"YK1.19A","coreAzi":117,"coreDip":23,"bedStrike":79,"bedDip":25,"data":[{"visible":true,"include":false,"step":"20","x":-1400.3809523809523,"y":-340.95238095238096,"z":2126.190476190476,"a95":2.9,"info":"\"14-11-30\" at \"14:34\""},{"visible":true,"include":false,"step":"100","x":-401.23809523809524,"y":-189.23809523809524,"z":626.0952380952381,"a95":2.6,"info":"\"15-01-31\" at \"11:20\""},{"visible":true,"include":false,"step":"150","x":-99.52380952380952,"y":-42.76190476190476,"z":465.7142857142857,"a95":3.8,"info":"\"15-01-31\" at \"14:42\""},{"visible":true,"include":false,"step":"180","x":75.14285714285714,"y":46.38095238095238,"z":398.76190476190476,"a95":3.5,"info":"\"15-02-01\" at \"08:11\""},{"visible":true,"include":false,"step":"210","x":167.52380952380952,"y":78.38095238095238,"z":395.3333333333333,"a95":3.4,"info":"\"15-02-01\" at \"11:23\""},{"visible":true,"include":false,"step":"240","x":211.33333333333334,"y":135.61904761904762,"z":360.0952380952381,"a95":4.3,"info":"\"15-02-02\" at \"16:06\""},{"visible":true,"include":false,"step":"270","x":250.95238095238096,"y":163.61904761904762,"z":298,"a95":3.6,"info":"\"15-02-02\" at \"20:02\""},{"visible":true,"include":false,"step":"300","x":291.7142857142857,"y":176,"z":287.5238095238095,"a95":3,"info":"\"15-02-02\" at \"23:41\""},{"visible":true,"include":false,"step":"320","x":298.85714285714283,"y":159.8095238095238,"z":291.9047619047619,"a95":3.3,"info":"\"15-02-03\" at \"18:17\""},{"visible":true,"include":false,"step":"340","x":291.04761904761904,"y":149.04761904761904,"z":276.95238095238096,"a95":3,"info":"\"15-02-04\" at \"16:12\""},{"visible":true,"include":false,"step":"370","x":282.4761904761905,"y":157.14285714285714,"z":292.6666666666667,"a95":3.2,"info":"\"15-02-04\" at \"21:17\""},{"visible":true,"include":false,"step":"400","x":365.14285714285717,"y":187.23809523809524,"z":205.23809523809524,"a95":2.8,"info":"\"15-02-05\" at \"01:28\""},{"visible":true,"include":false,"step":"420","x":342.85714285714283,"y":159.33333333333334,"z":202.76190476190476,"a95":2.4,"info":"\"15-02-09\" at \"20:06\""},{"visible":true,"include":true,"step":"450","x":279.04761904761904,"y":112.66666666666667,"z":146.57142857142858,"a95":2,"info":"\"15-02-09\" at \"22:25\""},{"visible":true,"include":true,"step":"500","x":180,"y":92.0952380952381,"z":96.76190476190476,"a95":2.1,"info":"\"15-02-10\" at \"19:19\""},{"visible":true,"include":true,"step":"530","x":101.71428571428571,"y":88.0952380952381,"z":62.095238095238095,"a95":2.8,"info":"\"15-02-10\" at \"23:16\""},{"visible":true,"include":true,"step":"550","x":58.4952380952381,"y":20.99047619047619,"z":34.46666666666666,"a95":5.9,"info":"\"15-02-11\" at \"18:16\""},{"visible":true,"include":false,"step":"580","x":-68.95238095238095,"y":94.57142857142857,"z":31.714285714285715,"a95":12.8,"info":"\"15-02-11\" at \"21:52\""}]},{"version":"v1.1.0","exported":"2016-11-28T14:22:36.858Z","volume":10.5,"added":"2016-11-28T14:17:59.543Z","format":"Utrecht","demagType":"Unknown","strat":"8","patch":1.1,"GEO":[{"dec":30.57562700460676,"inc":-11.999630900089329,"MAD":1.1074499586819706,"cm":[-2.4868995751603507e-14,-1.2434497875801753e-14,0],"intensity":414.03415195456597,"type":"GC","origin":false,"forced":true,"remark":"","nSteps":5,"minStep":"10.0","maxStep":"25.0","steps":["10.0","15.0","20.0","23.0","25.0"],"group":"None","version":"v1.1.0"}],"TECT":[{"dec":209.83610636364716,"inc":-6.9393093717514365,"MAD":1.1074499586814142,"cm":[-2.220446049250313e-14,-1.2434497875801753e-14,-9.992007221626409e-15],"intensity":414.034151954566,"type":"GC","origin":false,"forced":true,"remark":"","nSteps":5,"minStep":"10.0","maxStep":"25.0","steps":["10.0","15.0","20.0","23.0","25.0"],"group":"None","version":"v1.1.0"}],"interpreted":true,"name":"YK1.20A","coreAzi":117,"coreDip":20,"bedStrike":79,"bedDip":25,"data":[{"visible":true,"include":false,"step":"0.0","x":-595.8,"y":-85.91333333333334,"z":287.8095238095238,"a95":0.99,"info":"25/11/2014 at 05:42:32"},{"visible":true,"include":true,"step":"10.0","x":-241.32380952380953,"y":-55.425714285714285,"z":207.30476190476188,"a95":0.99,"info":"25/11/2014 at 05:42:32"},{"visible":true,"include":true,"step":"15.0","x":-114.57142857142857,"y":-29.68,"z":173.5047619047619,"a95":0.99,"info":"25/11/2014 at 05:42:32"},{"visible":true,"include":true,"step":"20.0","x":-43.04380952380952,"y":-12.310476190476189,"z":156.59047619047618,"a95":0.99,"info":"25/11/2014 at 05:42:32"},{"visible":true,"include":true,"step":"23.0","x":-16.592380952380953,"y":-5.1783809523809525,"z":132.1809523809524,"a95":0.99,"info":"25/11/2014 at 05:42:32"},{"visible":true,"include":true,"step":"25.0","x":-1.6068571428571428,"y":-0.7586761904761905,"z":123.22857142857144,"a95":0.99,"info":"25/11/2014 at 05:42:32"},{"visible":true,"include":false,"step":"30.0","x":25.85333333333333,"y":-12.681904761904761,"z":100.44761904761906,"a95":0.99,"info":"25/11/2014 at 05:42:32"},{"visible":true,"include":false,"step":"33.0","x":23.61047619047619,"y":-6.574571428571429,"z":93.92380952380952,"a95":0.99,"info":"25/11/2014 at 05:42:32"},{"visible":true,"include":false,"step":"35.0","x":36.99714285714286,"y":-5.295999999999999,"z":89.91714285714286,"a95":0.99,"info":"25/11/2014 at 05:42:32"},{"visible":true,"include":false,"step":"40.0","x":23.782857142857143,"y":-7.858380952380953,"z":85.86761904761904,"a95":0.99,"info":"25/11/2014 at 05:42:32"},{"visible":true,"include":false,"step":"45.0","x":24.90857142857143,"y":-10.253333333333334,"z":71.24666666666667,"a95":0.99,"info":"25/11/2014 at 05:42:32"},{"visible":true,"include":false,"step":"50.0","x":25.670476190476194,"y":-17.48095238095238,"z":62.46190476190476,"a95":0.99,"info":"25/11/2014 at 05:42:32"},{"visible":true,"include":false,"step":"60.0","x":2.1583809523809525,"y":3.5883809523809522,"z":45.95809523809524,"a95":0.99,"info":"25/11/2014 at 05:42:32"},{"visible":true,"include":false,"step":"70.0","x":-2.677238095238095,"y":-3.5087619047619047,"z":31.59047619047619,"a95":0.99,"info":"25/11/2014 at 05:42:32"},{"visible":true,"include":false,"step":"80.0","x":-9.584761904761905,"y":-17.934285714285714,"z":20.277142857142856,"a95":0.99,"info":"25/11/2014 at 05:42:32"},{"visible":true,"include":false,"step":"90.0","x":-4.319333333333334,"y":-16.53333333333333,"z":19.33238095238095,"a95":0.99,"info":"25/11/2014 at 05:42:32"}]},{"version":"v1.1.0","exported":"2016-11-28T14:22:36.858Z","volume":10.5,"added":"2016-11-28T14:17:59.543Z","format":"Utrecht","demagType":"Unknown","strat":"7","patch":1.1,"GEO":[{"dec":115.18372666634724,"inc":-19.81099231890119,"MAD":11.56324075166732,"cm":[-5.551115123125783e-15,-8.881784197001252e-16,0],"intensity":136.113406324242,"type":"dir","forced":true,"remark":"","origin":false,"nSteps":4,"minStep":"45.0","maxStep":"70.0","steps":["45.0","50.0","60.0","70.0"],"group":"None","version":"v1.1.0"}],"TECT":[{"dec":104.37489378142482,"inc":-32.81318165081964,"MAD":11.563240751667326,"cm":[7.105427357601002e-15,1.7763568394002505e-15,-1.1657341758564144e-15],"intensity":136.11340632424202,"type":"dir","forced":true,"remark":"","origin":false,"nSteps":4,"minStep":"45.0","maxStep":"70.0","steps":["45.0","50.0","60.0","70.0"],"group":"None","version":"v1.1.0"}],"interpreted":true,"name":"YK1.20B","coreAzi":117,"coreDip":20,"bedStrike":79,"bedDip":25,"data":[{"visible":true,"include":false,"step":"0.0","x":-380.1904761904762,"y":-46.03047619047619,"z":282.7333333333333,"a95":0.99,"info":"04/11/2014 at 19:40:30"},{"visible":true,"include":false,"step":"10.0","x":-91.9095238095238,"y":-31.815238095238094,"z":204.28571428571428,"a95":0.99,"info":"04/11/2014 at 19:40:30"},{"visible":true,"include":false,"step":"15.0","x":15.22857142857143,"y":1.1592380952380954,"z":176.1238095238095,"a95":0.99,"info":"04/11/2014 at 19:40:30"},{"visible":true,"include":false,"step":"20.0","x":71.03619047619047,"y":2.9827619047619045,"z":179.40952380952382,"a95":0.99,"info":"04/11/2014 at 19:40:30"},{"visible":true,"include":false,"step":"25.0","x":96.64761904761905,"y":17.412380952380953,"z":145.42857142857142,"a95":0.99,"info":"04/11/2014 at 19:40:30"},{"visible":true,"include":false,"step":"30.0","x":101.3047619047619,"y":17.803809523809523,"z":116.55238095238094,"a95":0.99,"info":"04/11/2014 at 19:40:30"},{"visible":true,"include":false,"step":"35.0","x":99.22857142857144,"y":4.1540952380952385,"z":108.4095238095238,"a95":0.99,"info":"04/11/2014 at 19:40:30"},{"visible":true,"include":false,"step":"40.0","x":98.95238095238095,"y":21.761904761904763,"z":99.80000000000001,"a95":0.99,"info":"04/11/2014 at 19:40:30"},{"visible":true,"include":true,"step":"45.0","x":76.28380952380952,"y":7.688000000000001,"z":78.71523809523809,"a95":0.99,"info":"04/11/2014 at 19:40:30"},{"visible":true,"include":true,"step":"50.0","x":55.66952380952381,"y":-5.15152380952381,"z":78.16285714285715,"a95":0.99,"info":"04/11/2014 at 19:40:30"},{"visible":true,"include":true,"step":"60.0","x":37.69619047619047,"y":-6.182761904761905,"z":45.494285714285716,"a95":0.99,"info":"04/11/2014 at 19:40:30"},{"visible":true,"include":true,"step":"70.0","x":10.811428571428571,"y":-28.033333333333335,"z":23.887619047619047,"a95":0.99,"info":"04/11/2014 at 19:40:30"},{"visible":true,"include":false,"step":"80.0","x":16.438095238095237,"y":16.65142857142857,"z":5.135238095238096,"a95":0.99,"info":"04/11/2014 at 19:40:30"},{"visible":true,"include":false,"step":"90.0","x":-9.918095238095239,"y":-27.014285714285712,"z":27.944761904761908,"a95":0.99,"info":"04/11/2014 at 19:40:30"}]}]
