# Supplementary material for: Paleomagnetic constraints on the timing and distribution of Cenozoic rotations in Central and Eastern Anatolia
Source: Copernicus journal article supplement (doi:10.5194/se-9-295-2018), 2018-03-21
Supplement: Supplementary file 2 [file se-9-295-2018-supplement.zip › se-2017-66_DATA_dir files/dir files Ulukisla/YK2.dir]

[{"version":"v1.1.0","exported":"2017-05-17T13:36:40.278Z","volume":10.5,"added":"2017-05-17T13:33:04.708Z","format":"Utrecht","demagType":"Unknown","strat":"7","patch":1.1,"GEO":[{"dec":269.8953868776878,"inc":-6.234384442919462,"MAD":8.606430968255356,"cm":[-5.684341886080802e-14,2.842170943040401e-14,0],"intensity":9373.157712263082,"type":"GC","origin":false,"forced":true,"remark":"","nSteps":5,"minStep":"10.0","maxStep":"25.0","steps":["10.0","15.0","20.0","23.0","25.0"],"group":"None","version":"v1.1.0"}],"TECT":[{"dec":274.76134204545167,"inc":-18.388327538020153,"MAD":8.606430968255319,"cm":[5.684341886080802e-14,2.8421709430404007e-13,5.684341886080802e-14],"intensity":9373.157712263082,"type":"GC","origin":false,"forced":true,"remark":"","nSteps":5,"minStep":"10.0","maxStep":"25.0","steps":["10.0","15.0","20.0","23.0","25.0"],"group":"None","version":"v1.1.0"}],"interpreted":true,"name":"YK2.1A","coreAzi":142,"coreDip":29,"bedStrike":121,"bedDip":25,"data":[{"visible":true,"include":false,"step":"0.0","x":-17047.619047619046,"y":148.7238095238095,"z":5197.238095238095,"a95":0.99,"info":"24/11/2014 at 19:15:10"},{"visible":true,"include":true,"step":"10.0","x":-7916.952380952381,"y":206.86666666666665,"z":3066.190476190476,"a95":0.99,"info":"24/11/2014 at 19:15:10"},{"visible":true,"include":true,"step":"15.0","x":-4431.142857142857,"y":654.5142857142857,"z":2124.4761904761904,"a95":0.99,"info":"24/11/2014 at 19:15:10"},{"visible":true,"include":true,"step":"20.0","x":-2170.9523809523807,"y":780.0571428571429,"z":2186.5714285714284,"a95":0.99,"info":"24/11/2014 at 19:15:10"},{"visible":true,"include":true,"step":"23.0","x":-1403.8095238095239,"y":986.2857142857143,"z":1613.4285714285713,"a95":0.99,"info":"24/11/2014 at 19:15:10"},{"visible":true,"include":true,"step":"25.0","x":-429.1904761904762,"y":793.1238095238094,"z":1080.857142857143,"a95":0.99,"info":"24/11/2014 at 19:15:10"},{"visible":true,"include":false,"step":"30.0","x":-589.1428571428571,"y":858.2095238095238,"z":2238.095238095238,"a95":0.99,"info":"24/11/2014 at 19:15:10"},{"visible":true,"include":false,"step":"33.0","x":-336.3619047619048,"y":1100.952380952381,"z":1547.7142857142858,"a95":0.99,"info":"24/11/2014 at 19:15:10"},{"visible":true,"include":false,"step":"35.0","x":-115.4,"y":765.4190476190475,"z":647.9904761904761,"a95":0.99,"info":"24/11/2014 at 19:15:10"},{"visible":true,"include":false,"step":"40.0","x":-89.80571428571429,"y":504.25714285714287,"z":1421.142857142857,"a95":0.99,"info":"24/11/2014 at 19:15:10"},{"visible":true,"include":false,"step":"45.0","x":-2.2473333333333336,"y":210.50476190476192,"z":1085.8095238095239,"a95":0.99,"info":"24/11/2014 at 19:15:10"},{"visible":true,"include":false,"step":"50.0","x":382.45714285714286,"y":371.49523809523805,"z":683.7047619047619,"a95":0.99,"info":"24/11/2014 at 19:15:10"},{"visible":true,"include":false,"step":"60.0","x":238.9142857142857,"y":477.93333333333334,"z":1256.4761904761904,"a95":0.99,"info":"24/11/2014 at 19:15:10"},{"visible":true,"include":false,"step":"70.0","x":-104.80000000000001,"y":528.6857142857143,"z":574.0190476190476,"a95":0.99,"info":"24/11/2014 at 19:15:10"},{"visible":true,"include":false,"step":"80.0","x":1322.4761904761904,"y":631.9238095238095,"z":-82.31428571428572,"a95":0.99,"info":"24/11/2014 at 19:15:10"},{"visible":true,"include":false,"step":"90.0","x":832.742857142857,"y":1149.8095238095239,"z":1157.4285714285713,"a95":0.99,"info":"24/11/2014 at 19:15:10"}]},{"version":"v1.1.0","exported":"2017-05-17T13:36:40.279Z","volume":10.5,"added":"2017-05-17T13:33:04.708Z","format":"Utrecht","demagType":"Unknown","strat":"6","patch":1.1,"GEO":[{"dec":40.09899634456508,"inc":-34.20495041159145,"MAD":4.348224531725683,"cm":[-8.526512829121202e-14,-1.1368683772161603e-13,0],"intensity":3553.763775654191,"type":"GC","origin":false,"forced":true,"remark":"","nSteps":6,"minStep":"20.0","maxStep":"45.0","steps":["20.0","25.0","30.0","35.0","40.0","45.0"],"group":"None","version":"v1.1.0"}],"TECT":[{"dec":218.51533633469666,"inc":-0.4530217553128164,"MAD":4.34822453172642,"cm":[-1.8474111129762605e-13,-8.526512829121202e-14,-9.947598300641403e-14],"intensity":3553.763775654191,"type":"GC","origin":false,"forced":true,"remark":"","nSteps":6,"minStep":"20.0","maxStep":"45.0","steps":["20.0","25.0","30.0","35.0","40.0","45.0"],"group":"None","version":"v1.1.0"}],"interpreted":true,"name":"YK2.2A","coreAzi":137,"coreDip":29,"bedStrike":121,"bedDip":35,"data":[{"visible":false,"include":false,"step":"0.0","x":5414.857142857143,"y":6339.714285714285,"z":-1677.904761904762,"a95":0.99,"info":"05/11/2014 at 13:44:22"},{"visible":false,"include":false,"step":"10.0","x":3142.9523809523807,"y":3267.5238095238096,"z":-2379.4285714285716,"a95":0.99,"info":"05/11/2014 at 13:44:22"},{"visible":true,"include":false,"step":"15.0","x":1606.5714285714287,"y":2092.190476190476,"z":-2327.5238095238096,"a95":0.99,"info":"05/11/2014 at 13:44:22"},{"visible":true,"include":true,"step":"20.0","x":868.847619047619,"y":1280.1904761904761,"z":-1952.7619047619048,"a95":0.99,"info":"05/11/2014 at 13:44:22"},{"visible":true,"include":true,"step":"25.0","x":189.48571428571427,"y":996,"z":-1912.1904761904761,"a95":0.99,"info":"05/11/2014 at 13:44:22"},{"visible":true,"include":true,"step":"30.0","x":-129.15238095238095,"y":714.0761904761905,"z":-1654.857142857143,"a95":0.99,"info":"05/11/2014 at 13:44:22"},{"visible":true,"include":true,"step":"35.0","x":-308.6952380952381,"y":412.3809523809524,"z":-1449.4285714285713,"a95":0.99,"info":"05/11/2014 at 13:44:22"},{"visible":true,"include":true,"step":"40.0","x":-477.6285714285715,"y":334.8952380952381,"z":-1446.952380952381,"a95":0.99,"info":"05/11/2014 at 13:44:22"},{"visible":true,"include":true,"step":"45.0","x":-510.0190476190476,"y":272.3809523809524,"z":-1223.7142857142858,"a95":0.99,"info":"05/11/2014 at 13:44:22"},{"visible":true,"include":false,"step":"50.0","x":-477.2857142857143,"y":146.61904761904762,"z":-612.0571428571429,"a95":0.99,"info":"05/11/2014 at 13:44:22"},{"visible":true,"include":false,"step":"60.0","x":-477.2095238095238,"y":225.22857142857143,"z":-871.4380952380952,"a95":0.99,"info":"05/11/2014 at 13:44:22"},{"visible":true,"include":false,"step":"70.0","x":-267.4190476190476,"y":-18.24952380952381,"z":-884.4285714285714,"a95":0.99,"info":"05/11/2014 at 13:44:22"},{"visible":true,"include":false,"step":"80.0","x":-502.7142857142857,"y":377.67619047619047,"z":-237,"a95":0.99,"info":"05/11/2014 at 13:44:22"},{"visible":true,"include":false,"step":"90.0","x":-416.3238095238095,"y":613.6761904761905,"z":-442.31428571428575,"a95":0.99,"info":"05/11/2014 at 13:44:22"}]},{"version":"v1.1.0","exported":"2017-05-17T13:36:40.279Z","volume":10.5,"added":"2017-05-17T13:33:04.709Z","format":"Utrecht","demagType":"Unknown","strat":null,"patch":1.1,"GEO":[{"dec":77.14327598007003,"inc":-3.946219490047059,"MAD":11.758257888981413,"cm":[5.684341886080802e-14,2.5579538487363607e-13,0],"intensity":32658.588100337143,"type":"GC","origin":false,"forced":true,"remark":"","nSteps":7,"minStep":"100","maxStep":"300","steps":["100","150","180","210","240","270","300"],"group":"None","version":"v1.1.0"}],"TECT":[{"dec":260.90364000317925,"inc":-19.882378536121642,"MAD":11.758257888980738,"cm":[1.7053025658242404e-13,1.509903313490213e-13,1.4210854715202004e-13],"intensity":32658.588100337147,"type":"GC","origin":false,"forced":true,"remark":"","nSteps":7,"minStep":"100","maxStep":"300","steps":["100","150","180","210","240","270","300"],"group":"None","version":"v1.1.0"}],"interpreted":true,"name":"YK2.3A","coreAzi":136,"coreDip":52,"bedStrike":121,"bedDip":35,"data":[{"visible":true,"include":false,"step":"20","x":-35652.57142857143,"y":-6986.952380952381,"z":30478.47619047619,"a95":2.3,"info":"\"14-11-30\" at \"13:51\""},{"visible":true,"include":true,"step":"100","x":-22033.04761904762,"y":-6190.666666666667,"z":17870,"a95":2.1,"info":"\"15-01-31\" at \"10:34\""},{"visible":true,"include":true,"step":"150","x":-7763.428571428572,"y":-1330.2857142857142,"z":8357.904761904761,"a95":2.3,"info":"\"15-01-31\" at \"13:52\""},{"visible":true,"include":true,"step":"180","x":-5011.428571428572,"y":-837.6190476190476,"z":6313.523809523809,"a95":2.7,"info":"\"15-02-01\" at \"07:30\""},{"visible":true,"include":true,"step":"210","x":-5046.666666666667,"y":-335.3333333333333,"z":5452.761904761905,"a95":2.9,"info":"\"15-02-01\" at \"10:36\""},{"visible":true,"include":true,"step":"240","x":-3031.3333333333335,"y":-195.9047619047619,"z":5105.9047619047615,"a95":3,"info":"\"15-02-02\" at \"15:17\""},{"visible":true,"include":true,"step":"270","x":-2695.6190476190477,"y":208.95238095238096,"z":4316,"a95":2.9,"info":"\"15-02-02\" at \"19:14\""},{"visible":true,"include":true,"step":"300","x":-1591.4285714285713,"y":-348.6666666666667,"z":3710.190476190476,"a95":3.3,"info":"\"15-02-02\" at \"22:51\""},{"visible":true,"include":false,"step":"320","x":-1352.857142857143,"y":859.4285714285714,"z":2898.4761904761904,"a95":3.9,"info":"\"15-02-03\" at \"17:27\""},{"visible":true,"include":false,"step":"340","x":-542.2857142857143,"y":830.2857142857143,"z":2447.0476190476193,"a95":3.1,"info":"\"15-02-04\" at \"15:18\""},{"visible":true,"include":false,"step":"370","x":-796.0952380952381,"y":495.14285714285717,"z":2819.714285714286,"a95":3.5,"info":"\"15-02-04\" at \"20:23\""},{"visible":true,"include":false,"step":"400","x":-145.33333333333334,"y":187.8095238095238,"z":1849.3333333333333,"a95":4.1,"info":"\"15-02-05\" at \"00:37\""},{"visible":true,"include":false,"step":"420","x":-108.38095238095238,"y":1629.904761904762,"z":2271.6190476190477,"a95":4.5,"info":"\"15-02-09\" at \"19:19\""}]},{"version":"v1.1.0","exported":"2017-05-17T13:36:40.279Z","volume":10.5,"added":"2017-05-17T13:33:04.709Z","format":"Utrecht","demagType":"Unknown","strat":null,"patch":1.1,"GEO":[{"dec":80.99165187053268,"inc":-7.046750059535271,"MAD":10.438872414549792,"cm":[-7.460698725481052e-14,3.197442310920451e-13,0],"intensity":25914.411892554333,"type":"GC","origin":false,"forced":true,"remark":"","nSteps":11,"minStep":"100","maxStep":"400","steps":["100","150","180","210","240","270","300","320","340","370","400"],"group":"None","version":"v1.1.0"}],"TECT":[{"dec":263.0414887819197,"inc":-15.39509277306306,"MAD":10.438872414549648,"cm":[-2.7000623958883807e-13,1.7630341631047486e-13,1.4210854715202004e-14],"intensity":25914.411892554333,"type":"GC","origin":false,"forced":true,"remark":"","nSteps":11,"minStep":"100","maxStep":"400","steps":["100","150","180","210","240","270","300","320","340","370","400"],"group":"None","version":"v1.1.0"}],"interpreted":true,"name":"YK2.4A","coreAzi":140,"coreDip":42,"bedStrike":121,"bedDip":35,"data":[{"visible":true,"include":false,"step":"20","x":-27633.904761904763,"y":-8439.238095238095,"z":20835.619047619046,"a95":2.1,"info":"\"14-11-30\" at \"13:54\""},{"visible":true,"include":true,"step":"100","x":-20638.285714285714,"y":-6766.285714285715,"z":10859.142857142857,"a95":1.8,"info":"\"15-01-31\" at \"10:36\""},{"visible":true,"include":true,"step":"150","x":-8214.47619047619,"y":-1990.4761904761904,"z":5818,"a95":2.1,"info":"\"15-01-31\" at \"13:55\""},{"visible":true,"include":true,"step":"180","x":-5634.285714285715,"y":-1317.2380952380952,"z":4600.761904761905,"a95":2.4,"info":"\"15-02-01\" at \"07:32\""},{"visible":true,"include":true,"step":"210","x":-5122.476190476191,"y":-602.7619047619048,"z":4225.809523809524,"a95":2.5,"info":"\"15-02-01\" at \"10:38\""},{"visible":true,"include":true,"step":"240","x":-4013.2380952380954,"y":-830.7619047619048,"z":3627.714285714286,"a95":2.9,"info":"\"15-02-02\" at \"15:19\""},{"visible":true,"include":true,"step":"270","x":-3358.5714285714284,"y":-662.952380952381,"z":3353.1428571428573,"a95":2.4,"info":"\"15-02-02\" at \"19:16\""},{"visible":true,"include":true,"step":"300","x":-2682.190476190476,"y":-948.5714285714286,"z":2603.0476190476193,"a95":3.1,"info":"\"15-02-02\" at \"22:54\""},{"visible":true,"include":true,"step":"320","x":-2007.3333333333333,"y":181.61904761904762,"z":2660.5714285714284,"a95":3.9,"info":"\"15-02-03\" at \"17:29\""},{"visible":true,"include":true,"step":"340","x":-1786.7619047619048,"y":-209.23809523809524,"z":2523.5238095238096,"a95":3.5,"info":"\"15-02-04\" at \"15:20\""},{"visible":true,"include":true,"step":"370","x":-1946.3809523809523,"y":-170.47619047619048,"z":2523.1428571428573,"a95":3,"info":"\"15-02-04\" at \"20:26\""},{"visible":true,"include":true,"step":"400","x":-830.2857142857143,"y":-47.61904761904762,"z":1956,"a95":3.7,"info":"\"15-02-05\" at \"00:40\""},{"visible":true,"include":false,"step":"420","x":-1039.142857142857,"y":841.5238095238095,"z":2280.5714285714284,"a95":3.9,"info":"\"15-02-09\" at \"19:21\""}]},{"version":"v1.1.0","exported":"2017-05-17T13:36:40.279Z","volume":10.5,"added":"2017-05-17T13:33:04.710Z","format":"Utrecht","demagType":"Unknown","strat":null,"patch":1.1,"GEO":[{"dec":77.20507411529167,"inc":-11.457760264547248,"MAD":7.957140252577298,"cm":[-1.2079226507921703e-13,1.9539925233402755e-13,0],"intensity":20683.262463000818,"type":"GC","origin":false,"forced":true,"remark":"","nSteps":11,"minStep":"100","maxStep":"400","steps":["100","150","180","210","240","270","300","320","340","370","400"],"group":"None","version":"v1.1.0"}],"TECT":[{"dec":257.5756801054204,"inc":-13.081020501235281,"MAD":7.95714025257729,"cm":[2.842170943040401e-14,-1.6964207816272392e-13,0],"intensity":20683.262463000818,"type":"GC","origin":false,"forced":true,"remark":"","nSteps":11,"minStep":"100","maxStep":"400","steps":["100","150","180","210","240","270","300","320","340","370","400"],"group":"None","version":"v1.1.0"}],"interpreted":true,"name":"YK2.5A","coreAzi":126,"coreDip":43,"bedStrike":121,"bedDip":35,"data":[{"visible":true,"include":false,"step":"20","x":-20835.428571428572,"y":-11155.52380952381,"z":20096.190476190477,"a95":2.3,"info":"\"14-11-30\" at \"13:56\""},{"visible":true,"include":true,"step":"100","x":-15102.952380952382,"y":-7393.9047619047615,"z":10106.57142857143,"a95":1.9,"info":"\"15-01-31\" at \"10:38\""},{"visible":true,"include":true,"step":"150","x":-5725.333333333333,"y":-2228.9523809523807,"z":5152.857142857143,"a95":2.2,"info":"\"15-01-31\" at \"13:57\""},{"visible":true,"include":true,"step":"180","x":-4130.380952380952,"y":-1422.952380952381,"z":4143.523809523809,"a95":2.6,"info":"\"15-02-01\" at \"07:34\""},{"visible":true,"include":true,"step":"210","x":-4019.5238095238096,"y":-689.8095238095239,"z":4147.809523809524,"a95":2.8,"info":"\"15-02-01\" at \"10:42\""},{"visible":true,"include":true,"step":"240","x":-2555.904761904762,"y":-736.2857142857143,"z":3415.904761904762,"a95":2.7,"info":"\"15-02-02\" at \"15:21\""},{"visible":true,"include":true,"step":"270","x":-2408.9523809523807,"y":-609.3333333333334,"z":3233.6190476190477,"a95":3.2,"info":"\"15-02-02\" at \"19:18\""},{"visible":true,"include":true,"step":"300","x":-1736.857142857143,"y":-589.4285714285714,"z":2464.4761904761904,"a95":3.3,"info":"\"15-02-02\" at \"22:56\""},{"visible":true,"include":true,"step":"320","x":-1155.2380952380952,"y":153.9047619047619,"z":2373.2380952380954,"a95":3.8,"info":"\"15-02-03\" at \"17:32\""},{"visible":true,"include":true,"step":"340","x":-891.3333333333334,"y":169.33333333333334,"z":2141.809523809524,"a95":2.8,"info":"\"15-02-04\" at \"15:22\""},{"visible":true,"include":true,"step":"370","x":-1310.1904761904761,"y":115.33333333333333,"z":2309.5238095238096,"a95":4,"info":"\"15-02-04\" at \"20:28\""},{"visible":true,"include":true,"step":"400","x":-486.95238095238096,"y":381.8095238095238,"z":1537.4285714285713,"a95":3.5,"info":"\"15-02-05\" at \"00:42\""},{"visible":true,"include":false,"step":"420","x":-632.952380952381,"y":782.1904761904761,"z":1666,"a95":4.5,"info":"\"15-02-09\" at \"19:23\""}]},{"version":"v1.1.0","exported":"2017-05-17T13:36:40.279Z","volume":10.5,"added":"2017-05-17T13:33:04.711Z","format":"Utrecht","demagType":"Unknown","strat":null,"patch":1.1,"GEO":[{"dec":68.14395120454162,"inc":-12.016405930740609,"MAD":4.772994446966907,"cm":[7.105427357601002e-15,-2.842170943040401e-14,0],"intensity":17959.9349599093,"type":"GC","origin":false,"forced":true,"remark":"","nSteps":11,"minStep":"100","maxStep":"400","steps":["100","150","180","210","240","270","300","320","340","370","400"],"group":"None","version":"v1.1.0"}],"TECT":[{"dec":248.9210670594075,"inc":-16.06041125097925,"MAD":4.772994446966851,"cm":[-1.5631940186722204e-13,-1.2789769243681803e-13,-3.907985046680551e-14],"intensity":17959.934959909297,"type":"GC","origin":false,"forced":true,"remark":"","nSteps":11,"minStep":"100","maxStep":"400","steps":["100","150","180","210","240","270","300","320","340","370","400"],"group":"None","version":"v1.1.0"}],"interpreted":true,"name":"YK2.6A","coreAzi":138,"coreDip":41,"bedStrike":121,"bedDip":35,"data":[{"visible":true,"include":false,"step":"20","x":-27764.47619047619,"y":-12448.190476190477,"z":19021.14285714286,"a95":2.2,"info":"\"14-11-30\" at \"13:58\""},{"visible":true,"include":true,"step":"100","x":-15109.047619047618,"y":-5292.571428571428,"z":6847.238095238095,"a95":1.8,"info":"\"15-01-31\" at \"10:41\""},{"visible":true,"include":true,"step":"150","x":-5265.523809523809,"y":-1968.6666666666667,"z":3597.2380952380954,"a95":2.2,"info":"\"15-01-31\" at \"13:59\""},{"visible":true,"include":true,"step":"180","x":-3949.1428571428573,"y":-1190.1904761904761,"z":3090.4761904761904,"a95":3.1,"info":"\"15-02-01\" at \"07:35\""},{"visible":true,"include":true,"step":"210","x":-3219.904761904762,"y":-880.6666666666666,"z":2844.285714285714,"a95":3.4,"info":"\"15-02-01\" at \"10:45\""},{"visible":true,"include":true,"step":"240","x":-2393.809523809524,"y":-535.1428571428571,"z":2777.6190476190477,"a95":3.2,"info":"\"15-02-02\" at \"15:23\""},{"visible":true,"include":true,"step":"270","x":-1884.1904761904761,"y":-362.85714285714283,"z":2539.1428571428573,"a95":2.7,"info":"\"15-02-02\" at \"19:20\""},{"visible":true,"include":true,"step":"300","x":-797.3333333333334,"y":-305.14285714285717,"z":2039.6190476190477,"a95":3.9,"info":"\"15-02-02\" at \"22:58\""},{"visible":true,"include":true,"step":"320","x":-413.5238095238095,"y":119.52380952380952,"z":2110.9523809523807,"a95":4.6,"info":"\"15-02-03\" at \"17:34\""},{"visible":true,"include":true,"step":"340","x":-384.3809523809524,"y":192.1904761904762,"z":2040.1904761904761,"a95":3.5,"info":"\"15-02-04\" at \"15:25\""},{"visible":true,"include":true,"step":"370","x":-197.42857142857142,"y":144.47619047619048,"z":2060.7619047619046,"a95":3.9,"info":"\"15-02-04\" at \"20:31\""},{"visible":true,"include":true,"step":"400","x":89.04761904761905,"y":288.85714285714283,"z":1633.4285714285713,"a95":4,"info":"\"15-02-05\" at \"00:44\""},{"visible":true,"include":false,"step":"420","x":-25.61904761904762,"y":594.1904761904761,"z":1820.1904761904761,"a95":4.5,"info":"\"15-02-09\" at \"19:26\""}]},{"version":"v1.1.0","exported":"2017-05-17T13:36:40.279Z","volume":10.5,"added":"2017-05-17T13:33:04.711Z","format":"Utrecht","demagType":"Unknown","strat":"1","patch":1.1,"GEO":[{"dec":61.2572280428202,"inc":-8.549145919407039,"MAD":5.473089677361748,"cm":[-5.684341886080802e-14,-1.4210854715202004e-13,0],"intensity":3543.425673277318,"type":"GC","origin":false,"forced":true,"remark":"","nSteps":4,"minStep":"10.0","maxStep":"23.0","steps":["10.0","15.0","20.0","23.0"],"group":"None","version":"v1.1.0"}],"TECT":[{"dec":243.4067691807091,"inc":-21.602246919431618,"MAD":5.473089677361683,"cm":[5.684341886080802e-14,2.2737367544323206e-13,-2.3092638912203256e-14],"intensity":3543.425673277318,"type":"GC","origin":false,"forced":true,"remark":"","nSteps":4,"minStep":"10.0","maxStep":"23.0","steps":["10.0","15.0","20.0","23.0"],"group":"None","version":"v1.1.0"}],"interpreted":true,"name":"YK2.6B","coreAzi":138,"coreDip":41,"bedStrike":121,"bedDip":35,"data":[{"visible":true,"include":false,"step":"0.0","x":-4644,"y":-509.6952380952381,"z":3272.6666666666665,"a95":0.99,"info":"07/07/2015 at 21:32:23"},{"visible":true,"include":true,"step":"10.0","x":-1506.2857142857142,"y":-303.96190476190475,"z":1982.1904761904761,"a95":0.99,"info":"07/07/2015 at 21:32:23"},{"visible":true,"include":true,"step":"15.0","x":-407.7142857142857,"y":117.01904761904763,"z":1651.8095238095239,"a95":0.99,"info":"07/07/2015 at 21:32:23"},{"visible":true,"include":true,"step":"20.0","x":205.21904761904764,"y":196.36190476190478,"z":1599.7142857142858,"a95":0.99,"info":"07/07/2015 at 21:32:23"},{"visible":true,"include":true,"step":"23.0","x":518.3047619047619,"y":175.42857142857142,"z":1418.2857142857142,"a95":0.99,"info":"07/07/2015 at 21:32:23"},{"visible":true,"include":false,"step":"25.0","x":501.2666666666667,"y":398.6190476190476,"z":1184.2857142857142,"a95":0.99,"info":"07/07/2015 at 21:32:23"},{"visible":true,"include":false,"step":"30.0","x":871.7333333333333,"y":550.2285714285714,"z":1227.047619047619,"a95":0.99,"info":"07/07/2015 at 21:32:23"},{"visible":true,"include":false,"step":"33.0","x":887.2380952380952,"y":575.7047619047619,"z":835.5619047619048,"a95":0.99,"info":"07/07/2015 at 21:32:23"},{"visible":true,"include":false,"step":"35.0","x":911.304761904762,"y":430.50476190476195,"z":1016.6666666666666,"a95":0.99,"info":"07/07/2015 at 21:32:23"},{"visible":true,"include":false,"step":"40.0","x":1086.857142857143,"y":553.7142857142857,"z":1112.857142857143,"a95":0.99,"info":"07/07/2015 at 21:32:23"},{"visible":true,"include":false,"step":"45.0","x":1264.1904761904761,"y":501.0952380952381,"z":898.8857142857142,"a95":0.99,"info":"07/07/2015 at 21:32:23"},{"visible":true,"include":false,"step":"50.0","x":1140.095238095238,"y":461.2476190476191,"z":834.7238095238096,"a95":0.99,"info":"07/07/2015 at 21:32:23"},{"visible":true,"include":false,"step":"55.0","x":1445.3333333333333,"y":492.3333333333333,"z":802.4285714285714,"a95":0.99,"info":"07/07/2015 at 21:32:23"},{"visible":true,"include":false,"step":"60.0","x":1472.095238095238,"y":528.8095238095239,"z":827.2857142857143,"a95":0.99,"info":"07/07/2015 at 21:32:23"},{"visible":true,"include":false,"step":"65.0","x":1375.6190476190477,"y":814.3714285714285,"z":508.6,"a95":0.99,"info":"07/07/2015 at 21:32:23"},{"visible":true,"include":false,"step":"70.0","x":1146.3809523809523,"y":731.2476190476191,"z":776.9619047619047,"a95":0.99,"info":"07/07/2015 at 21:32:23"},{"visible":true,"include":false,"step":"80.0","x":1485.4285714285713,"y":465.6380952380952,"z":549.6,"a95":0.99,"info":"07/07/2015 at 21:32:23"}]},{"version":"v1.1.0","exported":"2017-05-17T13:36:40.279Z","volume":10.5,"added":"2017-05-17T13:33:04.712Z","format":"Utrecht","demagType":"Unknown","strat":"2","patch":1.1,"GEO":[{"dec":54.33402969930842,"inc":-6.994476260603583,"MAD":8.271351882654285,"cm":[0,-5.684341886080802e-14,0],"intensity":4757.730084324188,"type":"GC","origin":false,"forced":true,"remark":"","nSteps":7,"minStep":"10.0","maxStep":"33.0","steps":["10.0","15.0","20.0","23.0","25.0","30.0","33.0"],"group":"None","version":"v1.1.0"}],"TECT":[{"dec":236.7133714160555,"inc":-25.02373915469239,"MAD":8.271351882654226,"cm":[-2.842170943040401e-14,-8.881784197001252e-14,1.0658141036401503e-14],"intensity":4757.730084324188,"type":"GC","origin":false,"forced":true,"remark":"","nSteps":7,"minStep":"10.0","maxStep":"33.0","steps":["10.0","15.0","20.0","23.0","25.0","30.0","33.0"],"group":"None","version":"v1.1.0"}],"interpreted":true,"name":"YK2.7B","coreAzi":149,"coreDip":50,"bedStrike":121,"bedDip":35,"data":[{"visible":true,"include":false,"step":"0.0","x":-6661.142857142857,"y":-373.6,"z":3769.6190476190477,"a95":0.99,"info":"07/07/2015 at 21:32:23"},{"visible":true,"include":true,"step":"10.0","x":-3245.1428571428573,"y":-453.2095238095238,"z":2531.4285714285716,"a95":0.99,"info":"07/07/2015 at 21:32:23"},{"visible":true,"include":true,"step":"15.0","x":-1779.3333333333333,"y":-287.0190476190476,"z":1823.047619047619,"a95":0.99,"info":"07/07/2015 at 21:32:23"},{"visible":true,"include":true,"step":"20.0","x":-767.495238095238,"y":-261.87619047619046,"z":1574.857142857143,"a95":0.99,"info":"07/07/2015 at 21:32:23"},{"visible":true,"include":true,"step":"23.0","x":-510.12380952380954,"y":-56.298095238095236,"z":1259.2380952380952,"a95":0.99,"info":"07/07/2015 at 21:32:23"},{"visible":true,"include":true,"step":"25.0","x":-158.0095238095238,"y":-80.30571428571429,"z":1200.952380952381,"a95":0.99,"info":"07/07/2015 at 21:32:23"},{"visible":true,"include":true,"step":"30.0","x":5.197619047619048,"y":-340.77142857142854,"z":1219.2380952380952,"a95":0.99,"info":"07/07/2015 at 21:32:23"},{"visible":true,"include":true,"step":"33.0","x":176.7047619047619,"y":-156.32380952380953,"z":1053.142857142857,"a95":0.99,"info":"07/07/2015 at 21:32:23"},{"visible":true,"include":false,"step":"35.0","x":-5.772857142857143,"y":-21.18857142857143,"z":754.8761904761905,"a95":0.99,"info":"07/07/2015 at 21:32:23"},{"visible":true,"include":false,"step":"40.0","x":217.9238095238095,"y":-163.06666666666666,"z":1149.4285714285713,"a95":0.99,"info":"07/07/2015 at 21:32:23"},{"visible":true,"include":false,"step":"45.0","x":418.3238095238095,"y":54.47428571428571,"z":978.2857142857143,"a95":0.99,"info":"07/07/2015 at 21:32:23"},{"visible":true,"include":false,"step":"50.0","x":214.25714285714284,"y":70.45809523809524,"z":471.0190476190476,"a95":0.99,"info":"07/07/2015 at 21:32:23"},{"visible":true,"include":false,"step":"55.0","x":615.0857142857143,"y":36.375238095238096,"z":384.81904761904764,"a95":0.99,"info":"07/07/2015 at 21:32:23"},{"visible":true,"include":false,"step":"60.0","x":568.2666666666667,"y":126.37142857142858,"z":394.3714285714285,"a95":0.99,"info":"07/07/2015 at 21:32:23"},{"visible":true,"include":false,"step":"65.0","x":572.4285714285714,"y":163.65714285714287,"z":269.54285714285714,"a95":0.99,"info":"07/07/2015 at 21:32:23"},{"visible":true,"include":false,"step":"70.0","x":848.6857142857143,"y":74.5552380952381,"z":700.8666666666667,"a95":0.99,"info":"07/07/2015 at 21:32:23"},{"visible":true,"include":false,"step":"80.0","x":843.304761904762,"y":183.4,"z":65.77904761904762,"a95":0.99,"info":"07/07/2015 at 21:32:23"}]},{"version":"v1.1.0","exported":"2017-05-17T13:36:40.279Z","volume":10.5,"added":"2017-05-17T13:33:04.715Z","format":"Utrecht","demagType":"Unknown","strat":null,"patch":1.1,"GEO":[{"dec":171.97606944913866,"inc":-2.395274593957562,"MAD":4.619662930026682,"cm":[2.842170943040401e-14,5.417888360170764e-14,0],"intensity":5277.732451315091,"type":"dir","forced":true,"remark":"","origin":false,"nSteps":11,"minStep":"150","maxStep":"420","steps":["150","180","210","240","270","300","320","340","370","400","420"],"group":"None","version":"v1.1.0"}],"TECT":[{"dec":165.20420025522128,"inc":-28.649324014704884,"MAD":4.6196629300266006,"cm":[2.842170943040401e-14,1.1901590823981678e-13,7.105427357601002e-15],"intensity":5277.732451315091,"type":"dir","forced":true,"remark":"","origin":false,"nSteps":11,"minStep":"150","maxStep":"420","steps":["150","180","210","240","270","300","320","340","370","400","420"],"group":"None","version":"v1.1.0"}],"interpreted":true,"name":"YK2.9A","coreAzi":135,"coreDip":23,"bedStrike":121,"bedDip":35,"data":[{"visible":false,"include":false,"step":"20","x":-12241.904761904761,"y":-4543.523809523809,"z":8065.238095238095,"a95":2.2,"info":"\"14-11-30\" at \"14:00\""},{"visible":false,"include":false,"step":"100","x":-3858.8571428571427,"y":-65.23809523809524,"z":2379.714285714286,"a95":2.2,"info":"\"15-01-31\" at \"10:44\""},{"visible":true,"include":true,"step":"150","x":710.5714285714286,"y":1497.7142857142858,"z":2116.190476190476,"a95":2.9,"info":"\"15-01-31\" at \"14:01\""},{"visible":true,"include":true,"step":"180","x":1066.4761904761904,"y":1541.047619047619,"z":2110.9523809523807,"a95":3.4,"info":"\"15-02-01\" at \"07:37\""},{"visible":true,"include":true,"step":"210","x":1108.1904761904761,"y":1798.4761904761904,"z":2131.5238095238096,"a95":2.7,"info":"\"15-02-01\" at \"10:47\""},{"visible":true,"include":true,"step":"240","x":1028.1904761904761,"y":1405.8095238095239,"z":2349.0476190476193,"a95":3,"info":"\"15-02-02\" at \"15:26\""},{"visible":true,"include":true,"step":"270","x":1116,"y":1774.4761904761904,"z":2064.7619047619046,"a95":2.6,"info":"\"15-02-02\" at \"19:22\""},{"visible":true,"include":true,"step":"300","x":948.5714285714286,"y":1665.6190476190477,"z":1901.2380952380952,"a95":3.2,"info":"\"15-02-02\" at \"23:00\""},{"visible":true,"include":true,"step":"320","x":1043.047619047619,"y":1762.5714285714287,"z":1959.904761904762,"a95":3,"info":"\"15-02-03\" at \"17:36\""},{"visible":true,"include":true,"step":"340","x":1133.4285714285713,"y":1791.8095238095239,"z":1816.6666666666667,"a95":2.4,"info":"\"15-02-04\" at \"15:28\""},{"visible":true,"include":true,"step":"370","x":913.1428571428571,"y":1704.952380952381,"z":1953.2380952380952,"a95":3.2,"info":"\"15-02-04\" at \"20:33\""},{"visible":true,"include":true,"step":"400","x":816.5714285714286,"y":1601.7142857142858,"z":1607.8095238095239,"a95":2.7,"info":"\"15-02-05\" at \"00:47\""},{"visible":true,"include":true,"step":"420","x":718.5714285714286,"y":1754.4761904761904,"z":1787.047619047619,"a95":2.7,"info":"\"15-02-09\" at \"19:28\""}]},{"version":"v1.1.0","exported":"2017-05-17T13:36:40.279Z","volume":10.5,"added":"2017-05-17T13:33:04.715Z","format":"Utrecht","demagType":"Unknown","strat":"7","patch":1.1,"GEO":[{"dec":155.6207795698889,"inc":-19.806404271687803,"MAD":5.071180102322935,"cm":[-1.7763568394002505e-14,-1.4210854715202004e-14,0],"intensity":1808.2415418190378,"type":"dir","forced":true,"remark":"","origin":false,"nSteps":7,"minStep":"25.0","maxStep":"70.0","steps":["25.0","30.0","35.0","40.0","45.0","50.0","70.0"],"group":"None","version":"v1.1.0"}],"TECT":[{"dec":138.45903476450536,"inc":-35.743620874178376,"MAD":5.071180102322955,"cm":[-1.0658141036401503e-14,-2.842170943040401e-14,-3.019806626980426e-14],"intensity":1808.2415418190376,"type":"dir","forced":true,"remark":"","origin":false,"nSteps":7,"minStep":"25.0","maxStep":"70.0","steps":["25.0","30.0","35.0","40.0","45.0","50.0","70.0"],"group":"None","version":"v1.1.0"}],"interpreted":true,"name":"YK2.9B","coreAzi":135,"coreDip":23,"bedStrike":121,"bedDip":35,"data":[{"visible":true,"include":false,"step":"0.0","x":-1776.4761904761904,"y":230.28571428571428,"z":2330,"a95":0.99,"info":"05/11/2014 at 13:44:22"},{"visible":true,"include":false,"step":"10.0","x":274.81904761904764,"y":653.8761904761905,"z":1492.1904761904761,"a95":0.99,"info":"05/11/2014 at 13:44:22"},{"visible":true,"include":false,"step":"15.0","x":898.8571428571429,"y":627.552380952381,"z":1182.857142857143,"a95":0.99,"info":"05/11/2014 at 13:44:22"},{"visible":true,"include":false,"step":"20.0","x":995.047619047619,"y":426.2190476190476,"z":1396,"a95":0.99,"info":"05/11/2014 at 13:44:22"},{"visible":true,"include":true,"step":"25.0","x":890.895238095238,"y":412.7142857142857,"z":974.7619047619048,"a95":0.99,"info":"05/11/2014 at 13:44:22"},{"visible":true,"include":true,"step":"30.0","x":845.8857142857142,"y":562.5904761904761,"z":712.6380952380953,"a95":0.99,"info":"05/11/2014 at 13:44:22"},{"visible":true,"include":true,"step":"35.0","x":853.152380952381,"y":429.95238095238096,"z":1033.2380952380952,"a95":0.99,"info":"05/11/2014 at 13:44:22"},{"visible":true,"include":true,"step":"40.0","x":1099.4285714285713,"y":507.2952380952381,"z":1004.2857142857143,"a95":0.99,"info":"05/11/2014 at 13:44:22"},{"visible":true,"include":true,"step":"45.0","x":583.504761904762,"y":232.21904761904764,"z":616.504761904762,"a95":0.99,"info":"05/11/2014 at 13:44:22"},{"visible":true,"include":true,"step":"50.0","x":525.5714285714286,"y":279.95238095238096,"z":637.9333333333334,"a95":0.99,"info":"05/11/2014 at 13:44:22"},{"visible":false,"include":false,"step":"60.0","x":771.4571428571429,"y":362.8666666666667,"z":393.34285714285716,"a95":0.99,"info":"05/11/2014 at 13:44:22"},{"visible":true,"include":true,"step":"70.0","x":248.23809523809524,"y":137.2,"z":317.4095238095238,"a95":0.99,"info":"05/11/2014 at 13:44:22"},{"visible":true,"include":false,"step":"80.0","x":217.3904761904762,"y":287.4190476190476,"z":488.45714285714286,"a95":0.99,"info":"05/11/2014 at 13:44:22"},{"visible":true,"include":false,"step":"90.0","x":-73.20285714285714,"y":491.0571428571429,"z":139.65714285714287,"a95":0.99,"info":"05/11/2014 at 13:44:22"}]},{"version":"v1.1.0","exported":"2017-05-17T13:36:40.279Z","volume":10.5,"added":"2017-05-17T13:33:04.716Z","format":"Utrecht","demagType":"Unknown","strat":"3","patch":1.1,"GEO":[{"dec":168.47487397248528,"inc":-17.341081475410277,"MAD":6.5737679011567876,"cm":[5.684341886080802e-14,4.973799150320701e-14,0],"intensity":3865.561717621873,"type":"dir","forced":true,"remark":"","origin":false,"nSteps":9,"minStep":"23.0","maxStep":"55.0","steps":["23.0","25.0","30.0","33.0","35.0","40.0","45.0","50.0","55.0"],"group":"None","version":"v1.1.0"}],"TECT":[{"dec":153.13644461779495,"inc":-40.36520840569306,"MAD":6.573767901156758,"cm":[1.4210854715202004e-14,-2.5579538487363607e-13,-9.947598300641403e-14],"intensity":3865.5617176218725,"type":"dir","forced":true,"remark":"","origin":false,"nSteps":9,"minStep":"23.0","maxStep":"55.0","steps":["23.0","25.0","30.0","33.0","35.0","40.0","45.0","50.0","55.0"],"group":"None","version":"v1.1.0"}],"interpreted":true,"name":"YK2.10B","coreAzi":122,"coreDip":19,"bedStrike":121,"bedDip":35,"data":[{"visible":true,"include":false,"step":"0.0","x":-2028.2857142857142,"y":842.6571428571428,"z":2137.5238095238096,"a95":0.99,"info":"07/07/2015 at 21:32:23"},{"visible":true,"include":false,"step":"10.0","x":204.8190476190476,"y":1419.142857142857,"z":1632.952380952381,"a95":0.99,"info":"07/07/2015 at 21:32:23"},{"visible":true,"include":false,"step":"15.0","x":711.9047619047619,"y":1844.5714285714287,"z":1484,"a95":0.99,"info":"07/07/2015 at 21:32:23"},{"visible":true,"include":false,"step":"20.0","x":1077.904761904762,"y":1651.142857142857,"z":1635.904761904762,"a95":0.99,"info":"07/07/2015 at 21:32:23"},{"visible":true,"include":true,"step":"23.0","x":1006.3809523809524,"y":1863.7142857142858,"z":1275.5238095238096,"a95":0.99,"info":"07/07/2015 at 21:32:23"},{"visible":true,"include":true,"step":"25.0","x":1067.6190476190477,"y":1631.4285714285713,"z":1153.5238095238096,"a95":0.99,"info":"07/07/2015 at 21:32:23"},{"visible":true,"include":true,"step":"30.0","x":1017.8095238095239,"y":1329.5238095238096,"z":936.8285714285715,"a95":0.99,"info":"07/07/2015 at 21:32:23"},{"visible":true,"include":true,"step":"33.0","x":1132.1904761904761,"y":1671.047619047619,"z":835.7238095238096,"a95":0.99,"info":"07/07/2015 at 21:32:23"},{"visible":true,"include":true,"step":"35.0","x":902.0571428571429,"y":1321.4285714285713,"z":1136.4761904761904,"a95":0.99,"info":"07/07/2015 at 21:32:23"},{"visible":true,"include":true,"step":"40.0","x":1240.5714285714287,"y":1100.6666666666667,"z":1070.952380952381,"a95":0.99,"info":"07/07/2015 at 21:32:23"},{"visible":true,"include":true,"step":"45.0","x":922.7809523809525,"y":1189.8095238095239,"z":1006,"a95":0.99,"info":"07/07/2015 at 21:32:23"},{"visible":true,"include":true,"step":"50.0","x":712.0380952380953,"y":1094,"z":999.2380952380952,"a95":0.99,"info":"07/07/2015 at 21:32:23"},{"visible":true,"include":true,"step":"55.0","x":757.4190476190475,"y":805.352380952381,"z":894.1904761904761,"a95":0.99,"info":"07/07/2015 at 21:32:23"},{"visible":true,"include":false,"step":"60.0","x":798.1714285714285,"y":790.742857142857,"z":1070.7619047619048,"a95":0.99,"info":"07/07/2015 at 21:32:23"},{"visible":true,"include":false,"step":"65.0","x":630.4,"y":637.4857142857143,"z":681.2666666666667,"a95":0.99,"info":"07/07/2015 at 21:32:23"},{"visible":true,"include":false,"step":"70.0","x":226.67619047619047,"y":757.447619047619,"z":986.3809523809524,"a95":0.99,"info":"07/07/2015 at 21:32:23"},{"visible":true,"include":false,"step":"80.0","x":1419.5238095238096,"y":601.0571428571429,"z":515.5333333333334,"a95":0.99,"info":"07/07/2015 at 21:32:23"}]},{"version":"v1.1.0","exported":"2017-05-17T13:36:40.279Z","volume":10.5,"added":"2017-05-17T13:33:04.716Z","format":"Utrecht","demagType":"Unknown","strat":"8","patch":1.1,"GEO":[{"dec":262.3340177839701,"inc":-2.376662444186672,"MAD":0.7740230309292662,"cm":[0,1.0658141036401503e-13,0],"intensity":4683.23916286566,"type":"GC","origin":false,"forced":true,"remark":"","nSteps":4,"minStep":"10.0","maxStep":"23.0","steps":["10.0","15.0","20.0","23.0"],"group":"None","version":"v1.1.0"}],"TECT":[{"dec":268.9955520869339,"inc":-23.08021854745793,"MAD":0.7740230309292075,"cm":[0,3.979039320256561e-13,5.684341886080802e-14],"intensity":4683.239162865659,"type":"GC","origin":false,"forced":true,"remark":"","nSteps":4,"minStep":"10.0","maxStep":"23.0","steps":["10.0","15.0","20.0","23.0"],"group":"None","version":"v1.1.0"}],"interpreted":true,"name":"YK2.11A","coreAzi":76,"coreDip":49,"bedStrike":121,"bedDip":35,"data":[{"visible":true,"include":false,"step":"0.0","x":-5973.238095238095,"y":-1878,"z":5921.142857142857,"a95":0.99,"info":"24/11/2014 at 19:15:10"},{"visible":true,"include":true,"step":"10.0","x":-2524.9523809523807,"y":-319.7333333333333,"z":2724.5714285714284,"a95":0.99,"info":"24/11/2014 at 19:15:10"},{"visible":true,"include":true,"step":"15.0","x":-1320,"y":513.2,"z":1295.904761904762,"a95":0.99,"info":"24/11/2014 at 19:15:10"},{"visible":true,"include":true,"step":"20.0","x":-1025.904761904762,"y":727.2095238095238,"z":987.8095238095239,"a95":0.99,"info":"24/11/2014 at 19:15:10"},{"visible":true,"include":true,"step":"23.0","x":-708.7523809523809,"y":1148.5714285714287,"z":560.0761904761905,"a95":0.99,"info":"24/11/2014 at 19:15:10"},{"visible":true,"include":false,"step":"25.0","x":-371.96190476190475,"y":931.2761904761904,"z":70.9342857142857,"a95":0.99,"info":"24/11/2014 at 19:15:10"},{"visible":true,"include":false,"step":"30.0","x":-474.72380952380956,"y":707.6761904761905,"z":71.3752380952381,"a95":0.99,"info":"24/11/2014 at 19:15:10"},{"visible":true,"include":false,"step":"33.0","x":-558.152380952381,"y":835.6095238095238,"z":-123.66666666666667,"a95":0.99,"info":"24/11/2014 at 19:15:10"},{"visible":true,"include":false,"step":"35.0","x":-270.7809523809524,"y":713.495238095238,"z":-83.30857142857143,"a95":0.99,"info":"24/11/2014 at 19:15:10"},{"visible":true,"include":false,"step":"40.0","x":-213.0952380952381,"y":763.0761904761905,"z":285.76190476190476,"a95":0.99,"info":"24/11/2014 at 19:15:10"},{"visible":true,"include":false,"step":"45.0","x":-72.72285714285715,"y":788.6857142857143,"z":158.88571428571427,"a95":0.99,"info":"24/11/2014 at 19:15:10"},{"visible":true,"include":false,"step":"50.0","x":83.47333333333333,"y":551.1714285714286,"z":349.6666666666667,"a95":0.99,"info":"24/11/2014 at 19:15:10"},{"visible":true,"include":false,"step":"60.0","x":38.22571428571429,"y":940.4666666666666,"z":298.81904761904764,"a95":0.99,"info":"24/11/2014 at 19:15:10"},{"visible":true,"include":false,"step":"70.0","x":-253.32380952380953,"y":968.0952380952381,"z":-367.95238095238096,"a95":0.99,"info":"24/11/2014 at 19:15:10"},{"visible":true,"include":false,"step":"80.0","x":392.7047619047619,"y":371.56190476190477,"z":-46.75333333333334,"a95":0.99,"info":"24/11/2014 at 19:15:10"},{"visible":true,"include":false,"step":"90.0","x":179.22857142857143,"y":520.8857142857144,"z":81.33714285714285,"a95":0.99,"info":"24/11/2014 at 19:15:10"}]},{"version":"v1.1.0","exported":"2017-05-17T13:36:40.279Z","volume":10.5,"added":"2017-05-17T13:33:04.716Z","format":"Utrecht","demagType":"Unknown","strat":null,"patch":1.1,"GEO":[{"dec":66.21548974123084,"inc":-9.356342382432686,"MAD":6.894860075181296,"cm":[-8.526512829121202e-14,-6.394884621840902e-14,0],"intensity":24112.101312519724,"type":"GC","origin":false,"forced":true,"remark":"","nSteps":10,"minStep":"100","maxStep":"370","steps":["100","150","180","210","240","270","300","320","340","370"],"group":"None","version":"v1.1.0"}],"TECT":[{"dec":248.05406187692344,"inc":-19.220135544296358,"MAD":6.8948600751813425,"cm":[-1.9895196601282805e-13,1.1191048088221578e-13,-4.263256414560601e-14],"intensity":24112.10131251973,"type":"GC","origin":false,"forced":true,"remark":"","nSteps":10,"minStep":"100","maxStep":"370","steps":["100","150","180","210","240","270","300","320","340","370"],"group":"None","version":"v1.1.0"}],"interpreted":true,"name":"YK2.12A","coreAzi":93,"coreDip":49,"bedStrike":121,"bedDip":35,"data":[{"visible":true,"include":false,"step":"20","x":-22035.714285714286,"y":-13329.333333333334,"z":19791.333333333332,"a95":2.1,"info":"\"14-11-30\" at \"14:02\""},{"visible":true,"include":true,"step":"100","x":-13653.142857142857,"y":-6771.428571428572,"z":16421.904761904763,"a95":2.1,"info":"\"15-01-31\" at \"10:46\""},{"visible":true,"include":true,"step":"150","x":-2696.5714285714284,"y":-204.85714285714286,"z":4883.142857142857,"a95":72.2,"info":"\"15-01-31\" at \"14:04\""},{"visible":true,"include":true,"step":"180","x":-3786.7619047619046,"y":-1160.6666666666667,"z":5450.285714285715,"a95":2.4,"info":"\"15-02-01\" at \"07:39\""},{"visible":true,"include":true,"step":"210","x":-3192,"y":-774.1904761904761,"z":4647.238095238095,"a95":2.3,"info":"\"15-02-01\" at \"10:49\""},{"visible":true,"include":true,"step":"240","x":-2584,"y":-472.57142857142856,"z":4115.428571428572,"a95":2.4,"info":"\"15-02-02\" at \"15:28\""},{"visible":true,"include":true,"step":"270","x":-2085.5238095238096,"y":-5.904761904761905,"z":3478.5714285714284,"a95":2.4,"info":"\"15-02-02\" at \"19:24\""},{"visible":true,"include":true,"step":"300","x":-1599.904761904762,"y":536.6666666666666,"z":2447.714285714286,"a95":2.6,"info":"\"15-02-02\" at \"23:02\""},{"visible":true,"include":true,"step":"320","x":-810.2857142857143,"y":774,"z":1967.904761904762,"a95":2.7,"info":"\"15-02-03\" at \"17:39\""},{"visible":true,"include":true,"step":"340","x":-641.1428571428571,"y":737.3333333333334,"z":1938.5714285714287,"a95":2.4,"info":"\"15-02-04\" at \"15:32\""},{"visible":true,"include":true,"step":"370","x":-719.1428571428571,"y":896.3809523809524,"z":2025.7142857142858,"a95":3.2,"info":"\"15-02-04\" at \"20:36\""},{"visible":true,"include":false,"step":"400","x":-553.9047619047619,"y":978.2857142857143,"z":1336.7619047619048,"a95":2.9,"info":"\"15-02-05\" at \"00:50\""},{"visible":true,"include":false,"step":"420","x":-470.76190476190476,"y":1078.5714285714287,"z":1296.952380952381,"a95":2.7,"info":"\"15-02-09\" at \"19:30\""}]}]
