# Supplementary material for: Paleomagnetic constraints on the timing and distribution of Cenozoic rotations in Central and Eastern Anatolia
Source: Copernicus journal article supplement (doi:10.5194/se-9-295-2018), 2018-03-21
Supplement: Supplementary file 2 [file se-9-295-2018-supplement.zip › se-2017-66_DATA_dir files/dir files Ulukisla/YK3.dir]

[{"version":"v1.1.0","exported":"2016-11-28T14:29:56.920Z","volume":10.5,"added":"2016-11-28T14:24:34.528Z","format":"Utrecht","demagType":"Unknown","strat":"1","patch":1.1,"GEO":[{"dec":330.2417324539709,"inc":-19.50305311061379,"MAD":0,"cm":[-5.684341886080802e-14,1.4210854715202004e-14,0],"intensity":1308.056926552873,"type":"GC","origin":false,"forced":true,"remark":"","nSteps":2,"minStep":"0.0","maxStep":"40.0","steps":["0.0","40.0"],"group":"None","version":"v1.1.0"}],"TECT":[{"dec":352.4890456661905,"inc":-33.723917350891874,"MAD":0,"cm":[-4.263256414560601e-14,0,7.105427357601002e-15],"intensity":1308.056926552873,"type":"GC","origin":false,"forced":true,"remark":"","nSteps":2,"minStep":"0.0","maxStep":"40.0","steps":["0.0","40.0"],"group":"None","version":"v1.1.0"}],"interpreted":true,"name":"YK3.00","coreAzi":144,"coreDip":14,"bedStrike":179,"bedDip":44,"data":[{"visible":true,"include":true,"step":"0.0","x":370.5238095238095,"y":-590.9047619047619,"z":97.57142857142857,"a95":0.99,"info":"08/07/2015 at 02:56:04"},{"visible":true,"include":false,"step":"10.0","x":458.2190476190476,"y":-581.152380952381,"z":114.32380952380953,"a95":0.99,"info":"08/07/2015 at 02:56:04"},{"visible":true,"include":false,"step":"15.0","x":504.64761904761906,"y":-550.9904761904761,"z":111.88571428571429,"a95":0.99,"info":"08/07/2015 at 02:56:04"},{"visible":true,"include":false,"step":"20.0","x":506.4857142857143,"y":-525.495238095238,"z":108.61904761904762,"a95":0.99,"info":"08/07/2015 at 02:56:04"},{"visible":true,"include":false,"step":"23.0","x":468.08571428571423,"y":-505.16190476190474,"z":95.55238095238094,"a95":0.99,"info":"08/07/2015 at 02:56:04"},{"visible":true,"include":false,"step":"25.0","x":494.45714285714286,"y":-490.0952380952381,"z":93.27238095238096,"a95":0.99,"info":"08/07/2015 at 02:56:04"},{"visible":true,"include":false,"step":"30.0","x":456.76190476190476,"y":-474.6,"z":97.86666666666666,"a95":0.99,"info":"08/07/2015 at 02:56:04"},{"visible":true,"include":false,"step":"33.0","x":446.3047619047619,"y":-455.3714285714285,"z":127.06666666666668,"a95":0.99,"info":"08/07/2015 at 02:56:04"},{"visible":true,"include":false,"step":"35.0","x":409.9238095238095,"y":-474.8666666666667,"z":100.8952380952381,"a95":0.99,"info":"08/07/2015 at 02:56:04"},{"visible":true,"include":true,"step":"40.0","x":414.50476190476195,"y":-439.1333333333333,"z":86.17999999999999,"a95":0.99,"info":"08/07/2015 at 02:56:04"},{"visible":true,"include":false,"step":"45.0","x":368.96190476190475,"y":-370.34285714285716,"z":93.50952380952381,"a95":0.99,"info":"08/07/2015 at 02:56:04"},{"visible":true,"include":false,"step":"50.0","x":354.84761904761905,"y":-373.0857142857143,"z":56.1447619047619,"a95":0.99,"info":"08/07/2015 at 02:56:04"},{"visible":true,"include":false,"step":"55.0","x":343.9142857142857,"y":-359.4,"z":77.97238095238096,"a95":0.99,"info":"08/07/2015 at 02:56:04"},{"visible":true,"include":false,"step":"60.0","x":341.54285714285714,"y":-335.0095238095238,"z":88.1352380952381,"a95":0.99,"info":"08/07/2015 at 02:56:04"},{"visible":true,"include":false,"step":"65.0","x":289.0857142857143,"y":-326.49523809523805,"z":71.11333333333334,"a95":0.99,"info":"08/07/2015 at 02:56:04"},{"visible":true,"include":false,"step":"70.0","x":337.81904761904764,"y":-329.1714285714286,"z":67.26952380952382,"a95":0.99,"info":"08/07/2015 at 02:56:04"},{"visible":true,"include":false,"step":"80.0","x":365.7904761904762,"y":-334.8,"z":81.65809523809523,"a95":0.99,"info":"08/07/2015 at 02:56:04"}]},{"version":"v1.1.0","exported":"2016-11-28T14:29:56.920Z","volume":10.5,"added":"2016-11-28T14:24:34.528Z","format":"Utrecht","demagType":"Unknown","strat":null,"patch":1.1,"GEO":[],"TECT":[],"interpreted":false,"name":"YK3.1A","coreAzi":189,"coreDip":14,"bedStrike":179,"bedDip":44,"data":[{"visible":true,"include":false,"step":"20","x":1712.952380952381,"y":-2107.4285714285716,"z":13.428571428571429,"a95":1.5,"info":"\"14-11-30\" at \"14:04\""},{"visible":true,"include":true,"step":"100","x":1940.6666666666667,"y":-2095.1428571428573,"z":-326.85714285714283,"a95":1.6,"info":"\"15-01-31\" at \"10:48\""},{"visible":true,"include":true,"step":"150","x":2080.5714285714284,"y":-2043.4285714285713,"z":-361.7142857142857,"a95":1.5,"info":"\"15-01-31\" at \"14:08\""},{"visible":true,"include":true,"step":"180","x":2082.285714285714,"y":-2088.285714285714,"z":-348.85714285714283,"a95":1.6,"info":"\"15-02-01\" at \"07:41\""},{"visible":true,"include":true,"step":"210","x":2111.5238095238096,"y":-2035.5238095238096,"z":-358.1904761904762,"a95":1.6,"info":"\"15-02-01\" at \"10:52\""},{"visible":true,"include":true,"step":"240","x":1987.7142857142858,"y":-2141.3333333333335,"z":-303.8095238095238,"a95":1.6,"info":"\"15-02-02\" at \"15:30\""},{"visible":true,"include":true,"step":"270","x":1960.095238095238,"y":-1937.047619047619,"z":-353.23809523809524,"a95":1.6,"info":"\"15-02-02\" at \"19:26\""},{"visible":true,"include":true,"step":"300","x":1946.6666666666667,"y":-1867.6190476190477,"z":-285.5238095238095,"a95":1.6,"info":"\"15-02-02\" at \"23:04\""},{"visible":true,"include":true,"step":"320","x":1760.3809523809523,"y":-1625.904761904762,"z":-251.23809523809524,"a95":1.6,"info":"\"15-02-03\" at \"17:41\""},{"visible":true,"include":true,"step":"340","x":1759.904761904762,"y":-1638.3809523809523,"z":-246.95238095238096,"a95":1.7,"info":"\"15-02-04\" at \"15:34\""},{"visible":true,"include":true,"step":"370","x":1818.3809523809523,"y":-1543.2380952380952,"z":-259.8095238095238,"a95":1.8,"info":"\"15-02-04\" at \"20:38\""},{"visible":true,"include":true,"step":"400","x":1211.5238095238096,"y":-1019.7142857142857,"z":-178.28571428571428,"a95":1.8,"info":"\"15-02-05\" at \"00:53\""},{"visible":true,"include":false,"step":"420","x":1117.6190476190477,"y":-1083.8095238095239,"z":-150.47619047619048,"a95":1.5,"info":"\"15-02-09\" at \"19:32\""}]},{"version":"v1.1.0","exported":"2016-11-28T14:29:56.920Z","volume":10.5,"added":"2016-11-28T14:24:34.529Z","format":"Utrecht","demagType":"Unknown","strat":"2","patch":1.1,"GEO":[],"TECT":[],"interpreted":false,"name":"YK3.1B","coreAzi":189,"coreDip":14,"bedStrike":179,"bedDip":44,"data":[{"visible":true,"include":false,"step":"0.0","x":59.85619047619048,"y":-411.2952380952381,"z":-221.1142857142857,"a95":0.99,"info":"08/07/2015 at 02:56:04"},{"visible":true,"include":true,"step":"10.0","x":163.67619047619047,"y":-407.06666666666666,"z":-220.42857142857142,"a95":0.99,"info":"08/07/2015 at 02:56:04"},{"visible":true,"include":true,"step":"15.0","x":187.96190476190475,"y":-394.06666666666666,"z":-220.14285714285714,"a95":0.99,"info":"08/07/2015 at 02:56:04"},{"visible":true,"include":true,"step":"20.0","x":188.7904761904762,"y":-354.84761904761905,"z":-236.47619047619048,"a95":0.99,"info":"08/07/2015 at 02:56:04"},{"visible":true,"include":true,"step":"23.0","x":187.28571428571428,"y":-357.9238095238095,"z":-203.52380952380952,"a95":0.99,"info":"08/07/2015 at 02:56:04"},{"visible":true,"include":true,"step":"25.0","x":188.65714285714287,"y":-348.6952380952381,"z":-198.84761904761905,"a95":0.99,"info":"08/07/2015 at 02:56:04"},{"visible":true,"include":true,"step":"30.0","x":184.05714285714285,"y":-330.83809523809526,"z":-195.0761904761905,"a95":0.99,"info":"08/07/2015 at 02:56:04"},{"visible":true,"include":false,"step":"33.0","x":147.52380952380952,"y":-311.0857142857143,"z":-198.35238095238094,"a95":0.99,"info":"08/07/2015 at 02:56:04"},{"visible":true,"include":false,"step":"35.0","x":138.42857142857142,"y":-272.31428571428575,"z":-168.55238095238096,"a95":0.99,"info":"08/07/2015 at 02:56:04"},{"visible":true,"include":false,"step":"40.0","x":146.1904761904762,"y":-265.65714285714284,"z":-165.41904761904763,"a95":0.99,"info":"08/07/2015 at 02:56:04"},{"visible":true,"include":false,"step":"45.0","x":143.51428571428573,"y":-242.25714285714284,"z":-152.4952380952381,"a95":0.99,"info":"08/07/2015 at 02:56:04"},{"visible":true,"include":false,"step":"50.0","x":153.47619047619048,"y":-203.0857142857143,"z":-140.9142857142857,"a95":0.99,"info":"08/07/2015 at 02:56:04"},{"visible":true,"include":false,"step":"55.0","x":145.63809523809525,"y":-191.26666666666665,"z":-146.65714285714287,"a95":0.99,"info":"08/07/2015 at 02:56:04"},{"visible":true,"include":false,"step":"60.0","x":117.96190476190475,"y":-194.7238095238095,"z":-144.40952380952382,"a95":0.99,"info":"08/07/2015 at 02:56:04"},{"visible":true,"include":false,"step":"65.0","x":109.38095238095238,"y":-181.37142857142857,"z":-122.87619047619049,"a95":0.99,"info":"08/07/2015 at 02:56:04"},{"visible":true,"include":false,"step":"70.0","x":135.67619047619047,"y":-157.56190476190477,"z":-86.60285714285715,"a95":0.99,"info":"08/07/2015 at 02:56:04"},{"visible":true,"include":false,"step":"80.0","x":222.22857142857143,"y":-112.81904761904761,"z":-63.105714285714285,"a95":0.99,"info":"08/07/2015 at 02:56:04"}]},{"version":"v1.1.0","exported":"2016-11-28T14:29:56.920Z","volume":10.5,"added":"2016-11-28T14:24:34.529Z","format":"Utrecht","demagType":"Unknown","strat":"8","patch":1.1,"GEO":[{"dec":332.79583748772836,"inc":-23.563451562108334,"MAD":11.09368404699443,"cm":[-9.681144774731365e-14,1.4210854715202004e-14,0],"intensity":2558.9951282829684,"type":"GC","origin":false,"forced":true,"remark":"","nSteps":7,"minStep":"10.0","maxStep":"40.0","steps":["10.0","15.0","20.0","25.0","30.0","35.0","40.0"],"group":"None","version":"v1.1.0"}],"TECT":[{"dec":358.06273951210005,"inc":-34.66176554542767,"MAD":11.093684046993976,"cm":[-2.6689761511988763e-13,4.263256414560601e-14,0],"intensity":2558.9951282829684,"type":"GC","origin":false,"forced":true,"remark":"","nSteps":7,"minStep":"10.0","maxStep":"40.0","steps":["10.0","15.0","20.0","25.0","30.0","35.0","40.0"],"group":"None","version":"v1.1.0"}],"interpreted":true,"name":"YK3.1C","coreAzi":189,"coreDip":14,"bedStrike":179,"bedDip":44,"data":[{"visible":true,"include":false,"step":"0.0","x":715.5238095238095,"y":-1269.3333333333333,"z":-476.7047619047619,"a95":0.99,"info":"04/11/2014 at 19:40:30"},{"visible":true,"include":true,"step":"10.0","x":845.9333333333333,"y":-1164.5714285714287,"z":-528.9809523809524,"a95":0.99,"info":"04/11/2014 at 19:40:30"},{"visible":true,"include":true,"step":"15.0","x":898.5333333333334,"y":-1050,"z":-500.152380952381,"a95":0.99,"info":"04/11/2014 at 19:40:30"},{"visible":true,"include":true,"step":"20.0","x":864.6761904761905,"y":-976.3809523809524,"z":-449.6190476190476,"a95":0.99,"info":"04/11/2014 at 19:40:30"},{"visible":true,"include":true,"step":"25.0","x":796.304761904762,"y":-924.8380952380952,"z":-401.9619047619048,"a95":0.99,"info":"04/11/2014 at 19:40:30"},{"visible":true,"include":true,"step":"30.0","x":781.5523809523809,"y":-836.352380952381,"z":-353.0095238095238,"a95":0.99,"info":"04/11/2014 at 19:40:30"},{"visible":true,"include":true,"step":"35.0","x":735.0952380952381,"y":-695.0285714285715,"z":-274.3904761904762,"a95":0.99,"info":"04/11/2014 at 19:40:30"},{"visible":true,"include":true,"step":"40.0","x":736.8285714285714,"y":-690.1619047619048,"z":-247.73333333333332,"a95":0.99,"info":"04/11/2014 at 19:40:30"},{"visible":true,"include":false,"step":"45.0","x":645.7142857142857,"y":-689.2952380952381,"z":-255.33333333333334,"a95":0.99,"info":"04/11/2014 at 19:40:30"},{"visible":true,"include":false,"step":"50.0","x":587.8666666666667,"y":-548.5238095238095,"z":-238.48571428571427,"a95":0.99,"info":"04/11/2014 at 19:40:30"},{"visible":true,"include":false,"step":"60.0","x":417.152380952381,"y":-450.847619047619,"z":-197.2095238095238,"a95":0.99,"info":"04/11/2014 at 19:40:30"},{"visible":true,"include":false,"step":"70.0","x":328.4,"y":-398.7714285714286,"z":-158.15238095238095,"a95":0.99,"info":"04/11/2014 at 19:40:30"},{"visible":true,"include":false,"step":"80.0","x":370.9904761904762,"y":-314.81904761904764,"z":-263.4,"a95":0.99,"info":"04/11/2014 at 19:40:30"},{"visible":true,"include":false,"step":"90.0","x":356.93333333333334,"y":-301.9047619047619,"z":-142.64761904761903,"a95":0.99,"info":"04/11/2014 at 19:40:30"}]},{"version":"v1.1.0","exported":"2016-11-28T14:29:56.920Z","volume":10.5,"added":"2016-11-28T14:24:34.530Z","format":"Utrecht","demagType":"Unknown","strat":"3","patch":1.1,"GEO":[{"dec":0.669977966631393,"inc":-15.725192034412602,"MAD":27.150238643667752,"cm":[-3.2507330161024584e-13,0,0],"intensity":4642.996575801289,"type":"GC","origin":false,"forced":true,"remark":"","nSteps":8,"minStep":"15.0","maxStep":"40.0","steps":["15.0","20.0","23.0","25.0","30.0","33.0","35.0","40.0"],"group":"None","version":"v1.1.0"}],"TECT":[{"dec":11.223916775680095,"inc":-10.106111791334493,"MAD":27.150238643667134,"cm":[-2.4868995751603507e-13,-4.263256414560601e-14,-1.4210854715202004e-14],"intensity":4642.996575801289,"type":"GC","origin":false,"forced":true,"remark":"","nSteps":8,"minStep":"15.0","maxStep":"40.0","steps":["15.0","20.0","23.0","25.0","30.0","33.0","35.0","40.0"],"group":"None","version":"v1.1.0"}],"interpreted":true,"name":"YK3.2B","coreAzi":190,"coreDip":17,"bedStrike":179,"bedDip":44,"data":[{"visible":true,"include":false,"step":"0.0","x":899.4190476190475,"y":-2867.5238095238096,"z":-488.34285714285716,"a95":0.99,"info":"08/07/2015 at 02:56:04"},{"visible":true,"include":false,"step":"10.0","x":1026,"y":-2788.095238095238,"z":-490.76190476190476,"a95":0.99,"info":"08/07/2015 at 02:56:04"},{"visible":true,"include":true,"step":"15.0","x":993.047619047619,"y":-2524,"z":-448.5619047619047,"a95":0.99,"info":"08/07/2015 at 02:56:04"},{"visible":true,"include":true,"step":"20.0","x":971.2380952380952,"y":-2345.4285714285716,"z":-393.25714285714287,"a95":0.99,"info":"08/07/2015 at 02:56:04"},{"visible":true,"include":true,"step":"23.0","x":931.2476190476191,"y":-2216.7619047619046,"z":-354.247619047619,"a95":0.99,"info":"08/07/2015 at 02:56:04"},{"visible":true,"include":true,"step":"25.0","x":844.2476190476191,"y":-2288.3809523809523,"z":-396.552380952381,"a95":0.99,"info":"08/07/2015 at 02:56:04"},{"visible":true,"include":true,"step":"30.0","x":756.9333333333334,"y":-2117.5238095238096,"z":-350.1047619047619,"a95":0.99,"info":"08/07/2015 at 02:56:04"},{"visible":true,"include":true,"step":"33.0","x":733.8095238095239,"y":-1964.857142857143,"z":-277.6380952380952,"a95":0.99,"info":"08/07/2015 at 02:56:04"},{"visible":true,"include":true,"step":"35.0","x":701.4190476190475,"y":-1851.142857142857,"z":-290.3619047619048,"a95":0.99,"info":"08/07/2015 at 02:56:04"},{"visible":true,"include":true,"step":"40.0","x":650.0857142857143,"y":-1754,"z":-297.25714285714287,"a95":0.99,"info":"08/07/2015 at 02:56:04"},{"visible":true,"include":false,"step":"45.0","x":582.4761904761905,"y":-1574.857142857143,"z":-200.9142857142857,"a95":0.99,"info":"08/07/2015 at 02:56:04"},{"visible":true,"include":false,"step":"50.0","x":510.447619047619,"y":-1516.4761904761904,"z":-252.62857142857143,"a95":0.99,"info":"08/07/2015 at 02:56:04"},{"visible":true,"include":false,"step":"55.0","x":479.152380952381,"y":-1312.3809523809523,"z":-208.21904761904764,"a95":0.99,"info":"08/07/2015 at 02:56:04"},{"visible":true,"include":false,"step":"60.0","x":401.4190476190476,"y":-1207.904761904762,"z":-282.0761904761905,"a95":0.99,"info":"08/07/2015 at 02:56:04"},{"visible":true,"include":false,"step":"65.0","x":385.6190476190476,"y":-1067.7142857142858,"z":-242.23809523809524,"a95":0.99,"info":"08/07/2015 at 02:56:04"},{"visible":true,"include":false,"step":"70.0","x":330.9809523809524,"y":-1013.7142857142857,"z":-163.71428571428572,"a95":0.99,"info":"08/07/2015 at 02:56:04"},{"visible":true,"include":false,"step":"80.0","x":-223.76190476190476,"y":-1050.857142857143,"z":-137.6952380952381,"a95":0.99,"info":"08/07/2015 at 02:56:04"}]},{"version":"v1.1.0","exported":"2016-11-28T14:29:56.920Z","volume":10.5,"added":"2016-11-28T14:24:34.531Z","format":"Utrecht","demagType":"Unknown","strat":"4","patch":1.1,"GEO":[],"TECT":[],"interpreted":false,"name":"YK3.3B","coreAzi":174,"coreDip":25,"bedStrike":179,"bedDip":44,"data":[{"visible":true,"include":false,"step":"0.0","x":1483.7142857142858,"y":-1632.4761904761904,"z":-418.4857142857143,"a95":0.99,"info":"08/07/2015 at 02:56:04"},{"visible":true,"include":false,"step":"10.0","x":1705.904761904762,"y":-1642.952380952381,"z":-495.50476190476195,"a95":0.99,"info":"08/07/2015 at 02:56:04"},{"visible":true,"include":false,"step":"15.0","x":1654.5714285714287,"y":-1530.5714285714287,"z":-486.06666666666666,"a95":0.99,"info":"08/07/2015 at 02:56:04"},{"visible":true,"include":false,"step":"20.0","x":1564.4761904761904,"y":-1451.3333333333333,"z":-430.93333333333334,"a95":0.99,"info":"08/07/2015 at 02:56:04"},{"visible":true,"include":false,"step":"23.0","x":1484,"y":-1306.095238095238,"z":-427.3238095238095,"a95":0.99,"info":"08/07/2015 at 02:56:04"},{"visible":true,"include":false,"step":"25.0","x":1426.3809523809523,"y":-1260.952380952381,"z":-439.6380952380952,"a95":0.99,"info":"08/07/2015 at 02:56:04"},{"visible":true,"include":false,"step":"30.0","x":1367.7142857142858,"y":-1147.5238095238096,"z":-401.91428571428577,"a95":0.99,"info":"08/07/2015 at 02:56:04"},{"visible":true,"include":false,"step":"33.0","x":1358.095238095238,"y":-1082.1904761904761,"z":-394.4,"a95":0.99,"info":"08/07/2015 at 02:56:04"},{"visible":true,"include":false,"step":"35.0","x":1208.5714285714287,"y":-1112.2857142857142,"z":-300.83809523809526,"a95":0.99,"info":"08/07/2015 at 02:56:04"},{"visible":true,"include":false,"step":"40.0","x":1147.4285714285713,"y":-1003.8095238095239,"z":-260.4666666666667,"a95":0.99,"info":"08/07/2015 at 02:56:04"},{"visible":true,"include":true,"step":"45.0","x":1030.1904761904761,"y":-830.895238095238,"z":-247.40952380952382,"a95":0.99,"info":"08/07/2015 at 02:56:04"},{"visible":true,"include":true,"step":"50.0","x":1031.904761904762,"y":-840.8285714285715,"z":-208.7238095238095,"a95":0.99,"info":"08/07/2015 at 02:56:04"},{"visible":true,"include":true,"step":"55.0","x":900.2,"y":-767.8095238095239,"z":-197.56190476190477,"a95":0.99,"info":"08/07/2015 at 02:56:04"},{"visible":true,"include":true,"step":"60.0","x":893.2,"y":-678.495238095238,"z":-97.4095238095238,"a95":0.99,"info":"08/07/2015 at 02:56:04"},{"visible":true,"include":true,"step":"65.0","x":832.695238095238,"y":-625.3619047619047,"z":-146.93333333333334,"a95":0.99,"info":"08/07/2015 at 02:56:04"},{"visible":true,"include":true,"step":"70.0","x":754.1142857142856,"y":-658.6190476190476,"z":-136.86666666666665,"a95":0.99,"info":"08/07/2015 at 02:56:04"},{"visible":true,"include":false,"step":"80.0","x":571.1904761904761,"y":-438.04761904761904,"z":-120.44761904761906,"a95":0.99,"info":"08/07/2015 at 02:56:04"}]},{"version":"v1.1.0","exported":"2016-11-28T14:29:56.920Z","volume":10.5,"added":"2016-11-28T14:24:34.531Z","format":"Utrecht","demagType":"Unknown","strat":"5","patch":1.1,"GEO":[{"dec":311.42591969724197,"inc":-15.719839638520885,"MAD":0,"cm":[-1.4210854715202004e-14,0,0],"intensity":595.210072114447,"type":"GC","origin":false,"forced":true,"remark":"","nSteps":2,"minStep":"35.0","maxStep":"40.0","steps":["35.0","40.0"],"group":"None","version":"v1.1.0"}],"TECT":[{"dec":332.5612292695125,"inc":-43.50969775938339,"MAD":0,"cm":[1.2789769243681803e-13,-1.0658141036401503e-13,-1.5987211554602254e-14],"intensity":595.210072114447,"type":"GC","origin":false,"forced":true,"remark":"","nSteps":2,"minStep":"35.0","maxStep":"40.0","steps":["35.0","40.0"],"group":"None","version":"v1.1.0"}],"interpreted":true,"name":"YK3.4B","coreAzi":167,"coreDip":12,"bedStrike":179,"bedDip":44,"data":[{"visible":true,"include":false,"step":"0.0","x":-248.52380952380952,"y":-671.7619047619048,"z":-49.055238095238096,"a95":0.99,"info":"08/07/2015 at 02:56:04"},{"visible":true,"include":false,"step":"10.0","x":-11.811428571428571,"y":-704.552380952381,"z":-262.81904761904764,"a95":0.99,"info":"08/07/2015 at 02:56:04"},{"visible":true,"include":false,"step":"15.0","x":53.62952380952381,"y":-637.9333333333334,"z":-292.9142857142857,"a95":0.99,"info":"08/07/2015 at 02:56:04"},{"visible":true,"include":false,"step":"20.0","x":65.76285714285714,"y":-566.3047619047619,"z":-276.1047619047619,"a95":0.99,"info":"08/07/2015 at 02:56:04"},{"visible":true,"include":false,"step":"23.0","x":132.9047619047619,"y":-452.35238095238094,"z":-266.04761904761904,"a95":0.99,"info":"08/07/2015 at 02:56:04"},{"visible":true,"include":false,"step":"25.0","x":87.47428571428571,"y":-383.6,"z":-264.6952380952381,"a95":0.99,"info":"08/07/2015 at 02:56:04"},{"visible":true,"include":false,"step":"30.0","x":107.15238095238094,"y":-401.3238095238095,"z":-244.04761904761904,"a95":0.99,"info":"08/07/2015 at 02:56:04"},{"visible":true,"include":false,"step":"33.0","x":114.86666666666666,"y":-247.76190476190476,"z":-244.17142857142858,"a95":0.99,"info":"08/07/2015 at 02:56:04"},{"visible":true,"include":true,"step":"35.0","x":125.4095238095238,"y":-280.6190476190476,"z":-175.54285714285714,"a95":0.99,"info":"08/07/2015 at 02:56:04"},{"visible":true,"include":true,"step":"40.0","x":60.78476190476191,"y":-197.13333333333335,"z":-126.71428571428571,"a95":0.99,"info":"08/07/2015 at 02:56:04"},{"visible":true,"include":false,"step":"45.0","x":39.16190476190476,"y":-42.81333333333333,"z":-160.0952380952381,"a95":0.99,"info":"08/07/2015 at 02:56:04"},{"visible":true,"include":false,"step":"50.0","x":35.81809523809524,"y":-167.66666666666666,"z":-159.7904761904762,"a95":0.99,"info":"08/07/2015 at 02:56:04"},{"visible":true,"include":false,"step":"55.0","x":9.645714285714286,"y":-17.122857142857143,"z":-152.9904761904762,"a95":0.99,"info":"08/07/2015 at 02:56:04"},{"visible":true,"include":false,"step":"60.0","x":-51.28285714285715,"y":-65.92666666666666,"z":-30.834285714285713,"a95":0.99,"info":"08/07/2015 at 02:56:04"},{"visible":true,"include":false,"step":"65.0","x":-29.662857142857142,"y":15.22,"z":-76.21523809523809,"a95":0.99,"info":"08/07/2015 at 02:56:04"},{"visible":true,"include":false,"step":"70.0","x":9.175142857142857,"y":-38.90952380952381,"z":-86.09619047619047,"a95":0.99,"info":"08/07/2015 at 02:56:04"},{"visible":true,"include":false,"step":"80.0","x":-120.54285714285714,"y":9.374857142857143,"z":-1.004857142857143,"a95":0.99,"info":"08/07/2015 at 02:56:04"}]},{"version":"v1.1.0","exported":"2016-11-28T14:29:56.920Z","volume":10.5,"added":"2016-11-28T14:24:34.532Z","format":"Utrecht","demagType":"Unknown","strat":null,"patch":1.1,"GEO":[{"dec":333.11963556265846,"inc":-20.983494569667112,"MAD":6.246747453077143,"cm":[-2.5224267119483557e-13,2.842170943040401e-14,0],"intensity":2156.8687747669364,"type":"GC","origin":false,"forced":true,"remark":"","nSteps":4,"minStep":"100","maxStep":"340","steps":["100","300","320","340"],"group":"None","version":"v1.1.0"}],"TECT":[{"dec":355.9739194258831,"inc":-32.73134887934271,"MAD":6.246747453077084,"cm":[-4.920508445138694e-13,2.842170943040401e-14,2.7977620220553945e-14],"intensity":2156.8687747669364,"type":"GC","origin":false,"forced":true,"remark":"","nSteps":4,"minStep":"100","maxStep":"340","steps":["100","300","320","340"],"group":"None","version":"v1.1.0"}],"interpreted":true,"name":"YK3.5A","coreAzi":176,"coreDip":12,"bedStrike":179,"bedDip":44,"data":[{"visible":true,"include":false,"step":"20","x":-38.857142857142854,"y":-997.1428571428571,"z":98.28571428571429,"a95":1.6,"info":"\"14-11-30\" at \"14:06\""},{"visible":true,"include":true,"step":"100","x":401.3333333333333,"y":-1029.904761904762,"z":-330.76190476190476,"a95":1.7,"info":"\"15-01-31\" at \"10:50\""},{"visible":true,"include":false,"step":"150","x":528.952380952381,"y":-1055.7142857142858,"z":-342.4761904761905,"a95":1.7,"info":"\"15-01-31\" at \"14:10\""},{"visible":true,"include":false,"step":"180","x":714.1904761904761,"y":-1039.047619047619,"z":-343.14285714285717,"a95":1.7,"info":"\"15-02-01\" at \"07:43\""},{"visible":true,"include":false,"step":"210","x":773.9047619047619,"y":-1065.047619047619,"z":-291.23809523809524,"a95":2.4,"info":"\"15-02-01\" at \"10:55\""},{"visible":true,"include":false,"step":"240","x":884.3809523809524,"y":-960,"z":-255.04761904761904,"a95":1.6,"info":"\"15-02-02\" at \"15:32\""},{"visible":true,"include":false,"step":"270","x":854,"y":-845.4285714285714,"z":-230.28571428571428,"a95":1.7,"info":"\"15-02-02\" at \"19:30\""},{"visible":true,"include":true,"step":"300","x":826.2857142857143,"y":-900.6666666666666,"z":-233.52380952380952,"a95":1.6,"info":"\"15-02-02\" at \"23:07\""},{"visible":true,"include":true,"step":"320","x":700.8571428571429,"y":-756.4761904761905,"z":-135.23809523809524,"a95":1.7,"info":"\"15-02-03\" at \"17:43\""},{"visible":true,"include":true,"step":"340","x":730.5714285714286,"y":-740.5714285714286,"z":-155.33333333333334,"a95":1.8,"info":"\"15-02-04\" at \"15:36\""},{"visible":true,"include":false,"step":"370","x":701.5238095238095,"y":-776.2857142857143,"z":-152.1904761904762,"a95":1.8,"info":"\"15-02-04\" at \"20:40\""},{"visible":true,"include":false,"step":"400","x":434.95238095238096,"y":-622,"z":-153.14285714285714,"a95":2,"info":"\"15-02-05\" at \"00:55\""},{"visible":true,"include":false,"step":"420","x":401.23809523809524,"y":-512.5714285714286,"z":-95.71428571428571,"a95":2.7,"info":"\"15-02-09\" at \"19:35\""}]},{"version":"v1.1.0","exported":"2016-11-28T14:29:56.920Z","volume":10.5,"added":"2016-11-28T14:24:34.533Z","format":"Utrecht","demagType":"Unknown","strat":"6","patch":1.1,"GEO":[],"TECT":[],"interpreted":false,"name":"YK3.6B","coreAzi":177,"coreDip":-1,"bedStrike":179,"bedDip":44,"data":[{"visible":true,"include":false,"step":"0.0","x":-286.83809523809526,"y":-661.2761904761904,"z":-293.4,"a95":0.99,"info":"08/07/2015 at 02:56:04"},{"visible":true,"include":false,"step":"10.0","x":-79.2647619047619,"y":-648.447619047619,"z":-321.8857142857143,"a95":0.99,"info":"08/07/2015 at 02:56:04"},{"visible":true,"include":false,"step":"15.0","x":-47.505714285714284,"y":-575.7047619047619,"z":-289.96190476190475,"a95":0.99,"info":"08/07/2015 at 02:56:04"},{"visible":true,"include":false,"step":"20.0","x":-12.151428571428571,"y":-555.4,"z":-207.60000000000002,"a95":0.99,"info":"08/07/2015 at 02:56:04"},{"visible":true,"include":false,"step":"23.0","x":-16.48857142857143,"y":-499.552380952381,"z":-216.34285714285713,"a95":0.99,"info":"08/07/2015 at 02:56:04"},{"visible":true,"include":false,"step":"25.0","x":-51.63619047619047,"y":-432.87619047619046,"z":-212.86666666666665,"a95":0.99,"info":"08/07/2015 at 02:56:04"},{"visible":true,"include":false,"step":"30.0","x":-68.63238095238096,"y":-447.6952380952381,"z":-151.06666666666666,"a95":0.99,"info":"08/07/2015 at 02:56:04"},{"visible":true,"include":false,"step":"33.0","x":-30.762857142857143,"y":-402.7523809523809,"z":-215.1809523809524,"a95":0.99,"info":"08/07/2015 at 02:56:04"},{"visible":true,"include":false,"step":"35.0","x":-61.77428571428571,"y":-406.08571428571423,"z":-142.47619047619048,"a95":0.99,"info":"08/07/2015 at 02:56:04"},{"visible":true,"include":false,"step":"40.0","x":-71.52666666666667,"y":-266.7333333333333,"z":-177.9047619047619,"a95":0.99,"info":"08/07/2015 at 02:56:04"},{"visible":true,"include":false,"step":"45.0","x":-22.676190476190477,"y":-200.95238095238096,"z":-145.74285714285713,"a95":0.99,"info":"08/07/2015 at 02:56:04"},{"visible":true,"include":false,"step":"50.0","x":23.386666666666667,"y":-225.87619047619046,"z":-159.8190476190476,"a95":0.99,"info":"08/07/2015 at 02:56:04"},{"visible":true,"include":false,"step":"55.0","x":-11.11047619047619,"y":-81.01523809523809,"z":-101.25714285714287,"a95":0.99,"info":"08/07/2015 at 02:56:04"},{"visible":true,"include":false,"step":"60.0","x":22.736190476190476,"y":-197.33333333333334,"z":-70.10190476190476,"a95":0.99,"info":"08/07/2015 at 02:56:04"},{"visible":true,"include":false,"step":"65.0","x":-0.48100000000000004,"y":-193.24761904761903,"z":-119.36190476190475,"a95":0.99,"info":"08/07/2015 at 02:56:04"},{"visible":true,"include":false,"step":"70.0","x":-71.42285714285715,"y":-62.555238095238096,"z":-96.07619047619048,"a95":0.99,"info":"08/07/2015 at 02:56:04"},{"visible":true,"include":false,"step":"80.0","x":10.82,"y":-183.11428571428573,"z":-95.13238095238096,"a95":0.99,"info":"08/07/2015 at 02:56:04"}]},{"version":"v1.1.0","exported":"2016-11-28T14:29:56.920Z","volume":10.5,"added":"2016-11-28T14:24:34.533Z","format":"Utrecht","demagType":"Unknown","strat":null,"patch":1.1,"GEO":[{"dec":339.0321585775034,"inc":-24.420674957584513,"MAD":2.1726489532940576,"cm":[6.128431095930864e-14,0,0],"intensity":1643.0725435049894,"type":"GC","origin":false,"forced":true,"remark":"","nSteps":7,"minStep":"100","maxStep":"300","steps":["100","150","180","210","240","270","300"],"group":"None","version":"v1.1.0"}],"TECT":[{"dec":3.245062695813999,"inc":-30.89033494617265,"MAD":2.172648953294325,"cm":[-1.5987211554602254e-13,2.1316282072803006e-14,-2.1316282072803006e-14],"intensity":1643.0725435049897,"type":"GC","origin":false,"forced":true,"remark":"","nSteps":7,"minStep":"100","maxStep":"300","steps":["100","150","180","210","240","270","300"],"group":"None","version":"v1.1.0"}],"interpreted":true,"name":"YK3.7A","coreAzi":182,"coreDip":1,"bedStrike":179,"bedDip":44,"data":[{"visible":true,"include":false,"step":"20","x":-1105.047619047619,"y":-571.2380952380952,"z":-342.85714285714283,"a95":2,"info":"\"14-11-30\" at \"14:08\""},{"visible":true,"include":true,"step":"100","x":-490.85714285714283,"y":-796.3809523809524,"z":-550.8571428571429,"a95":2.1,"info":"\"15-01-31\" at \"10:52\""},{"visible":true,"include":true,"step":"150","x":-209.23809523809524,"y":-819.9047619047619,"z":-470.57142857142856,"a95":2,"info":"\"15-01-31\" at \"14:12\""},{"visible":true,"include":true,"step":"180","x":12.761904761904763,"y":-825.7142857142857,"z":-336.1904761904762,"a95":1.8,"info":"\"15-02-01\" at \"07:45\""},{"visible":true,"include":true,"step":"210","x":197.14285714285714,"y":-777.1428571428571,"z":-222.57142857142858,"a95":1.8,"info":"\"15-02-01\" at \"10:57\""},{"visible":true,"include":true,"step":"240","x":272.3809523809524,"y":-780.952380952381,"z":-205.42857142857142,"a95":1.7,"info":"\"15-02-02\" at \"15:34\""},{"visible":true,"include":true,"step":"270","x":325.23809523809524,"y":-741.047619047619,"z":-148.38095238095238,"a95":1.7,"info":"\"15-02-02\" at \"19:32\""},{"visible":true,"include":true,"step":"300","x":363.42857142857144,"y":-694.7619047619048,"z":-127.33333333333333,"a95":1.6,"info":"\"15-02-02\" at \"23:10\""},{"visible":true,"include":false,"step":"320","x":201.23809523809524,"y":-643.9047619047619,"z":-164.1904761904762,"a95":1.7,"info":"\"15-02-03\" at \"17:45\""},{"visible":true,"include":false,"step":"340","x":219.8095238095238,"y":-634.1904761904761,"z":-169.23809523809524,"a95":1.8,"info":"\"15-02-04\" at \"15:39\""},{"visible":true,"include":false,"step":"370","x":228,"y":-633.2380952380952,"z":-156,"a95":2,"info":"\"15-02-04\" at \"20:43\""},{"visible":true,"include":false,"step":"400","x":89.23809523809524,"y":-319.7142857142857,"z":-0.5714285714285714,"a95":2.4,"info":"\"15-02-05\" at \"00:58\""},{"visible":true,"include":false,"step":"420","x":91.33333333333333,"y":-307.9047619047619,"z":-35.42857142857143,"a95":2.4,"info":"\"15-02-09\" at \"19:36\""}]},{"version":"v1.1.0","exported":"2016-11-28T14:29:56.920Z","volume":10.5,"added":"2016-11-28T14:24:34.534Z","format":"Utrecht","demagType":"Unknown","strat":"7","patch":1.1,"GEO":[],"TECT":[],"interpreted":false,"name":"YK3.8B","coreAzi":181,"coreDip":6,"bedStrike":179,"bedDip":44,"data":[{"visible":true,"include":false,"step":"0.0","x":-188.0952380952381,"y":-128.58095238095237,"z":-71.49904761904762,"a95":0.99,"info":"08/07/2015 at 02:56:04"},{"visible":true,"include":false,"step":"10.0","x":-21.065714285714286,"y":-123.65714285714287,"z":-75.73714285714286,"a95":0.99,"info":"08/07/2015 at 02:56:04"},{"visible":true,"include":true,"step":"15.0","x":20.142857142857142,"y":-117.93333333333332,"z":-71.20190476190476,"a95":0.99,"info":"08/07/2015 at 02:56:04"},{"visible":true,"include":true,"step":"20.0","x":29.622857142857146,"y":-116.39047619047618,"z":-25.429523809523808,"a95":0.99,"info":"08/07/2015 at 02:56:04"},{"visible":true,"include":true,"step":"23.0","x":13.184761904761904,"y":-117.0095238095238,"z":-27.921904761904763,"a95":0.99,"info":"08/07/2015 at 02:56:04"},{"visible":true,"include":true,"step":"25.0","x":37.5247619047619,"y":-109.13333333333334,"z":-6.470095238095238,"a95":0.99,"info":"08/07/2015 at 02:56:04"},{"visible":true,"include":true,"step":"30.0","x":-32.402857142857144,"y":-81.02666666666667,"z":71.26761904761904,"a95":0.99,"info":"08/07/2015 at 02:56:04"},{"visible":true,"include":false,"step":"33.0","x":5.761428571428572,"y":-65.3752380952381,"z":22.594285714285714,"a95":0.99,"info":"08/07/2015 at 02:56:04"},{"visible":true,"include":false,"step":"35.0","x":-22.37047619047619,"y":-71.48666666666666,"z":8.386,"a95":0.99,"info":"08/07/2015 at 02:56:04"},{"visible":true,"include":false,"step":"40.0","x":-17.976190476190474,"y":-53.41428571428572,"z":58.432380952380946,"a95":0.99,"info":"08/07/2015 at 02:56:04"},{"visible":true,"include":false,"step":"45.0","x":31.61619047619048,"y":-50.10095238095238,"z":-24.708571428571428,"a95":0.99,"info":"08/07/2015 at 02:56:04"},{"visible":true,"include":false,"step":"50.0","x":19.82,"y":-64.29142857142857,"z":19.862857142857145,"a95":0.99,"info":"08/07/2015 at 02:56:04"},{"visible":true,"include":false,"step":"55.0","x":-12.275238095238095,"y":-18.718095238095238,"z":3.719809523809524,"a95":0.99,"info":"08/07/2015 at 02:56:04"},{"visible":true,"include":false,"step":"60.0","x":-4.547428571428571,"y":-61.40095238095238,"z":3.1241904761904764,"a95":0.99,"info":"08/07/2015 at 02:56:04"},{"visible":true,"include":false,"step":"65.0","x":-12.979999999999999,"y":-100.4952380952381,"z":39.36666666666667,"a95":0.99,"info":"08/07/2015 at 02:56:04"},{"visible":true,"include":false,"step":"70.0","x":19.20380952380952,"y":-18.154285714285713,"z":19.792380952380952,"a95":0.99,"info":"08/07/2015 at 02:56:04"},{"visible":true,"include":false,"step":"80.0","x":-212.39999999999998,"y":-39.39142857142857,"z":75.40285714285714,"a95":0.99,"info":"08/07/2015 at 02:56:04"}]},{"version":"v1.1.0","exported":"2016-11-28T14:29:56.920Z","volume":10.5,"added":"2016-11-28T14:24:34.534Z","format":"Utrecht","demagType":"Unknown","strat":"1","patch":1.1,"GEO":[],"TECT":[],"interpreted":false,"name":"YK3.8C","coreAzi":181,"coreDip":6,"bedStrike":179,"bedDip":44,"data":[{"visible":true,"include":false,"step":"0.0","x":-432.152380952381,"y":-254.39999999999998,"z":-149.46666666666667,"a95":0.99,"info":"25/11/2014 at 00:28:41"},{"visible":true,"include":true,"step":"10.0","x":-262.06666666666666,"y":-226.71428571428572,"z":-90.46095238095238,"a95":0.99,"info":"25/11/2014 at 00:28:41"},{"visible":true,"include":true,"step":"15.0","x":-211.16190476190474,"y":-192.86666666666665,"z":-48.86857142857143,"a95":0.99,"info":"25/11/2014 at 00:28:41"},{"visible":true,"include":true,"step":"20.0","x":-143.71428571428572,"y":-170.1238095238095,"z":-64.9095238095238,"a95":0.99,"info":"25/11/2014 at 00:28:41"},{"visible":true,"include":true,"step":"23.0","x":-136.2,"y":-120.41904761904763,"z":-59.067619047619054,"a95":0.99,"info":"25/11/2014 at 00:28:41"},{"visible":true,"include":true,"step":"25.0","x":-129.66666666666666,"y":-158.8761904761905,"z":-82.63333333333333,"a95":0.99,"info":"25/11/2014 at 00:28:41"},{"visible":true,"include":false,"step":"30.0","x":-107.02857142857142,"y":-112.54285714285714,"z":-11.613333333333333,"a95":0.99,"info":"25/11/2014 at 00:28:41"},{"visible":true,"include":false,"step":"33.0","x":-109.06666666666668,"y":-69.73904761904762,"z":13.206666666666665,"a95":0.99,"info":"25/11/2014 at 00:28:41"},{"visible":true,"include":false,"step":"35.0","x":-75.19428571428571,"y":-98.47619047619048,"z":-2.6784761904761902,"a95":0.99,"info":"25/11/2014 at 00:28:41"},{"visible":true,"include":true,"step":"40.0","x":-112.05714285714285,"y":-116.84761904761906,"z":-54.419999999999995,"a95":0.99,"info":"25/11/2014 at 00:28:41"},{"visible":true,"include":true,"step":"45.0","x":-89.62761904761905,"y":-35.79047619047619,"z":-37.362857142857145,"a95":0.99,"info":"25/11/2014 at 00:28:41"},{"visible":true,"include":false,"step":"50.0","x":-82.86952380952381,"y":-37.90380952380953,"z":-73.03999999999999,"a95":0.99,"info":"25/11/2014 at 00:28:41"},{"visible":true,"include":false,"step":"60.0","x":-79.67904761904762,"y":-22.48857142857143,"z":-46.04380952380952,"a95":0.99,"info":"25/11/2014 at 00:28:41"},{"visible":true,"include":false,"step":"70.0","x":-33.31428571428572,"y":-63.9704761904762,"z":-63.74952380952381,"a95":0.99,"info":"25/11/2014 at 00:28:41"},{"visible":true,"include":false,"step":"80.0","x":-251.56190476190477,"y":-94.44095238095238,"z":-171.7904761904762,"a95":0.99,"info":"25/11/2014 at 00:28:41"},{"visible":true,"include":false,"step":"90.0","x":-77.79142857142857,"y":-34.26285714285714,"z":-50.67809523809524,"a95":0.99,"info":"25/11/2014 at 00:28:41"}]},{"version":"v1.1.0","exported":"2016-11-28T14:29:56.920Z","volume":10.5,"added":"2016-11-28T14:24:34.534Z","format":"Utrecht","demagType":"Unknown","strat":"8","patch":1.1,"GEO":[],"TECT":[],"interpreted":false,"name":"YK3.9B","coreAzi":181,"coreDip":1,"bedStrike":179,"bedDip":44,"data":[{"visible":true,"include":false,"step":"0.0","x":-41.27809523809524,"y":-601.2571428571429,"z":-83.36952380952381,"a95":0.99,"info":"08/07/2015 at 02:56:04"},{"visible":true,"include":true,"step":"10.0","x":120.71428571428571,"y":-486.64761904761906,"z":-100.42857142857143,"a95":0.99,"info":"08/07/2015 at 02:56:04"},{"visible":true,"include":true,"step":"15.0","x":129.85714285714286,"y":-326.6190476190476,"z":-99.44761904761906,"a95":0.99,"info":"08/07/2015 at 02:56:04"},{"visible":true,"include":true,"step":"20.0","x":145.71428571428572,"y":-153.52380952380952,"z":-86.3247619047619,"a95":0.99,"info":"08/07/2015 at 02:56:04"},{"visible":true,"include":true,"step":"23.0","x":182.71428571428572,"y":-158.01904761904763,"z":-139.36190476190475,"a95":0.99,"info":"08/07/2015 at 02:56:04"},{"visible":true,"include":true,"step":"25.0","x":157.43809523809523,"y":-133.16190476190476,"z":-136.07619047619048,"a95":0.99,"info":"08/07/2015 at 02:56:04"},{"visible":true,"include":false,"step":"30.0","x":123.41904761904763,"y":-118.4952380952381,"z":-114.17142857142856,"a95":0.99,"info":"08/07/2015 at 02:56:04"},{"visible":true,"include":false,"step":"33.0","x":136.3904761904762,"y":-95.17904761904762,"z":-84.44380952380952,"a95":0.99,"info":"08/07/2015 at 02:56:04"},{"visible":true,"include":false,"step":"35.0","x":110.97142857142858,"y":-98.4952380952381,"z":-120.72380952380952,"a95":0.99,"info":"08/07/2015 at 02:56:04"},{"visible":true,"include":false,"step":"40.0","x":76.70761904761905,"y":-84.55904761904762,"z":-45.38,"a95":0.99,"info":"08/07/2015 at 02:56:04"},{"visible":true,"include":false,"step":"45.0","x":77.97999999999999,"y":-48.691428571428574,"z":-86.63619047619048,"a95":0.99,"info":"08/07/2015 at 02:56:04"},{"visible":true,"include":false,"step":"50.0","x":38.54761904761905,"y":-70.49047619047619,"z":-36.124761904761904,"a95":0.99,"info":"08/07/2015 at 02:56:04"},{"visible":true,"include":false,"step":"55.0","x":59.8752380952381,"y":-41.77428571428571,"z":-33.72095238095238,"a95":0.99,"info":"08/07/2015 at 02:56:04"},{"visible":true,"include":false,"step":"60.0","x":42.29238095238095,"y":-18.16952380952381,"z":-27.67809523809524,"a95":0.99,"info":"08/07/2015 at 02:56:04"},{"visible":true,"include":false,"step":"65.0","x":38.14,"y":-59.28666666666667,"z":-13.92,"a95":0.99,"info":"08/07/2015 at 02:56:04"},{"visible":true,"include":false,"step":"70.0","x":-7.186857142857143,"y":-31.826666666666668,"z":0.4187047619047619,"a95":0.99,"info":"08/07/2015 at 02:56:04"},{"visible":true,"include":false,"step":"80.0","x":-414.2095238095238,"y":-75.96666666666667,"z":124.27619047619048,"a95":0.99,"info":"08/07/2015 at 02:56:04"}]},{"version":"v1.1.0","exported":"2016-11-28T14:29:56.920Z","volume":10.5,"added":"2016-11-28T14:24:34.534Z","format":"Utrecht","demagType":"Unknown","strat":null,"patch":1.1,"GEO":[{"dec":344.379294770483,"inc":-23.61639508860306,"MAD":0.36302303019463994,"cm":[3.108624468950438e-14,-3.552713678800501e-14,0],"intensity":932.5862364604004,"type":"GC","origin":false,"forced":true,"remark":"","nSteps":5,"minStep":"100","maxStep":"240","steps":["100","150","180","210","240"],"group":"None","version":"v1.1.0"}],"TECT":[{"dec":6.1948637935325905,"inc":-26.668972014220532,"MAD":0.3630230301969552,"cm":[-8.215650382226158e-15,-9.237055564881302e-14,0],"intensity":932.5862364604006,"type":"GC","origin":false,"forced":true,"remark":"","nSteps":5,"minStep":"100","maxStep":"240","steps":["100","150","180","210","240"],"group":"None","version":"v1.1.0"}],"interpreted":true,"name":"YK3.10A","coreAzi":116,"coreDip":15,"bedStrike":179,"bedDip":44,"data":[{"visible":true,"include":false,"step":"20","x":-891.3333333333334,"y":-709.3333333333334,"z":555.5238095238095,"a95":1.9,"info":"\"14-11-30\" at \"14:10\""},{"visible":true,"include":true,"step":"100","x":-540.952380952381,"y":-512.1904761904761,"z":328.1904761904762,"a95":1.8,"info":"\"15-01-31\" at \"10:54\""},{"visible":true,"include":true,"step":"150","x":-351.5238095238095,"y":-413.6190476190476,"z":294,"a95":1.9,"info":"\"15-01-31\" at \"14:14\""},{"visible":true,"include":true,"step":"180","x":-40.76190476190476,"y":-288.85714285714283,"z":270.0952380952381,"a95":2.2,"info":"\"15-02-01\" at \"07:47\""},{"visible":true,"include":true,"step":"210","x":143.61904761904762,"y":-210.95238095238096,"z":255.04761904761904,"a95":2.1,"info":"\"15-02-01\" at \"10:59\""},{"visible":true,"include":true,"step":"240","x":222.57142857142858,"y":-159.61904761904762,"z":234.85714285714286,"a95":2.1,"info":"\"15-02-02\" at \"15:37\""},{"visible":true,"include":false,"step":"270","x":232,"y":-154.85714285714286,"z":210,"a95":2,"info":"\"15-02-02\" at \"19:34\""},{"visible":true,"include":false,"step":"300","x":223.9047619047619,"y":-148.38095238095238,"z":177.8095238095238,"a95":1.8,"info":"\"15-02-02\" at \"23:12\""},{"visible":true,"include":false,"step":"320","x":190.1904761904762,"y":-59.61904761904762,"z":93.9047619047619,"a95":2.1,"info":"\"15-02-03\" at \"17:48\""},{"visible":true,"include":false,"step":"340","x":178.0952380952381,"y":-101.14285714285714,"z":115.04761904761905,"a95":2.2,"info":"\"15-02-04\" at \"15:41\""},{"visible":true,"include":false,"step":"370","x":185.23809523809524,"y":-99.14285714285714,"z":117.42857142857143,"a95":1.9,"info":"\"15-02-04\" at \"20:45\""},{"visible":true,"include":false,"step":"400","x":129.71428571428572,"y":-40.476190476190474,"z":98.76190476190476,"a95":2.2,"info":"\"15-02-05\" at \"01:00\""},{"visible":true,"include":false,"step":"420","x":58.19047619047619,"y":-54.19047619047619,"z":91.42857142857143,"a95":3,"info":"\"15-02-09\" at \"19:40\""}]},{"version":"v1.1.0","exported":"2016-11-28T14:29:56.920Z","volume":10.5,"added":"2016-11-28T14:24:34.535Z","format":"Utrecht","demagType":"Unknown","strat":"1","patch":1.1,"GEO":[{"dec":21.376740766485852,"inc":51.03029175598008,"MAD":6.905249765350678,"cm":[7.105427357601002e-15,-8.215650382226158e-15,0],"intensity":909.1204667181879,"type":"dir","forced":true,"remark":"","origin":false,"nSteps":8,"minStep":"33.0","maxStep":"65.0","steps":["33.0","35.0","40.0","45.0","50.0","55.0","60.0","65.0"],"group":"None","version":"v1.1.0"}],"TECT":[{"dec":326.6849950605749,"inc":46.517805806793525,"MAD":6.9052497653506215,"cm":[5.329070518200751e-15,-1.2434497875801753e-14,-7.105427357601002e-15],"intensity":909.1204667181878,"type":"dir","forced":true,"remark":"","origin":false,"nSteps":8,"minStep":"33.0","maxStep":"65.0","steps":["33.0","35.0","40.0","45.0","50.0","55.0","60.0","65.0"],"group":"None","version":"v1.1.0"}],"interpreted":true,"name":"YK3.11B","coreAzi":118,"coreDip":16,"bedStrike":179,"bedDip":44,"data":[{"visible":true,"include":false,"step":"0.0","x":-666.952380952381,"y":-694.9714285714285,"z":617.6190476190476,"a95":0.99,"info":"08/07/2015 at 08:20:22"},{"visible":true,"include":false,"step":"10.0","x":-517.0952380952381,"y":-599.104761904762,"z":194.17142857142858,"a95":0.99,"info":"08/07/2015 at 08:20:22"},{"visible":true,"include":false,"step":"15.0","x":-444.4,"y":-584.3142857142857,"z":156.13333333333335,"a95":0.99,"info":"08/07/2015 at 08:20:22"},{"visible":true,"include":false,"step":"20.0","x":-380.31428571428575,"y":-508.42857142857144,"z":183.76190476190476,"a95":0.99,"info":"08/07/2015 at 08:20:22"},{"visible":true,"include":false,"step":"23.0","x":-372.65714285714284,"y":-484.23809523809524,"z":178.67619047619047,"a95":0.99,"info":"08/07/2015 at 08:20:22"},{"visible":true,"include":false,"step":"25.0","x":-360.76190476190476,"y":-463.02857142857147,"z":134.1238095238095,"a95":0.99,"info":"08/07/2015 at 08:20:22"},{"visible":true,"include":false,"step":"30.0","x":-363.1047619047619,"y":-394.9619047619048,"z":110.80000000000001,"a95":0.99,"info":"08/07/2015 at 08:20:22"},{"visible":true,"include":true,"step":"33.0","x":-393.2190476190476,"y":-413.1714285714286,"z":69.61714285714285,"a95":0.99,"info":"08/07/2015 at 08:20:22"},{"visible":true,"include":true,"step":"35.0","x":-388.6,"y":-338.18095238095236,"z":20.175238095238097,"a95":0.99,"info":"08/07/2015 at 08:20:22"},{"visible":true,"include":true,"step":"40.0","x":-342.4095238095238,"y":-301.18095238095236,"z":76.33142857142857,"a95":0.99,"info":"08/07/2015 at 08:20:22"},{"visible":true,"include":true,"step":"45.0","x":-382.67619047619047,"y":-277.3904761904762,"z":76.92476190476191,"a95":0.99,"info":"08/07/2015 at 08:20:22"},{"visible":true,"include":true,"step":"50.0","x":-294.68571428571425,"y":-254.43809523809523,"z":112.20952380952382,"a95":0.99,"info":"08/07/2015 at 08:20:22"},{"visible":true,"include":true,"step":"55.0","x":-335.95238095238096,"y":-239.2,"z":58.019047619047626,"a95":0.99,"info":"08/07/2015 at 08:20:22"},{"visible":true,"include":true,"step":"60.0","x":-291.1714285714286,"y":-172.3047619047619,"z":97.42857142857143,"a95":0.99,"info":"08/07/2015 at 08:20:22"},{"visible":true,"include":true,"step":"65.0","x":-302.7333333333333,"y":-165.2095238095238,"z":17.708571428571428,"a95":0.99,"info":"08/07/2015 at 08:20:22"},{"visible":true,"include":false,"step":"70.0","x":-291.1047619047619,"y":-193.58095238095237,"z":39.55904761904762,"a95":0.99,"info":"08/07/2015 at 08:20:22"},{"visible":true,"include":false,"step":"80.0","x":-125.06666666666668,"y":-146.01904761904763,"z":11.681904761904761,"a95":0.99,"info":"08/07/2015 at 08:20:22"}]},{"version":"v1.1.0","exported":"2016-11-28T14:29:56.920Z","volume":10.5,"added":"2016-11-28T14:24:34.535Z","format":"Utrecht","demagType":"Unknown","strat":"2","patch":1.1,"GEO":[{"dec":23.271207155570437,"inc":54.816528202483006,"MAD":4.584083938835887,"cm":[1.2434497875801753e-14,-2.1316282072803006e-14,0],"intensity":672.5950201523847,"type":"dir","forced":true,"remark":"","origin":false,"nSteps":6,"minStep":"30.0","maxStep":"50.0","steps":["30.0","33.0","35.0","40.0","45.0","50.0"],"group":"None","version":"v1.1.0"}],"TECT":[{"dec":321.89160505261276,"inc":48.80337766054919,"MAD":4.584083938835928,"cm":[2.842170943040401e-14,1.4210854715202004e-14,-1.4210854715202004e-14],"intensity":672.5950201523847,"type":"dir","forced":true,"remark":"","origin":false,"nSteps":6,"minStep":"30.0","maxStep":"50.0","steps":["30.0","33.0","35.0","40.0","45.0","50.0"],"group":"None","version":"v1.1.0"}],"interpreted":true,"name":"YK3.11C","coreAzi":118,"coreDip":16,"bedStrike":179,"bedDip":44,"data":[{"visible":true,"include":false,"step":"0.0","x":-491.83809523809526,"y":-597.2666666666667,"z":135.64761904761903,"a95":0.99,"info":"25/11/2014 at 00:28:41"},{"visible":true,"include":false,"step":"10.0","x":-354.2,"y":-480.447619047619,"z":115.94285714285715,"a95":0.99,"info":"25/11/2014 at 00:28:41"},{"visible":true,"include":false,"step":"15.0","x":-304.9428571428572,"y":-419.68571428571425,"z":91.20666666666666,"a95":0.99,"info":"25/11/2014 at 00:28:41"},{"visible":true,"include":false,"step":"20.0","x":-259.752380952381,"y":-365.15238095238095,"z":55.57238095238095,"a95":0.99,"info":"25/11/2014 at 00:28:41"},{"visible":true,"include":false,"step":"23.0","x":-272.16190476190474,"y":-278.247619047619,"z":52.85142857142858,"a95":0.99,"info":"25/11/2014 at 00:28:41"},{"visible":true,"include":false,"step":"25.0","x":-306.247619047619,"y":-250.0190476190476,"z":73.97428571428571,"a95":0.99,"info":"25/11/2014 at 00:28:41"},{"visible":true,"include":true,"step":"30.0","x":-286.64761904761906,"y":-221.15238095238095,"z":58.38,"a95":0.99,"info":"25/11/2014 at 00:28:41"},{"visible":true,"include":true,"step":"33.0","x":-262.1904761904762,"y":-175.56190476190477,"z":67.81904761904762,"a95":0.99,"info":"25/11/2014 at 00:28:41"},{"visible":true,"include":true,"step":"35.0","x":-258.70476190476194,"y":-193.67619047619047,"z":96.18095238095238,"a95":0.99,"info":"25/11/2014 at 00:28:41"},{"visible":true,"include":true,"step":"40.0","x":-262.48571428571427,"y":-163.22857142857143,"z":58.978095238095236,"a95":0.99,"info":"25/11/2014 at 00:28:41"},{"visible":true,"include":true,"step":"45.0","x":-221.3904761904762,"y":-148.35238095238097,"z":16.484761904761903,"a95":0.99,"info":"25/11/2014 at 00:28:41"},{"visible":true,"include":true,"step":"50.0","x":-235.32380952380953,"y":-191.9142857142857,"z":38.086666666666666,"a95":0.99,"info":"25/11/2014 at 00:28:41"},{"visible":true,"include":false,"step":"60.0","x":-263.8285714285714,"y":-169.58095238095237,"z":35.5247619047619,"a95":0.99,"info":"25/11/2014 at 00:28:41"},{"visible":true,"include":false,"step":"70.0","x":-209.9904761904762,"y":-143.83809523809524,"z":56.58761904761904,"a95":0.99,"info":"25/11/2014 at 00:28:41"},{"visible":true,"include":false,"step":"80.0","x":-373.83809523809526,"y":-205.74285714285716,"z":30.260952380952382,"a95":0.99,"info":"25/11/2014 at 00:28:41"},{"visible":true,"include":false,"step":"90.0","x":-267.1047619047619,"y":-113.35238095238095,"z":-13.00095238095238,"a95":0.99,"info":"25/11/2014 at 00:28:41"}]},{"version":"v1.1.0","exported":"2016-11-28T14:29:56.920Z","volume":10.5,"added":"2016-11-28T14:24:34.535Z","format":"Utrecht","demagType":"Unknown","strat":"3","patch":1.1,"GEO":[{"dec":17.478516955983196,"inc":57.792410630969805,"MAD":11.63687450621292,"cm":[-5.995204332975845e-15,5.329070518200751e-15,0],"intensity":628.4877238878587,"type":"dir","forced":true,"remark":"","origin":false,"nSteps":7,"minStep":"33.0","maxStep":"70.0","steps":["33.0","35.0","40.0","45.0","50.0","60.0","70.0"],"group":"None","version":"v1.1.0"}],"TECT":[{"dec":316.31360484784614,"inc":46.55196581189274,"MAD":11.636874506212925,"cm":[7.105427357601002e-15,8.881784197001252e-15,3.552713678800501e-15],"intensity":628.4877238878588,"type":"dir","forced":true,"remark":"","origin":false,"nSteps":7,"minStep":"33.0","maxStep":"70.0","steps":["33.0","35.0","40.0","45.0","50.0","60.0","70.0"],"group":"None","version":"v1.1.0"}],"interpreted":true,"name":"YK3.13A","coreAzi":220,"coreDip":1,"bedStrike":179,"bedDip":44,"data":[{"visible":true,"include":false,"step":"0.0","x":-522.847619047619,"y":149.4952380952381,"z":-397.65714285714284,"a95":0.99,"info":"25/11/2014 at 00:28:41"},{"visible":true,"include":false,"step":"10.0","x":-378.29523809523806,"y":50.71142857142858,"z":-330.54285714285714,"a95":0.99,"info":"25/11/2014 at 00:28:41"},{"visible":true,"include":false,"step":"15.0","x":-329.3619047619048,"y":12.768571428571429,"z":-292.32380952380953,"a95":0.99,"info":"25/11/2014 at 00:28:41"},{"visible":true,"include":false,"step":"20.0","x":-305.81904761904764,"y":19.615238095238094,"z":-322.12380952380954,"a95":0.99,"info":"25/11/2014 at 00:28:41"},{"visible":true,"include":false,"step":"23.0","x":-336.03809523809525,"y":28.85142857142857,"z":-308.9904761904762,"a95":0.99,"info":"25/11/2014 at 00:28:41"},{"visible":true,"include":false,"step":"25.0","x":-338.04761904761904,"y":26.238095238095237,"z":-331.34285714285716,"a95":0.99,"info":"25/11/2014 at 00:28:41"},{"visible":true,"include":false,"step":"30.0","x":-375.1047619047619,"y":109.84761904761906,"z":-294.03809523809525,"a95":0.99,"info":"25/11/2014 at 00:28:41"},{"visible":true,"include":true,"step":"33.0","x":-302.7809523809524,"y":116.88571428571429,"z":-182.65714285714287,"a95":0.99,"info":"25/11/2014 at 00:28:41"},{"visible":true,"include":true,"step":"35.0","x":-295.96190476190475,"y":60.25619047619048,"z":-199.8190476190476,"a95":0.99,"info":"25/11/2014 at 00:28:41"},{"visible":true,"include":true,"step":"40.0","x":-255.41904761904763,"y":74.10190476190476,"z":-194.06666666666666,"a95":0.99,"info":"25/11/2014 at 00:28:41"},{"visible":true,"include":true,"step":"45.0","x":-242.24761904761903,"y":76.54380952380953,"z":-185.32380952380953,"a95":0.99,"info":"25/11/2014 at 00:28:41"},{"visible":true,"include":true,"step":"50.0","x":-319.5809523809524,"y":17.580000000000002,"z":-100.96190476190475,"a95":0.99,"info":"25/11/2014 at 00:28:41"},{"visible":true,"include":true,"step":"60.0","x":-257.4761904761905,"y":103.74285714285713,"z":-166.75238095238097,"a95":0.99,"info":"25/11/2014 at 00:28:41"},{"visible":true,"include":true,"step":"70.0","x":-278.03809523809525,"y":-2.377238095238095,"z":-28.373333333333335,"a95":0.99,"info":"25/11/2014 at 00:28:41"},{"visible":true,"include":false,"step":"80.0","x":-352.4666666666667,"y":-44.65142857142857,"z":-121.95238095238095,"a95":0.99,"info":"25/11/2014 at 00:28:41"},{"visible":true,"include":false,"step":"90.0","x":-194.86666666666665,"y":116.06666666666668,"z":-108.84761904761906,"a95":0.99,"info":"25/11/2014 at 00:28:41"}]},{"version":"v1.1.0","exported":"2016-11-28T14:29:56.920Z","volume":10.5,"added":"2016-11-28T14:24:34.535Z","format":"Utrecht","demagType":"Unknown","strat":null,"patch":1.1,"GEO":[{"dec":334.90533355419365,"inc":-25.0965621776751,"MAD":7.773720788775097,"cm":[-1.709743457922741e-14,-2.6645352591003757e-15,0],"intensity":240.99848984764105,"type":"GC","origin":false,"forced":true,"remark":"","nSteps":6,"minStep":"100","maxStep":"270","steps":["100","150","180","210","240","270"],"group":"None","version":"v1.1.0"}],"TECT":[{"dec":0.9878076969239373,"inc":-34.188887169402165,"MAD":7.7737207887750905,"cm":[-2.5757174171303632e-14,3.552713678800501e-15,5.773159728050814e-15],"intensity":240.998489847641,"type":"GC","origin":false,"forced":true,"remark":"","nSteps":6,"minStep":"100","maxStep":"270","steps":["100","150","180","210","240","270"],"group":"None","version":"v1.1.0"}],"interpreted":true,"name":"YK3.14A","coreAzi":219,"coreDip":3,"bedStrike":179,"bedDip":44,"data":[{"visible":true,"include":false,"step":"20","x":-243.42857142857142,"y":-45.523809523809526,"z":67.61904761904762,"a95":3.1,"info":"\"14-11-30\" at \"14:12\""},{"visible":true,"include":true,"step":"100","x":-80.57142857142857,"y":-51.42857142857143,"z":-152.28571428571428,"a95":2.8,"info":"\"15-01-31\" at \"10:56\""},{"visible":true,"include":true,"step":"150","x":-0.19047619047619047,"y":-70,"z":-147.71428571428572,"a95":3.1,"info":"\"15-01-31\" at \"14:17\""},{"visible":true,"include":true,"step":"180","x":47.80952380952381,"y":-64.57142857142857,"z":-114.47619047619048,"a95":2.5,"info":"\"15-02-01\" at \"07:48\""},{"visible":true,"include":true,"step":"210","x":44.857142857142854,"y":-63.523809523809526,"z":-91.04761904761905,"a95":3.2,"info":"\"15-02-01\" at \"11:01\""},{"visible":true,"include":true,"step":"240","x":110,"y":-100.38095238095238,"z":-72.38095238095238,"a95":2.1,"info":"\"15-02-02\" at \"15:39\""},{"visible":true,"include":true,"step":"270","x":101.80952380952381,"y":-83.33333333333333,"z":-46.38095238095238,"a95":2.2,"info":"\"15-02-02\" at \"19:36\""},{"visible":true,"include":false,"step":"300","x":71.9047619047619,"y":-91.9047619047619,"z":-3.142857142857143,"a95":2.6,"info":"\"15-02-02\" at \"23:14\""},{"visible":true,"include":false,"step":"320","x":87.42857142857143,"y":-84.95238095238095,"z":-9.142857142857142,"a95":2.4,"info":"\"15-02-03\" at \"17:50\""},{"visible":true,"include":false,"step":"340","x":81.14285714285714,"y":-95.33333333333333,"z":-7.523809523809524,"a95":2.7,"info":"\"15-02-04\" at \"15:46\""},{"visible":true,"include":false,"step":"370","x":91.9047619047619,"y":-86.0952380952381,"z":-5.523809523809524,"a95":2.7,"info":"\"15-02-04\" at \"20:48\""},{"visible":true,"include":false,"step":"400","x":79.61904761904762,"y":-73.61904761904762,"z":68.76190476190476,"a95":3.9,"info":"\"15-02-05\" at \"01:02\""},{"visible":true,"include":false,"step":"420","x":20.571428571428573,"y":-136.1904761904762,"z":84.95238095238095,"a95":5,"info":"\"15-02-09\" at \"19:42\""}]},{"version":"v1.1.0","exported":"2016-11-28T14:29:56.920Z","volume":10.5,"added":"2016-11-28T14:24:34.536Z","format":"Utrecht","demagType":"Unknown","strat":"2","patch":1.1,"GEO":[],"TECT":[],"interpreted":false,"name":"YK3.15B","coreAzi":220,"coreDip":4,"bedStrike":179,"bedDip":44,"data":[{"visible":true,"include":false,"step":"0.0","x":-131.7238095238095,"y":108.65714285714287,"z":-157.2761904761905,"a95":0.99,"info":"08/07/2015 at 08:20:22"},{"visible":true,"include":false,"step":"10.0","x":-51.00190476190476,"y":103.38095238095238,"z":-205.31428571428575,"a95":0.99,"info":"08/07/2015 at 08:20:22"},{"visible":true,"include":false,"step":"15.0","x":-9.61047619047619,"y":56.231428571428566,"z":-212.78095238095236,"a95":0.99,"info":"08/07/2015 at 08:20:22"},{"visible":true,"include":false,"step":"20.0","x":-18.915238095238095,"y":100.25714285714287,"z":-181.0952380952381,"a95":0.99,"info":"08/07/2015 at 08:20:22"},{"visible":true,"include":false,"step":"23.0","x":-32.915238095238095,"y":33.43714285714285,"z":-146.8,"a95":0.99,"info":"08/07/2015 at 08:20:22"},{"visible":true,"include":false,"step":"25.0","x":-18.29047619047619,"y":61.09619047619047,"z":-158.04761904761904,"a95":0.99,"info":"08/07/2015 at 08:20:22"},{"visible":true,"include":false,"step":"30.0","x":-37.80952380952381,"y":88.42,"z":-126.14285714285714,"a95":0.99,"info":"08/07/2015 at 08:20:22"},{"visible":true,"include":false,"step":"33.0","x":-37.049523809523805,"y":85.83619047619047,"z":-74.65428571428572,"a95":0.99,"info":"08/07/2015 at 08:20:22"},{"visible":true,"include":false,"step":"35.0","x":-4.718380952380953,"y":41.801904761904765,"z":-88.02190476190476,"a95":0.99,"info":"08/07/2015 at 08:20:22"},{"visible":true,"include":false,"step":"40.0","x":-58.97714285714286,"y":38.614285714285714,"z":-3.9628571428571426,"a95":0.99,"info":"08/07/2015 at 08:20:22"},{"visible":true,"include":false,"step":"45.0","x":-10.832380952380952,"y":84.96571428571428,"z":-72.44285714285714,"a95":0.99,"info":"08/07/2015 at 08:20:22"},{"visible":true,"include":false,"step":"50.0","x":-55.98761904761905,"y":124.71428571428571,"z":12.995238095238093,"a95":0.99,"info":"08/07/2015 at 08:20:22"},{"visible":true,"include":false,"step":"55.0","x":-53.542857142857144,"y":109.81904761904761,"z":-7.330761904761904,"a95":0.99,"info":"08/07/2015 at 08:20:22"},{"visible":true,"include":false,"step":"60.0","x":-16.184761904761906,"y":85.98761904761905,"z":17.29619047619048,"a95":0.99,"info":"08/07/2015 at 08:20:22"},{"visible":true,"include":false,"step":"65.0","x":-75.64666666666666,"y":71.27904761904762,"z":-0.6844095238095238,"a95":0.99,"info":"08/07/2015 at 08:20:22"},{"visible":true,"include":false,"step":"70.0","x":-35.88666666666667,"y":88.46285714285715,"z":87.78190476190477,"a95":0.99,"info":"08/07/2015 at 08:20:22"},{"visible":true,"include":false,"step":"80.0","x":-67.3952380952381,"y":49.02,"z":-0.9626666666666667,"a95":0.99,"info":"08/07/2015 at 08:20:22"}]},{"version":"v1.1.0","exported":"2016-11-28T14:29:56.920Z","volume":10.5,"added":"2016-11-28T14:24:34.536Z","format":"Utrecht","demagType":"Unknown","strat":"3","patch":1.1,"GEO":[],"TECT":[],"interpreted":false,"name":"YK3.16B","coreAzi":229,"coreDip":5,"bedStrike":179,"bedDip":44,"data":[{"visible":true,"include":false,"step":"0.0","x":-1.102095238095238,"y":27.68857142857143,"z":-76.85333333333334,"a95":0.99,"info":"08/07/2015 at 08:20:22"},{"visible":true,"include":false,"step":"10.0","x":25.696190476190477,"y":-49.25523809523809,"z":-90.43238095238095,"a95":0.99,"info":"08/07/2015 at 08:20:22"},{"visible":true,"include":false,"step":"15.0","x":31.78,"y":-62.10190476190477,"z":-97.8952380952381,"a95":0.99,"info":"08/07/2015 at 08:20:22"},{"visible":true,"include":false,"step":"20.0","x":-10.203809523809523,"y":-41.45904761904762,"z":-102.11428571428571,"a95":0.99,"info":"08/07/2015 at 08:20:22"},{"visible":true,"include":false,"step":"23.0","x":1.976857142857143,"y":-57.84761904761905,"z":-88.97238095238096,"a95":0.99,"info":"08/07/2015 at 08:20:22"},{"visible":true,"include":false,"step":"25.0","x":19.35904761904762,"y":-61.08380952380952,"z":-105.75238095238096,"a95":0.99,"info":"08/07/2015 at 08:20:22"},{"visible":true,"include":false,"step":"30.0","x":-18.82761904761905,"y":-44.04380952380952,"z":-52.5,"a95":0.99,"info":"08/07/2015 at 08:20:22"},{"visible":true,"include":false,"step":"33.0","x":13.07904761904762,"y":-55.50952380952381,"z":-46.0752380952381,"a95":0.99,"info":"08/07/2015 at 08:20:22"},{"visible":true,"include":false,"step":"35.0","x":-23.592380952380953,"y":-25.81238095238095,"z":-7.0550476190476195,"a95":0.99,"info":"08/07/2015 at 08:20:22"},{"visible":true,"include":false,"step":"40.0","x":-25.770476190476188,"y":-27.079047619047618,"z":-29.34190476190476,"a95":0.99,"info":"08/07/2015 at 08:20:22"},{"visible":true,"include":false,"step":"45.0","x":30.015238095238097,"y":-33.042857142857144,"z":-59.96476190476191,"a95":0.99,"info":"08/07/2015 at 08:20:22"},{"visible":true,"include":false,"step":"50.0","x":-52.93619047619048,"y":-33.76380952380952,"z":-49.5247619047619,"a95":0.99,"info":"08/07/2015 at 08:20:22"},{"visible":true,"include":false,"step":"55.0","x":-13.619047619047619,"y":6.150761904761905,"z":-20.315238095238094,"a95":0.99,"info":"08/07/2015 at 08:20:22"},{"visible":true,"include":false,"step":"60.0","x":22.08095238095238,"y":-7.622190476190476,"z":2.8446666666666665,"a95":0.99,"info":"08/07/2015 at 08:20:22"},{"visible":true,"include":false,"step":"65.0","x":-43.79714285714286,"y":-38.46380952380952,"z":-28.705714285714286,"a95":0.99,"info":"08/07/2015 at 08:20:22"},{"visible":true,"include":false,"step":"70.0","x":-54.41619047619048,"y":43.68,"z":45.49809523809524,"a95":0.99,"info":"08/07/2015 at 08:20:22"},{"visible":true,"include":false,"step":"80.0","x":109.60952380952382,"y":26.71047619047619,"z":-49.86285714285714,"a95":0.99,"info":"08/07/2015 at 08:20:22"}]},{"version":"v1.1.0","exported":"2016-11-28T14:29:56.920Z","volume":10.5,"added":"2016-11-28T14:24:34.536Z","format":"Utrecht","demagType":"Unknown","strat":"4","patch":1.1,"GEO":[{"dec":9.006159487668583,"inc":53.584716770731646,"MAD":7.634756777842557,"cm":[1.7763568394002505e-15,-3.9968028886505635e-15,0],"intensity":613.7437249013486,"type":"dir","forced":true,"remark":"","origin":false,"nSteps":9,"minStep":"15.0","maxStep":"45.0","steps":["15.0","20.0","23.0","25.0","30.0","33.0","35.0","40.0","45.0"],"group":"None","version":"v1.1.0"}],"TECT":[{"dec":319.33067189273976,"inc":40.58154738730915,"MAD":7.63475677784254,"cm":[1.9539925233402755e-14,2.042810365310288e-14,0],"intensity":613.7437249013486,"type":"dir","forced":true,"remark":"","origin":false,"nSteps":9,"minStep":"15.0","maxStep":"45.0","steps":["15.0","20.0","23.0","25.0","30.0","33.0","35.0","40.0","45.0"],"group":"None","version":"v1.1.0"}],"interpreted":true,"name":"YK3.16C","coreAzi":229,"coreDip":5,"bedStrike":179,"bedDip":44,"data":[{"visible":true,"include":false,"step":"0.0","x":-548.9904761904761,"y":258.2666666666667,"z":-101.62857142857142,"a95":0.99,"info":"25/11/2014 at 00:28:41"},{"visible":true,"include":false,"step":"10.0","x":-369.1142857142857,"y":182.26666666666665,"z":-153.58095238095237,"a95":0.99,"info":"25/11/2014 at 00:28:41"},{"visible":true,"include":true,"step":"15.0","x":-331.04761904761904,"y":140.1809523809524,"z":-152.83809523809524,"a95":0.99,"info":"25/11/2014 at 00:28:41"},{"visible":true,"include":true,"step":"20.0","x":-331.9904761904762,"y":124.57142857142857,"z":-88.59428571428572,"a95":0.99,"info":"25/11/2014 at 00:28:41"},{"visible":true,"include":true,"step":"23.0","x":-261.9047619047619,"y":173.86666666666665,"z":-118.12380952380951,"a95":0.99,"info":"25/11/2014 at 00:28:41"},{"visible":true,"include":true,"step":"25.0","x":-290.93333333333334,"y":131.1809523809524,"z":-99.61904761904762,"a95":0.99,"info":"25/11/2014 at 00:28:41"},{"visible":true,"include":true,"step":"30.0","x":-275.50476190476195,"y":123.55238095238094,"z":-81.3295238095238,"a95":0.99,"info":"25/11/2014 at 00:28:41"},{"visible":true,"include":true,"step":"33.0","x":-269.1047619047619,"y":109.9904761904762,"z":-142.9904761904762,"a95":0.99,"info":"25/11/2014 at 00:28:41"},{"visible":true,"include":true,"step":"35.0","x":-251.23809523809524,"y":131.26666666666665,"z":-197.55238095238096,"a95":0.99,"info":"25/11/2014 at 00:28:41"},{"visible":true,"include":true,"step":"40.0","x":-236.67619047619047,"y":89.34761904761905,"z":-150.92380952380952,"a95":0.99,"info":"25/11/2014 at 00:28:41"},{"visible":true,"include":true,"step":"45.0","x":-190.05714285714285,"y":81.4342857142857,"z":-83.84285714285714,"a95":0.99,"info":"25/11/2014 at 00:28:41"},{"visible":true,"include":false,"step":"50.0","x":-216.41904761904763,"y":19.165714285714287,"z":-103.41904761904763,"a95":0.99,"info":"25/11/2014 at 00:28:41"},{"visible":true,"include":false,"step":"60.0","x":-231.77142857142857,"y":147.55238095238096,"z":-106.27619047619048,"a95":0.99,"info":"25/11/2014 at 00:28:41"},{"visible":true,"include":false,"step":"70.0","x":-226.53333333333333,"y":160.13333333333335,"z":-59.82285714285714,"a95":0.99,"info":"25/11/2014 at 00:28:41"},{"visible":true,"include":false,"step":"80.0","x":74.4647619047619,"y":116.33333333333333,"z":-121.4,"a95":0.99,"info":"25/11/2014 at 00:28:41"},{"visible":true,"include":false,"step":"90.0","x":-199.8095238095238,"y":195.8,"z":-65.41809523809523,"a95":0.99,"info":"25/11/2014 at 00:28:41"}]},{"version":"v1.1.0","exported":"2016-11-28T14:29:56.920Z","volume":10.5,"added":"2016-11-28T14:24:34.537Z","format":"Utrecht","demagType":"Unknown","strat":"4","patch":1.1,"GEO":[{"dec":19.649554931792238,"inc":52.22848690505009,"MAD":9.602809667971448,"cm":[2.6645352591003757e-15,-2.220446049250313e-15,0],"intensity":679.9862098775111,"type":"dir","forced":true,"remark":"","origin":false,"nSteps":11,"minStep":"23.0","maxStep":"65.0","steps":["23.0","25.0","30.0","33.0","35.0","40.0","45.0","50.0","55.0","60.0","65.0"],"group":"None","version":"v1.1.0"}],"TECT":[{"dec":324.51390559813495,"inc":45.94378683934717,"MAD":9.602809667971467,"cm":[-1.1546319456101628e-14,-5.329070518200751e-15,7.105427357601002e-15],"intensity":679.9862098775112,"type":"dir","forced":true,"remark":"","origin":false,"nSteps":11,"minStep":"23.0","maxStep":"65.0","steps":["23.0","25.0","30.0","33.0","35.0","40.0","45.0","50.0","55.0","60.0","65.0"],"group":"None","version":"v1.1.0"}],"interpreted":true,"name":"YK3.17B","coreAzi":221,"coreDip":3,"bedStrike":179,"bedDip":44,"data":[{"visible":true,"include":false,"step":"0.0","x":-710.4857142857143,"y":457.00952380952384,"z":-313.54285714285714,"a95":0.99,"info":"08/07/2015 at 08:20:22"},{"visible":true,"include":false,"step":"10.0","x":-423.81904761904764,"y":184.21904761904761,"z":-315.51428571428573,"a95":0.99,"info":"08/07/2015 at 08:20:22"},{"visible":true,"include":false,"step":"15.0","x":-406.72380952380956,"y":156.54285714285714,"z":-265.97142857142853,"a95":0.99,"info":"08/07/2015 at 08:20:22"},{"visible":true,"include":false,"step":"20.0","x":-284.4,"y":105.81904761904761,"z":-230.31428571428575,"a95":0.99,"info":"08/07/2015 at 08:20:22"},{"visible":true,"include":true,"step":"23.0","x":-282.4095238095238,"y":131.61904761904762,"z":-271.2095238095238,"a95":0.99,"info":"08/07/2015 at 08:20:22"},{"visible":true,"include":true,"step":"25.0","x":-285.04761904761904,"y":36.518095238095235,"z":-260.3047619047619,"a95":0.99,"info":"08/07/2015 at 08:20:22"},{"visible":true,"include":true,"step":"30.0","x":-223.54285714285712,"y":102.65714285714287,"z":-171.54285714285714,"a95":0.99,"info":"08/07/2015 at 08:20:22"},{"visible":true,"include":true,"step":"33.0","x":-230.7238095238095,"y":98.9904761904762,"z":-147.51428571428573,"a95":0.99,"info":"08/07/2015 at 08:20:22"},{"visible":true,"include":true,"step":"35.0","x":-235.66666666666666,"y":65.29238095238095,"z":-173.88571428571427,"a95":0.99,"info":"08/07/2015 at 08:20:22"},{"visible":true,"include":true,"step":"40.0","x":-327.6190476190476,"y":104.15238095238094,"z":-171.56190476190477,"a95":0.99,"info":"08/07/2015 at 08:20:22"},{"visible":true,"include":true,"step":"45.0","x":-287.8,"y":89.02952380952381,"z":-140.7238095238095,"a95":0.99,"info":"08/07/2015 at 08:20:22"},{"visible":true,"include":true,"step":"50.0","x":-275.93333333333334,"y":15.834285714285713,"z":-108.80952380952381,"a95":0.99,"info":"08/07/2015 at 08:20:22"},{"visible":true,"include":true,"step":"55.0","x":-290.4761904761905,"y":50.731428571428566,"z":-123.61904761904762,"a95":0.99,"info":"08/07/2015 at 08:20:22"},{"visible":true,"include":true,"step":"60.0","x":-160.75238095238097,"y":23.82190476190476,"z":-109.24761904761904,"a95":0.99,"info":"08/07/2015 at 08:20:22"},{"visible":true,"include":true,"step":"65.0","x":-247.54285714285712,"y":33.923809523809524,"z":-121.38095238095238,"a95":0.99,"info":"08/07/2015 at 08:20:22"},{"visible":true,"include":false,"step":"70.0","x":-176.7238095238095,"y":48.018095238095235,"z":-131.13333333333335,"a95":0.99,"info":"08/07/2015 at 08:20:22"},{"visible":true,"include":false,"step":"80.0","x":-325.14285714285717,"y":85.90190476190476,"z":38.26285714285714,"a95":0.99,"info":"08/07/2015 at 08:20:22"}]},{"version":"v1.1.0","exported":"2016-11-28T14:29:56.920Z","volume":10.5,"added":"2016-11-28T14:24:34.537Z","format":"Utrecht","demagType":"Unknown","strat":null,"patch":1.1,"GEO":[{"dec":75.10491301595789,"inc":-1.9445133446875427,"MAD":4.700963863184471,"cm":[3.552713678800501e-15,-1.2434497875801753e-14,0],"intensity":567.8220953545126,"type":"GC","origin":false,"forced":true,"remark":"","nSteps":8,"minStep":"20","maxStep":"300","steps":["20","100","150","180","210","240","270","300"],"group":"None","version":"v1.1.0"}],"TECT":[{"dec":250.5993434833338,"inc":-40.50647243553224,"MAD":4.700963863184429,"cm":[1.7763568394002505e-14,-4.929390229335695e-14,-1.865174681370263e-14],"intensity":567.8220953545127,"type":"GC","origin":false,"forced":true,"remark":"","nSteps":8,"minStep":"20","maxStep":"300","steps":["20","100","150","180","210","240","270","300"],"group":"None","version":"v1.1.0"}],"interpreted":true,"name":"YK3.18A","coreAzi":183,"coreDip":6,"bedStrike":179,"bedDip":44,"data":[{"visible":true,"include":true,"step":"20","x":-526.2857142857143,"y":7.809523809523809,"z":-70.28571428571429,"a95":1.7,"info":"\"14-11-30\" at \"14:14\""},{"visible":true,"include":true,"step":"100","x":-389.6190476190476,"y":-215.71428571428572,"z":740.4761904761905,"a95":3.4,"info":"\"15-01-31\" at \"10:58\""},{"visible":true,"include":true,"step":"150","x":-260.4761904761905,"y":-166.85714285714286,"z":508.76190476190476,"a95":3.4,"info":"\"15-01-31\" at \"14:19\""},{"visible":true,"include":true,"step":"180","x":-114.38095238095238,"y":-129.52380952380952,"z":398.6666666666667,"a95":4,"info":"\"15-02-01\" at \"07:50\""},{"visible":true,"include":true,"step":"210","x":-75.61904761904762,"y":-143.71428571428572,"z":355.9047619047619,"a95":3.9,"info":"\"15-02-01\" at \"11:03\""},{"visible":true,"include":true,"step":"240","x":-16.761904761904763,"y":-114.38095238095238,"z":339.5238095238095,"a95":3.7,"info":"\"15-02-02\" at \"15:41\""},{"visible":true,"include":true,"step":"270","x":-3.4285714285714284,"y":-112.85714285714286,"z":299.23809523809524,"a95":3.6,"info":"\"15-02-02\" at \"19:38\""},{"visible":true,"include":true,"step":"300","x":0.19047619047619047,"y":-96.47619047619048,"z":264.6666666666667,"a95":3.4,"info":"\"15-02-02\" at \"23:16\""},{"visible":true,"include":false,"step":"320","x":6.476190476190476,"y":-74.19047619047619,"z":278.2857142857143,"a95":3.5,"info":"\"15-02-03\" at \"17:52\""},{"visible":true,"include":false,"step":"340","x":19.80952380952381,"y":-77.80952380952381,"z":277.04761904761904,"a95":3.6,"info":"\"15-02-04\" at \"15:48\""},{"visible":true,"include":false,"step":"370","x":18.666666666666668,"y":-82.47619047619048,"z":276.57142857142856,"a95":3.3,"info":"\"15-02-04\" at \"20:50\""},{"visible":true,"include":false,"step":"400","x":11.314285714285713,"y":-22.247619047619047,"z":87.0952380952381,"a95":7.5,"info":"\"15-02-05\" at \"01:04\""},{"visible":true,"include":false,"step":"420","x":-23.333333333333332,"y":-53.61904761904762,"z":110.19047619047619,"a95":7.1,"info":"\"15-02-09\" at \"19:44\""}]},{"version":"v1.1.0","exported":"2016-11-28T14:29:56.920Z","volume":10.5,"added":"2016-11-28T14:24:34.537Z","format":"Utrecht","demagType":"Unknown","strat":"5","patch":1.1,"GEO":[{"dec":24.438557782759005,"inc":53.45614178335073,"MAD":4.89721385184703,"cm":[3.552713678800501e-15,2.6645352591003757e-15,0],"intensity":414.6131992149614,"type":"dir","forced":true,"remark":"","origin":false,"nSteps":6,"minStep":"23.0","maxStep":"60.0","steps":["23.0","25.0","30.0","33.0","35.0","60.0"],"group":"None","version":"v1.1.0"}],"TECT":[{"dec":324.17200365929887,"inc":49.076830762909,"MAD":4.897213851847003,"cm":[1.7763568394002505e-14,3.375077994860476e-14,0],"intensity":414.6131992149614,"type":"dir","forced":true,"remark":"","origin":false,"nSteps":6,"minStep":"23.0","maxStep":"60.0","steps":["23.0","25.0","30.0","33.0","35.0","60.0"],"group":"None","version":"v1.1.0"}],"interpreted":true,"name":"YK3.18B","coreAzi":183,"coreDip":6,"bedStrike":179,"bedDip":44,"data":[{"visible":true,"include":false,"step":"0.0","x":-405.0761904761905,"y":-25.1,"z":-201.0952380952381,"a95":0.99,"info":"25/11/2014 at 00:28:41"},{"visible":true,"include":false,"step":"10.0","x":-299.81904761904764,"y":-56.34095238095239,"z":-200.45714285714288,"a95":0.99,"info":"25/11/2014 at 00:28:41"},{"visible":true,"include":false,"step":"15.0","x":-249.12380952380954,"y":-41.65904761904762,"z":-180.86666666666665,"a95":0.99,"info":"25/11/2014 at 00:28:41"},{"visible":true,"include":false,"step":"20.0","x":-221.63809523809522,"y":-41.47047619047619,"z":-145.61904761904762,"a95":0.99,"info":"25/11/2014 at 00:28:41"},{"visible":true,"include":true,"step":"23.0","x":-228.45714285714288,"y":-57.8447619047619,"z":-98.98095238095237,"a95":0.99,"info":"25/11/2014 at 00:28:41"},{"visible":true,"include":true,"step":"25.0","x":-234.96190476190475,"y":-38.39904761904762,"z":-130.2761904761905,"a95":0.99,"info":"25/11/2014 at 00:28:41"},{"visible":true,"include":true,"step":"30.0","x":-186.5047619047619,"y":-57.31714285714286,"z":-115.92380952380952,"a95":0.99,"info":"25/11/2014 at 00:28:41"},{"visible":true,"include":true,"step":"33.0","x":-183.34285714285713,"y":-67.9047619047619,"z":-116.71428571428571,"a95":0.99,"info":"25/11/2014 at 00:28:41"},{"visible":true,"include":true,"step":"35.0","x":-203.52380952380952,"y":-56.61904761904762,"z":-97.07619047619048,"a95":0.99,"info":"25/11/2014 at 00:28:41"},{"visible":true,"include":false,"step":"40.0","x":-118.8952380952381,"y":-58.478095238095236,"z":-106.52380952380952,"a95":0.99,"info":"25/11/2014 at 00:28:41"},{"visible":true,"include":false,"step":"45.0","x":-129.1904761904762,"y":-76.10857142857142,"z":-134.01904761904763,"a95":0.99,"info":"25/11/2014 at 00:28:41"},{"visible":true,"include":false,"step":"50.0","x":-133.8952380952381,"y":-87.44666666666667,"z":-129.82857142857142,"a95":0.99,"info":"25/11/2014 at 00:28:41"},{"visible":true,"include":true,"step":"60.0","x":-134.28571428571428,"y":-18.88952380952381,"z":-86.58190476190477,"a95":0.99,"info":"25/11/2014 at 00:28:41"},{"visible":true,"include":false,"step":"70.0","x":-84.50952380952381,"y":-60.63714285714286,"z":-40.44857142857143,"a95":0.99,"info":"25/11/2014 at 00:28:41"},{"visible":true,"include":false,"step":"80.0","x":-91.25809523809524,"y":-72.08,"z":-87.69904761904762,"a95":0.99,"info":"25/11/2014 at 00:28:41"},{"visible":true,"include":false,"step":"90.0","x":-133.38095238095238,"y":1.160952380952381,"z":-70.00380952380952,"a95":0.99,"info":"25/11/2014 at 00:28:41"}]},{"version":"v1.1.0","exported":"2016-11-28T14:29:56.920Z","volume":10.5,"added":"2016-11-28T14:24:34.537Z","format":"Utrecht","demagType":"Unknown","strat":"6","patch":1.1,"GEO":[{"dec":299.6870245223621,"inc":-32.79801678166663,"MAD":2.5888729379676527,"cm":[0,1.7763568394002505e-15,0],"intensity":173.15677781013167,"type":"GC","origin":false,"forced":true,"remark":"","nSteps":4,"minStep":"10.0","maxStep":"23.0","steps":["10.0","15.0","20.0","23.0"],"group":"None","version":"v1.1.0"}],"TECT":[{"dec":340.4791772398953,"inc":-63.100754238818126,"MAD":2.5888729379675914,"cm":[-3.552713678800501e-15,-1.7763568394002505e-15,8.881784197001252e-16],"intensity":173.15677781013164,"type":"GC","origin":false,"forced":true,"remark":"","nSteps":4,"minStep":"10.0","maxStep":"23.0","steps":["10.0","15.0","20.0","23.0"],"group":"None","version":"v1.1.0"}],"interpreted":true,"name":"YK3.19A","coreAzi":179,"coreDip":4,"bedStrike":179,"bedDip":44,"data":[{"visible":true,"include":false,"step":"0.0","x":-2.169809523809524,"y":-23.04285714285714,"z":-40.36761904761905,"a95":0.99,"info":"25/11/2014 at 00:28:41"},{"visible":true,"include":true,"step":"10.0","x":57.69333333333333,"y":-56.986666666666665,"z":-21.644761904761907,"a95":0.99,"info":"25/11/2014 at 00:28:41"},{"visible":true,"include":true,"step":"15.0","x":72.34571428571428,"y":-42.385714285714286,"z":15.173333333333332,"a95":0.99,"info":"25/11/2014 at 00:28:41"},{"visible":true,"include":true,"step":"20.0","x":66.13714285714286,"y":-29.837142857142858,"z":18.66952380952381,"a95":0.99,"info":"25/11/2014 at 00:28:41"},{"visible":true,"include":true,"step":"23.0","x":82.48380952380953,"y":13.814285714285715,"z":113.67619047619047,"a95":0.99,"info":"25/11/2014 at 00:28:41"},{"visible":true,"include":false,"step":"25.0","x":75.10190476190476,"y":5.317619047619048,"z":28.021904761904764,"a95":0.99,"info":"25/11/2014 at 00:28:41"},{"visible":true,"include":false,"step":"30.0","x":67.22095238095238,"y":-4.642857142857143,"z":62.016190476190474,"a95":0.99,"info":"25/11/2014 at 00:28:41"},{"visible":true,"include":false,"step":"33.0","x":34.021904761904764,"y":-26.85333333333333,"z":61.881904761904764,"a95":0.99,"info":"25/11/2014 at 00:28:41"},{"visible":true,"include":false,"step":"35.0","x":41.68095238095238,"y":-47.923809523809524,"z":63.19428571428571,"a95":0.99,"info":"25/11/2014 at 00:28:41"},{"visible":true,"include":false,"step":"40.0","x":9.033333333333333,"y":3.171333333333333,"z":81.0657142857143,"a95":0.99,"info":"25/11/2014 at 00:28:41"},{"visible":true,"include":false,"step":"45.0","x":15.383809523809523,"y":-51.76190476190476,"z":88.54380952380953,"a95":0.99,"info":"25/11/2014 at 00:28:41"},{"visible":true,"include":false,"step":"50.0","x":-24.07904761904762,"y":-56.80476190476191,"z":75.9695238095238,"a95":0.99,"info":"25/11/2014 at 00:28:41"},{"visible":true,"include":false,"step":"60.0","x":-22.06,"y":-85.60952380952381,"z":111.64761904761905,"a95":0.99,"info":"25/11/2014 at 00:28:41"},{"visible":true,"include":false,"step":"70.0","x":-11.025714285714285,"y":55.359047619047615,"z":78.61333333333334,"a95":0.99,"info":"25/11/2014 at 00:28:41"},{"visible":true,"include":false,"step":"80.0","x":5.002952380952381,"y":12.994285714285715,"z":53.18952380952381,"a95":0.99,"info":"25/11/2014 at 00:28:41"},{"visible":true,"include":false,"step":"90.0","x":-29.607619047619046,"y":-5.252761904761905,"z":54.260000000000005,"a95":0.99,"info":"25/11/2014 at 00:28:41"}]},{"version":"v1.1.0","exported":"2016-11-28T14:29:56.921Z","volume":10.5,"added":"2016-11-28T14:24:34.537Z","format":"Utrecht","demagType":"Unknown","strat":"7","patch":1.1,"GEO":[{"dec":8.557293056100605,"inc":50.366689962555704,"MAD":3.866520635991262,"cm":[-1.2434497875801753e-14,2.1593837828959295e-14,0],"intensity":776.1791346252903,"type":"dir","forced":true,"remark":"","origin":false,"nSteps":9,"minStep":"23.0","maxStep":"60.0","steps":["23.0","25.0","30.0","33.0","35.0","40.0","45.0","50.0","60.0"],"group":"None","version":"v1.1.0"}],"TECT":[{"dec":322.8932239987133,"inc":38.870644029473986,"MAD":3.866520635991252,"cm":[5.329070518200751e-15,2.1316282072803006e-14,-7.105427357601002e-15],"intensity":776.1791346252902,"type":"dir","forced":true,"remark":"","origin":false,"nSteps":9,"minStep":"23.0","maxStep":"60.0","steps":["23.0","25.0","30.0","33.0","35.0","40.0","45.0","50.0","60.0"],"group":"None","version":"v1.1.0"}],"interpreted":true,"name":"YK3.20A","coreAzi":202,"coreDip":13,"bedStrike":179,"bedDip":44,"data":[{"visible":true,"include":false,"step":"0.0","x":-652.4761904761905,"y":129.9904761904762,"z":-277.8952380952381,"a95":0.99,"info":"25/11/2014 at 00:28:41"},{"visible":true,"include":false,"step":"10.0","x":-476.3238095238095,"y":71.79047619047618,"z":-296.9142857142857,"a95":0.99,"info":"25/11/2014 at 00:28:41"},{"visible":true,"include":false,"step":"15.0","x":-412.0380952380952,"y":77.4342857142857,"z":-274.54285714285714,"a95":0.99,"info":"25/11/2014 at 00:28:41"},{"visible":true,"include":false,"step":"20.0","x":-431.23809523809524,"y":103.5904761904762,"z":-220.47619047619048,"a95":0.99,"info":"25/11/2014 at 00:28:41"},{"visible":true,"include":true,"step":"23.0","x":-419.4190476190476,"y":79.72761904761904,"z":-216.59047619047618,"a95":0.99,"info":"25/11/2014 at 00:28:41"},{"visible":true,"include":true,"step":"25.0","x":-391.2857142857143,"y":86.14857142857143,"z":-195.1904761904762,"a95":0.99,"info":"25/11/2014 at 00:28:41"},{"visible":true,"include":true,"step":"30.0","x":-382.6095238095238,"y":70.82761904761905,"z":-146.33333333333334,"a95":0.99,"info":"25/11/2014 at 00:28:41"},{"visible":true,"include":true,"step":"33.0","x":-419.6190476190476,"y":56.62285714285714,"z":-231.0095238095238,"a95":0.99,"info":"25/11/2014 at 00:28:41"},{"visible":true,"include":true,"step":"35.0","x":-376.12380952380954,"y":67.31142857142856,"z":-203.44761904761904,"a95":0.99,"info":"25/11/2014 at 00:28:41"},{"visible":true,"include":true,"step":"40.0","x":-394.8666666666667,"y":50.993333333333325,"z":-175.28571428571428,"a95":0.99,"info":"25/11/2014 at 00:28:41"},{"visible":true,"include":true,"step":"45.0","x":-329.74285714285713,"y":28.33809523809524,"z":-170,"a95":0.99,"info":"25/11/2014 at 00:28:41"},{"visible":true,"include":true,"step":"50.0","x":-289.0857142857143,"y":41.02857142857143,"z":-147.98095238095237,"a95":0.99,"info":"25/11/2014 at 00:28:41"},{"visible":true,"include":true,"step":"60.0","x":-279.9142857142857,"y":67.10380952380953,"z":-86.44,"a95":0.99,"info":"25/11/2014 at 00:28:41"},{"visible":true,"include":false,"step":"70.0","x":-226.30476190476188,"y":91.71523809523809,"z":-147.13333333333335,"a95":0.99,"info":"25/11/2014 at 00:28:41"},{"visible":true,"include":false,"step":"80.0","x":-376.43809523809523,"y":121.56190476190477,"z":-91.33619047619047,"a95":0.99,"info":"25/11/2014 at 00:28:41"},{"visible":true,"include":false,"step":"90.0","x":-290.6095238095238,"y":-6.2865714285714285,"z":-72.51523809523809,"a95":0.99,"info":"25/11/2014 at 00:28:41"}]},{"version":"v1.1.0","exported":"2016-11-28T14:29:56.921Z","volume":10.5,"added":"2016-11-28T14:24:34.537Z","format":"Utrecht","demagType":"Unknown","strat":null,"patch":1.1,"GEO":[{"dec":352.8167616926789,"inc":-29.980805263504664,"MAD":3.9513874164048204,"cm":[-2.6423307986078726e-14,2.4868995751603507e-14,0],"intensity":718.9536236261488,"type":"GC","origin":false,"forced":true,"remark":"","nSteps":7,"minStep":"100","maxStep":"300","steps":["100","150","180","210","240","270","300"],"group":"None","version":"v1.1.0"}],"TECT":[{"dec":17.012638134685176,"inc":-25.10448247170124,"MAD":3.951387416404217,"cm":[-4.063416270128073e-14,2.5757174171303632e-14,1.2434497875801753e-14],"intensity":718.9536236261489,"type":"GC","origin":false,"forced":true,"remark":"","nSteps":7,"minStep":"100","maxStep":"300","steps":["100","150","180","210","240","270","300"],"group":"None","version":"v1.1.0"}],"interpreted":true,"name":"YK3.21A","coreAzi":192,"coreDip":20,"bedStrike":179,"bedDip":44,"data":[{"visible":true,"include":false,"step":"20","x":-888,"y":-30.571428571428573,"z":41.42857142857143,"a95":1.6,"info":"\"14-11-30\" at \"14:16\""},{"visible":true,"include":true,"step":"100","x":-582.6666666666666,"y":-168.66666666666666,"z":-164.66666666666666,"a95":1.7,"info":"\"15-01-31\" at \"11:01\""},{"visible":true,"include":true,"step":"150","x":-445.8095238095238,"y":-193.8095238095238,"z":-150.76190476190476,"a95":1.8,"info":"\"15-01-31\" at \"14:21\""},{"visible":true,"include":true,"step":"180","x":-236.95238095238096,"y":-216.85714285714286,"z":-112.0952380952381,"a95":2,"info":"\"15-02-01\" at \"07:52\""},{"visible":true,"include":true,"step":"210","x":-130.57142857142858,"y":-203.14285714285714,"z":-106.38095238095238,"a95":2.1,"info":"\"15-02-01\" at \"11:05\""},{"visible":true,"include":true,"step":"240","x":-46.95238095238095,"y":-214.95238095238096,"z":-68.38095238095238,"a95":2,"info":"\"15-02-02\" at \"15:43\""},{"visible":true,"include":true,"step":"270","x":-23.428571428571427,"y":-187.9047619047619,"z":-58.19047619047619,"a95":1.9,"info":"\"15-02-02\" at \"19:41\""},{"visible":true,"include":true,"step":"300","x":-33.23809523809524,"y":-140.57142857142858,"z":-40.095238095238095,"a95":2.4,"info":"\"15-02-02\" at \"23:18\""},{"visible":true,"include":false,"step":"320","x":-40.857142857142854,"y":-122.28571428571429,"z":-1.3333333333333333,"a95":2.9,"info":"\"15-02-03\" at \"17:54\""},{"visible":true,"include":false,"step":"340","x":-27.333333333333332,"y":-123.80952380952381,"z":-6.761904761904762,"a95":2.8,"info":"\"15-02-04\" at \"15:50\""},{"visible":true,"include":false,"step":"370","x":-33.142857142857146,"y":-127.9047619047619,"z":-3.7142857142857144,"a95":2.9,"info":"\"15-02-04\" at \"20:53\""},{"visible":true,"include":false,"step":"400","x":52.857142857142854,"y":-132.95238095238096,"z":-44.476190476190474,"a95":3.8,"info":"\"15-02-05\" at \"01:06\""},{"visible":true,"include":false,"step":"420","x":131.04761904761904,"y":-106,"z":75.04761904761905,"a95":3.5,"info":"\"15-02-09\" at \"19:46\""}]},{"version":"v1.1.0","exported":"2016-11-28T14:29:56.921Z","volume":10.5,"added":"2016-11-28T14:24:34.537Z","format":"Utrecht","demagType":"Unknown","strat":null,"patch":1.1,"GEO":[{"dec":332.980429620529,"inc":-23.488843817695937,"MAD":4.736851475316878,"cm":[-2.0650148258027912e-14,2.3092638912203256e-14,0],"intensity":819.6686239336141,"type":"GC","origin":false,"forced":true,"remark":"","nSteps":7,"minStep":"100","maxStep":"300","steps":["100","150","180","210","240","270","300"],"group":"None","version":"v1.1.0"}],"TECT":[{"dec":358.12827882582405,"inc":-34.48484997337539,"MAD":4.73685147531838,"cm":[-6.061817714453355e-14,-1.4210854715202004e-14,2.042810365310288e-14],"intensity":819.6686239336142,"type":"GC","origin":false,"forced":true,"remark":"","nSteps":7,"minStep":"100","maxStep":"300","steps":["100","150","180","210","240","270","300"],"group":"None","version":"v1.1.0"}],"interpreted":true,"name":"YK3.22A","coreAzi":185,"coreDip":18,"bedStrike":179,"bedDip":44,"data":[{"visible":true,"include":false,"step":"20","x":-1051.4285714285713,"y":-316.2857142857143,"z":-131.23809523809524,"a95":1.5,"info":"\"14-11-30\" at \"14:18\""},{"visible":true,"include":true,"step":"100","x":-784.8571428571429,"y":-206.95238095238096,"z":-253.61904761904762,"a95":1.7,"info":"\"15-01-31\" at \"11:03\""},{"visible":true,"include":true,"step":"150","x":-654.7619047619048,"y":-191.04761904761904,"z":-214.47619047619048,"a95":1.7,"info":"\"15-01-31\" at \"14:26\""},{"visible":true,"include":true,"step":"180","x":-309.8095238095238,"y":-189.9047619047619,"z":-138,"a95":1.9,"info":"\"15-02-01\" at \"07:54\""},{"visible":true,"include":true,"step":"210","x":-132.47619047619048,"y":-194.85714285714286,"z":-118.38095238095238,"a95":2.3,"info":"\"15-02-01\" at \"11:07\""},{"visible":true,"include":true,"step":"240","x":11.142857142857142,"y":-170.76190476190476,"z":-98.95238095238095,"a95":2.4,"info":"\"15-02-02\" at \"15:45\""},{"visible":true,"include":true,"step":"270","x":23.523809523809526,"y":-195.23809523809524,"z":-108.19047619047619,"a95":2.2,"info":"\"15-02-02\" at \"19:43\""},{"visible":true,"include":true,"step":"300","x":89.04761904761905,"y":-92.85714285714286,"z":-59.142857142857146,"a95":2.2,"info":"\"15-02-02\" at \"23:20\""},{"visible":true,"include":false,"step":"320","x":72.66666666666667,"y":-66.66666666666667,"z":-35.142857142857146,"a95":3.3,"info":"\"15-02-03\" at \"17:57\""},{"visible":true,"include":false,"step":"340","x":77.80952380952381,"y":-66.19047619047619,"z":-31.80952380952381,"a95":3,"info":"\"15-02-04\" at \"15:52\""},{"visible":true,"include":false,"step":"370","x":79.61904761904762,"y":-72.57142857142857,"z":-28.857142857142858,"a95":3.2,"info":"\"15-02-04\" at \"20:55\""},{"visible":true,"include":false,"step":"400","x":41.40952380952381,"y":14.114285714285714,"z":-67.79047619047618,"a95":4.8,"info":"\"15-02-05\" at \"01:08\""},{"visible":true,"include":false,"step":"420","x":6.257142857142857,"y":1.2857142857142858,"z":19.885714285714286,"a95":16.5,"info":"\"15-02-09\" at \"19:48\""}]},{"version":"v1.1.0","exported":"2016-11-28T14:29:56.921Z","volume":10.5,"added":"2016-11-28T14:24:34.537Z","format":"Utrecht","demagType":"Unknown","strat":"8","patch":1.1,"GEO":[{"dec":6.717944278864422,"inc":54.87992800162246,"MAD":5.031733807793225,"cm":[-1.0658141036401503e-14,1.509903313490213e-14,0],"intensity":931.7036719697442,"type":"dir","forced":true,"remark":"","origin":false,"nSteps":11,"minStep":"15.0","maxStep":"60.0","steps":["15.0","20.0","23.0","25.0","30.0","33.0","35.0","40.0","45.0","50.0","60.0"],"group":"None","version":"v1.1.0"}],"TECT":[{"dec":317.0379919946323,"inc":39.94498897485181,"MAD":5.03173380779321,"cm":[-1.687538997430238e-14,-8.881784197001252e-15,1.3322676295501878e-14],"intensity":931.7036719697442,"type":"dir","forced":true,"remark":"","origin":false,"nSteps":11,"minStep":"15.0","maxStep":"60.0","steps":["15.0","20.0","23.0","25.0","30.0","33.0","35.0","40.0","45.0","50.0","60.0"],"group":"None","version":"v1.1.0"}],"interpreted":true,"name":"YK3.23A","coreAzi":176,"coreDip":17,"bedStrike":179,"bedDip":44,"data":[{"visible":true,"include":false,"step":"0.0","x":-925.1428571428571,"y":-122.54285714285714,"z":-238.9809523809524,"a95":0.99,"info":"25/11/2014 at 00:28:41"},{"visible":true,"include":false,"step":"10.0","x":-744.9428571428571,"y":-96.92380952380952,"z":-254.28571428571428,"a95":0.99,"info":"25/11/2014 at 00:28:41"},{"visible":true,"include":true,"step":"15.0","x":-606.0095238095239,"y":-84.04380952380953,"z":-198.1142857142857,"a95":0.99,"info":"25/11/2014 at 00:28:41"},{"visible":true,"include":true,"step":"20.0","x":-609.7904761904762,"y":-63.6647619047619,"z":-211.3904761904762,"a95":0.99,"info":"25/11/2014 at 00:28:41"},{"visible":true,"include":true,"step":"23.0","x":-544.3809523809524,"y":-60.28380952380952,"z":-163.94285714285715,"a95":0.99,"info":"25/11/2014 at 00:28:41"},{"visible":true,"include":true,"step":"25.0","x":-507.87619047619046,"y":-55.28666666666667,"z":-176.31428571428572,"a95":0.99,"info":"25/11/2014 at 00:28:41"},{"visible":true,"include":true,"step":"30.0","x":-482.5809523809524,"y":-60.32761904761905,"z":-169.2095238095238,"a95":0.99,"info":"25/11/2014 at 00:28:41"},{"visible":true,"include":true,"step":"33.0","x":-442.9047619047619,"y":-45.20095238095238,"z":-169.43809523809523,"a95":0.99,"info":"25/11/2014 at 00:28:41"},{"visible":true,"include":true,"step":"35.0","x":-426.3809523809524,"y":-80.35428571428572,"z":-116.96190476190475,"a95":0.99,"info":"25/11/2014 at 00:28:41"},{"visible":true,"include":true,"step":"40.0","x":-374.3047619047619,"y":-50.647619047619045,"z":-123.81904761904761,"a95":0.99,"info":"25/11/2014 at 00:28:41"},{"visible":true,"include":true,"step":"45.0","x":-330.2,"y":-13.921904761904763,"z":-52.21619047619048,"a95":0.99,"info":"25/11/2014 at 00:28:41"},{"visible":true,"include":true,"step":"50.0","x":-339.37142857142857,"y":-62.555238095238096,"z":-129.9047619047619,"a95":0.99,"info":"25/11/2014 at 00:28:41"},{"visible":true,"include":true,"step":"60.0","x":-300.7142857142857,"y":52.59619047619047,"z":-13.863809523809524,"a95":0.99,"info":"25/11/2014 at 00:28:41"},{"visible":true,"include":false,"step":"70.0","x":-274.64761904761906,"y":51.31142857142857,"z":10.517142857142858,"a95":0.99,"info":"25/11/2014 at 00:28:41"},{"visible":true,"include":false,"step":"80.0","x":-429.35238095238094,"y":-32.754285714285714,"z":-27.91142857142857,"a95":0.99,"info":"25/11/2014 at 00:28:41"},{"visible":true,"include":false,"step":"90.0","x":-186.35238095238097,"y":40.54666666666667,"z":-61.74857142857143,"a95":0.99,"info":"25/11/2014 at 00:28:41"}]}]
