# Supplementary material for: Paleomagnetic constraints on the timing and distribution of Cenozoic rotations in Central and Eastern Anatolia
Source: Copernicus journal article supplement (doi:10.5194/se-9-295-2018), 2018-03-21
Supplement: Supplementary file 2 [file se-9-295-2018-supplement.zip › se-2017-66_DATA_dir files/dir files Ulukisla/YK4.dir]

[{"version":"v1.1.0","exported":"2016-11-28T14:55:05.346Z","volume":10.5,"added":"2016-11-28T14:39:56.393Z","format":"Utrecht","demagType":"Unknown","strat":null,"patch":1.1,"GEO":[],"TECT":[],"interpreted":false,"name":"YK4.1A","coreAzi":95,"coreDip":40,"bedStrike":308,"bedDip":61,"data":[{"visible":true,"include":false,"step":"20","x":-67.14285714285714,"y":-63.523809523809526,"z":-131.14285714285714,"a95":3.1,"info":"\"14-09-15\" at \"16:02\""},{"visible":true,"include":false,"step":"100","x":-73.94285714285714,"y":-3.0571428571428574,"z":-4.3047619047619055,"a95":8,"info":"\"14-09-15\" at \"20:02\""},{"visible":true,"include":false,"step":"150","x":-51.7047619047619,"y":-5.104761904761905,"z":-7.190476190476191,"a95":8.8,"info":"\"14-09-15\" at \"22:38\""},{"visible":true,"include":false,"step":"180","x":-16.97142857142857,"y":29.609523809523807,"z":-13.847619047619048,"a95":11.3,"info":"\"14-09-16\" at \"11:36\""},{"visible":true,"include":false,"step":"210","x":-42.114285714285714,"y":49.714285714285715,"z":-38.142857142857146,"a95":10.1,"info":"\"14-09-16\" at \"14:18\""},{"visible":true,"include":false,"step":"240","x":7.761904761904762,"y":20.857142857142858,"z":-47.266666666666666,"a95":7.3,"info":"\"14-09-16\" at \"17:03\""},{"visible":true,"include":false,"step":"270","x":-17.942857142857143,"y":49.161904761904765,"z":-42.86666666666667,"a95":6.3,"info":"\"14-09-16\" at \"20:09\""},{"visible":true,"include":false,"step":"300","x":-26.314285714285717,"y":46.67619047619048,"z":-71.70476190476191,"a95":4.8,"info":"\"14-09-17\" at \"11:16\""},{"visible":true,"include":false,"step":"320","x":-11.104761904761904,"y":55.857142857142854,"z":-74.4857142857143,"a95":4.6,"info":"\"14-09-17\" at \"14:45\""},{"visible":true,"include":false,"step":"340","x":-16.45714285714286,"y":48.828571428571436,"z":-33.22857142857143,"a95":5.8,"info":"\"14-09-17\" at \"20:01\""},{"visible":true,"include":false,"step":"370","x":-17.523809523809526,"y":55.828571428571436,"z":-18.81904761904762,"a95":5.1,"info":"\"14-09-18\" at \"09:24\""},{"visible":true,"include":false,"step":"390","x":-32.68571428571428,"y":18.361904761904764,"z":-59.780952380952385,"a95":6.7,"info":"\"14-09-18\" at \"12:24\""},{"visible":true,"include":false,"step":"420","x":-6.038095238095238,"y":23.571428571428573,"z":-24.4,"a95":9.400001,"info":"\"14-09-18\" at \"15:55\""},{"visible":true,"include":false,"step":"450","x":-5.276190476190476,"y":13.161904761904761,"z":-23.38095238095238,"a95":12.7,"info":"\"14-09-19\" at \"10:38\""},{"visible":true,"include":false,"step":"480","x":-60.266666666666666,"y":24.495238095238093,"z":-8.028571428571428,"a95":8.2,"info":"\"14-09-19\" at \"13:36\""},{"visible":true,"include":false,"step":"510","x":-24.952380952380953,"y":-16.142857142857142,"z":44.39047619047619,"a95":11.4,"info":"\"14-09-19\" at \"16:17\""},{"visible":true,"include":false,"step":"540","x":19.714285714285715,"y":-99.71428571428571,"z":-146.47619047619048,"a95":5,"info":"\"14-10-04\" at \"11:57\""},{"visible":true,"include":false,"step":"570","x":130.57142857142858,"y":-422.2857142857143,"z":222.85714285714286,"a95":9.8,"info":"\"14-10-04\" at \"15:14\""}]},{"version":"v1.1.0","exported":"2016-11-28T14:55:05.346Z","volume":10.5,"added":"2016-11-28T14:39:56.394Z","format":"Utrecht","demagType":"Unknown","strat":"4","patch":1.1,"GEO":[],"TECT":[],"interpreted":false,"name":"YK4.1B","coreAzi":95,"coreDip":40,"bedStrike":308,"bedDip":61,"data":[{"visible":true,"include":false,"step":"0.0","x":-92.99714285714286,"y":5.695714285714286,"z":43.64666666666667,"a95":0.99,"info":"25/08/2014 at 22:43:42"},{"visible":true,"include":false,"step":"4.0","x":-59.05904761904762,"y":-12.884761904761904,"z":23.271428571428572,"a95":0.99,"info":"25/08/2014 at 22:43:42"},{"visible":true,"include":false,"step":"8.0","x":-26.69142857142857,"y":-6.766666666666667,"z":8.581809523809524,"a95":0.99,"info":"25/08/2014 at 22:43:42"},{"visible":true,"include":false,"step":"12.0","x":-11.794285714285715,"y":-0.5778761904761905,"z":-22.83047619047619,"a95":0.99,"info":"25/08/2014 at 22:43:42"},{"visible":true,"include":false,"step":"16.0","x":-13.099047619047619,"y":-7.484666666666667,"z":-5.5489523809523815,"a95":0.99,"info":"25/08/2014 at 22:43:42"},{"visible":true,"include":false,"step":"20.0","x":9.218285714285715,"y":-20.164761904761903,"z":-15.76,"a95":0.99,"info":"25/08/2014 at 22:43:42"},{"visible":true,"include":false,"step":"25.0","x":31.521904761904764,"y":-8.92590476190476,"z":-29.774285714285714,"a95":0.99,"info":"25/08/2014 at 22:43:42"},{"visible":true,"include":false,"step":"30.0","x":47.98095238095238,"y":23.265714285714285,"z":-33.561904761904756,"a95":0.99,"info":"25/08/2014 at 22:43:42"},{"visible":true,"include":false,"step":"35.0","x":30.85809523809524,"y":-9.89809523809524,"z":-41.30666666666667,"a95":0.99,"info":"25/08/2014 at 22:43:42"},{"visible":true,"include":false,"step":"40.0","x":10.135238095238096,"y":-22.861904761904764,"z":-33.637142857142855,"a95":0.99,"info":"25/08/2014 at 22:43:42"},{"visible":true,"include":false,"step":"45.0","x":30.813333333333336,"y":12.087619047619048,"z":-25.88952380952381,"a95":0.99,"info":"25/08/2014 at 22:43:42"},{"visible":true,"include":false,"step":"50.0","x":1.524952380952381,"y":-2.776,"z":-39.43714285714285,"a95":0.99,"info":"25/08/2014 at 22:43:42"},{"visible":true,"include":false,"step":"60.0","x":-5.497142857142857,"y":27.936190476190475,"z":-12.399999999999999,"a95":0.99,"info":"25/08/2014 at 22:43:42"},{"visible":true,"include":false,"step":"70.0","x":-0.6448571428571428,"y":4.2371428571428575,"z":3.9736190476190476,"a95":0.99,"info":"25/08/2014 at 22:43:42"},{"visible":true,"include":false,"step":"80.0","x":-68.40857142857142,"y":-0.6038285714285715,"z":18.347619047619048,"a95":0.99,"info":"25/08/2014 at 22:43:42"},{"visible":true,"include":false,"step":"90.0","x":32.99047619047619,"y":-11.31047619047619,"z":-52.82190476190476,"a95":0.99,"info":"25/08/2014 at 22:43:42"},{"visible":true,"include":false,"step":"100.0","x":1.2747619047619048,"y":-2.628095238095238,"z":-6.202476190476191,"a95":0.99,"info":"25/08/2014 at 22:43:42"}]},{"version":"v1.1.0","exported":"2016-11-28T14:55:05.346Z","volume":10.5,"added":"2016-11-28T14:39:56.394Z","format":"Utrecht","demagType":"Unknown","strat":"5","patch":1.1,"GEO":[{"dec":358.90594286832084,"inc":-6.853360626541457,"MAD":5.265314755293835,"cm":[-1.2545520178264269e-14,8.881784197001252e-16,0],"intensity":113.72910545929489,"type":"GC","origin":false,"forced":true,"remark":"","nSteps":6,"minStep":"4.0","maxStep":"25.0","steps":["4.0","8.0","12.0","16.0","20.0","25.0"],"group":"None","version":"v1.1.0"}],"TECT":[{"dec":331.2671053795182,"inc":-47.03786118825741,"MAD":5.265314755293788,"cm":[-9.769962616701378e-15,6.217248937900877e-15,5.773159728050814e-15],"intensity":113.72910545929486,"type":"GC","origin":false,"forced":true,"remark":"","nSteps":6,"minStep":"4.0","maxStep":"25.0","steps":["4.0","8.0","12.0","16.0","20.0","25.0"],"group":"None","version":"v1.1.0"}],"interpreted":true,"name":"YK4.2A","coreAzi":90,"coreDip":39,"bedStrike":308,"bedDip":61,"data":[{"visible":true,"include":false,"step":"0.0","x":-79.14,"y":-3.0018095238095235,"z":108.61904761904762,"a95":0.99,"info":"25/08/2014 at 22:43:42"},{"visible":true,"include":true,"step":"4.0","x":-44.23428571428571,"y":-10.083809523809524,"z":73.70285714285714,"a95":0.99,"info":"25/08/2014 at 22:43:42"},{"visible":true,"include":true,"step":"8.0","x":-18.66857142857143,"y":-3.323619047619048,"z":60.63047619047619,"a95":0.99,"info":"25/08/2014 at 22:43:42"},{"visible":true,"include":true,"step":"12.0","x":-5.061904761904762,"y":-9.48904761904762,"z":39.626666666666665,"a95":0.99,"info":"25/08/2014 at 22:43:42"},{"visible":true,"include":true,"step":"16.0","x":13.725714285714286,"y":-4.552,"z":46.5752380952381,"a95":0.99,"info":"25/08/2014 at 22:43:42"},{"visible":true,"include":true,"step":"20.0","x":54.31333333333333,"y":-0.41264761904761904,"z":54.57142857142857,"a95":0.99,"info":"25/08/2014 at 22:43:42"},{"visible":true,"include":true,"step":"25.0","x":50.40380952380953,"y":1.7085714285714286,"z":39.549523809523805,"a95":0.99,"info":"25/08/2014 at 22:43:42"},{"visible":true,"include":false,"step":"30.0","x":58.30952380952381,"y":1.0804761904761906,"z":26.291428571428572,"a95":0.99,"info":"25/08/2014 at 22:43:42"},{"visible":true,"include":false,"step":"35.0","x":53.77904761904762,"y":-23.86857142857143,"z":41.96380952380952,"a95":0.99,"info":"25/08/2014 at 22:43:42"},{"visible":true,"include":false,"step":"40.0","x":54.21333333333333,"y":24.387619047619047,"z":29.788571428571426,"a95":0.99,"info":"25/08/2014 at 22:43:42"},{"visible":true,"include":false,"step":"45.0","x":36.873333333333335,"y":31.45809523809524,"z":46.2447619047619,"a95":0.99,"info":"25/08/2014 at 22:43:42"},{"visible":true,"include":false,"step":"50.0","x":38.87904761904762,"y":19.655238095238094,"z":43.8352380952381,"a95":0.99,"info":"25/08/2014 at 22:43:42"},{"visible":true,"include":false,"step":"60.0","x":12.45047619047619,"y":-1.5035238095238097,"z":23.14952380952381,"a95":0.99,"info":"25/08/2014 at 22:43:42"},{"visible":true,"include":false,"step":"70.0","x":31.098095238095237,"y":-8.511523809523808,"z":31.16,"a95":0.99,"info":"25/08/2014 at 22:43:42"},{"visible":true,"include":false,"step":"80.0","x":-16.435238095238095,"y":23.15142857142857,"z":-17.66761904761905,"a95":0.99,"info":"25/08/2014 at 22:43:42"},{"visible":true,"include":false,"step":"90.0","x":16.277142857142856,"y":-18.25142857142857,"z":-35.595238095238095,"a95":0.99,"info":"25/08/2014 at 22:43:42"},{"visible":true,"include":false,"step":"100.0","x":35.973333333333336,"y":-19.00857142857143,"z":-9.726666666666667,"a95":0.99,"info":"25/08/2014 at 22:43:42"}]},{"version":"v1.1.0","exported":"2016-11-28T14:55:05.346Z","volume":10.5,"added":"2016-11-28T14:39:56.395Z","format":"Utrecht","demagType":"Unknown","strat":null,"patch":1.1,"GEO":[{"dec":307.4230871090874,"inc":-13.72047230436585,"MAD":12.153505076348708,"cm":[2.6645352591003757e-15,4.440892098500626e-15,0],"intensity":162.92753087633875,"type":"GC","origin":false,"forced":true,"remark":"","nSteps":5,"minStep":"100","maxStep":"240","steps":["100","150","180","210","240"],"group":"None","version":"v1.1.0"}],"TECT":[{"dec":295.67824914648213,"inc":-6.109824930705664,"MAD":12.15350507634881,"cm":[4.440892098500626e-16,2.1649348980190553e-15,-2.6645352591003757e-15],"intensity":162.92753087633878,"type":"GC","origin":false,"forced":true,"remark":"","nSteps":5,"minStep":"100","maxStep":"240","steps":["100","150","180","210","240"],"group":"None","version":"v1.1.0"}],"interpreted":true,"name":"YK4.3A","coreAzi":96,"coreDip":37,"bedStrike":308,"bedDip":61,"data":[{"visible":true,"include":false,"step":"20","x":-209.8095238095238,"y":-74.57142857142857,"z":304.4761904761905,"a95":2.6,"info":"\"14-09-15\" at \"16:04\""},{"visible":true,"include":true,"step":"100","x":-113.52380952380952,"y":-22.761904761904763,"z":50.666666666666664,"a95":3.8,"info":"\"14-09-15\" at \"20:04\""},{"visible":true,"include":true,"step":"150","x":-93.80952380952381,"y":-7.142857142857143,"z":49.61904761904762,"a95":4.5,"info":"\"14-09-15\" at \"22:40\""},{"visible":true,"include":true,"step":"180","x":-47.74285714285715,"y":10.714285714285714,"z":8.22857142857143,"a95":5.4,"info":"\"14-09-16\" at \"11:38\""},{"visible":true,"include":true,"step":"210","x":-63.37142857142857,"y":31.952380952380953,"z":9.59047619047619,"a95":5.5,"info":"\"14-09-16\" at \"14:20\""},{"visible":true,"include":true,"step":"240","x":-43.04761904761905,"y":26.314285714285717,"z":-5.742857142857143,"a95":6.3,"info":"\"14-09-16\" at \"17:06\""},{"visible":true,"include":false,"step":"270","x":-27.81904761904762,"y":58.285714285714285,"z":-7.0476190476190474,"a95":5.1,"info":"\"14-09-16\" at \"20:13\""},{"visible":true,"include":false,"step":"300","x":-1.7619047619047619,"y":47.2952380952381,"z":-21.933333333333334,"a95":5.4,"info":"\"14-09-17\" at \"11:19\""},{"visible":true,"include":false,"step":"320","x":-7,"y":37.60952380952381,"z":3.5619047619047617,"a95":5.3,"info":"\"14-09-17\" at \"14:48\""},{"visible":true,"include":false,"step":"340","x":11.219047619047618,"y":31.64761904761905,"z":-18.38095238095238,"a95":9.7,"info":"\"14-09-17\" at \"20:05\""},{"visible":true,"include":false,"step":"370","x":39.49523809523809,"y":48.8,"z":-11.723809523809523,"a95":5.2,"info":"\"14-09-18\" at \"09:27\""},{"visible":true,"include":false,"step":"390","x":36.51428571428571,"y":35.82857142857143,"z":-20.00952380952381,"a95":4.5,"info":"\"14-09-18\" at \"12:26\""},{"visible":true,"include":false,"step":"420","x":29.56190476190476,"y":53.69523809523809,"z":-18.428571428571427,"a95":4.6,"info":"\"14-09-18\" at \"15:57\""},{"visible":true,"include":false,"step":"450","x":35.304761904761904,"y":35.00952380952381,"z":39.457142857142856,"a95":2.7,"info":"\"14-09-19\" at \"10:41\""},{"visible":true,"include":false,"step":"480","x":-1.4095238095238096,"y":48.10476190476191,"z":-6.723809523809523,"a95":9.2,"info":"\"14-09-19\" at \"13:39\""},{"visible":true,"include":false,"step":"510","x":14.02857142857143,"y":-11.371428571428572,"z":7.580952380952381,"a95":19.1,"info":"\"14-09-19\" at \"16:19\""},{"visible":true,"include":false,"step":"540","x":34.885714285714286,"y":29.123809523809523,"z":-69.80952380952381,"a95":8,"info":"\"14-10-04\" at \"11:59\""},{"visible":true,"include":false,"step":"570","x":-11.80952380952381,"y":-389.04761904761904,"z":381.8095238095238,"a95":6.6,"info":"\"14-10-04\" at \"15:16\""}]},{"version":"v1.1.0","exported":"2016-11-28T14:55:05.346Z","volume":10.5,"added":"2016-11-28T14:39:56.395Z","format":"Utrecht","demagType":"Unknown","strat":"6","patch":1.1,"GEO":[],"TECT":[],"interpreted":false,"name":"YK4.3B","coreAzi":96,"coreDip":37,"bedStrike":308,"bedDip":61,"data":[{"visible":true,"include":false,"step":"0.0","x":-168.40952380952382,"y":-95.68571428571428,"z":121.8952380952381,"a95":0.99,"info":"25/08/2014 at 22:43:42"},{"visible":true,"include":false,"step":"4.0","x":-131.35238095238097,"y":-89.18761904761905,"z":97.15238095238095,"a95":0.99,"info":"25/08/2014 at 22:43:42"},{"visible":true,"include":false,"step":"8.0","x":-89.23333333333333,"y":-68.27047619047619,"z":83.94380952380952,"a95":0.99,"info":"25/08/2014 at 22:43:42"},{"visible":true,"include":false,"step":"12.0","x":-48.89809523809523,"y":-48.08761904761905,"z":40.36190476190476,"a95":0.99,"info":"25/08/2014 at 22:43:42"},{"visible":true,"include":false,"step":"16.0","x":-46.79142857142857,"y":-31.32190476190476,"z":35.05238095238095,"a95":0.99,"info":"25/08/2014 at 22:43:42"},{"visible":true,"include":false,"step":"20.0","x":-39.99142857142857,"y":-36.42952380952381,"z":14.300952380952381,"a95":0.99,"info":"25/08/2014 at 22:43:42"},{"visible":true,"include":false,"step":"25.0","x":-44.513333333333335,"y":-43.47238095238095,"z":10.177142857142858,"a95":0.99,"info":"25/08/2014 at 22:43:42"},{"visible":true,"include":false,"step":"30.0","x":-49.58571428571428,"y":-44.25904761904762,"z":27.738095238095237,"a95":0.99,"info":"25/08/2014 at 22:43:42"},{"visible":true,"include":false,"step":"35.0","x":-48.88,"y":-60.09809523809523,"z":18.14095238095238,"a95":0.99,"info":"25/08/2014 at 22:43:42"},{"visible":true,"include":false,"step":"40.0","x":-50.980952380952374,"y":-37.27047619047619,"z":18.38095238095238,"a95":0.99,"info":"25/08/2014 at 22:43:42"},{"visible":true,"include":false,"step":"45.0","x":-9.72857142857143,"y":-44.523809523809526,"z":40.626666666666665,"a95":0.99,"info":"25/08/2014 at 22:43:42"},{"visible":true,"include":false,"step":"50.0","x":-45.327619047619045,"y":-54.051428571428566,"z":30.484761904761903,"a95":0.99,"info":"25/08/2014 at 22:43:42"},{"visible":true,"include":false,"step":"60.0","x":-45.12952380952381,"y":-38.84571428571429,"z":34.64952380952381,"a95":0.99,"info":"25/08/2014 at 22:43:42"},{"visible":true,"include":false,"step":"70.0","x":-13.16095238095238,"y":-53.60952380952381,"z":33.45809523809524,"a95":0.99,"info":"25/08/2014 at 22:43:42"},{"visible":true,"include":false,"step":"80.0","x":-37.30095238095238,"y":-54.72095238095238,"z":29.474285714285717,"a95":0.99,"info":"25/08/2014 at 22:43:42"},{"visible":true,"include":false,"step":"90.0","x":-24.64190476190476,"y":-31.669523809523806,"z":10.10190476190476,"a95":0.99,"info":"25/08/2014 at 22:43:42"},{"visible":true,"include":false,"step":"100.0","x":45.396190476190476,"y":-18.99238095238095,"z":20.568571428571428,"a95":0.99,"info":"25/08/2014 at 22:43:42"}]},{"version":"v1.1.0","exported":"2016-11-28T14:55:05.346Z","volume":10.5,"added":"2016-11-28T14:39:56.396Z","format":"Utrecht","demagType":"Unknown","strat":"7","patch":1.1,"GEO":[{"dec":81.15344196084374,"inc":-55.84280187688551,"MAD":15.252463040936895,"cm":[-3.3306690738754696e-15,6.661338147750939e-16,0],"intensity":106.58560331708556,"type":"dir","forced":true,"remark":"","origin":false,"nSteps":6,"minStep":"25.0","maxStep":"50.0","steps":["25.0","30.0","35.0","40.0","45.0","50.0"],"group":"None","version":"v1.1.0"}],"TECT":[{"dec":181.82477064329072,"inc":-49.413689628494616,"MAD":15.252463040936883,"cm":[-3.1086244689504383e-15,-1.887379141862766e-15,3.552713678800501e-15],"intensity":106.58560331708557,"type":"dir","forced":true,"remark":"","origin":false,"nSteps":6,"minStep":"25.0","maxStep":"50.0","steps":["25.0","30.0","35.0","40.0","45.0","50.0"],"group":"None","version":"v1.1.0"}],"interpreted":true,"name":"YK4.4A","coreAzi":95,"coreDip":44,"bedStrike":308,"bedDip":61,"data":[{"visible":true,"include":false,"step":"0.0","x":-59.20571428571428,"y":-32.65904761904762,"z":75.90666666666667,"a95":0.99,"info":"25/08/2014 at 22:43:42"},{"visible":true,"include":false,"step":"4.0","x":-6.077714285714286,"y":-21.12666666666667,"z":43.41619047619048,"a95":0.99,"info":"25/08/2014 at 22:43:42"},{"visible":true,"include":false,"step":"8.0","x":20.98857142857143,"y":-2.7674285714285713,"z":0.4577428571428572,"a95":0.99,"info":"25/08/2014 at 22:43:42"},{"visible":true,"include":false,"step":"12.0","x":39.10952380952381,"y":-2.833142857142857,"z":-15.694285714285714,"a95":0.99,"info":"25/08/2014 at 22:43:42"},{"visible":true,"include":false,"step":"16.0","x":55.409523809523805,"y":18.48095238095238,"z":3.258952380952381,"a95":0.99,"info":"25/08/2014 at 22:43:42"},{"visible":true,"include":false,"step":"20.0","x":72.7895238095238,"y":17.68095238095238,"z":5.588,"a95":0.99,"info":"25/08/2014 at 22:43:42"},{"visible":true,"include":true,"step":"25.0","x":69.96285714285715,"y":-17.337142857142858,"z":-25.32095238095238,"a95":0.99,"info":"25/08/2014 at 22:43:42"},{"visible":true,"include":true,"step":"30.0","x":76.12761904761905,"y":9.762857142857143,"z":-8.481142857142858,"a95":0.99,"info":"25/08/2014 at 22:43:42"},{"visible":true,"include":true,"step":"35.0","x":84.11428571428571,"y":-13.424761904761905,"z":-14.335238095238097,"a95":0.99,"info":"25/08/2014 at 22:43:42"},{"visible":true,"include":true,"step":"40.0","x":49.86571428571429,"y":-0.06488095238095239,"z":-20.53333333333333,"a95":0.99,"info":"25/08/2014 at 22:43:42"},{"visible":true,"include":true,"step":"45.0","x":48.87428571428571,"y":-21.549523809523812,"z":14.063809523809523,"a95":0.99,"info":"25/08/2014 at 22:43:42"},{"visible":true,"include":true,"step":"50.0","x":23.78,"y":-18.516190476190474,"z":-10.558095238095238,"a95":0.99,"info":"25/08/2014 at 22:43:42"},{"visible":true,"include":false,"step":"60.0","x":10.074285714285715,"y":14.040952380952382,"z":6.194285714285715,"a95":0.99,"info":"25/08/2014 at 22:43:42"},{"visible":true,"include":false,"step":"70.0","x":0.8219333333333333,"y":-6.104857142857143,"z":5.615047619047619,"a95":0.99,"info":"25/08/2014 at 22:43:42"},{"visible":true,"include":false,"step":"80.0","x":23.75809523809524,"y":-14.436190476190477,"z":23.564761904761905,"a95":0.99,"info":"25/08/2014 at 22:43:42"},{"visible":true,"include":false,"step":"90.0","x":0.31714285714285717,"y":-18.93619047619048,"z":6.453047619047619,"a95":0.99,"info":"25/08/2014 at 22:43:42"},{"visible":true,"include":false,"step":"100.0","x":16.34952380952381,"y":9.963809523809525,"z":0.865742857142857,"a95":0.99,"info":"25/08/2014 at 22:43:42"}]},{"version":"v1.1.0","exported":"2016-11-28T14:55:05.347Z","volume":10.5,"added":"2016-11-28T14:39:56.396Z","format":"Utrecht","demagType":"Unknown","strat":"8","patch":1.1,"GEO":[],"TECT":[],"interpreted":false,"name":"YK4.5B","coreAzi":87,"coreDip":39,"bedStrike":308,"bedDip":61,"data":[{"visible":true,"include":false,"step":"0.0","x":-227.9238095238095,"y":-130.6952380952381,"z":195.04761904761904,"a95":0.99,"info":"25/08/2014 at 22:43:42"},{"visible":true,"include":false,"step":"4.0","x":-184.57142857142858,"y":-131.83809523809524,"z":169.67619047619047,"a95":0.99,"info":"25/08/2014 at 22:43:42"},{"visible":true,"include":false,"step":"8.0","x":-137.1904761904762,"y":-133.47619047619048,"z":129.7904761904762,"a95":0.99,"info":"25/08/2014 at 22:43:42"},{"visible":true,"include":false,"step":"12.0","x":-111.33333333333333,"y":-97.13333333333333,"z":98.37142857142858,"a95":0.99,"info":"25/08/2014 at 22:43:42"},{"visible":true,"include":false,"step":"16.0","x":-74.49047619047619,"y":-87.76571428571428,"z":116.55238095238094,"a95":0.99,"info":"25/08/2014 at 22:43:42"},{"visible":true,"include":false,"step":"20.0","x":-54.22857142857143,"y":-76.25333333333333,"z":72.37809523809524,"a95":0.99,"info":"25/08/2014 at 22:43:42"},{"visible":true,"include":false,"step":"25.0","x":-59.76952380952381,"y":-86.66190476190476,"z":74.52380952380952,"a95":0.99,"info":"25/08/2014 at 22:43:42"},{"visible":true,"include":false,"step":"30.0","x":-34.6447619047619,"y":-56.4352380952381,"z":72.40666666666667,"a95":0.99,"info":"25/08/2014 at 22:43:42"},{"visible":true,"include":false,"step":"35.0","x":-21.121904761904762,"y":-46.26761904761905,"z":64.16952380952381,"a95":0.99,"info":"25/08/2014 at 22:43:42"},{"visible":true,"include":false,"step":"40.0","x":-41.71523809523809,"y":-22.965714285714284,"z":55.12095238095238,"a95":0.99,"info":"25/08/2014 at 22:43:42"},{"visible":true,"include":false,"step":"45.0","x":-27.744761904761905,"y":-43.233333333333334,"z":58.93047619047619,"a95":0.99,"info":"25/08/2014 at 22:43:42"},{"visible":true,"include":false,"step":"50.0","x":-45.02857142857143,"y":-62.387619047619054,"z":33.75047619047619,"a95":0.99,"info":"25/08/2014 at 22:43:42"},{"visible":true,"include":false,"step":"60.0","x":-30.799999999999997,"y":-40.46857142857143,"z":29.215238095238096,"a95":0.99,"info":"25/08/2014 at 22:43:42"},{"visible":true,"include":false,"step":"70.0","x":-2.843714285714286,"y":-69.03999999999999,"z":28.482857142857142,"a95":0.99,"info":"25/08/2014 at 22:43:42"},{"visible":true,"include":false,"step":"80.0","x":-47.26380952380952,"y":-0.35900952380952383,"z":19.882857142857144,"a95":0.99,"info":"25/08/2014 at 22:43:42"},{"visible":true,"include":false,"step":"90.0","x":-10.117142857142857,"y":-28.507619047619045,"z":6.884380952380953,"a95":0.99,"info":"25/08/2014 at 22:43:42"},{"visible":true,"include":false,"step":"100.0","x":-7.955904761904763,"y":-21.185714285714283,"z":21.833333333333332,"a95":0.99,"info":"25/08/2014 at 22:43:42"}]},{"version":"v1.1.0","exported":"2016-11-28T14:55:05.347Z","volume":10.5,"added":"2016-11-28T14:39:56.397Z","format":"Utrecht","demagType":"Unknown","strat":"1","patch":1.1,"GEO":[{"dec":127.184394004453,"inc":-18.8844935037192,"MAD":15.565710659768014,"cm":[1.4210854715202004e-14,1.2434497875801753e-14,0],"intensity":238.07612883841333,"type":"dir","forced":true,"remark":"","origin":false,"nSteps":3,"minStep":"50.0","maxStep":"70.0","steps":["50.0","60.0","70.0"],"group":"None","version":"v1.1.0"}],"TECT":[{"dec":145.98138332929176,"inc":-33.81859448148565,"MAD":15.565710659767982,"cm":[-1.687538997430238e-14,-2.1316282072803006e-14,-4.440892098500626e-15],"intensity":238.07612883841333,"type":"dir","forced":true,"remark":"","origin":false,"nSteps":3,"minStep":"50.0","maxStep":"70.0","steps":["50.0","60.0","70.0"],"group":"None","version":"v1.1.0"}],"interpreted":true,"name":"YK4.7B","coreAzi":10,"coreDip":24,"bedStrike":338,"bedDip":39,"data":[{"visible":true,"include":false,"step":"0.0","x":-647.2476190476191,"y":292.81904761904764,"z":496.34285714285716,"a95":0.99,"info":"26/08/2014 at 04:12:28"},{"visible":true,"include":false,"step":"4.0","x":-499.4190476190476,"y":340.9428571428572,"z":351.1714285714286,"a95":0.99,"info":"26/08/2014 at 04:12:28"},{"visible":true,"include":false,"step":"8.0","x":-335.7142857142857,"y":345.9809523809524,"z":114.39047619047618,"a95":0.99,"info":"26/08/2014 at 04:12:28"},{"visible":true,"include":false,"step":"12.0","x":-192.35238095238097,"y":246.41904761904763,"z":-71.04761904761905,"a95":0.99,"info":"26/08/2014 at 04:12:28"},{"visible":true,"include":false,"step":"16.0","x":-68.32285714285715,"y":198.96190476190475,"z":-131.34285714285713,"a95":0.99,"info":"26/08/2014 at 04:12:28"},{"visible":true,"include":false,"step":"20.0","x":-45.743809523809524,"y":186.6095238095238,"z":-216.65714285714287,"a95":0.99,"info":"26/08/2014 at 04:12:28"},{"visible":true,"include":false,"step":"25.0","x":-49.04,"y":176.13333333333335,"z":-313.3904761904762,"a95":0.99,"info":"26/08/2014 at 04:12:28"},{"visible":true,"include":false,"step":"30.0","x":72.33619047619047,"y":145.0095238095238,"z":-147.46666666666667,"a95":0.99,"info":"26/08/2014 at 04:12:28"},{"visible":true,"include":false,"step":"35.0","x":79.42190476190476,"y":102.63809523809525,"z":-249.21904761904764,"a95":0.99,"info":"26/08/2014 at 04:12:28"},{"visible":true,"include":false,"step":"40.0","x":29.936190476190475,"y":126.33333333333333,"z":-135.44761904761904,"a95":0.99,"info":"26/08/2014 at 04:12:28"},{"visible":true,"include":false,"step":"45.0","x":28.325714285714287,"y":92.71809523809523,"z":-248.96190476190475,"a95":0.99,"info":"26/08/2014 at 04:12:28"},{"visible":true,"include":true,"step":"50.0","x":43.04761904761905,"y":142.9047619047619,"z":-103.46666666666667,"a95":0.99,"info":"26/08/2014 at 04:12:28"},{"visible":true,"include":true,"step":"60.0","x":-12.900952380952381,"y":88.70761904761905,"z":-58.457142857142856,"a95":0.99,"info":"26/08/2014 at 04:12:28"},{"visible":true,"include":true,"step":"70.0","x":-15.196190476190477,"y":72.22857142857143,"z":5.373904761904762,"a95":0.99,"info":"26/08/2014 at 04:12:28"},{"visible":true,"include":false,"step":"80.0","x":-322.22857142857146,"y":-134.67619047619047,"z":-51.061904761904756,"a95":0.99,"info":"26/08/2014 at 04:12:28"},{"visible":true,"include":false,"step":"90.0","x":32.86380952380952,"y":5.074571428571429,"z":9.207714285714285,"a95":0.99,"info":"26/08/2014 at 04:12:28"},{"visible":true,"include":false,"step":"100.0","x":-101.68571428571428,"y":-20.592380952380953,"z":-21.36952380952381,"a95":0.99,"info":"26/08/2014 at 04:12:28"}]},{"version":"v1.1.0","exported":"2016-11-28T14:55:05.347Z","volume":10.5,"added":"2016-11-28T14:39:56.398Z","format":"Utrecht","demagType":"Unknown","strat":null,"patch":1.1,"GEO":[{"dec":31.918214911678547,"inc":-14.876648724691435,"MAD":10.913075192694276,"cm":[-2.353672812205332e-14,7.105427357601002e-15,0],"intensity":983.2846108072372,"type":"GC","origin":false,"forced":true,"remark":"","nSteps":3,"minStep":"150","maxStep":"210","steps":["150","180","210"],"group":"None","version":"v1.1.0"}],"TECT":[{"dec":16.046310883699334,"inc":-43.715504986045055,"MAD":10.913075192695377,"cm":[-6.927791673660977e-14,1.4210854715202004e-14,-7.105427357601002e-15],"intensity":983.2846108072372,"type":"GC","origin":false,"forced":true,"remark":"","nSteps":3,"minStep":"150","maxStep":"210","steps":["150","180","210"],"group":"None","version":"v1.1.0"}],"interpreted":true,"name":"YK4.8A","coreAzi":14,"coreDip":22,"bedStrike":338,"bedDip":39,"data":[{"visible":true,"include":false,"step":"20","x":-1124.952380952381,"y":263.23809523809524,"z":368.3809523809524,"a95":2.1,"info":"\"14-09-15\" at \"16:06\""},{"visible":true,"include":false,"step":"100","x":-675.7142857142857,"y":265.6190476190476,"z":385.3333333333333,"a95":2.5,"info":"\"14-09-15\" at \"20:06\""},{"visible":true,"include":true,"step":"150","x":-476.3809523809524,"y":213.33333333333334,"z":278.76190476190476,"a95":2.9,"info":"\"14-09-15\" at \"22:42\""},{"visible":true,"include":true,"step":"180","x":-367.8095238095238,"y":203.42857142857142,"z":213.71428571428572,"a95":2.7,"info":"\"14-09-16\" at \"11:40\""},{"visible":true,"include":true,"step":"210","x":-307.42857142857144,"y":191.9047619047619,"z":155.14285714285714,"a95":3.3,"info":"\"14-09-16\" at \"14:22\""},{"visible":true,"include":false,"step":"240","x":-111.23809523809524,"y":178.57142857142858,"z":74.28571428571429,"a95":3.5,"info":"\"14-09-16\" at \"17:08\""},{"visible":true,"include":false,"step":"270","x":-177.14285714285714,"y":163.33333333333334,"z":17.80952380952381,"a95":3.5,"info":"\"14-09-16\" at \"20:16\""},{"visible":true,"include":false,"step":"300","x":-205.71428571428572,"y":155.33333333333334,"z":-73.61904761904762,"a95":3.5,"info":"\"14-09-17\" at \"11:21\""},{"visible":true,"include":false,"step":"320","x":-193.14285714285714,"y":127.23809523809524,"z":-86.85714285714286,"a95":2.9,"info":"\"14-09-17\" at \"14:51\""},{"visible":true,"include":false,"step":"340","x":-145.9047619047619,"y":94.47619047619048,"z":-119.33333333333333,"a95":3.2,"info":"\"14-09-17\" at \"20:07\""},{"visible":true,"include":false,"step":"370","x":-230.85714285714286,"y":69.52380952380952,"z":-112.95238095238095,"a95":3.5,"info":"\"14-09-18\" at \"09:29\""},{"visible":true,"include":false,"step":"390","x":-154.95238095238096,"y":86.76190476190476,"z":-178,"a95":4.4,"info":"\"14-09-18\" at \"12:28\""},{"visible":true,"include":false,"step":"420","x":-82.0952380952381,"y":97.42857142857143,"z":-174.76190476190476,"a95":4.9,"info":"\"14-09-18\" at \"16:00\""},{"visible":true,"include":false,"step":"450","x":-146.0952380952381,"y":86.85714285714286,"z":-144.28571428571428,"a95":5.3,"info":"\"14-09-19\" at \"10:45\""},{"visible":true,"include":false,"step":"480","x":-76.57142857142857,"y":83.04761904761905,"z":-100.0952380952381,"a95":6.6,"info":"\"14-09-19\" at \"13:41\""},{"visible":true,"include":false,"step":"510","x":-159.14285714285714,"y":58.19047619047619,"z":64.47619047619048,"a95":5.3,"info":"\"14-09-19\" at \"16:21\""},{"visible":true,"include":false,"step":"540","x":10.952380952380953,"y":81.61904761904762,"z":-216.95238095238096,"a95":6.6,"info":"\"14-10-04\" at \"12:01\""},{"visible":true,"include":false,"step":"570","x":-509.23809523809524,"y":51.714285714285715,"z":58.19047619047619,"a95":25.4,"info":"\"14-10-04\" at \"15:18\""}]},{"version":"v1.1.0","exported":"2016-11-28T14:55:05.347Z","volume":10.5,"added":"2016-11-28T14:39:56.398Z","format":"Utrecht","demagType":"Unknown","strat":"2","patch":1.1,"GEO":[{"dec":43.36570342070337,"inc":-32.148575157754,"MAD":4.28244595965774,"cm":[-7.993605777301127e-14,3.552713678800501e-14,0],"intensity":1327.3749742214336,"type":"GC","origin":false,"forced":true,"remark":"","nSteps":4,"minStep":"4.0","maxStep":"20.0","steps":["4.0","8.0","12.0","20.0"],"group":"None","version":"v1.1.0"}],"TECT":[{"dec":14.718358975585375,"inc":-63.878872660461006,"MAD":4.282445959657924,"cm":[1.5276668818842154e-13,-1.3500311979441904e-13,-3.1086244689504383e-15],"intensity":1327.3749742214334,"type":"GC","origin":false,"forced":true,"remark":"","nSteps":4,"minStep":"4.0","maxStep":"20.0","steps":["4.0","8.0","12.0","20.0"],"group":"None","version":"v1.1.0"}],"interpreted":true,"name":"YK4.8B","coreAzi":14,"coreDip":22,"bedStrike":338,"bedDip":39,"data":[{"visible":true,"include":false,"step":"0.0","x":-807.8380952380952,"y":386.6666666666667,"z":925.2476190476191,"a95":0.99,"info":"26/08/2014 at 04:12:28"},{"visible":true,"include":true,"step":"4.0","x":-679.4380952380952,"y":368.752380952381,"z":786.6380952380953,"a95":0.99,"info":"26/08/2014 at 04:12:28"},{"visible":true,"include":true,"step":"8.0","x":-516.8666666666667,"y":359.37142857142857,"z":475.4380952380953,"a95":0.99,"info":"26/08/2014 at 04:12:28"},{"visible":true,"include":true,"step":"12.0","x":-319.15238095238095,"y":331.1333333333333,"z":221.77142857142857,"a95":0.99,"info":"26/08/2014 at 04:12:28"},{"visible":true,"include":false,"step":"16.0","x":-167.71428571428572,"y":315.6666666666667,"z":148.66666666666666,"a95":0.99,"info":"26/08/2014 at 04:12:28"},{"visible":true,"include":true,"step":"20.0","x":-151.7904761904762,"y":298.57142857142856,"z":4.350095238095238,"a95":0.99,"info":"26/08/2014 at 04:12:28"},{"visible":true,"include":false,"step":"25.0","x":-86.17142857142856,"y":232.02857142857144,"z":59.290476190476184,"a95":0.99,"info":"26/08/2014 at 04:12:28"},{"visible":true,"include":false,"step":"30.0","x":-32.04857142857143,"y":206.71428571428572,"z":52.272380952380956,"a95":0.99,"info":"26/08/2014 at 04:12:28"},{"visible":true,"include":false,"step":"35.0","x":-80.86,"y":129.25714285714287,"z":-15.230476190476189,"a95":0.99,"info":"26/08/2014 at 04:12:28"},{"visible":true,"include":false,"step":"40.0","x":-28.609523809523807,"y":166.7238095238095,"z":-52.179047619047616,"a95":0.99,"info":"26/08/2014 at 04:12:28"},{"visible":true,"include":false,"step":"45.0","x":-39.436190476190475,"y":171.2,"z":48.233333333333334,"a95":0.99,"info":"26/08/2014 at 04:12:28"},{"visible":true,"include":false,"step":"50.0","x":-79.08,"y":62.049523809523805,"z":61.758095238095244,"a95":0.99,"info":"26/08/2014 at 04:12:28"},{"visible":true,"include":false,"step":"60.0","x":-12.299047619047618,"y":114.14285714285714,"z":72.54571428571428,"a95":0.99,"info":"26/08/2014 at 04:12:28"},{"visible":true,"include":false,"step":"70.0","x":-29.242857142857144,"y":41.01714285714286,"z":-32.38666666666667,"a95":0.99,"info":"26/08/2014 at 04:12:28"},{"visible":true,"include":false,"step":"80.0","x":247.61904761904762,"y":2.5467619047619046,"z":63.26380952380952,"a95":0.99,"info":"26/08/2014 at 04:12:28"},{"visible":true,"include":false,"step":"90.0","x":93.94571428571427,"y":191.4952380952381,"z":-88.29333333333334,"a95":0.99,"info":"26/08/2014 at 04:12:28"},{"visible":true,"include":false,"step":"100.0","x":48.27714285714286,"y":2.103904761904762,"z":99.4,"a95":0.99,"info":"26/08/2014 at 04:12:28"}]},{"version":"v1.1.0","exported":"2016-11-28T14:55:05.347Z","volume":10.5,"added":"2016-11-28T14:39:56.399Z","format":"Utrecht","demagType":"Unknown","strat":"3","patch":1.1,"GEO":[{"dec":23.194870757366346,"inc":-25.7697973230473,"MAD":2.7200722547140597,"cm":[4.707345624410664e-14,-2.1316282072803006e-14,0],"intensity":1396.7068714441223,"type":"GC","origin":false,"forced":true,"remark":"","nSteps":4,"minStep":"4.0","maxStep":"16.0","steps":["4.0","8.0","12.0","16.0"],"group":"None","version":"v1.1.0"}],"TECT":[{"dec":357.3574238820492,"inc":-47.728928833579644,"MAD":2.7200722547146743,"cm":[9.325873406851315e-14,-3.552713678800501e-14,3.552713678800501e-15],"intensity":1396.7068714441223,"type":"GC","origin":false,"forced":true,"remark":"","nSteps":4,"minStep":"4.0","maxStep":"16.0","steps":["4.0","8.0","12.0","16.0"],"group":"None","version":"v1.1.0"}],"interpreted":true,"name":"YK4.9B","coreAzi":16,"coreDip":25,"bedStrike":338,"bedDip":39,"data":[{"visible":true,"include":false,"step":"0.0","x":-961.7142857142857,"y":376.8952380952381,"z":1071.3333333333333,"a95":0.99,"info":"26/08/2014 at 04:12:28"},{"visible":true,"include":true,"step":"4.0","x":-740.5619047619048,"y":313.43809523809523,"z":849.3619047619047,"a95":0.99,"info":"26/08/2014 at 04:12:28"},{"visible":true,"include":true,"step":"8.0","x":-435.7523809523809,"y":288.5333333333333,"z":496.8666666666667,"a95":0.99,"info":"26/08/2014 at 04:12:28"},{"visible":true,"include":true,"step":"12.0","x":-205.95238095238096,"y":293.4095238095238,"z":208.16190476190474,"a95":0.99,"info":"26/08/2014 at 04:12:28"},{"visible":true,"include":true,"step":"16.0","x":-123.19047619047619,"y":247.64761904761906,"z":93.9857142857143,"a95":0.99,"info":"26/08/2014 at 04:12:28"},{"visible":true,"include":false,"step":"20.0","x":-83.24476190476192,"y":175.0857142857143,"z":20.938095238095237,"a95":0.99,"info":"26/08/2014 at 04:12:28"},{"visible":true,"include":false,"step":"25.0","x":-44.15904761904762,"y":150.96190476190475,"z":-82.48380952380953,"a95":0.99,"info":"26/08/2014 at 04:12:28"},{"visible":true,"include":false,"step":"30.0","x":-16.956190476190475,"y":208.12380952380954,"z":-59.73619047619048,"a95":0.99,"info":"26/08/2014 at 04:12:28"},{"visible":true,"include":false,"step":"35.0","x":30.697142857142858,"y":90.67999999999999,"z":4.833714285714286,"a95":0.99,"info":"26/08/2014 at 04:12:28"},{"visible":true,"include":false,"step":"40.0","x":-53.31714285714286,"y":166.06666666666666,"z":-107.23809523809524,"a95":0.99,"info":"26/08/2014 at 04:12:28"},{"visible":true,"include":false,"step":"45.0","x":-7.384190476190477,"y":129.17142857142858,"z":-7.8219047619047615,"a95":0.99,"info":"26/08/2014 at 04:12:28"},{"visible":true,"include":false,"step":"50.0","x":-48.82952380952381,"y":86.08666666666666,"z":32.33238095238095,"a95":0.99,"info":"26/08/2014 at 04:12:28"},{"visible":true,"include":false,"step":"60.0","x":74.30380952380953,"y":137.94285714285715,"z":39.10190476190476,"a95":0.99,"info":"26/08/2014 at 04:12:28"},{"visible":true,"include":false,"step":"70.0","x":69.50952380952381,"y":66.57809523809524,"z":-87.9695238095238,"a95":0.99,"info":"26/08/2014 at 04:12:28"},{"visible":true,"include":false,"step":"80.0","x":-92.77714285714285,"y":85.89714285714285,"z":54.24857142857143,"a95":0.99,"info":"26/08/2014 at 04:12:28"},{"visible":true,"include":false,"step":"90.0","x":96.54285714285714,"y":107.32380952380953,"z":-99.96190476190475,"a95":0.99,"info":"26/08/2014 at 04:12:28"},{"visible":true,"include":false,"step":"100.0","x":-104.39047619047618,"y":189.51428571428573,"z":-3.634190476190476,"a95":0.99,"info":"26/08/2014 at 04:12:28"}]},{"version":"v1.1.0","exported":"2016-11-28T14:55:05.347Z","volume":10.5,"added":"2016-11-28T14:39:56.399Z","format":"Utrecht","demagType":"Unknown","strat":null,"patch":1.1,"GEO":[{"dec":50.87342486207643,"inc":-13.494198355910148,"MAD":10.185703771734667,"cm":[-8.881784197001252e-15,-5.329070518200751e-15,0],"intensity":996.1221637326242,"type":"GC","origin":false,"forced":true,"remark":"","nSteps":7,"minStep":"150","maxStep":"320","steps":["150","180","210","240","270","300","320"],"group":"None","version":"v1.1.0"}],"TECT":[{"dec":41.53956431744632,"inc":-50.00993021978991,"MAD":10.185703771735284,"cm":[-9.059419880941277e-14,3.552713678800501e-15,4.440892098500626e-15],"intensity":996.1221637326242,"type":"GC","origin":false,"forced":true,"remark":"","nSteps":7,"minStep":"150","maxStep":"320","steps":["150","180","210","240","270","300","320"],"group":"None","version":"v1.1.0"}],"interpreted":true,"name":"YK4.10A","coreAzi":3,"coreDip":24,"bedStrike":338,"bedDip":39,"data":[{"visible":true,"include":false,"step":"20","x":-1017.3333333333334,"y":81.80952380952381,"z":502.76190476190476,"a95":2.3,"info":"\"14-09-15\" at \"16:09\""},{"visible":true,"include":false,"step":"100","x":-768.4761904761905,"y":195.9047619047619,"z":520.5714285714286,"a95":2.4,"info":"\"14-09-15\" at \"20:08\""},{"visible":true,"include":true,"step":"150","x":-616.7619047619048,"y":192,"z":317.9047619047619,"a95":2.6,"info":"\"14-09-15\" at \"22:44\""},{"visible":true,"include":true,"step":"180","x":-510.4761904761905,"y":240.1904761904762,"z":161.33333333333334,"a95":2.4,"info":"\"14-09-16\" at \"11:43\""},{"visible":true,"include":true,"step":"210","x":-528.0952380952381,"y":247.71428571428572,"z":99.61904761904762,"a95":2.4,"info":"\"14-09-16\" at \"14:24\""},{"visible":true,"include":true,"step":"240","x":-415.7142857142857,"y":220.0952380952381,"z":50.19047619047619,"a95":3,"info":"\"14-09-16\" at \"17:10\""},{"visible":true,"include":true,"step":"270","x":-298,"y":206.0952380952381,"z":40.38095238095238,"a95":3,"info":"\"14-09-16\" at \"20:18\""},{"visible":true,"include":true,"step":"300","x":-291.3333333333333,"y":177.42857142857142,"z":46.95238095238095,"a95":3.4,"info":"\"14-09-17\" at \"11:26\""},{"visible":true,"include":true,"step":"320","x":-255.71428571428572,"y":180.0952380952381,"z":-13.619047619047619,"a95":3.5,"info":"\"14-09-17\" at \"14:53\""},{"visible":true,"include":false,"step":"340","x":-229.8095238095238,"y":164.57142857142858,"z":13.523809523809524,"a95":3.4,"info":"\"14-09-17\" at \"20:10\""},{"visible":true,"include":false,"step":"370","x":-242.95238095238096,"y":152.38095238095238,"z":3.7142857142857144,"a95":4.4,"info":"\"14-09-18\" at \"09:32\""},{"visible":true,"include":false,"step":"390","x":-203.71428571428572,"y":172.66666666666666,"z":20.095238095238095,"a95":4.8,"info":"\"14-09-18\" at \"12:30\""},{"visible":true,"include":false,"step":"420","x":-158.85714285714286,"y":257.8095238095238,"z":-8.095238095238095,"a95":3,"info":"\"14-09-18\" at \"16:02\""},{"visible":true,"include":false,"step":"450","x":-231.23809523809524,"y":176.85714285714286,"z":57.333333333333336,"a95":3.5,"info":"\"14-09-19\" at \"10:48\""},{"visible":true,"include":false,"step":"480","x":-148.47619047619048,"y":8.476190476190476,"z":-0.5714285714285714,"a95":7.1,"info":"\"14-09-19\" at \"13:43\""},{"visible":true,"include":false,"step":"510","x":-113.04761904761905,"y":76.66666666666667,"z":21.142857142857142,"a95":6.7,"info":"\"14-09-19\" at \"16:23\""},{"visible":true,"include":false,"step":"540","x":-116.38095238095238,"y":250.1904761904762,"z":-313.7142857142857,"a95":3.9,"info":"\"14-10-04\" at \"12:03\""},{"visible":true,"include":false,"step":"570","x":-620.1904761904761,"y":-183.9047619047619,"z":307.9047619047619,"a95":19.8,"info":"\"14-10-04\" at \"15:20\""}]},{"version":"v1.1.0","exported":"2016-11-28T14:55:05.347Z","volume":10.5,"added":"2016-11-28T14:39:56.399Z","format":"Utrecht","demagType":"Unknown","strat":"4","patch":1.1,"GEO":[{"dec":49.08062649350239,"inc":-27.959498718148453,"MAD":5.990814023274737,"cm":[-1.9539925233402755e-14,-2.1316282072803006e-14,0],"intensity":917.720822418852,"type":"GC","origin":false,"forced":true,"remark":"","nSteps":5,"minStep":"8.0","maxStep":"25.0","steps":["8.0","12.0","16.0","20.0","25.0"],"group":"None","version":"v1.1.0"}],"TECT":[{"dec":29.050079734174233,"inc":-62.89816505177032,"MAD":5.990814023274801,"cm":[-1.5987211554602254e-14,-2.842170943040401e-14,1.865174681370263e-14],"intensity":917.720822418852,"type":"GC","origin":false,"forced":true,"remark":"","nSteps":5,"minStep":"8.0","maxStep":"25.0","steps":["8.0","12.0","16.0","20.0","25.0"],"group":"None","version":"v1.1.0"}],"interpreted":true,"name":"YK4.10B","coreAzi":3,"coreDip":24,"bedStrike":338,"bedDip":39,"data":[{"visible":true,"include":false,"step":"0.0","x":-942.2857142857143,"y":259.8857142857143,"z":1038.5714285714287,"a95":0.99,"info":"26/08/2014 at 04:12:28"},{"visible":true,"include":false,"step":"4.0","x":-785.5999999999999,"y":217.86666666666665,"z":847.8666666666667,"a95":0.99,"info":"26/08/2014 at 04:12:28"},{"visible":true,"include":true,"step":"8.0","x":-526.2095238095238,"y":257.65714285714284,"z":500.8666666666667,"a95":0.99,"info":"26/08/2014 at 04:12:28"},{"visible":true,"include":true,"step":"12.0","x":-389.96190476190475,"y":290.64761904761906,"z":257.49523809523805,"a95":0.99,"info":"26/08/2014 at 04:12:28"},{"visible":true,"include":true,"step":"16.0","x":-230.87619047619046,"y":197.85714285714286,"z":69.08380952380952,"a95":0.99,"info":"26/08/2014 at 04:12:28"},{"visible":true,"include":true,"step":"20.0","x":-148.52380952380952,"y":164.88571428571427,"z":8.326190476190476,"a95":0.99,"info":"26/08/2014 at 04:12:28"},{"visible":true,"include":true,"step":"25.0","x":-146.52380952380952,"y":142.62857142857143,"z":-21.896190476190476,"a95":0.99,"info":"26/08/2014 at 04:12:28"},{"visible":true,"include":false,"step":"30.0","x":-117.93333333333332,"y":187.0952380952381,"z":-10.936190476190475,"a95":0.99,"info":"26/08/2014 at 04:12:28"},{"visible":true,"include":false,"step":"35.0","x":-91.90857142857142,"y":77.41619047619048,"z":5.426761904761905,"a95":0.99,"info":"26/08/2014 at 04:12:28"},{"visible":true,"include":false,"step":"40.0","x":-100.84761904761906,"y":121.05714285714285,"z":-68.45904761904762,"a95":0.99,"info":"26/08/2014 at 04:12:28"},{"visible":true,"include":false,"step":"45.0","x":15.343809523809526,"y":84.42952380952381,"z":-98.84761904761906,"a95":0.99,"info":"26/08/2014 at 04:12:28"},{"visible":true,"include":false,"step":"50.0","x":-102.36190476190475,"y":20.53333333333333,"z":-25.44952380952381,"a95":0.99,"info":"26/08/2014 at 04:12:28"},{"visible":true,"include":false,"step":"60.0","x":-40.73238095238095,"y":21.353333333333335,"z":2.8244761904761906,"a95":0.99,"info":"26/08/2014 at 04:12:28"},{"visible":true,"include":false,"step":"70.0","x":-90.07428571428571,"y":26.015238095238097,"z":5.526857142857143,"a95":0.99,"info":"26/08/2014 at 04:12:28"},{"visible":true,"include":false,"step":"80.0","x":-46.1647619047619,"y":-85.05714285714286,"z":123.12380952380951,"a95":0.99,"info":"26/08/2014 at 04:12:28"},{"visible":true,"include":false,"step":"90.0","x":-78.85714285714286,"y":100.75238095238096,"z":-33.962857142857146,"a95":0.99,"info":"26/08/2014 at 04:12:28"},{"visible":true,"include":false,"step":"100.0","x":-52.328571428571436,"y":-8.381714285714285,"z":39.896190476190476,"a95":0.99,"info":"26/08/2014 at 04:12:28"}]},{"version":"v1.1.0","exported":"2016-11-28T14:55:05.347Z","volume":10.5,"added":"2016-11-28T14:39:56.399Z","format":"Utrecht","demagType":"Unknown","strat":"5","patch":1.1,"GEO":[{"dec":27.87603689617316,"inc":-17.12331085031393,"MAD":11.308144227422554,"cm":[-2.6645352591003757e-15,-1.7763568394002505e-15,0],"intensity":170.09216525779829,"type":"GC","origin":false,"forced":true,"remark":"","nSteps":3,"minStep":"8.0","maxStep":"16.0","steps":["8.0","12.0","16.0"],"group":"None","version":"v1.1.0"}],"TECT":[{"dec":9.850688410038458,"inc":-43.526895307501725,"MAD":11.308144227423206,"cm":[6.217248937900877e-15,-2.398081733190338e-14,-5.329070518200751e-15],"intensity":170.0921652577983,"type":"GC","origin":false,"forced":true,"remark":"","nSteps":3,"minStep":"8.0","maxStep":"16.0","steps":["8.0","12.0","16.0"],"group":"None","version":"v1.1.0"}],"interpreted":true,"name":"YK4.11B","coreAzi":35,"coreDip":15,"bedStrike":338,"bedDip":39,"data":[{"visible":true,"include":false,"step":"0.0","x":-116.83809523809524,"y":-71.48095238095237,"z":105.65714285714287,"a95":0.99,"info":"26/08/2014 at 04:12:28"},{"visible":true,"include":false,"step":"4.0","x":-93.3752380952381,"y":-64.38285714285715,"z":72.44285714285714,"a95":0.99,"info":"26/08/2014 at 04:12:28"},{"visible":true,"include":true,"step":"8.0","x":-66.27047619047619,"y":-67.13142857142857,"z":32.05714285714286,"a95":0.99,"info":"26/08/2014 at 04:12:28"},{"visible":true,"include":true,"step":"12.0","x":-41.446666666666665,"y":-75.30571428571429,"z":19.01809523809524,"a95":0.99,"info":"26/08/2014 at 04:12:28"},{"visible":true,"include":true,"step":"16.0","x":-35.73142857142857,"y":-62.36571428571429,"z":9.864761904761904,"a95":0.99,"info":"26/08/2014 at 04:12:28"},{"visible":true,"include":false,"step":"20.0","x":-36.48095238095238,"y":-48.37047619047619,"z":7.109809523809524,"a95":0.99,"info":"26/08/2014 at 04:12:28"},{"visible":true,"include":false,"step":"25.0","x":-28.219047619047622,"y":-47.45904761904762,"z":-4.25,"a95":0.99,"info":"26/08/2014 at 04:12:28"},{"visible":true,"include":false,"step":"30.0","x":-26.35238095238095,"y":-40.703809523809525,"z":7.825047619047619,"a95":0.99,"info":"26/08/2014 at 04:12:28"},{"visible":true,"include":false,"step":"35.0","x":-17.362857142857145,"y":-40.83047619047619,"z":13.868571428571428,"a95":0.99,"info":"26/08/2014 at 04:12:28"},{"visible":true,"include":false,"step":"40.0","x":-25.919047619047618,"y":-52.38285714285714,"z":-1.887047619047619,"a95":0.99,"info":"26/08/2014 at 04:12:28"},{"visible":true,"include":false,"step":"45.0","x":-10.618095238095238,"y":-26.0752380952381,"z":-7.3075238095238095,"a95":0.99,"info":"26/08/2014 at 04:12:28"},{"visible":true,"include":false,"step":"50.0","x":-21.35809523809524,"y":-30.156190476190474,"z":9.82095238095238,"a95":0.99,"info":"26/08/2014 at 04:12:28"},{"visible":true,"include":false,"step":"60.0","x":-22.307619047619045,"y":-7.674095238095238,"z":-4.076857142857143,"a95":0.99,"info":"26/08/2014 at 04:12:28"},{"visible":true,"include":false,"step":"70.0","x":19.39047619047619,"y":-20.37047619047619,"z":-8.887238095238095,"a95":0.99,"info":"26/08/2014 at 04:12:28"},{"visible":true,"include":false,"step":"80.0","x":7.695142857142858,"y":-12.272380952380953,"z":10.112380952380953,"a95":0.99,"info":"26/08/2014 at 04:12:28"},{"visible":true,"include":false,"step":"90.0","x":18.592380952380953,"y":0.9100666666666667,"z":-9.664761904761905,"a95":0.99,"info":"26/08/2014 at 04:12:28"},{"visible":true,"include":false,"step":"100.0","x":24.824761904761907,"y":6.513142857142857,"z":-11.625714285714285,"a95":0.99,"info":"26/08/2014 at 04:12:28"}]},{"version":"v1.1.0","exported":"2016-11-28T14:55:05.347Z","volume":10.5,"added":"2016-11-28T14:39:56.399Z","format":"Utrecht","demagType":"Unknown","strat":"6","patch":1.1,"GEO":[{"dec":47.834392133519714,"inc":-41.469985364065856,"MAD":2.3328697009948276,"cm":[-1.9984014443252818e-15,-3.9968028886505635e-15,0],"intensity":137.98149548527783,"type":"GC","origin":false,"forced":true,"remark":"","nSteps":5,"minStep":"4.0","maxStep":"30.0","steps":["4.0","8.0","20.0","25.0","30.0"],"group":"None","version":"v1.1.0"}],"TECT":[{"dec":4.691412215196806,"inc":-73.19473938962228,"MAD":2.332869700994641,"cm":[-4.884981308350689e-15,-1.4654943925052066e-14,6.328271240363392e-15],"intensity":137.98149548527783,"type":"GC","origin":false,"forced":true,"remark":"","nSteps":5,"minStep":"4.0","maxStep":"30.0","steps":["4.0","8.0","20.0","25.0","30.0"],"group":"None","version":"v1.1.0"}],"interpreted":true,"name":"YK4.12B","coreAzi":34,"coreDip":10,"bedStrike":338,"bedDip":39,"data":[{"visible":true,"include":false,"step":"0.0","x":-69.06857142857143,"y":-70.52285714285715,"z":101.05714285714285,"a95":0.99,"info":"26/08/2014 at 04:12:28"},{"visible":true,"include":true,"step":"4.0","x":-48.597142857142856,"y":-68.78666666666666,"z":81.91333333333334,"a95":0.99,"info":"26/08/2014 at 04:12:28"},{"visible":true,"include":true,"step":"8.0","x":-20.323809523809523,"y":-66.0304761904762,"z":48.22,"a95":0.99,"info":"26/08/2014 at 04:12:28"},{"visible":true,"include":false,"step":"12.0","x":-6.268857142857142,"y":-45.91238095238095,"z":44.13428571428572,"a95":0.99,"info":"26/08/2014 at 04:12:28"},{"visible":true,"include":false,"step":"16.0","x":6.874095238095238,"y":-38.25142857142857,"z":24.464761904761904,"a95":0.99,"info":"26/08/2014 at 04:12:28"},{"visible":true,"include":true,"step":"20.0","x":7.9391428571428575,"y":-57.578095238095244,"z":5.513714285714285,"a95":0.99,"info":"26/08/2014 at 04:12:28"},{"visible":true,"include":true,"step":"25.0","x":6.847619047619048,"y":-59.381904761904764,"z":10.653333333333332,"a95":0.99,"info":"26/08/2014 at 04:12:28"},{"visible":true,"include":true,"step":"30.0","x":9.257904761904761,"y":-37.33238095238095,"z":-2.9825714285714287,"a95":0.99,"info":"26/08/2014 at 04:12:28"},{"visible":true,"include":false,"step":"35.0","x":16.549523809523812,"y":-34.521904761904764,"z":18.79047619047619,"a95":0.99,"info":"26/08/2014 at 04:12:28"},{"visible":true,"include":false,"step":"40.0","x":14.356190476190477,"y":-46.420952380952386,"z":14.942857142857143,"a95":0.99,"info":"26/08/2014 at 04:12:28"},{"visible":true,"include":false,"step":"45.0","x":18.72952380952381,"y":-32.01714285714286,"z":12.264761904761905,"a95":0.99,"info":"26/08/2014 at 04:12:28"},{"visible":true,"include":false,"step":"50.0","x":-10.040000000000001,"y":-32.49714285714286,"z":-3.913809523809524,"a95":0.99,"info":"26/08/2014 at 04:12:28"},{"visible":true,"include":false,"step":"60.0","x":6.321714285714286,"y":-20.304761904761904,"z":13.55809523809524,"a95":0.99,"info":"26/08/2014 at 04:12:28"},{"visible":true,"include":false,"step":"70.0","x":15.230476190476189,"y":-26.403809523809525,"z":-9.542857142857143,"a95":0.99,"info":"26/08/2014 at 04:12:28"},{"visible":true,"include":false,"step":"80.0","x":14.697142857142856,"y":-5.80552380952381,"z":9.806666666666667,"a95":0.99,"info":"26/08/2014 at 04:12:28"},{"visible":true,"include":false,"step":"90.0","x":7.762095238095237,"y":-4.884190476190476,"z":-19.537142857142857,"a95":0.99,"info":"26/08/2014 at 04:12:28"},{"visible":true,"include":false,"step":"100.0","x":3.6312380952380954,"y":-29.954285714285714,"z":-0.7517809523809523,"a95":0.99,"info":"26/08/2014 at 04:12:28"}]},{"version":"v1.1.0","exported":"2016-11-28T14:55:05.347Z","volume":10.5,"added":"2016-11-28T14:39:56.399Z","format":"Utrecht","demagType":"Unknown","strat":null,"patch":1.1,"GEO":[],"TECT":[],"interpreted":false,"name":"YK4.13A","coreAzi":32,"coreDip":17,"bedStrike":338,"bedDip":39,"data":[{"visible":true,"include":false,"step":"20","x":-136.66666666666666,"y":-66.47619047619048,"z":42.285714285714285,"a95":2.2,"info":"\"14-09-15\" at \"16:11\""},{"visible":true,"include":false,"step":"100","x":-84.28571428571429,"y":-94.76190476190476,"z":68.76190476190476,"a95":3.1,"info":"\"14-09-15\" at \"20:10\""},{"visible":true,"include":false,"step":"150","x":-55.714285714285715,"y":-90.47619047619048,"z":53.714285714285715,"a95":4,"info":"\"14-09-15\" at \"22:46\""},{"visible":true,"include":false,"step":"180","x":-49.04761904761905,"y":-89.42857142857143,"z":47.142857142857146,"a95":2.3,"info":"\"14-09-16\" at \"11:45\""},{"visible":true,"include":false,"step":"210","x":-48.38095238095238,"y":-87.9047619047619,"z":45.904761904761905,"a95":4.9,"info":"\"14-09-16\" at \"14:26\""},{"visible":true,"include":false,"step":"240","x":-40.285714285714285,"y":-96.47619047619048,"z":40.476190476190474,"a95":2.4,"info":"\"14-09-16\" at \"17:14\""},{"visible":true,"include":false,"step":"270","x":-38,"y":-89.71428571428571,"z":43.142857142857146,"a95":3.9,"info":"\"14-09-16\" at \"20:21\""},{"visible":true,"include":false,"step":"300","x":-45.23809523809524,"y":-74.66666666666667,"z":42.285714285714285,"a95":3.5,"info":"\"14-09-17\" at \"11:28\""},{"visible":true,"include":false,"step":"320","x":-53.523809523809526,"y":-79.33333333333333,"z":36.095238095238095,"a95":2.6,"info":"\"14-09-17\" at \"14:56\""},{"visible":true,"include":false,"step":"340","x":-33.37142857142857,"y":-82.47619047619048,"z":31.771428571428572,"a95":2.5,"info":"\"14-09-17\" at \"20:13\""},{"visible":true,"include":false,"step":"370","x":-56,"y":-82.57142857142857,"z":31.333333333333332,"a95":2.6,"info":"\"14-09-18\" at \"09:34\""},{"visible":true,"include":false,"step":"390","x":-46.38095238095238,"y":-76.66666666666667,"z":37.80952380952381,"a95":2.3,"info":"\"14-09-18\" at \"12:32\""},{"visible":true,"include":false,"step":"420","x":-33.89523809523809,"y":-70.56190476190476,"z":26.390476190476193,"a95":4.1,"info":"\"14-09-18\" at \"16:05\""},{"visible":true,"include":false,"step":"450","x":-34.42857142857143,"y":-72.45714285714286,"z":31.552380952380954,"a95":2.3,"info":"\"14-09-19\" at \"10:50\""},{"visible":true,"include":false,"step":"480","x":-40.12380952380953,"y":-61.904761904761905,"z":13,"a95":3.1,"info":"\"14-09-19\" at \"13:45\""},{"visible":true,"include":false,"step":"510","x":-25.657142857142855,"y":-77.70476190476191,"z":40.438095238095244,"a95":3.4,"info":"\"14-09-19\" at \"16:25\""},{"visible":true,"include":false,"step":"540","x":-10.066666666666666,"y":-34.44761904761905,"z":-23.38095238095238,"a95":5.9,"info":"\"14-10-04\" at \"12:04\""},{"visible":true,"include":false,"step":"570","x":-49.171428571428564,"y":32.4,"z":39.78095238095238,"a95":21.2,"info":"\"14-10-04\" at \"15:21\""}]},{"version":"v1.1.0","exported":"2016-11-28T14:55:05.347Z","volume":10.5,"added":"2016-11-28T14:39:56.399Z","format":"Utrecht","demagType":"Unknown","strat":"7","patch":1.1,"GEO":[{"dec":1.4643527014825395,"inc":-29.839599688085137,"MAD":9.745915760685806,"cm":[-9.547918011776346e-15,-7.105427357601002e-15,0],"intensity":224.4586076315838,"type":"GC","origin":false,"forced":true,"remark":"","nSteps":5,"minStep":"4.0","maxStep":"20.0","steps":["4.0","8.0","12.0","16.0","20.0"],"group":"None","version":"v1.1.0"}],"TECT":[{"dec":334.7835128720677,"inc":-37.160326167212794,"MAD":9.745915760685826,"cm":[-6.217248937900877e-15,2.220446049250313e-15,4.440892098500626e-15],"intensity":224.45860763158376,"type":"GC","origin":false,"forced":true,"remark":"","nSteps":5,"minStep":"4.0","maxStep":"20.0","steps":["4.0","8.0","12.0","16.0","20.0"],"group":"None","version":"v1.1.0"}],"interpreted":true,"name":"YK4.13B","coreAzi":32,"coreDip":17,"bedStrike":338,"bedDip":39,"data":[{"visible":true,"include":false,"step":"0.0","x":-136.73333333333335,"y":-74.61809523809524,"z":90.67714285714285,"a95":0.99,"info":"26/08/2014 at 04:12:28"},{"visible":true,"include":true,"step":"4.0","x":-108.92380952380952,"y":-80.34571428571428,"z":66.56380952380952,"a95":0.99,"info":"26/08/2014 at 04:12:28"},{"visible":true,"include":true,"step":"8.0","x":-77.55142857142857,"y":-75.93904761904761,"z":33.32285714285714,"a95":0.99,"info":"26/08/2014 at 04:12:28"},{"visible":true,"include":true,"step":"12.0","x":-57.171428571428564,"y":-74.98190476190476,"z":25.996190476190474,"a95":0.99,"info":"26/08/2014 at 04:12:28"},{"visible":true,"include":true,"step":"16.0","x":-54.53523809523809,"y":-80.83619047619047,"z":5.054,"a95":0.99,"info":"26/08/2014 at 04:12:28"},{"visible":true,"include":true,"step":"20.0","x":-44.99523809523809,"y":-72.64,"z":-9.24047619047619,"a95":0.99,"info":"26/08/2014 at 04:12:28"},{"visible":true,"include":false,"step":"25.0","x":-31.63142857142857,"y":-73.45333333333333,"z":-2.4877142857142855,"a95":0.99,"info":"26/08/2014 at 04:12:28"},{"visible":true,"include":false,"step":"30.0","x":-32.91047619047619,"y":-68.66190476190476,"z":11.273333333333333,"a95":0.99,"info":"26/08/2014 at 04:12:28"},{"visible":true,"include":false,"step":"35.0","x":-12.292380952380952,"y":-61.73809523809524,"z":-10.219047619047618,"a95":0.99,"info":"26/08/2014 at 04:12:28"},{"visible":true,"include":false,"step":"40.0","x":-18.184761904761906,"y":-37.01714285714286,"z":-2.686,"a95":0.99,"info":"26/08/2014 at 04:12:28"},{"visible":true,"include":false,"step":"45.0","x":-27.64761904761905,"y":-49.171428571428564,"z":2.154571428571429,"a95":0.99,"info":"26/08/2014 at 04:12:28"},{"visible":true,"include":false,"step":"50.0","x":-17.39428571428571,"y":-37.59428571428572,"z":7.347142857142857,"a95":0.99,"info":"26/08/2014 at 04:12:28"},{"visible":true,"include":false,"step":"60.0","x":-0.4263809523809524,"y":-22.923809523809524,"z":10.051428571428572,"a95":0.99,"info":"26/08/2014 at 04:12:28"},{"visible":true,"include":false,"step":"70.0","x":13.497142857142856,"y":-26.301904761904762,"z":-3.8231428571428574,"a95":0.99,"info":"26/08/2014 at 04:12:28"},{"visible":true,"include":false,"step":"80.0","x":-58.18190476190476,"y":-39.05428571428571,"z":2.1917142857142857,"a95":0.99,"info":"26/08/2014 at 04:12:28"},{"visible":true,"include":false,"step":"90.0","x":8.800666666666666,"y":-4.02952380952381,"z":-4.152380952380953,"a95":0.99,"info":"26/08/2014 at 04:12:28"},{"visible":true,"include":false,"step":"100.0","x":5.930571428571429,"y":13.14857142857143,"z":-14.12,"a95":0.99,"info":"26/08/2014 at 04:12:28"}]},{"version":"v1.1.0","exported":"2016-11-28T14:55:05.347Z","volume":10.5,"added":"2016-11-28T14:39:56.400Z","format":"Utrecht","demagType":"Unknown","strat":"8","patch":1.1,"GEO":[{"dec":34.445104511132854,"inc":-25.005666172238378,"MAD":2.6272567062693306,"cm":[-5.329070518200751e-15,-8.881784197001252e-15,0],"intensity":224.69348114724653,"type":"GC","origin":false,"forced":true,"remark":"","nSteps":5,"minStep":"4.0","maxStep":"25.0","steps":["4.0","8.0","12.0","16.0","25.0"],"group":"None","version":"v1.1.0"}],"TECT":[{"dec":10.6454300895669,"inc":-53.49408027336251,"MAD":2.627256706269855,"cm":[-3.6415315207705135e-14,-4.618527782440651e-14,5.773159728050814e-15],"intensity":224.6934811472465,"type":"GC","origin":false,"forced":true,"remark":"","nSteps":5,"minStep":"4.0","maxStep":"25.0","steps":["4.0","8.0","12.0","16.0","25.0"],"group":"None","version":"v1.1.0"}],"interpreted":true,"name":"YK4.14B","coreAzi":31,"coreDip":14,"bedStrike":338,"bedDip":39,"data":[{"visible":true,"include":false,"step":"0.0","x":-98.68571428571428,"y":-112.05714285714285,"z":83.80952380952381,"a95":0.99,"info":"26/08/2014 at 04:12:28"},{"visible":true,"include":true,"step":"4.0","x":-69.74571428571429,"y":-115.42857142857143,"z":64.67238095238095,"a95":0.99,"info":"26/08/2014 at 04:12:28"},{"visible":true,"include":true,"step":"8.0","x":-36.50380952380952,"y":-104.60952380952382,"z":35.27333333333333,"a95":0.99,"info":"26/08/2014 at 04:12:28"},{"visible":true,"include":true,"step":"12.0","x":-23.12666666666667,"y":-103.63809523809525,"z":28.694285714285716,"a95":0.99,"info":"26/08/2014 at 04:12:28"},{"visible":true,"include":true,"step":"16.0","x":-8.036952380952382,"y":-96.61904761904762,"z":12.911428571428571,"a95":0.99,"info":"26/08/2014 at 04:12:28"},{"visible":true,"include":false,"step":"20.0","x":-11.120000000000001,"y":-85.18666666666667,"z":-2.2061904761904763,"a95":0.99,"info":"26/08/2014 at 04:12:28"},{"visible":true,"include":true,"step":"25.0","x":-2.5116190476190474,"y":-84.79904761904761,"z":7.264666666666666,"a95":0.99,"info":"26/08/2014 at 04:12:28"},{"visible":true,"include":false,"step":"30.0","x":4.032095238095239,"y":-81.65619047619047,"z":1.825904761904762,"a95":0.99,"info":"26/08/2014 at 04:12:28"},{"visible":true,"include":false,"step":"35.0","x":-7.5100952380952375,"y":-66.4695238095238,"z":8.235523809523809,"a95":0.99,"info":"26/08/2014 at 04:12:28"},{"visible":true,"include":false,"step":"40.0","x":0.19204761904761908,"y":-74.13428571428571,"z":6.3693333333333335,"a95":0.99,"info":"26/08/2014 at 04:12:28"},{"visible":true,"include":false,"step":"45.0","x":-8.15495238095238,"y":-55.55714285714286,"z":5.656,"a95":0.99,"info":"26/08/2014 at 04:12:28"},{"visible":true,"include":false,"step":"50.0","x":-14.488571428571428,"y":-47.666666666666664,"z":-7.2829523809523815,"a95":0.99,"info":"26/08/2014 at 04:12:28"},{"visible":true,"include":false,"step":"60.0","x":-2.195333333333333,"y":-51.095238095238095,"z":-12.484761904761905,"a95":0.99,"info":"26/08/2014 at 04:12:28"},{"visible":true,"include":false,"step":"70.0","x":8.829809523809523,"y":-38.836190476190474,"z":16.544761904761906,"a95":0.99,"info":"26/08/2014 at 04:12:28"},{"visible":true,"include":false,"step":"80.0","x":7.103142857142857,"y":-8.233809523809523,"z":4.175714285714285,"a95":0.99,"info":"26/08/2014 at 04:12:28"},{"visible":true,"include":false,"step":"90.0","x":16.80095238095238,"y":-16.916190476190476,"z":2.5562857142857145,"a95":0.99,"info":"26/08/2014 at 04:12:28"},{"visible":true,"include":false,"step":"100.0","x":32.75333333333334,"y":4.6860952380952385,"z":2.2333333333333334,"a95":0.99,"info":"26/08/2014 at 04:12:28"}]},{"version":"v1.1.0","exported":"2016-11-28T14:55:05.347Z","volume":10.5,"added":"2016-11-28T14:39:56.400Z","format":"Utrecht","demagType":"Unknown","strat":null,"patch":1.1,"GEO":[{"dec":39.54820426607472,"inc":-24.544624584781495,"MAD":5.613875727113652,"cm":[-6.217248937900877e-15,-7.105427357601002e-15,0],"intensity":166.80774763541956,"type":"GC","origin":false,"forced":true,"remark":"","nSteps":5,"minStep":"100","maxStep":"240","steps":["100","150","180","210","240"],"group":"None","version":"v1.1.0"}],"TECT":[{"dec":17.725625295883276,"inc":-55.70420414542724,"MAD":5.613875727113283,"cm":[-8.881784197001252e-15,-1.509903313490213e-14,4.884981308350689e-15],"intensity":166.8077476354196,"type":"GC","origin":false,"forced":true,"remark":"","nSteps":5,"minStep":"100","maxStep":"240","steps":["100","150","180","210","240"],"group":"None","version":"v1.1.0"}],"interpreted":true,"name":"YK4.15A","coreAzi":11,"coreDip":8,"bedStrike":338,"bedDip":39,"data":[{"visible":true,"include":false,"step":"20","x":-136.95238095238096,"y":-32.666666666666664,"z":34,"a95":2.1,"info":"\"14-09-15\" at \"16:13\""},{"visible":true,"include":true,"step":"100","x":-64.85714285714286,"y":-48,"z":73.80952380952381,"a95":5.2,"info":"\"14-09-15\" at \"20:13\""},{"visible":true,"include":true,"step":"150","x":-28.20952380952381,"y":-51.81904761904762,"z":49.457142857142856,"a95":3.9,"info":"\"14-09-15\" at \"22:48\""},{"visible":true,"include":true,"step":"180","x":-19.123809523809523,"y":-46.06666666666666,"z":44.304761904761904,"a95":3.4,"info":"\"14-09-16\" at \"11:47\""},{"visible":true,"include":true,"step":"210","x":-18.428571428571427,"y":-47.55238095238095,"z":43.561904761904756,"a95":7,"info":"\"14-09-16\" at \"14:28\""},{"visible":true,"include":true,"step":"240","x":-7.980952380952381,"y":-54.971428571428575,"z":35.352380952380955,"a95":2.7,"info":"\"14-09-16\" at \"17:17\""},{"visible":true,"include":false,"step":"270","x":-17.514285714285716,"y":-57.75238095238095,"z":32.08571428571428,"a95":3.1,"info":"\"14-09-16\" at \"20:24\""},{"visible":true,"include":false,"step":"300","x":-10.876190476190477,"y":-62.00952380952381,"z":18.885714285714286,"a95":2.8,"info":"\"14-09-17\" at \"11:30\""},{"visible":true,"include":false,"step":"320","x":-12.152380952380952,"y":-49.07619047619047,"z":33.77142857142857,"a95":3.9,"info":"\"14-09-17\" at \"14:58\""},{"visible":true,"include":false,"step":"340","x":2.3047619047619046,"y":-55.219047619047615,"z":43.86666666666667,"a95":3.6,"info":"\"14-09-17\" at \"20:15\""},{"visible":true,"include":false,"step":"370","x":-3.419047619047619,"y":-43.05714285714286,"z":36.87619047619047,"a95":4.1,"info":"\"14-09-18\" at \"09:37\""},{"visible":true,"include":false,"step":"390","x":1.7142857142857142,"y":-65.04761904761905,"z":30.16190476190476,"a95":4.5,"info":"\"14-09-18\" at \"12:34\""},{"visible":true,"include":false,"step":"420","x":0.9904761904761905,"y":-58.2952380952381,"z":23.771428571428572,"a95":3.5,"info":"\"14-09-18\" at \"16:08\""},{"visible":true,"include":false,"step":"450","x":4.809523809523809,"y":-65.06666666666668,"z":37.695238095238096,"a95":3.1,"info":"\"14-09-19\" at \"10:53\""},{"visible":true,"include":false,"step":"480","x":-5.542857142857143,"y":-56.971428571428575,"z":37.40952380952381,"a95":3.4,"info":"\"14-09-19\" at \"13:47\""},{"visible":true,"include":false,"step":"510","x":-5.0285714285714285,"y":-44.19047619047619,"z":63.790476190476184,"a95":3.7,"info":"\"14-09-19\" at \"16:27\""},{"visible":true,"include":false,"step":"540","x":-38.59047619047619,"y":-28.59047619047619,"z":32.06666666666666,"a95":6.6,"info":"\"14-10-04\" at \"12:06\""},{"visible":true,"include":false,"step":"570","x":-7.780952380952381,"y":60.75238095238095,"z":-10.038095238095238,"a95":24.8,"info":"\"14-10-04\" at \"15:23\""}]},{"version":"v1.1.0","exported":"2016-11-28T14:55:05.347Z","volume":10.5,"added":"2016-11-28T14:39:56.400Z","format":"Utrecht","demagType":"Unknown","strat":"1","patch":1.1,"GEO":[],"TECT":[],"interpreted":false,"name":"YK4.15B","coreAzi":11,"coreDip":8,"bedStrike":338,"bedDip":39,"data":[{"visible":true,"include":false,"step":"0.0","x":-120.08571428571429,"y":-46.43238095238095,"z":102.4095238095238,"a95":0.99,"info":"26/08/2014 at 09:48:10"},{"visible":true,"include":false,"step":"4.0","x":-104.25714285714287,"y":-44.19333333333333,"z":86.45142857142858,"a95":0.99,"info":"26/08/2014 at 09:48:10"},{"visible":true,"include":false,"step":"8.0","x":-85.78666666666666,"y":-44.894285714285715,"z":78.32190476190476,"a95":0.99,"info":"26/08/2014 at 09:48:10"},{"visible":true,"include":false,"step":"12.0","x":-72.56952380952382,"y":-32.83809523809524,"z":57.31809523809524,"a95":0.99,"info":"26/08/2014 at 09:48:10"},{"visible":true,"include":false,"step":"16.0","x":-56.72666666666667,"y":-35.05904761904762,"z":43.97428571428571,"a95":0.99,"info":"26/08/2014 at 09:48:10"},{"visible":true,"include":false,"step":"20.0","x":-58.24857142857143,"y":-28.562857142857144,"z":40.852380952380955,"a95":0.99,"info":"26/08/2014 at 09:48:10"},{"visible":true,"include":false,"step":"25.0","x":-44.07142857142857,"y":-24.976190476190474,"z":29.452380952380953,"a95":0.99,"info":"26/08/2014 at 09:48:10"},{"visible":true,"include":false,"step":"30.0","x":-34.31428571428572,"y":-29.42571428571429,"z":39.57809523809524,"a95":0.99,"info":"26/08/2014 at 09:48:10"},{"visible":true,"include":false,"step":"35.0","x":-34.06952380952381,"y":-24.77714285714286,"z":31.475238095238097,"a95":0.99,"info":"26/08/2014 at 09:48:10"},{"visible":true,"include":false,"step":"40.0","x":-21.69047619047619,"y":-12.792380952380952,"z":22.577142857142857,"a95":0.99,"info":"26/08/2014 at 09:48:10"},{"visible":true,"include":false,"step":"45.0","x":-29.002857142857142,"y":-20.74190476190476,"z":20.993333333333332,"a95":0.99,"info":"26/08/2014 at 09:48:10"},{"visible":true,"include":false,"step":"50.0","x":-31.18857142857143,"y":-39.735238095238095,"z":8.209142857142856,"a95":0.99,"info":"26/08/2014 at 09:48:10"},{"visible":true,"include":false,"step":"60.0","x":-22.047619047619047,"y":-13.641904761904764,"z":13.565714285714286,"a95":0.99,"info":"26/08/2014 at 09:48:10"},{"visible":true,"include":false,"step":"70.0","x":-6.866095238095237,"y":-8.437142857142858,"z":22.97904761904762,"a95":0.99,"info":"26/08/2014 at 09:48:10"},{"visible":true,"include":false,"step":"80.0","x":-7.7884761904761906,"y":-19.208571428571428,"z":16.92761904761905,"a95":0.99,"info":"26/08/2014 at 09:48:10"},{"visible":true,"include":false,"step":"90.0","x":-22.997142857142858,"y":4.744095238095238,"z":-4.612,"a95":0.99,"info":"26/08/2014 at 09:48:10"},{"visible":true,"include":false,"step":"100.0","x":-34.78285714285715,"y":-9.092857142857142,"z":1.5885714285714285,"a95":0.99,"info":"26/08/2014 at 09:48:10"}]},{"version":"v1.1.0","exported":"2016-11-28T14:55:05.347Z","volume":10.5,"added":"2016-11-28T14:39:56.400Z","format":"Utrecht","demagType":"Unknown","strat":"2","patch":1.1,"GEO":[{"dec":12.881554596936894,"inc":-37.92646754366233,"MAD":8.53899770977785,"cm":[7.993605777301127e-15,1.7763568394002505e-15,0],"intensity":139.58202279494432,"type":"GC","origin":false,"forced":true,"remark":"","nSteps":5,"minStep":"8.0","maxStep":"25.0","steps":["8.0","12.0","16.0","20.0","25.0"],"group":"None","version":"v1.1.0"}],"TECT":[{"dec":334.7944247146113,"inc":-49.601850411185296,"MAD":8.538997709777684,"cm":[5.329070518200751e-15,-2.3092638912203256e-14,-2.6645352591003757e-15],"intensity":139.58202279494435,"type":"GC","origin":false,"forced":true,"remark":"","nSteps":5,"minStep":"8.0","maxStep":"25.0","steps":["8.0","12.0","16.0","20.0","25.0"],"group":"None","version":"v1.1.0"}],"interpreted":true,"name":"YK4.16B","coreAzi":16,"coreDip":13,"bedStrike":338,"bedDip":39,"data":[{"visible":true,"include":false,"step":"0.0","x":-113.78095238095239,"y":-39.68857142857143,"z":132.52380952380952,"a95":0.99,"info":"26/08/2014 at 09:48:10"},{"visible":true,"include":false,"step":"4.0","x":-95.28571428571429,"y":-42.47428571428571,"z":111.8952380952381,"a95":0.99,"info":"26/08/2014 at 09:48:10"},{"visible":true,"include":true,"step":"8.0","x":-66.84380952380953,"y":-42.77809523809524,"z":77.16380952380953,"a95":0.99,"info":"26/08/2014 at 09:48:10"},{"visible":true,"include":true,"step":"12.0","x":-39.65714285714286,"y":-43.71333333333333,"z":52.19047619047619,"a95":0.99,"info":"26/08/2014 at 09:48:10"},{"visible":true,"include":true,"step":"16.0","x":-28.61714285714286,"y":-44.191428571428574,"z":27.82,"a95":0.99,"info":"26/08/2014 at 09:48:10"},{"visible":true,"include":true,"step":"20.0","x":-25.953333333333333,"y":-49.854285714285716,"z":27.802857142857142,"a95":0.99,"info":"26/08/2014 at 09:48:10"},{"visible":true,"include":true,"step":"25.0","x":-10.767619047619048,"y":-29.546666666666667,"z":13.548571428571428,"a95":0.99,"info":"26/08/2014 at 09:48:10"},{"visible":true,"include":false,"step":"30.0","x":8.699428571428571,"y":-56.764761904761905,"z":6.554476190476191,"a95":0.99,"info":"26/08/2014 at 09:48:10"},{"visible":true,"include":false,"step":"35.0","x":-7.4449523809523805,"y":-39.285714285714285,"z":16.155238095238094,"a95":0.99,"info":"26/08/2014 at 09:48:10"},{"visible":true,"include":false,"step":"40.0","x":-2.9459047619047616,"y":-23.623809523809523,"z":12.842857142857142,"a95":0.99,"info":"26/08/2014 at 09:48:10"},{"visible":true,"include":false,"step":"45.0","x":-3.908761904761905,"y":-21.80952380952381,"z":8.059904761904763,"a95":0.99,"info":"26/08/2014 at 09:48:10"},{"visible":true,"include":false,"step":"50.0","x":-15.05904761904762,"y":-46.88666666666667,"z":26.754285714285714,"a95":0.99,"info":"26/08/2014 at 09:48:10"},{"visible":true,"include":false,"step":"60.0","x":-4.309619047619047,"y":-32.60190476190476,"z":20.79619047619048,"a95":0.99,"info":"26/08/2014 at 09:48:10"},{"visible":true,"include":false,"step":"70.0","x":-4.6143809523809525,"y":-20.315238095238094,"z":34.653333333333336,"a95":0.99,"info":"26/08/2014 at 09:48:10"},{"visible":true,"include":false,"step":"80.0","x":-36.72285714285714,"y":10.275238095238095,"z":-13.257142857142856,"a95":0.99,"info":"26/08/2014 at 09:48:10"},{"visible":true,"include":false,"step":"90.0","x":7.650190476190476,"y":0.005190476190476191,"z":-2.713047619047619,"a95":0.99,"info":"26/08/2014 at 09:48:10"},{"visible":true,"include":false,"step":"100.0","x":-35.5752380952381,"y":-1.251809523809524,"z":0.3834476190476191,"a95":0.99,"info":"26/08/2014 at 09:48:10"}]},{"version":"v1.1.0","exported":"2016-11-28T14:55:05.347Z","volume":10.5,"added":"2016-11-28T14:39:56.400Z","format":"Utrecht","demagType":"Unknown","strat":"3","patch":1.1,"GEO":[{"dec":39.67035553539779,"inc":-33.95934600467873,"MAD":7.960784985105697,"cm":[0,2.6645352591003757e-15,0],"intensity":232.91824867923182,"type":"GC","origin":false,"forced":true,"remark":"","nSteps":5,"minStep":"4.0","maxStep":"20.0","steps":["4.0","8.0","12.0","16.0","20.0"],"group":"None","version":"v1.1.0"}],"TECT":[{"dec":6.740024819826431,"inc":-63.326684913483966,"MAD":7.960784985103841,"cm":[3.552713678800501e-15,-1.0658141036401503e-14,-5.329070518200751e-15],"intensity":232.91824867923174,"type":"GC","origin":false,"forced":true,"remark":"","nSteps":5,"minStep":"4.0","maxStep":"20.0","steps":["4.0","8.0","12.0","16.0","20.0"],"group":"None","version":"v1.1.0"}],"interpreted":true,"name":"YK4.17B","coreAzi":27,"coreDip":13,"bedStrike":338,"bedDip":39,"data":[{"visible":true,"include":false,"step":"0.0","x":-85.7895238095238,"y":-77.32285714285715,"z":112.97142857142858,"a95":0.99,"info":"26/08/2014 at 09:48:10"},{"visible":true,"include":true,"step":"4.0","x":-68.86761904761904,"y":-79.06095238095239,"z":96.88571428571429,"a95":0.99,"info":"26/08/2014 at 09:48:10"},{"visible":true,"include":true,"step":"8.0","x":-51.2,"y":-77.57428571428571,"z":74.03333333333333,"a95":0.99,"info":"26/08/2014 at 09:48:10"},{"visible":true,"include":true,"step":"12.0","x":-37.205714285714286,"y":-83.13047619047619,"z":69.72285714285715,"a95":0.99,"info":"26/08/2014 at 09:48:10"},{"visible":true,"include":true,"step":"16.0","x":-28.63047619047619,"y":-71.69047619047619,"z":51.66095238095239,"a95":0.99,"info":"26/08/2014 at 09:48:10"},{"visible":true,"include":true,"step":"20.0","x":-24.245714285714286,"y":-80.33333333333333,"z":45.15047619047619,"a95":0.99,"info":"26/08/2014 at 09:48:10"},{"visible":true,"include":false,"step":"25.0","x":-41.78857142857142,"y":-52.359047619047615,"z":32.83428571428571,"a95":0.99,"info":"26/08/2014 at 09:48:10"},{"visible":true,"include":false,"step":"30.0","x":-14.680952380952382,"y":-42.12285714285714,"z":37.05428571428571,"a95":0.99,"info":"26/08/2014 at 09:48:10"},{"visible":true,"include":false,"step":"35.0","x":-12.115238095238094,"y":-36.7047619047619,"z":47.10857142857143,"a95":0.99,"info":"26/08/2014 at 09:48:10"},{"visible":true,"include":false,"step":"40.0","x":-1.7548571428571427,"y":-32.375238095238096,"z":31.02857142857143,"a95":0.99,"info":"26/08/2014 at 09:48:10"},{"visible":true,"include":false,"step":"45.0","x":12.479999999999999,"y":-17.644761904761907,"z":40.85142857142857,"a95":0.99,"info":"26/08/2014 at 09:48:10"},{"visible":true,"include":false,"step":"50.0","x":-10.077142857142857,"y":-26.11809523809524,"z":32.22095238095238,"a95":0.99,"info":"26/08/2014 at 09:48:10"},{"visible":true,"include":false,"step":"60.0","x":2.463142857142857,"y":-1.8192380952380953,"z":13.554285714285713,"a95":0.99,"info":"26/08/2014 at 09:48:10"},{"visible":true,"include":false,"step":"70.0","x":-0.42020952380952387,"y":-7.155047619047619,"z":1.9795238095238095,"a95":0.99,"info":"26/08/2014 at 09:48:10"},{"visible":true,"include":false,"step":"80.0","x":65.05428571428573,"y":2.0761904761904764,"z":14.66952380952381,"a95":0.99,"info":"26/08/2014 at 09:48:10"},{"visible":true,"include":false,"step":"90.0","x":11.673333333333332,"y":11.974285714285715,"z":0.5685523809523809,"a95":0.99,"info":"26/08/2014 at 09:48:10"},{"visible":true,"include":false,"step":"100.0","x":16.83238095238095,"y":-14.876190476190475,"z":-2.618,"a95":0.99,"info":"26/08/2014 at 09:48:10"}]},{"version":"v1.1.0","exported":"2016-11-28T14:55:05.347Z","volume":10.5,"added":"2016-11-28T14:39:56.400Z","format":"Utrecht","demagType":"Unknown","strat":"4","patch":1.1,"GEO":[{"dec":50.31942552552084,"inc":-23.66201424537509,"MAD":2.265796598370047,"cm":[1.7763568394002505e-15,1.7763568394002505e-15,0],"intensity":141.23775596838163,"type":"GC","origin":false,"forced":true,"remark":"","nSteps":3,"minStep":"4.0","maxStep":"12.0","steps":["4.0","8.0","12.0"],"group":"None","version":"v1.1.0"}],"TECT":[{"dec":34.831909202987845,"inc":-59.438718603058625,"MAD":2.265796598370731,"cm":[-8.881784197001252e-15,-2.042810365310288e-14,-4.440892098500626e-16],"intensity":141.23775596838166,"type":"GC","origin":false,"forced":true,"remark":"","nSteps":3,"minStep":"4.0","maxStep":"12.0","steps":["4.0","8.0","12.0"],"group":"None","version":"v1.1.0"}],"interpreted":true,"name":"YK4.18A","coreAzi":13,"coreDip":14,"bedStrike":338,"bedDip":39,"data":[{"visible":true,"include":false,"step":"0.0","x":-44.38761904761905,"y":-27.048571428571428,"z":70.60761904761905,"a95":0.99,"info":"26/08/2014 at 09:48:10"},{"visible":true,"include":true,"step":"4.0","x":-27.74952380952381,"y":-34.7,"z":57.63238095238095,"a95":0.99,"info":"26/08/2014 at 09:48:10"},{"visible":true,"include":true,"step":"8.0","x":-0.5276952380952381,"y":-46.75238095238095,"z":41.436190476190475,"a95":0.99,"info":"26/08/2014 at 09:48:10"},{"visible":true,"include":true,"step":"12.0","x":7.440571428571429,"y":-57.95809523809523,"z":47.01047619047619,"a95":0.99,"info":"26/08/2014 at 09:48:10"},{"visible":true,"include":false,"step":"16.0","x":6.504095238095239,"y":-47.81238095238095,"z":22.638095238095236,"a95":0.99,"info":"26/08/2014 at 09:48:10"},{"visible":true,"include":false,"step":"20.0","x":-1.361047619047619,"y":-47.544761904761906,"z":35.06476190476191,"a95":0.99,"info":"26/08/2014 at 09:48:10"},{"visible":true,"include":false,"step":"25.0","x":8.640380952380953,"y":-44.91619047619048,"z":22.784761904761904,"a95":0.99,"info":"26/08/2014 at 09:48:10"},{"visible":true,"include":false,"step":"30.0","x":7.472190476190476,"y":-30.316190476190474,"z":30.64761904761905,"a95":0.99,"info":"26/08/2014 at 09:48:10"},{"visible":true,"include":false,"step":"35.0","x":18.156190476190474,"y":-46.58,"z":36.62285714285714,"a95":0.99,"info":"26/08/2014 at 09:48:10"},{"visible":true,"include":false,"step":"40.0","x":6.793904761904762,"y":-38.23142857142857,"z":55.850476190476186,"a95":0.99,"info":"26/08/2014 at 09:48:10"},{"visible":true,"include":false,"step":"45.0","x":7.310190476190477,"y":-30.943809523809527,"z":9.03647619047619,"a95":0.99,"info":"26/08/2014 at 09:48:10"},{"visible":true,"include":false,"step":"50.0","x":4.783619047619048,"y":-36.54,"z":23.277142857142856,"a95":0.99,"info":"26/08/2014 at 09:48:10"},{"visible":true,"include":false,"step":"60.0","x":16.442857142857143,"y":-23.815238095238094,"z":15.459047619047618,"a95":0.99,"info":"26/08/2014 at 09:48:10"},{"visible":true,"include":false,"step":"70.0","x":36.3447619047619,"y":-26.14952380952381,"z":16.447619047619046,"a95":0.99,"info":"26/08/2014 at 09:48:10"},{"visible":true,"include":false,"step":"80.0","x":-67.40380952380953,"y":-18.346666666666664,"z":-17.714285714285715,"a95":0.99,"info":"26/08/2014 at 09:48:10"},{"visible":true,"include":false,"step":"90.0","x":-2.5943809523809525,"y":-23.253333333333334,"z":13.188571428571427,"a95":0.99,"info":"26/08/2014 at 09:48:10"},{"visible":true,"include":false,"step":"100.0","x":8.079238095238095,"y":-13.403809523809525,"z":24.459047619047617,"a95":0.99,"info":"26/08/2014 at 09:48:10"}]},{"version":"v1.1.0","exported":"2016-11-28T14:55:05.347Z","volume":10.5,"added":"2016-11-28T14:39:56.400Z","format":"Utrecht","demagType":"Unknown","strat":"5","patch":1.1,"GEO":[{"dec":28.918610368566988,"inc":-19.284132584765914,"MAD":2.584640764835614,"cm":[-1.0658141036401503e-14,-8.881784197001252e-15,0],"intensity":178.12235467675535,"type":"GC","origin":false,"forced":true,"remark":"","nSteps":3,"minStep":"4.0","maxStep":"12.0","steps":["4.0","8.0","12.0"],"group":"None","version":"v1.1.0"}],"TECT":[{"dec":9.284579873024313,"inc":-45.86955135048375,"MAD":2.5846407648352656,"cm":[-9.769962616701378e-15,-3.197442310920451e-14,2.6645352591003757e-15],"intensity":178.1223546767554,"type":"GC","origin":false,"forced":true,"remark":"","nSteps":3,"minStep":"4.0","maxStep":"12.0","steps":["4.0","8.0","12.0"],"group":"None","version":"v1.1.0"}],"interpreted":true,"name":"YK4.19B","coreAzi":10,"coreDip":14,"bedStrike":338,"bedDip":39,"data":[{"visible":true,"include":false,"step":"0.0","x":-107.64761904761905,"y":-51.26761904761904,"z":104.20952380952382,"a95":0.99,"info":"26/08/2014 at 09:48:10"},{"visible":true,"include":true,"step":"4.0","x":-74.56857142857143,"y":-57.71619047619048,"z":74.20285714285714,"a95":0.99,"info":"26/08/2014 at 09:48:10"},{"visible":true,"include":true,"step":"8.0","x":-32.264761904761905,"y":-55.201904761904764,"z":41.285714285714285,"a95":0.99,"info":"26/08/2014 at 09:48:10"},{"visible":true,"include":true,"step":"12.0","x":-2.3344761904761904,"y":-65.99047619047619,"z":28.316190476190474,"a95":0.99,"info":"26/08/2014 at 09:48:10"},{"visible":true,"include":false,"step":"16.0","x":16.972380952380952,"y":-42.315238095238094,"z":24.973333333333336,"a95":0.99,"info":"26/08/2014 at 09:48:10"},{"visible":true,"include":false,"step":"20.0","x":18.257142857142856,"y":-60.03809523809524,"z":18.64952380952381,"a95":0.99,"info":"26/08/2014 at 09:48:10"},{"visible":true,"include":false,"step":"25.0","x":-1.132,"y":-60.4952380952381,"z":34.43238095238095,"a95":0.99,"info":"26/08/2014 at 09:48:10"},{"visible":true,"include":false,"step":"30.0","x":-27.539047619047622,"y":-54.89904761904762,"z":12.69142857142857,"a95":0.99,"info":"26/08/2014 at 09:48:10"},{"visible":true,"include":false,"step":"35.0","x":-12.495238095238093,"y":-40.50285714285714,"z":29.78,"a95":0.99,"info":"26/08/2014 at 09:48:10"},{"visible":true,"include":false,"step":"40.0","x":-1.5531428571428572,"y":-46.352380952380955,"z":23.05809523809524,"a95":0.99,"info":"26/08/2014 at 09:48:10"},{"visible":true,"include":false,"step":"45.0","x":17.847619047619048,"y":-51.11714285714286,"z":32.857142857142854,"a95":0.99,"info":"26/08/2014 at 09:48:10"},{"visible":true,"include":false,"step":"50.0","x":2.130190476190476,"y":-50.30190476190476,"z":3.7759047619047617,"a95":0.99,"info":"26/08/2014 at 09:48:10"},{"visible":true,"include":false,"step":"60.0","x":25.863809523809522,"y":-30.668571428571425,"z":11.758095238095237,"a95":0.99,"info":"26/08/2014 at 09:48:10"},{"visible":true,"include":false,"step":"70.0","x":-15.404761904761905,"y":-4.9932380952380955,"z":-15.637142857142857,"a95":0.99,"info":"26/08/2014 at 09:48:10"},{"visible":true,"include":false,"step":"80.0","x":33.42190476190476,"y":3.958571428571428,"z":-16.301904761904762,"a95":0.99,"info":"26/08/2014 at 09:48:10"},{"visible":true,"include":false,"step":"90.0","x":5.0442857142857145,"y":-3.9655238095238095,"z":-28.76666666666667,"a95":0.99,"info":"26/08/2014 at 09:48:10"},{"visible":true,"include":false,"step":"100.0","x":6.041619047619047,"y":-8.162857142857142,"z":-5.17552380952381,"a95":0.99,"info":"26/08/2014 at 09:48:10"}]},{"version":"v1.1.0","exported":"2016-11-28T14:55:05.347Z","volume":10.5,"added":"2016-11-28T14:39:56.400Z","format":"Utrecht","demagType":"Unknown","strat":null,"patch":1.1,"GEO":[{"dec":174.73802936582445,"inc":-77.71965591055759,"MAD":10.939062712705791,"cm":[-5.100087019371813e-16,4.85722573273506e-16,0],"intensity":33.810638479277756,"type":"dir","forced":true,"remark":"","origin":false,"nSteps":8,"minStep":"240","maxStep":"420","steps":["240","270","300","320","340","370","390","420"],"group":"None","version":"v1.1.0"}],"TECT":[{"dec":230.9107210981618,"inc":-46.12176784708868,"MAD":10.93906271270579,"cm":[-1.4988010832439613e-15,1.4432899320127035e-15,-2.7755575615628914e-16],"intensity":33.81063847927775,"type":"dir","forced":true,"remark":"","origin":false,"nSteps":8,"minStep":"240","maxStep":"420","steps":["240","270","300","320","340","370","390","420"],"group":"None","version":"v1.1.0"}],"interpreted":true,"name":"YK4.20A","coreAzi":34,"coreDip":26,"bedStrike":338,"bedDip":39,"data":[{"visible":true,"include":false,"step":"20","x":-44.75238095238095,"y":1.6952380952380952,"z":12.533333333333333,"a95":3.3,"info":"\"14-09-15\" at \"16:16\""},{"visible":true,"include":false,"step":"100","x":-23.676190476190477,"y":7.9714285714285715,"z":26.885714285714286,"a95":8.7,"info":"\"14-09-15\" at \"20:17\""},{"visible":true,"include":false,"step":"150","x":0.34285714285714286,"y":11.314285714285713,"z":-8.561904761904762,"a95":18.3,"info":"\"14-09-15\" at \"22:53\""},{"visible":true,"include":false,"step":"180","x":17.561904761904763,"y":10.961904761904762,"z":-15.247619047619047,"a95":6.6,"info":"\"14-09-16\" at \"11:49\""},{"visible":true,"include":false,"step":"210","x":7.838095238095238,"y":10.314285714285713,"z":-20.00952380952381,"a95":18.1,"info":"\"14-09-16\" at \"14:32\""},{"visible":true,"include":true,"step":"240","x":24.066666666666666,"y":9.142857142857142,"z":-14.59047619047619,"a95":5.2,"info":"\"14-09-16\" at \"17:20\""},{"visible":true,"include":true,"step":"270","x":21.923809523809524,"y":6.409523809523809,"z":-14.609523809523811,"a95":6.2,"info":"\"14-09-16\" at \"20:26\""},{"visible":true,"include":true,"step":"300","x":19.60952380952381,"y":1.380952380952381,"z":-15.085714285714285,"a95":7.6,"info":"\"14-09-17\" at \"11:33\""},{"visible":true,"include":true,"step":"320","x":16.476190476190474,"y":-0.5047619047619047,"z":-15.485714285714286,"a95":7.4,"info":"\"14-09-17\" at \"15:01\""},{"visible":true,"include":true,"step":"340","x":22.61904761904762,"y":5.771428571428571,"z":-16.904761904761905,"a95":11.1,"info":"\"14-09-17\" at \"20:19\""},{"visible":true,"include":true,"step":"370","x":15.552380952380954,"y":-4.9714285714285715,"z":-8.485714285714286,"a95":9.400001,"info":"\"14-09-18\" at \"09:39\""},{"visible":true,"include":true,"step":"390","x":6.542857142857143,"y":-1.7999999999999998,"z":-6.504761904761905,"a95":19.7,"info":"\"14-09-18\" at \"12:36\""},{"visible":true,"include":true,"step":"420","x":3.542857142857143,"y":-1.4,"z":-3.3238095238095235,"a95":66.3,"info":"\"14-09-18\" at \"16:10\""},{"visible":true,"include":false,"step":"450","x":-5.123809523809523,"y":-11.028571428571428,"z":12.790476190476191,"a95":10.7,"info":"\"14-09-19\" at \"10:56\""},{"visible":true,"include":false,"step":"480","x":-8.142857142857142,"y":-9.952380952380953,"z":9.047619047619047,"a95":14.5,"info":"\"14-09-19\" at \"13:50\""},{"visible":true,"include":false,"step":"510","x":60.13333333333333,"y":-23.295238095238094,"z":57.838095238095235,"a95":3.8,"info":"\"14-09-19\" at \"16:29\""},{"visible":true,"include":false,"step":"540","x":66.39047619047619,"y":-20.447619047619046,"z":-9.019047619047619,"a95":8,"info":"\"14-10-04\" at \"12:08\""},{"visible":true,"include":false,"step":"570","x":86.95238095238095,"y":-72.95238095238095,"z":11.047619047619047,"a95":18.3,"info":"\"14-10-04\" at \"15:25\""}]},{"version":"v1.1.0","exported":"2016-11-28T14:55:05.347Z","volume":10.5,"added":"2016-11-28T14:39:56.401Z","format":"Utrecht","demagType":"Unknown","strat":"6","patch":1.1,"GEO":[{"dec":162.76707119709044,"inc":-65.34708532746772,"MAD":18.734326734873214,"cm":[-5.551115123125783e-16,-1.27675647831893e-15,0],"intensity":34.31621332161656,"type":"dir","forced":true,"remark":"","origin":false,"nSteps":5,"minStep":"30.0","maxStep":"50.0","steps":["30.0","35.0","40.0","45.0","50.0"],"group":"None","version":"v1.1.0"}],"TECT":[{"dec":213.23663929089994,"inc":-43.195889394880275,"MAD":18.73432673487322,"cm":[-3.2751579226442118e-15,-1.3322676295501878e-15,1.897787482718627e-15],"intensity":34.316213321616566,"type":"dir","forced":true,"remark":"","origin":false,"nSteps":5,"minStep":"30.0","maxStep":"50.0","steps":["30.0","35.0","40.0","45.0","50.0"],"group":"None","version":"v1.1.0"}],"interpreted":true,"name":"YK4.20B","coreAzi":34,"coreDip":26,"bedStrike":338,"bedDip":39,"data":[{"visible":true,"include":false,"step":"0.0","x":0.5021428571428571,"y":20.76666666666667,"z":58.84095238095239,"a95":0.99,"info":"26/08/2014 at 09:48:10"},{"visible":true,"include":false,"step":"4.0","x":34.48952380952381,"y":31.622857142857146,"z":25.237142857142857,"a95":0.99,"info":"26/08/2014 at 09:48:10"},{"visible":true,"include":false,"step":"8.0","x":29.705714285714286,"y":24.49904761904762,"z":2.483904761904762,"a95":0.99,"info":"26/08/2014 at 09:48:10"},{"visible":true,"include":false,"step":"12.0","x":45.92761904761905,"y":20.37047619047619,"z":6.817047619047618,"a95":0.99,"info":"26/08/2014 at 09:48:10"},{"visible":true,"include":false,"step":"16.0","x":53.30380952380953,"y":20.919999999999998,"z":-0.6837809523809524,"a95":0.99,"info":"26/08/2014 at 09:48:10"},{"visible":true,"include":false,"step":"20.0","x":42.537142857142854,"y":8.385238095238096,"z":-18.29619047619048,"a95":0.99,"info":"26/08/2014 at 09:48:10"},{"visible":true,"include":false,"step":"25.0","x":36.76190476190476,"y":5.052952380952381,"z":-20.294285714285714,"a95":0.99,"info":"26/08/2014 at 09:48:10"},{"visible":true,"include":true,"step":"30.0","x":20.587619047619047,"y":12.810476190476189,"z":-20.638095238095236,"a95":0.99,"info":"26/08/2014 at 09:48:10"},{"visible":true,"include":true,"step":"35.0","x":20.93904761904762,"y":2.719809523809524,"z":-20.61142857142857,"a95":0.99,"info":"26/08/2014 at 09:48:10"},{"visible":true,"include":true,"step":"40.0","x":7.146285714285715,"y":12.926666666666666,"z":-7.217428571428572,"a95":0.99,"info":"26/08/2014 at 09:48:10"},{"visible":true,"include":true,"step":"45.0","x":14.041904761904762,"y":2.5096190476190476,"z":-1.3486666666666667,"a95":0.99,"info":"26/08/2014 at 09:48:10"},{"visible":true,"include":true,"step":"50.0","x":-1.776,"y":5.704285714285715,"z":-1.292,"a95":0.99,"info":"26/08/2014 at 09:48:10"},{"visible":true,"include":false,"step":"60.0","x":0.7637809523809524,"y":27.107619047619046,"z":-14.512380952380951,"a95":0.99,"info":"26/08/2014 at 09:48:10"},{"visible":true,"include":false,"step":"70.0","x":17.070476190476192,"y":-5.699142857142857,"z":-12.134285714285713,"a95":0.99,"info":"26/08/2014 at 09:48:10"},{"visible":true,"include":false,"step":"80.0","x":14.438095238095238,"y":12.529523809523809,"z":-14.017142857142858,"a95":0.99,"info":"26/08/2014 at 09:48:10"},{"visible":true,"include":false,"step":"90.0","x":-3.4674285714285715,"y":5.847047619047619,"z":-15.659047619047618,"a95":0.99,"info":"26/08/2014 at 09:48:10"},{"visible":true,"include":false,"step":"100.0","x":-3.195238095238095,"y":1.5467619047619048,"z":12.710476190476191,"a95":0.99,"info":"26/08/2014 at 09:48:10"}]},{"version":"v1.1.0","exported":"2016-11-28T14:55:05.347Z","volume":10.5,"added":"2016-11-28T14:39:56.401Z","format":"Utrecht","demagType":"Unknown","strat":"7","patch":1.1,"GEO":[{"dec":60.45266539337939,"inc":-25.214652331502847,"MAD":9.618745209895174,"cm":[-8.881784197001252e-16,3.774758283725532e-15,0],"intensity":108.43259230890835,"type":"GC","origin":false,"forced":true,"remark":"","nSteps":3,"minStep":"4.0","maxStep":"12.0","steps":["4.0","8.0","12.0"],"group":"None","version":"v1.1.0"}],"TECT":[{"dec":52.51448655834315,"inc":-63.57240670529683,"MAD":9.618745209895133,"cm":[-1.7763568394002505e-15,1.2698175844150228e-15,1.5543122344752192e-15],"intensity":108.43259230890834,"type":"GC","origin":false,"forced":true,"remark":"","nSteps":3,"minStep":"4.0","maxStep":"12.0","steps":["4.0","8.0","12.0"],"group":"None","version":"v1.1.0"}],"interpreted":true,"name":"YK4.21B","coreAzi":36,"coreDip":25,"bedStrike":338,"bedDip":39,"data":[{"visible":true,"include":false,"step":"0.0","x":-64.05333333333333,"y":-21.78,"z":84.22571428571429,"a95":0.99,"info":"26/08/2014 at 09:48:10"},{"visible":true,"include":true,"step":"4.0","x":-35.56,"y":-22.995238095238093,"z":62.400000000000006,"a95":0.99,"info":"26/08/2014 at 09:48:10"},{"visible":true,"include":true,"step":"8.0","x":-14.661904761904761,"y":-24.521904761904764,"z":30.684761904761906,"a95":0.99,"info":"26/08/2014 at 09:48:10"},{"visible":true,"include":true,"step":"12.0","x":-4.592380952380952,"y":-25.462857142857143,"z":25.901904761904763,"a95":0.99,"info":"26/08/2014 at 09:48:10"},{"visible":true,"include":false,"step":"16.0","x":8.938190476190476,"y":-19.822857142857142,"z":10.135238095238096,"a95":0.99,"info":"26/08/2014 at 09:48:10"},{"visible":true,"include":false,"step":"20.0","x":1.1205714285714286,"y":-17.32857142857143,"z":4.729142857142857,"a95":0.99,"info":"26/08/2014 at 09:48:10"},{"visible":true,"include":false,"step":"25.0","x":5.186190476190476,"y":-12.792380952380952,"z":-3.711047619047619,"a95":0.99,"info":"26/08/2014 at 09:48:10"},{"visible":true,"include":false,"step":"30.0","x":4.501619047619048,"y":-5.318476190476191,"z":0.3702190476190476,"a95":0.99,"info":"26/08/2014 at 09:48:10"},{"visible":true,"include":false,"step":"35.0","x":-1.5619047619047617,"y":-2.725904761904762,"z":-5.972,"a95":0.99,"info":"26/08/2014 at 09:48:10"},{"visible":true,"include":false,"step":"40.0","x":-9.438571428571429,"y":6.635142857142857,"z":21.32095238095238,"a95":0.99,"info":"26/08/2014 at 09:48:10"},{"visible":true,"include":false,"step":"45.0","x":-6.3428571428571425,"y":-5.027809523809524,"z":5.727142857142857,"a95":0.99,"info":"26/08/2014 at 09:48:10"},{"visible":true,"include":false,"step":"50.0","x":4.490190476190476,"y":0.2889333333333333,"z":5.36447619047619,"a95":0.99,"info":"26/08/2014 at 09:48:10"},{"visible":true,"include":false,"step":"60.0","x":-7.987619047619048,"y":8.53657142857143,"z":8.080666666666666,"a95":0.99,"info":"26/08/2014 at 09:48:10"},{"visible":true,"include":false,"step":"70.0","x":13.97809523809524,"y":-5.081428571428571,"z":1.4550476190476191,"a95":0.99,"info":"26/08/2014 at 09:48:10"},{"visible":true,"include":false,"step":"80.0","x":9.995238095238095,"y":28.901904761904763,"z":1.431142857142857,"a95":0.99,"info":"26/08/2014 at 09:48:10"},{"visible":true,"include":false,"step":"90.0","x":-26.845714285714287,"y":16.461904761904762,"z":-9.487238095238094,"a95":0.99,"info":"26/08/2014 at 09:48:10"},{"visible":true,"include":false,"step":"100.0","x":3.211047619047619,"y":-0.7958761904761905,"z":19.076190476190476,"a95":0.99,"info":"26/08/2014 at 09:48:10"}]}]
