# Supplementary material for: Paleomagnetic constraints on the timing and distribution of Cenozoic rotations in Central and Eastern Anatolia
Source: Copernicus journal article supplement (doi:10.5194/se-9-295-2018), 2018-03-21
Supplement: Supplementary file 2 [file se-9-295-2018-supplement.zip › se-2017-66_DATA_dir files/dir files Ulukisla/YL1.dir]

[{"version":"v1.1.0","exported":"2016-11-24T13:48:31.746Z","volume":10.5,"added":"2016-11-24T13:43:27.156Z","format":"Utrecht","demagType":"Unknown","strat":"1","patch":1.1,"GEO":[{"dec":308.66995765923565,"inc":-20.620302313749825,"MAD":4.97805680811404,"cm":[1.0658141036401503e-14,-1.2434497875801753e-14,0],"intensity":364.6938038541572,"type":"GC","origin":false,"forced":true,"remark":"","nSteps":4,"minStep":"10.0","maxStep":"23.0","steps":["10.0","15.0","20.0","23.0"],"group":"None","version":"v1.1.0"}],"TECT":[{"dec":300.3945740935839,"inc":-36.9819785314992,"MAD":4.978056808113408,"cm":[-4.263256414560601e-14,3.197442310920451e-14,0],"intensity":364.69380385415724,"type":"GC","origin":false,"forced":true,"remark":"","nSteps":4,"minStep":"10.0","maxStep":"23.0","steps":["10.0","15.0","20.0","23.0"],"group":"None","version":"v1.1.0"}],"interpreted":true,"name":"YL1.01A","coreAzi":259,"coreDip":48,"bedStrike":257,"bedDip":22,"data":[{"visible":false,"include":false,"step":"0.0","x":-223.3904761904762,"y":249.33333333333334,"z":-58.22666666666667,"a95":0.99,"info":"21/03/2016 at 01:05:41"},{"visible":true,"include":true,"step":"10.0","x":-113.58095238095237,"y":137.7047619047619,"z":-127.5047619047619,"a95":0.99,"info":"21/03/2016 at 01:05:41"},{"visible":true,"include":true,"step":"15.0","x":-82.84285714285714,"y":106.71428571428571,"z":-166.06666666666666,"a95":0.99,"info":"21/03/2016 at 01:05:41"},{"visible":true,"include":true,"step":"20.0","x":-48.38,"y":74.96857142857142,"z":-140.34285714285713,"a95":0.99,"info":"21/03/2016 at 01:05:41"},{"visible":true,"include":true,"step":"23.0","x":-32.859047619047615,"y":64.14952380952381,"z":-138.6,"a95":0.99,"info":"21/03/2016 at 01:05:41"},{"visible":false,"include":false,"step":"25.0","x":-32.860952380952384,"y":35.51047619047619,"z":-134.74285714285713,"a95":0.99,"info":"21/03/2016 at 01:05:41"},{"visible":false,"include":false,"step":"30.0","x":-1.8315238095238098,"y":143.63809523809525,"z":-90.9047619047619,"a95":0.99,"info":"21/03/2016 at 01:05:41"},{"visible":true,"include":false,"step":"33.0","x":-10.035238095238096,"y":39.41904761904762,"z":-119.20952380952382,"a95":0.99,"info":"21/03/2016 at 01:05:41"},{"visible":true,"include":false,"step":"35.0","x":9.657142857142858,"y":131.58095238095237,"z":-76.59238095238095,"a95":0.99,"info":"21/03/2016 at 01:05:41"},{"visible":true,"include":false,"step":"40.0","x":13.486666666666668,"y":144.57142857142858,"z":-58.76380952380952,"a95":0.99,"info":"21/03/2016 at 01:05:41"},{"visible":true,"include":false,"step":"45.0","x":-5.801047619047619,"y":174.8761904761905,"z":-58.38571428571428,"a95":0.99,"info":"21/03/2016 at 01:05:41"},{"visible":true,"include":false,"step":"50.0","x":-4.973809523809524,"y":144.25714285714287,"z":-21.197142857142858,"a95":0.99,"info":"21/03/2016 at 01:05:41"},{"visible":true,"include":false,"step":"55.0","x":-30.609523809523807,"y":151.24761904761903,"z":-0.3947809523809524,"a95":0.99,"info":"21/03/2016 at 01:05:41"},{"visible":true,"include":false,"step":"60.0","x":-7.310190476190477,"y":143.3047619047619,"z":30.526666666666664,"a95":0.99,"info":"21/03/2016 at 01:05:41"},{"visible":true,"include":false,"step":"65.0","x":32.8352380952381,"y":114.63809523809525,"z":7.702857142857143,"a95":0.99,"info":"21/03/2016 at 01:05:41"},{"visible":true,"include":false,"step":"70.0","x":89.8495238095238,"y":126.96190476190475,"z":15.92,"a95":0.99,"info":"21/03/2016 at 01:05:41"},{"visible":true,"include":false,"step":"80.0","x":-42.476190476190474,"y":121.60952380952382,"z":30.163809523809526,"a95":0.99,"info":"21/03/2016 at 01:05:41"}]},{"version":"v1.1.0","exported":"2016-11-24T13:48:31.746Z","volume":10.5,"added":"2016-11-24T13:43:27.156Z","format":"Utrecht","demagType":"Unknown","strat":"1","patch":1.1,"GEO":[{"dec":83.17851193082618,"inc":-29.95905824547023,"MAD":7.004911273885158,"cm":[-2.3092638912203256e-14,7.105427357601002e-15,0],"intensity":438.0932009804501,"type":"dir","forced":true,"remark":"","origin":false,"nSteps":6,"minStep":"10.0","maxStep":"55.0","steps":["10.0","15.0","20.0","23.0","25.0","55.0"],"group":"None","version":"v1.1.0"}],"TECT":[{"dec":94.61758776653852,"inc":-25.34625397808646,"MAD":7.004911273885182,"cm":[-1.021405182655144e-14,-7.105427357601002e-15,7.105427357601002e-15],"intensity":438.0932009804501,"type":"dir","forced":true,"remark":"","origin":false,"nSteps":6,"minStep":"10.0","maxStep":"55.0","steps":["10.0","15.0","20.0","23.0","25.0","55.0"],"group":"None","version":"v1.1.0"}],"interpreted":true,"name":"YL1.02A","coreAzi":183,"coreDip":59,"bedStrike":257,"bedDip":22,"data":[{"visible":false,"include":false,"step":"0.0","x":-148.78095238095239,"y":-260.4095238095238,"z":-52.394285714285715,"a95":0.99,"info":"21/03/2016 at 01:05:41"},{"visible":true,"include":true,"step":"10.0","x":-6.045047619047619,"y":-258.7809523809524,"z":-115.3047619047619,"a95":0.99,"info":"21/03/2016 at 01:05:41"},{"visible":true,"include":true,"step":"15.0","x":17.092380952380953,"y":-250.97142857142856,"z":-135.82857142857142,"a95":0.99,"info":"21/03/2016 at 01:05:41"},{"visible":true,"include":true,"step":"20.0","x":44.98952380952381,"y":-217.61904761904762,"z":-148.5047619047619,"a95":0.99,"info":"21/03/2016 at 01:05:41"},{"visible":true,"include":true,"step":"23.0","x":52.56285714285714,"y":-215.65714285714287,"z":-142.9714285714286,"a95":0.99,"info":"21/03/2016 at 01:05:41"},{"visible":true,"include":true,"step":"25.0","x":69.21238095238095,"y":-209.0761904761905,"z":-132.86666666666665,"a95":0.99,"info":"21/03/2016 at 01:05:41"},{"visible":true,"include":false,"step":"30.0","x":77.24571428571429,"y":-203.0190476190476,"z":-135.7047619047619,"a95":0.99,"info":"21/03/2016 at 01:05:41"},{"visible":true,"include":false,"step":"33.0","x":65.04190476190476,"y":-184.3904761904762,"z":-118.15238095238094,"a95":0.99,"info":"21/03/2016 at 01:05:41"},{"visible":true,"include":false,"step":"35.0","x":56.00761904761905,"y":-176.41904761904763,"z":-96.47619047619048,"a95":0.99,"info":"21/03/2016 at 01:05:41"},{"visible":true,"include":false,"step":"40.0","x":68.49238095238096,"y":-165.37142857142857,"z":-89.15523809523809,"a95":0.99,"info":"21/03/2016 at 01:05:41"},{"visible":true,"include":false,"step":"45.0","x":60.913333333333334,"y":-161.8,"z":-103.63809523809525,"a95":0.99,"info":"21/03/2016 at 01:05:41"},{"visible":false,"include":false,"step":"50.0","x":7.708380952380953,"y":-159.63809523809525,"z":-70.51904761904763,"a95":0.99,"info":"21/03/2016 at 01:05:41"},{"visible":true,"include":true,"step":"55.0","x":25.9247619047619,"y":-128.0952380952381,"z":-89.28571428571429,"a95":0.99,"info":"21/03/2016 at 01:05:41"},{"visible":false,"include":false,"step":"60.0","x":4.326380952380952,"y":-118.79047619047618,"z":-69.87047619047618,"a95":0.99,"info":"21/03/2016 at 01:05:41"},{"visible":false,"include":false,"step":"65.0","x":-20.552380952380954,"y":-134.44761904761904,"z":-71.10666666666667,"a95":0.99,"info":"21/03/2016 at 01:05:41"},{"visible":false,"include":false,"step":"70.0","x":-10.874285714285715,"y":-125.11428571428571,"z":-57.91619047619048,"a95":0.99,"info":"21/03/2016 at 01:05:41"},{"visible":false,"include":false,"step":"80.0","x":-34.754285714285714,"y":-130.14285714285714,"z":-83.02952380952381,"a95":0.99,"info":"21/03/2016 at 01:05:41"}]},{"version":"v1.1.0","exported":"2016-11-24T13:48:31.746Z","volume":10.5,"added":"2016-11-24T13:43:27.157Z","format":"Utrecht","demagType":"Unknown","strat":"1","patch":1.1,"GEO":[{"dec":89.6147738198892,"inc":14.133383694986575,"MAD":7.0071689411500975,"cm":[-1.3378187446733136e-14,1.7763568394002505e-15,0],"intensity":307.63364978074827,"type":"dir","forced":true,"remark":"","origin":false,"nSteps":9,"minStep":"10.0","maxStep":"40.0","steps":["10.0","15.0","20.0","23.0","25.0","30.0","33.0","35.0","40.0"],"group":"None","version":"v1.1.0"}],"TECT":[{"dec":83.3249100255643,"inc":17.80241994221925,"MAD":7.007168941150084,"cm":[-2.942091015256665e-14,-5.329070518200751e-15,5.773159728050814e-15],"intensity":307.6336497807482,"type":"dir","forced":true,"remark":"","origin":false,"nSteps":9,"minStep":"10.0","maxStep":"40.0","steps":["10.0","15.0","20.0","23.0","25.0","30.0","33.0","35.0","40.0"],"group":"None","version":"v1.1.0"}],"interpreted":true,"name":"YL1.03A","coreAzi":269,"coreDip":15,"bedStrike":257,"bedDip":22,"data":[{"visible":false,"include":false,"step":"0.0","x":-216.8190476190476,"y":86.13809523809525,"z":-149.4952380952381,"a95":0.99,"info":"21/03/2016 at 01:05:41"},{"visible":true,"include":true,"step":"10.0","x":-94.91714285714286,"y":19.285714285714285,"z":-164.13333333333335,"a95":0.99,"info":"21/03/2016 at 01:05:41"},{"visible":true,"include":true,"step":"15.0","x":-87.89428571428572,"y":6.835809523809523,"z":-160.7238095238095,"a95":0.99,"info":"21/03/2016 at 01:05:41"},{"visible":true,"include":true,"step":"20.0","x":-77.97238095238096,"y":1.3469523809523811,"z":-126.87619047619049,"a95":0.99,"info":"21/03/2016 at 01:05:41"},{"visible":true,"include":true,"step":"23.0","x":-39.17142857142857,"y":-8.855809523809524,"z":-113.80000000000001,"a95":0.99,"info":"21/03/2016 at 01:05:41"},{"visible":true,"include":true,"step":"25.0","x":-49.74761904761905,"y":-3.7760952380952384,"z":-139.2761904761905,"a95":0.99,"info":"21/03/2016 at 01:05:41"},{"visible":true,"include":true,"step":"30.0","x":-60.89714285714285,"y":-13.256190476190476,"z":-107.74285714285713,"a95":0.99,"info":"21/03/2016 at 01:05:41"},{"visible":true,"include":true,"step":"33.0","x":-48.25714285714285,"y":-12.368571428571428,"z":-83.13904761904762,"a95":0.99,"info":"21/03/2016 at 01:05:41"},{"visible":true,"include":true,"step":"35.0","x":-82.0847619047619,"y":-12.072380952380954,"z":-110.55238095238094,"a95":0.99,"info":"21/03/2016 at 01:05:41"},{"visible":true,"include":true,"step":"40.0","x":-72.89238095238095,"y":-7.9708571428571435,"z":-93.45238095238095,"a95":0.99,"info":"21/03/2016 at 01:05:41"},{"visible":false,"include":false,"step":"45.0","x":-83.54190476190476,"y":-17.834285714285713,"z":-112.5904761904762,"a95":0.99,"info":"21/03/2016 at 01:05:41"},{"visible":false,"include":false,"step":"50.0","x":-128.98095238095237,"y":-25.943809523809527,"z":-109.42857142857143,"a95":0.99,"info":"21/03/2016 at 01:05:41"},{"visible":false,"include":false,"step":"55.0","x":-99.88571428571429,"y":93.16857142857143,"z":-64.06,"a95":0.99,"info":"21/03/2016 at 01:05:41"},{"visible":false,"include":false,"step":"60.0","x":-56.08380952380952,"y":-2.108190476190476,"z":-19.005714285714287,"a95":0.99,"info":"21/03/2016 at 01:05:41"},{"visible":false,"include":false,"step":"65.0","x":-71.67238095238095,"y":-199.14285714285714,"z":-37.94857142857143,"a95":0.99,"info":"21/03/2016 at 01:05:41"},{"visible":false,"include":false,"step":"70.0","x":-12.372380952380952,"y":-103.34285714285713,"z":-5.674857142857142,"a95":0.99,"info":"21/03/2016 at 01:05:41"},{"visible":false,"include":false,"step":"80.0","x":-9.47904761904762,"y":-229.85714285714286,"z":-21.49142857142857,"a95":0.99,"info":"21/03/2016 at 01:05:41"}]},{"version":"v1.1.0","exported":"2016-11-24T13:48:31.746Z","volume":10.5,"added":"2016-11-24T13:43:27.158Z","format":"Utrecht","demagType":"Unknown","strat":"1","patch":1.1,"GEO":[{"dec":113.99717771408586,"inc":-8.033058964616261,"MAD":10.994526670226353,"cm":[-1.782601843913767e-14,-7.549516567451064e-15,0],"intensity":196.14142724258593,"type":"dir","forced":true,"remark":"","origin":false,"nSteps":8,"minStep":"10.0","maxStep":"35.0","steps":["10.0","15.0","20.0","23.0","25.0","30.0","33.0","35.0"],"group":"None","version":"v1.1.0"}],"TECT":[{"dec":114.40901004542178,"inc":5.373528578531614,"MAD":10.994526670226357,"cm":[-2.2148949341271873e-14,-8.881784197001252e-15,7.327471962526033e-15],"intensity":196.14142724258593,"type":"dir","forced":true,"remark":"","origin":false,"nSteps":8,"minStep":"10.0","maxStep":"35.0","steps":["10.0","15.0","20.0","23.0","25.0","30.0","33.0","35.0"],"group":"None","version":"v1.1.0"}],"interpreted":true,"name":"YL1.06A","coreAzi":270,"coreDip":12,"bedStrike":257,"bedDip":22,"data":[{"visible":false,"include":false,"step":"0.0","x":-112.38095238095238,"y":-17.798095238095236,"z":-112.42857142857143,"a95":0.99,"info":"21/03/2016 at 01:05:41"},{"visible":true,"include":true,"step":"10.0","x":-31.775238095238095,"y":-55.19809523809524,"z":-122.64761904761905,"a95":0.99,"info":"21/03/2016 at 01:05:41"},{"visible":true,"include":true,"step":"15.0","x":-16.343809523809526,"y":-48.754285714285714,"z":-98.37142857142858,"a95":0.99,"info":"21/03/2016 at 01:05:41"},{"visible":true,"include":true,"step":"20.0","x":-1.1575238095238096,"y":-54.55428571428572,"z":-83.82285714285715,"a95":0.99,"info":"21/03/2016 at 01:05:41"},{"visible":true,"include":true,"step":"23.0","x":7.907428571428572,"y":-39.28190476190476,"z":-85.11333333333334,"a95":0.99,"info":"21/03/2016 at 01:05:41"},{"visible":true,"include":true,"step":"25.0","x":2.708952380952381,"y":-35.85333333333333,"z":-85.0495238095238,"a95":0.99,"info":"21/03/2016 at 01:05:41"},{"visible":true,"include":true,"step":"30.0","x":4.511333333333333,"y":-16,"z":-76.73809523809524,"a95":0.99,"info":"21/03/2016 at 01:05:41"},{"visible":true,"include":true,"step":"33.0","x":9.107238095238095,"y":-33.79047619047619,"z":-58.733333333333334,"a95":0.99,"info":"21/03/2016 at 01:05:41"},{"visible":true,"include":true,"step":"35.0","x":10.957142857142857,"y":0.3451619047619048,"z":-64.51333333333334,"a95":0.99,"info":"21/03/2016 at 01:05:41"},{"visible":false,"include":false,"step":"40.0","x":-0.4281428571428571,"y":-29.502857142857142,"z":-30.4247619047619,"a95":0.99,"info":"21/03/2016 at 01:05:41"},{"visible":false,"include":false,"step":"45.0","x":-6.559619047619048,"y":15.368571428571428,"z":-49.179047619047616,"a95":0.99,"info":"21/03/2016 at 01:05:41"},{"visible":false,"include":false,"step":"50.0","x":-18.93904761904762,"y":-24.67809523809524,"z":-19.98857142857143,"a95":0.99,"info":"21/03/2016 at 01:05:41"},{"visible":false,"include":false,"step":"55.0","x":-25.460952380952378,"y":16.463809523809523,"z":-43.804761904761904,"a95":0.99,"info":"21/03/2016 at 01:05:41"},{"visible":false,"include":false,"step":"60.0","x":-22.834285714285713,"y":-5.117809523809524,"z":-29.57428571428571,"a95":0.99,"info":"21/03/2016 at 01:05:41"},{"visible":false,"include":false,"step":"65.0","x":-18.19047619047619,"y":26.077142857142857,"z":-31.45714285714286,"a95":0.99,"info":"21/03/2016 at 01:05:41"},{"visible":false,"include":false,"step":"70.0","x":-28.18857142857143,"y":1.2379047619047618,"z":-20.764761904761905,"a95":0.99,"info":"21/03/2016 at 01:05:41"},{"visible":false,"include":false,"step":"80.0","x":35.72857142857143,"y":20.585714285714285,"z":4.516285714285714,"a95":0.99,"info":"21/03/2016 at 01:05:41"}]},{"version":"v1.1.0","exported":"2016-11-24T13:48:31.746Z","volume":10.5,"added":"2016-11-24T13:43:27.159Z","format":"Utrecht","demagType":"Unknown","strat":"1","patch":1.1,"GEO":[{"dec":181.66762712502847,"inc":-53.238308794230036,"MAD":3.8477159269548937,"cm":[-1.3322676295501878e-15,6.6058269965196814e-15,0],"intensity":254.84148120430405,"type":"dir","forced":true,"remark":"","origin":false,"nSteps":10,"minStep":"10.0","maxStep":"45.0","steps":["10.0","15.0","20.0","23.0","25.0","30.0","33.0","35.0","40.0","45.0"],"group":"None","version":"v1.1.0"}],"TECT":[{"dec":180.76495050422488,"inc":-25.257596901666847,"MAD":3.8477159269548555,"cm":[-8.881784197001252e-16,1.3752887717544127e-14,0],"intensity":254.84148120430402,"type":"dir","forced":true,"remark":"","origin":false,"nSteps":10,"minStep":"10.0","maxStep":"45.0","steps":["10.0","15.0","20.0","23.0","25.0","30.0","33.0","35.0","40.0","45.0"],"group":"None","version":"v1.1.0"}],"interpreted":true,"name":"YL1.11A","coreAzi":315,"coreDip":37,"bedStrike":269,"bedDip":28,"data":[{"visible":false,"include":false,"step":"0.0","x":35.86,"y":-97.22857142857143,"z":-133.8190476190476,"a95":0.99,"info":"21/03/2016 at 01:05:41"},{"visible":true,"include":true,"step":"10.0","x":49.31714285714286,"y":-74.38857142857144,"z":-120.4095238095238,"a95":0.99,"info":"21/03/2016 at 01:05:41"},{"visible":true,"include":true,"step":"15.0","x":43.24285714285715,"y":-59.389523809523816,"z":-117.06666666666668,"a95":0.99,"info":"21/03/2016 at 01:05:41"},{"visible":true,"include":true,"step":"20.0","x":50.75333333333333,"y":-57.341904761904765,"z":-98.11428571428571,"a95":0.99,"info":"21/03/2016 at 01:05:41"},{"visible":true,"include":true,"step":"23.0","x":45.8447619047619,"y":-54.75904761904762,"z":-92.5647619047619,"a95":0.99,"info":"21/03/2016 at 01:05:41"},{"visible":true,"include":true,"step":"25.0","x":45.28666666666667,"y":-41.63809523809524,"z":-98.07619047619048,"a95":0.99,"info":"21/03/2016 at 01:05:41"},{"visible":true,"include":true,"step":"30.0","x":57.542857142857144,"y":-48.624761904761904,"z":-100.03809523809525,"a95":0.99,"info":"21/03/2016 at 01:05:41"},{"visible":true,"include":true,"step":"33.0","x":46.396190476190476,"y":-47.191428571428574,"z":-90.77904761904762,"a95":0.99,"info":"21/03/2016 at 01:05:41"},{"visible":true,"include":true,"step":"35.0","x":44.114285714285714,"y":-41.97142857142857,"z":-77.54095238095238,"a95":0.99,"info":"21/03/2016 at 01:05:41"},{"visible":true,"include":true,"step":"40.0","x":44.23047619047619,"y":-43.32666666666667,"z":-79.6352380952381,"a95":0.99,"info":"21/03/2016 at 01:05:41"},{"visible":true,"include":true,"step":"45.0","x":44.30571428571428,"y":-44.44380952380953,"z":-84.6704761904762,"a95":0.99,"info":"21/03/2016 at 01:05:41"},{"visible":false,"include":false,"step":"50.0","x":45.691428571428574,"y":-45.17333333333333,"z":-57.166666666666664,"a95":0.99,"info":"21/03/2016 at 01:05:41"},{"visible":false,"include":false,"step":"55.0","x":40.19904761904762,"y":-29.75904761904762,"z":-50.56857142857143,"a95":0.99,"info":"21/03/2016 at 01:05:41"},{"visible":false,"include":false,"step":"60.0","x":37.30952380952381,"y":-27.287619047619046,"z":-64.80952380952381,"a95":0.99,"info":"21/03/2016 at 01:05:41"},{"visible":false,"include":false,"step":"65.0","x":38.95428571428571,"y":-53.35142857142858,"z":-44.61904761904762,"a95":0.99,"info":"21/03/2016 at 01:05:41"},{"visible":false,"include":false,"step":"70.0","x":41.457142857142856,"y":-34.08857142857143,"z":-25.48952380952381,"a95":0.99,"info":"21/03/2016 at 01:05:41"},{"visible":false,"include":false,"step":"80.0","x":31.93047619047619,"y":-16.272380952380953,"z":-44.457142857142856,"a95":0.99,"info":"21/03/2016 at 01:05:41"}]},{"version":"v1.1.0","exported":"2016-11-24T13:48:31.746Z","volume":10.5,"added":"2016-11-24T13:43:27.160Z","format":"Utrecht","demagType":"Unknown","strat":null,"patch":1.1,"GEO":[{"dec":179.77258872456696,"inc":-57.62100580676478,"MAD":1.3825848728737031,"cm":[0,-1.3877787807814457e-15,0],"intensity":282.318237474812,"type":"dir","forced":true,"remark":"","origin":false,"nSteps":4,"minStep":"100","maxStep":"180","steps":["100","120","150","180"],"group":"None","version":"v1.1.0"}],"TECT":[{"dec":179.475930524374,"inc":-29.622512229731115,"MAD":1.382584872873726,"cm":[0,-4.690692279041286e-15,0],"intensity":282.318237474812,"type":"dir","forced":true,"remark":"","origin":false,"nSteps":4,"minStep":"100","maxStep":"180","steps":["100","120","150","180"],"group":"None","version":"v1.1.0"}],"interpreted":true,"name":"YL1.12A","coreAzi":322,"coreDip":28,"bedStrike":269,"bedDip":28,"data":[{"visible":false,"include":false,"step":"20","x":82.66666666666667,"y":-64.0952380952381,"z":-97.52380952380952,"a95":2.6,"info":"\"16-03-14\" at \"12:35\""},{"visible":true,"include":true,"step":"100","x":110.0952380952381,"y":-61.904761904761905,"z":-151.04761904761904,"a95":1.9,"info":"\"16-03-14\" at \"14:38\""},{"visible":true,"include":true,"step":"120","x":110,"y":-66,"z":-153.04761904761904,"a95":1.8,"info":"\"16-03-15\" at \"10:43\""},{"visible":true,"include":true,"step":"150","x":76.66666666666667,"y":-51.333333333333336,"z":-118.19047619047619,"a95":2.3,"info":"\"16-03-15\" at \"13:32\""},{"visible":true,"include":true,"step":"180","x":48.55238095238095,"y":-29.16190476190476,"z":-63.99047619047619,"a95":1.5,"info":"\"16-03-16\" at \"14:04\""},{"visible":false,"include":false,"step":"210","x":27.123809523809523,"y":-26.895238095238092,"z":-19.41904761904762,"a95":2.3,"info":"\"16-03-17\" at \"17:15\""},{"visible":false,"include":false,"step":"250","x":-13.171428571428573,"y":-15.533333333333333,"z":20.40952380952381,"a95":3.7,"info":"\"16-03-17\" at \"20:33\""},{"visible":false,"include":false,"step":"280","x":5.942857142857143,"y":-11.847619047619048,"z":15.77142857142857,"a95":7.1,"info":"\"16-03-18\" at \"15:53\""},{"visible":false,"include":false,"step":"310","x":-0.7523809523809524,"y":-10.028571428571428,"z":10.123809523809523,"a95":7.4,"info":"\"16-03-20\" at \"15:18\""},{"visible":false,"include":false,"step":"350","x":-7.523809523809524,"y":-3.9904761904761905,"z":-8.723809523809523,"a95":4.1,"info":"\"16-04-18\" at \"11:33\""},{"visible":false,"include":false,"step":"380","x":-2.1333333333333333,"y":-15.647619047619049,"z":1.2571428571428571,"a95":4.9,"info":"\"16-04-18\" at \"14:17\""},{"visible":false,"include":false,"step":"410","x":-15.22857142857143,"y":-14.019047619047617,"z":-0.5238095238095238,"a95":5.6,"info":"\"16-04-19\" at \"10:07\""},{"visible":false,"include":false,"step":"430","x":-22.895238095238096,"y":-4.961904761904762,"z":-10,"a95":4.4,"info":"\"16-04-19\" at \"13:30\""},{"visible":false,"include":false,"step":"450","x":-18.104761904761904,"y":2.857142857142857,"z":3.580952380952381,"a95":4.4,"info":"\"16-04-20\" at \"13:59\""}]},{"version":"v1.1.0","exported":"2016-11-24T13:48:31.746Z","volume":10.5,"added":"2016-11-24T13:43:27.160Z","format":"Utrecht","demagType":"Unknown","strat":"1","patch":1.1,"GEO":[{"dec":176.26043860790446,"inc":-50.319897701999686,"MAD":3.1355207840528694,"cm":[0,-7.13318293321663e-15,0],"intensity":283.35711555411376,"type":"dir","forced":true,"remark":"","origin":false,"nSteps":12,"minStep":"10.0","maxStep":"55.0","steps":["10.0","15.0","20.0","23.0","25.0","30.0","33.0","35.0","40.0","45.0","50.0","55.0"],"group":"None","version":"v1.1.0"}],"TECT":[{"dec":177.109209378439,"inc":-22.341118026520515,"MAD":3.135520784052887,"cm":[-2.6645352591003757e-15,-2.020605904817785e-14,4.440892098500626e-16],"intensity":283.35711555411376,"type":"dir","forced":true,"remark":"","origin":false,"nSteps":12,"minStep":"10.0","maxStep":"55.0","steps":["10.0","15.0","20.0","23.0","25.0","30.0","33.0","35.0","40.0","45.0","50.0","55.0"],"group":"None","version":"v1.1.0"}],"interpreted":true,"name":"YL1.12B","coreAzi":322,"coreDip":28,"bedStrike":269,"bedDip":28,"data":[{"visible":false,"include":false,"step":"0.0","x":25.329523809523806,"y":-90.49619047619048,"z":-142.62857142857143,"a95":0.99,"info":"19/03/2016 at 21:48:59"},{"visible":true,"include":true,"step":"10.0","x":66.56285714285714,"y":-77.39809523809524,"z":-149.04761904761904,"a95":0.99,"info":"19/03/2016 at 21:48:59"},{"visible":true,"include":true,"step":"15.0","x":76.28380952380952,"y":-67.92476190476191,"z":-137.98095238095237,"a95":0.99,"info":"19/03/2016 at 21:48:59"},{"visible":true,"include":true,"step":"20.0","x":74.2752380952381,"y":-63.47428571428571,"z":-144.1238095238095,"a95":0.99,"info":"19/03/2016 at 21:48:59"},{"visible":true,"include":true,"step":"23.0","x":62.542857142857144,"y":-60.567619047619054,"z":-137.44761904761904,"a95":0.99,"info":"19/03/2016 at 21:48:59"},{"visible":true,"include":true,"step":"25.0","x":63.25428571428571,"y":-51.01428571428571,"z":-123.51428571428572,"a95":0.99,"info":"19/03/2016 at 21:48:59"},{"visible":true,"include":true,"step":"30.0","x":68.20666666666666,"y":-47.45142857142857,"z":-122.54285714285714,"a95":0.99,"info":"19/03/2016 at 21:48:59"},{"visible":true,"include":true,"step":"33.0","x":62.73619047619048,"y":-49.54857142857143,"z":-114.17142857142856,"a95":0.99,"info":"19/03/2016 at 21:48:59"},{"visible":true,"include":true,"step":"35.0","x":63.9752380952381,"y":-52.44952380952381,"z":-119.6952380952381,"a95":0.99,"info":"19/03/2016 at 21:48:59"},{"visible":true,"include":true,"step":"40.0","x":57.01714285714285,"y":-42.11523809523809,"z":-107.92380952380952,"a95":0.99,"info":"19/03/2016 at 21:48:59"},{"visible":true,"include":true,"step":"45.0","x":50.33047619047619,"y":-34.864761904761906,"z":-97.56190476190477,"a95":0.99,"info":"19/03/2016 at 21:48:59"},{"visible":true,"include":true,"step":"50.0","x":56.07333333333333,"y":-32.15238095238095,"z":-90.42476190476191,"a95":0.99,"info":"19/03/2016 at 21:48:59"},{"visible":true,"include":true,"step":"55.0","x":51.95619047619047,"y":-32.00190476190476,"z":-83.92476190476191,"a95":0.99,"info":"19/03/2016 at 21:48:59"},{"visible":false,"include":false,"step":"60.0","x":48.850476190476186,"y":-20.125714285714285,"z":-94.30857142857143,"a95":0.99,"info":"19/03/2016 at 21:48:59"},{"visible":true,"include":false,"step":"65.0","x":42.465714285714284,"y":-29.20380952380952,"z":-79.1047619047619,"a95":0.99,"info":"19/03/2016 at 21:48:59"},{"visible":true,"include":false,"step":"70.0","x":45.00476190476191,"y":-17.336190476190477,"z":-67.83333333333333,"a95":0.99,"info":"19/03/2016 at 21:48:59"},{"visible":true,"include":false,"step":"80.0","x":42.174285714285716,"y":-9.68,"z":-68.11142857142856,"a95":0.99,"info":"19/03/2016 at 21:48:59"}]},{"version":"v1.1.0","exported":"2016-11-24T13:48:31.746Z","volume":10.5,"added":"2016-11-24T13:43:27.161Z","format":"Utrecht","demagType":"Unknown","strat":"1","patch":1.1,"GEO":[{"dec":160.8048316826496,"inc":-56.52872001358661,"MAD":5.524520750824778,"cm":[-2.886579864025407e-15,-6.453171330633722e-15,0],"intensity":179.49236134578967,"type":"dir","forced":true,"remark":"","origin":false,"nSteps":12,"minStep":"10.0","maxStep":"55.0","steps":["10.0","15.0","20.0","23.0","25.0","30.0","33.0","35.0","40.0","45.0","50.0","55.0"],"group":"None","version":"v1.1.0"}],"TECT":[{"dec":167.60182588417547,"inc":-29.376458799469617,"MAD":5.524520750824732,"cm":[2.220446049250313e-15,2.6645352591003757e-15,-2.220446049250313e-16],"intensity":179.49236134578967,"type":"dir","forced":true,"remark":"","origin":false,"nSteps":12,"minStep":"10.0","maxStep":"55.0","steps":["10.0","15.0","20.0","23.0","25.0","30.0","33.0","35.0","40.0","45.0","50.0","55.0"],"group":"None","version":"v1.1.0"}],"interpreted":true,"name":"YL1.13B","coreAzi":349,"coreDip":42,"bedStrike":269,"bedDip":28,"data":[{"visible":false,"include":false,"step":"0.0","x":1.1381904761904762,"y":20.026666666666667,"z":-110.87619047619049,"a95":0.99,"info":"19/03/2016 at 21:48:59"},{"visible":true,"include":true,"step":"10.0","x":25.620952380952378,"y":7.440571428571429,"z":-102.32380952380953,"a95":0.99,"info":"19/03/2016 at 21:48:59"},{"visible":true,"include":true,"step":"15.0","x":17.44857142857143,"y":0.7102285714285714,"z":-99.0095238095238,"a95":0.99,"info":"19/03/2016 at 21:48:59"},{"visible":true,"include":true,"step":"20.0","x":27.5752380952381,"y":1.7941904761904761,"z":-95.55238095238094,"a95":0.99,"info":"19/03/2016 at 21:48:59"},{"visible":true,"include":true,"step":"23.0","x":26.176190476190477,"y":5.680095238095238,"z":-91.43904761904761,"a95":0.99,"info":"19/03/2016 at 21:48:59"},{"visible":true,"include":true,"step":"25.0","x":30.551428571428573,"y":11.30952380952381,"z":-91.57428571428571,"a95":0.99,"info":"19/03/2016 at 21:48:59"},{"visible":true,"include":true,"step":"30.0","x":16.115238095238094,"y":10.327619047619047,"z":-90.94190476190477,"a95":0.99,"info":"19/03/2016 at 21:48:59"},{"visible":true,"include":true,"step":"33.0","x":17.016190476190474,"y":14.185714285714285,"z":-89.54571428571428,"a95":0.99,"info":"19/03/2016 at 21:48:59"},{"visible":true,"include":true,"step":"35.0","x":32.51238095238095,"y":6.982095238095238,"z":-80.08952380952381,"a95":0.99,"info":"19/03/2016 at 21:48:59"},{"visible":true,"include":true,"step":"40.0","x":28.982857142857142,"y":15.835238095238097,"z":-83.74285714285713,"a95":0.99,"info":"19/03/2016 at 21:48:59"},{"visible":true,"include":true,"step":"45.0","x":19.49904761904762,"y":15.714285714285714,"z":-79.1,"a95":0.99,"info":"19/03/2016 at 21:48:59"},{"visible":true,"include":true,"step":"50.0","x":14.184761904761904,"y":1.1401904761904762,"z":-75.55238095238094,"a95":0.99,"info":"19/03/2016 at 21:48:59"},{"visible":true,"include":true,"step":"55.0","x":22.585714285714285,"y":-6.5122857142857145,"z":-70.57142857142857,"a95":0.99,"info":"19/03/2016 at 21:48:59"},{"visible":true,"include":false,"step":"60.0","x":18.036190476190477,"y":4.3133333333333335,"z":-60.668571428571425,"a95":0.99,"info":"19/03/2016 at 21:48:59"},{"visible":true,"include":false,"step":"65.0","x":18.574285714285715,"y":3.6151428571428577,"z":-63.78000000000001,"a95":0.99,"info":"19/03/2016 at 21:48:59"},{"visible":true,"include":false,"step":"70.0","x":19.677142857142858,"y":-3.814095238095238,"z":-73.2352380952381,"a95":0.99,"info":"19/03/2016 at 21:49:00"},{"visible":false,"include":false,"step":"80.0","x":2.4666666666666663,"y":-7.1844761904761905,"z":-59.76571428571428,"a95":0.99,"info":"19/03/2016 at 21:49:00"}]},{"version":"v1.1.0","exported":"2016-11-24T13:48:31.746Z","volume":10.5,"added":"2016-11-24T13:43:27.161Z","format":"Utrecht","demagType":"Unknown","strat":null,"patch":1.1,"GEO":[{"dec":176.16673465987378,"inc":-49.69968393459092,"MAD":3.4050133921643013,"cm":[8.881784197001252e-16,-9.992007221626409e-15,0],"intensity":305.1002426994087,"type":"dir","forced":true,"remark":"","origin":false,"nSteps":5,"minStep":"100","maxStep":"210","steps":["100","120","150","180","210"],"group":"None","version":"v1.1.0"}],"TECT":[{"dec":177.0277933155087,"inc":-21.722574922332683,"MAD":3.405013392164301,"cm":[-1.0658141036401503e-14,-9.814371537686384e-14,5.329070518200751e-15],"intensity":305.1002426994087,"type":"dir","forced":true,"remark":"","origin":false,"nSteps":5,"minStep":"100","maxStep":"210","steps":["100","120","150","180","210"],"group":"None","version":"v1.1.0"}],"interpreted":true,"name":"YL1.15A","coreAzi":342,"coreDip":42,"bedStrike":269,"bedDip":28,"data":[{"visible":false,"include":false,"step":"20","x":35.714285714285715,"y":-6.476190476190476,"z":-208.85714285714286,"a95":2.3,"info":"\"16-03-14\" at \"12:36\""},{"visible":true,"include":true,"step":"100","x":30.38095238095238,"y":-29.80952380952381,"z":-232.76190476190476,"a95":2.5,"info":"\"16-03-14\" at \"14:39\""},{"visible":true,"include":true,"step":"120","x":33.523809523809526,"y":-38.57142857142857,"z":-224.38095238095238,"a95":2.5,"info":"\"16-03-15\" at \"10:45\""},{"visible":true,"include":true,"step":"150","x":37.142857142857146,"y":-30.952380952380953,"z":-201.8095238095238,"a95":2.8,"info":"\"16-03-15\" at \"13:34\""},{"visible":true,"include":true,"step":"180","x":16.857142857142858,"y":-21.714285714285715,"z":-122.19047619047619,"a95":2.3,"info":"\"16-03-16\" at \"14:05\""},{"visible":true,"include":true,"step":"210","x":9.20952380952381,"y":-32.20952380952381,"z":-63.333333333333336,"a95":3.8,"info":"\"16-03-17\" at \"17:16\""},{"visible":false,"include":false,"step":"250","x":-8.447619047619048,"y":2.8190476190476192,"z":13.276190476190477,"a95":3.7,"info":"\"16-03-17\" at \"20:34\""},{"visible":false,"include":false,"step":"280","x":-8.123809523809523,"y":-0.5238095238095238,"z":31.847619047619045,"a95":4.9,"info":"\"16-03-18\" at \"16:47\""},{"visible":false,"include":false,"step":"310","x":0.6095238095238096,"y":2.0857142857142854,"z":-2.8476190476190473,"a95":15.8,"info":"\"16-03-20\" at \"15:19\""},{"visible":false,"include":false,"step":"350","x":5.923809523809524,"y":-3.5999999999999996,"z":11.028571428571428,"a95":5.1,"info":"\"16-04-18\" at \"11:35\""},{"visible":false,"include":false,"step":"380","x":-6.895238095238096,"y":2.3142857142857145,"z":24.59047619047619,"a95":3.4,"info":"\"16-04-18\" at \"14:19\""},{"visible":false,"include":false,"step":"410","x":-4.0285714285714285,"y":2.742857142857143,"z":7.038095238095239,"a95":11.9,"info":"\"16-04-19\" at \"10:09\""}]},{"version":"v1.1.0","exported":"2016-11-24T13:48:31.747Z","volume":10.5,"added":"2016-11-24T13:43:27.161Z","format":"Utrecht","demagType":"Unknown","strat":"1","patch":1.1,"GEO":[{"dec":35.07683062217336,"inc":61.41602086523818,"MAD":4.8078895898997605,"cm":[-1.7763568394002505e-15,-2.220446049250313e-16,0],"intensity":262.1578311522795,"type":"dir","forced":true,"remark":"","origin":false,"nSteps":11,"minStep":"10.0","maxStep":"50.0","steps":["10.0","15.0","20.0","23.0","25.0","30.0","33.0","35.0","40.0","45.0","50.0"],"group":"None","version":"v1.1.0"}],"TECT":[{"dec":19.49684120038563,"inc":36.426377814678034,"MAD":4.807889589899697,"cm":[1.7763568394002505e-15,-2.220446049250313e-15,8.881784197001252e-16],"intensity":262.1578311522796,"type":"dir","forced":true,"remark":"","origin":false,"nSteps":11,"minStep":"10.0","maxStep":"50.0","steps":["10.0","15.0","20.0","23.0","25.0","30.0","33.0","35.0","40.0","45.0","50.0"],"group":"None","version":"v1.1.0"}],"interpreted":true,"name":"YL1.15B","coreAzi":342,"coreDip":42,"bedStrike":269,"bedDip":28,"data":[{"visible":false,"include":false,"step":"0.0","x":-103.47619047619048,"y":80.35428571428572,"z":171,"a95":0.99,"info":"19/03/2016 at 21:49:00"},{"visible":true,"include":true,"step":"10.0","x":-67.84857142857143,"y":63.6504761904762,"z":145.24761904761903,"a95":0.99,"info":"19/03/2016 at 21:49:00"},{"visible":true,"include":true,"step":"15.0","x":-59.8352380952381,"y":57.48,"z":122.54285714285714,"a95":0.99,"info":"19/03/2016 at 21:49:00"},{"visible":true,"include":true,"step":"20.0","x":-57.6247619047619,"y":47.44285714285714,"z":117.21904761904761,"a95":0.99,"info":"19/03/2016 at 21:49:00"},{"visible":true,"include":true,"step":"23.0","x":-62.52,"y":52.074285714285715,"z":108.27619047619048,"a95":0.99,"info":"19/03/2016 at 21:49:00"},{"visible":true,"include":true,"step":"25.0","x":-62.852380952380955,"y":41.47047619047619,"z":97.91428571428571,"a95":0.99,"info":"19/03/2016 at 21:49:00"},{"visible":true,"include":true,"step":"30.0","x":-62.156190476190474,"y":38.45809523809524,"z":93.27047619047619,"a95":0.99,"info":"19/03/2016 at 21:49:00"},{"visible":true,"include":true,"step":"33.0","x":-51.88666666666666,"y":48.98761904761905,"z":85.65904761904761,"a95":0.99,"info":"19/03/2016 at 21:49:00"},{"visible":true,"include":true,"step":"35.0","x":-52.413333333333334,"y":39.61523809523809,"z":83.75047619047619,"a95":0.99,"info":"19/03/2016 at 21:49:00"},{"visible":true,"include":true,"step":"40.0","x":-60.15714285714286,"y":40.01904761904762,"z":77.28285714285714,"a95":0.99,"info":"19/03/2016 at 21:49:00"},{"visible":true,"include":true,"step":"45.0","x":-43.07047619047619,"y":45.637142857142855,"z":74.6,"a95":0.99,"info":"19/03/2016 at 21:49:00"},{"visible":true,"include":true,"step":"50.0","x":-49.84,"y":45.8,"z":61.86761904761905,"a95":0.99,"info":"19/03/2016 at 21:49:00"},{"visible":true,"include":false,"step":"55.0","x":-37.285714285714285,"y":41.47047619047619,"z":46.402857142857144,"a95":0.99,"info":"19/03/2016 at 21:49:00"},{"visible":true,"include":false,"step":"60.0","x":-37.373333333333335,"y":28.830476190476194,"z":50.287619047619046,"a95":0.99,"info":"19/03/2016 at 21:49:00"},{"visible":true,"include":false,"step":"65.0","x":-31.355238095238096,"y":20.325714285714284,"z":51.46,"a95":0.99,"info":"19/03/2016 at 21:49:00"},{"visible":true,"include":false,"step":"70.0","x":-21.61904761904762,"y":33.618095238095236,"z":56.24666666666667,"a95":0.99,"info":"19/03/2016 at 21:49:00"},{"visible":true,"include":false,"step":"80.0","x":3.2101904761904763,"y":17.25142857142857,"z":45.61619047619048,"a95":0.99,"info":"19/03/2016 at 21:49:00"}]},{"version":"v1.1.0","exported":"2016-11-24T13:48:31.747Z","volume":10.5,"added":"2016-11-24T13:43:27.162Z","format":"Utrecht","demagType":"Unknown","strat":null,"patch":1.1,"GEO":[{"dec":347.51558346248225,"inc":57.77163575976343,"MAD":4.621631894565796,"cm":[1.7763568394002505e-15,5.329070518200751e-15,0],"intensity":197.8394690404422,"type":"dir","forced":true,"remark":"","origin":false,"nSteps":5,"minStep":"100","maxStep":"210","steps":["100","120","150","180","210"],"group":"None","version":"v1.1.0"}],"TECT":[{"dec":351.95011082289517,"inc":30.10305960841537,"MAD":4.621631894565794,"cm":[0,5.995204332975845e-15,-8.881784197001252e-16],"intensity":197.8394690404422,"type":"dir","forced":true,"remark":"","origin":false,"nSteps":5,"minStep":"100","maxStep":"210","steps":["100","120","150","180","210"],"group":"None","version":"v1.1.0"}],"interpreted":true,"name":"YL1.18A","coreAzi":300,"coreDip":8,"bedStrike":269,"bedDip":28,"data":[{"visible":false,"include":false,"step":"20","x":-151.04761904761904,"y":99.61904761904762,"z":92.47619047619048,"a95":2.1,"info":"\"16-03-14\" at \"12:37\""},{"visible":true,"include":true,"step":"100","x":-123.23809523809524,"y":55.04761904761905,"z":63.714285714285715,"a95":2.3,"info":"\"16-03-14\" at \"14:40\""},{"visible":true,"include":true,"step":"120","x":-113.33333333333333,"y":59.23809523809524,"z":68.95238095238095,"a95":2,"info":"\"16-03-15\" at \"10:47\""},{"visible":true,"include":true,"step":"150","x":-89.42857142857143,"y":39.904761904761905,"z":59.523809523809526,"a95":2,"info":"\"16-03-15\" at \"13:35\""},{"visible":true,"include":true,"step":"180","x":-55.24761904761905,"y":43.39047619047619,"z":38.48571428571429,"a95":2.2,"info":"\"16-03-16\" at \"14:06\""},{"visible":true,"include":true,"step":"210","x":-36,"y":15.533333333333333,"z":30.104761904761908,"a95":2.3,"info":"\"16-03-17\" at \"17:17\""},{"visible":true,"include":false,"step":"250","x":-20.00952380952381,"y":14.095238095238095,"z":7.6571428571428575,"a95":5.6,"info":"\"16-03-17\" at \"20:36\""},{"visible":true,"include":false,"step":"280","x":-8.066666666666666,"y":1.2,"z":19.238095238095237,"a95":10.5,"info":"\"16-03-18\" at \"16:51\""},{"visible":true,"include":false,"step":"310","x":-13.447619047619046,"y":1.8380952380952382,"z":11.638095238095238,"a95":11,"info":"\"16-03-20\" at \"15:20\""},{"visible":true,"include":false,"step":"350","x":-23.333333333333332,"y":2,"z":1.361904761904762,"a95":2.6,"info":"\"16-04-18\" at \"11:39\""},{"visible":true,"include":false,"step":"380","x":-19.514285714285716,"y":-3.3714285714285714,"z":8.219047619047618,"a95":3.2,"info":"\"16-04-18\" at \"14:21\""},{"visible":true,"include":false,"step":"410","x":-5.552380952380952,"y":3.857142857142857,"z":22.057142857142857,"a95":5.1,"info":"\"16-04-19\" at \"10:11\""},{"visible":true,"include":false,"step":"430","x":-22.01904761904762,"y":6.504761904761905,"z":-7.076190476190476,"a95":3.2,"info":"\"16-04-19\" at \"13:38\""}]}]
