# Supplementary material for: Paleomagnetic constraints on the timing and distribution of Cenozoic rotations in Central and Eastern Anatolia
Source: Copernicus journal article supplement (doi:10.5194/se-9-295-2018), 2018-03-21
Supplement: Supplementary file 2 [file se-9-295-2018-supplement.zip › se-2017-66_DATA_pmag files/Literature_data_Central_Turkey.pmag]

{"version":"v1.1.2","dateExported":"2017-06-26T09:04:16.471Z","apwp":{},"data":[{"data":[[342.6245967330283,44.42695451180049,0,0,"Siv - TT131.1",0],[357.3578546175253,67.37644162934343,0,0,"Siv - TT131.2",0],[7.673144521107645,42.53803433168343,0,0,"Siv - TT131.3",0],[342.60892824684333,49.093722186406666,0,0,"Siv - TT131.4",0],[7.924812726186474,52.27301403075345,0,0,"Siv - TT131.5",0],[345.7781801655833,34.151945968998824,0,0,"Siv - TT131.6",0],[343.52862079579666,15.700992958875185,0,0,"Siv - TT131.7",0]],"metaData":{"name":"Siv - TT131","dateAdded":"2016-11-18T11:03:38.709Z","version":"v1.1.1","markerColor":"#A52A2A","cutoff":"45","type":"Simulated","description":"sediment","author":"Cinku et al., Tectonics 2016","age":"42.9","minAge":"38","maxAge":"47.8","latitude":38.47,"longitude":36.55,"sanitized":true}},{"data":[[357.2551196393718,37.250390664399724,0,0,"Siv - TL06.1",0],[346.2894848084103,51.157418259327066,0,0,"Siv - TL06.2",0],[333.1952243080418,54.37209244080843,0,0,"Siv - TL06.3",0],[355.9544227244596,43.18015742423175,0,0,"Siv - TL06.4",0],[341.69082896775274,56.47288537496428,0,0,"Siv - TL06.5",0],[325.3328166425034,36.50338934171383,0,0,"Siv - TL06.6",0],[341.29654142191225,53.18996920185825,0,0,"Siv - TL06.7",0],[340.26460275084855,62.62099313853008,0,0,"Siv - TL06.8",0],[333.4164200739017,57.077259598958676,0,0,"Siv - TL06.9",0],[335.62761998340363,64.46418787279931,0,0,"Siv - TL06.10",0],[331.9046283501003,29.926232412251185,0,0,"Siv - TL06.11",0],[332.6426063815409,58.62877876866192,0,0,"Siv - TL06.12",0],[339.14321608485835,53.632892025528555,0,0,"Siv - TL06.13",0],[344.84244583734085,56.763538685780794,0,0,"Siv - TL06.14",0],[339.67467477938,41.453477971758744,0,0,"Siv - TL06.15",0],[321.28726801962216,48.539822638908426,0,0,"Siv - TL06.16",0],[335.9978217886387,49.466000272818924,0,0,"Siv - TL06.17",0],[344.7739891166371,62.53339400212084,0,0,"Siv - TL06.18",0],[342.039278069066,60.28395950292289,0,0,"Siv - TL06.19",0],[321.6216781595099,58.378521106895136,0,0,"Siv - TL06.20",0],[342.9092038804913,49.9121287667716,0,0,"Siv - TL06.21",0],[334.80185684470166,44.55662031813747,0,0,"Siv - TL06.22",0],[345.9884109702384,42.1718693482687,0,0,"Siv - TL06.23",0],[327.2472419712533,49.39772907558826,0,0,"Siv - TL06.24",0],[340.5562172710147,36.410250268174764,0,0,"Siv - TL06.25",0],[352.6510308404998,48.7790373301147,0,0,"Siv - TL06.26",0]],"metaData":{"name":"Siv - TL06","dateAdded":"2016-11-18T11:04:08.754Z","version":"v1.1.1","markerColor":"#A52A2A","cutoff":"45","type":"Simulated","description":"sediment","author":"Cinku et al., Tectonics 2016","age":"42.9","minAge":"38","maxAge":"47.8","latitude":38.57,"longitude":36.35,"sanitized":true,"edited":true,"timeEdited":"2016-11-18T11:05:27.924Z"}},{"data":[[335.01332487376123,38.213399032535555,0,0,"Siv - TL07.1",0],[319.51359884687326,46.448622795257954,0,0,"Siv - TL07.2",0],[327.76728537354575,22.946605830984126,0,0,"Siv - TL07.3",0],[333.371791216551,45.88859509217912,0,0,"Siv - TL07.4",0],[323.3570239419755,59.811029713506585,0,0,"Siv - TL07.5",0],[331.7170782781627,68.80383426156473,0,0,"Siv - TL07.6",0],[313.02321084642585,51.67516806056292,0,0,"Siv - TL07.7",0],[326.09585720328323,61.87343731778948,0,0,"Siv - TL07.8",0],[337.8223410014332,59.006331062166794,0,0,"Siv - TL07.9",0],[322.2929873260716,65.27694852077587,0,0,"Siv - TL07.10",0],[316.65949403295315,41.56958892124666,0,0,"Siv - TL07.11",0],[328.2896682702194,38.419372616190934,0,0,"Siv - TL07.12",0],[331.3927337603408,50.96256913727624,0,0,"Siv - TL07.13",0],[331.77048941206675,52.35073467708641,0,0,"Siv - TL07.14",0],[305.76032287372686,58.46131516022037,0,0,"Siv - TL07.15",0],[334.5851080263823,52.18123656664114,0,0,"Siv - TL07.16",0],[323.7103959350799,36.99437483190098,0,0,"Siv - TL07.17",0],[316.8739094875789,44.52730403629637,0,0,"Siv - TL07.18",0],[311.690860053483,59.3767714373623,0,0,"Siv - TL07.19",0],[310.8360615860024,43.41820857655597,0,0,"Siv - TL07.20",0]],"metaData":{"name":"Siv - TL07","dateAdded":"2016-11-18T11:05:58.034Z","version":"v1.1.1","markerColor":"#A52A2A","cutoff":"45","type":"Simulated","description":"sediment","author":"Cinku et al., Tectonics 2016","age":"42.9","minAge":"38","maxAge":"47.8","latitude":38.54,"longitude":36.54,"sanitized":true}},{"data":[[336.18038692526255,34.889527675408345,0,0,"Kir - Sariz.1",0],[321.0874947431487,27.092664358329316,0,0,"Kir - Sariz.2",0],[330.7473835583351,38.51166296681138,0,0,"Kir - Sariz.3",0],[302.16753424520994,30.916398034906933,0,0,"Kir - Sariz.4",0],[303.92433497940124,29.682458406816007,0,0,"Kir - Sariz.5",0],[314.90828086657785,33.289626034480705,0,0,"Kir - Sariz.6",0],[312.6557178546675,17.342921933679474,0,0,"Kir - Sariz.7",0],[333.10230566055117,22.88039420601807,0,0,"Kir - Sariz.8",0],[313.0181885197836,34.0378135978704,0,0,"Kir - Sariz.9",0],[297.60700554272717,46.89540101391247,0,0,"Kir - Sariz.10",0],[307.94172642704757,41.254035779866605,0,0,"Kir - Sariz.11",0],[304.2344284786526,-3.1672583041634037,0,0,"Kir - Sariz.12",0],[307.86858507032434,60.08113412857158,0,0,"Kir - Sariz.1",0],[317.5771679051153,25.69719734713096,0,0,"Kir - Sariz.2",0],[327.66722677616434,39.542178811734516,0,0,"Kir - Sariz.3",0],[323.04463836943535,41.14189971138347,0,0,"Kir - Sariz.4",0],[351.3929831684679,21.420679049389573,0,0,"Kir - Sariz.5",0],[328.47114946043206,55.36845002547637,0,0,"Kir - Sariz.1",0],[313.7810442695418,48.262175556235455,0,0,"Kir - Sariz.2",0],[331.4473830911034,37.23175761823647,0,0,"Kir - Sariz.3",0],[321.13819060767776,55.68036104210458,0,0,"Kir - Sariz.4",0],[341.313283585333,39.92506555930426,0,0,"Kir - Sariz.5",0],[325.6012994386367,4.7970502120071705,0,0,"Kir - Sariz.6",0],[310.9704539970671,46.13753190125814,0,0,"Kir - Sariz.7",0],[345.5173012398417,53.93474990818106,0,0,"Kir - Sariz.8",0],[326.31919932433993,24.76662210194055,0,0,"Kir - Sariz.9",0],[326.88087878192295,14.45487810804798,0,0,"Kir - Sariz.10",0]],"metaData":{"name":"Tau - Sariz","dateAdded":"2016-11-17T12:45:56.639Z","version":"v1.1.1","markerColor":"orange","cutoff":"45","type":"Input","description":"pluton","author":"Kissel et al., Tectonophysics 2003","age":"45.0","minAge":"33.9","maxAge":"56","latitude":38.6,"longitude":36.5,"sanitized":true}},{"data":[[12.2,43.1,0,0,"Tau - Osmaniye Basalts.1",0],[310.1,24.1,0,0,"Tau - Osmaniye Basalts.2",0],[13.1,14,0,0,"Tau - Osmaniye Basalts.3",0],[13.9,39,0,0,"Tau - Osmaniye Basalts.4",0],[9,43.3,0,0,"Tau - Osmaniye Basalts.5",0],[13.7,29.1,0,0,"Tau - Osmaniye Basalts.6",0],[12.8,58.7,0,0,"Tau - Osmaniye Basalts.7",0],[355.7,68.8,0,0,"Tau - Osmaniye Basalts.8",0],[11.6,59.4,0,0,"Tau - Osmaniye Basalts.9",0]],"metaData":{"name":"Tau - Osmaniye Basalts","dateAdded":"2016-11-17T13:11:54.063Z","version":"v1.1.1","markerColor":"orange","cutoff":"45","type":"Input","description":"volcanics","author":"Gursoy et al., Tectonics 2003","age":"1.3","minAge":"0.01","maxAge":"2.6","latitude":37,"longitude":36.1,"sanitized":true}},{"data":[[296,68.2,0,0,"Tau - Botas Basalts.1",0],[336.5,65.1,0,0,"Tau - Botas Basalts.2",0],[328,66.1,0,0,"Tau - Botas Basalts.3",0],[334.6,46.2,0,0,"Tau - Botas Basalts.4",0],[301.3,49.7,0,0,"Tau - Botas Basalts.5",0],[319.6,58,0,0,"Tau - Botas Basalts.6",0],[300.3,59.8,0,0,"Tau - Botas Basalts.7",0]],"metaData":{"name":"Tau - Botas Basalts","dateAdded":"2016-11-17T13:13:08.182Z","version":"v1.1.1","markerColor":"#32CD32","cutoff":"45","type":"Input","description":"volcanics","author":"Gursoy et al., Tectonics 2003","age":"1.3","minAge":"0.01","maxAge":"2.6","latitude":36.9,"longitude":35.9,"sanitized":true}},{"data":[[299.6,32.7,0,0,"Tau - Kepezdag.1",0],[314.8,68.7,0,0,"Tau - Kepezdag.2",0],[315,70.1,0,0,"Tau - Kepezdag.3",0],[345.4,33.8,0,0,"Tau - Kepezdag.4",0],[11.4,50.6,0,0,"Tau - Kepezdag.5",0],[340.8,41.6,0,0,"Tau - Kepezdag.6",0],[302.7,17.4,0,0,"Tau - Kepezdag.7",0],[347.8,64.9,0,0,"Tau - Kepezdag.8",0],[4.2,58.2,0,0,"Tau - Kepezdag.9",0],[350.4,44.2,0,0,"Tau - Kepezdag.10",0]],"metaData":{"name":"Tau - Kepezdag","dateAdded":"2016-11-17T13:21:40.665Z","version":"v1.1.1","markerColor":"orange","cutoff":"45","type":"Input","description":"volcanics","author":"Gursoy et al., J. Geodynamics 2011","age":"15","minAge":"14","maxAge":"16","latitude":38.3,"longitude":37.6,"sanitized":true}},{"data":[[337.2,34.3,0,0,"Tau - Yamadag.1",0],[358.5,48.3,0,0,"Tau - Yamadag.2",0],[1.7,42.6,0,0,"Tau - Yamadag.3",0],[298.1,74.3,0,0,"Tau - Yamadag.4",0],[309.1,15.7,0,0,"Tau - Yamadag.5",0],[343.1,53.9,0,0,"Tau - Yamadag.6",0],[338.8,50.4,0,0,"Tau - Yamadag.7",0],[309.8,32,0,0,"Tau - Yamadag.8",0],[303.3,19.9,0,0,"Tau - Yamadag.9",0],[352.5,53.1,0,0,"Tau - Yamadag.10",0],[20.6,-37.8,0,0,"Tau - Yamadag.11",0],[344.3,66,0,0,"Tau - Yamadag.12",0],[337.1,67.5,0,0,"Tau - Yamadag.13",0],[311.5,44.4,0,0,"Tau - Yamadag.14",0],[310.7,65.8,0,0,"Tau - Yamadag.15",0],[337.4,46.7,0,0,"Tau - Yamadag.16",0],[332,50.1,0,0,"Tau - Yamadag.17",0],[326.1,28.2,0,0,"Tau - Yamadag.18",0],[333.6,42.2,0,0,"Tau - Yamadag.19",0],[350.1,55.1,0,0,"Tau - Yamadag.20",0],[345.6,62.4,0,0,"Tau - Yamadag.21",0],[0.2,49.7,0,0,"Tau - Yamadag.22",0],[273.3,73.2,0,0,"Tau - Yamadag.23",0],[357.6,43,0,0,"Tau - Yamadag.24",0],[344.7,59.8,0,0,"Tau - Yamadag.25",0],[301,57.6,0,0,"Tau - Yamadag.26",0],[305.3,47.5,0,0,"Tau - Yamadag.27",0],[347.5,51.1,0,0,"Tau - Yamadag.28",0],[41.2,45.6,0,0,"Tau - Yamadag.29",0],[330.9,45,0,0,"Tau - Yamadag.30",0],[309.2,8.9,0,0,"Tau - Yamadag.31",0],[359.3,27.6,0,0,"Tau - Yamadag.32",0],[331.2,74,0,0,"Tau - Yamadag.33",0],[327,25,0,0,"Tau - Yamadag.34",0],[351.4,61.4,0,0,"Tau - Yamadag.35",0],[299.4,66.4,0,0,"Tau - Yamadag.36",0],[346.3,47.8,0,0,"Tau - Yamadag.37",0],[19.2,38.9,0,0,"Tau - Yamadag.38",0],[327,48.9,0,0,"Tau - Yamadag.39",0],[6.1,40.5,0,0,"Tau - Yamadag.40",0],[309.5,59.2,0,0,"Tau - Yamadag.41",0],[345.7,37.3,0,0,"Tau - Yamadag.42",0],[296.9,41.4,0,0,"Tau - Yamadag.43",0],[335,67.1,0,0,"Tau - Yamadag.44",0],[330.5,45.5,0,0,"Tau - Yamadag.45",0],[345.4,4.4,0,0,"Tau - Yamadag.46",0],[349.8,43.6,0,0,"Tau - Yamadag.47",0],[307.3,45.5,0,0,"Tau - Yamadag.48",0],[289.7,59.6,0,0,"Tau - Yamadag.49",0],[336.6,61.3,0,0,"Tau - Yamadag.50",0],[331.6,55.6,0,0,"Tau - Yamadag.51",0],[337.1,43.2,0,0,"Tau - Yamadag.52",0],[348.6,40.6,0,0,"Tau - Yamadag.53",0],[324.7,28.6,0,0,"Tau - Yamadag.54",0],[305.2,13.4,0,0,"Tau - Yamadag.55",0],[334,55.5,0,0,"Tau - Yamadag.56",0],[359.7,62.9,0,0,"Tau - Yamadag.57",0],[298.8,52.8,0,0,"Tau - Yamadag.58",0],[297.5,48.8,0,0,"Tau - Yamadag.59",0],[310,67.3,0,0,"Tau - Yamadag.60",0],[349.5,81.8,0,0,"Tau - Yamadag.61",0],[353.6,61.3,0,0,"Tau - Yamadag.62",0],[341.7,58.6,0,0,"Tau - Yamadag.63",0],[335.6,67.3,0,0,"Tau - Yamadag.64",0]],"metaData":{"name":"Tau - Yamadag","dateAdded":"2016-11-17T13:34:08.565Z","version":"v1.1.1","markerColor":"orange","cutoff":"45","type":"Input","description":"volcanics","author":"Gursoy et al., J. Geodynamics 2011","age":"13.5","minAge":"9","maxAge":"18","latitude":39,"longitude":38.1,"sanitized":true}},{"data":[[344.0730128876967,49.50724371101333,0,0,"Pon - TUN (A+D).1",0],[344.84914884707996,47.6343100733701,0,0,"Pon - TUN (A+D).2",0],[358.09235828197166,50.17299188408789,0,0,"Pon - TUN (A+D).3",0],[348.108386260996,46.70482347371285,0,0,"Pon - TUN (A+D).4",0],[2.8726091481846083,38.78679053474091,0,0,"Pon - TUN (A+D).5",0],[346.16101755483396,54.184858724786174,0,0,"Pon - TUN (A+D).6",0],[323.1125095744069,49.217885530535646,0,0,"Pon - TUN (A+D).1",0],[320.69583586337893,44.19246283861118,0,0,"Pon - TUN (A+D).2",0],[319.0262148641259,42.538914062785906,0,0,"Pon - TUN (A+D).3",0],[321.7143299964622,43.28821294143657,0,0,"Pon - TUN (A+D).4",0],[315.44757771185255,51.152425879927996,0,0,"Pon - TUN (A+D).5",0]],"metaData":{"name":"Tau - TUN (A+D)","dateAdded":"2016-11-17T14:04:04.802Z","version":"v1.1.1","markerColor":"orange","cutoff":"45","type":"Input","description":"sediments","author":"van der Voo, Tectonophysics 1968","age":"45.0","minAge":"33.9","maxAge":"56","latitude":39.1,"longitude":39.5,"sanitized":true}},{"data":[[325.56525309317874,17.10370328038369,0,0,"Tau - TT 64-65.1",0],[335.36684572249106,4.252271179287054,0,0,"Tau - TT 64-65.2",0],[303.05786626180486,53.18542747630116,0,0,"Tau - TT 64-65.3",0],[322.63928789640687,39.67682117028362,0,0,"Tau - TT 64-65.4",0],[315.0957462321352,14.243907544894208,0,0,"Tau - TT 64-65.5",0],[302.5259166611718,47.19499820745209,0,0,"Tau - TT 64-65.6",0],[311.56102457644965,16.517328118753717,0,0,"Tau - TT 64-65.7",0],[307.94912498763165,28.516413770703462,0,0,"Tau - TT 64-65.8",0],[324.41807214639505,39.19230496558878,0,0,"Tau - TT 64-65.9",0],[311.0569200095714,1.7666919453640673,0,0,"Tau - TT 64-65.10",0],[313.4860759392516,32.91341604917468,0,0,"Tau - TT 64-65.11",0],[315.89745635823374,39.15769559475599,0,0,"Tau - TT 64-65.12",0],[309.871707291064,2.4632670890343604,0,0,"Tau - TT 64-65.13",0],[322.9087654141872,33.85663913165499,0,0,"Tau - TT 64-65.14",0],[309.96399403055875,28.47533177370352,0,0,"Tau - TT 64-65.15",0],[310.90520584409455,33.9268855314208,0,0,"Tau - TT 64-65.1",0],[312.7879482175199,29.93329166771516,0,0,"Tau - TT 64-65.2",0],[313.75255076706867,52.8035651663936,0,0,"Tau - TT 64-65.3",0],[316.6556222405449,35.83359751394931,0,0,"Tau - TT 64-65.4",0],[326.2967921447211,33.004958597462,0,0,"Tau - TT 64-65.5",0],[304.15327671217096,53.410602737192605,0,0,"Tau - TT 64-65.6",0],[307.59728440853405,40.43295691004337,0,0,"Tau - TT 64-65.7",0]],"metaData":{"name":"Tau - TT 64-65","dateAdded":"2016-11-18T09:28:04.356Z","version":"v1.1.1","markerColor":"orange","cutoff":"45","type":"Simulated","description":"limestones","author":"Cinku et al., Tectonics 2016","age":"132","minAge":"100","maxAge":"164","latitude":37.4,"longitude":35.1,"sanitized":true}},{"data":[[332.4747832325961,15.161629307816272,0,0,"Tau - TT 48-49.1",0],[346.73124925001997,37.74643362333534,0,0,"Tau - TT 48-49.2",0],[336.7722636937316,-5.541146158617543,0,0,"Tau - TT 48-49.3",0],[328.9893278815405,9.665883938033037,0,0,"Tau - TT 48-49.4",0],[325.1439801429601,12.612373409382297,0,0,"Tau - TT 48-49.5",0],[337.41608766921973,19.847635649932467,0,0,"Tau - TT 48-49.6",0],[321.6584561015686,24.624944270048115,0,0,"Tau - TT 48-49.7",0],[340.56642602776384,35.15902009839989,0,0,"Tau - TT 48-49.8",0],[345.8666291134843,23.275634204801108,0,0,"Tau - TT 48-49.9",0],[338.44363630365575,0.006759855806065921,0,0,"Tau - TT 48-49.10",0],[352.08037658769615,42.27398984231418,0,0,"Tau - TT 48-49.11",0],[334.3465195796276,2.4791063324264546,0,0,"Tau - TT 48-49.12",0],[308.6286281313913,28.961672271986718,0,0,"Tau - TT 48-49.1",0],[302.5359903673252,65.27137705669392,0,0,"Tau - TT 48-49.2",0],[309.51928427930034,43.88941681690612,0,0,"Tau - TT 48-49.3",0],[310.6421037190576,29.096588606339676,0,0,"Tau - TT 48-49.4",0],[313.1097705947456,16.190667500260975,0,0,"Tau - TT 48-49.5",0],[312.65827298715436,47.21288486478712,0,0,"Tau - TT 48-49.6",0],[317.22602907142397,43.39795695856145,0,0,"Tau - TT 48-49.7",0],[328.1414889214987,54.34267818222316,0,0,"Tau - TT 48-49.8",0],[309.3314989640384,12.339797058951707,0,0,"Tau - TT 48-49.9",0],[315.8139171205825,46.92305149559572,0,0,"Tau - TT 48-49.10",0],[295.5155732347589,60.195560807576165,0,0,"Tau - TT 48-49.11",0],[308.01680143730005,34.52385028226142,0,0,"Tau - TT 48-49.12",0],[295.8476393972576,68.1020048614117,0,0,"Tau - TT 48-49.13",0]],"metaData":{"name":"Tau - TT 48-49","dateAdded":"2016-11-18T09:30:30.762Z","version":"v1.1.1","markerColor":"orange","cutoff":"45","type":"Simulated","description":"limestones","author":"Cinku et al., Tectonics 2016","age":"132","minAge":"100","maxAge":"164","latitude":37.1,"longitude":34.5,"sanitized":true}},{"data":[[312.4988481659436,6.041540843681442,0,0,"Tau - TT 119-120.1",0],[321.772539947313,-10.539261970759862,0,0,"Tau - TT 119-120.2",0],[309.41544817157717,-2.341840476713619,0,0,"Tau - TT 119-120.3",0],[317.0414070016353,21.51666762674165,0,0,"Tau - TT 119-120.4",0],[313.2068937737474,47.38369435004342,0,0,"Tau - TT 119-120.5",0],[323.43937405723324,30.540384951990312,0,0,"Tau - TT 119-120.6",0],[321.27405555648727,6.963712964802933,0,0,"Tau - TT 119-120.7",0],[330.69201489105245,-14.759966578853108,0,0,"Tau - TT 119-120.8",0],[337.2674278837022,20.837858929987274,0,0,"Tau - TT 119-120.9",0],[305.2816515514768,16.950826766662598,0,0,"Tau - TT 119-120.10",0],[313.3559996454062,13.8929632683899,0,0,"Tau - TT 119-120.1",0],[317.33514218450307,5.891600435758048,0,0,"Tau - TT 119-120.2",0],[312.16059230252597,15.02896872407764,0,0,"Tau - TT 119-120.3",0],[309.08039593195144,26.815362333645805,0,0,"Tau - TT 119-120.4",0],[313.8500277116043,29.265756957526506,0,0,"Tau - TT 119-120.5",0],[313.8044204425354,29.70208192962464,0,0,"Tau - TT 119-120.6",0],[312.818766471499,20.630916365862895,0,0,"Tau - TT 119-120.7",0],[312.4244907348225,41.66483368102611,0,0,"Tau - TT 119-120.8",0],[312.29921589756236,23.452154400157564,0,0,"Tau - TT 119-120.9",0]],"metaData":{"name":"Tau - TT 119-120","dateAdded":"2016-11-18T09:33:47.277Z","version":"v1.1.1","markerColor":"orange","cutoff":"45","type":"Simulated","description":"limestones","author":"Cinku et al., Tectonics 2016","age":"132","minAge":"100","maxAge":"164","latitude":37.75,"longitude":35.09,"sanitized":true}},{"data":[[291.2262126860826,0.9716461126111297,0,0,"Tau - TT 128.1",0],[296.30211737782963,18.769728884064683,0,0,"Tau - TT 128.2",0],[305.4083959607045,48.16699959398892,0,0,"Tau - TT 128.3",0],[317.5692894892329,60.92892080376924,0,0,"Tau - TT 128.4",0],[316.1983786275333,34.85595445905531,0,0,"Tau - TT 128.5",0],[300.42446120426416,34.14361452025634,0,0,"Tau - TT 128.6",0],[318.2931605167676,37.98257619925893,0,0,"Tau - TT 128.7",0],[323.4599350538408,37.9323953336174,0,0,"Tau - TT 128.8",0]],"metaData":{"name":"Tau - TT 128","dateAdded":"2016-11-18T09:34:28.631Z","version":"v1.1.1","markerColor":"orange","cutoff":"45","type":"Simulated","description":"limestones","author":"Cinku et al., Tectonics 2016","age":"132","minAge":"100","maxAge":"164","latitude":37.82,"longitude":35.45,"sanitized":true}},{"data":[[300.4270242115156,40.303395010100154,0,0,"Tau - TT37-38-40.1",0],[316.42054038792753,3.5840796326924194,0,0,"Tau - TT37-38-40.2",0],[319.4762047745482,20.649216635727363,0,0,"Tau - TT37-38-40.3",0],[300.98419626643704,32.11658170172416,0,0,"Tau - TT37-38-40.4",0],[303.1172008528124,50.565161484056354,0,0,"Tau - TT37-38-40.5",0],[295.43103153524885,45.73340688087539,0,0,"Tau - TT37-38-40.6",0],[324.39675885070704,28.526807987081405,0,0,"Tau - TT37-38-40.7",0],[313.51486264890866,34.780027354473944,0,0,"Tau - TT37-38-40.8",0],[312.46045850884366,53.081167436929135,0,0,"Tau - TT37-38-40.9",0],[328.2148030448816,30.11270311804851,0,0,"Tau - TT37-38-40.10",0],[337.0157871547458,21.512601733559737,0,0,"Tau - TT37-38-40.1",0],[2.7946642249858655,23.049250220063787,0,0,"Tau - TT37-38-40.2",0],[345.6995132364791,11.504129272833284,0,0,"Tau - TT37-38-40.3",0],[358.7682575363662,3.975129943906638,0,0,"Tau - TT37-38-40.4",0],[337.7445575519662,24.51690513585033,0,0,"Tau - TT37-38-40.5",0],[335.6024135409476,41.73525694620674,0,0,"Tau - TT37-38-40.6",0],[332.65443091602924,25.65740804255297,0,0,"Tau - TT37-38-40.7",0],[350.36059708074043,38.37916103536397,0,0,"Tau - TT37-38-40.8",0],[329.2938170843406,35.520722396860876,0,0,"Tau - TT37-38-40.9",0],[1.0536133398006768,18.39241781764463,0,0,"Tau - TT37-38-40.10",0],[326.828737784498,0.493427662426106,0,0,"Tau - TT37-38-40.1",0],[338.4883360461811,13.568946567867217,0,0,"Tau - TT37-38-40.2",0],[314.94315063887916,34.616385515532826,0,0,"Tau - TT37-38-40.3",0],[340.8762084967981,35.560439703885145,0,0,"Tau - TT37-38-40.4",0],[314.91804896553253,-11.365286344262907,0,0,"Tau - TT37-38-40.5",0],[335.8361300979701,61.0860837905669,0,0,"Tau - TT37-38-40.6",0],[317.6769621970916,38.3569826318223,0,0,"Tau - TT37-38-40.7",0],[327.01739683041404,29.980672793612133,0,0,"Tau - TT37-38-40.8",0],[336.64508416783633,19.897686316209963,0,0,"Tau - TT37-38-40.9",0],[332.8958033240758,29.981152204316135,0,0,"Tau - TT37-38-40.10",0]],"metaData":{"name":"Tau - TT37-38-40","dateAdded":"2016-11-18T10:21:44.430Z","version":"v1.1.1","markerColor":"orange","cutoff":"45","type":"Simulated","description":"limestone","author":"Cinku et al., Tectonics 2016","age":"83.0","minAge":"66","maxAge":"100","latitude":37.54,"longitude":34.98,"sanitized":true}},{"data":[[346.4346489605847,25.853653334886282,0,0,"Tau - TT129-130.1",0],[336.3773426090036,31.743688258586932,0,0,"Tau - TT129-130.2",0],[342.6725919978069,16.039048465909854,0,0,"Tau - TT129-130.3",0],[1.708660495651145,35.83380187723803,0,0,"Tau - TT129-130.4",0],[357.2147255864461,43.88180989598418,0,0,"Tau - TT129-130.5",0],[331.9320705686242,26.28413332518725,0,0,"Tau - TT129-130.6",0],[316.1412710750428,-37.95173825984839,0,0,"Tau - TT129-130.7",0],[341.3993277944181,32.95174081594475,0,0,"Tau - TT129-130.8",0],[348.51029554353914,6.206618260295997,0,0,"Tau - TT129-130.9",0],[336.0611094606721,39.85385638356855,0,0,"Tau - TT129-130.10",0],[304.0108246695545,62.802329515243365,0,0,"Tau - TT129-130.11",0],[336.14759231044604,65.31774885272725,0,0,"Tau - TT129-130.1",0],[310.45281209507084,73.83017540660293,0,0,"Tau - TT129-130.2",0],[328.7704531790596,62.95416326926989,0,0,"Tau - TT129-130.3",0],[317.61692410646754,60.169642474138115,0,0,"Tau - TT129-130.4",0],[345.53259417641243,59.97106792000506,0,0,"Tau - TT129-130.5",0],[320.6627887011887,62.02788308074695,0,0,"Tau - TT129-130.6",0],[322.74671933173295,66.64324513691804,0,0,"Tau - TT129-130.7",0],[328.3961321250547,74.64068945146043,0,0,"Tau - TT129-130.8",0],[306.12950819006073,64.08189655768642,0,0,"Tau - TT129-130.9",0],[335.279165929156,77.321269314427,0,0,"Tau - TT129-130.10",0]],"metaData":{"name":"Tau - TT129-130","dateAdded":"2016-11-18T10:23:47.940Z","version":"v1.1.1","markerColor":"orange","cutoff":"45","type":"Simulated","description":"limestone","author":"Cinku et al., Tectonics 2016","age":"83.0","minAge":"66","maxAge":"100","latitude":38.19,"longitude":35.92,"sanitized":true}},{"data":[[285.5860451473945,-0.04513534484124806,0,0,"Tau - TT44.1",0],[274.2233816437898,30.369645323671158,0,0,"Tau - TT44.2",0],[271.18854297852977,14.752707782483338,0,0,"Tau - TT44.3",0],[277.55091846944663,16.34373042013174,0,0,"Tau - TT44.4",0],[270.0019295636446,12.71142882475505,0,0,"Tau - TT44.5",0],[277.04842401547035,25.363907564349663,0,0,"Tau - TT44.6",0],[288.0133740088412,31.245659738316114,0,0,"Tau - TT44.7",0],[283.783665857557,14.343897672032735,0,0,"Tau - TT44.8",0],[275.683485517711,-11.002781281565097,0,0,"Tau - TT44.9",0],[288.89980299240113,20.438957419296845,0,0,"Tau - TT44.10",0],[284.1390629073125,17.44337988313371,0,0,"Tau - TT44.11",0],[289.3779289469781,13.751432585264286,0,0,"Tau - TT44.12",0],[271.7097905285691,15.08312659349895,0,0,"Tau - TT44.13",0],[273.80054635633746,28.35051828412895,0,0,"Tau - TT44.14",0],[277.32783668698494,30.943033353537448,0,0,"Tau - TT44.15",0]],"metaData":{"name":"Tau - TT44","dateAdded":"2016-11-18T10:24:58.138Z","version":"v1.1.1","markerColor":"orange","cutoff":"45","type":"Simulated","description":"chert","author":"Cinku et al., Tectonics 2016","age":"74.3","minAge":"66","maxAge":"83.6","latitude":37.02,"longitude":34.44,"sanitized":true,"edited":true,"timeEdited":"2016-11-18T10:25:23.299Z"}},{"data":[[358.2904245651792,54.96367638767427,0,0,"Tau - TT51.1",0],[338.00456100874885,43.482632947388595,0,0,"Tau - TT51.2",0],[352.6766296171036,66.16662684946489,0,0,"Tau - TT51.3",0],[341.53601808703587,17.04016810764101,0,0,"Tau - TT51.4",0],[328.01141708260866,30.52567500343935,0,0,"Tau - TT51.5",0],[324.284612900143,40.11495260818575,0,0,"Tau - TT51.6",0],[337.74759200100743,25.334328632474865,0,0,"Tau - TT51.7",0],[356.28866530844465,39.18373055787354,0,0,"Tau - TT51.8",0],[348.8485699278948,51.05496355370063,0,0,"Tau - TT51.9",0],[332.43355642736356,23.403805721332848,0,0,"Tau - TT51.10",0],[337.6335611725675,25.594671927412417,0,0,"Tau - TT51.11",0],[349.2600530009675,26.673050384690416,0,0,"Tau - TT51.12",0]],"metaData":{"name":"Tau - TT51","dateAdded":"2016-11-18T10:26:32.738Z","version":"v1.1.1","markerColor":"orange","cutoff":"45","type":"Simulated","description":"sandstone","author":"Cinku et al., Tectonics 2016","age":"74.3","minAge":"66","maxAge":"83.6","latitude":37.09,"longitude":34.57,"sanitized":true}},{"data":[[327.38625854388476,19.86843963079614,0,0,"Tau - TT53.1",0],[304.57944610729623,17.959470674820743,0,0,"Tau - TT53.2",0],[311.48747666989686,16.13894528196406,0,0,"Tau - TT53.3",0],[319.54982723963525,15.27231484643741,0,0,"Tau - TT53.4",0],[299.9059483022752,43.173739540474536,0,0,"Tau - TT53.5",0],[299.1083612085306,43.07826847343364,0,0,"Tau - TT53.6",0],[308.07726595895883,32.694460276274135,0,0,"Tau - TT53.7",0],[293.6680677670074,21.87756894734652,0,0,"Tau - TT53.8",0],[319.42378107796856,17.0814120335968,0,0,"Tau - TT53.9",0],[300.3999857110621,13.922955992420935,0,0,"Tau - TT53.10",0],[299.272072398471,26.707213852662278,0,0,"Tau - TT53.11",0],[302.98551377747935,45.56971425425058,0,0,"Tau - TT53.12",0],[295.16133289080756,18.693492593315618,0,0,"Tau - TT53.13",0],[309.1824194802149,17.052573922589538,0,0,"Tau - TT53.14",0]],"metaData":{"name":"Tau - TT53","dateAdded":"2016-11-18T10:27:30.982Z","version":"v1.1.1","markerColor":"orange","cutoff":"45","type":"Simulated","description":"sandstone","author":"Cinku et al., Tectonics 2016","age":"74.3","minAge":"66","maxAge":"83.6","latitude":37.08,"longitude":34.63,"sanitized":true}},{"data":[[325.75105329487474,45.03029013716275,0,0,"Tau - TT56.1",0],[332.0795291746145,46.47036816751628,0,0,"Tau - TT56.2",0],[325.4734351203457,34.6291490753866,0,0,"Tau - TT56.3",0],[323.0676231979512,45.19783421922021,0,0,"Tau - TT56.4",0],[339.7454290846469,38.69590114367802,0,0,"Tau - TT56.5",0],[324.6668335957536,40.30516855114997,0,0,"Tau - TT56.6",0],[335.5108642584086,42.7515945392863,0,0,"Tau - TT56.7",0]],"metaData":{"name":"Tau - TT56","dateAdded":"2016-11-18T10:28:40.057Z","version":"v1.1.1","markerColor":"orange","cutoff":"45","type":"Simulated","description":"sandstone","author":"Cinku et al., Tectonics 2016","age":"74.3","minAge":"66","maxAge":"83.6","latitude":37.8,"longitude":34.6,"sanitized":true}},{"data":[[8.892353741114391,50.51422451849643,0,0,"Kir - TT123-124.1",0],[5.808212548766278,63.805758609878986,0,0,"Kir - TT123-124.2",0],[2.5144854211605434,44.508519211866506,0,0,"Kir - TT123-124.3",0],[3.0774766520287926,44.39973101256043,0,0,"Kir - TT123-124.4",0],[4.907467260757755,51.73931992641441,0,0,"Kir - TT123-124.5",0],[5.804227015538231,34.91800306427157,0,0,"Kir - TT123-124.6",0],[37.86938094424086,65.44114560457224,0,0,"Kir - TT123-124.7",0],[16.161157337783493,18.636899862334314,0,0,"Kir - TT123-124.8",0],[32.97005120198987,63.131012729983965,0,0,"Kir - TT123-124.9",0],[32.24027523702557,38.07587991487773,0,0,"Kir - TT123-124.10",0],[26.855969504686975,60.86494649661362,0,0,"Kir - TT123-124.11",0],[349.4758847605137,80.19925589320815,0,0,"Kir - TT123-124.12",0],[51.5090848150663,50.83464501916207,0,0,"Kir - TT123-124.13",0],[28.9744894219883,66.30073113792676,0,0,"Kir - TT123-124.14",0],[336.7691098503401,68.61941722474626,0,0,"Kir - TT123-124.1",0],[5.198688793522535,34.970244448934125,0,0,"Kir - TT123-124.2",0],[14.356126643533571,51.40757702126811,0,0,"Kir - TT123-124.3",0],[2.811450664490053,56.80331860898465,0,0,"Kir - TT123-124.4",0],[18.095131312734225,52.27108753062366,0,0,"Kir - TT123-124.5",0],[340.2291947567087,41.971535465032105,0,0,"Kir - TT123-124.6",0],[350.17229127645226,26.639587087921623,0,0,"Kir - TT123-124.7",0],[5.075087352961873,10.971449564858753,0,0,"Kir - TT123-124.8",0],[352.46718817048423,41.20149451238979,0,0,"Kir - TT123-124.1",0],[353.0429448896584,50.5338770090781,0,0,"Kir - TT123-124.2",0],[6.144008136593641,53.66579047603209,0,0,"Kir - TT123-124.3",0],[12.750722163577866,42.797111940870906,0,0,"Kir - TT123-124.4",0],[27.8375284190164,69.20158175141316,0,0,"Kir - TT123-124.5",0],[350.92786233167567,49.362656303322645,0,0,"Kir - TT123-124.6",0],[354.67545950997453,55.45008337225918,0,0,"Kir - TT123-124.7",0],[10.368494132901242,69.78556147590209,0,0,"Kir - TT123-124.8",0],[22.30070025852564,53.088569026196744,0,0,"Kir - TT123-124.9",0],[340.3053237234316,70.00528906447131,0,0,"Kir - TT123-124.10",0],[3.17933464118799,54.97356828399334,0,0,"Kir - TT123-124.11",0],[23.101944276395955,53.36084893018898,0,0,"Kir - TT123-124.1",0],[350.9256591465896,22.077699675279927,0,0,"Kir - TT123-124.2",0],[350.53757557398467,63.402405901598264,0,0,"Kir - TT123-124.3",0],[344.3171427938539,51.922201693760755,0,0,"Kir - TT123-124.4",0],[2.7310904871294497,68.47521055507822,0,0,"Kir - TT123-124.5",0],[2.7528851581934077,32.93005861896259,0,0,"Kir - TT123-124.6",0],[344.65556895300574,46.3402830866057,0,0,"Kir - TT123-124.7",0],[340.1535231189782,69.35419964472548,0,0,"Kir - TT123-124.8",0],[332.9726674633723,45.56843299573478,0,0,"Kir - TT123-124.9",0],[16.757508002697193,67.22172418458052,0,0,"Kir - TT123-124.10",0],[29.432748450638996,64.53557455702104,0,0,"Kir - TT123-124.11",0],[354.7922979498551,63.06040982928088,0,0,"Kir - TT123-124.12",0],[358.57044531693157,88.63286079325161,0,0,"Kir - TT123-124.13",0],[9.138418961168838,34.914388539361234,0,0,"Kir - TT123-124.14",0],[351.7419038549376,52.38650777116643,0,0,"Kir - TT123-124.15",0],[10.783340316828458,47.524142450217354,0,0,"Kir - TT123-124.16",0],[28.24105929043094,48.782654660246614,0,0,"Kir - TT123-124.17",0]],"metaData":{"name":"Tau - TT57-8-9-60","dateAdded":"2016-11-18T11:19:20.180Z","version":"v1.1.1","markerColor":"orange","cutoff":"45","type":"Input","description":"sediments","author":"Çinku et al., Tectonics 2016","age":"14.2","minAge":"5.3","maxAge":"23","latitude":37.37,"longitude":35.26,"sanitized":true}},{"data":[[2.5397096568714232,47.97134409113783,0,0,"Tau - TT61.1",0],[355.1477129606992,51.590783002091214,0,0,"Tau - TT61.2",0],[7.680952243650665,56.718222574040446,0,0,"Tau - TT61.3",0],[359.9959916216178,38.807593483439774,0,0,"Tau - TT61.4",0],[13.07495091024225,41.951955660970455,0,0,"Tau - TT61.5",0],[20.06568283061341,51.1601504469221,0,0,"Tau - TT61.6",0],[357.64604120401714,47.54923356697974,0,0,"Tau - TT61.7",0],[351.76463711999133,51.66287150075141,0,0,"Tau - TT61.8",0],[350.8928575707969,50.88781690148799,0,0,"Tau - TT61.9",0],[8.489229318910418,38.64532612645323,0,0,"Tau - TT61.10",0],[359.9831975678454,33.97876767006164,0,0,"Tau - TT61.11",0],[8.724465551278115,41.10809312242169,0,0,"Tau - TT61.12",0],[6.658841253223102,65.70472803554148,0,0,"Tau - TT61.13",0],[22.587460012911492,45.62745767562699,0,0,"Tau - TT61.14",0],[356.0642959150134,46.2861351916482,0,0,"Tau - TT61.15",0],[4.627332556561214,61.74687654158212,0,0,"Tau - TT61.16",0],[3.0469826899224017,56.456603836476326,0,0,"Tau - TT61.17",0],[1.0433616771259153,56.208304193446466,0,0,"Tau - TT61.18",0],[357.8762569573106,50.143386852858654,0,0,"Tau - TT61.19",0],[358.7973522673176,44.87784109810015,0,0,"Tau - TT61.20",0],[5.337873633535423,52.02905939044314,0,0,"Tau - TT61.21",0],[21.725960639243397,22.680567812394038,0,0,"Tau - TT61.22",0],[13.60114949770741,50.082647815849114,0,0,"Tau - TT61.23",0]],"metaData":{"name":"Tau - TT61","dateAdded":"2016-11-18T11:21:27.601Z","version":"v1.1.1","markerColor":"orange","cutoff":"45","type":"Simulated","description":"sediments","author":"Çinku et al., Tectonics 2016","age":"14.2","minAge":"5.3","maxAge":"23","latitude":37.34,"longitude":35.26,"sanitized":true}},{"data":[[30,44,0,0,"Tau - East Anat. lavas.1",0],[14,53,0,0,"Tau - East Anat. lavas.2",0],[0,51,0,0,"Tau - East Anat. lavas.3",0],[9,36,0,0,"Tau - East Anat. lavas.4",0],[23,51,0,0,"Tau - East Anat. lavas.5",0],[2,50,0,0,"Tau - East Anat. lavas.6",0],[5,50,0,0,"Tau - East Anat. lavas.7",0],[43,75,0,0,"Tau - East Anat. lavas.8",0],[327,46,0,0,"Tau - East Anat. lavas.9",0],[340,55,0,0,"Tau - East Anat. lavas.10",0],[347,46,0,0,"Tau - East Anat. lavas.11",0],[353,57,0,0,"Tau - East Anat. lavas.12",0],[14,52,0,0,"Tau - East Anat. lavas.13",0],[3,62,0,0,"Tau - East Anat. lavas.14",0],[356,50,0,0,"Tau - East Anat. lavas.15",0],[345,42,0,0,"Tau - East Anat. lavas.16",0],[354,48,0,0,"Tau - East Anat. lavas.17",0],[348,49,0,0,"Tau - East Anat. lavas.18",0],[345,46,0,0,"Tau - East Anat. lavas.19",0],[3,49,0,0,"Tau - East Anat. lavas.20",0],[5,66,0,0,"Tau - East Anat. lavas.21",0],[340,80,0,0,"Tau - East Anat. lavas.22",0],[7,54,0,0,"Tau - East Anat. lavas.23",0],[57,15,0,0,"Tau - East Anat. lavas.24",0],[323,66,0,0,"Tau - East Anat. lavas.25",0],[354,59,0,0,"Tau - East Anat. lavas.26",0],[18,68,0,0,"Tau - East Anat. lavas.27",0],[340,50,0,0,"Tau - East Anat. lavas.28",0],[11,40,0,0,"Tau - East Anat. lavas.29",0],[51,25,0,0,"Tau - East Anat. lavas.30",0],[353,61,0,0,"Tau - East Anat. lavas.31",0],[27,56,0,0,"Tau - East Anat. lavas.32",0],[5,43,0,0,"Tau - East Anat. lavas.33",0],[3,47,0,0,"Tau - East Anat. lavas.34",0],[7,58,0,0,"Tau - East Anat. lavas.35",0],[8,47,0,0,"Tau - East Anat. lavas.36",0],[11,54,0,0,"Tau - East Anat. lavas.37",0],[21,44,0,0,"Tau - East Anat. lavas.38",0],[35,63,0,0,"Tau - East Anat. lavas.39",0],[1,48,0,0,"Tau - East Anat. lavas.40",0],[342,47,0,0,"Tau - East Anat. lavas.41",0],[340,60,0,0,"Tau - East Anat. lavas.42",0],[28,62,0,0,"Tau - East Anat. lavas.43",0],[336,53,0,0,"Tau - East Anat. lavas.44",0],[337,57,0,0,"Tau - East Anat. lavas.45",0],[334,59,0,0,"Tau - East Anat. lavas.46",0],[346,46,0,0,"Tau - East Anat. lavas.47",0],[320,55,0,0,"Tau - East Anat. lavas.48",0],[10,43,0,0,"Tau - East Anat. lavas.49",0],[356,40,0,0,"Tau - East Anat. lavas.50",0]],"metaData":{"name":"Tau - East Anat. lavas","dateAdded":"2016-11-21T08:32:51.860Z","version":"v1.1.1","markerColor":"orange","cutoff":"45","type":"Input","description":"volcanics","author":"Hisarlı et al., Int J Earth Sci 2016","age":"5.7","minAge":"11.1","maxAge":"0.3","latitude":39.5,"longitude":42.5,"sanitized":true}},{"data":[[307.15215636238895,54.394178111409325,0,0,"Tau - Adana Basin.1",0],[337.466650804816,15.540546225437337,0,0,"Tau - Adana Basin.2",0],[359.6819200695268,43.63191370696219,0,0,"Tau - Adana Basin.3",0],[339.15962214927686,20.273780111515357,0,0,"Tau - Adana Basin.4",0],[0.35261582958054305,41.58696425470803,0,0,"Tau - Adana Basin.5",0],[305.01849811099123,54.51834330930675,0,0,"Tau - Adana Basin.6",0],[314.45717198382886,33.058874663297935,0,0,"Tau - Adana Basin.7",0],[353.855488128499,61.121954885079305,0,0,"Tau - Adana Basin.8",0],[326.83954541484604,26.79249874648776,0,0,"Tau - Adana Basin.9",0],[343.7800109071936,2.4765824325331853,0,0,"Tau - Adana Basin.10",0],[346.5235087205927,58.57676322008223,0,0,"Tau - Adana Basin.11",0],[337.61278866828263,38.41992337443412,0,0,"Tau - Adana Basin.12",0],[326.94574305314814,8.650303950491269,0,0,"Tau - Adana Basin.13",0],[351.6223445949768,6.91600898066316,0,0,"Tau - Adana Basin.14",0],[339.1178629726853,23.269831368975204,0,0,"Tau - Adana Basin.15",0],[357.0776455893049,60.09285309271501,0,0,"Tau - Adana Basin.16",0],[7.223730278302924,17.36268159946747,0,0,"Tau - Adana Basin.17",0],[322.77561333534277,29.372645850781772,0,0,"Tau - Adana Basin.18",0],[350.07897811734153,47.832764369823025,0,0,"Tau - Adana Basin.19",0],[15.551871977348867,61.30028309035226,0,0,"Tau - Adana Basin.20",0],[346.52355811565894,31.05441755588863,0,0,"Tau - Adana Basin.21",0],[348.6421619479612,55.878181593691714,0,0,"Tau - Adana Basin.22",0],[342.1944595629361,43.49448331863099,0,0,"Tau - Adana Basin.23",0],[338.32955344131335,55.70253495627992,0,0,"Tau - Adana Basin.24",0],[316.62256018977894,51.458774438326415,0,0,"Tau - Adana Basin.25",0],[329.59970727335417,35.468192970091266,0,0,"Tau - Adana Basin.26",0],[341.142366051135,-32.62497807842135,0,0,"Tau - Adana Basin.27",0],[10.18727554785346,49.48611230918622,0,0,"Tau - Adana Basin.28",0],[10.10175973788705,44.85909168020388,0,0,"Tau - Adana Basin.29",0],[325.4097625230686,47.9333575657965,0,0,"Tau - Adana Basin.30",0],[356.33457315639885,59.83880058640366,0,0,"Tau - Adana Basin.31",0],[331.9250680092148,42.91633559895989,0,0,"Tau - Adana Basin.32",0],[341.31849014851355,18.669104951645785,0,0,"Tau - Adana Basin.33",0],[329.1861017561016,28.9297222815358,0,0,"Tau - Adana Basin.34",0],[18.96292415577625,49.43299466073692,0,0,"Tau - Adana Basin.35",0],[331.0315904641086,48.65880891348797,0,0,"Tau - Adana Basin.36",0],[331.6849944845627,-7.420039404125156,0,0,"Tau - Adana Basin.37",0],[337.30105439320334,-29.077141215077184,0,0,"Tau - Adana Basin.38",0],[352.3651712425158,46.58142988015472,0,0,"Tau - Adana Basin.39",0],[345.8831943865956,31.39729034696338,0,0,"Tau - Adana Basin.40",0],[333.0426916177546,58.41359452195352,0,0,"Tau - Adana Basin.41",0],[357.3935933514626,44.26465727624463,0,0,"Tau - Adana Basin.42",0],[338.5053033454277,68.05383046187391,0,0,"Tau - Adana Basin.43",0],[22.104588854578935,47.332938442397136,0,0,"Tau - Adana Basin.44",0],[338.6397878122582,54.79379775902192,0,0,"Tau - Adana Basin.45",0],[302.4028969399749,62.44136407235194,0,0,"Tau - Adana Basin.46",0],[305.7508839386194,24.43019163135158,0,0,"Tau - Adana Basin.47",0],[316.38533970884305,74.59387206220957,0,0,"Tau - Adana Basin.48",0],[353.9408423768973,48.47405340779422,0,0,"Tau - Adana Basin.49",0],[346.3946421200267,65.84656156724488,0,0,"Tau - Adana Basin.50",0],[332.2547482432076,22.26517710884498,0,0,"Tau - Adana Basin.51",0],[21.665051830090363,33.30146459503404,0,0,"Tau - Adana Basin.52",0],[325.6636326773448,29.621095301655828,0,0,"Tau - Adana Basin.53",0],[354.1888757778452,46.9117174510616,0,0,"Tau - Adana Basin.54",0],[9.213736976209304,27.731731734328303,0,0,"Tau - Adana Basin.55",0],[313.19273936774994,73.21279705483008,0,0,"Tau - Adana Basin.56",0],[340.5882294725584,-8.926450783843629,0,0,"Tau - Adana Basin.57",0],[348.5440646704,39.4656855417329,0,0,"Tau - Adana Basin.58",0],[4.100088442040601,34.85347838321367,0,0,"Tau - Adana Basin.59",0],[343.8711363932466,30.467541823568347,0,0,"Tau - Adana Basin.60",0],[327.0316055308125,56.157135312761696,0,0,"Tau - Adana Basin.61",0],[330.5422846278483,10.548910776435953,0,0,"Tau - Adana Basin.62",0],[351.3151413804431,28.38693926310659,0,0,"Tau - Adana Basin.63",0],[8.27800618566846,50.13361026544903,0,0,"Tau - Adana Basin.64",0],[345.92576736799344,48.64127811568123,0,0,"Tau - Adana Basin.65",0],[19.500611959056982,57.6771240229478,0,0,"Tau - Adana Basin.66",0]],"metaData":{"name":"Tau - Adana Basin","dateAdded":"2016-11-21T15:18:21.242Z","version":"v1.1.1","markerColor":"orange","cutoff":"45","type":"Simulated","description":"carbonates","author":"Lucifora et al., G-Cubed 2012","age":"8.5","minAge":"5.3","maxAge":"11.7","latitude":37.1,"longitude":35.2,"sanitized":true,"edited":true,"timeEdited":"2016-11-21T15:19:20.136Z"}},{"data":[[318.73442505733203,13.718814607111865,0,0,"Tau - TT41.1",0],[312.43877881691583,41.967206191938565,0,0,"Tau - TT41.2",0],[311.8435784143619,38.8685443922335,0,0,"Tau - TT41.3",0],[306.73577318038156,38.32486035927403,0,0,"Tau - TT41.4",0],[302.0667879736113,41.83696545767804,0,0,"Tau - TT41.5",0],[325.96487939945786,58.24958009688006,0,0,"Tau - TT41.6",0],[294.5499481887257,53.49718752767028,0,0,"Tau - TT41.7",0],[312.8536688621165,52.62983315705528,0,0,"Tau - TT41.8",0],[314.34457129933617,33.17871513786196,0,0,"Tau - TT41.9",0],[318.430611819828,30.494056403100643,0,0,"Tau - TT41.10",0],[322.8095717143006,30.63832843857928,0,0,"Tau - TT41.11",0],[323.90380286549475,51.73783539048095,0,0,"Tau - TT41.12",0],[313.70854024676174,30.374024967270323,0,0,"Tau - TT41.13",0],[313.7797423262811,45.721058771198145,0,0,"Tau - TT41.14",0]],"metaData":{"name":"Tau - TT41","dateAdded":"2016-11-18T10:22:21.685Z","version":"v1.1.1","markerColor":"orange","cutoff":"45","type":"Simulated","description":"limestone","author":"Cinku et al., Tectonics 2016","age":"83.0","minAge":"66","maxAge":"100","latitude":37.48,"longitude":35.26,"sanitized":true,"edited":true,"timeEdited":"2016-11-21T15:19:50.256Z"}},{"data":[[325.56525309317874,17.10370328038369,0,0,"Tau - TT 64-65.1",0],[335.36684572249106,4.252271179287054,0,0,"Tau - TT 64-65.2",0],[303.05786626180486,53.18542747630116,0,0,"Tau - TT 64-65.3",0],[322.63928789640687,39.67682117028362,0,0,"Tau - TT 64-65.4",0],[315.0957462321352,14.243907544894208,0,0,"Tau - TT 64-65.5",0],[302.5259166611718,47.19499820745209,0,0,"Tau - TT 64-65.6",0],[311.56102457644965,16.517328118753717,0,0,"Tau - TT 64-65.7",0],[307.94912498763165,28.516413770703462,0,0,"Tau - TT 64-65.8",0],[324.41807214639505,39.19230496558878,0,0,"Tau - TT 64-65.9",0],[311.0569200095714,1.7666919453640673,0,0,"Tau - TT 64-65.10",0],[313.4860759392516,32.91341604917468,0,0,"Tau - TT 64-65.11",0],[315.89745635823374,39.15769559475599,0,0,"Tau - TT 64-65.12",0],[309.871707291064,2.4632670890343604,0,0,"Tau - TT 64-65.13",0],[322.9087654141872,33.85663913165499,0,0,"Tau - TT 64-65.14",0],[309.96399403055875,28.47533177370352,0,0,"Tau - TT 64-65.15",0],[310.90520584409455,33.9268855314208,0,0,"Tau - TT 64-65.1",0],[312.7879482175199,29.93329166771516,0,0,"Tau - TT 64-65.2",0],[313.75255076706867,52.8035651663936,0,0,"Tau - TT 64-65.3",0],[316.6556222405449,35.83359751394931,0,0,"Tau - TT 64-65.4",0],[326.2967921447211,33.004958597462,0,0,"Tau - TT 64-65.5",0],[304.15327671217096,53.410602737192605,0,0,"Tau - TT 64-65.6",0],[307.59728440853405,40.43295691004337,0,0,"Tau - TT 64-65.7",0],[332.4747832325961,15.161629307816272,0,0,"Tau - TT 48-49.1",0],[346.73124925001997,37.74643362333534,0,0,"Tau - TT 48-49.2",0],[336.7722636937316,-5.541146158617543,0,0,"Tau - TT 48-49.3",0],[328.9893278815405,9.665883938033037,0,0,"Tau - TT 48-49.4",0],[325.1439801429601,12.612373409382297,0,0,"Tau - TT 48-49.5",0],[337.41608766921973,19.847635649932467,0,0,"Tau - TT 48-49.6",0],[321.6584561015686,24.624944270048115,0,0,"Tau - TT 48-49.7",0],[340.56642602776384,35.15902009839989,0,0,"Tau - TT 48-49.8",0],[345.8666291134843,23.275634204801108,0,0,"Tau - TT 48-49.9",0],[338.44363630365575,0.006759855806065921,0,0,"Tau - TT 48-49.10",0],[352.08037658769615,42.27398984231418,0,0,"Tau - TT 48-49.11",0],[334.3465195796276,2.4791063324264546,0,0,"Tau - TT 48-49.12",0],[308.6286281313913,28.961672271986718,0,0,"Tau - TT 48-49.1",0],[302.5359903673252,65.27137705669392,0,0,"Tau - TT 48-49.2",0],[309.51928427930034,43.88941681690612,0,0,"Tau - TT 48-49.3",0],[310.6421037190576,29.096588606339676,0,0,"Tau - TT 48-49.4",0],[313.1097705947456,16.190667500260975,0,0,"Tau - TT 48-49.5",0],[312.65827298715436,47.21288486478712,0,0,"Tau - TT 48-49.6",0],[317.22602907142397,43.39795695856145,0,0,"Tau - TT 48-49.7",0],[328.1414889214987,54.34267818222316,0,0,"Tau - TT 48-49.8",0],[309.3314989640384,12.339797058951707,0,0,"Tau - TT 48-49.9",0],[315.8139171205825,46.92305149559572,0,0,"Tau - TT 48-49.10",0],[295.5155732347589,60.195560807576165,0,0,"Tau - TT 48-49.11",0],[308.01680143730005,34.52385028226142,0,0,"Tau - TT 48-49.12",0],[295.8476393972576,68.1020048614117,0,0,"Tau - TT 48-49.13",0],[312.4988481659436,6.041540843681442,0,0,"Tau - TT 119-120.1",0],[321.772539947313,-10.539261970759862,0,0,"Tau - TT 119-120.2",0],[309.41544817157717,-2.341840476713619,0,0,"Tau - TT 119-120.3",0],[317.0414070016353,21.51666762674165,0,0,"Tau - TT 119-120.4",0],[313.2068937737474,47.38369435004342,0,0,"Tau - TT 119-120.5",0],[323.43937405723324,30.540384951990312,0,0,"Tau - TT 119-120.6",0],[321.27405555648727,6.963712964802933,0,0,"Tau - TT 119-120.7",0],[330.69201489105245,-14.759966578853108,0,0,"Tau - TT 119-120.8",0],[337.2674278837022,20.837858929987274,0,0,"Tau - TT 119-120.9",0],[305.2816515514768,16.950826766662598,0,0,"Tau - TT 119-120.10",0],[313.3559996454062,13.8929632683899,0,0,"Tau - TT 119-120.1",0],[317.33514218450307,5.891600435758048,0,0,"Tau - TT 119-120.2",0],[312.16059230252597,15.02896872407764,0,0,"Tau - TT 119-120.3",0],[309.08039593195144,26.815362333645805,0,0,"Tau - TT 119-120.4",0],[313.8500277116043,29.265756957526506,0,0,"Tau - TT 119-120.5",0],[313.8044204425354,29.70208192962464,0,0,"Tau - TT 119-120.6",0],[312.818766471499,20.630916365862895,0,0,"Tau - TT 119-120.7",0],[312.4244907348225,41.66483368102611,0,0,"Tau - TT 119-120.8",0],[312.29921589756236,23.452154400157564,0,0,"Tau - TT 119-120.9",0],[300.4270242115156,40.303395010100154,0,0,"Tau - TT37-38-40.1",0],[316.42054038792753,3.5840796326924194,0,0,"Tau - TT37-38-40.2",0],[319.4762047745482,20.649216635727363,0,0,"Tau - TT37-38-40.3",0],[300.98419626643704,32.11658170172416,0,0,"Tau - TT37-38-40.4",0],[303.1172008528124,50.565161484056354,0,0,"Tau - TT37-38-40.5",0],[295.43103153524885,45.73340688087539,0,0,"Tau - TT37-38-40.6",0],[324.39675885070704,28.526807987081405,0,0,"Tau - TT37-38-40.7",0],[313.51486264890866,34.780027354473944,0,0,"Tau - TT37-38-40.8",0],[312.46045850884366,53.081167436929135,0,0,"Tau - TT37-38-40.9",0],[328.2148030448816,30.11270311804851,0,0,"Tau - TT37-38-40.10",0],[337.0157871547458,21.512601733559737,0,0,"Tau - TT37-38-40.1",0],[2.7946642249858655,23.049250220063787,0,0,"Tau - TT37-38-40.2",0],[345.6995132364791,11.504129272833284,0,0,"Tau - TT37-38-40.3",0],[358.7682575363662,3.975129943906638,0,0,"Tau - TT37-38-40.4",0],[337.7445575519662,24.51690513585033,0,0,"Tau - TT37-38-40.5",0],[335.6024135409476,41.73525694620674,0,0,"Tau - TT37-38-40.6",0],[332.65443091602924,25.65740804255297,0,0,"Tau - TT37-38-40.7",0],[350.36059708074043,38.37916103536397,0,0,"Tau - TT37-38-40.8",0],[329.2938170843406,35.520722396860876,0,0,"Tau - TT37-38-40.9",0],[1.0536133398006768,18.39241781764463,0,0,"Tau - TT37-38-40.10",0],[326.828737784498,0.493427662426106,0,0,"Tau - TT37-38-40.1",0],[338.4883360461811,13.568946567867217,0,0,"Tau - TT37-38-40.2",0],[314.94315063887916,34.616385515532826,0,0,"Tau - TT37-38-40.3",0],[340.8762084967981,35.560439703885145,0,0,"Tau - TT37-38-40.4",0],[314.91804896553253,-11.365286344262907,0,0,"Tau - TT37-38-40.5",0],[335.8361300979701,61.0860837905669,0,0,"Tau - TT37-38-40.6",0],[317.6769621970916,38.3569826318223,0,0,"Tau - TT37-38-40.7",0],[327.01739683041404,29.980672793612133,0,0,"Tau - TT37-38-40.8",0],[336.64508416783633,19.897686316209963,0,0,"Tau - TT37-38-40.9",0],[332.8958033240758,29.981152204316135,0,0,"Tau - TT37-38-40.10",0],[285.5860451473945,-0.04513534484124806,0,0,"Tau - TT44.1",0],[274.2233816437898,30.369645323671158,0,0,"Tau - TT44.2",0],[271.18854297852977,14.752707782483338,0,0,"Tau - TT44.3",0],[277.55091846944663,16.34373042013174,0,0,"Tau - TT44.4",0],[270.0019295636446,12.71142882475505,0,0,"Tau - TT44.5",0],[277.04842401547035,25.363907564349663,0,0,"Tau - TT44.6",0],[288.0133740088412,31.245659738316114,0,0,"Tau - TT44.7",0],[283.783665857557,14.343897672032735,0,0,"Tau - TT44.8",0],[275.683485517711,-11.002781281565097,0,0,"Tau - TT44.9",0],[288.89980299240113,20.438957419296845,0,0,"Tau - TT44.10",0],[284.1390629073125,17.44337988313371,0,0,"Tau - TT44.11",0],[289.3779289469781,13.751432585264286,0,0,"Tau - TT44.12",0],[271.7097905285691,15.08312659349895,0,0,"Tau - TT44.13",0],[273.80054635633746,28.35051828412895,0,0,"Tau - TT44.14",0],[277.32783668698494,30.943033353537448,0,0,"Tau - TT44.15",0],[358.2904245651792,54.96367638767427,0,0,"Tau - TT51.1",0],[338.00456100874885,43.482632947388595,0,0,"Tau - TT51.2",0],[352.6766296171036,66.16662684946489,0,0,"Tau - TT51.3",0],[341.53601808703587,17.04016810764101,0,0,"Tau - TT51.4",0],[328.01141708260866,30.52567500343935,0,0,"Tau - TT51.5",0],[324.284612900143,40.11495260818575,0,0,"Tau - TT51.6",0],[337.74759200100743,25.334328632474865,0,0,"Tau - TT51.7",0],[356.28866530844465,39.18373055787354,0,0,"Tau - TT51.8",0],[348.8485699278948,51.05496355370063,0,0,"Tau - TT51.9",0],[332.43355642736356,23.403805721332848,0,0,"Tau - TT51.10",0],[337.6335611725675,25.594671927412417,0,0,"Tau - TT51.11",0],[349.2600530009675,26.673050384690416,0,0,"Tau - TT51.12",0],[327.38625854388476,19.86843963079614,0,0,"Tau - TT53.1",0],[304.57944610729623,17.959470674820743,0,0,"Tau - TT53.2",0],[311.48747666989686,16.13894528196406,0,0,"Tau - TT53.3",0],[319.54982723963525,15.27231484643741,0,0,"Tau - TT53.4",0],[299.9059483022752,43.173739540474536,0,0,"Tau - TT53.5",0],[299.1083612085306,43.07826847343364,0,0,"Tau - TT53.6",0],[308.07726595895883,32.694460276274135,0,0,"Tau - TT53.7",0],[293.6680677670074,21.87756894734652,0,0,"Tau - TT53.8",0],[319.42378107796856,17.0814120335968,0,0,"Tau - TT53.9",0],[300.3999857110621,13.922955992420935,0,0,"Tau - TT53.10",0],[299.272072398471,26.707213852662278,0,0,"Tau - TT53.11",0],[302.98551377747935,45.56971425425058,0,0,"Tau - TT53.12",0],[295.16133289080756,18.693492593315618,0,0,"Tau - TT53.13",0],[309.1824194802149,17.052573922589538,0,0,"Tau - TT53.14",0],[325.75105329487474,45.03029013716275,0,0,"Tau - TT56.1",0],[332.0795291746145,46.47036816751628,0,0,"Tau - TT56.2",0],[325.4734351203457,34.6291490753866,0,0,"Tau - TT56.3",0],[323.0676231979512,45.19783421922021,0,0,"Tau - TT56.4",0],[339.7454290846469,38.69590114367802,0,0,"Tau - TT56.5",0],[324.6668335957536,40.30516855114997,0,0,"Tau - TT56.6",0],[335.5108642584086,42.7515945392863,0,0,"Tau - TT56.7",0],[318.73442505733203,13.718814607111865,0,0,"Tau - TT41.1",0],[312.43877881691583,41.967206191938565,0,0,"Tau - TT41.2",0],[311.8435784143619,38.8685443922335,0,0,"Tau - TT41.3",0],[306.73577318038156,38.32486035927403,0,0,"Tau - TT41.4",0],[302.0667879736113,41.83696545767804,0,0,"Tau - TT41.5",0],[325.96487939945786,58.24958009688006,0,0,"Tau - TT41.6",0],[294.5499481887257,53.49718752767028,0,0,"Tau - TT41.7",0],[312.8536688621165,52.62983315705528,0,0,"Tau - TT41.8",0],[314.34457129933617,33.17871513786196,0,0,"Tau - TT41.9",0],[318.430611819828,30.494056403100643,0,0,"Tau - TT41.10",0],[322.8095717143006,30.63832843857928,0,0,"Tau - TT41.11",0],[323.90380286549475,51.73783539048095,0,0,"Tau - TT41.12",0],[313.70854024676174,30.374024967270323,0,0,"Tau - TT41.13",0],[313.7797423262811,45.721058771198145,0,0,"Tau - TT41.14",0]],"metaData":{"name":"Cretaceous-ETaur_Cinku","latitude":37.4,"longitude":34.9,"age":83,"minAge":66,"maxAge":100,"markerColor":"white","cutoff":"45","dateAdded":"2017-06-22T09:34:15.729Z","version":"v1.1.2","sanitized":true,"type":"Site Combination","author":"Unknown","description":"Multiple Sites","edited":true,"timeEdited":"2017-06-22T09:40:18.053Z","plateId":null,"lithology":null,"carriers":null}},{"data":[[342.6245967330283,44.42695451180049,0,0,"Siv - TT131.1",0],[357.3578546175253,67.37644162934343,0,0,"Siv - TT131.2",0],[7.673144521107645,42.53803433168343,0,0,"Siv - TT131.3",0],[342.60892824684333,49.093722186406666,0,0,"Siv - TT131.4",0],[7.924812726186474,52.27301403075345,0,0,"Siv - TT131.5",0],[345.7781801655833,34.151945968998824,0,0,"Siv - TT131.6",0],[343.52862079579666,15.700992958875185,0,0,"Siv - TT131.7",0],[357.2551196393718,37.250390664399724,0,0,"Siv - TL06.1",0],[346.2894848084103,51.157418259327066,0,0,"Siv - TL06.2",0],[333.1952243080418,54.37209244080843,0,0,"Siv - TL06.3",0],[355.9544227244596,43.18015742423175,0,0,"Siv - TL06.4",0],[341.69082896775274,56.47288537496428,0,0,"Siv - TL06.5",0],[325.3328166425034,36.50338934171383,0,0,"Siv - TL06.6",0],[341.29654142191225,53.18996920185825,0,0,"Siv - TL06.7",0],[340.26460275084855,62.62099313853008,0,0,"Siv - TL06.8",0],[333.4164200739017,57.077259598958676,0,0,"Siv - TL06.9",0],[335.62761998340363,64.46418787279931,0,0,"Siv - TL06.10",0],[331.9046283501003,29.926232412251185,0,0,"Siv - TL06.11",0],[332.6426063815409,58.62877876866192,0,0,"Siv - TL06.12",0],[339.14321608485835,53.632892025528555,0,0,"Siv - TL06.13",0],[344.84244583734085,56.763538685780794,0,0,"Siv - TL06.14",0],[339.67467477938,41.453477971758744,0,0,"Siv - TL06.15",0],[321.28726801962216,48.539822638908426,0,0,"Siv - TL06.16",0],[335.9978217886387,49.466000272818924,0,0,"Siv - TL06.17",0],[344.7739891166371,62.53339400212084,0,0,"Siv - TL06.18",0],[342.039278069066,60.28395950292289,0,0,"Siv - TL06.19",0],[321.6216781595099,58.378521106895136,0,0,"Siv - TL06.20",0],[342.9092038804913,49.9121287667716,0,0,"Siv - TL06.21",0],[334.80185684470166,44.55662031813747,0,0,"Siv - TL06.22",0],[345.9884109702384,42.1718693482687,0,0,"Siv - TL06.23",0],[327.2472419712533,49.39772907558826,0,0,"Siv - TL06.24",0],[340.5562172710147,36.410250268174764,0,0,"Siv - TL06.25",0],[352.6510308404998,48.7790373301147,0,0,"Siv - TL06.26",0],[335.01332487376123,38.213399032535555,0,0,"Siv - TL07.1",0],[319.51359884687326,46.448622795257954,0,0,"Siv - TL07.2",0],[327.76728537354575,22.946605830984126,0,0,"Siv - TL07.3",0],[333.371791216551,45.88859509217912,0,0,"Siv - TL07.4",0],[323.3570239419755,59.811029713506585,0,0,"Siv - TL07.5",0],[331.7170782781627,68.80383426156473,0,0,"Siv - TL07.6",0],[313.02321084642585,51.67516806056292,0,0,"Siv - TL07.7",0],[326.09585720328323,61.87343731778948,0,0,"Siv - TL07.8",0],[337.8223410014332,59.006331062166794,0,0,"Siv - TL07.9",0],[322.2929873260716,65.27694852077587,0,0,"Siv - TL07.10",0],[316.65949403295315,41.56958892124666,0,0,"Siv - TL07.11",0],[328.2896682702194,38.419372616190934,0,0,"Siv - TL07.12",0],[331.3927337603408,50.96256913727624,0,0,"Siv - TL07.13",0],[331.77048941206675,52.35073467708641,0,0,"Siv - TL07.14",0],[305.76032287372686,58.46131516022037,0,0,"Siv - TL07.15",0],[334.5851080263823,52.18123656664114,0,0,"Siv - TL07.16",0],[323.7103959350799,36.99437483190098,0,0,"Siv - TL07.17",0],[316.8739094875789,44.52730403629637,0,0,"Siv - TL07.18",0],[311.690860053483,59.3767714373623,0,0,"Siv - TL07.19",0],[310.8360615860024,43.41820857655597,0,0,"Siv - TL07.20",0],[336.18038692526255,34.889527675408345,0,0,"Kir - Sariz.1",0],[321.0874947431487,27.092664358329316,0,0,"Kir - Sariz.2",0],[330.7473835583351,38.51166296681138,0,0,"Kir - Sariz.3",0],[302.16753424520994,30.916398034906933,0,0,"Kir - Sariz.4",0],[303.92433497940124,29.682458406816007,0,0,"Kir - Sariz.5",0],[314.90828086657785,33.289626034480705,0,0,"Kir - Sariz.6",0],[312.6557178546675,17.342921933679474,0,0,"Kir - Sariz.7",0],[333.10230566055117,22.88039420601807,0,0,"Kir - Sariz.8",0],[313.0181885197836,34.0378135978704,0,0,"Kir - Sariz.9",0],[297.60700554272717,46.89540101391247,0,0,"Kir - Sariz.10",0],[307.94172642704757,41.254035779866605,0,0,"Kir - Sariz.11",0],[304.2344284786526,-3.1672583041634037,0,0,"Kir - Sariz.12",0],[307.86858507032434,60.08113412857158,0,0,"Kir - Sariz.1",0],[317.5771679051153,25.69719734713096,0,0,"Kir - Sariz.2",0],[327.66722677616434,39.542178811734516,0,0,"Kir - Sariz.3",0],[323.04463836943535,41.14189971138347,0,0,"Kir - Sariz.4",0],[351.3929831684679,21.420679049389573,0,0,"Kir - Sariz.5",0],[328.47114946043206,55.36845002547637,0,0,"Kir - Sariz.1",0],[313.7810442695418,48.262175556235455,0,0,"Kir - Sariz.2",0],[331.4473830911034,37.23175761823647,0,0,"Kir - Sariz.3",0],[321.13819060767776,55.68036104210458,0,0,"Kir - Sariz.4",0],[341.313283585333,39.92506555930426,0,0,"Kir - Sariz.5",0],[325.6012994386367,4.7970502120071705,0,0,"Kir - Sariz.6",0],[310.9704539970671,46.13753190125814,0,0,"Kir - Sariz.7",0],[345.5173012398417,53.93474990818106,0,0,"Kir - Sariz.8",0],[326.31919932433993,24.76662210194055,0,0,"Kir - Sariz.9",0],[326.88087878192295,14.45487810804798,0,0,"Kir - Sariz.10",0]],"metaData":{"name":"Eocene-ETaur_Cinku_Kissel","latitude":38.6,"longitude":36.4,"age":42.9,"minAge":38,"maxAge":47.8,"markerColor":"white","cutoff":"45","dateAdded":"2017-06-22T09:43:08.398Z","version":"v1.1.2","sanitized":true,"type":"Site Combination","author":"Cinku et al., 2016; Kissel et al., 2003","description":"Multiple Sites","edited":true,"timeEdited":"2017-06-22T09:44:27.840Z","plateId":null,"lithology":null,"carriers":null}},{"data":[[353.0144963228514,49.980743499234904,0,0,"Group 9.1",0],[356.9051264741518,46.95456020049482,0,0,"Group 9.2",0],[357.59491602515845,50.413711121130135,0,0,"Group 9.3",0],[354.15658663532326,45.72572853845588,0,0,"Group 9.4",0],[347.16514901878134,38.69932425524915,0,0,"Group 9.5",0],[351.10344981772573,53.80747797700492,0,0,"Group 9.6",0],[356.99438146774645,38.45743051901326,0,0,"Group 9.7",0],[355.18592869647256,39.99140166921332,0,0,"Group 9.8",0],[356.5617018273648,32.26747820041455,0,0,"Pon - BAY (G+I+L).1",0],[1.2709678483784614,43.88854007116223,0,0,"Pon - BAY (G+I+L).2",0],[0.04006932596558954,52.04571450321881,0,0,"Pon - BAY (G+I+L).3",0],[355.91846208401375,29.957806602654237,0,0,"Pon - BAY (G+I+L).4",0],[12.151919655400377,60.67569428986442,0,0,"Pon - Almus.1",0],[349.2346000034063,61.91610796001635,0,0,"Pon - Almus.2",0],[0.6674773986082414,-22.242863667719227,0,0,"Pon - Almus.3",0],[320.11916917794053,51.14945799256095,0,0,"Pon - Almus.4",0],[346.79591758407696,26.17830673960509,0,0,"Pon - Almus.5",0],[330.22462289726286,59.842568358069514,0,0,"Pon - Almus.6",0],[347.8976023025077,43.73409113218118,0,0,"Pon - Almus.7",0],[4.780036069621019,31.911477923023945,0,0,"Pon - F1/F2.1",0],[356.4474154733332,41.972787406734206,0,0,"Pon - F1/F2.2",0],[9.468549151574734,58.40497136524825,0,0,"Pon - F1/F2.3",0],[349.65042638663385,42.633916741501935,0,0,"Pon - F1/F2.4",0],[342.9548343738642,65.26726002243242,0,0,"Pon - F1/F2.5",0],[3.71863611027959,46.607545630021434,0,0,"Pon - F1/F2.6",0],[3.8932573866968028,46.84031785175093,0,0,"Pon - F1/F2.7",0],[346.0098932770245,53.68820770339017,0,0,"Pon - F1/F2.8",0],[10.492467766170307,62.69404816947005,0,0,"Pon - F1/F2.9",0],[7.986510895923686,48.99018090448488,0,0,"Pon - F1/F2.10",0],[7.165039698426654,48.49193549966429,0,0,"Pon - F1/F2.11",0],[349.87112259041635,52.38213524861535,0,0,"Pon - F1/F2.12",0],[2.5738221762465514,41.96535578327631,0,0,"Pon - F1/F2.13",0],[17.80668051420156,38.947806712646354,0,0,"Pon - F1/F2.1",0],[317.80138020924335,40.50181365604899,0,0,"Pon - F1/F2.2",0],[343.4420857750654,49.13408530058774,0,0,"Pon - F1/F2.3",0],[354.22402066692405,40.2264726249767,0,0,"Pon - F1/F2.4",0],[343.0132026363327,35.052694005857205,0,0,"Pon - F1/F2.5",0],[346.07423594584,12.07726352842449,0,0,"Pon - F1/F2.6",0],[345.39663768132084,55.175730706548435,0,0,"Pon - F1/F2.7",0],[349.52782779982715,41.99056823078636,0,0,"Pon - F1/F2.8",0],[4.733356940438853,33.41503397314201,0,0,"Pon - F1/F2.9",0],[318.1599737410304,3.5423659128672313,0,0,"Pon - F1/F2.10",0],[339.26241408060275,36.01259530709542,0,0,"Pon - F1/F2.11",0],[351.03532836228135,41.62694786967037,0,0,"Pon - F1/F2.12",0],[5.158291984824928,41.89072858254963,0,0,"Pon - F1/F2.13",0],[356.22283014997424,54.3144622590249,0,0,"Pon - F1/F2.14",0],[321.880564757015,25.584668809626713,0,0,"Pon - F1/F2.15",0],[18.858043866113974,38.33589719130903,0,0,"Pon - Group 8_Cret.1",0],[14.671710375540954,36.94670977797999,0,0,"Pon - Group 8_Cret.2",0],[21.34112225975435,38.36499534599874,0,0,"Pon - Group 8_Cret.3",0],[22.651655170261456,41.88554906476859,0,0,"Pon - Group 8_Cret.4",0],[18.816747821501338,38.977180880948545,0,0,"Pon - Group 8_Cret.5",0],[16.481016864553396,39.994566002485016,0,0,"Pon - Group 8_Cret.6",0],[24.72025125992938,42.338297043128755,0,0,"Pon - Group 8_Cret.7",0],[24.356017558835,38.02811369153584,0,0,"Pon - Group 8_Cret.8",0],[21.591314206093525,39.73061032367596,0,0,"Pon - Group 8_Cret.9",0],[16.423036542434716,30.933742097872898,0,0,"Pon - Group 8_Cret.10",0],[19.43891070036714,43.450943986422196,0,0,"Pon - Group 8_Cret.11",0],[19.799710454670766,35.4439263673581,0,0,"Pon - Group 8_Cret.12",0],[17.784148670138336,33.0553195180422,0,0,"Pon - Group 8_Cret.13",0],[13.104208024911088,37.173446606948744,0,0,"Pon - Group 8_Cret.14",0],[13.863402854510298,33.32876760434175,0,0,"Pon - Group 8_Cret.15",0],[349.5568150495479,44.613232568359415,0,0,"Pon - Group 8_Cret.1",0],[346.4499105760342,39.24847209710674,0,0,"Pon - Group 8_Cret.2",0],[344.0379545072651,39.25701755169759,0,0,"Pon - Group 8_Cret.3",0],[349.85117495351983,36.31212242814786,0,0,"Pon - Group 8_Cret.4",0],[348.8564619438455,38.07294217948143,0,0,"Pon - Group 8_Cret.5",0],[348.67847197102253,36.747280087218556,0,0,"Pon - Group 8_Cret.6",0],[346.3323489637319,42.01115154634516,0,0,"Pon - Group 8_Cret.7",0],[351.5455319819467,42.58805891583746,0,0,"Pon - Group 8_Cret.8",0],[350.8676878655934,36.194781783939526,0,0,"Pon - Group 8_Cret.9",0],[343.8755073483069,36.96522942085089,0,0,"Pon - Group 8_Cret.10",0],[348.9684708353442,38.641692322496034,0,0,"Pon - Group 8_Cret.11",0],[31.761998478953984,49.4568213717958,0,0,"Pon - Group 8_Cret.1",0],[26.716669938826556,50.205251469625644,0,0,"Pon - Group 8_Cret.2",0],[34.37317736863443,47.789452476557926,0,0,"Pon - Group 8_Cret.3",0],[27.81328965843801,47.70285817487058,0,0,"Pon - Group 8_Cret.4",0],[36.92527064159239,48.824866588901344,0,0,"Pon - Group 8_Cret.5",0],[26.77233472473955,55.84326136354429,0,0,"Pon - Group 8_Cret.6",0],[32.57000780032907,53.244716642352216,0,0,"Pon - Group 8_Cret.7",0],[18.38430155923504,53.258034690881104,0,0,"Pon - Group 8_Cret.8",0],[28.65298619318196,51.539793348054985,0,0,"Pon - Group 8_Cret.9",0],[38.37406827539954,44.71119569155036,0,0,"Pon - Group 8_Cret.10",0],[31.621863667797758,53.66775281284496,0,0,"Pon - Group 8_Cret.11",0],[35.285751084588924,54.57538252167274,0,0,"Pon - Group 8_Cret.12",0],[29.212466350961336,45.89914548744872,0,0,"Pon - Group 8_Cret.13",0],[26.76097273777748,48.085936048585445,0,0,"Pon - Group 8_Cret.14",0],[27.74237400561003,45.958262106588116,0,0,"Pon - Group 8_Cret.15",0],[9.355487298689852,44.4741972609359,0,0,"Pon - Group 8_Cret.1",0],[358.7302317858385,44.54258371484062,0,0,"Pon - Group 8_Cret.2",0],[13.113824738067514,50.66917353379371,0,0,"Pon - Group 8_Cret.3",0],[11.382290295333537,43.83868986628453,0,0,"Pon - Group 8_Cret.4",0],[8.242694750790625,52.25601415378068,0,0,"Pon - Group 8_Cret.5",0],[13.354623099560387,45.75820010750151,0,0,"Pon - Group 8_Cret.6",0],[4.31488017983213,51.9658426968396,0,0,"Pon - Group 8_Cret.7",0],[4.26888618901495,42.97900362318337,0,0,"Pon - Group 8_Cret.8",0],[8.190214411005767,51.50632173964048,0,0,"Pon - Group 8_Cret.9",0],[3.5768729515122004,49.84255189142158,0,0,"Pon - Group 8_Cret.10",0],[5.675571027362878,46.621127275497166,0,0,"Pon - Group 8_Cret.11",0],[7.238110786401474,40.52825048494995,0,0,"Pon - Group 8_Cret.1",0],[359.27948831916996,53.82207594676,0,0,"Pon - Group 8_Cret.2",0],[5.312247411905722,38.64222235794524,0,0,"Pon - Group 8_Cret.3",0],[8.881021265384586,45.35557025407606,0,0,"Pon - Group 8_Cret.4",0],[8.201581001450394,45.00868221195116,0,0,"Pon - Group 8_Cret.5",0],[1.5074050769460996,34.585623697029014,0,0,"Pon - Group 8_Cret.6",0],[0.8489319381315568,39.117932294834944,0,0,"Pon - Group 8_Cret.7",0],[10.75318296099316,49.58244522176602,0,0,"Pon - Group 8_Cret.8",0],[9.956671562066399,45.509028314233205,0,0,"Pon - Group 8_Cret.9",0],[1.835436635550252,38.67032414482173,0,0,"Pon - Group 8_Cret.10",0],[1.3502473315212455,42.33038442237018,0,0,"Pon - Group 8_Cret.11",0],[358.67807817791964,37.888070336301666,0,0,"Pon - Group 8_Cret.12",0],[10.333919527157544,40.83785867517775,0,0,"Pon - Group 8_Cret.13",0],[1.501083744153732,41.53980580938468,0,0,"Pon - Gumushane.1",0],[0.1530987689865242,13.139033321362017,0,0,"Pon - Gumushane.2",0],[347.21267784735824,13.566624500404895,0,0,"Pon - Gumushane.3",0],[357.11531584850127,44.17645459236346,0,0,"Pon - Gumushane.4",0],[352.0630418004723,27.50146259253053,0,0,"Pon - Gumushane.5",0],[349.3294013157629,24.475923913616203,0,0,"Pon - Gumushane.6",0],[343.33341616066787,21.477034028763864,0,0,"Pon - Gumushane.1",0],[359.33151871146487,37.704224855486714,0,0,"Pon - Gumushane.2",0],[10.373910235283518,33.19142440922684,0,0,"Pon - Gumushane.3",0],[8.222841562206952,31.61467192555296,0,0,"Pon - Gumushane.4",0],[357.7628001695697,24.296469442674997,0,0,"Pon - Gumushane.5",0],[9.358634572806125,37.18723554095924,0,0,"Pon - Gumushane.6",0],[343.1855918422791,35.78058869673899,0,0,"Pon - Gumushane.7",0],[349.24994081526256,48.40315110183353,0,0,"Pon - Gumushane.8",0],[0.05773920607595073,1.9856847869046277,0,0,"Pon - Gumushane.9",0],[9.770055404676782,30.522313918362602,0,0,"Pon - Gumushane.10",0],[0.21102435531236097,45.602971588506946,0,0,"Pon - Gumushane.1",0],[338.85735621173535,38.28715363905209,0,0,"Pon - Gumushane.2",0],[346.95147247147156,42.844922014646265,0,0,"Pon - Gumushane.3",0],[344.37483503047656,38.591674645935804,0,0,"Pon - Gumushane.4",0],[345.3595643375054,56.08482388042518,0,0,"Pon - Gumushane.5",0],[351.52872347020343,42.219340296976206,0,0,"Pon - Gumushane.6",0],[357.12223928931456,44.22324374821832,0,0,"Pon - Gumushane.7",0],[344.64153686630175,35.971699237343046,0,0,"Pon - Gumushane.8",0],[350.16117565142315,48.7940183680056,0,0,"Pon - Gumushane.9",0],[343.9624039448961,44.15546016150092,0,0,"Pon - Gumushane.10",0],[353.9458231363403,45.600900925749116,0,0,"Pon - Gumushane.11",0],[330.16400431183183,31.82958919942861,0,0,"Pon - Gumushane.1",0],[338.6668921417296,42.177338212584026,0,0,"Pon - Gumushane.2",0],[354.6996618657372,44.910167829325694,0,0,"Pon - Gumushane.3",0],[349.4897348332158,23.88012744591722,0,0,"Pon - Gumushane.4",0],[339.42968919075884,24.59617497723788,0,0,"Pon - Gumushane.5",0],[333.38973675703687,0.4300955469867736,0,0,"Pon - Gumushane.6",0],[342.2806728542386,34.12199322066834,0,0,"Pon - Gumushane.7",0],[339.12293544767886,38.68813852724649,0,0,"Pon - Gumushane.8",0],[16.91000659647267,55.56535394419802,0,0,"Pon - Mesuidye.1",0],[337.57961535522816,54.10886916589629,0,0,"Pon - Mesuidye.2",0],[352.6144833600447,44.041131979314116,0,0,"Pon - Mesuidye.3",0],[355.70907021432276,50.88349810591167,0,0,"Pon - Mesuidye.4",0],[18.53716367780305,25.015151888521395,0,0,"Pon - Mesuidye.5",0],[10.01414146304512,49.07175569457235,0,0,"Pon - Mesuidye.6",0],[332.86475858422807,61.71216930756595,0,0,"Pon - Mesuidye.7",0],[351.3863148117132,62.28660969933023,0,0,"Pon - Mesuidye.8",0],[331.7118457132012,61.7883958779389,0,0,"Pon - Mesuidye.9",0],[336.42523812884815,52.04242275066953,0,0,"Pon - Mesuidye.10",0],[349.1561715204499,42.39125959137903,0,0,"Pon - Mesuidye.11",0],[18.345533172737362,35.7483653326098,0,0,"Pon - Mesuidye.12",0],[356.6143706005546,-6.858635881756878,0,0,"Pon - Mesuidye.13",0],[325.87021261438474,40.155489815832205,0,0,"Pon - Mesuidye.14",0]],"metaData":{"name":"E_Pontides_all","latitude":40.6,"longitude":38.4,"age":67,"minAge":33.9,"maxAge":100,"markerColor":"white","cutoff":"45","dateAdded":"2017-06-22T11:34:48.052Z","version":"v1.1.2","sanitized":true,"type":"Site Combination","author":"Unknown","description":"BAY (G,I,L); Group 9; Group 8 Cretaceous; Gumushane; Almus; Mesuidye; F1/F2","edited":true,"timeEdited":"2017-06-22T11:37:14.585Z","plateId":null,"lithology":null,"carriers":null}},{"data":[[12.151919655400377,60.67569428986442,0,0,"Pon - Almus.1",0],[349.2346000034063,61.91610796001635,0,0,"Pon - Almus.2",0],[0.6674773986082414,-22.242863667719227,0,0,"Pon - Almus.3",0],[320.11916917794053,51.14945799256095,0,0,"Pon - Almus.4",0],[346.79591758407696,26.17830673960509,0,0,"Pon - Almus.5",0],[330.22462289726286,59.842568358069514,0,0,"Pon - Almus.6",0],[347.8976023025077,43.73409113218118,0,0,"Pon - Almus.7",0]],"metaData":{"name":"Pon - Almus","dateAdded":"2016-11-17T13:53:10.646Z","version":"v1.1.1","markerColor":"orange","cutoff":"45","type":"Simulated","description":"volcanics","author":"Orbay and Bayburdi, 1979","age":"45.0","minAge":"33.9","maxAge":"56","latitude":40.5,"longitude":37.7,"sanitized":true}},{"data":[[356.5617018273648,32.26747820041455,0,0,"Pon - BAY (G+I+L).1",0],[1.2709678483784614,43.88854007116223,0,0,"Pon - BAY (G+I+L).2",0],[0.04006932596558954,52.04571450321881,0,0,"Pon - BAY (G+I+L).3",0],[355.91846208401375,29.957806602654237,0,0,"Pon - BAY (G+I+L).4",0]],"metaData":{"name":"Pon - BAY (G+I+L)","dateAdded":"2016-11-17T12:29:33.214Z","version":"v1.1.1","markerColor":"orange","cutoff":"45","type":"Simulated","description":"sediments","author":"van der Voo, Tectonophysics 1968","age":"45.0","minAge":"33.9","maxAge":"56","latitude":40.9,"longitude":38.8,"sanitized":true}},{"data":[[65.33119698338396,37.849158302751725,0,0,"Pon - BG7.1",0],[72.52461174118105,31.03610026081979,0,0,"Pon - BG7.2",0],[81.48511576478083,39.54609626667425,0,0,"Pon - BG7.3",0],[72.70124615621518,45.46629968113874,0,0,"Pon - BG7.4",0],[79.69885353274398,43.13489150664941,0,0,"Pon - BG7.5",0],[71.90130268239551,48.61509692868354,0,0,"Pon - BG7.6",0],[71.45375550836422,57.14218030595247,0,0,"Pon - BG7.7",0],[81.12565051950509,44.90878515471311,0,0,"Pon - BG7.8",0],[79.06227245619294,48.44746784616959,0,0,"Pon - BG7.9",0],[64.514187408753,35.31747961132115,0,0,"Pon - BG7.10",0],[76.98444633903628,53.575994871278645,0,0,"Pon - BG7.11",0],[74.14355209626507,39.29319984820738,0,0,"Pon - BG7.12",0],[70.47809689844553,44.71998549121195,0,0,"Pon - BG7.13",0],[71.22447063662986,29.300077405330214,0,0,"Pon - BG7.14",0],[71.61356770998441,35.7973774240167,0,0,"Pon - BG7.15",0],[82.51160297053138,39.41938088038271,0,0,"Pon - BG7.16",0],[83.50966227521896,41.068027861423744,0,0,"Pon - BG7.17",0]],"metaData":{"name":"Pon - BG7","dateAdded":"2016-11-17T20:12:25.387Z","version":"v1.1.1","markerColor":"orange","cutoff":"45","type":"Simulated","description":"Sediments","author":"Meijers et al., Tectonics 2010","age":"86.7","minAge":"83.6","maxAge":"89.8","latitude":41.1,"longitude":35.9,"sanitized":true}},{"data":[[328.9034879532498,57.185572274430804,0,0,"Pon - ER/EE/EK.1",0],[322.45597954276053,46.87395164625935,0,0,"Pon - ER/EE/EK.2",0],[321.13729483744135,57.09821906080924,0,0,"Pon - ER/EE/EK.3",0],[315.55141860965193,61.60446040732519,0,0,"Pon - ER/EE/EK.4",0],[317.35718724289654,59.73189315547953,0,0,"Pon - ER/EE/EK.5",0],[300.0806152747523,30.465041101938645,0,0,"Pon - ER/EE/EK.6",0],[331.66160699452973,47.10798993851812,0,0,"Pon - ER/EE/EK.7",0],[323.591808143335,49.568973041418886,0,0,"Pon - ER/EE/EK.8",0],[303.9523550866045,49.13399009870535,0,0,"Pon - ER/EE/EK.9",0],[321.03026358474114,21.489518162856253,0,0,"Pon - ER/EE/EK.10",0],[295.18925324848317,40.47174325807295,0,0,"Pon - ER/EE/EK.11",0],[338.6958561830918,60.29144402484644,0,0,"Pon - ER/EE/EK.12",0],[312.0091584841979,36.19508329176123,0,0,"Pon - ER/EE/EK.13",0],[318.8708035632518,47.06052270066803,0,0,"Pon - ER/EE/EK.14",0],[348.10937622823235,47.92231124062165,0,0,"Pon - ER/EE/EK.1",0],[346.68500481161436,49.30604675999927,0,0,"Pon - ER/EE/EK.2",0],[342.1048277256473,24.65077597602413,0,0,"Pon - ER/EE/EK.3",0],[355.8163347640575,42.44034078835683,0,0,"Pon - ER/EE/EK.4",0],[355.11190148216025,49.4605010093504,0,0,"Pon - ER/EE/EK.5",0],[352.9545043668126,36.349582400313636,0,0,"Pon - ER/EE/EK.6",0],[350.4261402759977,33.09873807118461,0,0,"Pon - ER/EE/EK.7",0],[351.01246605895915,15.700159924696509,0,0,"Pon - ER/EE/EK.8",0],[346.17208913607715,46.91730343015411,0,0,"Pon - ER/EE/EK.9",0],[352.16512252896683,33.467961169974366,0,0,"Pon - ER/EE/EK.10",0],[344.92967576857586,39.32484484473344,0,0,"Pon - ER/EE/EK.11",0],[349.8194317721483,39.89734427670148,0,0,"Pon - ER/EE/EK.12",0],[311.4696224451841,29.074090017431505,0,0,"Pon - ER/EE/EK.1",0],[317.5900123898127,47.60346778577795,0,0,"Pon - ER/EE/EK.2",0],[324.0515936116133,47.209512845513004,0,0,"Pon - ER/EE/EK.3",0],[331.82613546633706,54.87742489343576,0,0,"Pon - ER/EE/EK.4",0],[317.64787200406545,46.38997974144419,0,0,"Pon - ER/EE/EK.5",0],[334.58621678012935,43.698057340237625,0,0,"Pon - ER/EE/EK.6",0],[320.72822466758794,52.506847532628136,0,0,"Pon - ER/EE/EK.7",0],[325.4344029204206,50.096352696613415,0,0,"Pon - ER/EE/EK.8",0],[339.1641164132232,45.52443605399886,0,0,"Pon - ER/EE/EK.9",0],[328.27849019568333,52.17086016211334,0,0,"Pon - ER/EE/EK.10",0],[324.8724334307325,40.69329742390647,0,0,"Pon - ER/EE/EK.11",0],[318.5794531668673,43.93051709909328,0,0,"Pon - ER/EE/EK.12",0],[330.45839132611786,40.31540587615822,0,0,"Pon - ER/EE/EK.13",0],[320.1126486278049,39.20563449494672,0,0,"Pon - ER/EE/EK.14",0]],"metaData":{"name":"Pon - ER/EE/EK","dateAdded":"2016-11-17T19:42:08.429Z","version":"v1.1.1","markerColor":"orange","cutoff":"45","type":"Simulated","description":"Sediments","author":"Meijers et al., Tectonics 2010","age":"86.7","minAge":"83.6","maxAge":"89.8","latitude":41.3,"longitude":31.5,"sanitized":true}},{"data":[[4.780036069621019,31.911477923023945,0,0,"Pon - F1/F2.1",0],[356.4474154733332,41.972787406734206,0,0,"Pon - F1/F2.2",0],[9.468549151574734,58.40497136524825,0,0,"Pon - F1/F2.3",0],[349.65042638663385,42.633916741501935,0,0,"Pon - F1/F2.4",0],[342.9548343738642,65.26726002243242,0,0,"Pon - F1/F2.5",0],[3.71863611027959,46.607545630021434,0,0,"Pon - F1/F2.6",0],[3.8932573866968028,46.84031785175093,0,0,"Pon - F1/F2.7",0],[346.0098932770245,53.68820770339017,0,0,"Pon - F1/F2.8",0],[10.492467766170307,62.69404816947005,0,0,"Pon - F1/F2.9",0],[7.986510895923686,48.99018090448488,0,0,"Pon - F1/F2.10",0],[7.165039698426654,48.49193549966429,0,0,"Pon - F1/F2.11",0],[349.87112259041635,52.38213524861535,0,0,"Pon - F1/F2.12",0],[2.5738221762465514,41.96535578327631,0,0,"Pon - F1/F2.13",0],[17.80668051420156,38.947806712646354,0,0,"Pon - F1/F2.1",0],[317.80138020924335,40.50181365604899,0,0,"Pon - F1/F2.2",0],[343.4420857750654,49.13408530058774,0,0,"Pon - F1/F2.3",0],[354.22402066692405,40.2264726249767,0,0,"Pon - F1/F2.4",0],[343.0132026363327,35.052694005857205,0,0,"Pon - F1/F2.5",0],[346.07423594584,12.07726352842449,0,0,"Pon - F1/F2.6",0],[345.39663768132084,55.175730706548435,0,0,"Pon - F1/F2.7",0],[349.52782779982715,41.99056823078636,0,0,"Pon - F1/F2.8",0],[4.733356940438853,33.41503397314201,0,0,"Pon - F1/F2.9",0],[318.1599737410304,3.5423659128672313,0,0,"Pon - F1/F2.10",0],[339.26241408060275,36.01259530709542,0,0,"Pon - F1/F2.11",0],[351.03532836228135,41.62694786967037,0,0,"Pon - F1/F2.12",0],[5.158291984824928,41.89072858254963,0,0,"Pon - F1/F2.13",0],[356.22283014997424,54.3144622590249,0,0,"Pon - F1/F2.14",0],[321.880564757015,25.584668809626713,0,0,"Pon - F1/F2.15",0]],"metaData":{"name":"Pon - F1/F2","dateAdded":"2016-11-17T20:00:11.261Z","version":"v1.1.1","markerColor":"orange","cutoff":"45","type":"Simulated","description":"Sediments","author":"Meijers et al., Tectonics 2010","age":"45.0","minAge":"33.9","maxAge":"56","latitude":40.8,"longitude":37.2,"sanitized":true}},{"data":[[346.47034040335456,48.580187425934064,0,0,"Group 1.1",0],[348.70678657090764,47.265331835167636,0,0,"Group 1.2",0],[350.3211955372181,49.33916129939355,0,0,"Group 1.3",0],[344.15634108047857,44.42487841636557,0,0,"Group 1.4",0],[347.09355584399833,47.61075978889435,0,0,"Group 1.5",0],[348.8055407824273,39.16197551679479,0,0,"Group 1.6",0],[353.0980690301645,53.21607969062299,0,0,"Group 1.7",0],[341.15758788705193,44.95704246268198,0,0,"Group 1.8",0],[342.5004514224031,41.77640038792621,0,0,"Group 1.9",0],[352.677991420238,52.44275733111843,0,0,"Group 1.1",0],[341.6031092732178,38.197785616718114,0,0,"Group 1.2",0],[339.6083130101083,26.69018112655221,0,0,"Group 1.3",0],[332.4896927907753,49.18408662485033,0,0,"Group 1.4",0],[328.88782208739144,45.95638581581399,0,0,"Group 1.5",0],[338.0365569617835,32.548193408875086,0,0,"Group 1.6",0],[333.142622096354,34.74667830683707,0,0,"Group 1.7",0],[339.1878606102355,46.82556520319649,0,0,"Group 1.8",0],[338.04496493126703,37.566893406300785,0,0,"Group 1.9",0],[356.28044545013836,41.04323698286646,0,0,"Group 1.10",0],[340.18994924945025,26.870075533078154,0,0,"Group 1.11",0],[341.55508049971843,35.72324540617984,0,0,"Group 1.12",0],[323.25262469665995,45.66462519489254,0,0,"Group 1.1",0],[348.0207831129804,44.30152249346093,0,0,"Group 1.2",0],[335.63078129149744,45.67737454091609,0,0,"Group 1.3",0],[328.46474753383563,42.60075332965665,0,0,"Group 1.4",0],[322.49611509304646,47.66357788245033,0,0,"Group 1.5",0],[336.1482197481739,46.673337713432815,0,0,"Group 1.6",0],[323.2999754798125,44.38796052751744,0,0,"Group 1.7",0],[325.68713040222224,44.87452436825815,0,0,"Group 1.8",0],[330.2206808282318,40.88365860025777,0,0,"Group 1.1",0],[338.4887555952519,27.025170606690526,0,0,"Group 1.2",0],[335.06705733494937,46.320047172401054,0,0,"Group 1.3",0],[337.0121489282043,34.29150821663639,0,0,"Group 1.4",0],[333.06293116319193,33.431931118070125,0,0,"Group 1.5",0],[345.3405671192761,26.747769881138233,0,0,"Group 1.6",0],[341.23516141734893,25.405659039467217,0,0,"Group 1.7",0],[336.66880737432416,37.828244901641895,0,0,"Group 1.8",0],[338.97368954928896,33.62691663439467,0,0,"Group 1.9",0],[339.9878590329317,34.933730536965484,0,0,"Group 1.10",0],[331.7081527767464,28.019562474425445,0,0,"Group 1.11",0],[339.2090715264527,20.29658411120492,0,0,"Group 1.12",0],[337.1936946638422,22.994701324689093,0,0,"Group 1.13",0],[334.3488641111974,29.85192595937915,0,0,"Group 1.14",0],[339.3406175841583,31.854424171491402,0,0,"Group 1.1",0],[325.7270939586425,36.5258224320139,0,0,"Group 1.2",0],[332.9782750305254,45.45967486581944,0,0,"Group 1.3",0],[337.3704098337583,36.010963576352204,0,0,"Group 1.4",0],[329.375644143257,40.417353125379506,0,0,"Group 1.5",0],[342.36249301193806,41.19256420318775,0,0,"Group 1.6",0],[323.7321095117244,50.55416603712568,0,0,"Group 1.7",0],[331.54727667051304,44.86313666666344,0,0,"Group 1.8",0],[324.5277892288799,52.45538774583141,0,0,"Group 1.9",0],[333.3262994213401,49.05170120578187,0,0,"Group 1.10",0],[329.8992368502643,43.18150952381996,0,0,"Group 1.11",0],[335.7479313559527,26.25965578616072,0,0,"Group 1.12",0],[322.8712307882861,50.054510263142205,0,0,"Group 1.13",0],[336.8491523556906,37.90743857439154,0,0,"Group 1.14",0],[336.43469729770106,45.48662238084438,0,0,"Group 1.15",0],[334.8280799848473,33.03903176359548,0,0,"Group 1.16",0]],"metaData":{"name":"Pon - Group 1","dateAdded":"2016-11-17T11:35:27.501Z","version":"v1.1.1","markerColor":"orange","cutoff":"45","type":"Input","description":"sediments","author":"Channell et al., Tectonics 1996","age":"83.0","minAge":"66","maxAge":"100","latitude":41.3,"longitude":31.6,"sanitized":true}},{"data":[[334.33643638963895,43.24785825369337,0,0,"Group 2.1",0],[340.09278781422836,38.49939997215608,0,0,"Group 2.2",0],[347.1080996310023,41.085994382179784,0,0,"Group 2.3",0],[336.8410548536905,27.40868947142607,0,0,"Group 2.4",0],[348.4113014282998,40.36734905539225,0,0,"Group 2.5",0],[344.6380562476316,33.78577243714725,0,0,"Group 2.6",0],[343.14534816544204,25.796529922508252,0,0,"Group 2.7",0],[345.6076442364803,43.41710910057567,0,0,"Group 2.8",0],[344.54484221830705,43.859668631412475,0,0,"Group 2.9",0],[336.60233139517254,43.34433469343306,0,0,"Group 2.10",0],[339.4808185440936,42.82204811951071,0,0,"Group 2.11",0],[339.881958396467,39.095857420333495,0,0,"Group 2.12",0],[345.3333936257956,38.21877428081185,0,0,"Group 2.13",0],[336.37819107358837,36.705033790831216,0,0,"Group 2.14",0],[338.0979979880001,44.83944660338974,0,0,"Group 2.15",0],[343.1716395783678,41.78455514820303,0,0,"Group 2.16",0],[343.97107009919483,40.20764536426267,0,0,"Group 2.17",0],[335.1383110034508,33.21318169064423,0,0,"Group 2.18",0],[339.3282752263997,45.450520474161344,0,0,"Group 2.19",0],[340.5748801820787,32.18757828570379,0,0,"Group 2.20",0],[310.1691243217989,40.81412415311161,0,0,"Group 2.1",0],[315.5076961907996,41.35310120417367,0,0,"Group 2.2",0],[349.7925449933464,35.69766866135337,0,0,"Group 2.3",0],[316.5153421877808,55.95065245995522,0,0,"Group 2.4",0],[312.08737159584336,53.467746607202194,0,0,"Group 2.5",0],[318.29061279147743,50.82110868596039,0,0,"Group 2.6",0],[316.7672798813418,35.682475832422945,0,0,"Group 2.7",0],[319.91853985517076,56.57597524358292,0,0,"Group 2.8",0],[290.851695020913,58.076282095189185,0,0,"Group 2.9",0],[317.80803423930513,56.76043270894666,0,0,"Group 2.10",0],[309.23095570237956,50.39135281452109,0,0,"Group 2.11",0],[319.041862178727,43.59393237855494,0,0,"Group 2.12",0],[310.25415843071676,41.69762900216843,0,0,"Group 2.13",0],[311.39584803339403,45.322957945133105,0,0,"Group 2.1",0],[323.09660480650024,55.40872611515199,0,0,"Group 2.2",0],[316.46868902783706,55.37213491665217,0,0,"Group 2.3",0],[300.1985339792243,52.947485511914586,0,0,"Group 2.4",0],[317.7221900368287,52.908314473827005,0,0,"Group 2.5",0],[330.80504521690204,56.75661680132687,0,0,"Group 2.6",0],[315.2618344843212,41.76258919922219,0,0,"Group 2.7",0],[324.645466185104,67.45004024860117,0,0,"Group 2.8",0],[322.99594463993105,51.579947823015225,0,0,"Group 2.9",0],[311.66800253720317,44.34843046240583,0,0,"Group 2.10",0],[318.0809745159496,37.229362951302925,0,0,"Group 2.11",0],[315.83559389861307,43.93691198588514,0,0,"Group 2.12",0],[325.27913300385796,49.310764688892675,0,0,"Group 2.13",0],[313.8721537638471,42.01209341182877,0,0,"Group 2.14",0]],"metaData":{"name":"Pon - Group 2","dateAdded":"2016-11-17T11:35:33.250Z","version":"v1.1.1","markerColor":"orange","cutoff":"45","type":"Input","description":"sediments","author":"Channell et al., Tectonics 1996","age":"83.0","minAge":"66","maxAge":"100","latitude":41.6,"longitude":32.3,"sanitized":true}},{"data":[[313.55134252893913,48.971085943295826,0,0,"Group 3.1",0],[320.6319630080739,52.016475021659964,0,0,"Group 3.2",0],[311.7507343886231,46.121950343383205,0,0,"Group 3.3",0],[311.9324020967982,53.362668561672045,0,0,"Group 3.4",0],[315.1131817638668,52.92898902380233,0,0,"Group 3.5",0],[316.98500770142533,50.27525723118715,0,0,"Group 3.6",0],[314.7041591290515,50.44815494879888,0,0,"Group 3.7",0],[311.63292017699587,47.87985309396272,0,0,"Group 3.8",0],[319.0793533669715,50.74699885238118,0,0,"Group 3.9",0],[315.8092187499601,48.805753736077996,0,0,"Group 3.10",0],[310.34007829145935,51.72562977737123,0,0,"Group 3.11",0],[320.8604992626092,58.411041043987794,0,0,"Group 3.1",0],[327.20358495646224,26.099986512396804,0,0,"Group 3.2",0],[335.959162214499,47.098048004011574,0,0,"Group 3.3",0],[333.0956930113366,23.421306624871505,0,0,"Group 3.4",0],[346.01918993682835,54.100913938834964,0,0,"Group 3.5",0],[320.88455791909587,42.40672586793725,0,0,"Group 3.6",0],[341.6530292146238,51.10462216552719,0,0,"Group 3.7",0],[336.53513783143796,37.29877674260054,0,0,"Group 3.8",0],[329.16084271491377,50.36666679922317,0,0,"Group 3.9",0],[323.5572210816056,49.60799300904332,0,0,"Group 3.10",0],[333.9968590953882,56.600163371559745,0,0,"Group 3.11",0],[330.8524939503693,15.029800244803498,0,0,"Group 3.12",0],[330.90167594101695,53.352549385478945,0,0,"Group 3.13",0],[308.0518143040549,41.636472732640826,0,0,"Group 3.1",0],[322.634314393914,27.166383156825898,0,0,"Group 3.2",0],[300.93496212391665,55.25374431930416,0,0,"Group 3.3",0],[324.70425362275046,36.89314709366868,0,0,"Group 3.4",0],[313.7587201884762,27.65629203084823,0,0,"Group 3.5",0],[306.4629535007206,28.66542049166504,0,0,"Group 3.6",0],[303.36265794414294,32.57830666613764,0,0,"Group 3.7",0],[326.3494668684614,32.94042361308678,0,0,"Group 3.8",0],[319.03980523440646,20.791867924760393,0,0,"Group 3.9",0],[294.042774923554,60.19991630205105,0,0,"Group 3.10",0],[319.13180519502447,57.67995100863641,0,0,"Group 3.11",0],[350.94503213372104,-44.41343054201066,0,0,"Group 3.1",0],[347.6060750857064,-52.32147258097211,0,0,"Group 3.2",0],[342.00278630589196,-35.47666698968352,0,0,"Group 3.3",0],[347.1905912905804,-44.27042064998001,0,0,"Group 3.4",0],[354.4572851241518,-19.269577281973582,0,0,"Group 3.5",0],[351.46489937054304,-43.29145633613625,0,0,"Group 3.6",0],[4.111629292757414,-66.21808782754157,0,0,"Group 3.7",0],[349.2114640046391,-44.64416770439053,0,0,"Group 3.8",0],[348.31312657851913,-54.52269827708716,0,0,"Group 3.9",0],[350.58645658600966,-37.939050368528825,0,0,"Group 3.10",0],[347.45999267531965,-58.53012132262364,0,0,"Group 3.11",0],[324.64650547776387,-55.09736662347864,0,0,"Group 3.12",0],[340.5461546487845,50.41037267043439,0,0,"Group 3.1",0],[326.77850997075393,45.78418672941952,0,0,"Group 3.2",0],[327.0242075020594,35.94172391931176,0,0,"Group 3.3",0],[333.75458961340723,46.39650050182666,0,0,"Group 3.4",0],[334.36328907188863,33.938675262296826,0,0,"Group 3.5",0],[328.0094949215138,31.17280103227555,0,0,"Group 3.6",0],[327.67147008117547,46.247986627422144,0,0,"Group 3.7",0],[338.8976960898963,31.12811055043118,0,0,"Group 3.8",0],[338.2493071427446,38.872372601780434,0,0,"Group 3.9",0],[328.45189156192373,48.226984534865096,0,0,"Group 3.10",0],[331.1499570812242,34.26481555696762,0,0,"Group 3.11",0],[349.75608831458396,40.83843332248822,0,0,"Group 3.12",0],[327.45731721276115,45.13854100362704,0,0,"Group 3.13",0],[327.290992216979,42.96871543596523,0,0,"Group 3.14",0],[336.91449202902197,31.27193876842063,0,0,"Group 3.15",0],[336.98209684477246,45.784671342680774,0,0,"Group 3.16",0],[343.97371413515566,52.217819768627,0,0,"Group 3.1",0],[355.358681125021,38.51229826230798,0,0,"Group 3.2",0],[351.7212883603946,47.94932609136693,0,0,"Group 3.3",0],[348.03880115671467,53.30541702329339,0,0,"Group 3.4",0],[347.2662778188775,36.44998754479683,0,0,"Group 3.5",0],[336.7100041209728,35.75103341318816,0,0,"Group 3.6",0],[340.35629255747176,50.03188333966143,0,0,"Group 3.7",0],[341.99284345219894,37.405710860268464,0,0,"Group 3.8",0],[348.68304211808305,51.70403105150034,0,0,"Group 3.9",0],[343.6074796488326,52.540473592674715,0,0,"Group 3.10",0],[345.78784501634465,44.37108627190485,0,0,"Group 3.11",0],[344.9702852132107,37.38216874101211,0,0,"Group 3.12",0],[331.81594211002607,44.40491456851935,0,0,"Group 3.13",0],[340.1169013067473,46.0028497801163,0,0,"Group 3.14",0],[343.637433963145,47.36233784152713,0,0,"Group 3.15",0],[318.7115904085544,37.50164530799037,0,0,"Group 3.1",0],[305.17117177690625,48.236653468345615,0,0,"Group 3.2",0],[316.6251498729407,30.782328617861314,0,0,"Group 3.3",0],[331.68059983837776,38.35316780608766,0,0,"Group 3.4",0],[324.94976627788077,50.72445297913881,0,0,"Group 3.5",0],[321.42801675039203,39.77722338415921,0,0,"Group 3.6",0],[321.83036478945945,32.183920899378364,0,0,"Group 3.7",0],[304.0176995940594,47.70007818134038,0,0,"Group 3.8",0],[320.80255093490166,26.569749079143783,0,0,"Group 3.9",0],[317.6058453373512,48.9571217619827,0,0,"Group 3.10",0],[310.2222748624665,50.877309278904,0,0,"Group 3.11",0],[307.7008603537704,34.234827029923835,0,0,"Group 3.12",0],[324.73494954733627,40.474007597037875,0,0,"Group 3.1",0],[322.26808982624544,28.234562589299355,0,0,"Group 3.2",0],[325.2688759518888,37.39029090854384,0,0,"Group 3.3",0],[323.3827075230941,29.07869902267773,0,0,"Group 3.4",0],[317.15141795311797,30.82557392813233,0,0,"Group 3.5",0],[323.3993760006179,26.119883932422912,0,0,"Group 3.6",0],[324.13341531422196,27.990665429027228,0,0,"Group 3.7",0],[325.33613410190867,28.346746855230116,0,0,"Group 3.8",0],[320.89447787448375,36.48608583884094,0,0,"Group 3.9",0],[328.79044471598473,45.296309336246786,0,0,"Group 3.10",0],[323.87912753338304,32.99712677663374,0,0,"Group 3.11",0],[319.0172838785585,32.234633969050684,0,0,"Group 3.12",0]],"metaData":{"name":"Pon - Group 3","dateAdded":"2016-11-17T11:35:40.189Z","version":"v1.1.1","markerColor":"orange","cutoff":"45","type":"Input","description":"sediments","author":"Channell et al., Tectonics 1996","age":"83.0","minAge":"66","maxAge":"100","latitude":41.8,"longitude":32.9,"sanitized":true}},{"data":[[337.9776618741625,44.869906554831005,0,0,"Group 4.1",0],[330.25494008908413,41.838801087758604,0,0,"Group 4.2",0],[340.8141822222235,34.71351584602487,0,0,"Group 4.3",0],[339.6713422836539,40.19498769896665,0,0,"Group 4.4",0],[332.27810044143666,31.06114510314897,0,0,"Group 4.5",0],[331.564361842199,38.49286781301549,0,0,"Group 4.6",0],[326.9294838317621,44.80171474984158,0,0,"Group 4.7",0],[339.6482374987144,33.948437262294824,0,0,"Group 4.8",0],[329.53761705001193,33.88098562059596,0,0,"Group 4.9",0],[336.4674317076849,41.42768282864287,0,0,"Group 4.10",0],[336.0773901425348,35.29806203329101,0,0,"Group 4.11",0],[335.2557908921729,37.01474806492153,0,0,"Group 4.12",0],[336.14533398228167,39.80159201952145,0,0,"Group 4.13",0],[331.99338434771136,40.4939707766572,0,0,"Group 4.14",0],[327.11508282543,32.095793170967355,0,0,"Group 4.15",0],[359.7539765209833,44.6666680223794,0,0,"Group 4.1",0],[1.0160379257894996,40.2469506286537,0,0,"Group 4.2",0],[353.18599903753966,46.64254094520986,0,0,"Group 4.3",0],[353.26342550393,35.06477645682845,0,0,"Group 4.4",0],[351.9824698232453,48.235357162609255,0,0,"Group 4.5",0],[357.72549585673454,46.55804121401425,0,0,"Group 4.6",0],[359.47870329301867,46.93831979603054,0,0,"Group 4.7",0],[4.67761941833956,39.079530831652164,0,0,"Group 4.8",0],[355.5926948508813,22.697816749502923,0,0,"Group 4.9",0],[7.382787824572568,38.081160390964,0,0,"Group 4.10",0],[344.59652039674415,35.77139824988844,0,0,"Group 4.1",0],[345.6863893003175,37.805067989655164,0,0,"Group 4.2",0],[342.35422626720015,43.60066800227347,0,0,"Group 4.3",0],[347.24396550467054,42.43038252743083,0,0,"Group 4.4",0],[354.1943344684579,40.57451597636814,0,0,"Group 4.5",0],[346.07388010782006,43.56924316553628,0,0,"Group 4.6",0],[347.40701730225555,35.53279097540615,0,0,"Group 4.7",0],[338.7150011781541,47.73088227751594,0,0,"Group 4.8",0],[349.2399963909623,39.33218916108492,0,0,"Group 4.9",0],[353.07630198604596,34.67921569056262,0,0,"Group 4.10",0],[345.652384899661,26.622011498181138,0,0,"Group 4.1",0],[340.4471074611404,31.401444153203112,0,0,"Group 4.2",0],[342.46734055881916,33.15405030816313,0,0,"Group 4.3",0],[341.4283840661667,24.33043839914098,0,0,"Group 4.4",0],[348.43633266249867,16.517530388647568,0,0,"Group 4.5",0],[345.4930382048243,34.09507487956524,0,0,"Group 4.6",0],[354.5639477849351,36.15847526449743,0,0,"Group 4.7",0],[345.185897414873,23.778669233920688,0,0,"Group 4.8",0],[353.44784552245176,25.716833342311496,0,0,"Group 4.9",0],[348.031225702812,37.19618471202242,0,0,"Group 4.10",0],[354.11463182657224,24.849464401283875,0,0,"Group 4.11",0],[340.2302575486357,44.27893349372401,0,0,"Group 4.12",0],[341.9040940390413,40.17785540160222,0,0,"Group 4.13",0],[347.1801024537584,30.733628916726857,0,0,"Group 4.14",0],[346.925315172816,40.73547773083922,0,0,"Group 4.15",0],[20.968063463630926,45.92588117784857,0,0,"Group 4.1",0],[27.962504793589936,36.808788513090235,0,0,"Group 4.2",0],[26.597481049117697,35.19683544859899,0,0,"Group 4.3",0],[28.125630110739138,43.14981753652531,0,0,"Group 4.4",0],[32.604461504165755,47.880531659189565,0,0,"Group 4.5",0],[17.885270369601415,32.73846289719422,0,0,"Group 4.6",0],[16.154448462344533,45.66645084901081,0,0,"Group 4.7",0],[24.735718250109358,32.41745127291625,0,0,"Group 4.8",0],[26.39868197305737,41.1575192417556,0,0,"Group 4.9",0],[30.786641681402777,28.835613347163903,0,0,"Group 4.10",0],[4.449263815571755,34.20197635103191,0,0,"Group 4.1",0],[359.59206377289763,37.397492510382456,0,0,"Group 4.2",0],[4.113003091799887,23.45943478523415,0,0,"Group 4.3",0],[359.12722018370204,41.522646806744525,0,0,"Group 4.4",0],[353.1447556665263,32.300073485559466,0,0,"Group 4.5",0],[355.41988950102774,23.668433076458484,0,0,"Group 4.6",0],[12.30267163610003,32.87254452248057,0,0,"Group 4.7",0],[5.144337694266625,39.13695967302399,0,0,"Group 4.8",0],[355.8042917346644,42.89496046754085,0,0,"Group 4.9",0],[356.8099460685159,16.948516438755366,0,0,"Group 4.10",0],[8.61536634467575,27.062895110185266,0,0,"Group 4.11",0]],"metaData":{"name":"Pon - Group 4","dateAdded":"2016-11-17T11:35:48.368Z","version":"v1.1.1","markerColor":"orange","cutoff":"45","type":"Input","description":"sediments","author":"Channell et al., Tectonics 1996","age":"83.0","minAge":"66","maxAge":"100","latitude":41.9,"longitude":33.6,"sanitized":true}},{"data":[[4.968469363471456,26.363610006107375,0,0,"Group 5.1",0],[10.652067901089278,37.44709787735919,0,0,"Group 5.2",0],[6.044704118104846,34.67173110811813,0,0,"Group 5.3",0],[2.5783737522734214,30.204286706233432,0,0,"Group 5.4",0],[9.759167308298643,37.1186295647686,0,0,"Group 5.5",0],[11.158141221057397,34.10826648781504,0,0,"Group 5.6",0],[8.254311438217881,38.22318730196139,0,0,"Group 5.7",0],[359.61683559681165,38.637838806159266,0,0,"Group 5.8",0],[7.462987053890686,38.193408026288225,0,0,"Group 5.9",0],[0.3055764164988659,46.566558084961386,0,0,"Group 5.10",0],[9.321978849292993,33.87286369730899,0,0,"Group 5.11",0],[4.377474719340569,35.63111735328504,0,0,"Group 5.12",0],[8.240045362827644,37.434152686632416,0,0,"Group 5.13",0],[3.819246700036558,34.02935083496105,0,0,"Group 5.14",0],[18.639155656467324,43.289604767110376,0,0,"Group 5.1",0],[21.056105171021937,49.47325985629567,0,0,"Group 5.2",0],[16.58010102337147,39.870563501337514,0,0,"Group 5.3",0],[21.386146323722052,39.18716756050335,0,0,"Group 5.4",0],[20.967691990793107,42.590877855478354,0,0,"Group 5.5",0],[18.404738697398273,45.85185333171006,0,0,"Group 5.6",0],[26.808147250522282,47.60956600308508,0,0,"Group 5.7",0],[26.841880723185795,41.88385783314944,0,0,"Group 5.8",0],[26.760962261717832,49.900910374003125,0,0,"Group 5.9",0],[18.710691451390687,30.98328265128902,0,0,"Group 5.10",0],[18.986412101606277,37.12540765984407,0,0,"Group 5.11",0],[20.654285126606453,45.25222825021037,0,0,"Group 5.12",0],[25.593181732799916,44.20023329913542,0,0,"Group 5.13",0],[19.06093645223916,42.61221896630418,0,0,"Group 5.14",0],[21.120451132377795,39.38421068739488,0,0,"Group 5.15",0],[17.918840012876863,37.113361369044135,0,0,"Group 5.1",0],[8.259465654454191,52.47940865171543,0,0,"Group 5.2",0],[11.718339666626406,43.49995897875068,0,0,"Group 5.3",0],[359.27160712146116,40.41258850080005,0,0,"Group 5.4",0],[16.755626885731413,31.039251370086284,0,0,"Group 5.5",0],[1.678722161063206,26.217101583699325,0,0,"Group 5.6",0],[16.07629322993308,42.19952453627589,0,0,"Group 5.7",0],[15.233249887735992,7.197138546492657,0,0,"Group 5.8",0],[21.10425726771652,32.6963344807774,0,0,"Group 5.9",0],[15.958913723952648,32.5681707371999,0,0,"Group 5.10",0],[16.3402296821168,41.83229988871739,0,0,"Group 5.11",0],[21.153046519550806,35.60425506886997,0,0,"Group 5.12",0],[4.631319689056397,16.407267892937305,0,0,"Group 5.13",0],[337.1845381136578,33.528058170398765,0,0,"Group 5.1",0],[337.9152299007975,35.31494456989501,0,0,"Group 5.2",0],[338.0767349814802,35.123032017912735,0,0,"Group 5.3",0],[336.06198164348507,32.16829875815928,0,0,"Group 5.4",0],[337.87521869425103,37.69896908899735,0,0,"Group 5.5",0],[336.805021607886,30.16635948843421,0,0,"Group 5.6",0],[331.46624634609327,35.25550096297124,0,0,"Group 5.7",0],[31.9529341074998,52.48417920527799,0,0,"Group 5.1",0],[25.949373666164774,55.831550598392646,0,0,"Group 5.2",0],[36.79252655244335,52.408321064898566,0,0,"Group 5.3",0],[42.88418978439287,51.207981071706804,0,0,"Group 5.4",0],[37.681855414928464,9.789375823972525,0,0,"Group 5.5",0],[35.8183618026124,50.857262205991276,0,0,"Group 5.6",0],[36.40128331858699,67.2283159454924,0,0,"Group 5.7",0],[49.35730586185294,52.17819455600343,0,0,"Group 5.8",0],[55.40977321179767,46.996747166117125,0,0,"Group 5.9",0],[37.54347560817115,35.28075149995919,0,0,"Group 5.10",0],[19.488066481472345,29.19968053695539,0,0,"Group 5.11",0],[57.613000511515,45.92480713133559,0,0,"Group 5.12",0],[30.697265339371427,52.88342759020272,0,0,"Group 5.13",0],[18.321257251694476,45.0662260523016,0,0,"Group 5.14",0]],"metaData":{"name":"Pon - Group 5","dateAdded":"2016-11-17T11:36:10.435Z","version":"v1.1.1","markerColor":"orange","cutoff":"45","type":"Input","description":"sediments","author":"Channell et al., Tectonics 1996","age":"83.0","minAge":"66","maxAge":"100","latitude":41.5,"longitude":34.7,"sanitized":true}},{"data":[[18.858043866113974,38.33589719130903,0,0,"Pon - Group 8_Cret.1",0],[14.671710375540954,36.94670977797999,0,0,"Pon - Group 8_Cret.2",0],[21.34112225975435,38.36499534599874,0,0,"Pon - Group 8_Cret.3",0],[22.651655170261456,41.88554906476859,0,0,"Pon - Group 8_Cret.4",0],[18.816747821501338,38.977180880948545,0,0,"Pon - Group 8_Cret.5",0],[16.481016864553396,39.994566002485016,0,0,"Pon - Group 8_Cret.6",0],[24.72025125992938,42.338297043128755,0,0,"Pon - Group 8_Cret.7",0],[24.356017558835,38.02811369153584,0,0,"Pon - Group 8_Cret.8",0],[21.591314206093525,39.73061032367596,0,0,"Pon - Group 8_Cret.9",0],[16.423036542434716,30.933742097872898,0,0,"Pon - Group 8_Cret.10",0],[19.43891070036714,43.450943986422196,0,0,"Pon - Group 8_Cret.11",0],[19.799710454670766,35.4439263673581,0,0,"Pon - Group 8_Cret.12",0],[17.784148670138336,33.0553195180422,0,0,"Pon - Group 8_Cret.13",0],[13.104208024911088,37.173446606948744,0,0,"Pon - Group 8_Cret.14",0],[13.863402854510298,33.32876760434175,0,0,"Pon - Group 8_Cret.15",0],[349.5568150495479,44.613232568359415,0,0,"Pon - Group 8_Cret.1",0],[346.4499105760342,39.24847209710674,0,0,"Pon - Group 8_Cret.2",0],[344.0379545072651,39.25701755169759,0,0,"Pon - Group 8_Cret.3",0],[349.85117495351983,36.31212242814786,0,0,"Pon - Group 8_Cret.4",0],[348.8564619438455,38.07294217948143,0,0,"Pon - Group 8_Cret.5",0],[348.67847197102253,36.747280087218556,0,0,"Pon - Group 8_Cret.6",0],[346.3323489637319,42.01115154634516,0,0,"Pon - Group 8_Cret.7",0],[351.5455319819467,42.58805891583746,0,0,"Pon - Group 8_Cret.8",0],[350.8676878655934,36.194781783939526,0,0,"Pon - Group 8_Cret.9",0],[343.8755073483069,36.96522942085089,0,0,"Pon - Group 8_Cret.10",0],[348.9684708353442,38.641692322496034,0,0,"Pon - Group 8_Cret.11",0],[31.761998478953984,49.4568213717958,0,0,"Pon - Group 8_Cret.1",0],[26.716669938826556,50.205251469625644,0,0,"Pon - Group 8_Cret.2",0],[34.37317736863443,47.789452476557926,0,0,"Pon - Group 8_Cret.3",0],[27.81328965843801,47.70285817487058,0,0,"Pon - Group 8_Cret.4",0],[36.92527064159239,48.824866588901344,0,0,"Pon - Group 8_Cret.5",0],[26.77233472473955,55.84326136354429,0,0,"Pon - Group 8_Cret.6",0],[32.57000780032907,53.244716642352216,0,0,"Pon - Group 8_Cret.7",0],[18.38430155923504,53.258034690881104,0,0,"Pon - Group 8_Cret.8",0],[28.65298619318196,51.539793348054985,0,0,"Pon - Group 8_Cret.9",0],[38.37406827539954,44.71119569155036,0,0,"Pon - Group 8_Cret.10",0],[31.621863667797758,53.66775281284496,0,0,"Pon - Group 8_Cret.11",0],[35.285751084588924,54.57538252167274,0,0,"Pon - Group 8_Cret.12",0],[29.212466350961336,45.89914548744872,0,0,"Pon - Group 8_Cret.13",0],[26.76097273777748,48.085936048585445,0,0,"Pon - Group 8_Cret.14",0],[27.74237400561003,45.958262106588116,0,0,"Pon - Group 8_Cret.15",0],[9.355487298689852,44.4741972609359,0,0,"Pon - Group 8_Cret.1",0],[358.7302317858385,44.54258371484062,0,0,"Pon - Group 8_Cret.2",0],[13.113824738067514,50.66917353379371,0,0,"Pon - Group 8_Cret.3",0],[11.382290295333537,43.83868986628453,0,0,"Pon - Group 8_Cret.4",0],[8.242694750790625,52.25601415378068,0,0,"Pon - Group 8_Cret.5",0],[13.354623099560387,45.75820010750151,0,0,"Pon - Group 8_Cret.6",0],[4.31488017983213,51.9658426968396,0,0,"Pon - Group 8_Cret.7",0],[4.26888618901495,42.97900362318337,0,0,"Pon - Group 8_Cret.8",0],[8.190214411005767,51.50632173964048,0,0,"Pon - Group 8_Cret.9",0],[3.5768729515122004,49.84255189142158,0,0,"Pon - Group 8_Cret.10",0],[5.675571027362878,46.621127275497166,0,0,"Pon - Group 8_Cret.11",0],[7.238110786401474,40.52825048494995,0,0,"Pon - Group 8_Cret.1",0],[359.27948831916996,53.82207594676,0,0,"Pon - Group 8_Cret.2",0],[5.312247411905722,38.64222235794524,0,0,"Pon - Group 8_Cret.3",0],[8.881021265384586,45.35557025407606,0,0,"Pon - Group 8_Cret.4",0],[8.201581001450394,45.00868221195116,0,0,"Pon - Group 8_Cret.5",0],[1.5074050769460996,34.585623697029014,0,0,"Pon - Group 8_Cret.6",0],[0.8489319381315568,39.117932294834944,0,0,"Pon - Group 8_Cret.7",0],[10.75318296099316,49.58244522176602,0,0,"Pon - Group 8_Cret.8",0],[9.956671562066399,45.509028314233205,0,0,"Pon - Group 8_Cret.9",0],[1.835436635550252,38.67032414482173,0,0,"Pon - Group 8_Cret.10",0],[1.3502473315212455,42.33038442237018,0,0,"Pon - Group 8_Cret.11",0],[358.67807817791964,37.888070336301666,0,0,"Pon - Group 8_Cret.12",0],[10.333919527157544,40.83785867517775,0,0,"Pon - Group 8_Cret.13",0]],"metaData":{"name":"Pon - Group 8_Cret","dateAdded":"2016-11-17T11:31:46.491Z","version":"v1.1.1","markerColor":"orange","cutoff":"45","type":"Simulated","description":"sediments","author":"Channell et al., Tectonics 1996","age":"83.0","minAge":"66","maxAge":"100","latitude":40.3,"longitude":39.6,"sanitized":true}},{"data":[[353.0144963228514,49.980743499234904,0,0,"Group 9.1",0],[356.9051264741518,46.95456020049482,0,0,"Group 9.2",0],[357.59491602515845,50.413711121130135,0,0,"Group 9.3",0],[354.15658663532326,45.72572853845588,0,0,"Group 9.4",0],[347.16514901878134,38.69932425524915,0,0,"Group 9.5",0],[351.10344981772573,53.80747797700492,0,0,"Group 9.6",0],[356.99438146774645,38.45743051901326,0,0,"Group 9.7",0],[355.18592869647256,39.99140166921332,0,0,"Group 9.8",0]],"metaData":{"name":"Pon - Group 9","dateAdded":"2016-11-17T11:36:00.239Z","version":"v1.1.1","markerColor":"orange","cutoff":"45","type":"Input","description":"sediments","author":"Channell et al., Tectonics 1996","age":"83.0","minAge":"66","maxAge":"100","latitude":40.8,"longitude":40,"sanitized":true}},{"data":[[1.501083744153732,41.53980580938468,0,0,"Pon - Gumushane.1",0],[0.1530987689865242,13.139033321362017,0,0,"Pon - Gumushane.2",0],[347.21267784735824,13.566624500404895,0,0,"Pon - Gumushane.3",0],[357.11531584850127,44.17645459236346,0,0,"Pon - Gumushane.4",0],[352.0630418004723,27.50146259253053,0,0,"Pon - Gumushane.5",0],[349.3294013157629,24.475923913616203,0,0,"Pon - Gumushane.6",0],[343.33341616066787,21.477034028763864,0,0,"Pon - Gumushane.1",0],[359.33151871146487,37.704224855486714,0,0,"Pon - Gumushane.2",0],[10.373910235283518,33.19142440922684,0,0,"Pon - Gumushane.3",0],[8.222841562206952,31.61467192555296,0,0,"Pon - Gumushane.4",0],[357.7628001695697,24.296469442674997,0,0,"Pon - Gumushane.5",0],[9.358634572806125,37.18723554095924,0,0,"Pon - Gumushane.6",0],[343.1855918422791,35.78058869673899,0,0,"Pon - Gumushane.7",0],[349.24994081526256,48.40315110183353,0,0,"Pon - Gumushane.8",0],[0.05773920607595073,1.9856847869046277,0,0,"Pon - Gumushane.9",0],[9.770055404676782,30.522313918362602,0,0,"Pon - Gumushane.10",0],[0.21102435531236097,45.602971588506946,0,0,"Pon - Gumushane.1",0],[338.85735621173535,38.28715363905209,0,0,"Pon - Gumushane.2",0],[346.95147247147156,42.844922014646265,0,0,"Pon - Gumushane.3",0],[344.37483503047656,38.591674645935804,0,0,"Pon - Gumushane.4",0],[345.3595643375054,56.08482388042518,0,0,"Pon - Gumushane.5",0],[351.52872347020343,42.219340296976206,0,0,"Pon - Gumushane.6",0],[357.12223928931456,44.22324374821832,0,0,"Pon - Gumushane.7",0],[344.64153686630175,35.971699237343046,0,0,"Pon - Gumushane.8",0],[350.16117565142315,48.7940183680056,0,0,"Pon - Gumushane.9",0],[343.9624039448961,44.15546016150092,0,0,"Pon - Gumushane.10",0],[353.9458231363403,45.600900925749116,0,0,"Pon - Gumushane.11",0],[330.16400431183183,31.82958919942861,0,0,"Pon - Gumushane.1",0],[338.6668921417296,42.177338212584026,0,0,"Pon - Gumushane.2",0],[354.6996618657372,44.910167829325694,0,0,"Pon - Gumushane.3",0],[349.4897348332158,23.88012744591722,0,0,"Pon - Gumushane.4",0],[339.42968919075884,24.59617497723788,0,0,"Pon - Gumushane.5",0],[333.38973675703687,0.4300955469867736,0,0,"Pon - Gumushane.6",0],[342.2806728542386,34.12199322066834,0,0,"Pon - Gumushane.7",0],[339.12293544767886,38.68813852724649,0,0,"Pon - Gumushane.8",0]],"metaData":{"name":"Pon - Gumushane","dateAdded":"2016-11-17T12:36:40.571Z","version":"v1.1.1","markerColor":"orange","cutoff":"45","type":"Simulated","description":"sediments","author":"Kissel et al., Tectonophysics 2003","age":"45.0","minAge":"33.9","maxAge":"56","latitude":40.4,"longitude":39.3,"sanitized":true}},{"data":[[19.797578456264034,10.836602090827341,0,0,"Pon - K5/K7.1",0],[23.581262303330107,16.154261240143214,0,0,"Pon - K5/K7.2",0],[38.78230843574908,7.139314072945556,0,0,"Pon - K5/K7.3",0],[30.792475726135212,44.7389560583981,0,0,"Pon - K5/K7.4",0],[27.095315013853167,30.996319763592727,0,0,"Pon - K5/K7.5",0],[42.33590248769541,41.50065474442945,0,0,"Pon - K5/K7.6",0],[23.013514284794894,35.73945927657183,0,0,"Pon - K5/K7.7",0],[35.77836071605972,16.839903291589728,0,0,"Pon - K5/K7.8",0],[23.153751631202113,34.1761141624821,0,0,"Pon - K5/K7.9",0],[21.039063218906904,39.90831935928521,0,0,"Pon - K5/K7.10",0],[34.79117387824228,45.82409458372799,0,0,"Pon - K5/K7.11",0],[12.88761340086728,23.521418259964044,0,0,"Pon - K5/K7.12",0],[30.31987554640568,29.82536129781322,0,0,"Pon - K5/K7.13",0],[15.987153713168084,38.127619644366696,0,0,"Pon - K5/K7.14",0],[30.761940173364668,27.405007047005913,0,0,"Pon - K5/K7.15",0],[32.68672661485091,44.34607376502682,0,0,"Pon - K5/K7.16",0],[47.13989342617847,32.73345502098959,0,0,"Pon - K5/K7.17",0],[14.673424757820499,7.8938790567497605,0,0,"Pon - K5/K7.18",0],[10.967602313322914,33.764577128573464,0,0,"Pon - K5/K7.19",0]],"metaData":{"name":"Pon - K5/K7","dateAdded":"2016-11-17T19:51:20.002Z","version":"v1.1.1","markerColor":"orange","cutoff":"45","type":"Simulated","description":"Sediments","author":"Meijers et al., Tectonics 2010","age":"74.8","minAge":"66","maxAge":"83.6","latitude":41.7,"longitude":35.2,"sanitized":true}},{"data":[[44.21693802375084,56.49543474264812,0,0,"Pon - K9/K10.1",0],[20.066847694067462,13.813891779668614,0,0,"Pon - K9/K10.2",0],[32.361917161289114,21.897257354128563,0,0,"Pon - K9/K10.3",0],[30.619377055345012,48.607705856884756,0,0,"Pon - K9/K10.4",0],[29.71864827079895,53.327340384480955,0,0,"Pon - K9/K10.5",0],[39.305552298606955,13.677714020523966,0,0,"Pon - K9/K10.6",0],[30.047995074040216,-20.445601765571276,0,0,"Pon - K9/K10.7",0],[44.17522017031583,49.375360021641164,0,0,"Pon - K9/K10.8",0],[44.68772375453461,45.37410267897781,0,0,"Pon - K9/K10.9",0],[61.35550445330708,43.174592446196016,0,0,"Pon - K9/K10.1",0],[52.060254514113524,45.872893354685516,0,0,"Pon - K9/K10.2",0],[52.01165678125858,53.44919274547942,0,0,"Pon - K9/K10.3",0],[54.23689307693593,44.20799443233677,0,0,"Pon - K9/K10.4",0],[57.492489311404086,48.75675609929504,0,0,"Pon - K9/K10.5",0],[57.85852251441373,34.06359307349478,0,0,"Pon - K9/K10.6",0],[54.368326919713354,46.37275794378133,0,0,"Pon - K9/K10.7",0],[56.13471640046082,42.975697358630555,0,0,"Pon - K9/K10.8",0],[56.41491768682774,40.20454404045065,0,0,"Pon - K9/K10.9",0],[49.7099639732383,46.13755684019424,0,0,"Pon - K9/K10.10",0],[55.72434736839227,45.762056602500046,0,0,"Pon - K9/K10.11",0],[58.032412755932356,47.69587526680435,0,0,"Pon - K9/K10.12",0],[50.71323380509159,38.86982595786753,0,0,"Pon - K9/K10.13",0]],"metaData":{"name":"Pon - K9/K10","dateAdded":"2016-11-17T19:56:19.430Z","version":"v1.1.1","markerColor":"orange","cutoff":"45","type":"Simulated","description":"Sediments","author":"Meijers et al., Tectonics 2010","age":"86.7","minAge":"83.6","maxAge":"89.8","latitude":41,"longitude":36.1,"sanitized":true}},{"data":[[16.91000659647267,55.56535394419802,0,0,"Pon - Mesuidye.1",0],[337.57961535522816,54.10886916589629,0,0,"Pon - Mesuidye.2",0],[352.6144833600447,44.041131979314116,0,0,"Pon - Mesuidye.3",0],[355.70907021432276,50.88349810591167,0,0,"Pon - Mesuidye.4",0],[18.53716367780305,25.015151888521395,0,0,"Pon - Mesuidye.5",0],[10.01414146304512,49.07175569457235,0,0,"Pon - Mesuidye.6",0],[332.86475858422807,61.71216930756595,0,0,"Pon - Mesuidye.7",0],[351.3863148117132,62.28660969933023,0,0,"Pon - Mesuidye.8",0],[331.7118457132012,61.7883958779389,0,0,"Pon - Mesuidye.9",0],[336.42523812884815,52.04242275066953,0,0,"Pon - Mesuidye.10",0],[349.1561715204499,42.39125959137903,0,0,"Pon - Mesuidye.11",0],[18.345533172737362,35.7483653326098,0,0,"Pon - Mesuidye.12",0],[356.6143706005546,-6.858635881756878,0,0,"Pon - Mesuidye.13",0],[325.87021261438474,40.155489815832205,0,0,"Pon - Mesuidye.14",0]],"metaData":{"name":"Pon - Mesuidye","dateAdded":"2016-11-17T13:52:20.884Z","version":"v1.1.1","markerColor":"orange","cutoff":"45","type":"Simulated","description":"volcanics","author":"Baydemir, 1990","age":"45.0","minAge":"33.9","maxAge":"56","latitude":40.5,"longitude":37.7,"sanitized":true}},{"data":[[315.05062015244084,58.830569749883516,0,0,"Pon - TA2/5.1",0],[330.1388961067926,57.054303824618884,0,0,"Pon - TA2/5.2",0],[326.8260290435198,40.99104600202036,0,0,"Pon - TA2/5.3",0],[315.7777367444128,58.41555937441607,0,0,"Pon - TA2/5.4",0],[325.3785384444198,64.04700737626058,0,0,"Pon - TA2/5.5",0],[327.74126039547906,36.102394500102875,0,0,"Pon - TA2/5.6",0],[337.16497886891085,31.771891729604533,0,0,"Pon - TA2/5.7",0],[333.920903822767,56.98330916971069,0,0,"Pon - TA2/5.8",0],[311.38472227885427,48.176799807643,0,0,"Pon - TA2/5.9",0],[317.39305214931824,30.944739380926237,0,0,"Pon - TA2/5.10",0],[324.48367083751566,47.58889330504996,0,0,"Pon - TA2/5.11",0],[318.7010139272718,59.001395771698824,0,0,"Pon - TA2/5.12",0],[318.12822631635277,46.208554332151515,0,0,"Pon - TA2/5.13",0],[320.25151327616857,55.12045577316431,0,0,"Pon - TA2/5.14",0],[319.45402399476734,41.48127010347396,0,0,"Pon - TA2/5.15",0],[328.81397603813167,68.61324294566056,0,0,"Pon - TA2/5.16",0],[326.30924673981593,45.192418287577745,0,0,"Pon - TA2/5.17",0],[320.30528072876564,61.84467698053541,0,0,"Pon - TA2/5.18",0],[328.42573920564104,44.58525682021843,0,0,"Pon - TA2/5.19",0],[308.2541053461962,49.9539560452859,0,0,"Pon - TA2/5.20",0],[318.673503173947,46.918866517725604,0,0,"Pon - TA2/5.21",0],[315.6473897006748,55.00363392464471,0,0,"Pon - TA2/5.22",0],[337.0300831877869,48.074410548511,0,0,"Pon - TA2/5.23",0],[334.1271650864652,32.07930405708701,0,0,"Pon - TA2/5.24",0],[313.09101594818003,45.06822998603183,0,0,"Pon - TA2/5.25",0],[321.88575108530745,45.998449773761074,0,0,"Pon - TA2/5.26",0],[296.6965505701057,38.22817003650366,0,0,"Pon - TA2/5.27",0],[328.4452738329607,54.07572010333421,0,0,"Pon - TA2/5.28",0],[330.51817860447017,31.81746319917081,0,0,"Pon - TA2/5.29",0],[319.2155648319924,46.2088693624531,0,0,"Pon - TA2/5.30",0],[309.71995360224867,48.633886863783204,0,0,"Pon - TA2/5.31",0],[321.96335939018445,40.35329143154704,0,0,"Pon - TA2/5.32",0],[334.47873636757305,39.05079559175072,0,0,"Pon - TA2/5.33",0],[317.24803499937207,53.26536611757423,0,0,"Pon - TA2/5.34",0],[336.439763034729,53.343286892553905,0,0,"Pon - TA2/5.35",0],[317.2892739528279,43.77079958182583,0,0,"Pon - TA2/5.36",0],[332.2919081333018,48.487746553770926,0,0,"Pon - TA2/5.37",0],[313.0810316085924,32.175190275431504,0,0,"Pon - TA2/5.38",0],[332.845431863522,60.11183643805873,0,0,"Pon - TA2/5.39",0],[324.49516512708874,50.71914306692235,0,0,"Pon - TA2/5.40",0],[323.6865014928695,46.78315783787302,0,0,"Pon - TA2/5.41",0],[332.45138552487964,53.689122611748175,0,0,"Pon - TA2/5.42",0],[343.29867415131963,55.68800611279261,0,0,"Pon - TA2/5.43",0],[332.74160171819227,41.462272931639916,0,0,"Pon - TA2/5.44",0],[320.3402015593899,50.27715543351466,0,0,"Pon - TA2/5.45",0],[328.2283733907597,59.95056983113361,0,0,"Pon - TA2/5.46",0],[324.7414656396462,33.80799876448228,0,0,"Pon - TA2/5.47",0],[323.22029218271837,56.26061146788638,0,0,"Pon - TA2/5.48",0],[320.4942590770013,61.385389860755595,0,0,"Pon - TA2/5.49",0],[325.44587668953574,45.65918202033115,0,0,"Pon - TA2/5.50",0],[319.39019687401264,41.7285299393091,0,0,"Pon - TA2/5.51",0],[323.9127441992848,36.17863250371793,0,0,"Pon - TA2/5.52",0],[319.0129278549334,52.714937536469826,0,0,"Pon - TA2/5.53",0],[316.604279386642,63.63969985064209,0,0,"Pon - TA2/5.54",0],[332.05741244113796,54.8618272435238,0,0,"Pon - TA2/5.55",0],[315.45110952779805,56.837176207641164,0,0,"Pon - TA2/5.56",0],[312.0943339689734,30.93226003970926,0,0,"Pon - TA2/5.57",0],[319.68850268320523,46.02020880589757,0,0,"Pon - TA2/5.58",0],[349.23347050159106,45.305781620680825,0,0,"Pon - TA2/5.59",0],[330.06835380445153,62.71685148799303,0,0,"Pon - TA2/5.60",0],[308.822352180242,52.08723586549963,0,0,"Pon - TA2/5.61",0],[326.02756845804714,50.87497973877139,0,0,"Pon - TA2/5.62",0],[303.274073004319,65.42954246965172,0,0,"Pon - TA2/5.63",0],[334.55768208207485,47.8486699086622,0,0,"Pon - TA2/5.64",0],[334.9095973499975,59.885234422195325,0,0,"Pon - TA2/5.65",0],[331.04280443507713,45.234572694590675,0,0,"Pon - TA2/5.66",0],[319.4351000533818,41.4772052969718,0,0,"Pon - TA2/5.67",0],[339.56342909664704,38.270714094695414,0,0,"Pon - TA2/5.68",0],[321.89287916973115,31.103867938690247,0,0,"Pon - TA2/5.69",0],[330.5101679721983,46.72137147794117,0,0,"Pon - TA2/5.70",0],[319.6601575562636,38.721122523963714,0,0,"Pon - TA2/5.71",0],[315.99432722170354,18.01089913052045,0,0,"Pon - TA2/5.72",0],[309.60087408701133,58.89608285971096,0,0,"Pon - TA2/5.73",0],[316.9561361090947,47.32317341985661,0,0,"Pon - TA2/5.74",0],[337.95438750437046,24.777741671475336,0,0,"Pon - TA2/5.75",0],[304.39833098895747,61.3775136123557,0,0,"Pon - TA2/5.76",0],[331.985640669797,54.270330238573464,0,0,"Pon - TA2/5.77",0],[338.312421081149,47.916841160735046,0,0,"Pon - TA2/5.78",0],[335.39023958846514,51.94966596301781,0,0,"Pon - TA2/5.79",0],[329.5717885593478,59.55678245585241,0,0,"Pon - TA2/5.80",0],[335.470957270955,54.262763029775215,0,0,"Pon - TA2/5.81",0],[345.95698225353027,59.30144655689397,0,0,"Pon - TA2/5.82",0],[327.57580493374695,50.16094516306026,0,0,"Pon - TA2/5.83",0],[336.8330843784645,41.535610748721105,0,0,"Pon - TA2/5.84",0],[340.73007367574155,54.15568222152897,0,0,"Pon - TA2/5.85",0],[341.4034622350672,34.947738879121665,0,0,"Pon - TA2/5.1",0],[343.916251009181,42.514481031320685,0,0,"Pon - TA2/5.2",0],[348.06611141495796,38.0572361989191,0,0,"Pon - TA2/5.3",0],[354.41373347204336,29.14874758294537,0,0,"Pon - TA2/5.4",0],[342.2494534333848,60.71816200260291,0,0,"Pon - TA2/5.5",0],[359.5060434084844,38.2422021585414,0,0,"Pon - TA2/5.6",0],[350.81924681000544,46.87997954459309,0,0,"Pon - TA2/5.7",0],[346.1657433177254,41.620937144122294,0,0,"Pon - TA2/5.8",0],[351.1638680390126,33.41196550014021,0,0,"Pon - TA2/5.9",0],[348.2706129883426,40.43225364960356,0,0,"Pon - TA2/5.10",0],[343.5548662397762,40.87648070064692,0,0,"Pon - TA2/5.11",0],[341.7298587903331,43.65024883028979,0,0,"Pon - TA2/5.12",0],[350.72488388919055,44.51672680405713,0,0,"Pon - TA2/5.13",0],[345.3363343210599,43.44483231018108,0,0,"Pon - TA2/5.14",0],[349.9184966508509,44.526739180507825,0,0,"Pon - TA2/5.15",0],[4.665422041468219,54.27888872773152,0,0,"Pon - TA2/5.16",0],[346.6471687750061,38.95067459608336,0,0,"Pon - TA2/5.17",0],[0.7274804788156644,24.9952812246572,0,0,"Pon - TA2/5.18",0],[355.91561229185413,34.16673664913672,0,0,"Pon - TA2/5.19",0],[0.2050490611059672,45.25060412155723,0,0,"Pon - TA2/5.20",0],[350.5797547178887,43.94194235124947,0,0,"Pon - TA2/5.21",0],[354.50007451307664,36.59907903583878,0,0,"Pon - TA2/5.22",0],[344.5334051277953,45.94413693825312,0,0,"Pon - TA2/5.23",0],[351.9852876390683,48.79138407566118,0,0,"Pon - TA2/5.24",0],[348.36101635478553,48.17434244237742,0,0,"Pon - TA2/5.25",0],[352.36636475727283,50.820409761854634,0,0,"Pon - TA2/5.26",0],[351.49395816952057,50.620572615715496,0,0,"Pon - TA2/5.27",0],[352.3353567487537,44.110661733271506,0,0,"Pon - TA2/5.28",0],[344.9006535871963,38.59723032362503,0,0,"Pon - TA2/5.29",0],[348.51955509962386,42.32892960728276,0,0,"Pon - TA2/5.30",0],[344.42642297066834,23.4562805027634,0,0,"Pon - TA2/5.31",0],[348.1725136240509,32.685817923491726,0,0,"Pon - TA2/5.32",0],[355.3767562696992,49.56612390755885,0,0,"Pon - TA2/5.33",0],[349.91390994390605,32.95300852140817,0,0,"Pon - TA2/5.34",0],[346.70538279568655,53.08617788874876,0,0,"Pon - TA2/5.35",0],[353.2945334262339,63.92972673972248,0,0,"Pon - TA2/5.36",0],[347.0710404929997,34.36528537235664,0,0,"Pon - TA2/5.37",0],[342.24893060320767,36.362148729171764,0,0,"Pon - TA2/5.38",0],[348.1111743721199,44.300072955025534,0,0,"Pon - TA2/5.39",0],[355.34078778519256,39.272920097556394,0,0,"Pon - TA2/5.40",0],[346.10965673468365,36.66511521813876,0,0,"Pon - TA2/5.41",0],[346.29867014923786,43.60390189864937,0,0,"Pon - TA2/5.42",0],[343.60935373593827,36.96688900268251,0,0,"Pon - TA2/5.43",0],[355.1607073091889,42.39948995311854,0,0,"Pon - TA2/5.44",0],[356.26643866694957,42.1809381830313,0,0,"Pon - TA2/5.45",0],[347.09888591300285,40.57832924672984,0,0,"Pon - TA2/5.46",0],[344.4826128168427,20.13721765838644,0,0,"Pon - TA2/5.47",0],[354.33521632470257,32.59356076575989,0,0,"Pon - TA2/5.48",0],[347.55925221091456,30.058329664263873,0,0,"Pon - TA2/5.49",0],[354.09995333690125,46.729957958780005,0,0,"Pon - TA2/5.50",0],[359.8289729275224,37.564684605230354,0,0,"Pon - TA2/5.51",0],[354.5322684399731,40.8450120831476,0,0,"Pon - TA2/5.52",0],[351.0927021090694,53.226724825489605,0,0,"Pon - TA2/5.53",0],[336.7334959379284,45.405954429160104,0,0,"Pon - TA2/5.54",0],[345.46663242903537,40.53070662876876,0,0,"Pon - TA2/5.55",0],[342.9196641681151,53.792851881773814,0,0,"Pon - TA2/5.56",0],[340.8644578438186,36.736475244571636,0,0,"Pon - TA2/5.57",0],[352.37902770493906,40.180995290774725,0,0,"Pon - TA2/5.58",0],[343.08534425716516,40.46189233038762,0,0,"Pon - TA2/5.59",0],[7.55871725216565,43.939974567803716,0,0,"Pon - TA2/5.60",0],[343.26448720664393,50.68216295961451,0,0,"Pon - TA2/5.61",0],[350.9673294512724,55.80229484123534,0,0,"Pon - TA2/5.62",0],[345.5969866000105,39.670612046312236,0,0,"Pon - TA2/5.63",0],[349.56190125685646,48.28952329241877,0,0,"Pon - TA2/5.64",0],[354.0593650700453,35.99516401754218,0,0,"Pon - TA2/5.65",0],[346.2232499265135,43.81036830146514,0,0,"Pon - TA2/5.66",0],[351.4687211216152,23.406951859477633,0,0,"Pon - TA2/5.67",0],[349.9643766264496,34.38301697048173,0,0,"Pon - TA2/5.68",0],[342.6368336202206,40.07840311388202,0,0,"Pon - TA2/5.69",0],[356.68278097586114,33.71455539643376,0,0,"Pon - TA2/5.70",0],[353.2868529072755,45.61813463181547,0,0,"Pon - TA2/5.71",0],[359.7869806716125,51.063966504844345,0,0,"Pon - TA2/5.72",0],[349.9065057939165,43.27649098859218,0,0,"Pon - TA2/5.73",0],[0.31858548404863996,40.843544110637716,0,0,"Pon - TA2/5.74",0],[343.71404786549056,46.1192728143966,0,0,"Pon - TA2/5.75",0],[344.0664978384916,42.030423357154405,0,0,"Pon - TA2/5.76",0],[349.6725071835838,47.86522550082466,0,0,"Pon - TA2/5.77",0],[347.5349201262179,51.64228118899209,0,0,"Pon - TA2/5.78",0],[355.07772732473273,30.82885867493896,0,0,"Pon - TA2/5.79",0],[348.4560932695997,42.60275012098006,0,0,"Pon - TA2/5.80",0],[334.67112991688714,55.16870202196821,0,0,"Pon - TA2/5.81",0],[350.3853829817095,36.95557457201188,0,0,"Pon - TA2/5.82",0],[349.3817899271439,49.82473360676449,0,0,"Pon - TA2/5.83",0],[349.89674659534666,55.819819872216144,0,0,"Pon - TA2/5.84",0],[338.07191387203875,44.36656939908363,0,0,"Pon - TA2/5.85",0],[351.20685614996444,47.000661916979496,0,0,"Pon - TA2/5.86",0],[1.2149849474001257,38.815466229522315,0,0,"Pon - TA2/5.87",0],[355.77904251274555,46.28565978788944,0,0,"Pon - TA2/5.88",0],[345.22619950345006,35.562764595589506,0,0,"Pon - TA2/5.89",0],[351.5147367197408,31.437913513977307,0,0,"Pon - TA2/5.90",0],[343.14505275729243,46.29875997022736,0,0,"Pon - TA2/5.91",0],[356.33924625951204,38.20564286862839,0,0,"Pon - TA2/5.92",0],[348.3358752197987,41.14587531681883,0,0,"Pon - TA2/5.93",0],[356.0375973650667,37.85957448320295,0,0,"Pon - TA2/5.94",0],[343.0174082173452,41.55833916671292,0,0,"Pon - TA2/5.95",0],[349.4884995005441,38.58668978072807,0,0,"Pon - TA2/5.96",0],[355.06370908389187,37.7585405146696,0,0,"Pon - TA2/5.97",0],[354.87576594793785,38.02659604884805,0,0,"Pon - TA2/5.98",0],[344.35120382255286,40.90349658595268,0,0,"Pon - TA2/5.99",0],[359.36119388322214,46.53753158260294,0,0,"Pon - TA2/5.100",0],[338.5482637405253,52.841194913367026,0,0,"Pon - TA2/5.101",0],[343.816983074526,45.58867883589525,0,0,"Pon - TA2/5.102",0],[349.56879755596185,41.53710183169048,0,0,"Pon - TA2/5.103",0],[341.1786266893282,46.3094955077003,0,0,"Pon - TA2/5.104",0],[347.5480249835558,47.43345430827775,0,0,"Pon - TA2/5.105",0],[349.0093406128101,45.58671835871137,0,0,"Pon - TA2/5.106",0],[353.16489089420946,33.7112714812851,0,0,"Pon - TA2/5.107",0],[350.49524676047434,41.60906798007062,0,0,"Pon - TA2/5.108",0],[349.636589166363,44.97363065249039,0,0,"Pon - TA2/5.109",0],[349.51928078355127,35.573989693436765,0,0,"Pon - TA2/5.110",0],[350.1128592533419,46.18268941036045,0,0,"Pon - TA2/5.111",0],[348.99533728404117,40.46350732148421,0,0,"Pon - TA2/5.112",0],[354.92208672793873,35.13118389518395,0,0,"Pon - TA2/5.113",0],[349.68151655019574,37.90459506371196,0,0,"Pon - TA2/5.114",0],[349.481495661159,35.749398483625995,0,0,"Pon - TA2/5.115",0]],"metaData":{"name":"Pon - TA2/5","dateAdded":"2016-11-17T20:09:46.751Z","version":"v1.1.1","markerColor":"orange","cutoff":"45","type":"Simulated","description":"Sediments","author":"Meijers et al., Tectonics 2010","age":"86.7","minAge":"83.6","maxAge":"89.8","latitude":41.7,"longitude":32.4,"sanitized":true}},{"data":[[359.58019620005985,25.54247244043534,0,0,"Pon - Yemislicay.1",0],[356.8142260511976,33.66793340761583,0,0,"Pon - Yemislicay.2",0],[354.6539549175344,22.457470479212162,0,0,"Pon - Yemislicay.3",0],[0.7144182173639138,28.2453328218453,0,0,"Pon - Yemislicay.4",0],[2.779758694458394,30.690289557121666,0,0,"Pon - Yemislicay.5",0],[355.75929049464276,32.73674617585934,0,0,"Pon - Yemislicay.6",0]],"metaData":{"name":"Pon - Yemislicay","dateAdded":"2016-11-18T09:20:43.872Z","version":"v1.1.1","markerColor":"orange","cutoff":"45","type":"Simulated","description":"volcanics","author":"Saribudak, 1989","age":"83.0","minAge":"66","maxAge":"100","latitude":41.6,"longitude":34.4,"sanitized":true}},{"data":[[337.9776618741625,44.869906554831005,0,0,"Group 4.1",0],[330.25494008908413,41.838801087758604,0,0,"Group 4.2",0],[340.8141822222235,34.71351584602487,0,0,"Group 4.3",0],[339.6713422836539,40.19498769896665,0,0,"Group 4.4",0],[332.27810044143666,31.06114510314897,0,0,"Group 4.5",0],[331.564361842199,38.49286781301549,0,0,"Group 4.6",0],[326.9294838317621,44.80171474984158,0,0,"Group 4.7",0],[339.6482374987144,33.948437262294824,0,0,"Group 4.8",0],[329.53761705001193,33.88098562059596,0,0,"Group 4.9",0],[336.4674317076849,41.42768282864287,0,0,"Group 4.10",0],[336.0773901425348,35.29806203329101,0,0,"Group 4.11",0],[335.2557908921729,37.01474806492153,0,0,"Group 4.12",0],[336.14533398228167,39.80159201952145,0,0,"Group 4.13",0],[331.99338434771136,40.4939707766572,0,0,"Group 4.14",0],[327.11508282543,32.095793170967355,0,0,"Group 4.15",0],[359.7539765209833,44.6666680223794,0,0,"Group 4.1",0],[1.0160379257894996,40.2469506286537,0,0,"Group 4.2",0],[353.18599903753966,46.64254094520986,0,0,"Group 4.3",0],[353.26342550393,35.06477645682845,0,0,"Group 4.4",0],[351.9824698232453,48.235357162609255,0,0,"Group 4.5",0],[357.72549585673454,46.55804121401425,0,0,"Group 4.6",0],[359.47870329301867,46.93831979603054,0,0,"Group 4.7",0],[4.67761941833956,39.079530831652164,0,0,"Group 4.8",0],[355.5926948508813,22.697816749502923,0,0,"Group 4.9",0],[7.382787824572568,38.081160390964,0,0,"Group 4.10",0],[344.59652039674415,35.77139824988844,0,0,"Group 4.1",0],[345.6863893003175,37.805067989655164,0,0,"Group 4.2",0],[342.35422626720015,43.60066800227347,0,0,"Group 4.3",0],[347.24396550467054,42.43038252743083,0,0,"Group 4.4",0],[354.1943344684579,40.57451597636814,0,0,"Group 4.5",0],[346.07388010782006,43.56924316553628,0,0,"Group 4.6",0],[347.40701730225555,35.53279097540615,0,0,"Group 4.7",0],[338.7150011781541,47.73088227751594,0,0,"Group 4.8",0],[349.2399963909623,39.33218916108492,0,0,"Group 4.9",0],[353.07630198604596,34.67921569056262,0,0,"Group 4.10",0],[345.652384899661,26.622011498181138,0,0,"Group 4.1",0],[340.4471074611404,31.401444153203112,0,0,"Group 4.2",0],[342.46734055881916,33.15405030816313,0,0,"Group 4.3",0],[341.4283840661667,24.33043839914098,0,0,"Group 4.4",0],[348.43633266249867,16.517530388647568,0,0,"Group 4.5",0],[345.4930382048243,34.09507487956524,0,0,"Group 4.6",0],[354.5639477849351,36.15847526449743,0,0,"Group 4.7",0],[345.185897414873,23.778669233920688,0,0,"Group 4.8",0],[353.44784552245176,25.716833342311496,0,0,"Group 4.9",0],[348.031225702812,37.19618471202242,0,0,"Group 4.10",0],[354.11463182657224,24.849464401283875,0,0,"Group 4.11",0],[340.2302575486357,44.27893349372401,0,0,"Group 4.12",0],[341.9040940390413,40.17785540160222,0,0,"Group 4.13",0],[347.1801024537584,30.733628916726857,0,0,"Group 4.14",0],[346.925315172816,40.73547773083922,0,0,"Group 4.15",0],[20.968063463630926,45.92588117784857,0,0,"Group 4.1",0],[27.962504793589936,36.808788513090235,0,0,"Group 4.2",0],[26.597481049117697,35.19683544859899,0,0,"Group 4.3",0],[28.125630110739138,43.14981753652531,0,0,"Group 4.4",0],[32.604461504165755,47.880531659189565,0,0,"Group 4.5",0],[17.885270369601415,32.73846289719422,0,0,"Group 4.6",0],[16.154448462344533,45.66645084901081,0,0,"Group 4.7",0],[24.735718250109358,32.41745127291625,0,0,"Group 4.8",0],[26.39868197305737,41.1575192417556,0,0,"Group 4.9",0],[30.786641681402777,28.835613347163903,0,0,"Group 4.10",0],[4.449263815571755,34.20197635103191,0,0,"Group 4.1",0],[359.59206377289763,37.397492510382456,0,0,"Group 4.2",0],[4.113003091799887,23.45943478523415,0,0,"Group 4.3",0],[359.12722018370204,41.522646806744525,0,0,"Group 4.4",0],[353.1447556665263,32.300073485559466,0,0,"Group 4.5",0],[355.41988950102774,23.668433076458484,0,0,"Group 4.6",0],[12.30267163610003,32.87254452248057,0,0,"Group 4.7",0],[5.144337694266625,39.13695967302399,0,0,"Group 4.8",0],[355.8042917346644,42.89496046754085,0,0,"Group 4.9",0],[356.8099460685159,16.948516438755366,0,0,"Group 4.10",0],[8.61536634467575,27.062895110185266,0,0,"Group 4.11",0],[359.58019620005985,25.54247244043534,0,0,"Pon - Yemislicay.1",0],[356.8142260511976,33.66793340761583,0,0,"Pon - Yemislicay.2",0],[354.6539549175344,22.457470479212162,0,0,"Pon - Yemislicay.3",0],[0.7144182173639138,28.2453328218453,0,0,"Pon - Yemislicay.4",0],[2.779758694458394,30.690289557121666,0,0,"Pon - Yemislicay.5",0],[355.75929049464276,32.73674617585934,0,0,"Pon - Yemislicay.6",0]],"metaData":{"name":"Pontide_oro_center","latitude":41.8,"longitude":33.6,"age":83,"minAge":66,"maxAge":100,"markerColor":"white","cutoff":"45","dateAdded":"2017-06-22T10:17:27.705Z","version":"v1.1.2","sanitized":true,"type":"Site Combination","author":"Meijers et al 2010 and refs therein","description":"Multiple Sites","edited":true,"timeEdited":"2017-06-22T10:18:23.892Z","plateId":null,"lithology":null,"carriers":null}},{"data":[[4.968469363471456,26.363610006107375,0,0,"Group 5.1",0],[10.652067901089278,37.44709787735919,0,0,"Group 5.2",0],[6.044704118104846,34.67173110811813,0,0,"Group 5.3",0],[2.5783737522734214,30.204286706233432,0,0,"Group 5.4",0],[9.759167308298643,37.1186295647686,0,0,"Group 5.5",0],[11.158141221057397,34.10826648781504,0,0,"Group 5.6",0],[8.254311438217881,38.22318730196139,0,0,"Group 5.7",0],[359.61683559681165,38.637838806159266,0,0,"Group 5.8",0],[7.462987053890686,38.193408026288225,0,0,"Group 5.9",0],[0.3055764164988659,46.566558084961386,0,0,"Group 5.10",0],[9.321978849292993,33.87286369730899,0,0,"Group 5.11",0],[4.377474719340569,35.63111735328504,0,0,"Group 5.12",0],[8.240045362827644,37.434152686632416,0,0,"Group 5.13",0],[3.819246700036558,34.02935083496105,0,0,"Group 5.14",0],[18.639155656467324,43.289604767110376,0,0,"Group 5.1",0],[21.056105171021937,49.47325985629567,0,0,"Group 5.2",0],[16.58010102337147,39.870563501337514,0,0,"Group 5.3",0],[21.386146323722052,39.18716756050335,0,0,"Group 5.4",0],[20.967691990793107,42.590877855478354,0,0,"Group 5.5",0],[18.404738697398273,45.85185333171006,0,0,"Group 5.6",0],[26.808147250522282,47.60956600308508,0,0,"Group 5.7",0],[26.841880723185795,41.88385783314944,0,0,"Group 5.8",0],[26.760962261717832,49.900910374003125,0,0,"Group 5.9",0],[18.710691451390687,30.98328265128902,0,0,"Group 5.10",0],[18.986412101606277,37.12540765984407,0,0,"Group 5.11",0],[20.654285126606453,45.25222825021037,0,0,"Group 5.12",0],[25.593181732799916,44.20023329913542,0,0,"Group 5.13",0],[19.06093645223916,42.61221896630418,0,0,"Group 5.14",0],[21.120451132377795,39.38421068739488,0,0,"Group 5.15",0],[17.918840012876863,37.113361369044135,0,0,"Group 5.1",0],[8.259465654454191,52.47940865171543,0,0,"Group 5.2",0],[11.718339666626406,43.49995897875068,0,0,"Group 5.3",0],[359.27160712146116,40.41258850080005,0,0,"Group 5.4",0],[16.755626885731413,31.039251370086284,0,0,"Group 5.5",0],[1.678722161063206,26.217101583699325,0,0,"Group 5.6",0],[16.07629322993308,42.19952453627589,0,0,"Group 5.7",0],[15.233249887735992,7.197138546492657,0,0,"Group 5.8",0],[21.10425726771652,32.6963344807774,0,0,"Group 5.9",0],[15.958913723952648,32.5681707371999,0,0,"Group 5.10",0],[16.3402296821168,41.83229988871739,0,0,"Group 5.11",0],[21.153046519550806,35.60425506886997,0,0,"Group 5.12",0],[4.631319689056397,16.407267892937305,0,0,"Group 5.13",0],[337.1845381136578,33.528058170398765,0,0,"Group 5.1",0],[337.9152299007975,35.31494456989501,0,0,"Group 5.2",0],[338.0767349814802,35.123032017912735,0,0,"Group 5.3",0],[336.06198164348507,32.16829875815928,0,0,"Group 5.4",0],[337.87521869425103,37.69896908899735,0,0,"Group 5.5",0],[336.805021607886,30.16635948843421,0,0,"Group 5.6",0],[331.46624634609327,35.25550096297124,0,0,"Group 5.7",0],[31.9529341074998,52.48417920527799,0,0,"Group 5.1",0],[25.949373666164774,55.831550598392646,0,0,"Group 5.2",0],[36.79252655244335,52.408321064898566,0,0,"Group 5.3",0],[42.88418978439287,51.207981071706804,0,0,"Group 5.4",0],[37.681855414928464,9.789375823972525,0,0,"Group 5.5",0],[35.8183618026124,50.857262205991276,0,0,"Group 5.6",0],[36.40128331858699,67.2283159454924,0,0,"Group 5.7",0],[49.35730586185294,52.17819455600343,0,0,"Group 5.8",0],[55.40977321179767,46.996747166117125,0,0,"Group 5.9",0],[37.54347560817115,35.28075149995919,0,0,"Group 5.10",0],[19.488066481472345,29.19968053695539,0,0,"Group 5.11",0],[57.613000511515,45.92480713133559,0,0,"Group 5.12",0],[30.697265339371427,52.88342759020272,0,0,"Group 5.13",0],[18.321257251694476,45.0662260523016,0,0,"Group 5.14",0],[19.797578456264034,10.836602090827341,0,0,"Pon - K5/K7.1",0],[23.581262303330107,16.154261240143214,0,0,"Pon - K5/K7.2",0],[38.78230843574908,7.139314072945556,0,0,"Pon - K5/K7.3",0],[30.792475726135212,44.7389560583981,0,0,"Pon - K5/K7.4",0],[27.095315013853167,30.996319763592727,0,0,"Pon - K5/K7.5",0],[42.33590248769541,41.50065474442945,0,0,"Pon - K5/K7.6",0],[23.013514284794894,35.73945927657183,0,0,"Pon - K5/K7.7",0],[35.77836071605972,16.839903291589728,0,0,"Pon - K5/K7.8",0],[23.153751631202113,34.1761141624821,0,0,"Pon - K5/K7.9",0],[21.039063218906904,39.90831935928521,0,0,"Pon - K5/K7.10",0],[34.79117387824228,45.82409458372799,0,0,"Pon - K5/K7.11",0],[12.88761340086728,23.521418259964044,0,0,"Pon - K5/K7.12",0],[30.31987554640568,29.82536129781322,0,0,"Pon - K5/K7.13",0],[15.987153713168084,38.127619644366696,0,0,"Pon - K5/K7.14",0],[30.761940173364668,27.405007047005913,0,0,"Pon - K5/K7.15",0],[32.68672661485091,44.34607376502682,0,0,"Pon - K5/K7.16",0],[47.13989342617847,32.73345502098959,0,0,"Pon - K5/K7.17",0],[14.673424757820499,7.8938790567497605,0,0,"Pon - K5/K7.18",0],[10.967602313322914,33.764577128573464,0,0,"Pon - K5/K7.19",0],[44.21693802375084,56.49543474264812,0,0,"Pon - K9/K10.1",0],[20.066847694067462,13.813891779668614,0,0,"Pon - K9/K10.2",0],[32.361917161289114,21.897257354128563,0,0,"Pon - K9/K10.3",0],[30.619377055345012,48.607705856884756,0,0,"Pon - K9/K10.4",0],[29.71864827079895,53.327340384480955,0,0,"Pon - K9/K10.5",0],[39.305552298606955,13.677714020523966,0,0,"Pon - K9/K10.6",0],[30.047995074040216,-20.445601765571276,0,0,"Pon - K9/K10.7",0],[44.17522017031583,49.375360021641164,0,0,"Pon - K9/K10.8",0],[44.68772375453461,45.37410267897781,0,0,"Pon - K9/K10.9",0],[61.35550445330708,43.174592446196016,0,0,"Pon - K9/K10.1",0],[52.060254514113524,45.872893354685516,0,0,"Pon - K9/K10.2",0],[52.01165678125858,53.44919274547942,0,0,"Pon - K9/K10.3",0],[54.23689307693593,44.20799443233677,0,0,"Pon - K9/K10.4",0],[57.492489311404086,48.75675609929504,0,0,"Pon - K9/K10.5",0],[57.85852251441373,34.06359307349478,0,0,"Pon - K9/K10.6",0],[54.368326919713354,46.37275794378133,0,0,"Pon - K9/K10.7",0],[56.13471640046082,42.975697358630555,0,0,"Pon - K9/K10.8",0],[56.41491768682774,40.20454404045065,0,0,"Pon - K9/K10.9",0],[49.7099639732383,46.13755684019424,0,0,"Pon - K9/K10.10",0],[55.72434736839227,45.762056602500046,0,0,"Pon - K9/K10.11",0],[58.032412755932356,47.69587526680435,0,0,"Pon - K9/K10.12",0],[50.71323380509159,38.86982595786753,0,0,"Pon - K9/K10.13",0],[65.33119698338396,37.849158302751725,0,0,"Pon - BG7.1",0],[72.52461174118105,31.03610026081979,0,0,"Pon - BG7.2",0],[81.48511576478083,39.54609626667425,0,0,"Pon - BG7.3",0],[72.70124615621518,45.46629968113874,0,0,"Pon - BG7.4",0],[79.69885353274398,43.13489150664941,0,0,"Pon - BG7.5",0],[71.90130268239551,48.61509692868354,0,0,"Pon - BG7.6",0],[71.45375550836422,57.14218030595247,0,0,"Pon - BG7.7",0],[81.12565051950509,44.90878515471311,0,0,"Pon - BG7.8",0],[79.06227245619294,48.44746784616959,0,0,"Pon - BG7.9",0],[64.514187408753,35.31747961132115,0,0,"Pon - BG7.10",0],[76.98444633903628,53.575994871278645,0,0,"Pon - BG7.11",0],[74.14355209626507,39.29319984820738,0,0,"Pon - BG7.12",0],[70.47809689844553,44.71998549121195,0,0,"Pon - BG7.13",0],[71.22447063662986,29.300077405330214,0,0,"Pon - BG7.14",0],[71.61356770998441,35.7973774240167,0,0,"Pon - BG7.15",0],[82.51160297053138,39.41938088038271,0,0,"Pon - BG7.16",0],[83.50966227521896,41.068027861423744,0,0,"Pon - BG7.17",0]],"metaData":{"name":"Pontide_oro_E_limb","latitude":41.3,"longitude":35.4,"age":83,"minAge":66,"maxAge":100,"markerColor":"white","cutoff":"45","dateAdded":"2017-06-22T10:13:33.421Z","version":"v1.1.2","sanitized":true,"type":"Site Combination","author":"Meijers et al 2010 and refs therein","description":"Multiple Sites","edited":true,"timeEdited":"2017-06-22T10:15:08.175Z","plateId":null,"lithology":"limestone","carriers":null}},{"data":[[346.47034040335456,48.580187425934064,0,0,"Group 1.1",0],[348.70678657090764,47.265331835167636,0,0,"Group 1.2",0],[350.3211955372181,49.33916129939355,0,0,"Group 1.3",0],[344.15634108047857,44.42487841636557,0,0,"Group 1.4",0],[347.09355584399833,47.61075978889435,0,0,"Group 1.5",0],[348.8055407824273,39.16197551679479,0,0,"Group 1.6",0],[353.0980690301645,53.21607969062299,0,0,"Group 1.7",0],[341.15758788705193,44.95704246268198,0,0,"Group 1.8",0],[342.5004514224031,41.77640038792621,0,0,"Group 1.9",0],[352.677991420238,52.44275733111843,0,0,"Group 1.1",0],[341.6031092732178,38.197785616718114,0,0,"Group 1.2",0],[339.6083130101083,26.69018112655221,0,0,"Group 1.3",0],[332.4896927907753,49.18408662485033,0,0,"Group 1.4",0],[328.88782208739144,45.95638581581399,0,0,"Group 1.5",0],[338.0365569617835,32.548193408875086,0,0,"Group 1.6",0],[333.142622096354,34.74667830683707,0,0,"Group 1.7",0],[339.1878606102355,46.82556520319649,0,0,"Group 1.8",0],[338.04496493126703,37.566893406300785,0,0,"Group 1.9",0],[356.28044545013836,41.04323698286646,0,0,"Group 1.10",0],[340.18994924945025,26.870075533078154,0,0,"Group 1.11",0],[341.55508049971843,35.72324540617984,0,0,"Group 1.12",0],[323.25262469665995,45.66462519489254,0,0,"Group 1.1",0],[348.0207831129804,44.30152249346093,0,0,"Group 1.2",0],[335.63078129149744,45.67737454091609,0,0,"Group 1.3",0],[328.46474753383563,42.60075332965665,0,0,"Group 1.4",0],[322.49611509304646,47.66357788245033,0,0,"Group 1.5",0],[336.1482197481739,46.673337713432815,0,0,"Group 1.6",0],[323.2999754798125,44.38796052751744,0,0,"Group 1.7",0],[325.68713040222224,44.87452436825815,0,0,"Group 1.8",0],[330.2206808282318,40.88365860025777,0,0,"Group 1.1",0],[338.4887555952519,27.025170606690526,0,0,"Group 1.2",0],[335.06705733494937,46.320047172401054,0,0,"Group 1.3",0],[337.0121489282043,34.29150821663639,0,0,"Group 1.4",0],[333.06293116319193,33.431931118070125,0,0,"Group 1.5",0],[345.3405671192761,26.747769881138233,0,0,"Group 1.6",0],[341.23516141734893,25.405659039467217,0,0,"Group 1.7",0],[336.66880737432416,37.828244901641895,0,0,"Group 1.8",0],[338.97368954928896,33.62691663439467,0,0,"Group 1.9",0],[339.9878590329317,34.933730536965484,0,0,"Group 1.10",0],[331.7081527767464,28.019562474425445,0,0,"Group 1.11",0],[339.2090715264527,20.29658411120492,0,0,"Group 1.12",0],[337.1936946638422,22.994701324689093,0,0,"Group 1.13",0],[334.3488641111974,29.85192595937915,0,0,"Group 1.14",0],[339.3406175841583,31.854424171491402,0,0,"Group 1.1",0],[325.7270939586425,36.5258224320139,0,0,"Group 1.2",0],[332.9782750305254,45.45967486581944,0,0,"Group 1.3",0],[337.3704098337583,36.010963576352204,0,0,"Group 1.4",0],[329.375644143257,40.417353125379506,0,0,"Group 1.5",0],[342.36249301193806,41.19256420318775,0,0,"Group 1.6",0],[323.7321095117244,50.55416603712568,0,0,"Group 1.7",0],[331.54727667051304,44.86313666666344,0,0,"Group 1.8",0],[324.5277892288799,52.45538774583141,0,0,"Group 1.9",0],[333.3262994213401,49.05170120578187,0,0,"Group 1.10",0],[329.8992368502643,43.18150952381996,0,0,"Group 1.11",0],[335.7479313559527,26.25965578616072,0,0,"Group 1.12",0],[322.8712307882861,50.054510263142205,0,0,"Group 1.13",0],[336.8491523556906,37.90743857439154,0,0,"Group 1.14",0],[336.43469729770106,45.48662238084438,0,0,"Group 1.15",0],[334.8280799848473,33.03903176359548,0,0,"Group 1.16",0],[334.33643638963895,43.24785825369337,0,0,"Group 2.1",0],[340.09278781422836,38.49939997215608,0,0,"Group 2.2",0],[347.1080996310023,41.085994382179784,0,0,"Group 2.3",0],[336.8410548536905,27.40868947142607,0,0,"Group 2.4",0],[348.4113014282998,40.36734905539225,0,0,"Group 2.5",0],[344.6380562476316,33.78577243714725,0,0,"Group 2.6",0],[343.14534816544204,25.796529922508252,0,0,"Group 2.7",0],[345.6076442364803,43.41710910057567,0,0,"Group 2.8",0],[344.54484221830705,43.859668631412475,0,0,"Group 2.9",0],[336.60233139517254,43.34433469343306,0,0,"Group 2.10",0],[339.4808185440936,42.82204811951071,0,0,"Group 2.11",0],[339.881958396467,39.095857420333495,0,0,"Group 2.12",0],[345.3333936257956,38.21877428081185,0,0,"Group 2.13",0],[336.37819107358837,36.705033790831216,0,0,"Group 2.14",0],[338.0979979880001,44.83944660338974,0,0,"Group 2.15",0],[343.1716395783678,41.78455514820303,0,0,"Group 2.16",0],[343.97107009919483,40.20764536426267,0,0,"Group 2.17",0],[335.1383110034508,33.21318169064423,0,0,"Group 2.18",0],[339.3282752263997,45.450520474161344,0,0,"Group 2.19",0],[340.5748801820787,32.18757828570379,0,0,"Group 2.20",0],[310.1691243217989,40.81412415311161,0,0,"Group 2.1",0],[315.5076961907996,41.35310120417367,0,0,"Group 2.2",0],[349.7925449933464,35.69766866135337,0,0,"Group 2.3",0],[316.5153421877808,55.95065245995522,0,0,"Group 2.4",0],[312.08737159584336,53.467746607202194,0,0,"Group 2.5",0],[318.29061279147743,50.82110868596039,0,0,"Group 2.6",0],[316.7672798813418,35.682475832422945,0,0,"Group 2.7",0],[319.91853985517076,56.57597524358292,0,0,"Group 2.8",0],[290.851695020913,58.076282095189185,0,0,"Group 2.9",0],[317.80803423930513,56.76043270894666,0,0,"Group 2.10",0],[309.23095570237956,50.39135281452109,0,0,"Group 2.11",0],[319.041862178727,43.59393237855494,0,0,"Group 2.12",0],[310.25415843071676,41.69762900216843,0,0,"Group 2.13",0],[311.39584803339403,45.322957945133105,0,0,"Group 2.1",0],[323.09660480650024,55.40872611515199,0,0,"Group 2.2",0],[316.46868902783706,55.37213491665217,0,0,"Group 2.3",0],[300.1985339792243,52.947485511914586,0,0,"Group 2.4",0],[317.7221900368287,52.908314473827005,0,0,"Group 2.5",0],[330.80504521690204,56.75661680132687,0,0,"Group 2.6",0],[315.2618344843212,41.76258919922219,0,0,"Group 2.7",0],[324.645466185104,67.45004024860117,0,0,"Group 2.8",0],[322.99594463993105,51.579947823015225,0,0,"Group 2.9",0],[311.66800253720317,44.34843046240583,0,0,"Group 2.10",0],[318.0809745159496,37.229362951302925,0,0,"Group 2.11",0],[315.83559389861307,43.93691198588514,0,0,"Group 2.12",0],[325.27913300385796,49.310764688892675,0,0,"Group 2.13",0],[313.8721537638471,42.01209341182877,0,0,"Group 2.14",0],[313.55134252893913,48.971085943295826,0,0,"Group 3.1",0],[320.6319630080739,52.016475021659964,0,0,"Group 3.2",0],[311.7507343886231,46.121950343383205,0,0,"Group 3.3",0],[311.9324020967982,53.362668561672045,0,0,"Group 3.4",0],[315.1131817638668,52.92898902380233,0,0,"Group 3.5",0],[316.98500770142533,50.27525723118715,0,0,"Group 3.6",0],[314.7041591290515,50.44815494879888,0,0,"Group 3.7",0],[311.63292017699587,47.87985309396272,0,0,"Group 3.8",0],[319.0793533669715,50.74699885238118,0,0,"Group 3.9",0],[315.8092187499601,48.805753736077996,0,0,"Group 3.10",0],[310.34007829145935,51.72562977737123,0,0,"Group 3.11",0],[320.8604992626092,58.411041043987794,0,0,"Group 3.1",0],[327.20358495646224,26.099986512396804,0,0,"Group 3.2",0],[335.959162214499,47.098048004011574,0,0,"Group 3.3",0],[333.0956930113366,23.421306624871505,0,0,"Group 3.4",0],[346.01918993682835,54.100913938834964,0,0,"Group 3.5",0],[320.88455791909587,42.40672586793725,0,0,"Group 3.6",0],[341.6530292146238,51.10462216552719,0,0,"Group 3.7",0],[336.53513783143796,37.29877674260054,0,0,"Group 3.8",0],[329.16084271491377,50.36666679922317,0,0,"Group 3.9",0],[323.5572210816056,49.60799300904332,0,0,"Group 3.10",0],[333.9968590953882,56.600163371559745,0,0,"Group 3.11",0],[330.8524939503693,15.029800244803498,0,0,"Group 3.12",0],[330.90167594101695,53.352549385478945,0,0,"Group 3.13",0],[308.0518143040549,41.636472732640826,0,0,"Group 3.1",0],[322.634314393914,27.166383156825898,0,0,"Group 3.2",0],[300.93496212391665,55.25374431930416,0,0,"Group 3.3",0],[324.70425362275046,36.89314709366868,0,0,"Group 3.4",0],[313.7587201884762,27.65629203084823,0,0,"Group 3.5",0],[306.4629535007206,28.66542049166504,0,0,"Group 3.6",0],[303.36265794414294,32.57830666613764,0,0,"Group 3.7",0],[326.3494668684614,32.94042361308678,0,0,"Group 3.8",0],[319.03980523440646,20.791867924760393,0,0,"Group 3.9",0],[294.042774923554,60.19991630205105,0,0,"Group 3.10",0],[319.13180519502447,57.67995100863641,0,0,"Group 3.11",0],[350.94503213372104,-44.41343054201066,0,0,"Group 3.1",0],[347.6060750857064,-52.32147258097211,0,0,"Group 3.2",0],[342.00278630589196,-35.47666698968352,0,0,"Group 3.3",0],[347.1905912905804,-44.27042064998001,0,0,"Group 3.4",0],[354.4572851241518,-19.269577281973582,0,0,"Group 3.5",0],[351.46489937054304,-43.29145633613625,0,0,"Group 3.6",0],[4.111629292757414,-66.21808782754157,0,0,"Group 3.7",0],[349.2114640046391,-44.64416770439053,0,0,"Group 3.8",0],[348.31312657851913,-54.52269827708716,0,0,"Group 3.9",0],[350.58645658600966,-37.939050368528825,0,0,"Group 3.10",0],[347.45999267531965,-58.53012132262364,0,0,"Group 3.11",0],[324.64650547776387,-55.09736662347864,0,0,"Group 3.12",0],[340.5461546487845,50.41037267043439,0,0,"Group 3.1",0],[326.77850997075393,45.78418672941952,0,0,"Group 3.2",0],[327.0242075020594,35.94172391931176,0,0,"Group 3.3",0],[333.75458961340723,46.39650050182666,0,0,"Group 3.4",0],[334.36328907188863,33.938675262296826,0,0,"Group 3.5",0],[328.0094949215138,31.17280103227555,0,0,"Group 3.6",0],[327.67147008117547,46.247986627422144,0,0,"Group 3.7",0],[338.8976960898963,31.12811055043118,0,0,"Group 3.8",0],[338.2493071427446,38.872372601780434,0,0,"Group 3.9",0],[328.45189156192373,48.226984534865096,0,0,"Group 3.10",0],[331.1499570812242,34.26481555696762,0,0,"Group 3.11",0],[349.75608831458396,40.83843332248822,0,0,"Group 3.12",0],[327.45731721276115,45.13854100362704,0,0,"Group 3.13",0],[327.290992216979,42.96871543596523,0,0,"Group 3.14",0],[336.91449202902197,31.27193876842063,0,0,"Group 3.15",0],[336.98209684477246,45.784671342680774,0,0,"Group 3.16",0],[343.97371413515566,52.217819768627,0,0,"Group 3.1",0],[355.358681125021,38.51229826230798,0,0,"Group 3.2",0],[351.7212883603946,47.94932609136693,0,0,"Group 3.3",0],[348.03880115671467,53.30541702329339,0,0,"Group 3.4",0],[347.2662778188775,36.44998754479683,0,0,"Group 3.5",0],[336.7100041209728,35.75103341318816,0,0,"Group 3.6",0],[340.35629255747176,50.03188333966143,0,0,"Group 3.7",0],[341.99284345219894,37.405710860268464,0,0,"Group 3.8",0],[348.68304211808305,51.70403105150034,0,0,"Group 3.9",0],[343.6074796488326,52.540473592674715,0,0,"Group 3.10",0],[345.78784501634465,44.37108627190485,0,0,"Group 3.11",0],[344.9702852132107,37.38216874101211,0,0,"Group 3.12",0],[331.81594211002607,44.40491456851935,0,0,"Group 3.13",0],[340.1169013067473,46.0028497801163,0,0,"Group 3.14",0],[343.637433963145,47.36233784152713,0,0,"Group 3.15",0],[318.7115904085544,37.50164530799037,0,0,"Group 3.1",0],[305.17117177690625,48.236653468345615,0,0,"Group 3.2",0],[316.6251498729407,30.782328617861314,0,0,"Group 3.3",0],[331.68059983837776,38.35316780608766,0,0,"Group 3.4",0],[324.94976627788077,50.72445297913881,0,0,"Group 3.5",0],[321.42801675039203,39.77722338415921,0,0,"Group 3.6",0],[321.83036478945945,32.183920899378364,0,0,"Group 3.7",0],[304.0176995940594,47.70007818134038,0,0,"Group 3.8",0],[320.80255093490166,26.569749079143783,0,0,"Group 3.9",0],[317.6058453373512,48.9571217619827,0,0,"Group 3.10",0],[310.2222748624665,50.877309278904,0,0,"Group 3.11",0],[307.7008603537704,34.234827029923835,0,0,"Group 3.12",0],[324.73494954733627,40.474007597037875,0,0,"Group 3.1",0],[322.26808982624544,28.234562589299355,0,0,"Group 3.2",0],[325.2688759518888,37.39029090854384,0,0,"Group 3.3",0],[323.3827075230941,29.07869902267773,0,0,"Group 3.4",0],[317.15141795311797,30.82557392813233,0,0,"Group 3.5",0],[323.3993760006179,26.119883932422912,0,0,"Group 3.6",0],[324.13341531422196,27.990665429027228,0,0,"Group 3.7",0],[325.33613410190867,28.346746855230116,0,0,"Group 3.8",0],[320.89447787448375,36.48608583884094,0,0,"Group 3.9",0],[328.79044471598473,45.296309336246786,0,0,"Group 3.10",0],[323.87912753338304,32.99712677663374,0,0,"Group 3.11",0],[319.0172838785585,32.234633969050684,0,0,"Group 3.12",0],[328.9034879532498,57.185572274430804,0,0,"Pon - ER/EE/EK.1",0],[322.45597954276053,46.87395164625935,0,0,"Pon - ER/EE/EK.2",0],[321.13729483744135,57.09821906080924,0,0,"Pon - ER/EE/EK.3",0],[315.55141860965193,61.60446040732519,0,0,"Pon - ER/EE/EK.4",0],[317.35718724289654,59.73189315547953,0,0,"Pon - ER/EE/EK.5",0],[300.0806152747523,30.465041101938645,0,0,"Pon - ER/EE/EK.6",0],[331.66160699452973,47.10798993851812,0,0,"Pon - ER/EE/EK.7",0],[323.591808143335,49.568973041418886,0,0,"Pon - ER/EE/EK.8",0],[303.9523550866045,49.13399009870535,0,0,"Pon - ER/EE/EK.9",0],[321.03026358474114,21.489518162856253,0,0,"Pon - ER/EE/EK.10",0],[295.18925324848317,40.47174325807295,0,0,"Pon - ER/EE/EK.11",0],[338.6958561830918,60.29144402484644,0,0,"Pon - ER/EE/EK.12",0],[312.0091584841979,36.19508329176123,0,0,"Pon - ER/EE/EK.13",0],[318.8708035632518,47.06052270066803,0,0,"Pon - ER/EE/EK.14",0],[348.10937622823235,47.92231124062165,0,0,"Pon - ER/EE/EK.1",0],[346.68500481161436,49.30604675999927,0,0,"Pon - ER/EE/EK.2",0],[342.1048277256473,24.65077597602413,0,0,"Pon - ER/EE/EK.3",0],[355.8163347640575,42.44034078835683,0,0,"Pon - ER/EE/EK.4",0],[355.11190148216025,49.4605010093504,0,0,"Pon - ER/EE/EK.5",0],[352.9545043668126,36.349582400313636,0,0,"Pon - ER/EE/EK.6",0],[350.4261402759977,33.09873807118461,0,0,"Pon - ER/EE/EK.7",0],[351.01246605895915,15.700159924696509,0,0,"Pon - ER/EE/EK.8",0],[346.17208913607715,46.91730343015411,0,0,"Pon - ER/EE/EK.9",0],[352.16512252896683,33.467961169974366,0,0,"Pon - ER/EE/EK.10",0],[344.92967576857586,39.32484484473344,0,0,"Pon - ER/EE/EK.11",0],[349.8194317721483,39.89734427670148,0,0,"Pon - ER/EE/EK.12",0],[311.4696224451841,29.074090017431505,0,0,"Pon - ER/EE/EK.1",0],[317.5900123898127,47.60346778577795,0,0,"Pon - ER/EE/EK.2",0],[324.0515936116133,47.209512845513004,0,0,"Pon - ER/EE/EK.3",0],[331.82613546633706,54.87742489343576,0,0,"Pon - ER/EE/EK.4",0],[317.64787200406545,46.38997974144419,0,0,"Pon - ER/EE/EK.5",0],[334.58621678012935,43.698057340237625,0,0,"Pon - ER/EE/EK.6",0],[320.72822466758794,52.506847532628136,0,0,"Pon - ER/EE/EK.7",0],[325.4344029204206,50.096352696613415,0,0,"Pon - ER/EE/EK.8",0],[339.1641164132232,45.52443605399886,0,0,"Pon - ER/EE/EK.9",0],[328.27849019568333,52.17086016211334,0,0,"Pon - ER/EE/EK.10",0],[324.8724334307325,40.69329742390647,0,0,"Pon - ER/EE/EK.11",0],[318.5794531668673,43.93051709909328,0,0,"Pon - ER/EE/EK.12",0],[330.45839132611786,40.31540587615822,0,0,"Pon - ER/EE/EK.13",0],[320.1126486278049,39.20563449494672,0,0,"Pon - ER/EE/EK.14",0],[315.05062015244084,58.830569749883516,0,0,"Pon - TA2/5.1",0],[330.1388961067926,57.054303824618884,0,0,"Pon - TA2/5.2",0],[326.8260290435198,40.99104600202036,0,0,"Pon - TA2/5.3",0],[315.7777367444128,58.41555937441607,0,0,"Pon - TA2/5.4",0],[325.3785384444198,64.04700737626058,0,0,"Pon - TA2/5.5",0],[327.74126039547906,36.102394500102875,0,0,"Pon - TA2/5.6",0],[337.16497886891085,31.771891729604533,0,0,"Pon - TA2/5.7",0],[333.920903822767,56.98330916971069,0,0,"Pon - TA2/5.8",0],[311.38472227885427,48.176799807643,0,0,"Pon - TA2/5.9",0],[317.39305214931824,30.944739380926237,0,0,"Pon - TA2/5.10",0],[324.48367083751566,47.58889330504996,0,0,"Pon - TA2/5.11",0],[318.7010139272718,59.001395771698824,0,0,"Pon - TA2/5.12",0],[318.12822631635277,46.208554332151515,0,0,"Pon - TA2/5.13",0],[320.25151327616857,55.12045577316431,0,0,"Pon - TA2/5.14",0],[319.45402399476734,41.48127010347396,0,0,"Pon - TA2/5.15",0],[328.81397603813167,68.61324294566056,0,0,"Pon - TA2/5.16",0],[326.30924673981593,45.192418287577745,0,0,"Pon - TA2/5.17",0],[320.30528072876564,61.84467698053541,0,0,"Pon - TA2/5.18",0],[328.42573920564104,44.58525682021843,0,0,"Pon - TA2/5.19",0],[308.2541053461962,49.9539560452859,0,0,"Pon - TA2/5.20",0],[318.673503173947,46.918866517725604,0,0,"Pon - TA2/5.21",0],[315.6473897006748,55.00363392464471,0,0,"Pon - TA2/5.22",0],[337.0300831877869,48.074410548511,0,0,"Pon - TA2/5.23",0],[334.1271650864652,32.07930405708701,0,0,"Pon - TA2/5.24",0],[313.09101594818003,45.06822998603183,0,0,"Pon - TA2/5.25",0],[321.88575108530745,45.998449773761074,0,0,"Pon - TA2/5.26",0],[296.6965505701057,38.22817003650366,0,0,"Pon - TA2/5.27",0],[328.4452738329607,54.07572010333421,0,0,"Pon - TA2/5.28",0],[330.51817860447017,31.81746319917081,0,0,"Pon - TA2/5.29",0],[319.2155648319924,46.2088693624531,0,0,"Pon - TA2/5.30",0],[309.71995360224867,48.633886863783204,0,0,"Pon - TA2/5.31",0],[321.96335939018445,40.35329143154704,0,0,"Pon - TA2/5.32",0],[334.47873636757305,39.05079559175072,0,0,"Pon - TA2/5.33",0],[317.24803499937207,53.26536611757423,0,0,"Pon - TA2/5.34",0],[336.439763034729,53.343286892553905,0,0,"Pon - TA2/5.35",0],[317.2892739528279,43.77079958182583,0,0,"Pon - TA2/5.36",0],[332.2919081333018,48.487746553770926,0,0,"Pon - TA2/5.37",0],[313.0810316085924,32.175190275431504,0,0,"Pon - TA2/5.38",0],[332.845431863522,60.11183643805873,0,0,"Pon - TA2/5.39",0],[324.49516512708874,50.71914306692235,0,0,"Pon - TA2/5.40",0],[323.6865014928695,46.78315783787302,0,0,"Pon - TA2/5.41",0],[332.45138552487964,53.689122611748175,0,0,"Pon - TA2/5.42",0],[343.29867415131963,55.68800611279261,0,0,"Pon - TA2/5.43",0],[332.74160171819227,41.462272931639916,0,0,"Pon - TA2/5.44",0],[320.3402015593899,50.27715543351466,0,0,"Pon - TA2/5.45",0],[328.2283733907597,59.95056983113361,0,0,"Pon - TA2/5.46",0],[324.7414656396462,33.80799876448228,0,0,"Pon - TA2/5.47",0],[323.22029218271837,56.26061146788638,0,0,"Pon - TA2/5.48",0],[320.4942590770013,61.385389860755595,0,0,"Pon - TA2/5.49",0],[325.44587668953574,45.65918202033115,0,0,"Pon - TA2/5.50",0],[319.39019687401264,41.7285299393091,0,0,"Pon - TA2/5.51",0],[323.9127441992848,36.17863250371793,0,0,"Pon - TA2/5.52",0],[319.0129278549334,52.714937536469826,0,0,"Pon - TA2/5.53",0],[316.604279386642,63.63969985064209,0,0,"Pon - TA2/5.54",0],[332.05741244113796,54.8618272435238,0,0,"Pon - TA2/5.55",0],[315.45110952779805,56.837176207641164,0,0,"Pon - TA2/5.56",0],[312.0943339689734,30.93226003970926,0,0,"Pon - TA2/5.57",0],[319.68850268320523,46.02020880589757,0,0,"Pon - TA2/5.58",0],[349.23347050159106,45.305781620680825,0,0,"Pon - TA2/5.59",0],[330.06835380445153,62.71685148799303,0,0,"Pon - TA2/5.60",0],[308.822352180242,52.08723586549963,0,0,"Pon - TA2/5.61",0],[326.02756845804714,50.87497973877139,0,0,"Pon - TA2/5.62",0],[303.274073004319,65.42954246965172,0,0,"Pon - TA2/5.63",0],[334.55768208207485,47.8486699086622,0,0,"Pon - TA2/5.64",0],[334.9095973499975,59.885234422195325,0,0,"Pon - TA2/5.65",0],[331.04280443507713,45.234572694590675,0,0,"Pon - TA2/5.66",0],[319.4351000533818,41.4772052969718,0,0,"Pon - TA2/5.67",0],[339.56342909664704,38.270714094695414,0,0,"Pon - TA2/5.68",0],[321.89287916973115,31.103867938690247,0,0,"Pon - TA2/5.69",0],[330.5101679721983,46.72137147794117,0,0,"Pon - TA2/5.70",0],[319.6601575562636,38.721122523963714,0,0,"Pon - TA2/5.71",0],[315.99432722170354,18.01089913052045,0,0,"Pon - TA2/5.72",0],[309.60087408701133,58.89608285971096,0,0,"Pon - TA2/5.73",0],[316.9561361090947,47.32317341985661,0,0,"Pon - TA2/5.74",0],[337.95438750437046,24.777741671475336,0,0,"Pon - TA2/5.75",0],[304.39833098895747,61.3775136123557,0,0,"Pon - TA2/5.76",0],[331.985640669797,54.270330238573464,0,0,"Pon - TA2/5.77",0],[338.312421081149,47.916841160735046,0,0,"Pon - TA2/5.78",0],[335.39023958846514,51.94966596301781,0,0,"Pon - TA2/5.79",0],[329.5717885593478,59.55678245585241,0,0,"Pon - TA2/5.80",0],[335.470957270955,54.262763029775215,0,0,"Pon - TA2/5.81",0],[345.95698225353027,59.30144655689397,0,0,"Pon - TA2/5.82",0],[327.57580493374695,50.16094516306026,0,0,"Pon - TA2/5.83",0],[336.8330843784645,41.535610748721105,0,0,"Pon - TA2/5.84",0],[340.73007367574155,54.15568222152897,0,0,"Pon - TA2/5.85",0],[341.4034622350672,34.947738879121665,0,0,"Pon - TA2/5.1",0],[343.916251009181,42.514481031320685,0,0,"Pon - TA2/5.2",0],[348.06611141495796,38.0572361989191,0,0,"Pon - TA2/5.3",0],[354.41373347204336,29.14874758294537,0,0,"Pon - TA2/5.4",0],[342.2494534333848,60.71816200260291,0,0,"Pon - TA2/5.5",0],[359.5060434084844,38.2422021585414,0,0,"Pon - TA2/5.6",0],[350.81924681000544,46.87997954459309,0,0,"Pon - TA2/5.7",0],[346.1657433177254,41.620937144122294,0,0,"Pon - TA2/5.8",0],[351.1638680390126,33.41196550014021,0,0,"Pon - TA2/5.9",0],[348.2706129883426,40.43225364960356,0,0,"Pon - TA2/5.10",0],[343.5548662397762,40.87648070064692,0,0,"Pon - TA2/5.11",0],[341.7298587903331,43.65024883028979,0,0,"Pon - TA2/5.12",0],[350.72488388919055,44.51672680405713,0,0,"Pon - TA2/5.13",0],[345.3363343210599,43.44483231018108,0,0,"Pon - TA2/5.14",0],[349.9184966508509,44.526739180507825,0,0,"Pon - TA2/5.15",0],[4.665422041468219,54.27888872773152,0,0,"Pon - TA2/5.16",0],[346.6471687750061,38.95067459608336,0,0,"Pon - TA2/5.17",0],[0.7274804788156644,24.9952812246572,0,0,"Pon - TA2/5.18",0],[355.91561229185413,34.16673664913672,0,0,"Pon - TA2/5.19",0],[0.2050490611059672,45.25060412155723,0,0,"Pon - TA2/5.20",0],[350.5797547178887,43.94194235124947,0,0,"Pon - TA2/5.21",0],[354.50007451307664,36.59907903583878,0,0,"Pon - TA2/5.22",0],[344.5334051277953,45.94413693825312,0,0,"Pon - TA2/5.23",0],[351.9852876390683,48.79138407566118,0,0,"Pon - TA2/5.24",0],[348.36101635478553,48.17434244237742,0,0,"Pon - TA2/5.25",0],[352.36636475727283,50.820409761854634,0,0,"Pon - TA2/5.26",0],[351.49395816952057,50.620572615715496,0,0,"Pon - TA2/5.27",0],[352.3353567487537,44.110661733271506,0,0,"Pon - TA2/5.28",0],[344.9006535871963,38.59723032362503,0,0,"Pon - TA2/5.29",0],[348.51955509962386,42.32892960728276,0,0,"Pon - TA2/5.30",0],[344.42642297066834,23.4562805027634,0,0,"Pon - TA2/5.31",0],[348.1725136240509,32.685817923491726,0,0,"Pon - TA2/5.32",0],[355.3767562696992,49.56612390755885,0,0,"Pon - TA2/5.33",0],[349.91390994390605,32.95300852140817,0,0,"Pon - TA2/5.34",0],[346.70538279568655,53.08617788874876,0,0,"Pon - TA2/5.35",0],[353.2945334262339,63.92972673972248,0,0,"Pon - TA2/5.36",0],[347.0710404929997,34.36528537235664,0,0,"Pon - TA2/5.37",0],[342.24893060320767,36.362148729171764,0,0,"Pon - TA2/5.38",0],[348.1111743721199,44.300072955025534,0,0,"Pon - TA2/5.39",0],[355.34078778519256,39.272920097556394,0,0,"Pon - TA2/5.40",0],[346.10965673468365,36.66511521813876,0,0,"Pon - TA2/5.41",0],[346.29867014923786,43.60390189864937,0,0,"Pon - TA2/5.42",0],[343.60935373593827,36.96688900268251,0,0,"Pon - TA2/5.43",0],[355.1607073091889,42.39948995311854,0,0,"Pon - TA2/5.44",0],[356.26643866694957,42.1809381830313,0,0,"Pon - TA2/5.45",0],[347.09888591300285,40.57832924672984,0,0,"Pon - TA2/5.46",0],[344.4826128168427,20.13721765838644,0,0,"Pon - TA2/5.47",0],[354.33521632470257,32.59356076575989,0,0,"Pon - TA2/5.48",0],[347.55925221091456,30.058329664263873,0,0,"Pon - TA2/5.49",0],[354.09995333690125,46.729957958780005,0,0,"Pon - TA2/5.50",0],[359.8289729275224,37.564684605230354,0,0,"Pon - TA2/5.51",0],[354.5322684399731,40.8450120831476,0,0,"Pon - TA2/5.52",0],[351.0927021090694,53.226724825489605,0,0,"Pon - TA2/5.53",0],[336.7334959379284,45.405954429160104,0,0,"Pon - TA2/5.54",0],[345.46663242903537,40.53070662876876,0,0,"Pon - TA2/5.55",0],[342.9196641681151,53.792851881773814,0,0,"Pon - TA2/5.56",0],[340.8644578438186,36.736475244571636,0,0,"Pon - TA2/5.57",0],[352.37902770493906,40.180995290774725,0,0,"Pon - TA2/5.58",0],[343.08534425716516,40.46189233038762,0,0,"Pon - TA2/5.59",0],[7.55871725216565,43.939974567803716,0,0,"Pon - TA2/5.60",0],[343.26448720664393,50.68216295961451,0,0,"Pon - TA2/5.61",0],[350.9673294512724,55.80229484123534,0,0,"Pon - TA2/5.62",0],[345.5969866000105,39.670612046312236,0,0,"Pon - TA2/5.63",0],[349.56190125685646,48.28952329241877,0,0,"Pon - TA2/5.64",0],[354.0593650700453,35.99516401754218,0,0,"Pon - TA2/5.65",0],[346.2232499265135,43.81036830146514,0,0,"Pon - TA2/5.66",0],[351.4687211216152,23.406951859477633,0,0,"Pon - TA2/5.67",0],[349.9643766264496,34.38301697048173,0,0,"Pon - TA2/5.68",0],[342.6368336202206,40.07840311388202,0,0,"Pon - TA2/5.69",0],[356.68278097586114,33.71455539643376,0,0,"Pon - TA2/5.70",0],[353.2868529072755,45.61813463181547,0,0,"Pon - TA2/5.71",0],[359.7869806716125,51.063966504844345,0,0,"Pon - TA2/5.72",0],[349.9065057939165,43.27649098859218,0,0,"Pon - TA2/5.73",0],[0.31858548404863996,40.843544110637716,0,0,"Pon - TA2/5.74",0],[343.71404786549056,46.1192728143966,0,0,"Pon - TA2/5.75",0],[344.0664978384916,42.030423357154405,0,0,"Pon - TA2/5.76",0],[349.6725071835838,47.86522550082466,0,0,"Pon - TA2/5.77",0],[347.5349201262179,51.64228118899209,0,0,"Pon - TA2/5.78",0],[355.07772732473273,30.82885867493896,0,0,"Pon - TA2/5.79",0],[348.4560932695997,42.60275012098006,0,0,"Pon - TA2/5.80",0],[334.67112991688714,55.16870202196821,0,0,"Pon - TA2/5.81",0],[350.3853829817095,36.95557457201188,0,0,"Pon - TA2/5.82",0],[349.3817899271439,49.82473360676449,0,0,"Pon - TA2/5.83",0],[349.89674659534666,55.819819872216144,0,0,"Pon - TA2/5.84",0],[338.07191387203875,44.36656939908363,0,0,"Pon - TA2/5.85",0],[351.20685614996444,47.000661916979496,0,0,"Pon - TA2/5.86",0],[1.2149849474001257,38.815466229522315,0,0,"Pon - TA2/5.87",0],[355.77904251274555,46.28565978788944,0,0,"Pon - TA2/5.88",0],[345.22619950345006,35.562764595589506,0,0,"Pon - TA2/5.89",0],[351.5147367197408,31.437913513977307,0,0,"Pon - TA2/5.90",0],[343.14505275729243,46.29875997022736,0,0,"Pon - TA2/5.91",0],[356.33924625951204,38.20564286862839,0,0,"Pon - TA2/5.92",0],[348.3358752197987,41.14587531681883,0,0,"Pon - TA2/5.93",0],[356.0375973650667,37.85957448320295,0,0,"Pon - TA2/5.94",0],[343.0174082173452,41.55833916671292,0,0,"Pon - TA2/5.95",0],[349.4884995005441,38.58668978072807,0,0,"Pon - TA2/5.96",0],[355.06370908389187,37.7585405146696,0,0,"Pon - TA2/5.97",0],[354.87576594793785,38.02659604884805,0,0,"Pon - TA2/5.98",0],[344.35120382255286,40.90349658595268,0,0,"Pon - TA2/5.99",0],[359.36119388322214,46.53753158260294,0,0,"Pon - TA2/5.100",0],[338.5482637405253,52.841194913367026,0,0,"Pon - TA2/5.101",0],[343.816983074526,45.58867883589525,0,0,"Pon - TA2/5.102",0],[349.56879755596185,41.53710183169048,0,0,"Pon - TA2/5.103",0],[341.1786266893282,46.3094955077003,0,0,"Pon - TA2/5.104",0],[347.5480249835558,47.43345430827775,0,0,"Pon - TA2/5.105",0],[349.0093406128101,45.58671835871137,0,0,"Pon - TA2/5.106",0],[353.16489089420946,33.7112714812851,0,0,"Pon - TA2/5.107",0],[350.49524676047434,41.60906798007062,0,0,"Pon - TA2/5.108",0],[349.636589166363,44.97363065249039,0,0,"Pon - TA2/5.109",0],[349.51928078355127,35.573989693436765,0,0,"Pon - TA2/5.110",0],[350.1128592533419,46.18268941036045,0,0,"Pon - TA2/5.111",0],[348.99533728404117,40.46350732148421,0,0,"Pon - TA2/5.112",0],[354.92208672793873,35.13118389518395,0,0,"Pon - TA2/5.113",0],[349.68151655019574,37.90459506371196,0,0,"Pon - TA2/5.114",0],[349.481495661159,35.749398483625995,0,0,"Pon - TA2/5.115",0]],"metaData":{"name":"Pontide_oro_W_limb","latitude":41.4,"longitude":32.1,"age":83,"minAge":66,"maxAge":100,"markerColor":"white","cutoff":"45","dateAdded":"2017-06-22T10:20:19.672Z","version":"v1.1.2","sanitized":true,"type":"Site Combination","author":"Meijers et al 2010 and refs therein","description":"Multiple Sites","edited":true,"timeEdited":"2017-06-22T10:21:31.026Z","plateId":null,"lithology":null,"carriers":null}},{"data":[[355,64,0,0,"Siv - Nevsehir Volcanics.1",0],[0,70,0,0,"Siv - Nevsehir Volcanics.2",0],[2,39,0,0,"Siv - Nevsehir Volcanics.3",0],[1,39,0,0,"Siv - Nevsehir Volcanics.4",0],[0,53,0,0,"Siv - Nevsehir Volcanics.5",0]],"metaData":{"name":"Kir - Nevsehir Volcanics","dateAdded":"2016-11-17T14:53:47.925Z","version":"v1.1.1","markerColor":"orange","cutoff":"45","type":"Input","description":"volcanics","author":"Platzman et al., Tectonophysics 1998","age":"0.08","minAge":"0.07","maxAge":"0.09","latitude":38.6,"longitude":34.7,"sanitized":true}},{"data":[[33.9,30.9,0,0,"Kir - Central Cappadocia.1",0],[359.1,62.1,0,0,"Kir - Central Cappadocia.2",0],[96.1,23.9,0,0,"Kir - Central Cappadocia.3",0]],"metaData":{"name":"Kir - Central Cappadocia","dateAdded":"2016-11-17T15:02:03.989Z","version":"v1.1.1","markerColor":"orange","cutoff":"45","type":"Input","description":"volcanics","author":"Tatar et al., Geol Soc London Spec Pub 2000","age":"1.3","minAge":"0","maxAge":"2.6","latitude":38.5,"longitude":34.6,"sanitized":true}},{"data":[[350.3,52.1,0,0,"Kir  - Cappadocia 2.1",0],[347.8,46.7,0,0,"Kir  - Cappadocia 2.2",0],[354.9,48.6,0,0,"Kir  - Cappadocia 2.3",0],[340.6,47.2,0,0,"Kir  - Cappadocia 2.4",0],[5.2,46.3,0,0,"Kir  - Cappadocia 2.5",0],[352.7,49.3,0,0,"Kir  - Cappadocia 2.6",0],[359.8,47.4,0,0,"Kir  - Cappadocia 2.7",0],[5.5,41.9,0,0,"Kir  - Cappadocia 2.8",0],[354.7,52,0,0,"Kir  - Cappadocia 2.9",0],[355.1,42.4,0,0,"Kir  - Cappadocia 2.10",0],[345.4,41.8,0,0,"Kir  - Cappadocia 2.11",0],[357,38.6,0,0,"Kir  - Cappadocia 2.12",0],[355.5,43.4,0,0,"Kir  - Cappadocia 2.13",0],[347.4,44.5,0,0,"Kir  - Cappadocia 2.14",0],[6.5,59.5,0,0,"Kir  - Cappadocia 2.15",0],[345.8,45.5,0,0,"Kir  - Cappadocia 2.16",0],[340,46,0,0,"Kir  - Cappadocia 2.17",0],[335.7,43.6,0,0,"Kir  - Cappadocia 2.18",0],[339.6,52,0,0,"Kir  - Cappadocia 2.19",0],[342.1,56.2,0,0,"Kir  - Cappadocia 2.20",0],[12.4,56.9,0,0,"Kir  - Cappadocia 2.21",0],[14.4,62,0,0,"Kir  - Cappadocia 2.22",0],[334,50.3,0,0,"Kir  - Cappadocia 2.23",0],[350.4,42.8,0,0,"Kir  - Cappadocia 2.24",0],[12,56.4,0,0,"Kir  - Cappadocia 2.25",0],[350.4,42.8,0,0,"Kir  - Cappadocia 2.26",0]],"metaData":{"name":"Kir  - Cappadocia 2","dateAdded":"2016-11-17T15:28:35.713Z","version":"v1.1.1","markerColor":"orange","cutoff":"45","type":"Input","description":"volcanics","author":"Piper et al., J Volc Geotherm Res 2002","age":"6.15","minAge":"1.1","maxAge":"11.2","latitude":38.6,"longitude":34.9,"sanitized":true}},{"data":[[359.8,47.4,0,0,"Kir - Cappadocia 3.1",0],[5.5,54.8,0,0,"Kir - Cappadocia 3.2",0],[5.2,46.3,0,0,"Kir - Cappadocia 3.3",0],[354.7,52,0,0,"Kir - Cappadocia 3.4",0],[351.5,50.3,0,0,"Kir - Cappadocia 3.5",0],[352.7,49.3,0,0,"Kir - Cappadocia 3.6",0],[4.7,45.5,0,0,"Kir - Cappadocia 3.7",0],[150.8,50.7,0,0,"Kir - Cappadocia 3.8",0],[347.8,46.7,0,0,"Kir - Cappadocia 3.9",0],[338.3,58.8,0,0,"Kir - Cappadocia 3.10",0],[330.9,50,0,0,"Kir - Cappadocia 3.11",0],[355.5,43.4,0,0,"Kir - Cappadocia 3.12",0],[350.3,52.1,0,0,"Kir - Cappadocia 3.13",0],[345.4,41.8,0,0,"Kir - Cappadocia 3.14",0],[357,38.6,0,0,"Kir - Cappadocia 3.15",0],[346.1,40.2,0,0,"Kir - Cappadocia 3.16",0],[357,40.3,0,0,"Kir - Cappadocia 3.17",0],[355.1,42.4,0,0,"Kir - Cappadocia 3.18",0],[333.9,65.3,0,0,"Kir - Cappadocia 3.19",0],[353.6,39.9,0,0,"Kir - Cappadocia 3.20",0],[31.6,75.9,0,0,"Kir - Cappadocia 3.21",0],[58,61.8,0,0,"Kir - Cappadocia 3.22",0],[343,46,0,0,"Kir - Cappadocia 3.23",0],[341.2,56.8,0,0,"Kir - Cappadocia 3.24",0],[347.3,58,0,0,"Kir - Cappadocia 3.25",0],[345.8,45.5,0,0,"Kir - Cappadocia 3.26",0],[346.3,40.5,0,0,"Kir - Cappadocia 3.27",0],[340,40.7,0,0,"Kir - Cappadocia 3.28",0],[5.9,53.6,0,0,"Kir - Cappadocia 3.29",0],[340,46,0,0,"Kir - Cappadocia 3.30",0],[343,46,0,0,"Kir - Cappadocia 3.31",0],[335.7,43.6,0,0,"Kir - Cappadocia 3.32",0],[340.6,47.2,0,0,"Kir - Cappadocia 3.33",0],[342.1,56.2,0,0,"Kir - Cappadocia 3.34",0],[342.8,59.2,0,0,"Kir - Cappadocia 3.35",0],[339.3,62.2,0,0,"Kir - Cappadocia 3.36",0],[6.5,59.5,0,0,"Kir - Cappadocia 3.37",0],[334,50.3,0,0,"Kir - Cappadocia 3.38",0],[14.4,62,0,0,"Kir - Cappadocia 3.39",0],[5.5,41.9,0,0,"Kir - Cappadocia 3.40",0],[354.7,70.7,0,0,"Kir - Cappadocia 3.41",0],[2,57.5,0,0,"Kir - Cappadocia 3.42",0],[19.4,58.1,0,0,"Kir - Cappadocia 3.43",0]],"metaData":{"name":"Kir - Cappadocia 3","dateAdded":"2016-11-17T16:03:49.786Z","version":"v1.1.1","markerColor":"orange","cutoff":"45","type":"Input","description":"volcanics","author":"Piper et al., J Volc Geotherm Res 2013","age":"6.15","minAge":"1.1","maxAge":"11.2","latitude":38.5,"longitude":34.9,"sanitized":true}},{"data":[[337.5913766974951,53.12548219688476,0,0,"Kir - AK.1",0],[345.8501478682232,70.61513781302259,0,0,"Kir - AK.2",0],[319.6730732452433,28.307412997937554,0,0,"Kir - AK.3",0],[285.2140527074689,68.85780687123186,0,0,"Kir - AK.4",0],[304.8387531570372,47.82762058706932,0,0,"Kir - AK.5",0],[307.88186559827966,67.972221087209,0,0,"Kir - AK.6",0],[312.44195068303304,72.32319859929096,0,0,"Kir - AK.7",0],[314.45305214167,43.38851747777921,0,0,"Kir - AK.8",0],[341.35163133314916,27.850669741514253,0,0,"Kir - AK.9",0],[323.01654252569756,48.789765046754766,0,0,"Kir - AK.10",0],[299.91050207493595,15.167164042196942,0,0,"Kir - AK.11",0],[304.40344671873413,26.3693522170267,0,0,"Kir - AK.12",0],[342.978236274039,62.42418797139724,0,0,"Kir - AK.13",0],[336.16156201092684,64.58927699084988,0,0,"Kir - AK.14",0],[340.9936640896413,71.97932845628841,0,0,"Kir - AK.15",0],[316.2465977910439,41.81825800720621,0,0,"Kir - AK.16",0],[341.63007266307426,58.56643082603647,0,0,"Kir - AK.17",0],[338.81314276682144,54.85635673460311,0,0,"Kir - AK.18",0],[279.05319374317514,56.10965660734977,0,0,"Kir - AK.19",0],[321.854095230942,45.2395219391494,0,0,"Kir - AK.20",0],[312.2358348229053,69.42956585382056,0,0,"Kir - AK.21",0],[326.2492111726499,4.886723191363873,0,0,"Kir - AK.22",0],[326.7048524447622,56.168899470127165,0,0,"Kir - AK.23",0],[280.5277147921404,69.72910046720196,0,0,"Kir - AK.24",0],[337.44867713340454,47.05333896552296,0,0,"Kir - AK.25",0],[299.4850766106713,58.58228688357715,0,0,"Kir - AK.26",0],[344.0372742504931,67.3678083940841,0,0,"Kir - AK.27",0],[320.8472212478794,62.40085523300893,0,0,"Kir - AK.28",0],[276.5483015964552,31.234059902289875,0,0,"Kir - AK.29",0],[294.9087055589125,48.52833082687216,0,0,"Kir - AK.30",0],[344.3799824275691,67.66220185019371,0,0,"Kir - AK.31",0],[316.3904049240561,33.296836915586816,0,0,"Kir - AK.32",0],[298.8158004679153,52.22174979752987,0,0,"Kir - AK.33",0],[340.36755084945094,65.28544881478163,0,0,"Kir - AK.34",0],[334.1398700190602,51.09540376838476,0,0,"Kir - AK.35",0],[316.17273689747014,37.42586461596573,0,0,"Kir - AK.36",0],[310.2527055249243,64.24579365895173,0,0,"Kir - AK.37",0],[327.8657965141321,39.14375626824895,0,0,"Kir - AK.38",0],[327.0745805342649,42.11139342444437,0,0,"Kir - AK.39",0],[354.98709883548224,57.999523208600614,0,0,"Kir - AK.40",0],[335.0511499916572,66.67380651435245,0,0,"Kir - AK.41",0],[331.5724184598544,21.28981295927583,0,0,"Kir - AK.42",0],[303.5142088368717,49.51438638387398,0,0,"Kir - AK.43",0],[321.228851117168,38.78536392112445,0,0,"Kir - AK.44",0],[312.7177075358295,62.47010741210877,0,0,"Kir - AK.45",0],[348.8398327009104,63.86708358703119,0,0,"Kir - AK.46",0],[336.4367186778188,48.64107326862423,0,0,"Kir - AK.47",0],[314.3367574071319,61.759258171952304,0,0,"Kir - AK.48",0],[312.01738682604196,42.985013328760274,0,0,"Kir - AK.49",0],[304.912831184329,54.20121826507187,0,0,"Kir - AK.50",0],[323.69241986702554,36.58412904469819,0,0,"Kir - AK.51",0],[297.8442659707571,34.829305513435976,0,0,"Kir - AK.52",0],[306.25499916955937,53.11706298163312,0,0,"Kir - AK.53",0],[337.7176202639943,66.97699140871056,0,0,"Kir - AK.54",0],[336.2773130545418,27.926576473970975,0,0,"Kir - AK.55",0],[308.9745634098026,47.90293932251278,0,0,"Kir - AK.56",0],[334.84292692483893,46.42188769123787,0,0,"Kir - AK.57",0],[289.7707153356521,55.828669341817296,0,0,"Kir - AK.58",0],[275.7766023870146,61.76243034975107,0,0,"Kir - AK.59",0],[318.4367072834684,36.402098728755576,0,0,"Kir - AK.60",0],[320.84527095185854,46.67653958466068,0,0,"Kir - AK.61",0],[285.89512839992017,60.11438456019816,0,0,"Kir - AK.62",0],[317.00243043862525,61.410732088191644,0,0,"Kir - AK.63",0],[294.1137328895243,31.925333234475936,0,0,"Kir - AK.64",0],[337.56267693797537,47.010250658112426,0,0,"Kir - AK.65",0],[273.1704482944622,55.261960244420756,0,0,"Kir - AK.66",0],[305.5490596645782,72.79169207681072,0,0,"Kir - AK.67",0],[314.4230172921457,23.886999205209445,0,0,"Kir - AK.68",0],[266.63522911079565,61.69777565056888,0,0,"Kir - AK.69",0],[334.23282321952274,57.61909003892548,0,0,"Kir - AK.70",0],[316.3816299514226,44.17966942414058,0,0,"Kir - AK.71",0],[322.7018582195928,74.21048883594347,0,0,"Kir - AK.72",0],[335.93432675562065,38.2021195907282,0,0,"Kir - AK.73",0],[309.81549697517596,49.90981783543336,0,0,"Kir - AK.74",0]],"metaData":{"name":"Kir - AK","dateAdded":"2016-11-18T14:17:41.367Z","version":"v1.1.1","markerColor":"orange","cutoff":"45","type":"Simulated","description":"pluton","author":"Lefebvre et al., EPSL 2013","age":"77.5","minAge":"85","maxAge":"70","latitude":38.59,"longitude":34.14,"sanitized":true}},{"data":[[351.92957142740624,58.60955007308146,0,0,"Kir - CA.1",0],[358.8153509130052,62.826667456591615,0,0,"Kir - CA.2",0],[9.039824335430353,51.36856981585487,0,0,"Kir - CA.3",0],[330.82783806645443,64.92944265685034,0,0,"Kir - CA.4",0],[352.7337618845959,68.90319164771911,0,0,"Kir - CA.5",0],[358.61879785695396,61.33943236223622,0,0,"Kir - CA.6",0],[347.75464280754204,57.01251775384162,0,0,"Kir - CA.7",0],[328.8960876889571,68.33238446287396,0,0,"Kir - CA.8",0],[342.4445482158769,69.29658774773844,0,0,"Kir - CA.9",0],[0.9310516401696987,61.5218850553836,0,0,"Kir - CA.10",0],[21.98512421538709,69.84517143610108,0,0,"Kir - CA.11",0],[25.113998985407477,60.83792274795412,0,0,"Kir - CA.12",0],[10.279305744667965,72.59019484232284,0,0,"Kir - CA.13",0],[350.7432723705749,74.36757988364249,0,0,"Kir - CA.14",0],[0.44284679398055005,53.88817312900758,0,0,"Kir - CA.15",0],[8.600211372162448,59.29127660381494,0,0,"Kir - CA.16",0],[351.86582529432235,62.71963128050433,0,0,"Kir - CA.17",0],[12.18432149917868,63.734126688962704,0,0,"Kir - CA.18",0],[23.92849509452975,57.36928191137125,0,0,"Kir - CA.19",0],[356.6701274650561,65.70447788807478,0,0,"Kir - CA.20",0],[8.018784379002739,58.839910246485665,0,0,"Kir - CA.21",0],[5.423158762871822,61.70335064599401,0,0,"Kir - CA.22",0],[7.6097517573201685,52.0698136619017,0,0,"Kir - CA.23",0],[17.535751341492414,67.06808033728491,0,0,"Kir - CA.24",0],[0.9783397130180447,69.93706376273434,0,0,"Kir - CA.25",0],[1.3011652386580295,69.90066931875495,0,0,"Kir - CA.26",0],[27.6121222443295,64.60031696027656,0,0,"Kir - CA.27",0],[357.0844702992738,71.12401005286411,0,0,"Kir - CA.28",0],[6.3380609075367715,61.015652733473274,0,0,"Kir - CA.29",0],[325.440311860346,67.42420494457119,0,0,"Kir - CA.30",0],[5.031043912017765,66.54486170723612,0,0,"Kir - CA.31",0],[15.618148708509523,56.3276372465529,0,0,"Kir - CA.32",0],[340.94094309491174,62.577907153283554,0,0,"Kir - CA.33",0],[331.49168325393316,70.08727512052899,0,0,"Kir - CA.34",0],[328.92358623673795,55.53071631785532,0,0,"Kir - CA.35",0],[8.948159832547674,64.1691505938774,0,0,"Kir - CA.36",0],[3.50971689770887,61.94039782555714,0,0,"Kir - CA.37",0]],"metaData":{"name":"Kir - CA","dateAdded":"2016-11-18T14:18:26.758Z","version":"v1.1.1","markerColor":"orange","cutoff":"45","type":"Simulated","description":"pluton","author":"Lefebvre et al., EPSL 2013","age":"77.5","minAge":"85","maxAge":"70","latitude":39.97,"longitude":33.57,"sanitized":true}},{"data":[[352.72721177746996,61.18003668006334,0,0,"Kir - HI.1",0],[345.1779005981267,-19.581499061446834,0,0,"Kir - HI.2",0],[13.812477472247792,12.824847012908902,0,0,"Kir - HI.3",0],[356.4377320165767,59.891719719425886,0,0,"Kir - HI.4",0],[13.680941052252491,46.90184621391694,0,0,"Kir - HI.5",0],[19.318955959685777,34.88989266339724,0,0,"Kir - HI.6",0],[21.94511300315399,53.62967302128236,0,0,"Kir - HI.7",0],[334.52740995925075,48.70551325259094,0,0,"Kir - HI.8",0],[8.317333775836511,68.57347563958777,0,0,"Kir - HI.9",0],[339.1114614423495,44.6476951854233,0,0,"Kir - HI.10",0],[0.20180058723263983,51.1475879340629,0,0,"Kir - HI.11",0],[6.973508356613205,44.13503428912971,0,0,"Kir - HI.12",0],[348.0396769838089,59.26406629030832,0,0,"Kir - HI.13",0],[4.867571212384422,52.764366089809954,0,0,"Kir - HI.14",0],[337.0249183124051,41.016903150016624,0,0,"Kir - HI.15",0],[4.836549022365439,54.538508155568586,0,0,"Kir - HI.16",0],[33.772901897088694,74.22675862967503,0,0,"Kir - HI.17",0],[357.559404726603,31.892926345651734,0,0,"Kir - HI.18",0],[2.9224505869284085,65.20215968069596,0,0,"Kir - HI.19",0],[1.0740195985197571,61.92078517136857,0,0,"Kir - HI.20",0],[6.285200076186572,52.64425267903904,0,0,"Kir - HI.21",0],[355.5695170798887,43.47909813112948,0,0,"Kir - HI.22",0],[6.436673543249618,23.389313151102062,0,0,"Kir - HI.23",0],[1.4132794443083894,48.19884011445433,0,0,"Kir - HI.24",0],[0.20426463263459027,60.86964098105621,0,0,"Kir - HI.25",0],[16.194247356108985,33.59136798173093,0,0,"Kir - HI.26",0],[11.277742877086135,61.671668802028115,0,0,"Kir - HI.27",0],[13.413714246835925,34.20959438230264,0,0,"Kir - HI.28",0],[25.117006538894664,53.874507828282674,0,0,"Kir - HI.29",0],[345.14964405879203,55.51374700127722,0,0,"Kir - HI.30",0],[25.102716160744563,72.36914407356709,0,0,"Kir - HI.31",0],[357.28664372784164,33.10880570941458,0,0,"Kir - HI.32",0],[357.0254864978864,48.14320507905717,0,0,"Kir - HI.33",0],[349.5174965219966,35.75897914270755,0,0,"Kir - HI.34",0],[2.227806081584858,47.071950382088886,0,0,"Kir - HI.35",0],[349.28335694424584,37.32306594276063,0,0,"Kir - HI.36",0],[353.790708543636,25.51382737289258,0,0,"Kir - HI.37",0],[24.261024764395394,58.83455478962329,0,0,"Kir - HI.38",0],[25.702590499305007,55.69981253746155,0,0,"Kir - HI.39",0],[359.38402363243773,61.146902277403846,0,0,"Kir - HI.40",0],[359.96989184616785,50.81999368024101,0,0,"Kir - HI.41",0],[5.473311929931438,53.04108871397755,0,0,"Kir - HI.42",0],[18.790286060687993,39.17675666317414,0,0,"Kir - HI.43",0],[32.74056192075003,51.338100107791824,0,0,"Kir - HI.44",0],[340.7088472538533,13.056709448246016,0,0,"Kir - HI.45",0],[0.843599042820471,49.93727949550835,0,0,"Kir - HI.46",0],[28.16461211465398,47.47291350842489,0,0,"Kir - HI.47",0],[4.394998974618802,51.44275382774614,0,0,"Kir - HI.48",0],[344.3119184650925,37.72884141164882,0,0,"Kir - HI.49",0],[346.08952145594077,43.693631218780645,0,0,"Kir - HI.50",0],[339.37647195717176,45.419817934746895,0,0,"Kir - HI.51",0],[16.43496309615505,21.78895507238739,0,0,"Kir - HI.52",0],[348.0329809024762,53.99269846335746,0,0,"Kir - HI.53",0],[349.9624849066433,57.526288208511296,0,0,"Kir - HI.54",0],[344.8555162981866,52.94883308114754,0,0,"Kir - HI.55",0],[350.4431822265866,44.71897707996171,0,0,"Kir - HI.56",0],[8.924685197528882,47.66627269506628,0,0,"Kir - HI.57",0],[6.116351060476588,54.50655226315044,0,0,"Kir - HI.58",0],[5.4295008641515965,58.45388085894931,0,0,"Kir - HI.59",0],[344.22431415142717,57.794979152474426,0,0,"Kir - HI.60",0],[353.5392068882985,62.064437174496724,0,0,"Kir - HI.61",0],[355.68087181344276,63.77711535998474,0,0,"Kir - HI.62",0],[8.085530476048008,41.5861283981198,0,0,"Kir - HI.63",0],[348.4484876489323,58.01515893667994,0,0,"Kir - HI.64",0],[347.4573275603599,57.24004063888294,0,0,"Kir - HI.65",0],[7.521427502632633,70.36373483826992,0,0,"Kir - HI.66",0],[358.8013047347556,46.4337738386148,0,0,"Kir - HI.67",0],[28.95316927365879,47.919263048948096,0,0,"Kir - HI.68",0],[22.809150694742318,45.595492327270904,0,0,"Kir - HI.69",0],[18.933296030431578,40.23227091416206,0,0,"Kir - HI.70",0],[22.290521493228905,45.115004459440996,0,0,"Kir - HI.71",0],[357.4877908812626,54.24140607863212,0,0,"Kir - HI.72",0],[347.2108534148508,55.46847640295218,0,0,"Kir - HI.73",0],[6.359907166184166,36.366867224398774,0,0,"Kir - HI.74",0]],"metaData":{"name":"Kir - HI","dateAdded":"2016-11-18T14:19:11.207Z","version":"v1.1.1","markerColor":"orange","cutoff":"45","type":"Simulated","description":"pluton","author":"Lefebvre et al., EPSL 2013","age":"77.5","minAge":"85","maxAge":"70","latitude":39.29,"longitude":33.45,"sanitized":true}},{"data":[[324.2684333912082,69.37302247746112,0,0,"Kir - KK.1",0],[327.24287984035755,62.23827077242124,0,0,"Kir - KK.2",0],[324.6721558227323,62.371866480299325,0,0,"Kir - KK.3",0],[339.692808222798,72.03078613535882,0,0,"Kir - KK.4",0],[333.3983225942709,73.85651242913653,0,0,"Kir - KK.5",0],[350.0897528157887,54.62154366789009,0,0,"Kir - KK.6",0],[330.5469839983307,68.4831266647677,0,0,"Kir - KK.7",0],[10.986619834720784,75.57587146539399,0,0,"Kir - KK.8",0],[336.9572621999964,62.792030292501934,0,0,"Kir - KK.9",0],[17.25147229008678,34.89047605309962,0,0,"Kir - KK.10",0],[347.90531365024793,51.519332002842326,0,0,"Kir - KK.11",0],[6.6264137268906325,27.57086237519479,0,0,"Kir - KK.12",0],[349.58017968986604,71.69654464885213,0,0,"Kir - KK.13",0],[15.885904752036595,62.10475784379221,0,0,"Kir - KK.14",0],[336.7029458945153,28.41322694360491,0,0,"Kir - KK.15",0],[355.37077489878624,57.86793201276987,0,0,"Kir - KK.16",0],[341.6194710289527,64.56329933705341,0,0,"Kir - KK.17",0],[5.773854607287888,47.62221453965281,0,0,"Kir - KK.18",0],[356.01632924079166,36.92084203140601,0,0,"Kir - KK.19",0],[341.13576142570105,66.15683404863479,0,0,"Kir - KK.20",0],[345.48890973252077,61.96603058456418,0,0,"Kir - KK.21",0],[0.25494309553675976,42.95887011721938,0,0,"Kir - KK.22",0],[323.73156625958313,75.49440218155131,0,0,"Kir - KK.23",0],[354.0981509904279,81.59626546347285,0,0,"Kir - KK.24",0],[321.8956741065149,69.87376102169807,0,0,"Kir - KK.25",0],[333.80474320786186,46.516886057846556,0,0,"Kir - KK.26",0],[326.3555410837246,43.30400023264675,0,0,"Kir - KK.27",0],[333.3161270522146,55.7935969422331,0,0,"Kir - KK.28",0],[349.7982093327631,55.39688532063722,0,0,"Kir - KK.29",0],[315.18035188272756,37.99752322339021,0,0,"Kir - KK.30",0],[331.6892656846894,28.233125036747815,0,0,"Kir - KK.31",0],[357.9956256095352,32.45658400784966,0,0,"Kir - KK.32",0],[355.43375236541704,48.33268394702215,0,0,"Kir - KK.33",0],[333.5335459961684,63.964595848766095,0,0,"Kir - KK.34",0],[330.84036996142163,60.93160827593809,0,0,"Kir - KK.35",0],[356.7044856482626,62.40861761018028,0,0,"Kir - KK.36",0],[0.3592878003157125,64.8205975856832,0,0,"Kir - KK.37",0],[347.30562764818876,57.88501888016472,0,0,"Kir - KK.38",0],[334.7723230822137,49.99249512605688,0,0,"Kir - KK.39",0],[327.99535034633095,43.907896854177245,0,0,"Kir - KK.40",0],[339.03754048161136,63.50715101636147,0,0,"Kir - KK.41",0],[353.47835902503545,86.99294414745656,0,0,"Kir - KK.42",0],[335.5324043694966,53.723984333475364,0,0,"Kir - KK.43",0],[21.076059262131082,48.03039160290804,0,0,"Kir - KK.44",0],[342.92295227479985,74.0877142188864,0,0,"Kir - KK.45",0],[343.37224703728805,68.05233003232125,0,0,"Kir - KK.46",0],[345.2151669042451,55.97414479141878,0,0,"Kir - KK.47",0],[1.796332438149534,70.3002989418494,0,0,"Kir - KK.48",0],[347.5108864065234,61.94308611140051,0,0,"Kir - KK.49",0],[312.0486587592311,77.55043593806704,0,0,"Kir - KK.50",0],[343.33709222475477,59.87562646075198,0,0,"Kir - KK.51",0],[8.82116308646664,53.617243469670385,0,0,"Kir - KK.52",0],[340.05578578923394,46.49695855052676,0,0,"Kir - KK.53",0],[332.6007333955795,54.885916919110166,0,0,"Kir - KK.54",0],[304.0104202682577,57.814408027899944,0,0,"Kir - KK.55",0],[323.3211610844537,66.082302817351,0,0,"Kir - KK.56",0],[24.631879970517502,76.95879780339578,0,0,"Kir - KK.57",0],[347.89767249512266,48.735153288677836,0,0,"Kir - KK.58",0],[316.719655402243,62.207001899992804,0,0,"Kir - KK.59",0],[340.20793662892936,68.67705058502567,0,0,"Kir - KK.60",0],[354.32172099189836,64.3401994922803,0,0,"Kir - KK.61",0],[311.86895163337863,43.23199663449102,0,0,"Kir - KK.62",0],[349.01523335154207,49.86229985616198,0,0,"Kir - KK.63",0],[349.72270168646025,16.917214585322224,0,0,"Kir - KK.64",0],[339.6615796738463,63.00331657869511,0,0,"Kir - KK.65",0],[343.20068336274585,22.415544499903973,0,0,"Kir - KK.66",0],[331.52047644766685,76.27015499930594,0,0,"Kir - KK.67",0],[310.01256071681155,46.28314369416866,0,0,"Kir - KK.68",0],[16.643320438012665,33.727187382875755,0,0,"Kir - KK.69",0],[3.108832893813542,49.08380080005403,0,0,"Kir - KK.70",0],[352.00125563291493,58.82988489259612,0,0,"Kir - KK.71",0],[8.879575655427573,58.77614820573918,0,0,"Kir - KK.72",0],[2.3129443347672236,19.210789389196034,0,0,"Kir - KK.73",0],[11.728958143168143,34.932058966728135,0,0,"Kir - KK.74",0],[325.9795797464503,60.849548570854886,0,0,"Kir - KK.75",0],[349.0138224214259,12.676330228825277,0,0,"Kir - KK.76",0],[353.61142099813804,69.36254098245651,0,0,"Kir - KK.77",0],[327.57971995417245,51.75259666587775,0,0,"Kir - KK.78",0],[337.9093247285025,69.55205887528648,0,0,"Kir - KK.79",0],[348.82678582635634,46.355885804994344,0,0,"Kir - KK.80",0],[352.27285285519224,70.41151822632857,0,0,"Kir - KK.81",0],[3.0674524339698905,44.62765913616939,0,0,"Kir - KK.82",0],[27.423723138821174,35.29829913495035,0,0,"Kir - KK.83",0],[338.23691365966,48.00090028173746,0,0,"Kir - KK.84",0],[14.964463976189734,60.24503088880112,0,0,"Kir - KK.85",0],[321.33141795291544,75.42896611880406,0,0,"Kir - KK.86",0]],"metaData":{"name":"Kir - KK","dateAdded":"2016-11-18T14:19:55.498Z","version":"v1.1.1","markerColor":"orange","cutoff":"45","type":"Simulated","description":"pluton","author":"Lefebvre et al., EPSL 2013","age":"77.5","minAge":"85","maxAge":"70","latitude":39.8,"longitude":33.78,"sanitized":true}},{"data":[[338.1112216052825,56.66933249572517,0,0,"Kir - KO.1",0],[9.931272643671434,72.07753621591506,0,0,"Kir - KO.2",0],[341.482583288088,47.675862112298496,0,0,"Kir - KO.3",0],[9.500448533705708,49.35963125716854,0,0,"Kir - KO.4",0],[334.79194926003936,58.1963295252931,0,0,"Kir - KO.5",0],[357.5345759394844,61.59820516168903,0,0,"Kir - KO.6",0],[343.5395465938911,56.81016336425984,0,0,"Kir - KO.7",0],[25.49914704299715,57.90542970546606,0,0,"Kir - KO.8",0],[346.7570715201512,59.16337137300729,0,0,"Kir - KO.9",0],[339.8985346632355,74.15846083873959,0,0,"Kir - KO.10",0],[326.40312645203085,49.94537334377284,0,0,"Kir - KO.11",0],[311.2527001433275,63.01571830468916,0,0,"Kir - KO.12",0],[328.49758233488956,30.087517371320068,0,0,"Kir - KO.13",0],[3.2576124444580614,72.2138737602235,0,0,"Kir - KO.14",0],[40.00478266029597,71.42954871977808,0,0,"Kir - KO.15",0],[339.8779352679228,54.030085670935534,0,0,"Kir - KO.16",0],[320.03617235720435,50.98824563150832,0,0,"Kir - KO.17",0],[340.83775002813104,51.466368525620865,0,0,"Kir - KO.18",0],[335.96027976311814,76.52546408956056,0,0,"Kir - KO.19",0],[338.14849437745886,60.142157741965306,0,0,"Kir - KO.20",0],[347.3998098553984,54.51867620185574,0,0,"Kir - KO.21",0],[20.42647300464256,56.49978709261892,0,0,"Kir - KO.22",0],[345.2866697354437,50.413755614398674,0,0,"Kir - KO.23",0],[0.34512360540014697,55.80650098924959,0,0,"Kir - KO.24",0],[341.14183919249103,52.155310993060446,0,0,"Kir - KO.25",0],[317.8432496050748,72.1407801369489,0,0,"Kir - KO.26",0],[333.3531583015616,51.55019434587517,0,0,"Kir - KO.27",0],[350.86243731299453,53.406246150002524,0,0,"Kir - KO.28",0],[355.5812054558737,38.34665169055765,0,0,"Kir - KO.29",0],[331.7880906900523,59.53563594269847,0,0,"Kir - KO.30",0],[348.99785004166966,59.84553985898523,0,0,"Kir - KO.31",0],[338.4092775479703,53.5002501107427,0,0,"Kir - KO.32",0],[352.32473241359753,43.893464666235914,0,0,"Kir - KO.33",0],[331.87658966433514,62.02467177334151,0,0,"Kir - KO.34",0],[335.7528726125231,52.48234278386586,0,0,"Kir - KO.35",0],[13.4798320550276,61.94929518497887,0,0,"Kir - KO.36",0],[347.54271391450277,62.73911243000251,0,0,"Kir - KO.37",0],[318.52005498602466,53.96944776884679,0,0,"Kir - KO.38",0],[321.91727337021837,41.44555561463494,0,0,"Kir - KO.39",0],[14.70736641977561,53.92403804277046,0,0,"Kir - KO.40",0],[0.6235849940993035,69.72864945941755,0,0,"Kir - KO.41",0],[30.548398507745674,30.746814157803964,0,0,"Kir - KO.42",0],[359.96440958452416,40.73034988969788,0,0,"Kir - KO.43",0],[331.1578579408706,49.717626097780645,0,0,"Kir - KO.44",0],[333.1455054321781,63.23215059035203,0,0,"Kir - KO.45",0],[347.87694459559356,59.68994873619627,0,0,"Kir - KO.46",0],[351.672831612851,67.36458221241023,0,0,"Kir - KO.47",0],[346.2300030301808,65.77197596395727,0,0,"Kir - KO.48",0],[347.44418785922943,63.14006328520447,0,0,"Kir - KO.49",0],[336.4710492047699,65.5781616164367,0,0,"Kir - KO.50",0],[350.04978962680343,58.980157960586844,0,0,"Kir - KO.51",0],[347.2238180842268,30.784987669786013,0,0,"Kir - KO.52",0],[335.826490182538,57.44270482819637,0,0,"Kir - KO.53",0],[0.019751367604669667,41.54899337513363,0,0,"Kir - KO.54",0],[339.45866229817216,59.391018690658186,0,0,"Kir - KO.55",0],[328.36880475107546,59.981334203686224,0,0,"Kir - KO.56",0],[352.15311621475246,40.85942863921017,0,0,"Kir - KO.57",0],[350.3296516779852,73.13291804590446,0,0,"Kir - KO.58",0],[315.1385449540877,60.66244773641923,0,0,"Kir - KO.59",0],[334.2059988835515,57.819004853048206,0,0,"Kir - KO.60",0],[325.95187832848455,50.747418754740146,0,0,"Kir - KO.61",0],[320.64622514293956,55.122935425197404,0,0,"Kir - KO.62",0],[346.31954054016387,61.72971995419184,0,0,"Kir - KO.63",0],[353.78731906627877,62.19112363276599,0,0,"Kir - KO.64",0],[320.0157260149206,54.82818578435598,0,0,"Kir - KO.65",0],[359.7849967010696,44.74004224298405,0,0,"Kir - KO.66",0],[331.2456630189665,56.48417630135131,0,0,"Kir - KO.67",0],[346.9556519645561,74.29655990717553,0,0,"Kir - KO.68",0],[357.76680785013826,44.76758245379378,0,0,"Kir - KO.69",0],[3.7310929089514957,48.28751823258612,0,0,"Kir - KO.70",0],[357.7211933309839,60.33904115888592,0,0,"Kir - KO.71",0]],"metaData":{"name":"Kir - KO","dateAdded":"2016-11-18T14:20:20.552Z","version":"v1.1.1","markerColor":"orange","cutoff":"45","type":"Simulated","description":"pluton","author":"Lefebvre et al., EPSL 2013","age":"77.5","minAge":"85","maxAge":"70","latitude":39.59,"longitude":33.43,"sanitized":true}},{"data":[[44.57095664456953,78.65837713193086,0,0,"Kir - OK.1",0],[13.443968900709649,72.7366124849812,0,0,"Kir - OK.2",0],[39.48867066753692,21.220432920104596,0,0,"Kir - OK.3",0],[1.273801977154676,66.29781031888034,0,0,"Kir - OK.4",0],[309.7621251933747,81.44651099571473,0,0,"Kir - OK.5",0],[2.218627341601973,69.5012517360672,0,0,"Kir - OK.6",0],[34.15913187146832,59.54737342553524,0,0,"Kir - OK.7",0],[23.05697204947031,57.68498906185762,0,0,"Kir - OK.8",0],[22.372798050627182,70.63129668157355,0,0,"Kir - OK.9",0],[32.72912365579705,49.80874067291265,0,0,"Kir - OK.10",0],[2.1864865096251265,53.02169282904277,0,0,"Kir - OK.11",0],[37.61062642777193,52.86994579592286,0,0,"Kir - OK.12",0],[10.95085878586167,57.56772361870334,0,0,"Kir - OK.13",0],[35.815832083346734,65.26458070919406,0,0,"Kir - OK.14",0],[338.94555617358714,76.80082042896801,0,0,"Kir - OK.15",0],[356.70574768015007,50.78495467388623,0,0,"Kir - OK.16",0],[57.714846313723804,43.25132119221299,0,0,"Kir - OK.17",0],[28.235736267694183,64.08543818904701,0,0,"Kir - OK.18",0],[32.48035473369765,49.462595677093184,0,0,"Kir - OK.19",0],[28.884173133089345,55.5134129156913,0,0,"Kir - OK.20",0],[32.6669565733946,33.70208802053772,0,0,"Kir - OK.21",0],[28.35437516531453,48.52015997600232,0,0,"Kir - OK.22",0],[40.118050300944034,55.344164165176394,0,0,"Kir - OK.23",0],[356.5926727051699,69.68628032379671,0,0,"Kir - OK.24",0],[6.271241237048969,54.12984132770418,0,0,"Kir - OK.25",0],[0.73745172082414,60.783080605592474,0,0,"Kir - OK.26",0]],"metaData":{"name":"Kir - OK","dateAdded":"2016-11-18T14:20:49.519Z","version":"v1.1.1","markerColor":"orange","cutoff":"45","type":"Simulated","description":"pluton","author":"Lefebvre et al., EPSL 2013","age":"77.5","minAge":"85","maxAge":"70","latitude":39.69,"longitude":35.97,"sanitized":true}},{"data":[[57.11780496830524,12.890055325999061,0,0,"Kir - SE.1",0],[61.99029195242292,-7.199112399038647,0,0,"Kir - SE.2",0],[46.98526711417486,-32.11908805850577,0,0,"Kir - SE.3",0],[34.128144932869844,-25.274105410711048,0,0,"Kir - SE.4",0],[3.997732719700309,23.232620900294656,0,0,"Kir - SE.5",0],[30.003214301123002,4.895040819572333,0,0,"Kir - SE.6",0],[62.772156603445744,14.780045238867118,0,0,"Kir - SE.7",0],[356.9494942633987,66.1363425135902,0,0,"Kir - SE.8",0],[42.14890216321835,16.634182975052063,0,0,"Kir - SE.9",0],[53.720782459779656,-7.509296590924622,0,0,"Kir - SE.10",0],[53.11229472877419,1.5125612074408716,0,0,"Kir - SE.11",0],[49.86038728778239,25.84518237534121,0,0,"Kir - SE.12",0],[39.7715516465372,20.166838900752985,0,0,"Kir - SE.13",0],[30.99470236950145,-21.692718366329878,0,0,"Kir - SE.14",0],[30.82596463434501,36.424943798916054,0,0,"Kir - SE.15",0],[17.788191018949135,37.584623362657204,0,0,"Kir - SE.16",0],[22.772775463139,-10.542498417632787,0,0,"Kir - SE.17",0],[358.9464298992423,36.37422704043128,0,0,"Kir - SE.18",0],[44.24467759938493,6.196785333202882,0,0,"Kir - SE.19",0],[44.25912210858462,55.30299581664389,0,0,"Kir - SE.20",0],[25.069745348652816,-22.620002081000965,0,0,"Kir - SE.21",0],[348.3850863419536,41.9028199319613,0,0,"Kir - SE.22",0],[39.424285996585525,26.91296118049731,0,0,"Kir - SE.23",0],[347.1877433187408,-5.678613540566204,0,0,"Kir - SE.24",0],[38.87132514194906,28.921729091885837,0,0,"Kir - SE.25",0],[23.91864869216454,-19.49095320406559,0,0,"Kir - SE.26",0],[1.352283812823032,36.12606190366038,0,0,"Kir - SE.27",0],[27.485167102250898,-14.825373736711107,0,0,"Kir - SE.28",0],[35.143755497995386,-27.99956927028382,0,0,"Kir - SE.29",0],[40.140210759321405,34.91618516351098,0,0,"Kir - SE.30",0],[34.72209695953178,22.189640622066136,0,0,"Kir - SE.31",0],[3.3581717739306214,11.062478741274749,0,0,"Kir - SE.32",0],[20.269612078506555,-36.05550794030077,0,0,"Kir - SE.33",0],[19.495146010557278,8.277812851745916,0,0,"Kir - SE.34",0],[10.69620380638878,-26.480680562583128,0,0,"Kir - SE.35",0],[15.694657327140192,19.27111222303485,0,0,"Kir - SE.36",0],[353.42976558154874,7.145497997031782,0,0,"Kir - SE.37",0],[22.4282959456026,12.933342148360998,0,0,"Kir - SE.38",0],[6.107504044207644,-7.8155829280319224,0,0,"Kir - SE.39",0],[31.176349980154068,-42.18599800235555,0,0,"Kir - SE.40",0],[32.647118036828175,47.12185908199831,0,0,"Kir - SE.41",0],[29.245391041147336,-40.55888746376738,0,0,"Kir - SE.42",0],[23.380682701683497,22.70259916776403,0,0,"Kir - SE.43",0],[3.096922795412354,9.769315270769471,0,0,"Kir - SE.44",0],[354.379009063089,-24.361556380954383,0,0,"Kir - SE.45",0],[49.46130344356068,46.3984862804311,0,0,"Kir - SE.46",0],[58.34078266688299,-19.588918819685606,0,0,"Kir - SE.47",0],[37.75106743811196,24.489121061173563,0,0,"Kir - SE.48",0],[36.08573331435413,35.76061198079884,0,0,"Kir - SE.49",0],[25.949433484699227,-19.89471256837026,0,0,"Kir - SE.50",0],[44.25639792048118,-18.679178639681776,0,0,"Kir - SE.51",0],[30.293731365384037,33.12603542502534,0,0,"Kir - SE.52",0],[13.577724519979427,-18.212412491048276,0,0,"Kir - SE.53",0],[21.380993168220584,-47.71694258177515,0,0,"Kir - SE.54",0],[345.6582033517805,19.916497198538067,0,0,"Kir - SE.55",0],[27.650210391871074,-28.67296173448347,0,0,"Kir - SE.56",0],[42.74777101276419,-10.843216592545422,0,0,"Kir - SE.57",0],[38.15526439064223,-25.724834200165013,0,0,"Kir - SE.58",0],[37.11846766866332,43.487825850231076,0,0,"Kir - SE.59",0],[1.5110094496928923,24.755347405063915,0,0,"Kir - SE.60",0],[50.06018166176368,28.835429945631052,0,0,"Kir - SE.61",0],[330.7763005780728,49.51589496567042,0,0,"Kir - SE.62",0],[24.854245420131974,21.369592724206765,0,0,"Kir - SE.63",0],[352.2632321694245,-16.978379163992916,0,0,"Kir - SE.64",0],[14.49632220867204,-18.373221509673,0,0,"Kir - SE.65",0]],"metaData":{"name":"Kir - SE","dateAdded":"2016-11-18T14:22:07.282Z","version":"v1.1.1","markerColor":"orange","cutoff":"45","type":"Simulated","description":"pluton","author":"Lefebvre et al., EPSL 2013","age":"77.5","minAge":"85","maxAge":"70","latitude":39.59,"longitude":34.7,"sanitized":true}},{"data":[[298.5057806884922,41.071178211300456,0,0,"Kir - SK.1",0],[326.0838972702767,54.598915545409994,0,0,"Kir - SK.2",0],[321.19646231102047,50.52181810908752,0,0,"Kir - SK.3",0],[316.27333772971133,56.92088947325569,0,0,"Kir - SK.4",0],[329.5809152675215,66.3408211746056,0,0,"Kir - SK.5",0],[339.3636857108262,60.36634724752861,0,0,"Kir - SK.6",0],[38.369761125270145,82.61860498506023,0,0,"Kir - SK.7",0],[310.56366016807624,43.48566732135,0,0,"Kir - SK.8",0],[329.04685950779947,41.76531154344895,0,0,"Kir - SK.9",0],[318.7566958978208,53.09209831017691,0,0,"Kir - SK.10",0],[319.5505015049574,63.52934789393253,0,0,"Kir - SK.11",0],[313.2956679026099,47.28143378411187,0,0,"Kir - SK.12",0],[343.3158143524561,44.0125749821922,0,0,"Kir - SK.13",0],[330.6005017980272,13.788005261977327,0,0,"Kir - SK.14",0],[340.2549709802925,58.72306292016095,0,0,"Kir - SK.15",0],[349.38166159353193,55.382263844745765,0,0,"Kir - SK.16",0],[309.8247239465486,72.81299834812198,0,0,"Kir - SK.17",0],[332.20983592433754,28.808942218931545,0,0,"Kir - SK.18",0],[355.2261880273955,59.63013748602476,0,0,"Kir - SK.19",0],[309.6651040134768,57.394781796448996,0,0,"Kir - SK.20",0],[322.35790128237954,55.67835600134195,0,0,"Kir - SK.21",0],[311.6786079715673,18.14995546595485,0,0,"Kir - SK.22",0],[327.8300231338651,70.84372456580643,0,0,"Kir - SK.23",0],[305.01194937746686,63.78633460051998,0,0,"Kir - SK.24",0],[305.38708640060156,42.229850725261414,0,0,"Kir - SK.25",0],[0.021937392038296366,62.005500469492745,0,0,"Kir - SK.26",0],[323.42382118076864,44.14921485926199,0,0,"Kir - SK.27",0],[326.2626410396381,57.49421805072492,0,0,"Kir - SK.28",0],[320.91123345755454,48.03062715386115,0,0,"Kir - SK.29",0],[292.36207399689897,54.807977350518435,0,0,"Kir - SK.30",0],[347.13133680225405,40.16380425329961,0,0,"Kir - SK.31",0],[327.153711873126,63.667968189755605,0,0,"Kir - SK.32",0],[352.5889976336653,71.24176796404517,0,0,"Kir - SK.33",0],[329.5192059233939,58.75062971610905,0,0,"Kir - SK.34",0],[359.08056510588875,63.00338490249755,0,0,"Kir - SK.35",0],[323.3584682369757,16.95578102097679,0,0,"Kir - SK.36",0],[306.99550360392027,74.91544794969313,0,0,"Kir - SK.37",0],[328.96303447815,42.70874160311408,0,0,"Kir - SK.38",0],[335.8568671207941,26.87995903529625,0,0,"Kir - SK.39",0],[324.07670285198867,11.31779045623983,0,0,"Kir - SK.40",0],[327.12580053106615,52.81010424975306,0,0,"Kir - SK.41",0],[319.16407925291537,52.824602159417196,0,0,"Kir - SK.42",0],[295.9980998398694,32.27132108502737,0,0,"Kir - SK.43",0],[328.5598243583423,47.51153799097883,0,0,"Kir - SK.44",0],[335.18953797066234,31.947639536407316,0,0,"Kir - SK.45",0],[337.9495168193504,28.479827888040422,0,0,"Kir - SK.46",0],[287.4895179977027,73.24089631327736,0,0,"Kir - SK.47",0],[304.1973918494715,25.205565230747307,0,0,"Kir - SK.48",0],[312.44063624570913,22.862580136890436,0,0,"Kir - SK.49",0],[316.22821557110854,26.204434312690836,0,0,"Kir - SK.50",0],[322.91332456002806,49.096758654221475,0,0,"Kir - SK.51",0],[12.348331975016492,44.49579489345879,0,0,"Kir - SK.52",0],[327.60228488200926,46.68878039528241,0,0,"Kir - SK.53",0],[342.788367310514,24.0126852479145,0,0,"Kir - SK.54",0],[342.2466987783708,69.29016231522495,0,0,"Kir - SK.55",0],[308.3176074930151,74.07123835616771,0,0,"Kir - SK.56",0],[301.8856498481571,61.885655901906986,0,0,"Kir - SK.57",0],[314.70618812402995,41.77760190017133,0,0,"Kir - SK.58",0],[345.3311312297698,44.300289929854664,0,0,"Kir - SK.59",0],[326.5931806066726,27.445509982155567,0,0,"Kir - SK.60",0]],"metaData":{"name":"Kir - SK","dateAdded":"2016-11-18T14:22:34.270Z","version":"v1.1.1","markerColor":"orange","cutoff":"45","type":"Simulated","description":"pluton","author":"Lefebvre et al., EPSL 2013","age":"77.5","minAge":"85","maxAge":"70","latitude":38.68,"longitude":34.01,"sanitized":true}},{"data":[[348.7649184171659,61.91379984258938,0,0,"Kir - YO.1",0],[31.7664993659462,45.964362364441456,0,0,"Kir - YO.2",0],[50.49585648011336,45.10751298981926,0,0,"Kir - YO.3",0],[14.604995090869899,77.24074254331421,0,0,"Kir - YO.4",0],[8.376416438456545,29.254884680766317,0,0,"Kir - YO.5",0],[357.4840970177341,36.258646047074265,0,0,"Kir - YO.6",0],[48.27157901225803,68.40367941161028,0,0,"Kir - YO.7",0],[7.183771573325998,35.289143924713834,0,0,"Kir - YO.8",0],[356.08670626704264,58.73395366704611,0,0,"Kir - YO.9",0],[10.079698196584241,31.022787909172337,0,0,"Kir - YO.10",0],[348.14154382468064,-3.304531369901943,0,0,"Kir - YO.11",0],[27.41186094523956,25.717913777971187,0,0,"Kir - YO.12",0],[359.2669575483628,64.39075581153735,0,0,"Kir - YO.13",0],[21.130163855032862,29.3085654856286,0,0,"Kir - YO.14",0],[20.21473305319855,54.21304442257474,0,0,"Kir - YO.15",0],[9.408647595620039,73.31361845463601,0,0,"Kir - YO.16",0],[356.92738754137713,9.458046610794659,0,0,"Kir - YO.17",0],[340.8751004293625,55.04529534096138,0,0,"Kir - YO.18",0],[33.7054733550781,72.9729026786779,0,0,"Kir - YO.19",0],[45.157473532898265,59.132883207037864,0,0,"Kir - YO.20",0],[31.76133233628723,36.139830148831756,0,0,"Kir - YO.21",0],[357.6554986725029,34.93416665521191,0,0,"Kir - YO.22",0],[355.9613163098905,58.105521212189544,0,0,"Kir - YO.23",0],[3.433422171238192,56.86474690356468,0,0,"Kir - YO.24",0],[0.13733723585608004,45.93896528578471,0,0,"Kir - YO.25",0],[10.404512275913614,-0.42121144119856563,0,0,"Kir - YO.26",0],[32.27227835224936,60.3459995405132,0,0,"Kir - YO.27",0],[31.097687723862002,74.22285203396191,0,0,"Kir - YO.28",0],[358.9263091350482,59.53834353273825,0,0,"Kir - YO.29",0],[13.51981445166497,29.57547003318917,0,0,"Kir - YO.30",0],[25.544656827103474,82.95960890797727,0,0,"Kir - YO.31",0],[46.40981686823355,71.98525044734582,0,0,"Kir - YO.32",0],[356.5294378275941,52.48138764838709,0,0,"Kir - YO.33",0],[20.426465863237325,48.81463184625837,0,0,"Kir - YO.34",0],[35.122227158327775,64.11245077947096,0,0,"Kir - YO.35",0],[23.786052453852754,25.755619446238875,0,0,"Kir - YO.36",0],[40.90431512114766,21.613811970447067,0,0,"Kir - YO.37",0],[29.107182063873047,69.04458865269358,0,0,"Kir - YO.38",0],[29.584155380428264,65.2784165755653,0,0,"Kir - YO.39",0],[9.974593996674102,34.72833856543099,0,0,"Kir - YO.40",0]],"metaData":{"name":"Kir - YO","dateAdded":"2016-11-18T14:23:08.919Z","version":"v1.1.1","markerColor":"orange","cutoff":"45","type":"Simulated","description":"pluton","author":"Lefebvre et al., EPSL 2013","age":"77.5","minAge":"85","maxAge":"70","latitude":39.79,"longitude":34.96,"sanitized":true}},{"data":[[349.41825257603864,60.63184344793056,0,0,"Kir - AG.1",0],[347.3452641433902,31.15431279104429,0,0,"Kir - AG.2",0],[351.0473927652463,47.07671295824488,0,0,"Kir - AG.3",0],[356.6025024045249,35.32575088522912,0,0,"Kir - AG.4",0],[336.9864639295063,42.55907431620968,0,0,"Kir - AG.5",0],[356.90246765946733,35.49053370531294,0,0,"Kir - AG.6",0],[332.6986543564999,50.09169523056106,0,0,"Kir - AG.7",0],[351.30492905046697,54.84499715128475,0,0,"Kir - AG.8",0],[327.5308905047326,67.96054333426439,0,0,"Kir - AG.9",0],[13.284596715130192,56.288772091833394,0,0,"Kir - AG.10",0],[345.9948407125487,52.80256079340823,0,0,"Kir - AG.11",0],[7.06589646958696,25.759740267196552,0,0,"Kir - AG.12",0],[1.867426729487761,45.167041926826315,0,0,"Kir - AG.13",0],[10.810966354285767,30.719024236744563,0,0,"Kir - AG.14",0],[353.5427028065958,57.08798837655593,0,0,"Kir - AG.15",0],[6.296286189304794,63.24871159953828,0,0,"Kir - AG.16",0],[349.03637989803565,49.48488841825512,0,0,"Kir - AG.17",0],[4.705081613959521,42.96623783777856,0,0,"Kir - AG.18",0],[11.427254996564841,50.63240514462882,0,0,"Kir - AG.19",0],[359.52776741953153,58.263376014537734,0,0,"Kir - AG.20",0],[333.7829906608,55.35363834302354,0,0,"Kir - AG.21",0],[8.213205427785283,46.50507465321699,0,0,"Kir - AG.22",0],[40.53829978044928,53.87453487474847,0,0,"Kir - AG.23",0],[9.060395571197319,58.96234602844349,0,0,"Kir - AG.24",0],[337.7728863312252,56.15900471287046,0,0,"Kir - AG.25",0],[352.0291612816093,67.3523097386943,0,0,"Kir - AG.26",0],[28.430311814747768,45.300765986562844,0,0,"Kir - AG.27",0],[338.177991712946,58.429672082699696,0,0,"Kir - AG.28",0],[348.4182647721964,64.68852664234294,0,0,"Kir - AG.29",0],[332.5634973382157,41.544764053592026,0,0,"Kir - AG.30",0],[332.7025686990785,64.57229253020391,0,0,"Kir - AG.31",0],[347.3226005630595,57.223754280812834,0,0,"Kir - AG.32",0],[352.3196689469014,45.62590695747095,0,0,"Kir - AG.33",0],[359.91158795371047,56.849723113014036,0,0,"Kir - AG.34",0],[345.7615432655505,58.76144176497653,0,0,"Kir - AG.35",0],[349.7257062491517,42.03480203450303,0,0,"Kir - AG.36",0],[353.6966323693555,40.79524278121114,0,0,"Kir - AG.37",0],[0.46074524851019305,59.757878701941245,0,0,"Kir - AG.38",0],[352.84900189525627,5.324651675001373,0,0,"Kir - AG.39",0],[344.4683708319094,44.66096714399899,0,0,"Kir - AG.40",0],[19.396201618701923,44.7208590072225,0,0,"Kir - AG.41",0],[14.835166818396829,27.453719429132033,0,0,"Kir - AG.42",0],[350.802698324311,67.778168504347,0,0,"Kir - AG.43",0],[327.579067227608,52.75103323049414,0,0,"Kir - AG.44",0],[350.8689802345656,52.59917239834358,0,0,"Kir - AG.45",0],[2.227755495072927,61.734409005338506,0,0,"Kir - AG.46",0],[332.4800190727883,46.911839504082,0,0,"Kir - AG.47",0],[355.60508754053797,54.13092776724438,0,0,"Kir - AG.48",0],[8.026413127225055,56.12793413349276,0,0,"Kir - AG.49",0],[8.797182259436681,62.487041588242036,0,0,"Kir - AG.50",0],[339.47337865716963,46.229558481396275,0,0,"Kir - AG.51",0],[347.19906210920294,39.665093205350466,0,0,"Kir - AG.52",0],[344.1548337316169,25.512048802517455,0,0,"Kir - AG.53",0],[341.7051536253563,65.32989071187278,0,0,"Kir - AG.54",0],[8.517700128154274,47.11963922644619,0,0,"Kir - AG.55",0]],"metaData":{"name":"Kir - AG","dateAdded":"2016-11-18T14:15:55.114Z","version":"v1.1.1","markerColor":"orange","cutoff":"45","type":"Simulated","description":"pluton","author":"Lefebvre et al., EPSL 2013","age":"77.5","minAge":"85","maxAge":"70","latitude":38.91,"longitude":33.81,"sanitized":true,"edited":true,"timeEdited":"2016-11-18T14:23:41.879Z"}},{"data":[[28.6,52.1,0,0,"Kir - TT21-22-23.1",0],[15,56.2,0,0,"Kir - TT21-22-23.2",0],[349.4,46,0,0,"Kir - TT21-22-23.3",0]],"metaData":{"name":"Kir - TT21-22-23","dateAdded":"2016-11-18T11:15:25.315Z","version":"v1.1.1","markerColor":"orange","cutoff":"45","type":"Input","description":"sediments","author":"Çinku et al., Tectonics 2016","age":"6.15","minAge":"1.1","maxAge":"11.2","latitude":38.4,"longitude":34.4,"sanitized":true,"edited":true,"timeEdited":"2016-11-18T14:24:47.028Z"}},{"data":[[337.5913766974951,53.12548219688476,0,0,"Kir - AK.1",0],[345.8501478682232,70.61513781302259,0,0,"Kir - AK.2",0],[319.6730732452433,28.307412997937554,0,0,"Kir - AK.3",0],[285.2140527074689,68.85780687123186,0,0,"Kir - AK.4",0],[304.8387531570372,47.82762058706932,0,0,"Kir - AK.5",0],[307.88186559827966,67.972221087209,0,0,"Kir - AK.6",0],[312.44195068303304,72.32319859929096,0,0,"Kir - AK.7",0],[314.45305214167,43.38851747777921,0,0,"Kir - AK.8",0],[341.35163133314916,27.850669741514253,0,0,"Kir - AK.9",0],[323.01654252569756,48.789765046754766,0,0,"Kir - AK.10",0],[299.91050207493595,15.167164042196942,0,0,"Kir - AK.11",0],[304.40344671873413,26.3693522170267,0,0,"Kir - AK.12",0],[342.978236274039,62.42418797139724,0,0,"Kir - AK.13",0],[336.16156201092684,64.58927699084988,0,0,"Kir - AK.14",0],[340.9936640896413,71.97932845628841,0,0,"Kir - AK.15",0],[316.2465977910439,41.81825800720621,0,0,"Kir - AK.16",0],[341.63007266307426,58.56643082603647,0,0,"Kir - AK.17",0],[338.81314276682144,54.85635673460311,0,0,"Kir - AK.18",0],[279.05319374317514,56.10965660734977,0,0,"Kir - AK.19",0],[321.854095230942,45.2395219391494,0,0,"Kir - AK.20",0],[312.2358348229053,69.42956585382056,0,0,"Kir - AK.21",0],[326.2492111726499,4.886723191363873,0,0,"Kir - AK.22",0],[326.7048524447622,56.168899470127165,0,0,"Kir - AK.23",0],[280.5277147921404,69.72910046720196,0,0,"Kir - AK.24",0],[337.44867713340454,47.05333896552296,0,0,"Kir - AK.25",0],[299.4850766106713,58.58228688357715,0,0,"Kir - AK.26",0],[344.0372742504931,67.3678083940841,0,0,"Kir - AK.27",0],[320.8472212478794,62.40085523300893,0,0,"Kir - AK.28",0],[276.5483015964552,31.234059902289875,0,0,"Kir - AK.29",0],[294.9087055589125,48.52833082687216,0,0,"Kir - AK.30",0],[344.3799824275691,67.66220185019371,0,0,"Kir - AK.31",0],[316.3904049240561,33.296836915586816,0,0,"Kir - AK.32",0],[298.8158004679153,52.22174979752987,0,0,"Kir - AK.33",0],[340.36755084945094,65.28544881478163,0,0,"Kir - AK.34",0],[334.1398700190602,51.09540376838476,0,0,"Kir - AK.35",0],[316.17273689747014,37.42586461596573,0,0,"Kir - AK.36",0],[310.2527055249243,64.24579365895173,0,0,"Kir - AK.37",0],[327.8657965141321,39.14375626824895,0,0,"Kir - AK.38",0],[327.0745805342649,42.11139342444437,0,0,"Kir - AK.39",0],[354.98709883548224,57.999523208600614,0,0,"Kir - AK.40",0],[335.0511499916572,66.67380651435245,0,0,"Kir - AK.41",0],[331.5724184598544,21.28981295927583,0,0,"Kir - AK.42",0],[303.5142088368717,49.51438638387398,0,0,"Kir - AK.43",0],[321.228851117168,38.78536392112445,0,0,"Kir - AK.44",0],[312.7177075358295,62.47010741210877,0,0,"Kir - AK.45",0],[348.8398327009104,63.86708358703119,0,0,"Kir - AK.46",0],[336.4367186778188,48.64107326862423,0,0,"Kir - AK.47",0],[314.3367574071319,61.759258171952304,0,0,"Kir - AK.48",0],[312.01738682604196,42.985013328760274,0,0,"Kir - AK.49",0],[304.912831184329,54.20121826507187,0,0,"Kir - AK.50",0],[323.69241986702554,36.58412904469819,0,0,"Kir - AK.51",0],[297.8442659707571,34.829305513435976,0,0,"Kir - AK.52",0],[306.25499916955937,53.11706298163312,0,0,"Kir - AK.53",0],[337.7176202639943,66.97699140871056,0,0,"Kir - AK.54",0],[336.2773130545418,27.926576473970975,0,0,"Kir - AK.55",0],[308.9745634098026,47.90293932251278,0,0,"Kir - AK.56",0],[334.84292692483893,46.42188769123787,0,0,"Kir - AK.57",0],[289.7707153356521,55.828669341817296,0,0,"Kir - AK.58",0],[275.7766023870146,61.76243034975107,0,0,"Kir - AK.59",0],[318.4367072834684,36.402098728755576,0,0,"Kir - AK.60",0],[320.84527095185854,46.67653958466068,0,0,"Kir - AK.61",0],[285.89512839992017,60.11438456019816,0,0,"Kir - AK.62",0],[317.00243043862525,61.410732088191644,0,0,"Kir - AK.63",0],[294.1137328895243,31.925333234475936,0,0,"Kir - AK.64",0],[337.56267693797537,47.010250658112426,0,0,"Kir - AK.65",0],[273.1704482944622,55.261960244420756,0,0,"Kir - AK.66",0],[305.5490596645782,72.79169207681072,0,0,"Kir - AK.67",0],[314.4230172921457,23.886999205209445,0,0,"Kir - AK.68",0],[266.63522911079565,61.69777565056888,0,0,"Kir - AK.69",0],[334.23282321952274,57.61909003892548,0,0,"Kir - AK.70",0],[316.3816299514226,44.17966942414058,0,0,"Kir - AK.71",0],[322.7018582195928,74.21048883594347,0,0,"Kir - AK.72",0],[335.93432675562065,38.2021195907282,0,0,"Kir - AK.73",0],[309.81549697517596,49.90981783543336,0,0,"Kir - AK.74",0],[330.65876412132343,21.913139645200054,0,0,"Kir - OR.1",0],[318.27805662751825,64.37055217967063,0,0,"Kir - OR.2",0],[327.5904455223455,50.46847338615549,0,0,"Kir - OR.3",0],[304.74330208934236,64.60564135349097,0,0,"Kir - OR.4",0],[327.422575855044,28.385134868930646,0,0,"Kir - OR.5",0],[347.76542775066423,41.918293277078384,0,0,"Kir - OR.6",0],[341.36180962039924,47.10991563453582,0,0,"Kir - OR.7",0],[325.9895815316097,32.200275952773566,0,0,"Kir - OR.8",0],[324.28853798601585,50.73735791904693,0,0,"Kir - OR.9",0],[308.87992329815097,40.31592693355746,0,0,"Kir - OR.10",0],[348.13271567530904,32.71826816942319,0,0,"Kir - OR.11",0],[333.4471056002194,13.857006786445906,0,0,"Kir - OR.12",0],[333.0262721605315,53.206921293609774,0,0,"Kir - OR.13",0],[308.7940838467284,21.104216091310526,0,0,"Kir - OR.14",0],[337.38325568535095,61.098997075910546,0,0,"Kir - OR.15",0],[330.634301302887,53.56327328594169,0,0,"Kir - OR.16",0],[334.95569650153055,56.71327371436031,0,0,"Kir - OR.17",0],[315.77445482289477,20.21440830151057,0,0,"Kir - OR.18",0],[351.9374477010226,45.622082723736156,0,0,"Kir - OR.19",0],[342.7338298423626,29.7812716218794,0,0,"Kir - OR.20",0],[315.0396255294022,51.99849520442558,0,0,"Kir - OR.21",0],[358.5635449084789,36.51120111545517,0,0,"Kir - OR.22",0],[328.52071181743486,29.78673221509984,0,0,"Kir - OR.23",0],[311.23042084296753,36.92800464629165,0,0,"Kir - OR.24",0],[351.32304750554454,13.508806512007402,0,0,"Kir - OR.25",0],[318.9348922465874,10.67911959372008,0,0,"Kir - OR.26",0],[319.1669615683692,44.163555344906065,0,0,"Kir - OR.27",0],[324.81217144957634,39.61073445033213,0,0,"Kir - OR.28",0],[329.81721523185,38.52969217019036,0,0,"Kir - OR.29",0],[334.99507798471745,49.13909832219821,0,0,"Kir - OR.30",0],[351.63490864788673,60.82498170955691,0,0,"Kir - OR.31",0],[338.56104263889125,49.86664592190402,0,0,"Kir - OR.32",0],[336.2188052421654,52.20991988520103,0,0,"Kir - OR.33",0],[318.77299768592854,42.4731170289071,0,0,"Kir - OR.34",0],[344.15611367375953,46.66746424927122,0,0,"Kir - OR.35",0],[295.2535348409641,52.54978067960292,0,0,"Kir - OR.36",0],[336.1186776908295,53.264809563544915,0,0,"Kir - OR.37",0],[331.01216551536754,44.69122312134057,0,0,"Kir - OR.38",0],[301.5566534301911,55.52362917697094,0,0,"Kir - OR.39",0],[340.29127789586346,60.04424494264574,0,0,"Kir - OR.40",0],[316.6924685465128,50.76470467185367,0,0,"Kir - OR.41",0],[319.4463150162319,39.86327429756249,0,0,"Kir - OR.42",0],[318.1134093388971,58.2163689179698,0,0,"Kir - OR.43",0],[6.201897410570552,53.69220538312974,0,0,"Kir - OR.44",0],[357.10029840950506,59.444473127280666,0,0,"Kir - OR.45",0],[316.33940348626584,43.32544980717508,0,0,"Kir - OR.46",0],[354.2092709708183,28.911216589682923,0,0,"Kir - OR.47",0],[336.13148742354673,50.7746197142054,0,0,"Kir - OR.48",0],[328.5807947435867,56.63559310694334,0,0,"Kir - OR.49",0],[331.1270341030877,33.03250643504145,0,0,"Kir - OR.50",0],[323.1055135703175,40.73309456045713,0,0,"Kir - OR.51",0],[324.21689709254144,41.83505537503443,0,0,"Kir - OR.52",0],[320.7405458249002,33.336971502070085,0,0,"Kir - OR.53",0],[358.3327500773965,38.65230911039433,0,0,"Kir - OR.54",0],[339.44356950254155,35.681843474486925,0,0,"Kir - OR.55",0],[345.26905411564456,44.72472048672205,0,0,"Kir - OR.56",0],[349.3104320509841,57.28646159579448,0,0,"Kir - OR.57",0],[347.111989269864,54.18086050297612,0,0,"Kir - OR.58",0],[341.8070511386343,28.940654050442934,0,0,"Kir - OR.59",0],[298.5057806884922,41.071178211300456,0,0,"Kir - SK.1",0],[326.0838972702767,54.598915545409994,0,0,"Kir - SK.2",0],[321.19646231102047,50.52181810908752,0,0,"Kir - SK.3",0],[316.27333772971133,56.92088947325569,0,0,"Kir - SK.4",0],[329.5809152675215,66.3408211746056,0,0,"Kir - SK.5",0],[339.3636857108262,60.36634724752861,0,0,"Kir - SK.6",0],[38.369761125270145,82.61860498506023,0,0,"Kir - SK.7",0],[310.56366016807624,43.48566732135,0,0,"Kir - SK.8",0],[329.04685950779947,41.76531154344895,0,0,"Kir - SK.9",0],[318.7566958978208,53.09209831017691,0,0,"Kir - SK.10",0],[319.5505015049574,63.52934789393253,0,0,"Kir - SK.11",0],[313.2956679026099,47.28143378411187,0,0,"Kir - SK.12",0],[343.3158143524561,44.0125749821922,0,0,"Kir - SK.13",0],[330.6005017980272,13.788005261977327,0,0,"Kir - SK.14",0],[340.2549709802925,58.72306292016095,0,0,"Kir - SK.15",0],[349.38166159353193,55.382263844745765,0,0,"Kir - SK.16",0],[309.8247239465486,72.81299834812198,0,0,"Kir - SK.17",0],[332.20983592433754,28.808942218931545,0,0,"Kir - SK.18",0],[355.2261880273955,59.63013748602476,0,0,"Kir - SK.19",0],[309.6651040134768,57.394781796448996,0,0,"Kir - SK.20",0],[322.35790128237954,55.67835600134195,0,0,"Kir - SK.21",0],[311.6786079715673,18.14995546595485,0,0,"Kir - SK.22",0],[327.8300231338651,70.84372456580643,0,0,"Kir - SK.23",0],[305.01194937746686,63.78633460051998,0,0,"Kir - SK.24",0],[305.38708640060156,42.229850725261414,0,0,"Kir - SK.25",0],[0.021937392038296366,62.005500469492745,0,0,"Kir - SK.26",0],[323.42382118076864,44.14921485926199,0,0,"Kir - SK.27",0],[326.2626410396381,57.49421805072492,0,0,"Kir - SK.28",0],[320.91123345755454,48.03062715386115,0,0,"Kir - SK.29",0],[292.36207399689897,54.807977350518435,0,0,"Kir - SK.30",0],[347.13133680225405,40.16380425329961,0,0,"Kir - SK.31",0],[327.153711873126,63.667968189755605,0,0,"Kir - SK.32",0],[352.5889976336653,71.24176796404517,0,0,"Kir - SK.33",0],[329.5192059233939,58.75062971610905,0,0,"Kir - SK.34",0],[359.08056510588875,63.00338490249755,0,0,"Kir - SK.35",0],[323.3584682369757,16.95578102097679,0,0,"Kir - SK.36",0],[306.99550360392027,74.91544794969313,0,0,"Kir - SK.37",0],[328.96303447815,42.70874160311408,0,0,"Kir - SK.38",0],[335.8568671207941,26.87995903529625,0,0,"Kir - SK.39",0],[324.07670285198867,11.31779045623983,0,0,"Kir - SK.40",0],[327.12580053106615,52.81010424975306,0,0,"Kir - SK.41",0],[319.16407925291537,52.824602159417196,0,0,"Kir - SK.42",0],[295.9980998398694,32.27132108502737,0,0,"Kir - SK.43",0],[328.5598243583423,47.51153799097883,0,0,"Kir - SK.44",0],[335.18953797066234,31.947639536407316,0,0,"Kir - SK.45",0],[337.9495168193504,28.479827888040422,0,0,"Kir - SK.46",0],[287.4895179977027,73.24089631327736,0,0,"Kir - SK.47",0],[304.1973918494715,25.205565230747307,0,0,"Kir - SK.48",0],[312.44063624570913,22.862580136890436,0,0,"Kir - SK.49",0],[316.22821557110854,26.204434312690836,0,0,"Kir - SK.50",0],[322.91332456002806,49.096758654221475,0,0,"Kir - SK.51",0],[12.348331975016492,44.49579489345879,0,0,"Kir - SK.52",0],[327.60228488200926,46.68878039528241,0,0,"Kir - SK.53",0],[342.788367310514,24.0126852479145,0,0,"Kir - SK.54",0],[342.2466987783708,69.29016231522495,0,0,"Kir - SK.55",0],[308.3176074930151,74.07123835616771,0,0,"Kir - SK.56",0],[301.8856498481571,61.885655901906986,0,0,"Kir - SK.57",0],[314.70618812402995,41.77760190017133,0,0,"Kir - SK.58",0],[345.3311312297698,44.300289929854664,0,0,"Kir - SK.59",0],[326.5931806066726,27.445509982155567,0,0,"Kir - SK.60",0],[349.41825257603864,60.63184344793056,0,0,"Kir - AG.1",0],[347.3452641433902,31.15431279104429,0,0,"Kir - AG.2",0],[351.0473927652463,47.07671295824488,0,0,"Kir - AG.3",0],[356.6025024045249,35.32575088522912,0,0,"Kir - AG.4",0],[336.9864639295063,42.55907431620968,0,0,"Kir - AG.5",0],[356.90246765946733,35.49053370531294,0,0,"Kir - AG.6",0],[332.6986543564999,50.09169523056106,0,0,"Kir - AG.7",0],[351.30492905046697,54.84499715128475,0,0,"Kir - AG.8",0],[327.5308905047326,67.96054333426439,0,0,"Kir - AG.9",0],[13.284596715130192,56.288772091833394,0,0,"Kir - AG.10",0],[345.9948407125487,52.80256079340823,0,0,"Kir - AG.11",0],[7.06589646958696,25.759740267196552,0,0,"Kir - AG.12",0],[1.867426729487761,45.167041926826315,0,0,"Kir - AG.13",0],[10.810966354285767,30.719024236744563,0,0,"Kir - AG.14",0],[353.5427028065958,57.08798837655593,0,0,"Kir - AG.15",0],[6.296286189304794,63.24871159953828,0,0,"Kir - AG.16",0],[349.03637989803565,49.48488841825512,0,0,"Kir - AG.17",0],[4.705081613959521,42.96623783777856,0,0,"Kir - AG.18",0],[11.427254996564841,50.63240514462882,0,0,"Kir - AG.19",0],[359.52776741953153,58.263376014537734,0,0,"Kir - AG.20",0],[333.7829906608,55.35363834302354,0,0,"Kir - AG.21",0],[8.213205427785283,46.50507465321699,0,0,"Kir - AG.22",0],[40.53829978044928,53.87453487474847,0,0,"Kir - AG.23",0],[9.060395571197319,58.96234602844349,0,0,"Kir - AG.24",0],[337.7728863312252,56.15900471287046,0,0,"Kir - AG.25",0],[352.0291612816093,67.3523097386943,0,0,"Kir - AG.26",0],[28.430311814747768,45.300765986562844,0,0,"Kir - AG.27",0],[338.177991712946,58.429672082699696,0,0,"Kir - AG.28",0],[348.4182647721964,64.68852664234294,0,0,"Kir - AG.29",0],[332.5634973382157,41.544764053592026,0,0,"Kir - AG.30",0],[332.7025686990785,64.57229253020391,0,0,"Kir - AG.31",0],[347.3226005630595,57.223754280812834,0,0,"Kir - AG.32",0],[352.3196689469014,45.62590695747095,0,0,"Kir - AG.33",0],[359.91158795371047,56.849723113014036,0,0,"Kir - AG.34",0],[345.7615432655505,58.76144176497653,0,0,"Kir - AG.35",0],[349.7257062491517,42.03480203450303,0,0,"Kir - AG.36",0],[353.6966323693555,40.79524278121114,0,0,"Kir - AG.37",0],[0.46074524851019305,59.757878701941245,0,0,"Kir - AG.38",0],[352.84900189525627,5.324651675001373,0,0,"Kir - AG.39",0],[344.4683708319094,44.66096714399899,0,0,"Kir - AG.40",0],[19.396201618701923,44.7208590072225,0,0,"Kir - AG.41",0],[14.835166818396829,27.453719429132033,0,0,"Kir - AG.42",0],[350.802698324311,67.778168504347,0,0,"Kir - AG.43",0],[327.579067227608,52.75103323049414,0,0,"Kir - AG.44",0],[350.8689802345656,52.59917239834358,0,0,"Kir - AG.45",0],[2.227755495072927,61.734409005338506,0,0,"Kir - AG.46",0],[332.4800190727883,46.911839504082,0,0,"Kir - AG.47",0],[355.60508754053797,54.13092776724438,0,0,"Kir - AG.48",0],[8.026413127225055,56.12793413349276,0,0,"Kir - AG.49",0],[8.797182259436681,62.487041588242036,0,0,"Kir - AG.50",0],[339.47337865716963,46.229558481396275,0,0,"Kir - AG.51",0],[347.19906210920294,39.665093205350466,0,0,"Kir - AG.52",0],[344.1548337316169,25.512048802517455,0,0,"Kir - AG.53",0],[341.7051536253563,65.32989071187278,0,0,"Kir - AG.54",0],[8.517700128154274,47.11963922644619,0,0,"Kir - AG.55",0]],"metaData":{"name":"Kirsehir AAB","latitude":38.91,"longitude":33.81,"age":60,"minAge":60,"maxAge":60,"markerColor":"white","cutoff":"45","dateAdded":"2017-06-14T15:42:43.826Z","version":"v1.1.2","sanitized":true,"type":"Site Combination","author":"Lefebvre et al EPSL 2013","description":"Multiple Sites","edited":true,"timeEdited":"2017-06-14T15:45:08.060Z","plateId":null,"lithology":"plutonic","carriers":null}},{"data":[[351.92957142740624,58.60955007308146,0,0,"Kir - CA.1",0],[358.8153509130052,62.826667456591615,0,0,"Kir - CA.2",0],[9.039824335430353,51.36856981585487,0,0,"Kir - CA.3",0],[330.82783806645443,64.92944265685034,0,0,"Kir - CA.4",0],[352.7337618845959,68.90319164771911,0,0,"Kir - CA.5",0],[358.61879785695396,61.33943236223622,0,0,"Kir - CA.6",0],[347.75464280754204,57.01251775384162,0,0,"Kir - CA.7",0],[328.8960876889571,68.33238446287396,0,0,"Kir - CA.8",0],[342.4445482158769,69.29658774773844,0,0,"Kir - CA.9",0],[0.9310516401696987,61.5218850553836,0,0,"Kir - CA.10",0],[21.98512421538709,69.84517143610108,0,0,"Kir - CA.11",0],[25.113998985407477,60.83792274795412,0,0,"Kir - CA.12",0],[10.279305744667965,72.59019484232284,0,0,"Kir - CA.13",0],[350.7432723705749,74.36757988364249,0,0,"Kir - CA.14",0],[0.44284679398055005,53.88817312900758,0,0,"Kir - CA.15",0],[8.600211372162448,59.29127660381494,0,0,"Kir - CA.16",0],[351.86582529432235,62.71963128050433,0,0,"Kir - CA.17",0],[12.18432149917868,63.734126688962704,0,0,"Kir - CA.18",0],[23.92849509452975,57.36928191137125,0,0,"Kir - CA.19",0],[356.6701274650561,65.70447788807478,0,0,"Kir - CA.20",0],[8.018784379002739,58.839910246485665,0,0,"Kir - CA.21",0],[5.423158762871822,61.70335064599401,0,0,"Kir - CA.22",0],[7.6097517573201685,52.0698136619017,0,0,"Kir - CA.23",0],[17.535751341492414,67.06808033728491,0,0,"Kir - CA.24",0],[0.9783397130180447,69.93706376273434,0,0,"Kir - CA.25",0],[1.3011652386580295,69.90066931875495,0,0,"Kir - CA.26",0],[27.6121222443295,64.60031696027656,0,0,"Kir - CA.27",0],[357.0844702992738,71.12401005286411,0,0,"Kir - CA.28",0],[6.3380609075367715,61.015652733473274,0,0,"Kir - CA.29",0],[325.440311860346,67.42420494457119,0,0,"Kir - CA.30",0],[5.031043912017765,66.54486170723612,0,0,"Kir - CA.31",0],[15.618148708509523,56.3276372465529,0,0,"Kir - CA.32",0],[340.94094309491174,62.577907153283554,0,0,"Kir - CA.33",0],[331.49168325393316,70.08727512052899,0,0,"Kir - CA.34",0],[328.92358623673795,55.53071631785532,0,0,"Kir - CA.35",0],[8.948159832547674,64.1691505938774,0,0,"Kir - CA.36",0],[3.50971689770887,61.94039782555714,0,0,"Kir - CA.37",0],[352.72721177746996,61.18003668006334,0,0,"Kir - HI.1",0],[345.1779005981267,-19.581499061446834,0,0,"Kir - HI.2",0],[13.812477472247792,12.824847012908902,0,0,"Kir - HI.3",0],[356.4377320165767,59.891719719425886,0,0,"Kir - HI.4",0],[13.680941052252491,46.90184621391694,0,0,"Kir - HI.5",0],[19.318955959685777,34.88989266339724,0,0,"Kir - HI.6",0],[21.94511300315399,53.62967302128236,0,0,"Kir - HI.7",0],[334.52740995925075,48.70551325259094,0,0,"Kir - HI.8",0],[8.317333775836511,68.57347563958777,0,0,"Kir - HI.9",0],[339.1114614423495,44.6476951854233,0,0,"Kir - HI.10",0],[0.20180058723263983,51.1475879340629,0,0,"Kir - HI.11",0],[6.973508356613205,44.13503428912971,0,0,"Kir - HI.12",0],[348.0396769838089,59.26406629030832,0,0,"Kir - HI.13",0],[4.867571212384422,52.764366089809954,0,0,"Kir - HI.14",0],[337.0249183124051,41.016903150016624,0,0,"Kir - HI.15",0],[4.836549022365439,54.538508155568586,0,0,"Kir - HI.16",0],[33.772901897088694,74.22675862967503,0,0,"Kir - HI.17",0],[357.559404726603,31.892926345651734,0,0,"Kir - HI.18",0],[2.9224505869284085,65.20215968069596,0,0,"Kir - HI.19",0],[1.0740195985197571,61.92078517136857,0,0,"Kir - HI.20",0],[6.285200076186572,52.64425267903904,0,0,"Kir - HI.21",0],[355.5695170798887,43.47909813112948,0,0,"Kir - HI.22",0],[6.436673543249618,23.389313151102062,0,0,"Kir - HI.23",0],[1.4132794443083894,48.19884011445433,0,0,"Kir - HI.24",0],[0.20426463263459027,60.86964098105621,0,0,"Kir - HI.25",0],[16.194247356108985,33.59136798173093,0,0,"Kir - HI.26",0],[11.277742877086135,61.671668802028115,0,0,"Kir - HI.27",0],[13.413714246835925,34.20959438230264,0,0,"Kir - HI.28",0],[25.117006538894664,53.874507828282674,0,0,"Kir - HI.29",0],[345.14964405879203,55.51374700127722,0,0,"Kir - HI.30",0],[25.102716160744563,72.36914407356709,0,0,"Kir - HI.31",0],[357.28664372784164,33.10880570941458,0,0,"Kir - HI.32",0],[357.0254864978864,48.14320507905717,0,0,"Kir - HI.33",0],[349.5174965219966,35.75897914270755,0,0,"Kir - HI.34",0],[2.227806081584858,47.071950382088886,0,0,"Kir - HI.35",0],[349.28335694424584,37.32306594276063,0,0,"Kir - HI.36",0],[353.790708543636,25.51382737289258,0,0,"Kir - HI.37",0],[24.261024764395394,58.83455478962329,0,0,"Kir - HI.38",0],[25.702590499305007,55.69981253746155,0,0,"Kir - HI.39",0],[359.38402363243773,61.146902277403846,0,0,"Kir - HI.40",0],[359.96989184616785,50.81999368024101,0,0,"Kir - HI.41",0],[5.473311929931438,53.04108871397755,0,0,"Kir - HI.42",0],[18.790286060687993,39.17675666317414,0,0,"Kir - HI.43",0],[32.74056192075003,51.338100107791824,0,0,"Kir - HI.44",0],[340.7088472538533,13.056709448246016,0,0,"Kir - HI.45",0],[0.843599042820471,49.93727949550835,0,0,"Kir - HI.46",0],[28.16461211465398,47.47291350842489,0,0,"Kir - HI.47",0],[4.394998974618802,51.44275382774614,0,0,"Kir - HI.48",0],[344.3119184650925,37.72884141164882,0,0,"Kir - HI.49",0],[346.08952145594077,43.693631218780645,0,0,"Kir - HI.50",0],[339.37647195717176,45.419817934746895,0,0,"Kir - HI.51",0],[16.43496309615505,21.78895507238739,0,0,"Kir - HI.52",0],[348.0329809024762,53.99269846335746,0,0,"Kir - HI.53",0],[349.9624849066433,57.526288208511296,0,0,"Kir - HI.54",0],[344.8555162981866,52.94883308114754,0,0,"Kir - HI.55",0],[350.4431822265866,44.71897707996171,0,0,"Kir - HI.56",0],[8.924685197528882,47.66627269506628,0,0,"Kir - HI.57",0],[6.116351060476588,54.50655226315044,0,0,"Kir - HI.58",0],[5.4295008641515965,58.45388085894931,0,0,"Kir - HI.59",0],[344.22431415142717,57.794979152474426,0,0,"Kir - HI.60",0],[353.5392068882985,62.064437174496724,0,0,"Kir - HI.61",0],[355.68087181344276,63.77711535998474,0,0,"Kir - HI.62",0],[8.085530476048008,41.5861283981198,0,0,"Kir - HI.63",0],[348.4484876489323,58.01515893667994,0,0,"Kir - HI.64",0],[347.4573275603599,57.24004063888294,0,0,"Kir - HI.65",0],[7.521427502632633,70.36373483826992,0,0,"Kir - HI.66",0],[358.8013047347556,46.4337738386148,0,0,"Kir - HI.67",0],[28.95316927365879,47.919263048948096,0,0,"Kir - HI.68",0],[22.809150694742318,45.595492327270904,0,0,"Kir - HI.69",0],[18.933296030431578,40.23227091416206,0,0,"Kir - HI.70",0],[22.290521493228905,45.115004459440996,0,0,"Kir - HI.71",0],[357.4877908812626,54.24140607863212,0,0,"Kir - HI.72",0],[347.2108534148508,55.46847640295218,0,0,"Kir - HI.73",0],[6.359907166184166,36.366867224398774,0,0,"Kir - HI.74",0],[324.2684333912082,69.37302247746112,0,0,"Kir - KK.1",0],[327.24287984035755,62.23827077242124,0,0,"Kir - KK.2",0],[324.6721558227323,62.371866480299325,0,0,"Kir - KK.3",0],[339.692808222798,72.03078613535882,0,0,"Kir - KK.4",0],[333.3983225942709,73.85651242913653,0,0,"Kir - KK.5",0],[350.0897528157887,54.62154366789009,0,0,"Kir - KK.6",0],[330.5469839983307,68.4831266647677,0,0,"Kir - KK.7",0],[10.986619834720784,75.57587146539399,0,0,"Kir - KK.8",0],[336.9572621999964,62.792030292501934,0,0,"Kir - KK.9",0],[17.25147229008678,34.89047605309962,0,0,"Kir - KK.10",0],[347.90531365024793,51.519332002842326,0,0,"Kir - KK.11",0],[6.6264137268906325,27.57086237519479,0,0,"Kir - KK.12",0],[349.58017968986604,71.69654464885213,0,0,"Kir - KK.13",0],[15.885904752036595,62.10475784379221,0,0,"Kir - KK.14",0],[336.7029458945153,28.41322694360491,0,0,"Kir - KK.15",0],[355.37077489878624,57.86793201276987,0,0,"Kir - KK.16",0],[341.6194710289527,64.56329933705341,0,0,"Kir - KK.17",0],[5.773854607287888,47.62221453965281,0,0,"Kir - KK.18",0],[356.01632924079166,36.92084203140601,0,0,"Kir - KK.19",0],[341.13576142570105,66.15683404863479,0,0,"Kir - KK.20",0],[345.48890973252077,61.96603058456418,0,0,"Kir - KK.21",0],[0.25494309553675976,42.95887011721938,0,0,"Kir - KK.22",0],[323.73156625958313,75.49440218155131,0,0,"Kir - KK.23",0],[354.0981509904279,81.59626546347285,0,0,"Kir - KK.24",0],[321.8956741065149,69.87376102169807,0,0,"Kir - KK.25",0],[333.80474320786186,46.516886057846556,0,0,"Kir - KK.26",0],[326.3555410837246,43.30400023264675,0,0,"Kir - KK.27",0],[333.3161270522146,55.7935969422331,0,0,"Kir - KK.28",0],[349.7982093327631,55.39688532063722,0,0,"Kir - KK.29",0],[315.18035188272756,37.99752322339021,0,0,"Kir - KK.30",0],[331.6892656846894,28.233125036747815,0,0,"Kir - KK.31",0],[357.9956256095352,32.45658400784966,0,0,"Kir - KK.32",0],[355.43375236541704,48.33268394702215,0,0,"Kir - KK.33",0],[333.5335459961684,63.964595848766095,0,0,"Kir - KK.34",0],[330.84036996142163,60.93160827593809,0,0,"Kir - KK.35",0],[356.7044856482626,62.40861761018028,0,0,"Kir - KK.36",0],[0.3592878003157125,64.8205975856832,0,0,"Kir - KK.37",0],[347.30562764818876,57.88501888016472,0,0,"Kir - KK.38",0],[334.7723230822137,49.99249512605688,0,0,"Kir - KK.39",0],[327.99535034633095,43.907896854177245,0,0,"Kir - KK.40",0],[339.03754048161136,63.50715101636147,0,0,"Kir - KK.41",0],[353.47835902503545,86.99294414745656,0,0,"Kir - KK.42",0],[335.5324043694966,53.723984333475364,0,0,"Kir - KK.43",0],[21.076059262131082,48.03039160290804,0,0,"Kir - KK.44",0],[342.92295227479985,74.0877142188864,0,0,"Kir - KK.45",0],[343.37224703728805,68.05233003232125,0,0,"Kir - KK.46",0],[345.2151669042451,55.97414479141878,0,0,"Kir - KK.47",0],[1.796332438149534,70.3002989418494,0,0,"Kir - KK.48",0],[347.5108864065234,61.94308611140051,0,0,"Kir - KK.49",0],[312.0486587592311,77.55043593806704,0,0,"Kir - KK.50",0],[343.33709222475477,59.87562646075198,0,0,"Kir - KK.51",0],[8.82116308646664,53.617243469670385,0,0,"Kir - KK.52",0],[340.05578578923394,46.49695855052676,0,0,"Kir - KK.53",0],[332.6007333955795,54.885916919110166,0,0,"Kir - KK.54",0],[304.0104202682577,57.814408027899944,0,0,"Kir - KK.55",0],[323.3211610844537,66.082302817351,0,0,"Kir - KK.56",0],[24.631879970517502,76.95879780339578,0,0,"Kir - KK.57",0],[347.89767249512266,48.735153288677836,0,0,"Kir - KK.58",0],[316.719655402243,62.207001899992804,0,0,"Kir - KK.59",0],[340.20793662892936,68.67705058502567,0,0,"Kir - KK.60",0],[354.32172099189836,64.3401994922803,0,0,"Kir - KK.61",0],[311.86895163337863,43.23199663449102,0,0,"Kir - KK.62",0],[349.01523335154207,49.86229985616198,0,0,"Kir - KK.63",0],[349.72270168646025,16.917214585322224,0,0,"Kir - KK.64",0],[339.6615796738463,63.00331657869511,0,0,"Kir - KK.65",0],[343.20068336274585,22.415544499903973,0,0,"Kir - KK.66",0],[331.52047644766685,76.27015499930594,0,0,"Kir - KK.67",0],[310.01256071681155,46.28314369416866,0,0,"Kir - KK.68",0],[16.643320438012665,33.727187382875755,0,0,"Kir - KK.69",0],[3.108832893813542,49.08380080005403,0,0,"Kir - KK.70",0],[352.00125563291493,58.82988489259612,0,0,"Kir - KK.71",0],[8.879575655427573,58.77614820573918,0,0,"Kir - KK.72",0],[2.3129443347672236,19.210789389196034,0,0,"Kir - KK.73",0],[11.728958143168143,34.932058966728135,0,0,"Kir - KK.74",0],[325.9795797464503,60.849548570854886,0,0,"Kir - KK.75",0],[349.0138224214259,12.676330228825277,0,0,"Kir - KK.76",0],[353.61142099813804,69.36254098245651,0,0,"Kir - KK.77",0],[327.57971995417245,51.75259666587775,0,0,"Kir - KK.78",0],[337.9093247285025,69.55205887528648,0,0,"Kir - KK.79",0],[348.82678582635634,46.355885804994344,0,0,"Kir - KK.80",0],[352.27285285519224,70.41151822632857,0,0,"Kir - KK.81",0],[3.0674524339698905,44.62765913616939,0,0,"Kir - KK.82",0],[27.423723138821174,35.29829913495035,0,0,"Kir - KK.83",0],[338.23691365966,48.00090028173746,0,0,"Kir - KK.84",0],[14.964463976189734,60.24503088880112,0,0,"Kir - KK.85",0],[321.33141795291544,75.42896611880406,0,0,"Kir - KK.86",0],[338.1112216052825,56.66933249572517,0,0,"Kir - KO.1",0],[9.931272643671434,72.07753621591506,0,0,"Kir - KO.2",0],[341.482583288088,47.675862112298496,0,0,"Kir - KO.3",0],[9.500448533705708,49.35963125716854,0,0,"Kir - KO.4",0],[334.79194926003936,58.1963295252931,0,0,"Kir - KO.5",0],[357.5345759394844,61.59820516168903,0,0,"Kir - KO.6",0],[343.5395465938911,56.81016336425984,0,0,"Kir - KO.7",0],[25.49914704299715,57.90542970546606,0,0,"Kir - KO.8",0],[346.7570715201512,59.16337137300729,0,0,"Kir - KO.9",0],[339.8985346632355,74.15846083873959,0,0,"Kir - KO.10",0],[326.40312645203085,49.94537334377284,0,0,"Kir - KO.11",0],[311.2527001433275,63.01571830468916,0,0,"Kir - KO.12",0],[328.49758233488956,30.087517371320068,0,0,"Kir - KO.13",0],[3.2576124444580614,72.2138737602235,0,0,"Kir - KO.14",0],[40.00478266029597,71.42954871977808,0,0,"Kir - KO.15",0],[339.8779352679228,54.030085670935534,0,0,"Kir - KO.16",0],[320.03617235720435,50.98824563150832,0,0,"Kir - KO.17",0],[340.83775002813104,51.466368525620865,0,0,"Kir - KO.18",0],[335.96027976311814,76.52546408956056,0,0,"Kir - KO.19",0],[338.14849437745886,60.142157741965306,0,0,"Kir - KO.20",0],[347.3998098553984,54.51867620185574,0,0,"Kir - KO.21",0],[20.42647300464256,56.49978709261892,0,0,"Kir - KO.22",0],[345.2866697354437,50.413755614398674,0,0,"Kir - KO.23",0],[0.34512360540014697,55.80650098924959,0,0,"Kir - KO.24",0],[341.14183919249103,52.155310993060446,0,0,"Kir - KO.25",0],[317.8432496050748,72.1407801369489,0,0,"Kir - KO.26",0],[333.3531583015616,51.55019434587517,0,0,"Kir - KO.27",0],[350.86243731299453,53.406246150002524,0,0,"Kir - KO.28",0],[355.5812054558737,38.34665169055765,0,0,"Kir - KO.29",0],[331.7880906900523,59.53563594269847,0,0,"Kir - KO.30",0],[348.99785004166966,59.84553985898523,0,0,"Kir - KO.31",0],[338.4092775479703,53.5002501107427,0,0,"Kir - KO.32",0],[352.32473241359753,43.893464666235914,0,0,"Kir - KO.33",0],[331.87658966433514,62.02467177334151,0,0,"Kir - KO.34",0],[335.7528726125231,52.48234278386586,0,0,"Kir - KO.35",0],[13.4798320550276,61.94929518497887,0,0,"Kir - KO.36",0],[347.54271391450277,62.73911243000251,0,0,"Kir - KO.37",0],[318.52005498602466,53.96944776884679,0,0,"Kir - KO.38",0],[321.91727337021837,41.44555561463494,0,0,"Kir - KO.39",0],[14.70736641977561,53.92403804277046,0,0,"Kir - KO.40",0],[0.6235849940993035,69.72864945941755,0,0,"Kir - KO.41",0],[30.548398507745674,30.746814157803964,0,0,"Kir - KO.42",0],[359.96440958452416,40.73034988969788,0,0,"Kir - KO.43",0],[331.1578579408706,49.717626097780645,0,0,"Kir - KO.44",0],[333.1455054321781,63.23215059035203,0,0,"Kir - KO.45",0],[347.87694459559356,59.68994873619627,0,0,"Kir - KO.46",0],[351.672831612851,67.36458221241023,0,0,"Kir - KO.47",0],[346.2300030301808,65.77197596395727,0,0,"Kir - KO.48",0],[347.44418785922943,63.14006328520447,0,0,"Kir - KO.49",0],[336.4710492047699,65.5781616164367,0,0,"Kir - KO.50",0],[350.04978962680343,58.980157960586844,0,0,"Kir - KO.51",0],[347.2238180842268,30.784987669786013,0,0,"Kir - KO.52",0],[335.826490182538,57.44270482819637,0,0,"Kir - KO.53",0],[0.019751367604669667,41.54899337513363,0,0,"Kir - KO.54",0],[339.45866229817216,59.391018690658186,0,0,"Kir - KO.55",0],[328.36880475107546,59.981334203686224,0,0,"Kir - KO.56",0],[352.15311621475246,40.85942863921017,0,0,"Kir - KO.57",0],[350.3296516779852,73.13291804590446,0,0,"Kir - KO.58",0],[315.1385449540877,60.66244773641923,0,0,"Kir - KO.59",0],[334.2059988835515,57.819004853048206,0,0,"Kir - KO.60",0],[325.95187832848455,50.747418754740146,0,0,"Kir - KO.61",0],[320.64622514293956,55.122935425197404,0,0,"Kir - KO.62",0],[346.31954054016387,61.72971995419184,0,0,"Kir - KO.63",0],[353.78731906627877,62.19112363276599,0,0,"Kir - KO.64",0],[320.0157260149206,54.82818578435598,0,0,"Kir - KO.65",0],[359.7849967010696,44.74004224298405,0,0,"Kir - KO.66",0],[331.2456630189665,56.48417630135131,0,0,"Kir - KO.67",0],[346.9556519645561,74.29655990717553,0,0,"Kir - KO.68",0],[357.76680785013826,44.76758245379378,0,0,"Kir - KO.69",0],[3.7310929089514957,48.28751823258612,0,0,"Kir - KO.70",0],[357.7211933309839,60.33904115888592,0,0,"Kir - KO.71",0]],"metaData":{"name":"Kirsehir KKB","latitude":39.59,"longitude":33.43,"age":60,"minAge":60,"maxAge":60,"markerColor":"white","cutoff":"45","dateAdded":"2017-06-14T15:49:15.210Z","version":"v1.1.2","sanitized":true,"type":"Site Combination","author":"Unknown","description":"Multiple Sites","edited":true,"timeEdited":"2017-06-14T15:49:52.802Z","plateId":null,"lithology":null,"carriers":null}},{"data":[[44.57095664456953,78.65837713193086,0,0,"Kir - OK.1",0],[13.443968900709649,72.7366124849812,0,0,"Kir - OK.2",0],[39.48867066753692,21.220432920104596,0,0,"Kir - OK.3",0],[1.273801977154676,66.29781031888034,0,0,"Kir - OK.4",0],[309.7621251933747,81.44651099571473,0,0,"Kir - OK.5",0],[2.218627341601973,69.5012517360672,0,0,"Kir - OK.6",0],[34.15913187146832,59.54737342553524,0,0,"Kir - OK.7",0],[23.05697204947031,57.68498906185762,0,0,"Kir - OK.8",0],[22.372798050627182,70.63129668157355,0,0,"Kir - OK.9",0],[32.72912365579705,49.80874067291265,0,0,"Kir - OK.10",0],[2.1864865096251265,53.02169282904277,0,0,"Kir - OK.11",0],[37.61062642777193,52.86994579592286,0,0,"Kir - OK.12",0],[10.95085878586167,57.56772361870334,0,0,"Kir - OK.13",0],[35.815832083346734,65.26458070919406,0,0,"Kir - OK.14",0],[338.94555617358714,76.80082042896801,0,0,"Kir - OK.15",0],[356.70574768015007,50.78495467388623,0,0,"Kir - OK.16",0],[57.714846313723804,43.25132119221299,0,0,"Kir - OK.17",0],[28.235736267694183,64.08543818904701,0,0,"Kir - OK.18",0],[32.48035473369765,49.462595677093184,0,0,"Kir - OK.19",0],[28.884173133089345,55.5134129156913,0,0,"Kir - OK.20",0],[32.6669565733946,33.70208802053772,0,0,"Kir - OK.21",0],[28.35437516531453,48.52015997600232,0,0,"Kir - OK.22",0],[40.118050300944034,55.344164165176394,0,0,"Kir - OK.23",0],[356.5926727051699,69.68628032379671,0,0,"Kir - OK.24",0],[6.271241237048969,54.12984132770418,0,0,"Kir - OK.25",0],[0.73745172082414,60.783080605592474,0,0,"Kir - OK.26",0],[348.7649184171659,61.91379984258938,0,0,"Kir - YO.1",0],[31.7664993659462,45.964362364441456,0,0,"Kir - YO.2",0],[50.49585648011336,45.10751298981926,0,0,"Kir - YO.3",0],[14.604995090869899,77.24074254331421,0,0,"Kir - YO.4",0],[8.376416438456545,29.254884680766317,0,0,"Kir - YO.5",0],[357.4840970177341,36.258646047074265,0,0,"Kir - YO.6",0],[48.27157901225803,68.40367941161028,0,0,"Kir - YO.7",0],[7.183771573325998,35.289143924713834,0,0,"Kir - YO.8",0],[356.08670626704264,58.73395366704611,0,0,"Kir - YO.9",0],[10.079698196584241,31.022787909172337,0,0,"Kir - YO.10",0],[348.14154382468064,-3.304531369901943,0,0,"Kir - YO.11",0],[27.41186094523956,25.717913777971187,0,0,"Kir - YO.12",0],[359.2669575483628,64.39075581153735,0,0,"Kir - YO.13",0],[21.130163855032862,29.3085654856286,0,0,"Kir - YO.14",0],[20.21473305319855,54.21304442257474,0,0,"Kir - YO.15",0],[9.408647595620039,73.31361845463601,0,0,"Kir - YO.16",0],[356.92738754137713,9.458046610794659,0,0,"Kir - YO.17",0],[340.8751004293625,55.04529534096138,0,0,"Kir - YO.18",0],[33.7054733550781,72.9729026786779,0,0,"Kir - YO.19",0],[45.157473532898265,59.132883207037864,0,0,"Kir - YO.20",0],[31.76133233628723,36.139830148831756,0,0,"Kir - YO.21",0],[357.6554986725029,34.93416665521191,0,0,"Kir - YO.22",0],[355.9613163098905,58.105521212189544,0,0,"Kir - YO.23",0],[3.433422171238192,56.86474690356468,0,0,"Kir - YO.24",0],[0.13733723585608004,45.93896528578471,0,0,"Kir - YO.25",0],[10.404512275913614,-0.42121144119856563,0,0,"Kir - YO.26",0],[32.27227835224936,60.3459995405132,0,0,"Kir - YO.27",0],[31.097687723862002,74.22285203396191,0,0,"Kir - YO.28",0],[358.9263091350482,59.53834353273825,0,0,"Kir - YO.29",0],[13.51981445166497,29.57547003318917,0,0,"Kir - YO.30",0],[25.544656827103474,82.95960890797727,0,0,"Kir - YO.31",0],[46.40981686823355,71.98525044734582,0,0,"Kir - YO.32",0],[356.5294378275941,52.48138764838709,0,0,"Kir - YO.33",0],[20.426465863237325,48.81463184625837,0,0,"Kir - YO.34",0],[35.122227158327775,64.11245077947096,0,0,"Kir - YO.35",0],[23.786052453852754,25.755619446238875,0,0,"Kir - YO.36",0],[40.90431512114766,21.613811970447067,0,0,"Kir - YO.37",0],[29.107182063873047,69.04458865269358,0,0,"Kir - YO.38",0],[29.584155380428264,65.2784165755653,0,0,"Kir - YO.39",0],[9.974593996674102,34.72833856543099,0,0,"Kir - YO.40",0]],"metaData":{"name":"Kirsehir AYB","latitude":39.79,"longitude":34.96,"age":60,"minAge":60,"maxAge":60,"markerColor":"white","cutoff":"45","dateAdded":"2017-06-14T15:52:57.072Z","version":"v1.1.2","sanitized":true,"type":"Site Combination","author":"Lefebvre et al., 2013","description":"Multiple Sites","edited":true,"timeEdited":"2017-06-14T15:54:50.798Z","plateId":null,"lithology":null,"carriers":null}},{"data":[[355,64,0,0,"Siv - Nevsehir Volcanics.1",0],[0,70,0,0,"Siv - Nevsehir Volcanics.2",0],[2,39,0,0,"Siv - Nevsehir Volcanics.3",0],[1,39,0,0,"Siv - Nevsehir Volcanics.4",0],[0,53,0,0,"Siv - Nevsehir Volcanics.5",0],[33.9,30.9,0,0,"Kir - Central Cappadocia.1",0],[359.1,62.1,0,0,"Kir - Central Cappadocia.2",0],[96.1,23.9,0,0,"Kir - Central Cappadocia.3",0],[350.3,52.1,0,0,"Kir  - Cappadocia 2.1",0],[347.8,46.7,0,0,"Kir  - Cappadocia 2.2",0],[354.9,48.6,0,0,"Kir  - Cappadocia 2.3",0],[340.6,47.2,0,0,"Kir  - Cappadocia 2.4",0],[5.2,46.3,0,0,"Kir  - Cappadocia 2.5",0],[352.7,49.3,0,0,"Kir  - Cappadocia 2.6",0],[359.8,47.4,0,0,"Kir  - Cappadocia 2.7",0],[5.5,41.9,0,0,"Kir  - Cappadocia 2.8",0],[354.7,52,0,0,"Kir  - Cappadocia 2.9",0],[355.1,42.4,0,0,"Kir  - Cappadocia 2.10",0],[345.4,41.8,0,0,"Kir  - Cappadocia 2.11",0],[357,38.6,0,0,"Kir  - Cappadocia 2.12",0],[355.5,43.4,0,0,"Kir  - Cappadocia 2.13",0],[347.4,44.5,0,0,"Kir  - Cappadocia 2.14",0],[6.5,59.5,0,0,"Kir  - Cappadocia 2.15",0],[345.8,45.5,0,0,"Kir  - Cappadocia 2.16",0],[340,46,0,0,"Kir  - Cappadocia 2.17",0],[335.7,43.6,0,0,"Kir  - Cappadocia 2.18",0],[339.6,52,0,0,"Kir  - Cappadocia 2.19",0],[342.1,56.2,0,0,"Kir  - Cappadocia 2.20",0],[12.4,56.9,0,0,"Kir  - Cappadocia 2.21",0],[14.4,62,0,0,"Kir  - Cappadocia 2.22",0],[334,50.3,0,0,"Kir  - Cappadocia 2.23",0],[350.4,42.8,0,0,"Kir  - Cappadocia 2.24",0],[12,56.4,0,0,"Kir  - Cappadocia 2.25",0],[350.4,42.8,0,0,"Kir  - Cappadocia 2.26",0],[359.8,47.4,0,0,"Kir - Cappadocia 3.1",0],[5.5,54.8,0,0,"Kir - Cappadocia 3.2",0],[5.2,46.3,0,0,"Kir - Cappadocia 3.3",0],[354.7,52,0,0,"Kir - Cappadocia 3.4",0],[351.5,50.3,0,0,"Kir - Cappadocia 3.5",0],[352.7,49.3,0,0,"Kir - Cappadocia 3.6",0],[4.7,45.5,0,0,"Kir - Cappadocia 3.7",0],[150.8,50.7,0,0,"Kir - Cappadocia 3.8",0],[347.8,46.7,0,0,"Kir - Cappadocia 3.9",0],[338.3,58.8,0,0,"Kir - Cappadocia 3.10",0],[330.9,50,0,0,"Kir - Cappadocia 3.11",0],[355.5,43.4,0,0,"Kir - Cappadocia 3.12",0],[350.3,52.1,0,0,"Kir - Cappadocia 3.13",0],[345.4,41.8,0,0,"Kir - Cappadocia 3.14",0],[357,38.6,0,0,"Kir - Cappadocia 3.15",0],[346.1,40.2,0,0,"Kir - Cappadocia 3.16",0],[357,40.3,0,0,"Kir - Cappadocia 3.17",0],[355.1,42.4,0,0,"Kir - Cappadocia 3.18",0],[333.9,65.3,0,0,"Kir - Cappadocia 3.19",0],[353.6,39.9,0,0,"Kir - Cappadocia 3.20",0],[31.6,75.9,0,0,"Kir - Cappadocia 3.21",0],[58,61.8,0,0,"Kir - Cappadocia 3.22",0],[343,46,0,0,"Kir - Cappadocia 3.23",0],[341.2,56.8,0,0,"Kir - Cappadocia 3.24",0],[347.3,58,0,0,"Kir - Cappadocia 3.25",0],[345.8,45.5,0,0,"Kir - Cappadocia 3.26",0],[346.3,40.5,0,0,"Kir - Cappadocia 3.27",0],[340,40.7,0,0,"Kir - Cappadocia 3.28",0],[5.9,53.6,0,0,"Kir - Cappadocia 3.29",0],[340,46,0,0,"Kir - Cappadocia 3.30",0],[343,46,0,0,"Kir - Cappadocia 3.31",0],[335.7,43.6,0,0,"Kir - Cappadocia 3.32",0],[340.6,47.2,0,0,"Kir - Cappadocia 3.33",0],[342.1,56.2,0,0,"Kir - Cappadocia 3.34",0],[342.8,59.2,0,0,"Kir - Cappadocia 3.35",0],[339.3,62.2,0,0,"Kir - Cappadocia 3.36",0],[6.5,59.5,0,0,"Kir - Cappadocia 3.37",0],[334,50.3,0,0,"Kir - Cappadocia 3.38",0],[14.4,62,0,0,"Kir - Cappadocia 3.39",0],[5.5,41.9,0,0,"Kir - Cappadocia 3.40",0],[354.7,70.7,0,0,"Kir - Cappadocia 3.41",0],[2,57.5,0,0,"Kir - Cappadocia 3.42",0],[19.4,58.1,0,0,"Kir - Cappadocia 3.43",0],[28.6,52.1,0,0,"Kir - TT21-22-23.1",0],[15,56.2,0,0,"Kir - TT21-22-23.2",0],[349.4,46,0,0,"Kir - TT21-22-23.3",0]],"metaData":{"name":"Cappadocia","latitude":38.864,"longitude":33.903,"age":null,"minAge":4,"maxAge":8.5,"markerColor":"white","cutoff":"45","dateAdded":"2017-06-11T11:30:40.936Z","version":"v1.1.2","sanitized":true,"type":"Site Combination","author":"Cinku et al 2016; Platzman et al 1998; Piper et al, 2002; 2012","description":"Multiple Sites","edited":true,"timeEdited":"2017-06-26T09:03:50.016Z","plateId":1001,"lithology":"volcanic","carriers":null}}]}
