# Supplementary material for: Paleomagnetic constraints on the timing and distribution of Cenozoic rotations in Central and Eastern Anatolia
Source: Copernicus journal article supplement (doi:10.5194/se-9-295-2018), 2018-03-21
Supplement: Supplementary file 2 [file se-9-295-2018-supplement.zip › se-2017-66_DATA_pmag files/SE_Anatolia.pmag]

{"version":"v1.1.3","dateExported":"2018-01-10T14:33:06.408Z","apwp":{"eastern Pontides 3300":{"lat":[0,42.67,43.2,41.87,41.02,40.36],"lon":[0,50.01,52.73,55.15,60.79,65.84],"rot":[0,-5,-9.82,-14.13,-17.87,-19.3],"age":[0,10,20,30,40,50],"type":"Euler Pole"},"SE Anatolian rotating domain":{"age":[10,20,40,50,60,70,80,130],"A95":[8.7,8.6,6,5.1,8.2,11.3,9.7,9],"lon":[277.7,290,278.4,277.5,276.8,281.5,292.2,289.3],"lat":[74.5,63,65.3,63.3,60.7,64.9,60.8,46.1],"type":"APWP"}},"data":[{"data":[[332.58091336370705,7.289563824726609,0,0,"Kon - TT80-81.1",0],[325.97406063733695,18.568141225328805,0,0,"Kon - TT80-81.2",0],[304.09251210680065,-14.95455410323356,0,0,"Kon - TT80-81.3",0],[335.5937040002394,35.03616568112066,0,0,"Kon - TT80-81.4",0],[333.145589501694,47.45244147859577,0,0,"Kon - TT80-81.5",0],[292.95854476859984,41.31669371327385,0,0,"Kon - TT80-81.6",0],[330.0666672369937,14.452926201906747,0,0,"Kon - TT80-81.7",0],[320.8437562721691,45.58394320526859,0,0,"Kon - TT80-81.8",0],[330.19321857367214,70.4519621327549,0,0,"Kon - TT80-81.9",0],[5.227383202964278,34.19281573709886,0,0,"Kon - TT80-81.1",0],[2.8663539045354014,42.56717232282003,0,0,"Kon - TT80-81.2",0],[6.219541668462599,48.436871706270644,0,0,"Kon - TT80-81.3",0],[5.191391382137341,46.28760149065631,0,0,"Kon - TT80-81.4",0],[8.67071370949398,41.02322101043269,0,0,"Kon - TT80-81.5",0],[2.401043307600844,52.80337159840177,0,0,"Kon - TT80-81.6",0],[7.499428119395125,49.10551693126989,0,0,"Kon - TT80-81.7",0],[359.95735888696737,34.2430696090617,0,0,"Kon - TT80-81.8",0],[0.3542241747198318,31.252485167215863,0,0,"Kon - TT80-81.9",0],[359.9580704253549,46.11705698697507,0,0,"Kon - TT80-81.10",0],[2.637951172508963,42.40252989624027,0,0,"Kon - TT80-81.11",0],[358.63961434542153,49.10102865310133,0,0,"Kon - TT80-81.12",0],[10.726542698602321,37.6673891447285,0,0,"Kon - TT80-81.13",0],[1.2269726803956473,30.679266086189703,0,0,"Kon - TT80-81.14",0],[39.76312995066852,37.34766935874687,0,0,"Kon - TT80-81.1",0],[10.46841423178978,50.7510578645079,0,0,"Kon - TT80-81.2",0],[6.519313526645533,46.96274675052365,0,0,"Kon - TT80-81.3",0],[22.601480714252247,46.978936722610754,0,0,"Kon - TT80-81.4",0],[14.455474916068876,43.406226319558115,0,0,"Kon - TT80-81.5",0],[15.130558861108245,31.395458945452038,0,0,"Kon - TT80-81.6",0],[21.21512966263719,42.76746236545963,0,0,"Kon - TT80-81.7",0],[350.180895874179,42.12121711232921,0,0,"Kon - TT80-81.8",0],[11.909139643793782,48.745780570737544,0,0,"Kon - TT80-81.9",0],[3.3704313750668007,48.7734837626226,0,0,"Kon - TT80-81.10",0],[19.260541750001575,57.91057587741888,0,0,"Kon - TT80-81.11",0],[8.89725301287757,63.710246412423736,0,0,"Kon - TT80-81.12",0],[2.987575058672803,56.91413104440243,0,0,"Kon - TT80-81.13",0],[10.325707060287073,58.48243984108259,0,0,"Kon - TT80-81.14",0],[4.525947181158642,41.62211709629089,0,0,"Kon - TT80-81.15",0],[19.30053516178154,35.067314905228606,0,0,"Kon - TT80-81.16",0],[17.138457364801432,52.84776318575272,0,0,"Kon - TT80-81.17",0],[23.016172072911395,39.41000335683388,0,0,"Kon - TT80-81.1",0],[351.4875417748478,27.637439574059233,0,0,"Kon - TT80-81.2",0],[348.0035966349638,7.55010056506512,0,0,"Kon - TT80-81.3",0],[2.833629120946975,7.913200373221087,0,0,"Kon - TT80-81.4",0],[339.9582889149041,31.82243499153044,0,0,"Kon - TT80-81.5",0],[24.05889492736923,25.141013765074458,0,0,"Kon - TT80-81.6",0],[358.72127524456937,33.838911581760044,0,0,"Kon - TT80-81.7",0],[354.0150464474542,10.07637359251182,0,0,"Kon - TT80-81.8",0],[351.6607077216041,25.65702979842658,0,0,"Kon - TT80-81.9",0],[4.338098108553946,22.62672149107005,0,0,"Kon - TT80-81.10",0],[336.43216833503567,10.514331711162768,0,0,"Kon - TT80-81.11",0],[356.2370571014262,46.87406214237691,0,0,"Kon - TT80-81.12",0],[18.589368044158093,2.9167236723710515,0,0,"Kon - TT80-81.13",0],[346.9990808750717,35.563344568898785,0,0,"Kon - TT80-81.1",0],[4.091077308093645,51.595310676455995,0,0,"Kon - TT80-81.2",0],[15.426771538073414,24.78586210988606,0,0,"Kon - TT80-81.3",0],[350.44355992703595,49.46050523087059,0,0,"Kon - TT80-81.4",0],[1.0621540549273618,43.05882078396922,0,0,"Kon - TT80-81.5",0],[339.17674938926297,21.477063812262433,0,0,"Kon - TT80-81.6",0],[5.857633110383915,45.47893226087941,0,0,"Kon - TT80-81.1",0],[12.600171413941283,52.0488518945344,0,0,"Kon - TT80-81.2",0],[15.2655875541741,47.47040958859836,0,0,"Kon - TT80-81.3",0],[356.83947118895355,47.53338727387241,0,0,"Kon - TT80-81.4",0],[11.03485006672064,17.94659588852662,0,0,"Kon - TT80-81.5",0],[14.849802675429672,45.01621206677219,0,0,"Kon - TT80-81.6",0],[20.511506369988787,12.973527835942775,0,0,"Kon - TT80-81.7",0],[3.51612589977492,35.773262739815955,0,0,"Kon - TT80-81.8",0],[8.997778816221114,0.36367124453175637,0,0,"Kon - TT80-81.9",0],[0.8422903230062389,32.33688072478834,0,0,"Kon - TT80-81.10",0],[9.8600663945125,13.408869404579596,0,0,"Kon - TT80-81.11",0],[354.59322539464284,31.16423710230333,0,0,"Kon - TT80-81.12",0],[2.015966580675979,41.029126808340656,0,0,"Kon - TT80-81.13",0],[9.01577750672026,28.602476213754496,0,0,"Kon - TT80-81.14",0],[5.033393437151972,42.070315659234566,0,0,"Kon - TT80-81.15",0],[3.2789414699050212,14.978926631526347,0,0,"Kon - TT80-81.16",0],[358.32714415630426,24.616947121652313,0,0,"Kon - TT80-81.17",0],[356.2957595629633,14.463608624486097,0,0,"Kon - TT80-81.18",0],[349.179240012207,21.778658391663324,0,0,"Kon - TT80-81.19",0]],"metaData":{"name":"Ulu - TT11-2-3-4-5-6","dateAdded":"2016-11-18T10:47:01.552Z","version":"v1.1.1","markerColor":"#0000FF","cutoff":"45","type":"Input","description":"sediment","author":"Cinku et al., Tectonics 2016","age":"61.0","minAge":"56","maxAge":"66","latitude":37.76,"longitude":34.95,"sanitized":true,"edited":true,"timeEdited":"2016-11-18T10:51:32.168Z"}},{"data":[[333.2213210117468,52.35333251054526,0,0,"Ulu - TT35.1",0],[315.1550927522951,17.63738279483424,0,0,"Ulu - TT35.2",0],[329.66855391443744,38.43409185828791,0,0,"Ulu - TT35.3",0],[345.16536964510567,19.03199029464106,0,0,"Ulu - TT35.4",0],[323.69002179711333,41.6513498401272,0,0,"Ulu - TT35.5",0],[345.2977454422132,55.67416497347761,0,0,"Ulu - TT35.6",0],[327.4835511996897,56.42443916104121,0,0,"Ulu - TT35.7",0],[337.2389429599557,48.82763943765728,0,0,"Ulu - TT35.8",0],[334.7593994481277,41.037181311955216,0,0,"Ulu - TT35.9",0]],"metaData":{"name":"Ulu - TT35","dateAdded":"2016-11-18T11:10:03.518Z","version":"v1.1.1","markerColor":"#00FFFF","cutoff":"45","type":"Simulated","description":"sediments","author":"Çinku et al., Tectonics 2016","age":"28.4","minAge":"23","maxAge":"33.9","latitude":37.72,"longitude":35.03,"sanitized":true}},{"data":[[20.423904076229107,19.802681313897633,0,0,"Siv - TT69.1",0],[48.50875085471863,11.020033846224642,0,0,"Siv - TT69.2",0],[28.6522147070177,-17.88225882349969,0,0,"Siv - TT69.3",0],[29.315641676840595,50.31389428178275,0,0,"Siv - TT69.4",0],[39.62387659090915,62.70013198615489,0,0,"Siv - TT69.5",0],[13.059619821477554,12.727883823348034,0,0,"Siv - TT69.6",0],[36.81496602166867,52.694330121106326,0,0,"Siv - TT69.7",0],[15.744090148910686,39.934103902094535,0,0,"Siv - TT69.8",0],[28.261421405873115,25.000671321067042,0,0,"Siv - TT69.9",0],[31.867277406884718,14.736096603312026,0,0,"Siv - TT69.10",0],[26.43317558548418,26.45414068720363,0,0,"Siv - TT69.11",0],[17.523787750587488,46.39915402423406,0,0,"Siv - TT69.12",0]],"metaData":{"name":"Siv - TT69","dateAdded":"2016-11-18T11:02:29.729Z","version":"v1.1.1","markerColor":"#00FFFF","cutoff":"45","type":"Simulated","description":"sediment","author":"Cinku et al., Tectonics 2016","age":"42.9","minAge":"38","maxAge":"47.8","latitude":38.93,"longitude":36.14,"sanitized":true}},{"data":[[344.17223879102517,53.83760674584503,0,0,"Siv - TT70.1",0],[3.503037049772388,35.95685735242127,0,0,"Siv - TT70.2",0],[334.16735984385855,62.25272921182947,0,0,"Siv - TT70.3",0],[350.1185394215544,30.166407322971878,0,0,"Siv - TT70.4",0],[329.61537687545626,55.542218788531805,0,0,"Siv - TT70.5",0],[350.62737220619795,53.57026036023289,0,0,"Siv - TT70.6",0],[351.7504885350586,63.781660327026145,0,0,"Siv - TT70.7",0],[335.10807418651666,41.79178553802853,0,0,"Siv - TT70.8",0],[336.4815538395917,58.13098561293282,0,0,"Siv - TT70.9",0],[1.2613570171203037,38.208944405867754,0,0,"Siv - TT70.10",0],[15.090346768507857,32.44467438280842,0,0,"Siv - TT70.11",0],[332.35154645561363,33.49813814873164,0,0,"Siv - TT70.12",0],[357.56979290291036,41.687140284787894,0,0,"Siv - TT70.13",0],[329.4500865828154,45.51029345095253,0,0,"Siv - TT70.14",0],[351.8687589071852,68.10541701311234,0,0,"Siv - TT70.15",0],[7.711149870547388,69.44824067402958,0,0,"Siv - TT70.16",0],[7.700918343469539,43.70813583052939,0,0,"Siv - TT70.17",0],[342.49645560035447,49.35652720460424,0,0,"Siv - TT70.18",0],[341.4226739326564,41.01521948448285,0,0,"Siv - TT70.19",0],[342.2429192680014,48.74615617776574,0,0,"Siv - TT70.20",0]],"metaData":{"name":"Siv - TT70","dateAdded":"2016-11-18T11:03:02.109Z","version":"v1.1.1","markerColor":"#00FFFF","cutoff":"45","type":"Simulated","description":"sediment","author":"Cinku et al., Tectonics 2016","age":"42.9","minAge":"38","maxAge":"47.8","latitude":39.06,"longitude":36.31,"sanitized":true}},{"data":[[342.6245967330283,44.42695451180049,0,0,"Siv - TT131.1",0],[357.3578546175253,67.37644162934343,0,0,"Siv - TT131.2",0],[7.673144521107645,42.53803433168343,0,0,"Siv - TT131.3",0],[342.60892824684333,49.093722186406666,0,0,"Siv - TT131.4",0],[7.924812726186474,52.27301403075345,0,0,"Siv - TT131.5",0],[345.7781801655833,34.151945968998824,0,0,"Siv - TT131.6",0],[343.52862079579666,15.700992958875185,0,0,"Siv - TT131.7",0]],"metaData":{"name":"Siv - TT131","dateAdded":"2016-11-18T11:03:38.709Z","version":"v1.1.1","markerColor":"#00FFFF","cutoff":"45","type":"Simulated","description":"sediment","author":"Cinku et al., Tectonics 2016","age":"42.9","minAge":"38","maxAge":"47.8","latitude":38.47,"longitude":36.55,"sanitized":true}},{"data":[[357.2551196393718,37.250390664399724,0,0,"Siv - TL06.1",0],[346.2894848084103,51.157418259327066,0,0,"Siv - TL06.2",0],[333.1952243080418,54.37209244080843,0,0,"Siv - TL06.3",0],[355.9544227244596,43.18015742423175,0,0,"Siv - TL06.4",0],[341.69082896775274,56.47288537496428,0,0,"Siv - TL06.5",0],[325.3328166425034,36.50338934171383,0,0,"Siv - TL06.6",0],[341.29654142191225,53.18996920185825,0,0,"Siv - TL06.7",0],[340.26460275084855,62.62099313853008,0,0,"Siv - TL06.8",0],[333.4164200739017,57.077259598958676,0,0,"Siv - TL06.9",0],[335.62761998340363,64.46418787279931,0,0,"Siv - TL06.10",0],[331.9046283501003,29.926232412251185,0,0,"Siv - TL06.11",0],[332.6426063815409,58.62877876866192,0,0,"Siv - TL06.12",0],[339.14321608485835,53.632892025528555,0,0,"Siv - TL06.13",0],[344.84244583734085,56.763538685780794,0,0,"Siv - TL06.14",0],[339.67467477938,41.453477971758744,0,0,"Siv - TL06.15",0],[321.28726801962216,48.539822638908426,0,0,"Siv - TL06.16",0],[335.9978217886387,49.466000272818924,0,0,"Siv - TL06.17",0],[344.7739891166371,62.53339400212084,0,0,"Siv - TL06.18",0],[342.039278069066,60.28395950292289,0,0,"Siv - TL06.19",0],[321.6216781595099,58.378521106895136,0,0,"Siv - TL06.20",0],[342.9092038804913,49.9121287667716,0,0,"Siv - TL06.21",0],[334.80185684470166,44.55662031813747,0,0,"Siv - TL06.22",0],[345.9884109702384,42.1718693482687,0,0,"Siv - TL06.23",0],[327.2472419712533,49.39772907558826,0,0,"Siv - TL06.24",0],[340.5562172710147,36.410250268174764,0,0,"Siv - TL06.25",0],[352.6510308404998,48.7790373301147,0,0,"Siv - TL06.26",0]],"metaData":{"name":"Siv - TL06","dateAdded":"2016-11-18T11:04:08.754Z","version":"v1.1.1","markerColor":"#00FFFF","cutoff":"45","type":"Simulated","description":"sediment","author":"Cinku et al., Tectonics 2016","age":"42.9","minAge":"38","maxAge":"47.8","latitude":38.57,"longitude":36.35,"sanitized":true,"edited":true,"timeEdited":"2016-11-18T11:05:27.924Z"}},{"data":[[335.01332487376123,38.213399032535555,0,0,"Siv - TL07.1",0],[319.51359884687326,46.448622795257954,0,0,"Siv - TL07.2",0],[327.76728537354575,22.946605830984126,0,0,"Siv - TL07.3",0],[333.371791216551,45.88859509217912,0,0,"Siv - TL07.4",0],[323.3570239419755,59.811029713506585,0,0,"Siv - TL07.5",0],[331.7170782781627,68.80383426156473,0,0,"Siv - TL07.6",0],[313.02321084642585,51.67516806056292,0,0,"Siv - TL07.7",0],[326.09585720328323,61.87343731778948,0,0,"Siv - TL07.8",0],[337.8223410014332,59.006331062166794,0,0,"Siv - TL07.9",0],[322.2929873260716,65.27694852077587,0,0,"Siv - TL07.10",0],[316.65949403295315,41.56958892124666,0,0,"Siv - TL07.11",0],[328.2896682702194,38.419372616190934,0,0,"Siv - TL07.12",0],[331.3927337603408,50.96256913727624,0,0,"Siv - TL07.13",0],[331.77048941206675,52.35073467708641,0,0,"Siv - TL07.14",0],[305.76032287372686,58.46131516022037,0,0,"Siv - TL07.15",0],[334.5851080263823,52.18123656664114,0,0,"Siv - TL07.16",0],[323.7103959350799,36.99437483190098,0,0,"Siv - TL07.17",0],[316.8739094875789,44.52730403629637,0,0,"Siv - TL07.18",0],[311.690860053483,59.3767714373623,0,0,"Siv - TL07.19",0],[310.8360615860024,43.41820857655597,0,0,"Siv - TL07.20",0]],"metaData":{"name":"Siv - TL07","dateAdded":"2016-11-18T11:05:58.034Z","version":"v1.1.1","markerColor":"#00FFFF","cutoff":"45","type":"Simulated","description":"sediment","author":"Cinku et al., Tectonics 2016","age":"42.9","minAge":"38","maxAge":"47.8","latitude":38.54,"longitude":36.54,"sanitized":true}},{"data":[[304.28890335216875,21.12787449246386,0,0,"Siv - TT36.1",0],[308.02735193727494,27.14936163893786,0,0,"Siv - TT36.2",0],[330.97846581686866,21.14461694378563,0,0,"Siv - TT36.3",0],[322.21210538186443,13.618360214316233,0,0,"Siv - TT36.4",0],[305.99960731224326,40.39860147016277,0,0,"Siv - TT36.5",0],[320.55944415017103,44.64037366443809,0,0,"Siv - TT36.6",0],[305.74662960366777,20.73089465404962,0,0,"Siv - TT36.7",0],[299.81222640492626,26.316082762450357,0,0,"Siv - TT36.8",0],[307.9170078090509,7.465748425891785,0,0,"Siv - TT36.9",0],[311.06095892217945,-18.31905413391985,0,0,"Siv - TT36.10",0],[317.9802434832688,11.403246097870523,0,0,"Siv - TT36.11",0]],"metaData":{"name":"Siv - TT36","dateAdded":"2016-11-18T11:07:13.577Z","version":"v1.1.1","markerColor":"#00FFFF","cutoff":"45","type":"Simulated","description":"sediment","author":"Cinku et al., Tectonics 2016","age":"28.4","minAge":"23","maxAge":"33.9","latitude":38.78,"longitude":36.45,"sanitized":true}},{"data":[[329.7511798847961,35.48536730925662,60,32,"SS57.01A",0],[347.5040849166087,42.14353616964852,60,32,"SS57.01B",0],[347.4854505275475,46.4211215946333,60,32,"SS57.02A",0],[355.8983446611974,39.53450240759337,60,32,"SS57.03A",0],[342.59163659691757,52.36572381821456,60,32,"SS57.04A",0],[314.84108598095753,16.352501889233494,60,32,"SS57.05A",0],[320.5380038501902,42.46081192673121,60,32,"SS57.06A",0],[313.1607753063028,20.026333345556974,60,32,"SS57.07A",0],[341.8480686352111,-7.397826432592886,60,32,"SS57.08A",0],[356.61083284439155,38.730089161710865,60,32,"SS57.08C",0],[359.4803051180648,56.69799716496083,235,22,"SS5.3A",0],[333.6648801125863,48.59113030276757,235,22,"SS5.4A",0],[335.3694439774859,40.399497850413645,235,22,"SS5.4B",0],[335.65021559659044,44.62449196843299,235,22,"SS5.5A",0],[324.6610174573926,50.33171435677659,235,22,"SS5.5B",0],[348.7895379842806,62.168610567614614,235,22,"SS5.6A",0],[342.222584837454,49.88630881833206,235,22,"SS5.6B",0],[356.0492350294229,52.539786854421465,235,22,"SS5.8A",0],[10.232445057219877,37.06047397804551,235,22,"SS5.9B",0],[334.9940715773666,60.61455804735061,235,22,"SS5.10A",0],[347.87644841118305,54.925504186564,235,22,"SS5.10B",0],[340.75032471121347,59.52580346429295,235,22,"SS5.11A",0],[5.563792180787004,59.026373767740786,235,22,"SS5.12A",0],[349.1682747390105,51.18871623651029,235,22,"SS5.13A",0],[356.75927329538325,53.60780699548833,197,23,"SS5.14B",0],[1.4416163422358181,52.71934416271135,197,23,"SS5.15A",0],[333.54128019362815,34.00552789869174,197,23,"SS5.16A",0],[343.65686615958816,46.282249544523005,197,23,"SS5.17A",0],[6.751191904255961,43.9229355218783,197,23,"SS5.18A",0],[2.0977890327197883,59.144224811197844,220,26,"SS27.01A",0],[4.194333546238113,57.93550682522738,220,26,"SS27.02A",0],[358.0745460502323,59.146359744935474,220,26,"SS27.02B",0],[10.851789066144192,57.394528689968155,220,26,"SS27.04A",0],[1.3675707966048094,60.28081624702074,220,26,"SS27.06A",0],[9.93452382066414,56.45827875971316,220,26,"SS27.04B",0],[351.3779871865547,53.837656016312586,221,20,"SS27.08A",0],[354.94298609994206,53.205244989506035,210,29,"SS27.11A",0],[354.0573999904159,45.02734991209612,210,29,"SS27.11B",0],[8.435913384972139,51.391452269458185,210,29,"SS27.12A",0],[359.42278072091034,46.68282375164436,210,29,"SS27.13A",0],[7.600692576049823,46.915228027566926,210,29,"SS27.14A",0],[356.49410990660715,59.95107559978565,213,25,"SS27.15B",0],[359.8951867591025,58.67909012957019,213,25,"SS27.17A",0],[2.3634727077904927,56.73716183196592,213,25,"SS27.18B",0],[357.1078281465977,58.62240237977403,213,25,"SS27.19A",0],[355.6516484372775,51.839626247659346,213,25,"SS27.20A",0],[354.0759210925127,48.702599578314874,219,21,"SS55.01A",0],[303.9087706215943,47.61202785084574,219,21,"SS55.02",0],[292.5899972798256,47.40947539113266,219,21,"SS55.03A",0],[333.14230795541175,40.08532762630429,219,21,"SS55.04A",0],[312.1377628909678,50.64975332254335,219,21,"SS55.04B",0],[340.17540717353614,57.74284194626238,219,21,"SS55.05A",0],[349.50478273292765,34.85009322807548,219,21,"SS55.08A",0],[8.614512161522725,43.649074833098545,219,21,"SS55.11B",0],[309.3189149086329,16.0675827996332,149,34,"SS25.01A",1],[305.68536159091616,15.383622369163174,149,34,"SS25.02A",0],[316.78823982281244,25.044996178699996,149,34,"SS25.03A",2],[306.1291235733351,9.695412164773701,149,34,"SS25.05A",0],[301.95544050802454,8.709842255334616,149,34,"SS25.06A",0],[336.31676069835623,17.04908124805375,149,34,"SS25.11A",0],[326.48278275198186,33.96014058949422,149,34,"SS25.13A",0],[339.9517179372874,17.341211189595352,149,34,"SS25.14A",5],[329.3763824777028,14.521875215387007,149,34,"SS25.15A",0],[332.5795219875081,14.477760123071633,149,34,"SS25.04A",0],[319.7729748193558,20.240457902780243,149,34,"SS25.08A",0],[323.92586974827964,17.194181817814687,149,34,"SS25.09A",3],[323.77290008930964,17.477318050157837,149,34,"SS25.10A",0],[322.6078448503905,20.6772501636114,149,34,"SS25.12A",4],[335.7942646496326,-8.841868308465331,149,34,"SS25.16A",6],[317.18473640718224,17.126498397556507,149,34,"SS25.17A",0],[346.9388898949011,36.21032307088079,149,34,"SS25.21A",0],[351.45253990034394,4.972624647086137,149,34,"SS25.21B",0],[34.729962274538934,65.93785898714283,223,41,"SS1.1A",0],[55.70088320890943,54.919093129703256,223,41,"SS1.1B",0],[33.179828283888014,47.80679580162715,223,41,"SS1.2A",0],[39.622211568342664,58.754411346135434,223,41,"SS1.2B",0],[34.47388041856959,67.89605741425379,223,41,"SS1.5A",0],[73.20389559219404,56.94570529204658,223,41,"SS1.6A",0],[75.41109166066468,68.1741097534022,223,41,"SS1.6B",0],[358.32819629004257,76.68273236209102,223,41,"SS1.7A",0],[20.662451002484886,60.55281538525742,223,41,"SS1.7B",0],[15.266306563719581,56.24135404740262,223,41,"SS1.8A",0],[13.392770208461684,70.5266650756068,223,41,"SS1.9A",0],[2.063059770985035,66.61058721665134,223,41,"SS1.11B",0],[359.70457699082476,67.68107800412739,223,41,"SS1.12A",0],[4.431722013058447,59.429925926708805,223,41,"SS1.15A",0],[29.4448052773638,65.5660065650268,223,41,"SS1.16A",0],[7.386553830430671,36.73020320004037,218,28,"SS56.01",0],[348.8777730671483,46.13623047331011,218,28,"SS56.03A",0],[336.22099079947975,33.900920423281626,218,28,"SS56.04A",0],[356.6059959633352,44.51862253899179,218,28,"SS56.05A",0],[1.6751984944087894,42.03266873490147,218,28,"SS56.05B",0],[347.2356171448358,45.982687710636256,218,28,"SS56.09A",0],[344.5253919670319,42.80392584864906,218,28,"SS56.09B",0],[20.576449261571838,54.44683252887738,218,28,"SS56.12A",0]],"metaData":{"name":"Akkisla_nor","dateAdded":"2017-09-05T11:13:43.864Z","version":"v1.1.3","markerColor":"#00FFFF","cutoff":"45","type":"Input","description":"Multiple Sites","plateId":null,"lithology":null,"carriers":null,"author":"Gürer et al., SE 2018","age":45,"minAge":33.9,"maxAge":56,"latitude":39,"longitude":36.2,"sanitized":true,"edited":true,"timeEdited":"2018-01-04T08:16:01.197Z"}},{"data":[[307.5696743466474,39.41825069284672,0,0,"TG 33A.1",0],[313.69785957618126,37.68835080443691,0,0,"TG 33B.1",0],[297.817328392225,59.671635465853164,0,0,"TG 35A.1",0],[301.87648557270484,56.84132392499037,0,0,"TG 35A.2",0],[293.0763851540219,47.91395661567607,0,0,"TG 35B.1",0],[307.0259525616842,44.05632759963239,0,0,"TG 42.1A",0],[293.6535161430728,49.505552231980005,0,0,"TG 42.2A",0],[282.5528847874365,26.13340889266537,0,0,"TG 45.1A",0],[283.98707493722907,24.341668414315986,0,0,"TG 45.2A",0],[5.947821846346642,53.299780981827176,0,0,"TG 46.1",0],[299.3059660371422,61.47691108405934,0,0,"TG 51.1",0],[332.3351305543638,61.03841099455529,0,0,"TG 56.1",0],[328.90117940899927,64.36088956967204,0,0,"TG 56.2",0],[314.7653151625388,39.6244472551297,0,0,"TG  1.1",0],[300.56034113365354,29.27056688646856,0,0,"TG  2.1",0],[1.0466126422894604,8.570040082743404,0,0,"TG  3A.1",0],[306.98763651771685,34.998270876696715,0,0,"TG  4B.1",0],[312.490709617571,17.4739961406006,0,0,"TG 17.1",0],[301.04894141970294,22.54316462181474,0,0,"TG 17.2A",0],[310.90289942571565,37.517950957363844,0,0,"TG 18.1A",0],[302.343398523309,32.708783651721625,0,0,"TG 18.1B",0],[306.5791543032912,35.700413867542004,0,0,"TG 19.1",0],[300.10959616273584,27.572862767741366,0,0,"TG 19.2",0],[300.0357878524421,11.278872383783517,0,0,"TG 30.1",0],[325.2400035328703,42.88153642004488,0,0,"TG 30.2",0],[357.7602757937842,31.079821635525555,0,0,"TG 32.2",0],[302.81993661842546,31.165468124578535,0,0,"TG 37.1",0],[310.7465978972649,37.08478961870971,0,0,"TG 38A.1",0],[306.29763928135344,26.037622998631193,0,0,"TG 39.1A",0],[308.61443841872114,31.318389010704507,0,0,"TG 39.2A",0],[313.4650975450422,36.30001016226799,0,0,"TG 40.1",0],[306.46312069645523,26.24979228467515,0,0,"TG 40.2",0],[304.206589187371,20.02809720019974,0,0,"TG 44.1A",0],[301.35126837125983,16.23559504565572,0,0,"TG 44.2",0],[322.2945192832328,42.49252082129581,0,0,"TG 47.1",0],[344.4868773179112,45.38675366811985,0,0,"TG 50.2",0],[310.09742597481977,35.67725327533867,0,0,"TG 51.2",0],[35.943487869918215,28.869531471351646,0,0,"TG 53B.1",0],[23.04913532203011,40.59324341851295,0,0,"TG 53B.2",0],[23.571683541343646,44.242134736061516,0,0,"TG 55.1A",0],[346.2920804073142,48.52854400078122,0,0,"TG 55.2A",0],[347.410775231128,52.28541314064353,0,0,"TG 58.1",0],[337.17152334245634,48.214127393416675,0,0,"TG 58.2",0],[303.9045098467871,48.18956655744467,0,0,"TG  5.1",0],[309.76034035193504,51.934584591552124,0,0,"TG  5.2",0],[319.9084261599992,19.50269127007372,0,0,"TG  7A.1",0],[321.3049488700903,16.208045956715832,0,0,"TG  7B.1",0],[311.8789781910231,33.719401624568036,0,0,"TG  8.1",0],[312.4574491651671,31.529854523324676,0,0,"TG  8.2",0],[301.3934731670656,3.9524089122574106,0,0,"TG  9.1",0],[302.7147668670133,39.76888519728437,0,0,"TG 10.1",0],[313.2856369913001,38.14612406908545,0,0,"TG 10.2",0],[312.4199102930045,58.141590330021145,0,0,"TG 11.1",0],[316.8058245727357,55.08016130309156,0,0,"TG 11.2",0],[314.99935547374304,34.83584909613049,0,0,"TG 12.1",0],[324.3396675167135,50.89448060158778,0,0,"TG 12.2",0],[324.3406563297143,23.268526761796544,0,0,"TG 13A.1",0],[326.2107785885193,19.15483593482942,0,0,"TG 13A.2",0],[301.75586398356404,17.730712309073727,0,0,"TG 14.1",0],[310.3164738209762,64.69474624654012,0,0,"TG 20A.1",0],[296.4872924435102,49.37816690665995,0,0,"TG 20A.2",0],[315.3431104057295,45.49687045836103,0,0,"TG 20B.1",0],[328.66570904035814,53.28618348107661,0,0,"TG 22A.1",0],[321.89701703757345,28.03361357468488,0,0,"TG 24.1A",0],[319.324113422377,23.347002730545224,0,0,"TG 24.2A",0],[317.29494518609914,32.8756864747095,0,0,"TG 25A.1",0],[290.5665136711202,17.407971081727954,0,0,"TG 25B.1",0],[309.30559771548684,39.0825881066721,0,0,"TG 26A.1",0],[306.44372433193377,34.317017932001946,0,0,"TG 26B.1",0],[303.7411230324861,38.761474552130956,0,0,"TG 26B.2",0],[299.26624565913244,27.77976142377385,0,0,"TG 14.2",0],[290.08009033953,11.834073430687019,0,0,"TG 15A.1",0],[287.6515582311952,20.056227716775762,0,0,"TG 15B.1",0],[299.6486861960948,27.578437463791488,0,0,"TG 16.1A",0],[322.7205133727575,34.85211914203244,0,0,"TG 16.2",0],[299.723534636472,17.001726034684957,0,0,"TG 44.2",0]],"metaData":{"name":"Gemerek_all_tc","dateAdded":"2016-10-11T10:54:11.027Z","version":"v1.1.0","markerColor":"#00FFFF","cutoff":"45","type":"Input","description":"Gemerek","author":"Gürer et al., SE 2018; Krijgsman et al Newl Strat 1996","age":19.5,"minAge":16,"maxAge":23,"latitude":39.163252,"longitude":36.048399,"sanitized":true,"edited":true,"timeEdited":"2018-01-04T08:23:44.417Z","plateId":null,"lithology":null,"carriers":null}},{"data":[[316.0622460410083,17.295706363808737,55,45,"SS54.01A",0],[341.3650383402167,15.030229074176502,55,45,"SS54.02A",0],[353.70115901959815,20.494757912022905,55,45,"SS54.02B",7],[314.94067414943436,-5.6911642943013865,55,45,"SS54.03A",0],[318.80386126023177,-10.616583819352343,55,45,"SS54.04A",0],[332.61307014924785,12.34746628537612,55,45,"SS54.06A",0],[325.0023997161996,15.572353084459879,55,45,"SS54.07A",1],[317.0365823657849,20.763516867553065,56,63,"SS54.08A",0],[330.7784050859752,-4.165694601070477,56,63,"SS54.09A",0],[336.4562984118448,3.3254517831186865,56,63,"SS54.10B",1],[28.21171254964338,69.1583150329863,195,40,"SS51.01A",0],[144.93553027236294,88.20435548403734,195,40,"SS51.02",1],[283.1513035902885,61.475990924244385,195,40,"SS51.04A",0],[294.9038406801057,74.21537819920067,195,40,"SS51.05A",0],[56.42932222361952,68.42487132151761,195,40,"SS51.06",2],[7.148775155363808,81.09524973144256,195,40,"SS51.08A",0],[33.14270147427533,66.7493197797864,195,40,"SS51.09",3],[27.390236474130234,63.77322303598403,195,40,"SS51.11A",0],[34.13403172047026,52.59749401806628,195,40,"SS51.11",4],[27.042144904338556,54.8798176025166,195,40,"SS51.12B",0],[54.647511645809914,54.22299112797083,195,40,"SS51.13",5],[45.996263731447584,49.36131909162853,195,40,"SS51.14",6],[47.50037964874235,61.441993243437835,195,40,"SS51.15B",0],[2.4365500869433276,63.37597482857929,195,40,"SS51.16B",0]],"metaData":{"name":"Gülük","latitude":39.6,"longitude":37.7,"age":30.5,"minAge":23,"maxAge":38,"markerColor":"#A52A2A","cutoff":"45","dateAdded":"2017-05-19T12:42:04.497Z","version":"v1.1.2","sanitized":true,"type":"Site Combination","author":"Gürer et al., SE 2018","description":"Multiple Sites","edited":true,"timeEdited":"2018-01-04T08:18:22.748Z","plateId":null,"lithology":null,"carriers":null}},{"data":[[344.7657374852768,21.164012344325815,82,20,"IN 001.1",0],[334.24017563715466,30.747166051841614,82,20,"IN 002.1",0],[297.3343743061252,30.060916230077314,82,20,"IN 003.1",0],[340.9689423713632,40.122986590197044,82,20,"IN 008.2",0],[22.63586756921984,31.51453845059254,82,20,"IN 014.1",0],[296.47337834050927,20.358191944401188,82,20,"IN 040",0],[332.7223585011756,41.912198494738554,82,20,"IN 184",0],[289.00378754009205,42.150639457333625,82,20,"IN 188",0],[327.77743485300766,26.938625923021252,82,20,"IN 067",0],[307.5123995059021,30.777269236857723,82,20,"IN 070",0],[322.4685746103558,44.15573260751583,82,20,"IN 077",0],[305.5635587252595,30.408489900471093,82,20,"IN 078",0],[315.30719965667026,40.361676060078494,82,20,"IN 079.2",0],[342.1393030623799,19.29499581434419,82,20,"IN 080",0],[321.76869180411484,15.29315872189328,82,20,"IN 081.1",0],[289.9841745568342,25.766878768391535,82,20,"IN 083",0],[324.8797530066817,47.363497980148395,82,20,"IN 084",0],[312.7236541893912,32.46976858626193,82,20,"IN 086",0],[305.4828570331255,38.10152530647284,82,20,"IN 087.1",0],[317.72784689288113,45.02534429890695,82,20,"IN 088",0],[2.123428129578542,60.43204773254245,82,20,"IN 094",0],[308.5999563736159,46.58339368334753,82,20,"IN 096",0],[331.13260189980076,34.40628356414211,82,20,"IN 098",0],[317.9811326758843,29.2678193682735,82,20,"IN 099",0],[295.9120810186707,22.84318599075965,82,20,"IN 100",0],[308.1635926782059,44.79236791258794,82,20,"IN 101",0],[329.8732011128651,49.5205781876503,82,20,"IN 102",0],[304.08286909435066,46.329000084099555,82,20,"IN 103",0],[312.6334842545244,49.962248582570396,82,20,"IN 104",0],[308.30422981129755,30.416030797438484,82,20,"IN 107",0],[340.54094081841913,46.99633982572851,57,11,"IN 113",0],[9.148249198878034,48.14728250507796,0,0,"IN 009.1",0],[348.23923327428633,36.96468150989719,0,0,"IN 011.1",0],[319.3189731908086,24.11384544104312,0,0,"IN 015.1",0],[300.67973000531913,30.434785462648197,0,0,"IN 016.1",0],[304.3463729524606,28.59691661366924,0,0,"IN 019.2",0],[309.0422214101435,40.643594819647234,0,0,"IN 020.2",0],[336.97325814615965,36.750479326852194,0,0,"IN 021.1",0],[296.287876460878,56.20993983891584,0,0,"IN 024.1",0],[285.52591839125216,28.272830410039912,0,0,"IN 025.1",0],[327.0302128891385,37.82502343938472,0,0,"IN 031.1",0],[304.372813224947,33.35503883562164,0,0,"IN 033",0],[324.71513225652416,27.933592360925815,0,0,"IN 043",0],[309.06066630406076,60.620626360868876,0,0,"IN 047",0],[288.60175969583264,27.685942294587814,0,0,"IN 124.4",0],[278.15668900363823,28.085580591981067,0,0,"IN 126.1",0],[282.50342403490424,75.49501730247236,0,0,"IN 136",0],[311.2782296939998,37.50338044168459,0,0,"IN 137.A",0],[302.97428691114493,17.380787978910963,0,0,"IN 146",0],[294.3725724269824,39.45403968355618,0,0,"IN 147",0],[338.35031380148484,35.004114819146885,0,0,"IN 150",0],[283.90779304327486,23.47364913690071,0,0,"IN 160",0],[289.12717006719754,29.010456235699117,0,0,"IN 161.B",0],[275.1776169423068,42.29843065143991,0,0,"IN 163.B",0],[338.50459196416557,40.3975693481885,0,0,"IN 164",0],[310.49875436875425,38.16386776997224,0,0,"IN 165",0],[305.0480416325854,45.77964702937138,0,0,"IN 176",0],[297.0172228325924,25.024234014399504,0,0,"IN 045",0],[305.6802365031621,84.42561690496201,0,0,"IN 054",0],[303.8513976708964,68.01575333693648,0,0,"IN 055",0],[308.1751423931733,32.604071228554275,0,0,"IN 166",0],[309.68125682388296,45.47986048135723,0,0,"IN 172",0],[42.380098192019204,56.560342493856204,0,0,"IN 007.2",0],[275.0661698378002,41.2638204485574,0,0,"IN 010.1",0],[257.50313894924284,53.240090876557964,0,0,"IN 013.1",0],[259.344608440925,47.56649536196354,0,0,"IN 017.1",0],[351.00017957978014,42.243885751569714,0,0,"IN 018.1",0],[283.10651554993876,53.22197085404482,0,0,"IN 023.1",0],[0.7093212599489789,50.39655022256042,0,0,"IN 028.1",0],[332.02954500611213,51.314230476481924,0,0,"IN 029.1",0],[308.04983894580164,45.97562446586246,0,0,"IN 032",0],[292.33874741093825,47.631134926808805,0,0,"IN 049",0],[348.62355859282536,53.52171411033362,0,0,"IN 063.B",0],[347.30452377152073,26.55279768042804,0,0,"IN 125",0],[333.00852715632186,34.69944793699318,0,0,"IN 126.2",0],[285.61795092475694,46.147698139167865,0,0,"IN 128",0],[31.190421726749946,78.85840457515984,0,0,"IN 130",0],[349.0246344344746,7.573652799179193,0,0,"IN 131",0],[264.4300409622813,26.377940405696112,0,0,"IN 144",0],[297.2362699753242,45.96422244288263,0,0,"IN 145",0],[314.5594583174741,44.7524651600693,0,0,"IN 154",0],[327.57186624068913,46.98691045448802,0,0,"IN 155",0],[269.00994926664464,51.32551980985161,0,0,"IN 158",0],[247.73613794723224,-0.1602848670495081,0,0,"IN 159",0],[324.5678323861355,27.51458214484815,0,0,"IN 170",0],[14.456243273672214,85.31881220687377,0,0,"IN 189",0],[279.9530981743532,36.797228396461534,0,0,"IN 052.2",0],[281.64023350017465,19.382997770347757,0,0,"IN 057.2?",0],[278.41132961501415,14.057127246379276,0,0,"IN 069",0],[240.1292837730674,50.854719227932506,0,0,"IN 085",0],[292.0545210322829,50.090554527021254,0,0,"IN 100",0],[285.83406792877395,54.96614778214839,0,0,"IN 101",0],[286.2418805156301,70.2440482453622,0,0,"IN 108",0],[325.33025863318517,35.07092081154662,0,0,"IN 111",0],[307.3140711898669,44.44144140583785,0,0,"IN 114",0],[305.43726779948406,44.19427038668945,0,0,"IN 194",0],[276.8821575265128,79.62125838131611,0,0,"IN 196",0],[313.7172556809329,40.35225500708822,0,0,"IN 197",0]],"metaData":{"name":"Inkonak_all_tc","latitude":39.3,"longitude":37.1,"age":25.6,"minAge":23,"maxAge":28.1,"markerColor":"#A52A2A","cutoff":"45","dateAdded":"2017-05-23T10:35:47.912Z","version":"v1.1.2","sanitized":true,"type":"Site Combination","author":"Gürer et al., SE 2018; Krijgsman et al, Newl Strat 1996","description":"Multiple Sites","edited":true,"timeEdited":"2018-01-04T08:22:47.487Z","plateId":null,"lithology":null,"carriers":null}},{"data":[[309.2010597396655,-24.70612240292085,58,46,"SS58.01B",0],[321.3715580368079,-15.189501398160463,58,46,"SS58.03A",0],[301.45950011803535,-14.466932732418657,58,46,"SS58.04A",0],[318.28267777194355,14.05353237970406,58,46,"SS58.06A",0],[321.4532506548131,-6.427376732877498,58,46,"SS58.08A",0],[5.481580011589131,69.63264709266096,10,25,"TY  1.1A",0],[288.24598324665635,7.056407593846889,10,25,"TY  2.1A",0],[339.1563560373997,18.33829023697938,10,25,"TY  3.A1",0],[312.17504279152917,10.355985842768668,10,25,"TY  3.B1",0],[300.7406040122957,39.02374221375035,329,29,"TY 11.A1",1.01],[298.31448474712244,39.02761063444609,329,29,"TY 11.B1",1.02],[294.30329141834204,42.58999485838901,329,29,"TY 12.1A",1.03],[306.52941655441276,37.55211313267489,329,29,"TY 13.1",1.04],[315.24669423763686,29.883867691334135,329,29,"TY 14.A2",1.05],[310.38382564860166,29.606965574019746,329,29,"TY 14.B1A",1.06],[307.7367777748641,24.20974400439643,329,29,"TY 15.1",1.07],[288.19422925974624,45.85213830985902,329,29,"TY 16.1B",1.08],[305.69773024240214,51.85670939235044,329,29,"TY 17.B1",1.09],[297.89664651376836,25.399455934382996,329,29,"TY 18.B1A",1.1],[296.72764986199365,34.04776803536213,329,29,"TY 23.1",2.06],[320.53320563261883,39.7956467318309,8,25,"TY 24.1",2.07],[298.6175573276166,28.44345576537369,8,25,"TY 25.C1",2.08],[314.403782188251,36.321179569254596,8,25,"TY 26.A1",2.09],[288.7936856210955,36.30290657103861,8,25,"TY 26.B1",2.1],[307.7468251719003,8.502642258275758,8,25,"TY 27.A1",3.01],[295.5031246983973,26.757245894491202,8,25,"TY 27.B1A",3.02],[318.9354402637397,37.659588443585186,8,25,"TY 28.A1",3.03],[302.90083772389175,42.96555745718099,8,25,"TY 28.B1",3.04],[329.92580577273907,34.05281178202364,8,25,"TY 29.1",3.05],[289.74232950098144,24.73396822737595,8,25,"TY 30.A1",3.06],[311.1194801249321,20.950723552852427,8,25,"TY 30.B1",3.07],[304.54337560345004,14.282170331837614,330,24,"TY 44.B1",2.09],[317.95031590464987,25.39798098382971,330,24,"TY 45.A1",2.1],[305.88048387277894,36.13467683427398,330,24,"TY 45.C1",3.01],[300.67983004473706,11.92885109231887,338,28,"TY 65.1",2.04],[295.0525927150033,28.554859252769017,22,24,"TY 74.A1",3.05],[324.99062483150385,-6.352667963182741,22,24,"TY 77.B1",3.09],[334.36394451405204,6.788931011886112,22,24,"TY 78.1",3.1],[346.2297937626395,41.45596724248487,0,0,"TY  5.A3",0],[314.2193778537615,40.29670527961443,0,0,"TY  6.2",0],[305.506720157665,21.541028316141027,0,0,"TY 35.A1",1.03],[319.3861478209346,43.54545075397627,0,0,"TY 35.B1",1.04],[307.5982310269314,35.37603827198024,0,0,"TY 36.1",1.05],[306.75017797002045,45.442933056684474,0,0,"TY 37.B1",1.06],[323.8492961021119,42.31716804549123,0,0,"TY 37.D1",1.07],[338.0160335395086,32.36006579471062,0,0,"TY 42.A1",2.05],[287.53534596270345,37.40189962306271,0,0,"TY 42.B1",2.06],[301.04619133115557,38.785305414274376,0,0,"TY 43.1A",2.07],[296.7455527324778,37.03815142157493,0,0,"TY 46.A1",3.02],[309.1734353720275,42.538595282101284,0,0,"TY 46.C1",3.03],[293.0751765183094,46.031022179445735,0,0,"TY 47.1",3.04],[25.313384116380576,38.68319264519218,0,0,"TY 49.1",3.06],[289.3167562009838,23.452182770104393,0,0,"TY 50.1",3.07],[304.8565911661602,30.97554211606278,0,0,"TY 51.1",3.08],[346.06936504541807,42.91425641689765,0,0,"TY 53.1",3.1],[322.42592155939377,37.176876164616736,0,0,"TY 55.1",1.02],[316.93141083375446,29.757772931199092,0,0,"TY 56.1",1.03],[304.6450728786475,45.75348008796012,0,0,"TY 57.1",1.04],[312.35118277866064,32.484760153479165,0,0,"TY 58.A1",1.05],[297.00316396571486,16.65211040909541,0,0,"TY 58.B1",1.06],[328.8689003969537,44.67515830820436,0,0,"TY 59.A1",1.07],[317.36440416093717,37.91805588679006,0,0,"TY 60.A1",1.09],[327.2718289190478,36.28259822587292,0,0,"TY 61.1A",1.1],[327.15385485963856,52.54869904919689,0,0,"TY 62.A1",2.01],[290.75627592134106,17.64243107088465,0,0,"TY 64.B1",2.03],[298.7085153869241,29.052263374776295,0,0,"TY 67.A1",2.06],[307.52700105534655,44.08324406451644,0,0,"TY 68.A1",2.07],[312.00431826393435,50.07105797723164,0,0,"TY 68.C1",2.08],[292.8595214755941,54.761993807597975,0,0,"TY 69.A1",2.09],[309.10550145960724,25.960237003668993,0,0,"TY 71.2",3.02],[329.18786253132737,61.293315140959415,0,0,"TY 75.A1",3.06],[351.914690120003,26.99184123467976,0,0,"TY  5.B1A",0],[11.758710120145565,26.67686104883542,0,0,"TY  7.B1",0],[271.0343634305989,74.37054956895567,0,0,"TY  7.B4",0],[325.30539666570655,36.46130103032918,0,0,"TY  8.A1",0],[301.6037124328242,52.147630848119356,0,0,"TY  8.B1A",0],[313.6904060683224,51.86116077032755,0,0,"TY 20.1A",2.03],[314.901905957538,48.76193407583713,0,0,"TY 21.A1",2.04],[331.2078158546343,27.143537217850454,0,0,"TY 22.1",2.05],[320.7519108910217,35.81593195069796,0,0,"TY 31.A1",3.08],[314.6305002923822,45.58017943750792,0,0,"TY 31.B1A",3.09],[347.87111887815547,14.424586001353836,0,0,"TY 33.2",1.01],[312.18429738958196,45.52565064533603,0,0,"TY 38.A1",1.08],[330.8080767229669,30.571615140216583,0,0,"TY 39.A1",1.1],[301.8777657131768,52.00253881455248,0,0,"TY 39.B1",2.01],[309.9693286998174,63.12340522182757,0,0,"TY 41.A1",2.03],[326.3985895165953,68.86384384611588,0,0,"TY 41.C1",2.04],[327.86124175413,13.461243115789843,0,0,"TY 48.1",3.05],[319.1994460824236,40.026637633065675,0,0,"TY 70.A1",2.1],[317.16623963711686,41.538369604778914,0,0,"TY 70.C1",3.01],[293.3394128513594,59.923159499596466,0,0,"TY 72.A1",3.03],[328.8501215911362,34.99163149422875,0,0,"TY 73.A1",3.04],[318.52708337860906,40.657122393263165,0,0,"TY 76.A1",3.08]],"metaData":{"name":"Yeniköy_all_tc","latitude":39.2,"longitude":36.4,"age":28.4,"minAge":23,"maxAge":33.9,"markerColor":"#00FFFF","cutoff":"45","dateAdded":"2017-05-23T09:40:45.876Z","version":"v1.1.2","sanitized":true,"type":"Site Combination","author":"Gürer et al., SE 2018; Krijgsman et al., Newsl Strat 1996","description":"Multiple Sites","edited":true,"timeEdited":"2018-01-04T08:20:51.140Z","plateId":null,"lithology":null,"carriers":null}},{"data":[[332.29221240202514,41.23931622894212,0,0,"SS10.8A",0],[331.5058536279236,36.53718742410222,0,0,"SS10.10A",0],[338.3690655548361,33.786546396711636,0,0,"SS10.11A",0],[342.3273560232119,31.043196569132324,0,0,"SS10.13A",0],[358.4044057909216,64.41902339788405,0,0,"SS10.1A",0],[352.4278772440882,30.282905960083887,0,0,"SS10.3A",0],[358.51570835789926,56.51478556002839,0,0,"SS10.5A",0],[348.13921105674126,46.5669627377521,0,0,"SS10.6A",0]],"metaData":{"name":"Gürün_tc","dateAdded":"2017-06-11T12:04:45.188Z","version":"v1.1.2","markerColor":"#A52A2A","cutoff":"45","type":"Interpretation","description":null,"plateId":null,"lithology":"volcanic","carriers":null,"author":"Gürer et al., SE 2018","age":14.2,"minAge":5.3,"maxAge":23,"latitude":38.7,"longitude":37.3,"sanitized":true,"edited":true,"timeEdited":"2018-01-04T08:31:37.929Z"}},{"data":[[336.18038692526255,34.889527675408345,0,0,"Kir - Sariz.1",0],[321.0874947431487,27.092664358329316,0,0,"Kir - Sariz.2",0],[330.7473835583351,38.51166296681138,0,0,"Kir - Sariz.3",0],[302.16753424520994,30.916398034906933,0,0,"Kir - Sariz.4",0],[303.92433497940124,29.682458406816007,0,0,"Kir - Sariz.5",0],[314.90828086657785,33.289626034480705,0,0,"Kir - Sariz.6",0],[312.6557178546675,17.342921933679474,0,0,"Kir - Sariz.7",0],[333.10230566055117,22.88039420601807,0,0,"Kir - Sariz.8",0],[313.0181885197836,34.0378135978704,0,0,"Kir - Sariz.9",0],[297.60700554272717,46.89540101391247,0,0,"Kir - Sariz.10",0],[307.94172642704757,41.254035779866605,0,0,"Kir - Sariz.11",0],[304.2344284786526,-3.1672583041634037,0,0,"Kir - Sariz.12",0],[307.86858507032434,60.08113412857158,0,0,"Kir - Sariz.1",0],[317.5771679051153,25.69719734713096,0,0,"Kir - Sariz.2",0],[327.66722677616434,39.542178811734516,0,0,"Kir - Sariz.3",0],[323.04463836943535,41.14189971138347,0,0,"Kir - Sariz.4",0],[351.3929831684679,21.420679049389573,0,0,"Kir - Sariz.5",0],[328.47114946043206,55.36845002547637,0,0,"Kir - Sariz.1",0],[313.7810442695418,48.262175556235455,0,0,"Kir - Sariz.2",0],[331.4473830911034,37.23175761823647,0,0,"Kir - Sariz.3",0],[321.13819060767776,55.68036104210458,0,0,"Kir - Sariz.4",0],[341.313283585333,39.92506555930426,0,0,"Kir - Sariz.5",0],[325.6012994386367,4.7970502120071705,0,0,"Kir - Sariz.6",0],[310.9704539970671,46.13753190125814,0,0,"Kir - Sariz.7",0],[345.5173012398417,53.93474990818106,0,0,"Kir - Sariz.8",0],[326.31919932433993,24.76662210194055,0,0,"Kir - Sariz.9",0],[326.88087878192295,14.45487810804798,0,0,"Kir - Sariz.10",0]],"metaData":{"name":"Tau - Sariz","dateAdded":"2016-11-17T12:45:56.639Z","version":"v1.1.1","markerColor":"#00FFFF","cutoff":"45","type":"Input","description":"pluton","author":"Kissel et al., Tectonophysics 2003","age":"45.0","minAge":"33.9","maxAge":"56","latitude":38.6,"longitude":36.5,"sanitized":true}},{"data":[[299.6,32.7,0,0,"Tau - Kepezdag.1",0],[314.8,68.7,0,0,"Tau - Kepezdag.2",0],[315,70.1,0,0,"Tau - Kepezdag.3",0],[345.4,33.8,0,0,"Tau - Kepezdag.4",0],[11.4,50.6,0,0,"Tau - Kepezdag.5",0],[340.8,41.6,0,0,"Tau - Kepezdag.6",0],[302.7,17.4,0,0,"Tau - Kepezdag.7",0],[347.8,64.9,0,0,"Tau - Kepezdag.8",0],[4.2,58.2,0,0,"Tau - Kepezdag.9",0],[350.4,44.2,0,0,"Tau - Kepezdag.10",0]],"metaData":{"name":"Tau - Kepezdag","dateAdded":"2016-11-17T13:21:40.665Z","version":"v1.1.1","markerColor":"#A52A2A","cutoff":"45","type":"Input","description":"volcanics","author":"Gursoy et al., J. Geodynamics 2011","age":"15","minAge":"14","maxAge":"16","latitude":38.3,"longitude":37.6,"sanitized":true}},{"data":[[337.2,34.3,0,0,"Tau - Yamadag.1",0],[358.5,48.3,0,0,"Tau - Yamadag.2",0],[1.7,42.6,0,0,"Tau - Yamadag.3",0],[298.1,74.3,0,0,"Tau - Yamadag.4",0],[309.1,15.7,0,0,"Tau - Yamadag.5",0],[343.1,53.9,0,0,"Tau - Yamadag.6",0],[338.8,50.4,0,0,"Tau - Yamadag.7",0],[309.8,32,0,0,"Tau - Yamadag.8",0],[303.3,19.9,0,0,"Tau - Yamadag.9",0],[352.5,53.1,0,0,"Tau - Yamadag.10",0],[20.6,-37.8,0,0,"Tau - Yamadag.11",0],[344.3,66,0,0,"Tau - Yamadag.12",0],[337.1,67.5,0,0,"Tau - Yamadag.13",0],[311.5,44.4,0,0,"Tau - Yamadag.14",0],[310.7,65.8,0,0,"Tau - Yamadag.15",0],[337.4,46.7,0,0,"Tau - Yamadag.16",0],[332,50.1,0,0,"Tau - Yamadag.17",0],[326.1,28.2,0,0,"Tau - Yamadag.18",0],[333.6,42.2,0,0,"Tau - Yamadag.19",0],[350.1,55.1,0,0,"Tau - Yamadag.20",0],[345.6,62.4,0,0,"Tau - Yamadag.21",0],[0.2,49.7,0,0,"Tau - Yamadag.22",0],[273.3,73.2,0,0,"Tau - Yamadag.23",0],[357.6,43,0,0,"Tau - Yamadag.24",0],[344.7,59.8,0,0,"Tau - Yamadag.25",0],[301,57.6,0,0,"Tau - Yamadag.26",0],[305.3,47.5,0,0,"Tau - Yamadag.27",0],[347.5,51.1,0,0,"Tau - Yamadag.28",0],[41.2,45.6,0,0,"Tau - Yamadag.29",0],[330.9,45,0,0,"Tau - Yamadag.30",0],[309.2,8.9,0,0,"Tau - Yamadag.31",0],[359.3,27.6,0,0,"Tau - Yamadag.32",0],[331.2,74,0,0,"Tau - Yamadag.33",0],[327,25,0,0,"Tau - Yamadag.34",0],[351.4,61.4,0,0,"Tau - Yamadag.35",0],[299.4,66.4,0,0,"Tau - Yamadag.36",0],[346.3,47.8,0,0,"Tau - Yamadag.37",0],[19.2,38.9,0,0,"Tau - Yamadag.38",0],[327,48.9,0,0,"Tau - Yamadag.39",0],[6.1,40.5,0,0,"Tau - Yamadag.40",0],[309.5,59.2,0,0,"Tau - Yamadag.41",0],[345.7,37.3,0,0,"Tau - Yamadag.42",0],[296.9,41.4,0,0,"Tau - Yamadag.43",0],[335,67.1,0,0,"Tau - Yamadag.44",0],[330.5,45.5,0,0,"Tau - Yamadag.45",0],[345.4,4.4,0,0,"Tau - Yamadag.46",0],[349.8,43.6,0,0,"Tau - Yamadag.47",0],[307.3,45.5,0,0,"Tau - Yamadag.48",0],[289.7,59.6,0,0,"Tau - Yamadag.49",0],[336.6,61.3,0,0,"Tau - Yamadag.50",0],[331.6,55.6,0,0,"Tau - Yamadag.51",0],[337.1,43.2,0,0,"Tau - Yamadag.52",0],[348.6,40.6,0,0,"Tau - Yamadag.53",0],[324.7,28.6,0,0,"Tau - Yamadag.54",0],[305.2,13.4,0,0,"Tau - Yamadag.55",0],[334,55.5,0,0,"Tau - Yamadag.56",0],[359.7,62.9,0,0,"Tau - Yamadag.57",0],[298.8,52.8,0,0,"Tau - Yamadag.58",0],[297.5,48.8,0,0,"Tau - Yamadag.59",0],[310,67.3,0,0,"Tau - Yamadag.60",0],[349.5,81.8,0,0,"Tau - Yamadag.61",0],[353.6,61.3,0,0,"Tau - Yamadag.62",0],[341.7,58.6,0,0,"Tau - Yamadag.63",0],[335.6,67.3,0,0,"Tau - Yamadag.64",0]],"metaData":{"name":"Tau - Yamadag","dateAdded":"2016-11-17T13:34:08.565Z","version":"v1.1.1","markerColor":"#A52A2A","cutoff":"45","type":"Input","description":"volcanics","author":"Gursoy et al., J. Geodynamics 2011","age":"13.5","minAge":"9","maxAge":"18","latitude":39,"longitude":38.1,"sanitized":true}},{"data":[[344.0730128876967,49.50724371101333,0,0,"Pon - TUN (A+D).1",0],[344.84914884707996,47.6343100733701,0,0,"Pon - TUN (A+D).2",0],[358.09235828197166,50.17299188408789,0,0,"Pon - TUN (A+D).3",0],[348.108386260996,46.70482347371285,0,0,"Pon - TUN (A+D).4",0],[2.8726091481846083,38.78679053474091,0,0,"Pon - TUN (A+D).5",0],[346.16101755483396,54.184858724786174,0,0,"Pon - TUN (A+D).6",0],[323.1125095744069,49.217885530535646,0,0,"Pon - TUN (A+D).1",0],[320.69583586337893,44.19246283861118,0,0,"Pon - TUN (A+D).2",0],[319.0262148641259,42.538914062785906,0,0,"Pon - TUN (A+D).3",0],[321.7143299964622,43.28821294143657,0,0,"Pon - TUN (A+D).4",0],[315.44757771185255,51.152425879927996,0,0,"Pon - TUN (A+D).5",0]],"metaData":{"name":"Tau - TUN (A+D)","dateAdded":"2016-11-17T14:04:04.802Z","version":"v1.1.1","markerColor":"#A52A2A","cutoff":"45","type":"Input","description":"sediments","author":"van der Voo, Tectonophysics 1968","age":"45.0","minAge":"33.9","maxAge":"56","latitude":39.1,"longitude":39.5,"sanitized":true}},{"data":[[325.56525309317874,17.10370328038369,0,0,"Tau - TT 64-65.1",0],[335.36684572249106,4.252271179287054,0,0,"Tau - TT 64-65.2",0],[303.05786626180486,53.18542747630116,0,0,"Tau - TT 64-65.3",0],[322.63928789640687,39.67682117028362,0,0,"Tau - TT 64-65.4",0],[315.0957462321352,14.243907544894208,0,0,"Tau - TT 64-65.5",0],[302.5259166611718,47.19499820745209,0,0,"Tau - TT 64-65.6",0],[311.56102457644965,16.517328118753717,0,0,"Tau - TT 64-65.7",0],[307.94912498763165,28.516413770703462,0,0,"Tau - TT 64-65.8",0],[324.41807214639505,39.19230496558878,0,0,"Tau - TT 64-65.9",0],[311.0569200095714,1.7666919453640673,0,0,"Tau - TT 64-65.10",0],[313.4860759392516,32.91341604917468,0,0,"Tau - TT 64-65.11",0],[315.89745635823374,39.15769559475599,0,0,"Tau - TT 64-65.12",0],[309.871707291064,2.4632670890343604,0,0,"Tau - TT 64-65.13",0],[322.9087654141872,33.85663913165499,0,0,"Tau - TT 64-65.14",0],[309.96399403055875,28.47533177370352,0,0,"Tau - TT 64-65.15",0],[310.90520584409455,33.9268855314208,0,0,"Tau - TT 64-65.1",0],[312.7879482175199,29.93329166771516,0,0,"Tau - TT 64-65.2",0],[313.75255076706867,52.8035651663936,0,0,"Tau - TT 64-65.3",0],[316.6556222405449,35.83359751394931,0,0,"Tau - TT 64-65.4",0],[326.2967921447211,33.004958597462,0,0,"Tau - TT 64-65.5",0],[304.15327671217096,53.410602737192605,0,0,"Tau - TT 64-65.6",0],[307.59728440853405,40.43295691004337,0,0,"Tau - TT 64-65.7",0]],"metaData":{"name":"Tau - TT 64-65","dateAdded":"2016-11-18T09:28:04.356Z","version":"v1.1.1","markerColor":"#00FFFF","cutoff":"45","type":"Simulated","description":"limestones","author":"Cinku et al., Tectonics 2016","age":"132","minAge":"100","maxAge":"164","latitude":37.4,"longitude":35.1,"sanitized":true}},{"data":[[332.4747832325961,15.161629307816272,0,0,"Tau - TT 48-49.1",0],[346.73124925001997,37.74643362333534,0,0,"Tau - TT 48-49.2",0],[336.7722636937316,-5.541146158617543,0,0,"Tau - TT 48-49.3",0],[328.9893278815405,9.665883938033037,0,0,"Tau - TT 48-49.4",0],[325.1439801429601,12.612373409382297,0,0,"Tau - TT 48-49.5",0],[337.41608766921973,19.847635649932467,0,0,"Tau - TT 48-49.6",0],[321.6584561015686,24.624944270048115,0,0,"Tau - TT 48-49.7",0],[340.56642602776384,35.15902009839989,0,0,"Tau - TT 48-49.8",0],[345.8666291134843,23.275634204801108,0,0,"Tau - TT 48-49.9",0],[338.44363630365575,0.006759855806065921,0,0,"Tau - TT 48-49.10",0],[352.08037658769615,42.27398984231418,0,0,"Tau - TT 48-49.11",0],[334.3465195796276,2.4791063324264546,0,0,"Tau - TT 48-49.12",0],[308.6286281313913,28.961672271986718,0,0,"Tau - TT 48-49.1",0],[302.5359903673252,65.27137705669392,0,0,"Tau - TT 48-49.2",0],[309.51928427930034,43.88941681690612,0,0,"Tau - TT 48-49.3",0],[310.6421037190576,29.096588606339676,0,0,"Tau - TT 48-49.4",0],[313.1097705947456,16.190667500260975,0,0,"Tau - TT 48-49.5",0],[312.65827298715436,47.21288486478712,0,0,"Tau - TT 48-49.6",0],[317.22602907142397,43.39795695856145,0,0,"Tau - TT 48-49.7",0],[328.1414889214987,54.34267818222316,0,0,"Tau - TT 48-49.8",0],[309.3314989640384,12.339797058951707,0,0,"Tau - TT 48-49.9",0],[315.8139171205825,46.92305149559572,0,0,"Tau - TT 48-49.10",0],[295.5155732347589,60.195560807576165,0,0,"Tau - TT 48-49.11",0],[308.01680143730005,34.52385028226142,0,0,"Tau - TT 48-49.12",0],[295.8476393972576,68.1020048614117,0,0,"Tau - TT 48-49.13",0]],"metaData":{"name":"Tau - TT 48-49","dateAdded":"2016-11-18T09:30:30.762Z","version":"v1.1.1","markerColor":"#0000FF","cutoff":"45","type":"Simulated","description":"limestones","author":"Cinku et al., Tectonics 2016","age":"132","minAge":"100","maxAge":"164","latitude":37.1,"longitude":34.5,"sanitized":true}},{"data":[[312.4988481659436,6.041540843681442,0,0,"Tau - TT 119-120.1",0],[321.772539947313,-10.539261970759862,0,0,"Tau - TT 119-120.2",0],[309.41544817157717,-2.341840476713619,0,0,"Tau - TT 119-120.3",0],[317.0414070016353,21.51666762674165,0,0,"Tau - TT 119-120.4",0],[313.2068937737474,47.38369435004342,0,0,"Tau - TT 119-120.5",0],[323.43937405723324,30.540384951990312,0,0,"Tau - TT 119-120.6",0],[321.27405555648727,6.963712964802933,0,0,"Tau - TT 119-120.7",0],[330.69201489105245,-14.759966578853108,0,0,"Tau - TT 119-120.8",0],[337.2674278837022,20.837858929987274,0,0,"Tau - TT 119-120.9",0],[305.2816515514768,16.950826766662598,0,0,"Tau - TT 119-120.10",0],[313.3559996454062,13.8929632683899,0,0,"Tau - TT 119-120.1",0],[317.33514218450307,5.891600435758048,0,0,"Tau - TT 119-120.2",0],[312.16059230252597,15.02896872407764,0,0,"Tau - TT 119-120.3",0],[309.08039593195144,26.815362333645805,0,0,"Tau - TT 119-120.4",0],[313.8500277116043,29.265756957526506,0,0,"Tau - TT 119-120.5",0],[313.8044204425354,29.70208192962464,0,0,"Tau - TT 119-120.6",0],[312.818766471499,20.630916365862895,0,0,"Tau - TT 119-120.7",0],[312.4244907348225,41.66483368102611,0,0,"Tau - TT 119-120.8",0],[312.29921589756236,23.452154400157564,0,0,"Tau - TT 119-120.9",0]],"metaData":{"name":"Tau - TT 119-120","dateAdded":"2016-11-18T09:33:47.277Z","version":"v1.1.1","markerColor":"#00FFFF","cutoff":"45","type":"Simulated","description":"limestones","author":"Cinku et al., Tectonics 2016","age":"132","minAge":"100","maxAge":"164","latitude":37.75,"longitude":35.09,"sanitized":true}},{"data":[[291.2262126860826,0.9716461126111297,0,0,"Tau - TT 128.1",0],[296.30211737782963,18.769728884064683,0,0,"Tau - TT 128.2",0],[305.4083959607045,48.16699959398892,0,0,"Tau - TT 128.3",0],[317.5692894892329,60.92892080376924,0,0,"Tau - TT 128.4",0],[316.1983786275333,34.85595445905531,0,0,"Tau - TT 128.5",0],[300.42446120426416,34.14361452025634,0,0,"Tau - TT 128.6",0],[318.2931605167676,37.98257619925893,0,0,"Tau - TT 128.7",0],[323.4599350538408,37.9323953336174,0,0,"Tau - TT 128.8",0]],"metaData":{"name":"Tau - TT 128","dateAdded":"2016-11-18T09:34:28.631Z","version":"v1.1.1","markerColor":"#00FFFF","cutoff":"45","type":"Simulated","description":"limestones","author":"Cinku et al., Tectonics 2016","age":"132","minAge":"100","maxAge":"164","latitude":37.82,"longitude":35.45,"sanitized":true}},{"data":[[300.4270242115156,40.303395010100154,0,0,"Tau - TT37-38-40.1",0],[316.42054038792753,3.5840796326924194,0,0,"Tau - TT37-38-40.2",0],[319.4762047745482,20.649216635727363,0,0,"Tau - TT37-38-40.3",0],[300.98419626643704,32.11658170172416,0,0,"Tau - TT37-38-40.4",0],[303.1172008528124,50.565161484056354,0,0,"Tau - TT37-38-40.5",0],[295.43103153524885,45.73340688087539,0,0,"Tau - TT37-38-40.6",0],[324.39675885070704,28.526807987081405,0,0,"Tau - TT37-38-40.7",0],[313.51486264890866,34.780027354473944,0,0,"Tau - TT37-38-40.8",0],[312.46045850884366,53.081167436929135,0,0,"Tau - TT37-38-40.9",0],[328.2148030448816,30.11270311804851,0,0,"Tau - TT37-38-40.10",0],[337.0157871547458,21.512601733559737,0,0,"Tau - TT37-38-40.1",0],[2.7946642249858655,23.049250220063787,0,0,"Tau - TT37-38-40.2",0],[345.6995132364791,11.504129272833284,0,0,"Tau - TT37-38-40.3",0],[358.7682575363662,3.975129943906638,0,0,"Tau - TT37-38-40.4",0],[337.7445575519662,24.51690513585033,0,0,"Tau - TT37-38-40.5",0],[335.6024135409476,41.73525694620674,0,0,"Tau - TT37-38-40.6",0],[332.65443091602924,25.65740804255297,0,0,"Tau - TT37-38-40.7",0],[350.36059708074043,38.37916103536397,0,0,"Tau - TT37-38-40.8",0],[329.2938170843406,35.520722396860876,0,0,"Tau - TT37-38-40.9",0],[1.0536133398006768,18.39241781764463,0,0,"Tau - TT37-38-40.10",0],[326.828737784498,0.493427662426106,0,0,"Tau - TT37-38-40.1",0],[338.4883360461811,13.568946567867217,0,0,"Tau - TT37-38-40.2",0],[314.94315063887916,34.616385515532826,0,0,"Tau - TT37-38-40.3",0],[340.8762084967981,35.560439703885145,0,0,"Tau - TT37-38-40.4",0],[314.91804896553253,-11.365286344262907,0,0,"Tau - TT37-38-40.5",0],[335.8361300979701,61.0860837905669,0,0,"Tau - TT37-38-40.6",0],[317.6769621970916,38.3569826318223,0,0,"Tau - TT37-38-40.7",0],[327.01739683041404,29.980672793612133,0,0,"Tau - TT37-38-40.8",0],[336.64508416783633,19.897686316209963,0,0,"Tau - TT37-38-40.9",0],[332.8958033240758,29.981152204316135,0,0,"Tau - TT37-38-40.10",0]],"metaData":{"name":"Tau - TT37-38-40","dateAdded":"2016-11-18T10:21:44.430Z","version":"v1.1.1","markerColor":"#00FFFF","cutoff":"45","type":"Simulated","description":"limestone","author":"Cinku et al., Tectonics 2016","age":"83.0","minAge":"66","maxAge":"100","latitude":37.54,"longitude":34.98,"sanitized":true}},{"data":[[346.4346489605847,25.853653334886282,0,0,"Tau - TT129-130.1",0],[336.3773426090036,31.743688258586932,0,0,"Tau - TT129-130.2",0],[342.6725919978069,16.039048465909854,0,0,"Tau - TT129-130.3",0],[1.708660495651145,35.83380187723803,0,0,"Tau - TT129-130.4",0],[357.2147255864461,43.88180989598418,0,0,"Tau - TT129-130.5",0],[331.9320705686242,26.28413332518725,0,0,"Tau - TT129-130.6",0],[316.1412710750428,-37.95173825984839,0,0,"Tau - TT129-130.7",0],[341.3993277944181,32.95174081594475,0,0,"Tau - TT129-130.8",0],[348.51029554353914,6.206618260295997,0,0,"Tau - TT129-130.9",0],[336.0611094606721,39.85385638356855,0,0,"Tau - TT129-130.10",0],[304.0108246695545,62.802329515243365,0,0,"Tau - TT129-130.11",0],[336.14759231044604,65.31774885272725,0,0,"Tau - TT129-130.1",0],[310.45281209507084,73.83017540660293,0,0,"Tau - TT129-130.2",0],[328.7704531790596,62.95416326926989,0,0,"Tau - TT129-130.3",0],[317.61692410646754,60.169642474138115,0,0,"Tau - TT129-130.4",0],[345.53259417641243,59.97106792000506,0,0,"Tau - TT129-130.5",0],[320.6627887011887,62.02788308074695,0,0,"Tau - TT129-130.6",0],[322.74671933173295,66.64324513691804,0,0,"Tau - TT129-130.7",0],[328.3961321250547,74.64068945146043,0,0,"Tau - TT129-130.8",0],[306.12950819006073,64.08189655768642,0,0,"Tau - TT129-130.9",0],[335.279165929156,77.321269314427,0,0,"Tau - TT129-130.10",0]],"metaData":{"name":"Tau - TT129-130","dateAdded":"2016-11-18T10:23:47.940Z","version":"v1.1.1","markerColor":"#00FFFF","cutoff":"45","type":"Simulated","description":"limestone","author":"Cinku et al., Tectonics 2016","age":"83.0","minAge":"66","maxAge":"100","latitude":38.19,"longitude":35.92,"sanitized":true}},{"data":[[358.2904245651792,54.96367638767427,0,0,"Tau - TT51.1",0],[338.00456100874885,43.482632947388595,0,0,"Tau - TT51.2",0],[352.6766296171036,66.16662684946489,0,0,"Tau - TT51.3",0],[341.53601808703587,17.04016810764101,0,0,"Tau - TT51.4",0],[328.01141708260866,30.52567500343935,0,0,"Tau - TT51.5",0],[324.284612900143,40.11495260818575,0,0,"Tau - TT51.6",0],[337.74759200100743,25.334328632474865,0,0,"Tau - TT51.7",0],[356.28866530844465,39.18373055787354,0,0,"Tau - TT51.8",0],[348.8485699278948,51.05496355370063,0,0,"Tau - TT51.9",0],[332.43355642736356,23.403805721332848,0,0,"Tau - TT51.10",0],[337.6335611725675,25.594671927412417,0,0,"Tau - TT51.11",0],[349.2600530009675,26.673050384690416,0,0,"Tau - TT51.12",0]],"metaData":{"name":"Tau - TT51","dateAdded":"2016-11-18T10:26:32.738Z","version":"v1.1.1","markerColor":"#0000FF","cutoff":"45","type":"Simulated","description":"sandstone","author":"Cinku et al., Tectonics 2016","age":"74.3","minAge":"66","maxAge":"83.6","latitude":37.09,"longitude":34.57,"sanitized":true}},{"data":[[327.38625854388476,19.86843963079614,0,0,"Tau - TT53.1",0],[304.57944610729623,17.959470674820743,0,0,"Tau - TT53.2",0],[311.48747666989686,16.13894528196406,0,0,"Tau - TT53.3",0],[319.54982723963525,15.27231484643741,0,0,"Tau - TT53.4",0],[299.9059483022752,43.173739540474536,0,0,"Tau - TT53.5",0],[299.1083612085306,43.07826847343364,0,0,"Tau - TT53.6",0],[308.07726595895883,32.694460276274135,0,0,"Tau - TT53.7",0],[293.6680677670074,21.87756894734652,0,0,"Tau - TT53.8",0],[319.42378107796856,17.0814120335968,0,0,"Tau - TT53.9",0],[300.3999857110621,13.922955992420935,0,0,"Tau - TT53.10",0],[299.272072398471,26.707213852662278,0,0,"Tau - TT53.11",0],[302.98551377747935,45.56971425425058,0,0,"Tau - TT53.12",0],[295.16133289080756,18.693492593315618,0,0,"Tau - TT53.13",0],[309.1824194802149,17.052573922589538,0,0,"Tau - TT53.14",0]],"metaData":{"name":"Tau - TT53","dateAdded":"2016-11-18T10:27:30.982Z","version":"v1.1.1","markerColor":"#0000FF","cutoff":"45","type":"Simulated","description":"sandstone","author":"Cinku et al., Tectonics 2016","age":"74.3","minAge":"66","maxAge":"83.6","latitude":37.08,"longitude":34.63,"sanitized":true}},{"data":[[325.75105329487474,45.03029013716275,0,0,"Tau - TT56.1",0],[332.0795291746145,46.47036816751628,0,0,"Tau - TT56.2",0],[325.4734351203457,34.6291490753866,0,0,"Tau - TT56.3",0],[323.0676231979512,45.19783421922021,0,0,"Tau - TT56.4",0],[339.7454290846469,38.69590114367802,0,0,"Tau - TT56.5",0],[324.6668335957536,40.30516855114997,0,0,"Tau - TT56.6",0],[335.5108642584086,42.7515945392863,0,0,"Tau - TT56.7",0]],"metaData":{"name":"Tau - TT56","dateAdded":"2016-11-18T10:28:40.057Z","version":"v1.1.1","markerColor":"#0000FF","cutoff":"45","type":"Simulated","description":"sandstone","author":"Cinku et al., Tectonics 2016","age":"74.3","minAge":"66","maxAge":"83.6","latitude":37.8,"longitude":34.6,"sanitized":true}},{"data":[[8.892353741114391,50.51422451849643,0,0,"Kir - TT123-124.1",0],[5.808212548766278,63.805758609878986,0,0,"Kir - TT123-124.2",0],[2.5144854211605434,44.508519211866506,0,0,"Kir - TT123-124.3",0],[3.0774766520287926,44.39973101256043,0,0,"Kir - TT123-124.4",0],[4.907467260757755,51.73931992641441,0,0,"Kir - TT123-124.5",0],[5.804227015538231,34.91800306427157,0,0,"Kir - TT123-124.6",0],[37.86938094424086,65.44114560457224,0,0,"Kir - TT123-124.7",0],[16.161157337783493,18.636899862334314,0,0,"Kir - TT123-124.8",0],[32.97005120198987,63.131012729983965,0,0,"Kir - TT123-124.9",0],[32.24027523702557,38.07587991487773,0,0,"Kir - TT123-124.10",0],[26.855969504686975,60.86494649661362,0,0,"Kir - TT123-124.11",0],[349.4758847605137,80.19925589320815,0,0,"Kir - TT123-124.12",0],[51.5090848150663,50.83464501916207,0,0,"Kir - TT123-124.13",0],[28.9744894219883,66.30073113792676,0,0,"Kir - TT123-124.14",0],[336.7691098503401,68.61941722474626,0,0,"Kir - TT123-124.1",0],[5.198688793522535,34.970244448934125,0,0,"Kir - TT123-124.2",0],[14.356126643533571,51.40757702126811,0,0,"Kir - TT123-124.3",0],[2.811450664490053,56.80331860898465,0,0,"Kir - TT123-124.4",0],[18.095131312734225,52.27108753062366,0,0,"Kir - TT123-124.5",0],[340.2291947567087,41.971535465032105,0,0,"Kir - TT123-124.6",0],[350.17229127645226,26.639587087921623,0,0,"Kir - TT123-124.7",0],[5.075087352961873,10.971449564858753,0,0,"Kir - TT123-124.8",0],[352.46718817048423,41.20149451238979,0,0,"Kir - TT123-124.1",0],[353.0429448896584,50.5338770090781,0,0,"Kir - TT123-124.2",0],[6.144008136593641,53.66579047603209,0,0,"Kir - TT123-124.3",0],[12.750722163577866,42.797111940870906,0,0,"Kir - TT123-124.4",0],[27.8375284190164,69.20158175141316,0,0,"Kir - TT123-124.5",0],[350.92786233167567,49.362656303322645,0,0,"Kir - TT123-124.6",0],[354.67545950997453,55.45008337225918,0,0,"Kir - TT123-124.7",0],[10.368494132901242,69.78556147590209,0,0,"Kir - TT123-124.8",0],[22.30070025852564,53.088569026196744,0,0,"Kir - TT123-124.9",0],[340.3053237234316,70.00528906447131,0,0,"Kir - TT123-124.10",0],[3.17933464118799,54.97356828399334,0,0,"Kir - TT123-124.11",0],[23.101944276395955,53.36084893018898,0,0,"Kir - TT123-124.1",0],[350.9256591465896,22.077699675279927,0,0,"Kir - TT123-124.2",0],[350.53757557398467,63.402405901598264,0,0,"Kir - TT123-124.3",0],[344.3171427938539,51.922201693760755,0,0,"Kir - TT123-124.4",0],[2.7310904871294497,68.47521055507822,0,0,"Kir - TT123-124.5",0],[2.7528851581934077,32.93005861896259,0,0,"Kir - TT123-124.6",0],[344.65556895300574,46.3402830866057,0,0,"Kir - TT123-124.7",0],[340.1535231189782,69.35419964472548,0,0,"Kir - TT123-124.8",0],[332.9726674633723,45.56843299573478,0,0,"Kir - TT123-124.9",0],[16.757508002697193,67.22172418458052,0,0,"Kir - TT123-124.10",0],[29.432748450638996,64.53557455702104,0,0,"Kir - TT123-124.11",0],[354.7922979498551,63.06040982928088,0,0,"Kir - TT123-124.12",0],[358.57044531693157,88.63286079325161,0,0,"Kir - TT123-124.13",0],[9.138418961168838,34.914388539361234,0,0,"Kir - TT123-124.14",0],[351.7419038549376,52.38650777116643,0,0,"Kir - TT123-124.15",0],[10.783340316828458,47.524142450217354,0,0,"Kir - TT123-124.16",0],[28.24105929043094,48.782654660246614,0,0,"Kir - TT123-124.17",0]],"metaData":{"name":"Tau - TT57-8-9-60","dateAdded":"2016-11-18T11:19:20.180Z","version":"v1.1.1","markerColor":"#00FFFF","cutoff":"45","type":"Input","description":"sediments","author":"Çinku et al., Tectonics 2016","age":"14.2","minAge":"5.3","maxAge":"23","latitude":37.37,"longitude":35.26,"sanitized":true}},{"data":[[2.5397096568714232,47.97134409113783,0,0,"Tau - TT61.1",0],[355.1477129606992,51.590783002091214,0,0,"Tau - TT61.2",0],[7.680952243650665,56.718222574040446,0,0,"Tau - TT61.3",0],[359.9959916216178,38.807593483439774,0,0,"Tau - TT61.4",0],[13.07495091024225,41.951955660970455,0,0,"Tau - TT61.5",0],[20.06568283061341,51.1601504469221,0,0,"Tau - TT61.6",0],[357.64604120401714,47.54923356697974,0,0,"Tau - TT61.7",0],[351.76463711999133,51.66287150075141,0,0,"Tau - TT61.8",0],[350.8928575707969,50.88781690148799,0,0,"Tau - TT61.9",0],[8.489229318910418,38.64532612645323,0,0,"Tau - TT61.10",0],[359.9831975678454,33.97876767006164,0,0,"Tau - TT61.11",0],[8.724465551278115,41.10809312242169,0,0,"Tau - TT61.12",0],[6.658841253223102,65.70472803554148,0,0,"Tau - TT61.13",0],[22.587460012911492,45.62745767562699,0,0,"Tau - TT61.14",0],[356.0642959150134,46.2861351916482,0,0,"Tau - TT61.15",0],[4.627332556561214,61.74687654158212,0,0,"Tau - TT61.16",0],[3.0469826899224017,56.456603836476326,0,0,"Tau - TT61.17",0],[1.0433616771259153,56.208304193446466,0,0,"Tau - TT61.18",0],[357.8762569573106,50.143386852858654,0,0,"Tau - TT61.19",0],[358.7973522673176,44.87784109810015,0,0,"Tau - TT61.20",0],[5.337873633535423,52.02905939044314,0,0,"Tau - TT61.21",0],[21.725960639243397,22.680567812394038,0,0,"Tau - TT61.22",0],[13.60114949770741,50.082647815849114,0,0,"Tau - TT61.23",0]],"metaData":{"name":"Tau - TT61","dateAdded":"2016-11-18T11:21:27.601Z","version":"v1.1.1","markerColor":"#00FFFF","cutoff":"45","type":"Simulated","description":"sediments","author":"Çinku et al., Tectonics 2016","age":"14.2","minAge":"5.3","maxAge":"23","latitude":37.34,"longitude":35.26,"sanitized":true}},{"data":[[30,44,0,0,"Tau - East Anat. lavas.1",0],[14,53,0,0,"Tau - East Anat. lavas.2",0],[0,51,0,0,"Tau - East Anat. lavas.3",0],[9,36,0,0,"Tau - East Anat. lavas.4",0],[23,51,0,0,"Tau - East Anat. lavas.5",0],[2,50,0,0,"Tau - East Anat. lavas.6",0],[5,50,0,0,"Tau - East Anat. lavas.7",0],[43,75,0,0,"Tau - East Anat. lavas.8",0],[327,46,0,0,"Tau - East Anat. lavas.9",0],[340,55,0,0,"Tau - East Anat. lavas.10",0],[347,46,0,0,"Tau - East Anat. lavas.11",0],[353,57,0,0,"Tau - East Anat. lavas.12",0],[14,52,0,0,"Tau - East Anat. lavas.13",0],[3,62,0,0,"Tau - East Anat. lavas.14",0],[356,50,0,0,"Tau - East Anat. lavas.15",0],[345,42,0,0,"Tau - East Anat. lavas.16",0],[354,48,0,0,"Tau - East Anat. lavas.17",0],[348,49,0,0,"Tau - East Anat. lavas.18",0],[345,46,0,0,"Tau - East Anat. lavas.19",0],[3,49,0,0,"Tau - East Anat. lavas.20",0],[5,66,0,0,"Tau - East Anat. lavas.21",0],[340,80,0,0,"Tau - East Anat. lavas.22",0],[7,54,0,0,"Tau - East Anat. lavas.23",0],[57,15,0,0,"Tau - East Anat. lavas.24",0],[323,66,0,0,"Tau - East Anat. lavas.25",0],[354,59,0,0,"Tau - East Anat. lavas.26",0],[18,68,0,0,"Tau - East Anat. lavas.27",0],[340,50,0,0,"Tau - East Anat. lavas.28",0],[11,40,0,0,"Tau - East Anat. lavas.29",0],[51,25,0,0,"Tau - East Anat. lavas.30",0],[353,61,0,0,"Tau - East Anat. lavas.31",0],[27,56,0,0,"Tau - East Anat. lavas.32",0],[5,43,0,0,"Tau - East Anat. lavas.33",0],[3,47,0,0,"Tau - East Anat. lavas.34",0],[7,58,0,0,"Tau - East Anat. lavas.35",0],[8,47,0,0,"Tau - East Anat. lavas.36",0],[11,54,0,0,"Tau - East Anat. lavas.37",0],[21,44,0,0,"Tau - East Anat. lavas.38",0],[35,63,0,0,"Tau - East Anat. lavas.39",0],[1,48,0,0,"Tau - East Anat. lavas.40",0],[342,47,0,0,"Tau - East Anat. lavas.41",0],[340,60,0,0,"Tau - East Anat. lavas.42",0],[28,62,0,0,"Tau - East Anat. lavas.43",0],[336,53,0,0,"Tau - East Anat. lavas.44",0],[337,57,0,0,"Tau - East Anat. lavas.45",0],[334,59,0,0,"Tau - East Anat. lavas.46",0],[346,46,0,0,"Tau - East Anat. lavas.47",0],[320,55,0,0,"Tau - East Anat. lavas.48",0],[10,43,0,0,"Tau - East Anat. lavas.49",0],[356,40,0,0,"Tau - East Anat. lavas.50",0]],"metaData":{"name":"Tau - East Anat. lavas","dateAdded":"2016-11-21T08:32:51.860Z","version":"v1.1.1","markerColor":"#A52A2A","cutoff":"45","type":"Input","description":"volcanics","author":"Hisarlı et al., Int J Earth Sci 2016","age":"5.7","minAge":"11.1","maxAge":"0.3","latitude":39.5,"longitude":42.5,"sanitized":true}},{"data":[[307.15215636238895,54.394178111409325,0,0,"Tau - Adana Basin.1",0],[337.466650804816,15.540546225437337,0,0,"Tau - Adana Basin.2",0],[359.6819200695268,43.63191370696219,0,0,"Tau - Adana Basin.3",0],[339.15962214927686,20.273780111515357,0,0,"Tau - Adana Basin.4",0],[0.35261582958054305,41.58696425470803,0,0,"Tau - Adana Basin.5",0],[305.01849811099123,54.51834330930675,0,0,"Tau - Adana Basin.6",0],[314.45717198382886,33.058874663297935,0,0,"Tau - Adana Basin.7",0],[353.855488128499,61.121954885079305,0,0,"Tau - Adana Basin.8",0],[326.83954541484604,26.79249874648776,0,0,"Tau - Adana Basin.9",0],[343.7800109071936,2.4765824325331853,0,0,"Tau - Adana Basin.10",0],[346.5235087205927,58.57676322008223,0,0,"Tau - Adana Basin.11",0],[337.61278866828263,38.41992337443412,0,0,"Tau - Adana Basin.12",0],[326.94574305314814,8.650303950491269,0,0,"Tau - Adana Basin.13",0],[351.6223445949768,6.91600898066316,0,0,"Tau - Adana Basin.14",0],[339.1178629726853,23.269831368975204,0,0,"Tau - Adana Basin.15",0],[357.0776455893049,60.09285309271501,0,0,"Tau - Adana Basin.16",0],[7.223730278302924,17.36268159946747,0,0,"Tau - Adana Basin.17",0],[322.77561333534277,29.372645850781772,0,0,"Tau - Adana Basin.18",0],[350.07897811734153,47.832764369823025,0,0,"Tau - Adana Basin.19",0],[15.551871977348867,61.30028309035226,0,0,"Tau - Adana Basin.20",0],[346.52355811565894,31.05441755588863,0,0,"Tau - Adana Basin.21",0],[348.6421619479612,55.878181593691714,0,0,"Tau - Adana Basin.22",0],[342.1944595629361,43.49448331863099,0,0,"Tau - Adana Basin.23",0],[338.32955344131335,55.70253495627992,0,0,"Tau - Adana Basin.24",0],[316.62256018977894,51.458774438326415,0,0,"Tau - Adana Basin.25",0],[329.59970727335417,35.468192970091266,0,0,"Tau - Adana Basin.26",0],[341.142366051135,-32.62497807842135,0,0,"Tau - Adana Basin.27",0],[10.18727554785346,49.48611230918622,0,0,"Tau - Adana Basin.28",0],[10.10175973788705,44.85909168020388,0,0,"Tau - Adana Basin.29",0],[325.4097625230686,47.9333575657965,0,0,"Tau - Adana Basin.30",0],[356.33457315639885,59.83880058640366,0,0,"Tau - Adana Basin.31",0],[331.9250680092148,42.91633559895989,0,0,"Tau - Adana Basin.32",0],[341.31849014851355,18.669104951645785,0,0,"Tau - Adana Basin.33",0],[329.1861017561016,28.9297222815358,0,0,"Tau - Adana Basin.34",0],[18.96292415577625,49.43299466073692,0,0,"Tau - Adana Basin.35",0],[331.0315904641086,48.65880891348797,0,0,"Tau - Adana Basin.36",0],[331.6849944845627,-7.420039404125156,0,0,"Tau - Adana Basin.37",0],[337.30105439320334,-29.077141215077184,0,0,"Tau - Adana Basin.38",0],[352.3651712425158,46.58142988015472,0,0,"Tau - Adana Basin.39",0],[345.8831943865956,31.39729034696338,0,0,"Tau - Adana Basin.40",0],[333.0426916177546,58.41359452195352,0,0,"Tau - Adana Basin.41",0],[357.3935933514626,44.26465727624463,0,0,"Tau - Adana Basin.42",0],[338.5053033454277,68.05383046187391,0,0,"Tau - Adana Basin.43",0],[22.104588854578935,47.332938442397136,0,0,"Tau - Adana Basin.44",0],[338.6397878122582,54.79379775902192,0,0,"Tau - Adana Basin.45",0],[302.4028969399749,62.44136407235194,0,0,"Tau - Adana Basin.46",0],[305.7508839386194,24.43019163135158,0,0,"Tau - Adana Basin.47",0],[316.38533970884305,74.59387206220957,0,0,"Tau - Adana Basin.48",0],[353.9408423768973,48.47405340779422,0,0,"Tau - Adana Basin.49",0],[346.3946421200267,65.84656156724488,0,0,"Tau - Adana Basin.50",0],[332.2547482432076,22.26517710884498,0,0,"Tau - Adana Basin.51",0],[21.665051830090363,33.30146459503404,0,0,"Tau - Adana Basin.52",0],[325.6636326773448,29.621095301655828,0,0,"Tau - Adana Basin.53",0],[354.1888757778452,46.9117174510616,0,0,"Tau - Adana Basin.54",0],[9.213736976209304,27.731731734328303,0,0,"Tau - Adana Basin.55",0],[313.19273936774994,73.21279705483008,0,0,"Tau - Adana Basin.56",0],[340.5882294725584,-8.926450783843629,0,0,"Tau - Adana Basin.57",0],[348.5440646704,39.4656855417329,0,0,"Tau - Adana Basin.58",0],[4.100088442040601,34.85347838321367,0,0,"Tau - Adana Basin.59",0],[343.8711363932466,30.467541823568347,0,0,"Tau - Adana Basin.60",0],[327.0316055308125,56.157135312761696,0,0,"Tau - Adana Basin.61",0],[330.5422846278483,10.548910776435953,0,0,"Tau - Adana Basin.62",0],[351.3151413804431,28.38693926310659,0,0,"Tau - Adana Basin.63",0],[8.27800618566846,50.13361026544903,0,0,"Tau - Adana Basin.64",0],[345.92576736799344,48.64127811568123,0,0,"Tau - Adana Basin.65",0],[19.500611959056982,57.6771240229478,0,0,"Tau - Adana Basin.66",0]],"metaData":{"name":"Tau - Adana Basin","dateAdded":"2016-11-21T15:18:21.242Z","version":"v1.1.1","markerColor":"#00FFFF","cutoff":"45","type":"Simulated","description":"carbonates","author":"Lucifora et al., G-Cubed 2012","age":"8.5","minAge":"5.3","maxAge":"11.7","latitude":37.1,"longitude":35.2,"sanitized":true,"edited":true,"timeEdited":"2016-11-21T15:19:20.136Z"}},{"data":[[318.73442505733203,13.718814607111865,0,0,"Tau - TT41.1",0],[312.43877881691583,41.967206191938565,0,0,"Tau - TT41.2",0],[311.8435784143619,38.8685443922335,0,0,"Tau - TT41.3",0],[306.73577318038156,38.32486035927403,0,0,"Tau - TT41.4",0],[302.0667879736113,41.83696545767804,0,0,"Tau - TT41.5",0],[325.96487939945786,58.24958009688006,0,0,"Tau - TT41.6",0],[294.5499481887257,53.49718752767028,0,0,"Tau - TT41.7",0],[312.8536688621165,52.62983315705528,0,0,"Tau - TT41.8",0],[314.34457129933617,33.17871513786196,0,0,"Tau - TT41.9",0],[318.430611819828,30.494056403100643,0,0,"Tau - TT41.10",0],[322.8095717143006,30.63832843857928,0,0,"Tau - TT41.11",0],[323.90380286549475,51.73783539048095,0,0,"Tau - TT41.12",0],[313.70854024676174,30.374024967270323,0,0,"Tau - TT41.13",0],[313.7797423262811,45.721058771198145,0,0,"Tau - TT41.14",0]],"metaData":{"name":"Tau - TT41","dateAdded":"2016-11-18T10:22:21.685Z","version":"v1.1.1","markerColor":"#00FFFF","cutoff":"45","type":"Simulated","description":"limestone","author":"Cinku et al., Tectonics 2016","age":"83.0","minAge":"66","maxAge":"100","latitude":37.48,"longitude":35.26,"sanitized":true,"edited":true,"timeEdited":"2016-11-21T15:19:50.256Z"}},{"data":[[337.97982929672935,32.322553332128514,0,0,"Kir - TT28-29-30.1",0],[335.324068342509,44.34540812581613,0,0,"Kir - TT28-29-30.2",0],[345.916063796085,47.25441957587487,0,0,"Kir - TT28-29-30.3",0],[332.79095808717284,50.980531952311,0,0,"Kir - TT28-29-30.4",0],[344.79652919192176,45.543161502713694,0,0,"Kir - TT28-29-30.5",0],[345.91441128093317,45.45196126359019,0,0,"Kir - TT28-29-30.6",0],[333.6149750605615,34.8390275974002,0,0,"Kir - TT28-29-30.7",0],[328.82958228824987,52.57885264030491,0,0,"Kir - TT28-29-30.8",0],[326.8854556674569,28.122731649424995,0,0,"Kir - TT28-29-30.9",0],[328.9052256171592,34.87282939528867,0,0,"Kir - TT28-29-30.10",0],[341.0428817966875,54.282300212503756,0,0,"Kir - TT28-29-30.11",0],[335.6805256099917,47.68381691200339,0,0,"Kir - TT28-29-30.12",0],[332.18584794242724,40.41778340829322,0,0,"Kir - TT28-29-30.13",0],[342.79076095755914,46.29193975027066,0,0,"Kir - TT28-29-30.14",0],[342.1249775892755,41.879133491343254,0,0,"Kir - TT28-29-30.15",0],[330.8693255990055,31.840021784337733,0,0,"Kir - TT28-29-30.16",0],[338.52203689575845,44.22220903854188,0,0,"Kir - TT28-29-30.17",0],[334.71201990691816,45.05373328009217,0,0,"Kir - TT28-29-30.18",0],[6.568713648199321,73.13506892911147,0,0,"Kir - TT28-29-30.1",0],[14.773840127726803,56.645843487495746,0,0,"Kir - TT28-29-30.2",0],[0.17498633627775462,66.75786962119666,0,0,"Kir - TT28-29-30.3",0],[11.675951662752402,53.796364131560104,0,0,"Kir - TT28-29-30.4",0],[35.21360633167777,52.02660762591803,0,0,"Kir - TT28-29-30.5",0],[352.3518605197284,31.261200610114063,0,0,"Kir - TT28-29-30.6",0],[353.6482723692781,-11.037787215479025,0,0,"Kir - TT28-29-30.7",0],[0.2501239635255388,47.1042275447774,0,0,"Kir - TT28-29-30.8",0],[14.36089521494206,32.73920084078599,0,0,"Kir - TT28-29-30.9",0],[351.1355237846409,27.463622817832118,0,0,"Kir - TT28-29-30.10",0],[348.14207234687166,48.19739110127094,0,0,"Kir - TT28-29-30.11",0],[14.25772520511991,43.11044504518695,0,0,"Kir - TT28-29-30.12",0],[30.707401235853435,44.78730801371155,0,0,"Kir - TT28-29-30.13",0],[350.61942558018126,42.61555008179446,0,0,"Kir - TT28-29-30.1",0],[328.1601328321253,26.13422129144238,0,0,"Kir - TT28-29-30.2",0],[7.458447165857365,26.080565957001543,0,0,"Kir - TT28-29-30.3",0],[346.4817985808662,22.63728407429688,0,0,"Kir - TT28-29-30.4",0],[349.6721657229674,5.385310994998567,0,0,"Kir - TT28-29-30.5",0],[337.2967029642084,-5.556920034096957,0,0,"Kir - TT28-29-30.6",0],[349.4362644315031,32.65356620500842,0,0,"Kir - TT28-29-30.7",0]],"metaData":{"name":"Kir - TT28-29-30","dateAdded":"2016-11-18T10:58:50.752Z","version":"v1.1.1","markerColor":"#FF0000","cutoff":"45","type":"Simulated","description":"sediment","author":"Cinku et al., Tectonics 2016","age":"42.9","minAge":"38","maxAge":"47.8","latitude":38.97,"longitude":34.62,"sanitized":true}},{"data":[[299.79162815919335,50.23786961983549,0,0,"Kir - TT32-33-34.1",0],[327.58173711633776,36.393715555323205,0,0,"Kir - TT32-33-34.2",0],[292.29541662423594,24.862765187844072,0,0,"Kir - TT32-33-34.3",0],[303.80121845623086,35.14714457752582,0,0,"Kir - TT32-33-34.4",0],[296.3651794006446,20.028591002899642,0,0,"Kir - TT32-33-34.5",0],[291.50807198171333,63.672919390055995,0,0,"Kir - TT32-33-34.6",0],[306.7092780741498,34.227234619773434,0,0,"Kir - TT32-33-34.7",0],[10.132394617637347,30.495736847440885,0,0,"Kir - TT32-33-34.1",0],[10.13495683065818,28.572616968617496,0,0,"Kir - TT32-33-34.2",0],[3.4034714754049733,10.097847741434476,0,0,"Kir - TT32-33-34.3",0],[7.404203633993421,-11.188416306716913,0,0,"Kir - TT32-33-34.4",0],[10.08627126834202,42.352052737616155,0,0,"Kir - TT32-33-34.5",0],[18.190702543272216,44.61938257916488,0,0,"Kir - TT32-33-34.6",0],[20.650988111273303,17.49414041157678,0,0,"Kir - TT32-33-34.7",0],[333.05984682844655,16.591417025195117,0,0,"Kir - TT32-33-34.8",0],[355.01171739951985,22.906448391891608,0,0,"Kir - TT32-33-34.9",0],[343.8717115787157,4.876883364560462,0,0,"Kir - TT32-33-34.1",0],[353.6786931268624,55.705031723178266,0,0,"Kir - TT32-33-34.2",0],[346.3339091273032,5.180357080541021,0,0,"Kir - TT32-33-34.3",0],[317.35313322797265,20.663154784097564,0,0,"Kir - TT32-33-34.4",0],[345.99222315542215,60.63452624109956,0,0,"Kir - TT32-33-34.5",0],[345.15720017472955,60.04092320926956,0,0,"Kir - TT32-33-34.6",0],[337.16767217652125,25.4812290797336,0,0,"Kir - TT32-33-34.7",0],[328.0692661982606,22.257884698998772,0,0,"Kir - TT32-33-34.8",0]],"metaData":{"name":"Kir - TT32-33-34","dateAdded":"2016-11-18T10:59:49.461Z","version":"v1.1.1","markerColor":"#FF0000","cutoff":"45","type":"Simulated","description":"sediment","author":"Cinku et al., Tectonics 2016","age":"42.9","minAge":"38","maxAge":"47.8","latitude":38.96,"longitude":34.85,"sanitized":true}},{"data":[[337.5913766974951,53.12548219688476,0,0,"Kir - AK.1",0],[345.8501478682232,70.61513781302259,0,0,"Kir - AK.2",0],[319.6730732452433,28.307412997937554,0,0,"Kir - AK.3",0],[285.2140527074689,68.85780687123186,0,0,"Kir - AK.4",0],[304.8387531570372,47.82762058706932,0,0,"Kir - AK.5",0],[307.88186559827966,67.972221087209,0,0,"Kir - AK.6",0],[312.44195068303304,72.32319859929096,0,0,"Kir - AK.7",0],[314.45305214167,43.38851747777921,0,0,"Kir - AK.8",0],[341.35163133314916,27.850669741514253,0,0,"Kir - AK.9",0],[323.01654252569756,48.789765046754766,0,0,"Kir - AK.10",0],[299.91050207493595,15.167164042196942,0,0,"Kir - AK.11",0],[304.40344671873413,26.3693522170267,0,0,"Kir - AK.12",0],[342.978236274039,62.42418797139724,0,0,"Kir - AK.13",0],[336.16156201092684,64.58927699084988,0,0,"Kir - AK.14",0],[340.9936640896413,71.97932845628841,0,0,"Kir - AK.15",0],[316.2465977910439,41.81825800720621,0,0,"Kir - AK.16",0],[341.63007266307426,58.56643082603647,0,0,"Kir - AK.17",0],[338.81314276682144,54.85635673460311,0,0,"Kir - AK.18",0],[279.05319374317514,56.10965660734977,0,0,"Kir - AK.19",0],[321.854095230942,45.2395219391494,0,0,"Kir - AK.20",0],[312.2358348229053,69.42956585382056,0,0,"Kir - AK.21",0],[326.2492111726499,4.886723191363873,0,0,"Kir - AK.22",0],[326.7048524447622,56.168899470127165,0,0,"Kir - AK.23",0],[280.5277147921404,69.72910046720196,0,0,"Kir - AK.24",0],[337.44867713340454,47.05333896552296,0,0,"Kir - AK.25",0],[299.4850766106713,58.58228688357715,0,0,"Kir - AK.26",0],[344.0372742504931,67.3678083940841,0,0,"Kir - AK.27",0],[320.8472212478794,62.40085523300893,0,0,"Kir - AK.28",0],[276.5483015964552,31.234059902289875,0,0,"Kir - AK.29",0],[294.9087055589125,48.52833082687216,0,0,"Kir - AK.30",0],[344.3799824275691,67.66220185019371,0,0,"Kir - AK.31",0],[316.3904049240561,33.296836915586816,0,0,"Kir - AK.32",0],[298.8158004679153,52.22174979752987,0,0,"Kir - AK.33",0],[340.36755084945094,65.28544881478163,0,0,"Kir - AK.34",0],[334.1398700190602,51.09540376838476,0,0,"Kir - AK.35",0],[316.17273689747014,37.42586461596573,0,0,"Kir - AK.36",0],[310.2527055249243,64.24579365895173,0,0,"Kir - AK.37",0],[327.8657965141321,39.14375626824895,0,0,"Kir - AK.38",0],[327.0745805342649,42.11139342444437,0,0,"Kir - AK.39",0],[354.98709883548224,57.999523208600614,0,0,"Kir - AK.40",0],[335.0511499916572,66.67380651435245,0,0,"Kir - AK.41",0],[331.5724184598544,21.28981295927583,0,0,"Kir - AK.42",0],[303.5142088368717,49.51438638387398,0,0,"Kir - AK.43",0],[321.228851117168,38.78536392112445,0,0,"Kir - AK.44",0],[312.7177075358295,62.47010741210877,0,0,"Kir - AK.45",0],[348.8398327009104,63.86708358703119,0,0,"Kir - AK.46",0],[336.4367186778188,48.64107326862423,0,0,"Kir - AK.47",0],[314.3367574071319,61.759258171952304,0,0,"Kir - AK.48",0],[312.01738682604196,42.985013328760274,0,0,"Kir - AK.49",0],[304.912831184329,54.20121826507187,0,0,"Kir - AK.50",0],[323.69241986702554,36.58412904469819,0,0,"Kir - AK.51",0],[297.8442659707571,34.829305513435976,0,0,"Kir - AK.52",0],[306.25499916955937,53.11706298163312,0,0,"Kir - AK.53",0],[337.7176202639943,66.97699140871056,0,0,"Kir - AK.54",0],[336.2773130545418,27.926576473970975,0,0,"Kir - AK.55",0],[308.9745634098026,47.90293932251278,0,0,"Kir - AK.56",0],[334.84292692483893,46.42188769123787,0,0,"Kir - AK.57",0],[289.7707153356521,55.828669341817296,0,0,"Kir - AK.58",0],[275.7766023870146,61.76243034975107,0,0,"Kir - AK.59",0],[318.4367072834684,36.402098728755576,0,0,"Kir - AK.60",0],[320.84527095185854,46.67653958466068,0,0,"Kir - AK.61",0],[285.89512839992017,60.11438456019816,0,0,"Kir - AK.62",0],[317.00243043862525,61.410732088191644,0,0,"Kir - AK.63",0],[294.1137328895243,31.925333234475936,0,0,"Kir - AK.64",0],[337.56267693797537,47.010250658112426,0,0,"Kir - AK.65",0],[273.1704482944622,55.261960244420756,0,0,"Kir - AK.66",0],[305.5490596645782,72.79169207681072,0,0,"Kir - AK.67",0],[314.4230172921457,23.886999205209445,0,0,"Kir - AK.68",0],[266.63522911079565,61.69777565056888,0,0,"Kir - AK.69",0],[334.23282321952274,57.61909003892548,0,0,"Kir - AK.70",0],[316.3816299514226,44.17966942414058,0,0,"Kir - AK.71",0],[322.7018582195928,74.21048883594347,0,0,"Kir - AK.72",0],[335.93432675562065,38.2021195907282,0,0,"Kir - AK.73",0],[309.81549697517596,49.90981783543336,0,0,"Kir - AK.74",0]],"metaData":{"name":"Kir - AK","dateAdded":"2016-11-18T14:17:41.367Z","version":"v1.1.1","markerColor":"#FF0000","cutoff":"45","type":"Simulated","description":"pluton","author":"Lefebvre et al., EPSL 2013","age":"77.5","minAge":"85","maxAge":"70","latitude":38.59,"longitude":34.14,"sanitized":true}},{"data":[[298.5057806884922,41.071178211300456,0,0,"Kir - SK.1",0],[326.0838972702767,54.598915545409994,0,0,"Kir - SK.2",0],[321.19646231102047,50.52181810908752,0,0,"Kir - SK.3",0],[316.27333772971133,56.92088947325569,0,0,"Kir - SK.4",0],[329.5809152675215,66.3408211746056,0,0,"Kir - SK.5",0],[339.3636857108262,60.36634724752861,0,0,"Kir - SK.6",0],[38.369761125270145,82.61860498506023,0,0,"Kir - SK.7",0],[310.56366016807624,43.48566732135,0,0,"Kir - SK.8",0],[329.04685950779947,41.76531154344895,0,0,"Kir - SK.9",0],[318.7566958978208,53.09209831017691,0,0,"Kir - SK.10",0],[319.5505015049574,63.52934789393253,0,0,"Kir - SK.11",0],[313.2956679026099,47.28143378411187,0,0,"Kir - SK.12",0],[343.3158143524561,44.0125749821922,0,0,"Kir - SK.13",0],[330.6005017980272,13.788005261977327,0,0,"Kir - SK.14",0],[340.2549709802925,58.72306292016095,0,0,"Kir - SK.15",0],[349.38166159353193,55.382263844745765,0,0,"Kir - SK.16",0],[309.8247239465486,72.81299834812198,0,0,"Kir - SK.17",0],[332.20983592433754,28.808942218931545,0,0,"Kir - SK.18",0],[355.2261880273955,59.63013748602476,0,0,"Kir - SK.19",0],[309.6651040134768,57.394781796448996,0,0,"Kir - SK.20",0],[322.35790128237954,55.67835600134195,0,0,"Kir - SK.21",0],[311.6786079715673,18.14995546595485,0,0,"Kir - SK.22",0],[327.8300231338651,70.84372456580643,0,0,"Kir - SK.23",0],[305.01194937746686,63.78633460051998,0,0,"Kir - SK.24",0],[305.38708640060156,42.229850725261414,0,0,"Kir - SK.25",0],[0.021937392038296366,62.005500469492745,0,0,"Kir - SK.26",0],[323.42382118076864,44.14921485926199,0,0,"Kir - SK.27",0],[326.2626410396381,57.49421805072492,0,0,"Kir - SK.28",0],[320.91123345755454,48.03062715386115,0,0,"Kir - SK.29",0],[292.36207399689897,54.807977350518435,0,0,"Kir - SK.30",0],[347.13133680225405,40.16380425329961,0,0,"Kir - SK.31",0],[327.153711873126,63.667968189755605,0,0,"Kir - SK.32",0],[352.5889976336653,71.24176796404517,0,0,"Kir - SK.33",0],[329.5192059233939,58.75062971610905,0,0,"Kir - SK.34",0],[359.08056510588875,63.00338490249755,0,0,"Kir - SK.35",0],[323.3584682369757,16.95578102097679,0,0,"Kir - SK.36",0],[306.99550360392027,74.91544794969313,0,0,"Kir - SK.37",0],[328.96303447815,42.70874160311408,0,0,"Kir - SK.38",0],[335.8568671207941,26.87995903529625,0,0,"Kir - SK.39",0],[324.07670285198867,11.31779045623983,0,0,"Kir - SK.40",0],[327.12580053106615,52.81010424975306,0,0,"Kir - SK.41",0],[319.16407925291537,52.824602159417196,0,0,"Kir - SK.42",0],[295.9980998398694,32.27132108502737,0,0,"Kir - SK.43",0],[328.5598243583423,47.51153799097883,0,0,"Kir - SK.44",0],[335.18953797066234,31.947639536407316,0,0,"Kir - SK.45",0],[337.9495168193504,28.479827888040422,0,0,"Kir - SK.46",0],[287.4895179977027,73.24089631327736,0,0,"Kir - SK.47",0],[304.1973918494715,25.205565230747307,0,0,"Kir - SK.48",0],[312.44063624570913,22.862580136890436,0,0,"Kir - SK.49",0],[316.22821557110854,26.204434312690836,0,0,"Kir - SK.50",0],[322.91332456002806,49.096758654221475,0,0,"Kir - SK.51",0],[12.348331975016492,44.49579489345879,0,0,"Kir - SK.52",0],[327.60228488200926,46.68878039528241,0,0,"Kir - SK.53",0],[342.788367310514,24.0126852479145,0,0,"Kir - SK.54",0],[342.2466987783708,69.29016231522495,0,0,"Kir - SK.55",0],[308.3176074930151,74.07123835616771,0,0,"Kir - SK.56",0],[301.8856498481571,61.885655901906986,0,0,"Kir - SK.57",0],[314.70618812402995,41.77760190017133,0,0,"Kir - SK.58",0],[345.3311312297698,44.300289929854664,0,0,"Kir - SK.59",0],[326.5931806066726,27.445509982155567,0,0,"Kir - SK.60",0]],"metaData":{"name":"Kir - SK","dateAdded":"2016-11-18T14:22:34.270Z","version":"v1.1.1","markerColor":"#FF0000","cutoff":"45","type":"Simulated","description":"pluton","author":"Lefebvre et al., EPSL 2013","age":"77.5","minAge":"85","maxAge":"70","latitude":38.68,"longitude":34.01,"sanitized":true}},{"data":[[349.41825257603864,60.63184344793056,0,0,"Kir - AG.1",0],[347.3452641433902,31.15431279104429,0,0,"Kir - AG.2",0],[351.0473927652463,47.07671295824488,0,0,"Kir - AG.3",0],[356.6025024045249,35.32575088522912,0,0,"Kir - AG.4",0],[336.9864639295063,42.55907431620968,0,0,"Kir - AG.5",0],[356.90246765946733,35.49053370531294,0,0,"Kir - AG.6",0],[332.6986543564999,50.09169523056106,0,0,"Kir - AG.7",0],[351.30492905046697,54.84499715128475,0,0,"Kir - AG.8",0],[327.5308905047326,67.96054333426439,0,0,"Kir - AG.9",0],[13.284596715130192,56.288772091833394,0,0,"Kir - AG.10",0],[345.9948407125487,52.80256079340823,0,0,"Kir - AG.11",0],[7.06589646958696,25.759740267196552,0,0,"Kir - AG.12",0],[1.867426729487761,45.167041926826315,0,0,"Kir - AG.13",0],[10.810966354285767,30.719024236744563,0,0,"Kir - AG.14",0],[353.5427028065958,57.08798837655593,0,0,"Kir - AG.15",0],[6.296286189304794,63.24871159953828,0,0,"Kir - AG.16",0],[349.03637989803565,49.48488841825512,0,0,"Kir - AG.17",0],[4.705081613959521,42.96623783777856,0,0,"Kir - AG.18",0],[11.427254996564841,50.63240514462882,0,0,"Kir - AG.19",0],[359.52776741953153,58.263376014537734,0,0,"Kir - AG.20",0],[333.7829906608,55.35363834302354,0,0,"Kir - AG.21",0],[8.213205427785283,46.50507465321699,0,0,"Kir - AG.22",0],[40.53829978044928,53.87453487474847,0,0,"Kir - AG.23",0],[9.060395571197319,58.96234602844349,0,0,"Kir - AG.24",0],[337.7728863312252,56.15900471287046,0,0,"Kir - AG.25",0],[352.0291612816093,67.3523097386943,0,0,"Kir - AG.26",0],[28.430311814747768,45.300765986562844,0,0,"Kir - AG.27",0],[338.177991712946,58.429672082699696,0,0,"Kir - AG.28",0],[348.4182647721964,64.68852664234294,0,0,"Kir - AG.29",0],[332.5634973382157,41.544764053592026,0,0,"Kir - AG.30",0],[332.7025686990785,64.57229253020391,0,0,"Kir - AG.31",0],[347.3226005630595,57.223754280812834,0,0,"Kir - AG.32",0],[352.3196689469014,45.62590695747095,0,0,"Kir - AG.33",0],[359.91158795371047,56.849723113014036,0,0,"Kir - AG.34",0],[345.7615432655505,58.76144176497653,0,0,"Kir - AG.35",0],[349.7257062491517,42.03480203450303,0,0,"Kir - AG.36",0],[353.6966323693555,40.79524278121114,0,0,"Kir - AG.37",0],[0.46074524851019305,59.757878701941245,0,0,"Kir - AG.38",0],[352.84900189525627,5.324651675001373,0,0,"Kir - AG.39",0],[344.4683708319094,44.66096714399899,0,0,"Kir - AG.40",0],[19.396201618701923,44.7208590072225,0,0,"Kir - AG.41",0],[14.835166818396829,27.453719429132033,0,0,"Kir - AG.42",0],[350.802698324311,67.778168504347,0,0,"Kir - AG.43",0],[327.579067227608,52.75103323049414,0,0,"Kir - AG.44",0],[350.8689802345656,52.59917239834358,0,0,"Kir - AG.45",0],[2.227755495072927,61.734409005338506,0,0,"Kir - AG.46",0],[332.4800190727883,46.911839504082,0,0,"Kir - AG.47",0],[355.60508754053797,54.13092776724438,0,0,"Kir - AG.48",0],[8.026413127225055,56.12793413349276,0,0,"Kir - AG.49",0],[8.797182259436681,62.487041588242036,0,0,"Kir - AG.50",0],[339.47337865716963,46.229558481396275,0,0,"Kir - AG.51",0],[347.19906210920294,39.665093205350466,0,0,"Kir - AG.52",0],[344.1548337316169,25.512048802517455,0,0,"Kir - AG.53",0],[341.7051536253563,65.32989071187278,0,0,"Kir - AG.54",0],[8.517700128154274,47.11963922644619,0,0,"Kir - AG.55",0]],"metaData":{"name":"Kir - AG","dateAdded":"2016-11-18T14:15:55.114Z","version":"v1.1.1","markerColor":"#FF0000","cutoff":"45","type":"Simulated","description":"pluton","author":"Lefebvre et al., EPSL 2013","age":"77.5","minAge":"85","maxAge":"70","latitude":38.91,"longitude":33.81,"sanitized":true,"edited":true,"timeEdited":"2016-11-18T14:23:41.879Z"}},{"data":[[355,64,0,0,"Siv - Nevsehir Volcanics.1",0],[0,70,0,0,"Siv - Nevsehir Volcanics.2",0],[2,39,0,0,"Siv - Nevsehir Volcanics.3",0],[1,39,0,0,"Siv - Nevsehir Volcanics.4",0],[0,53,0,0,"Siv - Nevsehir Volcanics.5",0],[33.9,30.9,0,0,"Kir - Central Cappadocia.1",0],[359.1,62.1,0,0,"Kir - Central Cappadocia.2",0],[96.1,23.9,0,0,"Kir - Central Cappadocia.3",0],[350.3,52.1,0,0,"Kir  - Cappadocia 2.1",0],[347.8,46.7,0,0,"Kir  - Cappadocia 2.2",0],[354.9,48.6,0,0,"Kir  - Cappadocia 2.3",0],[340.6,47.2,0,0,"Kir  - Cappadocia 2.4",0],[5.2,46.3,0,0,"Kir  - Cappadocia 2.5",0],[352.7,49.3,0,0,"Kir  - Cappadocia 2.6",0],[359.8,47.4,0,0,"Kir  - Cappadocia 2.7",0],[5.5,41.9,0,0,"Kir  - Cappadocia 2.8",0],[354.7,52,0,0,"Kir  - Cappadocia 2.9",0],[355.1,42.4,0,0,"Kir  - Cappadocia 2.10",0],[345.4,41.8,0,0,"Kir  - Cappadocia 2.11",0],[357,38.6,0,0,"Kir  - Cappadocia 2.12",0],[355.5,43.4,0,0,"Kir  - Cappadocia 2.13",0],[347.4,44.5,0,0,"Kir  - Cappadocia 2.14",0],[6.5,59.5,0,0,"Kir  - Cappadocia 2.15",0],[345.8,45.5,0,0,"Kir  - Cappadocia 2.16",0],[340,46,0,0,"Kir  - Cappadocia 2.17",0],[335.7,43.6,0,0,"Kir  - Cappadocia 2.18",0],[339.6,52,0,0,"Kir  - Cappadocia 2.19",0],[342.1,56.2,0,0,"Kir  - Cappadocia 2.20",0],[12.4,56.9,0,0,"Kir  - Cappadocia 2.21",0],[14.4,62,0,0,"Kir  - Cappadocia 2.22",0],[334,50.3,0,0,"Kir  - Cappadocia 2.23",0],[350.4,42.8,0,0,"Kir  - Cappadocia 2.24",0],[12,56.4,0,0,"Kir  - Cappadocia 2.25",0],[350.4,42.8,0,0,"Kir  - Cappadocia 2.26",0],[359.8,47.4,0,0,"Kir - Cappadocia 3.1",0],[5.5,54.8,0,0,"Kir - Cappadocia 3.2",0],[5.2,46.3,0,0,"Kir - Cappadocia 3.3",0],[354.7,52,0,0,"Kir - Cappadocia 3.4",0],[351.5,50.3,0,0,"Kir - Cappadocia 3.5",0],[352.7,49.3,0,0,"Kir - Cappadocia 3.6",0],[4.7,45.5,0,0,"Kir - Cappadocia 3.7",0],[150.8,50.7,0,0,"Kir - Cappadocia 3.8",0],[347.8,46.7,0,0,"Kir - Cappadocia 3.9",0],[338.3,58.8,0,0,"Kir - Cappadocia 3.10",0],[330.9,50,0,0,"Kir - Cappadocia 3.11",0],[355.5,43.4,0,0,"Kir - Cappadocia 3.12",0],[350.3,52.1,0,0,"Kir - Cappadocia 3.13",0],[345.4,41.8,0,0,"Kir - Cappadocia 3.14",0],[357,38.6,0,0,"Kir - Cappadocia 3.15",0],[346.1,40.2,0,0,"Kir - Cappadocia 3.16",0],[357,40.3,0,0,"Kir - Cappadocia 3.17",0],[355.1,42.4,0,0,"Kir - Cappadocia 3.18",0],[333.9,65.3,0,0,"Kir - Cappadocia 3.19",0],[353.6,39.9,0,0,"Kir - Cappadocia 3.20",0],[31.6,75.9,0,0,"Kir - Cappadocia 3.21",0],[58,61.8,0,0,"Kir - Cappadocia 3.22",0],[343,46,0,0,"Kir - Cappadocia 3.23",0],[341.2,56.8,0,0,"Kir - Cappadocia 3.24",0],[347.3,58,0,0,"Kir - Cappadocia 3.25",0],[345.8,45.5,0,0,"Kir - Cappadocia 3.26",0],[346.3,40.5,0,0,"Kir - Cappadocia 3.27",0],[340,40.7,0,0,"Kir - Cappadocia 3.28",0],[5.9,53.6,0,0,"Kir - Cappadocia 3.29",0],[340,46,0,0,"Kir - Cappadocia 3.30",0],[343,46,0,0,"Kir - Cappadocia 3.31",0],[335.7,43.6,0,0,"Kir - Cappadocia 3.32",0],[340.6,47.2,0,0,"Kir - Cappadocia 3.33",0],[342.1,56.2,0,0,"Kir - Cappadocia 3.34",0],[342.8,59.2,0,0,"Kir - Cappadocia 3.35",0],[339.3,62.2,0,0,"Kir - Cappadocia 3.36",0],[6.5,59.5,0,0,"Kir - Cappadocia 3.37",0],[334,50.3,0,0,"Kir - Cappadocia 3.38",0],[14.4,62,0,0,"Kir - Cappadocia 3.39",0],[5.5,41.9,0,0,"Kir - Cappadocia 3.40",0],[354.7,70.7,0,0,"Kir - Cappadocia 3.41",0],[2,57.5,0,0,"Kir - Cappadocia 3.42",0],[19.4,58.1,0,0,"Kir - Cappadocia 3.43",0],[28.6,52.1,0,0,"Kir - TT21-22-23.1",0],[15,56.2,0,0,"Kir - TT21-22-23.2",0],[349.4,46,0,0,"Kir - TT21-22-23.3",0]],"metaData":{"name":"Cappadocia","latitude":38.5,"longitude":34.7,"age":6.3,"minAge":4,"maxAge":8.5,"markerColor":"#FF0000","cutoff":"45","dateAdded":"2017-06-11T11:30:40.936Z","version":"v1.1.2","sanitized":true,"type":"Site Combination","author":"Cinku et al 2016; Platzman et al 1998; Piper et al, 2002; 2012","description":"Multiple Sites","edited":true,"timeEdited":"2018-01-05T06:20:39.251Z","plateId":1001,"lithology":"volcanic","carriers":null}},{"data":[[358.8975398737524,64.150093716436,0,0,"Ulu - Kurtulmus Tepe.1",0],[348.9051985851101,59.385008038487946,0,0,"Ulu - Kurtulmus Tepe.2",0],[338.2988205420557,51.24404900826829,0,0,"Ulu - Kurtulmus Tepe.3",0],[301.9865058614804,39.92094085746625,0,0,"Ulu - Kurtulmus Tepe.4",0],[17.242767947015636,54.97718257405379,0,0,"Ulu - Kurtulmus Tepe.5",0],[322.60135008179975,39.26827038381975,0,0,"Ulu - Kurtulmus Tepe.6",0],[346.82760827111974,58.926458061319366,0,0,"Ulu - Kurtulmus Tepe.7",0],[316.4642217124606,53.14312796506087,0,0,"Ulu - Kurtulmus Tepe.8",0],[336.70453735305784,51.77641633138932,0,0,"Ulu - Kurtulmus Tepe.9",0],[308.55486553637377,53.01784931824789,0,0,"Ulu - Kurtulmus Tepe.10",0],[326.2128949036877,60.96356808783972,0,0,"Ulu - Kurtulmus Tepe.11",0],[328.7069806269357,29.766583353305148,0,0,"Ulu - Kurtulmus Tepe.12",0],[0.5020605428753697,54.82089854113963,0,0,"Ulu - Kurtulmus Tepe.13",0],[278.2000600044122,69.31143067287076,0,0,"Ulu - Kurtulmus Tepe.14",0],[351.3124466507208,61.736691083977504,0,0,"Ulu - Kurtulmus Tepe.15",0],[326.3625197842521,29.067569060799,0,0,"Ulu - Kurtulmus Tepe.16",0],[6.746984575072247,62.71043004958375,0,0,"Ulu - Kurtulmus Tepe.17",0],[344.26254162218584,62.88961696483501,0,0,"Ulu - Kurtulmus Tepe.18",0],[338.55794650179166,48.19179755178487,0,0,"Ulu - Kurtulmus Tepe.19",0],[330.64118337936276,47.666233993149554,0,0,"Ulu - Kurtulmus Tepe.20",0],[332.7524733787556,66.24018288318894,0,0,"Ulu - Kurtulmus Tepe.21",0],[338.9804125382513,59.16311330501946,0,0,"Ulu - Kurtulmus Tepe.22",0],[320.172860993486,51.36664339128745,0,0,"Ulu - Kurtulmus Tepe.23",0],[289.9857407738036,68.15124890909637,0,0,"Ulu - Kurtulmus Tepe.24",0],[347.55404402338627,59.607555789815116,0,0,"Ulu - Kurtulmus Tepe.25",0],[301.72888815604483,43.74426838038665,0,0,"Ulu - Kurtulmus Tepe.26",0],[322.7826281323289,22.090869681105133,0,0,"Ulu - Kurtulmus Tepe.27",0],[290.85220882656245,57.34698160296344,0,0,"Ulu - Kurtulmus Tepe.28",0],[335.22267460029803,60.05396047572017,0,0,"Ulu - Kurtulmus Tepe.29",0],[332.22419327267954,48.88890454142327,0,0,"Ulu - Kurtulmus Tepe.30",0],[280.4520217915335,54.221892561396714,0,0,"Ulu - Kurtulmus Tepe.31",0],[297.58145207935445,50.073814960018915,0,0,"Ulu - Kurtulmus Tepe.32",0],[287.99928140559314,53.15910842521678,0,0,"Ulu - Kurtulmus Tepe.33",0],[5.7648534326704635,37.70754223852277,0,0,"Ulu - Kurtulmus Tepe.34",0],[327.6912546482329,60.26000955814987,0,0,"Ulu - Kurtulmus Tepe.35",0],[341.7886362741178,57.499786703383094,0,0,"Ulu - Kurtulmus Tepe.36",0],[335.04486750181286,1.8149171880149844,0,0,"Ulu - Kurtulmus Tepe.37",0],[320.96053040417974,41.13148745138763,0,0,"Ulu - Kurtulmus Tepe.38",0],[351.67903021556657,53.46371154542219,0,0,"Ulu - Kurtulmus Tepe.39",0],[319.2116177250367,32.90869586203916,0,0,"Ulu - Kurtulmus Tepe.40",0],[344.54511447163,75.90286568115133,0,0,"Ulu - Kurtulmus Tepe.41",0],[273.35312453308666,63.65737871068965,0,0,"Ulu - Kurtulmus Tepe.42",0],[317.0044021110009,-3.0502589714187485,0,0,"Ulu - Kurtulmus Tepe.43",0],[298.199425305201,55.717410855770765,0,0,"Ulu - Kurtulmus Tepe.44",0],[322.29061179421865,41.80264268955657,0,0,"Ulu - Kurtulmus Tepe.45",0],[305.80857125374337,52.64091087847697,0,0,"Ulu - Kurtulmus Tepe.46",0],[331.77586898397686,37.81943253308196,0,0,"Ulu - Kurtulmus Tepe.47",0],[330.5028530639403,57.10797721238569,0,0,"Ulu - Kurtulmus Tepe.48",0],[334.55524900316544,60.31879982697827,0,0,"Ulu - Kurtulmus Tepe.49",0],[304.07687485108977,80.89414352946962,0,0,"Ulu - Kurtulmus Tepe.50",0],[354.14832392919664,48.20481156421227,0,0,"Ulu - Kurtulmus Tepe.51",0],[331.0266846645586,49.44214470835549,0,0,"Ulu - Kurtulmus Tepe.52",0],[330.5319538897132,45.88747364846647,0,0,"Ulu - Kurtulmus Tepe.53",0],[341.9560162088694,53.91850165120659,0,0,"Ulu - Kurtulmus Tepe.54",0],[296.09425087671843,40.309114875067976,0,0,"Ulu - Kurtulmus Tepe.55",0],[348.2442080459328,50.145526876269,0,0,"Ulu - Kurtulmus Tepe.56",0],[298.3154061773797,47.14318390547201,0,0,"Ulu - Kurtulmus Tepe.57",0],[320.24160815252276,9.700816066209791,0,0,"Ulu - Kurtulmus Tepe.58",0],[303.20674664826186,-35.93967915747023,0,0,"Ulu - Kurtulmus Tepe.59",0],[306.9941899108733,38.08820757443823,0,0,"Ulu - Kurtulmus Tepe.60",0],[300.39573174624377,16.998744330589613,0,0,"Ulu - Kurtulmus Tepe.61",0],[337.58293896218686,65.72638142493354,0,0,"Ulu - Kurtulmus Tepe.62",0],[313.72488025250277,38.729452969389556,0,0,"Ulu - Kurtulmus Tepe.63",0],[336.2231341982037,53.740468723137866,0,0,"Ulu - Kurtulmus Tepe.64",0],[330.8158400848629,71.2704026565718,0,0,"Ulu - Kurtulmus Tepe.65",0],[336.09077818270237,53.83639473492196,0,0,"Ulu - Kurtulmus Tepe.66",0],[308.10679677259213,58.50856576383182,0,0,"Ulu - Kurtulmus Tepe.67",0],[335.4097064573074,51.235424418552334,0,0,"Ulu - Kurtulmus Tepe.68",0],[321.47873770009437,50.83410048849834,0,0,"Ulu - Kurtulmus Tepe.69",0],[321.27294327731113,44.89094452726208,0,0,"Ulu - Kurtulmus Tepe.70",0],[342.4940833586449,56.683523628171876,0,0,"Ulu - Kurtulmus Tepe.71",0],[328.77139886892724,30.08234471857188,0,0,"Ulu - Kurtulmus Tepe.72",0],[342.80524205561227,46.246087739858034,0,0,"Ulu - Kurtulmus Tepe.73",0],[354.88782574281413,58.236088723096614,0,0,"Ulu - Kurtulmus Tepe.74",0],[310.26422492639904,30.703677052167308,0,0,"Ulu - Kurtulmus Tepe.75",0],[332.90906981744246,43.543470031566116,0,0,"Ulu - Kurtulmus Tepe.76",0],[342.13999252949066,44.09247421239571,0,0,"Ulu - Kurtulmus Tepe.77",0],[319.55849410123847,33.25503285697175,0,0,"Ulu - Kurtulmus Tepe.78",0],[338.30337565393114,78.52049662778005,0,0,"Ulu - Kurtulmus Tepe.79",0],[336.7182200187202,37.06327189808509,0,0,"Ulu - Kurtulmus Tepe.80",0],[348.5013711742038,25.825131462118982,0,0,"Ulu - Kurtulmus Tepe.81",0],[321.84561334148486,64.28791499714134,0,0,"Ulu - Kurtulmus Tepe.82",0],[329.75894603801817,57.690014988355,0,0,"Ulu - Kurtulmus Tepe.83",0],[310.79255587936564,45.34735857963955,0,0,"Ulu - Kurtulmus Tepe.84",0],[328.89130240482365,25.530735896944613,0,0,"Ulu - Kurtulmus Tepe.85",0],[325.7818512495736,-17.75231157776768,0,0,"Ulu - Kurtulmus Tepe.86",0],[337.57749642656563,41.37544333536578,0,0,"Ulu - Kurtulmus Tepe.87",0],[337.48330197391743,7.296491102737565,0,0,"Ulu - Kurtulmus Tepe.88",0],[312.77831580179156,29.92938739213372,0,0,"Ulu - Kurtulmus Tepe.89",0],[358.10592822508306,54.33366198917467,0,0,"Ulu - Kurtulmus Tepe.90",0],[303.10560529842974,51.7649387930094,0,0,"Ulu - Kurtulmus Tepe.91",0],[358.7605760910423,49.3133938700313,0,0,"Ulu - Kurtulmus Tepe.92",0],[288.9768365675192,58.04112702320364,0,0,"Ulu - Kurtulmus Tepe.93",0],[324.7904604790933,57.72503180635074,0,0,"Ulu - Kurtulmus Tepe.94",0],[317.19943583422787,21.709341142046924,0,0,"Ulu - Kurtulmus Tepe.95",0],[314.5517482133896,54.285303490934595,0,0,"Ulu - Kurtulmus Tepe.96",0],[316.2046792881674,64.85881815544255,0,0,"Ulu - Kurtulmus Tepe.97",0],[334.8807838863683,24.233449401945215,0,0,"Ulu - Kurtulmus Tepe.98",0],[303.3381510884651,46.550045272435796,0,0,"Ulu - Kurtulmus Tepe.99",0],[333.00591536624984,18.70966843477427,0,0,"Ulu - Kurtulmus Tepe.100",0],[325.5428436054301,56.97504696139986,0,0,"Ulu - Kurtulmus Tepe.101",0],[348.3544922495611,59.315380853045795,0,0,"Ulu - Kurtulmus Tepe.102",0],[310.8054293025684,31.228233923505858,0,0,"Ulu - Kurtulmus Tepe.103",0],[339.6821565456688,34.27762168236339,0,0,"Ulu - Kurtulmus Tepe.104",0],[314.4008738396037,20.946404029536954,0,0,"Ulu - Kurtulmus Tepe.105",0],[354.9247259758166,29.617312669963663,0,0,"Ulu - Kurtulmus Tepe.106",0],[319.58406894584937,16.086676654822767,0,0,"Ulu - Kurtulmus Tepe.107",0],[331.2696351112233,65.78545318835445,0,0,"Ulu - Kurtulmus Tepe.108",0],[311.10815870022316,47.351924290653734,0,0,"Ulu - Kurtulmus Tepe.109",0],[295.6618206682589,72.4823628997621,0,0,"Ulu - Kurtulmus Tepe.110",0],[37.694672380197176,58.28956182866102,0,0,"Ulu - Kurtulmus Tepe.111",0],[297.93477092580497,69.3486415071391,0,0,"Ulu - Kurtulmus Tepe.112",0],[285.9674270272196,42.32932100515898,0,0,"Ulu - Kurtulmus Tepe.113",0],[295.2115464102468,17.498963250909938,0,0,"Ulu - Kurtulmus Tepe.114",0],[332.4266303683634,27.425862851583084,0,0,"Ulu - Kurtulmus Tepe.115",0],[318.63892870172367,47.15034169293908,0,0,"Ulu - Kurtulmus Tepe.116",0],[314.2353477943474,57.03211098937054,0,0,"Ulu - Kurtulmus Tepe.117",0],[353.30131924137714,14.45707414637053,0,0,"Ulu - Kurtulmus Tepe.118",0],[333.5004875850703,55.38865542551052,0,0,"Ulu - Kurtulmus Tepe.119",0],[297.7543816231191,45.55533159379234,0,0,"Ulu - Kurtulmus Tepe.120",0],[332.87890404222367,71.32923731832956,0,0,"Ulu - Kurtulmus Tepe.121",0]],"metaData":{"name":"Ulu - Kurtulmus Tepe","dateAdded":"2016-11-18T13:42:32.823Z","version":"v1.1.1","markerColor":"#0000FF","cutoff":"45","type":"Simulated","description":"sediments","author":"Meijers et al., G-Cubed 2016","age":"25.6","minAge":"23","maxAge":"28.1","latitude":37.522,"longitude":34.475,"sanitized":true}},{"data":[[347.03708687711946,60.19225868033503,218,26,"HB1.3A",1],[9.829875181691023,52.30351490677604,218,26,"HB1.7A",0],[13.900999835253742,45.07733367538951,218,26,"HB1.8A",0],[346.78143523567815,54.01781227462734,218,26,"HB1.11B",0],[359.55535520599005,47.15045419591536,218,26,"HB1.12A",0],[6.686373679274084,51.714507818694315,218,26,"HB1.12B",0],[2.8768606093345284,56.162071933015405,218,26,"HB1.13A",0],[7.152949915824195,49.198249484503776,218,26,"HB1.14A",4],[3.6475288758626903,48.96216390953584,218,26,"HB1.15A",0],[2.9652338194571257,49.10704736062947,218,26,"HB1.16A",0],[4.8224874671140014,39.41025850780814,218,26,"HB1.17A",5],[353.5319138068851,55.86614041770663,218,26,"HB1.17B",0],[5.12463417610229,57.61357973437202,218,26,"HB1.18A",0],[3.5702238271671263,53.30510394355888,218,26,"HB1.19B",0],[357.873723328486,61.64107923963392,218,26,"HB1.20A",0],[13.467826128629326,52.379526759442,218,26,"HB1.9A",3],[359.27597942539296,56.07751814793705,218,26,"HB1.19A",6],[3.8427265932863293,52.935043542262555,218,26,"HB1.22A",0]],"metaData":{"name":"Hacibekerli_nor","dateAdded":"2017-09-05T11:19:00.336Z","version":"v1.1.3","markerColor":"orange","cutoff":"45","type":"Interpretation","description":null,"plateId":null,"lithology":"volcanic","carriers":null,"author":null,"age":null,"minAge":null,"maxAge":null,"latitude":null,"longitude":null,"sanitized":true}},{"data":[[352.4944460398277,15.017308359085977,148,63,"TT 1.1B",5],[351.7438084654621,9.740783652044753,148,63,"TT 1.2B",6],[352.6415437711679,13.928890677285501,148,63,"TT 1.3B",7],[7.296468869642524,25.38746973537536,148,63,"TT 1.4",8],[3.265620574292882,26.31688889847113,148,63,"TT 1.5",1],[4.857110928427403,25.709481493076627,148,63,"TT 1.6B",2],[17.201743484626263,27.110022874070726,148,63,"TT 1.8B",4],[28.856251073079363,24.392744104196225,148,63,"TT 1.9B",5],[13.135565252564845,33.30023241548361,148,63,"TT 1.10",6],[5.915095147677505,13.058795562342931,148,63,"TT 1.11",7],[5.397959078428073,25.88307240895649,148,63,"TT 1.12B",8],[10.116829089722671,34.606329392394706,148,63,"TT 1.13A",0],[3.2339534988737455,32.26837355534693,148,63,"TT 1.13B",1],[356.4865382124126,27.40561279538572,148,63,"TT 1.14A",0],[8.533766129090964,38.43205307409639,148,63,"TT 1.14B",2],[6.164945397147335,22.14588737730816,148,63,"TT 1.15A",0],[2.4319254496114695,26.95929438135332,148,63,"TT 1.15B",3],[0.8687296840334966,19.939436873579012,148,63,"TT 1.16A",0],[349.63935888351017,39.571459695320755,148,63,"TT 1.16B",4],[5.10068932391448,18.69305278298465,148,63,"TT 1.18A",0],[7.158016884623066,30.41345692609475,148,63,"TT 1.19A",0],[211.33609158382518,-17.086597309756954,148,63,"TT 1.19B",6],[3.7131080708970785,32.302250999757284,148,63,"TT 1.20B",7],[9.00420397070883,23.887157341679462,148,63,"TT 1.21A",0],[357.5157030761822,33.91783561374156,148,63,"TT 1.21B",0],[2.6780037800525633,40.63259730267132,148,63,"TT 1.22",8],[6.081712856106947,20.30403595845657,148,63,"TT 1.24",0],[2.381248485411618,33.237608031921106,148,63,"TT 1.25A",0],[16.840139816020894,27.619244656240447,148,63,"TT 1.17A",5]],"metaData":{"name":"Topraktepe","dateAdded":"2017-06-11T11:11:49.831Z","version":"v1.1.2","markerColor":"#0000FF","cutoff":"45","type":"Interpretation","description":null,"plateId":null,"lithology":"clastic","carriers":null,"author":"Gürer et al., SE 2018","age":42.9,"minAge":38,"maxAge":47.8,"latitude":37.7,"longitude":34.8,"sanitized":true,"edited":true,"timeEdited":"2018-01-04T08:42:19.879Z"}},{"data":[[305.3543927583771,30.38143469333267,322,38,"BU1.6A",0],[302.0965999715457,26.03096341120163,322,38,"BU1.7A",0],[285.6705924431184,21.778150471765542,317,38,"BU1.7B",0],[295.4415535395623,46.25079180731203,322,38,"BU1.9A",0],[302.16201976942676,56.20672099361459,322,38,"BU1.9B",0]],"metaData":{"name":"BU1","dateAdded":"2017-06-11T08:38:06.185Z","version":"v1.1.2","markerColor":"#0000FF","cutoff":"45","type":"Input","description":"Unspecified","plateId":null,"lithology":null,"carriers":null,"author":"Gürer et al., SE 2018","age":57.6,"minAge":56,"maxAge":59.2,"latitude":37.767,"longitude":34.945,"sanitized":true,"edited":true,"timeEdited":"2018-01-10T11:03:09.096Z"}},{"data":[[297.22644309526623,5.101294004235855,8,32,"BU2.3B",0],[338.14604564899173,2.4435014915983913,13,40,"BU2.16A",0],[339.1955426265963,-6.8672147596990625,13,40,"BU2.16B",0],[323.2148537953642,6.96756260881382,13,40,"BU2.18B",0],[328.49726712497306,-11.777813002124569,13,40,"BU2.21A",0],[157.0203947364571,-3.695198702404842,13,38,"BU2.22B",0]],"metaData":{"name":"BU2","dateAdded":"2016-11-29T14:50:49.268Z","version":"v1.1.1","markerColor":"#0000FF","cutoff":"45","type":"Interpretation","description":"Unspecified","author":"Gürer et al., 2018","age":57.6,"minAge":56,"maxAge":59.2,"latitude":37.766,"longitude":34.946,"sanitized":true,"edited":true,"timeEdited":"2018-01-10T11:04:16.560Z","plateId":null,"lithology":null,"carriers":null}},{"data":[[339.7237875330345,15.211712479434398,121,35,"YK2.6B",1],[337.1079246923375,11.069003300122022,121,35,"YK2.7B",2],[351.32979715739714,3.354257873042741,121,35,"YK2.9A",0],[336.37120476302164,22.03518017118996,121,35,"YK2.9B",7],[346.452295693573,18.556023857438227,121,35,"YK2.10B",3],[333.9828100822066,24.345843554127576,121,35,"YK2.2A",6],[343.6704228509054,16.198634842364758,121,35,"YK2.3A",0],[348.33510791051833,15.640555840541309,121,35,"YK2.4A",0],[344.46365014139724,15.911153917690653,121,35,"YK2.5A",0],[351.5962012055918,14.690998626867778,121,35,"YK2.6A",0],[332.3261605564137,17.663353332013003,121,35,"YK2.7B",2],[353.7727829811512,16.994212878085214,121,35,"YK2.11A",8],[334.17513048057026,18.042828166456673,121,35,"YK2.12A",0]],"metaData":{"name":"YK1_nor","dateAdded":"2018-01-10T11:04:44.600Z","version":"v1.1.3","markerColor":"#0000FF","cutoff":"45","type":"Input","description":null,"plateId":null,"lithology":"volcanic","carriers":null,"author":"Gürer et al., Solid Earth 2018","age":57.6,"minAge":56,"maxAge":59.2,"latitude":37.701,"longitude":34.914,"sanitized":true,"edited":true,"timeEdited":"2018-01-10T11:05:24.417Z"}},{"data":[[345.2042002552213,28.649324014704884,0,0,"YK2.9A",0],[318.45903476450536,35.743620874178376,0,0,"YK2.9B",7],[333.13644461779495,40.36520840569306,0,0,"YK2.10B",3],[343.4175657180424,47.592651970533076,0,0,"YK2.1A",7],[308.1145118430202,41.5009277454019,0,0,"YK2.2A",6],[332.01718549491204,41.83026334379662,0,0,"YK2.3A",0],[337.8554596334567,43.57139994524148,0,0,"YK2.4A",0],[335.4148337737312,42.19557993999471,0,0,"YK2.5A",0],[325.2698573833019,39.345035364888396,0,0,"YK2.6A",0],[316.57313443003113,36.17973944839815,0,0,"YK2.6B",1],[309.02269996070675,33.0626812659331,0,0,"YK2.7B",2],[334.8376895624857,43.84269040040301,0,0,"YK2.11A",8],[322.1299653884485,38.20184399179896,0,0,"YK2.12A",0]],"metaData":{"name":"YK2_tc_nor","dateAdded":"2018-01-10T11:10:09.332Z","version":"v1.1.3","markerColor":"#0000FF","cutoff":"45","type":"Interpretation","description":null,"plateId":null,"lithology":"volcanic","carriers":null,"author":"Gürer et al., SE 2018","age":57.6,"minAge":56,"maxAge":59.2,"latitude":37.724,"longitude":34.91,"sanitized":true,"edited":true,"timeEdited":"2018-01-10T11:10:57.370Z"}},{"data":[[326.6849950605749,46.517805806793525,0,0,"YK3.11B",1],[321.89160505261276,48.80337766054919,0,0,"YK3.11C",2],[316.31360484784614,46.55196581189274,0,0,"YK3.13A",3],[319.33067189273976,40.58154738730915,0,0,"YK3.16C",4],[324.51390559813495,45.94378683934717,0,0,"YK3.17B",4],[324.17200365929887,49.076830762909,0,0,"YK3.18B",5],[322.8932239987133,38.870644029473986,0,0,"YK3.20A",7],[317.0379919946323,39.94498897485181,0,0,"YK3.23A",8],[312.1480183637943,48.78892285880497,0,0,"YK3.00",1],[314.2770279597579,46.23568720528175,0,0,"YK3.1C",8],[294.0986313220169,51.34313121422392,0,0,"YK3.2B",3],[315.6276266345215,45.221152916070345,0,0,"YK3.4B",5],[312.18019816610746,48.31641944670872,0,0,"YK3.5A",0],[313.0403398920928,46.93276818262569,0,0,"YK3.7A",0],[310.4550655963929,48.260464619692065,0,0,"YK3.10A",0],[314.8533138735979,45.569985897690216,0,0,"YK3.14A",0],[304.37119487509534,34.6761135259243,0,0,"YK3.18A",0],[320.0547981801163,25.427325494468423,0,0,"YK3.19A",6],[315.0308764969735,45.074679729468066,0,0,"YK3.21A",0],[314.16393105246607,46.339022072717086,0,0,"YK3.22A",0]],"metaData":{"name":"YK3_tc","dateAdded":"2017-06-11T09:08:05.175Z","version":"v1.1.2","markerColor":"#0000FF","cutoff":"45","type":"Interpretation","description":null,"plateId":null,"lithology":"volcanic","carriers":null,"author":"Gürer et al., SE 2018","age":57.6,"minAge":56,"maxAge":59.2,"latitude":37.761,"longitude":34.922,"sanitized":true,"edited":true,"timeEdited":"2018-01-10T11:11:37.635Z"}},{"data":[[317.1210411375102,31.413640411223955,338,39,"YK4.13A",0],[293.5052539979588,26.054912878442376,338,39,"YK4.13B",0],[301.4029562438651,4.015722324327462,338,39,"YK4.14B",0],[311.3301443486981,9.12961748608056,338,39,"YK4.15A",0],[303.86892684634427,14.857067095985622,338,39,"YK4.16B",0],[302.20493161951805,9.546716640476985,338,39,"YK4.19B",0],[305.98364899609294,14.943002465323927,338,39,"YK4.8A",0],[318.68494722590214,8.39099177098785,338,39,"YK4.8B",0],[302.10080853913274,17.779844839159093,338,39,"YK4.9B",0],[323.54605663573835,10.99621373204876,338,39,"YK4.10A",0],[322.93333916454134,7.214432050433598,338,39,"YK4.10B",0],[302.9798588586506,16.106249418516068,338,39,"YK4.11B",0],[316.1862120695234,9.564276938153018,338,39,"YK4.17B",0]],"metaData":{"name":"YK4","dateAdded":"2016-11-29T14:51:05.621Z","version":"v1.1.1","markerColor":"#0000FF","cutoff":"45","type":"Interpretation","description":"Unspecified","author":"Gürer et al., SE 2018","age":57.6,"minAge":56,"maxAge":59.2,"latitude":37.766,"longitude":34.146,"sanitized":true,"edited":true,"timeEdited":"2018-01-10T11:12:09.528Z","plateId":null,"lithology":null,"carriers":null}},{"data":[[328.3619792217288,22.2410552784323,30,16,"KL1.02A",0],[354.70216868752686,14.781248681751293,30,16,"KL1.02B",6],[326.9595041624153,22.53597426774521,30,16,"KL1.03A",0],[342.83046438320116,21.69068133291862,30,16,"KL1.3B",3],[341.13142149091755,22.778406268834193,30,16,"KL1.4A",0],[336.44133916507076,28.561937363863432,30,16,"KL1.4B",4],[333.41188419977834,21.744424322789083,30,16,"KL1.05A",0],[336.19983319174946,34.23430589715385,30,16,"KL1.05B",8]],"metaData":{"name":"KL1_nor","dateAdded":"2018-01-10T11:12:41.834Z","version":"v1.1.3","markerColor":"#0000FF","cutoff":"45","type":"Interpretation","description":null,"plateId":null,"lithology":"volcanic","carriers":null,"author":"Gürer et al., SE 2018","age":61,"minAge":56,"maxAge":66,"latitude":37.655,"longitude":34.531,"sanitized":true,"edited":true,"timeEdited":"2018-01-10T11:13:20.271Z"}},{"data":[[299.3709707193121,19.078145243661197,289,25,"EM3.5A",0],[336.6477729740526,73.67272747868273,289,25,"EM3.6A",3],[283.71086997240826,41.480217458358645,289,25,"EM3.7A",4],[314.867746648931,37.314664917681554,289,25,"EM3.9A",6],[305.42628235800305,52.553515598929735,283,29,"EM3.11A",7],[309.2686604441353,49.10425062587558,283,29,"EM3.12A",8],[342.52570440760826,62.548340711339264,283,29,"EM3.12B",0],[336.85715692447366,40.32709284107426,283,29,"EM3.13A",1],[324.03315992397575,41.019740330642556,283,29,"EM3.14A",0],[301.07885200815485,27.337259962812755,283,29,"EM3.15B",3]],"metaData":{"name":"EM3_nor","dateAdded":"2018-01-10T11:13:37.698Z","version":"v1.1.3","markerColor":"#0000FF","cutoff":"45","type":"Interpretation","description":null,"plateId":null,"lithology":"volcanic","carriers":null,"author":"Gürer et al., SE 2018","age":61,"minAge":56,"maxAge":66,"latitude":37.707,"longitude":34.554,"sanitized":true,"edited":true,"timeEdited":"2018-01-10T11:14:11.924Z"}},{"data":[[341.8936996123058,-16.893968254791695,93,85,"HP1.1A",0],[322.26227031819826,-33.64399046403766,93,85,"HP1.1B",7],[341.3658256534586,-37.92578390081452,93,85,"HP1.2B",1],[353.67044331651505,-43.50282222894659,93,85,"HP1.3A",2],[331.5836197232032,-31.51865348304346,93,85,"HP1.3B",8],[358.62321469170934,-37.828388775708724,93,85,"HP1.4A",3],[333.4386461553054,-27.919308909286325,93,85,"HP1.4B",0],[316.8787923611706,-25.922373570904334,93,85,"HP1.5A",4],[341.93245198391344,-42.38182233662681,89,90,"HP1.6A",5],[318.1541721006653,-61.61257070322941,89,90,"HP1.7A",6],[327.4273276125373,-54.533902720901885,89,90,"HP1.9A",8],[352.7364683227404,-59.2006070017545,89,90,"HP1.10A",1],[322.85104875040076,-51.74661526449001,89,90,"HP1.10B",1],[331.9518789735571,-22.87202642350709,89,90,"HP1.11A",0],[287.25156435574405,-60.818609634102216,89,90,"HP1.11B",2],[323.21132872891553,-72.79075684452148,89,90,"HP1.12A",3],[332.52532949560987,-67.65385615368272,89,90,"HP1.13A",4],[291.8932413718352,-84.3183707540607,89,90,"HP1.13B",2],[4.3567991470934,-74.2938144166243,89,90,"HP1.14A",5],[355.81362146643505,-27.317870110139047,85,83,"HP1.15A",0],[340.1886589970734,-46.82419504470607,85,83,"HP1.18A",0],[346.4220286466141,-29.967931209328086,85,83,"HP1.19A",8],[349.73754381840206,-38.13659771191027,85,83,"HP1.20A",0],[357.59355193689566,-37.55655584697281,85,83,"HP1.22A",0]],"metaData":{"name":"HP1(nor)","dateAdded":"2017-05-19T09:21:14.639Z","version":"v1.1.2","markerColor":"#0000FF","cutoff":"45","type":"Interpretation","description":null,"plateId":null,"lithology":"volcanic","carriers":null,"author":"Gürer et al., SE 2018","age":45,"minAge":33.9,"maxAge":56,"latitude":37.437,"longitude":34.274,"sanitized":true,"edited":true,"timeEdited":"2018-01-10T11:15:43.403Z"}},{"data":[[328.0739062845273,73.29059923973837,253,41,"HP2.8A",0],[319.03292604796155,73.49808794019027,253,41,"HP2.8B",2],[258.93250203459803,69.1295603387909,253,41,"HP2.10A",0],[253.30836173770427,61.42810689145198,253,41,"HP2.10B",6]],"metaData":{"name":"HP2","dateAdded":"2017-05-19T09:20:16.662Z","version":"v1.1.2","markerColor":"#0000FF","cutoff":"45","type":"Interpretation","description":null,"plateId":null,"lithology":"volcanic","carriers":null,"author":"Gürer et al., SE 2018","age":45,"minAge":33.9,"maxAge":56,"latitude":37.411,"longitude":34.283,"sanitized":true,"edited":true,"timeEdited":"2018-01-10T11:16:13.918Z"}},{"data":[[330.51414976334166,-22.667722491911494,111,66,"HP3.1A",0],[330.3712300096887,-15.013177653213326,111,66,"HP3.2B",0],[324.0790923826224,-11.965383672338843,111,66,"HP3.3A",0],[347.18146395633175,2.8284923037657186,111,66,"HP3.5A",0],[1.5387136578191871,6.50687981734207,111,66,"HP3.5B",5],[351.43716266652325,11.886896370064493,111,66,"HP3.8A",8],[350.7943296956679,6.552553982197455,111,66,"HP3.13B",5],[341.5496243710518,20.271270617523793,111,66,"HP3.17A",1],[336.4390840517326,-26.18858183398662,111,66,"HP3.18A",0],[6.951388278085233,49.79308697595715,111,66,"HP3.18B",2],[343.1081472591542,8.23121923681947,111,66,"HP3.2A",2],[335.9107519711065,16.35640583443305,111,66,"HP3.3B",3],[352.20138419322984,2.1457809594263146,111,66,"HP3.4A",4],[10.759799099796624,4.923906688100279,111,66,"HP3.10B",2],[10.88718037479714,1.542171877399781,111,66,"HP3.11A",3],[9.322836950695148,5.409074919059767,111,66,"HP3.12A",4]],"metaData":{"name":"HP3(nor)","dateAdded":"2017-05-19T09:23:08.621Z","version":"v1.1.2","markerColor":"#0000FF","cutoff":"45","type":"Interpretation","description":null,"plateId":null,"lithology":"volcanic","carriers":null,"author":null,"age":45,"minAge":33.9,"maxAge":56,"latitude":37.461,"longitude":34.168,"sanitized":true,"edited":true,"timeEdited":"2018-01-10T11:16:39.524Z"}},{"data":[[316.0152047418038,7.471398245788675,0,0,"HP6.1A",2],[336.547871642269,1.5725940911311624,0,0,"HP6.2A",0],[345.8157146175847,-9.038907103769096,0,0,"HP6.3A",0],[336.3223836047657,11.511405995190843,0,0,"HP6.4A",5],[326.3011840486969,10.519308524945657,0,0,"HP6.4B",3],[319.4773552580232,-9.49740132160818,0,0,"HP6.7A",0],[332.8657720442102,20.256462032020014,0,0,"HP6.7B",4],[322.27865940367246,4.106117180423527,0,0,"HP6.8A",5],[325.29609174860195,1.344747196921008,0,0,"HP6.8B",6],[300.0106477536075,-5.895233560003491,0,0,"HP6.9A",6],[345.20861831483626,-23.626043547493424,0,0,"HP6.13A",0],[331.6318661146746,0.5313828405792312,0,0,"HP6.6A",0],[312.48038854966563,9.015499896306341,0,0,"HP6.9B",8]],"metaData":{"name":"HP6(nor)","dateAdded":"2017-05-19T09:24:28.264Z","version":"v1.1.2","markerColor":"#0000FF","cutoff":"45","type":"Interpretation","description":null,"plateId":null,"lithology":"volcanic","carriers":null,"author":"Gürer et al., SE 2018","age":45,"minAge":33.9,"maxAge":56,"latitude":37.432,"longitude":34.423,"sanitized":true,"edited":true,"timeEdited":"2018-01-10T11:17:07.518Z"}},{"data":[[353.4194187137441,33.94073132228273,0,0,"KG2.02B",0],[357.4229529052585,35.30068269025845,0,0,"KG2.04B",0],[13.3193302412364,46.578169278214794,0,0,"KG2.5B",7],[351.86853491686975,35.31097686694492,0,0,"KG2.7A",1],[352.3739975004719,36.5216051304137,0,0,"KG2.8A",0],[347.80646717145953,35.39877630628154,0,0,"KG2.8B",2],[342.92399154670807,35.885815540854615,0,0,"KG2.9A",3],[344.42487097292826,31.536142631733377,0,0,"KG2.09B",0],[354.1253543032162,26.98609245614467,0,0,"KG2.10A",4],[340.5046272387699,23.49680948229994,0,0,"KG2.12A",0],[328.8064413585807,47.64719069957908,0,0,"KG2.14A",8],[341.8230593458161,31.635834536055214,0,0,"KG2.16A",0]],"metaData":{"name":"KG2_tc_nor","dateAdded":"2017-06-22T20:39:41.261Z","version":"v1.1.2","markerColor":"#0000FF","cutoff":"45","type":"Interpretation","description":null,"plateId":null,"lithology":"volcanic","carriers":null,"author":"Gürer et al., 2018","age":45,"minAge":33.9,"maxAge":56,"latitude":37.412,"longitude":34.561,"sanitized":true,"edited":true,"timeEdited":"2018-01-10T11:17:38.366Z"}},{"data":[[212.80307266718074,43.73918431975448,265,64,"AT3.1A",1],[356.0037501556019,45.80316236257144,265,64,"AT3.5A",0],[232.7436819781616,51.36637652877389,265,64,"AT3.6A",3],[231.7355024741454,69.23294288455168,265,64,"AT3.7A",0],[241.83419050134455,63.41950267958108,265,64,"AT3.7B",4],[252.79754375263144,44.07589533809473,265,64,"AT3.8A",5],[357.195956808735,71.77130679887871,265,64,"AT3.8B",0],[277.74110250393096,69.92689918208306,265,64,"AT3.9A",0],[206.03330014180432,53.322280352269814,265,64,"AT3.9B",6],[195.0674980419293,84.68361476643409,265,64,"AT3.10A",0],[182.64663293987178,57.50430121944387,265,64,"AT3.11A",8],[333.65177399341405,70.84545504169344,265,64,"AT3.12A",0],[240.6830642737865,42.52913927410966,265,64,"AT3.12B",1],[314.86028510220933,80.23002863468989,265,64,"AT3.13A",0],[194.47454675558845,39.4261594411145,265,64,"AT3.13B",2],[357.9477245207687,78.22230933129799,265,64,"AT3.14A",0],[218.23701683548683,51.37796237820744,265,64,"AT3.15A",4],[232.3008633313956,64.11528244724978,265,64,"AT3.15B",0],[212.83318284054872,66.87806142180972,265,64,"AT3.16A",0],[215.36879296025927,64.37421989299393,265,64,"AT3.17A",0],[243.29135562474693,58.5467657560628,265,64,"AT3.2A",2],[234.18022839892706,67.95714787066777,265,64,"AT3.7B",4],[54.52366128712174,62.02547060985804,265,64,"AT3.10B",7],[239.1621607751863,56.1761201130765,265,64,"AT3.14B",3],[208.03946079877988,73.20538289469148,265,64,"AT3.16B",5],[258.4419634941187,27.439758168713922,265,64,"AT3.17B",6],[231.50310959402918,70.70140771215239,265,64,"AT3.18B",7]],"metaData":{"name":"AT3 (nor)","dateAdded":"2017-05-18T12:49:46.612Z","version":"v1.1.2","markerColor":"#0000FF","cutoff":"45","type":"Interpretation","description":null,"plateId":null,"lithology":"volcanic","carriers":null,"author":null,"age":25.6,"minAge":23,"maxAge":28.1,"latitude":37.494,"longitude":34.327,"sanitized":true,"edited":true,"timeEdited":"2018-01-10T11:18:22.158Z"}},{"data":[[343.52700279570354,63.468870468597295,271,28,"CP2.1A",0],[330.07772653835116,71.56643599906471,271,28,"CP2.1B",1],[340.40020709489033,66.54231390980163,271,28,"CP2.2A",2],[293.7141111732366,76.0958531084913,271,28,"CP2.3A",0],[331.6462179577706,62.64397580146029,271,28,"CP2.4A",0],[353.4627269265236,73.22023728483344,271,28,"CP2.7A",0],[265.3404558584822,59.523633387953375,271,28,"CP2.7B",5],[275.5984964707574,60.03734800211363,271,28,"CP2.8A",0],[337.20768659674127,70.74455285122194,271,28,"CP2.9A",0],[353.1534300766857,79.16659329212199,271,28,"CP2.10C",6],[0.3614507940150702,56.27938371925735,271,28,"CP2.11A",7],[319.9945028722068,48.114613540657686,271,28,"CP2.12A",0]],"metaData":{"name":"CP2_normal","dateAdded":"2017-05-15T19:30:10.032Z","version":"v1.1.2","markerColor":"#0000FF","cutoff":"45","type":"Interpretation","description":null,"plateId":null,"lithology":"volcanic","carriers":null,"author":"Gürer et al., SE 2018","age":14.2,"minAge":5.3,"maxAge":23,"latitude":37.757,"longitude":34.772,"sanitized":true,"edited":true,"timeEdited":"2018-01-10T11:19:32.298Z"}},{"data":[[346.43540725232634,46.92873057953661,216,29,"CP3.1A",0],[351.44246461786844,46.586414585940695,216,29,"CP3.01B",0],[349.7329856251449,46.584225429775266,216,29,"CP3.2A",0],[351.6928833444492,55.25643213881443,216,29,"CP3.3A",0],[353.87586658343895,47.10784195445133,216,29,"CP3.04A",0],[184.36605192754502,-31.71365463179336,216,29,"CP3.5A",0],[23.193844072396757,48.2103518921228,216,29,"CP3.05B",0],[177.84027839933458,-57.400219621559394,216,29,"CP3.6A",0],[28.53040478879757,51.347020936389285,216,29,"CP3.06B",0],[191.1979381907007,-39.52605267897286,216,29,"CP3.7A",0],[187.82214654046723,-48.47753470879088,216,29,"CP3.8A",0],[1.7399013454475494,58.35415566235876,216,29,"CP3.10B",0],[357.45447514944846,51.608159240768586,216,29,"CP3.11A",0],[5.027943438313628,62.51463193153616,216,29,"CP3.18A",0],[305.4091548702124,59.08846429397233,216,29,"CP3.19A",0]],"metaData":{"name":"CP3","dateAdded":"2017-02-24T11:32:54.567Z","version":"v1.1.1","markerColor":"#0000FF","cutoff":"45","type":"Interpretation","description":null,"plateId":null,"lithology":"volcanic","carriers":null,"author":"Gürer et al., SE 2018","age":14.2,"minAge":5.3,"maxAge":23,"latitude":37.742,"longitude":34.738,"sanitized":true,"edited":true,"timeEdited":"2018-01-10T11:19:54.975Z"}},{"data":[[34.729962274538934,65.93785898714283,223,41,"SS1.1A",0],[55.70088320890943,54.919093129703256,223,41,"SS1.1B",0],[33.179828283888014,47.80679580162715,223,41,"SS1.2A",0],[39.622211568342664,58.754411346135434,223,41,"SS1.2B",0],[34.47388041856959,67.89605741425379,223,41,"SS1.5A",0],[73.20389559219404,56.94570529204658,223,41,"SS1.6A",0],[75.41109166066468,68.1741097534022,223,41,"SS1.6B",0],[358.32819629004257,76.68273236209102,223,41,"SS1.7A",0],[20.662451002484886,60.55281538525742,223,41,"SS1.7B",0],[15.266306563719581,56.24135404740262,223,41,"SS1.8A",0],[13.392770208461684,70.5266650756068,223,41,"SS1.9A",0],[2.063059770985035,66.61058721665134,223,41,"SS1.11B",0],[359.70457699082476,67.68107800412739,223,41,"SS1.12A",0],[4.431722013058447,59.429925926708805,223,41,"SS1.15A",0],[29.4448052773638,65.5660065650268,223,41,"SS1.16A",0]],"metaData":{"name":"SS1(nor)","dateAdded":"2017-05-19T10:49:07.630Z","version":"v1.1.2","markerColor":"#00FFFF","cutoff":"45","type":"Interpretation","description":"Unspecified","author":"Gürer et al., SE 2018","age":45,"minAge":33.9,"maxAge":56,"latitude":39.054,"longitude":36.329,"sanitized":true,"edited":true,"timeEdited":"2018-01-10T11:23:16.818Z","plateId":null,"lithology":null,"carriers":null}},{"data":[[309.3189149086329,16.0675827996332,149,34,"SS25.01A",1],[305.68536159091616,15.383622369163174,149,34,"SS25.02A",0],[316.78823982281244,25.044996178699996,149,34,"SS25.03A",2],[306.1291235733351,9.695412164773701,149,34,"SS25.05A",0],[301.95544050802454,8.709842255334616,149,34,"SS25.06A",0],[336.31676069835623,17.04908124805375,149,34,"SS25.11A",0],[326.48278275198186,33.96014058949422,149,34,"SS25.13A",0],[339.9517179372874,17.341211189595352,149,34,"SS25.14A",5],[329.3763824777028,14.521875215387007,149,34,"SS25.15A",0],[332.5795219875081,14.477760123071633,149,34,"SS25.04A",0],[319.7729748193558,20.240457902780243,149,34,"SS25.08A",0],[323.92586974827964,17.194181817814687,149,34,"SS25.09A",3],[323.77290008930964,17.477318050157837,149,34,"SS25.10A",0],[322.6078448503905,20.6772501636114,149,34,"SS25.12A",4],[335.7942646496326,-8.841868308465331,149,34,"SS25.16A",6],[317.18473640718224,17.126498397556507,149,34,"SS25.17A",0],[346.9388898949011,36.21032307088079,149,34,"SS25.21A",0],[351.45253990034394,4.972624647086137,149,34,"SS25.21B",0]],"metaData":{"name":"SS25(nor)","dateAdded":"2017-05-19T10:48:26.089Z","version":"v1.1.2","markerColor":"#00FFFF","cutoff":"45","type":"Interpretation","description":null,"plateId":null,"lithology":"volcanic","carriers":null,"author":"Gürer et al., SE 2018","age":45,"minAge":33.9,"maxAge":56,"latitude":38.757,"longitude":36.162,"sanitized":true,"edited":true,"timeEdited":"2018-01-10T11:24:11.276Z"}},{"data":[[2.0977890327197883,59.144224811197844,220,26,"SS27.01A",0],[4.194333546238113,57.93550682522738,220,26,"SS27.02A",0],[358.0745460502323,59.146359744935474,220,26,"SS27.02B",0],[10.851789066144192,57.394528689968155,220,26,"SS27.04A",0],[1.3675707966048094,60.28081624702074,220,26,"SS27.06A",0],[9.93452382066414,56.45827875971316,220,26,"SS27.04B",0],[351.3779871865547,53.837656016312586,221,20,"SS27.08A",0],[354.94298609994206,53.205244989506035,210,29,"SS27.11A",0],[354.0573999904159,45.02734991209612,210,29,"SS27.11B",0],[8.435913384972139,51.391452269458185,210,29,"SS27.12A",0],[359.42278072091034,46.68282375164436,210,29,"SS27.13A",0],[7.600692576049823,46.915228027566926,210,29,"SS27.14A",0],[356.49410990660715,59.95107559978565,213,25,"SS27.15B",0],[359.8951867591025,58.67909012957019,213,25,"SS27.17A",0],[2.3634727077904927,56.73716183196592,213,25,"SS27.18B",0],[357.1078281465977,58.62240237977403,213,25,"SS27.19A",0],[355.6516484372775,51.839626247659346,213,25,"SS27.20A",0]],"metaData":{"name":"SS27","dateAdded":"2016-10-17T12:03:39.998Z","version":"v1.1.1","markerColor":"#00FFFF","cutoff":"45","type":"Interpretation","description":"Unspecified","author":"Gürer et al., SE 2018","age":45,"minAge":33.9,"maxAge":56,"latitude":39.061,"longitude":36.309,"sanitized":true,"edited":true,"timeEdited":"2018-01-10T11:24:33.812Z","plateId":null,"lithology":null,"carriers":null}},{"data":[[359.4803051180648,56.69799716496083,235,22,"SS5.3A",0],[333.6648801125863,48.59113030276757,235,22,"SS5.4A",0],[335.3694439774859,40.399497850413645,235,22,"SS5.4B",0],[335.65021559659044,44.62449196843299,235,22,"SS5.5A",0],[324.6610174573926,50.33171435677659,235,22,"SS5.5B",0],[348.7895379842806,62.168610567614614,235,22,"SS5.6A",0],[342.222584837454,49.88630881833206,235,22,"SS5.6B",0],[356.0492350294229,52.539786854421465,235,22,"SS5.8A",0],[10.232445057219877,37.06047397804551,235,22,"SS5.9B",0],[334.9940715773666,60.61455804735061,235,22,"SS5.10A",0],[347.87644841118305,54.925504186564,235,22,"SS5.10B",0],[340.75032471121347,59.52580346429295,235,22,"SS5.11A",0],[5.563792180787004,59.026373767740786,235,22,"SS5.12A",0],[349.1682747390105,51.18871623651029,235,22,"SS5.13A",0],[356.75927329538325,53.60780699548833,197,23,"SS5.14B",0],[1.4416163422358181,52.71934416271135,197,23,"SS5.15A",0],[333.54128019362815,34.00552789869174,197,23,"SS5.16A",0],[343.65686615958816,46.282249544523005,197,23,"SS5.17A",0],[6.751191904255961,43.9229355218783,197,23,"SS5.18A",0]],"metaData":{"name":"SS5","dateAdded":"2016-10-17T11:56:13.875Z","version":"v1.1.1","markerColor":"#00FFFF","cutoff":"45","type":"Interpretation","description":"Unspecified","author":"Gürer et al., SE 2018","age":45,"minAge":33.9,"maxAge":56,"latitude":38.929,"longitude":36.112,"sanitized":true,"edited":true,"timeEdited":"2018-01-10T11:23:42.078Z","plateId":null,"lithology":null,"carriers":null}},{"data":[[28.21171254964338,69.1583150329863,195,40,"SS51.01A",0],[144.93553027236294,88.20435548403734,195,40,"SS51.02",1],[283.1513035902885,61.475990924244385,195,40,"SS51.04A",0],[294.9038406801057,74.21537819920067,195,40,"SS51.05A",0],[56.42932222361952,68.42487132151761,195,40,"SS51.06",2],[7.148775155363808,81.09524973144256,195,40,"SS51.08A",0],[33.14270147427533,66.7493197797864,195,40,"SS51.09",3],[27.390236474130234,63.77322303598403,195,40,"SS51.11A",0],[34.13403172047026,52.59749401806628,195,40,"SS51.11",4],[27.042144904338556,54.8798176025166,195,40,"SS51.12B",0],[54.647511645809914,54.22299112797083,195,40,"SS51.13",5],[45.996263731447584,49.36131909162853,195,40,"SS51.14",6],[47.50037964874235,61.441993243437835,195,40,"SS51.15B",0],[2.4365500869433276,63.37597482857929,195,40,"SS51.16B",0]],"metaData":{"name":"SS51(nor)","dateAdded":"2017-05-19T12:37:13.977Z","version":"v1.1.2","markerColor":"#A52A2A","cutoff":"45","type":"Interpretation","description":null,"plateId":null,"lithology":"volcanic","carriers":null,"author":"Gürer et al., SE 2018","age":30.5,"minAge":23,"maxAge":38,"latitude":39.593,"longitude":37.278,"sanitized":true,"edited":true,"timeEdited":"2018-01-10T11:27:37.094Z"}},{"data":[[316.0622460410083,17.295706363808737,55,45,"SS54.01A",0],[341.3650383402167,15.030229074176502,55,45,"SS54.02A",0],[353.70115901959815,20.494757912022905,55,45,"SS54.02B",7],[314.94067414943436,-5.6911642943013865,55,45,"SS54.03A",0],[318.80386126023177,-10.616583819352343,55,45,"SS54.04A",0],[332.61307014924785,12.34746628537612,55,45,"SS54.06A",0],[325.0023997161996,15.572353084459879,55,45,"SS54.07A",1],[317.0365823657849,20.763516867553065,56,63,"SS54.08A",0],[330.7784050859752,-4.165694601070477,56,63,"SS54.09A",0],[336.4562984118448,3.3254517831186865,56,63,"SS54.10B",1]],"metaData":{"name":"SS54","dateAdded":"2017-05-19T11:32:59.507Z","version":"v1.1.2","markerColor":"#A52A2A","cutoff":"45","type":"Interpretation","description":null,"plateId":null,"lithology":"volcanic","carriers":null,"author":"Gürer et al., SE 2018","age":30.5,"minAge":23,"maxAge":38,"latitude":39.605,"longitude":37.434,"sanitized":true,"edited":true,"timeEdited":"2018-01-10T11:27:21.828Z"}},{"data":[[354.0759210925127,48.702599578314874,219,21,"SS55.01A",0],[303.9087706215943,47.61202785084574,219,21,"SS55.02",0],[292.5899972798256,47.40947539113266,219,21,"SS55.03A",0],[333.14230795541175,40.08532762630429,219,21,"SS55.04A",0],[312.1377628909678,50.64975332254335,219,21,"SS55.04B",0],[340.17540717353614,57.74284194626238,219,21,"SS55.05A",0],[349.50478273292765,34.85009322807548,219,21,"SS55.08A",0],[8.614512161522725,43.649074833098545,219,21,"SS55.11B",0]],"metaData":{"name":"SS55","dateAdded":"2016-10-17T12:09:59.174Z","version":"v1.1.1","markerColor":"#00FFFF","cutoff":"45","type":"Interpretation","description":"Unspecified","author":"Gürer et al., SE 2018","age":45,"minAge":33.9,"maxAge":56,"latitude":39.049,"longitude":36.314,"sanitized":true,"edited":true,"timeEdited":"2018-01-10T11:24:57.984Z","plateId":null,"lithology":null,"carriers":null}},{"data":[[7.386553830430671,36.73020320004037,218,28,"SS56.01",0],[348.8777730671483,46.13623047331011,218,28,"SS56.03A",0],[336.22099079947975,33.900920423281626,218,28,"SS56.04A",0],[356.6059959633352,44.51862253899179,218,28,"SS56.05A",0],[1.6751984944087894,42.03266873490147,218,28,"SS56.05B",0],[347.2356171448358,45.982687710636256,218,28,"SS56.09A",0],[344.5253919670319,42.80392584864906,218,28,"SS56.09B",0],[20.576449261571838,54.44683252887738,218,28,"SS56.12A",0]],"metaData":{"name":"SS56","dateAdded":"2017-09-05T11:06:39.233Z","version":"v1.1.3","markerColor":"#00FFFF","cutoff":"45","type":"Interpretation","description":null,"plateId":null,"lithology":"volcanic","carriers":null,"author":"Gürer et al., SE 2018","age":45,"minAge":33.9,"maxAge":56,"latitude":39.031,"longitude":36.286,"sanitized":true,"edited":true,"timeEdited":"2018-01-10T11:25:38.516Z"}},{"data":[[329.7511798847961,35.48536730925662,60,32,"SS57.01A",0],[347.5040849166087,42.14353616964852,60,32,"SS57.01B",0],[347.4854505275475,46.4211215946333,60,32,"SS57.02A",0],[355.8983446611974,39.53450240759337,60,32,"SS57.03A",0],[342.59163659691757,52.36572381821456,60,32,"SS57.04A",0],[314.84108598095753,16.352501889233494,60,32,"SS57.05A",0],[320.5380038501902,42.46081192673121,60,32,"SS57.06A",0],[313.1607753063028,20.026333345556974,60,32,"SS57.07A",0],[341.8480686352111,-7.397826432592886,60,32,"SS57.08A",0],[356.61083284439155,38.730089161710865,60,32,"SS57.08C",0]],"metaData":{"name":"SS57","dateAdded":"2017-05-19T10:26:43.956Z","version":"v1.1.2","markerColor":"#00FFFF","cutoff":"45","type":"Interpretation","description":null,"plateId":null,"lithology":"volcanic","carriers":null,"author":"Gürer et al., SE 2018","age":45,"minAge":33.9,"maxAge":56,"latitude":39.053,"longitude":36.346,"sanitized":true,"edited":true,"timeEdited":"2018-01-10T11:26:03.785Z"}},{"data":[[309.2010597396655,-24.70612240292085,58,46,"SS58.01B",0],[321.3715580368079,-15.189501398160463,58,46,"SS58.03A",0],[301.45950011803535,-14.466932732418657,58,46,"SS58.04A",0],[318.28267777194355,14.05353237970406,58,46,"SS58.06A",0],[321.4532506548131,-6.427376732877498,58,46,"SS58.08A",0]],"metaData":{"name":"SS58","dateAdded":"2017-05-22T15:26:20.237Z","version":"v1.1.2","markerColor":"#00FFFF","cutoff":"45","type":"Interpretation","description":null,"plateId":null,"lithology":"volcanic","carriers":null,"author":"Gürer et al., SE 2018","age":28.4,"minAge":23,"maxAge":33.9,"latitude":39.198,"longitude":36.551,"sanitized":true,"edited":true,"timeEdited":"2018-01-10T11:28:29.008Z"}}]}
