# Supplementary material for: Paleomagnetic constraints on the timing and distribution of Cenozoic rotations in Central and Eastern Anatolia
Source: Copernicus journal article supplement (doi:10.5194/se-9-295-2018), 2018-03-21
Supplement: Supplementary file 2 [file se-9-295-2018-supplement.zip › se-2017-66_DATA_pmag files/sites_Sivas.pmag]

{"version":"v1.1.3","apwp":{"eastern Pontides 3300":{"lat":[0,42.67,43.2,41.87,41.02,40.36],"lon":[0,50.01,52.73,55.15,60.79,65.84],"rot":[0,-5,-9.82,-14.13,-17.87,-19.3],"age":[0,10,20,30,40,50],"type":"Euler Pole"}},"data":[{"data":[[34.729962274538934,65.93785898714283,223,41,"SS1.1A",0],[55.70088320890943,54.919093129703256,223,41,"SS1.1B",0],[33.179828283888014,47.80679580162715,223,41,"SS1.2A",0],[39.622211568342664,58.754411346135434,223,41,"SS1.2B",0],[34.47388041856959,67.89605741425379,223,41,"SS1.5A",0],[73.20389559219404,56.94570529204658,223,41,"SS1.6A",0],[75.41109166066468,68.1741097534022,223,41,"SS1.6B",0],[358.32819629004257,76.68273236209102,223,41,"SS1.7A",0],[20.662451002484886,60.55281538525742,223,41,"SS1.7B",0],[15.266306563719581,56.24135404740262,223,41,"SS1.8A",0],[13.392770208461684,70.5266650756068,223,41,"SS1.9A",0],[2.063059770985035,66.61058721665134,223,41,"SS1.11B",0],[359.70457699082476,67.68107800412739,223,41,"SS1.12A",0],[4.431722013058447,59.429925926708805,223,41,"SS1.15A",0],[29.4448052773638,65.5660065650268,223,41,"SS1.16A",0]],"metaData":{"name":"SS1(nor)","dateAdded":"2017-05-19T10:49:07.630Z","version":"v1.1.2","markerColor":"orange","cutoff":"45","type":"Interpretation","description":"Unspecified","author":"Gürer et al., SE 2018","age":45,"minAge":33.9,"maxAge":56,"latitude":39.054,"longitude":36.329,"sanitized":true,"edited":true,"timeEdited":"2018-01-10T11:23:16.818Z","plateId":null,"lithology":null,"carriers":null}},{"data":[[309.3189149086329,16.0675827996332,149,34,"SS25.01A",1],[305.68536159091616,15.383622369163174,149,34,"SS25.02A",0],[316.78823982281244,25.044996178699996,149,34,"SS25.03A",2],[306.1291235733351,9.695412164773701,149,34,"SS25.05A",0],[301.95544050802454,8.709842255334616,149,34,"SS25.06A",0],[336.31676069835623,17.04908124805375,149,34,"SS25.11A",0],[326.48278275198186,33.96014058949422,149,34,"SS25.13A",0],[339.9517179372874,17.341211189595352,149,34,"SS25.14A",5],[329.3763824777028,14.521875215387007,149,34,"SS25.15A",0],[332.5795219875081,14.477760123071633,149,34,"SS25.04A",0],[319.7729748193558,20.240457902780243,149,34,"SS25.08A",0],[323.92586974827964,17.194181817814687,149,34,"SS25.09A",3],[323.77290008930964,17.477318050157837,149,34,"SS25.10A",0],[322.6078448503905,20.6772501636114,149,34,"SS25.12A",4],[335.7942646496326,-8.841868308465331,149,34,"SS25.16A",6],[317.18473640718224,17.126498397556507,149,34,"SS25.17A",0],[346.9388898949011,36.21032307088079,149,34,"SS25.21A",0],[351.45253990034394,4.972624647086137,149,34,"SS25.21B",0]],"metaData":{"name":"SS25(nor)","dateAdded":"2017-05-19T10:48:26.089Z","version":"v1.1.2","markerColor":"orange","cutoff":"45","type":"Interpretation","description":null,"plateId":null,"lithology":"volcanic","carriers":null,"author":"Gürer et al., SE 2018","age":45,"minAge":33.9,"maxAge":56,"latitude":38.757,"longitude":36.162,"sanitized":true,"edited":true,"timeEdited":"2018-01-10T11:24:11.276Z"}},{"data":[[2.0977890327197883,59.144224811197844,220,26,"SS27.01A",0],[4.194333546238113,57.93550682522738,220,26,"SS27.02A",0],[358.0745460502323,59.146359744935474,220,26,"SS27.02B",0],[10.851789066144192,57.394528689968155,220,26,"SS27.04A",0],[1.3675707966048094,60.28081624702074,220,26,"SS27.06A",0],[9.93452382066414,56.45827875971316,220,26,"SS27.04B",0],[351.3779871865547,53.837656016312586,221,20,"SS27.08A",0],[354.94298609994206,53.205244989506035,210,29,"SS27.11A",0],[354.0573999904159,45.02734991209612,210,29,"SS27.11B",0],[8.435913384972139,51.391452269458185,210,29,"SS27.12A",0],[359.42278072091034,46.68282375164436,210,29,"SS27.13A",0],[7.600692576049823,46.915228027566926,210,29,"SS27.14A",0],[356.49410990660715,59.95107559978565,213,25,"SS27.15B",0],[359.8951867591025,58.67909012957019,213,25,"SS27.17A",0],[2.3634727077904927,56.73716183196592,213,25,"SS27.18B",0],[357.1078281465977,58.62240237977403,213,25,"SS27.19A",0],[355.6516484372775,51.839626247659346,213,25,"SS27.20A",0]],"metaData":{"name":"SS27","dateAdded":"2016-10-17T12:03:39.998Z","version":"v1.1.1","markerColor":"orange","cutoff":"45","type":"Interpretation","description":"Unspecified","author":"Gürer et al., SE 2018","age":45,"minAge":33.9,"maxAge":56,"latitude":39.061,"longitude":36.309,"sanitized":true,"edited":true,"timeEdited":"2018-01-10T11:24:33.812Z","plateId":null,"lithology":null,"carriers":null}},{"data":[[359.4803051180648,56.69799716496083,235,22,"SS5.3A",0],[333.6648801125863,48.59113030276757,235,22,"SS5.4A",0],[335.3694439774859,40.399497850413645,235,22,"SS5.4B",0],[335.65021559659044,44.62449196843299,235,22,"SS5.5A",0],[324.6610174573926,50.33171435677659,235,22,"SS5.5B",0],[348.7895379842806,62.168610567614614,235,22,"SS5.6A",0],[342.222584837454,49.88630881833206,235,22,"SS5.6B",0],[356.0492350294229,52.539786854421465,235,22,"SS5.8A",0],[10.232445057219877,37.06047397804551,235,22,"SS5.9B",0],[334.9940715773666,60.61455804735061,235,22,"SS5.10A",0],[347.87644841118305,54.925504186564,235,22,"SS5.10B",0],[340.75032471121347,59.52580346429295,235,22,"SS5.11A",0],[5.563792180787004,59.026373767740786,235,22,"SS5.12A",0],[349.1682747390105,51.18871623651029,235,22,"SS5.13A",0],[356.75927329538325,53.60780699548833,197,23,"SS5.14B",0],[1.4416163422358181,52.71934416271135,197,23,"SS5.15A",0],[333.54128019362815,34.00552789869174,197,23,"SS5.16A",0],[343.65686615958816,46.282249544523005,197,23,"SS5.17A",0],[6.751191904255961,43.9229355218783,197,23,"SS5.18A",0]],"metaData":{"name":"SS5","dateAdded":"2016-10-17T11:56:13.875Z","version":"v1.1.1","markerColor":"orange","cutoff":"45","type":"Interpretation","description":"Unspecified","author":"Gürer et al., SE 2018","age":45,"minAge":33.9,"maxAge":56,"latitude":38.929,"longitude":36.112,"sanitized":true,"edited":true,"timeEdited":"2018-01-10T11:23:42.078Z","plateId":null,"lithology":null,"carriers":null}},{"data":[[28.21171254964338,69.1583150329863,195,40,"SS51.01A",0],[144.93553027236294,88.20435548403734,195,40,"SS51.02",1],[283.1513035902885,61.475990924244385,195,40,"SS51.04A",0],[294.9038406801057,74.21537819920067,195,40,"SS51.05A",0],[56.42932222361952,68.42487132151761,195,40,"SS51.06",2],[7.148775155363808,81.09524973144256,195,40,"SS51.08A",0],[33.14270147427533,66.7493197797864,195,40,"SS51.09",3],[27.390236474130234,63.77322303598403,195,40,"SS51.11A",0],[34.13403172047026,52.59749401806628,195,40,"SS51.11",4],[27.042144904338556,54.8798176025166,195,40,"SS51.12B",0],[54.647511645809914,54.22299112797083,195,40,"SS51.13",5],[45.996263731447584,49.36131909162853,195,40,"SS51.14",6],[47.50037964874235,61.441993243437835,195,40,"SS51.15B",0],[2.4365500869433276,63.37597482857929,195,40,"SS51.16B",0]],"metaData":{"name":"SS51(nor)","dateAdded":"2017-05-19T12:37:13.977Z","version":"v1.1.2","markerColor":"orange","cutoff":"45","type":"Interpretation","description":null,"plateId":null,"lithology":"volcanic","carriers":null,"author":"Gürer et al., SE 2018","age":30.5,"minAge":23,"maxAge":38,"latitude":39.593,"longitude":37.278,"sanitized":true,"edited":true,"timeEdited":"2018-01-10T11:27:37.094Z"}},{"data":[[316.0622460410083,17.295706363808737,55,45,"SS54.01A",0],[341.3650383402167,15.030229074176502,55,45,"SS54.02A",0],[353.70115901959815,20.494757912022905,55,45,"SS54.02B",7],[314.94067414943436,-5.6911642943013865,55,45,"SS54.03A",0],[318.80386126023177,-10.616583819352343,55,45,"SS54.04A",0],[332.61307014924785,12.34746628537612,55,45,"SS54.06A",0],[325.0023997161996,15.572353084459879,55,45,"SS54.07A",1],[317.0365823657849,20.763516867553065,56,63,"SS54.08A",0],[330.7784050859752,-4.165694601070477,56,63,"SS54.09A",0],[336.4562984118448,3.3254517831186865,56,63,"SS54.10B",1]],"metaData":{"name":"SS54","dateAdded":"2017-05-19T11:32:59.507Z","version":"v1.1.2","markerColor":"orange","cutoff":"45","type":"Interpretation","description":null,"plateId":null,"lithology":"volcanic","carriers":null,"author":"Gürer et al., SE 2018","age":30.5,"minAge":23,"maxAge":38,"latitude":39.605,"longitude":37.434,"sanitized":true,"edited":true,"timeEdited":"2018-01-10T11:27:21.828Z"}},{"data":[[354.0759210925127,48.702599578314874,219,21,"SS55.01A",0],[303.9087706215943,47.61202785084574,219,21,"SS55.02",0],[292.5899972798256,47.40947539113266,219,21,"SS55.03A",0],[333.14230795541175,40.08532762630429,219,21,"SS55.04A",0],[312.1377628909678,50.64975332254335,219,21,"SS55.04B",0],[340.17540717353614,57.74284194626238,219,21,"SS55.05A",0],[349.50478273292765,34.85009322807548,219,21,"SS55.08A",0],[8.614512161522725,43.649074833098545,219,21,"SS55.11B",0]],"metaData":{"name":"SS55","dateAdded":"2016-10-17T12:09:59.174Z","version":"v1.1.1","markerColor":"orange","cutoff":"45","type":"Interpretation","description":"Unspecified","author":"Gürer et al., SE 2018","age":45,"minAge":33.9,"maxAge":56,"latitude":39.049,"longitude":36.314,"sanitized":true,"edited":true,"timeEdited":"2018-01-10T11:24:57.984Z","plateId":null,"lithology":null,"carriers":null}},{"data":[[7.386553830430671,36.73020320004037,218,28,"SS56.01",0],[348.8777730671483,46.13623047331011,218,28,"SS56.03A",0],[336.22099079947975,33.900920423281626,218,28,"SS56.04A",0],[356.6059959633352,44.51862253899179,218,28,"SS56.05A",0],[1.6751984944087894,42.03266873490147,218,28,"SS56.05B",0],[347.2356171448358,45.982687710636256,218,28,"SS56.09A",0],[344.5253919670319,42.80392584864906,218,28,"SS56.09B",0],[20.576449261571838,54.44683252887738,218,28,"SS56.12A",0]],"metaData":{"name":"SS56","dateAdded":"2017-09-05T11:06:39.233Z","version":"v1.1.3","markerColor":"orange","cutoff":"45","type":"Interpretation","description":null,"plateId":null,"lithology":"volcanic","carriers":null,"author":"Gürer et al., SE 2018","age":45,"minAge":33.9,"maxAge":56,"latitude":39.031,"longitude":36.286,"sanitized":true,"edited":true,"timeEdited":"2018-01-10T11:25:38.516Z"}},{"data":[[329.7511798847961,35.48536730925662,60,32,"SS57.01A",0],[347.5040849166087,42.14353616964852,60,32,"SS57.01B",0],[347.4854505275475,46.4211215946333,60,32,"SS57.02A",0],[355.8983446611974,39.53450240759337,60,32,"SS57.03A",0],[342.59163659691757,52.36572381821456,60,32,"SS57.04A",0],[314.84108598095753,16.352501889233494,60,32,"SS57.05A",0],[320.5380038501902,42.46081192673121,60,32,"SS57.06A",0],[313.1607753063028,20.026333345556974,60,32,"SS57.07A",0],[341.8480686352111,-7.397826432592886,60,32,"SS57.08A",0],[356.61083284439155,38.730089161710865,60,32,"SS57.08C",0]],"metaData":{"name":"SS57","dateAdded":"2017-05-19T10:26:43.956Z","version":"v1.1.2","markerColor":"orange","cutoff":"45","type":"Interpretation","description":null,"plateId":null,"lithology":"volcanic","carriers":null,"author":"Gürer et al., SE 2018","age":45,"minAge":33.9,"maxAge":56,"latitude":39.053,"longitude":36.346,"sanitized":true,"edited":true,"timeEdited":"2018-01-10T11:26:03.785Z"}},{"data":[[309.2010597396655,-24.70612240292085,58,46,"SS58.01B",0],[321.3715580368079,-15.189501398160463,58,46,"SS58.03A",0],[301.45950011803535,-14.466932732418657,58,46,"SS58.04A",0],[318.28267777194355,14.05353237970406,58,46,"SS58.06A",0],[321.4532506548131,-6.427376732877498,58,46,"SS58.08A",0]],"metaData":{"name":"SS58","dateAdded":"2017-05-22T15:26:20.237Z","version":"v1.1.2","markerColor":"orange","cutoff":"45","type":"Interpretation","description":null,"plateId":null,"lithology":"volcanic","carriers":null,"author":"Gürer et al., SE 2018","age":28.4,"minAge":23,"maxAge":33.9,"latitude":39.198,"longitude":36.551,"sanitized":true,"edited":true,"timeEdited":"2018-01-10T11:28:29.008Z"}}]}
