# Supplementary material for: Paleomagnetic constraints on the timing and distribution of Cenozoic rotations in Central and Eastern Anatolia
Source: Copernicus journal article supplement (doi:10.5194/se-9-295-2018), 2018-03-21
Supplement: Supplementary file 2 [file se-9-295-2018-supplement.zip › se-2017-66_DATA_pmag files/sites_Ulukisla.pmag]

{"version":"v1.1.3","apwp":{},"data":[{"data":[[358.8975398737524,64.150093716436,0,0,"Ulu - Kurtulmus Tepe.1",0],[348.9051985851101,59.385008038487946,0,0,"Ulu - Kurtulmus Tepe.2",0],[338.2988205420557,51.24404900826829,0,0,"Ulu - Kurtulmus Tepe.3",0],[301.9865058614804,39.92094085746625,0,0,"Ulu - Kurtulmus Tepe.4",0],[17.242767947015636,54.97718257405379,0,0,"Ulu - Kurtulmus Tepe.5",0],[322.60135008179975,39.26827038381975,0,0,"Ulu - Kurtulmus Tepe.6",0],[346.82760827111974,58.926458061319366,0,0,"Ulu - Kurtulmus Tepe.7",0],[316.4642217124606,53.14312796506087,0,0,"Ulu - Kurtulmus Tepe.8",0],[336.70453735305784,51.77641633138932,0,0,"Ulu - Kurtulmus Tepe.9",0],[308.55486553637377,53.01784931824789,0,0,"Ulu - Kurtulmus Tepe.10",0],[326.2128949036877,60.96356808783972,0,0,"Ulu - Kurtulmus Tepe.11",0],[328.7069806269357,29.766583353305148,0,0,"Ulu - Kurtulmus Tepe.12",0],[0.5020605428753697,54.82089854113963,0,0,"Ulu - Kurtulmus Tepe.13",0],[278.2000600044122,69.31143067287076,0,0,"Ulu - Kurtulmus Tepe.14",0],[351.3124466507208,61.736691083977504,0,0,"Ulu - Kurtulmus Tepe.15",0],[326.3625197842521,29.067569060799,0,0,"Ulu - Kurtulmus Tepe.16",0],[6.746984575072247,62.71043004958375,0,0,"Ulu - Kurtulmus Tepe.17",0],[344.26254162218584,62.88961696483501,0,0,"Ulu - Kurtulmus Tepe.18",0],[338.55794650179166,48.19179755178487,0,0,"Ulu - Kurtulmus Tepe.19",0],[330.64118337936276,47.666233993149554,0,0,"Ulu - Kurtulmus Tepe.20",0],[332.7524733787556,66.24018288318894,0,0,"Ulu - Kurtulmus Tepe.21",0],[338.9804125382513,59.16311330501946,0,0,"Ulu - Kurtulmus Tepe.22",0],[320.172860993486,51.36664339128745,0,0,"Ulu - Kurtulmus Tepe.23",0],[289.9857407738036,68.15124890909637,0,0,"Ulu - Kurtulmus Tepe.24",0],[347.55404402338627,59.607555789815116,0,0,"Ulu - Kurtulmus Tepe.25",0],[301.72888815604483,43.74426838038665,0,0,"Ulu - Kurtulmus Tepe.26",0],[322.7826281323289,22.090869681105133,0,0,"Ulu - Kurtulmus Tepe.27",0],[290.85220882656245,57.34698160296344,0,0,"Ulu - Kurtulmus Tepe.28",0],[335.22267460029803,60.05396047572017,0,0,"Ulu - Kurtulmus Tepe.29",0],[332.22419327267954,48.88890454142327,0,0,"Ulu - Kurtulmus Tepe.30",0],[280.4520217915335,54.221892561396714,0,0,"Ulu - Kurtulmus Tepe.31",0],[297.58145207935445,50.073814960018915,0,0,"Ulu - Kurtulmus Tepe.32",0],[287.99928140559314,53.15910842521678,0,0,"Ulu - Kurtulmus Tepe.33",0],[5.7648534326704635,37.70754223852277,0,0,"Ulu - Kurtulmus Tepe.34",0],[327.6912546482329,60.26000955814987,0,0,"Ulu - Kurtulmus Tepe.35",0],[341.7886362741178,57.499786703383094,0,0,"Ulu - Kurtulmus Tepe.36",0],[335.04486750181286,1.8149171880149844,0,0,"Ulu - Kurtulmus Tepe.37",0],[320.96053040417974,41.13148745138763,0,0,"Ulu - Kurtulmus Tepe.38",0],[351.67903021556657,53.46371154542219,0,0,"Ulu - Kurtulmus Tepe.39",0],[319.2116177250367,32.90869586203916,0,0,"Ulu - Kurtulmus Tepe.40",0],[344.54511447163,75.90286568115133,0,0,"Ulu - Kurtulmus Tepe.41",0],[273.35312453308666,63.65737871068965,0,0,"Ulu - Kurtulmus Tepe.42",0],[317.0044021110009,-3.0502589714187485,0,0,"Ulu - Kurtulmus Tepe.43",0],[298.199425305201,55.717410855770765,0,0,"Ulu - Kurtulmus Tepe.44",0],[322.29061179421865,41.80264268955657,0,0,"Ulu - Kurtulmus Tepe.45",0],[305.80857125374337,52.64091087847697,0,0,"Ulu - Kurtulmus Tepe.46",0],[331.77586898397686,37.81943253308196,0,0,"Ulu - Kurtulmus Tepe.47",0],[330.5028530639403,57.10797721238569,0,0,"Ulu - Kurtulmus Tepe.48",0],[334.55524900316544,60.31879982697827,0,0,"Ulu - Kurtulmus Tepe.49",0],[304.07687485108977,80.89414352946962,0,0,"Ulu - Kurtulmus Tepe.50",0],[354.14832392919664,48.20481156421227,0,0,"Ulu - Kurtulmus Tepe.51",0],[331.0266846645586,49.44214470835549,0,0,"Ulu - Kurtulmus Tepe.52",0],[330.5319538897132,45.88747364846647,0,0,"Ulu - Kurtulmus Tepe.53",0],[341.9560162088694,53.91850165120659,0,0,"Ulu - Kurtulmus Tepe.54",0],[296.09425087671843,40.309114875067976,0,0,"Ulu - Kurtulmus Tepe.55",0],[348.2442080459328,50.145526876269,0,0,"Ulu - Kurtulmus Tepe.56",0],[298.3154061773797,47.14318390547201,0,0,"Ulu - Kurtulmus Tepe.57",0],[320.24160815252276,9.700816066209791,0,0,"Ulu - Kurtulmus Tepe.58",0],[303.20674664826186,-35.93967915747023,0,0,"Ulu - Kurtulmus Tepe.59",0],[306.9941899108733,38.08820757443823,0,0,"Ulu - Kurtulmus Tepe.60",0],[300.39573174624377,16.998744330589613,0,0,"Ulu - Kurtulmus Tepe.61",0],[337.58293896218686,65.72638142493354,0,0,"Ulu - Kurtulmus Tepe.62",0],[313.72488025250277,38.729452969389556,0,0,"Ulu - Kurtulmus Tepe.63",0],[336.2231341982037,53.740468723137866,0,0,"Ulu - Kurtulmus Tepe.64",0],[330.8158400848629,71.2704026565718,0,0,"Ulu - Kurtulmus Tepe.65",0],[336.09077818270237,53.83639473492196,0,0,"Ulu - Kurtulmus Tepe.66",0],[308.10679677259213,58.50856576383182,0,0,"Ulu - Kurtulmus Tepe.67",0],[335.4097064573074,51.235424418552334,0,0,"Ulu - Kurtulmus Tepe.68",0],[321.47873770009437,50.83410048849834,0,0,"Ulu - Kurtulmus Tepe.69",0],[321.27294327731113,44.89094452726208,0,0,"Ulu - Kurtulmus Tepe.70",0],[342.4940833586449,56.683523628171876,0,0,"Ulu - Kurtulmus Tepe.71",0],[328.77139886892724,30.08234471857188,0,0,"Ulu - Kurtulmus Tepe.72",0],[342.80524205561227,46.246087739858034,0,0,"Ulu - Kurtulmus Tepe.73",0],[354.88782574281413,58.236088723096614,0,0,"Ulu - Kurtulmus Tepe.74",0],[310.26422492639904,30.703677052167308,0,0,"Ulu - Kurtulmus Tepe.75",0],[332.90906981744246,43.543470031566116,0,0,"Ulu - Kurtulmus Tepe.76",0],[342.13999252949066,44.09247421239571,0,0,"Ulu - Kurtulmus Tepe.77",0],[319.55849410123847,33.25503285697175,0,0,"Ulu - Kurtulmus Tepe.78",0],[338.30337565393114,78.52049662778005,0,0,"Ulu - Kurtulmus Tepe.79",0],[336.7182200187202,37.06327189808509,0,0,"Ulu - Kurtulmus Tepe.80",0],[348.5013711742038,25.825131462118982,0,0,"Ulu - Kurtulmus Tepe.81",0],[321.84561334148486,64.28791499714134,0,0,"Ulu - Kurtulmus Tepe.82",0],[329.75894603801817,57.690014988355,0,0,"Ulu - Kurtulmus Tepe.83",0],[310.79255587936564,45.34735857963955,0,0,"Ulu - Kurtulmus Tepe.84",0],[328.89130240482365,25.530735896944613,0,0,"Ulu - Kurtulmus Tepe.85",0],[325.7818512495736,-17.75231157776768,0,0,"Ulu - Kurtulmus Tepe.86",0],[337.57749642656563,41.37544333536578,0,0,"Ulu - Kurtulmus Tepe.87",0],[337.48330197391743,7.296491102737565,0,0,"Ulu - Kurtulmus Tepe.88",0],[312.77831580179156,29.92938739213372,0,0,"Ulu - Kurtulmus Tepe.89",0],[358.10592822508306,54.33366198917467,0,0,"Ulu - Kurtulmus Tepe.90",0],[303.10560529842974,51.7649387930094,0,0,"Ulu - Kurtulmus Tepe.91",0],[358.7605760910423,49.3133938700313,0,0,"Ulu - Kurtulmus Tepe.92",0],[288.9768365675192,58.04112702320364,0,0,"Ulu - Kurtulmus Tepe.93",0],[324.7904604790933,57.72503180635074,0,0,"Ulu - Kurtulmus Tepe.94",0],[317.19943583422787,21.709341142046924,0,0,"Ulu - Kurtulmus Tepe.95",0],[314.5517482133896,54.285303490934595,0,0,"Ulu - Kurtulmus Tepe.96",0],[316.2046792881674,64.85881815544255,0,0,"Ulu - Kurtulmus Tepe.97",0],[334.8807838863683,24.233449401945215,0,0,"Ulu - Kurtulmus Tepe.98",0],[303.3381510884651,46.550045272435796,0,0,"Ulu - Kurtulmus Tepe.99",0],[333.00591536624984,18.70966843477427,0,0,"Ulu - Kurtulmus Tepe.100",0],[325.5428436054301,56.97504696139986,0,0,"Ulu - Kurtulmus Tepe.101",0],[348.3544922495611,59.315380853045795,0,0,"Ulu - Kurtulmus Tepe.102",0],[310.8054293025684,31.228233923505858,0,0,"Ulu - Kurtulmus Tepe.103",0],[339.6821565456688,34.27762168236339,0,0,"Ulu - Kurtulmus Tepe.104",0],[314.4008738396037,20.946404029536954,0,0,"Ulu - Kurtulmus Tepe.105",0],[354.9247259758166,29.617312669963663,0,0,"Ulu - Kurtulmus Tepe.106",0],[319.58406894584937,16.086676654822767,0,0,"Ulu - Kurtulmus Tepe.107",0],[331.2696351112233,65.78545318835445,0,0,"Ulu - Kurtulmus Tepe.108",0],[311.10815870022316,47.351924290653734,0,0,"Ulu - Kurtulmus Tepe.109",0],[295.6618206682589,72.4823628997621,0,0,"Ulu - Kurtulmus Tepe.110",0],[37.694672380197176,58.28956182866102,0,0,"Ulu - Kurtulmus Tepe.111",0],[297.93477092580497,69.3486415071391,0,0,"Ulu - Kurtulmus Tepe.112",0],[285.9674270272196,42.32932100515898,0,0,"Ulu - Kurtulmus Tepe.113",0],[295.2115464102468,17.498963250909938,0,0,"Ulu - Kurtulmus Tepe.114",0],[332.4266303683634,27.425862851583084,0,0,"Ulu - Kurtulmus Tepe.115",0],[318.63892870172367,47.15034169293908,0,0,"Ulu - Kurtulmus Tepe.116",0],[314.2353477943474,57.03211098937054,0,0,"Ulu - Kurtulmus Tepe.117",0],[353.30131924137714,14.45707414637053,0,0,"Ulu - Kurtulmus Tepe.118",0],[333.5004875850703,55.38865542551052,0,0,"Ulu - Kurtulmus Tepe.119",0],[297.7543816231191,45.55533159379234,0,0,"Ulu - Kurtulmus Tepe.120",0],[332.87890404222367,71.32923731832956,0,0,"Ulu - Kurtulmus Tepe.121",0]],"metaData":{"name":"Ulu - Kurtulmus Tepe","dateAdded":"2016-11-18T13:42:32.823Z","version":"v1.1.1","markerColor":"orange","cutoff":"45","type":"Simulated","description":"sediments","author":"Meijers et al., G-Cubed 2016","age":"25.6","minAge":"23","maxAge":"28.1","latitude":37.522,"longitude":34.475,"sanitized":true}},{"data":[[347.03708687711946,60.19225868033503,218,26,"HB1.3A",1],[9.829875181691023,52.30351490677604,218,26,"HB1.7A",0],[13.900999835253742,45.07733367538951,218,26,"HB1.8A",0],[346.78143523567815,54.01781227462734,218,26,"HB1.11B",0],[359.55535520599005,47.15045419591536,218,26,"HB1.12A",0],[6.686373679274084,51.714507818694315,218,26,"HB1.12B",0],[2.8768606093345284,56.162071933015405,218,26,"HB1.13A",0],[7.152949915824195,49.198249484503776,218,26,"HB1.14A",4],[3.6475288758626903,48.96216390953584,218,26,"HB1.15A",0],[2.9652338194571257,49.10704736062947,218,26,"HB1.16A",0],[4.8224874671140014,39.41025850780814,218,26,"HB1.17A",5],[353.5319138068851,55.86614041770663,218,26,"HB1.17B",0],[5.12463417610229,57.61357973437202,218,26,"HB1.18A",0],[3.5702238271671263,53.30510394355888,218,26,"HB1.19B",0],[357.873723328486,61.64107923963392,218,26,"HB1.20A",0],[13.467826128629326,52.379526759442,218,26,"HB1.9A",3],[359.27597942539296,56.07751814793705,218,26,"HB1.19A",6],[3.8427265932863293,52.935043542262555,218,26,"HB1.22A",0]],"metaData":{"name":"Hacibekerli_nor","dateAdded":"2017-09-05T11:19:00.336Z","version":"v1.1.3","markerColor":"orange","cutoff":"45","type":"Interpretation","description":null,"plateId":null,"lithology":"volcanic","carriers":null,"author":null,"age":null,"minAge":null,"maxAge":null,"latitude":null,"longitude":null,"sanitized":true}},{"data":[[352.4944460398277,15.017308359085977,148,63,"TT 1.1B",5],[351.7438084654621,9.740783652044753,148,63,"TT 1.2B",6],[352.6415437711679,13.928890677285501,148,63,"TT 1.3B",7],[7.296468869642524,25.38746973537536,148,63,"TT 1.4",8],[3.265620574292882,26.31688889847113,148,63,"TT 1.5",1],[4.857110928427403,25.709481493076627,148,63,"TT 1.6B",2],[17.201743484626263,27.110022874070726,148,63,"TT 1.8B",4],[28.856251073079363,24.392744104196225,148,63,"TT 1.9B",5],[13.135565252564845,33.30023241548361,148,63,"TT 1.10",6],[5.915095147677505,13.058795562342931,148,63,"TT 1.11",7],[5.397959078428073,25.88307240895649,148,63,"TT 1.12B",8],[10.116829089722671,34.606329392394706,148,63,"TT 1.13A",0],[3.2339534988737455,32.26837355534693,148,63,"TT 1.13B",1],[356.4865382124126,27.40561279538572,148,63,"TT 1.14A",0],[8.533766129090964,38.43205307409639,148,63,"TT 1.14B",2],[6.164945397147335,22.14588737730816,148,63,"TT 1.15A",0],[2.4319254496114695,26.95929438135332,148,63,"TT 1.15B",3],[0.8687296840334966,19.939436873579012,148,63,"TT 1.16A",0],[349.63935888351017,39.571459695320755,148,63,"TT 1.16B",4],[5.10068932391448,18.69305278298465,148,63,"TT 1.18A",0],[7.158016884623066,30.41345692609475,148,63,"TT 1.19A",0],[211.33609158382518,-17.086597309756954,148,63,"TT 1.19B",6],[3.7131080708970785,32.302250999757284,148,63,"TT 1.20B",7],[9.00420397070883,23.887157341679462,148,63,"TT 1.21A",0],[357.5157030761822,33.91783561374156,148,63,"TT 1.21B",0],[2.6780037800525633,40.63259730267132,148,63,"TT 1.22",8],[6.081712856106947,20.30403595845657,148,63,"TT 1.24",0],[2.381248485411618,33.237608031921106,148,63,"TT 1.25A",0],[16.840139816020894,27.619244656240447,148,63,"TT 1.17A",5]],"metaData":{"name":"Topraktepe","dateAdded":"2017-06-11T11:11:49.831Z","version":"v1.1.2","markerColor":"orange","cutoff":"45","type":"Interpretation","description":null,"plateId":null,"lithology":"clastic","carriers":null,"author":"Gürer et al., SE 2018","age":42.9,"minAge":38,"maxAge":47.8,"latitude":37.7,"longitude":34.8,"sanitized":true,"edited":true,"timeEdited":"2018-01-04T08:42:19.879Z"}},{"data":[[305.3543927583771,30.38143469333267,322,38,"BU1.6A",0],[302.0965999715457,26.03096341120163,322,38,"BU1.7A",0],[285.6705924431184,21.778150471765542,317,38,"BU1.7B",0],[295.4415535395623,46.25079180731203,322,38,"BU1.9A",0],[302.16201976942676,56.20672099361459,322,38,"BU1.9B",0]],"metaData":{"name":"BU1","dateAdded":"2017-06-11T08:38:06.185Z","version":"v1.1.2","markerColor":"orange","cutoff":"45","type":"Input","description":"Unspecified","plateId":null,"lithology":null,"carriers":null,"author":"Gürer et al., SE 2018","age":57.6,"minAge":56,"maxAge":59.2,"latitude":37.767,"longitude":34.945,"sanitized":true,"edited":true,"timeEdited":"2018-01-10T11:03:09.096Z"}},{"data":[[297.22644309526623,5.101294004235855,8,32,"BU2.3B",0],[338.14604564899173,2.4435014915983913,13,40,"BU2.16A",0],[339.1955426265963,-6.8672147596990625,13,40,"BU2.16B",0],[323.2148537953642,6.96756260881382,13,40,"BU2.18B",0],[328.49726712497306,-11.777813002124569,13,40,"BU2.21A",0],[157.0203947364571,-3.695198702404842,13,38,"BU2.22B",0]],"metaData":{"name":"BU2","dateAdded":"2016-11-29T14:50:49.268Z","version":"v1.1.1","markerColor":"orange","cutoff":"45","type":"Interpretation","description":"Unspecified","author":"Gürer et al., 2018","age":57.6,"minAge":56,"maxAge":59.2,"latitude":37.766,"longitude":34.946,"sanitized":true,"edited":true,"timeEdited":"2018-01-10T11:04:16.560Z","plateId":null,"lithology":null,"carriers":null}},{"data":[[339.7237875330345,15.211712479434398,121,35,"YK2.6B",1],[337.1079246923375,11.069003300122022,121,35,"YK2.7B",2],[351.32979715739714,3.354257873042741,121,35,"YK2.9A",0],[336.37120476302164,22.03518017118996,121,35,"YK2.9B",7],[346.452295693573,18.556023857438227,121,35,"YK2.10B",3],[333.9828100822066,24.345843554127576,121,35,"YK2.2A",6],[343.6704228509054,16.198634842364758,121,35,"YK2.3A",0],[348.33510791051833,15.640555840541309,121,35,"YK2.4A",0],[344.46365014139724,15.911153917690653,121,35,"YK2.5A",0],[351.5962012055918,14.690998626867778,121,35,"YK2.6A",0],[332.3261605564137,17.663353332013003,121,35,"YK2.7B",2],[353.7727829811512,16.994212878085214,121,35,"YK2.11A",8],[334.17513048057026,18.042828166456673,121,35,"YK2.12A",0]],"metaData":{"name":"YK1_nor","dateAdded":"2018-01-10T11:04:44.600Z","version":"v1.1.3","markerColor":"orange","cutoff":"45","type":"Input","description":null,"plateId":null,"lithology":"volcanic","carriers":null,"author":"Gürer et al., Solid Earth 2018","age":57.6,"minAge":56,"maxAge":59.2,"latitude":37.701,"longitude":34.914,"sanitized":true,"edited":true,"timeEdited":"2018-01-10T11:05:24.417Z"}},{"data":[[345.2042002552213,28.649324014704884,0,0,"YK2.9A",0],[318.45903476450536,35.743620874178376,0,0,"YK2.9B",7],[333.13644461779495,40.36520840569306,0,0,"YK2.10B",3],[343.4175657180424,47.592651970533076,0,0,"YK2.1A",7],[308.1145118430202,41.5009277454019,0,0,"YK2.2A",6],[332.01718549491204,41.83026334379662,0,0,"YK2.3A",0],[337.8554596334567,43.57139994524148,0,0,"YK2.4A",0],[335.4148337737312,42.19557993999471,0,0,"YK2.5A",0],[325.2698573833019,39.345035364888396,0,0,"YK2.6A",0],[316.57313443003113,36.17973944839815,0,0,"YK2.6B",1],[309.02269996070675,33.0626812659331,0,0,"YK2.7B",2],[334.8376895624857,43.84269040040301,0,0,"YK2.11A",8],[322.1299653884485,38.20184399179896,0,0,"YK2.12A",0]],"metaData":{"name":"YK2_tc_nor","dateAdded":"2018-01-10T11:10:09.332Z","version":"v1.1.3","markerColor":"orange","cutoff":"45","type":"Interpretation","description":null,"plateId":null,"lithology":"volcanic","carriers":null,"author":"Gürer et al., SE 2018","age":57.6,"minAge":56,"maxAge":59.2,"latitude":37.724,"longitude":34.91,"sanitized":true,"edited":true,"timeEdited":"2018-01-10T11:10:57.370Z"}},{"data":[[326.6849950605749,46.517805806793525,0,0,"YK3.11B",1],[321.89160505261276,48.80337766054919,0,0,"YK3.11C",2],[316.31360484784614,46.55196581189274,0,0,"YK3.13A",3],[319.33067189273976,40.58154738730915,0,0,"YK3.16C",4],[324.51390559813495,45.94378683934717,0,0,"YK3.17B",4],[324.17200365929887,49.076830762909,0,0,"YK3.18B",5],[322.8932239987133,38.870644029473986,0,0,"YK3.20A",7],[317.0379919946323,39.94498897485181,0,0,"YK3.23A",8],[312.1480183637943,48.78892285880497,0,0,"YK3.00",1],[314.2770279597579,46.23568720528175,0,0,"YK3.1C",8],[294.0986313220169,51.34313121422392,0,0,"YK3.2B",3],[315.6276266345215,45.221152916070345,0,0,"YK3.4B",5],[312.18019816610746,48.31641944670872,0,0,"YK3.5A",0],[313.0403398920928,46.93276818262569,0,0,"YK3.7A",0],[310.4550655963929,48.260464619692065,0,0,"YK3.10A",0],[314.8533138735979,45.569985897690216,0,0,"YK3.14A",0],[304.37119487509534,34.6761135259243,0,0,"YK3.18A",0],[320.0547981801163,25.427325494468423,0,0,"YK3.19A",6],[315.0308764969735,45.074679729468066,0,0,"YK3.21A",0],[314.16393105246607,46.339022072717086,0,0,"YK3.22A",0]],"metaData":{"name":"YK3_tc","dateAdded":"2017-06-11T09:08:05.175Z","version":"v1.1.2","markerColor":"orange","cutoff":"45","type":"Interpretation","description":null,"plateId":null,"lithology":"volcanic","carriers":null,"author":"Gürer et al., SE 2018","age":57.6,"minAge":56,"maxAge":59.2,"latitude":37.761,"longitude":34.922,"sanitized":true,"edited":true,"timeEdited":"2018-01-10T11:11:37.635Z"}},{"data":[[317.1210411375102,31.413640411223955,338,39,"YK4.13A",0],[293.5052539979588,26.054912878442376,338,39,"YK4.13B",0],[301.4029562438651,4.015722324327462,338,39,"YK4.14B",0],[311.3301443486981,9.12961748608056,338,39,"YK4.15A",0],[303.86892684634427,14.857067095985622,338,39,"YK4.16B",0],[302.20493161951805,9.546716640476985,338,39,"YK4.19B",0],[305.98364899609294,14.943002465323927,338,39,"YK4.8A",0],[318.68494722590214,8.39099177098785,338,39,"YK4.8B",0],[302.10080853913274,17.779844839159093,338,39,"YK4.9B",0],[323.54605663573835,10.99621373204876,338,39,"YK4.10A",0],[322.93333916454134,7.214432050433598,338,39,"YK4.10B",0],[302.9798588586506,16.106249418516068,338,39,"YK4.11B",0],[316.1862120695234,9.564276938153018,338,39,"YK4.17B",0]],"metaData":{"name":"YK4","dateAdded":"2016-11-29T14:51:05.621Z","version":"v1.1.1","markerColor":"orange","cutoff":"45","type":"Interpretation","description":"Unspecified","author":"Gürer et al., SE 2018","age":57.6,"minAge":56,"maxAge":59.2,"latitude":37.766,"longitude":34.146,"sanitized":true,"edited":true,"timeEdited":"2018-01-10T11:12:09.528Z","plateId":null,"lithology":null,"carriers":null}},{"data":[[328.3619792217288,22.2410552784323,30,16,"KL1.02A",0],[354.70216868752686,14.781248681751293,30,16,"KL1.02B",6],[326.9595041624153,22.53597426774521,30,16,"KL1.03A",0],[342.83046438320116,21.69068133291862,30,16,"KL1.3B",3],[341.13142149091755,22.778406268834193,30,16,"KL1.4A",0],[336.44133916507076,28.561937363863432,30,16,"KL1.4B",4],[333.41188419977834,21.744424322789083,30,16,"KL1.05A",0],[336.19983319174946,34.23430589715385,30,16,"KL1.05B",8]],"metaData":{"name":"KL1_nor","dateAdded":"2018-01-10T11:12:41.834Z","version":"v1.1.3","markerColor":"orange","cutoff":"45","type":"Interpretation","description":null,"plateId":null,"lithology":"volcanic","carriers":null,"author":"Gürer et al., SE 2018","age":61,"minAge":56,"maxAge":66,"latitude":37.655,"longitude":34.531,"sanitized":true,"edited":true,"timeEdited":"2018-01-10T11:13:20.271Z"}},{"data":[[299.3709707193121,19.078145243661197,289,25,"EM3.5A",0],[336.6477729740526,73.67272747868273,289,25,"EM3.6A",3],[283.71086997240826,41.480217458358645,289,25,"EM3.7A",4],[314.867746648931,37.314664917681554,289,25,"EM3.9A",6],[305.42628235800305,52.553515598929735,283,29,"EM3.11A",7],[309.2686604441353,49.10425062587558,283,29,"EM3.12A",8],[342.52570440760826,62.548340711339264,283,29,"EM3.12B",0],[336.85715692447366,40.32709284107426,283,29,"EM3.13A",1],[324.03315992397575,41.019740330642556,283,29,"EM3.14A",0],[301.07885200815485,27.337259962812755,283,29,"EM3.15B",3]],"metaData":{"name":"EM3_nor","dateAdded":"2018-01-10T11:13:37.698Z","version":"v1.1.3","markerColor":"orange","cutoff":"45","type":"Interpretation","description":null,"plateId":null,"lithology":"volcanic","carriers":null,"author":"Gürer et al., SE 2018","age":61,"minAge":56,"maxAge":66,"latitude":37.707,"longitude":34.554,"sanitized":true,"edited":true,"timeEdited":"2018-01-10T11:14:11.924Z"}},{"data":[[341.8936996123058,-16.893968254791695,93,85,"HP1.1A",0],[322.26227031819826,-33.64399046403766,93,85,"HP1.1B",7],[341.3658256534586,-37.92578390081452,93,85,"HP1.2B",1],[353.67044331651505,-43.50282222894659,93,85,"HP1.3A",2],[331.5836197232032,-31.51865348304346,93,85,"HP1.3B",8],[358.62321469170934,-37.828388775708724,93,85,"HP1.4A",3],[333.4386461553054,-27.919308909286325,93,85,"HP1.4B",0],[316.8787923611706,-25.922373570904334,93,85,"HP1.5A",4],[341.93245198391344,-42.38182233662681,89,90,"HP1.6A",5],[318.1541721006653,-61.61257070322941,89,90,"HP1.7A",6],[327.4273276125373,-54.533902720901885,89,90,"HP1.9A",8],[352.7364683227404,-59.2006070017545,89,90,"HP1.10A",1],[322.85104875040076,-51.74661526449001,89,90,"HP1.10B",1],[331.9518789735571,-22.87202642350709,89,90,"HP1.11A",0],[287.25156435574405,-60.818609634102216,89,90,"HP1.11B",2],[323.21132872891553,-72.79075684452148,89,90,"HP1.12A",3],[332.52532949560987,-67.65385615368272,89,90,"HP1.13A",4],[291.8932413718352,-84.3183707540607,89,90,"HP1.13B",2],[4.3567991470934,-74.2938144166243,89,90,"HP1.14A",5],[355.81362146643505,-27.317870110139047,85,83,"HP1.15A",0],[340.1886589970734,-46.82419504470607,85,83,"HP1.18A",0],[346.4220286466141,-29.967931209328086,85,83,"HP1.19A",8],[349.73754381840206,-38.13659771191027,85,83,"HP1.20A",0],[357.59355193689566,-37.55655584697281,85,83,"HP1.22A",0]],"metaData":{"name":"HP1(nor)","dateAdded":"2017-05-19T09:21:14.639Z","version":"v1.1.2","markerColor":"orange","cutoff":"45","type":"Interpretation","description":null,"plateId":null,"lithology":"volcanic","carriers":null,"author":"Gürer et al., SE 2018","age":45,"minAge":33.9,"maxAge":56,"latitude":37.437,"longitude":34.274,"sanitized":true,"edited":true,"timeEdited":"2018-01-10T11:15:43.403Z"}},{"data":[[328.0739062845273,73.29059923973837,253,41,"HP2.8A",0],[319.03292604796155,73.49808794019027,253,41,"HP2.8B",2],[258.93250203459803,69.1295603387909,253,41,"HP2.10A",0],[253.30836173770427,61.42810689145198,253,41,"HP2.10B",6]],"metaData":{"name":"HP2","dateAdded":"2017-05-19T09:20:16.662Z","version":"v1.1.2","markerColor":"orange","cutoff":"45","type":"Interpretation","description":null,"plateId":null,"lithology":"volcanic","carriers":null,"author":"Gürer et al., SE 2018","age":45,"minAge":33.9,"maxAge":56,"latitude":37.411,"longitude":34.283,"sanitized":true,"edited":true,"timeEdited":"2018-01-10T11:16:13.918Z"}},{"data":[[330.51414976334166,-22.667722491911494,111,66,"HP3.1A",0],[330.3712300096887,-15.013177653213326,111,66,"HP3.2B",0],[324.0790923826224,-11.965383672338843,111,66,"HP3.3A",0],[347.18146395633175,2.8284923037657186,111,66,"HP3.5A",0],[1.5387136578191871,6.50687981734207,111,66,"HP3.5B",5],[351.43716266652325,11.886896370064493,111,66,"HP3.8A",8],[350.7943296956679,6.552553982197455,111,66,"HP3.13B",5],[341.5496243710518,20.271270617523793,111,66,"HP3.17A",1],[336.4390840517326,-26.18858183398662,111,66,"HP3.18A",0],[6.951388278085233,49.79308697595715,111,66,"HP3.18B",2],[343.1081472591542,8.23121923681947,111,66,"HP3.2A",2],[335.9107519711065,16.35640583443305,111,66,"HP3.3B",3],[352.20138419322984,2.1457809594263146,111,66,"HP3.4A",4],[10.759799099796624,4.923906688100279,111,66,"HP3.10B",2],[10.88718037479714,1.542171877399781,111,66,"HP3.11A",3],[9.322836950695148,5.409074919059767,111,66,"HP3.12A",4]],"metaData":{"name":"HP3(nor)","dateAdded":"2017-05-19T09:23:08.621Z","version":"v1.1.2","markerColor":"orange","cutoff":"45","type":"Interpretation","description":null,"plateId":null,"lithology":"volcanic","carriers":null,"author":null,"age":45,"minAge":33.9,"maxAge":56,"latitude":37.461,"longitude":34.168,"sanitized":true,"edited":true,"timeEdited":"2018-01-10T11:16:39.524Z"}},{"data":[[316.0152047418038,7.471398245788675,0,0,"HP6.1A",2],[336.547871642269,1.5725940911311624,0,0,"HP6.2A",0],[345.8157146175847,-9.038907103769096,0,0,"HP6.3A",0],[336.3223836047657,11.511405995190843,0,0,"HP6.4A",5],[326.3011840486969,10.519308524945657,0,0,"HP6.4B",3],[319.4773552580232,-9.49740132160818,0,0,"HP6.7A",0],[332.8657720442102,20.256462032020014,0,0,"HP6.7B",4],[322.27865940367246,4.106117180423527,0,0,"HP6.8A",5],[325.29609174860195,1.344747196921008,0,0,"HP6.8B",6],[300.0106477536075,-5.895233560003491,0,0,"HP6.9A",6],[345.20861831483626,-23.626043547493424,0,0,"HP6.13A",0],[331.6318661146746,0.5313828405792312,0,0,"HP6.6A",0],[312.48038854966563,9.015499896306341,0,0,"HP6.9B",8]],"metaData":{"name":"HP6(nor)","dateAdded":"2017-05-19T09:24:28.264Z","version":"v1.1.2","markerColor":"orange","cutoff":"45","type":"Interpretation","description":null,"plateId":null,"lithology":"volcanic","carriers":null,"author":"Gürer et al., SE 2018","age":45,"minAge":33.9,"maxAge":56,"latitude":37.432,"longitude":34.423,"sanitized":true,"edited":true,"timeEdited":"2018-01-10T11:17:07.518Z"}},{"data":[[353.4194187137441,33.94073132228273,0,0,"KG2.02B",0],[357.4229529052585,35.30068269025845,0,0,"KG2.04B",0],[13.3193302412364,46.578169278214794,0,0,"KG2.5B",7],[351.86853491686975,35.31097686694492,0,0,"KG2.7A",1],[352.3739975004719,36.5216051304137,0,0,"KG2.8A",0],[347.80646717145953,35.39877630628154,0,0,"KG2.8B",2],[342.92399154670807,35.885815540854615,0,0,"KG2.9A",3],[344.42487097292826,31.536142631733377,0,0,"KG2.09B",0],[354.1253543032162,26.98609245614467,0,0,"KG2.10A",4],[340.5046272387699,23.49680948229994,0,0,"KG2.12A",0],[328.8064413585807,47.64719069957908,0,0,"KG2.14A",8],[341.8230593458161,31.635834536055214,0,0,"KG2.16A",0]],"metaData":{"name":"KG2_tc_nor","dateAdded":"2017-06-22T20:39:41.261Z","version":"v1.1.2","markerColor":"orange","cutoff":"45","type":"Interpretation","description":null,"plateId":null,"lithology":"volcanic","carriers":null,"author":"Gürer et al., 2018","age":45,"minAge":33.9,"maxAge":56,"latitude":37.412,"longitude":34.561,"sanitized":true,"edited":true,"timeEdited":"2018-01-10T11:17:38.366Z"}},{"data":[[212.80307266718074,43.73918431975448,265,64,"AT3.1A",1],[356.0037501556019,45.80316236257144,265,64,"AT3.5A",0],[232.7436819781616,51.36637652877389,265,64,"AT3.6A",3],[231.7355024741454,69.23294288455168,265,64,"AT3.7A",0],[241.83419050134455,63.41950267958108,265,64,"AT3.7B",4],[252.79754375263144,44.07589533809473,265,64,"AT3.8A",5],[357.195956808735,71.77130679887871,265,64,"AT3.8B",0],[277.74110250393096,69.92689918208306,265,64,"AT3.9A",0],[206.03330014180432,53.322280352269814,265,64,"AT3.9B",6],[195.0674980419293,84.68361476643409,265,64,"AT3.10A",0],[182.64663293987178,57.50430121944387,265,64,"AT3.11A",8],[333.65177399341405,70.84545504169344,265,64,"AT3.12A",0],[240.6830642737865,42.52913927410966,265,64,"AT3.12B",1],[314.86028510220933,80.23002863468989,265,64,"AT3.13A",0],[194.47454675558845,39.4261594411145,265,64,"AT3.13B",2],[357.9477245207687,78.22230933129799,265,64,"AT3.14A",0],[218.23701683548683,51.37796237820744,265,64,"AT3.15A",4],[232.3008633313956,64.11528244724978,265,64,"AT3.15B",0],[212.83318284054872,66.87806142180972,265,64,"AT3.16A",0],[215.36879296025927,64.37421989299393,265,64,"AT3.17A",0],[243.29135562474693,58.5467657560628,265,64,"AT3.2A",2],[234.18022839892706,67.95714787066777,265,64,"AT3.7B",4],[54.52366128712174,62.02547060985804,265,64,"AT3.10B",7],[239.1621607751863,56.1761201130765,265,64,"AT3.14B",3],[208.03946079877988,73.20538289469148,265,64,"AT3.16B",5],[258.4419634941187,27.439758168713922,265,64,"AT3.17B",6],[231.50310959402918,70.70140771215239,265,64,"AT3.18B",7]],"metaData":{"name":"AT3 (nor)","dateAdded":"2017-05-18T12:49:46.612Z","version":"v1.1.2","markerColor":"orange","cutoff":"45","type":"Interpretation","description":null,"plateId":null,"lithology":"volcanic","carriers":null,"author":null,"age":25.6,"minAge":23,"maxAge":28.1,"latitude":37.494,"longitude":34.327,"sanitized":true,"edited":true,"timeEdited":"2018-01-10T11:18:22.158Z"}},{"data":[[343.52700279570354,63.468870468597295,271,28,"CP2.1A",0],[330.07772653835116,71.56643599906471,271,28,"CP2.1B",1],[340.40020709489033,66.54231390980163,271,28,"CP2.2A",2],[293.7141111732366,76.0958531084913,271,28,"CP2.3A",0],[331.6462179577706,62.64397580146029,271,28,"CP2.4A",0],[353.4627269265236,73.22023728483344,271,28,"CP2.7A",0],[265.3404558584822,59.523633387953375,271,28,"CP2.7B",5],[275.5984964707574,60.03734800211363,271,28,"CP2.8A",0],[337.20768659674127,70.74455285122194,271,28,"CP2.9A",0],[353.1534300766857,79.16659329212199,271,28,"CP2.10C",6],[0.3614507940150702,56.27938371925735,271,28,"CP2.11A",7],[319.9945028722068,48.114613540657686,271,28,"CP2.12A",0]],"metaData":{"name":"CP2_normal","dateAdded":"2017-05-15T19:30:10.032Z","version":"v1.1.2","markerColor":"orange","cutoff":"45","type":"Interpretation","description":null,"plateId":null,"lithology":"volcanic","carriers":null,"author":"Gürer et al., SE 2018","age":14.2,"minAge":5.3,"maxAge":23,"latitude":37.757,"longitude":34.772,"sanitized":true,"edited":true,"timeEdited":"2018-01-10T11:19:32.298Z"}},{"data":[[346.43540725232634,46.92873057953661,216,29,"CP3.1A",0],[351.44246461786844,46.586414585940695,216,29,"CP3.01B",0],[349.7329856251449,46.584225429775266,216,29,"CP3.2A",0],[351.6928833444492,55.25643213881443,216,29,"CP3.3A",0],[353.87586658343895,47.10784195445133,216,29,"CP3.04A",0],[184.36605192754502,-31.71365463179336,216,29,"CP3.5A",0],[23.193844072396757,48.2103518921228,216,29,"CP3.05B",0],[177.84027839933458,-57.400219621559394,216,29,"CP3.6A",0],[28.53040478879757,51.347020936389285,216,29,"CP3.06B",0],[191.1979381907007,-39.52605267897286,216,29,"CP3.7A",0],[187.82214654046723,-48.47753470879088,216,29,"CP3.8A",0],[1.7399013454475494,58.35415566235876,216,29,"CP3.10B",0],[357.45447514944846,51.608159240768586,216,29,"CP3.11A",0],[5.027943438313628,62.51463193153616,216,29,"CP3.18A",0],[305.4091548702124,59.08846429397233,216,29,"CP3.19A",0]],"metaData":{"name":"CP3","dateAdded":"2017-02-24T11:32:54.567Z","version":"v1.1.1","markerColor":"orange","cutoff":"45","type":"Interpretation","description":null,"plateId":null,"lithology":"volcanic","carriers":null,"author":"Gürer et al., SE 2018","age":14.2,"minAge":5.3,"maxAge":23,"latitude":37.742,"longitude":34.738,"sanitized":true,"edited":true,"timeEdited":"2018-01-10T11:19:54.975Z"}}]}
